# Supplementary material for: Alcohol use and burden for 195 countries and territories, 1990–2016: a systematic analysis for the Global Burden of Disease Study 2016
Source: PubMed Central journal article supplement (PMC6148333; doi:10.1016/s0140-6736(18)31310-2), 2018-09-22
Supplement: mmc2.pdf [file mmc2.pdf]

# THE LANCET

## Supplementary appendix 2

This appendix formed part of the original submission and has been peer reviewed.  
We post it as supplied by the authors.

Supplement to: GBD 2016 Alcohol Collaborators. Alcohol use and burden for 195 countries and territories, 1990–2016: a systematic analysis for the Global Burden of Disease Study 2016. *Lancet* 2018; published online Aug 23. [http://dx.doi.org/10.1016/S0140-6736\(18\)31310-2](http://dx.doi.org/10.1016/S0140-6736(18)31310-2).

# Supplemental Results Appendix for Alcohol use and burden: a systematic analysis from the Global Burden of Disease Study 2016 for 195 countries and territories, 1990–2016

## Contents

|                                                                                                                                                                                                                                                                                                       |   |
|-------------------------------------------------------------------------------------------------------------------------------------------------------------------------------------------------------------------------------------------------------------------------------------------------------|---|
| Supplemental Results Table 1: Prevalence of current drinkers and abstainers, Population average of standard drinks daily, Percent of total attributable deaths, Percent of total attributable DALYs, Attributable deaths, and DALYs to alcohol use by location, year, sex, and age for GBD 2016 ..... | 2 |
| Supplemental Results Figure 1: Attributable DALY rate disaggregated by cause by location, sex, and age in 2016 .....                                                                                                                                                                                  | 3 |

Supplemental Results Table 1: Prevalence of current drinkers and abstainers, Population average of standard drinks daily, Percent of total attributable deaths, Percent of total attributable DALYs, Attributable deaths, and DALYs to alcohol use by location, year, sex, and age for GBD 2016

| Location | Year | Sex    | Age      | Prevalence of current drinkers | Prevalence of abstainers | Population average of standard drinks daily | Percent of total attributable deaths | Percent of total attributable DALYs | Attributable deaths       | Attributable DALYs           |
|----------|------|--------|----------|--------------------------------|--------------------------|---------------------------------------------|--------------------------------------|-------------------------------------|---------------------------|------------------------------|
| Global   | 1990 | Female | All Ages | 26%<br>(24-29%)                | 74%<br>(71-76%)          | 0.76<br>(0.74-0.8)                          | 1.3%<br>(1.1-1.6%)                   | 2%<br>(1.4-2.8%)                    | 450000<br>(300000-610000) | 1500000<br>(1200000-1800000) |
| Global   | 1990 | Female | 15 to 19 | 21%<br>(16-28%)                | 79%<br>(72-84%)          | 0.56<br>(0.38-0.77)                         | 1.1%<br>(0.77-1.4%)                  | 1.3%<br>(0.84-2%)                   | 4200<br>(2700-6300)       | 470000<br>(330000-640000)    |
| Global   | 1990 | Female | 20 to 24 | 27%<br>(20-34%)                | 73%<br>(66-80%)          | 0.88<br>(0.64-1.2)                          | 1.8%<br>(1.4-2.4%)                   | 2%<br>(1.3-2.7%)                    | 7700<br>(5200-11000)      | 890000<br>(650000-1200000)   |
| Global   | 1990 | Female | 25 to 29 | 31%<br>(23-38%)                | 69%<br>(62-77%)          | 1<br>(0.77-1.3)                             | 2.3%<br>(1.8-2.8%)                   | 2.7%<br>(1.9-3.6%)                  | 10000<br>(7100-13000)     | 1000000<br>(760000-1300000)  |
| Global   | 1990 | Female | 30 to 34 | 34%<br>(26-42%)                | 66%<br>(58-74%)          | 1.1<br>(0.84-1.5)                           | 2.6%<br>(2-3.2%)                     | 3.5%<br>(2.6-4.4%)                  | 13000<br>(9900-17000)     | 1100000<br>(850000-1300000)  |
| Global   | 1990 | Female | 35 to 39 | 36%<br>(28-43%)                | 64%<br>(57-72%)          | 1.2<br>(0.9-1.5)                            | 2.8%<br>(2.3-3.5%)                   | 4.2%<br>(3.2-5.3%)                  | 18000<br>(14000-23000)    | 1200000<br>(950000-1500000)  |
| Global   | 1990 | Female | 40 to 44 | 38%<br>(30-47%)                | 62%<br>(53-70%)          | 1.3<br>(1-1.7)                              | 3.2%<br>(2.5-4%)                     | 5%<br>(3.8-6.2%)                    | 22000<br>(17000-28000)    | 1200000<br>(980000-1500000)  |
| Global   | 1990 | Female | 45 to 49 | 38%<br>(28-45%)                | 62%<br>(55-72%)          | 1.4<br>(1-1.8)                              | 3.3%<br>(2.5-4.3%)                   | 5%<br>(3.9-6.4%)                    | 26000<br>(20000-34000)    | 1200000<br>(960000-1600000)  |
| Global   | 1990 | Female | 50 to 54 | 39%<br>(30-46%)                | 61%<br>(54-70%)          | 1.4<br>(1.1-1.9)                            | 3.5%<br>(2.7-4.6%)                   | 5.1%<br>(3.8-6.5%)                  | 37000<br>(28000-48000)    | 1500000<br>(1100000-1900000) |
| Global   | 1990 | Female | 55 to 59 | 38%<br>(29-46%)                | 62%<br>(54-71%)          | 1.5<br>(1.1-1.9)                            | 3.4%<br>(2.4-4.5%)                   | 4.6%<br>(3.4-6.1%)                  | 44000<br>(32000-59000)    | 1500000<br>(1100000-2000000) |
| Global   | 1990 | Female | 60 to 64 | 40%<br>(31-49%)                | 60%<br>(51-69%)          | 1.5<br>(1.1-2.1)                            | 3%<br>(1.9-4.2%)                     | 3.9%<br>(2.5-5.5%)                  | 50000<br>(32000-71000)    | 1500000<br>(940000-2000000)  |
| Global   | 1990 | Female | 65 to 69 | 41%<br>(32-49%)                | 59%<br>(51-68%)          | 1.5<br>(1.1-1.9)                            | 2.6%<br>(1.6-3.6%)                   | 3.3%<br>(2.1-4.7%)                  | 53000<br>(33000-75000)    | 1300000<br>(800000-1800000)  |
| Global   | 1990 | Female | 70 to 74 | 38%<br>(29-46%)                | 62%<br>(54-71%)          | 1.2<br>(0.88-1.6)                           | 1.9%<br>(0.88-3%)                    | 2.4%<br>(1.1-3.7%)                  | 44000<br>(20000-69000)    | 830000<br>(370000-1300000)   |
| Global   | 1990 | Female | 75 to 79 | 39%<br>(29-49%)                | 61%<br>(51-71%)          | 1.3<br>(0.92-1.8)                           | 1.7%<br>(0.39-3.1%)                  | 2%<br>(0.42-3.6%)                   | 43000<br>(9300-80000)     | 650000<br>(150000-1200000)   |
| Global   | 1990 | Female | 80 to 84 | 40%<br>(30-50%)                | 60%<br>(50-70%)          | 1.4<br>(0.99-1.8)                           | 1.6%<br>(0.27-3%)                    | 1.8%<br>(0.26-3.5%)                 | 37000<br>(5300-73000)     | 420000<br>(72000-800000)     |

| Location | Year | Sex    | Age      | Prevalence of current drinkers | Prevalence of abstainers | Population average of standard drinks daily | Percent of total attributable deaths | Percent of total attributable DALYs | Attributable deaths          | Attributable DALYs           |
|----------|------|--------|----------|--------------------------------|--------------------------|---------------------------------------------|--------------------------------------|-------------------------------------|------------------------------|------------------------------|
| Global   | 1990 | Female | 85 to 89 | 41%<br>(31-51%)                | 59%<br>(49-69%)          | 1.4<br>(0.99-2)                             | 1.4%<br>(0.11-3%)                    | 1.6%<br>(-0.016-3.4%)               | 24000<br>(-250-52000)        | 200000<br>(15000-410000)     |
| Global   | 1990 | Female | 90 to 94 | 44%<br>(33-54%)                | 56%<br>(46-67%)          | 1.5<br>(0.98-2.1)                           | 1.3%<br>(-0.35-3.2%)                 | 1.3%<br>(-0.62-3.7%)                | 9700<br>(-4500-27000)        | 57000<br>(-16000-150000)     |
| Global   | 1990 | Female | 95 plus  | 47%<br>(33-59%)                | 53%<br>(41-67%)          | 1.5<br>(0.85-2.3)                           | 1%<br>(-1.1-3.5%)                    | 1%<br>(-1.5-4%)                     | 2500<br>(-3700-10000)        | 10000<br>(-11000-35000)      |
| Global   | 1990 | Male   | All Ages | 39%<br>(35-43%)                | 61%<br>(57-65%)          | 1.4<br>(1.4-1.5)                            | 4.5%<br>(4-4.9%)                     | 6.3%<br>(5.4-7.2%)                  | 1600000<br>(1300000-1800000) | 5800000<br>(5200000-6400000) |
| Global   | 1990 | Male   | 15 to 19 | 28%<br>(21-36%)                | 72%<br>(64-79%)          | 0.77<br>(0.54-1)                            | 3.1%<br>(2.3-4.2%)                   | 4%<br>(2.8-5.7%)                    | 16000<br>(11000-23000)       | 1500000<br>(1000000-2000000) |
| Global   | 1990 | Male   | 20 to 24 | 43%<br>(33-52%)                | 57%<br>(48-67%)          | 1.6<br>(1.2-2)                              | 7.2%<br>(5.6-8.9%)                   | 8.6%<br>(6.5-11%)                   | 47000<br>(35000-60000)       | 3900000<br>(3100000-4900000) |
| Global   | 1990 | Male   | 25 to 29 | 51%<br>(40-60%)                | 49%<br>(40-60%)          | 2.1<br>(1.6-2.6)                            | 9%<br>(7.3-11%)                      | 11%<br>(8.6-14%)                    | 62000<br>(49000-76000)       | 4800000<br>(3800000-5700000) |
| Global   | 1990 | Male   | 30 to 34 | 55%<br>(44-64%)                | 45%<br>(36-56%)          | 2.4<br>(1.9-3)                              | 10%<br>(8.3-12%)                     | 13%<br>(10-15%)                     | 77000<br>(62000-91000)       | 5200000<br>(4300000-6100000) |
| Global   | 1990 | Male   | 35 to 39 | 58%<br>(48-66%)                | 42%<br>(34-52%)          | 2.5<br>(1.9-3.2)                            | 11%<br>(8.8-13%)                     | 14%<br>(11-16%)                     | 93000<br>(76000-110000)      | 5500000<br>(4500000-6500000) |
| Global   | 1990 | Male   | 40 to 44 | 60%<br>(50-68%)                | 40%<br>(32-50%)          | 2.7<br>(2.1-3.4)                            | 11%<br>(9.1-13%)                     | 14%<br>(12-16%)                     | 100000<br>(85000-120000)     | 5300000<br>(4400000-6200000) |
| Global   | 1990 | Male   | 45 to 49 | 58%<br>(48-67%)                | 42%<br>(33-52%)          | 2.8<br>(2.1-3.6)                            | 11%<br>(9-13%)                       | 14%<br>(11-16%)                     | 120000<br>(96000-140000)     | 5300000<br>(4400000-6200000) |
| Global   | 1990 | Male   | 50 to 54 | 59%<br>(49-67%)                | 41%<br>(33-51%)          | 3<br>(2.3-3.8)                              | 11%<br>(8.9-13%)                     | 13%<br>(11-16%)                     | 160000<br>(130000-190000)    | 6100000<br>(5000000-7200000) |
| Global   | 1990 | Male   | 55 to 59 | 58%<br>(48-67%)                | 42%<br>(33-52%)          | 3<br>(2.3-3.7)                              | 9.9%<br>(8-12%)                      | 12%<br>(9.6-14%)                    | 170000<br>(140000-210000)    | 5900000<br>(4800000-7000000) |
| Global   | 1990 | Male   | 60 to 64 | 58%<br>(48-67%)                | 42%<br>(33-52%)          | 2.9<br>(2.3-3.7)                            | 8.6%<br>(6.7-11%)                    | 9.9%<br>(7.7-12%)                   | 190000<br>(150000-240000)    | 5400000<br>(4200000-6700000) |
| Global   | 1990 | Male   | 65 to 69 | 57%<br>(47-66%)                | 43%<br>(34-53%)          | 2.7<br>(2.2-3.3)                            | 7.1%<br>(5.5-8.9%)                   | 8.2%<br>(6.2-10%)                   | 170000<br>(130000-210000)    | 4000000<br>(3100000-5000000) |

| Location | Year | Sex    | Age      | Prevalence of current drinkers | Prevalence of abstainers | Population average of standard drinks daily | Percent of total attributable deaths | Percent of total attributable DALYs | Attributable deaths       | Attributable DALYs           |
|----------|------|--------|----------|--------------------------------|--------------------------|---------------------------------------------|--------------------------------------|-------------------------------------|---------------------------|------------------------------|
| Global   | 1990 | Male   | 70 to 74 | 54%<br>(44-63%)                | 46%<br>(37-56%)          | 2.1<br>(1.7-2.7)                            | 5.6%<br>(3.9-7.4%)                   | 6.3%<br>(4.4-8.4%)                  | 130000<br>(94000-180000)  | 2600000<br>(1800000-3400000) |
| Global   | 1990 | Male   | 75 to 79 | 54%<br>(43-65%)                | 46%<br>(35-57%)          | 2.3<br>(1.7-2.9)                            | 4.7%<br>(3.1-6.6%)                   | 5.2%<br>(3.3-7.4%)                  | 110000<br>(70000-160000)  | 1600000<br>(1100000-2300000) |
| Global   | 1990 | Male   | 80 to 84 | 54%<br>(42-64%)                | 46%<br>(36-58%)          | 2.3<br>(1.8-2.9)                            | 4.1%<br>(2.6-5.7%)                   | 4.4%<br>(2.8-6.3%)                  | 69000<br>(43000-98000)    | 770000<br>(500000-1100000)   |
| Global   | 1990 | Male   | 85 to 89 | 53%<br>(41-63%)                | 47%<br>(37-59%)          | 2.1<br>(1.6-2.8)                            | 3.3%<br>(1.9-4.8%)                   | 3.5%<br>(1.9-5.3%)                  | 32000<br>(18000-48000)    | 260000<br>(150000-390000)    |
| Global   | 1990 | Male   | 90 to 94 | 55%<br>(43-65%)                | 45%<br>(35-57%)          | 2<br>(1.4-2.7)                              | 2.6%<br>(1.1-4.2%)                   | 2.7%<br>(0.95-4.6%)                 | 9200<br>(3300-16000)      | 53000<br>(22000-88000)       |
| Global   | 1990 | Male   | 95 plus  | 58%<br>(44-69%)                | 42%<br>(31-56%)          | 1.9<br>(1.2-2.7)                            | 2%<br>(0.19-3.9%)                    | 1.9%<br>(-0.18-4.1%)                | 1700<br>(-160-3800)       | 7100<br>(680-14000)          |
| Global   | 1995 | Female | All Ages | 26%<br>(24-28%)                | 74%<br>(72-76%)          | 0.73<br>(0.7-0.75)                          | 1.4%<br>(1.1-1.7%)                   | 2%<br>(1.3-2.8%)                    | 470000<br>(300000-650000) | 1600000<br>(1300000-1900000) |
| Global   | 1995 | Female | 15 to 19 | 21%<br>(16-27%)                | 79%<br>(73-84%)          | 0.55<br>(0.38-0.76)                         | 1.1%<br>(0.8-1.5%)                   | 1.4%<br>(0.91-2.1%)                 | 4300<br>(2800-6300)       | 48000<br>(33000-64000)       |
| Global   | 1995 | Female | 20 to 24 | 27%<br>(21-33%)                | 73%<br>(67-79%)          | 0.85<br>(0.61-1.1)                          | 1.8%<br>(1.4-2.3%)                   | 1.9%<br>(1.3-2.7%)                  | 7900<br>(5300-11000)      | 90000<br>(66000-120000)      |
| Global   | 1995 | Female | 25 to 29 | 29%<br>(23-36%)                | 71%<br>(64-77%)          | 0.9<br>(0.68-1.2)                           | 2.1%<br>(1.6-2.5%)                   | 2.4%<br>(1.7-3.1%)                  | 10000<br>(7500-14000)     | 100000<br>(78000-130000)     |
| Global   | 1995 | Female | 30 to 34 | 33%<br>(26-40%)                | 67%<br>(60-74%)          | 1<br>(0.77-1.3)                             | 2.4%<br>(1.9-2.9%)                   | 3.2%<br>(2.4-4%)                    | 14000<br>(11000-18000)    | 120000<br>(91000-140000)     |
| Global   | 1995 | Female | 35 to 39 | 35%<br>(29-42%)                | 65%<br>(58-71%)          | 1.1<br>(0.88-1.5)                           | 2.9%<br>(2.3-3.5%)                   | 4.3%<br>(3.4-5.2%)                  | 20000<br>(16000-25000)    | 130000<br>(110000-160000)    |
| Global   | 1995 | Female | 40 to 44 | 36%<br>(30-44%)                | 64%<br>(56-70%)          | 1.2<br>(0.89-1.5)                           | 3.2%<br>(2.5-3.9%)                   | 4.9%<br>(3.9-6%)                    | 27000<br>(22000-33000)    | 150000<br>(120000-180000)    |
| Global   | 1995 | Female | 45 to 49 | 38%<br>(31-45%)                | 62%<br>(55-69%)          | 1.3<br>(0.99-1.7)                           | 3.4%<br>(2.7-4.3%)                   | 5.2%<br>(4.1-6.6%)                  | 33000<br>(26000-41000)    | 150000<br>(120000-190000)    |
| Global   | 1995 | Female | 50 to 54 | 37%<br>(30-44%)                | 63%<br>(56-70%)          | 1.3<br>(1-1.7)                              | 3.4%<br>(2.5-4.4%)                   | 5%<br>(3.7-6.3%)                    | 37000<br>(28000-48000)    | 150000<br>(110000-190000)    |
| Global   | 1995 | Female | 55 to 59 | 38%<br>(31-45%)                | 62%<br>(55-69%)          | 1.4<br>(1-1.9)                              | 3.4%<br>(2.5-4.6%)                   | 4.8%<br>(3.5-6.3%)                  | 49000<br>(36000-65000)    | 170000<br>(120000-220000)    |

| Location | Year | Sex    | Age      | Prevalence of current drinkers | Prevalence of abstainers | Population average of standard drinks daily | Percent of total attributable deaths | Percent of total attributable DALYs | Attributable deaths          | Attributable DALYs           |
|----------|------|--------|----------|--------------------------------|--------------------------|---------------------------------------------|--------------------------------------|-------------------------------------|------------------------------|------------------------------|
| Global   | 1995 | Female | 60 to 64 | 37%<br>(30-45%)                | 63%<br>(55-70%)          | 1.4<br>(1-1.8)                              | 2.8%<br>(1.8-4%)                     | 3.7%<br>(2.4-5.2%)                  | 51000<br>(33000-72000)       | 1500000<br>(950000-2100000)  |
| Global   | 1995 | Female | 65 to 69 | 39%<br>(32-47%)                | 61%<br>(53-68%)          | 1.3<br>(1-1.7)                              | 2.5%<br>(1.5-3.5%)                   | 3.1%<br>(1.9-4.5%)                  | 56000<br>(34000-79000)       | 1300000<br>(800000-1900000)  |
| Global   | 1995 | Female | 70 to 74 | 40%<br>(32-48%)                | 60%<br>(52-68%)          | 1.3<br>(0.93-1.7)                           | 2%<br>(0.85-3.2%)                    | 2.4%<br>(1-3.9%)                    | 53000<br>(23000-84000)       | 1000000<br>(420000-1600000)  |
| Global   | 1995 | Female | 75 to 79 | 37%<br>(28-47%)                | 63%<br>(53-72%)          | 1.1<br>(0.78-1.5)                           | 1.4%<br>(0.31-2.7%)                  | 1.7%<br>(0.32-3.2%)                 | 37000<br>(7100-70000)        | 550000<br>(120000-1000000)   |
| Global   | 1995 | Female | 80 to 84 | 39%<br>(29-49%)                | 61%<br>(51-71%)          | 1.3<br>(0.91-1.7)                           | 1.3%<br>(0.1-2.7%)                   | 1.5%<br>(0.066-3.1%)                | 34000<br>(1600-72000)        | 390000<br>(30000-790000)     |
| Global   | 1995 | Female | 85 to 89 | 42%<br>(32-52%)                | 58%<br>(48-68%)          | 1.4<br>(0.94-1.9)                           | 1.2%<br>(-0.11-2.7%)                 | 1.3%<br>(-0.25-3%)                  | 24000<br>(-4600-55000)       | 200000<br>(-180000-440000)   |
| Global   | 1995 | Female | 90 to 94 | 45%<br>(34-55%)                | 55%<br>(45-66%)          | 1.4<br>(0.94-2)                             | 1%<br>(-0.57-2.9%)                   | 1%<br>(-0.85-3.3%)                  | 9700<br>(-7900-30000)        | 58000<br>(-33000-170000)     |
| Global   | 1995 | Female | 95 plus  | 49%<br>(35-61%)                | 51%<br>(39-65%)          | 1.5<br>(0.85-2.2)                           | 0.84%<br>(-1.2-3.3%)                 | 0.78%<br>(-1.6-3.7%)                | 2500<br>(-5300-12000)        | 11000<br>(-16000-42000)      |
| Global   | 1995 | Male   | All Ages | 39%<br>(36-43%)                | 61%<br>(57-64%)          | 1.5<br>(1.4-1.5)                            | 5.2%<br>(4.6-5.7%)                   | 7%<br>(6-8%)                        | 1900000<br>(1600000-2100000) | 6900000<br>(6200000-7700000) |
| Global   | 1995 | Male   | 15 to 19 | 28%<br>(21-35%)                | 72%<br>(65-79%)          | 0.77<br>(0.54-1)                            | 3.3%<br>(2.4-4.3%)                   | 4.3%<br>(2.9-6%)                    | 17000<br>(12000-24000)       | 1500000<br>(1100000-2000000) |
| Global   | 1995 | Male   | 20 to 24 | 42%<br>(33-50%)                | 58%<br>(50-67%)          | 1.6<br>(1.2-2)                              | 7.4%<br>(5.8-9.2%)                   | 8.9%<br>(6.7-12%)                   | 52000<br>(39000-67000)       | 4300000<br>(3300000-5400000) |
| Global   | 1995 | Male   | 25 to 29 | 50%<br>(41-59%)                | 50%<br>(41-59%)          | 2<br>(1.5-2.5)                              | 9.1%<br>(7.3-11%)                    | 11%<br>(8.7-14%)                    | 73000<br>(57000-90000)       | 5500000<br>(4300000-6600000) |
| Global   | 1995 | Male   | 30 to 34 | 55%<br>(45-63%)                | 45%<br>(37-55%)          | 2.4<br>(1.9-3)                              | 10%<br>(8.5-12%)                     | 13%<br>(10-15%)                     | 94000<br>(77000-110000)      | 6300000<br>(5200000-7300000) |
| Global   | 1995 | Male   | 35 to 39 | 58%<br>(49-65%)                | 42%<br>(35-51%)          | 2.6<br>(2-3.3)                              | 11%<br>(9.4-13%)                     | 14%<br>(12-17%)                     | 120000<br>(96000-140000)     | 6800000<br>(5600000-8000000) |
| Global   | 1995 | Male   | 40 to 44 | 59%<br>(51-67%)                | 41%<br>(33-49%)          | 2.7<br>(2-3.3)                              | 12%<br>(10-14%)                      | 15%<br>(13-18%)                     | 150000<br>(120000-170000)    | 7500000<br>(6400000-8600000) |
| Global   | 1995 | Male   | 45 to 49 | 60%<br>(51-68%)                | 40%<br>(32-49%)          | 2.9<br>(2.2-3.8)                            | 12%<br>(10-14%)                      | 15%<br>(13-18%)                     | 160000<br>(130000-190000)    | 7200000<br>(6000000-8400000) |

| Location | Year | Sex    | Age      | Prevalence of current drinkers | Prevalence of abstainers | Population average of standard drinks daily | Percent of total attributable deaths | Percent of total attributable DALYs | Attributable deaths       | Attributable DALYs              |
|----------|------|--------|----------|--------------------------------|--------------------------|---------------------------------------------|--------------------------------------|-------------------------------------|---------------------------|---------------------------------|
| Global   | 1995 | Male   | 50 to 54 | 59%<br>(50-66%)                | 41%<br>(34-50%)          | 2.9<br>(2.3-3.7)                            | 11%<br>(9.2-13%)                     | 14%<br>(11-16%)                     | 160000<br>(130000-190000) | 6400000<br>(5300000-7600000)    |
| Global   | 1995 | Male   | 55 to 59 | 59%<br>(50-67%)                | 41%<br>(33-50%)          | 3<br>(2.3-3.8)                              | 11%<br>(8.5-13%)                     | 13%<br>(10-15%)                     | 210000<br>(170000-250000) | 6900000<br>(5600000-8200000)    |
| Global   | 1995 | Male   | 60 to 64 | 57%<br>(48-66%)                | 43%<br>(34-52%)          | 2.8<br>(2.2-3.6)                            | 8.9%<br>(7-11%)                      | 10%<br>(8.1-13%)                    | 210000<br>(170000-260000) | 6100000<br>(4700000-7500000)    |
| Global   | 1995 | Male   | 65 to 69 | 57%<br>(48-65%)                | 43%<br>(35-52%)          | 2.6<br>(2.1-3.2)                            | 7.4%<br>(5.6-9.3%)                   | 8.5%<br>(6.5-11%)                   | 200000<br>(160000-260000) | 4800000<br>(3700000-6000000)    |
| Global   | 1995 | Male   | 70 to 74 | 55%<br>(46-63%)                | 45%<br>(37-54%)          | 2.3<br>(1.8-2.9)                            | 5.9%<br>(4.2-7.8%)                   | 6.7%<br>(4.8-8.9%)                  | 160000<br>(120000-220000) | 3100000<br>(2300000-4100000)    |
| Global   | 1995 | Male   | 75 to 79 | 52%<br>(41-62%)                | 48%<br>(38-59%)          | 1.9<br>(1.4-2.4)                            | 4.6%<br>(3.1-6.4%)                   | 5.1%<br>(3.3-7.2%)                  | 110000<br>(73000-160000)  | 1700000<br>(1100000-2300000)    |
| Global   | 1995 | Male   | 80 to 84 | 53%<br>(42-63%)                | 47%<br>(37-58%)          | 2<br>(1.6-2.5)                              | 4%<br>(2.6-5.6%)                     | 4.4%<br>(2.8-6.2%)                  | 80000<br>(51000-110000)   | 890000<br>(580000-1300000)      |
| Global   | 1995 | Male   | 85 to 89 | 54%<br>(43-64%)                | 46%<br>(36-57%)          | 2<br>(1.5-2.6)                              | 3.3%<br>(1.9-4.8%)                   | 3.5%<br>(1.9-5.3%)                  | 39000<br>(21000-59000)    | 310000<br>(180000-470000)       |
| Global   | 1995 | Male   | 90 to 94 | 56%<br>(44-66%)                | 44%<br>(34-56%)          | 1.9<br>(1.4-2.6)                            | 2.5%<br>(1.4-4.2%)                   | 2.6%<br>(0.88-4.5%)                 | 12000<br>(3900-20000)     | 67000<br>(27000-110000)         |
| Global   | 1995 | Male   | 95 plus  | 58%<br>(45-70%)                | 42%<br>(30-55%)          | 1.8<br>(1.2-2.6)                            | 2%<br>(0.19-4%)                      | 2%<br>(-0.11-4.3%)                  | 2200<br>(-120-4800)       | 9000<br>(840-18000)             |
| Global   | 2000 | Female | All Ages | 25%<br>(23-27%)                | 75%<br>(73-77%)          | 0.71<br>(0.68-0.74)                         | 1.4%<br>(1.2-1.7%)                   | 2%<br>(1.3-2.8%)                    | 480000<br>(310000-660000) | 17000000<br>(14000000-20000000) |
| Global   | 2000 | Female | 15 to 19 | 21%<br>(16-27%)                | 79%<br>(73-84%)          | 0.53<br>(0.37-0.74)                         | 1.1%<br>(0.82-1.5%)                  | 1.5%<br>(0.96-2.1%)                 | 4600<br>(2900-6700)       | 510000<br>(360000-690000)       |
| Global   | 2000 | Female | 20 to 24 | 27%<br>(21-33%)                | 73%<br>(67-79%)          | 0.87<br>(0.63-1.2)                          | 1.9%<br>(1.4-2.4%)                   | 2.1%<br>(1.4-2.8%)                  | 8100<br>(5500-11000)      | 930000<br>(680000-1200000)      |
| Global   | 2000 | Female | 25 to 29 | 28%<br>(22-34%)                | 72%<br>(66-78%)          | 0.89<br>(0.67-1.1)                          | 2%<br>(1.6-2.5%)                     | 2.3%<br>(1.7-3%)                    | 11000<br>(7900-14000)     | 1100000<br>(820000-1300000)     |
| Global   | 2000 | Female | 30 to 34 | 29%<br>(23-36%)                | 71%<br>(64-77%)          | 0.93<br>(0.69-1.2)                          | 2.2%<br>(1.7-2.6%)                   | 2.8%<br>(2.2-3.5%)                  | 14000<br>(11000-18000)    | 1200000<br>(910000-1400000)     |
| Global   | 2000 | Female | 35 to 39 | 32%<br>(26-39%)                | 68%<br>(61-74%)          | 1.1<br>(0.8-1.4)                            | 2.6%<br>(2.1-3.2%)                   | 3.7%<br>(3-4.6%)                    | 20000<br>(16000-25000)    | 1400000<br>(1100000-1600000)    |



| Location | Year | Sex    | Age      | Prevalence of current drinkers | Prevalence of abstainers | Population average of standard drinks daily | Percent of total attributable deaths | Percent of total attributable DALYs | Attributable deaths          | Attributable DALYs              |
|----------|------|--------|----------|--------------------------------|--------------------------|---------------------------------------------|--------------------------------------|-------------------------------------|------------------------------|---------------------------------|
| Global   | 2000 | Female | 40 to 44 | 34%<br>(28-42%)                | 66%<br>(58-72%)          | 1.2<br>(0.89-1.5)                           | 3%<br>(2.4-3.7%)                     | 4.6%<br>(3.7-5.6%)                  | 28000<br>(22000-33000)       | 1500000<br>(1300000-1900000)    |
| Global   | 2000 | Female | 45 to 49 | 35%<br>(27-42%)                | 65%<br>(58-73%)          | 1.2<br>(0.88-1.5)                           | 3.2%<br>(2.5-4%)                     | 4.9%<br>(3.9-6.2%)                  | 36000<br>(28000-45000)       | 1700000<br>(1300000-2100000)    |
| Global   | 2000 | Female | 50 to 54 | 36%<br>(30-44%)                | 64%<br>(56-70%)          | 1.3<br>(0.97-1.7)                           | 3.4%<br>(2.6-4.3%)                   | 5%<br>(3.8-6.4%)                    | 42000<br>(32000-54000)       | 1700000<br>(1300000-2100000)    |
| Global   | 2000 | Female | 55 to 59 | 35%<br>(29-42%)                | 65%<br>(58-71%)          | 1.3<br>(0.97-1.7)                           | 3.2%<br>(2.3-4.2%)                   | 4.5%<br>(3.3-5.9%)                  | 46000<br>(34000-60000)       | 1600000<br>(1100000-2000000)    |
| Global   | 2000 | Female | 60 to 64 | 36%<br>(28-44%)                | 64%<br>(56-72%)          | 1.3<br>(0.94-1.8)                           | 2.8%<br>(1.8-4%)                     | 3.8%<br>(2.4-5.3%)                  | 54000<br>(35000-75000)       | 1500000<br>(1000000-2200000)    |
| Global   | 2000 | Female | 65 to 69 | 35%<br>(28-44%)                | 65%<br>(56-72%)          | 1.2<br>(0.88-1.5)                           | 2.3%<br>(1.5-3.3%)                   | 3%<br>(1.9-4.2%)                    | 56000<br>(36000-78000)       | 1300000<br>(830000-1800000)     |
| Global   | 2000 | Female | 70 to 74 | 37%<br>(29-45%)                | 63%<br>(55-71%)          | 1.1<br>(0.81-1.5)                           | 1.9%<br>(0.83-3%)                    | 2.3%<br>(1-3.7%)                    | 54000<br>(24000-86000)       | 1000000<br>(440000-1600000)     |
| Global   | 2000 | Female | 75 to 79 | 37%<br>(29-47%)                | 63%<br>(53-71%)          | 1.1<br>(0.78-1.5)                           | 1.4%<br>(0.32-2.7%)                  | 1.7%<br>(0.36-3.2%)                 | 43000<br>(9000-81000)        | 650000<br>(140000-1200000)      |
| Global   | 2000 | Female | 80 to 84 | 37%<br>(27-46%)                | 63%<br>(54-73%)          | 1.1<br>(0.76-1.5)                           | 1.1%<br>(0.16-2.3%)                  | 1.3%<br>(0.16-2.7%)                 | 30000<br>(3700-62000)        | 340000<br>(47000-680000)        |
| Global   | 2000 | Female | 85 to 89 | 41%<br>(30-51%)                | 59%<br>(49-70%)          | 1.2<br>(0.86-1.7)                           | 1%<br>(-0.14-2.4%)                   | 1.1%<br>(-0.29-2.8%)                | 23000<br>(-5900-56000)       | 190000<br>(-26000-450000)       |
| Global   | 2000 | Female | 90 to 94 | 46%<br>(35-55%)                | 54%<br>(45-65%)          | 1.4<br>(0.91-1.9)                           | 0.9%<br>(-0.63-2.8%)                 | 0.93%<br>(-0.91-3.2%)               | 10000<br>(-10000-36000)      | 64000<br>(-44000-200000)        |
| Global   | 2000 | Female | 95 plus  | 50%<br>(36-62%)                | 50%<br>(38-64%)          | 1.4<br>(0.84-2.2)                           | 0.74%<br>(-1.3-3.2%)                 | 0.67%<br>(-1.7-3.5%)                | 2800<br>(-7000-14000)        | 12000<br>(-20000-52000)         |
| Global   | 2000 | Male   | All Ages | 40%<br>(37-43%)                | 60%<br>(57-63%)          | 1.5<br>(1.4-1.6)                            | 5.5%<br>(5-6.1%)                     | 7.2%<br>(6.2-8.2%)                  | 2000000<br>(1700000-2300000) | 75000000<br>(67000000-83000000) |
| Global   | 2000 | Male   | 15 to 19 | 29%<br>(23-36%)                | 71%<br>(64-77%)          | 0.84<br>(0.59-1.1)                          | 3.4%<br>(2.5-4.5%)                   | 4.6%<br>(3.1-6.4%)                  | 19000<br>(13000-26000)       | 1700000<br>(1200000-2300000)    |
| Global   | 2000 | Male   | 20 to 24 | 43%<br>(34-50%)                | 57%<br>(50-66%)          | 1.8<br>(1.3-2.4)                            | 7.8%<br>(6.2-9.7%)                   | 9.5%<br>(7.2-12%)                   | 55000<br>(42000-71000)       | 4500000<br>(3500000-5600000)    |
| Global   | 2000 | Male   | 25 to 29 | 50%<br>(41-58%)                | 50%<br>(42-59%)          | 2.2<br>(1.7-2.7)                            | 9.2%<br>(7.4-11%)                    | 11%<br>(8.7-14%)                    | 77000<br>(60000-94000)       | 5800000<br>(4600000-7000000)    |

| Location | Year | Sex    | Age      | Prevalence of current drinkers | Prevalence of abstainers | Population average of standard drinks daily | Percent of total attributable deaths | Percent of total attributable DALYs | Attributable deaths       | Attributable DALYs           |
|----------|------|--------|----------|--------------------------------|--------------------------|---------------------------------------------|--------------------------------------|-------------------------------------|---------------------------|------------------------------|
| Global   | 2000 | Male   | 30 to 34 | 54%<br>(44-62%)                | 46%<br>(38-56%)          | 2.3<br>(1.8-3)                              | 9.8%<br>(8.2-12%)                    | 12%<br>(9.9-14%)                    | 97000<br>(79000-120000)   | 650000<br>(540000-760000)    |
| Global   | 2000 | Male   | 35 to 39 | 57%<br>(49-64%)                | 43%<br>(36-51%)          | 2.5<br>(1.9-3.3)                            | 11%<br>(9-13%)                       | 14%<br>(11-16%)                     | 120000<br>(100000-140000) | 720000<br>(600000-840000)    |
| Global   | 2000 | Male   | 40 to 44 | 58%<br>(51-66%)                | 42%<br>(34-49%)          | 2.7<br>(2.1-3.4)                            | 12%<br>(9.8-14%)                     | 15%<br>(12-17%)                     | 150000<br>(130000-180000) | 790000<br>(670000-910000)    |
| Global   | 2000 | Male   | 45 to 49 | 59%<br>(50-67%)                | 41%<br>(33-50%)          | 2.8<br>(2.1-3.6)                            | 12%<br>(10-14%)                      | 15%<br>(13-18%)                     | 190000<br>(160000-220000) | 860000<br>(730000-1000000)   |
| Global   | 2000 | Male   | 50 to 54 | 60%<br>(51-67%)                | 40%<br>(33-49%)          | 2.9<br>(2.2-3.7)                            | 12%<br>(9.5-14%)                     | 14%<br>(12-17%)                     | 190000<br>(160000-230000) | 760000<br>(630000-900000)    |
| Global   | 2000 | Male   | 55 to 59 | 57%<br>(49-65%)                | 43%<br>(35-51%)          | 2.8<br>(2.2-3.6)                            | 10%<br>(8.2-12%)                     | 12%<br>(10-15%)                     | 190000<br>(150000-220000) | 640000<br>(520000-760000)    |
| Global   | 2000 | Male   | 60 to 64 | 57%<br>(48-65%)                | 43%<br>(35-52%)          | 2.7<br>(2.1-3.5)                            | 8.9%<br>(6.9-11%)                    | 10%<br>(8.1-13%)                    | 220000<br>(170000-280000) | 640000<br>(500000-790000)    |
| Global   | 2000 | Male   | 65 to 69 | 55%<br>(46-64%)                | 45%<br>(36-54%)          | 2.4<br>(1.9-2.9)                            | 7.4%<br>(5.7-9.3%)                   | 8.6%<br>(6.7-11%)                   | 210000<br>(160000-260000) | 500000<br>(390000-630000)    |
| Global   | 2000 | Male   | 70 to 74 | 55%<br>(46-63%)                | 45%<br>(37-54%)          | 2.2<br>(1.7-2.7)                            | 5.9%<br>(4.2-7.9%)                   | 6.7%<br>(4.7-9%)                    | 190000<br>(130000-250000) | 360000<br>(250000-470000)    |
| Global   | 2000 | Male   | 75 to 79 | 53%<br>(43-63%)                | 47%<br>(37-57%)          | 2<br>(1.5-2.5)                              | 4.7%<br>(3.1-6.5%)                   | 5.2%<br>(3.4-7.4%)                  | 130000<br>(85000-180000)  | 200000<br>(130000-270000)    |
| Global   | 2000 | Male   | 80 to 84 | 51%<br>(39-61%)                | 49%<br>(39-61%)          | 1.7<br>(1.3-2.1)                            | 3.8%<br>(2.5-5.3%)                   | 4.2%<br>(2.6-5.9%)                  | 78000<br>(49000-110000)   | 870000<br>(580000-1200000)   |
| Global   | 2000 | Male   | 85 to 89 | 53%<br>(41-62%)                | 47%<br>(38-59%)          | 1.8<br>(1.3-2.3)                            | 3.1%<br>(1.8-4.7%)                   | 3.4%<br>(1.9-5.2%)                  | 44000<br>(24000-66000)    | 350000<br>(210000-530000)    |
| Global   | 2000 | Male   | 90 to 94 | 56%<br>(45-66%)                | 44%<br>(34-55%)          | 1.8<br>(1.3-2.4)                            | 2.4%<br>(0.93-4.1%)                  | 2.5%<br>(0.75-4.4%)                 | 14000<br>(4100-24000)     | 80000<br>(30000-130000)      |
| Global   | 2000 | Male   | 95 plus  | 58%<br>(45-70%)                | 42%<br>(30-55%)          | 1.8<br>(1.1-2.5)                            | 2%<br>(0.11-4%)                      | 1.9%<br>(-0.2-4.3%)                 | 2700<br>(-290-6000)       | 11000<br>(610-23000)         |
| Global   | 2005 | Female | All Ages | 24%<br>(23-27%)                | 76%<br>(73-77%)          | 0.71<br>(0.69-0.74)                         | 1.5%<br>(1.3-1.8%)                   | 2.1%<br>(1.4-2.8%)                  | 510000<br>(350000-670000) | 1700000<br>(1400000-2000000) |
| Global   | 2005 | Female | 15 to 19 | 20%<br>(16-25%)                | 80%<br>(75-84%)          | 0.51<br>(0.36-0.7)                          | 1.1%<br>(0.8-1.5%)                   | 1.5%<br>(0.97-2.1%)                 | 4400<br>(2900-6400)       | 510000<br>(360000-700000)    |

| Location | Year | Sex    | Age      | Prevalence of current drinkers | Prevalence of abstainers | Population average of standard drinks daily | Percent of total attributable deaths | Percent of total attributable DALYs | Attributable deaths    | Attributable DALYs           |
|----------|------|--------|----------|--------------------------------|--------------------------|---------------------------------------------|--------------------------------------|-------------------------------------|------------------------|------------------------------|
| Global   | 2005 | Female | 20 to 24 | 26%<br>(21-31%)                | 74%<br>(69-79%)          | 0.87<br>(0.64-1.2)                          | 1.9%<br>(1.5-2.4%)                   | 2.2%<br>(1.6-3%)                    | 8400<br>(5900-11000)   | 970000<br>(730000-1300000)   |
| Global   | 2005 | Female | 25 to 29 | 28%<br>(22-33%)                | 72%<br>(67-78%)          | 0.94<br>(0.71-1.2)                          | 2.1%<br>(1.7-2.5%)                   | 2.5%<br>(1.8-3.1%)                  | 11000<br>(8200-14000)  | 1100000<br>(840000-1400000)  |
| Global   | 2005 | Female | 30 to 34 | 29%<br>(23-34%)                | 71%<br>(66-77%)          | 0.94<br>(0.71-1.2)                          | 2.2%<br>(1.8-2.6%)                   | 2.8%<br>(2.2-3.5%)                  | 15000<br>(12000-18000) | 1200000<br>(960000-1500000)  |
| Global   | 2005 | Female | 35 to 39 | 30%<br>(25-36%)                | 70%<br>(64-75%)          | 0.98<br>(0.75-1.3)                          | 2.4%<br>(1.9-2.9%)                   | 3.5%<br>(2.8-4.3%)                  | 20000<br>(16000-24000) | 1300000<br>(1100000-1600000) |
| Global   | 2005 | Female | 40 to 44 | 33%<br>(28-39%)                | 67%<br>(61-72%)          | 1.1<br>(0.85-1.4)                           | 2.8%<br>(2.3-3.4%)                   | 4.4%<br>(3.6-5.3%)                  | 28000<br>(23000-34000) | 1600000<br>(1300000-1900000) |
| Global   | 2005 | Female | 45 to 49 | 34%<br>(28-40%)                | 66%<br>(60-72%)          | 1.2<br>(0.91-1.5)                           | 3.2%<br>(2.5-4%)                     | 5%<br>(4-6.2%)                      | 38000<br>(30000-47000) | 1800000<br>(1400000-2200000) |
| Global   | 2005 | Female | 50 to 54 | 34%<br>(28-40%)                | 66%<br>(60-72%)          | 1.2<br>(0.89-1.5)                           | 3.3%<br>(2.5-4.2%)                   | 4.9%<br>(3.8-6.2%)                  | 48000<br>(37000-59000) | 1900000<br>(1500000-2400000) |
| Global   | 2005 | Female | 55 to 59 | 35%<br>(30-41%)                | 65%<br>(59-70%)          | 1.3<br>(0.96-1.7)                           | 3.2%<br>(2.3-4.1%)                   | 4.6%<br>(3.4-6%)                    | 52000<br>(39000-67000) | 1800000<br>(1300000-2300000) |
| Global   | 2005 | Female | 60 to 64 | 34%<br>(28-40%)                | 66%<br>(60-72%)          | 1.2<br>(0.89-1.7)                           | 2.6%<br>(1.8-3.6%)                   | 3.6%<br>(2.5-4.9%)                  | 49000<br>(34000-66000) | 1400000<br>(950000-1900000)  |
| Global   | 2005 | Female | 65 to 69 | 34%<br>(27-41%)                | 66%<br>(59-73%)          | 1.1<br>(0.86-1.5)                           | 2.3%<br>(1.5-3.2%)                   | 3.1%<br>(2-4.2%)                    | 57000<br>(38000-78000) | 1300000<br>(880000-1900000)  |
| Global   | 2005 | Female | 70 to 74 | 33%<br>(27-40%)                | 67%<br>(60-73%)          | 1<br>(0.74-1.4)                             | 1.8%<br>(0.93-2.8%)                  | 2.3%<br>(1.2-3.5%)                  | 53000<br>(28000-80000) | 1000000<br>(510000-1500000)  |
| Global   | 2005 | Female | 75 to 79 | 34%<br>(27-42%)                | 66%<br>(58-73%)          | 1<br>(0.7-1.4)                              | 1.4%<br>(0.41-2.5%)                  | 1.7%<br>(0.55-3.1%)                 | 46000<br>(14000-81000) | 690000<br>(200000-1200000)   |
| Global   | 2005 | Female | 80 to 84 | 36%<br>(27-45%)                | 64%<br>(55-73%)          | 1.1<br>(0.78-1.5)                           | 1.3%<br>(0.32-2.4%)                  | 1.5%<br>(0.38-2.8%)                 | 40000<br>(10000-76000) | 440000<br>(110000-830000)    |
| Global   | 2005 | Female | 85 to 89 | 37%<br>(28-46%)                | 63%<br>(54-72%)          | 1.1<br>(0.75-1.5)                           | 1%<br>(0.026-2.2%)                   | 1.2%<br>(-0.015-2.5%)               | 23000<br>(-310-51000)  | 190000<br>(4800-410000)      |
| Global   | 2005 | Female | 90 to 94 | 43%<br>(33-53%)                | 57%<br>(47-67%)          | 1.3<br>(0.87-1.8)                           | 0.93%<br>(-0.46-2.6%)                | 0.99%<br>(-0.67-3%)                 | 13000<br>(-8700-39000) | 76000<br>(-37000-210000)     |
| Global   | 2005 | Female | 95 plus  | 49%<br>(36-62%)                | 51%<br>(38-64%)          | 1.4<br>(0.85-2.2)                           | 0.86%<br>(-1-3.2%)                   | 0.83%<br>(-1.4-3.6%)                | 4300<br>(-7300-18000)  | 18000<br>(-21000-66000)      |

| Location | Year | Sex  | Age      | Prevalence of current drinkers | Prevalence of abstainers | Population average of standard drinks daily | Percent of total attributable deaths | Percent of total attributable DALYs | Attributable deaths          | Attributable DALYs              |
|----------|------|------|----------|--------------------------------|--------------------------|---------------------------------------------|--------------------------------------|-------------------------------------|------------------------------|---------------------------------|
| Global   | 2005 | Male | All Ages | 41%<br>(38-43%)                | 59%<br>(57-62%)          | 1.6<br>(1.5-1.7)                            | 5.9%<br>(5.3-6.5%)                   | 7.4%<br>(6.5-8.4%)                  | 2100000<br>(1800000-2400000) | 79000000<br>(72000000-88000000) |
| Global   | 2005 | Male | 15 to 19 | 30%<br>(25-37%)                | 70%<br>(63-75%)          | 0.81<br>(0.58-1.1)                          | 3.4%<br>(2.5-4.4%)                   | 4.6%<br>(3.2-6.3%)                  | 19000<br>(13000-26000)       | 1800000<br>(1300000-2300000)    |
| Global   | 2005 | Male | 20 to 24 | 43%<br>(37-49%)                | 57%<br>(51-63%)          | 1.9<br>(1.4-2.4)                            | 7.9%<br>(6.3-9.7%)                   | 9.8%<br>(7.5-12%)                   | 56000<br>(43000-71000)       | 4700000<br>(3700000-5800000)    |
| Global   | 2005 | Male | 25 to 29 | 49%<br>(43-56%)                | 51%<br>(44-57%)          | 2.4<br>(1.8-3)                              | 9.3%<br>(7.6-11%)                    | 11%<br>(9.1-14%)                    | 77000<br>(61000-93000)       | 5800000<br>(4700000-6900000)    |
| Global   | 2005 | Male | 30 to 34 | 53%<br>(46-60%)                | 47%<br>(40-54%)          | 2.5<br>(1.9-3.1)                            | 9.9%<br>(8.3-12%)                    | 12%<br>(10-15%)                     | 100000<br>(82000-120000)     | 6700000<br>(5600000-7800000)    |
| Global   | 2005 | Male | 35 to 39 | 56%<br>(50-62%)                | 44%<br>(38-50%)          | 2.5<br>(1.8-3.2)                            | 10%<br>(8.7-12%)                     | 13%<br>(11-15%)                     | 120000<br>(100000-150000)    | 7400000<br>(6200000-8600000)    |
| Global   | 2005 | Male | 40 to 44 | 57%<br>(51-64%)                | 43%<br>(36-49%)          | 2.7<br>(2.1-3.4)                            | 11%<br>(9.7-13%)                     | 15%<br>(12-17%)                     | 160000<br>(140000-190000)    | 8400000<br>(7200000-9600000)    |
| Global   | 2005 | Male | 45 to 49 | 58%<br>(52-65%)                | 42%<br>(35-48%)          | 2.9<br>(2.2-3.7)                            | 12%<br>(10-14%)                      | 15%<br>(13-18%)                     | 200000<br>(170000-230000)    | 9100000<br>(7800000-10000000)   |
| Global   | 2005 | Male | 50 to 54 | 59%<br>(52-65%)                | 41%<br>(35-48%)          | 2.8<br>(2.1-3.5)                            | 12%<br>(9.9-14%)                     | 15%<br>(12-17%)                     | 240000<br>(200000-280000)    | 9400000<br>(7900000-11000000)   |
| Global   | 2005 | Male | 55 to 59 | 58%<br>(52-65%)                | 42%<br>(35-48%)          | 2.8<br>(2.2-3.6)                            | 11%<br>(8.6-12%)                     | 13%<br>(11-15%)                     | 220000<br>(190000-270000)    | 7700000<br>(6400000-9000000)    |
| Global   | 2005 | Male | 60 to 64 | 56%<br>(49-63%)                | 44%<br>(37-51%)          | 2.6<br>(2-3.4)                              | 8.6%<br>(6.7-11%)                    | 10%<br>(8-13%)                      | 200000<br>(160000-240000)    | 5800000<br>(4500000-7100000)    |
| Global   | 2005 | Male | 65 to 69 | 55%<br>(48-62%)                | 45%<br>(38-52%)          | 2.4<br>(1.9-2.9)                            | 7.4%<br>(5.7-9.2%)                   | 8.7%<br>(6.6-11%)                   | 220000<br>(170000-270000)    | 5300000<br>(4100000-6500000)    |
| Global   | 2005 | Male | 70 to 74 | 53%<br>(45-60%)                | 47%<br>(40-55%)          | 2.1<br>(1.6-2.6)                            | 5.8%<br>(4.1-7.7%)                   | 6.7%<br>(4.6-8.8%)                  | 190000<br>(130000-250000)    | 3600000<br>(2600000-4800000)    |
| Global   | 2005 | Male | 75 to 79 | 52%<br>(44-61%)                | 48%<br>(39-56%)          | 1.9<br>(1.5-2.4)                            | 4.6%<br>(2.9-6.4%)                   | 5.1%<br>(3.2-7.3%)                  | 140000<br>(91000-200000)     | 2200000<br>(1400000-3000000)    |

| Location | Year | Sex    | Age      | Prevalence of current drinkers | Prevalence of abstainers | Population average of standard drinks daily | Percent of total attributable deaths | Percent of total attributable DALYs | Attributable deaths       | Attributable DALYs              |
|----------|------|--------|----------|--------------------------------|--------------------------|---------------------------------------------|--------------------------------------|-------------------------------------|---------------------------|---------------------------------|
| Global   | 2005 | Male   | 80 to 84 | 51%<br>(40-61%)                | 49%<br>(39-60%)          | 1.8<br>(1.4-2.2)                            | 3.8%<br>(2.5-5.3%)                   | 4.2%<br>(2.7-6%)                    | 94000<br>(61000-130000)   | 1100000<br>(710000-1500000)     |
| Global   | 2005 | Male   | 85 to 89 | 50%<br>(40-60%)                | 50%<br>(40-60%)          | 1.6<br>(1.2-2)                              | 2.9%<br>(1.7-4.2%)                   | 3.1%<br>(1.7-4.7%)                  | 42000<br>(23000-64000)    | 350000<br>(200000-520000)       |
| Global   | 2005 | Male   | 90 to 94 | 55%<br>(44-64%)                | 45%<br>(36-56%)          | 1.7<br>(1.3-2.3)                            | 2.4%<br>(0.87-3.9%)                  | 2.4%<br>(0.71-4.3%)                 | 16000<br>(4700-28000)     | 93000<br>(35000-160000)         |
| Global   | 2005 | Male   | 95 plus  | 58%<br>(46-70%)                | 42%<br>(30-54%)          | 1.8<br>(1.1-2.5)                            | 2%<br>(0.12-4.2%)                    | 1.9%<br>(-0.22-4.3%)                | 3400<br>(-390-7700)       | 14000<br>(830-29000)            |
| Global   | 2010 | Female | All Ages | 24%<br>(23-26%)                | 76%<br>(74-77%)          | 0.71<br>(0.68-0.74)                         | 1.5%<br>(1.3-1.8%)                   | 2.1%<br>(1.5-2.8%)                  | 520000<br>(360000-680000) | 17000000<br>(14000000-20000000) |
| Global   | 2010 | Female | 15 to 19 | 19%<br>(15-24%)                | 81%<br>(76-85%)          | 0.49<br>(0.34-0.7)                          | 1%<br>(0.75-1.4%)                    | 1.4%<br>(0.86-2%)                   | 3600<br>(2300-5400)       | 450000<br>(320000-610000)       |
| Global   | 2010 | Female | 20 to 24 | 25%<br>(20-31%)                | 75%<br>(69-80%)          | 0.82<br>(0.59-1.1)                          | 1.9%<br>(1.5-2.4%)                   | 2.2%<br>(1.5-3%)                    | 7600<br>(5300-10000)      | 960000<br>(710000-1300000)      |
| Global   | 2010 | Female | 25 to 29 | 27%<br>(21-33%)                | 73%<br>(67-79%)          | 0.93<br>(0.7-1.2)                           | 2.1%<br>(1.7-2.5%)                   | 2.5%<br>(1.8-3.2%)                  | 10000<br>(7500-13000)     | 1100000<br>(830000-1400000)     |
| Global   | 2010 | Female | 30 to 34 | 28%<br>(22-34%)                | 72%<br>(66-78%)          | 0.98<br>(0.73-1.3)                          | 2.1%<br>(1.7-2.6%)                   | 2.8%<br>(2.2-3.5%)                  | 13000<br>(10000-16000)    | 1100000<br>(900000-1400000)     |
| Global   | 2010 | Female | 35 to 39 | 30%<br>(24-36%)                | 70%<br>(64-76%)          | 0.98<br>(0.75-1.3)                          | 2.3%<br>(1.9-2.8%)                   | 3.4%<br>(2.7-4.2%)                  | 18000<br>(14000-22000)    | 1300000<br>(1000000-1500000)    |
| Global   | 2010 | Female | 40 to 44 | 31%<br>(26-37%)                | 69%<br>(63-74%)          | 1<br>(0.76-1.3)                             | 2.5%<br>(2-3%)                       | 4%<br>(3.2-4.9%)                    | 24000<br>(20000-30000)    | 1400000<br>(1200000-1700000)    |
| Global   | 2010 | Female | 45 to 49 | 33%<br>(26-39%)                | 67%<br>(61-74%)          | 1.1<br>(0.85-1.4)                           | 2.9%<br>(2.3-3.6%)                   | 4.7%<br>(3.7-5.9%)                  | 35000<br>(28000-43000)    | 1700000<br>(1400000-2100000)    |
| Global   | 2010 | Female | 50 to 54 | 33%<br>(28-40%)                | 67%<br>(60-72%)          | 1.2<br>(0.9-1.5)                            | 3.2%<br>(2.4-4%)                     | 4.9%<br>(3.8-6.1%)                  | 46000<br>(36000-58000)    | 1900000<br>(1500000-2400000)    |
| Global   | 2010 | Female | 55 to 59 | 33%<br>(27-39%)                | 67%<br>(61-73%)          | 1.2<br>(0.88-1.6)                           | 3.1%<br>(2.3-4%)                     | 4.7%<br>(3.5-5.9%)                  | 56000<br>(42000-71000)    | 1900000<br>(1500000-2500000)    |
| Global   | 2010 | Female | 60 to 64 | 34%<br>(28-41%)                | 66%<br>(59-72%)          | 1.2<br>(0.89-1.6)                           | 2.7%<br>(1.8-3.6%)                   | 3.8%<br>(2.6-5%)                    | 55000<br>(38000-73000)    | 1600000<br>(1100000-2100000)    |
| Global   | 2010 | Female | 65 to 69 | 34%<br>(28-40%)                | 66%<br>(60-72%)          | 1.1<br>(0.85-1.4)                           | 2.2%<br>(1.5-3%)                     | 3.1%<br>(2.1-4.1%)                  | 52000<br>(36000-70000)    | 1200000<br>(830000-1700000)     |

| Location | Year | Sex    | Age      | Prevalence of current drinkers | Prevalence of abstainers | Population average of standard drinks daily | Percent of total attributable deaths | Percent of total attributable DALYs | Attributable deaths          | Attributable DALYs           |
|----------|------|--------|----------|--------------------------------|--------------------------|---------------------------------------------|--------------------------------------|-------------------------------------|------------------------------|------------------------------|
| Global   | 2010 | Female | 70 to 74 | 34%<br>(27-41%)                | 66%<br>(59-73%)          | 1<br>(0.75-1.4)                             | 1.9%<br>(0.97-2.8%)                  | 2.4%<br>(1.3-3.6%)                  | 56000<br>(31000-84000)       | 1100000<br>(570000-1600000)  |
| Global   | 2010 | Female | 75 to 79 | 33%<br>(25-41%)                | 67%<br>(59-75%)          | 0.95<br>(0.66-1.3)                          | 1.4%<br>(0.54-2.5%)                  | 1.8%<br>(0.71-3%)                   | 47000<br>(18000-79000)       | 710000<br>(270000-1200000)   |
| Global   | 2010 | Female | 80 to 84 | 35%<br>(26-43%)                | 65%<br>(57-74%)          | 1<br>(0.72-1.4)                             | 1.3%<br>(0.38-2.3%)                  | 1.5%<br>(0.48-2.8%)                 | 44000<br>(14000-82000)       | 490000<br>(150000-910000)    |
| Global   | 2010 | Female | 85 to 89 | 38%<br>(29-48%)                | 62%<br>(52-71%)          | 1.1<br>(0.77-1.5)                           | 1.1%<br>(0.16-2.3%)                  | 1.3%<br>(0.15-2.6%)                 | 32000<br>(3700-65000)        | 260000<br>(36000-520000)     |
| Global   | 2010 | Female | 90 to 94 | 42%<br>(32-51%)                | 58%<br>(49-68%)          | 1.2<br>(0.77-1.6)                           | 0.85%<br>(-0.31-2.3%)                | 0.93%<br>(-0.46-2.7%)               | 13000<br>(-6300-36000)       | 74000<br>(-26000-200000)     |
| Global   | 2010 | Female | 95 plus  | 49%<br>(36-61%)                | 51%<br>(39-64%)          | 1.4<br>(0.79-2.1)                           | 0.84%<br>(-0.93-3.1%)                | 0.83%<br>(-1.3-3.6%)                | 5300<br>(-8400-23000)        | 22000<br>(-23000-82000)      |
| Global   | 2010 | Male   | All Ages | 40%<br>(38-43%)                | 60%<br>(57-62%)          | 1.6<br>(1.5-1.8)                            | 5.9%<br>(5.3-6.5%)                   | 7.4%<br>(6.4-8.4%)                  | 2100000<br>(1900000-2400000) | 7900000<br>(7100000-8800000) |
| Global   | 2010 | Male   | 15 to 19 | 28%<br>(22-34%)                | 72%<br>(66-78%)          | 0.82<br>(0.56-1.1)                          | 3.1%<br>(2.3-4.1%)                   | 4.1%<br>(2.7-5.7%)                  | 16000<br>(11000-23000)       | 150000<br>(110000-210000)    |
| Global   | 2010 | Male   | 20 to 24 | 42%<br>(36-49%)                | 58%<br>(51-64%)          | 1.8<br>(1.3-2.4)                            | 7.5%<br>(5.9-9.2%)                   | 9.4%<br>(7-12%)                     | 54000<br>(40000-68000)       | 460000<br>(360000-570000)    |
| Global   | 2010 | Male   | 25 to 29 | 48%<br>(41-54%)                | 52%<br>(46-59%)          | 2.4<br>(1.8-3.1)                            | 9.1%<br>(7.4-11%)                    | 11%<br>(8.9-14%)                    | 74000<br>(59000-90000)       | 570000<br>(460000-680000)    |
| Global   | 2010 | Male   | 30 to 34 | 51%<br>(44-58%)                | 49%<br>(42-56%)          | 2.6<br>(2-3.4)                              | 9.6%<br>(8.1-11%)                    | 12%<br>(9.9-14%)                    | 91000<br>(75000-110000)      | 620000<br>(520000-720000)    |
| Global   | 2010 | Male   | 35 to 39 | 54%<br>(48-61%)                | 46%<br>(39-52%)          | 2.5<br>(1.9-3.3)                            | 10%<br>(8.4-12%)                     | 13%<br>(11-15%)                     | 120000<br>(96000-140000)     | 700000<br>(590000-810000)    |
| Global   | 2010 | Male   | 40 to 44 | 56%<br>(49-63%)                | 44%<br>(37-51%)          | 2.5<br>(1.9-3.2)                            | 11%<br>(8.9-12%)                     | 14%<br>(12-16%)                     | 150000<br>(120000-170000)    | 780000<br>(660000-900000)    |
| Global   | 2010 | Male   | 45 to 49 | 57%<br>(50-63%)                | 43%<br>(37-50%)          | 2.8<br>(2.1-3.5)                            | 11%<br>(9.5-13%)                     | 15%<br>(12-17%)                     | 190000<br>(160000-220000)    | 870000<br>(740000-1000000)   |
| Global   | 2010 | Male   | 50 to 54 | 57%<br>(50-63%)                | 43%<br>(37-50%)          | 2.9<br>(2.2-3.6)                            | 11%<br>(9.3-13%)                     | 14%<br>(12-16%)                     | 220000<br>(190000-260000)    | 900000<br>(760000-1000000)   |
| Global   | 2010 | Male   | 55 to 59 | 56%<br>(49-63%)                | 44%<br>(37-51%)          | 2.7<br>(2.1-3.5)                            | 10%<br>(8.5-12%)                     | 13%<br>(11-15%)                     | 250000<br>(210000-300000)    | 870000<br>(730000-1000000)   |

| Location | Year | Sex    | Age      | Prevalence of current drinkers | Prevalence of abstainers | Population average of standard drinks daily | Percent of total attributable deaths | Percent of total attributable DALYs | Attributable deaths       | Attributable DALYs              |
|----------|------|--------|----------|--------------------------------|--------------------------|---------------------------------------------|--------------------------------------|-------------------------------------|---------------------------|---------------------------------|
| Global   | 2010 | Male   | 60 to 64 | 56%<br>(49-64%)                | 44%<br>(36-51%)          | 2.7<br>(2-3.4)                              | 8.7%<br>(6.9-11%)                    | 11%<br>(8.3-13%)                    | 230000<br>(180000-280000) | 6700000<br>(5400000-8100000)    |
| Global   | 2010 | Male   | 65 to 69 | 54%<br>(46-61%)                | 46%<br>(39-54%)          | 2.4<br>(1.9-2.9)                            | 7.1%<br>(5.6-8.7%)                   | 8.4%<br>(6.6-10%)                   | 200000<br>(160000-240000) | 4800000<br>(3800000-5900000)    |
| Global   | 2010 | Male   | 70 to 74 | 53%<br>(45-60%)                | 47%<br>(40-55%)          | 2.1<br>(1.6-2.7)                            | 5.8%<br>(4.2-7.7%)                   | 6.8%<br>(4.7-8.9%)                  | 200000<br>(140000-260000) | 3800000<br>(2700000-5000000)    |
| Global   | 2010 | Male   | 75 to 79 | 51%<br>(43-60%)                | 49%<br>(40-57%)          | 1.9<br>(1.4-2.4)                            | 4.7%<br>(3.1-6.4%)                   | 5.3%<br>(3.5-7.4%)                  | 150000<br>(100000-210000) | 2300000<br>(1600000-3200000)    |
| Global   | 2010 | Male   | 80 to 84 | 52%<br>(41-61%)                | 48%<br>(39-59%)          | 1.8<br>(1.4-2.2)                            | 3.9%<br>(2.6-5.4%)                   | 4.3%<br>(2.8-6.2%)                  | 110000<br>(73000-160000)  | 1300000<br>(860000-1800000)     |
| Global   | 2010 | Male   | 85 to 89 | 53%<br>(43-62%)                | 47%<br>(38-57%)          | 1.8<br>(1.3-2.3)                            | 3.1%<br>(1.9-4.5%)                   | 3.4%<br>(1.9-5.1%)                  | 58000<br>(32000-86000)    | 470000<br>(280000-690000)       |
| Global   | 2010 | Male   | 90 to 94 | 54%<br>(44-63%)                | 46%<br>(37-56%)          | 1.6<br>(1.2-2.2)                            | 2.3%<br>(0.92-3.8%)                  | 2.4%<br>(0.79-4.1%)                 | 18000<br>(5800-31000)     | 100000<br>(42000-170000)        |
| Global   | 2010 | Male   | 95 plus  | 59%<br>(47-70%)                | 41%<br>(30-53%)          | 1.7<br>(1.1-2.5)                            | 2.1%<br>(0.25-4.1%)                  | 2%<br>(-0.076-4.4%)                 | 4600<br>(-170-9900)       | 19000<br>(2300-38000)           |
| Global   | 2016 | Female | All Ages | 25%<br>(23-27%)                | 75%<br>(73-77%)          | 0.74<br>(0.69-0.8)                          | 1.7%<br>(1.4-2%)                     | 2.3%<br>(1.6-3%)                    | 560000<br>(390000-750000) | 18000000<br>(15000000-22000000) |
| Global   | 2016 | Female | 15 to 19 | 19%<br>(14-25%)                | 81%<br>(75-86%)          | 0.52<br>(0.34-0.75)                         | 1%<br>(0.74-1.4%)                    | 1.4%<br>(0.84-2.1%)                 | 3100<br>(1900-4700)       | 41000<br>(290000-560000)        |
| Global   | 2016 | Female | 20 to 24 | 25%<br>(19-32%)                | 75%<br>(68-81%)          | 0.87<br>(0.62-1.2)                          | 1.9%<br>(1.5-2.5%)                   | 2.3%<br>(1.6-3.1%)                  | 6400<br>(4400-8900)       | 870000<br>(640000-1200000)      |
| Global   | 2016 | Female | 25 to 29 | 27%<br>(21-34%)                | 73%<br>(66-79%)          | 0.92<br>(0.67-1.2)                          | 2.2%<br>(1.7-2.7%)                   | 2.8%<br>(2-3.7%)                    | 9700<br>(7000-13000)      | 1100000<br>(830000-1400000)     |
| Global   | 2016 | Female | 30 to 34 | 29%<br>(21-36%)                | 71%<br>(64-79%)          | 0.99<br>(0.73-1.3)                          | 2.3%<br>(1.9-2.9%)                   | 3.4%<br>(2.6-4.4%)                  | 14000<br>(10000-17000)    | 1200000<br>(960000-1500000)     |
| Global   | 2016 | Female | 35 to 39 | 31%<br>(23-38%)                | 69%<br>(62-77%)          | 1.1<br>(0.78-1.4)                           | 2.5%<br>(2-3.2%)                     | 4.2%<br>(3.2-5.3%)                  | 18000<br>(14000-24000)    | 1300000<br>(1000000-1600000)    |
| Global   | 2016 | Female | 40 to 44 | 31%<br>(24-39%)                | 69%<br>(61-76%)          | 1.1<br>(0.78-1.4)                           | 2.6%<br>(2.1-3.3%)                   | 4.7%<br>(3.6-5.8%)                  | 25000<br>(19000-31000)    | 1500000<br>(1200000-1800000)    |
| Global   | 2016 | Female | 45 to 49 | 31%<br>(23-38%)                | 69%<br>(62-77%)          | 1.1<br>(0.76-1.4)                           | 2.7%<br>(2.1-3.5%)                   | 4.8%<br>(3.7-6%)                    | 34000<br>(27000-43000)    | 1700000<br>(1300000-2100000)    |

| Location | Year | Sex    | Age      | Prevalence of current drinkers | Prevalence of abstainers | Population average of standard drinks daily | Percent of total attributable deaths | Percent of total attributable DALYs | Attributable deaths          | Attributable DALYs           |
|----------|------|--------|----------|--------------------------------|--------------------------|---------------------------------------------|--------------------------------------|-------------------------------------|------------------------------|------------------------------|
| Global   | 2016 | Female | 50 to 54 | 32%<br>(25-39%)                | 68%<br>(61-75%)          | 1.1<br>(0.84-1.5)                           | 3%<br>(2.3-3.9%)                     | 5%<br>(3.8-6.2%)                    | 48000<br>(37000-60000)       | 2000000<br>(1500000-2500000) |
| Global   | 2016 | Female | 55 to 59 | 33%<br>(26-41%)                | 67%<br>(59-74%)          | 1.2<br>(0.9-1.6)                            | 3.1%<br>(2.3-4%)                     | 4.8%<br>(3.6-6.2%)                  | 58000<br>(44000-75000)       | 2000000<br>(1500000-2600000) |
| Global   | 2016 | Female | 60 to 64 | 33%<br>(26-41%)                | 67%<br>(59-74%)          | 1.2<br>(0.85-1.6)                           | 2.7%<br>(1.9-3.6%)                   | 3.9%<br>(2.8-5.3%)                  | 65000<br>(46000-86000)       | 1900000<br>(1300000-2500000) |
| Global   | 2016 | Female | 65 to 69 | 35%<br>(28-43%)                | 65%<br>(57-72%)          | 1.1<br>(0.84-1.5)                           | 2.3%<br>(1.5-3.1%)                   | 3.2%<br>(2.3-4.3%)                  | 63000<br>(43000-83000)       | 1500000<br>(1000000-2000000) |
| Global   | 2016 | Female | 70 to 74 | 34%<br>(27-42%)                | 66%<br>(58-73%)          | 1<br>(0.74-1.4)                             | 1.8%<br>(1-2.8%)                     | 2.5%<br>(1.4-3.7%)                  | 54000<br>(31000-80000)       | 1000000<br>(580000-1500000)  |
| Global   | 2016 | Female | 75 to 79 | 34%<br>(26-44%)                | 66%<br>(56-74%)          | 1<br>(0.68-1.4)                             | 1.5%<br>(0.55-2.6%)                  | 1.9%<br>(0.75-3.3%)                 | 52000<br>(20000-89000)       | 780000<br>(290000-1300000)   |
| Global   | 2016 | Female | 80 to 84 | 35%<br>(26-45%)                | 65%<br>(55-74%)          | 1<br>(0.71-1.4)                             | 1.3%<br>(0.44-2.3%)                  | 1.6%<br>(0.55-2.9%)                 | 46000<br>(16000-84000)       | 510000<br>(180000-930000)    |
| Global   | 2016 | Female | 85 to 89 | 38%<br>(28-47%)                | 62%<br>(53-72%)          | 1.1<br>(0.73-1.5)                           | 1.1%<br>(0.17-2.2%)                  | 1.3%<br>(0.15-2.7%)                 | 37000<br>(4200-79000)        | 300000<br>(47000-620000)     |
| Global   | 2016 | Female | 90 to 94 | 44%<br>(33-53%)                | 56%<br>(47-67%)          | 1.3<br>(0.81-1.8)                           | 0.95%<br>(-0.37-2.5%)                | 1%<br>(-0.49-2.9%)                  | 20000<br>(-9300-56000)       | 120000<br>(-45000-310000)    |
| Global   | 2016 | Female | 95 plus  | 48%<br>(35-61%)                | 52%<br>(39-65%)          | 1.3<br>(0.72-1.9)                           | 0.78%<br>(-0.81-2.8%)                | 0.77%<br>(-1.2-3.2%)                | 5900<br>(-9000-24000)        | 25000<br>(-26000-89000)      |
| Global   | 2016 | Male   | All Ages | 39%<br>(36-43%)                | 61%<br>(57-64%)          | 1.7<br>(1.5-1.9)                            | 6.2%<br>(5.6-6.9%)                   | 7.5%<br>(6.5-8.6%)                  | 2300000<br>(1900000-2600000) | 8100000<br>(7200000-9100000) |
| Global   | 2016 | Male   | 15 to 19 | 25%<br>(19-32%)                | 75%<br>(68-81%)          | 0.79<br>(0.53-1.1)                          | 2.9%<br>(2.1-3.9%)                   | 3.8%<br>(2.6-5.4%)                  | 14000<br>(9200-19000)        | 1400000<br>(990000-1800000)  |
| Global   | 2016 | Male   | 20 to 24 | 38%<br>(30-46%)                | 62%<br>(54-70%)          | 1.7<br>(1.3-2.3)                            | 7%<br>(5.5-8.8%)                     | 8.7%<br>(6.5-11%)                   | 46000<br>(34000-59000)       | 4000000<br>(3100000-5100000) |
| Global   | 2016 | Male   | 25 to 29 | 45%<br>(36-54%)                | 55%<br>(46-64%)          | 2.2<br>(1.6-2.9)                            | 8.8%<br>(7.2-11%)                    | 11%<br>(8.8-14%)                    | 72000<br>(56000-89000)       | 5600000<br>(4600000-6800000) |
| Global   | 2016 | Male   | 30 to 34 | 48%<br>(38-57%)                | 52%<br>(43-62%)          | 2.6<br>(1.9-3.5)                            | 9.6%<br>(8-11%)                      | 13%<br>(10-15%)                     | 90000<br>(74000-110000)      | 6300000<br>(5200000-7400000) |
| Global   | 2016 | Male   | 35 to 39 | 51%<br>(42-59%)                | 49%<br>(41-58%)          | 2.7<br>(2-3.7)                              | 9.9%<br>(8.3-12%)                    | 13%<br>(11-16%)                     | 110000<br>(88000-130000)     | 6600000<br>(5500000-7700000) |



| Location | Year | Sex    | Age      | Prevalence of current drinkers | Prevalence of abstainers | Population average of standard drinks daily | Percent of total attributable deaths | Percent of total attributable DALYs | Attributable deaths       | Attributable DALYs         |
|----------|------|--------|----------|--------------------------------|--------------------------|---------------------------------------------|--------------------------------------|-------------------------------------|---------------------------|----------------------------|
| Global   | 2016 | Male   | 40 to 44 | 53%<br>(44-62%)                | 47%<br>(38-56%)          | 2.7<br>(1.9-3.5)                            | 10%<br>(8.7-12%)                     | 14%<br>(12-16%)                     | 140000<br>(110000-160000) | 740000<br>(620000-860000)  |
| Global   | 2016 | Male   | 45 to 49 | 55%<br>(45-64%)                | 45%<br>(36-55%)          | 2.6<br>(1.9-3.5)                            | 11%<br>(9.1-13%)                     | 14%<br>(12-17%)                     | 180000<br>(150000-210000) | 850000<br>(720000-990000)  |
| Global   | 2016 | Male   | 50 to 54 | 56%<br>(46-64%)                | 44%<br>(36-54%)          | 2.7<br>(2-3.6)                              | 11%<br>(9.1-13%)                     | 14%<br>(12-16%)                     | 230000<br>(190000-270000) | 920000<br>(770000-1100000) |
| Global   | 2016 | Male   | 55 to 59 | 55%<br>(47-64%)                | 45%<br>(36-53%)          | 2.8<br>(2.1-3.6)                            | 10%<br>(8.3-12%)                     | 13%<br>(10-15%)                     | 250000<br>(210000-300000) | 880000<br>(740000-1000000) |
| Global   | 2016 | Male   | 60 to 64 | 55%<br>(46-65%)                | 45%<br>(35-54%)          | 2.6<br>(1.9-3.4)                            | 8.9%<br>(7.1-11%)                    | 11%<br>(8.7-13%)                    | 280000<br>(230000-340000) | 830000<br>(670000-1000000) |
| Global   | 2016 | Male   | 65 to 69 | 55%<br>(46-64%)                | 45%<br>(36-54%)          | 2.4<br>(1.8-3)                              | 7.4%<br>(5.9-9.1%)                   | 8.9%<br>(7.1-11%)                   | 250000<br>(200000-310000) | 610000<br>(490000-740000)  |
| Global   | 2016 | Male   | 70 to 74 | 53%<br>(43-61%)                | 47%<br>(39-57%)          | 2.1<br>(1.6-2.7)                            | 5.7%<br>(4.2-7.5%)                   | 6.7%<br>(4.8-8.7%)                  | 190000<br>(140000-250000) | 380000<br>(280000-490000)  |
| Global   | 2016 | Male   | 75 to 79 | 51%<br>(41-62%)                | 49%<br>(38-59%)          | 1.9<br>(1.4-2.5)                            | 4.6%<br>(3.1-6.4%)                   | 5.3%<br>(3.4-7.4%)                  | 170000<br>(110000-230000) | 250000<br>(170000-350000)  |
| Global   | 2016 | Male   | 80 to 84 | 51%<br>(40-61%)                | 49%<br>(39-60%)          | 1.7<br>(1.3-2.2)                            | 3.9%<br>(2.6-5.3%)                   | 4.4%<br>(2.8-6.1%)                  | 130000<br>(83000-180000)  | 140000<br>(97000-200000)   |
| Global   | 2016 | Male   | 85 to 89 | 52%<br>(41-62%)                | 48%<br>(38-59%)          | 1.7<br>(1.2-2.2)                            | 3.1%<br>(1.9-4.5%)                   | 3.4%<br>(1.9-5%)                    | 76000<br>(43000-110000)   | 620000<br>(370000-900000)  |
| Global   | 2016 | Male   | 90 to 94 | 56%<br>(45-66%)                | 44%<br>(34-55%)          | 1.8<br>(1.3-2.4)                            | 2.5%<br>(1-4%)                       | 2.6%<br>(0.91-4.4%)                 | 28000<br>(9700-47000)     | 160000<br>(68000-260000)   |
| Global   | 2016 | Male   | 95 plus  | 58%<br>(45-69%)                | 42%<br>(31-55%)          | 1.6<br>(0.98-2.3)                           | 2%<br>(0.29-3.8%)                    | 1.9%<br>(-0.027-4.1%)               | 5500<br>(-77-12000)       | 23000<br>(3400-45000)      |
| High SDI | 1990 | Female | All Ages | 73%<br>(69-76%)                | 27%<br>(24-31%)          | 2.3<br>(2-2.7)                              | 3.3%<br>(2-4.8%)                     | 3.2%<br>(0.62-6.1%)                 | 140000<br>(33000-260000)  | 410000<br>(250000-590000)  |
| High SDI | 1990 | Female | 15 to 19 | 69%<br>(59-78%)                | 31%<br>(22-41%)          | 2<br>(1.4-2.8)                              | 3%<br>(1.9-4.4%)                     | 9.3%<br>(5-14%)                     | 1100<br>(580-1600)        | 110000<br>(71000-160000)   |
| High SDI | 1990 | Female | 20 to 24 | 80%<br>(72-86%)                | 20%<br>(14-28%)          | 3.1<br>(2.2-4.1)                            | 4.6%<br>(3.3-6.1%)                   | 12%<br>(7.4-17%)                    | 1800<br>(1100-2500)       | 210000<br>(150000-280000)  |
| High SDI | 1990 | Female | 25 to 29 | 83%<br>(76-88%)                | 17%<br>(12-24%)          | 2.9<br>(2.2-3.8)                            | 4.2%<br>(3-5.4%)                     | 11%<br>(7-15%)                      | 2000<br>(1300-2800)       | 220000<br>(150000-290000)  |
| High SDI | 1990 | Female | 30 to 34 | 84%<br>(76-89%)                | 16%<br>(11-24%)          | 2.9<br>(2.1-3.7)                            | 4%<br>(2.9-5.3%)                     | 11%<br>(7.4-14%)                    | 2600<br>(1800-3500)       | 230000<br>(160000-290000)  |

| Location | Year | Sex    | Age      | Prevalence of current drinkers | Prevalence of abstainers | Population average of standard drinks daily | Percent of total attributable deaths | Percent of total attributable DALYs | Attributable deaths       | Attributable DALYs             |
|----------|------|--------|----------|--------------------------------|--------------------------|---------------------------------------------|--------------------------------------|-------------------------------------|---------------------------|--------------------------------|
| High SDI | 1990 | Female | 35 to 39 | 84%<br>(77-89%)                | 16%<br>(11-23%)          | 2.9<br>(2.2-3.9)                            | 4.4%<br>(3.2-5.8%)                   | 12%<br>(8.5-15%)                    | 3800<br>(2800-4900)       | 260000<br>(190000-340000)      |
| High SDI | 1990 | Female | 40 to 44 | 83%<br>(77-89%)                | 17%<br>(11-23%)          | 3.1<br>(2.3-4)                              | 4.9%<br>(3.5-6.4%)                   | 12%<br>(8.9-15%)                    | 5600<br>(4100-7100)       | 320000<br>(230000-410000)      |
| High SDI | 1990 | Female | 45 to 49 | 82%<br>(75-88%)                | 18%<br>(12-25%)          | 3.2<br>(2.3-4.3)                            | 5.3%<br>(3.7-7.2%)                   | 12%<br>(8.4-15%)                    | 7000<br>(5100-9100)       | 330000<br>(240000-440000)      |
| High SDI | 1990 | Female | 50 to 54 | 81%<br>(74-86%)                | 19%<br>(14-26%)          | 3.3<br>(2.4-4.4)                            | 5.6%<br>(3.7-7.7%)                   | 11%<br>(7.6-14%)                    | 9200<br>(6500-12000)      | 380000<br>(260000-510000)      |
| High SDI | 1990 | Female | 55 to 59 | 79%<br>(71-85%)                | 21%<br>(15-29%)          | 3.3<br>(2.4-4.4)                            | 5.3%<br>(3.3-7.5%)                   | 9.2%<br>(6.1-13%)                   | 11000<br>(7400-16000)     | 400000<br>(250000-560000)      |
| High SDI | 1990 | Female | 60 to 64 | 76%<br>(68-82%)                | 24%<br>(18-32%)          | 3.1<br>(2.2-4.3)                            | 4.5%<br>(2.3-7.1%)                   | 7.2%<br>(3.9-11%)                   | 13000<br>(7000-21000)     | 400000<br>(200000-630000)      |
| High SDI | 1990 | Female | 65 to 69 | 72%<br>(63-80%)                | 28%<br>(20-37%)          | 2.9<br>(2.1-3.8)                            | 3.8%<br>(1.6-6.2%)                   | 5.5%<br>(2.4-8.8%)                  | 16000<br>(6200-26000)     | 390000<br>(150000-640000)      |
| High SDI | 1990 | Female | 70 to 74 | 68%<br>(58-76%)                | 32%<br>(24-42%)          | 2.4<br>(1.6-3.3)                            | 2.5%<br>(0.14-5.2%)                  | 3.4%<br>(0.23-6.9%)                 | 12000<br>(140-25000)      | 240000<br>(5700-500000)        |
| High SDI | 1990 | Female | 75 to 79 | 66%<br>(56-76%)                | 34%<br>(24-44%)          | 2.4<br>(1.6-3.3)                            | 2.3%<br>(-0.54-5.5%)                 | 2.8%<br>(-0.79-6.9%)                | 17000<br>(-5300-41000)    | 260000<br>(-65000-630000)      |
| High SDI | 1990 | Female | 80 to 84 | 64%<br>(52-73%)                | 36%<br>(27-48%)          | 2.3<br>(1.6-3.2)                            | 2.1%<br>(-0.68-5.2%)                 | 2.4%<br>(-1.1-6.3%)                 | 18000<br>(-7700-47000)    | 210000<br>(-66000-530000)      |
| High SDI | 1990 | Female | 85 to 89 | 61%<br>(50-71%)                | 39%<br>(29-50%)          | 2.2<br>(1.5-3.1)                            | 1.7%<br>(-1.1-4.9%)                  | 1.8%<br>(-1.6-5.8%)                 | 13000<br>(-9700-39000)    | 110000<br>(-61000-310000)      |
| High SDI | 1990 | Female | 90 to 94 | 60%<br>(49-70%)                | 40%<br>(30-51%)          | 2.1<br>(1.3-3.1)                            | 1.3%<br>(-1.5-4.7%)                  | 1.3%<br>(-2.2-5.4%)                 | 5300<br>(-7600-21000)     | 33000<br>(-34000-110000)       |
| High SDI | 1990 | Female | 95 plus  | 59%<br>(44-72%)                | 41%<br>(28-56%)          | 1.9<br>(1.1-3)                              | 0.73%<br>(-2.3-4.3%)                 | 0.57%<br>(-3.2-4.9%)                | 1100<br>(-4300-7500)      | 5400<br>(-13000-27000)         |
| High SDI | 1990 | Male   | All Ages | 82%<br>(79-85%)                | 18%<br>(15-21%)          | 3.6<br>(3.1-4.1)                            | 8.4%<br>(6.5-10%)                    | 8.2%<br>(5.5-11%)                   | 350000<br>(230000-460000) | 12000000<br>(9200000-15000000) |
| High SDI | 1990 | Male   | 15 to 19 | 73%<br>(64-81%)                | 27%<br>(19-36%)          | 2.4<br>(1.7-3.2)                            | 7.2%<br>(4.7-10%)                    | 13%<br>(7.3-18%)                    | 4000<br>(2400-5800)       | 350000<br>(230000-480000)      |
| High SDI | 1990 | Male   | 20 to 24 | 86%<br>(78-91%)                | 14%<br>(9.3-22%)         | 4.5<br>(3.5-5.8)                            | 14%<br>(10-18%)                      | 21%<br>(14-28%)                     | 9900<br>(6900-13000)      | 840000<br>(620000-1100000)     |
| High SDI | 1990 | Male   | 25 to 29 | 89%<br>(83-93%)                | 11%<br>(7.3-17%)         | 4.7<br>(3.6-5.9)                            | 13%<br>(9.7-16%)                     | 20%<br>(14-26%)                     | 10000<br>(7400-14000)     | 850000<br>(640000-1100000)     |
| High SDI | 1990 | Male   | 30 to 34 | 91%<br>(86-94%)                | 9.2%<br>(5.6-14%)        | 4.6<br>(3.6-5.9)                            | 12%<br>(8.8-15%)                     | 18%<br>(13-23%)                     | 11000<br>(8200-14000)     | 820000<br>(630000-1000000)     |
| High SDI | 1990 | Male   | 35 to 39 | 92%<br>(87-95%)                | 8.3%<br>(5.1-13%)        | 4.4<br>(3.4-5.7)                            | 11%<br>(8.5-14%)                     | 17%<br>(12-21%)                     | 13000<br>(9700-16000)     | 830000<br>(640000-1000000)     |

| Location | Year | Sex    | Age      | Prevalence of current drinkers | Prevalence of abstainers | Population average of standard drinks daily | Percent of total attributable deaths | Percent of total attributable DALYs | Attributable deaths      | Attributable DALYs           |
|----------|------|--------|----------|--------------------------------|--------------------------|---------------------------------------------|--------------------------------------|-------------------------------------|--------------------------|------------------------------|
| High SDI | 1990 | Male   | 40 to 44 | 92%<br>(88-95%)                | 7.7%<br>(4.7-12%)        | 4.6<br>(3.5-5.8)                            | 11%<br>(8.4-14%)                     | 16%<br>(12-20%)                     | 16000<br>(12000-21000)   | 910000<br>(700000-1100000)   |
| High SDI | 1990 | Male   | 45 to 49 | 92%<br>(88-95%)                | 7.8%<br>(4.8-12%)        | 5<br>(3.8-6.5)                              | 12%<br>(8.8-15%)                     | 16%<br>(12-20%)                     | 21000<br>(15000-26000)   | 970000<br>(740000-1200000)   |
| High SDI | 1990 | Male   | 50 to 54 | 92%<br>(88-95%)                | 8.1%<br>(5.1-12%)        | 5.5<br>(4.2-7)                              | 12%<br>(8.8-15%)                     | 15%<br>(11-19%)                     | 28000<br>(21000-36000)   | 1100000<br>(870000-1400000)  |
| High SDI | 1990 | Male   | 55 to 59 | 91%<br>(86-94%)                | 9.3%<br>(6-14%)          | 5.7<br>(4.4-7.2)                            | 11%<br>(7.9-14%)                     | 13%<br>(9.6-17%)                    | 35000<br>(26000-45000)   | 1200000<br>(900000-1600000)  |
| High SDI | 1990 | Male   | 60 to 64 | 89%<br>(84-93%)                | 11%<br>(6.9-16%)         | 5.5<br>(4.2-7.1)                            | 9.1%<br>(6.2-12%)                    | 11%<br>(7.1-15%)                    | 41000<br>(27000-56000)   | 1200000<br>(820000-1600000)  |
| High SDI | 1990 | Male   | 65 to 69 | 88%<br>(83-92%)                | 12%<br>(7.9-17%)         | 5.1<br>(3.9-6.4)                            | 7.6%<br>(4.7-11%)                    | 8.7%<br>(5.3-12%)                   | 41000<br>(25000-58000)   | 1000000<br>(630000-1400000)  |
| High SDI | 1990 | Male   | 70 to 74 | 86%<br>(80-91%)                | 14%<br>(9.4-20%)         | 4.2<br>(3.1-5.4)                            | 5.5%<br>(2.7-8.4%)                   | 6.1%<br>(2.7-9.6%)                  | 29000<br>(13000-47000)   | 590000<br>(280000-920000)    |
| High SDI | 1990 | Male   | 75 to 79 | 85%<br>(79-91%)                | 15%<br>(9.4-21%)         | 4.1<br>(3-5.4)                              | 5.2%<br>(2.2-8.4%)                   | 5.7%<br>(2.1-9.4%)                  | 35000<br>(13000-59000)   | 550000<br>(230000-900000)    |
| High SDI | 1990 | Male   | 80 to 84 | 84%<br>(76-90%)                | 16%<br>(10-24%)          | 3.8<br>(2.8-5)                              | 4.7%<br>(1.7-7.8%)                   | 5%<br>(1.6-8.5%)                    | 29000<br>(8900-50000)    | 330000<br>(120000-560000)    |
| High SDI | 1990 | Male   | 85 to 89 | 82%<br>(74-88%)                | 18%<br>(12-26%)          | 3.5<br>(2.5-4.6)                            | 3.8%<br>(0.98-6.8%)                  | 4%<br>(0.66-7.4%)                   | 15000<br>(2600-28000)    | 120000<br>(32000-220000)     |
| High SDI | 1990 | Male   | 90 to 94 | 82%<br>(74-88%)                | 18%<br>(12-26%)          | 3.2<br>(2.2-4.4)                            | 2.8%<br>(-0.18-5.8%)                 | 2.7%<br>(-0.73-6.3%)                | 4200<br>(-900-9500)      | 25000<br>(-830-52000)        |
| High SDI | 1990 | Male   | 95 plus  | 81%<br>(71-89%)                | 19%<br>(11-29%)          | 2.8<br>(1.7-4.1)                            | 1.7%<br>(-1.4-5%)                    | 1.4%<br>(-2.3-5.3%)                 | 650<br>(-890-2200)       | 3000<br>(-2200-8500)         |
| High SDI | 1995 | Female | All Ages | 73%<br>(70-76%)                | 27%<br>(24-30%)          | 2.2<br>(1.9-2.6)                            | 3.1%<br>(1.8-4.4%)                   | 2.8%<br>(0.36-5.5%)                 | 120000<br>(21000-240000) | 3800000<br>(2300000-5500000) |
| High SDI | 1995 | Female | 15 to 19 | 68%<br>(59-77%)                | 32%<br>(23-41%)          | 1.9<br>(1.3-2.7)                            | 2.9%<br>(1.8-4.2%)                   | 8.9%<br>(4.8-14%)                   | 930<br>(510-1400)        | 100000<br>(65000-150000)     |
| High SDI | 1995 | Female | 20 to 24 | 80%<br>(72-86%)                | 20%<br>(14-28%)          | 3<br>(2.1-4)                                | 4.4%<br>(3.1-5.8%)                   | 12%<br>(7-17%)                      | 1500<br>(940-2200)       | 190000<br>(130000-250000)    |
| High SDI | 1995 | Female | 25 to 29 | 83%<br>(76-88%)                | 17%<br>(12-24%)          | 2.8<br>(2.1-3.7)                            | 3.9%<br>(2.8-5.1%)                   | 10%<br>(6.4-14%)                    | 1700<br>(1100-2400)      | 190000<br>(140000-250000)    |
| High SDI | 1995 | Female | 30 to 34 | 84%<br>(77-89%)                | 16%<br>(11-23%)          | 2.8<br>(2.1-3.7)                            | 3.7%<br>(2.7-4.9%)                   | 10%<br>(6.8-13%)                    | 2400<br>(1600-3200)      | 210000<br>(160000-280000)    |
| High SDI | 1995 | Female | 35 to 39 | 83%<br>(77-89%)                | 17%<br>(11-23%)          | 2.8<br>(2.1-3.7)                            | 4.2%<br>(3-5.4%)                     | 11%<br>(7.9-14%)                    | 3800<br>(2800-4800)      | 260000<br>(200000-340000)    |

| Location | Year | Sex    | Age      | Prevalence of current drinkers | Prevalence of abstainers | Population average of standard drinks daily | Percent of total attributable deaths | Percent of total attributable DALYs | Attributable deaths       | Attributable DALYs             |
|----------|------|--------|----------|--------------------------------|--------------------------|---------------------------------------------|--------------------------------------|-------------------------------------|---------------------------|--------------------------------|
| High SDI | 1995 | Female | 40 to 44 | 83%<br>(77-88%)                | 17%<br>(12-23%)          | 2.9<br>(2.2-3.8)                            | 4.7%<br>(3.3-6.1%)                   | 11%<br>(8.5-14%)                    | 5600<br>(4200-7000)       | 320000<br>(240000-410000)      |
| High SDI | 1995 | Female | 45 to 49 | 83%<br>(76-88%)                | 17%<br>(12-24%)          | 3.1<br>(2.2-4.1)                            | 5%<br>(3.5-6.7%)                     | 11%<br>(8.3-14%)                    | 7700<br>(5700-9900)       | 370000<br>(270000-480000)      |
| High SDI | 1995 | Female | 50 to 54 | 81%<br>(74-86%)                | 19%<br>(14-26%)          | 3.1<br>(2.2-4.1)                            | 5.2%<br>(3.5-7.1%)                   | 10%<br>(7.4-13%)                    | 8900<br>(6400-12000)      | 360000<br>(250000-490000)      |
| High SDI | 1995 | Female | 55 to 59 | 79%<br>(72-85%)                | 21%<br>(15-28%)          | 3.2<br>(2.3-4.2)                            | 5%<br>(3.2-7%)                       | 9%<br>(6.2-12%)                     | 11000<br>(7200-15000)     | 380000<br>(240000-520000)      |
| High SDI | 1995 | Female | 60 to 64 | 76%<br>(68-82%)                | 24%<br>(18-32%)          | 3<br>(2.1-4.1)                              | 4.2%<br>(2.2-6.5%)                   | 6.8%<br>(3.9-10%)                   | 12000<br>(6400-18000)     | 350000<br>(180000-540000)      |
| High SDI | 1995 | Female | 65 to 69 | 72%<br>(64-80%)                | 28%<br>(20-36%)          | 2.7<br>(2-3.5)                              | 3.3%<br>(1.3-5.5%)                   | 5%<br>(2.2-8%)                      | 13000<br>(5400-22000)     | 330000<br>(130000-550000)      |
| High SDI | 1995 | Female | 70 to 74 | 69%<br>(60-77%)                | 31%<br>(23-40%)          | 2.4<br>(1.7-3.3)                            | 2.6%<br>(0.33-5.2%)                  | 3.7%<br>(0.56-7%)                   | 15000<br>(1300-30000)     | 300000<br>(26000-590000)       |
| High SDI | 1995 | Female | 75 to 79 | 65%<br>(55-75%)                | 35%<br>(25-45%)          | 2.1<br>(1.4-3)                              | 1.6%<br>(-0.81-4.3%)                 | 2%<br>(-1.1-5.4%)                   | 9700<br>(-5900-28000)     | 160000<br>(-82000-430000)      |
| High SDI | 1995 | Female | 80 to 84 | 64%<br>(52-73%)                | 36%<br>(27-48%)          | 2.1<br>(1.5-2.9)                            | 1.6%<br>(-0.89-4.3%)                 | 1.8%<br>(-1.3-5.3%)                 | 13000<br>(-10000-39000)   | 160000<br>(-92000-450000)      |
| High SDI | 1995 | Female | 85 to 89 | 62%<br>(51-71%)                | 38%<br>(29-49%)          | 2.1<br>(1.4-2.9)                            | 1.3%<br>(-1.2-4.2%)                  | 1.4%<br>(-1.7-4.9%)                 | 10000<br>(-13000-38000)   | 94000<br>(-84000-300000)       |
| High SDI | 1995 | Female | 90 to 94 | 61%<br>(50-71%)                | 39%<br>(29-50%)          | 2<br>(1.3-2.9)                              | 0.9%<br>(-1.7-4.1%)                  | 0.83%<br>(-2.3-4.7%)                | 4300<br>(-10000-22000)    | 29000<br>(-48000-120000)       |
| High SDI | 1995 | Female | 95 plus  | 60%<br>(46-72%)                | 40%<br>(28-54%)          | 1.9<br>(1-2.9)                              | 0.5%<br>(-2.4-4%)                    | 0.3%<br>(-3.3-4.5%)                 | 810<br>(-5900-8800)       | 4700<br>(-18000-32000)         |
| High SDI | 1995 | Male   | All Ages | 83%<br>(80-85%)                | 17%<br>(15-20%)          | 3.4<br>(3-3.9)                              | 8.1%<br>(6.4-9.9%)                   | 7.8%<br>(5.2-10%)                   | 330000<br>(220000-450000) | 12000000<br>(9100000-14000000) |
| High SDI | 1995 | Male   | 15 to 19 | 73%<br>(64-80%)                | 27%<br>(20-36%)          | 2.3<br>(1.7-3)                              | 6.9%<br>(4.5-9.6%)                   | 12%<br>(7-18%)                      | 3500<br>(2100-5100)       | 310000<br>(210000-430000)      |
| High SDI | 1995 | Male   | 20 to 24 | 86%<br>(79-91%)                | 14%<br>(9.1-21%)         | 4.3<br>(3.3-5.4)                            | 13%<br>(9.7-17%)                     | 20%<br>(13-27%)                     | 8600<br>(5900-11000)      | 750000<br>(550000-950000)      |
| High SDI | 1995 | Male   | 25 to 29 | 89%<br>(84-93%)                | 11%<br>(7.1-16%)         | 4.4<br>(3.4-5.6)                            | 12%<br>(9.1-15%)                     | 19%<br>(12-25%)                     | 8800<br>(6000-12000)      | 740000<br>(550000-940000)      |
| High SDI | 1995 | Male   | 30 to 34 | 91%<br>(86-94%)                | 8.9%<br>(5.5-14%)        | 4.4<br>(3.4-5.6)                            | 11%<br>(8-13%)                       | 16%<br>(11-21%)                     | 10000<br>(7200-13000)     | 760000<br>(570000-960000)      |
| High SDI | 1995 | Male   | 35 to 39 | 92%<br>(88-95%)                | 8.2%<br>(5.2-12%)        | 4.2<br>(3.3-5.4)                            | 10%<br>(8-13%)                       | 16%<br>(11-20%)                     | 13000<br>(9600-16000)     | 840000<br>(650000-1000000)     |
| High SDI | 1995 | Male   | 40 to 44 | 92%<br>(88-95%)                | 7.8%<br>(4.9-12%)        | 4.3<br>(3.3-5.5)                            | 11%<br>(8.3-13%)                     | 16%<br>(12-20%)                     | 17000<br>(13000-22000)    | 960000<br>(750000-1200000)     |
| High SDI | 1995 | Male   | 45 to 49 | 92%<br>(88-95%)                | 7.6%<br>(4.7-12%)        | 4.8<br>(3.6-6.1)                            | 11%<br>(8.5-14%)                     | 16%<br>(12-20%)                     | 23000<br>(18000-29000)    | 1100000<br>(860000-1400000)    |

| Location | Year | Sex    | Age      | Prevalence of current drinkers | Prevalence of abstainers | Population average of standard drinks daily | Percent of total attributable deaths | Percent of total attributable DALYs | Attributable deaths      | Attributable DALYs           |
|----------|------|--------|----------|--------------------------------|--------------------------|---------------------------------------------|--------------------------------------|-------------------------------------|--------------------------|------------------------------|
| High SDI | 1995 | Male   | 50 to 54 | 92%<br>(88-95%)                | 8%<br>(5.2-12%)          | 5<br>(3.8-6.4)                              | 11%<br>(8.3-14%)                     | 15%<br>(11-18%)                     | 27000<br>(20000-33000)   | 1100000<br>(830000-1400000)  |
| High SDI | 1995 | Male   | 55 to 59 | 91%<br>(87-94%)                | 8.8%<br>(5.8-13%)        | 5.4<br>(4.1-6.9)                            | 11%<br>(8-13%)                       | 13%<br>(10-17%)                     | 34000<br>(26000-43000)   | 1200000<br>(910000-1500000)  |
| High SDI | 1995 | Male   | 60 to 64 | 90%<br>(85-93%)                | 10%<br>(6.7-15%)         | 5.2<br>(3.9-6.8)                            | 9%<br>(6.3-12%)                      | 11%<br>(7.5-15%)                    | 39000<br>(27000-52000)   | 1100000<br>(810000-1500000)  |
| High SDI | 1995 | Male   | 65 to 69 | 88%<br>(83-92%)                | 12%<br>(7.8-17%)         | 4.7<br>(3.7-5.9)                            | 7.4%<br>(4.9-10%)                    | 8.6%<br>(5.5-12%)                   | 42000<br>(26000-58000)   | 1000000<br>(670000-1400000)  |
| High SDI | 1995 | Male   | 70 to 74 | 87%<br>(81-91%)                | 13%<br>(9.1-19%)         | 4.2<br>(3.1-5.4)                            | 5.9%<br>(3.2-8.7%)                   | 6.6%<br>(3.4-10%)                   | 38000<br>(19000-58000)   | 760000<br>(400000-1100000)   |
| High SDI | 1995 | Male   | 75 to 79 | 85%<br>(78-90%)                | 15%<br>(9.9-22%)         | 3.5<br>(2.5-4.6)                            | 4%<br>(1.4-6.9%)                     | 4.3%<br>(1.2-7.7%)                  | 24000<br>(6200-42000)    | 380000<br>(120000-650000)    |
| High SDI | 1995 | Male   | 80 to 84 | 84%<br>(76-89%)                | 16%<br>(11-24%)          | 3.5<br>(2.6-4.5)                            | 4%<br>(1.4-6.9%)                     | 4.3%<br>(1.2-7.6%)                  | 26000<br>(6500-46000)    | 300000<br>(99000-520000)     |
| High SDI | 1995 | Male   | 85 to 89 | 83%<br>(75-88%)                | 17%<br>(12-25%)          | 3.2<br>(2.3-4.3)                            | 3.4%<br>(0.7-6.2%)                   | 3.5%<br>(0.35-6.8%)                 | 15000<br>(1500-29000)    | 130000<br>(26000-240000)     |
| High SDI | 1995 | Male   | 90 to 94 | 83%<br>(75-88%)                | 17%<br>(12-25%)          | 3<br>(2-4.1)                                | 2.5%<br>(-0.41-5.5%)                 | 2.4%<br>(-1-6%)                     | 4700<br>(-1800-11000)    | 29000<br>(-4300-64000)       |
| High SDI | 1995 | Male   | 95 plus  | 82%<br>(72-89%)                | 18%<br>(11-28%)          | 2.7<br>(1.7-4)                              | 1.7%<br>(-1.4-5%)                    | 1.5%<br>(-2.2-5.3%)                 | 790<br>(-1100-2700)      | 3600<br>(-2700-10000)        |
| High SDI | 2000 | Female | All Ages | 73%<br>(69-76%)                | 27%<br>(24-31%)          | 2.2<br>(1.9-2.5)                            | 2.9%<br>(1.7-4.1%)                   | 2.5%<br>(0.29-5%)                   | 110000<br>(18000-220000) | 3600000<br>(2100000-5100000) |
| High SDI | 2000 | Female | 15 to 19 | 68%<br>(58-76%)                | 32%<br>(24-42%)          | 1.9<br>(1.3-2.6)                            | 2.7%<br>(1.7-3.9%)                   | 8.9%<br>(4.7-14%)                   | 840<br>(450-1300)        | 95000<br>(62000-130000)      |
| High SDI | 2000 | Female | 20 to 24 | 79%<br>(71-86%)                | 21%<br>(14-29%)          | 2.9<br>(2.1-3.9)                            | 4.1%<br>(2.9-5.4%)                   | 12%<br>(7-17%)                      | 1400<br>(830-1900)       | 160000<br>(120000-220000)    |
| High SDI | 2000 | Female | 25 to 29 | 83%<br>(76-88%)                | 17%<br>(12-24%)          | 2.8<br>(2.1-3.7)                            | 3.7%<br>(2.6-4.8%)                   | 11%<br>(6.6-15%)                    | 1500<br>(930-2100)       | 170000<br>(120000-220000)    |
| High SDI | 2000 | Female | 30 to 34 | 84%<br>(77-89%)                | 16%<br>(11-23%)          | 2.7<br>(2-3.6)                              | 3.5%<br>(2.5-4.6%)                   | 10%<br>(7-14%)                      | 2000<br>(1400-2700)      | 190000<br>(130000-250000)    |
| High SDI | 2000 | Female | 35 to 39 | 84%<br>(78-89%)                | 16%<br>(11-22%)          | 2.8<br>(2.1-3.7)                            | 4%<br>(2.9-5.2%)                     | 11%<br>(8.1-14%)                    | 3500<br>(2600-4500)      | 250000<br>(190000-320000)    |
| High SDI | 2000 | Female | 40 to 44 | 83%<br>(77-88%)                | 17%<br>(12-23%)          | 2.9<br>(2.1-3.7)                            | 4.5%<br>(3.3-5.9%)                   | 11%<br>(8.6-14%)                    | 5500<br>(4200-7000)      | 320000<br>(240000-410000)    |
| High SDI | 2000 | Female | 45 to 49 | 82%<br>(75-87%)                | 18%<br>(13-25%)          | 3<br>(2.2-3.9)                              | 4.9%<br>(3.5-6.5%)                   | 11%<br>(8.3-14%)                    | 7700<br>(5800-9700)      | 370000<br>(270000-480000)    |
| High SDI | 2000 | Female | 50 to 54 | 81%<br>(74-86%)                | 19%<br>(14-26%)          | 3<br>(2.2-3.9)                              | 4.9%<br>(3.3-6.6%)                   | 9.9%<br>(7.2-13%)                   | 9600<br>(7100-12000)     | 400000<br>(280000-530000)    |

| Location | Year | Sex    | Age      | Prevalence of current drinkers | Prevalence of abstainers | Population average of standard drinks daily | Percent of total attributable deaths | Percent of total attributable DALYs | Attributable deaths       | Attributable DALYs             |
|----------|------|--------|----------|--------------------------------|--------------------------|---------------------------------------------|--------------------------------------|-------------------------------------|---------------------------|--------------------------------|
| High SDI | 2000 | Female | 55 to 59 | 79%<br>(72-85%)                | 21%<br>(15-28%)          | 3<br>(2.2-3.9)                              | 4.6%<br>(2.9-6.4%)                   | 8.5%<br>(6-11%)                     | 10000<br>(7000-13000)     | 350000<br>(230000-490000)      |
| High SDI | 2000 | Female | 60 to 64 | 76%<br>(68-82%)                | 24%<br>(18-32%)          | 2.8<br>(2-3.9)                              | 3.9%<br>(2.1-6%)                     | 6.7%<br>(4-9.8%)                    | 11000<br>(6400-16000)     | 330000<br>(180000-500000)      |
| High SDI | 2000 | Female | 65 to 69 | 71%<br>(62-79%)                | 29%<br>(21-38%)          | 2.5<br>(1.8-3.3)                            | 3%<br>(1.3-4.9%)                     | 4.8%<br>(2.3-7.4%)                  | 11000<br>(5200-18000)     | 280000<br>(120000-460000)      |
| High SDI | 2000 | Female | 70 to 74 | 68%<br>(59-76%)                | 32%<br>(24-41%)          | 2.2<br>(1.5-3.1)                            | 2.3%<br>(0.27-4.5%)                  | 3.3%<br>(0.64-6.3%)                 | 12000<br>(1800-24000)     | 240000<br>(23000-490000)       |
| High SDI | 2000 | Female | 75 to 79 | 66%<br>(56-75%)                | 34%<br>(25-44%)          | 2.1<br>(1.4-2.9)                            | 1.6%<br>(-0.55-4.1%)                 | 2.1%<br>(-0.71-5.3%)                | 12000<br>(-4700-31000)    | 190000<br>(-67000-490000)      |
| High SDI | 2000 | Female | 80 to 84 | 63%<br>(51-73%)                | 37%<br>(27-49%)          | 1.9<br>(1.3-2.6)                            | 1%<br>(-1-3.3%)                      | 1.2%<br>(-1.4-4.1%)                 | 7800<br>(-8900-27000)     | 95000<br>(-91000-310000)       |
| High SDI | 2000 | Female | 85 to 89 | 62%<br>(51-72%)                | 38%<br>(28-49%)          | 1.9<br>(1.3-2.8)                            | 1%<br>(-1.2-3.6%)                    | 1%<br>(-1.7-4.2%)                   | 8700<br>(-14000-34000)    | 79000<br>(-92000-280000)       |
| High SDI | 2000 | Female | 90 to 94 | 62%<br>(51-72%)                | 38%<br>(28-49%)          | 1.9<br>(1.2-2.9)                            | 0.7%<br>(-1.7-3.6%)                  | 0.61%<br>(-2.4-4.1%)                | 3800<br>(-13000-24000)    | 27000<br>(-61000-130000)       |
| High SDI | 2000 | Female | 95 plus  | 63%<br>(49-75%)                | 37%<br>(25-51%)          | 1.9<br>(1-2.9)                              | 0.35%<br>(-2.5-3.8%)                 | 0.13%<br>(-3.3-4.3%)                | 520<br>(-7800-11000)      | 4200<br>(-24000-38000)         |
| High SDI | 2000 | Male   | All Ages | 83%<br>(81-86%)                | 17%<br>(14-19%)          | 3.4<br>(2.9-3.9)                            | 8%<br>(6.3-9.7%)                     | 7.5%<br>(5.1-10%)                   | 320000<br>(220000-430000) | 11000000<br>(8800000-14000000) |
| High SDI | 2000 | Male   | 15 to 19 | 72%<br>(64-79%)                | 28%<br>(21-36%)          | 2.2<br>(1.6-3)                              | 6.5%<br>(4.3-8.9%)                   | 12%<br>(6.9-18%)                    | 2900<br>(1700-4200)       | 270000<br>(180000-370000)      |
| High SDI | 2000 | Male   | 20 to 24 | 86%<br>(79-91%)                | 14%<br>(9.5-21%)         | 4.2<br>(3.3-5.4)                            | 13%<br>(9.2-16%)                     | 20%<br>(13-27%)                     | 7300<br>(5000-9600)       | 640000<br>(470000-810000)      |
| High SDI | 2000 | Male   | 25 to 29 | 89%<br>(85-93%)                | 11%<br>(7-15%)           | 4.3<br>(3.3-5.4)                            | 12%<br>(8.7-15%)                     | 20%<br>(13-26%)                     | 7400<br>(5100-9800)       | 630000<br>(470000-800000)      |
| High SDI | 2000 | Male   | 30 to 34 | 91%<br>(87-95%)                | 8.7%<br>(5.4-13%)        | 4.2<br>(3.3-5.4)                            | 11%<br>(8-14%)                       | 18%<br>(12-24%)                     | 8300<br>(5800-11000)      | 640000<br>(480000-810000)      |
| High SDI | 2000 | Male   | 35 to 39 | 92%<br>(88-95%)                | 8%<br>(5.1-12%)          | 4.1<br>(3.1-5.3)                            | 11%<br>(8-13%)                       | 17%<br>(12-22%)                     | 12000<br>(8500-15000)     | 770000<br>(590000-950000)      |
| High SDI | 2000 | Male   | 40 to 44 | 92%<br>(89-95%)                | 7.7%<br>(4.9-11%)        | 4.2<br>(3.3-5.4)                            | 11%<br>(8.6-14%)                     | 17%<br>(13-21%)                     | 17000<br>(13000-21000)    | 960000<br>(750000-1200000)     |
| High SDI | 2000 | Male   | 45 to 49 | 92%<br>(88-95%)                | 7.6%<br>(4.9-12%)        | 4.6<br>(3.5-5.9)                            | 12%<br>(8.9-14%)                     | 17%<br>(13-21%)                     | 24000<br>(19000-30000)    | 1200000<br>(900000-1400000)    |
| High SDI | 2000 | Male   | 50 to 54 | 92%<br>(89-95%)                | 7.8%<br>(5.1-11%)        | 4.8<br>(3.7-6.1)                            | 11%<br>(8.3-13%)                     | 15%<br>(11-18%)                     | 30000<br>(23000-37000)    | 1200000<br>(940000-1500000)    |
| High SDI | 2000 | Male   | 55 to 59 | 91%<br>(88-94%)                | 8.6%<br>(5.7-12%)        | 4.9<br>(3.8-6.3)                            | 9.9%<br>(7.5-12%)                    | 13%<br>(9.7-16%)                    | 31000<br>(23000-39000)    | 1100000<br>(840000-1400000)    |

| Location | Year | Sex    | Age      | Prevalence of current drinkers | Prevalence of abstainers | Population average of standard drinks daily | Percent of total attributable deaths | Percent of total attributable DALYs | Attributable deaths      | Attributable DALYs           |
|----------|------|--------|----------|--------------------------------|--------------------------|---------------------------------------------|--------------------------------------|-------------------------------------|--------------------------|------------------------------|
| High SDI | 2000 | Male   | 60 to 64 | 90%<br>(86-94%)                | 9.7%<br>(6.5-14%)        | 4.9<br>(3.7-6.4)                            | 9%<br>(6.4-12%)                      | 11%<br>(7.9-15%)                    | 37000<br>(26000-48000)   | 1100000<br>(790000-1400000)  |
| High SDI | 2000 | Male   | 65 to 69 | 89%<br>(84-93%)                | 11%<br>(7.5-16%)         | 4.4<br>(3.5-5.6)                            | 7.3%<br>(4.9-9.8%)                   | 8.7%<br>(5.8-12%)                   | 38000<br>(25000-52000)   | 960000<br>(650000-1300000)   |
| High SDI | 2000 | Male   | 70 to 74 | 87%<br>(82-91%)                | 13%<br>(8.8-18%)         | 4<br>(3-5.1)                                | 5.7%<br>(3.1-8.4%)                   | 6.6%<br>(3.5-9.8%)                  | 38000<br>(20000-57000)   | 760000<br>(420000-1100000)   |
| High SDI | 2000 | Male   | 75 to 79 | 86%<br>(80-91%)                | 14%<br>(9.4-20%)         | 3.5<br>(2.6-4.7)                            | 4.4%<br>(1.8-7.2%)                   | 4.9%<br>(1.7-8.2%)                  | 31000<br>(11000-53000)   | 500000<br>(200000-820000)    |
| High SDI | 2000 | Male   | 80 to 84 | 84%<br>(76-89%)                | 16%<br>(11-24%)          | 3<br>(2.2-4)                                | 3.2%<br>(0.79-5.7%)                  | 3.3%<br>(0.51-6.3%)                 | 18000<br>(2700-34000)    | 220000<br>(53000-390000)     |
| High SDI | 2000 | Male   | 85 to 89 | 83%<br>(75-89%)                | 17%<br>(11-25%)          | 3<br>(2.2-4)                                | 3%<br>(0.47-5.7%)                    | 3%<br>(0.076-6.2%)                  | 14000<br>(390-29000)     | 130000<br>(19000-240000)     |
| High SDI | 2000 | Male   | 90 to 94 | 83%<br>(76-89%)                | 17%<br>(11-24%)          | 2.9<br>(2-4)                                | 2.3%<br>(-0.47-5.3%)                 | 2.2%<br>(-1.1-5.7%)                 | 5100<br>(-2400-13000)    | 32000<br>(-6600-74000)       |
| High SDI | 2000 | Male   | 95 plus  | 83%<br>(74-90%)                | 17%<br>(9.9-26%)         | 2.6<br>(1.6-3.9)                            | 1.6%<br>(-1.4-4.9%)                  | 1.3%<br>(-2.3-5.2%)                 | 870<br>(-1400-3400)      | 4100<br>(-3600-13000)        |
| High SDI | 2005 | Female | All Ages | 72%<br>(69-75%)                | 28%<br>(25-31%)          | 2.2<br>(1.9-2.5)                            | 2.8%<br>(1.8-3.9%)                   | 2.5%<br>(0.56-4.7%)                 | 110000<br>(27000-200000) | 3500000<br>(2300000-4900000) |
| High SDI | 2005 | Female | 15 to 19 | 67%<br>(58-75%)                | 33%<br>(25-42%)          | 1.9<br>(1.3-2.6)                            | 2.6%<br>(1.7-3.6%)                   | 8.8%<br>(4.6-13%)                   | 730<br>(400-1100)        | 88000<br>(58000-120000)      |
| High SDI | 2005 | Female | 20 to 24 | 79%<br>(71-85%)                | 21%<br>(15-29%)          | 3<br>(2.2-4)                                | 4.1%<br>(3-5.4%)                     | 12%<br>(7-17%)                      | 1300<br>(830-1900)       | 170000<br>(120000-220000)    |
| High SDI | 2005 | Female | 25 to 29 | 82%<br>(75-87%)                | 18%<br>(13-25%)          | 2.8<br>(2.1-3.7)                            | 3.7%<br>(2.7-4.7%)                   | 11%<br>(6.6-15%)                    | 1400<br>(880-1900)       | 160000<br>(120000-210000)    |
| High SDI | 2005 | Female | 30 to 34 | 83%<br>(77-88%)                | 17%<br>(12-23%)          | 2.7<br>(2-3.6)                              | 3.4%<br>(2.4-4.5%)                   | 11%<br>(6.8-14%)                    | 1900<br>(1200-2500)      | 170000<br>(120000-230000)    |
| High SDI | 2005 | Female | 35 to 39 | 83%<br>(78-88%)                | 17%<br>(12-22%)          | 2.8<br>(2.1-3.7)                            | 3.8%<br>(2.7-4.9%)                   | 11%<br>(8-14%)                      | 3100<br>(2300-4000)      | 230000<br>(170000-290000)    |
| High SDI | 2005 | Female | 40 to 44 | 83%<br>(77-88%)                | 17%<br>(12-23%)          | 2.9<br>(2.2-3.8)                            | 4.3%<br>(3.1-5.7%)                   | 12%<br>(8.6-15%)                    | 5300<br>(4000-6700)      | 310000<br>(230000-400000)    |
| High SDI | 2005 | Female | 45 to 49 | 82%<br>(75-87%)                | 18%<br>(13-25%)          | 3<br>(2.2-3.9)                              | 4.8%<br>(3.5-6.4%)                   | 11%<br>(8.4-14%)                    | 7900<br>(6100-9900)      | 390000<br>(290000-490000)    |
| High SDI | 2005 | Female | 50 to 54 | 80%<br>(74-85%)                | 20%<br>(15-26%)          | 2.9<br>(2.2-3.8)                            | 4.8%<br>(3.4-6.5%)                   | 10%<br>(7.5-13%)                    | 9900<br>(7500-13000)     | 410000<br>(300000-540000)    |
| High SDI | 2005 | Female | 55 to 59 | 78%<br>(72-84%)                | 22%<br>(16-28%)          | 2.9<br>(2.1-3.8)                            | 4.4%<br>(2.9-6.1%)                   | 8.4%<br>(6.2-11%)                   | 11000<br>(8300-15000)    | 400000<br>(280000-540000)    |
| High SDI | 2005 | Female | 60 to 64 | 75%<br>(68-81%)                | 25%<br>(19-32%)          | 2.7<br>(2-3.7)                              | 3.7%<br>(2.1-5.5%)                   | 6.6%<br>(4.3-9.1%)                  | 11000<br>(6800-15000)    | 320000<br>(180000-460000)    |
| High SDI | 2005 | Female | 65 to 69 | 71%<br>(62-78%)                | 29%<br>(22-38%)          | 2.4<br>(1.8-3.2)                            | 3%<br>(1.5-4.6%)                     | 4.9%<br>(2.8-7.2%)                  | 11000<br>(6200-16000)    | 270000<br>(130000-420000)    |

| Location | Year | Sex    | Age      | Prevalence of current drinkers | Prevalence of abstainers | Population average of standard drinks daily | Percent of total attributable deaths | Percent of total attributable DALYs | Attributable deaths       | Attributable DALYs             |
|----------|------|--------|----------|--------------------------------|--------------------------|---------------------------------------------|--------------------------------------|-------------------------------------|---------------------------|--------------------------------|
| High SDI | 2005 | Female | 70 to 74 | 67%<br>(59-74%)                | 33%<br>(26-41%)          | 2.1<br>(1.5-2.9)                            | 2.2%<br>(0.5-4%)                     | 3.4%<br>(1.1-5.8%)                  | 11000<br>(3400-20000)     | 220000<br>(48000-410000)       |
| High SDI | 2005 | Female | 75 to 79 | 65%<br>(55-73%)                | 35%<br>(27-45%)          | 1.9<br>(1.3-2.7)                            | 1.5%<br>(-0.27-3.6%)                 | 2.1%<br>(-0.23-4.7%)                | 11000<br>(-1500-26000)    | 170000<br>(-30000-410000)      |
| High SDI | 2005 | Female | 80 to 84 | 63%<br>(51-72%)                | 37%<br>(28-49%)          | 1.9<br>(1.3-2.6)                            | 1.2%<br>(-0.66-3.2%)                 | 1.4%<br>(-0.9-4%)                   | 11000<br>(-6600-32000)    | 130000<br>(-68000-370000)      |
| High SDI | 2005 | Female | 85 to 89 | 61%<br>(50-71%)                | 39%<br>(29-50%)          | 1.8<br>(1.2-2.5)                            | 0.76%<br>(-1.1-2.9%)                 | 0.81%<br>(-1.5-3.4%)                | 6300<br>(-11000-25000)    | 57000<br>(-76000-210000)       |
| High SDI | 2005 | Female | 90 to 94 | 62%<br>(52-72%)                | 38%<br>(28-48%)          | 1.9<br>(1.2-2.7)                            | 0.67%<br>(-1.5-3.3%)                 | 0.61%<br>(-2.1-3.8%)                | 4200<br>(-13000-25000)    | 29000<br>(-61000-140000)       |
| High SDI | 2005 | Female | 95 plus  | 64%<br>(50-76%)                | 36%<br>(24-50%)          | 1.9<br>(1.1-3)                              | 0.48%<br>(-2.2-3.7%)                 | 0.32%<br>(-2.9-4.2%)                | 1200<br>(-8700-13000)     | 6800<br>(-27000-48000)         |
| High SDI | 2005 | Male   | All Ages | 83%<br>(81-86%)                | 17%<br>(14-19%)          | 3.4<br>(2.9-3.9)                            | 7.9%<br>(6.3-9.6%)                   | 7.6%<br>(5.2-10%)                   | 330000<br>(230000-430000) | 11000000<br>(8900000-13000000) |
| High SDI | 2005 | Male   | 15 to 19 | 71%<br>(63-78%)                | 29%<br>(22-37%)          | 2.3<br>(1.6-3)                              | 6.1%<br>(4.2-8.3%)                   | 12%<br>(7.1-17%)                    | 2600<br>(1600-3600)       | 250000<br>(170000-330000)      |
| High SDI | 2005 | Male   | 20 to 24 | 86%<br>(80-90%)                | 14%<br>(9.6-20%)         | 4.4<br>(3.4-5.6)                            | 12%<br>(9.1-16%)                     | 20%<br>(13-27%)                     | 7100<br>(5000-9300)       | 630000<br>(470000-800000)      |
| High SDI | 2005 | Male   | 25 to 29 | 89%<br>(85-93%)                | 11%<br>(7.1-15%)         | 4.4<br>(3.4-5.5)                            | 12%<br>(8.7-15%)                     | 20%<br>(13-26%)                     | 6900<br>(4800-9000)       | 590000<br>(450000-750000)      |
| High SDI | 2005 | Male   | 30 to 34 | 91%<br>(87-95%)                | 8.6%<br>(5.5-13%)        | 4.3<br>(3.3-5.5)                            | 10%<br>(7.8-13%)                     | 18%<br>(12-24%)                     | 7600<br>(5300-9900)       | 590000<br>(440000-740000)      |
| High SDI | 2005 | Male   | 35 to 39 | 92%<br>(88-95%)                | 7.9%<br>(5-12%)          | 4.1<br>(3.1-5.3)                            | 10%<br>(7.6-13%)                     | 17%<br>(12-22%)                     | 10000<br>(7300-13000)     | 680000<br>(520000-850000)      |
| High SDI | 2005 | Male   | 40 to 44 | 92%<br>(89-95%)                | 7.7%<br>(4.9-11%)        | 4.2<br>(3.3-5.4)                            | 11%<br>(8.3-13%)                     | 17%<br>(13-21%)                     | 16000<br>(12000-20000)    | 910000<br>(710000-1100000)     |
| High SDI | 2005 | Male   | 45 to 49 | 92%<br>(88-95%)                | 7.7%<br>(5-12%)          | 4.7<br>(3.6-6)                              | 12%<br>(9-14%)                       | 17%<br>(13-21%)                     | 25000<br>(19000-30000)    | 1200000<br>(930000-1400000)    |
| High SDI | 2005 | Male   | 50 to 54 | 92%<br>(88-95%)                | 8%<br>(5.3-12%)          | 4.8<br>(3.7-6.1)                            | 11%<br>(8.8-14%)                     | 16%<br>(12-19%)                     | 32000<br>(25000-39000)    | 1300000<br>(1000000-1600000)   |
| High SDI | 2005 | Male   | 55 to 59 | 91%<br>(88-94%)                | 8.7%<br>(5.8-12%)        | 4.8<br>(3.7-6.1)                            | 9.9%<br>(7.7-12%)                    | 13%<br>(10-16%)                     | 36000<br>(28000-44000)    | 1300000<br>(1000000-1600000)   |
| High SDI | 2005 | Male   | 60 to 64 | 90%<br>(86-93%)                | 9.8%<br>(6.6-14%)        | 4.7<br>(3.5-6)                              | 8.5%<br>(6.2-11%)                    | 11%<br>(7.8-14%)                    | 34000<br>(25000-44000)    | 1000000<br>(770000-1300000)    |
| High SDI | 2005 | Male   | 65 to 69 | 89%<br>(84-93%)                | 11%<br>(7.4-16%)         | 4.4<br>(3.4-5.5)                            | 7.3%<br>(5.1-9.6%)                   | 9%<br>(6.2-12%)                     | 37000<br>(26000-49000)    | 940000<br>(660000-1200000)     |



| Location | Year | Sex    | Age      | Prevalence of current drinkers | Prevalence of abstainers | Population average of standard drinks daily | Percent of total attributable deaths | Percent of total attributable DALYs | Attributable deaths      | Attributable DALYs         |
|----------|------|--------|----------|--------------------------------|--------------------------|---------------------------------------------|--------------------------------------|-------------------------------------|--------------------------|----------------------------|
| High SDI | 2005 | Male   | 70 to 74 | 88%<br>(83-91%)                | 12%<br>(8.9-17%)         | 3.8<br>(2.9-5)                              | 5.7%<br>(3.3-8.2%)                   | 6.7%<br>(3.8-9.7%)                  | 36000<br>(20000-52000)   | 730000<br>(430000-1000000) |
| High SDI | 2005 | Male   | 75 to 79 | 86%<br>(80-91%)                | 14%<br>(9.4-20%)         | 3.4<br>(2.5-4.5)                            | 4.4%<br>(1.9-7%)                     | 4.9%<br>(2-8%)                      | 32000<br>(13000-53000)   | 520000<br>(230000-830000)  |
| High SDI | 2005 | Male   | 80 to 84 | 84%<br>(77-90%)                | 16%<br>(10-23%)          | 3.1<br>(2.3-4.1)                            | 3.5%<br>(1.2-6%)                     | 3.8%<br>(1-6.7%)                    | 25000<br>(7100-45000)    | 300000<br>(110000-520000)  |
| High SDI | 2005 | Male   | 85 to 89 | 83%<br>(76-88%)                | 17%<br>(12-24%)          | 2.8<br>(2-3.7)                              | 2.4%<br>(0.26-4.9%)                  | 2.5%<br>(-0.15-5.3%)                | 11000<br>(-550-24000)    | 100000<br>(11000-200000)   |
| High SDI | 2005 | Male   | 90 to 94 | 84%<br>(77-89%)                | 16%<br>(11-23%)          | 2.8<br>(1.9-3.8)                            | 2.1%<br>(-0.4-5%)                    | 2%<br>(-0.97-5.4%)                  | 5600<br>(-2600-15000)    | 36000<br>(-6700-83000)     |
| High SDI | 2005 | Male   | 95 plus  | 84%<br>(75-91%)                | 16%<br>(9.4-25%)         | 2.6<br>(1.6-3.9)                            | 1.7%<br>(-1.2-5%)                    | 1.4%<br>(-2-5.4%)                   | 1200<br>(-1600-4500)     | 5600<br>(-3900-17000)      |
| High SDI | 2010 | Female | All Ages | 72%<br>(68-75%)                | 28%<br>(25-32%)          | 2.2<br>(1.8-2.6)                            | 2.7%<br>(1.8-3.8%)                   | 2.5%<br>(0.65-4.6%)                 | 110000<br>(30000-200000) | 350000<br>(230000-490000)  |
| High SDI | 2010 | Female | 15 to 19 | 61%<br>(53-69%)                | 39%<br>(31-47%)          | 1.6<br>(1.1-2.3)                            | 2.2%<br>(1.5-3.1%)                   | 7.9%<br>(4.1-12%)                   | 540<br>(290-830)         | 73000<br>(48000-100000)    |
| High SDI | 2010 | Female | 20 to 24 | 79%<br>(71-85%)                | 21%<br>(15-29%)          | 3<br>(2.2-4)                                | 4%<br>(2.9-5.3%)                     | 12%<br>(7-17%)                      | 1200<br>(770-1700)       | 160000<br>(110000-210000)  |
| High SDI | 2010 | Female | 25 to 29 | 82%<br>(75-87%)                | 18%<br>(13-25%)          | 2.8<br>(2.1-3.7)                            | 3.7%<br>(2.7-4.8%)                   | 11%<br>(6.5-15%)                    | 1400<br>(900-2000)       | 170000<br>(120000-220000)  |
| High SDI | 2010 | Female | 30 to 34 | 83%<br>(76-88%)                | 17%<br>(12-24%)          | 2.7<br>(2-3.6)                              | 3.4%<br>(2.4-4.5%)                   | 11%<br>(6.9-14%)                    | 1800<br>(1200-2400)      | 170000<br>(120000-220000)  |
| High SDI | 2010 | Female | 35 to 39 | 83%<br>(77-88%)                | 17%<br>(12-23%)          | 2.8<br>(2-3.7)                              | 3.6%<br>(2.6-4.8%)                   | 11%<br>(7.8-15%)                    | 2800<br>(2000-3700)      | 210000<br>(150000-270000)  |
| High SDI | 2010 | Female | 40 to 44 | 82%<br>(76-87%)                | 18%<br>(13-24%)          | 2.9<br>(2.1-3.8)                            | 4.1%<br>(2.9-5.4%)                   | 12%<br>(8.5-15%)                    | 4700<br>(3500-5900)      | 280000<br>(210000-360000)  |
| High SDI | 2010 | Female | 45 to 49 | 82%<br>(75-87%)                | 18%<br>(13-25%)          | 3<br>(2.2-3.9)                              | 4.6%<br>(3.3-6.1%)                   | 11%<br>(8.6-14%)                    | 7600<br>(5900-9500)      | 380000<br>(280000-480000)  |
| High SDI | 2010 | Female | 50 to 54 | 80%<br>(74-85%)                | 20%<br>(15-26%)          | 2.9<br>(2.1-3.8)                            | 4.8%<br>(3.4-6.4%)                   | 10%<br>(7.6-13%)                    | 10000<br>(7700-13000)    | 430000<br>(310000-550000)  |
| High SDI | 2010 | Female | 55 to 59 | 78%<br>(71-84%)                | 22%<br>(16-29%)          | 2.8<br>(2.1-3.8)                            | 4.3%<br>(2.9-5.9%)                   | 8.5%<br>(6.2-11%)                   | 11000<br>(8500-15000)    | 410000<br>(280000-550000)  |
| High SDI | 2010 | Female | 60 to 64 | 75%<br>(68-81%)                | 25%<br>(19-32%)          | 2.6<br>(1.9-3.6)                            | 3.5%<br>(2-5.2%)                     | 6.5%<br>(4.3-8.9%)                  | 12000<br>(8000-16000)    | 360000<br>(210000-520000)  |
| High SDI | 2010 | Female | 65 to 69 | 71%<br>(63-78%)                | 29%<br>(22-37%)          | 2.4<br>(1.7-3.1)                            | 2.8%<br>(1.4-4.3%)                   | 4.8%<br>(2.9-6.9%)                  | 11000<br>(6500-16000)    | 260000<br>(140000-400000)  |
| High SDI | 2010 | Female | 70 to 74 | 68%<br>(60-74%)                | 32%<br>(26-40%)          | 2.1<br>(1.5-2.9)                            | 2.2%<br>(0.62-3.9%)                  | 3.5%<br>(1.4-5.8%)                  | 11000<br>(4400-19000)    | 220000<br>(63000-390000)   |
| High SDI | 2010 | Female | 75 to 79 | 65%<br>(55-73%)                | 35%<br>(27-45%)          | 1.9<br>(1.3-2.7)                            | 1.5%<br>(-0.11-3.4%)                 | 2.2%<br>(0.097-4.6%)                | 11000<br>(280-22000)     | 160000<br>(-11000-360000)  |
| High SDI | 2010 | Female | 80 to 84 | 63%<br>(51-72%)                | 37%<br>(28-49%)          | 1.8<br>(1.2-2.5)                            | 1.1%<br>(-0.54-3%)                   | 1.4%<br>(-0.69-3.8%)                | 11000<br>(-4900-28000)   | 130000<br>(-56000-340000)  |

| Location | Year | Sex    | Age      | Prevalence of current drinkers | Prevalence of abstainers | Population average of standard drinks daily | Percent of total attributable deaths | Percent of total attributable DALYs | Attributable deaths       | Attributable DALYs           |
|----------|------|--------|----------|--------------------------------|--------------------------|---------------------------------------------|--------------------------------------|-------------------------------------|---------------------------|------------------------------|
| High SDI | 2010 | Female | 85 to 89 | 62%<br>(51-71%)                | 38%<br>(29-49%)          | 1.8<br>(1.2-2.6)                            | 0.91%<br>(-0.89-3%)                  | 1%<br>(-1.2-3.6%)                   | 9900<br>(-11000-33000)    | 87000<br>(-77000-270000)     |
| High SDI | 2010 | Female | 90 to 94 | 62%<br>(51-71%)                | 38%<br>(29-49%)          | 1.7<br>(1.1-2.5)                            | 0.5%<br>(-1.4-2.8%)                  | 0.44%<br>(-1.9-3.2%)                | 3200<br>(-11000-21000)    | 22000<br>(-57000-120000)     |
| High SDI | 2010 | Female | 95 plus  | 64%<br>(50-76%)                | 36%<br>(24-50%)          | 1.8<br>(1-2.9)                              | 0.47%<br>(-2-3.5%)                   | 0.33%<br>(-2.7-4%)                  | 1600<br>(-10000-16000)    | 8500<br>(-31000-58000)       |
| High SDI | 2010 | Male   | All Ages | 83%<br>(81-85%)                | 17%<br>(15-19%)          | 3.4<br>(2.9-4)                              | 7.7%<br>(6-9.4%)                     | 7.3%<br>(5-9.7%)                    | 320000<br>(220000-430000) | 1100000<br>(850000-1300000)  |
| High SDI | 2010 | Male   | 15 to 19 | 68%<br>(60-76%)                | 32%<br>(24-40%)          | 2.2<br>(1.5-2.9)                            | 5.5%<br>(3.8-7.4%)                   | 11%<br>(6.6-17%)                    | 2000<br>(1200-2800)       | 200000<br>(140000-270000)    |
| High SDI | 2010 | Male   | 20 to 24 | 86%<br>(79-90%)                | 14%<br>(9.6-21%)         | 4.4<br>(3.4-5.7)                            | 12%<br>(8.8-15%)                     | 20%<br>(13-27%)                     | 6200<br>(4300-8100)       | 570000<br>(430000-720000)    |
| High SDI | 2010 | Male   | 25 to 29 | 89%<br>(84-93%)                | 11%<br>(7.3-16%)         | 4.4<br>(3.4-5.7)                            | 11%<br>(8.4-14%)                     | 19%<br>(13-26%)                     | 6500<br>(4500-8500)       | 570000<br>(430000-720000)    |
| High SDI | 2010 | Male   | 30 to 34 | 91%<br>(86-94%)                | 9.1%<br>(5.7-14%)        | 4.2<br>(3.2-5.5)                            | 10%<br>(7.6-13%)                     | 18%<br>(12-24%)                     | 6900<br>(4800-9000)       | 550000<br>(410000-690000)    |
| High SDI | 2010 | Male   | 35 to 39 | 92%<br>(88-95%)                | 8.2%<br>(5.2-12%)        | 4<br>(3-5.3)                                | 9.8%<br>(7.3-12%)                    | 17%<br>(12-23%)                     | 9000<br>(6400-12000)      | 610000<br>(460000-770000)    |
| High SDI | 2010 | Male   | 40 to 44 | 92%<br>(88-95%)                | 7.8%<br>(4.9-12%)        | 4.2<br>(3.1-5.4)                            | 10%<br>(7.7-13%)                     | 17%<br>(13-22%)                     | 14000<br>(10000-17000)    | 780000<br>(600000-970000)    |
| High SDI | 2010 | Male   | 45 to 49 | 92%<br>(88-95%)                | 7.9%<br>(5-12%)          | 4.6<br>(3.4-5.9)                            | 11%<br>(8.6-14%)                     | 17%<br>(13-21%)                     | 22000<br>(17000-28000)    | 1100000<br>(850000-1300000)  |
| High SDI | 2010 | Male   | 50 to 54 | 92%<br>(88-94%)                | 8.3%<br>(5.5-12%)        | 4.8<br>(3.6-6.1)                            | 11%<br>(8.7-14%)                     | 16%<br>(12-20%)                     | 32000<br>(25000-39000)    | 1300000<br>(1000000-1600000) |
| High SDI | 2010 | Male   | 55 to 59 | 91%<br>(87-94%)                | 9.3%<br>(6.2-13%)        | 4.8<br>(3.6-6.1)                            | 10%<br>(7.9-13%)                     | 14%<br>(11-17%)                     | 38000<br>(29000-46000)    | 1300000<br>(1100000-1600000) |
| High SDI | 2010 | Male   | 60 to 64 | 90%<br>(85-93%)                | 10%<br>(6.9-15%)         | 4.5<br>(3.4-5.9)                            | 8.4%<br>(6.1-11%)                    | 11%<br>(8-14%)                      | 39000<br>(28000-49000)    | 1200000<br>(880000-1500000)  |
| High SDI | 2010 | Male   | 65 to 69 | 88%<br>(84-92%)                | 12%<br>(7.8-16%)         | 4.1<br>(3.2-5.2)                            | 6.8%<br>(4.8-9%)                     | 8.6%<br>(6-11%)                     | 35000<br>(24000-45000)    | 880000<br>(620000-1200000)   |
| High SDI | 2010 | Male   | 70 to 74 | 88%<br>(83-91%)                | 12%<br>(8.7-17%)         | 3.8<br>(2.8-4.9)                            | 5.6%<br>(3.4-8%)                     | 6.8%<br>(4-9.7%)                    | 34000<br>(20000-49000)    | 710000<br>(430000-1000000)   |
| High SDI | 2010 | Male   | 75 to 79 | 86%<br>(81-91%)                | 14%<br>(9.1-19%)         | 3.3<br>(2.4-4.5)                            | 4.3%<br>(2-6.7%)                     | 4.9%<br>(2.2-7.8%)                  | 31000<br>(13000-49000)    | 500000<br>(230000-790000)    |
| High SDI | 2010 | Male   | 80 to 84 | 85%<br>(78-90%)                | 15%<br>(9.9-22%)         | 3.1<br>(2.2-4)                              | 3.4%<br>(1.2-5.8%)                   | 3.7%<br>(1.1-6.5%)                  | 27000<br>(7900-47000)     | 320000<br>(120000-550000)    |

| Location | Year | Sex    | Age      | Prevalence of current drinkers | Prevalence of abstainers | Population average of standard drinks daily | Percent of total attributable deaths | Percent of total attributable DALYs | Attributable deaths      | Attributable DALYs        |
|----------|------|--------|----------|--------------------------------|--------------------------|---------------------------------------------|--------------------------------------|-------------------------------------|--------------------------|---------------------------|
| High SDI | 2010 | Male   | 85 to 89 | 84%<br>(77-89%)                | 16%<br>(11-23%)          | 2.9<br>(2.1-3.9)                            | 2.7%<br>(0.52-5.1%)                  | 2.8%<br>(0.16-5.6%)                 | 17000<br>(1200-34000)    | 150000<br>(29000-280000)  |
| High SDI | 2010 | Male   | 90 to 94 | 83%<br>(76-89%)                | 17%<br>(11-24%)          | 2.6<br>(1.8-3.6)                            | 1.8%<br>(-0.45-4.4%)                 | 1.7%<br>(-1-4.7%)                   | 4900<br>(-2800-14000)    | 32000<br>(-8200-78000)    |
| High SDI | 2010 | Male   | 95 plus  | 84%<br>(75-91%)                | 16%<br>(9.5-25%)         | 2.5<br>(1.5-3.8)                            | 1.7%<br>(-1-4.9%)                    | 1.5%<br>(-1.8-5.2%)                 | 1600<br>(-1900-5700)     | 7400<br>(-4500-21000)     |
| High SDI | 2016 | Female | All Ages | 72%<br>(69-75%)                | 28%<br>(25-31%)          | 2.2<br>(1.6-2.8)                            | 2.6%<br>(1.5-4%)                     | 2.4%<br>(0.29-4.8%)                 | 110000<br>(14000-240000) | 350000<br>(200000-540000) |
| High SDI | 2016 | Female | 15 to 19 | 61%<br>(52-69%)                | 39%<br>(31-48%)          | 1.6<br>(1-2.4)                              | 2.1%<br>(1.4-3%)                     | 7.8%<br>(4-12%)                     | 470<br>(240-740)         | 65000<br>(43000-92000)    |
| High SDI | 2016 | Female | 20 to 24 | 79%<br>(70-85%)                | 21%<br>(15-30%)          | 3<br>(2-4.3)                                | 3.9%<br>(2.8-5.2%)                   | 12%<br>(6.8-17%)                    | 1200<br>(720-1700)       | 160000<br>(110000-210000) |
| High SDI | 2016 | Female | 25 to 29 | 83%<br>(76-88%)                | 17%<br>(12-24%)          | 2.9<br>(2-4)                                | 3.6%<br>(2.6-4.8%)                   | 11%<br>(6.4-16%)                    | 1400<br>(850-2000)       | 160000<br>(120000-220000) |
| High SDI | 2016 | Female | 30 to 34 | 83%<br>(76-88%)                | 17%<br>(12-24%)          | 2.7<br>(1.8-3.9)                            | 3.4%<br>(2.4-4.6%)                   | 11%<br>(6.7-15%)                    | 1800<br>(1200-2500)      | 170000<br>(120000-230000) |
| High SDI | 2016 | Female | 35 to 39 | 83%<br>(76-88%)                | 17%<br>(12-24%)          | 2.7<br>(1.8-3.9)                            | 3.6%<br>(2.4-4.9%)                   | 11%<br>(7.6-15%)                    | 2600<br>(1800-3500)      | 200000<br>(140000-260000) |
| High SDI | 2016 | Female | 40 to 44 | 83%<br>(76-88%)                | 17%<br>(12-24%)          | 2.8<br>(1.9-4)                              | 3.9%<br>(2.7-5.4%)                   | 12%<br>(8.2-15%)                    | 4400<br>(3100-5800)      | 260000<br>(180000-350000) |
| High SDI | 2016 | Female | 45 to 49 | 82%<br>(75-87%)                | 18%<br>(13-25%)          | 2.9<br>(2-4.2)                              | 4.4%<br>(3-6.1%)                     | 11%<br>(8.3-15%)                    | 7000<br>(5100-9100)      | 350000<br>(240000-470000) |
| High SDI | 2016 | Female | 50 to 54 | 80%<br>(74-86%)                | 20%<br>(14-26%)          | 2.9<br>(2-4.1)                              | 4.6%<br>(3.1-6.5%)                   | 10%<br>(7.4-13%)                    | 10000<br>(7200-13000)    | 430000<br>(290000-580000) |
| High SDI | 2016 | Female | 55 to 59 | 78%<br>(71-84%)                | 22%<br>(16-29%)          | 2.8<br>(1.9-3.9)                            | 4.2%<br>(2.7-6.1%)                   | 8.4%<br>(5.9-11%)                   | 12000<br>(8100-16000)    | 420000<br>(270000-600000) |
| High SDI | 2016 | Female | 60 to 64 | 75%<br>(68-82%)                | 25%<br>(18-32%)          | 2.6<br>(1.8-3.8)                            | 3.5%<br>(1.9-5.4%)                   | 6.5%<br>(4.1-9.3%)                  | 13000<br>(7700-18000)    | 380000<br>(200000-580000) |
| High SDI | 2016 | Female | 65 to 69 | 72%<br>(63-79%)                | 28%<br>(21-37%)          | 2.4<br>(1.6-3.3)                            | 2.7%<br>(1.2-4.4%)                   | 4.8%<br>(2.7-7.1%)                  | 12000<br>(6800-19000)    | 310000<br>(140000-500000) |
| High SDI | 2016 | Female | 70 to 74 | 68%<br>(59-76%)                | 32%<br>(24-41%)          | 2.1<br>(1.4-3.1)                            | 2%<br>(0.44-3.9%)                    | 3.4%<br>(1.2-5.9%)                  | 11000<br>(3900-20000)    | 220000<br>(48000-430000)  |
| High SDI | 2016 | Female | 75 to 79 | 67%<br>(57-76%)                | 33%<br>(24-43%)          | 2<br>(1.2-2.9)                              | 1.5%<br>(-0.23-3.7%)                 | 2.2%<br>(-0.064-5%)                 | 11000<br>(-490-25000)    | 170000<br>(-25000-410000) |
| High SDI | 2016 | Female | 80 to 84 | 65%<br>(53-74%)                | 35%<br>(26-47%)          | 1.8<br>(1.2-2.7)                            | 1.1%<br>(-0.71-3.2%)                 | 1.4%<br>(-0.89-4.1%)                | 10000<br>(-6300-30000)   | 120000<br>(-76000-360000) |
| High SDI | 2016 | Female | 85 to 89 | 63%<br>(52-73%)                | 37%<br>(27-48%)          | 1.8<br>(1.1-2.7)                            | 0.84%<br>(-1.1-3.1%)                 | 0.95%<br>(-1.4-3.7%)                | 9700<br>(-13000-37000)   | 86000<br>(-100000-310000) |
| High SDI | 2016 | Female | 90 to 94 | 64%<br>(53-73%)                | 36%<br>(27-47%)          | 1.8<br>(1.1-2.8)                            | 0.64%<br>(-1.5-3.3%)                 | 0.61%<br>(-2-3.8%)                  | 5900<br>(-18000-35000)   | 40000<br>(-87000-200000)  |
| High SDI | 2016 | Female | 95 plus  | 64%<br>(50-76%)                | 36%<br>(24-50%)          | 1.7<br>(0.91-2.8)                           | 0.29%<br>(-2.1-3.4%)                 | 0.13%<br>(-2.8-3.8%)                | 780<br>(-12000-16000)    | 5900<br>(-36000-59000)    |

| Location | Year | Sex  | Age      | Prevalence of current drinkers | Prevalence of abstainers | Population average of standard drinks daily | Percent of total attributable deaths | Percent of total attributable DALYs | Attributable deaths       | Attributable DALYs             |
|----------|------|------|----------|--------------------------------|--------------------------|---------------------------------------------|--------------------------------------|-------------------------------------|---------------------------|--------------------------------|
| High SDI | 2016 | Male | All Ages | 83%<br>(80-85%)                | 17%<br>(15-20%)          | 3.3<br>(2.5-4.4)                            | 7.3%<br>(5.4-9.4%)                   | 6.8%<br>(4.1-9.7%)                  | 330000<br>(200000-480000) | 11000000<br>(7800000-14000000) |
| High SDI | 2016 | Male | 15 to 19 | 68%<br>(59-76%)                | 32%<br>(24-41%)          | 2.1<br>(1.4-3.1)                            | 5.2%<br>(3.5-7.3%)                   | 11%<br>(6.3-17%)                    | 1700<br>(980-2500)        | 180000<br>(120000-240000)      |
| High SDI | 2016 | Male | 20 to 24 | 85%<br>(78-90%)                | 15%<br>(10-22%)          | 4.4<br>(3.1-6.1)                            | 12%<br>(8.5-15%)                     | 20%<br>(12-27%)                     | 6000<br>(4000-8100)       | 550000<br>(410000-710000)      |
| High SDI | 2016 | Male | 25 to 29 | 89%<br>(83-93%)                | 11%<br>(7.4-17%)         | 4.4<br>(3.1-6.1)                            | 11%<br>(8.1-14%)                     | 19%<br>(12-27%)                     | 6400<br>(4300-8700)       | 570000<br>(420000-730000)      |
| High SDI | 2016 | Male | 30 to 34 | 91%<br>(85-94%)                | 9.4%<br>(5.8-15%)        | 4.2<br>(2.9-5.9)                            | 10%<br>(7.4-13%)                     | 18%<br>(12-25%)                     | 7000<br>(4800-9500)       | 560000<br>(410000-720000)      |
| High SDI | 2016 | Male | 35 to 39 | 91%<br>(87-95%)                | 8.8%<br>(5.4-13%)        | 4<br>(2.7-5.6)                              | 9.7%<br>(7.1-13%)                    | 17%<br>(12-23%)                     | 8400<br>(5800-11000)      | 580000<br>(420000-740000)      |
| High SDI | 2016 | Male | 40 to 44 | 92%<br>(88-95%)                | 8.1%<br>(5-12%)          | 4<br>(2.8-5.6)                              | 9.8%<br>(7.2-13%)                    | 17%<br>(12-22%)                     | 12000<br>(8600-16000)     | 720000<br>(530000-920000)      |
| High SDI | 2016 | Male | 45 to 49 | 92%<br>(87-95%)                | 8.1%<br>(5-13%)          | 4.4<br>(3-6.2)                              | 11%<br>(7.9-14%)                     | 17%<br>(12-22%)                     | 20000<br>(14000-26000)    | 970000<br>(720000-1200000)     |
| High SDI | 2016 | Male | 50 to 54 | 91%<br>(87-94%)                | 8.6%<br>(5.6-13%)        | 4.6<br>(3.2-6.4)                            | 11%<br>(8.1-14%)                     | 16%<br>(12-20%)                     | 30000<br>(22000-38000)    | 1300000<br>(940000-1600000)    |
| High SDI | 2016 | Male | 55 to 59 | 90%<br>(86-94%)                | 9.6%<br>(6.3-14%)        | 4.6<br>(3.2-6.4)                            | 10%<br>(7.4-13%)                     | 14%<br>(10-18%)                     | 37000<br>(27000-48000)    | 1300000<br>(990000-1700000)    |
| High SDI | 2016 | Male | 60 to 64 | 89%<br>(85-93%)                | 11%<br>(7.1-15%)         | 4.5<br>(3.1-6.2)                            | 8.5%<br>(5.9-11%)                    | 11%<br>(7.8-15%)                    | 41000<br>(28000-54000)    | 1200000<br>(870000-1700000)    |
| High SDI | 2016 | Male | 65 to 69 | 88%<br>(83-92%)                | 12%<br>(7.9-17%)         | 4<br>(2.8-5.4)                              | 6.6%<br>(4.3-9%)                     | 8.4%<br>(5.5-11%)                   | 39000<br>(25000-54000)    | 1000000<br>(650000-1400000)    |
| High SDI | 2016 | Male | 70 to 74 | 87%<br>(82-91%)                | 13%<br>(8.9-18%)         | 3.6<br>(2.4-5)                              | 5.2%<br>(2.8-7.8%)                   | 6.4%<br>(3.4-9.5%)                  | 34000<br>(18000-52000)    | 710000<br>(380000-1100000)     |
| High SDI | 2016 | Male | 75 to 79 | 87%<br>(80-91%)                | 13%<br>(8.7-20%)         | 3.3<br>(2.2-4.7)                            | 4.1%<br>(1.7-6.8%)                   | 4.7%<br>(1.9-8.1%)                  | 31000<br>(12000-53000)    | 510000<br>(210000-860000)      |
| High SDI | 2016 | Male | 80 to 84 | 85%<br>(77-90%)                | 15%<br>(9.5-23%)         | 3<br>(2-4.2)                                | 3.2%<br>(0.91-5.9%)                  | 3.5%<br>(0.76-6.7%)                 | 27000<br>(5800-51000)     | 330000<br>(92000-610000)       |
| High SDI | 2016 | Male | 85 to 89 | 83%<br>(76-89%)                | 17%<br>(11-24%)          | 2.7<br>(1.8-3.9)                            | 2.5%<br>(0.2-5.2%)                   | 2.6%<br>(-0.16-5.8%)                | 19000<br>(-960-43000)     | 170000<br>(13000-360000)       |
| High SDI | 2016 | Male | 90 to 94 | 83%<br>(76-89%)                | 17%<br>(11-24%)          | 2.6<br>(1.7-3.9)                            | 2%<br>(-0.5-4.9%)                    | 1.9%<br>(-1-5.4%)                   | 8600<br>(-4500-24000)     | 55000<br>(-14000-140000)       |
| High SDI | 2016 | Male | 95 plus  | 83%<br>(73-90%)                | 17%<br>(10-27%)          | 2.3<br>(1.3-3.6)                            | 1.3%<br>(-1.2-4.4%)                  | 1%<br>(-2-4.7%)                     | 1400<br>(-2500-6100)      | 6800<br>(-6500-23000)          |

| Location        | Year | Sex    | Age      | Prevalence of current drinkers | Prevalence of abstainers | Population average of standard drinks daily | Percent of total attributable deaths | Percent of total attributable DALYs | Attributable deaths       | Attributable DALYs             |
|-----------------|------|--------|----------|--------------------------------|--------------------------|---------------------------------------------|--------------------------------------|-------------------------------------|---------------------------|--------------------------------|
| High-middle SDI | 1990 | Female | All Ages | 49%<br>(45-54%)                | 51%<br>(46-55%)          | 1.6<br>(1.3-1.9)                            | 3.6%<br>(2.2-5.2%)                   | 3.7%<br>(1.4-6.5%)                  | 99000<br>(34000-170000)   | 3300000<br>(2000000-4700000)   |
| High-middle SDI | 1990 | Female | 15 to 19 | 46%<br>(36-57%)                | 54%<br>(43-64%)          | 1.5<br>(0.93-2.3)                           | 3%<br>(1.9-4.5%)                     | 6.3%<br>(3.3-10%)                   | 680<br>(350-1100)         | 75000<br>(46000-110000)        |
| High-middle SDI | 1990 | Female | 20 to 24 | 54%<br>(44-63%)                | 46%<br>(37-56%)          | 2.1<br>(1.3-3.1)                            | 4.6%<br>(3.2-6.2%)                   | 7.9%<br>(4.6-12%)                   | 1100<br>(630-1600)        | 130000<br>(89000-190000)       |
| High-middle SDI | 1990 | Female | 25 to 29 | 59%<br>(49-67%)                | 41%<br>(33-51%)          | 2.2<br>(1.5-3.1)                            | 5.3%<br>(3.9-6.8%)                   | 8.8%<br>(5.8-12%)                   | 1500<br>(970-2100)        | 170000<br>(120000-230000)      |
| High-middle SDI | 1990 | Female | 30 to 34 | 63%<br>(53-71%)                | 37%<br>(29-47%)          | 2.4<br>(1.6-3.3)                            | 5.9%<br>(4.5-7.5%)                   | 10%<br>(7.3-14%)                    | 2300<br>(1600-3100)       | 220000<br>(160000-280000)      |
| High-middle SDI | 1990 | Female | 35 to 39 | 64%<br>(55-72%)                | 36%<br>(28-45%)          | 2.6<br>(1.7-3.6)                            | 6.7%<br>(5-8.5%)                     | 12%<br>(8.6-16%)                    | 3500<br>(2400-4700)       | 260000<br>(190000-340000)      |
| High-middle SDI | 1990 | Female | 40 to 44 | 65%<br>(57-73%)                | 35%<br>(27-43%)          | 2.7<br>(1.8-3.8)                            | 7.3%<br>(5.4-9.5%)                   | 13%<br>(9.2-17%)                    | 4600<br>(3300-6200)       | 280000<br>(200000-370000)      |
| High-middle SDI | 1990 | Female | 45 to 49 | 64%<br>(54-73%)                | 36%<br>(27-46%)          | 2.8<br>(1.8-3.9)                            | 7.3%<br>(5.1-9.9%)                   | 12%<br>(8.5-17%)                    | 5100<br>(3500-7100)       | 260000<br>(180000-350000)      |
| High-middle SDI | 1990 | Female | 50 to 54 | 65%<br>(56-73%)                | 35%<br>(27-44%)          | 2.5<br>(1.7-3.6)                            | 7.4%<br>(5-10%)                      | 11%<br>(7.5-16%)                    | 9000<br>(5900-13000)      | 400000<br>(270000-540000)      |
| High-middle SDI | 1990 | Female | 55 to 59 | 60%<br>(49-69%)                | 40%<br>(31-51%)          | 2.4<br>(1.6-3.5)                            | 6.5%<br>(3.8-9.5%)                   | 9.6%<br>(5.6-14%)                   | 9500<br>(5400-14000)      | 350000<br>(200000-510000)      |
| High-middle SDI | 1990 | Female | 60 to 64 | 56%<br>(45-67%)                | 44%<br>(33-55%)          | 2.2<br>(1.4-3.3)                            | 5.1%<br>(2.2-8.5%)                   | 7%<br>(3-12%)                       | 12000<br>(4500-20000)     | 350000<br>(150000-600000)      |
| High-middle SDI | 1990 | Female | 65 to 69 | 53%<br>(42-64%)                | 47%<br>(36-58%)          | 2<br>(1.3-3)                                | 4.3%<br>(1.4-7.6%)                   | 5.7%<br>(1.8-10%)                   | 11000<br>(2800-21000)     | 280000<br>(79000-510000)       |
| High-middle SDI | 1990 | Female | 70 to 74 | 48%<br>(37-58%)                | 52%<br>(42-63%)          | 1.8<br>(1.1-2.7)                            | 3.3%<br>(0.35-6.9%)                  | 4.2%<br>(0.45-8.7%)                 | 8800<br>(-93-19000)       | 180000<br>(4800-380000)        |
| High-middle SDI | 1990 | Female | 75 to 79 | 40%<br>(29-52%)                | 60%<br>(48-71%)          | 1.5<br>(0.84-2.3)                           | 2.4%<br>(-0.41-6%)                   | 2.9%<br>(-0.6-7.3%)                 | 11000<br>(-3500-28000)    | 160000<br>(-43000-420000)      |
| High-middle SDI | 1990 | Female | 80 to 84 | 36%<br>(25-48%)                | 64%<br>(52-75%)          | 1.4<br>(0.8-2.1)                            | 2.2%<br>(-0.4-5.4%)                  | 2.5%<br>(-0.57-6.4%)                | 9500<br>(-3200-25000)     | 110000<br>(-28000-280000)      |
| High-middle SDI | 1990 | Female | 85 to 89 | 35%<br>(24-47%)                | 65%<br>(53-76%)          | 1.4<br>(0.77-2.2)                           | 2%<br>(-0.58-5.3%)                   | 2.3%<br>(-0.82-6.3%)                | 6100<br>(-2900-17000)     | 49000<br>(-18000-130000)       |
| High-middle SDI | 1990 | Female | 90 to 94 | 37%<br>(26-48%)                | 63%<br>(52-74%)          | 1.4<br>(0.76-2.4)                           | 2%<br>(-0.8-5.7%)                    | 2.3%<br>(-1.1-6.7%)                 | 2700<br>(-1500-8200)      | 15000<br>(-6300-43000)         |
| High-middle SDI | 1990 | Female | 95 plus  | 38%<br>(24-54%)                | 62%<br>(46-76%)          | 1.4<br>(0.65-2.6)                           | 1.8%<br>(-1.4-6.1%)                  | 2%<br>(-1.8-7.1%)                   | 910<br>(-820-3200)        | 3400<br>(-2400-11000)          |
| High-middle SDI | 1990 | Male   | All Ages | 57%<br>(53-61%)                | 43%<br>(39-47%)          | 3.1<br>(2.6-3.7)                            | 9.3%<br>(6.9-12%)                    | 9.5%<br>(6.3-13%)                   | 290000<br>(190000-390000) | 11000000<br>(8000000-14000000) |
| High-middle SDI | 1990 | Male   | 15 to 19 | 52%<br>(41-63%)                | 48%<br>(37-59%)          | 1.9<br>(1.2-2.9)                            | 6.2%<br>(3.9-9.1%)                   | 9.4%<br>(5.4-15%)                   | 2400<br>(1400-3700)       | 210000<br>(130000-310000)      |
| High-middle SDI | 1990 | Male   | 20 to 24 | 59%<br>(50-67%)                | 41%<br>(33-50%)          | 3.3<br>(2.2-4.7)                            | 11%<br>(7.8-16%)                     | 15%<br>(9.5-21%)                    | 6600<br>(4200-9300)       | 540000<br>(370000-730000)      |

| Location        | Year | Sex    | Age      | Prevalence of current drinkers | Prevalence of abstainers | Population average of standard drinks daily | Percent of total attributable deaths | Percent of total attributable DALYs | Attributable deaths      | Attributable DALYs           |
|-----------------|------|--------|----------|--------------------------------|--------------------------|---------------------------------------------|--------------------------------------|-------------------------------------|--------------------------|------------------------------|
| High-middle SDI | 1990 | Male   | 25 to 29 | 65%<br>(58-72%)                | 35%<br>(28-42%)          | 4.1<br>(2.8-5.6)                            | 14%<br>(10-18%)                      | 18%<br>(13-24%)                     | 10000<br>(7200-14000)    | 770000<br>(570000-1000000)   |
| High-middle SDI | 1990 | Male   | 30 to 34 | 69%<br>(62-76%)                | 31%<br>(24-38%)          | 4.7<br>(3.3-6.4)                            | 15%<br>(12-19%)                      | 20%<br>(15-26%)                     | 15000<br>(11000-19000)   | 990000<br>(750000-1300000)   |
| High-middle SDI | 1990 | Male   | 35 to 39 | 71%<br>(64-78%)                | 29%<br>(22-36%)          | 5.1<br>(3.4-7.1)                            | 16%<br>(12-21%)                      | 21%<br>(15-27%)                     | 19000<br>(14000-25000)   | 1100000<br>(820000-1400000)  |
| High-middle SDI | 1990 | Male   | 40 to 44 | 73%<br>(66-79%)                | 27%<br>(21-34%)          | 5.5<br>(3.8-7.6)                            | 17%<br>(12-21%)                      | 22%<br>(16-28%)                     | 22000<br>(16000-28000)   | 1100000<br>(820000-1400000)  |
| High-middle SDI | 1990 | Male   | 45 to 49 | 72%<br>(64-78%)                | 28%<br>(22-36%)          | 5.9<br>(4.1-8.3)                            | 16%<br>(12-21%)                      | 20%<br>(15-26%)                     | 22000<br>(15000-29000)   | 980000<br>(710000-1300000)   |
| High-middle SDI | 1990 | Male   | 50 to 54 | 76%<br>(69-81%)                | 24%<br>(19-31%)          | 6<br>(4-8.2)                                | 16%<br>(11-20%)                      | 19%<br>(13-25%)                     | 38000<br>(25000-50000)   | 1500000<br>(1000000-1900000) |
| High-middle SDI | 1990 | Male   | 55 to 59 | 73%<br>(65-80%)                | 27%<br>(20-35%)          | 5.6<br>(3.9-7.7)                            | 13%<br>(8.4-18%)                     | 15%<br>(9.9-21%)                    | 34000<br>(21000-47000)   | 1200000<br>(740000-1600000)  |
| High-middle SDI | 1990 | Male   | 60 to 64 | 74%<br>(65-81%)                | 26%<br>(19-35%)          | 5.2<br>(3.5-7.3)                            | 11%<br>(6-16%)                       | 12%<br>(6.8-19%)                    | 38000<br>(20000-57000)   | 1100000<br>(590000-1600000)  |
| High-middle SDI | 1990 | Male   | 65 to 69 | 71%<br>(62-78%)                | 29%<br>(22-38%)          | 4.9<br>(3.5-6.6)                            | 9%<br>(4.6-14%)                      | 10%<br>(5.1-16%)                    | 26000<br>(12000-42000)   | 640000<br>(310000-990000)    |
| High-middle SDI | 1990 | Male   | 70 to 74 | 69%<br>(60-76%)                | 31%<br>(24-40%)          | 4.2<br>(2.8-5.8)                            | 7%<br>(2.9-11%)                      | 8%<br>(3.2-13%)                     | 17000<br>(5900-29000)    | 330000<br>(120000-550000)    |
| High-middle SDI | 1990 | Male   | 75 to 79 | 65%<br>(55-74%)                | 35%<br>(26-45%)          | 3.6<br>(2.3-5.2)                            | 5.4%<br>(1.4-10%)                    | 6%<br>(1.4-11%)                     | 17000<br>(2800-33000)    | 260000<br>(53000-500000)     |
| High-middle SDI | 1990 | Male   | 80 to 84 | 63%<br>(52-73%)                | 37%<br>(27-48%)          | 3.4<br>(2.2-4.7)                            | 4.9%<br>(1-9.3%)                     | 5.4%<br>(0.93-10%)                  | 12000<br>(1300-24000)    | 140000<br>(22000-270000)     |
| High-middle SDI | 1990 | Male   | 85 to 89 | 60%<br>(47-70%)                | 40%<br>(30-53%)          | 3<br>(1.9-4.4)                              | 4.2%<br>(0.7-8.2%)                   | 4.6%<br>(0.48-9.2%)                 | 5800<br>(340-12000)      | 46000<br>(5900-93000)        |
| High-middle SDI | 1990 | Male   | 90 to 94 | 58%<br>(46-69%)                | 42%<br>(31-54%)          | 2.7<br>(1.6-4.1)                            | 3.4%<br>(0.22-7.3%)                  | 3.6%<br>(-0.1-8.1%)                 | 1700<br>(-87-3900)       | 9600<br>(440-21000)          |
| High-middle SDI | 1990 | Male   | 95 plus  | 58%<br>(43-72%)                | 42%<br>(28-57%)          | 2.4<br>(1.2-4)                              | 2.6%<br>(-0.74-6.7%)                 | 2.6%<br>(-1.3-7.4%)                 | 340<br>(-180-960)        | 1300<br>(-390-3500)          |
| High-middle SDI | 1995 | Female | All Ages | 49%<br>(45-54%)                | 51%<br>(46-55%)          | 1.5<br>(1.2-1.8)                            | 3.7%<br>(2.3-5.2%)                   | 3.5%<br>(1.2-6.1%)                  | 110000<br>(34000-190000) | 3800000<br>(2300000-5400000) |
| High-middle SDI | 1995 | Female | 15 to 19 | 47%<br>(38-57%)                | 53%<br>(43-62%)          | 1.4<br>(0.89-2.2)                           | 3.1%<br>(1.9-4.5%)                   | 6.2%<br>(3.2-9.8%)                  | 790<br>(430-1200)        | 83000<br>(53000-120000)      |

| Location        | Year | Sex    | Age      | Prevalence of current drinkers | Prevalence of abstainers | Population average of standard drinks daily | Percent of total attributable deaths | Percent of total attributable DALYs | Attributable deaths       | Attributable DALYs           |
|-----------------|------|--------|----------|--------------------------------|--------------------------|---------------------------------------------|--------------------------------------|-------------------------------------|---------------------------|------------------------------|
| High-middle SDI | 1995 | Female | 20 to 24 | 54%<br>(45-63%)                | 46%<br>(37-55%)          | 2<br>(1.3-3)                                | 4.7%<br>(3.3-6.4%)                   | 7.8%<br>(4.6-12%)                   | 1400<br>(850-2100)        | 160000<br>(110000-220000)    |
| High-middle SDI | 1995 | Female | 25 to 29 | 57%<br>(48-66%)                | 43%<br>(34-52%)          | 2.1<br>(1.3-2.9)                            | 5.2%<br>(3.9-6.8%)                   | 8.4%<br>(5.4-12%)                   | 1800<br>(1200-2600)       | 180000<br>(130000-240000)    |
| High-middle SDI | 1995 | Female | 30 to 34 | 61%<br>(52-69%)                | 39%<br>(31-48%)          | 2.2<br>(1.5-3.1)                            | 6.1%<br>(4.6-7.7%)                   | 10%<br>(7.1-13%)                    | 3100<br>(2200-4100)       | 260000<br>(190000-330000)    |
| High-middle SDI | 1995 | Female | 35 to 39 | 63%<br>(55-71%)                | 37%<br>(29-45%)          | 2.4<br>(1.6-3.4)                            | 7.3%<br>(5.6-9.2%)                   | 12%<br>(9-15%)                      | 5400<br>(4000-7000)       | 360000<br>(270000-450000)    |
| High-middle SDI | 1995 | Female | 40 to 44 | 64%<br>(56-72%)                | 36%<br>(28-44%)          | 2.5<br>(1.7-3.4)                            | 7.9%<br>(6-10%)                      | 13%<br>(9.6-17%)                    | 7700<br>(5700-10000)      | 430000<br>(320000-540000)    |
| High-middle SDI | 1995 | Female | 45 to 49 | 65%<br>(56-73%)                | 35%<br>(27-44%)          | 2.5<br>(1.7-3.6)                            | 7.8%<br>(5.6-10%)                    | 12%<br>(8.7-16%)                    | 8700<br>(6100-12000)      | 420000<br>(300000-550000)    |
| High-middle SDI | 1995 | Female | 50 to 54 | 63%<br>(54-71%)                | 37%<br>(29-46%)          | 2.5<br>(1.6-3.5)                            | 7.2%<br>(4.8-10%)                    | 11%<br>(7.3-15%)                    | 8200<br>(5400-11000)      | 340000<br>(230000-470000)    |
| High-middle SDI | 1995 | Female | 55 to 59 | 61%<br>(51-70%)                | 39%<br>(30-49%)          | 2.2<br>(1.4-3.3)                            | 6.7%<br>(3.9-9.8%)                   | 9.4%<br>(5.5-14%)                   | 13000<br>(7800-20000)     | 470000<br>(280000-700000)    |
| High-middle SDI | 1995 | Female | 60 to 64 | 56%<br>(46-67%)                | 44%<br>(33-54%)          | 2.1<br>(1.3-3.2)                            | 4.9%<br>(2-8.4%)                     | 6.8%<br>(2.8-12%)                   | 11000<br>(3900-19000)     | 330000<br>(120000-570000)    |
| High-middle SDI | 1995 | Female | 65 to 69 | 54%<br>(43-64%)                | 46%<br>(36-57%)          | 1.9<br>(1.2-2.7)                            | 3.7%<br>(0.81-7%)                    | 4.8%<br>(1.1-9.1%)                  | 12000<br>(1500-25000)     | 310000<br>(49000-610000)     |
| High-middle SDI | 1995 | Female | 70 to 74 | 49%<br>(38-59%)                | 51%<br>(41-62%)          | 1.7<br>(1-2.6)                              | 2.9%<br>(-0.15-6.5%)                 | 3.7%<br>(-0.14-8.2%)                | 11000<br>(-2700-26000)    | 210000<br>(-41000-510000)    |
| High-middle SDI | 1995 | Female | 75 to 79 | 42%<br>(31-54%)                | 58%<br>(46-69%)          | 1.4<br>(0.82-2.3)                           | 2.1%<br>(-0.58-5.5%)                 | 2.6%<br>(-0.77-6.7%)                | 7100<br>(-4200-21000)     | 110000<br>(-54000-320000)    |
| High-middle SDI | 1995 | Female | 80 to 84 | 37%<br>(27-49%)                | 63%<br>(51-73%)          | 1.3<br>(0.75-2)                             | 1.7%<br>(-0.77-4.7%)                 | 2%<br>(-1-5.6%)                     | 7500<br>(-6400-24000)     | 87000<br>(-61000-270000)     |
| High-middle SDI | 1995 | Female | 85 to 89 | 37%<br>(26-48%)                | 63%<br>(52-74%)          | 1.3<br>(0.74-2.1)                           | 1.7%<br>(-0.87-4.9%)                 | 1.9%<br>(-1.1-5.7%)                 | 5500<br>(-5200-19000)     | 46000<br>(-35000-150000)     |
| High-middle SDI | 1995 | Female | 90 to 94 | 38%<br>(27-50%)                | 62%<br>(50-73%)          | 1.4<br>(0.74-2.3)                           | 1.7%<br>(-1-5.3%)                    | 1.9%<br>(-1.3-6.2%)                 | 2600<br>(-2600-9700)      | 15000<br>(-12000-51000)      |
| High-middle SDI | 1995 | Female | 95 plus  | 40%<br>(26-56%)                | 60%<br>(44-74%)          | 1.5<br>(0.68-2.6)                           | 1.8%<br>(-1.5-6.2%)                  | 2%<br>(-1.9-7.2%)                   | 930<br>(-1000-3500)       | 3400<br>(-3100-12000)        |
| High-middle SDI | 1995 | Male   | All Ages | 57%<br>(53-61%)                | 43%<br>(39-47%)          | 3<br>(2.5-3.6)                              | 10%<br>(7.6-13%)                     | 9.9%<br>(6.7-13%)                   | 390000<br>(260000-530000) | 1500000<br>(1100000-1900000) |
| High-middle SDI | 1995 | Male   | 15 to 19 | 53%<br>(43-63%)                | 47%<br>(37-57%)          | 1.9<br>(1.1-2.8)                            | 6.3%<br>(4-9.3%)                     | 9.2%<br>(5.3-14%)                   | 3000<br>(1700-4600)       | 260000<br>(160000-370000)    |
| High-middle SDI | 1995 | Male   | 20 to 24 | 60%<br>(51-67%)                | 40%<br>(33-49%)          | 3.2<br>(2.1-4.5)                            | 12%<br>(8.1-16%)                     | 15%<br>(9.5-21%)                    | 9400<br>(6100-13000)      | 730000<br>(510000-990000)    |
| High-middle SDI | 1995 | Male   | 25 to 29 | 63%<br>(55-70%)                | 37%<br>(30-45%)          | 3.9<br>(2.6-5.4)                            | 14%<br>(10-18%)                      | 17%<br>(12-23%)                     | 13000<br>(9200-18000)     | 950000<br>(690000-1200000)   |

| Location        | Year | Sex    | Age      | Prevalence of current drinkers | Prevalence of abstainers | Population average of standard drinks daily | Percent of total attributable deaths | Percent of total attributable DALYs | Attributable deaths      | Attributable DALYs           |
|-----------------|------|--------|----------|--------------------------------|--------------------------|---------------------------------------------|--------------------------------------|-------------------------------------|--------------------------|------------------------------|
| High-middle SDI | 1995 | Male   | 30 to 34 | 67%<br>(59-74%)                | 33%<br>(26-41%)          | 4.4<br>(3-6)                                | 15%<br>(12-19%)                      | 19%<br>(14-24%)                     | 21000<br>(16000-27000)   | 1300000<br>(1000000-1700000) |
| High-middle SDI | 1995 | Male   | 35 to 39 | 70%<br>(63-76%)                | 30%<br>(24-37%)          | 4.8<br>(3.3-6.6)                            | 17%<br>(13-21%)                      | 21%<br>(15-26%)                     | 32000<br>(23000-41000)   | 1800000<br>(1300000-2300000) |
| High-middle SDI | 1995 | Male   | 40 to 44 | 72%<br>(65-78%)                | 28%<br>(22-35%)          | 5.2<br>(3.6-7.1)                            | 18%<br>(13-22%)                      | 21%<br>(16-27%)                     | 41000<br>(30000-54000)   | 2000000<br>(1500000-2600000) |
| High-middle SDI | 1995 | Male   | 45 to 49 | 74%<br>(66-80%)                | 26%<br>(20-34%)          | 5.7<br>(4-7.9)                              | 18%<br>(13-22%)                      | 21%<br>(15-27%)                     | 44000<br>(31000-57000)   | 1900000<br>(1400000-2500000) |
| High-middle SDI | 1995 | Male   | 50 to 54 | 72%<br>(65-78%)                | 28%<br>(22-35%)          | 5.7<br>(3.9-7.8)                            | 15%<br>(11-20%)                      | 18%<br>(12-24%)                     | 37000<br>(25000-49000)   | 1400000<br>(960000-1800000)  |
| High-middle SDI | 1995 | Male   | 55 to 59 | 74%<br>(66-80%)                | 26%<br>(20-34%)          | 5.2<br>(3.6-7.1)                            | 14%<br>(8.8-19%)                     | 16%<br>(10-22%)                     | 54000<br>(33000-75000)   | 1800000<br>(1100000-2500000) |
| High-middle SDI | 1995 | Male   | 60 to 64 | 71%<br>(63-79%)                | 29%<br>(21-37%)          | 4.9<br>(3.4-7)                              | 11%<br>(5.9-16%)                     | 12%<br>(6.7-18%)                    | 42000<br>(22000-64000)   | 1200000<br>(630000-1800000)  |
| High-middle SDI | 1995 | Male   | 65 to 69 | 73%<br>(64-80%)                | 27%<br>(20-36%)          | 4.4<br>(3.1-6)                              | 8.6%<br>(4-13%)                      | 9.7%<br>(4.4-15%)                   | 39000<br>(16000-65000)   | 940000<br>(400000-1500000)   |
| High-middle SDI | 1995 | Male   | 70 to 74 | 69%<br>(60-76%)                | 31%<br>(24-40%)          | 4<br>(2.8-5.6)                              | 7%<br>(2.7-12%)                      | 7.9%<br>(3-13%)                     | 24000<br>(7300-42000)    | 470000<br>(150000-810000)    |
| High-middle SDI | 1995 | Male   | 75 to 79 | 65%<br>(55-73%)                | 35%<br>(27-45%)          | 3.4<br>(2.2-4.9)                            | 5.2%<br>(1.6-9.5%)                   | 5.8%<br>(1.6-11%)                   | 14000<br>(2300-27000)    | 210000<br>(45000-400000)     |
| High-middle SDI | 1995 | Male   | 80 to 84 | 64%<br>(52-73%)                | 36%<br>(27-48%)          | 3.1<br>(2.1-4.4)                            | 4.5%<br>(0.9-8.6%)                   | 4.9%<br>(0.79-9.6%)                 | 12000<br>(410-24000)     | 130000<br>(13000-270000)     |
| High-middle SDI | 1995 | Male   | 85 to 89 | 59%<br>(48-69%)                | 41%<br>(31-52%)          | 2.8<br>(1.8-4.1)                            | 3.9%<br>(0.56-7.8%)                  | 4.2%<br>(0.37-8.7%)                 | 6300<br>(-180-14000)     | 51000<br>(2700-110000)       |
| High-middle SDI | 1995 | Male   | 90 to 94 | 58%<br>(47-69%)                | 42%<br>(31-53%)          | 2.6<br>(1.6-4)                              | 3.3%<br>(0.21-7%)                    | 3.5%<br>(-0.048-7.9%)               | 2000<br>(-230-4700)      | 11000<br>(-35-25000)         |
| High-middle SDI | 1995 | Male   | 95 plus  | 58%<br>(43-71%)                | 42%<br>(29-57%)          | 2.3<br>(1.2-3.9)                            | 2.7%<br>(-0.57-6.7%)                 | 2.8%<br>(-1.1-7.4%)                 | 400<br>(-190-1100)       | 1600<br>(-430-4000)          |
| High-middle SDI | 2000 | Female | All Ages | 48%<br>(44-52%)                | 52%<br>(48-56%)          | 1.5<br>(1.2-1.8)                            | 3.7%<br>(2.3-5.1%)                   | 3.4%<br>(1.2-5.9%)                  | 110000<br>(35000-190000) | 3900000<br>(2400000-5400000) |
| High-middle SDI | 2000 | Female | 15 to 19 | 47%<br>(37-57%)                | 53%<br>(43-63%)          | 1.4<br>(0.87-2.2)                           | 3.1%<br>(2-4.5%)                     | 6.4%<br>(3.4-10%)                   | 800<br>(450-1200)        | 85000<br>(54000-120000)      |
| High-middle SDI | 2000 | Female | 20 to 24 | 52%<br>(43-61%)                | 48%<br>(39-57%)          | 2<br>(1.3-2.9)                              | 4.8%<br>(3.4-6.4%)                   | 8.1%<br>(4.9-12%)                   | 1600<br>(980-2300)       | 170000<br>(120000-230000)    |



| Location        | Year | Sex    | Age      | Prevalence of current drinkers | Prevalence of abstainers | Population average of standard drinks daily | Percent of total attributable deaths | Percent of total attributable DALYs | Attributable deaths       | Attributable DALYs           |
|-----------------|------|--------|----------|--------------------------------|--------------------------|---------------------------------------------|--------------------------------------|-------------------------------------|---------------------------|------------------------------|
| High-middle SDI | 2000 | Female | 25 to 29 | 56%<br>(47-64%)                | 44%<br>(36-53%)          | 2<br>(1.3-2.9)                              | 5.3%<br>(4-6.8%)                     | 8.8%<br>(5.8-12%)                   | 2000<br>(1400-2800)       | 200000<br>(150000-270000)    |
| High-middle SDI | 2000 | Female | 30 to 34 | 57%<br>(48-66%)                | 43%<br>(34-52%)          | 2.1<br>(1.4-3)                              | 5.7%<br>(4.4-7.2%)                   | 9.8%<br>(7-13%)                     | 2800<br>(2000-3700)       | 230000<br>(180000-300000)    |
| High-middle SDI | 2000 | Female | 35 to 39 | 60%<br>(51-68%)                | 40%<br>(32-49%)          | 2.3<br>(1.6-3.3)                            | 6.9%<br>(5.4-8.6%)                   | 12%<br>(9-15%)                      | 4900<br>(3700-6300)       | 330000<br>(260000-420000)    |
| High-middle SDI | 2000 | Female | 40 to 44 | 62%<br>(54-70%)                | 38%<br>(30-46%)          | 2.5<br>(1.7-3.4)                            | 7.9%<br>(6.2-9.9%)                   | 13%<br>(10-17%)                     | 7800<br>(5900-9900)       | 440000<br>(340000-560000)    |
| High-middle SDI | 2000 | Female | 45 to 49 | 63%<br>(54-71%)                | 37%<br>(29-46%)          | 2.4<br>(1.7-3.4)                            | 7.8%<br>(5.8-10%)                    | 12%<br>(9.1-16%)                    | 9900<br>(7200-13000)      | 480000<br>(360000-620000)    |
| High-middle SDI | 2000 | Female | 50 to 54 | 61%<br>(52-70%)                | 39%<br>(30-48%)          | 2.3<br>(1.5-3.3)                            | 7.4%<br>(5.1-10%)                    | 11%<br>(7.7-15%)                    | 10000<br>(7200-14000)     | 430000<br>(300000-590000)    |
| High-middle SDI | 2000 | Female | 55 to 59 | 56%<br>(46-66%)                | 44%<br>(34-54%)          | 2.2<br>(1.4-3.2)                            | 6.3%<br>(3.8-9.3%)                   | 9.3%<br>(5.6-14%)                   | 9200<br>(5500-14000)      | 330000<br>(200000-480000)    |
| High-middle SDI | 2000 | Female | 60 to 64 | 55%<br>(44-66%)                | 45%<br>(34-56%)          | 1.9<br>(1.2-3)                              | 4.9%<br>(2.1-8.4%)                   | 6.8%<br>(2.8-12%)                   | 13000<br>(4800-22000)     | 380000<br>(150000-660000)    |
| High-middle SDI | 2000 | Female | 65 to 69 | 51%<br>(40-62%)                | 49%<br>(38-60%)          | 1.8<br>(1.1-2.6)                            | 3.7%<br>(0.96-6.8%)                  | 4.9%<br>(1.3-9.1%)                  | 10000<br>(1700-21000)     | 260000<br>(54000-510000)     |
| High-middle SDI | 2000 | Female | 70 to 74 | 46%<br>(35-57%)                | 54%<br>(43-65%)          | 1.5<br>(0.88-2.3)                           | 2.6%<br>(-0.21-5.9%)                 | 3.3%<br>(-0.28-7.5%)                | 11000<br>(-3000-28000)    | 220000<br>(-43000-540000)    |
| High-middle SDI | 2000 | Female | 75 to 79 | 39%<br>(28-51%)                | 61%<br>(49-72%)          | 1.3<br>(0.71-2)                             | 2%<br>(-0.65-5.3%)                   | 2.4%<br>(-0.82-6.5%)                | 9000<br>(-5300-27000)     | 140000<br>(-68000-410000)    |
| High-middle SDI | 2000 | Female | 80 to 84 | 37%<br>(26-49%)                | 63%<br>(51-74%)          | 1.2<br>(0.71-1.9)                           | 1.8%<br>(-0.6-4.7%)                  | 2.1%<br>(-0.79-5.7%)                | 6400<br>(-4200-20000)     | 74000<br>(-39000-220000)     |
| High-middle SDI | 2000 | Female | 85 to 89 | 37%<br>(26-48%)                | 63%<br>(52-74%)          | 1.2<br>(0.69-1.9)                           | 1.5%<br>(-0.9-4.6%)                  | 1.6%<br>(-1.2-5.3%)                 | 5200<br>(-5700-19000)     | 44000<br>(-38000-150000)     |
| High-middle SDI | 2000 | Female | 90 to 94 | 38%<br>(27-49%)                | 62%<br>(51-73%)          | 1.3<br>(0.7-2.1)                            | 1.5%<br>(-1.1-5%)                    | 1.7%<br>(-1.4-5.9%)                 | 2800<br>(-3300-11000)     | 16000<br>(-15000-57000)      |
| High-middle SDI | 2000 | Female | 95 plus  | 40%<br>(26-55%)                | 60%<br>(45-74%)          | 1.4<br>(0.65-2.5)                           | 1.7%<br>(-1.4-6.1%)                  | 1.9%<br>(-1.8-7.1%)                 | 1100<br>(-1200-4200)      | 3900<br>(-3600-14000)        |
| High-middle SDI | 2000 | Male   | All Ages | 57%<br>(53-60%)                | 43%<br>(40-47%)          | 3<br>(2.5-3.6)                              | 10%<br>(7.9-13%)                     | 10%<br>(6.9-13%)                    | 410000<br>(280000-540000) | 1600000<br>(1200000-1900000) |
| High-middle SDI | 2000 | Male   | 15 to 19 | 55%<br>(45-64%)                | 45%<br>(36-55%)          | 1.8<br>(1.1-2.7)                            | 6.5%<br>(4.1-9.4%)                   | 9.5%<br>(5.3-14%)                   | 3000<br>(1700-4600)       | 260000<br>(160000-370000)    |
| High-middle SDI | 2000 | Male   | 20 to 24 | 58%<br>(50-65%)                | 42%<br>(35-50%)          | 3<br>(2-4.3)                                | 12%<br>(8.1-15%)                     | 15%<br>(9.6-21%)                    | 10000<br>(6800-14000)     | 790000<br>(560000-1100000)   |
| High-middle SDI | 2000 | Male   | 25 to 29 | 61%<br>(54-68%)                | 39%<br>(32-46%)          | 3.7<br>(2.6-5.2)                            | 14%<br>(10-17%)                      | 17%<br>(12-23%)                     | 15000<br>(10000-19000)    | 1000000<br>(760000-1300000)  |
| High-middle SDI | 2000 | Male   | 30 to 34 | 64%<br>(56-70%)                | 36%<br>(30-44%)          | 4.2<br>(3-5.8)                              | 14%<br>(11-18%)                      | 18%<br>(13-23%)                     | 18000<br>(13000-23000)    | 1200000<br>(880000-1400000)  |

| Location        | Year | Sex    | Age      | Prevalence of current drinkers | Prevalence of abstainers | Population average of standard drinks daily | Percent of total attributable deaths | Percent of total attributable DALYs | Attributable deaths      | Attributable DALYs           |
|-----------------|------|--------|----------|--------------------------------|--------------------------|---------------------------------------------|--------------------------------------|-------------------------------------|--------------------------|------------------------------|
| High-middle SDI | 2000 | Male   | 35 to 39 | 68%<br>(61-74%)                | 32%<br>(26-39%)          | 4.7<br>(3.2-6.4)                            | 16%<br>(13-20%)                      | 20%<br>(15-25%)                     | 28000<br>(21000-36000)   | 1600000<br>(1200000-2000000) |
| High-middle SDI | 2000 | Male   | 40 to 44 | 70%<br>(64-76%)                | 30%<br>(24-36%)          | 5.2<br>(3.6-7)                              | 18%<br>(14-22%)                      | 22%<br>(17-27%)                     | 42000<br>(32000-53000)   | 2100000<br>(1600000-2600000) |
| High-middle SDI | 2000 | Male   | 45 to 49 | 72%<br>(64-77%)                | 28%<br>(23-36%)          | 5.6<br>(4-7.6)                              | 18%<br>(14-22%)                      | 21%<br>(16-26%)                     | 51000<br>(38000-64000)   | 2200000<br>(1700000-2800000) |
| High-middle SDI | 2000 | Male   | 50 to 54 | 73%<br>(66-79%)                | 27%<br>(21-34%)          | 5.7<br>(4-7.8)                              | 16%<br>(12-21%)                      | 20%<br>(14-25%)                     | 49000<br>(35000-64000)   | 1900000<br>(1300000-2400000) |
| High-middle SDI | 2000 | Male   | 55 to 59 | 70%<br>(63-77%)                | 30%<br>(23-37%)          | 5.2<br>(3.7-7)                              | 13%<br>(8.9-18%)                     | 16%<br>(11-21%)                     | 36000<br>(24000-49000)   | 1200000<br>(790000-1600000)  |
| High-middle SDI | 2000 | Male   | 60 to 64 | 72%<br>(64-79%)                | 28%<br>(21-36%)          | 4.7<br>(3.2-6.7)                            | 11%<br>(6.5-16%)                     | 13%<br>(7.3-19%)                    | 51000<br>(27000-75000)   | 1400000<br>(800000-2100000)  |
| High-middle SDI | 2000 | Male   | 65 to 69 | 70%<br>(61-77%)                | 30%<br>(23-39%)          | 4.3<br>(3.1-5.8)                            | 8.9%<br>(4.6-13%)                    | 10%<br>(5.2-16%)                    | 37000<br>(17000-58000)   | 890000<br>(420000-1400000)   |
| High-middle SDI | 2000 | Male   | 70 to 74 | 70%<br>(61-77%)                | 30%<br>(23-39%)          | 3.7<br>(2.5-5.1)                            | 6.8%<br>(2.6-11%)                    | 7.6%<br>(2.8-13%)                   | 32000<br>(9100-57000)    | 610000<br>(200000-1100000)   |
| High-middle SDI | 2000 | Male   | 75 to 79 | 63%<br>(54-72%)                | 37%<br>(28-46%)          | 3.2<br>(2.1-4.6)                            | 5.4%<br>(1.7-9.6%)                   | 6%<br>(1.8-11%)                     | 19000<br>(3700-36000)    | 280000<br>(66000-530000)     |
| High-middle SDI | 2000 | Male   | 80 to 84 | 61%<br>(50-71%)                | 39%<br>(29-50%)          | 2.9<br>(1.9-4.1)                            | 4.6%<br>(1.3-8.3%)                   | 5.1%<br>(1.3-9.3%)                  | 10000<br>(1500-20000)    | 110000<br>(23000-220000)     |
| High-middle SDI | 2000 | Male   | 85 to 89 | 60%<br>(48-70%)                | 40%<br>(30-52%)          | 2.6<br>(1.7-3.8)                            | 3.7%<br>(0.66-7.3%)                  | 4%<br>(0.51-8.1%)                   | 6100<br>(120-13000)      | 50000<br>(4600-100000)       |
| High-middle SDI | 2000 | Male   | 90 to 94 | 58%<br>(46-69%)                | 42%<br>(31-54%)          | 2.4<br>(1.5-3.7)                            | 3.2%<br>(0.19-6.7%)                  | 3.4%<br>(-0.065-7.5%)               | 2200<br>(-270-5200)      | 13000<br>(-79-28000)         |
| High-middle SDI | 2000 | Male   | 95 plus  | 58%<br>(44-71%)                | 42%<br>(29-56%)          | 2.2<br>(1.1-3.7)                            | 2.7%<br>(-0.46-6.6%)                 | 2.8%<br>(-0.95-7.3%)                | 490<br>(-190-1300)       | 1900<br>(-400-4700)          |
| High-middle SDI | 2005 | Female | All Ages | 47%<br>(43-51%)                | 53%<br>(49-57%)          | 1.6<br>(1.3-1.9)                            | 4%<br>(2.7-5.4%)                     | 3.7%<br>(1.6-6.1%)                  | 130000<br>(58000-220000) | 4500000<br>(3000000-6100000) |
| High-middle SDI | 2005 | Female | 15 to 19 | 46%<br>(37-55%)                | 54%<br>(45-63%)          | 1.5<br>(0.91-2.2)                           | 3.1%<br>(2.1-4.5%)                   | 6.7%<br>(3.7-10%)                   | 760<br>(430-1200)        | 83000<br>(54000-120000)      |
| High-middle SDI | 2005 | Female | 20 to 24 | 50%<br>(41-59%)                | 50%<br>(41-59%)          | 2<br>(1.3-2.9)                              | 4.8%<br>(3.5-6.3%)                   | 8.3%<br>(5.3-12%)                   | 1700<br>(1100-2400)      | 180000<br>(130000-250000)    |
| High-middle SDI | 2005 | Female | 25 to 29 | 54%<br>(45-62%)                | 46%<br>(38-55%)          | 2<br>(1.4-2.9)                              | 5.5%<br>(4.2-6.9%)                   | 9%<br>(6.2-12%)                     | 2600<br>(1800-3400)      | 240000<br>(180000-310000)    |

| Location        | Year | Sex    | Age      | Prevalence of current drinkers | Prevalence of abstainers | Population average of standard drinks daily | Percent of total attributable deaths | Percent of total attributable DALYs | Attributable deaths       | Attributable DALYs           |
|-----------------|------|--------|----------|--------------------------------|--------------------------|---------------------------------------------|--------------------------------------|-------------------------------------|---------------------------|------------------------------|
| High-middle SDI | 2005 | Female | 30 to 34 | 56%<br>(47-65%)                | 44%<br>(35-53%)          | 2.2<br>(1.5-3.1)                            | 6.1%<br>(4.8-7.6%)                   | 10%<br>(7.5-13%)                    | 3800<br>(2800-4900)       | 290000<br>(230000-370000)    |
| High-middle SDI | 2005 | Female | 35 to 39 | 57%<br>(49-66%)                | 43%<br>(34-51%)          | 2.4<br>(1.7-3.3)                            | 6.9%<br>(5.4-8.6%)                   | 12%<br>(8.9-15%)                    | 5400<br>(4100-7000)       | 350000<br>(270000-440000)    |
| High-middle SDI | 2005 | Female | 40 to 44 | 60%<br>(53-68%)                | 40%<br>(32-47%)          | 2.6<br>(1.8-3.5)                            | 8.1%<br>(6.3-10%)                    | 13%<br>(10-17%)                     | 8800<br>(6800-11000)      | 480000<br>(380000-610000)    |
| High-middle SDI | 2005 | Female | 45 to 49 | 62%<br>(53-69%)                | 38%<br>(31-47%)          | 2.5<br>(1.8-3.5)                            | 8.3%<br>(6.4-11%)                    | 13%<br>(9.9-17%)                    | 12000<br>(9100-15000)     | 570000<br>(440000-720000)    |
| High-middle SDI | 2005 | Female | 50 to 54 | 59%<br>(50-68%)                | 41%<br>(32-50%)          | 2.3<br>(1.6-3.3)                            | 7.9%<br>(5.6-10%)                    | 12%<br>(8.4-16%)                    | 14000<br>(9900-18000)     | 570000<br>(410000-750000)    |
| High-middle SDI | 2005 | Female | 55 to 59 | 56%<br>(46-65%)                | 44%<br>(35-54%)          | 2.2<br>(1.4-3.2)                            | 6.9%<br>(4.4-9.8%)                   | 10%<br>(6.4-14%)                    | 14000<br>(8700-19000)     | 470000<br>(310000-670000)    |
| High-middle SDI | 2005 | Female | 60 to 64 | 51%<br>(41-61%)                | 49%<br>(39-59%)          | 2<br>(1.2-3)                                | 5.1%<br>(2.4-8.2%)                   | 7.2%<br>(3.6-12%)                   | 9800<br>(4600-16000)      | 300000<br>(140000-480000)    |
| High-middle SDI | 2005 | Female | 65 to 69 | 49%<br>(39-59%)                | 51%<br>(41-61%)          | 1.7<br>(1.1-2.5)                            | 4%<br>(1.3-7%)                       | 5.3%<br>(1.8-9.3%)                  | 14000<br>(3900-25000)     | 340000<br>(110000-600000)    |
| High-middle SDI | 2005 | Female | 70 to 74 | 42%<br>(32-53%)                | 58%<br>(47-68%)          | 1.4<br>(0.87-2.2)                           | 2.9%<br>(0.28-6%)                    | 3.8%<br>(0.4-7.7%)                  | 11000<br>(-180-25000)     | 220000<br>(5200-480000)      |
| High-middle SDI | 2005 | Female | 75 to 79 | 36%<br>(26-48%)                | 64%<br>(52-74%)          | 1.2<br>(0.69-1.9)                           | 2.1%<br>(-0.3-5.2%)                  | 2.6%<br>(-0.41-6.4%)                | 12000<br>(-3600-32000)    | 190000<br>(-42000-480000)    |
| High-middle SDI | 2005 | Female | 80 to 84 | 35%<br>(25-47%)                | 65%<br>(53-75%)          | 1.2<br>(0.7-1.9)                            | 2%<br>(-0.33-5%)                     | 2.4%<br>(-0.46-5.9%)                | 10000<br>(-3500-28000)    | 120000<br>(-30000-310000)    |
| High-middle SDI | 2005 | Female | 85 to 89 | 36%<br>(25-47%)                | 64%<br>(53-75%)          | 1.2<br>(0.69-1.9)                           | 1.8%<br>(-0.41-4.8%)                 | 2.1%<br>(-0.57-5.7%)                | 6200<br>(-2500-18000)     | 50000<br>(-16000-140000)     |
| High-middle SDI | 2005 | Female | 90 to 94 | 37%<br>(26-48%)                | 63%<br>(52-74%)          | 1.3<br>(0.68-2.1)                           | 1.7%<br>(-0.8-5.1%)                  | 1.9%<br>(-1.1-6%)                   | 3800<br>(-2600-13000)     | 21000<br>(-12000-66000)      |
| High-middle SDI | 2005 | Female | 95 plus  | 39%<br>(26-54%)                | 61%<br>(46-74%)          | 1.4<br>(0.64-2.4)                           | 1.9%<br>(-1.1-6.2%)                  | 2.1%<br>(-1.5-7.1%)                 | 1500<br>(-1100-5100)      | 5500<br>(-3300-18000)        |
| High-middle SDI | 2005 | Male   | All Ages | 56%<br>(52-60%)                | 44%<br>(40-48%)          | 3.2<br>(2.7-3.8)                            | 11%<br>(8.5-13%)                     | 10%<br>(7.5-13%)                    | 470000<br>(340000-600000) | 1700000<br>(1400000-2100000) |
| High-middle SDI | 2005 | Male   | 15 to 19 | 53%<br>(44-62%)                | 47%<br>(38-56%)          | 1.9<br>(1.2-2.8)                            | 6.5%<br>(4.2-9.2%)                   | 9.9%<br>(5.6-15%)                   | 2800<br>(1600-4200)       | 240000<br>(150000-350000)    |
| High-middle SDI | 2005 | Male   | 20 to 24 | 55%<br>(48-62%)                | 45%<br>(38-52%)          | 3.1<br>(2.1-4.3)                            | 11%<br>(8.2-15%)                     | 15%<br>(10-21%)                     | 10000<br>(7000-14000)     | 790000<br>(570000-1000000)   |
| High-middle SDI | 2005 | Male   | 25 to 29 | 59%<br>(53-66%)                | 41%<br>(34-47%)          | 3.9<br>(2.7-5.3)                            | 13%<br>(10-17%)                      | 17%<br>(12-23%)                     | 17000<br>(12000-22000)    | 1200000<br>(880000-1500000)  |
| High-middle SDI | 2005 | Male   | 30 to 34 | 61%<br>(55-68%)                | 39%<br>(32-45%)          | 4.4<br>(3.1-5.9)                            | 14%<br>(11-17%)                      | 18%<br>(14-23%)                     | 22000<br>(17000-28000)    | 1400000<br>(1100000-1700000) |

| Location        | Year | Sex    | Age      | Prevalence of current drinkers | Prevalence of abstainers | Population average of standard drinks daily | Percent of total attributable deaths | Percent of total attributable DALYs | Attributable deaths      | Attributable DALYs           |
|-----------------|------|--------|----------|--------------------------------|--------------------------|---------------------------------------------|--------------------------------------|-------------------------------------|--------------------------|------------------------------|
| High-middle SDI | 2005 | Male   | 35 to 39 | 63%<br>(56-70%)                | 37%<br>(30-44%)          | 4.7<br>(3.2-6.4)                            | 15%<br>(12-18%)                      | 19%<br>(14-24%)                     | 28000<br>(21000-34000)   | 1500000<br>(1200000-1900000) |
| High-middle SDI | 2005 | Male   | 40 to 44 | 67%<br>(61-73%)                | 33%<br>(27-39%)          | 5.2<br>(3.6-7)                              | 17%<br>(14-20%)                      | 21%<br>(16-25%)                     | 44000<br>(34000-54000)   | 2100000<br>(1700000-2600000) |
| High-middle SDI | 2005 | Male   | 45 to 49 | 70%<br>(63-76%)                | 30%<br>(24-37%)          | 5.8<br>(4.2-7.9)                            | 18%<br>(14-22%)                      | 22%<br>(17-26%)                     | 60000<br>(46000-74000)   | 2600000<br>(2000000-3100000) |
| High-middle SDI | 2005 | Male   | 50 to 54 | 71%<br>(64-76%)                | 29%<br>(24-36%)          | 5.8<br>(4.1-7.9)                            | 17%<br>(13-21%)                      | 20%<br>(15-25%)                     | 65000<br>(48000-81000)   | 2400000<br>(1800000-3100000) |
| High-middle SDI | 2005 | Male   | 55 to 59 | 71%<br>(64-77%)                | 29%<br>(23-36%)          | 5.5<br>(3.9-7.4)                            | 15%<br>(10-19%)                      | 17%<br>(12-22%)                     | 54000<br>(37000-70000)   | 1800000<br>(1200000-2300000) |
| High-middle SDI | 2005 | Male   | 60 to 64 | 68%<br>(61-75%)                | 32%<br>(25-39%)          | 4.9<br>(3.3-6.9)                            | 11%<br>(6.8-16%)                     | 13%<br>(8-18%)                      | 37000<br>(21000-53000)   | 1100000<br>(620000-1500000)  |
| High-middle SDI | 2005 | Male   | 65 to 69 | 70%<br>(62-77%)                | 30%<br>(23-38%)          | 4.4<br>(3.1-5.9)                            | 9.7%<br>(5.2-14%)                    | 11%<br>(5.8-16%)                    | 48000<br>(23000-72000)   | 1100000<br>(570000-1700000)  |
| High-middle SDI | 2005 | Male   | 70 to 74 | 66%<br>(58-73%)                | 34%<br>(27-42%)          | 3.7<br>(2.6-5.1)                            | 7.2%<br>(3.2-11%)                    | 8.2%<br>(3.6-13%)                   | 32000<br>(11000-54000)   | 620000<br>(230000-1000000)   |
| High-middle SDI | 2005 | Male   | 75 to 79 | 64%<br>(54-73%)                | 36%<br>(27-46%)          | 3.2<br>(2.1-4.6)                            | 5.5%<br>(1.6-9.9%)                   | 6.2%<br>(1.7-11%)                   | 25000<br>(4000-49000)    | 380000<br>(80000-730000)     |
| High-middle SDI | 2005 | Male   | 80 to 84 | 61%<br>(50-71%)                | 39%<br>(29-50%)          | 2.9<br>(1.9-4.2)                            | 4.9%<br>(1.6-8.7%)                   | 5.5%<br>(1.6-9.9%)                  | 14000<br>(3000-27000)    | 160000<br>(40000-300000)     |
| High-middle SDI | 2005 | Male   | 85 to 89 | 57%<br>(46-67%)                | 43%<br>(33-54%)          | 2.5<br>(1.6-3.7)                            | 3.9%<br>(1.1-7.2%)                   | 4.3%<br>(1-8.1%)                    | 6000<br>(950-12000)      | 48000<br>(11000-92000)       |
| High-middle SDI | 2005 | Male   | 90 to 94 | 58%<br>(47-68%)                | 42%<br>(32-53%)          | 2.4<br>(1.4-3.6)                            | 3.2%<br>(0.36-6.5%)                  | 3.4%<br>(0.1-7.3%)                  | 2400<br>(-100-5400)      | 14000<br>(790-29000)         |
| High-middle SDI | 2005 | Male   | 95 plus  | 58%<br>(43-71%)                | 42%<br>(29-57%)          | 2.2<br>(1.1-3.7)                            | 2.8%<br>(-0.32-6.6%)                 | 2.9%<br>(-0.77-7.3%)                | 630<br>(-180-1600)       | 2400<br>(-300-5800)          |
| High-middle SDI | 2010 | Female | All Ages | 47%<br>(43-51%)                | 53%<br>(49-57%)          | 1.6<br>(1.3-2)                              | 3.8%<br>(2.5-5.2%)                   | 3.6%<br>(1.5-6.1%)                  | 120000<br>(51000-210000) | 4100000<br>(2700000-5600000) |
| High-middle SDI | 2010 | Female | 15 to 19 | 44%<br>(34-53%)                | 56%<br>(47-66%)          | 1.4<br>(0.84-2.1)                           | 2.7%<br>(1.8-4%)                     | 6.3%<br>(3.3-9.9%)                  | 520<br>(280-820)         | 61000<br>(38000-89000)       |
| High-middle SDI | 2010 | Female | 20 to 24 | 48%<br>(39-58%)                | 52%<br>(42-61%)          | 1.9<br>(1.2-2.8)                            | 4.5%<br>(3.3-6%)                     | 7.9%<br>(5-11%)                     | 1300<br>(820-1800)       | 160000<br>(110000-220000)    |
| High-middle SDI | 2010 | Female | 25 to 29 | 51%<br>(41-60%)                | 49%<br>(40-59%)          | 2<br>(1.3-2.8)                              | 5%<br>(3.8-6.2%)                     | 8.1%<br>(5.6-11%)                   | 2100<br>(1400-2700)      | 220000<br>(160000-280000)    |

| Location        | Year | Sex    | Age      | Prevalence of current drinkers | Prevalence of abstainers | Population average of standard drinks daily | Percent of total attributable deaths | Percent of total attributable DALYs | Attributable deaths       | Attributable DALYs           |
|-----------------|------|--------|----------|--------------------------------|--------------------------|---------------------------------------------|--------------------------------------|-------------------------------------|---------------------------|------------------------------|
| High-middle SDI | 2010 | Female | 30 to 34 | 54%<br>(45-63%)                | 46%<br>(37-55%)          | 2.1<br>(1.4-3)                              | 5.5%<br>(4.4-6.9%)                   | 9.4%<br>(6.8-12%)                   | 3300<br>(2400-4200)       | 280000<br>(210000-350000)    |
| High-middle SDI | 2010 | Female | 35 to 39 | 56%<br>(48-65%)                | 44%<br>(35-52%)          | 2.4<br>(1.6-3.4)                            | 6.4%<br>(5-7.9%)                     | 11%<br>(8.5-14%)                    | 4800<br>(3600-6000)       | 330000<br>(250000-410000)    |
| High-middle SDI | 2010 | Female | 40 to 44 | 57%<br>(49-66%)                | 43%<br>(34-51%)          | 2.5<br>(1.7-3.5)                            | 6.8%<br>(5.3-8.6%)                   | 12%<br>(9.2-15%)                    | 6200<br>(4700-7900)       | 360000<br>(280000-450000)    |
| High-middle SDI | 2010 | Female | 45 to 49 | 59%<br>(50-67%)                | 41%<br>(33-50%)          | 2.5<br>(1.7-3.6)                            | 7.2%<br>(5.5-9.3%)                   | 12%<br>(9.2-16%)                    | 8800<br>(6600-11000)      | 440000<br>(330000-560000)    |
| High-middle SDI | 2010 | Female | 50 to 54 | 59%<br>(50-67%)                | 41%<br>(33-50%)          | 2.4<br>(1.6-3.4)                            | 7.3%<br>(5.3-9.7%)                   | 11%<br>(8.3-15%)                    | 12000<br>(8500-16000)     | 500000<br>(360000-670000)    |
| High-middle SDI | 2010 | Female | 55 to 59 | 56%<br>(45-66%)                | 44%<br>(34-55%)          | 2.2<br>(1.4-3.3)                            | 6.6%<br>(4.3-9.3%)                   | 9.9%<br>(6.5-14%)                   | 14000<br>(8800-19000)     | 490000<br>(320000-680000)    |
| High-middle SDI | 2010 | Female | 60 to 64 | 53%<br>(42-64%)                | 47%<br>(36-58%)          | 2.1<br>(1.3-3.2)                            | 5.2%<br>(2.7-8.3%)                   | 7.5%<br>(3.9-12%)                   | 12000<br>(5700-19000)     | 360000<br>(180000-570000)    |
| High-middle SDI | 2010 | Female | 65 to 69 | 50%<br>(39-61%)                | 50%<br>(39-61%)          | 1.9<br>(1.2-2.7)                            | 4%<br>(1.6-7%)                       | 5.7%<br>(2.2-9.7%)                  | 9400<br>(3300-17000)      | 240000<br>(86000-420000)     |
| High-middle SDI | 2010 | Female | 70 to 74 | 46%<br>(35-57%)                | 54%<br>(43-65%)          | 1.6<br>(0.95-2.5)                           | 3.2%<br>(0.39-6.6%)                  | 4.1%<br>(0.48-8.5%)                 | 13000<br>(610-29000)      | 270000<br>(23000-580000)     |
| High-middle SDI | 2010 | Female | 75 to 79 | 39%<br>(28-51%)                | 61%<br>(49-72%)          | 1.3<br>(0.76-2.1)                           | 2.4%<br>(-0.15-5.6%)                 | 3%<br>(-0.25-7%)                    | 11000<br>(-2100-28000)    | 170000<br>(-22000-430000)    |
| High-middle SDI | 2010 | Female | 80 to 84 | 36%<br>(25-48%)                | 64%<br>(52-75%)          | 1.2<br>(0.72-1.9)                           | 2%<br>(-0.3-5.1%)                    | 2.4%<br>(-0.45-6.2%)                | 13000<br>(-3400-33000)    | 140000<br>(-27000-370000)    |
| High-middle SDI | 2010 | Female | 85 to 89 | 36%<br>(25-47%)                | 64%<br>(53-75%)          | 1.2<br>(0.69-2)                             | 1.9%<br>(-0.4-5%)                    | 2.2%<br>(-0.59-5.9%)                | 8800<br>(-3300-25000)     | 71000<br>(-19000-190000)     |
| High-middle SDI | 2010 | Female | 90 to 94 | 37%<br>(27-49%)                | 63%<br>(51-73%)          | 1.3<br>(0.68-2.1)                           | 1.7%<br>(-0.59-4.9%)                 | 2%<br>(-0.83-5.8%)                  | 3600<br>(-1900-11000)     | 20000<br>(-8300-60000)       |
| High-middle SDI | 2010 | Female | 95 plus  | 40%<br>(26-54%)                | 60%<br>(46-74%)          | 1.4<br>(0.64-2.4)                           | 1.9%<br>(-0.95-5.8%)                 | 2.1%<br>(-1.3-6.8%)                 | 1700<br>(-1100-5700)      | 6300<br>(-3300-20000)        |
| High-middle SDI | 2010 | Male   | All Ages | 54%<br>(50-58%)                | 46%<br>(42-50%)          | 3.3<br>(2.7-3.9)                            | 9.9%<br>(7.9-12%)                    | 9.7%<br>(7-12%)                     | 400000<br>(290000-530000) | 1500000<br>(1100000-1800000) |
| High-middle SDI | 2010 | Male   | 15 to 19 | 49%<br>(39-58%)                | 51%<br>(42-61%)          | 1.8<br>(1.1-2.7)                            | 5.5%<br>(3.5-8%)                     | 9.2%<br>(5.2-14%)                   | 1700<br>(960-2600)        | 160000<br>(99000-230000)     |
| High-middle SDI | 2010 | Male   | 20 to 24 | 53%<br>(45-60%)                | 47%<br>(40-55%)          | 3<br>(2-4.3)                                | 11%<br>(7.6-14%)                     | 15%<br>(9.6-20%)                    | 7500<br>(5000-10000)      | 610000<br>(440000-810000)    |
| High-middle SDI | 2010 | Male   | 25 to 29 | 56%<br>(49-62%)                | 44%<br>(38-51%)          | 3.8<br>(2.5-5.3)                            | 12%<br>(9.3-15%)                     | 16%<br>(12-22%)                     | 13000<br>(9600-17000)     | 950000<br>(720000-1200000)   |
| High-middle SDI | 2010 | Male   | 30 to 34 | 59%<br>(52-66%)                | 41%<br>(34-48%)          | 4.3<br>(3-6)                                | 13%<br>(10-16%)                      | 17%<br>(13-22%)                     | 19000<br>(14000-23000)    | 1200000<br>(940000-1500000)  |
| High-middle SDI | 2010 | Male   | 35 to 39 | 60%<br>(53-67%)                | 40%<br>(33-47%)          | 4.6<br>(3.1-6.5)                            | 14%<br>(11-17%)                      | 18%<br>(14-23%)                     | 23000<br>(18000-29000)    | 1300000<br>(1000000-1600000) |

| Location        | Year | Sex    | Age      | Prevalence of current drinkers | Prevalence of abstainers | Population average of standard drinks daily | Percent of total attributable deaths | Percent of total attributable DALYs | Attributable deaths      | Attributable DALYs           |
|-----------------|------|--------|----------|--------------------------------|--------------------------|---------------------------------------------|--------------------------------------|-------------------------------------|--------------------------|------------------------------|
| High-middle SDI | 2010 | Male   | 40 to 44 | 62%<br>(55-69%)                | 38%<br>(31-45%)          | 4.9<br>(3.4-6.8)                            | 14%<br>(11-17%)                      | 19%<br>(15-23%)                     | 28000<br>(22000-35000)   | 1400000<br>(1100000-1700000) |
| High-middle SDI | 2010 | Male   | 45 to 49 | 66%<br>(58-72%)                | 34%<br>(28-42%)          | 5.6<br>(3.9-7.7)                            | 16%<br>(13-19%)                      | 20%<br>(16-25%)                     | 41000<br>(32000-51000)   | 1800000<br>(1400000-2200000) |
| High-middle SDI | 2010 | Male   | 50 to 54 | 68%<br>(61-74%)                | 32%<br>(26-39%)          | 5.8<br>(3.9-8)                              | 16%<br>(12-20%)                      | 20%<br>(15-24%)                     | 53000<br>(40000-66000)   | 2000000<br>(1500000-2500000) |
| High-middle SDI | 2010 | Male   | 55 to 59 | 68%<br>(60-75%)                | 32%<br>(25-40%)          | 5.3<br>(3.7-7.3)                            | 14%<br>(10-18%)                      | 17%<br>(12-22%)                     | 53000<br>(38000-69000)   | 1800000<br>(1300000-2300000) |
| High-middle SDI | 2010 | Male   | 60 to 64 | 69%<br>(61-76%)                | 31%<br>(24-39%)          | 5<br>(3.4-7.1)                              | 12%<br>(7.5-16%)                     | 14%<br>(8.8-19%)                    | 45000<br>(28000-62000)   | 1300000<br>(800000-1800000)  |
| High-middle SDI | 2010 | Male   | 65 to 69 | 66%<br>(58-73%)                | 34%<br>(27-42%)          | 4.4<br>(3.1-5.9)                            | 9.3%<br>(5.5-13%)                    | 11%<br>(6.4-16%)                    | 30000<br>(16000-44000)   | 730000<br>(410000-1100000)   |
| High-middle SDI | 2010 | Male   | 70 to 74 | 66%<br>(58-73%)                | 34%<br>(27-42%)          | 3.7<br>(2.5-5.2)                            | 7.4%<br>(3.4-12%)                    | 8.5%<br>(3.8-14%)                   | 35000<br>(14000-58000)   | 690000<br>(280000-1100000)   |
| High-middle SDI | 2010 | Male   | 75 to 79 | 61%<br>(51-70%)                | 39%<br>(30-49%)          | 3.2<br>(2.1-4.7)                            | 5.7%<br>(2.1-9.8%)                   | 6.5%<br>(2.3-11%)                   | 24000<br>(6400-43000)    | 360000<br>(110000-650000)    |
| High-middle SDI | 2010 | Male   | 80 to 84 | 62%<br>(50-71%)                | 38%<br>(29-50%)          | 2.9<br>(1.9-4.2)                            | 4.9%<br>(1.5-8.9%)                   | 5.5%<br>(1.4-10%)                   | 18000<br>(3300-35000)    | 210000<br>(48000-390000)     |
| High-middle SDI | 2010 | Male   | 85 to 89 | 58%<br>(47-68%)                | 42%<br>(32-53%)          | 2.7<br>(1.7-3.9)                            | 4.2%<br>(1.2-7.7%)                   | 4.7%<br>(1.2-8.7%)                  | 8800<br>(1600-17000)     | 71000<br>(17000-130000)      |
| High-middle SDI | 2010 | Male   | 90 to 94 | 56%<br>(46-67%)                | 44%<br>(33-54%)          | 2.4<br>(1.4-3.7)                            | 3.3%<br>(0.57-6.5%)                  | 3.6%<br>(0.36-7.3%)                 | 2600<br>(110-5500)       | 15000<br>(1900-30000)        |
| High-middle SDI | 2010 | Male   | 95 plus  | 58%<br>(44-71%)                | 42%<br>(29-56%)          | 2.3<br>(1.2-3.8)                            | 2.9%<br>(-0.13-6.7%)                 | 3.1%<br>(-0.56-7.4%)                | 730<br>(-150-1800)       | 2800<br>(-170-6400)          |
| High-middle SDI | 2016 | Female | All Ages | 46%<br>(42-51%)                | 54%<br>(49-58%)          | 1.7<br>(1.2-2.2)                            | 3.7%<br>(2.3-5.4%)                   | 3.5%<br>(1.2-6.4%)                  | 130000<br>(41000-250000) | 4000000<br>(2200000-6400000) |
| High-middle SDI | 2016 | Female | 15 to 19 | 42%<br>(32-52%)                | 58%<br>(48-68%)          | 1.4<br>(0.75-2.2)                           | 2.4%<br>(1.5-3.6%)                   | 6%<br>(3-9.8%)                      | 380<br>(180-670)         | 47000<br>(28000-73000)       |
| High-middle SDI | 2016 | Female | 20 to 24 | 47%<br>(38-57%)                | 53%<br>(43-62%)          | 1.9<br>(1.1-3.1)                            | 4.1%<br>(2.9-5.6%)                   | 7.7%<br>(4.5-11%)                   | 870<br>(450-1500)        | 120000<br>(75000-170000)     |
| High-middle SDI | 2016 | Female | 25 to 29 | 51%<br>(41-60%)                | 49%<br>(40-59%)          | 2.1<br>(1.2-3.1)                            | 4.9%<br>(3.7-6.4%)                   | 8.3%<br>(5.5-12%)                   | 1900<br>(970-3100)       | 210000<br>(140000-300000)    |
| High-middle SDI | 2016 | Female | 30 to 34 | 51%<br>(41-61%)                | 49%<br>(39-59%)          | 2.1<br>(1.3-3.1)                            | 5.2%<br>(3.9-6.8%)                   | 8.9%<br>(6.3-12%)                   | 3100<br>(1700-5300)      | 270000<br>(170000-410000)    |
| High-middle SDI | 2016 | Female | 35 to 39 | 53%<br>(44-62%)                | 47%<br>(38-56%)          | 2.3<br>(1.4-3.5)                            | 5.7%<br>(4.2-7.6%)                   | 10%<br>(7.6-14%)                    | 4600<br>(2400-7900)      | 320000<br>(200000-500000)    |

| Location        | Year | Sex    | Age      | Prevalence of current drinkers | Prevalence of abstainers | Population average of standard drinks daily | Percent of total attributable deaths | Percent of total attributable DALYs | Attributable deaths       | Attributable DALYs             |
|-----------------|------|--------|----------|--------------------------------|--------------------------|---------------------------------------------|--------------------------------------|-------------------------------------|---------------------------|--------------------------------|
| High-middle SDI | 2016 | Female | 40 to 44 | 55%<br>(46-64%)                | 45%<br>(36-54%)          | 2.5<br>(1.5-3.7)                            | 6.3%<br>(4.5-8.4%)                   | 12%<br>(8.5-15%)                    | 6000<br>(3300-9800)       | 350000<br>(220000-540000)      |
| High-middle SDI | 2016 | Female | 45 to 49 | 56%<br>(46-65%)                | 44%<br>(35-54%)          | 2.5<br>(1.5-3.7)                            | 6.1%<br>(4.3-8.5%)                   | 11%<br>(8-15%)                      | 6800<br>(4000-11000)      | 350000<br>(220000-530000)      |
| High-middle SDI | 2016 | Female | 50 to 54 | 57%<br>(47-66%)                | 43%<br>(34-53%)          | 2.4<br>(1.5-3.7)                            | 6.6%<br>(4.5-9.2%)                   | 11%<br>(7.6-15%)                    | 10000<br>(5900-16000)     | 440000<br>(270000-690000)      |
| High-middle SDI | 2016 | Female | 55 to 59 | 55%<br>(45-66%)                | 45%<br>(34-55%)          | 2.3<br>(1.4-3.6)                            | 6.3%<br>(3.9-9.2%)                   | 9.8%<br>(6.2-14%)                   | 13000<br>(7300-22000)     | 480000<br>(280000-760000)      |
| High-middle SDI | 2016 | Female | 60 to 64 | 54%<br>(42-65%)                | 46%<br>(35-58%)          | 2.2<br>(1.2-3.4)                            | 5.1%<br>(2.5-8.4%)                   | 7.6%<br>(3.7-12%)                   | 14000<br>(6100-24000)     | 420000<br>(200000-730000)      |
| High-middle SDI | 2016 | Female | 65 to 69 | 52%<br>(41-63%)                | 48%<br>(37-59%)          | 2<br>(1.2-3)                                | 4.1%<br>(1.4-7.3%)                   | 5.8%<br>(2.1-10%)                   | 12000<br>(3700-23000)     | 300000<br>(100000-560000)      |
| High-middle SDI | 2016 | Female | 70 to 74 | 47%<br>(36-58%)                | 53%<br>(42-64%)          | 1.8<br>(0.98-2.8)                           | 3.3%<br>(0.44-6.9%)                  | 4.5%<br>(0.67-9.4%)                 | 9800<br>(730-22000)       | 200000<br>(20000-450000)       |
| High-middle SDI | 2016 | Female | 75 to 79 | 42%<br>(30-55%)                | 58%<br>(45-70%)          | 1.5<br>(0.78-2.5)                           | 2.5%<br>(-0.32-6.3%)                 | 3.1%<br>(-0.51-8%)                  | 13000<br>(-3300-38000)    | 210000<br>(-40000-580000)      |
| High-middle SDI | 2016 | Female | 80 to 84 | 38%<br>(27-50%)                | 62%<br>(50-73%)          | 1.4<br>(0.74-2.3)                           | 2.3%<br>(-0.21-5.7%)                 | 2.8%<br>(-0.31-7%)                  | 12000<br>(-2700-33000)    | 140000<br>(-23000-370000)      |
| High-middle SDI | 2016 | Female | 85 to 89 | 37%<br>(25-49%)                | 63%<br>(51-75%)          | 1.3<br>(0.7-2.2)                            | 1.9%<br>(-0.5-5.4%)                  | 2.2%<br>(-0.72-6.5%)                | 11000<br>(-5200-34000)    | 91000<br>(-32000-260000)       |
| High-middle SDI | 2016 | Female | 90 to 94 | 38%<br>(27-50%)                | 62%<br>(50-73%)          | 1.4<br>(0.72-2.5)                           | 2%<br>(-0.62-5.8%)                   | 2.2%<br>(-0.9-6.9%)                 | 6000<br>(-3100-19000)     | 34000<br>(-13000-100000)       |
| High-middle SDI | 2016 | Female | 95 plus  | 41%<br>(27-56%)                | 59%<br>(44-73%)          | 1.5<br>(0.67-2.8)                           | 2.1%<br>(-0.84-6.4%)                 | 2.4%<br>(-1.2-7.6%)                 | 2300<br>(-1200-7400)      | 8400<br>(-3500-26000)          |
| High-middle SDI | 2016 | Male   | All Ages | 52%<br>(48-56%)                | 48%<br>(44-52%)          | 3.1<br>(2.3-4.2)                            | 9.3%<br>(7-12%)                      | 9.1%<br>(6.1-12%)                   | 380000<br>(220000-570000) | 13000000<br>(8800000-19000000) |
| High-middle SDI | 2016 | Male   | 15 to 19 | 46%<br>(36-55%)                | 54%<br>(45-64%)          | 1.6<br>(0.91-2.6)                           | 5%<br>(3.1-7.5%)                     | 8.6%<br>(4.6-14%)                   | 1300<br>(640-2200)        | 120000<br>(72000-190000)       |
| High-middle SDI | 2016 | Male   | 20 to 24 | 51%<br>(42-58%)                | 49%<br>(42-58%)          | 2.8<br>(1.7-4.3)                            | 9.8%<br>(6.8-13%)                    | 14%<br>(8.6-20%)                    | 5100<br>(2900-7900)       | 430000<br>(270000-630000)      |
| High-middle SDI | 2016 | Male   | 25 to 29 | 55%<br>(47-62%)                | 45%<br>(38-53%)          | 3.7<br>(2.3-5.4)                            | 12%<br>(8.9-15%)                     | 16%<br>(11-22%)                     | 12000<br>(7100-18000)     | 880000<br>(580000-1200000)     |
| High-middle SDI | 2016 | Male   | 30 to 34 | 56%<br>(47-63%)                | 44%<br>(37-53%)          | 4<br>(2.6-5.9)                              | 12%<br>(9.3-15%)                     | 16%<br>(12-21%)                     | 18000<br>(11000-27000)    | 1200000<br>(750000-1700000)    |
| High-middle SDI | 2016 | Male   | 35 to 39 | 58%<br>(50-65%)                | 42%<br>(35-50%)          | 4.4<br>(2.7-6.5)                            | 13%<br>(9.5-16%)                     | 17%<br>(12-22%)                     | 21000<br>(13000-32000)    | 1200000<br>(780000-1800000)    |
| High-middle SDI | 2016 | Male   | 40 to 44 | 60%<br>(52-67%)                | 40%<br>(33-48%)          | 4.7<br>(3-6.9)                              | 13%<br>(10-17%)                      | 18%<br>(14-23%)                     | 26000<br>(16000-39000)    | 1300000<br>(860000-1900000)    |

| Location        | Year | Sex    | Age      | Prevalence of current drinkers | Prevalence of abstainers | Population average of standard drinks daily | Percent of total attributable deaths | Percent of total attributable DALYs | Attributable deaths      | Attributable DALYs           |
|-----------------|------|--------|----------|--------------------------------|--------------------------|---------------------------------------------|--------------------------------------|-------------------------------------|--------------------------|------------------------------|
| High-middle SDI | 2016 | Male   | 45 to 49 | 60%<br>(52-67%)                | 40%<br>(33-48%)          | 5<br>(3.2-7.3)                              | 13%<br>(10-17%)                      | 18%<br>(14-22%)                     | 30000<br>(19000-45000)   | 1400000<br>(880000-1900000)  |
| High-middle SDI | 2016 | Male   | 50 to 54 | 64%<br>(56-71%)                | 36%<br>(29-44%)          | 5.3<br>(3.3-7.8)                            | 14%<br>(11-18%)                      | 18%<br>(14-22%)                     | 44000<br>(27000-65000)   | 1700000<br>(1100000-2500000) |
| High-middle SDI | 2016 | Male   | 55 to 59 | 65%<br>(57-72%)                | 35%<br>(28-43%)          | 5<br>(3.2-7.3)                              | 13%<br>(9.3-17%)                     | 16%<br>(12-21%)                     | 50000<br>(31000-75000)   | 1700000<br>(1100000-2500000) |
| High-middle SDI | 2016 | Male   | 60 to 64 | 66%<br>(57-73%)                | 34%<br>(27-43%)          | 4.7<br>(2.9-7.1)                            | 11%<br>(7-15%)                       | 13%<br>(8.3-18%)                    | 50000<br>(28000-76000)   | 1400000<br>(810000-2200000)  |
| High-middle SDI | 2016 | Male   | 65 to 69 | 67%<br>(58-74%)                | 33%<br>(26-42%)          | 4.3<br>(2.8-6.3)                            | 9.3%<br>(5.3-13%)                    | 11%<br>(6.3-16%)                    | 38000<br>(19000-61000)   | 930000<br>(480000-1400000)   |
| High-middle SDI | 2016 | Male   | 70 to 74 | 63%<br>(55-71%)                | 37%<br>(29-45%)          | 3.7<br>(2.3-5.5)                            | 7%<br>(3.3-11%)                      | 8.3%<br>(3.9-13%)                   | 24000<br>(9300-41000)    | 470000<br>(190000-780000)    |
| High-middle SDI | 2016 | Male   | 75 to 79 | 63%<br>(53-72%)                | 37%<br>(28-47%)          | 3.2<br>(1.9-4.9)                            | 5.6%<br>(1.7-10%)                    | 6.4%<br>(1.8-11%)                   | 26000<br>(5300-50000)    | 400000<br>(97000-750000)     |
| High-middle SDI | 2016 | Male   | 80 to 84 | 61%<br>(49-70%)                | 39%<br>(30-51%)          | 3<br>(1.8-4.6)                              | 5%<br>(1.5-8.9%)                     | 5.6%<br>(1.5-10%)                   | 18000<br>(3400-35000)    | 210000<br>(48000-390000)     |
| High-middle SDI | 2016 | Male   | 85 to 89 | 58%<br>(46-68%)                | 42%<br>(32-54%)          | 2.6<br>(1.5-4.1)                            | 3.9%<br>(0.6-7.7%)                   | 4.3%<br>(0.44-8.8%)                 | 11000<br>(360-24000)     | 94000<br>(10000-190000)      |
| High-middle SDI | 2016 | Male   | 90 to 94 | 57%<br>(46-68%)                | 43%<br>(32-54%)          | 2.5<br>(1.4-4.1)                            | 3.5%<br>(0.42-7.1%)                  | 3.8%<br>(0.22-8.1%)                 | 4200<br>(-26-9200)       | 24000<br>(1800-50000)        |
| High-middle SDI | 2016 | Male   | 95 plus  | 57%<br>(43-69%)                | 43%<br>(31-57%)          | 2.2<br>(1.1-3.9)                            | 2.9%<br>(-0.15-6.6%)                 | 3.1%<br>(-0.57-7.4%)                | 930<br>(-190-2300)       | 3500<br>(-250-8100)          |
| Middle SDI      | 1990 | Female | All Ages | 16%<br>(14-19%)                | 84%<br>(81-86%)          | 0.33<br>(0.26-0.4)                          | 1.2%<br>(0.84-1.5%)                  | 1.8%<br>(1.1-2.5%)                  | 110000<br>(67000-160000) | 3800000<br>(2800000-5000000) |
| Middle SDI      | 1990 | Female | 15 to 19 | 14%<br>(9.1-20%)               | 86%<br>(80-91%)          | 0.26<br>(0.14-0.45)                         | 0.97%<br>(0.59-1.5%)                 | 1.4%<br>(0.71-2.4%)                 | 1300<br>(630-2200)       | 140000<br>(87000-220000)     |
| Middle SDI      | 1990 | Female | 20 to 24 | 17%<br>(11-25%)                | 83%<br>(75-89%)          | 0.37<br>(0.2-0.62)                          | 1.5%<br>(0.99-2.2%)                  | 1.8%<br>(0.87-3%)                   | 2300<br>(1100-3900)      | 280000<br>(180000-410000)    |
| Middle SDI      | 1990 | Female | 25 to 29 | 19%<br>(13-27%)                | 81%<br>(73-87%)          | 0.45<br>(0.25-0.72)                         | 1.8%<br>(1.2-2.5%)                   | 2.2%<br>(1.1-3.5%)                  | 2900<br>(1600-4600)      | 300000<br>(200000-420000)    |
| Middle SDI      | 1990 | Female | 30 to 34 | 21%<br>(13-30%)                | 79%<br>(70-87%)          | 0.51<br>(0.28-0.82)                         | 1.9%<br>(1.3-2.6%)                   | 2.5%<br>(1.5-3.9%)                  | 3500<br>(2100-5200)      | 290000<br>(200000-410000)    |
| Middle SDI      | 1990 | Female | 35 to 39 | 22%<br>(14-31%)                | 78%<br>(69-86%)          | 0.52<br>(0.28-0.84)                         | 1.9%<br>(1.3-2.7%)                   | 2.9%<br>(1.8-4.3%)                  | 4500<br>(2800-6600)      | 310000<br>(210000-430000)    |
| Middle SDI      | 1990 | Female | 40 to 44 | 23%<br>(15-32%)                | 77%<br>(68-85%)          | 0.58<br>(0.31-0.93)                         | 2.2%<br>(1.5-3.1%)                   | 3.5%<br>(2.2-5%)                    | 5200<br>(3300-7600)      | 290000<br>(200000-410000)    |
| Middle SDI      | 1990 | Female | 45 to 49 | 22%<br>(14-31%)                | 78%<br>(69-86%)          | 0.62<br>(0.32-1)                            | 2.4%<br>(1.5-3.5%)                   | 3.7%<br>(2.3-5.5%)                  | 6400<br>(4000-9600)      | 300000<br>(190000-430000)    |



| Location   | Year | Sex    | Age      | Prevalence of current drinkers | Prevalence of abstainers | Population average of standard drinks daily | Percent of total attributable deaths | Percent of total attributable DALYs | Attributable deaths       | Attributable DALYs           |
|------------|------|--------|----------|--------------------------------|--------------------------|---------------------------------------------|--------------------------------------|-------------------------------------|---------------------------|------------------------------|
| Middle SDI | 1990 | Female | 50 to 54 | 22%<br>(14-31%)                | 78%<br>(69-86%)          | 0.63<br>(0.33-1.1)                          | 2.5%<br>(1.5-3.7%)                   | 3.8%<br>(2.3-5.6%)                  | 8900<br>(5400-13000)      | 350000<br>(210000-510000)    |
| Middle SDI | 1990 | Female | 55 to 59 | 21%<br>(13-30%)                | 79%<br>(70-87%)          | 0.62<br>(0.33-1.1)                          | 2.5%<br>(1.5-3.8%)                   | 3.6%<br>(2.1-5.5%)                  | 11000<br>(6800-17000)     | 370000<br>(220000-570000)    |
| Middle SDI | 1990 | Female | 60 to 64 | 21%<br>(13-31%)                | 79%<br>(69-87%)          | 0.63<br>(0.32-1.1)                          | 2.3%<br>(1.2-3.7%)                   | 3.1%<br>(1.7-5%)                    | 13000<br>(7100-20000)     | 350000<br>(190000-570000)    |
| Middle SDI | 1990 | Female | 65 to 69 | 21%<br>(13-29%)                | 79%<br>(71-87%)          | 0.59<br>(0.32-0.98)                         | 2.1%<br>(1.1-3.3%)                   | 2.7%<br>(1.5-4.3%)                  | 14000<br>(7600-22000)     | 310000<br>(170000-490000)    |
| Middle SDI | 1990 | Female | 70 to 74 | 20%<br>(13-28%)                | 80%<br>(72-87%)          | 0.5<br>(0.25-0.87)                          | 1.6%<br>(0.7-2.8%)                   | 2%<br>(0.89-3.5%)                   | 13000<br>(6100-22000)     | 240000<br>(110000-410000)    |
| Middle SDI | 1990 | Female | 75 to 79 | 18%<br>(11-27%)                | 82%<br>(73-89%)          | 0.46<br>(0.22-0.82)                         | 1.2%<br>(0.35-2.4%)                  | 1.5%<br>(0.45-2.9%)                 | 9900<br>(3100-19000)      | 140000<br>(42000-270000)     |
| Middle SDI | 1990 | Female | 80 to 84 | 17%<br>(11-25%)                | 83%<br>(75-89%)          | 0.46<br>(0.22-0.8)                          | 1%<br>(0.17-2.1%)                    | 1.2%<br>(0.21-2.5%)                 | 6500<br>(1000-14000)      | 69000<br>(11000-140000)      |
| Middle SDI | 1990 | Female | 85 to 89 | 18%<br>(11-27%)                | 82%<br>(73-89%)          | 0.47<br>(0.23-0.85)                         | 0.84%<br>(0.019-2%)                  | 0.99%<br>(0.0038-2.4%)              | 3700<br>(-31-8800)        | 28000<br>(500-65000)         |
| Middle SDI | 1990 | Female | 90 to 94 | 20%<br>(13-29%)                | 80%<br>(71-87%)          | 0.54<br>(0.25-1)                            | 0.71%<br>(-0.19-2%)                  | 0.81%<br>(-0.26-2.4%)               | 1300<br>(-440-3800)       | 6900<br>(-1900-20000)        |
| Middle SDI | 1990 | Female | 95 plus  | 23%<br>(13-36%)                | 77%<br>(64-87%)          | 0.64<br>(0.24-1.3)                          | 0.72%<br>(-0.44-2.5%)                | 0.77%<br>(-0.6-2.9%)                | 350<br>(-270-1300)        | 1300<br>(-790-4500)          |
| Middle SDI | 1990 | Male   | All Ages | 40%<br>(36-45%)                | 60%<br>(55-64%)          | 1.6<br>(1.4-1.9)                            | 5.7%<br>(4.7-6.6%)                   | 7.7%<br>(6.3-9.3%)                  | 610000<br>(490000-740000) | 2200000<br>(1800000-2600000) |
| Middle SDI | 1990 | Male   | 15 to 19 | 29%<br>(20-39%)                | 71%<br>(61-80%)          | 0.63<br>(0.37-0.99)                         | 2.9%<br>(1.9-4.3%)                   | 3.8%<br>(2.1-5.9%)                  | 6200<br>(3500-9700)       | 550000<br>(340000-810000)    |
| Middle SDI | 1990 | Male   | 20 to 24 | 45%<br>(33-56%)                | 55%<br>(44-67%)          | 1.6<br>(1-2.2)                              | 6.8%<br>(4.8-9.2%)                   | 8.3%<br>(5.4-12%)                   | 19000<br>(13000-27000)    | 1600000<br>(1100000-2100000) |
| Middle SDI | 1990 | Male   | 25 to 29 | 52%<br>(40-63%)                | 48%<br>(37-60%)          | 2.2<br>(1.5-3)                              | 8.8%<br>(6.4-11%)                    | 11%<br>(7.6-15%)                    | 24000<br>(17000-33000)    | 1800000<br>(1300000-2300000) |
| Middle SDI | 1990 | Male   | 30 to 34 | 55%<br>(43-66%)                | 45%<br>(34-57%)          | 2.7<br>(1.9-3.6)                            | 9.7%<br>(7.4-12%)                    | 12%<br>(9.2-16%)                    | 28000<br>(20000-35000)    | 1800000<br>(1400000-2300000) |
| Middle SDI | 1990 | Male   | 35 to 39 | 58%<br>(46-68%)                | 42%<br>(32-54%)          | 3.1<br>(2.2-4.3)                            | 10%<br>(8.1-13%)                     | 13%<br>(10-17%)                     | 34000<br>(25000-43000)    | 2000000<br>(1500000-2500000) |
| Middle SDI | 1990 | Male   | 40 to 44 | 58%<br>(47-69%)                | 42%<br>(31-53%)          | 3.5<br>(2.5-4.6)                            | 11%<br>(8.7-14%)                     | 14%<br>(11-17%)                     | 35000<br>(27000-43000)    | 1800000<br>(1400000-2200000) |
| Middle SDI | 1990 | Male   | 45 to 49 | 58%<br>(46-69%)                | 42%<br>(31-54%)          | 3.7<br>(2.6-5)                              | 12%<br>(9.2-14%)                     | 15%<br>(11-18%)                     | 42000<br>(32000-52000)    | 1900000<br>(1500000-2300000) |

| Location   | Year | Sex    | Age      | Prevalence of current drinkers | Prevalence of abstainers | Population average of standard drinks daily | Percent of total attributable deaths | Percent of total attributable DALYs | Attributable deaths      | Attributable DALYs        |
|------------|------|--------|----------|--------------------------------|--------------------------|---------------------------------------------|--------------------------------------|-------------------------------------|--------------------------|---------------------------|
| Middle SDI | 1990 | Male   | 50 to 54 | 57%<br>(46-68%)                | 43%<br>(32-54%)          | 3.8<br>(2.6-5.1)                            | 12%<br>(8.9-14%)                     | 14%<br>(11-17%)                     | 55000<br>(42000-68000)   | 220000<br>(170000-270000) |
| Middle SDI | 1990 | Male   | 55 to 59 | 56%<br>(44-67%)                | 44%<br>(33-56%)          | 3.7<br>(2.6-5.1)                            | 11%<br>(8.4-14%)                     | 13%<br>(9.9-16%)                    | 69000<br>(52000-86000)   | 230000<br>(180000-290000) |
| Middle SDI | 1990 | Male   | 60 to 64 | 55%<br>(43-66%)                | 45%<br>(34-57%)          | 3.4<br>(2.3-4.8)                            | 10%<br>(7.3-13%)                     | 12%<br>(8.4-15%)                    | 77000<br>(56000-98000)   | 220000<br>(160000-280000) |
| Middle SDI | 1990 | Male   | 65 to 69 | 52%<br>(40-63%)                | 48%<br>(37-60%)          | 2.9<br>(2-4)                                | 8.6%<br>(6.2-11%)                    | 9.8%<br>(7.1-13%)                   | 73000<br>(53000-95000)   | 170000<br>(120000-220000) |
| Middle SDI | 1990 | Male   | 70 to 74 | 48%<br>(37-59%)                | 52%<br>(41-63%)          | 2.3<br>(1.5-3.3)                            | 7%<br>(4.7-9.6%)                     | 7.8%<br>(5.2-11%)                   | 68000<br>(46000-94000)   | 130000<br>(86000-170000)  |
| Middle SDI | 1990 | Male   | 75 to 79 | 45%<br>(33-57%)                | 55%<br>(43-67%)          | 1.9<br>(1.2-2.9)                            | 5.5%<br>(3.4-8.1%)                   | 6.1%<br>(3.6-9.1%)                  | 45000<br>(27000-66000)   | 65000<br>(40000-95000)    |
| Middle SDI | 1990 | Male   | 80 to 84 | 41%<br>(29-54%)                | 59%<br>(46-71%)          | 1.7<br>(1-2.4)                              | 4.4%<br>(2.5-6.6%)                   | 4.9%<br>(2.8-7.4%)                  | 23000<br>(13000-34000)   | 24000<br>(14000-36000)    |
| Middle SDI | 1990 | Male   | 85 to 89 | 39%<br>(28-51%)                | 61%<br>(49-72%)          | 1.5<br>(0.88-2.3)                           | 3.5%<br>(1.8-5.5%)                   | 3.8%<br>(1.9-6.1%)                  | 9600<br>(4900-15000)     | 74000<br>(39000-120000)   |
| Middle SDI | 1990 | Male   | 90 to 94 | 40%<br>(29-51%)                | 60%<br>(49-71%)          | 1.5<br>(0.85-2.3)                           | 2.8%<br>(1.2-4.7%)                   | 3%<br>(1.2-5.2%)                    | 2900<br>(1200-4900)      | 16000<br>(6800-26000)     |
| Middle SDI | 1990 | Male   | 95 plus  | 43%<br>(29-57%)                | 57%<br>(43-71%)          | 1.5<br>(0.77-2.5)                           | 2.6%<br>(0.78-4.8%)                  | 2.7%<br>(0.62-5.2%)                 | 620<br>(140-1200)        | 2300<br>(690-4300)        |
| Middle SDI | 1995 | Female | All Ages | 17%<br>(14-20%)                | 83%<br>(80-86%)          | 0.37<br>(0.3-0.45)                          | 1.4%<br>(1-1.8%)                     | 2%<br>(1.3-2.9%)                    | 130000<br>(83000-190000) | 440000<br>(320000-570000) |
| Middle SDI | 1995 | Female | 15 to 19 | 15%<br>(10-22%)                | 85%<br>(78-90%)          | 0.33<br>(0.17-0.56)                         | 1.1%<br>(0.66-1.6%)                  | 1.7%<br>(0.83-2.8%)                 | 1200<br>(600-2000)       | 14000<br>(8300-21000)     |
| Middle SDI | 1995 | Female | 20 to 24 | 18%<br>(12-26%)                | 82%<br>(74-88%)          | 0.43<br>(0.23-0.71)                         | 1.6%<br>(1-2.3%)                     | 1.9%<br>(0.96-3.2%)                 | 2300<br>(1100-3800)      | 28000<br>(17000-41000)    |
| Middle SDI | 1995 | Female | 25 to 29 | 19%<br>(13-27%)                | 81%<br>(73-87%)          | 0.46<br>(0.26-0.75)                         | 1.7%<br>(1.1-2.4%)                   | 2.1%<br>(1.1-3.3%)                  | 3100<br>(1600-4900)      | 32000<br>(21000-46000)    |
| Middle SDI | 1995 | Female | 30 to 34 | 21%<br>(14-30%)                | 79%<br>(70-86%)          | 0.54<br>(0.29-0.86)                         | 1.8%<br>(1.3-2.5%)                   | 2.5%<br>(1.5-3.8%)                  | 3700<br>(2300-5600)      | 32000<br>(22000-45000)    |
| Middle SDI | 1995 | Female | 35 to 39 | 22%<br>(15-31%)                | 78%<br>(69-85%)          | 0.59<br>(0.32-0.96)                         | 2%<br>(1.4-2.8%)                     | 3.1%<br>(2-4.6%)                    | 4700<br>(3000-6900)      | 32000<br>(22000-45000)    |
| Middle SDI | 1995 | Female | 40 to 44 | 22%<br>(15-31%)                | 78%<br>(69-85%)          | 0.59<br>(0.32-0.95)                         | 2.2%<br>(1.5-3%)                     | 3.5%<br>(2.3-5.1%)                  | 6700<br>(4400-9700)      | 37000<br>(25000-52000)    |
| Middle SDI | 1995 | Female | 45 to 49 | 22%<br>(13-30%)                | 78%<br>(70-87%)          | 0.65<br>(0.34-1.1)                          | 2.4%<br>(1.6-3.5%)                   | 3.9%<br>(2.4-5.7%)                  | 8000<br>(5000-12000)     | 37000<br>(24000-53000)    |
| Middle SDI | 1995 | Female | 50 to 54 | 21%<br>(14-30%)                | 79%<br>(70-86%)          | 0.68<br>(0.36-1.2)                          | 2.7%<br>(1.7-3.9%)                   | 4.1%<br>(2.5-5.9%)                  | 9600<br>(6000-14000)     | 38000<br>(24000-55000)    |

| Location   | Year | Sex    | Age      | Prevalence of current drinkers | Prevalence of abstainers | Population average of standard drinks daily | Percent of total attributable deaths | Percent of total attributable DALYs | Attributable deaths       | Attributable DALYs           |
|------------|------|--------|----------|--------------------------------|--------------------------|---------------------------------------------|--------------------------------------|-------------------------------------|---------------------------|------------------------------|
| Middle SDI | 1995 | Female | 55 to 59 | 21%<br>(14-30%)                | 79%<br>(70-86%)          | 0.7<br>(0.36-1.2)                           | 2.7%<br>(1.7-4.1%)                   | 4%<br>(2.5-6%)                      | 13000<br>(7900-19000)     | 420000<br>(260000-630000)    |
| Middle SDI | 1995 | Female | 60 to 64 | 20%<br>(13-30%)                | 80%<br>(70-87%)          | 0.67<br>(0.35-1.2)                          | 2.5%<br>(1.4-3.9%)                   | 3.4%<br>(2-5.3%)                    | 16000<br>(9100-24000)     | 430000<br>(250000-670000)    |
| Middle SDI | 1995 | Female | 65 to 69 | 21%<br>(13-29%)                | 79%<br>(71-87%)          | 0.64<br>(0.35-1.1)                          | 2.3%<br>(1.3-3.6%)                   | 3.1%<br>(1.7-4.7%)                  | 17000<br>(9700-26000)     | 390000<br>(220000-600000)    |
| Middle SDI | 1995 | Female | 70 to 74 | 20%<br>(13-28%)                | 80%<br>(72-87%)          | 0.57<br>(0.3-1)                             | 1.8%<br>(0.84-3.2%)                  | 2.4%<br>(1.1-4%)                    | 16000<br>(7800-27000)     | 290000<br>(140000-500000)    |
| Middle SDI | 1995 | Female | 75 to 79 | 19%<br>(12-28%)                | 81%<br>(72-88%)          | 0.52<br>(0.26-0.92)                         | 1.4%<br>(0.46-2.7%)                  | 1.8%<br>(0.59-3.3%)                 | 13000<br>(4600-24000)     | 180000<br>(62000-350000)     |
| Middle SDI | 1995 | Female | 80 to 84 | 19%<br>(12-27%)                | 81%<br>(73-88%)          | 0.53<br>(0.27-0.9)                          | 1.2%<br>(0.29-2.4%)                  | 1.4%<br>(0.35-2.9%)                 | 9600<br>(2300-19000)      | 100000<br>(24000-200000)     |
| Middle SDI | 1995 | Female | 85 to 89 | 19%<br>(12-29%)                | 81%<br>(71-88%)          | 0.56<br>(0.27-0.99)                         | 1%<br>(0.13-2.3%)                    | 1.2%<br>(0.14-2.8%)                 | 5700<br>(580-13000)       | 43000<br>(4800-97000)        |
| Middle SDI | 1995 | Female | 90 to 94 | 21%<br>(14-31%)                | 79%<br>(69-86%)          | 0.63<br>(0.3-1.2)                           | 0.9%<br>(-0.12-2.4%)                 | 1%<br>(-0.17-2.8%)                  | 2200<br>(-390-6000)       | 12000<br>(-1600-31000)       |
| Middle SDI | 1995 | Female | 95 plus  | 25%<br>(14-38%)                | 75%<br>(62-86%)          | 0.74<br>(0.29-1.5)                          | 0.93%<br>(-0.39-2.9%)                | 1%<br>(-0.55-3.4%)                  | 620<br>(-340-2100)        | 2300<br>(-980-7200)          |
| Middle SDI | 1995 | Male   | All Ages | 41%<br>(37-46%)                | 59%<br>(54-63%)          | 1.9<br>(1.7-2.2)                            | 6.8%<br>(5.7-7.8%)                   | 8.7%<br>(7.1-10%)                   | 740000<br>(610000-880000) | 2700000<br>(2200000-3100000) |
| Middle SDI | 1995 | Male   | 15 to 19 | 30%<br>(22-40%)                | 70%<br>(60-78%)          | 0.73<br>(0.42-1.1)                          | 3.3%<br>(2.1-4.8%)                   | 4.3%<br>(2.5-6.7%)                  | 6500<br>(3700-10000)      | 570000<br>(350000-840000)    |
| Middle SDI | 1995 | Male   | 20 to 24 | 45%<br>(34-56%)                | 55%<br>(44-66%)          | 1.8<br>(1.2-2.5)                            | 7.4%<br>(5.3-10%)                    | 9.1%<br>(6-13%)                     | 22000<br>(14000-30000)    | 170000<br>(120000-240000)    |
| Middle SDI | 1995 | Male   | 25 to 29 | 53%<br>(41-63%)                | 47%<br>(37-59%)          | 2.5<br>(1.7-3.4)                            | 9.3%<br>(6.8-12%)                    | 12%<br>(8.1-15%)                    | 31000<br>(22000-42000)    | 230000<br>(160000-290000)    |
| Middle SDI | 1995 | Male   | 30 to 34 | 56%<br>(43-66%)                | 44%<br>(34-57%)          | 3<br>(2.2-4)                                | 10%<br>(7.9-13%)                     | 13%<br>(9.7-16%)                    | 35000<br>(26000-45000)    | 230000<br>(180000-290000)    |
| Middle SDI | 1995 | Male   | 35 to 39 | 57%<br>(47-67%)                | 43%<br>(33-53%)          | 3.5<br>(2.5-4.7)                            | 11%<br>(8.7-14%)                     | 14%<br>(11-18%)                     | 39000<br>(30000-49000)    | 230000<br>(180000-280000)    |
| Middle SDI | 1995 | Male   | 40 to 44 | 59%<br>(48-69%)                | 41%<br>(31-52%)          | 3.9<br>(2.9-5.2)                            | 12%<br>(9.4-14%)                     | 15%<br>(12-18%)                     | 50000<br>(39000-61000)    | 260000<br>(210000-310000)    |
| Middle SDI | 1995 | Male   | 45 to 49 | 59%<br>(46-69%)                | 41%<br>(31-54%)          | 4.2<br>(3-5.7)                              | 12%<br>(10-15%)                      | 16%<br>(12-19%)                     | 54000<br>(42000-66000)    | 240000<br>(190000-300000)    |
| Middle SDI | 1995 | Male   | 50 to 54 | 58%<br>(46-68%)                | 42%<br>(32-54%)          | 4.3<br>(3-5.7)                              | 12%<br>(9.7-15%)                     | 15%<br>(12-18%)                     | 59000<br>(45000-72000)    | 230000<br>(180000-280000)    |

| Location   | Year | Sex    | Age      | Prevalence of current drinkers | Prevalence of abstainers | Population average of standard drinks daily | Percent of total attributable deaths | Percent of total attributable DALYs | Attributable deaths      | Attributable DALYs         |
|------------|------|--------|----------|--------------------------------|--------------------------|---------------------------------------------|--------------------------------------|-------------------------------------|--------------------------|----------------------------|
| Middle SDI | 1995 | Male   | 55 to 59 | 56%<br>(44-67%)                | 44%<br>(33-56%)          | 4.1<br>(2.9-5.6)                            | 12%<br>(9.1-14%)                     | 14%<br>(11-17%)                     | 74000<br>(57000-91000)   | 250000<br>(190000-310000)  |
| Middle SDI | 1995 | Male   | 60 to 64 | 54%<br>(42-65%)                | 46%<br>(35-58%)          | 3.7<br>(2.6-5.3)                            | 11%<br>(8.1-14%)                     | 12%<br>(9.2-16%)                    | 91000<br>(68000-110000)  | 260000<br>(190000-320000)  |
| Middle SDI | 1995 | Male   | 65 to 69 | 51%<br>(40-62%)                | 49%<br>(38-60%)          | 3.2<br>(2.2-4.3)                            | 9.2%<br>(6.8-12%)                    | 11%<br>(7.6-14%)                    | 88000<br>(64000-110000)  | 210000<br>(150000-260000)  |
| Middle SDI | 1995 | Male   | 70 to 74 | 48%<br>(37-59%)                | 52%<br>(41-63%)          | 2.6<br>(1.7-3.7)                            | 7.6%<br>(5.2-10%)                    | 8.4%<br>(5.8-11%)                   | 77000<br>(53000-100000)  | 140000<br>(100000-190000)  |
| Middle SDI | 1995 | Male   | 75 to 79 | 45%<br>(33-58%)                | 55%<br>(42-67%)          | 2.2<br>(1.4-3.3)                            | 6.3%<br>(4.1-9%)                     | 7%<br>(4.5-10%)                     | 60000<br>(38000-85000)   | 860000<br>(560000-1200000) |
| Middle SDI | 1995 | Male   | 80 to 84 | 43%<br>(31-55%)                | 57%<br>(45-69%)          | 2<br>(1.3-2.9)                              | 5.3%<br>(3.2-7.6%)                   | 5.8%<br>(3.5-8.4%)                  | 36000<br>(22000-51000)   | 380000<br>(240000-550000)  |
| Middle SDI | 1995 | Male   | 85 to 89 | 40%<br>(29-52%)                | 60%<br>(48-71%)          | 1.7<br>(1-2.6)                              | 4.1%<br>(2.3-6.2%)                   | 4.5%<br>(2.5-6.9%)                  | 15000<br>(8200-22000)    | 110000<br>(64000-170000)   |
| Middle SDI | 1995 | Male   | 90 to 94 | 41%<br>(30-52%)                | 59%<br>(48-70%)          | 1.7<br>(0.98-2.6)                           | 3.3%<br>(1.6-5.3%)                   | 3.5%<br>(1.6-5.9%)                  | 4300<br>(2000-7100)      | 23000<br>(11000-37000)     |
| Middle SDI | 1995 | Male   | 95 plus  | 44%<br>(30-57%)                | 56%<br>(43-70%)          | 1.6<br>(0.85-2.7)                           | 2.9%<br>(0.93-5.3%)                  | 3%<br>(0.76-5.7%)                   | 870<br>(220-1700)        | 3300<br>(1000-6000)        |
| Middle SDI | 2000 | Female | All Ages | 17%<br>(15-20%)                | 83%<br>(80-85%)          | 0.4<br>(0.33-0.48)                          | 1.5%<br>(1.1-1.9%)                   | 2.1%<br>(1.3-3%)                    | 140000<br>(89000-210000) | 470000<br>(350000-610000)  |
| Middle SDI | 2000 | Female | 15 to 19 | 17%<br>(12-24%)                | 83%<br>(76-88%)          | 0.38<br>(0.2-0.63)                          | 1.1%<br>(0.71-1.7%)                  | 1.9%<br>(0.95-3.2%)                 | 1400<br>(690-2300)       | 150000<br>(93000-230000)   |
| Middle SDI | 2000 | Female | 20 to 24 | 20%<br>(14-28%)                | 80%<br>(72-86%)          | 0.52<br>(0.28-0.85)                         | 1.7%<br>(1.1-2.5%)                   | 2.2%<br>(1.2-3.6%)                  | 2300<br>(1200-3800)      | 270000<br>(170000-400000)  |
| Middle SDI | 2000 | Female | 25 to 29 | 20%<br>(13-27%)                | 80%<br>(73-87%)          | 0.5<br>(0.28-0.8)                           | 1.7%<br>(1.2-2.4%)                   | 2.1%<br>(1.2-3.3%)                  | 3300<br>(1800-5200)      | 34000<br>(22000-48000)     |
| Middle SDI | 2000 | Female | 30 to 34 | 20%<br>(13-28%)                | 80%<br>(72-87%)          | 0.51<br>(0.28-0.82)                         | 1.7%<br>(1.2-2.3%)                   | 2.3%<br>(1.4-3.5%)                  | 4000<br>(2500-6100)      | 35000<br>(24000-50000)     |
| Middle SDI | 2000 | Female | 35 to 39 | 21%<br>(14-29%)                | 79%<br>(71-86%)          | 0.58<br>(0.32-0.94)                         | 1.9%<br>(1.3-2.6%)                   | 2.9%<br>(1.9-4.2%)                  | 5000<br>(3200-7400)      | 36000<br>(24000-50000)     |
| Middle SDI | 2000 | Female | 40 to 44 | 21%<br>(14-29%)                | 79%<br>(71-86%)          | 0.62<br>(0.34-1)                            | 2.1%<br>(1.4-2.9%)                   | 3.4%<br>(2.2-4.9%)                  | 6500<br>(4200-9400)      | 37000<br>(25000-52000)     |
| Middle SDI | 2000 | Female | 45 to 49 | 20%<br>(13-28%)                | 80%<br>(72-87%)          | 0.62<br>(0.32-1)                            | 2.2%<br>(1.4-3.1%)                   | 3.6%<br>(2.2-5.2%)                  | 8900<br>(5600-13000)     | 42000<br>(27000-61000)     |
| Middle SDI | 2000 | Female | 50 to 54 | 20%<br>(13-29%)                | 80%<br>(71-87%)          | 0.68<br>(0.36-1.1)                          | 2.5%<br>(1.5-3.6%)                   | 3.8%<br>(2.4-5.6%)                  | 11000<br>(6700-16000)    | 43000<br>(27000-62000)     |
| Middle SDI | 2000 | Female | 55 to 59 | 20%<br>(14-29%)                | 80%<br>(71-86%)          | 0.72<br>(0.38-1.2)                          | 2.6%<br>(1.6-4%)                     | 3.9%<br>(2.4-5.8%)                  | 13000<br>(7800-19000)    | 42000<br>(26000-63000)     |

| Location   | Year | Sex    | Age      | Prevalence of current drinkers | Prevalence of abstainers | Population average of standard drinks daily | Percent of total attributable deaths | Percent of total attributable DALYs | Attributable deaths       | Attributable DALYs              |
|------------|------|--------|----------|--------------------------------|--------------------------|---------------------------------------------|--------------------------------------|-------------------------------------|---------------------------|---------------------------------|
| Middle SDI | 2000 | Female | 60 to 64 | 20%<br>(13-29%)                | 80%<br>(71-87%)          | 0.7<br>(0.37-1.2)                           | 2.4%<br>(1.4-3.9%)                   | 3.4%<br>(1.9-5.3%)                  | 16000<br>(9100-25000)     | 440000<br>(250000-710000)       |
| Middle SDI | 2000 | Female | 65 to 69 | 19%<br>(12-27%)                | 81%<br>(73-88%)          | 0.62<br>(0.34-1)                            | 2.2%<br>(1.2-3.5%)                   | 3%<br>(1.7-4.6%)                    | 19000<br>(11000-29000)    | 430000<br>(240000-660000)       |
| Middle SDI | 2000 | Female | 70 to 74 | 19%<br>(13-27%)                | 81%<br>(73-87%)          | 0.57<br>(0.29-1)                            | 1.8%<br>(0.83-3.1%)                  | 2.4%<br>(1.1-4%)                    | 18000<br>(8500-30000)     | 330000<br>(150000-560000)       |
| Middle SDI | 2000 | Female | 75 to 79 | 18%<br>(12-27%)                | 82%<br>(73-88%)          | 0.53<br>(0.26-0.94)                         | 1.4%<br>(0.44-2.6%)                  | 1.8%<br>(0.58-3.3%)                 | 14000<br>(4600-26000)     | 200000<br>(63000-370000)        |
| Middle SDI | 2000 | Female | 80 to 84 | 18%<br>(12-26%)                | 82%<br>(74-88%)          | 0.53<br>(0.27-0.91)                         | 1.2%<br>(0.29-2.4%)                  | 1.5%<br>(0.38-2.9%)                 | 11000<br>(2700-22000)     | 120000<br>(27000-230000)        |
| Middle SDI | 2000 | Female | 85 to 89 | 19%<br>(12-28%)                | 81%<br>(72-88%)          | 0.57<br>(0.28-0.99)                         | 1.1%<br>(0.15-2.4%)                  | 1.3%<br>(0.17-2.8%)                 | 7200<br>(790-16000)       | 54000<br>(6700-120000)          |
| Middle SDI | 2000 | Female | 90 to 94 | 21%<br>(14-30%)                | 79%<br>(70-86%)          | 0.65<br>(0.31-1.2)                          | 1%<br>(-0.04-2.6%)                   | 1.2%<br>(-0.08-3%)                  | 3200<br>(-270-8200)       | 17000<br>(-780-43000)           |
| Middle SDI | 2000 | Female | 95 plus  | 24%<br>(14-37%)                | 76%<br>(63-86%)          | 0.77<br>(0.3-1.6)                           | 1.1%<br>(-0.3-3.1%)                  | 1.2%<br>(-0.44-3.6%)                | 990<br>(-370-3000)        | 3600<br>(-1000-10000)           |
| Middle SDI | 2000 | Male   | All Ages | 43%<br>(39-48%)                | 57%<br>(52-61%)          | 2.1<br>(1.8-2.4)                            | 7.4%<br>(6.3-8.6%)                   | 9.1%<br>(7.4-11%)                   | 820000<br>(660000-980000) | 29000000<br>(25000000-34000000) |
| Middle SDI | 2000 | Male   | 15 to 19 | 34%<br>(26-43%)                | 66%<br>(57-74%)          | 0.87<br>(0.52-1.3)                          | 3.7%<br>(2.4-5.4%)                   | 5%<br>(2.9-7.6%)                    | 7600<br>(4300-12000)      | 650000<br>(400000-960000)       |
| Middle SDI | 2000 | Male   | 20 to 24 | 46%<br>(36-56%)                | 54%<br>(44-64%)          | 1.9<br>(1.3-2.7)                            | 8%<br>(5.7-11%)                      | 9.9%<br>(6.5-14%)                   | 21000<br>(14000-30000)    | 1700000<br>(1200000-2300000)    |
| Middle SDI | 2000 | Male   | 25 to 29 | 52%<br>(41-62%)                | 48%<br>(38-59%)          | 2.5<br>(1.7-3.5)                            | 9.4%<br>(6.9-12%)                    | 12%<br>(8.2-16%)                    | 30000<br>(20000-40000)    | 2200000<br>(1600000-2900000)    |
| Middle SDI | 2000 | Male   | 30 to 34 | 56%<br>(43-66%)                | 44%<br>(34-57%)          | 3.1<br>(2.2-4.1)                            | 10%<br>(7.9-13%)                     | 13%<br>(9.7-17%)                    | 38000<br>(28000-49000)    | 2500000<br>(1900000-3200000)    |
| Middle SDI | 2000 | Male   | 35 to 39 | 58%<br>(47-68%)                | 42%<br>(32-53%)          | 3.6<br>(2.6-4.8)                            | 11%<br>(8.7-14%)                     | 14%<br>(11-18%)                     | 44000<br>(33000-56000)    | 2600000<br>(2000000-3300000)    |
| Middle SDI | 2000 | Male   | 40 to 44 | 58%<br>(48-68%)                | 42%<br>(32-52%)          | 4<br>(2.9-5.2)                              | 12%<br>(9.5-15%)                     | 15%<br>(12-19%)                     | 52000<br>(40000-64000)    | 2700000<br>(2100000-3300000)    |
| Middle SDI | 2000 | Male   | 45 to 49 | 59%<br>(47-69%)                | 41%<br>(31-53%)          | 4.3<br>(3.1-5.8)                            | 13%<br>(10-15%)                      | 16%<br>(12-19%)                     | 69000<br>(54000-84000)    | 3200000<br>(2500000-3800000)    |
| Middle SDI | 2000 | Male   | 50 to 54 | 58%<br>(47-68%)                | 42%<br>(32-53%)          | 4.4<br>(3.1-5.8)                            | 12%<br>(9.7-15%)                     | 15%<br>(12-18%)                     | 69000<br>(53000-84000)    | 2800000<br>(2200000-3400000)    |

| Location   | Year | Sex    | Age      | Prevalence of current drinkers | Prevalence of abstainers | Population average of standard drinks daily | Percent of total attributable deaths | Percent of total attributable DALYs | Attributable deaths      | Attributable DALYs         |
|------------|------|--------|----------|--------------------------------|--------------------------|---------------------------------------------|--------------------------------------|-------------------------------------|--------------------------|----------------------------|
| Middle SDI | 2000 | Male   | 55 to 59 | 56%<br>(45-66%)                | 44%<br>(34-55%)          | 4.2<br>(2.9-5.7)                            | 12%<br>(9-14%)                       | 14%<br>(11-17%)                     | 75000<br>(57000-92000)   | 260000<br>(200000-320000)  |
| Middle SDI | 2000 | Male   | 60 to 64 | 53%<br>(42-65%)                | 47%<br>(35-58%)          | 3.7<br>(2.6-5.3)                            | 11%<br>(7.9-13%)                     | 12%<br>(9.2-16%)                    | 92000<br>(68000-120000)  | 260000<br>(200000-330000)  |
| Middle SDI | 2000 | Male   | 65 to 69 | 51%<br>(39-61%)                | 49%<br>(39-61%)          | 3.2<br>(2.2-4.3)                            | 9.3%<br>(6.8-12%)                    | 11%<br>(7.7-14%)                    | 100000<br>(73000-130000) | 240000<br>(170000-300000)  |
| Middle SDI | 2000 | Male   | 70 to 74 | 48%<br>(37-58%)                | 52%<br>(42-63%)          | 2.6<br>(1.7-3.7)                            | 7.7%<br>(5.3-10%)                    | 8.6%<br>(5.8-12%)                   | 90000<br>(61000-120000)  | 170000<br>(120000-230000)  |
| Middle SDI | 2000 | Male   | 75 to 79 | 45%<br>(34-57%)                | 55%<br>(43-66%)          | 2.2<br>(1.5-3.3)                            | 6.3%<br>(4-9%)                       | 7%<br>(4.4-10%)                     | 64000<br>(41000-92000)   | 930000<br>(600000-1300000) |
| Middle SDI | 2000 | Male   | 80 to 84 | 43%<br>(31-55%)                | 57%<br>(45-69%)          | 2<br>(1.3-2.9)                              | 5.4%<br>(3.3-7.8%)                   | 5.9%<br>(3.6-8.7%)                  | 42000<br>(26000-61000)   | 460000<br>(280000-660000)  |
| Middle SDI | 2000 | Male   | 85 to 89 | 41%<br>(30-52%)                | 59%<br>(48-70%)          | 1.8<br>(1.1-2.7)                            | 4.3%<br>(2.5-6.5%)                   | 4.8%<br>(2.7-7.2%)                  | 20000<br>(11000-30000)   | 150000<br>(88000-230000)   |
| Middle SDI | 2000 | Male   | 90 to 94 | 41%<br>(30-52%)                | 59%<br>(48-70%)          | 1.7<br>(1-2.6)                              | 3.4%<br>(1.7-5.6%)                   | 3.7%<br>(1.7-6.1%)                  | 5600<br>(2600-9400)      | 30000<br>(15000-50000)     |
| Middle SDI | 2000 | Male   | 95 plus  | 44%<br>(30-57%)                | 56%<br>(43-70%)          | 1.7<br>(0.88-2.8)                           | 3%<br>(0.99-5.6%)                    | 3.1%<br>(0.83-6%)                   | 1100<br>(290-2200)       | 4300<br>(1400-8100)        |
| Middle SDI | 2005 | Female | All Ages | 18%<br>(16-20%)                | 82%<br>(80-84%)          | 0.43<br>(0.35-0.52)                         | 1.5%<br>(1.1-1.9%)                   | 2%<br>(1.3-2.9%)                    | 150000<br>(93000-210000) | 480000<br>(350000-620000)  |
| Middle SDI | 2005 | Female | 15 to 19 | 18%<br>(13-24%)                | 82%<br>(76-87%)          | 0.38<br>(0.21-0.62)                         | 1.1%<br>(0.72-1.7%)                  | 1.9%<br>(1-3.2%)                    | 1500<br>(770-2400)       | 170000<br>(100000-240000)  |
| Middle SDI | 2005 | Female | 20 to 24 | 22%<br>(16-28%)                | 78%<br>(72-84%)          | 0.57<br>(0.32-0.9)                          | 1.8%<br>(1.2-2.5%)                   | 2.4%<br>(1.3-3.8%)                  | 2600<br>(1400-4000)      | 300000<br>(190000-430000)  |
| Middle SDI | 2005 | Female | 25 to 29 | 21%<br>(16-28%)                | 79%<br>(72-84%)          | 0.59<br>(0.36-0.91)                         | 1.8%<br>(1.3-2.4%)                   | 2.4%<br>(1.4-3.6%)                  | 3100<br>(1800-4900)      | 320000<br>(210000-460000)  |
| Middle SDI | 2005 | Female | 30 to 34 | 20%<br>(15-27%)                | 80%<br>(73-85%)          | 0.54<br>(0.32-0.82)                         | 1.6%<br>(1.2-2.2%)                   | 2.3%<br>(1.5-3.4%)                  | 4100<br>(2500-6100)      | 350000<br>(240000-500000)  |
| Middle SDI | 2005 | Female | 35 to 39 | 21%<br>(16-28%)                | 79%<br>(72-84%)          | 0.55<br>(0.33-0.85)                         | 1.7%<br>(1.2-2.3%)                   | 2.7%<br>(1.7-3.8%)                  | 4900<br>(3000-7400)      | 360000<br>(240000-500000)  |
| Middle SDI | 2005 | Female | 40 to 44 | 22%<br>(16-29%)                | 78%<br>(71-84%)          | 0.62<br>(0.37-0.95)                         | 1.9%<br>(1.3-2.6%)                   | 3.2%<br>(2.1-4.5%)                  | 6600<br>(4300-9500)      | 390000<br>(260000-540000)  |
| Middle SDI | 2005 | Female | 45 to 49 | 21%<br>(15-27%)                | 79%<br>(73-85%)          | 0.67<br>(0.39-1.1)                          | 2%<br>(1.3-3%)                       | 3.5%<br>(2.2-5.1%)                  | 8400<br>(5300-13000)     | 410000<br>(270000-590000)  |
| Middle SDI | 2005 | Female | 50 to 54 | 20%<br>(15-27%)                | 80%<br>(73-85%)          | 0.64<br>(0.37-1)                            | 2.2%<br>(1.4-3.2%)                   | 3.5%<br>(2.2-5.1%)                  | 12000<br>(7700-18000)    | 480000<br>(310000-700000)  |
| Middle SDI | 2005 | Female | 55 to 59 | 19%<br>(14-25%)                | 81%<br>(75-86%)          | 0.66<br>(0.38-1.1)                          | 2.3%<br>(1.4-3.5%)                   | 3.5%<br>(2.2-5.3%)                  | 14000<br>(8400-20000)    | 460000<br>(280000-690000)  |

| Location   | Year | Sex    | Age      | Prevalence of current drinkers | Prevalence of abstainers | Population average of standard drinks daily | Percent of total attributable deaths | Percent of total attributable DALYs | Attributable deaths        | Attributable DALYs           |
|------------|------|--------|----------|--------------------------------|--------------------------|---------------------------------------------|--------------------------------------|-------------------------------------|----------------------------|------------------------------|
| Middle SDI | 2005 | Female | 60 to 64 | 18%<br>(12-25%)                | 82%<br>(75-88%)          | 0.65<br>(0.35-1.1)                          | 2.2%<br>(1.3-3.5%)                   | 3.2%<br>(1.9-4.9%)                  | 14000<br>(8400-22000)      | 400000<br>(230000-620000)    |
| Middle SDI | 2005 | Female | 65 to 69 | 17%<br>(12-24%)                | 83%<br>(76-88%)          | 0.58<br>(0.32-0.94)                         | 2%<br>(1.2-3.2%)                     | 2.8%<br>(1.6-4.3%)                  | 17000<br>(9900-27000)      | 400000<br>(220000-620000)    |
| Middle SDI | 2005 | Female | 70 to 74 | 16%<br>(11-23%)                | 84%<br>(77-89%)          | 0.52<br>(0.27-0.9)                          | 1.7%<br>(0.83-2.8%)                  | 2.2%<br>(1.1-3.6%)                  | 18000<br>(8900-30000)      | 330000<br>(160000-550000)    |
| Middle SDI | 2005 | Female | 75 to 79 | 16%<br>(10-23%)                | 84%<br>(77-90%)          | 0.49<br>(0.24-0.87)                         | 1.3%<br>(0.48-2.4%)                  | 1.7%<br>(0.64-3%)                   | 14000<br>(5300-26000)      | 210000<br>(72000-380000)     |
| Middle SDI | 2005 | Female | 80 to 84 | 15%<br>(9.2-22%)               | 85%<br>(78-91%)          | 0.49<br>(0.24-0.85)                         | 1.2%<br>(0.36-2.3%)                  | 1.5%<br>(0.46-2.8%)                 | 12000<br>(3600-24000)      | 130000<br>(38000-250000)     |
| Middle SDI | 2005 | Female | 85 to 89 | 15%<br>(9.3-22%)               | 85%<br>(78-91%)          | 0.51<br>(0.25-0.9)                          | 1.1%<br>(0.22-2.2%)                  | 1.3%<br>(0.27-2.6%)                 | 8100<br>(1500-17000)       | 62000<br>(12000-130000)      |
| Middle SDI | 2005 | Female | 90 to 94 | 17%<br>(11-25%)                | 83%<br>(75-89%)          | 0.58<br>(0.28-1.1)                          | 1%<br>(0.05-2.3%)                    | 1.2%<br>(0.032-2.8%)                | 3800<br>(86-9200)          | 20000<br>(1200-48000)        |
| Middle SDI | 2005 | Female | 95 plus  | 20%<br>(12-31%)                | 80%<br>(69-88%)          | 0.73<br>(0.28-1.5)                          | 1.2%<br>(-0.15-3%)                   | 1.3%<br>(-0.27-3.5%)                | 1400<br>(-280-3700)        | 5000<br>(-580-13000)         |
| Middle SDI | 2005 | Male   | All Ages | 44%<br>(41-48%)                | 56%<br>(52-59%)          | 2.3<br>(2-2.6)                              | 7.8%<br>(6.6-9.1%)                   | 9.1%<br>(7.4-11%)                   | 850000<br>(690000-1000000) | 3000000<br>(2600000-3600000) |
| Middle SDI | 2005 | Male   | 15 to 19 | 36%<br>(29-45%)                | 64%<br>(55-71%)          | 0.93<br>(0.58-1.4)                          | 3.8%<br>(2.5-5.4%)                   | 5.3%<br>(3.2-7.9%)                  | 8300<br>(4800-13000)       | 730000<br>(470000-1000000)   |
| Middle SDI | 2005 | Male   | 20 to 24 | 49%<br>(41-57%)                | 51%<br>(43-59%)          | 2.1<br>(1.4-2.9)                            | 8.4%<br>(6.1-11%)                    | 11%<br>(7.1-15%)                    | 21000<br>(14000-30000)     | 1700000<br>(1200000-2300000) |
| Middle SDI | 2005 | Male   | 25 to 29 | 53%<br>(44-61%)                | 47%<br>(39-56%)          | 2.7<br>(1.9-3.7)                            | 9.7%<br>(7.1-12%)                    | 13%<br>(8.8-17%)                    | 26000<br>(17000-35000)     | 1900000<br>(1400000-2600000) |
| Middle SDI | 2005 | Male   | 30 to 34 | 56%<br>(46-65%)                | 44%<br>(35-54%)          | 3.2<br>(2.4-4.2)                            | 10%<br>(7.9-13%)                     | 13%<br>(9.9-17%)                    | 35000<br>(26000-46000)     | 2400000<br>(1800000-3000000) |
| Middle SDI | 2005 | Male   | 35 to 39 | 58%<br>(49-66%)                | 42%<br>(34-51%)          | 3.7<br>(2.7-4.8)                            | 11%<br>(8.6-14%)                     | 14%<br>(11-18%)                     | 46000<br>(35000-59000)     | 2800000<br>(2200000-3500000) |
| Middle SDI | 2005 | Male   | 40 to 44 | 58%<br>(49-67%)                | 42%<br>(33-51%)          | 4<br>(3-5.3)                                | 12%<br>(9.5-14%)                     | 15%<br>(12-19%)                     | 58000<br>(45000-72000)     | 3100000<br>(2400000-3700000) |
| Middle SDI | 2005 | Male   | 45 to 49 | 58%<br>(49-67%)                | 42%<br>(33-51%)          | 4.3<br>(3.2-5.7)                            | 12%<br>(9.9-15%)                     | 16%<br>(13-19%)                     | 66000<br>(52000-81000)     | 3100000<br>(2400000-3700000) |
| Middle SDI | 2005 | Male   | 50 to 54 | 59%<br>(49-68%)                | 41%<br>(32-51%)          | 4.5<br>(3.3-5.9)                            | 12%<br>(9.8-15%)                     | 15%<br>(12-18%)                     | 89000<br>(70000-110000)    | 3600000<br>(2800000-4300000) |

| Location   | Year | Sex    | Age      | Prevalence of current drinkers | Prevalence of abstainers | Population average of standard drinks daily | Percent of total attributable deaths | Percent of total attributable DALYs | Attributable deaths       | Attributable DALYs         |
|------------|------|--------|----------|--------------------------------|--------------------------|---------------------------------------------|--------------------------------------|-------------------------------------|---------------------------|----------------------------|
| Middle SDI | 2005 | Male   | 55 to 59 | 56%<br>(47-65%)                | 44%<br>(35-53%)          | 4.2<br>(3.1-5.7)                            | 12%<br>(9-14%)                       | 14%<br>(11-17%)                     | 86000<br>(67000-110000)   | 300000<br>(230000-360000)  |
| Middle SDI | 2005 | Male   | 60 to 64 | 53%<br>(44-63%)                | 47%<br>(37-56%)          | 3.8<br>(2.7-5.3)                            | 10%<br>(7.7-13%)                     | 12%<br>(9.1-15%)                    | 84000<br>(62000-110000)   | 240000<br>(180000-300000)  |
| Middle SDI | 2005 | Male   | 65 to 69 | 50%<br>(40-59%)                | 50%<br>(41-60%)          | 3.1<br>(2.2-4.2)                            | 8.8%<br>(6.5-11%)                    | 10%<br>(7.5-13%)                    | 96000<br>(70000-120000)   | 230000<br>(170000-290000)  |
| Middle SDI | 2005 | Male   | 70 to 74 | 46%<br>(36-56%)                | 54%<br>(44-64%)          | 2.5<br>(1.7-3.6)                            | 7.3%<br>(5-9.6%)                     | 8.2%<br>(5.6-11%)                   | 91000<br>(62000-120000)   | 170000<br>(120000-230000)  |
| Middle SDI | 2005 | Male   | 75 to 79 | 43%<br>(33-54%)                | 57%<br>(46-67%)          | 2.1<br>(1.4-3.2)                            | 5.8%<br>(3.7-8.3%)                   | 6.5%<br>(4.1-9.3%)                  | 67000<br>(42000-96000)    | 990000<br>(620000-1400000) |
| Middle SDI | 2005 | Male   | 80 to 84 | 40%<br>(29-52%)                | 60%<br>(48-71%)          | 1.9<br>(1.2-2.8)                            | 5%<br>(2.9-7.3%)                     | 5.5%<br>(3.2-8.1%)                  | 45000<br>(26000-67000)    | 490000<br>(290000-730000)  |
| Middle SDI | 2005 | Male   | 85 to 89 | 39%<br>(28-50%)                | 61%<br>(50-72%)          | 1.7<br>(1.1-2.6)                            | 4%<br>(2.3-6.2%)                     | 4.4%<br>(2.4-6.9%)                  | 21000<br>(12000-33000)    | 170000<br>(94000-260000)   |
| Middle SDI | 2005 | Male   | 90 to 94 | 40%<br>(29-51%)                | 60%<br>(49-71%)          | 1.6<br>(1-2.5)                              | 3.2%<br>(1.6-5.4%)                   | 3.5%<br>(1.6-6%)                    | 6900<br>(3100-12000)      | 38000<br>(18000-64000)     |
| Middle SDI | 2005 | Male   | 95 plus  | 42%<br>(29-56%)                | 58%<br>(44-71%)          | 1.6<br>(0.86-2.7)                           | 2.9%<br>(0.88-5.4%)                  | 3%<br>(0.72-5.9%)                   | 1400<br>(320-2800)        | 5200<br>(1500-10000)       |
| Middle SDI | 2010 | Female | All Ages | 18%<br>(16-20%)                | 82%<br>(80-84%)          | 0.47<br>(0.38-0.57)                         | 1.6%<br>(1.2-2%)                     | 2.1%<br>(1.4-3%)                    | 160000<br>(100000-220000) | 500000<br>(370000-640000)  |
| Middle SDI | 2010 | Female | 15 to 19 | 18%<br>(13-24%)                | 82%<br>(76-87%)          | 0.41<br>(0.22-0.68)                         | 1.1%<br>(0.73-1.7%)                  | 2%<br>(1-3.3%)                      | 1200<br>(640-2000)        | 140000<br>(91000-220000)   |
| Middle SDI | 2010 | Female | 20 to 24 | 21%<br>(15-28%)                | 79%<br>(72-85%)          | 0.54<br>(0.3-0.87)                          | 1.8%<br>(1.2-2.5%)                   | 2.3%<br>(1.2-3.7%)                  | 2500<br>(1400-3800)       | 310000<br>(200000-440000)  |
| Middle SDI | 2010 | Female | 25 to 29 | 22%<br>(16-28%)                | 78%<br>(72-84%)          | 0.63<br>(0.37-0.99)                         | 1.9%<br>(1.3-2.5%)                   | 2.5%<br>(1.4-3.8%)                  | 2900<br>(1700-4500)       | 320000<br>(210000-450000)  |
| Middle SDI | 2010 | Female | 30 to 34 | 22%<br>(16-29%)                | 78%<br>(71-84%)          | 0.63<br>(0.37-0.97)                         | 1.8%<br>(1.2-2.4%)                   | 2.5%<br>(1.6-3.7%)                  | 3100<br>(1900-4700)       | 300000<br>(200000-420000)  |
| Middle SDI | 2010 | Female | 35 to 39 | 22%<br>(16-28%)                | 78%<br>(72-84%)          | 0.59<br>(0.35-0.93)                         | 1.7%<br>(1.2-2.3%)                   | 2.8%<br>(1.8-4%)                    | 4300<br>(2700-6400)       | 330000<br>(220000-460000)  |
| Middle SDI | 2010 | Female | 40 to 44 | 21%<br>(16-28%)                | 79%<br>(72-84%)          | 0.61<br>(0.36-0.95)                         | 1.8%<br>(1.2-2.4%)                   | 3.2%<br>(2.1-4.4%)                  | 6300<br>(4100-9100)       | 390000<br>(260000-540000)  |
| Middle SDI | 2010 | Female | 45 to 49 | 21%<br>(15-28%)                | 79%<br>(72-85%)          | 0.68<br>(0.39-1.1)                          | 2%<br>(1.3-2.9%)                     | 3.6%<br>(2.3-5.2%)                  | 9100<br>(5800-13000)      | 450000<br>(290000-640000)  |
| Middle SDI | 2010 | Female | 50 to 54 | 20%<br>(15-27%)                | 80%<br>(73-85%)          | 0.72<br>(0.41-1.2)                          | 2.3%<br>(1.4-3.3%)                   | 3.9%<br>(2.5-5.6%)                  | 12000<br>(7800-18000)     | 500000<br>(320000-730000)  |
| Middle SDI | 2010 | Female | 55 to 59 | 19%<br>(14-25%)                | 81%<br>(75-86%)          | 0.67<br>(0.38-1.1)                          | 2.3%<br>(1.4-3.5%)                   | 3.8%<br>(2.4-5.5%)                  | 16000<br>(10000-24000)    | 550000<br>(340000-820000)  |



| Location   | Year | Sex    | Age      | Prevalence of current drinkers | Prevalence of abstainers | Population average of standard drinks daily | Percent of total attributable deaths | Percent of total attributable DALYs | Attributable deaths        | Attributable DALYs           |
|------------|------|--------|----------|--------------------------------|--------------------------|---------------------------------------------|--------------------------------------|-------------------------------------|----------------------------|------------------------------|
| Middle SDI | 2010 | Female | 60 to 64 | 17%<br>(12-24%)                | 83%<br>(76-88%)          | 0.64<br>(0.34-1.1)                          | 2.2%<br>(1.3-3.4%)                   | 3.4%<br>(2.1-5%)                    | 17000<br>(10000-25000)     | 470000<br>(280000-720000)    |
| Middle SDI | 2010 | Female | 65 to 69 | 17%<br>(12-24%)                | 83%<br>(76-88%)          | 0.59<br>(0.32-0.95)                         | 2.1%<br>(1.2-3.1%)                   | 3%<br>(1.8-4.4%)                    | 17000<br>(10000-26000)     | 390000<br>(230000-600000)    |
| Middle SDI | 2010 | Female | 70 to 74 | 16%<br>(11-23%)                | 84%<br>(77-89%)          | 0.54<br>(0.27-0.95)                         | 1.7%<br>(0.87-2.8%)                  | 2.3%<br>(1.2-3.8%)                  | 18000<br>(9300-29000)      | 340000<br>(170000-550000)    |
| Middle SDI | 2010 | Female | 75 to 79 | 15%<br>(9.8-22%)               | 85%<br>(78-90%)          | 0.5<br>(0.24-0.89)                          | 1.4%<br>(0.53-2.4%)                  | 1.8%<br>(0.72-3.1%)                 | 16000<br>(6300-28000)      | 230000<br>(88000-410000)     |
| Middle SDI | 2010 | Female | 80 to 84 | 15%<br>(9-22%)                 | 85%<br>(78-91%)          | 0.52<br>(0.25-0.9)                          | 1.2%<br>(0.4-2.3%)                   | 1.5%<br>(0.51-2.8%)                 | 14000<br>(4600-27000)      | 150000<br>(49000-290000)     |
| Middle SDI | 2010 | Female | 85 to 89 | 15%<br>(9.4-23%)               | 85%<br>(77-91%)          | 0.56<br>(0.27-1)                            | 1.1%<br>(0.25-2.3%)                  | 1.4%<br>(0.3-2.8%)                  | 9900<br>(2000-20000)       | 76000<br>(17000-150000)      |
| Middle SDI | 2010 | Female | 90 to 94 | 17%<br>(11-26%)                | 83%<br>(74-89%)          | 0.64<br>(0.3-1.2)                           | 1%<br>(0.087-2.4%)                   | 1.2%<br>(0.04-2.9%)                 | 4800<br>(180-11000)        | 26000<br>(2300-59000)        |
| Middle SDI | 2010 | Female | 95 plus  | 21%<br>(12-32%)                | 79%<br>(68-88%)          | 0.78<br>(0.3-1.6)                           | 1.1%<br>(-0.15-2.9%)                 | 1.3%<br>(-0.31-3.4%)                | 1800<br>(-370-4700)        | 6500<br>(-710-17000)         |
| Middle SDI | 2010 | Male   | All Ages | 44%<br>(41-48%)                | 56%<br>(52-59%)          | 2.5<br>(2.2-2.9)                            | 8.2%<br>(6.9-9.5%)                   | 9.3%<br>(7.6-11%)                   | 910000<br>(730000-1100000) | 3200000<br>(2700000-3700000) |
| Middle SDI | 2010 | Male   | 15 to 19 | 34%<br>(27-42%)                | 66%<br>(58-73%)          | 0.93<br>(0.56-1.4)                          | 3.8%<br>(2.5-5.4%)                   | 5.3%<br>(3.2-8%)                    | 7200<br>(4100-11000)       | 640000<br>(400000-930000)    |
| Middle SDI | 2010 | Male   | 20 to 24 | 48%<br>(39-57%)                | 52%<br>(43-61%)          | 2.1<br>(1.5-3)                              | 8.3%<br>(5.9-11%)                    | 11%<br>(7.1-15%)                    | 22000<br>(14000-31000)     | 180000<br>(130000-250000)    |
| Middle SDI | 2010 | Male   | 25 to 29 | 52%<br>(43-60%)                | 48%<br>(40-57%)          | 2.8<br>(2-3.9)                              | 9.7%<br>(7.2-13%)                    | 13%<br>(9-17%)                      | 26000<br>(17000-35000)     | 200000<br>(140000-260000)    |
| Middle SDI | 2010 | Male   | 30 to 34 | 55%<br>(45-63%)                | 45%<br>(37-55%)          | 3.4<br>(2.4-4.5)                            | 10%<br>(7.9-13%)                     | 14%<br>(10-18%)                     | 30000<br>(22000-40000)     | 210000<br>(160000-270000)    |
| Middle SDI | 2010 | Male   | 35 to 39 | 57%<br>(48-65%)                | 43%<br>(35-52%)          | 3.9<br>(2.8-5.2)                            | 11%<br>(8.7-14%)                     | 15%<br>(11-18%)                     | 42000<br>(31000-54000)     | 260000<br>(200000-330000)    |
| Middle SDI | 2010 | Male   | 40 to 44 | 57%<br>(48-67%)                | 43%<br>(33-52%)          | 4.3<br>(3.2-5.6)                            | 12%<br>(9.5-14%)                     | 15%<br>(12-19%)                     | 59000<br>(46000-74000)     | 320000<br>(260000-390000)    |
| Middle SDI | 2010 | Male   | 45 to 49 | 58%<br>(48-67%)                | 42%<br>(33-52%)          | 4.6<br>(3.4-6.1)                            | 12%<br>(10-15%)                      | 16%<br>(13-19%)                     | 73000<br>(57000-89000)     | 340000<br>(270000-420000)    |
| Middle SDI | 2010 | Male   | 50 to 54 | 57%<br>(47-66%)                | 43%<br>(34-53%)          | 4.7<br>(3.4-6.1)                            | 12%<br>(9.7-15%)                     | 15%<br>(12-18%)                     | 85000<br>(66000-100000)    | 350000<br>(270000-420000)    |

| Location   | Year | Sex    | Age      | Prevalence of current drinkers | Prevalence of abstainers | Population average of standard drinks daily | Percent of total attributable deaths | Percent of total attributable DALYs | Attributable deaths       | Attributable DALYs           |
|------------|------|--------|----------|--------------------------------|--------------------------|---------------------------------------------|--------------------------------------|-------------------------------------|---------------------------|------------------------------|
| Middle SDI | 2010 | Male   | 55 to 59 | 56%<br>(46-65%)                | 44%<br>(35-54%)          | 4.6<br>(3.4-6.1)                            | 12%<br>(9.2-14%)                     | 14%<br>(11-17%)                     | 110000<br>(83000-130000)  | 3700000<br>(2900000-4500000) |
| Middle SDI | 2010 | Male   | 60 to 64 | 53%<br>(43-63%)                | 47%<br>(37-57%)          | 4<br>(2.8-5.6)                              | 10%<br>(7.9-13%)                     | 12%<br>(9.4-15%)                    | 98000<br>(75000-120000)   | 2900000<br>(2200000-3600000) |
| Middle SDI | 2010 | Male   | 65 to 69 | 49%<br>(40-59%)                | 51%<br>(41-60%)          | 3.3<br>(2.4-4.5)                            | 8.9%<br>(6.8-11%)                    | 10%<br>(7.9-13%)                    | 92000<br>(70000-120000)   | 2200000<br>(1700000-2800000) |
| Middle SDI | 2010 | Male   | 70 to 74 | 46%<br>(36-55%)                | 54%<br>(45-64%)          | 2.7<br>(1.9-3.8)                            | 7.4%<br>(5.2-9.7%)                   | 8.5%<br>(5.9-11%)                   | 93000<br>(65000-120000)   | 1800000<br>(1300000-2400000) |
| Middle SDI | 2010 | Male   | 75 to 79 | 43%<br>(33-54%)                | 57%<br>(46-67%)          | 2.3<br>(1.5-3.4)                            | 6.1%<br>(4-8.5%)                     | 6.9%<br>(4.4-9.7%)                  | 78000<br>(50000-110000)   | 1200000<br>(760000-1600000)  |
| Middle SDI | 2010 | Male   | 80 to 84 | 41%<br>(30-53%)                | 59%<br>(47-70%)          | 2.1<br>(1.3-3)                              | 5.3%<br>(3.3-7.6%)                   | 5.9%<br>(3.6-8.6%)                  | 58000<br>(35000-84000)    | 640000<br>(400000-920000)    |
| Middle SDI | 2010 | Male   | 85 to 89 | 39%<br>(28-50%)                | 61%<br>(50-72%)          | 1.9<br>(1.1-2.8)                            | 4.3%<br>(2.5-6.5%)                   | 4.8%<br>(2.7-7.2%)                  | 28000<br>(16000-42000)    | 220000<br>(120000-330000)    |
| Middle SDI | 2010 | Male   | 90 to 94 | 40%<br>(29-51%)                | 60%<br>(49-71%)          | 1.8<br>(1.1-2.8)                            | 3.5%<br>(1.7-5.7%)                   | 3.8%<br>(1.7-6.4%)                  | 8900<br>(4000-15000)      | 49000<br>(24000-80000)       |
| Middle SDI | 2010 | Male   | 95 plus  | 43%<br>(29-57%)                | 57%<br>(43-71%)          | 1.8<br>(0.97-3)                             | 3.2%<br>(1.1-5.9%)                   | 3.3%<br>(0.88-6.4%)                 | 2000<br>(540-3900)        | 7800<br>(2600-14000)         |
| Middle SDI | 2016 | Female | All Ages | 19%<br>(16-22%)                | 81%<br>(78-84%)          | 0.52<br>(0.39-0.69)                         | 1.7%<br>(1.2-2.2%)                   | 2.3%<br>(1.4-3.4%)                  | 170000<br>(110000-250000) | 5300000<br>(3800000-7100000) |
| Middle SDI | 2016 | Female | 15 to 19 | 18%<br>(12-26%)                | 82%<br>(74-88%)          | 0.46<br>(0.23-0.79)                         | 1.1%<br>(0.72-1.7%)                  | 2.1%<br>(1.1-3.6%)                  | 880<br>(440-1500)         | 110000<br>(70000-170000)     |
| Middle SDI | 2016 | Female | 20 to 24 | 22%<br>(15-30%)                | 78%<br>(70-85%)          | 0.61<br>(0.32-1)                            | 1.9%<br>(1.3-2.6%)                   | 2.5%<br>(1.3-4.1%)                  | 1700<br>(910-2800)        | 240000<br>(160000-360000)    |
| Middle SDI | 2016 | Female | 25 to 29 | 23%<br>(16-31%)                | 77%<br>(69-84%)          | 0.62<br>(0.34-1)                            | 1.8%<br>(1.3-2.5%)                   | 2.4%<br>(1.4-3.9%)                  | 2500<br>(1400-3900)       | 310000<br>(210000-440000)    |
| Middle SDI | 2016 | Female | 30 to 34 | 24%<br>(16-33%)                | 76%<br>(67-84%)          | 0.67<br>(0.37-1.1)                          | 1.8%<br>(1.3-2.5%)                   | 2.7%<br>(1.7-4.1%)                  | 3100<br>(1900-4700)       | 310000<br>(210000-440000)    |
| Middle SDI | 2016 | Female | 35 to 39 | 25%<br>(17-34%)                | 75%<br>(66-83%)          | 0.72<br>(0.38-1.2)                          | 1.9%<br>(1.3-2.6%)                   | 3.3%<br>(2.1-4.8%)                  | 4100<br>(2500-6100)       | 320000<br>(210000-450000)    |
| Middle SDI | 2016 | Female | 40 to 44 | 23%<br>(16-32%)                | 77%<br>(68-84%)          | 0.69<br>(0.37-1.1)                          | 1.9%<br>(1.3-2.6%)                   | 3.6%<br>(2.3-5.1%)                  | 6200<br>(4000-9200)       | 380000<br>(250000-550000)    |
| Middle SDI | 2016 | Female | 45 to 49 | 21%<br>(13-30%)                | 79%<br>(70-87%)          | 0.68<br>(0.36-1.1)                          | 2%<br>(1.3-2.8%)                     | 3.8%<br>(2.4-5.5%)                  | 9700<br>(6100-14000)      | 480000<br>(310000-700000)    |
| Middle SDI | 2016 | Female | 50 to 54 | 20%<br>(13-29%)                | 80%<br>(71-87%)          | 0.73<br>(0.39-1.2)                          | 2.3%<br>(1.4-3.3%)                   | 4.1%<br>(2.6-5.8%)                  | 14000<br>(8700-20000)     | 570000<br>(360000-830000)    |
| Middle SDI | 2016 | Female | 55 to 59 | 20%<br>(13-29%)                | 80%<br>(71-87%)          | 0.77<br>(0.4-1.3)                           | 2.5%<br>(1.6-3.7%)                   | 4.3%<br>(2.8-6.1%)                  | 17000<br>(11000-26000)    | 590000<br>(360000-880000)    |

| Location   | Year | Sex    | Age      | Prevalence of current drinkers | Prevalence of abstainers | Population average of standard drinks daily | Percent of total attributable deaths | Percent of total attributable DALYs | Attributable deaths         | Attributable DALYs           |
|------------|------|--------|----------|--------------------------------|--------------------------|---------------------------------------------|--------------------------------------|-------------------------------------|-----------------------------|------------------------------|
| Middle SDI | 2016 | Female | 60 to 64 | 19%<br>(11-29%)                | 81%<br>(71-89%)          | 0.69<br>(0.34-1.2)                          | 2.3%<br>(1.4-3.6%)                   | 3.7%<br>(2.3-5.5%)                  | 21000<br>(13000-33000)      | 610000<br>(360000-940000)    |
| Middle SDI | 2016 | Female | 65 to 69 | 19%<br>(12-27%)                | 81%<br>(73-88%)          | 0.64<br>(0.33-1.1)                          | 2.1%<br>(1.2-3.3%)                   | 3.2%<br>(2-4.8%)                    | 21000<br>(13000-32000)      | 490000<br>(280000-760000)    |
| Middle SDI | 2016 | Female | 70 to 74 | 18%<br>(11-26%)                | 82%<br>(74-89%)          | 0.59<br>(0.29-1.1)                          | 1.8%<br>(0.9-2.9%)                   | 2.6%<br>(1.4-4.1%)                  | 18000<br>(9600-30000)       | 340000<br>(170000-580000)    |
| Middle SDI | 2016 | Female | 75 to 79 | 17%<br>(10-26%)                | 83%<br>(74-90%)          | 0.55<br>(0.25-1)                            | 1.4%<br>(0.55-2.6%)                  | 1.9%<br>(0.78-3.4%)                 | 17000<br>(6600-30000)       | 240000<br>(91000-440000)     |
| Middle SDI | 2016 | Female | 80 to 84 | 16%<br>(9.5-24%)               | 84%<br>(76-90%)          | 0.57<br>(0.27-1)                            | 1.3%<br>(0.39-2.4%)                  | 1.6%<br>(0.51-3%)                   | 16000<br>(4800-30000)       | 170000<br>(52000-320000)     |
| Middle SDI | 2016 | Female | 85 to 89 | 17%<br>(9.9-26%)               | 83%<br>(74-90%)          | 0.61<br>(0.28-1.1)                          | 1.1%<br>(0.22-2.3%)                  | 1.4%<br>(0.25-2.8%)                 | 12000<br>(2200-25000)       | 95000<br>(19000-200000)      |
| Middle SDI | 2016 | Female | 90 to 94 | 19%<br>(12-29%)                | 81%<br>(71-88%)          | 0.71<br>(0.32-1.4)                          | 1%<br>(-0.0074-2.4%)                 | 1.2%<br>(-0.08-2.9%)                | 6300<br>(-320-15000)        | 35000<br>(350-81000)         |
| Middle SDI | 2016 | Female | 95 plus  | 23%<br>(12-35%)                | 77%<br>(65-88%)          | 0.85<br>(0.32-1.8)                          | 1.1%<br>(-0.27-3%)                   | 1.2%<br>(-0.46-3.5%)                | 2400<br>(-770-6600)         | 8800<br>(-1800-23000)        |
| Middle SDI | 2016 | Male   | All Ages | 45%<br>(41-49%)                | 55%<br>(51-59%)          | 2.8<br>(2.3-3.3)                            | 8.5%<br>(7-10%)                      | 9.4%<br>(7.6-11%)                   | 1000000<br>(800000-1200000) | 3400000<br>(2800000-4000000) |
| Middle SDI | 2016 | Male   | 15 to 19 | 32%<br>(24-42%)                | 68%<br>(58-76%)          | 0.9<br>(0.51-1.5)                           | 3.7%<br>(2.3-5.3%)                   | 5.2%<br>(2.9-8.1%)                  | 5800<br>(3100-9300)         | 520000<br>(320000-780000)    |
| Middle SDI | 2016 | Male   | 20 to 24 | 45%<br>(35-55%)                | 55%<br>(45-65%)          | 2.1<br>(1.3-3.1)                            | 8.2%<br>(5.7-11%)                    | 11%<br>(6.8-15%)                    | 18000<br>(11000-27000)      | 150000<br>(100000-210000)    |
| Middle SDI | 2016 | Male   | 25 to 29 | 50%<br>(39-60%)                | 50%<br>(40-61%)          | 2.8<br>(1.9-4.1)                            | 9.4%<br>(6.9-12%)                    | 13%<br>(8.6-17%)                    | 26000<br>(17000-36000)      | 210000<br>(150000-270000)    |
| Middle SDI | 2016 | Male   | 30 to 34 | 53%<br>(41-63%)                | 47%<br>(37-59%)          | 3.4<br>(2.3-4.8)                            | 10%<br>(7.7-13%)                     | 14%<br>(10-18%)                     | 30000<br>(21000-40000)      | 210000<br>(160000-270000)    |
| Middle SDI | 2016 | Male   | 35 to 39 | 55%<br>(45-65%)                | 45%<br>(35-55%)          | 3.9<br>(2.6-5.5)                            | 11%<br>(8.2-13%)                     | 15%<br>(11-19%)                     | 35000<br>(25000-46000)      | 220000<br>(160000-280000)    |
| Middle SDI | 2016 | Male   | 40 to 44 | 57%<br>(47-67%)                | 43%<br>(33-53%)          | 4.4<br>(3.1-6)                              | 11%<br>(9.1-14%)                     | 15%<br>(12-19%)                     | 51000<br>(39000-65000)      | 280000<br>(220000-350000)    |
| Middle SDI | 2016 | Male   | 45 to 49 | 58%<br>(47-68%)                | 42%<br>(32-53%)          | 4.9<br>(3.5-6.6)                            | 12%<br>(9.8-15%)                     | 16%<br>(13-19%)                     | 76000<br>(59000-94000)      | 370000<br>(290000-450000)    |
| Middle SDI | 2016 | Male   | 50 to 54 | 58%<br>(47-68%)                | 42%<br>(32-53%)          | 5<br>(3.6-6.7)                              | 12%<br>(9.6-15%)                     | 15%<br>(12-19%)                     | 94000<br>(73000-120000)     | 390000<br>(310000-480000)    |

| Location       | Year | Sex    | Age      | Prevalence of current drinkers | Prevalence of abstainers | Population average of standard drinks daily | Percent of total attributable deaths | Percent of total attributable DALYs | Attributable deaths       | Attributable DALYs           |
|----------------|------|--------|----------|--------------------------------|--------------------------|---------------------------------------------|--------------------------------------|-------------------------------------|---------------------------|------------------------------|
| Middle SDI     | 2016 | Male   | 55 to 59 | 57%<br>(46-67%)                | 43%<br>(33-54%)          | 4.8<br>(3.5-6.6)                            | 12%<br>(9.1-14%)                     | 14%<br>(11-17%)                     | 100000<br>(80000-130000)  | 3700000<br>(2900000-4600000) |
| Middle SDI     | 2016 | Male   | 60 to 64 | 55%<br>(44-66%)                | 45%<br>(34-56%)          | 4.5<br>(3.1-6.3)                            | 11%<br>(8.3-13%)                     | 13%<br>(10-16%)                     | 130000<br>(100000-170000) | 3900000<br>(3000000-4900000) |
| Middle SDI     | 2016 | Male   | 65 to 69 | 52%<br>(41-63%)                | 48%<br>(37-59%)          | 3.7<br>(2.6-5.1)                            | 9.5%<br>(7.2-12%)                    | 11%<br>(8.4-14%)                    | 120000<br>(92000-160000)  | 3000000<br>(2300000-3800000) |
| Middle SDI     | 2016 | Male   | 70 to 74 | 48%<br>(37-58%)                | 52%<br>(42-63%)          | 2.9<br>(1.9-4.3)                            | 7.6%<br>(5.3-10%)                    | 8.8%<br>(6-12%)                     | 97000<br>(67000-130000)   | 1900000<br>(1300000-2500000) |
| Middle SDI     | 2016 | Male   | 75 to 79 | 44%<br>(32-56%)                | 56%<br>(44-68%)          | 2.5<br>(1.5-3.7)                            | 6.3%<br>(4-8.8%)                     | 7.1%<br>(4.5-10%)                   | 84000<br>(53000-120000)   | 1300000<br>(810000-1800000)  |
| Middle SDI     | 2016 | Male   | 80 to 84 | 42%<br>(30-54%)                | 58%<br>(46-70%)          | 2.2<br>(1.4-3.3)                            | 5.5%<br>(3.4-7.8%)                   | 6.1%<br>(3.7-8.9%)                  | 68000<br>(41000-98000)    | 750000<br>(460000-1100000)   |
| Middle SDI     | 2016 | Male   | 85 to 89 | 40%<br>(29-51%)                | 60%<br>(49-71%)          | 2<br>(1.2-3.1)                              | 4.6%<br>(2.7-6.9%)                   | 5.1%<br>(2.9-7.8%)                  | 39000<br>(22000-59000)    | 310000<br>(180000-460000)    |
| Middle SDI     | 2016 | Male   | 90 to 94 | 41%<br>(31-53%)                | 59%<br>(47-69%)          | 1.9<br>(1.2-3)                              | 3.7%<br>(1.8-6%)                     | 4.1%<br>(1.8-6.7%)                  | 13000<br>(5900-22000)     | 72000<br>(35000-120000)      |
| Middle SDI     | 2016 | Male   | 95 plus  | 44%<br>(31-58%)                | 56%<br>(42-69%)          | 1.9<br>(1-3.2)                              | 3.3%<br>(1.1-6.2%)                   | 3.5%<br>(0.87-6.7%)                 | 2900<br>(720-5500)        | 11000<br>(3600-20000)        |
| Low-middle SDI | 1990 | Female | All Ages | 7.6%<br>(6-9.5%)               | 92%<br>(90-94%)          | 0.2<br>(0.15-0.26)                          | 0.54%<br>(0.38-0.73%)                | 0.88%<br>(0.53-1.3%)                | 61000<br>(37000-93000)    | 2400000<br>(1700000-3300000) |
| Low-middle SDI | 1990 | Female | 15 to 19 | 6.7%<br>(4-10%)                | 93%<br>(90-96%)          | 0.15<br>(0.074-0.28)                        | 0.47%<br>(0.25-0.79%)                | 0.49%<br>(0.17-0.99%)               | 570<br>(180-1200)         | 74000<br>(39000-130000)      |
| Low-middle SDI | 1990 | Female | 20 to 24 | 7.8%<br>(4.7-12%)              | 92%<br>(88-95%)          | 0.24<br>(0.11-0.42)                         | 0.91%<br>(0.54-1.4%)                 | 0.84%<br>(0.35-1.6%)                | 1300<br>(530-2500)        | 160000<br>(90000-250000)     |
| Low-middle SDI | 1990 | Female | 25 to 29 | 8.5%<br>(5.1-13%)              | 92%<br>(87-95%)          | 0.3<br>(0.14-0.53)                          | 1.2%<br>(0.73-1.9%)                  | 1.2%<br>(0.57-2.3%)                 | 2000<br>(890-3600)        | 190000<br>(110000-300000)    |
| Low-middle SDI | 1990 | Female | 30 to 34 | 9.5%<br>(5.7-15%)              | 91%<br>(85-94%)          | 0.36<br>(0.17-0.62)                         | 1.4%<br>(0.89-2.2%)                  | 1.7%<br>(0.91-2.9%)                 | 2700<br>(1400-4500)       | 210000<br>(130000-320000)    |
| Low-middle SDI | 1990 | Female | 35 to 39 | 10%<br>(6-15%)                 | 90%<br>(85-94%)          | 0.4<br>(0.19-0.69)                          | 1.7%<br>(1.1-2.6%)                   | 2.2%<br>(1.3-3.7%)                  | 3600<br>(2000-5900)       | 230000<br>(140000-350000)    |
| Low-middle SDI | 1990 | Female | 40 to 44 | 11%<br>(7-17%)                 | 89%<br>(83-93%)          | 0.42<br>(0.2-0.73)                          | 1.8%<br>(1.1-2.7%)                   | 2.5%<br>(1.5-4%)                    | 4000<br>(2300-6400)       | 220000<br>(140000-330000)    |
| Low-middle SDI | 1990 | Female | 45 to 49 | 11%<br>(6.7-17%)               | 89%<br>(83-93%)          | 0.39<br>(0.17-0.71)                         | 1.8%<br>(1.1-2.8%)                   | 2.4%<br>(1.4-4%)                    | 4700<br>(2600-7700)       | 220000<br>(130000-340000)    |
| Low-middle SDI | 1990 | Female | 50 to 54 | 12%<br>(7.1-18%)               | 88%<br>(82-93%)          | 0.41<br>(0.19-0.76)                         | 1.8%<br>(1.1-2.9%)                   | 2.4%<br>(1.4-4%)                    | 6100<br>(3400-10000)      | 240000<br>(140000-390000)    |

| Location       | Year | Sex    | Age      | Prevalence of current drinkers | Prevalence of abstainers | Population average of standard drinks daily | Percent of total attributable deaths | Percent of total attributable DALYs | Attributable deaths       | Attributable DALYs             |
|----------------|------|--------|----------|--------------------------------|--------------------------|---------------------------------------------|--------------------------------------|-------------------------------------|---------------------------|--------------------------------|
| Low-middle SDI | 1990 | Female | 55 to 59 | 12%<br>(7-19%)                 | 88%<br>(81-93%)          | 0.48<br>(0.22-0.91)                         | 1.9%<br>(1-3.1%)                     | 2.4%<br>(1.3-4.1%)                  | 7600<br>(3900-13000)      | 250000<br>(140000-420000)      |
| Low-middle SDI | 1990 | Female | 60 to 64 | 13%<br>(7.3-20%)               | 87%<br>(80-93%)          | 0.51<br>(0.23-0.99)                         | 1.7%<br>(0.8-2.9%)                   | 2.1%<br>(0.97-3.7%)                 | 7800<br>(3700-14000)      | 220000<br>(110000-380000)      |
| Low-middle SDI | 1990 | Female | 65 to 69 | 13%<br>(7.6-20%)               | 87%<br>(80-92%)          | 0.48<br>(0.22-0.87)                         | 1.4%<br>(0.66-2.5%)                  | 1.7%<br>(0.78-3.1%)                 | 7500<br>(3400-13000)      | 170000<br>(81000-310000)       |
| Low-middle SDI | 1990 | Female | 70 to 74 | 13%<br>(7.5-19%)               | 87%<br>(81-93%)          | 0.41<br>(0.18-0.78)                         | 1.1%<br>(0.4-2.2%)                   | 1.3%<br>(0.46-2.7%)                 | 6100<br>(2200-12000)      | 110000<br>(42000-220000)       |
| Low-middle SDI | 1990 | Female | 75 to 79 | 12%<br>(6.5-20%)               | 88%<br>(80-93%)          | 0.35<br>(0.14-0.72)                         | 0.79%<br>(0.17-1.8%)                 | 0.92%<br>(0.18-2.1%)                | 3700<br>(830-8300)        | 53000<br>(13000-120000)        |
| Low-middle SDI | 1990 | Female | 80 to 84 | 11%<br>(5.9-20%)               | 89%<br>(80-94%)          | 0.33<br>(0.13-0.72)                         | 0.61%<br>(0.088-1.5%)                | 0.71%<br>(0.086-1.7%)               | 2200<br>(330-5300)        | 23000<br>(4000-55000)          |
| Low-middle SDI | 1990 | Female | 85 to 89 | 12%<br>(6.5-22%)               | 88%<br>(78-93%)          | 0.36<br>(0.15-0.76)                         | 0.5%<br>(-0.01-1.3%)                 | 0.56%<br>(-0.042-1.5%)              | 990<br>(-41-2600)         | 7600<br>(71-20000)             |
| Low-middle SDI | 1990 | Female | 90 to 94 | 15%<br>(7.8-26%)               | 85%<br>(74-92%)          | 0.42<br>(0.16-0.9)                          | 0.41%<br>(-0.15-1.3%)                | 0.45%<br>(-0.22-1.5%)               | 290<br>(-130-950)         | 1600<br>(-520-5000)            |
| Low-middle SDI | 1990 | Female | 95 plus  | 18%<br>(8.5-31%)               | 82%<br>(69-91%)          | 0.5<br>(0.17-1.1)                           | 0.41%<br>(-0.3-1.6%)                 | 0.41%<br>(-0.42-1.8%)               | 67<br>(-64-280)           | 260<br>(-180-980)              |
| Low-middle SDI | 1990 | Male   | All Ages | 17%<br>(15-20%)                | 83%<br>(80-85%)          | 0.76<br>(0.6-0.96)                          | 2.2%<br>(1.7-2.7%)                   | 3.1%<br>(2.2-4.1%)                  | 240000<br>(170000-320000) | 10000000<br>(7900000-13000000) |
| Low-middle SDI | 1990 | Male   | 15 to 19 | 10%<br>(6.9-15%)               | 90%<br>(85-93%)          | 0.36<br>(0.19-0.61)                         | 1.5%<br>(0.93-2.2%)                  | 1.6%<br>(0.84-2.6%)                 | 2100<br>(1100-3500)       | 220000<br>(140000-340000)      |
| Low-middle SDI | 1990 | Male   | 20 to 24 | 18%<br>(12-24%)                | 82%<br>(76-88%)          | 0.85<br>(0.47-1.4)                          | 4%<br>(2.7-5.7%)                     | 4.2%<br>(2.5-6.5%)                  | 7500<br>(4300-11000)      | 680000<br>(440000-970000)      |
| Low-middle SDI | 1990 | Male   | 25 to 29 | 25%<br>(18-33%)                | 75%<br>(67-82%)          | 1.3<br>(0.79-2)                             | 6%<br>(4.2-8.2%)                     | 6.7%<br>(4.2-9.7%)                  | 13000<br>(7800-18000)     | 1000000<br>(690000-1400000)    |
| Low-middle SDI | 1990 | Male   | 30 to 34 | 31%<br>(22-40%)                | 69%<br>(60-78%)          | 1.6<br>(1-2.4)                              | 7.5%<br>(5.4-9.9%)                   | 8.8%<br>(5.9-12%)                   | 18000<br>(12000-25000)    | 1200000<br>(870000-1600000)    |
| Low-middle SDI | 1990 | Male   | 35 to 39 | 34%<br>(25-42%)                | 66%<br>(58-75%)          | 1.8<br>(1.1-2.7)                            | 7.9%<br>(5.7-11%)                    | 9.6%<br>(6.5-13%)                   | 21000<br>(14000-29000)    | 1200000<br>(890000-1600000)    |
| Low-middle SDI | 1990 | Male   | 40 to 44 | 34%<br>(26-42%)                | 66%<br>(58-74%)          | 1.9<br>(1.1-2.8)                            | 8%<br>(5.7-11%)                      | 9.8%<br>(6.7-13%)                   | 22000<br>(15000-30000)    | 1100000<br>(800000-1500000)    |
| Low-middle SDI | 1990 | Male   | 45 to 49 | 32%<br>(23-40%)                | 68%<br>(60-77%)          | 1.8<br>(1.1-2.9)                            | 7.7%<br>(5.3-11%)                    | 9.5%<br>(6.4-13%)                   | 25000<br>(17000-35000)    | 1100000<br>(780000-1600000)    |
| Low-middle SDI | 1990 | Male   | 50 to 54 | 30%<br>(23-39%)                | 70%<br>(61-77%)          | 1.7<br>(1-2.7)                              | 6.9%<br>(4.5-9.6%)                   | 8.4%<br>(5.4-12%)                   | 27000<br>(17000-39000)    | 1100000<br>(690000-1500000)    |

| Location       | Year | Sex    | Age      | Prevalence of current drinkers | Prevalence of abstainers | Population average of standard drinks daily | Percent of total attributable deaths | Percent of total attributable DALYs | Attributable deaths    | Attributable DALYs           |
|----------------|------|--------|----------|--------------------------------|--------------------------|---------------------------------------------|--------------------------------------|-------------------------------------|------------------------|------------------------------|
| Low-middle SDI | 1990 | Male   | 55 to 59 | 29%<br>(21-37%)                | 71%<br>(63-79%)          | 1.6<br>(0.94-2.5)                           | 6%<br>(4-8.4%)                       | 7.2%<br>(4.8-10%)                   | 28000<br>(18000-40000) | 940000<br>(620000-1300000)   |
| Low-middle SDI | 1990 | Male   | 60 to 64 | 27%<br>(20-36%)                | 73%<br>(64-80%)          | 1.4<br>(0.79-2.3)                           | 4.8%<br>(2.9-7.1%)                   | 5.6%<br>(3.4-8.5%)                  | 26000<br>(15000-40000) | 740000<br>(450000-1100000)   |
| Low-middle SDI | 1990 | Male   | 65 to 69 | 26%<br>(19-33%)                | 74%<br>(67-81%)          | 1.2<br>(0.73-1.9)                           | 3.8%<br>(2.2-5.7%)                   | 4.5%<br>(2.6-6.7%)                  | 22000<br>(12000-33000) | 510000<br>(290000-760000)    |
| Low-middle SDI | 1990 | Male   | 70 to 74 | 24%<br>(17-31%)                | 76%<br>(69-83%)          | 1<br>(0.57-1.6)                             | 2.9%<br>(1.5-4.6%)                   | 3.3%<br>(1.7-5.4%)                  | 16000<br>(7900-26000)  | 300000<br>(150000-480000)    |
| Low-middle SDI | 1990 | Male   | 75 to 79 | 21%<br>(14-28%)                | 79%<br>(72-86%)          | 0.77<br>(0.4-1.3)                           | 2%<br>(0.91-3.4%)                    | 2.3%<br>(0.98-3.9%)                 | 8900<br>(3800-16000)   | 130000<br>(58000-220000)     |
| Low-middle SDI | 1990 | Male   | 80 to 84 | 18%<br>(12-25%)                | 82%<br>(75-88%)          | 0.6<br>(0.33-0.98)                          | 1.3%<br>(0.55-2.4%)                  | 1.5%<br>(0.58-2.7%)                 | 3800<br>(1500-7000)    | 42000<br>(17000-75000)       |
| Low-middle SDI | 1990 | Male   | 85 to 89 | 18%<br>(12-25%)                | 82%<br>(75-88%)          | 0.52<br>(0.28-0.87)                         | 0.95%<br>(0.33-1.8%)                 | 1%<br>(0.3-2%)                      | 1500<br>(430-2900)     | 12000<br>(4100-23000)        |
| Low-middle SDI | 1990 | Male   | 90 to 94 | 19%<br>(13-26%)                | 81%<br>(74-87%)          | 0.5<br>(0.25-0.87)                          | 0.67%<br>(0.12-1.4%)                 | 0.68%<br>(0.042-1.6%)               | 360<br>(20-830)        | 2100<br>(380-4500)           |
| Low-middle SDI | 1990 | Male   | 95 plus  | 21%<br>(13-31%)                | 79%<br>(69-87%)          | 0.49<br>(0.2-0.93)                          | 0.59%<br>(0.0079-1.4%)               | 0.54%<br>(-0.14-1.5%)               | 66<br>(-17-190)        | 290<br>(3.4-710)             |
| Low-middle SDI | 1995 | Female | All Ages | 6.4%<br>(5.4-7.6%)             | 94%<br>(92-95%)          | 0.18<br>(0.14-0.23)                         | 0.53%<br>(0.39-0.7%)                 | 0.86%<br>(0.54-1.2%)                | 64000<br>(40000-93000) | 2500000<br>(1800000-3300000) |
| Low-middle SDI | 1995 | Female | 15 to 19 | 5.6%<br>(3.7-8%)               | 94%<br>(92-96%)          | 0.15<br>(0.073-0.26)                        | 0.46%<br>(0.26-0.75%)                | 0.46%<br>(0.18-0.92%)               | 590<br>(220-1200)      | 80000<br>(43000-130000)      |
| Low-middle SDI | 1995 | Female | 20 to 24 | 6.9%<br>(4.5-9.6%)             | 93%<br>(90-95%)          | 0.23<br>(0.12-0.39)                         | 0.84%<br>(0.51-1.3%)                 | 0.74%<br>(0.32-1.3%)                | 1300<br>(560-2300)     | 160000<br>(95000-250000)     |
| Low-middle SDI | 1995 | Female | 25 to 29 | 7.4%<br>(4.9-10%)              | 93%<br>(90-95%)          | 0.27<br>(0.14-0.46)                         | 1%<br>(0.65-1.5%)                    | 1%<br>(0.5-1.7%)                    | 1900<br>(930-3300)     | 190000<br>(120000-290000)    |
| Low-middle SDI | 1995 | Female | 30 to 34 | 8%<br>(5.3-11%)                | 92%<br>(89-95%)          | 0.31<br>(0.17-0.52)                         | 1.2%<br>(0.81-1.7%)                  | 1.4%<br>(0.8-2.2%)                  | 2600<br>(1500-4100)    | 210000<br>(130000-300000)    |
| Low-middle SDI | 1995 | Female | 35 to 39 | 8.7%<br>(5.9-12%)              | 91%<br>(88-94%)          | 0.34<br>(0.18-0.56)                         | 1.4%<br>(0.97-2.1%)                  | 1.8%<br>(1.1-2.8%)                  | 3500<br>(2100-5500)    | 230000<br>(150000-330000)    |
| Low-middle SDI | 1995 | Female | 40 to 44 | 9.1%<br>(6.4-12%)              | 91%<br>(88-94%)          | 0.35<br>(0.19-0.59)                         | 1.6%<br>(1-2.2%)                     | 2.1%<br>(1.3-3.1%)                  | 4200<br>(2600-6400)    | 230000<br>(150000-340000)    |
| Low-middle SDI | 1995 | Female | 45 to 49 | 9.5%<br>(6.4-13%)              | 90%<br>(87-94%)          | 0.35<br>(0.17-0.61)                         | 1.6%<br>(1.1-2.4%)                   | 2.2%<br>(1.3-3.3%)                  | 4700<br>(2800-7300)    | 230000<br>(140000-330000)    |
| Low-middle SDI | 1995 | Female | 50 to 54 | 9.9%<br>(7-14%)                | 90%<br>(86-93%)          | 0.37<br>(0.19-0.64)                         | 1.7%<br>(1.1-2.6%)                   | 2.3%<br>(1.4-3.5%)                  | 6100<br>(3600-9500)    | 250000<br>(150000-370000)    |
| Low-middle SDI | 1995 | Female | 55 to 59 | 9.9%<br>(6.9-14%)              | 90%<br>(86-93%)          | 0.43<br>(0.21-0.74)                         | 1.7%<br>(1-2.7%)                     | 2.2%<br>(1.3-3.5%)                  | 7600<br>(4300-12000)   | 260000<br>(150000-410000)    |
| Low-middle SDI | 1995 | Female | 60 to 64 | 9.8%<br>(6.6-14%)              | 90%<br>(86-93%)          | 0.43<br>(0.21-0.77)                         | 1.5%<br>(0.8-2.4%)                   | 1.9%<br>(0.97-3.1%)                 | 7800<br>(4000-13000)   | 220000<br>(120000-370000)    |

| Location       | Year | Sex    | Age      | Prevalence of current drinkers | Prevalence of abstainers | Population average of standard drinks daily | Percent of total attributable deaths | Percent of total attributable DALYs | Attributable deaths       | Attributable DALYs           |
|----------------|------|--------|----------|--------------------------------|--------------------------|---------------------------------------------|--------------------------------------|-------------------------------------|---------------------------|------------------------------|
| Low-middle SDI | 1995 | Female | 65 to 69 | 10%<br>(6.7-14%)               | 90%<br>(86-93%)          | 0.4<br>(0.2-0.69)                           | 1.3%<br>(0.66-2.2%)                  | 1.6%<br>(0.78-2.7%)                 | 7800<br>(3900-13000)      | 180000<br>(92000-300000)     |
| Low-middle SDI | 1995 | Female | 70 to 74 | 10%<br>(6.9-15%)               | 90%<br>(85-93%)          | 0.36<br>(0.18-0.65)                         | 1.1%<br>(0.42-2%)                    | 1.3%<br>(0.5-2.4%)                  | 6600<br>(2600-12000)      | 120000<br>(49000-230000)     |
| Low-middle SDI | 1995 | Female | 75 to 79 | 10%<br>(6.5-15%)               | 90%<br>(85-93%)          | 0.34<br>(0.15-0.66)                         | 0.8%<br>(0.23-1.6%)                  | 0.94%<br>(0.26-2%)                  | 4400<br>(1200-9100)       | 63000<br>(18000-130000)      |
| Low-middle SDI | 1995 | Female | 80 to 84 | 11%<br>(6.5-16%)               | 89%<br>(84-94%)          | 0.36<br>(0.16-0.7)                          | 0.65%<br>(0.14-1.4%)                 | 0.75%<br>(0.15-1.7%)                | 2700<br>(550-6000)        | 29000<br>(6500-63000)        |
| Low-middle SDI | 1995 | Female | 85 to 89 | 12%<br>(7.3-19%)               | 88%<br>(81-93%)          | 0.41<br>(0.18-0.81)                         | 0.55%<br>(0.049-1.3%)                | 0.63%<br>(0.032-1.5%)               | 1300<br>(66-3300)         | 10000<br>(920-24000)         |
| Low-middle SDI | 1995 | Female | 90 to 94 | 14%<br>(8.7-23%)               | 86%<br>(77-91%)          | 0.49<br>(0.2-0.99)                          | 0.48%<br>(-0.067-1.4%)               | 0.53%<br>(-0.12-1.6%)               | 430<br>(-99-1300)         | 2300<br>(-320-6600)          |
| Low-middle SDI | 1995 | Female | 95 plus  | 17%<br>(9.6-28%)               | 83%<br>(72-90%)          | 0.58<br>(0.2-1.3)                           | 0.49%<br>(-0.21-1.6%)                | 0.5%<br>(-0.32-1.9%)                | 110<br>(-69-390)          | 410<br>(-180-1400)           |
| Low-middle SDI | 1995 | Male   | All Ages | 17%<br>(15-19%)                | 83%<br>(81-85%)          | 0.91<br>(0.72-1.1)                          | 2.6%<br>(2.1-3.2%)                   | 3.6%<br>(2.7-4.6%)                  | 300000<br>(220000-390000) | 1300000<br>(1000000-1600000) |
| Low-middle SDI | 1995 | Male   | 15 to 19 | 8.5%<br>(5.7-12%)              | 92%<br>(88-94%)          | 0.34<br>(0.18-0.57)                         | 1.4%<br>(0.92-2.1%)                  | 1.5%<br>(0.85-2.5%)                 | 2200<br>(1200-3500)       | 240000<br>(150000-360000)    |
| Low-middle SDI | 1995 | Male   | 20 to 24 | 16%<br>(12-21%)                | 84%<br>(79-88%)          | 0.89<br>(0.51-1.4)                          | 4%<br>(2.7-5.5%)                     | 4.2%<br>(2.6-6.2%)                  | 8300<br>(5000-13000)      | 760000<br>(500000-1100000)   |
| Low-middle SDI | 1995 | Male   | 25 to 29 | 24%<br>(18-30%)                | 76%<br>(70-82%)          | 1.5<br>(0.92-2.2)                           | 6%<br>(4.3-8%)                       | 6.7%<br>(4.3-9.5%)                  | 15000<br>(9400-21000)     | 1100000<br>(810000-1500000)  |
| Low-middle SDI | 1995 | Male   | 30 to 34 | 29%<br>(23-36%)                | 71%<br>(64-77%)          | 1.9<br>(1.2-2.8)                            | 7.6%<br>(5.6-10%)                    | 9%<br>(6.2-12%)                     | 21000<br>(15000-29000)    | 1500000<br>(1100000-1900000) |
| Low-middle SDI | 1995 | Male   | 35 to 39 | 33%<br>(26-40%)                | 67%<br>(60-74%)          | 2.2<br>(1.4-3.1)                            | 8.2%<br>(6.1-11%)                    | 10%<br>(7.1-13%)                    | 26000<br>(18000-34000)    | 1500000<br>(1100000-2000000) |
| Low-middle SDI | 1995 | Male   | 40 to 44 | 34%<br>(28-41%)                | 66%<br>(59-72%)          | 2.3<br>(1.4-3.3)                            | 8.5%<br>(6.3-11%)                    | 10%<br>(7.5-14%)                    | 30000<br>(21000-39000)    | 1500000<br>(1100000-2000000) |
| Low-middle SDI | 1995 | Male   | 45 to 49 | 33%<br>(26-39%)                | 67%<br>(61-74%)          | 2.3<br>(1.4-3.4)                            | 8.3%<br>(6-11%)                      | 10%<br>(7.1-14%)                    | 31000<br>(22000-42000)    | 1400000<br>(1000000-1800000) |
| Low-middle SDI | 1995 | Male   | 50 to 54 | 31%<br>(25-37%)                | 69%<br>(63-75%)          | 2.2<br>(1.3-3.3)                            | 7.5%<br>(5.2-10%)                    | 9.2%<br>(6.2-12%)                   | 33000<br>(22000-45000)    | 1300000<br>(870000-1700000)  |
| Low-middle SDI | 1995 | Male   | 55 to 59 | 29%<br>(23-36%)                | 71%<br>(64-77%)          | 2<br>(1.2-3)                                | 6.7%<br>(4.6-9.1%)                   | 8.1%<br>(5.5-11%)                   | 35000<br>(23000-49000)    | 1200000<br>(810000-1600000)  |

| Location       | Year | Sex    | Age      | Prevalence of current drinkers | Prevalence of abstainers | Population average of standard drinks daily | Percent of total attributable deaths | Percent of total attributable DALYs | Attributable deaths     | Attributable DALYs           |
|----------------|------|--------|----------|--------------------------------|--------------------------|---------------------------------------------|--------------------------------------|-------------------------------------|-------------------------|------------------------------|
| Low-middle SDI | 1995 | Male   | 60 to 64 | 27%<br>(21-34%)                | 73%<br>(66-79%)          | 1.7<br>(1-2.7)                              | 5.3%<br>(3.5-7.6%)                   | 6.2%<br>(4-9%)                      | 32000<br>(20000-47000)  | 920000<br>(600000-1300000)   |
| Low-middle SDI | 1995 | Male   | 65 to 69 | 25%<br>(19-31%)                | 75%<br>(69-81%)          | 1.5<br>(0.88-2.2)                           | 4.3%<br>(2.7-6.1%)                   | 5%<br>(3.1-7.2%)                    | 28000<br>(17000-40000)  | 650000<br>(410000-940000)    |
| Low-middle SDI | 1995 | Male   | 70 to 74 | 23%<br>(18-29%)                | 77%<br>(71-82%)          | 1.2<br>(0.7-1.8)                            | 3.2%<br>(1.8-5%)                     | 3.7%<br>(2.1-5.8%)                  | 20000<br>(11000-32000)  | 380000<br>(220000-590000)    |
| Low-middle SDI | 1995 | Male   | 75 to 79 | 20%<br>(15-26%)                | 80%<br>(74-85%)          | 0.91<br>(0.51-1.5)                          | 2.3%<br>(1.1-3.7%)                   | 2.6%<br>(1.2-4.3%)                  | 12000<br>(5600-20000)   | 170000<br>(86000-280000)     |
| Low-middle SDI | 1995 | Male   | 80 to 84 | 18%<br>(13-23%)                | 82%<br>(77-87%)          | 0.72<br>(0.42-1.2)                          | 1.6%<br>(0.74-2.6%)                  | 1.8%<br>(0.8-3%)                    | 5400<br>(2400-9100)     | 59000<br>(28000-98000)       |
| Low-middle SDI | 1995 | Male   | 85 to 89 | 18%<br>(13-24%)                | 82%<br>(76-87%)          | 0.65<br>(0.37-1)                            | 1.1%<br>(0.48-2.1%)                  | 1.3%<br>(0.48-2.3%)                 | 2200<br>(830-4100)      | 18000<br>(7300-31000)        |
| Low-middle SDI | 1995 | Male   | 90 to 94 | 19%<br>(13-25%)                | 81%<br>(75-87%)          | 0.61<br>(0.33-1)                            | 0.81%<br>(0.24-1.6%)                 | 0.84%<br>(0.16-1.8%)                | 560<br>(110-1200)       | 3300<br>(970-6500)           |
| Low-middle SDI | 1995 | Male   | 95 plus  | 21%<br>(14-29%)                | 79%<br>(71-86%)          | 0.59<br>(0.26-1.1)                          | 0.7%<br>(0.087-1.6%)                 | 0.65%<br>(-0.054-1.7%)              | 100<br>(-9.1-270)       | 450<br>(54-1000)             |
| Low-middle SDI | 2000 | Female | All Ages | 6.4%<br>(5.4-7.5%)             | 94%<br>(92-95%)          | 0.19<br>(0.14-0.24)                         | 0.56%<br>(0.41-0.73%)                | 0.87%<br>(0.55-1.3%)                | 68000<br>(42000-100000) | 2600000<br>(1900000-3600000) |
| Low-middle SDI | 2000 | Female | 15 to 19 | 5.7%<br>(3.9-8.1%)             | 94%<br>(92-96%)          | 0.15<br>(0.079-0.27)                        | 0.48%<br>(0.27-0.76%)                | 0.47%<br>(0.19-0.91%)               | 640<br>(250-1300)       | 89000<br>(50000-150000)      |
| Low-middle SDI | 2000 | Female | 20 to 24 | 6.9%<br>(4.7-9.5%)             | 93%<br>(91-95%)          | 0.23<br>(0.12-0.39)                         | 0.84%<br>(0.52-1.3%)                 | 0.7%<br>(0.32-1.3%)                 | 1300<br>(600-2400)      | 180000<br>(100000-270000)    |
| Low-middle SDI | 2000 | Female | 25 to 29 | 7.4%<br>(5.2-10%)              | 93%<br>(90-95%)          | 0.28<br>(0.15-0.45)                         | 0.98%<br>(0.64-1.4%)                 | 0.91%<br>(0.46-1.5%)                | 1900<br>(990-3300)      | 200000<br>(130000-300000)    |
| Low-middle SDI | 2000 | Female | 30 to 34 | 7.8%<br>(5.4-11%)              | 92%<br>(89-95%)          | 0.31<br>(0.17-0.5)                          | 1.1%<br>(0.78-1.6%)                  | 1.2%<br>(0.75-1.9%)                 | 2600<br>(1500-4200)     | 220000<br>(140000-320000)    |
| Low-middle SDI | 2000 | Female | 35 to 39 | 8.3%<br>(5.8-11%)              | 92%<br>(89-94%)          | 0.33<br>(0.18-0.53)                         | 1.3%<br>(0.93-1.9%)                  | 1.7%<br>(1.1-2.5%)                  | 3700<br>(2300-5600)     | 250000<br>(170000-350000)    |
| Low-middle SDI | 2000 | Female | 40 to 44 | 8.7%<br>(6.3-11%)              | 91%<br>(89-94%)          | 0.34<br>(0.18-0.56)                         | 1.4%<br>(0.98-2%)                    | 1.9%<br>(1.2-2.8%)                  | 4400<br>(2700-6600)     | 250000<br>(170000-360000)    |
| Low-middle SDI | 2000 | Female | 45 to 49 | 8.8%<br>(6.1-12%)              | 91%<br>(88-94%)          | 0.33<br>(0.17-0.57)                         | 1.5%<br>(0.99-2.1%)                  | 2%<br>(1.3-3%)                      | 5200<br>(3100-8000)     | 250000<br>(160000-370000)    |
| Low-middle SDI | 2000 | Female | 50 to 54 | 9.4%<br>(6.6-13%)              | 91%<br>(87-93%)          | 0.36<br>(0.18-0.62)                         | 1.6%<br>(1-2.4%)                     | 2.1%<br>(1.3-3.2%)                  | 6300<br>(3800-9900)     | 260000<br>(160000-390000)    |
| Low-middle SDI | 2000 | Female | 55 to 59 | 9.4%<br>(6.4-13%)              | 91%<br>(87-94%)          | 0.42<br>(0.21-0.73)                         | 1.6%<br>(0.98-2.5%)                  | 2.1%<br>(1.2-3.3%)                  | 7800<br>(4300-12000)    | 260000<br>(150000-410000)    |
| Low-middle SDI | 2000 | Female | 60 to 64 | 9.3%<br>(6.2-13%)              | 91%<br>(87-94%)          | 0.42<br>(0.2-0.75)                          | 1.4%<br>(0.76-2.3%)                  | 1.8%<br>(0.92-2.9%)                 | 8200<br>(4200-14000)    | 240000<br>(120000-390000)    |
| Low-middle SDI | 2000 | Female | 65 to 69 | 9.3%<br>(6.2-13%)              | 91%<br>(87-94%)          | 0.38<br>(0.19-0.66)                         | 1.2%<br>(0.65-2.1%)                  | 1.5%<br>(0.78-2.5%)                 | 8500<br>(4300-14000)    | 200000<br>(100000-330000)    |
| Low-middle SDI | 2000 | Female | 70 to 74 | 9.6%<br>(6.4-14%)              | 90%<br>(86-94%)          | 0.35<br>(0.17-0.64)                         | 1%<br>(0.41-1.8%)                    | 1.2%<br>(0.48-2.2%)                 | 7200<br>(2800-13000)    | 130000<br>(54000-250000)     |



| Location       | Year | Sex    | Age      | Prevalence of current drinkers | Prevalence of abstainers | Population average of standard drinks daily | Percent of total attributable deaths | Percent of total attributable DALYs | Attributable deaths       | Attributable DALYs           |
|----------------|------|--------|----------|--------------------------------|--------------------------|---------------------------------------------|--------------------------------------|-------------------------------------|---------------------------|------------------------------|
| Low-middle SDI | 2000 | Female | 75 to 79 | 9.7%<br>(6.1-15%)              | 90%<br>(85-94%)          | 0.33<br>(0.15-0.64)                         | 0.76%<br>(0.22-1.5%)                 | 0.9%<br>(0.25-1.8%)                 | 4800<br>(1300-9800)       | 69000<br>(20000-140000)      |
| Low-middle SDI | 2000 | Female | 80 to 84 | 9.9%<br>(5.9-15%)              | 90%<br>(85-94%)          | 0.34<br>(0.15-0.68)                         | 0.62%<br>(0.15-1.3%)                 | 0.72%<br>(0.16-1.6%)                | 3000<br>(660-6500)        | 32000<br>(7800-69000)        |
| Low-middle SDI | 2000 | Female | 85 to 89 | 11%<br>(6.6-18%)               | 89%<br>(82-93%)          | 0.39<br>(0.17-0.8)                          | 0.53%<br>(0.061-1.2%)                | 0.6%<br>(0.051-1.4%)                | 1500<br>(120-3600)        | 12000<br>(1300-27000)        |
| Low-middle SDI | 2000 | Female | 90 to 94 | 13%<br>(7.8-21%)               | 87%<br>(79-92%)          | 0.47<br>(0.2-0.94)                          | 0.46%<br>(-0.048-1.3%)               | 0.51%<br>(-0.099-1.5%)              | 500<br>(-100-1400)        | 2800<br>(-290-7600)          |
| Low-middle SDI | 2000 | Female | 95 plus  | 16%<br>(8.6-27%)               | 84%<br>(73-91%)          | 0.56<br>(0.2-1.2)                           | 0.46%<br>(-0.17-1.5%)                | 0.47%<br>(-0.27-1.7%)               | 130<br>(-76-460)          | 490<br>(-190-1600)           |
| Low-middle SDI | 2000 | Male   | All Ages | 18%<br>(16-20%)                | 82%<br>(80-84%)          | 1<br>(0.83-1.3)                             | 2.9%<br>(2.4-3.5%)                   | 3.8%<br>(2.9-4.8%)                  | 340000<br>(250000-430000) | 1500000<br>(1200000-1800000) |
| Low-middle SDI | 2000 | Male   | 15 to 19 | 11%<br>(8.1-15%)               | 89%<br>(85-92%)          | 0.48<br>(0.27-0.78)                         | 1.8%<br>(1.2-2.6%)                   | 2%<br>(1.1-3.1%)                    | 3200<br>(1800-5100)       | 340000<br>(220000-500000)    |
| Low-middle SDI | 2000 | Male   | 20 to 24 | 21%<br>(16-26%)                | 79%<br>(74-84%)          | 1.3<br>(0.77-1.9)                           | 4.9%<br>(3.5-6.7%)                   | 5.3%<br>(3.4-7.7%)                  | 12000<br>(7400-17000)     | 1000000<br>(720000-1400000)  |
| Low-middle SDI | 2000 | Male   | 25 to 29 | 28%<br>(22-33%)                | 72%<br>(67-78%)          | 1.9<br>(1.2-2.7)                            | 6.7%<br>(4.9-8.8%)                   | 7.4%<br>(5-10%)                     | 19000<br>(13000-26000)    | 1500000<br>(1100000-1900000) |
| Low-middle SDI | 2000 | Male   | 30 to 34 | 31%<br>(25-37%)                | 69%<br>(63-75%)          | 2.1<br>(1.4-3.1)                            | 7.7%<br>(5.9-9.9%)                   | 8.9%<br>(6.4-12%)                   | 25000<br>(18000-34000)    | 1700000<br>(1300000-2200000) |
| Low-middle SDI | 2000 | Male   | 35 to 39 | 33%<br>(27-38%)                | 67%<br>(62-73%)          | 2.3<br>(1.5-3.3)                            | 8%<br>(6-10%)                        | 9.5%<br>(6.9-12%)                   | 30000<br>(21000-39000)    | 1800000<br>(1300000-2200000) |
| Low-middle SDI | 2000 | Male   | 40 to 44 | 33%<br>(27-39%)                | 67%<br>(61-73%)          | 2.4<br>(1.5-3.4)                            | 8.1%<br>(6.1-10%)                    | 9.9%<br>(7.2-13%)                   | 34000<br>(24000-44000)    | 1800000<br>(1300000-2200000) |
| Low-middle SDI | 2000 | Male   | 45 to 49 | 32%<br>(26-38%)                | 68%<br>(62-74%)          | 2.4<br>(1.5-3.5)                            | 8%<br>(5.9-11%)                      | 9.8%<br>(7-13%)                     | 38000<br>(27000-50000)    | 1700000<br>(1200000-2200000) |
| Low-middle SDI | 2000 | Male   | 50 to 54 | 30%<br>(24-36%)                | 70%<br>(64-76%)          | 2.2<br>(1.3-3.3)                            | 7.3%<br>(5.1-9.7%)                   | 8.9%<br>(6-12%)                     | 36000<br>(24000-49000)    | 1400000<br>(970000-1900000)  |
| Low-middle SDI | 2000 | Male   | 55 to 59 | 27%<br>(21-33%)                | 73%<br>(67-79%)          | 1.9<br>(1.2-3)                              | 6.3%<br>(4.4-8.5%)                   | 7.6%<br>(5.2-10%)                   | 35000<br>(23000-49000)    | 1200000<br>(820000-1600000)  |
| Low-middle SDI | 2000 | Male   | 60 to 64 | 24%<br>(18-31%)                | 76%<br>(69-82%)          | 1.6<br>(0.94-2.6)                           | 5%<br>(3.3-7.1%)                     | 5.8%<br>(3.8-8.4%)                  | 33000<br>(21000-48000)    | 950000<br>(620000-1400000)   |
| Low-middle SDI | 2000 | Male   | 65 to 69 | 22%<br>(16-28%)                | 78%<br>(72-84%)          | 1.4<br>(0.81-2.1)                           | 4%<br>(2.6-5.7%)                     | 4.7%<br>(3-6.7%)                    | 29000<br>(18000-42000)    | 680000<br>(440000-980000)    |

| Location       | Year | Sex    | Age      | Prevalence of current drinkers | Prevalence of abstainers | Population average of standard drinks daily | Percent of total attributable deaths | Percent of total attributable DALYs | Attributable deaths     | Attributable DALYs           |
|----------------|------|--------|----------|--------------------------------|--------------------------|---------------------------------------------|--------------------------------------|-------------------------------------|-------------------------|------------------------------|
| Low-middle SDI | 2000 | Male   | 70 to 74 | 20%<br>(15-26%)                | 80%<br>(74-85%)          | 1.1<br>(0.64-1.8)                           | 3%<br>(1.8-4.6%)                     | 3.5%<br>(2-5.4%)                    | 21000<br>(12000-34000)  | 410000<br>(240000-630000)    |
| Low-middle SDI | 2000 | Male   | 75 to 79 | 17%<br>(12-23%)                | 83%<br>(77-88%)          | 0.82<br>(0.44-1.4)                          | 2.1%<br>(1.1-3.4%)                   | 2.4%<br>(1.2-3.9%)                  | 13000<br>(6300-21000)   | 190000<br>(97000-300000)     |
| Low-middle SDI | 2000 | Male   | 80 to 84 | 15%<br>(9.9-20%)               | 85%<br>(80-90%)          | 0.63<br>(0.35-1)                            | 1.4%<br>(0.73-2.4%)                  | 1.6%<br>(0.77-2.7%)                 | 5900<br>(2800-10000)    | 65000<br>(32000-110000)      |
| Low-middle SDI | 2000 | Male   | 85 to 89 | 15%<br>(9.8-21%)               | 85%<br>(79-90%)          | 0.57<br>(0.31-0.94)                         | 1.1%<br>(0.48-1.9%)                  | 1.2%<br>(0.48-2.1%)                 | 2500<br>(990-4500)      | 20000<br>(8700-35000)        |
| Low-middle SDI | 2000 | Male   | 90 to 94 | 16%<br>(11-22%)                | 84%<br>(78-89%)          | 0.54<br>(0.28-0.94)                         | 0.77%<br>(0.26-1.5%)                 | 0.8%<br>(0.2-1.7%)                  | 650<br>(160-1400)       | 3800<br>(1300-7400)          |
| Low-middle SDI | 2000 | Male   | 95 plus  | 18%<br>(11-26%)                | 82%<br>(74-89%)          | 0.53<br>(0.22-0.99)                         | 0.67%<br>(0.12-1.5%)                 | 0.62%<br>(-0.0097-1.6%)             | 130<br>(-3-320)         | 540<br>(95-1200)             |
| Low-middle SDI | 2005 | Female | All Ages | 6.5%<br>(5.5-7.7%)             | 93%<br>(92-95%)          | 0.2<br>(0.15-0.25)                          | 0.57%<br>(0.42-0.75%)                | 0.86%<br>(0.54-1.2%)                | 67000<br>(41000-100000) | 2600000<br>(1900000-3500000) |
| Low-middle SDI | 2005 | Female | 15 to 19 | 5.8%<br>(3.9-8.2%)             | 94%<br>(92-96%)          | 0.16<br>(0.079-0.27)                        | 0.45%<br>(0.27-0.71%)                | 0.44%<br>(0.18-0.83%)               | 570<br>(230-1100)       | 86000<br>(49000-140000)      |
| Low-middle SDI | 2005 | Female | 20 to 24 | 6.9%<br>(4.8-9.6%)             | 93%<br>(90-95%)          | 0.24<br>(0.12-0.41)                         | 0.82%<br>(0.52-1.2%)                 | 0.68%<br>(0.32-1.2%)                | 1200<br>(580-2200)      | 180000<br>(110000-270000)    |
| Low-middle SDI | 2005 | Female | 25 to 29 | 7.5%<br>(5.3-10%)              | 92%<br>(90-95%)          | 0.29<br>(0.16-0.47)                         | 0.92%<br>(0.62-1.3%)                 | 0.85%<br>(0.45-1.4%)                | 1800<br>(940-3100)      | 200000<br>(130000-290000)    |
| Low-middle SDI | 2005 | Female | 30 to 34 | 8.1%<br>(5.6-11%)              | 92%<br>(89-94%)          | 0.32<br>(0.18-0.52)                         | 1%<br>(0.71-1.4%)                    | 1.1%<br>(0.71-1.8%)                 | 2500<br>(1400-3900)     | 210000<br>(140000-310000)    |
| Low-middle SDI | 2005 | Female | 35 to 39 | 8.4%<br>(5.9-11%)              | 92%<br>(89-94%)          | 0.34<br>(0.19-0.56)                         | 1.2%<br>(0.85-1.7%)                  | 1.6%<br>(1-2.3%)                    | 3500<br>(2100-5400)     | 240000<br>(160000-340000)    |
| Low-middle SDI | 2005 | Female | 40 to 44 | 8.6%<br>(6.2-11%)              | 91%<br>(89-94%)          | 0.35<br>(0.18-0.57)                         | 1.3%<br>(0.88-1.8%)                  | 1.7%<br>(1.2-2.5%)                  | 4300<br>(2700-6400)     | 250000<br>(160000-350000)    |
| Low-middle SDI | 2005 | Female | 45 to 49 | 8.8%<br>(6.1-12%)              | 91%<br>(88-94%)          | 0.33<br>(0.17-0.58)                         | 1.3%<br>(0.88-1.9%)                  | 1.8%<br>(1.2-2.7%)                  | 5100<br>(3100-7800)     | 250000<br>(160000-360000)    |
| Low-middle SDI | 2005 | Female | 50 to 54 | 8.9%<br>(6.3-12%)              | 91%<br>(88-94%)          | 0.36<br>(0.18-0.62)                         | 1.4%<br>(0.92-2.1%)                  | 1.9%<br>(1.2-2.9%)                  | 6300<br>(3700-9900)     | 260000<br>(160000-390000)    |
| Low-middle SDI | 2005 | Female | 55 to 59 | 9.3%<br>(6.4-13%)              | 91%<br>(87-94%)          | 0.43<br>(0.22-0.75)                         | 1.5%<br>(0.9-2.3%)                   | 2%<br>(1.1-3.1%)                    | 7500<br>(4100-12000)    | 260000<br>(150000-410000)    |
| Low-middle SDI | 2005 | Female | 60 to 64 | 9.1%<br>(6.1-13%)              | 91%<br>(87-94%)          | 0.43<br>(0.21-0.77)                         | 1.3%<br>(0.71-2.1%)                  | 1.7%<br>(0.87-2.7%)                 | 7800<br>(3900-13000)    | 230000<br>(120000-370000)    |
| Low-middle SDI | 2005 | Female | 65 to 69 | 9.2%<br>(6.2-13%)              | 91%<br>(87-94%)          | 0.39<br>(0.2-0.67)                          | 1.1%<br>(0.59-1.9%)                  | 1.4%<br>(0.71-2.4%)                 | 8400<br>(4100-14000)    | 200000<br>(100000-330000)    |
| Low-middle SDI | 2005 | Female | 70 to 74 | 9.2%<br>(6.2-13%)              | 91%<br>(87-94%)          | 0.35<br>(0.17-0.64)                         | 0.93%<br>(0.37-1.7%)                 | 1.1%<br>(0.44-2.1%)                 | 7400<br>(2800-14000)    | 140000<br>(55000-250000)     |
| Low-middle SDI | 2005 | Female | 75 to 79 | 9.2%<br>(5.8-14%)              | 91%<br>(86-94%)          | 0.33<br>(0.15-0.64)                         | 0.71%<br>(0.2-1.4%)                  | 0.85%<br>(0.23-1.7%)                | 5100<br>(1300-10000)    | 74000<br>(20000-150000)      |
| Low-middle SDI | 2005 | Female | 80 to 84 | 9.4%<br>(5.6-15%)              | 91%<br>(85-94%)          | 0.34<br>(0.15-0.66)                         | 0.59%<br>(0.14-1.2%)                 | 0.69%<br>(0.15-1.5%)                | 3300<br>(650-7200)      | 36000<br>(7800-77000)        |

| Location       | Year | Sex    | Age      | Prevalence of current drinkers | Prevalence of abstainers | Population average of standard drinks daily | Percent of total attributable deaths | Percent of total attributable DALYs | Attributable deaths       | Attributable DALYs           |
|----------------|------|--------|----------|--------------------------------|--------------------------|---------------------------------------------|--------------------------------------|-------------------------------------|---------------------------|------------------------------|
| Low-middle SDI | 2005 | Female | 85 to 89 | 10%<br>(6.2-17%)               | 90%<br>(83-94%)          | 0.38<br>(0.17-0.78)                         | 0.52%<br>(0.066-1.2%)                | 0.59%<br>(0.053-1.4%)               | 1800<br>(130-4200)        | 14000<br>(1600-32000)        |
| Low-middle SDI | 2005 | Female | 90 to 94 | 12%<br>(7.3-20%)               | 88%<br>(80-93%)          | 0.46<br>(0.19-0.91)                         | 0.46%<br>(-0.029-1.2%)               | 0.5%<br>(-0.078-1.4%)               | 600<br>(-100-1700)        | 3300<br>(-210-8800)          |
| Low-middle SDI | 2005 | Female | 95 plus  | 15%<br>(8-25%)                 | 85%<br>(75-92%)          | 0.55<br>(0.2-1.2)                           | 0.47%<br>(-0.15-1.5%)                | 0.48%<br>(-0.26-1.7%)               | 150<br>(-85-540)          | 600<br>(-200-1900)           |
| Low-middle SDI | 2005 | Male   | All Ages | 19%<br>(17-21%)                | 81%<br>(79-83%)          | 1.1<br>(0.89-1.4)                           | 3.2%<br>(2.6-3.9%)                   | 4%<br>(3.1-5%)                      | 370000<br>(280000-460000) | 1600000<br>(1300000-1900000) |
| Low-middle SDI | 2005 | Male   | 15 to 19 | 11%<br>(8.1-15%)               | 89%<br>(85-92%)          | 0.48<br>(0.27-0.79)                         | 1.8%<br>(1.2-2.5%)                   | 1.9%<br>(1.1-3%)                    | 3200<br>(1800-5200)       | 35000<br>(230000-510000)     |
| Low-middle SDI | 2005 | Male   | 20 to 24 | 21%<br>(16-26%)                | 79%<br>(74-84%)          | 1.3<br>(0.79-1.9)                           | 5%<br>(3.6-6.7%)                     | 5.4%<br>(3.5-7.8%)                  | 13000<br>(8100-18000)     | 110000<br>(78000-150000)     |
| Low-middle SDI | 2005 | Male   | 25 to 29 | 28%<br>(22-33%)                | 72%<br>(67-78%)          | 1.9<br>(1.2-2.7)                            | 6.6%<br>(4.9-8.6%)                   | 7.3%<br>(5-10%)                     | 20000<br>(14000-27000)    | 160000<br>(110000-200000)    |
| Low-middle SDI | 2005 | Male   | 30 to 34 | 31%<br>(25-38%)                | 69%<br>(62-75%)          | 2.2<br>(1.5-3.2)                            | 7.5%<br>(5.7-9.5%)                   | 8.6%<br>(6.3-11%)                   | 27000<br>(19000-35000)    | 180000<br>(140000-230000)    |
| Low-middle SDI | 2005 | Male   | 35 to 39 | 33%<br>(27-39%)                | 67%<br>(61-73%)          | 2.4<br>(1.6-3.4)                            | 7.8%<br>(6-9.9%)                     | 9.2%<br>(6.8-12%)                   | 32000<br>(24000-42000)    | 190000<br>(150000-240000)    |
| Low-middle SDI | 2005 | Male   | 40 to 44 | 33%<br>(27-39%)                | 67%<br>(61-73%)          | 2.4<br>(1.6-3.5)                            | 7.9%<br>(6-10%)                      | 9.5%<br>(7.1-12%)                   | 36000<br>(27000-47000)    | 190000<br>(140000-240000)    |
| Low-middle SDI | 2005 | Male   | 45 to 49 | 32%<br>(26-38%)                | 68%<br>(62-74%)          | 2.4<br>(1.5-3.6)                            | 7.8%<br>(5.8-10%)                    | 9.5%<br>(6.9-12%)                   | 40000<br>(29000-54000)    | 180000<br>(140000-240000)    |
| Low-middle SDI | 2005 | Male   | 50 to 54 | 30%<br>(24-36%)                | 70%<br>(64-76%)          | 2.3<br>(1.4-3.4)                            | 7.2%<br>(5.2-9.5%)                   | 8.7%<br>(6.1-12%)                   | 42000<br>(29000-57000)    | 170000<br>(120000-220000)    |
| Low-middle SDI | 2005 | Male   | 55 to 59 | 27%<br>(22-34%)                | 73%<br>(66-78%)          | 2<br>(1.3-3.1)                              | 6.4%<br>(4.5-8.5%)                   | 7.7%<br>(5.4-10%)                   | 38000<br>(26000-52000)    | 130000<br>(91000-170000)     |
| Low-middle SDI | 2005 | Male   | 60 to 64 | 25%<br>(19-32%)                | 75%<br>(68-81%)          | 1.7<br>(1-2.7)                              | 5.1%<br>(3.4-7.1%)                   | 6%<br>(3.9-8.4%)                    | 35000<br>(22000-50000)    | 100000<br>(66000-140000)     |
| Low-middle SDI | 2005 | Male   | 65 to 69 | 23%<br>(17-29%)                | 77%<br>(71-83%)          | 1.5<br>(0.88-2.2)                           | 4%<br>(2.6-5.7%)                     | 4.7%<br>(3-6.7%)                    | 31000<br>(20000-46000)    | 74000<br>(48000-110000)      |
| Low-middle SDI | 2005 | Male   | 70 to 74 | 21%<br>(16-27%)                | 79%<br>(73-84%)          | 1.2<br>(0.69-1.9)                           | 3%<br>(1.8-4.6%)                     | 3.5%<br>(2-5.4%)                    | 24000<br>(13000-36000)    | 45000<br>(26000-69000)       |

| Location       | Year | Sex    | Age      | Prevalence of current drinkers | Prevalence of abstainers | Population average of standard drinks daily | Percent of total attributable deaths | Percent of total attributable DALYs | Attributable deaths     | Attributable DALYs           |
|----------------|------|--------|----------|--------------------------------|--------------------------|---------------------------------------------|--------------------------------------|-------------------------------------|-------------------------|------------------------------|
| Low-middle SDI | 2005 | Male   | 75 to 79 | 18%<br>(13-24%)                | 82%<br>(76-87%)          | 0.89<br>(0.48-1.4)                          | 2.1%<br>(1.1-3.4%)                   | 2.4%<br>(1.2-3.9%)                  | 14000<br>(7100-24000)   | 210000<br>(110000-350000)    |
| Low-middle SDI | 2005 | Male   | 80 to 84 | 15%<br>(10-21%)                | 85%<br>(79-90%)          | 0.66<br>(0.37-1.1)                          | 1.5%<br>(0.73-2.4%)                  | 1.6%<br>(0.77-2.8%)                 | 7100<br>(3300-12000)    | 79000<br>(39000-130000)      |
| Low-middle SDI | 2005 | Male   | 85 to 89 | 15%<br>(9.7-21%)               | 85%<br>(79-90%)          | 0.59<br>(0.32-0.99)                         | 1.1%<br>(0.49-1.9%)                  | 1.2%<br>(0.5-2.1%)                  | 3000<br>(1200-5500)     | 24000<br>(11000-42000)       |
| Low-middle SDI | 2005 | Male   | 90 to 94 | 16%<br>(11-22%)                | 84%<br>(78-89%)          | 0.57<br>(0.29-0.97)                         | 0.8%<br>(0.27-1.6%)                  | 0.82%<br>(0.2-1.7%)                 | 800<br>(190-1700)       | 4700<br>(1600-9300)          |
| Low-middle SDI | 2005 | Male   | 95 plus  | 18%<br>(11-26%)                | 82%<br>(74-89%)          | 0.56<br>(0.24-1)                            | 0.63%<br>(0.14-1.6%)                 | 0.63%<br>(-0.011-1.6%)              | 150<br>(-3.8-400)       | 670<br>(130-1500)            |
| Low-middle SDI | 2010 | Female | All Ages | 7.3%<br>(6.1-8.7%)             | 93%<br>(91-94%)          | 0.22<br>(0.16-0.29)                         | 0.63%<br>(0.47-0.83%)                | 0.91%<br>(0.57-1.3%)                | 69000<br>(42000-100000) | 2700000<br>(1900000-3600000) |
| Low-middle SDI | 2010 | Female | 15 to 19 | 6.2%<br>(4.1-8.9%)             | 94%<br>(91-96%)          | 0.17<br>(0.078-0.31)                        | 0.47%<br>(0.28-0.73%)                | 0.43%<br>(0.17-0.82%)               | 510<br>(200-1000)       | 85000<br>(49000-140000)      |
| Low-middle SDI | 2010 | Female | 20 to 24 | 7.2%<br>(4.8-10%)              | 93%<br>(90-95%)          | 0.25<br>(0.12-0.45)                         | 0.88%<br>(0.57-1.3%)                 | 0.69%<br>(0.33-1.2%)                | 1100<br>(510-2000)      | 180000<br>(110000-270000)    |
| Low-middle SDI | 2010 | Female | 25 to 29 | 7.8%<br>(5.2-11%)              | 92%<br>(89-95%)          | 0.31<br>(0.16-0.53)                         | 0.99%<br>(0.67-1.4%)                 | 0.9%<br>(0.48-1.5%)                 | 1700<br>(890-2900)      | 210000<br>(140000-310000)    |
| Low-middle SDI | 2010 | Female | 30 to 34 | 8.2%<br>(5.6-11%)              | 92%<br>(89-94%)          | 0.34<br>(0.18-0.57)                         | 1.1%<br>(0.73-1.5%)                  | 1.2%<br>(0.7-1.8%)                  | 2300<br>(1300-3700)     | 220000<br>(140000-310000)    |
| Low-middle SDI | 2010 | Female | 35 to 39 | 8.7%<br>(5.9-12%)              | 91%<br>(88-94%)          | 0.36<br>(0.19-0.62)                         | 1.2%<br>(0.83-1.6%)                  | 1.5%<br>(0.99-2.2%)                 | 3300<br>(2000-5000)     | 240000<br>(160000-330000)    |
| Low-middle SDI | 2010 | Female | 40 to 44 | 8.7%<br>(6.1-12%)              | 91%<br>(88-94%)          | 0.36<br>(0.18-0.62)                         | 1.2%<br>(0.86-1.7%)                  | 1.7%<br>(1.1-2.5%)                  | 4000<br>(2500-6100)     | 240000<br>(160000-350000)    |
| Low-middle SDI | 2010 | Female | 45 to 49 | 8.7%<br>(5.8-12%)              | 91%<br>(88-94%)          | 0.35<br>(0.17-0.62)                         | 1.3%<br>(0.87-1.8%)                  | 1.8%<br>(1.1-2.7%)                  | 5000<br>(3100-7700)     | 250000<br>(160000-370000)    |
| Low-middle SDI | 2010 | Female | 50 to 54 | 9.1%<br>(6.2-13%)              | 91%<br>(87-94%)          | 0.38<br>(0.18-0.69)                         | 1.4%<br>(0.9-2.1%)                   | 1.9%<br>(1.2-2.9%)                  | 6600<br>(3900-10000)    | 270000<br>(170000-410000)    |
| Low-middle SDI | 2010 | Female | 55 to 59 | 9.2%<br>(6.2-13%)              | 91%<br>(87-94%)          | 0.46<br>(0.22-0.83)                         | 1.5%<br>(0.86-2.3%)                  | 2%<br>(1.1-3.1%)                    | 8000<br>(4400-13000)    | 280000<br>(160000-440000)    |
| Low-middle SDI | 2010 | Female | 60 to 64 | 9.6%<br>(6.3-14%)              | 90%<br>(86-94%)          | 0.48<br>(0.23-0.9)                          | 1.3%<br>(0.7-2.2%)                   | 1.7%<br>(0.87-2.9%)                 | 8200<br>(4100-14000)    | 240000<br>(120000-400000)    |
| Low-middle SDI | 2010 | Female | 65 to 69 | 9.5%<br>(6.2-14%)              | 90%<br>(86-94%)          | 0.43<br>(0.21-0.77)                         | 1.2%<br>(0.57-1.9%)                  | 1.5%<br>(0.7-2.5%)                  | 8500<br>(4100-15000)    | 200000<br>(100000-340000)    |
| Low-middle SDI | 2010 | Female | 70 to 74 | 9.1%<br>(6-13%)                | 91%<br>(87-94%)          | 0.37<br>(0.17-0.7)                          | 0.91%<br>(0.37-1.7%)                 | 1.1%<br>(0.44-2.1%)                 | 7700<br>(3000-14000)    | 150000<br>(58000-270000)     |
| Low-middle SDI | 2010 | Female | 75 to 79 | 8.3%<br>(5.1-13%)              | 92%<br>(87-95%)          | 0.32<br>(0.14-0.64)                         | 0.69%<br>(0.21-1.4%)                 | 0.83%<br>(0.24-1.7%)                | 5500<br>(1600-11000)    | 81000<br>(24000-160000)      |
| Low-middle SDI | 2010 | Female | 80 to 84 | 7.8%<br>(4.5-13%)              | 92%<br>(87-96%)          | 0.3<br>(0.13-0.61)                          | 0.57%<br>(0.15-1.2%)                 | 0.67%<br>(0.16-1.4%)                | 3800<br>(850-8200)      | 41000<br>(10000-87000)       |
| Low-middle SDI | 2010 | Female | 85 to 89 | 8.4%<br>(4.8-14%)              | 92%<br>(86-95%)          | 0.32<br>(0.14-0.65)                         | 0.47%<br>(0.067-1.1%)                | 0.54%<br>(0.052-1.3%)               | 2000<br>(160-4700)      | 16000<br>(2000-36000)        |

| Location       | Year | Sex    | Age      | Prevalence of current drinkers | Prevalence of abstainers | Population average of standard drinks daily | Percent of total attributable deaths | Percent of total attributable DALYs | Attributable deaths       | Attributable DALYs           |
|----------------|------|--------|----------|--------------------------------|--------------------------|---------------------------------------------|--------------------------------------|-------------------------------------|---------------------------|------------------------------|
| Low-middle SDI | 2010 | Female | 90 to 94 | 9.5%<br>(5.5-16%)              | 90%<br>(84-95%)          | 0.37<br>(0.15-0.75)                         | 0.42%<br>(-0.0035-1.1%)              | 0.46%<br>(-0.048-1.3%)              | 700<br>(-77-1900)         | 3900<br>(-41-10000)          |
| Low-middle SDI | 2010 | Female | 95 plus  | 11%<br>(5.9-20%)               | 89%<br>(80-94%)          | 0.43<br>(0.15-0.98)                         | 0.43%<br>(-0.098-1.3%)               | 0.44%<br>(-0.19-1.4%)               | 180<br>(-79-590)          | 720<br>(-160-2100)           |
| Low-middle SDI | 2010 | Male   | All Ages | 20%<br>(18-22%)                | 80%<br>(78-82%)          | 1.2<br>(0.93-1.6)                           | 3.5%<br>(2.8-4.2%)                   | 4.2%<br>(3.3-5.3%)                  | 390000<br>(290000-490000) | 1700000<br>(1300000-2000000) |
| Low-middle SDI | 2010 | Male   | 15 to 19 | 12%<br>(8.5-16%)               | 88%<br>(84-91%)          | 0.51<br>(0.28-0.85)                         | 1.7%<br>(1.1-2.5%)                   | 1.9%<br>(1.1-3.1%)                  | 3100<br>(1700-5100)       | 34000<br>(22000-50000)       |
| Low-middle SDI | 2010 | Male   | 20 to 24 | 22%<br>(18-27%)                | 78%<br>(73-82%)          | 1.4<br>(0.83-2.1)                           | 5%<br>(3.5-6.7%)                     | 5.6%<br>(3.6-8%)                    | 12000<br>(7900-18000)     | 110000<br>(77000-150000)     |
| Low-middle SDI | 2010 | Male   | 25 to 29 | 29%<br>(24-34%)                | 71%<br>(66-76%)          | 2<br>(1.3-3)                                | 6.8%<br>(5-8.8%)                     | 7.8%<br>(5.3-11%)                   | 21000<br>(14000-28000)    | 160000<br>(120000-210000)    |
| Low-middle SDI | 2010 | Male   | 30 to 34 | 32%<br>(26-37%)                | 68%<br>(63-74%)          | 2.3<br>(1.5-3.4)                            | 7.5%<br>(5.8-9.5%)                   | 8.7%<br>(6.4-11%)                   | 26000<br>(19000-35000)    | 180000<br>(140000-230000)    |
| Low-middle SDI | 2010 | Male   | 35 to 39 | 33%<br>(28-39%)                | 67%<br>(61-72%)          | 2.4<br>(1.6-3.5)                            | 7.7%<br>(5.9-9.7%)                   | 9.2%<br>(6.8-12%)                   | 32000<br>(24000-42000)    | 190000<br>(150000-250000)    |
| Low-middle SDI | 2010 | Male   | 40 to 44 | 33%<br>(28-38%)                | 67%<br>(62-72%)          | 2.5<br>(1.6-3.6)                            | 7.6%<br>(5.8-9.6%)                   | 9.3%<br>(6.9-12%)                   | 36000<br>(26000-47000)    | 190000<br>(140000-240000)    |
| Low-middle SDI | 2010 | Male   | 45 to 49 | 32%<br>(26-37%)                | 68%<br>(63-74%)          | 2.4<br>(1.5-3.7)                            | 7.5%<br>(5.6-9.7%)                   | 9.2%<br>(6.7-12%)                   | 41000<br>(30000-55000)    | 190000<br>(140000-250000)    |
| Low-middle SDI | 2010 | Male   | 50 to 54 | 30%<br>(25-36%)                | 70%<br>(64-75%)          | 2.3<br>(1.4-3.6)                            | 7%<br>(5-9.1%)                       | 8.5%<br>(6-11%)                     | 44000<br>(31000-59000)    | 170000<br>(120000-230000)    |
| Low-middle SDI | 2010 | Male   | 55 to 59 | 29%<br>(23-35%)                | 71%<br>(65-77%)          | 2.2<br>(1.3-3.4)                            | 6.3%<br>(4.4-8.3%)                   | 7.6%<br>(5.3-10%)                   | 44000<br>(30000-60000)    | 150000<br>(110000-200000)    |
| Low-middle SDI | 2010 | Male   | 60 to 64 | 28%<br>(21-35%)                | 72%<br>(65-79%)          | 1.9<br>(1.2-3.1)                            | 5.1%<br>(3.4-7.2%)                   | 6.1%<br>(3.9-8.6%)                  | 38000<br>(24000-54000)    | 110000<br>(71000-150000)     |
| Low-middle SDI | 2010 | Male   | 65 to 69 | 26%<br>(20-33%)                | 74%<br>(67-80%)          | 1.7<br>(1-2.6)                              | 4.1%<br>(2.6-5.9%)                   | 4.8%<br>(3-6.9%)                    | 33000<br>(20000-48000)    | 79000<br>(50000-110000)      |
| Low-middle SDI | 2010 | Male   | 70 to 74 | 24%<br>(18-31%)                | 76%<br>(69-82%)          | 1.4<br>(0.82-2.2)                           | 3.1%<br>(1.7-4.7%)                   | 3.6%<br>(2-5.6%)                    | 27000<br>(14000-42000)    | 51000<br>(28000-79000)       |
| Low-middle SDI | 2010 | Male   | 75 to 79 | 21%<br>(15-28%)                | 79%<br>(72-85%)          | 1.1<br>(0.6-1.8)                            | 2.2%<br>(1.1-3.6%)                   | 2.5%<br>(1.2-4.1%)                  | 17000<br>(7700-28000)     | 25000<br>(12000-41000)       |

| Location       | Year | Sex    | Age      | Prevalence of current drinkers | Prevalence of abstainers | Population average of standard drinks daily | Percent of total attributable deaths | Percent of total attributable DALYs | Attributable deaths     | Attributable DALYs        |
|----------------|------|--------|----------|--------------------------------|--------------------------|---------------------------------------------|--------------------------------------|-------------------------------------|-------------------------|---------------------------|
| Low-middle SDI | 2010 | Male   | 80 to 84 | 18%<br>(12-24%)                | 82%<br>(76-88%)          | 0.83<br>(0.45-1.3)                          | 1.5%<br>(0.69-2.5%)                  | 1.7%<br>(0.73-2.9%)                 | 8800<br>(3800-15000)    | 98000<br>(44000-170000)   |
| Low-middle SDI | 2010 | Male   | 85 to 89 | 17%<br>(11-25%)                | 83%<br>(75-89%)          | 0.7<br>(0.37-1.2)                           | 1.1%<br>(0.45-2%)                    | 1.2%<br>(0.42-2.2%)                 | 3800<br>(1300-7100)     | 31000<br>(12000-55000)    |
| Low-middle SDI | 2010 | Male   | 90 to 94 | 18%<br>(12-26%)                | 82%<br>(74-88%)          | 0.68<br>(0.34-1.2)                          | 0.79%<br>(0.2-1.6%)                  | 0.79%<br>(0.1-1.8%)                 | 990<br>(120-2200)       | 6000<br>(1500-12000)      |
| Low-middle SDI | 2010 | Male   | 95 plus  | 22%<br>(13-32%)                | 78%<br>(68-87%)          | 0.69<br>(0.29-1.3)                          | 0.68%<br>(0.035-1.6%)                | 0.6%<br>(-0.15-1.7%)                | 180<br>(-49-530)        | 830<br>(37-2000)          |
| Low-middle SDI | 2016 | Female | All Ages | 8%<br>(6.6-9.7%)               | 92%<br>(90-93%)          | 0.26<br>(0.17-0.4)                          | 0.82%<br>(0.59-1.1%)                 | 1.1%<br>(0.69-1.7%)                 | 83000<br>(49000-130000) | 320000<br>(230000-440000) |
| Low-middle SDI | 2016 | Female | 15 to 19 | 7%<br>(4.5-10%)                | 93%<br>(90-96%)          | 0.19<br>(0.075-0.38)                        | 0.51%<br>(0.3-0.83%)                 | 0.47%<br>(0.17-0.99%)               | 520<br>(190-1100)       | 90000<br>(51000-150000)   |
| Low-middle SDI | 2016 | Female | 20 to 24 | 8.1%<br>(5.1-12%)              | 92%<br>(88-95%)          | 0.29<br>(0.12-0.57)                         | 1%<br>(0.64-1.5%)                    | 0.82%<br>(0.37-1.6%)                | 1200<br>(490-2200)      | 190000<br>(120000-300000) |
| Low-middle SDI | 2016 | Female | 25 to 29 | 8.6%<br>(5.5-12%)              | 91%<br>(88-94%)          | 0.36<br>(0.16-0.68)                         | 1.2%<br>(0.78-1.7%)                  | 1.1%<br>(0.57-2%)                   | 1800<br>(900-3400)      | 230000<br>(150000-350000) |
| Low-middle SDI | 2016 | Female | 30 to 34 | 9%<br>(5.8-13%)                | 91%<br>(87-94%)          | 0.42<br>(0.19-0.78)                         | 1.3%<br>(0.86-1.9%)                  | 1.5%<br>(0.87-2.5%)                 | 2700<br>(1500-4600)     | 260000<br>(170000-390000) |
| Low-middle SDI | 2016 | Female | 35 to 39 | 9.4%<br>(6.1-13%)              | 91%<br>(87-94%)          | 0.45<br>(0.2-0.82)                          | 1.4%<br>(0.97-2%)                    | 2%<br>(1.2-3%)                      | 3900<br>(2200-6200)     | 290000<br>(180000-420000) |
| Low-middle SDI | 2016 | Female | 40 to 44 | 9.6%<br>(6.5-13%)              | 90%<br>(87-94%)          | 0.45<br>(0.2-0.82)                          | 1.5%<br>(0.97-2.1%)                  | 2.1%<br>(1.3-3.2%)                  | 4800<br>(2800-7500)     | 290000<br>(190000-430000) |
| Low-middle SDI | 2016 | Female | 45 to 49 | 9.5%<br>(6.1-13%)              | 90%<br>(87-94%)          | 0.42<br>(0.19-0.81)                         | 1.5%<br>(0.95-2.2%)                  | 2.1%<br>(1.3-3.3%)                  | 5800<br>(3400-9300)     | 300000<br>(190000-440000) |
| Low-middle SDI | 2016 | Female | 50 to 54 | 9.4%<br>(6.2-13%)              | 91%<br>(87-94%)          | 0.44<br>(0.19-0.84)                         | 1.6%<br>(0.98-2.4%)                  | 2.2%<br>(1.3-3.5%)                  | 7800<br>(4600-13000)    | 330000<br>(200000-510000) |
| Low-middle SDI | 2016 | Female | 55 to 59 | 9.6%<br>(6.2-14%)              | 90%<br>(86-94%)          | 0.51<br>(0.23-0.99)                         | 1.6%<br>(0.91-2.6%)                  | 2.2%<br>(1.2-3.6%)                  | 9500<br>(5100-16000)    | 330000<br>(190000-540000) |
| Low-middle SDI | 2016 | Female | 60 to 64 | 9.7%<br>(6.1-15%)              | 90%<br>(85-94%)          | 0.54<br>(0.24-1.1)                          | 1.4%<br>(0.72-2.4%)                  | 1.9%<br>(0.94-3.3%)                 | 10000<br>(5000-18000)   | 300000<br>(150000-510000) |
| Low-middle SDI | 2016 | Female | 65 to 69 | 9.8%<br>(6.3-14%)              | 90%<br>(86-94%)          | 0.49<br>(0.22-0.94)                         | 1.3%<br>(0.61-2.2%)                  | 1.6%<br>(0.77-2.8%)                 | 10000<br>(4800-18000)   | 240000<br>(120000-420000) |
| Low-middle SDI | 2016 | Female | 70 to 74 | 9.3%<br>(6-14%)                | 91%<br>(86-94%)          | 0.41<br>(0.18-0.83)                         | 0.99%<br>(0.4-1.9%)                  | 1.2%<br>(0.48-2.4%)                 | 8700<br>(3400-17000)    | 170000<br>(66000-310000)  |
| Low-middle SDI | 2016 | Female | 75 to 79 | 8.4%<br>(5.1-13%)              | 92%<br>(87-95%)          | 0.35<br>(0.14-0.73)                         | 0.74%<br>(0.23-1.5%)                 | 0.9%<br>(0.27-1.9%)                 | 6600<br>(1900-14000)    | 96000<br>(29000-200000)   |
| Low-middle SDI | 2016 | Female | 80 to 84 | 7.7%<br>(4.3-13%)              | 92%<br>(87-96%)          | 0.34<br>(0.14-0.7)                          | 0.63%<br>(0.18-1.3%)                 | 0.75%<br>(0.2-1.6%)                 | 5000<br>(1300-11000)    | 54000<br>(15000-120000)   |
| Low-middle SDI | 2016 | Female | 85 to 89 | 8.2%<br>(4.5-14%)              | 92%<br>(86-95%)          | 0.36<br>(0.14-0.75)                         | 0.55%<br>(0.12-1.2%)                 | 0.64%<br>(0.11-1.5%)                | 3000<br>(480-6900)      | 23000<br>(4700-53000)     |
| Low-middle SDI | 2016 | Female | 90 to 94 | 9.3%<br>(5.2-16%)              | 91%<br>(84-95%)          | 0.4<br>(0.15-0.86)                          | 0.49%<br>(0.035-1.3%)                | 0.54%<br>(-0.0036-1.5%)             | 1100<br>(-13-3100)      | 6300<br>(450-16000)       |

| Location       | Year | Sex    | Age      | Prevalence of current drinkers | Prevalence of abstainers | Population average of standard drinks daily | Percent of total attributable deaths | Percent of total attributable DALYs | Attributable deaths       | Attributable DALYs           |
|----------------|------|--------|----------|--------------------------------|--------------------------|---------------------------------------------|--------------------------------------|-------------------------------------|---------------------------|------------------------------|
| Low-middle SDI | 2016 | Female | 95 plus  | 11%<br>(5.5-19%)               | 89%<br>(81-95%)          | 0.47<br>(0.15-1.1)                          | 0.52%<br>(-0.048-1.4%)               | 0.54%<br>(-0.13-1.6%)               | 320<br>(-78-960)          | 1200<br>(-110-3400)          |
| Low-middle SDI | 2016 | Male   | All Ages | 20%<br>(17-22%)                | 80%<br>(78-83%)          | 1.3<br>(0.94-1.7)                           | 3.9%<br>(3.2-4.7%)                   | 4.6%<br>(3.5-5.9%)                  | 430000<br>(320000-550000) | 1800000<br>(1400000-2200000) |
| Low-middle SDI | 2016 | Male   | 15 to 19 | 10%<br>(6.9-15%)               | 90%<br>(85-93%)          | 0.46<br>(0.22-0.85)                         | 1.6%<br>(0.99-2.4%)                  | 1.7%<br>(0.89-2.9%)                 | 2700<br>(1300-4700)       | 300000<br>(190000-470000)    |
| Low-middle SDI | 2016 | Male   | 20 to 24 | 18%<br>(13-24%)                | 82%<br>(76-87%)          | 1.2<br>(0.64-2)                             | 4.4%<br>(3-6.2%)                     | 4.9%<br>(2.9-7.4%)                  | 11000<br>(6200-16000)     | 990000<br>(650000-1400000)   |
| Low-middle SDI | 2016 | Male   | 25 to 29 | 26%<br>(19-32%)                | 74%<br>(68-81%)          | 1.9<br>(1.1-3)                              | 6.3%<br>(4.5-8.3%)                   | 7.4%<br>(4.9-10%)                   | 19000<br>(12000-26000)    | 1500000<br>(1100000-2000000) |
| Low-middle SDI | 2016 | Male   | 30 to 34 | 29%<br>(22-37%)                | 71%<br>(63-78%)          | 2.3<br>(1.4-3.6)                            | 7.3%<br>(5.5-9.4%)                   | 8.9%<br>(6.4-12%)                   | 26000<br>(18000-36000)    | 1800000<br>(1400000-2400000) |
| Low-middle SDI | 2016 | Male   | 35 to 39 | 32%<br>(24-39%)                | 68%<br>(61-76%)          | 2.5<br>(1.5-3.9)                            | 7.7%<br>(5.9-9.9%)                   | 9.6%<br>(7-12%)                     | 33000<br>(24000-44000)    | 2000000<br>(1500000-2600000) |
| Low-middle SDI | 2016 | Male   | 40 to 44 | 32%<br>(25-39%)                | 68%<br>(61-75%)          | 2.6<br>(1.6-4)                              | 7.8%<br>(5.9-9.9%)                   | 9.8%<br>(7.2-13%)                   | 37000<br>(27000-49000)    | 2000000<br>(1500000-2600000) |
| Low-middle SDI | 2016 | Male   | 45 to 49 | 31%<br>(24-38%)                | 69%<br>(62-76%)          | 2.6<br>(1.5-4.1)                            | 7.7%<br>(5.7-10%)                    | 9.7%<br>(7-13%)                     | 44000<br>(31000-58000)    | 2000000<br>(1500000-2600000) |
| Low-middle SDI | 2016 | Male   | 50 to 54 | 30%<br>(24-37%)                | 70%<br>(63-76%)          | 2.5<br>(1.4-4)                              | 7.1%<br>(5.1-9.3%)                   | 8.9%<br>(6.2-12%)                   | 48000<br>(33000-64000)    | 1900000<br>(1400000-2500000) |
| Low-middle SDI | 2016 | Male   | 55 to 59 | 29%<br>(23-36%)                | 71%<br>(64-77%)          | 2.4<br>(1.4-3.8)                            | 6.5%<br>(4.5-8.6%)                   | 8%<br>(5.5-11%)                     | 51000<br>(35000-69000)    | 1800000<br>(1200000-2300000) |
| Low-middle SDI | 2016 | Male   | 60 to 64 | 28%<br>(22-36%)                | 72%<br>(64-78%)          | 2.2<br>(1.3-3.5)                            | 5.3%<br>(3.5-7.5%)                   | 6.4%<br>(4.1-9.1%)                  | 47000<br>(30000-68000)    | 1400000<br>(890000-1900000)  |
| Low-middle SDI | 2016 | Male   | 65 to 69 | 27%<br>(21-34%)                | 73%<br>(66-79%)          | 1.9<br>(1.2-3)                              | 4.3%<br>(2.7-6.2%)                   | 5.1%<br>(3.1-7.4%)                  | 39000<br>(24000-58000)    | 940000<br>(580000-1400000)   |
| Low-middle SDI | 2016 | Male   | 70 to 74 | 25%<br>(19-32%)                | 75%<br>(68-81%)          | 1.6<br>(0.89-2.5)                           | 3.3%<br>(1.8-5.1%)                   | 3.8%<br>(2-6%)                      | 30000<br>(16000-48000)    | 580000<br>(320000-900000)    |
| Low-middle SDI | 2016 | Male   | 75 to 79 | 22%<br>(16-29%)                | 78%<br>(71-84%)          | 1.2<br>(0.66-2)                             | 2.3%<br>(1.1-3.9%)                   | 2.7%<br>(1.2-4.5%)                  | 20000<br>(9300-34000)     | 300000<br>(150000-500000)    |
| Low-middle SDI | 2016 | Male   | 80 to 84 | 18%<br>(12-25%)                | 82%<br>(75-88%)          | 0.95<br>(0.52-1.6)                          | 1.6%<br>(0.75-2.8%)                  | 1.8%<br>(0.78-3.2%)                 | 12000<br>(5000-21000)     | 130000<br>(60000-220000)     |

| Location       | Year | Sex    | Age      | Prevalence of current drinkers | Prevalence of abstainers | Population average of standard drinks daily | Percent of total attributable deaths | Percent of total attributable DALYs | Attributable deaths    | Attributable DALYs          |
|----------------|------|--------|----------|--------------------------------|--------------------------|---------------------------------------------|--------------------------------------|-------------------------------------|------------------------|-----------------------------|
| Low-middle SDI | 2016 | Male   | 85 to 89 | 18%<br>(11-25%)                | 82%<br>(75-89%)          | 0.81<br>(0.43-1.4)                          | 1.2%<br>(0.5-2.2%)                   | 1.3%<br>(0.48-2.4%)                 | 5300<br>(2000-9900)    | 43000<br>(18000-77000)      |
| Low-middle SDI | 2016 | Male   | 90 to 94 | 19%<br>(13-26%)                | 81%<br>(74-87%)          | 0.77<br>(0.39-1.4)                          | 0.88%<br>(0.22-1.8%)                 | 0.91%<br>(0.12-2%)                  | 1500<br>(210-3400)     | 9100<br>(2200-19000)        |
| Low-middle SDI | 2016 | Male   | 95 plus  | 22%<br>(13-31%)                | 78%<br>(69-87%)          | 0.77<br>(0.33-1.5)                          | 0.77%<br>(0.054-1.8%)                | 0.7%<br>(-0.14-1.9%)                | 290<br>(-60-810)       | 1300<br>(87-3100)           |
| Low SDI        | 1990 | Female | All Ages | 24%<br>(20-29%)                | 76%<br>(71-80%)          | 0.62<br>(0.47-0.81)                         | 1%<br>(0.59-1.5%)                    | 1.9%<br>(0.96-2.9%)                 | 41000<br>(21000-64000) | 1500000<br>(870000-2200000) |
| Low SDI        | 1990 | Female | 15 to 19 | 24%<br>(15-35%)                | 76%<br>(65-85%)          | 0.68<br>(0.35-1.2)                          | 1.5%<br>(0.65-2.5%)                  | 1.8%<br>(0.6-3.4%)                  | 670<br>(210-1300)      | 61000<br>(27000-110000)     |
| Low SDI        | 1990 | Female | 20 to 24 | 30%<br>(19-43%)                | 70%<br>(57-81%)          | 1<br>(0.53-1.7)                             | 2.3%<br>(1.1-3.9%)                   | 2.5%<br>(0.89-4.7%)                 | 1200<br>(420-2300)     | 110000<br>(51000-180000)    |
| Low SDI        | 1990 | Female | 25 to 29 | 33%<br>(21-46%)                | 67%<br>(54-79%)          | 1.2<br>(0.69-2)                             | 3%<br>(1.5-4.8%)                     | 3.4%<br>(1.4-5.9%)                  | 1700<br>(720-3000)     | 130000<br>(66000-210000)    |
| Low SDI        | 1990 | Female | 30 to 34 | 35%<br>(23-49%)                | 65%<br>(51-77%)          | 1.4<br>(0.75-2.2)                           | 3.4%<br>(1.8-5.4%)                   | 4.1%<br>(1.9-6.9%)                  | 2100<br>(960-3600)     | 140000<br>(71000-220000)    |
| Low SDI        | 1990 | Female | 35 to 39 | 38%<br>(25-52%)                | 62%<br>(48-75%)          | 1.3<br>(0.74-2.2)                           | 3.6%<br>(1.8-5.8%)                   | 4.5%<br>(2-7.5%)                    | 2500<br>(1100-4100)    | 140000<br>(68000-220000)    |
| Low SDI        | 1990 | Female | 40 to 44 | 39%<br>(27-53%)                | 61%<br>(47-73%)          | 1.3<br>(0.7-2.2)                            | 3.7%<br>(1.8-5.9%)                   | 4.7%<br>(2.2-7.7%)                  | 2600<br>(1200-4300)    | 130000<br>(63000-210000)    |
| Low SDI        | 1990 | Female | 45 to 49 | 39%<br>(25-53%)                | 61%<br>(47-75%)          | 1.3<br>(0.68-2.3)                           | 4.1%<br>(1.9-6.7%)                   | 5.3%<br>(2.4-8.8%)                  | 3100<br>(1300-5300)    | 130000<br>(60000-220000)    |
| Low SDI        | 1990 | Female | 50 to 54 | 37%<br>(25-52%)                | 63%<br>(48-75%)          | 1.3<br>(0.67-2.3)                           | 4.6%<br>(2.1-7.6%)                   | 5.8%<br>(2.5-9.7%)                  | 3900<br>(1700-6700)    | 140000<br>(64000-250000)    |
| Low SDI        | 1990 | Female | 55 to 59 | 36%<br>(24-51%)                | 64%<br>(49-76%)          | 1.3<br>(0.67-2.3)                           | 4.7%<br>(2-7.9%)                     | 5.8%<br>(2.4-9.7%)                  | 4600<br>(1900-8000)    | 150000<br>(60000-250000)    |
| Low SDI        | 1990 | Female | 60 to 64 | 37%<br>(23-52%)                | 63%<br>(48-77%)          | 1.3<br>(0.65-2.4)                           | 4.2%<br>(1.7-7.4%)                   | 5.1%<br>(2.1-8.9%)                  | 4700<br>(1900-8300)    | 130000<br>(51000-220000)    |
| Low SDI        | 1990 | Female | 65 to 69 | 37%<br>(25-51%)                | 63%<br>(49-75%)          | 1.2<br>(0.63-2.1)                           | 3.9%<br>(1.4-6.9%)                   | 4.6%<br>(1.7-8.1%)                  | 5000<br>(1800-8900)    | 110000<br>(41000-200000)    |
| Low SDI        | 1990 | Female | 70 to 74 | 36%<br>(24-50%)                | 64%<br>(50-76%)          | 1<br>(0.51-1.9)                             | 3.2%<br>(0.75-6.2%)                  | 3.7%<br>(0.84-7.2%)                 | 4000<br>(870-7800)     | 71000<br>(16000-140000)     |
| Low SDI        | 1990 | Female | 75 to 79 | 33%<br>(21-48%)                | 67%<br>(52-79%)          | 0.87<br>(0.39-1.6)                          | 2.4%<br>(0.28-5.1%)                  | 2.8%<br>(0.31-5.9%)                 | 2600<br>(290-5500)     | 36000<br>(4100-76000)       |
| Low SDI        | 1990 | Female | 80 to 84 | 32%<br>(19-47%)                | 68%<br>(53-81%)          | 0.79<br>(0.37-1.4)                          | 1.9%<br>(0.11-4.1%)                  | 2.2%<br>(0.11-4.8%)                 | 1300<br>(59-2800)      | 13000<br>(690-29000)        |
| Low SDI        | 1990 | Female | 85 to 89 | 31%<br>(19-46%)                | 69%<br>(54-81%)          | 0.76<br>(0.35-1.4)                          | 1.4%<br>(-0.095-3.5%)                | 1.7%<br>(-0.15-4.1%)                | 510<br>(-43-1200)      | 3700<br>(-260-9100)         |
| Low SDI        | 1990 | Female | 90 to 94 | 33%<br>(21-48%)                | 67%<br>(52-79%)          | 0.77<br>(0.34-1.5)                          | 1.1%<br>(-0.32-3.1%)                 | 1.3%<br>(-0.43-3.6%)                | 140<br>(-45-380)       | 710<br>(-200-1900)          |
| Low SDI        | 1990 | Female | 95 plus  | 36%<br>(21-55%)                | 64%<br>(45-79%)          | 0.8<br>(0.3-1.7)                            | 1.2%<br>(-0.36-3.3%)                 | 1.3%<br>(-0.52-3.9%)                | 36<br>(-14-110)        | 130<br>(-39-360)            |



| Location | Year | Sex    | Age      | Prevalence of current drinkers | Prevalence of abstainers | Population average of standard drinks daily | Percent of total attributable deaths | Percent of total attributable DALYs | Attributable deaths     | Attributable DALYs           |
|----------|------|--------|----------|--------------------------------|--------------------------|---------------------------------------------|--------------------------------------|-------------------------------------|-------------------------|------------------------------|
| Low SDI  | 1990 | Male   | All Ages | 29%<br>(24-35%)                | 71%<br>(65-76%)          | 0.89<br>(0.68-1.1)                          | 1.8%<br>(1.2-2.5%)                   | 3%<br>(1.9-4.1%)                    | 73000<br>(46000-100000) | 3100000<br>(2100000-4100000) |
| Low SDI  | 1990 | Male   | 15 to 19 | 26%<br>(17-37%)                | 74%<br>(63-83%)          | 0.81<br>(0.44-1.4)                          | 2.6%<br>(1.4-4.2%)                   | 3%<br>(1.4-5.2%)                    | 1400<br>(590-2400)      | 120000<br>(64000-200000)     |
| Low SDI  | 1990 | Male   | 20 to 24 | 36%<br>(24-49%)                | 64%<br>(51-76%)          | 1.4<br>(0.76-2.2)                           | 5%<br>(2.8-7.6%)                     | 5.3%<br>(2.6-8.6%)                  | 3300<br>(1600-5500)     | 270000<br>(150000-410000)    |
| Low SDI  | 1990 | Male   | 25 to 29 | 42%<br>(28-55%)                | 58%<br>(45-72%)          | 1.8<br>(1.1-2.8)                            | 6.2%<br>(3.7-9.3%)                   | 6.8%<br>(3.5-11%)                   | 4700<br>(2500-7300)     | 330000<br>(200000-490000)    |
| Low SDI  | 1990 | Male   | 30 to 34 | 45%<br>(31-59%)                | 55%<br>(41-69%)          | 2.1<br>(1.2-3.2)                            | 7.1%<br>(4.3-10%)                    | 8%<br>(4.4-12%)                     | 5600<br>(3100-8400)     | 350000<br>(210000-500000)    |
| Low SDI  | 1990 | Male   | 35 to 39 | 46%<br>(33-60%)                | 54%<br>(40-67%)          | 2.2<br>(1.3-3.5)                            | 7.8%<br>(4.7-11%)                    | 8.9%<br>(5.1-13%)                   | 6400<br>(3600-9500)     | 350000<br>(210000-510000)    |
| Low SDI  | 1990 | Male   | 40 to 44 | 47%<br>(34-61%)                | 53%<br>(39-66%)          | 2.2<br>(1.2-3.5)                            | 8%<br>(4.8-12%)                      | 9.4%<br>(5.4-14%)                   | 7000<br>(4000-10000)    | 340000<br>(200000-490000)    |
| Low SDI  | 1990 | Male   | 45 to 49 | 48%<br>(34-62%)                | 52%<br>(38-66%)          | 2.2<br>(1.2-3.5)                            | 8.2%<br>(4.9-12%)                    | 9.7%<br>(5.6-14%)                   | 7400<br>(4200-11000)    | 310000<br>(180000-470000)    |
| Low SDI  | 1990 | Male   | 50 to 54 | 49%<br>(35-62%)                | 51%<br>(38-65%)          | 2.1<br>(1.2-3.5)                            | 8.3%<br>(4.7-12%)                    | 9.9%<br>(5.5-15%)                   | 7800<br>(4200-12000)    | 290000<br>(160000-440000)    |
| Low SDI  | 1990 | Male   | 55 to 59 | 49%<br>(35-62%)                | 51%<br>(38-65%)          | 2.1<br>(1.1-3.4)                            | 8%<br>(4.5-12%)                      | 9.4%<br>(5.2-14%)                   | 8100<br>(4400-12000)    | 260000<br>(140000-400000)    |
| Low SDI  | 1990 | Male   | 60 to 64 | 46%<br>(32-61%)                | 54%<br>(39-68%)          | 1.8<br>(0.97-3.2)                           | 6.6%<br>(3.5-10%)                    | 7.6%<br>(4-12%)                     | 7100<br>(3700-11000)    | 190000<br>(100000-310000)    |
| Low SDI  | 1990 | Male   | 65 to 69 | 44%<br>(30-58%)                | 56%<br>(42-70%)          | 1.5<br>(0.82-2.5)                           | 5.1%<br>(2.5-8.1%)                   | 5.8%<br>(2.8-9.4%)                  | 5600<br>(2700-9200)     | 130000<br>(63000-210000)     |
| Low SDI  | 1990 | Male   | 70 to 74 | 42%<br>(28-56%)                | 58%<br>(44-72%)          | 1.2<br>(0.64-2.1)                           | 3.8%<br>(1.5-6.7%)                   | 4.4%<br>(1.7-7.8%)                  | 4200<br>(1600-7500)     | 76000<br>(30000-130000)      |
| Low SDI  | 1990 | Male   | 75 to 79 | 40%<br>(27-55%)                | 60%<br>(45-73%)          | 1<br>(0.5-1.8)                              | 3%<br>(0.92-5.7%)                    | 3.4%<br>(1-6.5%)                    | 2600<br>(770-5100)      | 37000<br>(11000-70000)       |
| Low SDI  | 1990 | Male   | 80 to 84 | 38%<br>(24-53%)                | 62%<br>(47-76%)          | 0.86<br>(0.43-1.5)                          | 2.3%<br>(0.67-4.5%)                  | 2.6%<br>(0.71-5.1%)                 | 1100<br>(300-2200)      | 12000<br>(3400-23000)        |
| Low SDI  | 1990 | Male   | 85 to 89 | 35%<br>(22-49%)                | 65%<br>(51-78%)          | 0.71<br>(0.35-1.3)                          | 1.7%<br>(0.46-3.3%)                  | 1.9%<br>(0.44-3.8%)                 | 390<br>(91-790)         | 3000<br>(800-5900)           |
| Low SDI  | 1990 | Male   | 90 to 94 | 35%<br>(22-49%)                | 65%<br>(51-78%)          | 0.64<br>(0.3-1.2)                           | 1.1%<br>(0.12-2.5%)                  | 1.2%<br>(0.0068-2.8%)               | 83<br>(0.39-200)        | 460<br>(46-1000)             |
| Low SDI  | 1990 | Male   | 95 plus  | 37%<br>(21-55%)                | 63%<br>(45-79%)          | 0.62<br>(0.23-1.3)                          | 1.1%<br>(-0.038-2.7%)                | 1.1%<br>(-0.24-3%)                  | 18<br>(-3.9-48)         | 70<br>(-2.7-170)             |
| Low SDI  | 1995 | Female | All Ages | 24%<br>(20-29%)                | 76%<br>(71-80%)          | 0.6<br>(0.46-0.78)                          | 1%<br>(0.57-1.5%)                    | 1.8%<br>(0.86-2.8%)                 | 45000<br>(22000-71000)  | 1700000<br>(950000-2500000)  |
| Low SDI  | 1995 | Female | 15 to 19 | 24%<br>(16-35%)                | 76%<br>(65-84%)          | 0.68<br>(0.36-1.1)                          | 1.5%<br>(0.67-2.6%)                  | 1.8%<br>(0.61-3.5%)                 | 790<br>(260-1500)       | 72000<br>(33000-120000)      |
| Low SDI  | 1995 | Female | 20 to 24 | 31%<br>(20-43%)                | 69%<br>(57-80%)          | 1<br>(0.54-1.6)                             | 2.1%<br>(1-3.6%)                     | 2.2%<br>(0.75-4.3%)                 | 1400<br>(480-2600)      | 120000<br>(58000-200000)     |

| Location | Year | Sex    | Age      | Prevalence of current drinkers | Prevalence of abstainers | Population average of standard drinks daily | Percent of total attributable deaths | Percent of total attributable DALYs | Attributable deaths     | Attributable DALYs        |
|----------|------|--------|----------|--------------------------------|--------------------------|---------------------------------------------|--------------------------------------|-------------------------------------|-------------------------|---------------------------|
| Low SDI  | 1995 | Female | 25 to 29 | 33%<br>(21-46%)                | 67%<br>(54-79%)          | 1.2<br>(0.68-1.9)                           | 2.5%<br>(1.2-4%)                     | 2.7%<br>(1-4.8%)                    | 1900<br>(820-3300)      | 140000<br>(74000-230000)  |
| Low SDI  | 1995 | Female | 30 to 34 | 35%<br>(23-50%)                | 65%<br>(50-77%)          | 1.3<br>(0.73-2.1)                           | 2.7%<br>(1.4-4.4%)                   | 3.1%<br>(1.3-5.4%)                  | 2300<br>(1000-4000)     | 150000<br>(78000-240000)  |
| Low SDI  | 1995 | Female | 35 to 39 | 38%<br>(25-52%)                | 62%<br>(48-75%)          | 1.3<br>(0.71-2.1)                           | 3%<br>(1.5-4.9%)                     | 3.6%<br>(1.5-6.2%)                  | 2700<br>(1200-4600)     | 150000<br>(75000-250000)  |
| Low SDI  | 1995 | Female | 40 to 44 | 39%<br>(27-53%)                | 61%<br>(47-73%)          | 1.3<br>(0.68-2.1)                           | 3.2%<br>(1.6-5.3%)                   | 4%<br>(1.8-6.7%)                    | 2900<br>(1400-4900)     | 140000<br>(71000-240000)  |
| Low SDI  | 1995 | Female | 45 to 49 | 39%<br>(25-53%)                | 61%<br>(47-75%)          | 1.3<br>(0.66-2.2)                           | 3.6%<br>(1.6-6%)                     | 4.5%<br>(1.9-7.7%)                  | 3500<br>(1500-6000)     | 150000<br>(67000-250000)  |
| Low SDI  | 1995 | Female | 50 to 54 | 37%<br>(25-52%)                | 63%<br>(48-75%)          | 1.3<br>(0.65-2.2)                           | 4.2%<br>(1.8-7%)                     | 5.1%<br>(2.2-8.7%)                  | 4500<br>(1800-7700)     | 160000<br>(69000-280000)  |
| Low SDI  | 1995 | Female | 55 to 59 | 36%<br>(23-51%)                | 64%<br>(49-77%)          | 1.3<br>(0.64-2.2)                           | 4.3%<br>(1.7-7.3%)                   | 5.2%<br>(2.1-8.9%)                  | 4900<br>(1900-8600)     | 160000<br>(62000-270000)  |
| Low SDI  | 1995 | Female | 60 to 64 | 37%<br>(23-52%)                | 63%<br>(48-77%)          | 1.3<br>(0.62-2.3)                           | 4%<br>(1.5-7%)                       | 4.7%<br>(1.8-8.4%)                  | 5200<br>(2000-9400)     | 140000<br>(54000-250000)  |
| Low SDI  | 1995 | Female | 65 to 69 | 37%<br>(25-51%)                | 63%<br>(49-75%)          | 1.2<br>(0.61-2)                             | 3.8%<br>(1.3-6.7%)                   | 4.4%<br>(1.5-7.8%)                  | 5400<br>(1900-9800)     | 120000<br>(43000-220000)  |
| Low SDI  | 1995 | Female | 70 to 74 | 36%<br>(24-50%)                | 64%<br>(50-76%)          | 1<br>(0.48-1.8)                             | 3%<br>(0.62-5.8%)                    | 3.4%<br>(0.7-6.7%)                  | 4400<br>(850-8800)      | 79000<br>(16000-160000)   |
| Low SDI  | 1995 | Female | 75 to 79 | 33%<br>(21-48%)                | 67%<br>(52-79%)          | 0.83<br>(0.37-1.5)                          | 2.2%<br>(0.2-4.8%)                   | 2.6%<br>(0.21-5.5%)                 | 2800<br>(250-6100)      | 39000<br>(3700-84000)     |
| Low SDI  | 1995 | Female | 80 to 84 | 31%<br>(19-46%)                | 69%<br>(54-81%)          | 0.75<br>(0.35-1.4)                          | 1.7%<br>(0.0058-3.8%)                | 1.9%<br>(-0.0058-4.4%)              | 1400<br>(-2.8-3100)     | 14000<br>(110-32000)      |
| Low SDI  | 1995 | Female | 85 to 89 | 31%<br>(19-45%)                | 69%<br>(55-81%)          | 0.73<br>(0.34-1.3)                          | 1.3%<br>(-0.17-3.3%)                 | 1.5%<br>(-0.23-3.8%)                | 560<br>(-80-1400)       | 4200<br>(-520-10000)      |
| Low SDI  | 1995 | Female | 90 to 94 | 33%<br>(21-48%)                | 67%<br>(52-79%)          | 0.74<br>(0.33-1.4)                          | 1%<br>(-0.37-2.9%)                   | 1.2%<br>(-0.49-3.5%)                | 150<br>(-62-450)        | 790<br>(-280-2300)        |
| Low SDI  | 1995 | Female | 95 plus  | 36%<br>(21-55%)                | 64%<br>(45-79%)          | 0.75<br>(0.29-1.6)                          | 1.1%<br>(-0.4-3.1%)                  | 1.2%<br>(-0.57-3.6%)                | 41<br>(-19-130)         | 150<br>(-55-430)          |
| Low SDI  | 1995 | Male   | All Ages | 29%<br>(24-35%)                | 71%<br>(65-76%)          | 0.87<br>(0.67-1.1)                          | 1.9%<br>(1.3-2.5%)                   | 2.9%<br>(1.9-4.1%)                  | 81000<br>(52000-110000) | 350000<br>(230000-470000) |
| Low SDI  | 1995 | Male   | 15 to 19 | 26%<br>(18-38%)                | 74%<br>(62-82%)          | 0.83<br>(0.45-1.4)                          | 2.8%<br>(1.5-4.4%)                   | 3.2%<br>(1.5-5.5%)                  | 1700<br>(770-2900)      | 150000<br>(80000-240000)  |
| Low SDI  | 1995 | Male   | 20 to 24 | 37%<br>(25-49%)                | 63%<br>(51-75%)          | 1.3<br>(0.77-2.1)                           | 5.1%<br>(2.9-7.9%)                   | 5.4%<br>(2.5-8.9%)                  | 3900<br>(1900-6400)     | 320000<br>(180000-480000) |
| Low SDI  | 1995 | Male   | 25 to 29 | 42%<br>(29-55%)                | 58%<br>(45-71%)          | 1.8<br>(1.1-2.7)                            | 5.9%<br>(3.4-8.9%)                   | 6.2%<br>(3.2-10%)                   | 5400<br>(2900-8300)     | 380000<br>(230000-560000) |
| Low SDI  | 1995 | Male   | 30 to 34 | 45%<br>(31-59%)                | 55%<br>(41-69%)          | 2<br>(1.2-3.1)                              | 6.1%<br>(3.6-9.1%)                   | 6.7%<br>(3.6-10%)                   | 6300<br>(3600-9500)     | 390000<br>(240000-570000) |
| Low SDI  | 1995 | Male   | 35 to 39 | 46%<br>(33-60%)                | 54%<br>(40-67%)          | 2.1<br>(1.2-3.3)                            | 6.6%<br>(3.9-9.8%)                   | 7.4%<br>(4.1-11%)                   | 7100<br>(4100-11000)    | 390000<br>(240000-570000) |

| Location | Year | Sex    | Age      | Prevalence of current drinkers | Prevalence of abstainers | Population average of standard drinks daily | Percent of total attributable deaths | Percent of total attributable DALYs | Attributable deaths    | Attributable DALYs           |
|----------|------|--------|----------|--------------------------------|--------------------------|---------------------------------------------|--------------------------------------|-------------------------------------|------------------------|------------------------------|
| Low SDI  | 1995 | Male   | 40 to 44 | 47%<br>(34-60%)                | 53%<br>(40-66%)          | 2.1<br>(1.2-3.4)                            | 6.9%<br>(4-10%)                      | 7.9%<br>(4.4-12%)                   | 7800<br>(4500-12000)   | 380000<br>(230000-550000)    |
| Low SDI  | 1995 | Male   | 45 to 49 | 48%<br>(34-61%)                | 52%<br>(39-66%)          | 2.1<br>(1.2-3.4)                            | 7.1%<br>(4.1-11%)                    | 8.3%<br>(4.6-12%)                   | 8200<br>(4600-12000)   | 350000<br>(200000-520000)    |
| Low SDI  | 1995 | Male   | 50 to 54 | 48%<br>(35-62%)                | 52%<br>(38-65%)          | 2<br>(1.1-3.3)                              | 7.5%<br>(4.1-11%)                    | 8.7%<br>(4.7-13%)                   | 8700<br>(4600-13000)   | 320000<br>(180000-490000)    |
| Low SDI  | 1995 | Male   | 55 to 59 | 48%<br>(34-62%)                | 52%<br>(38-66%)          | 2<br>(1.1-3.2)                              | 7.3%<br>(4.1-11%)                    | 8.6%<br>(4.7-13%)                   | 8600<br>(4600-13000)   | 280000<br>(150000-420000)    |
| Low SDI  | 1995 | Male   | 60 to 64 | 46%<br>(32-61%)                | 54%<br>(39-68%)          | 1.8<br>(0.94-3)                             | 6.1%<br>(3.3-9.5%)                   | 7.1%<br>(3.7-11%)                   | 7900<br>(4100-13000)   | 220000<br>(110000-340000)    |
| Low SDI  | 1995 | Male   | 65 to 69 | 44%<br>(30-58%)                | 56%<br>(42-70%)          | 1.5<br>(0.79-2.4)                           | 4.7%<br>(2.3-7.6%)                   | 5.4%<br>(2.6-8.8%)                  | 6100<br>(2800-10000)   | 140000<br>(66000-220000)     |
| Low SDI  | 1995 | Male   | 70 to 74 | 41%<br>(28-55%)                | 59%<br>(45-72%)          | 1.2<br>(0.61-2)                             | 3.6%<br>(1.4-6.3%)                   | 4.1%<br>(1.5-7.3%)                  | 4600<br>(1800-8200)    | 83000<br>(33000-150000)      |
| Low SDI  | 1995 | Male   | 75 to 79 | 39%<br>(26-54%)                | 61%<br>(46-74%)          | 0.96<br>(0.47-1.7)                          | 2.7%<br>(0.83-5.2%)                  | 3.1%<br>(0.9-6%)                    | 3000<br>(880-5700)     | 42000<br>(13000-80000)       |
| Low SDI  | 1995 | Male   | 80 to 84 | 37%<br>(23-51%)                | 63%<br>(49-77%)          | 0.8<br>(0.4-1.4)                            | 2.1%<br>(0.58-4.1%)                  | 2.4%<br>(0.6-4.6%)                  | 1300<br>(340-2600)     | 14000<br>(3900-27000)        |
| Low SDI  | 1995 | Male   | 85 to 89 | 34%<br>(22-48%)                | 66%<br>(52-78%)          | 0.67<br>(0.33-1.2)                          | 1.6%<br>(0.43-3.2%)                  | 1.8%<br>(0.41-3.6%)                 | 450<br>(110-930)       | 3500<br>(950-7000)           |
| Low SDI  | 1995 | Male   | 90 to 94 | 34%<br>(22-49%)                | 66%<br>(51-78%)          | 0.6<br>(0.28-1.1)                           | 1%<br>(0.081-2.3%)                   | 1.1%<br>(-0.032-2.6%)               | 94<br>(-2.3-230)       | 530<br>(43-1200)             |
| Low SDI  | 1995 | Male   | 95 plus  | 37%<br>(20-55%)                | 63%<br>(45-80%)          | 0.57<br>(0.22-1.2)                          | 1%<br>(-0.066-2.6%)                  | 1%<br>(-0.27-2.8%)                  | 22<br>(-5.6-59)        | 86<br>(-5.3-210)             |
| Low SDI  | 2000 | Female | All Ages | 23%<br>(19-28%)                | 77%<br>(72-81%)          | 0.59<br>(0.45-0.76)                         | 1.1%<br>(0.63-1.6%)                  | 1.9%<br>(0.96-3%)                   | 52000<br>(27000-82000) | 1900000<br>(1100000-2800000) |
| Low SDI  | 2000 | Female | 15 to 19 | 24%<br>(16-34%)                | 76%<br>(66-84%)          | 0.68<br>(0.37-1.1)                          | 1.5%<br>(0.74-2.6%)                  | 1.9%<br>(0.73-3.6%)                 | 910<br>(340-1700)      | 83000<br>(41000-140000)      |
| Low SDI  | 2000 | Female | 20 to 24 | 29%<br>(20-41%)                | 71%<br>(59-80%)          | 0.98<br>(0.54-1.6)                          | 2.2%<br>(1.1-3.6%)                   | 2.4%<br>(0.88-4.4%)                 | 1500<br>(590-2800)     | 140000<br>(70000-230000)     |
| Low SDI  | 2000 | Female | 25 to 29 | 31%<br>(21-43%)                | 69%<br>(57-79%)          | 1.2<br>(0.67-1.8)                           | 2.3%<br>(1.2-3.8%)                   | 2.4%<br>(1-4.4%)                    | 2100<br>(960-3700)     | 160000<br>(86000-260000)     |
| Low SDI  | 2000 | Female | 30 to 34 | 33%<br>(22-46%)                | 67%<br>(54-78%)          | 1.2<br>(0.71-2)                             | 2.4%<br>(1.3-3.9%)                   | 2.6%<br>(1.2-4.6%)                  | 2500<br>(1200-4200)    | 160000<br>(88000-260000)     |
| Low SDI  | 2000 | Female | 35 to 39 | 36%<br>(25-49%)                | 64%<br>(51-75%)          | 1.2<br>(0.7-2)                              | 2.6%<br>(1.3-4.3%)                   | 3%<br>(1.4-5.3%)                    | 2900<br>(1400-4900)    | 160000<br>(84000-260000)     |
| Low SDI  | 2000 | Female | 40 to 44 | 37%<br>(26-50%)                | 63%<br>(50-74%)          | 1.2<br>(0.67-2)                             | 2.9%<br>(1.5-4.7%)                   | 3.5%<br>(1.6-5.9%)                  | 3200<br>(1600-5400)    | 160000<br>(81000-260000)     |
| Low SDI  | 2000 | Female | 45 to 49 | 37%<br>(25-50%)                | 63%<br>(50-75%)          | 1.3<br>(0.68-2.2)                           | 3.5%<br>(1.7-5.8%)                   | 4.3%<br>(1.9-7.3%)                  | 4000<br>(1800-6900)    | 170000<br>(82000-290000)     |
| Low SDI  | 2000 | Female | 50 to 54 | 36%<br>(25-50%)                | 64%<br>(50-75%)          | 1.2<br>(0.66-2.1)                           | 4.2%<br>(1.9-6.9%)                   | 5.1%<br>(2.3-8.6%)                  | 5200<br>(2300-8900)    | 190000<br>(86000-320000)     |

| Location | Year | Sex    | Age      | Prevalence of current drinkers | Prevalence of abstainers | Population average of standard drinks daily | Percent of total attributable deaths | Percent of total attributable DALYs | Attributable deaths     | Attributable DALYs        |
|----------|------|--------|----------|--------------------------------|--------------------------|---------------------------------------------|--------------------------------------|-------------------------------------|-------------------------|---------------------------|
| Low SDI  | 2000 | Female | 55 to 59 | 35%<br>(24-49%)                | 65%<br>(51-76%)          | 1.3<br>(0.66-2.2)                           | 4.5%<br>(2-7.6%)                     | 5.5%<br>(2.4-9.3%)                  | 6000<br>(2500-10000)    | 190000<br>(82000-320000)  |
| Low SDI  | 2000 | Female | 60 to 64 | 36%<br>(23-50%)                | 64%<br>(50-77%)          | 1.2<br>(0.63-2.2)                           | 4%<br>(1.7-7%)                       | 4.8%<br>(2-8.5%)                    | 5800<br>(2300-10000)    | 150000<br>(62000-280000)  |
| Low SDI  | 2000 | Female | 65 to 69 | 37%<br>(25-50%)                | 63%<br>(50-75%)          | 1.2<br>(0.63-2)                             | 4%<br>(1.5-7%)                       | 4.7%<br>(1.8-8.2%)                  | 6500<br>(2500-12000)    | 140000<br>(56000-260000)  |
| Low SDI  | 2000 | Female | 70 to 74 | 35%<br>(23-48%)                | 65%<br>(52-77%)          | 1<br>(0.49-1.8)                             | 3.1%<br>(0.78-6.1%)                  | 3.6%<br>(0.87-7%)                   | 5000<br>(1200-10000)    | 91000<br>(23000-180000)   |
| Low SDI  | 2000 | Female | 75 to 79 | 32%<br>(20-47%)                | 68%<br>(53-80%)          | 0.85<br>(0.39-1.6)                          | 2.5%<br>(0.39-5.2%)                  | 2.9%<br>(0.43-6%)                   | 3700<br>(580-7700)      | 51000<br>(8300-110000)    |
| Low SDI  | 2000 | Female | 80 to 84 | 31%<br>(19-46%)                | 69%<br>(54-81%)          | 0.77<br>(0.36-1.4)                          | 1.9%<br>(0.15-4.1%)                  | 2.2%<br>(0.16-4.8%)                 | 1900<br>(150-4100)      | 19000<br>(1500-42000)     |
| Low SDI  | 2000 | Female | 85 to 89 | 31%<br>(19-45%)                | 69%<br>(55-81%)          | 0.72<br>(0.34-1.3)                          | 1.4%<br>(-0.11-3.4%)                 | 1.6%<br>(-0.16-3.9%)                | 690<br>(-57-1700)       | 5100<br>(-360-12000)      |
| Low SDI  | 2000 | Female | 90 to 94 | 33%<br>(21-47%)                | 67%<br>(53-79%)          | 0.74<br>(0.34-1.4)                          | 1.1%<br>(-0.31-3.1%)                 | 1.3%<br>(-0.41-3.6%)                | 190<br>(-59-540)        | 1000<br>(-260-2700)       |
| Low SDI  | 2000 | Female | 95 plus  | 36%<br>(21-54%)                | 64%<br>(46-79%)          | 0.77<br>(0.3-1.6)                           | 1.2%<br>(-0.34-3.4%)                 | 1.3%<br>(-0.51-3.9%)                | 53<br>(-20-160)         | 190<br>(-53-540)          |
| Low SDI  | 2000 | Male   | All Ages | 29%<br>(24-34%)                | 71%<br>(66-76%)          | 0.89<br>(0.69-1.1)                          | 2%<br>(1.4-2.7%)                     | 3.1%<br>(2.1-4.3%)                  | 94000<br>(62000-130000) | 400000<br>(280000-530000) |
| Low SDI  | 2000 | Male   | 15 to 19 | 26%<br>(18-36%)                | 74%<br>(64-82%)          | 0.85<br>(0.47-1.4)                          | 2.9%<br>(1.7-4.5%)                   | 3.4%<br>(1.7-5.7%)                  | 2000<br>(970-3400)      | 180000<br>(99000-280000)  |
| Low SDI  | 2000 | Male   | 20 to 24 | 36%<br>(26-48%)                | 64%<br>(52-74%)          | 1.4<br>(0.8-2.1)                            | 5.5%<br>(3.2-8.1%)                   | 5.9%<br>(3.1-9.3%)                  | 4700<br>(2500-7600)     | 380000<br>(220000-570000) |
| Low SDI  | 2000 | Male   | 25 to 29 | 42%<br>(30-54%)                | 58%<br>(46-70%)          | 1.8<br>(1.1-2.7)                            | 6%<br>(3.6-9%)                       | 6.4%<br>(3.4-10%)                   | 6400<br>(3600-9700)     | 450000<br>(280000-650000) |
| Low SDI  | 2000 | Male   | 30 to 34 | 45%<br>(32-57%)                | 55%<br>(43-68%)          | 2.1<br>(1.3-3.1)                            | 6%<br>(3.7-8.8%)                     | 6.5%<br>(3.7-9.9%)                  | 7300<br>(4300-11000)    | 450000<br>(290000-650000) |
| Low SDI  | 2000 | Male   | 35 to 39 | 46%<br>(34-59%)                | 54%<br>(41-66%)          | 2.2<br>(1.3-3.4)                            | 6.2%<br>(3.7-9%)                     | 6.9%<br>(3.9-10%)                   | 8100<br>(4800-12000)    | 440000<br>(280000-640000) |
| Low SDI  | 2000 | Male   | 40 to 44 | 47%<br>(35-60%)                | 53%<br>(40-65%)          | 2.2<br>(1.3-3.4)                            | 6.6%<br>(4-9.5%)                     | 7.5%<br>(4.3-11%)                   | 8800<br>(5200-13000)    | 420000<br>(260000-610000) |
| Low SDI  | 2000 | Male   | 45 to 49 | 48%<br>(35-60%)                | 52%<br>(40-65%)          | 2.2<br>(1.2-3.4)                            | 7%<br>(4.2-10%)                      | 8.1%<br>(4.7-12%)                   | 9400<br>(5500-14000)    | 400000<br>(240000-590000) |
| Low SDI  | 2000 | Male   | 50 to 54 | 49%<br>(36-61%)                | 51%<br>(39-64%)          | 2.1<br>(1.2-3.4)                            | 7.6%<br>(4.4-11%)                    | 8.8%<br>(5-13%)                     | 9800<br>(5500-15000)    | 370000<br>(210000-550000) |
| Low SDI  | 2000 | Male   | 55 to 59 | 48%<br>(36-61%)                | 52%<br>(39-64%)          | 2.1<br>(1.2-3.3)                            | 7.7%<br>(4.5-11%)                    | 9%<br>(5.1-13%)                     | 10000<br>(5600-15000)   | 320000<br>(180000-480000) |
| Low SDI  | 2000 | Male   | 60 to 64 | 46%<br>(33-60%)                | 54%<br>(40-67%)          | 1.8<br>(1-3.1)                              | 6.3%<br>(3.4-9.8%)                   | 7.4%<br>(3.9-11%)                   | 8500<br>(4400-13000)    | 230000<br>(120000-360000) |
| Low SDI  | 2000 | Male   | 65 to 69 | 44%<br>(31-57%)                | 56%<br>(43-69%)          | 1.5<br>(0.85-2.4)                           | 5%<br>(2.5-8.1%)                     | 5.8%<br>(2.9-9.4%)                  | 7200<br>(3500-12000)    | 160000<br>(81000-260000)  |

| Location | Year | Sex    | Age      | Prevalence of current drinkers | Prevalence of abstainers | Population average of standard drinks daily | Percent of total attributable deaths | Percent of total attributable DALYs | Attributable deaths    | Attributable DALYs           |
|----------|------|--------|----------|--------------------------------|--------------------------|---------------------------------------------|--------------------------------------|-------------------------------------|------------------------|------------------------------|
| Low SDI  | 2000 | Male   | 70 to 74 | 42%<br>(29-55%)                | 58%<br>(45-71%)          | 1.2<br>(0.67-2)                             | 3.8%<br>(1.5-6.7%)                   | 4.4%<br>(1.7-7.7%)                  | 5200<br>(2100-9200)    | 94000<br>(38000-170000)      |
| Low SDI  | 2000 | Male   | 75 to 79 | 40%<br>(27-55%)                | 60%<br>(45-73%)          | 1<br>(0.53-1.8)                             | 3.1%<br>(1-5.8%)                     | 3.6%<br>(1.1-6.7%)                  | 3600<br>(1200-6900)    | 51000<br>(17000-96000)       |
| Low SDI  | 2000 | Male   | 80 to 84 | 37%<br>(23-52%)                | 63%<br>(48-77%)          | 0.85<br>(0.44-1.4)                          | 2.3%<br>(0.74-4.5%)                  | 2.7%<br>(0.79-5.1%)                 | 1700<br>(520-3300)     | 18000<br>(5800-34000)        |
| Low SDI  | 2000 | Male   | 85 to 89 | 34%<br>(22-48%)                | 66%<br>(52-78%)          | 0.69<br>(0.35-1.2)                          | 1.7%<br>(0.49-3.3%)                  | 1.9%<br>(0.47-3.8%)                 | 600<br>(150-1200)      | 4600<br>(1300-8900)          |
| Low SDI  | 2000 | Male   | 90 to 94 | 35%<br>(23-49%)                | 65%<br>(51-77%)          | 0.63<br>(0.3-1.2)                           | 1.2%<br>(0.17-2.5%)                  | 1.3%<br>(0.07-2.9%)                 | 130<br>(7.6-300)       | 710<br>(100-1500)            |
| Low SDI  | 2000 | Male   | 95 plus  | 38%<br>(21-56%)                | 62%<br>(44-79%)          | 0.6<br>(0.23-1.2)                           | 1.2%<br>(0.027-2.9%)                 | 1.3%<br>(-0.16-3.2%)                | 31<br>(-3.9-79)        | 120<br>(2.8-280)             |
| Low SDI  | 2005 | Female | All Ages | 23%<br>(19-28%)                | 77%<br>(72-81%)          | 0.6<br>(0.45-0.78)                          | 1.1%<br>(0.65-1.6%)                  | 1.9%<br>(0.96-3%)                   | 53000<br>(27000-85000) | 1900000<br>(1100000-2900000) |
| Low SDI  | 2005 | Female | 15 to 19 | 24%<br>(16-34%)                | 76%<br>(66-84%)          | 0.69<br>(0.38-1.1)                          | 1.4%<br>(0.71-2.4%)                  | 1.7%<br>(0.65-3.3%)                 | 900<br>(340-1700)      | 86000<br>(42000-150000)      |
| Low SDI  | 2005 | Female | 20 to 24 | 30%<br>(20-41%)                | 70%<br>(59-80%)          | 1<br>(0.55-1.6)                             | 2.3%<br>(1.2-3.7%)                   | 2.4%<br>(0.93-4.5%)                 | 1600<br>(610-2900)     | 150000<br>(76000-240000)     |
| Low SDI  | 2005 | Female | 25 to 29 | 31%<br>(21-43%)                | 69%<br>(57-79%)          | 1.2<br>(0.68-1.9)                           | 2.3%<br>(1.3-3.8%)                   | 2.5%<br>(1.1-4.6%)                  | 2100<br>(980-3700)     | 170000<br>(93000-260000)     |
| Low SDI  | 2005 | Female | 30 to 34 | 33%<br>(23-46%)                | 67%<br>(54-77%)          | 1.3<br>(0.73-2)                             | 2.3%<br>(1.2-3.7%)                   | 2.5%<br>(1.2-4.4%)                  | 2500<br>(1200-4200)    | 170000<br>(93000-260000)     |
| Low SDI  | 2005 | Female | 35 to 39 | 36%<br>(25-49%)                | 64%<br>(51-75%)          | 1.3<br>(0.71-2)                             | 2.4%<br>(1.3-3.9%)                   | 2.8%<br>(1.3-4.8%)                  | 2900<br>(1400-4800)    | 160000<br>(87000-270000)     |
| Low SDI  | 2005 | Female | 40 to 44 | 37%<br>(26-50%)                | 63%<br>(50-74%)          | 1.3<br>(0.69-2.1)                           | 2.7%<br>(1.4-4.3%)                   | 3.2%<br>(1.5-5.4%)                  | 3200<br>(1500-5400)    | 160000<br>(82000-260000)     |
| Low SDI  | 2005 | Female | 45 to 49 | 37%<br>(25-50%)                | 63%<br>(50-75%)          | 1.3<br>(0.68-2.2)                           | 3.3%<br>(1.6-5.5%)                   | 4.1%<br>(1.9-6.9%)                  | 4100<br>(1900-7100)    | 180000<br>(85000-300000)     |
| Low SDI  | 2005 | Female | 50 to 54 | 36%<br>(24-50%)                | 64%<br>(50-76%)          | 1.3<br>(0.66-2.2)                           | 4.1%<br>(1.9-6.7%)                   | 5%<br>(2.3-8.4%)                    | 5300<br>(2300-9200)    | 200000<br>(88000-340000)     |
| Low SDI  | 2005 | Female | 55 to 59 | 35%<br>(23-49%)                | 65%<br>(51-77%)          | 1.3<br>(0.65-2.2)                           | 4.3%<br>(1.9-7.3%)                   | 5.3%<br>(2.3-9.1%)                  | 6100<br>(2500-11000)   | 190000<br>(81000-340000)     |
| Low SDI  | 2005 | Female | 60 to 64 | 35%<br>(23-50%)                | 65%<br>(50-77%)          | 1.3<br>(0.63-2.3)                           | 4%<br>(1.6-7%)                       | 4.8%<br>(2-8.4%)                    | 6100<br>(2400-11000)   | 160000<br>(64000-290000)     |
| Low SDI  | 2005 | Female | 65 to 69 | 36%<br>(24-50%)                | 64%<br>(50-76%)          | 1.2<br>(0.61-2)                             | 3.8%<br>(1.4-6.7%)                   | 4.5%<br>(1.7-8%)                    | 6300<br>(2200-11000)   | 140000<br>(50000-250000)     |
| Low SDI  | 2005 | Female | 70 to 74 | 35%<br>(23-48%)                | 65%<br>(52-77%)          | 1<br>(0.5-1.8)                              | 3.1%<br>(0.77-6.1%)                  | 3.7%<br>(0.87-7.2%)                 | 5400<br>(1200-11000)   | 98000<br>(23000-190000)      |
| Low SDI  | 2005 | Female | 75 to 79 | 32%<br>(20-47%)                | 68%<br>(53-80%)          | 0.82<br>(0.38-1.5)                          | 2.4%<br>(0.31-5%)                    | 2.7%<br>(0.35-5.8%)                 | 3500<br>(420-7500)     | 49000<br>(6000-100000)       |
| Low SDI  | 2005 | Female | 80 to 84 | 31%<br>(19-46%)                | 69%<br>(54-81%)          | 0.78<br>(0.37-1.4)                          | 1.9%<br>(0.16-4.2%)                  | 2.2%<br>(0.19-4.8%)                 | 2100<br>(160-4600)     | 22000<br>(1700-47000)        |

| Location | Year | Sex    | Age      | Prevalence of current drinkers | Prevalence of abstainers | Population average of standard drinks daily | Percent of total attributable deaths | Percent of total attributable DALYs | Attributable deaths     | Attributable DALYs        |
|----------|------|--------|----------|--------------------------------|--------------------------|---------------------------------------------|--------------------------------------|-------------------------------------|-------------------------|---------------------------|
| Low SDI  | 2005 | Female | 85 to 89 | 31%<br>(19-45%)                | 69%<br>(55-81%)          | 0.75<br>(0.35-1.4)                          | 1.5%<br>(-0.06-3.5%)                 | 1.7%<br>(-0.094-4.1%)               | 860<br>(-48-2100)       | 6400<br>(-270-15000)      |
| Low SDI  | 2005 | Female | 90 to 94 | 32%<br>(20-47%)                | 68%<br>(53-80%)          | 0.74<br>(0.33-1.4)                          | 1.2%<br>(-0.28-3.1%)                 | 1.3%<br>(-0.39-3.7%)                | 230<br>(-66-630)        | 1200<br>(-280-3200)       |
| Low SDI  | 2005 | Female | 95 plus  | 36%<br>(21-54%)                | 64%<br>(46-79%)          | 0.78<br>(0.3-1.6)                           | 1.3%<br>(-0.31-3.5%)                 | 1.4%<br>(-0.46-4.1%)                | 64<br>(-20-180)         | 220<br>(-54-620)          |
| Low SDI  | 2005 | Male   | All Ages | 29%<br>(24-34%)                | 71%<br>(66-76%)          | 0.9<br>(0.69-1.1)                           | 2.2%<br>(1.6-3%)                     | 3.4%<br>(2.2-4.7%)                  | 99000<br>(65000-140000) | 430000<br>(300000-570000) |
| Low SDI  | 2005 | Male   | 15 to 19 | 27%<br>(19-37%)                | 73%<br>(63-81%)          | 0.88<br>(0.5-1.4)                           | 3%<br>(1.8-4.7%)                     | 3.6%<br>(1.8-5.9%)                  | 2200<br>(1100-3600)     | 190000<br>(110000-300000) |
| Low SDI  | 2005 | Male   | 20 to 24 | 37%<br>(27-48%)                | 63%<br>(52-73%)          | 1.4<br>(0.82-2.2)                           | 6.1%<br>(3.7-8.9%)                   | 6.7%<br>(3.6-11%)                   | 5200<br>(2700-8300)     | 420000<br>(250000-630000) |
| Low SDI  | 2005 | Male   | 25 to 29 | 41%<br>(30-53%)                | 59%<br>(47-70%)          | 1.8<br>(1.1-2.7)                            | 6.8%<br>(4.2-9.9%)                   | 7.5%<br>(4.1-12%)                   | 7000<br>(3900-11000)    | 500000<br>(310000-720000) |
| Low SDI  | 2005 | Male   | 30 to 34 | 44%<br>(32-56%)                | 56%<br>(44-68%)          | 2.1<br>(1.3-3.1)                            | 6.5%<br>(4.1-9.3%)                   | 7.2%<br>(4.1-11%)                   | 7900<br>(4700-12000)    | 500000<br>(320000-710000) |
| Low SDI  | 2005 | Male   | 35 to 39 | 45%<br>(34-58%)                | 55%<br>(42-66%)          | 2.2<br>(1.3-3.4)                            | 6.3%<br>(4-9.2%)                     | 7.1%<br>(4.2-11%)                   | 8400<br>(5000-12000)    | 460000<br>(290000-660000) |
| Low SDI  | 2005 | Male   | 40 to 44 | 46%<br>(35-59%)                | 54%<br>(41-65%)          | 2.2<br>(1.3-3.4)                            | 6.5%<br>(4-9.3%)                     | 7.4%<br>(4.4-11%)                   | 9100<br>(5400-13000)    | 440000<br>(270000-640000) |
| Low SDI  | 2005 | Male   | 45 to 49 | 48%<br>(35-60%)                | 52%<br>(40-65%)          | 2.2<br>(1.2-3.5)                            | 7%<br>(4.3-10%)                      | 8.1%<br>(4.8-12%)                   | 9700<br>(5700-14000)    | 420000<br>(250000-610000) |
| Low SDI  | 2005 | Male   | 50 to 54 | 48%<br>(36-61%)                | 52%<br>(39-64%)          | 2.1<br>(1.2-3.4)                            | 7.5%<br>(4.4-11%)                    | 8.9%<br>(5.1-13%)                   | 10000<br>(5800-16000)   | 390000<br>(220000-570000) |
| Low SDI  | 2005 | Male   | 55 to 59 | 48%<br>(36-61%)                | 52%<br>(39-64%)          | 2.1<br>(1.2-3.4)                            | 7.7%<br>(4.5-11%)                    | 9.2%<br>(5.2-14%)                   | 10000<br>(5800-16000)   | 340000<br>(190000-510000) |
| Low SDI  | 2005 | Male   | 60 to 64 | 46%<br>(33-60%)                | 54%<br>(40-67%)          | 1.8<br>(0.99-3.1)                           | 6.4%<br>(3.5-9.9%)                   | 7.5%<br>(4-12%)                     | 9300<br>(4800-15000)    | 250000<br>(140000-400000) |
| Low SDI  | 2005 | Male   | 65 to 69 | 43%<br>(30-57%)                | 57%<br>(43-70%)          | 1.5<br>(0.84-2.5)                           | 5%<br>(2.5-8.1%)                     | 5.8%<br>(2.8-9.5%)                  | 7300<br>(3500-12000)    | 170000<br>(82000-270000)  |
| Low SDI  | 2005 | Male   | 70 to 74 | 42%<br>(29-55%)                | 58%<br>(45-71%)          | 1.3<br>(0.68-2.1)                           | 3.9%<br>(1.6-6.9%)                   | 4.6%<br>(1.8-8%)                    | 5900<br>(2400-10000)    | 110000<br>(44000-190000)  |
| Low SDI  | 2005 | Male   | 75 to 79 | 40%<br>(27-54%)                | 60%<br>(46-73%)          | 1.1<br>(0.52-1.9)                           | 3.1%<br>(1-5.8%)                     | 3.6%<br>(1.1-6.8%)                  | 3800<br>(1200-7200)     | 54000<br>(18000-100000)   |
| Low SDI  | 2005 | Male   | 80 to 84 | 38%<br>(24-53%)                | 62%<br>(47-76%)          | 0.88<br>(0.45-1.5)                          | 2.4%<br>(0.79-4.6%)                  | 2.8%<br>(0.84-5.3%)                 | 1900<br>(590-3700)      | 20000<br>(6600-39000)     |
| Low SDI  | 2005 | Male   | 85 to 89 | 34%<br>(22-48%)                | 66%<br>(52-78%)          | 0.69<br>(0.35-1.2)                          | 1.7%<br>(0.52-3.3%)                  | 1.9%<br>(0.51-3.8%)                 | 730<br>(190-1400)       | 5600<br>(1700-11000)      |
| Low SDI  | 2005 | Male   | 90 to 94 | 34%<br>(22-49%)                | 66%<br>(51-78%)          | 0.6<br>(0.29-1.1)                           | 1.1%<br>(0.16-2.5%)                  | 1.2%<br>(0.059-2.8%)                | 160<br>(7.7-360)        | 860<br>(120-1900)         |
| Low SDI  | 2005 | Male   | 95 plus  | 38%<br>(21-56%)                | 62%<br>(44-79%)          | 0.59<br>(0.23-1.2)                          | 1.3%<br>(0.061-3%)                   | 1.3%<br>(-0.12-3.4%)                | 38<br>(-3.6-97)         | 150<br>(6.6-340)          |

| Location | Year | Sex    | Age      | Prevalence of current drinkers | Prevalence of abstainers | Population average of standard drinks daily | Percent of total attributable deaths | Percent of total attributable DALYs | Attributable deaths      | Attributable DALYs          |
|----------|------|--------|----------|--------------------------------|--------------------------|---------------------------------------------|--------------------------------------|-------------------------------------|--------------------------|-----------------------------|
| Low SDI  | 2010 | Female | All Ages | 23%<br>(19-28%)                | 77%<br>(72-81%)          | 0.61<br>(0.44-0.84)                         | 1.2%<br>(0.65-1.8%)                  | 2%<br>(0.94-3.3%)                   | 55000<br>(25000-90000)   | 200000<br>(1100000-3000000) |
| Low SDI  | 2010 | Female | 15 to 19 | 24%<br>(16-34%)                | 76%<br>(66-84%)          | 0.67<br>(0.34-1.2)                          | 1.3%<br>(0.62-2.2%)                  | 1.5%<br>(0.51-2.9%)                 | 850<br>(300-1600)        | 86000<br>(42000-150000)     |
| Low SDI  | 2010 | Female | 20 to 24 | 30%<br>(20-42%)                | 70%<br>(58-80%)          | 1<br>(0.53-1.7)                             | 2.2%<br>(1.2-3.6%)                   | 2.3%<br>(0.87-4.4%)                 | 1500<br>(580-2800)       | 150000<br>(79000-240000)    |
| Low SDI  | 2010 | Female | 25 to 29 | 32%<br>(22-44%)                | 68%<br>(56-78%)          | 1.2<br>(0.67-2)                             | 2.4%<br>(1.3-3.9%)                   | 2.7%<br>(1.1-4.8%)                  | 2100<br>(960-3700)       | 170000<br>(96000-270000)    |
| Low SDI  | 2010 | Female | 30 to 34 | 34%<br>(23-47%)                | 66%<br>(53-77%)          | 1.3<br>(0.73-2.2)                           | 2.4%<br>(1.3-3.9%)                   | 2.8%<br>(1.3-4.8%)                  | 2600<br>(1200-4400)      | 180000<br>(97000-280000)    |
| Low SDI  | 2010 | Female | 35 to 39 | 37%<br>(25-50%)                | 63%<br>(50-75%)          | 1.3<br>(0.7-2.2)                            | 2.5%<br>(1.3-4.1%)                   | 3%<br>(1.4-5.2%)                    | 3000<br>(1400-5000)      | 170000<br>(90000-280000)    |
| Low SDI  | 2010 | Female | 40 to 44 | 38%<br>(27-51%)                | 62%<br>(49-73%)          | 1.3<br>(0.67-2.2)                           | 2.8%<br>(1.4-4.5%)                   | 3.4%<br>(1.6-5.7%)                  | 3300<br>(1500-5600)      | 170000<br>(83000-270000)    |
| Low SDI  | 2010 | Female | 45 to 49 | 38%<br>(25-51%)                | 62%<br>(49-75%)          | 1.3<br>(0.66-2.3)                           | 3.4%<br>(1.6-5.6%)                   | 4.3%<br>(1.9-7.3%)                  | 4200<br>(1800-7300)      | 180000<br>(82000-310000)    |
| Low SDI  | 2010 | Female | 50 to 54 | 37%<br>(25-52%)                | 63%<br>(48-75%)          | 1.3<br>(0.64-2.3)                           | 4.1%<br>(1.8-6.8%)                   | 5.2%<br>(2.3-8.7%)                  | 5400<br>(2300-9500)      | 200000<br>(87000-350000)    |
| Low SDI  | 2010 | Female | 55 to 59 | 36%<br>(23-51%)                | 64%<br>(49-77%)          | 1.3<br>(0.64-2.3)                           | 4.4%<br>(1.8-7.5%)                   | 5.5%<br>(2.2-9.4%)                  | 6300<br>(2400-11000)     | 200000<br>(78000-360000)    |
| Low SDI  | 2010 | Female | 60 to 64 | 36%<br>(23-51%)                | 64%<br>(49-77%)          | 1.3<br>(0.6-2.3)                            | 3.9%<br>(1.4-6.9%)                   | 4.7%<br>(1.8-8.5%)                  | 6200<br>(2100-11000)     | 170000<br>(58000-310000)    |
| Low SDI  | 2010 | Female | 65 to 69 | 37%<br>(25-51%)                | 63%<br>(49-75%)          | 1.2<br>(0.59-2.1)                           | 3.7%<br>(1.3-6.7%)                   | 4.5%<br>(1.5-8.1%)                  | 6700<br>(2100-12000)     | 150000<br>(48000-280000)    |
| Low SDI  | 2010 | Female | 70 to 74 | 35%<br>(24-49%)                | 65%<br>(51-76%)          | 1<br>(0.48-1.8)                             | 2.9%<br>(0.56-6%)                    | 3.4%<br>(0.64-7.1%)                 | 5300<br>(910-11000)      | 96000<br>(17000-200000)     |
| Low SDI  | 2010 | Female | 75 to 79 | 33%<br>(21-48%)                | 67%<br>(52-79%)          | 0.86<br>(0.38-1.6)                          | 2.4%<br>(0.23-5.1%)                  | 2.8%<br>(0.26-6%)                   | 4000<br>(310-8800)       | 56000<br>(4600-120000)      |
| Low SDI  | 2010 | Female | 80 to 84 | 32%<br>(19-47%)                | 68%<br>(53-81%)          | 0.77<br>(0.35-1.4)                          | 1.8%<br>(0.04-4.1%)                  | 2.1%<br>(0.043-4.8%)                | 2200<br>(3.3-5200)       | 23000<br>(150-53000)        |
| Low SDI  | 2010 | Female | 85 to 89 | 31%<br>(19-45%)                | 69%<br>(55-81%)          | 0.74<br>(0.34-1.4)                          | 1.4%<br>(-0.13-3.5%)                 | 1.7%<br>(-0.16-4.1%)                | 970<br>(-100-2400)       | 7200<br>(-700-18000)        |
| Low SDI  | 2010 | Female | 90 to 94 | 33%<br>(20-47%)                | 67%<br>(53-80%)          | 0.75<br>(0.33-1.4)                          | 1.1%<br>(-0.34-3.2%)                 | 1.3%<br>(-0.47-3.8%)                | 280<br>(-99-790)         | 1400<br>(-450-4000)         |
| Low SDI  | 2010 | Female | 95 plus  | 36%<br>(20-53%)                | 64%<br>(47-80%)          | 0.76<br>(0.29-1.6)                          | 1.2%<br>(-0.37-3.5%)                 | 1.3%<br>(-0.54-4%)                  | 71<br>(-29-220)          | 250<br>(-79-740)            |
| Low SDI  | 2010 | Male   | All Ages | 28%<br>(23-34%)                | 72%<br>(66-77%)          | 0.89<br>(0.65-1.2)                          | 2.4%<br>(1.7-3.4%)                   | 3.6%<br>(2.3-5.1%)                  | 110000<br>(66000-150000) | 460000<br>(310000-630000)   |
| Low SDI  | 2010 | Male   | 15 to 19 | 26%<br>(18-37%)                | 74%<br>(63-82%)          | 0.82<br>(0.44-1.4)                          | 2.7%<br>(1.6-4.3%)                   | 3%<br>(1.4-5.2%)                    | 2100<br>(990-3700)       | 200000<br>(110000-320000)   |
| Low SDI  | 2010 | Male   | 20 to 24 | 36%<br>(26-48%)                | 64%<br>(52-74%)          | 1.4<br>(0.76-2.2)                           | 6%<br>(3.6-8.8%)                     | 6.4%<br>(3.3-10%)                   | 5400<br>(2700-8900)      | 460000<br>(270000-690000)   |

| Location | Year | Sex    | Age      | Prevalence of current drinkers | Prevalence of abstainers | Population average of standard drinks daily | Percent of total attributable deaths | Percent of total attributable DALYs | Attributable deaths     | Attributable DALYs           |
|----------|------|--------|----------|--------------------------------|--------------------------|---------------------------------------------|--------------------------------------|-------------------------------------|-------------------------|------------------------------|
| Low SDI  | 2010 | Male   | 25 to 29 | 41%<br>(29-53%)                | 59%<br>(47-71%)          | 1.8<br>(1.1-2.8)                            | 7.1%<br>(4.4-10%)                    | 7.9%<br>(4.3-12%)                   | 7600<br>(4100-12000)    | 550000<br>(340000-810000)    |
| Low SDI  | 2010 | Male   | 30 to 34 | 43%<br>(31-57%)                | 57%<br>(43-69%)          | 2<br>(1.2-3.2)                              | 7%<br>(4.4-10%)                      | 8%<br>(4.6-12%)                     | 8600<br>(4900-13000)    | 550000<br>(340000-790000)    |
| Low SDI  | 2010 | Male   | 35 to 39 | 45%<br>(33-58%)                | 55%<br>(42-67%)          | 2.1<br>(1.2-3.5)                            | 6.9%<br>(4.3-9.9%)                   | 7.9%<br>(4.6-12%)                   | 9100<br>(5300-14000)    | 510000<br>(320000-750000)    |
| Low SDI  | 2010 | Male   | 40 to 44 | 46%<br>(34-59%)                | 54%<br>(41-66%)          | 2.2<br>(1.2-3.6)                            | 7%<br>(4.3-10%)                      | 8.2%<br>(4.9-12%)                   | 9700<br>(5600-15000)    | 480000<br>(290000-700000)    |
| Low SDI  | 2010 | Male   | 45 to 49 | 47%<br>(34-60%)                | 53%<br>(40-66%)          | 2.2<br>(1.2-3.6)                            | 7.4%<br>(4.5-11%)                    | 8.7%<br>(5.1-13%)                   | 10000<br>(5900-16000)   | 440000<br>(260000-660000)    |
| Low SDI  | 2010 | Male   | 50 to 54 | 48%<br>(35-61%)                | 52%<br>(39-65%)          | 2.1<br>(1.1-3.6)                            | 7.8%<br>(4.5-12%)                    | 9.3%<br>(5.2-14%)                   | 11000<br>(6000-17000)   | 410000<br>(230000-620000)    |
| Low SDI  | 2010 | Male   | 55 to 59 | 47%<br>(35-61%)                | 53%<br>(39-65%)          | 2<br>(1.1-3.4)                              | 7.7%<br>(4.3-11%)                    | 9.2%<br>(5.1-14%)                   | 11000<br>(6000-17000)   | 360000<br>(200000-550000)    |
| Low SDI  | 2010 | Male   | 60 to 64 | 46%<br>(32-61%)                | 54%<br>(39-68%)          | 1.8<br>(0.94-3.2)                           | 6.3%<br>(3.3-9.9%)                   | 7.5%<br>(3.8-12%)                   | 9800<br>(4900-16000)    | 270000<br>(140000-430000)    |
| Low SDI  | 2010 | Male   | 65 to 69 | 44%<br>(30-58%)                | 56%<br>(42-70%)          | 1.5<br>(0.79-2.5)                           | 4.9%<br>(2.3-8.1%)                   | 5.8%<br>(2.7-9.5%)                  | 8000<br>(3600-14000)    | 180000<br>(85000-310000)     |
| Low SDI  | 2010 | Male   | 70 to 74 | 42%<br>(28-55%)                | 58%<br>(45-72%)          | 1.2<br>(0.63-2.2)                           | 3.7%<br>(1.4-6.7%)                   | 4.3%<br>(1.6-7.8%)                  | 6000<br>(2200-11000)    | 110000<br>(41000-200000)     |
| Low SDI  | 2010 | Male   | 75 to 79 | 40%<br>(26-55%)                | 60%<br>(45-74%)          | 1<br>(0.5-1.9)                              | 3%<br>(0.9-5.8%)                     | 3.4%<br>(1-6.7%)                    | 4200<br>(1200-8300)     | 59000<br>(18000-120000)      |
| Low SDI  | 2010 | Male   | 80 to 84 | 38%<br>(24-53%)                | 62%<br>(47-76%)          | 0.88<br>(0.42-1.6)                          | 2.3%<br>(0.69-4.5%)                  | 2.7%<br>(0.74-5.3%)                 | 2200<br>(600-4400)      | 23000<br>(6800-46000)        |
| Low SDI  | 2010 | Male   | 85 to 89 | 34%<br>(22-49%)                | 66%<br>(51-78%)          | 0.7<br>(0.34-1.3)                           | 1.7%<br>(0.47-3.4%)                  | 1.9%<br>(0.45-3.9%)                 | 820<br>(200-1700)       | 6300<br>(1700-13000)         |
| Low SDI  | 2010 | Male   | 90 to 94 | 34%<br>(22-49%)                | 66%<br>(51-78%)          | 0.6<br>(0.28-1.1)                           | 1.1%<br>(0.12-2.4%)                  | 1.1%<br>(0.0095-2.7%)               | 180<br>(1.8-440)        | 1000<br>(120-2300)           |
| Low SDI  | 2010 | Male   | 95 plus  | 37%<br>(21-55%)                | 63%<br>(45-79%)          | 0.56<br>(0.22-1.1)                          | 1.2%<br>(0.03-2.8%)                  | 1.2%<br>(-0.16-3.1%)                | 45<br>(-5.8-120)        | 170<br>(4.5-420)             |
| Low SDI  | 2016 | Female | All Ages | 24%<br>(20-29%)                | 76%<br>(71-80%)          | 0.63<br>(0.36-1)                            | 1.4%<br>(0.68-2.3%)                  | 2.4%<br>(0.88-4.2%)                 | 60000<br>(22000-110000) | 2200000<br>(1100000-3600000) |
| Low SDI  | 2016 | Female | 15 to 19 | 24%<br>(17-35%)                | 76%<br>(65-83%)          | 0.67<br>(0.3-1.3)                           | 1.3%<br>(0.61-2.3%)                  | 1.6%<br>(0.5-3.3%)                  | 860<br>(270-1800)       | 92000<br>(42000-160000)      |
| Low SDI  | 2016 | Female | 20 to 24 | 30%<br>(20-42%)                | 70%<br>(58-80%)          | 1<br>(0.45-1.9)                             | 2.3%<br>(1.2-3.8%)                   | 2.5%<br>(0.87-4.8%)                 | 1500<br>(520-3000)      | 160000<br>(82000-270000)     |
| Low SDI  | 2016 | Female | 25 to 29 | 32%<br>(21-44%)                | 68%<br>(56-79%)          | 1.2<br>(0.57-2.3)                           | 2.7%<br>(1.5-4.3%)                   | 3.1%<br>(1.3-5.7%)                  | 2100<br>(870-3900)      | 190000<br>(99000-300000)     |
| Low SDI  | 2016 | Female | 30 to 34 | 34%<br>(23-47%)                | 66%<br>(53-77%)          | 1.3<br>(0.63-2.5)                           | 2.9%<br>(1.5-4.6%)                   | 3.5%<br>(1.5-6.2%)                  | 2700<br>(1200-4900)     | 200000<br>(100000-320000)    |
| Low SDI  | 2016 | Female | 35 to 39 | 37%<br>(25-49%)                | 63%<br>(51-75%)          | 1.3<br>(0.61-2.5)                           | 3.1%<br>(1.6-5%)                     | 3.9%<br>(1.8-6.8%)                  | 3300<br>(1400-5800)     | 200000<br>(96000-330000)     |



| Location | Year | Sex    | Age      | Prevalence of current drinkers | Prevalence of abstainers | Population average of standard drinks daily | Percent of total attributable deaths | Percent of total attributable DALYs | Attributable deaths      | Attributable DALYs        |
|----------|------|--------|----------|--------------------------------|--------------------------|---------------------------------------------|--------------------------------------|-------------------------------------|--------------------------|---------------------------|
| Low SDI  | 2016 | Female | 40 to 44 | 38%<br>(27-51%)                | 62%<br>(49-73%)          | 1.3<br>(0.6-2.5)                            | 3.3%<br>(1.6-5.4%)                   | 4.4%<br>(2-7.4%)                    | 3700<br>(1600-6500)      | 190000<br>(88000-320000)  |
| Low SDI  | 2016 | Female | 45 to 49 | 38%<br>(26-51%)                | 62%<br>(49-74%)          | 1.3<br>(0.57-2.6)                           | 3.8%<br>(1.7-6.7%)                   | 5.1%<br>(2.1-9%)                    | 4600<br>(1800-8300)      | 200000<br>(82000-360000)  |
| Low SDI  | 2016 | Female | 50 to 54 | 37%<br>(25-52%)                | 63%<br>(48-75%)          | 1.3<br>(0.55-2.6)                           | 4.3%<br>(1.7-7.6%)                   | 5.7%<br>(2.2-10%)                   | 5800<br>(2100-11000)     | 220000<br>(81000-390000)  |
| Low SDI  | 2016 | Female | 55 to 59 | 36%<br>(23-50%)                | 64%<br>(50-77%)          | 1.3<br>(0.54-2.6)                           | 4.4%<br>(1.5-8.1%)                   | 5.7%<br>(2-10%)                     | 6700<br>(2100-13000)     | 210000<br>(69000-400000)  |
| Low SDI  | 2016 | Female | 60 to 64 | 36%<br>(23-51%)                | 64%<br>(49-77%)          | 1.3<br>(0.53-2.6)                           | 3.9%<br>(1.2-7.5%)                   | 4.9%<br>(1.5-9.3%)                  | 6700<br>(1900-13000)     | 180000<br>(50000-360000)  |
| Low SDI  | 2016 | Female | 65 to 69 | 37%<br>(24-51%)                | 63%<br>(49-76%)          | 1.2<br>(0.51-2.3)                           | 3.6%<br>(0.91-7.1%)                  | 4.4%<br>(1.1-8.7%)                  | 7100<br>(1700-14000)     | 160000<br>(37000-320000)  |
| Low SDI  | 2016 | Female | 70 to 74 | 36%<br>(24-49%)                | 64%<br>(51-76%)          | 1<br>(0.42-2.1)                             | 2.9%<br>(0.29-6.5%)                  | 3.4%<br>(0.33-7.7%)                 | 5900<br>(510-14000)      | 110000<br>(9900-240000)   |
| Low SDI  | 2016 | Female | 75 to 79 | 33%<br>(21-48%)                | 67%<br>(52-79%)          | 0.85<br>(0.33-1.8)                          | 2.3%<br>(0.0096-5.5%)                | 2.7%<br>(0.017-6.5%)                | 4300<br>(-37-11000)      | 60000<br>(-580-150000)    |
| Low SDI  | 2016 | Female | 80 to 84 | 32%<br>(19-47%)                | 68%<br>(53-81%)          | 0.78<br>(0.31-1.6)                          | 1.8%<br>(-0.15-4.5%)                 | 2.1%<br>(-0.17-5.2%)                | 2600<br>(-270-6600)      | 27000<br>(-2800-68000)    |
| Low SDI  | 2016 | Female | 85 to 89 | 32%<br>(20-46%)                | 68%<br>(54-80%)          | 0.76<br>(0.3-1.6)                           | 1.5%<br>(-0.27-4%)                   | 1.7%<br>(-0.33-4.7%)                | 1200<br>(-250-3400)      | 9100<br>(-1800-25000)     |
| Low SDI  | 2016 | Female | 90 to 94 | 33%<br>(21-48%)                | 67%<br>(52-79%)          | 0.76<br>(0.29-1.6)                          | 1.1%<br>(-0.47-3.6%)                 | 1.3%<br>(-0.6-4.2%)                 | 350<br>(-160-1100)       | 1800<br>(-760-5800)       |
| Low SDI  | 2016 | Female | 95 plus  | 36%<br>(21-54%)                | 64%<br>(46-79%)          | 0.81<br>(0.27-1.8)                          | 1.3%<br>(-0.41-4%)                   | 1.5%<br>(-0.58-4.7%)                | 100<br>(-42-330)         | 370<br>(-120-1100)        |
| Low SDI  | 2016 | Male   | All Ages | 29%<br>(24-34%)                | 71%<br>(66-76%)          | 0.91<br>(0.53-1.5)                          | 3%<br>(1.8-4.3%)                     | 4.2%<br>(2.3-6.4%)                  | 120000<br>(62000-180000) | 520000<br>(310000-760000) |
| Low SDI  | 2016 | Male   | 15 to 19 | 26%<br>(18-37%)                | 74%<br>(63-82%)          | 0.82<br>(0.38-1.5)                          | 2.8%<br>(1.5-4.6%)                   | 3.1%<br>(1.3-5.7%)                  | 2400<br>(950-4400)       | 230000<br>(120000-380000) |
| Low SDI  | 2016 | Male   | 20 to 24 | 36%<br>(25-48%)                | 64%<br>(52-75%)          | 1.3<br>(0.64-2.4)                           | 6.1%<br>(3.5-9.4%)                   | 6.5%<br>(3-11%)                     | 5900<br>(2600-10000)     | 520000<br>(280000-820000) |
| Low SDI  | 2016 | Male   | 25 to 29 | 41%<br>(29-53%)                | 59%<br>(47-71%)          | 1.8<br>(0.89-3.2)                           | 7.5%<br>(4.5-11%)                    | 8.4%<br>(4.3-14%)                   | 8300<br>(4000-14000)     | 620000<br>(350000-950000) |
| Low SDI  | 2016 | Male   | 30 to 34 | 44%<br>(31-57%)                | 56%<br>(43-69%)          | 2.1<br>(1-3.7)                              | 7.8%<br>(4.6-11%)                    | 9%<br>(4.8-14%)                     | 9500<br>(4800-15000)     | 620000<br>(350000-930000) |
| Low SDI  | 2016 | Male   | 35 to 39 | 45%<br>(33-57%)                | 55%<br>(43-67%)          | 2.2<br>(1-3.9)                              | 7.7%<br>(4.5-11%)                    | 9.1%<br>(5-14%)                     | 10000<br>(5300-16000)    | 580000<br>(330000-880000) |
| Low SDI  | 2016 | Male   | 40 to 44 | 46%<br>(34-59%)                | 54%<br>(41-66%)          | 2.2<br>(1-4)                                | 7.9%<br>(4.5-12%)                    | 9.5%<br>(5.2-14%)                   | 11000<br>(5600-17000)    | 540000<br>(300000-830000) |
| Low SDI  | 2016 | Male   | 45 to 49 | 47%<br>(34-60%)                | 53%<br>(40-66%)          | 2.2<br>(1-4.1)                              | 8.2%<br>(4.5-12%)                    | 9.9%<br>(5.3-15%)                   | 11000<br>(5700-18000)    | 500000<br>(260000-770000) |
| Low SDI  | 2016 | Male   | 50 to 54 | 48%<br>(35-61%)                | 52%<br>(39-65%)          | 2.2<br>(0.98-4.1)                           | 8.2%<br>(4.3-13%)                    | 10%<br>(5-16%)                      | 12000<br>(5700-19000)    | 450000<br>(220000-720000) |

| Location | Year | Sex    | Age      | Prevalence of current drinkers | Prevalence of abstainers | Population average of standard drinks daily | Percent of total attributable deaths | Percent of total attributable DALYs | Attributable deaths    | Attributable DALYs           |
|----------|------|--------|----------|--------------------------------|--------------------------|---------------------------------------------|--------------------------------------|-------------------------------------|------------------------|------------------------------|
| Low SDI  | 2016 | Male   | 55 to 59 | 47%<br>(35-61%)                | 53%<br>(39-65%)          | 2.1<br>(0.95-3.9)                           | 7.8%<br>(3.9-12%)                    | 9.5%<br>(4.7-15%)                   | 12000<br>(5600-19000)  | 390000<br>(190000-630000)    |
| Low SDI  | 2016 | Male   | 60 to 64 | 46%<br>(32-60%)                | 54%<br>(40-68%)          | 1.8<br>(0.81-3.5)                           | 6.3%<br>(2.9-10%)                    | 7.5%<br>(3.3-13%)                   | 11000<br>(4600-18000)  | 290000<br>(130000-500000)    |
| Low SDI  | 2016 | Male   | 65 to 69 | 43%<br>(30-57%)                | 57%<br>(43-70%)          | 1.5<br>(0.68-2.8)                           | 4.8%<br>(1.9-8.6%)                   | 5.7%<br>(2.2-10%)                   | 8600<br>(3200-16000)   | 200000<br>(76000-360000)     |
| Low SDI  | 2016 | Male   | 70 to 74 | 42%<br>(28-55%)                | 58%<br>(45-72%)          | 1.2<br>(0.54-2.4)                           | 3.6%<br>(1.1-7.1%)                   | 4.2%<br>(1.3-8.4%)                  | 6600<br>(1900-13000)   | 120000<br>(36000-240000)     |
| Low SDI  | 2016 | Male   | 75 to 79 | 40%<br>(26-55%)                | 60%<br>(45-74%)          | 1<br>(0.43-2.1)                             | 2.9%<br>(0.72-6.1%)                  | 3.3%<br>(0.8-7.2%)                  | 4500<br>(1000-9900)    | 64000<br>(16000-140000)      |
| Low SDI  | 2016 | Male   | 80 to 84 | 38%<br>(24-53%)                | 62%<br>(47-76%)          | 0.88<br>(0.38-1.7)                          | 2.3%<br>(0.52-4.9%)                  | 2.6%<br>(0.54-5.7%)                 | 2500<br>(500-5500)     | 27000<br>(5900-58000)        |
| Low SDI  | 2016 | Male   | 85 to 89 | 35%<br>(22-50%)                | 65%<br>(50-78%)          | 0.73<br>(0.31-1.5)                          | 1.7%<br>(0.37-3.9%)                  | 1.9%<br>(0.34-4.5%)                 | 1000<br>(180-2400)     | 8000<br>(1700-18000)         |
| Low SDI  | 2016 | Male   | 90 to 94 | 35%<br>(22-49%)                | 65%<br>(51-78%)          | 0.63<br>(0.25-1.3)                          | 1.2%<br>(0.088-2.9%)                 | 1.2%<br>(-0.025-3.3%)               | 240<br>(-6.1-650)      | 1300<br>(97-3400)            |
| Low SDI  | 2016 | Male   | 95 plus  | 38%<br>(21-55%)                | 62%<br>(45-79%)          | 0.58<br>(0.2-1.3)                           | 1.2%<br>(0.021-3.1%)                 | 1.2%<br>(-0.17-3.5%)                | 60<br>(-8.7-170)       | 230<br>(2.7-610)             |
| China    | 1990 | Female | All Ages | 12%<br>(9.9-14%)               | 88%<br>(86-90%)          | 0.14<br>(0.11-0.17)                         | 0.85%<br>(0.61-1.1%)                 | 1.3%<br>(0.81-1.8%)                 | 49000<br>(31000-68000) | 1500000<br>(1100000-2000000) |
| China    | 1990 | Female | 15 to 19 | 8.7%<br>(5.4-13%)              | 91%<br>(87-95%)          | 0.086<br>(0.046-0.15)                       | 0.63%<br>(0.42-0.92%)                | 0.72%<br>(0.38-1.2%)                | 410<br>(220-710)       | 51000<br>(34000-74000)       |
| China    | 1990 | Female | 20 to 24 | 11%<br>(6.4-17%)               | 89%<br>(83-94%)          | 0.095<br>(0.049-0.16)                       | 0.91%<br>(0.59-1.3%)                 | 0.67%<br>(0.23-1.3%)                | 560<br>(200-1100)      | 97000<br>(61000-140000)      |
| China    | 1990 | Female | 25 to 29 | 12%<br>(7.3-19%)               | 88%<br>(81-93%)          | 0.12<br>(0.061-0.2)                         | 1%<br>(0.68-1.4%)                    | 0.79%<br>(0.3-1.5%)                 | 540<br>(210-1000)      | 87000<br>(58000-120000)      |
| China    | 1990 | Female | 30 to 34 | 14%<br>(8.3-23%)               | 86%<br>(77-92%)          | 0.16<br>(0.081-0.26)                        | 1%<br>(0.7-1.4%)                     | 1%<br>(0.54-1.7%)                   | 720<br>(370-1200)      | 82000<br>(55000-120000)      |
| China    | 1990 | Female | 35 to 39 | 17%<br>(9.7-25%)               | 83%<br>(75-90%)          | 0.21<br>(0.11-0.34)                         | 1.2%<br>(0.84-1.6%)                  | 1.6%<br>(0.99-2.3%)                 | 1400<br>(870-2100)     | 110000<br>(75000-150000)     |
| China    | 1990 | Female | 40 to 44 | 18%<br>(11-28%)                | 82%<br>(72-89%)          | 0.26<br>(0.15-0.41)                         | 1.4%<br>(0.98-1.9%)                  | 2.1%<br>(1.4-3%)                    | 1800<br>(1200-2600)    | 100000<br>(76000-140000)     |
| China    | 1990 | Female | 45 to 49 | 18%<br>(11-27%)                | 82%<br>(73-89%)          | 0.29<br>(0.16-0.44)                         | 1.6%<br>(1.1-2.2%)                   | 2.5%<br>(1.6-3.5%)                  | 2400<br>(1600-3500)    | 110000<br>(75000-150000)     |
| China    | 1990 | Female | 50 to 54 | 18%<br>(11-27%)                | 82%<br>(73-89%)          | 0.3<br>(0.17-0.47)                          | 1.7%<br>(1.2-2.5%)                   | 2.6%<br>(1.7-3.7%)                  | 3700<br>(2400-5100)    | 140000<br>(92000-190000)     |
| China    | 1990 | Female | 55 to 59 | 18%<br>(11-26%)                | 82%<br>(74-89%)          | 0.31<br>(0.18-0.49)                         | 1.9%<br>(1.2-2.7%)                   | 2.7%<br>(1.7-3.8%)                  | 5400<br>(3500-7700)    | 170000<br>(110000-240000)    |
| China    | 1990 | Female | 60 to 64 | 18%<br>(11-27%)                | 82%<br>(73-89%)          | 0.32<br>(0.18-0.54)                         | 1.7%<br>(1.1-2.6%)                   | 2.3%<br>(1.5-3.4%)                  | 6400<br>(4000-9300)    | 170000<br>(110000-250000)    |
| China    | 1990 | Female | 65 to 69 | 18%<br>(12-26%)                | 82%<br>(74-88%)          | 0.34<br>(0.2-0.52)                          | 1.6%<br>(1-2.4%)                     | 2.1%<br>(1.3-3%)                    | 7500<br>(4700-11000)   | 160000<br>(100000-240000)    |

| Location | Year | Sex    | Age      | Prevalence of current drinkers | Prevalence of abstainers | Population average of standard drinks daily | Percent of total attributable deaths | Percent of total attributable DALYs | Attributable deaths       | Attributable DALYs           |
|----------|------|--------|----------|--------------------------------|--------------------------|---------------------------------------------|--------------------------------------|-------------------------------------|---------------------------|------------------------------|
| China    | 1990 | Female | 70 to 74 | 18%<br>(11-25%)                | 82%<br>(75-89%)          | 0.33<br>(0.19-0.54)                         | 1.3%<br>(0.75-2.1%)                  | 1.7%<br>(0.93-2.6%)                 | 7900<br>(4500-12000)      | 140000<br>(77000-220000)     |
| China    | 1990 | Female | 75 to 79 | 16%<br>(10-24%)                | 84%<br>(76-90%)          | 0.3<br>(0.16-0.51)                          | 0.97%<br>(0.42-1.7%)                 | 1.2%<br>(0.54-2%)                   | 5600<br>(2500-9500)       | 76000<br>(32000-130000)      |
| China    | 1990 | Female | 80 to 84 | 16%<br>(9.7-23%)               | 84%<br>(77-90%)          | 0.3<br>(0.17-0.48)                          | 0.62%<br>(0.12-1.2%)                 | 0.73%<br>(0.16-1.5%)                | 2700<br>(580-5400)        | 28000<br>(5600-55000)        |
| China    | 1990 | Female | 85 to 89 | 16%<br>(10-24%)                | 84%<br>(76-90%)          | 0.31<br>(0.16-0.52)                         | 0.43%<br>(-0.011-1%)                 | 0.51%<br>(-0.019-1.2%)              | 1200<br>(-45-2800)        | 8800<br>(-230-21000)         |
| China    | 1990 | Female | 90 to 94 | 18%<br>(12-27%)                | 82%<br>(73-88%)          | 0.35<br>(0.19-0.6)                          | 0.3%<br>(-0.19-1%)                   | 0.33%<br>(-0.23-1.1%)               | 310<br>(-210-1000)        | 1600<br>(-1000-5200)         |
| China    | 1990 | Female | 95 plus  | 21%<br>(12-32%)                | 79%<br>(68-88%)          | 0.41<br>(0.18-0.76)                         | 0.25%<br>(-0.39-1.2%)                | 0.24%<br>(-0.49-1.3%)               | 55<br>(-110-300)          | 220<br>(-350-1000)           |
| China    | 1990 | Male   | All Ages | 41%<br>(37-47%)                | 59%<br>(53-63%)          | 1.8<br>(1.6-2.1)                            | 6.3%<br>(5.4-7.2%)                   | 8.8%<br>(7.4-10%)                   | 420000<br>(340000-500000) | 1400000<br>(1200000-1600000) |
| China    | 1990 | Male   | 15 to 19 | 24%<br>(16-36%)                | 76%<br>(64-84%)          | 0.46<br>(0.28-0.72)                         | 2.3%<br>(1.5-3.2%)                   | 2.8%<br>(1.7-4.4%)                  | 2300<br>(1400-3600)       | 210000<br>(140000-310000)    |
| China    | 1990 | Male   | 20 to 24 | 43%<br>(30-56%)                | 57%<br>(44-70%)          | 1.4<br>(0.92-1.9)                           | 5.8%<br>(4.3-7.8%)                   | 7.1%<br>(4.8-9.7%)                  | 8200<br>(5500-11000)      | 690000<br>(500000-910000)    |
| China    | 1990 | Male   | 25 to 29 | 52%<br>(38-65%)                | 48%<br>(35-62%)          | 2.1<br>(1.5-2.8)                            | 7.8%<br>(5.8-9.8%)                   | 10%<br>(7-13%)                      | 9800<br>(6800-13000)      | 750000<br>(550000-960000)    |
| China    | 1990 | Male   | 30 to 34 | 57%<br>(41-69%)                | 43%<br>(31-59%)          | 2.7<br>(2-3.4)                              | 9%<br>(7-11%)                        | 12%<br>(8.9-15%)                    | 12000<br>(9000-15000)     | 810000<br>(630000-990000)    |
| China    | 1990 | Male   | 35 to 39 | 59%<br>(45-71%)                | 41%<br>(29-55%)          | 3.3<br>(2.4-4.3)                            | 9.9%<br>(7.9-12%)                    | 13%<br>(10-16%)                     | 17000<br>(13000-21000)    | 1100000<br>(840000-1300000)  |
| China    | 1990 | Male   | 40 to 44 | 61%<br>(48-73%)                | 39%<br>(27-52%)          | 3.8<br>(2.8-4.8)                            | 11%<br>(8.9-13%)                     | 14%<br>(11-17%)                     | 19000<br>(15000-23000)    | 1000000<br>(820000-1200000)  |
| China    | 1990 | Male   | 45 to 49 | 62%<br>(47-74%)                | 38%<br>(26-53%)          | 4.2<br>(3.1-5.3)                            | 12%<br>(10-14%)                      | 15%<br>(12-18%)                     | 25000<br>(20000-30000)    | 1100000<br>(930000-1400000)  |
| China    | 1990 | Male   | 50 to 54 | 62%<br>(48-74%)                | 38%<br>(26-52%)          | 4.3<br>(3.1-5.4)                            | 13%<br>(10-15%)                      | 15%<br>(12-18%)                     | 37000<br>(29000-44000)    | 1400000<br>(1200000-1700000) |
| China    | 1990 | Male   | 55 to 59 | 60%<br>(47-72%)                | 40%<br>(28-53%)          | 4.1<br>(3-5.4)                              | 12%<br>(9.8-15%)                     | 15%<br>(11-17%)                     | 50000<br>(39000-60000)    | 1700000<br>(1300000-2000000) |
| China    | 1990 | Male   | 60 to 64 | 59%<br>(45-71%)                | 41%<br>(29-55%)          | 3.8<br>(2.7-5.1)                            | 12%<br>(8.9-14%)                     | 13%<br>(10-16%)                     | 59000<br>(45000-73000)    | 1700000<br>(1300000-2000000) |
| China    | 1990 | Male   | 65 to 69 | 55%<br>(42-67%)                | 45%<br>(33-58%)          | 3.2<br>(2.4-4.3)                            | 10%<br>(7.8-13%)                     | 11%<br>(8.7-14%)                    | 58000<br>(44000-73000)    | 1300000<br>(1000000-1700000) |

| Location | Year | Sex    | Age      | Prevalence of current drinkers | Prevalence of abstainers | Population average of standard drinks daily | Percent of total attributable deaths | Percent of total attributable DALYs | Attributable deaths    | Attributable DALYs           |
|----------|------|--------|----------|--------------------------------|--------------------------|---------------------------------------------|--------------------------------------|-------------------------------------|------------------------|------------------------------|
| China    | 1990 | Male   | 70 to 74 | 51%<br>(39-63%)                | 49%<br>(37-61%)          | 2.7<br>(1.9-3.7)                            | 8.3%<br>(6-11%)                      | 9.1%<br>(6.5-12%)                   | 57000<br>(41000-76000) | 1100000<br>(760000-1400000)  |
| China    | 1990 | Male   | 75 to 79 | 48%<br>(34-61%)                | 52%<br>(39-66%)          | 2.3<br>(1.5-3.3)                            | 6.9%<br>(4.6-9.7%)                   | 7.5%<br>(4.9-11%)                   | 37000<br>(25000-53000) | 540000<br>(360000-750000)    |
| China    | 1990 | Male   | 80 to 84 | 44%<br>(31-57%)                | 56%<br>(43-69%)          | 2<br>(1.3-2.8)                              | 5.7%<br>(3.6-8%)                     | 6.2%<br>(3.9-8.7%)                  | 18000<br>(11000-25000) | 190000<br>(120000-270000)    |
| China    | 1990 | Male   | 85 to 89 | 42%<br>(30-54%)                | 58%<br>(46-70%)          | 1.8<br>(1.1-2.6)                            | 4.6%<br>(2.8-6.8%)                   | 5%<br>(3-7.4%)                      | 7100<br>(4300-10000)   | 54000<br>(33000-79000)       |
| China    | 1990 | Male   | 90 to 94 | 43%<br>(31-55%)                | 57%<br>(45-69%)          | 1.8<br>(1.1-2.6)                            | 3.8%<br>(2.1-5.8%)                   | 4.1%<br>(2.2-6.3%)                  | 2000<br>(1100-3000)    | 11000<br>(5800-16000)        |
| China    | 1990 | Male   | 95 plus  | 46%<br>(31-60%)                | 54%<br>(40-69%)          | 1.8<br>(0.99-2.8)                           | 3.4%<br>(1.5-5.7%)                   | 3.5%<br>(1.4-6.1%)                  | 390<br>(160-680)       | 1400<br>(620-2400)           |
| China    | 1995 | Female | All Ages | 12%<br>(10-15%)                | 88%<br>(85-90%)          | 0.16<br>(0.13-0.2)                          | 1.1%<br>(0.79-1.4%)                  | 1.6%<br>(1-2.2%)                    | 62000<br>(40000-85000) | 1900000<br>(1400000-2400000) |
| China    | 1995 | Female | 15 to 19 | 8.7%<br>(5.5-13%)              | 91%<br>(87-94%)          | 0.099<br>(0.052-0.17)                       | 0.68%<br>(0.46-0.96%)                | 0.79%<br>(0.43-1.4%)                | 290<br>(150-490)       | 38000<br>(25000-55000)       |
| China    | 1995 | Female | 20 to 24 | 11%<br>(6.8-18%)               | 89%<br>(82-93%)          | 0.11<br>(0.058-0.2)                         | 0.98%<br>(0.64-1.4%)                 | 0.77%<br>(0.33-1.5%)                | 570<br>(240-1100)      | 94000<br>(60000-140000)      |
| China    | 1995 | Female | 25 to 29 | 13%<br>(8.1-20%)               | 87%<br>(80-92%)          | 0.14<br>(0.076-0.24)                        | 1%<br>(0.71-1.4%)                    | 0.9%<br>(0.37-1.7%)                 | 800<br>(330-1500)      | 110000<br>(74000-160000)     |
| China    | 1995 | Female | 30 to 34 | 15%<br>(9-24%)                 | 85%<br>(76-91%)          | 0.18<br>(0.097-0.29)                        | 1.1%<br>(0.78-1.5%)                  | 1.2%<br>(0.69-2%)                   | 980<br>(560-1600)      | 100000<br>(71000-150000)     |
| China    | 1995 | Female | 35 to 39 | 17%<br>(9.6-25%)               | 83%<br>(75-90%)          | 0.23<br>(0.13-0.38)                         | 1.3%<br>(0.92-1.7%)                  | 1.8%<br>(1.1-2.6%)                  | 1400<br>(910-2100)     | 110000<br>(75000-140000)     |
| China    | 1995 | Female | 40 to 44 | 17%<br>(11-26%)                | 83%<br>(74-89%)          | 0.27<br>(0.16-0.44)                         | 1.5%<br>(1.1-2%)                     | 2.4%<br>(1.6-3.3%)                  | 2700<br>(1900-3900)    | 150000<br>(110000-210000)    |
| China    | 1995 | Female | 45 to 49 | 17%<br>(10-26%)                | 83%<br>(74-90%)          | 0.3<br>(0.17-0.47)                          | 1.7%<br>(1.2-2.4%)                   | 2.8%<br>(1.8-3.9%)                  | 3400<br>(2200-4800)    | 150000<br>(100000-210000)    |
| China    | 1995 | Female | 50 to 54 | 17%<br>(11-26%)                | 83%<br>(74-89%)          | 0.32<br>(0.19-0.51)                         | 1.9%<br>(1.3-2.7%)                   | 3%<br>(2-4.2%)                      | 4000<br>(2700-5600)    | 150000<br>(100000-210000)    |
| China    | 1995 | Female | 55 to 59 | 17%<br>(11-25%)                | 83%<br>(75-89%)          | 0.33<br>(0.19-0.52)                         | 2.1%<br>(1.4-2.9%)                   | 3.1%<br>(2.1-4.3%)                  | 5800<br>(3900-8000)    | 190000<br>(130000-260000)    |
| China    | 1995 | Female | 60 to 64 | 17%<br>(10-26%)                | 83%<br>(74-90%)          | 0.34<br>(0.19-0.57)                         | 2%<br>(1.3-2.8%)                     | 2.7%<br>(1.8-3.9%)                  | 7800<br>(5300-11000)   | 210000<br>(140000-300000)    |
| China    | 1995 | Female | 65 to 69 | 17%<br>(11-25%)                | 83%<br>(75-89%)          | 0.36<br>(0.21-0.56)                         | 1.9%<br>(1.2-2.6%)                   | 2.5%<br>(1.7-3.4%)                  | 9000<br>(6100-12000)   | 200000<br>(130000-270000)    |
| China    | 1995 | Female | 70 to 74 | 17%<br>(11-25%)                | 83%<br>(75-89%)          | 0.36<br>(0.21-0.6)                          | 1.6%<br>(0.92-2.4%)                  | 2%<br>(1.2-3%)                      | 9400<br>(5600-15000)   | 170000<br>(97000-260000)     |
| China    | 1995 | Female | 75 to 79 | 17%<br>(11-26%)                | 83%<br>(74-89%)          | 0.37<br>(0.2-0.61)                          | 1.2%<br>(0.54-2.1%)                  | 1.5%<br>(0.68-2.5%)                 | 7800<br>(3700-13000)   | 110000<br>(48000-180000)     |
| China    | 1995 | Female | 80 to 84 | 18%<br>(11-26%)                | 82%<br>(74-89%)          | 0.38<br>(0.22-0.61)                         | 0.83%<br>(0.25-1.6%)                 | 0.99%<br>(0.31-1.9%)                | 4600<br>(1400-8700)    | 47000<br>(14000-89000)       |

| Location | Year | Sex    | Age      | Prevalence of current drinkers | Prevalence of abstainers | Population average of standard drinks daily | Percent of total attributable deaths | Percent of total attributable DALYs | Attributable deaths       | Attributable DALYs           |
|----------|------|--------|----------|--------------------------------|--------------------------|---------------------------------------------|--------------------------------------|-------------------------------------|---------------------------|------------------------------|
| China    | 1995 | Female | 85 to 89 | 19%<br>(12-28%)                | 81%<br>(72-88%)          | 0.41<br>(0.22-0.67)                         | 0.64%<br>(0.074-1.4%)                | 0.75%<br>(0.092-1.7%)               | 2200<br>(270-4900)        | 16000<br>(1900-36000)        |
| China    | 1995 | Female | 90 to 94 | 21%<br>(14-30%)                | 79%<br>(70-86%)          | 0.46<br>(0.25-0.78)                         | 0.51%<br>(-0.13-1.4%)                | 0.57%<br>(-0.16-1.6%)               | 700<br>(-200-2000)        | 3700<br>(-1000-10000)        |
| China    | 1995 | Female | 95 plus  | 24%<br>(14-36%)                | 76%<br>(64-86%)          | 0.53<br>(0.24-0.96)                         | 0.47%<br>(-0.37-1.7%)                | 0.49%<br>(-0.46-1.9%)               | 150<br>(-140-610)         | 570<br>(-450-2100)           |
| China    | 1995 | Male   | All Ages | 43%<br>(38-48%)                | 57%<br>(52-62%)          | 2.2<br>(2-2.5)                              | 7.7%<br>(6.6-8.8%)                   | 10%<br>(8.5-12%)                    | 510000<br>(430000-600000) | 1700000<br>(1400000-1900000) |
| China    | 1995 | Male   | 15 to 19 | 23%<br>(15-34%)                | 77%<br>(66-85%)          | 0.51<br>(0.31-0.79)                         | 2.5%<br>(1.7-3.5%)                   | 3.2%<br>(2-4.9%)                    | 1800<br>(1100-2800)       | 170000<br>(110000-250000)    |
| China    | 1995 | Male   | 20 to 24 | 42%<br>(30-55%)                | 58%<br>(45-70%)          | 1.6<br>(1.1-2.1)                            | 6.6%<br>(4.9-8.8%)                   | 8.1%<br>(5.5-11%)                   | 8800<br>(5900-12000)      | 730000<br>(530000-980000)    |
| China    | 1995 | Male   | 25 to 29 | 53%<br>(39-65%)                | 47%<br>(35-61%)          | 2.4<br>(1.7-3.2)                            | 8.8%<br>(6.6-11%)                    | 11%<br>(8.1-15%)                    | 15000<br>(11000-19000)    | 1100000<br>(810000-1400000)  |
| China    | 1995 | Male   | 30 to 34 | 57%<br>(42-69%)                | 43%<br>(31-58%)          | 3.1<br>(2.3-3.9)                            | 9.9%<br>(7.8-12%)                    | 13%<br>(9.8-16%)                    | 17000<br>(13000-21000)    | 1100000<br>(880000-1400000)  |
| China    | 1995 | Male   | 35 to 39 | 59%<br>(47-71%)                | 41%<br>(29-53%)          | 3.8<br>(2.8-4.9)                            | 11%<br>(8.9-13%)                     | 14%<br>(11-18%)                     | 19000<br>(15000-23000)    | 1100000<br>(920000-1400000)  |
| China    | 1995 | Male   | 40 to 44 | 61%<br>(49-73%)                | 39%<br>(27-51%)          | 4.4<br>(3.3-5.5)                            | 12%<br>(10-15%)                      | 15%<br>(13-18%)                     | 30000<br>(25000-36000)    | 1600000<br>(1300000-1900000) |
| China    | 1995 | Male   | 45 to 49 | 62%<br>(48-74%)                | 38%<br>(26-52%)          | 4.8<br>(3.6-6.1)                            | 13%<br>(11-16%)                      | 16%<br>(13-19%)                     | 33000<br>(27000-39000)    | 1500000<br>(1300000-1800000) |
| China    | 1995 | Male   | 50 to 54 | 62%<br>(48-73%)                | 38%<br>(27-52%)          | 4.9<br>(3.7-6.3)                            | 14%<br>(11-16%)                      | 16%<br>(13-19%)                     | 38000<br>(31000-45000)    | 1500000<br>(1200000-1800000) |
| China    | 1995 | Male   | 55 to 59 | 60%<br>(46-72%)                | 40%<br>(28-54%)          | 4.7<br>(3.4-6.1)                            | 13%<br>(11-16%)                      | 16%<br>(12-18%)                     | 52000<br>(41000-61000)    | 1800000<br>(1400000-2100000) |
| China    | 1995 | Male   | 60 to 64 | 57%<br>(43-70%)                | 43%<br>(30-57%)          | 4.2<br>(3-5.7)                              | 12%<br>(9.8-15%)                     | 14%<br>(11-17%)                     | 69000<br>(54000-84000)    | 2000000<br>(1500000-2400000) |
| China    | 1995 | Male   | 65 to 69 | 54%<br>(41-66%)                | 46%<br>(34-59%)          | 3.6<br>(2.6-4.8)                            | 11%<br>(8.5-14%)                     | 12%<br>(9.4-15%)                    | 69000<br>(53000-86000)    | 1600000<br>(1200000-2000000) |
| China    | 1995 | Male   | 70 to 74 | 51%<br>(38-62%)                | 49%<br>(38-62%)          | 3<br>(2.1-4.2)                              | 9.2%<br>(6.8-12%)                    | 10%<br>(7.4-13%)                    | 63000<br>(46000-83000)    | 1200000<br>(860000-1500000)  |

| Location | Year | Sex    | Age      | Prevalence of current drinkers | Prevalence of abstainers | Population average of standard drinks daily | Percent of total attributable deaths | Percent of total attributable DALYs | Attributable deaths    | Attributable DALYs           |
|----------|------|--------|----------|--------------------------------|--------------------------|---------------------------------------------|--------------------------------------|-------------------------------------|------------------------|------------------------------|
| China    | 1995 | Male   | 75 to 79 | 48%<br>(35-62%)                | 52%<br>(38-65%)          | 2.7<br>(1.8-3.8)                            | 7.9%<br>(5.4-11%)                    | 8.6%<br>(5.9-12%)                   | 51000<br>(35000-70000) | 730000<br>(510000-1000000)   |
| China    | 1995 | Male   | 80 to 84 | 46%<br>(33-59%)                | 54%<br>(41-67%)          | 2.5<br>(1.6-3.4)                            | 6.8%<br>(4.5-9.3%)                   | 7.4%<br>(4.9-10%)                   | 30000<br>(20000-41000) | 320000<br>(210000-430000)    |
| China    | 1995 | Male   | 85 to 89 | 45%<br>(32-57%)                | 55%<br>(43-68%)          | 2.2<br>(1.4-3.2)                            | 5.7%<br>(3.6-8%)                     | 6.1%<br>(3.9-8.7%)                  | 11000<br>(7200-16000)  | 87000<br>(55000-120000)      |
| China    | 1995 | Male   | 90 to 94 | 45%<br>(34-57%)                | 55%<br>(43-66%)          | 2.1<br>(1.4-3.2)                            | 4.7%<br>(2.8-6.9%)                   | 5%<br>(2.9-7.6%)                    | 3100<br>(1800-4700)    | 17000<br>(9700-25000)        |
| China    | 1995 | Male   | 95 plus  | 48%<br>(34-62%)                | 52%<br>(38-66%)          | 2.1<br>(1.2-3.3)                            | 4.2%<br>(1.9-6.8%)                   | 4.4%<br>(1.9-7.2%)                  | 590<br>(250-980)       | 2200<br>(950-3500)           |
| China    | 2000 | Female | All Ages | 13%<br>(11-16%)                | 87%<br>(84-89%)          | 0.16<br>(0.14-0.2)                          | 1.1%<br>(0.77-1.4%)                  | 1.4%<br>(0.88-2%)                   | 56000<br>(34000-80000) | 1700000<br>(1300000-2200000) |
| China    | 2000 | Female | 15 to 19 | 12%<br>(8-18%)                 | 88%<br>(82-92%)          | 0.14<br>(0.074-0.23)                        | 0.76%<br>(0.51-1.1%)                 | 0.99%<br>(0.54-1.7%)                | 320<br>(170-540)       | 42000<br>(28000-59000)       |
| China    | 2000 | Female | 20 to 24 | 13%<br>(8.4-20%)               | 87%<br>(80-92%)          | 0.13<br>(0.068-0.22)                        | 1.1%<br>(0.74-1.5%)                  | 0.87%<br>(0.4-1.6%)                 | 400<br>(190-720)       | 71000<br>(47000-100000)      |
| China    | 2000 | Female | 25 to 29 | 14%<br>(8.7-21%)               | 86%<br>(79-91%)          | 0.15<br>(0.081-0.24)                        | 1.1%<br>(0.77-1.5%)                  | 0.93%<br>(0.46-1.6%)                | 620<br>(310-1100)      | 99000<br>(67000-140000)      |
| China    | 2000 | Female | 30 to 34 | 15%<br>(9-23%)                 | 85%<br>(77-91%)          | 0.18<br>(0.096-0.29)                        | 1.1%<br>(0.78-1.5%)                  | 1.2%<br>(0.68-1.8%)                 | 900<br>(530-1400)      | 110000<br>(77000-150000)     |
| China    | 2000 | Female | 35 to 39 | 16%<br>(9.4-24%)               | 84%<br>(76-91%)          | 0.22<br>(0.12-0.35)                         | 1.2%<br>(0.85-1.5%)                  | 1.6%<br>(1-2.3%)                    | 1300<br>(830-1800)     | 110000<br>(77000-140000)     |
| China    | 2000 | Female | 40 to 44 | 16%<br>(9.8-24%)               | 84%<br>(76-90%)          | 0.25<br>(0.14-0.39)                         | 1.3%<br>(0.94-1.7%)                  | 2%<br>(1.4-2.9%)                    | 1900<br>(1300-2700)    | 120000<br>(85000-160000)     |
| China    | 2000 | Female | 45 to 49 | 16%<br>(9.2-23%)               | 84%<br>(77-91%)          | 0.27<br>(0.15-0.42)                         | 1.5%<br>(0.98-2%)                    | 2.4%<br>(1.5-3.4%)                  | 3400<br>(2200-4800)    | 160000<br>(110000-220000)    |
| China    | 2000 | Female | 50 to 54 | 16%<br>(10-24%)                | 84%<br>(76-90%)          | 0.3<br>(0.18-0.47)                          | 1.7%<br>(1.1-2.3%)                   | 2.7%<br>(1.7-3.8%)                  | 4300<br>(2700-6000)    | 160000<br>(110000-230000)    |
| China    | 2000 | Female | 55 to 59 | 16%<br>(10-24%)                | 84%<br>(76-90%)          | 0.31<br>(0.18-0.49)                         | 1.8%<br>(1.2-2.7%)                   | 2.8%<br>(1.8-4%)                    | 5100<br>(3300-7400)    | 160000<br>(110000-230000)    |
| China    | 2000 | Female | 60 to 64 | 16%<br>(9.6-24%)               | 84%<br>(76-90%)          | 0.31<br>(0.18-0.53)                         | 1.7%<br>(1.1-2.5%)                   | 2.4%<br>(1.5-3.5%)                  | 6700<br>(4300-9900)    | 180000<br>(120000-260000)    |
| China    | 2000 | Female | 65 to 69 | 16%<br>(9.8-23%)               | 84%<br>(77-90%)          | 0.32<br>(0.19-0.5)                          | 1.7%<br>(1-2.4%)                     | 2.2%<br>(1.5-3.2%)                  | 8900<br>(5700-13000)   | 200000<br>(120000-280000)    |
| China    | 2000 | Female | 70 to 74 | 16%<br>(10-24%)                | 84%<br>(76-90%)          | 0.33<br>(0.19-0.54)                         | 1.4%<br>(0.74-2.1%)                  | 1.7%<br>(0.98-2.7%)                 | 8800<br>(4900-14000)   | 150000<br>(84000-240000)     |
| China    | 2000 | Female | 75 to 79 | 16%<br>(10-24%)                | 84%<br>(76-90%)          | 0.34<br>(0.18-0.56)                         | 1%<br>(0.38-1.7%)                    | 1.3%<br>(0.52-2.1%)                 | 6600<br>(2800-11000)   | 90000<br>(35000-160000)      |
| China    | 2000 | Female | 80 to 84 | 17%<br>(11-24%)                | 83%<br>(76-89%)          | 0.36<br>(0.2-0.57)                          | 0.66%<br>(0.089-1.4%)                | 0.81%<br>(0.14-1.6%)                | 4000<br>(710-8200)     | 41000<br>(5600-84000)        |
| China    | 2000 | Female | 85 to 89 | 18%<br>(12-26%)                | 82%<br>(74-88%)          | 0.39<br>(0.21-0.63)                         | 0.5%<br>(-0.091-1.3%)                | 0.58%<br>(-0.1-1.5%)                | 2100<br>(-370-5400)    | 15000<br>(-2700-40000)       |

| Location | Year | Sex    | Age      | Prevalence of current drinkers | Prevalence of abstainers | Population average of standard drinks daily | Percent of total attributable deaths | Percent of total attributable DALYs | Attributable deaths       | Attributable DALYs           |
|----------|------|--------|----------|--------------------------------|--------------------------|---------------------------------------------|--------------------------------------|-------------------------------------|---------------------------|------------------------------|
| China    | 2000 | Female | 90 to 94 | 20%<br>(14-29%)                | 80%<br>(71-86%)          | 0.44<br>(0.24-0.75)                         | 0.38%<br>(-0.27-1.3%)                | 0.42%<br>(-0.32-1.5%)               | 650<br>(-490-2300)        | 3400<br>(-2400-12000)        |
| China    | 2000 | Female | 95 plus  | 23%<br>(14-34%)                | 77%<br>(66-86%)          | 0.52<br>(0.23-0.93)                         | 0.36%<br>(-0.51-1.6%)                | 0.36%<br>(-0.62-1.8%)               | 150<br>(-270-750)         | 600<br>(-850-2700)           |
| China    | 2000 | Male   | All Ages | 45%<br>(40-50%)                | 55%<br>(50-60%)          | 2.3<br>(2.1-2.6)                            | 8.4%<br>(7.2-9.6%)                   | 10%<br>(8.6-12%)                    | 550000<br>(450000-640000) | 1800000<br>(1500000-2000000) |
| China    | 2000 | Male   | 15 to 19 | 29%<br>(20-40%)                | 71%<br>(60-80%)          | 0.64<br>(0.39-0.97)                         | 3%<br>(2.1-4.1%)                     | 3.9%<br>(2.4-5.8%)                  | 2100<br>(1300-3100)       | 20000<br>(13000-28000)       |
| China    | 2000 | Male   | 20 to 24 | 43%<br>(30-55%)                | 57%<br>(45-70%)          | 1.6<br>(1.1-2.1)                            | 7%<br>(5.1-9.4%)                     | 8.6%<br>(5.8-12%)                   | 6900<br>(4600-9600)       | 58000<br>(42000-79000)       |
| China    | 2000 | Male   | 25 to 29 | 52%<br>(38-64%)                | 48%<br>(36-62%)          | 2.3<br>(1.7-3.1)                            | 8.8%<br>(6.6-11%)                    | 11%<br>(8-15%)                      | 13000<br>(8900-17000)     | 98000<br>(72000-120000)      |
| China    | 2000 | Male   | 30 to 34 | 56%<br>(41-69%)                | 44%<br>(31-59%)          | 3<br>(2.2-3.8)                              | 9.9%<br>(7.8-12%)                    | 13%<br>(9.7-16%)                    | 19000<br>(14000-23000)    | 130000<br>(99000-160000)     |
| China    | 2000 | Male   | 35 to 39 | 59%<br>(47-71%)                | 41%<br>(29-53%)          | 3.7<br>(2.8-4.8)                            | 11%<br>(8.9-14%)                     | 14%<br>(11-18%)                     | 22000<br>(17000-27000)    | 130000<br>(110000-160000)    |
| China    | 2000 | Male   | 40 to 44 | 61%<br>(49-73%)                | 39%<br>(27-51%)          | 4.4<br>(3.4-5.5)                            | 12%<br>(10-15%)                      | 16%<br>(13-19%)                     | 28000<br>(23000-33000)    | 150000<br>(120000-180000)    |
| China    | 2000 | Male   | 45 to 49 | 62%<br>(48-74%)                | 38%<br>(26-52%)          | 4.8<br>(3.6-6.1)                            | 13%<br>(11-16%)                      | 16%<br>(13-19%)                     | 43000<br>(35000-51000)    | 200000<br>(160000-230000)    |
| China    | 2000 | Male   | 50 to 54 | 62%<br>(48-73%)                | 38%<br>(27-52%)          | 4.9<br>(3.7-6.2)                            | 13%<br>(11-16%)                      | 16%<br>(13-19%)                     | 44000<br>(35000-52000)    | 180000<br>(140000-210000)    |
| China    | 2000 | Male   | 55 to 59 | 60%<br>(46-71%)                | 40%<br>(29-54%)          | 4.6<br>(3.4-6)                              | 13%<br>(10-15%)                      | 15%<br>(12-18%)                     | 50000<br>(40000-59000)    | 170000<br>(140000-200000)    |
| China    | 2000 | Male   | 60 to 64 | 56%<br>(43-69%)                | 44%<br>(31-57%)          | 4.1<br>(3-5.5)                              | 12%<br>(9.4-15%)                     | 14%<br>(11-17%)                     | 67000<br>(52000-81000)    | 190000<br>(150000-230000)    |
| China    | 2000 | Male   | 65 to 69 | 53%<br>(41-65%)                | 47%<br>(35-59%)          | 3.5<br>(2.5-4.6)                            | 11%<br>(8.2-13%)                     | 12%<br>(9.2-15%)                    | 77000<br>(59000-97000)    | 180000<br>(140000-230000)    |
| China    | 2000 | Male   | 70 to 74 | 51%<br>(39-62%)                | 49%<br>(38-61%)          | 3<br>(2.1-4.1)                              | 9.1%<br>(6.6-12%)                    | 10%<br>(7.2-13%)                    | 72000<br>(52000-93000)    | 130000<br>(96000-170000)     |
| China    | 2000 | Male   | 75 to 79 | 48%<br>(36-61%)                | 52%<br>(39-64%)          | 2.7<br>(1.8-3.8)                            | 7.8%<br>(5.3-11%)                    | 8.5%<br>(5.8-12%)                   | 52000<br>(35000-71000)    | 75000<br>(51000-100000)      |

| Location | Year | Sex    | Age      | Prevalence of current drinkers | Prevalence of abstainers | Population average of standard drinks daily | Percent of total attributable deaths | Percent of total attributable DALYs | Attributable deaths    | Attributable DALYs           |
|----------|------|--------|----------|--------------------------------|--------------------------|---------------------------------------------|--------------------------------------|-------------------------------------|------------------------|------------------------------|
| China    | 2000 | Male   | 80 to 84 | 46%<br>(33-58%)                | 54%<br>(42-67%)          | 2.4<br>(1.6-3.4)                            | 6.6%<br>(4.4-9.2%)                   | 7.2%<br>(4.8-10%)                   | 34000<br>(22000-47000) | 370000<br>(240000-510000)    |
| China    | 2000 | Male   | 85 to 89 | 44%<br>(32-56%)                | 56%<br>(44-68%)          | 2.2<br>(1.4-3.1)                            | 5.5%<br>(3.4-7.8%)                   | 5.9%<br>(3.7-8.5%)                  | 16000<br>(9600-22000)  | 120000<br>(75000-170000)     |
| China    | 2000 | Male   | 90 to 94 | 45%<br>(33-56%)                | 55%<br>(44-67%)          | 2.1<br>(1.3-3.1)                            | 4.5%<br>(2.6-6.9%)                   | 4.9%<br>(2.7-7.5%)                  | 4000<br>(2200-6200)    | 21000<br>(12000-33000)       |
| China    | 2000 | Male   | 95 plus  | 48%<br>(34-61%)                | 52%<br>(39-66%)          | 2.1<br>(1.2-3.1)                            | 4.1%<br>(1.7-6.9%)                   | 4.2%<br>(1.6-7.3%)                  | 750<br>(280-1300)      | 2800<br>(1100-4700)          |
| China    | 2005 | Female | All Ages | 15%<br>(13-16%)                | 85%<br>(84-87%)          | 0.18<br>(0.15-0.21)                         | 0.98%<br>(0.73-1.3%)                 | 1.2%<br>(0.76-1.7%)                 | 47000<br>(29000-66000) | 1500000<br>(1100000-1900000) |
| China    | 2005 | Female | 15 to 19 | 15%<br>(11-20%)                | 85%<br>(80-89%)          | 0.16<br>(0.09-0.25)                         | 0.77%<br>(0.52-1.1%)                 | 1.1%<br>(0.59-1.8%)                 | 350<br>(190-570)       | 48000<br>(31000-67000)       |
| China    | 2005 | Female | 20 to 24 | 17%<br>(12-23%)                | 83%<br>(77-88%)          | 0.16<br>(0.091-0.25)                        | 1.1%<br>(0.78-1.5%)                  | 0.98%<br>(0.44-1.7%)                | 300<br>(140-510)       | 63000<br>(42000-91000)       |
| China    | 2005 | Female | 25 to 29 | 16%<br>(11-21%)                | 84%<br>(79-89%)          | 0.16<br>(0.096-0.24)                        | 1.1%<br>(0.81-1.5%)                  | 0.99%<br>(0.51-1.6%)                | 330<br>(170-540)       | 65000<br>(45000-91000)       |
| China    | 2005 | Female | 30 to 34 | 16%<br>(12-22%)                | 84%<br>(78-88%)          | 0.18<br>(0.12-0.26)                         | 1.1%<br>(0.76-1.4%)                  | 1.1%<br>(0.68-1.7%)                 | 620<br>(380-930)       | 88000<br>(62000-120000)      |
| China    | 2005 | Female | 35 to 39 | 18%<br>(13-24%)                | 82%<br>(76-87%)          | 0.23<br>(0.15-0.34)                         | 1.1%<br>(0.8-1.4%)                   | 1.5%<br>(0.98-2.1%)                 | 1200<br>(800-1700)     | 110000<br>(81000-150000)     |
| China    | 2005 | Female | 40 to 44 | 18%<br>(14-25%)                | 82%<br>(75-86%)          | 0.27<br>(0.17-0.38)                         | 1.1%<br>(0.81-1.5%)                  | 1.9%<br>(1.3-2.6%)                  | 1700<br>(1200-2400)    | 110000<br>(80000-150000)     |
| China    | 2005 | Female | 45 to 49 | 17%<br>(13-23%)                | 83%<br>(77-87%)          | 0.28<br>(0.19-0.41)                         | 1.2%<br>(0.82-1.7%)                  | 2.1%<br>(1.4-3%)                    | 2400<br>(1600-3500)    | 120000<br>(82000-160000)     |
| China    | 2005 | Female | 50 to 54 | 17%<br>(12-23%)                | 83%<br>(77-88%)          | 0.3<br>(0.2-0.42)                           | 1.4%<br>(0.89-2%)                    | 2.3%<br>(1.5-3.3%)                  | 4600<br>(3000-6500)    | 180000<br>(120000-250000)    |
| China    | 2005 | Female | 55 to 59 | 16%<br>(12-21%)                | 84%<br>(79-88%)          | 0.29<br>(0.19-0.41)                         | 1.5%<br>(0.95-2.2%)                  | 2.4%<br>(1.6-3.5%)                  | 5200<br>(3400-7700)    | 170000<br>(110000-240000)    |
| China    | 2005 | Female | 60 to 64 | 14%<br>(10-19%)                | 86%<br>(81-90%)          | 0.27<br>(0.17-0.41)                         | 1.4%<br>(0.92-2.1%)                  | 2.2%<br>(1.4-3.1%)                  | 5400<br>(3500-7600)    | 140000<br>(91000-200000)     |
| China    | 2005 | Female | 65 to 69 | 14%<br>(9.7-19%)               | 86%<br>(81-90%)          | 0.27<br>(0.18-0.38)                         | 1.4%<br>(0.89-2%)                    | 1.9%<br>(1.3-2.7%)                  | 7200<br>(4600-10000)   | 160000<br>(98000-220000)     |
| China    | 2005 | Female | 70 to 74 | 13%<br>(9.1-19%)               | 87%<br>(81-91%)          | 0.26<br>(0.16-0.42)                         | 1.1%<br>(0.63-1.7%)                  | 1.5%<br>(0.87-2.2%)                 | 7600<br>(4400-11000)   | 130000<br>(76000-200000)     |
| China    | 2005 | Female | 75 to 79 | 13%<br>(8.2-19%)               | 87%<br>(81-92%)          | 0.25<br>(0.14-0.41)                         | 0.76%<br>(0.3-1.3%)                  | 0.98%<br>(0.42-1.6%)                | 5300<br>(2300-8700)    | 72000<br>(28000-120000)      |
| China    | 2005 | Female | 80 to 84 | 12%<br>(7.3-18%)               | 88%<br>(82-93%)          | 0.25<br>(0.14-0.4)                          | 0.44%<br>(0.018-0.93%)               | 0.55%<br>(0.044-1.1%)               | 2900<br>(230-5900)     | 29000<br>(1100-61000)        |
| China    | 2005 | Female | 85 to 89 | 13%<br>(7.8-19%)               | 87%<br>(81-92%)          | 0.27<br>(0.14-0.44)                         | 0.27%<br>(-0.15-0.78%)               | 0.32%<br>(-0.17-0.9%)               | 1300<br>(-690-3600)    | 9500<br>(-4900-27000)        |
| China    | 2005 | Female | 90 to 94 | 14%<br>(8.9-21%)               | 86%<br>(79-91%)          | 0.31<br>(0.16-0.52)                         | 0.16%<br>(-0.32-0.77%)               | 0.15%<br>(-0.38-0.84%)              | 290<br>(-720-1600)     | 1800<br>(-3500-8800)         |



| Location | Year | Sex    | Age      | Prevalence of current drinkers | Prevalence of abstainers | Population average of standard drinks daily | Percent of total attributable deaths | Percent of total attributable DALYs | Attributable deaths       | Attributable DALYs           |
|----------|------|--------|----------|--------------------------------|--------------------------|---------------------------------------------|--------------------------------------|-------------------------------------|---------------------------|------------------------------|
| China    | 2005 | Female | 95 plus  | 17%<br>(9.6-26%)               | 83%<br>(74-90%)          | 0.37<br>(0.16-0.67)                         | 0.13%<br>(-0.51-0.95%)               | 0.087%<br>(-0.65-1%)                | 46<br>(-350-550)          | 270<br>(-1100-2000)          |
| China    | 2005 | Male   | All Ages | 47%<br>(44-51%)                | 53%<br>(49-56%)          | 2.5<br>(2.2-2.8)                            | 8.8%<br>(7.5-10%)                    | 10%<br>(8.3-12%)                    | 540000<br>(450000-640000) | 1800000<br>(1500000-2000000) |
| China    | 2005 | Male   | 15 to 19 | 35%<br>(27-44%)                | 65%<br>(56-73%)          | 0.75<br>(0.49-1.1)                          | 3.2%<br>(2.2-4.4%)                   | 4.5%<br>(2.9-6.6%)                  | 2800<br>(1800-4200)       | 260000<br>(180000-360000)    |
| China    | 2005 | Male   | 20 to 24 | 48%<br>(40-58%)                | 52%<br>(42-60%)          | 1.8<br>(1.3-2.4)                            | 7.4%<br>(5.5-9.7%)                   | 9.7%<br>(6.6-14%)                   | 6500<br>(4400-9000)       | 550000<br>(400000-730000)    |
| China    | 2005 | Male   | 25 to 29 | 54%<br>(44-64%)                | 46%<br>(36-56%)          | 2.4<br>(1.8-3.2)                            | 9.1%<br>(6.8-11%)                    | 12%<br>(8.8-16%)                    | 8900<br>(6300-12000)      | 700000<br>(520000-890000)    |
| China    | 2005 | Male   | 30 to 34 | 57%<br>(47-67%)                | 43%<br>(33-53%)          | 3.1<br>(2.4-3.8)                            | 9.9%<br>(7.7-12%)                    | 13%<br>(9.8-16%)                    | 16000<br>(12000-20000)    | 1100000<br>(860000-1400000)  |
| China    | 2005 | Male   | 35 to 39 | 59%<br>(50-69%)                | 41%<br>(31-50%)          | 3.7<br>(2.9-4.7)                            | 11%<br>(8.9-13%)                     | 14%<br>(11-18%)                     | 24000<br>(19000-30000)    | 1500000<br>(1200000-1800000) |
| China    | 2005 | Male   | 40 to 44 | 61%<br>(50-71%)                | 39%<br>(29-50%)          | 4.3<br>(3.4-5.3)                            | 12%<br>(10-15%)                      | 16%<br>(13-19%)                     | 32000<br>(26000-38000)    | 1700000<br>(1400000-2000000) |
| China    | 2005 | Male   | 45 to 49 | 62%<br>(52-72%)                | 38%<br>(28-48%)          | 4.7<br>(3.7-5.9)                            | 13%<br>(11-15%)                      | 16%<br>(13-19%)                     | 37000<br>(30000-43000)    | 1700000<br>(1400000-2000000) |
| China    | 2005 | Male   | 50 to 54 | 62%<br>(52-72%)                | 38%<br>(28-48%)          | 4.9<br>(3.8-6.1)                            | 13%<br>(11-15%)                      | 16%<br>(13-18%)                     | 57000<br>(46000-67000)    | 2300000<br>(1900000-2700000) |
| China    | 2005 | Male   | 55 to 59 | 60%<br>(51-69%)                | 40%<br>(31-49%)          | 4.6<br>(3.5-5.9)                            | 13%<br>(10-15%)                      | 15%<br>(12-18%)                     | 57000<br>(46000-67000)    | 2000000<br>(1600000-2300000) |
| China    | 2005 | Male   | 60 to 64 | 56%<br>(46-66%)                | 44%<br>(34-54%)          | 4<br>(3-5.3)                                | 11%<br>(9-14%)                       | 13%<br>(10-16%)                     | 57000<br>(44000-69000)    | 1700000<br>(1300000-2000000) |
| China    | 2005 | Male   | 65 to 69 | 52%<br>(42-61%)                | 48%<br>(39-58%)          | 3.3<br>(2.5-4.3)                            | 9.9%<br>(7.7-12%)                    | 11%<br>(8.6-14%)                    | 70000<br>(54000-86000)    | 1700000<br>(1300000-2000000) |
| China    | 2005 | Male   | 70 to 74 | 48%<br>(38-58%)                | 52%<br>(42-62%)          | 2.8<br>(2-3.7)                              | 8.2%<br>(5.9-10%)                    | 9.1%<br>(6.5-12%)                   | 69000<br>(49000-89000)    | 1300000<br>(950000-1700000)  |
| China    | 2005 | Male   | 75 to 79 | 44%<br>(34-55%)                | 56%<br>(45-66%)          | 2.4<br>(1.6-3.3)                            | 6.8%<br>(4.6-9.2%)                   | 7.4%<br>(5-10%)                     | 51000<br>(34000-71000)    | 750000<br>(510000-1000000)   |
| China    | 2005 | Male   | 80 to 84 | 42%<br>(30-55%)                | 58%<br>(45-70%)          | 2.1<br>(1.4-3)                              | 5.7%<br>(3.6-8.1%)                   | 6.3%<br>(3.9-8.8%)                  | 34000<br>(21000-48000)    | 370000<br>(230000-520000)    |

| Location | Year | Sex    | Age      | Prevalence of current drinkers | Prevalence of abstainers | Population average of standard drinks daily | Percent of total attributable deaths | Percent of total attributable DALYs | Attributable deaths    | Attributable DALYs        |
|----------|------|--------|----------|--------------------------------|--------------------------|---------------------------------------------|--------------------------------------|-------------------------------------|------------------------|---------------------------|
| China    | 2005 | Male   | 85 to 89 | 41%<br>(29-52%)                | 59%<br>(48-71%)          | 1.9<br>(1.3-2.8)                            | 4.7%<br>(2.9-6.9%)                   | 5.1%<br>(3.1-7.6%)                  | 16000<br>(9400-23000)  | 120000<br>(74000-180000)  |
| China    | 2005 | Male   | 90 to 94 | 42%<br>(31-53%)                | 58%<br>(47-69%)          | 1.9<br>(1.2-2.7)                            | 3.8%<br>(2-6%)                       | 4%<br>(2.1-6.5%)                    | 4700<br>(2400-7500)    | 25000<br>(13000-41000)    |
| China    | 2005 | Male   | 95 plus  | 45%<br>(31-59%)                | 55%<br>(41-69%)          | 1.8<br>(1.1-2.8)                            | 3.4%<br>(1.2-6.1%)                   | 3.5%<br>(1.1-6.5%)                  | 810<br>(260-1500)      | 3000<br>(1100-5500)       |
| China    | 2010 | Female | All Ages | 14%<br>(13-16%)                | 86%<br>(84-87%)          | 0.21<br>(0.17-0.24)                         | 1.1%<br>(0.8-1.3%)                   | 1.3%<br>(0.87-1.9%)                 | 50000<br>(32000-70000) | 160000<br>(120000-200000) |
| China    | 2010 | Female | 15 to 19 | 14%<br>(10-19%)                | 86%<br>(81-90%)          | 0.16<br>(0.092-0.26)                        | 0.74%<br>(0.51-1%)                   | 1.1%<br>(0.62-1.8%)                 | 210<br>(120-340)       | 34000<br>(23000-48000)    |
| China    | 2010 | Female | 20 to 24 | 16%<br>(12-22%)                | 84%<br>(78-88%)          | 0.17<br>(0.096-0.26)                        | 1.1%<br>(0.8-1.6%)                   | 0.99%<br>(0.48-1.7%)                | 310<br>(150-530)       | 75000<br>(50000-110000)   |
| China    | 2010 | Female | 25 to 29 | 16%<br>(11-22%)                | 84%<br>(78-89%)          | 0.17<br>(0.1-0.27)                          | 1.1%<br>(0.86-1.5%)                  | 1%<br>(0.58-1.6%)                   | 290<br>(170-470)       | 65000<br>(45000-91000)    |
| China    | 2010 | Female | 30 to 34 | 16%<br>(12-22%)                | 84%<br>(78-88%)          | 0.2<br>(0.13-0.29)                          | 1.1%<br>(0.79-1.4%)                  | 1.2%<br>(0.78-1.8%)                 | 420<br>(280-630)       | 67000<br>(46000-92000)    |
| China    | 2010 | Female | 35 to 39 | 18%<br>(13-23%)                | 82%<br>(77-87%)          | 0.25<br>(0.16-0.37)                         | 1.1%<br>(0.81-1.4%)                  | 1.6%<br>(1.1-2.3%)                  | 960<br>(650-1300)      | 96000<br>(70000-130000)   |
| China    | 2010 | Female | 40 to 44 | 18%<br>(13-24%)                | 82%<br>(76-87%)          | 0.28<br>(0.19-0.41)                         | 1.1%<br>(0.82-1.5%)                  | 2.1%<br>(1.4-2.8%)                  | 1900<br>(1300-2600)    | 130000<br>(92000-170000)  |
| China    | 2010 | Female | 45 to 49 | 17%<br>(12-23%)                | 83%<br>(77-88%)          | 0.3<br>(0.2-0.43)                           | 1.2%<br>(0.86-1.7%)                  | 2.4%<br>(1.6-3.4%)                  | 2700<br>(1800-3800)    | 140000<br>(95000-180000)  |
| China    | 2010 | Female | 50 to 54 | 16%<br>(12-22%)                | 84%<br>(78-88%)          | 0.32<br>(0.21-0.45)                         | 1.4%<br>(0.96-2%)                    | 2.7%<br>(1.8-3.7%)                  | 4000<br>(2600-5500)    | 160000<br>(110000-210000) |
| China    | 2010 | Female | 55 to 59 | 15%<br>(11-20%)                | 85%<br>(80-89%)          | 0.31<br>(0.21-0.44)                         | 1.6%<br>(1.1-2.3%)                   | 2.9%<br>(1.9-4%)                    | 6600<br>(4300-9200)    | 210000<br>(140000-290000) |
| China    | 2010 | Female | 60 to 64 | 14%<br>(9.8-19%)               | 86%<br>(81-90%)          | 0.29<br>(0.19-0.44)                         | 1.6%<br>(1-2.2%)                     | 2.5%<br>(1.8-3.5%)                  | 6900<br>(4700-9400)    | 190000<br>(130000-250000) |
| China    | 2010 | Female | 65 to 69 | 13%<br>(9.5-18%)               | 87%<br>(82-90%)          | 0.28<br>(0.18-0.41)                         | 1.5%<br>(0.99-2%)                    | 2.2%<br>(1.6-3%)                    | 6900<br>(4800-9300)    | 150000<br>(100000-210000) |
| China    | 2010 | Female | 70 to 74 | 13%<br>(8.8-18%)               | 87%<br>(82-91%)          | 0.28<br>(0.17-0.45)                         | 1.2%<br>(0.69-1.7%)                  | 1.6%<br>(1-2.4%)                    | 7300<br>(4500-11000)   | 130000<br>(78000-190000)  |
| China    | 2010 | Female | 75 to 79 | 12%<br>(8.1-18%)               | 88%<br>(82-92%)          | 0.28<br>(0.16-0.44)                         | 0.81%<br>(0.32-1.4%)                 | 1.1%<br>(0.46-1.8%)                 | 5900<br>(2500-9700)    | 82000<br>(32000-140000)   |
| China    | 2010 | Female | 80 to 84 | 12%<br>(7.3-18%)               | 88%<br>(82-93%)          | 0.28<br>(0.15-0.44)                         | 0.49%<br>(0.049-0.97%)               | 0.61%<br>(0.073-1.2%)               | 3400<br>(410-6800)     | 36000<br>(3600-72000)     |
| China    | 2010 | Female | 85 to 89 | 13%<br>(7.7-19%)               | 87%<br>(81-92%)          | 0.29<br>(0.15-0.49)                         | 0.31%<br>(-0.15-0.84%)               | 0.35%<br>(-0.19-1%)                 | 1500<br>(-830-4300)    | 12000<br>(-5700-32000)    |
| China    | 2010 | Female | 90 to 94 | 14%<br>(8.7-21%)               | 86%<br>(79-91%)          | 0.33<br>(0.18-0.57)                         | 0.18%<br>(-0.33-0.86%)               | 0.16%<br>(-0.44-0.95%)              | 360<br>(-990-2100)     | 2400<br>(-4600-12000)     |
| China    | 2010 | Female | 95 plus  | 16%<br>(9.2-25%)               | 84%<br>(75-91%)          | 0.4<br>(0.17-0.73)                          | 0.16%<br>(-0.53-1.1%)                | 0.1%<br>(-0.73-1.2%)                | 72<br>(-510-850)       | 450<br>(-1500-3200)       |

| Location | Year | Sex  | Age      | Prevalence of current drinkers | Prevalence of abstainers | Population average of standard drinks daily | Percent of total attributable deaths | Percent of total attributable DALYs | Attributable deaths       | Attributable DALYs              |
|----------|------|------|----------|--------------------------------|--------------------------|---------------------------------------------|--------------------------------------|-------------------------------------|---------------------------|---------------------------------|
| China    | 2010 | Male | All Ages | 47%<br>(44-52%)                | 53%<br>(48-56%)          | 3<br>(2.6-3.3)                              | 9.4%<br>(8-11%)                      | 11%<br>(8.8-12%)                    | 580000<br>(480000-680000) | 19000000<br>(16000000-21000000) |
| China    | 2010 | Male | 15 to 19 | 32%<br>(25-41%)                | 68%<br>(59-75%)          | 0.76<br>(0.5-1.1)                           | 3.1%<br>(2.2-4.3%)                   | 4.7%<br>(3.1-6.8%)                  | 2000<br>(1300-2900)       | 190000<br>(130000-260000)       |
| China    | 2010 | Male | 20 to 24 | 48%<br>(39-58%)                | 52%<br>(42-61%)          | 2<br>(1.4-2.6)                              | 7.4%<br>(5.5-9.7%)                   | 10%<br>(6.8-14%)                    | 7400<br>(4900-10000)      | 650000<br>(480000-860000)       |
| China    | 2010 | Male | 25 to 29 | 53%<br>(44-63%)                | 47%<br>(37-56%)          | 2.7<br>(2-3.5)                              | 9.3%<br>(7-12%)                      | 13%<br>(9.2-17%)                    | 8400<br>(5900-11000)      | 680000<br>(500000-870000)       |
| China    | 2010 | Male | 30 to 34 | 57%<br>(47-67%)                | 43%<br>(33-53%)          | 3.4<br>(2.6-4.3)                            | 10%<br>(8-13%)                       | 14%<br>(11-18%)                     | 11000<br>(8600-14000)     | 830000<br>(650000-1000000)      |
| China    | 2010 | Male | 35 to 39 | 59%<br>(50-68%)                | 41%<br>(32-50%)          | 4.1<br>(3.2-5.2)                            | 11%<br>(9.2-14%)                     | 15%<br>(12-19%)                     | 21000<br>(16000-26000)    | 1300000<br>(1100000-1600000)    |
| China    | 2010 | Male | 40 to 44 | 60%<br>(50-71%)                | 40%<br>(29-50%)          | 4.7<br>(3.7-5.8)                            | 12%<br>(10-15%)                      | 16%<br>(13-20%)                     | 34000<br>(28000-41000)    | 1900000<br>(1600000-2300000)    |
| China    | 2010 | Male | 45 to 49 | 61%<br>(51-71%)                | 39%<br>(29-49%)          | 5.2<br>(4.1-6.5)                            | 13%<br>(11-15%)                      | 17%<br>(14-20%)                     | 41000<br>(34000-49000)    | 2000000<br>(1700000-2400000)    |
| China    | 2010 | Male | 50 to 54 | 61%<br>(51-71%)                | 39%<br>(29-49%)          | 5.4<br>(4.2-6.6)                            | 13%<br>(11-16%)                      | 16%<br>(14-19%)                     | 50000<br>(41000-58000)    | 2100000<br>(1700000-2400000)    |
| China    | 2010 | Male | 55 to 59 | 59%<br>(50-69%)                | 41%<br>(31-50%)          | 5.1<br>(3.9-6.4)                            | 13%<br>(10-15%)                      | 15%<br>(13-18%)                     | 69000<br>(57000-82000)    | 2500000<br>(2000000-2900000)    |
| China    | 2010 | Male | 60 to 64 | 56%<br>(46-66%)                | 44%<br>(34-54%)          | 4.4<br>(3.3-5.8)                            | 12%<br>(9.3-14%)                     | 14%<br>(11-16%)                     | 67000<br>(54000-81000)    | 2000000<br>(1600000-2400000)    |
| China    | 2010 | Male | 65 to 69 | 51%<br>(42-62%)                | 49%<br>(38-58%)          | 3.6<br>(2.8-4.7)                            | 10%<br>(8.1-12%)                     | 12%<br>(9.3-14%)                    | 66000<br>(53000-81000)    | 1600000<br>(1300000-2000000)    |
| China    | 2010 | Male | 70 to 74 | 47%<br>(38-57%)                | 53%<br>(43-62%)          | 3<br>(2.2-4.1)                              | 8.5%<br>(6.2-11%)                    | 9.6%<br>(7-12%)                     | 71000<br>(51000-90000)    | 1400000<br>(1000000-1700000)    |
| China    | 2010 | Male | 75 to 79 | 44%<br>(35-55%)                | 56%<br>(45-65%)          | 2.6<br>(1.8-3.6)                            | 7.1%<br>(4.9-9.5%)                   | 7.9%<br>(5.4-11%)                   | 60000<br>(41000-81000)    | 900000<br>(620000-1200000)      |
| China    | 2010 | Male | 80 to 84 | 42%<br>(31-55%)                | 58%<br>(45-69%)          | 2.4<br>(1.6-3.3)                            | 6.2%<br>(4.1-8.6%)                   | 6.8%<br>(4.5-9.5%)                  | 45000<br>(29000-62000)    | 490000<br>(330000-680000)       |
| China    | 2010 | Male | 85 to 89 | 41%<br>(30-52%)                | 59%<br>(48-70%)          | 2.2<br>(1.4-3.1)                            | 5.2%<br>(3.2-7.6%)                   | 5.7%<br>(3.5-8.2%)                  | 20000<br>(12000-29000)    | 160000<br>(96000-230000)        |

| Location | Year | Sex    | Age      | Prevalence of current drinkers | Prevalence of abstainers | Population average of standard drinks daily | Percent of total attributable deaths | Percent of total attributable DALYs | Attributable deaths    | Attributable DALYs           |
|----------|------|--------|----------|--------------------------------|--------------------------|---------------------------------------------|--------------------------------------|-------------------------------------|------------------------|------------------------------|
| China    | 2010 | Male   | 90 to 94 | 42%<br>(31-53%)                | 58%<br>(47-69%)          | 2.1<br>(1.4-3)                              | 4.3%<br>(2.3-6.6%)                   | 4.6%<br>(2.3-7.2%)                  | 6000<br>(3100-9500)    | 33000<br>(18000-51000)       |
| China    | 2010 | Male   | 95 plus  | 45%<br>(31-59%)                | 55%<br>(41-69%)          | 2.1<br>(1.2-3.2)                            | 3.8%<br>(1.5-6.6%)                   | 3.9%<br>(1.3-7%)                    | 1300<br>(430-2300)     | 4800<br>(1800-8400)          |
| China    | 2016 | Female | All Ages | 16%<br>(13-19%)                | 84%<br>(81-87%)          | 0.24<br>(0.2-0.3)                           | 1.2%<br>(0.9-1.5%)                   | 1.6%<br>(1-2.2%)                    | 59000<br>(39000-81000) | 1700000<br>(1300000-2200000) |
| China    | 2016 | Female | 15 to 19 | 14%<br>(8.4-21%)               | 86%<br>(79-92%)          | 0.17<br>(0.085-0.29)                        | 0.72%<br>(0.5-1%)                    | 1.2%<br>(0.66-2%)                   | 120<br>(67-200)        | 21000<br>(15000-31000)       |
| China    | 2016 | Female | 20 to 24 | 16%<br>(9.4-25%)               | 84%<br>(75-91%)          | 0.18<br>(0.086-0.3)                         | 1.1%<br>(0.79-1.6%)                  | 1.1%<br>(0.55-1.9%)                 | 190<br>(97-340)        | 52000<br>(34000-77000)       |
| China    | 2016 | Female | 25 to 29 | 18%<br>(10-27%)                | 82%<br>(73-90%)          | 0.2<br>(0.1-0.35)                           | 1.2%<br>(0.86-1.5%)                  | 1.2%<br>(0.65-1.9%)                 | 340<br>(190-560)       | 78000<br>(54000-110000)      |
| China    | 2016 | Female | 30 to 34 | 19%<br>(11-30%)                | 81%<br>(70-89%)          | 0.25<br>(0.13-0.41)                         | 1.1%<br>(0.83-1.5%)                  | 1.4%<br>(0.9-2.2%)                  | 440<br>(280-680)       | 70000<br>(48000-100000)      |
| China    | 2016 | Female | 35 to 39 | 20%<br>(12-31%)                | 80%<br>(69-88%)          | 0.3<br>(0.16-0.5)                           | 1.1%<br>(0.83-1.5%)                  | 2%<br>(1.3-2.9%)                    | 680<br>(440-1000)      | 70000<br>(51000-96000)       |
| China    | 2016 | Female | 40 to 44 | 19%<br>(11-29%)                | 81%<br>(71-89%)          | 0.33<br>(0.18-0.53)                         | 1.2%<br>(0.86-1.6%)                  | 2.5%<br>(1.7-3.5%)                  | 1600<br>(1100-2300)    | 110000<br>(79000-150000)     |
| China    | 2016 | Female | 45 to 49 | 18%<br>(9.6-27%)               | 82%<br>(73-90%)          | 0.33<br>(0.18-0.52)                         | 1.3%<br>(0.92-1.8%)                  | 2.9%<br>(1.9-4%)                    | 3400<br>(2200-4600)    | 170000<br>(120000-220000)    |
| China    | 2016 | Female | 50 to 54 | 16%<br>(9.4-26%)               | 84%<br>(74-91%)          | 0.33<br>(0.18-0.53)                         | 1.5%<br>(1.1-2.1%)                   | 3.1%<br>(2.1-4.2%)                  | 4900<br>(3400-6600)    | 190000<br>(140000-260000)    |
| China    | 2016 | Female | 55 to 59 | 15%<br>(9.1-24%)               | 85%<br>(76-91%)          | 0.33<br>(0.19-0.54)                         | 1.8%<br>(1.2-2.4%)                   | 3.4%<br>(2.4-4.5%)                  | 6200<br>(4400-8300)    | 200000<br>(140000-270000)    |
| China    | 2016 | Female | 60 to 64 | 15%<br>(8.5-25%)               | 85%<br>(75-92%)          | 0.34<br>(0.18-0.58)                         | 1.8%<br>(1.2-2.5%)                   | 3.1%<br>(2.2-4.2%)                  | 9700<br>(6900-13000)   | 260000<br>(180000-360000)    |
| China    | 2016 | Female | 65 to 69 | 15%<br>(8.8-24%)               | 85%<br>(76-91%)          | 0.35<br>(0.19-0.56)                         | 1.6%<br>(1.1-2.3%)                   | 2.6%<br>(1.8-3.6%)                  | 9700<br>(6800-13000)   | 220000<br>(140000-300000)    |
| China    | 2016 | Female | 70 to 74 | 15%<br>(8.9-23%)               | 85%<br>(77-91%)          | 0.34<br>(0.19-0.58)                         | 1.3%<br>(0.77-1.9%)                  | 2%<br>(1.2-2.9%)                    | 7800<br>(4900-11000)   | 140000<br>(81000-210000)     |
| China    | 2016 | Female | 75 to 79 | 14%<br>(8-22%)                 | 86%<br>(78-92%)          | 0.33<br>(0.17-0.56)                         | 0.96%<br>(0.42-1.6%)                 | 1.3%<br>(0.63-2.1%)                 | 6600<br>(3100-11000)   | 92000<br>(40000-150000)      |
| China    | 2016 | Female | 80 to 84 | 14%<br>(7.9-21%)               | 86%<br>(79-92%)          | 0.33<br>(0.17-0.56)                         | 0.6%<br>(0.11-1.2%)                  | 0.79%<br>(0.16-1.5%)                | 4300<br>(860-8200)     | 45000<br>(8300-87000)        |
| China    | 2016 | Female | 85 to 89 | 14%<br>(8.4-23%)               | 86%<br>(77-92%)          | 0.35<br>(0.18-0.6)                          | 0.39%<br>(-0.11-0.99%)               | 0.46%<br>(-0.15-1.2%)               | 2400<br>(-800-6300)    | 19000<br>(-5300-48000)       |
| China    | 2016 | Female | 90 to 94 | 16%<br>(9.7-25%)               | 84%<br>(75-90%)          | 0.4<br>(0.21-0.72)                          | 0.23%<br>(-0.38-1%)                  | 0.22%<br>(-0.53-1.1%)               | 620<br>(-1500-3200)    | 4100<br>(-6700-18000)        |
| China    | 2016 | Female | 95 plus  | 19%<br>(11-31%)                | 81%<br>(69-89%)          | 0.49<br>(0.2-0.92)                          | 0.18%<br>(-0.69-1.3%)                | 0.11%<br>(-0.91-1.4%)               | 110<br>(-900-1400)     | 740<br>(-2700-5300)          |
| China    | 2016 | Male   | All Ages | 48%<br>(44-53%)                | 52%<br>(47-56%)          | 3.3<br>(2.9-3.7)                            | 9.8%<br>(8.4-11%)                    | 11%<br>(9.1-13%)                    | 65000<br>(54000-76000) | 2000000<br>(1700000-2300000) |

| Location | Year | Sex  | Age      | Prevalence of current drinkers | Prevalence of abstainers | Population average of standard drinks daily | Percent of total attributable deaths | Percent of total attributable DALYs | Attributable deaths     | Attributable DALYs           |
|----------|------|------|----------|--------------------------------|--------------------------|---------------------------------------------|--------------------------------------|-------------------------------------|-------------------------|------------------------------|
| China    | 2016 | Male | 15 to 19 | 28%<br>(20-40%)                | 72%<br>(60-80%)          | 0.72<br>(0.45-1.1)                          | 3%<br>(2.1-4.1%)                     | 4.6%<br>(2.9-6.8%)                  | 1200<br>(770-1800)      | 120000<br>(87000-170000)     |
| China    | 2016 | Male | 20 to 24 | 42%<br>(30-54%)                | 58%<br>(46-70%)          | 1.8<br>(1.2-2.5)                            | 7.1%<br>(5.2-9.5%)                   | 9.9%<br>(6.5-14%)                   | 4900<br>(3200-7000)     | 460000<br>(330000-610000)    |
| China    | 2016 | Male | 25 to 29 | 49%<br>(36-62%)                | 51%<br>(38-64%)          | 2.6<br>(1.9-3.6)                            | 8.7%<br>(6.5-11%)                    | 12%<br>(8.6-17%)                    | 9500<br>(6600-13000)    | 790000<br>(590000-1000000)   |
| China    | 2016 | Male | 30 to 34 | 54%<br>(39-67%)                | 46%<br>(33-61%)          | 3.4<br>(2.4-4.5)                            | 9.8%<br>(7.6-12%)                    | 14%<br>(10-18%)                     | 11000<br>(8000-14000)   | 810000<br>(620000-1000000)   |
| China    | 2016 | Male | 35 to 39 | 57%<br>(45-70%)                | 43%<br>(30-55%)          | 4.2<br>(3.1-5.6)                            | 11%<br>(8.6-13%)                     | 15%<br>(12-19%)                     | 13000<br>(10000-16000)  | 880000<br>(690000-1100000)   |
| China    | 2016 | Male | 40 to 44 | 60%<br>(48-73%)                | 40%<br>(27-52%)          | 4.9<br>(3.8-6.3)                            | 12%<br>(9.8-14%)                     | 16%<br>(13-20%)                     | 26000<br>(21000-31000)  | 1500000<br>(1200000-1800000) |
| China    | 2016 | Male | 45 to 49 | 62%<br>(49-74%)                | 38%<br>(26-51%)          | 5.6<br>(4.3-7.1)                            | 13%<br>(11-15%)                      | 17%<br>(14-20%)                     | 45000<br>(37000-53000)  | 2200000<br>(1800000-2600000) |
| China    | 2016 | Male | 50 to 54 | 63%<br>(50-74%)                | 37%<br>(26-50%)          | 5.9<br>(4.5-7.4)                            | 13%<br>(11-15%)                      | 17%<br>(14-20%)                     | 57000<br>(47000-66000)  | 2400000<br>(2000000-2800000) |
| China    | 2016 | Male | 55 to 59 | 62%<br>(50-73%)                | 38%<br>(27-50%)          | 5.6<br>(4.3-7.2)                            | 13%<br>(11-15%)                      | 16%<br>(13-19%)                     | 63000<br>(52000-74000)  | 2200000<br>(1900000-2700000) |
| China    | 2016 | Male | 60 to 64 | 59%<br>(46-71%)                | 41%<br>(29-54%)          | 5.1<br>(3.7-6.7)                            | 12%<br>(9.9-15%)                     | 14%<br>(12-17%)                     | 94000<br>(76000-110000) | 2800000<br>(2300000-3400000) |
| China    | 2016 | Male | 65 to 69 | 55%<br>(43-67%)                | 45%<br>(33-57%)          | 4.2<br>(3.1-5.5)                            | 11%<br>(8.7-13%)                     | 13%<br>(10-16%)                     | 93000<br>(73000-110000) | 2300000<br>(1800000-2800000) |
| China    | 2016 | Male | 70 to 74 | 50%<br>(38-61%)                | 50%<br>(39-62%)          | 3.4<br>(2.4-4.7)                            | 9.1%<br>(6.6-12%)                    | 10%<br>(7.5-13%)                    | 74000<br>(54000-94000)  | 1400000<br>(1100000-1800000) |
| China    | 2016 | Male | 75 to 79 | 46%<br>(33-59%)                | 54%<br>(41-67%)          | 2.9<br>(1.9-4)                              | 7.6%<br>(5.1-10%)                    | 8.4%<br>(5.7-11%)                   | 66000<br>(45000-89000)  | 1000000<br>(680000-1300000)  |
| China    | 2016 | Male | 80 to 84 | 43%<br>(31-56%)                | 57%<br>(44-69%)          | 2.6<br>(1.7-3.6)                            | 6.5%<br>(4.3-9%)                     | 7.2%<br>(4.7-10%)                   | 53000<br>(34000-73000)  | 580000<br>(390000-810000)    |
| China    | 2016 | Male | 85 to 89 | 42%<br>(31-53%)                | 58%<br>(47-69%)          | 2.4<br>(1.6-3.4)                            | 5.6%<br>(3.7-8.1%)                   | 6.1%<br>(3.9-8.9%)                  | 30000<br>(19000-43000)  | 230000<br>(150000-340000)    |
| China    | 2016 | Male | 90 to 94 | 44%<br>(33-55%)                | 56%<br>(45-67%)          | 2.3<br>(1.5-3.4)                            | 4.7%<br>(2.6-7.1%)                   | 5.1%<br>(2.7-7.8%)                  | 9300<br>(4900-14000)    | 51000<br>(28000-77000)       |

| Location    | Year | Sex    | Age      | Prevalence of current drinkers | Prevalence of abstainers | Population average of standard drinks daily | Percent of total attributable deaths | Percent of total attributable DALYs | Attributable deaths | Attributable DALYs        |
|-------------|------|--------|----------|--------------------------------|--------------------------|---------------------------------------------|--------------------------------------|-------------------------------------|---------------------|---------------------------|
| China       | 2016 | Male   | 95 plus  | 47%<br>(33-60%)                | 53%<br>(40-67%)          | 2.3<br>(1.3-3.5)                            | 4.2%<br>(1.7-7.2%)                   | 4.4%<br>(1.5-7.6%)                  | 1800<br>(640-3200)  | 6900<br>(2800-12000)      |
| North Korea | 1990 | Female | All Ages | 16%<br>(13-20%)                | 84%<br>(80-87%)          | 0.26<br>(0.22-0.31)                         | 0.85%<br>(0.5-1.2%)                  | 1.2%<br>(0.47-2.1%)                 | 680<br>(270-1200)   | 24000<br>(15000-35000)    |
| North Korea | 1990 | Female | 15 to 19 | 16%<br>(9.8-25%)               | 84%<br>(75-90%)          | 0.25<br>(0.13-0.43)                         | 0.92%<br>(0.56-1.5%)                 | 1.4%<br>(0.63-2.6%)                 | 8.6<br>(3.7-17)     | 1100<br>(680-1800)        |
| North Korea | 1990 | Female | 20 to 24 | 19%<br>(12-29%)                | 81%<br>(71-88%)          | 0.27<br>(0.13-0.47)                         | 1.3%<br>(0.8-1.9%)                   | 1.3%<br>(0.47-2.7%)                 | 10<br>(3.6-20)      | 1800<br>(1100-2800)       |
| North Korea | 1990 | Female | 25 to 29 | 20%<br>(11-31%)                | 80%<br>(69-89%)          | 0.28<br>(0.15-0.48)                         | 1.3%<br>(0.81-1.8%)                  | 1.3%<br>(0.51-2.4%)                 | 8.7<br>(3.4-16)     | 1400<br>(890-2100)        |
| North Korea | 1990 | Female | 30 to 34 | 21%<br>(12-33%)                | 79%<br>(67-88%)          | 0.32<br>(0.17-0.54)                         | 1.2%<br>(0.77-1.7%)                  | 1.4%<br>(0.66-2.5%)                 | 13<br>(6.1-24)      | 1600<br>(1000-2400)       |
| North Korea | 1990 | Female | 35 to 39 | 22%<br>(13-35%)                | 78%<br>(65-87%)          | 0.4<br>(0.21-0.68)                          | 1.2%<br>(0.8-1.9%)                   | 1.8%<br>(0.91-3.1%)                 | 13<br>(6.6-23)      | 1100<br>(660-1600)        |
| North Korea | 1990 | Female | 40 to 44 | 23%<br>(14-36%)                | 77%<br>(64-86%)          | 0.46<br>(0.25-0.75)                         | 1.3%<br>(0.77-2%)                    | 2.1%<br>(1.1-3.4%)                  | 31<br>(16-51)       | 1900<br>(1100-2900)       |
| North Korea | 1990 | Female | 45 to 49 | 22%<br>(12-35%)                | 78%<br>(65-88%)          | 0.48<br>(0.25-0.81)                         | 1.3%<br>(0.69-2.2%)                  | 2.1%<br>(1-3.7%)                    | 50<br>(24-86)       | 2400<br>(1300-4000)       |
| North Korea | 1990 | Female | 50 to 54 | 22%<br>(13-34%)                | 78%<br>(66-87%)          | 0.5<br>(0.29-0.82)                          | 1.4%<br>(0.68-2.5%)                  | 2.2%<br>(1-3.8%)                    | 74<br>(33-130)      | 2900<br>(1400-5000)       |
| North Korea | 1990 | Female | 55 to 59 | 21%<br>(12-32%)                | 79%<br>(68-88%)          | 0.51<br>(0.25-0.85)                         | 1.5%<br>(0.52-2.7%)                  | 2.2%<br>(0.79-3.9%)                 | 82<br>(30-150)      | 2700<br>(980-4900)        |
| North Korea | 1990 | Female | 60 to 64 | 19%<br>(11-31%)                | 81%<br>(69-89%)          | 0.49<br>(0.24-0.87)                         | 1.3%<br>(0.41-2.7%)                  | 1.9%<br>(0.65-3.7%)                 | 86<br>(30-170)      | 2400<br>(750-4800)        |
| North Korea | 1990 | Female | 65 to 69 | 19%<br>(11-29%)                | 81%<br>(71-89%)          | 0.49<br>(0.25-0.83)                         | 1.3%<br>(0.34-2.5%)                  | 1.7%<br>(0.51-3.3%)                 | 91<br>(27-180)      | 2100<br>(590-4100)        |
| North Korea | 1990 | Female | 70 to 74 | 18%<br>(11-28%)                | 82%<br>(72-89%)          | 0.47<br>(0.23-0.85)                         | 1.1%<br>(0.2-2.4%)                   | 1.4%<br>(0.29-3%)                   | 85<br>(17-180)      | 1500<br>(280-3400)        |
| North Korea | 1990 | Female | 75 to 79 | 16%<br>(9.9-27%)               | 84%<br>(73-90%)          | 0.45<br>(0.22-0.8)                          | 0.83%<br>(-0.018-2%)                 | 1%<br>(0.0095-2.5%)                 | 63<br>(0.59-150)    | 890<br>(-20-2200)         |
| North Korea | 1990 | Female | 80 to 84 | 16%<br>(9.3-26%)               | 84%<br>(74-91%)          | 0.43<br>(0.22-0.73)                         | 0.58%<br>(-0.18-1.7%)                | 0.69%<br>(-0.2-2%)                  | 36<br>(-10-110)     | 380<br>(-110-1100)        |
| North Korea | 1990 | Female | 85 to 89 | 16%<br>(9.3-25%)               | 84%<br>(75-91%)          | 0.44<br>(0.22-0.78)                         | 0.45%<br>(-0.3-1.5%)                 | 0.51%<br>(-0.38-1.8%)               | 22<br>(-16-74)      | 170<br>(-110-560)         |
| North Korea | 1990 | Female | 90 to 94 | 18%<br>(11-27%)                | 82%<br>(73-89%)          | 0.48<br>(0.23-0.86)                         | 0.36%<br>(-0.44-1.6%)                | 0.38%<br>(-0.55-1.8%)               | 7.8<br>(-11-38)     | 45<br>(-55-200)           |
| North Korea | 1990 | Female | 95 plus  | 20%<br>(11-33%)                | 80%<br>(67-89%)          | 0.54<br>(0.23-1)                            | 0.36%<br>(-0.62-1.9%)                | 0.32%<br>(-0.8-2.1%)                | 2.2<br>(-5.4-14)    | 9.3<br>(-16-50)           |
| North Korea | 1990 | Male   | All Ages | 37%<br>(31-45%)                | 63%<br>(55-69%)          | 1.5<br>(1.4-1.7)                            | 5.6%<br>(4.4-6.8%)                   | 7.9%<br>(6-9.9%)                    | 4100<br>(3000-5200) | 170000<br>(130000-200000) |
| North Korea | 1990 | Male   | 15 to 19 | 30%<br>(19-45%)                | 70%<br>(55-81%)          | 0.54<br>(0.27-0.97)                         | 2.6%<br>(1.6-4.1%)                   | 3.3%<br>(1.7-5.6%)                  | 44<br>(22-76)       | 4100<br>(2400-6600)       |
| North Korea | 1990 | Male   | 20 to 24 | 42%<br>(28-58%)                | 58%<br>(42-72%)          | 1.3<br>(0.73-2)                             | 5.8%<br>(3.7-8.5%)                   | 6.9%<br>(3.7-11%)                   | 130<br>(71-220)     | 12000<br>(7100-17000)     |

| Location    | Year | Sex    | Age      | Prevalence of current drinkers | Prevalence of abstainers | Population average of standard drinks daily | Percent of total attributable deaths | Percent of total attributable DALYs | Attributable deaths | Attributable DALYs     |
|-------------|------|--------|----------|--------------------------------|--------------------------|---------------------------------------------|--------------------------------------|-------------------------------------|---------------------|------------------------|
| North Korea | 1990 | Male   | 25 to 29 | 48%<br>(31-65%)                | 52%<br>(35-69%)          | 1.9<br>(1.1-2.9)                            | 7.8%<br>(4.9-11%)                    | 9.8%<br>(5.5-15%)                   | 150<br>(81-220)     | 11000<br>(6900-17000)  |
| North Korea | 1990 | Male   | 30 to 34 | 51%<br>(34-68%)                | 49%<br>(32-66%)          | 2.4<br>(1.5-3.5)                            | 8.7%<br>(5.8-12%)                    | 11%<br>(7.1-16%)                    | 210<br>(130-310)    | 15000<br>(9600-20000)  |
| North Korea | 1990 | Male   | 35 to 39 | 54%<br>(37-70%)                | 46%<br>(30-63%)          | 2.9<br>(1.8-4.4)                            | 10%<br>(6.7-14%)                     | 13%<br>(8.1-18%)                    | 160<br>(98-230)     | 9600<br>(6200-13000)   |
| North Korea | 1990 | Male   | 40 to 44 | 55%<br>(39-72%)                | 45%<br>(28-61%)          | 3.4<br>(2.1-4.9)                            | 11%<br>(7.4-14%)                     | 14%<br>(9.1-19%)                    | 310<br>(200-430)    | 17000<br>(11000-23000) |
| North Korea | 1990 | Male   | 45 to 49 | 56%<br>(37-73%)                | 44%<br>(27-63%)          | 3.8<br>(2.4-5.5)                            | 11%<br>(7.9-15%)                     | 14%<br>(9.4-19%)                    | 490<br>(330-660)    | 23000<br>(16000-30000) |
| North Korea | 1990 | Male   | 50 to 54 | 55%<br>(37-73%)                | 45%<br>(27-63%)          | 3.9<br>(2.5-5.6)                            | 11%<br>(7.5-15%)                     | 14%<br>(8.9-18%)                    | 630<br>(390-860)    | 25000<br>(16000-34000) |
| North Korea | 1990 | Male   | 55 to 59 | 54%<br>(36-71%)                | 46%<br>(29-64%)          | 3.6<br>(2.2-5.6)                            | 11%<br>(6.8-15%)                     | 13%<br>(7.8-17%)                    | 550<br>(320-780)    | 19000<br>(11000-26000) |
| North Korea | 1990 | Male   | 60 to 64 | 51%<br>(33-69%)                | 49%<br>(31-67%)          | 3.2<br>(1.8-5.2)                            | 9.2%<br>(5.1-14%)                    | 11%<br>(5.7-16%)                    | 430<br>(220-670)    | 13000<br>(6700-19000)  |
| North Korea | 1990 | Male   | 65 to 69 | 48%<br>(32-65%)                | 52%<br>(35-68%)          | 2.7<br>(1.5-4.1)                            | 7.9%<br>(4.2-12%)                    | 9%<br>(4.6-14%)                     | 370<br>(190-600)    | 8700<br>(4600-14000)   |
| North Korea | 1990 | Male   | 70 to 74 | 44%<br>(29-61%)                | 56%<br>(39-71%)          | 2.3<br>(1.2-3.6)                            | 6.3%<br>(2.9-10%)                    | 7%<br>(3.1-12%)                     | 280<br>(130-490)    | 5500<br>(2600-9200)    |
| North Korea | 1990 | Male   | 75 to 79 | 41%<br>(27-59%)                | 59%<br>(41-73%)          | 1.9<br>(0.99-3.3)                           | 5.2%<br>(2.1-9.4%)                   | 5.8%<br>(2.2-11%)                   | 190<br>(74-360)     | 2900<br>(1100-5300)    |
| North Korea | 1990 | Male   | 80 to 84 | 39%<br>(24-56%)                | 61%<br>(44-76%)          | 1.8<br>(0.9-2.9)                            | 4.6%<br>(1.9-8.3%)                   | 5%<br>(2-9.1%)                      | 77<br>(29-140)      | 850<br>(340-1500)      |
| North Korea | 1990 | Male   | 85 to 89 | 38%<br>(24-53%)                | 62%<br>(47-76%)          | 1.6<br>(0.85-2.7)                           | 3.8%<br>(1.4-7.1%)                   | 4%<br>(1.4-7.8%)                    | 35<br>(12-68)       | 280<br>(100-530)       |
| North Korea | 1990 | Male   | 90 to 94 | 39%<br>(27-55%)                | 61%<br>(45-73%)          | 1.6<br>(0.82-2.7)                           | 3.1%<br>(0.88-6.6%)                  | 3.3%<br>(0.77-7.2%)                 | 12<br>(2.8-27)      | 66<br>(19-140)         |
| North Korea | 1990 | Male   | 95 plus  | 43%<br>(26-62%)                | 57%<br>(38-74%)          | 1.7<br>(0.74-3.1)                           | 2.8%<br>(0.24-6.9%)                  | 2.9%<br>(-0.041-7.3%)               | 2.8<br>(-0.042-7.2) | 11<br>(0.92-26)        |
| North Korea | 1995 | Female | All Ages | 16%<br>(13-20%)                | 84%<br>(80-87%)          | 0.28<br>(0.24-0.34)                         | 0.55%<br>(0.3-0.91%)                 | 0.87%<br>(0.37-1.6%)                | 930<br>(400-1600)   | 31000<br>(18000-46000) |
| North Korea | 1995 | Female | 15 to 19 | 16%<br>(10-25%)                | 84%<br>(75-90%)          | 0.26<br>(0.14-0.47)                         | 0.76%<br>(0.46-1.2%)                 | 0.97%<br>(0.39-1.9%)                | 6.2<br>(2.7-12)     | 790<br>(490-1300)      |
| North Korea | 1995 | Female | 20 to 24 | 20%<br>(12-30%)                | 80%<br>(70-88%)          | 0.29<br>(0.14-0.51)                         | 1.1%<br>(0.65-1.7%)                  | 0.92%<br>(0.33-1.9%)                | 11<br>(4.1-22)      | 1900<br>(1100-3000)    |
| North Korea | 1995 | Female | 25 to 29 | 20%<br>(12-31%)                | 80%<br>(69-88%)          | 0.3<br>(0.16-0.49)                          | 1%<br>(0.64-1.5%)                    | 0.93%<br>(0.35-1.8%)                | 13<br>(5.1-24)      | 2000<br>(1200-2900)    |
| North Korea | 1995 | Female | 30 to 34 | 21%<br>(12-33%)                | 79%<br>(67-88%)          | 0.34<br>(0.19-0.56)                         | 1%<br>(0.64-1.5%)                    | 1.1%<br>(0.48-1.9%)                 | 13<br>(6.4-24)      | 1600<br>(990-2300)     |
| North Korea | 1995 | Female | 35 to 39 | 23%<br>(13-35%)                | 77%<br>(65-87%)          | 0.42<br>(0.23-0.71)                         | 1.1%<br>(0.65-1.6%)                  | 1.4%<br>(0.69-2.5%)                 | 26<br>(13-46)       | 2100<br>(1300-3200)    |
| North Korea | 1995 | Female | 40 to 44 | 23%<br>(14-36%)                | 77%<br>(64-86%)          | 0.48<br>(0.26-0.79)                         | 1.2%<br>(0.69-1.9%)                  | 1.7%<br>(0.86-3%)                   | 24<br>(13-41)       | 1400<br>(840-2200)     |

| Location    | Year | Sex    | Age      | Prevalence of current drinkers | Prevalence of abstainers | Population average of standard drinks daily | Percent of total attributable deaths | Percent of total attributable DALYs | Attributable deaths | Attributable DALYs        |
|-------------|------|--------|----------|--------------------------------|--------------------------|---------------------------------------------|--------------------------------------|-------------------------------------|---------------------|---------------------------|
| North Korea | 1995 | Female | 45 to 49 | 22%<br>(13-35%)                | 78%<br>(65-87%)          | 0.52<br>(0.26-0.88)                         | 1.2%<br>(0.66-2.2%)                  | 1.9%<br>(0.87-3.4%)                 | 53<br>(25-95)       | 2500<br>(1300-4300)       |
| North Korea | 1995 | Female | 50 to 54 | 22%<br>(13-34%)                | 78%<br>(66-87%)          | 0.54<br>(0.31-0.9)                          | 1.4%<br>(0.66-2.4%)                  | 2%<br>(0.96-3.5%)                   | 89<br>(41-150)      | 3500<br>(1700-5900)       |
| North Korea | 1995 | Female | 55 to 59 | 21%<br>(13-32%)                | 79%<br>(68-87%)          | 0.54<br>(0.29-0.9)                          | 1.4%<br>(0.55-2.6%)                  | 2%<br>(0.82-3.6%)                   | 120<br>(45-210)     | 3900<br>(1500-7000)       |
| North Korea | 1995 | Female | 60 to 64 | 20%<br>(11-32%)                | 80%<br>(68-89%)          | 0.53<br>(0.27-0.91)                         | 1.3%<br>(0.45-2.5%)                  | 1.8%<br>(0.64-3.3%)                 | 120<br>(44-230)     | 3300<br>(1100-6400)       |
| North Korea | 1995 | Female | 65 to 69 | 19%<br>(11-30%)                | 81%<br>(70-89%)          | 0.52<br>(0.27-0.87)                         | 1.3%<br>(0.43-2.4%)                  | 1.6%<br>(0.61-3.1%)                 | 130<br>(47-250)     | 2900<br>(1000-5700)       |
| North Korea | 1995 | Female | 70 to 74 | 18%<br>(11-28%)                | 82%<br>(72-89%)          | 0.5<br>(0.26-0.88)                          | 1.1%<br>(0.24-2.3%)                  | 1.3%<br>(0.33-2.8%)                 | 130<br>(30-260)     | 2300<br>(490-4800)        |
| North Korea | 1995 | Female | 75 to 79 | 17%<br>(10-28%)                | 83%<br>(72-90%)          | 0.48<br>(0.23-0.85)                         | 0.81%<br>(0.042-2%)                  | 0.96%<br>(0.077-2.3%)               | 96<br>(8.2-230)     | 1400<br>(72-3300)         |
| North Korea | 1995 | Female | 80 to 84 | 16%<br>(9.6-26%)               | 84%<br>(74-90%)          | 0.46<br>(0.24-0.78)                         | 0.57%<br>(-0.097-1.5%)               | 0.64%<br>(-0.1-1.7%)                | 54<br>(-9.5-140)    | 570<br>(-100-1500)        |
| North Korea | 1995 | Female | 85 to 89 | 17%<br>(9.9-25%)               | 83%<br>(75-90%)          | 0.48<br>(0.24-0.82)                         | 0.44%<br>(-0.17-1.3%)                | 0.47%<br>(-0.2-1.5%)                | 32<br>(-14-99)      | 250<br>(-93-750)          |
| North Korea | 1995 | Female | 90 to 94 | 18%<br>(11-27%)                | 82%<br>(73-89%)          | 0.52<br>(0.25-0.95)                         | 0.34%<br>(-0.27-1.3%)                | 0.33%<br>(-0.32-1.4%)               | 14<br>(-12-55)      | 76<br>(-58-290)           |
| North Korea | 1995 | Female | 95 plus  | 21%<br>(11-34%)                | 79%<br>(66-89%)          | 0.59<br>(0.24-1.2)                          | 0.3%<br>(-0.34-1.4%)                 | 0.27%<br>(-0.41-1.4%)               | 4.2<br>(-6.8-22)    | 18<br>(-21-81)            |
| North Korea | 1995 | Male   | All Ages | 38%<br>(31-46%)                | 62%<br>(54-69%)          | 1.7<br>(1.5-2)                              | 3.5%<br>(2.3-5.4%)                   | 5.4%<br>(3.5-7.9%)                  | 5400<br>(4000-6800) | 210000<br>(170000-250000) |
| North Korea | 1995 | Male   | 15 to 19 | 30%<br>(19-45%)                | 70%<br>(55-81%)          | 0.57<br>(0.29-1)                            | 2.3%<br>(1.4-3.7%)                   | 2.7%<br>(1.4-4.9%)                  | 32<br>(16-58)       | 3000<br>(1800-4900)       |
| North Korea | 1995 | Male   | 20 to 24 | 42%<br>(28-58%)                | 58%<br>(42-72%)          | 1.4<br>(0.77-2.2)                           | 5.3%<br>(3.3-7.9%)                   | 6%<br>(3.2-9.6%)                    | 150<br>(80-240)     | 12000<br>(7600-19000)     |
| North Korea | 1995 | Male   | 25 to 29 | 48%<br>(31-65%)                | 52%<br>(35-69%)          | 2<br>(1.2-3.1)                              | 6.8%<br>(4.3-10%)                    | 8%<br>(4.3-13%)                     | 220<br>(130-340)    | 17000<br>(10000-24000)    |
| North Korea | 1995 | Male   | 30 to 34 | 51%<br>(33-69%)                | 49%<br>(31-67%)          | 2.6<br>(1.6-3.8)                            | 7.9%<br>(5.2-11%)                    | 9.4%<br>(5.7-14%)                   | 220<br>(130-320)    | 15000<br>(9800-21000)     |
| North Korea | 1995 | Male   | 35 to 39 | 54%<br>(37-71%)                | 46%<br>(29-63%)          | 3.1<br>(1.9-4.8)                            | 8.6%<br>(5.6-12%)                    | 10%<br>(6.3-15%)                    | 330<br>(200-480)    | 20000<br>(13000-28000)    |
| North Korea | 1995 | Male   | 40 to 44 | 55%<br>(39-73%)                | 45%<br>(27-61%)          | 3.6<br>(2.2-5.3)                            | 9.6%<br>(6.3-13%)                    | 11%<br>(7.1-16%)                    | 250<br>(160-350)    | 13000<br>(9200-18000)     |
| North Korea | 1995 | Male   | 45 to 49 | 56%<br>(37-72%)                | 44%<br>(28-63%)          | 4<br>(2.5-5.9)                              | 10%<br>(6.8-14%)                     | 12%<br>(7.7-16%)                    | 510<br>(330-690)    | 23000<br>(16000-31000)    |
| North Korea | 1995 | Male   | 50 to 54 | 55%<br>(38-73%)                | 45%<br>(27-62%)          | 4.1<br>(2.6-6.1)                            | 10%<br>(6.8-14%)                     | 12%<br>(7.7-16%)                    | 750<br>(490-1000)   | 30000<br>(20000-40000)    |
| North Korea | 1995 | Male   | 55 to 59 | 54%<br>(36-71%)                | 46%<br>(29-64%)          | 3.9<br>(2.3-5.7)                            | 9.7%<br>(6.3-13%)                    | 11%<br>(7-15%)                      | 910<br>(550-1300)   | 31000<br>(20000-43000)    |
| North Korea | 1995 | Male   | 60 to 64 | 51%<br>(33-69%)                | 49%<br>(31-67%)          | 3.4<br>(1.9-5.5)                            | 8.5%<br>(4.8-12%)                    | 9.5%<br>(5.1-14%)                   | 710<br>(380-1100)   | 20000<br>(11000-31000)    |



| Location    | Year | Sex    | Age      | Prevalence of current drinkers | Prevalence of abstainers | Population average of standard drinks daily | Percent of total attributable deaths | Percent of total attributable DALYs | Attributable deaths | Attributable DALYs     |
|-------------|------|--------|----------|--------------------------------|--------------------------|---------------------------------------------|--------------------------------------|-------------------------------------|---------------------|------------------------|
| North Korea | 1995 | Male   | 65 to 69 | 48%<br>(31-65%)                | 52%<br>(35-69%)          | 2.9<br>(1.6-4.3)                            | 7.3%<br>(4.1-11%)                    | 8%<br>(4.4-12%)                     | 500<br>(270-770)    | 12000<br>(6400-18000)  |
| North Korea | 1995 | Male   | 70 to 74 | 44%<br>(29-61%)                | 56%<br>(39-71%)          | 2.4<br>(1.3-3.8)                            | 5.6%<br>(2.7-9.2%)                   | 6.1%<br>(2.8-10%)                   | 350<br>(170-590)    | 6800<br>(3300-11000)   |
| North Korea | 1995 | Male   | 75 to 79 | 41%<br>(26-59%)                | 59%<br>(41-74%)          | 2<br>(1-3.5)                                | 4.6%<br>(1.9-8.1%)                   | 4.9%<br>(1.9-8.8%)                  | 240<br>(95-440)     | 3600<br>(1500-6400)    |
| North Korea | 1995 | Male   | 80 to 84 | 39%<br>(24-56%)                | 61%<br>(44-76%)          | 1.8<br>(0.97-3.1)                           | 3.8%<br>(1.5-7%)                     | 3.9%<br>(1.5-7.5%)                  | 110<br>(43-190)     | 1200<br>(510-2100)     |
| North Korea | 1995 | Male   | 85 to 89 | 38%<br>(24-53%)                | 62%<br>(47-76%)          | 1.7<br>(0.89-2.8)                           | 3%<br>(1.1-5.8%)                     | 3.1%<br>(1-6.3%)                    | 57<br>(20-110)      | 450<br>(170-820)       |
| North Korea | 1995 | Male   | 90 to 94 | 40%<br>(26-55%)                | 60%<br>(45-74%)          | 1.7<br>(0.87-2.9)                           | 2.4%<br>(0.62-5.2%)                  | 2.4%<br>(0.52-5.4%)                 | 17<br>(4.2-38)      | 95<br>(26-200)         |
| North Korea | 1995 | Male   | 95 plus  | 43%<br>(26-62%)                | 57%<br>(38-74%)          | 1.8<br>(0.78-3.3)                           | 1.8%<br>(0.16-4.6%)                  | 1.7%<br>(0.048-4.7%)                | 4.2<br>(0.16-10)    | 17<br>(1.9-39)         |
| North Korea | 2000 | Female | All Ages | 16%<br>(13-20%)                | 84%<br>(80-87%)          | 0.27<br>(0.22-0.32)                         | 0.52%<br>(0.27-0.89%)                | 0.77%<br>(0.26-1.5%)                | 970<br>(320-1800)   | 32000<br>(17000-50000) |
| North Korea | 2000 | Female | 15 to 19 | 16%<br>(9.9-25%)               | 84%<br>(75-90%)          | 0.25<br>(0.13-0.44)                         | 0.74%<br>(0.44-1.2%)                 | 0.94%<br>(0.39-1.9%)                | 8<br>(3.4-16)       | 990<br>(580-1600)      |
| North Korea | 2000 | Female | 20 to 24 | 20%<br>(12-30%)                | 80%<br>(70-88%)          | 0.27<br>(0.13-0.49)                         | 1%<br>(0.63-1.6%)                    | 0.91%<br>(0.33-1.9%)                | 7.9<br>(2.9-16)     | 1300<br>(780-2000)     |
| North Korea | 2000 | Female | 25 to 29 | 20%<br>(12-32%)                | 80%<br>(68-88%)          | 0.28<br>(0.14-0.46)                         | 0.99%<br>(0.63-1.4%)                 | 0.87%<br>(0.32-1.7%)                | 13<br>(5-25)        | 2000<br>(1200-3000)    |
| North Korea | 2000 | Female | 30 to 34 | 21%<br>(12-34%)                | 79%<br>(66-88%)          | 0.31<br>(0.17-0.52)                         | 0.94%<br>(0.61-1.4%)                 | 0.96%<br>(0.43-1.8%)                | 19<br>(8.5-34)      | 2200<br>(1400-3300)    |
| North Korea | 2000 | Female | 35 to 39 | 23%<br>(14-35%)                | 77%<br>(65-86%)          | 0.39<br>(0.21-0.65)                         | 1%<br>(0.62-1.5%)                    | 1.3%<br>(0.61-2.2%)                 | 24<br>(12-43)       | 1900<br>(1200-2900)    |
| North Korea | 2000 | Female | 40 to 44 | 23%<br>(14-36%)                | 77%<br>(64-86%)          | 0.45<br>(0.25-0.73)                         | 1.1%<br>(0.59-1.7%)                  | 1.5%<br>(0.73-2.6%)                 | 44<br>(22-75)       | 2600<br>(1500-4100)    |
| North Korea | 2000 | Female | 45 to 49 | 23%<br>(13-36%)                | 77%<br>(64-87%)          | 0.48<br>(0.24-0.82)                         | 1.1%<br>(0.53-2.1%)                  | 1.7%<br>(0.73-3.1%)                 | 37<br>(17-68)       | 1800<br>(870-3100)     |
| North Korea | 2000 | Female | 50 to 54 | 22%<br>(13-35%)                | 78%<br>(65-87%)          | 0.5<br>(0.27-0.85)                          | 1.3%<br>(0.55-2.3%)                  | 1.8%<br>(0.77-3.3%)                 | 82<br>(35-150)      | 3200<br>(1400-5800)    |
| North Korea | 2000 | Female | 55 to 59 | 21%<br>(13-32%)                | 79%<br>(68-87%)          | 0.5<br>(0.26-0.83)                          | 1.3%<br>(0.38-2.4%)                  | 1.7%<br>(0.54-3.3%)                 | 120<br>(36-230)     | 3900<br>(1200-7400)    |
| North Korea | 2000 | Female | 60 to 64 | 20%<br>(11-32%)                | 80%<br>(68-89%)          | 0.48<br>(0.25-0.81)                         | 1.1%<br>(0.28-2.2%)                  | 1.5%<br>(0.39-3%)                   | 140<br>(34-280)     | 3900<br>(860-7600)     |
| North Korea | 2000 | Female | 65 to 69 | 19%<br>(11-30%)                | 81%<br>(70-89%)          | 0.48<br>(0.26-0.8)                          | 1.1%<br>(0.24-2.2%)                  | 1.4%<br>(0.36-2.8%)                 | 140<br>(36-290)     | 3200<br>(730-6600)     |
| North Korea | 2000 | Female | 70 to 74 | 18%<br>(11-29%)                | 82%<br>(71-89%)          | 0.47<br>(0.25-0.84)                         | 0.9%<br>(0.07-2.1%)                  | 1.1%<br>(0.13-2.6%)                 | 140<br>(15-300)     | 2400<br>(170-5600)     |
| North Korea | 2000 | Female | 75 to 79 | 17%<br>(10-27%)                | 83%<br>(73-90%)          | 0.44<br>(0.22-0.81)                         | 0.67%<br>(-0.098-1.8%)               | 0.79%<br>(-0.096-2.2%)              | 100<br>(-12-270)    | 1400<br>(-210-3800)    |
| North Korea | 2000 | Female | 80 to 84 | 17%<br>(9.7-26%)               | 83%<br>(74-90%)          | 0.43<br>(0.22-0.75)                         | 0.43%<br>(-0.24-1.4%)                | 0.49%<br>(-0.28-1.6%)               | 51<br>(-30-170)     | 540<br>(-300-1800)     |

| Location    | Year | Sex    | Age      | Prevalence of current drinkers | Prevalence of abstainers | Population average of standard drinks daily | Percent of total attributable deaths | Percent of total attributable DALYs | Attributable deaths | Attributable DALYs        |
|-------------|------|--------|----------|--------------------------------|--------------------------|---------------------------------------------|--------------------------------------|-------------------------------------|---------------------|---------------------------|
| North Korea | 2000 | Female | 85 to 89 | 17%<br>(10-26%)                | 83%<br>(74-90%)          | 0.44<br>(0.23-0.77)                         | 0.31%<br>(-0.3-1.2%)                 | 0.33%<br>(-0.35-1.3%)               | 28<br>(-29-110)     | 210<br>(-200-830)         |
| North Korea | 2000 | Female | 90 to 94 | 18%<br>(11-28%)                | 82%<br>(72-89%)          | 0.48<br>(0.23-0.85)                         | 0.21%<br>(-0.37-1.1%)                | 0.2%<br>(-0.44-1.2%)                | 9<br>(-19-52)       | 53<br>(-93-270)           |
| North Korea | 2000 | Female | 95 plus  | 21%<br>(11-35%)                | 79%<br>(65-89%)          | 0.54<br>(0.22-1.1)                          | 0.17%<br>(-0.47-1.2%)                | 0.14%<br>(-0.56-1.2%)               | 2.6<br>(-10-23)     | 12<br>(-35-87)            |
| North Korea | 2000 | Male   | All Ages | 38%<br>(32-46%)                | 62%<br>(54-68%)          | 1.6<br>(1.4-1.9)                            | 3.7%<br>(2.5-5.5%)                   | 5.5%<br>(3.5-8%)                    | 6300<br>(4500-8100) | 240000<br>(190000-300000) |
| North Korea | 2000 | Male   | 15 to 19 | 30%<br>(19-44%)                | 70%<br>(56-81%)          | 0.52<br>(0.26-0.93)                         | 2.3%<br>(1.3-3.6%)                   | 2.7%<br>(1.3-4.7%)                  | 41<br>(20-73)       | 3700<br>(2200-6100)       |
| North Korea | 2000 | Male   | 20 to 24 | 42%<br>(28-58%)                | 58%<br>(42-72%)          | 1.2<br>(0.69-2)                             | 5.4%<br>(3.4-8.2%)                   | 6.1%<br>(3.3-9.8%)                  | 110<br>(60-180)     | 9200<br>(5600-14000)      |
| North Korea | 2000 | Male   | 25 to 29 | 48%<br>(32-65%)                | 52%<br>(35-68%)          | 1.9<br>(1.1-2.9)                            | 6.8%<br>(4.2-10%)                    | 7.8%<br>(4.4-12%)                   | 240<br>(130-380)    | 18000<br>(11000-26000)    |
| North Korea | 2000 | Male   | 30 to 34 | 51%<br>(34-68%)                | 49%<br>(32-66%)          | 2.4<br>(1.5-3.5)                            | 7.6%<br>(5.1-11%)                    | 8.9%<br>(5.5-13%)                   | 330<br>(200-490)    | 22000<br>(14000-31000)    |
| North Korea | 2000 | Male   | 35 to 39 | 54%<br>(38-70%)                | 46%<br>(30-62%)          | 2.8<br>(1.7-4.2)                            | 8.5%<br>(5.5-12%)                    | 10%<br>(6-15%)                      | 330<br>(200-500)    | 20000<br>(12000-28000)    |
| North Korea | 2000 | Male   | 40 to 44 | 55%<br>(39-73%)                | 45%<br>(27-61%)          | 3.3<br>(2-4.8)                              | 9.2%<br>(6-13%)                      | 11%<br>(6.6-15%)                    | 510<br>(320-730)    | 27000<br>(17000-37000)    |
| North Korea | 2000 | Male   | 45 to 49 | 56%<br>(37-72%)                | 44%<br>(28-63%)          | 3.6<br>(2.2-5.4)                            | 10%<br>(6.5-14%)                     | 12%<br>(7.2-16%)                    | 390<br>(250-540)    | 18000<br>(12000-24000)    |
| North Korea | 2000 | Male   | 50 to 54 | 56%<br>(37-73%)                | 44%<br>(27-63%)          | 3.7<br>(2.3-5.6)                            | 10%<br>(6.3-14%)                     | 11%<br>(7-16%)                      | 750<br>(450-1000)   | 30000<br>(19000-40000)    |
| North Korea | 2000 | Male   | 55 to 59 | 54%<br>(36-73%)                | 46%<br>(27-64%)          | 3.5<br>(2.1-5.3)                            | 9.4%<br>(5.6-13%)                    | 11%<br>(6.1-15%)                    | 1000<br>(590-1500)  | 35000<br>(21000-49000)    |
| North Korea | 2000 | Male   | 60 to 64 | 51%<br>(33-70%)                | 49%<br>(30-67%)          | 3.1<br>(1.7-4.9)                            | 8.2%<br>(4.5-12%)                    | 9%<br>(4.8-14%)                     | 1100<br>(560-1600)  | 31000<br>(17000-46000)    |
| North Korea | 2000 | Male   | 65 to 69 | 48%<br>(32-65%)                | 52%<br>(35-68%)          | 2.6<br>(1.6-3.9)                            | 7%<br>(3.7-10%)                      | 7.6%<br>(3.9-12%)                   | 690<br>(360-1100)   | 16000<br>(8900-25000)     |
| North Korea | 2000 | Male   | 70 to 74 | 45%<br>(29-62%)                | 55%<br>(38-71%)          | 2.2<br>(1.2-3.6)                            | 5.3%<br>(2.4-8.9%)                   | 5.7%<br>(2.5-9.7%)                  | 390<br>(180-670)    | 7500<br>(3400-13000)      |
| North Korea | 2000 | Male   | 75 to 79 | 42%<br>(27-60%)                | 58%<br>(40-73%)          | 1.9<br>(0.97-3.2)                           | 4.3%<br>(1.6-7.9%)                   | 4.5%<br>(1.7-8.5%)                  | 240<br>(88-450)     | 3500<br>(1300-6500)       |
| North Korea | 2000 | Male   | 80 to 84 | 39%<br>(24-56%)                | 61%<br>(44-76%)          | 1.7<br>(0.9-2.8)                            | 3.4%<br>(1.3-6.6%)                   | 3.6%<br>(1.2-7%)                    | 100<br>(39-200)     | 1100<br>(450-2100)        |
| North Korea | 2000 | Male   | 85 to 89 | 38%<br>(25-54%)                | 62%<br>(46-75%)          | 1.6<br>(0.81-2.6)                           | 2.7%<br>(0.9-5.5%)                   | 2.7%<br>(0.8-5.8%)                  | 65<br>(21-130)      | 510<br>(180-1000)         |
| North Korea | 2000 | Male   | 90 to 94 | 40%<br>(26-55%)                | 60%<br>(45-74%)          | 1.5<br>(0.79-2.7)                           | 2%<br>(0.43-4.7%)                    | 2%<br>(0.33-4.9%)                   | 21<br>(4.1-49)      | 120<br>(29-270)           |
| North Korea | 2000 | Male   | 95 plus  | 43%<br>(26-62%)                | 57%<br>(38-74%)          | 1.6<br>(0.7-3)                              | 1.6%<br>(0.093-4.5%)                 | 1.5%<br>(-0.042-4.5%)               | 4.4<br>(-0.14-12)   | 18<br>(1.2-45)            |
| North Korea | 2005 | Female | All Ages | 17%<br>(14-20%)                | 83%<br>(80-86%)          | 0.24<br>(0.2-0.28)                          | 0.63%<br>(0.27-1.1%)                 | 0.73%<br>(0.043-1.6%)               | 730<br>(45-1600)    | 26000<br>(11000-45000)    |

| Location    | Year | Sex    | Age      | Prevalence of current drinkers | Prevalence of abstainers | Population average of standard drinks daily | Percent of total attributable deaths | Percent of total attributable DALYs | Attributable deaths | Attributable DALYs        |
|-------------|------|--------|----------|--------------------------------|--------------------------|---------------------------------------------|--------------------------------------|-------------------------------------|---------------------|---------------------------|
| North Korea | 2005 | Female | 15 to 19 | 16%<br>(10-26%)                | 84%<br>(74-90%)          | 0.21<br>(0.11-0.36)                         | 0.83%<br>(0.5-1.3%)                  | 1.2%<br>(0.5-2.2%)                  | 7.4<br>(2.9-14)     | 940<br>(570-1500)         |
| North Korea | 2005 | Female | 20 to 24 | 20%<br>(12-30%)                | 80%<br>(70-88%)          | 0.23<br>(0.11-0.42)                         | 1.1%<br>(0.7-1.8%)                   | 1.1%<br>(0.39-2.2%)                 | 8.2<br>(2.8-17)     | 1500<br>(870-2300)        |
| North Korea | 2005 | Female | 25 to 29 | 20%<br>(12-31%)                | 80%<br>(69-88%)          | 0.24<br>(0.12-0.41)                         | 1.1%<br>(0.72-1.5%)                  | 1%<br>(0.4-2%)                      | 7.9<br>(2.9-16)     | 1300<br>(790-1900)        |
| North Korea | 2005 | Female | 30 to 34 | 21%<br>(12-34%)                | 79%<br>(66-88%)          | 0.27<br>(0.14-0.45)                         | 1%<br>(0.64-1.5%)                    | 1.1%<br>(0.45-1.9%)                 | 16<br>(6.6-29)      | 2000<br>(1200-3000)       |
| North Korea | 2005 | Female | 35 to 39 | 23%<br>(13-35%)                | 77%<br>(65-87%)          | 0.33<br>(0.18-0.54)                         | 1%<br>(0.62-1.5%)                    | 1.3%<br>(0.58-2.3%)                 | 28<br>(12-49)       | 2400<br>(1400-3600)       |
| North Korea | 2005 | Female | 40 to 44 | 23%<br>(14-36%)                | 77%<br>(64-86%)          | 0.38<br>(0.21-0.61)                         | 1%<br>(0.57-1.6%)                    | 1.5%<br>(0.68-2.6%)                 | 34<br>(15-57)       | 2100<br>(1200-3200)       |
| North Korea | 2005 | Female | 45 to 49 | 23%<br>(12-35%)                | 77%<br>(65-88%)          | 0.41<br>(0.21-0.69)                         | 1%<br>(0.48-1.8%)                    | 1.6%<br>(0.64-2.9%)                 | 56<br>(22-100)      | 2700<br>(1300-4800)       |
| North Korea | 2005 | Female | 50 to 54 | 22%<br>(13-35%)                | 78%<br>(65-87%)          | 0.43<br>(0.23-0.7)                          | 1.1%<br>(0.41-2%)                    | 1.6%<br>(0.6-3.1%)                  | 46<br>(16-86)       | 1800<br>(670-3300)        |
| North Korea | 2005 | Female | 55 to 59 | 21%<br>(13-33%)                | 79%<br>(67-87%)          | 0.43<br>(0.22-0.71)                         | 1%<br>(0.22-2.1%)                    | 1.5%<br>(0.3-3%)                    | 86<br>(18-180)      | 2800<br>(560-5800)        |
| North Korea | 2005 | Female | 60 to 64 | 20%<br>(11-32%)                | 80%<br>(68-89%)          | 0.41<br>(0.21-0.71)                         | 0.88%<br>(0.04-2%)                   | 1.2%<br>(0.12-2.7%)                 | 110<br>(9.6-240)    | 2900<br>(130-6600)        |
| North Korea | 2005 | Female | 65 to 69 | 19%<br>(11-30%)                | 81%<br>(70-89%)          | 0.41<br>(0.22-0.67)                         | 0.8%<br>(-0.023-1.9%)                | 1.1%<br>(0.031-2.5%)                | 130<br>(3.7-290)    | 2800<br>(-75-6600)        |
| North Korea | 2005 | Female | 70 to 74 | 18%<br>(11-29%)                | 82%<br>(71-89%)          | 0.4<br>(0.21-0.72)                          | 0.65%<br>(-0.16-1.7%)                | 0.84%<br>(-0.17-2.2%)               | 110<br>(-21-280)    | 1900<br>(-460-5200)       |
| North Korea | 2005 | Female | 75 to 79 | 17%<br>(11-27%)                | 83%<br>(73-89%)          | 0.38<br>(0.19-0.68)                         | 0.42%<br>(-0.35-1.5%)                | 0.53%<br>(-0.39-1.9%)               | 70<br>(-51-250)     | 960<br>(-790-3600)        |
| North Korea | 2005 | Female | 80 to 84 | 17%<br>(9.6-26%)               | 83%<br>(74-90%)          | 0.37<br>(0.19-0.63)                         | 0.2%<br>(-0.53-1.2%)                 | 0.24%<br>(-0.65-1.4%)               | 25<br>(-66-150)     | 260<br>(-690-1500)        |
| North Korea | 2005 | Female | 85 to 89 | 17%<br>(10-26%)                | 83%<br>(74-90%)          | 0.38<br>(0.19-0.67)                         | 0.089%<br>(-0.62-1.1%)               | 0.083%<br>(-0.75-1.3%)              | 5.9<br>(-54-90)     | 55<br>(-390-680)          |
| North Korea | 2005 | Female | 90 to 94 | 18%<br>(11-28%)                | 82%<br>(72-89%)          | 0.41<br>(0.2-0.73)                          | -0.0014%<br>(-0.75-1.1%)             | -0.047%<br>(-0.96-1.2%)             | -1.7<br>(-33-43)    | -0.27<br>(-160-230)       |
| North Korea | 2005 | Female | 95 plus  | 21%<br>(11-34%)                | 79%<br>(66-89%)          | 0.47<br>(0.19-0.94)                         | -0.054%<br>(-1-1.4%)                 | -0.14%<br>(-1.3-1.5%)               | -1.6<br>(-14-17)    | -2.3<br>(-45-60)          |
| North Korea | 2005 | Male   | All Ages | 39%<br>(33-47%)                | 61%<br>(53-67%)          | 1.4<br>(1.3-1.6)                            | 5.4%<br>(4-6.7%)                     | 6.9%<br>(4.8-9.1%)                  | 6200<br>(4200-8200) | 240000<br>(180000-300000) |
| North Korea | 2005 | Male   | 15 to 19 | 30%<br>(19-45%)                | 70%<br>(55-81%)          | 0.44<br>(0.21-0.81)                         | 2.5%<br>(1.4-4%)                     | 3%<br>(1.4-5.4%)                    | 40<br>(19-72)       | 3700<br>(2100-5900)       |
| North Korea | 2005 | Male   | 20 to 24 | 42%<br>(28-59%)                | 58%<br>(41-72%)          | 1.1<br>(0.57-1.7)                           | 5.5%<br>(3.4-8.3%)                   | 6.2%<br>(3.4-10%)                   | 120<br>(66-200)     | 10000<br>(6200-16000)     |
| North Korea | 2005 | Male   | 25 to 29 | 48%<br>(31-64%)                | 52%<br>(36-69%)          | 1.6<br>(0.88-2.5)                           | 7.2%<br>(4.4-10%)                    | 8.6%<br>(4.7-13%)                   | 160<br>(81-240)     | 12000<br>(6900-17000)     |
| North Korea | 2005 | Male   | 30 to 34 | 51%<br>(33-68%)                | 49%<br>(32-67%)          | 2<br>(1.2-2.9)                              | 7.8%<br>(5.1-11%)                    | 9.3%<br>(5.7-14%)                   | 290<br>(170-440)    | 20000<br>(13000-28000)    |

| Location    | Year | Sex    | Age      | Prevalence of current drinkers | Prevalence of abstainers | Population average of standard drinks daily | Percent of total attributable deaths | Percent of total attributable DALYs | Attributable deaths | Attributable DALYs     |
|-------------|------|--------|----------|--------------------------------|--------------------------|---------------------------------------------|--------------------------------------|-------------------------------------|---------------------|------------------------|
| North Korea | 2005 | Male   | 35 to 39 | 54%<br>(37-71%)                | 46%<br>(29-63%)          | 2.4<br>(1.5-3.5)                            | 8.6%<br>(5.7-12%)                    | 10%<br>(6.5-15%)                    | 420<br>(240-620)    | 25000<br>(16000-36000) |
| North Korea | 2005 | Male   | 40 to 44 | 55%<br>(39-73%)                | 45%<br>(27-61%)          | 2.8<br>(1.8-4)                              | 9.4%<br>(6.5-13%)                    | 11%<br>(7.5-16%)                    | 430<br>(270-600)    | 23000<br>(15000-31000) |
| North Korea | 2005 | Male   | 45 to 49 | 56%<br>(37-72%)                | 44%<br>(28-63%)          | 3.1<br>(1.8-4.5)                            | 10%<br>(6.4-14%)                     | 12%<br>(7.4-17%)                    | 680<br>(420-990)    | 31000<br>(20000-45000) |
| North Korea | 2005 | Male   | 50 to 54 | 55%<br>(37-72%)                | 45%<br>(28-63%)          | 3.2<br>(1.9-4.7)                            | 10%<br>(5.9-14%)                     | 12%<br>(6.8-17%)                    | 490<br>(280-700)    | 19000<br>(12000-27000) |
| North Korea | 2005 | Male   | 55 to 59 | 53%<br>(36-71%)                | 47%<br>(29-64%)          | 3<br>(1.7-4.5)                              | 9.2%<br>(5-14%)                      | 11%<br>(5.4-16%)                    | 850<br>(440-1300)   | 29000<br>(16000-43000) |
| North Korea | 2005 | Male   | 60 to 64 | 51%<br>(33-70%)                | 49%<br>(30-67%)          | 2.6<br>(1.5-4.3)                            | 7.9%<br>(3.8-13%)                    | 8.9%<br>(4.2-14%)                   | 1000<br>(470-1700)  | 29000<br>(14000-47000) |
| North Korea | 2005 | Male   | 65 to 69 | 48%<br>(32-66%)                | 52%<br>(34-68%)          | 2.2<br>(1.3-3.3)                            | 6.5%<br>(3.2-10%)                    | 7.3%<br>(3.4-12%)                   | 880<br>(420-1400)   | 21000<br>(10000-34000) |
| North Korea | 2005 | Male   | 70 to 74 | 45%<br>(29-62%)                | 55%<br>(38-71%)          | 1.8<br>(1-3)                                | 5%<br>(2-8.9%)                       | 5.5%<br>(2.2-10%)                   | 460<br>(180-830)    | 8700<br>(3500-16000)   |
| North Korea | 2005 | Male   | 75 to 79 | 41%<br>(27-58%)                | 59%<br>(42-73%)          | 1.6<br>(0.8-2.7)                            | 3.9%<br>(1.2-7.6%)                   | 4.2%<br>(1.3-8.4%)                  | 220<br>(67-440)     | 3200<br>(1000-6400)    |
| North Korea | 2005 | Male   | 80 to 84 | 39%<br>(24-56%)                | 61%<br>(44-76%)          | 1.4<br>(0.73-2.4)                           | 3.3%<br>(1.1-6.7%)                   | 3.5%<br>(1.1-7.4%)                  | 87<br>(26-180)      | 970<br>(320-2000)      |
| North Korea | 2005 | Male   | 85 to 89 | 38%<br>(24-53%)                | 62%<br>(47-76%)          | 1.3<br>(0.7-2.2)                            | 2.6%<br>(0.69-5.4%)                  | 2.7%<br>(0.61-5.8%)                 | 43<br>(9.4-93)      | 350<br>(94-730)        |
| North Korea | 2005 | Male   | 90 to 94 | 39%<br>(26-54%)                | 61%<br>(46-74%)          | 1.3<br>(0.68-2.2)                           | 2.1%<br>(0.26-5.2%)                  | 2.1%<br>(0.08-5.6%)                 | 17<br>(0.66-46)     | 98<br>(12-250)         |
| North Korea | 2005 | Male   | 95 plus  | 43%<br>(26-61%)                | 57%<br>(39-74%)          | 1.3<br>(0.59-2.5)                           | 1.9%<br>(-0.19-5.4%)                 | 1.8%<br>(-0.54-5.7%)                | 3.8<br>(-1.1-12)    | 15<br>(-1.5-44)        |
| North Korea | 2010 | Female | All Ages | 17%<br>(14-21%)                | 83%<br>(79-86%)          | 0.24<br>(0.19-0.29)                         | 0.6%<br>(0.22-1.1%)                  | 0.63%<br>(-0.094-1.5%)              | 700<br>(-100-1700)  | 26000<br>(8900-46000)  |
| North Korea | 2010 | Female | 15 to 19 | 16%<br>(10-26%)                | 84%<br>(74-90%)          | 0.2<br>(0.1-0.36)                           | 0.82%<br>(0.49-1.3%)                 | 1.2%<br>(0.49-2.1%)                 | 7.4<br>(3-14)       | 960<br>(540-1500)      |
| North Korea | 2010 | Female | 20 to 24 | 20%<br>(12-30%)                | 80%<br>(70-88%)          | 0.22<br>(0.1-0.4)                           | 1.1%<br>(0.72-1.7%)                  | 1%<br>(0.33-2.1%)                   | 7.7<br>(2.3-15)     | 1500<br>(880-2300)     |
| North Korea | 2010 | Female | 25 to 29 | 20%<br>(12-32%)                | 80%<br>(68-88%)          | 0.23<br>(0.11-0.4)                          | 1.1%<br>(0.71-1.6%)                  | 0.99%<br>(0.35-1.9%)                | 8.8<br>(3.1-17)     | 1500<br>(940-2200)     |
| North Korea | 2010 | Female | 30 to 34 | 21%<br>(12-33%)                | 79%<br>(67-88%)          | 0.26<br>(0.13-0.43)                         | 1%<br>(0.62-1.5%)                    | 1%<br>(0.43-1.9%)                   | 9.9<br>(3.9-18)     | 1300<br>(780-1900)     |
| North Korea | 2010 | Female | 35 to 39 | 23%<br>(14-35%)                | 77%<br>(65-86%)          | 0.32<br>(0.17-0.52)                         | 0.98%<br>(0.61-1.5%)                 | 1.3%<br>(0.56-2.3%)                 | 26<br>(11-45)       | 2200<br>(1300-3300)    |
| North Korea | 2010 | Female | 40 to 44 | 23%<br>(14-37%)                | 77%<br>(63-86%)          | 0.36<br>(0.2-0.59)                          | 0.98%<br>(0.55-1.5%)                 | 1.4%<br>(0.64-2.5%)                 | 43<br>(19-75)       | 2700<br>(1500-4200)    |
| North Korea | 2010 | Female | 45 to 49 | 23%<br>(12-36%)                | 77%<br>(64-88%)          | 0.39<br>(0.2-0.65)                          | 0.98%<br>(0.44-1.7%)                 | 1.5%<br>(0.59-2.7%)                 | 49<br>(18-93)       | 2400<br>(1100-4100)    |
| North Korea | 2010 | Female | 50 to 54 | 22%<br>(14-35%)                | 78%<br>(65-86%)          | 0.41<br>(0.22-0.67)                         | 1%<br>(0.35-1.9%)                    | 1.5%<br>(0.51-2.8%)                 | 80<br>(27-150)      | 3100<br>(1100-5700)    |

| Location    | Year | Sex    | Age      | Prevalence of current drinkers | Prevalence of abstainers | Population average of standard drinks daily | Percent of total attributable deaths | Percent of total attributable DALYs | Attributable deaths | Attributable DALYs        |
|-------------|------|--------|----------|--------------------------------|--------------------------|---------------------------------------------|--------------------------------------|-------------------------------------|---------------------|---------------------------|
| North Korea | 2010 | Female | 55 to 59 | 21%<br>(13-33%)                | 79%<br>(67-87%)          | 0.41<br>(0.22-0.68)                         | 0.95%<br>(0.18-2%)                   | 1.4%<br>(0.28-2.9%)                 | 57<br>(12-120)      | 1800<br>(370-3900)        |
| North Korea | 2010 | Female | 60 to 64 | 20%<br>(11-32%)                | 80%<br>(68-89%)          | 0.4<br>(0.2-0.7)                            | 0.81%<br>(0.024-1.9%)                | 1.1%<br>(0.083-2.6%)                | 96<br>(7.1-210)     | 2600<br>(78-6000)         |
| North Korea | 2010 | Female | 65 to 69 | 19%<br>(12-29%)                | 81%<br>(71-88%)          | 0.39<br>(0.21-0.66)                         | 0.7%<br>(-0.075-1.6%)                | 0.97%<br>(-0.055-2.2%)              | 120<br>(-7.5-270)   | 2600<br>(-280-6100)       |
| North Korea | 2010 | Female | 70 to 74 | 18%<br>(12-29%)                | 82%<br>(71-88%)          | 0.38<br>(0.2-0.69)                          | 0.56%<br>(-0.22-1.7%)                | 0.74%<br>(-0.24-2.1%)               | 120<br>(-40-350)    | 2100<br>(-840-6300)       |
| North Korea | 2010 | Female | 75 to 79 | 17%<br>(10-27%)                | 83%<br>(73-90%)          | 0.37<br>(0.18-0.66)                         | 0.33%<br>(-0.42-1.4%)                | 0.42%<br>(-0.5-1.7%)                | 67<br>(-81-280)     | 910<br>(-1200-3900)       |
| North Korea | 2010 | Female | 80 to 84 | 17%<br>(10-26%)                | 83%<br>(74-90%)          | 0.36<br>(0.18-0.61)                         | 0.11%<br>(-0.63-1.1%)                | 0.13%<br>(-0.75-1.3%)               | 17<br>(-98-170)     | 180<br>(-1000-1700)       |
| North Korea | 2010 | Female | 85 to 89 | 17%<br>(10-26%)                | 83%<br>(74-90%)          | 0.37<br>(0.19-0.64)                         | 0.0026%<br>(-0.74-0.98%)             | -0.018%<br>(-0.88-1.1%)             | -1.7<br>(-79-98)    | 1.9<br>(-560-740)         |
| North Korea | 2010 | Female | 90 to 94 | 19%<br>(11-28%)                | 81%<br>(72-89%)          | 0.4<br>(0.19-0.72)                          | -0.087%<br>(-0.86-1%)                | -0.15%<br>(-1.1-1%)                 | -6<br>(-42-45)      | -21<br>(-200-230)         |
| North Korea | 2010 | Female | 95 plus  | 21%<br>(12-35%)                | 79%<br>(65-88%)          | 0.45<br>(0.18-0.9)                          | -0.14%<br>(-1.2-1.3%)                | -0.24%<br>(-1.4-1.4%)               | -3.2<br>(-19-19)    | -7.1<br>(-59-65)          |
| North Korea | 2010 | Male   | All Ages | 40%<br>(34-47%)                | 60%<br>(53-66%)          | 1.4<br>(1.2-1.7)                            | 5.4%<br>(4-6.9%)                     | 6.6%<br>(4.4-9%)                    | 6500<br>(4300-9100) | 250000<br>(180000-320000) |
| North Korea | 2010 | Male   | 15 to 19 | 30%<br>(19-45%)                | 70%<br>(55-81%)          | 0.42<br>(0.2-0.77)                          | 2.4%<br>(1.4-3.9%)                   | 3%<br>(1.4-5.3%)                    | 42<br>(20-73)       | 3900<br>(2200-6100)       |
| North Korea | 2010 | Male   | 20 to 24 | 43%<br>(28-58%)                | 57%<br>(42-72%)          | 1<br>(0.55-1.7)                             | 5.4%<br>(3.3-8.1%)                   | 6.1%<br>(3.2-10%)                   | 120<br>(65-210)     | 10000<br>(6100-16000)     |
| North Korea | 2010 | Male   | 25 to 29 | 48%<br>(31-64%)                | 52%<br>(36-69%)          | 1.5<br>(0.82-2.4)                           | 6.9%<br>(4.2-10%)                    | 8.1%<br>(4.3-13%)                   | 180<br>(91-280)     | 13000<br>(7900-20000)     |
| North Korea | 2010 | Male   | 30 to 34 | 51%<br>(33-68%)                | 49%<br>(32-67%)          | 1.9<br>(1.2-2.9)                            | 7.7%<br>(5-11%)                      | 9.2%<br>(5.4-14%)                   | 190<br>(110-300)    | 13000<br>(8400-19000)     |
| North Korea | 2010 | Male   | 35 to 39 | 53%<br>(37-70%)                | 47%<br>(30-63%)          | 2.3<br>(1.4-3.3)                            | 8.2%<br>(5.3-12%)                    | 9.9%<br>(5.9-15%)                   | 390<br>(220-600)    | 24000<br>(15000-35000)    |
| North Korea | 2010 | Male   | 40 to 44 | 55%<br>(38-72%)                | 45%<br>(28-62%)          | 2.6<br>(1.7-3.8)                            | 8.8%<br>(5.8-12%)                    | 11%<br>(6.6-15%)                    | 550<br>(330-820)    | 29000<br>(19000-42000)    |
| North Korea | 2010 | Male   | 45 to 49 | 56%<br>(37-72%)                | 44%<br>(28-63%)          | 2.9<br>(1.8-4.4)                            | 9.4%<br>(6-13%)                      | 11%<br>(6.8-16%)                    | 590<br>(350-880)    | 27000<br>(17000-40000)    |
| North Korea | 2010 | Male   | 50 to 54 | 56%<br>(38-72%)                | 44%<br>(28-62%)          | 3<br>(1.9-4.3)                              | 9.4%<br>(5.5-13%)                    | 11%<br>(6.1-16%)                    | 900<br>(500-1300)   | 36000<br>(21000-52000)    |
| North Korea | 2010 | Male   | 55 to 59 | 54%<br>(36-72%)                | 46%<br>(28-64%)          | 2.8<br>(1.7-4.4)                            | 8.7%<br>(4.9-13%)                    | 9.9%<br>(5.4-15%)                   | 580<br>(310-880)    | 20000<br>(11000-30000)    |
| North Korea | 2010 | Male   | 60 to 64 | 51%<br>(33-70%)                | 49%<br>(30-67%)          | 2.5<br>(1.4-4.1)                            | 7.5%<br>(3.6-12%)                    | 8.4%<br>(3.9-14%)                   | 920<br>(430-1500)   | 27000<br>(13000-44000)    |
| North Korea | 2010 | Male   | 65 to 69 | 48%<br>(32-66%)                | 52%<br>(34-68%)          | 2.1<br>(1.2-3.3)                            | 6.1%<br>(2.9-10%)                    | 6.8%<br>(3.2-12%)                   | 930<br>(430-1600)   | 22000<br>(11000-37000)    |
| North Korea | 2010 | Male   | 70 to 74 | 45%<br>(29-62%)                | 55%<br>(38-71%)          | 1.7<br>(0.95-2.8)                           | 4.7%<br>(1.8-8.8%)                   | 5.2%<br>(1.9-9.8%)                  | 690<br>(250-1300)   | 13000<br>(4900-24000)     |

| Location    | Year | Sex    | Age      | Prevalence of current drinkers | Prevalence of abstainers | Population average of standard drinks daily | Percent of total attributable deaths | Percent of total attributable DALYs | Attributable deaths | Attributable DALYs    |
|-------------|------|--------|----------|--------------------------------|--------------------------|---------------------------------------------|--------------------------------------|-------------------------------------|---------------------|-----------------------|
| North Korea | 2010 | Male   | 75 to 79 | 41%<br>(27-59%)                | 59%<br>(41-73%)          | 1.5<br>(0.74-2.5)                           | 3.6%<br>(1-7.5%)                     | 3.9%<br>(1.1-8.2%)                  | 300<br>(80-620)     | 4400<br>(1300-9000)   |
| North Korea | 2010 | Male   | 80 to 84 | 39%<br>(24-56%)                | 61%<br>(44-76%)          | 1.3<br>(0.7-2.3)                            | 3%<br>(0.91-6.3%)                    | 3.2%<br>(0.85-7%)                   | 100<br>(28-230)     | 1200<br>(350-2500)    |
| North Korea | 2010 | Male   | 85 to 89 | 38%<br>(24-53%)                | 62%<br>(47-76%)          | 1.3<br>(0.65-2.1)                           | 2.4%<br>(0.51-5.1%)                  | 2.5%<br>(0.39-5.6%)                 | 43<br>(6.7-100)     | 340<br>(74-770)       |
| North Korea | 2010 | Male   | 90 to 94 | 40%<br>(26-55%)                | 60%<br>(45-74%)          | 1.2<br>(0.65-2.1)                           | 1.8%<br>(0.11-4.8%)                  | 1.9%<br>(-0.069-5.2%)               | 14<br>(-0.51-38)    | 78<br>(4.8-200)       |
| North Korea | 2010 | Male   | 95 plus  | 43%<br>(26-62%)                | 57%<br>(38-74%)          | 1.3<br>(0.56-2.4)                           | 1.7%<br>(-0.34-5.2%)                 | 1.5%<br>(-0.69-5.5%)                | 3.7<br>(-1.7-13)    | 15<br>(-3.2-47)       |
| North Korea | 2016 | Female | All Ages | 18%<br>(15-21%)                | 82%<br>(79-85%)          | 0.26<br>(0.17-0.36)                         | 0.68%<br>(0.19-1.3%)                 | 0.71%<br>(-0.13-1.8%)               | 870<br>(-150-2300)  | 30000<br>(8000-57000) |
| North Korea | 2016 | Female | 15 to 19 | 17%<br>(11-26%)                | 83%<br>(74-89%)          | 0.21<br>(0.096-0.4)                         | 0.87%<br>(0.52-1.3%)                 | 1.2%<br>(0.5-2.3%)                  | 6.9<br>(2.8-13)     | 920<br>(540-1400)     |
| North Korea | 2016 | Female | 20 to 24 | 20%<br>(12-30%)                | 80%<br>(70-88%)          | 0.23<br>(0.098-0.44)                        | 1.2%<br>(0.74-1.8%)                  | 1.1%<br>(0.36-2.1%)                 | 7.9<br>(2.5-16)     | 1500<br>(880-2300)    |
| North Korea | 2016 | Female | 25 to 29 | 20%<br>(12-32%)                | 80%<br>(68-88%)          | 0.23<br>(0.11-0.43)                         | 1.1%<br>(0.72-1.6%)                  | 0.99%<br>(0.33-2%)                  | 8.6<br>(2.8-18)     | 1500<br>(910-2400)    |
| North Korea | 2016 | Female | 30 to 34 | 21%<br>(13-33%)                | 79%<br>(67-87%)          | 0.26<br>(0.13-0.49)                         | 1%<br>(0.65-1.5%)                    | 1%<br>(0.41-2%)                     | 12<br>(4.6-23)      | 1600<br>(940-2300)    |
| North Korea | 2016 | Female | 35 to 39 | 23%<br>(13-36%)                | 77%<br>(64-87%)          | 0.33<br>(0.16-0.59)                         | 1%<br>(0.62-1.6%)                    | 1.3%<br>(0.59-2.4%)                 | 17<br>(7.1-31)      | 1500<br>(840-2300)    |
| North Korea | 2016 | Female | 40 to 44 | 23%<br>(14-37%)                | 77%<br>(63-86%)          | 0.38<br>(0.19-0.67)                         | 1%<br>(0.56-1.8%)                    | 1.5%<br>(0.69-2.8%)                 | 40<br>(18-79)       | 2500<br>(1300-4400)   |
| North Korea | 2016 | Female | 45 to 49 | 23%<br>(13-37%)                | 77%<br>(63-87%)          | 0.4<br>(0.2-0.72)                           | 1%<br>(0.46-2%)                      | 1.6%<br>(0.62-3.1%)                 | 71<br>(27-140)      | 3500<br>(1500-6600)   |
| North Korea | 2016 | Female | 50 to 54 | 22%<br>(14-35%)                | 78%<br>(65-86%)          | 0.42<br>(0.21-0.76)                         | 1.1%<br>(0.39-2.1%)                  | 1.6%<br>(0.56-3.2%)                 | 81<br>(29-160)      | 3200<br>(1200-6000)   |
| North Korea | 2016 | Female | 55 to 59 | 22%<br>(13-33%)                | 78%<br>(67-87%)          | 0.42<br>(0.21-0.72)                         | 1%<br>(0.2-2.2%)                     | 1.5%<br>(0.31-3.3%)                 | 120<br>(24-250)     | 3800<br>(720-8200)    |
| North Korea | 2016 | Female | 60 to 64 | 20%<br>(12-32%)                | 80%<br>(68-88%)          | 0.41<br>(0.21-0.72)                         | 0.9%<br>(0.06-2.2%)                  | 1.3%<br>(0.14-3%)                   | 84<br>(8.7-190)     | 2200<br>(150-5300)    |
| North Korea | 2016 | Female | 65 to 69 | 19%<br>(12-30%)                | 81%<br>(70-88%)          | 0.4<br>(0.21-0.7)                           | 0.82%<br>(-0.074-2%)                 | 1.1%<br>(-0.035-2.7%)               | 120<br>(-3.6-290)   | 2700<br>(-240-6500)   |
| North Korea | 2016 | Female | 70 to 74 | 18%<br>(11-29%)                | 82%<br>(71-89%)          | 0.39<br>(0.19-0.73)                         | 0.67%<br>(-0.24-2%)                  | 0.88%<br>(-0.23-2.5%)               | 150<br>(-40-420)    | 2600<br>(-890-7600)   |
| North Korea | 2016 | Female | 75 to 79 | 17%<br>(11-27%)                | 83%<br>(73-89%)          | 0.38<br>(0.18-0.7)                          | 0.43%<br>(-0.38-1.7%)                | 0.53%<br>(-0.44-2.1%)               | 110<br>(-90-440)    | 1500<br>(-1300-6300)  |
| North Korea | 2016 | Female | 80 to 84 | 17%<br>(10-27%)                | 83%<br>(73-90%)          | 0.37<br>(0.17-0.66)                         | 0.2%<br>(-0.63-1.4%)                 | 0.23%<br>(-0.75-1.7%)               | 39<br>(-120-280)    | 410<br>(-1300-3000)   |
| North Korea | 2016 | Female | 85 to 89 | 18%<br>(10-27%)                | 82%<br>(73-90%)          | 0.39<br>(0.18-0.71)                         | 0.069%<br>(-0.75-1.3%)               | 0.058%<br>(-0.9-1.5%)               | 6.7<br>(-100-170)   | 69<br>(-740-1300)     |
| North Korea | 2016 | Female | 90 to 94 | 19%<br>(12-29%)                | 81%<br>(71-88%)          | 0.42<br>(0.18-0.79)                         | -0.027%<br>(-0.85-1.3%)              | -0.079%<br>(-1.1-1.5%)              | -4.2<br>(-55-81)    | -8.1<br>(-270-410)    |

| Location    | Year | Sex    | Age      | Prevalence of current drinkers | Prevalence of abstainers | Population average of standard drinks daily | Percent of total attributable deaths | Percent of total attributable DALYs | Attributable deaths  | Attributable DALYs        |
|-------------|------|--------|----------|--------------------------------|--------------------------|---------------------------------------------|--------------------------------------|-------------------------------------|----------------------|---------------------------|
| North Korea | 2016 | Female | 95 plus  | 22%<br>(12-35%)                | 78%<br>(65-88%)          | 0.48<br>(0.18-0.99)                         | -0.068%<br>(-1.2-1.7%)               | -0.16%<br>(-1.4-1.9%)               | -2.5<br>(-22-30)     | -4<br>(-70-110)           |
| North Korea | 2016 | Male   | All Ages | 41%<br>(35-49%)                | 59%<br>(51-65%)          | 1.5<br>(1.1-2.1)                            | 5.7%<br>(3.7-7.9%)                   | 6.8%<br>(3.7-10%)                   | 7500<br>(4200-11000) | 270000<br>(170000-380000) |
| North Korea | 2016 | Male   | 15 to 19 | 30%<br>(19-45%)                | 70%<br>(55-81%)          | 0.44<br>(0.19-0.84)                         | 2.5%<br>(1.3-4.1%)                   | 3%<br>(1.3-5.6%)                    | 42<br>(18-78)        | 3900<br>(2100-6400)       |
| North Korea | 2016 | Male   | 20 to 24 | 43%<br>(28-59%)                | 57%<br>(41-72%)          | 1.1<br>(0.51-1.8)                           | 5.4%<br>(3.2-8.6%)                   | 6.2%<br>(3.1-11%)                   | 140<br>(64-230)      | 11000<br>(6300-18000)     |
| North Korea | 2016 | Male   | 25 to 29 | 49%<br>(31-65%)                | 51%<br>(35-69%)          | 1.6<br>(0.77-2.7)                           | 6.9%<br>(4.1-11%)                    | 8.2%<br>(4.3-13%)                   | 180<br>(89-300)      | 14000<br>(8000-22000)     |
| North Korea | 2016 | Male   | 30 to 34 | 52%<br>(34-69%)                | 48%<br>(31-66%)          | 2<br>(1-3.2)                                | 7.6%<br>(4.7-11%)                    | 9.1%<br>(5.1-14%)                   | 230<br>(130-380)     | 16000<br>(9600-24000)     |
| North Korea | 2016 | Male   | 35 to 39 | 54%<br>(38-71%)                | 46%<br>(29-62%)          | 2.3<br>(1.2-3.9)                            | 8.5%<br>(5-13%)                      | 10%<br>(5.5-16%)                    | 260<br>(140-440)     | 16000<br>(9400-25000)     |
| North Korea | 2016 | Male   | 40 to 44 | 55%<br>(39-73%)                | 45%<br>(27-61%)          | 2.7<br>(1.5-4.3)                            | 9%<br>(5.5-13%)                      | 11%<br>(6.2-17%)                    | 520<br>(290-850)     | 28000<br>(16000-44000)    |
| North Korea | 2016 | Male   | 45 to 49 | 56%<br>(37-73%)                | 44%<br>(27-63%)          | 3<br>(1.6-4.7)                              | 9.3%<br>(5.4-14%)                    | 11%<br>(6-17%)                      | 830<br>(440-1300)    | 39000<br>(22000-59000)    |
| North Korea | 2016 | Male   | 50 to 54 | 56%<br>(38-73%)                | 44%<br>(27-62%)          | 3.1<br>(1.8-4.8)                            | 9.4%<br>(5.1-14%)                    | 11%<br>(5.7-17%)                    | 870<br>(440-1300)    | 35000<br>(19000-52000)    |
| North Korea | 2016 | Male   | 55 to 59 | 54%<br>(36-72%)                | 46%<br>(28-64%)          | 2.9<br>(1.6-4.8)                            | 8.7%<br>(4.6-13%)                    | 10%<br>(5.1-16%)                    | 1200<br>(580-1800)   | 40000<br>(21000-62000)    |
| North Korea | 2016 | Male   | 60 to 64 | 52%<br>(34-70%)                | 48%<br>(30-66%)          | 2.6<br>(1.4-4.3)                            | 7.5%<br>(3.2-12%)                    | 8.4%<br>(3.5-14%)                   | 750<br>(310-1300)    | 22000<br>(9400-36000)     |
| North Korea | 2016 | Male   | 65 to 69 | 48%<br>(33-66%)                | 52%<br>(34-67%)          | 2.2<br>(1.2-3.5)                            | 6.3%<br>(2.8-11%)                    | 7.1%<br>(3-12%)                     | 870<br>(360-1500)    | 21000<br>(9000-35000)     |
| North Korea | 2016 | Male   | 70 to 74 | 45%<br>(29-62%)                | 55%<br>(38-71%)          | 1.8<br>(0.91-3.2)                           | 4.9%<br>(1.6-9.7%)                   | 5.4%<br>(1.6-11%)                   | 830<br>(240-1700)    | 16000<br>(4900-32000)     |
| North Korea | 2016 | Male   | 75 to 79 | 42%<br>(27-60%)                | 58%<br>(40-73%)          | 1.5<br>(0.72-2.7)                           | 3.9%<br>(0.95-7.9%)                  | 4.2%<br>(0.94-8.7%)                 | 540<br>(120-1100)    | 8000<br>(2000-16000)      |
| North Korea | 2016 | Male   | 80 to 84 | 40%<br>(25-57%)                | 60%<br>(43-75%)          | 1.4<br>(0.68-2.4)                           | 3.2%<br>(0.64-7%)                    | 3.4%<br>(0.58-7.7%)                 | 190<br>(32-420)      | 2100<br>(420-4500)        |
| North Korea | 2016 | Male   | 85 to 89 | 39%<br>(25-54%)                | 61%<br>(46-75%)          | 1.3<br>(0.63-2.3)                           | 2.5%<br>(0.33-6%)                    | 2.6%<br>(0.21-6.6%)                 | 64<br>(5.2-160)      | 510<br>(69-1200)          |
| North Korea | 2016 | Male   | 90 to 94 | 40%<br>(26-56%)                | 60%<br>(44-74%)          | 1.3<br>(0.62-2.4)                           | 1.9%<br>(-0.064-5.6%)                | 2%<br>(-0.27-6.2%)                  | 17<br>(-2.3-53)      | 96<br>(-3.2-280)          |
| North Korea | 2016 | Male   | 95 plus  | 43%<br>(26-62%)                | 57%<br>(38-74%)          | 1.3<br>(0.54-2.6)                           | 1.7%<br>(-0.42-5.8%)                 | 1.6%<br>(-0.77-6.3%)                | 3.5<br>(-1.7-13)     | 14<br>(-3.4-47)           |
| Taiwan      | 1990 | Female | All Ages | 16%<br>(13-20%)                | 84%<br>(80-87%)          | 0.3<br>(0.17-0.5)                           | 1.2%<br>(0.55-2.2%)                  | 1.6%<br>(0.31-3.6%)                 | 630<br>(120-1500)    | 23000<br>(11000-43000)    |
| Taiwan      | 1990 | Female | 15 to 19 | 15%<br>(9.4-24%)               | 85%<br>(76-91%)          | 0.28<br>(0.12-0.58)                         | 0.97%<br>(0.52-1.6%)                 | 1.6%<br>(0.56-3.4%)                 | 7.5<br>(2.5-16)      | 930<br>(490-1600)         |
| Taiwan      | 1990 | Female | 20 to 24 | 19%<br>(11-29%)                | 81%<br>(71-89%)          | 0.3<br>(0.12-0.61)                          | 1.4%<br>(0.87-2.1%)                  | 1.8%<br>(0.69-3.5%)                 | 9.8<br>(3.9-19)      | 1600<br>(950-2500)        |

| Location | Year | Sex    | Age      | Prevalence of current drinkers | Prevalence of abstainers | Population average of standard drinks daily | Percent of total attributable deaths | Percent of total attributable DALYs | Attributable deaths | Attributable DALYs        |
|----------|------|--------|----------|--------------------------------|--------------------------|---------------------------------------------|--------------------------------------|-------------------------------------|---------------------|---------------------------|
| Taiwan   | 1990 | Female | 25 to 29 | 19%<br>(11-30%)                | 81%<br>(70-89%)          | 0.31<br>(0.13-0.63)                         | 1.4%<br>(0.91-2.1%)                  | 1.9%<br>(0.83-3.5%)                 | 13<br>(5.6-24)      | 1800<br>(1100-2800)       |
| Taiwan   | 1990 | Female | 30 to 34 | 20%<br>(12-32%)                | 80%<br>(68-88%)          | 0.36<br>(0.16-0.71)                         | 1.4%<br>(0.94-2.2%)                  | 2.3%<br>(1.2-4.2%)                  | 18<br>(9.7-33)      | 1900<br>(1200-3000)       |
| Taiwan   | 1990 | Female | 35 to 39 | 22%<br>(13-34%)                | 78%<br>(66-87%)          | 0.45<br>(0.19-0.86)                         | 1.6%<br>(1.1-2.6%)                   | 3.2%<br>(1.9-5.3%)                  | 30<br>(18-50)       | 2200<br>(1500-3400)       |
| Taiwan   | 1990 | Female | 40 to 44 | 22%<br>(13-35%)                | 78%<br>(65-87%)          | 0.51<br>(0.22-0.99)                         | 1.8%<br>(1.1-2.9%)                   | 3.6%<br>(2.1-6%)                    | 32<br>(19-54)       | 1800<br>(1200-3000)       |
| Taiwan   | 1990 | Female | 45 to 49 | 22%<br>(12-34%)                | 78%<br>(66-88%)          | 0.55<br>(0.22-1.1)                          | 1.8%<br>(0.92-3.2%)                  | 3.5%<br>(1.9-6.3%)                  | 41<br>(22-76)       | 1900<br>(1000-3500)       |
| Taiwan   | 1990 | Female | 50 to 54 | 21%<br>(13-33%)                | 79%<br>(67-87%)          | 0.57<br>(0.24-1.2)                          | 1.8%<br>(0.77-3.5%)                  | 3.3%<br>(1.6-6.2%)                  | 57<br>(28-110)      | 2200<br>(980-4300)        |
| Taiwan   | 1990 | Female | 55 to 59 | 20%<br>(12-31%)                | 80%<br>(69-88%)          | 0.57<br>(0.23-1.1)                          | 1.6%<br>(0.5-3.5%)                   | 2.8%<br>(1.2-5.6%)                  | 66<br>(29-130)      | 2100<br>(670-4500)        |
| Taiwan   | 1990 | Female | 60 to 64 | 19%<br>(11-30%)                | 81%<br>(70-89%)          | 0.55<br>(0.21-1.1)                          | 1.4%<br>(0.18-3.3%)                  | 2.2%<br>(0.61-4.9%)                 | 72<br>(20-160)      | 1900<br>(260-4600)        |
| Taiwan   | 1990 | Female | 65 to 69 | 18%<br>(11-28%)                | 82%<br>(72-89%)          | 0.54<br>(0.23-1)                            | 1.2%<br>(-0.075-3.3%)                | 1.8%<br>(0.13-4.5%)                 | 77<br>(5.5-190)     | 1700<br>(-99-4600)        |
| Taiwan   | 1990 | Female | 70 to 74 | 17%<br>(11-27%)                | 83%<br>(73-89%)          | 0.52<br>(0.21-1)                            | 1%<br>(-0.29-3.3%)                   | 1.4%<br>(-0.23-4.2%)                | 70<br>(-11-210)     | 1300<br>(-350-4100)       |
| Taiwan   | 1990 | Female | 75 to 79 | 16%<br>(9.6-26%)               | 84%<br>(74-90%)          | 0.5<br>(0.2-1)                              | 0.83%<br>(-0.57-3.2%)                | 1%<br>(-0.58-3.7%)                  | 66<br>(-38-240)     | 940<br>(-590-3500)        |
| Taiwan   | 1990 | Female | 80 to 84 | 15%<br>(8.8-25%)               | 85%<br>(75-91%)          | 0.48<br>(0.19-0.92)                         | 0.67%<br>(-0.59-2.8%)                | 0.8%<br>(-0.66-3.3%)                | 42<br>(-35-170)     | 450<br>(-380-1900)        |
| Taiwan   | 1990 | Female | 85 to 89 | 16%<br>(9.1-24%)               | 84%<br>(76-91%)          | 0.49<br>(0.19-0.98)                         | 0.58%<br>(-0.61-2.6%)                | 0.66%<br>(-0.72-3%)                 | 21<br>(-23-95)      | 160<br>(-180-730)         |
| Taiwan   | 1990 | Female | 90 to 94 | 17%<br>(10-26%)                | 83%<br>(74-90%)          | 0.52<br>(0.21-1.1)                          | 0.49%<br>(-0.68-2.5%)                | 0.52%<br>(-0.82-2.8%)               | 6.8<br>(-11-37)     | 39<br>(-53-200)           |
| Taiwan   | 1990 | Female | 95 plus  | 19%<br>(10-32%)                | 81%<br>(68-90%)          | 0.6<br>(0.19-1.4)                           | 0.55%<br>(-0.81-3.3%)                | 0.54%<br>(-1-3.6%)                  | 2<br>(-3.7-13)      | 7.9<br>(-12-47)           |
| Taiwan   | 1990 | Male   | All Ages | 39%<br>(32-46%)                | 61%<br>(54-68%)          | 2<br>(1.1-3.2)                              | 8.6%<br>(5.4-12%)                    | 10%<br>(5.6-15%)                    | 6800<br>(3700-9600) | 240000<br>(150000-320000) |
| Taiwan   | 1990 | Male   | 15 to 19 | 29%<br>(18-43%)                | 71%<br>(57-82%)          | 0.61<br>(0.25-1.3)                          | 3.1%<br>(1.5-5.5%)                   | 4.1%<br>(1.6-7.8%)                  | 53<br>(21-100)      | 4500<br>(2200-8200)       |
| Taiwan   | 1990 | Male   | 20 to 24 | 41%<br>(27-57%)                | 59%<br>(43-73%)          | 1.5<br>(0.67-2.8)                           | 6.7%<br>(3.7-11%)                    | 8.7%<br>(4-16%)                     | 130<br>(59-230)     | 11000<br>(5700-18000)     |
| Taiwan   | 1990 | Male   | 25 to 29 | 47%<br>(31-64%)                | 53%<br>(36-69%)          | 2.2<br>(0.99-4)                             | 8.7%<br>(4.6-14%)                    | 12%<br>(5.4-20%)                    | 210<br>(97-350)     | 16000<br>(8100-25000)     |
| Taiwan   | 1990 | Male   | 30 to 34 | 50%<br>(33-67%)                | 50%<br>(33-67%)          | 2.8<br>(1.3-5)                              | 10%<br>(5.7-15%)                     | 14%<br>(7.2-22%)                    | 270<br>(140-420)    | 18000<br>(9900-27000)     |
| Taiwan   | 1990 | Male   | 35 to 39 | 53%<br>(36-69%)                | 47%<br>(31-64%)          | 3.3<br>(1.5-6.2)                            | 11%<br>(6.9-16%)                     | 16%<br>(9-23%)                      | 360<br>(200-530)    | 21000<br>(13000-30000)    |
| Taiwan   | 1990 | Male   | 40 to 44 | 54%<br>(37-72%)                | 46%<br>(28-63%)          | 3.9<br>(1.8-7)                              | 13%<br>(8.2-18%)                     | 17%<br>(10-24%)                     | 380<br>(230-530)    | 20000<br>(12000-27000)    |



| Location | Year | Sex    | Age      | Prevalence of current drinkers | Prevalence of abstainers | Population average of standard drinks daily | Percent of total attributable deaths | Percent of total attributable DALYs | Attributable deaths | Attributable DALYs     |
|----------|------|--------|----------|--------------------------------|--------------------------|---------------------------------------------|--------------------------------------|-------------------------------------|---------------------|------------------------|
| Taiwan   | 1990 | Male   | 45 to 49 | 55%<br>(36-72%)                | 45%<br>(28-64%)          | 4.3<br>(2-8.3)                              | 14%<br>(8.8-19%)                     | 18%<br>(11-24%)                     | 480<br>(300-640)    | 22000<br>(14000-29000) |
| Taiwan   | 1990 | Male   | 50 to 54 | 54%<br>(36-72%)                | 46%<br>(28-64%)          | 4.4<br>(2-8.3)                              | 14%<br>(8.2-18%)                     | 17%<br>(10-23%)                     | 600<br>(360-810)    | 24000<br>(15000-32000) |
| Taiwan   | 1990 | Male   | 55 to 59 | 53%<br>(35-70%)                | 47%<br>(30-65%)          | 4.1<br>(2-7.7)                              | 12%<br>(7.1-17%)                     | 15%<br>(8.5-20%)                    | 740<br>(430-1000)   | 26000<br>(15000-35000) |
| Taiwan   | 1990 | Male   | 60 to 64 | 50%<br>(33-68%)                | 50%<br>(32-67%)          | 3.7<br>(1.7-6.9)                            | 10%<br>(5.3-15%)                     | 12%<br>(6.3-18%)                    | 930<br>(470-1300)   | 27000<br>(14000-40000) |
| Taiwan   | 1990 | Male   | 65 to 69 | 47%<br>(31-64%)                | 53%<br>(36-69%)          | 3.1<br>(1.4-5.7)                            | 9.1%<br>(4-14%)                      | 11%<br>(4.6-16%)                    | 890<br>(390-1400)   | 22000<br>(9500-33000)  |
| Taiwan   | 1990 | Male   | 70 to 74 | 43%<br>(28-60%)                | 57%<br>(40-72%)          | 2.5<br>(1.1-4.9)                            | 7.4%<br>(2.7-12%)                    | 8.5%<br>(3-14%)                     | 680<br>(240-1100)   | 13000<br>(4900-22000)  |
| Taiwan   | 1990 | Male   | 75 to 79 | 40%<br>(25-58%)                | 60%<br>(42-75%)          | 2.2<br>(0.91-4.2)                           | 6.3%<br>(1.8-11%)                    | 7%<br>(2-13%)                       | 580<br>(160-1000)   | 8500<br>(2500-15000)   |
| Taiwan   | 1990 | Male   | 80 to 84 | 38%<br>(23-54%)                | 62%<br>(46-77%)          | 2<br>(0.79-3.7)                             | 5.7%<br>(1.4-11%)                    | 6.3%<br>(1.4-12%)                   | 310<br>(71-590)     | 3400<br>(850-6500)     |
| Taiwan   | 1990 | Male   | 85 to 89 | 37%<br>(24-52%)                | 63%<br>(48-76%)          | 1.8<br>(0.75-3.6)                           | 4.8%<br>(1.1-9.8%)                   | 5.3%<br>(1.1-11%)                   | 130<br>(25-260)     | 990<br>(220-2000)      |
| Taiwan   | 1990 | Male   | 90 to 94 | 39%<br>(25-54%)                | 61%<br>(46-75%)          | 1.8<br>(0.76-3.6)                           | 4%<br>(0.52-8.5%)                    | 4.3%<br>(0.45-9.4%)                 | 32<br>(3.4-70)      | 170<br>(22-370)        |
| Taiwan   | 1990 | Male   | 95 plus  | 42%<br>(26-61%)                | 58%<br>(39-74%)          | 1.9<br>(0.65-4)                             | 3.6%<br>(0.072-8.6%)                 | 3.7%<br>(-0.19-9.3%)                | 6.5<br>(-0.33-16)   | 24<br>(0.46-57)        |
| Taiwan   | 1995 | Female | All Ages | 16%<br>(13-20%)                | 84%<br>(80-87%)          | 0.34<br>(0.19-0.55)                         | 1.4%<br>(0.71-2.5%)                  | 2%<br>(0.58-4.1%)                   | 880<br>(260-1800)   | 29000<br>(15000-50000) |
| Taiwan   | 1995 | Female | 15 to 19 | 15%<br>(9.4-24%)               | 85%<br>(76-91%)          | 0.3<br>(0.12-0.61)                          | 1.8%<br>(0.57-1.8%)                  | 1.8%<br>(0.63-3.7%)                 | 8.2<br>(2.9-17)     | 1000<br>(540-1800)     |
| Taiwan   | 1995 | Female | 20 to 24 | 19%<br>(11-28%)                | 81%<br>(72-89%)          | 0.32<br>(0.13-0.69)                         | 1.5%<br>(0.92-2.3%)                  | 1.9%<br>(0.75-3.7%)                 | 9.2<br>(3.7-18)     | 1500<br>(890-2400)     |
| Taiwan   | 1995 | Female | 25 to 29 | 19%<br>(11-29%)                | 81%<br>(71-89%)          | 0.33<br>(0.14-0.69)                         | 1.5%<br>(1-2.3%)                     | 2%<br>(0.93-3.6%)                   | 12<br>(5.3-21)      | 1700<br>(1100-2600)    |
| Taiwan   | 1995 | Female | 30 to 34 | 20%<br>(12-31%)                | 80%<br>(69-88%)          | 0.38<br>(0.15-0.77)                         | 1.5%<br>(1-2.3%)                     | 2.5%<br>(1.4-4.3%)                  | 19<br>(11-34)       | 2000<br>(1300-3100)    |
| Taiwan   | 1995 | Female | 35 to 39 | 22%<br>(13-34%)                | 78%<br>(66-87%)          | 0.47<br>(0.2-0.9)                           | 1.7%<br>(1.2-2.6%)                   | 3.4%<br>(2.1-5.5%)                  | 34<br>(21-55)       | 2500<br>(1700-3800)    |
| Taiwan   | 1995 | Female | 40 to 44 | 22%<br>(13-35%)                | 78%<br>(65-87%)          | 0.54<br>(0.24-1)                            | 1.9%<br>(1.1-3%)                     | 3.8%<br>(2.3-6.3%)                  | 49<br>(29-81)       | 2900<br>(1800-4600)    |
| Taiwan   | 1995 | Female | 45 to 49 | 21%<br>(12-34%)                | 79%<br>(66-88%)          | 0.58<br>(0.23-1.2)                          | 1.9%<br>(1-3.3%)                     | 3.8%<br>(2.2-6.6%)                  | 49<br>(27-85)       | 2300<br>(1300-4000)    |
| Taiwan   | 1995 | Female | 50 to 54 | 21%<br>(12-33%)                | 79%<br>(67-88%)          | 0.6<br>(0.25-1.2)                           | 2%<br>(0.95-3.7%)                    | 3.8%<br>(2.1-6.7%)                  | 62<br>(33-110)      | 2400<br>(1200-4400)    |
| Taiwan   | 1995 | Female | 55 to 59 | 20%<br>(12-31%)                | 80%<br>(69-88%)          | 0.6<br>(0.25-1.2)                           | 2%<br>(0.81-3.9%)                    | 3.5%<br>(1.8-6.4%)                  | 85<br>(42-160)      | 2700<br>(1200-5300)    |
| Taiwan   | 1995 | Female | 60 to 64 | 19%<br>(11-30%)                | 81%<br>(70-89%)          | 0.58<br>(0.23-1.2)                          | 1.8%<br>(0.56-3.8%)                  | 3%<br>(1.2-5.6%)                    | 100<br>(42-190)     | 2700<br>(860-5600)     |

| Location | Year | Sex    | Age      | Prevalence of current drinkers | Prevalence of abstainers | Population average of standard drinks daily | Percent of total attributable deaths | Percent of total attributable DALYs | Attributable deaths  | Attributable DALYs        |
|----------|------|--------|----------|--------------------------------|--------------------------|---------------------------------------------|--------------------------------------|-------------------------------------|----------------------|---------------------------|
| Taiwan   | 1995 | Female | 65 to 69 | 18%<br>(11-29%)                | 82%<br>(71-89%)          | 0.57<br>(0.24-1.1)                          | 1.7%<br>(0.33-3.8%)                  | 2.6%<br>(0.8-5.3%)                  | 120<br>(37-240)      | 2700<br>(500-5900)        |
| Taiwan   | 1995 | Female | 70 to 74 | 17%<br>(11-27%)                | 83%<br>(73-89%)          | 0.55<br>(0.22-1.1)                          | 1.5%<br>(0.077-3.8%)                 | 2%<br>(0.27-4.9%)                   | 120<br>(15-290)      | 2200<br>(120-5500)        |
| Taiwan   | 1995 | Female | 75 to 79 | 16%<br>(9.6-26%)               | 84%<br>(74-90%)          | 0.53<br>(0.2-1)                             | 1.1%<br>(-0.22-3.5%)                 | 1.5%<br>(-0.16-4.3%)                | 91<br>(-11-270)      | 1300<br>(-250-4000)       |
| Taiwan   | 1995 | Female | 80 to 84 | 15%<br>(9-25%)                 | 85%<br>(75-91%)          | 0.51<br>(0.2-1)                             | 0.88%<br>(-0.39-3%)                  | 1.1%<br>(-0.42-3.6%)                | 69<br>(-27-230)      | 740<br>(-330-2500)        |
| Taiwan   | 1995 | Female | 85 to 89 | 16%<br>(9.5-24%)               | 84%<br>(76-91%)          | 0.53<br>(0.21-1.1)                          | 0.77%<br>(-0.49-2.8%)                | 0.89%<br>(-0.53-3.3%)               | 39<br>(-23-140)      | 300<br>(-180-1100)        |
| Taiwan   | 1995 | Female | 90 to 94 | 17%<br>(10-26%)                | 83%<br>(74-90%)          | 0.57<br>(0.22-1.2)                          | 0.65%<br>(-0.56-2.6%)                | 0.71%<br>(-0.68-3%)                 | 13<br>(-12-55)       | 74<br>(-63-300)           |
| Taiwan   | 1995 | Female | 95 plus  | 20%<br>(11-33%)                | 80%<br>(67-89%)          | 0.65<br>(0.21-1.5)                          | 0.73%<br>(-0.79-3.5%)                | 0.74%<br>(-0.99-3.9%)               | 4.1<br>(-5.4-21)     | 16<br>(-17-75)            |
| Taiwan   | 1995 | Male   | All Ages | 39%<br>(33-47%)                | 61%<br>(53-67%)          | 2.2<br>(1.2-3.5)                            | 9.1%<br>(5.8-12%)                    | 11%<br>(5.7-14%)                    | 7800<br>(4400-11000) | 270000<br>(170000-360000) |
| Taiwan   | 1995 | Male   | 15 to 19 | 28%<br>(18-43%)                | 72%<br>(57-82%)          | 0.65<br>(0.25-1.4)                          | 3.2%<br>(1.6-5.8%)                   | 4.3%<br>(1.7-8.5%)                  | 56<br>(22-110)       | 4800<br>(2400-8700)       |
| Taiwan   | 1995 | Male   | 20 to 24 | 41%<br>(27-57%)                | 59%<br>(43-73%)          | 1.5<br>(0.71-3)                             | 7.2%<br>(3.9-12%)                    | 9.3%<br>(4.3-17%)                   | 120<br>(56-220)      | 10000<br>(5500-17000)     |
| Taiwan   | 1995 | Male   | 25 to 29 | 47%<br>(30-64%)                | 53%<br>(36-70%)          | 2.3<br>(1-4.4)                              | 9.3%<br>(5-14%)                      | 13%<br>(5.8-21%)                    | 200<br>(90-320)      | 15000<br>(7800-23000)     |
| Taiwan   | 1995 | Male   | 30 to 34 | 50%<br>(32-68%)                | 50%<br>(32-68%)          | 3<br>(1.3-5.4)                              | 11%<br>(5.9-16%)                     | 15%<br>(7.3-22%)                    | 300<br>(150-460)     | 20000<br>(11000-30000)    |
| Taiwan   | 1995 | Male   | 35 to 39 | 53%<br>(36-70%)                | 47%<br>(30-64%)          | 3.6<br>(1.6-6.5)                            | 12%<br>(7.4-17%)                     | 16%<br>(9.5-24%)                    | 430<br>(250-620)     | 25000<br>(15000-36000)    |
| Taiwan   | 1995 | Male   | 40 to 44 | 54%<br>(37-72%)                | 46%<br>(28-63%)          | 4.1<br>(1.9-7.4)                            | 14%<br>(8.8-19%)                     | 18%<br>(11-25%)                     | 590<br>(360-800)     | 31000<br>(19000-41000)    |
| Taiwan   | 1995 | Male   | 45 to 49 | 54%<br>(36-72%)                | 46%<br>(28-64%)          | 4.6<br>(2.1-8.6)                            | 15%<br>(9.4-19%)                     | 19%<br>(12-25%)                     | 580<br>(360-760)     | 26000<br>(17000-35000)    |
| Taiwan   | 1995 | Male   | 50 to 54 | 54%<br>(36-72%)                | 46%<br>(28-64%)          | 4.7<br>(2.1-8.9)                            | 14%<br>(9.1-19%)                     | 18%<br>(11-23%)                     | 630<br>(390-830)     | 25000<br>(16000-33000)    |
| Taiwan   | 1995 | Male   | 55 to 59 | 52%<br>(34-70%)                | 48%<br>(30-66%)          | 4.4<br>(2.1-7.8)                            | 13%<br>(7.9-17%)                     | 16%<br>(9.4-21%)                    | 740<br>(450-970)     | 26000<br>(15000-34000)    |
| Taiwan   | 1995 | Male   | 60 to 64 | 50%<br>(32-68%)                | 50%<br>(32-68%)          | 3.9<br>(1.8-7.2)                            | 11%<br>(6-15%)                       | 13%<br>(7.1-18%)                    | 870<br>(470-1200)    | 26000<br>(14000-36000)    |
| Taiwan   | 1995 | Male   | 65 to 69 | 47%<br>(30-65%)                | 53%<br>(35-70%)          | 3.3<br>(1.5-6.1)                            | 9.3%<br>(4.4-14%)                    | 11%<br>(5-16%)                      | 1100<br>(490-1600)   | 26000<br>(12000-39000)    |
| Taiwan   | 1995 | Male   | 70 to 74 | 43%<br>(27-60%)                | 57%<br>(40-73%)          | 2.7<br>(1.1-5.1)                            | 7.6%<br>(2.9-12%)                    | 8.7%<br>(3.3-14%)                   | 910<br>(350-1500)    | 18000<br>(6900-28000)     |
| Taiwan   | 1995 | Male   | 75 to 79 | 40%<br>(25-57%)                | 60%<br>(43-75%)          | 2.3<br>(0.94-4.4)                           | 6.2%<br>(2-11%)                      | 7%<br>(2.3-12%)                     | 640<br>(200-1100)    | 9700<br>(3100-16000)      |
| Taiwan   | 1995 | Male   | 80 to 84 | 37%<br>(23-54%)                | 63%<br>(46-77%)          | 2.1<br>(0.86-4)                             | 5.7%<br>(1.6-10%)                    | 6.3%<br>(1.7-11%)                   | 470<br>(120-830)     | 5100<br>(1400-9200)       |

| Location | Year | Sex    | Age      | Prevalence of current drinkers | Prevalence of abstainers | Population average of standard drinks daily | Percent of total attributable deaths | Percent of total attributable DALYs | Attributable deaths  | Attributable DALYs        |
|----------|------|--------|----------|--------------------------------|--------------------------|---------------------------------------------|--------------------------------------|-------------------------------------|----------------------|---------------------------|
| Taiwan   | 1995 | Male   | 85 to 89 | 37%<br>(23-51%)                | 63%<br>(49-77%)          | 1.9<br>(0.82-3.8)                           | 4.9%<br>(1.2-9.5%)                   | 5.4%<br>(1.2-11%)                   | 190<br>(43-370)      | 1500<br>(360-2900)        |
| Taiwan   | 1995 | Male   | 90 to 94 | 38%<br>(25-54%)                | 62%<br>(46-75%)          | 1.9<br>(0.8-3.7)                            | 4.2%<br>(0.67-8.6%)                  | 4.5%<br>(0.57-9.5%)                 | 52<br>(6.4-110)      | 280<br>(46-570)           |
| Taiwan   | 1995 | Male   | 95 plus  | 42%<br>(25-60%)                | 58%<br>(40-75%)          | 2<br>(0.66-4.2)                             | 3.8%<br>(0.078-8.7%)                 | 3.9%<br>(-0.14-9.5%)                | 10<br>(-0.37-25)     | 38<br>(0.81-89)           |
| Taiwan   | 2000 | Female | All Ages | 17%<br>(14-20%)                | 83%<br>(80-86%)          | 0.38<br>(0.21-0.62)                         | 1.6%<br>(0.81-2.7%)                  | 2.2%<br>(0.84-4.4%)                 | 1100<br>(400-2100)   | 34000<br>(17000-58000)    |
| Taiwan   | 2000 | Female | 15 to 19 | 15%<br>(9.5-24%)               | 85%<br>(76-91%)          | 0.31<br>(0.13-0.65)                         | 1%<br>(0.59-1.7%)                    | 1.8%<br>(0.67-3.7%)                 | 6.7<br>(2.5-14)      | 910<br>(490-1500)         |
| Taiwan   | 2000 | Female | 20 to 24 | 19%<br>(11-29%)                | 81%<br>(71-89%)          | 0.34<br>(0.14-0.71)                         | 1.5%<br>(0.96-2.3%)                  | 2%<br>(0.82-3.9%)                   | 8.8<br>(3.7-18)      | 1600<br>(980-2500)        |
| Taiwan   | 2000 | Female | 25 to 29 | 19%<br>(11-30%)                | 81%<br>(70-89%)          | 0.35<br>(0.14-0.72)                         | 1.6%<br>(1-2.3%)                     | 2.2%<br>(0.99-4.1%)                 | 9.9<br>(4.5-18)      | 1600<br>(1000-2400)       |
| Taiwan   | 2000 | Female | 30 to 34 | 20%<br>(12-32%)                | 80%<br>(68-88%)          | 0.4<br>(0.16-0.82)                          | 1.6%<br>(1-2.3%)                     | 2.6%<br>(1.4-4.5%)                  | 17<br>(9.3-30)       | 1900<br>(1200-3000)       |
| Taiwan   | 2000 | Female | 35 to 39 | 21%<br>(13-34%)                | 79%<br>(66-87%)          | 0.5<br>(0.21-0.98)                          | 1.7%<br>(1.2-2.7%)                   | 3.5%<br>(2.2-5.8%)                  | 34<br>(21-55)        | 2600<br>(1800-3900)       |
| Taiwan   | 2000 | Female | 40 to 44 | 22%<br>(13-35%)                | 78%<br>(65-87%)          | 0.57<br>(0.25-1.1)                          | 1.9%<br>(1.1-3.1%)                   | 3.9%<br>(2.3-6.6%)                  | 52<br>(30-88)        | 3100<br>(1900-5100)       |
| Taiwan   | 2000 | Female | 45 to 49 | 21%<br>(12-34%)                | 79%<br>(66-88%)          | 0.61<br>(0.25-1.2)                          | 1.9%<br>(1-3.2%)                     | 3.9%<br>(2.3-6.7%)                  | 68<br>(38-120)       | 3300<br>(1900-5600)       |
| Taiwan   | 2000 | Female | 50 to 54 | 21%<br>(12-33%)                | 79%<br>(67-88%)          | 0.63<br>(0.26-1.3)                          | 2%<br>(0.97-3.6%)                    | 3.9%<br>(2.2-6.7%)                  | 68<br>(37-120)       | 2700<br>(1300-4800)       |
| Taiwan   | 2000 | Female | 55 to 59 | 20%<br>(12-31%)                | 80%<br>(69-88%)          | 0.63<br>(0.26-1.3)                          | 2.1%<br>(0.9-4.1%)                   | 3.8%<br>(2-6.8%)                    | 86<br>(44-160)       | 2800<br>(1200-5500)       |
| Taiwan   | 2000 | Female | 60 to 64 | 19%<br>(11-30%)                | 81%<br>(70-89%)          | 0.62<br>(0.23-1.2)                          | 2%<br>(0.73-4.2%)                    | 3.5%<br>(1.6-6.4%)                  | 120<br>(53-220)      | 3200<br>(1100-6300)       |
| Taiwan   | 2000 | Female | 65 to 69 | 18%<br>(11-29%)                | 82%<br>(71-89%)          | 0.61<br>(0.26-1.2)                          | 2%<br>(0.6-4.1%)                     | 3.2%<br>(1.2-5.9%)                  | 150<br>(57-270)      | 3300<br>(990-6700)        |
| Taiwan   | 2000 | Female | 70 to 74 | 17%<br>(10-27%)                | 83%<br>(73-90%)          | 0.6<br>(0.24-1.2)                           | 1.8%<br>(0.3-4.2%)                   | 2.6%<br>(0.65-5.6%)                 | 160<br>(40-350)      | 3000<br>(480-7000)        |
| Taiwan   | 2000 | Female | 75 to 79 | 16%<br>(9.6-26%)               | 84%<br>(74-90%)          | 0.56<br>(0.22-1.1)                          | 1.4%<br>(0.014-3.5%)                 | 1.9%<br>(0.16-4.4%)                 | 130<br>(12-310)      | 1900<br>(19-4800)         |
| Taiwan   | 2000 | Female | 80 to 84 | 15%<br>(9-24%)                 | 85%<br>(76-91%)          | 0.54<br>(0.22-1)                            | 1.1%<br>(-0.19-3.2%)                 | 1.3%<br>(-0.18-3.9%)                | 89<br>(-11-260)      | 970<br>(-170-2900)        |
| Taiwan   | 2000 | Female | 85 to 89 | 16%<br>(9.2-25%)               | 84%<br>(75-91%)          | 0.56<br>(0.23-1.1)                          | 0.93%<br>(-0.33-3%)                  | 1.1%<br>(-0.35-3.5%)                | 61<br>(-20-190)      | 480<br>(-170-1500)        |
| Taiwan   | 2000 | Female | 90 to 94 | 17%<br>(10-27%)                | 83%<br>(73-90%)          | 0.6<br>(0.23-1.2)                           | 0.8%<br>(-0.47-3%)                   | 0.88%<br>(-0.57-3.4%)               | 23<br>(-15-88)       | 130<br>(-74-490)          |
| Taiwan   | 2000 | Female | 95 plus  | 20%<br>(11-32%)                | 80%<br>(68-89%)          | 0.69<br>(0.22-1.6)                          | 0.88%<br>(-0.67-3.8%)                | 0.91%<br>(-0.85-4.2%)               | 7.8<br>(-7.3-37)     | 30<br>(-22-130)           |
| Taiwan   | 2000 | Male   | All Ages | 40%<br>(34-48%)                | 60%<br>(52-66%)          | 2.5<br>(1.4-4)                              | 9.7%<br>(6.2-13%)                    | 11%<br>(6.3-15%)                    | 8500<br>(5000-12000) | 290000<br>(190000-380000) |

| Location | Year | Sex    | Age      | Prevalence of current drinkers | Prevalence of abstainers | Population average of standard drinks daily | Percent of total attributable deaths | Percent of total attributable DALYs | Attributable deaths | Attributable DALYs     |
|----------|------|--------|----------|--------------------------------|--------------------------|---------------------------------------------|--------------------------------------|-------------------------------------|---------------------|------------------------|
| Taiwan   | 2000 | Male   | 15 to 19 | 28%<br>(18-43%)                | 72%<br>(57-82%)          | 0.67<br>(0.27-1.4)                          | 3.1%<br>(1.6-5.5%)                   | 4.5%<br>(1.9-8.7%)                  | 40<br>(17-77)       | 3700<br>(1900-6500)    |
| Taiwan   | 2000 | Male   | 20 to 24 | 41%<br>(26-56%)                | 59%<br>(44-74%)          | 1.6<br>(0.72-3.2)                           | 7.1%<br>(3.9-12%)                    | 9.6%<br>(4.5-18%)                   | 110<br>(49-200)     | 9400<br>(5100-16000)   |
| Taiwan   | 2000 | Male   | 25 to 29 | 47%<br>(30-64%)                | 53%<br>(36-70%)          | 2.5<br>(1.1-4.6)                            | 9.5%<br>(5.2-15%)                    | 14%<br>(6.4-22%)                    | 160<br>(77-270)     | 13000<br>(6700-20000)  |
| Taiwan   | 2000 | Male   | 30 to 34 | 50%<br>(33-67%)                | 50%<br>(33-67%)          | 3.2<br>(1.4-5.7)                            | 11%<br>(6.5-16%)                     | 16%<br>(8.1-24%)                    | 280<br>(140-420)    | 19000<br>(11000-27000) |
| Taiwan   | 2000 | Male   | 35 to 39 | 52%<br>(36-69%)                | 48%<br>(31-64%)          | 3.7<br>(1.7-7)                              | 13%<br>(7.9-18%)                     | 17%<br>(10-24%)                     | 450<br>(270-650)    | 27000<br>(16000-37000) |
| Taiwan   | 2000 | Male   | 40 to 44 | 53%<br>(37-71%)                | 47%<br>(29-63%)          | 4.3<br>(2-7.9)                              | 15%<br>(9.5-19%)                     | 19%<br>(12-26%)                     | 680<br>(420-910)    | 35000<br>(23000-47000) |
| Taiwan   | 2000 | Male   | 45 to 49 | 54%<br>(35-72%)                | 46%<br>(28-65%)          | 4.8<br>(2.2-8.8)                            | 15%<br>(10-20%)                      | 20%<br>(13-26%)                     | 850<br>(560-1100)   | 39000<br>(26000-50000) |
| Taiwan   | 2000 | Male   | 50 to 54 | 54%<br>(36-72%)                | 46%<br>(28-64%)          | 4.9<br>(2.3-9.1)                            | 15%<br>(9.9-19%)                     | 19%<br>(12-24%)                     | 730<br>(500-960)    | 30000<br>(20000-39000) |
| Taiwan   | 2000 | Male   | 55 to 59 | 52%<br>(35-71%)                | 48%<br>(29-65%)          | 4.6<br>(2.1-8.5)                            | 13%<br>(8.3-17%)                     | 16%<br>(10-21%)                     | 740<br>(460-970)    | 26000<br>(16000-34000) |
| Taiwan   | 2000 | Male   | 60 to 64 | 49%<br>(31-68%)                | 51%<br>(32-69%)          | 4.1<br>(1.7-7.6)                            | 11%<br>(6.1-15%)                     | 13%<br>(7.4-18%)                    | 800<br>(450-1100)   | 24000<br>(13000-33000) |
| Taiwan   | 2000 | Male   | 65 to 69 | 46%<br>(31-63%)                | 54%<br>(37-69%)          | 3.4<br>(1.5-6.4)                            | 9.3%<br>(4.7-13%)                    | 11%<br>(5.5-16%)                    | 900<br>(460-1300)   | 22000<br>(11000-32000) |
| Taiwan   | 2000 | Male   | 70 to 74 | 43%<br>(27-60%)                | 57%<br>(40-73%)          | 2.8<br>(1.2-5.4)                            | 7.5%<br>(3.1-12%)                    | 8.7%<br>(3.6-14%)                   | 1000<br>(440-1600)  | 20000<br>(8800-32000)  |
| Taiwan   | 2000 | Male   | 75 to 79 | 40%<br>(25-58%)                | 60%<br>(42-75%)          | 2.4<br>(0.98-4.7)                           | 6.2%<br>(2.3-10%)                    | 7.1%<br>(2.5-12%)                   | 820<br>(290-1400)   | 13000<br>(4500-21000)  |
| Taiwan   | 2000 | Male   | 80 to 84 | 37%<br>(23-54%)                | 63%<br>(46-77%)          | 2.2<br>(0.94-4.2)                           | 5.7%<br>(1.9-9.8%)                   | 6.4%<br>(2-11%)                     | 530<br>(170-920)    | 5900<br>(1900-10000)   |
| Taiwan   | 2000 | Male   | 85 to 89 | 36%<br>(23-52%)                | 64%<br>(48-77%)          | 2<br>(0.87-3.9)                             | 5%<br>(1.3-9.3%)                     | 5.6%<br>(1.4-10%)                   | 290<br>(73-540)     | 2300<br>(610-4200)     |
| Taiwan   | 2000 | Male   | 90 to 94 | 38%<br>(25-54%)                | 62%<br>(46-75%)          | 2<br>(0.83-4)                               | 4.3%<br>(0.8-8.4%)                   | 4.7%<br>(0.75-9.4%)                 | 80<br>(13-160)      | 440<br>(81-850)        |
| Taiwan   | 2000 | Male   | 95 plus  | 42%<br>(25-60%)                | 58%<br>(40-75%)          | 2.1<br>(0.71-4.5)                           | 4.1%<br>(0.27-8.9%)                  | 4.2%<br>(0.025-9.8%)                | 18<br>(0.11-41)     | 67<br>(4.6-150)        |
| Taiwan   | 2005 | Female | All Ages | 17%<br>(14-21%)                | 83%<br>(79-86%)          | 0.41<br>(0.22-0.69)                         | 1.5%<br>(0.76-2.7%)                  | 2.1%<br>(0.8-4.2%)                  | 1100<br>(420-2200)  | 34000<br>(17000-60000) |
| Taiwan   | 2005 | Female | 15 to 19 | 15%<br>(9.4-25%)               | 85%<br>(75-91%)          | 0.31<br>(0.13-0.66)                         | 1%<br>(0.59-1.7%)                    | 1.9%<br>(0.71-4.1%)                 | 4.6<br>(1.7-9.7)    | 690<br>(400-1100)      |
| Taiwan   | 2005 | Female | 20 to 24 | 19%<br>(11-29%)                | 81%<br>(71-89%)          | 0.34<br>(0.14-0.74)                         | 1.6%<br>(1-2.4%)                     | 2.1%<br>(0.84-4.4%)                 | 8<br>(3.1-17)       | 1500<br>(930-2400)     |
| Taiwan   | 2005 | Female | 25 to 29 | 19%<br>(11-30%)                | 81%<br>(70-89%)          | 0.35<br>(0.14-0.73)                         | 1.6%<br>(1-2.4%)                     | 2.3%<br>(0.91-4.6%)                 | 11<br>(4.3-22)      | 1800<br>(1100-2700)    |
| Taiwan   | 2005 | Female | 30 to 34 | 20%<br>(12-31%)                | 80%<br>(69-88%)          | 0.4<br>(0.16-0.81)                          | 1.6%<br>(1-2.4%)                     | 2.7%<br>(1.3-4.9%)                  | 15<br>(7.7-28)      | 1800<br>(1100-2700)    |

| Location | Year | Sex    | Age      | Prevalence of current drinkers | Prevalence of abstainers | Population average of standard drinks daily | Percent of total attributable deaths | Percent of total attributable DALYs | Attributable deaths  | Attributable DALYs        |
|----------|------|--------|----------|--------------------------------|--------------------------|---------------------------------------------|--------------------------------------|-------------------------------------|----------------------|---------------------------|
| Taiwan   | 2005 | Female | 35 to 39 | 21%<br>(13-34%)                | 79%<br>(66-87%)          | 0.5<br>(0.21-0.99)                          | 1.7%<br>(1.1-2.7%)                   | 3.5%<br>(2-5.9%)                    | 29<br>(16-49)        | 2300<br>(1500-3700)       |
| Taiwan   | 2005 | Female | 40 to 44 | 22%<br>(13-35%)                | 78%<br>(65-87%)          | 0.57<br>(0.24-1.2)                          | 1.8%<br>(1.1-3%)                     | 3.8%<br>(2.1-6.5%)                  | 47<br>(27-80)        | 2900<br>(1800-4900)       |
| Taiwan   | 2005 | Female | 45 to 49 | 21%<br>(12-33%)                | 79%<br>(67-88%)          | 0.61<br>(0.25-1.2)                          | 1.7%<br>(0.87-3%)                    | 3.7%<br>(2.1-6.5%)                  | 64<br>(35-110)       | 3200<br>(1700-5600)       |
| Taiwan   | 2005 | Female | 50 to 54 | 21%<br>(13-33%)                | 79%<br>(67-87%)          | 0.64<br>(0.26-1.2)                          | 1.8%<br>(0.8-3.2%)                   | 3.7%<br>(1.9-6.4%)                  | 86<br>(44-150)       | 3500<br>(1600-6300)       |
| Taiwan   | 2005 | Female | 55 to 59 | 20%<br>(12-31%)                | 80%<br>(69-88%)          | 0.64<br>(0.25-1.3)                          | 1.8%<br>(0.76-3.6%)                  | 3.5%<br>(1.8-6.4%)                  | 83<br>(42-150)       | 2800<br>(1200-5400)       |
| Taiwan   | 2005 | Female | 60 to 64 | 19%<br>(11-30%)                | 81%<br>(70-89%)          | 0.62<br>(0.24-1.2)                          | 1.9%<br>(0.67-3.9%)                  | 3.4%<br>(1.6-6.3%)                  | 100<br>(49-180)      | 2800<br>(1000-5600)       |
| Taiwan   | 2005 | Female | 65 to 69 | 18%<br>(11-28%)                | 82%<br>(72-89%)          | 0.61<br>(0.26-1.2)                          | 1.9%<br>(0.67-3.9%)                  | 3.2%<br>(1.4-5.9%)                  | 150<br>(65-270)      | 3300<br>(1100-6700)       |
| Taiwan   | 2005 | Female | 70 to 74 | 17%<br>(11-27%)                | 83%<br>(73-89%)          | 0.6<br>(0.24-1.3)                           | 1.8%<br>(0.39-4%)                    | 2.6%<br>(0.77-5.5%)                 | 170<br>(46-340)      | 3100<br>(670-7100)        |
| Taiwan   | 2005 | Female | 75 to 79 | 16%<br>(9.6-26%)               | 84%<br>(74-90%)          | 0.56<br>(0.22-1.2)                          | 1.3%<br>(0.11-3.4%)                  | 1.8%<br>(0.32-4.3%)                 | 140<br>(26-350)      | 2100<br>(180-5400)        |
| Taiwan   | 2005 | Female | 80 to 84 | 15%<br>(9-25%)                 | 85%<br>(75-91%)          | 0.55<br>(0.23-1.1)                          | 1%<br>(-0.11-2.9%)                   | 1.3%<br>(-0.056-3.5%)               | 110<br>(-4.6-290)    | 1200<br>(-120-3300)       |
| Taiwan   | 2005 | Female | 85 to 89 | 16%<br>(9.5-25%)               | 84%<br>(75-91%)          | 0.57<br>(0.23-1.1)                          | 0.88%<br>(-0.23-2.8%)                | 1%<br>(-0.23-3.2%)                  | 66<br>(-14-210)      | 530<br>(-140-1600)        |
| Taiwan   | 2005 | Female | 90 to 94 | 17%<br>(10-27%)                | 83%<br>(73-90%)          | 0.62<br>(0.24-1.3)                          | 0.77%<br>(-0.37-2.9%)                | 0.85%<br>(-0.46-3.3%)               | 31<br>(-17-120)      | 180<br>(-87-680)          |
| Taiwan   | 2005 | Female | 95 plus  | 20%<br>(11-33%)                | 80%<br>(67-89%)          | 0.71<br>(0.23-1.6)                          | 0.88%<br>(-0.58-3.8%)                | 0.91%<br>(-0.76-4.2%)               | 12<br>(-10-56)       | 46<br>(-31-200)           |
| Taiwan   | 2005 | Male   | All Ages | 41%<br>(35-49%)                | 59%<br>(51-65%)          | 2.6<br>(1.4-4.3)                            | 10%<br>(6.6-13%)                     | 11%<br>(6.3-15%)                    | 9100<br>(5300-13000) | 310000<br>(200000-410000) |
| Taiwan   | 2005 | Male   | 15 to 19 | 28%<br>(17-43%)                | 72%<br>(57-83%)          | 0.67<br>(0.27-1.4)                          | 3%<br>(1.6-5.2%)                     | 4.6%<br>(1.9-9%)                    | 26<br>(11-51)        | 2600<br>(1400-4400)       |
| Taiwan   | 2005 | Male   | 20 to 24 | 40%<br>(26-57%)                | 60%<br>(43-74%)          | 1.6<br>(0.68-3.3)                           | 6.9%<br>(3.9-11%)                    | 9.8%<br>(4.3-18%)                   | 86<br>(37-160)       | 7900<br>(4500-13000)      |
| Taiwan   | 2005 | Male   | 25 to 29 | 46%<br>(29-63%)                | 54%<br>(37-71%)          | 2.4<br>(1-4.7)                              | 9.4%<br>(5.2-14%)                    | 14%<br>(6.4-22%)                    | 170<br>(81-290)      | 14000<br>(7300-21000)     |
| Taiwan   | 2005 | Male   | 30 to 34 | 50%<br>(32-67%)                | 50%<br>(33-68%)          | 3.1<br>(1.4-5.8)                            | 11%<br>(6.7-17%)                     | 16%<br>(8.7-24%)                    | 260<br>(140-400)     | 18000<br>(10000-25000)    |
| Taiwan   | 2005 | Male   | 35 to 39 | 52%<br>(36-70%)                | 48%<br>(30-64%)          | 3.7<br>(1.7-7)                              | 13%<br>(8.2-18%)                     | 18%<br>(11-26%)                     | 450<br>(260-630)     | 27000<br>(16000-37000)    |
| Taiwan   | 2005 | Male   | 40 to 44 | 54%<br>(37-71%)                | 46%<br>(29-63%)          | 4.3<br>(2-8)                                | 15%<br>(10-20%)                      | 20%<br>(13-27%)                     | 750<br>(460-990)     | 39000<br>(25000-51000)    |
| Taiwan   | 2005 | Male   | 45 to 49 | 54%<br>(36-71%)                | 46%<br>(29-64%)          | 4.8<br>(2.2-9)                              | 16%<br>(10-20%)                      | 21%<br>(13-27%)                     | 970<br>(620-1300)    | 44000<br>(29000-57000)    |
| Taiwan   | 2005 | Male   | 50 to 54 | 54%<br>(35-71%)                | 46%<br>(29-65%)          | 4.9<br>(2.2-9)                              | 15%<br>(9.6-19%)                     | 19%<br>(12-25%)                     | 1100<br>(690-1400)   | 43000<br>(28000-56000)    |

| Location | Year | Sex    | Age      | Prevalence of current drinkers | Prevalence of abstainers | Population average of standard drinks daily | Percent of total attributable deaths | Percent of total attributable DALYs | Attributable deaths | Attributable DALYs     |
|----------|------|--------|----------|--------------------------------|--------------------------|---------------------------------------------|--------------------------------------|-------------------------------------|---------------------|------------------------|
| Taiwan   | 2005 | Male   | 55 to 59 | 52%<br>(34-70%)                | 48%<br>(30-66%)          | 4.6<br>(2.1-8.3)                            | 13%<br>(8.2-17%)                     | 16%<br>(10-21%)                     | 830<br>(510-1100)   | 29000<br>(18000-38000) |
| Taiwan   | 2005 | Male   | 60 to 64 | 49%<br>(31-68%)                | 51%<br>(32-69%)          | 4.1<br>(1.8-7.8)                            | 11%<br>(6.1-15%)                     | 13%<br>(7.3-18%)                    | 770<br>(430-1100)   | 23000<br>(13000-32000) |
| Taiwan   | 2005 | Male   | 65 to 69 | 46%<br>(30-65%)                | 54%<br>(35-70%)          | 3.4<br>(1.5-6.6)                            | 9%<br>(4.7-13%)                      | 11%<br>(5.5-16%)                    | 810<br>(410-1200)   | 20000<br>(10000-29000) |
| Taiwan   | 2005 | Male   | 70 to 74 | 43%<br>(28-61%)                | 57%<br>(39-72%)          | 2.8<br>(1.2-5.5)                            | 7.1%<br>(3.2-11%)                    | 8.4%<br>(3.6-13%)                   | 840<br>(370-1300)   | 17000<br>(7400-27000)  |
| Taiwan   | 2005 | Male   | 75 to 79 | 39%<br>(25-56%)                | 61%<br>(44-75%)          | 2.4<br>(0.96-4.8)                           | 5.8%<br>(2.1-9.8%)                   | 6.6%<br>(2.3-11%)                   | 910<br>(320-1600)   | 14000<br>(5100-24000)  |
| Taiwan   | 2005 | Male   | 80 to 84 | 37%<br>(22-54%)                | 63%<br>(46-78%)          | 2.1<br>(0.92-4.1)                           | 5.1%<br>(1.7-9.1%)                   | 5.8%<br>(1.9-10%)                   | 640<br>(210-1200)   | 7400<br>(2500-13000)   |
| Taiwan   | 2005 | Male   | 85 to 89 | 36%<br>(22-52%)                | 64%<br>(48-78%)          | 2<br>(0.87-3.8)                             | 4.6%<br>(1.2-8.7%)                   | 5.1%<br>(1.3-9.8%)                  | 330<br>(82-640)     | 2700<br>(730-5100)     |
| Taiwan   | 2005 | Male   | 90 to 94 | 38%<br>(25-53%)                | 62%<br>(47-75%)          | 2<br>(0.81-4)                               | 4.1%<br>(0.83-8.1%)                  | 4.4%<br>(0.77-9.1%)                 | 130<br>(22-270)     | 730<br>(150-1400)      |
| Taiwan   | 2005 | Male   | 95 plus  | 41%<br>(25-59%)                | 59%<br>(41-75%)          | 2<br>(0.71-4.6)                             | 3.9%<br>(0.43-8.7%)                  | 4.1%<br>(0.26-9.7%)                 | 30<br>(1.8-70)      | 110<br>(12-250)        |
| Taiwan   | 2010 | Female | All Ages | 18%<br>(15-22%)                | 82%<br>(78-85%)          | 0.44<br>(0.24-0.73)                         | 1.5%<br>(0.76-2.6%)                  | 2.1%<br>(0.85-4.2%)                 | 1200<br>(500-2400)  | 35000<br>(18000-61000) |
| Taiwan   | 2010 | Female | 15 to 19 | 16%<br>(9.7-25%)               | 84%<br>(75-90%)          | 0.33<br>(0.13-0.69)                         | 0.98%<br>(0.57-1.6%)                 | 2%<br>(0.8-4.2%)                    | 3.7<br>(1.4-7.5)    | 630<br>(360-1000)      |
| Taiwan   | 2010 | Female | 20 to 24 | 19%<br>(12-29%)                | 81%<br>(71-88%)          | 0.35<br>(0.14-0.8)                          | 1.6%<br>(0.98-2.4%)                  | 2.4%<br>(0.94-5%)                   | 5.6<br>(2.2-12)     | 1200<br>(710-1800)     |
| Taiwan   | 2010 | Female | 25 to 29 | 19%<br>(11-30%)                | 81%<br>(70-89%)          | 0.37<br>(0.15-0.74)                         | 1.6%<br>(1.1-2.4%)                   | 2.5%<br>(0.89-5.1%)                 | 9.7<br>(3.6-20)     | 1700<br>(1000-2500)    |
| Taiwan   | 2010 | Female | 30 to 34 | 20%<br>(12-31%)                | 80%<br>(69-88%)          | 0.42<br>(0.17-0.88)                         | 1.6%<br>(1-2.4%)                     | 2.8%<br>(1.3-5.4%)                  | 16<br>(7.4-31)      | 1900<br>(1200-3000)    |
| Taiwan   | 2010 | Female | 35 to 39 | 22%<br>(13-34%)                | 78%<br>(66-87%)          | 0.52<br>(0.22-1)                            | 1.7%<br>(1-2.6%)                     | 3.6%<br>(2-6.3%)                    | 25<br>(14-45)       | 2100<br>(1400-3300)    |
| Taiwan   | 2010 | Female | 40 to 44 | 22%<br>(14-35%)                | 78%<br>(65-86%)          | 0.59<br>(0.25-1.1)                          | 1.7%<br>(1-2.8%)                     | 3.9%<br>(2.2-6.6%)                  | 43<br>(24-74)       | 2700<br>(1700-4600)    |
| Taiwan   | 2010 | Female | 45 to 49 | 22%<br>(12-34%)                | 78%<br>(66-88%)          | 0.62<br>(0.26-1.2)                          | 1.6%<br>(0.88-2.8%)                  | 3.8%<br>(2.1-6.4%)                  | 63<br>(35-110)      | 3200<br>(1700-5500)    |
| Taiwan   | 2010 | Female | 50 to 54 | 21%<br>(13-33%)                | 79%<br>(67-87%)          | 0.65<br>(0.28-1.3)                          | 1.7%<br>(0.77-3%)                    | 3.7%<br>(2-6.2%)                    | 85<br>(46-140)      | 3500<br>(1700-6400)    |
| Taiwan   | 2010 | Female | 55 to 59 | 20%<br>(12-32%)                | 80%<br>(68-88%)          | 0.66<br>(0.27-1.3)                          | 1.7%<br>(0.7-3.4%)                   | 3.6%<br>(1.9-6.3%)                  | 110<br>(58-190)     | 3700<br>(1500-7500)    |
| Taiwan   | 2010 | Female | 60 to 64 | 19%<br>(11-31%)                | 81%<br>(69-89%)          | 0.64<br>(0.25-1.3)                          | 1.8%<br>(0.68-3.6%)                  | 3.4%<br>(1.8-6.1%)                  | 110<br>(54-190)     | 3000<br>(1100-6100)    |
| Taiwan   | 2010 | Female | 65 to 69 | 18%<br>(11-29%)                | 82%<br>(71-89%)          | 0.63<br>(0.27-1.3)                          | 1.9%<br>(0.75-3.6%)                  | 3.4%<br>(1.6-5.9%)                  | 130<br>(62-230)     | 3100<br>(1200-6100)    |
| Taiwan   | 2010 | Female | 70 to 74 | 17%<br>(11-28%)                | 83%<br>(72-89%)          | 0.62<br>(0.27-1.3)                          | 1.8%<br>(0.52-3.8%)                  | 2.8%<br>(1.1-5.6%)                  | 170<br>(67-340)     | 3300<br>(1000-7200)    |

| Location | Year | Sex    | Age      | Prevalence of current drinkers | Prevalence of abstainers | Population average of standard drinks daily | Percent of total attributable deaths | Percent of total attributable DALYs | Attributable deaths  | Attributable DALYs        |
|----------|------|--------|----------|--------------------------------|--------------------------|---------------------------------------------|--------------------------------------|-------------------------------------|----------------------|---------------------------|
| Taiwan   | 2010 | Female | 75 to 79 | 16%<br>(9.8-27%)               | 84%<br>(73-90%)          | 0.59<br>(0.24-1.3)                          | 1.4%<br>(0.23-3.4%)                  | 2%<br>(0.48-4.5%)                   | 160<br>(39-380)      | 2400<br>(410-6100)        |
| Taiwan   | 2010 | Female | 80 to 84 | 16%<br>(9.5-25%)               | 84%<br>(75-91%)          | 0.57<br>(0.25-1.1)                          | 1.1%<br>(-0.022-3%)                  | 1.4%<br>(0.069-3.7%)                | 130<br>(6.7-370)     | 1500<br>(-29-4300)        |
| Taiwan   | 2010 | Female | 85 to 89 | 16%<br>(9.7-25%)               | 84%<br>(75-90%)          | 0.59<br>(0.25-1.2)                          | 0.92%<br>(-0.13-2.8%)                | 1.1%<br>(-0.13-3.4%)                | 95<br>(-11-300)      | 780<br>(-110-2500)        |
| Taiwan   | 2010 | Female | 90 to 94 | 18%<br>(11-27%)                | 82%<br>(73-89%)          | 0.64<br>(0.24-1.3)                          | 0.82%<br>(-0.32-2.8%)                | 0.91%<br>(-0.4-3.3%)                | 44<br>(-19-160)      | 260<br>(-100-900)         |
| Taiwan   | 2010 | Female | 95 plus  | 20%<br>(11-33%)                | 80%<br>(67-89%)          | 0.73<br>(0.26-1.6)                          | 0.94%<br>(-0.46-3.9%)                | 0.99%<br>(-0.63-4.4%)               | 21<br>(-13-94)       | 79<br>(-40-330)           |
| Taiwan   | 2010 | Male   | All Ages | 43%<br>(36-51%)                | 57%<br>(49-64%)          | 2.8<br>(1.5-4.7)                            | 10%<br>(6.9-13%)                     | 11%<br>(6.3-14%)                    | 9500<br>(5600-13000) | 320000<br>(210000-410000) |
| Taiwan   | 2010 | Male   | 15 to 19 | 28%<br>(18-43%)                | 72%<br>(57-82%)          | 0.68<br>(0.27-1.5)                          | 2.8%<br>(1.6-4.8%)                   | 4.6%<br>(2-9%)                      | 20<br>(8.7-39)       | 2200<br>(1300-3700)       |
| Taiwan   | 2010 | Male   | 20 to 24 | 41%<br>(27-57%)                | 59%<br>(43-73%)          | 1.7<br>(0.7-3.4)                            | 6.8%<br>(4-11%)                      | 10%<br>(4.6-20%)                    | 60<br>(26-110)       | 5900<br>(3400-9700)       |
| Taiwan   | 2010 | Male   | 25 to 29 | 47%<br>(30-64%)                | 53%<br>(36-70%)          | 2.5<br>(1.1-4.8)                            | 9%<br>(5.2-13%)                      | 14%<br>(6.5-22%)                    | 130<br>(59-210)      | 11000<br>(6100-16000)     |
| Taiwan   | 2010 | Male   | 30 to 34 | 50%<br>(32-67%)                | 50%<br>(33-68%)          | 3.2<br>(1.5-6)                              | 11%<br>(6.5-16%)                     | 16%<br>(9-24%)                      | 230<br>(130-340)     | 17000<br>(9800-24000)     |
| Taiwan   | 2010 | Male   | 35 to 39 | 52%<br>(36-69%)                | 48%<br>(31-64%)          | 3.8<br>(1.7-7.3)                            | 13%<br>(8.2-18%)                     | 19%<br>(11-26%)                     | 380<br>(230-530)     | 23000<br>(14000-32000)    |
| Taiwan   | 2010 | Male   | 40 to 44 | 53%<br>(37-71%)                | 47%<br>(29-63%)          | 4.3<br>(2-8)                                | 15%<br>(10-20%)                      | 21%<br>(13-27%)                     | 680<br>(430-900)     | 36000<br>(23000-47000)    |
| Taiwan   | 2010 | Male   | 45 to 49 | 54%<br>(36-71%)                | 46%<br>(29-64%)          | 4.8<br>(2.3-8.5)                            | 16%<br>(10-20%)                      | 21%<br>(14-27%)                     | 980<br>(650-1300)    | 46000<br>(30000-58000)    |
| Taiwan   | 2010 | Male   | 50 to 54 | 54%<br>(36-71%)                | 46%<br>(29-64%)          | 4.9<br>(2.3-8.8)                            | 15%<br>(9.9-19%)                     | 20%<br>(13-24%)                     | 1100<br>(740-1400)   | 46000<br>(30000-59000)    |
| Taiwan   | 2010 | Male   | 55 to 59 | 52%<br>(35-71%)                | 48%<br>(29-65%)          | 4.7<br>(2.2-8.1)                            | 13%<br>(8.5-17%)                     | 17%<br>(11-22%)                     | 1200<br>(750-1500)   | 41000<br>(27000-54000)    |
| Taiwan   | 2010 | Male   | 60 to 64 | 50%<br>(32-69%)                | 50%<br>(31-68%)          | 4.1<br>(1.8-7.6)                            | 11%<br>(6.2-15%)                     | 14%<br>(7.6-19%)                    | 840<br>(470-1100)    | 26000<br>(14000-35000)    |
| Taiwan   | 2010 | Male   | 65 to 69 | 47%<br>(31-64%)                | 53%<br>(36-69%)          | 3.5<br>(1.6-6.4)                            | 9%<br>(4.7-13%)                      | 11%<br>(5.8-16%)                    | 770<br>(400-1100)    | 20000<br>(10000-28000)    |
| Taiwan   | 2010 | Male   | 70 to 74 | 43%<br>(27-60%)                | 57%<br>(40-73%)          | 2.9<br>(1.3-5.6)                            | 7.1%<br>(3.2-11%)                    | 8.4%<br>(3.8-13%)                   | 770<br>(340-1200)    | 16000<br>(7000-24000)     |
| Taiwan   | 2010 | Male   | 75 to 79 | 40%<br>(25-58%)                | 60%<br>(42-75%)          | 2.4<br>(1.1-4.9)                            | 5.7%<br>(2.2-9.8%)                   | 6.6%<br>(2.5-11%)                   | 780<br>(290-1300)    | 12000<br>(4600-21000)     |
| Taiwan   | 2010 | Male   | 80 to 84 | 38%<br>(23-54%)                | 62%<br>(46-77%)          | 2.2<br>(0.97-4.4)                           | 5%<br>(1.7-9%)                       | 5.7%<br>(1.9-10%)                   | 820<br>(270-1500)    | 9500<br>(3300-17000)      |
| Taiwan   | 2010 | Male   | 85 to 89 | 37%<br>(23-52%)                | 63%<br>(48-77%)          | 2.1<br>(0.89-4.1)                           | 4.5%<br>(1.4-8.5%)                   | 5%<br>(1.5-9.7%)                    | 480<br>(140-920)     | 4000<br>(1300-7600)       |
| Taiwan   | 2010 | Male   | 90 to 94 | 38%<br>(25-53%)                | 62%<br>(47-75%)          | 2<br>(0.84-4.1)                             | 4%<br>(1-8%)                         | 4.4%<br>(0.96-9.2%)                 | 180<br>(38-370)      | 1000<br>(260-2100)        |

| Location | Year | Sex    | Age      | Prevalence of current drinkers | Prevalence of abstainers | Population average of standard drinks daily | Percent of total attributable deaths | Percent of total attributable DALYs | Attributable deaths   | Attributable DALYs        |
|----------|------|--------|----------|--------------------------------|--------------------------|---------------------------------------------|--------------------------------------|-------------------------------------|-----------------------|---------------------------|
| Taiwan   | 2010 | Male   | 95 plus  | 42%<br>(25-61%)                | 58%<br>(39-75%)          | 2.1<br>(0.8-4.5)                            | 4%<br>(0.71-8.9%)                    | 4.2%<br>(0.49-9.9%)                 | 61<br>(7-140)         | 220<br>(40-500)           |
| Taiwan   | 2016 | Female | All Ages | 18%<br>(15-22%)                | 82%<br>(78-85%)          | 0.47<br>(0.26-0.79)                         | 1.6%<br>(0.79-2.7%)                  | 2.2%<br>(0.89-4.2%)                 | 1600<br>(610-3000)    | 40000<br>(20000-71000)    |
| Taiwan   | 2016 | Female | 15 to 19 | 16%<br>(9.8-25%)               | 84%<br>(75-90%)          | 0.34<br>(0.14-0.7)                          | 0.96%<br>(0.58-1.6%)                 | 2%<br>(0.77-4.1%)                   | 3.1<br>(1.2-6.6)      | 560<br>(320-930)          |
| Taiwan   | 2016 | Female | 20 to 24 | 19%<br>(12-29%)                | 81%<br>(71-88%)          | 0.36<br>(0.14-0.79)                         | 1.6%<br>(1-2.4%)                     | 2.4%<br>(0.95-4.9%)                 | 5.2<br>(2-11)         | 1100<br>(700-1800)        |
| Taiwan   | 2016 | Female | 25 to 29 | 19%<br>(12-30%)                | 81%<br>(70-88%)          | 0.37<br>(0.15-0.78)                         | 1.6%<br>(1-2.4%)                     | 2.5%<br>(0.98-5%)                   | 6.9<br>(2.6-14)       | 1300<br>(800-1900)        |
| Taiwan   | 2016 | Female | 30 to 34 | 20%<br>(12-32%)                | 80%<br>(68-88%)          | 0.42<br>(0.18-0.86)                         | 1.5%<br>(0.97-2.4%)                  | 2.8%<br>(1.3-5.5%)                  | 15<br>(6.3-28)        | 1800<br>(1100-2900)       |
| Taiwan   | 2016 | Female | 35 to 39 | 22%<br>(13-34%)                | 78%<br>(66-87%)          | 0.52<br>(0.22-1)                            | 1.7%<br>(1.1-2.7%)                   | 3.7%<br>(2-6.6%)                    | 28<br>(14-51)         | 2400<br>(1500-3900)       |
| Taiwan   | 2016 | Female | 40 to 44 | 22%<br>(13-35%)                | 78%<br>(65-87%)          | 0.59<br>(0.26-1.2)                          | 1.7%<br>(1-2.9%)                     | 3.9%<br>(2.2-6.6%)                  | 40<br>(21-70)         | 2600<br>(1500-4300)       |
| Taiwan   | 2016 | Female | 45 to 49 | 22%<br>(12-34%)                | 78%<br>(66-88%)          | 0.64<br>(0.27-1.2)                          | 1.7%<br>(0.91-2.9%)                  | 3.9%<br>(2.1-6.5%)                  | 60<br>(32-110)        | 3100<br>(1600-5500)       |
| Taiwan   | 2016 | Female | 50 to 54 | 21%<br>(13-33%)                | 79%<br>(67-87%)          | 0.67<br>(0.3-1.3)                           | 1.7%<br>(0.83-3.2%)                  | 3.8%<br>(2.2-6.4%)                  | 93<br>(50-150)        | 3900<br>(1800-7300)       |
| Taiwan   | 2016 | Female | 55 to 59 | 20%<br>(12-32%)                | 80%<br>(68-88%)          | 0.67<br>(0.29-1.3)                          | 1.7%<br>(0.72-3.3%)                  | 3.7%<br>(2-6.2%)                    | 120<br>(64-220)       | 4200<br>(1800-8200)       |
| Taiwan   | 2016 | Female | 60 to 64 | 19%<br>(11-31%)                | 81%<br>(69-89%)          | 0.65<br>(0.26-1.3)                          | 1.8%<br>(0.72-3.6%)                  | 3.6%<br>(1.9-6.3%)                  | 170<br>(89-320)       | 4900<br>(1900-9900)       |
| Taiwan   | 2016 | Female | 65 to 69 | 18%<br>(11-29%)                | 82%<br>(71-89%)          | 0.64<br>(0.28-1.2)                          | 2%<br>(0.84-3.7%)                    | 3.5%<br>(1.8-6%)                    | 160<br>(79-270)       | 3700<br>(1600-7100)       |
| Taiwan   | 2016 | Female | 70 to 74 | 17%<br>(11-27%)                | 83%<br>(73-89%)          | 0.62<br>(0.26-1.3)                          | 1.9%<br>(0.66-3.9%)                  | 3.1%<br>(1.3-5.8%)                  | 200<br>(84-390)       | 3800<br>(1300-7900)       |
| Taiwan   | 2016 | Female | 75 to 79 | 16%<br>(9.9-26%)               | 84%<br>(74-90%)          | 0.6<br>(0.24-1.2)                           | 1.5%<br>(0.34-3.5%)                  | 2.2%<br>(0.68-4.7%)                 | 210<br>(63-440)       | 3100<br>(680-7200)        |
| Taiwan   | 2016 | Female | 80 to 84 | 16%<br>(9.3-26%)               | 84%<br>(74-91%)          | 0.59<br>(0.25-1.2)                          | 1.2%<br>(0.095-3.1%)                 | 1.5%<br>(0.2-3.8%)                  | 180<br>(23-450)       | 2000<br>(160-5300)        |
| Taiwan   | 2016 | Female | 85 to 89 | 17%<br>(9.7-26%)               | 83%<br>(74-90%)          | 0.61<br>(0.26-1.2)                          | 0.99%<br>(-0.085-2.9%)               | 1.2%<br>(-0.11-3.5%)                | 140<br>(-13-420)      | 1200<br>(-95-3500)        |
| Taiwan   | 2016 | Female | 90 to 94 | 18%<br>(11-29%)                | 82%<br>(71-89%)          | 0.66<br>(0.27-1.4)                          | 0.9%<br>(-0.24-3.1%)                 | 1%<br>(-0.32-3.6%)                  | 81<br>(-26-290)       | 470<br>(-120-1600)        |
| Taiwan   | 2016 | Female | 95 plus  | 21%<br>(11-34%)                | 79%<br>(66-89%)          | 0.76<br>(0.27-1.7)                          | 1.1%<br>(-0.45-4%)                   | 1.1%<br>(-0.61-4.5%)                | 38<br>(-21-160)       | 140<br>(-60-540)          |
| Taiwan   | 2016 | Male   | All Ages | 44%<br>(37-52%)                | 56%<br>(48-63%)          | 3<br>(1.7-5)                                | 10%<br>(6.9-13%)                     | 10%<br>(6.1-14%)                    | 11000<br>(6100-15000) | 340000<br>(220000-450000) |
| Taiwan   | 2016 | Male   | 15 to 19 | 29%<br>(18-43%)                | 71%<br>(57-82%)          | 0.7<br>(0.28-1.5)                           | 2.7%<br>(1.6-4.5%)                   | 4.6%<br>(2-8.7%)                    | 17<br>(7.3-33)        | 1900<br>(1100-3300)       |
| Taiwan   | 2016 | Male   | 20 to 24 | 41%<br>(27-57%)                | 59%<br>(43-73%)          | 1.7<br>(0.72-3.4)                           | 6.7%<br>(4-11%)                      | 10%<br>(4.7-19%)                    | 56<br>(25-110)        | 5800<br>(3400-9400)       |



| Location | Year | Sex    | Age      | Prevalence of current drinkers | Prevalence of abstainers | Population average of standard drinks daily | Percent of total attributable deaths | Percent of total attributable DALYs | Attributable deaths | Attributable DALYs     |
|----------|------|--------|----------|--------------------------------|--------------------------|---------------------------------------------|--------------------------------------|-------------------------------------|---------------------|------------------------|
| Taiwan   | 2016 | Male   | 25 to 29 | 47%<br>(30-64%)                | 53%<br>(36-70%)          | 2.5<br>(1.1-4.9)                            | 8.8%<br>(5.2-13%)                    | 14%<br>(7-23%)                      | 94<br>(45-160)      | 8300<br>(4800-13000)   |
| Taiwan   | 2016 | Male   | 30 to 34 | 50%<br>(33-68%)                | 50%<br>(32-67%)          | 3.2<br>(1.5-6.2)                            | 11%<br>(6.6-15%)                     | 16%<br>(9-24%)                      | 210<br>(110-320)    | 15000<br>(9300-22000)  |
| Taiwan   | 2016 | Male   | 35 to 39 | 53%<br>(37-70%)                | 47%<br>(30-63%)          | 3.9<br>(1.7-7.6)                            | 13%<br>(8.1-18%)                     | 19%<br>(11-25%)                     | 410<br>(240-590)    | 25000<br>(15000-35000) |
| Taiwan   | 2016 | Male   | 40 to 44 | 54%<br>(38-72%)                | 46%<br>(28-62%)          | 4.4<br>(2-8.2)                              | 15%<br>(9.6-20%)                     | 21%<br>(13-27%)                     | 590<br>(360-820)    | 31000<br>(20000-43000) |
| Taiwan   | 2016 | Male   | 45 to 49 | 55%<br>(36-71%)                | 45%<br>(29-64%)          | 4.9<br>(2.3-8.8)                            | 16%<br>(11-20%)                      | 21%<br>(14-27%)                     | 910<br>(610-1200)   | 43000<br>(29000-57000) |
| Taiwan   | 2016 | Male   | 50 to 54 | 54%<br>(36-72%)                | 46%<br>(28-64%)          | 5<br>(2.5-9.2)                              | 15%<br>(10-19%)                      | 20%<br>(14-25%)                     | 1200<br>(790-1600)  | 49000<br>(33000-66000) |
| Taiwan   | 2016 | Male   | 55 to 59 | 53%<br>(35-71%)                | 47%<br>(29-65%)          | 4.7<br>(2.3-8.6)                            | 13%<br>(8.8-17%)                     | 17%<br>(11-22%)                     | 1300<br>(840-1800)  | 46000<br>(30000-63000) |
| Taiwan   | 2016 | Male   | 60 to 64 | 50%<br>(33-69%)                | 50%<br>(31-67%)          | 4.2<br>(1.9-7.8)                            | 11%<br>(6.5-15%)                     | 14%<br>(8.1-19%)                    | 1300<br>(770-1900)  | 41000<br>(24000-57000) |
| Taiwan   | 2016 | Male   | 65 to 69 | 47%<br>(32-65%)                | 53%<br>(35-68%)          | 3.6<br>(1.6-6.4)                            | 9.1%<br>(5-13%)                      | 11%<br>(6.1-16%)                    | 900<br>(480-1300)   | 23000<br>(12000-33000) |
| Taiwan   | 2016 | Male   | 70 to 74 | 43%<br>(28-61%)                | 57%<br>(39-72%)          | 2.9<br>(1.3-5.7)                            | 7.3%<br>(3.3-11%)                    | 8.7%<br>(3.8-13%)                   | 850<br>(390-1300)   | 17000<br>(8000-27000)  |
| Taiwan   | 2016 | Male   | 75 to 79 | 40%<br>(26-58%)                | 60%<br>(42-74%)          | 2.5<br>(1.1-5.1)                            | 5.9%<br>(2.3-9.8%)                   | 6.8%<br>(2.5-11%)                   | 780<br>(290-1300)   | 12000<br>(4700-21000)  |
| Taiwan   | 2016 | Male   | 80 to 84 | 38%<br>(24-55%)                | 62%<br>(45-76%)          | 2.3<br>(1-4.3)                              | 5.2%<br>(1.7-9.1%)                   | 5.9%<br>(1.9-11%)                   | 780<br>(260-1400)   | 9100<br>(3100-16000)   |
| Taiwan   | 2016 | Male   | 85 to 89 | 37%<br>(23-52%)                | 63%<br>(48-77%)          | 2.1<br>(0.93-4.1)                           | 4.6%<br>(1.4-8.5%)                   | 5.1%<br>(1.5-9.6%)                  | 750<br>(230-1400)   | 6200<br>(2000-11000)   |
| Taiwan   | 2016 | Male   | 90 to 94 | 38%<br>(25-54%)                | 62%<br>(46-75%)          | 2.1<br>(0.91-4.2)                           | 4.1%<br>(1.1-8.1%)                   | 4.5%<br>(1.1-9.1%)                  | 330<br>(80-670)     | 1900<br>(520-3800)     |
| Taiwan   | 2016 | Male   | 95 plus  | 42%<br>(25-61%)                | 58%<br>(39-75%)          | 2.2<br>(0.8-4.6)                            | 4.1%<br>(0.76-8.9%)                  | 4.4%<br>(0.58-9.9%)                 | 110<br>(15-260)     | 420<br>(80-910)        |
| Cambodia | 1990 | Female | All Ages | 8.5%<br>(5.9-12%)              | 92%<br>(88-94%)          | 0.24<br>(0.15-0.36)                         | 1.1%<br>(0.63-1.6%)                  | 2.1%<br>(1.1-3.3%)                  | 890<br>(450-1500)   | 28000<br>(17000-42000) |
| Cambodia | 1990 | Female | 15 to 19 | 8.3%<br>(3.7-16%)              | 92%<br>(84-96%)          | 0.22<br>(0.069-0.49)                        | 0.72%<br>(0.34-1.4%)                 | 0.9%<br>(0.31-1.9%)                 | 6.9<br>(2.4-15)     | 700<br>(320-1400)      |
| Cambodia | 1990 | Female | 20 to 24 | 10%<br>(4.1-20%)               | 90%<br>(80-96%)          | 0.29<br>(0.099-0.64)                        | 1.4%<br>(0.63-2.7%)                  | 1.6%<br>(0.5-3.5%)                  | 16<br>(5.1-36)      | 1500<br>(670-2900)     |
| Cambodia | 1990 | Female | 25 to 29 | 11%<br>(4.6-21%)               | 89%<br>(79-95%)          | 0.34<br>(0.11-0.72)                         | 1.6%<br>(0.75-3.2%)                  | 2%<br>(0.65-4.4%)                   | 20<br>(6.7-46)      | 1700<br>(730-3200)     |
| Cambodia | 1990 | Female | 30 to 34 | 12%<br>(4.8-22%)               | 88%<br>(78-95%)          | 0.39<br>(0.13-0.81)                         | 1.9%<br>(0.92-3.5%)                  | 2.4%<br>(1-4.9%)                    | 27<br>(11-55)       | 1900<br>(900-3500)     |
| Cambodia | 1990 | Female | 35 to 39 | 13%<br>(5.6-24%)               | 87%<br>(76-94%)          | 0.43<br>(0.15-0.91)                         | 2.4%<br>(1.2-4.4%)                   | 3.3%<br>(1.5-6%)                    | 42<br>(19-77)       | 2400<br>(1200-4300)    |
| Cambodia | 1990 | Female | 40 to 44 | 13%<br>(5.9-24%)               | 87%<br>(76-94%)          | 0.48<br>(0.17-1)                            | 2.6%<br>(1.3-4.8%)                   | 3.6%<br>(1.7-6.5%)                  | 43<br>(20-78)       | 2200<br>(1100-3900)    |

| Location | Year | Sex    | Age      | Prevalence of current drinkers | Prevalence of abstainers | Population average of standard drinks daily | Percent of total attributable deaths | Percent of total attributable DALYs | Attributable deaths | Attributable DALYs      |
|----------|------|--------|----------|--------------------------------|--------------------------|---------------------------------------------|--------------------------------------|-------------------------------------|---------------------|-------------------------|
| Cambodia | 1990 | Female | 45 to 49 | 13%<br>(5.7-24%)               | 87%<br>(76-94%)          | 0.54<br>(0.18-1.2)                          | 2.9%<br>(1.4-5.5%)                   | 3.9%<br>(1.8-7.5%)                  | 53<br>(24-100)      | 2300<br>(1100-4400)     |
| Cambodia | 1990 | Female | 50 to 54 | 14%<br>(6.1-26%)               | 86%<br>(74-94%)          | 0.61<br>(0.2-1.4)                           | 3.6%<br>(1.6-6.8%)                   | 4.6%<br>(2-8.7%)                    | 78<br>(34-150)      | 2900<br>(1300-5500)     |
| Cambodia | 1990 | Female | 55 to 59 | 14%<br>(6.5-26%)               | 86%<br>(74-94%)          | 0.66<br>(0.21-1.5)                          | 3.7%<br>(1.5-7.1%)                   | 4.5%<br>(1.8-8.7%)                  | 94<br>(38-190)      | 3100<br>(1200-6000)     |
| Cambodia | 1990 | Female | 60 to 64 | 14%<br>(6.2-26%)               | 86%<br>(74-94%)          | 0.66<br>(0.21-1.6)                          | 3.7%<br>(1.3-7.4%)                   | 4.4%<br>(1.5-9%)                    | 110<br>(39-230)     | 3100<br>(1100-6300)     |
| Cambodia | 1990 | Female | 65 to 69 | 13%<br>(6.2-24%)               | 87%<br>(76-94%)          | 0.61<br>(0.19-1.4)                          | 3.4%<br>(1.1-6.8%)                   | 4%<br>(1.3-8%)                      | 120<br>(40-240)     | 2800<br>(920-5500)      |
| Cambodia | 1990 | Female | 70 to 74 | 13%<br>(6-23%)                 | 87%<br>(77-94%)          | 0.55<br>(0.17-1.3)                          | 3%<br>(0.89-6.7%)                    | 3.5%<br>(1-7.7%)                    | 110<br>(32-250)     | 2000<br>(600-4500)      |
| Cambodia | 1990 | Female | 75 to 79 | 12%<br>(5.5-23%)               | 88%<br>(77-94%)          | 0.51<br>(0.14-1.3)                          | 2.5%<br>(0.6-5.7%)                   | 2.8%<br>(0.68-6.5%)                 | 77<br>(18-180)      | 1100<br>(260-2500)      |
| Cambodia | 1990 | Female | 80 to 84 | 12%<br>(5.4-23%)               | 88%<br>(77-95%)          | 0.51<br>(0.15-1.2)                          | 2.5%<br>(0.67-5.6%)                  | 2.9%<br>(0.77-6.4%)                 | 52<br>(14-120)      | 540<br>(150-1200)       |
| Cambodia | 1990 | Female | 85 to 89 | 13%<br>(5.7-24%)               | 87%<br>(76-94%)          | 0.55<br>(0.16-1.4)                          | 2.3%<br>(0.58-5.6%)                  | 2.7%<br>(0.67-6.5%)                 | 25<br>(6.2-62)      | 190<br>(47-450)         |
| Cambodia | 1990 | Female | 90 to 94 | 15%<br>(6.5-28%)               | 85%<br>(72-94%)          | 0.62<br>(0.16-1.6)                          | 2.1%<br>(0.42-5.3%)                  | 2.5%<br>(0.48-6.3%)                 | 8.5<br>(1.6-21)     | 44<br>(8.6-110)         |
| Cambodia | 1990 | Female | 95 plus  | 19%<br>(7.1-37%)               | 81%<br>(63-93%)          | 0.76<br>(0.15-2.1)                          | 2.3%<br>(0.3-6%)                     | 2.6%<br>(0.33-7%)                   | 2.4<br>(0.31-6.6)   | 8.4<br>(1.1-22)         |
| Cambodia | 1990 | Male   | All Ages | 25%<br>(19-32%)                | 75%<br>(68-81%)          | 0.72<br>(0.49-0.98)                         | 2.5%<br>(1.7-3.6%)                   | 4.1%<br>(2.6-6%)                    | 1800<br>(1100-2700) | 76000<br>(49000-110000) |
| Cambodia | 1990 | Male   | 15 to 19 | 23%<br>(13-38%)                | 77%<br>(62-87%)          | 0.39<br>(0.16-0.74)                         | 1.5%<br>(0.75-2.6%)                  | 1.8%<br>(0.71-3.3%)                 | 19<br>(7.6-35)      | 1700<br>(810-2900)      |
| Cambodia | 1990 | Male   | 20 to 24 | 35%<br>(20-53%)                | 65%<br>(47-80%)          | 0.92<br>(0.43-1.6)                          | 4.4%<br>(2.2-6.9%)                   | 5.1%<br>(2.3-8.5%)                  | 72<br>(32-120)      | 5500<br>(2700-8800)     |
| Cambodia | 1990 | Male   | 25 to 29 | 41%<br>(22-59%)                | 59%<br>(41-78%)          | 1.3<br>(0.62-2.1)                           | 6.6%<br>(3.4-11%)                    | 8%<br>(3.7-13%)                     | 100<br>(47-170)     | 6900<br>(3600-11000)    |
| Cambodia | 1990 | Male   | 30 to 34 | 44%<br>(24-63%)                | 56%<br>(37-76%)          | 1.6<br>(0.83-2.6)                           | 8.1%<br>(4.7-12%)                    | 10%<br>(5.6-16%)                    | 130<br>(73-210)     | 8100<br>(4700-12000)    |
| Cambodia | 1990 | Male   | 35 to 39 | 46%<br>(28-66%)                | 54%<br>(34-72%)          | 1.8<br>(0.88-3.1)                           | 9.4%<br>(5.5-14%)                    | 12%<br>(6.6-18%)                    | 180<br>(97-270)     | 9500<br>(5500-15000)    |
| Cambodia | 1990 | Male   | 40 to 44 | 46%<br>(28-67%)                | 54%<br>(33-72%)          | 1.9<br>(0.96-3.2)                           | 9.6%<br>(5.7-14%)                    | 12%<br>(6.8-18%)                    | 170<br>(96-260)     | 8200<br>(4700-13000)    |
| Cambodia | 1990 | Male   | 45 to 49 | 44%<br>(25-64%)                | 56%<br>(36-75%)          | 1.9<br>(0.89-3.3)                           | 9.5%<br>(5.4-15%)                    | 11%<br>(6.5-18%)                    | 190<br>(110-300)    | 8300<br>(4700-13000)    |
| Cambodia | 1990 | Male   | 50 to 54 | 42%<br>(24-62%)                | 58%<br>(38-76%)          | 1.8<br>(0.83-3.1)                           | 8.7%<br>(4.6-14%)                    | 10%<br>(5.4-17%)                    | 220<br>(110-350)    | 8200<br>(4400-13000)    |
| Cambodia | 1990 | Male   | 55 to 59 | 40%<br>(23-60%)                | 60%<br>(40-77%)          | 1.6<br>(0.74-2.9)                           | 7.4%<br>(3.7-13%)                    | 8.7%<br>(4.2-15%)                   | 220<br>(100-370)    | 7100<br>(3400-12000)    |
| Cambodia | 1990 | Male   | 60 to 64 | 37%<br>(21-57%)                | 63%<br>(43-79%)          | 1.4<br>(0.62-2.7)                           | 6.5%<br>(2.8-11%)                    | 7.4%<br>(3.2-13%)                   | 200<br>(87-360)     | 5600<br>(2400-10000)    |

| Location | Year | Sex    | Age      | Prevalence of current drinkers | Prevalence of abstainers | Population average of standard drinks daily | Percent of total attributable deaths | Percent of total attributable DALYs | Attributable deaths | Attributable DALYs     |
|----------|------|--------|----------|--------------------------------|--------------------------|---------------------------------------------|--------------------------------------|-------------------------------------|---------------------|------------------------|
| Cambodia | 1990 | Male   | 65 to 69 | 33%<br>(19-52%)                | 67%<br>(48-81%)          | 1.2<br>(0.5-2.1)                            | 5.1%<br>(2.3-9.3%)                   | 5.9%<br>(2.6-11%)                   | 150<br>(65-280)     | 3500<br>(1500-6400)    |
| Cambodia | 1990 | Male   | 70 to 74 | 30%<br>(17-47%)                | 70%<br>(53-83%)          | 0.95<br>(0.41-1.8)                          | 4.3%<br>(1.6-8.7%)                   | 4.9%<br>(1.7-9.9%)                  | 110<br>(39-220)     | 2000<br>(740-4100)     |
| Cambodia | 1990 | Male   | 75 to 79 | 27%<br>(15-44%)                | 73%<br>(56-85%)          | 0.81<br>(0.33-1.6)                          | 3.3%<br>(1.1-6.8%)                   | 3.7%<br>(1.2-7.7%)                  | 54<br>(17-110)      | 770<br>(250-1600)      |
| Cambodia | 1990 | Male   | 80 to 84 | 25%<br>(13-42%)                | 75%<br>(58-87%)          | 0.7<br>(0.27-1.4)                           | 2.9%<br>(0.96-5.9%)                  | 3.3%<br>(1.1-6.7%)                  | 23<br>(7.4-46)      | 240<br>(80-490)        |
| Cambodia | 1990 | Male   | 85 to 89 | 24%<br>(13-39%)                | 76%<br>(61-87%)          | 0.62<br>(0.25-1.3)                          | 2.1%<br>(0.69-4.5%)                  | 2.4%<br>(0.75-5.2%)                 | 6.9<br>(2.2-15)     | 53<br>(17-110)         |
| Cambodia | 1990 | Male   | 90 to 94 | 25%<br>(13-42%)                | 75%<br>(58-87%)          | 0.6<br>(0.23-1.2)                           | 1.6%<br>(0.38-3.7%)                  | 1.8%<br>(0.4-4.3%)                  | 2.3<br>(0.49-5.5)   | 12<br>(2.9-28)         |
| Cambodia | 1990 | Male   | 95 plus  | 29%<br>(13-48%)                | 71%<br>(52-87%)          | 0.63<br>(0.21-1.4)                          | 1.4%<br>(0.27-3.7%)                  | 1.5%<br>(0.22-4.1%)                 | 0.55<br>(0.077-1.5) | 2<br>(0.37-5.2)        |
| Cambodia | 1995 | Female | All Ages | 8.5%<br>(6.1-12%)              | 92%<br>(88-94%)          | 0.41<br>(0.26-0.6)                          | 1.7%<br>(1.2-2.3%)                   | 3.3%<br>(2.1-4.6%)                  | 1600<br>(1000-2200) | 49000<br>(35000-67000) |
| Cambodia | 1995 | Female | 15 to 19 | 8.3%<br>(3.9-15%)              | 92%<br>(85-96%)          | 0.38<br>(0.13-0.85)                         | 1.2%<br>(0.52-2.2%)                  | 1.6%<br>(0.53-3.4%)                 | 11<br>(3.7-23)      | 1000<br>(440-2000)     |
| Cambodia | 1995 | Female | 20 to 24 | 10%<br>(4.4-19%)               | 90%<br>(81-96%)          | 0.52<br>(0.18-1.1)                          | 2.1%<br>(0.96-4%)                    | 2.8%<br>(0.96-5.6%)                 | 30<br>(11-62)       | 2500<br>(1100-4700)    |
| Cambodia | 1995 | Female | 25 to 29 | 11%<br>(4.8-21%)               | 89%<br>(79-95%)          | 0.6<br>(0.19-1.3)                           | 2.4%<br>(1.1-4.4%)                   | 3.2%<br>(1.2-6.2%)                  | 37<br>(14-72)       | 2800<br>(1300-5100)    |
| Cambodia | 1995 | Female | 30 to 34 | 12%<br>(4.9-23%)               | 88%<br>(77-95%)          | 0.67<br>(0.23-1.4)                          | 2.8%<br>(1.4-4.9%)                   | 3.8%<br>(1.7-6.9%)                  | 48<br>(21-86)       | 3200<br>(1500-5500)    |
| Cambodia | 1995 | Female | 35 to 39 | 13%<br>(5.3-24%)               | 87%<br>(76-95%)          | 0.74<br>(0.25-1.5)                          | 3.5%<br>(1.8-6%)                     | 4.9%<br>(2.4-8.5%)                  | 70<br>(34-120)      | 3900<br>(2000-6600)    |
| Cambodia | 1995 | Female | 40 to 44 | 13%<br>(6-24%)                 | 87%<br>(76-94%)          | 0.83<br>(0.29-1.8)                          | 3.9%<br>(2-6.5%)                     | 5.3%<br>(2.7-9%)                    | 86<br>(43-140)      | 4300<br>(2200-7200)    |
| Cambodia | 1995 | Female | 45 to 49 | 13%<br>(5.8-24%)               | 87%<br>(76-94%)          | 0.94<br>(0.31-2.1)                          | 4.3%<br>(2.2-7.1%)                   | 5.7%<br>(2.9-9.8%)                  | 92<br>(46-160)      | 4000<br>(2000-6800)    |
| Cambodia | 1995 | Female | 50 to 54 | 14%<br>(6.1-25%)               | 86%<br>(75-94%)          | 1.1<br>(0.34-2.4)                           | 5.2%<br>(2.7-8.7%)                   | 6.7%<br>(3.3-11%)                   | 130<br>(65-220)     | 4900<br>(2500-8100)    |
| Cambodia | 1995 | Female | 55 to 59 | 14%<br>(6.2-25%)               | 86%<br>(75-94%)          | 1.2<br>(0.36-2.6)                           | 5.3%<br>(2.6-9.1%)                   | 6.6%<br>(3.2-11%)                   | 160<br>(74-270)     | 5100<br>(2500-8800)    |
| Cambodia | 1995 | Female | 60 to 64 | 14%<br>(5.9-26%)               | 86%<br>(74-94%)          | 1.2<br>(0.34-2.7)                           | 5.3%<br>(2.4-9.4%)                   | 6.4%<br>(3-12%)                     | 180<br>(83-320)     | 5100<br>(2300-8900)    |
| Cambodia | 1995 | Female | 65 to 69 | 13%<br>(6-24%)                 | 87%<br>(76-94%)          | 1.1<br>(0.33-2.4)                           | 5.3%<br>(2.2-9.1%)                   | 6.2%<br>(2.7-11%)                   | 210<br>(90-360)     | 4800<br>(2100-8200)    |
| Cambodia | 1995 | Female | 70 to 74 | 13%<br>(5.8-23%)               | 87%<br>(77-94%)          | 0.97<br>(0.29-2.3)                          | 4.7%<br>(1.8-8.7%)                   | 5.5%<br>(2.1-10%)                   | 200<br>(78-370)     | 3700<br>(1400-6800)    |
| Cambodia | 1995 | Female | 75 to 79 | 12%<br>(5.3-23%)               | 88%<br>(77-95%)          | 0.9<br>(0.25-2.3)                           | 4%<br>(1.3-7.6%)                     | 4.6%<br>(1.5-8.7%)                  | 150<br>(49-290)     | 2200<br>(710-4100)     |
| Cambodia | 1995 | Female | 80 to 84 | 12%<br>(5.1-23%)               | 88%<br>(77-95%)          | 0.89<br>(0.26-2.1)                          | 4.1%<br>(1.5-7.6%)                   | 4.7%<br>(1.7-8.8%)                  | 100<br>(36-190)     | 1100<br>(370-2000)     |

| Location | Year | Sex    | Age      | Prevalence of current drinkers | Prevalence of abstainers | Population average of standard drinks daily | Percent of total attributable deaths | Percent of total attributable DALYs | Attributable deaths | Attributable DALYs       |
|----------|------|--------|----------|--------------------------------|--------------------------|---------------------------------------------|--------------------------------------|-------------------------------------|---------------------|--------------------------|
| Cambodia | 1995 | Female | 85 to 89 | 13%<br>(5.9-24%)               | 87%<br>(76-94%)          | 0.96<br>(0.28-2.3)                          | 3.8%<br>(1.4-7.6%)                   | 4.4%<br>(1.6-8.9%)                  | 47<br>(16-95)       | 350<br>(120-700)         |
| Cambodia | 1995 | Female | 90 to 94 | 15%<br>(6.6-28%)               | 85%<br>(72-93%)          | 1.1<br>(0.27-2.8)                           | 3.5%<br>(1.1-7.1%)                   | 4.1%<br>(1.3-8.3%)                  | 15<br>(4.8-31)      | 78<br>(25-160)           |
| Cambodia | 1995 | Female | 95 plus  | 19%<br>(7.8-36%)               | 81%<br>(64-92%)          | 1.3<br>(0.26-3.6)                           | 3.6%<br>(0.84-7.8%)                  | 4.1%<br>(0.95-9%)                   | 4.1<br>(0.92-9)     | 14<br>(3.3-31)           |
| Cambodia | 1995 | Male   | All Ages | 25%<br>(19-32%)                | 75%<br>(68-81%)          | 1.2<br>(0.83-1.6)                           | 4.1%<br>(2.9-5.2%)                   | 6.7%<br>(4.6-8.8%)                  | 3400<br>(2300-4500) | 130000<br>(97000-170000) |
| Cambodia | 1995 | Male   | 15 to 19 | 23%<br>(13-38%)                | 77%<br>(62-87%)          | 0.67<br>(0.29-1.3)                          | 2.3%<br>(1.2-3.9%)                   | 2.8%<br>(1.3-5.1%)                  | 27<br>(12-49)       | 2200<br>(1200-3900)      |
| Cambodia | 1995 | Male   | 20 to 24 | 35%<br>(19-54%)                | 65%<br>(46-81%)          | 1.6<br>(0.76-2.7)                           | 6.4%<br>(3.6-9.9%)                   | 7.6%<br>(3.9-12%)                   | 130<br>(69-210)     | 9700<br>(5300-15000)     |
| Cambodia | 1995 | Male   | 25 to 29 | 41%<br>(23-59%)                | 59%<br>(41-77%)          | 2.2<br>(1.1-3.6)                            | 9.4%<br>(5.5-15%)                    | 12%<br>(6.4-18%)                    | 200<br>(110-310)    | 13000<br>(7700-20000)    |
| Cambodia | 1995 | Male   | 30 to 34 | 44%<br>(25-63%)                | 56%<br>(37-75%)          | 2.7<br>(1.4-4.5)                            | 11%<br>(7.1-17%)                     | 14%<br>(8.5-21%)                    | 230<br>(140-330)    | 14000<br>(8500-20000)    |
| Cambodia | 1995 | Male   | 35 to 39 | 46%<br>(29-66%)                | 54%<br>(34-71%)          | 3.1<br>(1.6-5.3)                            | 13%<br>(8.4-19%)                     | 16%<br>(10-23%)                     | 290<br>(170-400)    | 15000<br>(9400-21000)    |
| Cambodia | 1995 | Male   | 40 to 44 | 46%<br>(29-66%)                | 54%<br>(34-71%)          | 3.3<br>(1.6-5.5)                            | 14%<br>(9-19%)                       | 17%<br>(11-23%)                     | 340<br>(220-480)    | 16000<br>(11000-23000)   |
| Cambodia | 1995 | Male   | 45 to 49 | 44%<br>(25-64%)                | 56%<br>(36-75%)          | 3.2<br>(1.6-5.6)                            | 14%<br>(8.7-19%)                     | 17%<br>(11-23%)                     | 320<br>(190-440)    | 14000<br>(8300-18000)    |
| Cambodia | 1995 | Male   | 50 to 54 | 42%<br>(24-62%)                | 58%<br>(38-76%)          | 3.1<br>(1.4-5.3)                            | 13%<br>(7.6-18%)                     | 16%<br>(9.2-21%)                    | 340<br>(200-470)    | 13000<br>(7500-17000)    |
| Cambodia | 1995 | Male   | 55 to 59 | 40%<br>(23-59%)                | 60%<br>(41-77%)          | 2.8<br>(1.3-5)                              | 12%<br>(6.4-16%)                     | 14%<br>(7.6-20%)                    | 370<br>(210-540)    | 12000<br>(6700-18000)    |
| Cambodia | 1995 | Male   | 60 to 64 | 37%<br>(21-57%)                | 63%<br>(43-79%)          | 2.4<br>(1.1-4.6)                            | 10%<br>(5.4-16%)                     | 12%<br>(6.2-18%)                    | 380<br>(190-580)    | 11000<br>(5400-16000)    |
| Cambodia | 1995 | Male   | 65 to 69 | 34%<br>(19-52%)                | 66%<br>(48-81%)          | 2<br>(0.9-3.7)                              | 8.8%<br>(4.4-14%)                    | 10%<br>(5.1-16%)                    | 320<br>(160-510)    | 7300<br>(3600-12000)     |
| Cambodia | 1995 | Male   | 70 to 74 | 30%<br>(17-46%)                | 70%<br>(54-83%)          | 1.7<br>(0.73-3.2)                           | 7.6%<br>(3.4-13%)                    | 8.7%<br>(3.8-15%)                   | 250<br>(110-430)    | 4600<br>(2000-7900)      |
| Cambodia | 1995 | Male   | 75 to 79 | 27%<br>(15-44%)                | 73%<br>(56-85%)          | 1.4<br>(0.57-2.8)                           | 6%<br>(2.5-11%)                      | 6.9%<br>(2.8-12%)                   | 140<br>(57-250)     | 2000<br>(820-3600)       |
| Cambodia | 1995 | Male   | 80 to 84 | 25%<br>(13-41%)                | 75%<br>(59-87%)          | 1.2<br>(0.49-2.5)                           | 5.4%<br>(2.2-10%)                    | 6.2%<br>(2.5-12%)                   | 62<br>(24-110)      | 650<br>(250-1200)        |
| Cambodia | 1995 | Male   | 85 to 89 | 24%<br>(13-39%)                | 76%<br>(61-87%)          | 1.1<br>(0.45-2.2)                           | 4.2%<br>(1.7-8%)                     | 4.8%<br>(1.9-9.3%)                  | 21<br>(8.1-40)      | 160<br>(62-300)          |
| Cambodia | 1995 | Male   | 90 to 94 | 25%<br>(14-41%)                | 75%<br>(59-86%)          | 1.1<br>(0.43-2.2)                           | 3.3%<br>(1.2-6.8%)                   | 3.8%<br>(1.3-7.9%)                  | 4.7<br>(1.6-9.8)    | 25<br>(8.8-51)           |
| Cambodia | 1995 | Male   | 95 plus  | 29%<br>(14-50%)                | 71%<br>(50-86%)          | 1.1<br>(0.37-2.4)                           | 3%<br>(0.88-6.6%)                    | 3.3%<br>(0.88-7.5%)                 | 1.2<br>(0.31-2.6)   | 4.2<br>(1.2-9.3)         |
| Cambodia | 2000 | Female | All Ages | 8.5%<br>(6.1-12%)              | 92%<br>(88-94%)          | 0.81<br>(0.53-1.2)                          | 2.4%<br>(1.8-3.1%)                   | 4.6%<br>(3.3-6.2%)                  | 2300<br>(1600-3100) | 72000<br>(54000-92000)   |

| Location | Year | Sex    | Age      | Prevalence of current drinkers | Prevalence of abstainers | Population average of standard drinks daily | Percent of total attributable deaths | Percent of total attributable DALYs | Attributable deaths | Attributable DALYs        |
|----------|------|--------|----------|--------------------------------|--------------------------|---------------------------------------------|--------------------------------------|-------------------------------------|---------------------|---------------------------|
| Cambodia | 2000 | Female | 15 to 19 | 8.2%<br>(3.9-15%)              | 92%<br>(85-96%)          | 0.73<br>(0.26-1.6)                          | 1.8%<br>(0.85-3.2%)                  | 2.7%<br>(1.1-5.1%)                  | 33<br>(13-61)       | 2800<br>(1300-5000)       |
| Cambodia | 2000 | Female | 20 to 24 | 9.9%<br>(4.2-18%)              | 90%<br>(82-96%)          | 0.98<br>(0.34-2.1)                          | 2.9%<br>(1.4-4.9%)                   | 4%<br>(1.7-7.3%)                    | 34<br>(15-62)       | 2800<br>(1400-4700)       |
| Cambodia | 2000 | Female | 25 to 29 | 11%<br>(4.5-20%)               | 89%<br>(80-95%)          | 1.1<br>(0.38-2.5)                           | 3.1%<br>(1.6-5.1%)                   | 4.2%<br>(1.8-7.3%)                  | 52<br>(24-91)       | 3900<br>(2000-6400)       |
| Cambodia | 2000 | Female | 30 to 34 | 12%<br>(4.7-22%)               | 88%<br>(78-95%)          | 1.3<br>(0.43-2.7)                           | 3.6%<br>(1.9-5.7%)                   | 5%<br>(2.4-8.1%)                    | 72<br>(36-120)      | 4700<br>(2500-7400)       |
| Cambodia | 2000 | Female | 35 to 39 | 13%<br>(5.4-23%)               | 87%<br>(77-95%)          | 1.4<br>(0.48-2.9)                           | 4.4%<br>(2.4-6.9%)                   | 6.2%<br>(3.3-9.8%)                  | 100<br>(56-160)     | 5900<br>(3300-9000)       |
| Cambodia | 2000 | Female | 40 to 44 | 13%<br>(6.2-23%)               | 87%<br>(77-94%)          | 1.6<br>(0.57-3.3)                           | 4.9%<br>(2.9-7.5%)                   | 6.8%<br>(3.9-10%)                   | 120<br>(71-190)     | 6100<br>(3600-9100)       |
| Cambodia | 2000 | Female | 45 to 49 | 13%<br>(5.9-24%)               | 87%<br>(76-94%)          | 1.8<br>(0.6-4)                              | 5.4%<br>(3.1-8.3%)                   | 7.3%<br>(4.2-12%)                   | 160<br>(91-250)     | 7000<br>(4100-11000)      |
| Cambodia | 2000 | Female | 50 to 54 | 14%<br>(6.1-26%)               | 86%<br>(74-94%)          | 2<br>(0.66-4.5)                             | 6.5%<br>(3.8-10%)                    | 8.4%<br>(5-13%)                     | 190<br>(110-300)    | 7200<br>(4300-11000)      |
| Cambodia | 2000 | Female | 55 to 59 | 14%<br>(6.4-26%)               | 86%<br>(74-94%)          | 2.2<br>(0.73-4.9)                           | 6.6%<br>(3.7-11%)                    | 8.2%<br>(4.7-13%)                   | 220<br>(130-360)    | 7200<br>(4100-12000)      |
| Cambodia | 2000 | Female | 60 to 64 | 14%<br>(5.9-26%)               | 86%<br>(74-94%)          | 2.2<br>(0.65-5.3)                           | 6.5%<br>(3.7-11%)                    | 8%<br>(4.6-13%)                     | 260<br>(150-430)    | 7100<br>(4000-12000)      |
| Cambodia | 2000 | Female | 65 to 69 | 13%<br>(6.2-24%)               | 87%<br>(76-94%)          | 2.1<br>(0.64-4.5)                           | 6.5%<br>(3.5-11%)                    | 7.8%<br>(4.2-13%)                   | 300<br>(160-490)    | 6900<br>(3700-11000)      |
| Cambodia | 2000 | Female | 70 to 74 | 13%<br>(6.1-23%)               | 87%<br>(77-94%)          | 1.8<br>(0.56-4.3)                           | 6%<br>(3.1-10%)                      | 7.1%<br>(3.7-12%)                   | 270<br>(140-450)    | 5000<br>(2700-8400)       |
| Cambodia | 2000 | Female | 75 to 79 | 12%<br>(5.4-23%)               | 88%<br>(77-95%)          | 1.7<br>(0.47-4.3)                           | 5.3%<br>(2.6-9%)                     | 6.1%<br>(3-10%)                     | 200<br>(99-350)     | 2900<br>(1400-4900)       |
| Cambodia | 2000 | Female | 80 to 84 | 12%<br>(5.7-24%)               | 88%<br>(76-94%)          | 1.8<br>(0.53-4)                             | 5.4%<br>(2.6-9.1%)                   | 6.3%<br>(3-11%)                     | 150<br>(70-250)     | 1500<br>(730-2600)        |
| Cambodia | 2000 | Female | 85 to 89 | 13%<br>(5.9-25%)               | 87%<br>(75-94%)          | 1.9<br>(0.56-4.7)                           | 5%<br>(2.4-9.1%)                     | 5.9%<br>(2.8-11%)                   | 73<br>(34-130)      | 540<br>(250-960)          |
| Cambodia | 2000 | Female | 90 to 94 | 16%<br>(6.7-28%)               | 84%<br>(72-93%)          | 2.2<br>(0.53-5.5)                           | 4.7%<br>(2.1-8.4%)                   | 5.5%<br>(2.5-9.7%)                  | 22<br>(10-40)       | 120<br>(51-200)           |
| Cambodia | 2000 | Female | 95 plus  | 19%<br>(7.1-38%)               | 81%<br>(62-93%)          | 2.6<br>(0.54-7.4)                           | 4.9%<br>(2-9.4%)                     | 5.6%<br>(2.2-11%)                   | 5.8<br>(2.3-11)     | 20<br>(7.9-38)            |
| Cambodia | 2000 | Male   | All Ages | 25%<br>(19-32%)                | 75%<br>(68-81%)          | 2.3<br>(1.6-3.1)                            | 6%<br>(5-7.1%)                       | 9.7%<br>(7.9-12%)                   | 5300<br>(4300-6400) | 210000<br>(170000-250000) |
| Cambodia | 2000 | Male   | 15 to 19 | 23%<br>(13-38%)                | 77%<br>(62-87%)          | 1.3<br>(0.56-2.4)                           | 3.8%<br>(1.9-6.7%)                   | 5%<br>(2.4-9.1%)                    | 88<br>(42-160)      | 7100<br>(3600-12000)      |
| Cambodia | 2000 | Male   | 20 to 24 | 35%<br>(20-53%)                | 65%<br>(47-80%)          | 3.1<br>(1.5-5.2)                            | 10%<br>(6.3-15%)                     | 13%<br>(7.4-19%)                    | 170<br>(100-260)    | 12000<br>(7400-18000)     |
| Cambodia | 2000 | Male   | 25 to 29 | 41%<br>(23-59%)                | 59%<br>(41-77%)          | 4.3<br>(2.2-7.1)                            | 12%<br>(8.2-17%)                     | 15%<br>(9.5-21%)                    | 330<br>(220-450)    | 21000<br>(15000-29000)    |
| Cambodia | 2000 | Male   | 30 to 34 | 44%<br>(25-63%)                | 56%<br>(37-75%)          | 5.3<br>(2.8-8.7)                            | 14%<br>(9.4-18%)                     | 17%<br>(11-23%)                     | 410<br>(290-530)    | 24000<br>(17000-32000)    |

| Location | Year | Sex    | Age      | Prevalence of current drinkers | Prevalence of abstainers | Population average of standard drinks daily | Percent of total attributable deaths | Percent of total attributable DALYs | Attributable deaths | Attributable DALYs      |
|----------|------|--------|----------|--------------------------------|--------------------------|---------------------------------------------|--------------------------------------|-------------------------------------|---------------------|-------------------------|
| Cambodia | 2000 | Male   | 35 to 39 | 46%<br>(28-66%)                | 54%<br>(34-72%)          | 6<br>(3-10)                                 | 15%<br>(11-20%)                      | 19%<br>(13-25%)                     | 470<br>(350-600)    | 25000<br>(19000-32000)  |
| Cambodia | 2000 | Male   | 40 to 44 | 45%<br>(28-65%)                | 55%<br>(35-72%)          | 6.2<br>(3.1-11)                             | 16%<br>(12-20%)                      | 19%<br>(14-25%)                     | 440<br>(320-550)    | 21000<br>(16000-26000)  |
| Cambodia | 2000 | Male   | 45 to 49 | 44%<br>(25-64%)                | 56%<br>(36-75%)          | 6.2<br>(3-11)                               | 16%<br>(12-21%)                      | 20%<br>(14-25%)                     | 520<br>(380-670)    | 22000<br>(16000-28000)  |
| Cambodia | 2000 | Male   | 50 to 54 | 42%<br>(23-62%)                | 58%<br>(38-77%)          | 5.9<br>(2.8-10)                             | 16%<br>(11-20%)                      | 19%<br>(14-24%)                     | 460<br>(330-590)    | 17000<br>(13000-22000)  |
| Cambodia | 2000 | Male   | 55 to 59 | 39%<br>(23-60%)                | 61%<br>(40-77%)          | 5.3<br>(2.5-9.6)                            | 15%<br>(11-20%)                      | 18%<br>(13-23%)                     | 480<br>(340-630)    | 15000<br>(11000-20000)  |
| Cambodia | 2000 | Male   | 60 to 64 | 37%<br>(20-56%)                | 63%<br>(44-80%)          | 4.6<br>(2-8.7)                              | 14%<br>(9.4-18%)                     | 16%<br>(11-21%)                     | 520<br>(350-710)    | 14000<br>(9800-20000)   |
| Cambodia | 2000 | Male   | 65 to 69 | 33%<br>(19-52%)                | 67%<br>(48-81%)          | 3.9<br>(1.7-7.3)                            | 12%<br>(8.1-17%)                     | 14%<br>(9.5-20%)                    | 510<br>(330-710)    | 12000<br>(7700-16000)   |
| Cambodia | 2000 | Male   | 70 to 74 | 30%<br>(17-46%)                | 70%<br>(54-83%)          | 3.2<br>(1.4-6.1)                            | 11%<br>(6.9-16%)                     | 13%<br>(7.9-19%)                    | 430<br>(260-630)    | 7900<br>(4800-11000)    |
| Cambodia | 2000 | Male   | 75 to 79 | 27%<br>(15-44%)                | 73%<br>(56-85%)          | 2.7<br>(1.1-5.4)                            | 9.3%<br>(5.2-14%)                    | 11%<br>(6-16%)                      | 260<br>(150-390)    | 3800<br>(2100-5600)     |
| Cambodia | 2000 | Male   | 80 to 84 | 25%<br>(13-41%)                | 75%<br>(59-87%)          | 2.3<br>(0.92-4.6)                           | 8.8%<br>(4.6-13%)                    | 10%<br>(5.2-15%)                    | 140<br>(70-200)     | 1400<br>(740-2200)      |
| Cambodia | 2000 | Male   | 85 to 89 | 23%<br>(12-38%)                | 77%<br>(62-88%)          | 2<br>(0.83-4.2)                             | 7.3%<br>(3.7-11%)                    | 8.4%<br>(4.2-13%)                   | 54<br>(27-85)       | 410<br>(210-640)        |
| Cambodia | 2000 | Male   | 90 to 94 | 25%<br>(13-40%)                | 75%<br>(60-87%)          | 2<br>(0.8-4)                                | 6.2%<br>(2.9-9.8%)                   | 7.1%<br>(3.2-11%)                   | 14<br>(6.1-22)      | 70<br>(32-110)          |
| Cambodia | 2000 | Male   | 95 plus  | 28%<br>(13-48%)                | 72%<br>(52-87%)          | 2<br>(0.69-4.5)                             | 5.7%<br>(2.3-9.8%)                   | 6.4%<br>(2.5-11%)                   | 2.3<br>(0.89-4)     | 8.1<br>(3.3-14)         |
| Cambodia | 2005 | Female | All Ages | 8.6%<br>(6.2-12%)              | 91%<br>(88-94%)          | 1.1<br>(0.73-1.6)                           | 2.8%<br>(2.2-3.7%)                   | 5.3%<br>(3.8-7.1%)                  | 2500<br>(1800-3400) | 78000<br>(60000-100000) |
| Cambodia | 2005 | Female | 15 to 19 | 8.1%<br>(3.6-15%)              | 92%<br>(85-96%)          | 0.93<br>(0.31-2)                            | 1.9%<br>(0.95-3.2%)                  | 3.2%<br>(1.4-5.7%)                  | 28<br>(12-50)       | 2500<br>(1300-4200)     |
| Cambodia | 2005 | Female | 20 to 24 | 9.8%<br>(4.2-18%)              | 90%<br>(82-96%)          | 1.3<br>(0.44-2.6)                           | 2.9%<br>(1.6-4.7%)                   | 4.2%<br>(1.9-7.3%)                  | 53<br>(24-91)       | 4600<br>(2500-7300)     |
| Cambodia | 2005 | Female | 25 to 29 | 11%<br>(4.4-19%)               | 89%<br>(81-96%)          | 1.5<br>(0.49-3.2)                           | 3.2%<br>(1.7-5%)                     | 4.6%<br>(2.2-7.8%)                  | 35<br>(17-59)       | 2700<br>(1500-4300)     |
| Cambodia | 2005 | Female | 30 to 34 | 12%<br>(4.8-22%)               | 88%<br>(78-95%)          | 1.6<br>(0.56-3.5)                           | 3.6%<br>(2.1-5.7%)                   | 5.2%<br>(2.7-8.4%)                  | 64<br>(34-100)      | 4300<br>(2500-6700)     |
| Cambodia | 2005 | Female | 35 to 39 | 12%<br>(5.2-23%)               | 88%<br>(77-95%)          | 1.8<br>(0.62-3.8)                           | 4.4%<br>(2.5-6.7%)                   | 6.4%<br>(3.5-9.7%)                  | 98<br>(54-150)      | 5700<br>(3300-8400)     |
| Cambodia | 2005 | Female | 40 to 44 | 13%<br>(5.8-23%)               | 87%<br>(77-94%)          | 2<br>(0.7-4.1)                              | 4.9%<br>(3-7.3%)                     | 7.2%<br>(4.4-11%)                   | 130<br>(80-200)     | 6800<br>(4100-10000)    |
| Cambodia | 2005 | Female | 45 to 49 | 13%<br>(5.6-24%)               | 87%<br>(76-94%)          | 2.3<br>(0.76-5.2)                           | 5.5%<br>(3.3-8.3%)                   | 7.8%<br>(4.6-12%)                   | 160<br>(95-250)     | 7300<br>(4300-11000)    |
| Cambodia | 2005 | Female | 50 to 54 | 13%<br>(6.1-25%)               | 87%<br>(75-94%)          | 2.6<br>(0.86-5.9)                           | 6.5%<br>(3.9-10%)                    | 8.7%<br>(5.3-13%)                   | 240<br>(150-380)    | 9200<br>(5600-14000)    |

| Location | Year | Sex    | Age      | Prevalence of current drinkers | Prevalence of abstainers | Population average of standard drinks daily | Percent of total attributable deaths | Percent of total attributable DALYs | Attributable deaths | Attributable DALYs     |
|----------|------|--------|----------|--------------------------------|--------------------------|---------------------------------------------|--------------------------------------|-------------------------------------|---------------------|------------------------|
| Cambodia | 2005 | Female | 55 to 59 | 14%<br>(6.3-26%)               | 86%<br>(74-94%)          | 2.9<br>(0.93-6.6)                           | 6.7%<br>(3.9-11%)                    | 8.6%<br>(5-14%)                     | 250<br>(140-410)    | 8200<br>(4700-13000)   |
| Cambodia | 2005 | Female | 60 to 64 | 14%<br>(6.1-26%)               | 86%<br>(74-94%)          | 3<br>(0.88-6.7)                             | 6.6%<br>(3.8-11%)                    | 8.3%<br>(4.8-14%)                   | 280<br>(160-460)    | 7800<br>(4500-13000)   |
| Cambodia | 2005 | Female | 65 to 69 | 13%<br>(6-23%)                 | 87%<br>(77-94%)          | 2.7<br>(0.85-5.8)                           | 6.6%<br>(3.6-11%)                    | 8.1%<br>(4.5-13%)                   | 320<br>(180-530)    | 7400<br>(4100-12000)   |
| Cambodia | 2005 | Female | 70 to 74 | 13%<br>(5.8-23%)               | 87%<br>(77-94%)          | 2.4<br>(0.71-5.6)                           | 6.1%<br>(3.2-10%)                    | 7.4%<br>(3.9-12%)                   | 320<br>(170-540)    | 6000<br>(3100-9900)    |
| Cambodia | 2005 | Female | 75 to 79 | 12%<br>(5.2-23%)               | 88%<br>(77-95%)          | 2.3<br>(0.62-5.6)                           | 5.4%<br>(2.7-9.1%)                   | 6.4%<br>(3.1-11%)                   | 240<br>(120-400)    | 3400<br>(1700-5600)    |
| Cambodia | 2005 | Female | 80 to 84 | 12%<br>(5.3-23%)               | 88%<br>(77-95%)          | 2.3<br>(0.69-5.3)                           | 5.5%<br>(2.6-9%)                     | 6.4%<br>(3.1-11%)                   | 160<br>(79-280)     | 1700<br>(840-2900)     |
| Cambodia | 2005 | Female | 85 to 89 | 13%<br>(5.9-25%)               | 87%<br>(75-94%)          | 2.5<br>(0.72-6)                             | 5.2%<br>(2.5-9.2%)                   | 6.1%<br>(2.9-11%)                   | 89<br>(43-160)      | 660<br>(320-1200)      |
| Cambodia | 2005 | Female | 90 to 94 | 15%<br>(6.8-28%)               | 85%<br>(72-93%)          | 2.8<br>(0.7-7.1)                            | 4.8%<br>(2.4-8.4%)                   | 5.7%<br>(2.8-9.9%)                  | 29<br>(15-51)       | 150<br>(76-260)        |
| Cambodia | 2005 | Female | 95 plus  | 19%<br>(7.4-36%)               | 81%<br>(64-93%)          | 3.3<br>(0.67-9.1)                           | 5%<br>(2.1-9.1%)                     | 5.8%<br>(2.5-11%)                   | 7<br>(3-13)         | 24<br>(11-44)          |
| Cambodia | 2005 | Male   | All Ages | 25%<br>(20-33%)                | 75%<br>(67-80%)          | 3.1<br>(2.3-4.2)                            | 7.2%<br>(5.9-8.5%)                   | 11%<br>(9.1-13%)                    | 5900<br>(4900-7200) | 23000<br>(19000-27000) |
| Cambodia | 2005 | Male   | 15 to 19 | 23%<br>(13-38%)                | 77%<br>(62-87%)          | 1.6<br>(0.7-3)                              | 4.7%<br>(2.4-7.9%)                   | 6.4%<br>(3.1-11%)                   | 96<br>(45-170)      | 7700<br>(4000-13000)   |
| Cambodia | 2005 | Male   | 20 to 24 | 34%<br>(19-52%)                | 66%<br>(48-81%)          | 3.9<br>(1.9-6.5)                            | 12%<br>(7.2-16%)                     | 15%<br>(8.9-21%)                    | 350<br>(210-500)    | 25000<br>(16000-35000) |
| Cambodia | 2005 | Male   | 25 to 29 | 39%<br>(22-57%)                | 61%<br>(43-78%)          | 5.5<br>(2.7-9.4)                            | 14%<br>(9.5-18%)                     | 17%<br>(12-23%)                     | 240<br>(160-330)    | 16000<br>(11000-21000) |
| Cambodia | 2005 | Male   | 30 to 34 | 43%<br>(24-62%)                | 57%<br>(38-76%)          | 6.8<br>(3.6-11)                             | 14%<br>(9.5-18%)                     | 17%<br>(11-22%)                     | 390<br>(280-510)    | 24000<br>(17000-30000) |
| Cambodia | 2005 | Male   | 35 to 39 | 45%<br>(27-65%)                | 55%<br>(35-73%)          | 7.7<br>(3.9-13)                             | 15%<br>(11-19%)                      | 18%<br>(13-24%)                     | 510<br>(380-650)    | 27000<br>(21000-35000) |
| Cambodia | 2005 | Male   | 40 to 44 | 45%<br>(27-65%)                | 55%<br>(35-73%)          | 8<br>(4-13)                                 | 15%<br>(12-19%)                      | 19%<br>(14-23%)                     | 560<br>(420-700)    | 27000<br>(20000-34000) |
| Cambodia | 2005 | Male   | 45 to 49 | 43%<br>(24-63%)                | 57%<br>(37-76%)          | 8<br>(3.9-13)                               | 16%<br>(12-20%)                      | 20%<br>(15-25%)                     | 510<br>(380-640)    | 22000<br>(16000-27000) |
| Cambodia | 2005 | Male   | 50 to 54 | 41%<br>(23-61%)                | 59%<br>(39-77%)          | 7.5<br>(3.6-13)                             | 16%<br>(12-20%)                      | 19%<br>(15-24%)                     | 570<br>(430-730)    | 22000<br>(16000-27000) |
| Cambodia | 2005 | Male   | 55 to 59 | 39%<br>(23-59%)                | 61%<br>(41-77%)          | 6.7<br>(3.3-12)                             | 15%<br>(11-20%)                      | 18%<br>(13-24%)                     | 520<br>(380-680)    | 17000<br>(12000-22000) |
| Cambodia | 2005 | Male   | 60 to 64 | 36%<br>(20-55%)                | 64%<br>(45-80%)          | 5.8<br>(2.6-11)                             | 14%<br>(9.8-18%)                     | 17%<br>(12-22%)                     | 520<br>(360-700)    | 15000<br>(10000-19000) |
| Cambodia | 2005 | Male   | 65 to 69 | 33%<br>(19-51%)                | 67%<br>(49-81%)          | 4.9<br>(2.2-9.2)                            | 13%<br>(8.8-17%)                     | 15%<br>(10-20%)                     | 530<br>(360-730)    | 12000<br>(8400-17000)  |
| Cambodia | 2005 | Male   | 70 to 74 | 29%<br>(16-46%)                | 71%<br>(54-84%)          | 4.1<br>(1.8-7.8)                            | 12%<br>(7.6-16%)                     | 13%<br>(8.9-19%)                    | 500<br>(330-720)    | 9300<br>(6000-13000)   |

| Location | Year | Sex    | Age      | Prevalence of current drinkers | Prevalence of abstainers | Population average of standard drinks daily | Percent of total attributable deaths | Percent of total attributable DALYs | Attributable deaths | Attributable DALYs      |
|----------|------|--------|----------|--------------------------------|--------------------------|---------------------------------------------|--------------------------------------|-------------------------------------|---------------------|-------------------------|
| Cambodia | 2005 | Male   | 75 to 79 | 27%<br>(15-43%)                | 73%<br>(57-85%)          | 3.4<br>(1.4-6.9)                            | 9.8%<br>(6.3-14%)                    | 11%<br>(7.1-16%)                    | 330<br>(200-480)    | 4700<br>(2900-6900)     |
| Cambodia | 2005 | Male   | 80 to 84 | 24%<br>(12-40%)                | 76%<br>(60-88%)          | 3<br>(1.2-5.9)                              | 9.3%<br>(5.5-14%)                    | 11%<br>(6.3-16%)                    | 180<br>(100-260)    | 1900<br>(1100-2800)     |
| Cambodia | 2005 | Male   | 85 to 89 | 23%<br>(12-37%)                | 77%<br>(63-88%)          | 2.6<br>(1-5.3)                              | 7.9%<br>(4.5-12%)                    | 9%<br>(5.1-14%)                     | 81<br>(46-120)      | 610<br>(350-940)        |
| Cambodia | 2005 | Male   | 90 to 94 | 24%<br>(13-40%)                | 76%<br>(60-87%)          | 2.5<br>(1-5.1)                              | 6.8%<br>(3.7-10%)                    | 7.8%<br>(4.2-12%)                   | 23<br>(12-34)       | 120<br>(66-180)         |
| Cambodia | 2005 | Male   | 95 plus  | 27%<br>(13-47%)                | 73%<br>(53-87%)          | 2.6<br>(0.84-5.7)                           | 6.4%<br>(3-11%)                      | 7.2%<br>(3.3-12%)                   | 4.1<br>(1.9-6.9)    | 15<br>(6.7-24)          |
| Cambodia | 2010 | Female | All Ages | 8.7%<br>(6.2-12%)              | 91%<br>(88-94%)          | 1.3<br>(0.83-2)                             | 3.1%<br>(2.3-4.1%)                   | 5.7%<br>(4.1-7.6%)                  | 2600<br>(1800-3400) | 77000<br>(59000-100000) |
| Cambodia | 2010 | Female | 15 to 19 | 8%<br>(3.5-16%)                | 92%<br>(84-96%)          | 1<br>(0.34-2.3)                             | 1.7%<br>(0.91-3%)                    | 3%<br>(1.3-5.6%)                    | 21<br>(9.2-40)      | 2000<br>(1100-3400)     |
| Cambodia | 2010 | Female | 20 to 24 | 9.6%<br>(3.8-18%)              | 90%<br>(82-96%)          | 1.4<br>(0.47-3.1)                           | 2.7%<br>(1.5-4.4%)                   | 4.1%<br>(1.9-7.1%)                  | 31<br>(14-56)       | 2900<br>(1700-4700)     |
| Cambodia | 2010 | Female | 25 to 29 | 10%<br>(4.4-20%)               | 90%<br>(80-96%)          | 1.6<br>(0.52-3.6)                           | 3.1%<br>(1.8-4.9%)                   | 4.9%<br>(2.3-8%)                    | 61<br>(29-100)      | 5000<br>(2800-7900)     |
| Cambodia | 2010 | Female | 30 to 34 | 11%<br>(4.6-22%)               | 89%<br>(78-95%)          | 1.8<br>(0.63-4)                             | 3.7%<br>(2.2-5.7%)                   | 5.8%<br>(3.2-9.3%)                  | 40<br>(22-66)       | 2700<br>(1600-4300)     |
| Cambodia | 2010 | Female | 35 to 39 | 12%<br>(5.2-23%)               | 88%<br>(77-95%)          | 2<br>(0.66-4.3)                             | 4.4%<br>(2.6-6.6%)                   | 6.9%<br>(4.1-11%)                   | 82<br>(47-130)      | 4900<br>(2900-7400)     |
| Cambodia | 2010 | Female | 40 to 44 | 13%<br>(5.8-23%)               | 87%<br>(77-94%)          | 2.3<br>(0.77-4.8)                           | 4.9%<br>(3.1-7.3%)                   | 7.6%<br>(4.8-11%)                   | 120<br>(74-180)     | 6100<br>(3900-8900)     |
| Cambodia | 2010 | Female | 45 to 49 | 13%<br>(5.2-24%)               | 87%<br>(76-95%)          | 2.6<br>(0.8-5.7)                            | 5.4%<br>(3.2-8.2%)                   | 8%<br>(4.8-12%)                     | 170<br>(100-260)    | 7500<br>(4600-11000)    |
| Cambodia | 2010 | Female | 50 to 54 | 13%<br>(5.6-25%)               | 87%<br>(75-94%)          | 2.8<br>(0.9-6.4)                            | 6.3%<br>(3.8-9.8%)                   | 8.7%<br>(5.3-13%)                   | 230<br>(140-360)    | 8800<br>(5400-14000)    |
| Cambodia | 2010 | Female | 55 to 59 | 13%<br>(6.2-25%)               | 87%<br>(75-94%)          | 3.1<br>(0.94-7)                             | 6.4%<br>(3.7-10%)                    | 8.4%<br>(5-13%)                     | 280<br>(170-450)    | 9400<br>(5600-15000)    |
| Cambodia | 2010 | Female | 60 to 64 | 13%<br>(5.8-25%)               | 87%<br>(75-94%)          | 3.2<br>(0.96-7.4)                           | 6.3%<br>(3.7-10%)                    | 8%<br>(4.8-13%)                     | 280<br>(160-450)    | 7900<br>(4700-13000)    |
| Cambodia | 2010 | Female | 65 to 69 | 13%<br>(5.8-24%)               | 87%<br>(76-94%)          | 3<br>(0.94-6.5)                             | 6.3%<br>(3.4-10%)                    | 7.9%<br>(4.4-13%)                   | 320<br>(180-520)    | 7400<br>(4100-12000)    |
| Cambodia | 2010 | Female | 70 to 74 | 12%<br>(5.5-22%)               | 88%<br>(78-95%)          | 2.7<br>(0.78-6.5)                           | 5.8%<br>(3.1-9.6%)                   | 7.1%<br>(3.8-12%)                   | 310<br>(160-520)    | 5800<br>(3100-9700)     |
| Cambodia | 2010 | Female | 75 to 79 | 12%<br>(5.1-22%)               | 88%<br>(78-95%)          | 2.5<br>(0.66-6.2)                           | 5.1%<br>(2.6-8.5%)                   | 6.1%<br>(3.1-10%)                   | 270<br>(140-440)    | 3900<br>(2000-6300)     |
| Cambodia | 2010 | Female | 80 to 84 | 12%<br>(5.6-23%)               | 88%<br>(77-94%)          | 2.5<br>(0.75-5.9)                           | 5.2%<br>(2.7-8.6%)                   | 6.2%<br>(3.2-10%)                   | 190<br>(100-320)    | 2000<br>(1100-3400)     |
| Cambodia | 2010 | Female | 85 to 89 | 13%<br>(5.6-24%)               | 87%<br>(76-94%)          | 2.7<br>(0.79-6.7)                           | 5%<br>(2.5-8.7%)                     | 5.9%<br>(2.9-10%)                   | 100<br>(50-180)     | 760<br>(380-1300)       |
| Cambodia | 2010 | Female | 90 to 94 | 15%<br>(6.4-28%)               | 85%<br>(72-94%)          | 3.2<br>(0.75-8.3)                           | 4.8%<br>(2.3-8.4%)                   | 5.7%<br>(2.7-9.9%)                  | 37<br>(18-65)       | 190<br>(92-330)         |



| Location | Year | Sex    | Age      | Prevalence of current drinkers | Prevalence of abstainers | Population average of standard drinks daily | Percent of total attributable deaths | Percent of total attributable DALYs | Attributable deaths | Attributable DALYs        |
|----------|------|--------|----------|--------------------------------|--------------------------|---------------------------------------------|--------------------------------------|-------------------------------------|---------------------|---------------------------|
| Cambodia | 2010 | Female | 95 plus  | 19%<br>(7.2-36%)               | 81%<br>(64-93%)          | 3.9<br>(0.75-11)                            | 5.1%<br>(2.2-9.3%)                   | 5.9%<br>(2.5-11%)                   | 9.5<br>(4-18)       | 33<br>(14-60)             |
| Cambodia | 2010 | Male   | All Ages | 26%<br>(20-33%)                | 74%<br>(67-80%)          | 3.7<br>(2.6-5.1)                            | 8.3%<br>(6.8-9.7%)                   | 12%<br>(10-14%)                     | 6400<br>(5200-7600) | 250000<br>(200000-290000) |
| Cambodia | 2010 | Male   | 15 to 19 | 22%<br>(12-37%)                | 78%<br>(63-88%)          | 1.7<br>(0.72-3.3)                           | 4.7%<br>(2.4-7.8%)                   | 6.4%<br>(3-11%)                     | 98<br>(46-170)      | 7900<br>(4000-13000)      |
| Cambodia | 2010 | Male   | 20 to 24 | 34%<br>(19-51%)                | 66%<br>(49-81%)          | 4.2<br>(2-7.2)                              | 12%<br>(7.4-16%)                     | 15%<br>(9-21%)                      | 270<br>(160-390)    | 19000<br>(12000-28000)    |
| Cambodia | 2010 | Male   | 25 to 29 | 39%<br>(22-58%)                | 61%<br>(42-78%)          | 5.9<br>(2.9-10)                             | 14%<br>(9.8-18%)                     | 18%<br>(12-23%)                     | 510<br>(340-690)    | 34000<br>(23000-45000)    |
| Cambodia | 2010 | Male   | 30 to 34 | 42%<br>(23-62%)                | 58%<br>(38-77%)          | 7.4<br>(3.8-13)                             | 15%<br>(11-19%)                      | 19%<br>(13-24%)                     | 270<br>(190-350)    | 16000<br>(12000-21000)    |
| Cambodia | 2010 | Male   | 35 to 39 | 45%<br>(27-63%)                | 55%<br>(37-73%)          | 8.4<br>(4.2-15)                             | 15%<br>(12-19%)                      | 19%<br>(14-24%)                     | 470<br>(350-590)    | 25000<br>(19000-32000)    |
| Cambodia | 2010 | Male   | 40 to 44 | 44%<br>(27-64%)                | 56%<br>(36-73%)          | 8.8<br>(4.3-15)                             | 16%<br>(12-19%)                      | 19%<br>(15-24%)                     | 550<br>(420-690)    | 27000<br>(21000-34000)    |
| Cambodia | 2010 | Male   | 45 to 49 | 43%<br>(25-62%)                | 57%<br>(38-75%)          | 8.7<br>(4.2-15)                             | 16%<br>(12-20%)                      | 20%<br>(15-25%)                     | 660<br>(500-840)    | 29000<br>(21000-36000)    |
| Cambodia | 2010 | Male   | 50 to 54 | 41%<br>(22-60%)                | 59%<br>(40-78%)          | 8.2<br>(3.9-14)                             | 16%<br>(12-20%)                      | 20%<br>(15-24%)                     | 540<br>(400-680)    | 21000<br>(15000-26000)    |
| Cambodia | 2010 | Male   | 55 to 59 | 38%<br>(23-58%)                | 62%<br>(42-77%)          | 7.4<br>(3.5-14)                             | 15%<br>(11-19%)                      | 18%<br>(13-24%)                     | 610<br>(440-800)    | 20000<br>(15000-26000)    |
| Cambodia | 2010 | Male   | 60 to 64 | 36%<br>(20-56%)                | 64%<br>(44-80%)          | 6.4<br>(2.8-12)                             | 14%<br>(9.7-18%)                     | 16%<br>(12-22%)                     | 560<br>(390-750)    | 16000<br>(11000-21000)    |
| Cambodia | 2010 | Male   | 65 to 69 | 32%<br>(18-50%)                | 68%<br>(50-82%)          | 5.4<br>(2.4-10)                             | 12%<br>(8.7-17%)                     | 15%<br>(10-20%)                     | 530<br>(370-740)    | 12000<br>(8600-17000)     |
| Cambodia | 2010 | Male   | 70 to 74 | 29%<br>(16-45%)                | 71%<br>(55-84%)          | 4.4<br>(1.9-8.8)                            | 11%<br>(7.5-16%)                     | 13%<br>(8.8-18%)                    | 520<br>(350-720)    | 9700<br>(6500-13000)      |
| Cambodia | 2010 | Male   | 75 to 79 | 26%<br>(15-42%)                | 74%<br>(58-85%)          | 3.8<br>(1.5-7.5)                            | 9.6%<br>(6.3-14%)                    | 11%<br>(7.2-16%)                    | 400<br>(250-560)    | 5700<br>(3600-8100)       |
| Cambodia | 2010 | Male   | 80 to 84 | 24%<br>(12-40%)                | 76%<br>(60-88%)          | 3.2<br>(1.3-6.5)                            | 9.2%<br>(5.6-13%)                    | 11%<br>(6.4-15%)                    | 230<br>(140-340)    | 2500<br>(1400-3600)       |
| Cambodia | 2010 | Male   | 85 to 89 | 22%<br>(12-36%)                | 78%<br>(64-88%)          | 2.8<br>(1.1-5.8)                            | 7.8%<br>(4.6-11%)                    | 8.9%<br>(5.2-13%)                   | 100<br>(59-160)     | 790<br>(450-1200)         |
| Cambodia | 2010 | Male   | 90 to 94 | 24%<br>(13-39%)                | 76%<br>(61-87%)          | 2.7<br>(1.1-5.9)                            | 6.7%<br>(3.9-10%)                    | 7.7%<br>(4.5-12%)                   | 32<br>(18-49)       | 170<br>(97-260)           |
| Cambodia | 2010 | Male   | 95 plus  | 27%<br>(12-47%)                | 73%<br>(53-88%)          | 2.8<br>(0.92-6.4)                           | 6.6%<br>(3.2-11%)                    | 7.3%<br>(3.4-12%)                   | 6.6<br>(3.1-11)     | 23<br>(11-38)             |
| Cambodia | 2016 | Female | All Ages | 8.8%<br>(6.3-12%)              | 91%<br>(88-94%)          | 1.4<br>(0.79-2.2)                           | 3.3%<br>(2.4-4.3%)                   | 5.8%<br>(4.1-7.7%)                  | 2600<br>(1900-3500) | 77000<br>(58000-100000)   |
| Cambodia | 2016 | Female | 15 to 19 | 7.9%<br>(3.5-15%)              | 92%<br>(85-96%)          | 1<br>(0.32-2.4)                             | 1.5%<br>(0.8-2.5%)                   | 2.7%<br>(1.2-4.8%)                  | 14<br>(5.9-26)      | 1500<br>(770-2400)        |
| Cambodia | 2016 | Female | 20 to 24 | 9.4%<br>(3.9-18%)              | 91%<br>(82-96%)          | 1.4<br>(0.45-3.2)                           | 2.3%<br>(1.4-3.7%)                   | 3.6%<br>(1.7-6.1%)                  | 25<br>(12-44)       | 2700<br>(1600-4200)       |

| Location | Year | Sex    | Age      | Prevalence of current drinkers | Prevalence of abstainers | Population average of standard drinks daily | Percent of total attributable deaths | Percent of total attributable DALYs | Attributable deaths | Attributable DALYs     |
|----------|------|--------|----------|--------------------------------|--------------------------|---------------------------------------------|--------------------------------------|-------------------------------------|---------------------|------------------------|
| Cambodia | 2016 | Female | 25 to 29 | 10%<br>(4.4-19%)               | 90%<br>(81-96%)          | 1.6<br>(0.53-3.5)                           | 2.8%<br>(1.7-4.3%)                   | 4.5%<br>(2.3-7.6%)                  | 33<br>(16-55)       | 2900<br>(1700-4500)    |
| Cambodia | 2016 | Female | 30 to 34 | 11%<br>(4.7-21%)               | 89%<br>(79-95%)          | 1.8<br>(0.58-4.1)                           | 3.3%<br>(2-5.1%)                     | 5.5%<br>(3.1-8.5%)                  | 73<br>(40-120)      | 5400<br>(3300-8100)    |
| Cambodia | 2016 | Female | 35 to 39 | 12%<br>(5.4-22%)               | 88%<br>(78-95%)          | 2<br>(0.71-4.5)                             | 4%<br>(2.5-6%)                       | 6.7%<br>(4-9.9%)                    | 62<br>(36-94)       | 3800<br>(2400-5600)    |
| Cambodia | 2016 | Female | 40 to 44 | 12%<br>(5.7-22%)               | 88%<br>(78-94%)          | 2.3<br>(0.75-4.9)                           | 4.6%<br>(2.9-6.7%)                   | 7.4%<br>(4.7-11%)                   | 98<br>(61-150)      | 5100<br>(3300-7500)    |
| Cambodia | 2016 | Female | 45 to 49 | 13%<br>(5.6-24%)               | 87%<br>(76-94%)          | 2.6<br>(0.8-6.1)                            | 5%<br>(3-7.6%)                       | 7.7%<br>(4.6-12%)                   | 150<br>(91-230)     | 6900<br>(4100-10000)   |
| Cambodia | 2016 | Female | 50 to 54 | 13%<br>(5.6-25%)               | 87%<br>(75-94%)          | 2.9<br>(0.87-6.4)                           | 5.8%<br>(3.5-8.9%)                   | 8.3%<br>(5.1-13%)                   | 230<br>(140-370)    | 9100<br>(5500-14000)   |
| Cambodia | 2016 | Female | 55 to 59 | 13%<br>(5.9-25%)               | 87%<br>(75-94%)          | 3.1<br>(0.94-7.3)                           | 5.9%<br>(3.4-9.4%)                   | 8.1%<br>(4.7-13%)                   | 280<br>(160-440)    | 9200<br>(5200-15000)   |
| Cambodia | 2016 | Female | 60 to 64 | 13%<br>(5.6-24%)               | 87%<br>(76-94%)          | 3.2<br>(0.92-7.3)                           | 5.8%<br>(3.5-9.2%)                   | 7.6%<br>(4.6-12%)                   | 320<br>(190-520)    | 9200<br>(5500-15000)   |
| Cambodia | 2016 | Female | 65 to 69 | 13%<br>(5.7-24%)               | 87%<br>(76-94%)          | 3<br>(0.87-6.8)                             | 5.8%<br>(3.2-9.2%)                   | 7.4%<br>(4.1-12%)                   | 330<br>(190-540)    | 7800<br>(4400-13000)   |
| Cambodia | 2016 | Female | 70 to 74 | 12%<br>(5.9-22%)               | 88%<br>(78-94%)          | 2.7<br>(0.77-6.9)                           | 5.4%<br>(2.9-8.8%)                   | 6.8%<br>(3.7-11%)                   | 320<br>(170-530)    | 6000<br>(3200-9900)    |
| Cambodia | 2016 | Female | 75 to 79 | 12%<br>(5.2-23%)               | 88%<br>(77-95%)          | 2.6<br>(0.68-6.6)                           | 4.8%<br>(2.5-8.1%)                   | 5.9%<br>(3-9.8%)                    | 270<br>(140-460)    | 3900<br>(2000-6600)    |
| Cambodia | 2016 | Female | 80 to 84 | 12%<br>(5.2-23%)               | 88%<br>(77-95%)          | 2.6<br>(0.74-6.1)                           | 4.9%<br>(2.5-8.1%)                   | 5.9%<br>(3-9.7%)                    | 220<br>(110-370)    | 2300<br>(1200-3900)    |
| Cambodia | 2016 | Female | 85 to 89 | 13%<br>(5.7-24%)               | 87%<br>(76-94%)          | 2.8<br>(0.76-7.1)                           | 4.7%<br>(2.3-8.3%)                   | 5.6%<br>(2.7-9.9%)                  | 140<br>(69-250)     | 1100<br>(520-1900)     |
| Cambodia | 2016 | Female | 90 to 94 | 15%<br>(6.3-27%)               | 85%<br>(73-94%)          | 3.2<br>(0.75-8.7)                           | 4.4%<br>(2.1-7.8%)                   | 5.3%<br>(2.5-9.3%)                  | 49<br>(23-86)       | 250<br>(120-440)       |
| Cambodia | 2016 | Female | 95 plus  | 18%<br>(7-35%)                 | 82%<br>(65-93%)          | 3.8<br>(0.71-11)                            | 4.7%<br>(2-8.6%)                     | 5.4%<br>(2.3-10%)                   | 13<br>(5.5-24)      | 44<br>(19-82)          |
| Cambodia | 2016 | Male   | All Ages | 27%<br>(21-34%)                | 73%<br>(66-79%)          | 4<br>(2.5-6.1)                              | 9%<br>(7.4-11%)                      | 13%<br>(10-15%)                     | 6700<br>(5400-8000) | 25000<br>(21000-30000) |
| Cambodia | 2016 | Male   | 15 to 19 | 22%<br>(12-35%)                | 78%<br>(65-88%)          | 1.7<br>(0.67-3.5)                           | 4.5%<br>(2.3-7.7%)                   | 6.3%<br>(2.9-11%)                   | 81<br>(36-140)      | 6600<br>(3200-11000)   |
| Cambodia | 2016 | Male   | 20 to 24 | 33%<br>(18-51%)                | 67%<br>(49-82%)          | 4.2<br>(1.9-7.7)                            | 11%<br>(6.8-15%)                     | 14%<br>(8.4-20%)                    | 300<br>(180-450)    | 22000<br>(13000-32000) |
| Cambodia | 2016 | Male   | 25 to 29 | 39%<br>(21-57%)                | 61%<br>(43-79%)          | 5.9<br>(2.8-11)                             | 14%<br>(9.7-18%)                     | 18%<br>(12-23%)                     | 320<br>(210-450)    | 22000<br>(15000-29000) |
| Cambodia | 2016 | Male   | 30 to 34 | 42%<br>(23-62%)                | 58%<br>(38-77%)          | 7.3<br>(3.5-13)                             | 14%<br>(11-19%)                      | 19%<br>(14-25%)                     | 550<br>(380-740)    | 34000<br>(24000-45000) |
| Cambodia | 2016 | Male   | 35 to 39 | 44%<br>(27-63%)                | 56%<br>(37-73%)          | 8.4<br>(3.8-16)                             | 16%<br>(12-20%)                      | 20%<br>(15-26%)                     | 350<br>(260-450)    | 19000<br>(14000-24000) |
| Cambodia | 2016 | Male   | 40 to 44 | 44%<br>(27-64%)                | 56%<br>(36-73%)          | 8.8<br>(3.9-16)                             | 15%<br>(12-19%)                      | 20%<br>(16-25%)                     | 450<br>(330-570)    | 22000<br>(16000-28000) |

| Location  | Year | Sex    | Age      | Prevalence of current drinkers | Prevalence of abstainers | Population average of standard drinks daily | Percent of total attributable deaths | Percent of total attributable DALYs | Attributable deaths  | Attributable DALYs        |
|-----------|------|--------|----------|--------------------------------|--------------------------|---------------------------------------------|--------------------------------------|-------------------------------------|----------------------|---------------------------|
| Cambodia  | 2016 | Male   | 45 to 49 | 42%<br>(24-61%)                | 58%<br>(39-76%)          | 8.6<br>(3.8-16)                             | 16%<br>(12-20%)                      | 20%<br>(15-25%)                     | 610<br>(460-780)     | 27000<br>(20000-34000)    |
| Cambodia  | 2016 | Male   | 50 to 54 | 40%<br>(23-61%)                | 60%<br>(39-77%)          | 8.1<br>(3.5-15)                             | 15%<br>(11-19%)                      | 19%<br>(14-24%)                     | 730<br>(530-930)     | 28000<br>(20000-35000)    |
| Cambodia  | 2016 | Male   | 55 to 59 | 38%<br>(22-59%)                | 62%<br>(41-78%)          | 7.4<br>(3.3-14)                             | 14%<br>(10-18%)                      | 17%<br>(13-22%)                     | 610<br>(440-810)     | 20000<br>(15000-27000)    |
| Cambodia  | 2016 | Male   | 60 to 64 | 35%<br>(19-55%)                | 65%<br>(45-81%)          | 6.4<br>(2.7-13)                             | 13%<br>(9.1-17%)                     | 16%<br>(11-20%)                     | 650<br>(460-870)     | 18000<br>(13000-24000)    |
| Cambodia  | 2016 | Male   | 65 to 69 | 32%<br>(18-51%)                | 68%<br>(49-82%)          | 5.3<br>(2.2-11)                             | 12%<br>(8.1-16%)                     | 14%<br>(9.7-19%)                    | 600<br>(420-810)     | 14000<br>(9600-19000)     |
| Cambodia  | 2016 | Male   | 70 to 74 | 28%<br>(16-45%)                | 72%<br>(55-84%)          | 4.4<br>(1.8-9)                              | 10%<br>(6.8-14%)                     | 12%<br>(7.9-17%)                    | 520<br>(340-720)     | 9600<br>(6300-13000)      |
| Cambodia  | 2016 | Male   | 75 to 79 | 26%<br>(14-42%)                | 74%<br>(58-86%)          | 3.7<br>(1.4-7.8)                            | 8.8%<br>(5.6-12%)                    | 10%<br>(6.4-14%)                    | 420<br>(260-590)     | 6000<br>(3800-8500)       |
| Cambodia  | 2016 | Male   | 80 to 84 | 24%<br>(12-40%)                | 76%<br>(60-88%)          | 3.2<br>(1.2-6.7)                            | 8.3%<br>(5-12%)                      | 9.5%<br>(5.8-14%)                   | 280<br>(170-410)     | 3000<br>(1800-4400)       |
| Cambodia  | 2016 | Male   | 85 to 89 | 22%<br>(11-37%)                | 78%<br>(63-89%)          | 2.8<br>(1.1-6.1)                            | 7%<br>(4-10%)                        | 8%<br>(4.6-12%)                     | 130<br>(75-200)      | 1000<br>(570-1500)        |
| Cambodia  | 2016 | Male   | 90 to 94 | 23%<br>(12-38%)                | 77%<br>(62-88%)          | 2.7<br>(1-5.7)                              | 6.1%<br>(3.3-9.3%)                   | 7%<br>(3.7-11%)                     | 40<br>(22-62)        | 210<br>(120-320)          |
| Cambodia  | 2016 | Male   | 95 plus  | 27%<br>(12-45%)                | 73%<br>(55-88%)          | 2.8<br>(0.88-6.9)                           | 6%<br>(2.8-9.6%)                     | 6.6%<br>(3-11%)                     | 8.8<br>(4.1-15)      | 31<br>(15-51)             |
| Indonesia | 1990 | Female | All Ages | 2.5%<br>(2-3.1%)               | 98%<br>(97-98%)          | 0.11<br>(0.1-0.12)                          | 0.76%<br>(0.61-0.93%)                | 1.3%<br>(0.92-1.7%)                 | 8400<br>(6200-11000) | 290000<br>(230000-350000) |
| Indonesia | 1990 | Female | 15 to 19 | 2.3%<br>(1.3-3.8%)             | 98%<br>(96-99%)          | 0.092<br>(0.046-0.16)                       | 0.54%<br>(0.35-0.83%)                | 0.61%<br>(0.32-1.1%)                | 80<br>(41-140)       | 9000<br>(5700-14000)      |
| Indonesia | 1990 | Female | 20 to 24 | 2.8%<br>(1.5-4.7%)             | 97%<br>(95-99%)          | 0.12<br>(0.06-0.21)                         | 0.96%<br>(0.62-1.4%)                 | 0.92%<br>(0.46-1.5%)                | 150<br>(76-250)      | 17000<br>(11000-25000)    |
| Indonesia | 1990 | Female | 25 to 29 | 3.1%<br>(1.7-4.9%)             | 97%<br>(95-98%)          | 0.14<br>(0.073-0.23)                        | 1.1%<br>(0.78-1.6%)                  | 1.2%<br>(0.66-1.9%)                 | 190<br>(100-300)     | 19000<br>(12000-27000)    |
| Indonesia | 1990 | Female | 30 to 34 | 3.4%<br>(1.8-5.5%)             | 97%<br>(94-98%)          | 0.16<br>(0.084-0.26)                        | 1.2%<br>(0.88-1.8%)                  | 1.4%<br>(0.92-2.2%)                 | 240<br>(150-360)     | 19000<br>(13000-28000)    |
| Indonesia | 1990 | Female | 35 to 39 | 3.7%<br>(1.9-5.9%)             | 96%<br>(94-98%)          | 0.19<br>(0.096-0.3)                         | 1.5%<br>(1.1-2.2%)                   | 2%<br>(1.3-3%)                      | 330<br>(210-480)     | 21000<br>(14000-29000)    |
| Indonesia | 1990 | Female | 40 to 44 | 3.7%<br>(2.1-6.1%)             | 96%<br>(94-98%)          | 0.22<br>(0.11-0.36)                         | 1.7%<br>(1.2-2.4%)                   | 2.3%<br>(1.6-3.4%)                  | 400<br>(270-590)     | 22000<br>(15000-31000)    |
| Indonesia | 1990 | Female | 45 to 49 | 3.7%<br>(1.9-5.8%)             | 96%<br>(94-98%)          | 0.25<br>(0.12-0.42)                         | 1.9%<br>(1.3-2.8%)                   | 2.5%<br>(1.7-3.8%)                  | 570<br>(370-860)     | 26000<br>(18000-39000)    |
| Indonesia | 1990 | Female | 50 to 54 | 3.7%<br>(2.1-6.2%)             | 96%<br>(94-98%)          | 0.25<br>(0.13-0.43)                         | 2.1%<br>(1.4-3%)                     | 2.7%<br>(1.8-4%)                    | 830<br>(550-1200)    | 32000<br>(22000-48000)    |
| Indonesia | 1990 | Female | 55 to 59 | 3.7%<br>(2.1-6%)               | 96%<br>(94-98%)          | 0.24<br>(0.12-0.41)                         | 1.8%<br>(1.2-2.8%)                   | 2.4%<br>(1.5-3.6%)                  | 900<br>(570-1400)    | 30000<br>(19000-45000)    |
| Indonesia | 1990 | Female | 60 to 64 | 3.7%<br>(2-6.3%)               | 96%<br>(94-98%)          | 0.23<br>(0.11-0.43)                         | 1.8%<br>(1.1-2.8%)                   | 2.2%<br>(1.3-3.5%)                  | 1000<br>(600-1600)   | 28000<br>(17000-44000)    |

| Location  | Year | Sex    | Age      | Prevalence of current drinkers | Prevalence of abstainers | Population average of standard drinks daily | Percent of total attributable deaths | Percent of total attributable DALYs | Attributable deaths | Attributable DALYs        |
|-----------|------|--------|----------|--------------------------------|--------------------------|---------------------------------------------|--------------------------------------|-------------------------------------|---------------------|---------------------------|
| Indonesia | 1990 | Female | 65 to 69 | 3.7%<br>(2.1-5.8%)             | 96%<br>(94-98%)          | 0.22<br>(0.11-0.39)                         | 1.6%<br>(0.95-2.6%)                  | 2%<br>(1.1-3.1%)                    | 970<br>(580-1500)   | 22000<br>(13000-36000)    |
| Indonesia | 1990 | Female | 70 to 74 | 3.6%<br>(2.1-5.8%)             | 96%<br>(94-98%)          | 0.21<br>(0.098-0.37)                        | 1.5%<br>(0.82-2.4%)                  | 1.7%<br>(0.96-2.8%)                 | 960<br>(540-1600)   | 18000<br>(10000-29000)    |
| Indonesia | 1990 | Female | 75 to 79 | 3.5%<br>(2-5.9%)               | 96%<br>(94-98%)          | 0.2<br>(0.087-0.37)                         | 1.2%<br>(0.68-2.1%)                  | 1.4%<br>(0.79-2.4%)                 | 810<br>(440-1300)   | 12000<br>(6400-19000)     |
| Indonesia | 1990 | Female | 80 to 84 | 3.5%<br>(1.9-5.8%)             | 96%<br>(94-98%)          | 0.19<br>(0.091-0.34)                        | 1.2%<br>(0.65-2%)                    | 1.4%<br>(0.75-2.3%)                 | 570<br>(300-930)    | 6000<br>(3200-9700)       |
| Indonesia | 1990 | Female | 85 to 89 | 3.8%<br>(2.1-6.4%)             | 96%<br>(94-98%)          | 0.2<br>(0.093-0.37)                         | 1.1%<br>(0.55-1.9%)                  | 1.3%<br>(0.65-2.2%)                 | 300<br>(150-520)    | 2200<br>(1200-3900)       |
| Indonesia | 1990 | Female | 90 to 94 | 4.4%<br>(2.5-7.2%)             | 96%<br>(93-97%)          | 0.23<br>(0.1-0.43)                          | 0.96%<br>(0.46-1.8%)                 | 1.1%<br>(0.54-2.1%)                 | 96<br>(46-180)      | 500<br>(240-900)          |
| Indonesia | 1990 | Female | 95 plus  | 5.3%<br>(2.6-9.3%)             | 95%<br>(91-97%)          | 0.26<br>(0.098-0.52)                        | 1%<br>(0.42-1.9%)                    | 1.1%<br>(0.46-2.2%)                 | 24<br>(9.9-46)      | 84<br>(36-160)            |
| Indonesia | 1990 | Male   | All Ages | 6.6%<br>(5.4-8.1%)             | 93%<br>(92-95%)          | 0.061<br>(0.055-0.068)                      | 0.64%<br>(0.44-0.81%)                | 0.87%<br>(0.56-1.2%)                | 6200<br>(4000-8400) | 270000<br>(190000-350000) |
| Indonesia | 1990 | Male   | 15 to 19 | 5.6%<br>(3.3-9%)               | 94%<br>(91-97%)          | 0.027<br>(0.013-0.047)                      | 0.44%<br>(0.3-0.61%)                 | 0.32%<br>(0.11-0.55%)               | 47<br>(16-81)       | 7600<br>(4800-11000)      |
| Indonesia | 1990 | Male   | 20 to 24 | 8.8%<br>(4.9-14%)              | 91%<br>(86-95%)          | 0.068<br>(0.037-0.11)                       | 0.64%<br>(0.55-1.4%)                 | 0.64%<br>(0.18-1.2%)                | 130<br>(36-240)     | 19000<br>(11000-28000)    |
| Indonesia | 1990 | Male   | 25 to 29 | 10%<br>(5.8-16%)               | 90%<br>(84-94%)          | 0.1<br>(0.054-0.16)                         | 1.2%<br>(0.72-1.8%)                  | 1%<br>(0.3-1.8%)                    | 210<br>(60-360)     | 23000<br>(13000-35000)    |
| Indonesia | 1990 | Male   | 30 to 34 | 11%<br>(6.3-18%)               | 89%<br>(82-94%)          | 0.13<br>(0.073-0.2)                         | 1.7%<br>(1-2.3%)                     | 1.7%<br>(0.84-2.6%)                 | 360<br>(180-540)    | 29000<br>(17000-40000)    |
| Indonesia | 1990 | Male   | 35 to 39 | 12%<br>(6.9-19%)               | 88%<br>(81-93%)          | 0.15<br>(0.082-0.24)                        | 2.1%<br>(1.4-2.9%)                   | 2.5%<br>(1.4-3.6%)                  | 510<br>(290-750)    | 32000<br>(20000-44000)    |
| Indonesia | 1990 | Male   | 40 to 44 | 12%<br>(7-19%)                 | 88%<br>(81-93%)          | 0.15<br>(0.08-0.26)                         | 2.3%<br>(1.5-3%)                     | 2.8%<br>(1.8-3.9%)                  | 570<br>(370-790)    | 30000<br>(20000-40000)    |
| Indonesia | 1990 | Male   | 45 to 49 | 11%<br>(6-17%)                 | 89%<br>(83-94%)          | 0.14<br>(0.076-0.24)                        | 2.2%<br>(1.5-3%)                     | 2.8%<br>(1.8-3.8%)                  | 720<br>(460-990)    | 32000<br>(22000-43000)    |
| Indonesia | 1990 | Male   | 50 to 54 | 10%<br>(6.3-16%)               | 90%<br>(84-94%)          | 0.13<br>(0.066-0.21)                        | 1.9%<br>(1.3-2.6%)                   | 2.4%<br>(1.6-3.3%)                  | 820<br>(530-1100)   | 31000<br>(21000-42000)    |
| Indonesia | 1990 | Male   | 55 to 59 | 9.8%<br>(5.8-15%)              | 90%<br>(85-94%)          | 0.11<br>(0.056-0.18)                        | 1.5%<br>(0.97-2%)                    | 1.8%<br>(1.1-2.6%)                  | 730<br>(450-1000)   | 24000<br>(15000-33000)    |
| Indonesia | 1990 | Male   | 60 to 64 | 9.2%<br>(5.4-15%)              | 91%<br>(85-95%)          | 0.091<br>(0.044-0.16)                       | 1.2%<br>(0.7-1.7%)                   | 1.5%<br>(0.81-2.1%)                 | 690<br>(390-1000)   | 19000<br>(11000-28000)    |
| Indonesia | 1990 | Male   | 65 to 69 | 8.6%<br>(5.2-13%)              | 91%<br>(87-95%)          | 0.08<br>(0.042-0.13)                        | 0.88%<br>(0.48-1.3%)                 | 1%<br>(0.54-1.5%)                   | 510<br>(270-760)    | 12000<br>(6600-17000)     |
| Indonesia | 1990 | Male   | 70 to 74 | 7.5%<br>(4.7-12%)              | 92%<br>(88-95%)          | 0.066<br>(0.033-0.12)                       | 0.68%<br>(0.35-1%)                   | 0.78%<br>(0.38-1.2%)                | 390<br>(190-600)    | 7300<br>(3800-11000)      |
| Indonesia | 1990 | Male   | 75 to 79 | 6.5%<br>(3.8-10%)              | 94%<br>(90-96%)          | 0.054<br>(0.024-0.097)                      | 0.57%<br>(0.27-0.84%)                | 0.65%<br>(0.29-0.99%)               | 300<br>(140-460)    | 4400<br>(2100-6500)       |
| Indonesia | 1990 | Male   | 80 to 84 | 5.8%<br>(3.3-9%)               | 94%<br>(91-97%)          | 0.046<br>(0.022-0.08)                       | 0.46%<br>(0.2-0.69%)                 | 0.52%<br>(0.21-0.8%)                | 150<br>(61-230)     | 1600<br>(710-2500)        |

| Location  | Year | Sex    | Age      | Prevalence of current drinkers | Prevalence of abstainers | Population average of standard drinks daily | Percent of total attributable deaths | Percent of total attributable DALYs | Attributable deaths  | Attributable DALYs        |
|-----------|------|--------|----------|--------------------------------|--------------------------|---------------------------------------------|--------------------------------------|-------------------------------------|----------------------|---------------------------|
| Indonesia | 1990 | Male   | 85 to 89 | 5.6%<br>(3.2-8.9%)             | 94%<br>(91-97%)          | 0.043<br>(0.021-0.075)                      | 0.33%<br>(0.13-0.52%)                | 0.37%<br>(0.13-0.6%)                | 63<br>(22-100)       | 480<br>(190-760)          |
| Indonesia | 1990 | Male   | 90 to 94 | 6%<br>(3.6-9.6%)               | 94%<br>(90-96%)          | 0.043<br>(0.02-0.08)                        | 0.25%<br>(0.083-0.42%)               | 0.28%<br>(0.072-0.48%)              | 17<br>(4.5-30)       | 91<br>(30-160)            |
| Indonesia | 1990 | Male   | 95 plus  | 7.1%<br>(3.8-12%)              | 93%<br>(88-96%)          | 0.048<br>(0.019-0.092)                      | 0.22%<br>(0.048-0.4%)                | 0.23%<br>(0.021-0.44%)              | 3.5<br>(0.33-6.8)    | 14<br>(2.9-24)            |
| Indonesia | 1995 | Female | All Ages | 2.2%<br>(1.8-2.8%)             | 98%<br>(97-98%)          | 0.11<br>(0.1-0.12)                          | 0.84%<br>(0.69-1%)                   | 1.4%<br>(1-1.8%)                    | 9400<br>(7000-13000) | 300000<br>(250000-380000) |
| Indonesia | 1995 | Female | 15 to 19 | 2.2%<br>(1.2-3.6%)             | 98%<br>(96-99%)          | 0.1<br>(0.05-0.18)                          | 0.57%<br>(0.37-0.84%)                | 0.66%<br>(0.35-1.1%)                | 75<br>(40-130)       | 9000<br>(5800-13000)      |
| Indonesia | 1995 | Female | 20 to 24 | 2.5%<br>(1.3-4.2%)             | 97%<br>(96-99%)          | 0.13<br>(0.061-0.22)                        | 0.98%<br>(0.66-1.4%)                 | 0.95%<br>(0.51-1.5%)                | 130<br>(72-220)      | 17000<br>(11000-25000)    |
| Indonesia | 1995 | Female | 25 to 29 | 2.6%<br>(1.4-4.3%)             | 97%<br>(96-99%)          | 0.14<br>(0.072-0.22)                        | 1.1%<br>(0.77-1.5%)                  | 1.2%<br>(0.67-1.8%)                 | 170<br>(100-270)     | 18000<br>(13000-26000)    |
| Indonesia | 1995 | Female | 30 to 34 | 2.7%<br>(1.4-4.5%)             | 97%<br>(96-99%)          | 0.15<br>(0.076-0.24)                        | 1.2%<br>(0.85-1.6%)                  | 1.4%<br>(0.9-2%)                    | 220<br>(140-320)     | 19000<br>(14000-26000)    |
| Indonesia | 1995 | Female | 35 to 39 | 2.8%<br>(1.4-4.6%)             | 97%<br>(95-99%)          | 0.16<br>(0.082-0.27)                        | 1.4%<br>(1-1.9%)                     | 1.9%<br>(1.2-2.7%)                  | 330<br>(220-480)     | 22000<br>(16000-30000)    |
| Indonesia | 1995 | Female | 40 to 44 | 2.9%<br>(1.6-4.9%)             | 97%<br>(95-98%)          | 0.2<br>(0.1-0.33)                           | 1.6%<br>(1.1-2.2%)                   | 2.2%<br>(1.5-3.1%)                  | 410<br>(280-580)     | 23000<br>(16000-31000)    |
| Indonesia | 1995 | Female | 45 to 49 | 3.1%<br>(1.5-4.9%)             | 97%<br>(95-98%)          | 0.24<br>(0.12-0.42)                         | 1.8%<br>(1.2-2.6%)                   | 2.4%<br>(1.6-3.6%)                  | 530<br>(350-790)     | 25000<br>(17000-36000)    |
| Indonesia | 1995 | Female | 50 to 54 | 3.1%<br>(1.7-5.2%)             | 97%<br>(95-98%)          | 0.25<br>(0.13-0.43)                         | 2%<br>(1.3-2.9%)                     | 2.6%<br>(1.8-3.8%)                  | 800<br>(540-1200)    | 32000<br>(22000-46000)    |
| Indonesia | 1995 | Female | 55 to 59 | 3.1%<br>(1.7-5.1%)             | 97%<br>(95-98%)          | 0.24<br>(0.11-0.41)                         | 1.8%<br>(1.2-2.6%)                   | 2.3%<br>(1.5-3.4%)                  | 950<br>(620-1400)    | 32000<br>(21000-47000)    |
| Indonesia | 1995 | Female | 60 to 64 | 3.2%<br>(1.8-5.4%)             | 97%<br>(95-98%)          | 0.23<br>(0.11-0.43)                         | 1.7%<br>(1.1-2.7%)                   | 2.2%<br>(1.4-3.4%)                  | 1100<br>(720-1700)   | 32000<br>(20000-49000)    |
| Indonesia | 1995 | Female | 65 to 69 | 3.3%<br>(1.9-5.2%)             | 97%<br>(95-98%)          | 0.23<br>(0.11-0.41)                         | 1.7%<br>(1-2.6%)                     | 2%<br>(1.2-3.1%)                    | 1200<br>(750-1900)   | 28000<br>(17000-44000)    |
| Indonesia | 1995 | Female | 70 to 74 | 3.4%<br>(2-5.4%)               | 97%<br>(95-98%)          | 0.23<br>(0.11-0.4)                          | 1.5%<br>(0.9-2.5%)                   | 1.8%<br>(1.1-2.9%)                  | 1100<br>(670-1900)   | 21000<br>(12000-35000)    |
| Indonesia | 1995 | Female | 75 to 79 | 3.4%<br>(1.9-5.8%)             | 97%<br>(94-98%)          | 0.23<br>(0.1-0.42)                          | 1.4%<br>(0.77-2.2%)                  | 1.6%<br>(0.9-2.6%)                  | 970<br>(540-1600)    | 14000<br>(7700-23000)     |
| Indonesia | 1995 | Female | 80 to 84 | 3.5%<br>(1.9-5.8%)             | 96%<br>(94-98%)          | 0.23<br>(0.1-0.4)                           | 1.3%<br>(0.74-2.2%)                  | 1.6%<br>(0.87-2.6%)                 | 730<br>(400-1200)    | 7600<br>(4200-12000)      |
| Indonesia | 1995 | Female | 85 to 89 | 3.8%<br>(2.1-6.5%)             | 96%<br>(94-98%)          | 0.24<br>(0.11-0.43)                         | 1.2%<br>(0.63-2.1%)                  | 1.4%<br>(0.74-2.4%)                 | 430<br>(230-730)     | 3200<br>(1700-5500)       |
| Indonesia | 1995 | Female | 90 to 94 | 4.4%<br>(2.5-7%)               | 96%<br>(93-98%)          | 0.26<br>(0.11-0.5)                          | 1.1%<br>(0.55-1.9%)                  | 1.3%<br>(0.64-2.3%)                 | 150<br>(76-280)      | 790<br>(400-1400)         |
| Indonesia | 1995 | Female | 95 plus  | 5.3%<br>(2.6-9.2%)             | 95%<br>(91-97%)          | 0.3<br>(0.11-0.6)                           | 1.1%<br>(0.49-1.9%)                  | 1.3%<br>(0.56-2.3%)                 | 39<br>(17-68)        | 130<br>(59-240)           |
| Indonesia | 1995 | Male   | All Ages | 7.5%<br>(6-9.3%)               | 93%<br>(91-94%)          | 0.078<br>(0.07-0.086)                       | 0.81%<br>(0.61-0.99%)                | 1.1%<br>(0.76-1.4%)                 | 7700<br>(5300-9700)  | 330000<br>(250000-410000) |

| Location  | Year | Sex    | Age      | Prevalence of current drinkers | Prevalence of abstainers | Population average of standard drinks daily | Percent of total attributable deaths | Percent of total attributable DALYs | Attributable deaths   | Attributable DALYs        |
|-----------|------|--------|----------|--------------------------------|--------------------------|---------------------------------------------|--------------------------------------|-------------------------------------|-----------------------|---------------------------|
| Indonesia | 1995 | Male   | 15 to 19 | 8%<br>(4.8-13%)                | 92%<br>(87-95%)          | 0.045<br>(0.022-0.078)                      | 0.5%<br>(0.33-0.72%)                 | 0.42%<br>(0.16-0.72%)               | 61<br>(22-100)        | 8700<br>(5400-13000)      |
| Indonesia | 1995 | Male   | 20 to 24 | 13%<br>(7.4-19%)               | 87%<br>(81-93%)          | 0.11<br>(0.063-0.18)                        | 1.1%<br>(0.62-1.7%)                  | 0.9%<br>(0.27-1.6%)                 | 180<br>(51-320)       | 22000<br>(12000-34000)    |
| Indonesia | 1995 | Male   | 25 to 29 | 13%<br>(7.5-19%)               | 87%<br>(81-92%)          | 0.15<br>(0.081-0.23)                        | 1.5%<br>(0.83-2.2%)                  | 1.4%<br>(0.47-2.3%)                 | 280<br>(96-480)       | 28000<br>(15000-42000)    |
| Indonesia | 1995 | Male   | 30 to 34 | 12%<br>(6.9-19%)               | 88%<br>(81-93%)          | 0.16<br>(0.092-0.25)                        | 1.9%<br>(1.3-2.6%)                   | 2.1%<br>(1.2-3%)                    | 450<br>(250-650)      | 35000<br>(23000-47000)    |
| Indonesia | 1995 | Male   | 35 to 39 | 12%<br>(6.8-18%)               | 88%<br>(82-93%)          | 0.17<br>(0.095-0.28)                        | 2.3%<br>(1.6-3.1%)                   | 2.9%<br>(1.9-4%)                    | 680<br>(440-950)      | 42000<br>(29000-56000)    |
| Indonesia | 1995 | Male   | 40 to 44 | 11%<br>(6.3-17%)               | 89%<br>(83-94%)          | 0.16<br>(0.083-0.27)                        | 2.5%<br>(1.8-3.2%)                   | 3.2%<br>(2.2-4.2%)                  | 760<br>(530-1000)     | 39000<br>(28000-51000)    |
| Indonesia | 1995 | Male   | 45 to 49 | 9.3%<br>(4.9-15%)              | 91%<br>(85-95%)          | 0.14<br>(0.071-0.24)                        | 2.4%<br>(1.7-3.1%)                   | 3.1%<br>(2.2-4.1%)                  | 790<br>(550-1000)     | 35000<br>(25000-45000)    |
| Indonesia | 1995 | Male   | 50 to 54 | 8.2%<br>(4.9-13%)              | 92%<br>(87-95%)          | 0.12<br>(0.059-0.2)                         | 2.1%<br>(1.5-2.7%)                   | 2.7%<br>(1.9-3.4%)                  | 870<br>(630-1200)     | 34000<br>(24000-43000)    |
| Indonesia | 1995 | Male   | 55 to 59 | 7.5%<br>(4.4-12%)              | 93%<br>(88-96%)          | 0.094<br>(0.047-0.16)                       | 1.6%<br>(1.2-2.1%)                   | 2%<br>(1.4-2.7%)                    | 870<br>(600-1100)     | 29000<br>(20000-38000)    |
| Indonesia | 1995 | Male   | 60 to 64 | 7.3%<br>(4.2-12%)              | 93%<br>(88-96%)          | 0.083<br>(0.04-0.15)                        | 1.3%<br>(0.88-1.8%)                  | 1.6%<br>(1-2.2%)                    | 850<br>(550-1200)     | 24000<br>(16000-33000)    |
| Indonesia | 1995 | Male   | 65 to 69 | 7.3%<br>(4.3-11%)              | 93%<br>(89-96%)          | 0.078<br>(0.039-0.13)                       | 1%<br>(0.64-1.4%)                    | 1.2%<br>(0.73-1.6%)                 | 680<br>(420-950)      | 16000<br>(10000-22000)    |
| Indonesia | 1995 | Male   | 70 to 74 | 6.7%<br>(4.1-10%)              | 93%<br>(90-96%)          | 0.067<br>(0.034-0.12)                       | 0.78%<br>(0.48-1.1%)                 | 0.91%<br>(0.54-1.3%)                | 510<br>(310-750)      | 9600<br>(5800-14000)      |
| Indonesia | 1995 | Male   | 75 to 79 | 5.9%<br>(3.5-9.5%)             | 94%<br>(90-97%)          | 0.056<br>(0.025-0.1)                        | 0.66%<br>(0.36-0.92%)                | 0.76%<br>(0.39-1.1%)                | 360<br>(190-520)      | 5200<br>(2900-7400)       |
| Indonesia | 1995 | Male   | 80 to 84 | 5.4%<br>(3.1-8.3%)             | 95%<br>(92-97%)          | 0.049<br>(0.023-0.085)                      | 0.53%<br>(0.26-0.76%)                | 0.61%<br>(0.29-0.89%)               | 200<br>(93-290)       | 2100<br>(1000-3000)       |
| Indonesia | 1995 | Male   | 85 to 89 | 5.5%<br>(3-8.6%)               | 95%<br>(91-97%)          | 0.048<br>(0.023-0.084)                      | 0.38%<br>(0.18-0.56%)                | 0.43%<br>(0.19-0.66%)               | 91<br>(40-140)        | 690<br>(330-1000)         |
| Indonesia | 1995 | Male   | 90 to 94 | 6%<br>(3.5-9.3%)               | 94%<br>(91-96%)          | 0.049<br>(0.023-0.094)                      | 0.28%<br>(0.12-0.45%)                | 0.32%<br>(0.11-0.52%)               | 26<br>(9.4-43)        | 140<br>(56-220)           |
| Indonesia | 1995 | Male   | 95 plus  | 7%<br>(3.6-11%)                | 93%<br>(89-96%)          | 0.053<br>(0.021-0.1)                        | 0.27%<br>(0.092-0.44%)               | 0.28%<br>(0.065-0.49%)              | 5.3<br>(1.3-9.5)      | 20<br>(7.1-34)            |
| Indonesia | 2000 | Female | All Ages | 2.3%<br>(1.9-2.8%)             | 98%<br>(97-98%)          | 0.12<br>(0.12-0.13)                         | 0.99%<br>(0.81-1.2%)                 | 1.6%<br>(1.2-2.1%)                  | 12000<br>(8600-15000) | 360000<br>(290000-440000) |
| Indonesia | 2000 | Female | 15 to 19 | 2.2%<br>(1.2-3.6%)             | 98%<br>(96-99%)          | 0.11<br>(0.053-0.19)                        | 0.59%<br>(0.38-0.86%)                | 0.73%<br>(0.39-1.2%)                | 73<br>(39-120)        | 9000<br>(5900-13000)      |
| Indonesia | 2000 | Female | 20 to 24 | 2.6%<br>(1.3-4.3%)             | 97%<br>(96-99%)          | 0.14<br>(0.066-0.24)                        | 1%<br>(0.68-1.4%)                    | 1%<br>(0.56-1.7%)                   | 130<br>(70-220)       | 17000<br>(11000-24000)    |
| Indonesia | 2000 | Female | 25 to 29 | 2.7%<br>(1.5-4.4%)             | 97%<br>(96-99%)          | 0.15<br>(0.076-0.24)                        | 1.2%<br>(0.82-1.6%)                  | 1.3%<br>(0.73-2%)                   | 180<br>(100-270)      | 19000<br>(13000-27000)    |
| Indonesia | 2000 | Female | 30 to 34 | 2.7%<br>(1.4-4.5%)             | 97%<br>(96-99%)          | 0.16<br>(0.082-0.26)                        | 1.2%<br>(0.9-1.7%)                   | 1.5%<br>(0.97-2.2%)                 | 240<br>(160-360)      | 21000<br>(16000-29000)    |

| Location  | Year | Sex    | Age      | Prevalence of current drinkers | Prevalence of abstainers | Population average of standard drinks daily | Percent of total attributable deaths | Percent of total attributable DALYs | Attributable deaths  | Attributable DALYs        |
|-----------|------|--------|----------|--------------------------------|--------------------------|---------------------------------------------|--------------------------------------|-------------------------------------|----------------------|---------------------------|
| Indonesia | 2000 | Female | 35 to 39 | 2.8%<br>(1.4-4.6%)             | 97%<br>(95-99%)          | 0.18<br>(0.092-0.29)                        | 1.4%<br>(1-1.9%)                     | 1.9%<br>(1.3-2.8%)                  | 370<br>(250-540)     | 25000<br>(18000-34000)    |
| Indonesia | 2000 | Female | 40 to 44 | 3%<br>(1.6-4.9%)               | 97%<br>(95-98%)          | 0.21<br>(0.11-0.35)                         | 1.6%<br>(1.2-2.2%)                   | 2.3%<br>(1.6-3.2%)                  | 520<br>(370-730)     | 29000<br>(21000-39000)    |
| Indonesia | 2000 | Female | 45 to 49 | 3.1%<br>(1.5-4.9%)             | 97%<br>(95-98%)          | 0.26<br>(0.13-0.45)                         | 1.8%<br>(1.3-2.6%)                   | 2.5%<br>(1.7-3.7%)                  | 640<br>(440-940)     | 30000<br>(21000-43000)    |
| Indonesia | 2000 | Female | 50 to 54 | 3.2%<br>(1.8-5.3%)             | 97%<br>(95-98%)          | 0.27<br>(0.13-0.47)                         | 2%<br>(1.4-2.9%)                     | 2.7%<br>(1.8-3.9%)                  | 850<br>(580-1200)    | 33000<br>(23000-48000)    |
| Indonesia | 2000 | Female | 55 to 59 | 3.2%<br>(1.8-5.2%)             | 97%<br>(95-98%)          | 0.26<br>(0.12-0.45)                         | 1.9%<br>(1.3-2.7%)                   | 2.4%<br>(1.6-3.6%)                  | 1100<br>(700-1500)   | 35000<br>(24000-51000)    |
| Indonesia | 2000 | Female | 60 to 64 | 3.3%<br>(1.7-5.6%)             | 97%<br>(94-98%)          | 0.25<br>(0.12-0.47)                         | 1.8%<br>(1.2-2.8%)                   | 2.3%<br>(1.5-3.5%)                  | 1300<br>(860-2000)   | 38000<br>(24000-58000)    |
| Indonesia | 2000 | Female | 65 to 69 | 3.4%<br>(1.8-5.4%)             | 97%<br>(95-98%)          | 0.25<br>(0.12-0.44)                         | 1.8%<br>(1.1-2.7%)                   | 2.1%<br>(1.3-3.3%)                  | 1500<br>(960-2400)   | 36000<br>(22000-55000)    |
| Indonesia | 2000 | Female | 70 to 74 | 3.4%<br>(2-5.5%)               | 97%<br>(95-98%)          | 0.25<br>(0.12-0.45)                         | 1.6%<br>(0.98-2.6%)                  | 2%<br>(1.2-3.1%)                    | 1500<br>(920-2400)   | 29000<br>(17000-45000)    |
| Indonesia | 2000 | Female | 75 to 79 | 3.5%<br>(1.9-5.9%)             | 97%<br>(94-98%)          | 0.24<br>(0.11-0.45)                         | 1.5%<br>(0.83-2.4%)                  | 1.7%<br>(0.97-2.8%)                 | 1300<br>(720-2100)   | 18000<br>(10000-29000)    |
| Indonesia | 2000 | Female | 80 to 84 | 3.6%<br>(1.9-6.1%)             | 96%<br>(94-98%)          | 0.25<br>(0.11-0.44)                         | 1.4%<br>(0.82-2.3%)                  | 1.7%<br>(0.96-2.7%)                 | 950<br>(540-1500)    | 9900<br>(5600-16000)      |
| Indonesia | 2000 | Female | 85 to 89 | 3.9%<br>(2.2-6.6%)             | 96%<br>(93-98%)          | 0.26<br>(0.12-0.47)                         | 1.3%<br>(0.71-2.2%)                  | 1.5%<br>(0.84-2.6%)                 | 550<br>(300-910)     | 4100<br>(2300-6700)       |
| Indonesia | 2000 | Female | 90 to 94 | 4.5%<br>(2.6-7.2%)             | 95%<br>(93-97%)          | 0.29<br>(0.13-0.55)                         | 1.2%<br>(0.63-2%)                    | 1.4%<br>(0.74-2.4%)                 | 210<br>(110-370)     | 1100<br>(580-1900)        |
| Indonesia | 2000 | Female | 95 plus  | 5.4%<br>(2.7-9.7%)             | 95%<br>(90-97%)          | 0.33<br>(0.13-0.66)                         | 1.2%<br>(0.57-2.1%)                  | 1.4%<br>(0.64-2.5%)                 | 58<br>(27-110)       | 200<br>(97-360)           |
| Indonesia | 2000 | Male   | All Ages | 7.7%<br>(6.2-9.6%)             | 92%<br>(90-94%)          | 0.085<br>(0.075-0.094)                      | 0.97%<br>(0.75-1.2%)                 | 1.2%<br>(0.92-1.5%)                 | 9100<br>(6700-11000) | 390000<br>(300000-470000) |
| Indonesia | 2000 | Male   | 15 to 19 | 8%<br>(4.8-12%)                | 92%<br>(88-95%)          | 0.046<br>(0.023-0.081)                      | 0.53%<br>(0.35-0.74%)                | 0.46%<br>(0.19-0.77%)               | 68<br>(28-110)       | 9500<br>(6100-14000)      |
| Indonesia | 2000 | Male   | 20 to 24 | 13%<br>(7.3-19%)               | 87%<br>(81-93%)          | 0.12<br>(0.065-0.19)                        | 1.2%<br>(0.69-1.8%)                  | 0.99%<br>(0.35-1.7%)                | 200<br>(76-360)      | 25000<br>(14000-37000)    |
| Indonesia | 2000 | Male   | 25 to 29 | 13%<br>(7.4-19%)               | 87%<br>(81-93%)          | 0.15<br>(0.082-0.24)                        | 1.5%<br>(0.94-2.2%)                  | 1.5%<br>(0.58-2.4%)                 | 320<br>(130-530)     | 31000<br>(18000-46000)    |
| Indonesia | 2000 | Male   | 30 to 34 | 12%<br>(6.8-19%)               | 88%<br>(81-93%)          | 0.17<br>(0.094-0.26)                        | 2%<br>(1.4-2.6%)                     | 2.2%<br>(1.4-3.1%)                  | 530<br>(330-750)     | 41000<br>(28000-54000)    |
| Indonesia | 2000 | Male   | 35 to 39 | 12%<br>(7-18%)                 | 88%<br>(82-93%)          | 0.18<br>(0.098-0.28)                        | 2.5%<br>(1.8-3.2%)                   | 3.1%<br>(2.1-4.1%)                  | 810<br>(550-1100)    | 49000<br>(35000-65000)    |
| Indonesia | 2000 | Male   | 40 to 44 | 11%<br>(6.4-17%)               | 89%<br>(83-94%)          | 0.17<br>(0.088-0.27)                        | 2.6%<br>(2-3.3%)                     | 3.4%<br>(2.5-4.4%)                  | 990<br>(730-1300)    | 51000<br>(39000-66000)    |
| Indonesia | 2000 | Male   | 45 to 49 | 9.3%<br>(5-14%)                | 91%<br>(86-95%)          | 0.14<br>(0.074-0.24)                        | 2.5%<br>(1.9-3.3%)                   | 3.3%<br>(2.3-4.3%)                  | 1000<br>(750-1400)   | 46000<br>(34000-60000)    |
| Indonesia | 2000 | Male   | 50 to 54 | 8.1%<br>(4.8-13%)              | 92%<br>(87-95%)          | 0.12<br>(0.06-0.21)                         | 2.2%<br>(1.6-2.8%)                   | 2.8%<br>(2.1-3.6%)                  | 960<br>(700-1200)    | 37000<br>(27000-46000)    |

| Location  | Year | Sex    | Age      | Prevalence of current drinkers | Prevalence of abstainers | Population average of standard drinks daily | Percent of total attributable deaths | Percent of total attributable DALYs | Attributable deaths   | Attributable DALYs        |
|-----------|------|--------|----------|--------------------------------|--------------------------|---------------------------------------------|--------------------------------------|-------------------------------------|-----------------------|---------------------------|
| Indonesia | 2000 | Male   | 55 to 59 | 7.5%<br>(4.4-11%)              | 93%<br>(89-96%)          | 0.097<br>(0.049-0.17)                       | 1.7%<br>(1.3-2.2%)                   | 2.2%<br>(1.5-2.8%)                  | 940<br>(680-1200)     | 31000<br>(23000-40000)    |
| Indonesia | 2000 | Male   | 60 to 64 | 7.3%<br>(4.2-12%)              | 93%<br>(88-96%)          | 0.086<br>(0.041-0.16)                       | 1.4%<br>(0.97-1.9%)                  | 1.7%<br>(1.1-2.3%)                  | 990<br>(660-1300)     | 28000<br>(19000-37000)    |
| Indonesia | 2000 | Male   | 65 to 69 | 7.3%<br>(4.3-11%)              | 93%<br>(89-96%)          | 0.08<br>(0.042-0.13)                        | 1%<br>(0.68-1.4%)                    | 1.3%<br>(0.78-1.7%)                 | 800<br>(510-1100)     | 19000<br>(12000-25000)    |
| Indonesia | 2000 | Male   | 70 to 74 | 6.8%<br>(4.1-11%)              | 93%<br>(89-96%)          | 0.07<br>(0.035-0.12)                        | 0.82%<br>(0.53-1.2%)                 | 0.96%<br>(0.61-1.4%)                | 630<br>(390-890)      | 12000<br>(7600-17000)     |
| Indonesia | 2000 | Male   | 75 to 79 | 5.9%<br>(3.4-9.6%)             | 94%<br>(90-97%)          | 0.058<br>(0.026-0.1)                        | 0.69%<br>(0.41-0.94%)                | 0.81%<br>(0.47-1.1%)                | 430<br>(250-600)      | 6200<br>(3700-8500)       |
| Indonesia | 2000 | Male   | 80 to 84 | 5.5%<br>(3.1-8.6%)             | 94%<br>(91-97%)          | 0.052<br>(0.024-0.089)                      | 0.56%<br>(0.3-0.78%)                 | 0.64%<br>(0.33-0.91%)               | 220<br>(110-320)      | 2400<br>(1300-3300)       |
| Indonesia | 2000 | Male   | 85 to 89 | 5.5%<br>(3.1-8.6%)             | 95%<br>(91-97%)          | 0.05<br>(0.024-0.088)                       | 0.41%<br>(0.21-0.58%)                | 0.46%<br>(0.23-0.69%)               | 110<br>(52-160)       | 810<br>(420-1200)         |
| Indonesia | 2000 | Male   | 90 to 94 | 6%<br>(3.5-9.4%)               | 94%<br>(91-96%)          | 0.052<br>(0.023-0.096)                      | 0.3%<br>(0.14-0.45%)                 | 0.34%<br>(0.14-0.53%)               | 34<br>(14-53)         | 180<br>(84-280)           |
| Indonesia | 2000 | Male   | 95 plus  | 7.1%<br>(3.8-12%)              | 93%<br>(88-96%)          | 0.056<br>(0.022-0.11)                       | 0.28%<br>(0.11-0.45%)                | 0.29%<br>(0.078-0.5%)               | 7.2<br>(2-12)         | 28<br>(10-45)             |
| Indonesia | 2005 | Female | All Ages | 2.4%<br>(1.9-3%)               | 98%<br>(97-98%)          | 0.14<br>(0.13-0.15)                         | 1.1%<br>(0.89-1.3%)                  | 1.7%<br>(1.3-2.2%)                  | 12000<br>(9000-16000) | 370000<br>(300000-450000) |
| Indonesia | 2005 | Female | 15 to 19 | 2.3%<br>(1.3-3.7%)             | 98%<br>(96-99%)          | 0.12<br>(0.056-0.2)                         | 0.59%<br>(0.39-0.85%)                | 0.75%<br>(0.4-1.3%)                 | 63<br>(34-110)        | 8300<br>(5500-12000)      |
| Indonesia | 2005 | Female | 20 to 24 | 2.6%<br>(1.4-4.3%)             | 97%<br>(96-99%)          | 0.15<br>(0.069-0.25)                        | 1%<br>(0.7-1.4%)                     | 1%<br>(0.55-1.7%)                   | 110<br>(59-180)       | 16000<br>(10000-22000)    |
| Indonesia | 2005 | Female | 25 to 29 | 2.7%<br>(1.4-4.4%)             | 97%<br>(96-99%)          | 0.16<br>(0.083-0.26)                        | 1.1%<br>(0.83-1.5%)                  | 1.2%<br>(0.73-1.9%)                 | 160<br>(94-250)       | 19000<br>(13000-26000)    |
| Indonesia | 2005 | Female | 30 to 34 | 2.8%<br>(1.5-4.7%)             | 97%<br>(95-99%)          | 0.17<br>(0.088-0.28)                        | 1.2%<br>(0.88-1.6%)                  | 1.4%<br>(0.96-2.1%)                 | 230<br>(150-330)      | 21000<br>(15000-28000)    |
| Indonesia | 2005 | Female | 35 to 39 | 2.9%<br>(1.5-4.8%)             | 97%<br>(95-99%)          | 0.19<br>(0.098-0.31)                        | 1.4%<br>(1-1.8%)                     | 1.9%<br>(1.3-2.6%)                  | 370<br>(260-520)      | 26000<br>(19000-34000)    |
| Indonesia | 2005 | Female | 40 to 44 | 3.1%<br>(1.8-5%)               | 97%<br>(95-98%)          | 0.23<br>(0.12-0.37)                         | 1.6%<br>(1.2-2.1%)                   | 2.2%<br>(1.6-3.1%)                  | 550<br>(390-760)      | 31000<br>(23000-42000)    |
| Indonesia | 2005 | Female | 45 to 49 | 3.2%<br>(1.6-5.1%)             | 97%<br>(95-98%)          | 0.27<br>(0.13-0.47)                         | 1.8%<br>(1.3-2.5%)                   | 2.5%<br>(1.7-3.6%)                  | 730<br>(500-1100)     | 35000<br>(24000-48000)    |
| Indonesia | 2005 | Female | 50 to 54 | 3.3%<br>(1.8-5.5%)             | 97%<br>(95-98%)          | 0.29<br>(0.14-0.49)                         | 2%<br>(1.4-2.8%)                     | 2.6%<br>(1.8-3.7%)                  | 960<br>(660-1400)     | 38000<br>(26000-54000)    |
| Indonesia | 2005 | Female | 55 to 59 | 3.3%<br>(1.8-5.4%)             | 97%<br>(95-98%)          | 0.27<br>(0.13-0.48)                         | 1.8%<br>(1.2-2.7%)                   | 2.4%<br>(1.6-3.5%)                  | 1100<br>(720-1500)    | 36000<br>(25000-52000)    |
| Indonesia | 2005 | Female | 60 to 64 | 3.4%<br>(1.8-5.8%)             | 97%<br>(94-98%)          | 0.27<br>(0.13-0.5)                          | 1.8%<br>(1.1-2.7%)                   | 2.2%<br>(1.4-3.4%)                  | 1300<br>(810-1900)    | 36000<br>(23000-54000)    |
| Indonesia | 2005 | Female | 65 to 69 | 3.5%<br>(2-5.6%)               | 96%<br>(94-98%)          | 0.27<br>(0.13-0.47)                         | 1.7%<br>(1.1-2.7%)                   | 2.1%<br>(1.3-3.3%)                  | 1500<br>(930-2300)    | 35000<br>(22000-54000)    |
| Indonesia | 2005 | Female | 70 to 74 | 3.6%<br>(2.1-5.8%)             | 96%<br>(94-98%)          | 0.27<br>(0.13-0.48)                         | 1.6%<br>(0.97-2.6%)                  | 2%<br>(1.2-3.1%)                    | 1600<br>(960-2500)    | 30000<br>(18000-47000)    |



| Location  | Year | Sex    | Age      | Prevalence of current drinkers | Prevalence of abstainers | Population average of standard drinks daily | Percent of total attributable deaths | Percent of total attributable DALYs | Attributable deaths   | Attributable DALYs        |
|-----------|------|--------|----------|--------------------------------|--------------------------|---------------------------------------------|--------------------------------------|-------------------------------------|-----------------------|---------------------------|
| Indonesia | 2005 | Female | 75 to 79 | 3.6%<br>(2-6.1%)               | 96%<br>(94-98%)          | 0.26<br>(0.12-0.48)                         | 1.5%<br>(0.84-2.4%)                  | 1.7%<br>(0.98-2.8%)                 | 1300<br>(750-2100)    | 19000<br>(11000-31000)    |
| Indonesia | 2005 | Female | 80 to 84 | 3.7%<br>(2-6.1%)               | 96%<br>(94-98%)          | 0.26<br>(0.12-0.46)                         | 1.4%<br>(0.85-2.3%)                  | 1.7%<br>(1-2.7%)                    | 1100<br>(650-1700)    | 12000<br>(6800-18000)     |
| Indonesia | 2005 | Female | 85 to 89 | 4%<br>(2.2-6.7%)               | 96%<br>(93-98%)          | 0.28<br>(0.13-0.51)                         | 1.3%<br>(0.75-2.2%)                  | 1.6%<br>(0.88-2.6%)                 | 630<br>(360-1100)     | 4700<br>(2700-7900)       |
| Indonesia | 2005 | Female | 90 to 94 | 4.7%<br>(2.7-7.6%)             | 95%<br>(92-97%)          | 0.31<br>(0.14-0.59)                         | 1.2%<br>(0.66-2.1%)                  | 1.4%<br>(0.78-2.5%)                 | 240<br>(130-420)      | 1200<br>(680-2100)        |
| Indonesia | 2005 | Female | 95 plus  | 5.6%<br>(2.7-9.9%)             | 94%<br>(90-97%)          | 0.35<br>(0.14-0.7)                          | 1.2%<br>(0.6-2.2%)                   | 1.4%<br>(0.67-2.5%)                 | 72<br>(34-130)        | 250<br>(120-440)          |
| Indonesia | 2005 | Male   | All Ages | 7.6%<br>(6.2-9.4%)             | 92%<br>(91-94%)          | 0.084<br>(0.074-0.094)                      | 1.1%<br>(0.88-1.3%)                  | 1.4%<br>(1-1.6%)                    | 10000<br>(7900-12000) | 440000<br>(350000-520000) |
| Indonesia | 2005 | Male   | 15 to 19 | 7.8%<br>(4.6-12%)              | 92%<br>(88-95%)          | 0.044<br>(0.021-0.078)                      | 0.55%<br>(0.38-0.76%)                | 0.5%<br>(0.23-0.8%)                 | 70<br>(32-110)        | 9600<br>(6400-14000)      |
| Indonesia | 2005 | Male   | 20 to 24 | 12%<br>(7.3-19%)               | 88%<br>(81-93%)          | 0.11<br>(0.06-0.18)                         | 1.2%<br>(0.77-1.7%)                  | 1%<br>(0.45-1.7%)                   | 210<br>(91-350)       | 25000<br>(15000-36000)    |
| Indonesia | 2005 | Male   | 25 to 29 | 13%<br>(7.4-19%)               | 87%<br>(81-93%)          | 0.15<br>(0.08-0.24)                         | 1.6%<br>(1-2.1%)                     | 1.5%<br>(0.67-2.3%)                 | 340<br>(150-530)      | 33000<br>(21000-47000)    |
| Indonesia | 2005 | Male   | 30 to 34 | 12%<br>(6.8-19%)               | 88%<br>(81-93%)          | 0.16<br>(0.091-0.26)                        | 2%<br>(1.5-2.6%)                     | 2.3%<br>(1.5-3.1%)                  | 580<br>(380-790)      | 44000<br>(31000-57000)    |
| Indonesia | 2005 | Male   | 35 to 39 | 12%<br>(6.8-18%)               | 88%<br>(82-93%)          | 0.17<br>(0.095-0.27)                        | 2.5%<br>(1.9-3.2%)                   | 3.1%<br>(2.2-4.1%)                  | 910<br>(650-1200)     | 56000<br>(41000-72000)    |
| Indonesia | 2005 | Male   | 40 to 44 | 11%<br>(6.2-17%)               | 89%<br>(83-94%)          | 0.16<br>(0.085-0.26)                        | 2.6%<br>(2.1-3.3%)                   | 3.4%<br>(2.6-4.3%)                  | 1100<br>(860-1400)    | 59000<br>(45000-73000)    |
| Indonesia | 2005 | Male   | 45 to 49 | 9.1%<br>(4.8-14%)              | 91%<br>(86-95%)          | 0.14<br>(0.072-0.23)                        | 2.6%<br>(1.9-3.3%)                   | 3.4%<br>(2.5-4.2%)                  | 1300<br>(940-1600)    | 56000<br>(42000-71000)    |
| Indonesia | 2005 | Male   | 50 to 54 | 8%<br>(4.7-13%)                | 92%<br>(87-95%)          | 0.11<br>(0.059-0.19)                        | 2.2%<br>(1.7-2.8%)                   | 2.9%<br>(2.2-3.6%)                  | 1200<br>(920-1500)    | 47000<br>(36000-59000)    |
| Indonesia | 2005 | Male   | 55 to 59 | 7.4%<br>(4.4-12%)              | 93%<br>(88-96%)          | 0.095<br>(0.048-0.16)                       | 1.7%<br>(1.3-2.2%)                   | 2.2%<br>(1.6-2.8%)                  | 1100<br>(820-1400)    | 37000<br>(28000-46000)    |
| Indonesia | 2005 | Male   | 60 to 64 | 7.3%<br>(4.2-12%)              | 93%<br>(88-96%)          | 0.084<br>(0.04-0.15)                        | 1.4%<br>(1-1.8%)                     | 1.7%<br>(1.2-2.3%)                  | 1000<br>(720-1300)    | 29000<br>(20000-37000)    |
| Indonesia | 2005 | Male   | 65 to 69 | 7.2%<br>(4.3-11%)              | 93%<br>(89-96%)          | 0.078<br>(0.041-0.13)                       | 1%<br>(0.71-1.4%)                    | 1.3%<br>(0.84-1.6%)                 | 830<br>(570-1100)     | 19000<br>(14000-26000)    |
| Indonesia | 2005 | Male   | 70 to 74 | 6.6%<br>(4.1-10%)              | 93%<br>(90-96%)          | 0.067<br>(0.032-0.12)                       | 0.81%<br>(0.54-1.1%)                 | 0.97%<br>(0.63-1.3%)                | 670<br>(440-920)      | 12000<br>(8400-17000)     |
| Indonesia | 2005 | Male   | 75 to 79 | 5.8%<br>(3.3-9.4%)             | 94%<br>(91-97%)          | 0.055<br>(0.025-0.1)                        | 0.71%<br>(0.44-0.94%)                | 0.84%<br>(0.5-1.1%)                 | 480<br>(280-640)      | 6800<br>(4200-9100)       |
| Indonesia | 2005 | Male   | 80 to 84 | 5.3%<br>(3-8.3%)               | 95%<br>(92-97%)          | 0.048<br>(0.023-0.082)                      | 0.59%<br>(0.35-0.8%)                 | 0.7%<br>(0.39-0.94%)                | 280<br>(160-390)      | 3000<br>(1700-4100)       |
| Indonesia | 2005 | Male   | 85 to 89 | 5.2%<br>(3-8.2%)               | 95%<br>(92-97%)          | 0.046<br>(0.022-0.081)                      | 0.43%<br>(0.23-0.58%)                | 0.49%<br>(0.27-0.68%)               | 130<br>(69-180)       | 990<br>(540-1300)         |
| Indonesia | 2005 | Male   | 90 to 94 | 5.7%<br>(3.3-9%)               | 94%<br>(91-97%)          | 0.047<br>(0.022-0.088)                      | 0.32%<br>(0.16-0.46%)                | 0.36%<br>(0.17-0.53%)               | 41<br>(19-61)         | 220<br>(110-320)          |

| Location  | Year | Sex    | Age      | Prevalence of current drinkers | Prevalence of abstainers | Population average of standard drinks daily | Percent of total attributable deaths | Percent of total attributable DALYs | Attributable deaths   | Attributable DALYs        |
|-----------|------|--------|----------|--------------------------------|--------------------------|---------------------------------------------|--------------------------------------|-------------------------------------|-----------------------|---------------------------|
| Indonesia | 2005 | Male   | 95 plus  | 6.8%<br>(3.6-11%)              | 93%<br>(89-96%)          | 0.052<br>(0.02-0.1)                         | 0.29%<br>(0.13-0.44%)                | 0.3%<br>(0.1-0.47%)                 | 9.7<br>(3.3-15)       | 37<br>(16-55)             |
| Indonesia | 2010 | Female | All Ages | 3%<br>(2.4-3.7%)               | 97%<br>(96-98%)          | 0.17<br>(0.15-0.18)                         | 1.2%<br>(0.95-1.4%)                  | 1.7%<br>(1.3-2.2%)                  | 12000<br>(9300-16000) | 390000<br>(320000-480000) |
| Indonesia | 2010 | Female | 15 to 19 | 2.6%<br>(1.5-4.3%)             | 97%<br>(96-99%)          | 0.12<br>(0.06-0.23)                         | 0.59%<br>(0.39-0.86%)                | 0.76%<br>(0.4-1.3%)                 | 54<br>(29-96)         | 7600<br>(4900-11000)      |
| Indonesia | 2010 | Female | 20 to 24 | 3.2%<br>(1.7-5.2%)             | 97%<br>(95-98%)          | 0.17<br>(0.078-0.3)                         | 1.1%<br>(0.73-1.5%)                  | 1.1%<br>(0.58-1.9%)                 | 98<br>(51-170)        | 15000<br>(9900-22000)     |
| Indonesia | 2010 | Female | 25 to 29 | 3.5%<br>(1.9-5.5%)             | 97%<br>(94-98%)          | 0.19<br>(0.095-0.31)                        | 1.2%<br>(0.86-1.6%)                  | 1.3%<br>(0.76-2.1%)                 | 160<br>(90-250)       | 20000<br>(14000-28000)    |
| Indonesia | 2010 | Female | 30 to 34 | 3.7%<br>(2-6.1%)               | 96%<br>(94-98%)          | 0.21<br>(0.11-0.34)                         | 1.3%<br>(0.93-1.7%)                  | 1.6%<br>(1-2.3%)                    | 230<br>(150-330)      | 23000<br>(16000-31000)    |
| Indonesia | 2010 | Female | 35 to 39 | 4.1%<br>(2.1-6.6%)             | 96%<br>(93-98%)          | 0.24<br>(0.13-0.39)                         | 1.5%<br>(1.1-2%)                     | 2.1%<br>(1.4-2.9%)                  | 410<br>(280-580)      | 29000<br>(21000-40000)    |
| Indonesia | 2010 | Female | 40 to 44 | 4.1%<br>(2.4-6.8%)             | 96%<br>(93-98%)          | 0.28<br>(0.15-0.45)                         | 1.7%<br>(1.2-2.3%)                   | 2.4%<br>(1.7-3.3%)                  | 630<br>(440-870)      | 36000<br>(26000-49000)    |
| Indonesia | 2010 | Female | 45 to 49 | 4.1%<br>(2.1-6.4%)             | 96%<br>(94-98%)          | 0.32<br>(0.16-0.53)                         | 1.9%<br>(1.3-2.6%)                   | 2.6%<br>(1.8-3.8%)                  | 880<br>(600-1300)     | 42000<br>(29000-59000)    |
| Indonesia | 2010 | Female | 50 to 54 | 4.1%<br>(2.3-6.8%)             | 96%<br>(93-98%)          | 0.33<br>(0.17-0.55)                         | 2%<br>(1.4-2.8%)                     | 2.7%<br>(1.9-3.9%)                  | 1100<br>(770-1600)    | 46000<br>(32000-65000)    |
| Indonesia | 2010 | Female | 55 to 59 | 4.1%<br>(2.3-6.6%)             | 96%<br>(93-98%)          | 0.32<br>(0.16-0.54)                         | 1.9%<br>(1.2-2.7%)                   | 2.4%<br>(1.6-3.6%)                  | 1100<br>(730-1600)    | 38000<br>(25000-55000)    |
| Indonesia | 2010 | Female | 60 to 64 | 4.1%<br>(2.3-7%)               | 96%<br>(93-98%)          | 0.3<br>(0.14-0.55)                          | 1.8%<br>(1.1-2.7%)                   | 2.3%<br>(1.4-3.4%)                  | 1200<br>(730-1900)    | 35000<br>(21000-53000)    |
| Indonesia | 2010 | Female | 65 to 69 | 4.1%<br>(2.3-6.4%)             | 96%<br>(94-98%)          | 0.29<br>(0.15-0.49)                         | 1.7%<br>(1-2.6%)                     | 2.1%<br>(1.3-3.2%)                  | 1400<br>(840-2100)    | 32000<br>(20000-50000)    |
| Indonesia | 2010 | Female | 70 to 74 | 4%<br>(2.4-6.4%)               | 96%<br>(94-98%)          | 0.27<br>(0.13-0.48)                         | 1.6%<br>(0.92-2.4%)                  | 1.9%<br>(1.1-2.9%)                  | 1600<br>(930-2400)    | 29000<br>(18000-45000)    |
| Indonesia | 2010 | Female | 75 to 79 | 3.9%<br>(2.2-6.5%)             | 96%<br>(94-98%)          | 0.26<br>(0.12-0.46)                         | 1.3%<br>(0.77-2.1%)                  | 1.6%<br>(0.91-2.6%)                 | 1300<br>(720-2000)    | 18000<br>(10000-30000)    |
| Indonesia | 2010 | Female | 80 to 84 | 3.9%<br>(2.1-6.3%)             | 96%<br>(94-98%)          | 0.26<br>(0.12-0.44)                         | 1.4%<br>(0.78-2.1%)                  | 1.6%<br>(0.92-2.5%)                 | 1100<br>(640-1800)    | 12000<br>(6700-19000)     |
| Indonesia | 2010 | Female | 85 to 89 | 4.2%<br>(2.3-7%)               | 96%<br>(93-98%)          | 0.27<br>(0.12-0.49)                         | 1.2%<br>(0.71-2.1%)                  | 1.5%<br>(0.83-2.5%)                 | 710<br>(400-1200)     | 5300<br>(3000-9000)       |
| Indonesia | 2010 | Female | 90 to 94 | 4.9%<br>(2.8-7.9%)             | 95%<br>(92-97%)          | 0.3<br>(0.13-0.58)                          | 1.1%<br>(0.61-2%)                    | 1.3%<br>(0.72-2.4%)                 | 270<br>(140-470)      | 1400<br>(750-2400)        |
| Indonesia | 2010 | Female | 95 plus  | 5.9%<br>(2.9-11%)              | 94%<br>(89-97%)          | 0.35<br>(0.13-0.7)                          | 1.2%<br>(0.55-2.1%)                  | 1.4%<br>(0.62-2.5%)                 | 78<br>(35-140)        | 270<br>(120-470)          |
| Indonesia | 2010 | Male   | All Ages | 7.1%<br>(5.8-8.6%)             | 93%<br>(91-94%)          | 0.073<br>(0.065-0.082)                      | 1.2%<br>(0.96-1.4%)                  | 1.4%<br>(1.1-1.7%)                  | 11000<br>(8600-13000) | 470000<br>(380000-550000) |
| Indonesia | 2010 | Male   | 15 to 19 | 5.3%<br>(3.1-8.4%)             | 95%<br>(92-97%)          | 0.026<br>(0.012-0.049)                      | 0.55%<br>(0.38-0.72%)                | 0.47%<br>(0.21-0.7%)                | 60<br>(27-90)         | 8800<br>(5900-12000)      |
| Indonesia | 2010 | Male   | 20 to 24 | 8.4%<br>(4.7-13%)              | 92%<br>(87-95%)          | 0.066<br>(0.034-0.11)                       | 1.1%<br>(0.81-1.5%)                  | 0.85%<br>(0.45-1.3%)                | 150<br>(83-240)       | 21000<br>(15000-30000)    |

| Location  | Year | Sex    | Age      | Prevalence of current drinkers | Prevalence of abstainers | Population average of standard drinks daily | Percent of total attributable deaths | Percent of total attributable DALYs | Attributable deaths   | Attributable DALYs        |
|-----------|------|--------|----------|--------------------------------|--------------------------|---------------------------------------------|--------------------------------------|-------------------------------------|-----------------------|---------------------------|
| Indonesia | 2010 | Male   | 25 to 29 | 9.9%<br>(5.5-15%)              | 90%<br>(85-94%)          | 0.1<br>(0.052-0.17)                         | 1.4%<br>(1-1.9%)                     | 1.3%<br>(0.66-1.8%)                 | 290<br>(150-420)      | 32000<br>(22000-43000)    |
| Indonesia | 2010 | Male   | 30 to 34 | 11%<br>(6.2-17%)               | 89%<br>(83-94%)          | 0.13<br>(0.072-0.2)                         | 1.9%<br>(1.4-2.4%)                   | 2.1%<br>(1.4-2.8%)                  | 530<br>(360-700)      | 43000<br>(32000-55000)    |
| Indonesia | 2010 | Male   | 35 to 39 | 12%<br>(6.6-18%)               | 88%<br>(82-93%)          | 0.15<br>(0.082-0.23)                        | 2.4%<br>(1.9-3%)                     | 3%<br>(2.2-3.8%)                    | 920<br>(670-1200)     | 58000<br>(45000-72000)    |
| Indonesia | 2010 | Male   | 40 to 44 | 11%<br>(6.8-18%)               | 89%<br>(82-93%)          | 0.15<br>(0.08-0.24)                         | 2.5%<br>(2-3%)                       | 3.3%<br>(2.6-4.1%)                  | 1200<br>(930-1500)    | 63000<br>(50000-77000)    |
| Indonesia | 2010 | Male   | 45 to 49 | 11%<br>(5.8-16%)               | 89%<br>(84-94%)          | 0.14<br>(0.076-0.23)                        | 2.5%<br>(1.9-3.1%)                   | 3.3%<br>(2.5-4.1%)                  | 1500<br>(1100-1800)   | 66000<br>(49000-82000)    |
| Indonesia | 2010 | Male   | 50 to 54 | 10%<br>(6-15%)                 | 90%<br>(85-94%)          | 0.13<br>(0.068-0.21)                        | 2.2%<br>(1.6-2.7%)                   | 2.8%<br>(2.1-3.6%)                  | 1500<br>(1100-2000)   | 59000<br>(45000-76000)    |
| Indonesia | 2010 | Male   | 55 to 59 | 9.4%<br>(5.6-15%)              | 91%<br>(85-94%)          | 0.11<br>(0.056-0.17)                        | 1.7%<br>(1.3-2.2%)                   | 2.2%<br>(1.6-2.7%)                  | 1300<br>(960-1700)    | 44000<br>(33000-55000)    |
| Indonesia | 2010 | Male   | 60 to 64 | 8.9%<br>(5.2-14%)              | 91%<br>(86-95%)          | 0.09<br>(0.045-0.16)                        | 1.4%<br>(0.95-1.8%)                  | 1.7%<br>(1.2-2.2%)                  | 1100<br>(720-1400)    | 30000<br>(20000-38000)    |
| Indonesia | 2010 | Male   | 65 to 69 | 8.3%<br>(4.9-13%)              | 92%<br>(87-95%)          | 0.079<br>(0.04-0.13)                        | 0.99%<br>(0.7-1.3%)                  | 1.2%<br>(0.83-1.6%)                 | 850<br>(590-1100)     | 20000<br>(14000-26000)    |
| Indonesia | 2010 | Male   | 70 to 74 | 7.2%<br>(4.5-11%)              | 93%<br>(89-95%)          | 0.064<br>(0.031-0.11)                       | 0.76%<br>(0.52-1%)                   | 0.91%<br>(0.61-1.2%)                | 690<br>(460-920)      | 13000<br>(8800-17000)     |
| Indonesia | 2010 | Male   | 75 to 79 | 6.1%<br>(3.6-9.9%)             | 94%<br>(90-96%)          | 0.051<br>(0.023-0.092)                      | 0.67%<br>(0.43-0.89%)                | 0.8%<br>(0.5-1.1%)                  | 500<br>(310-670)      | 7200<br>(4500-9600)       |
| Indonesia | 2010 | Male   | 80 to 84 | 5.4%<br>(3.1-8.4%)             | 95%<br>(92-97%)          | 0.044<br>(0.02-0.075)                       | 0.57%<br>(0.34-0.74%)                | 0.67%<br>(0.38-0.88%)               | 310<br>(180-420)      | 3300<br>(2000-4400)       |
| Indonesia | 2010 | Male   | 85 to 89 | 5.3%<br>(3-8.3%)               | 95%<br>(92-97%)          | 0.041<br>(0.02-0.072)                       | 0.41%<br>(0.24-0.54%)                | 0.47%<br>(0.27-0.64%)               | 160<br>(88-210)       | 1200<br>(700-1600)        |
| Indonesia | 2010 | Male   | 90 to 94 | 5.7%<br>(3.4-9%)               | 94%<br>(91-97%)          | 0.041<br>(0.019-0.077)                      | 0.3%<br>(0.16-0.42%)                 | 0.34%<br>(0.17-0.49%)               | 48<br>(24-69)         | 250<br>(140-360)          |
| Indonesia | 2010 | Male   | 95 plus  | 6.7%<br>(3.5-11%)              | 93%<br>(89-96%)          | 0.045<br>(0.018-0.091)                      | 0.28%<br>(0.13-0.41%)                | 0.29%<br>(0.11-0.45%)               | 11<br>(4.2-17)        | 42<br>(19-60)             |
| Indonesia | 2016 | Female | All Ages | 3.1%<br>(2.5-3.7%)             | 97%<br>(96-97%)          | 0.2<br>(0.15-0.24)                          | 1.3%<br>(1-1.6%)                     | 1.8%<br>(1.4-2.5%)                  | 13000<br>(9700-18000) | 420000<br>(330000-540000) |
| Indonesia | 2016 | Female | 15 to 19 | 2.6%<br>(1.5-4.3%)             | 97%<br>(96-98%)          | 0.14<br>(0.064-0.27)                        | 0.6%<br>(0.39-0.88%)                 | 0.81%<br>(0.41-1.5%)                | 54<br>(27-97)         | 7900<br>(5100-12000)      |
| Indonesia | 2016 | Female | 20 to 24 | 3.2%<br>(1.7-5.3%)             | 97%<br>(95-98%)          | 0.19<br>(0.082-0.37)                        | 1.1%<br>(0.76-1.6%)                  | 1.1%<br>(0.58-2%)                   | 89<br>(44-150)        | 15000<br>(9900-21000)     |
| Indonesia | 2016 | Female | 25 to 29 | 3.5%<br>(1.9-5.5%)             | 97%<br>(95-98%)          | 0.21<br>(0.097-0.36)                        | 1.2%<br>(0.88-1.7%)                  | 1.4%<br>(0.74-2.2%)                 | 130<br>(70-210)       | 18000<br>(12000-25000)    |
| Indonesia | 2016 | Female | 30 to 34 | 3.7%<br>(2-6.2%)               | 96%<br>(94-98%)          | 0.23<br>(0.11-0.4)                          | 1.3%<br>(0.92-1.7%)                  | 1.6%<br>(1-2.4%)                    | 210<br>(130-320)      | 23000<br>(16000-31000)    |
| Indonesia | 2016 | Female | 35 to 39 | 4.1%<br>(2.2-6.5%)             | 96%<br>(93-98%)          | 0.27<br>(0.13-0.45)                         | 1.5%<br>(1-2%)                       | 2.1%<br>(1.4-3%)                    | 380<br>(250-550)      | 29000<br>(21000-40000)    |
| Indonesia | 2016 | Female | 40 to 44 | 4.1%<br>(2.4-6.8%)             | 96%<br>(93-98%)          | 0.31<br>(0.16-0.52)                         | 1.6%<br>(1.2-2.2%)                   | 2.4%<br>(1.7-3.4%)                  | 610<br>(420-870)      | 37000<br>(26000-50000)    |

| Location  | Year | Sex    | Age      | Prevalence of current drinkers | Prevalence of abstainers | Population average of standard drinks daily | Percent of total attributable deaths | Percent of total attributable DALYs | Attributable deaths    | Attributable DALYs        |
|-----------|------|--------|----------|--------------------------------|--------------------------|---------------------------------------------|--------------------------------------|-------------------------------------|------------------------|---------------------------|
| Indonesia | 2016 | Female | 45 to 49 | 4.1%<br>(2.1-6.5%)             | 96%<br>(93-98%)          | 0.35<br>(0.18-0.6)                          | 1.8%<br>(1.3-2.6%)                   | 2.6%<br>(1.8-3.9%)                  | 910<br>(610-1300)      | 45000<br>(31000-64000)    |
| Indonesia | 2016 | Female | 50 to 54 | 4.1%<br>(2.3-6.8%)             | 96%<br>(93-98%)          | 0.37<br>(0.2-0.63)                          | 1.9%<br>(1.3-2.8%)                   | 2.7%<br>(1.8-3.9%)                  | 1200<br>(820-1800)     | 51000<br>(35000-73000)    |
| Indonesia | 2016 | Female | 55 to 59 | 4.2%<br>(2.3-6.7%)             | 96%<br>(93-98%)          | 0.35<br>(0.18-0.6)                          | 1.8%<br>(1.2-2.7%)                   | 2.5%<br>(1.6-3.7%)                  | 1400<br>(890-2000)     | 48000<br>(32000-71000)    |
| Indonesia | 2016 | Female | 60 to 64 | 4.2%<br>(2.3-7%)               | 96%<br>(93-98%)          | 0.34<br>(0.16-0.64)                         | 1.8%<br>(1.1-2.7%)                   | 2.3%<br>(1.4-3.6%)                  | 1400<br>(860-2200)     | 41000<br>(25000-63000)    |
| Indonesia | 2016 | Female | 65 to 69 | 4.2%<br>(2.4-6.5%)             | 96%<br>(94-98%)          | 0.33<br>(0.16-0.6)                          | 1.7%<br>(1-2.7%)                     | 2.2%<br>(1.3-3.5%)                  | 1500<br>(890-2300)     | 35000<br>(21000-55000)    |
| Indonesia | 2016 | Female | 70 to 74 | 4%<br>(2.4-6.3%)               | 96%<br>(94-98%)          | 0.31<br>(0.14-0.59)                         | 1.6%<br>(0.94-2.5%)                  | 2%<br>(1.2-3.2%)                    | 1500<br>(910-2400)     | 29000<br>(17000-46000)    |
| Indonesia | 2016 | Female | 75 to 79 | 3.9%<br>(2.2-6.6%)             | 96%<br>(93-98%)          | 0.29<br>(0.13-0.56)                         | 1.4%<br>(0.76-2.3%)                  | 1.7%<br>(0.92-2.8%)                 | 1500<br>(810-2500)     | 22000<br>(12000-36000)    |
| Indonesia | 2016 | Female | 80 to 84 | 4%<br>(2.1-6.6%)               | 96%<br>(93-98%)          | 0.29<br>(0.13-0.53)                         | 1.4%<br>(0.76-2.2%)                  | 1.6%<br>(0.92-2.6%)                 | 1200<br>(660-1900)     | 13000<br>(7100-20000)     |
| Indonesia | 2016 | Female | 85 to 89 | 4.3%<br>(2.4-7.1%)             | 96%<br>(93-98%)          | 0.31<br>(0.14-0.58)                         | 1.3%<br>(0.7-2.1%)                   | 1.5%<br>(0.83-2.5%)                 | 770<br>(420-1300)      | 5800<br>(3200-9700)       |
| Indonesia | 2016 | Female | 90 to 94 | 5%<br>(2.9-7.9%)               | 95%<br>(92-97%)          | 0.34<br>(0.15-0.65)                         | 1.2%<br>(0.6-2%)                     | 1.4%<br>(0.71-2.4%)                 | 330<br>(170-560)       | 1700<br>(900-2900)        |
| Indonesia | 2016 | Female | 95 plus  | 6%<br>(3-10%)                  | 94%<br>(90-97%)          | 0.4<br>(0.15-0.85)                          | 1.2%<br>(0.54-2.2%)                  | 1.4%<br>(0.61-2.5%)                 | 97<br>(42-180)         | 340<br>(150-610)          |
| Indonesia | 2016 | Male   | All Ages | 7.3%<br>(6-8.8%)               | 93%<br>(91-94%)          | 0.082<br>(0.062-0.1)                        | 1.3%<br>(1.1-1.5%)                   | 1.5%<br>(1.2-1.8%)                  | 12000<br>(10000-15000) | 520000<br>(420000-620000) |
| Indonesia | 2016 | Male   | 15 to 19 | 5.2%<br>(3.1-8.6%)             | 95%<br>(91-97%)          | 0.028<br>(0.013-0.057)                      | 0.59%<br>(0.4-0.79%)                 | 0.54%<br>(0.23-0.78%)               | 70<br>(30-100)         | 10000<br>(6700-14000)     |
| Indonesia | 2016 | Male   | 20 to 24 | 8.4%<br>(4.7-13%)              | 92%<br>(87-95%)          | 0.073<br>(0.034-0.14)                       | 1.2%<br>(0.89-1.7%)                  | 0.96%<br>(0.54-1.5%)                | 170<br>(98-270)        | 24000<br>(17000-33000)    |
| Indonesia | 2016 | Male   | 25 to 29 | 9.9%<br>(5.7-15%)              | 90%<br>(85-94%)          | 0.11<br>(0.052-0.19)                        | 1.6%<br>(1.2-2.1%)                   | 1.4%<br>(0.85-2.1%)                 | 260<br>(160-380)       | 29000<br>(21000-40000)    |
| Indonesia | 2016 | Male   | 30 to 34 | 11%<br>(6-17%)                 | 89%<br>(83-94%)          | 0.14<br>(0.07-0.23)                         | 2%<br>(1.6-2.6%)                     | 2.3%<br>(1.6-3%)                    | 530<br>(370-700)       | 44000<br>(33000-57000)    |
| Indonesia | 2016 | Male   | 35 to 39 | 12%<br>(6.7-18%)               | 88%<br>(82-93%)          | 0.16<br>(0.082-0.27)                        | 2.5%<br>(1.9-3.1%)                   | 3.2%<br>(2.4-4%)                    | 910<br>(670-1200)      | 59000<br>(45000-73000)    |
| Indonesia | 2016 | Male   | 40 to 44 | 11%<br>(6.7-18%)               | 89%<br>(82-93%)          | 0.16<br>(0.084-0.27)                        | 2.5%<br>(2-3.1%)                     | 3.4%<br>(2.6-4.2%)                  | 1200<br>(960-1500)     | 66000<br>(52000-81000)    |
| Indonesia | 2016 | Male   | 45 to 49 | 11%<br>(5.8-16%)               | 89%<br>(84-94%)          | 0.15<br>(0.079-0.27)                        | 2.5%<br>(1.9-3.1%)                   | 3.3%<br>(2.5-4.1%)                  | 1600<br>(1200-2000)    | 71000<br>(55000-90000)    |
| Indonesia | 2016 | Male   | 50 to 54 | 10%<br>(6-16%)                 | 90%<br>(84-94%)          | 0.14<br>(0.072-0.23)                        | 2.1%<br>(1.7-2.7%)                   | 2.8%<br>(2.1-3.6%)                  | 1700<br>(1200-2200)    | 65000<br>(50000-84000)    |
| Indonesia | 2016 | Male   | 55 to 59 | 9.4%<br>(5.6-15%)              | 91%<br>(85-94%)          | 0.11<br>(0.058-0.19)                        | 1.7%<br>(1.3-2.2%)                   | 2.2%<br>(1.6-2.8%)                  | 1600<br>(1200-2100)    | 53000<br>(40000-68000)    |
| Indonesia | 2016 | Male   | 60 to 64 | 8.8%<br>(5.2-14%)              | 91%<br>(86-95%)          | 0.097<br>(0.046-0.18)                       | 1.4%<br>(1-1.8%)                     | 1.7%<br>(1.2-2.3%)                  | 1400<br>(990-1900)     | 41000<br>(28000-54000)    |

| Location  | Year | Sex    | Age      | Prevalence of current drinkers | Prevalence of abstainers | Population average of standard drinks daily | Percent of total attributable deaths | Percent of total attributable DALYs | Attributable deaths | Attributable DALYs     |
|-----------|------|--------|----------|--------------------------------|--------------------------|---------------------------------------------|--------------------------------------|-------------------------------------|---------------------|------------------------|
| Indonesia | 2016 | Male   | 65 to 69 | 8.3%<br>(5.1-13%)              | 92%<br>(87-95%)          | 0.085<br>(0.042-0.15)                       | 1%<br>(0.75-1.3%)                    | 1.2%<br>(0.89-1.6%)                 | 980<br>(700-1300)   | 23000<br>(17000-30000) |
| Indonesia | 2016 | Male   | 70 to 74 | 7.2%<br>(4.5-11%)              | 93%<br>(89-95%)          | 0.07<br>(0.033-0.13)                        | 0.8%<br>(0.58-1.1%)                  | 0.97%<br>(0.68-1.3%)                | 780<br>(540-1100)   | 15000<br>(10000-20000) |
| Indonesia | 2016 | Male   | 75 to 79 | 6.1%<br>(3.5-9.8%)             | 94%<br>(90-96%)          | 0.056<br>(0.024-0.11)                       | 0.71%<br>(0.49-0.94%)                | 0.85%<br>(0.58-1.1%)                | 630<br>(410-870)    | 9100<br>(6100-12000)   |
| Indonesia | 2016 | Male   | 80 to 84 | 5.4%<br>(3-8.4%)               | 95%<br>(92-97%)          | 0.047<br>(0.021-0.085)                      | 0.61%<br>(0.39-0.79%)                | 0.72%<br>(0.44-0.95%)               | 360<br>(220-480)    | 3800<br>(2500-5000)    |
| Indonesia | 2016 | Male   | 85 to 89 | 5.2%<br>(3-8.3%)               | 95%<br>(92-97%)          | 0.044<br>(0.021-0.081)                      | 0.44%<br>(0.28-0.58%)                | 0.51%<br>(0.32-0.68%)               | 170<br>(110-230)    | 1300<br>(840-1700)     |
| Indonesia | 2016 | Male   | 90 to 94 | 5.6%<br>(3.4-8.9%)             | 94%<br>(91-97%)          | 0.045<br>(0.021-0.084)                      | 0.33%<br>(0.19-0.45%)                | 0.38%<br>(0.21-0.53%)               | 59<br>(33-83)       | 310<br>(190-430)       |
| Indonesia | 2016 | Male   | 95 plus  | 6.6%<br>(3.6-11%)              | 93%<br>(89-96%)          | 0.049<br>(0.018-0.1)                        | 0.31%<br>(0.15-0.44%)                | 0.33%<br>(0.14-0.49%)               | 14<br>(5.8-21)      | 52<br>(26-75)          |
| Laos      | 1990 | Female | All Ages | 24%<br>(20-28%)                | 76%<br>(72-80%)          | 0.63<br>(0.52-0.76)                         | 1.2%<br>(0.68-1.8%)                  | 2.5%<br>(1.3-4%)                    | 710<br>(370-1100)   | 22000<br>(13000-32000) |
| Laos      | 1990 | Female | 15 to 19 | 24%<br>(17-33%)                | 76%<br>(67-83%)          | 0.77<br>(0.46-1.2)                          | 1.9%<br>(1.3-3.3%)                   | 2.7%<br>(1.3-4.6%)                  | 13<br>(6.2-23)      | 1000<br>(550-1700)     |
| Laos      | 1990 | Female | 20 to 24 | 31%<br>(21-42%)                | 69%<br>(58-79%)          | 1.1<br>(0.62-1.6)                           | 3%<br>(1.6-4.9%)                     | 3.7%<br>(1.8-6.4%)                  | 22<br>(10-37)       | 1700<br>(890-2700)     |
| Laos      | 1990 | Female | 25 to 29 | 33%<br>(23-43%)                | 67%<br>(57-77%)          | 1.1<br>(0.69-1.6)                           | 3.3%<br>(1.7-5.4%)                   | 4.2%<br>(2-7.4%)                    | 24<br>(11-41)       | 1600<br>(840-2700)     |
| Laos      | 1990 | Female | 30 to 34 | 34%<br>(23-46%)                | 66%<br>(54-77%)          | 1.1<br>(0.69-1.7)                           | 3.2%<br>(1.7-5.1%)                   | 4.1%<br>(2-6.9%)                    | 22<br>(11-36)       | 1400<br>(720-2200)     |
| Laos      | 1990 | Female | 35 to 39 | 36%<br>(24-46%)                | 64%<br>(54-76%)          | 1.2<br>(0.75-1.9)                           | 4.3%<br>(2.2-7.1%)                   | 5.8%<br>(2.9-9.5%)                  | 31<br>(16-52)       | 1700<br>(870-2700)     |
| Laos      | 1990 | Female | 40 to 44 | 35%<br>(25-46%)                | 65%<br>(54-75%)          | 1.3<br>(0.77-1.9)                           | 4.5%<br>(2.2-7.5%)                   | 6.1%<br>(2.9-10%)                   | 34<br>(16-55)       | 1600<br>(790-2600)     |
| Laos      | 1990 | Female | 45 to 49 | 34%<br>(23-45%)                | 66%<br>(55-77%)          | 1.2<br>(0.7-2)                              | 4.9%<br>(2.3-8.7%)                   | 6.5%<br>(2.9-11%)                   | 40<br>(18-70)       | 1700<br>(770-2900)     |
| Laos      | 1990 | Female | 50 to 54 | 34%<br>(24-45%)                | 66%<br>(55-76%)          | 1.2<br>(0.72-2)                             | 4.9%<br>(1.9-8.9%)                   | 6.3%<br>(2.4-11%)                   | 51<br>(20-91)       | 1900<br>(730-3400)     |
| Laos      | 1990 | Female | 55 to 59 | 34%<br>(25-46%)                | 66%<br>(54-75%)          | 1.3<br>(0.7-2.1)                            | 4.7%<br>(1.6-8.8%)                   | 5.8%<br>(1.9-11%)                   | 61<br>(20-110)      | 1900<br>(660-3600)     |
| Laos      | 1990 | Female | 60 to 64 | 32%<br>(22-44%)                | 68%<br>(56-78%)          | 1.2<br>(0.7-2.1)                            | 4.3%<br>(1.3-8.6%)                   | 5.2%<br>(1.5-10%)                   | 73<br>(22-140)      | 2000<br>(590-3900)     |
| Laos      | 1990 | Female | 65 to 69 | 28%<br>(19-37%)                | 72%<br>(63-81%)          | 1.2<br>(0.72-1.8)                           | 4.3%<br>(1.7-8.1%)                   | 5.1%<br>(2-9.6%)                    | 85<br>(32-160)      | 1900<br>(730-3500)     |
| Laos      | 1990 | Female | 70 to 74 | 27%<br>(19-36%)                | 73%<br>(64-81%)          | 1.2<br>(0.7-1.9)                            | 4.6%<br>(1.6-8.8%)                   | 5.3%<br>(1.9-10%)                   | 96<br>(34-190)      | 1700<br>(620-3400)     |
| Laos      | 1990 | Female | 75 to 79 | 28%<br>(19-38%)                | 72%<br>(62-81%)          | 1.3<br>(0.71-2)                             | 4.3%<br>(1.4-8.3%)                   | 4.9%<br>(1.6-9.7%)                  | 78<br>(25-150)      | 1100<br>(360-2100)     |
| Laos      | 1990 | Female | 80 to 84 | 29%<br>(20-38%)                | 71%<br>(62-80%)          | 1.2<br>(0.75-1.9)                           | 4.2%<br>(1.4-7.8%)                   | 4.9%<br>(1.7-9%)                    | 53<br>(18-98)       | 550<br>(190-1000)      |

| Location | Year | Sex    | Age      | Prevalence of current drinkers | Prevalence of abstainers | Population average of standard drinks daily | Percent of total attributable deaths | Percent of total attributable DALYs | Attributable deaths  | Attributable DALYs     |
|----------|------|--------|----------|--------------------------------|--------------------------|---------------------------------------------|--------------------------------------|-------------------------------------|----------------------|------------------------|
| Laos     | 1990 | Female | 85 to 89 | 29%<br>(20-40%)                | 71%<br>(60-80%)          | 1.2<br>(0.73-1.9)                           | 3.6%<br>(1.2-6.7%)                   | 4.1%<br>(1.4-7.8%)                  | 20<br>(6.8-38)       | 150<br>(52-280)        |
| Laos     | 1990 | Female | 90 to 94 | 31%<br>(21-42%)                | 69%<br>(58-79%)          | 1.3<br>(0.72-2.1)                           | 3.1%<br>(0.74-6.4%)                  | 3.7%<br>(0.81-7.7%)                 | 5.3<br>(1.2-11)      | 27<br>(6.4-56)         |
| Laos     | 1990 | Female | 95 plus  | 34%<br>(22-47%)                | 66%<br>(53-78%)          | 1.4<br>(0.64-2.5)                           | 3.3%<br>(0.33-7.4%)                  | 3.7%<br>(0.29-8.5%)                 | 1.2<br>(0.095-2.8)   | 4.2<br>(0.41-9.5)      |
| Laos     | 1990 | Male   | All Ages | 48%<br>(41-54%)                | 52%<br>(46-59%)          | 1.4<br>(1.2-1.6)                            | 2.9%<br>(2-3.8%)                     | 4.9%<br>(3.3-6.7%)                  | 1500<br>(1000-2100)  | 61000<br>(45000-80000) |
| Laos     | 1990 | Male   | 15 to 19 | 46%<br>(34-58%)                | 54%<br>(42-66%)          | 1<br>(0.62-1.5)                             | 3.5%<br>(1.9-5.5%)                   | 4.4%<br>(2.4-7.1%)                  | 26<br>(14-42)        | 2000<br>(1100-3200)    |
| Laos     | 1990 | Male   | 20 to 24 | 66%<br>(53-76%)                | 34%<br>(24-47%)          | 2.4<br>(1.6-3.1)                            | 9.9%<br>(6.5-14%)                    | 12%<br>(7.8-17%)                    | 89<br>(56-130)       | 6300<br>(4100-8700)    |
| Laos     | 1990 | Male   | 25 to 29 | 71%<br>(60-79%)                | 29%<br>(21-40%)          | 2.9<br>(2-3.7)                              | 14%<br>(8.7-19%)                     | 17%<br>(10-23%)                     | 120<br>(72-160)      | 7500<br>(4800-10000)   |
| Laos     | 1990 | Male   | 30 to 34 | 75%<br>(65-82%)                | 25%<br>(18-35%)          | 3.2<br>(2.4-4.2)                            | 15%<br>(10-20%)                      | 18%<br>(12-25%)                     | 120<br>(80-170)      | 7200<br>(4800-9800)    |
| Laos     | 1990 | Male   | 35 to 39 | 76%<br>(67-83%)                | 24%<br>(17-33%)          | 3.3<br>(2.4-4.3)                            | 16%<br>(11-21%)                      | 19%<br>(13-26%)                     | 130<br>(88-180)      | 6900<br>(4700-9300)    |
| Laos     | 1990 | Male   | 40 to 44 | 75%<br>(65-82%)                | 25%<br>(18-35%)          | 3.2<br>(2.3-4.3)                            | 15%<br>(9.9-21%)                     | 18%<br>(12-26%)                     | 120<br>(77-170)      | 5700<br>(3700-7900)    |
| Laos     | 1990 | Male   | 45 to 49 | 72%<br>(60-79%)                | 28%<br>(21-40%)          | 3.2<br>(2.2-4.3)                            | 15%<br>(9.6-21%)                     | 18%<br>(11-26%)                     | 140<br>(83-190)      | 5700<br>(3500-7900)    |
| Laos     | 1990 | Male   | 50 to 54 | 69%<br>(58-77%)                | 31%<br>(23-42%)          | 2.9<br>(1.9-4)                              | 14%<br>(7.9-20%)                     | 16%<br>(9.2-24%)                    | 150<br>(87-220)      | 5600<br>(3300-8200)    |
| Laos     | 1990 | Male   | 55 to 59 | 67%<br>(55-77%)                | 33%<br>(23-45%)          | 2.5<br>(1.7-3.5)                            | 11%<br>(5.9-17%)                     | 13%<br>(7-20%)                      | 140<br>(77-220)      | 4500<br>(2500-7000)    |
| Laos     | 1990 | Male   | 60 to 64 | 63%<br>(50-74%)                | 37%<br>(26-50%)          | 2.1<br>(1.4-3.2)                            | 9%<br>(4.4-15%)                      | 11%<br>(5-17%)                      | 140<br>(65-230)      | 3800<br>(1800-6300)    |
| Laos     | 1990 | Male   | 65 to 69 | 56%<br>(43-67%)                | 44%<br>(33-57%)          | 1.8<br>(1.2-2.6)                            | 7.5%<br>(3.6-13%)                    | 8.7%<br>(4.1-15%)                   | 120<br>(57-200)      | 2700<br>(1300-4500)    |
| Laos     | 1990 | Male   | 70 to 74 | 52%<br>(39-64%)                | 48%<br>(36-61%)          | 1.7<br>(1-2.4)                              | 6.7%<br>(2.7-11%)                    | 7.7%<br>(3.1-13%)                   | 110<br>(43-190)      | 1900<br>(810-3300)     |
| Laos     | 1990 | Male   | 75 to 79 | 52%<br>(38-67%)                | 48%<br>(33-62%)          | 1.6<br>(0.92-2.4)                           | 5%<br>(1.6-9.2%)                     | 5.8%<br>(1.8-11%)                   | 64<br>(19-120)       | 890<br>(290-1600)      |
| Laos     | 1990 | Male   | 80 to 84 | 50%<br>(34-65%)                | 50%<br>(35-66%)          | 1.3<br>(0.8-1.9)                            | 4.1%<br>(1.2-7.9%)                   | 4.8%<br>(1.3-9.2%)                  | 31<br>(8.4-59)       | 320<br>(93-610)        |
| Laos     | 1990 | Male   | 85 to 89 | 45%<br>(31-59%)                | 55%<br>(41-69%)          | 1.1<br>(0.62-1.7)                           | 2.6%<br>(0.52-5.3%)                  | 2.9%<br>(0.51-6.1%)                 | 9.2<br>(1.6-19)      | 69<br>(14-140)         |
| Laos     | 1990 | Male   | 90 to 94 | 44%<br>(30-58%)                | 56%<br>(42-70%)          | 0.95<br>(0.54-1.5)                          | 1.6%<br>(-0.03-3.8%)                 | 1.8%<br>(-0.13-4.5%)                | 1.9<br>(-0.14-4.7)   | 9.9<br>(-0.19-24)      |
| Laos     | 1990 | Male   | 95 plus  | 45%<br>(29-64%)                | 55%<br>(36-71%)          | 0.86<br>(0.39-1.6)                          | 1.1%<br>(-0.49-3.5%)                 | 1.1%<br>(-0.72-3.9%)                | 0.26<br>(-0.17-0.88) | 1<br>(-0.43-3.1)       |
| Laos     | 1995 | Female | All Ages | 24%<br>(20-28%)                | 76%<br>(72-80%)          | 0.62<br>(0.52-0.75)                         | 1.2%<br>(0.73-1.8%)                  | 2.5%<br>(1.3-4%)                    | 730<br>(390-1100)    | 23000<br>(14000-33000) |

| Location | Year | Sex    | Age      | Prevalence of current drinkers | Prevalence of abstainers | Population average of standard drinks daily | Percent of total attributable deaths | Percent of total attributable DALYs | Attributable deaths | Attributable DALYs     |
|----------|------|--------|----------|--------------------------------|--------------------------|---------------------------------------------|--------------------------------------|-------------------------------------|---------------------|------------------------|
| Laos     | 1995 | Female | 15 to 19 | 24%<br>(16-33%)                | 76%<br>(67-84%)          | 0.76<br>(0.47-1.2)                          | 2.1%<br>(1.1-3.3%)                   | 2.9%<br>(1.5-4.9%)                  | 15<br>(7.5-25)      | 1200<br>(640-1900)     |
| Laos     | 1995 | Female | 20 to 24 | 31%<br>(21-42%)                | 69%<br>(58-79%)          | 1.1<br>(0.62-1.6)                           | 3%<br>(1.6-5%)                       | 3.9%<br>(1.9-6.6%)                  | 24<br>(12-41)       | 1900<br>(990-3000)     |
| Laos     | 1995 | Female | 25 to 29 | 33%<br>(23-44%)                | 67%<br>(56-77%)          | 1.1<br>(0.68-1.6)                           | 3.3%<br>(1.8-5.2%)                   | 4.3%<br>(2.1-7.2%)                  | 25<br>(12-43)       | 1800<br>(930-2900)     |
| Laos     | 1995 | Female | 30 to 34 | 34%<br>(23-46%)                | 66%<br>(54-77%)          | 1.1<br>(0.66-1.7)                           | 3.2%<br>(1.7-5.1%)                   | 4.2%<br>(2.1-7%)                    | 24<br>(12-40)       | 1500<br>(840-2400)     |
| Laos     | 1995 | Female | 35 to 39 | 36%<br>(24-46%)                | 64%<br>(54-76%)          | 1.2<br>(0.73-1.9)                           | 4.2%<br>(2.2-6.9%)                   | 5.8%<br>(2.9-9.6%)                  | 34<br>(17-57)       | 1900<br>(1000-3000)    |
| Laos     | 1995 | Female | 40 to 44 | 35%<br>(25-46%)                | 65%<br>(54-75%)          | 1.3<br>(0.76-1.9)                           | 4.5%<br>(2.3-7.1%)                   | 6.1%<br>(3.1-9.6%)                  | 37<br>(19-59)       | 1800<br>(930-2800)     |
| Laos     | 1995 | Female | 45 to 49 | 34%<br>(23-44%)                | 66%<br>(56-77%)          | 1.2<br>(0.72-2)                             | 4.7%<br>(2.1-8.1%)                   | 6.3%<br>(2.8-11%)                   | 42<br>(19-72)       | 1800<br>(820-3000)     |
| Laos     | 1995 | Female | 50 to 54 | 34%<br>(24-45%)                | 66%<br>(55-76%)          | 1.2<br>(0.71-2)                             | 4.7%<br>(1.8-8.5%)                   | 6.1%<br>(2.3-11%)                   | 49<br>(18-88)       | 1800<br>(680-3200)     |
| Laos     | 1995 | Female | 55 to 59 | 34%<br>(25-45%)                | 66%<br>(55-75%)          | 1.2<br>(0.68-2.1)                           | 4.4%<br>(1.4-8.6%)                   | 5.5%<br>(1.8-11%)                   | 58<br>(18-110)      | 1800<br>(590-3600)     |
| Laos     | 1995 | Female | 60 to 64 | 32%<br>(22-44%)                | 68%<br>(56-78%)          | 1.2<br>(0.68-2)                             | 4.1%<br>(1.2-8.4%)                   | 4.9%<br>(1.4-9.8%)                  | 67<br>(19-130)      | 1800<br>(510-3700)     |
| Laos     | 1995 | Female | 65 to 69 | 29%<br>(20-37%)                | 71%<br>(63-80%)          | 1.2<br>(0.72-1.8)                           | 4.1%<br>(1.5-7.5%)                   | 4.9%<br>(1.8-8.9%)                  | 85<br>(31-160)      | 1900<br>(700-3500)     |
| Laos     | 1995 | Female | 70 to 74 | 27%<br>(19-37%)                | 73%<br>(63-81%)          | 1.2<br>(0.71-1.9)                           | 4.4%<br>(1.6-8.4%)                   | 5.1%<br>(1.8-9.8%)                  | 97<br>(34-190)      | 1800<br>(630-3500)     |
| Laos     | 1995 | Female | 75 to 79 | 28%<br>(19-39%)                | 72%<br>(61-81%)          | 1.2<br>(0.69-2)                             | 4.1%<br>(1.3-8.3%)                   | 4.7%<br>(1.5-9.6%)                  | 82<br>(25-170)      | 1200<br>(350-2300)     |
| Laos     | 1995 | Female | 80 to 84 | 29%<br>(19-39%)                | 71%<br>(61-81%)          | 1.2<br>(0.73-2)                             | 4.1%<br>(1.5-7.5%)                   | 4.7%<br>(1.7-8.7%)                  | 58<br>(21-110)      | 600<br>(220-1100)      |
| Laos     | 1995 | Female | 85 to 89 | 29%<br>(20-40%)                | 71%<br>(60-80%)          | 1.2<br>(0.72-2)                             | 3.5%<br>(1.2-6.9%)                   | 4%<br>(1.4-8%)                      | 24<br>(8.1-47)      | 170<br>(61-340)        |
| Laos     | 1995 | Female | 90 to 94 | 31%<br>(22-42%)                | 69%<br>(58-78%)          | 1.3<br>(0.7-2.1)                            | 3%<br>(0.74-6.3%)                    | 3.5%<br>(0.82-7.4%)                 | 6.3<br>(1.5-13)     | 32<br>(8.2-67)         |
| Laos     | 1995 | Female | 95 plus  | 34%<br>(22-46%)                | 66%<br>(54-78%)          | 1.3<br>(0.61-2.5)                           | 3.2%<br>(0.25-7.4%)                  | 3.6%<br>(0.2-8.5%)                  | 1.5<br>(0.085-3.5)  | 5.1<br>(0.41-12)       |
| Laos     | 1995 | Male   | All Ages | 48%<br>(41-54%)                | 52%<br>(46-59%)          | 1.3<br>(1.2-1.5)                            | 3%<br>(2.1-4%)                       | 4.9%<br>(3.3-6.8%)                  | 1600<br>(1100-2100) | 65000<br>(48000-84000) |
| Laos     | 1995 | Male   | 15 to 19 | 46%<br>(34-58%)                | 54%<br>(42-66%)          | 1<br>(0.63-1.4)                             | 3.6%<br>(2-5.5%)                     | 4.7%<br>(2.5-7.3%)                  | 27<br>(15-43)       | 2200<br>(1200-3300)    |
| Laos     | 1995 | Male   | 20 to 24 | 66%<br>(54-76%)                | 34%<br>(24-46%)          | 2.3<br>(1.6-3.1)                            | 10%<br>(6.7-14%)                     | 13%<br>(8.1-18%)                    | 97<br>(61-140)      | 6900<br>(4500-9400)    |
| Laos     | 1995 | Male   | 25 to 29 | 72%<br>(61-79%)                | 28%<br>(21-39%)          | 2.8<br>(2.1-3.7)                            | 14%<br>(9.2-19%)                     | 17%<br>(11-23%)                     | 120<br>(80-180)     | 8100<br>(5400-11000)   |
| Laos     | 1995 | Male   | 30 to 34 | 75%<br>(65-82%)                | 25%<br>(18-35%)          | 3.2<br>(2.4-4.1)                            | 15%<br>(10-20%)                      | 18%<br>(12-25%)                     | 130<br>(89-190)     | 8000<br>(5400-11000)   |

| Location | Year | Sex    | Age      | Prevalence of current drinkers | Prevalence of abstainers | Population average of standard drinks daily | Percent of total attributable deaths | Percent of total attributable DALYs | Attributable deaths | Attributable DALYs     |
|----------|------|--------|----------|--------------------------------|--------------------------|---------------------------------------------|--------------------------------------|-------------------------------------|---------------------|------------------------|
| Laos     | 1995 | Male   | 35 to 39 | 76%<br>(67-83%)                | 24%<br>(17-33%)          | 3.3<br>(2.4-4.2)                            | 16%<br>(11-21%)                      | 19%<br>(13-26%)                     | 140<br>(95-200)     | 7600<br>(5100-10000)   |
| Laos     | 1995 | Male   | 40 to 44 | 75%<br>(66-82%)                | 25%<br>(18-34%)          | 3.2<br>(2.3-4.2)                            | 15%<br>(10-20%)                      | 18%<br>(12-25%)                     | 140<br>(94-200)     | 6800<br>(4600-9400)    |
| Laos     | 1995 | Male   | 45 to 49 | 72%<br>(60-79%)                | 28%<br>(21-40%)          | 3.1<br>(2.2-4.2)                            | 15%<br>(9.6-21%)                     | 18%<br>(11-25%)                     | 140<br>(88-200)     | 5900<br>(3700-8200)    |
| Laos     | 1995 | Male   | 50 to 54 | 69%<br>(58-77%)                | 31%<br>(23-42%)          | 2.9<br>(1.9-4)                              | 13%<br>(7.9-19%)                     | 16%<br>(9.2-23%)                    | 140<br>(84-210)     | 5300<br>(3200-7600)    |
| Laos     | 1995 | Male   | 55 to 59 | 67%<br>(56-77%)                | 33%<br>(23-44%)          | 2.5<br>(1.7-3.5)                            | 10%<br>(5.8-16%)                     | 12%<br>(6.8-19%)                    | 140<br>(77-210)     | 4500<br>(2500-6800)    |
| Laos     | 1995 | Male   | 60 to 64 | 63%<br>(50-74%)                | 37%<br>(26-50%)          | 2.1<br>(1.4-3.2)                            | 8.6%<br>(4.3-14%)                    | 10%<br>(5-17%)                      | 140<br>(67-230)     | 3800<br>(1900-6200)    |
| Laos     | 1995 | Male   | 65 to 69 | 56%<br>(43-67%)                | 44%<br>(33-57%)          | 1.8<br>(1.3-2.6)                            | 7.1%<br>(3.4-12%)                    | 8.2%<br>(3.9-14%)                   | 120<br>(59-210)     | 2800<br>(1400-4600)    |
| Laos     | 1995 | Male   | 70 to 74 | 52%<br>(40-64%)                | 48%<br>(36-60%)          | 1.6<br>(1-2.4)                              | 6.3%<br>(2.6-11%)                    | 7.3%<br>(3-13%)                     | 110<br>(45-190)     | 2000<br>(840-3500)     |
| Laos     | 1995 | Male   | 75 to 79 | 53%<br>(37-67%)                | 47%<br>(33-63%)          | 1.5<br>(0.92-2.3)                           | 4.7%<br>(1.4-8.7%)                   | 5.4%<br>(1.5-10%)                   | 68<br>(19-120)      | 960<br>(290-1700)      |
| Laos     | 1995 | Male   | 80 to 84 | 50%<br>(34-65%)                | 50%<br>(35-66%)          | 1.3<br>(0.76-1.9)                           | 3.8%<br>(1-7.4%)                     | 4.4%<br>(1.1-8.7%)                  | 33<br>(8.3-65)      | 350<br>(92-680)        |
| Laos     | 1995 | Male   | 85 to 89 | 45%<br>(31-60%)                | 55%<br>(40-69%)          | 1<br>(0.6-1.7)                              | 2.4%<br>(0.43-5%)                    | 2.7%<br>(0.39-5.7%)                 | 10<br>(1.5-22)      | 77<br>(14-160)         |
| Laos     | 1995 | Male   | 90 to 94 | 45%<br>(31-59%)                | 55%<br>(41-69%)          | 0.93<br>(0.53-1.5)                          | 1.4%<br>(-0.11-3.5%)                 | 1.6%<br>(-0.25-4.1%)                | 2<br>(-0.32-5.1)    | 11<br>(-0.83-26)       |
| Laos     | 1995 | Male   | 95 plus  | 46%<br>(29-65%)                | 54%<br>(35-71%)          | 0.85<br>(0.4-1.6)                           | 1%<br>(-0.53-3.2%)                   | 1%<br>(-0.8-3.6%)                   | 0.29<br>(-0.23-1)   | 1.1<br>(-0.61-3.6)     |
| Laos     | 2000 | Female | All Ages | 22%<br>(19-25%)                | 78%<br>(75-81%)          | 0.54<br>(0.45-0.65)                         | 1.1%<br>(0.69-1.7%)                  | 2.2%<br>(1.2-3.6%)                  | 630<br>(330-1000)   | 20000<br>(12000-29000) |
| Laos     | 2000 | Female | 15 to 19 | 22%<br>(16-29%)                | 78%<br>(71-84%)          | 0.66<br>(0.41-1)                            | 1.9%<br>(1-3%)                       | 2.7%<br>(1.4-4.4%)                  | 14<br>(7.1-23)      | 1100<br>(620-1800)     |
| Laos     | 2000 | Female | 20 to 24 | 29%<br>(22-37%)                | 71%<br>(63-78%)          | 0.96<br>(0.6-1.5)                           | 2.8%<br>(1.5-4.5%)                   | 3.5%<br>(1.7-6.1%)                  | 22<br>(11-36)       | 1700<br>(940-2700)     |
| Laos     | 2000 | Female | 25 to 29 | 30%<br>(23-38%)                | 70%<br>(62-77%)          | 0.95<br>(0.65-1.4)                          | 3%<br>(1.7-4.6%)                     | 3.9%<br>(1.9-6.4%)                  | 23<br>(11-38)       | 1600<br>(900-2600)     |
| Laos     | 2000 | Female | 30 to 34 | 31%<br>(24-41%)                | 69%<br>(59-76%)          | 0.97<br>(0.64-1.4)                          | 2.8%<br>(1.6-4.4%)                   | 3.8%<br>(1.9-6.1%)                  | 22<br>(11-35)       | 1400<br>(790-2200)     |
| Laos     | 2000 | Female | 35 to 39 | 34%<br>(26-42%)                | 66%<br>(58-74%)          | 1.1<br>(0.73-1.6)                           | 3.7%<br>(2.1-6.1%)                   | 5.2%<br>(2.8-8.4%)                  | 31<br>(17-52)       | 1700<br>(980-2800)     |
| Laos     | 2000 | Female | 40 to 44 | 34%<br>(26-42%)                | 66%<br>(58-74%)          | 1.2<br>(0.76-1.7)                           | 3.9%<br>(2.1-6.3%)                   | 5.5%<br>(2.9-8.8%)                  | 34<br>(18-55)       | 1700<br>(900-2600)     |
| Laos     | 2000 | Female | 45 to 49 | 31%<br>(23-38%)                | 69%<br>(62-77%)          | 1.1<br>(0.67-1.7)                           | 3.9%<br>(1.7-6.7%)                   | 5.4%<br>(2.3-9.1%)                  | 37<br>(16-63)       | 1600<br>(720-2700)     |
| Laos     | 2000 | Female | 50 to 54 | 28%<br>(20-36%)                | 72%<br>(64-80%)          | 0.96<br>(0.57-1.6)                          | 3.6%<br>(1.3-6.6%)                   | 4.7%<br>(1.7-8.5%)                  | 39<br>(14-71)       | 1500<br>(510-2600)     |



| Location | Year | Sex    | Age      | Prevalence of current drinkers | Prevalence of abstainers | Population average of standard drinks daily | Percent of total attributable deaths | Percent of total attributable DALYs | Attributable deaths | Attributable DALYs     |
|----------|------|--------|----------|--------------------------------|--------------------------|---------------------------------------------|--------------------------------------|-------------------------------------|---------------------|------------------------|
| Laos     | 2000 | Female | 55 to 59 | 27%<br>(19-36%)                | 73%<br>(64-81%)          | 0.95<br>(0.54-1.6)                          | 3.3%<br>(1.1-6.4%)                   | 4.2%<br>(1.3-8.1%)                  | 42<br>(13-81)       | 1300<br>(430-2600)     |
| Laos     | 2000 | Female | 60 to 64 | 26%<br>(18-35%)                | 74%<br>(65-82%)          | 0.95<br>(0.54-1.6)                          | 3.1%<br>(0.87-6.5%)                  | 3.8%<br>(1.1-8%)                    | 51<br>(14-110)      | 1400<br>(380-2900)     |
| Laos     | 2000 | Female | 65 to 69 | 24%<br>(17-32%)                | 76%<br>(68-83%)          | 0.95<br>(0.58-1.5)                          | 3.2%<br>(1.2-6%)                     | 3.8%<br>(1.5-7.1%)                  | 63<br>(23-120)      | 1400<br>(540-2700)     |
| Laos     | 2000 | Female | 70 to 74 | 24%<br>(16-32%)                | 76%<br>(68-84%)          | 1<br>(0.59-1.7)                             | 3.5%<br>(1.2-7.1%)                   | 4.2%<br>(1.4-8.3%)                  | 82<br>(28-160)      | 1500<br>(500-3000)     |
| Laos     | 2000 | Female | 75 to 79 | 26%<br>(18-36%)                | 74%<br>(64-82%)          | 1.2<br>(0.68-1.9)                           | 3.6%<br>(1-7.4%)                     | 4.2%<br>(1.2-8.5%)                  | 76<br>(21-160)      | 1100<br>(300-2200)     |
| Laos     | 2000 | Female | 80 to 84 | 28%<br>(19-38%)                | 72%<br>(62-81%)          | 1.2<br>(0.71-1.9)                           | 3.7%<br>(1.2-7%)                     | 4.3%<br>(1.4-8.3%)                  | 59<br>(20-110)      | 610<br>(210-1200)      |
| Laos     | 2000 | Female | 85 to 89 | 28%<br>(19-38%)                | 72%<br>(62-81%)          | 1.2<br>(0.67-1.8)                           | 3.1%<br>(1-6.2%)                     | 3.7%<br>(1.1-7.3%)                  | 25<br>(7.8-50)      | 190<br>(59-360)        |
| Laos     | 2000 | Female | 90 to 94 | 30%<br>(21-40%)                | 70%<br>(60-79%)          | 1.2<br>(0.65-2)                             | 2.7%<br>(0.58-5.8%)                  | 3.2%<br>(0.64-6.8%)                 | 7<br>(1.4-15)       | 36<br>(7.6-76)         |
| Laos     | 2000 | Female | 95 plus  | 32%<br>(21-45%)                | 68%<br>(55-79%)          | 1.3<br>(0.59-2.3)                           | 2.9%<br>(0.15-6.8%)                  | 3.2%<br>(0.08-7.8%)                 | 1.6<br>(0.04-3.9)   | 5.5<br>(0.3-13)        |
| Laos     | 2000 | Male   | All Ages | 51%<br>(45-57%)                | 49%<br>(43-55%)          | 1.4<br>(1.2-1.6)                            | 3.3%<br>(2.4-4.4%)                   | 5.3%<br>(3.7-7.3%)                  | 1600<br>(1100-2200) | 69000<br>(52000-88000) |
| Laos     | 2000 | Male   | 15 to 19 | 49%<br>(40-59%)                | 51%<br>(41-60%)          | 1<br>(0.68-1.4)                             | 3.7%<br>(2.2-5.4%)                   | 5%<br>(2.9-7.5%)                    | 30<br>(17-47)       | 2400<br>(1400-3600)    |
| Laos     | 2000 | Male   | 20 to 24 | 70%<br>(61-77%)                | 30%<br>(23-39%)          | 2.4<br>(1.7-3.1)                            | 10%<br>(6.9-14%)                     | 13%<br>(8.5-18%)                    | 100<br>(67-140)     | 7200<br>(4900-9900)    |
| Laos     | 2000 | Male   | 25 to 29 | 76%<br>(69-81%)                | 24%<br>(19-31%)          | 3<br>(2.2-3.8)                              | 14%<br>(9.4-19%)                     | 17%<br>(11-24%)                     | 130<br>(87-180)     | 8700<br>(5800-12000)   |
| Laos     | 2000 | Male   | 30 to 34 | 79%<br>(73-83%)                | 21%<br>(17-27%)          | 3.3<br>(2.5-4.2)                            | 15%<br>(11-20%)                      | 19%<br>(13-25%)                     | 140<br>(97-190)     | 8400<br>(5900-11000)   |
| Laos     | 2000 | Male   | 35 to 39 | 80%<br>(75-84%)                | 20%<br>(16-25%)          | 3.4<br>(2.6-4.3)                            | 15%<br>(11-21%)                      | 19%<br>(13-26%)                     | 150<br>(100-210)    | 8100<br>(5600-11000)   |
| Laos     | 2000 | Male   | 40 to 44 | 78%<br>(73-83%)                | 22%<br>(17-27%)          | 3.3<br>(2.5-4.3)                            | 15%<br>(10-20%)                      | 18%<br>(12-25%)                     | 150<br>(100-210)    | 7300<br>(5000-10000)   |
| Laos     | 2000 | Male   | 45 to 49 | 76%<br>(69-81%)                | 24%<br>(19-31%)          | 3.3<br>(2.4-4.4)                            | 15%<br>(9.7-20%)                     | 18%<br>(12-25%)                     | 170<br>(110-230)    | 7000<br>(4600-9700)    |
| Laos     | 2000 | Male   | 50 to 54 | 73%<br>(66-78%)                | 27%<br>(22-34%)          | 3<br>(2.1-4.1)                              | 13%<br>(8-18%)                       | 16%<br>(9.4-22%)                    | 150<br>(90-220)     | 5500<br>(3400-8000)    |
| Laos     | 2000 | Male   | 55 to 59 | 71%<br>(62-78%)                | 29%<br>(22-38%)          | 2.5<br>(1.8-3.5)                            | 10%<br>(5.9-15%)                     | 12%<br>(6.8-18%)                    | 130<br>(75-200)     | 4200<br>(2500-6200)    |
| Laos     | 2000 | Male   | 60 to 64 | 64%<br>(54-73%)                | 36%<br>(27-46%)          | 2.1<br>(1.4-3)                              | 8%<br>(4-13%)                        | 9.5%<br>(4.6-15%)                   | 130<br>(64-220)     | 3600<br>(1800-5900)    |
| Laos     | 2000 | Male   | 65 to 69 | 53%<br>(42-64%)                | 47%<br>(36-58%)          | 1.7<br>(1.2-2.3)                            | 6.3%<br>(3-11%)                      | 7.4%<br>(3.5-13%)                   | 110<br>(55-190)     | 2600<br>(1300-4400)    |
| Laos     | 2000 | Male   | 70 to 74 | 54%<br>(43-64%)                | 46%<br>(36-57%)          | 1.7<br>(1.1-2.4)                            | 6%<br>(2.4-10%)                      | 7%<br>(2.8-12%)                     | 120<br>(47-200)     | 2100<br>(850-3600)     |

| Location | Year | Sex    | Age      | Prevalence of current drinkers | Prevalence of abstainers | Population average of standard drinks daily | Percent of total attributable deaths | Percent of total attributable DALYs | Attributable deaths | Attributable DALYs     |
|----------|------|--------|----------|--------------------------------|--------------------------|---------------------------------------------|--------------------------------------|-------------------------------------|---------------------|------------------------|
| Laos     | 2000 | Male   | 75 to 79 | 56%<br>(43-68%)                | 44%<br>(32-57%)          | 1.6<br>(1-2.4)                              | 4.6%<br>(1.3-8.6%)                   | 5.3%<br>(1.4-9.9%)                  | 74<br>(20-140)      | 1100<br>(300-2000)     |
| Laos     | 2000 | Male   | 80 to 84 | 50%<br>(34-65%)                | 50%<br>(35-66%)          | 1.3<br>(0.75-1.9)                           | 3.6%<br>(0.84-6.9%)                  | 4.1%<br>(0.91-8%)                   | 36<br>(8-71)        | 380<br>(89-730)        |
| Laos     | 2000 | Male   | 85 to 89 | 43%<br>(30-58%)                | 57%<br>(42-70%)          | 0.97<br>(0.57-1.5)                          | 2.1%<br>(0.36-4.6%)                  | 2.4%<br>(0.33-5.3%)                 | 11<br>(1.5-24)      | 84<br>(14-180)         |
| Laos     | 2000 | Male   | 90 to 94 | 42%<br>(29-57%)                | 58%<br>(43-71%)          | 0.85<br>(0.47-1.4)                          | 1.3%<br>(-0.11-3.1%)                 | 1.4%<br>(-0.28-3.6%)                | 2.2<br>(-0.44-5.6)  | 12<br>(-1-29)          |
| Laos     | 2000 | Male   | 95 plus  | 44%<br>(26-62%)                | 56%<br>(38-74%)          | 0.77<br>(0.36-1.4)                          | 0.92%<br>(-0.53-3%)                  | 0.9%<br>(-0.76-3.4%)                | 0.31<br>(-0.26-1.2) | 1.2<br>(-0.71-4.1)     |
| Laos     | 2005 | Female | All Ages | 22%<br>(19-25%)                | 78%<br>(75-81%)          | 0.53<br>(0.45-0.64)                         | 1.1%<br>(0.67-1.6%)                  | 2.1%<br>(1.1-3.4%)                  | 540<br>(280-880)    | 17000<br>(11000-25000) |
| Laos     | 2005 | Female | 15 to 19 | 21%<br>(15-28%)                | 79%<br>(72-85%)          | 0.62<br>(0.39-0.93)                         | 1.7%<br>(0.95-2.6%)                  | 2.5%<br>(1.3-4%)                    | 13<br>(6.6-21)      | 1100<br>(620-1700)     |
| Laos     | 2005 | Female | 20 to 24 | 28%<br>(21-36%)                | 72%<br>(64-79%)          | 0.91<br>(0.56-1.4)                          | 2.5%<br>(1.4-3.9%)                   | 3.2%<br>(1.6-5.5%)                  | 19<br>(9.2-32)      | 1500<br>(890-2400)     |
| Laos     | 2005 | Female | 25 to 29 | 30%<br>(23-37%)                | 70%<br>(63-77%)          | 0.91<br>(0.61-1.3)                          | 2.6%<br>(1.5-4.1%)                   | 3.5%<br>(1.7-5.9%)                  | 19<br>(9.4-32)      | 1400<br>(790-2200)     |
| Laos     | 2005 | Female | 30 to 34 | 30%<br>(23-39%)                | 70%<br>(61-77%)          | 0.93<br>(0.6-1.4)                           | 2.5%<br>(1.5-3.9%)                   | 3.4%<br>(1.8-5.4%)                  | 18<br>(9.7-29)      | 1200<br>(740-1900)     |
| Laos     | 2005 | Female | 35 to 39 | 33%<br>(25-41%)                | 67%<br>(59-75%)          | 1.1<br>(0.67-1.6)                           | 3.2%<br>(1.8-5%)                     | 4.5%<br>(2.4-7.2%)                  | 26<br>(14-42)       | 1500<br>(830-2300)     |
| Laos     | 2005 | Female | 40 to 44 | 33%<br>(26-40%)                | 67%<br>(60-74%)          | 1.1<br>(0.73-1.6)                           | 3.4%<br>(1.8-5.3%)                   | 4.8%<br>(2.5-7.7%)                  | 30<br>(15-48)       | 1500<br>(800-2400)     |
| Laos     | 2005 | Female | 45 to 49 | 30%<br>(23-38%)                | 70%<br>(62-77%)          | 1<br>(0.64-1.6)                             | 3.3%<br>(1.4-5.6%)                   | 4.7%<br>(2-7.9%)                    | 32<br>(14-56)       | 1400<br>(610-2400)     |
| Laos     | 2005 | Female | 50 to 54 | 27%<br>(19-36%)                | 73%<br>(64-81%)          | 0.92<br>(0.53-1.5)                          | 3%<br>(0.99-5.6%)                    | 4%<br>(1.3-7.4%)                    | 34<br>(11-63)       | 1300<br>(420-2400)     |
| Laos     | 2005 | Female | 55 to 59 | 27%<br>(19-36%)                | 73%<br>(64-81%)          | 0.91<br>(0.52-1.5)                          | 2.7%<br>(0.75-5.4%)                  | 3.5%<br>(1-7.1%)                    | 36<br>(10-71)       | 1200<br>(320-2300)     |
| Laos     | 2005 | Female | 60 to 64 | 25%<br>(17-34%)                | 75%<br>(66-83%)          | 0.91<br>(0.5-1.5)                           | 2.6%<br>(0.66-5.7%)                  | 3.2%<br>(0.82-7.2%)                 | 40<br>(9.9-88)      | 1100<br>(270-2500)     |
| Laos     | 2005 | Female | 65 to 69 | 23%<br>(16-31%)                | 77%<br>(69-84%)          | 0.9<br>(0.54-1.4)                           | 2.7%<br>(0.85-5.2%)                  | 3.3%<br>(1.1-6.3%)                  | 51<br>(17-100)      | 1200<br>(370-2300)     |
| Laos     | 2005 | Female | 70 to 74 | 23%<br>(16-31%)                | 77%<br>(69-84%)          | 0.97<br>(0.56-1.6)                          | 3%<br>(0.92-6.3%)                    | 3.6%<br>(1.1-7.4%)                  | 68<br>(20-140)      | 1200<br>(370-2500)     |
| Laos     | 2005 | Female | 75 to 79 | 26%<br>(18-36%)                | 74%<br>(64-82%)          | 1.1<br>(0.63-1.8)                           | 3.1%<br>(0.82-6.6%)                  | 3.6%<br>(0.92-7.7%)                 | 68<br>(18-150)      | 960<br>(260-2100)      |
| Laos     | 2005 | Female | 80 to 84 | 27%<br>(19-38%)                | 73%<br>(62-81%)          | 1.1<br>(0.68-1.8)                           | 3.2%<br>(1-6.1%)                     | 3.8%<br>(1.2-7.2%)                  | 54<br>(17-110)      | 570<br>(180-1100)      |
| Laos     | 2005 | Female | 85 to 89 | 28%<br>(19-38%)                | 72%<br>(62-81%)          | 1.1<br>(0.64-1.8)                           | 2.7%<br>(0.83-5.5%)                  | 3.2%<br>(0.95-6.5%)                 | 25<br>(7.5-51)      | 190<br>(57-380)        |
| Laos     | 2005 | Female | 90 to 94 | 29%<br>(20-40%)                | 71%<br>(60-80%)          | 1.1<br>(0.64-1.9)                           | 2.4%<br>(0.4-5.3%)                   | 2.8%<br>(0.39-6.2%)                 | 7.4<br>(1-17)       | 38<br>(6.3-84)         |

| Location | Year | Sex    | Age      | Prevalence of current drinkers | Prevalence of abstainers | Population average of standard drinks daily | Percent of total attributable deaths | Percent of total attributable DALYs | Attributable deaths | Attributable DALYs     |
|----------|------|--------|----------|--------------------------------|--------------------------|---------------------------------------------|--------------------------------------|-------------------------------------|---------------------|------------------------|
| Laos     | 2005 | Female | 95 plus  | 32%<br>(21-44%)                | 68%<br>(56-79%)          | 1.2<br>(0.56-2.1)                           | 2.5%<br>(-0.053-6.1%)                | 2.8%<br>(-0.17-7%)                  | 1.7<br>(-0.11-4.3)  | 5.9<br>(-0.13-15)      |
| Laos     | 2005 | Male   | All Ages | 51%<br>(46-58%)                | 49%<br>(42-54%)          | 1.4<br>(1.2-1.6)                            | 3.4%<br>(2.5-4.6%)                   | 5.2%<br>(3.6-7.1%)                  | 1500<br>(1100-2000) | 64000<br>(48000-82000) |
| Laos     | 2005 | Male   | 15 to 19 | 48%<br>(39-58%)                | 52%<br>(42-61%)          | 0.99<br>(0.65-1.3)                          | 3.6%<br>(2.2-5.3%)                   | 4.9%<br>(2.8-7.3%)                  | 31<br>(18-47)       | 2500<br>(1500-3700)    |
| Laos     | 2005 | Male   | 20 to 24 | 69%<br>(60-76%)                | 31%<br>(24-40%)          | 2.3<br>(1.7-3)                              | 9.7%<br>(6.4-13%)                    | 12%<br>(8-17%)                      | 97<br>(61-130)      | 6900<br>(4600-9400)    |
| Laos     | 2005 | Male   | 25 to 29 | 75%<br>(69-80%)                | 25%<br>(20-31%)          | 2.9<br>(2.1-3.7)                            | 13%<br>(8.2-17%)                     | 16%<br>(10-22%)                     | 120<br>(75-160)     | 7800<br>(5000-10000)   |
| Laos     | 2005 | Male   | 30 to 34 | 79%<br>(73-83%)                | 21%<br>(17-27%)          | 3.3<br>(2.5-4.1)                            | 14%<br>(9.5-18%)                     | 17%<br>(12-23%)                     | 130<br>(85-170)     | 7600<br>(5300-10000)   |
| Laos     | 2005 | Male   | 35 to 39 | 79%<br>(74-84%)                | 21%<br>(16-26%)          | 3.3<br>(2.5-4.2)                            | 14%<br>(9.9-19%)                     | 17%<br>(12-24%)                     | 130<br>(92-180)     | 7200<br>(5000-9800)    |
| Laos     | 2005 | Male   | 40 to 44 | 78%<br>(73-83%)                | 22%<br>(17-27%)          | 3.2<br>(2.4-4.2)                            | 13%<br>(9.2-18%)                     | 16%<br>(11-23%)                     | 140<br>(94-200)     | 6800<br>(4700-9300)    |
| Laos     | 2005 | Male   | 45 to 49 | 75%<br>(69-81%)                | 25%<br>(19-31%)          | 3.2<br>(2.3-4.1)                            | 13%<br>(8.8-18%)                     | 16%<br>(11-22%)                     | 160<br>(100-220)    | 6800<br>(4500-9300)    |
| Laos     | 2005 | Male   | 50 to 54 | 72%<br>(65-78%)                | 28%<br>(22-35%)          | 2.9<br>(2-3.9)                              | 11%<br>(7.1-17%)                     | 14%<br>(8.5-20%)                    | 160<br>(95-230)     | 5800<br>(3600-8400)    |
| Laos     | 2005 | Male   | 55 to 59 | 70%<br>(61-78%)                | 30%<br>(22-39%)          | 2.5<br>(1.7-3.4)                            | 8.9%<br>(5-13%)                      | 11%<br>(5.8-16%)                    | 120<br>(66-180)     | 4000<br>(2200-5900)    |
| Laos     | 2005 | Male   | 60 to 64 | 63%<br>(53-72%)                | 37%<br>(28-47%)          | 2<br>(1.4-3)                                | 6.9%<br>(3.1-12%)                    | 8.2%<br>(3.7-14%)                   | 110<br>(49-190)     | 3000<br>(1400-5100)    |
| Laos     | 2005 | Male   | 65 to 69 | 53%<br>(42-63%)                | 47%<br>(37-58%)          | 1.6<br>(1.1-2.2)                            | 5.5%<br>(2.6-9%)                     | 6.4%<br>(3-11%)                     | 100<br>(49-170)     | 2300<br>(1100-3800)    |
| Laos     | 2005 | Male   | 70 to 74 | 53%<br>(42-63%)                | 47%<br>(37-58%)          | 1.6<br>(1-2.2)                              | 5.1%<br>(2.1-8.6%)                   | 6%<br>(2.4-9.9%)                    | 100<br>(43-170)     | 1900<br>(780-3100)     |
| Laos     | 2005 | Male   | 75 to 79 | 55%<br>(43-67%)                | 45%<br>(33-57%)          | 1.5<br>(0.99-2.3)                           | 3.9%<br>(0.98-7.3%)                  | 4.5%<br>(1-8.4%)                    | 69<br>(16-130)      | 990<br>(250-1800)      |
| Laos     | 2005 | Male   | 80 to 84 | 50%<br>(35-63%)                | 50%<br>(37-65%)          | 1.2<br>(0.74-1.8)                           | 3%<br>(0.67-5.7%)                    | 3.5%<br>(0.69-6.5%)                 | 35<br>(6.8-66)      | 370<br>(81-690)        |
| Laos     | 2005 | Male   | 85 to 89 | 42%<br>(28-57%)                | 58%<br>(43-72%)          | 0.92<br>(0.53-1.4)                          | 1.7%<br>(0.18-3.8%)                  | 2%<br>(0.1-4.4%)                    | 11<br>(0.55-24)     | 82<br>(8.8-180)        |
| Laos     | 2005 | Male   | 90 to 94 | 41%<br>(28-55%)                | 59%<br>(45-72%)          | 0.8<br>(0.45-1.3)                           | 1%<br>(-0.25-2.6%)                   | 1.1%<br>(-0.46-2.9%)                | 2.1<br>(-0.88-5.6)  | 12<br>(-2.9-30)        |
| Laos     | 2005 | Male   | 95 plus  | 42%<br>(26-61%)                | 58%<br>(39-74%)          | 0.72<br>(0.34-1.4)                          | 0.71%<br>(-0.92-2.5%)                | 0.64%<br>(-0.92-2.7%)               | 0.28<br>(-0.4-1.2)  | 1.2<br>(-1-4.1)        |
| Laos     | 2010 | Female | All Ages | 24%<br>(20-27%)                | 76%<br>(73-80%)          | 0.63<br>(0.51-0.76)                         | 1.2%<br>(0.71-1.9%)                  | 2.4%<br>(1.1-4%)                    | 560<br>(280-920)    | 18000<br>(11000-26000) |
| Laos     | 2010 | Female | 15 to 19 | 23%<br>(15-31%)                | 77%<br>(69-85%)          | 0.71<br>(0.42-1.1)                          | 1.7%<br>(0.98-2.8%)                  | 2.7%<br>(1.4-4.5%)                  | 13<br>(6.5-21)      | 1100<br>(630-1800)     |
| Laos     | 2010 | Female | 20 to 24 | 30%<br>(20-40%)                | 70%<br>(60-80%)          | 0.98<br>(0.59-1.5)                          | 2.4%<br>(1.4-3.9%)                   | 3.2%<br>(1.5-5.5%)                  | 18<br>(8.1-31)      | 1600<br>(860-2500)     |

| Location | Year | Sex    | Age      | Prevalence of current drinkers | Prevalence of abstainers | Population average of standard drinks daily | Percent of total attributable deaths | Percent of total attributable DALYs | Attributable deaths | Attributable DALYs     |
|----------|------|--------|----------|--------------------------------|--------------------------|---------------------------------------------|--------------------------------------|-------------------------------------|---------------------|------------------------|
| Laos     | 2010 | Female | 25 to 29 | 31%<br>(21-41%)                | 69%<br>(59-79%)          | 0.98<br>(0.62-1.5)                          | 2.5%<br>(1.5-4%)                     | 3.4%<br>(1.7-5.8%)                  | 17<br>(8.2-28)      | 1300<br>(750-2100)     |
| Laos     | 2010 | Female | 30 to 34 | 32%<br>(22-44%)                | 68%<br>(56-78%)          | 1<br>(0.61-1.6)                             | 2.4%<br>(1.4-3.8%)                   | 3.4%<br>(1.7-5.6%)                  | 16<br>(8.2-27)      | 1100<br>(670-1800)     |
| Laos     | 2010 | Female | 35 to 39 | 34%<br>(23-45%)                | 66%<br>(55-77%)          | 1.1<br>(0.67-1.8)                           | 3%<br>(1.6-4.7%)                     | 4.4%<br>(2.3-7%)                    | 23<br>(12-38)       | 1400<br>(740-2100)     |
| Laos     | 2010 | Female | 40 to 44 | 33%<br>(24-44%)                | 67%<br>(56-76%)          | 1.2<br>(0.71-1.8)                           | 3.1%<br>(1.6-5.1%)                   | 4.7%<br>(2.4-7.6%)                  | 27<br>(14-44)       | 1400<br>(740-2200)     |
| Laos     | 2010 | Female | 45 to 49 | 32%<br>(21-42%)                | 68%<br>(58-79%)          | 1.1<br>(0.65-1.9)                           | 3.1%<br>(1.4-5.5%)                   | 4.6%<br>(2-8%)                      | 32<br>(14-56)       | 1400<br>(610-2500)     |
| Laos     | 2010 | Female | 50 to 54 | 32%<br>(22-42%)                | 68%<br>(58-78%)          | 1.1<br>(0.63-1.9)                           | 3.2%<br>(0.92-6.2%)                  | 4.4%<br>(1.3-8.4%)                  | 37<br>(11-72)       | 1400<br>(420-2800)     |
| Laos     | 2010 | Female | 55 to 59 | 32%<br>(23-43%)                | 68%<br>(57-77%)          | 1.2<br>(0.63-1.9)                           | 2.9%<br>(0.73-6.3%)                  | 3.9%<br>(0.92-8.4%)                 | 41<br>(9.9-87)      | 1300<br>(340-2900)     |
| Laos     | 2010 | Female | 60 to 64 | 30%<br>(20-41%)                | 70%<br>(59-80%)          | 1.1<br>(0.61-2)                             | 2.7%<br>(0.51-6.4%)                  | 3.5%<br>(0.67-8%)                   | 44<br>(8.4-100)     | 1200<br>(230-2800)     |
| Laos     | 2010 | Female | 65 to 69 | 27%<br>(18-36%)                | 73%<br>(64-82%)          | 1.1<br>(0.63-1.8)                           | 2.9%<br>(0.75-6%)                    | 3.6%<br>(0.93-7.4%)                 | 53<br>(14-110)      | 1200<br>(320-2500)     |
| Laos     | 2010 | Female | 70 to 74 | 25%<br>(18-35%)                | 75%<br>(65-82%)          | 1.1<br>(0.64-1.9)                           | 3.2%<br>(0.82-6.5%)                  | 3.8%<br>(1-7.9%)                    | 70<br>(19-140)      | 1300<br>(330-2600)     |
| Laos     | 2010 | Female | 75 to 79 | 26%<br>(18-37%)                | 74%<br>(63-82%)          | 1.2<br>(0.65-2)                             | 3.1%<br>(0.59-6.4%)                  | 3.6%<br>(0.67-7.8%)                 | 66<br>(12-140)      | 950<br>(180-2000)      |
| Laos     | 2010 | Female | 80 to 84 | 27%<br>(18-37%)                | 73%<br>(63-82%)          | 1.2<br>(0.68-1.9)                           | 3.2%<br>(0.99-6.3%)                  | 3.8%<br>(1.2-7.5%)                  | 56<br>(17-110)      | 590<br>(180-1200)      |
| Laos     | 2010 | Female | 85 to 89 | 28%<br>(19-38%)                | 72%<br>(62-81%)          | 1.2<br>(0.68-1.9)                           | 2.9%<br>(0.78-5.8%)                  | 3.4%<br>(0.89-6.8%)                 | 32<br>(8.4-64)      | 240<br>(65-480)        |
| Laos     | 2010 | Female | 90 to 94 | 30%<br>(20-40%)                | 70%<br>(60-80%)          | 1.2<br>(0.67-2.1)                           | 2.5%<br>(0.38-5.7%)                  | 3%<br>(0.39-6.7%)                   | 10<br>(1.4-23)      | 53<br>(8.3-120)        |
| Laos     | 2010 | Female | 95 plus  | 32%<br>(20-45%)                | 68%<br>(55-80%)          | 1.3<br>(0.58-2.4)                           | 2.7%<br>(-0.077-6.6%)                | 3%<br>(-0.18-7.5%)                  | 2.4<br>(-0.15-6.2)  | 8.5<br>(-0.24-21)      |
| Laos     | 2010 | Male   | All Ages | 48%<br>(41-54%)                | 52%<br>(46-59%)          | 1.4<br>(1.2-1.7)                            | 3.6%<br>(2.3-4.9%)                   | 5.2%<br>(3.2-7.1%)                  | 1400<br>(940-1900)  | 61000<br>(42000-78000) |
| Laos     | 2010 | Male   | 15 to 19 | 44%<br>(32-56%)                | 56%<br>(44-68%)          | 0.93<br>(0.57-1.3)                          | 3.3%<br>(2-5.1%)                     | 4.7%<br>(2.6-7.2%)                  | 30<br>(17-47)       | 2500<br>(1500-3700)    |
| Laos     | 2010 | Male   | 20 to 24 | 64%<br>(51-74%)                | 36%<br>(26-49%)          | 2.2<br>(1.5-3)                              | 8.8%<br>(5.7-12%)                    | 11%<br>(7-16%)                      | 96<br>(59-140)      | 7000<br>(4500-9700)    |
| Laos     | 2010 | Male   | 25 to 29 | 70%<br>(58-79%)                | 30%<br>(21-42%)          | 2.7<br>(1.9-3.6)                            | 11%<br>(6.1-15%)                     | 14%<br>(7.2-20%)                    | 110<br>(56-150)     | 7300<br>(4000-10000)   |
| Laos     | 2010 | Male   | 30 to 34 | 73%<br>(62-81%)                | 27%<br>(19-38%)          | 3.1<br>(2.2-4)                              | 12%<br>(6.8-16%)                     | 15%<br>(8.3-21%)                    | 110<br>(61-160)     | 6800<br>(3900-9400)    |
| Laos     | 2010 | Male   | 35 to 39 | 75%<br>(64-82%)                | 25%<br>(18-36%)          | 3.2<br>(2.3-4.3)                            | 12%<br>(7.8-17%)                     | 16%<br>(9.5-22%)                    | 120<br>(72-170)     | 6600<br>(4100-9300)    |
| Laos     | 2010 | Male   | 40 to 44 | 74%<br>(64-81%)                | 26%<br>(19-36%)          | 3.1<br>(2.2-4.3)                            | 12%<br>(7.8-17%)                     | 15%<br>(9.6-21%)                    | 120<br>(78-180)     | 6100<br>(4000-8600)    |

| Location | Year | Sex    | Age      | Prevalence of current drinkers | Prevalence of abstainers | Population average of standard drinks daily | Percent of total attributable deaths | Percent of total attributable DALYs | Attributable deaths | Attributable DALYs    |
|----------|------|--------|----------|--------------------------------|--------------------------|---------------------------------------------|--------------------------------------|-------------------------------------|---------------------|-----------------------|
| Laos     | 2010 | Male   | 45 to 49 | 70%<br>(57-79%)                | 30%<br>(21-43%)          | 3<br>(2.1-4.2)                              | 12%<br>(7.5-17%)                     | 15%<br>(9.3-21%)                    | 150<br>(92-210)     | 6300<br>(4100-9000)   |
| Laos     | 2010 | Male   | 50 to 54 | 68%<br>(57-76%)                | 32%<br>(24-43%)          | 2.8<br>(1.8-3.9)                            | 10%<br>(6.1-15%)                     | 13%<br>(7.4-19%)                    | 150<br>(87-220)     | 5600<br>(3300-8300)   |
| Laos     | 2010 | Male   | 55 to 59 | 66%<br>(53-76%)                | 34%<br>(24-47%)          | 2.4<br>(1.5-3.4)                            | 8%<br>(4.1-12%)                      | 9.6%<br>(4.9-15%)                   | 130<br>(66-200)     | 4300<br>(2200-6700)   |
| Laos     | 2010 | Male   | 60 to 64 | 61%<br>(47-73%)                | 39%<br>(27-53%)          | 2<br>(1.3-3.1)                              | 6.3%<br>(2.9-11%)                    | 7.4%<br>(3.4-13%)                   | 100<br>(48-180)     | 2900<br>(1400-5100)   |
| Laos     | 2010 | Male   | 65 to 69 | 54%<br>(41-66%)                | 46%<br>(34-59%)          | 1.7<br>(1.1-2.5)                            | 5.2%<br>(2.5-8.6%)                   | 6.1%<br>(2.9-10%)                   | 95<br>(45-160)      | 2200<br>(1100-3700)   |
| Laos     | 2010 | Male   | 70 to 74 | 50%<br>(37-62%)                | 50%<br>(38-63%)          | 1.5<br>(0.97-2.4)                           | 4.6%<br>(1.9-7.7%)                   | 5.3%<br>(2.2-8.9%)                  | 93<br>(37-160)      | 1700<br>(730-2900)    |
| Laos     | 2010 | Male   | 75 to 79 | 50%<br>(35-65%)                | 50%<br>(35-65%)          | 1.4<br>(0.83-2.2)                           | 3.3%<br>(0.9-6.2%)                   | 3.8%<br>(0.92-7.2%)                 | 61<br>(15-120)      | 890<br>(230-1700)     |
| Laos     | 2010 | Male   | 80 to 84 | 47%<br>(31-62%)                | 53%<br>(38-69%)          | 1.2<br>(0.71-1.8)                           | 2.7%<br>(0.67-5.1%)                  | 3%<br>(0.68-6%)                     | 33<br>(7.4-65)      | 360<br>(90-690)       |
| Laos     | 2010 | Male   | 85 to 89 | 43%<br>(29-57%)                | 57%<br>(43-71%)          | 0.97<br>(0.56-1.5)                          | 1.6%<br>(0.15-3.4%)                  | 1.8%<br>(0.026-3.7%)                | 11<br>(0.17-24)     | 89<br>(8.6-190)       |
| Laos     | 2010 | Male   | 90 to 94 | 42%<br>(28-57%)                | 58%<br>(43-72%)          | 0.85<br>(0.47-1.4)                          | 0.89%<br>(-0.34-2.4%)                | 0.93%<br>(-0.56-2.7%)               | 2.2<br>(-1.3-6.5)   | 13<br>(-4.8-35)       |
| Laos     | 2010 | Male   | 95 plus  | 43%<br>(26-61%)                | 57%<br>(39-74%)          | 0.76<br>(0.34-1.4)                          | 0.59%<br>(-0.66-2.4%)                | 0.49%<br>(-1-2.6%)                  | 0.27<br>(-0.55-1.4) | 1.3<br>(-1.4-5.2)     |
| Laos     | 2016 | Female | All Ages | 23%<br>(20-27%)                | 77%<br>(73-80%)          | 0.66<br>(0.45-0.92)                         | 1.4%<br>(0.59-2.4%)                  | 2.6%<br>(0.92-4.9%)                 | 560<br>(200-1000)   | 18000<br>(8300-29000) |
| Laos     | 2016 | Female | 15 to 19 | 22%<br>(15-30%)                | 78%<br>(70-85%)          | 0.73<br>(0.36-1.2)                          | 1.7%<br>(0.88-2.7%)                  | 2.8%<br>(1.3-4.8%)                  | 9<br>(3.9-16)       | 850<br>(450-1400)     |
| Laos     | 2016 | Female | 20 to 24 | 29%<br>(19-39%)                | 71%<br>(61-81%)          | 1<br>(0.52-1.6)                             | 2.3%<br>(1.3-3.8%)                   | 3.3%<br>(1.4-5.8%)                  | 15<br>(6.3-27)      | 1400<br>(770-2300)    |
| Laos     | 2016 | Female | 25 to 29 | 30%<br>(21-41%)                | 70%<br>(59-79%)          | 1<br>(0.58-1.6)                             | 2.3%<br>(1.3-3.7%)                   | 3.3%<br>(1.5-5.8%)                  | 15<br>(6.7-26)      | 1300<br>(710-2100)    |
| Laos     | 2016 | Female | 30 to 34 | 31%<br>(21-43%)                | 69%<br>(57-79%)          | 1<br>(0.58-1.7)                             | 2.3%<br>(1.2-3.6%)                   | 3.3%<br>(1.5-5.8%)                  | 14<br>(6.3-25)      | 1100<br>(580-1800)    |
| Laos     | 2016 | Female | 35 to 39 | 33%<br>(22-44%)                | 67%<br>(56-78%)          | 1.2<br>(0.63-1.9)                           | 2.7%<br>(1.4-4.5%)                   | 4.3%<br>(1.9-7.2%)                  | 20<br>(9-35)        | 1300<br>(630-2100)    |
| Laos     | 2016 | Female | 40 to 44 | 33%<br>(23-43%)                | 67%<br>(57-77%)          | 1.2<br>(0.64-2)                             | 3%<br>(1.4-5.1%)                     | 4.7%<br>(2.1-8%)                    | 26<br>(12-45)       | 1400<br>(640-2400)    |
| Laos     | 2016 | Female | 45 to 49 | 31%<br>(21-42%)                | 69%<br>(58-79%)          | 1.2<br>(0.64-2)                             | 3%<br>(1.2-5.4%)                     | 4.5%<br>(1.8-8.4%)                  | 31<br>(12-58)       | 1400<br>(570-2600)    |
| Laos     | 2016 | Female | 50 to 54 | 31%<br>(22-42%)                | 69%<br>(58-78%)          | 1.2<br>(0.61-2.1)                           | 3%<br>(0.85-6.1%)                    | 4.4%<br>(1.2-8.8%)                  | 39<br>(11-77)       | 1500<br>(410-3000)    |
| Laos     | 2016 | Female | 55 to 59 | 32%<br>(23-43%)                | 68%<br>(57-77%)          | 1.2<br>(0.62-2.2)                           | 2.9%<br>(0.5-6.5%)                   | 4%<br>(0.74-9%)                     | 44<br>(8.4-97)      | 1500<br>(250-3300)    |
| Laos     | 2016 | Female | 60 to 64 | 30%<br>(20-41%)                | 70%<br>(59-80%)          | 1.2<br>(0.61-2.2)                           | 2.7%<br>(0.35-6.6%)                  | 3.5%<br>(0.47-8.5%)                 | 47<br>(6.6-110)     | 1300<br>(170-3200)    |

| Location | Year | Sex    | Age      | Prevalence of current drinkers | Prevalence of abstainers | Population average of standard drinks daily | Percent of total attributable deaths | Percent of total attributable DALYs | Attributable deaths | Attributable DALYs     |
|----------|------|--------|----------|--------------------------------|--------------------------|---------------------------------------------|--------------------------------------|-------------------------------------|---------------------|------------------------|
| Laos     | 2016 | Female | 65 to 69 | 26%<br>(18-35%)                | 74%<br>(65-82%)          | 1.1<br>(0.6-2)                              | 2.8%<br>(0.54-6.2%)                  | 3.6%<br>(0.72-7.9%)                 | 56<br>(11-120)      | 1300<br>(260-2800)     |
| Laos     | 2016 | Female | 70 to 74 | 25%<br>(18-35%)                | 75%<br>(65-82%)          | 1.2<br>(0.62-2.1)                           | 3.1%<br>(0.47-6.6%)                  | 3.8%<br>(0.57-8%)                   | 66<br>(10-140)      | 1200<br>(180-2700)     |
| Laos     | 2016 | Female | 75 to 79 | 26%<br>(17-37%)                | 74%<br>(63-83%)          | 1.2<br>(0.62-2.1)                           | 3%<br>(0.23-6.7%)                    | 3.6%<br>(0.2-8.1%)                  | 65<br>(3.6-150)     | 950<br>(71-2200)       |
| Laos     | 2016 | Female | 80 to 84 | 27%<br>(18-37%)                | 73%<br>(63-82%)          | 1.2<br>(0.67-2)                             | 3.2%<br>(0.65-6.7%)                  | 3.8%<br>(0.74-8.1%)                 | 56<br>(11-120)      | 600<br>(120-1300)      |
| Laos     | 2016 | Female | 85 to 89 | 28%<br>(18-38%)                | 72%<br>(62-82%)          | 1.2<br>(0.65-2.1)                           | 2.9%<br>(0.48-6.5%)                  | 3.4%<br>(0.49-7.6%)                 | 37<br>(5.1-82)      | 280<br>(46-610)        |
| Laos     | 2016 | Female | 90 to 94 | 29%<br>(20-40%)                | 71%<br>(60-80%)          | 1.3<br>(0.67-2.2)                           | 2.6%<br>(0.17-6.5%)                  | 3.1%<br>(0.15-7.7%)                 | 15<br>(0.74-38)     | 78<br>(5.3-190)        |
| Laos     | 2016 | Female | 95 plus  | 32%<br>(20-45%)                | 68%<br>(55-80%)          | 1.4<br>(0.57-2.6)                           | 2.8%<br>(-0.14-7.2%)                 | 3.1%<br>(-0.28-8%)                  | 3.9<br>(-0.34-10)   | 14<br>(-0.67-35)       |
| Laos     | 2016 | Male   | All Ages | 49%<br>(42-55%)                | 51%<br>(45-58%)          | 1.5<br>(1.1-2.1)                            | 3.9%<br>(2.2-5.9%)                   | 5.4%<br>(2.9-8.3%)                  | 1400<br>(800-2100)  | 62000<br>(38000-87000) |
| Laos     | 2016 | Male   | 15 to 19 | 43%<br>(31-56%)                | 57%<br>(44-69%)          | 0.96<br>(0.52-1.5)                          | 3.3%<br>(1.9-5.2%)                   | 4.8%<br>(2.5-7.8%)                  | 26<br>(14-42)       | 2100<br>(1200-3300)    |
| Laos     | 2016 | Male   | 20 to 24 | 64%<br>(50-74%)                | 36%<br>(26-50%)          | 2.3<br>(1.4-3.4)                            | 8.5%<br>(5.3-12%)                    | 11%<br>(6.6-17%)                    | 94<br>(54-140)      | 7100<br>(4400-10000)   |
| Laos     | 2016 | Male   | 25 to 29 | 70%<br>(58-79%)                | 30%<br>(21-42%)          | 2.8<br>(1.9-4.3)                            | 10%<br>(5.8-15%)                     | 14%<br>(6.8-20%)                    | 110<br>(57-170)     | 7900<br>(4300-11000)   |
| Laos     | 2016 | Male   | 30 to 34 | 73%<br>(63-81%)                | 27%<br>(19-37%)          | 3.2<br>(2.1-4.7)                            | 11%<br>(5.1-16%)                     | 14%<br>(5.8-21%)                    | 110<br>(43-160)     | 7000<br>(3200-10000)   |
| Laos     | 2016 | Male   | 35 to 39 | 75%<br>(63-82%)                | 25%<br>(18-37%)          | 3.3<br>(2.1-4.9)                            | 11%<br>(5.9-17%)                     | 15%<br>(6.9-22%)                    | 120<br>(55-180)     | 6600<br>(3400-9600)    |
| Laos     | 2016 | Male   | 40 to 44 | 74%<br>(63-81%)                | 26%<br>(19-37%)          | 3.3<br>(2-4.8)                              | 11%<br>(6.3-17%)                     | 14%<br>(7.5-21%)                    | 120<br>(63-180)     | 6000<br>(3300-9100)    |
| Laos     | 2016 | Male   | 45 to 49 | 70%<br>(57-79%)                | 30%<br>(21-43%)          | 3.2<br>(2-4.8)                              | 11%<br>(6.4-16%)                     | 14%<br>(7.8-21%)                    | 140<br>(76-210)     | 6100<br>(3400-9200)    |
| Laos     | 2016 | Male   | 50 to 54 | 68%<br>(56-77%)                | 32%<br>(23-44%)          | 2.9<br>(1.7-4.5)                            | 9.7%<br>(5.2-15%)                    | 12%<br>(6.4-19%)                    | 150<br>(77-230)     | 5700<br>(3000-8900)    |
| Laos     | 2016 | Male   | 55 to 59 | 66%<br>(54-76%)                | 34%<br>(24-46%)          | 2.5<br>(1.5-3.9)                            | 7.7%<br>(3.5-13%)                    | 9.3%<br>(4.1-16%)                   | 130<br>(60-230)     | 4400<br>(2000-7700)    |
| Laos     | 2016 | Male   | 60 to 64 | 61%<br>(47-73%)                | 39%<br>(27-53%)          | 2.1<br>(1.2-3.6)                            | 6%<br>(2.4-12%)                      | 7.2%<br>(2.7-14%)                   | 120<br>(46-230)     | 3400<br>(1300-6600)    |
| Laos     | 2016 | Male   | 65 to 69 | 53%<br>(40-65%)                | 47%<br>(35-60%)          | 1.8<br>(1-3)                                | 4.9%<br>(2-9.6%)                     | 5.8%<br>(2.3-11%)                   | 98<br>(39-190)      | 2300<br>(950-4400)     |
| Laos     | 2016 | Male   | 70 to 74 | 49%<br>(37-62%)                | 51%<br>(38-63%)          | 1.6<br>(0.93-2.6)                           | 4.2%<br>(1.5-8%)                     | 4.9%<br>(1.7-9.3%)                  | 84<br>(30-160)      | 1600<br>(570-3100)     |
| Laos     | 2016 | Male   | 75 to 79 | 50%<br>(34-64%)                | 50%<br>(36-66%)          | 1.5<br>(0.79-2.5)                           | 3.1%<br>(0.67-6.7%)                  | 3.5%<br>(0.69-7.8%)                 | 58<br>(11-130)      | 860<br>(180-1900)      |
| Laos     | 2016 | Male   | 80 to 84 | 47%<br>(31-61%)                | 53%<br>(39-69%)          | 1.2<br>(0.67-2)                             | 2.4%<br>(0.44-5.3%)                  | 2.7%<br>(0.41-6.2%)                 | 32<br>(5-73)        | 350<br>(66-780)        |

| Location | Year | Sex    | Age      | Prevalence of current drinkers | Prevalence of abstainers | Population average of standard drinks daily | Percent of total attributable deaths | Percent of total attributable DALYs | Attributable deaths | Attributable DALYs       |
|----------|------|--------|----------|--------------------------------|--------------------------|---------------------------------------------|--------------------------------------|-------------------------------------|---------------------|--------------------------|
| Laos     | 2016 | Male   | 85 to 89 | 42%<br>(28-57%)                | 58%<br>(43-72%)          | 1<br>(0.53-1.6)                             | 1.5%<br>(-0.0076-3.6%)               | 1.6%<br>(-0.15-4.2%)                | 12<br>(-1.2-31)     | 96<br>(-0.5-240)         |
| Laos     | 2016 | Male   | 90 to 94 | 41%<br>(28-55%)                | 59%<br>(45-72%)          | 0.88<br>(0.46-1.5)                          | 0.8%<br>(-0.48-2.6%)                 | 0.8%<br>(-0.76-2.9%)                | 2.5<br>(-2.3-9)     | 15<br>(-9-49)            |
| Laos     | 2016 | Male   | 95 plus  | 42%<br>(26-60%)                | 58%<br>(40-74%)          | 0.79<br>(0.34-1.5)                          | 0.53%<br>(-0.78-2.4%)                | 0.39%<br>(-1.1-2.5%)                | 0.29<br>(-0.82-1.8) | 1.5<br>(-2.3-6.8)        |
| Malaysia | 1990 | Female | All Ages | 2.5%<br>(2.1-3.1%)             | 97%<br>(97-98%)          | 0.46<br>(0.32-0.62)                         | 1.4%<br>(1.1-1.9%)                   | 2.6%<br>(1.8-3.5%)                  | 910<br>(640-1300)   | 27000<br>(21000-35000)   |
| Malaysia | 1990 | Female | 15 to 19 | 2.4%<br>(1.4-3.7%)             | 98%<br>(96-99%)          | 0.42<br>(0.2-0.77)                          | 0.93%<br>(0.62-1.4%)                 | 1.9%<br>(1.1-3%)                    | 8.8<br>(5.2-14)     | 950<br>(630-1400)        |
| Malaysia | 1990 | Female | 20 to 24 | 2.9%<br>(1.6-4.4%)             | 97%<br>(96-98%)          | 0.56<br>(0.27-1)                            | 1.3%<br>(0.9-1.9%)                   | 2.2%<br>(1.3-3.4%)                  | 12<br>(7.1-19)      | 1400<br>(930-2000)       |
| Malaysia | 1990 | Female | 25 to 29 | 3.1%<br>(1.8-4.9%)             | 97%<br>(95-98%)          | 0.66<br>(0.33-1.1)                          | 1.5%<br>(1-2.1%)                     | 2.5%<br>(1.5-3.8%)                  | 15<br>(9-24)        | 1600<br>(1100-2300)      |
| Malaysia | 1990 | Female | 30 to 34 | 3.3%<br>(1.8-5.5%)             | 97%<br>(95-98%)          | 0.72<br>(0.37-1.3)                          | 1.6%<br>(1.1-2.3%)                   | 2.7%<br>(1.6-4.2%)                  | 19<br>(12-29)       | 1600<br>(1100-2400)      |
| Malaysia | 1990 | Female | 35 to 39 | 3.5%<br>(1.9-5.4%)             | 96%<br>(95-98%)          | 0.73<br>(0.35-1.2)                          | 1.7%<br>(1.1-2.4%)                   | 3%<br>(1.8-4.4%)                    | 25<br>(15-37)       | 1800<br>(1100-2500)      |
| Malaysia | 1990 | Female | 40 to 44 | 3.6%<br>(2.1-5.5%)             | 96%<br>(95-98%)          | 0.81<br>(0.39-1.4)                          | 1.9%<br>(1.2-2.7%)                   | 3.2%<br>(2.1-4.7%)                  | 32<br>(20-47)       | 1800<br>(1200-2600)      |
| Malaysia | 1990 | Female | 45 to 49 | 3.5%<br>(2-5.4%)               | 96%<br>(95-98%)          | 0.97<br>(0.44-1.7)                          | 2.1%<br>(1.4-3.1%)                   | 3.5%<br>(2.2-5.2%)                  | 39<br>(25-58)       | 1900<br>(1200-2700)      |
| Malaysia | 1990 | Female | 50 to 54 | 3.6%<br>(2.2-5.5%)             | 96%<br>(94-98%)          | 1.1<br>(0.49-2)                             | 2.5%<br>(1.6-3.7%)                   | 3.7%<br>(2.3-5.5%)                  | 63<br>(39-95)       | 2600<br>(1600-3800)      |
| Malaysia | 1990 | Female | 55 to 59 | 3.7%<br>(2.2-5.7%)             | 96%<br>(94-98%)          | 1.1<br>(0.52-2)                             | 2.6%<br>(1.6-4.1%)                   | 3.6%<br>(2.3-5.7%)                  | 76<br>(47-120)      | 2600<br>(1600-4000)      |
| Malaysia | 1990 | Female | 60 to 64 | 3.6%<br>(2.1-5.8%)             | 96%<br>(94-98%)          | 1.1<br>(0.48-2)                             | 2.5%<br>(1.6-3.9%)                   | 3.3%<br>(2-5.1%)                    | 97<br>(60-150)      | 2800<br>(1700-4400)      |
| Malaysia | 1990 | Female | 65 to 69 | 3.4%<br>(1.9-5%)               | 97%<br>(95-98%)          | 1<br>(0.46-1.8)                             | 2.5%<br>(1.5-3.8%)                   | 3.1%<br>(1.8-4.7%)                  | 110<br>(65-170)     | 2600<br>(1500-3900)      |
| Malaysia | 1990 | Female | 70 to 74 | 3.2%<br>(2-5%)                 | 97%<br>(95-98%)          | 0.99<br>(0.43-1.9)                          | 2.4%<br>(1.4-3.9%)                   | 2.8%<br>(1.7-4.7%)                  | 130<br>(75-210)     | 2400<br>(1400-3900)      |
| Malaysia | 1990 | Female | 75 to 79 | 3.3%<br>(1.9-5.2%)             | 97%<br>(95-98%)          | 1<br>(0.41-2)                               | 2.2%<br>(1.2-3.6%)                   | 2.6%<br>(1.5-4.3%)                  | 110<br>(60-180)     | 1600<br>(870-2500)       |
| Malaysia | 1990 | Female | 80 to 84 | 3.4%<br>(1.8-5.1%)             | 97%<br>(95-98%)          | 1<br>(0.42-1.9)                             | 2.2%<br>(1.2-3.6%)                   | 2.6%<br>(1.4-4.3%)                  | 88<br>(45-140)      | 930<br>(480-1500)        |
| Malaysia | 1990 | Female | 85 to 89 | 3.5%<br>(2-5.5%)               | 96%<br>(94-98%)          | 1<br>(0.47-1.8)                             | 2.2%<br>(1.2-3.6%)                   | 2.5%<br>(1.4-4.3%)                  | 58<br>(30-97)       | 430<br>(230-730)         |
| Malaysia | 1990 | Female | 90 to 94 | 3.8%<br>(2.3-6%)               | 96%<br>(94-98%)          | 1.1<br>(0.45-2.1)                           | 2.1%<br>(1.2-3.6%)                   | 2.5%<br>(1.3-4.3%)                  | 23<br>(12-39)       | 120<br>(65-200)          |
| Malaysia | 1990 | Female | 95 plus  | 4.3%<br>(2.5-7.1%)             | 96%<br>(93-98%)          | 1.2<br>(0.45-2.6)                           | 2.3%<br>(1.2-3.9%)                   | 2.7%<br>(1.4-4.6%)                  | 8.4<br>(4.4-15)     | 29<br>(15-49)            |
| Malaysia | 1990 | Male   | All Ages | 7.9%<br>(6.5-9.5%)             | 92%<br>(90-94%)          | 1.8<br>(1.3-2.3)                            | 4.9%<br>(3.9-6%)                     | 6.5%<br>(5.1-8%)                    | 3100<br>(2400-3800) | 120000<br>(92000-140000) |

| Location | Year | Sex    | Age      | Prevalence of current drinkers | Prevalence of abstainers | Population average of standard drinks daily | Percent of total attributable deaths | Percent of total attributable DALYs | Attributable deaths | Attributable DALYs     |
|----------|------|--------|----------|--------------------------------|--------------------------|---------------------------------------------|--------------------------------------|-------------------------------------|---------------------|------------------------|
| Malaysia | 1990 | Male   | 15 to 19 | 7%<br>(4.3-10%)                | 93%<br>(90-96%)          | 0.87<br>(0.4-1.6)                           | 3.5%<br>(2.2-5.6%)                   | 5.4%<br>(3.1-8.8%)                  | 61<br>(36-98)       | 5100<br>(3100-7900)    |
| Malaysia | 1990 | Male   | 20 to 24 | 11%<br>(6.5-16%)               | 89%<br>(84-94%)          | 2.1<br>(1.1-3.6)                            | 7%<br>(4.3-10%)                      | 9.5%<br>(5.3-15%)                   | 130<br>(74-200)     | 10000<br>(6400-15000)  |
| Malaysia | 1990 | Male   | 25 to 29 | 12%<br>(7.5-18%)               | 88%<br>(82-93%)          | 2.8<br>(1.5-4.7)                            | 7.7%<br>(5.1-11%)                    | 11%<br>(6.8-16%)                    | 150<br>(91-210)     | 11000<br>(7300-15000)  |
| Malaysia | 1990 | Male   | 30 to 34 | 13%<br>(7.8-20%)               | 87%<br>(80-92%)          | 3.4<br>(1.9-5.5)                            | 7.8%<br>(5.3-11%)                    | 11%<br>(7.5-16%)                    | 150<br>(100-220)    | 10000<br>(7200-14000)  |
| Malaysia | 1990 | Male   | 35 to 39 | 13%<br>(8.2-19%)               | 87%<br>(81-92%)          | 4<br>(2.1-6.5)                              | 8%<br>(5.7-11%)                      | 12%<br>(8.2-16%)                    | 170<br>(110-230)    | 9900<br>(7100-13000)   |
| Malaysia | 1990 | Male   | 40 to 44 | 13%<br>(8.4-19%)               | 87%<br>(81-92%)          | 4.1<br>(2.1-6.6)                            | 8.3%<br>(5.9-11%)                    | 12%<br>(8.2-15%)                    | 190<br>(130-250)    | 10000<br>(7100-13000)  |
| Malaysia | 1990 | Male   | 45 to 49 | 13%<br>(7.6-19%)               | 87%<br>(81-92%)          | 3.7<br>(1.9-6.4)                            | 8.4%<br>(6-11%)                      | 11%<br>(8.1-15%)                    | 220<br>(160-290)    | 9900<br>(7100-13000)   |
| Malaysia | 1990 | Male   | 50 to 54 | 13%<br>(8-18%)                 | 87%<br>(82-92%)          | 3.7<br>(1.8-6.4)                            | 8%<br>(5.7-11%)                      | 10%<br>(7.2-14%)                    | 290<br>(210-390)    | 11000<br>(8100-15000)  |
| Malaysia | 1990 | Male   | 55 to 59 | 12%<br>(7.6-18%)               | 88%<br>(82-92%)          | 3.9<br>(1.9-6.8)                            | 7.7%<br>(5.3-11%)                    | 9.3%<br>(6.4-13%)                   | 310<br>(210-440)    | 10000<br>(7200-14000)  |
| Malaysia | 1990 | Male   | 60 to 64 | 11%<br>(7-17%)                 | 89%<br>(83-93%)          | 3.4<br>(1.6-6.2)                            | 6.8%<br>(4.6-9.5%)                   | 8%<br>(5.4-11%)                     | 340<br>(230-480)    | 9700<br>(6600-13000)   |
| Malaysia | 1990 | Male   | 65 to 69 | 9.6%<br>(6.1-14%)              | 90%<br>(86-94%)          | 2.6<br>(1.2-4.3)                            | 5.9%<br>(3.9-8.4%)                   | 6.8%<br>(4.5-9.8%)                  | 310<br>(210-440)    | 7200<br>(4800-10000)   |
| Malaysia | 1990 | Male   | 70 to 74 | 8.2%<br>(5.3-12%)              | 92%<br>(88-95%)          | 1.9<br>(0.9-3.4)                            | 4.9%<br>(3.3-7.1%)                   | 5.7%<br>(3.7-8.1%)                  | 290<br>(190-420)    | 5500<br>(3600-7900)    |
| Malaysia | 1990 | Male   | 75 to 79 | 7.4%<br>(4.6-12%)              | 93%<br>(88-95%)          | 1.6<br>(0.67-3.1)                           | 4%<br>(2.6-6%)                       | 4.6%<br>(2.9-6.9%)                  | 210<br>(130-320)    | 3000<br>(1900-4600)    |
| Malaysia | 1990 | Male   | 80 to 84 | 6.7%<br>(3.9-9.9%)             | 93%<br>(90-96%)          | 1.3<br>(0.62-2.5)                           | 3.6%<br>(2.3-5.3%)                   | 4.2%<br>(2.6-6.2%)                  | 140<br>(86-210)     | 1500<br>(930-2200)     |
| Malaysia | 1990 | Male   | 85 to 89 | 6.4%<br>(3.8-9.9%)             | 94%<br>(90-96%)          | 1.2<br>(0.55-2.2)                           | 3.2%<br>(1.9-4.8%)                   | 3.7%<br>(2.2-5.6%)                  | 79<br>(47-120)      | 600<br>(370-900)       |
| Malaysia | 1990 | Male   | 90 to 94 | 6.8%<br>(4.1-11%)              | 93%<br>(89-96%)          | 1.2<br>(0.52-2.3)                           | 2.9%<br>(1.8-4.3%)                   | 3.4%<br>(2-5.1%)                    | 27<br>(16-41)       | 140<br>(85-210)        |
| Malaysia | 1990 | Male   | 95 plus  | 7.9%<br>(4.3-13%)              | 92%<br>(87-96%)          | 1.3<br>(0.49-2.7)                           | 3.1%<br>(1.7-4.9%)                   | 3.4%<br>(1.9-5.6%)                  | 7.2<br>(3.9-12)     | 26<br>(14-42)          |
| Malaysia | 1995 | Female | All Ages | 2.6%<br>(2.1-3.1%)             | 97%<br>(97-98%)          | 0.38<br>(0.26-0.5)                          | 1.4%<br>(1.1-1.8%)                   | 2.5%<br>(1.8-3.5%)                  | 980<br>(700-1400)   | 29000<br>(22000-37000) |
| Malaysia | 1995 | Female | 15 to 19 | 2.4%<br>(1.4-3.6%)             | 98%<br>(96-99%)          | 0.34<br>(0.16-0.61)                         | 0.87%<br>(0.59-1.3%)                 | 1.8%<br>(1-2.9%)                    | 8.4<br>(4.9-13)     | 950<br>(620-1400)      |
| Malaysia | 1995 | Female | 20 to 24 | 2.9%<br>(1.6-4.5%)             | 97%<br>(96-98%)          | 0.45<br>(0.21-0.81)                         | 1.3%<br>(0.84-1.8%)                  | 2.1%<br>(1.3-3.2%)                  | 11<br>(6.6-17)      | 1400<br>(920-2000)     |
| Malaysia | 1995 | Female | 25 to 29 | 3.2%<br>(1.8-4.9%)             | 97%<br>(95-98%)          | 0.53<br>(0.27-0.91)                         | 1.4%<br>(0.97-2%)                    | 2.4%<br>(1.4-3.6%)                  | 14<br>(8.2-21)      | 1500<br>(1000-2200)    |
| Malaysia | 1995 | Female | 30 to 34 | 3.3%<br>(1.8-5.5%)             | 97%<br>(94-98%)          | 0.57<br>(0.3-1)                             | 1.5%<br>(1-2.1%)                     | 2.5%<br>(1.6-3.9%)                  | 18<br>(11-28)       | 1700<br>(1200-2500)    |



| Location | Year | Sex    | Age      | Prevalence of current drinkers | Prevalence of abstainers | Population average of standard drinks daily | Percent of total attributable deaths | Percent of total attributable DALYs | Attributable deaths | Attributable DALYs        |
|----------|------|--------|----------|--------------------------------|--------------------------|---------------------------------------------|--------------------------------------|-------------------------------------|---------------------|---------------------------|
| Malaysia | 1995 | Female | 35 to 39 | 3.5%<br>(1.8-5.4%)             | 96%<br>(95-98%)          | 0.57<br>(0.28-0.98)                         | 1.5%<br>(0.98-2.1%)                  | 2.7%<br>(1.7-4.1%)                  | 24<br>(15-36)       | 1800<br>(1200-2500)       |
| Malaysia | 1995 | Female | 40 to 44 | 3.5%<br>(2.1-5.5%)             | 96%<br>(95-98%)          | 0.63<br>(0.31-1.1)                          | 1.6%<br>(1.1-2.4%)                   | 2.9%<br>(1.9-4.2%)                  | 32<br>(20-47)       | 2000<br>(1300-2800)       |
| Malaysia | 1995 | Female | 45 to 49 | 3.5%<br>(2-5.3%)               | 96%<br>(95-98%)          | 0.76<br>(0.35-1.3)                          | 1.9%<br>(1.2-2.8%)                   | 3.1%<br>(2-4.7%)                    | 44<br>(28-67)       | 2200<br>(1400-3300)       |
| Malaysia | 1995 | Female | 50 to 54 | 3.6%<br>(2.2-5.4%)             | 96%<br>(95-98%)          | 0.86<br>(0.41-1.6)                          | 2.3%<br>(1.4-3.3%)                   | 3.4%<br>(2.1-5%)                    | 57<br>(36-85)       | 2400<br>(1500-3400)       |
| Malaysia | 1995 | Female | 55 to 59 | 3.7%<br>(2.2-5.6%)             | 96%<br>(94-98%)          | 0.87<br>(0.41-1.6)                          | 2.4%<br>(1.5-3.6%)                   | 3.4%<br>(2.1-5.1%)                  | 81<br>(51-120)      | 2800<br>(1800-4300)       |
| Malaysia | 1995 | Female | 60 to 64 | 3.6%<br>(2.1-5.7%)             | 96%<br>(94-98%)          | 0.84<br>(0.39-1.6)                          | 2.4%<br>(1.5-3.7%)                   | 3.1%<br>(1.9-4.8%)                  | 98<br>(60-150)      | 2800<br>(1800-4400)       |
| Malaysia | 1995 | Female | 65 to 69 | 3.4%<br>(1.9-5%)               | 97%<br>(95-98%)          | 0.8<br>(0.37-1.4)                           | 2.3%<br>(1.4-3.5%)                   | 2.9%<br>(1.7-4.5%)                  | 120<br>(71-180)     | 2800<br>(1700-4200)       |
| Malaysia | 1995 | Female | 70 to 74 | 3.2%<br>(2-5%)                 | 97%<br>(95-98%)          | 0.78<br>(0.34-1.5)                          | 2.2%<br>(1.3-3.7%)                   | 2.7%<br>(1.6-4.5%)                  | 130<br>(78-220)     | 2500<br>(1500-4000)       |
| Malaysia | 1995 | Female | 75 to 79 | 3.3%<br>(1.9-5.2%)             | 97%<br>(95-98%)          | 0.8<br>(0.33-1.6)                           | 2.1%<br>(1.1-3.5%)                   | 2.5%<br>(1.4-4.2%)                  | 120<br>(67-200)     | 1800<br>(970-2900)        |
| Malaysia | 1995 | Female | 80 to 84 | 3.4%<br>(1.8-4.9%)             | 97%<br>(95-98%)          | 0.79<br>(0.33-1.4)                          | 2.2%<br>(1.1-3.5%)                   | 2.6%<br>(1.3-4.1%)                  | 100<br>(51-160)     | 1100<br>(540-1700)        |
| Malaysia | 1995 | Female | 85 to 89 | 3.5%<br>(2-5.5%)               | 97%<br>(94-98%)          | 0.79<br>(0.37-1.4)                          | 2.1%<br>(1.1-3.6%)                   | 2.5%<br>(1.3-4.2%)                  | 72<br>(38-120)      | 530<br>(290-900)          |
| Malaysia | 1995 | Female | 90 to 94 | 3.8%<br>(2.3-5.9%)             | 96%<br>(94-98%)          | 0.84<br>(0.36-1.6)                          | 2.1%<br>(1.1-3.6%)                   | 2.5%<br>(1.3-4.2%)                  | 32<br>(17-54)       | 160<br>(88-280)           |
| Malaysia | 1995 | Female | 95 plus  | 4.4%<br>(2.5-6.9%)             | 96%<br>(93-98%)          | 0.94<br>(0.36-2.1)                          | 2.3%<br>(1.2-3.9%)                   | 2.7%<br>(1.4-4.5%)                  | 9<br>(4.6-15)       | 31<br>(16-51)             |
| Malaysia | 1995 | Male   | All Ages | 8.1%<br>(6.7-9.7%)             | 92%<br>(90-93%)          | 1.5<br>(1.1-1.9)                            | 4.9%<br>(3.9-5.9%)                   | 6.2%<br>(4.9-7.6%)                  | 3300<br>(2600-4000) | 130000<br>(100000-150000) |
| Malaysia | 1995 | Male   | 15 to 19 | 6.9%<br>(4.2-10%)              | 93%<br>(90-96%)          | 0.68<br>(0.31-1.2)                          | 3.3%<br>(2-5.4%)                     | 4.8%<br>(2.7-7.9%)                  | 68<br>(37-110)      | 5700<br>(3300-8800)       |
| Malaysia | 1995 | Male   | 20 to 24 | 11%<br>(6.3-16%)               | 89%<br>(84-94%)          | 1.7<br>(0.86-2.8)                           | 6.7%<br>(4.2-10%)                    | 8.8%<br>(5.1-14%)                   | 150<br>(85-230)     | 12000<br>(7300-17000)     |
| Malaysia | 1995 | Male   | 25 to 29 | 12%<br>(7.4-18%)               | 88%<br>(82-93%)          | 2.2<br>(1.1-3.7)                            | 7.2%<br>(4.8-10%)                    | 9.9%<br>(6.2-15%)                   | 150<br>(95-220)     | 11000<br>(7600-16000)     |
| Malaysia | 1995 | Male   | 30 to 34 | 13%<br>(7.8-20%)               | 87%<br>(80-92%)          | 2.7<br>(1.5-4.5)                            | 7.2%<br>(4.9-9.8%)                   | 10%<br>(6.7-14%)                    | 170<br>(110-240)    | 12000<br>(8000-16000)     |
| Malaysia | 1995 | Male   | 35 to 39 | 13%<br>(8.3-20%)               | 87%<br>(80-92%)          | 3.2<br>(1.7-5.1)                            | 7.5%<br>(5.4-10%)                    | 11%<br>(7.4-14%)                    | 190<br>(130-260)    | 12000<br>(8500-16000)     |
| Malaysia | 1995 | Male   | 40 to 44 | 13%<br>(8.5-19%)               | 87%<br>(81-92%)          | 3.2<br>(1.7-5.3)                            | 7.6%<br>(5.5-10%)                    | 11%<br>(7.6-14%)                    | 220<br>(160-290)    | 12000<br>(8500-15000)     |
| Malaysia | 1995 | Male   | 45 to 49 | 13%<br>(7.6-18%)               | 87%<br>(82-92%)          | 2.9<br>(1.5-4.9)                            | 7.7%<br>(5.5-10%)                    | 10%<br>(7.4-14%)                    | 250<br>(180-340)    | 12000<br>(8300-15000)     |
| Malaysia | 1995 | Male   | 50 to 54 | 13%<br>(8.2-18%)               | 87%<br>(82-92%)          | 2.9<br>(1.5-4.9)                            | 7.4%<br>(5.3-10%)                    | 9.5%<br>(6.7-13%)                   | 290<br>(200-390)    | 11000<br>(8100-15000)     |

| Location | Year | Sex    | Age      | Prevalence of current drinkers | Prevalence of abstainers | Population average of standard drinks daily | Percent of total attributable deaths | Percent of total attributable DALYs | Attributable deaths | Attributable DALYs     |
|----------|------|--------|----------|--------------------------------|--------------------------|---------------------------------------------|--------------------------------------|-------------------------------------|---------------------|------------------------|
| Malaysia | 1995 | Male   | 55 to 59 | 12%<br>(8.1-18%)               | 88%<br>(82-92%)          | 3.1<br>(1.5-5.4)                            | 7.1%<br>(4.9-9.7%)                   | 8.7%<br>(6.1-12%)                   | 350<br>(240-490)    | 12000<br>(8300-16000)  |
| Malaysia | 1995 | Male   | 60 to 64 | 11%<br>(7-17%)                 | 89%<br>(83-93%)          | 2.7<br>(1.3-4.8)                            | 6.3%<br>(4.3-8.9%)                   | 7.5%<br>(5.1-11%)                   | 350<br>(240-490)    | 9900<br>(6800-14000)   |
| Malaysia | 1995 | Male   | 65 to 69 | 9.7%<br>(6-14%)                | 90%<br>(86-94%)          | 2<br>(1-3.5)                                | 5.4%<br>(3.6-7.6%)                   | 6.3%<br>(4.2-8.9%)                  | 340<br>(230-480)    | 7900<br>(5300-11000)   |
| Malaysia | 1995 | Male   | 70 to 74 | 8.2%<br>(5.4-12%)              | 92%<br>(88-95%)          | 1.5<br>(0.7-2.6)                            | 4.5%<br>(3-6.4%)                     | 5.1%<br>(3.4-7.4%)                  | 280<br>(190-410)    | 5300<br>(3500-7600)    |
| Malaysia | 1995 | Male   | 75 to 79 | 7.3%<br>(4.5-11%)              | 93%<br>(89-96%)          | 1.2<br>(0.53-2.4)                           | 3.6%<br>(2.2-5.4%)                   | 4.1%<br>(2.5-6.2%)                  | 200<br>(130-310)    | 3000<br>(1900-4500)    |
| Malaysia | 1995 | Male   | 80 to 84 | 6.6%<br>(3.9-9.8%)             | 93%<br>(90-96%)          | 1<br>(0.47-1.9)                             | 3.3%<br>(2-4.9%)                     | 3.7%<br>(2.3-5.6%)                  | 140<br>(87-220)     | 1600<br>(950-2300)     |
| Malaysia | 1995 | Male   | 85 to 89 | 6.4%<br>(3.7-9.9%)             | 94%<br>(90-96%)          | 0.93<br>(0.44-1.7)                          | 3%<br>(1.8-4.6%)                     | 3.4%<br>(2-5.3%)                    | 86<br>(50-130)      | 650<br>(390-1000)      |
| Malaysia | 1995 | Male   | 90 to 94 | 6.9%<br>(4.2-11%)              | 93%<br>(89-96%)          | 0.95<br>(0.42-1.9)                          | 2.8%<br>(1.6-4.3%)                   | 3.2%<br>(1.8-5%)                    | 35<br>(20-55)       | 180<br>(110-280)       |
| Malaysia | 1995 | Male   | 95 plus  | 8%<br>(4.4-13%)                | 92%<br>(87-96%)          | 1<br>(0.38-2.3)                             | 3%<br>(1.5-4.9%)                     | 3.3%<br>(1.6-5.6%)                  | 8.3<br>(4.1-14)     | 30<br>(15-50)          |
| Malaysia | 2000 | Female | All Ages | 2.3%<br>(1.9-2.8%)             | 98%<br>(97-98%)          | 0.23<br>(0.16-0.3)                          | 1.3%<br>(0.97-1.7%)                  | 2.3%<br>(1.6-3.1%)                  | 970<br>(680-1300)   | 27000<br>(21000-35000) |
| Malaysia | 2000 | Female | 15 to 19 | 2.3%<br>(1.4-3.4%)             | 98%<br>(97-99%)          | 0.22<br>(0.11-0.39)                         | 0.73%<br>(0.48-1.1%)                 | 1.4%<br>(0.84-2.3%)                 | 6.8<br>(3.9-11)     | 860<br>(560-1200)      |
| Malaysia | 2000 | Female | 20 to 24 | 2.5%<br>(1.5-3.9%)             | 97%<br>(96-99%)          | 0.26<br>(0.13-0.48)                         | 1.1%<br>(0.72-1.5%)                  | 1.6%<br>(0.93-2.4%)                 | 8.1<br>(4.8-13)     | 1200<br>(810-1800)     |
| Malaysia | 2000 | Female | 25 to 29 | 2.5%<br>(1.4-3.9%)             | 97%<br>(96-99%)          | 0.29<br>(0.14-0.5)                          | 1.1%<br>(0.77-1.5%)                  | 1.6%<br>(0.98-2.5%)                 | 8.8<br>(5.2-13)     | 1300<br>(840-1800)     |
| Malaysia | 2000 | Female | 30 to 34 | 2.5%<br>(1.4-4.1%)             | 98%<br>(96-99%)          | 0.29<br>(0.15-0.51)                         | 1.1%<br>(0.74-1.6%)                  | 1.7%<br>(1.1-2.6%)                  | 12<br>(7.2-18)      | 1300<br>(900-1900)     |
| Malaysia | 2000 | Female | 35 to 39 | 2.7%<br>(1.4-4.1%)             | 97%<br>(96-99%)          | 0.3<br>(0.14-0.51)                          | 1.1%<br>(0.74-1.5%)                  | 1.9%<br>(1.1-2.8%)                  | 17<br>(10-26)       | 1500<br>(990-2100)     |
| Malaysia | 2000 | Female | 40 to 44 | 3%<br>(1.8-4.5%)               | 97%<br>(96-98%)          | 0.36<br>(0.18-0.6)                          | 1.3%<br>(0.85-1.8%)                  | 2.2%<br>(1.4-3.2%)                  | 27<br>(17-41)       | 1800<br>(1200-2600)    |
| Malaysia | 2000 | Female | 45 to 49 | 2.9%<br>(1.7-4.4%)             | 97%<br>(96-98%)          | 0.43<br>(0.2-0.77)                          | 1.5%<br>(0.99-2.2%)                  | 2.4%<br>(1.5-3.7%)                  | 40<br>(25-61)       | 2100<br>(1400-3200)    |
| Malaysia | 2000 | Female | 50 to 54 | 3%<br>(1.9-4.6%)               | 97%<br>(95-98%)          | 0.48<br>(0.23-0.85)                         | 1.8%<br>(1.2-2.6%)                   | 2.7%<br>(1.7-4%)                    | 58<br>(37-85)       | 2500<br>(1600-3600)    |
| Malaysia | 2000 | Female | 55 to 59 | 3.5%<br>(2.2-5.1%)             | 97%<br>(95-98%)          | 0.54<br>(0.27-0.98)                         | 2%<br>(1.3-3%)                       | 2.9%<br>(1.8-4.3%)                  | 71<br>(45-110)      | 2500<br>(1600-3700)    |
| Malaysia | 2000 | Female | 60 to 64 | 3.5%<br>(2.1-5.3%)             | 97%<br>(95-98%)          | 0.55<br>(0.27-0.98)                         | 2.1%<br>(1.3-3.2%)                   | 2.7%<br>(1.7-4.2%)                  | 100<br>(62-150)     | 2900<br>(1900-4500)    |
| Malaysia | 2000 | Female | 65 to 69 | 3.2%<br>(1.9-4.8%)             | 97%<br>(95-98%)          | 0.52<br>(0.25-0.94)                         | 2.1%<br>(1.3-3.1%)                   | 2.6%<br>(1.6-4%)                    | 120<br>(71-180)     | 2800<br>(1700-4300)    |
| Malaysia | 2000 | Female | 70 to 74 | 3.3%<br>(2.1-5%)               | 97%<br>(95-98%)          | 0.54<br>(0.25-0.98)                         | 2%<br>(1.2-3.4%)                     | 2.5%<br>(1.5-4.1%)                  | 140<br>(81-230)     | 2600<br>(1500-4200)    |

| Location | Year | Sex    | Age      | Prevalence of current drinkers | Prevalence of abstainers | Population average of standard drinks daily | Percent of total attributable deaths | Percent of total attributable DALYs | Attributable deaths | Attributable DALYs        |
|----------|------|--------|----------|--------------------------------|--------------------------|---------------------------------------------|--------------------------------------|-------------------------------------|---------------------|---------------------------|
| Malaysia | 2000 | Female | 75 to 79 | 3.5%<br>(2.1-5.4%)             | 97%<br>(95-98%)          | 0.57<br>(0.25-1.1)                          | 2%<br>(1.1-3.4%)                     | 2.4%<br>(1.3-4%)                    | 140<br>(74-230)     | 2000<br>(1100-3200)       |
| Malaysia | 2000 | Female | 80 to 84 | 3.4%<br>(1.9-5.1%)             | 97%<br>(95-98%)          | 0.55<br>(0.24-0.98)                         | 2%<br>(1-3.3%)                       | 2.4%<br>(1.2-3.9%)                  | 100<br>(53-170)     | 1100<br>(570-1800)        |
| Malaysia | 2000 | Female | 85 to 89 | 3.5%<br>(2-5.4%)               | 97%<br>(95-98%)          | 0.54<br>(0.25-0.96)                         | 1.9%<br>(1-3.2%)                     | 2.3%<br>(1.2-3.9%)                  | 74<br>(39-130)      | 560<br>(300-950)          |
| Malaysia | 2000 | Female | 90 to 94 | 3.8%<br>(2.3-6%)               | 96%<br>(94-98%)          | 0.57<br>(0.25-1.1)                          | 1.9%<br>(0.96-3.3%)                  | 2.2%<br>(1.1-4%)                    | 35<br>(18-62)       | 180<br>(92-320)           |
| Malaysia | 2000 | Female | 95 plus  | 4.3%<br>(2.5-6.8%)             | 96%<br>(93-98%)          | 0.63<br>(0.26-1.3)                          | 2%<br>(0.94-3.6%)                    | 2.3%<br>(1.1-4.2%)                  | 11<br>(5.1-20)      | 39<br>(18-68)             |
| Malaysia | 2000 | Male   | All Ages | 8.2%<br>(7.1-9.5%)             | 92%<br>(90-93%)          | 1<br>(0.74-1.3)                             | 4.8%<br>(3.9-5.8%)                   | 6%<br>(4.7-7.3%)                    | 3500<br>(2800-4400) | 140000<br>(110000-170000) |
| Malaysia | 2000 | Male   | 15 to 19 | 6.5%<br>(4.1-9.6%)             | 94%<br>(90-96%)          | 0.42<br>(0.2-0.76)                          | 2.6%<br>(1.5-4%)                     | 3.7%<br>(1.9-6.1%)                  | 53<br>(27-87)       | 4700<br>(2700-7200)       |
| Malaysia | 2000 | Male   | 20 to 24 | 10%<br>(6.8-14%)               | 90%<br>(86-93%)          | 1.1<br>(0.58-1.8)                           | 5.6%<br>(3.7-8.2%)                   | 7.4%<br>(4.4-12%)                   | 120<br>(72-200)     | 10000<br>(6500-15000)     |
| Malaysia | 2000 | Male   | 25 to 29 | 11%<br>(7.8-15%)               | 89%<br>(85-92%)          | 1.4<br>(0.78-2.3)                           | 5.9%<br>(4.2-8.4%)                   | 8%<br>(5.3-12%)                     | 130<br>(88-200)     | 10000<br>(7200-14000)     |
| Malaysia | 2000 | Male   | 30 to 34 | 12%<br>(8.2-17%)               | 88%<br>(83-92%)          | 1.7<br>(0.97-2.7)                           | 6.1%<br>(4.4-8.3%)                   | 8.2%<br>(5.7-11%)                   | 160<br>(110-220)    | 11000<br>(8100-15000)     |
| Malaysia | 2000 | Male   | 35 to 39 | 12%<br>(8.1-17%)               | 88%<br>(83-92%)          | 1.9<br>(1.1-3.1)                            | 6.3%<br>(4.7-8.6%)                   | 8.7%<br>(6.1-12%)                   | 200<br>(140-270)    | 12000<br>(9100-17000)     |
| Malaysia | 2000 | Male   | 40 to 44 | 13%<br>(9.1-17%)               | 87%<br>(83-91%)          | 2.1<br>(1.1-3.3)                            | 6.7%<br>(5-8.8%)                     | 9.2%<br>(6.8-12%)                   | 250<br>(190-330)    | 13000<br>(10000-17000)    |
| Malaysia | 2000 | Male   | 45 to 49 | 14%<br>(9.5-18%)               | 86%<br>(82-91%)          | 2.1<br>(1.2-3.4)                            | 7.3%<br>(5.5-9.2%)                   | 9.8%<br>(7.3-12%)                   | 310<br>(230-390)    | 14000<br>(11000-18000)    |
| Malaysia | 2000 | Male   | 50 to 54 | 14%<br>(9.5-19%)               | 86%<br>(81-90%)          | 2.1<br>(1.1-3.5)                            | 7.2%<br>(5.3-9.5%)                   | 9.2%<br>(6.7-12%)                   | 350<br>(260-470)    | 14000<br>(10000-18000)    |
| Malaysia | 2000 | Male   | 55 to 59 | 15%<br>(10-20%)                | 85%<br>(80-90%)          | 2.5<br>(1.3-4.2)                            | 7.5%<br>(5.2-9.9%)                   | 9.2%<br>(6.5-12%)                   | 410<br>(280-540)    | 14000<br>(9800-18000)     |
| Malaysia | 2000 | Male   | 60 to 64 | 14%<br>(9.5-20%)               | 86%<br>(80-91%)          | 2.3<br>(1.2-3.8)                            | 6.7%<br>(4.7-9%)                     | 8%<br>(5.6-11%)                     | 470<br>(330-640)    | 13000<br>(9600-18000)     |
| Malaysia | 2000 | Male   | 65 to 69 | 10%<br>(6.9-14%)               | 90%<br>(86-93%)          | 1.4<br>(0.78-2.4)                           | 5.2%<br>(3.5-7.1%)                   | 6%<br>(4.1-8.3%)                    | 360<br>(250-500)    | 8500<br>(5900-12000)      |
| Malaysia | 2000 | Male   | 70 to 74 | 8.4%<br>(5.6-12%)              | 92%<br>(88-94%)          | 1<br>(0.51-1.8)                             | 3.9%<br>(2.4-5.7%)                   | 4.5%<br>(2.8-6.5%)                  | 290<br>(180-420)    | 5500<br>(3400-7900)       |
| Malaysia | 2000 | Male   | 75 to 79 | 7.6%<br>(4.9-11%)              | 92%<br>(89-95%)          | 0.84<br>(0.39-1.6)                          | 3.1%<br>(1.7-4.8%)                   | 3.5%<br>(1.8-5.5%)                  | 190<br>(100-300)    | 2900<br>(1600-4500)       |
| Malaysia | 2000 | Male   | 80 to 84 | 6.7%<br>(4-9.7%)               | 93%<br>(90-96%)          | 0.7<br>(0.33-1.3)                           | 2.7%<br>(1.5-4.1%)                   | 3.1%<br>(1.6-4.8%)                  | 120<br>(64-190)     | 1300<br>(720-2000)        |
| Malaysia | 2000 | Male   | 85 to 89 | 6.3%<br>(3.6-9.8%)             | 94%<br>(90-96%)          | 0.61<br>(0.28-1.1)                          | 2.3%<br>(1.2-3.8%)                   | 2.7%<br>(1.3-4.4%)                  | 78<br>(39-130)      | 610<br>(310-1000)         |
| Malaysia | 2000 | Male   | 90 to 94 | 6.7%<br>(4.1-11%)              | 93%<br>(89-96%)          | 0.62<br>(0.27-1.2)                          | 2.2%<br>(0.9-3.7%)                   | 2.5%<br>(0.99-4.3%)                 | 32<br>(13-57)       | 170<br>(73-300)           |

| Location | Year | Sex    | Age      | Prevalence of current drinkers | Prevalence of abstainers | Population average of standard drinks daily | Percent of total attributable deaths | Percent of total attributable DALYs | Attributable deaths | Attributable DALYs        |
|----------|------|--------|----------|--------------------------------|--------------------------|---------------------------------------------|--------------------------------------|-------------------------------------|---------------------|---------------------------|
| Malaysia | 2000 | Male   | 95 plus  | 7.8%<br>(4.3-13%)              | 92%<br>(87-96%)          | 0.67<br>(0.25-1.4)                          | 2.3%<br>(0.83-4.1%)                  | 2.5%<br>(0.82-4.7%)                 | 8.9<br>(3-17)       | 32<br>(12-60)             |
| Malaysia | 2005 | Female | All Ages | 2.3%<br>(1.9-2.8%)             | 98%<br>(97-98%)          | 0.2<br>(0.14-0.27)                          | 1.2%<br>(0.89-1.6%)                  | 2.1%<br>(1.5-3%)                    | 1000<br>(700-1500)  | 29000<br>(21000-37000)    |
| Malaysia | 2005 | Female | 15 to 19 | 2.2%<br>(1.4-3.4%)             | 98%<br>(97-99%)          | 0.18<br>(0.085-0.34)                        | 0.63%<br>(0.4-0.94%)                 | 1.3%<br>(0.73-2.2%)                 | 6.1<br>(3.5-10)     | 810<br>(520-1200)         |
| Malaysia | 2005 | Female | 20 to 24 | 2.5%<br>(1.5-3.8%)             | 97%<br>(96-99%)          | 0.22<br>(0.11-0.4)                          | 0.95%<br>(0.64-1.4%)                 | 1.4%<br>(0.79-2.2%)                 | 7.5<br>(4.3-12)     | 1200<br>(790-1800)        |
| Malaysia | 2005 | Female | 25 to 29 | 2.5%<br>(1.4-3.9%)             | 98%<br>(96-99%)          | 0.24<br>(0.12-0.42)                         | 0.99%<br>(0.69-1.4%)                 | 1.4%<br>(0.84-2.2%)                 | 8.2<br>(4.8-13)     | 1300<br>(850-1800)        |
| Malaysia | 2005 | Female | 30 to 34 | 2.4%<br>(1.3-4.1%)             | 98%<br>(96-99%)          | 0.24<br>(0.12-0.43)                         | 0.98%<br>(0.66-1.4%)                 | 1.5%<br>(0.92-2.4%)                 | 10<br>(6.3-16)      | 1300<br>(830-1800)        |
| Malaysia | 2005 | Female | 35 to 39 | 2.6%<br>(1.4-4.2%)             | 97%<br>(96-99%)          | 0.25<br>(0.11-0.45)                         | 0.96%<br>(0.64-1.4%)                 | 1.6%<br>(0.92-2.5%)                 | 15<br>(8.6-23)      | 1400<br>(910-2000)        |
| Malaysia | 2005 | Female | 40 to 44 | 2.9%<br>(1.8-4.3%)             | 97%<br>(96-98%)          | 0.3<br>(0.15-0.5)                           | 1.1%<br>(0.73-1.6%)                  | 1.9%<br>(1.2-2.9%)                  | 26<br>(15-39)       | 1700<br>(1100-2500)       |
| Malaysia | 2005 | Female | 45 to 49 | 2.9%<br>(1.7-4.3%)             | 97%<br>(96-98%)          | 0.36<br>(0.18-0.63)                         | 1.4%<br>(0.88-2%)                    | 2.2%<br>(1.4-3.4%)                  | 43<br>(27-66)       | 2300<br>(1500-3500)       |
| Malaysia | 2005 | Female | 50 to 54 | 3%<br>(1.9-4.6%)               | 97%<br>(95-98%)          | 0.41<br>(0.19-0.72)                         | 1.6%<br>(1-2.4%)                     | 2.5%<br>(1.5-3.7%)                  | 63<br>(39-96)       | 2700<br>(1700-4100)       |
| Malaysia | 2005 | Female | 55 to 59 | 3.4%<br>(2.1-5%)               | 97%<br>(95-98%)          | 0.46<br>(0.23-0.82)                         | 1.8%<br>(1.1-2.7%)                   | 2.6%<br>(1.6-3.9%)                  | 82<br>(50-120)      | 2900<br>(1800-4400)       |
| Malaysia | 2005 | Female | 60 to 64 | 3.4%<br>(2.1-5.2%)             | 97%<br>(95-98%)          | 0.46<br>(0.22-0.83)                         | 1.8%<br>(1.1-2.8%)                   | 2.4%<br>(1.5-3.8%)                  | 95<br>(56-150)      | 2900<br>(1700-4500)       |
| Malaysia | 2005 | Female | 65 to 69 | 3.2%<br>(2-4.8%)               | 97%<br>(95-98%)          | 0.44<br>(0.22-0.78)                         | 1.9%<br>(1.1-2.8%)                   | 2.4%<br>(1.4-3.6%)                  | 120<br>(72-190)     | 2900<br>(1700-4400)       |
| Malaysia | 2005 | Female | 70 to 74 | 3.3%<br>(2.1-5%)               | 97%<br>(95-98%)          | 0.46<br>(0.21-0.83)                         | 1.8%<br>(1-3%)                       | 2.3%<br>(1.3-3.7%)                  | 140<br>(78-230)     | 2700<br>(1500-4400)       |
| Malaysia | 2005 | Female | 75 to 79 | 3.5%<br>(2.1-5.4%)             | 97%<br>(95-98%)          | 0.49<br>(0.21-0.93)                         | 1.9%<br>(0.94-3.2%)                  | 2.2%<br>(1.1-3.8%)                  | 140<br>(71-240)     | 2100<br>(1100-3500)       |
| Malaysia | 2005 | Female | 80 to 84 | 3.5%<br>(1.9-5.2%)             | 97%<br>(95-98%)          | 0.47<br>(0.21-0.84)                         | 1.9%<br>(0.94-3.1%)                  | 2.2%<br>(1.1-3.6%)                  | 120<br>(60-200)     | 1300<br>(640-2100)        |
| Malaysia | 2005 | Female | 85 to 89 | 3.4%<br>(2-5.4%)               | 97%<br>(95-98%)          | 0.45<br>(0.21-0.82)                         | 1.8%<br>(0.93-3.2%)                  | 2.1%<br>(1-3.7%)                    | 89<br>(44-150)      | 660<br>(340-1200)         |
| Malaysia | 2005 | Female | 90 to 94 | 3.8%<br>(2.2-5.8%)             | 96%<br>(94-98%)          | 0.48<br>(0.21-0.93)                         | 1.9%<br>(0.87-3.3%)                  | 2.1%<br>(0.97-3.9%)                 | 49<br>(22-88)       | 250<br>(120-450)          |
| Malaysia | 2005 | Female | 95 plus  | 4.3%<br>(2.4-7%)               | 96%<br>(93-98%)          | 0.54<br>(0.21-1.1)                          | 2%<br>(0.76-3.7%)                    | 2.2%<br>(0.84-4.1%)                 | 15<br>(5.5-28)      | 49<br>(19-91)             |
| Malaysia | 2005 | Male   | All Ages | 8.3%<br>(7.1-9.6%)             | 92%<br>(90-93%)          | 0.89<br>(0.63-1.2)                          | 4.4%<br>(3.5-5.5%)                   | 5.4%<br>(4.1-6.8%)                  | 3600<br>(2800-4600) | 140000<br>(110000-170000) |
| Malaysia | 2005 | Male   | 15 to 19 | 6.3%<br>(4-9.2%)               | 94%<br>(91-96%)          | 0.35<br>(0.16-0.63)                         | 2.2%<br>(1.3-3.3%)                   | 3.3%<br>(1.7-5.4%)                  | 47<br>(24-76)       | 4200<br>(2500-6300)       |
| Malaysia | 2005 | Male   | 20 to 24 | 9.9%<br>(6.6-14%)              | 90%<br>(86-93%)          | 0.89<br>(0.47-1.5)                          | 4.8%<br>(3.1-7.3%)                   | 6.5%<br>(3.7-10%)                   | 110<br>(64-190)     | 9700<br>(6200-15000)      |

| Location | Year | Sex    | Age      | Prevalence of current drinkers | Prevalence of abstainers | Population average of standard drinks daily | Percent of total attributable deaths | Percent of total attributable DALYs | Attributable deaths | Attributable DALYs     |
|----------|------|--------|----------|--------------------------------|--------------------------|---------------------------------------------|--------------------------------------|-------------------------------------|---------------------|------------------------|
| Malaysia | 2005 | Male   | 25 to 29 | 11%<br>(7.5-16%)               | 89%<br>(84-92%)          | 1.2<br>(0.64-2)                             | 5.1%<br>(3.5-7.3%)                   | 7%<br>(4.5-10%)                     | 120<br>(79-180)     | 9900<br>(6800-14000)   |
| Malaysia | 2005 | Male   | 30 to 34 | 12%<br>(8-17%)                 | 88%<br>(83-92%)          | 1.4<br>(0.81-2.2)                           | 5.4%<br>(3.8-7.4%)                   | 7.3%<br>(4.9-10%)                   | 150<br>(99-210)     | 10000<br>(7500-14000)  |
| Malaysia | 2005 | Male   | 35 to 39 | 12%<br>(7.9-17%)               | 88%<br>(83-92%)          | 1.6<br>(0.88-2.6)                           | 5.8%<br>(4.1-7.9%)                   | 7.9%<br>(5.3-11%)                   | 190<br>(120-260)    | 11000<br>(8000-15000)  |
| Malaysia | 2005 | Male   | 40 to 44 | 12%<br>(8.7-17%)               | 88%<br>(83-91%)          | 1.7<br>(0.91-2.8)                           | 6.1%<br>(4.4-8.2%)                   | 8.4%<br>(5.9-11%)                   | 240<br>(170-330)    | 13000<br>(9400-17000)  |
| Malaysia | 2005 | Male   | 45 to 49 | 14%<br>(9.2-18%)               | 86%<br>(82-91%)          | 1.8<br>(0.98-2.9)                           | 6.6%<br>(4.8-8.7%)                   | 8.9%<br>(6.3-11%)                   | 330<br>(230-420)    | 15000<br>(11000-19000) |
| Malaysia | 2005 | Male   | 50 to 54 | 13%<br>(9.1-18%)               | 87%<br>(82-91%)          | 1.8<br>(0.92-2.8)                           | 6.5%<br>(4.5-8.7%)                   | 8.4%<br>(5.9-11%)                   | 380<br>(260-510)    | 15000<br>(11000-20000) |
| Malaysia | 2005 | Male   | 55 to 59 | 15%<br>(10-19%)                | 85%<br>(81-90%)          | 2<br>(1.1-3.5)                              | 6.9%<br>(4.7-9.3%)                   | 8.5%<br>(5.8-12%)                   | 460<br>(310-620)    | 16000<br>(11000-21000) |
| Malaysia | 2005 | Male   | 60 to 64 | 14%<br>(9.1-19%)               | 86%<br>(81-91%)          | 1.9<br>(0.95-3.1)                           | 6.1%<br>(4.1-8.2%)                   | 7.4%<br>(5-10%)                     | 470<br>(320-650)    | 14000<br>(9000-19000)  |
| Malaysia | 2005 | Male   | 65 to 69 | 10%<br>(6.8-14%)               | 90%<br>(86-93%)          | 1.2<br>(0.63-2)                             | 4.7%<br>(2.9-6.5%)                   | 5.5%<br>(3.4-7.7%)                  | 400<br>(250-560)    | 9500<br>(6000-13000)   |
| Malaysia | 2005 | Male   | 70 to 74 | 8.2%<br>(5.4-12%)              | 92%<br>(88-95%)          | 0.85<br>(0.42-1.5)                          | 3.4%<br>(2-5.1%)                     | 4%<br>(2.2-6%)                      | 300<br>(160-450)    | 5700<br>(3200-8500)    |
| Malaysia | 2005 | Male   | 75 to 79 | 7.4%<br>(4.7-11%)              | 93%<br>(89-95%)          | 0.7<br>(0.31-1.3)                           | 2.6%<br>(1.3-4.3%)                   | 3%<br>(1.4-5%)                      | 210<br>(93-330)     | 3100<br>(1400-4900)    |
| Malaysia | 2005 | Male   | 80 to 84 | 6.5%<br>(4-9.5%)               | 93%<br>(90-96%)          | 0.58<br>(0.27-1)                            | 2.3%<br>(1.1-3.6%)                   | 2.6%<br>(1.2-4.2%)                  | 120<br>(56-190)     | 1300<br>(640-2100)     |
| Malaysia | 2005 | Male   | 85 to 89 | 6.1%<br>(3.5-9.6%)             | 94%<br>(90-97%)          | 0.5<br>(0.24-0.91)                          | 2%<br>(0.85-3.4%)                    | 2.2%<br>(0.93-3.9%)                 | 75<br>(31-130)      | 580<br>(250-1000)      |
| Malaysia | 2005 | Male   | 90 to 94 | 6.5%<br>(3.9-9.8%)             | 94%<br>(90-96%)          | 0.5<br>(0.22-0.95)                          | 1.8%<br>(0.69-3.4%)                  | 2%<br>(0.73-3.9%)                   | 38<br>(14-72)       | 200<br>(78-380)        |
| Malaysia | 2005 | Male   | 95 plus  | 7.5%<br>(4.1-12%)              | 93%<br>(88-96%)          | 0.54<br>(0.2-1.1)                           | 1.9%<br>(0.63-3.8%)                  | 2%<br>(0.61-4.1%)                   | 9.9<br>(3-20)       | 36<br>(12-70)          |
| Malaysia | 2010 | Female | All Ages | 2.7%<br>(2.2-3.2%)             | 97%<br>(97-98%)          | 0.28<br>(0.19-0.39)                         | 1.3%<br>(0.99-1.7%)                  | 2.2%<br>(1.5-3.2%)                  | 1200<br>(840-1700)  | 34000<br>(26000-45000) |
| Malaysia | 2010 | Female | 15 to 19 | 2.3%<br>(1.4-3.6%)             | 98%<br>(96-99%)          | 0.22<br>(0.095-0.41)                        | 0.64%<br>(0.41-0.97%)                | 1.4%<br>(0.77-2.4%)                 | 6.7<br>(3.7-11)     | 930<br>(590-1400)      |
| Malaysia | 2010 | Female | 20 to 24 | 2.8%<br>(1.6-4.4%)             | 97%<br>(96-98%)          | 0.29<br>(0.13-0.52)                         | 1%<br>(0.7-1.5%)                     | 1.6%<br>(0.93-2.6%)                 | 9.3<br>(5.3-15)     | 1500<br>(970-2200)     |
| Malaysia | 2010 | Female | 25 to 29 | 3.1%<br>(1.7-4.8%)             | 97%<br>(95-98%)          | 0.34<br>(0.17-0.61)                         | 1.1%<br>(0.77-1.6%)                  | 1.8%<br>(1.1-2.8%)                  | 12<br>(7-18)        | 1700<br>(1100-2500)    |
| Malaysia | 2010 | Female | 30 to 34 | 3.2%<br>(1.8-5.4%)             | 97%<br>(95-98%)          | 0.37<br>(0.19-0.65)                         | 1.2%<br>(0.81-1.6%)                  | 2%<br>(1.3-3.1%)                    | 14<br>(8.5-21)      | 1600<br>(1000-2300)    |
| Malaysia | 2010 | Female | 35 to 39 | 3.4%<br>(1.9-5.3%)             | 97%<br>(95-98%)          | 0.37<br>(0.18-0.65)                         | 1.2%<br>(0.76-1.7%)                  | 2.1%<br>(1.3-3.2%)                  | 19<br>(11-29)       | 1700<br>(1100-2400)    |
| Malaysia | 2010 | Female | 40 to 44 | 3.4%<br>(2.1-5.3%)             | 97%<br>(95-98%)          | 0.41<br>(0.2-0.71)                          | 1.3%<br>(0.84-1.9%)                  | 2.3%<br>(1.5-3.6%)                  | 31<br>(19-48)       | 2100<br>(1400-3100)    |

| Location | Year | Sex    | Age      | Prevalence of current drinkers | Prevalence of abstainers | Population average of standard drinks daily | Percent of total attributable deaths | Percent of total attributable DALYs | Attributable deaths | Attributable DALYs        |
|----------|------|--------|----------|--------------------------------|--------------------------|---------------------------------------------|--------------------------------------|-------------------------------------|---------------------|---------------------------|
| Malaysia | 2010 | Female | 45 to 49 | 3.4%<br>(1.9-5.4%)             | 97%<br>(95-98%)          | 0.49<br>(0.22-0.88)                         | 1.5%<br>(0.97-2.3%)                  | 2.6%<br>(1.6-4.1%)                  | 54<br>(33-85)       | 2900<br>(1800-4400)       |
| Malaysia | 2010 | Female | 50 to 54 | 3.5%<br>(2.1-5.5%)             | 96%<br>(95-98%)          | 0.55<br>(0.25-0.99)                         | 1.8%<br>(1.1-2.7%)                   | 2.8%<br>(1.7-4.2%)                  | 82<br>(51-120)      | 3600<br>(2300-5400)       |
| Malaysia | 2010 | Female | 55 to 59 | 3.7%<br>(2.2-5.6%)             | 96%<br>(94-98%)          | 0.56<br>(0.26-1)                            | 1.9%<br>(1.2-2.9%)                   | 2.8%<br>(1.7-4.4%)                  | 100<br>(63-160)     | 3800<br>(2400-5700)       |
| Malaysia | 2010 | Female | 60 to 64 | 3.5%<br>(2-5.6%)               | 96%<br>(94-98%)          | 0.54<br>(0.25-1)                            | 1.8%<br>(1.1-2.9%)                   | 2.6%<br>(1.5-4%)                    | 110<br>(70-180)     | 3500<br>(2100-5500)       |
| Malaysia | 2010 | Female | 65 to 69 | 3.3%<br>(1.9-5%)               | 97%<br>(95-98%)          | 0.52<br>(0.23-0.93)                         | 1.9%<br>(1.1-2.9%)                   | 2.5%<br>(1.4-3.8%)                  | 130<br>(74-200)     | 3100<br>(1800-4800)       |
| Malaysia | 2010 | Female | 70 to 74 | 3.2%<br>(2-4.8%)               | 97%<br>(95-98%)          | 0.51<br>(0.22-0.97)                         | 1.8%<br>(1-3.1%)                     | 2.3%<br>(1.3-3.9%)                  | 160<br>(91-280)     | 3100<br>(1700-5200)       |
| Malaysia | 2010 | Female | 75 to 79 | 3.2%<br>(1.8-5.1%)             | 97%<br>(95-98%)          | 0.51<br>(0.21-1)                            | 1.8%<br>(0.93-3.1%)                  | 2.1%<br>(1.1-3.6%)                  | 150<br>(76-250)     | 2200<br>(1100-3700)       |
| Malaysia | 2010 | Female | 80 to 84 | 3.3%<br>(1.8-4.9%)             | 97%<br>(95-98%)          | 0.51<br>(0.22-0.97)                         | 1.9%<br>(0.95-3%)                    | 2.2%<br>(1.1-3.6%)                  | 140<br>(68-220)     | 1400<br>(730-2400)        |
| Malaysia | 2010 | Female | 85 to 89 | 3.5%<br>(2-5.6%)               | 97%<br>(94-98%)          | 0.53<br>(0.25-0.98)                         | 1.9%<br>(1-3.4%)                     | 2.2%<br>(1.2-3.9%)                  | 110<br>(57-200)     | 840<br>(440-1400)         |
| Malaysia | 2010 | Female | 90 to 94 | 3.8%<br>(2.3-6.1%)             | 96%<br>(94-98%)          | 0.56<br>(0.24-1.1)                          | 2%<br>(1-3.5%)                       | 2.3%<br>(1.1-4%)                    | 52<br>(26-93)       | 270<br>(140-470)          |
| Malaysia | 2010 | Female | 95 plus  | 4.3%<br>(2.5-6.8%)             | 96%<br>(93-98%)          | 0.62<br>(0.24-1.3)                          | 2.1%<br>(0.92-3.7%)                  | 2.3%<br>(1-4.2%)                    | 13<br>(5.6-23)      | 44<br>(19-78)             |
| Malaysia | 2010 | Male   | All Ages | 8.6%<br>(7.2-10%)              | 91%<br>(90-93%)          | 1<br>(0.72-1.4)                             | 4.4%<br>(3.5-5.4%)                   | 5.3%<br>(4-6.5%)                    | 4100<br>(3100-5100) | 150000<br>(120000-190000) |
| Malaysia | 2010 | Male   | 15 to 19 | 6.7%<br>(4.1-9.8%)             | 93%<br>(90-96%)          | 0.42<br>(0.19-0.78)                         | 2.4%<br>(1.4-3.7%)                   | 3.7%<br>(1.9-6.2%)                  | 52<br>(27-87)       | 4600<br>(2700-7200)       |
| Malaysia | 2010 | Male   | 20 to 24 | 10%<br>(6.3-15%)               | 90%<br>(85-94%)          | 1.1<br>(0.53-1.8)                           | 5.1%<br>(3.3-7.7%)                   | 7.2%<br>(4-12%)                     | 130<br>(74-220)     | 11000<br>(7200-17000)     |
| Malaysia | 2010 | Male   | 25 to 29 | 12%<br>(7.2-17%)               | 88%<br>(83-93%)          | 1.4<br>(0.73-2.4)                           | 5.6%<br>(3.8-7.9%)                   | 8%<br>(5-12%)                       | 150<br>(93-220)     | 12000<br>(8100-17000)     |
| Malaysia | 2010 | Male   | 30 to 34 | 13%<br>(7.7-19%)               | 87%<br>(81-92%)          | 1.7<br>(0.94-2.8)                           | 5.8%<br>(4-8%)                       | 8%<br>(5.3-12%)                     | 170<br>(110-240)    | 12000<br>(8400-16000)     |
| Malaysia | 2010 | Male   | 35 to 39 | 13%<br>(7.9-19%)               | 87%<br>(81-92%)          | 2<br>(1-3.4)                                | 6.2%<br>(4.3-8.5%)                   | 8.6%<br>(5.7-12%)                   | 210<br>(140-290)    | 13000<br>(8800-18000)     |
| Malaysia | 2010 | Male   | 40 to 44 | 13%<br>(8.1-19%)               | 87%<br>(81-92%)          | 2<br>(1-3.4)                                | 6.3%<br>(4.4-8.4%)                   | 8.7%<br>(5.9-12%)                   | 260<br>(180-350)    | 14000<br>(9900-19000)     |
| Malaysia | 2010 | Male   | 45 to 49 | 13%<br>(7.4-18%)               | 87%<br>(82-93%)          | 1.9<br>(0.94-3.1)                           | 6.4%<br>(4.5-8.7%)                   | 8.6%<br>(5.9-11%)                   | 350<br>(240-460)    | 16000<br>(11000-21000)    |
| Malaysia | 2010 | Male   | 50 to 54 | 12%<br>(7.7-18%)               | 88%<br>(82-92%)          | 1.8<br>(0.91-3.1)                           | 6.2%<br>(4.2-8.5%)                   | 8%<br>(5.4-11%)                     | 420<br>(290-590)    | 17000<br>(12000-23000)    |
| Malaysia | 2010 | Male   | 55 to 59 | 12%<br>(7.5-17%)               | 88%<br>(83-92%)          | 1.9<br>(0.91-3.5)                           | 6%<br>(4-8.3%)                       | 7.5%<br>(4.9-10%)                   | 470<br>(320-670)    | 16000<br>(11000-23000)    |
| Malaysia | 2010 | Male   | 60 to 64 | 11%<br>(6.8-16%)               | 89%<br>(84-93%)          | 1.7<br>(0.79-3)                             | 5.3%<br>(3.4-7.4%)                   | 6.4%<br>(4.1-9%)                    | 490<br>(320-690)    | 14000<br>(9200-20000)     |

| Location | Year | Sex    | Age      | Prevalence of current drinkers | Prevalence of abstainers | Population average of standard drinks daily | Percent of total attributable deaths | Percent of total attributable DALYs | Attributable deaths | Attributable DALYs     |
|----------|------|--------|----------|--------------------------------|--------------------------|---------------------------------------------|--------------------------------------|-------------------------------------|---------------------|------------------------|
| Malaysia | 2010 | Male   | 65 to 69 | 9.3%<br>(5.8-13%)              | 91%<br>(87-94%)          | 1.3<br>(0.6-2.1)                            | 4.5%<br>(2.9-6.4%)                   | 5.3%<br>(3.4-7.6%)                  | 420<br>(270-610)    | 10000<br>(6500-14000)  |
| Malaysia | 2010 | Male   | 70 to 74 | 8%<br>(5.1-12%)                | 92%<br>(88-95%)          | 0.94<br>(0.44-1.7)                          | 3.6%<br>(2.1-5.2%)                   | 4.2%<br>(2.5-6.1%)                  | 390<br>(230-580)    | 7500<br>(4500-11000)   |
| Malaysia | 2010 | Male   | 75 to 79 | 7.1%<br>(4.3-11%)              | 93%<br>(89-96%)          | 0.76<br>(0.33-1.5)                          | 2.7%<br>(1.4-4.3%)                   | 3.2%<br>(1.5-5.2%)                  | 250<br>(120-410)    | 3800<br>(1900-6100)    |
| Malaysia | 2010 | Male   | 80 to 84 | 6.4%<br>(3.7-9.3%)             | 94%<br>(91-96%)          | 0.65<br>(0.3-1.3)                           | 2.4%<br>(1.2-3.7%)                   | 2.8%<br>(1.4-4.4%)                  | 170<br>(82-260)     | 1900<br>(960-2900)     |
| Malaysia | 2010 | Male   | 85 to 89 | 6.1%<br>(3.4-9.5%)             | 94%<br>(91-97%)          | 0.57<br>(0.26-1.1)                          | 2.1%<br>(0.99-3.4%)                  | 2.4%<br>(1.1-4%)                    | 100<br>(47-170)     | 800<br>(380-1300)      |
| Malaysia | 2010 | Male   | 90 to 94 | 6.4%<br>(3.9-9.9%)             | 94%<br>(90-96%)          | 0.57<br>(0.24-1.1)                          | 2%<br>(0.8-3.5%)                     | 2.2%<br>(0.84-4%)                   | 45<br>(17-82)       | 240<br>(98-420)        |
| Malaysia | 2010 | Male   | 95 plus  | 7.4%<br>(4-12%)                | 93%<br>(88-96%)          | 0.61<br>(0.23-1.3)                          | 2%<br>(0.75-3.8%)                    | 2.2%<br>(0.71-4.2%)                 | 12<br>(3.9-23)      | 43<br>(16-82)          |
| Malaysia | 2016 | Female | All Ages | 2.7%<br>(2.2-3.3%)             | 97%<br>(97-98%)          | 0.36<br>(0.22-0.56)                         | 1.3%<br>(1-1.8%)                     | 2.3%<br>(1.6-3.1%)                  | 1300<br>(930-1900)  | 39000<br>(29000-51000) |
| Malaysia | 2016 | Female | 15 to 19 | 2.3%<br>(1.4-3.5%)             | 98%<br>(96-99%)          | 0.27<br>(0.11-0.51)                         | 0.66%<br>(0.42-0.98%)                | 1.5%<br>(0.87-2.4%)                 | 6.3<br>(3.6-10)     | 920<br>(590-1300)      |
| Malaysia | 2016 | Female | 20 to 24 | 2.8%<br>(1.6-4.3%)             | 97%<br>(96-98%)          | 0.35<br>(0.15-0.66)                         | 1%<br>(0.67-1.4%)                    | 1.7%<br>(1-2.6%)                    | 9<br>(5.4-14)       | 1500<br>(1000-2200)    |
| Malaysia | 2016 | Female | 25 to 29 | 3.1%<br>(1.7-4.8%)             | 97%<br>(95-98%)          | 0.41<br>(0.18-0.76)                         | 1.1%<br>(0.78-1.6%)                  | 1.9%<br>(1.1-3%)                    | 11<br>(6.7-18)      | 1800<br>(1200-2600)    |
| Malaysia | 2016 | Female | 30 to 34 | 3.2%<br>(1.8-5.3%)             | 97%<br>(95-98%)          | 0.44<br>(0.2-0.84)                          | 1.1%<br>(0.79-1.6%)                  | 2.1%<br>(1.3-3.2%)                  | 17<br>(9.9-26)      | 2000<br>(1300-2900)    |
| Malaysia | 2016 | Female | 35 to 39 | 3.4%<br>(1.8-5.2%)             | 97%<br>(95-98%)          | 0.44<br>(0.19-0.85)                         | 1.1%<br>(0.76-1.6%)                  | 2.2%<br>(1.3-3.2%)                  | 20<br>(12-31)       | 1900<br>(1200-2700)    |
| Malaysia | 2016 | Female | 40 to 44 | 3.4%<br>(2-5.3%)               | 97%<br>(95-98%)          | 0.49<br>(0.23-0.9)                          | 1.3%<br>(0.83-1.8%)                  | 2.4%<br>(1.5-3.6%)                  | 30<br>(19-46)       | 2200<br>(1400-3100)    |
| Malaysia | 2016 | Female | 45 to 49 | 3.4%<br>(1.9-5.3%)             | 97%<br>(95-98%)          | 0.6<br>(0.24-1.2)                           | 1.5%<br>(0.94-2.3%)                  | 2.6%<br>(1.6-4%)                    | 52<br>(31-81)       | 2900<br>(1800-4300)    |
| Malaysia | 2016 | Female | 50 to 54 | 3.5%<br>(2.1-5.3%)             | 96%<br>(95-98%)          | 0.67<br>(0.28-1.3)                          | 1.7%<br>(1.1-2.6%)                   | 2.8%<br>(1.8-4.2%)                  | 85<br>(54-130)      | 3900<br>(2500-5700)    |
| Malaysia | 2016 | Female | 55 to 59 | 3.6%<br>(2.2-5.7%)             | 96%<br>(94-98%)          | 0.68<br>(0.29-1.4)                          | 1.8%<br>(1.1-2.8%)                   | 2.8%<br>(1.7-4.2%)                  | 120<br>(74-190)     | 4400<br>(2800-6800)    |
| Malaysia | 2016 | Female | 60 to 64 | 3.5%<br>(2-5.5%)               | 97%<br>(94-98%)          | 0.65<br>(0.28-1.3)                          | 1.8%<br>(1.1-2.8%)                   | 2.5%<br>(1.5-4%)                    | 130<br>(81-210)     | 4200<br>(2500-6600)    |
| Malaysia | 2016 | Female | 65 to 69 | 3.2%<br>(1.9-4.9%)             | 97%<br>(95-98%)          | 0.62<br>(0.26-1.2)                          | 1.8%<br>(1.1-2.8%)                   | 2.4%<br>(1.5-3.8%)                  | 170<br>(100-270)    | 4300<br>(2600-6500)    |
| Malaysia | 2016 | Female | 70 to 74 | 3.1%<br>(1.9-4.8%)             | 97%<br>(95-98%)          | 0.61<br>(0.24-1.3)                          | 1.8%<br>(1-2.9%)                     | 2.3%<br>(1.3-3.7%)                  | 180<br>(100-290)    | 3400<br>(1900-5500)    |
| Malaysia | 2016 | Female | 75 to 79 | 3.2%<br>(1.9-5%)               | 97%<br>(95-98%)          | 0.62<br>(0.24-1.3)                          | 1.7%<br>(0.92-2.9%)                  | 2.1%<br>(1.1-3.5%)                  | 180<br>(94-310)     | 2700<br>(1500-4600)    |
| Malaysia | 2016 | Female | 80 to 84 | 3.3%<br>(1.8-4.9%)             | 97%<br>(95-98%)          | 0.62<br>(0.25-1.2)                          | 1.8%<br>(0.95-2.9%)                  | 2.2%<br>(1.1-3.5%)                  | 150<br>(77-240)     | 1600<br>(860-2600)     |

| Location | Year | Sex    | Age      | Prevalence of current drinkers | Prevalence of abstainers | Population average of standard drinks daily | Percent of total attributable deaths | Percent of total attributable DALYs | Attributable deaths | Attributable DALYs        |
|----------|------|--------|----------|--------------------------------|--------------------------|---------------------------------------------|--------------------------------------|-------------------------------------|---------------------|---------------------------|
| Malaysia | 2016 | Female | 85 to 89 | 3.5%<br>(2-5.6%)               | 97%<br>(94-98%)          | 0.64<br>(0.27-1.2)                          | 1.8%<br>(0.96-3.2%)                  | 2.2%<br>(1.1-3.7%)                  | 110<br>(56-190)     | 840<br>(430-1400)         |
| Malaysia | 2016 | Female | 90 to 94 | 3.8%<br>(2.3-6%)               | 96%<br>(94-98%)          | 0.69<br>(0.28-1.4)                          | 1.9%<br>(0.99-3.2%)                  | 2.2%<br>(1.1-3.7%)                  | 58<br>(30-100)      | 300<br>(160-510)          |
| Malaysia | 2016 | Female | 95 plus  | 4.4%<br>(2.5-7%)               | 96%<br>(93-98%)          | 0.77<br>(0.28-1.7)                          | 2%<br>(0.98-3.5%)                    | 2.3%<br>(1.1-4.1%)                  | 17<br>(7.7-29)      | 57<br>(27-97)             |
| Malaysia | 2016 | Male   | All Ages | 8.9%<br>(7.3-11%)              | 91%<br>(89-93%)          | 1.3<br>(0.82-2.1)                           | 4.6%<br>(3.6-5.7%)                   | 5.3%<br>(4.1-6.6%)                  | 4800<br>(3700-6000) | 180000<br>(140000-220000) |
| Malaysia | 2016 | Male   | 15 to 19 | 6.5%<br>(4-9.7%)               | 93%<br>(90-96%)          | 0.5<br>(0.21-0.98)                          | 2.5%<br>(1.5-3.9%)                   | 4.1%<br>(2.1-6.8%)                  | 49<br>(25-81)       | 4400<br>(2700-7000)       |
| Malaysia | 2016 | Male   | 20 to 24 | 10%<br>(6.3-15%)               | 90%<br>(85-94%)          | 1.3<br>(0.59-2.4)                           | 5.3%<br>(3.5-7.9%)                   | 7.6%<br>(4.3-12%)                   | 140<br>(79-210)     | 11000<br>(7200-17000)     |
| Malaysia | 2016 | Male   | 25 to 29 | 12%<br>(7-17%)                 | 88%<br>(83-93%)          | 1.7<br>(0.81-3.1)                           | 5.9%<br>(4-8.2%)                     | 8.6%<br>(5.4-12%)                   | 170<br>(110-250)    | 14000<br>(9500-19000)     |
| Malaysia | 2016 | Male   | 30 to 34 | 12%<br>(7.5-19%)               | 88%<br>(81-92%)          | 2.1<br>(1-3.7)                              | 6.1%<br>(4.2-8.3%)                   | 8.7%<br>(5.7-12%)                   | 220<br>(140-310)    | 15000<br>(11000-21000)    |
| Malaysia | 2016 | Male   | 35 to 39 | 13%<br>(7.8-19%)               | 87%<br>(81-92%)          | 2.4<br>(1.1-4.5)                            | 6.3%<br>(4.3-8.6%)                   | 9%<br>(6-13%)                       | 230<br>(150-330)    | 14000<br>(10000-20000)    |
| Malaysia | 2016 | Male   | 40 to 44 | 13%<br>(8-18%)                 | 87%<br>(82-92%)          | 2.5<br>(1.2-4.5)                            | 6.3%<br>(4.4-8.4%)                   | 8.9%<br>(6.1-12%)                   | 280<br>(190-370)    | 15000<br>(11000-20000)    |
| Malaysia | 2016 | Male   | 45 to 49 | 12%<br>(7.3-18%)               | 88%<br>(82-93%)          | 2.3<br>(1-4.2)                              | 6.4%<br>(4.4-8.6%)                   | 8.7%<br>(5.9-12%)                   | 360<br>(250-490)    | 17000<br>(12000-23000)    |
| Malaysia | 2016 | Male   | 50 to 54 | 12%<br>(7.7-18%)               | 88%<br>(82-92%)          | 2.2<br>(0.99-4.1)                           | 6.1%<br>(4.2-8.3%)                   | 8%<br>(5.6-11%)                     | 450<br>(320-620)    | 18000<br>(13000-25000)    |
| Malaysia | 2016 | Male   | 55 to 59 | 12%<br>(7.3-17%)               | 88%<br>(83-93%)          | 2.3<br>(1-4.4)                              | 5.8%<br>(4-8%)                       | 7.3%<br>(5.1-10%)                   | 550<br>(380-760)    | 19000<br>(13000-26000)    |
| Malaysia | 2016 | Male   | 60 to 64 | 11%<br>(6.6-17%)               | 89%<br>(83-93%)          | 2<br>(0.9-4.2)                              | 5.2%<br>(3.5-7.3%)                   | 6.3%<br>(4.2-9%)                    | 570<br>(380-790)    | 16000<br>(11000-23000)    |
| Malaysia | 2016 | Male   | 65 to 69 | 9.2%<br>(5.7-13%)              | 91%<br>(87-94%)          | 1.5<br>(0.7-2.9)                            | 4.4%<br>(2.9-6.3%)                   | 5.3%<br>(3.4-7.6%)                  | 580<br>(380-820)    | 14000<br>(9100-20000)     |
| Malaysia | 2016 | Male   | 70 to 74 | 7.9%<br>(5.1-12%)              | 92%<br>(88-95%)          | 1.1<br>(0.5-2.2)                            | 3.6%<br>(2.2-5.3%)                   | 4.2%<br>(2.6-6.2%)                  | 430<br>(270-640)    | 8200<br>(5200-12000)      |
| Malaysia | 2016 | Male   | 75 to 79 | 7%<br>(4.3-11%)                | 93%<br>(89-96%)          | 0.92<br>(0.37-1.9)                          | 2.8%<br>(1.5-4.4%)                   | 3.3%<br>(1.8-5.3%)                  | 320<br>(170-520)    | 4800<br>(2700-7600)       |
| Malaysia | 2016 | Male   | 80 to 84 | 6.2%<br>(3.7-9.3%)             | 94%<br>(91-96%)          | 0.77<br>(0.32-1.5)                          | 2.5%<br>(1.4-3.7%)                   | 2.9%<br>(1.5-4.4%)                  | 240<br>(130-370)    | 2600<br>(1400-4100)       |
| Malaysia | 2016 | Male   | 85 to 89 | 5.9%<br>(3.3-9.3%)             | 94%<br>(91-97%)          | 0.68<br>(0.27-1.3)                          | 2.2%<br>(1.1-3.6%)                   | 2.5%<br>(1.2-4.2%)                  | 160<br>(77-260)     | 1200<br>(620-2000)        |
| Malaysia | 2016 | Male   | 90 to 94 | 6.4%<br>(3.9-10%)              | 94%<br>(90-96%)          | 0.69<br>(0.28-1.5)                          | 2.1%<br>(0.94-3.5%)                  | 2.4%<br>(1-4%)                      | 72<br>(31-120)      | 380<br>(170-640)          |
| Malaysia | 2016 | Male   | 95 plus  | 7.4%<br>(4.1-12%)              | 93%<br>(88-96%)          | 0.74<br>(0.27-1.6)                          | 2.2%<br>(0.91-3.9%)                  | 2.4%<br>(0.89-4.4%)                 | 18<br>(6.7-33)      | 65<br>(26-120)            |
| Maldives | 1990 | Female | All Ages | 14%<br>(9.8-18%)               | 86%<br>(82-90%)          | 0.1<br>(0.061-0.15)                         | 0.14%<br>(-0.024-0.31%)              | 0.027%<br>(-0.34-0.45%)             | 0.17<br>(-2.2-3)    | 61<br>(-10-140)           |



| Location | Year | Sex    | Age      | Prevalence of current drinkers | Prevalence of abstainers | Population average of standard drinks daily | Percent of total attributable deaths | Percent of total attributable DALYs | Attributable deaths        | Attributable DALYs       |
|----------|------|--------|----------|--------------------------------|--------------------------|---------------------------------------------|--------------------------------------|-------------------------------------|----------------------------|--------------------------|
| Maldives | 1990 | Female | 15 to 19 | 13%<br>(6.7-23%)               | 87%<br>(77-93%)          | 0.099<br>(0.034-0.21)                       | 0.36%<br>(0.2-0.58%)                 | 0.27%<br>(0.034-0.63%)              | 0.039<br>(0.005-0.091)     | 7.4<br>(3.9-12)          |
| Maldives | 1990 | Female | 20 to 24 | 16%<br>(7.5-29%)               | 84%<br>(71-93%)          | 0.13<br>(0.049-0.28)                        | 0.54%<br>(0.29-0.88%)                | 0.24%<br>(-0.044-0.72%)             | 0.045<br>(-0.0081-0.13)    | 12<br>(6.4-20)           |
| Maldives | 1990 | Female | 25 to 29 | 18%<br>(8.1-31%)               | 82%<br>(69-92%)          | 0.16<br>(0.052-0.32)                        | 0.49%<br>(0.23-0.83%)                | 0.21%<br>(-0.13-0.67%)              | 0.049<br>(-0.029-0.15)     | 11<br>(5.1-19)           |
| Maldives | 1990 | Female | 30 to 34 | 19%<br>(8.5-35%)               | 81%<br>(65-92%)          | 0.18<br>(0.062-0.37)                        | 0.46%<br>(0.16-0.8%)                 | 0.25%<br>(-0.16-0.74%)              | 0.053<br>(-0.033-0.15)     | 8.6<br>(3-15)            |
| Maldives | 1990 | Female | 35 to 39 | 21%<br>(9.4-35%)               | 79%<br>(65-91%)          | 0.19<br>(0.065-0.39)                        | 0.47%<br>(0.043-0.92%)               | 0.39%<br>(-0.21-1.1%)               | 0.068<br>(-0.041-0.19)     | 6.5<br>(0.59-13)         |
| Maldives | 1990 | Female | 40 to 44 | 21%<br>(10-35%)                | 79%<br>(65-90%)          | 0.22<br>(0.074-0.47)                        | 0.57%<br>(0.13-1.1%)                 | 0.69%<br>(0.014-1.5%)               | 0.08<br>(0.0015-0.18)      | 5.5<br>(1.2-11)          |
| Maldives | 1990 | Female | 45 to 49 | 21%<br>(9.8-35%)               | 79%<br>(65-90%)          | 0.24<br>(0.079-0.53)                        | 0.55%<br>(0.016-1.3%)                | 0.71%<br>(-0.094-1.9%)              | 0.14<br>(-0.02-0.39)       | 7.5<br>(0.21-18)         |
| Maldives | 1990 | Female | 50 to 54 | 21%<br>(10-36%)                | 79%<br>(64-90%)          | 0.27<br>(0.092-0.57)                        | 0.43%<br>(-0.26-1.3%)                | 0.55%<br>(-0.41-1.7%)               | 0.17<br>(-0.13-0.55)       | 7.2<br>(-4.2-21)         |
| Maldives | 1990 | Female | 55 to 59 | 21%<br>(11-37%)                | 79%<br>(63-89%)          | 0.29<br>(0.1-0.63)                          | 0.24%<br>(-0.6-1.3%)                 | 0.31%<br>(-0.77-1.7%)               | 0.12<br>(-0.3-0.63)        | 3.9<br>(-9.7-21)         |
| Maldives | 1990 | Female | 60 to 64 | 21%<br>(11-36%)                | 79%<br>(64-89%)          | 0.29<br>(0.1-0.67)                          | -0.065%<br>(-1-1%)                   | -0.087%<br>(-1.2-1.3%)              | -0.037<br>(-0.52-0.53)     | -0.93<br>(-14-15)        |
| Maldives | 1990 | Female | 65 to 69 | 21%<br>(10-34%)                | 79%<br>(66-90%)          | 0.27<br>(0.094-0.55)                        | -0.27%<br>(-1.2-0.64%)               | -0.33%<br>(-1.4-0.81%)              | -0.15<br>(-0.68-0.38)      | -3.4<br>(-15-8.5)        |
| Maldives | 1990 | Female | 70 to 74 | 20%<br>(9.9-34%)               | 80%<br>(66-90%)          | 0.25<br>(0.08-0.54)                         | -0.24%<br>(-1.1-0.71%)               | -0.29%<br>(-1.2-0.86%)              | -0.12<br>(-0.51-0.34)      | -2.2<br>(-9.4-6.2)       |
| Maldives | 1990 | Female | 75 to 79 | 19%<br>(9.2-34%)               | 81%<br>(66-91%)          | 0.23<br>(0.071-0.58)                        | -0.34%<br>(-1.1-0.48%)               | -0.41%<br>(-1.4-0.59%)              | -0.11<br>(-0.38-0.16)      | -1.6<br>(-5.4-2.2)       |
| Maldives | 1990 | Female | 80 to 84 | 19%<br>(9.1-34%)               | 81%<br>(66-91%)          | 0.24<br>(0.071-0.55)                        | -0.49%<br>(-1.4-0.29%)               | -0.58%<br>(-1.7-0.33%)              | -0.1<br>(-0.29-0.059)      | -1<br>(-2.9-0.63)        |
| Maldives | 1990 | Female | 85 to 89 | 21%<br>(11-36%)                | 79%<br>(64-89%)          | 0.25<br>(0.077-0.6)                         | -0.59%<br>(-1.5-0.14%)               | -0.72%<br>(-1.8-0.14%)              | -0.054<br>(-0.14-0.01)     | -0.38<br>(-1-0.092)      |
| Maldives | 1990 | Female | 90 to 94 | 24%<br>(12-41%)                | 76%<br>(59-88%)          | 0.29<br>(0.079-0.7)                         | -0.55%<br>(-1.5-0.31%)               | -0.69%<br>(-1.8-0.31%)              | -0.015<br>(-0.039-0.0067)  | -0.07<br>(-0.19-0.04)    |
| Maldives | 1990 | Female | 95 plus  | 29%<br>(13-49%)                | 71%<br>(51-87%)          | 0.34<br>(0.069-0.91)                        | -0.59%<br>(-1.9-0.45%)               | -0.77%<br>(-2.3-0.42%)              | -0.0039<br>(-0.011-0.0022) | -0.012<br>(-0.037-0.009) |
| Maldives | 1990 | Male   | All Ages | 35%<br>(29-42%)                | 65%<br>(58-71%)          | 0.26<br>(0.17-0.38)                         | 0.29%<br>(-0.2-0.77%)                | 0.018%<br>(-1-0.95%)                | 0.13<br>(-7.5-7.1)         | 140<br>(-94-360)         |
| Maldives | 1990 | Male   | 15 to 19 | 34%<br>(21-49%)                | 66%<br>(51-79%)          | 0.16<br>(0.071-0.3)                         | 0.83%<br>(0.47-1.4%)                 | 0.82%<br>(0.23-1.7%)                | 0.095<br>(0.028-0.2)       | 14<br>(7.7-23)           |
| Maldives | 1990 | Male   | 20 to 24 | 47%<br>(31-63%)                | 53%<br>(37-69%)          | 0.35<br>(0.18-0.59)                         | 1.8%<br>(0.95-3%)                    | 1.7%<br>(0.24-3.5%)                 | 0.21<br>(0.03-0.44)        | 29<br>(14-47)            |
| Maldives | 1990 | Male   | 25 to 29 | 51%<br>(34-68%)                | 49%<br>(32-66%)          | 0.47<br>(0.24-0.77)                         | 2%<br>(0.87-3.3%)                    | 1.8%<br>(-0.16-4.1%)                | 0.22<br>(-0.019-0.5)       | 27<br>(12-47)            |
| Maldives | 1990 | Male   | 30 to 34 | 53%<br>(35-70%)                | 47%<br>(30-65%)          | 0.55<br>(0.29-0.91)                         | 1.7%<br>(0.37-3.3%)                  | 1.5%<br>(-0.71-4%)                  | 0.21<br>(-0.1-0.56)        | 23<br>(4.5-43)           |

| Location | Year | Sex    | Age      | Prevalence of current drinkers | Prevalence of abstainers | Population average of standard drinks daily | Percent of total attributable deaths | Percent of total attributable DALYs | Attributable deaths       | Attributable DALYs        |
|----------|------|--------|----------|--------------------------------|--------------------------|---------------------------------------------|--------------------------------------|-------------------------------------|---------------------------|---------------------------|
| Maldives | 1990 | Male   | 35 to 39 | 55%<br>(39-71%)                | 45%<br>(29-61%)          | 0.62<br>(0.31-1)                            | 1.7%<br>(0.019-3.5%)                 | 1.7%<br>(-0.89-4.4%)                | 0.22<br>(-0.12-0.58)      | 18<br>(0.21-37)           |
| Maldives | 1990 | Male   | 40 to 44 | 55%<br>(40-73%)                | 45%<br>(27-60%)          | 0.65<br>(0.32-1.1)                          | 1.3%<br>(-0.44-3.1%)                 | 1.3%<br>(-1.3-4%)                   | 0.19<br>(-0.18-0.56)      | 13<br>(-4.4-31)           |
| Maldives | 1990 | Male   | 45 to 49 | 54%<br>(36-71%)                | 46%<br>(29-64%)          | 0.65<br>(0.32-1.1)                          | 1.1%<br>(-0.71-2.9%)                 | 1.1%<br>(-1.6-3.7%)                 | 0.23<br>(-0.32-0.79)      | 14<br>(-9.2-38)           |
| Maldives | 1990 | Male   | 50 to 54 | 52%<br>(34-70%)                | 48%<br>(30-66%)          | 0.63<br>(0.31-1.1)                          | 0.49%<br>(-1.3-2.3%)                 | 0.35%<br>(-2.1-2.8%)                | 0.13<br>(-0.79-1)         | 9.5<br>(-25-43)           |
| Maldives | 1990 | Male   | 55 to 59 | 51%<br>(34-68%)                | 49%<br>(32-66%)          | 0.58<br>(0.29-1)                            | 0.33%<br>(-1.4-2%)                   | 0.22%<br>(-2.1-2.4%)                | 0.1<br>(-1.1-1.1)         | 6.9<br>(-29-40)           |
| Maldives | 1990 | Male   | 60 to 64 | 48%<br>(31-67%)                | 52%<br>(33-69%)          | 0.52<br>(0.25-0.95)                         | 0.034%<br>(-1.7-1.6%)                | -0.1%<br>(-2.3-1.9%)                | -0.063<br>(-1.4-1.1)      | 0.71<br>(-36-33)          |
| Maldives | 1990 | Male   | 65 to 69 | 45%<br>(29-63%)                | 55%<br>(37-71%)          | 0.45<br>(0.22-0.77)                         | -0.26%<br>(-1.7-1.1%)                | -0.44%<br>(-2.3-1.3%)               | -0.27<br>(-1.4-0.73)      | -4.5<br>(-29-18)          |
| Maldives | 1990 | Male   | 70 to 74 | 41%<br>(26-59%)                | 59%<br>(41-74%)          | 0.38<br>(0.18-0.69)                         | -0.49%<br>(-1.8-0.57%)               | -0.7%<br>(-2.4-0.62%)               | -0.39<br>(-1.4-0.36)      | -6.1<br>(-23-7.3)         |
| Maldives | 1990 | Male   | 75 to 79 | 38%<br>(23-56%)                | 62%<br>(44-77%)          | 0.33<br>(0.15-0.62)                         | -0.59%<br>(-1.9-0.32%)               | -0.81%<br>(-2.4-0.32%)              | -0.36<br>(-1.1-0.14)      | -4.5<br>(-15-2.4)         |
| Maldives | 1990 | Male   | 80 to 84 | 35%<br>(20-53%)                | 65%<br>(47-80%)          | 0.29<br>(0.13-0.53)                         | -0.65%<br>(-1.9-0.24%)               | -0.81%<br>(-2.2-0.22%)              | -0.25<br>(-0.69-0.069)    | -2.4<br>(-6.8-0.85)       |
| Maldives | 1990 | Male   | 85 to 89 | 34%<br>(20-51%)                | 66%<br>(49-80%)          | 0.26<br>(0.11-0.48)                         | -0.54%<br>(-1.5-0.18%)               | -0.68%<br>(-1.8-0.17%)              | -0.11<br>(-0.29-0.026)    | -0.72<br>(-2-0.25)        |
| Maldives | 1990 | Male   | 90 to 94 | 36%<br>(22-51%)                | 64%<br>(49-78%)          | 0.25<br>(0.11-0.48)                         | -0.46%<br>(-1.2-0.14%)               | -0.61%<br>(-1.5-0.099%)             | -0.034<br>(-0.086-0.0057) | -0.15<br>(-0.42-0.043)    |
| Maldives | 1990 | Male   | 95 plus  | 39%<br>(22-58%)                | 61%<br>(42-78%)          | 0.25<br>(0.087-0.51)                        | -0.54%<br>(-1.5-0.1%)                | -0.74%<br>(-1.9-0.012%)             | -0.012<br>(-0.03-0.00019) | -0.033<br>(-0.093-0.0064) |
| Maldives | 1995 | Female | All Ages | 13%<br>(9.8-18%)               | 87%<br>(82-90%)          | 0.15<br>(0.099-0.21)                        | 0.29%<br>(0.045-0.59%)               | 0.25%<br>(-0.36-1%)                 | 1.3<br>(-1.8-5.2)         | 100<br>(15-210)           |
| Maldives | 1995 | Female | 15 to 19 | 13%<br>(6.6-23%)               | 87%<br>(77-93%)          | 0.14<br>(0.049-0.3)                         | 0.47%<br>(0.27-0.74%)                | 0.46%<br>(0.13-1.1%)                | 0.041<br>(0.012-0.09)     | 8.5<br>(4.8-14)           |
| Maldives | 1995 | Female | 20 to 24 | 16%<br>(7.5-28%)               | 84%<br>(72-92%)          | 0.19<br>(0.072-0.4)                         | 0.77%<br>(0.47-1.2%)                 | 0.45%<br>(0.062-1.2%)               | 0.053<br>(0.0073-0.14)    | 14<br>(8.3-22)            |
| Maldives | 1995 | Female | 25 to 29 | 17%<br>(8.1-31%)               | 83%<br>(69-92%)          | 0.22<br>(0.081-0.44)                        | 0.74%<br>(0.46-1.1%)                 | 0.41%<br>(0.027-0.98%)              | 0.056<br>(0.0035-0.14)    | 13<br>(7.7-21)            |
| Maldives | 1995 | Female | 30 to 34 | 19%<br>(8.6-33%)               | 81%<br>(67-91%)          | 0.25<br>(0.096-0.53)                        | 0.67%<br>(0.39-1%)                   | 0.47%<br>(0.019-1.2%)               | 0.068<br>(0.0028-0.17)    | 11<br>(6.2-18)            |
| Maldives | 1995 | Female | 35 to 39 | 20%<br>(8.9-35%)               | 80%<br>(65-91%)          | 0.28<br>(0.1-0.56)                          | 0.66%<br>(0.25-1.2%)                 | 0.66%<br>(-0.015-1.6%)              | 0.11<br>(-0.0026-0.27)    | 11<br>(4-20)              |
| Maldives | 1995 | Female | 40 to 44 | 21%<br>(10-35%)                | 79%<br>(65-90%)          | 0.31<br>(0.12-0.67)                         | 0.77%<br>(0.31-1.5%)                 | 1.1%<br>(0.27-2.4%)                 | 0.12<br>(0.029-0.26)      | 7.9<br>(3.2-15)           |
| Maldives | 1995 | Female | 45 to 49 | 21%<br>(10-34%)                | 79%<br>(66-90%)          | 0.36<br>(0.12-0.74)                         | 0.82%<br>(0.21-1.8%)                 | 1.2%<br>(0.21-3%)                   | 0.15<br>(0.026-0.36)      | 7.7<br>(1.9-17)           |
| Maldives | 1995 | Female | 50 to 54 | 21%<br>(10-37%)                | 79%<br>(63-90%)          | 0.39<br>(0.14-0.81)                         | 0.78%<br>(-0.1-2%)                   | 1.1%<br>(-0.17-2.8%)                | 0.29<br>(-0.048-0.77)     | 12<br>(-1.6-31)           |

| Location | Year | Sex    | Age      | Prevalence of current drinkers | Prevalence of abstainers | Population average of standard drinks daily | Percent of total attributable deaths | Percent of total attributable DALYs | Attributable deaths       | Attributable DALYs        |
|----------|------|--------|----------|--------------------------------|--------------------------|---------------------------------------------|--------------------------------------|-------------------------------------|---------------------------|---------------------------|
| Maldives | 1995 | Female | 55 to 59 | 21%<br>(11-37%)                | 79%<br>(63-89%)          | 0.43<br>(0.16-0.88)                         | 0.64%<br>(-0.32-1.9%)                | 0.88%<br>(-0.45-2.7%)               | 0.33<br>(-0.18-1)         | 11<br>(-5.9-34)           |
| Maldives | 1995 | Female | 60 to 64 | 21%<br>(10-37%)                | 79%<br>(63-90%)          | 0.43<br>(0.15-0.9)                          | 0.32%<br>(-0.84-1.8%)                | 0.4%<br>(-1.1-2.3%)                 | 0.2<br>(-0.55-1.1)        | 5.7<br>(-15-32)           |
| Maldives | 1995 | Female | 65 to 69 | 20%<br>(9.9-34%)               | 80%<br>(66-90%)          | 0.4<br>(0.14-0.79)                          | 0.076%<br>(-1.1-1.4%)                | 0.089%<br>(-1.3-1.7%)               | 0.041<br>(-0.61-0.77)     | 1<br>(-14-18)             |
| Maldives | 1995 | Female | 70 to 74 | 20%<br>(9.6-33%)               | 80%<br>(67-90%)          | 0.36<br>(0.12-0.79)                         | 0.067%<br>(-0.89-1.5%)               | 0.081%<br>(-1.1-1.8%)               | 0.037<br>(-0.51-0.79)     | 0.7<br>(-9.4-15)          |
| Maldives | 1995 | Female | 75 to 79 | 19%<br>(8.9-32%)               | 81%<br>(68-91%)          | 0.34<br>(0.1-0.81)                          | -0.11%<br>(-1.1-1.1%)                | -0.14%<br>(-1.2-1.3%)               | -0.05<br>(-0.45-0.44)     | -0.64<br>(-6.1-6.4)       |
| Maldives | 1995 | Female | 80 to 84 | 19%<br>(9.1-33%)               | 81%<br>(67-91%)          | 0.34<br>(0.11-0.76)                         | -0.25%<br>(-1.3-0.84%)               | -0.32%<br>(-1.5-0.91%)              | -0.067<br>(-0.32-0.2)     | -0.65<br>(-3.3-2.1)       |
| Maldives | 1995 | Female | 85 to 89 | 21%<br>(9.8-36%)               | 79%<br>(64-90%)          | 0.37<br>(0.11-0.82)                         | -0.3%<br>(-1.2-0.73%)                | -0.41%<br>(-1.6-0.83%)              | -0.035<br>(-0.13-0.07)    | -0.23<br>(-0.95-0.57)     |
| Maldives | 1995 | Female | 90 to 94 | 24%<br>(12-42%)                | 76%<br>(58-88%)          | 0.42<br>(0.12-1)                            | -0.31%<br>(-1.4-1%)                  | -0.42%<br>(-1.6-1.1%)               | -0.014<br>(-0.056-0.038)  | -0.062<br>(-0.27-0.21)    |
| Maldives | 1995 | Female | 95 plus  | 28%<br>(13-49%)                | 72%<br>(51-87%)          | 0.49<br>(0.11-1.3)                          | -0.34%<br>(-1.7-1.6%)                | -0.48%<br>(-2.2-1.7%)               | -0.0033<br>(-0.014-0.012) | -0.0089<br>(-0.046-0.043) |
| Maldives | 1995 | Male   | All Ages | 34%<br>(28-42%)                | 66%<br>(58-72%)          | 0.36<br>(0.26-0.5)                          | 0.52%<br>(-0.1-1.1%)                 | 0.18%<br>(-1-1.4%)                  | 1.2<br>(-7-9.4)           | 210<br>(-45-450)          |
| Maldives | 1995 | Male   | 15 to 19 | 33%<br>(21-49%)                | 67%<br>(51-79%)          | 0.23<br>(0.11-0.41)                         | 0.99%<br>(0.57-1.6%)                 | 1.1%<br>(0.4-2.2%)                  | 0.12<br>(0.041-0.24)      | 17<br>(9.6-28)            |
| Maldives | 1995 | Male   | 20 to 24 | 46%<br>(31-62%)                | 54%<br>(38-69%)          | 0.5<br>(0.27-0.82)                          | 2.3%<br>(1.3-3.5%)                   | 2.4%<br>(0.8-4.5%)                  | 0.28<br>(0.092-0.53)      | 35<br>(19-54)             |
| Maldives | 1995 | Male   | 25 to 29 | 51%<br>(33-68%)                | 49%<br>(32-67%)          | 0.67<br>(0.37-1)                            | 2.5%<br>(1.4-3.8%)                   | 2.8%<br>(0.7-5.2%)                  | 0.26<br>(0.068-0.5)       | 32<br>(17-49)             |
| Maldives | 1995 | Male   | 30 to 34 | 53%<br>(35-70%)                | 47%<br>(30-65%)          | 0.8<br>(0.46-1.2)                           | 2.3%<br>(1.1-3.8%)                   | 2.5%<br>(0.31-5.1%)                 | 0.28<br>(0.039-0.57)      | 30<br>(13-49)             |
| Maldives | 1995 | Male   | 35 to 39 | 55%<br>(39-72%)                | 45%<br>(28-61%)          | 0.89<br>(0.48-1.4)                          | 2.3%<br>(0.81-3.9%)                  | 2.7%<br>(0.13-5.5%)                 | 0.35<br>(0.017-0.72)      | 28<br>(9.2-48)            |
| Maldives | 1995 | Male   | 40 to 44 | 55%<br>(39-72%)                | 45%<br>(28-61%)          | 0.94<br>(0.5-1.5)                           | 2%<br>(0.41-3.8%)                    | 2.4%<br>(-0.29-5.3%)                | 0.28<br>(-0.033-0.64)     | 19<br>(3.7-37)            |
| Maldives | 1995 | Male   | 45 to 49 | 53%<br>(36-70%)                | 47%<br>(30-64%)          | 0.94<br>(0.48-1.6)                          | 1.7%<br>(-0.11-3.7%)                 | 2.1%<br>(-0.81-5%)                  | 0.3<br>(-0.12-0.74)       | 17<br>(-0.95-36)          |
| Maldives | 1995 | Male   | 50 to 54 | 52%<br>(35-69%)                | 48%<br>(31-65%)          | 0.91<br>(0.47-1.5)                          | 1%<br>(-0.89-3.1%)                   | 1.1%<br>(-1.7-3.9%)                 | 0.33<br>(-0.5-1.2)        | 17<br>(-14-49)            |
| Maldives | 1995 | Male   | 55 to 59 | 50%<br>(34-67%)                | 50%<br>(33-66%)          | 0.84<br>(0.43-1.4)                          | 0.76%<br>(-1.1-2.7%)                 | 0.75%<br>(-1.7-3.3%)                | 0.39<br>(-0.92-1.7)       | 17<br>(-24-61)            |
| Maldives | 1995 | Male   | 60 to 64 | 48%<br>(30-66%)                | 52%<br>(34-70%)          | 0.75<br>(0.37-1.3)                          | 0.39%<br>(-1.3-2.5%)                 | 0.32%<br>(-1.9-2.9%)                | 0.24<br>(-1.4-2.1)        | 10<br>(-34-63)            |
| Maldives | 1995 | Male   | 65 to 69 | 44%<br>(29-62%)                | 56%<br>(38-71%)          | 0.65<br>(0.34-1.1)                          | -0.039%<br>(-1.5-1.5%)               | -0.18%<br>(-2.1-1.8%)               | -0.13<br>(-1.5-1.3)       | -0.74<br>(-32-31)         |
| Maldives | 1995 | Male   | 70 to 74 | 41%<br>(26-58%)                | 59%<br>(42-74%)          | 0.56<br>(0.27-1)                            | -0.45%<br>(-1.9-0.87%)               | -0.66%<br>(-2.4-0.93%)              | -0.47<br>(-1.7-0.66)      | -7<br>(-30-14)            |

| Location | Year | Sex    | Age      | Prevalence of current drinkers | Prevalence of abstainers | Population average of standard drinks daily | Percent of total attributable deaths | Percent of total attributable DALYs | Attributable deaths         | Attributable DALYs        |
|----------|------|--------|----------|--------------------------------|--------------------------|---------------------------------------------|--------------------------------------|-------------------------------------|-----------------------------|---------------------------|
| Maldives | 1995 | Male   | 75 to 79 | 38%<br>(23-56%)                | 62%<br>(44-77%)          | 0.48<br>(0.21-0.89)                         | -0.64%<br>(-2.1-0.42%)               | -0.88%<br>(-2.7-0.44%)              | -0.49<br>(-1.5-0.24)        | -6<br>(-19-4.1)           |
| Maldives | 1995 | Male   | 80 to 84 | 35%<br>(20-53%)                | 65%<br>(47-80%)          | 0.42<br>(0.19-0.76)                         | -0.67%<br>(-1.9-0.29%)               | -0.87%<br>(-2.4-0.28%)              | -0.31<br>(-0.85-0.096)      | -2.9<br>(-8.4-1.3)        |
| Maldives | 1995 | Male   | 85 to 89 | 34%<br>(19-51%)                | 66%<br>(49-81%)          | 0.37<br>(0.17-0.7)                          | -0.54%<br>(-1.5-0.19%)               | -0.74%<br>(-1.9-0.16%)              | -0.13<br>(-0.35-0.027)      | -0.87<br>(-2.5-0.29)      |
| Maldives | 1995 | Male   | 90 to 94 | 35%<br>(21-52%)                | 65%<br>(48-79%)          | 0.36<br>(0.16-0.67)                         | -0.46%<br>(-1.2-0.15%)               | -0.67%<br>(-1.7-0.098%)             | -0.041<br>(-0.1-0.0059)     | -0.18<br>(-0.47-0.057)    |
| Maldives | 1995 | Male   | 95 plus  | 39%<br>(22-59%)                | 61%<br>(41-78%)          | 0.36<br>(0.13-0.75)                         | -0.58%<br>(-1.5-0.12%)               | -0.86%<br>(-2--0.014%)              | -0.013<br>(-0.031--0.00021) | -0.036<br>(-0.096-0.0073) |
| Maldives | 2000 | Female | All Ages | 13%<br>(9.7-18%)               | 87%<br>(82-90%)          | 0.19<br>(0.13-0.27)                         | 0.48%<br>(0.15-0.87%)                | 0.53%<br>(-0.29-1.6%)               | 2.4<br>(-1.3-7.1)           | 140<br>(44-260)           |
| Maldives | 2000 | Female | 15 to 19 | 13%<br>(6.3-22%)               | 87%<br>(78-94%)          | 0.18<br>(0.064-0.36)                        | 0.53%<br>(0.31-0.84%)                | 0.63%<br>(0.21-1.4%)                | 0.041<br>(0.014-0.09)       | 11<br>(5.9-17)            |
| Maldives | 2000 | Female | 20 to 24 | 16%<br>(7.1-28%)               | 84%<br>(72-93%)          | 0.24<br>(0.087-0.5)                         | 0.95%<br>(0.6-1.4%)                  | 0.68%<br>(0.19-1.6%)                | 0.046<br>(0.012-0.11)       | 15<br>(9.2-24)            |
| Maldives | 2000 | Female | 25 to 29 | 17%<br>(7.4-30%)               | 83%<br>(70-93%)          | 0.28<br>(0.097-0.57)                        | 0.95%<br>(0.6-1.3%)                  | 0.63%<br>(0.18-1.3%)                | 0.046<br>(0.013-0.099)      | 14<br>(8.6-21)            |
| Maldives | 2000 | Female | 30 to 34 | 18%<br>(8.1-33%)               | 82%<br>(67-92%)          | 0.31<br>(0.12-0.66)                         | 0.85%<br>(0.54-1.3%)                 | 0.72%<br>(0.25-1.5%)                | 0.061<br>(0.02-0.13)        | 13<br>(7.5-20)            |
| Maldives | 2000 | Female | 35 to 39 | 20%<br>(8.7-34%)               | 80%<br>(66-91%)          | 0.34<br>(0.12-0.68)                         | 0.82%<br>(0.45-1.4%)                 | 0.95%<br>(0.24-2.1%)                | 0.12<br>(0.031-0.27)        | 13<br>(7-22)              |
| Maldives | 2000 | Female | 40 to 44 | 20%<br>(9.9-33%)               | 80%<br>(67-90%)          | 0.38<br>(0.14-0.79)                         | 0.9%<br>(0.44-1.6%)                  | 1.4%<br>(0.53-2.8%)                 | 0.18<br>(0.065-0.35)        | 13<br>(6.1-22)            |
| Maldives | 2000 | Female | 45 to 49 | 20%<br>(9.6-34%)               | 80%<br>(66-90%)          | 0.43<br>(0.15-0.89)                         | 0.97%<br>(0.38-2%)                   | 1.6%<br>(0.49-3.6%)                 | 0.18<br>(0.054-0.41)        | 9.9<br>(3.7-21)           |
| Maldives | 2000 | Female | 50 to 54 | 21%<br>(10-36%)                | 79%<br>(64-90%)          | 0.48<br>(0.18-0.99)                         | 1.1%<br>(0.098-2.6%)                 | 1.5%<br>(0.11-3.6%)                 | 0.29<br>(0.021-0.71)        | 12<br>(1.1-28)            |
| Maldives | 2000 | Female | 55 to 59 | 21%<br>(10-35%)                | 79%<br>(65-90%)          | 0.53<br>(0.19-1.1)                          | 0.96%<br>(-0.049-2.5%)               | 1.4%<br>(-0.1-3.7%)                 | 0.39<br>(-0.027-1)          | 14<br>(-0.77-35)          |
| Maldives | 2000 | Female | 60 to 64 | 21%<br>(9.9-35%)               | 79%<br>(65-90%)          | 0.53<br>(0.18-1.1)                          | 0.7%<br>(-0.56-2.4%)                 | 0.89%<br>(-0.74-3.1%)               | 0.49<br>(-0.4-1.7)          | 14<br>(-11-49)            |
| Maldives | 2000 | Female | 65 to 69 | 20%<br>(9.6-34%)               | 80%<br>(66-90%)          | 0.5<br>(0.18-1)                             | 0.42%<br>(-0.77-2%)                  | 0.52%<br>(-0.97-2.4%)               | 0.28<br>(-0.51-1.3)         | 6.7<br>(-12-31)           |
| Maldives | 2000 | Female | 70 to 74 | 19%<br>(9.5-32%)               | 81%<br>(68-91%)          | 0.45<br>(0.16-1)                            | 0.35%<br>(-0.68-2%)                  | 0.43%<br>(-0.84-2.5%)               | 0.21<br>(-0.41-1.2)         | 4<br>(-7.6-22)            |
| Maldives | 2000 | Female | 75 to 79 | 19%<br>(8.6-33%)               | 81%<br>(67-91%)          | 0.43<br>(0.13-0.96)                         | 0.13%<br>(-0.92-1.6%)                | 0.14%<br>(-1.1-1.9%)                | 0.062<br>(-0.51-0.87)       | 1<br>(-7-13)              |
| Maldives | 2000 | Female | 80 to 84 | 19%<br>(9-34%)                 | 81%<br>(66-91%)          | 0.43<br>(0.13-0.94)                         | 0.0018%<br>(-1-1.4%)                 | -0.026%<br>(-1.3-1.6%)              | -0.0071<br>(-0.36-0.44)     | 0.01<br>(-3.6-4.8)        |
| Maldives | 2000 | Female | 85 to 89 | 20%<br>(9.6-36%)               | 80%<br>(64-90%)          | 0.45<br>(0.14-1)                            | -0.062%<br>(-0.99-1.2%)              | -0.13%<br>(-1.3-1.4%)               | -0.016<br>(-0.16-0.17)      | -0.068<br>(-1.1-1.4)      |
| Maldives | 2000 | Female | 90 to 94 | 23%<br>(11-41%)                | 77%<br>(59-89%)          | 0.51<br>(0.14-1.2)                          | -0.036%<br>(-1.2-1.7%)               | -0.11%<br>(-1.5-1.9%)               | -0.0062<br>(-0.084-0.11)    | -0.012<br>(-0.39-0.58)    |

| Location | Year | Sex    | Age      | Prevalence of current drinkers | Prevalence of abstainers | Population average of standard drinks daily | Percent of total attributable deaths | Percent of total attributable DALYs | Attributable deaths         | Attributable DALYs       |
|----------|------|--------|----------|--------------------------------|--------------------------|---------------------------------------------|--------------------------------------|-------------------------------------|-----------------------------|--------------------------|
| Maldives | 2000 | Female | 95 plus  | 28%<br>(12-49%)                | 72%<br>(51-88%)          | 0.61<br>(0.14-1.6)                          | -0.033%<br>(-1.5-2.3%)               | -0.15%<br>(-1.9-2.5%)               | -0.0018<br>(-0.023-0.03)    | -0.0015<br>(-0.072-0.11) |
| Maldives | 2000 | Male   | All Ages | 35%<br>(28-42%)                | 65%<br>(58-72%)          | 0.47<br>(0.35-0.61)                         | 0.77%<br>(0.17-1.4%)                 | 0.32%<br>(-0.94-1.6%)               | 2<br>(-5.9-10)              | 260<br>(54-490)          |
| Maldives | 2000 | Male   | 15 to 19 | 33%<br>(20-49%)                | 67%<br>(51-80%)          | 0.28<br>(0.13-0.5)                          | 1.1%<br>(0.64-1.7%)                  | 1.4%<br>(0.51-2.6%)                 | 0.16<br>(0.06-0.31)         | 23<br>(13-37)            |
| Maldives | 2000 | Male   | 20 to 24 | 46%<br>(30-62%)                | 54%<br>(38-70%)          | 0.62<br>(0.33-1)                            | 2.6%<br>(1.6-3.8%)                   | 3%<br>(1.2-5.1%)                    | 0.32<br>(0.13-0.57)         | 41<br>(25-63)            |
| Maldives | 2000 | Male   | 25 to 29 | 50%<br>(33-67%)                | 50%<br>(33-67%)          | 0.83<br>(0.45-1.3)                          | 2.9%<br>(1.9-4.1%)                   | 3.6%<br>(1.5-6.1%)                  | 0.26<br>(0.11-0.45)         | 35<br>(21-51)            |
| Maldives | 2000 | Male   | 30 to 34 | 53%<br>(35-70%)                | 47%<br>(30-65%)          | 0.99<br>(0.56-1.5)                          | 2.7%<br>(1.6-3.9%)                   | 3.3%<br>(1.1-5.8%)                  | 0.27<br>(0.092-0.48)        | 33<br>(19-48)            |
| Maldives | 2000 | Male   | 35 to 39 | 54%<br>(38-71%)                | 46%<br>(29-62%)          | 1.1<br>(0.59-1.7)                           | 2.7%<br>(1.4-4.1%)                   | 3.5%<br>(1.1-6.1%)                  | 0.39<br>(0.12-0.69)         | 34<br>(17-52)            |
| Maldives | 2000 | Male   | 40 to 44 | 54%<br>(38-72%)                | 46%<br>(28-62%)          | 1.2<br>(0.62-1.8)                           | 2.3%<br>(0.98-3.9%)                  | 3.1%<br>(0.66-5.7%)                 | 0.41<br>(0.083-0.76)        | 29<br>(11-48)            |
| Maldives | 2000 | Male   | 45 to 49 | 53%<br>(35-71%)                | 47%<br>(29-65%)          | 1.2<br>(0.61-1.9)                           | 2.1%<br>(0.46-3.9%)                  | 2.7%<br>(-0.0068-5.6%)              | 0.36<br>(-0.00094-0.76)     | 21<br>(4.4-39)           |
| Maldives | 2000 | Male   | 50 to 54 | 51%<br>(35-69%)                | 49%<br>(31-65%)          | 1.1<br>(0.6-1.9)                            | 1.4%<br>(-0.58-3.4%)                 | 1.5%<br>(-1.3-4.4%)                 | 0.32<br>(-0.27-0.93)        | 16<br>(-6.9-40)          |
| Maldives | 2000 | Male   | 55 to 59 | 50%<br>(33-67%)                | 50%<br>(33-67%)          | 1<br>(0.55-1.7)                             | 1.1%<br>(-0.69-3.1%)                 | 1.2%<br>(-1.2-3.8%)                 | 0.49<br>(-0.5-1.6)          | 20<br>(-12-58)           |
| Maldives | 2000 | Male   | 60 to 64 | 47%<br>(30-67%)                | 53%<br>(33-70%)          | 0.93<br>(0.47-1.6)                          | 0.7%<br>(-0.99-2.8%)                 | 0.68%<br>(-1.5-3.3%)                | 0.46<br>(-1-2.2)            | 17<br>(-23-66)           |
| Maldives | 2000 | Male   | 65 to 69 | 44%<br>(28-62%)                | 56%<br>(38-72%)          | 0.81<br>(0.41-1.4)                          | 0.22%<br>(-1.3-1.9%)                 | 0.11%<br>(-1.8-2.2%)                | 0.093<br>(-1.6-1.8)         | 5.5<br>(-31-45)          |
| Maldives | 2000 | Male   | 70 to 74 | 40%<br>(26-58%)                | 60%<br>(42-74%)          | 0.68<br>(0.34-1.2)                          | -0.29%<br>(-1.7-1.1%)                | -0.5%<br>(-2.3-1.2%)                | -0.41<br>(-1.8-0.98)        | -5.3<br>(-31-21)         |
| Maldives | 2000 | Male   | 75 to 79 | 37%<br>(22-55%)                | 63%<br>(45-78%)          | 0.59<br>(0.26-1.1)                          | -0.55%<br>(-1.9-0.64%)               | -0.79%<br>(-2.5-0.62%)              | -0.51<br>(-1.7-0.39)        | -6<br>(-22-7.3)          |
| Maldives | 2000 | Male   | 80 to 84 | 35%<br>(20-52%)                | 65%<br>(48-80%)          | 0.51<br>(0.22-0.92)                         | -0.58%<br>(-1.8-0.43%)               | -0.8%<br>(-2.2-0.41%)               | -0.36<br>(-1-0.19)          | -3.3<br>(-9.9-2.4)       |
| Maldives | 2000 | Male   | 85 to 89 | 33%<br>(19-50%)                | 67%<br>(50-81%)          | 0.46<br>(0.22-0.85)                         | -0.45%<br>(-1.4-0.29%)               | -0.67%<br>(-1.8-0.27%)              | -0.15<br>(-0.4-0.06)        | -0.92<br>(-2.8-0.6)      |
| Maldives | 2000 | Male   | 90 to 94 | 35%<br>(21-52%)                | 65%<br>(48-79%)          | 0.44<br>(0.2-0.81)                          | -0.47%<br>(-1.3-0.18%)               | -0.68%<br>(-1.7-0.14%)              | -0.068<br>(-0.17-0.013)     | -0.29<br>(-0.78-0.11)    |
| Maldives | 2000 | Male   | 95 plus  | 38%<br>(20-58%)                | 62%<br>(42-80%)          | 0.45<br>(0.16-0.9)                          | -0.64%<br>(-1.6-0.12%)               | -0.95%<br>(-2.2-0.002%)             | -0.023<br>(-0.054-0.000047) | -0.064<br>(-0.16-0.012)  |
| Maldives | 2005 | Female | All Ages | 14%<br>(10-18%)                | 86%<br>(82-90%)          | 0.24<br>(0.16-0.33)                         | 0.61%<br>(0.28-1.1%)                 | 0.73%<br>(-0.17-2.1%)               | 3<br>(-0.69-8.7)            | 160<br>(72-300)          |
| Maldives | 2005 | Female | 15 to 19 | 12%<br>(6.1-22%)               | 88%<br>(78-94%)          | 0.2<br>(0.07-0.41)                          | 0.55%<br>(0.33-0.86%)                | 0.71%<br>(0.27-1.5%)                | 0.037<br>(0.014-0.081)      | 11<br>(6.5-18)           |

| Location | Year | Sex    | Age      | Prevalence of current drinkers | Prevalence of abstainers | Population average of standard drinks daily | Percent of total attributable deaths | Percent of total attributable DALYs | Attributable deaths     | Attributable DALYs    |
|----------|------|--------|----------|--------------------------------|--------------------------|---------------------------------------------|--------------------------------------|-------------------------------------|-------------------------|-----------------------|
| Maldives | 2005 | Female | 20 to 24 | 15%<br>(7.1-26%)               | 85%<br>(74-93%)          | 0.27<br>(0.1-0.55)                          | 1%<br>(0.66-1.6%)                    | 0.8%<br>(0.27-1.8%)                 | 0.043<br>(0.014-0.097)  | 20<br>(12-31)         |
| Maldives | 2005 | Female | 25 to 29 | 16%<br>(7.5-29%)               | 84%<br>(71-92%)          | 0.31<br>(0.1-0.61)                          | 1.1%<br>(0.7-1.5%)                   | 0.78%<br>(0.28-1.6%)                | 0.036<br>(0.013-0.075)  | 16<br>(9.9-24)        |
| Maldives | 2005 | Female | 30 to 34 | 18%<br>(7.9-31%)               | 82%<br>(69-92%)          | 0.34<br>(0.12-0.71)                         | 0.93%<br>(0.59-1.4%)                 | 0.88%<br>(0.35-1.8%)                | 0.053<br>(0.021-0.11)   | 14<br>(8.1-21)        |
| Maldives | 2005 | Female | 35 to 39 | 19%<br>(8.5-33%)               | 81%<br>(67-91%)          | 0.38<br>(0.14-0.77)                         | 0.88%<br>(0.53-1.4%)                 | 1.2%<br>(0.45-2.4%)                 | 0.094<br>(0.035-0.19)   | 13<br>(7.6-21)        |
| Maldives | 2005 | Female | 40 to 44 | 19%<br>(9.4-32%)               | 81%<br>(68-91%)          | 0.42<br>(0.15-0.9)                          | 0.93%<br>(0.49-1.6%)                 | 1.6%<br>(0.69-3.3%)                 | 0.17<br>(0.072-0.34)    | 14<br>(7.2-24)        |
| Maldives | 2005 | Female | 45 to 49 | 20%<br>(8.9-34%)               | 80%<br>(66-91%)          | 0.48<br>(0.17-1)                            | 1%<br>(0.44-2.1%)                    | 1.9%<br>(0.71-4.2%)                 | 0.23<br>(0.085-0.5)     | 14<br>(6-28)          |
| Maldives | 2005 | Female | 50 to 54 | 20%<br>(9.7-35%)               | 80%<br>(65-90%)          | 0.54<br>(0.19-1.1)                          | 1.1%<br>(0.27-2.5%)                  | 1.8%<br>(0.4-4.2%)                  | 0.3<br>(0.067-0.69)     | 13<br>(3.1-29)        |
| Maldives | 2005 | Female | 55 to 59 | 20%<br>(10-35%)                | 80%<br>(65-90%)          | 0.59<br>(0.2-1.2)                           | 1.1%<br>(0.13-2.7%)                  | 1.7%<br>(0.19-4.2%)                 | 0.29<br>(0.033-0.71)    | 11<br>(1.2-25)        |
| Maldives | 2005 | Female | 60 to 64 | 20%<br>(10-35%)                | 80%<br>(65-90%)          | 0.6<br>(0.2-1.2)                            | 0.92%<br>(-0.3-2.9%)                 | 1.3%<br>(-0.41-4%)                  | 0.49<br>(-0.16-1.5)     | 15<br>(-5.1-45)       |
| Maldives | 2005 | Female | 65 to 69 | 20%<br>(9.5-32%)               | 80%<br>(68-90%)          | 0.55<br>(0.2-1.2)                           | 0.66%<br>(-0.45-2.4%)                | 0.88%<br>(-0.64-3.1%)               | 0.47<br>(-0.33-1.7)     | 11<br>(-7.6-41)       |
| Maldives | 2005 | Female | 70 to 74 | 19%<br>(9.6-32%)               | 81%<br>(68-90%)          | 0.5<br>(0.17-1.1)                           | 0.56%<br>(-0.5-2.5%)                 | 0.72%<br>(-0.62-3.2%)               | 0.41<br>(-0.36-1.8)     | 7.9<br>(-6.7-35)      |
| Maldives | 2005 | Female | 75 to 79 | 18%<br>(8.5-32%)               | 82%<br>(68-91%)          | 0.47<br>(0.14-1.1)                          | 0.35%<br>(-0.68-2%)                  | 0.4%<br>(-0.85-2.4%)                | 0.21<br>(-0.44-1.2)     | 3.1<br>(-6.3-18)      |
| Maldives | 2005 | Female | 80 to 84 | 18%<br>(8.7-32%)               | 82%<br>(68-91%)          | 0.47<br>(0.15-1)                            | 0.23%<br>(-0.76-1.9%)                | 0.25%<br>(-0.99-2.2%)               | 0.089<br>(-0.35-0.83)   | 1.1<br>(-3.5-9)       |
| Maldives | 2005 | Female | 85 to 89 | 20%<br>(9.8-34%)               | 80%<br>(66-90%)          | 0.51<br>(0.16-1.1)                          | 0.17%<br>(-0.74-1.8%)                | 0.14%<br>(-1-2.1%)                  | 0.026<br>(-0.18-0.38)   | 0.3<br>(-1.3-3)       |
| Maldives | 2005 | Female | 90 to 94 | 23%<br>(11-40%)                | 77%<br>(60-89%)          | 0.58<br>(0.16-1.4)                          | 0.23%<br>(-0.83-2.3%)                | 0.2%<br>(-1.1-2.7%)                 | 0.017<br>(-0.096-0.23)  | 0.12<br>(-0.46-1.2)   |
| Maldives | 2005 | Female | 95 plus  | 27%<br>(12-47%)                | 73%<br>(53-88%)          | 0.68<br>(0.15-1.8)                          | 0.26%<br>(-1.2-2.7%)                 | 0.18%<br>(-1.5-3%)                  | 0.0043<br>(-0.035-0.07) | 0.025<br>(-0.11-0.26) |
| Maldives | 2005 | Male   | All Ages | 36%<br>(29-44%)                | 64%<br>(56-71%)          | 0.57<br>(0.42-0.76)                         | 0.96%<br>(0.31-1.7%)                 | 0.39%<br>(-0.82-1.8%)               | 2.3<br>(-5-11)          | 300<br>(91-520)       |
| Maldives | 2005 | Male   | 15 to 19 | 32%<br>(20-48%)                | 68%<br>(52-80%)          | 0.3<br>(0.14-0.55)                          | 1.1%<br>(0.65-1.7%)                  | 1.5%<br>(0.58-2.9%)                 | 0.15<br>(0.06-0.31)     | 25<br>(14-39)         |
| Maldives | 2005 | Male   | 20 to 24 | 45%<br>(28-62%)                | 55%<br>(38-72%)          | 0.69<br>(0.36-1.1)                          | 2.6%<br>(1.7-3.8%)                   | 3.2%<br>(1.5-5.5%)                  | 0.35<br>(0.17-0.61)     | 51<br>(32-76)         |
| Maldives | 2005 | Male   | 25 to 29 | 50%<br>(32-67%)                | 50%<br>(33-68%)          | 0.92<br>(0.48-1.4)                          | 3%<br>(2-4.1%)                       | 3.8%<br>(1.7-6.2%)                  | 0.29<br>(0.13-0.49)     | 41<br>(26-59)         |
| Maldives | 2005 | Male   | 30 to 34 | 52%<br>(34-70%)                | 48%<br>(30-66%)          | 1.1<br>(0.61-1.7)                           | 2.8%<br>(1.8-3.9%)                   | 3.7%<br>(1.6-6.2%)                  | 0.26<br>(0.11-0.44)     | 35<br>(22-50)         |
| Maldives | 2005 | Male   | 35 to 39 | 54%<br>(37-70%)                | 46%<br>(30-63%)          | 1.2<br>(0.69-1.9)                           | 2.8%<br>(1.7-4%)                     | 3.9%<br>(1.6-6.4%)                  | 0.37<br>(0.16-0.61)     | 35<br>(20-51)         |

| Location | Year | Sex    | Age      | Prevalence of current drinkers | Prevalence of abstainers | Population average of standard drinks daily | Percent of total attributable deaths | Percent of total attributable DALYs | Attributable deaths       | Attributable DALYs     |
|----------|------|--------|----------|--------------------------------|--------------------------|---------------------------------------------|--------------------------------------|-------------------------------------|---------------------------|------------------------|
| Maldives | 2005 | Male   | 40 to 44 | 54%<br>(37-71%)                | 46%<br>(29-63%)          | 1.3<br>(0.69-2.1)                           | 2.4%<br>(1.2-3.9%)                   | 3.4%<br>(0.99-6%)                   | 0.42<br>(0.13-0.73)       | 32<br>(15-51)          |
| Maldives | 2005 | Male   | 45 to 49 | 52%<br>(33-69%)                | 48%<br>(31-67%)          | 1.3<br>(0.69-2.2)                           | 2.2%<br>(0.74-4%)                    | 3%<br>(0.39-6.1%)                   | 0.5<br>(0.063-0.99)       | 30<br>(9.5-57)         |
| Maldives | 2005 | Male   | 50 to 54 | 51%<br>(32-68%)                | 49%<br>(32-68%)          | 1.2<br>(0.65-2)                             | 1.5%<br>(-0.18-3.6%)                 | 1.8%<br>(-0.96-4.9%)                | 0.36<br>(-0.19-0.95)      | 19<br>(-1.9-44)        |
| Maldives | 2005 | Male   | 55 to 59 | 49%<br>(32-66%)                | 51%<br>(34-68%)          | 1.1<br>(0.59-2)                             | 1.3%<br>(-0.35-3.3%)                 | 1.5%<br>(-0.95-4.3%)                | 0.39<br>(-0.25-1.1)       | 16<br>(-4.2-41)        |
| Maldives | 2005 | Male   | 60 to 64 | 46%<br>(30-64%)                | 54%<br>(36-70%)          | 1<br>(0.5-1.8)                              | 0.9%<br>(-0.73-2.9%)                 | 0.93%<br>(-1.2-3.5%)                | 0.46<br>(-0.61-1.7)       | 17<br>(-13-53)         |
| Maldives | 2005 | Male   | 65 to 69 | 43%<br>(27-60%)                | 57%<br>(40-73%)          | 0.88<br>(0.46-1.5)                          | 0.41%<br>(-0.96-2.1%)                | 0.33%<br>(-1.5-2.5%)                | 0.26<br>(-1.2-1.9)        | 9.6<br>(-23-49)        |
| Maldives | 2005 | Male   | 70 to 74 | 39%<br>(25-57%)                | 61%<br>(43-75%)          | 0.74<br>(0.35-1.4)                          | -0.13%<br>(-1.5-1.3%)                | -0.33%<br>(-2.1-1.3%)               | -0.32<br>(-2-1.3)         | -2.9<br>(-34-28)       |
| Maldives | 2005 | Male   | 75 to 79 | 36%<br>(22-53%)                | 64%<br>(47-78%)          | 0.64<br>(0.28-1.2)                          | -0.42%<br>(-1.7-0.78%)               | -0.66%<br>(-2.3-0.79%)              | -0.51<br>(-1.8-0.59)      | -5.6<br>(-23-11)       |
| Maldives | 2005 | Male   | 80 to 84 | 34%<br>(19-51%)                | 66%<br>(49-81%)          | 0.56<br>(0.25-1)                            | -0.46%<br>(-1.6-0.53%)               | -0.68%<br>(-2.1-0.53%)              | -0.37<br>(-1.1-0.28)      | -3.2<br>(-11-3.5)      |
| Maldives | 2005 | Male   | 85 to 89 | 32%<br>(18-48%)                | 68%<br>(52-82%)          | 0.49<br>(0.22-0.93)                         | -0.35%<br>(-1.1-0.34%)               | -0.56%<br>(-1.6-0.33%)              | -0.16<br>(-0.47-0.093)    | -0.94<br>(-3.1-0.97)   |
| Maldives | 2005 | Male   | 90 to 94 | 33%<br>(20-49%)                | 67%<br>(51-80%)          | 0.48<br>(0.21-0.94)                         | -0.37%<br>(-1.1-0.26%)               | -0.59%<br>(-1.5-0.21%)              | -0.08<br>(-0.2-0.028)     | -0.33<br>(-0.95-0.22)  |
| Maldives | 2005 | Male   | 95 plus  | 37%<br>(20-58%)                | 63%<br>(42-80%)          | 0.48<br>(0.18-1)                            | -0.56%<br>(-1.5-0.19%)               | -0.89%<br>(-2.2-0.055%)             | -0.033<br>(-0.079-0.0019) | -0.087<br>(-0.24-0.03) |
| Maldives | 2010 | Female | All Ages | 14%<br>(10-19%)                | 86%<br>(81-90%)          | 0.24<br>(0.14-0.37)                         | 0.61%<br>(0.29-1.1%)                 | 0.63%<br>(-0.25-2.1%)               | 2.6<br>(-1-8.4)           | 170<br>(74-300)        |
| Maldives | 2010 | Female | 15 to 19 | 12%<br>(6.2-22%)               | 88%<br>(78-94%)          | 0.18<br>(0.06-0.41)                         | 0.56%<br>(0.34-0.9%)                 | 0.69%<br>(0.26-1.5%)                | 0.031<br>(0.012-0.066)    | 10<br>(6-17)           |
| Maldives | 2010 | Female | 20 to 24 | 15%<br>(7-27%)                 | 85%<br>(73-93%)          | 0.25<br>(0.088-0.53)                        | 1.1%<br>(0.65-1.6%)                  | 0.75%<br>(0.25-1.6%)                | 0.041<br>(0.013-0.089)    | 23<br>(13-35)          |
| Maldives | 2010 | Female | 25 to 29 | 16%<br>(7.2-29%)               | 84%<br>(71-93%)          | 0.28<br>(0.091-0.59)                        | 1.1%<br>(0.75-1.5%)                  | 0.74%<br>(0.26-1.6%)                | 0.036<br>(0.013-0.076)    | 21<br>(13-31)          |
| Maldives | 2010 | Female | 30 to 34 | 18%<br>(7.9-33%)               | 82%<br>(67-92%)          | 0.32<br>(0.11-0.67)                         | 0.97%<br>(0.62-1.4%)                 | 0.86%<br>(0.36-1.7%)                | 0.046<br>(0.019-0.094)    | 16<br>(9.4-25)         |
| Maldives | 2010 | Female | 35 to 39 | 19%<br>(8.3-33%)               | 81%<br>(67-92%)          | 0.35<br>(0.12-0.73)                         | 0.87%<br>(0.54-1.3%)                 | 1.2%<br>(0.49-2.3%)                 | 0.073<br>(0.03-0.15)      | 13<br>(7.6-20)         |
| Maldives | 2010 | Female | 40 to 44 | 19%<br>(9.5-33%)               | 81%<br>(67-91%)          | 0.39<br>(0.14-0.84)                         | 0.85%<br>(0.48-1.4%)                 | 1.6%<br>(0.74-3.3%)                 | 0.14<br>(0.061-0.28)      | 13<br>(7.1-23)         |
| Maldives | 2010 | Female | 45 to 49 | 19%<br>(8.8-32%)               | 81%<br>(68-91%)          | 0.44<br>(0.15-1)                            | 0.88%<br>(0.41-1.8%)                 | 1.8%<br>(0.75-4.1%)                 | 0.2<br>(0.08-0.44)        | 13<br>(6.4-29)         |
| Maldives | 2010 | Female | 50 to 54 | 19%<br>(9.4-33%)               | 81%<br>(67-91%)          | 0.49<br>(0.16-1.1)                          | 0.96%<br>(0.3-2.1%)                  | 1.8%<br>(0.58-4%)                   | 0.3<br>(0.096-0.7)        | 15<br>(4.6-32)         |
| Maldives | 2010 | Female | 55 to 59 | 20%<br>(9.8-34%)               | 80%<br>(66-90%)          | 0.55<br>(0.17-1.2)                          | 0.94%<br>(0.15-2.3%)                 | 1.7%<br>(0.31-4.1%)                 | 0.28<br>(0.052-0.66)      | 11<br>(1.8-26)         |

| Location | Year | Sex    | Age      | Prevalence of current drinkers | Prevalence of abstainers | Population average of standard drinks daily | Percent of total attributable deaths | Percent of total attributable DALYs | Attributable deaths      | Attributable DALYs    |
|----------|------|--------|----------|--------------------------------|--------------------------|---------------------------------------------|--------------------------------------|-------------------------------------|--------------------------|-----------------------|
| Maldives | 2010 | Female | 60 to 64 | 20%<br>(9.3-34%)               | 80%<br>(66-91%)          | 0.55<br>(0.17-1.2)                          | 0.81%<br>(-0.21-2.5%)                | 1.3%<br>(-0.24-3.8%)                | 0.28<br>(-0.054-0.85)    | 8.6<br>(-2.2-27)      |
| Maldives | 2010 | Female | 65 to 69 | 19%<br>(9.4-32%)               | 81%<br>(68-91%)          | 0.51<br>(0.17-1.1)                          | 0.57%<br>(-0.4-2.1%)                 | 0.81%<br>(-0.56-2.9%)               | 0.36<br>(-0.24-1.3)      | 8.9<br>(-6.3-33)      |
| Maldives | 2010 | Female | 70 to 74 | 19%<br>(9-31%)                 | 81%<br>(69-91%)          | 0.47<br>(0.14-1.1)                          | 0.49%<br>(-0.45-2.3%)                | 0.64%<br>(-0.56-2.9%)               | 0.45<br>(-0.39-2)        | 8.6<br>(-8-40)        |
| Maldives | 2010 | Female | 75 to 79 | 18%<br>(8.2-31%)               | 82%<br>(69-92%)          | 0.44<br>(0.12-1.1)                          | 0.29%<br>(-0.64-1.9%)                | 0.34%<br>(-0.83-2.3%)               | 0.24<br>(-0.57-1.6)      | 3.7<br>(-8.2-24)      |
| Maldives | 2010 | Female | 80 to 84 | 18%<br>(8.9-33%)               | 82%<br>(67-91%)          | 0.44<br>(0.13-1)                            | 0.17%<br>(-0.79-1.6%)                | 0.18%<br>(-1-1.9%)                  | 0.082<br>(-0.47-0.87)    | 1.1<br>(-4.9-9.8)     |
| Maldives | 2010 | Female | 85 to 89 | 20%<br>(9.3-34%)               | 80%<br>(66-91%)          | 0.48<br>(0.14-1.2)                          | 0.12%<br>(-0.69-1.5%)                | 0.09%<br>(-1-1.9%)                  | 0.021<br>(-0.22-0.41)    | 0.29<br>(-1.6-3.5)    |
| Maldives | 2010 | Female | 90 to 94 | 23%<br>(10-40%)                | 77%<br>(60-90%)          | 0.55<br>(0.14-1.4)                          | 0.18%<br>(-0.68-1.8%)                | 0.15%<br>(-0.95-2.2%)               | 0.017<br>(-0.11-0.25)    | 0.15<br>(-0.55-1.5)   |
| Maldives | 2010 | Female | 95 plus  | 27%<br>(11-48%)                | 73%<br>(52-89%)          | 0.64<br>(0.14-1.7)                          | 0.22%<br>(-1-2.4%)                   | 0.12%<br>(-1.4-2.7%)                | 0.0042<br>(-0.049-0.094) | 0.033<br>(-0.15-0.37) |
| Maldives | 2010 | Male   | All Ages | 37%<br>(30-45%)                | 63%<br>(55-70%)          | 0.58<br>(0.37-0.85)                         | 0.98%<br>(0.27-1.8%)                 | 0.24%<br>(-0.99-1.6%)               | 1.5<br>(-6.2-10)         | 310<br>(81-550)       |
| Maldives | 2010 | Male   | 15 to 19 | 31%<br>(19-47%)                | 69%<br>(53-81%)          | 0.28<br>(0.12-0.51)                         | 1.1%<br>(0.66-1.7%)                  | 1.4%<br>(0.55-2.8%)                 | 0.13<br>(0.05-0.25)      | 22<br>(13-34)         |
| Maldives | 2010 | Male   | 20 to 24 | 44%<br>(27-61%)                | 56%<br>(39-73%)          | 0.63<br>(0.31-1.1)                          | 2.5%<br>(1.7-3.7%)                   | 3%<br>(1.3-5.5%)                    | 0.37<br>(0.16-0.68)      | 57<br>(36-86)         |
| Maldives | 2010 | Male   | 25 to 29 | 49%<br>(31-66%)                | 51%<br>(34-69%)          | 0.85<br>(0.44-1.4)                          | 2.8%<br>(1.9-4%)                     | 3.5%<br>(1.5-5.9%)                  | 0.34<br>(0.14-0.58)      | 53<br>(33-77)         |
| Maldives | 2010 | Male   | 30 to 34 | 52%<br>(33-68%)                | 48%<br>(32-67%)          | 1<br>(0.56-1.7)                             | 2.7%<br>(1.7-3.7%)                   | 3.4%<br>(1.3-5.8%)                  | 0.28<br>(0.11-0.49)      | 39<br>(24-56)         |
| Maldives | 2010 | Male   | 35 to 39 | 53%<br>(36-70%)                | 47%<br>(30-64%)          | 1.1<br>(0.6-2)                              | 2.6%<br>(1.6-3.9%)                   | 3.8%<br>(1.6-6.3%)                  | 0.3<br>(0.12-0.5)        | 34<br>(20-50)         |
| Maldives | 2010 | Male   | 40 to 44 | 53%<br>(36-72%)                | 47%<br>(28-64%)          | 1.2<br>(0.61-2.1)                           | 2.3%<br>(1.1-3.6%)                   | 3.3%<br>(0.93-6.1%)                 | 0.37<br>(0.1-0.68)       | 32<br>(15-51)         |
| Maldives | 2010 | Male   | 45 to 49 | 52%<br>(33-69%)                | 48%<br>(31-67%)          | 1.2<br>(0.59-2.1)                           | 2%<br>(0.66-3.7%)                    | 2.8%<br>(0.26-6%)                   | 0.49<br>(0.042-1.1)      | 32<br>(10-60)         |
| Maldives | 2010 | Male   | 50 to 54 | 50%<br>(32-68%)                | 50%<br>(32-68%)          | 1.2<br>(0.56-2)                             | 1.4%<br>(-0.16-3.2%)                 | 1.6%<br>(-1-4.5%)                   | 0.42<br>(-0.28-1.2)      | 24<br>(-2.8-58)       |
| Maldives | 2010 | Male   | 55 to 59 | 48%<br>(32-66%)                | 52%<br>(34-68%)          | 1.1<br>(0.5-1.9)                            | 1.2%<br>(-0.25-3.2%)                 | 1.4%<br>(-0.84-4.2%)                | 0.41<br>(-0.26-1.2)      | 18<br>(-3.7-47)       |
| Maldives | 2010 | Male   | 60 to 64 | 46%<br>(29-64%)                | 54%<br>(36-71%)          | 0.95<br>(0.42-1.7)                          | 0.82%<br>(-0.7-2.6%)                 | 0.84%<br>(-1.2-3.3%)                | 0.31<br>(-0.41-1.2)      | 12<br>(-9.5-38)       |
| Maldives | 2010 | Male   | 65 to 69 | 42%<br>(27-60%)                | 58%<br>(40-73%)          | 0.82<br>(0.39-1.5)                          | 0.32%<br>(-1-2%)                     | 0.22%<br>(-1.5-2.4%)                | 0.15<br>(-1-1.5)         | 6.5<br>(-20-40)       |
| Maldives | 2010 | Male   | 70 to 74 | 39%<br>(24-57%)                | 61%<br>(43-76%)          | 0.69<br>(0.31-1.4)                          | -0.2%<br>(-1.5-1.2%)                 | -0.42%<br>(-2-1.3%)                 | -0.44<br>(-2.1-1.4)      | -4.8<br>(-36-30)      |
| Maldives | 2010 | Male   | 75 to 79 | 35%<br>(21-55%)                | 65%<br>(45-79%)          | 0.59<br>(0.24-1.2)                          | -0.41%<br>(-1.7-0.65%)               | -0.67%<br>(-2.3-0.63%)              | -0.72<br>(-2.5-0.7)      | -7.8<br>(-31-13)      |



| Location | Year | Sex    | Age      | Prevalence of current drinkers | Prevalence of abstainers | Population average of standard drinks daily | Percent of total attributable deaths | Percent of total attributable DALYs | Attributable deaths       | Attributable DALYs      |
|----------|------|--------|----------|--------------------------------|--------------------------|---------------------------------------------|--------------------------------------|-------------------------------------|---------------------------|-------------------------|
| Maldives | 2010 | Male   | 80 to 84 | 33%<br>(19-50%)                | 67%<br>(50-81%)          | 0.51<br>(0.2-1)                             | -0.48%<br>(-1.6-0.43%)               | -0.71%<br>(-2.1-0.4%)               | -0.56<br>(-1.7-0.31)      | -4.8<br>(-16-4.3)       |
| Maldives | 2010 | Male   | 85 to 89 | 31%<br>(18-47%)                | 69%<br>(53-82%)          | 0.46<br>(0.2-0.91)                          | -0.35%<br>(-1.1-0.29%)               | -0.56%<br>(-1.6-0.25%)              | -0.22<br>(-0.61-0.099)    | -1.3<br>(-4.1-1.1)      |
| Maldives | 2010 | Male   | 90 to 94 | 33%<br>(19-49%)                | 67%<br>(51-81%)          | 0.44<br>(0.18-0.89)                         | -0.29%<br>(-0.91-0.23%)              | -0.51%<br>(-1.4-0.16%)              | -0.08<br>(-0.21-0.025)    | -0.31<br>(-0.99-0.25)   |
| Maldives | 2010 | Male   | 95 plus  | 37%<br>(20-57%)                | 63%<br>(43-80%)          | 0.45<br>(0.16-0.98)                         | -0.42%<br>(-1.3-0.24%)               | -0.78%<br>(-1.9-0.091%)             | -0.035<br>(-0.087-0.0042) | -0.086<br>(-0.26-0.047) |
| Maldives | 2016 | Female | All Ages | 14%<br>(11-19%)                | 86%<br>(81-89%)          | 0.23<br>(0.098-0.41)                        | 0.62%<br>(0.3-1.2%)                  | 0.54%<br>(-0.26-2.1%)               | 2.4<br>(-1.1-9.6)         | 180<br>(80-350)         |
| Maldives | 2016 | Female | 15 to 19 | 12%<br>(6.2-21%)               | 88%<br>(79-94%)          | 0.16<br>(0.045-0.39)                        | 0.56%<br>(0.33-0.89%)                | 0.66%<br>(0.25-1.4%)                | 0.02<br>(0.0072-0.044)    | 8.1<br>(4.5-13)         |
| Maldives | 2016 | Female | 20 to 24 | 15%<br>(6.9-26%)               | 85%<br>(74-93%)          | 0.22<br>(0.062-0.52)                        | 1.1%<br>(0.69-1.6%)                  | 0.72%<br>(0.23-1.8%)                | 0.031<br>(0.0093-0.08)    | 20<br>(12-31)           |
| Maldives | 2016 | Female | 25 to 29 | 16%<br>(7.1-28%)               | 84%<br>(72-93%)          | 0.25<br>(0.07-0.58)                         | 1.1%<br>(0.73-1.6%)                  | 0.69%<br>(0.24-1.5%)                | 0.038<br>(0.012-0.088)    | 24<br>(15-36)           |
| Maldives | 2016 | Female | 30 to 34 | 17%<br>(7.5-31%)               | 83%<br>(69-92%)          | 0.27<br>(0.078-0.6)                         | 0.97%<br>(0.61-1.4%)                 | 0.82%<br>(0.35-1.7%)                | 0.059<br>(0.022-0.13)     | 22<br>(13-34)           |
| Maldives | 2016 | Female | 35 to 39 | 19%<br>(8.3-33%)               | 81%<br>(67-92%)          | 0.31<br>(0.086-0.72)                        | 0.86%<br>(0.52-1.3%)                 | 1.1%<br>(0.49-2.3%)                 | 0.09<br>(0.033-0.2)       | 17<br>(9.6-27)          |
| Maldives | 2016 | Female | 40 to 44 | 19%<br>(9.4-33%)               | 81%<br>(67-91%)          | 0.34<br>(0.1-0.83)                          | 0.82%<br>(0.45-1.4%)                 | 1.5%<br>(0.7-3.2%)                  | 0.14<br>(0.057-0.29)      | 15<br>(7.7-26)          |
| Maldives | 2016 | Female | 45 to 49 | 19%<br>(8.7-33%)               | 81%<br>(67-91%)          | 0.39<br>(0.11-0.95)                         | 0.81%<br>(0.37-1.6%)                 | 1.7%<br>(0.67-3.9%)                 | 0.2<br>(0.077-0.47)       | 14<br>(6.4-29)          |
| Maldives | 2016 | Female | 50 to 54 | 20%<br>(9.2-34%)               | 80%<br>(66-91%)          | 0.44<br>(0.13-1.1)                          | 0.86%<br>(0.27-2%)                   | 1.6%<br>(0.48-3.9%)                 | 0.33<br>(0.091-0.85)      | 16<br>(4.7-39)          |
| Maldives | 2016 | Female | 55 to 59 | 20%<br>(9.9-34%)               | 80%<br>(66-90%)          | 0.48<br>(0.13-1.2)                          | 0.81%<br>(0.11-2.2%)                 | 1.5%<br>(0.26-4%)                   | 0.37<br>(0.065-1)         | 15<br>(1.8-40)          |
| Maldives | 2016 | Female | 60 to 64 | 20%<br>(9.5-34%)               | 80%<br>(66-90%)          | 0.48<br>(0.12-1.2)                          | 0.68%<br>(-0.15-2.4%)                | 1.1%<br>(-0.17-3.7%)                | 0.34<br>(-0.051-1.2)      | 11<br>(-2.4-39)         |
| Maldives | 2016 | Female | 65 to 69 | 20%<br>(9.5-33%)               | 80%<br>(67-90%)          | 0.45<br>(0.12-1.1)                          | 0.45%<br>(-0.41-2%)                  | 0.68%<br>(-0.54-2.9%)               | 0.22<br>(-0.18-0.99)      | 5.5<br>(-5.1-26)        |
| Maldives | 2016 | Female | 70 to 74 | 19%<br>(9.4-31%)               | 81%<br>(69-91%)          | 0.41<br>(0.11-1)                            | 0.39%<br>(-0.39-1.9%)                | 0.55%<br>(-0.49-2.7%)               | 0.3<br>(-0.27-1.5)        | 5.9<br>(-5.9-29)        |
| Maldives | 2016 | Female | 75 to 79 | 18%<br>(8.8-32%)               | 82%<br>(68-91%)          | 0.39<br>(0.093-0.99)                        | 0.21%<br>(-0.59-1.7%)                | 0.27%<br>(-0.76-2.3%)               | 0.21<br>(-0.64-1.7)       | 3.4<br>(-9.5-27)        |
| Maldives | 2016 | Female | 80 to 84 | 18%<br>(8.5-32%)               | 82%<br>(68-91%)          | 0.39<br>(0.094-0.94)                        | 0.083%<br>(-0.74-1.5%)               | 0.076%<br>(-0.94-1.9%)              | 0.047<br>(-0.64-1.2)      | 0.73<br>(-6.6-13)       |
| Maldives | 2016 | Female | 85 to 89 | 20%<br>(9.5-34%)               | 80%<br>(66-91%)          | 0.42<br>(0.1-1.1)                           | 0.038%<br>(-0.7-1.3%)                | -0.012%<br>(-0.97-1.7%)             | -0.0051<br>(-0.36-0.59)   | 0.14<br>(-2.7-5.1)      |
| Maldives | 2016 | Female | 90 to 94 | 22%<br>(11-39%)                | 78%<br>(61-89%)          | 0.47<br>(0.11-1.3)                          | 0.059%<br>(-0.7-1.6%)                | -0.004%<br>(-0.97-2%)               | -0.0012<br>(-0.2-0.38)    | 0.079<br>(-0.99-2.2)    |
| Maldives | 2016 | Female | 95 plus  | 27%<br>(12-47%)                | 73%<br>(53-88%)          | 0.56<br>(0.11-1.6)                          | 0.09%<br>(-0.94-2.3%)                | -0.019%<br>(-1.3-2.5%)              | -0.0015<br>(-0.095-0.18)  | 0.028<br>(-0.3-0.69)    |

| Location | Year | Sex    | Age      | Prevalence of current drinkers | Prevalence of abstainers | Population average of standard drinks daily | Percent of total attributable deaths | Percent of total attributable DALYs | Attributable deaths      | Attributable DALYs     |
|----------|------|--------|----------|--------------------------------|--------------------------|---------------------------------------------|--------------------------------------|-------------------------------------|--------------------------|------------------------|
| Maldives | 2016 | Male   | All Ages | 38%<br>(32-46%)                | 62%<br>(54-68%)          | 0.55<br>(0.25-0.93)                         | 1.1%<br>(0.4-2%)                     | 0.28%<br>(-0.84-1.6%)               | 1.9<br>(-5.7-11)         | 350<br>(120-670)       |
| Maldives | 2016 | Male   | 15 to 19 | 31%<br>(18-46%)                | 69%<br>(54-82%)          | 0.24<br>(0.083-0.51)                        | 1%<br>(0.63-1.6%)                    | 1.3%<br>(0.48-2.6%)                 | 0.075<br>(0.026-0.16)    | 16<br>(9.3-25)         |
| Maldives | 2016 | Male   | 20 to 24 | 44%<br>(28-60%)                | 56%<br>(40-72%)          | 0.55<br>(0.21-1.1)                          | 2.5%<br>(1.6-3.7%)                   | 2.7%<br>(0.97-5.4%)                 | 0.28<br>(0.091-0.57)     | 50<br>(30-78)          |
| Maldives | 2016 | Male   | 25 to 29 | 49%<br>(31-66%)                | 51%<br>(34-69%)          | 0.74<br>(0.28-1.4)                          | 2.8%<br>(1.8-4.1%)                   | 3.1%<br>(1.1-5.8%)                  | 0.35<br>(0.11-0.7)       | 61<br>(38-92)          |
| Maldives | 2016 | Male   | 30 to 34 | 51%<br>(33-68%)                | 49%<br>(32-67%)          | 0.88<br>(0.36-1.7)                          | 2.6%<br>(1.6-3.9%)                   | 2.9%<br>(1-5.3%)                    | 0.36<br>(0.12-0.72)      | 56<br>(33-86)          |
| Maldives | 2016 | Male   | 35 to 39 | 53%<br>(35-70%)                | 47%<br>(30-65%)          | 0.98<br>(0.41-1.9)                          | 2.5%<br>(1.5-4%)                     | 3.3%<br>(1.2-6.5%)                  | 0.37<br>(0.12-0.79)      | 43<br>(25-71)          |
| Maldives | 2016 | Male   | 40 to 44 | 53%<br>(37-71%)                | 47%<br>(29-63%)          | 1<br>(0.43-2)                               | 2.2%<br>(0.98-3.7%)                  | 2.9%<br>(0.55-5.9%)                 | 0.4<br>(0.074-0.93)      | 36<br>(16-66)          |
| Maldives | 2016 | Male   | 45 to 49 | 52%<br>(34-71%)                | 48%<br>(29-66%)          | 1<br>(0.43-2.1)                             | 1.9%<br>(0.62-3.7%)                  | 2.4%<br>(0.019-5.8%)                | 0.49<br>(0.0033-1.2)     | 34<br>(11-68)          |
| Maldives | 2016 | Male   | 50 to 54 | 50%<br>(32-69%)                | 50%<br>(31-68%)          | 1<br>(0.4-2)                                | 1.2%<br>(-0.13-3.2%)                 | 1.4%<br>(-0.91-4.3%)                | 0.44<br>(-0.29-1.4)      | 26<br>(-2.9-68)        |
| Maldives | 2016 | Male   | 55 to 59 | 48%<br>(31-67%)                | 52%<br>(33-69%)          | 0.92<br>(0.34-1.9)                          | 1.1%<br>(-0.21-3.1%)                 | 1.2%<br>(-0.81-4.1%)                | 0.53<br>(-0.35-1.9)      | 25<br>(-5.1-73)        |
| Maldives | 2016 | Male   | 60 to 64 | 45%<br>(29-64%)                | 55%<br>(36-71%)          | 0.82<br>(0.28-1.7)                          | 0.76%<br>(-0.55-2.7%)                | 0.78%<br>(-1-3.4%)                  | 0.39<br>(-0.52-1.7)      | 15<br>(-10-53)         |
| Maldives | 2016 | Male   | 65 to 69 | 42%<br>(26-59%)                | 58%<br>(41-74%)          | 0.7<br>(0.26-1.4)                           | 0.33%<br>(-0.8-1.9%)                 | 0.23%<br>(-1.3-2.3%)                | 0.12<br>(-0.65-1.2)      | 5.3<br>(-12-31)        |
| Maldives | 2016 | Male   | 70 to 74 | 38%<br>(24-55%)                | 62%<br>(45-76%)          | 0.59<br>(0.2-1.3)                           | -0.082%<br>(-1.2-1.1%)               | -0.28%<br>(-1.8-1.3%)               | -0.22<br>(-1.3-0.98)     | -1.5<br>(-22-21)       |
| Maldives | 2016 | Male   | 75 to 79 | 35%<br>(21-53%)                | 65%<br>(47-79%)          | 0.51<br>(0.16-1.1)                          | -0.28%<br>(-1.4-0.62%)               | -0.52%<br>(-2-0.63%)                | -0.55<br>(-2.1-0.67)     | -5.5<br>(-26-12)       |
| Maldives | 2016 | Male   | 80 to 84 | 32%<br>(18-50%)                | 68%<br>(50-82%)          | 0.44<br>(0.15-0.92)                         | -0.37%<br>(-1.3-0.42%)               | -0.57%<br>(-1.8-0.4%)               | -0.59<br>(-1.9-0.46)     | -4.9<br>(-18-5.8)      |
| Maldives | 2016 | Male   | 85 to 89 | 31%<br>(17-47%)                | 69%<br>(53-83%)          | 0.39<br>(0.13-0.88)                         | -0.28%<br>(-0.99-0.27%)              | -0.48%<br>(-1.4-0.27%)              | -0.32<br>(-0.95-0.16)    | -1.8<br>(-6.4-1.7)     |
| Maldives | 2016 | Male   | 90 to 94 | 32%<br>(19-49%)                | 68%<br>(51-81%)          | 0.38<br>(0.13-0.81)                         | -0.28%<br>(-0.91-0.21%)              | -0.48%<br>(-1.4-0.16%)              | -0.13<br>(-0.39-0.045)   | -0.52<br>(-1.8-0.4)    |
| Maldives | 2016 | Male   | 95 plus  | 36%<br>(19-57%)                | 64%<br>(43-81%)          | 0.38<br>(0.11-0.94)                         | -0.41%<br>(-1.3-0.19%)               | -0.72%<br>(-1.9-0.049%)             | -0.061<br>(-0.16-0.0041) | -0.15<br>(-0.47-0.074) |
| Myanmar  | 1990 | Female | All Ages | 2.1%<br>(1.8-2.7%)             | 98%<br>(97-98%)          | 0.025<br>(0.016-0.035)                      | 0.41%<br>(0.32-0.52%)                | 0.58%<br>(0.43-0.77%)               | 1200<br>(880-1600)       | 45000<br>(36000-56000) |
| Myanmar  | 1990 | Female | 15 to 19 | 2%<br>(1.2-3.1%)               | 98%<br>(97-99%)          | 0.024<br>(0.011-0.045)                      | 0.38%<br>(0.24-0.55%)                | 0.3%<br>(0.15-0.5%)                 | 10<br>(5.1-18)           | 1700<br>(1000-2500)    |
| Myanmar  | 1990 | Female | 20 to 24 | 2.5%<br>(1.3-3.8%)             | 98%<br>(96-99%)          | 0.032<br>(0.014-0.062)                      | 0.64%<br>(0.42-0.9%)                 | 0.38%<br>(0.18-0.67%)               | 17<br>(8.1-30)           | 3100<br>(2000-4500)    |
| Myanmar  | 1990 | Female | 25 to 29 | 2.7%<br>(1.5-4.3%)             | 97%<br>(96-99%)          | 0.035<br>(0.015-0.067)                      | 0.7%<br>(0.47-0.97%)                 | 0.46%<br>(0.22-0.77%)               | 21<br>(9.8-36)           | 3100<br>(2000-4500)    |

| Location | Year | Sex    | Age      | Prevalence of current drinkers | Prevalence of abstainers | Population average of standard drinks daily | Percent of total attributable deaths | Percent of total attributable DALYs | Attributable deaths   | Attributable DALYs        |
|----------|------|--------|----------|--------------------------------|--------------------------|---------------------------------------------|--------------------------------------|-------------------------------------|-----------------------|---------------------------|
| Myanmar  | 1990 | Female | 30 to 34 | 2.9%<br>(1.6-4.8%)             | 97%<br>(95-98%)          | 0.038<br>(0.018-0.072)                      | 0.81%<br>(0.57-1.1%)                 | 0.74%<br>(0.44-1.1%)                | 37<br>(22-56)         | 3600<br>(2500-5000)       |
| Myanmar  | 1990 | Female | 35 to 39 | 3%<br>(1.7-4.7%)               | 97%<br>(95-98%)          | 0.042<br>(0.019-0.076)                      | 1%<br>(0.72-1.4%)                    | 1.1%<br>(0.71-1.6%)                 | 65<br>(41-97)         | 4500<br>(3200-6200)       |
| Myanmar  | 1990 | Female | 40 to 44 | 3%<br>(1.8-4.7%)               | 97%<br>(95-98%)          | 0.044<br>(0.021-0.08)                       | 1.2%<br>(0.84-1.6%)                  | 1.4%<br>(0.96-2%)                   | 74<br>(49-110)        | 4100<br>(2900-5600)       |
| Myanmar  | 1990 | Female | 45 to 49 | 3.1%<br>(1.7-4.6%)             | 97%<br>(95-98%)          | 0.047<br>(0.021-0.088)                      | 1.2%<br>(0.81-1.6%)                  | 1.4%<br>(0.91-2%)                   | 88<br>(57-130)        | 4100<br>(2800-5700)       |
| Myanmar  | 1990 | Female | 50 to 54 | 3.1%<br>(1.8-4.9%)             | 97%<br>(95-98%)          | 0.052<br>(0.024-0.096)                      | 1.1%<br>(0.78-1.6%)                  | 1.3%<br>(0.86-2%)                   | 110<br>(73-170)       | 4500<br>(3000-6600)       |
| Myanmar  | 1990 | Female | 55 to 59 | 3.2%<br>(1.8-4.8%)             | 97%<br>(95-98%)          | 0.057<br>(0.026-0.11)                       | 0.96%<br>(0.66-1.4%)                 | 1.1%<br>(0.76-1.7%)                 | 130<br>(84-190)       | 4400<br>(2900-6300)       |
| Myanmar  | 1990 | Female | 60 to 64 | 3%<br>(1.8-4.9%)               | 97%<br>(95-98%)          | 0.057<br>(0.026-0.11)                       | 0.82%<br>(0.51-1.2%)                 | 0.97%<br>(0.6-1.5%)                 | 150<br>(92-220)       | 4200<br>(2600-6100)       |
| Myanmar  | 1990 | Female | 65 to 69 | 2.8%<br>(1.6-4.3%)             | 97%<br>(96-98%)          | 0.054<br>(0.025-0.097)                      | 0.69%<br>(0.44-1%)                   | 0.81%<br>(0.51-1.2%)                | 140<br>(87-210)       | 3200<br>(2000-4800)       |
| Myanmar  | 1990 | Female | 70 to 74 | 2.7%<br>(1.6-4.2%)             | 97%<br>(96-98%)          | 0.053<br>(0.023-0.1)                        | 0.6%<br>(0.36-0.96%)                 | 0.7%<br>(0.41-1.1%)                 | 140<br>(80-220)       | 2500<br>(1500-4100)       |
| Myanmar  | 1990 | Female | 75 to 79 | 2.8%<br>(1.6-4.5%)             | 97%<br>(96-98%)          | 0.054<br>(0.024-0.11)                       | 0.47%<br>(0.26-0.78%)                | 0.55%<br>(0.29-0.91%)               | 97<br>(52-160)        | 1400<br>(740-2300)        |
| Myanmar  | 1990 | Female | 80 to 84 | 3%<br>(1.7-4.5%)               | 97%<br>(96-98%)          | 0.056<br>(0.025-0.1)                        | 0.42%<br>(0.22-0.7%)                 | 0.49%<br>(0.25-0.83%)               | 63<br>(32-110)        | 650<br>(330-1100)         |
| Myanmar  | 1990 | Female | 85 to 89 | 3.4%<br>(1.8-5.5%)             | 97%<br>(95-98%)          | 0.062<br>(0.027-0.12)                       | 0.35%<br>(0.16-0.6%)                 | 0.41%<br>(0.19-0.71%)               | 28<br>(13-50)         | 210<br>(98-360)           |
| Myanmar  | 1990 | Female | 90 to 94 | 4%<br>(2.2-6.5%)               | 96%<br>(93-98%)          | 0.07<br>(0.029-0.14)                        | 0.29%<br>(0.12-0.55%)                | 0.34%<br>(0.13-0.66%)               | 7.9<br>(3-15)         | 40<br>(16-76)             |
| Myanmar  | 1990 | Female | 95 plus  | 5%<br>(2.3-9.4%)               | 95%<br>(91-98%)          | 0.084<br>(0.027-0.18)                       | 0.34%<br>(0.11-0.7%)                 | 0.37%<br>(0.11-0.81%)               | 2<br>(0.6-4.4)        | 7<br>(2.3-15)             |
| Myanmar  | 1990 | Male   | All Ages | 19%<br>(16-22%)                | 81%<br>(78-84%)          | 0.48<br>(0.34-0.63)                         | 3.3%<br>(2-4.7%)                     | 4.8%<br>(2.8-7.1%)                  | 11000<br>(6400-16000) | 420000<br>(270000-590000) |
| Myanmar  | 1990 | Male   | 15 to 19 | 16%<br>(10-22%)                | 84%<br>(78-90%)          | 0.21<br>(0.11-0.38)                         | 1.2%<br>(0.56-2.2%)                  | 1.4%<br>(0.4-2.7%)                  | 71<br>(20-140)        | 6600<br>(2900-11000)      |
| Myanmar  | 1990 | Male   | 20 to 24 | 25%<br>(17-34%)                | 75%<br>(66-83%)          | 0.55<br>(0.3-0.9)                           | 4%<br>(1.8-7%)                       | 4.6%<br>(1.8-8.4%)                  | 320<br>(130-610)      | 25000<br>(11000-44000)    |
| Myanmar  | 1990 | Male   | 25 to 29 | 30%<br>(21-41%)                | 70%<br>(59-79%)          | 0.79<br>(0.46-1.2)                          | 6.7%<br>(3.3-11%)                    | 8.1%<br>(3.6-14%)                   | 560<br>(250-990)      | 38000<br>(19000-64000)    |
| Myanmar  | 1990 | Male   | 30 to 34 | 32%<br>(22-44%)                | 68%<br>(56-78%)          | 0.98<br>(0.55-1.5)                          | 8.6%<br>(4.7-13%)                    | 11%<br>(5.5-17%)                    | 780<br>(400-1200)     | 47000<br>(25000-73000)    |
| Myanmar  | 1990 | Male   | 35 to 39 | 34%<br>(22-44%)                | 66%<br>(56-78%)          | 1.1<br>(0.62-1.8)                           | 10%<br>(5.6-15%)                     | 12%<br>(6.9-19%)                    | 1000<br>(550-1500)    | 54000<br>(31000-81000)    |
| Myanmar  | 1990 | Male   | 40 to 44 | 33%<br>(23-43%)                | 67%<br>(57-77%)          | 1.2<br>(0.68-1.9)                           | 11%<br>(6.5-16%)                     | 13%<br>(7.8-19%)                    | 1000<br>(590-1500)    | 47000<br>(28000-70000)    |
| Myanmar  | 1990 | Male   | 45 to 49 | 32%<br>(21-42%)                | 68%<br>(58-79%)          | 1.3<br>(0.68-2.1)                           | 11%<br>(6.5-17%)                     | 14%<br>(7.7-20%)                    | 1200<br>(670-1800)    | 49000<br>(28000-75000)    |

| Location | Year | Sex    | Age      | Prevalence of current drinkers | Prevalence of abstainers | Population average of standard drinks daily | Percent of total attributable deaths | Percent of total attributable DALYs | Attributable deaths | Attributable DALYs     |
|----------|------|--------|----------|--------------------------------|--------------------------|---------------------------------------------|--------------------------------------|-------------------------------------|---------------------|------------------------|
| Myanmar  | 1990 | Male   | 50 to 54 | 29%<br>(21-39%)                | 71%<br>(61-79%)          | 1.2<br>(0.63-1.9)                           | 9.7%<br>(5.3-15%)                    | 12%<br>(6.4-18%)                    | 1200<br>(660-1900)  | 45000<br>(24000-70000) |
| Myanmar  | 1990 | Male   | 55 to 59 | 26%<br>(18-35%)                | 74%<br>(65-82%)          | 0.96<br>(0.51-1.6)                          | 7.3%<br>(4-12%)                      | 8.7%<br>(4.7-14%)                   | 1100<br>(600-1900)  | 37000<br>(19000-59000) |
| Myanmar  | 1990 | Male   | 60 to 64 | 24%<br>(16-33%)                | 76%<br>(67-84%)          | 0.81<br>(0.42-1.4)                          | 5.8%<br>(2.7-10%)                    | 6.8%<br>(3.2-12%)                   | 1100<br>(510-1900)  | 30000<br>(14000-52000) |
| Myanmar  | 1990 | Male   | 65 to 69 | 21%<br>(14-29%)                | 79%<br>(71-86%)          | 0.7<br>(0.36-1.2)                           | 4.5%<br>(2.1-8.1%)                   | 5.3%<br>(2.4-9.2%)                  | 880<br>(400-1500)   | 20000<br>(9200-34000)  |
| Myanmar  | 1990 | Male   | 70 to 74 | 19%<br>(13-26%)                | 81%<br>(74-87%)          | 0.59<br>(0.28-1)                            | 3.7%<br>(1.5-7%)                     | 4.3%<br>(1.8-8%)                    | 730<br>(300-1400)   | 13000<br>(5500-25000)  |
| Myanmar  | 1990 | Male   | 75 to 79 | 17%<br>(11-24%)                | 83%<br>(76-89%)          | 0.5<br>(0.24-0.93)                          | 2.8%<br>(1.1-5.3%)                   | 3.2%<br>(1.2-6.1%)                  | 410<br>(150-810)    | 5800<br>(2100-11000)   |
| Myanmar  | 1990 | Male   | 80 to 84 | 15%<br>(9.8-21%)               | 85%<br>(79-90%)          | 0.42<br>(0.2-0.72)                          | 2.3%<br>(0.88-4.3%)                  | 2.7%<br>(0.97-5%)                   | 210<br>(77-390)     | 2200<br>(810-4100)     |
| Myanmar  | 1990 | Male   | 85 to 89 | 15%<br>(9.2-23%)               | 85%<br>(77-91%)          | 0.37<br>(0.17-0.69)                         | 1.7%<br>(0.6-3.4%)                   | 2%<br>(0.67-3.9%)                   | 80<br>(27-160)      | 590<br>(200-1100)      |
| Myanmar  | 1990 | Male   | 90 to 94 | 17%<br>(11-24%)                | 83%<br>(76-89%)          | 0.36<br>(0.16-0.67)                         | 1.3%<br>(0.31-2.8%)                  | 1.5%<br>(0.34-3.3%)                 | 21<br>(4.6-44)      | 110<br>(24-220)        |
| Myanmar  | 1990 | Male   | 95 plus  | 19%<br>(11-30%)                | 81%<br>(70-89%)          | 0.37<br>(0.14-0.7)                          | 1.2%<br>(0.18-2.7%)                  | 1.3%<br>(0.13-3.1%)                 | 3.8<br>(0.38-9.1)   | 13<br>(2.1-31)         |
| Myanmar  | 1995 | Female | All Ages | 2.2%<br>(1.8-2.7%)             | 98%<br>(97-98%)          | 0.028<br>(0.018-0.04)                       | 0.47%<br>(0.37-0.59%)                | 0.64%<br>(0.47-0.84%)               | 1400<br>(1000-1800) | 52000<br>(41000-64000) |
| Myanmar  | 1995 | Female | 15 to 19 | 2%<br>(1.2-3.1%)               | 98%<br>(97-99%)          | 0.026<br>(0.012-0.049)                      | 0.4%<br>(0.25-0.58%)                 | 0.32%<br>(0.16-0.51%)               | 11<br>(5.8-19)      | 1800<br>(1100-2700)    |
| Myanmar  | 1995 | Female | 20 to 24 | 2.5%<br>(1.4-3.8%)             | 98%<br>(96-99%)          | 0.034<br>(0.015-0.066)                      | 0.68%<br>(0.46-0.95%)                | 0.4%<br>(0.21-0.7%)                 | 18<br>(9.4-32)      | 3300<br>(2100-4800)    |
| Myanmar  | 1995 | Female | 25 to 29 | 2.7%<br>(1.5-4.2%)             | 97%<br>(96-99%)          | 0.038<br>(0.017-0.072)                      | 0.73%<br>(0.5-1%)                    | 0.49%<br>(0.26-0.81%)               | 23<br>(12-38)       | 3500<br>(2300-4900)    |
| Myanmar  | 1995 | Female | 30 to 34 | 2.9%<br>(1.5-4.7%)             | 97%<br>(95-98%)          | 0.041<br>(0.018-0.077)                      | 0.85%<br>(0.61-1.1%)                 | 0.78%<br>(0.5-1.1%)                 | 40<br>(26-60)       | 4000<br>(2700-5400)    |
| Myanmar  | 1995 | Female | 35 to 39 | 3%<br>(1.6-4.6%)               | 97%<br>(95-98%)          | 0.045<br>(0.021-0.081)                      | 1%<br>(0.76-1.4%)                    | 1.2%<br>(0.77-1.7%)                 | 71<br>(47-100)      | 5000<br>(3500-6900)    |
| Myanmar  | 1995 | Female | 40 to 44 | 3%<br>(1.8-4.7%)               | 97%<br>(95-98%)          | 0.048<br>(0.023-0.087)                      | 1.2%<br>(0.86-1.6%)                  | 1.5%<br>(1-2.1%)                    | 100<br>(70-150)     | 5800<br>(4200-8100)    |
| Myanmar  | 1995 | Female | 45 to 49 | 3.1%<br>(1.7-4.7%)             | 97%<br>(95-98%)          | 0.051<br>(0.023-0.095)                      | 1.2%<br>(0.85-1.6%)                  | 1.5%<br>(1-2.1%)                    | 100<br>(68-150)     | 4700<br>(3300-6600)    |
| Myanmar  | 1995 | Female | 50 to 54 | 3.1%<br>(1.8-4.7%)             | 97%<br>(95-98%)          | 0.056<br>(0.026-0.1)                        | 1.2%<br>(0.8-1.7%)                   | 1.4%<br>(0.94-2%)                   | 120<br>(79-180)     | 4800<br>(3200-6700)    |
| Myanmar  | 1995 | Female | 55 to 59 | 3.1%<br>(1.8-4.8%)             | 97%<br>(95-98%)          | 0.062<br>(0.029-0.11)                       | 1%<br>(0.67-1.4%)                    | 1.2%<br>(0.78-1.7%)                 | 140<br>(87-190)     | 4600<br>(3000-6300)    |
| Myanmar  | 1995 | Female | 60 to 64 | 3%<br>(1.8-4.9%)               | 97%<br>(95-98%)          | 0.061<br>(0.028-0.12)                       | 0.87%<br>(0.54-1.3%)                 | 1%<br>(0.62-1.6%)                   | 160<br>(95-240)     | 4400<br>(2700-6600)    |
| Myanmar  | 1995 | Female | 65 to 69 | 2.8%<br>(1.6-4.2%)             | 97%<br>(96-98%)          | 0.058<br>(0.028-0.1)                        | 0.73%<br>(0.48-1.1%)                 | 0.87%<br>(0.55-1.3%)                | 170<br>(110-250)    | 3900<br>(2500-5700)    |

| Location | Year | Sex    | Age      | Prevalence of current drinkers | Prevalence of abstainers | Population average of standard drinks daily | Percent of total attributable deaths | Percent of total attributable DALYs | Attributable deaths   | Attributable DALYs        |
|----------|------|--------|----------|--------------------------------|--------------------------|---------------------------------------------|--------------------------------------|-------------------------------------|-----------------------|---------------------------|
| Myanmar  | 1995 | Female | 70 to 74 | 2.7%<br>(1.7-4.2%)             | 97%<br>(96-98%)          | 0.057<br>(0.025-0.11)                       | 0.65%<br>(0.38-1%)                   | 0.76%<br>(0.43-1.2%)                | 160<br>(91-250)       | 2900<br>(1700-4600)       |
| Myanmar  | 1995 | Female | 75 to 79 | 2.8%<br>(1.7-4.5%)             | 97%<br>(96-98%)          | 0.059<br>(0.026-0.12)                       | 0.51%<br>(0.28-0.83%)                | 0.6%<br>(0.32-0.97%)                | 120<br>(64-200)       | 1700<br>(920-2700)        |
| Myanmar  | 1995 | Female | 80 to 84 | 3%<br>(1.6-4.5%)               | 97%<br>(95-98%)          | 0.061<br>(0.027-0.11)                       | 0.46%<br>(0.25-0.77%)                | 0.53%<br>(0.28-0.9%)                | 79<br>(42-130)        | 810<br>(440-1400)         |
| Myanmar  | 1995 | Female | 85 to 89 | 3.4%<br>(1.8-5.6%)             | 97%<br>(94-98%)          | 0.067<br>(0.029-0.13)                       | 0.38%<br>(0.19-0.65%)                | 0.45%<br>(0.22-0.76%)               | 35<br>(17-59)         | 250<br>(120-430)          |
| Myanmar  | 1995 | Female | 90 to 94 | 4%<br>(2.2-6.6%)               | 96%<br>(93-98%)          | 0.077<br>(0.032-0.14)                       | 0.32%<br>(0.14-0.6%)                 | 0.38%<br>(0.16-0.71%)               | 10<br>(4.5-19)        | 53<br>(23-99)             |
| Myanmar  | 1995 | Female | 95 plus  | 4.9%<br>(2.3-9.2%)             | 95%<br>(91-98%)          | 0.092<br>(0.03-0.2)                         | 0.37%<br>(0.13-0.72%)                | 0.41%<br>(0.13-0.83%)               | 2.8<br>(0.92-5.7)     | 9.9<br>(3.5-19)           |
| Myanmar  | 1995 | Male   | All Ages | 19%<br>(16-23%)                | 81%<br>(77-84%)          | 0.55<br>(0.39-0.73)                         | 3.8%<br>(2.4-5.3%)                   | 5.3%<br>(3.3-7.6%)                  | 12000<br>(7600-18000) | 490000<br>(310000-680000) |
| Myanmar  | 1995 | Male   | 15 to 19 | 16%<br>(10-23%)                | 84%<br>(77-90%)          | 0.23<br>(0.12-0.42)                         | 1.3%<br>(0.65-2.3%)                  | 1.5%<br>(0.53-2.8%)                 | 82<br>(29-160)        | 7500<br>(3600-13000)      |
| Myanmar  | 1995 | Male   | 20 to 24 | 26%<br>(17-34%)                | 74%<br>(66-83%)          | 0.6<br>(0.32-1)                             | 4.2%<br>(2-6.9%)                     | 4.8%<br>(2-8.2%)                    | 370<br>(150-640)      | 28000<br>(13000-47000)    |
| Myanmar  | 1995 | Male   | 25 to 29 | 30%<br>(21-41%)                | 70%<br>(59-79%)          | 0.87<br>(0.5-1.4)                           | 6.9%<br>(3.6-11%)                    | 8.2%<br>(4-14%)                     | 660<br>(310-1100)     | 44000<br>(23000-72000)    |
| Myanmar  | 1995 | Male   | 30 to 34 | 33%<br>(22-45%)                | 67%<br>(55-78%)          | 1.1<br>(0.61-1.7)                           | 8.8%<br>(5-13%)                      | 11%<br>(5.9-17%)                    | 900<br>(490-1400)     | 54000<br>(31000-82000)    |
| Myanmar  | 1995 | Male   | 35 to 39 | 34%<br>(23-45%)                | 66%<br>(55-77%)          | 1.2<br>(0.68-1.9)                           | 10%<br>(6.1-15%)                     | 13%<br>(7.4-19%)                    | 1200<br>(680-1800)    | 63000<br>(37000-94000)    |
| Myanmar  | 1995 | Male   | 40 to 44 | 33%<br>(23-44%)                | 67%<br>(56-77%)          | 1.3<br>(0.75-2.1)                           | 11%<br>(6.7-16%)                     | 13%<br>(8.2-19%)                    | 1400<br>(830-2000)    | 66000<br>(40000-95000)    |
| Myanmar  | 1995 | Male   | 45 to 49 | 32%<br>(21-42%)                | 68%<br>(58-79%)          | 1.4<br>(0.73-2.3)                           | 11%<br>(6.9-17%)                     | 14%<br>(8.4-20%)                    | 1300<br>(790-2000)    | 56000<br>(33000-84000)    |
| Myanmar  | 1995 | Male   | 50 to 54 | 29%<br>(21-40%)                | 71%<br>(60-79%)          | 1.3<br>(0.67-2.1)                           | 10%<br>(5.6-15%)                     | 12%<br>(6.7-18%)                    | 1300<br>(710-2100)    | 49000<br>(26000-75000)    |
| Myanmar  | 1995 | Male   | 55 to 59 | 27%<br>(18-36%)                | 73%<br>(64-82%)          | 1.1<br>(0.56-1.7)                           | 7.7%<br>(4.3-12%)                    | 9.2%<br>(5.1-14%)                   | 1200<br>(650-1900)    | 39000<br>(21000-61000)    |
| Myanmar  | 1995 | Male   | 60 to 64 | 24%<br>(16-34%)                | 76%<br>(66-84%)          | 0.89<br>(0.46-1.6)                          | 6.1%<br>(3.1-10%)                    | 7.1%<br>(3.6-12%)                   | 1200<br>(570-2000)    | 32000<br>(16000-55000)    |
| Myanmar  | 1995 | Male   | 65 to 69 | 21%<br>(14-29%)                | 79%<br>(71-86%)          | 0.77<br>(0.4-1.3)                           | 4.8%<br>(2.3-8.1%)                   | 5.6%<br>(2.7-9.4%)                  | 1100<br>(510-1800)    | 24000<br>(11000-40000)    |
| Myanmar  | 1995 | Male   | 70 to 74 | 19%<br>(13-26%)                | 81%<br>(74-87%)          | 0.64<br>(0.31-1.1)                          | 4%<br>(1.7-7.3%)                     | 4.6%<br>(2-8.3%)                    | 840<br>(350-1500)     | 15000<br>(6500-28000)     |
| Myanmar  | 1995 | Male   | 75 to 79 | 17%<br>(11-24%)                | 83%<br>(76-89%)          | 0.55<br>(0.26-0.99)                         | 3%<br>(1.2-5.5%)                     | 3.4%<br>(1.3-6.4%)                  | 520<br>(200-980)      | 7300<br>(2900-14000)      |
| Myanmar  | 1995 | Male   | 80 to 84 | 15%<br>(9.8-21%)               | 85%<br>(79-90%)          | 0.46<br>(0.22-0.78)                         | 2.5%<br>(0.96-4.5%)                  | 2.8%<br>(1.1-5.2%)                  | 260<br>(99-490)       | 2800<br>(1100-5100)       |
| Myanmar  | 1995 | Male   | 85 to 89 | 15%<br>(9.1-22%)               | 85%<br>(78-91%)          | 0.41<br>(0.18-0.72)                         | 1.9%<br>(0.68-3.6%)                  | 2.1%<br>(0.75-4.1%)                 | 99<br>(36-190)        | 730<br>(270-1400)         |

| Location | Year | Sex    | Age      | Prevalence of current drinkers | Prevalence of abstainers | Population average of standard drinks daily | Percent of total attributable deaths | Percent of total attributable DALYs | Attributable deaths   | Attributable DALYs        |
|----------|------|--------|----------|--------------------------------|--------------------------|---------------------------------------------|--------------------------------------|-------------------------------------|-----------------------|---------------------------|
| Myanmar  | 1995 | Male   | 90 to 94 | 17%<br>(11-24%)                | 83%<br>(76-89%)          | 0.4<br>(0.17-0.7)                           | 1.4%<br>(0.43-2.9%)                  | 1.7%<br>(0.48-3.4%)                 | 27<br>(7.7-56)        | 140<br>(42-280)           |
| Myanmar  | 1995 | Male   | 95 plus  | 20%<br>(11-30%)                | 80%<br>(70-89%)          | 0.4<br>(0.15-0.76)                          | 1.3%<br>(0.29-2.9%)                  | 1.4%<br>(0.27-3.3%)                 | 5.4<br>(1-12)         | 19<br>(4.3-43)            |
| Myanmar  | 2000 | Female | All Ages | 2%<br>(1.6-2.4%)               | 98%<br>(98-98%)          | 0.029<br>(0.019-0.04)                       | 0.52%<br>(0.41-0.64%)                | 0.7%<br>(0.53-0.92%)                | 1500<br>(1100-1900)   | 56000<br>(45000-68000)    |
| Myanmar  | 2000 | Female | 15 to 19 | 1.9%<br>(1.1-2.9%)             | 98%<br>(97-99%)          | 0.027<br>(0.012-0.052)                      | 0.4%<br>(0.26-0.58%)                 | 0.31%<br>(0.17-0.5%)                | 11<br>(5.8-18)        | 1800<br>(1200-2700)       |
| Myanmar  | 2000 | Female | 20 to 24 | 2.2%<br>(1.2-3.3%)             | 98%<br>(97-99%)          | 0.034<br>(0.015-0.066)                      | 0.68%<br>(0.46-0.97%)                | 0.39%<br>(0.21-0.66%)               | 17<br>(9.3-29)        | 3400<br>(2200-5000)       |
| Myanmar  | 2000 | Female | 25 to 29 | 2.2%<br>(1.3-3.4%)             | 98%<br>(97-99%)          | 0.034<br>(0.016-0.065)                      | 0.74%<br>(0.53-0.99%)                | 0.46%<br>(0.28-0.73%)               | 21<br>(13-34)         | 3500<br>(2400-4900)       |
| Myanmar  | 2000 | Female | 30 to 34 | 2.2%<br>(1.2-3.5%)             | 98%<br>(96-99%)          | 0.036<br>(0.017-0.066)                      | 0.84%<br>(0.63-1.1%)                 | 0.74%<br>(0.5-1.1%)                 | 39<br>(26-57)         | 4100<br>(2900-5400)       |
| Myanmar  | 2000 | Female | 35 to 39 | 2.4%<br>(1.4-3.8%)             | 98%<br>(96-99%)          | 0.041<br>(0.019-0.073)                      | 1%<br>(0.76-1.4%)                    | 1.1%<br>(0.77-1.7%)                 | 70<br>(46-100)        | 5000<br>(3700-6900)       |
| Myanmar  | 2000 | Female | 40 to 44 | 2.6%<br>(1.5-3.8%)             | 97%<br>(96-99%)          | 0.045<br>(0.023-0.08)                       | 1.2%<br>(0.87-1.6%)                  | 1.5%<br>(1-2%)                      | 110<br>(73-150)       | 6000<br>(4300-8100)       |
| Myanmar  | 2000 | Female | 45 to 49 | 2.6%<br>(1.5-3.9%)             | 97%<br>(96-99%)          | 0.049<br>(0.022-0.091)                      | 1.2%<br>(0.89-1.6%)                  | 1.5%<br>(1.1-2.1%)                  | 130<br>(94-190)       | 6400<br>(4500-8600)       |
| Myanmar  | 2000 | Female | 50 to 54 | 2.9%<br>(1.8-4.2%)             | 97%<br>(96-98%)          | 0.059<br>(0.027-0.1)                        | 1.2%<br>(0.84-1.7%)                  | 1.5%<br>(0.98-2.1%)                 | 130<br>(88-190)       | 5200<br>(3600-7400)       |
| Myanmar  | 2000 | Female | 55 to 59 | 3.1%<br>(1.9-4.5%)             | 97%<br>(95-98%)          | 0.068<br>(0.032-0.12)                       | 1.1%<br>(0.71-1.5%)                  | 1.3%<br>(0.81-1.8%)                 | 140<br>(89-200)       | 4600<br>(3100-6700)       |
| Myanmar  | 2000 | Female | 60 to 64 | 2.8%<br>(1.7-4.5%)             | 97%<br>(96-98%)          | 0.065<br>(0.03-0.12)                        | 0.93%<br>(0.6-1.3%)                  | 1.1%<br>(0.71-1.7%)                 | 160<br>(100-240)      | 4500<br>(2900-6500)       |
| Myanmar  | 2000 | Female | 65 to 69 | 2.6%<br>(1.5-3.9%)             | 97%<br>(96-98%)          | 0.061<br>(0.03-0.11)                        | 0.78%<br>(0.52-1.1%)                 | 0.93%<br>(0.61-1.4%)                | 180<br>(120-260)      | 4100<br>(2700-5900)       |
| Myanmar  | 2000 | Female | 70 to 74 | 2.6%<br>(1.6-4%)               | 97%<br>(96-98%)          | 0.062<br>(0.028-0.12)                       | 0.69%<br>(0.44-1.1%)                 | 0.82%<br>(0.52-1.3%)                | 190<br>(120-290)      | 3400<br>(2200-5300)       |
| Myanmar  | 2000 | Female | 75 to 79 | 2.8%<br>(1.6-4.4%)             | 97%<br>(96-98%)          | 0.065<br>(0.028-0.13)                       | 0.56%<br>(0.33-0.89%)                | 0.66%<br>(0.38-1.1%)                | 140<br>(78-220)       | 1900<br>(1100-3100)       |
| Myanmar  | 2000 | Female | 80 to 84 | 3%<br>(1.6-4.4%)               | 97%<br>(96-98%)          | 0.068<br>(0.03-0.13)                        | 0.5%<br>(0.27-0.8%)                  | 0.59%<br>(0.31-0.96%)               | 95<br>(51-150)        | 980<br>(540-1600)         |
| Myanmar  | 2000 | Female | 85 to 89 | 3.3%<br>(1.8-5.4%)             | 97%<br>(95-98%)          | 0.074<br>(0.033-0.14)                       | 0.42%<br>(0.23-0.69%)                | 0.49%<br>(0.26-0.82%)               | 45<br>(24-75)         | 330<br>(180-540)          |
| Myanmar  | 2000 | Female | 90 to 94 | 3.9%<br>(2.2-6.5%)             | 96%<br>(93-98%)          | 0.084<br>(0.036-0.16)                       | 0.35%<br>(0.17-0.62%)                | 0.41%<br>(0.19-0.73%)               | 13<br>(6.1-23)        | 67<br>(32-120)            |
| Myanmar  | 2000 | Female | 95 plus  | 4.9%<br>(2.4-9.2%)             | 95%<br>(91-98%)          | 0.1<br>(0.034-0.22)                         | 0.4%<br>(0.16-0.76%)                 | 0.45%<br>(0.17-0.88%)               | 3.7<br>(1.4-7.2)      | 13<br>(5.3-25)            |
| Myanmar  | 2000 | Male   | All Ages | 21%<br>(19-23%)                | 79%<br>(77-81%)          | 0.69<br>(0.49-0.91)                         | 4.3%<br>(2.9-5.9%)                   | 5.8%<br>(3.8-7.9%)                  | 14000<br>(8800-19000) | 560000<br>(380000-760000) |
| Myanmar  | 2000 | Male   | 15 to 19 | 15%<br>(11-20%)                | 85%<br>(80-89%)          | 0.25<br>(0.13-0.41)                         | 1.4%<br>(0.75-2.2%)                  | 1.6%<br>(0.7-2.8%)                  | 87<br>(38-150)        | 8000<br>(4300-13000)      |

| Location | Year | Sex    | Age      | Prevalence of current drinkers | Prevalence of abstainers | Population average of standard drinks daily | Percent of total attributable deaths | Percent of total attributable DALYs | Attributable deaths | Attributable DALYs      |
|----------|------|--------|----------|--------------------------------|--------------------------|---------------------------------------------|--------------------------------------|-------------------------------------|---------------------|-------------------------|
| Myanmar  | 2000 | Male   | 20 to 24 | 27%<br>(21-33%)                | 73%<br>(67-79%)          | 0.7<br>(0.41-1.1)                           | 4.6%<br>(2.6-7.2%)                   | 5.2%<br>(2.7-8.6%)                  | 420<br>(200-690)    | 32000<br>(17000-50000)  |
| Myanmar  | 2000 | Male   | 25 to 29 | 34%<br>(28-40%)                | 66%<br>(60-72%)          | 1.1<br>(0.7-1.6)                            | 7.6%<br>(4.2-11%)                    | 9%<br>(4.7-14%)                     | 780<br>(410-1200)   | 52000<br>(29000-79000)  |
| Myanmar  | 2000 | Male   | 30 to 34 | 37%<br>(30-43%)                | 63%<br>(57-70%)          | 1.3<br>(0.84-1.9)                           | 9.3%<br>(5.7-13%)                    | 11%<br>(6.6-17%)                    | 1100<br>(640-1500)  | 64000<br>(39000-91000)  |
| Myanmar  | 2000 | Male   | 35 to 39 | 37%<br>(30-43%)                | 63%<br>(57-70%)          | 1.5<br>(0.89-2.2)                           | 11%<br>(6.6-15%)                     | 13%<br>(7.9-18%)                    | 1300<br>(810-1900)  | 72000<br>(44000-100000) |
| Myanmar  | 2000 | Male   | 40 to 44 | 37%<br>(31-43%)                | 63%<br>(57-69%)          | 1.6<br>(1-2.4)                              | 11%<br>(7.5-16%)                     | 14%<br>(9.1-19%)                    | 1600<br>(1000-2300) | 77000<br>(50000-110000) |
| Myanmar  | 2000 | Male   | 45 to 49 | 35%<br>(29-41%)                | 65%<br>(59-71%)          | 1.7<br>(1-2.6)                              | 12%<br>(7.9-17%)                     | 15%<br>(9.5-21%)                    | 1900<br>(1200-2700) | 80000<br>(51000-110000) |
| Myanmar  | 2000 | Male   | 50 to 54 | 32%<br>(26-38%)                | 68%<br>(62-74%)          | 1.6<br>(0.9-2.4)                            | 11%<br>(6.5-16%)                     | 13%<br>(7.8-19%)                    | 1600<br>(900-2300)  | 57000<br>(34000-85000)  |
| Myanmar  | 2000 | Male   | 55 to 59 | 26%<br>(21-33%)                | 74%<br>(67-79%)          | 1.2<br>(0.68-1.8)                           | 7.9%<br>(4.6-12%)                    | 9.4%<br>(5.5-14%)                   | 1200<br>(700-1900)  | 40000<br>(23000-62000)  |
| Myanmar  | 2000 | Male   | 60 to 64 | 20%<br>(15-27%)                | 80%<br>(73-85%)          | 0.85<br>(0.47-1.5)                          | 5.8%<br>(3.1-9.3%)                   | 6.7%<br>(3.6-11%)                   | 1100<br>(570-1800)  | 30000<br>(16000-49000)  |
| Myanmar  | 2000 | Male   | 65 to 69 | 17%<br>(12-22%)                | 83%<br>(78-88%)          | 0.68<br>(0.38-1.1)                          | 4.3%<br>(2.4-7.1%)                   | 5%<br>(2.7-8.3%)                    | 940<br>(500-1500)   | 21000<br>(11000-35000)  |
| Myanmar  | 2000 | Male   | 70 to 74 | 15%<br>(11-21%)                | 85%<br>(79-89%)          | 0.57<br>(0.28-0.98)                         | 3.6%<br>(1.8-6.3%)                   | 4.1%<br>(2-7.3%)                    | 850<br>(410-1500)   | 15000<br>(7500-27000)   |
| Myanmar  | 2000 | Male   | 75 to 79 | 15%<br>(9.6-21%)               | 85%<br>(79-90%)          | 0.53<br>(0.25-0.93)                         | 2.8%<br>(1.3-5.1%)                   | 3.2%<br>(1.4-5.8%)                  | 540<br>(230-1000)   | 7600<br>(3300-14000)    |
| Myanmar  | 2000 | Male   | 80 to 84 | 15%<br>(9.5-20%)               | 85%<br>(80-90%)          | 0.49<br>(0.24-0.83)                         | 2.5%<br>(1.1-4.4%)                   | 2.9%<br>(1.2-5.2%)                  | 310<br>(130-560)    | 3200<br>(1400-5700)     |
| Myanmar  | 2000 | Male   | 85 to 89 | 15%<br>(9.5-22%)               | 85%<br>(78-91%)          | 0.46<br>(0.22-0.79)                         | 2%<br>(0.82-3.6%)                    | 2.3%<br>(0.93-4.2%)                 | 130<br>(52-230)     | 950<br>(390-1700)       |
| Myanmar  | 2000 | Male   | 90 to 94 | 17%<br>(11-25%)                | 83%<br>(75-89%)          | 0.45<br>(0.21-0.81)                         | 1.6%<br>(0.54-3.1%)                  | 1.8%<br>(0.62-3.7%)                 | 35<br>(11-69)       | 180<br>(61-360)         |
| Myanmar  | 2000 | Male   | 95 plus  | 20%<br>(11-30%)                | 80%<br>(70-89%)          | 0.45<br>(0.17-0.85)                         | 1.4%<br>(0.38-3%)                    | 1.6%<br>(0.37-3.4%)                 | 7.2<br>(1.7-16)     | 25<br>(6.7-54)          |
| Myanmar  | 2005 | Female | All Ages | 2%<br>(1.6-2.4%)               | 98%<br>(98-98%)          | 0.032<br>(0.021-0.045)                      | 0.57%<br>(0.45-0.69%)                | 0.76%<br>(0.58-0.96%)               | 1500<br>(1200-1900) | 55000<br>(45000-67000)  |
| Myanmar  | 2005 | Female | 15 to 19 | 1.8%<br>(1.1-2.9%)             | 98%<br>(97-99%)          | 0.029<br>(0.013-0.055)                      | 0.41%<br>(0.26-0.58%)                | 0.3%<br>(0.17-0.48%)                | 8<br>(4.4-13)       | 1600<br>(990-2300)      |
| Myanmar  | 2005 | Female | 20 to 24 | 2.1%<br>(1.1-3.2%)             | 98%<br>(97-99%)          | 0.036<br>(0.016-0.071)                      | 0.72%<br>(0.49-1%)                   | 0.38%<br>(0.22-0.61%)               | 14<br>(8.2-23)      | 3300<br>(2200-4800)     |
| Myanmar  | 2005 | Female | 25 to 29 | 2.1%<br>(1.2-3.3%)             | 98%<br>(97-99%)          | 0.037<br>(0.016-0.069)                      | 0.76%<br>(0.54-1%)                   | 0.45%<br>(0.29-0.66%)               | 18<br>(12-28)       | 3400<br>(2300-4800)     |
| Myanmar  | 2005 | Female | 30 to 34 | 2.2%<br>(1.2-3.5%)             | 98%<br>(96-99%)          | 0.038<br>(0.018-0.073)                      | 0.84%<br>(0.63-1.1%)                 | 0.72%<br>(0.49-1%)                  | 34<br>(23-49)       | 3800<br>(2700-5200)     |
| Myanmar  | 2005 | Female | 35 to 39 | 2.4%<br>(1.4-3.6%)             | 98%<br>(96-99%)          | 0.044<br>(0.021-0.078)                      | 1%<br>(0.74-1.3%)                    | 1.1%<br>(0.75-1.6%)                 | 64<br>(42-92)       | 4800<br>(3500-6400)     |

| Location | Year | Sex    | Age      | Prevalence of current drinkers | Prevalence of abstainers | Population average of standard drinks daily | Percent of total attributable deaths | Percent of total attributable DALYs | Attributable deaths   | Attributable DALYs      |
|----------|------|--------|----------|--------------------------------|--------------------------|---------------------------------------------|--------------------------------------|-------------------------------------|-----------------------|-------------------------|
| Myanmar  | 2005 | Female | 40 to 44 | 2.5%<br>(1.5-3.7%)             | 97%<br>(96-98%)          | 0.049<br>(0.025-0.085)                      | 1.1%<br>(0.84-1.5%)                  | 1.4%<br>(1-2%)                      | 96<br>(67-140)        | 5600<br>(4100-7500)     |
| Myanmar  | 2005 | Female | 45 to 49 | 2.6%<br>(1.5-3.8%)             | 97%<br>(96-99%)          | 0.053<br>(0.024-0.097)                      | 1.2%<br>(0.86-1.6%)                  | 1.5%<br>(1-2.1%)                    | 130<br>(87-180)       | 6100<br>(4400-8200)     |
| Myanmar  | 2005 | Female | 50 to 54 | 2.8%<br>(1.8-4.1%)             | 97%<br>(96-98%)          | 0.063<br>(0.03-0.11)                        | 1.2%<br>(0.83-1.6%)                  | 1.5%<br>(1-2.1%)                    | 160<br>(110-240)      | 6600<br>(4600-9200)     |
| Myanmar  | 2005 | Female | 55 to 59 | 3%<br>(1.8-4.5%)               | 97%<br>(95-98%)          | 0.073<br>(0.035-0.13)                       | 1%<br>(0.71-1.5%)                    | 1.3%<br>(0.85-1.9%)                 | 140<br>(93-210)       | 4800<br>(3200-6900)     |
| Myanmar  | 2005 | Female | 60 to 64 | 2.8%<br>(1.7-4.3%)             | 97%<br>(96-98%)          | 0.07<br>(0.032-0.13)                        | 0.94%<br>(0.62-1.4%)                 | 1.2%<br>(0.76-1.7%)                 | 150<br>(99-220)       | 4300<br>(2800-6100)     |
| Myanmar  | 2005 | Female | 65 to 69 | 2.6%<br>(1.5-3.8%)             | 97%<br>(96-99%)          | 0.065<br>(0.032-0.12)                       | 0.8%<br>(0.54-1.1%)                  | 0.98%<br>(0.64-1.4%)                | 170<br>(110-240)      | 3900<br>(2600-5500)     |
| Myanmar  | 2005 | Female | 70 to 74 | 2.6%<br>(1.6-4.1%)             | 97%<br>(96-98%)          | 0.067<br>(0.03-0.13)                        | 0.72%<br>(0.46-1.1%)                 | 0.87%<br>(0.55-1.3%)                | 190<br>(120-280)      | 3400<br>(2200-5200)     |
| Myanmar  | 2005 | Female | 75 to 79 | 2.7%<br>(1.6-4.4%)             | 97%<br>(96-98%)          | 0.071<br>(0.032-0.14)                       | 0.57%<br>(0.35-0.9%)                 | 0.69%<br>(0.41-1.1%)                | 160<br>(93-240)       | 2200<br>(1300-3400)     |
| Myanmar  | 2005 | Female | 80 to 84 | 2.9%<br>(1.6-4.4%)             | 97%<br>(96-98%)          | 0.074<br>(0.032-0.14)                       | 0.52%<br>(0.3-0.81%)                 | 0.62%<br>(0.36-0.97%)               | 110<br>(62-170)       | 1100<br>(650-1700)      |
| Myanmar  | 2005 | Female | 85 to 89 | 3.3%<br>(1.8-5.3%)             | 97%<br>(95-98%)          | 0.081<br>(0.036-0.16)                       | 0.44%<br>(0.24-0.72%)                | 0.52%<br>(0.28-0.85%)               | 52<br>(28-87)         | 380<br>(210-630)        |
| Myanmar  | 2005 | Female | 90 to 94 | 3.9%<br>(2.2-6.4%)             | 96%<br>(94-98%)          | 0.092<br>(0.039-0.17)                       | 0.37%<br>(0.19-0.64%)                | 0.43%<br>(0.22-0.75%)               | 16<br>(8.1-28)        | 84<br>(43-150)          |
| Myanmar  | 2005 | Female | 95 plus  | 4.8%<br>(2.4-9%)               | 95%<br>(91-98%)          | 0.11<br>(0.037-0.24)                        | 0.42%<br>(0.18-0.78%)                | 0.47%<br>(0.18-0.9%)                | 4.4<br>(1.7-8.5)      | 16<br>(6.7-29)          |
| Myanmar  | 2005 | Male   | All Ages | 21%<br>(19-24%)                | 79%<br>(76-81%)          | 0.78<br>(0.56-1)                            | 4.5%<br>(3.2-6%)                     | 5.9%<br>(4-7.8%)                    | 14000<br>(9100-20000) | 55000<br>(38000-77000)  |
| Myanmar  | 2005 | Male   | 15 to 19 | 15%<br>(11-20%)                | 85%<br>(80-89%)          | 0.26<br>(0.14-0.44)                         | 1.4%<br>(0.84-2.2%)                  | 1.7%<br>(0.8-2.8%)                  | 74<br>(35-120)        | 7000<br>(4100-11000)    |
| Myanmar  | 2005 | Male   | 20 to 24 | 26%<br>(21-32%)                | 74%<br>(68-79%)          | 0.75<br>(0.44-1.2)                          | 4.4%<br>(2.7-6.6%)                   | 5.1%<br>(2.8-8%)                    | 380<br>(200-610)      | 30000<br>(17000-46000)  |
| Myanmar  | 2005 | Male   | 25 to 29 | 34%<br>(28-39%)                | 66%<br>(61-72%)          | 1.2<br>(0.74-1.8)                           | 7%<br>(4.3-10%)                      | 8.3%<br>(4.7-13%)                   | 720<br>(400-1100)     | 49000<br>(29000-74000)  |
| Myanmar  | 2005 | Male   | 30 to 34 | 36%<br>(30-42%)                | 64%<br>(58-70%)          | 1.4<br>(0.91-2.1)                           | 8.4%<br>(5.4-12%)                    | 10%<br>(6.1-15%)                    | 980<br>(590-1400)     | 60000<br>(37000-85000)  |
| Myanmar  | 2005 | Male   | 35 to 39 | 36%<br>(30-42%)                | 64%<br>(58-70%)          | 1.6<br>(0.98-2.4)                           | 9.7%<br>(6.3-14%)                    | 12%<br>(7.6-16%)                    | 1300<br>(820-1900)    | 70000<br>(45000-100000) |
| Myanmar  | 2005 | Male   | 40 to 44 | 36%<br>(30-42%)                | 64%<br>(58-70%)          | 1.7<br>(1.1-2.6)                            | 11%<br>(7.1-14%)                     | 13%<br>(8.6-18%)                    | 1600<br>(1000-2300)   | 74000<br>(49000-110000) |
| Myanmar  | 2005 | Male   | 45 to 49 | 35%<br>(28-40%)                | 65%<br>(60-72%)          | 1.8<br>(1.1-2.8)                            | 11%<br>(7.5-16%)                     | 14%<br>(9-19%)                      | 1900<br>(1200-2700)   | 79000<br>(51000-110000) |
| Myanmar  | 2005 | Male   | 50 to 54 | 32%<br>(26-37%)                | 68%<br>(63-74%)          | 1.7<br>(0.96-2.6)                           | 10%<br>(6.3-15%)                     | 12%<br>(7.6-18%)                    | 1800<br>(1100-2800)   | 69000<br>(41000-100000) |
| Myanmar  | 2005 | Male   | 55 to 59 | 26%<br>(20-32%)                | 74%<br>(68-80%)          | 1.2<br>(0.73-2)                             | 7.5%<br>(4.7-11%)                    | 9.1%<br>(5.5-13%)                   | 1200<br>(730-2000)    | 40000<br>(24000-63000)  |



| Location | Year | Sex    | Age      | Prevalence of current drinkers | Prevalence of abstainers | Population average of standard drinks daily | Percent of total attributable deaths | Percent of total attributable DALYs | Attributable deaths | Attributable DALYs     |
|----------|------|--------|----------|--------------------------------|--------------------------|---------------------------------------------|--------------------------------------|-------------------------------------|---------------------|------------------------|
| Myanmar  | 2005 | Male   | 60 to 64 | 20%<br>(15-26%)                | 80%<br>(74-85%)          | 0.9<br>(0.49-1.5)                           | 5.6%<br>(3.1-8.9%)                   | 6.6%<br>(3.6-10%)                   | 1000<br>(550-1700)  | 28000<br>(15000-46000) |
| Myanmar  | 2005 | Male   | 65 to 69 | 17%<br>(12-22%)                | 83%<br>(78-88%)          | 0.72<br>(0.4-1.2)                           | 4.2%<br>(2.4-6.7%)                   | 4.9%<br>(2.8-8%)                    | 870<br>(480-1400)   | 20000<br>(11000-32000) |
| Myanmar  | 2005 | Male   | 70 to 74 | 15%<br>(10-20%)                | 85%<br>(80-90%)          | 0.6<br>(0.3-1)                              | 3.5%<br>(1.8-5.9%)                   | 4%<br>(2.1-6.9%)                    | 800<br>(400-1400)   | 15000<br>(7400-25000)  |
| Myanmar  | 2005 | Male   | 75 to 79 | 14%<br>(9.4-20%)               | 86%<br>(80-91%)          | 0.56<br>(0.27-1)                            | 2.7%<br>(1.3-4.9%)                   | 3.2%<br>(1.5-5.6%)                  | 580<br>(260-1100)   | 8200<br>(3800-15000)   |
| Myanmar  | 2005 | Male   | 80 to 84 | 14%<br>(9.4-20%)               | 86%<br>(80-91%)          | 0.52<br>(0.26-0.88)                         | 2.5%<br>(1.1-4.2%)                   | 2.9%<br>(1.3-5%)                    | 340<br>(150-600)    | 3600<br>(1600-6300)    |
| Myanmar  | 2005 | Male   | 85 to 89 | 15%<br>(9.3-22%)               | 85%<br>(78-91%)          | 0.48<br>(0.22-0.85)                         | 1.9%<br>(0.88-3.5%)                  | 2.2%<br>(1-4%)                      | 140<br>(62-260)     | 1100<br>(470-1900)     |
| Myanmar  | 2005 | Male   | 90 to 94 | 16%<br>(11-24%)                | 84%<br>(76-89%)          | 0.47<br>(0.22-0.84)                         | 1.5%<br>(0.58-2.9%)                  | 1.8%<br>(0.65-3.4%)                 | 40<br>(15-78)       | 210<br>(78-400)        |
| Myanmar  | 2005 | Male   | 95 plus  | 19%<br>(11-29%)                | 81%<br>(71-89%)          | 0.47<br>(0.18-0.89)                         | 1.4%<br>(0.42-2.8%)                  | 1.5%<br>(0.41-3.2%)                 | 8<br>(2.1-17)       | 28<br>(9-58)           |
| Myanmar  | 2010 | Female | All Ages | 2.2%<br>(1.9-2.7%)             | 98%<br>(97-98%)          | 0.045<br>(0.029-0.064)                      | 0.67%<br>(0.54-0.82%)                | 0.88%<br>(0.67-1.1%)                | 1600<br>(1200-2000) | 57000<br>(45000-69000) |
| Myanmar  | 2010 | Female | 15 to 19 | 1.9%<br>(1.1-3%)               | 98%<br>(97-99%)          | 0.037<br>(0.017-0.073)                      | 0.44%<br>(0.28-0.65%)                | 0.32%<br>(0.18-0.49%)               | 6<br>(3.5-9.1)      | 1400<br>(880-2100)     |
| Myanmar  | 2010 | Female | 20 to 24 | 2.4%<br>(1.3-3.7%)             | 98%<br>(96-99%)          | 0.049<br>(0.021-0.097)                      | 0.82%<br>(0.54-1.2%)                 | 0.41%<br>(0.24-0.66%)               | 9.9<br>(5.6-16)     | 2800<br>(1800-4200)    |
| Myanmar  | 2010 | Female | 25 to 29 | 2.6%<br>(1.4-4.2%)             | 97%<br>(96-99%)          | 0.054<br>(0.023-0.11)                       | 0.85%<br>(0.61-1.2%)                 | 0.5%<br>(0.32-0.76%)                | 15<br>(9.6-23)      | 3200<br>(2200-4600)    |
| Myanmar  | 2010 | Female | 30 to 34 | 2.8%<br>(1.5-4.5%)             | 97%<br>(95-98%)          | 0.058<br>(0.026-0.11)                       | 0.89%<br>(0.66-1.2%)                 | 0.78%<br>(0.54-1.1%)                | 30<br>(20-43)       | 3800<br>(2700-5100)    |
| Myanmar  | 2010 | Female | 35 to 39 | 2.9%<br>(1.6-4.5%)             | 97%<br>(95-98%)          | 0.063<br>(0.03-0.12)                        | 1%<br>(0.77-1.3%)                    | 1.2%<br>(0.83-1.7%)                 | 58<br>(39-82)       | 4600<br>(3300-6200)    |
| Myanmar  | 2010 | Female | 40 to 44 | 3%<br>(1.8-4.5%)               | 97%<br>(96-98%)          | 0.068<br>(0.033-0.12)                       | 1.2%<br>(0.88-1.5%)                  | 1.5%<br>(1.1-2.1%)                  | 93<br>(65-130)      | 5600<br>(4200-7400)    |
| Myanmar  | 2010 | Female | 45 to 49 | 3%<br>(1.6-4.5%)               | 97%<br>(95-98%)          | 0.072<br>(0.032-0.13)                       | 1.2%<br>(0.87-1.6%)                  | 1.6%<br>(1.1-2.2%)                  | 120<br>(84-180)     | 6100<br>(4500-8200)    |
| Myanmar  | 2010 | Female | 50 to 54 | 3%<br>(1.8-4.7%)               | 97%<br>(95-98%)          | 0.08<br>(0.036-0.15)                        | 1.2%<br>(0.84-1.7%)                  | 1.6%<br>(1.1-2.2%)                  | 160<br>(110-240)    | 6600<br>(4700-9200)    |
| Myanmar  | 2010 | Female | 55 to 59 | 3.1%<br>(1.7-4.8%)             | 97%<br>(95-98%)          | 0.087<br>(0.041-0.17)                       | 1.1%<br>(0.73-1.5%)                  | 1.4%<br>(0.91-2%)                   | 180<br>(120-270)    | 6300<br>(4200-8900)    |
| Myanmar  | 2010 | Female | 60 to 64 | 2.9%<br>(1.7-4.8%)             | 97%<br>(95-98%)          | 0.087<br>(0.039-0.16)                       | 0.98%<br>(0.64-1.4%)                 | 1.3%<br>(0.81-1.8%)                 | 160<br>(100-230)    | 4600<br>(3000-6600)    |
| Myanmar  | 2010 | Female | 65 to 69 | 2.7%<br>(1.5-4.1%)             | 97%<br>(96-98%)          | 0.083<br>(0.04-0.15)                        | 0.86%<br>(0.58-1.2%)                 | 1.1%<br>(0.72-1.6%)                 | 170<br>(110-240)    | 3800<br>(2600-5600)    |
| Myanmar  | 2010 | Female | 70 to 74 | 2.6%<br>(1.6-4.1%)             | 97%<br>(96-98%)          | 0.082<br>(0.035-0.16)                       | 0.78%<br>(0.49-1.2%)                 | 0.96%<br>(0.59-1.5%)                | 180<br>(120-270)    | 3300<br>(2100-5100)    |
| Myanmar  | 2010 | Female | 75 to 79 | 2.7%<br>(1.6-4.5%)             | 97%<br>(96-98%)          | 0.084<br>(0.037-0.17)                       | 0.62%<br>(0.37-0.99%)                | 0.76%<br>(0.45-1.2%)                | 160<br>(93-250)     | 2200<br>(1300-3600)    |

| Location | Year | Sex    | Age      | Prevalence of current drinkers | Prevalence of abstainers | Population average of standard drinks daily | Percent of total attributable deaths | Percent of total attributable DALYs | Attributable deaths   | Attributable DALYs        |
|----------|------|--------|----------|--------------------------------|--------------------------|---------------------------------------------|--------------------------------------|-------------------------------------|-----------------------|---------------------------|
| Myanmar  | 2010 | Female | 80 to 84 | 3%<br>(1.6-4.5%)               | 97%<br>(95-98%)          | 0.088<br>(0.038-0.16)                       | 0.57%<br>(0.34-0.91%)                | 0.69%<br>(0.41-1.1%)                | 120<br>(72-190)       | 1300<br>(740-2000)        |
| Myanmar  | 2010 | Female | 85 to 89 | 3.3%<br>(1.8-5.5%)             | 97%<br>(94-98%)          | 0.097<br>(0.041-0.19)                       | 0.49%<br>(0.28-0.81%)                | 0.58%<br>(0.33-0.97%)               | 68<br>(38-110)        | 500<br>(290-840)          |
| Myanmar  | 2010 | Female | 90 to 94 | 3.9%<br>(2.2-6.5%)             | 96%<br>(94-98%)          | 0.11<br>(0.046-0.21)                        | 0.42%<br>(0.22-0.69%)                | 0.49%<br>(0.24-0.83%)               | 22<br>(11-37)         | 110<br>(58-190)           |
| Myanmar  | 2010 | Female | 95 plus  | 4.8%<br>(2.3-9.2%)             | 95%<br>(91-98%)          | 0.13<br>(0.043-0.28)                        | 0.47%<br>(0.21-0.87%)                | 0.52%<br>(0.22-0.97%)               | 6.2<br>(2.6-11)       | 22<br>(9.7-39)            |
| Myanmar  | 2010 | Male   | All Ages | 20%<br>(17-23%)                | 80%<br>(77-83%)          | 0.86<br>(0.61-1.2)                          | 5%<br>(3.5-6.6%)                     | 6.4%<br>(4.3-8.4%)                  | 14000<br>(9300-20000) | 540000<br>(380000-740000) |
| Myanmar  | 2010 | Male   | 15 to 19 | 15%<br>(9.9-21%)               | 85%<br>(79-90%)          | 0.32<br>(0.16-0.56)                         | 1.5%<br>(0.95-2.4%)                  | 1.9%<br>(0.95-3.1%)                 | 71<br>(34-120)        | 6700<br>(4000-10000)      |
| Myanmar  | 2010 | Male   | 20 to 24 | 25%<br>(16-33%)                | 75%<br>(67-84%)          | 0.83<br>(0.43-1.4)                          | 4.5%<br>(2.7-6.8%)                   | 5.2%<br>(2.9-8.3%)                  | 300<br>(160-510)      | 24000<br>(15000-39000)    |
| Myanmar  | 2010 | Male   | 25 to 29 | 29%<br>(19-39%)                | 71%<br>(61-81%)          | 1.2<br>(0.69-1.9)                           | 6.5%<br>(4.1-9.5%)                   | 7.8%<br>(4.5-12%)                   | 580<br>(340-930)      | 41000<br>(26000-63000)    |
| Myanmar  | 2010 | Male   | 30 to 34 | 31%<br>(21-43%)                | 69%<br>(57-79%)          | 1.5<br>(0.84-2.4)                           | 7.7%<br>(4.9-11%)                    | 9.3%<br>(5.6-14%)                   | 840<br>(510-1300)     | 53000<br>(34000-76000)    |
| Myanmar  | 2010 | Male   | 35 to 39 | 33%<br>(22-43%)                | 67%<br>(57-78%)          | 1.7<br>(0.93-2.7)                           | 8.9%<br>(6-13%)                      | 11%<br>(7.2-16%)                    | 1100<br>(720-1700)    | 63000<br>(41000-91000)    |
| Myanmar  | 2010 | Male   | 40 to 44 | 32%<br>(22-42%)                | 68%<br>(58-78%)          | 1.8<br>(1-2.9)                              | 9.6%<br>(6.5-13%)                    | 12%<br>(8.1-16%)                    | 1400<br>(880-2100)    | 69000<br>(44000-100000)   |
| Myanmar  | 2010 | Male   | 45 to 49 | 30%<br>(20-40%)                | 70%<br>(60-80%)          | 1.9<br>(1-3.1)                              | 10%<br>(6.8-14%)                     | 13%<br>(8.6-18%)                    | 1700<br>(1100-2600)   | 74000<br>(47000-110000)   |
| Myanmar  | 2010 | Male   | 50 to 54 | 28%<br>(19-38%)                | 72%<br>(62-81%)          | 1.7<br>(0.93-2.8)                           | 9.7%<br>(5.8-14%)                    | 12%<br>(7.3-17%)                    | 1800<br>(1100-2700)   | 68000<br>(41000-100000)   |
| Myanmar  | 2010 | Male   | 55 to 59 | 25%<br>(17-34%)                | 75%<br>(66-83%)          | 1.4<br>(0.74-2.4)                           | 7.8%<br>(4.7-11%)                    | 9.5%<br>(5.8-14%)                   | 1600<br>(950-2500)    | 52000<br>(32000-81000)    |
| Myanmar  | 2010 | Male   | 60 to 64 | 23%<br>(15-32%)                | 77%<br>(68-85%)          | 1.2<br>(0.62-2.1)                           | 6.3%<br>(3.5-9.9%)                   | 7.5%<br>(4.2-12%)                   | 1200<br>(640-1900)    | 33000<br>(18000-53000)    |
| Myanmar  | 2010 | Male   | 65 to 69 | 20%<br>(14-27%)                | 80%<br>(73-86%)          | 1<br>(0.55-1.8)                             | 5.1%<br>(2.8-8.1%)                   | 6%<br>(3.3-9.8%)                    | 1000<br>(550-1700)    | 24000<br>(13000-39000)    |
| Myanmar  | 2010 | Male   | 70 to 74 | 18%<br>(12-24%)                | 82%<br>(76-88%)          | 0.87<br>(0.42-1.5)                          | 4.2%<br>(2.1-7%)                     | 4.9%<br>(2.4-8.3%)                  | 930<br>(450-1600)     | 17000<br>(8400-30000)     |
| Myanmar  | 2010 | Male   | 75 to 79 | 16%<br>(10-23%)                | 84%<br>(77-90%)          | 0.74<br>(0.34-1.4)                          | 3.2%<br>(1.5-5.7%)                   | 3.7%<br>(1.8-6.5%)                  | 680<br>(310-1200)     | 9800<br>(4500-17000)      |
| Myanmar  | 2010 | Male   | 80 to 84 | 15%<br>(9.1-21%)               | 85%<br>(79-91%)          | 0.62<br>(0.29-1.1)                          | 2.7%<br>(1.3-4.7%)                   | 3.1%<br>(1.4-5.4%)                  | 410<br>(190-720)      | 4300<br>(2000-7600)       |
| Myanmar  | 2010 | Male   | 85 to 89 | 14%<br>(8.5-21%)               | 86%<br>(79-91%)          | 0.54<br>(0.25-0.97)                         | 2.1%<br>(0.99-3.7%)                  | 2.4%<br>(1.1-4.3%)                  | 180<br>(85-330)       | 1400<br>(660-2500)        |
| Myanmar  | 2010 | Male   | 90 to 94 | 15%<br>(9.8-23%)               | 85%<br>(77-90%)          | 0.52<br>(0.24-0.95)                         | 1.6%<br>(0.69-3.1%)                  | 1.9%<br>(0.77-3.6%)                 | 51<br>(21-99)         | 270<br>(110-510)          |
| Myanmar  | 2010 | Male   | 95 plus  | 18%<br>(9.8-28%)               | 82%<br>(72-90%)          | 0.53<br>(0.2-1)                             | 1.5%<br>(0.53-3%)                    | 1.6%<br>(0.52-3.4%)                 | 11<br>(3.4-23)        | 39<br>(14-80)             |

| Location | Year | Sex    | Age      | Prevalence of current drinkers | Prevalence of abstainers | Population average of standard drinks daily | Percent of total attributable deaths | Percent of total attributable DALYs | Attributable deaths   | Attributable DALYs        |
|----------|------|--------|----------|--------------------------------|--------------------------|---------------------------------------------|--------------------------------------|-------------------------------------|-----------------------|---------------------------|
| Myanmar  | 2016 | Female | All Ages | 2.3%<br>(1.9-2.7%)             | 98%<br>(97-98%)          | 0.054<br>(0.032-0.082)                      | 0.78%<br>(0.63-0.96%)                | 0.99%<br>(0.76-1.3%)                | 1600<br>(1200-2100)   | 58000<br>(46000-71000)    |
| Myanmar  | 2016 | Female | 15 to 19 | 1.9%<br>(1.1-3%)               | 98%<br>(97-99%)          | 0.043<br>(0.018-0.088)                      | 0.48%<br>(0.3-0.69%)                 | 0.35%<br>(0.21-0.57%)               | 5.4<br>(3.3-8.7)      | 1400<br>(850-2100)        |
| Myanmar  | 2016 | Female | 20 to 24 | 2.4%<br>(1.3-3.6%)             | 98%<br>(96-99%)          | 0.057<br>(0.023-0.12)                       | 0.92%<br>(0.62-1.3%)                 | 0.45%<br>(0.27-0.75%)               | 8.2<br>(4.8-13)       | 2800<br>(1800-4200)       |
| Myanmar  | 2016 | Female | 25 to 29 | 2.6%<br>(1.4-4.1%)             | 97%<br>(96-99%)          | 0.062<br>(0.027-0.12)                       | 0.96%<br>(0.67-1.3%)                 | 0.56%<br>(0.36-0.85%)               | 12<br>(7.6-18)        | 3100<br>(2000-4300)       |
| Myanmar  | 2016 | Female | 30 to 34 | 2.7%<br>(1.4-4.6%)             | 97%<br>(95-99%)          | 0.067<br>(0.028-0.13)                       | 0.98%<br>(0.72-1.3%)                 | 0.87%<br>(0.6-1.2%)                 | 24<br>(16-34)         | 3500<br>(2400-4900)       |
| Myanmar  | 2016 | Female | 35 to 39 | 2.9%<br>(1.5-4.4%)             | 97%<br>(96-98%)          | 0.072<br>(0.032-0.14)                       | 1.1%<br>(0.8-1.4%)                   | 1.3%<br>(0.92-1.8%)                 | 50<br>(34-70)         | 4400<br>(3100-5700)       |
| Myanmar  | 2016 | Female | 40 to 44 | 2.9%<br>(1.7-4.5%)             | 97%<br>(96-98%)          | 0.078<br>(0.036-0.15)                       | 1.2%<br>(0.87-1.6%)                  | 1.6%<br>(1.2-2.3%)                  | 85<br>(60-120)        | 5400<br>(4000-7200)       |
| Myanmar  | 2016 | Female | 45 to 49 | 2.9%<br>(1.6-4.5%)             | 97%<br>(96-98%)          | 0.084<br>(0.035-0.16)                       | 1.2%<br>(0.88-1.6%)                  | 1.7%<br>(1.2-2.3%)                  | 120<br>(82-170)       | 6100<br>(4500-8300)       |
| Myanmar  | 2016 | Female | 50 to 54 | 3%<br>(1.8-4.6%)               | 97%<br>(95-98%)          | 0.092<br>(0.041-0.18)                       | 1.2%<br>(0.83-1.7%)                  | 1.6%<br>(1.1-2.3%)                  | 150<br>(100-220)      | 6500<br>(4500-8900)       |
| Myanmar  | 2016 | Female | 55 to 59 | 3%<br>(1.7-4.6%)               | 97%<br>(95-98%)          | 0.1<br>(0.042-0.19)                         | 1.1%<br>(0.74-1.5%)                  | 1.5%<br>(0.95-2.1%)                 | 180<br>(110-260)      | 6300<br>(4300-8900)       |
| Myanmar  | 2016 | Female | 60 to 64 | 2.9%<br>(1.7-4.7%)             | 97%<br>(95-98%)          | 0.1<br>(0.044-0.19)                         | 1%<br>(0.64-1.4%)                    | 1.3%<br>(0.85-1.9%)                 | 210<br>(130-310)      | 6100<br>(4000-8800)       |
| Myanmar  | 2016 | Female | 65 to 69 | 2.7%<br>(1.6-4%)               | 97%<br>(96-98%)          | 0.096<br>(0.043-0.18)                       | 0.9%<br>(0.6-1.3%)                   | 1.2%<br>(0.77-1.7%)                 | 190<br>(120-280)      | 4300<br>(2800-6400)       |
| Myanmar  | 2016 | Female | 70 to 74 | 2.6%<br>(1.6-4%)               | 97%<br>(96-98%)          | 0.095<br>(0.039-0.19)                       | 0.82%<br>(0.51-1.3%)                 | 1.1%<br>(0.65-1.6%)                 | 180<br>(110-270)      | 3300<br>(2000-5000)       |
| Myanmar  | 2016 | Female | 75 to 79 | 2.7%<br>(1.6-4.3%)             | 97%<br>(96-98%)          | 0.098<br>(0.039-0.2)                        | 0.67%<br>(0.39-1.1%)                 | 0.83%<br>(0.49-1.3%)                | 160<br>(91-250)       | 2200<br>(1300-3600)       |
| Myanmar  | 2016 | Female | 80 to 84 | 2.9%<br>(1.6-4.4%)             | 97%<br>(96-98%)          | 0.1<br>(0.041-0.19)                         | 0.62%<br>(0.36-1%)                   | 0.76%<br>(0.45-1.3%)                | 130<br>(73-210)       | 1300<br>(770-2200)        |
| Myanmar  | 2016 | Female | 85 to 89 | 3.3%<br>(1.8-5.3%)             | 97%<br>(95-98%)          | 0.11<br>(0.046-0.22)                        | 0.53%<br>(0.29-0.93%)                | 0.64%<br>(0.35-1.1%)                | 83<br>(45-140)        | 620<br>(330-1100)         |
| Myanmar  | 2016 | Female | 90 to 94 | 3.9%<br>(2.2-6.5%)             | 96%<br>(93-98%)          | 0.13<br>(0.051-0.26)                        | 0.47%<br>(0.23-0.8%)                 | 0.55%<br>(0.26-0.94%)               | 32<br>(15-56)         | 170<br>(83-290)           |
| Myanmar  | 2016 | Female | 95 plus  | 4.9%<br>(2.4-9.2%)             | 95%<br>(91-98%)          | 0.16<br>(0.05-0.34)                         | 0.52%<br>(0.22-1%)                   | 0.59%<br>(0.24-1.1%)                | 9.2<br>(3.7-18)       | 33<br>(14-63)             |
| Myanmar  | 2016 | Male   | All Ages | 20%<br>(17-23%)                | 80%<br>(77-83%)          | 1.1<br>(0.67-1.6)                           | 5.8%<br>(4.1-7.7%)                   | 7.1%<br>(4.7-9.5%)                  | 15000<br>(9700-20000) | 560000<br>(390000-750000) |
| Myanmar  | 2016 | Male   | 15 to 19 | 15%<br>(9.8-21%)               | 85%<br>(79-90%)          | 0.37<br>(0.17-0.68)                         | 1.7%<br>(1-2.7%)                     | 2.1%<br>(1.1-3.7%)                  | 78<br>(40-140)        | 7400<br>(4400-12000)      |
| Myanmar  | 2016 | Male   | 20 to 24 | 24%<br>(16-34%)                | 76%<br>(66-84%)          | 0.97<br>(0.47-1.7)                          | 4.9%<br>(2.9-7.7%)                   | 5.7%<br>(3-9.5%)                    | 310<br>(160-520)      | 25000<br>(15000-40000)    |
| Myanmar  | 2016 | Male   | 25 to 29 | 29%<br>(20-39%)                | 71%<br>(61-80%)          | 1.4<br>(0.72-2.4)                           | 7%<br>(4.4-10%)                      | 8.6%<br>(5.1-13%)                   | 500<br>(280-790)      | 36000<br>(22000-55000)    |

| Location    | Year | Sex    | Age      | Prevalence of current drinkers | Prevalence of abstainers | Population average of standard drinks daily | Percent of total attributable deaths | Percent of total attributable DALYs | Attributable deaths | Attributable DALYs       |
|-------------|------|--------|----------|--------------------------------|--------------------------|---------------------------------------------|--------------------------------------|-------------------------------------|---------------------|--------------------------|
| Myanmar     | 2016 | Male   | 30 to 34 | 31%<br>(21-43%)                | 69%<br>(57-79%)          | 1.7<br>(0.93-2.9)                           | 8.3%<br>(5.4-12%)                    | 10%<br>(6.4-15%)                    | 740<br>(440-1100)   | 47000<br>(30000-69000)   |
| Myanmar     | 2016 | Male   | 35 to 39 | 32%<br>(22-43%)                | 68%<br>(57-78%)          | 1.9<br>(1-3.4)                              | 9.5%<br>(6.3-13%)                    | 12%<br>(8-17%)                      | 1000<br>(660-1500)  | 58000<br>(39000-83000)   |
| Myanmar     | 2016 | Male   | 40 to 44 | 32%<br>(22-42%)                | 68%<br>(58-78%)          | 2.1<br>(1.1-3.6)                            | 10%<br>(6.9-14%)                     | 13%<br>(9-17%)                      | 1300<br>(860-1800)  | 65000<br>(44000-89000)   |
| Myanmar     | 2016 | Male   | 45 to 49 | 30%<br>(19-39%)                | 70%<br>(61-81%)          | 2.2<br>(1.1-3.8)                            | 11%<br>(7.2-15%)                     | 14%<br>(9.3-19%)                    | 1700<br>(1100-2400) | 74000<br>(48000-100000)  |
| Myanmar     | 2016 | Male   | 50 to 54 | 28%<br>(19-38%)                | 72%<br>(62-81%)          | 2<br>(1-3.6)                                | 10%<br>(6.3-14%)                     | 13%<br>(8-17%)                      | 1800<br>(1100-2600) | 70000<br>(44000-97000)   |
| Myanmar     | 2016 | Male   | 55 to 59 | 25%<br>(17-35%)                | 75%<br>(65-83%)          | 1.7<br>(0.82-3)                             | 8.3%<br>(5-12%)                      | 10%<br>(6.1-15%)                    | 1800<br>(1100-2600) | 59000<br>(36000-86000)   |
| Myanmar     | 2016 | Male   | 60 to 64 | 23%<br>(15-33%)                | 77%<br>(67-85%)          | 1.4<br>(0.67-2.5)                           | 6.7%<br>(3.6-10%)                    | 8%<br>(4.4-12%)                     | 1700<br>(920-2600)  | 47000<br>(26000-73000)   |
| Myanmar     | 2016 | Male   | 65 to 69 | 20%<br>(13-27%)                | 80%<br>(73-87%)          | 1.2<br>(0.6-2.2)                            | 5.4%<br>(2.9-8.6%)                   | 6.5%<br>(3.4-10%)                   | 1300<br>(680-2100)  | 30000<br>(16000-48000)   |
| Myanmar     | 2016 | Male   | 70 to 74 | 18%<br>(12-24%)                | 82%<br>(76-88%)          | 1<br>(0.46-1.8)                             | 4.5%<br>(2.1-7.4%)                   | 5.3%<br>(2.4-8.8%)                  | 1000<br>(480-1700)  | 19000<br>(9200-32000)    |
| Myanmar     | 2016 | Male   | 75 to 79 | 16%<br>(10-23%)                | 84%<br>(77-90%)          | 0.85<br>(0.38-1.6)                          | 3.5%<br>(1.6-6.1%)                   | 4%<br>(1.8-7.1%)                    | 760<br>(340-1300)   | 11000<br>(4900-19000)    |
| Myanmar     | 2016 | Male   | 80 to 84 | 14%<br>(9.1-20%)               | 86%<br>(80-91%)          | 0.71<br>(0.31-1.3)                          | 3%<br>(1.3-5.1%)                     | 3.4%<br>(1.5-5.9%)                  | 470<br>(210-810)    | 5000<br>(2200-8600)      |
| Myanmar     | 2016 | Male   | 85 to 89 | 14%<br>(8.4-21%)               | 86%<br>(79-92%)          | 0.62<br>(0.26-1.2)                          | 2.3%<br>(1-4.1%)                     | 2.6%<br>(1.2-4.7%)                  | 230<br>(110-430)    | 1800<br>(810-3200)       |
| Myanmar     | 2016 | Male   | 90 to 94 | 15%<br>(9.5-23%)               | 85%<br>(77-90%)          | 0.6<br>(0.25-1.2)                           | 1.8%<br>(0.73-3.5%)                  | 2.1%<br>(0.84-4%)                   | 76<br>(31-150)      | 400<br>(160-780)         |
| Myanmar     | 2016 | Male   | 95 plus  | 18%<br>(10-28%)                | 82%<br>(72-90%)          | 0.62<br>(0.22-1.3)                          | 1.7%<br>(0.57-3.4%)                  | 1.8%<br>(0.56-3.8%)                 | 16<br>(4.9-34)      | 57<br>(20-120)           |
| Philippines | 1990 | Female | All Ages | 16%<br>(13-19%)                | 84%<br>(81-87%)          | 0.38<br>(0.32-0.47)                         | 1.2%<br>(0.78-1.7%)                  | 2.1%<br>(1.2-3.3%)                  | 3300<br>(1800-5100) | 120000<br>(79000-170000) |
| Philippines | 1990 | Female | 15 to 19 | 16%<br>(11-23%)                | 84%<br>(77-89%)          | 0.4<br>(0.23-0.64)                          | 1.1%<br>(0.66-1.8%)                  | 1.8%<br>(0.88-3.1%)                 | 52<br>(26-91)       | 5300<br>(3100-8400)      |
| Philippines | 1990 | Female | 20 to 24 | 20%<br>(13-28%)                | 80%<br>(72-87%)          | 0.55<br>(0.31-0.89)                         | 1.8%<br>(1.1-2.7%)                   | 2.3%<br>(1.1-4%)                    | 77<br>(35-130)      | 8300<br>(4800-13000)     |
| Philippines | 1990 | Female | 25 to 29 | 22%<br>(14-31%)                | 78%<br>(69-86%)          | 0.62<br>(0.36-0.97)                         | 2.1%<br>(1.2-3.3%)                   | 2.9%<br>(1.4-5%)                    | 110<br>(50-180)     | 9500<br>(5600-15000)     |
| Philippines | 1990 | Female | 30 to 34 | 23%<br>(15-33%)                | 77%<br>(67-85%)          | 0.68<br>(0.39-1)                            | 2.3%<br>(1.4-3.6%)                   | 3.5%<br>(1.7-5.7%)                  | 130<br>(67-220)     | 10000<br>(5800-15000)    |
| Philippines | 1990 | Female | 35 to 39 | 24%<br>(15-32%)                | 76%<br>(68-85%)          | 0.74<br>(0.42-1.1)                          | 2.7%<br>(1.5-4.4%)                   | 4.3%<br>(2.1-7.1%)                  | 180<br>(86-290)     | 11000<br>(6100-17000)    |
| Philippines | 1990 | Female | 40 to 44 | 23%<br>(16-31%)                | 77%<br>(69-84%)          | 0.74<br>(0.43-1.1)                          | 2.8%<br>(1.5-4.5%)                   | 4.6%<br>(2.4-7.5%)                  | 180<br>(90-290)     | 9400<br>(5000-15000)     |
| Philippines | 1990 | Female | 45 to 49 | 22%<br>(14-30%)                | 78%<br>(70-86%)          | 0.71<br>(0.4-1.2)                           | 2.9%<br>(1.4-4.9%)                   | 4.6%<br>(2.1-7.8%)                  | 200<br>(94-350)     | 9200<br>(4500-15000)     |

| Location    | Year | Sex    | Age      | Prevalence of current drinkers | Prevalence of abstainers | Population average of standard drinks daily | Percent of total attributable deaths | Percent of total attributable DALYs | Attributable deaths    | Attributable DALYs        |
|-------------|------|--------|----------|--------------------------------|--------------------------|---------------------------------------------|--------------------------------------|-------------------------------------|------------------------|---------------------------|
| Philippines | 1990 | Female | 50 to 54 | 22%<br>(15-31%)                | 78%<br>(69-85%)          | 0.79<br>(0.45-1.3)                          | 3.3%<br>(1.6-5.8%)                   | 5%<br>(2.4-8.7%)                    | 270<br>(130-480)       | 11000<br>(5100-18000)     |
| Philippines | 1990 | Female | 55 to 59 | 23%<br>(15-31%)                | 77%<br>(69-85%)          | 0.97<br>(0.56-1.5)                          | 4.2%<br>(2-7%)                       | 6.2%<br>(3-10%)                     | 370<br>(180-620)       | 12000<br>(6000-21000)     |
| Philippines | 1990 | Female | 60 to 64 | 21%<br>(14-30%)                | 79%<br>(70-86%)          | 0.93<br>(0.54-1.5)                          | 3.9%<br>(1.9-6.8%)                   | 5.5%<br>(2.6-9.7%)                  | 390<br>(180-690)       | 11000<br>(5300-19000)     |
| Philippines | 1990 | Female | 65 to 69 | 19%<br>(13-27%)                | 81%<br>(73-87%)          | 0.76<br>(0.44-1.2)                          | 3.1%<br>(1.3-5.4%)                   | 4.3%<br>(1.9-7.5%)                  | 360<br>(160-640)       | 8400<br>(3800-15000)      |
| Philippines | 1990 | Female | 70 to 74 | 18%<br>(13-26%)                | 82%<br>(74-87%)          | 0.65<br>(0.35-1.1)                          | 2.3%<br>(0.64-4.7%)                  | 3.1%<br>(0.88-6.2%)                 | 300<br>(86-610)        | 5700<br>(1500-11000)      |
| Philippines | 1990 | Female | 75 to 79 | 19%<br>(12-27%)                | 81%<br>(73-88%)          | 0.62<br>(0.32-1.1)                          | 1.8%<br>(0.19-4.2%)                  | 2.2%<br>(0.23-5.3%)                 | 250<br>(27-600)        | 3700<br>(380-8800)        |
| Philippines | 1990 | Female | 80 to 84 | 20%<br>(13-27%)                | 80%<br>(73-87%)          | 0.65<br>(0.36-1.1)                          | 1.6%<br>(0.18-3.7%)                  | 1.9%<br>(0.19-4.3%)                 | 210<br>(22-500)        | 2300<br>(250-5300)        |
| Philippines | 1990 | Female | 85 to 89 | 22%<br>(14-31%)                | 78%<br>(69-86%)          | 0.7<br>(0.37-1.2)                           | 1.4%<br>(0.039-3.3%)                 | 1.6%<br>(0.019-3.8%)                | 130<br>(1.5-310)       | 960<br>(28-2300)          |
| Philippines | 1990 | Female | 90 to 94 | 24%<br>(16-34%)                | 76%<br>(66-84%)          | 0.8<br>(0.42-1.4)                           | 1.2%<br>(-0.14-3.3%)                 | 1.3%<br>(-0.24-3.8%)                | 46<br>(-8.3-130)       | 250<br>(-30-690)          |
| Philippines | 1990 | Female | 95 plus  | 28%<br>(16-42%)                | 72%<br>(58-84%)          | 0.93<br>(0.42-1.7)                          | 1.3%<br>(-0.34-4.2%)                 | 1.4%<br>(-0.51-4.8%)                | 18<br>(-6.5-59)        | 65<br>(-16-200)           |
| Philippines | 1990 | Male   | All Ages | 56%<br>(50-62%)                | 44%<br>(38-50%)          | 1.7<br>(1.5-1.9)                            | 5.8%<br>(4.7-6.9%)                   | 8.2%<br>(6.5-10%)                   | 18000<br>(14000-23000) | 780000<br>(630000-930000) |
| Philippines | 1990 | Male   | 15 to 19 | 54%<br>(43-65%)                | 46%<br>(35-57%)          | 1.3<br>(0.79-1.8)                           | 4.3%<br>(2.8-6%)                     | 6.1%<br>(3.8-8.6%)                  | 320<br>(200-450)       | 27000<br>(17000-37000)    |
| Philippines | 1990 | Male   | 20 to 24 | 74%<br>(64-81%)                | 26%<br>(19-36%)          | 2.8<br>(2-3.7)                              | 11%<br>(7.8-14%)                     | 14%<br>(9.7-18%)                    | 1000<br>(730-1400)     | 79000<br>(57000-100000)   |
| Philippines | 1990 | Male   | 25 to 29 | 77%<br>(69-84%)                | 23%<br>(16-31%)          | 3.1<br>(2.3-4)                              | 12%<br>(9.3-16%)                     | 16%<br>(12-20%)                     | 1300<br>(940-1700)     | 89000<br>(67000-110000)   |
| Philippines | 1990 | Male   | 30 to 34 | 79%<br>(71-85%)                | 21%<br>(15-29%)          | 3.4<br>(2.7-4.3)                            | 13%<br>(10-16%)                      | 17%<br>(13-22%)                     | 1400<br>(1000-1800)    | 87000<br>(66000-110000)   |
| Philippines | 1990 | Male   | 35 to 39 | 79%<br>(71-85%)                | 21%<br>(15-29%)          | 3.8<br>(2.7-4.9)                            | 15%<br>(11-18%)                      | 19%<br>(14-24%)                     | 1600<br>(1200-2100)    | 90000<br>(67000-110000)   |
| Philippines | 1990 | Male   | 40 to 44 | 78%<br>(71-84%)                | 22%<br>(16-29%)          | 3.9<br>(2.8-5.1)                            | 15%<br>(11-19%)                      | 20%<br>(15-25%)                     | 1600<br>(1200-2100)    | 79000<br>(58000-100000)   |
| Philippines | 1990 | Male   | 45 to 49 | 75%<br>(66-82%)                | 25%<br>(18-34%)          | 3.9<br>(2.7-5.3)                            | 16%<br>(11-21%)                      | 20%<br>(14-26%)                     | 1800<br>(1300-2400)    | 80000<br>(55000-110000)   |
| Philippines | 1990 | Male   | 50 to 54 | 71%<br>(62-78%)                | 29%<br>(22-38%)          | 3.6<br>(2.5-5)                              | 15%<br>(10-20%)                      | 19%<br>(13-25%)                     | 1900<br>(1300-2600)    | 73000<br>(48000-97000)    |
| Philippines | 1990 | Male   | 55 to 59 | 66%<br>(55-75%)                | 34%<br>(25-45%)          | 3.3<br>(2.3-4.6)                            | 14%<br>(9.3-19%)                     | 17%<br>(12-23%)                     | 1900<br>(1300-2700)    | 63000<br>(42000-88000)    |
| Philippines | 1990 | Male   | 60 to 64 | 62%<br>(49-72%)                | 38%<br>(28-51%)          | 2.8<br>(1.9-4.2)                            | 12%<br>(7.2-17%)                     | 14%<br>(8.5-21%)                    | 1700<br>(1000-2500)    | 47000<br>(28000-69000)    |
| Philippines | 1990 | Male   | 65 to 69 | 58%<br>(45-70%)                | 42%<br>(30-55%)          | 2.2<br>(1.5-3.2)                            | 8.9%<br>(5.2-14%)                    | 11%<br>(6.3-16%)                    | 1300<br>(750-2000)     | 30000<br>(18000-46000)    |

| Location    | Year | Sex    | Age      | Prevalence of current drinkers | Prevalence of abstainers | Population average of standard drinks daily | Percent of total attributable deaths | Percent of total attributable DALYs | Attributable deaths | Attributable DALYs       |
|-------------|------|--------|----------|--------------------------------|--------------------------|---------------------------------------------|--------------------------------------|-------------------------------------|---------------------|--------------------------|
| Philippines | 1990 | Male   | 70 to 74 | 53%<br>(40-65%)                | 47%<br>(35-60%)          | 1.7<br>(1.1-2.6)                            | 6.3%<br>(3.1-10%)                    | 7.4%<br>(3.6-12%)                   | 920<br>(440-1500)   | 17000<br>(8400-29000)    |
| Philippines | 1990 | Male   | 75 to 79 | 47%<br>(33-62%)                | 53%<br>(38-67%)          | 1.4<br>(0.81-2.3)                           | 4.3%<br>(1.5-8%)                     | 4.9%<br>(1.6-9.4%)                  | 610<br>(190-1200)   | 8800<br>(2900-17000)     |
| Philippines | 1990 | Male   | 80 to 84 | 42%<br>(29-56%)                | 58%<br>(44-71%)          | 1.2<br>(0.69-1.8)                           | 3%<br>(0.77-5.7%)                    | 3.2%<br>(0.76-6.4%)                 | 350<br>(80-690)     | 3700<br>(950-7400)       |
| Philippines | 1990 | Male   | 85 to 89 | 41%<br>(28-55%)                | 59%<br>(45-72%)          | 1<br>(0.58-1.6)                             | 1.9%<br>(0.29-3.9%)                  | 2%<br>(0.2-4.4%)                    | 140<br>(14-310)     | 1100<br>(170-2400)       |
| Philippines | 1990 | Male   | 90 to 94 | 43%<br>(29-57%)                | 57%<br>(43-71%)          | 0.99<br>(0.57-1.6)                          | 1.2%<br>(-0.21-3.1%)                 | 1.2%<br>(-0.42-3.4%)                | 29<br>(-10-83)      | 170<br>(-31-440)         |
| Philippines | 1990 | Male   | 95 plus  | 46%<br>(28-64%)                | 54%<br>(36-72%)          | 0.99<br>(0.48-1.7)                          | 0.99%<br>(-0.51-3.3%)                | 0.9%<br>(-0.84-3.4%)                | 5.3<br>(-4.9-20)    | 23<br>(-12-76)           |
| Philippines | 1995 | Female | All Ages | 16%<br>(14-19%)                | 84%<br>(81-86%)          | 0.39<br>(0.32-0.48)                         | 1.2%<br>(0.85-1.7%)                  | 2.1%<br>(1.2-3.3%)                  | 3400<br>(1900-5300) | 120000<br>(84000-170000) |
| Philippines | 1995 | Female | 15 to 19 | 16%<br>(11-22%)                | 84%<br>(78-89%)          | 0.4<br>(0.23-0.62)                          | 1.1%<br>(0.66-1.6%)                  | 1.7%<br>(0.89-2.9%)                 | 46<br>(24-78)       | 5100<br>(3100-7900)      |
| Philippines | 1995 | Female | 20 to 24 | 20%<br>(13-29%)                | 80%<br>(71-87%)          | 0.54<br>(0.29-0.88)                         | 1.7%<br>(1-2.6%)                     | 2.3%<br>(1-3.9%)                    | 71<br>(33-120)      | 8200<br>(4900-12000)     |
| Philippines | 1995 | Female | 25 to 29 | 22%<br>(14-30%)                | 78%<br>(70-86%)          | 0.61<br>(0.36-0.97)                         | 2%<br>(1.2-3.1%)                     | 2.8%<br>(1.4-4.9%)                  | 100<br>(50-170)     | 9500<br>(5800-15000)     |
| Philippines | 1995 | Female | 30 to 34 | 22%<br>(15-33%)                | 78%<br>(67-85%)          | 0.67<br>(0.38-1.1)                          | 2.2%<br>(1.3-3.2%)                   | 3.3%<br>(1.8-5.2%)                  | 130<br>(68-200)     | 10000<br>(6100-15000)    |
| Philippines | 1995 | Female | 35 to 39 | 23%<br>(15-32%)                | 77%<br>(68-85%)          | 0.73<br>(0.42-1.1)                          | 2.5%<br>(1.5-3.8%)                   | 4%<br>(2.1-6.5%)                    | 170<br>(90-270)     | 11000<br>(6500-17000)    |
| Philippines | 1995 | Female | 40 to 44 | 23%<br>(16-31%)                | 77%<br>(69-84%)          | 0.74<br>(0.44-1.1)                          | 2.5%<br>(1.4-3.9%)                   | 4.3%<br>(2.4-6.6%)                  | 200<br>(110-310)    | 11000<br>(6300-17000)    |
| Philippines | 1995 | Female | 45 to 49 | 22%<br>(14-30%)                | 78%<br>(70-86%)          | 0.71<br>(0.39-1.1)                          | 2.6%<br>(1.4-4.4%)                   | 4.2%<br>(2.1-6.9%)                  | 210<br>(100-340)    | 9600<br>(5000-16000)     |
| Philippines | 1995 | Female | 50 to 54 | 22%<br>(15-30%)                | 78%<br>(70-85%)          | 0.79<br>(0.45-1.3)                          | 3%<br>(1.5-5%)                       | 4.6%<br>(2.3-7.6%)                  | 270<br>(140-450)    | 11000<br>(5400-18000)    |
| Philippines | 1995 | Female | 55 to 59 | 23%<br>(15-31%)                | 77%<br>(69-85%)          | 0.98<br>(0.55-1.6)                          | 3.8%<br>(1.9-6.2%)                   | 5.6%<br>(2.9-9.2%)                  | 380<br>(200-620)    | 13000<br>(6800-21000)    |
| Philippines | 1995 | Female | 60 to 64 | 21%<br>(14-31%)                | 79%<br>(69-86%)          | 0.94<br>(0.53-1.5)                          | 3.7%<br>(1.7-6.3%)                   | 5.1%<br>(2.4-8.7%)                  | 450<br>(200-760)    | 13000<br>(5800-22000)    |
| Philippines | 1995 | Female | 65 to 69 | 19%<br>(13-27%)                | 81%<br>(73-87%)          | 0.77<br>(0.46-1.2)                          | 2.9%<br>(1.3-4.9%)                   | 3.9%<br>(1.9-6.7%)                  | 370<br>(180-640)    | 8700<br>(4100-15000)     |
| Philippines | 1995 | Female | 70 to 74 | 18%<br>(13-25%)                | 82%<br>(75-87%)          | 0.65<br>(0.36-1.1)                          | 2.2%<br>(0.63-4.2%)                  | 2.9%<br>(0.89-5.5%)                 | 340<br>(100-650)    | 6300<br>(1800-12000)     |
| Philippines | 1995 | Female | 75 to 79 | 19%<br>(12-26%)                | 81%<br>(74-88%)          | 0.62<br>(0.32-1.1)                          | 1.6%<br>(0.16-3.8%)                  | 2.1%<br>(0.25-4.8%)                 | 260<br>(30-600)     | 3700<br>(370-8700)       |
| Philippines | 1995 | Female | 80 to 84 | 20%<br>(13-27%)                | 80%<br>(73-87%)          | 0.65<br>(0.37-1.1)                          | 1.4%<br>(0.056-3.4%)                 | 1.7%<br>(0.021-3.9%)                | 230<br>(2.9-540)    | 2400<br>(94-5700)        |
| Philippines | 1995 | Female | 85 to 89 | 21%<br>(14-30%)                | 79%<br>(70-86%)          | 0.7<br>(0.39-1.2)                           | 1.2%<br>(-0.096-2.9%)                | 1.3%<br>(-0.15-3.4%)                | 150<br>(-16-360)    | 1100<br>(-88-2700)       |

| Location    | Year | Sex    | Age      | Prevalence of current drinkers | Prevalence of abstainers | Population average of standard drinks daily | Percent of total attributable deaths | Percent of total attributable DALYs | Attributable deaths    | Attributable DALYs        |
|-------------|------|--------|----------|--------------------------------|--------------------------|---------------------------------------------|--------------------------------------|-------------------------------------|------------------------|---------------------------|
| Philippines | 1995 | Female | 90 to 94 | 24%<br>(16-34%)                | 76%<br>(66-84%)          | 0.79<br>(0.42-1.4)                          | 1%<br>(-0.27-3.1%)                   | 1.1%<br>(-0.4-3.6%)                 | 51<br>(-18-160)        | 280<br>(-73-850)          |
| Philippines | 1995 | Female | 95 plus  | 28%<br>(16-42%)                | 72%<br>(58-84%)          | 0.92<br>(0.41-1.7)                          | 1.2%<br>(-0.49-4.1%)                 | 1.3%<br>(-0.67-4.6%)                | 18<br>(-9.5-66)        | 68<br>(-27-230)           |
| Philippines | 1995 | Male   | All Ages | 56%<br>(50-62%)                | 44%<br>(38-50%)          | 1.8<br>(1.6-2)                              | 6%<br>(4.9-7.1%)                     | 8.2%<br>(6.4-10%)                   | 19000<br>(15000-24000) | 810000<br>(660000-970000) |
| Philippines | 1995 | Male   | 15 to 19 | 54%<br>(43-65%)                | 46%<br>(35-57%)          | 1.3<br>(0.81-1.8)                           | 4.1%<br>(2.8-5.7%)                   | 6.2%<br>(4.1-8.6%)                  | 300<br>(200-430)       | 26000<br>(18000-36000)    |
| Philippines | 1995 | Male   | 20 to 24 | 74%<br>(63-81%)                | 26%<br>(19-37%)          | 2.8<br>(2-3.6)                              | 10%<br>(7.4-13%)                     | 13%<br>(9.7-17%)                    | 900<br>(650-1200)      | 71000<br>(53000-90000)    |
| Philippines | 1995 | Male   | 25 to 29 | 77%<br>(69-84%)                | 23%<br>(16-31%)          | 3.1<br>(2.3-3.9)                            | 11%<br>(8.6-14%)                     | 15%<br>(11-19%)                     | 1200<br>(840-1500)     | 82000<br>(60000-100000)   |
| Philippines | 1995 | Male   | 30 to 34 | 79%<br>(71-85%)                | 21%<br>(15-29%)          | 3.4<br>(2.6-4.3)                            | 12%<br>(9.1-15%)                     | 16%<br>(12-20%)                     | 1300<br>(970-1700)     | 84000<br>(63000-110000)   |
| Philippines | 1995 | Male   | 35 to 39 | 79%<br>(71-85%)                | 21%<br>(15-29%)          | 3.8<br>(2.7-4.9)                            | 13%<br>(10-17%)                      | 18%<br>(13-23%)                     | 1600<br>(1200-2100)    | 90000<br>(67000-110000)   |
| Philippines | 1995 | Male   | 40 to 44 | 78%<br>(70-84%)                | 22%<br>(16-30%)          | 3.9<br>(2.9-5)                              | 14%<br>(10-18%)                      | 19%<br>(14-24%)                     | 1800<br>(1300-2400)    | 92000<br>(67000-120000)   |
| Philippines | 1995 | Male   | 45 to 49 | 75%<br>(65-82%)                | 25%<br>(18-35%)          | 3.9<br>(2.7-5.3)                            | 15%<br>(10-19%)                      | 19%<br>(13-24%)                     | 2000<br>(1400-2600)    | 87000<br>(61000-110000)   |
| Philippines | 1995 | Male   | 50 to 54 | 71%<br>(62-78%)                | 29%<br>(22-38%)          | 3.6<br>(2.5-5)                              | 14%<br>(9.4-19%)                     | 17%<br>(11-23%)                     | 2100<br>(1400-2900)    | 81000<br>(53000-110000)   |
| Philippines | 1995 | Male   | 55 to 59 | 66%<br>(55-75%)                | 34%<br>(25-45%)          | 3.3<br>(2.3-4.6)                            | 13%<br>(8.6-18%)                     | 16%<br>(11-22%)                     | 2200<br>(1400-3000)    | 71000<br>(47000-98000)    |
| Philippines | 1995 | Male   | 60 to 64 | 62%<br>(49-73%)                | 38%<br>(27-51%)          | 2.9<br>(1.9-4.2)                            | 11%<br>(7-17%)                       | 13%<br>(8.2-20%)                    | 2100<br>(1300-3100)    | 59000<br>(37000-86000)    |
| Philippines | 1995 | Male   | 65 to 69 | 58%<br>(45-70%)                | 42%<br>(30-55%)          | 2.2<br>(1.5-3.2)                            | 8.4%<br>(4.9-13%)                    | 9.8%<br>(5.9-15%)                   | 1500<br>(870-2200)     | 34000<br>(20000-51000)    |
| Philippines | 1995 | Male   | 70 to 74 | 53%<br>(41-65%)                | 47%<br>(35-59%)          | 1.8<br>(1.1-2.6)                            | 5.9%<br>(2.9-9.7%)                   | 6.8%<br>(3.3-11%)                   | 1100<br>(500-1700)     | 20000<br>(9500-33000)     |
| Philippines | 1995 | Male   | 75 to 79 | 46%<br>(32-61%)                | 54%<br>(39-68%)          | 1.4<br>(0.81-2.3)                           | 4%<br>(1.3-7.6%)                     | 4.5%<br>(1.4-8.7%)                  | 630<br>(190-1200)      | 9100<br>(3100-17000)      |
| Philippines | 1995 | Male   | 80 to 84 | 42%<br>(29-56%)                | 58%<br>(44-71%)          | 1.2<br>(0.69-1.8)                           | 2.6%<br>(0.55-5.3%)                  | 2.8%<br>(0.45-5.9%)                 | 350<br>(56-730)        | 3800<br>(810-7700)        |
| Philippines | 1995 | Male   | 85 to 89 | 41%<br>(28-56%)                | 59%<br>(44-72%)          | 1<br>(0.59-1.6)                             | 1.6%<br>(-0.056-3.7%)                | 1.7%<br>(-0.17-4%)                  | 140<br>(-14-330)       | 1100<br>(-39-2600)        |
| Philippines | 1995 | Male   | 90 to 94 | 43%<br>(30-57%)                | 57%<br>(43-70%)          | 1<br>(0.57-1.6)                             | 0.92%<br>(-0.49-2.8%)                | 0.9%<br>(-0.76-3.1%)                | 29<br>(-25-100)        | 180<br>(-96-540)          |
| Philippines | 1995 | Male   | 95 plus  | 47%<br>(29-65%)                | 53%<br>(35-71%)          | 1<br>(0.48-1.8)                             | 0.81%<br>(-0.78-2.9%)                | 0.66%<br>(-1.2-3.1%)                | 5.3<br>(-9.5-25)       | 25<br>(-23-92)            |
| Philippines | 2000 | Female | All Ages | 13%<br>(11-15%)                | 87%<br>(85-89%)          | 0.33<br>(0.28-0.4)                          | 1.2%<br>(0.86-1.7%)                  | 2.1%<br>(1.2-3.2%)                  | 3800<br>(2200-5700)    | 130000<br>(91000-180000)  |
| Philippines | 2000 | Female | 15 to 19 | 13%<br>(9.1-17%)               | 87%<br>(83-91%)          | 0.34<br>(0.2-0.51)                          | 0.9%<br>(0.57-1.3%)                  | 1.3%<br>(0.72-2.2%)                 | 37<br>(20-61)          | 4700<br>(2800-7000)       |

| Location    | Year | Sex    | Age      | Prevalence of current drinkers | Prevalence of abstainers | Population average of standard drinks daily | Percent of total attributable deaths | Percent of total attributable DALYs | Attributable deaths    | Attributable DALYs         |
|-------------|------|--------|----------|--------------------------------|--------------------------|---------------------------------------------|--------------------------------------|-------------------------------------|------------------------|----------------------------|
| Philippines | 2000 | Female | 20 to 24 | 15%<br>(11-20%)                | 85%<br>(80-89%)          | 0.41<br>(0.25-0.64)                         | 1.5%<br>(0.93-2.1%)                  | 1.7%<br>(0.87-2.9%)                 | 59<br>(29-98)          | 7800<br>(4800-11000)       |
| Philippines | 2000 | Female | 25 to 29 | 15%<br>(11-21%)                | 85%<br>(79-89%)          | 0.46<br>(0.29-0.7)                          | 1.7%<br>(1.1-2.5%)                   | 2.2%<br>(1.2-3.6%)                  | 82<br>(44-140)         | 8600<br>(5500-13000)       |
| Philippines | 2000 | Female | 30 to 34 | 18%<br>(14-23%)                | 82%<br>(77-86%)          | 0.55<br>(0.35-0.81)                         | 1.9%<br>(1.2-2.7%)                   | 2.7%<br>(1.5-4.2%)                  | 120<br>(65-180)        | 9600<br>(6100-14000)       |
| Philippines | 2000 | Female | 35 to 39 | 19%<br>(14-24%)                | 81%<br>(76-86%)          | 0.61<br>(0.39-0.9)                          | 2.1%<br>(1.3-3.1%)                   | 3.3%<br>(1.9-5.2%)                  | 160<br>(95-250)        | 11000<br>(6800-16000)      |
| Philippines | 2000 | Female | 40 to 44 | 18%<br>(14-23%)                | 82%<br>(77-86%)          | 0.6<br>(0.39-0.86)                          | 2.2%<br>(1.3-3.2%)                   | 3.5%<br>(2.2-5.4%)                  | 200<br>(120-300)       | 11000<br>(6900-16000)      |
| Philippines | 2000 | Female | 45 to 49 | 18%<br>(13-23%)                | 82%<br>(77-87%)          | 0.59<br>(0.37-0.91)                         | 2.2%<br>(1.3-3.5%)                   | 3.5%<br>(2-5.6%)                    | 240<br>(130-370)       | 11000<br>(6600-17000)      |
| Philippines | 2000 | Female | 50 to 54 | 18%<br>(14-24%)                | 82%<br>(76-86%)          | 0.68<br>(0.41-1)                            | 2.6%<br>(1.4-4.2%)                   | 3.9%<br>(2.1-6.2%)                  | 290<br>(160-460)       | 11000<br>(6100-18000)      |
| Philippines | 2000 | Female | 55 to 59 | 20%<br>(16-26%)                | 80%<br>(74-84%)          | 0.92<br>(0.59-1.4)                          | 3.5%<br>(2-5.7%)                     | 5.2%<br>(2.9-8.3%)                  | 430<br>(240-700)       | 15000<br>(8100-24000)      |
| Philippines | 2000 | Female | 60 to 64 | 20%<br>(15-26%)                | 80%<br>(74-85%)          | 0.91<br>(0.57-1.4)                          | 3.5%<br>(1.8-5.8%)                   | 4.8%<br>(2.4-7.9%)                  | 510<br>(260-840)       | 15000<br>(7400-25000)      |
| Philippines | 2000 | Female | 65 to 69 | 16%<br>(12-22%)                | 84%<br>(78-88%)          | 0.67<br>(0.42-1)                            | 2.6%<br>(1.3-4.4%)                   | 3.5%<br>(1.7-5.8%)                  | 440<br>(220-740)       | 10000<br>(5100-18000)      |
| Philippines | 2000 | Female | 70 to 74 | 14%<br>(10-20%)                | 86%<br>(80-90%)          | 0.53<br>(0.3-0.88)                          | 1.9%<br>(0.68-3.6%)                  | 2.4%<br>(0.87-4.7%)                 | 340<br>(120-650)       | 6300<br>(2300-12000)       |
| Philippines | 2000 | Female | 75 to 79 | 15%<br>(9.8-22%)               | 85%<br>(78-90%)          | 0.52<br>(0.28-0.91)                         | 1.5%<br>(0.25-3.3%)                  | 1.8%<br>(0.33-4%)                   | 290<br>(51-640)        | 4200<br>(720-9500)         |
| Philippines | 2000 | Female | 80 to 84 | 18%<br>(11-25%)                | 82%<br>(75-89%)          | 0.61<br>(0.34-1)                            | 1.4%<br>(0.24-3.3%)                  | 1.7%<br>(0.26-3.8%)                 | 260<br>(40-590)        | 2700<br>(450-6200)         |
| Philippines | 2000 | Female | 85 to 89 | 20%<br>(13-29%)                | 80%<br>(71-87%)          | 0.7<br>(0.39-1.1)                           | 1.3%<br>(0.077-3.1%)                 | 1.5%<br>(0.035-3.5%)                | 200<br>(4-5-460)       | 1500<br>(86-3400)          |
| Philippines | 2000 | Female | 90 to 94 | 23%<br>(15-33%)                | 77%<br>(67-85%)          | 0.79<br>(0.42-1.4)                          | 1.2%<br>(-0.13-3.3%)                 | 1.3%<br>(-0.23-3.8%)                | 88<br>(-15-250)        | 470<br>(-49-1300)          |
| Philippines | 2000 | Female | 95 plus  | 27%<br>(15-40%)                | 73%<br>(60-85%)          | 0.93<br>(0.42-1.7)                          | 1.5%<br>(-0.28-4.5%)                 | 1.6%<br>(-0.41-5.1%)                | 34<br>(-8.6-110)       | 120<br>(-22-360)           |
| Philippines | 2000 | Male   | All Ages | 60%<br>(56-65%)                | 40%<br>(35-44%)          | 2<br>(1.8-2.2)                              | 6.7%<br>(5.4-7.9%)                   | 8.9%<br>(7-11%)                     | 23000<br>(18000-29000) | 970000<br>(800000-1200000) |
| Philippines | 2000 | Male   | 15 to 19 | 63%<br>(56-69%)                | 37%<br>(31-44%)          | 1.6<br>(1.1-2.2)                            | 4.5%<br>(2.8-6.1%)                   | 6.9%<br>(4.3-9.4%)                  | 360<br>(230-500)       | 31000<br>(20000-42000)     |
| Philippines | 2000 | Male   | 20 to 24 | 79%<br>(74-82%)                | 21%<br>(18-26%)          | 3.3<br>(2.4-4.1)                            | 10%<br>(7.5-13%)                     | 14%<br>(9.9-18%)                    | 1000<br>(740-1300)     | 79000<br>(59000-100000)    |
| Philippines | 2000 | Male   | 25 to 29 | 80%<br>(76-84%)                | 20%<br>(16-24%)          | 3.4<br>(2.6-4.3)                            | 11%<br>(8.3-14%)                     | 15%<br>(11-19%)                     | 1200<br>(870-1600)     | 86000<br>(64000-110000)    |
| Philippines | 2000 | Male   | 30 to 34 | 82%<br>(78-85%)                | 18%<br>(15-22%)          | 3.8<br>(3-4.8)                              | 12%<br>(9.1-15%)                     | 16%<br>(12-21%)                     | 1500<br>(1100-1900)    | 93000<br>(69000-120000)    |



| Location    | Year | Sex    | Age      | Prevalence of current drinkers | Prevalence of abstainers | Population average of standard drinks daily | Percent of total attributable deaths | Percent of total attributable DALYs | Attributable deaths | Attributable DALYs        |
|-------------|------|--------|----------|--------------------------------|--------------------------|---------------------------------------------|--------------------------------------|-------------------------------------|---------------------|---------------------------|
| Philippines | 2000 | Male   | 35 to 39 | 81%<br>(78-85%)                | 19%<br>(15-22%)          | 4.2<br>(3.1-5.4)                            | 14%<br>(9.8-18%)                     | 18%<br>(13-24%)                     | 1900<br>(1300-2400) | 110000<br>(76000-140000)  |
| Philippines | 2000 | Male   | 40 to 44 | 80%<br>(76-84%)                | 20%<br>(16-24%)          | 4.3<br>(3.3-5.5)                            | 14%<br>(11-18%)                      | 19%<br>(14-24%)                     | 2200<br>(1600-2800) | 110000<br>(82000-140000)  |
| Philippines | 2000 | Male   | 45 to 49 | 78%<br>(73-82%)                | 22%<br>(18-27%)          | 4.3<br>(3.2-5.7)                            | 15%<br>(11-19%)                      | 19%<br>(14-25%)                     | 2700<br>(1900-3600) | 120000<br>(84000-150000)  |
| Philippines | 2000 | Male   | 50 to 54 | 73%<br>(68-78%)                | 27%<br>(22-32%)          | 3.9<br>(2.8-5.2)                            | 14%<br>(9.8-19%)                     | 18%<br>(12-23%)                     | 2700<br>(1800-3700) | 100000<br>(69000-140000)  |
| Philippines | 2000 | Male   | 55 to 59 | 66%<br>(58-74%)                | 34%<br>(26-42%)          | 3.5<br>(2.5-4.7)                            | 13%<br>(8.7-18%)                     | 16%<br>(10-22%)                     | 2700<br>(1800-3700) | 89000<br>(60000-120000)   |
| Philippines | 2000 | Male   | 60 to 64 | 60%<br>(50-70%)                | 40%<br>(30-50%)          | 2.9<br>(2-4.1)                              | 11%<br>(6.9-16%)                     | 13%<br>(8-19%)                      | 2500<br>(1600-3700) | 70000<br>(44000-100000)   |
| Philippines | 2000 | Male   | 65 to 69 | 55%<br>(44-66%)                | 45%<br>(34-56%)          | 2.2<br>(1.5-3)                              | 8.1%<br>(5-12%)                      | 9.4%<br>(5.9-14%)                   | 1900<br>(1200-2900) | 45000<br>(28000-66000)    |
| Philippines | 2000 | Male   | 70 to 74 | 51%<br>(39-61%)                | 49%<br>(39-61%)          | 1.7<br>(1.2-2.5)                            | 5.8%<br>(3-9.3%)                     | 6.6%<br>(3.4-11%)                   | 1200<br>(610-2000)  | 23000<br>(12000-37000)    |
| Philippines | 2000 | Male   | 75 to 79 | 44%<br>(31-57%)                | 56%<br>(43-69%)          | 1.4<br>(0.82-2.2)                           | 4%<br>(1.7-8.3%)                     | 4.4%<br>(1.7-8.3%)                  | 770<br>(280-1400)   | 11000<br>(4400-21000)     |
| Philippines | 2000 | Male   | 80 to 84 | 39%<br>(26-53%)                | 61%<br>(47-74%)          | 1.1<br>(0.67-1.8)                           | 2.7%<br>(0.87-5.3%)                  | 3%<br>(0.86-5.8%)                   | 400<br>(120-780)    | 4400<br>(1400-8400)       |
| Philippines | 2000 | Male   | 85 to 89 | 38%<br>(26-52%)                | 62%<br>(48-74%)          | 1<br>(0.57-1.6)                             | 1.8%<br>(0.21-3.8%)                  | 1.8%<br>(0.11-4.1%)                 | 180<br>(10-400)     | 1400<br>(170-3000)        |
| Philippines | 2000 | Male   | 90 to 94 | 40%<br>(27-55%)                | 60%<br>(45-73%)          | 0.96<br>(0.53-1.6)                          | 1.1%<br>(-0.34-3.2%)                 | 1.1%<br>(-0.54-3.4%)                | 46<br>(-22-140)     | 260<br>(-78-750)          |
| Philippines | 2000 | Male   | 95 plus  | 44%<br>(27-62%)                | 56%<br>(38-73%)          | 0.95<br>(0.45-1.7)                          | 1%<br>(-0.58-3.6%)                   | 0.93%<br>(-0.85-3.7%)               | 11<br>(-9.8-43)     | 45<br>(-26-150)           |
| Philippines | 2005 | Female | All Ages | 13%<br>(11-15%)                | 87%<br>(85-89%)          | 0.34<br>(0.29-0.42)                         | 1.3%<br>(0.92-1.8%)                  | 2.2%<br>(1.3-3.4%)                  | 4500<br>(2500-6800) | 150000<br>(100000-210000) |
| Philippines | 2005 | Female | 15 to 19 | 13%<br>(8.8-18%)               | 87%<br>(82-91%)          | 0.34<br>(0.2-0.52)                          | 0.88%<br>(0.57-1.3%)                 | 1.3%<br>(0.7-2.2%)                  | 40<br>(21-68)       | 5100<br>(3200-7500)       |
| Philippines | 2005 | Female | 20 to 24 | 15%<br>(10-20%)                | 85%<br>(80-90%)          | 0.42<br>(0.25-0.66)                         | 1.5%<br>(0.95-2.1%)                  | 1.7%<br>(0.83-2.8%)                 | 65<br>(31-110)      | 8400<br>(5400-13000)      |
| Philippines | 2005 | Female | 25 to 29 | 15%<br>(11-20%)                | 85%<br>(80-89%)          | 0.46<br>(0.29-0.71)                         | 1.6%<br>(1.1-2.4%)                   | 2.1%<br>(1.1-3.4%)                  | 89<br>(48-150)      | 9400<br>(5900-14000)      |
| Philippines | 2005 | Female | 30 to 34 | 17%<br>(13-23%)                | 83%<br>(77-87%)          | 0.56<br>(0.36-0.82)                         | 1.8%<br>(1.2-2.6%)                   | 2.6%<br>(1.4-4.1%)                  | 120<br>(68-200)     | 10000<br>(6500-15000)     |
| Philippines | 2005 | Female | 35 to 39 | 18%<br>(14-23%)                | 82%<br>(77-86%)          | 0.61<br>(0.39-0.91)                         | 2%<br>(1.3-3%)                       | 3.2%<br>(1.8-4.9%)                  | 180<br>(100-280)    | 12000<br>(7300-18000)     |
| Philippines | 2005 | Female | 40 to 44 | 18%<br>(13-23%)                | 82%<br>(77-87%)          | 0.6<br>(0.39-0.89)                          | 2.1%<br>(1.2-3.1%)                   | 3.4%<br>(2-5.2%)                    | 220<br>(130-350)    | 12000<br>(7600-19000)     |
| Philippines | 2005 | Female | 45 to 49 | 18%<br>(13-22%)                | 82%<br>(78-87%)          | 0.6<br>(0.38-0.93)                          | 2.2%<br>(1.2-3.5%)                   | 3.4%<br>(1.8-5.5%)                  | 280<br>(150-460)    | 13000<br>(7000-21000)     |
| Philippines | 2005 | Female | 50 to 54 | 18%<br>(13-23%)                | 82%<br>(77-87%)          | 0.68<br>(0.42-1)                            | 2.5%<br>(1.3-4.1%)                   | 3.8%<br>(1.9-6.2%)                  | 390<br>(190-630)    | 16000<br>(7600-25000)     |

| Location    | Year | Sex    | Age      | Prevalence of current drinkers | Prevalence of abstainers | Population average of standard drinks daily | Percent of total attributable deaths | Percent of total attributable DALYs | Attributable deaths    | Attributable DALYs          |
|-------------|------|--------|----------|--------------------------------|--------------------------|---------------------------------------------|--------------------------------------|-------------------------------------|------------------------|-----------------------------|
| Philippines | 2005 | Female | 55 to 59 | 20%<br>(15-25%)                | 80%<br>(75-85%)          | 0.92<br>(0.6-1.4)                           | 3.5%<br>(1.9-5.8%)                   | 5.1%<br>(2.8-8.2%)                  | 530<br>(290-890)       | 18000<br>(9600-30000)       |
| Philippines | 2005 | Female | 60 to 64 | 19%<br>(14-25%)                | 81%<br>(75-86%)          | 0.91<br>(0.58-1.4)                          | 3.4%<br>(1.7-5.8%)                   | 4.7%<br>(2.3-7.9%)                  | 590<br>(290-980)       | 17000<br>(8200-28000)       |
| Philippines | 2005 | Female | 65 to 69 | 16%<br>(11-21%)                | 84%<br>(79-89%)          | 0.67<br>(0.43-1)                            | 2.5%<br>(1.2-4.4%)                   | 3.4%<br>(1.7-5.9%)                  | 520<br>(250-910)       | 12000<br>(5900-22000)       |
| Philippines | 2005 | Female | 70 to 74 | 14%<br>(10-19%)                | 86%<br>(81-90%)          | 0.54<br>(0.3-0.9)                           | 1.9%<br>(0.55-3.8%)                  | 2.4%<br>(0.74-4.8%)                 | 420<br>(130-830)       | 7900<br>(2400-16000)        |
| Philippines | 2005 | Female | 75 to 79 | 15%<br>(9.9-21%)               | 85%<br>(79-90%)          | 0.53<br>(0.28-0.92)                         | 1.5%<br>(0.22-3.4%)                  | 1.8%<br>(0.3-4.2%)                  | 330<br>(54-760)        | 4800<br>(710-11000)         |
| Philippines | 2005 | Female | 80 to 84 | 17%<br>(11-25%)                | 83%<br>(75-89%)          | 0.61<br>(0.35-1)                            | 1.4%<br>(0.18-3.5%)                  | 1.7%<br>(0.2-4%)                    | 310<br>(37-750)        | 3300<br>(400-7800)          |
| Philippines | 2005 | Female | 85 to 89 | 20%<br>(13-29%)                | 80%<br>(71-87%)          | 0.72<br>(0.38-1.2)                          | 1.4%<br>(0.1-3.3%)                   | 1.6%<br>(0.082-3.7%)                | 250<br>(13-600)        | 1900<br>(140-4500)          |
| Philippines | 2005 | Female | 90 to 94 | 23%<br>(15-32%)                | 77%<br>(68-85%)          | 0.81<br>(0.42-1.4)                          | 1.3%<br>(-0.093-3.6%)                | 1.5%<br>(-0.19-4.1%)                | 120<br>(-15-330)       | 610<br>(-44-1700)           |
| Philippines | 2005 | Female | 95 plus  | 27%<br>(16-40%)                | 73%<br>(60-84%)          | 0.95<br>(0.43-1.7)                          | 1.6%<br>(-0.17-4.7%)                 | 1.7%<br>(-0.29-5.2%)                | 50<br>(-8.4-150)       | 180<br>(-18-520)            |
| Philippines | 2005 | Male   | All Ages | 61%<br>(56-65%)                | 39%<br>(35-44%)          | 2.1<br>(1.9-2.3)                            | 7.3%<br>(6-8.7%)                     | 9.5%<br>(7.5-12%)                   | 28000<br>(22000-34000) | 1100000<br>(930000-1400000) |
| Philippines | 2005 | Male   | 15 to 19 | 63%<br>(56-69%)                | 37%<br>(31-44%)          | 1.6<br>(1.1-2.2)                            | 4.5%<br>(3-6.2%)                     | 7.1%<br>(4.5-9.7%)                  | 410<br>(260-580)       | 34000<br>(22000-47000)      |
| Philippines | 2005 | Male   | 20 to 24 | 78%<br>(74-82%)                | 22%<br>(18-26%)          | 3.3<br>(2.4-4.2)                            | 10%<br>(7.7-13%)                     | 14%<br>(10-19%)                     | 1100<br>(810-1500)     | 87000<br>(63000-110000)     |
| Philippines | 2005 | Male   | 25 to 29 | 80%<br>(76-83%)                | 20%<br>(17-24%)          | 3.5<br>(2.6-4.4)                            | 11%<br>(8.3-14%)                     | 15%<br>(11-19%)                     | 1300<br>(960-1700)     | 93000<br>(68000-120000)     |
| Philippines | 2005 | Male   | 30 to 34 | 82%<br>(78-85%)                | 18%<br>(15-22%)          | 3.9<br>(3-4.9)                              | 12%<br>(9.1-16%)                     | 16%<br>(12-21%)                     | 1600<br>(1100-2000)    | 99000<br>(73000-130000)     |
| Philippines | 2005 | Male   | 35 to 39 | 81%<br>(77-85%)                | 19%<br>(15-23%)          | 4.2<br>(3.2-5.4)                            | 14%<br>(10-18%)                      | 18%<br>(13-24%)                     | 2100<br>(1500-2700)    | 120000<br>(84000-150000)    |
| Philippines | 2005 | Male   | 40 to 44 | 80%<br>(76-84%)                | 20%<br>(16-24%)          | 4.4<br>(3.3-5.6)                            | 15%<br>(11-19%)                      | 19%<br>(14-25%)                     | 2600<br>(1900-3400)    | 130000<br>(95000-160000)    |
| Philippines | 2005 | Male   | 45 to 49 | 78%<br>(73-82%)                | 22%<br>(18-27%)          | 4.4<br>(3.2-5.8)                            | 15%<br>(11-20%)                      | 19%<br>(14-25%)                     | 3200<br>(2300-4300)    | 140000<br>(100000-190000)   |
| Philippines | 2005 | Male   | 50 to 54 | 73%<br>(67-77%)                | 27%<br>(23-33%)          | 4<br>(2.8-5.3)                              | 15%<br>(9.9-19%)                     | 18%<br>(12-24%)                     | 3700<br>(2500-4900)    | 140000<br>(96000-190000)    |
| Philippines | 2005 | Male   | 55 to 59 | 66%<br>(57-74%)                | 34%<br>(26-43%)          | 3.5<br>(2.6-4.8)                            | 13%<br>(8.7-18%)                     | 16%<br>(10-22%)                     | 3400<br>(2200-4700)    | 110000<br>(73000-160000)    |
| Philippines | 2005 | Male   | 60 to 64 | 59%<br>(50-68%)                | 41%<br>(32-50%)          | 2.9<br>(2-4.1)                              | 11%<br>(6.7-16%)                     | 13%<br>(7.8-19%)                    | 3000<br>(1800-4300)    | 83000<br>(51000-120000)     |
| Philippines | 2005 | Male   | 65 to 69 | 55%<br>(44-65%)                | 45%<br>(35-56%)          | 2.2<br>(1.5-3.1)                            | 8.1%<br>(4.9-12%)                    | 9.4%<br>(5.8-14%)                   | 2300<br>(1400-3400)    | 53000<br>(33000-78000)      |

| Location    | Year | Sex    | Age      | Prevalence of current drinkers | Prevalence of abstainers | Population average of standard drinks daily | Percent of total attributable deaths | Percent of total attributable DALYs | Attributable deaths | Attributable DALYs        |
|-------------|------|--------|----------|--------------------------------|--------------------------|---------------------------------------------|--------------------------------------|-------------------------------------|---------------------|---------------------------|
| Philippines | 2005 | Male   | 70 to 74 | 50%<br>(39-61%)                | 50%<br>(39-61%)          | 1.8<br>(1.2-2.6)                            | 5.8%<br>(3-9.5%)                     | 6.6%<br>(3.4-11%)                   | 1600<br>(800-2600)  | 29000<br>(15000-48000)    |
| Philippines | 2005 | Male   | 75 to 79 | 43%<br>(31-57%)                | 57%<br>(43-69%)          | 1.4<br>(0.82-2.2)                           | 3.9%<br>(1.5-7.3%)                   | 4.3%<br>(1.6-8.2%)                  | 850<br>(320-1600)   | 12000<br>(4700-23000)     |
| Philippines | 2005 | Male   | 80 to 84 | 38%<br>(25-52%)                | 62%<br>(48-75%)          | 1.1<br>(0.67-1.7)                           | 2.6%<br>(0.9-5.1%)                   | 2.9%<br>(0.87-5.6%)                 | 440<br>(140-880)    | 4800<br>(1600-9300)       |
| Philippines | 2005 | Male   | 85 to 89 | 37%<br>(25-51%)                | 63%<br>(49-75%)          | 0.99<br>(0.56-1.5)                          | 1.7%<br>(0.28-3.7%)                  | 1.8%<br>(0.17-4%)                   | 200<br>(18-440)     | 1600<br>(250-3300)        |
| Philippines | 2005 | Male   | 90 to 94 | 39%<br>(26-53%)                | 61%<br>(47-74%)          | 0.95<br>(0.54-1.6)                          | 1.2%<br>(-0.22-3.1%)                 | 1.2%<br>(-0.43-3.3%)                | 51<br>(-19-140)     | 290<br>(-55-760)          |
| Philippines | 2005 | Male   | 95 plus  | 43%<br>(26-62%)                | 57%<br>(38-74%)          | 0.95<br>(0.45-1.7)                          | 1.1%<br>(-0.52-3.4%)                 | 1%<br>(-0.78-3.5%)                  | 13<br>(-9.8-46)     | 53<br>(-25-170)           |
| Philippines | 2010 | Female | All Ages | 15%<br>(13-18%)                | 85%<br>(82-87%)          | 0.41<br>(0.33-0.51)                         | 1.5%<br>(0.97-2%)                    | 2.2%<br>(1.1-3.6%)                  | 5300<br>(2700-8400) | 180000<br>(120000-250000) |
| Philippines | 2010 | Female | 15 to 19 | 14%<br>(9.4-21%)               | 86%<br>(79-91%)          | 0.37<br>(0.21-0.6)                          | 0.94%<br>(0.58-1.5%)                 | 1.4%<br>(0.64-2.4%)                 | 45<br>(22-82)       | 5700<br>(3500-9200)       |
| Philippines | 2010 | Female | 20 to 24 | 18%<br>(12-27%)                | 82%<br>(73-88%)          | 0.51<br>(0.27-0.83)                         | 1.6%<br>(1-2.4%)                     | 1.9%<br>(0.86-3.3%)                 | 76<br>(34-130)      | 9600<br>(5800-14000)      |
| Philippines | 2010 | Female | 25 to 29 | 20%<br>(13-28%)                | 80%<br>(72-87%)          | 0.57<br>(0.33-0.92)                         | 1.8%<br>(1.1-2.7%)                   | 2.3%<br>(1.1-4%)                    | 110<br>(50-180)     | 11000<br>(6500-17000)     |
| Philippines | 2010 | Female | 30 to 34 | 20%<br>(13-29%)                | 80%<br>(71-87%)          | 0.63<br>(0.36-0.99)                         | 1.9%<br>(1.2-2.8%)                   | 2.6%<br>(1.3-4.3%)                  | 140<br>(71-230)     | 12000<br>(7000-18000)     |
| Philippines | 2010 | Female | 35 to 39 | 21%<br>(14-29%)                | 79%<br>(71-86%)          | 0.68<br>(0.39-1.1)                          | 2.1%<br>(1.3-3.3%)                   | 3.2%<br>(1.7-5.2%)                  | 200<br>(110-330)    | 13000<br>(7900-21000)     |
| Philippines | 2010 | Female | 40 to 44 | 21%<br>(14-29%)                | 79%<br>(71-86%)          | 0.69<br>(0.42-1.1)                          | 2.2%<br>(1.2-3.5%)                   | 3.5%<br>(1.9-5.6%)                  | 270<br>(150-440)    | 15000<br>(8900-23000)     |
| Philippines | 2010 | Female | 45 to 49 | 20%<br>(12-28%)                | 80%<br>(72-88%)          | 0.66<br>(0.36-1.1)                          | 2.2%<br>(1.1-3.7%)                   | 3.4%<br>(1.7-5.9%)                  | 330<br>(160-560)    | 16000<br>(8000-26000)     |
| Philippines | 2010 | Female | 50 to 54 | 20%<br>(14-28%)                | 80%<br>(72-86%)          | 0.74<br>(0.43-1.2)                          | 2.5%<br>(1.2-4.5%)                   | 3.8%<br>(1.8-6.7%)                  | 450<br>(210-780)    | 18000<br>(8400-31000)     |
| Philippines | 2010 | Female | 55 to 59 | 21%<br>(14-29%)                | 79%<br>(71-86%)          | 0.92<br>(0.53-1.4)                          | 3.3%<br>(1.7-5.6%)                   | 4.7%<br>(2.4-7.9%)                  | 650<br>(330-1100)   | 22000<br>(11000-38000)    |
| Philippines | 2010 | Female | 60 to 64 | 20%<br>(13-28%)                | 80%<br>(72-87%)          | 0.88<br>(0.5-1.4)                           | 3.1%<br>(1.5-5.5%)                   | 4.2%<br>(2-7.5%)                    | 700<br>(340-1300)   | 20000<br>(9500-36000)     |
| Philippines | 2010 | Female | 65 to 69 | 18%<br>(12-25%)                | 82%<br>(75-88%)          | 0.72<br>(0.43-1.1)                          | 2.4%<br>(1-4.4%)                     | 3.2%<br>(1.4-5.8%)                  | 580<br>(260-1000)   | 14000<br>(6000-25000)     |
| Philippines | 2010 | Female | 70 to 74 | 17%<br>(11-24%)                | 83%<br>(76-89%)          | 0.61<br>(0.33-1)                            | 1.9%<br>(0.42-3.9%)                  | 2.4%<br>(0.62-5%)                   | 560<br>(140-1200)   | 10000<br>(2400-22000)     |
| Philippines | 2010 | Female | 75 to 79 | 17%<br>(11-25%)                | 83%<br>(75-89%)          | 0.59<br>(0.31-1)                            | 1.4%<br>(0.046-3.5%)                 | 1.8%<br>(0.09-4.3%)                 | 450<br>(23-1100)    | 6400<br>(190-16000)       |
| Philippines | 2010 | Female | 80 to 84 | 18%<br>(12-25%)                | 82%<br>(75-88%)          | 0.62<br>(0.34-1)                            | 1.3%<br>(0.0026-3.2%)                | 1.5%<br>(-0.023-3.7%)               | 350<br>(-5.3-890)   | 3700<br>(7.6-9400)        |
| Philippines | 2010 | Female | 85 to 89 | 20%<br>(13-28%)                | 80%<br>(72-87%)          | 0.67<br>(0.35-1.1)                          | 1.2%<br>(-0.039-2.9%)                | 1.3%<br>(-0.076-3.3%)               | 240<br>(-15-600)    | 1800<br>(-62-4500)        |

| Location    | Year | Sex    | Age      | Prevalence of current drinkers | Prevalence of abstainers | Population average of standard drinks daily | Percent of total attributable deaths | Percent of total attributable DALYs | Attributable deaths    | Attributable DALYs          |
|-------------|------|--------|----------|--------------------------------|--------------------------|---------------------------------------------|--------------------------------------|-------------------------------------|------------------------|-----------------------------|
| Philippines | 2010 | Female | 90 to 94 | 22%<br>(14-32%)                | 78%<br>(68-86%)          | 0.76<br>(0.4-1.3)                           | 1.1%<br>(-0.25-3.2%)                 | 1.2%<br>(-0.38-3.6%)                | 120<br>(-36-350)       | 620<br>(-140-1800)          |
| Philippines | 2010 | Female | 95 plus  | 26%<br>(15-39%)                | 74%<br>(61-85%)          | 0.88<br>(0.4-1.6)                           | 1.4%<br>(-0.37-4.3%)                 | 1.4%<br>(-0.5-4.7%)                 | 48<br>(-17-160)        | 180<br>(-47-550)            |
| Philippines | 2010 | Male   | All Ages | 56%<br>(50-62%)                | 44%<br>(38-50%)          | 1.9<br>(1.7-2.1)                            | 6.9%<br>(5.5-8.3%)                   | 8.5%<br>(6.6-11%)                   | 29000<br>(21000-36000) | 1100000<br>(920000-1400000) |
| Philippines | 2010 | Male   | 15 to 19 | 51%<br>(40-63%)                | 49%<br>(37-60%)          | 1.2<br>(0.74-1.8)                           | 3.6%<br>(2.3-5.2%)                   | 5.4%<br>(3.2-7.8%)                  | 330<br>(200-490)       | 29000<br>(18000-41000)      |
| Philippines | 2010 | Male   | 20 to 24 | 72%<br>(61-80%)                | 28%<br>(20-39%)          | 2.7<br>(1.9-3.7)                            | 9.2%<br>(6.5-12%)                    | 12%<br>(8.5-17%)                    | 1000<br>(690-1400)     | 78000<br>(55000-100000)     |
| Philippines | 2010 | Male   | 25 to 29 | 76%<br>(66-83%)                | 24%<br>(17-34%)          | 3<br>(2.2-4)                                | 10%<br>(7.3-13%)                     | 13%<br>(9.3-18%)                    | 1200<br>(840-1600)     | 87000<br>(62000-110000)     |
| Philippines | 2010 | Male   | 30 to 34 | 78%<br>(69-84%)                | 22%<br>(16-31%)          | 3.4<br>(2.6-4.4)                            | 11%<br>(7.9-14%)                     | 14%<br>(10-19%)                     | 1500<br>(1000-2000)    | 95000<br>(68000-120000)     |
| Philippines | 2010 | Male   | 35 to 39 | 78%<br>(69-84%)                | 22%<br>(16-31%)          | 3.8<br>(2.7-5)                              | 12%<br>(8.6-16%)                     | 16%<br>(11-21%)                     | 2000<br>(1300-2600)    | 110000<br>(77000-150000)    |
| Philippines | 2010 | Male   | 40 to 44 | 77%<br>(68-83%)                | 23%<br>(17-32%)          | 3.9<br>(2.8-5.1)                            | 13%<br>(9.3-17%)                     | 17%<br>(12-22%)                     | 2600<br>(1800-3400)    | 130000<br>(92000-170000)    |
| Philippines | 2010 | Male   | 45 to 49 | 74%<br>(62-81%)                | 26%<br>(19-38%)          | 3.8<br>(2.7-5.2)                            | 13%<br>(8.9-18%)                     | 17%<br>(11-23%)                     | 3200<br>(2100-4400)    | 140000<br>(96000-190000)    |
| Philippines | 2010 | Male   | 50 to 54 | 69%<br>(59-77%)                | 31%<br>(23-41%)          | 3.5<br>(2.4-4.9)                            | 13%<br>(8.2-18%)                     | 16%<br>(9.9-21%)                    | 3700<br>(2300-5000)    | 140000<br>(91000-190000)    |
| Philippines | 2010 | Male   | 55 to 59 | 64%<br>(52-74%)                | 36%<br>(26-48%)          | 3.2<br>(2.2-4.4)                            | 12%<br>(7.5-16%)                     | 14%<br>(8.9-20%)                    | 3900<br>(2400-5500)    | 130000<br>(82000-180000)    |
| Philippines | 2010 | Male   | 60 to 64 | 59%<br>(46-70%)                | 41%<br>(30-54%)          | 2.8<br>(1.8-4.1)                            | 9.7%<br>(5.6-15%)                    | 11%<br>(6.6-17%)                    | 3400<br>(2000-5200)    | 96000<br>(56000-140000)     |
| Philippines | 2010 | Male   | 65 to 69 | 55%<br>(41-67%)                | 45%<br>(33-59%)          | 2.1<br>(1.4-3.1)                            | 7.2%<br>(4.3-11%)                    | 8.3%<br>(4.8-13%)                   | 2400<br>(1400-3700)    | 56000<br>(34000-85000)      |
| Philippines | 2010 | Male   | 70 to 74 | 49%<br>(36-62%)                | 51%<br>(38-64%)          | 1.6<br>(1-2.5)                              | 5%<br>(2.5-8.5%)                     | 5.7%<br>(2.8-9.7%)                  | 1700<br>(850-2900)     | 32000<br>(16000-54000)      |
| Philippines | 2010 | Male   | 75 to 79 | 43%<br>(30-58%)                | 57%<br>(42-70%)          | 1.3<br>(0.76-2.1)                           | 3.3%<br>(1.2-6.3%)                   | 3.7%<br>(1.3-7.1%)                  | 990<br>(340-1900)      | 15000<br>(5000-28000)       |
| Philippines | 2010 | Male   | 80 to 84 | 39%<br>(26-53%)                | 61%<br>(47-74%)          | 1.1<br>(0.64-1.7)                           | 2.3%<br>(0.64-4.5%)                  | 2.4%<br>(0.61-5%)                   | 470<br>(120-960)       | 5200<br>(1500-11000)        |
| Philippines | 2010 | Male   | 85 to 89 | 38%<br>(25-52%)                | 62%<br>(48-75%)          | 0.95<br>(0.54-1.5)                          | 1.4%<br>(0.068-3.4%)                 | 1.5%<br>(-0.045-3.6%)               | 170<br>(-5.2-420)      | 1400<br>(66-3200)           |
| Philippines | 2010 | Male   | 90 to 94 | 39%<br>(27-54%)                | 61%<br>(46-73%)          | 0.92<br>(0.51-1.5)                          | 0.92%<br>(-0.4-2.8%)                 | 0.91%<br>(-0.56-3%)                 | 43<br>(-26-140)        | 250<br>(-110-730)           |
| Philippines | 2010 | Male   | 95 plus  | 43%<br>(26-62%)                | 57%<br>(38-74%)          | 0.92<br>(0.44-1.7)                          | 0.87%<br>(-0.93-3.2%)                | 0.76%<br>(-0.93-3.3%)               | 9.6<br>(-12-41)        | 41<br>(-31-150)             |
| Philippines | 2016 | Female | All Ages | 16%<br>(13-19%)                | 84%<br>(81-87%)          | 0.41<br>(0.3-0.58)                          | 1.4%<br>(0.78-2.2%)                  | 2.1%<br>(0.81-3.8%)                 | 5400<br>(2000-10000)   | 180000<br>(98000-300000)    |

| Location    | Year | Sex    | Age      | Prevalence of current drinkers | Prevalence of abstainers | Population average of standard drinks daily | Percent of total attributable deaths | Percent of total attributable DALYs | Attributable deaths    | Attributable DALYs       |
|-------------|------|--------|----------|--------------------------------|--------------------------|---------------------------------------------|--------------------------------------|-------------------------------------|------------------------|--------------------------|
| Philippines | 2016 | Female | 15 to 19 | 15%<br>(9.8-21%)               | 85%<br>(79-90%)          | 0.36<br>(0.19-0.61)                         | 0.88%<br>(0.52-1.4%)                 | 1.2%<br>(0.56-2.3%)                 | 38<br>(16-73)          | 5200<br>(3000-8400)      |
| Philippines | 2016 | Female | 20 to 24 | 18%<br>(12-26%)                | 82%<br>(74-88%)          | 0.49<br>(0.25-0.81)                         | 1.5%<br>(0.9-2.3%)                   | 1.7%<br>(0.7-3.1%)                  | 71<br>(27-140)         | 10000<br>(5600-16000)    |
| Philippines | 2016 | Female | 25 to 29 | 20%<br>(13-28%)                | 80%<br>(72-87%)          | 0.55<br>(0.29-0.92)                         | 1.7%<br>(1-2.6%)                     | 2.2%<br>(0.9-3.9%)                  | 99<br>(40-180)         | 11000<br>(6000-17000)    |
| Philippines | 2016 | Female | 30 to 34 | 21%<br>(14-30%)                | 79%<br>(70-86%)          | 0.61<br>(0.32-1)                            | 1.7%<br>(0.98-2.7%)                  | 2.3%<br>(1.1-4.1%)                  | 120<br>(52-220)        | 11000<br>(6000-18000)    |
| Philippines | 2016 | Female | 35 to 39 | 22%<br>(14-30%)                | 78%<br>(70-86%)          | 0.67<br>(0.36-1.1)                          | 1.9%<br>(1.1-3.2%)                   | 3%<br>(1.4-5.2%)                    | 190<br>(86-340)        | 13000<br>(7100-22000)    |
| Philippines | 2016 | Female | 40 to 44 | 21%<br>(14-29%)                | 79%<br>(71-86%)          | 0.67<br>(0.38-1.1)                          | 2%<br>(1.1-3.5%)                     | 3.3%<br>(1.7-5.7%)                  | 250<br>(120-460)       | 14000<br>(7400-24000)    |
| Philippines | 2016 | Female | 45 to 49 | 21%<br>(13-28%)                | 79%<br>(72-87%)          | 0.64<br>(0.33-1.1)                          | 2%<br>(0.96-3.6%)                    | 3.2%<br>(1.5-5.8%)                  | 330<br>(150-620)       | 16000<br>(7300-29000)    |
| Philippines | 2016 | Female | 50 to 54 | 21%<br>(14-29%)                | 79%<br>(71-86%)          | 0.72<br>(0.39-1.2)                          | 2.3%<br>(0.96-4.2%)                  | 3.5%<br>(1.5-6.5%)                  | 450<br>(190-850)       | 18000<br>(7700-34000)    |
| Philippines | 2016 | Female | 55 to 59 | 21%<br>(14-29%)                | 79%<br>(71-86%)          | 0.89<br>(0.49-1.5)                          | 2.9%<br>(1.2-5.4%)                   | 4.3%<br>(1.9-7.7%)                  | 700<br>(300-1300)      | 24000<br>(10000-46000)   |
| Philippines | 2016 | Female | 60 to 64 | 20%<br>(13-28%)                | 80%<br>(72-87%)          | 0.85<br>(0.47-1.5)                          | 2.7%<br>(0.99-5.4%)                  | 3.8%<br>(1.5-7.4%)                  | 710<br>(270-1400)      | 21000<br>(7500-40000)    |
| Philippines | 2016 | Female | 65 to 69 | 18%<br>(12-25%)                | 82%<br>(75-88%)          | 0.7<br>(0.36-1.1)                           | 2.2%<br>(0.72-4.2%)                  | 2.9%<br>(1-5.6%)                    | 650<br>(220-1300)      | 15000<br>(5000-31000)    |
| Philippines | 2016 | Female | 70 to 74 | 17%<br>(11-24%)                | 83%<br>(76-89%)          | 0.6<br>(0.3-1.1)                            | 1.7%<br>(0.27-3.9%)                  | 2.2%<br>(0.44-5%)                   | 510<br>(99-1200)       | 9700<br>(1600-24000)     |
| Philippines | 2016 | Female | 75 to 79 | 17%<br>(11-26%)                | 83%<br>(74-89%)          | 0.58<br>(0.26-1.1)                          | 1.3%<br>(-0.081-3.5%)                | 1.6%<br>(-0.078-4.3%)               | 450<br>(-20-1200)      | 6500<br>(-360-18000)     |
| Philippines | 2016 | Female | 80 to 84 | 18%<br>(12-26%)                | 82%<br>(74-88%)          | 0.6<br>(0.3-1)                              | 1.1%<br>(-0.1-3.1%)                  | 1.3%<br>(-0.12-3.7%)                | 400<br>(-37-1100)      | 4300<br>(-400-12000)     |
| Philippines | 2016 | Female | 85 to 89 | 20%<br>(13-29%)                | 80%<br>(71-87%)          | 0.66<br>(0.34-1.1)                          | 1%<br>(-0.26-2.9%)                   | 1.1%<br>(-0.33-3.3%)                | 270<br>(-78-790)       | 2000<br>(-510-5800)      |
| Philippines | 2016 | Female | 90 to 94 | 23%<br>(15-32%)                | 77%<br>(68-85%)          | 0.74<br>(0.38-1.3)                          | 0.97%<br>(-0.44-3.2%)                | 1.1%<br>(-0.56-3.6%)                | 100<br>(-56-350)       | 550<br>(-250-1800)       |
| Philippines | 2016 | Female | 95 plus  | 27%<br>(15-40%)                | 73%<br>(60-85%)          | 0.86<br>(0.4-1.6)                           | 1.2%<br>(-0.54-4%)                   | 1.3%<br>(-0.72-4.4%)                | 45<br>(-26-160)        | 170<br>(-75-560)         |
| Philippines | 2016 | Male   | All Ages | 57%<br>(51-63%)                | 43%<br>(37-49%)          | 1.9<br>(1.4-2.5)                            | 6.7%<br>(4.6-9.1%)                   | 7.9%<br>(5-11%)                     | 29000<br>(18000-43000) | 120000<br>(78000-160000) |
| Philippines | 2016 | Male   | 15 to 19 | 51%<br>(40-63%)                | 49%<br>(37-60%)          | 1.2<br>(0.64-1.8)                           | 3.3%<br>(2-5.1%)                     | 5%<br>(2.7-7.8%)                    | 300<br>(160-500)       | 26000<br>(15000-42000)   |
| Philippines | 2016 | Male   | 20 to 24 | 72%<br>(61-80%)                | 28%<br>(20-39%)          | 2.6<br>(1.6-3.8)                            | 8.6%<br>(5.7-12%)                    | 12%<br>(7.3-17%)                    | 1000<br>(630-1600)     | 81000<br>(51000-120000)  |
| Philippines | 2016 | Male   | 25 to 29 | 76%<br>(67-83%)                | 24%<br>(17-33%)          | 2.9<br>(1.9-4.2)                            | 9.6%<br>(6.5-13%)                    | 13%<br>(8.1-18%)                    | 1300<br>(780-1800)     | 90000<br>(59000-130000)  |

| Location    | Year | Sex    | Age      | Prevalence of current drinkers | Prevalence of abstainers | Population average of standard drinks daily | Percent of total attributable deaths | Percent of total attributable DALYs | Attributable deaths | Attributable DALYs       |
|-------------|------|--------|----------|--------------------------------|--------------------------|---------------------------------------------|--------------------------------------|-------------------------------------|---------------------|--------------------------|
| Philippines | 2016 | Male   | 30 to 34 | 78%<br>(69-84%)                | 22%<br>(16-31%)          | 3.3<br>(2.2-4.6)                            | 10%<br>(6.8-14%)                     | 14%<br>(8.6-19%)                    | 1400<br>(860-2100)  | 92000<br>(59000-130000)  |
| Philippines | 2016 | Male   | 35 to 39 | 78%<br>(69-84%)                | 22%<br>(16-31%)          | 3.6<br>(2.5-5.2)                            | 11%<br>(7.4-16%)                     | 15%<br>(9.4-21%)                    | 1900<br>(1100-2900) | 110000<br>(69000-160000) |
| Philippines | 2016 | Male   | 40 to 44 | 77%<br>(68-83%)                | 23%<br>(17-32%)          | 3.7<br>(2.5-5.3)                            | 12%<br>(7.9-17%)                     | 16%<br>(10-22%)                     | 2400<br>(1500-3600) | 120000<br>(77000-180000) |
| Philippines | 2016 | Male   | 45 to 49 | 74%<br>(63-81%)                | 26%<br>(19-37%)          | 3.7<br>(2.4-5.3)                            | 12%<br>(7.4-18%)                     | 15%<br>(9.3-22%)                    | 3200<br>(1900-4700) | 140000<br>(84000-210000) |
| Philippines | 2016 | Male   | 50 to 54 | 70%<br>(60-77%)                | 30%<br>(23-40%)          | 3.4<br>(2.2-5.1)                            | 12%<br>(6.8-17%)                     | 14%<br>(8.3-21%)                    | 3700<br>(2100-5600) | 140000<br>(82000-210000) |
| Philippines | 2016 | Male   | 55 to 59 | 64%<br>(52-75%)                | 36%<br>(25-48%)          | 3.1<br>(2-4.7)                              | 11%<br>(6.2-16%)                     | 13%<br>(7.3-20%)                    | 4100<br>(2300-6500) | 140000<br>(77000-210000) |
| Philippines | 2016 | Male   | 60 to 64 | 59%<br>(47-71%)                | 41%<br>(29-53%)          | 2.7<br>(1.6-4.1)                            | 8.9%<br>(4.7-14%)                    | 10%<br>(5.6-17%)                    | 3700<br>(1900-6200) | 110000<br>(55000-170000) |
| Philippines | 2016 | Male   | 65 to 69 | 56%<br>(42-67%)                | 44%<br>(33-58%)          | 2.1<br>(1.2-3.1)                            | 6.5%<br>(3.2-11%)                    | 7.5%<br>(3.6-12%)                   | 2800<br>(1300-4600) | 65000<br>(31000-110000)  |
| Philippines | 2016 | Male   | 70 to 74 | 50%<br>(37-62%)                | 50%<br>(38-63%)          | 1.6<br>(0.9-2.5)                            | 4.5%<br>(1.8-8.2%)                   | 5.1%<br>(2-9.4%)                    | 1600<br>(570-3000)  | 31000<br>(11000-57000)   |
| Philippines | 2016 | Male   | 75 to 79 | 43%<br>(30-58%)                | 57%<br>(42-70%)          | 1.3<br>(0.68-2.2)                           | 2.9%<br>(0.65-6.3%)                  | 3.2%<br>(0.65-7%)                   | 980<br>(190-2200)   | 15000<br>(3300-32000)    |
| Philippines | 2016 | Male   | 80 to 84 | 39%<br>(26-53%)                | 61%<br>(47-74%)          | 1<br>(0.56-1.7)                             | 2%<br>(0.33-4.4%)                    | 2.1%<br>(0.24-4.9%)                 | 540<br>(54-1300)    | 6000<br>(1000-14000)     |
| Philippines | 2016 | Male   | 85 to 89 | 38%<br>(25-52%)                | 62%<br>(48-75%)          | 0.91<br>(0.48-1.5)                          | 1.2%<br>(-0.17-3.2%)                 | 1.3%<br>(-0.28-3.5%)                | 210<br>(-46-590)    | 1700<br>(-230-4500)      |
| Philippines | 2016 | Male   | 90 to 94 | 40%<br>(27-53%)                | 60%<br>(47-73%)          | 0.89<br>(0.49-1.5)                          | 0.78%<br>(-0.63-2.8%)                | 0.74%<br>(-0.85-3.1%)               | 37<br>(-42-150)     | 220<br>(-180-770)        |
| Philippines | 2016 | Male   | 95 plus  | 44%<br>(26-62%)                | 56%<br>(38-74%)          | 0.89<br>(0.42-1.7)                          | 0.74%<br>(-0.72-3%)                  | 0.61%<br>(-1-3%)                    | 8.1<br>(-14-40)     | 37<br>(-36-150)          |
| Sri Lanka   | 1990 | Female | All Ages | 5%<br>(4.2-6%)                 | 95%<br>(94-96%)          | 0.11<br>(0.08-0.13)                         | 0.51%<br>(0.38-0.67%)                | 0.56%<br>(0.27-0.91%)               | 210<br>(100-340)    | 11000<br>(7800-14000)    |
| Sri Lanka   | 1990 | Female | 15 to 19 | 4.5%<br>(2.9-6.7%)             | 95%<br>(93-97%)          | 0.088<br>(0.046-0.15)                       | 0.5%<br>(0.29-0.8%)                  | 0.47%<br>(0.13-1%)                  | 3.9<br>(1-8.6)      | 630<br>(350-1000)        |
| Sri Lanka   | 1990 | Female | 20 to 24 | 5.7%<br>(3.4-8.4%)             | 94%<br>(92-97%)          | 0.12<br>(0.06-0.21)                         | 0.9%<br>(0.55-1.3%)                  | 0.65%<br>(0.17-1.4%)                | 6.3<br>(1.6-14)     | 1200<br>(710-1800)       |
| Sri Lanka   | 1990 | Female | 25 to 29 | 6.2%<br>(3.7-9.4%)             | 94%<br>(91-96%)          | 0.14<br>(0.075-0.24)                        | 0.98%<br>(0.63-1.4%)                 | 0.76%<br>(0.32-1.5%)                | 6.6<br>(2.7-13)     | 1200<br>(740-1700)       |
| Sri Lanka   | 1990 | Female | 30 to 34 | 6.6%<br>(3.9-10%)              | 93%<br>(90-96%)          | 0.15<br>(0.083-0.26)                        | 0.99%<br>(0.69-1.3%)                 | 0.97%<br>(0.56-1.6%)                | 8.5<br>(4.9-14)     | 1200<br>(770-1600)       |
| Sri Lanka   | 1990 | Female | 35 to 39 | 6.9%<br>(3.9-10%)              | 93%<br>(90-96%)          | 0.16<br>(0.079-0.27)                        | 0.93%<br>(0.66-1.3%)                 | 1.1%<br>(0.69-1.7%)                 | 9.1<br>(5.7-14)     | 950<br>(660-1300)        |
| Sri Lanka   | 1990 | Female | 40 to 44 | 6.8%<br>(4.1-10%)              | 93%<br>(90-96%)          | 0.16<br>(0.085-0.29)                        | 0.91%<br>(0.64-1.2%)                 | 1.3%<br>(0.86-1.9%)                 | 12<br>(7.5-17)      | 900<br>(630-1200)        |
| Sri Lanka   | 1990 | Female | 45 to 49 | 6.7%<br>(3.8-9.9%)             | 93%<br>(90-96%)          | 0.18<br>(0.091-0.32)                        | 0.95%<br>(0.65-1.4%)                 | 1.4%<br>(0.9-2.2%)                  | 15<br>(9.1-23)      | 890<br>(610-1300)        |

| Location  | Year | Sex    | Age      | Prevalence of current drinkers | Prevalence of abstainers | Population average of standard drinks daily | Percent of total attributable deaths | Percent of total attributable DALYs | Attributable deaths | Attributable DALYs     |
|-----------|------|--------|----------|--------------------------------|--------------------------|---------------------------------------------|--------------------------------------|-------------------------------------|---------------------|------------------------|
| Sri Lanka | 1990 | Female | 50 to 54 | 6.8%<br>(4.2-10%)              | 93%<br>(90-96%)          | 0.21<br>(0.11-0.36)                         | 0.93%<br>(0.62-1.4%)                 | 1.4%<br>(0.84-2.2%)                 | 18<br>(11-28)       | 860<br>(570-1300)      |
| Sri Lanka | 1990 | Female | 55 to 59 | 6.9%<br>(4.3-10%)              | 93%<br>(90-96%)          | 0.23<br>(0.12-0.4)                          | 0.87%<br>(0.51-1.4%)                 | 1.3%<br>(0.7-2.1%)                  | 20<br>(11-34)       | 790<br>(460-1300)      |
| Sri Lanka | 1990 | Female | 60 to 64 | 6.7%<br>(4-10%)                | 93%<br>(90-96%)          | 0.23<br>(0.12-0.4)                          | 0.75%<br>(0.36-1.3%)                 | 1.1%<br>(0.47-1.8%)                 | 22<br>(10-39)       | 710<br>(350-1200)      |
| Sri Lanka | 1990 | Female | 65 to 69 | 6.1%<br>(3.7-9%)               | 94%<br>(91-96%)          | 0.21<br>(0.11-0.35)                         | 0.6%<br>(0.25-1.1%)                  | 0.81%<br>(0.32-1.4%)                | 23<br>(9-41)        | 590<br>(250-1000)      |
| Sri Lanka | 1990 | Female | 70 to 74 | 5.9%<br>(3.8-8.9%)             | 94%<br>(91-96%)          | 0.2<br>(0.1-0.34)                           | 0.52%<br>(0.16-1%)                   | 0.67%<br>(0.19-1.3%)                | 23<br>(6.2-45)      | 460<br>(140-900)       |
| Sri Lanka | 1990 | Female | 75 to 79 | 6.3%<br>(3.8-9.5%)             | 94%<br>(90-96%)          | 0.2<br>(0.097-0.37)                         | 0.38%<br>(0.0096-0.86%)              | 0.46%<br>(-0.017-1.1%)              | 17<br>(-0.64-41)    | 270<br>(6.8-620)       |
| Sri Lanka | 1990 | Female | 80 to 84 | 6.7%<br>(4-9.6%)               | 93%<br>(90-96%)          | 0.21<br>(0.11-0.37)                         | 0.31%<br>(-0.04-0.79%)               | 0.35%<br>(-0.074-0.92%)             | 14<br>(-3-37)       | 160<br>(-20-410)       |
| Sri Lanka | 1990 | Female | 85 to 89 | 7.5%<br>(4.4-12%)              | 93%<br>(88-96%)          | 0.23<br>(0.11-0.4)                          | 0.24%<br>(-0.11-0.71%)               | 0.25%<br>(-0.15-0.8%)               | 9.3<br>(-5.3-30)    | 76<br>(-34-240)        |
| Sri Lanka | 1990 | Female | 90 to 94 | 8.6%<br>(5.1-13%)              | 91%<br>(87-95%)          | 0.25<br>(0.12-0.46)                         | 0.17%<br>(-0.2-0.71%)                | 0.16%<br>(-0.27-0.79%)              | 2.7<br>(-4.6-13)    | 17<br>(-21-72)         |
| Sri Lanka | 1990 | Female | 95 plus  | 10%<br>(5.2-17%)               | 90%<br>(83-95%)          | 0.28<br>(0.12-0.57)                         | 0.15%<br>(-0.32-0.89%)               | 0.11%<br>(-0.42-0.93%)              | 0.56<br>(-2.2-4.7)  | 3<br>(-6.2-18)         |
| Sri Lanka | 1990 | Male   | All Ages | 33%<br>(28-39%)                | 67%<br>(61-72%)          | 0.48<br>(0.38-0.58)                         | 2%<br>(1.3-2.8%)                     | 2%<br>(1.1-2.9%)                    | 1300<br>(660-1900)  | 63000<br>(38000-87000) |
| Sri Lanka | 1990 | Male   | 15 to 19 | 26%<br>(16-37%)                | 74%<br>(63-84%)          | 0.19<br>(0.095-0.33)                        | 1%<br>(0.39-2%)                      | 1.1%<br>(0.15-2.5%)                 | 19<br>(2.5-43)      | 1900<br>(710-3700)     |
| Sri Lanka | 1990 | Male   | 20 to 24 | 39%<br>(25-53%)                | 61%<br>(47-75%)          | 0.46<br>(0.27-0.73)                         | 2.5%<br>(0.99-4.6%)                  | 2.6%<br>(0.62-5.3%)                 | 79<br>(19-160)      | 6500<br>(2500-12000)   |
| Sri Lanka | 1990 | Male   | 25 to 29 | 46%<br>(31-60%)                | 54%<br>(40-69%)          | 0.66<br>(0.39-0.98)                         | 3.4%<br>(1.6-5.4%)                   | 3.8%<br>(1.4-6.5%)                  | 100<br>(38-180)     | 7800<br>(3700-12000)   |
| Sri Lanka | 1990 | Male   | 30 to 34 | 51%<br>(34-66%)                | 49%<br>(34-66%)          | 0.85<br>(0.52-1.2)                          | 4.1%<br>(2.3-6.2%)                   | 4.7%<br>(2.3-7.8%)                  | 120<br>(59-200)     | 8300<br>(4600-12000)   |
| Sri Lanka | 1990 | Male   | 35 to 39 | 54%<br>(39-68%)                | 46%<br>(32-61%)          | 1<br>(0.64-1.5)                             | 4.7%<br>(3-6.9%)                     | 5.8%<br>(3.4-8.5%)                  | 130<br>(78-200)     | 8000<br>(5100-12000)   |
| Sri Lanka | 1990 | Male   | 40 to 44 | 55%<br>(41-70%)                | 45%<br>(30-59%)          | 1.1<br>(0.69-1.6)                           | 4.8%<br>(3-6.6%)                     | 5.9%<br>(3.5-8.6%)                  | 140<br>(83-210)     | 7700<br>(4800-11000)   |
| Sri Lanka | 1990 | Male   | 45 to 49 | 54%<br>(37-68%)                | 46%<br>(32-63%)          | 1.1<br>(0.64-1.6)                           | 4.5%<br>(2.7-6.5%)                   | 5.6%<br>(3.2-8.1%)                  | 140<br>(82-220)     | 6700<br>(4100-9700)    |
| Sri Lanka | 1990 | Male   | 50 to 54 | 52%<br>(37-67%)                | 48%<br>(33-63%)          | 1<br>(0.58-1.5)                             | 3.6%<br>(2-5.4%)                     | 4.4%<br>(2.2-6.8%)                  | 130<br>(63-200)     | 5300<br>(2900-8000)    |
| Sri Lanka | 1990 | Male   | 55 to 59 | 50%<br>(35-65%)                | 50%<br>(35-65%)          | 0.87<br>(0.5-1.4)                           | 2.6%<br>(1.2-4.1%)                   | 3.2%<br>(1.3-5.2%)                  | 110<br>(43-180)     | 3900<br>(1800-6200)    |
| Sri Lanka | 1990 | Male   | 60 to 64 | 46%<br>(31-63%)                | 54%<br>(37-69%)          | 0.74<br>(0.4-1.2)                           | 1.9%<br>(0.68-3.1%)                  | 2.2%<br>(0.52-3.8%)                 | 90<br>(21-160)      | 2800<br>(1000-4700)    |
| Sri Lanka | 1990 | Male   | 65 to 69 | 41%<br>(27-55%)                | 59%<br>(45-73%)          | 0.6<br>(0.33-0.95)                          | 1.4%<br>(0.42-2.3%)                  | 1.5%<br>(0.34-2.7%)                 | 76<br>(17-130)      | 2000<br>(610-3300)     |

| Location  | Year | Sex    | Age      | Prevalence of current drinkers | Prevalence of abstainers | Population average of standard drinks daily | Percent of total attributable deaths | Percent of total attributable DALYs | Attributable deaths | Attributable DALYs    |
|-----------|------|--------|----------|--------------------------------|--------------------------|---------------------------------------------|--------------------------------------|-------------------------------------|---------------------|-----------------------|
| Sri Lanka | 1990 | Male   | 70 to 74 | 36%<br>(24-50%)                | 64%<br>(50-76%)          | 0.49<br>(0.26-0.8)                          | 0.98%<br>(0.21-1.9%)                 | 1.1%<br>(0.12-2.2%)                 | 59<br>(6.5-120)     | 1200<br>(260-2400)    |
| Sri Lanka | 1990 | Male   | 75 to 79 | 33%<br>(20-49%)                | 67%<br>(51-80%)          | 0.43<br>(0.23-0.75)                         | 0.51%<br>(-0.17-1.2%)                | 0.49%<br>(-0.32-1.4%)               | 27<br>(-17-75)      | 480<br>(-150-1200)    |
| Sri Lanka | 1990 | Male   | 80 to 84 | 29%<br>(17-44%)                | 71%<br>(56-83%)          | 0.38<br>(0.2-0.63)                          | 0.32%<br>(-0.26-0.95%)               | 0.29%<br>(-0.41-1%)                 | 16<br>(-22-54)      | 220<br>(-180-630)     |
| Sri Lanka | 1990 | Male   | 85 to 89 | 27%<br>(16-40%)                | 73%<br>(60-84%)          | 0.32<br>(0.17-0.57)                         | 0.14%<br>(-0.42-0.62%)               | 0.086%<br>(-0.57-0.64%)             | 3.6<br>(-24-27)     | 50<br>(-150-220)      |
| Sri Lanka | 1990 | Male   | 90 to 94 | 27%<br>(17-39%)                | 73%<br>(61-83%)          | 0.3<br>(0.15-0.54)                          | 0.0016%<br>(-0.51-0.46%)             | -0.078%<br>(-0.7-0.46%)             | -1.2<br>(-11-7.4)   | 0.16<br>(-48-44)      |
| Sri Lanka | 1990 | Male   | 95 plus  | 28%<br>(16-44%)                | 72%<br>(56-84%)          | 0.3<br>(0.13-0.58)                          | -0.066%<br>(-0.68-0.42%)             | -0.2%<br>(-0.93-0.36%)              | -0.73<br>(-3.3-1.3) | -0.9<br>(-9.4-5.8)    |
| Sri Lanka | 1995 | Female | All Ages | 5.4%<br>(4.6-6.4%)             | 95%<br>(94-95%)          | 0.11<br>(0.085-0.15)                        | 0.59%<br>(0.43-0.78%)                | 0.6%<br>(0.29-0.99%)                | 250<br>(120-410)    | 13000<br>(8900-17000) |
| Sri Lanka | 1995 | Female | 15 to 19 | 4.8%<br>(3-7.2%)               | 95%<br>(93-97%)          | 0.091<br>(0.046-0.16)                       | 0.52%<br>(0.29-0.86%)                | 0.51%<br>(0.13-1.1%)                | 4.9<br>(1.3-11)     | 730<br>(400-1200)     |
| Sri Lanka | 1995 | Female | 20 to 24 | 6%<br>(3.6-9%)                 | 94%<br>(91-96%)          | 0.12<br>(0.062-0.22)                        | 0.92%<br>(0.57-1.4%)                 | 0.7%<br>(0.19-1.5%)                 | 7<br>(1.9-15)       | 1300<br>(730-2000)    |
| Sri Lanka | 1995 | Female | 25 to 29 | 6.5%<br>(3.9-10%)              | 93%<br>(90-96%)          | 0.14<br>(0.076-0.25)                        | 0.99%<br>(0.68-1.4%)                 | 0.79%<br>(0.32-1.5%)                | 7.3<br>(2.9-14)     | 1300<br>(810-1800)    |
| Sri Lanka | 1995 | Female | 30 to 34 | 6.9%<br>(4-11%)                | 93%<br>(89-96%)          | 0.15<br>(0.082-0.27)                        | 1%<br>(0.69-1.4%)                    | 1%<br>(0.58-1.7%)                   | 9.1<br>(5.2-15)     | 1200<br>(820-1700)    |
| Sri Lanka | 1995 | Female | 35 to 39 | 7.2%<br>(4.2-11%)              | 93%<br>(89-96%)          | 0.16<br>(0.081-0.27)                        | 0.95%<br>(0.7-1.3%)                  | 1.1%<br>(0.71-1.8%)                 | 11<br>(6.9-18)      | 1200<br>(820-1600)    |
| Sri Lanka | 1995 | Female | 40 to 44 | 7.2%<br>(4.4-10%)              | 93%<br>(90-96%)          | 0.17<br>(0.086-0.28)                        | 0.94%<br>(0.67-1.3%)                 | 1.4%<br>(0.9-2%)                    | 14<br>(9.2-20)      | 1100<br>(740-1400)    |
| Sri Lanka | 1995 | Female | 45 to 49 | 7%<br>(4-10%)                  | 93%<br>(90-96%)          | 0.19<br>(0.092-0.33)                        | 1%<br>(0.72-1.5%)                    | 1.5%<br>(0.98-2.3%)                 | 21<br>(14-31)       | 1200<br>(830-1700)    |
| Sri Lanka | 1995 | Female | 50 to 54 | 7.1%<br>(4.5-11%)              | 93%<br>(89-95%)          | 0.21<br>(0.11-0.37)                         | 1%<br>(0.66-1.5%)                    | 1.5%<br>(0.91-2.2%)                 | 24<br>(15-37)       | 1100<br>(730-1600)    |
| Sri Lanka | 1995 | Female | 55 to 59 | 7.2%<br>(4.5-11%)              | 93%<br>(89-95%)          | 0.23<br>(0.12-0.42)                         | 0.9%<br>(0.51-1.5%)                  | 1.3%<br>(0.72-2.2%)                 | 25<br>(14-41)       | 970<br>(560-1500)     |
| Sri Lanka | 1995 | Female | 60 to 64 | 6.9%<br>(4.1-10%)              | 93%<br>(90-96%)          | 0.23<br>(0.11-0.4)                          | 0.75%<br>(0.34-1.3%)                 | 1%<br>(0.46-1.8%)                   | 27<br>(12-48)       | 860<br>(390-1500)     |
| Sri Lanka | 1995 | Female | 65 to 69 | 6.4%<br>(3.8-9.4%)             | 94%<br>(91-96%)          | 0.21<br>(0.11-0.35)                         | 0.6%<br>(0.25-1.1%)                  | 0.79%<br>(0.31-1.5%)                | 29<br>(11-54)       | 740<br>(310-1300)     |
| Sri Lanka | 1995 | Female | 70 to 74 | 6.2%<br>(3.9-9.3%)             | 94%<br>(91-96%)          | 0.2<br>(0.1-0.35)                           | 0.5%<br>(0.13-1%)                    | 0.62%<br>(0.13-1.3%)                | 29<br>(6.7-59)      | 580<br>(150-1200)     |
| Sri Lanka | 1995 | Female | 75 to 79 | 6.6%<br>(4-9.9%)               | 93%<br>(90-96%)          | 0.21<br>(0.1-0.37)                          | 0.36%<br>(-0.038-0.87%)              | 0.43%<br>(-0.066-1.1%)              | 19<br>(-2.8-46)     | 300<br>(-30-710)      |
| Sri Lanka | 1995 | Female | 80 to 84 | 7.1%<br>(4.3-10%)              | 93%<br>(90-96%)          | 0.22<br>(0.11-0.38)                         | 0.25%<br>(-0.11-0.77%)               | 0.28%<br>(-0.17-0.9%)               | 12<br>(-7.1-37)     | 140<br>(-64-420)      |
| Sri Lanka | 1995 | Female | 85 to 89 | 7.9%<br>(4.6-12%)              | 92%<br>(88-95%)          | 0.23<br>(0.12-0.4)                          | 0.17%<br>(-0.18-0.65%)               | 0.17%<br>(-0.25-0.71%)              | 6.3<br>(-9.7-28)    | 58<br>(-64-220)       |



| Location  | Year | Sex    | Age      | Prevalence of current drinkers | Prevalence of abstainers | Population average of standard drinks daily | Percent of total attributable deaths | Percent of total attributable DALYs | Attributable deaths | Attributable DALYs      |
|-----------|------|--------|----------|--------------------------------|--------------------------|---------------------------------------------|--------------------------------------|-------------------------------------|---------------------|-------------------------|
| Sri Lanka | 1995 | Female | 90 to 94 | 9%<br>(5.4-14%)                | 91%<br>(86-95%)          | 0.25<br>(0.12-0.46)                         | 0.1%<br>(-0.27-0.58%)                | 0.071%<br>(-0.39-0.65%)             | 1.4<br>(-7.4-12)    | 12<br>(-33-69)          |
| Sri Lanka | 1995 | Female | 95 plus  | 11%<br>(5.8-18%)               | 89%<br>(82-94%)          | 0.29<br>(0.12-0.58)                         | 0.086%<br>(-0.4-0.79%)               | 0.018%<br>(-0.57-0.86%)             | 0.11<br>(-3.5-5.2)  | 2.1<br>(-9.8-20)        |
| Sri Lanka | 1995 | Male   | All Ages | 35%<br>(30-42%)                | 65%<br>(58-70%)          | 0.5<br>(0.39-0.61)                          | 2.6%<br>(1.7-3.6%)                   | 2.5%<br>(1.4-3.6%)                  | 1700<br>(990-2500)  | 83000<br>(54000-110000) |
| Sri Lanka | 1995 | Male   | 15 to 19 | 27%<br>(17-39%)                | 73%<br>(61-83%)          | 0.19<br>(0.096-0.33)                        | 1%<br>(0.4-2%)                       | 1.1%<br>(0.19-2.5%)                 | 21<br>(3.7-46)      | 2000<br>(760-3800)      |
| Sri Lanka | 1995 | Male   | 20 to 24 | 40%<br>(27-55%)                | 60%<br>(45-73%)          | 0.46<br>(0.27-0.74)                         | 2.6%<br>(1-4.8%)                     | 2.8%<br>(0.74-5.5%)                 | 91<br>(25-180)      | 7300<br>(2800-13000)    |
| Sri Lanka | 1995 | Male   | 25 to 29 | 47%<br>(32-62%)                | 53%<br>(38-68%)          | 0.65<br>(0.39-0.98)                         | 3.7%<br>(1.8-5.9%)                   | 4%<br>(1.6-6.9%)                    | 130<br>(50-220)     | 9400<br>(4600-15000)    |
| Sri Lanka | 1995 | Male   | 30 to 34 | 52%<br>(35-67%)                | 48%<br>(33-65%)          | 0.85<br>(0.53-1.3)                          | 4.5%<br>(2.7-6.8%)                   | 5.3%<br>(2.8-8.4%)                  | 150<br>(79-240)     | 9900<br>(5800-15000)    |
| Sri Lanka | 1995 | Male   | 35 to 39 | 56%<br>(40-70%)                | 44%<br>(30-60%)          | 1<br>(0.64-1.5)                             | 5.5%<br>(3.6-7.8%)                   | 6.8%<br>(4.2-9.8%)                  | 200<br>(120-290)    | 12000<br>(7500-16000)   |
| Sri Lanka | 1995 | Male   | 40 to 44 | 57%<br>(42-70%)                | 43%<br>(30-58%)          | 1.1<br>(0.68-1.6)                           | 5.6%<br>(3.7-7.6%)                   | 7%<br>(4.4-9.7%)                    | 200<br>(130-290)    | 11000<br>(6900-14000)   |
| Sri Lanka | 1995 | Male   | 45 to 49 | 55%<br>(38-69%)                | 45%<br>(31-62%)          | 1.1<br>(0.66-1.6)                           | 5.4%<br>(3.3-7.6%)                   | 6.7%<br>(3.8-9.5%)                  | 230<br>(130-340)    | 11000<br>(6400-15000)   |
| Sri Lanka | 1995 | Male   | 50 to 54 | 53%<br>(38-68%)                | 47%<br>(32-62%)          | 0.99<br>(0.58-1.5)                          | 4.3%<br>(2.4-6.2%)                   | 5.2%<br>(2.7-7.7%)                  | 190<br>(98-290)     | 7700<br>(4100-11000)    |
| Sri Lanka | 1995 | Male   | 55 to 59 | 51%<br>(35-67%)                | 49%<br>(33-65%)          | 0.87<br>(0.49-1.4)                          | 3.1%<br>(1.5-4.7%)                   | 3.7%<br>(1.7-5.7%)                  | 150<br>(68-240)     | 5300<br>(2700-8100)     |
| Sri Lanka | 1995 | Male   | 60 to 64 | 48%<br>(32-63%)                | 52%<br>(37-68%)          | 0.74<br>(0.4-1.2)                           | 2.1%<br>(0.83-3.4%)                  | 2.5%<br>(0.78-4.1%)                 | 120<br>(39-210)     | 3600<br>(1400-6000)     |
| Sri Lanka | 1995 | Male   | 65 to 69 | 42%<br>(28-57%)                | 58%<br>(43-72%)          | 0.6<br>(0.33-0.96)                          | 1.5%<br>(0.52-2.5%)                  | 1.7%<br>(0.48-3%)                   | 100<br>(29-180)     | 2600<br>(900-4300)      |
| Sri Lanka | 1995 | Male   | 70 to 74 | 37%<br>(24-51%)                | 63%<br>(49-76%)          | 0.49<br>(0.26-0.8)                          | 1.1%<br>(0.26-1.9%)                  | 1.2%<br>(0.22-2.2%)                 | 79<br>(14-150)      | 1600<br>(390-3000)      |
| Sri Lanka | 1995 | Male   | 75 to 79 | 34%<br>(21-50%)                | 66%<br>(50-79%)          | 0.44<br>(0.23-0.76)                         | 0.52%<br>(-0.11-1.3%)                | 0.51%<br>(-0.26-1.4%)               | 29<br>(-14-77)      | 520<br>(-110-1200)      |
| Sri Lanka | 1995 | Male   | 80 to 84 | 30%<br>(18-45%)                | 70%<br>(55-82%)          | 0.38<br>(0.2-0.63)                          | 0.33%<br>(-0.24-0.91%)               | 0.3%<br>(-0.42-0.99%)               | 15<br>(-21-50)      | 220<br>(-160-590)       |
| Sri Lanka | 1995 | Male   | 85 to 89 | 28%<br>(17-41%)                | 72%<br>(59-83%)          | 0.33<br>(0.17-0.56)                         | 0.15%<br>(-0.38-0.61%)               | 0.082%<br>(-0.56-0.62%)             | 3.1<br>(-21-24)     | 51<br>(-130-210)        |
| Sri Lanka | 1995 | Male   | 90 to 94 | 28%<br>(17-41%)                | 72%<br>(59-83%)          | 0.31<br>(0.15-0.56)                         | 0.014%<br>(-0.49-0.42%)              | -0.089%<br>(-0.71-0.4%)             | -1.5<br>(-12-6.7)   | 1.4<br>(-50-44)         |
| Sri Lanka | 1995 | Male   | 95 plus  | 30%<br>(17-46%)                | 70%<br>(54-83%)          | 0.31<br>(0.13-0.59)                         | -0.00028%<br>(-0.58-0.43%)           | -0.18%<br>(-0.9-0.35%)              | -0.72<br>(-3.7-1.5) | 0.0039<br>(-9.6-7.1)    |
| Sri Lanka | 2000 | Female | All Ages | 5%<br>(4.3-5.9%)               | 95%<br>(94-96%)          | 0.14<br>(0.1-0.18)                          | 0.74%<br>(0.54-1%)                   | 0.87%<br>(0.45-1.4%)                | 380<br>(190-620)    | 16000<br>(11000-22000)  |
| Sri Lanka | 2000 | Female | 15 to 19 | 4.5%<br>(2.9-6.7%)             | 95%<br>(93-97%)          | 0.11<br>(0.057-0.2)                         | 0.6%<br>(0.35-1%)                    | 0.65%<br>(0.2-1.4%)                 | 5.6<br>(1.7-12)     | 790<br>(440-1300)       |

| Location  | Year | Sex    | Age      | Prevalence of current drinkers | Prevalence of abstainers | Population average of standard drinks daily | Percent of total attributable deaths | Percent of total attributable DALYs | Attributable deaths | Attributable DALYs       |
|-----------|------|--------|----------|--------------------------------|--------------------------|---------------------------------------------|--------------------------------------|-------------------------------------|---------------------|--------------------------|
| Sri Lanka | 2000 | Female | 20 to 24 | 5.6%<br>(3.5-8.1%)             | 94%<br>(92-97%)          | 0.15<br>(0.073-0.25)                        | 1%<br>(0.66-1.6%)                    | 0.86%<br>(0.28-1.8%)                | 7.6<br>(2.5-16)     | 1300<br>(800-2100)       |
| Sri Lanka | 2000 | Female | 25 to 29 | 6.3%<br>(3.9-9.3%)             | 94%<br>(91-96%)          | 0.18<br>(0.092-0.3)                         | 1.1%<br>(0.76-1.6%)                  | 0.99%<br>(0.42-1.9%)                | 7.3<br>(3.1-14)     | 1200<br>(800-1800)       |
| Sri Lanka | 2000 | Female | 30 to 34 | 6.4%<br>(4-9.7%)               | 94%<br>(90-96%)          | 0.18<br>(0.097-0.33)                        | 1.1%<br>(0.76-1.6%)                  | 1.2%<br>(0.7-2%)                    | 9.4<br>(5.3-17)     | 1300<br>(840-1800)       |
| Sri Lanka | 2000 | Female | 35 to 39 | 6.2%<br>(3.7-9%)               | 94%<br>(91-96%)          | 0.17<br>(0.091-0.3)                         | 1%<br>(0.73-1.4%)                    | 1.3%<br>(0.82-2.1%)                 | 12<br>(7.3-19)      | 1200<br>(850-1700)       |
| Sri Lanka | 2000 | Female | 40 to 44 | 6.1%<br>(3.9-8.7%)             | 94%<br>(91-96%)          | 0.18<br>(0.096-0.3)                         | 1%<br>(0.72-1.4%)                    | 1.5%<br>(1-2.2%)                    | 16<br>(11-23)       | 1300<br>(900-1700)       |
| Sri Lanka | 2000 | Female | 45 to 49 | 6%<br>(3.6-8.6%)               | 94%<br>(91-96%)          | 0.2<br>(0.1-0.35)                           | 1.1%<br>(0.75-1.6%)                  | 1.7%<br>(1.1-2.5%)                  | 24<br>(16-35)       | 1400<br>(940-1900)       |
| Sri Lanka | 2000 | Female | 50 to 54 | 5.8%<br>(3.8-8.5%)             | 94%<br>(91-96%)          | 0.22<br>(0.11-0.37)                         | 1.1%<br>(0.72-1.6%)                  | 1.6%<br>(1-2.5%)                    | 32<br>(20-50)       | 1500<br>(1000-2200)      |
| Sri Lanka | 2000 | Female | 55 to 59 | 6.2%<br>(3.9-8.9%)             | 94%<br>(91-96%)          | 0.25<br>(0.13-0.44)                         | 1.1%<br>(0.63-1.7%)                  | 1.6%<br>(0.92-2.6%)                 | 34<br>(19-55)       | 1300<br>(790-2200)       |
| Sri Lanka | 2000 | Female | 60 to 64 | 6.2%<br>(3.9-9.3%)             | 94%<br>(91-96%)          | 0.27<br>(0.13-0.47)                         | 0.96%<br>(0.46-1.7%)                 | 1.3%<br>(0.65-2.3%)                 | 38<br>(18-67)       | 1200<br>(590-2100)       |
| Sri Lanka | 2000 | Female | 65 to 69 | 5.9%<br>(3.7-8.5%)             | 94%<br>(92-96%)          | 0.25<br>(0.13-0.41)                         | 0.84%<br>(0.39-1.5%)                 | 1.1%<br>(0.51-2%)                   | 44<br>(21-80)       | 1100<br>(530-2000)       |
| Sri Lanka | 2000 | Female | 70 to 74 | 6%<br>(3.9-8.7%)               | 94%<br>(91-96%)          | 0.25<br>(0.12-0.44)                         | 0.75%<br>(0.26-1.4%)                 | 0.94%<br>(0.31-1.9%)                | 50<br>(16-99)       | 980<br>(320-1900)        |
| Sri Lanka | 2000 | Female | 75 to 79 | 6.4%<br>(3.9-9.7%)             | 94%<br>(90-96%)          | 0.26<br>(0.12-0.47)                         | 0.59%<br>(0.089-1.3%)                | 0.72%<br>(0.074-1.6%)               | 36<br>(3.8-82)      | 570<br>(80-1300)         |
| Sri Lanka | 2000 | Female | 80 to 84 | 6.8%<br>(4.2-9.9%)             | 93%<br>(90-96%)          | 0.27<br>(0.13-0.46)                         | 0.5%<br>(0.025-1.2%)                 | 0.58%<br>(0.0084-1.4%)              | 30<br>(0.45-74)     | 340<br>(17-820)          |
| Sri Lanka | 2000 | Female | 85 to 89 | 7.7%<br>(4.4-12%)              | 92%<br>(88-96%)          | 0.29<br>(0.14-0.5)                          | 0.42%<br>(-0.0014-1.1%)              | 0.48%<br>(-0.032-1.3%)              | 18<br>(-1.2-47)     | 150<br>(-0.52-390)       |
| Sri Lanka | 2000 | Female | 90 to 94 | 8.8%<br>(5.3-14%)              | 91%<br>(86-95%)          | 0.32<br>(0.16-0.58)                         | 0.36%<br>(-0.099-1.1%)               | 0.39%<br>(-0.17-1.3%)               | 8.4<br>(-3.9-28)    | 50<br>(-14-150)          |
| Sri Lanka | 2000 | Female | 95 plus  | 11%<br>(5.6-18%)               | 89%<br>(82-94%)          | 0.36<br>(0.15-0.73)                         | 0.39%<br>(-0.25-1.5%)                | 0.37%<br>(-0.37-1.7%)               | 2.8<br>(-2.8-13)    | 12<br>(-7.6-47)          |
| Sri Lanka | 2000 | Male   | All Ages | 38%<br>(33-43%)                | 62%<br>(57-67%)          | 0.72<br>(0.55-0.91)                         | 3.5%<br>(2.4-4.8%)                   | 3.4%<br>(2.1-4.8%)                  | 2500<br>(1600-3600) | 110000<br>(76000-150000) |
| Sri Lanka | 2000 | Male   | 15 to 19 | 27%<br>(19-38%)                | 73%<br>(62-81%)          | 0.25<br>(0.13-0.43)                         | 1.3%<br>(0.55-2.3%)                  | 1.5%<br>(0.36-3.2%)                 | 23<br>(5.2-47)      | 2200<br>(930-4000)       |
| Sri Lanka | 2000 | Male   | 20 to 24 | 40%<br>(29-52%)                | 60%<br>(48-71%)          | 0.6<br>(0.34-0.95)                          | 3.3%<br>(1.6-5.7%)                   | 3.7%<br>(1.3-6.8%)                  | 100<br>(37-190)     | 8200<br>(3900-14000)     |
| Sri Lanka | 2000 | Male   | 25 to 29 | 48%<br>(36-60%)                | 52%<br>(40-64%)          | 0.85<br>(0.52-1.3)                          | 4.5%<br>(2.5-7.2%)                   | 5.3%<br>(2.4-8.8%)                  | 130<br>(59-220)     | 9500<br>(5200-15000)     |
| Sri Lanka | 2000 | Male   | 30 to 34 | 54%<br>(40-66%)                | 46%<br>(34-60%)          | 1.1<br>(0.72-1.7)                           | 5.6%<br>(3.4-8.2%)                   | 6.9%<br>(3.8-11%)                   | 170<br>(97-270)     | 11000<br>(6700-16000)    |
| Sri Lanka | 2000 | Male   | 35 to 39 | 59%<br>(47-71%)                | 41%<br>(29-53%)          | 1.4<br>(0.89-2.1)                           | 6.9%<br>(4.6-9.7%)                   | 8.7%<br>(5.5-12%)                   | 260<br>(170-370)    | 15000<br>(9900-21000)    |

| Location  | Year | Sex    | Age      | Prevalence of current drinkers | Prevalence of abstainers | Population average of standard drinks daily | Percent of total attributable deaths | Percent of total attributable DALYs | Attributable deaths | Attributable DALYs     |
|-----------|------|--------|----------|--------------------------------|--------------------------|---------------------------------------------|--------------------------------------|-------------------------------------|---------------------|------------------------|
| Sri Lanka | 2000 | Male   | 40 to 44 | 60%<br>(48-72%)                | 40%<br>(28-52%)          | 1.5<br>(0.96-2.2)                           | 6.9%<br>(4.8-9.3%)                   | 8.8%<br>(5.8-12%)                   | 310<br>(200-430)    | 16000<br>(11000-21000) |
| Sri Lanka | 2000 | Male   | 45 to 49 | 58%<br>(44-70%)                | 42%<br>(30-56%)          | 1.5<br>(0.95-2.2)                           | 6.6%<br>(4.2-9.1%)                   | 8.2%<br>(5.1-11%)                   | 350<br>(210-490)    | 15000<br>(9700-21000)  |
| Sri Lanka | 2000 | Male   | 50 to 54 | 57%<br>(44-69%)                | 43%<br>(31-56%)          | 1.4<br>(0.84-2.1)                           | 5.4%<br>(3.2-7.8%)                   | 6.5%<br>(3.7-9.5%)                  | 340<br>(190-510)    | 13000<br>(8000-20000)  |
| Sri Lanka | 2000 | Male   | 55 to 59 | 55%<br>(42-68%)                | 45%<br>(32-58%)          | 1.2<br>(0.75-2)                             | 3.9%<br>(2.1-6.2%)                   | 4.8%<br>(2.4-7.5%)                  | 250<br>(120-390)    | 8500<br>(4600-13000)   |
| Sri Lanka | 2000 | Male   | 60 to 64 | 50%<br>(37-64%)                | 50%<br>(36-63%)          | 1<br>(0.59-1.7)                             | 2.8%<br>(1.2-4.7%)                   | 3.3%<br>(1.3-5.7%)                  | 190<br>(74-320)     | 5500<br>(2400-9400)    |
| Sri Lanka | 2000 | Male   | 65 to 69 | 43%<br>(30-56%)                | 57%<br>(44-70%)          | 0.8<br>(0.46-1.2)                           | 2%<br>(0.87-3.4%)                    | 2.3%<br>(0.93-3.9%)                 | 150<br>(60-260)     | 3800<br>(1600-6200)    |
| Sri Lanka | 2000 | Male   | 70 to 74 | 37%<br>(25-50%)                | 63%<br>(50-75%)          | 0.65<br>(0.35-1)                            | 1.5%<br>(0.46-2.8%)                  | 1.6%<br>(0.44-3.2%)                 | 130<br>(34-240)     | 2500<br>(790-4700)     |
| Sri Lanka | 2000 | Male   | 75 to 79 | 36%<br>(23-50%)                | 64%<br>(50-77%)          | 0.6<br>(0.32-1)                             | 0.8%<br>(-0.022-1.9%)                | 0.84%<br>(-0.17-2.1%)               | 54<br>(-11-140)     | 910<br>(-24-2100)      |
| Sri Lanka | 2000 | Male   | 80 to 84 | 31%<br>(18-46%)                | 69%<br>(54-82%)          | 0.5<br>(0.26-0.85)                          | 0.57%<br>(-0.14-1.5%)                | 0.58%<br>(-0.28-1.6%)               | 33<br>(-16-93)      | 420<br>(-100-1100)     |
| Sri Lanka | 2000 | Male   | 85 to 89 | 26%<br>(16-39%)                | 74%<br>(61-84%)          | 0.41<br>(0.21-0.7)                          | 0.39%<br>(-0.11-0.99%)               | 0.37%<br>(-0.26-1.1%)               | 14<br>(-9.4-41)     | 140<br>(-41-350)       |
| Sri Lanka | 2000 | Male   | 90 to 94 | 26%<br>(16-39%)                | 74%<br>(61-84%)          | 0.38<br>(0.19-0.68)                         | 0.22%<br>(-0.29-0.74%)               | 0.14%<br>(-0.5-0.8%)                | 2.7<br>(-8.9-15)    | 26<br>(-34-86)         |
| Sri Lanka | 2000 | Male   | 95 plus  | 28%<br>(15-43%)                | 72%<br>(57-85%)          | 0.37<br>(0.16-0.73)                         | 0.21%<br>(-0.37-0.77%)               | 0.044%<br>(-0.67-0.67%)             | 0.24<br>(-3.6-3.6)  | 4.6<br>(-7.9-17)       |
| Sri Lanka | 2005 | Female | All Ages | 4.8%<br>(4.1-5.6%)             | 95%<br>(94-96%)          | 0.21<br>(0.15-0.28)                         | 1.5%<br>(0.71-1.4%)                  | 1.5%<br>(0.81-2.3%)                 | 680<br>(370-1100)   | 22000<br>(16000-32000) |
| Sri Lanka | 2005 | Female | 15 to 19 | 4.2%<br>(2.7-6.3%)             | 96%<br>(94-97%)          | 0.16<br>(0.081-0.28)                        | 0.75%<br>(0.42-1.2%)                 | 0.98%<br>(0.37-2.1%)                | 6.2<br>(2.3-13)     | 810<br>(450-1400)      |
| Sri Lanka | 2005 | Female | 20 to 24 | 5.2%<br>(3.1-7.6%)             | 95%<br>(92-97%)          | 0.21<br>(0.1-0.38)                          | 1.3%<br>(0.8-2%)                     | 1.3%<br>(0.5-2.6%)                  | 9.3<br>(3.5-19)     | 1500<br>(910-2400)     |
| Sri Lanka | 2005 | Female | 25 to 29 | 5.8%<br>(3.7-8.6%)             | 94%<br>(91-96%)          | 0.26<br>(0.13-0.45)                         | 1.4%<br>(0.88-2%)                    | 1.5%<br>(0.68-2.8%)                 | 9.8<br>(4.4-19)     | 1500<br>(960-2300)     |
| Sri Lanka | 2005 | Female | 30 to 34 | 6%<br>(3.7-9.2%)               | 94%<br>(91-96%)          | 0.27<br>(0.14-0.47)                         | 1.3%<br>(0.91-1.9%)                  | 1.7%<br>(0.91-3%)                   | 11<br>(5.8-19)      | 1400<br>(880-2000)     |
| Sri Lanka | 2005 | Female | 35 to 39 | 5.8%<br>(3.5-8.4%)             | 94%<br>(92-97%)          | 0.25<br>(0.13-0.44)                         | 1.2%<br>(0.82-1.7%)                  | 1.7%<br>(1-2.8%)                    | 13<br>(7.6-22)      | 1400<br>(910-2000)     |
| Sri Lanka | 2005 | Female | 40 to 44 | 5.7%<br>(3.6-8.2%)             | 94%<br>(92-96%)          | 0.26<br>(0.14-0.46)                         | 1.2%<br>(0.82-1.7%)                  | 1.9%<br>(1.2-2.9%)                  | 18<br>(11-28)       | 1400<br>(980-2000)     |
| Sri Lanka | 2005 | Female | 45 to 49 | 5.6%<br>(3.3-8.1%)             | 94%<br>(92-97%)          | 0.3<br>(0.15-0.53)                          | 1.3%<br>(0.83-1.9%)                  | 2.1%<br>(1.3-3.3%)                  | 29<br>(18-45)       | 1700<br>(1100-2600)    |
| Sri Lanka | 2005 | Female | 50 to 54 | 5.5%<br>(3.5-8%)               | 95%<br>(92-97%)          | 0.32<br>(0.17-0.55)                         | 1.4%<br>(0.87-2.2%)                  | 2.2%<br>(1.3-3.5%)                  | 40<br>(24-65)       | 1900<br>(1200-3000)    |
| Sri Lanka | 2005 | Female | 55 to 59 | 5.8%<br>(3.7-8.3%)             | 94%<br>(92-96%)          | 0.37<br>(0.19-0.64)                         | 1.4%<br>(0.82-2.4%)                  | 2.3%<br>(1.3-3.8%)                  | 53<br>(30-88)       | 2100<br>(1200-3400)    |

| Location  | Year | Sex    | Age      | Prevalence of current drinkers | Prevalence of abstainers | Population average of standard drinks daily | Percent of total attributable deaths | Percent of total attributable DALYs | Attributable deaths | Attributable DALYs        |
|-----------|------|--------|----------|--------------------------------|--------------------------|---------------------------------------------|--------------------------------------|-------------------------------------|---------------------|---------------------------|
| Sri Lanka | 2005 | Female | 60 to 64 | 5.8%<br>(3.7-8.7%)             | 94%<br>(91-96%)          | 0.39<br>(0.19-0.66)                         | 1.4%<br>(0.71-2.4%)                  | 2.1%<br>(1-3.6%)                    | 61<br>(29-100)      | 2000<br>(970-3300)        |
| Sri Lanka | 2005 | Female | 65 to 69 | 5.5%<br>(3.5-7.7%)             | 94%<br>(92-96%)          | 0.36<br>(0.19-0.59)                         | 1.4%<br>(0.67-2.3%)                  | 1.9%<br>(0.93-3.1%)                 | 74<br>(37-120)      | 1900<br>(950-3100)        |
| Sri Lanka | 2005 | Female | 70 to 74 | 5.6%<br>(3.5-8.3%)             | 94%<br>(92-97%)          | 0.36<br>(0.18-0.64)                         | 1.3%<br>(0.58-2.5%)                  | 1.7%<br>(0.73-3.2%)                 | 95<br>(41-180)      | 1900<br>(810-3600)        |
| Sri Lanka | 2005 | Female | 75 to 79 | 6.1%<br>(3.7-9.3%)             | 94%<br>(91-96%)          | 0.38<br>(0.18-0.68)                         | 1.2%<br>(0.41-2.3%)                  | 1.5%<br>(0.49-2.8%)                 | 83<br>(28-160)      | 1300<br>(440-2600)        |
| Sri Lanka | 2005 | Female | 80 to 84 | 6.6%<br>(3.9-9.5%)             | 93%<br>(91-96%)          | 0.4<br>(0.2-0.69)                           | 1.1%<br>(0.37-2.3%)                  | 1.4%<br>(0.43-2.8%)                 | 82<br>(26-170)      | 920<br>(300-1800)         |
| Sri Lanka | 2005 | Female | 85 to 89 | 7.3%<br>(4.2-11%)              | 93%<br>(89-96%)          | 0.43<br>(0.21-0.77)                         | 1%<br>(0.3-2.1%)                     | 1.2%<br>(0.33-2.6%)                 | 52<br>(14-110)      | 420<br>(130-880)          |
| Sri Lanka | 2005 | Female | 90 to 94 | 8.4%<br>(5-13%)                | 92%<br>(87-95%)          | 0.47<br>(0.23-0.89)                         | 0.97%<br>(0.21-2.3%)                 | 1.1%<br>(0.22-2.8%)                 | 28<br>(5.4-70)      | 160<br>(36-380)           |
| Sri Lanka | 2005 | Female | 95 plus  | 10%<br>(5.1-16%)               | 90%<br>(84-95%)          | 0.54<br>(0.21-1.1)                          | 1.1%<br>(0.096-2.7%)                 | 1.2%<br>(0.039-3.2%)                | 12<br>(0.36-31)     | 43<br>(4-110)             |
| Sri Lanka | 2005 | Male   | All Ages | 37%<br>(32-43%)                | 63%<br>(57-68%)          | 1.1<br>(0.86-1.4)                           | 4.6%<br>(3.1-6.2%)                   | 4.8%<br>(3.1-6.9%)                  | 3500<br>(2300-5000) | 140000<br>(100000-190000) |
| Sri Lanka | 2005 | Male   | 15 to 19 | 25%<br>(17-36%)                | 75%<br>(64-83%)          | 0.37<br>(0.19-0.64)                         | 1.7%<br>(0.92-2.9%)                  | 2.3%<br>(0.92-4.3%)                 | 22<br>(8.6-43)      | 2200<br>(1100-3700)       |
| Sri Lanka | 2005 | Male   | 20 to 24 | 39%<br>(27-51%)                | 61%<br>(49-73%)          | 0.9<br>(0.51-1.4)                           | 4.5%<br>(2.5-7.3%)                   | 5.7%<br>(2.7-9.7%)                  | 94<br>(43-160)      | 7700<br>(4100-12000)      |
| Sri Lanka | 2005 | Male   | 25 to 29 | 46%<br>(34-58%)                | 54%<br>(42-66%)          | 1.3<br>(0.76-2)                             | 6%<br>(3.4-8.9%)                     | 7.8%<br>(4-12%)                     | 130<br>(66-210)     | 9700<br>(5600-14000)      |
| Sri Lanka | 2005 | Male   | 30 to 34 | 53%<br>(39-66%)                | 47%<br>(34-61%)          | 1.7<br>(1.1-2.5)                            | 7.2%<br>(4.6-10%)                    | 9.8%<br>(5.9-15%)                   | 160<br>(95-250)     | 11000<br>(6900-16000)     |
| Sri Lanka | 2005 | Male   | 35 to 39 | 58%<br>(46-69%)                | 42%<br>(31-54%)          | 2.2<br>(1.4-3.2)                            | 8.7%<br>(5.8-12%)                    | 12%<br>(7.5-17%)                    | 270<br>(170-380)    | 16000<br>(10000-22000)    |
| Sri Lanka | 2005 | Male   | 40 to 44 | 58%<br>(47-71%)                | 42%<br>(29-53%)          | 2.3<br>(1.5-3.3)                            | 9.1%<br>(6.3-12%)                    | 12%<br>(8.1-16%)                    | 370<br>(240-510)    | 19000<br>(13000-26000)    |
| Sri Lanka | 2005 | Male   | 45 to 49 | 57%<br>(43-69%)                | 43%<br>(31-57%)          | 2.3<br>(1.5-3.3)                            | 8.8%<br>(5.8-12%)                    | 11%<br>(7.4-16%)                    | 460<br>(290-670)    | 21000<br>(13000-30000)    |
| Sri Lanka | 2005 | Male   | 50 to 54 | 56%<br>(43-68%)                | 44%<br>(32-57%)          | 2.1<br>(1.3-3.1)                            | 7.5%<br>(4.6-11%)                    | 9.4%<br>(5.6-14%)                   | 470<br>(280-720)    | 19000<br>(11000-28000)    |
| Sri Lanka | 2005 | Male   | 55 to 59 | 54%<br>(41-66%)                | 46%<br>(34-59%)          | 1.9<br>(1.1-3)                              | 5.9%<br>(3.3-9.2%)                   | 7.2%<br>(4.1-12%)                   | 420<br>(230-670)    | 15000<br>(8200-23000)     |
| Sri Lanka | 2005 | Male   | 60 to 64 | 49%<br>(36-63%)                | 51%<br>(37-64%)          | 1.6<br>(0.89-2.5)                           | 4.4%<br>(2.1-7.3%)                   | 5.3%<br>(2.4-8.8%)                  | 320<br>(140-550)    | 9400<br>(4400-16000)      |
| Sri Lanka | 2005 | Male   | 65 to 69 | 41%<br>(29-55%)                | 59%<br>(45-71%)          | 1.2<br>(0.69-1.9)                           | 3.3%<br>(1.5-5.5%)                   | 3.8%<br>(1.6-6.5%)                  | 260<br>(120-450)    | 6400<br>(3100-11000)      |
| Sri Lanka | 2005 | Male   | 70 to 74 | 36%<br>(24-49%)                | 64%<br>(51-76%)          | 0.98<br>(0.52-1.6)                          | 2.5%<br>(1-4.6%)                     | 2.9%<br>(1.1-5.3%)                  | 230<br>(88-420)     | 4500<br>(1800-8100)       |
| Sri Lanka | 2005 | Male   | 75 to 79 | 34%<br>(22-49%)                | 66%<br>(51-78%)          | 0.91<br>(0.47-1.6)                          | 1.7%<br>(0.4-3.7%)                   | 1.9%<br>(0.36-4.2%)                 | 140<br>(26-310)     | 2200<br>(530-4700)        |

| Location  | Year | Sex    | Age      | Prevalence of current drinkers | Prevalence of abstainers | Population average of standard drinks daily | Percent of total attributable deaths | Percent of total attributable DALYs | Attributable deaths | Attributable DALYs     |
|-----------|------|--------|----------|--------------------------------|--------------------------|---------------------------------------------|--------------------------------------|-------------------------------------|---------------------|------------------------|
| Sri Lanka | 2005 | Male   | 80 to 84 | 29%<br>(17-44%)                | 71%<br>(56-83%)          | 0.75<br>(0.38-1.3)                          | 1.3%<br>(0.24-2.8%)                  | 1.4%<br>(0.18-3.2%)                 | 90<br>(11-200)      | 1100<br>(190-2300)     |
| Sri Lanka | 2005 | Male   | 85 to 89 | 25%<br>(15-37%)                | 75%<br>(63-85%)          | 0.6<br>(0.3-1.1)                            | 0.88%<br>(0.15-1.9%)                 | 0.94%<br>(0.072-2.2%)               | 39<br>(3-91)        | 340<br>(61-750)        |
| Sri Lanka | 2005 | Male   | 90 to 94 | 25%<br>(15-37%)                | 75%<br>(63-85%)          | 0.56<br>(0.28-1)                            | 0.63%<br>(0.0096-1.5%)               | 0.62%<br>(-0.14-1.7%)               | 14<br>(-3.2-38)     | 90<br>(1.4-220)        |
| Sri Lanka | 2005 | Male   | 95 plus  | 26%<br>(14-42%)                | 74%<br>(58-86%)          | 0.55<br>(0.22-1.1)                          | 0.61%<br>(-0.089-1.7%)               | 0.49%<br>(-0.36-1.7%)               | 3.4<br>(-2.6-12)    | 18<br>(-2.6-48)        |
| Sri Lanka | 2010 | Female | All Ages | 5.2%<br>(4.4-6.1%)             | 95%<br>(94-96%)          | 0.34<br>(0.25-0.46)                         | 1.5%<br>(1-2%)                       | 2.3%<br>(1.4-3.6%)                  | 1200<br>(690-1900)  | 34000<br>(23000-48000) |
| Sri Lanka | 2010 | Female | 15 to 19 | 4.4%<br>(2.7-6.5%)             | 96%<br>(93-97%)          | 0.24<br>(0.12-0.45)                         | 0.82%<br>(0.46-1.4%)                 | 1%<br>(0.38-2.2%)                   | 7.2<br>(2.6-15)     | 920<br>(500-1600)      |
| Sri Lanka | 2010 | Female | 20 to 24 | 5.5%<br>(3.3-8.2%)             | 95%<br>(92-97%)          | 0.33<br>(0.16-0.61)                         | 1.4%<br>(0.85-2.2%)                  | 1.5%<br>(0.54-2.9%)                 | 10<br>(3.9-21)      | 1600<br>(940-2500)     |
| Sri Lanka | 2010 | Female | 25 to 29 | 6%<br>(3.6-9.3%)               | 94%<br>(91-96%)          | 0.38<br>(0.19-0.68)                         | 1.5%<br>(0.97-2.2%)                  | 1.7%<br>(0.77-3.2%)                 | 12<br>(5.4-24)      | 1700<br>(1100-2700)    |
| Sri Lanka | 2010 | Female | 30 to 34 | 6.4%<br>(3.7-10%)              | 94%<br>(90-96%)          | 0.41<br>(0.21-0.75)                         | 1.5%<br>(0.98-2.1%)                  | 1.9%<br>(0.97-3.4%)                 | 14<br>(7.4-27)      | 1800<br>(1100-2600)    |
| Sri Lanka | 2010 | Female | 35 to 39 | 6.6%<br>(3.7-10%)              | 93%<br>(90-96%)          | 0.42<br>(0.21-0.76)                         | 1.5%<br>(0.93-2.2%)                  | 2.1%<br>(1.2-3.7%)                  | 17<br>(9.1-30)      | 1700<br>(1000-2500)    |
| Sri Lanka | 2010 | Female | 40 to 44 | 6.6%<br>(4-9.9%)               | 93%<br>(90-96%)          | 0.45<br>(0.22-0.78)                         | 1.5%<br>(0.93-2.2%)                  | 2.4%<br>(1.4-3.9%)                  | 24<br>(14-38)       | 1800<br>(1100-2800)    |
| Sri Lanka | 2010 | Female | 45 to 49 | 6.4%<br>(3.7-9.5%)             | 94%<br>(90-96%)          | 0.49<br>(0.25-0.89)                         | 1.7%<br>(1-2.6%)                     | 2.8%<br>(1.6-4.6%)                  | 40<br>(23-66)       | 2400<br>(1500-3700)    |
| Sri Lanka | 2010 | Female | 50 to 54 | 6.5%<br>(4.1-9.7%)             | 93%<br>(90-96%)          | 0.56<br>(0.29-0.99)                         | 1.9%<br>(1.2-3.1%)                   | 3.1%<br>(1.8-5%)                    | 66<br>(38-110)      | 3100<br>(1900-4900)    |
| Sri Lanka | 2010 | Female | 55 to 59 | 6.7%<br>(4.1-10%)              | 93%<br>(90-96%)          | 0.62<br>(0.31-1.1)                          | 2.1%<br>(1.2-3.4%)                   | 3.3%<br>(1.8-5.3%)                  | 88<br>(46-140)      | 3500<br>(1900-5600)    |
| Sri Lanka | 2010 | Female | 60 to 64 | 6.4%<br>(3.9-9.9%)             | 94%<br>(90-96%)          | 0.61<br>(0.31-1)                            | 2.1%<br>(1.1-3.5%)                   | 3.1%<br>(1.6-5.2%)                  | 110<br>(59-190)     | 3700<br>(2000-6400)    |
| Sri Lanka | 2010 | Female | 65 to 69 | 5.9%<br>(3.6-8.5%)             | 94%<br>(92-96%)          | 0.56<br>(0.29-0.95)                         | 2%<br>(1.1-3.4%)                     | 2.8%<br>(1.4-4.7%)                  | 130<br>(69-230)     | 3400<br>(1800-5800)    |
| Sri Lanka | 2010 | Female | 70 to 74 | 5.7%<br>(3.7-8.6%)             | 94%<br>(91-96%)          | 0.54<br>(0.28-0.95)                         | 2%<br>(0.97-3.7%)                    | 2.6%<br>(1.2-4.6%)                  | 150<br>(70-270)     | 2900<br>(1400-5200)    |
| Sri Lanka | 2010 | Female | 75 to 79 | 6.1%<br>(3.7-9.3%)             | 94%<br>(91-96%)          | 0.56<br>(0.26-0.99)                         | 1.8%<br>(0.78-3.4%)                  | 2.3%<br>(0.96-4.3%)                 | 140<br>(60-280)     | 2200<br>(960-4300)     |
| Sri Lanka | 2010 | Female | 80 to 84 | 6.6%<br>(4-9.8%)               | 93%<br>(90-96%)          | 0.59<br>(0.29-1)                            | 1.9%<br>(0.84-3.5%)                  | 2.3%<br>(1-4.3%)                    | 160<br>(70-320)     | 1800<br>(800-3400)     |
| Sri Lanka | 2010 | Female | 85 to 89 | 7.3%<br>(4.3-11%)              | 93%<br>(89-96%)          | 0.63<br>(0.3-1.1)                           | 1.8%<br>(0.72-3.4%)                  | 2.2%<br>(0.85-4.2%)                 | 120<br>(47-240)     | 950<br>(380-1800)      |
| Sri Lanka | 2010 | Female | 90 to 94 | 8.4%<br>(5.1-13%)              | 92%<br>(87-95%)          | 0.7<br>(0.34-1.4)                           | 1.8%<br>(0.64-3.7%)                  | 2.1%<br>(0.72-4.6%)                 | 66<br>(22-140)      | 360<br>(130-770)       |
| Sri Lanka | 2010 | Female | 95 plus  | 10%<br>(5.3-17%)               | 90%<br>(83-95%)          | 0.81<br>(0.33-1.6)                          | 1.9%<br>(0.48-3.9%)                  | 2.3%<br>(0.5-4.8%)                  | 28<br>(6.1-59)      | 100<br>(26-210)        |

| Location  | Year | Sex    | Age      | Prevalence of current drinkers | Prevalence of abstainers | Population average of standard drinks daily | Percent of total attributable deaths | Percent of total attributable DALYs | Attributable deaths | Attributable DALYs        |
|-----------|------|--------|----------|--------------------------------|--------------------------|---------------------------------------------|--------------------------------------|-------------------------------------|---------------------|---------------------------|
| Sri Lanka | 2010 | Male   | All Ages | 35%<br>(30-41%)                | 65%<br>(59-70%)          | 1.6<br>(1.2-2)                              | 5.6%<br>(4-7.5%)                     | 6.3%<br>(4.1-9%)                    | 4700<br>(3000-6900) | 180000<br>(120000-240000) |
| Sri Lanka | 2010 | Male   | 15 to 19 | 25%<br>(16-37%)                | 75%<br>(63-84%)          | 0.52<br>(0.25-0.94)                         | 1.5%<br>(0.79-2.6%)                  | 1.7%<br>(0.71-3.4%)                 | 22<br>(9.7-42)      | 2200<br>(1200-3600)       |
| Sri Lanka | 2010 | Male   | 20 to 24 | 38%<br>(25-52%)                | 62%<br>(48-75%)          | 1.3<br>(0.68-2.2)                           | 3.7%<br>(2-6.2%)                     | 4.1%<br>(1.9-7.6%)                  | 91<br>(43-160)      | 7400<br>(4000-12000)      |
| Sri Lanka | 2010 | Male   | 25 to 29 | 45%<br>(30-59%)                | 55%<br>(41-70%)          | 1.9<br>(1-3)                                | 5.4%<br>(3.1-8.6%)                   | 6.5%<br>(3.3-11%)                   | 140<br>(74-230)     | 10000<br>(6000-16000)     |
| Sri Lanka | 2010 | Male   | 30 to 34 | 50%<br>(33-65%)                | 50%<br>(35-67%)          | 2.4<br>(1.4-3.7)                            | 6.8%<br>(4.3-10%)                    | 8.7%<br>(5-13%)                     | 190<br>(110-290)    | 13000<br>(7900-19000)     |
| Sri Lanka | 2010 | Male   | 35 to 39 | 53%<br>(38-67%)                | 47%<br>(33-62%)          | 2.9<br>(1.7-4.4)                            | 8.8%<br>(5.8-12%)                    | 12%<br>(7.3-17%)                    | 270<br>(170-400)    | 16000<br>(10000-23000)    |
| Sri Lanka | 2010 | Male   | 40 to 44 | 54%<br>(39-68%)                | 46%<br>(32-61%)          | 3.1<br>(1.8-4.6)                            | 10%<br>(6.8-14%)                     | 13%<br>(8.9-18%)                    | 380<br>(250-540)    | 20000<br>(13000-27000)    |
| Sri Lanka | 2010 | Male   | 45 to 49 | 53%<br>(36-67%)                | 47%<br>(33-64%)          | 3.1<br>(1.9-4.7)                            | 10%<br>(7.1-14%)                     | 14%<br>(9.1-19%)                    | 530<br>(340-750)    | 24000<br>(16000-34000)    |
| Sri Lanka | 2010 | Male   | 50 to 54 | 51%<br>(36-65%)                | 49%<br>(35-64%)          | 2.8<br>(1.7-4.4)                            | 9.4%<br>(5.9-13%)                    | 12%<br>(7.5-17%)                    | 600<br>(360-860)    | 24000<br>(14000-34000)    |
| Sri Lanka | 2010 | Male   | 55 to 59 | 49%<br>(34-65%)                | 51%<br>(35-66%)          | 2.5<br>(1.4-4)                              | 7.9%<br>(4.5-12%)                    | 9.8%<br>(5.7-15%)                   | 580<br>(320-890)    | 20000<br>(12000-31000)    |
| Sri Lanka | 2010 | Male   | 60 to 64 | 45%<br>(31-62%)                | 55%<br>(38-69%)          | 2.1<br>(1.1-3.5)                            | 6.2%<br>(3-9.8%)                     | 7.7%<br>(3.6-12%)                   | 540<br>(250-890)    | 16000<br>(7600-26000)     |
| Sri Lanka | 2010 | Male   | 65 to 69 | 40%<br>(26-55%)                | 60%<br>(45-74%)          | 1.7<br>(0.91-2.7)                           | 5.1%<br>(2.5-8.5%)                   | 6.1%<br>(2.9-10%)                   | 450<br>(210-760)    | 11000<br>(5400-18000)     |
| Sri Lanka | 2010 | Male   | 70 to 74 | 35%<br>(22-49%)                | 65%<br>(51-78%)          | 1.4<br>(0.73-2.4)                           | 4.1%<br>(1.8-7.4%)                   | 4.8%<br>(2-8.6%)                    | 360<br>(150-650)    | 6900<br>(3000-12000)      |
| Sri Lanka | 2010 | Male   | 75 to 79 | 32%<br>(19-48%)                | 68%<br>(52-81%)          | 1.2<br>(0.62-2.3)                           | 3.1%<br>(1.1-6.2%)                   | 3.5%<br>(1.2-7.2%)                  | 250<br>(80-510)     | 3800<br>(1300-7600)       |
| Sri Lanka | 2010 | Male   | 80 to 84 | 28%<br>(16-43%)                | 72%<br>(57-84%)          | 1.1<br>(0.51-1.9)                           | 2.5%<br>(0.86-5.2%)                  | 2.8%<br>(0.86-6%)                   | 180<br>(54-380)     | 2000<br>(700-4100)        |
| Sri Lanka | 2010 | Male   | 85 to 89 | 25%<br>(15-38%)                | 75%<br>(62-85%)          | 0.9<br>(0.46-1.6)                           | 1.8%<br>(0.54-3.9%)                  | 2.1%<br>(0.52-4.5%)                 | 92<br>(23-200)      | 760<br>(230-1600)         |
| Sri Lanka | 2010 | Male   | 90 to 94 | 25%<br>(15-37%)                | 75%<br>(63-85%)          | 0.84<br>(0.41-1.5)                          | 1.4%<br>(0.28-3.2%)                  | 1.5%<br>(0.18-3.6%)                 | 37<br>(4.4-91)      | 220<br>(45-510)           |
| Sri Lanka | 2010 | Male   | 95 plus  | 27%<br>(15-43%)                | 73%<br>(57-85%)          | 0.82<br>(0.32-1.7)                          | 1.3%<br>(0.16-3.4%)                  | 1.3%<br>(-0.049-3.7%)               | 13<br>(-0.47-37)    | 55<br>(6.4-140)           |
| Sri Lanka | 2016 | Female | All Ages | 5.3%<br>(4.4-6.1%)             | 95%<br>(94-96%)          | 0.43<br>(0.28-0.62)                         | 1.8%<br>(1.2-2.5%)                   | 2.8%<br>(1.7-4.3%)                  | 1400<br>(800-2300)  | 39000<br>(25000-57000)    |
| Sri Lanka | 2016 | Female | 15 to 19 | 4.3%<br>(2.7-6.6%)             | 96%<br>(93-97%)          | 0.3<br>(0.14-0.54)                          | 1.1%<br>(0.58-1.8%)                  | 1.9%<br>(0.72-3.9%)                 | 7.5<br>(2.6-16)     | 950<br>(500-1600)         |
| Sri Lanka | 2016 | Female | 20 to 24 | 5.4%<br>(3.2-8.1%)             | 95%<br>(92-97%)          | 0.4<br>(0.19-0.75)                          | 1.8%<br>(1-2.8%)                     | 2.6%<br>(0.97-5%)                   | 10<br>(3.7-21)      | 1600<br>(890-2500)        |
| Sri Lanka | 2016 | Female | 25 to 29 | 6%<br>(3.5-9.2%)               | 94%<br>(91-96%)          | 0.47<br>(0.21-0.86)                         | 1.8%<br>(1.2-2.7%)                   | 2.7%<br>(1.2-4.8%)                  | 11<br>(4.3-22)      | 1600<br>(960-2500)        |

| Location  | Year | Sex    | Age      | Prevalence of current drinkers | Prevalence of abstainers | Population average of standard drinks daily | Percent of total attributable deaths | Percent of total attributable DALYs | Attributable deaths | Attributable DALYs        |
|-----------|------|--------|----------|--------------------------------|--------------------------|---------------------------------------------|--------------------------------------|-------------------------------------|---------------------|---------------------------|
| Sri Lanka | 2016 | Female | 30 to 34 | 6.3%<br>(3.7-10%)              | 94%<br>(90-96%)          | 0.5<br>(0.23-0.98)                          | 1.8%<br>(1.1-2.6%)                   | 2.9%<br>(1.5-5%)                    | 14<br>(6.3-26)      | 1800<br>(1100-2700)       |
| Sri Lanka | 2016 | Female | 35 to 39 | 6.5%<br>(3.6-9.6%)             | 93%<br>(90-96%)          | 0.5<br>(0.24-0.92)                          | 1.7%<br>(1.1-2.5%)                   | 3%<br>(1.6-5%)                      | 19<br>(9.1-35)      | 1900<br>(1200-3000)       |
| Sri Lanka | 2016 | Female | 40 to 44 | 6.5%<br>(3.9-9.6%)             | 94%<br>(90-96%)          | 0.54<br>(0.25-0.97)                         | 1.7%<br>(1.1-2.5%)                   | 3.2%<br>(1.8-5.1%)                  | 24<br>(13-42)       | 1900<br>(1200-3000)       |
| Sri Lanka | 2016 | Female | 45 to 49 | 6.4%<br>(3.6-9.5%)             | 94%<br>(91-96%)          | 0.6<br>(0.29-1.1)                           | 1.9%<br>(1.1-3%)                     | 3.5%<br>(2-5.4%)                    | 40<br>(20-69)       | 2500<br>(1400-3900)       |
| Sri Lanka | 2016 | Female | 50 to 54 | 6.5%<br>(4-9.6%)               | 94%<br>(90-96%)          | 0.68<br>(0.33-1.2)                          | 2.2%<br>(1.3-3.4%)                   | 3.8%<br>(2.2-5.8%)                  | 67<br>(35-120)      | 3300<br>(1900-5400)       |
| Sri Lanka | 2016 | Female | 55 to 59 | 6.6%<br>(4.1-9.6%)             | 93%<br>(90-96%)          | 0.77<br>(0.36-1.3)                          | 2.3%<br>(1.3-3.6%)                   | 3.8%<br>(2.2-5.8%)                  | 95<br>(49-160)      | 3900<br>(2100-6300)       |
| Sri Lanka | 2016 | Female | 60 to 64 | 6.3%<br>(3.8-9.5%)             | 94%<br>(91-96%)          | 0.76<br>(0.36-1.3)                          | 2.3%<br>(1.3-3.7%)                   | 3.5%<br>(2-5.6%)                    | 120<br>(62-200)     | 4100<br>(2100-6600)       |
| Sri Lanka | 2016 | Female | 65 to 69 | 5.8%<br>(3.5-8.5%)             | 94%<br>(91-97%)          | 0.69<br>(0.34-1.2)                          | 2.2%<br>(1.2-3.7%)                   | 3.2%<br>(1.8-5.1%)                  | 180<br>(92-310)     | 4800<br>(2500-8100)       |
| Sri Lanka | 2016 | Female | 70 to 74 | 5.7%<br>(3.6-8.6%)             | 94%<br>(91-96%)          | 0.66<br>(0.32-1.2)                          | 2.2%<br>(1.1-3.6%)                   | 2.9%<br>(1.5-4.9%)                  | 220<br>(110-390)    | 4400<br>(2200-7700)       |
| Sri Lanka | 2016 | Female | 75 to 79 | 6.1%<br>(3.7-9.2%)             | 94%<br>(91-96%)          | 0.69<br>(0.32-1.3)                          | 2%<br>(0.97-3.7%)                    | 2.6%<br>(1.2-4.8%)                  | 160<br>(67-290)     | 2500<br>(1100-4500)       |
| Sri Lanka | 2016 | Female | 80 to 84 | 6.6%<br>(3.9-9.8%)             | 93%<br>(90-96%)          | 0.72<br>(0.34-1.3)                          | 2.2%<br>(1-3.9%)                     | 2.7%<br>(1.3-4.8%)                  | 190<br>(82-350)     | 2200<br>(960-3900)        |
| Sri Lanka | 2016 | Female | 85 to 89 | 7.4%<br>(4.3-11%)              | 93%<br>(89-96%)          | 0.78<br>(0.35-1.5)                          | 2.1%<br>(0.89-3.8%)                  | 2.6%<br>(1.1-4.7%)                  | 150<br>(62-280)     | 1200<br>(530-2200)        |
| Sri Lanka | 2016 | Female | 90 to 94 | 8.4%<br>(5.1-13%)              | 92%<br>(87-95%)          | 0.87<br>(0.39-1.7)                          | 2.1%<br>(0.79-3.8%)                  | 2.5%<br>(0.93-4.8%)                 | 89<br>(31-170)      | 500<br>(190-930)          |
| Sri Lanka | 2016 | Female | 95 plus  | 10%<br>(5.3-17%)               | 90%<br>(83-95%)          | 1<br>(0.38-2.1)                             | 2.3%<br>(0.69-4.3%)                  | 2.7%<br>(0.73-5.3%)                 | 38<br>(10-75)       | 140<br>(41-260)           |
| Sri Lanka | 2016 | Male   | All Ages | 35%<br>(30-41%)                | 65%<br>(59-70%)          | 1.9<br>(1.3-2.7)                            | 7.7%<br>(5.3-10%)                    | 8.5%<br>(5.4-12%)                   | 6100<br>(3500-9400) | 220000<br>(140000-310000) |
| Sri Lanka | 2016 | Male   | 15 to 19 | 24%<br>(15-36%)                | 76%<br>(64-85%)          | 0.64<br>(0.28-1.2)                          | 2.3%<br>(1.2-4.1%)                   | 3.8%<br>(1.6-7%)                    | 23<br>(8.7-46)      | 2300<br>(1200-4000)       |
| Sri Lanka | 2016 | Male   | 20 to 24 | 38%<br>(25-51%)                | 62%<br>(49-75%)          | 1.6<br>(0.78-2.7)                           | 6.7%<br>(3.6-11%)                    | 9.6%<br>(4.5-16%)                   | 100<br>(44-190)     | 8100<br>(4200-14000)      |
| Sri Lanka | 2016 | Male   | 25 to 29 | 45%<br>(29-59%)                | 55%<br>(41-71%)          | 2.3<br>(1.1-3.7)                            | 8.9%<br>(5-14%)                      | 13%<br>(6.8-21%)                    | 140<br>(63-240)     | 10000<br>(5300-16000)     |
| Sri Lanka | 2016 | Male   | 30 to 34 | 50%<br>(33-65%)                | 50%<br>(35-67%)          | 2.9<br>(1.6-4.8)                            | 10%<br>(6.3-16%)                     | 16%<br>(9-23%)                      | 200<br>(100-310)    | 13000<br>(7400-20000)     |
| Sri Lanka | 2016 | Male   | 35 to 39 | 53%<br>(38-68%)                | 47%<br>(32-62%)          | 3.5<br>(1.9-5.7)                            | 12%<br>(7.5-17%)                     | 17%<br>(11-24%)                     | 330<br>(180-500)    | 19000<br>(11000-28000)    |
| Sri Lanka | 2016 | Male   | 40 to 44 | 54%<br>(39-68%)                | 46%<br>(32-61%)          | 3.8<br>(2.1-5.9)                            | 12%<br>(8.3-17%)                     | 18%<br>(12-24%)                     | 430<br>(260-660)    | 22000<br>(14000-33000)    |
| Sri Lanka | 2016 | Male   | 45 to 49 | 53%<br>(36-67%)                | 47%<br>(33-64%)          | 3.7<br>(2.1-6)                              | 13%<br>(8.5-17%)                     | 17%<br>(12-23%)                     | 590<br>(350-890)    | 27000<br>(17000-39000)    |

| Location  | Year | Sex    | Age      | Prevalence of current drinkers | Prevalence of abstainers | Population average of standard drinks daily | Percent of total attributable deaths | Percent of total attributable DALYs | Attributable deaths  | Attributable DALYs        |
|-----------|------|--------|----------|--------------------------------|--------------------------|---------------------------------------------|--------------------------------------|-------------------------------------|----------------------|---------------------------|
| Sri Lanka | 2016 | Male   | 50 to 54 | 51%<br>(36-65%)                | 49%<br>(35-64%)          | 3.4<br>(1.9-5.5)                            | 11%<br>(6.9-16%)                     | 15%<br>(9.5-20%)                    | 710<br>(390-1100)    | 28000<br>(16000-42000)    |
| Sri Lanka | 2016 | Male   | 55 to 59 | 49%<br>(34-64%)                | 51%<br>(36-66%)          | 3<br>(1.6-4.9)                              | 9.6%<br>(5.6-14%)                    | 12%<br>(7.1-18%)                    | 730<br>(390-1100)    | 25000<br>(14000-39000)    |
| Sri Lanka | 2016 | Male   | 60 to 64 | 45%<br>(30-62%)                | 55%<br>(38-70%)          | 2.6<br>(1.4-4.3)                            | 7.8%<br>(4-12%)                      | 9.8%<br>(5-15%)                     | 680<br>(330-1100)    | 20000<br>(9900-32000)     |
| Sri Lanka | 2016 | Male   | 65 to 69 | 40%<br>(26-54%)                | 60%<br>(46-74%)          | 2.1<br>(1.1-3.5)                            | 6.5%<br>(3.4-10%)                    | 7.9%<br>(4-12%)                     | 770<br>(350-1300)    | 19000<br>(8600-30000)     |
| Sri Lanka | 2016 | Male   | 70 to 74 | 35%<br>(23-48%)                | 65%<br>(52-77%)          | 1.7<br>(0.85-3)                             | 5.3%<br>(2.4-8.9%)                   | 6.3%<br>(2.8-10%)                   | 640<br>(270-1100)    | 12000<br>(5300-22000)     |
| Sri Lanka | 2016 | Male   | 75 to 79 | 32%<br>(19-47%)                | 68%<br>(53-81%)          | 1.5<br>(0.7-2.9)                            | 4.1%<br>(1.6-7.6%)                   | 4.8%<br>(1.8-8.9%)                  | 350<br>(120-670)     | 5300<br>(2000-10000)      |
| Sri Lanka | 2016 | Male   | 80 to 84 | 28%<br>(16-42%)                | 72%<br>(58-84%)          | 1.3<br>(0.61-2.4)                           | 3.4%<br>(1.3-6.6%)                   | 4%<br>(1.4-7.7%)                    | 250<br>(81-500)      | 2800<br>(960-5500)        |
| Sri Lanka | 2016 | Male   | 85 to 89 | 25%<br>(15-38%)                | 75%<br>(62-85%)          | 1.1<br>(0.51-2.1)                           | 2.6%<br>(0.9-5.2%)                   | 3%<br>(0.97-6.3%)                   | 140<br>(42-290)      | 1100<br>(360-2300)        |
| Sri Lanka | 2016 | Male   | 90 to 94 | 25%<br>(16-37%)                | 75%<br>(63-84%)          | 1<br>(0.47-2)                               | 2%<br>(0.56-4.4%)                    | 2.3%<br>(0.55-5.2%)                 | 60<br>(14-140)       | 350<br>(96-780)           |
| Sri Lanka | 2016 | Male   | 95 plus  | 27%<br>(15-43%)                | 73%<br>(57-85%)          | 1<br>(0.39-2.1)                             | 2%<br>(0.4-4.6%)                     | 2%<br>(0.23-5.1%)                   | 21<br>(2.5-54)       | 87<br>(18-200)            |
| Thailand  | 1990 | Female | All Ages | 10%<br>(7.2-14%)               | 90%<br>(86-93%)          | 0.62<br>(0.46-0.82)                         | 3%<br>(2.4-3.8%)                     | 5.8%<br>(4.2-7.8%)                  | 7900<br>(5600-11000) | 220000<br>(180000-280000) |
| Thailand  | 1990 | Female | 15 to 19 | 9%<br>(4-17%)                  | 91%<br>(83-96%)          | 0.47<br>(0.16-1)                            | 1.5%<br>(0.76-2.8%)                  | 2.9%<br>(1.3-5.7%)                  | 69<br>(30-140)       | 6300<br>(3100-12000)      |
| Thailand  | 1990 | Female | 20 to 24 | 11%<br>(4.5-21%)               | 89%<br>(79-95%)          | 0.63<br>(0.22-1.3)                          | 2.3%<br>(1.2-3.8%)                   | 3.9%<br>(1.6-7.3%)                  | 100<br>(43-190)      | 9400<br>(5000-16000)      |
| Thailand  | 1990 | Female | 25 to 29 | 12%<br>(5.1-22%)               | 88%<br>(78-95%)          | 0.72<br>(0.26-1.5)                          | 2.7%<br>(1.5-4.5%)                   | 4.8%<br>(2.2-8.8%)                  | 120<br>(56-230)      | 11000<br>(5900-18000)     |
| Thailand  | 1990 | Female | 30 to 34 | 13%<br>(5.5-24%)               | 87%<br>(76-94%)          | 0.83<br>(0.32-1.7)                          | 3%<br>(1.8-4.8%)                     | 5.5%<br>(3.1-8.9%)                  | 160<br>(88-260)      | 12000<br>(7200-18000)     |
| Thailand  | 1990 | Female | 35 to 39 | 14%<br>(6.4-26%)               | 86%<br>(74-94%)          | 0.93<br>(0.37-1.8)                          | 3.5%<br>(2.2-5.4%)                   | 6.5%<br>(3.8-9.9%)                  | 220<br>(130-340)     | 14000<br>(8500-20000)     |
| Thailand  | 1990 | Female | 40 to 44 | 15%<br>(6.7-26%)               | 85%<br>(74-93%)          | 1<br>(0.38-2)                               | 4.3%<br>(2.7-6.5%)                   | 7.4%<br>(4.6-11%)                   | 300<br>(180-460)     | 16000<br>(10000-24000)    |
| Thailand  | 1990 | Female | 45 to 49 | 15%<br>(6.5-27%)               | 85%<br>(73-93%)          | 1.2<br>(0.39-2.5)                           | 5.2%<br>(3.2-7.8%)                   | 8.5%<br>(5.3-13%)                   | 420<br>(260-640)     | 19000<br>(12000-29000)    |
| Thailand  | 1990 | Female | 50 to 54 | 15%<br>(6.8-28%)               | 85%<br>(72-93%)          | 1.3<br>(0.48-2.8)                           | 6%<br>(3.7-8.9%)                     | 9.2%<br>(5.7-13%)                   | 630<br>(390-920)     | 25000<br>(16000-36000)    |
| Thailand  | 1990 | Female | 55 to 59 | 15%<br>(7.2-28%)               | 85%<br>(72-93%)          | 1.4<br>(0.51-2.9)                           | 6%<br>(3.7-9.1%)                     | 8.9%<br>(5.5-14%)                   | 720<br>(440-1100)    | 24000<br>(15000-37000)    |
| Thailand  | 1990 | Female | 60 to 64 | 15%<br>(6.7-28%)               | 85%<br>(72-93%)          | 1.4<br>(0.51-3.2)                           | 6%<br>(3.6-9.5%)                     | 8.5%<br>(5.1-13%)                   | 820<br>(480-1300)    | 23000<br>(14000-37000)    |
| Thailand  | 1990 | Female | 65 to 69 | 15%<br>(6.8-26%)               | 85%<br>(74-93%)          | 1.3<br>(0.49-2.8)                           | 6.2%<br>(3.5-9.5%)                   | 8.5%<br>(4.9-13%)                   | 870<br>(510-1300)    | 20000<br>(12000-32000)    |



| Location | Year | Sex    | Age      | Prevalence of current drinkers | Prevalence of abstainers | Population average of standard drinks daily | Percent of total attributable deaths | Percent of total attributable DALYs | Attributable deaths    | Attributable DALYs        |
|----------|------|--------|----------|--------------------------------|--------------------------|---------------------------------------------|--------------------------------------|-------------------------------------|------------------------|---------------------------|
| Thailand | 1990 | Female | 70 to 74 | 14%<br>(6.7-25%)               | 86%<br>(75-93%)          | 1.2<br>(0.4-2.8)                            | 5.5%<br>(2.8-9%)                     | 7.2%<br>(3.7-12%)                   | 860<br>(440-1400)      | 16000<br>(8200-26000)     |
| Thailand | 1990 | Female | 75 to 79 | 14%<br>(6.2-25%)               | 86%<br>(75-94%)          | 1.1<br>(0.34-2.6)                           | 4.7%<br>(2.1-8.3%)                   | 6.1%<br>(2.7-11%)                   | 760<br>(350-1300)      | 11000<br>(5000-19000)     |
| Thailand | 1990 | Female | 80 to 84 | 14%<br>(6-26%)                 | 86%<br>(74-94%)          | 1.1<br>(0.34-2.6)                           | 5%<br>(2.2-8.6%)                     | 6.4%<br>(2.8-11%)                   | 830<br>(360-1400)      | 8700<br>(3800-15000)      |
| Thailand | 1990 | Female | 85 to 89 | 15%<br>(6.3-27%)               | 85%<br>(73-94%)          | 1.2<br>(0.36-2.8)                           | 4.7%<br>(1.9-8.9%)                   | 5.8%<br>(2.4-11%)                   | 620<br>(250-1200)      | 4600<br>(1900-8700)       |
| Thailand | 1990 | Female | 90 to 94 | 17%<br>(7.3-31%)               | 83%<br>(69-93%)          | 1.4<br>(0.35-3.4)                           | 4.2%<br>(1.5-8.1%)                   | 5.1%<br>(1.8-9.9%)                  | 280<br>(98-550)        | 1400<br>(510-2800)        |
| Thailand | 1990 | Female | 95 plus  | 21%<br>(8.2-40%)               | 79%<br>(60-92%)          | 1.7<br>(0.34-4.4)                           | 4.2%<br>(1.1-8.9%)                   | 4.9%<br>(1.2-11%)                   | 83<br>(20-180)         | 290<br>(72-600)           |
| Thailand | 1990 | Male   | All Ages | 31%<br>(24-39%)                | 69%<br>(61-76%)          | 1.8<br>(1.5-2.1)                            | 8.1%<br>(6.7-9.7%)                   | 11%<br>(8.9-14%)                    | 21000<br>(17000-26000) | 800000<br>(670000-950000) |
| Thailand | 1990 | Male   | 15 to 19 | 25%<br>(15-41%)                | 75%<br>(59-85%)          | 0.82<br>(0.37-1.5)                          | 3.7%<br>(1.9-6.3%)                   | 5.1%<br>(2.5-9.2%)                  | 300<br>(150-540)       | 23000<br>(12000-41000)    |
| Thailand | 1990 | Male   | 20 to 24 | 37%<br>(21-56%)                | 63%<br>(44-79%)          | 1.9<br>(1-3.1)                              | 8.8%<br>(5.1-14%)                    | 11%<br>(6.2-18%)                    | 920<br>(500-1500)      | 65000<br>(38000-100000)   |
| Thailand | 1990 | Male   | 25 to 29 | 43%<br>(24-61%)                | 57%<br>(39-76%)          | 2.7<br>(1.5-4.1)                            | 12%<br>(7.6-17%)                     | 16%<br>(9.4-23%)                    | 1200<br>(750-1800)     | 81000<br>(50000-120000)   |
| Thailand | 1990 | Male   | 30 to 34 | 46%<br>(26-65%)                | 54%<br>(35-74%)          | 3.3<br>(1.9-4.9)                            | 14%<br>(9.4-18%)                     | 18%<br>(12-24%)                     | 1400<br>(930-1900)     | 84000<br>(58000-110000)   |
| Thailand | 1990 | Male   | 35 to 39 | 49%<br>(30-68%)                | 51%<br>(32-70%)          | 3.8<br>(2.1-5.8)                            | 15%<br>(11-20%)                      | 20%<br>(14-26%)                     | 1500<br>(1100-2000)    | 84000<br>(59000-110000)   |
| Thailand | 1990 | Male   | 40 to 44 | 48%<br>(30-69%)                | 52%<br>(31-70%)          | 3.9<br>(2.3-6.2)                            | 15%<br>(11-20%)                      | 20%<br>(14-26%)                     | 1600<br>(1100-2000)    | 78000<br>(56000-99000)    |
| Thailand | 1990 | Male   | 45 to 49 | 47%<br>(27-66%)                | 53%<br>(34-73%)          | 3.9<br>(2.1-6.1)                            | 15%<br>(11-20%)                      | 20%<br>(14-26%)                     | 1700<br>(1200-2200)    | 76000<br>(53000-97000)    |
| Thailand | 1990 | Male   | 50 to 54 | 45%<br>(26-64%)                | 55%<br>(36-74%)          | 3.7<br>(2-5.9)                              | 15%<br>(10-19%)                      | 19%<br>(13-24%)                     | 2100<br>(1400-2700)    | 80000<br>(56000-100000)   |
| Thailand | 1990 | Male   | 55 to 59 | 42%<br>(25-62%)                | 58%<br>(38-75%)          | 3.3<br>(1.7-5.5)                            | 13%<br>(8.9-17%)                     | 17%<br>(11-22%)                     | 2100<br>(1500-2800)    | 70000<br>(48000-94000)    |
| Thailand | 1990 | Male   | 60 to 64 | 39%<br>(23-59%)                | 61%<br>(41-77%)          | 2.9<br>(1.5-5.1)                            | 12%<br>(7.3-16%)                     | 14%<br>(9.2-20%)                    | 2100<br>(1300-2900)    | 59000<br>(38000-81000)    |
| Thailand | 1990 | Male   | 65 to 69 | 36%<br>(21-54%)                | 64%<br>(46-79%)          | 2.5<br>(1.2-4.2)                            | 10%<br>(6.1-15%)                     | 13%<br>(7.7-18%)                    | 1800<br>(1100-2600)    | 42000<br>(25000-60000)    |
| Thailand | 1990 | Male   | 70 to 74 | 32%<br>(18-50%)                | 68%<br>(50-82%)          | 2<br>(0.94-3.7)                             | 9.1%<br>(5-14%)                      | 11%<br>(6-17%)                      | 1600<br>(860-2400)     | 29000<br>(16000-45000)    |
| Thailand | 1990 | Male   | 75 to 79 | 29%<br>(17-47%)                | 71%<br>(53-83%)          | 1.7<br>(0.75-3.2)                           | 7.1%<br>(3.4-11%)                    | 8.5%<br>(4.1-14%)                   | 1100<br>(540-1800)     | 16000<br>(7800-26000)     |
| Thailand | 1990 | Male   | 80 to 84 | 27%<br>(14-44%)                | 73%<br>(56-86%)          | 1.5<br>(0.65-2.8)                           | 6.6%<br>(3.3-11%)                    | 7.8%<br>(3.8-13%)                   | 860<br>(430-1400)      | 9100<br>(4500-15000)      |
| Thailand | 1990 | Male   | 85 to 89 | 26%<br>(13-41%)                | 74%<br>(59-87%)          | 1.3<br>(0.59-2.5)                           | 5.1%<br>(2.3-9%)                     | 5.9%<br>(2.7-11%)                   | 430<br>(200-780)       | 3300<br>(1500-5900)       |

| Location | Year | Sex    | Age      | Prevalence of current drinkers | Prevalence of abstainers | Population average of standard drinks daily | Percent of total attributable deaths | Percent of total attributable DALYs | Attributable deaths    | Attributable DALYs        |
|----------|------|--------|----------|--------------------------------|--------------------------|---------------------------------------------|--------------------------------------|-------------------------------------|------------------------|---------------------------|
| Thailand | 1990 | Male   | 90 to 94 | 27%<br>(15-44%)                | 73%<br>(56-85%)          | 1.3<br>(0.53-2.5)                           | 3.9%<br>(1.5-7.5%)                   | 4.5%<br>(1.7-8.7%)                  | 150<br>(56-290)        | 770<br>(300-1500)         |
| Thailand | 1990 | Male   | 95 plus  | 31%<br>(15-50%)                | 69%<br>(50-85%)          | 1.3<br>(0.46-2.9)                           | 3.6%<br>(1.1-7.6%)                   | 3.9%<br>(1.1-8.5%)                  | 35<br>(9.7-76)         | 120<br>(39-270)           |
| Thailand | 1995 | Female | All Ages | 11%<br>(7.9-14%)               | 89%<br>(86-92%)          | 0.74<br>(0.56-0.98)                         | 3.4%<br>(2.7-4.3%)                   | 6.1%<br>(4.4-8%)                    | 9000<br>(6600-12000)   | 260000<br>(210000-320000) |
| Thailand | 1995 | Female | 15 to 19 | 9.2%<br>(4.3-17%)              | 91%<br>(83-96%)          | 0.53<br>(0.18-1.1)                          | 1.6%<br>(0.82-3%)                    | 3.1%<br>(1.4-5.9%)                  | 71<br>(31-140)         | 6500<br>(3200-12000)      |
| Thailand | 1995 | Female | 20 to 24 | 11%<br>(4.9-21%)               | 89%<br>(79-95%)          | 0.72<br>(0.24-1.5)                          | 2.4%<br>(1.3-4.1%)                   | 3.6%<br>(1.5-6.7%)                  | 120<br>(51-230)        | 11000<br>(5600-19000)     |
| Thailand | 1995 | Female | 25 to 29 | 12%<br>(5.5-22%)               | 88%<br>(78-94%)          | 0.83<br>(0.3-1.6)                           | 2.8%<br>(1.5-4.5%)                   | 4.2%<br>(1.8-7.5%)                  | 160<br>(70-290)        | 13000<br>(7100-22000)     |
| Thailand | 1995 | Female | 30 to 34 | 13%<br>(5.6-25%)               | 87%<br>(75-94%)          | 0.94<br>(0.34-1.9)                          | 3.1%<br>(1.9-4.9%)                   | 5.1%<br>(2.8-8.3%)                  | 200<br>(110-320)       | 14000<br>(8600-22000)     |
| Thailand | 1995 | Female | 35 to 39 | 14%<br>(6.2-26%)               | 86%<br>(74-94%)          | 1<br>(0.41-2)                               | 3.6%<br>(2.2-5.5%)                   | 6.2%<br>(3.7-9.5%)                  | 260<br>(150-410)       | 17000<br>(10000-25000)    |
| Thailand | 1995 | Female | 40 to 44 | 15%<br>(6.9-27%)               | 85%<br>(73-93%)          | 1.2<br>(0.43-2.3)                           | 4.2%<br>(2.7-6.3%)                   | 7.2%<br>(4.5-11%)                   | 370<br>(220-550)       | 20000<br>(12000-29000)    |
| Thailand | 1995 | Female | 45 to 49 | 15%<br>(6.3-27%)               | 85%<br>(73-94%)          | 1.3<br>(0.45-2.7)                           | 5.1%<br>(3.2-7.4%)                   | 8.3%<br>(5.3-12%)                   | 480<br>(300-710)       | 22000<br>(14000-33000)    |
| Thailand | 1995 | Female | 50 to 54 | 15%<br>(6.7-28%)               | 85%<br>(72-93%)          | 1.4<br>(0.54-3)                             | 5.9%<br>(3.8-8.6%)                   | 9.1%<br>(5.9-13%)                   | 620<br>(400-900)       | 25000<br>(16000-36000)    |
| Thailand | 1995 | Female | 55 to 59 | 15%<br>(7.1-28%)               | 85%<br>(72-93%)          | 1.6<br>(0.55-3.2)                           | 5.9%<br>(3.6-8.8%)                   | 8.7%<br>(5.5-13%)                   | 780<br>(490-1200)      | 27000<br>(17000-41000)    |
| Thailand | 1995 | Female | 60 to 64 | 15%<br>(6.8-28%)               | 85%<br>(72-93%)          | 1.6<br>(0.55-3.5)                           | 5.9%<br>(3.6-9.3%)                   | 8.4%<br>(5-13%)                     | 970<br>(590-1500)      | 28000<br>(17000-44000)    |
| Thailand | 1995 | Female | 65 to 69 | 15%<br>(6.7-26%)               | 85%<br>(74-93%)          | 1.5<br>(0.55-3)                             | 5.9%<br>(3.6-9%)                     | 8.2%<br>(5.1-12%)                   | 1100<br>(650-1600)     | 25000<br>(15000-39000)    |
| Thailand | 1995 | Female | 70 to 74 | 14%<br>(6.7-25%)               | 86%<br>(75-93%)          | 1.3<br>(0.46-3.1)                           | 5.3%<br>(2.9-8.5%)                   | 7.1%<br>(4-11%)                     | 970<br>(540-1500)      | 18000<br>(10000-29000)    |
| Thailand | 1995 | Female | 75 to 79 | 14%<br>(5.9-25%)               | 86%<br>(75-94%)          | 1.3<br>(0.38-2.8)                           | 4.6%<br>(2.2-7.8%)                   | 5.9%<br>(2.9-9.9%)                  | 830<br>(400-1400)      | 12000<br>(5900-20000)     |
| Thailand | 1995 | Female | 80 to 84 | 14%<br>(6-25%)                 | 86%<br>(75-94%)          | 1.2<br>(0.39-2.8)                           | 4.9%<br>(2.3-8.1%)                   | 6.1%<br>(2.8-10%)                   | 910<br>(410-1500)      | 9700<br>(4400-16000)      |
| Thailand | 1995 | Female | 85 to 89 | 15%<br>(6.7-27%)               | 85%<br>(73-93%)          | 1.3<br>(0.42-3)                             | 4.6%<br>(2-8.5%)                     | 5.6%<br>(2.4-10%)                   | 740<br>(320-1400)      | 5600<br>(2400-10000)      |
| Thailand | 1995 | Female | 90 to 94 | 17%<br>(7.6-31%)               | 83%<br>(69-92%)          | 1.5<br>(0.41-3.6)                           | 4.1%<br>(1.6-7.9%)                   | 4.9%<br>(1.9-9.5%)                  | 350<br>(130-680)       | 1800<br>(720-3500)        |
| Thailand | 1995 | Female | 95 plus  | 21%<br>(8.1-39%)               | 79%<br>(61-92%)          | 1.8<br>(0.39-4.7)                           | 4.1%<br>(1.2-8.4%)                   | 4.7%<br>(1.3-9.9%)                  | 110<br>(30-230)        | 390<br>(110-790)          |
| Thailand | 1995 | Male   | All Ages | 33%<br>(26-41%)                | 67%<br>(59-74%)          | 2.2<br>(1.9-2.5)                            | 9.6%<br>(7.9-11%)                    | 12%<br>(9.9-14%)                    | 27000<br>(22000-32000) | 110000<br>(89000-130000)  |

| Location | Year | Sex    | Age      | Prevalence of current drinkers | Prevalence of abstainers | Population average of standard drinks daily | Percent of total attributable deaths | Percent of total attributable DALYs | Attributable deaths   | Attributable DALYs        |
|----------|------|--------|----------|--------------------------------|--------------------------|---------------------------------------------|--------------------------------------|-------------------------------------|-----------------------|---------------------------|
| Thailand | 1995 | Male   | 15 to 19 | 26%<br>(14-41%)                | 74%<br>(59-86%)          | 0.91<br>(0.42-1.7)                          | 4.3%<br>(2.2-7.7%)                   | 5.6%<br>(2.7-10%)                   | 440<br>(210-790)      | 33000<br>(16000-59000)    |
| Thailand | 1995 | Male   | 20 to 24 | 38%<br>(22-56%)                | 62%<br>(44-78%)          | 2.2<br>(1.1-3.6)                            | 9.6%<br>(5.4-15%)                    | 12%<br>(6.4-19%)                    | 1400<br>(740-2200)    | 95000<br>(53000-150000)   |
| Thailand | 1995 | Male   | 25 to 29 | 44%<br>(25-62%)                | 56%<br>(38-75%)          | 3<br>(1.7-4.6)                              | 12%<br>(7.6-18%)                     | 14%<br>(8.6-21%)                    | 2200<br>(1300-3300)   | 140000<br>(87000-210000)  |
| Thailand | 1995 | Male   | 30 to 34 | 47%<br>(28-66%)                | 53%<br>(34-72%)          | 3.7<br>(2.2-5.4)                            | 14%<br>(9.6-19%)                     | 16%<br>(11-22%)                     | 2400<br>(1600-3200)   | 140000<br>(96000-190000)  |
| Thailand | 1995 | Male   | 35 to 39 | 49%<br>(32-69%)                | 51%<br>(31-68%)          | 4.2<br>(2.4-6.3)                            | 15%<br>(11-20%)                      | 18%<br>(13-24%)                     | 2400<br>(1700-3100)   | 130000<br>(90000-170000)  |
| Thailand | 1995 | Male   | 40 to 44 | 49%<br>(31-68%)                | 51%<br>(32-69%)          | 4.4<br>(2.6-6.6)                            | 15%<br>(11-19%)                      | 19%<br>(13-24%)                     | 2200<br>(1500-2800)   | 110000<br>(77000-140000)  |
| Thailand | 1995 | Male   | 45 to 49 | 47%<br>(28-67%)                | 53%<br>(33-72%)          | 4.3<br>(2.3-6.8)                            | 15%<br>(11-19%)                      | 19%<br>(14-24%)                     | 2100<br>(1500-2800)   | 93000<br>(67000-120000)   |
| Thailand | 1995 | Male   | 50 to 54 | 45%<br>(26-64%)                | 55%<br>(36-74%)          | 4.1<br>(2.2-6.5)                            | 14%<br>(10-18%)                      | 18%<br>(13-23%)                     | 2100<br>(1500-2600)   | 80000<br>(57000-100000)   |
| Thailand | 1995 | Male   | 55 to 59 | 43%<br>(26-63%)                | 57%<br>(37-74%)          | 3.7<br>(2-6.1)                              | 13%<br>(8.9-17%)                     | 16%<br>(11-21%)                     | 2200<br>(1500-2900)   | 75000<br>(52000-99000)    |
| Thailand | 1995 | Male   | 60 to 64 | 40%<br>(23-60%)                | 60%<br>(40-77%)          | 3.3<br>(1.6-5.6)                            | 11%<br>(7.5-15%)                     | 14%<br>(9.3-19%)                    | 2300<br>(1500-3100)   | 66000<br>(43000-89000)    |
| Thailand | 1995 | Male   | 65 to 69 | 37%<br>(21-55%)                | 63%<br>(45-79%)          | 2.8<br>(1.4-4.6)                            | 10%<br>(6.4-14%)                     | 13%<br>(8-18%)                      | 2200<br>(1400-3000)   | 51000<br>(32000-70000)    |
| Thailand | 1995 | Male   | 70 to 74 | 33%<br>(19-50%)                | 67%<br>(50-81%)          | 2.3<br>(1.1-4.1)                            | 8.9%<br>(5.2-13%)                    | 11%<br>(6.5-16%)                    | 1800<br>(1000-2600)   | 33000<br>(19000-49000)    |
| Thailand | 1995 | Male   | 75 to 79 | 30%<br>(17-47%)                | 70%<br>(53-83%)          | 1.9<br>(0.87-3.6)                           | 7%<br>(3.6-11%)                      | 8.3%<br>(4.3-13%)                   | 1200<br>(610-1900)    | 18000<br>(9100-27000)     |
| Thailand | 1995 | Male   | 80 to 84 | 27%<br>(15-44%)                | 73%<br>(56-85%)          | 1.7<br>(0.72-3.1)                           | 6.3%<br>(3.2-10%)                    | 7.4%<br>(3.7-12%)                   | 940<br>(470-1500)     | 10000<br>(5100-16000)     |
| Thailand | 1995 | Male   | 85 to 89 | 26%<br>(14-41%)                | 74%<br>(59-86%)          | 1.5<br>(0.69-2.7)                           | 5%<br>(2.5-8.5%)                     | 5.7%<br>(2.8-10%)                   | 520<br>(250-910)      | 4000<br>(2000-6900)       |
| Thailand | 1995 | Male   | 90 to 94 | 28%<br>(15-45%)                | 72%<br>(55-85%)          | 1.5<br>(0.65-2.8)                           | 3.9%<br>(1.6-7.1%)                   | 4.4%<br>(1.8-8.4%)                  | 180<br>(73-340)       | 960<br>(400-1800)         |
| Thailand | 1995 | Male   | 95 plus  | 31%<br>(15-52%)                | 69%<br>(48-85%)          | 1.5<br>(0.55-3.1)                           | 3.5%<br>(1.2-7.4%)                   | 3.8%<br>(1.1-8.1%)                  | 42<br>(12-89)         | 150<br>(49-320)           |
| Thailand | 2000 | Female | All Ages | 11%<br>(8.1-15%)               | 89%<br>(85-92%)          | 0.89<br>(0.66-1.2)                          | 3.6%<br>(2.8-4.5%)                   | 6.1%<br>(4.4-8.1%)                  | 10000<br>(7400-14000) | 290000<br>(230000-370000) |
| Thailand | 2000 | Female | 15 to 19 | 9.4%<br>(4.4-17%)              | 91%<br>(83-96%)          | 0.59<br>(0.2-1.3)                           | 1.7%<br>(0.83-3.1%)                  | 3.4%<br>(1.5-6.8%)                  | 61<br>(26-120)        | 5700<br>(2800-10000)      |
| Thailand | 2000 | Female | 20 to 24 | 11%<br>(5-21%)                 | 89%<br>(79-95%)          | 0.8<br>(0.27-1.7)                           | 2.3%<br>(1.2-3.8%)                   | 3.5%<br>(1.5-6.4%)                  | 110<br>(45-190)       | 9600<br>(4900-16000)      |
| Thailand | 2000 | Female | 25 to 29 | 12%<br>(5.1-22%)               | 88%<br>(78-95%)          | 0.9<br>(0.32-1.9)                           | 2.7%<br>(1.4-4.4%)                   | 3.6%<br>(1.6-6.4%)                  | 210<br>(95-370)       | 16000<br>(8300-27000)     |
| Thailand | 2000 | Female | 30 to 34 | 13%<br>(5.4-24%)               | 87%<br>(76-95%)          | 1<br>(0.36-2)                               | 3%<br>(1.8-4.8%)                     | 4.2%<br>(2.3-6.7%)                  | 280<br>(150-460)      | 20000<br>(12000-31000)    |

| Location | Year | Sex    | Age      | Prevalence of current drinkers | Prevalence of abstainers | Population average of standard drinks daily | Percent of total attributable deaths | Percent of total attributable DALYs | Attributable deaths    | Attributable DALYs          |
|----------|------|--------|----------|--------------------------------|--------------------------|---------------------------------------------|--------------------------------------|-------------------------------------|------------------------|-----------------------------|
| Thailand | 2000 | Female | 35 to 39 | 14%<br>(6-26%)                 | 86%<br>(74-94%)          | 1.1<br>(0.43-2.2)                           | 3.3%<br>(2-5%)                       | 5.2%<br>(3-7.9%)                    | 320<br>(190-490)       | 20000<br>(12000-30000)      |
| Thailand | 2000 | Female | 40 to 44 | 15%<br>(6.8-26%)               | 85%<br>(74-93%)          | 1.3<br>(0.49-2.5)                           | 3.9%<br>(2.5-5.8%)                   | 6.5%<br>(4.1-9.5%)                  | 430<br>(270-630)       | 23000<br>(15000-34000)      |
| Thailand | 2000 | Female | 45 to 49 | 15%<br>(6.5-27%)               | 85%<br>(73-94%)          | 1.4<br>(0.49-2.9)                           | 4.6%<br>(3-7%)                       | 7.7%<br>(4.9-11%)                   | 550<br>(350-810)       | 26000<br>(17000-39000)      |
| Thailand | 2000 | Female | 50 to 54 | 15%<br>(6.7-29%)               | 85%<br>(71-93%)          | 1.6<br>(0.62-3.3)                           | 5.6%<br>(3.6-8.1%)                   | 8.7%<br>(5.7-13%)                   | 670<br>(430-990)       | 27000<br>(18000-40000)      |
| Thailand | 2000 | Female | 55 to 59 | 16%<br>(7.3-29%)               | 84%<br>(71-93%)          | 1.8<br>(0.65-3.8)                           | 5.8%<br>(3.6-8.8%)                   | 8.6%<br>(5.4-13%)                   | 770<br>(480-1100)      | 27000<br>(17000-41000)      |
| Thailand | 2000 | Female | 60 to 64 | 16%<br>(7-29%)                 | 84%<br>(71-93%)          | 1.8<br>(0.63-4)                             | 5.8%<br>(3.6-9.1%)                   | 8.3%<br>(5.3-13%)                   | 1000<br>(650-1600)     | 30000<br>(18000-49000)      |
| Thailand | 2000 | Female | 65 to 69 | 15%<br>(6.9-27%)               | 85%<br>(73-93%)          | 1.7<br>(0.61-3.3)                           | 5.8%<br>(3.6-8.9%)                   | 8.2%<br>(5-12%)                     | 1200<br>(730-1900)     | 29000<br>(18000-45000)      |
| Thailand | 2000 | Female | 70 to 74 | 14%<br>(6.8-26%)               | 86%<br>(74-93%)          | 1.5<br>(0.51-3.4)                           | 5.2%<br>(2.9-8.4%)                   | 7.1%<br>(4-11%)                     | 1200<br>(670-1900)     | 23000<br>(13000-37000)      |
| Thailand | 2000 | Female | 75 to 79 | 14%<br>(6.2-26%)               | 86%<br>(74-94%)          | 1.4<br>(0.4-3.2)                            | 4.5%<br>(2.1-7.7%)                   | 5.9%<br>(2.8-9.7%)                  | 980<br>(460-1600)      | 15000<br>(6900-24000)       |
| Thailand | 2000 | Female | 80 to 84 | 14%<br>(6.3-26%)               | 86%<br>(74-94%)          | 1.4<br>(0.42-3.1)                           | 4.8%<br>(2.1-8.1%)                   | 6%<br>(2.7-10%)                     | 1000<br>(460-1800)     | 11000<br>(4900-19000)       |
| Thailand | 2000 | Female | 85 to 89 | 15%<br>(6.7-28%)               | 85%<br>(72-93%)          | 1.5<br>(0.47-3.4)                           | 4.6%<br>(2-8.3%)                     | 5.6%<br>(2.5-10%)                   | 800<br>(350-1500)      | 6100<br>(2600-11000)        |
| Thailand | 2000 | Female | 90 to 94 | 17%<br>(7.7-31%)               | 83%<br>(69-92%)          | 1.7<br>(0.47-4.1)                           | 4.2%<br>(1.6-8.2%)                   | 5.1%<br>(2-9.9%)                    | 440<br>(170-840)       | 2300<br>(910-4400)          |
| Thailand | 2000 | Female | 95 plus  | 21%<br>(8.3-40%)               | 79%<br>(60-92%)          | 2<br>(0.42-5.6)                             | 4.3%<br>(1.2-8.7%)                   | 4.9%<br>(1.3-10%)                   | 150<br>(40-310)        | 510<br>(150-1000)           |
| Thailand | 2000 | Male   | All Ages | 34%<br>(27-42%)                | 66%<br>(58-73%)          | 2.6<br>(2.2-3)                              | 9.9%<br>(8.3-12%)                    | 12%<br>(10-14%)                     | 29000<br>(24000-35000) | 1100000<br>(950000-1400000) |
| Thailand | 2000 | Male   | 15 to 19 | 26%<br>(15-41%)                | 74%<br>(59-85%)          | 1<br>(0.45-1.9)                             | 4.7%<br>(2.4-8.3%)                   | 6.3%<br>(3.1-12%)                   | 390<br>(190-710)       | 29000<br>(15000-52000)      |
| Thailand | 2000 | Male   | 20 to 24 | 38%<br>(22-56%)                | 62%<br>(44-78%)          | 2.4<br>(1.2-4.1)                            | 10%<br>(5.8-16%)                     | 13%<br>(7.1-21%)                    | 1100<br>(600-1800)     | 80000<br>(44000-130000)     |
| Thailand | 2000 | Male   | 25 to 29 | 44%<br>(25-62%)                | 56%<br>(38-75%)          | 3.3<br>(1.8-5.2)                            | 12%<br>(7.2-17%)                     | 14%<br>(8.1-20%)                    | 1800<br>(1100-2700)    | 120000<br>(72000-170000)    |
| Thailand | 2000 | Male   | 30 to 34 | 47%<br>(27-66%)                | 53%<br>(34-73%)          | 4<br>(2.3-6)                                | 12%<br>(8.4-16%)                     | 14%<br>(9.5-19%)                    | 2400<br>(1700-3300)    | 140000<br>(100000-200000)   |
| Thailand | 2000 | Male   | 35 to 39 | 49%<br>(31-69%)                | 51%<br>(31-69%)          | 4.5<br>(2.7-6.8)                            | 13%<br>(9.3-17%)                     | 15%<br>(11-20%)                     | 2500<br>(1800-3400)    | 140000<br>(99000-180000)    |
| Thailand | 2000 | Male   | 40 to 44 | 49%<br>(30-69%)                | 51%<br>(31-70%)          | 4.7<br>(2.8-7)                              | 13%<br>(10-17%)                      | 17%<br>(12-21%)                     | 2600<br>(1900-3400)    | 130000<br>(95000-170000)    |
| Thailand | 2000 | Male   | 45 to 49 | 47%<br>(27-67%)                | 53%<br>(33-73%)          | 4.6<br>(2.6-7.2)                            | 14%<br>(11-18%)                      | 18%<br>(14-22%)                     | 2600<br>(1900-3300)    | 110000<br>(86000-150000)    |

| Location | Year | Sex    | Age      | Prevalence of current drinkers | Prevalence of abstainers | Population average of standard drinks daily | Percent of total attributable deaths | Percent of total attributable DALYs | Attributable deaths   | Attributable DALYs        |
|----------|------|--------|----------|--------------------------------|--------------------------|---------------------------------------------|--------------------------------------|-------------------------------------|-----------------------|---------------------------|
| Thailand | 2000 | Male   | 50 to 54 | 45%<br>(26-65%)                | 55%<br>(35-74%)          | 4.4<br>(2.4-6.9)                            | 14%<br>(10-17%)                      | 18%<br>(13-22%)                     | 2400<br>(1800-3100)   | 94000<br>(69000-120000)   |
| Thailand | 2000 | Male   | 55 to 59 | 43%<br>(25-63%)                | 57%<br>(37-75%)          | 4<br>(2.2-6.7)                              | 13%<br>(9.2-17%)                     | 17%<br>(12-21%)                     | 2300<br>(1600-2900)   | 77000<br>(54000-99000)    |
| Thailand | 2000 | Male   | 60 to 64 | 40%<br>(23-61%)                | 60%<br>(39-77%)          | 3.6<br>(1.7-6.1)                            | 12%<br>(7.7-15%)                     | 15%<br>(9.9-19%)                    | 2600<br>(1700-3400)   | 73000<br>(48000-97000)    |
| Thailand | 2000 | Male   | 65 to 69 | 36%<br>(21-56%)                | 64%<br>(44-79%)          | 3<br>(1.5-5.1)                              | 10%<br>(6.9-14%)                     | 13%<br>(8.7-18%)                    | 2500<br>(1600-3400)   | 59000<br>(39000-81000)    |
| Thailand | 2000 | Male   | 70 to 74 | 33%<br>(19-49%)                | 67%<br>(51-81%)          | 2.5<br>(1.2-4.4)                            | 9%<br>(5.5-13%)                      | 11%<br>(6.8-16%)                    | 2300<br>(1400-3300)   | 43000<br>(26000-63000)    |
| Thailand | 2000 | Male   | 75 to 79 | 30%<br>(17-47%)                | 70%<br>(53-83%)          | 2.1<br>(0.91-3.9)                           | 7.1%<br>(4-11%)                      | 8.7%<br>(4.9-13%)                   | 1500<br>(830-2200)    | 22000<br>(12000-33000)    |
| Thailand | 2000 | Male   | 80 to 84 | 28%<br>(14-44%)                | 72%<br>(56-86%)          | 1.8<br>(0.82-3.4)                           | 6.4%<br>(3.2-9.9%)                   | 7.6%<br>(3.8-12%)                   | 1100<br>(570-1700)    | 12000<br>(6200-19000)     |
| Thailand | 2000 | Male   | 85 to 89 | 26%<br>(14-41%)                | 74%<br>(59-86%)          | 1.6<br>(0.73-3)                             | 5.2%<br>(2.4-8.7%)                   | 6.1%<br>(2.8-10%)                   | 620<br>(280-1000)     | 4700<br>(2200-8000)       |
| Thailand | 2000 | Male   | 90 to 94 | 28%<br>(16-44%)                | 72%<br>(56-84%)          | 1.6<br>(0.73-3)                             | 4.2%<br>(1.8-7.6%)                   | 4.8%<br>(2-8.9%)                    | 240<br>(98-450)       | 1300<br>(540-2400)        |
| Thailand | 2000 | Male   | 95 plus  | 31%<br>(15-52%)                | 69%<br>(48-85%)          | 1.6<br>(0.57-3.4)                           | 3.8%<br>(1.2-8%)                     | 4.1%<br>(1.2-8.8%)                  | 56<br>(16-120)        | 200<br>(68-420)           |
| Thailand | 2005 | Female | All Ages | 11%<br>(8.2-15%)               | 89%<br>(85-92%)          | 0.97<br>(0.73-1.3)                          | 3.6%<br>(2.8-4.6%)                   | 6.1%<br>(4.4-8.2%)                  | 11000<br>(7700-14000) | 280000<br>(220000-360000) |
| Thailand | 2005 | Female | 15 to 19 | 9.1%<br>(4.2-17%)              | 91%<br>(83-96%)          | 0.61<br>(0.21-1.4)                          | 1.5%<br>(0.77-2.7%)                  | 3.2%<br>(1.4-6.4%)                  | 46<br>(20-93)         | 4500<br>(2200-8100)       |
| Thailand | 2005 | Female | 20 to 24 | 11%<br>(4.7-20%)               | 89%<br>(80-95%)          | 0.82<br>(0.27-1.7)                          | 2%<br>(1.1-3.3%)                     | 3.4%<br>(1.5-6.3%)                  | 69<br>(30-130)        | 6900<br>(3800-11000)      |
| Thailand | 2005 | Female | 25 to 29 | 12%<br>(5.1-22%)               | 88%<br>(78-95%)          | 0.94<br>(0.32-2)                            | 2.2%<br>(1.2-3.6%)                   | 3.2%<br>(1.4-5.7%)                  | 120<br>(55-210)       | 10000<br>(5600-17000)     |
| Thailand | 2005 | Female | 30 to 34 | 13%<br>(5.2-24%)               | 87%<br>(76-95%)          | 1.1<br>(0.36-2.2)                           | 2.5%<br>(1.4-4%)                     | 3.7%<br>(1.9-6.2%)                  | 180<br>(90-300)       | 14000<br>(7700-21000)     |
| Thailand | 2005 | Female | 35 to 39 | 14%<br>(5.7-26%)               | 86%<br>(74-94%)          | 1.2<br>(0.44-2.3)                           | 2.8%<br>(1.7-4.3%)                   | 4.7%<br>(2.6-7.2%)                  | 250<br>(140-390)      | 16000<br>(9500-24000)     |
| Thailand | 2005 | Female | 40 to 44 | 14%<br>(6.5-26%)               | 86%<br>(74-93%)          | 1.3<br>(0.49-2.5)                           | 3.5%<br>(2.2-5.1%)                   | 6%<br>(3.7-8.8%)                    | 370<br>(230-540)      | 21000<br>(13000-31000)    |
| Thailand | 2005 | Female | 45 to 49 | 14%<br>(6.4-25%)               | 86%<br>(75-94%)          | 1.5<br>(0.53-2.9)                           | 4.1%<br>(2.6-6.1%)                   | 7.2%<br>(4.5-11%)                   | 520<br>(330-790)      | 25000<br>(16000-38000)    |
| Thailand | 2005 | Female | 50 to 54 | 15%<br>(6.9-27%)               | 85%<br>(73-93%)          | 1.7<br>(0.67-3.5)                           | 5%<br>(3.2-7.4%)                     | 8.2%<br>(5.3-12%)                   | 720<br>(460-1100)     | 30000<br>(19000-44000)    |
| Thailand | 2005 | Female | 55 to 59 | 15%<br>(7.2-29%)               | 85%<br>(71-93%)          | 1.9<br>(0.69-3.8)                           | 5.5%<br>(3.3-8.5%)                   | 8.4%<br>(5.2-13%)                   | 840<br>(530-1300)     | 29000<br>(18000-46000)    |
| Thailand | 2005 | Female | 60 to 64 | 15%<br>(6.9-28%)               | 85%<br>(72-93%)          | 1.9<br>(0.68-4)                             | 5.5%<br>(3.4-8.7%)                   | 8%<br>(5-13%)                       | 950<br>(590-1500)     | 28000<br>(17000-45000)    |
| Thailand | 2005 | Female | 65 to 69 | 15%<br>(6.9-27%)               | 85%<br>(73-93%)          | 1.7<br>(0.64-3.4)                           | 5.6%<br>(3.4-8.5%)                   | 8%<br>(4.9-12%)                     | 1300<br>(780-1900)    | 31000<br>(19000-48000)    |

| Location | Year | Sex    | Age      | Prevalence of current drinkers | Prevalence of abstainers | Population average of standard drinks daily | Percent of total attributable deaths | Percent of total attributable DALYs | Attributable deaths    | Attributable DALYs          |
|----------|------|--------|----------|--------------------------------|--------------------------|---------------------------------------------|--------------------------------------|-------------------------------------|------------------------|-----------------------------|
| Thailand | 2005 | Female | 70 to 74 | 14%<br>(6.5-25%)               | 86%<br>(75-93%)          | 1.6<br>(0.52-3.5)                           | 5%<br>(2.8-7.9%)                     | 6.8%<br>(3.9-11%)                   | 1300<br>(760-2100)     | 26000<br>(15000-40000)      |
| Thailand | 2005 | Female | 75 to 79 | 13%<br>(6.1-25%)               | 87%<br>(75-94%)          | 1.4<br>(0.43-3.3)                           | 4.3%<br>(2.1-7.3%)                   | 5.7%<br>(2.9-9.4%)                  | 1200<br>(610-2000)     | 18000<br>(9000-30000)       |
| Thailand | 2005 | Female | 80 to 84 | 14%<br>(6.3-26%)               | 86%<br>(74-94%)          | 1.4<br>(0.45-3.2)                           | 4.5%<br>(2-7.7%)                     | 5.7%<br>(2.6-9.8%)                  | 1300<br>(570-2200)     | 14000<br>(6100-23000)       |
| Thailand | 2005 | Female | 85 to 89 | 15%<br>(6.6-27%)               | 85%<br>(73-93%)          | 1.6<br>(0.49-3.5)                           | 4.4%<br>(2-8.1%)                     | 5.5%<br>(2.4-10%)                   | 920<br>(400-1700)      | 7000<br>(3100-13000)        |
| Thailand | 2005 | Female | 90 to 94 | 17%<br>(7.5-32%)               | 83%<br>(68-93%)          | 1.8<br>(0.48-4.3)                           | 4.2%<br>(1.7-7.7%)                   | 5.1%<br>(2-9.6%)                    | 480<br>(190-910)       | 2500<br>(1000-4700)         |
| Thailand | 2005 | Female | 95 plus  | 21%<br>(8.1-40%)               | 79%<br>(60-92%)          | 2.1<br>(0.44-5.8)                           | 4.2%<br>(1.3-8.7%)                   | 4.9%<br>(1.4-10%)                   | 180<br>(50-360)        | 610<br>(180-1200)           |
| Thailand | 2005 | Male   | All Ages | 34%<br>(28-43%)                | 66%<br>(57-72%)          | 2.8<br>(2.4-3.2)                            | 10%<br>(8.6-12%)                     | 12%<br>(10-15%)                     | 29000<br>(24000-35000) | 1100000<br>(920000-1300000) |
| Thailand | 2005 | Male   | 15 to 19 | 25%<br>(14-41%)                | 75%<br>(59-86%)          | 1<br>(0.46-1.9)                             | 4.6%<br>(2.5-8.2%)                   | 6.5%<br>(3.3-12%)                   | 330<br>(170-600)       | 25000<br>(14000-45000)      |
| Thailand | 2005 | Male   | 20 to 24 | 37%<br>(21-56%)                | 63%<br>(44-79%)          | 2.4<br>(1.2-4.2)                            | 10%<br>(5.9-16%)                     | 14%<br>(7.5-22%)                    | 890<br>(480-1400)      | 64000<br>(37000-100000)     |
| Thailand | 2005 | Male   | 25 to 29 | 43%<br>(25-61%)                | 57%<br>(39-75%)          | 3.4<br>(1.8-5.5)                            | 12%<br>(7.6-17%)                     | 15%<br>(9.2-22%)                    | 1300<br>(790-1900)     | 89000<br>(56000-130000)     |
| Thailand | 2005 | Male   | 30 to 34 | 46%<br>(26-65%)                | 54%<br>(35-74%)          | 4.1<br>(2.4-6.3)                            | 12%<br>(8.4-16%)                     | 15%<br>(10-19%)                     | 1700<br>(1200-2300)    | 110000<br>(74000-140000)    |
| Thailand | 2005 | Male   | 35 to 39 | 48%<br>(29-68%)                | 52%<br>(32-71%)          | 4.7<br>(2.6-7)                              | 12%<br>(8.4-16%)                     | 15%<br>(10-19%)                     | 2000<br>(1300-2600)    | 110000<br>(78000-140000)    |
| Thailand | 2005 | Male   | 40 to 44 | 48%<br>(31-67%)                | 52%<br>(33-69%)          | 4.9<br>(3-7.3)                              | 13%<br>(10-17%)                      | 17%<br>(13-21%)                     | 2400<br>(1800-3100)    | 120000<br>(92000-150000)    |
| Thailand | 2005 | Male   | 45 to 49 | 47%<br>(27-66%)                | 53%<br>(34-73%)          | 4.9<br>(2.8-7.3)                            | 14%<br>(11-17%)                      | 19%<br>(14-23%)                     | 2800<br>(2100-3400)    | 120000<br>(95000-150000)    |
| Thailand | 2005 | Male   | 50 to 54 | 45%<br>(26-64%)                | 55%<br>(36-74%)          | 4.6<br>(2.6-7)                              | 14%<br>(11-18%)                      | 19%<br>(14-23%)                     | 2900<br>(2200-3600)    | 110000<br>(85000-140000)    |
| Thailand | 2005 | Male   | 55 to 59 | 42%<br>(26-62%)                | 58%<br>(38-74%)          | 4.2<br>(2.2-6.9)                            | 13%<br>(9.6-17%)                     | 18%<br>(13-22%)                     | 2700<br>(1900-3500)    | 92000<br>(67000-120000)     |
| Thailand | 2005 | Male   | 60 to 64 | 39%<br>(22-59%)                | 61%<br>(41-78%)          | 3.7<br>(1.8-6.3)                            | 12%<br>(8.1-16%)                     | 15%<br>(10-20%)                     | 2500<br>(1700-3300)    | 73000<br>(50000-96000)      |
| Thailand | 2005 | Male   | 65 to 69 | 36%<br>(20-54%)                | 64%<br>(46-80%)          | 3.1<br>(1.5-5.1)                            | 10%<br>(7.1-14%)                     | 13%<br>(9.1-18%)                    | 2700<br>(1800-3600)    | 64000<br>(44000-87000)      |
| Thailand | 2005 | Male   | 70 to 74 | 32%<br>(18-50%)                | 68%<br>(50-82%)          | 2.5<br>(1.2-4.7)                            | 8.8%<br>(5.5-13%)                    | 11%<br>(6.9-16%)                    | 2500<br>(1500-3600)    | 47000<br>(29000-67000)      |
| Thailand | 2005 | Male   | 75 to 79 | 29%<br>(17-46%)                | 71%<br>(54-83%)          | 2.1<br>(0.95-4.1)                           | 7%<br>(4-11%)                        | 8.7%<br>(5-13%)                     | 1900<br>(1100-2800)    | 28000<br>(16000-41000)      |
| Thailand | 2005 | Male   | 80 to 84 | 27%<br>(15-43%)                | 73%<br>(57-85%)          | 1.9<br>(0.84-3.5)                           | 6.2%<br>(3.1-9.7%)                   | 7.4%<br>(3.8-12%)                   | 1400<br>(730-2300)     | 16000<br>(8000-25000)       |

| Location | Year | Sex    | Age      | Prevalence of current drinkers | Prevalence of abstainers | Population average of standard drinks daily | Percent of total attributable deaths | Percent of total attributable DALYs | Attributable deaths   | Attributable DALYs        |
|----------|------|--------|----------|--------------------------------|--------------------------|---------------------------------------------|--------------------------------------|-------------------------------------|-----------------------|---------------------------|
| Thailand | 2005 | Male   | 85 to 89 | 25%<br>(14-40%)                | 75%<br>(60-86%)          | 1.6<br>(0.73-3)                             | 5.1%<br>(2.3-8.3%)                   | 6%<br>(2.7-9.9%)                    | 750<br>(340-1300)     | 5800<br>(2600-9500)       |
| Thailand | 2005 | Male   | 90 to 94 | 27%<br>(15-43%)                | 73%<br>(57-85%)          | 1.6<br>(0.72-3)                             | 4.1%<br>(1.7-7.5%)                   | 4.8%<br>(1.9-8.7%)                  | 280<br>(110-520)      | 1500<br>(620-2700)        |
| Thailand | 2005 | Male   | 95 plus  | 30%<br>(15-50%)                | 70%<br>(50-85%)          | 1.6<br>(0.58-3.5)                           | 3.9%<br>(1.2-7.9%)                   | 4.2%<br>(1.2-8.7%)                  | 73<br>(20-150)        | 260<br>(80-530)           |
| Thailand | 2010 | Female | All Ages | 11%<br>(8.3-15%)               | 89%<br>(85-92%)          | 1<br>(0.76-1.4)                             | 3.6%<br>(2.8-4.6%)                   | 6.1%<br>(4.4-8.2%)                  | 11000<br>(7600-14000) | 270000<br>(220000-350000) |
| Thailand | 2010 | Female | 15 to 19 | 9%<br>(4.2-17%)                | 91%<br>(83-96%)          | 0.63<br>(0.21-1.4)                          | 1.5%<br>(0.78-2.8%)                  | 3.3%<br>(1.4-6.5%)                  | 41<br>(18-82)         | 4000<br>(2000-7400)       |
| Thailand | 2010 | Female | 20 to 24 | 11%<br>(4.6-20%)               | 89%<br>(80-95%)          | 0.84<br>(0.26-1.9)                          | 1.9%<br>(1.1-3.1%)                   | 3.5%<br>(1.5-6.4%)                  | 48<br>(21-88)         | 5400<br>(3000-8900)       |
| Thailand | 2010 | Female | 25 to 29 | 12%<br>(5.2-23%)               | 88%<br>(77-95%)          | 0.95<br>(0.31-2)                            | 2.1%<br>(1.2-3.3%)                   | 3.4%<br>(1.5-6.2%)                  | 71<br>(31-130)        | 7000<br>(3900-12000)      |
| Thailand | 2010 | Female | 30 to 34 | 13%<br>(5.3-25%)               | 87%<br>(75-95%)          | 1.1<br>(0.38-2.2)                           | 2.3%<br>(1.3-3.6%)                   | 3.9%<br>(1.8-6.6%)                  | 120<br>(56-210)       | 9900<br>(5500-16000)      |
| Thailand | 2010 | Female | 35 to 39 | 14%<br>(5.8-26%)               | 86%<br>(74-94%)          | 1.2<br>(0.45-2.3)                           | 2.7%<br>(1.6-4.3%)                   | 4.9%<br>(2.6-8%)                    | 200<br>(110-330)      | 14000<br>(7700-21000)     |
| Thailand | 2010 | Female | 40 to 44 | 14%<br>(6.5-25%)               | 86%<br>(75-94%)          | 1.3<br>(0.49-2.5)                           | 3.3%<br>(2.1-5%)                     | 6.1%<br>(3.8-9.2%)                  | 340<br>(210-520)      | 19000<br>(13000-29000)    |
| Thailand | 2010 | Female | 45 to 49 | 14%<br>(5.8-26%)               | 86%<br>(74-94%)          | 1.4<br>(0.54-2.9)                           | 3.9%<br>(2.4-6%)                     | 7.2%<br>(4.6-11%)                   | 510<br>(320-760)      | 25000<br>(16000-37000)    |
| Thailand | 2010 | Female | 50 to 54 | 15%<br>(6.4-28%)               | 85%<br>(72-94%)          | 1.6<br>(0.64-3.4)                           | 4.7%<br>(2.9-7%)                     | 8.1%<br>(5.1-12%)                   | 740<br>(460-1100)     | 31000<br>(19000-46000)    |
| Thailand | 2010 | Female | 55 to 59 | 15%<br>(6.8-28%)               | 85%<br>(72-93%)          | 1.8<br>(0.65-3.7)                           | 5%<br>(3.1-7.8%)                     | 8.2%<br>(5.2-13%)                   | 880<br>(550-1400)     | 31000<br>(20000-49000)    |
| Thailand | 2010 | Female | 60 to 64 | 15%<br>(6.4-28%)               | 85%<br>(72-94%)          | 1.8<br>(0.63-4)                             | 5.1%<br>(3.2-8.1%)                   | 7.9%<br>(5-12%)                     | 970<br>(610-1500)     | 29000<br>(18000-46000)    |
| Thailand | 2010 | Female | 65 to 69 | 14%<br>(6.1-26%)               | 86%<br>(74-94%)          | 1.7<br>(0.62-3.3)                           | 5.3%<br>(3.3-7.9%)                   | 7.8%<br>(5-11%)                     | 1100<br>(700-1700)    | 27000<br>(17000-42000)    |
| Thailand | 2010 | Female | 70 to 74 | 14%<br>(6.3-25%)               | 86%<br>(75-94%)          | 1.5<br>(0.52-3.6)                           | 4.7%<br>(2.7-7.4%)                   | 6.7%<br>(4-10%)                     | 1400<br>(790-2100)    | 26000<br>(15000-41000)    |
| Thailand | 2010 | Female | 75 to 79 | 13%<br>(5.9-25%)               | 87%<br>(75-94%)          | 1.5<br>(0.44-3.4)                           | 4.2%<br>(2.1-6.9%)                   | 5.7%<br>(3-9.2%)                    | 1300<br>(680-2200)    | 20000<br>(10000-33000)    |
| Thailand | 2010 | Female | 80 to 84 | 13%<br>(5.9-26%)               | 87%<br>(74-94%)          | 1.5<br>(0.43-3.2)                           | 4.2%<br>(1.9-7%)                     | 5.5%<br>(2.6-9.5%)                  | 1300<br>(620-2300)    | 15000<br>(6800-25000)     |
| Thailand | 2010 | Female | 85 to 89 | 15%<br>(6.4-28%)               | 85%<br>(72-94%)          | 1.6<br>(0.45-3.6)                           | 4.1%<br>(1.8-7.6%)                   | 5.2%<br>(2.3-9.6%)                  | 1000<br>(440-1900)    | 8000<br>(3400-15000)      |
| Thailand | 2010 | Female | 90 to 94 | 17%<br>(7.8-32%)               | 83%<br>(68-92%)          | 1.8<br>(0.47-4.3)                           | 3.8%<br>(1.4-7.1%)                   | 4.8%<br>(1.7-9.2%)                  | 470<br>(180-900)      | 2500<br>(940-4800)        |
| Thailand | 2010 | Female | 95 plus  | 21%<br>(8.1-39%)               | 79%<br>(61-92%)          | 2.2<br>(0.45-5.8)                           | 4%<br>(1.2-8.1%)                     | 4.8%<br>(1.3-9.8%)                  | 170<br>(46-340)       | 590<br>(170-1200)         |

| Location | Year | Sex    | Age      | Prevalence of current drinkers | Prevalence of abstainers | Population average of standard drinks daily | Percent of total attributable deaths | Percent of total attributable DALYs | Attributable deaths    | Attributable DALYs          |
|----------|------|--------|----------|--------------------------------|--------------------------|---------------------------------------------|--------------------------------------|-------------------------------------|------------------------|-----------------------------|
| Thailand | 2010 | Male   | All Ages | 35%<br>(28-43%)                | 65%<br>(57-72%)          | 2.9<br>(2.4-3.5)                            | 11%<br>(9-13%)                       | 13%<br>(11-15%)                     | 30000<br>(24000-35000) | 1100000<br>(910000-1200000) |
| Thailand | 2010 | Male   | 15 to 19 | 24%<br>(14-39%)                | 76%<br>(61-86%)          | 1<br>(0.45-1.9)                             | 4.6%<br>(2.6-7.9%)                   | 6.6%<br>(3.6-12%)                   | 260<br>(140-450)       | 20000<br>(11000-34000)      |
| Thailand | 2010 | Male   | 20 to 24 | 36%<br>(20-54%)                | 64%<br>(46-80%)          | 2.4<br>(1.2-4.1)                            | 9.9%<br>(5.7-15%)                    | 14%<br>(7.5-22%)                    | 610<br>(330-950)       | 45000<br>(26000-69000)      |
| Thailand | 2010 | Male   | 25 to 29 | 42%<br>(24-60%)                | 58%<br>(40-76%)          | 3.3<br>(1.7-5.6)                            | 12%<br>(7.5-17%)                     | 16%<br>(9.7-23%)                    | 920<br>(560-1300)      | 63000<br>(39000-89000)      |
| Thailand | 2010 | Male   | 30 to 34 | 45%<br>(26-64%)                | 55%<br>(36-74%)          | 4.1<br>(2.2-6.5)                            | 13%<br>(8.8-17%)                     | 17%<br>(11-22%)                     | 1400<br>(950-1900)     | 88000<br>(61000-120000)     |
| Thailand | 2010 | Male   | 35 to 39 | 48%<br>(30-67%)                | 52%<br>(33-70%)          | 4.7<br>(2.7-7.2)                            | 13%<br>(9.4-17%)                     | 17%<br>(12-22%)                     | 1900<br>(1300-2500)    | 110000<br>(75000-140000)    |
| Thailand | 2010 | Male   | 40 to 44 | 48%<br>(30-67%)                | 52%<br>(33-70%)          | 4.9<br>(2.9-7.2)                            | 14%<br>(10-17%)                      | 18%<br>(13-23%)                     | 2400<br>(1800-3100)    | 120000<br>(92000-160000)    |
| Thailand | 2010 | Male   | 45 to 49 | 46%<br>(27-65%)                | 54%<br>(35-73%)          | 4.8<br>(2.6-7.2)                            | 15%<br>(11-18%)                      | 20%<br>(15-24%)                     | 3000<br>(2300-3800)    | 140000<br>(100000-170000)   |
| Thailand | 2010 | Male   | 50 to 54 | 44%<br>(25-63%)                | 56%<br>(37-75%)          | 4.5<br>(2.5-7)                              | 14%<br>(11-18%)                      | 19%<br>(15-24%)                     | 3300<br>(2500-4100)    | 130000<br>(100000-160000)   |
| Thailand | 2010 | Male   | 55 to 59 | 42%<br>(25-62%)                | 58%<br>(38-75%)          | 4.1<br>(2.2-6.6)                            | 13%<br>(9.6-17%)                     | 18%<br>(13-22%)                     | 3200<br>(2300-4000)    | 110000<br>(80000-140000)    |
| Thailand | 2010 | Male   | 60 to 64 | 39%<br>(22-58%)                | 61%<br>(42-78%)          | 3.6<br>(1.7-6.1)                            | 12%<br>(8.2-15%)                     | 15%<br>(11-20%)                     | 2800<br>(2000-3700)    | 82000<br>(57000-110000)     |
| Thailand | 2010 | Male   | 65 to 69 | 35%<br>(20-53%)                | 65%<br>(47-80%)          | 3<br>(1.5-5)                                | 10%<br>(7-14%)                       | 13%<br>(9.1-18%)                    | 2500<br>(1700-3400)    | 61000<br>(41000-81000)      |
| Thailand | 2010 | Male   | 70 to 74 | 31%<br>(18-49%)                | 69%<br>(51-82%)          | 2.5<br>(1.2-4.5)                            | 8.6%<br>(5.4-12%)                    | 11%<br>(6.9-15%)                    | 2600<br>(1600-3600)    | 49000<br>(31000-68000)      |
| Thailand | 2010 | Male   | 75 to 79 | 29%<br>(16-46%)                | 71%<br>(54-84%)          | 2.1<br>(0.93-4)                             | 6.8%<br>(3.8-10%)                    | 8.6%<br>(4.8-13%)                   | 2000<br>(1100-3000)    | 30000<br>(17000-44000)      |
| Thailand | 2010 | Male   | 80 to 84 | 26%<br>(14-44%)                | 74%<br>(56-86%)          | 1.8<br>(0.79-3.4)                           | 5.7%<br>(2.9-9.1%)                   | 7.1%<br>(3.6-11%)                   | 1500<br>(740-2400)     | 17000<br>(8300-26000)       |
| Thailand | 2010 | Male   | 85 to 89 | 25%<br>(13-40%)                | 75%<br>(60-87%)          | 1.6<br>(0.69-3.1)                           | 4.5%<br>(2.1-7.6%)                   | 5.5%<br>(2.5-9.5%)                  | 790<br>(350-1400)      | 6300<br>(2900-11000)        |
| Thailand | 2010 | Male   | 90 to 94 | 26%<br>(14-44%)                | 74%<br>(56-86%)          | 1.6<br>(0.66-2.9)                           | 3.6%<br>(1.5-6.9%)                   | 4.4%<br>(1.7-8.4%)                  | 260<br>(100-510)       | 1500<br>(610-2700)          |
| Thailand | 2010 | Male   | 95 plus  | 30%<br>(14-51%)                | 70%<br>(49-86%)          | 1.6<br>(0.56-3.4)                           | 3.5%<br>(1.1-7.3%)                   | 3.9%<br>(1-8.5%)                    | 64<br>(17-140)         | 250<br>(76-520)             |
| Thailand | 2016 | Female | All Ages | 12%<br>(8.6-15%)               | 88%<br>(85-91%)          | 1.1<br>(0.73-1.6)                           | 3.5%<br>(2.7-4.7%)                   | 5.9%<br>(4.1-7.9%)                  | 12000<br>(7900-16000)  | 280000<br>(210000-370000)   |
| Thailand | 2016 | Female | 15 to 19 | 8.9%<br>(4.2-16%)              | 91%<br>(84-96%)          | 0.62<br>(0.2-1.4)                           | 1.5%<br>(0.75-2.6%)                  | 3.3%<br>(1.4-6.6%)                  | 33<br>(14-63)          | 3400<br>(1700-6200)         |
| Thailand | 2016 | Female | 20 to 24 | 11%<br>(4.5-20%)               | 89%<br>(80-95%)          | 0.82<br>(0.25-1.9)                          | 1.9%<br>(1.1-3%)                     | 3.5%<br>(1.6-6.4%)                  | 39<br>(18-73)          | 4800<br>(2800-7800)         |



| Location | Year | Sex    | Age      | Prevalence of current drinkers | Prevalence of abstainers | Population average of standard drinks daily | Percent of total attributable deaths | Percent of total attributable DALYs | Attributable deaths    | Attributable DALYs          |
|----------|------|--------|----------|--------------------------------|--------------------------|---------------------------------------------|--------------------------------------|-------------------------------------|------------------------|-----------------------------|
| Thailand | 2016 | Female | 25 to 29 | 11%<br>(4.8-21%)               | 89%<br>(79-95%)          | 0.93<br>(0.29-2)                            | 1.9%<br>(1.1-3%)                     | 3.3%<br>(1.4-6%)                    | 51<br>(21-95)          | 5700<br>(3300-9100)         |
| Thailand | 2016 | Female | 30 to 34 | 12%<br>(5.2-23%)               | 88%<br>(77-95%)          | 1<br>(0.34-2.2)                             | 2.1%<br>(1.2-3.3%)                   | 3.6%<br>(1.7-6.3%)                  | 83<br>(37-150)         | 7600<br>(4300-12000)        |
| Thailand | 2016 | Female | 35 to 39 | 14%<br>(5.7-25%)               | 86%<br>(75-94%)          | 1.2<br>(0.41-2.4)                           | 2.4%<br>(1.4-3.8%)                   | 4.5%<br>(2.1-7.3%)                  | 150<br>(71-260)        | 11000<br>(6100-18000)       |
| Thailand | 2016 | Female | 40 to 44 | 14%<br>(6.4-24%)               | 86%<br>(76-94%)          | 1.3<br>(0.47-2.7)                           | 3.1%<br>(1.9-4.7%)                   | 5.7%<br>(3.4-8.7%)                  | 290<br>(170-450)       | 17000<br>(10000-26000)      |
| Thailand | 2016 | Female | 45 to 49 | 14%<br>(6-26%)                 | 86%<br>(74-94%)          | 1.5<br>(0.5-3.1)                            | 3.7%<br>(2.3-5.6%)                   | 6.8%<br>(4.2-10%)                   | 480<br>(290-740)       | 24000<br>(15000-36000)      |
| Thailand | 2016 | Female | 50 to 54 | 15%<br>(6.3-28%)               | 85%<br>(72-94%)          | 1.6<br>(0.63-3.6)                           | 4.4%<br>(2.7-6.7%)                   | 7.9%<br>(4.8-12%)                   | 730<br>(440-1100)      | 31000<br>(19000-46000)      |
| Thailand | 2016 | Female | 55 to 59 | 15%<br>(6.9-28%)               | 85%<br>(72-93%)          | 1.8<br>(0.64-3.7)                           | 4.7%<br>(2.9-7.4%)                   | 8.1%<br>(5.1-12%)                   | 940<br>(590-1500)      | 34000<br>(21000-54000)      |
| Thailand | 2016 | Female | 60 to 64 | 15%<br>(6.5-28%)               | 85%<br>(72-93%)          | 1.8<br>(0.63-3.9)                           | 4.8%<br>(3-7.8%)                     | 7.7%<br>(4.9-12%)                   | 1200<br>(730-1800)     | 36000<br>(22000-57000)      |
| Thailand | 2016 | Female | 65 to 69 | 14%<br>(6.6-27%)               | 86%<br>(73-93%)          | 1.7<br>(0.61-3.5)                           | 5%<br>(3.1-7.6%)                     | 7.6%<br>(4.8-11%)                   | 1300<br>(820-1900)     | 32000<br>(20000-48000)      |
| Thailand | 2016 | Female | 70 to 74 | 14%<br>(6.6-25%)               | 86%<br>(75-93%)          | 1.5<br>(0.51-3.5)                           | 4.4%<br>(2.6-6.9%)                   | 6.5%<br>(3.8-9.8%)                  | 1300<br>(720-2000)     | 25000<br>(14000-39000)      |
| Thailand | 2016 | Female | 75 to 79 | 13%<br>(5.9-25%)               | 87%<br>(75-94%)          | 1.4<br>(0.4-3.3)                            | 3.8%<br>(2-6.4%)                     | 5.3%<br>(2.8-8.6%)                  | 1400<br>(700-2200)     | 21000<br>(10000-34000)      |
| Thailand | 2016 | Female | 80 to 84 | 13%<br>(6-25%)                 | 87%<br>(75-94%)          | 1.4<br>(0.43-3.4)                           | 3.8%<br>(1.7-6.4%)                   | 5.1%<br>(2.3-8.8%)                  | 1500<br>(680-2500)     | 16000<br>(7500-28000)       |
| Thailand | 2016 | Female | 85 to 89 | 14%<br>(6.8-27%)               | 86%<br>(73-93%)          | 1.6<br>(0.46-3.7)                           | 3.7%<br>(1.5-6.7%)                   | 4.9%<br>(2-8.8%)                    | 1300<br>(510-2300)     | 9800<br>(4000-18000)        |
| Thailand | 2016 | Female | 90 to 94 | 17%<br>(7.3-30%)               | 83%<br>(70-93%)          | 1.8<br>(0.46-4.6)                           | 3.5%<br>(1.2-6.6%)                   | 4.5%<br>(1.6-8.5%)                  | 660<br>(230-1300)      | 3500<br>(1200-6700)         |
| Thailand | 2016 | Female | 95 plus  | 20%<br>(7.8-39%)               | 80%<br>(61-92%)          | 2.2<br>(0.43-6)                             | 3.7%<br>(1.1-7.5%)                   | 4.5%<br>(1.2-9.3%)                  | 220<br>(57-450)        | 770<br>(210-1500)           |
| Thailand | 2016 | Male   | All Ages | 35%<br>(29-44%)                | 65%<br>(56-71%)          | 3<br>(2.2-4.1)                              | 11%<br>(8.7-13%)                     | 13%<br>(9.7-15%)                    | 32000<br>(24000-40000) | 1100000<br>(880000-1400000) |
| Thailand | 2016 | Male   | 15 to 19 | 24%<br>(14-38%)                | 76%<br>(62-86%)          | 0.99<br>(0.41-2)                            | 4.5%<br>(2.4-7.7%)                   | 6.8%<br>(3.4-12%)                   | 220<br>(110-390)       | 17000<br>(9100-29000)       |
| Thailand | 2016 | Male   | 20 to 24 | 36%<br>(20-55%)                | 64%<br>(45-80%)          | 2.4<br>(1.1-4.5)                            | 9.9%<br>(5.7-15%)                    | 14%<br>(7.5-23%)                    | 550<br>(290-910)       | 42000<br>(24000-65000)      |
| Thailand | 2016 | Male   | 25 to 29 | 42%<br>(24-60%)                | 58%<br>(40-76%)          | 3.4<br>(1.5-6)                              | 12%<br>(7.2-17%)                     | 17%<br>(9.5-24%)                    | 800<br>(450-1200)      | 56000<br>(33000-80000)      |
| Thailand | 2016 | Male   | 30 to 34 | 45%<br>(26-65%)                | 55%<br>(35-74%)          | 4.1<br>(2.1-7)                              | 13%<br>(8.6-17%)                     | 17%<br>(11-24%)                     | 1200<br>(760-1700)     | 76000<br>(50000-110000)     |
| Thailand | 2016 | Male   | 35 to 39 | 47%<br>(30-66%)                | 53%<br>(34-70%)          | 4.6<br>(2.4-7.7)                            | 14%<br>(9.7-18%)                     | 19%<br>(13-24%)                     | 1800<br>(1200-2500)    | 100000<br>(71000-140000)    |

| Location    | Year | Sex    | Age      | Prevalence of current drinkers | Prevalence of abstainers | Population average of standard drinks daily | Percent of total attributable deaths | Percent of total attributable DALYs | Attributable deaths   | Attributable DALYs        |
|-------------|------|--------|----------|--------------------------------|--------------------------|---------------------------------------------|--------------------------------------|-------------------------------------|-----------------------|---------------------------|
| Thailand    | 2016 | Male   | 40 to 44 | 47%<br>(30-67%)                | 53%<br>(33-70%)          | 4.8<br>(2.5-8)                              | 14%<br>(11-19%)                      | 19%<br>(14-24%)                     | 2500<br>(1800-3300)   | 120000<br>(90000-160000)  |
| Thailand    | 2016 | Male   | 45 to 49 | 46%<br>(27-65%)                | 54%<br>(35-73%)          | 4.8<br>(2.4-7.8)                            | 15%<br>(11-19%)                      | 20%<br>(15-25%)                     | 3200<br>(2300-4100)   | 140000<br>(100000-180000) |
| Thailand    | 2016 | Male   | 50 to 54 | 44%<br>(25-64%)                | 56%<br>(36-75%)          | 4.5<br>(2.3-7.4)                            | 14%<br>(11-18%)                      | 19%<br>(14-24%)                     | 3600<br>(2600-4700)   | 140000<br>(100000-180000) |
| Thailand    | 2016 | Male   | 55 to 59 | 42%<br>(24-62%)                | 58%<br>(38-76%)          | 4.1<br>(2.1-6.8)                            | 13%<br>(9.2-17%)                     | 17%<br>(13-22%)                     | 3700<br>(2700-4800)   | 130000<br>(90000-160000)  |
| Thailand    | 2016 | Male   | 60 to 64 | 38%<br>(22-59%)                | 62%<br>(41-78%)          | 3.6<br>(1.7-6.3)                            | 11%<br>(7.7-15%)                     | 15%<br>(11-20%)                     | 3600<br>(2400-4900)   | 110000<br>(72000-140000)  |
| Thailand    | 2016 | Male   | 65 to 69 | 35%<br>(20-54%)                | 65%<br>(46-80%)          | 3<br>(1.4-5.4)                              | 9.9%<br>(6.6-13%)                    | 13%<br>(8.9-17%)                    | 3200<br>(2100-4300)   | 76000<br>(50000-100000)   |
| Thailand    | 2016 | Male   | 70 to 74 | 31%<br>(18-49%)                | 69%<br>(51-82%)          | 2.4<br>(1.1-4.6)                            | 8.2%<br>(5-12%)                      | 11%<br>(6.3-15%)                    | 2600<br>(1500-3800)   | 51000<br>(29000-73000)    |
| Thailand    | 2016 | Male   | 75 to 79 | 28%<br>(16-45%)                | 72%<br>(55-84%)          | 2.1<br>(0.84-4)                             | 6.4%<br>(3.4-9.8%)                   | 8.1%<br>(4.5-12%)                   | 2200<br>(1100-3300)   | 33000<br>(17000-49000)    |
| Thailand    | 2016 | Male   | 80 to 84 | 26%<br>(14-43%)                | 74%<br>(57-86%)          | 1.8<br>(0.73-3.4)                           | 5.3%<br>(2.5-8.4%)                   | 6.6%<br>(3.2-11%)                   | 1700<br>(800-2700)    | 19000<br>(9000-30000)     |
| Thailand    | 2016 | Male   | 85 to 89 | 24%<br>(13-39%)                | 76%<br>(61-87%)          | 1.6<br>(0.65-3.1)                           | 4.2%<br>(1.8-7.2%)                   | 5.2%<br>(2.1-9.1%)                  | 920<br>(380-1700)     | 7400<br>(3100-13000)      |
| Thailand    | 2016 | Male   | 90 to 94 | 26%<br>(14-42%)                | 74%<br>(58-86%)          | 1.5<br>(0.62-3)                             | 3.4%<br>(1.2-6.5%)                   | 4.2%<br>(1.4-8.4%)                  | 380<br>(130-750)      | 2100<br>(750-4100)        |
| Thailand    | 2016 | Male   | 95 plus  | 29%<br>(14-50%)                | 71%<br>(50-86%)          | 1.6<br>(0.51-3.5)                           | 3.4%<br>(0.92-7.2%)                  | 3.7%<br>(0.82-8.5%)                 | 88<br>(19-200)        | 340<br>(93-730)           |
| Timor-Leste | 1990 | Female | All Ages | 8.4%<br>(5.9-12%)              | 92%<br>(88-94%)          | 0.024<br>(0.018-0.032)                      | 0.12%<br>(0.055-0.19%)               | 0.091%<br>(-0.031-0.22%)            | 3.2<br>(-1.1-8)       | 300<br>(130-480)          |
| Timor-Leste | 1990 | Female | 15 to 19 | 8.3%<br>(3.8-16%)              | 92%<br>(84-96%)          | 0.022<br>(0.0077-0.047)                     | 0.27%<br>(0.16-0.4%)                 | 0.16%<br>(0.037-0.33%)              | 0.13<br>(0.03-0.28)   | 26<br>(15-40)             |
| Timor-Leste | 1990 | Female | 20 to 24 | 10%<br>(4.2-19%)               | 90%<br>(81-96%)          | 0.029<br>(0.01-0.061)                       | 0.44%<br>(0.25-0.66%)                | 0.15%<br>(-0.028-0.37%)             | 0.15<br>(-0.029-0.37) | 44<br>(24-68)             |
| Timor-Leste | 1990 | Female | 25 to 29 | 11%<br>(4.7-21%)               | 89%<br>(79-95%)          | 0.034<br>(0.013-0.068)                      | 0.47%<br>(0.27-0.72%)                | 0.17%<br>(-0.048-0.47%)             | 0.17<br>(-0.049-0.46) | 43<br>(23-68)             |
| Timor-Leste | 1990 | Female | 30 to 34 | 12%<br>(4.7-23%)               | 88%<br>(77-95%)          | 0.038<br>(0.014-0.076)                      | 0.47%<br>(0.25-0.7%)                 | 0.26%<br>(0.012-0.54%)              | 0.25<br>(0.012-0.53)  | 39<br>(20-61)             |
| Timor-Leste | 1990 | Female | 35 to 39 | 13%<br>(5.3-24%)               | 87%<br>(76-95%)          | 0.043<br>(0.016-0.082)                      | 0.46%<br>(0.24-0.69%)                | 0.34%<br>(0.066-0.66%)              | 0.33<br>(0.064-0.67)  | 34<br>(17-53)             |
| Timor-Leste | 1990 | Female | 40 to 44 | 13%<br>(5.9-24%)               | 87%<br>(76-94%)          | 0.048<br>(0.018-0.099)                      | 0.46%<br>(0.23-0.71%)                | 0.43%<br>(0.11-0.8%)                | 0.43<br>(0.11-0.81)   | 32<br>(15-51)             |
| Timor-Leste | 1990 | Female | 45 to 49 | 14%<br>(6-25%)                 | 86%<br>(75-94%)          | 0.055<br>(0.019-0.12)                       | 0.43%<br>(0.16-0.71%)                | 0.42%<br>(0.06-0.84%)               | 0.45<br>(0.061-0.92)  | 26<br>(9.4-46)            |
| Timor-Leste | 1990 | Female | 50 to 54 | 14%<br>(6.1-26%)               | 86%<br>(74-94%)          | 0.061<br>(0.021-0.14)                       | 0.44%<br>(0.086-0.82%)               | 0.48%<br>(0.0077-1%)                | 0.56<br>(0.0082-1.2)  | 25<br>(5-48)              |
| Timor-Leste | 1990 | Female | 55 to 59 | 14%<br>(6.3-26%)               | 86%<br>(74-94%)          | 0.067<br>(0.022-0.14)                       | 0.33%<br>(-0.055-0.64%)              | 0.36%<br>(-0.14-0.78%)              | 0.42<br>(-0.15-0.98)  | 16<br>(-2.8-34)           |

| Location    | Year | Sex    | Age      | Prevalence of current drinkers | Prevalence of abstainers | Population average of standard drinks daily | Percent of total attributable deaths | Percent of total attributable DALYs | Attributable deaths        | Attributable DALYs      |
|-------------|------|--------|----------|--------------------------------|--------------------------|---------------------------------------------|--------------------------------------|-------------------------------------|----------------------------|-------------------------|
| Timor-Leste | 1990 | Female | 60 to 64 | 14%<br>(6.1-27%)               | 86%<br>(73-94%)          | 0.068<br>(0.021-0.16)                       | 0.19%<br>(-0.24-0.54%)               | 0.2%<br>(-0.33-0.64%)               | 0.28<br>(-0.47-0.95)       | 8.8<br>(-12-27)         |
| Timor-Leste | 1990 | Female | 65 to 69 | 14%<br>(6-25%)                 | 86%<br>(75-94%)          | 0.064<br>(0.021-0.13)                       | 0.091%<br>(-0.36-0.42%)              | 0.096%<br>(-0.44-0.52%)             | 0.13<br>(-0.59-0.66)       | 3.3<br>(-13-15)         |
| Timor-Leste | 1990 | Female | 70 to 74 | 13%<br>(6.1-24%)               | 87%<br>(76-94%)          | 0.058<br>(0.018-0.14)                       | 0.054%<br>(-0.38-0.35%)              | 0.056%<br>(-0.46-0.41%)             | 0.073<br>(-0.59-0.57)      | 1.5<br>(-11-10)         |
| Timor-Leste | 1990 | Female | 75 to 79 | 12%<br>(5.4-24%)               | 88%<br>(76-95%)          | 0.054<br>(0.015-0.13)                       | -0.028%<br>(-0.47-0.23%)             | -0.039%<br>(-0.56-0.26%)            | -0.036<br>(-0.51-0.26)     | -0.41<br>(-7-3.6)       |
| Timor-Leste | 1990 | Female | 80 to 84 | 12%<br>(5.5-24%)               | 88%<br>(76-94%)          | 0.053<br>(0.016-0.12)                       | -0.057%<br>(-0.46-0.19%)             | -0.074%<br>(-0.55-0.22%)            | -0.044<br>(-0.32-0.13)     | -0.41<br>(-3.3-1.4)     |
| Timor-Leste | 1990 | Female | 85 to 89 | 13%<br>(5.7-25%)               | 87%<br>(75-94%)          | 0.056<br>(0.017-0.14)                       | -0.093%<br>(-0.49-0.13%)             | -0.12%<br>(-0.59-0.14%)             | -0.052<br>(-0.26-0.065)    | -0.35<br>(-1.9-0.49)    |
| Timor-Leste | 1990 | Female | 90 to 94 | 15%<br>(6.3-29%)               | 85%<br>(71-94%)          | 0.065<br>(0.017-0.16)                       | -0.12%<br>(-0.54-0.11%)              | -0.16%<br>(-0.67-0.12%)             | -0.036<br>(-0.14-0.027)    | -0.17<br>(-0.71-0.14)   |
| Timor-Leste | 1990 | Female | 95 plus  | 19%<br>(7.1-37%)               | 81%<br>(63-93%)          | 0.08<br>(0.016-0.22)                        | -0.13%<br>(-0.67-0.15%)              | -0.18%<br>(-0.84-0.16%)             | -0.0099<br>(-0.045-0.0088) | -0.029<br>(-0.14-0.033) |
| Timor-Leste | 1990 | Male   | All Ages | 26%<br>(20-34%)                | 74%<br>(66-80%)          | 0.079<br>(0.07-0.089)                       | 0.31%<br>(0.094-0.54%)               | 0.35%<br>(-0.041-0.76%)             | 12<br>(-1.5-26)            | 850<br>(280-1400)       |
| Timor-Leste | 1990 | Male   | 15 to 19 | 23%<br>(14-38%)                | 77%<br>(62-86%)          | 0.04<br>(0.019-0.074)                       | 0.52%<br>(0.34-0.79%)                | 0.4%<br>(0.19-0.7%)                 | 0.32<br>(0.15-0.58)        | 48<br>(30-73)           |
| Timor-Leste | 1990 | Male   | 20 to 24 | 35%<br>(19-53%)                | 65%<br>(47-81%)          | 0.094<br>(0.049-0.15)                       | 0.98%<br>(0.56-1.5%)                 | 0.64%<br>(0.15-1.3%)                | 0.72<br>(0.16-1.4)         | 100<br>(59-160)         |
| Timor-Leste | 1990 | Male   | 25 to 29 | 40%<br>(22-59%)                | 60%<br>(41-78%)          | 0.13<br>(0.074-0.2)                         | 1.2%<br>(0.45-2.1%)                  | 0.89%<br>(-0.19-2.1%)               | 0.92<br>(-0.19-2.2)        | 120<br>(42-200)         |
| Timor-Leste | 1990 | Male   | 30 to 34 | 44%<br>(25-63%)                | 56%<br>(37-75%)          | 0.16<br>(0.098-0.24)                        | 1.5%<br>(0.48-2.5%)                  | 1.3%<br>(-0.11-2.9%)                | 1.2<br>(-0.11-2.7)         | 120<br>(40-210)         |
| Timor-Leste | 1990 | Male   | 35 to 39 | 46%<br>(28-66%)                | 54%<br>(34-72%)          | 0.19<br>(0.1-0.29)                          | 1.6%<br>(0.49-2.8%)                  | 1.7%<br>(-0.049-3.6%)               | 1.5<br>(-0.039-3.2)        | 120<br>(33-210)         |
| Timor-Leste | 1990 | Male   | 40 to 44 | 46%<br>(28-66%)                | 54%<br>(34-72%)          | 0.2<br>(0.11-0.31)                          | 1.6%<br>(0.36-2.9%)                  | 1.8%<br>(-0.068-3.9%)               | 1.7<br>(-0.052-3.6)        | 110<br>(24-190)         |
| Timor-Leste | 1990 | Male   | 45 to 49 | 44%<br>(25-64%)                | 56%<br>(36-75%)          | 0.19<br>(0.1-0.32)                          | 1.5%<br>(0.2-2.9%)                   | 1.8%<br>(-0.21-3.8%)                | 1.7<br>(-0.2-3.7)          | 88<br>(11-170)          |
| Timor-Leste | 1990 | Male   | 50 to 54 | 42%<br>(24-62%)                | 58%<br>(38-76%)          | 0.18<br>(0.094-0.3)                         | 1.2%<br>(-0.15-2.5%)                 | 1.4%<br>(-0.53-3.2%)                | 1.3<br>(-0.49-3.1)         | 60<br>(-7.1-120)        |
| Timor-Leste | 1990 | Male   | 55 to 59 | 40%<br>(23-60%)                | 60%<br>(40-77%)          | 0.16<br>(0.079-0.29)                        | 0.96%<br>(-0.12-2%)                  | 1.1%<br>(-0.4-2.6%)                 | 0.96<br>(-0.33-2.3)        | 37<br>(-4.2-79)         |
| Timor-Leste | 1990 | Male   | 60 to 64 | 37%<br>(21-56%)                | 63%<br>(44-79%)          | 0.14<br>(0.067-0.26)                        | 0.75%<br>(-0.22-1.7%)                | 0.82%<br>(-0.46-2.1%)               | 0.83<br>(-0.43-2.1)        | 27<br>(-7.3-62)         |
| Timor-Leste | 1990 | Male   | 65 to 69 | 34%<br>(19-52%)                | 66%<br>(48-81%)          | 0.12<br>(0.057-0.21)                        | 0.5%<br>(-0.39-1.3%)                 | 0.52%<br>(-0.63-1.6%)               | 0.45<br>(-0.54-1.4)        | 12<br>(-9.5-33)         |
| Timor-Leste | 1990 | Male   | 70 to 74 | 30%<br>(17-47%)                | 70%<br>(53-83%)          | 0.096<br>(0.043-0.18)                       | 0.35%<br>(-0.4-1.1%)                 | 0.35%<br>(-0.58-1.2%)               | 0.3<br>(-0.49-1.1)         | 6.6<br>(-7.2-20)        |
| Timor-Leste | 1990 | Male   | 75 to 79 | 27%<br>(15-45%)                | 73%<br>(55-85%)          | 0.081<br>(0.033-0.16)                       | 0.21%<br>(-0.44-0.72%)               | 0.19%<br>(-0.61-0.82%)              | 0.11<br>(-0.36-0.5)        | 2.2<br>(-4.5-7.3)       |

| Location    | Year | Sex    | Age      | Prevalence of current drinkers | Prevalence of abstainers | Population average of standard drinks daily | Percent of total attributable deaths | Percent of total attributable DALYs | Attributable deaths       | Attributable DALYs       |
|-------------|------|--------|----------|--------------------------------|--------------------------|---------------------------------------------|--------------------------------------|-------------------------------------|---------------------------|--------------------------|
| Timor-Leste | 1990 | Male   | 80 to 84 | 25%<br>(13-42%)                | 75%<br>(58-87%)          | 0.07<br>(0.029-0.13)                        | 0.16%<br>(-0.37-0.6%)                | 0.13%<br>(-0.52-0.67%)              | 0.044<br>(-0.17-0.23)     | 0.67<br>(-1.5-2.5)       |
| Timor-Leste | 1990 | Male   | 85 to 89 | 24%<br>(12-39%)                | 76%<br>(61-88%)          | 0.062<br>(0.026-0.12)                       | 0.11%<br>(-0.28-0.42%)               | 0.079%<br>(-0.39-0.48%)             | 0.02<br>(-0.1-0.12)       | 0.24<br>(-0.61-0.95)     |
| Timor-Leste | 1990 | Male   | 90 to 94 | 25%<br>(14-41%)                | 75%<br>(59-86%)          | 0.06<br>(0.024-0.12)                        | 0.05%<br>(-0.29-0.31%)               | 0.015%<br>(-0.41-0.33%)             | 0.0018<br>(-0.049-0.04)   | 0.038<br>(-0.22-0.23)    |
| Timor-Leste | 1990 | Male   | 95 plus  | 29%<br>(13-48%)                | 71%<br>(52-87%)          | 0.063<br>(0.021-0.13)                       | 0.069%<br>(-0.33-0.34%)              | 0.0032%<br>(-0.46-0.34%)            | 0.00011<br>(-0.016-0.012) | 0.0095<br>(-0.044-0.047) |
| Timor-Leste | 1995 | Female | All Ages | 8.4%<br>(6-11%)                | 92%<br>(89-94%)          | 0.027<br>(0.02-0.036)                       | 0.14%<br>(0.076-0.21%)               | 0.11%<br>(-0.021-0.24%)             | 3.7<br>(-0.68-8.2)        | 340<br>(180-500)         |
| Timor-Leste | 1995 | Female | 15 to 19 | 8.2%<br>(3.6-15%)              | 92%<br>(85-96%)          | 0.025<br>(0.0085-0.055)                     | 0.29%<br>(0.17-0.44%)                | 0.17%<br>(0.049-0.33%)              | 0.11<br>(0.03-0.21)       | 21<br>(12-34)            |
| Timor-Leste | 1995 | Female | 20 to 24 | 10%<br>(4.3-18%)               | 90%<br>(82-96%)          | 0.033<br>(0.011-0.069)                      | 0.48%<br>(0.28-0.71%)                | 0.15%<br>(0.0066-0.34%)             | 0.15<br>(0.0065-0.34)     | 48<br>(27-75)            |
| Timor-Leste | 1995 | Female | 25 to 29 | 11%<br>(4.7-20%)               | 89%<br>(80-95%)          | 0.038<br>(0.013-0.075)                      | 0.51%<br>(0.31-0.74%)                | 0.18%<br>(0.0035-0.41%)             | 0.17<br>(0.0036-0.41)     | 46<br>(27-71)            |
| Timor-Leste | 1995 | Female | 30 to 34 | 12%<br>(4.8-22%)               | 88%<br>(78-95%)          | 0.043<br>(0.017-0.087)                      | 0.5%<br>(0.31-0.72%)                 | 0.27%<br>(0.056-0.52%)              | 0.27<br>(0.056-0.54)      | 44<br>(26-66)            |
| Timor-Leste | 1995 | Female | 35 to 39 | 13%<br>(5.3-24%)               | 87%<br>(76-95%)          | 0.048<br>(0.019-0.093)                      | 0.48%<br>(0.29-0.71%)                | 0.35%<br>(0.088-0.66%)              | 0.37<br>(0.089-0.7)       | 39<br>(22-60)            |
| Timor-Leste | 1995 | Female | 40 to 44 | 13%<br>(6.1-24%)               | 87%<br>(76-94%)          | 0.055<br>(0.02-0.11)                        | 0.49%<br>(0.28-0.71%)                | 0.45%<br>(0.17-0.78%)               | 0.47<br>(0.18-0.82)       | 35<br>(20-53)            |
| Timor-Leste | 1995 | Female | 45 to 49 | 13%<br>(5.7-25%)               | 87%<br>(75-94%)          | 0.063<br>(0.021-0.14)                       | 0.45%<br>(0.22-0.69%)                | 0.45%<br>(0.12-0.8%)                | 0.52<br>(0.14-0.95)       | 31<br>(15-49)            |
| Timor-Leste | 1995 | Female | 50 to 54 | 13%<br>(5.8-26%)               | 87%<br>(74-94%)          | 0.069<br>(0.024-0.15)                       | 0.47%<br>(0.14-0.82%)                | 0.52%<br>(0.09-1%)                  | 0.67<br>(0.12-1.3)        | 30<br>(9.6-55)           |
| Timor-Leste | 1995 | Female | 55 to 59 | 14%<br>(6-25%)                 | 86%<br>(75-94%)          | 0.076<br>(0.025-0.16)                       | 0.35%<br>(-0.017-0.68%)              | 0.4%<br>(-0.075-0.84%)              | 0.56<br>(-0.1-1.2)        | 21<br>(-0.99-42)         |
| Timor-Leste | 1995 | Female | 60 to 64 | 13%<br>(6-25%)                 | 87%<br>(75-94%)          | 0.076<br>(0.024-0.18)                       | 0.21%<br>(-0.2-0.52%)                | 0.23%<br>(-0.29-0.64%)              | 0.33<br>(-0.39-0.93)      | 10<br>(-9.7-27)          |
| Timor-Leste | 1995 | Female | 65 to 69 | 13%<br>(5.8-24%)               | 87%<br>(76-94%)          | 0.07<br>(0.024-0.15)                        | 0.1%<br>(-0.31-0.41%)                | 0.11%<br>(-0.37-0.51%)              | 0.19<br>(-0.68-0.83)      | 4.8<br>(-15-19)          |
| Timor-Leste | 1995 | Female | 70 to 74 | 12%<br>(5.9-23%)               | 88%<br>(77-94%)          | 0.063<br>(0.02-0.15)                        | 0.07%<br>(-0.31-0.36%)               | 0.078%<br>(-0.38-0.42%)             | 0.11<br>(-0.56-0.63)      | 2.2<br>(-9.8-11)         |
| Timor-Leste | 1995 | Female | 75 to 79 | 12%<br>(5.2-23%)               | 88%<br>(77-95%)          | 0.059<br>(0.017-0.14)                       | -0.024%<br>(-0.44-0.23%)             | -0.035%<br>(-0.54-0.27%)            | -0.041<br>(-0.63-0.31)    | -0.47<br>(-8.8-4.4)      |
| Timor-Leste | 1995 | Female | 80 to 84 | 12%<br>(5.4-23%)               | 88%<br>(77-95%)          | 0.059<br>(0.018-0.13)                       | -0.061%<br>(-0.44-0.17%)             | -0.078%<br>(-0.52-0.2%)             | -0.05<br>(-0.34-0.13)     | -0.48<br>(-3.5-1.4)      |
| Timor-Leste | 1995 | Female | 85 to 89 | 13%<br>(5.9-24%)               | 87%<br>(76-94%)          | 0.064<br>(0.02-0.15)                        | -0.1%<br>(-0.5-0.13%)                | -0.13%<br>(-0.59-0.14%)             | -0.051<br>(-0.24-0.054)   | -0.35<br>(-1.7-0.41)     |
| Timor-Leste | 1995 | Female | 90 to 94 | 15%<br>(6.8-28%)               | 85%<br>(72-93%)          | 0.073<br>(0.02-0.17)                        | -0.14%<br>(-0.57-0.1%)               | -0.18%<br>(-0.72-0.1%)              | -0.034<br>(-0.14-0.02)    | -0.16<br>(-0.66-0.12)    |
| Timor-Leste | 1995 | Female | 95 plus  | 18%<br>(7.2-36%)               | 82%<br>(64-93%)          | 0.09<br>(0.019-0.24)                        | -0.14%<br>(-0.68-0.15%)              | -0.2%<br>(-0.85-0.16%)              | -0.014<br>(-0.061-0.011)  | -0.04<br>(-0.2-0.041)    |

| Location    | Year | Sex    | Age      | Prevalence of current drinkers | Prevalence of abstainers | Population average of standard drinks daily | Percent of total attributable deaths | Percent of total attributable DALYs | Attributable deaths       | Attributable DALYs      |
|-------------|------|--------|----------|--------------------------------|--------------------------|---------------------------------------------|--------------------------------------|-------------------------------------|---------------------------|-------------------------|
| Timor-Leste | 1995 | Male   | All Ages | 26%<br>(21-34%)                | 74%<br>(66-79%)          | 0.092<br>(0.081-0.1)                        | 0.39%<br>(0.16-0.65%)                | 0.45%<br>(0.023-0.93%)              | 15<br>(0.86-31)           | 1000<br>(410-1600)      |
| Timor-Leste | 1995 | Male   | 15 to 19 | 23%<br>(13-38%)                | 77%<br>(62-87%)          | 0.045<br>(0.021-0.086)                      | 0.52%<br>(0.33-0.76%)                | 0.39%<br>(0.18-0.7%)                | 0.27<br>(0.13-0.47)       | 39<br>(25-57)           |
| Timor-Leste | 1995 | Male   | 20 to 24 | 35%<br>(19-53%)                | 65%<br>(47-81%)          | 0.11<br>(0.054-0.17)                        | 0.92%<br>(0.51-1.4%)                 | 0.59%<br>(0.14-1.1%)                | 0.82<br>(0.21-1.6)        | 120<br>(63-180)         |
| Timor-Leste | 1995 | Male   | 25 to 29 | 40%<br>(22-59%)                | 60%<br>(41-78%)          | 0.15<br>(0.083-0.22)                        | 1.2%<br>(0.57-1.9%)                  | 0.83%<br>(0.051-1.7%)               | 1<br>(0.059-2.2)          | 130<br>(62-200)         |
| Timor-Leste | 1995 | Male   | 30 to 34 | 44%<br>(24-63%)                | 56%<br>(37-76%)          | 0.18<br>(0.11-0.27)                         | 1.4%<br>(0.61-2.3%)                  | 1.3%<br>(0.1-2.5%)                  | 1.5<br>(0.11-3.1)         | 140<br>(61-240)         |
| Timor-Leste | 1995 | Male   | 35 to 39 | 46%<br>(28-65%)                | 54%<br>(35-72%)          | 0.21<br>(0.12-0.32)                         | 1.6%<br>(0.67-2.8%)                  | 1.7%<br>(0.19-3.5%)                 | 1.9<br>(0.19-4)           | 140<br>(54-250)         |
| Timor-Leste | 1995 | Male   | 40 to 44 | 46%<br>(28-65%)                | 54%<br>(35-72%)          | 0.22<br>(0.12-0.34)                         | 1.7%<br>(0.55-2.8%)                  | 1.9%<br>(0.16-3.7%)                 | 2<br>(0.14-3.9)           | 120<br>(41-220)         |
| Timor-Leste | 1995 | Male   | 45 to 49 | 44%<br>(26-64%)                | 56%<br>(36-74%)          | 0.22<br>(0.11-0.35)                         | 1.6%<br>(0.38-2.8%)                  | 1.9%<br>(0.16-3.7%)                 | 2.2<br>(0.17-4.3)         | 110<br>(26-200)         |
| Timor-Leste | 1995 | Male   | 50 to 54 | 42%<br>(24-61%)                | 58%<br>(39-76%)          | 0.21<br>(0.11-0.34)                         | 1.3%<br>(0.098-2.5%)                 | 1.6%<br>(-0.19-3.2%)                | 1.8<br>(-0.23-3.8)        | 80<br>(5.8-150)         |
| Timor-Leste | 1995 | Male   | 55 to 59 | 39%<br>(23-60%)                | 61%<br>(40-77%)          | 0.19<br>(0.091-0.32)                        | 1%<br>(0.088-2%)                     | 1.2%<br>(-0.11-2.6%)                | 1.4<br>(-0.13-3)          | 53<br>(4.4-100)         |
| Timor-Leste | 1995 | Male   | 60 to 64 | 37%<br>(20-57%)                | 63%<br>(43-80%)          | 0.16<br>(0.076-0.3)                         | 0.81%<br>(-0.036-1.6%)               | 0.91%<br>(-0.24-2.1%)               | 1<br>(-0.28-2.4)          | 34<br>(-1.5-69)         |
| Timor-Leste | 1995 | Male   | 65 to 69 | 33%<br>(19-51%)                | 67%<br>(49-81%)          | 0.13<br>(0.064-0.24)                        | 0.54%<br>(-0.25-1.3%)                | 0.58%<br>(-0.46-1.6%)               | 0.69<br>(-0.51-1.9)       | 19<br>(-8.1-44)         |
| Timor-Leste | 1995 | Male   | 70 to 74 | 30%<br>(17-46%)                | 70%<br>(54-83%)          | 0.11<br>(0.049-0.2)                         | 0.38%<br>(-0.31-1%)                  | 0.39%<br>(-0.47-1.2%)               | 0.39<br>(-0.47-1.2)       | 8.4<br>(-6.7-23)        |
| Timor-Leste | 1995 | Male   | 75 to 79 | 27%<br>(15-44%)                | 73%<br>(56-85%)          | 0.092<br>(0.038-0.18)                       | 0.23%<br>(-0.34-0.73%)               | 0.21%<br>(-0.5-0.84%)               | 0.17<br>(-0.39-0.68)      | 3.2<br>(-4.6-10)        |
| Timor-Leste | 1995 | Male   | 80 to 84 | 25%<br>(13-41%)                | 75%<br>(59-87%)          | 0.079<br>(0.033-0.15)                       | 0.17%<br>(-0.3-0.59%)                | 0.15%<br>(-0.44-0.69%)              | 0.057<br>(-0.17-0.26)     | 0.83<br>(-1.5-2.9)      |
| Timor-Leste | 1995 | Male   | 85 to 89 | 23%<br>(13-39%)                | 77%<br>(61-87%)          | 0.07<br>(0.03-0.13)                         | 0.11%<br>(-0.26-0.44%)               | 0.09%<br>(-0.37-0.49%)              | 0.026<br>(-0.1-0.14)      | 0.29<br>(-0.63-1.1)     |
| Timor-Leste | 1995 | Male   | 90 to 94 | 25%<br>(14-41%)                | 75%<br>(59-86%)          | 0.068<br>(0.028-0.13)                       | 0.05%<br>(-0.28-0.32%)               | 0.014%<br>(-0.39-0.35%)             | 0.0021<br>(-0.057-0.052)  | 0.045<br>(-0.24-0.29)   |
| Timor-Leste | 1995 | Male   | 95 plus  | 28%<br>(14-48%)                | 72%<br>(52-86%)          | 0.07<br>(0.024-0.15)                        | 0.074%<br>(-0.3-0.34%)               | 0.0071%<br>(-0.44-0.32%)            | 0.00032<br>(-0.019-0.014) | 0.013<br>(-0.053-0.061) |
| Timor-Leste | 2000 | Female | All Ages | 7.7%<br>(5.5-11%)              | 92%<br>(89-94%)          | 0.03<br>(0.023-0.04)                        | 0.16%<br>(0.085-0.24%)               | 0.13%<br>(-0.043-0.3%)              | 3.3<br>(-1.1-7.5)         | 280<br>(150-410)        |
| Timor-Leste | 2000 | Female | 15 to 19 | 7.8%<br>(3.4-15%)              | 92%<br>(85-97%)          | 0.029<br>(0.01-0.064)                       | 0.33%<br>(0.19-0.5%)                 | 0.2%<br>(0.066-0.38%)               | 0.13<br>(0.039-0.25)      | 27<br>(16-41)           |
| Timor-Leste | 2000 | Female | 20 to 24 | 9.5%<br>(3.9-18%)              | 91%<br>(82-96%)          | 0.04<br>(0.013-0.086)                       | 0.54%<br>(0.32-0.79%)                | 0.18%<br>(0.015-0.4%)               | 0.088<br>(0.0071-0.2)     | 29<br>(17-45)           |
| Timor-Leste | 2000 | Female | 25 to 29 | 10%<br>(4.3-20%)               | 90%<br>(80-96%)          | 0.046<br>(0.016-0.097)                      | 0.57%<br>(0.36-0.82%)                | 0.2%<br>(0.016-0.45%)               | 0.11<br>(0.0085-0.25)     | 32<br>(19-48)           |

| Location    | Year | Sex    | Age      | Prevalence of current drinkers | Prevalence of abstainers | Population average of standard drinks daily | Percent of total attributable deaths | Percent of total attributable DALYs | Attributable deaths      | Attributable DALYs      |
|-------------|------|--------|----------|--------------------------------|--------------------------|---------------------------------------------|--------------------------------------|-------------------------------------|--------------------------|-------------------------|
| Timor-Leste | 2000 | Female | 30 to 34 | 11%<br>(4.5-22%)               | 89%<br>(78-95%)          | 0.052<br>(0.019-0.11)                       | 0.55%<br>(0.35-0.78%)                | 0.3%<br>(0.075-0.55%)               | 0.17<br>(0.041-0.31)     | 29<br>(17-43)           |
| Timor-Leste | 2000 | Female | 35 to 39 | 12%<br>(5.3-23%)               | 88%<br>(77-95%)          | 0.058<br>(0.022-0.11)                       | 0.52%<br>(0.31-0.74%)                | 0.38%<br>(0.1-0.69%)                | 0.27<br>(0.07-0.5)       | 31<br>(18-45)           |
| Timor-Leste | 2000 | Female | 40 to 44 | 13%<br>(5.9-22%)               | 87%<br>(78-94%)          | 0.066<br>(0.024-0.13)                       | 0.51%<br>(0.31-0.74%)                | 0.48%<br>(0.17-0.8%)                | 0.37<br>(0.13-0.64)      | 29<br>(17-43)           |
| Timor-Leste | 2000 | Female | 45 to 49 | 13%<br>(5.6-23%)               | 87%<br>(77-94%)          | 0.075<br>(0.025-0.16)                       | 0.47%<br>(0.24-0.72%)                | 0.49%<br>(0.17-0.85%)               | 0.44<br>(0.14-0.8)       | 27<br>(13-41)           |
| Timor-Leste | 2000 | Female | 50 to 54 | 13%<br>(5.6-25%)               | 87%<br>(75-94%)          | 0.083<br>(0.03-0.17)                        | 0.49%<br>(0.17-0.82%)                | 0.57%<br>(0.14-1%)                  | 0.65<br>(0.16-1.2)       | 29<br>(10-49)           |
| Timor-Leste | 2000 | Female | 55 to 59 | 13%<br>(6.1-25%)               | 87%<br>(75-94%)          | 0.091<br>(0.032-0.19)                       | 0.38%<br>(0.0095-0.73%)              | 0.45%<br>(-0.043-0.92%)             | 0.6<br>(-0.049-1.3)      | 22<br>(0.53-43)         |
| Timor-Leste | 2000 | Female | 60 to 64 | 13%<br>(5.8-25%)               | 87%<br>(75-94%)          | 0.093<br>(0.031-0.2)                        | 0.23%<br>(-0.2-0.59%)                | 0.27%<br>(-0.25-0.74%)              | 0.41<br>(-0.43-1.2)      | 12<br>(-11-33)          |
| Timor-Leste | 2000 | Female | 65 to 69 | 13%<br>(5.8-23%)               | 87%<br>(77-94%)          | 0.086<br>(0.029-0.18)                       | 0.11%<br>(-0.33-0.42%)               | 0.12%<br>(-0.42-0.54%)              | 0.19<br>(-0.63-0.81)     | 4.8<br>(-13-19)         |
| Timor-Leste | 2000 | Female | 70 to 74 | 12%<br>(5.7-23%)               | 88%<br>(77-94%)          | 0.078<br>(0.025-0.18)                       | 0.074%<br>(-0.32-0.37%)              | 0.086%<br>(-0.38-0.46%)             | 0.15<br>(-0.65-0.8)      | 2.8<br>(-12-14)         |
| Timor-Leste | 2000 | Female | 75 to 79 | 12%<br>(5.4-22%)               | 88%<br>(78-95%)          | 0.073<br>(0.022-0.18)                       | -0.028%<br>(-0.47-0.24%)             | -0.038%<br>(-0.55-0.29%)            | -0.047<br>(-0.68-0.36)   | -0.57<br>(-9.6-5.1)     |
| Timor-Leste | 2000 | Female | 80 to 84 | 12%<br>(5.5-23%)               | 88%<br>(77-95%)          | 0.072<br>(0.022-0.16)                       | -0.066%<br>(-0.47-0.18%)             | -0.085%<br>(-0.56-0.22%)            | -0.065<br>(-0.46-0.17)   | -0.63<br>(-4.5-1.8)     |
| Timor-Leste | 2000 | Female | 85 to 89 | 13%<br>(5.7-23%)               | 87%<br>(77-94%)          | 0.077<br>(0.024-0.18)                       | -0.11%<br>(-0.52-0.13%)              | -0.14%<br>(-0.63-0.15%)             | -0.067<br>(-0.3-0.071)   | -0.46<br>(-2.2-0.53)    |
| Timor-Leste | 2000 | Female | 90 to 94 | 15%<br>(6.3-27%)               | 85%<br>(73-94%)          | 0.089<br>(0.024-0.21)                       | -0.15%<br>(-0.61-0.11%)              | -0.19%<br>(-0.74-0.12%)             | -0.036<br>(-0.14-0.023)  | -0.16<br>(-0.67-0.12)   |
| Timor-Leste | 2000 | Female | 95 plus  | 18%<br>(6.7-34%)               | 82%<br>(66-93%)          | 0.11<br>(0.022-0.29)                        | -0.15%<br>(-0.7-0.16%)               | -0.21%<br>(-0.88-0.17%)             | -0.014<br>(-0.056-0.011) | -0.039<br>(-0.18-0.042) |
| Timor-Leste | 2000 | Male   | All Ages | 23%<br>(18-30%)                | 77%<br>(70-82%)          | 0.097<br>(0.085-0.11)                       | 0.46%<br>(0.19-0.74%)                | 0.56%<br>(0.056-1.1%)               | 14<br>(1.4-28)           | 860<br>(360-1400)       |
| Timor-Leste | 2000 | Male   | 15 to 19 | 22%<br>(12-37%)                | 78%<br>(63-88%)          | 0.054<br>(0.024-0.1)                        | 0.65%<br>(0.42-0.97%)                | 0.57%<br>(0.28-1%)                  | 0.36<br>(0.17-0.65)      | 53<br>(33-78)           |
| Timor-Leste | 2000 | Male   | 20 to 24 | 34%<br>(19-52%)                | 66%<br>(48-81%)          | 0.13<br>(0.063-0.22)                        | 1.3%<br>(0.74-1.9%)                  | 0.99%<br>(0.29-1.8%)                | 0.53<br>(0.14-1)         | 71<br>(39-110)          |
| Timor-Leste | 2000 | Male   | 25 to 29 | 39%<br>(22-58%)                | 61%<br>(42-78%)          | 0.18<br>(0.098-0.29)                        | 1.5%<br>(0.73-2.3%)                  | 1.2%<br>(0.087-2.5%)                | 0.75<br>(0.051-1.5)      | 92<br>(45-140)          |
| Timor-Leste | 2000 | Male   | 30 to 34 | 43%<br>(24-62%)                | 57%<br>(38-76%)          | 0.22<br>(0.13-0.34)                         | 1.7%<br>(0.74-2.7%)                  | 1.6%<br>(0.12-3.2%)                 | 1<br>(0.077-2)           | 97<br>(41-160)          |
| Timor-Leste | 2000 | Male   | 35 to 39 | 45%<br>(27-65%)                | 55%<br>(35-73%)          | 0.26<br>(0.14-0.39)                         | 1.8%<br>(0.79-3%)                    | 2%<br>(0.21-4%)                     | 1.5<br>(0.14-3.2)        | 120<br>(48-200)         |
| Timor-Leste | 2000 | Male   | 40 to 44 | 44%<br>(27-64%)                | 56%<br>(36-73%)          | 0.27<br>(0.15-0.4)                          | 1.8%<br>(0.66-3%)                    | 2.1%<br>(0.23-4%)                   | 1.7<br>(0.18-3.4)        | 110<br>(38-190)         |
| Timor-Leste | 2000 | Male   | 45 to 49 | 43%<br>(24-63%)                | 57%<br>(37-76%)          | 0.26<br>(0.14-0.42)                         | 1.7%<br>(0.49-2.9%)                  | 2.1%<br>(0.24-4%)                   | 1.9<br>(0.2-3.7)         | 99<br>(28-170)          |

| Location    | Year | Sex    | Age      | Prevalence of current drinkers | Prevalence of abstainers | Population average of standard drinks daily | Percent of total attributable deaths | Percent of total attributable DALYs | Attributable deaths        | Attributable DALYs      |
|-------------|------|--------|----------|--------------------------------|--------------------------|---------------------------------------------|--------------------------------------|-------------------------------------|----------------------------|-------------------------|
| Timor-Leste | 2000 | Male   | 50 to 54 | 41%<br>(23-61%)                | 59%<br>(39-77%)          | 0.25<br>(0.13-0.4)                          | 1.4%<br>(0.27-2.5%)                  | 1.7%<br>(0.061-3.4%)                | 1.9<br>(0.065-3.8)         | 84<br>(16-160)          |
| Timor-Leste | 2000 | Male   | 55 to 59 | 39%<br>(22-59%)                | 61%<br>(41-78%)          | 0.22<br>(0.11-0.37)                         | 1.1%<br>(0.21-2.1%)                  | 1.3%<br>(0.034-2.7%)                | 1.6<br>(0.035-3.3)         | 59<br>(9.7-110)         |
| Timor-Leste | 2000 | Male   | 60 to 64 | 36%<br>(20-56%)                | 64%<br>(44-80%)          | 0.19<br>(0.094-0.34)                        | 0.86%<br>(0.023-1.7%)                | 0.98%<br>(-0.12-2.1%)               | 1.3<br>(-0.18-2.8)         | 41<br>(1.2-82)          |
| Timor-Leste | 2000 | Male   | 65 to 69 | 32%<br>(18-51%)                | 68%<br>(49-82%)          | 0.16<br>(0.079-0.27)                        | 0.57%<br>(-0.2-1.3%)                 | 0.63%<br>(-0.41-1.6%)               | 0.74<br>(-0.44-1.9)        | 20<br>(-6.1-45)         |
| Timor-Leste | 2000 | Male   | 70 to 74 | 29%<br>(16-45%)                | 71%<br>(55-84%)          | 0.13<br>(0.06-0.24)                         | 0.41%<br>(-0.29-1%)                  | 0.43%<br>(-0.45-1.2%)               | 0.52<br>(-0.56-1.5)        | 11<br>(-8.1-29)         |
| Timor-Leste | 2000 | Male   | 75 to 79 | 26%<br>(15-43%)                | 74%<br>(57-85%)          | 0.11<br>(0.048-0.21)                        | 0.24%<br>(-0.32-0.71%)               | 0.22%<br>(-0.5-0.8%)                | 0.18<br>(-0.41-0.67)       | 3.4<br>(-4.8-10)        |
| Timor-Leste | 2000 | Male   | 80 to 84 | 24%<br>(12-40%)                | 76%<br>(60-88%)          | 0.095<br>(0.041-0.17)                       | 0.18%<br>(-0.33-0.62%)               | 0.16%<br>(-0.46-0.71%)              | 0.074<br>(-0.22-0.35)      | 1.1<br>(-2-3.9)         |
| Timor-Leste | 2000 | Male   | 85 to 89 | 23%<br>(12-37%)                | 77%<br>(63-88%)          | 0.084<br>(0.036-0.16)                       | 0.11%<br>(-0.27-0.45%)               | 0.082%<br>(-0.39-0.5%)              | 0.026<br>(-0.12-0.16)      | 0.31<br>(-0.78-1.3)     |
| Timor-Leste | 2000 | Male   | 90 to 94 | 24%<br>(13-41%)                | 76%<br>(59-87%)          | 0.082<br>(0.034-0.16)                       | 0.042%<br>(-0.3-0.33%)               | 0.0032%<br>(-0.43-0.35%)            | 0.00049<br>(-0.069-0.057)  | 0.041<br>(-0.3-0.32)    |
| Timor-Leste | 2000 | Male   | 95 plus  | 28%<br>(13-48%)                | 72%<br>(52-87%)          | 0.084<br>(0.029-0.18)                       | 0.064%<br>(-0.34-0.35%)              | -0.0078%<br>(-0.51-0.34%)           | -0.00042<br>(-0.027-0.018) | 0.014<br>(-0.073-0.073) |
| Timor-Leste | 2005 | Female | All Ages | 7.6%<br>(5.4-10%)              | 92%<br>(90-95%)          | 0.033<br>(0.023-0.046)                      | 0.19%<br>(0.11-0.27%)                | 0.14%<br>(-0.03-0.32%)              | 3.6<br>(-0.73-7.9)         | 310<br>(180-440)        |
| Timor-Leste | 2005 | Female | 15 to 19 | 7.7%<br>(3.5-15%)              | 92%<br>(85-97%)          | 0.033<br>(0.011-0.071)                      | 0.36%<br>(0.22-0.52%)                | 0.21%<br>(0.088-0.4%)               | 0.12<br>(0.046-0.23)       | 30<br>(17-44)           |
| Timor-Leste | 2005 | Female | 20 to 24 | 9.3%<br>(4.1-18%)              | 91%<br>(82-96%)          | 0.044<br>(0.015-0.096)                      | 0.62%<br>(0.38-0.94%)                | 0.19%<br>(0.046-0.4%)               | 0.12<br>(0.028-0.27)       | 49<br>(29-77)           |
| Timor-Leste | 2005 | Female | 25 to 29 | 10%<br>(4.3-19%)               | 90%<br>(81-96%)          | 0.05<br>(0.017-0.11)                        | 0.64%<br>(0.43-0.93%)                | 0.22%<br>(0.029-0.45%)              | 0.087<br>(0.012-0.18)      | 29<br>(18-44)           |
| Timor-Leste | 2005 | Female | 30 to 34 | 11%<br>(4.4-21%)               | 89%<br>(79-96%)          | 0.057<br>(0.02-0.12)                        | 0.6%<br>(0.39-0.84%)                 | 0.3%<br>(0.049-0.54%)               | 0.15<br>(0.026-0.27)       | 31<br>(19-46)           |
| Timor-Leste | 2005 | Female | 35 to 39 | 12%<br>(5-22%)                 | 88%<br>(78-95%)          | 0.063<br>(0.022-0.12)                       | 0.55%<br>(0.37-0.74%)                | 0.39%<br>(0.11-0.67%)               | 0.22<br>(0.066-0.39)       | 28<br>(18-40)           |
| Timor-Leste | 2005 | Female | 40 to 44 | 12%<br>(5.4-22%)               | 88%<br>(78-95%)          | 0.071<br>(0.025-0.15)                       | 0.52%<br>(0.32-0.73%)                | 0.49%<br>(0.2-0.8%)                 | 0.36<br>(0.13-0.59)        | 31<br>(18-44)           |
| Timor-Leste | 2005 | Female | 45 to 49 | 12%<br>(5.4-22%)               | 88%<br>(78-95%)          | 0.081<br>(0.027-0.18)                       | 0.48%<br>(0.27-0.71%)                | 0.51%<br>(0.18-0.87%)               | 0.44<br>(0.16-0.79)        | 28<br>(15-42)           |
| Timor-Leste | 2005 | Female | 50 to 54 | 13%<br>(5.5-23%)               | 87%<br>(77-94%)          | 0.089<br>(0.032-0.19)                       | 0.52%<br>(0.22-0.85%)                | 0.62%<br>(0.2-1.1%)                 | 0.67<br>(0.21-1.3)         | 31<br>(12-52)           |
| Timor-Leste | 2005 | Female | 55 to 59 | 13%<br>(5.9-24%)               | 87%<br>(76-94%)          | 0.098<br>(0.033-0.22)                       | 0.41%<br>(0.052-0.73%)               | 0.5%<br>(0.012-0.97%)               | 0.7<br>(0.017-1.3)         | 26<br>(3.3-46)          |
| Timor-Leste | 2005 | Female | 60 to 64 | 13%<br>(5.7-25%)               | 87%<br>(75-94%)          | 0.099<br>(0.032-0.22)                       | 0.26%<br>(-0.16-0.65%)               | 0.31%<br>(-0.21-0.83%)              | 0.53<br>(-0.36-1.4)        | 16<br>(-9.8-39)         |
| Timor-Leste | 2005 | Female | 65 to 69 | 13%<br>(5.6-23%)               | 87%<br>(77-94%)          | 0.092<br>(0.03-0.19)                        | 0.13%<br>(-0.27-0.44%)               | 0.15%<br>(-0.36-0.55%)              | 0.28<br>(-0.7-1)           | 7<br>(-16-24)           |

| Location    | Year | Sex    | Age      | Prevalence of current drinkers | Prevalence of abstainers | Population average of standard drinks daily | Percent of total attributable deaths | Percent of total attributable DALYs | Attributable deaths      | Attributable DALYs     |
|-------------|------|--------|----------|--------------------------------|--------------------------|---------------------------------------------|--------------------------------------|-------------------------------------|--------------------------|------------------------|
| Timor-Leste | 2005 | Female | 70 to 74 | 12%<br>(5.4-22%)               | 88%<br>(78-95%)          | 0.083<br>(0.026-0.2)                        | 0.09%<br>(-0.27-0.37%)               | 0.11%<br>(-0.34-0.46%)              | 0.19<br>(-0.62-0.83)     | 3.7<br>(-11-15)        |
| Timor-Leste | 2005 | Female | 75 to 79 | 11%<br>(5.1-22%)               | 89%<br>(78-95%)          | 0.077<br>(0.023-0.19)                       | -0.014%<br>(-0.44-0.27%)             | -0.023%<br>(-0.55-0.32%)            | -0.039<br>(-0.87-0.55)   | -0.4<br>(-12-7.8)      |
| Timor-Leste | 2005 | Female | 80 to 84 | 11%<br>(5.2-22%)               | 89%<br>(78-95%)          | 0.078<br>(0.024-0.18)                       | -0.056%<br>(-0.47-0.19%)             | -0.074%<br>(-0.57-0.22%)            | -0.08<br>(-0.61-0.24)    | -0.76<br>(-6.2-2.6)    |
| Timor-Leste | 2005 | Female | 85 to 89 | 12%<br>(5.5-23%)               | 88%<br>(77-95%)          | 0.084<br>(0.025-0.2)                        | -0.11%<br>(-0.52-0.13%)              | -0.14%<br>(-0.64-0.15%)             | -0.089<br>(-0.39-0.094)  | -0.61<br>(-2.8-0.72)   |
| Timor-Leste | 2005 | Female | 90 to 94 | 14%<br>(6.3-27%)               | 86%<br>(73-94%)          | 0.099<br>(0.026-0.24)                       | -0.15%<br>(-0.57-0.11%)              | -0.2%<br>(-0.71-0.13%)              | -0.05<br>(-0.18-0.033)   | -0.23<br>(-0.87-0.18)  |
| Timor-Leste | 2005 | Female | 95 plus  | 18%<br>(6.9-36%)               | 82%<br>(64-93%)          | 0.12<br>(0.024-0.35)                        | -0.16%<br>(-0.69-0.22%)              | -0.22%<br>(-0.88-0.23%)             | -0.015<br>(-0.059-0.015) | -0.042<br>(-0.19-0.06) |
| Timor-Leste | 2005 | Male   | All Ages | 23%<br>(18-30%)                | 77%<br>(70-82%)          | 0.1<br>(0.083-0.13)                         | 0.56%<br>(0.27-0.87%)                | 0.66%<br>(0.15-1.2%)                | 17<br>(3.8-31)           | 1000<br>(510-1600)     |
| Timor-Leste | 2005 | Male   | 15 to 19 | 22%<br>(12-36%)                | 78%<br>(64-88%)          | 0.058<br>(0.027-0.11)                       | 0.74%<br>(0.47-1.1%)                 | 0.7%<br>(0.35-1.2%)                 | 0.43<br>(0.21-0.77)      | 62<br>(38-94)          |
| Timor-Leste | 2005 | Male   | 20 to 24 | 33%<br>(18-51%)                | 67%<br>(49-82%)          | 0.14<br>(0.067-0.23)                        | 1.5%<br>(0.88-2.2%)                  | 1.3%<br>(0.38-2.3%)                 | 0.92<br>(0.28-1.7)       | 130<br>(70-190)        |
| Timor-Leste | 2005 | Male   | 25 to 29 | 38%<br>(21-56%)                | 62%<br>(44-79%)          | 0.19<br>(0.1-0.33)                          | 1.7%<br>(0.94-2.6%)                  | 1.5%<br>(0.18-3%)                   | 0.71<br>(0.081-1.4)      | 86<br>(46-130)         |
| Timor-Leste | 2005 | Male   | 30 to 34 | 42%<br>(23-61%)                | 58%<br>(39-77%)          | 0.24<br>(0.13-0.4)                          | 1.9%<br>(0.92-2.9%)                  | 1.9%<br>(0.21-3.6%)                 | 1.1<br>(0.13-2.2)        | 110<br>(52-170)        |
| Timor-Leste | 2005 | Male   | 35 to 39 | 44%<br>(26-64%)                | 56%<br>(36-74%)          | 0.28<br>(0.15-0.43)                         | 2%<br>(0.83-3.2%)                    | 2.3%<br>(0.29-4.4%)                 | 1.5<br>(0.19-3)          | 110<br>(49-190)        |
| Timor-Leste | 2005 | Male   | 40 to 44 | 44%<br>(26-64%)                | 56%<br>(36-74%)          | 0.29<br>(0.15-0.47)                         | 1.9%<br>(0.73-3%)                    | 2.3%<br>(0.3-4.2%)                  | 2<br>(0.25-3.7)          | 120<br>(47-210)        |
| Timor-Leste | 2005 | Male   | 45 to 49 | 42%<br>(24-62%)                | 58%<br>(38-76%)          | 0.29<br>(0.14-0.48)                         | 1.8%<br>(0.65-3%)                    | 2.3%<br>(0.43-4.2%)                 | 2.2<br>(0.4-4.2)         | 120<br>(40-200)        |
| Timor-Leste | 2005 | Male   | 50 to 54 | 40%<br>(22-60%)                | 60%<br>(40-78%)          | 0.27<br>(0.14-0.44)                         | 1.5%<br>(0.43-2.5%)                  | 1.9%<br>(0.27-3.4%)                 | 2.2<br>(0.34-4.1)        | 94<br>(27-160)         |
| Timor-Leste | 2005 | Male   | 55 to 59 | 38%<br>(21-57%)                | 62%<br>(43-79%)          | 0.24<br>(0.11-0.41)                         | 1.1%<br>(0.33-2.1%)                  | 1.4%<br>(0.19-2.7%)                 | 2<br>(0.26-3.9)          | 75<br>(21-140)         |
| Timor-Leste | 2005 | Male   | 60 to 64 | 35%<br>(19-54%)                | 65%<br>(46-81%)          | 0.21<br>(0.096-0.37)                        | 0.9%<br>(0.12-1.6%)                  | 1%<br>(0.0027-2.1%)                 | 1.7<br>(0.0044-3.5)      | 54<br>(6.6-100)        |
| Timor-Leste | 2005 | Male   | 65 to 69 | 32%<br>(17-49%)                | 68%<br>(51-83%)          | 0.17<br>(0.083-0.3)                         | 0.59%<br>(-0.037-1.2%)               | 0.66%<br>(-0.18-1.5%)               | 1.1<br>(-0.3-2.4)        | 28<br>(-1.8-57)        |
| Timor-Leste | 2005 | Male   | 70 to 74 | 28%<br>(15-45%)                | 72%<br>(55-85%)          | 0.14<br>(0.063-0.26)                        | 0.43%<br>(-0.18-0.95%)               | 0.47%<br>(-0.33-1.2%)               | 0.66<br>(-0.47-1.6)      | 14<br>(-6.1-31)        |
| Timor-Leste | 2005 | Male   | 75 to 79 | 26%<br>(14-42%)                | 74%<br>(58-86%)          | 0.12<br>(0.05-0.23)                         | 0.25%<br>(-0.27-0.67%)               | 0.24%<br>(-0.41-0.76%)              | 0.3<br>(-0.49-0.92)      | 5.4<br>(-5.7-14)       |
| Timor-Leste | 2005 | Male   | 80 to 84 | 24%<br>(13-39%)                | 76%<br>(61-87%)          | 0.1<br>(0.043-0.2)                          | 0.19%<br>(-0.24-0.59%)               | 0.17%<br>(-0.36-0.66%)              | 0.12<br>(-0.27-0.48)     | 1.7<br>(-2.2-5.4)      |
| Timor-Leste | 2005 | Male   | 85 to 89 | 22%<br>(11-36%)                | 78%<br>(64-89%)          | 0.089<br>(0.037-0.17)                       | 0.11%<br>(-0.24-0.41%)               | 0.086%<br>(-0.34-0.45%)             | 0.038<br>(-0.15-0.2)     | 0.44<br>(-0.95-1.6)    |



| Location    | Year | Sex    | Age      | Prevalence of current drinkers | Prevalence of abstainers | Population average of standard drinks daily | Percent of total attributable deaths | Percent of total attributable DALYs | Attributable deaths        | Attributable DALYs      |
|-------------|------|--------|----------|--------------------------------|--------------------------|---------------------------------------------|--------------------------------------|-------------------------------------|----------------------------|-------------------------|
| Timor-Leste | 2005 | Male   | 90 to 94 | 23%<br>(12-39%)                | 77%<br>(61-88%)          | 0.086<br>(0.035-0.18)                       | 0.044%<br>(-0.3-0.31%)               | 0.0062%<br>(-0.42-0.32%)            | 0.0012<br>(-0.085-0.067)   | 0.056<br>(-0.38-0.38)   |
| Timor-Leste | 2005 | Male   | 95 plus  | 27%<br>(12-46%)                | 73%<br>(54-88%)          | 0.088<br>(0.029-0.2)                        | 0.065%<br>(-0.34-0.33%)              | -0.0099%<br>(-0.51-0.32%)           | -0.00061<br>(-0.032-0.019) | 0.016<br>(-0.085-0.081) |
| Timor-Leste | 2010 | Female | All Ages | 7.6%<br>(5.5-10%)              | 92%<br>(90-94%)          | 0.037<br>(0.024-0.056)                      | 0.21%<br>(0.12-0.31%)                | 0.14%<br>(-0.051-0.32%)             | 3.8<br>(-1.3-8.8)          | 340<br>(200-500)        |
| Timor-Leste | 2010 | Female | 15 to 19 | 7.5%<br>(3.4-14%)              | 92%<br>(86-97%)          | 0.034<br>(0.011-0.081)                      | 0.4%<br>(0.25-0.61%)                 | 0.22%<br>(0.1-0.41%)                | 0.09<br>(0.037-0.17)       | 30<br>(17-47)           |
| Timor-Leste | 2010 | Female | 20 to 24 | 9.1%<br>(3.8-17%)              | 91%<br>(83-96%)          | 0.046<br>(0.015-0.1)                        | 0.76%<br>(0.47-1.1%)                 | 0.21%<br>(0.083-0.42%)              | 0.093<br>(0.035-0.2)       | 51<br>(31-79)           |
| Timor-Leste | 2010 | Female | 25 to 29 | 9.9%<br>(4.2-19%)              | 90%<br>(81-96%)          | 0.052<br>(0.018-0.12)                       | 0.75%<br>(0.5-1.1%)                  | 0.23%<br>(0.039-0.43%)              | 0.099<br>(0.017-0.19)      | 45<br>(28-68)           |
| Timor-Leste | 2010 | Female | 30 to 34 | 11%<br>(4.4-21%)               | 89%<br>(79-96%)          | 0.06<br>(0.02-0.13)                         | 0.69%<br>(0.46-0.97%)                | 0.33%<br>(0.053-0.54%)              | 0.12<br>(0.02-0.21)        | 31<br>(20-48)           |
| Timor-Leste | 2010 | Female | 35 to 39 | 12%<br>(4.9-22%)               | 88%<br>(78-95%)          | 0.065<br>(0.023-0.13)                       | 0.6%<br>(0.4-0.83%)                  | 0.42%<br>(0.071-0.73%)              | 0.22<br>(0.037-0.4)        | 34<br>(21-49)           |
| Timor-Leste | 2010 | Female | 40 to 44 | 12%<br>(5.5-22%)               | 88%<br>(78-95%)          | 0.073<br>(0.025-0.15)                       | 0.56%<br>(0.37-0.77%)                | 0.53%<br>(0.24-0.86%)               | 0.33<br>(0.14-0.56)        | 32<br>(20-46)           |
| Timor-Leste | 2010 | Female | 45 to 49 | 12%<br>(5.2-23%)               | 88%<br>(77-95%)          | 0.083<br>(0.026-0.18)                       | 0.51%<br>(0.3-0.74%)                 | 0.55%<br>(0.23-0.93%)               | 0.41<br>(0.16-0.72)        | 28<br>(16-42)           |
| Timor-Leste | 2010 | Female | 50 to 54 | 12%<br>(5.3-24%)               | 88%<br>(76-95%)          | 0.093<br>(0.031-0.21)                       | 0.52%<br>(0.24-0.83%)                | 0.65%<br>(0.24-1.2%)                | 0.56<br>(0.19-1)           | 27<br>(12-46)           |
| Timor-Leste | 2010 | Female | 55 to 59 | 13%<br>(5.7-23%)               | 87%<br>(77-94%)          | 0.1<br>(0.034-0.23)                         | 0.41%<br>(0.098-0.71%)               | 0.52%<br>(0.086-1%)                 | 0.49<br>(0.085-0.94)       | 19<br>(4.4-34)          |
| Timor-Leste | 2010 | Female | 60 to 64 | 13%<br>(5.4-23%)               | 87%<br>(77-95%)          | 0.1<br>(0.033-0.23)                         | 0.27%<br>(-0.1-0.63%)                | 0.34%<br>(-0.15-0.83%)              | 0.93<br>(-0.43-2.3)        | 29<br>(-11-69)          |
| Timor-Leste | 2010 | Female | 65 to 69 | 12%<br>(5.3-22%)               | 88%<br>(78-95%)          | 0.095<br>(0.031-0.2)                        | 0.14%<br>(-0.24-0.44%)               | 0.18%<br>(-0.34-0.59%)              | 0.44<br>(-0.83-1.6)        | 11<br>(-18-37)          |
| Timor-Leste | 2010 | Female | 70 to 74 | 12%<br>(5.5-21%)               | 88%<br>(79-95%)          | 0.086<br>(0.028-0.2)                        | 0.11%<br>(-0.24-0.38%)               | 0.13%<br>(-0.31-0.5%)               | 0.31<br>(-0.73-1.2)        | 6<br>(-14-22)           |
| Timor-Leste | 2010 | Female | 75 to 79 | 11%<br>(5-22%)                 | 89%<br>(78-95%)          | 0.082<br>(0.023-0.2)                        | 0.0032%<br>(-0.39-0.29%)             | -0.0022%<br>(-0.48-0.36%)           | -0.0044<br>(-1-0.78)       | 0.14<br>(-15-12)        |
| Timor-Leste | 2010 | Female | 80 to 84 | 11%<br>(5-22%)                 | 89%<br>(78-95%)          | 0.082<br>(0.024-0.2)                        | -0.042%<br>(-0.42-0.21%)             | -0.058%<br>(-0.52-0.24%)            | -0.09<br>(-0.8-0.38)       | -0.84<br>(-8.5-4.2)     |
| Timor-Leste | 2010 | Female | 85 to 89 | 12%<br>(5.3-23%)               | 88%<br>(77-95%)          | 0.089<br>(0.026-0.22)                       | -0.1%<br>(-0.5-0.15%)                | -0.14%<br>(-0.62-0.17%)             | -0.12<br>(-0.56-0.15)      | -0.82<br>(-4.1-1.1)     |
| Timor-Leste | 2010 | Female | 90 to 94 | 14%<br>(6-27%)                 | 86%<br>(73-94%)          | 0.1<br>(0.025-0.26)                         | -0.15%<br>(-0.56-0.16%)              | -0.2%<br>(-0.72-0.17%)              | -0.069<br>(-0.26-0.057)    | -0.31<br>(-1.2-0.34)    |
| Timor-Leste | 2010 | Female | 95 plus  | 18%<br>(6.9-36%)               | 82%<br>(64-93%)          | 0.13<br>(0.024-0.37)                        | -0.16%<br>(-0.68-0.29%)              | -0.23%<br>(-0.89-0.28%)             | -0.022<br>(-0.088-0.027)   | -0.061<br>(-0.28-0.11)  |
| Timor-Leste | 2010 | Male   | All Ages | 23%<br>(18-29%)                | 77%<br>(71-82%)          | 0.11<br>(0.078-0.16)                        | 0.62%<br>(0.35-0.94%)                | 0.71%<br>(0.24-1.2%)                | 20<br>(6.9-37)             | 1200<br>(670-1800)      |
| Timor-Leste | 2010 | Male   | 15 to 19 | 21%<br>(12-34%)                | 79%<br>(66-88%)          | 0.059<br>(0.026-0.12)                       | 0.79%<br>(0.52-1.1%)                 | 0.74%<br>(0.36-1.3%)                | 0.4<br>(0.2-0.74)          | 64<br>(39-96)           |

| Location    | Year | Sex    | Age      | Prevalence of current drinkers | Prevalence of abstainers | Population average of standard drinks daily | Percent of total attributable deaths | Percent of total attributable DALYs | Attributable deaths        | Attributable DALYs    |
|-------------|------|--------|----------|--------------------------------|--------------------------|---------------------------------------------|--------------------------------------|-------------------------------------|----------------------------|-----------------------|
| Timor-Leste | 2010 | Male   | 20 to 24 | 32%<br>(17-49%)                | 68%<br>(51-83%)          | 0.14<br>(0.066-0.25)                        | 1.7%<br>(1.1-2.3%)                   | 1.4%<br>(0.54-2.5%)                 | 0.87<br>(0.33-1.6)         | 130<br>(82-190)       |
| Timor-Leste | 2010 | Male   | 25 to 29 | 37%<br>(21-55%)                | 63%<br>(45-79%)          | 0.2<br>(0.1-0.36)                           | 1.9%<br>(1.1-2.7%)                   | 1.6%<br>(0.22-3%)                   | 0.98<br>(0.13-1.9)         | 130<br>(76-200)       |
| Timor-Leste | 2010 | Male   | 30 to 34 | 41%<br>(23-61%)                | 59%<br>(39-77%)          | 0.25<br>(0.13-0.44)                         | 2%<br>(1.1-3%)                       | 2.1%<br>(0.27-4%)                   | 1<br>(0.13-2)              | 110<br>(54-160)       |
| Timor-Leste | 2010 | Male   | 35 to 39 | 43%<br>(26-62%)                | 57%<br>(38-74%)          | 0.29<br>(0.14-0.48)                         | 2.1%<br>(0.98-3.4%)                  | 2.6%<br>(0.29-4.8%)                 | 1.7<br>(0.18-3.5)          | 140<br>(62-230)       |
| Timor-Leste | 2010 | Male   | 40 to 44 | 43%<br>(26-63%)                | 57%<br>(37-74%)          | 0.3<br>(0.15-0.51)                          | 2%<br>(0.88-3.2%)                    | 2.7%<br>(0.38-4.7%)                 | 2<br>(0.29-3.9)            | 130<br>(55-220)       |
| Timor-Leste | 2010 | Male   | 45 to 49 | 42%<br>(23-61%)                | 58%<br>(39-77%)          | 0.3<br>(0.14-0.53)                          | 1.9%<br>(0.75-3.2%)                  | 2.6%<br>(0.52-4.8%)                 | 2.3<br>(0.46-4.4)          | 120<br>(46-210)       |
| Timor-Leste | 2010 | Male   | 50 to 54 | 39%<br>(22-58%)                | 61%<br>(42-78%)          | 0.28<br>(0.13-0.49)                         | 1.6%<br>(0.61-2.6%)                  | 2.1%<br>(0.56-3.7%)                 | 2.1<br>(0.53-3.9)          | 92<br>(35-160)        |
| Timor-Leste | 2010 | Male   | 55 to 59 | 37%<br>(21-56%)                | 63%<br>(44-79%)          | 0.25<br>(0.11-0.44)                         | 1.2%<br>(0.55-2.1%)                  | 1.6%<br>(0.46-2.8%)                 | 1.6<br>(0.45-3)            | 62<br>(26-110)        |
| Timor-Leste | 2010 | Male   | 60 to 64 | 34%<br>(18-54%)                | 66%<br>(46-82%)          | 0.21<br>(0.096-0.4)                         | 0.97%<br>(0.32-1.6%)                 | 1.2%<br>(0.24-2.1%)                 | 3.5<br>(0.73-6.8)          | 110<br>(35-200)       |
| Timor-Leste | 2010 | Male   | 65 to 69 | 31%<br>(17-48%)                | 69%<br>(52-83%)          | 0.17<br>(0.079-0.32)                        | 0.66%<br>(0.14-1.2%)                 | 0.76%<br>(0.011-1.5%)               | 1.9<br>(0.024-4)           | 52<br>(11-99)         |
| Timor-Leste | 2010 | Male   | 70 to 74 | 27%<br>(15-44%)                | 73%<br>(56-85%)          | 0.14<br>(0.059-0.29)                        | 0.49%<br>(0.046-0.95%)               | 0.56%<br>(-0.04-1.2%)               | 1.2<br>(-0.083-2.6)        | 25<br>(2.3-51)        |
| Timor-Leste | 2010 | Male   | 75 to 79 | 25%<br>(14-40%)                | 75%<br>(60-86%)          | 0.12<br>(0.048-0.24)                        | 0.29%<br>(-0.14-0.64%)               | 0.29%<br>(-0.27-0.75%)              | 0.54<br>(-0.47-1.4)        | 9.8<br>(-4.5-22)      |
| Timor-Leste | 2010 | Male   | 80 to 84 | 23%<br>(12-38%)                | 77%<br>(62-88%)          | 0.1<br>(0.042-0.21)                         | 0.22%<br>(-0.17-0.53%)               | 0.2%<br>(-0.27-0.62%)               | 0.24<br>(-0.33-0.74)       | 3.3<br>(-2.7-8.3)     |
| Timor-Leste | 2010 | Male   | 85 to 89 | 21%<br>(11-35%)                | 79%<br>(65-89%)          | 0.09<br>(0.036-0.18)                        | 0.13%<br>(-0.18-0.38%)               | 0.1%<br>(-0.28-0.42%)               | 0.067<br>(-0.18-0.27)      | 0.75<br>(-1.1-2.3)    |
| Timor-Leste | 2010 | Male   | 90 to 94 | 22%<br>(12-38%)                | 78%<br>(62-88%)          | 0.087<br>(0.034-0.18)                       | 0.054%<br>(-0.27-0.28%)              | 0.016%<br>(-0.38-0.3%)              | 0.0044<br>(-0.11-0.079)    | 0.093<br>(-0.46-0.48) |
| Timor-Leste | 2010 | Male   | 95 plus  | 26%<br>(11-45%)                | 74%<br>(55-89%)          | 0.09<br>(0.026-0.2)                         | 0.075%<br>(-0.3-0.31%)               | -0.0043%<br>(-0.48-0.29%)           | -0.00033<br>(-0.039-0.024) | 0.025<br>(-0.099-0.1) |
| Timor-Leste | 2016 | Female | All Ages | 7.8%<br>(5.6-10%)              | 92%<br>(90-94%)          | 0.04<br>(0.023-0.064)                       | 0.26%<br>(0.15-0.38%)                | 0.15%<br>(-0.078-0.38%)             | 4.1<br>(-2.1-11)           | 380<br>(220-570)      |
| Timor-Leste | 2016 | Female | 15 to 19 | 7.6%<br>(3.2-14%)              | 92%<br>(86-97%)          | 0.036<br>(0.01-0.083)                       | 0.44%<br>(0.26-0.68%)                | 0.25%<br>(0.11-0.46%)               | 0.091<br>(0.034-0.18)      | 32<br>(18-53)         |
| Timor-Leste | 2016 | Female | 20 to 24 | 9.1%<br>(3.8-17%)              | 91%<br>(83-96%)          | 0.047<br>(0.015-0.11)                       | 0.84%<br>(0.52-1.3%)                 | 0.23%<br>(0.089-0.44%)              | 0.091<br>(0.032-0.19)      | 58<br>(34-92)         |
| Timor-Leste | 2016 | Female | 25 to 29 | 9.8%<br>(4.1-18%)              | 90%<br>(82-96%)          | 0.054<br>(0.018-0.12)                       | 0.83%<br>(0.55-1.1%)                 | 0.25%<br>(0.033-0.47%)              | 0.097<br>(0.013-0.21)      | 50<br>(32-76)         |
| Timor-Leste | 2016 | Female | 30 to 34 | 11%<br>(4.4-20%)               | 89%<br>(80-96%)          | 0.061<br>(0.019-0.14)                       | 0.75%<br>(0.5-1.1%)                  | 0.35%<br>(0.045-0.6%)               | 0.15<br>(0.019-0.28)       | 44<br>(27-65)         |
| Timor-Leste | 2016 | Female | 35 to 39 | 12%<br>(5-22%)                 | 88%<br>(78-95%)          | 0.069<br>(0.021-0.15)                       | 0.66%<br>(0.45-0.9%)                 | 0.47%<br>(0.11-0.79%)               | 0.19<br>(0.053-0.36)       | 30<br>(20-44)         |

| Location    | Year | Sex    | Age      | Prevalence of current drinkers | Prevalence of abstainers | Population average of standard drinks daily | Percent of total attributable deaths | Percent of total attributable DALYs | Attributable deaths     | Attributable DALYs     |
|-------------|------|--------|----------|--------------------------------|--------------------------|---------------------------------------------|--------------------------------------|-------------------------------------|-------------------------|------------------------|
| Timor-Leste | 2016 | Female | 40 to 44 | 12%<br>(5.5-22%)               | 88%<br>(78-94%)          | 0.078<br>(0.025-0.18)                       | 0.6%<br>(0.39-0.83%)                 | 0.59%<br>(0.21-0.96%)               | 0.36<br>(0.11-0.62)     | 35<br>(21-51)          |
| Timor-Leste | 2016 | Female | 45 to 49 | 12%<br>(5.3-22%)               | 88%<br>(78-95%)          | 0.088<br>(0.028-0.2)                        | 0.55%<br>(0.35-0.79%)                | 0.62%<br>(0.28-1%)                  | 0.51<br>(0.2-0.91)      | 34<br>(20-52)          |
| Timor-Leste | 2016 | Female | 50 to 54 | 13%<br>(5.6-25%)               | 87%<br>(75-94%)          | 0.099<br>(0.031-0.23)                       | 0.55%<br>(0.27-0.88%)                | 0.69%<br>(0.28-1.2%)                | 0.7<br>(0.26-1.3)       | 34<br>(15-57)          |
| Timor-Leste | 2016 | Female | 55 to 59 | 13%<br>(5.5-25%)               | 87%<br>(75-95%)          | 0.11<br>(0.033-0.26)                        | 0.42%<br>(0.093-0.78%)               | 0.54%<br>(0.063-1.1%)               | 0.65<br>(0.061-1.4)     | 25<br>(5-49)           |
| Timor-Leste | 2016 | Female | 60 to 64 | 13%<br>(5.6-25%)               | 87%<br>(75-94%)          | 0.11<br>(0.032-0.27)                        | 0.28%<br>(-0.095-0.65%)              | 0.35%<br>(-0.14-0.87%)              | 0.42<br>(-0.16-1.1)     | 13<br>(-4.8-32)        |
| Timor-Leste | 2016 | Female | 65 to 69 | 13%<br>(5.6-23%)               | 87%<br>(77-94%)          | 0.1<br>(0.031-0.23)                         | 0.15%<br>(-0.25-0.51%)               | 0.19%<br>(-0.35-0.65%)              | 0.66<br>(-1.3-2.3)      | 17<br>(-28-55)         |
| Timor-Leste | 2016 | Female | 70 to 74 | 12%<br>(5.6-22%)               | 88%<br>(78-94%)          | 0.095<br>(0.027-0.23)                       | 0.12%<br>(-0.24-0.42%)               | 0.15%<br>(-0.31-0.54%)              | 0.53<br>(-1.2-2.1)      | 10<br>(-22-39)         |
| Timor-Leste | 2016 | Female | 75 to 79 | 12%<br>(5-22%)                 | 88%<br>(78-95%)          | 0.089<br>(0.024-0.22)                       | 0.0087%<br>(-0.37-0.3%)              | 0.0034%<br>(-0.48-0.39%)            | 0.0094<br>(-1.2-1)      | 0.44<br>(-17-15)       |
| Timor-Leste | 2016 | Female | 80 to 84 | 12%<br>(5-22%)                 | 88%<br>(78-95%)          | 0.089<br>(0.024-0.23)                       | -0.035%<br>(-0.42-0.23%)             | -0.051%<br>(-0.53-0.29%)            | -0.1<br>(-1.1-0.57)     | -0.93<br>(-11-6.1)     |
| Timor-Leste | 2016 | Female | 85 to 89 | 13%<br>(5.4-23%)               | 87%<br>(77-95%)          | 0.096<br>(0.026-0.26)                       | -0.097%<br>(-0.5-0.21%)              | -0.13%<br>(-0.63-0.22%)             | -0.18<br>(-0.89-0.32)   | -1.2<br>(-6.5-2.6)     |
| Timor-Leste | 2016 | Female | 90 to 94 | 15%<br>(6-27%)                 | 85%<br>(73-94%)          | 0.11<br>(0.025-0.29)                        | -0.14%<br>(-0.57-0.21%)              | -0.19%<br>(-0.73-0.22%)             | -0.1<br>(-0.39-0.13)    | -0.46<br>(-1.9-0.7)    |
| Timor-Leste | 2016 | Female | 95 plus  | 18%<br>(6.8-35%)               | 82%<br>(65-93%)          | 0.14<br>(0.026-0.41)                        | -0.15%<br>(-0.69-0.32%)              | -0.22%<br>(-0.9-0.33%)              | -0.029<br>(-0.12-0.047) | -0.079<br>(-0.38-0.18) |
| Timor-Leste | 2016 | Male   | All Ages | 23%<br>(18-30%)                | 77%<br>(70-82%)          | 0.12<br>(0.07-0.18)                         | 0.79%<br>(0.45-1.2%)                 | 0.83%<br>(0.31-1.4%)                | 24<br>(8.8-43)          | 1400<br>(780-2000)     |
| Timor-Leste | 2016 | Male   | 15 to 19 | 21%<br>(12-34%)                | 79%<br>(66-88%)          | 0.062<br>(0.025-0.13)                       | 0.83%<br>(0.53-1.2%)                 | 0.81%<br>(0.41-1.5%)                | 0.46<br>(0.21-0.85)     | 73<br>(45-110)         |
| Timor-Leste | 2016 | Male   | 20 to 24 | 32%<br>(18-50%)                | 68%<br>(50-82%)          | 0.15<br>(0.063-0.29)                        | 1.7%<br>(1.1-2.5%)                   | 1.5%<br>(0.62-2.8%)                 | 1.1<br>(0.4-2)          | 150<br>(94-230)        |
| Timor-Leste | 2016 | Male   | 25 to 29 | 38%<br>(21-56%)                | 62%<br>(44-79%)          | 0.21<br>(0.093-0.38)                        | 2%<br>(1.2-2.9%)                     | 1.8%<br>(0.25-3.3%)                 | 1.2<br>(0.15-2.4)       | 150<br>(83-230)        |
| Timor-Leste | 2016 | Male   | 30 to 34 | 41%<br>(22-61%)                | 59%<br>(39-78%)          | 0.26<br>(0.12-0.47)                         | 2.2%<br>(1.2-3.2%)                   | 2.2%<br>(0.27-4.2%)                 | 1.5<br>(0.17-3)         | 150<br>(76-240)        |
| Timor-Leste | 2016 | Male   | 35 to 39 | 43%<br>(26-62%)                | 57%<br>(38-74%)          | 0.3<br>(0.13-0.54)                          | 2.3%<br>(1.1-3.6%)                   | 2.8%<br>(0.35-5%)                   | 1.6<br>(0.17-3.2)       | 120<br>(57-200)        |
| Timor-Leste | 2016 | Male   | 40 to 44 | 43%<br>(25-63%)                | 57%<br>(37-75%)          | 0.31<br>(0.14-0.58)                         | 2.2%<br>(0.91-3.5%)                  | 2.8%<br>(0.34-4.9%)                 | 2.3<br>(0.26-4.3)       | 140<br>(58-240)        |
| Timor-Leste | 2016 | Male   | 45 to 49 | 42%<br>(24-60%)                | 58%<br>(40-76%)          | 0.31<br>(0.14-0.57)                         | 2.1%<br>(0.93-3.3%)                  | 2.8%<br>(0.77-4.9%)                 | 2.9<br>(0.74-5.4)       | 150<br>(64-250)        |
| Timor-Leste | 2016 | Male   | 50 to 54 | 40%<br>(22-60%)                | 60%<br>(40-78%)          | 0.29<br>(0.12-0.55)                         | 1.7%<br>(0.77-2.7%)                  | 2.3%<br>(0.8-3.8%)                  | 2.7<br>(0.84-5)         | 120<br>(54-210)        |
| Timor-Leste | 2016 | Male   | 55 to 59 | 37%<br>(21-57%)                | 63%<br>(43-79%)          | 0.26<br>(0.11-0.51)                         | 1.3%<br>(0.59-2.1%)                  | 1.7%<br>(0.56-2.9%)                 | 2.4<br>(0.76-4.4)       | 90<br>(39-160)         |

| Location    | Year | Sex    | Age      | Prevalence of current drinkers | Prevalence of abstainers | Population average of standard drinks daily | Percent of total attributable deaths | Percent of total attributable DALYs | Attributable deaths       | Attributable DALYs      |
|-------------|------|--------|----------|--------------------------------|--------------------------|---------------------------------------------|--------------------------------------|-------------------------------------|---------------------------|-------------------------|
| Timor-Leste | 2016 | Male   | 60 to 64 | 34%<br>(18-54%)                | 66%<br>(46-82%)          | 0.22<br>(0.09-0.44)                         | 1%<br>(0.41-1.7%)                    | 1.3%<br>(0.36-2.2%)                 | 1.7<br>(0.48-3.3)         | 55<br>(21-97)           |
| Timor-Leste | 2016 | Male   | 65 to 69 | 31%<br>(17-49%)                | 69%<br>(51-83%)          | 0.19<br>(0.074-0.36)                        | 0.71%<br>(0.18-1.3%)                 | 0.83%<br>(0.085-1.6%)               | 3<br>(0.34-6.1)           | 80<br>(20-150)          |
| Timor-Leste | 2016 | Male   | 70 to 74 | 28%<br>(15-45%)                | 72%<br>(55-85%)          | 0.15<br>(0.06-0.31)                         | 0.53%<br>(0.083-1%)                  | 0.61%<br>(-0.015-1.2%)              | 2.1<br>(-0.048-4.4)       | 45<br>(6.9-86)          |
| Timor-Leste | 2016 | Male   | 75 to 79 | 25%<br>(13-41%)                | 75%<br>(59-87%)          | 0.13<br>(0.046-0.26)                        | 0.33%<br>(-0.12-0.68%)               | 0.34%<br>(-0.23-0.8%)               | 0.76<br>(-0.53-1.8)       | 13<br>(-5-29)           |
| Timor-Leste | 2016 | Male   | 80 to 84 | 23%<br>(11-38%)                | 77%<br>(62-89%)          | 0.11<br>(0.039-0.24)                        | 0.24%<br>(-0.14-0.55%)               | 0.23%<br>(-0.25-0.62%)              | 0.35<br>(-0.37-0.96)      | 4.7<br>(-2.7-11)        |
| Timor-Leste | 2016 | Male   | 85 to 89 | 21%<br>(11-35%)                | 79%<br>(65-89%)          | 0.094<br>(0.034-0.2)                        | 0.14%<br>(-0.18-0.38%)               | 0.12%<br>(-0.27-0.41%)              | 0.13<br>(-0.3-0.45)       | 1.4<br>(-1.8-3.7)       |
| Timor-Leste | 2016 | Male   | 90 to 94 | 22%<br>(12-37%)                | 78%<br>(63-88%)          | 0.092<br>(0.033-0.2)                        | 0.061%<br>(-0.27-0.29%)              | 0.023%<br>(-0.39-0.3%)              | 0.0091<br>(-0.15-0.12)    | 0.15<br>(-0.67-0.68)    |
| Timor-Leste | 2016 | Male   | 95 plus  | 26%<br>(12-45%)                | 74%<br>(55-88%)          | 0.095<br>(0.027-0.21)                       | 0.084%<br>(-0.32-0.32%)              | 0.0064%<br>(-0.5-0.3%)              | 0.00064<br>(-0.047-0.029) | 0.033<br>(-0.12-0.13)   |
| Vietnam     | 1990 | Female | All Ages | 9.3%<br>(7.8-11%)              | 91%<br>(89-92%)          | 0.13<br>(0.084-0.18)                        | 0.86%<br>(0.5-1.3%)                  | 0.8%<br>(0.074-1.9%)                | 2000<br>(180-4700)        | 90000<br>(51000-140000) |
| Vietnam     | 1990 | Female | 15 to 19 | 9.3%<br>(5.8-14%)              | 91%<br>(86-94%)          | 0.13<br>(0.062-0.23)                        | 1.1%<br>(0.7-1.5%)                   | 0.8%<br>(0.26-1.6%)                 | 22<br>(6.9-42)            | 5200<br>(3200-7800)     |
| Vietnam     | 1990 | Female | 20 to 24 | 11%<br>(6.6-15%)               | 89%<br>(85-93%)          | 0.15<br>(0.075-0.28)                        | 2.2%<br>(1.4-3.2%)                   | 1%<br>(0.23-2.3%)                   | 33<br>(6.9-74)            | 11000<br>(6400-17000)   |
| Vietnam     | 1990 | Female | 25 to 29 | 11%<br>(7-17%)                 | 89%<br>(83-93%)          | 0.16<br>(0.081-0.29)                        | 2.2%<br>(1.5-3.2%)                   | 1.1%<br>(0.15-2.6%)                 | 40<br>(5-97)              | 11000<br>(6600-17000)   |
| Vietnam     | 1990 | Female | 30 to 34 | 12%<br>(7.4-18%)               | 88%<br>(82-93%)          | 0.18<br>(0.089-0.31)                        | 1.9%<br>(1.2-2.7%)                   | 1.1%<br>(0.31-2.3%)                 | 44<br>(12-93)             | 8900<br>(5400-14000)    |
| Vietnam     | 1990 | Female | 35 to 39 | 12%<br>(7.6-18%)               | 88%<br>(82-92%)          | 0.2<br>(0.098-0.35)                         | 1.7%<br>(1.1-2.6%)                   | 1.4%<br>(0.44-2.8%)                 | 56<br>(18-120)            | 7300<br>(4300-11000)    |
| Vietnam     | 1990 | Female | 40 to 44 | 12%<br>(7.7-17%)               | 88%<br>(83-92%)          | 0.21<br>(0.11-0.37)                         | 1.6%<br>(1-2.5%)                     | 1.6%<br>(0.7-2.9%)                  | 60<br>(27-110)            | 5400<br>(3200-8200)     |
| Vietnam     | 1990 | Female | 45 to 49 | 12%<br>(7.1-17%)               | 88%<br>(83-93%)          | 0.23<br>(0.11-0.44)                         | 1.5%<br>(0.95-2.5%)                  | 1.6%<br>(0.7-3.2%)                  | 76<br>(32-150)            | 5000<br>(2900-8400)     |
| Vietnam     | 1990 | Female | 50 to 54 | 12%<br>(8.1-18%)               | 88%<br>(82-92%)          | 0.26<br>(0.13-0.47)                         | 1.4%<br>(0.78-2.4%)                  | 1.6%<br>(0.63-3.1%)                 | 110<br>(44-230)           | 5700<br>(3000-10000)    |
| Vietnam     | 1990 | Female | 55 to 59 | 13%<br>(8.3-19%)               | 87%<br>(81-92%)          | 0.29<br>(0.15-0.52)                         | 1.3%<br>(0.59-2.4%)                  | 1.5%<br>(0.51-3.1%)                 | 170<br>(53-360)           | 6700<br>(2900-13000)    |
| Vietnam     | 1990 | Female | 60 to 64 | 13%<br>(7.9-19%)               | 87%<br>(81-92%)          | 0.29<br>(0.14-0.51)                         | 1.2%<br>(0.4-2.4%)                   | 1.5%<br>(0.37-3.1%)                 | 210<br>(50-460)           | 6600<br>(2100-14000)    |
| Vietnam     | 1990 | Female | 65 to 69 | 11%<br>(7.2-16%)               | 89%<br>(84-93%)          | 0.26<br>(0.13-0.44)                         | 0.92%<br>(0.16-2.1%)                 | 1.1%<br>(0.11-2.6%)                 | 220<br>(23-540)           | 5500<br>(970-12000)     |
| Vietnam     | 1990 | Female | 70 to 74 | 11%<br>(7.1-16%)               | 89%<br>(84-93%)          | 0.25<br>(0.13-0.45)                         | 0.78%<br>(0.007-2.1%)                | 0.93%<br>(-0.06-2.5%)               | 230<br>(-12-640)          | 4400<br>(30-12000)      |
| Vietnam     | 1990 | Female | 75 to 79 | 11%<br>(7.2-17%)               | 89%<br>(83-93%)          | 0.25<br>(0.12-0.46)                         | 0.61%<br>(-0.19-2%)                  | 0.71%<br>(-0.27-2.4%)               | 220<br>(-78-750)          | 3300<br>(-950-11000)    |

| Location | Year | Sex    | Age      | Prevalence of current drinkers | Prevalence of abstainers | Population average of standard drinks daily | Percent of total attributable deaths | Percent of total attributable DALYs | Attributable deaths   | Attributable DALYs        |
|----------|------|--------|----------|--------------------------------|--------------------------|---------------------------------------------|--------------------------------------|-------------------------------------|-----------------------|---------------------------|
| Vietnam  | 1990 | Female | 80 to 84 | 12%<br>(7.5-17%)               | 88%<br>(83-93%)          | 0.27<br>(0.13-0.46)                         | 0.65%<br>(-0.2-2%)                   | 0.77%<br>(-0.28-2.4%)               | 260<br>(-94-820)      | 2800<br>(-840-8400)       |
| Vietnam  | 1990 | Female | 85 to 89 | 13%<br>(8.2-20%)               | 87%<br>(80-92%)          | 0.3<br>(0.14-0.53)                          | 0.55%<br>(-0.27-1.8%)                | 0.64%<br>(-0.34-2.2%)               | 170<br>(-90-600)      | 1300<br>(-590-4300)       |
| Vietnam  | 1990 | Female | 90 to 94 | 16%<br>(9.7-24%)               | 84%<br>(76-90%)          | 0.34<br>(0.16-0.62)                         | 0.41%<br>(-0.44-1.8%)                | 0.44%<br>(-0.58-2.1%)               | 60<br>(-77-280)       | 330<br>(-350-1400)        |
| Vietnam  | 1990 | Female | 95 plus  | 19%<br>(10-31%)                | 81%<br>(69-90%)          | 0.41<br>(0.16-0.84)                         | 0.4%<br>(-0.66-2.1%)                 | 0.38%<br>(-0.88-2.4%)               | 16<br>(-37-100)       | 67<br>(-110-360)          |
| Vietnam  | 1990 | Male   | All Ages | 43%<br>(37-49%)                | 57%<br>(51-63%)          | 0.75<br>(0.52-1)                            | 3.4%<br>(2-5%)                       | 4.2%<br>(1.9-6.6%)                  | 11000<br>(4900-17000) | 420000<br>(250000-640000) |
| Vietnam  | 1990 | Male   | 15 to 19 | 35%<br>(25-46%)                | 65%<br>(54-75%)          | 0.39<br>(0.2-0.61)                          | 2.2%<br>(1.1-3.7%)                   | 2.8%<br>(1.1-5%)                    | 150<br>(54-280)       | 14000<br>(6900-23000)     |
| Vietnam  | 1990 | Male   | 20 to 24 | 52%<br>(40-63%)                | 48%<br>(37-60%)          | 0.89<br>(0.53-1.4)                          | 5.2%<br>(3-7.9%)                     | 6%<br>(2.9-9.7%)                    | 450<br>(200-770)      | 38000<br>(21000-60000)    |
| Vietnam  | 1990 | Male   | 25 to 29 | 62%<br>(51-71%)                | 38%<br>(29-49%)          | 1.2<br>(0.73-1.7)                           | 6.6%<br>(3.6-10%)                    | 8%<br>(3.6-13%)                     | 630<br>(280-1100)     | 46000<br>(24000-73000)    |
| Vietnam  | 1990 | Male   | 30 to 34 | 70%<br>(58-78%)                | 30%<br>(22-42%)          | 1.5<br>(0.97-2.1)                           | 7.7%<br>(4.4-12%)                    | 9.7%<br>(5-15%)                     | 770<br>(370-1200)     | 50000<br>(27000-78000)    |
| Vietnam  | 1990 | Male   | 35 to 39 | 72%<br>(62-79%)                | 28%<br>(21-38%)          | 1.8<br>(1.2-2.7)                            | 8.8%<br>(5.2-13%)                    | 11%<br>(6.3-17%)                    | 880<br>(460-1400)     | 50000<br>(28000-76000)    |
| Vietnam  | 1990 | Male   | 40 to 44 | 71%<br>(61-79%)                | 29%<br>(21-39%)          | 1.9<br>(1.2-2.8)                            | 8.7%<br>(5.3-12%)                    | 11%<br>(6.5-16%)                    | 700<br>(390-1100)     | 35000<br>(20000-53000)    |
| Vietnam  | 1990 | Male   | 45 to 49 | 66%<br>(53-75%)                | 34%<br>(25-47%)          | 1.7<br>(1.1-2.5)                            | 8%<br>(4.8-12%)                      | 10%<br>(5.7-15%)                    | 730<br>(410-1100)     | 32000<br>(18000-49000)    |
| Vietnam  | 1990 | Male   | 50 to 54 | 63%<br>(51-72%)                | 37%<br>(28-49%)          | 1.6<br>(0.99-2.4)                           | 7.2%<br>(4.1-11%)                    | 8.9%<br>(4.9-13%)                   | 900<br>(480-1400)     | 34000<br>(19000-53000)    |
| Vietnam  | 1990 | Male   | 55 to 59 | 61%<br>(48-71%)                | 39%<br>(29-52%)          | 1.6<br>(1-2.4)                              | 6.6%<br>(3.3-10%)                    | 8.1%<br>(4-13%)                     | 1200<br>(580-1900)    | 39000<br>(20000-63000)    |
| Vietnam  | 1990 | Male   | 60 to 64 | 57%<br>(44-69%)                | 43%<br>(31-56%)          | 1.5<br>(0.87-2.3)                           | 5.2%<br>(2.2-8.7%)                   | 6.2%<br>(2.5-10%)                   | 1100<br>(440-1900)    | 31000<br>(13000-53000)    |
| Vietnam  | 1990 | Male   | 65 to 69 | 53%<br>(41-65%)                | 47%<br>(35-59%)          | 1.3<br>(0.74-1.9)                           | 3.9%<br>(1.4-6.9%)                   | 4.5%<br>(1.5-8.1%)                  | 990<br>(320-1800)     | 23000<br>(8000-41000)     |
| Vietnam  | 1990 | Male   | 70 to 74 | 50%<br>(38-63%)                | 50%<br>(37-62%)          | 1.1<br>(0.61-1.8)                           | 3.3%<br>(0.67-6.5%)                  | 3.8%<br>(0.72-7.7%)                 | 890<br>(150-1800)     | 16000<br>(3000-33000)     |
| Vietnam  | 1990 | Male   | 75 to 79 | 49%<br>(35-64%)                | 51%<br>(36-65%)          | 0.98<br>(0.51-1.7)                          | 2.3%<br>(-0.14-5.4%)                 | 2.6%<br>(-0.25-6.3%)                | 600<br>(-58-1500)     | 8700<br>(-500-21000)      |
| Vietnam  | 1990 | Male   | 80 to 84 | 46%<br>(30-61%)                | 54%<br>(39-70%)          | 0.82<br>(0.44-1.4)                          | 1.9%<br>(-0.36-4.8%)                 | 2.2%<br>(-0.5-5.6%)                 | 400<br>(-91-1000)     | 4200<br>(-840-11000)      |
| Vietnam  | 1990 | Male   | 85 to 89 | 42%<br>(28-57%)                | 58%<br>(43-72%)          | 0.67<br>(0.35-1.2)                          | 1%<br>(-0.68-3.1%)                   | 1.1%<br>(-0.88-3.6%)                | 130<br>(-99-430)      | 1000<br>(-660-3200)       |
| Vietnam  | 1990 | Male   | 90 to 94 | 41%<br>(28-56%)                | 59%<br>(44-72%)          | 0.58<br>(0.29-1)                            | 0.36%<br>(-0.98-2.1%)                | 0.33%<br>(-1.3-2.3%)                | 16<br>(-62-120)       | 100<br>(-280-610)         |
| Vietnam  | 1990 | Male   | 95 plus  | 43%<br>(27-61%)                | 57%<br>(39-73%)          | 0.52<br>(0.22-1)                            | 0.075%<br>(-1.2-1.5%)                | -0.084%<br>(-1.6-1.7%)              | -0.99<br>(-19-20)     | 3.6<br>(-55-75)           |

| Location | Year | Sex    | Age      | Prevalence of current drinkers | Prevalence of abstainers | Population average of standard drinks daily | Percent of total attributable deaths | Percent of total attributable DALYs | Attributable deaths   | Attributable DALYs        |
|----------|------|--------|----------|--------------------------------|--------------------------|---------------------------------------------|--------------------------------------|-------------------------------------|-----------------------|---------------------------|
| Vietnam  | 1995 | Female | All Ages | 9.6%<br>(8-11%)                | 90%<br>(89-92%)          | 0.19<br>(0.13-0.26)                         | 1.3%<br>(0.79-2%)                    | 1.5%<br>(0.47-3%)                   | 3900<br>(1200-7900)   | 130000<br>(78000-200000)  |
| Vietnam  | 1995 | Female | 15 to 19 | 9.3%<br>(5.8-14%)              | 91%<br>(86-94%)          | 0.19<br>(0.088-0.33)                        | 1.2%<br>(0.82-1.8%)                  | 1.1%<br>(0.45-2.1%)                 | 26<br>(11-50)         | 5800<br>(3700-8600)       |
| Vietnam  | 1995 | Female | 20 to 24 | 11%<br>(6.5-15%)               | 89%<br>(85-93%)          | 0.22<br>(0.11-0.39)                         | 2.6%<br>(1.7-3.7%)                   | 1.5%<br>(0.52-3.1%)                 | 43<br>(14-88)         | 12000<br>(7700-19000)     |
| Vietnam  | 1995 | Female | 25 to 29 | 11%<br>(7.2-17%)               | 89%<br>(83-93%)          | 0.23<br>(0.12-0.41)                         | 2.6%<br>(1.8-3.7%)                   | 1.8%<br>(0.6-3.6%)                  | 56<br>(17-120)        | 13000<br>(7800-19000)     |
| Vietnam  | 1995 | Female | 30 to 34 | 12%<br>(7.3-19%)               | 88%<br>(81-93%)          | 0.25<br>(0.13-0.44)                         | 2.3%<br>(1.5-3.2%)                   | 1.7%<br>(0.74-3.3%)                 | 64<br>(25-120)        | 11000<br>(7000-16000)     |
| Vietnam  | 1995 | Female | 35 to 39 | 12%<br>(7.5-18%)               | 88%<br>(82-93%)          | 0.28<br>(0.14-0.47)                         | 2.1%<br>(1.4-3.1%)                   | 2.1%<br>(0.91-3.8%)                 | 97<br>(40-190)        | 11000<br>(6600-16000)     |
| Vietnam  | 1995 | Female | 40 to 44 | 12%<br>(7.9-17%)               | 88%<br>(83-92%)          | 0.3<br>(0.16-0.5)                           | 2%<br>(1.3-3%)                       | 2.2%<br>(1.1-4%)                    | 120<br>(55-210)       | 9500<br>(5800-14000)      |
| Vietnam  | 1995 | Female | 45 to 49 | 12%<br>(7-17%)                 | 88%<br>(83-93%)          | 0.33<br>(0.16-0.59)                         | 2%<br>(1.2-3.2%)                     | 2.3%<br>(1.1-4.3%)                  | 120<br>(51-230)       | 7400<br>(4200-12000)      |
| Vietnam  | 1995 | Female | 50 to 54 | 13%<br>(8.2-19%)               | 87%<br>(81-92%)          | 0.37<br>(0.19-0.65)                         | 2%<br>(1.1-3.4%)                     | 2.4%<br>(1-4.6%)                    | 160<br>(60-290)       | 7400<br>(3900-13000)      |
| Vietnam  | 1995 | Female | 55 to 59 | 13%<br>(8.3-19%)               | 87%<br>(81-92%)          | 0.42<br>(0.22-0.72)                         | 1.9%<br>(0.93-3.5%)                  | 2.4%<br>(0.97-4.7%)                 | 230<br>(86-450)       | 8600<br>(4000-16000)      |
| Vietnam  | 1995 | Female | 60 to 64 | 13%<br>(8.1-19%)               | 87%<br>(81-92%)          | 0.41<br>(0.2-0.74)                          | 1.9%<br>(0.79-3.6%)                  | 2.4%<br>(0.86-4.6%)                 | 370<br>(130-740)      | 11000<br>(4500-21000)     |
| Vietnam  | 1995 | Female | 65 to 69 | 11%<br>(7.2-16%)               | 89%<br>(84-93%)          | 0.37<br>(0.19-0.61)                         | 1.6%<br>(0.56-3.1%)                  | 1.9%<br>(0.6-4%)                    | 390<br>(110-810)      | 9500<br>(3100-19000)      |
| Vietnam  | 1995 | Female | 70 to 74 | 11%<br>(7-15%)                 | 89%<br>(85-93%)          | 0.35<br>(0.18-0.62)                         | 1.4%<br>(0.36-3.1%)                  | 1.7%<br>(0.41-3.9%)                 | 470<br>(100-1100)     | 9000<br>(2200-21000)      |
| Vietnam  | 1995 | Female | 75 to 79 | 11%<br>(7.2-17%)               | 89%<br>(83-93%)          | 0.36<br>(0.18-0.65)                         | 1.2%<br>(0.15-3%)                    | 1.5%<br>(0.16-3.6%)                 | 470<br>(49-1200)      | 6800<br>(860-17000)       |
| Vietnam  | 1995 | Female | 80 to 84 | 12%<br>(7.7-17%)               | 88%<br>(83-92%)          | 0.38<br>(0.19-0.64)                         | 1.3%<br>(0.17-3.1%)                  | 1.6%<br>(0.19-3.7%)                 | 610<br>(69-1500)      | 6400<br>(780-15000)       |
| Vietnam  | 1995 | Female | 85 to 89 | 13%<br>(8.1-20%)               | 87%<br>(80-92%)          | 0.42<br>(0.21-0.73)                         | 1.2%<br>(0.069-2.8%)                 | 1.4%<br>(0.047-3.4%)                | 460<br>(15-1100)      | 3400<br>(190-8300)        |
| Vietnam  | 1995 | Female | 90 to 94 | 16%<br>(9.7-23%)               | 84%<br>(77-90%)          | 0.48<br>(0.23-0.89)                         | 1%<br>(-0.14-2.9%)                   | 1.2%<br>(-0.21-3.5%)                | 200<br>(-37-580)      | 1100<br>(-140-3000)       |
| Vietnam  | 1995 | Female | 95 plus  | 19%<br>(10-31%)                | 81%<br>(69-90%)          | 0.57<br>(0.22-1.2)                          | 1.1%<br>(-0.33-3.4%)                 | 1.2%<br>(-0.49-3.9%)                | 70<br>(-30-240)       | 250<br>(-76-820)          |
| Vietnam  | 1995 | Male   | All Ages | 44%<br>(39-50%)                | 56%<br>(50-61%)          | 1.1<br>(0.81-1.5)                           | 5.1%<br>(3.4-7%)                     | 6.4%<br>(3.8-9.2%)                  | 17000<br>(9700-25000) | 640000<br>(420000-900000) |
| Vietnam  | 1995 | Male   | 15 to 19 | 36%<br>(26-46%)                | 64%<br>(54-74%)          | 0.55<br>(0.3-0.87)                          | 2.8%<br>(1.6-4.4%)                   | 3.6%<br>(1.7-6.2%)                  | 200<br>(85-370)       | 18000<br>(9900-30000)     |
| Vietnam  | 1995 | Male   | 20 to 24 | 52%<br>(39-63%)                | 48%<br>(37-61%)          | 1.3<br>(0.78-1.8)                           | 6.5%<br>(4.2-9.5%)                   | 7.8%<br>(4.4-12%)                   | 620<br>(320-1000)     | 50000<br>(30000-79000)    |
| Vietnam  | 1995 | Male   | 25 to 29 | 62%<br>(51-72%)                | 38%<br>(28-49%)          | 1.7<br>(1.1-2.4)                            | 8.4%<br>(5.2-12%)                    | 11%<br>(6.1-16%)                    | 870<br>(460-1400)     | 62000<br>(38000-94000)    |

| Location | Year | Sex    | Age      | Prevalence of current drinkers | Prevalence of abstainers | Population average of standard drinks daily | Percent of total attributable deaths | Percent of total attributable DALYs | Attributable deaths  | Attributable DALYs        |
|----------|------|--------|----------|--------------------------------|--------------------------|---------------------------------------------|--------------------------------------|-------------------------------------|----------------------|---------------------------|
| Vietnam  | 1995 | Male   | 30 to 34 | 69%<br>(58-78%)                | 31%<br>(22-42%)          | 2.1<br>(1.4-3)                              | 9.8%<br>(6.4-14%)                    | 13%<br>(7.9-18%)                    | 1100<br>(640-1700)   | 70000<br>(43000-100000)   |
| Vietnam  | 1995 | Male   | 35 to 39 | 72%<br>(61-80%)                | 28%<br>(20-39%)          | 2.6<br>(1.7-3.7)                            | 11%<br>(7.4-15%)                     | 14%<br>(9.4-20%)                    | 1400<br>(830-2000)   | 77000<br>(49000-110000)   |
| Vietnam  | 1995 | Male   | 40 to 44 | 71%<br>(61-79%)                | 29%<br>(21-39%)          | 2.7<br>(1.7-3.8)                            | 11%<br>(7.3-15%)                     | 14%<br>(9.4-19%)                    | 1300<br>(830-2000)   | 67000<br>(43000-96000)    |
| Vietnam  | 1995 | Male   | 45 to 49 | 66%<br>(54-76%)                | 34%<br>(24-46%)          | 2.4<br>(1.5-3.5)                            | 10%<br>(6.8-15%)                     | 13%<br>(8.5-19%)                    | 1100<br>(670-1600)   | 48000<br>(31000-70000)    |
| Vietnam  | 1995 | Male   | 50 to 54 | 63%<br>(52-72%)                | 37%<br>(28-48%)          | 2.3<br>(1.4-3.4)                            | 9.7%<br>(5.9-14%)                    | 12%<br>(7.3-17%)                    | 1200<br>(680-1700)   | 44000<br>(26000-66000)    |
| Vietnam  | 1995 | Male   | 55 to 59 | 61%<br>(48-70%)                | 39%<br>(30-52%)          | 2.3<br>(1.4-3.4)                            | 9.2%<br>(5.5-14%)                    | 11%<br>(6.7-17%)                    | 1500<br>(870-2300)   | 50000<br>(29000-76000)    |
| Vietnam  | 1995 | Male   | 60 to 64 | 57%<br>(44-68%)                | 43%<br>(32-56%)          | 2.1<br>(1.3-3.1)                            | 7.6%<br>(4.2-12%)                    | 9%<br>(4.9-14%)                     | 1900<br>(960-3000)   | 52000<br>(27000-82000)    |
| Vietnam  | 1995 | Male   | 65 to 69 | 53%<br>(40-65%)                | 47%<br>(35-60%)          | 1.8<br>(1.1-2.7)                            | 5.9%<br>(2.8-9.7%)                   | 6.9%<br>(3.2-11%)                   | 1600<br>(750-2700)   | 38000<br>(18000-62000)    |
| Vietnam  | 1995 | Male   | 70 to 74 | 50%<br>(38-62%)                | 50%<br>(38-62%)          | 1.6<br>(0.88-2.4)                           | 5.2%<br>(2-9%)                       | 6.1%<br>(2.3-11%)                   | 1700<br>(630-2900)   | 30000<br>(12000-53000)    |
| Vietnam  | 1995 | Male   | 75 to 79 | 49%<br>(34-64%)                | 51%<br>(36-66%)          | 1.4<br>(0.75-2.2)                           | 3.9%<br>(0.85-7.4%)                  | 4.4%<br>(0.86-8.5%)                 | 1200<br>(220-2300)   | 17000<br>(3600-33000)     |
| Vietnam  | 1995 | Male   | 80 to 84 | 46%<br>(30-61%)                | 54%<br>(39-70%)          | 1.2<br>(0.63-1.8)                           | 3.3%<br>(0.54-6.7%)                  | 3.8%<br>(0.51-7.8%)                 | 880<br>(120-1800)    | 9300<br>(1500-18000)      |
| Vietnam  | 1995 | Male   | 85 to 89 | 42%<br>(28-58%)                | 58%<br>(42-72%)          | 0.94<br>(0.51-1.5)                          | 2%<br>(-0.048-4.6%)                  | 2.3%<br>(-0.15-5.3%)                | 350<br>(-23-810)     | 2700<br>(-64-6000)        |
| Vietnam  | 1995 | Male   | 90 to 94 | 42%<br>(28-57%)                | 58%<br>(43-72%)          | 0.82<br>(0.42-1.4)                          | 1%<br>(-0.57-3.2%)                   | 1.1%<br>(-0.84-3.6%)                | 72<br>(-55-240)      | 400<br>(-220-1200)        |
| Vietnam  | 1995 | Male   | 95 plus  | 43%<br>(26-62%)                | 57%<br>(38-74%)          | 0.72<br>(0.31-1.4)                          | 0.5%<br>(-1-2.5%)                    | 0.39%<br>(-1.4-2.7%)                | 6.8<br>(-24-48)      | 34<br>(-69-170)           |
| Vietnam  | 2000 | Female | All Ages | 8.8%<br>(7.3-11%)              | 91%<br>(89-93%)          | 0.29<br>(0.2-0.4)                           | 2.1%<br>(1.4-3.1%)                   | 3.1%<br>(1.5-5.1%)                  | 8500<br>(3900-14000) | 220000<br>(130000-310000) |
| Vietnam  | 2000 | Female | 15 to 19 | 9%<br>(5.7-13%)                | 91%<br>(87-94%)          | 0.3<br>(0.15-0.53)                          | 1.5%<br>(1-2.2%)                     | 1.7%<br>(0.74-3.2%)                 | 39<br>(17-73)        | 7300<br>(4600-11000)      |
| Vietnam  | 2000 | Female | 20 to 24 | 9.8%<br>(6.3-14%)              | 90%<br>(86-94%)          | 0.34<br>(0.17-0.6)                          | 3%<br>(2-4.2%)                       | 2.3%<br>(1-4.3%)                    | 60<br>(25-120)       | 14000<br>(8900-22000)     |
| Vietnam  | 2000 | Female | 25 to 29 | 10%<br>(6.6-15%)               | 90%<br>(85-93%)          | 0.35<br>(0.18-0.6)                          | 3.1%<br>(2.2-4.3%)                   | 2.7%<br>(1.3-5%)                    | 80<br>(34-160)       | 15000<br>(9700-22000)     |
| Vietnam  | 2000 | Female | 30 to 34 | 10%<br>(6.9-16%)               | 90%<br>(84-93%)          | 0.37<br>(0.2-0.61)                          | 2.7%<br>(1.8-3.7%)                   | 2.6%<br>(1.4-4.4%)                  | 91<br>(45-170)       | 14000<br>(8600-20000)     |
| Vietnam  | 2000 | Female | 35 to 39 | 10%<br>(6.3-15%)               | 90%<br>(85-94%)          | 0.38<br>(0.2-0.64)                          | 2.7%<br>(1.8-3.8%)                   | 3%<br>(1.6-5.3%)                    | 140<br>(68-250)      | 14000<br>(9100-21000)     |
| Vietnam  | 2000 | Female | 40 to 44 | 9.7%<br>(6.3-14%)              | 90%<br>(86-94%)          | 0.4<br>(0.21-0.65)                          | 2.5%<br>(1.7-3.7%)                   | 3.1%<br>(1.7-5.1%)                  | 190<br>(100-320)     | 14000<br>(9000-21000)     |
| Vietnam  | 2000 | Female | 45 to 49 | 9.9%<br>(6.1-14%)              | 90%<br>(86-94%)          | 0.44<br>(0.22-0.81)                         | 2.6%<br>(1.6-4.1%)                   | 3.4%<br>(1.8-5.8%)                  | 240<br>(120-420)     | 14000<br>(8200-22000)     |

| Location | Year | Sex    | Age      | Prevalence of current drinkers | Prevalence of abstainers | Population average of standard drinks daily | Percent of total attributable deaths | Percent of total attributable DALYs | Attributable deaths    | Attributable DALYs          |
|----------|------|--------|----------|--------------------------------|--------------------------|---------------------------------------------|--------------------------------------|-------------------------------------|------------------------|-----------------------------|
| Vietnam  | 2000 | Female | 50 to 54 | 11%<br>(7.6-16%)               | 89%<br>(84-92%)          | 0.53<br>(0.28-0.93)                         | 2.9%<br>(1.7-4.6%)                   | 3.8%<br>(1.8-6.5%)                  | 270<br>(130-470)       | 12000<br>(6800-20000)       |
| Vietnam  | 2000 | Female | 55 to 59 | 12%<br>(8.1-17%)               | 88%<br>(83-92%)          | 0.64<br>(0.34-1.1)                          | 3.1%<br>(1.6-5.2%)                   | 4.1%<br>(2-7.1%)                    | 360<br>(170-630)       | 13000<br>(7000-22000)       |
| Vietnam  | 2000 | Female | 60 to 64 | 12%<br>(7.7-17%)               | 88%<br>(83-92%)          | 0.64<br>(0.32-1.1)                          | 3.3%<br>(1.6-5.6%)                   | 4.2%<br>(2-7.4%)                    | 570<br>(260-990)       | 17000<br>(8300-29000)       |
| Vietnam  | 2000 | Female | 65 to 69 | 11%<br>(6.9-15%)               | 89%<br>(85-93%)          | 0.57<br>(0.3-0.93)                          | 2.9%<br>(1.3-4.9%)                   | 3.7%<br>(1.7-6.3%)                  | 800<br>(340-1400)      | 19000<br>(8700-34000)       |
| Vietnam  | 2000 | Female | 70 to 74 | 9.9%<br>(6.6-14%)              | 90%<br>(86-93%)          | 0.53<br>(0.27-0.93)                         | 2.6%<br>(1.1-4.9%)                   | 3.3%<br>(1.4-6.1%)                  | 920<br>(360-1800)      | 17000<br>(7000-33000)       |
| Vietnam  | 2000 | Female | 75 to 79 | 11%<br>(6.7-16%)               | 89%<br>(84-93%)          | 0.56<br>(0.28-1)                            | 2.5%<br>(0.87-4.8%)                  | 3.1%<br>(1.1-5.9%)                  | 1100<br>(340-2200)     | 16000<br>(5100-31000)       |
| Vietnam  | 2000 | Female | 80 to 84 | 12%<br>(7.7-17%)               | 88%<br>(83-92%)          | 0.62<br>(0.32-1.1)                          | 2.8%<br>(1.1-5.1%)                   | 3.4%<br>(1.3-6.2%)                  | 1500<br>(540-2800)     | 16000<br>(5900-29000)       |
| Vietnam  | 2000 | Female | 85 to 89 | 14%<br>(8.3-20%)               | 86%<br>(80-92%)          | 0.71<br>(0.35-1.2)                          | 2.7%<br>(0.97-5.3%)                  | 3.3%<br>(1.1-6.3%)                  | 1200<br>(420-2400)     | 9200<br>(3200-18000)        |
| Vietnam  | 2000 | Female | 90 to 94 | 16%<br>(9.8-24%)               | 84%<br>(76-90%)          | 0.82<br>(0.39-1.5)                          | 2.6%<br>(0.71-5.4%)                  | 3%<br>(0.78-6.5%)                   | 640<br>(160-1400)      | 3300<br>(900-7000)          |
| Vietnam  | 2000 | Female | 95 plus  | 20%<br>(10-32%)                | 80%<br>(68-90%)          | 1<br>(0.39-2)                               | 2.8%<br>(0.43-6.5%)                  | 3.2%<br>(0.41-7.7%)                 | 250<br>(33-590)        | 850<br>(130-2000)           |
| Vietnam  | 2000 | Male   | All Ages | 49%<br>(45-54%)                | 51%<br>(46-55%)          | 2.1<br>(1.5-2.7)                            | 8.8%<br>(6.4-11%)                    | 11%<br>(7.3-15%)                    | 32000<br>(20000-45000) | 1100000<br>(760000-1500000) |
| Vietnam  | 2000 | Male   | 15 to 19 | 34%<br>(26-44%)                | 66%<br>(56-74%)          | 0.87<br>(0.5-1.3)                           | 3.7%<br>(2.3-5.7%)                   | 5.1%<br>(2.8-8.2%)                  | 300<br>(150-510)       | 26000<br>(15000-41000)      |
| Vietnam  | 2000 | Male   | 20 to 24 | 53%<br>(43-62%)                | 47%<br>(38-57%)          | 2.1<br>(1.4-3.1)                            | 9.1%<br>(6-13%)                      | 11%<br>(7.1-17%)                    | 930<br>(550-1400)      | 73000<br>(45000-110000)     |
| Vietnam  | 2000 | Male   | 25 to 29 | 67%<br>(59-73%)                | 33%<br>(27-41%)          | 3<br>(2-4.3)                                | 12%<br>(8.1-16%)                     | 16%<br>(10-22%)                     | 1300<br>(790-1900)     | 90000<br>(59000-130000)     |
| Vietnam  | 2000 | Male   | 30 to 34 | 74%<br>(67-80%)                | 26%<br>(20-33%)          | 3.8<br>(2.6-5.3)                            | 14%<br>(9.7-18%)                     | 18%<br>(13-25%)                     | 1600<br>(980-2400)     | 100000<br>(67000-150000)    |
| Vietnam  | 2000 | Male   | 35 to 39 | 76%<br>(70-81%)                | 24%<br>(19-30%)          | 4.6<br>(3.1-6.5)                            | 15%<br>(11-20%)                      | 21%<br>(15-27%)                     | 2000<br>(1300-2900)    | 110000<br>(75000-160000)    |
| Vietnam  | 2000 | Male   | 40 to 44 | 75%<br>(69-81%)                | 25%<br>(19-31%)          | 4.8<br>(3.2-6.7)                            | 16%<br>(11-20%)                      | 21%<br>(15-26%)                     | 2300<br>(1500-3300)    | 120000<br>(78000-160000)    |
| Vietnam  | 2000 | Male   | 45 to 49 | 71%<br>(63-77%)                | 29%<br>(23-37%)          | 4.2<br>(2.8-6)                              | 15%<br>(11-20%)                      | 20%<br>(14-26%)                     | 2500<br>(1600-3400)    | 110000<br>(72000-150000)    |
| Vietnam  | 2000 | Male   | 50 to 54 | 68%<br>(59-75%)                | 32%<br>(25-41%)          | 4<br>(2.6-5.8)                              | 15%<br>(9.9-20%)                     | 19%<br>(12-25%)                     | 2100<br>(1300-2900)    | 80000<br>(51000-110000)     |
| Vietnam  | 2000 | Male   | 55 to 59 | 66%<br>(56-73%)                | 34%<br>(27-44%)          | 4.1<br>(2.7-6)                              | 15%<br>(10-21%)                      | 19%<br>(12-25%)                     | 2500<br>(1600-3400)    | 81000<br>(53000-110000)     |
| Vietnam  | 2000 | Male   | 60 to 64 | 62%<br>(52-70%)                | 38%<br>(30-48%)          | 3.8<br>(2.4-5.6)                            | 13%<br>(8.1-19%)                     | 16%<br>(9.5-22%)                    | 3000<br>(1800-4300)    | 84000<br>(51000-120000)     |



| Location | Year | Sex    | Age      | Prevalence of current drinkers | Prevalence of abstainers | Population average of standard drinks daily | Percent of total attributable deaths | Percent of total attributable DALYs | Attributable deaths   | Attributable DALYs        |
|----------|------|--------|----------|--------------------------------|--------------------------|---------------------------------------------|--------------------------------------|-------------------------------------|-----------------------|---------------------------|
| Vietnam  | 2000 | Male   | 65 to 69 | 59%<br>(49-68%)                | 41%<br>(32-51%)          | 3.4<br>(2.1-4.9)                            | 11%<br>(6.2-16%)                     | 13%<br>(7.2-19%)                    | 3700<br>(2000-5400)   | 84000<br>(45000-120000)   |
| Vietnam  | 2000 | Male   | 70 to 74 | 57%<br>(46-67%)                | 43%<br>(33-54%)          | 2.9<br>(1.7-4.4)                            | 10%<br>(5-16%)                       | 12%<br>(5.9-18%)                    | 3600<br>(1700-5500)   | 66000<br>(32000-100000)   |
| Vietnam  | 2000 | Male   | 75 to 79 | 53%<br>(40-67%)                | 47%<br>(33-60%)          | 2.5<br>(1.4-4)                              | 7.9%<br>(3.2-13%)                    | 9%<br>(3.6-15%)                     | 2900<br>(1100-4900)   | 41000<br>(17000-69000)    |
| Vietnam  | 2000 | Male   | 80 to 84 | 48%<br>(32-63%)                | 52%<br>(37-68%)          | 2<br>(1.1-3.1)                              | 6.5%<br>(2.6-11%)                    | 7.5%<br>(2.9-13%)                   | 2100<br>(820-3700)    | 22000<br>(8900-39000)     |
| Vietnam  | 2000 | Male   | 85 to 89 | 43%<br>(29-59%)                | 57%<br>(41-71%)          | 1.6<br>(0.87-2.6)                           | 4.5%<br>(1.5-8.2%)                   | 5.1%<br>(1.6-9.3%)                  | 960<br>(300-1800)     | 7300<br>(2300-13000)      |
| Vietnam  | 2000 | Male   | 90 to 94 | 43%<br>(29-58%)                | 57%<br>(42-71%)          | 1.4<br>(0.74-2.4)                           | 2.8%<br>(0.51-6%)                    | 3.2%<br>(0.43-6.8%)                 | 270<br>(36-580)       | 1400<br>(250-3000)        |
| Vietnam  | 2000 | Male   | 95 plus  | 44%<br>(28-62%)                | 56%<br>(38-72%)          | 1.2<br>(0.53-2.4)                           | 1.9%<br>(-0.26-5.5%)                 | 1.9%<br>(-0.58-5.9%)                | 44<br>(-13-130)       | 170<br>(-24-480)          |
| Vietnam  | 2005 | Female | All Ages | 9.1%<br>(7.7-11%)              | 91%<br>(89-92%)          | 0.47<br>(0.32-0.66)                         | 3.1%<br>(2.2-4.1%)                   | 4.8%<br>(2.8-7.1%)                  | 14000<br>(7800-21000) | 320000<br>(210000-440000) |
| Vietnam  | 2005 | Female | 15 to 19 | 9.2%<br>(5.8-13%)              | 91%<br>(87-94%)          | 0.47<br>(0.23-0.83)                         | 1.8%<br>(1.2-2.8%)                   | 2.6%<br>(1.2-4.8%)                  | 58<br>(26-110)        | 9100<br>(5700-14000)      |
| Vietnam  | 2005 | Female | 20 to 24 | 9.9%<br>(6.3-14%)              | 90%<br>(86-94%)          | 0.51<br>(0.25-0.94)                         | 3.4%<br>(2.3-4.8%)                   | 3.3%<br>(1.5-5.9%)                  | 82<br>(38-150)        | 17000<br>(11000-25000)    |
| Vietnam  | 2005 | Female | 25 to 29 | 10%<br>(6.8-15%)               | 90%<br>(85-93%)          | 0.53<br>(0.28-0.93)                         | 3.5%<br>(2.5-4.8%)                   | 3.5%<br>(1.7-6.1%)                  | 98<br>(45-180)        | 17000<br>(11000-25000)    |
| Vietnam  | 2005 | Female | 30 to 34 | 10%<br>(6.8-16%)               | 90%<br>(84-93%)          | 0.55<br>(0.3-0.92)                          | 3.1%<br>(2.2-4.4%)                   | 3.4%<br>(1.9-5.6%)                  | 120<br>(57-210)       | 16000<br>(10000-24000)    |
| Vietnam  | 2005 | Female | 35 to 39 | 10%<br>(6.4-15%)               | 90%<br>(85-94%)          | 0.58<br>(0.31-0.99)                         | 3.2%<br>(2.2-4.5%)                   | 4.1%<br>(2.3-6.6%)                  | 180<br>(91-320)       | 17000<br>(11000-26000)    |
| Vietnam  | 2005 | Female | 40 to 44 | 9.8%<br>(6.2-14%)              | 90%<br>(86-94%)          | 0.6<br>(0.32-1)                             | 3.2%<br>(2.1-4.6%)                   | 4.3%<br>(2.5-6.7%)                  | 270<br>(150-440)      | 19000<br>(12000-29000)    |
| Vietnam  | 2005 | Female | 45 to 49 | 9.9%<br>(6.1-14%)              | 90%<br>(86-94%)          | 0.67<br>(0.34-1.3)                          | 3.5%<br>(2.2-5.3%)                   | 4.8%<br>(2.7-7.8%)                  | 410<br>(220-690)      | 23000<br>(14000-35000)    |
| Vietnam  | 2005 | Female | 50 to 54 | 11%<br>(7.7-16%)               | 89%<br>(84-92%)          | 0.82<br>(0.44-1.5)                          | 4%<br>(2.4-6%)                       | 5.5%<br>(3.1-8.7%)                  | 550<br>(310-910)      | 24000<br>(15000-38000)    |
| Vietnam  | 2005 | Female | 55 to 59 | 12%<br>(8.1-18%)               | 88%<br>(82-92%)          | 0.99<br>(0.53-1.7)                          | 4.4%<br>(2.6-6.8%)                   | 6%<br>(3.3-9.3%)                    | 590<br>(320-950)      | 21000<br>(12000-33000)    |
| Vietnam  | 2005 | Female | 60 to 64 | 12%<br>(7.8-17%)               | 88%<br>(83-92%)          | 0.98<br>(0.49-1.7)                          | 4.6%<br>(2.5-7.2%)                   | 6.1%<br>(3.3-9.7%)                  | 760<br>(400-1200)     | 22000<br>(12000-35000)    |
| Vietnam  | 2005 | Female | 65 to 69 | 11%<br>(6.9-15%)               | 89%<br>(85-93%)          | 0.86<br>(0.45-1.5)                          | 4.2%<br>(2.3-6.5%)                   | 5.4%<br>(2.9-8.4%)                  | 1000<br>(520-1700)    | 25000<br>(13000-39000)    |
| Vietnam  | 2005 | Female | 70 to 74 | 9.9%<br>(6.7-14%)              | 90%<br>(86-93%)          | 0.8<br>(0.42-1.4)                           | 3.9%<br>(2-6.4%)                     | 4.9%<br>(2.4-8.1%)                  | 1500<br>(710-2600)    | 28000<br>(14000-48000)    |
| Vietnam  | 2005 | Female | 75 to 79 | 11%<br>(6.9-16%)               | 89%<br>(84-93%)          | 0.85<br>(0.43-1.5)                          | 3.8%<br>(1.8-6.4%)                   | 4.7%<br>(2.2-7.9%)                  | 1700<br>(790-2900)    | 26000<br>(12000-43000)    |
| Vietnam  | 2005 | Female | 80 to 84 | 12%<br>(7.5-17%)               | 88%<br>(83-93%)          | 0.97<br>(0.49-1.7)                          | 4.3%<br>(2.1-7%)                     | 5.3%<br>(2.6-8.6%)                  | 2600<br>(1300-4200)   | 28000<br>(13000-45000)    |

| Location | Year | Sex    | Age      | Prevalence of current drinkers | Prevalence of abstainers | Population average of standard drinks daily | Percent of total attributable deaths | Percent of total attributable DALYs | Attributable deaths    | Attributable DALYs           |
|----------|------|--------|----------|--------------------------------|--------------------------|---------------------------------------------|--------------------------------------|-------------------------------------|------------------------|------------------------------|
| Vietnam  | 2005 | Female | 85 to 89 | 14%<br>(8.5-21%)               | 86%<br>(79-92%)          | 1.1<br>(0.54-1.9)                           | 4.4%<br>(2-7.3%)                     | 5.3%<br>(2.4-8.9%)                  | 2300<br>(1000-3900)    | 17000<br>(7800-29000)        |
| Vietnam  | 2005 | Female | 90 to 94 | 17%<br>(10-24%)                | 83%<br>(76-90%)          | 1.3<br>(0.63-2.4)                           | 4.3%<br>(1.8-7.7%)                   | 5.1%<br>(2.1-9.4%)                  | 1300<br>(530-2300)     | 6600<br>(2800-12000)         |
| Vietnam  | 2005 | Female | 95 plus  | 20%<br>(11-33%)                | 80%<br>(67-89%)          | 1.6<br>(0.62-3.2)                           | 4.7%<br>(1.5-9.2%)                   | 5.4%<br>(1.7-11%)                   | 540<br>(160-1100)      | 1900<br>(600-3600)           |
| Vietnam  | 2005 | Male   | All Ages | 51%<br>(47-56%)                | 49%<br>(44-53%)          | 3.5<br>(2.5-4.5)                            | 12%<br>(9.5-15%)                     | 16%<br>(12-19%)                     | 47000<br>(33000-62000) | 1500000<br>(1200000-2000000) |
| Vietnam  | 2005 | Male   | 15 to 19 | 34%<br>(26-44%)                | 66%<br>(56-74%)          | 1.3<br>(0.75-2)                             | 4.9%<br>(3-7.5%)                     | 6.9%<br>(3.8-11%)                   | 430<br>(230-700)       | 36000<br>(21000-56000)       |
| Vietnam  | 2005 | Male   | 20 to 24 | 53%<br>(44-62%)                | 47%<br>(38-56%)          | 3.3<br>(2.1-4.7)                            | 12%<br>(8-16%)                       | 15%<br>(10-22%)                     | 1300<br>(760-2000)     | 98000<br>(64000-150000)      |
| Vietnam  | 2005 | Male   | 25 to 29 | 67%<br>(58-73%)                | 33%<br>(27-42%)          | 4.5<br>(3-6.5)                              | 14%<br>(9.9-19%)                     | 19%<br>(13-26%)                     | 1600<br>(910-2300)     | 110000<br>(69000-160000)     |
| Vietnam  | 2005 | Male   | 30 to 34 | 74%<br>(67-80%)                | 26%<br>(20-33%)          | 5.7<br>(3.9-8)                              | 16%<br>(12-20%)                      | 22%<br>(16-28%)                     | 1900<br>(1200-2800)    | 120000<br>(79000-170000)     |
| Vietnam  | 2005 | Male   | 35 to 39 | 76%<br>(70-82%)                | 24%<br>(18-30%)          | 7<br>(4.6-9.9)                              | 18%<br>(13-22%)                      | 25%<br>(19-30%)                     | 2500<br>(1600-3500)    | 140000<br>(98000-190000)     |
| Vietnam  | 2005 | Male   | 40 to 44 | 75%<br>(69-81%)                | 25%<br>(19-31%)          | 7.3<br>(4.9-10)                             | 19%<br>(14-22%)                      | 25%<br>(20-29%)                     | 3100<br>(2200-4300)    | 160000<br>(110000-210000)    |
| Vietnam  | 2005 | Male   | 45 to 49 | 71%<br>(63-78%)                | 29%<br>(22-37%)          | 6.5<br>(4.4-9.1)                            | 19%<br>(15-23%)                      | 25%<br>(20-30%)                     | 3900<br>(2800-5300)    | 170000<br>(130000-230000)    |
| Vietnam  | 2005 | Male   | 50 to 54 | 68%<br>(59-75%)                | 32%<br>(25-41%)          | 6.1<br>(4-8.8)                              | 19%<br>(14-23%)                      | 24%<br>(18-29%)                     | 4200<br>(3000-5500)    | 160000<br>(120000-210000)    |
| Vietnam  | 2005 | Male   | 55 to 59 | 66%<br>(56-73%)                | 34%<br>(27-44%)          | 6.2<br>(4.1-8.9)                            | 20%<br>(15-24%)                      | 24%<br>(19-29%)                     | 3600<br>(2600-4700)    | 120000<br>(88000-150000)     |
| Vietnam  | 2005 | Male   | 60 to 64 | 62%<br>(52-71%)                | 38%<br>(29-48%)          | 5.8<br>(3.7-8.6)                            | 18%<br>(13-22%)                      | 21%<br>(15-26%)                     | 3700<br>(2500-4800)    | 100000<br>(72000-130000)     |
| Vietnam  | 2005 | Male   | 65 to 69 | 59%<br>(49-68%)                | 41%<br>(32-51%)          | 5.1<br>(3.1-7.4)                            | 16%<br>(10-20%)                      | 19%<br>(12-23%)                     | 4400<br>(2900-5800)    | 100000<br>(68000-130000)     |
| Vietnam  | 2005 | Male   | 70 to 74 | 57%<br>(46-66%)                | 43%<br>(34-54%)          | 4.5<br>(2.7-6.7)                            | 15%<br>(8.9-20%)                     | 17%<br>(10-23%)                     | 5700<br>(3400-7800)    | 110000<br>(62000-140000)     |
| Vietnam  | 2005 | Male   | 75 to 79 | 53%<br>(39-66%)                | 47%<br>(34-61%)          | 3.7<br>(2.1-6)                              | 12%<br>(6.5-17%)                     | 14%<br>(7.4-20%)                    | 4600<br>(2400-6700)    | 65000<br>(35000-95000)       |
| Vietnam  | 2005 | Male   | 80 to 84 | 48%<br>(31-63%)                | 52%<br>(37-69%)          | 3<br>(1.7-4.8)                              | 10%<br>(5.1-15%)                     | 12%<br>(5.8-18%)                    | 3800<br>(1900-5900)    | 40000<br>(20000-62000)       |
| Vietnam  | 2005 | Male   | 85 to 89 | 43%<br>(28-58%)                | 57%<br>(42-72%)          | 2.4<br>(1.3-4)                              | 7.5%<br>(3.2-12%)                    | 8.5%<br>(3.7-14%)                   | 1900<br>(810-3300)     | 15000<br>(6300-24000)        |
| Vietnam  | 2005 | Male   | 90 to 94 | 42%<br>(29-58%)                | 58%<br>(42-71%)          | 2.1<br>(1.1-3.6)                            | 5.2%<br>(1.8-10%)                    | 5.8%<br>(1.9-12%)                   | 590<br>(200-1200)      | 3100<br>(1100-6100)          |
| Vietnam  | 2005 | Male   | 95 plus  | 44%<br>(27-63%)                | 56%<br>(37-73%)          | 1.8<br>(0.78-3.7)                           | 3.8%<br>(0.54-9%)                    | 4%<br>(0.37-9.9%)                   | 120<br>(11-290)        | 430<br>(61-1000)             |

| Location | Year | Sex    | Age      | Prevalence of current drinkers | Prevalence of abstainers | Population average of standard drinks daily | Percent of total attributable deaths | Percent of total attributable DALYs | Attributable deaths    | Attributable DALYs           |
|----------|------|--------|----------|--------------------------------|--------------------------|---------------------------------------------|--------------------------------------|-------------------------------------|------------------------|------------------------------|
| Vietnam  | 2010 | Female | All Ages | 10%<br>(8.7-12%)               | 90%<br>(88-91%)          | 0.76<br>(0.51-1.1)                          | 4%<br>(2.9-5.1%)                     | 6.1%<br>(4-8.4%)                    | 19000<br>(12000-26000) | 420000<br>(300000-550000)    |
| Vietnam  | 2010 | Female | 15 to 19 | 9.3%<br>(5.9-14%)              | 91%<br>(86-94%)          | 0.65<br>(0.31-1.1)                          | 2.2%<br>(1.4-3.3%)                   | 3.6%<br>(1.6-6.2%)                  | 72<br>(31-130)         | 10000<br>(6500-16000)        |
| Vietnam  | 2010 | Female | 20 to 24 | 10%<br>(6.5-15%)               | 90%<br>(85-94%)          | 0.76<br>(0.36-1.4)                          | 4%<br>(2.7-5.5%)                     | 4.4%<br>(2.1-7.4%)                  | 110<br>(48-190)        | 20000<br>(13000-29000)       |
| Vietnam  | 2010 | Female | 25 to 29 | 11%<br>(7.1-16%)               | 89%<br>(84-93%)          | 0.81<br>(0.4-1.5)                           | 4.1%<br>(2.9-5.5%)                   | 4.7%<br>(2.4-7.8%)                  | 120<br>(59-220)        | 20000<br>(13000-29000)       |
| Vietnam  | 2010 | Female | 30 to 34 | 12%<br>(7.3-18%)               | 88%<br>(82-93%)          | 0.87<br>(0.43-1.5)                          | 3.7%<br>(2.5-5.1%)                   | 4.7%<br>(2.5-7.5%)                  | 150<br>(73-260)        | 19000<br>(12000-27000)       |
| Vietnam  | 2010 | Female | 35 to 39 | 12%<br>(7.4-17%)               | 88%<br>(83-93%)          | 0.95<br>(0.49-1.6)                          | 3.9%<br>(2.7-5.3%)                   | 5.6%<br>(3.3-8.6%)                  | 240<br>(130-400)       | 22000<br>(14000-31000)       |
| Vietnam  | 2010 | Female | 40 to 44 | 12%<br>(7.7-17%)               | 88%<br>(83-92%)          | 1<br>(0.53-1.8)                             | 4.1%<br>(2.7-5.7%)                   | 6.2%<br>(3.7-9.1%)                  | 360<br>(200-570)       | 25000<br>(16000-36000)       |
| Vietnam  | 2010 | Female | 45 to 49 | 12%<br>(6.9-17%)               | 88%<br>(83-93%)          | 1.1<br>(0.54-2.1)                           | 4.5%<br>(2.9-6.6%)                   | 6.8%<br>(4-10%)                     | 590<br>(330-920)       | 32000<br>(20000-47000)       |
| Vietnam  | 2010 | Female | 50 to 54 | 12%<br>(8.1-18%)               | 88%<br>(82-92%)          | 1.2<br>(0.65-2.3)                           | 5%<br>(3.3-7.5%)                     | 7.3%<br>(4.4-11%)                   | 870<br>(500-1300)      | 38000<br>(24000-56000)       |
| Vietnam  | 2010 | Female | 55 to 59 | 13%<br>(8.1-19%)               | 87%<br>(81-92%)          | 1.4<br>(0.73-2.5)                           | 5.4%<br>(3.4-8%)                     | 7.6%<br>(4.7-11%)                   | 1000<br>(610-1600)     | 38000<br>(24000-58000)       |
| Vietnam  | 2010 | Female | 60 to 64 | 13%<br>(7.9-19%)               | 87%<br>(81-92%)          | 1.4<br>(0.69-2.6)                           | 5.5%<br>(3.4-8.3%)                   | 7.5%<br>(4.5-11%)                   | 1000<br>(590-1500)     | 30000<br>(18000-45000)       |
| Vietnam  | 2010 | Female | 65 to 69 | 11%<br>(7.2-16%)               | 89%<br>(84-93%)          | 1.3<br>(0.64-2.2)                           | 5.2%<br>(3.1-7.7%)                   | 6.8%<br>(4-10%)                     | 1100<br>(640-1700)     | 28000<br>(16000-42000)       |
| Vietnam  | 2010 | Female | 70 to 74 | 11%<br>(7.2-16%)               | 89%<br>(84-93%)          | 1.2<br>(0.59-2.2)                           | 4.9%<br>(2.8-7.7%)                   | 6.3%<br>(3.7-9.8%)                  | 1600<br>(860-2600)     | 30000<br>(17000-49000)       |
| Vietnam  | 2010 | Female | 75 to 79 | 11%<br>(7.2-17%)               | 89%<br>(83-93%)          | 1.2<br>(0.59-2.3)                           | 4.7%<br>(2.6-7.2%)                   | 5.9%<br>(3.3-9.2%)                  | 2300<br>(1200-3600)    | 34000<br>(18000-53000)       |
| Vietnam  | 2010 | Female | 80 to 84 | 12%<br>(7.5-17%)               | 88%<br>(83-92%)          | 1.3<br>(0.67-2.3)                           | 5%<br>(2.9-7.6%)                     | 6.2%<br>(3.6-9.5%)                  | 3300<br>(1800-5000)    | 35000<br>(20000-53000)       |
| Vietnam  | 2010 | Female | 85 to 89 | 14%<br>(8.3-20%)               | 86%<br>(80-92%)          | 1.5<br>(0.74-2.6)                           | 5.2%<br>(2.8-8.2%)                   | 6.4%<br>(3.4-10%)                   | 3100<br>(1600-4800)    | 23000<br>(12000-36000)       |
| Vietnam  | 2010 | Female | 90 to 94 | 16%<br>(9.6-24%)               | 84%<br>(76-90%)          | 1.7<br>(0.81-3.2)                           | 5.2%<br>(2.7-8.7%)                   | 6.3%<br>(3.1-10%)                   | 1900<br>(950-3100)     | 9800<br>(5100-16000)         |
| Vietnam  | 2010 | Female | 95 plus  | 19%<br>(10-31%)                | 81%<br>(69-90%)          | 2<br>(0.81-4.2)                             | 5.7%<br>(2.3-10%)                    | 6.6%<br>(2.6-12%)                   | 800<br>(310-1500)      | 2800<br>(1100-5000)          |
| Vietnam  | 2010 | Male   | All Ages | 49%<br>(44-54%)                | 51%<br>(46-56%)          | 4.8<br>(3.4-6.4)                            | 14%<br>(11-17%)                      | 18%<br>(14-21%)                     | 56000<br>(41000-72000) | 1800000<br>(1400000-2300000) |
| Vietnam  | 2010 | Male   | 15 to 19 | 35%<br>(25-46%)                | 65%<br>(54-75%)          | 1.9<br>(1-2.9)                              | 6.4%<br>(3.8-9.9%)                   | 9.2%<br>(5.1-15%)                   | 550<br>(280-910)       | 46000<br>(25000-72000)       |
| Vietnam  | 2010 | Male   | 20 to 24 | 51%<br>(39-62%)                | 49%<br>(38-61%)          | 4.4<br>(2.6-6.6)                            | 14%<br>(9.7-20%)                     | 19%<br>(12-28%)                     | 1600<br>(950-2500)     | 120000<br>(78000-180000)     |

| Location | Year | Sex    | Age      | Prevalence of current drinkers | Prevalence of abstainers | Population average of standard drinks daily | Percent of total attributable deaths | Percent of total attributable DALYs | Attributable deaths    | Attributable DALYs        |
|----------|------|--------|----------|--------------------------------|--------------------------|---------------------------------------------|--------------------------------------|-------------------------------------|------------------------|---------------------------|
| Vietnam  | 2010 | Male   | 25 to 29 | 62%<br>(51-71%)                | 38%<br>(29-49%)          | 5.8<br>(3.6-8.7)                            | 16%<br>(12-21%)                      | 22%<br>(16-29%)                     | 1800<br>(1100-2600)    | 130000<br>(82000-170000)  |
| Vietnam  | 2010 | Male   | 30 to 34 | 69%<br>(58-78%)                | 31%<br>(22-42%)          | 7.4<br>(4.7-11)                             | 17%<br>(13-21%)                      | 24%<br>(19-30%)                     | 2000<br>(1300-2800)    | 130000<br>(91000-170000)  |
| Vietnam  | 2010 | Male   | 35 to 39 | 72%<br>(61-79%)                | 28%<br>(21-39%)          | 9<br>(5.7-13)                               | 19%<br>(14-22%)                      | 26%<br>(21-31%)                     | 2500<br>(1800-3500)    | 150000<br>(110000-200000) |
| Vietnam  | 2010 | Male   | 40 to 44 | 71%<br>(61-78%)                | 29%<br>(22-39%)          | 9.4<br>(5.9-14)                             | 20%<br>(16-23%)                      | 27%<br>(22-31%)                     | 3400<br>(2500-4500)    | 170000<br>(130000-230000) |
| Vietnam  | 2010 | Male   | 45 to 49 | 66%<br>(53-75%)                | 34%<br>(25-47%)          | 8.3<br>(5.4-12)                             | 21%<br>(17-24%)                      | 27%<br>(23-32%)                     | 4600<br>(3400-6100)    | 200000<br>(150000-260000) |
| Vietnam  | 2010 | Male   | 50 to 54 | 63%<br>(52-72%)                | 37%<br>(28-48%)          | 7.8<br>(5-12)                               | 20%<br>(17-24%)                      | 26%<br>(22-30%)                     | 5600<br>(4200-7200)    | 210000<br>(160000-270000) |
| Vietnam  | 2010 | Male   | 55 to 59 | 60%<br>(48-70%)                | 40%<br>(30-52%)          | 7.8<br>(5-12)                               | 21%<br>(17-24%)                      | 25%<br>(21-30%)                     | 5900<br>(4400-7500)    | 190000<br>(150000-240000) |
| Vietnam  | 2010 | Male   | 60 to 64 | 57%<br>(44-68%)                | 43%<br>(32-56%)          | 7.3<br>(4.3-11)                             | 19%<br>(15-22%)                      | 22%<br>(18-26%)                     | 4300<br>(3200-5500)    | 120000<br>(90000-150000)  |
| Vietnam  | 2010 | Male   | 65 to 69 | 53%<br>(40-65%)                | 47%<br>(35-60%)          | 6.3<br>(3.7-9.6)                            | 17%<br>(13-20%)                      | 20%<br>(15-24%)                     | 4200<br>(3000-5400)    | 98000<br>(72000-130000)   |
| Vietnam  | 2010 | Male   | 70 to 74 | 50%<br>(37-63%)                | 50%<br>(37-63%)          | 5.4<br>(3-8.4)                              | 16%<br>(11-20%)                      | 18%<br>(13-23%)                     | 5000<br>(3500-6600)    | 94000<br>(66000-120000)   |
| Vietnam  | 2010 | Male   | 75 to 79 | 49%<br>(34-64%)                | 51%<br>(36-66%)          | 4.7<br>(2.6-8)                              | 14%<br>(8.7-18%)                     | 16%<br>(9.9-21%)                    | 5500<br>(3400-7600)    | 80000<br>(49000-110000)   |
| Vietnam  | 2010 | Male   | 80 to 84 | 46%<br>(30-61%)                | 54%<br>(39-70%)          | 4<br>(2.1-6.5)                              | 12%<br>(7.4-17%)                     | 14%<br>(8.3-20%)                    | 5100<br>(3000-7100)    | 54000<br>(32000-76000)    |
| Vietnam  | 2010 | Male   | 85 to 89 | 41%<br>(28-56%)                | 59%<br>(44-72%)          | 3.2<br>(1.7-5.4)                            | 9.7%<br>(5.2-14%)                    | 11%<br>(5.9-16%)                    | 2900<br>(1500-4300)    | 22000<br>(11000-33000)    |
| Vietnam  | 2010 | Male   | 90 to 94 | 40%<br>(27-56%)                | 60%<br>(44-73%)          | 2.8<br>(1.4-4.7)                            | 7.2%<br>(3.2-12%)                    | 8.2%<br>(3.5-14%)                   | 1000<br>(430-1700)     | 5400<br>(2400-8700)       |
| Vietnam  | 2010 | Male   | 95 plus  | 42%<br>(25-61%)                | 58%<br>(39-75%)          | 2.4<br>(1-4.8)                              | 5.6%<br>(1.5-11%)                    | 6.1%<br>(1.4-12%)                   | 220<br>(50-440)        | 790<br>(210-1500)         |
| Vietnam  | 2016 | Female | All Ages | 10%<br>(8.8-12%)               | 90%<br>(88-91%)          | 0.85<br>(0.51-1.3)                          | 4%<br>(2.9-5.1%)                     | 5.9%<br>(3.8-8.1%)                  | 19000<br>(12000-27000) | 430000<br>(310000-560000) |
| Vietnam  | 2016 | Female | 15 to 19 | 9.3%<br>(5.8-14%)              | 91%<br>(86-94%)          | 0.71<br>(0.31-1.3)                          | 2.3%<br>(1.5-3.3%)                   | 3.7%<br>(1.6-6.5%)                  | 51<br>(22-93)          | 7700<br>(4800-11000)      |
| Vietnam  | 2016 | Female | 20 to 24 | 10%<br>(6.5-15%)               | 90%<br>(85-93%)          | 0.82<br>(0.36-1.6)                          | 4.1%<br>(2.8-5.5%)                   | 4.4%<br>(2.1-7.5%)                  | 91<br>(42-160)         | 19000<br>(12000-27000)    |
| Vietnam  | 2016 | Female | 25 to 29 | 11%<br>(6.8-17%)               | 89%<br>(83-93%)          | 0.86<br>(0.41-1.7)                          | 4.1%<br>(2.9-5.5%)                   | 4.4%<br>(2.1-7.5%)                  | 110<br>(50-200)        | 21000<br>(14000-30000)    |
| Vietnam  | 2016 | Female | 30 to 34 | 12%<br>(7.2-18%)               | 88%<br>(82-93%)          | 0.92<br>(0.42-1.8)                          | 3.7%<br>(2.6-5.1%)                   | 4.4%<br>(2.3-7.4%)                  | 140<br>(67-250)        | 20000<br>(13000-29000)    |
| Vietnam  | 2016 | Female | 35 to 39 | 12%<br>(7.3-17%)               | 88%<br>(83-93%)          | 1<br>(0.49-1.9)                             | 3.8%<br>(2.6-5.3%)                   | 5.4%<br>(2.9-8.2%)                  | 220<br>(110-370)       | 22000<br>(14000-31000)    |
| Vietnam  | 2016 | Female | 40 to 44 | 12%<br>(7.6-17%)               | 88%<br>(83-92%)          | 1.1<br>(0.53-2)                             | 3.9%<br>(2.6-5.5%)                   | 5.9%<br>(3.4-8.8%)                  | 330<br>(180-540)       | 25000<br>(16000-36000)    |

| Location | Year | Sex    | Age      | Prevalence of current drinkers | Prevalence of abstainers | Population average of standard drinks daily | Percent of total attributable deaths | Percent of total attributable DALYs | Attributable deaths    | Attributable DALYs           |
|----------|------|--------|----------|--------------------------------|--------------------------|---------------------------------------------|--------------------------------------|-------------------------------------|------------------------|------------------------------|
| Vietnam  | 2016 | Female | 45 to 49 | 12%<br>(7-17%)                 | 88%<br>(83-93%)          | 1.2<br>(0.54-2.1)                           | 4.3%<br>(2.8-6.2%)                   | 6.6%<br>(3.8-9.7%)                  | 530<br>(300-840)       | 31000<br>(19000-45000)       |
| Vietnam  | 2016 | Female | 50 to 54 | 12%<br>(7.8-18%)               | 88%<br>(82-92%)          | 1.3<br>(0.64-2.4)                           | 4.8%<br>(3.1-6.9%)                   | 7%<br>(4.3-10%)                     | 830<br>(480-1300)      | 38000<br>(23000-56000)       |
| Vietnam  | 2016 | Female | 55 to 59 | 13%<br>(8.4-18%)               | 87%<br>(82-92%)          | 1.5<br>(0.73-2.7)                           | 5.1%<br>(3.3-7.4%)                   | 7.2%<br>(4.4-11%)                   | 1200<br>(710-1800)     | 45000<br>(28000-66000)       |
| Vietnam  | 2016 | Female | 60 to 64 | 12%<br>(8-18%)                 | 88%<br>(82-92%)          | 1.5<br>(0.71-2.8)                           | 5.1%<br>(3.1-7.6%)                   | 7%<br>(4.2-10%)                     | 1400<br>(810-2100)     | 44000<br>(26000-65000)       |
| Vietnam  | 2016 | Female | 65 to 69 | 11%<br>(7.3-16%)               | 89%<br>(84-93%)          | 1.4<br>(0.67-2.6)                           | 4.9%<br>(2.9-7.2%)                   | 6.5%<br>(3.8-9.7%)                  | 1300<br>(750-1900)     | 32000<br>(19000-47000)       |
| Vietnam  | 2016 | Female | 70 to 74 | 11%<br>(7.2-16%)               | 89%<br>(84-93%)          | 1.3<br>(0.6-2.4)                            | 4.6%<br>(2.6-7.1%)                   | 5.9%<br>(3.4-9.1%)                  | 1300<br>(720-2000)     | 26000<br>(15000-40000)       |
| Vietnam  | 2016 | Female | 75 to 79 | 11%<br>(7.2-17%)               | 89%<br>(83-93%)          | 1.3<br>(0.62-2.7)                           | 4.4%<br>(2.4-6.9%)                   | 5.6%<br>(3.1-8.6%)                  | 1700<br>(940-2700)     | 26000<br>(14000-40000)       |
| Vietnam  | 2016 | Female | 80 to 84 | 12%<br>(7.7-17%)               | 88%<br>(83-92%)          | 1.4<br>(0.69-2.5)                           | 4.7%<br>(2.6-7.1%)                   | 5.8%<br>(3.2-9%)                    | 3000<br>(1700-4600)    | 33000<br>(19000-50000)       |
| Vietnam  | 2016 | Female | 85 to 89 | 14%<br>(8.3-20%)               | 86%<br>(80-92%)          | 1.6<br>(0.7-2.9)                            | 4.9%<br>(2.6-7.6%)                   | 5.9%<br>(3.1-9.4%)                  | 3500<br>(1800-5500)    | 26000<br>(14000-41000)       |
| Vietnam  | 2016 | Female | 90 to 94 | 16%<br>(9.7-24%)               | 84%<br>(76-90%)          | 1.8<br>(0.81-3.5)                           | 5%<br>(2.4-8.1%)                     | 5.9%<br>(2.8-9.8%)                  | 2200<br>(1100-3700)    | 12000<br>(5600-19000)        |
| Vietnam  | 2016 | Female | 95 plus  | 19%<br>(9.9-31%)               | 81%<br>(69-90%)          | 2.2<br>(0.79-4.7)                           | 5.5%<br>(2.2-9.8%)                   | 6.3%<br>(2.4-12%)                   | 1000<br>(390-1900)     | 3600<br>(1400-6600)          |
| Vietnam  | 2016 | Male   | All Ages | 50%<br>(45-55%)                | 50%<br>(45-55%)          | 5.4<br>(3.4-7.9)                            | 14%<br>(12-17%)                      | 18%<br>(14-21%)                     | 60000<br>(44000-76000) | 1900000<br>(1500000-2400000) |
| Vietnam  | 2016 | Male   | 15 to 19 | 35%<br>(24-46%)                | 65%<br>(54-76%)          | 2<br>(1-3.3)                                | 6.6%<br>(3.8-11%)                    | 9.7%<br>(5.3-16%)                   | 410<br>(210-710)       | 34000<br>(19000-56000)       |
| Vietnam  | 2016 | Male   | 20 to 24 | 51%<br>(39-62%)                | 49%<br>(38-61%)          | 4.7<br>(2.6-7.5)                            | 14%<br>(9.6-20%)                     | 19%<br>(12-28%)                     | 1400<br>(800-2200)     | 110000<br>(70000-160000)     |
| Vietnam  | 2016 | Male   | 25 to 29 | 62%<br>(50-71%)                | 38%<br>(29-50%)          | 6.2<br>(3.5-9.7)                            | 16%<br>(11-21%)                      | 22%<br>(15-29%)                     | 1800<br>(1000-2600)    | 130000<br>(82000-180000)     |
| Vietnam  | 2016 | Male   | 30 to 34 | 69%<br>(57-78%)                | 31%<br>(22-43%)          | 7.9<br>(4.6-12)                             | 17%<br>(13-22%)                      | 24%<br>(18-30%)                     | 2000<br>(1200-3000)    | 130000<br>(87000-190000)     |
| Vietnam  | 2016 | Male   | 35 to 39 | 72%<br>(61-79%)                | 28%<br>(21-39%)          | 9.7<br>(5.7-16)                             | 18%<br>(14-22%)                      | 26%<br>(20-31%)                     | 2400<br>(1600-3500)    | 140000<br>(97000-200000)     |
| Vietnam  | 2016 | Male   | 40 to 44 | 70%<br>(61-79%)                | 30%<br>(21-39%)          | 10<br>(5.9-16)                              | 19%<br>(15-22%)                      | 26%<br>(21-30%)                     | 3100<br>(2200-4300)    | 160000<br>(120000-220000)    |
| Vietnam  | 2016 | Male   | 45 to 49 | 66%<br>(53-75%)                | 34%<br>(25-47%)          | 8.9<br>(5.3-14)                             | 20%<br>(16-24%)                      | 27%<br>(22-31%)                     | 4400<br>(3200-6000)    | 200000<br>(150000-260000)    |
| Vietnam  | 2016 | Male   | 50 to 54 | 63%<br>(51-72%)                | 37%<br>(28-49%)          | 8.3<br>(4.8-13)                             | 20%<br>(16-23%)                      | 25%<br>(21-29%)                     | 5800<br>(4300-7700)    | 230000<br>(170000-290000)    |
| Vietnam  | 2016 | Male   | 55 to 59 | 60%<br>(48-71%)                | 40%<br>(29-52%)          | 8.4<br>(4.9-13)                             | 20%<br>(16-24%)                      | 25%<br>(20-29%)                     | 7400<br>(5500-9400)    | 250000<br>(190000-310000)    |

| Location | Year | Sex    | Age      | Prevalence of current drinkers | Prevalence of abstainers | Population average of standard drinks daily | Percent of total attributable deaths | Percent of total attributable DALYs | Attributable deaths    | Attributable DALYs        |
|----------|------|--------|----------|--------------------------------|--------------------------|---------------------------------------------|--------------------------------------|-------------------------------------|------------------------|---------------------------|
| Vietnam  | 2016 | Male   | 60 to 64 | 57%<br>(44-68%)                | 43%<br>(32-56%)          | 7.8<br>(4.3-12)                             | 18%<br>(14-21%)                      | 22%<br>(17-26%)                     | 7100<br>(5400-9000)    | 200000<br>(150000-250000) |
| Vietnam  | 2016 | Male   | 65 to 69 | 53%<br>(39-64%)                | 47%<br>(36-61%)          | 6.6<br>(3.6-11)                             | 16%<br>(12-19%)                      | 19%<br>(14-23%)                     | 5100<br>(3800-6500)    | 120000<br>(89000-150000)  |
| Vietnam  | 2016 | Male   | 70 to 74 | 50%<br>(37-62%)                | 50%<br>(38-63%)          | 5.7<br>(2.9-9.5)                            | 14%<br>(9.9-18%)                     | 17%<br>(12-21%)                     | 4400<br>(3000-5800)    | 83000<br>(57000-110000)   |
| Vietnam  | 2016 | Male   | 75 to 79 | 49%<br>(34-64%)                | 51%<br>(36-66%)          | 5<br>(2.5-8.8)                              | 13%<br>(7.8-17%)                     | 15%<br>(9-20%)                      | 4400<br>(2700-6100)    | 64000<br>(40000-88000)    |
| Vietnam  | 2016 | Male   | 80 to 84 | 45%<br>(30-60%)                | 55%<br>(40-70%)          | 4.2<br>(2.1-7.3)                            | 12%<br>(6.7-16%)                     | 13%<br>(7.6-19%)                    | 5000<br>(2900-7100)    | 54000<br>(31000-75000)    |
| Vietnam  | 2016 | Male   | 85 to 89 | 41%<br>(26-56%)                | 59%<br>(44-74%)          | 3.4<br>(1.6-5.9)                            | 9.2%<br>(4.7-14%)                    | 11%<br>(5.2-16%)                    | 3400<br>(1700-5100)    | 26000<br>(13000-39000)    |
| Vietnam  | 2016 | Male   | 90 to 94 | 40%<br>(27-56%)                | 60%<br>(44-73%)          | 2.9<br>(1.4-5.4)                            | 7.1%<br>(2.8-12%)                    | 8.1%<br>(3-13%)                     | 1300<br>(480-2100)     | 6700<br>(2700-11000)      |
| Vietnam  | 2016 | Male   | 95 plus  | 42%<br>(25-61%)                | 58%<br>(39-75%)          | 2.6<br>(1-5.1)                              | 5.7%<br>(1.3-11%)                    | 6.1%<br>(1.1-12%)                   | 300<br>(56-620)        | 1100<br>(260-2200)        |
| Fiji     | 1990 | Female | All Ages | 7.9%<br>(6.1-10%)              | 92%<br>(90-94%)          | 0.19<br>(0.14-0.25)                         | 0.42%<br>(0.22-0.66%)                | 0.24%<br>(-0.051-0.62%)             | 4.5<br>(-0.9-13)       | 440<br>(220-730)          |
| Fiji     | 1990 | Female | 15 to 19 | 9.2%<br>(5.2-16%)              | 91%<br>(84-95%)          | 0.25<br>(0.12-0.45)                         | 0.77%<br>(0.44-1.3%)                 | 1%<br>(0.4-2.1%)                    | 0.31<br>(0.11-0.7)     | 39<br>(21-67)             |
| Fiji     | 1990 | Female | 20 to 24 | 12%<br>(6.5-20%)               | 88%<br>(80-94%)          | 0.41<br>(0.21-0.69)                         | 1.4%<br>(0.88-2.2%)                  | 1.6%<br>(0.7-3%)                    | 0.69<br>(0.26-1.4)     | 83<br>(47-140)            |
| Fiji     | 1990 | Female | 25 to 29 | 12%<br>(6.7-21%)               | 88%<br>(79-93%)          | 0.36<br>(0.2-0.59)                          | 1.4%<br>(0.89-1.9%)                  | 1.5%<br>(0.77-2.5%)                 | 0.89<br>(0.37-1.7)     | 94<br>(56-150)            |
| Fiji     | 1990 | Female | 30 to 34 | 12%<br>(6-20%)                 | 88%<br>(80-94%)          | 0.33<br>(0.17-0.57)                         | 1.1%<br>(0.68-1.7%)                  | 1.1%<br>(0.58-2%)                   | 0.85<br>(0.36-1.6)     | 80<br>(45-130)            |
| Fiji     | 1990 | Female | 35 to 39 | 11%<br>(6-19%)                 | 89%<br>(81-94%)          | 0.34<br>(0.16-0.59)                         | 1.1%<br>(0.59-1.7%)                  | 1.2%<br>(0.57-2.1%)                 | 0.98<br>(0.38-1.9)     | 71<br>(36-120)            |
| Fiji     | 1990 | Female | 40 to 44 | 10%<br>(5.6-19%)               | 90%<br>(81-94%)          | 0.29<br>(0.14-0.53)                         | 0.79%<br>(0.35-1.4%)                 | 0.92%<br>(0.33-1.8%)                | 0.86<br>(0.27-1.9)     | 52<br>(22-100)            |
| Fiji     | 1990 | Female | 45 to 49 | 10%<br>(5-18%)                 | 90%<br>(82-95%)          | 0.22<br>(0.094-0.4)                         | 0.37%<br>(-0.04-0.92%)               | 0.42%<br>(-0.088-1.2%)              | 0.47<br>(-0.11-1.4)    | 25<br>(-3.2-66)           |
| Fiji     | 1990 | Female | 50 to 54 | 10%<br>(5.4-18%)               | 90%<br>(82-95%)          | 0.19<br>(0.077-0.37)                        | 0.071%<br>(-0.41-0.58%)              | 0.092%<br>(-0.47-0.73%)             | 0.12<br>(-0.62-1)      | 4.7<br>(-27-40)           |
| Fiji     | 1990 | Female | 55 to 59 | 9.3%<br>(5.1-16%)              | 91%<br>(84-95%)          | 0.18<br>(0.079-0.35)                        | 0.036%<br>(-0.43-0.59%)              | 0.079%<br>(-0.46-0.76%)             | 0.12<br>(-0.72-1.2)    | 2.4<br>(-28-39)           |
| Fiji     | 1990 | Female | 60 to 64 | 8.5%<br>(4.3-15%)              | 91%<br>(85-96%)          | 0.16<br>(0.07-0.33)                         | -0.05%<br>(-0.52-0.5%)               | -0.026%<br>(-0.55-0.63%)            | -0.037<br>(-0.86-1.1)  | -2.6<br>(-29-30)          |
| Fiji     | 1990 | Female | 65 to 69 | 8.9%<br>(4.8-15%)              | 91%<br>(85-95%)          | 0.16<br>(0.076-0.31)                        | -0.072%<br>(-0.56-0.42%)             | -0.044%<br>(-0.59-0.54%)            | -0.067<br>(-0.98-0.89) | -3.1<br>(-25-20)          |
| Fiji     | 1990 | Female | 70 to 74 | 9.1%<br>(5.2-15%)              | 91%<br>(85-95%)          | 0.16<br>(0.074-0.31)                        | -0.15%<br>(-0.64-0.36%)              | -0.16%<br>(-0.7-0.43%)              | -0.27<br>(-1.2-0.84)   | -6<br>(-25-15)            |
| Fiji     | 1990 | Female | 75 to 79 | 8.9%<br>(4.9-16%)              | 91%<br>(84-95%)          | 0.15<br>(0.064-0.3)                         | -0.082%<br>(-0.51-0.4%)              | -0.073%<br>(-0.55-0.47%)            | -0.11<br>(-0.9-0.81)   | -2.2<br>(-14-11)          |

| Location | Year | Sex    | Age      | Prevalence of current drinkers | Prevalence of abstainers | Population average of standard drinks daily | Percent of total attributable deaths | Percent of total attributable DALYs | Attributable deaths       | Attributable DALYs     |
|----------|------|--------|----------|--------------------------------|--------------------------|---------------------------------------------|--------------------------------------|-------------------------------------|---------------------------|------------------------|
| Fiji     | 1990 | Female | 80 to 84 | 8.9%<br>(4.8-15%)              | 91%<br>(85-95%)          | 0.15<br>(0.067-0.28)                        | -0.13%<br>(-0.52-0.26%)              | -0.15%<br>(-0.58-0.3%)              | -0.16<br>(-0.67-0.33)     | -1.8<br>(-7.2-3.6)     |
| Fiji     | 1990 | Female | 85 to 89 | 9.1%<br>(4.9-15%)              | 91%<br>(85-95%)          | 0.15<br>(0.07-0.27)                         | -0.14%<br>(-0.49-0.24%)              | -0.16%<br>(-0.56-0.26%)             | -0.11<br>(-0.37-0.17)     | -0.8<br>(-2.8-1.3)     |
| Fiji     | 1990 | Female | 90 to 94 | 9.8%<br>(5.5-16%)              | 90%<br>(84-95%)          | 0.16<br>(0.07-0.3)                          | -0.1%<br>(-0.4-0.26%)                | -0.12%<br>(-0.47-0.28%)             | -0.031<br>(-0.12-0.068)   | -0.15<br>(-0.6-0.39)   |
| Fiji     | 1990 | Female | 95 plus  | 11%<br>(5.6-20%)               | 89%<br>(80-94%)          | 0.18<br>(0.07-0.37)                         | -0.089%<br>(-0.53-0.41%)             | -0.14%<br>(-0.64-0.42%)             | -0.0082<br>(-0.037-0.024) | -0.02<br>(-0.12-0.091) |
| Fiji     | 1990 | Male   | All Ages | 37%<br>(29-47%)                | 63%<br>(53-71%)          | 1.2<br>(1-1.4)                              | 3.1%<br>(1.9-4.2%)                   | 2.8%<br>(1.4-4.4%)                  | 76<br>(37-130)            | 4200<br>(2600-6300)    |
| Fiji     | 1990 | Male   | 15 to 19 | 34%<br>(19-51%)                | 66%<br>(49-81%)          | 0.79<br>(0.37-1.4)                          | 2.3%<br>(1.2-3.8%)                   | 3%<br>(1.4-5.4%)                    | 1.8<br>(0.81-3.3)         | 160<br>(82-270)        |
| Fiji     | 1990 | Male   | 20 to 24 | 52%<br>(33-70%)                | 48%<br>(30-67%)          | 2.1<br>(1.2-3.2)                            | 7.1%<br>(4.2-10%)                    | 8.8%<br>(5-13%)                     | 8.1<br>(4.2-13)           | 610<br>(360-950)       |
| Fiji     | 1990 | Male   | 25 to 29 | 59%<br>(39-76%)                | 41%<br>(24-61%)          | 2.8<br>(1.8-4)                              | 8.6%<br>(5.5-12%)                    | 11%<br>(6.4-15%)                    | 12<br>(6.8-19)            | 820<br>(490-1200)      |
| Fiji     | 1990 | Male   | 30 to 34 | 60%<br>(39-77%)                | 40%<br>(23-61%)          | 3<br>(1.8-4.3)                              | 7.6%<br>(4.7-11%)                    | 9.2%<br>(5.3-14%)                   | 12<br>(6-19)              | 760<br>(420-1200)      |
| Fiji     | 1990 | Male   | 35 to 39 | 58%<br>(39-75%)                | 42%<br>(25-61%)          | 2.7<br>(1.6-4.1)                            | 6.5%<br>(3.2-10%)                    | 7.6%<br>(3.4-12%)                   | 10<br>(4-18)              | 580<br>(260-990)       |
| Fiji     | 1990 | Male   | 40 to 44 | 56%<br>(37-73%)                | 44%<br>(27-63%)          | 2.3<br>(1.2-3.6)                            | 4.7%<br>(1.5-8.7%)                   | 5.2%<br>(1.3-10%)                   | 8<br>(1.9-17)             | 420<br>(130-830)       |
| Fiji     | 1990 | Male   | 45 to 49 | 52%<br>(31-71%)                | 48%<br>(29-69%)          | 1.7<br>(0.88-2.9)                           | 2.8%<br>(0.23-6.4%)                  | 3%<br>(-0.27-7.2%)                  | 5.4<br>(-0.52-14)         | 270<br>(23-630)        |
| Fiji     | 1990 | Male   | 50 to 54 | 49%<br>(30-68%)                | 51%<br>(32-70%)          | 1.4<br>(0.68-2.3)                           | 2.1%<br>(-0.28-5.5%)                 | 2.2%<br>(-0.56-6.1%)                | 4.5<br>(-1.2-13)          | 190<br>(-24-530)       |
| Fiji     | 1990 | Male   | 55 to 59 | 47%<br>(29-67%)                | 53%<br>(33-71%)          | 1.2<br>(0.59-2.2)                           | 1.8%<br>(-0.24-4.9%)                 | 1.8%<br>(-0.46-5.5%)                | 4.1<br>(-1.1-12)          | 150<br>(-21-420)       |
| Fiji     | 1990 | Male   | 60 to 64 | 44%<br>(26-64%)                | 56%<br>(36-74%)          | 1<br>(0.5-1.9)                              | 1.5%<br>(-0.22-4.7%)                 | 1.6%<br>(-0.38-5.1%)                | 3.7<br>(-0.88-12)         | 120<br>(-17-350)       |
| Fiji     | 1990 | Male   | 65 to 69 | 43%<br>(24-62%)                | 57%<br>(38-76%)          | 0.93<br>(0.46-1.6)                          | 1.2%<br>(-0.28-3.5%)                 | 1.3%<br>(-0.36-3.8%)                | 2.8<br>(-0.77-8.5)        | 72<br>(-16-210)        |
| Fiji     | 1990 | Male   | 70 to 74 | 40%<br>(23-57%)                | 60%<br>(43-77%)          | 0.79<br>(0.38-1.4)                          | 0.9%<br>(-0.42-3%)                   | 0.93%<br>(-0.49-3.2%)               | 2.1<br>(-1.2-7.2)         | 42<br>(-20-140)        |
| Fiji     | 1990 | Male   | 75 to 79 | 36%<br>(21-55%)                | 64%<br>(45-79%)          | 0.66<br>(0.3-1.3)                           | 0.68%<br>(-0.4-2.4%)                 | 0.7%<br>(-0.48-2.5%)                | 1.3<br>(-0.9-4.8)         | 20<br>(-12-73)         |
| Fiji     | 1990 | Male   | 80 to 84 | 33%<br>(18-52%)                | 67%<br>(48-82%)          | 0.58<br>(0.27-1.1)                          | 0.54%<br>(-0.29-1.8%)                | 0.53%<br>(-0.39-1.9%)               | 0.6<br>(-0.41-2.1)        | 7.2<br>(-3.8-24)       |
| Fiji     | 1990 | Male   | 85 to 89 | 32%<br>(19-48%)                | 68%<br>(52-81%)          | 0.55<br>(0.26-0.97)                         | 0.38%<br>(-0.37-1.5%)                | 0.35%<br>(-0.47-1.6%)               | 0.19<br>(-0.25-0.84)      | 1.7<br>(-1.7-6.9)      |
| Fiji     | 1990 | Male   | 90 to 94 | 33%<br>(20-49%)                | 67%<br>(51-80%)          | 0.56<br>(0.25-1)                            | 0.21%<br>(-0.46-1.2%)                | 0.15%<br>(-0.61-1.3%)               | 0.026<br>(-0.11-0.23)     | 0.23<br>(-0.49-1.3)    |
| Fiji     | 1990 | Male   | 95 plus  | 36%<br>(19-57%)                | 64%<br>(43-81%)          | 0.61<br>(0.25-1.2)                          | 0.11%<br>(-0.77-1.3%)                | -0.024%<br>(-1-1.4%)                | -0.0012<br>(-0.05-0.067)  | 0.021<br>(-0.14-0.25)  |

| Location | Year | Sex    | Age      | Prevalence of current drinkers | Prevalence of abstainers | Population average of standard drinks daily | Percent of total attributable deaths | Percent of total attributable DALYs | Attributable deaths      | Attributable DALYs    |
|----------|------|--------|----------|--------------------------------|--------------------------|---------------------------------------------|--------------------------------------|-------------------------------------|--------------------------|-----------------------|
| Fiji     | 1995 | Female | All Ages | 8.2%<br>(6.4-11%)              | 92%<br>(89-94%)          | 0.19<br>(0.14-0.25)                         | 0.35%<br>(0.13-0.6%)                 | 0.12%<br>(-0.19-0.52%)              | 2.8<br>(-4-12)           | 410<br>(160-710)      |
| Fiji     | 1995 | Female | 15 to 19 | 9.4%<br>(5.4-16%)              | 91%<br>(84-95%)          | 0.25<br>(0.12-0.45)                         | 0.79%<br>(0.42-1.3%)                 | 1%<br>(0.4-2.1%)                    | 0.39<br>(0.14-0.81)      | 46<br>(25-80)         |
| Fiji     | 1995 | Female | 20 to 24 | 12%<br>(6.5-20%)               | 88%<br>(80-93%)          | 0.41<br>(0.21-0.7)                          | 1.5%<br>(0.87-2.3%)                  | 1.6%<br>(0.71-2.9%)                 | 0.75<br>(0.31-1.5)       | 89<br>(51-140)        |
| Fiji     | 1995 | Female | 25 to 29 | 12%<br>(6.7-21%)               | 88%<br>(79-93%)          | 0.35<br>(0.19-0.6)                          | 1.4%<br>(0.91-2%)                    | 1.4%<br>(0.78-2.5%)                 | 0.89<br>(0.41-1.6)       | 91<br>(56-140)        |
| Fiji     | 1995 | Female | 30 to 34 | 12%<br>(6.1-20%)               | 88%<br>(80-94%)          | 0.33<br>(0.17-0.56)                         | 1.1%<br>(0.64-1.7%)                  | 1.1%<br>(0.52-1.9%)                 | 0.9<br>(0.4-1.7)         | 84<br>(48-140)        |
| Fiji     | 1995 | Female | 35 to 39 | 11%<br>(5.8-20%)               | 89%<br>(80-94%)          | 0.33<br>(0.16-0.57)                         | 0.99%<br>(0.55-1.6%)                 | 1.1%<br>(0.48-2%)                   | 1.2<br>(0.48-2.2)        | 85<br>(45-140)        |
| Fiji     | 1995 | Female | 40 to 44 | 11%<br>(5.8-18%)               | 89%<br>(82-94%)          | 0.28<br>(0.14-0.51)                         | 0.7%<br>(0.24-1.4%)                  | 0.79%<br>(0.16-1.7%)                | 0.91<br>(0.19-2)         | 56<br>(20-110)        |
| Fiji     | 1995 | Female | 45 to 49 | 10%<br>(5.3-19%)               | 90%<br>(81-95%)          | 0.22<br>(0.098-0.4)                         | 0.24%<br>(-0.2-0.8%)                 | 0.27%<br>(-0.27-0.98%)              | 0.38<br>(-0.4-1.4)       | 20<br>(-18-66)        |
| Fiji     | 1995 | Female | 50 to 54 | 10%<br>(5.6-18%)               | 90%<br>(82-94%)          | 0.19<br>(0.081-0.36)                        | -0.067%<br>(-0.57-0.48%)             | -0.068%<br>(-0.65-0.58%)            | -0.12<br>(-1.1-0.95)     | -5.8<br>(-49-39)      |
| Fiji     | 1995 | Female | 55 to 59 | 9.3%<br>(5.1-16%)              | 91%<br>(84-95%)          | 0.17<br>(0.076-0.34)                        | -0.092%<br>(-0.6-0.46%)              | -0.071%<br>(-0.64-0.59%)            | -0.13<br>(-1.2-1.1)      | -7.1<br>(-47-36)      |
| Fiji     | 1995 | Female | 60 to 64 | 8.6%<br>(4.5-15%)              | 91%<br>(85-96%)          | 0.16<br>(0.07-0.32)                         | -0.18%<br>(-0.7-0.36%)               | -0.18%<br>(-0.76-0.44%)             | -0.35<br>(-1.5-0.84)     | -12<br>(-48-24)       |
| Fiji     | 1995 | Female | 65 to 69 | 9.1%<br>(5.1-16%)              | 91%<br>(84-95%)          | 0.16<br>(0.077-0.31)                        | -0.2%<br>(-0.7-0.3%)                 | -0.19%<br>(-0.78-0.38%)             | -0.37<br>(-1.5-0.69)     | -10<br>(-38-15)       |
| Fiji     | 1995 | Female | 70 to 74 | 9.4%<br>(5.3-16%)              | 91%<br>(84-95%)          | 0.16<br>(0.074-0.31)                        | -0.28%<br>(-0.78-0.22%)              | -0.3%<br>(-0.86-0.28%)              | -0.57<br>(-1.7-0.54)     | -12<br>(-34-9.8)      |
| Fiji     | 1995 | Female | 75 to 79 | 9.2%<br>(5.1-16%)              | 91%<br>(84-95%)          | 0.15<br>(0.065-0.28)                        | -0.18%<br>(-0.65-0.27%)              | -0.19%<br>(-0.7-0.34%)              | -0.4<br>(-1.5-0.74)      | -6.4<br>(-23-10)      |
| Fiji     | 1995 | Female | 80 to 84 | 9%<br>(4.9-16%)                | 91%<br>(84-95%)          | 0.14<br>(0.068-0.27)                        | -0.23%<br>(-0.64-0.15%)              | -0.25%<br>(-0.71-0.17%)             | -0.36<br>(-1.1-0.25)     | -4<br>(-12-2.6)       |
| Fiji     | 1995 | Female | 85 to 89 | 9.1%<br>(5.1-15%)              | 91%<br>(85-95%)          | 0.15<br>(0.066-0.27)                        | -0.22%<br>(-0.61-0.14%)              | -0.25%<br>(-0.7-0.15%)              | -0.2<br>(-0.58-0.13)     | -1.5<br>(-4.3-1.1)    |
| Fiji     | 1995 | Female | 90 to 94 | 9.9%<br>(5.4-16%)              | 90%<br>(84-95%)          | 0.16<br>(0.067-0.29)                        | -0.17%<br>(-0.51-0.21%)              | -0.21%<br>(-0.59-0.21%)             | -0.062<br>(-0.18-0.064)  | -0.31<br>(-0.93-0.37) |
| Fiji     | 1995 | Female | 95 plus  | 11%<br>(5.7-20%)               | 89%<br>(80-94%)          | 0.18<br>(0.067-0.35)                        | -0.17%<br>(-0.64-0.36%)              | -0.23%<br>(-0.79-0.35%)             | -0.018<br>(-0.059-0.028) | -0.05<br>(-0.18-0.11) |
| Fiji     | 1995 | Male   | All Ages | 39%<br>(30-48%)                | 61%<br>(52-70%)          | 1.2<br>(1.1-1.4)                            | 3%<br>(1.9-4.3%)                     | 2.7%<br>(1.3-4.4%)                  | 83<br>(40-140)           | 4600<br>(2800-6900)   |
| Fiji     | 1995 | Male   | 15 to 19 | 33%<br>(19-51%)                | 67%<br>(49-81%)          | 0.76<br>(0.35-1.3)                          | 2.3%<br>(1.2-3.9%)                   | 3%<br>(1.3-5.5%)                    | 2.1<br>(0.93-3.9)        | 180<br>(94-320)       |
| Fiji     | 1995 | Male   | 20 to 24 | 51%<br>(33-69%)                | 49%<br>(31-67%)          | 2.1<br>(1.2-3.1)                            | 7.2%<br>(4.2-11%)                    | 8.8%<br>(4.9-14%)                   | 8.8<br>(4.7-14)          | 660<br>(380-1000)     |
| Fiji     | 1995 | Male   | 25 to 29 | 59%<br>(39-76%)                | 41%<br>(24-61%)          | 2.8<br>(1.8-4)                              | 8.6%<br>(5.4-12%)                    | 10%<br>(6.3-15%)                    | 12<br>(6.8-18)           | 810<br>(500-1200)     |



| Location | Year | Sex    | Age      | Prevalence of current drinkers | Prevalence of abstainers | Population average of standard drinks daily | Percent of total attributable deaths | Percent of total attributable DALYs | Attributable deaths      | Attributable DALYs    |
|----------|------|--------|----------|--------------------------------|--------------------------|---------------------------------------------|--------------------------------------|-------------------------------------|--------------------------|-----------------------|
| Fiji     | 1995 | Male   | 30 to 34 | 60%<br>(39-77%)                | 40%<br>(23-61%)          | 2.9<br>(1.8-4.2)                            | 7.6%<br>(4.7-11%)                    | 9%<br>(5.2-14%)                     | 12<br>(6.5-20)           | 800<br>(460-1200)     |
| Fiji     | 1995 | Male   | 35 to 39 | 59%<br>(40-75%)                | 41%<br>(25-60%)          | 2.7<br>(1.6-4)                              | 6.3%<br>(3.1-9.9%)                   | 7.2%<br>(3.1-12%)                   | 12<br>(4.8-22)           | 710<br>(330-1200)     |
| Fiji     | 1995 | Male   | 40 to 44 | 56%<br>(38-74%)                | 44%<br>(26-62%)          | 2.2<br>(1.3-3.4)                            | 4.4%<br>(1.3-8.4%)                   | 4.9%<br>(1.1-9.7%)                  | 9.2<br>(1.7-20)          | 490<br>(140-1000)     |
| Fiji     | 1995 | Male   | 45 to 49 | 52%<br>(31-70%)                | 48%<br>(30-69%)          | 1.7<br>(0.89-2.8)                           | 2.7%<br>(0.063-6%)                   | 2.7%<br>(-0.41-6.7%)                | 6.1<br>(-0.74-16)        | 300<br>(8.3-740)      |
| Fiji     | 1995 | Male   | 50 to 54 | 49%<br>(30-68%)                | 51%<br>(32-70%)          | 1.3<br>(0.66-2.3)                           | 1.9%<br>(-0.37-5.1%)                 | 2%<br>(-0.67-5.6%)                  | 5<br>(-1.7-14)           | 220<br>(-40-570)      |
| Fiji     | 1995 | Male   | 55 to 59 | 47%<br>(28-66%)                | 53%<br>(34-72%)          | 1.2<br>(0.58-2.1)                           | 1.6%<br>(-0.33-4.6%)                 | 1.6%<br>(-0.54-5%)                  | 4.4<br>(-1.4-13)         | 160<br>(-34-460)      |
| Fiji     | 1995 | Male   | 60 to 64 | 45%<br>(26-65%)                | 55%<br>(35-74%)          | 1<br>(0.5-1.9)                              | 1.4%<br>(-0.32-4.4%)                 | 1.4%<br>(-0.44-4.8%)                | 3.9<br>(-1.3-14)         | 120<br>(-28-390)      |
| Fiji     | 1995 | Male   | 65 to 69 | 43%<br>(25-62%)                | 57%<br>(38-75%)          | 0.9<br>(0.45-1.6)                           | 1.1%<br>(-0.35-3.3%)                 | 1.1%<br>(-0.45-3.5%)                | 3<br>(-1.3-9.3)          | 76<br>(-25-220)       |
| Fiji     | 1995 | Male   | 70 to 74 | 40%<br>(23-58%)                | 60%<br>(42-77%)          | 0.77<br>(0.37-1.4)                          | 0.8%<br>(-0.5-2.8%)                  | 0.82%<br>(-0.58-3%)                 | 1.9<br>(-1.3-6.7)        | 38<br>(-24-130)       |
| Fiji     | 1995 | Male   | 75 to 79 | 36%<br>(21-55%)                | 64%<br>(45-79%)          | 0.65<br>(0.29-1.2)                          | 0.6%<br>(-0.47-2.3%)                 | 0.61%<br>(-0.58-2.4%)               | 1.3<br>(-1.2-5.4)        | 21<br>(-17-81)        |
| Fiji     | 1995 | Male   | 80 to 84 | 33%<br>(18-51%)                | 67%<br>(49-82%)          | 0.57<br>(0.28-1)                            | 0.47%<br>(-0.34-1.7%)                | 0.46%<br>(-0.45-1.8%)               | 0.56<br>(-0.56-2.2)      | 6.9<br>(-5-25)        |
| Fiji     | 1995 | Male   | 85 to 89 | 32%<br>(18-49%)                | 68%<br>(51-82%)          | 0.54<br>(0.25-0.96)                         | 0.32%<br>(-0.42-1.5%)                | 0.28%<br>(-0.54-1.5%)               | 0.19<br>(-0.36-1)        | 1.8<br>(-2.5-8.3)     |
| Fiji     | 1995 | Male   | 90 to 94 | 33%<br>(20-50%)                | 67%<br>(50-80%)          | 0.55<br>(0.25-1)                            | 0.17%<br>(-0.5-1.2%)                 | 0.093%<br>(-0.67-1.2%)              | 0.02<br>(-0.15-0.26)     | 0.22<br>(-0.65-1.5)   |
| Fiji     | 1995 | Male   | 95 plus  | 36%<br>(20-57%)                | 64%<br>(43-80%)          | 0.6<br>(0.25-1.1)                           | 0.065%<br>(-0.8-1.3%)                | -0.076%<br>(-1.1-1.3%)              | -0.0039<br>(-0.057-0.07) | 0.013<br>(-0.17-0.27) |
| Fiji     | 2000 | Female | All Ages | 7.6%<br>(6-9.7%)               | 92%<br>(90-94%)          | 0.17<br>(0.13-0.23)                         | 0.28%<br>(0.07-0.51%)                | 0.03%<br>(-0.26-0.38%)              | 0.81<br>(-6.8-9.9)       | 360<br>(86-660)       |
| Fiji     | 2000 | Female | 15 to 19 | 9.3%<br>(5.8-15%)              | 91%<br>(85-94%)          | 0.24<br>(0.13-0.41)                         | 0.78%<br>(0.44-1.3%)                 | 0.99%<br>(0.41-2%)                  | 0.42<br>(0.17-0.83)      | 50<br>(29-84)         |
| Fiji     | 2000 | Female | 20 to 24 | 11%<br>(6.6-18%)               | 89%<br>(82-93%)          | 0.37<br>(0.21-0.63)                         | 1.4%<br>(0.84-2.1%)                  | 1.4%<br>(0.68-2.7%)                 | 0.77<br>(0.34-1.5)       | 94<br>(56-150)        |
| Fiji     | 2000 | Female | 25 to 29 | 10%<br>(5.9-18%)               | 90%<br>(82-94%)          | 0.3<br>(0.16-0.49)                          | 1.2%<br>(0.85-1.8%)                  | 1.3%<br>(0.69-2.1%)                 | 0.75<br>(0.39-1.3)       | 82<br>(53-120)        |
| Fiji     | 2000 | Female | 30 to 34 | 9.9%<br>(5.5-17%)              | 90%<br>(83-94%)          | 0.27<br>(0.14-0.46)                         | 0.96%<br>(0.62-1.5%)                 | 0.91%<br>(0.47-1.6%)                | 0.66<br>(0.31-1.2)       | 67<br>(42-110)        |
| Fiji     | 2000 | Female | 35 to 39 | 9.8%<br>(5.2-18%)              | 90%<br>(82-95%)          | 0.28<br>(0.14-0.51)                         | 0.88%<br>(0.48-1.4%)                 | 0.93%<br>(0.41-1.7%)                | 1<br>(0.42-1.9)          | 77<br>(41-130)        |
| Fiji     | 2000 | Female | 40 to 44 | 9.3%<br>(5.1-16%)              | 91%<br>(84-95%)          | 0.25<br>(0.12-0.45)                         | 0.62%<br>(0.21-1.2%)                 | 0.67%<br>(0.14-1.4%)                | 0.93<br>(0.17-2.1)       | 59<br>(20-120)        |
| Fiji     | 2000 | Female | 45 to 49 | 9.2%<br>(4.7-16%)              | 91%<br>(84-95%)          | 0.19<br>(0.082-0.35)                        | 0.19%<br>(-0.21-0.65%)               | 0.19%<br>(-0.29-0.79%)              | 0.29<br>(-0.45-1.2)      | 17<br>(-20-60)        |

| Location | Year | Sex    | Age      | Prevalence of current drinkers | Prevalence of abstainers | Population average of standard drinks daily | Percent of total attributable deaths | Percent of total attributable DALYs | Attributable deaths      | Attributable DALYs     |
|----------|------|--------|----------|--------------------------------|--------------------------|---------------------------------------------|--------------------------------------|-------------------------------------|--------------------------|------------------------|
| Fiji     | 2000 | Female | 50 to 54 | 9.1%<br>(5.1-16%)              | 91%<br>(84-95%)          | 0.16<br>(0.067-0.32)                        | -0.11%<br>(-0.58-0.35%)              | -0.13%<br>(-0.66-0.43%)             | -0.25<br>(-1.3-0.83)     | -10<br>(-56-34)        |
| Fiji     | 2000 | Female | 55 to 59 | 8.4%<br>(4.5-15%)              | 92%<br>(85-95%)          | 0.15<br>(0.067-0.3)                         | -0.11%<br>(-0.57-0.37%)              | -0.11%<br>(-0.63-0.46%)             | -0.25<br>(-1.4-1.1)      | -11<br>(-56-36)        |
| Fiji     | 2000 | Female | 60 to 64 | 8%<br>(4.1-15%)                | 92%<br>(85-96%)          | 0.14<br>(0.062-0.29)                        | -0.2%<br>(-0.71-0.29%)               | -0.21%<br>(-0.79-0.34%)             | -0.53<br>(-1.9-0.79)     | -17<br>(-59-24)        |
| Fiji     | 2000 | Female | 65 to 69 | 8.8%<br>(4.8-15%)              | 91%<br>(85-95%)          | 0.15<br>(0.074-0.28)                        | -0.24%<br>(-0.74-0.22%)              | -0.25%<br>(-0.82-0.28%)             | -0.61<br>(-2-0.72)       | -16<br>(-51-15)        |
| Fiji     | 2000 | Female | 70 to 74 | 9.3%<br>(5.2-16%)              | 91%<br>(84-95%)          | 0.15<br>(0.071-0.29)                        | -0.33%<br>(-0.86-0.16%)              | -0.36%<br>(-0.96-0.18%)             | -0.87<br>(-2.4-0.43)     | -17<br>(-47-8)         |
| Fiji     | 2000 | Female | 75 to 79 | 9.2%<br>(5-16%)                | 91%<br>(84-95%)          | 0.15<br>(0.062-0.28)                        | -0.24%<br>(-0.7-0.2%)                | -0.25%<br>(-0.77-0.24%)             | -0.54<br>(-1.7-0.49)     | -8.4<br>(-26-7.1)      |
| Fiji     | 2000 | Female | 80 to 84 | 9%<br>(4.9-16%)                | 91%<br>(84-95%)          | 0.14<br>(0.067-0.26)                        | -0.28%<br>(-0.7-0.098%)              | -0.31%<br>(-0.77-0.11%)             | -0.55<br>(-1.4-0.2)      | -6<br>(-15-2)          |
| Fiji     | 2000 | Female | 85 to 89 | 9.2%<br>(4.9-15%)              | 91%<br>(85-95%)          | 0.14<br>(0.068-0.27)                        | -0.26%<br>(-0.67-0.11%)              | -0.3%<br>(-0.76-0.11%)              | -0.3<br>(-0.78-0.11)     | -2.3<br>(-5.9-0.94)    |
| Fiji     | 2000 | Female | 90 to 94 | 10%<br>(5.4-17%)               | 90%<br>(83-95%)          | 0.16<br>(0.068-0.29)                        | -0.21%<br>(-0.57-0.17%)              | -0.25%<br>(-0.66-0.18%)             | -0.092<br>(-0.24-0.068)  | -0.46<br>(-1.2-0.36)   |
| Fiji     | 2000 | Female | 95 plus  | 12%<br>(5.6-21%)               | 88%<br>(79-94%)          | 0.18<br>(0.068-0.36)                        | -0.21%<br>(-0.71-0.31%)              | -0.28%<br>(-0.86-0.31%)             | -0.025<br>(-0.078-0.028) | -0.074<br>(-0.25-0.11) |
| Fiji     | 2000 | Male   | All Ages | 42%<br>(34-50%)                | 58%<br>(50-66%)          | 1.3<br>(1.1-1.5)                            | 3%<br>(1.9-4.2%)                     | 2.6%<br>(1.2-4.2%)                  | 87<br>(42-140)           | 4900<br>(3200-7000)    |
| Fiji     | 2000 | Male   | 15 to 19 | 40%<br>(25-56%)                | 60%<br>(44-75%)          | 0.92<br>(0.47-1.5)                          | 2.7%<br>(1.5-4.4%)                   | 3.6%<br>(1.8-6.3%)                  | 2.8<br>(1.3-4.9)         | 240<br>(130-400)       |
| Fiji     | 2000 | Male   | 20 to 24 | 59%<br>(42-73%)                | 41%<br>(27-58%)          | 2.5<br>(1.7-3.4)                            | 8.2%<br>(5.2-12%)                    | 10%<br>(6.2-15%)                    | 11<br>(7-17)             | 850<br>(540-1200)      |
| Fiji     | 2000 | Male   | 25 to 29 | 64%<br>(48-78%)                | 36%<br>(22-52%)          | 3<br>(2-4.2)                                | 9.2%<br>(6-13%)                      | 11%<br>(7.1-16%)                    | 12<br>(7.4-18)           | 850<br>(540-1200)      |
| Fiji     | 2000 | Male   | 30 to 34 | 62%<br>(45-77%)                | 38%<br>(23-55%)          | 3<br>(2-4.2)                                | 7.6%<br>(4.7-11%)                    | 9.1%<br>(5.3-14%)                   | 11<br>(6.4-17)           | 730<br>(440-1100)      |
| Fiji     | 2000 | Male   | 35 to 39 | 60%<br>(44-75%)                | 40%<br>(25-56%)          | 2.7<br>(1.7-3.8)                            | 6.3%<br>(3.1-9.9%)                   | 7.3%<br>(3.2-12%)                   | 12<br>(5.1-20)           | 710<br>(350-1200)      |
| Fiji     | 2000 | Male   | 40 to 44 | 56%<br>(40-72%)                | 44%<br>(28-60%)          | 2.2<br>(1.3-3.3)                            | 4.3%<br>(1.1-8%)                     | 4.7%<br>(0.87-9.2%)                 | 10<br>(1.9-21)           | 550<br>(150-1000)      |
| Fiji     | 2000 | Male   | 45 to 49 | 51%<br>(33-67%)                | 49%<br>(33-67%)          | 1.6<br>(0.94-2.5)                           | 2.4%<br>(0.1-5.5%)                   | 2.5%<br>(-0.23-6%)                  | 6.1<br>(-0.62-16)        | 310<br>(13-720)        |
| Fiji     | 2000 | Male   | 50 to 54 | 47%<br>(30-64%)                | 53%<br>(36-70%)          | 1.2<br>(0.63-2)                             | 1.7%<br>(-0.37-4.5%)                 | 1.7%<br>(-0.7-4.9%)                 | 4.9<br>(-2-15)           | 220<br>(-49-590)       |
| Fiji     | 2000 | Male   | 55 to 59 | 44%<br>(28-61%)                | 56%<br>(39-72%)          | 1.1<br>(0.55-1.8)                           | 1.4%<br>(-0.27-4.1%)                 | 1.4%<br>(-0.46-4.5%)                | 4.6<br>(-1.5-14)         | 180<br>(-34-510)       |
| Fiji     | 2000 | Male   | 60 to 64 | 42%<br>(25-60%)                | 58%<br>(40-75%)          | 0.91<br>(0.46-1.7)                          | 1.2%<br>(-0.32-3.8%)                 | 1.2%<br>(-0.43-4.1%)                | 4.1<br>(-1.4-14)         | 130<br>(-33-410)       |
| Fiji     | 2000 | Male   | 65 to 69 | 41%<br>(24-60%)                | 59%<br>(40-76%)          | 0.84<br>(0.43-1.5)                          | 0.97%<br>(-0.39-3%)                  | 0.99%<br>(-0.5-3.2%)                | 3.1<br>(-1.6-9.8)        | 78<br>(-33-240)        |

| Location | Year | Sex    | Age      | Prevalence of current drinkers | Prevalence of abstainers | Population average of standard drinks daily | Percent of total attributable deaths | Percent of total attributable DALYs | Attributable deaths      | Attributable DALYs   |
|----------|------|--------|----------|--------------------------------|--------------------------|---------------------------------------------|--------------------------------------|-------------------------------------|--------------------------|----------------------|
| Fiji     | 2000 | Male   | 70 to 74 | 40%<br>(23-57%)                | 60%<br>(43-77%)          | 0.74<br>(0.35-1.3)                          | 0.69%<br>(-0.55-2.4%)                | 0.69%<br>(-0.66-2.6%)               | 1.9<br>(-1.9-7.6)        | 40<br>(-34-150)      |
| Fiji     | 2000 | Male   | 75 to 79 | 36%<br>(21-55%)                | 64%<br>(45-79%)          | 0.63<br>(0.29-1.2)                          | 0.52%<br>(-0.51-2.1%)                | 0.51%<br>(-0.62-2.2%)               | 1.1<br>(-1.3-4.7)        | 17<br>(-17-72)       |
| Fiji     | 2000 | Male   | 80 to 84 | 34%<br>(18-52%)                | 66%<br>(48-82%)          | 0.56<br>(0.27-1)                            | 0.41%<br>(-0.38-1.6%)                | 0.39%<br>(-0.47-1.6%)               | 0.54<br>(-0.66-2.3)      | 6.7<br>(-6.3-26)     |
| Fiji     | 2000 | Male   | 85 to 89 | 32%<br>(18-49%)                | 68%<br>(51-82%)          | 0.53<br>(0.25-0.95)                         | 0.27%<br>(-0.46-1.4%)                | 0.22%<br>(-0.6-1.5%)                | 0.17<br>(-0.48-1.1)      | 1.8<br>(-3.2-9.1)    |
| Fiji     | 2000 | Male   | 90 to 94 | 34%<br>(20-51%)                | 66%<br>(49-80%)          | 0.55<br>(0.25-1)                            | 0.13%<br>(-0.56-1.2%)                | 0.055%<br>(-0.74-1.2%)              | 0.015<br>(-0.21-0.34)    | 0.22<br>(-0.95-2)    |
| Fiji     | 2000 | Male   | 95 plus  | 37%<br>(20-57%)                | 63%<br>(43-80%)          | 0.6<br>(0.24-1.2)                           | 0.039%<br>(-0.85-1.3%)               | -0.1%<br>(-1.1-1.3%)                | -0.007<br>(-0.078-0.086) | 0.01<br>(-0.23-0.35) |
| Fiji     | 2005 | Female | All Ages | 7.6%<br>(6.1-9.7%)             | 92%<br>(90-94%)          | 0.19<br>(0.14-0.25)                         | 0.27%<br>(0.045-0.53%)               | 0.028%<br>(-0.3-0.41%)              | 0.83<br>(-8.7-12)        | 370<br>(58-740)      |
| Fiji     | 2005 | Female | 15 to 19 | 9%<br>(5.6-15%)                | 91%<br>(85-94%)          | 0.25<br>(0.14-0.44)                         | 0.81%<br>(0.45-1.3%)                 | 1.1%<br>(0.44-2.1%)                 | 0.38<br>(0.16-0.78)      | 45<br>(25-75)        |
| Fiji     | 2005 | Female | 20 to 24 | 11%<br>(6.6-18%)               | 89%<br>(82-93%)          | 0.4<br>(0.21-0.65)                          | 1.4%<br>(0.89-2.2%)                  | 1.6%<br>(0.73-2.8%)                 | 0.75<br>(0.33-1.4)       | 94<br>(56-150)       |
| Fiji     | 2005 | Female | 25 to 29 | 10%<br>(5.8-18%)               | 90%<br>(82-94%)          | 0.32<br>(0.18-0.53)                         | 1.3%<br>(0.86-1.8%)                  | 1.3%<br>(0.71-2.2%)                 | 0.75<br>(0.38-1.3)       | 86<br>(56-130)       |
| Fiji     | 2005 | Female | 30 to 34 | 9.7%<br>(5.4-17%)              | 90%<br>(83-95%)          | 0.29<br>(0.15-0.5)                          | 1%<br>(0.64-1.5%)                    | 0.95%<br>(0.5-1.7%)                 | 0.61<br>(0.3-1.1)        | 65<br>(40-100)       |
| Fiji     | 2005 | Female | 35 to 39 | 9.6%<br>(5-17%)                | 90%<br>(83-95%)          | 0.3<br>(0.15-0.54)                          | 0.91%<br>(0.51-1.5%)                 | 0.98%<br>(0.45-1.8%)                | 0.89<br>(0.37-1.7)       | 72<br>(38-120)       |
| Fiji     | 2005 | Female | 40 to 44 | 9%<br>(5-15%)                  | 91%<br>(85-95%)          | 0.26<br>(0.13-0.47)                         | 0.66%<br>(0.23-1.2%)                 | 0.73%<br>(0.18-1.5%)                | 1.1<br>(0.26-2.3)        | 70<br>(24-140)       |
| Fiji     | 2005 | Female | 45 to 49 | 9%<br>(4.6-16%)                | 91%<br>(84-95%)          | 0.2<br>(0.091-0.37)                         | 0.23%<br>(-0.21-0.72%)               | 0.24%<br>(-0.27-0.84%)              | 0.46<br>(-0.51-1.6)      | 26<br>(-24-83)       |
| Fiji     | 2005 | Female | 50 to 54 | 9%<br>(5-16%)                  | 91%<br>(84-95%)          | 0.17<br>(0.073-0.35)                        | -0.074%<br>(-0.58-0.45%)             | -0.093%<br>(-0.67-0.52%)            | -0.21<br>(-1.6-1.2)      | -8.2<br>(-66-49)     |
| Fiji     | 2005 | Female | 55 to 59 | 8.3%<br>(4.5-15%)              | 92%<br>(85-95%)          | 0.17<br>(0.074-0.32)                        | -0.086%<br>(-0.56-0.43%)             | -0.08%<br>(-0.63-0.51%)             | -0.21<br>(-1.7-1.4)      | -9.3<br>(-63-47)     |
| Fiji     | 2005 | Female | 60 to 64 | 7.9%<br>(4.1-15%)              | 92%<br>(85-96%)          | 0.16<br>(0.068-0.31)                        | -0.18%<br>(-0.72-0.37%)              | -0.19%<br>(-0.79-0.43%)             | -0.6<br>(-2.5-1.4)       | -19<br>(-76-41)      |
| Fiji     | 2005 | Female | 65 to 69 | 8.8%<br>(4.8-16%)              | 91%<br>(84-95%)          | 0.17<br>(0.079-0.31)                        | -0.22%<br>(-0.75-0.29%)              | -0.23%<br>(-0.82-0.34%)             | -0.67<br>(-2.4-1)        | -18<br>(-61-24)      |
| Fiji     | 2005 | Female | 70 to 74 | 9.2%<br>(5.2-16%)              | 91%<br>(84-95%)          | 0.17<br>(0.078-0.33)                        | -0.3%<br>(-0.84-0.24%)               | -0.33%<br>(-0.94-0.28%)             | -0.96<br>(-2.7-0.81)     | -19<br>(-52-15)      |
| Fiji     | 2005 | Female | 75 to 79 | 9%<br>(4.9-16%)                | 91%<br>(84-95%)          | 0.16<br>(0.069-0.3)                         | -0.2%<br>(-0.7-0.3%)                 | -0.21%<br>(-0.77-0.35%)             | -0.5<br>(-1.8-0.83)      | -8<br>(-28-12)       |
| Fiji     | 2005 | Female | 80 to 84 | 8.9%<br>(4.8-16%)              | 91%<br>(84-95%)          | 0.15<br>(0.072-0.28)                        | -0.25%<br>(-0.66-0.19%)              | -0.28%<br>(-0.75-0.2%)              | -0.52<br>(-1.4-0.37)     | -5.6<br>(-15-4.4)    |
| Fiji     | 2005 | Female | 85 to 89 | 9.1%<br>(4.9-15%)              | 91%<br>(85-95%)          | 0.16<br>(0.073-0.29)                        | -0.23%<br>(-0.64-0.19%)              | -0.27%<br>(-0.72-0.2%)              | -0.3<br>(-0.82-0.24)     | -2.2<br>(-6.2-1.9)   |

| Location | Year | Sex    | Age      | Prevalence of current drinkers | Prevalence of abstainers | Population average of standard drinks daily | Percent of total attributable deaths | Percent of total attributable DALYs | Attributable deaths     | Attributable DALYs     |
|----------|------|--------|----------|--------------------------------|--------------------------|---------------------------------------------|--------------------------------------|-------------------------------------|-------------------------|------------------------|
| Fiji     | 2005 | Female | 90 to 94 | 9.9%<br>(5.5-16%)              | 90%<br>(84-94%)          | 0.17<br>(0.074-0.33)                        | -0.19%<br>(-0.58-0.25%)              | -0.23%<br>(-0.67-0.27%)             | -0.098<br>(-0.29-0.11)  | -0.48<br>(-1.5-0.61)   |
| Fiji     | 2005 | Female | 95 plus  | 11%<br>(5.6-20%)               | 89%<br>(80-94%)          | 0.19<br>(0.076-0.39)                        | -0.19%<br>(-0.74-0.37%)              | -0.26%<br>(-0.89-0.37%)             | -0.027<br>(-0.09-0.038) | -0.075<br>(-0.29-0.15) |
| Fiji     | 2005 | Male   | All Ages | 43%<br>(36-51%)                | 57%<br>(49-64%)          | 1.5<br>(1.3-1.8)                            | 3.2%<br>(2.1-4.5%)                   | 2.7%<br>(1.4-4.4%)                  | 100<br>(48-170)         | 5500<br>(3400-8100)    |
| Fiji     | 2005 | Male   | 15 to 19 | 40%<br>(25-56%)                | 60%<br>(44-75%)          | 1<br>(0.52-1.7)                             | 2.9%<br>(1.6-4.8%)                   | 4%<br>(2-6.7%)                      | 2.4<br>(1.2-4.3)        | 200<br>(110-340)       |
| Fiji     | 2005 | Male   | 20 to 24 | 59%<br>(42-73%)                | 41%<br>(27-58%)          | 2.7<br>(1.8-3.8)                            | 8.7%<br>(5.4-12%)                    | 11%<br>(6.4-16%)                    | 11<br>(6.4-17)          | 830<br>(500-1200)      |
| Fiji     | 2005 | Male   | 25 to 29 | 64%<br>(48-78%)                | 36%<br>(22-52%)          | 3.3<br>(2.2-4.5)                            | 9.8%<br>(6.4-14%)                    | 12%<br>(7.8-18%)                    | 12<br>(7.4-18)          | 880<br>(550-1300)      |
| Fiji     | 2005 | Male   | 30 to 34 | 62%<br>(44-77%)                | 38%<br>(23-56%)          | 3.3<br>(2.1-4.6)                            | 8.4%<br>(5.3-12%)                    | 10%<br>(6.2-15%)                    | 11<br>(6.2-16)          | 710<br>(440-1000)      |
| Fiji     | 2005 | Male   | 35 to 39 | 60%<br>(44-75%)                | 40%<br>(25-56%)          | 2.9<br>(1.9-4.2)                            | 7.1%<br>(4-10%)                      | 8.5%<br>(4.5-13%)                   | 12<br>(5.7-19)          | 700<br>(390-1100)      |
| Fiji     | 2005 | Male   | 40 to 44 | 56%<br>(40-72%)                | 44%<br>(28-60%)          | 2.4<br>(1.5-3.5)                            | 5.1%<br>(1.8-8.7%)                   | 5.7%<br>(1.5-10%)                   | 12<br>(3.4-22)          | 660<br>(240-1100)      |
| Fiji     | 2005 | Male   | 45 to 49 | 50%<br>(33-66%)                | 50%<br>(34-67%)          | 1.7<br>(1-2.6)                              | 3.1%<br>(0.58-6.2%)                  | 3.2%<br>(0.25-6.9%)                 | 9.5<br>(0.7-22)         | 480<br>(87-1000)       |
| Fiji     | 2005 | Male   | 50 to 54 | 46%<br>(30-64%)                | 54%<br>(36-70%)          | 1.3<br>(0.68-2.1)                           | 2.2%<br>(-0.045-5.1%)                | 2.2%<br>(-0.3-5.7%)                 | 7.3<br>(-1-20)          | 320<br>(-6.8-810)      |
| Fiji     | 2005 | Male   | 55 to 59 | 44%<br>(28-61%)                | 56%<br>(39-72%)          | 1.1<br>(0.6-1.9)                            | 1.8%<br>(-0.1-4.6%)                  | 1.9%<br>(-0.25-5%)                  | 6.9<br>(-0.97-19)       | 260<br>(-15-680)       |
| Fiji     | 2005 | Male   | 60 to 64 | 42%<br>(26-61%)                | 58%<br>(39-74%)          | 0.99<br>(0.5-1.8)                           | 1.6%<br>(-0.16-4.1%)                 | 1.6%<br>(-0.27-4.5%)                | 6.7<br>(-1.2-20)        | 210<br>(-23-580)       |
| Fiji     | 2005 | Male   | 65 to 69 | 41%<br>(24-60%)                | 59%<br>(40-76%)          | 0.92<br>(0.47-1.6)                          | 1.3%<br>(-0.18-3.6%)                 | 1.3%<br>(-0.3-3.8%)                 | 5.2<br>(-1.1-15)        | 130<br>(-18-360)       |
| Fiji     | 2005 | Male   | 70 to 74 | 39%<br>(22-57%)                | 61%<br>(43-78%)          | 0.8<br>(0.37-1.5)                           | 0.94%<br>(-0.45-3%)                  | 0.96%<br>(-0.56-3.1%)               | 3.3<br>(-2-11)          | 67<br>(-35-210)        |
| Fiji     | 2005 | Male   | 75 to 79 | 36%<br>(21-54%)                | 64%<br>(46-79%)          | 0.67<br>(0.3-1.3)                           | 0.71%<br>(-0.43-2.5%)                | 0.72%<br>(-0.5-2.6%)                | 2<br>(-1.5-7.4)         | 32<br>(-19-110)        |
| Fiji     | 2005 | Male   | 80 to 84 | 33%<br>(18-51%)                | 67%<br>(49-82%)          | 0.6<br>(0.29-1.1)                           | 0.56%<br>(-0.31-1.9%)                | 0.55%<br>(-0.38-1.9%)               | 0.9<br>(-0.61-3.2)      | 11<br>(-5.9-36)        |
| Fiji     | 2005 | Male   | 85 to 89 | 31%<br>(18-48%)                | 69%<br>(52-82%)          | 0.56<br>(0.26-1)                            | 0.42%<br>(-0.37-1.6%)                | 0.4%<br>(-0.48-1.7%)                | 0.34<br>(-0.41-1.5)     | 3.1<br>(-2.7-12)       |
| Fiji     | 2005 | Male   | 90 to 94 | 32%<br>(20-49%)                | 68%<br>(51-80%)          | 0.57<br>(0.27-1)                            | 0.27%<br>(-0.44-1.4%)                | 0.2%<br>(-0.6-1.5%)                 | 0.066<br>(-0.19-0.47)   | 0.51<br>(-0.86-2.7)    |
| Fiji     | 2005 | Male   | 95 plus  | 36%<br>(19-56%)                | 64%<br>(44-81%)          | 0.62<br>(0.25-1.2)                          | 0.2%<br>(-0.71-1.6%)                 | 0.078%<br>(-0.94-1.6%)              | 0.0066<br>(-0.079-0.14) | 0.066<br>(-0.23-0.53)  |
| Fiji     | 2010 | Female | All Ages | 8.4%<br>(6.7-11%)              | 92%<br>(89-93%)          | 0.26<br>(0.19-0.35)                         | 0.39%<br>(0.082-0.79%)               | 0.18%<br>(-0.26-0.79%)              | 5.6<br>(-8.2-25)        | 560<br>(120-1100)      |
| Fiji     | 2010 | Female | 15 to 19 | 9%<br>(5.2-15%)                | 91%<br>(85-95%)          | 0.31<br>(0.15-0.56)                         | 0.95%<br>(0.52-1.7%)                 | 1.3%<br>(0.52-2.7%)                 | 0.5<br>(0.2-1.1)        | 56<br>(30-100)         |

| Location | Year | Sex    | Age      | Prevalence of current drinkers | Prevalence of abstainers | Population average of standard drinks daily | Percent of total attributable deaths | Percent of total attributable DALYs | Attributable deaths      | Attributable DALYs     |
|----------|------|--------|----------|--------------------------------|--------------------------|---------------------------------------------|--------------------------------------|-------------------------------------|--------------------------|------------------------|
| Fiji     | 2010 | Female | 20 to 24 | 12%<br>(6.2-19%)               | 88%<br>(81-94%)          | 0.51<br>(0.25-0.9)                          | 1.7%<br>(1-2.6%)                     | 2.1%<br>(0.92-3.9%)                 | 0.84<br>(0.36-1.6)       | 100<br>(60-160)        |
| Fiji     | 2010 | Female | 25 to 29 | 12%<br>(6.4-20%)               | 88%<br>(80-94%)          | 0.45<br>(0.24-0.74)                         | 1.6%<br>(1-2.3%)                     | 1.8%<br>(0.94-3%)                   | 0.96<br>(0.5-1.7)        | 110<br>(67-160)        |
| Fiji     | 2010 | Female | 30 to 34 | 11%<br>(5.8-19%)               | 89%<br>(81-94%)          | 0.41<br>(0.21-0.71)                         | 1.3%<br>(0.78-1.9%)                  | 1.4%<br>(0.69-2.5%)                 | 0.87<br>(0.43-1.6)       | 88<br>(53-140)         |
| Fiji     | 2010 | Female | 35 to 39 | 11%<br>(5.5-19%)               | 89%<br>(81-94%)          | 0.41<br>(0.2-0.74)                          | 1.2%<br>(0.68-1.9%)                  | 1.4%<br>(0.65-2.6%)                 | 1<br>(0.46-2)            | 83<br>(45-140)         |
| Fiji     | 2010 | Female | 40 to 44 | 10%<br>(5.5-18%)               | 90%<br>(82-95%)          | 0.36<br>(0.17-0.64)                         | 0.93%<br>(0.36-1.8%)                 | 1.1%<br>(0.33-2.3%)                 | 1.3<br>(0.4-2.9)         | 84<br>(34-170)         |
| Fiji     | 2010 | Female | 45 to 49 | 10%<br>(4.9-18%)               | 90%<br>(82-95%)          | 0.27<br>(0.12-0.52)                         | 0.42%<br>(-0.11-1.2%)                | 0.51%<br>(-0.2-1.4%)                | 0.9<br>(-0.36-2.5)       | 48<br>(-13-130)        |
| Fiji     | 2010 | Female | 50 to 54 | 10%<br>(5.4-18%)               | 90%<br>(82-95%)          | 0.24<br>(0.097-0.46)                        | 0.072%<br>(-0.56-0.88%)              | 0.093%<br>(-0.64-1.1%)              | 0.23<br>(-1.8-3)         | 9.3<br>(-75-120)       |
| Fiji     | 2010 | Female | 55 to 59 | 9.1%<br>(5.1-16%)              | 91%<br>(84-95%)          | 0.22<br>(0.098-0.43)                        | 0.046%<br>(-0.56-0.83%)              | 0.077%<br>(-0.63-1%)                | 0.22<br>(-1.9-2.9)       | 5.6<br>(-72-100)       |
| Fiji     | 2010 | Female | 60 to 64 | 8.4%<br>(4.2-15%)              | 92%<br>(85-96%)          | 0.2<br>(0.089-0.4)                          | -0.041%<br>(-0.67-0.73%)             | -0.035%<br>(-0.75-0.85%)            | -0.13<br>(-2.8-3)        | -5.2<br>(-82-88)       |
| Fiji     | 2010 | Female | 65 to 69 | 8.7%<br>(4.7-15%)              | 91%<br>(85-95%)          | 0.2<br>(0.092-0.38)                         | -0.058%<br>(-0.66-0.64%)             | -0.047%<br>(-0.73-0.75%)            | -0.18<br>(-2.7-2.8)      | -6.1<br>(-68-67)       |
| Fiji     | 2010 | Female | 70 to 74 | 9%<br>(5.2-15%)                | 91%<br>(85-95%)          | 0.2<br>(0.091-0.4)                          | -0.12%<br>(-0.71-0.63%)              | -0.13%<br>(-0.8-0.73%)              | -0.49<br>(-3-2.6)        | -10<br>(-57-52)        |
| Fiji     | 2010 | Female | 75 to 79 | 8.9%<br>(4.9-15%)              | 91%<br>(85-95%)          | 0.19<br>(0.08-0.37)                         | -0.028%<br>(-0.56-0.71%)             | -0.021%<br>(-0.64-0.84%)            | -0.069<br>(-2-2.4)       | -1.5<br>(-30-37)       |
| Fiji     | 2010 | Female | 80 to 84 | 8.7%<br>(4.7-15%)              | 91%<br>(85-95%)          | 0.19<br>(0.084-0.35)                        | -0.084%<br>(-0.55-0.52%)             | -0.098%<br>(-0.63-0.58%)            | -0.22<br>(-1.4-1.4)      | -2.4<br>(-15-15)       |
| Fiji     | 2010 | Female | 85 to 89 | 8.9%<br>(4.7-15%)              | 91%<br>(85-95%)          | 0.19<br>(0.085-0.36)                        | -0.079%<br>(-0.52-0.46%)             | -0.1%<br>(-0.6-0.49%)               | -0.12<br>(-0.73-0.61)    | -0.83<br>(-5.5-4.8)    |
| Fiji     | 2010 | Female | 90 to 94 | 9.7%<br>(5.4-16%)              | 90%<br>(84-95%)          | 0.2<br>(0.09-0.38)                          | -0.062%<br>(-0.47-0.5%)              | -0.093%<br>(-0.55-0.53%)            | -0.043<br>(-0.26-0.25)   | -0.17<br>(-1.3-1.4)    |
| Fiji     | 2010 | Female | 95 plus  | 11%<br>(5.5-20%)               | 89%<br>(80-95%)          | 0.23<br>(0.087-0.46)                        | -0.057%<br>(-0.6-0.61%)              | -0.12%<br>(-0.73-0.62%)             | -0.015<br>(-0.088-0.076) | -0.027<br>(-0.28-0.29) |
| Fiji     | 2010 | Male   | All Ages | 41%<br>(33-50%)                | 59%<br>(50-67%)          | 1.7<br>(1.4-2.1)                            | 3.7%<br>(2.4-5.2%)                   | 3.4%<br>(1.6-5.5%)                  | 140<br>(63-220)          | 6500<br>(4000-9300)    |
| Fiji     | 2010 | Male   | 15 to 19 | 32%<br>(18-50%)                | 68%<br>(50-82%)          | 0.96<br>(0.47-1.7)                          | 2.7%<br>(1.5-4.8%)                   | 3.9%<br>(1.8-7.4%)                  | 2<br>(0.88-3.8)          | 180<br>(94-320)        |
| Fiji     | 2010 | Male   | 20 to 24 | 50%<br>(32-68%)                | 50%<br>(32-68%)          | 2.6<br>(1.5-4)                              | 8.5%<br>(5.1-12%)                    | 11%<br>(6.3-17%)                    | 9.1<br>(4.8-15)          | 700<br>(400-1100)      |
| Fiji     | 2010 | Male   | 25 to 29 | 58%<br>(38-75%)                | 42%<br>(25-62%)          | 3.5<br>(2.1-5.1)                            | 9.9%<br>(6.6-13%)                    | 13%<br>(8.4-18%)                    | 12<br>(7.1-17)           | 850<br>(550-1200)      |
| Fiji     | 2010 | Male   | 30 to 34 | 59%<br>(37-77%)                | 41%<br>(23-63%)          | 3.7<br>(2.2-5.4)                            | 9.1%<br>(5.9-12%)                    | 12%<br>(7.3-16%)                    | 11<br>(6.6-17)           | 760<br>(480-1100)      |
| Fiji     | 2010 | Male   | 35 to 39 | 58%<br>(39-76%)                | 42%<br>(24-61%)          | 3.4<br>(1.9-5.1)                            | 8.1%<br>(4.7-12%)                    | 10%<br>(5.5-15%)                    | 12<br>(6.1-18)           | 700<br>(410-1000)      |

| Location | Year | Sex    | Age      | Prevalence of current drinkers | Prevalence of abstainers | Population average of standard drinks daily | Percent of total attributable deaths | Percent of total attributable DALYs | Attributable deaths    | Attributable DALYs   |
|----------|------|--------|----------|--------------------------------|--------------------------|---------------------------------------------|--------------------------------------|-------------------------------------|------------------------|----------------------|
| Fiji     | 2010 | Male   | 40 to 44 | 55%<br>(37-73%)                | 45%<br>(27-63%)          | 2.8<br>(1.6-4.4)                            | 6.4%<br>(2.9-10%)                    | 7.5%<br>(3-13%)                     | 13<br>(5-22)           | 690<br>(320-1100)    |
| Fiji     | 2010 | Male   | 45 to 49 | 51%<br>(31-71%)                | 49%<br>(29-69%)          | 2.1<br>(1.1-3.4)                            | 4.5%<br>(1.4-8.2%)                   | 4.9%<br>(1.2-9.4%)                  | 13<br>(3.3-27)         | 650<br>(200-1200)    |
| Fiji     | 2010 | Male   | 50 to 54 | 48%<br>(29-68%)                | 52%<br>(32-71%)          | 1.7<br>(0.85-2.9)                           | 3.4%<br>(0.51-7.3%)                  | 3.7%<br>(0.28-8.4%)                 | 14<br>(1.1-31)         | 580<br>(88-1200)     |
| Fiji     | 2010 | Male   | 55 to 59 | 46%<br>(28-66%)                | 54%<br>(34-72%)          | 1.5<br>(0.74-2.7)                           | 3%<br>(0.4-6.6%)                     | 3.2%<br>(0.26-7.3%)                 | 14<br>(1.1-30)         | 480<br>(63-1000)     |
| Fiji     | 2010 | Male   | 60 to 64 | 43%<br>(25-63%)                | 57%<br>(37-75%)          | 1.3<br>(0.61-2.4)                           | 2.5%<br>(0.25-5.9%)                  | 2.7%<br>(0.17-6.5%)                 | 13<br>(0.77-32)        | 390<br>(39-930)      |
| Fiji     | 2010 | Male   | 65 to 69 | 42%<br>(24-61%)                | 58%<br>(39-76%)          | 1.1<br>(0.56-1.9)                           | 2.1%<br>(0.15-4.9%)                  | 2.2%<br>(0.11-5.3%)                 | 10<br>(0.49-24)        | 260<br>(17-580)      |
| Fiji     | 2010 | Male   | 70 to 74 | 39%<br>(23-56%)                | 61%<br>(44-77%)          | 0.96<br>(0.45-1.8)                          | 1.5%<br>(-0.18-4.3%)                 | 1.6%<br>(-0.26-4.6%)                | 6.8<br>(-1.1-19)       | 130<br>(-15-370)     |
| Fiji     | 2010 | Male   | 75 to 79 | 35%<br>(21-53%)                | 65%<br>(47-79%)          | 0.8<br>(0.35-1.5)                           | 1.2%<br>(-0.25-3.5%)                 | 1.2%<br>(-0.32-3.8%)                | 4.1<br>(-1.1-12)       | 63<br>(-14-180)      |
| Fiji     | 2010 | Male   | 80 to 84 | 33%<br>(18-51%)                | 67%<br>(49-82%)          | 0.72<br>(0.33-1.3)                          | 0.97%<br>(-0.12-2.8%)                | 1%<br>(-0.19-3%)                    | 2<br>(-0.37-5.9)       | 23<br>(-2.7-66)      |
| Fiji     | 2010 | Male   | 85 to 89 | 31%<br>(18-47%)                | 69%<br>(53-82%)          | 0.68<br>(0.31-1.3)                          | 0.82%<br>(-0.18-2.5%)                | 0.84%<br>(-0.27-2.7%)               | 0.79<br>(-0.25-2.4)    | 6.6<br>(-1.5-19)     |
| Fiji     | 2010 | Male   | 90 to 94 | 32%<br>(19-49%)                | 68%<br>(51-81%)          | 0.69<br>(0.32-1.3)                          | 0.59%<br>(-0.27-2%)                  | 0.57%<br>(-0.43-2.2%)               | 0.19<br>(-0.13-0.7)    | 1.2<br>(-0.54-4)     |
| Fiji     | 2010 | Male   | 95 plus  | 35%<br>(18-56%)                | 65%<br>(44-82%)          | 0.75<br>(0.3-1.4)                           | 0.55%<br>(-0.5-2.4%)                 | 0.47%<br>(-0.7-2.5%)                | 0.042<br>(-0.063-0.21) | 0.19<br>(-0.18-0.79) |
| Fiji     | 2016 | Female | All Ages | 8.4%<br>(6.7-11%)              | 92%<br>(89-93%)          | 0.28<br>(0.18-0.43)                         | 0.47%<br>(0.046-1.1%)                | 0.28%<br>(-0.27-1.1%)               | 10<br>(-10-41)         | 730<br>(76-1700)     |
| Fiji     | 2016 | Female | 15 to 19 | 9%<br>(5.2-15%)                | 91%<br>(85-95%)          | 0.34<br>(0.15-0.67)                         | 1.1%<br>(0.53-2%)                    | 1.5%<br>(0.54-3.3%)                 | 0.53<br>(0.18-1.2)     | 57<br>(27-100)       |
| Fiji     | 2016 | Female | 20 to 24 | 12%<br>(6.4-19%)               | 88%<br>(81-94%)          | 0.57<br>(0.26-1)                            | 1.9%<br>(1.1-3.1%)                   | 2.4%<br>(0.93-4.6%)                 | 0.98<br>(0.34-2.1)     | 110<br>(58-190)      |
| Fiji     | 2016 | Female | 25 to 29 | 12%<br>(6.2-20%)               | 88%<br>(80-94%)          | 0.49<br>(0.24-0.86)                         | 1.7%<br>(1-2.7%)                     | 2%<br>(0.98-3.7%)                   | 1<br>(0.42-2.1)        | 110<br>(63-180)      |
| Fiji     | 2016 | Female | 30 to 34 | 12%<br>(5.9-20%)               | 88%<br>(80-94%)          | 0.45<br>(0.21-0.82)                         | 1.4%<br>(0.81-2.3%)                  | 1.6%<br>(0.71-3%)                   | 1.1<br>(0.41-2.4)      | 110<br>(57-190)      |
| Fiji     | 2016 | Female | 35 to 39 | 11%<br>(5.8-19%)               | 89%<br>(81-94%)          | 0.45<br>(0.21-0.82)                         | 1.4%<br>(0.71-2.4%)                  | 1.6%<br>(0.69-3.2%)                 | 1.5<br>(0.5-3.2)       | 110<br>(53-210)      |
| Fiji     | 2016 | Female | 40 to 44 | 10%<br>(5.5-18%)               | 90%<br>(82-94%)          | 0.39<br>(0.17-0.78)                         | 1.1%<br>(0.38-2.3%)                  | 1.3%<br>(0.34-2.9%)                 | 1.6<br>(0.35-3.7)      | 96<br>(33-210)       |
| Fiji     | 2016 | Female | 45 to 49 | 10%<br>(5.1-17%)               | 90%<br>(83-95%)          | 0.3<br>(0.12-0.59)                          | 0.55%<br>(-0.075-1.6%)               | 0.66%<br>(-0.16-2%)                 | 1.1<br>(-0.24-3.5)     | 59<br>(-7.5-170)     |
| Fiji     | 2016 | Female | 50 to 54 | 10%<br>(5.5-18%)               | 90%<br>(82-94%)          | 0.25<br>(0.1-0.51)                          | 0.2%<br>(-0.48-1.2%)                 | 0.25%<br>(-0.57-1.5%)               | 0.66<br>(-1.7-3.7)     | 28<br>(-71-160)      |
| Fiji     | 2016 | Female | 55 to 59 | 9.1%<br>(5.1-16%)              | 91%<br>(84-95%)          | 0.24<br>(0.099-0.48)                        | 0.17%<br>(-0.52-1.1%)                | 0.22%<br>(-0.57-1.4%)               | 0.81<br>(-2.2-5.1)     | 26<br>(-86-180)      |

| Location | Year | Sex    | Age      | Prevalence of current drinkers | Prevalence of abstainers | Population average of standard drinks daily | Percent of total attributable deaths | Percent of total attributable DALYs | Attributable deaths     | Attributable DALYs    |
|----------|------|--------|----------|--------------------------------|--------------------------|---------------------------------------------|--------------------------------------|-------------------------------------|-------------------------|-----------------------|
| Fiji     | 2016 | Female | 60 to 64 | 8.4%<br>(4.3-15%)              | 92%<br>(85-96%)          | 0.22<br>(0.087-0.46)                        | 0.083%<br>(-0.61-1%)                 | 0.11%<br>(-0.67-1.2%)               | 0.43<br>(-3.1-5.3)      | 12<br>(-92-160)       |
| Fiji     | 2016 | Female | 65 to 69 | 8.9%<br>(4.6-16%)              | 91%<br>(84-95%)          | 0.22<br>(0.092-0.43)                        | 0.058%<br>(-0.61-0.96%)              | 0.085%<br>(-0.67-1.1%)              | 0.35<br>(-3.1-4.6)      | 6.9<br>(-77-110)      |
| Fiji     | 2016 | Female | 70 to 74 | 9.2%<br>(5.1-16%)              | 91%<br>(84-95%)          | 0.22<br>(0.089-0.46)                        | -0.016%<br>(-0.66-0.97%)             | -0.013%<br>(-0.75-1.1%)             | -0.088<br>(-3.9-5.3)    | -2.1<br>(-76-100)     |
| Fiji     | 2016 | Female | 75 to 79 | 8.9%<br>(5-16%)                | 91%<br>(84-95%)          | 0.21<br>(0.082-0.44)                        | 0.072%<br>(-0.56-0.94%)              | 0.09%<br>(-0.6-1.1%)                | 0.36<br>(-2.6-4.6)      | 4.8<br>(-39-67)       |
| Fiji     | 2016 | Female | 80 to 84 | 8.8%<br>(4.7-15%)              | 91%<br>(85-95%)          | 0.21<br>(0.089-0.4)                         | 0.0092%<br>(-0.53-0.84%)             | 0.005%<br>(-0.61-0.95%)             | 0.0095<br>(-2-2.9)      | 0.3<br>(-22-32)       |
| Fiji     | 2016 | Female | 85 to 89 | 9%<br>(4.9-15%)                | 91%<br>(85-95%)          | 0.21<br>(0.089-0.4)                         | 0.0038%<br>(-0.51-0.76%)             | -0.012%<br>(-0.58-0.84%)            | -0.023<br>(-1.1-1.5)    | 0.041<br>(-7.7-11)    |
| Fiji     | 2016 | Female | 90 to 94 | 9.7%<br>(5.5-16%)              | 90%<br>(84-95%)          | 0.22<br>(0.093-0.44)                        | 0.017%<br>(-0.45-0.78%)              | -0.007%<br>(-0.55-0.84%)            | -0.0045<br>(-0.32-0.51) | 0.058<br>(-1.6-2.7)   |
| Fiji     | 2016 | Female | 95 plus  | 11%<br>(5.7-20%)               | 89%<br>(80-94%)          | 0.25<br>(0.093-0.54)                        | 0.021%<br>(-0.59-0.98%)              | -0.033%<br>(-0.76-1%)               | -0.0051<br>(-0.12-0.16) | 0.012<br>(-0.36-0.57) |
| Fiji     | 2016 | Male   | All Ages | 41%<br>(33-50%)                | 59%<br>(50-67%)          | 1.9<br>(1.3-2.7)                            | 4.3%<br>(2.3-6.5%)                   | 3.9%<br>(1.6-6.6%)                  | 180<br>(67-340)         | 8100<br>(4100-14000)  |
| Fiji     | 2016 | Male   | 15 to 19 | 33%<br>(19-50%)                | 67%<br>(50-81%)          | 1.1<br>(0.47-2)                             | 3.2%<br>(1.5-6%)                     | 4.4%<br>(1.9-8.8%)                  | 2.4<br>(0.91-4.9)       | 210<br>(95-390)       |
| Fiji     | 2016 | Male   | 20 to 24 | 50%<br>(32-69%)                | 50%<br>(31-68%)          | 2.9<br>(1.5-4.8)                            | 9.5%<br>(5.3-14%)                    | 12%<br>(6.5-19%)                    | 11<br>(5.2-19)          | 840<br>(440-1400)     |
| Fiji     | 2016 | Male   | 25 to 29 | 58%<br>(37-74%)                | 42%<br>(26-63%)          | 3.8<br>(2.2-6.1)                            | 11%<br>(6.8-15%)                     | 14%<br>(8.5-20%)                    | 13<br>(6.7-21)          | 950<br>(510-1400)     |
| Fiji     | 2016 | Male   | 30 to 34 | 59%<br>(38-76%)                | 41%<br>(24-62%)          | 4.1<br>(2.3-6.4)                            | 10%<br>(6.3-14%)                     | 13%<br>(7.5-18%)                    | 15<br>(7.6-25)          | 980<br>(540-1500)     |
| Fiji     | 2016 | Male   | 35 to 39 | 58%<br>(40-76%)                | 42%<br>(24-60%)          | 3.7<br>(2.1-6.2)                            | 8.9%<br>(5-13%)                      | 11%<br>(5.7-16%)                    | 16<br>(6.8-28)          | 950<br>(450-1600)     |
| Fiji     | 2016 | Male   | 40 to 44 | 55%<br>(37-73%)                | 45%<br>(27-63%)          | 3.1<br>(1.6-5.4)                            | 7.1%<br>(3.3-11%)                    | 8.3%<br>(3.4-14%)                   | 15<br>(5.4-28)          | 800<br>(340-1400)     |
| Fiji     | 2016 | Male   | 45 to 49 | 51%<br>(29-70%)                | 49%<br>(30-71%)          | 2.4<br>(1.1-4.2)                            | 5.2%<br>(1.6-9.5%)                   | 5.8%<br>(1.3-11%)                   | 15<br>(2.9-31)          | 710<br>(200-1400)     |
| Fiji     | 2016 | Male   | 50 to 54 | 48%<br>(28-68%)                | 52%<br>(32-72%)          | 1.9<br>(0.87-3.4)                           | 4.1%<br>(0.71-8.5%)                  | 4.4%<br>(0.45-9.3%)                 | 18<br>(1.9-41)          | 740<br>(140-1600)     |
| Fiji     | 2016 | Male   | 55 to 59 | 46%<br>(28-66%)                | 54%<br>(34-72%)          | 1.7<br>(0.77-3.1)                           | 3.6%<br>(0.55-7.5%)                  | 3.8%<br>(0.41-8.4%)                 | 19<br>(1.7-47)          | 700<br>(100-1600)     |
| Fiji     | 2016 | Male   | 60 to 64 | 44%<br>(26-64%)                | 56%<br>(36-74%)          | 1.4<br>(0.61-2.7)                           | 3%<br>(0.27-6.7%)                    | 3.2%<br>(0.19-7.4%)                 | 17<br>(1-40)            | 510<br>(47-1200)      |
| Fiji     | 2016 | Male   | 65 to 69 | 42%<br>(24-61%)                | 58%<br>(39-76%)          | 1.2<br>(0.56-2.2)                           | 2.6%<br>(0.28-5.9%)                  | 2.8%<br>(0.24-6.4%)                 | 15<br>(1.2-36)          | 360<br>(39-850)       |
| Fiji     | 2016 | Male   | 70 to 74 | 39%<br>(23-57%)                | 61%<br>(43-77%)          | 1.1<br>(0.46-2)                             | 2%<br>(-0.058-5.2%)                  | 2.1%<br>(-0.11-5.6%)                | 11<br>(-0.65-29)        | 220<br>(-6.4-570)     |
| Fiji     | 2016 | Male   | 75 to 79 | 35%<br>(20-54%)                | 65%<br>(46-80%)          | 0.89<br>(0.36-1.8)                          | 1.6%<br>(-0.12-4.4%)                 | 1.6%<br>(-0.19-4.7%)                | 6.8<br>(-0.84-20)       | 100<br>(-8.5-300)     |

| Location | Year | Sex    | Age      | Prevalence of current drinkers | Prevalence of abstainers | Population average of standard drinks daily | Percent of total attributable deaths | Percent of total attributable DALYs | Attributable deaths        | Attributable DALYs        |
|----------|------|--------|----------|--------------------------------|--------------------------|---------------------------------------------|--------------------------------------|-------------------------------------|----------------------------|---------------------------|
| Fiji     | 2016 | Male   | 80 to 84 | 32%<br>(17-50%)                | 68%<br>(50-83%)          | 0.79<br>(0.34-1.5)                          | 1.3%<br>(-0.031-3.4%)                | 1.3%<br>(-0.086-3.7%)               | 3.5<br>(-0.22-9.8)         | 40<br>(-0.92-110)         |
| Fiji     | 2016 | Male   | 85 to 89 | 31%<br>(17-47%)                | 69%<br>(53-83%)          | 0.75<br>(0.34-1.4)                          | 1.1%<br>(-0.1-3.2%)                  | 1.2%<br>(-0.17-3.4%)                | 1.4<br>(-0.2-4.1)          | 12<br>(-1-31)             |
| Fiji     | 2016 | Male   | 90 to 94 | 32%<br>(19-50%)                | 68%<br>(50-81%)          | 0.77<br>(0.34-1.4)                          | 0.86%<br>(-0.2-2.7%)                 | 0.86%<br>(-0.32-2.9%)               | 0.33<br>(-0.12-1.1)        | 2<br>(-0.49-6.2)          |
| Fiji     | 2016 | Male   | 95 plus  | 36%<br>(18-56%)                | 64%<br>(44-82%)          | 0.84<br>(0.32-1.8)                          | 0.85%<br>(-0.47-3.1%)                | 0.79%<br>(-0.65-3.3%)               | 0.069<br>(-0.055-0.29)     | 0.29<br>(-0.15-1.1)       |
| Kiribati | 1990 | Female | All Ages | 7.4%<br>(5.8-9.6%)             | 93%<br>(90-94%)          | 0.14<br>(0.11-0.18)                         | 0.39%<br>(0.24-0.57%)                | 0.41%<br>(0.16-0.71%)               | 1.5<br>(0.59-2.6)          | 84<br>(52-120)            |
| Kiribati | 1990 | Female | 15 to 19 | 9.1%<br>(5.1-16%)              | 91%<br>(84-95%)          | 0.18<br>(0.092-0.32)                        | 0.95%<br>(0.44-1.9%)                 | 1.3%<br>(0.42-2.7%)                 | 0.06<br>(0.019-0.13)       | 5.7<br>(2.6-11)           |
| Kiribati | 1990 | Female | 20 to 24 | 12%<br>(6.4-19%)               | 88%<br>(81-94%)          | 0.31<br>(0.16-0.5)                          | 1.7%<br>(0.87-2.7%)                  | 2%<br>(0.8-3.6%)                    | 0.16<br>(0.066-0.3)        | 15<br>(7.8-25)            |
| Kiribati | 1990 | Female | 25 to 29 | 12%<br>(6.5-21%)               | 88%<br>(79-94%)          | 0.3<br>(0.17-0.47)                          | 1.5%<br>(0.93-2.3%)                  | 1.7%<br>(0.9-2.9%)                  | 0.15<br>(0.076-0.25)       | 13<br>(7.9-19)            |
| Kiribati | 1990 | Female | 30 to 34 | 12%<br>(6.1-20%)               | 88%<br>(80-94%)          | 0.29<br>(0.15-0.49)                         | 1.4%<br>(0.81-2.2%)                  | 1.6%<br>(0.79-2.7%)                 | 0.16<br>(0.078-0.29)       | 12<br>(6.9-19)            |
| Kiribati | 1990 | Female | 35 to 39 | 11%<br>(5.9-19%)               | 89%<br>(81-94%)          | 0.27<br>(0.14-0.49)                         | 1.3%<br>(0.74-2.2%)                  | 1.6%<br>(0.76-2.8%)                 | 0.16<br>(0.079-0.3)        | 10<br>(5.7-17)            |
| Kiribati | 1990 | Female | 40 to 44 | 10%<br>(5.6-18%)               | 90%<br>(82-94%)          | 0.24<br>(0.12-0.42)                         | 1.3%<br>(0.58-2.3%)                  | 1.6%<br>(0.64-2.9%)                 | 0.18<br>(0.076-0.34)       | 9.7<br>(4.5-17)           |
| Kiribati | 1990 | Female | 45 to 49 | 10%<br>(5-18%)                 | 90%<br>(82-95%)          | 0.21<br>(0.095-0.39)                        | 0.72%<br>(0.22-1.4%)                 | 0.9%<br>(0.23-1.9%)                 | 0.11<br>(0.03-0.24)        | 5.2<br>(1.5-10)           |
| Kiribati | 1990 | Female | 50 to 54 | 10%<br>(5.4-18%)               | 90%<br>(82-95%)          | 0.19<br>(0.088-0.35)                        | 0.55%<br>(-0.045-1.4%)               | 0.71%<br>(0.01-1.8%)                | 0.12<br>(0.0017-0.31)      | 4.5<br>(-0.34-12)         |
| Kiribati | 1990 | Female | 55 to 59 | 9.2%<br>(5.1-16%)              | 91%<br>(84-95%)          | 0.16<br>(0.073-0.3)                         | 0.4%<br>(-0.11-1.1%)                 | 0.53%<br>(-0.098-1.4%)              | 0.093<br>(-0.019-0.24)     | 2.8<br>(-0.81-7.5)        |
| Kiribati | 1990 | Female | 60 to 64 | 8.4%<br>(4.3-15%)              | 92%<br>(85-96%)          | 0.14<br>(0.062-0.27)                        | 0.25%<br>(-0.19-0.78%)               | 0.34%<br>(-0.16-0.98%)              | 0.09<br>(-0.042-0.27)      | 2.2<br>(-1.6-7.1)         |
| Kiribati | 1990 | Female | 65 to 69 | 8.8%<br>(4.8-15%)              | 91%<br>(85-95%)          | 0.14<br>(0.064-0.25)                        | 0.22%<br>(-0.21-0.78%)               | 0.3%<br>(-0.2-0.92%)                | 0.079<br>(-0.05-0.25)      | 1.5<br>(-1.4-5.4)         |
| Kiribati | 1990 | Female | 70 to 74 | 9.1%<br>(5.3-15%)              | 91%<br>(85-95%)          | 0.14<br>(0.063-0.26)                        | 0.16%<br>(-0.3-0.81%)                | 0.22%<br>(-0.32-0.98%)              | 0.069<br>(-0.1-0.32)       | 1.1<br>(-2-5.4)           |
| Kiribati | 1990 | Female | 75 to 79 | 9%<br>(4.9-16%)                | 91%<br>(84-95%)          | 0.13<br>(0.059-0.24)                        | 0.21%<br>(-0.21-0.71%)               | 0.26%<br>(-0.21-0.84%)              | 0.075<br>(-0.064-0.24)     | 0.96<br>(-0.96-3.3)       |
| Kiribati | 1990 | Female | 80 to 84 | 8.8%<br>(4.8-15%)              | 91%<br>(85-95%)          | 0.12<br>(0.06-0.22)                         | 0.07%<br>(-0.2-0.37%)                | 0.089%<br>(-0.21-0.42%)             | 0.018<br>(-0.044-0.085)    | 0.17<br>(-0.5-0.87)       |
| Kiribati | 1990 | Female | 85 to 89 | 9%<br>(4.8-15%)                | 91%<br>(85-95%)          | 0.13<br>(0.058-0.23)                        | -0.0034%<br>(-0.24-0.23%)            | -0.00054%<br>(-0.25-0.26%)          | -0.00005<br>(-0.026-0.026) | -0.0028<br>(-0.2-0.2)     |
| Kiribati | 1990 | Female | 90 to 94 | 9.7%<br>(5.4-16%)              | 90%<br>(84-95%)          | 0.14<br>(0.06-0.25)                         | 0.03%<br>(-0.17-0.26%)               | 0.034%<br>(-0.19-0.29%)             | 0.0014<br>(-0.0075-0.012)  | 0.007<br>(-0.041-0.062)   |
| Kiribati | 1990 | Female | 95 plus  | 11%<br>(5.4-20%)               | 89%<br>(80-95%)          | 0.15<br>(0.06-0.31)                         | 0.11%<br>(-0.18-0.44%)               | 0.098%<br>(-0.23-0.46%)             | 0.0012<br>(-0.0029-0.0057) | 0.0055<br>(-0.0084-0.021) |



| Location | Year | Sex    | Age      | Prevalence of current drinkers | Prevalence of abstainers | Population average of standard drinks daily | Percent of total attributable deaths | Percent of total attributable DALYs | Attributable deaths          | Attributable DALYs        |
|----------|------|--------|----------|--------------------------------|--------------------------|---------------------------------------------|--------------------------------------|-------------------------------------|------------------------------|---------------------------|
| Kiribati | 1990 | Male   | All Ages | 39%<br>(31-48%)                | 61%<br>(52-69%)          | 0.76<br>(0.68-0.84)                         | 2.3%<br>(1.6-3%)                     | 2.7%<br>(1.7-3.8%)                  | 12<br>(7.5-17)               | 580<br>(400-750)          |
| Kiribati | 1990 | Male   | 15 to 19 | 37%<br>(22-55%)                | 63%<br>(45-78%)          | 0.51<br>(0.25-0.83)                         | 2.1%<br>(0.84-4%)                    | 2.5%<br>(0.85-5.2%)                 | 0.2<br>(0.069-0.42)          | 17<br>(6.8-32)            |
| Kiribati | 1990 | Male   | 20 to 24 | 56%<br>(37-73%)                | 44%<br>(27-63%)          | 1.4<br>(0.84-2)                             | 7.2%<br>(4-11%)                      | 8.5%<br>(4.4-13%)                   | 1.2<br>(0.61-1.8)            | 85<br>(47-130)            |
| Kiribati | 1990 | Male   | 25 to 29 | 63%<br>(44-79%)                | 37%<br>(21-56%)          | 1.9<br>(1.3-2.6)                            | 9.1%<br>(5.8-13%)                    | 11%<br>(6.7-15%)                    | 1.5<br>(0.91-2.2)            | 97<br>(61-140)            |
| Kiribati | 1990 | Male   | 30 to 34 | 64%<br>(43-80%)                | 36%<br>(20-57%)          | 2<br>(1.2-2.9)                              | 8.8%<br>(5.5-13%)                    | 10%<br>(6.4-15%)                    | 1.5<br>(0.89-2.2)            | 90<br>(55-130)            |
| Kiribati | 1990 | Male   | 35 to 39 | 62%<br>(44-79%)                | 38%<br>(21-56%)          | 1.8<br>(1.1-2.6)                            | 6.3%<br>(3.5-9.6%)                   | 7.2%<br>(3.9-11%)                   | 1.1<br>(0.57-1.7)            | 60<br>(33-93)             |
| Kiribati | 1990 | Male   | 40 to 44 | 60%<br>(41-75%)                | 40%<br>(25-59%)          | 1.5<br>(0.85-2.4)                           | 5.8%<br>(2.8-9.4%)                   | 6.6%<br>(3.1-11%)                   | 1.2<br>(0.54-2)              | 58<br>(28-95)             |
| Kiribati | 1990 | Male   | 45 to 49 | 56%<br>(34-74%)                | 44%<br>(26-66%)          | 1.3<br>(0.71-2.2)                           | 5%<br>(2.2-8.6%)                     | 5.6%<br>(2.4-9.7%)                  | 1.2<br>(0.5-2.1)             | 52<br>(23-91)             |
| Kiribati | 1990 | Male   | 50 to 54 | 53%<br>(34-72%)                | 47%<br>(28-66%)          | 1.1<br>(0.56-1.9)                           | 3.8%<br>(1.2-7.3%)                   | 4.2%<br>(1.3-8.1%)                  | 1.1<br>(0.32-2.1)            | 41<br>(13-79)             |
| Kiribati | 1990 | Male   | 55 to 59 | 51%<br>(33-71%)                | 49%<br>(29-67%)          | 0.9<br>(0.47-1.6)                           | 2.6%<br>(0.61-5.2%)                  | 2.8%<br>(0.6-5.8%)                  | 0.76<br>(0.16-1.6)           | 25<br>(5.8-52)            |
| Kiribati | 1990 | Male   | 60 to 64 | 48%<br>(29-69%)                | 52%<br>(31-71%)          | 0.75<br>(0.37-1.4)                          | 1.9%<br>(0.29-4.5%)                  | 2.1%<br>(0.28-4.9%)                 | 0.68<br>(0.088-1.6)          | 19<br>(2.7-44)            |
| Kiribati | 1990 | Male   | 65 to 69 | 46%<br>(27-65%)                | 54%<br>(35-73%)          | 0.68<br>(0.36-1.1)                          | 2.2%<br>(0.52-4.7%)                  | 2.4%<br>(0.58-5.2%)                 | 0.73<br>(0.17-1.6)           | 16<br>(3.8-35)            |
| Kiribati | 1990 | Male   | 70 to 74 | 44%<br>(26-61%)                | 56%<br>(39-74%)          | 0.6<br>(0.3-1)                              | 1.5%<br>(0.17-3.6%)                  | 1.7%<br>(0.17-4%)                   | 0.49<br>(0.05-1.1)           | 8.9<br>(1-21)             |
| Kiribati | 1990 | Male   | 75 to 79 | 40%<br>(24-59%)                | 60%<br>(41-76%)          | 0.51<br>(0.25-0.92)                         | 1.3%<br>(0.17-3%)                    | 1.4%<br>(0.18-3.3%)                 | 0.32<br>(0.039-0.74)         | 4.5<br>(0.57-10)          |
| Kiribati | 1990 | Male   | 80 to 84 | 37%<br>(21-56%)                | 63%<br>(44-79%)          | 0.46<br>(0.24-0.77)                         | 0.84%<br>(0.12-1.9%)                 | 0.92%<br>(0.13-2%)                  | 0.12<br>(0.017-0.27)         | 1.3<br>(0.19-2.9)         |
| Kiribati | 1990 | Male   | 85 to 89 | 36%<br>(21-53%)                | 64%<br>(47-79%)          | 0.43<br>(0.21-0.76)                         | 0.6%<br>(-0.018-1.5%)                | 0.65%<br>(-0.044-1.7%)              | 0.04<br>(-0.0027-0.1)        | 0.31<br>(-0.0094-0.79)    |
| Kiribati | 1990 | Male   | 90 to 94 | 37%<br>(23-54%)                | 63%<br>(46-77%)          | 0.44<br>(0.21-0.79)                         | 0.36%<br>(-0.089-1%)                 | 0.37%<br>(-0.13-1.1%)               | 0.0079<br>(-0.0029-0.023)    | 0.045<br>(-0.011-0.13)    |
| Kiribati | 1990 | Male   | 95 plus  | 40%<br>(22-61%)                | 60%<br>(39-78%)          | 0.48<br>(0.2-0.91)                          | 0.016%<br>(-0.54-0.68%)              | -0.08%<br>(-0.71-0.65%)             | -0.00048<br>(-0.0042-0.0038) | 0.00037<br>(-0.012-0.016) |
| Kiribati | 1995 | Female | All Ages | 7.4%<br>(5.8-9.5%)             | 93%<br>(91-94%)          | 0.14<br>(0.11-0.17)                         | 0.4%<br>(0.24-0.58%)                 | 0.4%<br>(0.14-0.7%)                 | 1.5<br>(0.52-2.6)            | 83<br>(50-120)            |
| Kiribati | 1995 | Female | 15 to 19 | 9.2%<br>(5.1-16%)              | 91%<br>(84-95%)          | 0.18<br>(0.093-0.33)                        | 0.92%<br>(0.42-1.7%)                 | 1.2%<br>(0.39-2.5%)                 | 0.064<br>(0.02-0.14)         | 6.3<br>(2.9-12)           |
| Kiribati | 1995 | Female | 20 to 24 | 12%<br>(6.3-20%)               | 88%<br>(80-94%)          | 0.3<br>(0.16-0.51)                          | 1.6%<br>(0.87-2.6%)                  | 1.8%<br>(0.73-3.5%)                 | 0.11<br>(0.047-0.22)         | 11<br>(5.8-18)            |
| Kiribati | 1995 | Female | 25 to 29 | 12%<br>(6.6-20%)               | 88%<br>(80-93%)          | 0.3<br>(0.17-0.46)                          | 1.5%<br>(0.94-2.2%)                  | 1.6%<br>(0.86-2.7%)                 | 0.16<br>(0.082-0.27)         | 14<br>(8.6-21)            |

| Location | Year | Sex    | Age      | Prevalence of current drinkers | Prevalence of abstainers | Population average of standard drinks daily | Percent of total attributable deaths | Percent of total attributable DALYs | Attributable deaths        | Attributable DALYs        |
|----------|------|--------|----------|--------------------------------|--------------------------|---------------------------------------------|--------------------------------------|-------------------------------------|----------------------------|---------------------------|
| Kiribati | 1995 | Female | 30 to 34 | 12%<br>(6.2-20%)               | 88%<br>(80-94%)          | 0.29<br>(0.15-0.48)                         | 1.3%<br>(0.82-2.1%)                  | 1.5%<br>(0.79-2.7%)                 | 0.16<br>(0.082-0.28)       | 12<br>(7.3-19)            |
| Kiribati | 1995 | Female | 35 to 39 | 11%<br>(5.9-19%)               | 89%<br>(81-94%)          | 0.28<br>(0.15-0.49)                         | 1.3%<br>(0.75-2.1%)                  | 1.6%<br>(0.77-2.7%)                 | 0.19<br>(0.095-0.33)       | 12<br>(7-20)              |
| Kiribati | 1995 | Female | 40 to 44 | 10%<br>(5.6-18%)               | 90%<br>(82-94%)          | 0.24<br>(0.12-0.42)                         | 1.2%<br>(0.59-2.2%)                  | 1.6%<br>(0.67-2.8%)                 | 0.19<br>(0.08-0.34)        | 9.9<br>(4.7-17)           |
| Kiribati | 1995 | Female | 45 to 49 | 10%<br>(5.1-18%)               | 90%<br>(82-95%)          | 0.21<br>(0.097-0.38)                        | 0.68%<br>(0.17-1.3%)                 | 0.85%<br>(0.21-1.7%)                | 0.12<br>(0.027-0.24)       | 5.5<br>(1.4-10)           |
| Kiribati | 1995 | Female | 50 to 54 | 10%<br>(5.3-18%)               | 90%<br>(82-95%)          | 0.19<br>(0.086-0.36)                        | 0.49%<br>(-0.11-1.3%)                | 0.64%<br>(-0.092-1.6%)              | 0.11<br>(-0.016-0.29)      | 4<br>(-0.85-11)           |
| Kiribati | 1995 | Female | 55 to 59 | 9.1%<br>(4.9-16%)              | 91%<br>(84-95%)          | 0.16<br>(0.072-0.3)                         | 0.35%<br>(-0.14-0.97%)               | 0.48%<br>(-0.11-1.3%)               | 0.098<br>(-0.022-0.27)     | 2.9<br>(-1.2-8.3)         |
| Kiribati | 1995 | Female | 60 to 64 | 8.3%<br>(4.3-15%)              | 92%<br>(85-96%)          | 0.13<br>(0.061-0.26)                        | 0.21%<br>(-0.21-0.74%)               | 0.3%<br>(-0.18-0.92%)               | 0.073<br>(-0.045-0.22)     | 1.7<br>(-1.7-5.9)         |
| Kiribati | 1995 | Female | 65 to 69 | 8.9%<br>(4.9-15%)              | 91%<br>(85-95%)          | 0.14<br>(0.065-0.25)                        | 0.17%<br>(-0.27-0.68%)               | 0.25%<br>(-0.27-0.83%)              | 0.07<br>(-0.073-0.24)      | 1.3<br>(-2.5)             |
| Kiribati | 1995 | Female | 70 to 74 | 9.3%<br>(5.3-16%)              | 91%<br>(84-95%)          | 0.14<br>(0.062-0.25)                        | 0.12%<br>(-0.34-0.7%)                | 0.18%<br>(-0.35-0.87%)              | 0.058<br>(-0.12-0.28)      | 0.84<br>(-2.3-4.9)        |
| Kiribati | 1995 | Female | 75 to 79 | 9.1%<br>(4.9-16%)              | 91%<br>(84-95%)          | 0.13<br>(0.057-0.25)                        | 0.18%<br>(-0.23-0.65%)               | 0.23%<br>(-0.23-0.76%)              | 0.069<br>(-0.071-0.23)     | 0.87<br>(-1.1-3.1)        |
| Kiribati | 1995 | Female | 80 to 84 | 8.8%<br>(4.7-15%)              | 91%<br>(85-95%)          | 0.12<br>(0.058-0.21)                        | 0.049%<br>(-0.22-0.33%)              | 0.066%<br>(-0.23-0.38%)             | 0.014<br>(-0.049-0.083)    | 0.13<br>(-0.56-0.84)      |
| Kiribati | 1995 | Female | 85 to 89 | 8.9%<br>(4.9-15%)              | 91%<br>(85-95%)          | 0.12<br>(0.056-0.23)                        | -0.021%<br>(-0.26-0.21%)             | -0.02%<br>(-0.3-0.23%)              | -0.0024<br>(-0.034-0.027)  | -0.02<br>(-0.26-0.2)      |
| Kiribati | 1995 | Female | 90 to 94 | 9.7%<br>(5.3-16%)              | 90%<br>(84-95%)          | 0.13<br>(0.059-0.25)                        | 0.014%<br>(-0.19-0.23%)              | 0.016%<br>(-0.21-0.26%)             | 0.0006<br>(-0.008-0.01)    | 0.0031<br>(-0.043-0.052)  |
| Kiribati | 1995 | Female | 95 plus  | 11%<br>(5.5-20%)               | 89%<br>(80-95%)          | 0.15<br>(0.059-0.3)                         | 0.1%<br>(-0.22-0.43%)                | 0.079%<br>(-0.27-0.44%)             | 0.00087<br>(-0.003-0.0049) | 0.0043<br>(-0.0089-0.018) |
| Kiribati | 1995 | Male   | All Ages | 38%<br>(30-48%)                | 62%<br>(52-70%)          | 0.74<br>(0.67-0.81)                         | 2.4%<br>(1.7-3.2%)                   | 2.8%<br>(1.8-3.9%)                  | 13<br>(8-18)               | 610<br>(430-800)          |
| Kiribati | 1995 | Male   | 15 to 19 | 37%<br>(22-55%)                | 63%<br>(45-78%)          | 0.5<br>(0.24-0.84)                          | 2%<br>(0.76-3.9%)                    | 2.3%<br>(0.7-4.8%)                  | 0.23<br>(0.073-0.49)       | 19<br>(7.7-38)            |
| Kiribati | 1995 | Male   | 20 to 24 | 55%<br>(36-72%)                | 45%<br>(28-64%)          | 1.3<br>(0.81-2)                             | 6.6%<br>(3.5-10%)                    | 7.7%<br>(3.8-12%)                   | 0.94<br>(0.46-1.5)         | 67<br>(35-110)            |
| Kiribati | 1995 | Male   | 25 to 29 | 62%<br>(43-78%)                | 38%<br>(22-57%)          | 1.9<br>(1.2-2.6)                            | 8.5%<br>(5.4-12%)                    | 9.9%<br>(6.1-14%)                   | 1.6<br>(1-2.4)             | 110<br>(68-150)           |
| Kiribati | 1995 | Male   | 30 to 34 | 63%<br>(42-79%)                | 37%<br>(21-58%)          | 2<br>(1.3-2.8)                              | 8.2%<br>(5.1-12%)                    | 9.5%<br>(5.7-14%)                   | 1.7<br>(1-2.5)             | 100<br>(63-150)           |
| Kiribati | 1995 | Male   | 35 to 39 | 62%<br>(44-78%)                | 38%<br>(22-56%)          | 1.8<br>(1.1-2.6)                            | 6%<br>(3.2-9.1%)                     | 6.8%<br>(3.5-10%)                   | 1.3<br>(0.72-2.1)          | 74<br>(41-110)            |
| Kiribati | 1995 | Male   | 40 to 44 | 59%<br>(42-76%)                | 41%<br>(24-58%)          | 1.5<br>(0.86-2.4)                           | 5.6%<br>(2.6-8.9%)                   | 6.3%<br>(2.8-10%)                   | 1.3<br>(0.59-2.2)          | 65<br>(30-100)            |
| Kiribati | 1995 | Male   | 45 to 49 | 55%<br>(34-73%)                | 45%<br>(27-66%)          | 1.3<br>(0.71-2.1)                           | 4.7%<br>(2-8.1%)                     | 5.3%<br>(2.2-9.1%)                  | 1.4<br>(0.56-2.4)          | 59<br>(25-100)            |

| Location | Year | Sex    | Age      | Prevalence of current drinkers | Prevalence of abstainers | Population average of standard drinks daily | Percent of total attributable deaths | Percent of total attributable DALYs | Attributable deaths          | Attributable DALYs         |
|----------|------|--------|----------|--------------------------------|--------------------------|---------------------------------------------|--------------------------------------|-------------------------------------|------------------------------|----------------------------|
| Kiribati | 1995 | Male   | 50 to 54 | 52%<br>(33-71%)                | 48%<br>(29-67%)          | 1.1<br>(0.55-1.9)                           | 3.6%<br>(1.1-6.9%)                   | 4%<br>(1.1-7.6%)                    | 1.1<br>(0.31-2.1)            | 41<br>(12-79)              |
| Kiribati | 1995 | Male   | 55 to 59 | 50%<br>(32-70%)                | 50%<br>(30-68%)          | 0.88<br>(0.44-1.5)                          | 2.4%<br>(0.55-5.1%)                  | 2.7%<br>(0.58-5.6%)                 | 0.77<br>(0.16-1.6)           | 25<br>(5.9-53)             |
| Kiribati | 1995 | Male   | 60 to 64 | 48%<br>(29-68%)                | 52%<br>(32-71%)          | 0.74<br>(0.37-1.3)                          | 1.8%<br>(0.16-4.3%)                  | 2%<br>(0.17-4.7%)                   | 0.65<br>(0.054-1.5)          | 18<br>(1.5-42)             |
| Kiribati | 1995 | Male   | 65 to 69 | 47%<br>(28-65%)                | 53%<br>(35-72%)          | 0.68<br>(0.36-1.1)                          | 2.1%<br>(0.4-4.5%)                   | 2.3%<br>(0.45-5%)                   | 0.78<br>(0.15-1.7)           | 18<br>(3.2-37)             |
| Kiribati | 1995 | Male   | 70 to 74 | 44%<br>(27-63%)                | 56%<br>(37-73%)          | 0.6<br>(0.3-1.1)                            | 1.5%<br>(0.093-3.5%)                 | 1.6%<br>(0.12-3.9%)                 | 0.52<br>(0.038-1.3)          | 9.5<br>(0.62-23)           |
| Kiribati | 1995 | Male   | 75 to 79 | 40%<br>(24-59%)                | 60%<br>(41-76%)          | 0.51<br>(0.24-0.91)                         | 1.3%<br>(0.13-3%)                    | 1.4%<br>(0.14-3.4%)                 | 0.33<br>(0.034-0.79)         | 4.7<br>(0.51-11)           |
| Kiribati | 1995 | Male   | 80 to 84 | 37%<br>(21-55%)                | 63%<br>(45-79%)          | 0.45<br>(0.23-0.76)                         | 0.8%<br>(0.077-1.8%)                 | 0.88%<br>(0.075-2%)                 | 0.13<br>(0.011-0.29)         | 1.4<br>(0.13-3)            |
| Kiribati | 1995 | Male   | 85 to 89 | 35%<br>(20-52%)                | 65%<br>(48-80%)          | 0.43<br>(0.2-0.76)                          | 0.55%<br>(-0.047-1.4%)               | 0.6%<br>(-0.071-1.6%)               | 0.04<br>(-0.0048-0.1)        | 0.31<br>(-0.026-0.79)      |
| Kiribati | 1995 | Male   | 90 to 94 | 37%<br>(23-54%)                | 63%<br>(46-77%)          | 0.43<br>(0.2-0.79)                          | 0.33%<br>(-0.13-0.95%)               | 0.33%<br>(-0.19-1%)                 | 0.0068<br>(-0.0039-0.021)    | 0.039<br>(-0.015-0.12)     |
| Kiribati | 1995 | Male   | 95 plus  | 40%<br>(22-60%)                | 60%<br>(40-78%)          | 0.47<br>(0.19-0.89)                         | -0.016%<br>(-0.59-0.64%)             | -0.12%<br>(-0.77-0.59%)             | -0.00066<br>(-0.0043-0.0033) | -0.00034<br>(-0.013-0.014) |
| Kiribati | 2000 | Female | All Ages | 7.3%<br>(5.8-9.3%)             | 93%<br>(91-94%)          | 0.13<br>(0.11-0.17)                         | 0.38%<br>(0.24-0.55%)                | 0.35%<br>(0.11-0.63%)               | 1.3<br>(0.41-2.4)            | 78<br>(47-110)             |
| Kiribati | 2000 | Female | 15 to 19 | 9.5%<br>(5.4-16%)              | 91%<br>(84-95%)          | 0.19<br>(0.097-0.33)                        | 0.91%<br>(0.44-1.7%)                 | 1.2%<br>(0.42-2.5%)                 | 0.071<br>(0.024-0.15)        | 7.1<br>(3.3-13)            |
| Kiribati | 2000 | Female | 20 to 24 | 12%<br>(6.5-20%)               | 88%<br>(80-93%)          | 0.3<br>(0.16-0.51)                          | 1.6%<br>(0.86-2.5%)                  | 1.8%<br>(0.73-3.4%)                 | 0.12<br>(0.047-0.22)         | 11<br>(6.3-19)             |
| Kiribati | 2000 | Female | 25 to 29 | 12%<br>(6.7-19%)               | 88%<br>(81-93%)          | 0.29<br>(0.17-0.45)                         | 1.4%<br>(0.94-2.1%)                  | 1.6%<br>(0.87-2.6%)                 | 0.11<br>(0.063-0.19)         | 10<br>(6.7-16)             |
| Kiribati | 2000 | Female | 30 to 34 | 11%<br>(6-18%)                 | 89%<br>(82-94%)          | 0.26<br>(0.15-0.44)                         | 1.2%<br>(0.79-1.8%)                  | 1.3%<br>(0.72-2.2%)                 | 0.15<br>(0.077-0.25)         | 12<br>(7.5-18)             |
| Kiribati | 2000 | Female | 35 to 39 | 9.1%<br>(4.8-17%)              | 91%<br>(83-95%)          | 0.22<br>(0.11-0.4)                          | 1.1%<br>(0.68-1.8%)                  | 1.3%<br>(0.66-2.3%)                 | 0.17<br>(0.084-0.3)          | 11<br>(6.7-18)             |
| Kiribati | 2000 | Female | 40 to 44 | 8.6%<br>(4.7-15%)              | 91%<br>(85-95%)          | 0.2<br>(0.097-0.35)                         | 1.1%<br>(0.58-1.7%)                  | 1.3%<br>(0.64-2.3%)                 | 0.19<br>(0.092-0.34)         | 10<br>(5.6-18)             |
| Kiribati | 2000 | Female | 45 to 49 | 10%<br>(5.5-17%)               | 90%<br>(83-95%)          | 0.2<br>(0.1-0.36)                           | 0.61%<br>(0.13-1.2%)                 | 0.76%<br>(0.16-1.6%)                | 0.12<br>(0.024-0.24)         | 5.4<br>(1.2-10)            |
| Kiribati | 2000 | Female | 50 to 54 | 10%<br>(6.1-17%)               | 90%<br>(83-94%)          | 0.19<br>(0.095-0.34)                        | 0.39%<br>(-0.18-1.2%)                | 0.53%<br>(-0.16-1.5%)               | 0.1<br>(-0.031-0.28)         | 3.7<br>(-1.6-10)           |
| Kiribati | 2000 | Female | 55 to 59 | 8.9%<br>(5.1-16%)              | 91%<br>(84-95%)          | 0.15<br>(0.071-0.28)                        | 0.28%<br>(-0.18-0.83%)               | 0.39%<br>(-0.14-1.1%)               | 0.081<br>(-0.029-0.23)       | 2.4<br>(-1.6-7.1)          |
| Kiribati | 2000 | Female | 60 to 64 | 8.1%<br>(4.2-14%)              | 92%<br>(86-96%)          | 0.13<br>(0.059-0.24)                        | 0.16%<br>(-0.24-0.64%)               | 0.24%<br>(-0.22-0.81%)              | 0.062<br>(-0.058-0.21)       | 1.4<br>(-2-5.4)            |
| Kiribati | 2000 | Female | 65 to 69 | 8.9%<br>(4.8-15%)              | 91%<br>(85-95%)          | 0.13<br>(0.064-0.24)                        | 0.12%<br>(-0.3-0.58%)                | 0.19%<br>(-0.29-0.74%)              | 0.055<br>(-0.084-0.21)       | 0.92<br>(-2.4-4.5)         |

| Location | Year | Sex    | Age      | Prevalence of current drinkers | Prevalence of abstainers | Population average of standard drinks daily | Percent of total attributable deaths | Percent of total attributable DALYs | Attributable deaths         | Attributable DALYs         |
|----------|------|--------|----------|--------------------------------|--------------------------|---------------------------------------------|--------------------------------------|-------------------------------------|-----------------------------|----------------------------|
| Kiribati | 2000 | Female | 70 to 74 | 9.4%<br>(5.4-16%)              | 91%<br>(84-95%)          | 0.14<br>(0.062-0.25)                        | 0.046%<br>(-0.39-0.54%)              | 0.094%<br>(-0.41-0.69%)             | 0.032<br>(-0.14-0.24)       | 0.34<br>(-2.9-4.1)         |
| Kiribati | 2000 | Female | 75 to 79 | 9.3%<br>(5.3-16%)              | 91%<br>(84-95%)          | 0.13<br>(0.058-0.24)                        | 0.12%<br>(-0.27-0.54%)               | 0.17%<br>(-0.27-0.65%)              | 0.052<br>(-0.084-0.21)      | 0.61<br>(-1.4-2.8)         |
| Kiribati | 2000 | Female | 80 to 84 | 9.2%<br>(4.9-16%)              | 91%<br>(84-95%)          | 0.13<br>(0.061-0.22)                        | 0.019%<br>(-0.26-0.3%)               | 0.034%<br>(-0.28-0.35%)             | 0.0077<br>(-0.062-0.08)     | 0.052<br>(-0.71-0.82)      |
| Kiribati | 2000 | Female | 85 to 89 | 9.4%<br>(5-15%)                | 91%<br>(85-95%)          | 0.13<br>(0.06-0.24)                         | -0.046%<br>(-0.32-0.21%)             | -0.047%<br>(-0.35-0.24%)            | -0.0059<br>(-0.045-0.03)    | -0.049<br>(-0.35-0.22)     |
| Kiribati | 2000 | Female | 90 to 94 | 10%<br>(5.7-17%)               | 90%<br>(83-94%)          | 0.14<br>(0.063-0.26)                        | -0.0019%<br>(-0.22-0.22%)            | -0.00095%<br>(-0.24-0.25%)          | -0.000044<br>(-0.01-0.011)  | -0.00052<br>(-0.056-0.057) |
| Kiribati | 2000 | Female | 95 plus  | 12%<br>(5.7-21%)               | 88%<br>(79-94%)          | 0.16<br>(0.063-0.31)                        | 0.084%<br>(-0.26-0.45%)              | 0.062%<br>(-0.33-0.46%)             | 0.00065<br>(-0.0035-0.0049) | 0.0035<br>(-0.011-0.018)   |
| Kiribati | 2000 | Male   | All Ages | 40%<br>(32-48%)                | 60%<br>(52-68%)          | 0.76<br>(0.69-0.83)                         | 2.9%<br>(1.7-3.4%)                   | 2.9%<br>(1.7-4%)                    | 13<br>(7.9-19)              | 640<br>(440-850)           |
| Kiribati | 2000 | Male   | 15 to 19 | 38%<br>(22-56%)                | 62%<br>(44-78%)          | 0.51<br>(0.25-0.84)                         | 2.1%<br>(0.79-4%)                    | 2.5%<br>(0.75-5.1%)                 | 0.28<br>(0.085-0.57)        | 23<br>(9-44)               |
| Kiribati | 2000 | Male   | 20 to 24 | 56%<br>(38-74%)                | 44%<br>(26-62%)          | 1.4<br>(0.86-2)                             | 6.9%<br>(3.6-11%)                    | 8.1%<br>(4-13%)                     | 1.1<br>(0.54-1.8)           | 79<br>(41-120)             |
| Kiribati | 2000 | Male   | 25 to 29 | 65%<br>(50-79%)                | 35%<br>(21-50%)          | 2<br>(1.4-2.7)                              | 8.9%<br>(5.5-13%)                    | 10%<br>(6.3-15%)                    | 1.3<br>(0.81-2)             | 88<br>(54-130)             |
| Kiribati | 2000 | Male   | 30 to 34 | 66%<br>(49-80%)                | 34%<br>(20-51%)          | 2.1<br>(1.4-2.8)                            | 8.1%<br>(4.9-12%)                    | 9.4%<br>(5.4-14%)                   | 1.9<br>(1.1-2.7)            | 110<br>(67-160)            |
| Kiribati | 2000 | Male   | 35 to 39 | 62%<br>(47-77%)                | 38%<br>(23-53%)          | 1.7<br>(1.1-2.5)                            | 5.7%<br>(3.2-8.6%)                   | 6.4%<br>(3.5-9.9%)                  | 1.5<br>(0.8-2.4)            | 82<br>(46-130)             |
| Kiribati | 2000 | Male   | 40 to 44 | 59%<br>(43-74%)                | 41%<br>(26-57%)          | 1.5<br>(0.89-2.2)                           | 5.1%<br>(2.2-8.3%)                   | 5.7%<br>(2.4-9.3%)                  | 1.5<br>(0.63-2.6)           | 74<br>(33-120)             |
| Kiribati | 2000 | Male   | 45 to 49 | 57%<br>(38-72%)                | 43%<br>(28-62%)          | 1.4<br>(0.81-2.1)                           | 4.4%<br>(1.7-7.7%)                   | 4.9%<br>(1.9-8.7%)                  | 1.4<br>(0.54-2.5)           | 63<br>(24-110)             |
| Kiribati | 2000 | Male   | 50 to 54 | 55%<br>(36-70%)                | 45%<br>(30-64%)          | 1.1<br>(0.63-1.9)                           | 3.4%<br>(0.86-6.6%)                  | 3.7%<br>(0.84-7.4%)                 | 1.3<br>(0.31-2.5)           | 48<br>(13-95)              |
| Kiribati | 2000 | Male   | 55 to 59 | 51%<br>(34-67%)                | 49%<br>(33-66%)          | 0.88<br>(0.47-1.4)                          | 2.2%<br>(0.3-4.7%)                   | 2.4%<br>(0.27-5.2%)                 | 0.76<br>(0.088-1.7)         | 25<br>(3.4-57)             |
| Kiribati | 2000 | Male   | 60 to 64 | 48%<br>(30-66%)                | 52%<br>(34-70%)          | 0.73<br>(0.38-1.3)                          | 1.6%<br>(0.0088-4%)                  | 1.8%<br>(-0.0011-4.4%)              | 0.61<br>(-0.00037-1.5)      | 17<br>(0.091-42)           |
| Kiribati | 2000 | Male   | 65 to 69 | 47%<br>(29-65%)                | 53%<br>(35-71%)          | 0.69<br>(0.37-1.2)                          | 1.8%<br>(0.24-4.2%)                  | 2%<br>(0.27-4.6%)                   | 0.66<br>(0.088-1.5)         | 15<br>(1.9-34)             |
| Kiribati | 2000 | Male   | 70 to 74 | 44%<br>(27-62%)                | 56%<br>(38-73%)          | 0.6<br>(0.31-1.1)                           | 1.3%<br>(0.0028-3.3%)                | 1.4%<br>(0.016-3.6%)                | 0.44<br>(0.0049-1.1)        | 8.1<br>(0.017-21)          |
| Kiribati | 2000 | Male   | 75 to 79 | 41%<br>(24-59%)                | 59%<br>(41-76%)          | 0.52<br>(0.25-0.91)                         | 1.1%<br>(0.077-2.9%)                 | 1.3%<br>(0.083-3.2%)                | 0.29<br>(0.019-0.73)        | 4.1<br>(0.28-10)           |
| Kiribati | 2000 | Male   | 80 to 84 | 38%<br>(21-57%)                | 62%<br>(43-79%)          | 0.46<br>(0.24-0.78)                         | 0.75%<br>(0.022-1.8%)                | 0.83%<br>(0.02-2%)                  | 0.12<br>(0.0029-0.29)       | 1.3<br>(0.037-3.1)         |
| Kiribati | 2000 | Male   | 85 to 89 | 37%<br>(22-54%)                | 63%<br>(46-78%)          | 0.44<br>(0.21-0.77)                         | 0.48%<br>(-0.13-1.4%)                | 0.52%<br>(-0.16-1.6%)               | 0.036<br>(-0.011-0.11)      | 0.28<br>(-0.074-0.84)      |

| Location | Year | Sex    | Age      | Prevalence of current drinkers | Prevalence of abstainers | Population average of standard drinks daily | Percent of total attributable deaths | Percent of total attributable DALYs | Attributable deaths          | Attributable DALYs        |
|----------|------|--------|----------|--------------------------------|--------------------------|---------------------------------------------|--------------------------------------|-------------------------------------|------------------------------|---------------------------|
| Kiribati | 2000 | Male   | 90 to 94 | 38%<br>(23-55%)                | 62%<br>(45-77%)          | 0.45<br>(0.21-0.81)                         | 0.28%<br>(-0.2-0.98%)                | 0.27%<br>(-0.28-1.1%)               | 0.0058<br>(-0.0059-0.023)    | 0.035<br>(-0.026-0.12)    |
| Kiribati | 2000 | Male   | 95 plus  | 41%<br>(23-62%)                | 59%<br>(38-77%)          | 0.49<br>(0.2-0.91)                          | -0.059%<br>(-0.69-0.64%)             | -0.17%<br>(-0.89-0.6%)              | -0.00092<br>(-0.0047-0.0032) | -0.0012<br>(-0.014-0.013) |
| Kiribati | 2005 | Female | All Ages | 7.5%<br>(6-9.7%)               | 92%<br>(90-94%)          | 0.14<br>(0.12-0.18)                         | 0.38%<br>(0.23-0.55%)                | 0.34%<br>(0.086-0.6%)               | 1.3<br>(0.35-2.4)            | 82<br>(49-120)            |
| Kiribati | 2005 | Female | 15 to 19 | 9.5%<br>(5.4-16%)              | 90%<br>(84-95%)          | 0.19<br>(0.099-0.33)                        | 0.89%<br>(0.45-1.6%)                 | 1.2%<br>(0.42-2.4%)                 | 0.079<br>(0.028-0.17)        | 8<br>(3.9-15)             |
| Kiribati | 2005 | Female | 20 to 24 | 12%<br>(6.7-20%)               | 88%<br>(80-93%)          | 0.31<br>(0.16-0.52)                         | 1.5%<br>(0.87-2.5%)                  | 1.8%<br>(0.75-3.3%)                 | 0.14<br>(0.057-0.26)         | 14<br>(7.6-23)            |
| Kiribati | 2005 | Female | 25 to 29 | 12%<br>(6.9-20%)               | 88%<br>(80-93%)          | 0.29<br>(0.17-0.46)                         | 1.4%<br>(0.91-2%)                    | 1.5%<br>(0.83-2.5%)                 | 0.12<br>(0.066-0.21)         | 12<br>(7.3-17)            |
| Kiribati | 2005 | Female | 30 to 34 | 11%<br>(6.1-18%)               | 89%<br>(82-94%)          | 0.26<br>(0.15-0.45)                         | 1.2%<br>(0.77-1.8%)                  | 1.3%<br>(0.71-2.2%)                 | 0.12<br>(0.061-0.2)          | 9.7<br>(6-15)             |
| Kiribati | 2005 | Female | 35 to 39 | 9.2%<br>(5-17%)                | 91%<br>(83-95%)          | 0.23<br>(0.12-0.41)                         | 1.1%<br>(0.69-1.7%)                  | 1.3%<br>(0.69-2.3%)                 | 0.18<br>(0.092-0.32)         | 12<br>(7.6-20)            |
| Kiribati | 2005 | Female | 40 to 44 | 8.7%<br>(4.8-15%)              | 91%<br>(85-95%)          | 0.2<br>(0.098-0.36)                         | 1%<br>(0.58-1.7%)                    | 1.3%<br>(0.62-2.2%)                 | 0.19<br>(0.097-0.34)         | 11<br>(5.9-18)            |
| Kiribati | 2005 | Female | 45 to 49 | 10%<br>(5.6-16%)               | 90%<br>(84-94%)          | 0.21<br>(0.1-0.35)                          | 0.57%<br>(0.12-1.1%)                 | 0.73%<br>(0.12-1.5%)                | 0.13<br>(0.02-0.29)          | 6.3<br>(1.2-13)           |
| Kiribati | 2005 | Female | 50 to 54 | 11%<br>(6.3-17%)               | 89%<br>(83-94%)          | 0.19<br>(0.096-0.33)                        | 0.33%<br>(-0.23-0.99%)               | 0.47%<br>(-0.2-1.3%)                | 0.098<br>(-0.042-0.27)       | 3.4<br>(-2.4-10)          |
| Kiribati | 2005 | Female | 55 to 59 | 9.1%<br>(4.9-16%)              | 91%<br>(84-95%)          | 0.15<br>(0.073-0.29)                        | 0.24%<br>(-0.24-0.76%)               | 0.36%<br>(-0.2-1%)                  | 0.086<br>(-0.046-0.24)       | 2.4<br>(-2.3-7.4)         |
| Kiribati | 2005 | Female | 60 to 64 | 8.2%<br>(4.2-15%)              | 92%<br>(85-96%)          | 0.13<br>(0.061-0.25)                        | 0.14%<br>(-0.28-0.59%)               | 0.22%<br>(-0.27-0.76%)              | 0.055<br>(-0.07-0.19)        | 1.2<br>(-2.4-5)           |
| Kiribati | 2005 | Female | 65 to 69 | 9%<br>(4.8-16%)                | 91%<br>(84-95%)          | 0.14<br>(0.066-0.25)                        | 0.096%<br>(-0.35-0.56%)              | 0.17%<br>(-0.35-0.69%)              | 0.051<br>(-0.1-0.21)         | 0.81<br>(-3-4.6)          |
| Kiribati | 2005 | Female | 70 to 74 | 9.6%<br>(5.4-16%)              | 90%<br>(84-95%)          | 0.14<br>(0.065-0.27)                        | 0.021%<br>(-0.44-0.48%)              | 0.067%<br>(-0.46-0.63%)             | 0.029<br>(-0.2-0.27)         | 0.2<br>(-4.1-4.6)         |
| Kiribati | 2005 | Female | 75 to 79 | 9.4%<br>(5.2-16%)              | 91%<br>(84-95%)          | 0.13<br>(0.06-0.25)                         | 0.1%<br>(-0.3-0.53%)                 | 0.15%<br>(-0.29-0.65%)              | 0.049<br>(-0.094-0.22)       | 0.55<br>(-1.6-2.9)        |
| Kiribati | 2005 | Female | 80 to 84 | 9.2%<br>(4.8-16%)              | 91%<br>(84-95%)          | 0.13<br>(0.062-0.23)                        | 0.0058%<br>(-0.3-0.29%)              | 0.019%<br>(-0.32-0.35%)             | 0.0045<br>(-0.077-0.082)     | 0.016<br>(-0.88-0.82)     |
| Kiribati | 2005 | Female | 85 to 89 | 9.4%<br>(5.1-15%)              | 91%<br>(85-95%)          | 0.13<br>(0.061-0.24)                        | -0.059%<br>(-0.36-0.21%)             | -0.063%<br>(-0.39-0.23%)            | -0.0088<br>(-0.056-0.031)    | -0.07<br>(-0.43-0.24)     |
| Kiribati | 2005 | Female | 90 to 94 | 10%<br>(5.7-17%)               | 90%<br>(83-94%)          | 0.14<br>(0.066-0.26)                        | -0.012%<br>(-0.24-0.23%)             | -0.014%<br>(-0.27-0.24%)            | -0.00072<br>(-0.013-0.012)   | -0.0037<br>(-0.071-0.067) |
| Kiribati | 2005 | Female | 95 plus  | 12%<br>(5.8-21%)               | 88%<br>(79-94%)          | 0.16<br>(0.066-0.32)                        | 0.072%<br>(-0.29-0.43%)              | 0.043%<br>(-0.38-0.46%)             | 0.00054<br>(-0.0048-0.0058)  | 0.0035<br>(-0.014-0.021)  |
| Kiribati | 2005 | Male   | All Ages | 41%<br>(33-50%)                | 59%<br>(50-67%)          | 0.79<br>(0.72-0.86)                         | 2.6%<br>(1.7-3.5%)                   | 2.8%<br>(1.7-4%)                    | 14<br>(8.3-20)               | 690<br>(470-940)          |
| Kiribati | 2005 | Male   | 15 to 19 | 38%<br>(22-56%)                | 62%<br>(44-78%)          | 0.51<br>(0.26-0.84)                         | 2.1%<br>(0.83-4%)                    | 2.5%<br>(0.83-5.1%)                 | 0.33<br>(0.11-0.7)           | 28<br>(11-53)             |

| Location | Year | Sex    | Age      | Prevalence of current drinkers | Prevalence of abstainers | Population average of standard drinks daily | Percent of total attributable deaths | Percent of total attributable DALYs | Attributable deaths         | Attributable DALYs        |
|----------|------|--------|----------|--------------------------------|--------------------------|---------------------------------------------|--------------------------------------|-------------------------------------|-----------------------------|---------------------------|
| Kiribati | 2005 | Male   | 20 to 24 | 58%<br>(39-74%)                | 42%<br>(26-61%)          | 1.4<br>(0.89-2)                             | 6.8%<br>(3.7-10%)                    | 8.1%<br>(4-13%)                     | 1.3<br>(0.64-2.1)           | 96<br>(50-150)            |
| Kiribati | 2005 | Male   | 25 to 29 | 66%<br>(50-80%)                | 34%<br>(20-50%)          | 2<br>(1.4-2.7)                              | 8.7%<br>(5.5-12%)                    | 10%<br>(6.2-15%)                    | 1.6<br>(0.97-2.3)           | 110<br>(65-150)           |
| Kiribati | 2005 | Male   | 30 to 34 | 66%<br>(50-80%)                | 34%<br>(20-50%)          | 2.1<br>(1.4-3)                              | 7.9%<br>(4.9-12%)                    | 9.2%<br>(5.5-14%)                   | 1.5<br>(0.86-2.2)           | 90<br>(54-130)            |
| Kiribati | 2005 | Male   | 35 to 39 | 62%<br>(46-77%)                | 38%<br>(23-54%)          | 1.7<br>(1.1-2.5)                            | 5.7%<br>(3.1-8.6%)                   | 6.4%<br>(3.3-9.9%)                  | 1.6<br>(0.85-2.6)           | 91<br>(51-140)            |
| Kiribati | 2005 | Male   | 40 to 44 | 59%<br>(44-75%)                | 41%<br>(25-56%)          | 1.5<br>(0.9-2.2)                            | 5%<br>(2.2-8.3%)                     | 5.6%<br>(2.3-9.3%)                  | 1.7<br>(0.68-2.9)           | 84<br>(35-140)            |
| Kiribati | 2005 | Male   | 45 to 49 | 57%<br>(39-73%)                | 43%<br>(27-61%)          | 1.4<br>(0.8-2.1)                            | 4.2%<br>(1.5-7.6%)                   | 4.7%<br>(1.6-8.5%)                  | 1.6<br>(0.56-2.9)           | 71<br>(25-120)            |
| Kiribati | 2005 | Male   | 50 to 54 | 55%<br>(37-71%)                | 45%<br>(29-63%)          | 1.1<br>(0.63-1.9)                           | 3.2%<br>(0.65-6.3%)                  | 3.5%<br>(0.76-7%)                   | 1.2<br>(0.26-2.5)           | 47<br>(11-96)             |
| Kiribati | 2005 | Male   | 55 to 59 | 51%<br>(34-68%)                | 49%<br>(32-66%)          | 0.89<br>(0.49-1.5)                          | 2%<br>(0.21-4.6%)                    | 2.2%<br>(0.2-5.1%)                  | 0.82<br>(0.074-1.9)         | 28<br>(3-61)              |
| Kiribati | 2005 | Male   | 60 to 64 | 48%<br>(30-67%)                | 52%<br>(33-70%)          | 0.73<br>(0.38-1.3)                          | 1.5%<br>(0.016-3.9%)                 | 1.7%<br>(0.014-4.3%)                | 0.61<br>(0.0056-1.6)        | 17<br>(0.18-43)           |
| Kiribati | 2005 | Male   | 65 to 69 | 47%<br>(28-66%)                | 53%<br>(34-72%)          | 0.69<br>(0.37-1.1)                          | 1.7%<br>(0.079-3.9%)                 | 1.9%<br>(0.094-4.3%)                | 0.63<br>(0.032-1.4)         | 14<br>(0.68-33)           |
| Kiribati | 2005 | Male   | 70 to 74 | 45%<br>(27-62%)                | 55%<br>(38-73%)          | 0.61<br>(0.3-1.1)                           | 1.2%<br>(-0.066-3%)                  | 1.3%<br>(-0.1-3.4%)                 | 0.52<br>(-0.039-1.3)        | 9.5<br>(-0.54-25)         |
| Kiribati | 2005 | Male   | 75 to 79 | 41%<br>(25-60%)                | 59%<br>(40-75%)          | 0.52<br>(0.25-0.94)                         | 1.1%<br>(0.024-2.7%)                 | 1.2%<br>(0.047-2.9%)                | 0.29<br>(0.012-0.72)        | 4.2<br>(0.091-10)         |
| Kiribati | 2005 | Male   | 80 to 84 | 38%<br>(21-56%)                | 62%<br>(44-79%)          | 0.46<br>(0.24-0.77)                         | 0.72%<br>(0.019-1.8%)                | 0.78%<br>(0.011-1.9%)               | 0.12<br>(0.0017-0.29)       | 1.3<br>(0.034-3.1)        |
| Kiribati | 2005 | Male   | 85 to 89 | 36%<br>(21-54%)                | 64%<br>(46-79%)          | 0.44<br>(0.21-0.76)                         | 0.44%<br>(-0.2-1.4%)                 | 0.47%<br>(-0.24-1.5%)               | 0.034<br>(-0.018-0.11)      | 0.27<br>(-0.12-0.84)      |
| Kiribati | 2005 | Male   | 90 to 94 | 37%<br>(23-54%)                | 63%<br>(46-77%)          | 0.44<br>(0.21-0.8)                          | 0.24%<br>(-0.26-0.94%)               | 0.23%<br>(-0.36-1%)                 | 0.0054<br>(-0.0084-0.024)   | 0.034<br>(-0.036-0.13)    |
| Kiribati | 2005 | Male   | 95 plus  | 41%<br>(22-61%)                | 59%<br>(39-78%)          | 0.48<br>(0.2-0.93)                          | -0.083%<br>(-0.71-0.65%)             | -0.2%<br>(-0.91-0.6%)               | -0.0012<br>(-0.0054-0.0034) | -0.0019<br>(-0.016-0.015) |
| Kiribati | 2010 | Female | All Ages | 7.8%<br>(6.1-9.9%)             | 92%<br>(90-94%)          | 0.15<br>(0.12-0.19)                         | 0.41%<br>(0.24-0.61%)                | 0.36%<br>(0.11-0.65%)               | 1.5<br>(0.45-2.7)           | 92<br>(54-130)            |
| Kiribati | 2010 | Female | 15 to 19 | 9.6%<br>(5.5-16%)              | 90%<br>(84-94%)          | 0.19<br>(0.098-0.33)                        | 0.88%<br>(0.46-1.6%)                 | 1.2%<br>(0.43-2.3%)                 | 0.075<br>(0.028-0.16)       | 7.8<br>(4-14)             |
| Kiribati | 2010 | Female | 20 to 24 | 12%<br>(6.8-20%)               | 88%<br>(80-93%)          | 0.31<br>(0.17-0.51)                         | 1.5%<br>(0.91-2.4%)                  | 1.7%<br>(0.78-3.2%)                 | 0.15<br>(0.064-0.28)        | 16<br>(9-25)              |
| Kiribati | 2010 | Female | 25 to 29 | 12%<br>(6.9-20%)               | 88%<br>(80-93%)          | 0.29<br>(0.17-0.45)                         | 1.4%<br>(0.92-2%)                    | 1.5%<br>(0.83-2.5%)                 | 0.14<br>(0.074-0.24)        | 14<br>(8.5-21)            |
| Kiribati | 2010 | Female | 30 to 34 | 11%<br>(6-18%)                 | 89%<br>(82-94%)          | 0.26<br>(0.15-0.44)                         | 1.2%<br>(0.77-1.8%)                  | 1.3%<br>(0.72-2.1%)                 | 0.13<br>(0.069-0.23)        | 11<br>(7-17)              |
| Kiribati | 2010 | Female | 35 to 39 | 9.2%<br>(4.8-17%)              | 91%<br>(83-95%)          | 0.23<br>(0.11-0.43)                         | 1.1%<br>(0.7-1.8%)                   | 1.3%<br>(0.7-2.3%)                  | 0.16<br>(0.08-0.29)         | 11<br>(6.6-18)            |

| Location | Year | Sex    | Age      | Prevalence of current drinkers | Prevalence of abstainers | Population average of standard drinks daily | Percent of total attributable deaths | Percent of total attributable DALYs | Attributable deaths         | Attributable DALYs       |
|----------|------|--------|----------|--------------------------------|--------------------------|---------------------------------------------|--------------------------------------|-------------------------------------|-----------------------------|--------------------------|
| Kiribati | 2010 | Female | 40 to 44 | 8.7%<br>(4.8-16%)              | 91%<br>(84-95%)          | 0.21<br>(0.099-0.38)                        | 1%<br>(0.58-1.7%)                    | 1.3%<br>(0.66-2.2%)                 | 0.23<br>(0.11-0.4)          | 13<br>(7-21)             |
| Kiribati | 2010 | Female | 45 to 49 | 10%<br>(5.4-17%)               | 90%<br>(83-95%)          | 0.21<br>(0.11-0.36)                         | 0.6%<br>(0.14-1.2%)                  | 0.76%<br>(0.14-1.5%)                | 0.17<br>(0.032-0.33)        | 7.8<br>(1.8-15)          |
| Kiribati | 2010 | Female | 50 to 54 | 11%<br>(6.2-18%)               | 89%<br>(82-94%)          | 0.2<br>(0.096-0.35)                         | 0.35%<br>(-0.2-0.94%)                | 0.48%<br>(-0.21-1.3%)               | 0.12<br>(-0.057-0.33)       | 4.4<br>(-2.6-12)         |
| Kiribati | 2010 | Female | 55 to 59 | 9.2%<br>(5-16%)                | 91%<br>(84-95%)          | 0.16<br>(0.075-0.3)                         | 0.27%<br>(-0.25-0.77%)               | 0.38%<br>(-0.21-1%)                 | 0.11<br>(-0.06-0.29)        | 3.1<br>(-2.8-9.2)        |
| Kiribati | 2010 | Female | 60 to 64 | 8.3%<br>(4.4-15%)              | 92%<br>(85-96%)          | 0.13<br>(0.062-0.26)                        | 0.15%<br>(-0.23-0.62%)               | 0.23%<br>(-0.21-0.79%)              | 0.065<br>(-0.061-0.22)      | 1.5<br>(-2.2-5.9)        |
| Kiribati | 2010 | Female | 65 to 69 | 9%<br>(5-15%)                  | 91%<br>(85-95%)          | 0.14<br>(0.067-0.24)                        | 0.11%<br>(-0.33-0.56%)               | 0.19%<br>(-0.32-0.73%)              | 0.066<br>(-0.11-0.25)       | 1.1<br>(-3.3-5.4)        |
| Kiribati | 2010 | Female | 70 to 74 | 9.5%<br>(5.5-16%)              | 90%<br>(84-94%)          | 0.14<br>(0.065-0.27)                        | 0.022%<br>(-0.44-0.49%)              | 0.069%<br>(-0.45-0.6%)              | 0.029<br>(-0.19-0.27)       | 0.21<br>(-4-4.5)         |
| Kiribati | 2010 | Female | 75 to 79 | 9.3%<br>(5.1-16%)              | 91%<br>(84-95%)          | 0.13<br>(0.059-0.26)                        | 0.11%<br>(-0.29-0.52%)               | 0.16%<br>(-0.29-0.63%)              | 0.06<br>(-0.11-0.24)        | 0.69<br>(-1.8-3.2)       |
| Kiribati | 2010 | Female | 80 to 84 | 9.2%<br>(4.9-16%)              | 91%<br>(84-95%)          | 0.13<br>(0.061-0.23)                        | 0.011%<br>(-0.29-0.3%)               | 0.024%<br>(-0.31-0.36%)             | 0.0068<br>(-0.086-0.097)    | 0.037<br>(-0.99-1)       |
| Kiribati | 2010 | Female | 85 to 89 | 9.5%<br>(5.1-15%)              | 91%<br>(85-95%)          | 0.13<br>(0.062-0.23)                        | -0.053%<br>(-0.37-0.18%)             | -0.057%<br>(-0.41-0.21%)            | -0.0086<br>(-0.063-0.03)    | -0.069<br>(-0.48-0.22)   |
| Kiribati | 2010 | Female | 90 to 94 | 10%<br>(5.7-17%)               | 90%<br>(83-94%)          | 0.14<br>(0.065-0.27)                        | -0.0089%<br>(-0.24-0.23%)            | -0.012%<br>(-0.27-0.25%)            | -0.00066<br>(-0.015-0.014)  | -0.003<br>(-0.08-0.078)  |
| Kiribati | 2010 | Female | 95 plus  | 12%<br>(5.8-20%)               | 88%<br>(80-94%)          | 0.16<br>(0.068-0.31)                        | 0.081%<br>(-0.29-0.44%)              | 0.049%<br>(-0.37-0.45%)             | 0.00071<br>(-0.0053-0.0065) | 0.0045<br>(-0.016-0.024) |
| Kiribati | 2010 | Male   | All Ages | 42%<br>(35-51%)                | 58%<br>(49-65%)          | 0.84<br>(0.75-0.94)                         | 2.7%<br>(1.8-3.7%)                   | 2.9%<br>(1.7-4.1%)                  | 15<br>(8.8-23)              | 760<br>(500-1000)        |
| Kiribati | 2010 | Male   | 15 to 19 | 38%<br>(22-56%)                | 62%<br>(44-78%)          | 0.51<br>(0.26-0.84)                         | 2.1%<br>(0.8-3.9%)                   | 2.5%<br>(0.71-5.1%)                 | 0.33<br>(0.094-0.67)        | 28<br>(10-52)            |
| Kiribati | 2010 | Male   | 20 to 24 | 57%<br>(39-74%)                | 43%<br>(26-61%)          | 1.4<br>(0.88-2)                             | 6.7%<br>(3.6-11%)                    | 8%<br>(3.9-13%)                     | 1.6<br>(0.76-2.5)           | 110<br>(60-180)          |
| Kiribati | 2010 | Male   | 25 to 29 | 66%<br>(51-79%)                | 34%<br>(21-49%)          | 2<br>(1.4-2.7)                              | 8.6%<br>(5.2-12%)                    | 10%<br>(5.9-15%)                    | 1.9<br>(1.1-2.8)            | 130<br>(78-180)          |
| Kiribati | 2010 | Male   | 30 to 34 | 66%<br>(49-81%)                | 34%<br>(19-51%)          | 2.1<br>(1.4-2.9)                            | 7.7%<br>(4.8-11%)                    | 8.9%<br>(5.3-13%)                   | 1.7<br>(1-2.6)              | 110<br>(65-160)          |
| Kiribati | 2010 | Male   | 35 to 39 | 62%<br>(46-78%)                | 38%<br>(22-54%)          | 1.7<br>(1.1-2.5)                            | 5.6%<br>(3-8.6%)                     | 6.3%<br>(3.3-9.9%)                  | 1.4<br>(0.71-2.3)           | 78<br>(41-120)           |
| Kiribati | 2010 | Male   | 40 to 44 | 60%<br>(43-75%)                | 40%<br>(25-57%)          | 1.5<br>(0.9-2.3)                            | 4.9%<br>(2-8.1%)                     | 5.5%<br>(2.1-9.1%)                  | 1.9<br>(0.68-3.2)           | 92<br>(36-160)           |
| Kiribati | 2010 | Male   | 45 to 49 | 58%<br>(39-73%)                | 42%<br>(27-61%)          | 1.4<br>(0.83-2.2)                           | 4.1%<br>(1.4-7.5%)                   | 4.6%<br>(1.5-8.3%)                  | 1.9<br>(0.62-3.6)           | 84<br>(29-150)           |
| Kiribati | 2010 | Male   | 50 to 54 | 55%<br>(37-71%)                | 45%<br>(29-63%)          | 1.1<br>(0.64-1.9)                           | 3.1%<br>(0.55-6%)                    | 3.4%<br>(0.51-6.8%)                 | 1.4<br>(0.22-2.9)           | 54<br>(11-110)           |
| Kiribati | 2010 | Male   | 55 to 59 | 51%<br>(34-68%)                | 49%<br>(32-66%)          | 0.89<br>(0.5-1.4)                           | 2%<br>(0.24-4.3%)                    | 2.1%<br>(0.2-4.8%)                  | 0.93<br>(0.085-2)           | 31<br>(3.6-68)           |

| Location | Year | Sex    | Age      | Prevalence of current drinkers | Prevalence of abstainers | Population average of standard drinks daily | Percent of total attributable deaths | Percent of total attributable DALYs | Attributable deaths         | Attributable DALYs        |
|----------|------|--------|----------|--------------------------------|--------------------------|---------------------------------------------|--------------------------------------|-------------------------------------|-----------------------------|---------------------------|
| Kiribati | 2010 | Male   | 60 to 64 | 48%<br>(30-66%)                | 52%<br>(34-70%)          | 0.74<br>(0.4-1.3)                           | 1.5%<br>(0.0019-3.8%)                | 1.6%<br>(-0.013-4.1%)               | 0.65<br>(-0.0055-1.7)       | 18<br>(0.022-48)          |
| Kiribati | 2010 | Male   | 65 to 69 | 47%<br>(28-66%)                | 53%<br>(34-72%)          | 0.69<br>(0.37-1.2)                          | 1.6%<br>(0.13-3.7%)                  | 1.8%<br>(0.17-4.1%)                 | 0.7<br>(0.067-1.7)          | 16<br>(1.3-37)            |
| Kiribati | 2010 | Male   | 70 to 74 | 45%<br>(28-63%)                | 55%<br>(37-72%)          | 0.61<br>(0.3-1.1)                           | 1.2%<br>(-0.058-3%)                  | 1.3%<br>(-0.066-3.4%)               | 0.48<br>(-0.026-1.3)        | 8.8<br>(-0.45-23)         |
| Kiribati | 2010 | Male   | 75 to 79 | 41%<br>(25-60%)                | 59%<br>(40-75%)          | 0.52<br>(0.26-0.94)                         | 1.1%<br>(0.016-2.6%)                 | 1.2%<br>(0.024-2.9%)                | 0.32<br>(0.0065-0.79)       | 4.5<br>(0.067-11)         |
| Kiribati | 2010 | Male   | 80 to 84 | 38%<br>(22-57%)                | 62%<br>(43-78%)          | 0.46<br>(0.24-0.77)                         | 0.71%<br>(-0.01-1.7%)                | 0.78%<br>(-0.024-1.8%)              | 0.14<br>(-0.0041-0.32)      | 1.4<br>(-0.021-3.4)       |
| Kiribati | 2010 | Male   | 85 to 89 | 37%<br>(22-53%)                | 63%<br>(47-78%)          | 0.44<br>(0.21-0.76)                         | 0.43%<br>(-0.21-1.3%)                | 0.45%<br>(-0.26-1.4%)               | 0.033<br>(-0.019-0.1)       | 0.26<br>(-0.13-0.8)       |
| Kiribati | 2010 | Male   | 90 to 94 | 37%<br>(23-55%)                | 63%<br>(45-77%)          | 0.44<br>(0.21-0.79)                         | 0.23%<br>(-0.26-0.89%)               | 0.21%<br>(-0.35-0.94%)              | 0.005<br>(-0.0085-0.023)    | 0.032<br>(-0.038-0.13)    |
| Kiribati | 2010 | Male   | 95 plus  | 41%<br>(22-61%)                | 59%<br>(39-78%)          | 0.47<br>(0.2-0.91)                          | -0.091%<br>(-0.71-0.62%)             | -0.21%<br>(-0.91-0.54%)             | -0.0013<br>(-0.0057-0.0033) | -0.0022<br>(-0.017-0.015) |
| Kiribati | 2016 | Female | All Ages | 8.4%<br>(6.6-11%)              | 92%<br>(89-93%)          | 0.17<br>(0.12-0.23)                         | 0.47%<br>(0.23-0.77%)                | 0.39%<br>(0.076-0.82%)              | 1.8<br>(0.35-3.9)           | 110<br>(52-170)           |
| Kiribati | 2016 | Female | 15 to 19 | 9.5%<br>(5.4-16%)              | 91%<br>(84-95%)          | 0.19<br>(0.093-0.36)                        | 0.88%<br>(0.44-1.6%)                 | 1.2%<br>(0.4-2.5%)                  | 0.074<br>(0.025-0.16)       | 8<br>(3.9-15)             |
| Kiribati | 2016 | Female | 20 to 24 | 12%<br>(6.7-20%)               | 88%<br>(80-93%)          | 0.32<br>(0.15-0.58)                         | 1.5%<br>(0.86-2.5%)                  | 1.8%<br>(0.72-3.6%)                 | 0.15<br>(0.055-0.3)         | 16<br>(8.3-26)            |
| Kiribati | 2016 | Female | 25 to 29 | 13%<br>(6.7-21%)               | 87%<br>(79-93%)          | 0.32<br>(0.15-0.53)                         | 1.5%<br>(0.89-2.2%)                  | 1.6%<br>(0.81-2.8%)                 | 0.16<br>(0.075-0.3)         | 16<br>(9.3-25)            |
| Kiribati | 2016 | Female | 30 to 34 | 12%<br>(6.3-21%)               | 88%<br>(79-94%)          | 0.31<br>(0.15-0.54)                         | 1.3%<br>(0.78-2%)                    | 1.5%<br>(0.71-2.5%)                 | 0.17<br>(0.079-0.32)        | 15<br>(8.4-23)            |
| Kiribati | 2016 | Female | 35 to 39 | 12%<br>(6.1-21%)               | 88%<br>(79-94%)          | 0.29<br>(0.14-0.53)                         | 1.3%<br>(0.74-2.1%)                  | 1.5%<br>(0.79-2.8%)                 | 0.21<br>(0.1-0.39)          | 14<br>(7.9-24)            |
| Kiribati | 2016 | Female | 40 to 44 | 11%<br>(6-19%)                 | 89%<br>(81-94%)          | 0.26<br>(0.12-0.49)                         | 1.1%<br>(0.56-2.1%)                  | 1.5%<br>(0.64-2.8%)                 | 0.23<br>(0.094-0.45)        | 13<br>(5.9-23)            |
| Kiribati | 2016 | Female | 45 to 49 | 11%<br>(5.3-19%)               | 89%<br>(81-95%)          | 0.22<br>(0.099-0.43)                        | 0.63%<br>(0.086-1.4%)                | 0.8%<br>(0.14-1.8%)                 | 0.19<br>(0.033-0.42)        | 9.1<br>(1.3-20)           |
| Kiribati | 2016 | Female | 50 to 54 | 11%<br>(5.7-19%)               | 89%<br>(81-94%)          | 0.2<br>(0.09-0.38)                          | 0.38%<br>(-0.17-1.1%)                | 0.53%<br>(-0.18-1.5%)               | 0.17<br>(-0.06-0.48)        | 6.2<br>(-2.9-18)          |
| Kiribati | 2016 | Female | 55 to 59 | 9.6%<br>(5.2-17%)              | 90%<br>(83-95%)          | 0.16<br>(0.072-0.33)                        | 0.28%<br>(-0.25-0.94%)               | 0.41%<br>(-0.21-1.2%)               | 0.14<br>(-0.076-0.44)       | 4.2<br>(-3.7-14)          |
| Kiribati | 2016 | Female | 60 to 64 | 8.8%<br>(4.6-16%)              | 91%<br>(84-95%)          | 0.14<br>(0.061-0.28)                        | 0.16%<br>(-0.27-0.67%)               | 0.25%<br>(-0.24-0.87%)              | 0.099<br>(-0.096-0.34)      | 2.2<br>(-3.8-9)           |
| Kiribati | 2016 | Female | 65 to 69 | 9.4%<br>(5-16%)                | 91%<br>(84-95%)          | 0.15<br>(0.067-0.28)                        | 0.13%<br>(-0.34-0.67%)               | 0.21%<br>(-0.33-0.83%)              | 0.079<br>(-0.13-0.31)       | 1.3<br>(-3.4-6.9)         |
| Kiribati | 2016 | Female | 70 to 74 | 9.7%<br>(5.6-16%)              | 90%<br>(84-94%)          | 0.15<br>(0.063-0.29)                        | 0.039%<br>(-0.44-0.61%)              | 0.088%<br>(-0.45-0.76%)             | 0.038<br>(-0.19-0.33)       | 0.38<br>(-4.1-5.7)        |
| Kiribati | 2016 | Female | 75 to 79 | 9.5%<br>(5.3-17%)              | 90%<br>(83-95%)          | 0.14<br>(0.059-0.27)                        | 0.13%<br>(-0.29-0.6%)                | 0.18%<br>(-0.29-0.72%)              | 0.086<br>(-0.14-0.35)       | 1<br>(-2.3-4.6)           |



| Location | Year | Sex    | Age      | Prevalence of current drinkers | Prevalence of abstainers | Population average of standard drinks daily | Percent of total attributable deaths | Percent of total attributable DALYs | Attributable deaths        | Attributable DALYs         |
|----------|------|--------|----------|--------------------------------|--------------------------|---------------------------------------------|--------------------------------------|-------------------------------------|----------------------------|----------------------------|
| Kiribati | 2016 | Female | 80 to 84 | 9.3%<br>(4.9-16%)              | 91%<br>(84-95%)          | 0.13<br>(0.061-0.25)                        | 0.019%<br>(-0.29-0.35%)              | 0.034%<br>(-0.31-0.41%)             | 0.012<br>(-0.11-0.14)      | 0.081<br>(-1.3-1.5)        |
| Kiribati | 2016 | Female | 85 to 89 | 9.5%<br>(5.1-16%)              | 91%<br>(84-95%)          | 0.14<br>(0.061-0.26)                        | -0.038%<br>(-0.34-0.24%)             | -0.041%<br>(-0.38-0.27%)            | -0.0082<br>(-0.076-0.053)  | -0.066<br>(-0.58-0.42)     |
| Kiribati | 2016 | Female | 90 to 94 | 10%<br>(5.6-16%)               | 90%<br>(84-94%)          | 0.15<br>(0.064-0.28)                        | 0.0032%<br>(-0.24-0.26%)             | 0.00096%<br>(-0.27-0.29%)           | 0.000058<br>(-0.019-0.02)  | 0.0013<br>(-0.099-0.11)    |
| Kiribati | 2016 | Female | 95 plus  | 12%<br>(5.9-21%)               | 88%<br>(79-94%)          | 0.17<br>(0.065-0.34)                        | 0.087%<br>(-0.31-0.48%)              | 0.061%<br>(-0.39-0.51%)             | 0.0011<br>(-0.0072-0.0092) | 0.0061<br>(-0.022-0.033)   |
| Kiribati | 2016 | Male   | All Ages | 43%<br>(35-52%)                | 57%<br>(48-65%)          | 0.88<br>(0.65-1.1)                          | 3%<br>(1.6-4.6%)                     | 3.1%<br>(1.5-5.1%)                  | 18<br>(8.1-30)             | 870<br>(470-1400)          |
| Kiribati | 2016 | Male   | 15 to 19 | 38%<br>(23-56%)                | 62%<br>(44-77%)          | 0.53<br>(0.25-0.95)                         | 2.1%<br>(0.79-4.3%)                  | 2.6%<br>(0.71-5.8%)                 | 0.34<br>(0.09-0.74)        | 29<br>(11-58)              |
| Kiribati | 2016 | Male   | 20 to 24 | 56%<br>(37-73%)                | 44%<br>(27-63%)          | 1.4<br>(0.81-2.3)                           | 6.8%<br>(3.3-11%)                    | 8%<br>(3.5-14%)                     | 1.6<br>(0.67-2.8)          | 110<br>(54-190)            |
| Kiribati | 2016 | Male   | 25 to 29 | 63%<br>(43-78%)                | 37%<br>(22-57%)          | 1.9<br>(1.2-2.9)                            | 8.3%<br>(4.7-13%)                    | 9.8%<br>(5.2-15%)                   | 2.2<br>(1.1-3.5)           | 150<br>(81-230)            |
| Kiribati | 2016 | Male   | 30 to 34 | 64%<br>(43-80%)                | 36%<br>(20-57%)          | 2.1<br>(1.2-3.2)                            | 7.7%<br>(4.3-12%)                    | 8.9%<br>(4.5-14%)                   | 2.1<br>(1-3.4)             | 130<br>(66-200)            |
| Kiribati | 2016 | Male   | 35 to 39 | 63%<br>(46-80%)                | 37%<br>(20-54%)          | 1.8<br>(1.1-2.9)                            | 5.9%<br>(2.9-9.7%)                   | 6.6%<br>(3-11%)                     | 1.7<br>(0.71-2.9)          | 93<br>(43-160)             |
| Kiribati | 2016 | Male   | 40 to 44 | 61%<br>(43-78%)                | 39%<br>(22-57%)          | 1.6<br>(0.86-2.7)                           | 5.1%<br>(2-9.2%)                     | 5.7%<br>(2.1-10%)                   | 1.7<br>(0.53-3.1)          | 83<br>(29-150)             |
| Kiribati | 2016 | Male   | 45 to 49 | 57%<br>(34-75%)                | 43%<br>(25-66%)          | 1.4<br>(0.7-2.4)                            | 4.2%<br>(1.3-7.9%)                   | 4.6%<br>(1.3-9%)                    | 2<br>(0.59-4.1)            | 90<br>(28-180)             |
| Kiribati | 2016 | Male   | 50 to 54 | 54%<br>(34-73%)                | 46%<br>(27-66%)          | 1.2<br>(0.58-2.1)                           | 3.2%<br>(0.56-6.7%)                  | 3.5%<br>(0.54-7.5%)                 | 2<br>(0.29-4.3)            | 76<br>(13-170)             |
| Kiribati | 2016 | Male   | 55 to 59 | 52%<br>(33-71%)                | 48%<br>(29-67%)          | 0.95<br>(0.46-1.7)                          | 2.1%<br>(0.15-5.3%)                  | 2.4%<br>(0.083-5.9%)                | 1.3<br>(0.046-3.2)         | 43<br>(3-110)              |
| Kiribati | 2016 | Male   | 60 to 64 | 49%<br>(30-69%)                | 51%<br>(31-70%)          | 0.79<br>(0.36-1.5)                          | 1.6%<br>(-0.049-4.5%)                | 1.8%<br>(-0.053-5%)                 | 0.95<br>(-0.028-2.8)       | 27<br>(-0.79-77)           |
| Kiribati | 2016 | Male   | 65 to 69 | 48%<br>(30-67%)                | 52%<br>(33-70%)          | 0.71<br>(0.35-1.2)                          | 1.7%<br>(0.093-4.3%)                 | 1.9%<br>(0.13-4.7%)                 | 0.9<br>(0.062-2.3)         | 21<br>(1.1-54)             |
| Kiribati | 2016 | Male   | 70 to 74 | 45%<br>(28-62%)                | 55%<br>(38-72%)          | 0.62<br>(0.3-1.1)                           | 1.2%<br>(-0.094-3.2%)                | 1.4%<br>(-0.091-3.6%)               | 0.57<br>(-0.037-1.6)       | 11<br>(-0.81-29)           |
| Kiribati | 2016 | Male   | 75 to 79 | 40%<br>(24-59%)                | 60%<br>(41-76%)          | 0.52<br>(0.24-0.97)                         | 1.1%<br>(-0.0042-2.7%)               | 1.2%<br>(-0.00046-3.1%)             | 0.43<br>(-0.00017-1.1)     | 6.2<br>(-0.022-16)         |
| Kiribati | 2016 | Male   | 80 to 84 | 37%<br>(21-56%)                | 63%<br>(44-79%)          | 0.47<br>(0.23-0.87)                         | 0.77%<br>(-0.019-2%)                 | 0.84%<br>(-0.019-2.1%)              | 0.18<br>(-0.0036-0.44)     | 1.9<br>(-0.046-4.8)        |
| Kiribati | 2016 | Male   | 85 to 89 | 36%<br>(22-52%)                | 64%<br>(48-78%)          | 0.45<br>(0.21-0.82)                         | 0.49%<br>(-0.19-1.6%)                | 0.52%<br>(-0.23-1.7%)               | 0.047<br>(-0.021-0.16)     | 0.37<br>(-0.15-1.2)        |
| Kiribati | 2016 | Male   | 90 to 94 | 38%<br>(23-55%)                | 62%<br>(45-77%)          | 0.46<br>(0.21-0.85)                         | 0.27%<br>(-0.26-1%)                  | 0.25%<br>(-0.35-1.1%)               | 0.0067<br>(-0.0092-0.028)  | 0.042<br>(-0.041-0.16)     |
| Kiribati | 2016 | Male   | 95 plus  | 41%<br>(22-62%)                | 59%<br>(38-78%)          | 0.5<br>(0.2-0.97)                           | -0.036%<br>(-0.7-0.8%)               | -0.16%<br>(-0.91-0.78%)             | -0.001<br>(-0.0059-0.0051) | -0.00091<br>(-0.018-0.021) |

| Location         | Year | Sex    | Age      | Prevalence of current drinkers | Prevalence of abstainers | Population average of standard drinks daily | Percent of total attributable deaths | Percent of total attributable DALYs | Attributable deaths        | Attributable DALYs       |
|------------------|------|--------|----------|--------------------------------|--------------------------|---------------------------------------------|--------------------------------------|-------------------------------------|----------------------------|--------------------------|
| Marshall Islands | 1990 | Female | All Ages | 18%<br>(13-25%)                | 82%<br>(75-87%)          | 0.28<br>(0.15-0.48)                         | 0.061%<br>(-0.39-0.7%)               | -0.39%<br>(-1.2-0.7%)               | -0.46<br>(-1.4-0.79)       | 4.5<br>(-27-53)          |
| Marshall Islands | 1990 | Female | 15 to 19 | 20%<br>(9-36%)                 | 80%<br>(64-91%)          | 0.35<br>(0.13-0.82)                         | 1%<br>(0.4-2.1%)                     | 1.5%<br>(0.33-3.7%)                 | 0.034<br>(0.0076-0.088)    | 3.6<br>(1.4-7.5)         |
| Marshall Islands | 1990 | Female | 20 to 24 | 24%<br>(10-43%)                | 76%<br>(57-90%)          | 0.55<br>(0.19-1.2)                          | 1.7%<br>(0.81-3.2%)                  | 2.2%<br>(0.63-5.2%)                 | 0.056<br>(0.017-0.13)      | 5.8<br>(2.8-11)          |
| Marshall Islands | 1990 | Female | 25 to 29 | 26%<br>(10-46%)                | 74%<br>(54-90%)          | 0.57<br>(0.21-1.2)                          | 1.6%<br>(0.75-2.9%)                  | 2%<br>(0.58-4.2%)                   | 0.055<br>(0.016-0.12)      | 5.2<br>(2.5-9.7)         |
| Marshall Islands | 1990 | Female | 30 to 34 | 27%<br>(11-47%)                | 73%<br>(53-89%)          | 0.59<br>(0.22-1.2)                          | 1.3%<br>(0.45-2.7%)                  | 1.6%<br>(0.24-3.9%)                 | 0.05<br>(0.008-0.12)       | 4.2<br>(1.5-9)           |
| Marshall Islands | 1990 | Female | 35 to 39 | 27%<br>(11-46%)                | 73%<br>(54-89%)          | 0.6<br>(0.22-1.2)                           | 0.97%<br>(-0.034-2.6%)               | 1.3%<br>(-0.24-3.8%)                | 0.049<br>(-0.0096-0.15)    | 3.3<br>(-0.13-8.9)       |
| Marshall Islands | 1990 | Female | 40 to 44 | 26%<br>(13-44%)                | 74%<br>(56-87%)          | 0.55<br>(0.21-1.1)                          | 0.46%<br>(-0.89-2.5%)                | 0.65%<br>(-1.3-3.5%)                | 0.028<br>(-0.054-0.16)     | 1.5<br>(-2.9-8.2)        |
| Marshall Islands | 1990 | Female | 45 to 49 | 26%<br>(12-44%)                | 74%<br>(56-88%)          | 0.48<br>(0.16-1)                            | -0.22%<br>(-1.6-1.6%)                | -0.15%<br>(-2-2.3%)                 | -0.008<br>(-0.1-0.12)      | -0.74<br>(-5.6-5.4)      |
| Marshall Islands | 1990 | Female | 50 to 54 | 26%<br>(12-44%)                | 74%<br>(56-88%)          | 0.43<br>(0.13-0.95)                         | -0.78%<br>(-2.6-0.91%)               | -0.8%<br>(-2.9-1.5%)                | -0.05<br>(-0.19-0.093)     | -2.6<br>(-8.6-3.1)       |
| Marshall Islands | 1990 | Female | 55 to 59 | 25%<br>(12-45%)                | 75%<br>(55-88%)          | 0.39<br>(0.12-0.95)                         | -1%<br>(-3-0.6%)                     | -1%<br>(-3.3-0.98%)                 | -0.074<br>(-0.24-0.069)    | -3.2<br>(-9.7-1.9)       |
| Marshall Islands | 1990 | Female | 60 to 64 | 25%<br>(12-46%)                | 75%<br>(54-88%)          | 0.37<br>(0.11-0.87)                         | -1.3%<br>(-3.4-0.27%)                | -1.3%<br>(-3.8-0.51%)               | -0.11<br>(-0.31-0.043)     | -3.8<br>(-10-0.8)        |
| Marshall Islands | 1990 | Female | 65 to 69 | 26%<br>(12-43%)                | 74%<br>(57-88%)          | 0.37<br>(0.12-0.82)                         | -1.3%<br>(-3.1-0.23%)                | -1.4%<br>(-3.4-0.39%)               | -0.13<br>(-0.32-0.034)     | -3.5<br>(-8.1-0.58)      |
| Marshall Islands | 1990 | Female | 70 to 74 | 26%<br>(12-43%)                | 74%<br>(57-88%)          | 0.36<br>(0.11-0.83)                         | -1.3%<br>(-2.9-0.2%)                 | -1.4%<br>(-3.3-0.35%)               | -0.13<br>(-0.32-0.035)     | -2.7<br>(-6.4-0.43)      |
| Marshall Islands | 1990 | Female | 75 to 79 | 25%<br>(11-44%)                | 75%<br>(56-89%)          | 0.34<br>(0.093-0.85)                        | -1%<br>(-2.7-0.29%)                  | -1.1%<br>(-3-0.4%)                  | -0.094<br>(-0.26-0.035)    | -1.5<br>(-4-0.43)        |
| Marshall Islands | 1990 | Female | 80 to 84 | 24%<br>(10-43%)                | 76%<br>(57-90%)          | 0.32<br>(0.086-0.77)                        | -1%<br>(-2.5-0.1%)                   | -1.1%<br>(-2.9-0.16%)               | -0.07<br>(-0.18-0.0099)    | -0.79<br>(-2-0.073)      |
| Marshall Islands | 1990 | Female | 85 to 89 | 25%<br>(11-43%)                | 75%<br>(57-89%)          | 0.33<br>(0.11-0.85)                         | -1%<br>(-2.5-0.1%)                   | -1.2%<br>(-2.9-0.12%)               | -0.041<br>(-0.1-0.004)     | -0.32<br>(-0.76-0.031)   |
| Marshall Islands | 1990 | Female | 90 to 94 | 28%<br>(13-48%)                | 72%<br>(52-87%)          | 0.37<br>(0.12-0.86)                         | -0.97%<br>(-2.2-0.17%)               | -1.1%<br>(-2.5-0.19%)               | -0.015<br>(-0.033-0.0025)  | -0.077<br>(-0.17-0.013)  |
| Marshall Islands | 1990 | Female | 95 plus  | 33%<br>(15-56%)                | 67%<br>(44-85%)          | 0.43<br>(0.12-1.1)                          | -1.3%<br>(-3-0.31%)                  | -1.5%<br>(-3.4-0.33%)               | -0.0048<br>(-0.011-0.0011) | -0.016<br>(-0.038-0.004) |
| Marshall Islands | 1990 | Male   | All Ages | 39%<br>(31-49%)                | 61%<br>(51-69%)          | 0.64<br>(0.37-1.1)                          | 1.9%<br>(0.86-3.5%)                  | 2%<br>(0.65-4.3%)                   | 3.4<br>(1.1-7.2)           | 190<br>(85-350)          |
| Marshall Islands | 1990 | Male   | 15 to 19 | 37%<br>(22-55%)                | 63%<br>(45-78%)          | 0.43<br>(0.16-0.87)                         | 1.9%<br>(0.79-3.6%)                  | 2.4%<br>(0.76-4.9%)                 | 0.11<br>(0.035-0.23)       | 9.8<br>(4-18)            |
| Marshall Islands | 1990 | Male   | 20 to 24 | 55%<br>(37-73%)                | 45%<br>(27-63%)          | 1.2<br>(0.55-2.1)                           | 5.4%<br>(2.5-9.6%)                   | 6.5%<br>(2.7-12%)                   | 0.4<br>(0.16-0.73)         | 30<br>(14-53)            |
| Marshall Islands | 1990 | Male   | 25 to 29 | 63%<br>(43-78%)                | 37%<br>(22-57%)          | 1.6<br>(0.8-2.9)                            | 6.8%<br>(3.5-12%)                    | 8.2%<br>(3.9-15%)                   | 0.51<br>(0.24-0.93)        | 35<br>(18-61)            |

| Location         | Year | Sex    | Age      | Prevalence of current drinkers | Prevalence of abstainers | Population average of standard drinks daily | Percent of total attributable deaths | Percent of total attributable DALYs | Attributable deaths          | Attributable DALYs           |
|------------------|------|--------|----------|--------------------------------|--------------------------|---------------------------------------------|--------------------------------------|-------------------------------------|------------------------------|------------------------------|
| Marshall Islands | 1990 | Male   | 30 to 34 | 64%<br>(43-80%)                | 36%<br>(20-57%)          | 1.7<br>(0.84-3.2)                           | 6.2%<br>(3.2-11%)                    | 7.3%<br>(3.4-14%)                   | 0.47<br>(0.22-0.89)          | 30<br>(16-54)                |
| Marshall Islands | 1990 | Male   | 35 to 39 | 62%<br>(44-79%)                | 38%<br>(21-56%)          | 1.5<br>(0.71-2.9)                           | 4.8%<br>(2.1-9.3%)                   | 5.6%<br>(2.2-11%)                   | 0.4<br>(0.16-0.8)            | 23<br>(10-45)                |
| Marshall Islands | 1990 | Male   | 40 to 44 | 59%<br>(42-76%)                | 41%<br>(24-58%)          | 1.3<br>(0.58-2.6)                           | 3.7%<br>(1.1-8%)                     | 4.1%<br>(0.98-9.3%)                 | 0.33<br>(0.079-0.76)         | 17<br>(5.3-38)               |
| Marshall Islands | 1990 | Male   | 45 to 49 | 56%<br>(34-74%)                | 44%<br>(26-66%)          | 1.1<br>(0.48-2.3)                           | 2.9%<br>(0.61-6.7%)                  | 3.2%<br>(0.44-7.8%)                 | 0.3<br>(0.039-0.74)          | 14<br>(2.9-33)               |
| Marshall Islands | 1990 | Male   | 50 to 54 | 53%<br>(34-71%)                | 47%<br>(29-66%)          | 0.94<br>(0.38-1.9)                          | 2.2%<br>(0.14-6%)                    | 2.4%<br>(0.0055-6.8%)               | 0.27<br>(0.00058-0.75)       | 11<br>(0.75-29)              |
| Marshall Islands | 1990 | Male   | 55 to 59 | 51%<br>(33-70%)                | 49%<br>(30-67%)          | 0.77<br>(0.31-1.6)                          | 1.4%<br>(-0.16-4.2%)                 | 1.5%<br>(-0.29-4.6%)                | 0.18<br>(-0.036-0.58)        | 6.5<br>(-0.81-20)            |
| Marshall Islands | 1990 | Male   | 60 to 64 | 48%<br>(29-68%)                | 52%<br>(32-71%)          | 0.64<br>(0.26-1.4)                          | 0.97%<br>(-0.4-3.6%)                 | 1%<br>(-0.46-3.9%)                  | 0.14<br>(-0.062-0.53)        | 4.2<br>(-1.7-16)             |
| Marshall Islands | 1990 | Male   | 65 to 69 | 46%<br>(28-65%)                | 54%<br>(35-72%)          | 0.58<br>(0.23-1.2)                          | 0.85%<br>(-0.36-3.1%)                | 0.94%<br>(-0.39-3.5%)               | 0.12<br>(-0.05-0.46)         | 2.9<br>(-1.3-11)             |
| Marshall Islands | 1990 | Male   | 70 to 74 | 44%<br>(26-61%)                | 56%<br>(39-74%)          | 0.52<br>(0.2-1.1)                           | 0.58%<br>(-0.42-2.7%)                | 0.63%<br>(-0.48-3%)                 | 0.072<br>(-0.055-0.33)       | 1.4<br>(-1-6.3)              |
| Marshall Islands | 1990 | Male   | 75 to 79 | 40%<br>(24-59%)                | 60%<br>(41-76%)          | 0.44<br>(0.16-0.98)                         | 0.43%<br>(-0.41-2.2%)                | 0.45%<br>(-0.47-2.4%)               | 0.038<br>(-0.04-0.21)        | 0.59<br>(-0.55-3)            |
| Marshall Islands | 1990 | Male   | 80 to 84 | 37%<br>(21-55%)                | 63%<br>(45-79%)          | 0.39<br>(0.15-0.86)                         | 0.34%<br>(-0.34-1.6%)                | 0.35%<br>(-0.4-1.7%)                | 0.018<br>(-0.021-0.092)      | 0.21<br>(-0.21-1)            |
| Marshall Islands | 1990 | Male   | 85 to 89 | 35%<br>(21-52%)                | 65%<br>(48-79%)          | 0.37<br>(0.15-0.82)                         | 0.17%<br>(-0.48-1.3%)                | 0.15%<br>(-0.59-1.4%)               | 0.0034<br>(-0.013-0.03)      | 0.033<br>(-0.093-0.24)       |
| Marshall Islands | 1990 | Male   | 90 to 94 | 37%<br>(23-54%)                | 63%<br>(46-77%)          | 0.38<br>(0.15-0.82)                         | 0.12%<br>(-0.44-1.1%)                | 0.074%<br>(-0.57-1.1%)              | 0.00051<br>(-0.0039-0.0076)  | 0.0047<br>(-0.018-0.044)     |
| Marshall Islands | 1990 | Male   | 95 plus  | 40%<br>(22-62%)                | 60%<br>(38-78%)          | 0.41<br>(0.14-0.94)                         | -0.093%<br>(-0.79-1%)                | -0.22%<br>(-1-0.98%)                | -0.00034<br>(-0.0016-0.0015) | -0.00056<br>(-0.0049-0.0062) |
| Marshall Islands | 1995 | Female | All Ages | 19%<br>(13-26%)                | 81%<br>(74-87%)          | 0.29<br>(0.15-0.49)                         | -0.091%<br>(-0.65-0.71%)             | -0.69%<br>(-1.6-0.59%)              | -0.95<br>(-2.2-0.84)         | -7.3<br>(-51-55)             |
| Marshall Islands | 1995 | Female | 15 to 19 | 20%<br>(9-35%)                 | 80%<br>(65-91%)          | 0.35<br>(0.12-0.78)                         | 0.98%<br>(0.38-2.1%)                 | 1.5%<br>(0.28-3.6%)                 | 0.036<br>(0.0068-0.089)      | 3.7<br>(1.4-7.6)             |
| Marshall Islands | 1995 | Female | 20 to 24 | 24%<br>(10-43%)                | 76%<br>(57-90%)          | 0.55<br>(0.19-1.2)                          | 1.7%<br>(0.79-3.2%)                  | 2.1%<br>(0.59-4.8%)                 | 0.068<br>(0.018-0.16)        | 7<br>(3.2-14)                |
| Marshall Islands | 1995 | Female | 25 to 29 | 26%<br>(10-45%)                | 74%<br>(55-90%)          | 0.56<br>(0.2-1.2)                           | 1.4%<br>(0.59-2.8%)                  | 1.7%<br>(0.41-4%)                   | 0.062<br>(0.015-0.15)        | 5.8<br>(2.3-11)              |
| Marshall Islands | 1995 | Female | 30 to 34 | 27%<br>(10-48%)                | 73%<br>(52-90%)          | 0.59<br>(0.21-1.2)                          | 1.1%<br>(0.083-2.7%)                 | 1.2%<br>(-0.15-3.6%)                | 0.052<br>(-0.0065-0.16)      | 4.4<br>(0.36-11)             |
| Marshall Islands | 1995 | Female | 35 to 39 | 28%<br>(11-47%)                | 72%<br>(53-89%)          | 0.61<br>(0.22-1.2)                          | 0.69%<br>(-0.55-2.6%)                | 0.85%<br>(-0.82-3.5%)               | 0.045<br>(-0.043-0.19)       | 3<br>(-2.4-11)               |
| Marshall Islands | 1995 | Female | 40 to 44 | 27%<br>(13-44%)                | 73%<br>(56-87%)          | 0.56<br>(0.2-1.2)                           | 0.095%<br>(-1.5-2.3%)                | 0.15%<br>(-2.1-3.1%)                | 0.0091<br>(-0.12-0.18)       | 0.4<br>(-6.6-9.7)            |
| Marshall Islands | 1995 | Female | 45 to 49 | 26%<br>(11-45%)                | 74%<br>(55-89%)          | 0.48<br>(0.16-1)                            | -0.59%<br>(-2.3-1.4%)                | -0.63%<br>(-2.8-2%)                 | -0.043<br>(-0.19-0.13)       | -2.5<br>(-10-6.1)            |

| Location         | Year | Sex    | Age      | Prevalence of current drinkers | Prevalence of abstainers | Population average of standard drinks daily | Percent of total attributable deaths | Percent of total attributable DALYs | Attributable deaths        | Attributable DALYs        |
|------------------|------|--------|----------|--------------------------------|--------------------------|---------------------------------------------|--------------------------------------|-------------------------------------|----------------------------|---------------------------|
| Marshall Islands | 1995 | Female | 50 to 54 | 25%<br>(11-46%)                | 75%<br>(54-89%)          | 0.42<br>(0.13-0.95)                         | -1.1%<br>(-3.3-0.54%)                | -1.3%<br>(-3.8-0.81%)               | -0.1<br>(-0.3-0.067)       | -4.8<br>(-14-2.3)         |
| Marshall Islands | 1995 | Female | 55 to 59 | 25%<br>(11-45%)                | 75%<br>(55-89%)          | 0.38<br>(0.12-0.93)                         | -1.3%<br>(-3.5-0.25%)                | -1.4%<br>(-3.9-0.42%)               | -0.13<br>(-0.35-0.037)     | -5.1<br>(-14-1)           |
| Marshall Islands | 1995 | Female | 60 to 64 | 25%<br>(11-46%)                | 75%<br>(54-89%)          | 0.36<br>(0.11-0.88)                         | -1.6%<br>(-3.9-0.13%)                | -1.7%<br>(-4.4-0.24%)               | -0.18<br>(-0.45-0.024)     | -5.7<br>(-14-0.49)        |
| Marshall Islands | 1995 | Female | 65 to 69 | 27%<br>(12-47%)                | 73%<br>(53-88%)          | 0.38<br>(0.12-0.86)                         | -1.7%<br>(-3.8--0.054%)              | -1.8%<br>(-4.2-0.096%)              | -0.21<br>(-0.47-0.011)     | -5.3<br>(-12--0.17)       |
| Marshall Islands | 1995 | Female | 70 to 74 | 27%<br>(13-45%)                | 73%<br>(55-87%)          | 0.37<br>(0.11-0.84)                         | -1.6%<br>(-3.5--0.058%)              | -1.8%<br>(-3.9--0.011%)             | -0.21<br>(-0.45--0.0012)   | -4.2<br>(-8.9--0.14)      |
| Marshall Islands | 1995 | Female | 75 to 79 | 26%<br>(11-45%)                | 74%<br>(55-89%)          | 0.34<br>(0.093-0.85)                        | -1.3%<br>(-3.2-0.14%)                | -1.4%<br>(-3.5-0.26%)               | -0.15<br>(-0.38-0.029)     | -2.3<br>(-5.7-0.26)       |
| Marshall Islands | 1995 | Female | 80 to 84 | 25%<br>(11-44%)                | 75%<br>(56-89%)          | 0.32<br>(0.088-0.77)                        | -1.3%<br>(-2.9--0.039%)              | -1.4%<br>(-3.2--0.037%)             | -0.11<br>(-0.25--0.0029)   | -1.2<br>(-2.7--0.039)     |
| Marshall Islands | 1995 | Female | 85 to 89 | 26%<br>(11-44%)                | 74%<br>(56-89%)          | 0.33<br>(0.1-0.81)                          | -1.3%<br>(-3--0.078%)                | -1.4%<br>(-3.3--0.096%)             | -0.065<br>(-0.15--0.0045)  | -0.5<br>(-1.1--0.033)     |
| Marshall Islands | 1995 | Female | 90 to 94 | 29%<br>(13-48%)                | 71%<br>(52-87%)          | 0.37<br>(0.12-0.86)                         | -1.2%<br>(-2.7-0.046%)               | -1.4%<br>(-3-0.045%)                | -0.022<br>(-0.047-0.0007)  | -0.11<br>(-0.25-0.0042)   |
| Marshall Islands | 1995 | Female | 95 plus  | 34%<br>(14-57%)                | 66%<br>(43-86%)          | 0.43<br>(0.11-1)                            | -1.6%<br>(-3.6-0.31%)                | -1.8%<br>(-4.2-0.29%)               | -0.0073<br>(-0.016-0.0011) | -0.024<br>(-0.055-0.0048) |
| Marshall Islands | 1995 | Male   | All Ages | 39%<br>(31-48%)                | 61%<br>(52-69%)          | 0.64<br>(0.36-1.1)                          | 1.9%<br>(0.82-3.6%)                  | 1.9%<br>(0.58-4.3%)                 | 3.4<br>(1.1-7.8)           | 200<br>(89-390)           |
| Marshall Islands | 1995 | Male   | 15 to 19 | 37%<br>(22-55%)                | 63%<br>(45-78%)          | 0.43<br>(0.16-0.88)                         | 1.8%<br>(0.74-3.5%)                  | 2.3%<br>(0.69-4.6%)                 | 0.11<br>(0.033-0.23)       | 9.8<br>(4-18)             |
| Marshall Islands | 1995 | Male   | 20 to 24 | 55%<br>(36-72%)                | 45%<br>(28-64%)          | 1.1<br>(0.54-2.1)                           | 5.2%<br>(2.5-9.1%)                   | 6.2%<br>(2.6-11%)                   | 0.44<br>(0.18-0.82)        | 34<br>(16-60)             |
| Marshall Islands | 1995 | Male   | 25 to 29 | 62%<br>(43-78%)                | 38%<br>(22-57%)          | 1.6<br>(0.78-2.9)                           | 6.5%<br>(3.3-12%)                    | 7.7%<br>(3.6-14%)                   | 0.54<br>(0.25-1)           | 38<br>(19-67)             |
| Marshall Islands | 1995 | Male   | 30 to 34 | 63%<br>(42-79%)                | 37%<br>(21-58%)          | 1.7<br>(0.81-3.2)                           | 5.8%<br>(2.9-11%)                    | 6.7%<br>(3.1-13%)                   | 0.5<br>(0.23-0.98)         | 32<br>(16-60)             |
| Marshall Islands | 1995 | Male   | 35 to 39 | 62%<br>(44-78%)                | 38%<br>(22-56%)          | 1.5<br>(0.71-2.8)                           | 4.5%<br>(1.9-9%)                     | 5.2%<br>(1.9-11%)                   | 0.43<br>(0.16-0.88)        | 25<br>(11-50)             |
| Marshall Islands | 1995 | Male   | 40 to 44 | 59%<br>(42-76%)                | 41%<br>(24-58%)          | 1.3<br>(0.56-2.5)                           | 3.3%<br>(0.91-7.7%)                  | 3.7%<br>(0.78-9%)                   | 0.36<br>(0.075-0.85)       | 19<br>(5.2-43)            |
| Marshall Islands | 1995 | Male   | 45 to 49 | 55%<br>(34-73%)                | 45%<br>(27-66%)          | 1.1<br>(0.45-2.2)                           | 2.5%<br>(0.34-6.2%)                  | 2.8%<br>(0.19-7.2%)                 | 0.3<br>(0.02-0.77)         | 14<br>(2-36)              |
| Marshall Islands | 1995 | Male   | 50 to 54 | 52%<br>(32-71%)                | 48%<br>(29-68%)          | 0.91<br>(0.36-1.8)                          | 1.9%<br>(-0.093-5.4%)                | 2%<br>(-0.26-6.2%)                  | 0.26<br>(-0.033-0.78)      | 11<br>(-0.53-31)          |
| Marshall Islands | 1995 | Male   | 55 to 59 | 50%<br>(32-70%)                | 50%<br>(30-68%)          | 0.75<br>(0.29-1.6)                          | 1.1%<br>(-0.37-4.3%)                 | 1.2%<br>(-0.44-4.6%)                | 0.16<br>(-0.064-0.62)      | 6<br>(-1.9-22)            |
| Marshall Islands | 1995 | Male   | 60 to 64 | 48%<br>(28-68%)                | 52%<br>(32-72%)          | 0.62<br>(0.25-1.4)                          | 0.78%<br>(-0.51-3.5%)                | 0.83%<br>(-0.62-3.9%)               | 0.12<br>(-0.094-0.56)      | 3.7<br>(-2.5-16)          |
| Marshall Islands | 1995 | Male   | 65 to 69 | 47%<br>(28-65%)                | 53%<br>(35-72%)          | 0.57<br>(0.23-1.2)                          | 0.66%<br>(-0.51-2.9%)                | 0.72%<br>(-0.59-3.1%)               | 0.1<br>(-0.084-0.45)       | 2.4<br>(-2-11)            |

| Location         | Year | Sex    | Age      | Prevalence of current drinkers | Prevalence of abstainers | Population average of standard drinks daily | Percent of total attributable deaths | Percent of total attributable DALYs | Attributable deaths          | Attributable DALYs          |
|------------------|------|--------|----------|--------------------------------|--------------------------|---------------------------------------------|--------------------------------------|-------------------------------------|------------------------------|-----------------------------|
| Marshall Islands | 1995 | Male   | 70 to 74 | 44%<br>(27-62%)                | 56%<br>(38-73%)          | 0.51<br>(0.19-1.1)                          | 0.43%<br>(-0.59-2.4%)                | 0.46%<br>(-0.66-2.5%)               | 0.057<br>(-0.08-0.31)        | 1.1<br>(-1.5-6)             |
| Marshall Islands | 1995 | Male   | 75 to 79 | 40%<br>(24-58%)                | 60%<br>(42-76%)          | 0.43<br>(0.16-0.97)                         | 0.3%<br>(-0.56-2%)                   | 0.3%<br>(-0.63-2.1%)                | 0.029<br>(-0.061-0.2)        | 0.46<br>(-0.86-2.9)         |
| Marshall Islands | 1995 | Male   | 80 to 84 | 37%<br>(21-55%)                | 63%<br>(45-79%)          | 0.38<br>(0.15-0.84)                         | 0.25%<br>(-0.43-1.5%)                | 0.25%<br>(-0.49-1.6%)               | 0.013<br>(-0.026-0.093)      | 0.16<br>(-0.28-1)           |
| Marshall Islands | 1995 | Male   | 85 to 89 | 35%<br>(21-52%)                | 65%<br>(48-79%)          | 0.36<br>(0.14-0.77)                         | 0.097%<br>(-0.58-1.2%)               | 0.063%<br>(-0.68-1.2%)              | 0.0017<br>(-0.018-0.033)     | 0.022<br>(-0.13-0.26)       |
| Marshall Islands | 1995 | Male   | 90 to 94 | 37%<br>(23-54%)                | 63%<br>(46-77%)          | 0.37<br>(0.14-0.83)                         | 0.053%<br>(-0.5-0.95%)               | -0.0014%<br>(-0.65-0.99%)           | -0.00001<br>(-0.005-0.0076)  | 0.0024<br>(-0.024-0.044)    |
| Marshall Islands | 1995 | Male   | 95 plus  | 41%<br>(22-61%)                | 59%<br>(39-78%)          | 0.41<br>(0.14-0.96)                         | -0.15%<br>(-0.87-0.92%)              | -0.29%<br>(-1.1-0.89%)              | -0.00048<br>(-0.0019-0.0015) | -0.00097<br>(-0.0057-0.006) |
| Marshall Islands | 2000 | Female | All Ages | 19%<br>(13-26%)                | 81%<br>(74-87%)          | 0.29<br>(0.16-0.49)                         | -0.21%<br>(-0.81-0.55%)              | -0.86%<br>(-1.8-0.35%)              | -1.5<br>(-3.1-0.63)          | -20<br>(-77-54)             |
| Marshall Islands | 2000 | Female | 15 to 19 | 20%<br>(9.3-36%)               | 80%<br>(64-91%)          | 0.35<br>(0.12-0.78)                         | 0.98%<br>(0.37-2.2%)                 | 1.4%<br>(0.26-3.6%)                 | 0.041<br>(0.0076-0.1)        | 4.1<br>(1.5-9.1)            |
| Marshall Islands | 2000 | Female | 20 to 24 | 24%<br>(11-43%)                | 76%<br>(57-89%)          | 0.55<br>(0.2-1.2)                           | 1.6%<br>(0.76-3.2%)                  | 2%<br>(0.56-4.6%)                   | 0.077<br>(0.021-0.18)        | 7.7<br>(3.5-15)             |
| Marshall Islands | 2000 | Female | 25 to 29 | 26%<br>(11-45%)                | 74%<br>(55-89%)          | 0.56<br>(0.2-1.2)                           | 1.3%<br>(0.38-2.7%)                  | 1.5%<br>(0.13-3.6%)                 | 0.071<br>(0.0067-0.17)       | 6.6<br>(1.9-14)             |
| Marshall Islands | 2000 | Female | 30 to 34 | 27%<br>(10-46%)                | 73%<br>(54-90%)          | 0.58<br>(0.21-1.2)                          | 0.88%<br>(-0.19-2.3%)                | 0.95%<br>(-0.54-3.1%)               | 0.05<br>(-0.028-0.16)        | 4.2<br>(-0.95-11)           |
| Marshall Islands | 2000 | Female | 35 to 39 | 27%<br>(12-46%)                | 73%<br>(54-88%)          | 0.6<br>(0.22-1.2)                           | 0.43%<br>(-1-2.6%)                   | 0.51%<br>(-1.3-3.4%)                | 0.033<br>(-0.086-0.22)       | 2.2<br>(-5.2-13)            |
| Marshall Islands | 2000 | Female | 40 to 44 | 26%<br>(13-44%)                | 74%<br>(56-87%)          | 0.55<br>(0.21-1.2)                          | -0.2%<br>(-2-2.1%)                   | -0.19%<br>(-2.4-2.7%)               | -0.014<br>(-0.19-0.21)       | -1.1<br>(-10-11)            |
| Marshall Islands | 2000 | Female | 45 to 49 | 26%<br>(11-43%)                | 74%<br>(57-89%)          | 0.47<br>(0.16-0.97)                         | -0.84%<br>(-2.8-1.2%)                | -0.92%<br>(-3.3-1.6%)               | -0.082<br>(-0.29-0.14)       | -4.5<br>(-15-6.5)           |
| Marshall Islands | 2000 | Female | 50 to 54 | 25%<br>(12-44%)                | 75%<br>(56-88%)          | 0.41<br>(0.13-0.94)                         | -1.4%<br>(-3.7-0.35%)                | -1.5%<br>(-4.2-0.51%)               | -0.16<br>(-0.42-0.056)       | -7<br>(-19-2)               |
| Marshall Islands | 2000 | Female | 55 to 59 | 25%<br>(12-44%)                | 75%<br>(56-88%)          | 0.37<br>(0.12-0.9)                          | -1.5%<br>(-3.8-0.086%)               | -1.7%<br>(-4.2-0.16%)               | -0.19<br>(-0.48-0.017)       | -7.2<br>(-18-0.39)          |
| Marshall Islands | 2000 | Female | 60 to 64 | 25%<br>(11-44%)                | 75%<br>(56-89%)          | 0.36<br>(0.11-0.86)                         | -1.7%<br>(-4-0.11%)                  | -1.9%<br>(-4.5-0.095%)              | -0.24<br>(-0.56-0.012)       | -7.5<br>(-17-0.47)          |
| Marshall Islands | 2000 | Female | 65 to 69 | 26%<br>(12-45%)                | 74%<br>(55-88%)          | 0.36<br>(0.12-0.84)                         | -1.8%<br>(-3.9-0.18%)                | -2%<br>(-4.4-0.12%)                 | -0.28<br>(-0.6-0.016)        | -6.9<br>(-15-0.71)          |
| Marshall Islands | 2000 | Female | 70 to 74 | 26%<br>(12-44%)                | 74%<br>(56-88%)          | 0.35<br>(0.11-0.8)                          | -1.8%<br>(-3.7-0.13%)                | -2%<br>(-4.3-0.12%)                 | -0.28<br>(-0.6-0.018)        | -5.4<br>(-12-0.4)           |
| Marshall Islands | 2000 | Female | 75 to 79 | 25%<br>(11-44%)                | 75%<br>(56-89%)          | 0.33<br>(0.087-0.83)                        | -1.4%<br>(-3.4-0.022%)               | -1.6%<br>(-3.8-0.026%)              | -0.21<br>(-0.48-0.0034)      | -3.1<br>(-7.2-0.048)        |
| Marshall Islands | 2000 | Female | 80 to 84 | 24%<br>(10-43%)                | 76%<br>(57-90%)          | 0.31<br>(0.085-0.76)                        | -1.4%<br>(-3.2-0.076%)               | -1.6%<br>(-3.5-0.083%)              | -0.15<br>(-0.36-0.008)       | -1.7<br>(-3.8-0.086)        |
| Marshall Islands | 2000 | Female | 85 to 89 | 25%<br>(11-43%)                | 75%<br>(57-89%)          | 0.33<br>(0.098-0.78)                        | -1.4%<br>(-3.2-0.093%)               | -1.6%<br>(-3.6-0.11%)               | -0.093<br>(-0.21-0.0064)     | -0.7<br>(-1.6-0.047)        |

| Location         | Year | Sex    | Age      | Prevalence of current drinkers | Prevalence of abstainers | Population average of standard drinks daily | Percent of total attributable deaths | Percent of total attributable DALYs | Attributable deaths          | Attributable DALYs          |
|------------------|------|--------|----------|--------------------------------|--------------------------|---------------------------------------------|--------------------------------------|-------------------------------------|------------------------------|-----------------------------|
| Marshall Islands | 2000 | Female | 90 to 94 | 29%<br>(13-49%)                | 71%<br>(51-87%)          | 0.38<br>(0.11-0.89)                         | -1.4%<br>(-2.9-0.071%)               | -1.6%<br>(-3.3-0.03%)               | -0.033<br>(-0.07-0.00063)    | -0.17<br>(-0.36-0.0088)     |
| Marshall Islands | 2000 | Female | 95 plus  | 34%<br>(15-56%)                | 66%<br>(44-85%)          | 0.44<br>(0.12-1.1)                          | -1.7%<br>(-4-0.25%)                  | -2%<br>(-4.5-0.2%)                  | -0.01<br>(-0.023-0.00097)    | -0.034<br>(-0.079-0.0047)   |
| Marshall Islands | 2000 | Male   | All Ages | 39%<br>(30-49%)                | 61%<br>(51-70%)          | 0.66<br>(0.36-1.1)                          | 1.8%<br>(0.77-3.5%)                  | 1.8%<br>(0.48-3.9%)                 | 3.7<br>(1-8.2)               | 220<br>(91-410)             |
| Marshall Islands | 2000 | Male   | 15 to 19 | 37%<br>(21-55%)                | 63%<br>(45-79%)          | 0.43<br>(0.16-0.87)                         | 1.9%<br>(0.8-3.6%)                   | 2.3%<br>(0.72-4.8%)                 | 0.12<br>(0.038-0.25)         | 11<br>(4.5-20)              |
| Marshall Islands | 2000 | Male   | 20 to 24 | 55%<br>(35-72%)                | 45%<br>(28-65%)          | 1.2<br>(0.52-2.1)                           | 5.2%<br>(2.5-9.2%)                   | 6.2%<br>(2.6-11%)                   | 0.48<br>(0.2-0.88)           | 36<br>(17-64)               |
| Marshall Islands | 2000 | Male   | 25 to 29 | 62%<br>(43-78%)                | 38%<br>(22-57%)          | 1.6<br>(0.78-2.8)                           | 6.5%<br>(3.3-11%)                    | 7.7%<br>(3.5-14%)                   | 0.65<br>(0.3-1.2)            | 45<br>(23-78)               |
| Marshall Islands | 2000 | Male   | 30 to 34 | 63%<br>(42-79%)                | 37%<br>(21-58%)          | 1.7<br>(0.84-3.1)                           | 5.6%<br>(2.7-10%)                    | 6.5%<br>(2.8-12%)                   | 0.55<br>(0.24-1)             | 35<br>(17-63)               |
| Marshall Islands | 2000 | Male   | 35 to 39 | 62%<br>(44-78%)                | 38%<br>(22-56%)          | 1.5<br>(0.69-2.8)                           | 4.4%<br>(1.7-8.8%)                   | 4.9%<br>(1.7-10%)                   | 0.47<br>(0.16-0.98)          | 28<br>(11-55)               |
| Marshall Islands | 2000 | Male   | 40 to 44 | 59%<br>(42-76%)                | 41%<br>(24-58%)          | 1.3<br>(0.57-2.5)                           | 3.2%<br>(0.75-7.2%)                  | 3.5%<br>(0.55-8.3%)                 | 0.39<br>(0.06-0.95)          | 21<br>(4.7-48)              |
| Marshall Islands | 2000 | Male   | 45 to 49 | 56%<br>(34-73%)                | 44%<br>(27-66%)          | 1.1<br>(0.47-2.3)                           | 2.4%<br>(0.13-6.1%)                  | 2.5%<br>(-0.028-6.9%)               | 0.33<br>(-0.0036-0.9)        | 16<br>(0.88-41)             |
| Marshall Islands | 2000 | Male   | 50 to 54 | 52%<br>(33-70%)                | 48%<br>(30-67%)          | 0.93<br>(0.37-1.9)                          | 1.7%<br>(-0.33-5.4%)                 | 1.8%<br>(-0.58-6%)                  | 0.27<br>(-0.08-0.87)         | 11<br>(-2.3-34)             |
| Marshall Islands | 2000 | Male   | 55 to 59 | 50%<br>(32-68%)                | 50%<br>(32-68%)          | 0.76<br>(0.3-1.6)                           | 1%<br>(-0.51-3.9%)                   | 1%<br>(-0.64-4.3%)                  | 0.16<br>(-0.097-0.68)        | 6<br>(-3-24)                |
| Marshall Islands | 2000 | Male   | 60 to 64 | 48%<br>(28-67%)                | 52%<br>(33-72%)          | 0.64<br>(0.26-1.3)                          | 0.67%<br>(-0.69-3.2%)                | 0.69%<br>(-0.8-3.5%)                | 0.11<br>(-0.13-0.57)         | 3.5<br>(-3.6-17)            |
| Marshall Islands | 2000 | Male   | 65 to 69 | 46%<br>(27-65%)                | 54%<br>(35-73%)          | 0.57<br>(0.24-1.2)                          | 0.55%<br>(-0.62-2.7%)                | 0.59%<br>(-0.69-3%)                 | 0.093<br>(-0.11-0.46)        | 2.3<br>(-2.6-11)            |
| Marshall Islands | 2000 | Male   | 70 to 74 | 43%<br>(25-61%)                | 57%<br>(39-75%)          | 0.51<br>(0.19-1.1)                          | 0.33%<br>(-0.7-2.1%)                 | 0.34%<br>(-0.79-2.4%)               | 0.047<br>(-0.11-0.31)        | 0.95<br>(-1.9-6.1)          |
| Marshall Islands | 2000 | Male   | 75 to 79 | 40%<br>(23-59%)                | 60%<br>(41-77%)          | 0.43<br>(0.17-0.97)                         | 0.22%<br>(-0.66-1.7%)                | 0.21%<br>(-0.75-1.9%)               | 0.022<br>(-0.08-0.2)         | 0.38<br>(-1.2-2.9)          |
| Marshall Islands | 2000 | Male   | 80 to 84 | 37%<br>(20-55%)                | 63%<br>(45-80%)          | 0.39<br>(0.15-0.82)                         | 0.18%<br>(-0.54-1.4%)                | 0.17%<br>(-0.63-1.4%)               | 0.011<br>(-0.04-0.094)       | 0.14<br>(-0.41-1)           |
| Marshall Islands | 2000 | Male   | 85 to 89 | 35%<br>(21-53%)                | 65%<br>(47-79%)          | 0.37<br>(0.15-0.75)                         | 0.035%<br>(-0.68-1.1%)               | -0.013%<br>(-0.82-1.1%)             | -0.00041<br>(-0.027-0.037)   | 0.0098<br>(-0.19-0.3)       |
| Marshall Islands | 2000 | Male   | 90 to 94 | 37%<br>(23-55%)                | 63%<br>(45-77%)          | 0.38<br>(0.14-0.8)                          | -0.0041%<br>(-0.6-0.9%)              | -0.071%<br>(-0.74-0.93%)            | -0.00076<br>(-0.008-0.0099)  | -0.00027<br>(-0.038-0.058)  |
| Marshall Islands | 2000 | Male   | 95 plus  | 41%<br>(22-62%)                | 59%<br>(38-78%)          | 0.42<br>(0.14-0.94)                         | -0.2%<br>(-0.95-0.94%)               | -0.35%<br>(-1.2-0.9%)               | -0.00077<br>(-0.0027-0.0019) | -0.0017<br>(-0.0082-0.0083) |
| Marshall Islands | 2005 | Female | All Ages | 19%<br>(13-25%)                | 81%<br>(75-87%)          | 0.31<br>(0.17-0.53)                         | -0.31%<br>(-1.1-0.68%)               | -1%<br>(-2.2-0.39%)                 | -2<br>(-4.4-0.85)            | -32<br>(-110-73)            |
| Marshall Islands | 2005 | Female | 15 to 19 | 20%<br>(9.6-35%)               | 80%<br>(65-90%)          | 0.37<br>(0.13-0.8)                          | 1%<br>(0.38-2.2%)                    | 1.5%<br>(0.31-3.6%)                 | 0.046<br>(0.0099-0.11)       | 4.6<br>(1.7-9.6)            |

| Location         | Year | Sex    | Age      | Prevalence of current drinkers | Prevalence of abstainers | Population average of standard drinks daily | Percent of total attributable deaths | Percent of total attributable DALYs | Attributable deaths       | Attributable DALYs       |
|------------------|------|--------|----------|--------------------------------|--------------------------|---------------------------------------------|--------------------------------------|-------------------------------------|---------------------------|--------------------------|
| Marshall Islands | 2005 | Female | 20 to 24 | 24%<br>(11-42%)                | 76%<br>(58-89%)          | 0.58<br>(0.22-1.2)                          | 1.7%<br>(0.74-3.3%)                  | 2.1%<br>(0.58-4.8%)                 | 0.092<br>(0.026-0.22)     | 8.9<br>(3.8-17)          |
| Marshall Islands | 2005 | Female | 25 to 29 | 26%<br>(11-44%)                | 74%<br>(56-89%)          | 0.59<br>(0.2-1.2)                           | 1.3%<br>(0.36-2.9%)                  | 1.5%<br>(0.084-3.9%)                | 0.083<br>(0.005-0.23)     | 7.5<br>(2-17)            |
| Marshall Islands | 2005 | Female | 30 to 34 | 27%<br>(10-45%)                | 73%<br>(55-90%)          | 0.6<br>(0.21-1.3)                           | 0.83%<br>(-0.35-2.6%)                | 0.88%<br>(-0.74-3.3%)               | 0.061<br>(-0.052-0.23)    | 5.1<br>(-2.3-16)         |
| Marshall Islands | 2005 | Female | 35 to 39 | 27%<br>(11-46%)                | 73%<br>(54-89%)          | 0.63<br>(0.23-1.3)                          | 0.38%<br>(-1.2-2.5%)                 | 0.44%<br>(-1.6-3.2%)                | 0.037<br>(-0.13-0.28)     | 2.4<br>(-8-16)           |
| Marshall Islands | 2005 | Female | 40 to 44 | 26%<br>(13-44%)                | 74%<br>(56-87%)          | 0.57<br>(0.22-1.2)                          | -0.26%<br>(-2.1-2.3%)                | -0.27%<br>(-2.6-2.9%)               | -0.026<br>(-0.25-0.28)    | -1.7<br>(-14-15)         |
| Marshall Islands | 2005 | Female | 45 to 49 | 26%<br>(11-44%)                | 74%<br>(56-89%)          | 0.49<br>(0.17-1.1)                          | -0.91%<br>(-3.1-1.2%)                | -1%<br>(-3.6-1.5%)                  | -0.11<br>(-0.41-0.17)     | -6.1<br>(-21-7.6)        |
| Marshall Islands | 2005 | Female | 50 to 54 | 26%<br>(12-44%)                | 74%<br>(56-88%)          | 0.44<br>(0.13-1)                            | -1.5%<br>(-3.9-0.5%)                 | -1.7%<br>(-4.5-0.73%)               | -0.22<br>(-0.6-0.092)     | -9.7<br>(-25-3.2)        |
| Marshall Islands | 2005 | Female | 55 to 59 | 25%<br>(11-45%)                | 75%<br>(55-89%)          | 0.4<br>(0.12-0.94)                          | -1.6%<br>(-4-0.23%)                  | -1.8%<br>(-4.5-0.36%)               | -0.26<br>(-0.67-0.058)    | -9.6<br>(-24-1.5)        |
| Marshall Islands | 2005 | Female | 60 to 64 | 25%<br>(11-45%)                | 75%<br>(55-89%)          | 0.38<br>(0.11-0.89)                         | -1.8%<br>(-4.2--0.1%)                | -2%<br>(-4.7--0.071%)               | -0.32<br>(-0.76--0.012)   | -9.7<br>(-23--0.56)      |
| Marshall Islands | 2005 | Female | 65 to 69 | 27%<br>(12-46%)                | 73%<br>(54-88%)          | 0.39<br>(0.13-0.88)                         | -1.9%<br>(-4.2--0.24%)               | -2.1%<br>(-4.7--0.23%)              | -0.36<br>(-0.82--0.039)   | -8.9<br>(-20--1.1)       |
| Marshall Islands | 2005 | Female | 70 to 74 | 27%<br>(12-44%)                | 73%<br>(56-88%)          | 0.38<br>(0.11-0.85)                         | -1.9%<br>(-4--0.22%)                 | -2.1%<br>(-4.5--0.23%)              | -0.38<br>(-0.82--0.043)   | -7.4<br>(-16--0.81)      |
| Marshall Islands | 2005 | Female | 75 to 79 | 25%<br>(11-45%)                | 75%<br>(55-89%)          | 0.35<br>(0.097-0.9)                         | -1.5%<br>(-3.6-0.07%)                | -1.7%<br>(-4-0.09%)                 | -0.28<br>(-0.65-0.015)    | -4.1<br>(-9.5-0.17)      |
| Marshall Islands | 2005 | Female | 80 to 84 | 24%<br>(11-44%)                | 76%<br>(56-89%)          | 0.33<br>(0.094-0.81)                        | -1.5%<br>(-3.5--0.1%)                | -1.7%<br>(-3.9--0.12%)              | -0.21<br>(-0.49--0.015)   | -2.2<br>(-5.3--0.16)     |
| Marshall Islands | 2005 | Female | 85 to 89 | 25%<br>(11-44%)                | 75%<br>(56-89%)          | 0.34<br>(0.11-0.81)                         | -1.5%<br>(-3.4--0.00053%)            | -1.7%<br>(-3.8--0.05%)              | -0.12<br>(-0.27--0.0036)  | -0.9<br>(-2--0.00033)    |
| Marshall Islands | 2005 | Female | 90 to 94 | 28%<br>(13-48%)                | 72%<br>(52-87%)          | 0.39<br>(0.12-0.94)                         | -1.4%<br>(-3.1-0.14%)                | -1.7%<br>(-3.5-0.098%)              | -0.044<br>(-0.093-0.0026) | -0.23<br>(-0.49-0.021)   |
| Marshall Islands | 2005 | Female | 95 plus  | 33%<br>(14-57%)                | 67%<br>(43-86%)          | 0.46<br>(0.12-1.1)                          | -1.8%<br>(-4.2-0.2%)                 | -2.1%<br>(-4.9-0.17%)               | -0.014<br>(-0.033-0.0011) | -0.047<br>(-0.11-0.0052) |
| Marshall Islands | 2005 | Male   | All Ages | 40%<br>(32-49%)                | 60%<br>(51-68%)          | 0.7<br>(0.39-1.2)                           | 2%<br>(0.77-4%)                      | 1.9%<br>(0.41-4.3%)                 | 4.5<br>(1-9)              | 260<br>(97-510)          |
| Marshall Islands | 2005 | Male   | 15 to 19 | 36%<br>(21-54%)                | 64%<br>(46-79%)          | 0.44<br>(0.17-0.9)                          | 1.9%<br>(0.85-3.7%)                  | 2.4%<br>(0.81-4.9%)                 | 0.13<br>(0.045-0.29)      | 12<br>(5-22)             |
| Marshall Islands | 2005 | Male   | 20 to 24 | 55%<br>(36-72%)                | 45%<br>(28-64%)          | 1.2<br>(0.55-2.2)                           | 5.4%<br>(2.6-9.4%)                   | 6.4%<br>(2.7-12%)                   | 0.54<br>(0.22-1)          | 41<br>(19-74)            |
| Marshall Islands | 2005 | Male   | 25 to 29 | 62%<br>(43-78%)                | 38%<br>(22-57%)          | 1.6<br>(0.79-2.9)                           | 6.6%<br>(3.4-12%)                    | 7.8%<br>(3.5-14%)                   | 0.73<br>(0.33-1.3)        | 51<br>(26-88)            |
| Marshall Islands | 2005 | Male   | 30 to 34 | 63%<br>(42-80%)                | 37%<br>(20-58%)          | 1.8<br>(0.88-3.1)                           | 5.7%<br>(2.6-10%)                    | 6.5%<br>(2.7-12%)                   | 0.71<br>(0.29-1.3)        | 46<br>(21-80)            |
| Marshall Islands | 2005 | Male   | 35 to 39 | 62%<br>(43-78%)                | 38%<br>(22-57%)          | 1.6<br>(0.73-2.9)                           | 4.5%<br>(1.6-8.9%)                   | 5%<br>(1.6-10%)                     | 0.59<br>(0.18-1.2)        | 35<br>(12-68)            |

| Location         | Year | Sex    | Age      | Prevalence of current drinkers | Prevalence of abstainers | Population average of standard drinks daily | Percent of total attributable deaths | Percent of total attributable DALYs | Attributable deaths        | Attributable DALYs        |
|------------------|------|--------|----------|--------------------------------|--------------------------|---------------------------------------------|--------------------------------------|-------------------------------------|----------------------------|---------------------------|
| Marshall Islands | 2005 | Male   | 40 to 44 | 59%<br>(41-76%)                | 41%<br>(24-59%)          | 1.4<br>(0.58-2.7)                           | 3.2%<br>(0.64-7.4%)                  | 3.5%<br>(0.5-8.5%)                  | 0.49<br>(0.071-1.2)        | 26<br>(5.6-61)            |
| Marshall Islands | 2005 | Male   | 45 to 49 | 55%<br>(34-73%)                | 45%<br>(27-66%)          | 1.2<br>(0.48-2.3)                           | 2.4%<br>(0.014-6.5%)                 | 2.5%<br>(-0.2-7.2%)                 | 0.42<br>(-0.029-1.2)       | 20<br>(0.12-56)           |
| Marshall Islands | 2005 | Male   | 50 to 54 | 52%<br>(33-71%)                | 48%<br>(29-67%)          | 0.97<br>(0.39-1.9)                          | 1.7%<br>(-0.44-5.5%)                 | 1.8%<br>(-0.67-6.1%)                | 0.34<br>(-0.13-1.2)        | 14<br>(-3.9-46)           |
| Marshall Islands | 2005 | Male   | 55 to 59 | 50%<br>(32-69%)                | 50%<br>(31-68%)          | 0.79<br>(0.31-1.6)                          | 0.98%<br>(-0.7-4%)                   | 1%<br>(-0.81-4.2%)                  | 0.19<br>(-0.16-0.81)       | 7.2<br>(-5.1-29)          |
| Marshall Islands | 2005 | Male   | 60 to 64 | 48%<br>(28-68%)                | 52%<br>(32-72%)          | 0.66<br>(0.25-1.4)                          | 0.65%<br>(-0.76-3.2%)                | 0.65%<br>(-0.9-3.5%)                | 0.13<br>(-0.18-0.68)       | 4<br>(-4.8-20)            |
| Marshall Islands | 2005 | Male   | 65 to 69 | 46%<br>(28-64%)                | 54%<br>(36-72%)          | 0.6<br>(0.24-1.2)                           | 0.51%<br>(-0.72-2.6%)                | 0.53%<br>(-0.82-2.8%)               | 0.1<br>(-0.16-0.55)        | 2.5<br>(-3.6-13)          |
| Marshall Islands | 2005 | Male   | 70 to 74 | 43%<br>(26-61%)                | 57%<br>(39-74%)          | 0.53<br>(0.2-1.1)                           | 0.3%<br>(-0.77-2%)                   | 0.29%<br>(-0.86-2.2%)               | 0.049<br>(-0.14-0.37)      | 1<br>(-2.6-7.3)           |
| Marshall Islands | 2005 | Male   | 75 to 79 | 39%<br>(24-58%)                | 61%<br>(42-76%)          | 0.44<br>(0.17-0.97)                         | 0.19%<br>(-0.74-1.6%)                | 0.17%<br>(-0.85-1.8%)               | 0.022<br>(-0.11-0.22)      | 0.39<br>(-1.5-3.3)        |
| Marshall Islands | 2005 | Male   | 80 to 84 | 36%<br>(21-55%)                | 64%<br>(45-79%)          | 0.39<br>(0.16-0.82)                         | 0.16%<br>(-0.59-1.3%)                | 0.13%<br>(-0.69-1.4%)               | 0.01<br>(-0.053-0.1)       | 0.15<br>(-0.55-1.2)       |
| Marshall Islands | 2005 | Male   | 85 to 89 | 35%<br>(20-52%)                | 65%<br>(48-80%)          | 0.37<br>(0.15-0.79)                         | 0.014%<br>(-0.71-1%)                 | -0.044%<br>(-0.85-1.1%)             | -0.0017<br>(-0.034-0.043)  | 0.0047<br>(-0.24-0.36)    |
| Marshall Islands | 2005 | Male   | 90 to 94 | 36%<br>(22-53%)                | 64%<br>(47-78%)          | 0.38<br>(0.14-0.8)                          | -0.029%<br>(-0.66-0.84%)             | -0.11%<br>(-0.83-0.87%)             | -0.0015<br>(-0.011-0.012)  | -0.0024<br>(-0.054-0.067) |
| Marshall Islands | 2005 | Male   | 95 plus  | 40%<br>(22-61%)                | 60%<br>(39-78%)          | 0.41<br>(0.13-0.93)                         | -0.21%<br>(-0.98-0.83%)              | -0.37%<br>(-1.3-0.74%)              | -0.0012<br>(-0.004-0.0023) | -0.0026<br>(-0.012-0.01)  |
| Marshall Islands | 2010 | Female | All Ages | 19%<br>(13-26%)                | 81%<br>(74-87%)          | 0.33<br>(0.17-0.57)                         | -0.36%<br>(-1.2-0.75%)               | -1.1%<br>(-2.4-0.43%)               | -2.4<br>(-5.2-0.92)        | -40<br>(-130-84)          |
| Marshall Islands | 2010 | Female | 15 to 19 | 20%<br>(8.9-35%)               | 80%<br>(65-91%)          | 0.38<br>(0.13-0.84)                         | 1%<br>(0.38-2.2%)                    | 1.5%<br>(0.33-3.7%)                 | 0.05<br>(0.011-0.13)       | 5<br>(2-11)               |
| Marshall Islands | 2010 | Female | 20 to 24 | 24%<br>(10-42%)                | 76%<br>(58-90%)          | 0.59<br>(0.21-1.3)                          | 1.7%<br>(0.76-3.3%)                  | 2.1%<br>(0.55-4.9%)                 | 0.093<br>(0.025-0.22)      | 9.2<br>(4-18)             |
| Marshall Islands | 2010 | Female | 25 to 29 | 25%<br>(11-44%)                | 75%<br>(56-89%)          | 0.61<br>(0.21-1.3)                          | 1.4%<br>(0.35-3%)                    | 1.5%<br>(0.051-4.2%)                | 0.09<br>(0.0029-0.25)      | 8.3<br>(2-19)             |
| Marshall Islands | 2010 | Female | 30 to 34 | 26%<br>(10-46%)                | 74%<br>(54-90%)          | 0.63<br>(0.22-1.3)                          | 0.88%<br>(-0.4-2.7%)                 | 0.93%<br>(-0.79-3.6%)               | 0.068<br>(-0.057-0.24)     | 5.8<br>(-2.6-17)          |
| Marshall Islands | 2010 | Female | 35 to 39 | 27%<br>(11-45%)                | 73%<br>(55-89%)          | 0.65<br>(0.24-1.4)                          | 0.38%<br>(-1.4-2.6%)                 | 0.44%<br>(-1.8-3.3%)                | 0.044<br>(-0.19-0.33)      | 2.9<br>(-11-20)           |
| Marshall Islands | 2010 | Female | 40 to 44 | 26%<br>(13-44%)                | 74%<br>(56-87%)          | 0.61<br>(0.23-1.3)                          | -0.29%<br>(-2.3-2.3%)                | -0.29%<br>(-2.8-2.8%)               | -0.031<br>(-0.31-0.32)     | -2.2<br>(-18-17)          |
| Marshall Islands | 2010 | Female | 45 to 49 | 26%<br>(12-44%)                | 74%<br>(56-88%)          | 0.53<br>(0.18-1.1)                          | -0.94%<br>(-3.2-1.2%)                | -1%<br>(-3.7-1.7%)                  | -0.13<br>(-0.49-0.22)      | -7.2<br>(-25-9.8)         |
| Marshall Islands | 2010 | Female | 50 to 54 | 26%<br>(12-46%)                | 74%<br>(54-88%)          | 0.46<br>(0.15-1)                            | -1.5%<br>(-4-0.77%)                  | -1.7%<br>(-4.5-1%)                  | -0.26<br>(-0.71-0.16)      | -11<br>(-31-6.2)          |
| Marshall Islands | 2010 | Female | 55 to 59 | 25%<br>(11-44%)                | 75%<br>(56-89%)          | 0.42<br>(0.13-0.97)                         | -1.6%<br>(-4-0.31%)                  | -1.8%<br>(-4.6-0.44%)               | -0.32<br>(-0.85-0.079)     | -12<br>(-30-2.2)          |



| Location         | Year | Sex    | Age      | Prevalence of current drinkers | Prevalence of abstainers | Population average of standard drinks daily | Percent of total attributable deaths | Percent of total attributable DALYs | Attributable deaths       | Attributable DALYs      |
|------------------|------|--------|----------|--------------------------------|--------------------------|---------------------------------------------|--------------------------------------|-------------------------------------|---------------------------|-------------------------|
| Marshall Islands | 2010 | Female | 60 to 64 | 25%<br>(11-44%)                | 75%<br>(56-89%)          | 0.4<br>(0.11-0.94)                          | -1.8%<br>(-4.2-0.014%)               | -2%<br>(-4.7-0.094%)                | -0.38<br>(-0.9-0.018)     | -12<br>(-27-0.092)      |
| Marshall Islands | 2010 | Female | 65 to 69 | 26%<br>(11-45%)                | 74%<br>(55-89%)          | 0.41<br>(0.13-0.93)                         | -1.9%<br>(-4.3--0.16%)               | -2.1%<br>(-4.8--0.14%)              | -0.43<br>(-0.98--0.028)   | -11<br>(-24--0.88)      |
| Marshall Islands | 2010 | Female | 70 to 74 | 26%<br>(11-43%)                | 74%<br>(57-89%)          | 0.39<br>(0.11-0.92)                         | -1.9%<br>(-4--0.21%)                 | -2.1%<br>(-4.5--0.23%)              | -0.44<br>(-0.96--0.049)   | -8.5<br>(-18--0.96)     |
| Marshall Islands | 2010 | Female | 75 to 79 | 25%<br>(11-43%)                | 75%<br>(57-89%)          | 0.36<br>(0.096-0.9)                         | -1.5%<br>(-3.6-0.0049%)              | -1.7%<br>(-4-0.0012%)               | -0.34<br>(-0.8-0.00027)   | -4.9<br>(-12-0.018)     |
| Marshall Islands | 2010 | Female | 80 to 84 | 24%<br>(10-43%)                | 76%<br>(57-90%)          | 0.35<br>(0.1-0.86)                          | -1.5%<br>(-3.5--0.15%)               | -1.7%<br>(-3.9--0.2%)               | -0.26<br>(-0.6--0.032)    | -2.8<br>(-6.5--0.28)    |
| Marshall Islands | 2010 | Female | 85 to 89 | 25%<br>(11-43%)                | 75%<br>(57-89%)          | 0.36<br>(0.12-0.89)                         | -1.5%<br>(-3.4--0.12%)               | -1.7%<br>(-3.9--0.16%)              | -0.14<br>(-0.31--0.013)   | -1.1<br>(-2.4--0.077)   |
| Marshall Islands | 2010 | Female | 90 to 94 | 28%<br>(13-48%)                | 72%<br>(52-87%)          | 0.41<br>(0.13-0.99)                         | -1.5%<br>(-3.2-0.13%)                | -1.7%<br>(-3.7-0.094%)              | -0.051<br>(-0.11-0.0028)  | -0.26<br>(-0.57-0.022)  |
| Marshall Islands | 2010 | Female | 95 plus  | 33%<br>(14-56%)                | 67%<br>(44-86%)          | 0.48<br>(0.14-1.1)                          | -1.8%<br>(-4.2-0.27%)                | -2.1%<br>(-4.9-0.19%)               | -0.017<br>(-0.039-0.0015) | -0.055<br>(-0.13-0.008) |
| Marshall Islands | 2010 | Male   | All Ages | 40%<br>(32-50%)                | 60%<br>(50-68%)          | 0.74<br>(0.41-1.3)                          | 2.2%<br>(0.8-4.3%)                   | 2%<br>(0.38-4.5%)                   | 5.2<br>(1-12)             | 300<br>(110-590)        |
| Marshall Islands | 2010 | Male   | 15 to 19 | 36%<br>(21-55%)                | 64%<br>(45-79%)          | 0.46<br>(0.17-0.93)                         | 2%<br>(0.9-3.8%)                     | 2.5%<br>(0.83-5.2%)                 | 0.15<br>(0.048-0.32)      | 13<br>(5.5-25)          |
| Marshall Islands | 2010 | Male   | 20 to 24 | 54%<br>(36-72%)                | 46%<br>(28-64%)          | 1.2<br>(0.58-2.2)                           | 5.5%<br>(2.7-9.8%)                   | 6.6%<br>(2.9-13%)                   | 0.58<br>(0.24-1.1)        | 43<br>(20-81)           |
| Marshall Islands | 2010 | Male   | 25 to 29 | 61%<br>(42-77%)                | 39%<br>(23-58%)          | 1.7<br>(0.82-3.1)                           | 6.8%<br>(3.4-12%)                    | 8.1%<br>(3.6-15%)                   | 0.81<br>(0.36-1.5)        | 56<br>(28-98)           |
| Marshall Islands | 2010 | Male   | 30 to 34 | 63%<br>(41-79%)                | 37%<br>(21-59%)          | 1.8<br>(0.88-3.3)                           | 5.9%<br>(2.7-11%)                    | 6.7%<br>(2.8-13%)                   | 0.79<br>(0.32-1.5)        | 51<br>(23-92)           |
| Marshall Islands | 2010 | Male   | 35 to 39 | 62%<br>(43-78%)                | 38%<br>(22-57%)          | 1.6<br>(0.75-3.1)                           | 4.6%<br>(1.6-9.1%)                   | 5.2%<br>(1.6-11%)                   | 0.75<br>(0.22-1.5)        | 44<br>(15-86)           |
| Marshall Islands | 2010 | Male   | 40 to 44 | 59%<br>(41-76%)                | 41%<br>(24-59%)          | 1.4<br>(0.61-2.7)                           | 3.3%<br>(0.57-7.9%)                  | 3.6%<br>(0.46-9%)                   | 0.58<br>(0.076-1.4)       | 31<br>(5.5-72)          |
| Marshall Islands | 2010 | Male   | 45 to 49 | 55%<br>(34-73%)                | 45%<br>(27-66%)          | 1.2<br>(0.51-2.4)                           | 2.5%<br>(-0.1-6.6%)                  | 2.6%<br>(-0.39-7.3%)                | 0.51<br>(-0.068-1.4)      | 24<br>(-1-63)           |
| Marshall Islands | 2010 | Male   | 50 to 54 | 52%<br>(33-71%)                | 48%<br>(29-67%)          | 1<br>(0.4-2)                                | 1.8%<br>(-0.44-5.5%)                 | 1.9%<br>(-0.61-6%)                  | 0.42<br>(-0.14-1.3)       | 18<br>(-4.5-53)         |
| Marshall Islands | 2010 | Male   | 55 to 59 | 50%<br>(32-69%)                | 50%<br>(31-68%)          | 0.82<br>(0.33-1.7)                          | 1.1%<br>(-0.65-4.1%)                 | 1.1%<br>(-0.84-4.5%)                | 0.25<br>(-0.2-1)          | 9.3<br>(-6-36)          |
| Marshall Islands | 2010 | Male   | 60 to 64 | 47%<br>(28-67%)                | 53%<br>(33-72%)          | 0.68<br>(0.25-1.5)                          | 0.7%<br>(-0.75-3.3%)                 | 0.71%<br>(-0.9-3.6%)                | 0.16<br>(-0.21-0.84)      | 5.1<br>(-5.6-25)        |
| Marshall Islands | 2010 | Male   | 65 to 69 | 45%<br>(27-64%)                | 55%<br>(36-73%)          | 0.62<br>(0.24-1.3)                          | 0.54%<br>(-0.73-2.8%)                | 0.56%<br>(-0.85-3%)                 | 0.12<br>(-0.19-0.67)      | 3.1<br>(-4.2-16)        |
| Marshall Islands | 2010 | Male   | 70 to 74 | 43%<br>(26-61%)                | 57%<br>(39-74%)          | 0.55<br>(0.22-1.2)                          | 0.32%<br>(-0.78-2.3%)                | 0.32%<br>(-0.89-2.5%)               | 0.061<br>(-0.17-0.49)     | 1.3<br>(-3.1-9.4)       |
| Marshall Islands | 2010 | Male   | 75 to 79 | 39%<br>(24-58%)                | 61%<br>(42-76%)          | 0.47<br>(0.18-1)                            | 0.21%<br>(-0.76-2%)                  | 0.19%<br>(-0.85-2.1%)               | 0.028<br>(-0.13-0.32)     | 0.51<br>(-1.7-4.8)      |

| Location         | Year | Sex    | Age      | Prevalence of current drinkers | Prevalence of abstainers | Population average of standard drinks daily | Percent of total attributable deaths | Percent of total attributable DALYs | Attributable deaths         | Attributable DALYs        |
|------------------|------|--------|----------|--------------------------------|--------------------------|---------------------------------------------|--------------------------------------|-------------------------------------|-----------------------------|---------------------------|
| Marshall Islands | 2010 | Male   | 80 to 84 | 37%<br>(21-56%)                | 63%<br>(44-79%)          | 0.42<br>(0.17-0.89)                         | 0.17%<br>(-0.6-1.5%)                 | 0.14%<br>(-0.72-1.6%)               | 0.013<br>(-0.062-0.15)      | 0.19<br>(-0.65-1.7)       |
| Marshall Islands | 2010 | Male   | 85 to 89 | 35%<br>(20-52%)                | 65%<br>(48-80%)          | 0.39<br>(0.16-0.85)                         | 0.029%<br>(-0.69-1.1%)               | -0.032%<br>(-0.85-1.2%)             | -0.0014<br>(-0.038-0.053)   | 0.011<br>(-0.26-0.43)     |
| Marshall Islands | 2010 | Male   | 90 to 94 | 36%<br>(22-54%)                | 64%<br>(46-78%)          | 0.4<br>(0.16-0.87)                          | -0.021%<br>(-0.68-0.9%)              | -0.1%<br>(-0.85-0.92%)              | -0.0016<br>(-0.013-0.014)   | -0.0019<br>(-0.061-0.082) |
| Marshall Islands | 2010 | Male   | 95 plus  | 40%<br>(21-60%)                | 60%<br>(40-79%)          | 0.43<br>(0.15-0.97)                         | -0.19%<br>(-1-0.99%)                 | -0.35%<br>(-1.3-0.98%)              | -0.0013<br>(-0.0049-0.0037) | -0.0028<br>(-0.015-0.015) |
| Marshall Islands | 2016 | Female | All Ages | 19%<br>(14-26%)                | 81%<br>(74-86%)          | 0.36<br>(0.2-0.61)                          | -0.4%<br>(-1.3-0.89%)                | -1.2%<br>(-2.6-0.62%)               | -2.9<br>(-6.5-1.6)          | -48<br>(-170-110)         |
| Marshall Islands | 2016 | Female | 15 to 19 | 20%<br>(8.8-35%)               | 80%<br>(65-91%)          | 0.41<br>(0.13-0.94)                         | 1%<br>(0.41-2.4%)                    | 1.6%<br>(0.38-4%)                   | 0.054<br>(0.013-0.15)       | 5.6<br>(2.2-13)           |
| Marshall Islands | 2016 | Female | 20 to 24 | 24%<br>(9.9-42%)               | 76%<br>(58-90%)          | 0.64<br>(0.23-1.4)                          | 1.8%<br>(0.78-3.5%)                  | 2.2%<br>(0.64-5.4%)                 | 0.1<br>(0.027-0.25)         | 10<br>(4.6-20)            |
| Marshall Islands | 2016 | Female | 25 to 29 | 25%<br>(11-44%)                | 75%<br>(56-89%)          | 0.65<br>(0.23-1.3)                          | 1.4%<br>(0.29-3.2%)                  | 1.6%<br>(-0.087-4.3%)               | 0.091<br>(-0.0053-0.26)     | 8.7<br>(1.9-20)           |
| Marshall Islands | 2016 | Female | 30 to 34 | 26%<br>(9.8-46%)               | 74%<br>(54-90%)          | 0.67<br>(0.23-1.3)                          | 0.92%<br>(-0.39-2.9%)                | 0.97%<br>(-0.84-4%)                 | 0.072<br>(-0.062-0.27)      | 6.4<br>(-2.8-20)          |
| Marshall Islands | 2016 | Female | 35 to 39 | 27%<br>(11-45%)                | 73%<br>(55-89%)          | 0.69<br>(0.25-1.5)                          | 0.41%<br>(-1.4-2.8%)                 | 0.45%<br>(-1.9-3.6%)                | 0.046<br>(-0.2-0.38)        | 3.4<br>(-11-24)           |
| Marshall Islands | 2016 | Female | 40 to 44 | 26%<br>(12-43%)                | 74%<br>(57-88%)          | 0.63<br>(0.24-1.3)                          | -0.23%<br>(-2.3-2.2%)                | -0.28%<br>(-3-2.9%)                 | -0.035<br>(-0.37-0.38)      | -2<br>(-20-20)            |
| Marshall Islands | 2016 | Female | 45 to 49 | 26%<br>(12-44%)                | 74%<br>(56-88%)          | 0.54<br>(0.19-1.2)                          | -0.88%<br>(-3.1-1.4%)                | -1%<br>(-3.7-1.7%)                  | -0.15<br>(-0.55-0.26)       | -7.6<br>(-27-12)          |
| Marshall Islands | 2016 | Female | 50 to 54 | 25%<br>(11-44%)                | 75%<br>(56-89%)          | 0.48<br>(0.15-1)                            | -1.4%<br>(-3.8-1.1%)                 | -1.6%<br>(-4.4-1.2%)                | -0.28<br>(-0.81-0.22)       | -12<br>(-35-9.1)          |
| Marshall Islands | 2016 | Female | 55 to 59 | 25%<br>(11-45%)                | 75%<br>(55-89%)          | 0.44<br>(0.15-1)                            | -1.5%<br>(-4.1-0.63%)                | -1.8%<br>(-4.6-0.78%)               | -0.36<br>(-0.99-0.15)       | -13<br>(-36-5.3)          |
| Marshall Islands | 2016 | Female | 60 to 64 | 25%<br>(12-45%)                | 75%<br>(55-88%)          | 0.43<br>(0.13-1)                            | -1.8%<br>(-4.3-0.27%)                | -2%<br>(-4.8-0.36%)                 | -0.46<br>(-1.1-0.091)       | -14<br>(-33-2.3)          |
| Marshall Islands | 2016 | Female | 65 to 69 | 26%<br>(12-45%)                | 74%<br>(55-88%)          | 0.44<br>(0.14-1)                            | -1.9%<br>(-4.3-0.16%)                | -2.2%<br>(-4.8-0.19%)               | -0.51<br>(-1.2-0.048)       | -13<br>(-29-1.2)          |
| Marshall Islands | 2016 | Female | 70 to 74 | 26%<br>(12-44%)                | 74%<br>(56-88%)          | 0.42<br>(0.13-1)                            | -1.9%<br>(-4.1-0.17%)                | -2.1%<br>(-4.7-0.19%)               | -0.53<br>(-1.2-0.043)       | -10<br>(-23-0.91)         |
| Marshall Islands | 2016 | Female | 75 to 79 | 25%<br>(11-44%)                | 75%<br>(56-89%)          | 0.39<br>(0.11-0.99)                         | -1.5%<br>(-3.7-0.35%)                | -1.7%<br>(-4.2-0.4%)                | -0.41<br>(-1-0.095)         | -6<br>(-15-1.3)           |
| Marshall Islands | 2016 | Female | 80 to 84 | 24%<br>(11-43%)                | 76%<br>(57-89%)          | 0.37<br>(0.11-0.94)                         | -1.5%<br>(-3.6-0.14%)                | -1.7%<br>(-4.1-0.14%)               | -0.31<br>(-0.78-0.026)      | -3.3<br>(-8.2-0.32)       |
| Marshall Islands | 2016 | Female | 85 to 89 | 25%<br>(11-44%)                | 75%<br>(56-89%)          | 0.39<br>(0.13-0.93)                         | -1.5%<br>(-3.6-0.099%)               | -1.7%<br>(-4.1-0.071%)              | -0.17<br>(-0.41-0.0065)     | -1.3<br>(-3.1-0.078)      |
| Marshall Islands | 2016 | Female | 90 to 94 | 28%<br>(13-48%)                | 72%<br>(52-87%)          | 0.43<br>(0.13-1)                            | -1.5%<br>(-3.4-0.25%)                | -1.7%<br>(-4-0.18%)                 | -0.061<br>(-0.14-0.0061)    | -0.31<br>(-0.72-0.047)    |
| Marshall Islands | 2016 | Female | 95 plus  | 33%<br>(14-56%)                | 67%<br>(44-86%)          | 0.51<br>(0.14-1.2)                          | -1.8%<br>(-4.5-0.33%)                | -2.2%<br>(-5.2-0.27%)               | -0.019<br>(-0.045-0.0023)   | -0.063<br>(-0.15-0.011)   |

| Location                       | Year | Sex    | Age      | Prevalence of current drinkers | Prevalence of abstainers | Population average of standard drinks daily | Percent of total attributable deaths | Percent of total attributable DALYs | Attributable deaths        | Attributable DALYs       |
|--------------------------------|------|--------|----------|--------------------------------|--------------------------|---------------------------------------------|--------------------------------------|-------------------------------------|----------------------------|--------------------------|
| Marshall Islands               | 2016 | Male   | All Ages | 41%<br>(32-50%)                | 59%<br>(50-68%)          | 0.82<br>(0.45-1.4)                          | 2.4%<br>(0.83-4.9%)                  | 2.1%<br>(0.41-5.2%)                 | 6.3<br>(1.2-15)            | 360<br>(120-730)         |
| Marshall Islands               | 2016 | Male   | 15 to 19 | 36%<br>(21-55%)                | 64%<br>(45-79%)          | 0.5<br>(0.19-0.99)                          | 2.1%<br>(0.93-4%)                    | 2.7%<br>(0.92-5.5%)                 | 0.17<br>(0.058-0.37)       | 15<br>(6.6-30)           |
| Marshall Islands               | 2016 | Male   | 20 to 24 | 55%<br>(36-72%)                | 45%<br>(28-64%)          | 1.3<br>(0.63-2.5)                           | 5.8%<br>(2.8-11%)                    | 7%<br>(3-13%)                       | 0.68<br>(0.28-1.3)         | 51<br>(25-94)            |
| Marshall Islands               | 2016 | Male   | 25 to 29 | 62%<br>(42-77%)                | 38%<br>(23-58%)          | 1.9<br>(0.86-3.4)                           | 7.1%<br>(3.5-12%)                    | 8.5%<br>(3.8-16%)                   | 0.88<br>(0.39-1.7)         | 62<br>(29-110)           |
| Marshall Islands               | 2016 | Male   | 30 to 34 | 63%<br>(42-79%)                | 37%<br>(21-58%)          | 2<br>(0.96-3.7)                             | 6.1%<br>(2.8-11%)                    | 7.1%<br>(2.8-14%)                   | 0.89<br>(0.35-1.7)         | 58<br>(26-110)           |
| Marshall Islands               | 2016 | Male   | 35 to 39 | 62%<br>(44-79%)                | 38%<br>(21-56%)          | 1.7<br>(0.85-3.2)                           | 4.9%<br>(1.7-9.5%)                   | 5.6%<br>(1.7-12%)                   | 0.86<br>(0.27-1.7)         | 51<br>(18-98)            |
| Marshall Islands               | 2016 | Male   | 40 to 44 | 59%<br>(41-76%)                | 41%<br>(24-59%)          | 1.5<br>(0.65-2.9)                           | 3.5%<br>(0.67-7.9%)                  | 3.8%<br>(0.47-9.2%)                 | 0.75<br>(0.095-1.8)        | 41<br>(7.4-94)           |
| Marshall Islands               | 2016 | Male   | 45 to 49 | 55%<br>(33-74%)                | 45%<br>(26-67%)          | 1.3<br>(0.56-2.5)                           | 2.6%<br>(-0.039-6.9%)                | 2.8%<br>(-0.29-7.9%)                | 0.63<br>(-0.062-1.8)       | 31<br>(-0.45-81)         |
| Marshall Islands               | 2016 | Male   | 50 to 54 | 52%<br>(32-72%)                | 48%<br>(28-68%)          | 1.1<br>(0.46-2.2)                           | 2%<br>(-0.49-6%)                     | 2.1%<br>(-0.67-6.5%)                | 0.53<br>(-0.17-1.7)        | 23<br>(-5.6-67)          |
| Marshall Islands               | 2016 | Male   | 55 to 59 | 50%<br>(32-69%)                | 50%<br>(31-68%)          | 0.89<br>(0.34-1.9)                          | 1.2%<br>(-0.57-4.8%)                 | 1.2%<br>(-0.75-5.2%)                | 0.34<br>(-0.21-1.5)        | 13<br>(-6.2-51)          |
| Marshall Islands               | 2016 | Male   | 60 to 64 | 47%<br>(28-67%)                | 53%<br>(33-72%)          | 0.73<br>(0.27-1.6)                          | 0.83%<br>(-0.72-3.9%)                | 0.85%<br>(-0.88-4.3%)               | 0.24<br>(-0.25-1.2)        | 7.5<br>(-6.8-37)         |
| Marshall Islands               | 2016 | Male   | 65 to 69 | 46%<br>(27-65%)                | 54%<br>(35-73%)          | 0.66<br>(0.26-1.3)                          | 0.65%<br>(-0.7-3.3%)                 | 0.67%<br>(-0.81-3.6%)               | 0.17<br>(-0.2-0.91)        | 4.5<br>(-4.8-22)         |
| Marshall Islands               | 2016 | Male   | 70 to 74 | 43%<br>(26-60%)                | 57%<br>(40-74%)          | 0.58<br>(0.23-1.2)                          | 0.39%<br>(-0.73-2.6%)                | 0.39%<br>(-0.84-2.8%)               | 0.089<br>(-0.2-0.64)       | 1.9<br>(-3.6-12)         |
| Marshall Islands               | 2016 | Male   | 75 to 79 | 39%<br>(23-58%)                | 61%<br>(42-77%)          | 0.5<br>(0.19-1.1)                           | 0.27%<br>(-0.74-2.1%)                | 0.24%<br>(-0.86-2.3%)               | 0.043<br>(-0.16-0.39)      | 0.78<br>(-2.2-5.9)       |
| Marshall Islands               | 2016 | Male   | 80 to 84 | 36%<br>(20-54%)                | 64%<br>(46-80%)          | 0.44<br>(0.18-0.94)                         | 0.23%<br>(-0.54-1.7%)                | 0.2%<br>(-0.67-1.8%)                | 0.021<br>(-0.07-0.19)      | 0.29<br>(-0.68-2.2)      |
| Marshall Islands               | 2016 | Male   | 85 to 89 | 34%<br>(21-51%)                | 66%<br>(49-79%)          | 0.42<br>(0.17-0.89)                         | 0.078%<br>(-0.71-1.4%)               | 0.017%<br>(-0.88-1.4%)              | 0.00088<br>(-0.047-0.079)  | 0.036<br>(-0.33-0.64)    |
| Marshall Islands               | 2016 | Male   | 90 to 94 | 36%<br>(22-54%)                | 64%<br>(46-78%)          | 0.44<br>(0.16-0.94)                         | 0.015%<br>(-0.75-1.1%)               | -0.072%<br>(-0.94-1.2%)             | -0.0013<br>(-0.016-0.02)   | 0.0015<br>(-0.076-0.11)  |
| Marshall Islands               | 2016 | Male   | 95 plus  | 40%<br>(21-61%)                | 60%<br>(39-79%)          | 0.48<br>(0.17-1.1)                          | -0.15%<br>(-1.1-1.2%)                | -0.32%<br>(-1.4-1.2%)               | -0.0014<br>(-0.0057-0.005) | -0.0025<br>(-0.018-0.02) |
| Federated States of Micronesia | 1990 | Female | All Ages | 15%<br>(12-19%)                | 85%<br>(81-88%)          | 0.23<br>(0.15-0.33)                         | 0.4%<br>(0.14-0.76%)                 | 0.29%<br>(-0.13-0.9%)               | 0.96<br>(-0.42-3)          | 72<br>(26-140)           |
| Federated States of Micronesia | 1990 | Female | 15 to 19 | 19%<br>(12-30%)                | 81%<br>(70-88%)          | 0.33<br>(0.15-0.58)                         | 0.97%<br>(0.44-1.7%)                 | 1.4%<br>(0.43-2.9%)                 | 0.081<br>(0.024-0.17)      | 8.2<br>(3.6-15)          |
| Federated States of Micronesia | 1990 | Female | 20 to 24 | 24%<br>(14-36%)                | 76%<br>(64-86%)          | 0.52<br>(0.26-0.9)                          | 1.7%<br>(0.91-2.8%)                  | 2.1%<br>(0.82-4.1%)                 | 0.14<br>(0.057-0.28)       | 14<br>(7.5-24)           |
| Federated States of Micronesia | 1990 | Female | 25 to 29 | 24%<br>(14-37%)                | 76%<br>(63-86%)          | 0.48<br>(0.24-0.81)                         | 1.5%<br>(0.9-2.5%)                   | 1.8%<br>(0.82-3.4%)                 | 0.13<br>(0.059-0.26)       | 12<br>(6.6-20)           |

| Location                       | Year | Sex    | Age      | Prevalence of current drinkers | Prevalence of abstainers | Population average of standard drinks daily | Percent of total attributable deaths | Percent of total attributable DALYs | Attributable deaths        | Attributable DALYs       |
|--------------------------------|------|--------|----------|--------------------------------|--------------------------|---------------------------------------------|--------------------------------------|-------------------------------------|----------------------------|--------------------------|
| Federated States of Micronesia | 1990 | Female | 30 to 34 | 23%<br>(13-37%)                | 77%<br>(63-87%)          | 0.47<br>(0.23-0.81)                         | 1.3%<br>(0.66-2.2%)                  | 1.5%<br>(0.63-2.9%)                 | 0.13<br>(0.051-0.27)       | 11<br>(5.3-18)           |
| Federated States of Micronesia | 1990 | Female | 35 to 39 | 22%<br>(13-36%)                | 78%<br>(64-87%)          | 0.49<br>(0.24-0.89)                         | 1.4%<br>(0.67-2.5%)                  | 1.7%<br>(0.75-3.4%)                 | 0.19<br>(0.079-0.39)       | 12<br>(5.8-23)           |
| Federated States of Micronesia | 1990 | Female | 40 to 44 | 21%<br>(12-34%)                | 79%<br>(66-88%)          | 0.45<br>(0.21-0.84)                         | 1.3%<br>(0.52-2.5%)                  | 1.7%<br>(0.61-3.4%)                 | 0.16<br>(0.056-0.34)       | 8.3<br>(3.3-17)          |
| Federated States of Micronesia | 1990 | Female | 45 to 49 | 21%<br>(11-33%)                | 79%<br>(67-89%)          | 0.39<br>(0.18-0.72)                         | 0.78%<br>(0.046-1.7%)                | 1%<br>(0.084-2.4%)                  | 0.12<br>(0.0098-0.27)      | 5.1<br>(0.32-12)         |
| Federated States of Micronesia | 1990 | Female | 50 to 54 | 21%<br>(12-33%)                | 79%<br>(67-88%)          | 0.35<br>(0.16-0.68)                         | 0.47%<br>(-0.22-1.5%)                | 0.68%<br>(-0.23-2.2%)               | 0.086<br>(-0.027-0.27)     | 2.9<br>(-1.4-9.7)        |
| Federated States of Micronesia | 1990 | Female | 55 to 59 | 19%<br>(11-30%)                | 81%<br>(70-89%)          | 0.28<br>(0.13-0.54)                         | 0.27%<br>(-0.43-1.2%)                | 0.43%<br>(-0.43-1.6%)               | 0.075<br>(-0.071-0.29)     | 1.9<br>(-2.9-8.6)        |
| Federated States of Micronesia | 1990 | Female | 60 to 64 | 17%<br>(9.8-29%)               | 83%<br>(71-90%)          | 0.24<br>(0.11-0.47)                         | 0.0092%<br>(-0.63-0.79%)             | 0.095%<br>(-0.66-1%)                | 0.021<br>(-0.14-0.23)      | 0.074<br>(-4.6-5.8)      |
| Federated States of Micronesia | 1990 | Female | 65 to 69 | 18%<br>(10-28%)                | 82%<br>(72-90%)          | 0.24<br>(0.11-0.44)                         | -0.019%<br>(-0.7-0.75%)              | 0.063%<br>(-0.73-0.95%)             | 0.018<br>(-0.2-0.28)       | -0.15<br>(-5.3-5.8)      |
| Federated States of Micronesia | 1990 | Female | 70 to 74 | 18%<br>(11-29%)                | 82%<br>(71-89%)          | 0.24<br>(0.11-0.46)                         | -0.17%<br>(-0.8-0.61%)               | -0.13%<br>(-0.86-0.78%)             | -0.045<br>(-0.29-0.25)     | -1.2<br>(-5.7-4.4)       |
| Federated States of Micronesia | 1990 | Female | 75 to 79 | 18%<br>(11-30%)                | 82%<br>(70-89%)          | 0.23<br>(0.11-0.44)                         | -0.13%<br>(-0.74-0.62%)              | -0.095%<br>(-0.79-0.73%)            | -0.03<br>(-0.25-0.23)      | -0.65<br>(-3.8-3.1)      |
| Federated States of Micronesia | 1990 | Female | 80 to 84 | 18%<br>(10-29%)                | 82%<br>(71-90%)          | 0.23<br>(0.1-0.41)                          | -0.28%<br>(-0.88-0.3%)               | -0.3%<br>(-0.98-0.37%)              | -0.069<br>(-0.22-0.086)    | -0.78<br>(-2.4-0.84)     |
| Federated States of Micronesia | 1990 | Female | 85 to 89 | 18%<br>(11-29%)                | 82%<br>(71-89%)          | 0.23<br>(0.11-0.42)                         | -0.32%<br>(-0.9-0.24%)               | -0.36%<br>(-1-0.29%)                | -0.041<br>(-0.12-0.033)    | -0.31<br>(-0.87-0.23)    |
| Federated States of Micronesia | 1990 | Female | 90 to 94 | 20%<br>(12-30%)                | 80%<br>(70-88%)          | 0.24<br>(0.1-0.46)                          | -0.26%<br>(-0.76-0.28%)              | -0.29%<br>(-0.86-0.31%)             | -0.013<br>(-0.037-0.014)   | -0.067<br>(-0.2-0.071)   |
| Federated States of Micronesia | 1990 | Female | 95 plus  | 22%<br>(12-36%)                | 78%<br>(64-88%)          | 0.27<br>(0.1-0.53)                          | -0.29%<br>(-0.98-0.4%)               | -0.36%<br>(-1.2-0.41%)              | -0.0044<br>(-0.014-0.0049) | -0.013<br>(-0.046-0.018) |
| Federated States of Micronesia | 1990 | Male   | All Ages | 36%<br>(27-45%)                | 64%<br>(55-73%)          | 0.71<br>(0.5-0.98)                          | 2.1%<br>(1.3-3.2%)                   | 2.2%<br>(1.1-3.6%)                  | 9<br>(4.5-15)              | 470<br>(290-700)         |
| Federated States of Micronesia | 1990 | Male   | 15 to 19 | 36%<br>(21-53%)                | 64%<br>(47-79%)          | 0.46<br>(0.21-0.82)                         | 1.9%<br>(0.86-3.5%)                  | 2.4%<br>(0.83-4.8%)                 | 0.25<br>(0.087-0.5)        | 22<br>(9.6-40)           |
| Federated States of Micronesia | 1990 | Male   | 20 to 24 | 54%<br>(35-72%)                | 46%<br>(28-65%)          | 1.3<br>(0.75-2.1)                           | 5.9%<br>(3.3-9.4%)                   | 7.1%<br>(3.7-12%)                   | 0.96<br>(0.48-1.6)         | 72<br>(40-110)           |
| Federated States of Micronesia | 1990 | Male   | 25 to 29 | 61%<br>(42-77%)                | 39%<br>(23-58%)          | 2<br>(1.2-3.1)                              | 8.2%<br>(5-12%)                      | 9.9%<br>(5.9-15%)                   | 1.3<br>(0.72-2)            | 86<br>(54-130)           |
| Federated States of Micronesia | 1990 | Male   | 30 to 34 | 62%<br>(41-79%)                | 38%<br>(21-59%)          | 2.2<br>(1.2-3.4)                            | 7.6%<br>(4.5-12%)                    | 9.2%<br>(5.2-14%)                   | 1.3<br>(0.67-2.1)          | 80<br>(46-120)           |
| Federated States of Micronesia | 1990 | Male   | 35 to 39 | 61%<br>(43-78%)                | 39%<br>(22-57%)          | 1.8<br>(1-2.9)                              | 5.8%<br>(3.2-9.4%)                   | 6.8%<br>(3.5-11%)                   | 1.1<br>(0.55-1.8)          | 62<br>(34-100)           |
| Federated States of Micronesia | 1990 | Male   | 40 to 44 | 58%<br>(40-75%)                | 42%<br>(25-60%)          | 1.6<br>(0.89-2.6)                           | 4.6%<br>(2.2-7.9%)                   | 5.2%<br>(2.2-9.2%)                  | 0.78<br>(0.34-1.4)         | 40<br>(20-71)            |
| Federated States of Micronesia | 1990 | Male   | 45 to 49 | 54%<br>(33-72%)                | 46%<br>(28-67%)          | 1.4<br>(0.72-2.5)                           | 4.1%<br>(1.7-7.4%)                   | 4.6%<br>(1.7-8.5%)                  | 0.81<br>(0.3-1.5)          | 37<br>(15-67)            |

| Location                       | Year | Sex    | Age      | Prevalence of current drinkers | Prevalence of abstainers | Population average of standard drinks daily | Percent of total attributable deaths | Percent of total attributable DALYs | Attributable deaths        | Attributable DALYs        |
|--------------------------------|------|--------|----------|--------------------------------|--------------------------|---------------------------------------------|--------------------------------------|-------------------------------------|----------------------------|---------------------------|
| Federated States of Micronesia | 1990 | Male   | 50 to 54 | 51%<br>(32-70%)                | 49%<br>(30-68%)          | 1.2<br>(0.58-2.1)                           | 3.3%<br>(1.1-6.4%)                   | 3.6%<br>(0.94-7.3%)                 | 0.62<br>(0.16-1.3)         | 25<br>(7.9-50)            |
| Federated States of Micronesia | 1990 | Male   | 55 to 59 | 49%<br>(31-69%)                | 51%<br>(31-69%)          | 0.88<br>(0.44-1.6)                          | 1.9%<br>(0.35-4.3%)                  | 2%<br>(0.25-4.9%)                   | 0.48<br>(0.061-1.1)        | 17<br>(3.1-38)            |
| Federated States of Micronesia | 1990 | Male   | 60 to 64 | 46%<br>(27-66%)                | 54%<br>(34-73%)          | 0.69<br>(0.32-1.3)                          | 1.3%<br>(0.012-3.6%)                 | 1.4%<br>(-0.1-3.9%)                 | 0.41<br>(-0.029-1.2)       | 12<br>(0.12-33)           |
| Federated States of Micronesia | 1990 | Male   | 65 to 69 | 45%<br>(26-64%)                | 55%<br>(36-74%)          | 0.62<br>(0.3-1.2)                           | 1.2%<br>(-0.02-2.8%)                 | 1.3%<br>(-0.061-3.2%)               | 0.42<br>(-0.023-1.1)       | 9.9<br>(-0.17-25)         |
| Federated States of Micronesia | 1990 | Male   | 70 to 74 | 42%<br>(25-59%)                | 58%<br>(41-75%)          | 0.55<br>(0.26-1)                            | 0.81%<br>(-0.16-2.2%)                | 0.88%<br>(-0.22-2.5%)               | 0.33<br>(-0.082-0.94)      | 6.3<br>(-1.3-17)          |
| Federated States of Micronesia | 1990 | Male   | 75 to 79 | 38%<br>(23-57%)                | 62%<br>(43-77%)          | 0.46<br>(0.21-0.91)                         | 0.58%<br>(-0.22-1.9%)                | 0.61%<br>(-0.27-2.1%)               | 0.21<br>(-0.092-0.72)      | 3.1<br>(-1.2-10)          |
| Federated States of Micronesia | 1990 | Male   | 80 to 84 | 36%<br>(20-54%)                | 64%<br>(46-80%)          | 0.41<br>(0.19-0.75)                         | 0.43%<br>(-0.2-1.3%)                 | 0.44%<br>(-0.26-1.5%)               | 0.096<br>(-0.058-0.31)     | 1.1<br>(-0.54-3.4)        |
| Federated States of Micronesia | 1990 | Male   | 85 to 89 | 34%<br>(21-51%)                | 66%<br>(49-79%)          | 0.39<br>(0.18-0.72)                         | 0.26%<br>(-0.32-1%)                  | 0.25%<br>(-0.42-1.1%)               | 0.025<br>(-0.042-0.11)     | 0.22<br>(-0.27-0.88)      |
| Federated States of Micronesia | 1990 | Male   | 90 to 94 | 35%<br>(21-52%)                | 65%<br>(48-79%)          | 0.4<br>(0.17-0.75)                          | 0.17%<br>(-0.32-0.81%)               | 0.13%<br>(-0.44-0.85%)              | 0.0057<br>(-0.019-0.038)   | 0.042<br>(-0.081-0.21)    |
| Federated States of Micronesia | 1990 | Male   | 95 plus  | 38%<br>(21-59%)                | 62%<br>(41-79%)          | 0.43<br>(0.16-0.84)                         | -0.081%<br>(-0.75-0.69%)             | -0.21%<br>(-0.97-0.66%)             | -0.0022<br>(-0.011-0.0072) | -0.0034<br>(-0.032-0.029) |
| Federated States of Micronesia | 1995 | Female | All Ages | 16%<br>(13-20%)                | 84%<br>(80-87%)          | 0.24<br>(0.18-0.31)                         | 0.43%<br>(0.17-0.75%)                | 0.26%<br>(-0.17-0.79%)              | 0.92<br>(-0.59-2.7)        | 77<br>(30-130)            |
| Federated States of Micronesia | 1995 | Female | 15 to 19 | 19%<br>(12-30%)                | 81%<br>(70-88%)          | 0.34<br>(0.18-0.57)                         | 0.99%<br>(0.49-1.8%)                 | 1.4%<br>(0.52-3%)                   | 0.089<br>(0.029-0.18)      | 9.1<br>(4.3-16)           |
| Federated States of Micronesia | 1995 | Female | 20 to 24 | 24%<br>(14-36%)                | 76%<br>(64-86%)          | 0.54<br>(0.29-0.87)                         | 1.7%<br>(0.96-2.7%)                  | 2.1%<br>(0.89-3.9%)                 | 0.14<br>(0.055-0.27)       | 14<br>(7.7-23)            |
| Federated States of Micronesia | 1995 | Female | 25 to 29 | 24%<br>(14-37%)                | 76%<br>(63-86%)          | 0.49<br>(0.28-0.8)                          | 1.6%<br>(0.97-2.4%)                  | 1.9%<br>(0.96-3.2%)                 | 0.14<br>(0.066-0.25)       | 12<br>(7.3-20)            |
| Federated States of Micronesia | 1995 | Female | 30 to 34 | 23%<br>(13-37%)                | 77%<br>(63-87%)          | 0.48<br>(0.26-0.79)                         | 1.3%<br>(0.75-2%)                    | 1.5%<br>(0.72-2.6%)                 | 0.14<br>(0.065-0.26)       | 11<br>(6.5-19)            |
| Federated States of Micronesia | 1995 | Female | 35 to 39 | 22%<br>(12-35%)                | 78%<br>(65-88%)          | 0.51<br>(0.26-0.85)                         | 1.4%<br>(0.71-2.3%)                  | 1.7%<br>(0.81-3.1%)                 | 0.22<br>(0.095-0.42)       | 14<br>(7.2-24)            |
| Federated States of Micronesia | 1995 | Female | 40 to 44 | 21%<br>(12-34%)                | 79%<br>(66-88%)          | 0.47<br>(0.24-0.8)                          | 1.2%<br>(0.51-2.2%)                  | 1.6%<br>(0.63-3.1%)                 | 0.23<br>(0.083-0.45)       | 12<br>(5-22)              |
| Federated States of Micronesia | 1995 | Female | 45 to 49 | 21%<br>(11-34%)                | 79%<br>(66-89%)          | 0.41<br>(0.2-0.72)                          | 0.74%<br>(0.054-1.6%)                | 1%<br>(0.078-2.3%)                  | 0.14<br>(0.011-0.31)       | 5.9<br>(0.39-13)          |
| Federated States of Micronesia | 1995 | Female | 50 to 54 | 21%<br>(12-33%)                | 79%<br>(67-88%)          | 0.36<br>(0.17-0.67)                         | 0.41%<br>(-0.27-1.4%)                | 0.62%<br>(-0.23-1.9%)               | 0.089<br>(-0.034-0.27)     | 2.9<br>(-1.9-9.9)         |
| Federated States of Micronesia | 1995 | Female | 55 to 59 | 19%<br>(11-30%)                | 81%<br>(70-89%)          | 0.29<br>(0.14-0.54)                         | 0.21%<br>(-0.46-1%)                  | 0.38%<br>(-0.43-1.4%)               | 0.064<br>(-0.072-0.24)     | 1.5<br>(-3.3-7.3)         |
| Federated States of Micronesia | 1995 | Female | 60 to 64 | 17%<br>(9.7-29%)               | 83%<br>(71-90%)          | 0.25<br>(0.12-0.46)                         | -0.053%<br>(-0.71-0.62%)             | 0.034%<br>(-0.73-0.83%)             | 0.0098<br>(-0.2-0.23)      | -0.48<br>(-6.8-5.8)       |
| Federated States of Micronesia | 1995 | Female | 65 to 69 | 18%<br>(11-30%)                | 82%<br>(70-89%)          | 0.25<br>(0.13-0.46)                         | -0.098%<br>(-0.77-0.61%)             | -0.017%<br>(-0.79-0.83%)            | -0.0045<br>(-0.21-0.22)    | -0.7<br>(-5.6-4.4)        |

| Location                       | Year | Sex    | Age      | Prevalence of current drinkers | Prevalence of abstainers | Population average of standard drinks daily | Percent of total attributable deaths | Percent of total attributable DALYs | Attributable deaths        | Attributable DALYs       |
|--------------------------------|------|--------|----------|--------------------------------|--------------------------|---------------------------------------------|--------------------------------------|-------------------------------------|----------------------------|--------------------------|
| Federated States of Micronesia | 1995 | Female | 70 to 74 | 19%<br>(11-30%)                | 81%<br>(70-89%)          | 0.25<br>(0.12-0.47)                         | -0.26%<br>(-0.96-0.4%)               | -0.23%<br>(-1-0.53%)                | -0.092<br>(-0.4-0.21)      | -2.2<br>(-8.1-3.2)       |
| Federated States of Micronesia | 1995 | Female | 75 to 79 | 19%<br>(12-30%)                | 81%<br>(70-88%)          | 0.24<br>(0.12-0.44)                         | -0.18%<br>(-0.82-0.5%)               | -0.16%<br>(-0.87-0.62%)             | -0.063<br>(-0.36-0.24)     | -1.2<br>(-5.5-3.2)       |
| Federated States of Micronesia | 1995 | Female | 80 to 84 | 18%<br>(11-29%)                | 82%<br>(71-89%)          | 0.23<br>(0.11-0.41)                         | -0.35%<br>(-0.97-0.23%)              | -0.37%<br>(-1.1-0.29%)              | -0.11<br>(-0.31-0.083)     | -1.2<br>(-3.4-0.83)      |
| Federated States of Micronesia | 1995 | Female | 85 to 89 | 19%<br>(11-29%)                | 81%<br>(71-89%)          | 0.24<br>(0.11-0.42)                         | -0.38%<br>(-1-0.15%)                 | -0.42%<br>(-1.1-0.19%)              | -0.058<br>(-0.16-0.027)    | -0.45<br>(-1.2-0.17)     |
| Federated States of Micronesia | 1995 | Female | 90 to 94 | 20%<br>(12-30%)                | 80%<br>(70-88%)          | 0.25<br>(0.12-0.45)                         | -0.31%<br>(-0.82-0.23%)              | -0.35%<br>(-0.95-0.27%)             | -0.016<br>(-0.042-0.012)   | -0.081<br>(-0.22-0.064)  |
| Federated States of Micronesia | 1995 | Female | 95 plus  | 22%<br>(12-37%)                | 78%<br>(63-88%)          | 0.28<br>(0.11-0.54)                         | -0.34%<br>(-1.1-0.32%)               | -0.42%<br>(-1.3-0.31%)              | -0.0052<br>(-0.016-0.0038) | -0.016<br>(-0.051-0.015) |
| Federated States of Micronesia | 1995 | Male   | All Ages | 36%<br>(28-46%)                | 64%<br>(54-72%)          | 0.75<br>(0.6-0.91)                          | 2.4%<br>(1.5-3.2%)                   | 2.3%<br>(1.3-3.4%)                  | 9.9<br>(5.5-15)            | 520<br>(340-730)         |
| Federated States of Micronesia | 1995 | Male   | 15 to 19 | 36%<br>(20-54%)                | 64%<br>(46-80%)          | 0.47<br>(0.23-0.83)                         | 2%<br>(0.94-3.5%)                    | 2.5%<br>(0.94-4.9%)                 | 0.3<br>(0.11-0.57)         | 26<br>(12-45)            |
| Federated States of Micronesia | 1995 | Male   | 20 to 24 | 53%<br>(34-71%)                | 47%<br>(29-66%)          | 1.4<br>(0.84-2)                             | 6%<br>(3.4-9.3%)                     | 7.3%<br>(3.8-12%)                   | 0.93<br>(0.47-1.5)         | 70<br>(39-110)           |
| Federated States of Micronesia | 1995 | Male   | 25 to 29 | 61%<br>(41-77%)                | 39%<br>(23-59%)          | 2.1<br>(1.3-3)                              | 8.3%<br>(5.4-12%)                    | 10%<br>(6.4-15%)                    | 1.1<br>(0.68-1.7)          | 77<br>(48-110)           |
| Federated States of Micronesia | 1995 | Male   | 30 to 34 | 62%<br>(41-78%)                | 38%<br>(22-59%)          | 2.2<br>(1.4-3.3)                            | 7.7%<br>(4.9-11%)                    | 9.2%<br>(5.6-14%)                   | 1.4<br>(0.84-2.3)          | 92<br>(55-140)           |
| Federated States of Micronesia | 1995 | Male   | 35 to 39 | 61%<br>(42-77%)                | 39%<br>(23-58%)          | 1.9<br>(1.1-2.8)                            | 5.9%<br>(3.5-8.6%)                   | 6.9%<br>(3.9-11%)                   | 1.3<br>(0.69-2)            | 72<br>(43-110)           |
| Federated States of Micronesia | 1995 | Male   | 40 to 44 | 58%<br>(40-75%)                | 42%<br>(25-60%)          | 1.6<br>(0.97-2.5)                           | 4.5%<br>(2.5-7.2%)                   | 5.1%<br>(2.6-8.5%)                  | 1.1<br>(0.54-1.9)          | 60<br>(31-99)            |
| Federated States of Micronesia | 1995 | Male   | 45 to 49 | 54%<br>(33-72%)                | 46%<br>(28-67%)          | 1.5<br>(0.78-2.4)                           | 4%<br>(1.7-6.4%)                     | 4.4%<br>(1.8-7.4%)                  | 1<br>(0.43-1.8)            | 48<br>(21-80)            |
| Federated States of Micronesia | 1995 | Male   | 50 to 54 | 51%<br>(32-70%)                | 49%<br>(30-68%)          | 1.2<br>(0.62-2)                             | 3.2%<br>(1.1-5.9%)                   | 3.5%<br>(1-6.6%)                    | 0.68<br>(0.19-1.3)         | 28<br>(9.4-51)           |
| Federated States of Micronesia | 1995 | Male   | 55 to 59 | 49%<br>(31-68%)                | 51%<br>(32-69%)          | 0.9<br>(0.48-1.6)                           | 1.8%<br>(0.42-4%)                    | 1.9%<br>(0.31-4.5%)                 | 0.41<br>(0.062-0.96)       | 14<br>(3.1-33)           |
| Federated States of Micronesia | 1995 | Male   | 60 to 64 | 47%<br>(27-66%)                | 53%<br>(34-73%)          | 0.72<br>(0.35-1.3)                          | 1.2%<br>(0.05-3.2%)                  | 1.3%<br>(-0.063-3.5%)               | 0.54<br>(-0.025-1.5)       | 16<br>(0.6-42)           |
| Federated States of Micronesia | 1995 | Male   | 65 to 69 | 45%<br>(27-63%)                | 55%<br>(37-73%)          | 0.65<br>(0.33-1.1)                          | 1.1%<br>(-0.0012-2.6%)               | 1.2%<br>(-0.034-3%)                 | 0.39<br>(-0.0096-0.94)     | 9.1<br>(-0.0093-22)      |
| Federated States of Micronesia | 1995 | Male   | 70 to 74 | 43%<br>(25-61%)                | 57%<br>(39-75%)          | 0.57<br>(0.29-1.1)                          | 0.77%<br>(-0.19-2.1%)                | 0.83%<br>(-0.24-2.3%)               | 0.33<br>(-0.095-0.92)      | 6.3<br>(-1.7-17)         |
| Federated States of Micronesia | 1995 | Male   | 75 to 79 | 39%<br>(23-58%)                | 61%<br>(42-77%)          | 0.49<br>(0.24-0.89)                         | 0.55%<br>(-0.23-1.7%)                | 0.58%<br>(-0.31-1.9%)               | 0.23<br>(-0.12-0.75)       | 3.5<br>(-1.4-11)         |
| Federated States of Micronesia | 1995 | Male   | 80 to 84 | 36%<br>(20-53%)                | 64%<br>(47-80%)          | 0.43<br>(0.22-0.76)                         | 0.41%<br>(-0.2-1.2%)                 | 0.42%<br>(-0.29-1.3%)               | 0.098<br>(-0.067-0.31)     | 1.1<br>(-0.54-3.4)       |
| Federated States of Micronesia | 1995 | Male   | 85 to 89 | 34%<br>(20-51%)                | 66%<br>(49-80%)          | 0.41<br>(0.19-0.7)                          | 0.24%<br>(-0.33-1%)                  | 0.23%<br>(-0.44-1.1%)               | 0.026<br>(-0.049-0.12)     | 0.24<br>(-0.32-0.97)     |

| Location                       | Year | Sex    | Age      | Prevalence of current drinkers | Prevalence of abstainers | Population average of standard drinks daily | Percent of total attributable deaths | Percent of total attributable DALYs | Attributable deaths        | Attributable DALYs        |
|--------------------------------|------|--------|----------|--------------------------------|--------------------------|---------------------------------------------|--------------------------------------|-------------------------------------|----------------------------|---------------------------|
| Federated States of Micronesia | 1995 | Male   | 90 to 94 | 35%<br>(22-52%)                | 65%<br>(48-78%)          | 0.41<br>(0.19-0.76)                         | 0.15%<br>(-0.33-0.76%)               | 0.11%<br>(-0.47-0.78%)              | 0.0038<br>(-0.016-0.028)   | 0.032<br>(-0.071-0.16)    |
| Federated States of Micronesia | 1995 | Male   | 95 plus  | 39%<br>(21-59%)                | 61%<br>(41-79%)          | 0.45<br>(0.18-0.86)                         | -0.093%<br>(-0.73-0.66%)             | -0.23%<br>(-0.97-0.62%)             | -0.0025<br>(-0.011-0.0067) | -0.004<br>(-0.031-0.029)  |
| Federated States of Micronesia | 2000 | Female | All Ages | 15%<br>(12-19%)                | 85%<br>(81-88%)          | 0.21<br>(0.17-0.27)                         | 0.33%<br>(0.1-0.61%)                 | 0.082%<br>(-0.3-0.5%)               | 0.29<br>(-1.1-1.8)         | 58<br>(17-100)            |
| Federated States of Micronesia | 2000 | Female | 15 to 19 | 19%<br>(11-30%)                | 81%<br>(70-89%)          | 0.3<br>(0.16-0.51)                          | 0.86%<br>(0.45-1.5%)                 | 1.2%<br>(0.42-2.5%)                 | 0.075<br>(0.025-0.16)      | 8.3<br>(4.1-15)           |
| Federated States of Micronesia | 2000 | Female | 20 to 24 | 22%<br>(13-34%)                | 78%<br>(66-87%)          | 0.45<br>(0.24-0.72)                         | 1.4%<br>(0.81-2.2%)                  | 1.6%<br>(0.71-3%)                   | 0.11<br>(0.044-0.21)       | 12<br>(6.9-20)            |
| Federated States of Micronesia | 2000 | Female | 25 to 29 | 21%<br>(13-33%)                | 79%<br>(67-87%)          | 0.38<br>(0.23-0.6)                          | 1.3%<br>(0.85-1.9%)                  | 1.4%<br>(0.77-2.3%)                 | 0.11<br>(0.05-0.19)        | 11<br>(6.6-16)            |
| Federated States of Micronesia | 2000 | Female | 30 to 34 | 20%<br>(11-32%)                | 80%<br>(68-89%)          | 0.37<br>(0.2-0.6)                           | 1.1%<br>(0.63-1.6%)                  | 1.1%<br>(0.55-1.9%)                 | 0.11<br>(0.051-0.2)        | 9.9<br>(5.6-15)           |
| Federated States of Micronesia | 2000 | Female | 35 to 39 | 20%<br>(11-33%)                | 80%<br>(67-89%)          | 0.41<br>(0.21-0.71)                         | 1.1%<br>(0.59-1.9%)                  | 1.3%<br>(0.61-2.4%)                 | 0.17<br>(0.07-0.31)        | 11<br>(5.6-18)            |
| Federated States of Micronesia | 2000 | Female | 40 to 44 | 20%<br>(12-32%)                | 80%<br>(68-88%)          | 0.4<br>(0.2-0.69)                           | 0.94%<br>(0.35-1.7%)                 | 1.2%<br>(0.41-2.3%)                 | 0.19<br>(0.059-0.36)       | 10<br>(3.6-18)            |
| Federated States of Micronesia | 2000 | Female | 45 to 49 | 20%<br>(10-32%)                | 80%<br>(68-90%)          | 0.35<br>(0.17-0.6)                          | 0.49%<br>(-0.11-1.2%)                | 0.69%<br>(-0.12-1.7%)               | 0.12<br>(-0.02-0.31)       | 5.2<br>(-1.3-13)          |
| Federated States of Micronesia | 2000 | Female | 50 to 54 | 20%<br>(11-31%)                | 80%<br>(69-89%)          | 0.31<br>(0.15-0.58)                         | 0.16%<br>(-0.55-0.85%)               | 0.3%<br>(-0.57-1.2%)                | 0.057<br>(-0.11-0.23)      | 1.5<br>(-5-8.1)           |
| Federated States of Micronesia | 2000 | Female | 55 to 59 | 18%<br>(11-30%)                | 82%<br>(70-89%)          | 0.25<br>(0.12-0.46)                         | 0.012%<br>(-0.64-0.6%)               | 0.13%<br>(-0.66-0.87%)              | 0.024<br>(-0.12-0.16)      | 0.091<br>(-4.9-4.6)       |
| Federated States of Micronesia | 2000 | Female | 60 to 64 | 17%<br>(9.3-28%)               | 83%<br>(72-91%)          | 0.22<br>(0.1-0.4)                           | -0.2%<br>(-0.89-0.35%)               | -0.14%<br>(-0.92-0.52%)             | -0.029<br>(-0.19-0.099)    | -1.4<br>(-6.1-2.3)        |
| Federated States of Micronesia | 2000 | Female | 65 to 69 | 18%<br>(11-28%)                | 82%<br>(72-89%)          | 0.22<br>(0.11-0.38)                         | -0.25%<br>(-0.9-0.31%)               | -0.2%<br>(-0.93-0.47%)              | -0.063<br>(-0.29-0.14)     | -2.2<br>(-7.8-2.6)        |
| Federated States of Micronesia | 2000 | Female | 70 to 74 | 19%<br>(11-30%)                | 81%<br>(70-89%)          | 0.22<br>(0.11-0.4)                          | -0.42%<br>(-1-0.11%)                 | -0.42%<br>(-1.1-0.23%)              | -0.12<br>(-0.31-0.059)     | -2.5<br>(-6.3-0.7)        |
| Federated States of Micronesia | 2000 | Female | 75 to 79 | 18%<br>(11-29%)                | 82%<br>(71-89%)          | 0.21<br>(0.1-0.39)                          | -0.33%<br>(-0.95-0.18%)              | -0.32%<br>(-1-0.28%)                | -0.14<br>(-0.46-0.12)      | -2.3<br>(-7-1.3)          |
| Federated States of Micronesia | 2000 | Female | 80 to 84 | 18%<br>(10-30%)                | 82%<br>(70-90%)          | 0.21<br>(0.1-0.36)                          | -0.47%<br>(-1.1--0.015%)             | -0.51%<br>(-1.2-0.017%)             | -0.19<br>(-0.46-0.0066)    | -2.1<br>(-5--0.068)       |
| Federated States of Micronesia | 2000 | Female | 85 to 89 | 18%<br>(11-28%)                | 82%<br>(72-89%)          | 0.21<br>(0.11-0.37)                         | -0.48%<br>(-1.1--0.043%)             | -0.54%<br>(-1.2--0.036%)            | -0.1<br>(-0.24--0.007)     | -0.79<br>(-1.8--0.071)    |
| Federated States of Micronesia | 2000 | Female | 90 to 94 | 20%<br>(12-31%)                | 80%<br>(69-88%)          | 0.23<br>(0.11-0.41)                         | -0.41%<br>(-0.97-0.0079%)            | -0.47%<br>(-1.1-0.012%)             | -0.028<br>(-0.067-0.00069) | -0.15<br>(-0.35-0.0026)   |
| Federated States of Micronesia | 2000 | Female | 95 plus  | 22%<br>(12-36%)                | 78%<br>(64-88%)          | 0.25<br>(0.1-0.48)                          | -0.45%<br>(-1.2-0.12%)               | -0.55%<br>(-1.4-0.12%)              | -0.0074<br>(-0.019-0.0017) | -0.023<br>(-0.063-0.0064) |
| Federated States of Micronesia | 2000 | Male   | All Ages | 39%<br>(31-47%)                | 61%<br>(53-69%)          | 0.76<br>(0.65-0.89)                         | 2.3%<br>(1.5-3.1%)                   | 2.1%<br>(1.2-3%)                    | 8.6<br>(4.8-13)            | 480<br>(320-650)          |
| Federated States of Micronesia | 2000 | Male   | 15 to 19 | 35%<br>(21-53%)                | 65%<br>(47-79%)          | 0.43<br>(0.22-0.73)                         | 1.9%<br>(0.91-3.2%)                  | 2.4%<br>(0.91-4.5%)                 | 0.28<br>(0.11-0.53)        | 24<br>(12-42)             |

| Location                       | Year | Sex    | Age      | Prevalence of current drinkers | Prevalence of abstainers | Population average of standard drinks daily | Percent of total attributable deaths | Percent of total attributable DALYs | Attributable deaths        | Attributable DALYs        |
|--------------------------------|------|--------|----------|--------------------------------|--------------------------|---------------------------------------------|--------------------------------------|-------------------------------------|----------------------------|---------------------------|
| Federated States of Micronesia | 2000 | Male   | 20 to 24 | 54%<br>(36-72%)                | 46%<br>(28-64%)          | 1.3<br>(0.84-1.9)                           | 5.6%<br>(3.3-8.6%)                   | 6.8%<br>(3.6-11%)                   | 0.93<br>(0.5-1.5)          | 70<br>(41-110)            |
| Federated States of Micronesia | 2000 | Male   | 25 to 29 | 64%<br>(47-78%)                | 36%<br>(22-53%)          | 2.1<br>(1.4-2.8)                            | 7.9%<br>(5.2-11%)                    | 9.6%<br>(6.1-14%)                   | 1.1<br>(0.69-1.7)          | 79<br>(51-110)            |
| Federated States of Micronesia | 2000 | Male   | 30 to 34 | 66%<br>(47-81%)                | 34%<br>(19-53%)          | 2.3<br>(1.4-3.1)                            | 7.2%<br>(4.8-10%)                    | 8.6%<br>(5.4-13%)                   | 1.2<br>(0.71-1.9)          | 78<br>(48-110)            |
| Federated States of Micronesia | 2000 | Male   | 35 to 39 | 64%<br>(47-79%)                | 36%<br>(21-53%)          | 1.9<br>(1.2-2.6)                            | 5.5%<br>(3.3-8.1%)                   | 6.4%<br>(3.6-9.8%)                  | 1.1<br>(0.6-1.8)           | 67<br>(37-100)            |
| Federated States of Micronesia | 2000 | Male   | 40 to 44 | 60%<br>(43-75%)                | 40%<br>(25-57%)          | 1.6<br>(0.96-2.3)                           | 4%<br>(2-6.5%)                       | 4.5%<br>(1.9-7.5%)                  | 0.92<br>(0.39-1.6)         | 49<br>(24-82)             |
| Federated States of Micronesia | 2000 | Male   | 45 to 49 | 54%<br>(35-70%)                | 46%<br>(30-65%)          | 1.4<br>(0.83-2)                             | 3.3%<br>(1.5-5.4%)                   | 3.6%<br>(1.3-6.1%)                  | 1<br>(0.38-1.8)            | 48<br>(21-81)             |
| Federated States of Micronesia | 2000 | Male   | 50 to 54 | 50%<br>(32-67%)                | 50%<br>(33-68%)          | 1.1<br>(0.6-1.7)                            | 2.5%<br>(0.82-4.7%)                  | 2.7%<br>(0.76-5.2%)                 | 0.74<br>(0.2-1.4)          | 31<br>(9.8-55)            |
| Federated States of Micronesia | 2000 | Male   | 55 to 59 | 47%<br>(30-66%)                | 53%<br>(34-70%)          | 0.79<br>(0.43-1.4)                          | 1.4%<br>(0.19-3%)                    | 1.4%<br>(0.046-3.3%)                | 0.3<br>(0.0075-0.7)        | 11<br>(1.5-24)            |
| Federated States of Micronesia | 2000 | Male   | 60 to 64 | 45%<br>(26-65%)                | 55%<br>(35-74%)          | 0.63<br>(0.31-1.1)                          | 0.88%<br>(-0.17-2.4%)                | 0.91%<br>(-0.31-2.6%)               | 0.23<br>(-0.075-0.66)      | 7.1<br>(-1.3-20)          |
| Federated States of Micronesia | 2000 | Male   | 65 to 69 | 44%<br>(26-62%)                | 56%<br>(38-74%)          | 0.58<br>(0.3-1)                             | 0.78%<br>(-0.14-2%)                  | 0.85%<br>(-0.21-2.2%)               | 0.32<br>(-0.083-0.88)      | 7.8<br>(-1.3-21)          |
| Federated States of Micronesia | 2000 | Male   | 70 to 74 | 42%<br>(24-59%)                | 58%<br>(41-76%)          | 0.52<br>(0.26-0.92)                         | 0.5%<br>(-0.33-1.6%)                 | 0.53%<br>(-0.41-1.8%)               | 0.13<br>(-0.1-0.43)        | 2.5<br>(-1.6-8.1)         |
| Federated States of Micronesia | 2000 | Male   | 75 to 79 | 38%<br>(22-57%)                | 62%<br>(43-78%)          | 0.44<br>(0.22-0.8)                          | 0.35%<br>(-0.35-1.3%)                | 0.36%<br>(-0.42-1.5%)               | 0.15<br>(-0.18-0.61)       | 2.4<br>(-2.4-9.1)         |
| Federated States of Micronesia | 2000 | Male   | 80 to 84 | 35%<br>(19-54%)                | 65%<br>(46-81%)          | 0.39<br>(0.2-0.66)                          | 0.27%<br>(-0.3-0.91%)                | 0.27%<br>(-0.38-0.99%)              | 0.08<br>(-0.12-0.3)        | 0.98<br>(-1.1-3.3)        |
| Federated States of Micronesia | 2000 | Male   | 85 to 89 | 34%<br>(19-51%)                | 66%<br>(49-81%)          | 0.37<br>(0.19-0.63)                         | 0.12%<br>(-0.4-0.68%)                | 0.088%<br>(-0.52-0.71%)             | 0.013<br>(-0.074-0.1)      | 0.15<br>(-0.5-0.85)       |
| Federated States of Micronesia | 2000 | Male   | 90 to 94 | 35%<br>(21-53%)                | 65%<br>(47-79%)          | 0.37<br>(0.18-0.68)                         | 0.052%<br>(-0.44-0.54%)              | -0.0023%<br>(-0.55-0.54%)           | -0.00009<br>(-0.027-0.027) | 0.015<br>(-0.13-0.16)     |
| Federated States of Micronesia | 2000 | Male   | 95 plus  | 39%<br>(21-59%)                | 61%<br>(41-79%)          | 0.41<br>(0.16-0.77)                         | -0.18%<br>(-0.84-0.42%)              | -0.33%<br>(-1.1-0.35%)              | -0.0036<br>(-0.012-0.0038) | -0.0078<br>(-0.035-0.018) |
| Federated States of Micronesia | 2005 | Female | All Ages | 15%<br>(12-19%)                | 85%<br>(81-88%)          | 0.2<br>(0.15-0.25)                          | 0.24%<br>(-0.053-0.52%)              | -0.099%<br>(-0.54-0.32%)            | -0.36<br>(-2-1.1)          | 38<br>(-8.2-82)           |
| Federated States of Micronesia | 2005 | Female | 15 to 19 | 19%<br>(11-29%)                | 81%<br>(71-89%)          | 0.27<br>(0.15-0.45)                         | 0.77%<br>(0.38-1.3%)                 | 1%<br>(0.32-2%)                     | 0.061<br>(0.018-0.13)      | 7<br>(3.5-12)             |
| Federated States of Micronesia | 2005 | Female | 20 to 24 | 22%<br>(13-34%)                | 78%<br>(66-87%)          | 0.4<br>(0.22-0.65)                          | 1.3%<br>(0.76-2%)                    | 1.4%<br>(0.57-2.6%)                 | 0.11<br>(0.043-0.22)       | 13<br>(7.6-21)            |
| Federated States of Micronesia | 2005 | Female | 25 to 29 | 20%<br>(12-33%)                | 80%<br>(67-88%)          | 0.34<br>(0.2-0.56)                          | 1.2%<br>(0.74-1.7%)                  | 1.2%<br>(0.56-2%)                   | 0.089<br>(0.038-0.16)      | 9.2<br>(5.5-13)           |
| Federated States of Micronesia | 2005 | Female | 30 to 34 | 20%<br>(12-32%)                | 80%<br>(68-88%)          | 0.33<br>(0.18-0.56)                         | 0.95%<br>(0.53-1.5%)                 | 0.98%<br>(0.4-1.7%)                 | 0.077<br>(0.031-0.14)      | 6.9<br>(3.7-11)           |
| Federated States of Micronesia | 2005 | Female | 35 to 39 | 20%<br>(12-33%)                | 80%<br>(67-88%)          | 0.38<br>(0.2-0.65)                          | 0.95%<br>(0.44-1.6%)                 | 1.1%<br>(0.4-2.1%)                  | 0.14<br>(0.047-0.26)       | 8.8<br>(4.1-15)           |



| Location                       | Year | Sex    | Age      | Prevalence of current drinkers | Prevalence of abstainers | Population average of standard drinks daily | Percent of total attributable deaths | Percent of total attributable DALYs | Attributable deaths        | Attributable DALYs      |
|--------------------------------|------|--------|----------|--------------------------------|--------------------------|---------------------------------------------|--------------------------------------|-------------------------------------|----------------------------|-------------------------|
| Federated States of Micronesia | 2005 | Female | 40 to 44 | 20%<br>(12-32%)                | 80%<br>(68-88%)          | 0.36<br>(0.18-0.63)                         | 0.77%<br>(0.17-1.5%)                 | 0.98%<br>(0.14-2%)                  | 0.14<br>(0.021-0.3)        | 7.7<br>(1.8-15)         |
| Federated States of Micronesia | 2005 | Female | 45 to 49 | 19%<br>(10-31%)                | 81%<br>(69-90%)          | 0.31<br>(0.15-0.53)                         | 0.32%<br>(-0.27-0.91%)               | 0.47%<br>(-0.33-1.3%)               | 0.093<br>(-0.063-0.26)     | 3.8<br>(-3.2-11)        |
| Federated States of Micronesia | 2005 | Female | 50 to 54 | 20%<br>(12-32%)                | 80%<br>(68-88%)          | 0.28<br>(0.14-0.5)                          | -0.016%<br>(-0.72-0.58%)             | 0.083%<br>(-0.72-0.85%)             | 0.02<br>(-0.19-0.21)       | -0.2<br>(-8.4-7.4)      |
| Federated States of Micronesia | 2005 | Female | 55 to 59 | 18%<br>(11-30%)                | 82%<br>(70-89%)          | 0.23<br>(0.12-0.42)                         | -0.14%<br>(-0.85-0.4%)               | -0.044%<br>(-0.86-0.62%)            | -0.01<br>(-0.21-0.16)      | -1.4<br>(-8.4-4.2)      |
| Federated States of Micronesia | 2005 | Female | 60 to 64 | 17%<br>(9.4-29%)               | 83%<br>(71-91%)          | 0.2<br>(0.091-0.36)                         | -0.32%<br>(-1-0.19%)                 | -0.28%<br>(-1.1-0.33%)              | -0.063<br>(-0.25-0.079)    | -2.4<br>(-7.9-1.6)      |
| Federated States of Micronesia | 2005 | Female | 65 to 69 | 18%<br>(11-29%)                | 82%<br>(71-89%)          | 0.2<br>(0.098-0.35)                         | -0.37%<br>(-1.1-0.13%)               | -0.34%<br>(-1.2-0.28%)              | -0.092<br>(-0.31-0.071)    | -2.8<br>(-7.9-0.93)     |
| Federated States of Micronesia | 2005 | Female | 70 to 74 | 19%<br>(11-30%)                | 81%<br>(70-89%)          | 0.2<br>(0.096-0.36)                         | -0.55%<br>(-1.2--0.023%)             | -0.56%<br>(-1.3-0.03%)              | -0.24<br>(-0.56-0.013)     | -4.9<br>(-11--0.2)      |
| Federated States of Micronesia | 2005 | Female | 75 to 79 | 18%<br>(11-29%)                | 82%<br>(71-89%)          | 0.19<br>(0.092-0.35)                        | -0.44%<br>(-1-0.044%)                | -0.45%<br>(-1.1-0.088%)             | -0.17<br>(-0.45-0.034)     | -2.8<br>(-6.8-0.24)     |
| Federated States of Micronesia | 2005 | Female | 80 to 84 | 18%<br>(10-29%)                | 82%<br>(71-90%)          | 0.19<br>(0.095-0.32)                        | -0.56%<br>(-1.2--0.12%)              | -0.62%<br>(-1.3--0.12%)             | -0.26<br>(-0.58--0.051)    | -2.9<br>(-6.2--0.61)    |
| Federated States of Micronesia | 2005 | Female | 85 to 89 | 18%<br>(11-28%)                | 82%<br>(72-89%)          | 0.19<br>(0.098-0.35)                        | -0.56%<br>(-1.2--0.12%)              | -0.62%<br>(-1.3--0.13%)             | -0.19<br>(-0.39--0.038)    | -1.4<br>(-3--0.3)       |
| Federated States of Micronesia | 2005 | Female | 90 to 94 | 19%<br>(12-30%)                | 81%<br>(70-88%)          | 0.21<br>(0.1-0.38)                          | -0.49%<br>(-1--0.074%)               | -0.55%<br>(-1.2--0.082%)            | -0.054<br>(-0.12--0.0079)  | -0.28<br>(-0.6--0.044)  |
| Federated States of Micronesia | 2005 | Female | 95 plus  | 22%<br>(12-36%)                | 78%<br>(64-88%)          | 0.23<br>(0.092-0.43)                        | -0.53%<br>(-1.3-0.046%)              | -0.63%<br>(-1.5-0.029%)             | -0.014<br>(-0.032-0.00063) | -0.043<br>(-0.1-0.0038) |
| Federated States of Micronesia | 2005 | Male   | All Ages | 39%<br>(31-48%)                | 61%<br>(52-69%)          | 0.68<br>(0.57-0.79)                         | 2.2%<br>(1.4-3%)                     | 1.7%<br>(0.86-2.6%)                 | 6.7<br>(3.4-11)            | 400<br>(250-570)        |
| Federated States of Micronesia | 2005 | Male   | 15 to 19 | 35%<br>(20-53%)                | 65%<br>(47-80%)          | 0.37<br>(0.19-0.62)                         | 1.7%<br>(0.82-2.9%)                  | 2.1%<br>(0.82-4.1%)                 | 0.24<br>(0.089-0.48)       | 22<br>(11-38)           |
| Federated States of Micronesia | 2005 | Male   | 20 to 24 | 55%<br>(37-72%)                | 45%<br>(28-63%)          | 1.1<br>(0.74-1.6)                           | 5%<br>(3-7.6%)                       | 6%<br>(3.2-9.7%)                    | 0.94<br>(0.49-1.6)         | 73<br>(42-120)          |
| Federated States of Micronesia | 2005 | Male   | 25 to 29 | 65%<br>(48-79%)                | 35%<br>(21-52%)          | 1.8<br>(1.3-2.6)                            | 7%<br>(4.4-10%)                      | 8.5%<br>(5-12%)                     | 1.1<br>(0.62-1.6)          | 75<br>(46-110)          |
| Federated States of Micronesia | 2005 | Male   | 30 to 34 | 66%<br>(48-81%)                | 34%<br>(19-52%)          | 2<br>(1.3-2.8)                              | 6.3%<br>(3.9-9.3%)                   | 7.5%<br>(4.3-11%)                   | 0.81<br>(0.44-1.3)         | 53<br>(31-80)           |
| Federated States of Micronesia | 2005 | Male   | 35 to 39 | 64%<br>(48-79%)                | 36%<br>(21-52%)          | 1.7<br>(1.1-2.5)                            | 4.8%<br>(2.7-7.2%)                   | 5.5%<br>(2.8-8.7%)                  | 0.75<br>(0.37-1.2)         | 45<br>(24-72)           |
| Federated States of Micronesia | 2005 | Male   | 40 to 44 | 60%<br>(43-75%)                | 40%<br>(25-57%)          | 1.4<br>(0.86-2.1)                           | 3.3%<br>(1.5-5.6%)                   | 3.7%<br>(1.4-6.5%)                  | 0.73<br>(0.28-1.3)         | 40<br>(18-69)           |
| Federated States of Micronesia | 2005 | Male   | 45 to 49 | 54%<br>(35-70%)                | 46%<br>(30-65%)          | 1.2<br>(0.71-1.8)                           | 2.6%<br>(1-4.5%)                     | 2.8%<br>(0.82-5%)                   | 0.71<br>(0.21-1.3)         | 35<br>(13-63)           |
| Federated States of Micronesia | 2005 | Male   | 50 to 54 | 50%<br>(32-68%)                | 50%<br>(32-68%)          | 0.95<br>(0.54-1.5)                          | 2%<br>(0.48-3.6%)                    | 2.1%<br>(0.37-4%)                   | 0.71<br>(0.13-1.4)         | 30<br>(7.5-59)          |
| Federated States of Micronesia | 2005 | Male   | 55 to 59 | 48%<br>(30-66%)                | 52%<br>(34-70%)          | 0.7<br>(0.38-1.2)                           | 1%<br>(-0.059-2.4%)                  | 1%<br>(-0.22-2.7%)                  | 0.32<br>(-0.066-0.83)      | 12<br>(-0.77-30)        |

| Location                       | Year | Sex    | Age      | Prevalence of current drinkers | Prevalence of abstainers | Population average of standard drinks daily | Percent of total attributable deaths | Percent of total attributable DALYs | Attributable deaths       | Attributable DALYs      |
|--------------------------------|------|--------|----------|--------------------------------|--------------------------|---------------------------------------------|--------------------------------------|-------------------------------------|---------------------------|-------------------------|
| Federated States of Micronesia | 2005 | Male   | 60 to 64 | 45%<br>(26-65%)                | 55%<br>(35-74%)          | 0.56<br>(0.28-1)                            | 0.59%<br>(-0.34-1.9%)                | 0.59%<br>(-0.48-2.1%)               | 0.14<br>(-0.12-0.51)      | 4.5<br>(-2.6-15)        |
| Federated States of Micronesia | 2005 | Male   | 65 to 69 | 44%<br>(25-63%)                | 56%<br>(37-75%)          | 0.52<br>(0.26-0.89)                         | 0.51%<br>(-0.32-1.5%)                | 0.53%<br>(-0.39-1.7%)               | 0.15<br>(-0.11-0.49)      | 3.7<br>(-2.3-12)        |
| Federated States of Micronesia | 2005 | Male   | 70 to 74 | 41%<br>(24-60%)                | 59%<br>(40-76%)          | 0.45<br>(0.22-0.8)                          | 0.27%<br>(-0.45-1.2%)                | 0.27%<br>(-0.56-1.3%)               | 0.11<br>(-0.22-0.53)      | 2.3<br>(-4-11)          |
| Federated States of Micronesia | 2005 | Male   | 75 to 79 | 37%<br>(22-57%)                | 63%<br>(43-78%)          | 0.38<br>(0.19-0.69)                         | 0.18%<br>(-0.49-0.93%)               | 0.17%<br>(-0.57-0.99%)              | 0.047<br>(-0.16-0.28)     | 0.84<br>(-2.2-4.3)      |
| Federated States of Micronesia | 2005 | Male   | 80 to 84 | 35%<br>(19-53%)                | 65%<br>(47-81%)          | 0.34<br>(0.17-0.6)                          | 0.15%<br>(-0.38-0.68%)               | 0.12%<br>(-0.47-0.71%)              | 0.037<br>(-0.14-0.22)     | 0.53<br>(-1.4-2.4)      |
| Federated States of Micronesia | 2005 | Male   | 85 to 89 | 33%<br>(19-50%)                | 67%<br>(50-81%)          | 0.32<br>(0.16-0.56)                         | 0.011%<br>(-0.5-0.48%)               | -0.037%<br>(-0.61-0.5%)             | -0.0084<br>(-0.14-0.11)   | 0.022<br>(-0.96-0.93)   |
| Federated States of Micronesia | 2005 | Male   | 90 to 94 | 34%<br>(21-51%)                | 66%<br>(49-79%)          | 0.33<br>(0.15-0.59)                         | -0.031%<br>(-0.48-0.36%)             | -0.097%<br>(-0.66-0.35%)            | -0.0072<br>(-0.049-0.026) | -0.013<br>(-0.22-0.16)  |
| Federated States of Micronesia | 2005 | Male   | 95 plus  | 37%<br>(20-58%)                | 63%<br>(42-80%)          | 0.35<br>(0.14-0.67)                         | -0.24%<br>(-0.84-0.28%)              | -0.39%<br>(-1.1-0.19%)              | -0.0069<br>(-0.02-0.0034) | -0.017<br>(-0.06-0.019) |
| Federated States of Micronesia | 2010 | Female | All Ages | 16%<br>(13-20%)                | 84%<br>(80-87%)          | 0.2<br>(0.15-0.27)                          | 0.18%<br>(-0.13-0.46%)               | -0.17%<br>(-0.62-0.24%)             | -0.66<br>(-2.4-0.94)      | 28<br>(-19-74)          |
| Federated States of Micronesia | 2010 | Female | 15 to 19 | 18%<br>(11-29%)                | 82%<br>(71-89%)          | 0.25<br>(0.12-0.43)                         | 0.74%<br>(0.37-1.2%)                 | 0.93%<br>(0.26-1.9%)                | 0.056<br>(0.015-0.12)     | 6.8<br>(3.3-12)         |
| Federated States of Micronesia | 2010 | Female | 20 to 24 | 23%<br>(14-35%)                | 77%<br>(65-86%)          | 0.4<br>(0.2-0.65)                           | 1.3%<br>(0.73-2%)                    | 1.3%<br>(0.51-2.7%)                 | 0.098<br>(0.035-0.2)      | 12<br>(6.4-20)          |
| Federated States of Micronesia | 2010 | Female | 25 to 29 | 23%<br>(13-36%)                | 77%<br>(64-87%)          | 0.37<br>(0.21-0.61)                         | 1.2%<br>(0.73-1.8%)                  | 1.3%<br>(0.55-2.2%)                 | 0.11<br>(0.047-0.21)      | 11<br>(6.7-18)          |
| Federated States of Micronesia | 2010 | Female | 30 to 34 | 23%<br>(13-36%)                | 77%<br>(64-87%)          | 0.36<br>(0.18-0.61)                         | 0.8%<br>(0.35-1.3%)                  | 0.75%<br>(0.073-1.6%)               | 0.055<br>(0.0051-0.12)    | 5.4<br>(2.3-9.5)        |
| Federated States of Micronesia | 2010 | Female | 35 to 39 | 22%<br>(12-35%)                | 78%<br>(65-88%)          | 0.38<br>(0.2-0.66)                          | 0.91%<br>(0.39-1.6%)                 | 1.1%<br>(0.32-2%)                   | 0.096<br>(0.027-0.19)     | 6.3<br>(2.5-11)         |
| Federated States of Micronesia | 2010 | Female | 40 to 44 | 20%<br>(12-33%)                | 80%<br>(67-88%)          | 0.35<br>(0.17-0.62)                         | 0.7%<br>(0.08-1.4%)                  | 0.86%<br>(0.027-1.9%)               | 0.12<br>(0.004-0.26)      | 6.4<br>(0.78-13)        |
| Federated States of Micronesia | 2010 | Female | 45 to 49 | 20%<br>(11-32%)                | 80%<br>(68-89%)          | 0.3<br>(0.15-0.54)                          | 0.27%<br>(-0.38-0.86%)               | 0.37%<br>(-0.42-1.2%)               | 0.068<br>(-0.077-0.22)    | 2.8<br>(-3.8-9.4)       |
| Federated States of Micronesia | 2010 | Female | 50 to 54 | 20%<br>(11-33%)                | 80%<br>(67-89%)          | 0.27<br>(0.13-0.47)                         | -0.088%<br>(-0.83-0.49%)             | -0.026%<br>(-0.9-0.69%)             | -0.0067<br>(-0.25-0.19)   | -1.1<br>(-11-6.6)       |
| Federated States of Micronesia | 2010 | Female | 55 to 59 | 18%<br>(11-30%)                | 82%<br>(70-89%)          | 0.22<br>(0.11-0.4)                          | -0.19%<br>(-0.94-0.33%)              | -0.13%<br>(-0.98-0.52%)             | -0.041<br>(-0.31-0.18)    | -2.6<br>(-12-4.6)       |
| Federated States of Micronesia | 2010 | Female | 60 to 64 | 17%<br>(9.5-28%)               | 83%<br>(72-91%)          | 0.19<br>(0.086-0.35)                        | -0.38%<br>(-1.1-0.16%)               | -0.36%<br>(-1.2-0.26%)              | -0.11<br>(-0.38-0.08)     | -4<br>(-12-1.6)         |
| Federated States of Micronesia | 2010 | Female | 65 to 69 | 18%<br>(11-28%)                | 82%<br>(72-89%)          | 0.19<br>(0.09-0.33)                         | -0.41%<br>(-1.1-0.089%)              | -0.4%<br>(-1.2-0.18%)               | -0.11<br>(-0.35-0.052)    | -3.3<br>(-8.9-0.7)      |
| Federated States of Micronesia | 2010 | Female | 70 to 74 | 18%<br>(11-29%)                | 82%<br>(71-89%)          | 0.19<br>(0.087-0.34)                        | -0.59%<br>(-1.2--0.068%)             | -0.62%<br>(-1.3--0.036%)            | -0.21<br>(-0.47--0.012)   | -4.3<br>(-9.2--0.54)    |
| Federated States of Micronesia | 2010 | Female | 75 to 79 | 18%<br>(11-29%)                | 82%<br>(71-89%)          | 0.18<br>(0.081-0.32)                        | -0.48%<br>(-1.1--0.037%)             | -0.5%<br>(-1.2--0.0021%)            | -0.23<br>(-0.58--0.00094) | -3.6<br>(-8.7--0.29)    |

| Location                       | Year | Sex    | Age      | Prevalence of current drinkers | Prevalence of abstainers | Population average of standard drinks daily | Percent of total attributable deaths | Percent of total attributable DALYs | Attributable deaths         | Attributable DALYs       |
|--------------------------------|------|--------|----------|--------------------------------|--------------------------|---------------------------------------------|--------------------------------------|-------------------------------------|-----------------------------|--------------------------|
| Federated States of Micronesia | 2010 | Female | 80 to 84 | 18%<br>(10-29%)                | 82%<br>(71-90%)          | 0.17<br>(0.083-0.3)                         | -0.58%<br>(-1.2--0.15%)              | -0.64%<br>(-1.3--0.14%)             | -0.28<br>(-0.62--0.06)      | -3.1<br>(-6.6--0.76)     |
| Federated States of Micronesia | 2010 | Female | 85 to 89 | 18%<br>(11-28%)                | 82%<br>(72-89%)          | 0.17<br>(0.087-0.3)                         | -0.58%<br>(-1.2--0.13%)              | -0.65%<br>(-1.3--0.14%)             | -0.17<br>(-0.35--0.037)     | -1.3<br>(-2.7--0.3)      |
| Federated States of Micronesia | 2010 | Female | 90 to 94 | 19%<br>(12-29%)                | 81%<br>(71-88%)          | 0.19<br>(0.088-0.35)                        | -0.52%<br>(-1--0.13%)                | -0.59%<br>(-1.2--0.15%)             | -0.072<br>(-0.15--0.018)    | -0.37<br>(-0.76--0.086)  |
| Federated States of Micronesia | 2010 | Female | 95 plus  | 22%<br>(12-35%)                | 78%<br>(65-88%)          | 0.21<br>(0.084-0.39)                        | -0.55%<br>(-1.3-0.025%)              | -0.67%<br>(-1.5--0.011%)            | -0.019<br>(-0.043--0.00029) | -0.06<br>(-0.14-0.0026)  |
| Federated States of Micronesia | 2010 | Male   | All Ages | 38%<br>(30-48%)                | 62%<br>(52-70%)          | 0.62<br>(0.49-0.76)                         | 1.9%<br>(1.1-2.8%)                   | 1.4%<br>(0.56-2.4%)                 | 5.9<br>(2.3-10)             | 360<br>(200-550)         |
| Federated States of Micronesia | 2010 | Male   | 15 to 19 | 34%<br>(20-52%)                | 66%<br>(48-80%)          | 0.34<br>(0.16-0.58)                         | 1.6%<br>(0.81-2.8%)                  | 2%<br>(0.73-3.9%)                   | 0.21<br>(0.076-0.44)        | 20<br>(10-36)            |
| Federated States of Micronesia | 2010 | Male   | 20 to 24 | 52%<br>(34-70%)                | 48%<br>(30-66%)          | 1<br>(0.62-1.5)                             | 4.6%<br>(2.7-7.2%)                   | 5.4%<br>(2.8-8.8%)                  | 0.89<br>(0.45-1.5)          | 69<br>(40-110)           |
| Federated States of Micronesia | 2010 | Male   | 25 to 29 | 59%<br>(40-76%)                | 41%<br>(24-60%)          | 1.5<br>(0.99-2.2)                           | 6.1%<br>(3.7-8.8%)                   | 7.2%<br>(4-11%)                     | 1.2<br>(0.64-1.8)           | 82<br>(50-120)           |
| Federated States of Micronesia | 2010 | Male   | 30 to 34 | 61%<br>(39-78%)                | 39%<br>(22-61%)          | 1.6<br>(0.96-2.5)                           | 5.1%<br>(2.5-8%)                     | 5.7%<br>(2.3-9.4%)                  | 0.72<br>(0.28-1.2)          | 48<br>(22-78)            |
| Federated States of Micronesia | 2010 | Male   | 35 to 39 | 59%<br>(41-77%)                | 41%<br>(23-59%)          | 1.4<br>(0.8-2.3)                            | 4.3%<br>(2.2-7%)                     | 4.8%<br>(2.2-8.1%)                  | 0.53<br>(0.24-0.96)         | 32<br>(16-54)            |
| Federated States of Micronesia | 2010 | Male   | 40 to 44 | 57%<br>(39-75%)                | 43%<br>(25-61%)          | 1.2<br>(0.66-1.9)                           | 3%<br>(1.2-5.3%)                     | 3.2%<br>(0.99-5.8%)                 | 0.52<br>(0.15-1.1)          | 28<br>(11-52)            |
| Federated States of Micronesia | 2010 | Male   | 45 to 49 | 53%<br>(32-72%)                | 47%<br>(28-68%)          | 1.1<br>(0.6-1.8)                            | 2.4%<br>(0.76-4.2%)                  | 2.4%<br>(0.54-4.6%)                 | 0.64<br>(0.14-1.3)          | 31<br>(10-59)            |
| Federated States of Micronesia | 2010 | Male   | 50 to 54 | 50%<br>(31-69%)                | 50%<br>(31-69%)          | 0.89<br>(0.47-1.5)                          | 1.7%<br>(0.24-3.5%)                  | 1.8%<br>(0.027-3.8%)                | 0.6<br>(0.0097-1.4)         | 26<br>(3.5-55)           |
| Federated States of Micronesia | 2010 | Male   | 55 to 59 | 48%<br>(30-67%)                | 52%<br>(33-70%)          | 0.66<br>(0.35-1.1)                          | 0.81%<br>(-0.25-2.2%)                | 0.78%<br>(-0.44-2.3%)               | 0.36<br>(-0.21-1)           | 14<br>(-4.1-37)          |
| Federated States of Micronesia | 2010 | Male   | 60 to 64 | 45%<br>(26-65%)                | 55%<br>(35-74%)          | 0.52<br>(0.25-0.96)                         | 0.43%<br>(-0.5-1.7%)                 | 0.41%<br>(-0.68-1.8%)               | 0.16<br>(-0.28-0.72)        | 5.5<br>(-6.8-21)         |
| Federated States of Micronesia | 2010 | Male   | 65 to 69 | 43%<br>(25-62%)                | 57%<br>(38-75%)          | 0.47<br>(0.23-0.82)                         | 0.35%<br>(-0.41-1.3%)                | 0.35%<br>(-0.52-1.4%)               | 0.098<br>(-0.14-0.39)       | 2.6<br>(-3-9.4)          |
| Federated States of Micronesia | 2010 | Male   | 70 to 74 | 41%<br>(24-58%)                | 59%<br>(42-76%)          | 0.4<br>(0.19-0.73)                          | 0.17%<br>(-0.5-0.96%)                | 0.15%<br>(-0.58-1.1%)               | 0.047<br>(-0.19-0.32)       | 1.1<br>(-3.3-6.2)        |
| Federated States of Micronesia | 2010 | Male   | 75 to 79 | 37%<br>(22-56%)                | 63%<br>(44-78%)          | 0.34<br>(0.16-0.63)                         | 0.099%<br>(-0.52-0.74%)              | 0.069%<br>(-0.61-0.77%)             | 0.027<br>(-0.24-0.31)       | 0.63<br>(-3.2-4.8)       |
| Federated States of Micronesia | 2010 | Male   | 80 to 84 | 35%<br>(19-53%)                | 65%<br>(47-81%)          | 0.31<br>(0.15-0.54)                         | 0.088%<br>(-0.43-0.59%)              | 0.057%<br>(-0.53-0.6%)              | 0.017<br>(-0.16-0.19)       | 0.32<br>(-1.5-2.2)       |
| Federated States of Micronesia | 2010 | Male   | 85 to 89 | 33%<br>(19-50%)                | 67%<br>(50-81%)          | 0.29<br>(0.15-0.51)                         | -0.041%<br>(-0.53-0.39%)             | -0.098%<br>(-0.66-0.39%)            | -0.017<br>(-0.12-0.066)     | -0.061<br>(-0.82-0.58)   |
| Federated States of Micronesia | 2010 | Male   | 90 to 94 | 34%<br>(21-51%)                | 66%<br>(49-79%)          | 0.29<br>(0.14-0.52)                         | -0.066%<br>(-0.5-0.28%)              | -0.14%<br>(-0.66-0.26%)             | -0.012<br>(-0.058-0.023)    | -0.035<br>(-0.26-0.14)   |
| Federated States of Micronesia | 2010 | Male   | 95 plus  | 37%<br>(20-57%)                | 63%<br>(43-80%)          | 0.31<br>(0.13-0.61)                         | -0.26%<br>(-0.86-0.19%)              | -0.41%<br>(-1.1-0.11%)              | -0.0085<br>(-0.023-0.0023)  | -0.021<br>(-0.069-0.015) |

| Location                       | Year | Sex    | Age      | Prevalence of current drinkers | Prevalence of abstainers | Population average of standard drinks daily | Percent of total attributable deaths | Percent of total attributable DALYs | Attributable deaths         | Attributable DALYs         |
|--------------------------------|------|--------|----------|--------------------------------|--------------------------|---------------------------------------------|--------------------------------------|-------------------------------------|-----------------------------|----------------------------|
| Federated States of Micronesia | 2016 | Female | All Ages | 16%<br>(13-21%)                | 84%<br>(79-87%)          | 0.2<br>(0.13-0.3)                           | 0.15%<br>(-0.17-0.5%)                | -0.21%<br>(-0.67-0.25%)             | -0.82<br>(-2.6-0.96)        | 24<br>(-26-81)             |
| Federated States of Micronesia | 2016 | Female | 15 to 19 | 18%<br>(11-28%)                | 82%<br>(72-89%)          | 0.24<br>(0.11-0.44)                         | 0.72%<br>(0.36-1.3%)                 | 0.9%<br>(0.22-2.1%)                 | 0.051<br>(0.011-0.12)       | 6.4<br>(3-11)              |
| Federated States of Micronesia | 2016 | Female | 20 to 24 | 23%<br>(14-35%)                | 77%<br>(65-86%)          | 0.39<br>(0.18-0.7)                          | 1.2%<br>(0.69-2.1%)                  | 1.3%<br>(0.39-2.9%)                 | 0.1<br>(0.03-0.23)          | 13<br>(6.8-22)             |
| Federated States of Micronesia | 2016 | Female | 25 to 29 | 23%<br>(13-36%)                | 77%<br>(64-87%)          | 0.36<br>(0.18-0.62)                         | 1.2%<br>(0.68-1.8%)                  | 1.2%<br>(0.48-2.3%)                 | 0.11<br>(0.04-0.21)         | 11<br>(6.3-18)             |
| Federated States of Micronesia | 2016 | Female | 30 to 34 | 22%<br>(12-36%)                | 78%<br>(64-88%)          | 0.34<br>(0.17-0.61)                         | 0.89%<br>(0.46-1.5%)                 | 0.87%<br>(0.24-1.7%)                | 0.094<br>(0.024-0.2)        | 8.9<br>(4.4-15)            |
| Federated States of Micronesia | 2016 | Female | 35 to 39 | 22%<br>(12-35%)                | 78%<br>(65-88%)          | 0.36<br>(0.17-0.7)                          | 0.74%<br>(0.22-1.6%)                 | 0.8%<br>(0.068-1.9%)                | 0.08<br>(0.0061-0.21)       | 5.7<br>(1.7-13)            |
| Federated States of Micronesia | 2016 | Female | 40 to 44 | 20%<br>(12-33%)                | 80%<br>(67-88%)          | 0.34<br>(0.15-0.66)                         | 0.53%<br>(0.045-1.4%)                | 0.61%<br>(0.016-1.8%)               | 0.06<br>(0.0013-0.17)       | 3.5<br>(0.28-8.8)          |
| Federated States of Micronesia | 2016 | Female | 45 to 49 | 20%<br>(11-32%)                | 80%<br>(68-89%)          | 0.29<br>(0.12-0.54)                         | 0.23%<br>(-0.45-0.92%)               | 0.32%<br>(-0.54-1.3%)               | 0.053<br>(-0.086-0.22)      | 2.2<br>(-4.2-9)            |
| Federated States of Micronesia | 2016 | Female | 50 to 54 | 20%<br>(11-33%)                | 80%<br>(67-89%)          | 0.26<br>(0.11-0.49)                         | -0.12%<br>(-0.86-0.55%)              | -0.067%<br>(-0.93-0.73%)            | -0.015<br>(-0.23-0.18)      | -1.4<br>(-9.7-5.8)         |
| Federated States of Micronesia | 2016 | Female | 55 to 59 | 18%<br>(11-30%)                | 82%<br>(70-89%)          | 0.21<br>(0.094-0.41)                        | -0.22%<br>(-0.92-0.37%)              | -0.16%<br>(-1-0.52%)                | -0.056<br>(-0.34-0.19)      | -3.1<br>(-13-4.8)          |
| Federated States of Micronesia | 2016 | Female | 60 to 64 | 17%<br>(9.5-28%)               | 83%<br>(72-91%)          | 0.18<br>(0.076-0.35)                        | -0.38%<br>(-1.1-0.13%)               | -0.37%<br>(-1.2-0.22%)              | -0.16<br>(-0.52-0.096)      | -5.6<br>(-16-1.9)          |
| Federated States of Micronesia | 2016 | Female | 65 to 69 | 17%<br>(10-28%)                | 83%<br>(72-90%)          | 0.18<br>(0.079-0.33)                        | -0.44%<br>(-1.1-0.12%)               | -0.43%<br>(-1.2-0.17%)              | -0.18<br>(-0.53-0.076)      | -5.1<br>(-13-1.4)          |
| Federated States of Micronesia | 2016 | Female | 70 to 74 | 18%<br>(11-29%)                | 82%<br>(71-89%)          | 0.18<br>(0.079-0.35)                        | -0.6%<br>(-1.2--0.086%)              | -0.64%<br>(-1.4--0.058%)            | -0.24<br>(-0.51--0.022)     | -4.9<br>(-10--0.72)        |
| Federated States of Micronesia | 2016 | Female | 75 to 79 | 18%<br>(11-28%)                | 82%<br>(72-89%)          | 0.17<br>(0.07-0.32)                         | -0.49%<br>(-1.1--0.028%)             | -0.51%<br>(-1.2-0.0093%)            | -0.19<br>(-0.46-0.0037)     | -2.9<br>(-6.9--0.18)       |
| Federated States of Micronesia | 2016 | Female | 80 to 84 | 18%<br>(10-28%)                | 82%<br>(72-90%)          | 0.17<br>(0.074-0.31)                        | -0.59%<br>(-1.2--0.15%)              | -0.65%<br>(-1.3--0.15%)             | -0.26<br>(-0.54--0.058)     | -2.8<br>(-5.8--0.71)       |
| Federated States of Micronesia | 2016 | Female | 85 to 89 | 18%<br>(11-27%)                | 82%<br>(73-89%)          | 0.17<br>(0.077-0.32)                        | -0.58%<br>(-1.2--0.15%)              | -0.66%<br>(-1.3--0.16%)             | -0.19<br>(-0.38--0.044)     | -1.4<br>(-2.9--0.33)       |
| Federated States of Micronesia | 2016 | Female | 90 to 94 | 19%<br>(12-29%)                | 81%<br>(71-88%)          | 0.18<br>(0.074-0.36)                        | -0.52%<br>(-1--0.15%)                | -0.6%<br>(-1.2--0.17%)              | -0.063<br>(-0.13--0.017)    | -0.32<br>(-0.67--0.087)    |
| Federated States of Micronesia | 2016 | Female | 95 plus  | 22%<br>(12-35%)                | 78%<br>(65-88%)          | 0.2<br>(0.077-0.43)                         | -0.56%<br>(-1.3--0.0013%)            | -0.67%<br>(-1.5--0.025%)            | -0.023<br>(-0.053--0.00081) | -0.074<br>(-0.17--0.00016) |
| Federated States of Micronesia | 2016 | Male   | All Ages | 39%<br>(31-49%)                | 61%<br>(51-69%)          | 0.65<br>(0.43-0.92)                         | 1.9%<br>(0.98-3.2%)                  | 1.4%<br>(0.41-2.7%)                 | 6.2<br>(1.7-13)             | 380<br>(190-660)           |
| Federated States of Micronesia | 2016 | Male   | 15 to 19 | 34%<br>(20-51%)                | 66%<br>(49-80%)          | 0.33<br>(0.14-0.61)                         | 1.6%<br>(0.77-2.8%)                  | 1.9%<br>(0.69-3.9%)                 | 0.19<br>(0.067-0.4)         | 18<br>(8.8-33)             |
| Federated States of Micronesia | 2016 | Male   | 20 to 24 | 52%<br>(33-70%)                | 48%<br>(30-67%)          | 0.97<br>(0.52-1.6)                          | 4.4%<br>(2.4-7.3%)                   | 5.2%<br>(2.5-9.1%)                  | 0.85<br>(0.38-1.5)          | 67<br>(36-110)             |
| Federated States of Micronesia | 2016 | Male   | 25 to 29 | 59%<br>(39-76%)                | 41%<br>(24-61%)          | 1.5<br>(0.86-2.3)                           | 5.8%<br>(3.3-9%)                     | 6.9%<br>(3.5-11%)                   | 1.2<br>(0.61-2.1)           | 89<br>(49-140)             |

| Location                       | Year | Sex    | Age      | Prevalence of current drinkers | Prevalence of abstainers | Population average of standard drinks daily | Percent of total attributable deaths | Percent of total attributable DALYs | Attributable deaths      | Attributable DALYs       |
|--------------------------------|------|--------|----------|--------------------------------|--------------------------|---------------------------------------------|--------------------------------------|-------------------------------------|--------------------------|--------------------------|
| Federated States of Micronesia | 2016 | Male   | 30 to 34 | 60%<br>(39-78%)                | 40%<br>(22-61%)          | 1.6<br>(0.86-2.6)                           | 5.1%<br>(2.7-8.3%)                   | 5.8%<br>(2.7-10%)                   | 1.1<br>(0.51-2)          | 73<br>(38-120)           |
| Federated States of Micronesia | 2016 | Male   | 35 to 39 | 59%<br>(40-77%)                | 41%<br>(23-60%)          | 1.4<br>(0.74-2.3)                           | 3.3%<br>(0.92-6.3%)                  | 3.6%<br>(0.43-7.3%)                 | 0.57<br>(0.063-1.2)      | 35<br>(9.8-69)           |
| Federated States of Micronesia | 2016 | Male   | 40 to 44 | 56%<br>(38-74%)                | 44%<br>(26-62%)          | 1.2<br>(0.59-2)                             | 2.7%<br>(0.83-5.5%)                  | 2.9%<br>(0.43-6.2%)                 | 0.39<br>(0.058-0.86)     | 21<br>(6.4-44)           |
| Federated States of Micronesia | 2016 | Male   | 45 to 49 | 52%<br>(31-71%)                | 48%<br>(29-69%)          | 1.1<br>(0.51-1.9)                           | 2.3%<br>(0.49-4.8%)                  | 2.4%<br>(0.11-5.1%)                 | 0.47<br>(0.019-1.1)      | 23<br>(4.4-49)           |
| Federated States of Micronesia | 2016 | Male   | 50 to 54 | 49%<br>(29-69%)                | 51%<br>(31-71%)          | 0.86<br>(0.42-1.6)                          | 1.7%<br>(0.00082-3.8%)               | 1.7%<br>(-0.23-4.2%)                | 0.58<br>(-0.075-1.5)     | 25<br>(0.013-59)         |
| Federated States of Micronesia | 2016 | Male   | 55 to 59 | 47%<br>(29-67%)                | 53%<br>(33-71%)          | 0.64<br>(0.3-1.2)                           | 0.79%<br>(-0.37-2.4%)                | 0.77%<br>(-0.56-2.5%)               | 0.33<br>(-0.25-1.1)      | 13<br>(-5.8-39)          |
| Federated States of Micronesia | 2016 | Male   | 60 to 64 | 45%<br>(26-66%)                | 55%<br>(34-74%)          | 0.5<br>(0.22-0.98)                          | 0.42%<br>(-0.51-1.7%)                | 0.39%<br>(-0.71-1.8%)               | 0.23<br>(-0.42-1.1)      | 7.8<br>(-10-33)          |
| Federated States of Micronesia | 2016 | Male   | 65 to 69 | 43%<br>(25-62%)                | 57%<br>(38-75%)          | 0.45<br>(0.21-0.82)                         | 0.32%<br>(-0.46-1.3%)                | 0.32%<br>(-0.57-1.5%)               | 0.17<br>(-0.28-0.78)     | 4.4<br>(-6.2-19)         |
| Federated States of Micronesia | 2016 | Male   | 70 to 74 | 40%<br>(24-58%)                | 60%<br>(42-76%)          | 0.39<br>(0.18-0.74)                         | 0.16%<br>(-0.53-1%)                  | 0.14%<br>(-0.64-1.1%)               | 0.046<br>(-0.22-0.37)    | 1.1<br>(-3.7-7.2)        |
| Federated States of Micronesia | 2016 | Male   | 75 to 79 | 36%<br>(21-55%)                | 64%<br>(45-79%)          | 0.33<br>(0.14-0.64)                         | 0.11%<br>(-0.49-0.81%)               | 0.073%<br>(-0.59-0.87%)             | 0.021<br>(-0.17-0.25)    | 0.49<br>(-2.3-3.7)       |
| Federated States of Micronesia | 2016 | Male   | 80 to 84 | 33%<br>(18-51%)                | 67%<br>(49-82%)          | 0.29<br>(0.13-0.56)                         | 0.11%<br>(-0.39-0.63%)               | 0.076%<br>(-0.48-0.68%)             | 0.021<br>(-0.13-0.19)    | 0.35<br>(-1.3-2.1)       |
| Federated States of Micronesia | 2016 | Male   | 85 to 89 | 32%<br>(19-48%)                | 68%<br>(52-81%)          | 0.28<br>(0.12-0.54)                         | -0.03%<br>(-0.52-0.43%)              | -0.087%<br>(-0.66-0.42%)            | -0.017<br>(-0.13-0.08)   | -0.05<br>(-0.87-0.7)     |
| Federated States of Micronesia | 2016 | Male   | 90 to 94 | 33%<br>(20-51%)                | 67%<br>(49-80%)          | 0.29<br>(0.12-0.57)                         | -0.061%<br>(-0.51-0.33%)             | -0.13%<br>(-0.66-0.3%)              | -0.0087<br>(-0.043-0.02) | -0.023<br>(-0.2-0.13)    |
| Federated States of Micronesia | 2016 | Male   | 95 plus  | 37%<br>(19-57%)                | 63%<br>(43-81%)          | 0.32<br>(0.12-0.67)                         | -0.26%<br>(-0.87-0.23%)              | -0.41%<br>(-1.1-0.16%)              | -0.01<br>(-0.029-0.004)  | -0.025<br>(-0.086-0.023) |
| Papua New Guinea               | 1990 | Female | All Ages | 20%<br>(14-27%)                | 80%<br>(73-86%)          | 1<br>(0.66-1.5)                             | 2%<br>(1.2-2.9%)                     | 3.1%<br>(1.6-4.9%)                  | 630<br>(320-1000)        | 25000<br>(15000-37000)   |
| Papua New Guinea               | 1990 | Female | 15 to 19 | 21%<br>(9.7-37%)               | 79%<br>(63-90%)          | 1.3<br>(0.5-2.5)                            | 2.6%<br>(1.1-4.9%)                   | 3.9%<br>(1.4-7.8%)                  | 17<br>(6.1-36)           | 1400<br>(560-2700)       |
| Papua New Guinea               | 1990 | Female | 20 to 24 | 26%<br>(12-45%)                | 74%<br>(55-88%)          | 2<br>(0.86-4)                               | 4%<br>(2.1-6.9%)                     | 5.4%<br>(2.5-9.4%)                  | 28<br>(13-51)            | 2100<br>(1100-3700)      |
| Papua New Guinea               | 1990 | Female | 25 to 29 | 27%<br>(11-47%)                | 73%<br>(53-89%)          | 2.1<br>(0.89-3.8)                           | 4.7%<br>(2.4-7.7%)                   | 6.1%<br>(3-10%)                     | 36<br>(16-61)            | 2400<br>(1200-4000)      |
| Papua New Guinea               | 1990 | Female | 30 to 34 | 28%<br>(11-49%)                | 72%<br>(51-89%)          | 2.1<br>(0.78-4.1)                           | 4.5%<br>(2.3-7.4%)                   | 5.8%<br>(2.7-9.5%)                  | 38<br>(17-66)            | 2300<br>(1200-3900)      |
| Papua New Guinea               | 1990 | Female | 35 to 39 | 28%<br>(12-48%)                | 72%<br>(52-88%)          | 2.2<br>(0.85-4.1)                           | 5%<br>(2.6-8.1%)                     | 6.3%<br>(3.2-10%)                   | 51<br>(24-88)            | 2800<br>(1400-4700)      |
| Papua New Guinea               | 1990 | Female | 40 to 44 | 28%<br>(14-46%)                | 72%<br>(54-86%)          | 2<br>(0.81-3.9)                             | 5.3%<br>(2.5-8.9%)                   | 6.6%<br>(3.1-11%)                   | 55<br>(24-97)            | 2700<br>(1200-4600)      |
| Papua New Guinea               | 1990 | Female | 45 to 49 | 27%<br>(12-46%)                | 73%<br>(54-88%)          | 1.7<br>(0.66-3.4)                           | 4.9%<br>(2.1-9%)                     | 6.1%<br>(2.6-11%)                   | 55<br>(22-100)           | 2400<br>(960-4300)       |

| Location         | Year | Sex    | Age      | Prevalence of current drinkers | Prevalence of abstainers | Population average of standard drinks daily | Percent of total attributable deaths | Percent of total attributable DALYs | Attributable deaths  | Attributable DALYs     |
|------------------|------|--------|----------|--------------------------------|--------------------------|---------------------------------------------|--------------------------------------|-------------------------------------|----------------------|------------------------|
| Papua New Guinea | 1990 | Female | 50 to 54 | 27%<br>(13-46%)                | 73%<br>(54-87%)          | 1.5<br>(0.58-3.2)                           | 4.6%<br>(1.5-9%)                     | 5.6%<br>(1.9-11%)                   | 59<br>(20-120)       | 2200<br>(730-4400)     |
| Papua New Guinea | 1990 | Female | 55 to 59 | 27%<br>(13-47%)                | 73%<br>(53-87%)          | 1.4<br>(0.53-3.1)                           | 4%<br>(1.2-8.4%)                     | 4.7%<br>(1.4-9.9%)                  | 56<br>(16-120)       | 1800<br>(500-3800)     |
| Papua New Guinea | 1990 | Female | 60 to 64 | 27%<br>(13-47%)                | 73%<br>(53-87%)          | 1.3<br>(0.48-3.1)                           | 3.3%<br>(0.62-7.4%)                  | 3.7%<br>(0.74-8.4%)                 | 48<br>(9.5-110)      | 1300<br>(250-3100)     |
| Papua New Guinea | 1990 | Female | 65 to 69 | 28%<br>(13-46%)                | 72%<br>(54-87%)          | 1.4<br>(0.48-2.9)                           | 3.6%<br>(0.79-7.6%)                  | 4%<br>(0.9-8.6%)                    | 57<br>(14-120)       | 1300<br>(300-2800)     |
| Papua New Guinea | 1990 | Female | 70 to 74 | 27%<br>(12-45%)                | 73%<br>(55-88%)          | 1.3<br>(0.44-2.8)                           | 3.1%<br>(0.54-7.2%)                  | 3.5%<br>(0.62-8.1%)                 | 49<br>(8.7-120)      | 890<br>(150-2200)      |
| Papua New Guinea | 1990 | Female | 75 to 79 | 26%<br>(11-44%)                | 74%<br>(56-89%)          | 1.2<br>(0.39-2.8)                           | 3.1%<br>(0.48-7.2%)                  | 3.4%<br>(0.5-8%)                    | 40<br>(6.2-95)       | 560<br>(86-1300)       |
| Papua New Guinea | 1990 | Female | 80 to 84 | 26%<br>(11-45%)                | 74%<br>(55-89%)          | 1.2<br>(0.36-2.6)                           | 2.6%<br>(0.45-6.5%)                  | 2.9%<br>(0.47-7.2%)                 | 24<br>(3.9-60)       | 250<br>(43-630)        |
| Papua New Guinea | 1990 | Female | 85 to 89 | 27%<br>(12-47%)                | 73%<br>(53-88%)          | 1.2<br>(0.44-2.7)                           | 2.5%<br>(0.42-6.4%)                  | 2.8%<br>(0.43-7.1%)                 | 9.3<br>(1.5-24)      | 70<br>(12-180)         |
| Papua New Guinea | 1990 | Female | 90 to 94 | 30%<br>(15-50%)                | 70%<br>(50-85%)          | 1.4<br>(0.47-3)                             | 2.3%<br>(0.32-5.8%)                  | 2.6%<br>(0.32-6.4%)                 | 2.5<br>(0.31-6.2)    | 13<br>(1.8-32)         |
| Papua New Guinea | 1990 | Female | 95 plus  | 35%<br>(16-57%)                | 65%<br>(43-84%)          | 1.6<br>(0.5-3.6)                            | 2.5%<br>(0.042-6.6%)                 | 2.7%<br>(-0.039-7.2%)               | 0.6<br>(-0.0085-1.6) | 2.1<br>(0.035-5.4)     |
| Papua New Guinea | 1990 | Male   | All Ages | 40%<br>(32-50%)                | 60%<br>(50-68%)          | 2.3<br>(1.6-3.1)                            | 4.9%<br>(3.4-6.2%)                   | 6.6%<br>(4.5-8.6%)                  | 1500<br>(1000-2100)  | 70000<br>(49000-92000) |
| Papua New Guinea | 1990 | Male   | 15 to 19 | 39%<br>(23-57%)                | 61%<br>(43-77%)          | 1.6<br>(0.71-2.9)                           | 4.7%<br>(2.2-8.7%)                   | 6.2%<br>(2.7-12%)                   | 41<br>(18-78)        | 3100<br>(1400-5800)    |
| Papua New Guinea | 1990 | Male   | 20 to 24 | 57%<br>(38-74%)                | 43%<br>(26-62%)          | 4.2<br>(2.3-6.7)                            | 14%<br>(8.4-19%)                     | 17%<br>(10-24%)                     | 130<br>(82-200)      | 9300<br>(5800-13000)   |
| Papua New Guinea | 1990 | Male   | 25 to 29 | 64%<br>(45-79%)                | 36%<br>(21-55%)          | 5.8<br>(3.3-9.1)                            | 16%<br>(11-20%)                      | 19%<br>(13-26%)                     | 150<br>(100-210)     | 9600<br>(6500-13000)   |
| Papua New Guinea | 1990 | Male   | 30 to 34 | 65%<br>(45-81%)                | 35%<br>(19-55%)          | 6.2<br>(3.5-9.9)                            | 15%<br>(11-20%)                      | 18%<br>(13-24%)                     | 150<br>(100-210)     | 8900<br>(6200-12000)   |
| Papua New Guinea | 1990 | Male   | 35 to 39 | 64%<br>(46-79%)                | 36%<br>(21-54%)          | 5.5<br>(2.9-9.4)                            | 14%<br>(9.2-18%)                     | 17%<br>(11-22%)                     | 160<br>(99-220)      | 8400<br>(5400-12000)   |
| Papua New Guinea | 1990 | Male   | 40 to 44 | 61%<br>(44-77%)                | 39%<br>(23-56%)          | 4.8<br>(2.3-8.5)                            | 12%<br>(7.7-17%)                     | 15%<br>(8.7-20%)                    | 160<br>(92-230)      | 7500<br>(4500-11000)   |
| Papua New Guinea | 1990 | Male   | 45 to 49 | 58%<br>(36-75%)                | 42%<br>(25-64%)          | 4.2<br>(2-7.4)                              | 11%<br>(6.5-15%)                     | 13%<br>(7.3-18%)                    | 160<br>(90-240)      | 6800<br>(3900-10000)   |
| Papua New Guinea | 1990 | Male   | 50 to 54 | 55%<br>(35-74%)                | 45%<br>(26-65%)          | 3.5<br>(1.6-6.4)                            | 9.4%<br>(4.8-14%)                    | 11%<br>(5.4-16%)                    | 150<br>(78-230)      | 5800<br>(3000-8600)    |
| Papua New Guinea | 1990 | Male   | 55 to 59 | 53%<br>(34-73%)                | 47%<br>(27-66%)          | 2.8<br>(1.3-5.3)                            | 7.3%<br>(3.4-11%)                    | 8%<br>(3.7-13%)                     | 120<br>(55-200)      | 4100<br>(1800-6400)    |
| Papua New Guinea | 1990 | Male   | 60 to 64 | 50%<br>(30-70%)                | 50%<br>(30-70%)          | 2.4<br>(1.1-4.7)                            | 6%<br>(2.4-9.9%)                     | 6.5%<br>(2.6-11%)                   | 100<br>(41-180)      | 2900<br>(1200-4900)    |
| Papua New Guinea | 1990 | Male   | 65 to 69 | 48%<br>(29-68%)                | 52%<br>(32-71%)          | 2.2<br>(0.98-4.1)                           | 5.5%<br>(2.3-9.2%)                   | 6%<br>(2.5-10%)                     | 84<br>(33-140)       | 1900<br>(780-3300)     |

| Location         | Year | Sex    | Age      | Prevalence of current drinkers | Prevalence of abstainers | Population average of standard drinks daily | Percent of total attributable deaths | Percent of total attributable DALYs | Attributable deaths  | Attributable DALYs     |
|------------------|------|--------|----------|--------------------------------|--------------------------|---------------------------------------------|--------------------------------------|-------------------------------------|----------------------|------------------------|
| Papua New Guinea | 1990 | Male   | 70 to 74 | 46%<br>(27-63%)                | 54%<br>(37-73%)          | 1.9<br>(0.86-3.7)                           | 4.6%<br>(1.7-8.1%)                   | 5%<br>(1.8-8.9%)                    | 56<br>(20-100)       | 1000<br>(380-1800)     |
| Papua New Guinea | 1990 | Male   | 75 to 79 | 42%<br>(26-60%)                | 58%<br>(40-74%)          | 1.6<br>(0.7-3.1)                            | 3.8%<br>(1.3-7%)                     | 4.1%<br>(1.4-7.6%)                  | 30<br>(9.9-57)       | 440<br>(150-810)       |
| Papua New Guinea | 1990 | Male   | 80 to 84 | 39%<br>(22-57%)                | 61%<br>(43-78%)          | 1.4<br>(0.64-2.7)                           | 3.4%<br>(1.3-6.1%)                   | 3.6%<br>(1.3-6.6%)                  | 14<br>(5.2-25)       | 150<br>(58-270)        |
| Papua New Guinea | 1990 | Male   | 85 to 89 | 37%<br>(22-54%)                | 63%<br>(46-78%)          | 1.4<br>(0.6-2.6)                            | 3%<br>(0.99-5.7%)                    | 3.2%<br>(0.99-6.2%)                 | 5.3<br>(1.6-10)      | 41<br>(14-79)          |
| Papua New Guinea | 1990 | Male   | 90 to 94 | 39%<br>(24-56%)                | 61%<br>(44-76%)          | 1.4<br>(0.59-2.8)                           | 2.4%<br>(0.75-4.8%)                  | 2.6%<br>(0.72-5.3%)                 | 1.3<br>(0.35-2.7)    | 7.1<br>(2.2-14)        |
| Papua New Guinea | 1990 | Male   | 95 plus  | 42%<br>(24-63%)                | 58%<br>(37-76%)          | 1.5<br>(0.55-3.2)                           | 2.4%<br>(0.44-5.3%)                  | 2.5%<br>(0.3-5.7%)                  | 0.29<br>(0.035-0.67) | 1.1<br>(0.19-2.5)      |
| Papua New Guinea | 1995 | Female | All Ages | 20%<br>(14-27%)                | 80%<br>(73-86%)          | 1.1<br>(0.73-1.7)                           | 2.3%<br>(1.4-3.3%)                   | 3.4%<br>(1.8-5.4%)                  | 780<br>(410-1300)    | 30000<br>(18000-45000) |
| Papua New Guinea | 1995 | Female | 15 to 19 | 21%<br>(9.8-38%)               | 79%<br>(62-90%)          | 1.4<br>(0.52-2.7)                           | 2.8%<br>(1.2-5.2%)                   | 4.1%<br>(1.5-8.2%)                  | 19<br>(7-39)         | 1500<br>(640-2900)     |
| Papua New Guinea | 1995 | Female | 20 to 24 | 26%<br>(11-44%)                | 74%<br>(56-89%)          | 2.1<br>(0.87-4.1)                           | 4.1%<br>(2.1-7%)                     | 5.6%<br>(2.6-9.8%)                  | 36<br>(16-64)        | 2700<br>(1400-4600)    |
| Papua New Guinea | 1995 | Female | 25 to 29 | 27%<br>(12-46%)                | 73%<br>(54-88%)          | 2.2<br>(0.95-4)                             | 4.9%<br>(2.6-8%)                     | 6.4%<br>(3.2-11%)                   | 43<br>(21-73)        | 2900<br>(1500-4800)    |
| Papua New Guinea | 1995 | Female | 30 to 34 | 28%<br>(11-49%)                | 72%<br>(51-89%)          | 2.3<br>(0.87-4.4)                           | 4.8%<br>(2.4-7.7%)                   | 6.1%<br>(2.9-10%)                   | 45<br>(21-78)        | 2800<br>(1400-4700)    |
| Papua New Guinea | 1995 | Female | 35 to 39 | 29%<br>(13-48%)                | 71%<br>(52-87%)          | 2.4<br>(0.98-4.5)                           | 5.5%<br>(2.9-8.6%)                   | 6.9%<br>(3.6-11%)                   | 62<br>(30-100)       | 3400<br>(1700-5600)    |
| Papua New Guinea | 1995 | Female | 40 to 44 | 28%<br>(14-47%)                | 72%<br>(53-86%)          | 2.2<br>(0.91-4.4)                           | 5.7%<br>(2.8-9.4%)                   | 7.2%<br>(3.4-12%)                   | 72<br>(33-120)       | 3500<br>(1700-5900)    |
| Papua New Guinea | 1995 | Female | 45 to 49 | 28%<br>(12-47%)                | 72%<br>(53-88%)          | 1.9<br>(0.71-3.7)                           | 5.3%<br>(2.2-9.5%)                   | 6.6%<br>(2.8-12%)                   | 70<br>(29-130)       | 3000<br>(1200-5500)    |
| Papua New Guinea | 1995 | Female | 50 to 54 | 27%<br>(12-47%)                | 73%<br>(53-88%)          | 1.7<br>(0.62-3.3)                           | 5%<br>(1.7-9.6%)                     | 6%<br>(2.1-12%)                     | 73<br>(26-140)       | 2700<br>(960-5400)     |
| Papua New Guinea | 1995 | Female | 55 to 59 | 26%<br>(12-46%)                | 74%<br>(54-88%)          | 1.5<br>(0.55-3.3)                           | 4.3%<br>(1.3-8.9%)                   | 5.1%<br>(1.6-10%)                   | 69<br>(21-140)       | 2200<br>(670-4700)     |
| Papua New Guinea | 1995 | Female | 60 to 64 | 27%<br>(12-47%)                | 73%<br>(53-88%)          | 1.4<br>(0.5-3.3)                            | 3.5%<br>(0.66-7.7%)                  | 4%<br>(0.77-8.6%)                   | 59<br>(12-130)       | 1600<br>(300-3600)     |
| Papua New Guinea | 1995 | Female | 65 to 69 | 28%<br>(13-47%)                | 72%<br>(53-87%)          | 1.5<br>(0.53-3)                             | 3.9%<br>(0.9-8.1%)                   | 4.4%<br>(1-9.2%)                    | 71<br>(17-150)       | 1600<br>(360-3400)     |
| Papua New Guinea | 1995 | Female | 70 to 74 | 28%<br>(14-47%)                | 72%<br>(53-86%)          | 1.4<br>(0.51-2.9)                           | 3.4%<br>(0.67-7.7%)                  | 3.8%<br>(0.67-8.5%)                 | 62<br>(11-150)       | 1100<br>(200-2700)     |
| Papua New Guinea | 1995 | Female | 75 to 79 | 26%<br>(12-47%)                | 74%<br>(53-88%)          | 1.3<br>(0.43-2.9)                           | 3.4%<br>(0.56-7.5%)                  | 3.7%<br>(0.62-8.5%)                 | 51<br>(8.9-120)      | 720<br>(120-1600)      |
| Papua New Guinea | 1995 | Female | 80 to 84 | 26%<br>(12-46%)                | 74%<br>(54-88%)          | 1.3<br>(0.41-2.8)                           | 2.9%<br>(0.56-6.9%)                  | 3.2%<br>(0.59-7.7%)                 | 32<br>(5.9-78)       | 340<br>(64-820)        |
| Papua New Guinea | 1995 | Female | 85 to 89 | 27%<br>(12-45%)                | 73%<br>(55-88%)          | 1.3<br>(0.48-2.9)                           | 2.8%<br>(0.52-6.9%)                  | 3.1%<br>(0.54-7.7%)                 | 13<br>(2.3-32)       | 96<br>(19-240)         |

| Location         | Year | Sex    | Age      | Prevalence of current drinkers | Prevalence of abstainers | Population average of standard drinks daily | Percent of total attributable deaths | Percent of total attributable DALYs | Attributable deaths  | Attributable DALYs      |
|------------------|------|--------|----------|--------------------------------|--------------------------|---------------------------------------------|--------------------------------------|-------------------------------------|----------------------|-------------------------|
| Papua New Guinea | 1995 | Female | 90 to 94 | 30%<br>(15-50%)                | 70%<br>(50-85%)          | 1.5<br>(0.5-3.2)                            | 2.5%<br>(0.46-6.2%)                  | 2.8%<br>(0.49-6.9%)                 | 3.2<br>(0.58-8)      | 17<br>(3.1-42)          |
| Papua New Guinea | 1995 | Female | 95 plus  | 35%<br>(16-57%)                | 65%<br>(43-84%)          | 1.7<br>(0.53-3.8)                           | 2.8%<br>(0.22-7%)                    | 3%<br>(0.16-7.8%)                   | 0.82<br>(0.043-2.1)  | 2.9<br>(0.23-7.2)       |
| Papua New Guinea | 1995 | Male   | All Ages | 41%<br>(33-50%)                | 59%<br>(50-67%)          | 2.5<br>(1.7-3.4)                            | 5.2%<br>(3.8-6.8%)                   | 7%<br>(4.9-9.1%)                    | 1800<br>(1200-2400)  | 81000<br>(58000-110000) |
| Papua New Guinea | 1995 | Male   | 15 to 19 | 39%<br>(23-57%)                | 61%<br>(43-77%)          | 1.7<br>(0.75-3.1)                           | 4.9%<br>(2.3-8.8%)                   | 6.4%<br>(2.8-12%)                   | 44<br>(19-84)        | 3400<br>(1600-6200)     |
| Papua New Guinea | 1995 | Male   | 20 to 24 | 56%<br>(38-73%)                | 44%<br>(27-62%)          | 4.5<br>(2.5-7.1)                            | 14%<br>(8.7-19%)                     | 17%<br>(11-24%)                     | 170<br>(100-240)     | 12000<br>(7400-16000)   |
| Papua New Guinea | 1995 | Male   | 25 to 29 | 63%<br>(44-79%)                | 37%<br>(21-56%)          | 6.2<br>(3.5-9.4)                            | 16%<br>(11-21%)                      | 19%<br>(14-26%)                     | 180<br>(120-240)     | 11000<br>(7800-15000)   |
| Papua New Guinea | 1995 | Male   | 30 to 34 | 65%<br>(44-80%)                | 35%<br>(20-56%)          | 6.6<br>(3.7-10)                             | 15%<br>(11-20%)                      | 18%<br>(13-24%)                     | 170<br>(120-230)     | 10000<br>(7100-13000)   |
| Papua New Guinea | 1995 | Male   | 35 to 39 | 64%<br>(45-79%)                | 36%<br>(21-55%)          | 5.8<br>(3.2-10)                             | 14%<br>(9.9-18%)                     | 17%<br>(12-22%)                     | 180<br>(110-240)     | 9400<br>(6200-13000)    |
| Papua New Guinea | 1995 | Male   | 40 to 44 | 61%<br>(43-77%)                | 39%<br>(23-57%)          | 5.1<br>(2.5-9.1)                            | 13%<br>(8-17%)                       | 15%<br>(9.3-20%)                    | 180<br>(110-260)     | 8800<br>(5400-12000)    |
| Papua New Guinea | 1995 | Male   | 45 to 49 | 57%<br>(36-74%)                | 43%<br>(26-64%)          | 4.4<br>(2.1-8)                              | 11%<br>(6.9-15%)                     | 13%<br>(7.7-18%)                    | 180<br>(100-260)     | 7500<br>(4500-11000)    |
| Papua New Guinea | 1995 | Male   | 50 to 54 | 54%<br>(34-72%)                | 46%<br>(28-66%)          | 3.7<br>(1.7-6.7)                            | 9.6%<br>(5.3-14%)                    | 11%<br>(5.8-16%)                    | 170<br>(92-260)      | 6400<br>(3500-9500)     |
| Papua New Guinea | 1995 | Male   | 55 to 59 | 52%<br>(34-71%)                | 48%<br>(29-66%)          | 3<br>(1.4-5.7)                              | 7.5%<br>(3.6-11%)                    | 8.3%<br>(3.9-13%)                   | 140<br>(65-230)      | 4600<br>(2200-7300)     |
| Papua New Guinea | 1995 | Male   | 60 to 64 | 50%<br>(30-70%)                | 50%<br>(30-70%)          | 2.5<br>(1.1-4.9)                            | 6.2%<br>(2.7-10%)                    | 6.8%<br>(2.9-11%)                   | 120<br>(50-190)      | 3300<br>(1400-5400)     |
| Papua New Guinea | 1995 | Male   | 65 to 69 | 48%<br>(29-67%)                | 52%<br>(33-71%)          | 2.3<br>(1-4.3)                              | 5.8%<br>(2.6-9.4%)                   | 6.4%<br>(2.7-10%)                   | 100<br>(41-170)      | 2300<br>(960-3800)      |
| Papua New Guinea | 1995 | Male   | 70 to 74 | 46%<br>(28-64%)                | 54%<br>(36-72%)          | 2.1<br>(0.94-4)                             | 4.9%<br>(1.9-8.4%)                   | 5.3%<br>(2-9.2%)                    | 68<br>(25-120)       | 1300<br>(480-2200)      |
| Papua New Guinea | 1995 | Male   | 75 to 79 | 42%<br>(26-60%)                | 58%<br>(40-74%)          | 1.8<br>(0.77-3.3)                           | 4.1%<br>(1.4-7.1%)                   | 4.4%<br>(1.5-7.8%)                  | 38<br>(13-68)        | 540<br>(190-970)        |
| Papua New Guinea | 1995 | Male   | 80 to 84 | 39%<br>(22-57%)                | 61%<br>(43-78%)          | 1.6<br>(0.67-2.9)                           | 3.6%<br>(1.4-6.3%)                   | 3.9%<br>(1.5-6.9%)                  | 18<br>(6.9-31)       | 200<br>(77-340)         |
| Papua New Guinea | 1995 | Male   | 85 to 89 | 37%<br>(22-54%)                | 63%<br>(46-78%)          | 1.5<br>(0.63-2.8)                           | 3.2%<br>(1.1-5.9%)                   | 3.4%<br>(1.1-6.4%)                  | 6.8<br>(2.3-13)      | 53<br>(19-100)          |
| Papua New Guinea | 1995 | Male   | 90 to 94 | 39%<br>(24-56%)                | 61%<br>(44-76%)          | 1.5<br>(0.63-3)                             | 2.6%<br>(0.83-5.1%)                  | 2.8%<br>(0.77-5.7%)                 | 1.6<br>(0.46-3.3)    | 8.9<br>(2.9-18)         |
| Papua New Guinea | 1995 | Male   | 95 plus  | 42%<br>(24-63%)                | 58%<br>(37-76%)          | 1.6<br>(0.58-3.4)                           | 2.6%<br>(0.54-5.8%)                  | 2.7%<br>(0.41-6.1%)                 | 0.38<br>(0.057-0.85) | 1.4<br>(0.28-3.1)       |
| Papua New Guinea | 2000 | Female | All Ages | 20%<br>(13-27%)                | 80%<br>(73-87%)          | 1.1<br>(0.68-1.5)                           | 2.2%<br>(1.2-3.3%)                   | 3.2%<br>(1.6-5.2%)                  | 810<br>(390-1300)    | 32000<br>(18000-48000)  |
| Papua New Guinea | 2000 | Female | 15 to 19 | 21%<br>(9.3-36%)               | 79%<br>(64-91%)          | 1.3<br>(0.48-2.5)                           | 2.2%<br>(0.91-4.3%)                  | 3.3%<br>(1.1-6.7%)                  | 16<br>(5.3-32)       | 1300<br>(540-2500)      |



| Location         | Year | Sex    | Age      | Prevalence of current drinkers | Prevalence of abstainers | Population average of standard drinks daily | Percent of total attributable deaths | Percent of total attributable DALYs | Attributable deaths   | Attributable DALYs      |
|------------------|------|--------|----------|--------------------------------|--------------------------|---------------------------------------------|--------------------------------------|-------------------------------------|-----------------------|-------------------------|
| Papua New Guinea | 2000 | Female | 20 to 24 | 25%<br>(11-45%)                | 75%<br>(55-89%)          | 2<br>(0.81-3.9)                             | 3.7%<br>(1.9-6.1%)                   | 4.9%<br>(2.2-8.8%)                  | 33<br>(14-58)         | 2500<br>(1300-4300)     |
| Papua New Guinea | 2000 | Female | 25 to 29 | 27%<br>(11-46%)                | 73%<br>(54-89%)          | 2<br>(0.9-3.7)                              | 4.4%<br>(2.3-7%)                     | 5.7%<br>(2.8-9.5%)                  | 49<br>(23-83)         | 3300<br>(1700-5500)     |
| Papua New Guinea | 2000 | Female | 30 to 34 | 27%<br>(12-47%)                | 73%<br>(53-88%)          | 2.1<br>(0.82-4)                             | 4.2%<br>(2.2-7.1%)                   | 5.4%<br>(2.5-9.2%)                  | 47<br>(22-82)         | 2900<br>(1500-5000)     |
| Papua New Guinea | 2000 | Female | 35 to 39 | 28%<br>(11-47%)                | 72%<br>(53-89%)          | 2.2<br>(0.84-4.1)                           | 4.9%<br>(2.4-7.9%)                   | 6.1%<br>(3-10%)                     | 64<br>(29-110)        | 3500<br>(1600-6000)     |
| Papua New Guinea | 2000 | Female | 40 to 44 | 27%<br>(13-45%)                | 73%<br>(55-87%)          | 2<br>(0.8-4)                                | 5.2%<br>(2.4-8.8%)                   | 6.5%<br>(2.9-11%)                   | 74<br>(32-130)        | 3600<br>(1600-6400)     |
| Papua New Guinea | 2000 | Female | 45 to 49 | 27%<br>(12-44%)                | 73%<br>(56-88%)          | 1.7<br>(0.66-3.4)                           | 4.8%<br>(1.9-9%)                     | 5.9%<br>(2.4-11%)                   | 78<br>(31-150)        | 3400<br>(1300-6400)     |
| Papua New Guinea | 2000 | Female | 50 to 54 | 26%<br>(12-46%)                | 74%<br>(54-88%)          | 1.5<br>(0.57-3)                             | 4.4%<br>(1.4-8.9%)                   | 5.3%<br>(1.7-11%)                   | 78<br>(25-160)        | 2900<br>(930-5900)      |
| Papua New Guinea | 2000 | Female | 55 to 59 | 26%<br>(12-45%)                | 74%<br>(55-88%)          | 1.4<br>(0.49-3.1)                           | 3.8%<br>(1-8.2%)                     | 4.5%<br>(1.2-9.7%)                  | 72<br>(19-160)        | 2300<br>(600-5200)      |
| Papua New Guinea | 2000 | Female | 60 to 64 | 26%<br>(12-45%)                | 74%<br>(55-88%)          | 1.3<br>(0.47-3)                             | 3.1%<br>(0.48-7.1%)                  | 3.5%<br>(0.58-8.2%)                 | 61<br>(10-140)        | 1700<br>(250-4000)      |
| Papua New Guinea | 2000 | Female | 65 to 69 | 27%<br>(13-46%)                | 73%<br>(54-87%)          | 1.3<br>(0.49-2.8)                           | 3.4%<br>(0.61-7.5%)                  | 3.9%<br>(0.71-8.6%)                 | 71<br>(14-160)        | 1600<br>(310-3700)      |
| Papua New Guinea | 2000 | Female | 70 to 74 | 27%<br>(13-45%)                | 73%<br>(55-87%)          | 1.3<br>(0.46-2.7)                           | 3%<br>(0.34-7.2%)                    | 3.3%<br>(0.41-8%)                   | 62<br>(7.3-150)       | 1100<br>(120-2800)      |
| Papua New Guinea | 2000 | Female | 75 to 79 | 26%<br>(11-44%)                | 74%<br>(56-89%)          | 1.2<br>(0.39-2.7)                           | 2.9%<br>(0.4-7.1%)                   | 3.2%<br>(0.45-7.9%)                 | 52<br>(7.1-130)       | 740<br>(99-1800)        |
| Papua New Guinea | 2000 | Female | 80 to 84 | 25%<br>(11-45%)                | 75%<br>(55-89%)          | 1.1<br>(0.35-2.6)                           | 2.5%<br>(0.4-6.6%)                   | 2.8%<br>(0.42-7.2%)                 | 34<br>(5.1-89)        | 360<br>(56-940)         |
| Papua New Guinea | 2000 | Female | 85 to 89 | 26%<br>(12-46%)                | 74%<br>(54-88%)          | 1.2<br>(0.41-2.7)                           | 2.4%<br>(0.38-6.3%)                  | 2.7%<br>(0.39-7%)                   | 14<br>(2-36)          | 100<br>(17-270)         |
| Papua New Guinea | 2000 | Female | 90 to 94 | 29%<br>(13-49%)                | 71%<br>(51-87%)          | 1.4<br>(0.46-3)                             | 2.3%<br>(0.33-5.8%)                  | 2.5%<br>(0.34-6.5%)                 | 3.6<br>(0.49-9.3)     | 19<br>(2.8-49)          |
| Papua New Guinea | 2000 | Female | 95 plus  | 34%<br>(15-58%)                | 66%<br>(42-85%)          | 1.6<br>(0.47-3.6)                           | 2.5%<br>(0.05-6.7%)                  | 2.7%<br>(-0.011-7.6%)               | 0.89<br>(-0.0036-2.4) | 3.2<br>(0.061-8.3)      |
| Papua New Guinea | 2000 | Male   | All Ages | 41%<br>(32-50%)                | 59%<br>(50-68%)          | 2.4<br>(1.7-3.3)                            | 5.1%<br>(3.5-6.7%)                   | 6.6%<br>(4.5-8.8%)                  | 1800<br>(1200-2500)   | 84000<br>(61000-110000) |
| Papua New Guinea | 2000 | Male   | 15 to 19 | 38%<br>(22-56%)                | 62%<br>(44-78%)          | 1.6<br>(0.69-2.9)                           | 4.3%<br>(1.9-7.8%)                   | 5.7%<br>(2.3-11%)                   | 39<br>(16-76)         | 3100<br>(1400-5600)     |
| Papua New Guinea | 2000 | Male   | 20 to 24 | 56%<br>(37-73%)                | 44%<br>(27-63%)          | 4.2<br>(2.3-6.6)                            | 12%<br>(7.7-18%)                     | 16%<br>(9.3-22%)                    | 160<br>(95-240)       | 11000<br>(6700-16000)   |
| Papua New Guinea | 2000 | Male   | 25 to 29 | 63%<br>(43-79%)                | 37%<br>(21-57%)          | 5.8<br>(3.3-8.9)                            | 14%<br>(9.5-19%)                     | 17%<br>(12-23%)                     | 200<br>(130-280)      | 13000<br>(8700-17000)   |
| Papua New Guinea | 2000 | Male   | 30 to 34 | 64%<br>(43-80%)                | 36%<br>(20-57%)          | 6.1<br>(3.4-9.7)                            | 14%<br>(9.3-18%)                     | 16%<br>(11-22%)                     | 180<br>(120-250)      | 11000<br>(7100-15000)   |
| Papua New Guinea | 2000 | Male   | 35 to 39 | 63%<br>(45-79%)                | 37%<br>(21-55%)          | 5.4<br>(2.9-9.4)                            | 13%<br>(8.4-17%)                     | 15%<br>(10-20%)                     | 180<br>(110-260)      | 9700<br>(6300-14000)    |

| Location         | Year | Sex    | Age      | Prevalence of current drinkers | Prevalence of abstainers | Population average of standard drinks daily | Percent of total attributable deaths | Percent of total attributable DALYs | Attributable deaths | Attributable DALYs     |
|------------------|------|--------|----------|--------------------------------|--------------------------|---------------------------------------------|--------------------------------------|-------------------------------------|---------------------|------------------------|
| Papua New Guinea | 2000 | Male   | 40 to 44 | 61%<br>(43-77%)                | 39%<br>(23-57%)          | 4.8<br>(2.3-8.4)                            | 12%<br>(7.1-16%)                     | 14%<br>(8.1-19%)                    | 190<br>(110-270)    | 9000<br>(5400-13000)   |
| Papua New Guinea | 2000 | Male   | 45 to 49 | 57%<br>(35-74%)                | 43%<br>(26-65%)          | 4.1<br>(1.9-7.5)                            | 10%<br>(6.2-14%)                     | 12%<br>(6.9-17%)                    | 190<br>(110-290)    | 8200<br>(4800-12000)   |
| Papua New Guinea | 2000 | Male   | 50 to 54 | 54%<br>(34-72%)                | 46%<br>(28-66%)          | 3.5<br>(1.6-6.3)                            | 8.9%<br>(4.7-13%)                    | 10%<br>(5.1-15%)                    | 180<br>(87-270)     | 6600<br>(3400-10000)   |
| Papua New Guinea | 2000 | Male   | 55 to 59 | 52%<br>(34-70%)                | 48%<br>(30-66%)          | 2.8<br>(1.3-5.4)                            | 6.9%<br>(3.2-11%)                    | 7.7%<br>(3.5-12%)                   | 140<br>(62-230)     | 4700<br>(2100-7500)    |
| Papua New Guinea | 2000 | Male   | 60 to 64 | 49%<br>(30-69%)                | 51%<br>(31-70%)          | 2.4<br>(1.1-4.6)                            | 5.7%<br>(2.4-9.5%)                   | 6.3%<br>(2.5-11%)                   | 120<br>(49-210)     | 3400<br>(1400-5700)    |
| Papua New Guinea | 2000 | Male   | 65 to 69 | 47%<br>(28-66%)                | 53%<br>(34-72%)          | 2.1<br>(0.98-4)                             | 5.3%<br>(2.3-8.9%)                   | 5.8%<br>(2.4-9.8%)                  | 100<br>(41-180)     | 2400<br>(980-4000)     |
| Papua New Guinea | 2000 | Male   | 70 to 74 | 45%<br>(27-63%)                | 55%<br>(37-73%)          | 1.9<br>(0.84-3.6)                           | 4.4%<br>(1.5-7.8%)                   | 4.8%<br>(1.6-8.6%)                  | 71<br>(25-130)      | 1300<br>(470-2400)     |
| Papua New Guinea | 2000 | Male   | 75 to 79 | 41%<br>(24-60%)                | 59%<br>(40-76%)          | 1.6<br>(0.69-3)                             | 3.6%<br>(1.2-6.7%)                   | 3.9%<br>(1.2-7.3%)                  | 40<br>(13-75)       | 580<br>(190-1100)      |
| Papua New Guinea | 2000 | Male   | 80 to 84 | 38%<br>(21-57%)                | 62%<br>(43-79%)          | 1.4<br>(0.63-2.7)                           | 3.3%<br>(1.2-5.8%)                   | 3.5%<br>(1.2-6.3%)                  | 20<br>(7-35)        | 210<br>(80-380)        |
| Papua New Guinea | 2000 | Male   | 85 to 89 | 37%<br>(21-54%)                | 63%<br>(46-79%)          | 1.4<br>(0.62-2.7)                           | 2.9%<br>(0.97-5.4%)                  | 3.1%<br>(0.98-6%)                   | 7.4<br>(2.4-15)     | 58<br>(20-110)         |
| Papua New Guinea | 2000 | Male   | 90 to 94 | 38%<br>(23-57%)                | 62%<br>(43-77%)          | 1.4<br>(0.61-2.8)                           | 2.3%<br>(0.72-4.7%)                  | 2.5%<br>(0.67-5.2%)                 | 1.8<br>(0.49-3.8)   | 9.9<br>(3-20)          |
| Papua New Guinea | 2000 | Male   | 95 plus  | 42%<br>(23-63%)                | 58%<br>(37-77%)          | 1.5<br>(0.55-3.3)                           | 2.4%<br>(0.44-5.2%)                  | 2.4%<br>(0.3-5.6%)                  | 0.4<br>(0.048-0.93) | 1.5<br>(0.29-3.3)      |
| Papua New Guinea | 2005 | Female | All Ages | 20%<br>(14-27%)                | 80%<br>(73-86%)          | 0.97<br>(0.63-1.4)                          | 2.1%<br>(1.1-3.3%)                   | 2.9%<br>(1.3-5%)                    | 850<br>(370-1500)   | 34000<br>(18000-53000) |
| Papua New Guinea | 2005 | Female | 15 to 19 | 21%<br>(9.7-37%)               | 79%<br>(63-90%)          | 1.1<br>(0.45-2.3)                           | 2.1%<br>(0.86-4.2%)                  | 3.1%<br>(1.1-6.4%)                  | 16<br>(5.4-33)      | 1300<br>(540-2600)     |
| Papua New Guinea | 2005 | Female | 20 to 24 | 25%<br>(11-45%)                | 75%<br>(55-89%)          | 1.8<br>(0.72-3.5)                           | 3.5%<br>(1.7-5.9%)                   | 4.6%<br>(2-8.3%)                    | 34<br>(14-62)       | 2600<br>(1300-4500)    |
| Papua New Guinea | 2005 | Female | 25 to 29 | 27%<br>(11-47%)                | 73%<br>(53-89%)          | 1.8<br>(0.77-3.4)                           | 4.1%<br>(2.1-6.7%)                   | 5.2%<br>(2.4-8.9%)                  | 51<br>(23-88)       | 3500<br>(1700-5800)    |
| Papua New Guinea | 2005 | Female | 30 to 34 | 28%<br>(11-48%)                | 72%<br>(52-89%)          | 1.9<br>(0.71-3.6)                           | 4%<br>(2-6.6%)                       | 5%<br>(2.3-8.4%)                    | 58<br>(27-100)      | 3600<br>(1800-6200)    |
| Papua New Guinea | 2005 | Female | 35 to 39 | 28%<br>(12-47%)                | 72%<br>(53-88%)          | 2<br>(0.79-3.6)                             | 4.6%<br>(2.2-7.6%)                   | 5.7%<br>(2.6-9.5%)                  | 73<br>(32-130)      | 4000<br>(1800-6900)    |
| Papua New Guinea | 2005 | Female | 40 to 44 | 27%<br>(14-46%)                | 73%<br>(54-86%)          | 1.8<br>(0.72-3.5)                           | 4.7%<br>(2-8.4%)                     | 5.9%<br>(2.5-11%)                   | 80<br>(33-150)      | 3900<br>(1600-7100)    |
| Papua New Guinea | 2005 | Female | 45 to 49 | 27%<br>(12-46%)                | 73%<br>(54-88%)          | 1.5<br>(0.59-3)                             | 4.3%<br>(1.6-8.4%)                   | 5.3%<br>(1.9-10%)                   | 82<br>(29-160)      | 3500<br>(1300-6900)    |
| Papua New Guinea | 2005 | Female | 50 to 54 | 27%<br>(12-45%)                | 73%<br>(55-88%)          | 1.4<br>(0.52-2.7)                           | 3.8%<br>(1-8.1%)                     | 4.6%<br>(1.2-9.8%)                  | 85<br>(22-190)      | 3200<br>(810-7000)     |
| Papua New Guinea | 2005 | Female | 55 to 59 | 26%<br>(12-46%)                | 74%<br>(54-88%)          | 1.2<br>(0.46-2.7)                           | 3.2%<br>(0.58-7.5%)                  | 3.8%<br>(0.74-8.8%)                 | 75<br>(14-180)      | 2400<br>(440-5700)     |

| Location         | Year | Sex    | Age      | Prevalence of current drinkers | Prevalence of abstainers | Population average of standard drinks daily | Percent of total attributable deaths | Percent of total attributable DALYs | Attributable deaths | Attributable DALYs      |
|------------------|------|--------|----------|--------------------------------|--------------------------|---------------------------------------------|--------------------------------------|-------------------------------------|---------------------|-------------------------|
| Papua New Guinea | 2005 | Female | 60 to 64 | 26%<br>(12-46%)                | 74%<br>(54-88%)          | 1.2<br>(0.43-2.7)                           | 2.6%<br>(0.11-6.6%)                  | 3%<br>(0.14-7.5%)                   | 61<br>(2.7-150)     | 1700<br>(65-4300)       |
| Papua New Guinea | 2005 | Female | 65 to 69 | 27%<br>(13-46%)                | 73%<br>(54-87%)          | 1.2<br>(0.43-2.5)                           | 2.8%<br>(0.22-6.8%)                  | 3.2%<br>(0.32-7.7%)                 | 70<br>(6.3-170)     | 1600<br>(130-3900)      |
| Papua New Guinea | 2005 | Female | 70 to 74 | 27%<br>(13-44%)                | 73%<br>(56-87%)          | 1.1<br>(0.41-2.3)                           | 2.4%<br>(-0.053-6.5%)                | 2.7%<br>(-0.018-7.2%)               | 60<br>(-0.45-160)   | 1100<br>(-25-3000)      |
| Papua New Guinea | 2005 | Female | 75 to 79 | 26%<br>(11-44%)                | 74%<br>(56-89%)          | 1.1<br>(0.34-2.4)                           | 2.4%<br>(0.12-6.3%)                  | 2.7%<br>(0.15-7%)                   | 51<br>(2.7-140)     | 720<br>(34-2000)        |
| Papua New Guinea | 2005 | Female | 80 to 84 | 25%<br>(11-44%)                | 75%<br>(56-89%)          | 1<br>(0.33-2.3)                             | 2.1%<br>(0.17-5.8%)                  | 2.3%<br>(0.17-6.4%)                 | 34<br>(2.7-99)      | 360<br>(29-1000)        |
| Papua New Guinea | 2005 | Female | 85 to 89 | 26%<br>(12-45%)                | 74%<br>(55-88%)          | 1.1<br>(0.39-2.4)                           | 2%<br>(0.078-5.7%)                   | 2.2%<br>(0.051-6.4%)                | 14<br>(0.32-40)     | 110<br>(4.2-300)        |
| Papua New Guinea | 2005 | Female | 90 to 94 | 30%<br>(14-49%)                | 70%<br>(51-86%)          | 1.2<br>(0.43-2.8)                           | 1.9%<br>(0.07-5.3%)                  | 2.1%<br>(0.03-6%)                   | 3.7<br>(0.053-11)   | 20<br>(0.73-56)         |
| Papua New Guinea | 2005 | Female | 95 plus  | 34%<br>(15-57%)                | 66%<br>(43-85%)          | 1.4<br>(0.44-3.2)                           | 2.1%<br>(-0.22-6.2%)                 | 2.2%<br>(-0.32-6.9%)                | 0.89<br>(-0.13-2.8) | 3.2<br>(-0.35-9.5)      |
| Papua New Guinea | 2005 | Male   | All Ages | 41%<br>(33-50%)                | 59%<br>(50-67%)          | 2.2<br>(1.5-2.9)                            | 5%<br>(3.3-6.7%)                     | 6.3%<br>(4-8.6%)                    | 2000<br>(1200-2700) | 91000<br>(62000-120000) |
| Papua New Guinea | 2005 | Male   | 15 to 19 | 38%<br>(22-56%)                | 62%<br>(44-78%)          | 1.4<br>(0.59-2.5)                           | 3.9%<br>(1.8-7.1%)                   | 5.1%<br>(2.2-9.6%)                  | 38<br>(15-75)       | 3000<br>(1300-5600)     |
| Papua New Guinea | 2005 | Male   | 20 to 24 | 56%<br>(37-73%)                | 44%<br>(27-63%)          | 3.7<br>(2-5.9)                              | 12%<br>(6.9-17%)                     | 14%<br>(8.3-21%)                    | 160<br>(91-240)     | 11000<br>(6600-16000)   |
| Papua New Guinea | 2005 | Male   | 25 to 29 | 63%<br>(44-79%)                | 37%<br>(21-56%)          | 5.1<br>(2.9-7.7)                            | 13%<br>(9-18%)                       | 16%<br>(11-22%)                     | 210<br>(130-290)    | 13000<br>(8700-18000)   |
| Papua New Guinea | 2005 | Male   | 30 to 34 | 64%<br>(44-80%)                | 36%<br>(20-56%)          | 5.4<br>(3.1-8.5)                            | 13%<br>(8.5-17%)                     | 15%<br>(9.9-21%)                    | 220<br>(140-320)    | 13000<br>(8700-18000)   |
| Papua New Guinea | 2005 | Male   | 35 to 39 | 63%<br>(45-79%)                | 37%<br>(21-55%)          | 4.8<br>(2.6-8.1)                            | 12%<br>(7.5-16%)                     | 14%<br>(8.8-19%)                    | 210<br>(120-310)    | 11000<br>(6800-16000)   |
| Papua New Guinea | 2005 | Male   | 40 to 44 | 60%<br>(42-77%)                | 40%<br>(23-58%)          | 4.2<br>(2-7.3)                              | 11%<br>(6.1-15%)                     | 12%<br>(6.8-18%)                    | 210<br>(110-310)    | 9900<br>(5400-15000)    |
| Papua New Guinea | 2005 | Male   | 45 to 49 | 56%<br>(35-74%)                | 44%<br>(26-65%)          | 3.6<br>(1.7-6.5)                            | 9.4%<br>(5.2-14%)                    | 11%<br>(5.8-16%)                    | 200<br>(100-310)    | 8700<br>(4600-13000)    |
| Papua New Guinea | 2005 | Male   | 50 to 54 | 53%<br>(34-73%)                | 47%<br>(27-66%)          | 3<br>(1.4-5.6)                              | 8%<br>(3.8-12%)                      | 9%<br>(4.1-14%)                     | 190<br>(85-310)     | 7300<br>(3300-11000)    |
| Papua New Guinea | 2005 | Male   | 55 to 59 | 51%<br>(33-71%)                | 49%<br>(29-67%)          | 2.4<br>(1.1-4.6)                            | 6.1%<br>(2.6-10%)                    | 6.8%<br>(2.7-11%)                   | 150<br>(57-250)     | 4800<br>(2000-8200)     |
| Papua New Guinea | 2005 | Male   | 60 to 64 | 49%<br>(30-69%)                | 51%<br>(31-70%)          | 2.1<br>(0.93-4.1)                           | 5%<br>(1.9-9%)                       | 5.5%<br>(2-9.9%)                    | 120<br>(43-220)     | 3400<br>(1300-6100)     |
| Papua New Guinea | 2005 | Male   | 65 to 69 | 47%<br>(28-66%)                | 53%<br>(34-72%)          | 1.9<br>(0.87-3.5)                           | 4.6%<br>(1.7-8.2%)                   | 5.1%<br>(1.9-9.1%)                  | 100<br>(37-190)     | 2400<br>(880-4400)      |
| Papua New Guinea | 2005 | Male   | 70 to 74 | 44%<br>(27-62%)                | 56%<br>(38-73%)          | 1.6<br>(0.73-3.1)                           | 3.8%<br>(1.2-7.3%)                   | 4.1%<br>(1.3-8%)                    | 70<br>(22-140)      | 1300<br>(420-2500)      |
| Papua New Guinea | 2005 | Male   | 75 to 79 | 40%<br>(25-60%)                | 60%<br>(40-75%)          | 1.4<br>(0.59-2.6)                           | 3.1%<br>(0.92-6.1%)                  | 3.3%<br>(0.94-6.6%)                 | 40<br>(11-81)       | 590<br>(170-1200)       |

| Location         | Year | Sex    | Age      | Prevalence of current drinkers | Prevalence of abstainers | Population average of standard drinks daily | Percent of total attributable deaths | Percent of total attributable DALYs | Attributable deaths  | Attributable DALYs     |
|------------------|------|--------|----------|--------------------------------|--------------------------|---------------------------------------------|--------------------------------------|-------------------------------------|----------------------|------------------------|
| Papua New Guinea | 2005 | Male   | 80 to 84 | 38%<br>(21-56%)                | 62%<br>(44-79%)          | 1.2<br>(0.53-2.3)                           | 2.7%<br>(0.91-5.2%)                  | 2.9%<br>(0.9-5.5%)                  | 20<br>(6.3-39)       | 220<br>(74-420)        |
| Papua New Guinea | 2005 | Male   | 85 to 89 | 36%<br>(22-53%)                | 64%<br>(47-78%)          | 1.2<br>(0.52-2.3)                           | 2.3%<br>(0.7-4.8%)                   | 2.5%<br>(0.69-5.2%)                 | 7.6<br>(2.1-16)      | 60<br>(18-120)         |
| Papua New Guinea | 2005 | Male   | 90 to 94 | 37%<br>(23-55%)                | 63%<br>(45-77%)          | 1.2<br>(0.52-2.4)                           | 1.9%<br>(0.48-4.2%)                  | 2%<br>(0.42-4.6%)                   | 1.8<br>(0.38-4.2)    | 10<br>(2.5-23)         |
| Papua New Guinea | 2005 | Male   | 95 plus  | 41%<br>(22-62%)                | 59%<br>(38-78%)          | 1.3<br>(0.46-2.7)                           | 1.9%<br>(0.22-4.5%)                  | 1.9%<br>(0.047-4.8%)                | 0.4<br>(0.0094-0.99) | 1.5<br>(0.18-3.6)      |
| Papua New Guinea | 2010 | Female | All Ages | 20%<br>(14-27%)                | 80%<br>(73-86%)          | 0.9<br>(0.57-1.3)                           | 2%<br>(0.96-3.4%)                    | 2.7%<br>(1-5%)                      | 870<br>(310-1600)    | 35000<br>(16000-57000) |
| Papua New Guinea | 2010 | Female | 15 to 19 | 20%<br>(9.7-36%)               | 80%<br>(64-90%)          | 1<br>(0.39-2.1)                             | 2.1%<br>(0.83-4.1%)                  | 3.1%<br>(1-6.5%)                    | 17<br>(5.2-36)       | 1400<br>(550-2800)     |
| Papua New Guinea | 2010 | Female | 20 to 24 | 25%<br>(11-44%)                | 75%<br>(56-89%)          | 1.6<br>(0.65-3.2)                           | 3.4%<br>(1.7-5.9%)                   | 4.5%<br>(2-8.3%)                    | 33<br>(13-60)        | 2600<br>(1200-4500)    |
| Papua New Guinea | 2010 | Female | 25 to 29 | 26%<br>(11-46%)                | 74%<br>(54-89%)          | 1.7<br>(0.71-3.2)                           | 3.9%<br>(2-6.6%)                     | 5.1%<br>(2.3-8.7%)                  | 49<br>(21-88)        | 3400<br>(1700-5800)    |
| Papua New Guinea | 2010 | Female | 30 to 34 | 27%<br>(11-47%)                | 73%<br>(53-89%)          | 1.7<br>(0.65-3.3)                           | 3.8%<br>(1.9-6.4%)                   | 4.8%<br>(2.2-8.4%)                  | 57<br>(25-100)       | 3600<br>(1700-6300)    |
| Papua New Guinea | 2010 | Female | 35 to 39 | 28%<br>(12-47%)                | 72%<br>(53-88%)          | 1.8<br>(0.73-3.3)                           | 4.4%<br>(2.1-7.4%)                   | 5.5%<br>(2.5-9.5%)                  | 84<br>(35-150)       | 4600<br>(2000-8200)    |
| Papua New Guinea | 2010 | Female | 40 to 44 | 27%<br>(13-46%)                | 73%<br>(54-87%)          | 1.7<br>(0.69-3.3)                           | 4.4%<br>(1.9-8.2%)                   | 5.6%<br>(2.3-10%)                   | 86<br>(33-170)       | 4200<br>(1600-7900)    |
| Papua New Guinea | 2010 | Female | 45 to 49 | 27%<br>(12-45%)                | 73%<br>(55-88%)          | 1.4<br>(0.54-2.9)                           | 3.9%<br>(1.2-8%)                     | 4.9%<br>(1.5-10%)                   | 83<br>(26-170)       | 3600<br>(1100-7500)    |
| Papua New Guinea | 2010 | Female | 50 to 54 | 27%<br>(12-47%)                | 73%<br>(53-88%)          | 1.3<br>(0.49-2.6)                           | 3.4%<br>(0.72-7.8%)                  | 4.2%<br>(0.95-9.3%)                 | 85<br>(19-200)       | 3200<br>(680-7400)     |
| Papua New Guinea | 2010 | Female | 55 to 59 | 26%<br>(12-47%)                | 74%<br>(53-88%)          | 1.2<br>(0.43-2.6)                           | 2.9%<br>(0.31-7%)                    | 3.4%<br>(0.42-8.2%)                 | 80<br>(9.1-200)      | 2600<br>(270-6600)     |
| Papua New Guinea | 2010 | Female | 60 to 64 | 26%<br>(12-46%)                | 74%<br>(54-88%)          | 1.1<br>(0.38-2.5)                           | 2.2%<br>(-0.21-6.1%)                 | 2.6%<br>(-0.19-7.1%)                | 62<br>(-4.5-170)     | 1700<br>(-160-4700)    |
| Papua New Guinea | 2010 | Female | 65 to 69 | 27%<br>(13-46%)                | 73%<br>(54-87%)          | 1.1<br>(0.41-2.3)                           | 2.3%<br>(-0.074-6.3%)                | 2.7%<br>(-0.063-7.2%)               | 68<br>(-1.4-180)     | 1500<br>(-45-4100)     |
| Papua New Guinea | 2010 | Female | 70 to 74 | 27%<br>(12-45%)                | 73%<br>(55-88%)          | 1.1<br>(0.36-2.3)                           | 2.1%<br>(-0.28-6%)                   | 2.4%<br>(-0.26-6.6%)                | 61<br>(-6.9-170)     | 1100<br>(-150-3200)    |
| Papua New Guinea | 2010 | Female | 75 to 79 | 26%<br>(11-45%)                | 74%<br>(55-89%)          | 0.99<br>(0.32-2.3)                          | 2.1%<br>(-0.13-6.2%)                 | 2.3%<br>(-0.12-6.7%)                | 51<br>(-2.5-150)     | 730<br>(-43-2200)      |
| Papua New Guinea | 2010 | Female | 80 to 84 | 25%<br>(11-45%)                | 75%<br>(55-89%)          | 0.95<br>(0.3-2.1)                           | 1.8%<br>(-0.023-5.3%)                | 2%<br>(-0.037-6%)                   | 35<br>(-0.7-100)     | 380<br>(-4.7-1100)     |
| Papua New Guinea | 2010 | Female | 85 to 89 | 26%<br>(12-45%)                | 74%<br>(55-88%)          | 0.99<br>(0.35-2.2)                          | 1.7%<br>(-0.15-5.6%)                 | 1.9%<br>(-0.21-6.1%)                | 14<br>(-1.5-46)      | 110<br>(-10-340)       |
| Papua New Guinea | 2010 | Female | 90 to 94 | 29%<br>(14-49%)                | 71%<br>(51-86%)          | 1.1<br>(0.38-2.4)                           | 1.6%<br>(-0.16-4.9%)                 | 1.8%<br>(-0.23-5.4%)                | 3.8<br>(-0.49-12)    | 20<br>(-2.1-60)        |
| Papua New Guinea | 2010 | Female | 95 plus  | 34%<br>(15-56%)                | 66%<br>(44-85%)          | 1.3<br>(0.4-2.9)                            | 1.7%<br>(-0.52-6%)                   | 1.8%<br>(-0.7-6.6%)                 | 0.88<br>(-0.34-3.3)  | 3.2<br>(-0.98-11)      |

| Location         | Year | Sex    | Age      | Prevalence of current drinkers | Prevalence of abstainers | Population average of standard drinks daily | Percent of total attributable deaths | Percent of total attributable DALYs | Attributable deaths  | Attributable DALYs      |
|------------------|------|--------|----------|--------------------------------|--------------------------|---------------------------------------------|--------------------------------------|-------------------------------------|----------------------|-------------------------|
| Papua New Guinea | 2010 | Male   | All Ages | 41%<br>(33-51%)                | 59%<br>(49-67%)          | 2<br>(1.4-2.8)                              | 5%<br>(3.2-7%)                       | 6.2%<br>(3.7-8.7%)                  | 2100<br>(1200-3000)  | 97000<br>(62000-130000) |
| Papua New Guinea | 2010 | Male   | 15 to 19 | 38%<br>(23-56%)                | 62%<br>(44-77%)          | 1.3<br>(0.55-2.4)                           | 3.8%<br>(1.8-7%)                     | 5.1%<br>(2.2-9.6%)                  | 41<br>(17-81)        | 3200<br>(1400-6100)     |
| Papua New Guinea | 2010 | Male   | 20 to 24 | 56%<br>(38-73%)                | 44%<br>(27-62%)          | 3.4<br>(1.8-5.6)                            | 11%<br>(6.6-16%)                     | 14%<br>(7.8-21%)                    | 160<br>(88-240)      | 11000<br>(6500-17000)   |
| Papua New Guinea | 2010 | Male   | 25 to 29 | 63%<br>(43-79%)                | 37%<br>(21-57%)          | 4.7<br>(2.7-7.3)                            | 13%<br>(8.4-18%)                     | 16%<br>(10-22%)                     | 210<br>(130-300)     | 14000<br>(8500-19000)   |
| Papua New Guinea | 2010 | Male   | 30 to 34 | 64%<br>(43-80%)                | 36%<br>(20-57%)          | 5<br>(2.7-7.9)                              | 12%<br>(8.1-17%)                     | 15%<br>(9.4-21%)                    | 230<br>(140-330)     | 14000<br>(8700-19000)   |
| Papua New Guinea | 2010 | Male   | 35 to 39 | 63%<br>(44-79%)                | 37%<br>(21-56%)          | 4.4<br>(2.3-7.4)                            | 11%<br>(6.8-16%)                     | 14%<br>(7.9-19%)                    | 250<br>(130-380)     | 13000<br>(7600-20000)   |
| Papua New Guinea | 2010 | Male   | 40 to 44 | 61%<br>(43-77%)                | 39%<br>(23-57%)          | 3.9<br>(1.9-6.9)                            | 10%<br>(5.5-15%)                     | 12%<br>(6.2-18%)                    | 230<br>(120-360)     | 11000<br>(5800-17000)   |
| Papua New Guinea | 2010 | Male   | 45 to 49 | 57%<br>(35-75%)                | 43%<br>(25-65%)          | 3.4<br>(1.6-6.1)                            | 8.9%<br>(4.5-14%)                    | 10%<br>(5.1-16%)                    | 220<br>(110-350)     | 9300<br>(4700-15000)    |
| Papua New Guinea | 2010 | Male   | 50 to 54 | 54%<br>(34-72%)                | 46%<br>(28-66%)          | 2.8<br>(1.3-5.1)                            | 7.5%<br>(3.4-12%)                    | 8.5%<br>(3.7-14%)                   | 200<br>(85-340)      | 7600<br>(3400-13000)    |
| Papua New Guinea | 2010 | Male   | 55 to 59 | 52%<br>(33-71%)                | 48%<br>(29-67%)          | 2.3<br>(1.1-4.3)                            | 5.7%<br>(2.3-9.7%)                   | 6.3%<br>(2.5-11%)                   | 160<br>(60-290)      | 5300<br>(2100-9500)     |
| Papua New Guinea | 2010 | Male   | 60 to 64 | 49%<br>(29-68%)                | 51%<br>(32-71%)          | 1.9<br>(0.89-3.7)                           | 4.6%<br>(1.6-8.6%)                   | 5%<br>(1.6-9.6%)                    | 130<br>(40-240)      | 3500<br>(1200-6700)     |
| Papua New Guinea | 2010 | Male   | 65 to 69 | 47%<br>(28-66%)                | 53%<br>(34-72%)          | 1.7<br>(0.78-3.2)                           | 4.2%<br>(1.3-7.7%)                   | 4.5%<br>(1.4-8.6%)                  | 110<br>(31-210)      | 2500<br>(770-4800)      |
| Papua New Guinea | 2010 | Male   | 70 to 74 | 44%<br>(27-62%)                | 56%<br>(38-73%)          | 1.5<br>(0.67-2.9)                           | 3.4%<br>(0.95-6.9%)                  | 3.6%<br>(0.98-7.6%)                 | 73<br>(20-150)       | 1400<br>(400-2800)      |
| Papua New Guinea | 2010 | Male   | 75 to 79 | 41%<br>(25-59%)                | 59%<br>(41-75%)          | 1.3<br>(0.56-2.5)                           | 2.7%<br>(0.73-5.6%)                  | 2.9%<br>(0.74-6.1%)                 | 42<br>(10-89)        | 620<br>(160-1300)       |
| Papua New Guinea | 2010 | Male   | 80 to 84 | 38%<br>(22-57%)                | 62%<br>(43-78%)          | 1.2<br>(0.51-2.2)                           | 2.4%<br>(0.72-4.9%)                  | 2.6%<br>(0.72-5.4%)                 | 22<br>(5.9-46)       | 240<br>(70-500)         |
| Papua New Guinea | 2010 | Male   | 85 to 89 | 36%<br>(22-53%)                | 64%<br>(47-78%)          | 1.1<br>(0.46-2.2)                           | 2%<br>(0.53-4.5%)                    | 2.2%<br>(0.5-4.9%)                  | 8.2<br>(1.9-19)      | 65<br>(16-140)          |
| Papua New Guinea | 2010 | Male   | 90 to 94 | 38%<br>(23-56%)                | 62%<br>(44-77%)          | 1.1<br>(0.46-2.2)                           | 1.7%<br>(0.34-3.8%)                  | 1.7%<br>(0.25-4.2%)                 | 2<br>(0.28-4.7)      | 11<br>(2.2-26)          |
| Papua New Guinea | 2010 | Male   | 95 plus  | 41%<br>(22-62%)                | 59%<br>(38-78%)          | 1.2<br>(0.44-2.5)                           | 1.7%<br>(0.082-4.2%)                 | 1.7%<br>(-0.097-4.5%)               | 0.42<br>(-0.025-1.2) | 1.7<br>(0.082-4.2)      |
| Papua New Guinea | 2016 | Female | All Ages | 20%<br>(14-27%)                | 80%<br>(73-86%)          | 0.94<br>(0.54-1.5)                          | 2.1%<br>(0.93-3.7%)                  | 2.8%<br>(0.79-5.4%)                 | 940<br>(250-1900)    | 37000<br>(15000-65000)  |
| Papua New Guinea | 2016 | Female | 15 to 19 | 21%<br>(9.6-36%)               | 79%<br>(64-90%)          | 1.1<br>(0.38-2.2)                           | 2.1%<br>(0.84-4.2%)                  | 3.3%<br>(1.1-6.9%)                  | 18<br>(5.8-38)       | 1600<br>(620-3100)      |
| Papua New Guinea | 2016 | Female | 20 to 24 | 25%<br>(11-44%)                | 75%<br>(56-89%)          | 1.7<br>(0.66-3.3)                           | 3.4%<br>(1.7-6.1%)                   | 4.8%<br>(2.1-8.9%)                  | 34<br>(15-64)        | 2800<br>(1400-4800)     |
| Papua New Guinea | 2016 | Female | 25 to 29 | 27%<br>(11-46%)                | 73%<br>(54-89%)          | 1.7<br>(0.69-3.6)                           | 4%<br>(2-6.8%)                       | 5.4%<br>(2.4-9.7%)                  | 47<br>(20-86)        | 3400<br>(1600-5900)     |

| Location         | Year | Sex    | Age      | Prevalence of current drinkers | Prevalence of abstainers | Population average of standard drinks daily | Percent of total attributable deaths | Percent of total attributable DALYs | Attributable deaths | Attributable DALYs       |
|------------------|------|--------|----------|--------------------------------|--------------------------|---------------------------------------------|--------------------------------------|-------------------------------------|---------------------|--------------------------|
| Papua New Guinea | 2016 | Female | 30 to 34 | 27%<br>(10-48%)                | 73%<br>(52-90%)          | 1.8<br>(0.61-3.6)                           | 3.8%<br>(1.7-6.7%)                   | 5%<br>(2.1-9%)                      | 55<br>(21-100)      | 3500<br>(1600-6400)      |
| Papua New Guinea | 2016 | Female | 35 to 39 | 28%<br>(11-47%)                | 72%<br>(53-89%)          | 1.8<br>(0.69-3.8)                           | 4.3%<br>(1.9-7.5%)                   | 5.5%<br>(2.3-9.7%)                  | 81<br>(32-150)      | 4500<br>(1900-8200)      |
| Papua New Guinea | 2016 | Female | 40 to 44 | 28%<br>(13-46%)                | 72%<br>(54-87%)          | 1.7<br>(0.66-3.8)                           | 4.4%<br>(1.6-8.1%)                   | 5.6%<br>(2.1-10%)                   | 100<br>(36-200)     | 4900<br>(1800-9400)      |
| Papua New Guinea | 2016 | Female | 45 to 49 | 27%<br>(12-45%)                | 73%<br>(55-88%)          | 1.4<br>(0.53-2.9)                           | 3.8%<br>(1.1-7.7%)                   | 4.9%<br>(1.4-9.8%)                  | 94<br>(26-190)      | 4100<br>(1100-8500)      |
| Papua New Guinea | 2016 | Female | 50 to 54 | 27%<br>(13-46%)                | 73%<br>(54-87%)          | 1.3<br>(0.45-2.6)                           | 3.3%<br>(0.46-7.6%)                  | 4.1%<br>(0.67-9.3%)                 | 89<br>(15-210)      | 3400<br>(520-7800)       |
| Papua New Guinea | 2016 | Female | 55 to 59 | 26%<br>(12-45%)                | 74%<br>(55-88%)          | 1.1<br>(0.41-2.5)                           | 2.7%<br>(0.29-7%)                    | 3.3%<br>(0.42-8.2%)                 | 83<br>(11-210)      | 2700<br>(280-6900)       |
| Papua New Guinea | 2016 | Female | 60 to 64 | 26%<br>(12-46%)                | 74%<br>(54-88%)          | 1.1<br>(0.36-2.6)                           | 2.1%<br>(-0.29-6.2%)                 | 2.5%<br>(-0.3-7.1%)                 | 71<br>(-8.1-210)    | 2000<br>(-280-5600)      |
| Papua New Guinea | 2016 | Female | 65 to 69 | 27%<br>(12-47%)                | 73%<br>(53-88%)          | 1.1<br>(0.38-2.4)                           | 2.2%<br>(-0.19-6.4%)                 | 2.6%<br>(-0.17-7.3%)                | 77<br>(-4.9-210)    | 1700<br>(-150-5000)      |
| Papua New Guinea | 2016 | Female | 70 to 74 | 27%<br>(13-46%)                | 73%<br>(54-87%)          | 1.1<br>(0.37-2.4)                           | 2%<br>(-0.43-6.6%)                   | 2.3%<br>(-0.42-7.4%)                | 68<br>(-12-220)     | 1200<br>(-250-4000)      |
| Papua New Guinea | 2016 | Female | 75 to 79 | 26%<br>(11-45%)                | 74%<br>(55-89%)          | 1<br>(0.31-2.4)                             | 2%<br>(-0.32-6.2%)                   | 2.3%<br>(-0.34-6.9%)                | 59<br>(-9.1-180)    | 840<br>(-130-2600)       |
| Papua New Guinea | 2016 | Female | 80 to 84 | 25%<br>(11-45%)                | 75%<br>(55-89%)          | 0.97<br>(0.29-2.3)                          | 1.8%<br>(-0.26-5.9%)                 | 2%<br>(-0.27-6.6%)                  | 43<br>(-5.8-140)    | 460<br>(-68-1500)        |
| Papua New Guinea | 2016 | Female | 85 to 89 | 26%<br>(12-46%)                | 74%<br>(54-88%)          | 1<br>(0.35-2.5)                             | 1.8%<br>(-0.32-5.8%)                 | 2%<br>(-0.4-6.4%)                   | 18<br>(-3.6-60)     | 130<br>(-24-450)         |
| Papua New Guinea | 2016 | Female | 90 to 94 | 30%<br>(13-49%)                | 70%<br>(51-87%)          | 1.2<br>(0.36-2.7)                           | 1.7%<br>(-0.28-5.5%)                 | 1.9%<br>(-0.34-6.1%)                | 4.8<br>(-0.88-15)   | 26<br>(-4.1-82)          |
| Papua New Guinea | 2016 | Female | 95 plus  | 34%<br>(14-57%)                | 66%<br>(43-86%)          | 1.3<br>(0.4-3.2)                            | 1.7%<br>(-0.69-6.3%)                 | 1.8%<br>(-0.86-6.9%)                | 1.1<br>(-0.51-3.9)  | 3.8<br>(-1.5-14)         |
| Papua New Guinea | 2016 | Male   | All Ages | 42%<br>(34-51%)                | 58%<br>(49-66%)          | 2.1<br>(1.3-3.2)                            | 5.3%<br>(3.2-7.5%)                   | 6.3%<br>(3.5-9.2%)                  | 2300<br>(1200-3300) | 100000<br>(62000-150000) |
| Papua New Guinea | 2016 | Male   | 15 to 19 | 38%<br>(22-56%)                | 62%<br>(44-78%)          | 1.3<br>(0.52-2.6)                           | 3.9%<br>(1.8-7.6%)                   | 5.3%<br>(2.2-10%)                   | 47<br>(20-97)       | 3700<br>(1700-7300)      |
| Papua New Guinea | 2016 | Male   | 20 to 24 | 56%<br>(37-73%)                | 44%<br>(27-63%)          | 3.5<br>(1.7-6)                              | 11%<br>(6.4-16%)                     | 14%<br>(7.6-21%)                    | 180<br>(92-270)     | 12000<br>(6800-19000)    |
| Papua New Guinea | 2016 | Male   | 25 to 29 | 63%<br>(43-79%)                | 37%<br>(21-57%)          | 4.8<br>(2.5-8.2)                            | 13%<br>(8.1-18%)                     | 16%<br>(10-23%)                     | 210<br>(120-300)    | 14000<br>(8400-20000)    |
| Papua New Guinea | 2016 | Male   | 30 to 34 | 64%<br>(43-81%)                | 36%<br>(19-57%)          | 5.1<br>(2.7-8.7)                            | 12%<br>(7.8-17%)                     | 15%<br>(9.2-21%)                    | 230<br>(130-320)    | 14000<br>(8200-19000)    |
| Papua New Guinea | 2016 | Male   | 35 to 39 | 63%<br>(45-80%)                | 37%<br>(20-55%)          | 4.5<br>(2.2-8.2)                            | 11%<br>(6.5-16%)                     | 14%<br>(7.7-20%)                    | 250<br>(130-370)    | 14000<br>(7400-20000)    |
| Papua New Guinea | 2016 | Male   | 40 to 44 | 60%<br>(42-77%)                | 40%<br>(23-58%)          | 4<br>(1.8-7.5)                              | 10%<br>(5.1-15%)                     | 12%<br>(5.6-17%)                    | 270<br>(130-420)    | 13000<br>(6600-20000)    |
| Papua New Guinea | 2016 | Male   | 45 to 49 | 56%<br>(35-74%)                | 44%<br>(26-65%)          | 3.4<br>(1.6-6.3)                            | 8.7%<br>(4.2-13%)                    | 10%<br>(4.8-15%)                    | 250<br>(110-400)    | 11000<br>(5100-17000)    |

| Location         | Year | Sex    | Age      | Prevalence of current drinkers | Prevalence of abstainers | Population average of standard drinks daily | Percent of total attributable deaths | Percent of total attributable DALYs | Attributable deaths   | Attributable DALYs   |
|------------------|------|--------|----------|--------------------------------|--------------------------|---------------------------------------------|--------------------------------------|-------------------------------------|-----------------------|----------------------|
| Papua New Guinea | 2016 | Male   | 50 to 54 | 53%<br>(33-73%)                | 47%<br>(27-67%)          | 2.8<br>(1.2-5.3)                            | 7.4%<br>(3.1-12%)                    | 8.4%<br>(3.4-14%)                   | 220<br>(88-370)       | 8400<br>(3600-14000) |
| Papua New Guinea | 2016 | Male   | 55 to 59 | 51%<br>(33-71%)                | 49%<br>(29-67%)          | 2.3<br>(1-4.5)                              | 5.6%<br>(2-9.7%)                     | 6.2%<br>(2.2-11%)                   | 170<br>(61-330)       | 5800<br>(2100-11000) |
| Papua New Guinea | 2016 | Male   | 60 to 64 | 49%<br>(29-69%)                | 51%<br>(31-71%)          | 1.9<br>(0.8-3.8)                            | 4.4%<br>(1.4-8.4%)                   | 4.9%<br>(1.4-9.3%)                  | 140<br>(40-280)       | 4000<br>(1200-7700)  |
| Papua New Guinea | 2016 | Male   | 65 to 69 | 47%<br>(29-66%)                | 53%<br>(34-71%)          | 1.7<br>(0.73-3.5)                           | 4%<br>(1.2-7.7%)                     | 4.4%<br>(1.2-8.6%)                  | 120<br>(32-230)       | 2800<br>(790-5400)   |
| Papua New Guinea | 2016 | Male   | 70 to 74 | 45%<br>(27-62%)                | 55%<br>(38-73%)          | 1.5<br>(0.63-3.1)                           | 3.3%<br>(0.87-6.7%)                  | 3.6%<br>(0.9-7.3%)                  | 82<br>(20-170)        | 1500<br>(390-3200)   |
| Papua New Guinea | 2016 | Male   | 75 to 79 | 40%<br>(24-59%)                | 60%<br>(41-76%)          | 1.3<br>(0.53-2.7)                           | 2.7%<br>(0.61-5.5%)                  | 2.9%<br>(0.61-6%)                   | 50<br>(10-110)        | 740<br>(170-1500)    |
| Papua New Guinea | 2016 | Male   | 80 to 84 | 37%<br>(21-56%)                | 63%<br>(44-79%)          | 1.2<br>(0.49-2.3)                           | 2.4%<br>(0.62-5.2%)                  | 2.6%<br>(0.61-5.6%)                 | 27<br>(6.4-59)        | 300<br>(75-640)      |
| Papua New Guinea | 2016 | Male   | 85 to 89 | 36%<br>(21-52%)                | 64%<br>(48-79%)          | 1.1<br>(0.46-2.4)                           | 2.1%<br>(0.43-4.7%)                  | 2.2%<br>(0.39-5.1%)                 | 10<br>(1.9-24)        | 82<br>(17-190)       |
| Papua New Guinea | 2016 | Male   | 90 to 94 | 38%<br>(23-55%)                | 62%<br>(45-77%)          | 1.2<br>(0.46-2.4)                           | 1.7%<br>(0.3-4.1%)                   | 1.8%<br>(0.19-4.4%)                 | 2.6<br>(0.27-6.4)     | 15<br>(2.5-34)       |
| Papua New Guinea | 2016 | Male   | 95 plus  | 42%<br>(22-62%)                | 58%<br>(38-78%)          | 1.3<br>(0.43-2.8)                           | 1.8%<br>(0.1-4.6%)                   | 1.8%<br>(-0.14-5%)                  | 0.57<br>(-0.047-1.6)  | 2.2<br>(0.13-5.8)    |
| Samoa            | 1990 | Female | All Ages | 18%<br>(12-24%)                | 82%<br>(76-88%)          | 0.42<br>(0.31-0.53)                         | 0.8%<br>(0.39-1.3%)                  | 0.84%<br>(0.039-1.9%)               | 3.1<br>(0.13-7)       | 160<br>(79-260)      |
| Samoa            | 1990 | Female | 15 to 19 | 19%<br>(7.9-34%)               | 81%<br>(66-92%)          | 0.51<br>(0.22-0.96)                         | 1.2%<br>(0.62-2.2%)                  | 2.2%<br>(0.81-4.4%)                 | 0.13<br>(0.049-0.27)  | 15<br>(7.3-26)       |
| Samoa            | 1990 | Female | 20 to 24 | 23%<br>(9.3-41%)               | 77%<br>(59-91%)          | 0.81<br>(0.35-1.4)                          | 2.1%<br>(1.3-3.4%)                   | 3.2%<br>(1.3-6%)                    | 0.2<br>(0.079-0.37)   | 22<br>(12-35)        |
| Samoa            | 1990 | Female | 25 to 29 | 24%<br>(10-43%)                | 76%<br>(57-90%)          | 0.83<br>(0.37-1.5)                          | 2.2%<br>(1.3-3.3%)                   | 3.2%<br>(1.5-5.5%)                  | 0.22<br>(0.1-0.4)     | 22<br>(13-35)        |
| Samoa            | 1990 | Female | 30 to 34 | 25%<br>(9.9-45%)               | 75%<br>(55-90%)          | 0.87<br>(0.35-1.5)                          | 2%<br>(1.2-3.3%)                     | 3%<br>(1.4-5.3%)                    | 0.2<br>(0.088-0.37)   | 17<br>(9.3-27)       |
| Samoa            | 1990 | Female | 35 to 39 | 26%<br>(11-44%)                | 74%<br>(56-89%)          | 0.9<br>(0.38-1.6)                           | 2.1%<br>(1.1-3.5%)                   | 3.1%<br>(1.4-5.4%)                  | 0.3<br>(0.13-0.55)    | 20<br>(10-33)        |
| Samoa            | 1990 | Female | 40 to 44 | 25%<br>(12-43%)                | 75%<br>(57-88%)          | 0.83<br>(0.35-1.5)                          | 2%<br>(0.85-3.6%)                    | 3%<br>(1.2-5.7%)                    | 0.3<br>(0.11-0.58)    | 16<br>(6.7-31)       |
| Samoa            | 1990 | Female | 45 to 49 | 25%<br>(11-43%)                | 75%<br>(57-89%)          | 0.72<br>(0.28-1.4)                          | 1.4%<br>(0.39-3.1%)                  | 2.1%<br>(0.64-4.7%)                 | 0.33<br>(0.093-0.73)  | 15<br>(3.9-33)       |
| Samoa            | 1990 | Female | 50 to 54 | 25%<br>(11-44%)                | 75%<br>(56-89%)          | 0.63<br>(0.24-1.3)                          | 1.1%<br>(-0.0077-3%)                 | 1.6%<br>(0.15-4.3%)                 | 0.28<br>(0.027-0.73)  | 10<br>(-0.07-28)     |
| Samoa            | 1990 | Female | 55 to 59 | 24%<br>(11-42%)                | 76%<br>(58-89%)          | 0.56<br>(0.21-1.1)                          | 0.8%<br>(-0.27-2.3%)                 | 1.3%<br>(-0.13-3.3%)                | 0.32<br>(-0.035-0.86) | 9.6<br>(-3.1-28)     |
| Samoa            | 1990 | Female | 60 to 64 | 24%<br>(11-44%)                | 76%<br>(56-89%)          | 0.54<br>(0.2-1.1)                           | 0.42%<br>(-0.74-1.8%)                | 0.7%<br>(-0.67-2.5%)                | 0.2<br>(-0.2-0.74)    | 4.6<br>(-8.1-20)     |
| Samoa            | 1990 | Female | 65 to 69 | 25%<br>(11-42%)                | 75%<br>(58-89%)          | 0.54<br>(0.21-1.1)                          | 0.38%<br>(-0.78-1.7%)                | 0.65%<br>(-0.73-2.4%)               | 0.23<br>(-0.28-0.86)  | 4.2<br>(-8.5-19)     |

| Location | Year | Sex    | Age      | Prevalence of current drinkers | Prevalence of abstainers | Population average of standard drinks daily | Percent of total attributable deaths | Percent of total attributable DALYs | Attributable deaths        | Attributable DALYs     |
|----------|------|--------|----------|--------------------------------|--------------------------|---------------------------------------------|--------------------------------------|-------------------------------------|----------------------------|------------------------|
| Samoa    | 1990 | Female | 70 to 74 | 24%<br>(11-40%)                | 76%<br>(60-89%)          | 0.52<br>(0.19-1)                            | 0.23%<br>(-0.86-1.8%)                | 0.39%<br>(-0.9-2.4%)                | 0.13<br>(-0.31-0.79)       | 1.8<br>(-6.7-14)       |
| Samoa    | 1990 | Female | 75 to 79 | 23%<br>(10-42%)                | 77%<br>(58-90%)          | 0.48<br>(0.16-1)                            | 0.27%<br>(-0.8-1.8%)                 | 0.4%<br>(-0.87-2.2%)                | 0.15<br>(-0.35-0.85)       | 1.8<br>(-5.6-12)       |
| Samoa    | 1990 | Female | 80 to 84 | 23%<br>(9.3-42%)               | 77%<br>(58-91%)          | 0.46<br>(0.16-0.99)                         | 0.12%<br>(-0.81-1.4%)                | 0.19%<br>(-0.89-1.7%)               | 0.06<br>(-0.29-0.53)       | 0.5<br>(-3.3-5.6)      |
| Samoa    | 1990 | Female | 85 to 89 | 24%<br>(11-42%)                | 76%<br>(58-89%)          | 0.48<br>(0.18-1)                            | 0.03%<br>(-0.87-1.2%)                | 0.049%<br>(-1-1.4%)                 | 0.0098<br>(-0.2-0.27)      | 0.054<br>(-1.5-2)      |
| Samoa    | 1990 | Female | 90 to 94 | 27%<br>(12-46%)                | 73%<br>(54-88%)          | 0.56<br>(0.2-1.2)                           | 0.088%<br>(-0.82-1.5%)               | 0.11%<br>(-0.94-1.7%)               | 0.011<br>(-0.095-0.17)     | 0.054<br>(-0.51-0.87)  |
| Samoa    | 1990 | Female | 95 plus  | 32%<br>(13-55%)                | 68%<br>(45-87%)          | 0.65<br>(0.21-1.5)                          | 0.039%<br>(-1.3-1.8%)                | -0.0092%<br>(-1.5-2%)               | -0.00024<br>(-0.048-0.062) | 0.0047<br>(-0.15-0.22) |
| Samoa    | 1990 | Male   | All Ages | 36%<br>(28-46%)                | 64%<br>(54-72%)          | 0.91<br>(0.76-1.1)                          | 3.1%<br>(2-4.3%)                     | 3.3%<br>(2-4.9%)                    | 17<br>(11-26)              | 860<br>(590-1200)      |
| Samoa    | 1990 | Male   | 15 to 19 | 35%<br>(20-53%)                | 65%<br>(47-80%)          | 0.64<br>(0.32-1.1)                          | 2.4%<br>(1.2-4.2%)                   | 3.3%<br>(1.3-6.2%)                  | 0.55<br>(0.22-1)           | 47<br>(23-82)          |
| Samoa    | 1990 | Male   | 20 to 24 | 53%<br>(35-71%)                | 47%<br>(29-65%)          | 1.7<br>(1.1-2.5)                            | 7%<br>(4.2-11%)                      | 9.1%<br>(5.1-14%)                   | 1.9<br>(1-3.1)             | 140<br>(82-220)        |
| Samoa    | 1990 | Male   | 25 to 29 | 61%<br>(41-77%)                | 39%<br>(23-59%)          | 2.4<br>(1.5-3.4)                            | 8.9%<br>(5.6-13%)                    | 12%<br>(7-17%)                      | 2.3<br>(1.3-3.5)           | 160<br>(98-230)        |
| Samoa    | 1990 | Male   | 30 to 34 | 62%<br>(41-79%)                | 38%<br>(21-59%)          | 2.6<br>(1.6-3.8)                            | 8.3%<br>(5.1-12%)                    | 11%<br>(6.2-16%)                    | 1.6<br>(0.9-2.6)           | 100<br>(61-160)        |
| Samoa    | 1990 | Male   | 35 to 39 | 60%<br>(42-77%)                | 40%<br>(23-58%)          | 2.3<br>(1.3-3.5)                            | 7%<br>(4-11%)                        | 8.7%<br>(4.7-14%)                   | 1.6<br>(0.85-2.6)          | 91<br>(52-150)         |
| Samoa    | 1990 | Male   | 40 to 44 | 57%<br>(39-74%)                | 43%<br>(26-61%)          | 2<br>(1-3.2)                                | 5.7%<br>(2.9-9.5%)                   | 6.9%<br>(3.3-12%)                   | 1.1<br>(0.51-2)            | 59<br>(28-100)         |
| Samoa    | 1990 | Male   | 45 to 49 | 53%<br>(32-72%)                | 47%<br>(28-68%)          | 1.7<br>(0.83-3)                             | 4.8%<br>(2.2-8.4%)                   | 5.6%<br>(2.4-10%)                   | 1.4<br>(0.58-2.5)          | 63<br>(28-110)         |
| Samoa    | 1990 | Male   | 50 to 54 | 51%<br>(31-69%)                | 49%<br>(31-69%)          | 1.4<br>(0.71-2.4)                           | 4%<br>(1.6-7.4%)                     | 4.6%<br>(1.7-8.9%)                  | 1.5<br>(0.52-2.9)          | 59<br>(23-110)         |
| Samoa    | 1990 | Male   | 55 to 59 | 48%<br>(30-69%)                | 52%<br>(31-70%)          | 1.1<br>(0.57-2)                             | 2.9%<br>(0.94-6.1%)                  | 3.3%<br>(0.97-7.1%)                 | 1.3<br>(0.36-2.8)          | 44<br>(14-94)          |
| Samoa    | 1990 | Male   | 60 to 64 | 46%<br>(27-66%)                | 54%<br>(34-73%)          | 0.95<br>(0.45-1.7)                          | 2.3%<br>(0.58-5.3%)                  | 2.6%<br>(0.6-6.1%)                  | 1.1<br>(0.26-2.7)          | 33<br>(8.6-78)         |
| Samoa    | 1990 | Male   | 65 to 69 | 44%<br>(26-64%)                | 56%<br>(36-74%)          | 0.87<br>(0.43-1.5)                          | 2%<br>(0.48-4.1%)                    | 2.2%<br>(0.53-4.8%)                 | 1.3<br>(0.31-2.9)          | 31<br>(8-68)           |
| Samoa    | 1990 | Male   | 70 to 74 | 42%<br>(25-59%)                | 58%<br>(41-75%)          | 0.76<br>(0.37-1.4)                          | 1.5%<br>(0.21-3.6%)                  | 1.7%<br>(0.18-4%)                   | 0.85<br>(0.092-2.1)        | 16<br>(2.1-39)         |
| Samoa    | 1990 | Male   | 75 to 79 | 38%<br>(22-57%)                | 62%<br>(43-78%)          | 0.64<br>(0.31-1.2)                          | 1.2%<br>(0.11-3%)                    | 1.3%<br>(0.056-3.4%)                | 0.55<br>(0.027-1.5)        | 8.2<br>(0.73-22)       |
| Samoa    | 1990 | Male   | 80 to 84 | 35%<br>(19-53%)                | 65%<br>(47-81%)          | 0.57<br>(0.28-1)                            | 0.97%<br>(0.13-2.2%)                 | 1.1%<br>(0.11-2.5%)                 | 0.28<br>(0.031-0.67)       | 3.1<br>(0.44-7.2)      |
| Samoa    | 1990 | Male   | 85 to 89 | 34%<br>(20-50%)                | 66%<br>(50-80%)          | 0.54<br>(0.26-0.99)                         | 0.74%<br>(-0.0085-1.8%)              | 0.8%<br>(-0.062-2.1%)               | 0.1<br>(-0.0079-0.28)      | 0.84<br>(-0.0096-2.1)  |



| Location | Year | Sex    | Age      | Prevalence of current drinkers | Prevalence of abstainers | Population average of standard drinks daily | Percent of total attributable deaths | Percent of total attributable DALYs | Attributable deaths         | Attributable DALYs      |
|----------|------|--------|----------|--------------------------------|--------------------------|---------------------------------------------|--------------------------------------|-------------------------------------|-----------------------------|-------------------------|
| Samoa    | 1990 | Male   | 90 to 94 | 35%<br>(21-52%)                | 65%<br>(48-79%)          | 0.55<br>(0.25-1.1)                          | 0.55%<br>(-0.067-1.5%)               | 0.56%<br>(-0.15-1.7%)               | 0.026<br>(-0.0066-0.078)    | 0.15<br>(-0.018-0.43)   |
| Samoa    | 1990 | Male   | 95 plus  | 38%<br>(21-59%)                | 62%<br>(41-79%)          | 0.61<br>(0.24-1.2)                          | 0.36%<br>(-0.47-1.6%)                | 0.28%<br>(-0.68-1.7%)               | 0.0025<br>(-0.0061-0.016)   | 0.013<br>(-0.016-0.057) |
| Samoa    | 1995 | Female | All Ages | 18%<br>(12-24%)                | 82%<br>(76-88%)          | 0.43<br>(0.32-0.56)                         | 0.85%<br>(0.4-1.4%)                  | 0.84%<br>(-0.022-2%)                | 3.3<br>(-0.087-7.8)         | 170<br>(81-290)         |
| Samoa    | 1995 | Female | 15 to 19 | 19%<br>(8.5-33%)               | 81%<br>(67-91%)          | 0.53<br>(0.23-0.98)                         | 1.3%<br>(0.65-2.2%)                  | 2.3%<br>(0.85-4.6%)                 | 0.12<br>(0.045-0.24)        | 13<br>(6.6-23)          |
| Samoa    | 1995 | Female | 20 to 24 | 23%<br>(9.4-39%)               | 77%<br>(61-91%)          | 0.83<br>(0.36-1.5)                          | 2.2%<br>(1.3-3.5%)                   | 3.3%<br>(1.4-6.2%)                  | 0.2<br>(0.083-0.39)         | 22<br>(13-37)           |
| Samoa    | 1995 | Female | 25 to 29 | 24%<br>(9.7-42%)               | 76%<br>(58-90%)          | 0.85<br>(0.37-1.5)                          | 2.2%<br>(1.4-3.4%)                   | 3.3%<br>(1.6-5.6%)                  | 0.24<br>(0.11-0.43)         | 23<br>(14-37)           |
| Samoa    | 1995 | Female | 30 to 34 | 25%<br>(9.4-44%)               | 75%<br>(56-91%)          | 0.89<br>(0.35-1.6)                          | 2.1%<br>(1.2-3.3%)                   | 3%<br>(1.4-5.3%)                    | 0.28<br>(0.12-0.49)         | 22<br>(13-36)           |
| Samoa    | 1995 | Female | 35 to 39 | 26%<br>(11-44%)                | 74%<br>(56-89%)          | 0.93<br>(0.38-1.6)                          | 2.1%<br>(1.1-3.6%)                   | 3.2%<br>(1.5-5.6%)                  | 0.29<br>(0.12-0.54)         | 19<br>(9.8-33)          |
| Samoa    | 1995 | Female | 40 to 44 | 25%<br>(12-42%)                | 75%<br>(58-88%)          | 0.86<br>(0.37-1.6)                          | 2%<br>(0.87-3.7%)                    | 3%<br>(1.2-5.6%)                    | 0.41<br>(0.16-0.8)          | 22<br>(9.6-42)          |
| Samoa    | 1995 | Female | 45 to 49 | 24%<br>(11-42%)                | 76%<br>(58-89%)          | 0.73<br>(0.29-1.4)                          | 1.4%<br>(0.42-3.1%)                  | 2.2%<br>(0.65-4.6%)                 | 0.31<br>(0.089-0.69)        | 14<br>(3.7-30)          |
| Samoa    | 1995 | Female | 50 to 54 | 24%<br>(11-43%)                | 76%<br>(57-89%)          | 0.64<br>(0.24-1.3)                          | 1%<br>(-0.067-2.8%)                  | 1.6%<br>(0.1-4.1%)                  | 0.35<br>(0.023-0.94)        | 13<br>(-0.73-36)        |
| Samoa    | 1995 | Female | 55 to 59 | 23%<br>(11-41%)                | 77%<br>(59-89%)          | 0.57<br>(0.22-1.1)                          | 0.77%<br>(-0.31-2.3%)                | 1.2%<br>(-0.16-3.2%)                | 0.26<br>(-0.035-0.7)        | 7.6<br>(-3.2-23)        |
| Samoa    | 1995 | Female | 60 to 64 | 23%<br>(10-42%)                | 77%<br>(58-90%)          | 0.55<br>(0.2-1.2)                           | 0.4%<br>(-0.73-1.8%)                 | 0.69%<br>(-0.7-2.6%)                | 0.23<br>(-0.24-0.89)        | 5.1<br>(-8.9-24)        |
| Samoa    | 1995 | Female | 65 to 69 | 25%<br>(11-43%)                | 75%<br>(57-89%)          | 0.56<br>(0.22-1.1)                          | 0.36%<br>(-0.87-1.9%)                | 0.63%<br>(-0.85-2.6%)               | 0.24<br>(-0.32-0.93)        | 4.2<br>(-9.8-21)        |
| Samoa    | 1995 | Female | 70 to 74 | 25%<br>(11-42%)                | 75%<br>(58-89%)          | 0.54<br>(0.2-1.1)                           | 0.2%<br>(-0.94-1.7%)                 | 0.36%<br>(-0.99-2.3%)               | 0.15<br>(-0.42-0.98)        | 2<br>(-9.3-17)          |
| Samoa    | 1995 | Female | 75 to 79 | 23%<br>(10-42%)                | 77%<br>(58-90%)          | 0.5<br>(0.16-1.1)                           | 0.25%<br>(-0.9-1.8%)                 | 0.38%<br>(-0.92-2.3%)               | 0.16<br>(-0.38-0.91)        | 1.8<br>(-6.3-13)        |
| Samoa    | 1995 | Female | 80 to 84 | 23%<br>(9.7-42%)               | 77%<br>(58-90%)          | 0.47<br>(0.17-0.99)                         | 0.12%<br>(-0.84-1.4%)                | 0.18%<br>(-0.95-1.6%)               | 0.072<br>(-0.37-0.67)       | 0.6<br>(-4.3-7.1)       |
| Samoa    | 1995 | Female | 85 to 89 | 24%<br>(11-42%)                | 76%<br>(58-89%)          | 0.49<br>(0.18-1)                            | 0.033%<br>(-0.88-1.2%)               | 0.051%<br>(-1-1.5%)                 | 0.014<br>(-0.27-0.4)        | 0.083<br>(-2.1-3)       |
| Samoa    | 1995 | Female | 90 to 94 | 27%<br>(13-47%)                | 73%<br>(53-87%)          | 0.56<br>(0.22-1.2)                          | 0.091%<br>(-0.87-1.5%)               | 0.11%<br>(-1-1.7%)                  | 0.012<br>(-0.11-0.19)       | 0.06<br>(-0.57-0.96)    |
| Samoa    | 1995 | Female | 95 plus  | 32%<br>(14-55%)                | 68%<br>(45-86%)          | 0.66<br>(0.22-1.5)                          | 0.05%<br>(-1.3-1.8%)                 | -0.0024%<br>(-1.6-2.1%)             | -0.000039<br>(-0.056-0.074) | 0.0074<br>(-0.18-0.26)  |
| Samoa    | 1995 | Male   | All Ages | 36%<br>(28-46%)                | 64%<br>(54-72%)          | 0.98<br>(0.81-1.2)                          | 3.3%<br>(2.3-4.6%)                   | 3.4%<br>(2-5%)                      | 18<br>(11-27)               | 890<br>(620-1200)       |
| Samoa    | 1995 | Male   | 15 to 19 | 35%<br>(20-53%)                | 65%<br>(47-80%)          | 0.65<br>(0.32-1.1)                          | 2.4%<br>(1.2-4.2%)                   | 3.4%<br>(1.4-6.3%)                  | 0.5<br>(0.21-0.96)          | 43<br>(21-76)           |

| Location | Year | Sex    | Age      | Prevalence of current drinkers | Prevalence of abstainers | Population average of standard drinks daily | Percent of total attributable deaths | Percent of total attributable DALYs | Attributable deaths       | Attributable DALYs      |
|----------|------|--------|----------|--------------------------------|--------------------------|---------------------------------------------|--------------------------------------|-------------------------------------|---------------------------|-------------------------|
| Samoa    | 1995 | Male   | 20 to 24 | 53%<br>(34-70%)                | 47%<br>(30-66%)          | 1.8<br>(1.1-2.7)                            | 7.2%<br>(4.3-11%)                    | 9.4%<br>(5.3-15%)                   | 1.8<br>(0.91-2.8)         | 130<br>(75-210)         |
| Samoa    | 1995 | Male   | 25 to 29 | 60%<br>(40-76%)                | 40%<br>(24-60%)          | 2.5<br>(1.6-3.5)                            | 9%<br>(5.9-13%)                      | 12%<br>(7.3-17%)                    | 2.2<br>(1.3-3.3)          | 150<br>(96-220)         |
| Samoa    | 1995 | Male   | 30 to 34 | 61%<br>(40-78%)                | 39%<br>(22-60%)          | 2.7<br>(1.7-3.9)                            | 8.2%<br>(5.2-12%)                    | 11%<br>(6.4-16%)                    | 2.1<br>(1.2-3.4)          | 140<br>(83-210)         |
| Samoa    | 1995 | Male   | 35 to 39 | 60%<br>(42-77%)                | 40%<br>(23-58%)          | 2.3<br>(1.4-3.7)                            | 7%<br>(4-11%)                        | 8.9%<br>(4.9-14%)                   | 1.5<br>(0.78-2.4)         | 86<br>(48-140)          |
| Samoa    | 1995 | Male   | 40 to 44 | 57%<br>(40-75%)                | 43%<br>(25-60%)          | 2<br>(1.1-3.3)                              | 5.7%<br>(3-9.4%)                     | 7%<br>(3.3-12%)                     | 1.6<br>(0.75-2.8)         | 83<br>(41-140)          |
| Samoa    | 1995 | Male   | 45 to 49 | 53%<br>(32-71%)                | 47%<br>(29-68%)          | 1.7<br>(0.91-3)                             | 4.8%<br>(2.2-8.7%)                   | 5.7%<br>(2.4-11%)                   | 1.2<br>(0.51-2.3)         | 58<br>(26-100)          |
| Samoa    | 1995 | Male   | 50 to 54 | 50%<br>(30-69%)                | 50%<br>(31-70%)          | 1.4<br>(0.74-2.5)                           | 4%<br>(1.6-7.7%)                     | 4.6%<br>(1.7-9.2%)                  | 1.5<br>(0.53-3)           | 60<br>(24-120)          |
| Samoa    | 1995 | Male   | 55 to 59 | 48%<br>(30-68%)                | 52%<br>(32-70%)          | 1.2<br>(0.58-2)                             | 2.8%<br>(0.92-5.9%)                  | 3.2%<br>(0.88-6.9%)                 | 1.2<br>(0.34-2.7)         | 43<br>(15-92)           |
| Samoa    | 1995 | Male   | 60 to 64 | 46%<br>(27-66%)                | 54%<br>(34-73%)          | 0.97<br>(0.45-1.8)                          | 2.2%<br>(0.51-5.1%)                  | 2.5%<br>(0.52-5.9%)                 | 1.1<br>(0.24-2.7)         | 34<br>(7.9-78)          |
| Samoa    | 1995 | Male   | 65 to 69 | 44%<br>(26-63%)                | 56%<br>(37-74%)          | 0.88<br>(0.44-1.5)                          | 1.9%<br>(0.41-4.2%)                  | 2.2%<br>(0.4-4.8%)                  | 1.2<br>(0.22-2.6)         | 28<br>(5.6-61)          |
| Samoa    | 1995 | Male   | 70 to 74 | 42%<br>(25-59%)                | 58%<br>(41-75%)          | 0.78<br>(0.38-1.4)                          | 1.5%<br>(0.19-3.6%)                  | 1.7%<br>(0.17-4.1%)                 | 1<br>(0.1-2.5)            | 20<br>(2.5-48)          |
| Samoa    | 1995 | Male   | 75 to 79 | 38%<br>(22-57%)                | 62%<br>(43-78%)          | 0.67<br>(0.32-1.3)                          | 1.2%<br>(0.095-3%)                   | 1.3%<br>(0.07-3.3%)                 | 0.6<br>(0.036-1.6)        | 9<br>(0.78-23)          |
| Samoa    | 1995 | Male   | 80 to 84 | 35%<br>(20-53%)                | 65%<br>(47-80%)          | 0.59<br>(0.29-1.1)                          | 0.98%<br>(0.14-2.3%)                 | 1.1%<br>(0.11-2.6%)                 | 0.34<br>(0.033-0.82)      | 3.7<br>(0.53-8.9)       |
| Samoa    | 1995 | Male   | 85 to 89 | 33%<br>(19-50%)                | 67%<br>(50-81%)          | 0.56<br>(0.27-1)                            | 0.75%<br>(0.002-1.9%)                | 0.8%<br>(-0.055-2.1%)               | 0.14<br>(-0.01-0.38)      | 1.2<br>(0.0031-3)       |
| Samoa    | 1995 | Male   | 90 to 94 | 35%<br>(21-52%)                | 65%<br>(48-79%)          | 0.57<br>(0.26-1.1)                          | 0.55%<br>(-0.083-1.6%)               | 0.57%<br>(-0.17-1.7%)               | 0.033<br>(-0.01-0.1)      | 0.2<br>(-0.03-0.54)     |
| Samoa    | 1995 | Male   | 95 plus  | 38%<br>(20-59%)                | 62%<br>(41-80%)          | 0.63<br>(0.25-1.3)                          | 0.37%<br>(-0.49-1.7%)                | 0.29%<br>(-0.69-1.9%)               | 0.0041<br>(-0.0097-0.026) | 0.021<br>(-0.028-0.097) |
| Samoa    | 2000 | Female | All Ages | 17%<br>(12-24%)                | 83%<br>(76-88%)          | 0.44<br>(0.32-0.56)                         | 0.83%<br>(0.37-1.5%)                 | 0.74%<br>(-0.13-1.9%)               | 3.1<br>(-0.53-8.1)        | 170<br>(70-290)         |
| Samoa    | 2000 | Female | 15 to 19 | 18%<br>(8-34%)                 | 82%<br>(66-92%)          | 0.54<br>(0.22-1)                            | 1.2%<br>(0.63-2.3%)                  | 2.3%<br>(0.83-4.9%)                 | 0.11<br>(0.04-0.24)       | 12<br>(6.1-22)          |
| Samoa    | 2000 | Female | 20 to 24 | 22%<br>(9.4-41%)               | 78%<br>(59-91%)          | 0.84<br>(0.35-1.5)                          | 2.2%<br>(1.2-3.5%)                   | 3.3%<br>(1.3-6.3%)                  | 0.19<br>(0.072-0.36)      | 21<br>(11-34)           |
| Samoa    | 2000 | Female | 25 to 29 | 24%<br>(10-43%)                | 76%<br>(57-90%)          | 0.87<br>(0.38-1.5)                          | 2.3%<br>(1.4-3.5%)                   | 3.3%<br>(1.6-5.7%)                  | 0.24<br>(0.11-0.43)       | 23<br>(13-36)           |
| Samoa    | 2000 | Female | 30 to 34 | 25%<br>(9.6-44%)               | 75%<br>(56-90%)          | 0.9<br>(0.35-1.6)                           | 2.1%<br>(1.2-3.4%)                   | 3%<br>(1.3-5.2%)                    | 0.28<br>(0.12-0.5)        | 23<br>(13-37)           |
| Samoa    | 2000 | Female | 35 to 39 | 25%<br>(9.7-44%)               | 75%<br>(56-90%)          | 0.93<br>(0.39-1.6)                          | 2.1%<br>(1.1-3.5%)                   | 3.1%<br>(1.4-5.5%)                  | 0.36<br>(0.16-0.67)       | 24<br>(12-42)           |

| Location | Year | Sex    | Age      | Prevalence of current drinkers | Prevalence of abstainers | Population average of standard drinks daily | Percent of total attributable deaths | Percent of total attributable DALYs | Attributable deaths        | Attributable DALYs     |
|----------|------|--------|----------|--------------------------------|--------------------------|---------------------------------------------|--------------------------------------|-------------------------------------|----------------------------|------------------------|
| Samoa    | 2000 | Female | 40 to 44 | 25%<br>(12-43%)                | 75%<br>(57-88%)          | 0.86<br>(0.36-1.6)                          | 1.9%<br>(0.79-3.5%)                  | 2.8%<br>(1.1-5.3%)                  | 0.4<br>(0.15-0.81)         | 22<br>(9.2-42)         |
| Samoa    | 2000 | Female | 45 to 49 | 24%<br>(10-41%)                | 76%<br>(59-90%)          | 0.73<br>(0.29-1.4)                          | 1.3%<br>(0.28-3%)                    | 2%<br>(0.51-4.6%)                   | 0.33<br>(0.082-0.74)       | 15<br>(3.1-34)         |
| Samoa    | 2000 | Female | 50 to 54 | 24%<br>(10-42%)                | 76%<br>(58-90%)          | 0.64<br>(0.25-1.3)                          | 0.94%<br>(-0.26-2.7%)                | 1.5%<br>(-0.053-3.8%)               | 0.28<br>(-0.01-0.76)       | 10<br>(-2.8-29)        |
| Samoa    | 2000 | Female | 55 to 59 | 23%<br>(10-42%)                | 77%<br>(58-90%)          | 0.57<br>(0.22-1.2)                          | 0.66%<br>(-0.45-2.3%)                | 1.1%<br>(-0.33-3.2%)                | 0.26<br>(-0.076-0.76)      | 7.4<br>(-5.5-24)       |
| Samoa    | 2000 | Female | 60 to 64 | 23%<br>(10-40%)                | 77%<br>(60-90%)          | 0.54<br>(0.2-1.2)                           | 0.3%<br>(-0.87-1.7%)                 | 0.55%<br>(-0.85-2.4%)               | 0.16<br>(-0.25-0.68)       | 3.3<br>(-9.6-18)       |
| Samoa    | 2000 | Female | 65 to 69 | 24%<br>(11-41%)                | 76%<br>(59-89%)          | 0.56<br>(0.22-1.1)                          | 0.25%<br>(-1-1.8%)                   | 0.48%<br>(-1-2.4%)                  | 0.17<br>(-0.38-0.83)       | 2.8<br>(-12-19)        |
| Samoa    | 2000 | Female | 70 to 74 | 24%<br>(11-40%)                | 76%<br>(60-89%)          | 0.54<br>(0.2-1.1)                           | 0.1%<br>(-1-1.5%)                    | 0.23%<br>(-1.1-2%)                  | 0.11<br>(-0.53-0.94)       | 1.1<br>(-12-17)        |
| Samoa    | 2000 | Female | 75 to 79 | 23%<br>(10-41%)                | 77%<br>(59-90%)          | 0.51<br>(0.17-1.1)                          | 0.17%<br>(-0.99-1.7%)                | 0.29%<br>(-1.1-2.1%)                | 0.15<br>(-0.54-1.1)        | 1.6<br>(-8.9-15)       |
| Samoa    | 2000 | Female | 80 to 84 | 23%<br>(9.1-41%)               | 77%<br>(59-91%)          | 0.49<br>(0.17-1)                            | 0.069%<br>(-0.91-1.5%)               | 0.12%<br>(-1-1.8%)                  | 0.058<br>(-0.51-0.85)      | 0.43<br>(-5.7-9.1)     |
| Samoa    | 2000 | Female | 85 to 89 | 23%<br>(10-43%)                | 77%<br>(57-90%)          | 0.51<br>(0.19-1.1)                          | 0.008%<br>(-0.99-1.3%)               | 0.017%<br>(-1.1-1.5%)               | 0.006<br>(-0.38-0.53)      | 0.027<br>(-2.9-4)      |
| Samoa    | 2000 | Female | 90 to 94 | 26%<br>(12-46%)                | 74%<br>(54-88%)          | 0.57<br>(0.21-1.2)                          | 0.078%<br>(-0.92-1.5%)               | 0.085%<br>(-1.1-1.8%)               | 0.013<br>(-0.16-0.28)      | 0.073<br>(-0.83-1.4)   |
| Samoa    | 2000 | Female | 95 plus  | 31%<br>(13-55%)                | 69%<br>(45-87%)          | 0.68<br>(0.22-1.5)                          | 0.037%<br>(-1.4-1.9%)                | -0.025%<br>(-1.7-2.1%)              | -0.00092<br>(-0.065-0.085) | 0.0059<br>(-0.21-0.29) |
| Samoa    | 2000 | Male   | All Ages | 36%<br>(28-46%)                | 64%<br>(54-72%)          | 1<br>(0.84-1.2)                             | 3.3%<br>(2.2-4.6%)                   | 3.3%<br>(1.9-5%)                    | 18<br>(10-27)              | 880<br>(590-1200)      |
| Samoa    | 2000 | Male   | 15 to 19 | 34%<br>(19-52%)                | 66%<br>(48-81%)          | 0.67<br>(0.31-1.2)                          | 2.5%<br>(1.3-4.4%)                   | 3.4%<br>(1.5-6.6%)                  | 0.45<br>(0.19-0.88)        | 39<br>(20-70)          |
| Samoa    | 2000 | Male   | 20 to 24 | 52%<br>(33-69%)                | 48%<br>(31-67%)          | 1.8<br>(1.1-2.8)                            | 7.2%<br>(4.4-11%)                    | 9.5%<br>(5.3-15%)                   | 1.5<br>(0.81-2.5)          | 120<br>(66-180)        |
| Samoa    | 2000 | Male   | 25 to 29 | 59%<br>(39-76%)                | 41%<br>(24-61%)          | 2.5<br>(1.6-3.7)                            | 9%<br>(5.6-13%)                      | 12%<br>(7.1-18%)                    | 2<br>(1.1-3.1)             | 140<br>(84-210)        |
| Samoa    | 2000 | Male   | 30 to 34 | 61%<br>(40-77%)                | 39%<br>(23-60%)          | 2.7<br>(1.7-3.9)                            | 8%<br>(5.1-11%)                      | 10%<br>(6.3-16%)                    | 2<br>(1.1-3.1)             | 130<br>(78-200)        |
| Samoa    | 2000 | Male   | 35 to 39 | 59%<br>(41-76%)                | 41%<br>(24-59%)          | 2.4<br>(1.4-3.6)                            | 6.9%<br>(4-10%)                      | 8.8%<br>(4.7-14%)                   | 1.8<br>(0.89-3)            | 110<br>(58-170)        |
| Samoa    | 2000 | Male   | 40 to 44 | 57%<br>(39-74%)                | 43%<br>(26-61%)          | 2.1<br>(1.1-3.3)                            | 5.6%<br>(2.9-9%)                     | 6.9%<br>(3.3-11%)                   | 1.7<br>(0.74-3)            | 89<br>(43-150)         |
| Samoa    | 2000 | Male   | 45 to 49 | 53%<br>(32-70%)                | 47%<br>(30-68%)          | 1.8<br>(0.89-3)                             | 4.7%<br>(2.2-8.4%)                   | 5.6%<br>(2.4-10%)                   | 1.5<br>(0.62-2.9)          | 72<br>(32-130)         |
| Samoa    | 2000 | Male   | 50 to 54 | 50%<br>(30-68%)                | 50%<br>(32-70%)          | 1.5<br>(0.74-2.6)                           | 3.9%<br>(1.5-7.4%)                   | 4.6%<br>(1.5-9.1%)                  | 1.3<br>(0.46-2.7)          | 56<br>(22-110)         |
| Samoa    | 2000 | Male   | 55 to 59 | 48%<br>(30-67%)                | 52%<br>(33-70%)          | 1.2<br>(0.59-2.1)                           | 2.7%<br>(0.86-5.7%)                  | 3.1%<br>(0.81-6.8%)                 | 1.2<br>(0.3-2.7)           | 42<br>(13-91)          |

| Location | Year | Sex    | Age      | Prevalence of current drinkers | Prevalence of abstainers | Population average of standard drinks daily | Percent of total attributable deaths | Percent of total attributable DALYs | Attributable deaths      | Attributable DALYs     |
|----------|------|--------|----------|--------------------------------|--------------------------|---------------------------------------------|--------------------------------------|-------------------------------------|--------------------------|------------------------|
| Samoa    | 2000 | Male   | 60 to 64 | 45%<br>(26-65%)                | 55%<br>(35-74%)          | 1<br>(0.44-1.9)                             | 2.2%<br>(0.42-5%)                    | 2.4%<br>(0.38-5.8%)                 | 1.1<br>(0.17-2.7)        | 33<br>(6.4-80)         |
| Samoa    | 2000 | Male   | 65 to 69 | 43%<br>(25-62%)                | 57%<br>(38-75%)          | 0.91<br>(0.44-1.6)                          | 1.9%<br>(0.29-4.1%)                  | 2.1%<br>(0.28-4.7%)                 | 1.1<br>(0.15-2.5)        | 28<br>(4.5-61)         |
| Samoa    | 2000 | Male   | 70 to 74 | 41%<br>(23-59%)                | 59%<br>(41-77%)          | 0.79<br>(0.38-1.4)                          | 1.4%<br>(0.1-3.7%)                   | 1.6%<br>(0.074-4.1%)                | 0.89<br>(0.041-2.3)      | 17<br>(1.3-44)         |
| Samoa    | 2000 | Male   | 75 to 79 | 37%<br>(21-55%)                | 63%<br>(45-79%)          | 0.67<br>(0.32-1.3)                          | 1.1%<br>(0.038-3%)                   | 1.2%<br>(-0.019-3.4%)               | 0.69<br>(-0.01-1.9)      | 11<br>(0.37-29)        |
| Samoa    | 2000 | Male   | 80 to 84 | 34%<br>(18-53%)                | 66%<br>(47-82%)          | 0.6<br>(0.29-1.1)                           | 0.94%<br>(0.075-2.4%)                | 1%<br>(0.05-2.6%)                   | 0.39<br>(0.02-1)         | 4.4<br>(0.36-11)       |
| Samoa    | 2000 | Male   | 85 to 89 | 33%<br>(18-50%)                | 67%<br>(50-82%)          | 0.57<br>(0.28-1)                            | 0.71%<br>(-0.055-2%)                 | 0.75%<br>(-0.11-2.2%)               | 0.16<br>(-0.023-0.46)    | 1.3<br>(-0.095-3.6)    |
| Samoa    | 2000 | Male   | 90 to 94 | 34%<br>(21-52%)                | 66%<br>(48-79%)          | 0.58<br>(0.26-1.1)                          | 0.53%<br>(-0.16-1.5%)                | 0.53%<br>(-0.28-1.7%)               | 0.043<br>(-0.023-0.14)   | 0.25<br>(-0.081-0.75)  |
| Samoa    | 2000 | Male   | 95 plus  | 38%<br>(20-59%)                | 62%<br>(41-80%)          | 0.64<br>(0.26-1.3)                          | 0.35%<br>(-0.53-1.8%)                | 0.27%<br>(-0.76-1.9%)               | 0.0046<br>(-0.013-0.033) | 0.024<br>(-0.037-0.12) |
| Samoa    | 2005 | Female | All Ages | 17%<br>(12-23%)                | 83%<br>(77-88%)          | 0.47<br>(0.35-0.61)                         | 0.88%<br>(0.35-1.5%)                 | 0.78%<br>(-0.17-2%)                 | 3.6<br>(-0.9-9.7)        | 180<br>(73-330)        |
| Samoa    | 2005 | Female | 15 to 19 | 18%<br>(8.4-32%)               | 82%<br>(68-92%)          | 0.58<br>(0.25-1.1)                          | 1.3%<br>(0.67-2.4%)                  | 2.4%<br>(0.92-5.2%)                 | 0.12<br>(0.043-0.26)     | 13<br>(6.5-24)         |
| Samoa    | 2005 | Female | 20 to 24 | 22%<br>(9.3-41%)               | 78%<br>(59-91%)          | 0.91<br>(0.38-1.7)                          | 2.3%<br>(1.3-3.8%)                   | 3.6%<br>(1.5-7.1%)                  | 0.19<br>(0.075-0.37)     | 21<br>(12-35)          |
| Samoa    | 2005 | Female | 25 to 29 | 24%<br>(9.9-42%)               | 76%<br>(58-90%)          | 0.92<br>(0.39-1.7)                          | 2.4%<br>(1.4-3.7%)                   | 3.6%<br>(1.6-6.3%)                  | 0.24<br>(0.11-0.44)      | 23<br>(13-37)          |
| Samoa    | 2005 | Female | 30 to 34 | 24%<br>(9.5-43%)               | 76%<br>(57-91%)          | 0.95<br>(0.38-1.7)                          | 2.2%<br>(1.2-3.5%)                   | 3.2%<br>(1.5-5.5%)                  | 0.29<br>(0.13-0.51)      | 24<br>(13-39)          |
| Samoa    | 2005 | Female | 35 to 39 | 25%<br>(10-43%)                | 75%<br>(57-90%)          | 0.98<br>(0.41-1.7)                          | 2.2%<br>(1.1-3.6%)                   | 3.2%<br>(1.5-5.6%)                  | 0.4<br>(0.18-0.71)       | 26<br>(14-46)          |
| Samoa    | 2005 | Female | 40 to 44 | 24%<br>(12-41%)                | 76%<br>(59-88%)          | 0.9<br>(0.39-1.6)                           | 1.9%<br>(0.84-3.5%)                  | 2.9%<br>(1.2-5.5%)                  | 0.45<br>(0.18-0.89)      | 25<br>(10-47)          |
| Samoa    | 2005 | Female | 45 to 49 | 24%<br>(10-41%)                | 76%<br>(59-90%)          | 0.77<br>(0.31-1.5)                          | 1.4%<br>(0.3-3.1%)                   | 2.1%<br>(0.6-4.6%)                  | 0.39<br>(0.11-0.88)      | 18<br>(4-41)           |
| Samoa    | 2005 | Female | 50 to 54 | 24%<br>(11-41%)                | 76%<br>(59-89%)          | 0.68<br>(0.27-1.3)                          | 0.97%<br>(-0.26-2.8%)                | 1.5%<br>(-0.011-4%)                 | 0.35<br>(-0.0025-0.93)   | 13<br>(-3.5-37)        |
| Samoa    | 2005 | Female | 55 to 59 | 23%<br>(10-42%)                | 77%<br>(58-90%)          | 0.62<br>(0.23-1.3)                          | 0.71%<br>(-0.47-2.3%)                | 1.2%<br>(-0.3-3.3%)                 | 0.29<br>(-0.078-0.84)    | 8.3<br>(-5.5-27)       |
| Samoa    | 2005 | Female | 60 to 64 | 23%<br>(10-42%)                | 77%<br>(58-90%)          | 0.6<br>(0.22-1.3)                           | 0.35%<br>(-0.99-2%)                  | 0.64%<br>(-0.96-2.6%)               | 0.19<br>(-0.29-0.83)     | 4<br>(-12-23)          |
| Samoa    | 2005 | Female | 65 to 69 | 25%<br>(11-43%)                | 75%<br>(57-89%)          | 0.62<br>(0.23-1.2)                          | 0.29%<br>(-1-2%)                     | 0.54%<br>(-1.1-2.7%)                | 0.21<br>(-0.43-1)        | 3.5<br>(-13-23)        |
| Samoa    | 2005 | Female | 70 to 74 | 25%<br>(11-42%)                | 75%<br>(58-89%)          | 0.59<br>(0.21-1.2)                          | 0.14%<br>(-1.1-1.7%)                 | 0.28%<br>(-1.2-2.2%)                | 0.13<br>(-0.55-1.1)      | 1.5<br>(-12-20)        |
| Samoa    | 2005 | Female | 75 to 79 | 23%<br>(10-41%)                | 77%<br>(59-90%)          | 0.55<br>(0.19-1.2)                          | 0.22%<br>(-1.1-1.9%)                 | 0.34%<br>(-1.1-2.3%)                | 0.21<br>(-0.69-1.4)      | 2.5<br>(-11-20)        |

| Location | Year | Sex    | Age      | Prevalence of current drinkers | Prevalence of abstainers | Population average of standard drinks daily | Percent of total attributable deaths | Percent of total attributable DALYs | Attributable deaths     | Attributable DALYs     |
|----------|------|--------|----------|--------------------------------|--------------------------|---------------------------------------------|--------------------------------------|-------------------------------------|-------------------------|------------------------|
| Samoa    | 2005 | Female | 80 to 84 | 22%<br>(9.8-40%)               | 78%<br>(60-90%)          | 0.52<br>(0.18-1.1)                          | 0.13%<br>(-0.9-1.5%)                 | 0.19%<br>(-1-1.9%)                  | 0.11<br>(-0.6-1.1)      | 1<br>(-7.1-12)         |
| Samoa    | 2005 | Female | 85 to 89 | 23%<br>(11-41%)                | 77%<br>(59-89%)          | 0.54<br>(0.21-1.1)                          | 0.068%<br>(-0.91-1.4%)               | 0.083%<br>(-1.1-1.7%)               | 0.035<br>(-0.46-0.7)    | 0.26<br>(-3.5-5.3)     |
| Samoa    | 2005 | Female | 90 to 94 | 27%<br>(12-46%)                | 73%<br>(54-88%)          | 0.62<br>(0.23-1.3)                          | 0.14%<br>(-0.93-1.7%)                | 0.15%<br>(-1.1-2%)                  | 0.028<br>(-0.21-0.38)   | 0.16<br>(-1-2)         |
| Samoa    | 2005 | Female | 95 plus  | 31%<br>(12-54%)                | 69%<br>(46-88%)          | 0.74<br>(0.24-1.6)                          | 0.094%<br>(-1.4-2.3%)                | 0.032%<br>(-1.7-2.6%)               | 0.0018<br>(-0.095-0.15) | 0.021<br>(-0.31-0.51)  |
| Samoa    | 2005 | Male   | All Ages | 36%<br>(29-45%)                | 64%<br>(55-71%)          | 1.1<br>(0.91-1.3)                           | 3.4%<br>(2.3-4.7%)                   | 3.3%<br>(1.9-5.1%)                  | 19<br>(11-29)           | 910<br>(610-1300)      |
| Samoa    | 2005 | Male   | 15 to 19 | 34%<br>(19-51%)                | 66%<br>(49-81%)          | 0.7<br>(0.33-1.2)                           | 2.6%<br>(1.3-4.5%)                   | 3.6%<br>(1.5-6.8%)                  | 0.44<br>(0.18-0.87)     | 38<br>(19-70)          |
| Samoa    | 2005 | Male   | 20 to 24 | 52%<br>(33-70%)                | 48%<br>(30-67%)          | 1.9<br>(1.1-2.9)                            | 7.5%<br>(4.5-11%)                    | 9.9%<br>(5.3-16%)                   | 1.5<br>(0.77-2.4)       | 110<br>(64-180)        |
| Samoa    | 2005 | Male   | 25 to 29 | 60%<br>(40-76%)                | 40%<br>(24-60%)          | 2.7<br>(1.7-3.9)                            | 9.2%<br>(5.9-13%)                    | 12%<br>(7.6-19%)                    | 1.8<br>(1-2.8)          | 130<br>(78-190)        |
| Samoa    | 2005 | Male   | 30 to 34 | 61%<br>(40-78%)                | 39%<br>(22-60%)          | 2.9<br>(1.8-4.2)                            | 8.3%<br>(5.3-12%)                    | 11%<br>(6.5-16%)                    | 1.8<br>(1-2.8)          | 120<br>(72-180)        |
| Samoa    | 2005 | Male   | 35 to 39 | 59%<br>(41-76%)                | 41%<br>(24-59%)          | 2.5<br>(1.5-3.8)                            | 7.2%<br>(4.2-11%)                    | 9.3%<br>(5.1-14%)                   | 1.9<br>(0.95-3.1)       | 110<br>(62-180)        |
| Samoa    | 2005 | Male   | 40 to 44 | 57%<br>(39-74%)                | 43%<br>(26-61%)          | 2.2<br>(1.2-3.4)                            | 5.8%<br>(3.1-9.1%)                   | 7.3%<br>(3.5-12%)                   | 1.8<br>(0.81-3)         | 95<br>(48-160)         |
| Samoa    | 2005 | Male   | 45 to 49 | 52%<br>(32-71%)                | 48%<br>(29-68%)          | 1.9<br>(0.96-3.2)                           | 4.9%<br>(2.3-8.5%)                   | 5.9%<br>(2.5-11%)                   | 1.7<br>(0.74-3.2)       | 84<br>(39-150)         |
| Samoa    | 2005 | Male   | 50 to 54 | 49%<br>(30-69%)                | 51%<br>(31-70%)          | 1.5<br>(0.8-2.6)                            | 4.1%<br>(1.5-7.6%)                   | 4.7%<br>(1.6-9.3%)                  | 1.6<br>(0.54-3.2)       | 69<br>(26-130)         |
| Samoa    | 2005 | Male   | 55 to 59 | 47%<br>(30-66%)                | 53%<br>(34-70%)          | 1.3<br>(0.63-2.2)                           | 2.9%<br>(0.92-5.9%)                  | 3.3%<br>(0.9-7.1%)                  | 1.3<br>(0.35-2.8)       | 46<br>(15-99)          |
| Samoa    | 2005 | Male   | 60 to 64 | 45%<br>(26-65%)                | 55%<br>(35-74%)          | 1.1<br>(0.49-1.9)                           | 2.3%<br>(0.52-5.3%)                  | 2.6%<br>(0.5-6.2%)                  | 1.2<br>(0.23-2.8)       | 35<br>(7.9-81)         |
| Samoa    | 2005 | Male   | 65 to 69 | 43%<br>(25-62%)                | 57%<br>(38-75%)          | 0.95<br>(0.48-1.7)                          | 1.9%<br>(0.4-4.2%)                   | 2.2%<br>(0.41-4.8%)                 | 1.2<br>(0.22-2.6)       | 29<br>(6-63)           |
| Samoa    | 2005 | Male   | 70 to 74 | 40%<br>(23-58%)                | 60%<br>(42-77%)          | 0.83<br>(0.4-1.5)                           | 1.5%<br>(0.14-3.8%)                  | 1.7%<br>(0.13-4.3%)                 | 0.95<br>(0.076-2.4)     | 19<br>(2-47)           |
| Samoa    | 2005 | Male   | 75 to 79 | 36%<br>(21-55%)                | 64%<br>(45-79%)          | 0.7<br>(0.33-1.3)                           | 1.2%<br>(0.053-3.1%)                 | 1.3%<br>(-0.0023-3.5%)              | 0.7<br>(-0.0014-1.9)    | 11<br>(0.54-29)        |
| Samoa    | 2005 | Male   | 80 to 84 | 34%<br>(19-52%)                | 66%<br>(48-81%)          | 0.62<br>(0.3-1.1)                           | 0.97%<br>(0.14-2.5%)                 | 1%<br>(0.096-2.7%)                  | 0.45<br>(0.041-1.2)     | 5.2<br>(0.74-13)       |
| Samoa    | 2005 | Male   | 85 to 89 | 32%<br>(18-49%)                | 68%<br>(51-82%)          | 0.59<br>(0.29-1.1)                          | 0.74%<br>(-0.02-1.9%)                | 0.78%<br>(-0.085-2.1%)              | 0.22<br>(-0.024-0.62)   | 1.8<br>(-0.049-4.9)    |
| Samoa    | 2005 | Male   | 90 to 94 | 34%<br>(21-51%)                | 66%<br>(49-79%)          | 0.61<br>(0.28-1.2)                          | 0.55%<br>(-0.17-1.7%)                | 0.55%<br>(-0.29-1.8%)               | 0.056<br>(-0.03-0.18)   | 0.34<br>(-0.1-1)       |
| Samoa    | 2005 | Male   | 95 plus  | 37%<br>(19-58%)                | 63%<br>(42-81%)          | 0.66<br>(0.26-1.4)                          | 0.4%<br>(-0.55-1.9%)                 | 0.31%<br>(-0.78-2.1%)               | 0.008<br>(-0.02-0.052)  | 0.041<br>(-0.055-0.19) |

| Location | Year | Sex    | Age      | Prevalence of current drinkers | Prevalence of abstainers | Population average of standard drinks daily | Percent of total attributable deaths | Percent of total attributable DALYs | Attributable deaths    | Attributable DALYs    |
|----------|------|--------|----------|--------------------------------|--------------------------|---------------------------------------------|--------------------------------------|-------------------------------------|------------------------|-----------------------|
| Samoa    | 2010 | Female | All Ages | 17%<br>(12-23%)                | 83%<br>(77-88%)          | 0.48<br>(0.35-0.64)                         | 0.92%<br>(0.36-1.7%)                 | 0.81%<br>(-0.2-2.1%)                | 4.2<br>(-1-11)         | 200<br>(82-380)       |
| Samoa    | 2010 | Female | 15 to 19 | 18%<br>(8.2-33%)               | 82%<br>(67-92%)          | 0.58<br>(0.24-1.1)                          | 1.3%<br>(0.65-2.4%)                  | 2.4%<br>(0.9-5.2%)                  | 0.13<br>(0.047-0.27)   | 14<br>(6.8-26)        |
| Samoa    | 2010 | Female | 20 to 24 | 22%<br>(8.9-39%)               | 78%<br>(61-91%)          | 0.91<br>(0.37-1.7)                          | 2.3%<br>(1.2-3.8%)                   | 3.5%<br>(1.4-6.9%)                  | 0.19<br>(0.075-0.38)   | 22<br>(12-37)         |
| Samoa    | 2010 | Female | 25 to 29 | 23%<br>(9.7-41%)               | 77%<br>(59-90%)          | 0.92<br>(0.39-1.7)                          | 2.4%<br>(1.4-3.9%)                   | 3.5%<br>(1.6-6.4%)                  | 0.24<br>(0.11-0.45)    | 23<br>(13-38)         |
| Samoa    | 2010 | Female | 30 to 34 | 24%<br>(9.2-43%)               | 76%<br>(57-91%)          | 0.96<br>(0.36-1.8)                          | 2.2%<br>(1.2-3.6%)                   | 3.2%<br>(1.5-5.7%)                  | 0.29<br>(0.13-0.53)    | 24<br>(13-40)         |
| Samoa    | 2010 | Female | 35 to 39 | 25%<br>(9.6-43%)               | 75%<br>(57-90%)          | 1<br>(0.4-1.8)                              | 2.2%<br>(1.1-3.7%)                   | 3.3%<br>(1.5-5.6%)                  | 0.4<br>(0.17-0.74)     | 27<br>(14-46)         |
| Samoa    | 2010 | Female | 40 to 44 | 24%<br>(12-41%)                | 76%<br>(59-88%)          | 0.91<br>(0.4-1.6)                           | 2%<br>(0.87-3.7%)                    | 3%<br>(1.2-5.7%)                    | 0.5<br>(0.19-0.96)     | 27<br>(12-51)         |
| Samoa    | 2010 | Female | 45 to 49 | 24%<br>(9.9-41%)               | 76%<br>(59-90%)          | 0.78<br>(0.32-1.5)                          | 1.4%<br>(0.38-3.2%)                  | 2.2%<br>(0.6-4.5%)                  | 0.46<br>(0.13-1)       | 21<br>(5.6-47)        |
| Samoa    | 2010 | Female | 50 to 54 | 23%<br>(10-42%)                | 77%<br>(58-90%)          | 0.69<br>(0.26-1.4)                          | 1%<br>(-0.21-3%)                     | 1.6%<br>(0.048-4.1%)                | 0.42<br>(0.014-1.1)    | 16<br>(-3.4-44)       |
| Samoa    | 2010 | Female | 55 to 59 | 23%<br>(10-41%)                | 77%<br>(59-90%)          | 0.63<br>(0.24-1.3)                          | 0.78%<br>(-0.46-2.5%)                | 1.2%<br>(-0.28-3.5%)                | 0.37<br>(-0.081-1.1)   | 11<br>(-6.8-36)       |
| Samoa    | 2010 | Female | 60 to 64 | 23%<br>(10-41%)                | 77%<br>(59-90%)          | 0.6<br>(0.22-1.3)                           | 0.42%<br>(-0.86-2.3%)                | 0.71%<br>(-0.89-3.1%)               | 0.22<br>(-0.26-0.94)   | 5.1<br>(-11-28)       |
| Samoa    | 2010 | Female | 65 to 69 | 24%<br>(11-42%)                | 76%<br>(58-89%)          | 0.61<br>(0.23-1.2)                          | 0.36%<br>(-1-2.1%)                   | 0.62%<br>(-1-2.8%)                  | 0.26<br>(-0.43-1.2)    | 4.7<br>(-13-28)       |
| Samoa    | 2010 | Female | 70 to 74 | 24%<br>(10-41%)                | 76%<br>(59-90%)          | 0.58<br>(0.21-1.2)                          | 0.2%<br>(-1-1.9%)                    | 0.34%<br>(-1.1-2.5%)                | 0.17<br>(-0.58-1.3)    | 2.5<br>(-13-24)       |
| Samoa    | 2010 | Female | 75 to 79 | 23%<br>(9.5-41%)               | 77%<br>(59-90%)          | 0.55<br>(0.17-1.2)                          | 0.27%<br>(-0.94-2%)                  | 0.4%<br>(-1.1-2.5%)                 | 0.24<br>(-0.67-1.5)    | 3<br>(-11-22)         |
| Samoa    | 2010 | Female | 80 to 84 | 22%<br>(8.8-42%)               | 78%<br>(58-91%)          | 0.53<br>(0.17-1.1)                          | 0.17%<br>(-0.89-1.6%)                | 0.24%<br>(-1-1.9%)                  | 0.17<br>(-0.74-1.4)    | 1.6<br>(-8.6-15)      |
| Samoa    | 2010 | Female | 85 to 89 | 23%<br>(11-42%)                | 77%<br>(58-89%)          | 0.56<br>(0.21-1.2)                          | 0.1%<br>(-0.9-1.5%)                  | 0.12%<br>(-1-1.8%)                  | 0.069<br>(-0.59-1)     | 0.53<br>(-4.6-7.7)    |
| Samoa    | 2010 | Female | 90 to 94 | 27%<br>(12-47%)                | 73%<br>(53-88%)          | 0.64<br>(0.23-1.3)                          | 0.16%<br>(-0.93-1.8%)                | 0.17%<br>(-1.1-2%)                  | 0.044<br>(-0.28-0.51)  | 0.25<br>(-1.4-2.7)    |
| Samoa    | 2010 | Female | 95 plus  | 31%<br>(13-55%)                | 69%<br>(45-87%)          | 0.75<br>(0.25-1.6)                          | 0.11%<br>(-1.4-2.3%)                 | 0.044%<br>(-1.8-2.5%)               | 0.0033<br>(-0.13-0.19) | 0.033<br>(-0.42-0.68) |
| Samoa    | 2010 | Male   | All Ages | 37%<br>(29-46%)                | 63%<br>(54-71%)          | 1.1<br>(0.89-1.4)                           | 3.5%<br>(2.3-4.8%)                   | 3.3%<br>(1.9-5.2%)                  | 19<br>(11-31)          | 930<br>(620-1300)     |
| Samoa    | 2010 | Male   | 15 to 19 | 34%<br>(19-52%)                | 66%<br>(48-81%)          | 0.71<br>(0.35-1.2)                          | 2.5%<br>(1.3-4.5%)                   | 3.6%<br>(1.6-6.9%)                  | 0.46<br>(0.18-0.87)    | 40<br>(20-70)         |
| Samoa    | 2010 | Male   | 20 to 24 | 51%<br>(33-69%)                | 49%<br>(31-67%)          | 1.9<br>(1.1-3)                              | 7.4%<br>(4.5-11%)                    | 10%<br>(5.5-16%)                    | 1.4<br>(0.71-2.4)      | 110<br>(60-180)       |
| Samoa    | 2010 | Male   | 25 to 29 | 59%<br>(39-76%)                | 41%<br>(24-61%)          | 2.7<br>(1.6-4)                              | 9.2%<br>(5.6-13%)                    | 12%<br>(7.2-18%)                    | 1.7<br>(0.94-2.7)      | 120<br>(72-180)       |

| Location | Year | Sex    | Age      | Prevalence of current drinkers | Prevalence of abstainers | Population average of standard drinks daily | Percent of total attributable deaths | Percent of total attributable DALYs | Attributable deaths     | Attributable DALYs     |
|----------|------|--------|----------|--------------------------------|--------------------------|---------------------------------------------|--------------------------------------|-------------------------------------|-------------------------|------------------------|
| Samoa    | 2010 | Male   | 30 to 34 | 60%<br>(39-77%)                | 40%<br>(23-61%)          | 2.9<br>(1.7-4.3)                            | 8.3%<br>(5.2-12%)                    | 11%<br>(6.4-17%)                    | 1.7<br>(0.91-2.6)       | 110<br>(67-170)        |
| Samoa    | 2010 | Male   | 35 to 39 | 59%<br>(40-76%)                | 41%<br>(24-60%)          | 2.5<br>(1.5-3.9)                            | 7.1%<br>(4.1-11%)                    | 9.4%<br>(5-15%)                     | 1.8<br>(0.92-2.9)       | 110<br>(60-170)        |
| Samoa    | 2010 | Male   | 40 to 44 | 56%<br>(39-74%)                | 44%<br>(26-61%)          | 2.2<br>(1.2-3.5)                            | 5.8%<br>(2.9-9.2%)                   | 7.3%<br>(3.4-12%)                   | 1.9<br>(0.85-3.3)       | 100<br>(50-170)        |
| Samoa    | 2010 | Male   | 45 to 49 | 53%<br>(32-71%)                | 47%<br>(29-68%)          | 1.9<br>(1-3.3)                              | 4.9%<br>(2.4-8.4%)                   | 6%<br>(2.6-11%)                     | 1.9<br>(0.75-3.5)       | 91<br>(41-160)         |
| Samoa    | 2010 | Male   | 50 to 54 | 49%<br>(31-68%)                | 51%<br>(32-69%)          | 1.6<br>(0.8-2.7)                            | 4.1%<br>(1.6-7.8%)                   | 4.9%<br>(1.7-9.5%)                  | 1.9<br>(0.65-3.9)       | 82<br>(30-160)         |
| Samoa    | 2010 | Male   | 55 to 59 | 47%<br>(30-67%)                | 53%<br>(33-70%)          | 1.3<br>(0.65-2.2)                           | 3%<br>(0.97-6.2%)                    | 3.4%<br>(0.97-7.3%)                 | 1.5<br>(0.43-3.4)       | 55<br>(17-120)         |
| Samoa    | 2010 | Male   | 60 to 64 | 45%<br>(26-64%)                | 55%<br>(36-74%)          | 1.1<br>(0.51-2)                             | 2.3%<br>(0.55-5.4%)                  | 2.6%<br>(0.51-6.4%)                 | 1.2<br>(0.23-3)         | 36<br>(8.7-86)         |
| Samoa    | 2010 | Male   | 65 to 69 | 43%<br>(25-61%)                | 57%<br>(39-75%)          | 0.96<br>(0.48-1.7)                          | 1.9%<br>(0.47-4.4%)                  | 2.2%<br>(0.49-5.1%)                 | 1.2<br>(0.27-2.8)       | 29<br>(7.3-67)         |
| Samoa    | 2010 | Male   | 70 to 74 | 40%<br>(24-58%)                | 60%<br>(42-76%)          | 0.83<br>(0.41-1.5)                          | 1.5%<br>(0.18-3.8%)                  | 1.7%<br>(0.13-4.3%)                 | 0.99<br>(0.079-2.5)     | 20<br>(2.5-49)         |
| Samoa    | 2010 | Male   | 75 to 79 | 37%<br>(22-55%)                | 63%<br>(45-78%)          | 0.71<br>(0.34-1.3)                          | 1.2%<br>(0.097-3.1%)                 | 1.3%<br>(0.03-3.5%)                 | 0.7<br>(0.017-1.9)      | 11<br>(0.94-30)        |
| Samoa    | 2010 | Male   | 80 to 84 | 34%<br>(19-53%)                | 66%<br>(47-81%)          | 0.63<br>(0.31-1.1)                          | 0.99%<br>(0.16-2.4%)                 | 1.1%<br>(0.13-2.7%)                 | 0.5<br>(0.056-1.3)      | 5.7<br>(0.9-14)        |
| Samoa    | 2010 | Male   | 85 to 89 | 32%<br>(19-49%)                | 68%<br>(51-81%)          | 0.6<br>(0.29-1.1)                           | 0.75%<br>(-0.014-2%)                 | 0.8%<br>(-0.074-2.3%)               | 0.27<br>(-0.024-0.73)   | 2.2<br>(-0.042-5.9)    |
| Samoa    | 2010 | Male   | 90 to 94 | 34%<br>(20-50%)                | 66%<br>(50-80%)          | 0.61<br>(0.28-1.2)                          | 0.56%<br>(-0.15-1.8%)                | 0.56%<br>(-0.26-1.9%)               | 0.083<br>(-0.039-0.28)  | 0.5<br>(-0.13-1.6)     |
| Samoa    | 2010 | Male   | 95 plus  | 37%<br>(20-58%)                | 63%<br>(42-80%)          | 0.67<br>(0.26-1.3)                          | 0.43%<br>(-0.49-2.1%)                | 0.34%<br>(-0.72-2.2%)               | 0.011<br>(-0.024-0.074) | 0.057<br>(-0.065-0.27) |
| Samoa    | 2016 | Female | All Ages | 18%<br>(13-24%)                | 82%<br>(76-87%)          | 0.49<br>(0.31-0.71)                         | 0.91%<br>(0.2-2%)                    | 0.79%<br>(-0.37-2.5%)               | 4.6<br>(-2.16)          | 210<br>(44-450)        |
| Samoa    | 2016 | Female | 15 to 19 | 18%<br>(7.7-33%)               | 82%<br>(67-92%)          | 0.58<br>(0.22-1.2)                          | 1.3%<br>(0.62-2.4%)                  | 2.4%<br>(0.76-5.3%)                 | 0.13<br>(0.041-0.3)     | 14<br>(6.9-27)         |
| Samoa    | 2016 | Female | 20 to 24 | 22%<br>(8.9-39%)               | 78%<br>(61-91%)          | 0.91<br>(0.35-1.7)                          | 2.2%<br>(1.3-3.7%)                   | 3.4%<br>(1.2-7%)                    | 0.21<br>(0.074-0.43)    | 24<br>(13-42)          |
| Samoa    | 2016 | Female | 25 to 29 | 23%<br>(9.6-41%)               | 77%<br>(59-90%)          | 0.93<br>(0.36-1.9)                          | 2.3%<br>(1.3-3.9%)                   | 3.4%<br>(1.3-6.9%)                  | 0.22<br>(0.081-0.45)    | 22<br>(12-39)          |
| Samoa    | 2016 | Female | 30 to 34 | 24%<br>(9.1-44%)               | 76%<br>(56-91%)          | 0.96<br>(0.35-1.9)                          | 2.2%<br>(1.1-3.8%)                   | 3.2%<br>(1.2-6.3%)                  | 0.26<br>(0.097-0.51)    | 21<br>(11-38)          |
| Samoa    | 2016 | Female | 35 to 39 | 25%<br>(9.7-43%)               | 75%<br>(57-90%)          | 1<br>(0.38-1.9)                             | 2.2%<br>(1.1-4%)                     | 3.3%<br>(1.4-6.1%)                  | 0.38<br>(0.15-0.72)     | 25<br>(12-47)          |
| Samoa    | 2016 | Female | 40 to 44 | 24%<br>(11-41%)                | 76%<br>(59-89%)          | 0.93<br>(0.38-1.8)                          | 2%<br>(0.77-3.9%)                    | 3%<br>(1.1-5.9%)                    | 0.48<br>(0.16-0.99)     | 27<br>(10-53)          |
| Samoa    | 2016 | Female | 45 to 49 | 24%<br>(10-42%)                | 76%<br>(58-90%)          | 0.79<br>(0.3-1.6)                           | 1.5%<br>(0.28-3.4%)                  | 2.2%<br>(0.54-5%)                   | 0.49<br>(0.11-1.2)      | 23<br>(4.2-53)         |

| Location | Year | Sex    | Age      | Prevalence of current drinkers | Prevalence of abstainers | Population average of standard drinks daily | Percent of total attributable deaths | Percent of total attributable DALYs | Attributable deaths    | Attributable DALYs |
|----------|------|--------|----------|--------------------------------|--------------------------|---------------------------------------------|--------------------------------------|-------------------------------------|------------------------|--------------------|
| Samoa    | 2016 | Female | 50 to 54 | 24%<br>(11-42%)                | 76%<br>(58-89%)          | 0.7<br>(0.27-1.4)                           | 1.1%<br>(-0.25-3.1%)                 | 1.6%<br>(-0.064-4.3%)               | 0.48<br>(-0.017-1.4)   | 18<br>(-4.2-59)    |
| Samoa    | 2016 | Female | 55 to 59 | 23%<br>(11-41%)                | 77%<br>(59-89%)          | 0.64<br>(0.23-1.4)                          | 0.79%<br>(-0.53-2.9%)                | 1.2%<br>(-0.43-4%)                  | 0.45<br>(-0.16-1.5)    | 14<br>(-9.4-52)    |
| Samoa    | 2016 | Female | 60 to 64 | 24%<br>(11-43%)                | 76%<br>(57-89%)          | 0.62<br>(0.21-1.3)                          | 0.43%<br>(-0.97-2.5%)                | 0.72%<br>(-0.98-3.4%)               | 0.3<br>(-0.41-1.4)     | 6.9<br>(-16-41)    |
| Samoa    | 2016 | Female | 65 to 69 | 25%<br>(11-43%)                | 75%<br>(57-89%)          | 0.63<br>(0.22-1.3)                          | 0.4%<br>(-1.1-2.5%)                  | 0.66%<br>(-1.1-3.3%)                | 0.28<br>(-0.46-1.4)    | 5.3<br>(-14-33)    |
| Samoa    | 2016 | Female | 70 to 74 | 24%<br>(11-41%)                | 76%<br>(59-89%)          | 0.6<br>(0.21-1.3)                           | 0.23%<br>(-1.1-2.2%)                 | 0.37%<br>(-1.2-2.8%)                | 0.21<br>(-0.73-1.6)    | 3.2<br>(-16-31)    |
| Samoa    | 2016 | Female | 75 to 79 | 23%<br>(9.8-41%)               | 77%<br>(59-90%)          | 0.56<br>(0.17-1.3)                          | 0.3%<br>(-1.2-2.2%)                  | 0.42%<br>(-1.1-2.7%)                | 0.29<br>(-0.73-1.8)    | 3.7<br>(-12-27)    |
| Samoa    | 2016 | Female | 80 to 84 | 22%<br>(8.9-41%)               | 78%<br>(59-91%)          | 0.54<br>(0.16-1.2)                          | 0.2%<br>(-0.98-1.9%)                 | 0.26%<br>(-1.1-2.2%)                | 0.21<br>(-0.96-1.9)    | 2.1<br>(-11-21)    |
| Samoa    | 2016 | Female | 85 to 89 | 24%<br>(10-42%)                | 76%<br>(58-90%)          | 0.56<br>(0.19-1.2)                          | 0.14%<br>(-0.97-1.7%)                | 0.15%<br>(-1.1-2.1%)                | 0.11<br>(-0.8-1.4)     | 0.84<br>(-6.2-11)  |
| Samoa    | 2016 | Female | 90 to 94 | 27%<br>(12-46%)                | 73%<br>(54-88%)          | 0.65<br>(0.22-1.4)                          | 0.18%<br>(-0.92-2%)                  | 0.19%<br>(-1.1-2.3%)                | 0.072<br>(-0.41-0.86)  | 0.42<br>(-2.1-4.6) |
| Samoa    | 2016 | Female | 95 plus  | 32%<br>(12-54%)                | 68%<br>(46-88%)          | 0.76<br>(0.24-1.7)                          | 0.12%<br>(-1.5-2.4%)                 | 0.054%<br>(-1.8-2.7%)               | 0.0058<br>(-0.19-0.29) | 0.051<br>(-0.62-1) |
| Samoa    | 2016 | Male   | All Ages | 37%<br>(29-45%)                | 63%<br>(55-71%)          | 1.1<br>(0.77-1.5)                           | 3.5%<br>(2.1-5.5%)                   | 3.3%<br>(1.5-5.8%)                  | 21<br>(9.3-38)         | 980<br>(550-1500)  |
| Samoa    | 2016 | Male   | 15 to 19 | 34%<br>(19-51%)                | 66%<br>(49-81%)          | 0.72<br>(0.33-1.3)                          | 2.5%<br>(1.3-4.4%)                   | 3.7%<br>(1.6-7.2%)                  | 0.45<br>(0.17-0.88)    | 41<br>(19-73)      |
| Samoa    | 2016 | Male   | 20 to 24 | 52%<br>(34-69%)                | 48%<br>(31-66%)          | 2<br>(1-3.2)                                | 7.5%<br>(4.2-12%)                    | 10%<br>(5.1-17%)                    | 1.6<br>(0.78-2.9)      | 130<br>(66-210)    |
| Samoa    | 2016 | Male   | 25 to 29 | 59%<br>(39-75%)                | 41%<br>(25-61%)          | 2.7<br>(1.5-4.5)                            | 9.1%<br>(5.3-14%)                    | 12%<br>(6.7-20%)                    | 1.7<br>(0.83-2.7)      | 120<br>(67-190)    |
| Samoa    | 2016 | Male   | 30 to 34 | 60%<br>(39-78%)                | 40%<br>(22-61%)          | 2.9<br>(1.5-4.8)                            | 8.3%<br>(4.9-13%)                    | 11%<br>(5.9-17%)                    | 1.5<br>(0.76-2.6)      | 100<br>(57-160)    |
| Samoa    | 2016 | Male   | 35 to 39 | 59%<br>(40-77%)                | 41%<br>(23-60%)          | 2.6<br>(1.3-4.3)                            | 7.3%<br>(4-12%)                      | 9.5%<br>(4.7-16%)                   | 1.6<br>(0.78-2.7)      | 98<br>(51-160)     |
| Samoa    | 2016 | Male   | 40 to 44 | 56%<br>(38-74%)                | 44%<br>(26-62%)          | 2.2<br>(1.1-3.7)                            | 5.9%<br>(2.7-9.8%)                   | 7.4%<br>(3-13%)                     | 1.8<br>(0.72-3.3)      | 98<br>(42-170)     |
| Samoa    | 2016 | Male   | 45 to 49 | 52%<br>(30-71%)                | 48%<br>(29-70%)          | 1.9<br>(0.93-3.4)                           | 5%<br>(2.2-8.8%)                     | 6%<br>(2.3-11%)                     | 2.1<br>(0.76-4)        | 100<br>(44-190)    |
| Samoa    | 2016 | Male   | 50 to 54 | 49%<br>(30-69%)                | 51%<br>(31-70%)          | 1.6<br>(0.74-2.8)                           | 4.2%<br>(1.5-7.9%)                   | 5%<br>(1.5-9.4%)                    | 2.2<br>(0.65-4.4)      | 93<br>(30-180)     |
| Samoa    | 2016 | Male   | 55 to 59 | 47%<br>(29-67%)                | 53%<br>(33-71%)          | 1.3<br>(0.6-2.4)                            | 3.1%<br>(0.9-6.7%)                   | 3.5%<br>(0.89-7.8%)                 | 1.9<br>(0.5-4.5)       | 70<br>(21-160)     |
| Samoa    | 2016 | Male   | 60 to 64 | 45%<br>(26-65%)                | 55%<br>(35-74%)          | 1.1<br>(0.47-2.1)                           | 2.4%<br>(0.47-5.7%)                  | 2.7%<br>(0.41-6.7%)                 | 1.6<br>(0.23-4.2)      | 49<br>(9.6-120)    |
| Samoa    | 2016 | Male   | 65 to 69 | 43%<br>(25-61%)                | 57%<br>(39-75%)          | 0.96<br>(0.43-1.7)                          | 2%<br>(0.36-4.7%)                    | 2.3%<br>(0.38-5.5%)                 | 1.3<br>(0.2-3.2)       | 32<br>(5.6-76)     |



| Location        | Year | Sex    | Age      | Prevalence of current drinkers | Prevalence of abstainers | Population average of standard drinks daily | Percent of total attributable deaths | Percent of total attributable DALYs | Attributable deaths     | Attributable DALYs     |
|-----------------|------|--------|----------|--------------------------------|--------------------------|---------------------------------------------|--------------------------------------|-------------------------------------|-------------------------|------------------------|
| Samoa           | 2016 | Male   | 70 to 74 | 40%<br>(24-58%)                | 60%<br>(42-76%)          | 0.85<br>(0.39-1.6)                          | 1.5%<br>(0.18-4.2%)                  | 1.7%<br>(0.15-4.7%)                 | 1<br>(0.093-2.8)        | 20<br>(2.3-55)         |
| Samoa           | 2016 | Male   | 75 to 79 | 36%<br>(21-55%)                | 64%<br>(45-79%)          | 0.72<br>(0.3-1.4)                           | 1.2%<br>(0.068-3.4%)                 | 1.3%<br>(0.013-3.8%)                | 0.83<br>(0.0066-2.4)    | 13<br>(0.69-37)        |
| Samoa           | 2016 | Male   | 80 to 84 | 33%<br>(18-51%)                | 67%<br>(49-82%)          | 0.63<br>(0.29-1.2)                          | 1%<br>(0.12-2.7%)                    | 1.1%<br>(0.084-3%)                  | 0.57<br>(0.04-1.6)      | 6.6<br>(0.69-18)       |
| Samoa           | 2016 | Male   | 85 to 89 | 32%<br>(19-48%)                | 68%<br>(52-81%)          | 0.6<br>(0.27-1.1)                           | 0.8%<br>(-0.051-2.1%)                | 0.85%<br>(-0.14-2.4%)               | 0.31<br>(-0.054-0.86)   | 2.6<br>(-0.16-6.8)     |
| Samoa           | 2016 | Male   | 90 to 94 | 34%<br>(20-51%)                | 66%<br>(49-80%)          | 0.63<br>(0.26-1.2)                          | 0.62%<br>(-0.13-1.9%)                | 0.62%<br>(-0.23-2.1%)               | 0.11<br>(-0.041-0.38)   | 0.66<br>(-0.13-2.1)    |
| Samoa           | 2016 | Male   | 95 plus  | 38%<br>(19-59%)                | 62%<br>(41-81%)          | 0.69<br>(0.25-1.5)                          | 0.49%<br>(-0.48-2.2%)                | 0.4%<br>(-0.72-2.3%)                | 0.021<br>(-0.038-0.12)  | 0.099<br>(-0.097-0.44) |
| Solomon Islands | 1990 | Female | All Ages | 18%<br>(13-25%)                | 82%<br>(75-87%)          | 0.14<br>(0.11-0.18)                         | 0.064%<br>(-0.2-0.3%)                | -0.2%<br>(-0.65-0.21%)              | -2.2<br>(-7.3-2.4)      | 41<br>(-130-190)       |
| Solomon Islands | 1990 | Female | 15 to 19 | 20%<br>(8.9-36%)               | 80%<br>(64-91%)          | 0.19<br>(0.079-0.35)                        | 0.51%<br>(0.18-1%)                   | 0.5%<br>(-0.023-1.3%)               | 0.13<br>(-0.0057-0.34)  | 17<br>(5.8-33)         |
| Solomon Islands | 1990 | Female | 20 to 24 | 24%<br>(10-43%)                | 76%<br>(57-90%)          | 0.29<br>(0.13-0.53)                         | 0.88%<br>(0.43-1.5%)                 | 0.76%<br>(0.15-1.8%)                | 0.22<br>(0.045-0.52)    | 27<br>(13-49)          |
| Solomon Islands | 1990 | Female | 25 to 29 | 25%<br>(11-45%)                | 75%<br>(55-89%)          | 0.29<br>(0.13-0.51)                         | 0.86%<br>(0.47-1.4%)                 | 0.77%<br>(0.23-1.5%)                | 0.26<br>(0.075-0.53)    | 27<br>(14-45)          |
| Solomon Islands | 1990 | Female | 30 to 34 | 27%<br>(11-47%)                | 73%<br>(53-89%)          | 0.31<br>(0.12-0.55)                         | 0.64%<br>(0.22-1.1%)                 | 0.55%<br>(0.016-1.3%)               | 0.22<br>(0.0063-0.5)    | 20<br>(6.8-37)         |
| Solomon Islands | 1990 | Female | 35 to 39 | 27%<br>(11-47%)                | 73%<br>(53-89%)          | 0.32<br>(0.13-0.56)                         | 0.57%<br>(0.052-1.2%)                | 0.58%<br>(-0.11-1.4%)               | 0.28<br>(-0.05-0.7)     | 19<br>(1.8-40)         |
| Solomon Islands | 1990 | Female | 40 to 44 | 27%<br>(13-45%)                | 73%<br>(55-87%)          | 0.3<br>(0.13-0.55)                          | 0.33%<br>(-0.31-0.99%)               | 0.36%<br>(-0.49-1.2%)               | 0.2<br>(-0.28-0.71)     | 12<br>(-11-35)         |
| Solomon Islands | 1990 | Female | 45 to 49 | 26%<br>(11-45%)                | 74%<br>(55-89%)          | 0.26<br>(0.11-0.48)                         | -0.056%<br>(-0.77-0.47%)             | -0.062%<br>(-0.91-0.6%)             | -0.042<br>(-0.64-0.42)  | -2<br>(-28-17)         |
| Solomon Islands | 1990 | Female | 50 to 54 | 26%<br>(12-46%)                | 74%<br>(54-88%)          | 0.23<br>(0.087-0.45)                        | -0.3%<br>(-1.2-0.32%)                | -0.3%<br>(-1.3-0.45%)               | -0.19<br>(-0.86-0.27)   | -8.5<br>(-35-9.2)      |
| Solomon Islands | 1990 | Female | 55 to 59 | 25%<br>(12-45%)                | 75%<br>(55-88%)          | 0.2<br>(0.075-0.42)                         | -0.42%<br>(-1.5-0.19%)               | -0.41%<br>(-1.6-0.28%)              | -0.33<br>(-1.3-0.23)    | -13<br>(-46-5.8)       |
| Solomon Islands | 1990 | Female | 60 to 64 | 25%<br>(11-45%)                | 75%<br>(55-89%)          | 0.19<br>(0.069-0.41)                        | -0.63%<br>(-1.8-0.029%)              | -0.65%<br>(-1.9-0.076%)             | -0.5<br>(-1.4-0.057)    | -16<br>(-43-0.67)      |
| Solomon Islands | 1990 | Female | 65 to 69 | 26%<br>(12-43%)                | 74%<br>(57-88%)          | 0.2<br>(0.073-0.38)                         | -0.7%<br>(-1.7--0.0095%)             | -0.72%<br>(-1.9-0.039%)             | -0.68<br>(-1.7-0.034)   | -17<br>(-43--0.25)     |
| Solomon Islands | 1990 | Female | 70 to 74 | 26%<br>(12-44%)                | 74%<br>(56-88%)          | 0.19<br>(0.07-0.37)                         | -0.73%<br>(-1.6--0.058%)             | -0.76%<br>(-1.8--0.039%)            | -0.65<br>(-1.5--0.032)  | -13<br>(-30--1.1)      |
| Solomon Islands | 1990 | Female | 75 to 79 | 25%<br>(11-43%)                | 75%<br>(57-89%)          | 0.17<br>(0.055-0.39)                        | -0.62%<br>(-1.7--0.0024%)            | -0.65%<br>(-1.8-0.025%)             | -0.51<br>(-1.4-0.018)   | -7.6<br>(-20--0.029)   |
| Solomon Islands | 1990 | Female | 80 to 84 | 24%<br>(10-43%)                | 76%<br>(57-90%)          | 0.16<br>(0.053-0.35)                        | -0.6%<br>(-1.5--0.068%)              | -0.65%<br>(-1.7--0.068%)            | -0.38<br>(-0.95--0.039) | -4.1<br>(-10--0.47)    |
| Solomon Islands | 1990 | Female | 85 to 89 | 25%<br>(11-44%)                | 75%<br>(56-89%)          | 0.17<br>(0.063-0.36)                        | -0.65%<br>(-1.6--0.11%)              | -0.72%<br>(-1.8--0.12%)             | -0.17<br>(-0.43--0.031) | -1.3<br>(-3.2--0.22)   |

| Location        | Year | Sex    | Age      | Prevalence of current drinkers | Prevalence of abstainers | Population average of standard drinks daily | Percent of total attributable deaths | Percent of total attributable DALYs | Attributable deaths        | Attributable DALYs        |
|-----------------|------|--------|----------|--------------------------------|--------------------------|---------------------------------------------|--------------------------------------|-------------------------------------|----------------------------|---------------------------|
| Solomon Islands | 1990 | Female | 90 to 94 | 29%<br>(13-48%)                | 71%<br>(52-87%)          | 0.2<br>(0.068-0.41)                         | -0.56%<br>(-1.3--0.1%)               | -0.63%<br>(-1.4--0.12%)             | -0.047<br>(-0.11--0.0088)  | -0.25<br>(-0.56--0.046)   |
| Solomon Islands | 1990 | Female | 95 plus  | 34%<br>(15-55%)                | 66%<br>(45-85%)          | 0.23<br>(0.075-0.47)                        | -0.77%<br>(-1.9--0.06%)              | -0.9%<br>(-2.1--0.091%)             | -0.017<br>(-0.039--0.0017) | -0.055<br>(-0.13--0.0044) |
| Solomon Islands | 1990 | Male   | All Ages | 37%<br>(30-47%)                | 63%<br>(53-70%)          | 0.3<br>(0.25-0.37)                          | 0.87%<br>(0.39-1.4%)                 | 0.72%<br>(0.085-1.4%)               | 11<br>(1.3-21)             | 680<br>(310-1100)         |
| Solomon Islands | 1990 | Male   | 15 to 19 | 37%<br>(22-55%)                | 63%<br>(45-78%)          | 0.23<br>(0.11-0.38)                         | 1%<br>(0.44-1.9%)                    | 1%<br>(0.26-2.3%)                   | 0.43<br>(0.1-0.94)         | 42<br>(18-79)             |
| Solomon Islands | 1990 | Male   | 20 to 24 | 56%<br>(37-73%)                | 44%<br>(27-63%)          | 0.6<br>(0.36-0.89)                          | 2.8%<br>(1.4-4.5%)                   | 3%<br>(1.2-5.2%)                    | 1.5<br>(0.58-2.6)          | 120<br>(59-200)           |
| Solomon Islands | 1990 | Male   | 25 to 29 | 63%<br>(44-78%)                | 37%<br>(22-56%)          | 0.83<br>(0.5-1.2)                           | 3.4%<br>(1.8-5.4%)                   | 3.6%<br>(1.6-6.2%)                  | 1.9<br>(0.82-3.2)          | 140<br>(71-220)           |
| Solomon Islands | 1990 | Male   | 30 to 34 | 64%<br>(43-80%)                | 36%<br>(20-57%)          | 0.89<br>(0.53-1.3)                          | 3%<br>(1.5-4.9%)                     | 3.2%<br>(1.3-5.5%)                  | 1.7<br>(0.63-3)            | 110<br>(53-190)           |
| Solomon Islands | 1990 | Male   | 35 to 39 | 62%<br>(44-79%)                | 38%<br>(21-56%)          | 0.78<br>(0.45-1.2)                          | 2.2%<br>(1-3.8%)                     | 2.3%<br>(0.72-4.2%)                 | 1.2<br>(0.38-2.4)          | 76<br>(34-130)            |
| Solomon Islands | 1990 | Male   | 40 to 44 | 60%<br>(41-76%)                | 40%<br>(24-59%)          | 0.68<br>(0.37-1.1)                          | 1.6%<br>(0.44-3.1%)                  | 1.6%<br>(0.14-3.3%)                 | 1.1<br>(0.097-2.3)         | 60<br>(16-120)            |
| Solomon Islands | 1990 | Male   | 45 to 49 | 56%<br>(34-74%)                | 44%<br>(26-66%)          | 0.58<br>(0.3-0.99)                          | 1.2%<br>(0.0075-2.6%)                | 1.2%<br>(-0.29-2.8%)                | 1.1<br>(-0.27-2.5)         | 55<br>(0.34-120)          |
| Solomon Islands | 1990 | Male   | 50 to 54 | 53%<br>(34-72%)                | 47%<br>(28-66%)          | 0.48<br>(0.24-0.83)                         | 0.93%<br>(-0.19-2.1%)                | 0.88%<br>(-0.38-2.2%)               | 0.84<br>(-0.37-2.2)        | 37<br>(-7.5-88)           |
| Solomon Islands | 1990 | Male   | 55 to 59 | 51%<br>(33-70%)                | 49%<br>(30-67%)          | 0.39<br>(0.19-0.7)                          | 0.47%<br>(-0.42-1.4%)                | 0.42%<br>(-0.62-1.5%)               | 0.46<br>(-0.67-1.7)        | 19<br>(-17-57)            |
| Solomon Islands | 1990 | Male   | 60 to 64 | 48%<br>(29-68%)                | 52%<br>(32-71%)          | 0.33<br>(0.16-0.59)                         | 0.29%<br>(-0.49-1.1%)                | 0.27%<br>(-0.62-1.2%)               | 0.28<br>(-0.65-1.3)        | 9.3<br>(-16-36)           |
| Solomon Islands | 1990 | Male   | 65 to 69 | 47%<br>(28-66%)                | 53%<br>(34-72%)          | 0.3<br>(0.15-0.51)                          | 0.25%<br>(-0.46-1%)                  | 0.24%<br>(-0.56-1.1%)               | 0.28<br>(-0.63-1.3)        | 7.1<br>(-13-30)           |
| Solomon Islands | 1990 | Male   | 70 to 74 | 44%<br>(27-62%)                | 56%<br>(38-73%)          | 0.26<br>(0.13-0.47)                         | 0.12%<br>(-0.46-0.76%)               | 0.11%<br>(-0.53-0.83%)              | 0.13<br>(-0.61-0.97)       | 2.8<br>(-11-18)           |
| Solomon Islands | 1990 | Male   | 75 to 79 | 40%<br>(25-59%)                | 60%<br>(41-75%)          | 0.23<br>(0.1-0.43)                          | 0.061%<br>(-0.43-0.56%)              | 0.04%<br>(-0.5-0.59%)               | 0.04<br>(-0.5-0.61)        | 0.96<br>(-6.6-8.9)        |
| Solomon Islands | 1990 | Male   | 80 to 84 | 37%<br>(21-56%)                | 63%<br>(44-79%)          | 0.2<br>(0.099-0.35)                         | 0.055%<br>(-0.32-0.4%)               | 0.032%<br>(-0.39-0.43%)             | 0.024<br>(-0.29-0.31)      | 0.48<br>(-2.7-3.6)        |
| Solomon Islands | 1990 | Male   | 85 to 89 | 35%<br>(21-52%)                | 65%<br>(48-79%)          | 0.19<br>(0.088-0.33)                        | -0.034%<br>(-0.42-0.29%)             | -0.073%<br>(-0.52-0.3%)             | -0.028<br>(-0.2-0.12)      | -0.11<br>(-1.4-0.97)      |
| Solomon Islands | 1990 | Male   | 90 to 94 | 37%<br>(22-54%)                | 63%<br>(46-78%)          | 0.19<br>(0.089-0.36)                        | -0.04%<br>(-0.4-0.24%)               | -0.087%<br>(-0.51-0.23%)            | -0.012<br>(-0.072-0.033)   | -0.033<br>(-0.32-0.2)     |
| Solomon Islands | 1990 | Male   | 95 plus  | 41%<br>(22-62%)                | 59%<br>(38-78%)          | 0.22<br>(0.088-0.43)                        | -0.22%<br>(-0.72-0.11%)              | -0.34%<br>(-0.94-0.055%)            | -0.013<br>(-0.037-0.0022)  | -0.034<br>(-0.11-0.017)   |
| Solomon Islands | 1995 | Female | All Ages | 19%<br>(13-25%)                | 81%<br>(75-87%)          | 0.13<br>(0.096-0.17)                        | 0.015%<br>(-0.25-0.24%)              | -0.28%<br>(-0.75-0.12%)             | -3.6<br>(-9.9-1.4)         | 11<br>(-180-170)          |
| Solomon Islands | 1995 | Female | 15 to 19 | 20%<br>(9.4-36%)               | 80%<br>(64-91%)          | 0.16<br>(0.07-0.31)                         | 0.49%<br>(0.18-0.96%)                | 0.47%<br>(-0.03-1.3%)               | 0.13<br>(-0.0084-0.35)     | 18<br>(6.8-35)            |

| Location        | Year | Sex    | Age      | Prevalence of current drinkers | Prevalence of abstainers | Population average of standard drinks daily | Percent of total attributable deaths | Percent of total attributable DALYs | Attributable deaths        | Attributable DALYs        |
|-----------------|------|--------|----------|--------------------------------|--------------------------|---------------------------------------------|--------------------------------------|-------------------------------------|----------------------------|---------------------------|
| Solomon Islands | 1995 | Female | 20 to 24 | 25%<br>(10-42%)                | 75%<br>(58-90%)          | 0.26<br>(0.12-0.46)                         | 0.82%<br>(0.41-1.3%)                 | 0.66%<br>(0.11-1.5%)                | 0.24<br>(0.042-0.58)       | 33<br>(16-56)             |
| Solomon Islands | 1995 | Female | 25 to 29 | 26%<br>(11-45%)                | 74%<br>(55-89%)          | 0.26<br>(0.11-0.45)                         | 0.8%<br>(0.44-1.2%)                  | 0.67%<br>(0.19-1.3%)                | 0.26<br>(0.073-0.54)       | 29<br>(15-46)             |
| Solomon Islands | 1995 | Female | 30 to 34 | 27%<br>(11-48%)                | 73%<br>(52-89%)          | 0.27<br>(0.11-0.49)                         | 0.55%<br>(0.18-0.99%)                | 0.42%<br>(-0.054-1%)                | 0.19<br>(-0.025-0.47)      | 20<br>(6.6-37)            |
| Solomon Islands | 1995 | Female | 35 to 39 | 27%<br>(11-46%)                | 73%<br>(54-89%)          | 0.29<br>(0.12-0.5)                          | 0.44%<br>(-0.069-0.91%)              | 0.4%<br>(-0.21-1.1%)                | 0.23<br>(-0.11-0.63)       | 17<br>(-2.4-37)           |
| Solomon Islands | 1995 | Female | 40 to 44 | 27%<br>(13-44%)                | 73%<br>(56-87%)          | 0.26<br>(0.12-0.47)                         | 0.2%<br>(-0.45-0.73%)                | 0.18%<br>(-0.57-0.89%)              | 0.11<br>(-0.39-0.55)       | 7.2<br>(-18-27)           |
| Solomon Islands | 1995 | Female | 45 to 49 | 26%<br>(12-44%)                | 74%<br>(56-88%)          | 0.23<br>(0.09-0.44)                         | -0.15%<br>(-0.88-0.34%)              | -0.18%<br>(-1-0.44%)                | -0.13<br>(-0.78-0.3)       | -6<br>(-35-13)            |
| Solomon Islands | 1995 | Female | 50 to 54 | 26%<br>(12-44%)                | 74%<br>(56-88%)          | 0.2<br>(0.076-0.4)                          | -0.4%<br>(-1.3-0.16%)                | -0.42%<br>(-1.4-0.23%)              | -0.38<br>(-1.3-0.2)        | -16<br>(-54-7)            |
| Solomon Islands | 1995 | Female | 55 to 59 | 25%<br>(11-44%)                | 75%<br>(56-89%)          | 0.18<br>(0.067-0.37)                        | -0.49%<br>(-1.6-0.1%)                | -0.5%<br>(-1.7-0.18%)               | -0.41<br>(-1.4-0.14)       | -16<br>(-50-3.4)          |
| Solomon Islands | 1995 | Female | 60 to 64 | 25%<br>(11-45%)                | 75%<br>(55-89%)          | 0.17<br>(0.058-0.38)                        | -0.7%<br>(-1.9--0.046%)              | -0.72%<br>(-2-0.0047%)              | -0.73<br>(-2.1-0.0047)     | -23<br>(-62--1.4)         |
| Solomon Islands | 1995 | Female | 65 to 69 | 27%<br>(12-45%)                | 73%<br>(55-88%)          | 0.18<br>(0.061-0.34)                        | -0.78%<br>(-1.8--0.054%)             | -0.81%<br>(-2--0.024%)              | -0.79<br>(-2--0.022)       | -20<br>(-49--1.4)         |
| Solomon Islands | 1995 | Female | 70 to 74 | 27%<br>(12-45%)                | 73%<br>(55-88%)          | 0.17<br>(0.06-0.33)                         | -0.8%<br>(-1.8--0.12%)               | -0.85%<br>(-1.9--0.1%)              | -0.97<br>(-2.3--0.12)      | -19<br>(-43--2.7)         |
| Solomon Islands | 1995 | Female | 75 to 79 | 25%<br>(11-46%)                | 75%<br>(54-89%)          | 0.15<br>(0.048-0.34)                        | -0.66%<br>(-1.7--0.034%)             | -0.69%<br>(-1.8--0.02%)             | -0.6<br>(-1.6--0.017)      | -9<br>(-23--0.43)         |
| Solomon Islands | 1995 | Female | 80 to 84 | 24%<br>(11-45%)                | 76%<br>(55-89%)          | 0.14<br>(0.047-0.31)                        | -0.64%<br>(-1.6--0.088%)             | -0.7%<br>(-1.7--0.1%)               | -0.45<br>(-1.1--0.066)     | -4.8<br>(-12--0.65)       |
| Solomon Islands | 1995 | Female | 85 to 89 | 25%<br>(11-44%)                | 75%<br>(56-89%)          | 0.15<br>(0.054-0.32)                        | -0.68%<br>(-1.6--0.12%)              | -0.75%<br>(-1.8--0.13%)             | -0.22<br>(-0.52--0.039)    | -1.7<br>(-4--0.29)        |
| Solomon Islands | 1995 | Female | 90 to 94 | 29%<br>(14-49%)                | 71%<br>(51-86%)          | 0.17<br>(0.06-0.36)                         | -0.6%<br>(-1.3--0.13%)               | -0.68%<br>(-1.5--0.14%)             | -0.056<br>(-0.12--0.012)   | -0.29<br>(-0.65--0.062)   |
| Solomon Islands | 1995 | Female | 95 plus  | 34%<br>(15-56%)                | 66%<br>(44-85%)          | 0.2<br>(0.067-0.43)                         | -0.81%<br>(-1.9--0.088%)             | -0.94%<br>(-2.2--0.13%)             | -0.018<br>(-0.043--0.0026) | -0.061<br>(-0.14--0.0066) |
| Solomon Islands | 1995 | Male   | All Ages | 38%<br>(30-47%)                | 62%<br>(53-70%)          | 0.28<br>(0.22-0.34)                         | 0.81%<br>(0.34-1.3%)                 | 0.63%<br>(0.022-1.2%)               | 10<br>(0.35-20)            | 690<br>(280-1100)         |
| Solomon Islands | 1995 | Male   | 15 to 19 | 37%<br>(22-56%)                | 63%<br>(44-78%)          | 0.2<br>(0.095-0.33)                         | 0.96%<br>(0.45-1.8%)                 | 0.99%<br>(0.24-2.2%)                | 0.44<br>(0.11-0.99)        | 46<br>(21-85)             |
| Solomon Islands | 1995 | Male   | 20 to 24 | 55%<br>(37-72%)                | 45%<br>(28-63%)          | 0.52<br>(0.31-0.77)                         | 2.5%<br>(1.3-4.2%)                   | 2.6%<br>(0.94-4.8%)                 | 1.7<br>(0.59-3)            | 140<br>(66-240)           |
| Solomon Islands | 1995 | Male   | 25 to 29 | 62%<br>(43-78%)                | 38%<br>(22-57%)          | 0.73<br>(0.46-1)                            | 3%<br>(1.6-4.8%)                     | 3.2%<br>(1.4-5.5%)                  | 1.8<br>(0.79-3.3)          | 140<br>(72-230)           |
| Solomon Islands | 1995 | Male   | 30 to 34 | 63%<br>(43-79%)                | 37%<br>(21-57%)          | 0.78<br>(0.47-1.2)                          | 2.6%<br>(1.3-4.2%)                   | 2.6%<br>(0.98-4.7%)                 | 1.6<br>(0.59-3)            | 110<br>(55-190)           |
| Solomon Islands | 1995 | Male   | 35 to 39 | 62%<br>(44-78%)                | 38%<br>(22-56%)          | 0.68<br>(0.39-1.1)                          | 2%<br>(0.87-3.3%)                    | 1.9%<br>(0.47-3.6%)                 | 1.3<br>(0.32-2.5)          | 83<br>(34-140)            |

| Location        | Year | Sex    | Age      | Prevalence of current drinkers | Prevalence of abstainers | Population average of standard drinks daily | Percent of total attributable deaths | Percent of total attributable DALYs | Attributable deaths       | Attributable DALYs      |
|-----------------|------|--------|----------|--------------------------------|--------------------------|---------------------------------------------|--------------------------------------|-------------------------------------|---------------------------|-------------------------|
| Solomon Islands | 1995 | Male   | 40 to 44 | 60%<br>(42-77%)                | 40%<br>(23-58%)          | 0.59<br>(0.31-0.97)                         | 1.4%<br>(0.25-2.7%)                  | 1.3%<br>(-0.12-2.9%)                | 0.91<br>(-0.074-2)        | 54<br>(10-110)          |
| Solomon Islands | 1995 | Male   | 45 to 49 | 56%<br>(34-73%)                | 44%<br>(27-66%)          | 0.51<br>(0.26-0.88)                         | 1%<br>(-0.1-2.2%)                    | 0.95%<br>(-0.42-2.3%)               | 0.83<br>(-0.38-2.1)       | 44<br>(-4.1-96)         |
| Solomon Islands | 1995 | Male   | 50 to 54 | 53%<br>(32-72%)                | 47%<br>(28-68%)          | 0.42<br>(0.2-0.73)                          | 0.75%<br>(-0.29-1.7%)                | 0.67%<br>(-0.55-1.8%)               | 0.77<br>(-0.61-2.2)       | 37<br>(-14-86)          |
| Solomon Islands | 1995 | Male   | 55 to 59 | 51%<br>(33-70%)                | 49%<br>(30-67%)          | 0.34<br>(0.16-0.61)                         | 0.36%<br>(-0.5-1.1%)                 | 0.29%<br>(-0.7-1.2%)                | 0.33<br>(-0.81-1.4)       | 15<br>(-21-49)          |
| Solomon Islands | 1995 | Male   | 60 to 64 | 48%<br>(29-68%)                | 52%<br>(32-71%)          | 0.29<br>(0.14-0.52)                         | 0.22%<br>(-0.51-0.88%)               | 0.18%<br>(-0.67-0.95%)              | 0.23<br>(-0.84-1.2)       | 8.6<br>(-20-35)         |
| Solomon Islands | 1995 | Male   | 65 to 69 | 47%<br>(28-66%)                | 53%<br>(34-72%)          | 0.26<br>(0.13-0.47)                         | 0.16%<br>(-0.46-0.81%)               | 0.14%<br>(-0.59-0.88%)              | 0.16<br>(-0.66-1)         | 4.7<br>(-14-24)         |
| Solomon Islands | 1995 | Male   | 70 to 74 | 44%<br>(27-63%)                | 56%<br>(37-73%)          | 0.23<br>(0.11-0.42)                         | 0.055%<br>(-0.47-0.61%)              | 0.035%<br>(-0.55-0.66%)             | 0.041<br>(-0.67-0.79)     | 1.3<br>(-11-15)         |
| Solomon Islands | 1995 | Male   | 75 to 79 | 40%<br>(24-59%)                | 60%<br>(41-76%)          | 0.2<br>(0.093-0.38)                         | 0.011%<br>(-0.47-0.42%)              | -0.02%<br>(-0.57-0.43%)             | -0.02<br>(-0.57-0.44)     | 0.18<br>(-7.4-6.6)      |
| Solomon Islands | 1995 | Male   | 80 to 84 | 37%<br>(21-55%)                | 63%<br>(45-79%)          | 0.18<br>(0.085-0.32)                        | 0.032%<br>(-0.33-0.34%)              | 0.004%<br>(-0.39-0.34%)             | 0.0029<br>(-0.29-0.24)    | 0.27<br>(-2.8-2.9)      |
| Solomon Islands | 1995 | Male   | 85 to 89 | 36%<br>(21-52%)                | 64%<br>(48-79%)          | 0.17<br>(0.077-0.3)                         | -0.057%<br>(-0.45-0.23%)             | -0.1%<br>(-0.55-0.22%)              | -0.039<br>(-0.21-0.085)   | -0.18<br>(-1.5-0.74)    |
| Solomon Islands | 1995 | Male   | 90 to 94 | 37%<br>(23-55%)                | 63%<br>(45-77%)          | 0.17<br>(0.076-0.32)                        | -0.053%<br>(-0.42-0.2%)              | -0.1%<br>(-0.54-0.19%)              | -0.014<br>(-0.072-0.026)  | -0.042<br>(-0.33-0.16)  |
| Solomon Islands | 1995 | Male   | 95 plus  | 41%<br>(22-62%)                | 59%<br>(38-78%)          | 0.19<br>(0.078-0.38)                        | -0.23%<br>(-0.73-0.1%)               | -0.35%<br>(-0.96-0.043%)            | -0.013<br>(-0.036-0.0017) | -0.034<br>(-0.11-0.015) |
| Solomon Islands | 2000 | Female | All Ages | 19%<br>(13-26%)                | 81%<br>(74-87%)          | 0.14<br>(0.11-0.19)                         | 0.013%<br>(-0.29-0.25%)              | -0.31%<br>(-0.83-0.11%)             | -4.6<br>(-13-1.6)         | 11<br>(-230-200)        |
| Solomon Islands | 2000 | Female | 15 to 19 | 20%<br>(9.2-35%)               | 80%<br>(65-91%)          | 0.18<br>(0.074-0.34)                        | 0.53%<br>(0.21-1%)                   | 0.56%<br>(0.034-1.4%)               | 0.17<br>(0.009-0.42)      | 21<br>(8.1-40)          |
| Solomon Islands | 2000 | Female | 20 to 24 | 24%<br>(11-43%)                | 76%<br>(57-89%)          | 0.28<br>(0.12-0.5)                          | 0.9%<br>(0.46-1.5%)                  | 0.79%<br>(0.2-1.7%)                 | 0.34<br>(0.082-0.73)      | 42<br>(21-72)           |
| Solomon Islands | 2000 | Female | 25 to 29 | 26%<br>(11-45%)                | 74%<br>(55-89%)          | 0.29<br>(0.13-0.49)                         | 0.88%<br>(0.48-1.3%)                 | 0.79%<br>(0.27-1.5%)                | 0.41<br>(0.12-0.81)       | 43<br>(23-66)           |
| Solomon Islands | 2000 | Female | 30 to 34 | 27%<br>(11-48%)                | 73%<br>(52-89%)          | 0.3<br>(0.12-0.55)                          | 0.59%<br>(0.2-1%)                    | 0.49%<br>(-0.052-1.1%)              | 0.25<br>(-0.028-0.6)      | 25<br>(8.3-45)          |
| Solomon Islands | 2000 | Female | 35 to 39 | 28%<br>(11-47%)                | 72%<br>(53-89%)          | 0.31<br>(0.12-0.55)                         | 0.45%<br>(-0.076-0.94%)              | 0.44%<br>(-0.18-1.1%)               | 0.29<br>(-0.13-0.74)      | 21<br>(-3.7-45)         |
| Solomon Islands | 2000 | Female | 40 to 44 | 27%<br>(13-45%)                | 73%<br>(55-87%)          | 0.28<br>(0.12-0.52)                         | 0.18%<br>(-0.52-0.71%)               | 0.17%<br>(-0.66-0.87%)              | 0.13<br>(-0.49-0.64)      | 8.2<br>(-23-32)         |
| Solomon Islands | 2000 | Female | 45 to 49 | 26%<br>(11-44%)                | 74%<br>(56-89%)          | 0.24<br>(0.098-0.47)                        | -0.18%<br>(-0.95-0.37%)              | -0.2%<br>(-1.1-0.46%)               | -0.16<br>(-0.89-0.36)     | -7.6<br>(-40-16)        |
| Solomon Islands | 2000 | Female | 50 to 54 | 26%<br>(12-44%)                | 74%<br>(56-88%)          | 0.22<br>(0.079-0.44)                        | -0.43%<br>(-1.4-0.16%)               | -0.45%<br>(-1.5-0.23%)              | -0.45<br>(-1.6-0.23)      | -20<br>(-65-7.5)        |
| Solomon Islands | 2000 | Female | 55 to 59 | 25%<br>(11-44%)                | 75%<br>(56-89%)          | 0.19<br>(0.072-0.4)                         | -0.54%<br>(-1.7-0.095%)              | -0.53%<br>(-1.8-0.18%)              | -0.65<br>(-2.2-0.22)      | -25<br>(-80-4.4)        |

| Location        | Year | Sex    | Age      | Prevalence of current drinkers | Prevalence of abstainers | Population average of standard drinks daily | Percent of total attributable deaths | Percent of total attributable DALYs | Attributable deaths        | Attributable DALYs        |
|-----------------|------|--------|----------|--------------------------------|--------------------------|---------------------------------------------|--------------------------------------|-------------------------------------|----------------------------|---------------------------|
| Solomon Islands | 2000 | Female | 60 to 64 | 25%<br>(11-44%)                | 75%<br>(56-89%)          | 0.18<br>(0.062-0.39)                        | -0.74%<br>(-2--0.047%)               | -0.76%<br>(-2.1--0.018%)            | -0.81<br>(-2.3--0.017)     | -25<br>(-68--1.5)         |
| Solomon Islands | 2000 | Female | 65 to 69 | 26%<br>(12-44%)                | 74%<br>(56-88%)          | 0.19<br>(0.065-0.37)                        | -0.82%<br>(-1.9--0.077%)             | -0.85%<br>(-2.1--0.045%)            | -1.1<br>(-2.8--0.052)      | -28<br>(-68--2.7)         |
| Solomon Islands | 2000 | Female | 70 to 74 | 26%<br>(12-44%)                | 74%<br>(56-88%)          | 0.18<br>(0.063-0.35)                        | -0.86%<br>(-1.9--0.15%)              | -0.91%<br>(-2.1--0.15%)             | -1.1<br>(-2.5--0.17)       | -22<br>(-47--3.6)         |
| Solomon Islands | 2000 | Female | 75 to 79 | 25%<br>(11-44%)                | 75%<br>(56-89%)          | 0.16<br>(0.053-0.35)                        | -0.71%<br>(-1.8--0.047%)             | -0.75%<br>(-1.9--0.037%)            | -0.89<br>(-2.2--0.044)     | -13<br>(-33--0.82)        |
| Solomon Islands | 2000 | Female | 80 to 84 | 24%<br>(10-44%)                | 76%<br>(56-90%)          | 0.15<br>(0.05-0.33)                         | -0.7%<br>(-1.7--0.12%)               | -0.76%<br>(-1.8--0.14%)             | -0.63<br>(-1.5--0.11)      | -6.8<br>(-16--1.2)        |
| Solomon Islands | 2000 | Female | 85 to 89 | 25%<br>(12-44%)                | 75%<br>(56-88%)          | 0.16<br>(0.057-0.34)                        | -0.74%<br>(-1.8--0.16%)              | -0.83%<br>(-2--0.17%)               | -0.27<br>(-0.63--0.057)    | -2<br>(-4.8--0.44)        |
| Solomon Islands | 2000 | Female | 90 to 94 | 29%<br>(13-48%)                | 71%<br>(52-87%)          | 0.19<br>(0.065-0.39)                        | -0.67%<br>(-1.5--0.14%)              | -0.75%<br>(-1.7--0.16%)             | -0.074<br>(-0.16--0.016)   | -0.38<br>(-0.87--0.079)   |
| Solomon Islands | 2000 | Female | 95 plus  | 34%<br>(14-56%)                | 66%<br>(44-86%)          | 0.22<br>(0.07-0.47)                         | -0.9%<br>(-2.1--0.11%)               | -1%<br>(-2.4--0.15%)                | -0.022<br>(-0.051--0.0033) | -0.073<br>(-0.17--0.0089) |
| Solomon Islands | 2000 | Male   | All Ages | 39%<br>(30-48%)                | 61%<br>(52-70%)          | 0.31<br>(0.25-0.39)                         | 0.93%<br>(0.43-1.5%)                 | 0.72%<br>(0.087-1.4%)               | 13<br>(1.6-25)             | 880<br>(410-1400)         |
| Solomon Islands | 2000 | Male   | 15 to 19 | 37%<br>(22-55%)                | 63%<br>(45-78%)          | 0.22<br>(0.1-0.38)                          | 1.1%<br>(0.51-1.9%)                  | 1.2%<br>(0.34-2.5%)                 | 0.54<br>(0.15-1.1)         | 53<br>(24-97)             |
| Solomon Islands | 2000 | Male   | 20 to 24 | 55%<br>(36-72%)                | 45%<br>(28-64%)          | 0.58<br>(0.34-0.86)                         | 2.9%<br>(1.5-4.6%)                   | 3.1%<br>(1.3-5.5%)                  | 2.2<br>(0.89-3.9)          | 180<br>(89-290)           |
| Solomon Islands | 2000 | Male   | 25 to 29 | 62%<br>(43-78%)                | 38%<br>(22-57%)          | 0.79<br>(0.51-1.1)                          | 3.4%<br>(1.9-5.1%)                   | 3.6%<br>(1.8-5.9%)                  | 2.7<br>(1.3-4.6)           | 200<br>(110-320)          |
| Solomon Islands | 2000 | Male   | 30 to 34 | 63%<br>(42-79%)                | 37%<br>(21-58%)          | 0.83<br>(0.5-1.3)                           | 2.8%<br>(1.5-4.4%)                   | 2.9%<br>(1.2-4.9%)                  | 2<br>(0.86-3.7)            | 140<br>(72-240)           |
| Solomon Islands | 2000 | Male   | 35 to 39 | 62%<br>(44-78%)                | 38%<br>(22-56%)          | 0.73<br>(0.42-1.2)                          | 2.1%<br>(0.89-3.5%)                  | 2.1%<br>(0.56-3.9%)                 | 1.7<br>(0.41-3.1)          | 110<br>(44-180)           |
| Solomon Islands | 2000 | Male   | 40 to 44 | 59%<br>(42-76%)                | 41%<br>(24-58%)          | 0.64<br>(0.34-1.1)                          | 1.4%<br>(0.32-2.8%)                  | 1.3%<br>(-0.049-3%)                 | 1.2<br>(-0.042-2.7)        | 71<br>(16-140)            |
| Solomon Islands | 2000 | Male   | 45 to 49 | 56%<br>(35-73%)                | 44%<br>(27-65%)          | 0.55<br>(0.27-0.96)                         | 1.1%<br>(-0.058-2.3%)                | 1%<br>(-0.39-2.5%)                  | 0.94<br>(-0.37-2.4)        | 51<br>(-2.7-110)          |
| Solomon Islands | 2000 | Male   | 50 to 54 | 53%<br>(33-71%)                | 47%<br>(29-67%)          | 0.46<br>(0.22-0.81)                         | 0.8%<br>(-0.24-1.8%)                 | 0.72%<br>(-0.49-2%)                 | 0.81<br>(-0.57-2.3)        | 38<br>(-12-90)            |
| Solomon Islands | 2000 | Male   | 55 to 59 | 50%<br>(32-69%)                | 50%<br>(31-68%)          | 0.38<br>(0.18-0.68)                         | 0.38%<br>(-0.49-1.3%)                | 0.3%<br>(-0.68-1.3%)                | 0.42<br>(-0.97-1.9)        | 19<br>(-26-64)            |
| Solomon Islands | 2000 | Male   | 60 to 64 | 48%<br>(28-68%)                | 52%<br>(32-72%)          | 0.31<br>(0.15-0.58)                         | 0.21%<br>(-0.5-0.95%)                | 0.17%<br>(-0.66-0.98%)              | 0.23<br>(-0.93-1.4)        | 9<br>(-22-40)             |
| Solomon Islands | 2000 | Male   | 65 to 69 | 46%<br>(27-65%)                | 54%<br>(35-73%)          | 0.29<br>(0.14-0.5)                          | 0.15%<br>(-0.43-0.78%)               | 0.14%<br>(-0.54-0.85%)              | 0.2<br>(-0.83-1.3)         | 5.7<br>(-16-29)           |
| Solomon Islands | 2000 | Male   | 70 to 74 | 44%<br>(26-62%)                | 56%<br>(38-74%)          | 0.25<br>(0.12-0.47)                         | 0.042%<br>(-0.51-0.58%)              | 0.019%<br>(-0.61-0.65%)             | 0.023<br>(-0.74-0.77)      | 1.1<br>(-13-15)           |
| Solomon Islands | 2000 | Male   | 75 to 79 | 40%<br>(24-59%)                | 60%<br>(41-76%)          | 0.22<br>(0.1-0.41)                          | -0.01%<br>(-0.5-0.43%)               | -0.045%<br>(-0.6-0.45%)             | -0.049<br>(-0.67-0.5)      | -0.17<br>(-8.7-7.6)       |

| Location        | Year | Sex    | Age      | Prevalence of current drinkers | Prevalence of abstainers | Population average of standard drinks daily | Percent of total attributable deaths | Percent of total attributable DALYs | Attributable deaths        | Attributable DALYs      |
|-----------------|------|--------|----------|--------------------------------|--------------------------|---------------------------------------------|--------------------------------------|-------------------------------------|----------------------------|-------------------------|
| Solomon Islands | 2000 | Male   | 80 to 84 | 37%<br>(20-56%)                | 63%<br>(44-80%)          | 0.19<br>(0.093-0.35)                        | 0.021%<br>(-0.37-0.36%)              | -0.01%<br>(-0.45-0.37%)             | -0.0082<br>(-0.37-0.3)     | 0.2<br>(-3.6-3.4)       |
| Solomon Islands | 2000 | Male   | 85 to 89 | 36%<br>(20-53%)                | 64%<br>(47-80%)          | 0.18<br>(0.082-0.33)                        | -0.076%<br>(-0.49-0.23%)             | -0.13%<br>(-0.61-0.22%)             | -0.051<br>(-0.24-0.089)    | -0.26<br>(-1.7-0.77)    |
| Solomon Islands | 2000 | Male   | 90 to 94 | 37%<br>(23-55%)                | 63%<br>(45-77%)          | 0.19<br>(0.083-0.36)                        | -0.075%<br>(-0.46-0.2%)              | -0.13%<br>(-0.59-0.19%)             | -0.019<br>(-0.084-0.026)   | -0.062<br>(-0.39-0.17)  |
| Solomon Islands | 2000 | Male   | 95 plus  | 41%<br>(23-61%)                | 59%<br>(39-77%)          | 0.21<br>(0.083-0.41)                        | -0.26%<br>(-0.78-0.12%)              | -0.39%<br>(-0.99-0.046%)            | -0.015<br>(-0.038-0.0017)  | -0.039<br>(-0.12-0.018) |
| Solomon Islands | 2005 | Female | All Ages | 19%<br>(13-26%)                | 81%<br>(74-87%)          | 0.19<br>(0.14-0.24)                         | 0.024%<br>(-0.33-0.34%)              | -0.34%<br>(-0.95-0.16%)             | -6.2<br>(-18-2.9)          | 23<br>(-310-320)        |
| Solomon Islands | 2005 | Female | 15 to 19 | 20%<br>(9.1-36%)               | 80%<br>(64-91%)          | 0.23<br>(0.092-0.42)                        | 0.64%<br>(0.26-1.2%)                 | 0.75%<br>(0.13-1.8%)                | 0.25<br>(0.046-0.61)       | 28<br>(11-54)           |
| Solomon Islands | 2005 | Female | 20 to 24 | 25%<br>(10-42%)                | 75%<br>(58-90%)          | 0.35<br>(0.16-0.63)                         | 1.1%<br>(0.56-1.8%)                  | 1.1%<br>(0.35-2.3%)                 | 0.51<br>(0.15-1.1)         | 55<br>(28-98)           |
| Solomon Islands | 2005 | Female | 25 to 29 | 26%<br>(11-44%)                | 74%<br>(56-89%)          | 0.36<br>(0.16-0.63)                         | 1%<br>(0.55-1.7%)                    | 1%<br>(0.36-1.9%)                   | 0.66<br>(0.23-1.3)         | 60<br>(32-99)           |
| Solomon Islands | 2005 | Female | 30 to 34 | 27%<br>(11-47%)                | 73%<br>(53-89%)          | 0.38<br>(0.16-0.68)                         | 0.73%<br>(0.25-1.3%)                 | 0.69%<br>(0.054-1.5%)               | 0.5<br>(0.038-1.1)         | 42<br>(14-78)           |
| Solomon Islands | 2005 | Female | 35 to 39 | 28%<br>(11-47%)                | 72%<br>(53-89%)          | 0.39<br>(0.17-0.69)                         | 0.61%<br>(-0.016-1.3%)               | 0.65%<br>(-0.14-1.6%)               | 0.55<br>(-0.13-1.3)        | 35<br>(-0.8-76)         |
| Solomon Islands | 2005 | Female | 40 to 44 | 27%<br>(13-44%)                | 73%<br>(56-87%)          | 0.36<br>(0.15-0.67)                         | 0.27%<br>(-0.53-1%)                  | 0.3%<br>(-0.7-1.3%)                 | 0.28<br>(-0.65-1.3)        | 16<br>(-30-62)          |
| Solomon Islands | 2005 | Female | 45 to 49 | 26%<br>(12-45%)                | 74%<br>(55-88%)          | 0.31<br>(0.12-0.58)                         | -0.19%<br>(-1.1-0.52%)               | -0.19%<br>(-1.3-0.65%)              | -0.19<br>(-1.3-0.67)       | -10<br>(-61-27)         |
| Solomon Islands | 2005 | Female | 50 to 54 | 26%<br>(12-45%)                | 74%<br>(55-88%)          | 0.27<br>(0.1-0.56)                          | -0.51%<br>(-1.7-0.25%)               | -0.51%<br>(-1.8-0.38%)              | -0.59<br>(-2.2-0.42)       | -27<br>(-93-13)         |
| Solomon Islands | 2005 | Female | 55 to 59 | 25%<br>(12-46%)                | 75%<br>(54-88%)          | 0.25<br>(0.091-0.51)                        | -0.63%<br>(-1.9-0.12%)               | -0.62%<br>(-2-0.22%)                | -0.85<br>(-2.8-0.29)       | -33<br>(-99-6)          |
| Solomon Islands | 2005 | Female | 60 to 64 | 26%<br>(12-45%)                | 74%<br>(55-88%)          | 0.24<br>(0.084-0.52)                        | -0.87%<br>(-2.2--0.091%)             | -0.89%<br>(-2.3--0.041%)            | -1.4<br>(-3.6--0.065)      | -42<br>(-110--4)        |
| Solomon Islands | 2005 | Female | 65 to 69 | 27%<br>(12-45%)                | 73%<br>(55-88%)          | 0.24<br>(0.086-0.48)                        | -0.97%<br>(-2.2--0.1%)               | -1%<br>(-2.3--0.048%)               | -1.4<br>(-3.3--0.06)       | -35<br>(-80--3.3)       |
| Solomon Islands | 2005 | Female | 70 to 74 | 27%<br>(12-44%)                | 73%<br>(56-88%)          | 0.23<br>(0.081-0.44)                        | -1%<br>(-2.2--0.17%)                 | -1.1%<br>(-2.3--0.16%)              | -1.8<br>(-4.2--0.27)       | -36<br>(-80--6.1)       |
| Solomon Islands | 2005 | Female | 75 to 79 | 25%<br>(11-45%)                | 75%<br>(55-89%)          | 0.21<br>(0.069-0.46)                        | -0.82%<br>(-2--0.071%)               | -0.87%<br>(-2.2--0.055%)            | -1.2<br>(-3--0.073)        | -18<br>(-45--1.5)       |
| Solomon Islands | 2005 | Female | 80 to 84 | 24%<br>(11-44%)                | 76%<br>(56-89%)          | 0.2<br>(0.066-0.42)                         | -0.81%<br>(-2--0.17%)                | -0.88%<br>(-2.2--0.16%)             | -0.96<br>(-2.3--0.18)      | -10<br>(-24--2.2)       |
| Solomon Islands | 2005 | Female | 85 to 89 | 25%<br>(12-43%)                | 75%<br>(57-88%)          | 0.21<br>(0.075-0.44)                        | -0.86%<br>(-2--0.19%)                | -0.95%<br>(-2.2--0.21%)             | -0.44<br>(-1--0.097)       | -3.3<br>(-7.7--0.72)    |
| Solomon Islands | 2005 | Female | 90 to 94 | 29%<br>(14-48%)                | 71%<br>(52-86%)          | 0.24<br>(0.084-0.49)                        | -0.76%<br>(-1.6--0.18%)              | -0.86%<br>(-1.8--0.2%)              | -0.1<br>(-0.22--0.025)     | -0.53<br>(-1.1--0.13)   |
| Solomon Islands | 2005 | Female | 95 plus  | 34%<br>(15-57%)                | 66%<br>(43-85%)          | 0.28<br>(0.094-0.59)                        | -1%<br>(-2.3--0.15%)                 | -1.2%<br>(-2.6--0.21%)              | -0.033<br>(-0.073--0.0059) | -0.11<br>(-0.24--0.016) |

| Location        | Year | Sex    | Age      | Prevalence of current drinkers | Prevalence of abstainers | Population average of standard drinks daily | Percent of total attributable deaths | Percent of total attributable DALYs | Attributable deaths       | Attributable DALYs      |
|-----------------|------|--------|----------|--------------------------------|--------------------------|---------------------------------------------|--------------------------------------|-------------------------------------|---------------------------|-------------------------|
| Solomon Islands | 2005 | Male   | All Ages | 39%<br>(31-48%)                | 61%<br>(52-69%)          | 0.4<br>(0.32-0.49)                          | 1.1%<br>(0.59-1.8%)                  | 0.92%<br>(0.24-1.7%)                | 20<br>(5.5-36)            | 1200<br>(640-1900)      |
| Solomon Islands | 2005 | Male   | 15 to 19 | 37%<br>(22-56%)                | 63%<br>(44-78%)          | 0.27<br>(0.12-0.46)                         | 1.2%<br>(0.59-2.2%)                  | 1.4%<br>(0.44-2.8%)                 | 0.72<br>(0.23-1.5)        | 68<br>(32-120)          |
| Solomon Islands | 2005 | Male   | 20 to 24 | 55%<br>(37-72%)                | 45%<br>(28-63%)          | 0.71<br>(0.42-1.1)                          | 3.4%<br>(1.9-5.4%)                   | 3.8%<br>(1.8-6.4%)                  | 2.8<br>(1.3-4.7)          | 220<br>(120-350)        |
| Solomon Islands | 2005 | Male   | 25 to 29 | 63%<br>(43-79%)                | 37%<br>(21-57%)          | 1<br>(0.63-1.4)                             | 4.1%<br>(2.3-6.1%)                   | 4.6%<br>(2.4-7.1%)                  | 3.7<br>(1.9-6.1)          | 270<br>(150-410)        |
| Solomon Islands | 2005 | Male   | 30 to 34 | 64%<br>(43-80%)                | 36%<br>(20-57%)          | 1.1<br>(0.65-1.6)                           | 3.5%<br>(1.9-5.4%)                   | 3.7%<br>(1.7-6.2%)                  | 3.3<br>(1.5-5.6)          | 220<br>(120-350)        |
| Solomon Islands | 2005 | Male   | 35 to 39 | 62%<br>(43-78%)                | 38%<br>(22-57%)          | 0.93<br>(0.55-1.4)                          | 2.6%<br>(1.2-4.2%)                   | 2.6%<br>(0.97-4.7%)                 | 2.5<br>(0.9-4.7)          | 150<br>(72-270)         |
| Solomon Islands | 2005 | Male   | 40 to 44 | 59%<br>(41-76%)                | 41%<br>(24-59%)          | 0.81<br>(0.44-1.3)                          | 1.8%<br>(0.5-3.4%)                   | 1.7%<br>(0.24-3.7%)                 | 2<br>(0.27-4.3)           | 110<br>(32-220)         |
| Solomon Islands | 2005 | Male   | 45 to 49 | 56%<br>(34-74%)                | 44%<br>(26-66%)          | 0.69<br>(0.34-1.2)                          | 1.3%<br>(0.019-2.9%)                 | 1.3%<br>(-0.28-3.1%)                | 1.6<br>(-0.35-3.9)        | 80<br>(1.5-170)         |
| Solomon Islands | 2005 | Male   | 50 to 54 | 53%<br>(33-72%)                | 47%<br>(28-67%)          | 0.57<br>(0.29-0.99)                         | 1%<br>(-0.21-2.3%)                   | 0.96%<br>(-0.47-2.5%)               | 1.3<br>(-0.58-3.5)        | 58<br>(-13-140)         |
| Solomon Islands | 2005 | Male   | 55 to 59 | 51%<br>(33-70%)                | 49%<br>(30-67%)          | 0.47<br>(0.22-0.83)                         | 0.5%<br>(-0.44-1.6%)                 | 0.45%<br>(-0.65-1.7%)               | 0.69<br>(-0.99-2.7)       | 28<br>(-25-90)          |
| Solomon Islands | 2005 | Male   | 60 to 64 | 48%<br>(29-68%)                | 52%<br>(32-71%)          | 0.39<br>(0.19-0.71)                         | 0.3%<br>(-0.46-1.2%)                 | 0.27%<br>(-0.58-1.3%)               | 0.48<br>(-1.1-2.4)        | 17<br>(-26-69)          |
| Solomon Islands | 2005 | Male   | 65 to 69 | 46%<br>(27-65%)                | 54%<br>(35-73%)          | 0.36<br>(0.18-0.62)                         | 0.25%<br>(-0.44-1.1%)                | 0.24%<br>(-0.53-1.1%)               | 0.4<br>(-0.89-1.9)        | 10<br>(-19-45)          |
| Solomon Islands | 2005 | Male   | 70 to 74 | 43%<br>(26-61%)                | 57%<br>(39-74%)          | 0.31<br>(0.15-0.56)                         | 0.1%<br>(-0.49-0.8%)                 | 0.087%<br>(-0.57-0.87%)             | 0.15<br>(-0.99-1.5)       | 3.6<br>(-17-29)         |
| Solomon Islands | 2005 | Male   | 75 to 79 | 39%<br>(23-59%)                | 61%<br>(41-77%)          | 0.27<br>(0.12-0.49)                         | 0.032%<br>(-0.51-0.63%)              | 0.0023%<br>(-0.62-0.65%)            | 0.0032<br>(-0.84-0.91)    | 0.71<br>(-11-13)        |
| Solomon Islands | 2005 | Male   | 80 to 84 | 37%<br>(21-55%)                | 63%<br>(45-79%)          | 0.24<br>(0.12-0.42)                         | 0.035%<br>(-0.41-0.44%)              | 0.0037%<br>(-0.5-0.45%)             | 0.0038<br>(-0.5-0.47)     | 0.42<br>(-4.9-5.3)      |
| Solomon Islands | 2005 | Male   | 85 to 89 | 35%<br>(20-52%)                | 65%<br>(48-80%)          | 0.22<br>(0.11-0.4)                          | -0.065%<br>(-0.5-0.31%)              | -0.12%<br>(-0.61-0.3%)              | -0.058<br>(-0.31-0.15)    | -0.27<br>(-2.1-1.3)     |
| Solomon Islands | 2005 | Male   | 90 to 94 | 36%<br>(22-54%)                | 64%<br>(46-78%)          | 0.23<br>(0.11-0.43)                         | -0.081%<br>(-0.49-0.25%)             | -0.15%<br>(-0.64-0.23%)             | -0.024<br>(-0.11-0.038)   | -0.08<br>(-0.49-0.23)   |
| Solomon Islands | 2005 | Male   | 95 plus  | 40%<br>(21-61%)                | 60%<br>(39-79%)          | 0.25<br>(0.1-0.51)                          | -0.27%<br>(-0.83-0.13%)              | -0.41%<br>(-1.1-0.052%)             | -0.018<br>(-0.048-0.0023) | -0.047<br>(-0.14-0.023) |
| Solomon Islands | 2010 | Female | All Ages | 19%<br>(13-26%)                | 81%<br>(74-87%)          | 0.23<br>(0.17-0.3)                          | 0.11%<br>(-0.3-0.51%)                | -0.29%<br>(-0.97-0.34%)             | -5.9<br>(-20-6.8)         | 110<br>(-300-530)       |
| Solomon Islands | 2010 | Female | 15 to 19 | 20%<br>(9-36%)                 | 80%<br>(64-91%)          | 0.27<br>(0.11-0.53)                         | 0.78%<br>(0.32-1.5%)                 | 1%<br>(0.25-2.3%)                   | 0.36<br>(0.086-0.88)      | 37<br>(15-75)           |
| Solomon Islands | 2010 | Female | 20 to 24 | 24%<br>(10-42%)                | 76%<br>(58-90%)          | 0.42<br>(0.18-0.78)                         | 1.3%<br>(0.68-2.2%)                  | 1.4%<br>(0.5-3%)                    | 0.68<br>(0.23-1.5)        | 69<br>(35-120)          |
| Solomon Islands | 2010 | Female | 25 to 29 | 25%<br>(11-44%)                | 75%<br>(56-89%)          | 0.43<br>(0.19-0.76)                         | 1.3%<br>(0.68-2.1%)                  | 1.4%<br>(0.55-2.5%)                 | 0.89<br>(0.34-1.7)        | 77<br>(41-130)          |

| Location        | Year | Sex    | Age      | Prevalence of current drinkers | Prevalence of abstainers | Population average of standard drinks daily | Percent of total attributable deaths | Percent of total attributable DALYs | Attributable deaths        | Attributable DALYs      |
|-----------------|------|--------|----------|--------------------------------|--------------------------|---------------------------------------------|--------------------------------------|-------------------------------------|----------------------------|-------------------------|
| Solomon Islands | 2010 | Female | 30 to 34 | 26%<br>(10-46%)                | 74%<br>(54-90%)          | 0.45<br>(0.19-0.81)                         | 0.96%<br>(0.36-1.8%)                 | 1%<br>(0.19-2.2%)                   | 0.85<br>(0.15-1.9)         | 66<br>(24-130)          |
| Solomon Islands | 2010 | Female | 35 to 39 | 27%<br>(12-46%)                | 73%<br>(54-88%)          | 0.47<br>(0.21-0.82)                         | 0.86%<br>(0.12-1.8%)                 | 0.99%<br>(0.043-2.2%)               | 1.1<br>(0.041-2.4)         | 65<br>(7.9-130)         |
| Solomon Islands | 2010 | Female | 40 to 44 | 26%<br>(13-44%)                | 74%<br>(56-87%)          | 0.44<br>(0.19-0.8)                          | 0.49%<br>(-0.41-1.5%)                | 0.58%<br>(-0.52-1.9%)               | 0.6<br>(-0.54-1.9)         | 31<br>(-27-93)          |
| Solomon Islands | 2010 | Female | 45 to 49 | 26%<br>(11-45%)                | 74%<br>(55-89%)          | 0.38<br>(0.15-0.73)                         | -0.049%<br>(-1.1-0.85%)              | -0.022%<br>(-1.2-1.2%)              | -0.027<br>(-1.5-1.3)       | -3<br>(-68-53)          |
| Solomon Islands | 2010 | Female | 50 to 54 | 26%<br>(12-46%)                | 74%<br>(54-88%)          | 0.34<br>(0.13-0.67)                         | -0.45%<br>(-1.7-0.49%)               | -0.45%<br>(-1.9-0.66%)              | -0.57<br>(-2.5-0.84)       | -26<br>(-100-28)        |
| Solomon Islands | 2010 | Female | 55 to 59 | 25%<br>(11-45%)                | 75%<br>(55-89%)          | 0.3<br>(0.11-0.61)                          | -0.61%<br>(-2.1-0.29%)               | -0.6%<br>(-2.2-0.48%)               | -0.82<br>(-3.1-0.66)       | -32<br>(-110-15)        |
| Solomon Islands | 2010 | Female | 60 to 64 | 25%<br>(11-44%)                | 75%<br>(56-89%)          | 0.29<br>(0.1-0.6)                           | -0.89%<br>(-2.3-0.022%)              | -0.92%<br>(-2.5-0.11%)              | -1.5<br>(-4.2-0.18)        | -46<br>(-120-1.3)       |
| Solomon Islands | 2010 | Female | 65 to 69 | 26%<br>(12-44%)                | 74%<br>(56-88%)          | 0.29<br>(0.11-0.56)                         | -0.98%<br>(-2.3--0.049%)             | -1%<br>(-2.5-0.027%)                | -1.9<br>(-4.7-0.05)        | -48<br>(-110--2.1)      |
| Solomon Islands | 2010 | Female | 70 to 74 | 26%<br>(12-44%)                | 74%<br>(56-88%)          | 0.28<br>(0.099-0.56)                        | -1%<br>(-2.3--0.11%)                 | -1.1%<br>(-2.5-0.099%)              | -1.8<br>(-4.3--0.16)       | -36<br>(-83--4.3)       |
| Solomon Islands | 2010 | Female | 75 to 79 | 25%<br>(11-43%)                | 75%<br>(57-89%)          | 0.26<br>(0.085-0.54)                        | -0.83%<br>(-2.1--0.041%)             | -0.88%<br>(-2.2-0.011%)             | -1.7<br>(-4.2-0.022)       | -25<br>(-61--1.1)       |
| Solomon Islands | 2010 | Female | 80 to 84 | 24%<br>(11-44%)                | 76%<br>(56-89%)          | 0.25<br>(0.084-0.53)                        | -0.83%<br>(-2--0.12%)                | -0.91%<br>(-2.2--0.13%)             | -1.3<br>(-3.1--0.17)       | -14<br>(-33--2.1)       |
| Solomon Islands | 2010 | Female | 85 to 89 | 25%<br>(12-44%)                | 75%<br>(56-88%)          | 0.26<br>(0.095-0.56)                        | -0.88%<br>(-2--0.17%)                | -0.98%<br>(-2.3--0.2%)              | -0.54<br>(-1.2--0.11)      | -4<br>(-9.4-0.79)       |
| Solomon Islands | 2010 | Female | 90 to 94 | 29%<br>(14-48%)                | 71%<br>(52-86%)          | 0.29<br>(0.1-0.62)                          | -0.78%<br>(-1.7--0.14%)              | -0.88%<br>(-2--0.15%)               | -0.14<br>(-0.31--0.024)    | -0.72<br>(-1.6--0.13)   |
| Solomon Islands | 2010 | Female | 95 plus  | 34%<br>(15-56%)                | 66%<br>(44-85%)          | 0.35<br>(0.11-0.73)                         | -1%<br>(-2.4--0.099%)                | -1.2%<br>(-2.7--0.15%)              | -0.038<br>(-0.085--0.0045) | -0.12<br>(-0.28--0.012) |
| Solomon Islands | 2010 | Male   | All Ages | 39%<br>(31-49%)                | 61%<br>(51-69%)          | 0.5<br>(0.4-0.62)                           | 1.5%<br>(0.83-2.2%)                  | 1.2%<br>(0.45-2.1%)                 | 29<br>(11-50)              | 1700<br>(980-2600)      |
| Solomon Islands | 2010 | Male   | 15 to 19 | 37%<br>(22-55%)                | 63%<br>(45-78%)          | 0.33<br>(0.16-0.56)                         | 1.5%<br>(0.71-2.6%)                  | 1.8%<br>(0.65-3.5%)                 | 0.95<br>(0.34-1.9)         | 86<br>(40-150)          |
| Solomon Islands | 2010 | Male   | 20 to 24 | 55%<br>(36-72%)                | 45%<br>(28-64%)          | 0.89<br>(0.53-1.3)                          | 4.1%<br>(2.4-6.3%)                   | 4.7%<br>(2.4-7.6%)                  | 3.4<br>(1.7-5.7)           | 260<br>(150-410)        |
| Solomon Islands | 2010 | Male   | 25 to 29 | 62%<br>(43-78%)                | 38%<br>(22-57%)          | 1.2<br>(0.77-1.8)                           | 5%<br>(3-7.4%)                       | 5.7%<br>(3.1-8.8%)                  | 4.6<br>(2.5-7.2)           | 320<br>(190-490)        |
| Solomon Islands | 2010 | Male   | 30 to 34 | 63%<br>(42-79%)                | 37%<br>(21-58%)          | 1.3<br>(0.8-2)                              | 4.2%<br>(2.4-6.4%)                   | 4.7%<br>(2.4-7.4%)                  | 4.6<br>(2.3-7.7)           | 300<br>(170-480)        |
| Solomon Islands | 2010 | Male   | 35 to 39 | 62%<br>(44-79%)                | 38%<br>(21-56%)          | 1.1<br>(0.66-1.8)                           | 3.2%<br>(1.7-5.2%)                   | 3.4%<br>(1.5-5.9%)                  | 4.1<br>(1.8-7.1)           | 240<br>(120-400)        |
| Solomon Islands | 2010 | Male   | 40 to 44 | 59%<br>(41-76%)                | 41%<br>(24-59%)          | 1<br>(0.54-1.6)                             | 2.3%<br>(0.76-4.2%)                  | 2.4%<br>(0.49-4.6%)                 | 3<br>(0.62-6.1)            | 160<br>(53-300)         |
| Solomon Islands | 2010 | Male   | 45 to 49 | 56%<br>(34-73%)                | 44%<br>(27-66%)          | 0.86<br>(0.44-1.5)                          | 1.8%<br>(0.23-3.5%)                  | 1.8%<br>(-0.047-3.9%)               | 2.6<br>(-0.073-5.7)        | 130<br>(16-260)         |



| Location        | Year | Sex    | Age      | Prevalence of current drinkers | Prevalence of abstainers | Population average of standard drinks daily | Percent of total attributable deaths | Percent of total attributable DALYs | Attributable deaths       | Attributable DALYs      |
|-----------------|------|--------|----------|--------------------------------|--------------------------|---------------------------------------------|--------------------------------------|-------------------------------------|---------------------------|-------------------------|
| Solomon Islands | 2010 | Male   | 50 to 54 | 53%<br>(34-71%)                | 47%<br>(29-66%)          | 0.71<br>(0.36-1.3)                          | 1.4%<br>(0.005-3.1%)                 | 1.4%<br>(-0.27-3.3%)                | 2.2<br>(-0.45-5.4)        | 93<br>(0.35-220)        |
| Solomon Islands | 2010 | Male   | 55 to 59 | 50%<br>(32-70%)                | 50%<br>(30-68%)          | 0.58<br>(0.28-1)                            | 0.75%<br>(-0.33-2%)                  | 0.72%<br>(-0.55-2.2%)               | 1.2<br>(-0.95-3.7)        | 45<br>(-21-130)         |
| Solomon Islands | 2010 | Male   | 60 to 64 | 48%<br>(28-67%)                | 52%<br>(33-72%)          | 0.49<br>(0.23-0.9)                          | 0.5%<br>(-0.41-1.8%)                 | 0.5%<br>(-0.56-1.9%)                | 0.9<br>(-0.99-3.6)        | 28<br>(-23-110)         |
| Solomon Islands | 2010 | Male   | 65 to 69 | 46%<br>(28-64%)                | 54%<br>(36-72%)          | 0.44<br>(0.21-0.77)                         | 0.42%<br>(-0.36-1.5%)                | 0.43%<br>(-0.45-1.6%)               | 0.87<br>(-0.95-3.3)       | 22<br>(-19-77)          |
| Solomon Islands | 2010 | Male   | 70 to 74 | 43%<br>(27-61%)                | 57%<br>(39-73%)          | 0.38<br>(0.18-0.7)                          | 0.22%<br>(-0.44-1%)                  | 0.21%<br>(-0.53-1.1%)               | 0.4<br>(-0.97-2.1)        | 8.4<br>(-17-41)         |
| Solomon Islands | 2010 | Male   | 75 to 79 | 40%<br>(24-58%)                | 60%<br>(42-76%)          | 0.33<br>(0.15-0.61)                         | 0.11%<br>(-0.48-0.83%)               | 0.089%<br>(-0.58-0.86%)             | 0.16<br>(-1.1-1.6)        | 3.3<br>(-14-24)         |
| Solomon Islands | 2010 | Male   | 80 to 84 | 37%<br>(21-55%)                | 63%<br>(45-79%)          | 0.29<br>(0.14-0.51)                         | 0.093%<br>(-0.4-0.61%)               | 0.064%<br>(-0.49-0.65%)             | 0.084<br>(-0.66-0.84)     | 1.4<br>(-6.3-9.4)       |
| Solomon Islands | 2010 | Male   | 85 to 89 | 35%<br>(20-52%)                | 65%<br>(48-80%)          | 0.28<br>(0.13-0.5)                          | -0.017%<br>(-0.46-0.43%)             | -0.067%<br>(-0.58-0.45%)            | -0.037<br>(-0.32-0.25)    | -0.081<br>(-2.2-2.1)    |
| Solomon Islands | 2010 | Male   | 90 to 94 | 37%<br>(22-54%)                | 63%<br>(46-78%)          | 0.28<br>(0.13-0.53)                         | -0.058%<br>(-0.51-0.31%)             | -0.13%<br>(-0.65-0.3%)              | -0.023<br>(-0.12-0.056)   | -0.063<br>(-0.55-0.35)  |
| Solomon Islands | 2010 | Male   | 95 plus  | 40%<br>(21-61%)                | 60%<br>(39-79%)          | 0.31<br>(0.12-0.64)                         | -0.27%<br>(-0.84-0.19%)              | -0.41%<br>(-1.1-0.12%)              | -0.019<br>(-0.052-0.0053) | -0.048<br>(-0.15-0.036) |
| Solomon Islands | 2016 | Female | All Ages | 19%<br>(13-26%)                | 81%<br>(74-87%)          | 0.27<br>(0.18-0.4)                          | 0.16%<br>(-0.35-0.72%)               | -0.25%<br>(-1.1-0.64%)              | -5.5<br>(-23-13)          | 170<br>(-380-760)       |
| Solomon Islands | 2016 | Female | 15 to 19 | 20%<br>(9-35%)                 | 80%<br>(65-91%)          | 0.31<br>(0.13-0.63)                         | 0.87%<br>(0.39-1.8%)                 | 1.2%<br>(0.33-2.8%)                 | 0.44<br>(0.12-1.1)        | 45<br>(20-91)           |
| Solomon Islands | 2016 | Female | 20 to 24 | 24%<br>(9.9-43%)               | 76%<br>(57-90%)          | 0.49<br>(0.21-0.96)                         | 1.5%<br>(0.77-2.6%)                  | 1.7%<br>(0.58-3.6%)                 | 0.81<br>(0.27-1.8)        | 82<br>(41-150)          |
| Solomon Islands | 2016 | Female | 25 to 29 | 26%<br>(11-45%)                | 74%<br>(55-89%)          | 0.51<br>(0.2-0.95)                          | 1.5%<br>(0.78-2.5%)                  | 1.6%<br>(0.64-3.2%)                 | 0.98<br>(0.33-2.1)        | 84<br>(44-150)          |
| Solomon Islands | 2016 | Female | 30 to 34 | 27%<br>(10-47%)                | 73%<br>(53-90%)          | 0.53<br>(0.21-1)                            | 1.1%<br>(0.43-2.2%)                  | 1.3%<br>(0.29-2.9%)                 | 0.98<br>(0.21-2.3)        | 74<br>(26-150)          |
| Solomon Islands | 2016 | Female | 35 to 39 | 27%<br>(11-47%)                | 73%<br>(53-89%)          | 0.54<br>(0.23-0.99)                         | 1%<br>(0.17-2.2%)                    | 1.2%<br>(0.083-2.7%)                | 1.4<br>(0.091-3.3)        | 84<br>(14-180)          |
| Solomon Islands | 2016 | Female | 40 to 44 | 26%<br>(13-44%)                | 74%<br>(56-87%)          | 0.5<br>(0.21-0.96)                          | 0.63%<br>(-0.42-1.9%)                | 0.78%<br>(-0.52-2.5%)               | 1<br>(-0.72-3.3)          | 52<br>(-37-170)         |
| Solomon Islands | 2016 | Female | 45 to 49 | 26%<br>(11-45%)                | 74%<br>(55-89%)          | 0.43<br>(0.17-0.84)                         | 0.06%<br>(-1.1-1.2%)                 | 0.13%<br>(-1.3-1.6%)                | 0.17<br>(-1.7-2.2)        | 4.4<br>(-80-88)         |
| Solomon Islands | 2016 | Female | 50 to 54 | 26%<br>(12-44%)                | 74%<br>(56-88%)          | 0.38<br>(0.14-0.77)                         | -0.37%<br>(-1.6-0.82%)               | -0.34%<br>(-1.8-1.1%)               | -0.5<br>(-2.7-1.8)        | -25<br>(-120-59)        |
| Solomon Islands | 2016 | Female | 55 to 59 | 25%<br>(12-45%)                | 75%<br>(55-88%)          | 0.34<br>(0.13-0.71)                         | -0.56%<br>(-2-0.5%)                  | -0.53%<br>(-2.2-0.74%)              | -0.88<br>(-3.6-1.2)       | -36<br>(-130-32)        |
| Solomon Islands | 2016 | Female | 60 to 64 | 25%<br>(11-46%)                | 75%<br>(54-89%)          | 0.33<br>(0.11-0.71)                         | -0.88%<br>(-2.4-0.19%)               | -0.9%<br>(-2.6-0.31%)               | -1.5<br>(-4.4-0.51)       | -48<br>(-130-11)        |
| Solomon Islands | 2016 | Female | 65 to 69 | 27%<br>(12-45%)                | 73%<br>(55-88%)          | 0.34<br>(0.12-0.68)                         | -0.97%<br>(-2.4-0.1%)                | -1%<br>(-2.7-0.22%)                 | -2<br>(-5.4-0.4)          | -51<br>(-130-5.6)       |

| Location        | Year | Sex    | Age      | Prevalence of current drinkers | Prevalence of abstainers | Population average of standard drinks daily | Percent of total attributable deaths | Percent of total attributable DALYs | Attributable deaths       | Attributable DALYs      |
|-----------------|------|--------|----------|--------------------------------|--------------------------|---------------------------------------------|--------------------------------------|-------------------------------------|---------------------------|-------------------------|
| Solomon Islands | 2016 | Female | 70 to 74 | 26%<br>(12-44%)                | 74%<br>(56-88%)          | 0.32<br>(0.11-0.67)                         | -1%<br>(-2.3-0.11%)                  | -1.1%<br>(-2.5-0.18%)               | -2.4<br>(-5.9-0.37)       | -48<br>(-110-4.6)       |
| Solomon Islands | 2016 | Female | 75 to 79 | 25%<br>(11-44%)                | 75%<br>(56-89%)          | 0.3<br>(0.093-0.67)                         | -0.79%<br>(-2.1-0.17%)               | -0.84%<br>(-2.2-0.25%)              | -1.5<br>(-4.2-0.43)       | -23<br>(-62-5.2)        |
| Solomon Islands | 2016 | Female | 80 to 84 | 24%<br>(11-43%)                | 76%<br>(57-89%)          | 0.28<br>(0.091-0.62)                        | -0.8%<br>(-2-0.03%)                  | -0.88%<br>(-2.2-0.072%)             | -1.4<br>(-3.5-0.11)       | -15<br>(-37-0.57)       |
| Solomon Islands | 2016 | Female | 85 to 89 | 25%<br>(12-45%)                | 75%<br>(55-88%)          | 0.3<br>(0.1-0.64)                           | -0.85%<br>(-2.1--0.066%)             | -0.95%<br>(-2.3--0.069%)            | -0.79<br>(-1.9--0.058)    | -5.9<br>(-14--0.47)     |
| Solomon Islands | 2016 | Female | 90 to 94 | 29%<br>(13-48%)                | 71%<br>(52-87%)          | 0.34<br>(0.12-0.71)                         | -0.76%<br>(-1.7-0.005%)              | -0.86%<br>(-2-0.02%)                | -0.18<br>(-0.41-0.0041)   | -0.91<br>(-2.1-0.006)   |
| Solomon Islands | 2016 | Female | 95 plus  | 34%<br>(14-56%)                | 66%<br>(44-86%)          | 0.4<br>(0.12-0.87)                          | -1%<br>(-2.5-0.03%)                  | -1.2%<br>(-2.8-0.027%)              | -0.056<br>(-0.13--0.0013) | -0.18<br>(-0.42-0.0051) |
| Solomon Islands | 2016 | Male   | All Ages | 39%<br>(31-48%)                | 61%<br>(52-69%)          | 0.58<br>(0.41-0.8)                          | 1.8%<br>(0.92-2.9%)                  | 1.5%<br>(0.51-2.8%)                 | 38<br>(13-71)             | 2200<br>(1100-3500)     |
| Solomon Islands | 2016 | Male   | 15 to 19 | 37%<br>(22-55%)                | 63%<br>(45-78%)          | 0.38<br>(0.17-0.67)                         | 1.6%<br>(0.79-2.9%)                  | 2%<br>(0.73-3.9%)                   | 1.2<br>(0.42-2.3)         | 110<br>(50-180)         |
| Solomon Islands | 2016 | Male   | 20 to 24 | 55%<br>(36-72%)                | 45%<br>(28-64%)          | 1<br>(0.56-1.7)                             | 4.5%<br>(2.5-7.1%)                   | 5.2%<br>(2.6-8.8%)                  | 4.3<br>(2.1-7.5)          | 340<br>(190-560)        |
| Solomon Islands | 2016 | Male   | 25 to 29 | 62%<br>(42-77%)                | 38%<br>(23-58%)          | 1.4<br>(0.8-2.2)                            | 5.5%<br>(3.1-8.5%)                   | 6.4%<br>(3.2-10%)                   | 5.2<br>(2.6-8.8)          | 370<br>(200-590)        |
| Solomon Islands | 2016 | Male   | 30 to 34 | 63%<br>(42-79%)                | 37%<br>(21-58%)          | 1.5<br>(0.85-2.4)                           | 4.7%<br>(2.6-7.8%)                   | 5.3%<br>(2.6-9.2%)                  | 5<br>(2.5-8.5)            | 330<br>(170-540)        |
| Solomon Islands | 2016 | Male   | 35 to 39 | 62%<br>(44-79%)                | 38%<br>(21-56%)          | 1.3<br>(0.72-2.1)                           | 3.7%<br>(1.8-6.2%)                   | 4.1%<br>(1.7-7.2%)                  | 4.9<br>(2-9.1)            | 290<br>(140-510)        |
| Solomon Islands | 2016 | Male   | 40 to 44 | 59%<br>(41-76%)                | 41%<br>(24-59%)          | 1.1<br>(0.61-2)                             | 2.7%<br>(0.94-5.4%)                  | 2.8%<br>(0.72-6.1%)                 | 4.5<br>(1.1-9.7)          | 240<br>(83-490)         |
| Solomon Islands | 2016 | Male   | 45 to 49 | 55%<br>(33-73%)                | 45%<br>(27-67%)          | 0.98<br>(0.47-1.8)                          | 2.1%<br>(0.38-4.4%)                  | 2.2%<br>(0.12-4.9%)                 | 3.7<br>(0.19-8.6)         | 180<br>(33-390)         |
| Solomon Islands | 2016 | Male   | 50 to 54 | 52%<br>(32-71%)                | 48%<br>(29-68%)          | 0.82<br>(0.38-1.5)                          | 1.6%<br>(0.12-3.8%)                  | 1.7%<br>(-0.16-4.1%)                | 3.1<br>(-0.29-8.1)        | 130<br>(9.1-320)        |
| Solomon Islands | 2016 | Male   | 55 to 59 | 50%<br>(31-69%)                | 50%<br>(31-69%)          | 0.66<br>(0.31-1.2)                          | 0.93%<br>(-0.31-2.6%)                | 0.92%<br>(-0.5-2.8%)                | 1.8<br>(-0.95-6)          | 69<br>(-21-210)         |
| Solomon Islands | 2016 | Male   | 60 to 64 | 48%<br>(28-68%)                | 52%<br>(32-72%)          | 0.54<br>(0.25-1.1)                          | 0.65%<br>(-0.33-2.1%)                | 0.65%<br>(-0.45-2.3%)               | 1.3<br>(-0.88-4.8)        | 41<br>(-21-140)         |
| Solomon Islands | 2016 | Male   | 65 to 69 | 46%<br>(27-65%)                | 54%<br>(35-73%)          | 0.5<br>(0.23-0.91)                          | 0.57%<br>(-0.29-1.8%)                | 0.59%<br>(-0.38-2%)                 | 1.2<br>(-0.79-4.2)        | 30<br>(-15-100)         |
| Solomon Islands | 2016 | Male   | 70 to 74 | 43%<br>(26-61%)                | 57%<br>(39-74%)          | 0.44<br>(0.2-0.84)                          | 0.34%<br>(-0.43-1.5%)                | 0.35%<br>(-0.52-1.6%)               | 0.76<br>(-1.1-3.4)        | 16<br>(-19-66)          |
| Solomon Islands | 2016 | Male   | 75 to 79 | 39%<br>(23-58%)                | 61%<br>(42-77%)          | 0.38<br>(0.17-0.74)                         | 0.22%<br>(-0.41-1.1%)                | 0.2%<br>(-0.51-1.2%)                | 0.36<br>(-0.9-2.2)        | 6.3<br>(-12-32)         |
| Solomon Islands | 2016 | Male   | 80 to 84 | 36%<br>(20-54%)                | 64%<br>(46-80%)          | 0.33<br>(0.15-0.63)                         | 0.17%<br>(-0.35-0.8%)                | 0.15%<br>(-0.43-0.85%)              | 0.21<br>(-0.59-1.2)       | 2.9<br>(-5.8-14)        |
| Solomon Islands | 2016 | Male   | 85 to 89 | 35%<br>(20-51%)                | 65%<br>(49-80%)          | 0.32<br>(0.14-0.61)                         | 0.048%<br>(-0.45-0.63%)              | 0.0019%<br>(-0.56-0.66%)            | 0.0014<br>(-0.43-0.5)     | 0.31<br>(-2.9-4.2)      |

| Location        | Year | Sex    | Age      | Prevalence of current drinkers | Prevalence of abstainers | Population average of standard drinks daily | Percent of total attributable deaths | Percent of total attributable DALYs | Attributable deaths        | Attributable DALYs        |
|-----------------|------|--------|----------|--------------------------------|--------------------------|---------------------------------------------|--------------------------------------|-------------------------------------|----------------------------|---------------------------|
| Solomon Islands | 2016 | Male   | 90 to 94 | 37%<br>(23-54%)                | 63%<br>(46-77%)          | 0.33<br>(0.14-0.64)                         | -0.019%<br>(-0.51-0.45%)             | -0.089%<br>(-0.66-0.46%)            | -0.019<br>(-0.14-0.097)    | -0.024<br>(-0.65-0.58)    |
| Solomon Islands | 2016 | Male   | 95 plus  | 40%<br>(22-61%)                | 60%<br>(39-78%)          | 0.37<br>(0.14-0.74)                         | -0.23%<br>(-0.87-0.37%)              | -0.38%<br>(-1.2-0.28%)              | -0.019<br>(-0.058-0.015)   | -0.046<br>(-0.17-0.074)   |
| Tonga           | 1990 | Female | All Ages | 17%<br>(12-24%)                | 83%<br>(76-88%)          | 0.14<br>(0.099-0.19)                        | -0.044%<br>(-0.32-0.19%)             | -0.42%<br>(-0.91--0.014%)           | -1.2<br>(-2.8--0.047)      | -6.2<br>(-46-27)          |
| Tonga           | 1990 | Female | 15 to 19 | 18%<br>(8.2-33%)               | 82%<br>(67-92%)          | 0.17<br>(0.072-0.34)                        | 0.48%<br>(0.25-0.77%)                | 0.4%<br>(0.075-1%)                  | 0.016<br>(0.0027-0.039)    | 3.3<br>(1.7-5.4)          |
| Tonga           | 1990 | Female | 20 to 24 | 23%<br>(9.7-41%)               | 77%<br>(59-90%)          | 0.27<br>(0.12-0.49)                         | 0.87%<br>(0.53-1.3%)                 | 0.58%<br>(0.19-1.2%)                | 0.034<br>(0.011-0.074)     | 7.6<br>(4.5-12)           |
| Tonga           | 1990 | Female | 25 to 29 | 24%<br>(10-44%)                | 76%<br>(56-90%)          | 0.28<br>(0.12-0.51)                         | 0.84%<br>(0.54-1.2%)                 | 0.59%<br>(0.21-1.2%)                | 0.03<br>(0.011-0.066)      | 5.4<br>(3.2-8.1)          |
| Tonga           | 1990 | Female | 30 to 34 | 25%<br>(9.9-45%)               | 75%<br>(55-90%)          | 0.29<br>(0.11-0.53)                         | 0.7%<br>(0.41-1.1%)                  | 0.58%<br>(0.21-1.1%)                | 0.03<br>(0.011-0.06)       | 3.9<br>(2.1-5.9)          |
| Tonga           | 1990 | Female | 35 to 39 | 25%<br>(10-43%)                | 75%<br>(57-90%)          | 0.3<br>(0.12-0.56)                          | 0.58%<br>(0.25-0.97%)                | 0.62%<br>(0.19-1.2%)                | 0.046<br>(0.014-0.097)     | 3.8<br>(1.6-6.5)          |
| Tonga           | 1990 | Female | 40 to 44 | 25%<br>(12-42%)                | 75%<br>(58-88%)          | 0.27<br>(0.11-0.52)                         | 0.39%<br>(-0.067-0.84%)              | 0.52%<br>(-0.048-1.2%)              | 0.045<br>(-0.0037-0.11)    | 2.6<br>(-0.41-5.8)        |
| Tonga           | 1990 | Female | 45 to 49 | 24%<br>(11-42%)                | 76%<br>(58-89%)          | 0.24<br>(0.088-0.47)                        | 0.023%<br>(-0.63-0.49%)              | 0.13%<br>(-0.62-0.76%)              | 0.013<br>(-0.067-0.076)    | 0.15<br>(-4.1-3.3)        |
| Tonga           | 1990 | Female | 50 to 54 | 24%<br>(11-43%)                | 76%<br>(57-89%)          | 0.21<br>(0.076-0.42)                        | -0.33%<br>(-1.2-0.26%)               | -0.27%<br>(-1.3-0.4%)               | -0.038<br>(-0.19-0.055)    | -2.5<br>(-9.7-1.9)        |
| Tonga           | 1990 | Female | 55 to 59 | 23%<br>(10-42%)                | 77%<br>(58-90%)          | 0.19<br>(0.067-0.41)                        | -0.52%<br>(-1.6-0.12%)               | -0.46%<br>(-1.7-0.25%)              | -0.091<br>(-0.35-0.051)    | -4.5<br>(-14-1.1)         |
| Tonga           | 1990 | Female | 60 to 64 | 24%<br>(11-43%)                | 76%<br>(57-89%)          | 0.18<br>(0.063-0.38)                        | -0.72%<br>(-2-0.019%)                | -0.71%<br>(-2.1-0.09%)              | -0.18<br>(-0.53-0.023)     | -6.7<br>(-18-0.16)        |
| Tonga           | 1990 | Female | 65 to 69 | 24%<br>(11-41%)                | 76%<br>(59-89%)          | 0.18<br>(0.065-0.37)                        | -0.87%<br>(-2--0.11%)                | -0.91%<br>(-2.2--0.059%)            | -0.25<br>(-0.63--0.017)    | -7<br>(-17--0.9)          |
| Tonga           | 1990 | Female | 70 to 74 | 24%<br>(12-40%)                | 76%<br>(60-88%)          | 0.17<br>(0.058-0.36)                        | -0.86%<br>(-1.8--0.16%)              | -0.92%<br>(-2--0.15%)               | -0.28<br>(-0.64--0.045)    | -5.9<br>(-13--1.1)        |
| Tonga           | 1990 | Female | 75 to 79 | 23%<br>(10-42%)                | 77%<br>(58-90%)          | 0.16<br>(0.051-0.35)                        | -0.6%<br>(-1.6--0.056%)              | -0.62%<br>(-1.7--0.027%)            | -0.18<br>(-0.51--0.0074)   | -3<br>(-8.1--0.28)        |
| Tonga           | 1990 | Female | 80 to 84 | 22%<br>(9.2-42%)               | 78%<br>(58-91%)          | 0.15<br>(0.045-0.34)                        | -0.6%<br>(-1.6--0.079%)              | -0.64%<br>(-1.7--0.076%)            | -0.19<br>(-0.5--0.021)     | -2.2<br>(-5.7--0.28)      |
| Tonga           | 1990 | Female | 85 to 89 | 23%<br>(10-42%)                | 77%<br>(58-90%)          | 0.16<br>(0.053-0.35)                        | -0.63%<br>(-1.5--0.13%)              | -0.68%<br>(-1.7--0.13%)             | -0.13<br>(-0.32--0.027)    | -1.1<br>(-2.5--0.22)      |
| Tonga           | 1990 | Female | 90 to 94 | 27%<br>(12-47%)                | 73%<br>(53-88%)          | 0.18<br>(0.059-0.39)                        | -0.68%<br>(-1.5--0.15%)              | -0.75%<br>(-1.7--0.16%)             | -0.064<br>(-0.14--0.014)   | -0.34<br>(-0.76--0.075)   |
| Tonga           | 1990 | Female | 95 plus  | 32%<br>(13-53%)                | 68%<br>(47-87%)          | 0.22<br>(0.067-0.49)                        | -0.83%<br>(-2--0.052%)               | -0.97%<br>(-2.3--0.08%)             | -0.021<br>(-0.049--0.0017) | -0.069<br>(-0.17--0.0043) |
| Tonga           | 1990 | Male   | All Ages | 36%<br>(28-45%)                | 64%<br>(55-72%)          | 0.3<br>(0.22-0.39)                          | 0.88%<br>(0.51-1.3%)                 | 0.62%<br>(0.18-1.1%)                | 2.2<br>(0.67-3.8)          | 150<br>(89-230)           |
| Tonga           | 1990 | Male   | 15 to 19 | 35%<br>(20-52%)                | 65%<br>(48-80%)          | 0.2<br>(0.099-0.35)                         | 1.1%<br>(0.59-1.8%)                  | 1.1%<br>(0.43-2.2%)                 | 0.096<br>(0.037-0.19)      | 10<br>(5.7-17)            |

| Location | Year | Sex    | Age      | Prevalence of current drinkers | Prevalence of abstainers | Population average of standard drinks daily | Percent of total attributable deaths | Percent of total attributable DALYs | Attributable deaths          | Attributable DALYs        |
|----------|------|--------|----------|--------------------------------|--------------------------|---------------------------------------------|--------------------------------------|-------------------------------------|------------------------------|---------------------------|
| Tonga    | 1990 | Male   | 20 to 24 | 53%<br>(34-71%)                | 47%<br>(29-66%)          | 0.55<br>(0.33-0.84)                         | 2.7%<br>(1.6-4%)                     | 2.8%<br>(1.4-4.8%)                  | 0.4<br>(0.18-0.68)           | 36<br>(21-55)             |
| Tonga    | 1990 | Male   | 25 to 29 | 60%<br>(40-77%)                | 40%<br>(23-60%)          | 0.77<br>(0.46-1.2)                          | 3.3%<br>(2-4.8%)                     | 3.6%<br>(1.9-5.6%)                  | 0.38<br>(0.18-0.61)          | 31<br>(18-45)             |
| Tonga    | 1990 | Male   | 30 to 34 | 61%<br>(40-78%)                | 39%<br>(22-60%)          | 0.83<br>(0.48-1.3)                          | 2.7%<br>(1.6-3.9%)                   | 2.8%<br>(1.4-4.5%)                  | 0.22<br>(0.1-0.38)           | 17<br>(10-27)             |
| Tonga    | 1990 | Male   | 35 to 39 | 60%<br>(42-76%)                | 40%<br>(24-58%)          | 0.73<br>(0.38-1.2)                          | 2.2%<br>(1.2-3.4%)                   | 2.3%<br>(0.98-3.9%)                 | 0.23<br>(0.097-0.4)          | 16<br>(8.6-25)            |
| Tonga    | 1990 | Male   | 40 to 44 | 57%<br>(39-74%)                | 43%<br>(26-61%)          | 0.63<br>(0.3-1.1)                           | 1.6%<br>(0.85-2.6%)                  | 1.7%<br>(0.67-2.9%)                 | 0.18<br>(0.062-0.33)         | 11<br>(5.7-19)            |
| Tonga    | 1990 | Male   | 45 to 49 | 53%<br>(32-72%)                | 47%<br>(28-68%)          | 0.54<br>(0.24-0.97)                         | 1.5%<br>(0.69-2.2%)                  | 1.5%<br>(0.53-2.6%)                 | 0.18<br>(0.06-0.32)          | 9.7<br>(4.5-16)           |
| Tonga    | 1990 | Male   | 50 to 54 | 50%<br>(31-69%)                | 50%<br>(31-69%)          | 0.44<br>(0.2-0.79)                          | 1.1%<br>(0.35-1.9%)                  | 1.1%<br>(0.19-2.1%)                 | 0.19<br>(0.03-0.37)          | 8.8<br>(2.7-16)           |
| Tonga    | 1990 | Male   | 55 to 59 | 48%<br>(29-68%)                | 52%<br>(32-71%)          | 0.36<br>(0.17-0.66)                         | 0.63%<br>(-0.091-1.3%)               | 0.61%<br>(-0.27-1.4%)               | 0.14<br>(-0.06-0.33)         | 5.6<br>(-0.8-11)          |
| Tonga    | 1990 | Male   | 60 to 64 | 45%<br>(27-65%)                | 55%<br>(35-73%)          | 0.3<br>(0.13-0.57)                          | 0.34%<br>(-0.26-0.89%)               | 0.33%<br>(-0.37-0.95%)              | 0.1<br>(-0.12-0.31)          | 3.5<br>(-2.7-9.4)         |
| Tonga    | 1990 | Male   | 65 to 69 | 44%<br>(26-62%)                | 56%<br>(38-74%)          | 0.27<br>(0.13-0.49)                         | 0.23%<br>(-0.26-0.69%)               | 0.23%<br>(-0.36-0.76%)              | 0.076<br>(-0.12-0.25)        | 2<br>(-2.2-6.1)           |
| Tonga    | 1990 | Male   | 70 to 74 | 41%<br>(24-58%)                | 59%<br>(42-76%)          | 0.24<br>(0.1-0.44)                          | 0.084%<br>(-0.35-0.48%)              | 0.067%<br>(-0.43-0.53%)             | 0.023<br>(-0.15-0.18)        | 0.6<br>(-2.6-3.6)         |
| Tonga    | 1990 | Male   | 75 to 79 | 37%<br>(22-56%)                | 63%<br>(44-78%)          | 0.21<br>(0.089-0.39)                        | -0.025%<br>(-0.45-0.29%)             | -0.068%<br>(-0.55-0.28%)            | -0.021<br>(-0.17-0.089)      | -0.13<br>(-2.2-1.5)       |
| Tonga    | 1990 | Male   | 80 to 84 | 34%<br>(19-53%)                | 66%<br>(47-81%)          | 0.18<br>(0.082-0.33)                        | -0.001%<br>(-0.36-0.26%)             | -0.038%<br>(-0.45-0.26%)            | -0.0093<br>(-0.11-0.065)     | -0.004<br>(-1.1-0.77)     |
| Tonga    | 1990 | Male   | 85 to 89 | 33%<br>(19-49%)                | 67%<br>(51-81%)          | 0.17<br>(0.081-0.31)                        | -0.081%<br>(-0.45-0.17%)             | -0.13%<br>(-0.56-0.16%)             | -0.02<br>(-0.082-0.024)      | -0.1<br>(-0.57-0.21)      |
| Tonga    | 1990 | Male   | 90 to 94 | 34%<br>(21-52%)                | 66%<br>(48-79%)          | 0.18<br>(0.077-0.33)                        | -0.076%<br>(-0.44-0.18%)             | -0.13%<br>(-0.57-0.17%)             | -0.0077<br>(-0.032-0.0094)   | -0.026<br>(-0.15-0.061)   |
| Tonga    | 1990 | Male   | 95 plus  | 38%<br>(20-60%)                | 62%<br>(40-80%)          | 0.2<br>(0.077-0.41)                         | -0.24%<br>(-0.72-0.071%)             | -0.38%<br>(-0.96-0.00049%)          | -0.0049<br>(-0.012-0.000063) | -0.012<br>(-0.036-0.0035) |
| Tonga    | 1995 | Female | All Ages | 18%<br>(12-24%)                | 82%<br>(76-88%)          | 0.17<br>(0.12-0.22)                         | -0.029%<br>(-0.33-0.22%)             | -0.4%<br>(-0.96-0.042%)             | -1.2<br>(-3-0.13)            | -4.1<br>(-45-32)          |
| Tonga    | 1995 | Female | 15 to 19 | 18%<br>(8.3-33%)               | 82%<br>(67-92%)          | 0.2<br>(0.086-0.38)                         | 0.55%<br>(0.3-0.89%)                 | 0.56%<br>(0.13-1.3%)                | 0.02<br>(0.0047-0.046)       | 3.5<br>(1.9-5.8)          |
| Tonga    | 1995 | Female | 20 to 24 | 23%<br>(9.7-40%)               | 77%<br>(60-90%)          | 0.32<br>(0.14-0.58)                         | 0.96%<br>(0.58-1.4%)                 | 0.74%<br>(0.26-1.5%)                | 0.031<br>(0.011-0.067)       | 6.2<br>(3.6-9.5)          |
| Tonga    | 1995 | Female | 25 to 29 | 24%<br>(9.9-42%)               | 76%<br>(58-90%)          | 0.33<br>(0.13-0.59)                         | 0.94%<br>(0.6-1.4%)                  | 0.75%<br>(0.31-1.4%)                | 0.042<br>(0.017-0.08)        | 6.7<br>(4.1-10)           |
| Tonga    | 1995 | Female | 30 to 34 | 25%<br>(8.9-44%)               | 75%<br>(56-91%)          | 0.34<br>(0.14-0.61)                         | 0.8%<br>(0.45-1.2%)                  | 0.74%<br>(0.33-1.4%)                | 0.039<br>(0.017-0.073)       | 4.6<br>(2.5-7.1)          |

| Location | Year | Sex    | Age      | Prevalence of current drinkers | Prevalence of abstainers | Population average of standard drinks daily | Percent of total attributable deaths | Percent of total attributable DALYs | Attributable deaths       | Attributable DALYs       |
|----------|------|--------|----------|--------------------------------|--------------------------|---------------------------------------------|--------------------------------------|-------------------------------------|---------------------------|--------------------------|
| Tonga    | 1995 | Female | 35 to 39 | 25%<br>(11-43%)                | 75%<br>(57-89%)          | 0.35<br>(0.15-0.63)                         | 0.7%<br>(0.34-1.2%)                  | 0.82%<br>(0.35-1.5%)                | 0.059<br>(0.025-0.12)     | 4.5<br>(2.3-7.5)         |
| Tonga    | 1995 | Female | 40 to 44 | 24%<br>(11-41%)                | 76%<br>(59-89%)          | 0.32<br>(0.13-0.6)                          | 0.54%<br>(0.082-1%)                  | 0.76%<br>(0.14-1.6%)                | 0.072<br>(0.012-0.15)     | 4<br>(0.57-7.7)          |
| Tonga    | 1995 | Female | 45 to 49 | 24%<br>(10-41%)                | 76%<br>(59-90%)          | 0.28<br>(0.1-0.55)                          | 0.16%<br>(-0.46-0.7%)                | 0.35%<br>(-0.41-1%)                 | 0.037<br>(-0.044-0.11)    | 1.1<br>(-3.1-4.9)        |
| Tonga    | 1995 | Female | 50 to 54 | 24%<br>(11-42%)                | 76%<br>(58-89%)          | 0.25<br>(0.091-0.48)                        | -0.21%<br>(-1.1-0.37%)               | -0.078%<br>(-1.1-0.61%)             | -0.011<br>(-0.16-0.084)   | -1.6<br>(-8.2-2.8)       |
| Tonga    | 1995 | Female | 55 to 59 | 23%<br>(10-41%)                | 77%<br>(59-90%)          | 0.22<br>(0.083-0.46)                        | -0.41%<br>(-1.5-0.22%)               | -0.3%<br>(-1.5-0.42%)               | -0.06<br>(-0.3-0.083)     | -3.6<br>(-13-1.8)        |
| Tonga    | 1995 | Female | 60 to 64 | 23%<br>(11-42%)                | 77%<br>(58-89%)          | 0.21<br>(0.077-0.44)                        | -0.67%<br>(-1.9-0.079%)              | -0.63%<br>(-2-0.18%)                | -0.16<br>(-0.51-0.045)    | -6.4<br>(-18-0.7)        |
| Tonga    | 1995 | Female | 65 to 69 | 25%<br>(11-43%)                | 75%<br>(57-89%)          | 0.22<br>(0.081-0.43)                        | -0.86%<br>(-2.1--0.068%)             | -0.88%<br>(-2.2--0.021%)            | -0.29<br>(-0.73--0.0073)  | -8.3<br>(-20--0.64)      |
| Tonga    | 1995 | Female | 70 to 74 | 25%<br>(11-42%)                | 75%<br>(58-89%)          | 0.21<br>(0.073-0.42)                        | -0.9%<br>(-2--0.14%)                 | -0.97%<br>(-2.2--0.13%)             | -0.33<br>(-0.76--0.04)    | -7.2<br>(-16--1.1)       |
| Tonga    | 1995 | Female | 75 to 79 | 23%<br>(10-42%)                | 77%<br>(58-90%)          | 0.19<br>(0.063-0.43)                        | -0.62%<br>(-1.6--0.028%)             | -0.64%<br>(-1.7-0.011%)             | -0.22<br>(-0.61-0.0039)   | -3.8<br>(-9.7--0.17)     |
| Tonga    | 1995 | Female | 80 to 84 | 22%<br>(9.8-42%)               | 78%<br>(58-90%)          | 0.18<br>(0.059-0.38)                        | -0.61%<br>(-1.5--0.091%)             | -0.65%<br>(-1.7--0.072%)            | -0.23<br>(-0.58--0.024)   | -2.7<br>(-6.5--0.39)     |
| Tonga    | 1995 | Female | 85 to 89 | 24%<br>(10-41%)                | 76%<br>(59-90%)          | 0.19<br>(0.066-0.4)                         | -0.65%<br>(-1.5--0.12%)              | -0.71%<br>(-1.7--0.13%)             | -0.15<br>(-0.36--0.027)   | -1.2<br>(-2.8--0.22)     |
| Tonga    | 1995 | Female | 90 to 94 | 27%<br>(12-46%)                | 73%<br>(54-88%)          | 0.21<br>(0.075-0.46)                        | -0.67%<br>(-1.4--0.14%)              | -0.74%<br>(-1.6--0.15%)             | -0.065<br>(-0.14--0.013)  | -0.35<br>(-0.75--0.075)  |
| Tonga    | 1995 | Female | 95 plus  | 32%<br>(13-55%)                | 68%<br>(45-87%)          | 0.26<br>(0.082-0.55)                        | -0.82%<br>(-1.9--0.051%)             | -0.96%<br>(-2.3--0.09%)             | -0.025<br>(-0.06--0.0023) | -0.084<br>(-0.2--0.0051) |
| Tonga    | 1995 | Male   | All Ages | 36%<br>(28-45%)                | 64%<br>(55-72%)          | 0.35<br>(0.27-0.45)                         | 0.98%<br>(0.6-1.4%)                  | 0.69%<br>(0.23-1.1%)                | 2.5<br>(0.86-4.3)         | 170<br>(100-240)         |
| Tonga    | 1995 | Male   | 15 to 19 | 34%<br>(20-52%)                | 66%<br>(48-80%)          | 0.24<br>(0.11-0.42)                         | 1.2%<br>(0.7-2%)                     | 1.4%<br>(0.59-2.6%)                 | 0.11<br>(0.048-0.21)      | 11<br>(6.6-19)           |
| Tonga    | 1995 | Male   | 20 to 24 | 52%<br>(33-70%)                | 48%<br>(30-67%)          | 0.66<br>(0.39-1)                            | 3.1%<br>(1.9-4.6%)                   | 3.5%<br>(1.8-5.6%)                  | 0.36<br>(0.19-0.6)        | 31<br>(18-47)            |
| Tonga    | 1995 | Male   | 25 to 29 | 60%<br>(40-76%)                | 40%<br>(24-60%)          | 0.92<br>(0.57-1.4)                          | 3.7%<br>(2.4-5.2%)                   | 4.1%<br>(2.4-6.3%)                  | 0.46<br>(0.25-0.72)       | 36<br>(22-53)            |
| Tonga    | 1995 | Male   | 30 to 34 | 61%<br>(40-78%)                | 39%<br>(22-60%)          | 0.99<br>(0.57-1.5)                          | 3%<br>(1.9-4.4%)                     | 3.2%<br>(1.7-5.2%)                  | 0.28<br>(0.14-0.47)       | 21<br>(13-32)            |
| Tonga    | 1995 | Male   | 35 to 39 | 59%<br>(41-77%)                | 41%<br>(23-59%)          | 0.87<br>(0.49-1.4)                          | 2.5%<br>(1.5-3.7%)                   | 2.7%<br>(1.3-4.3%)                  | 0.26<br>(0.12-0.45)       | 18<br>(10-28)            |
| Tonga    | 1995 | Male   | 40 to 44 | 57%<br>(39-74%)                | 43%<br>(26-61%)          | 0.76<br>(0.39-1.3)                          | 1.9%<br>(1-2.8%)                     | 1.9%<br>(0.83-3.2%)                 | 0.24<br>(0.1-0.42)        | 15<br>(8.2-24)           |
| Tonga    | 1995 | Male   | 45 to 49 | 53%<br>(32-71%)                | 47%<br>(29-68%)          | 0.64<br>(0.31-1.1)                          | 1.7%<br>(0.78-2.6%)                  | 1.8%<br>(0.66-2.9%)                 | 0.22<br>(0.078-0.38)      | 12<br>(5.4-19)           |
| Tonga    | 1995 | Male   | 50 to 54 | 50%<br>(30-69%)                | 50%<br>(31-70%)          | 0.52<br>(0.25-0.92)                         | 1.2%<br>(0.38-2.1%)                  | 1.3%<br>(0.24-2.3%)                 | 0.21<br>(0.038-0.39)      | 9.7<br>(2.9-17)          |

| Location | Year | Sex    | Age      | Prevalence of current drinkers | Prevalence of abstainers | Population average of standard drinks daily | Percent of total attributable deaths | Percent of total attributable DALYs | Attributable deaths           | Attributable DALYs       |
|----------|------|--------|----------|--------------------------------|--------------------------|---------------------------------------------|--------------------------------------|-------------------------------------|-------------------------------|--------------------------|
| Tonga    | 1995 | Male   | 55 to 59 | 48%<br>(30-67%)                | 52%<br>(33-70%)          | 0.42<br>(0.21-0.73)                         | 0.71%<br>(-0.066-1.4%)               | 0.71%<br>(-0.23-1.6%)               | 0.17<br>(-0.059-0.37)         | 6.7<br>(-0.63-14)        |
| Tonga    | 1995 | Male   | 60 to 64 | 45%<br>(27-66%)                | 55%<br>(34-73%)          | 0.35<br>(0.17-0.65)                         | 0.41%<br>(-0.27-0.98%)               | 0.4%<br>(-0.39-1.1%)                | 0.12<br>(-0.11-0.33)          | 4.1<br>(-2.6-11)         |
| Tonga    | 1995 | Male   | 65 to 69 | 44%<br>(26-63%)                | 56%<br>(37-74%)          | 0.32<br>(0.16-0.56)                         | 0.28%<br>(-0.26-0.78%)               | 0.29%<br>(-0.32-0.87%)              | 0.12<br>(-0.13-0.36)          | 3<br>(-2.9-8.6)          |
| Tonga    | 1995 | Male   | 70 to 74 | 41%<br>(25-60%)                | 59%<br>(40-75%)          | 0.29<br>(0.14-0.52)                         | 0.11%<br>(-0.39-0.55%)               | 0.096%<br>(-0.46-0.6%)              | 0.037<br>(-0.19-0.23)         | 0.9<br>(-3.4-4.4)        |
| Tonga    | 1995 | Male   | 75 to 79 | 37%<br>(22-55%)                | 63%<br>(45-78%)          | 0.24<br>(0.11-0.45)                         | -0.015%<br>(-0.43-0.34%)             | -0.056%<br>(-0.54-0.33%)            | -0.019<br>(-0.19-0.12)        | -0.082<br>(-2.5-1.9)     |
| Tonga    | 1995 | Male   | 80 to 84 | 34%<br>(19-52%)                | 66%<br>(48-81%)          | 0.22<br>(0.1-0.39)                          | 0.0045%<br>(-0.37-0.3%)              | -0.032%<br>(-0.45-0.3%)             | -0.0089<br>(-0.12-0.081)      | 0.014<br>(-1.2-0.96)     |
| Tonga    | 1995 | Male   | 85 to 89 | 33%<br>(19-50%)                | 67%<br>(50-81%)          | 0.2<br>(0.096-0.37)                         | -0.081%<br>(-0.48-0.19%)             | -0.13%<br>(-0.6-0.18%)              | -0.023<br>(-0.1-0.03)         | -0.12<br>(-0.69-0.28)    |
| Tonga    | 1995 | Male   | 90 to 94 | 34%<br>(21-52%)                | 66%<br>(48-79%)          | 0.21<br>(0.093-0.39)                        | -0.081%<br>(-0.47-0.2%)              | -0.14%<br>(-0.62-0.18%)             | -0.0096<br>(-0.041-0.012)     | -0.032<br>(-0.19-0.077)  |
| Tonga    | 1995 | Male   | 95 plus  | 38%<br>(21-59%)                | 62%<br>(41-79%)          | 0.24<br>(0.092-0.48)                        | -0.25%<br>(-0.74-0.087%)             | -0.4%<br>(-0.99--0.0034%)           | -0.0069<br>(-0.017--0.000061) | -0.017<br>(-0.051-0.006) |
| Tonga    | 2000 | Female | All Ages | 18%<br>(12-24%)                | 82%<br>(76-88%)          | 0.22<br>(0.16-0.29)                         | 0.021%<br>(-0.3-0.33%)               | -0.36%<br>(-0.97-0.15%)             | -1.2<br>(-3.2-0.51)           | 3<br>(-46-46)            |
| Tonga    | 2000 | Female | 15 to 19 | 18%<br>(8.5-33%)               | 82%<br>(67-91%)          | 0.27<br>(0.11-0.52)                         | 0.62%<br>(0.34-0.98%)                | 0.71%<br>(0.19-1.6%)                | 0.027<br>(0.0073-0.059)       | 4.3<br>(2.4-6.9)         |
| Tonga    | 2000 | Female | 20 to 24 | 22%<br>(9.7-39%)               | 78%<br>(61-90%)          | 0.42<br>(0.18-0.78)                         | 1.1%<br>(0.68-1.6%)                  | 0.94%<br>(0.34-1.9%)                | 0.041<br>(0.015-0.088)        | 7.2<br>(4.4-11)          |
| Tonga    | 2000 | Female | 25 to 29 | 24%<br>(9.5-42%)               | 76%<br>(58-91%)          | 0.43<br>(0.18-0.76)                         | 1.1%<br>(0.69-1.5%)                  | 0.96%<br>(0.4-1.8%)                 | 0.044<br>(0.018-0.084)        | 6.3<br>(3.9-9.5)         |
| Tonga    | 2000 | Female | 30 to 34 | 25%<br>(9.2-44%)               | 75%<br>(56-91%)          | 0.45<br>(0.17-0.81)                         | 0.93%<br>(0.55-1.4%)                 | 0.95%<br>(0.45-1.8%)                | 0.058<br>(0.026-0.11)         | 6.3<br>(3.5-9.6)         |
| Tonga    | 2000 | Female | 35 to 39 | 25%<br>(10-43%)                | 75%<br>(57-90%)          | 0.46<br>(0.19-0.83)                         | 0.89%<br>(0.44-1.5%)                 | 1.1%<br>(0.46-2.1%)                 | 0.072<br>(0.028-0.14)         | 5.2<br>(2.6-9)           |
| Tonga    | 2000 | Female | 40 to 44 | 24%<br>(11-42%)                | 76%<br>(58-89%)          | 0.43<br>(0.18-0.8)                          | 0.73%<br>(0.15-1.4%)                 | 1.1%<br>(0.31-2.2%)                 | 0.097<br>(0.026-0.2)          | 5.2<br>(1.1-10)          |
| Tonga    | 2000 | Female | 45 to 49 | 24%<br>(10-41%)                | 76%<br>(59-90%)          | 0.37<br>(0.14-0.7)                          | 0.33%<br>(-0.36-1%)                  | 0.62%<br>(-0.24-1.6%)               | 0.074<br>(-0.029-0.19)        | 2.6<br>(-2.9-7.9)        |
| Tonga    | 2000 | Female | 50 to 54 | 24%<br>(11-41%)                | 76%<br>(59-89%)          | 0.32<br>(0.12-0.62)                         | -0.086%<br>(-1-0.62%)                | 0.1%<br>(-0.93-1%)                  | 0.013<br>(-0.13-0.13)         | -0.65<br>(-7.9-4.7)      |
| Tonga    | 2000 | Female | 55 to 59 | 23%<br>(10-42%)                | 77%<br>(58-90%)          | 0.29<br>(0.11-0.59)                         | -0.33%<br>(-1.4-0.37%)               | -0.18%<br>(-1.3-0.67%)              | -0.033<br>(-0.25-0.11)        | -2.7<br>(-12-3.1)        |
| Tonga    | 2000 | Female | 60 to 64 | 23%<br>(11-43%)                | 77%<br>(57-89%)          | 0.28<br>(0.099-0.6)                         | -0.63%<br>(-1.9-0.16%)               | -0.57%<br>(-2-0.32%)                | -0.14<br>(-0.51-0.081)        | -5.7<br>(-18-1.4)        |
| Tonga    | 2000 | Female | 65 to 69 | 25%<br>(11-43%)                | 75%<br>(57-89%)          | 0.28<br>(0.1-0.56)                          | -0.83%<br>(-2.1-0.019%)              | -0.84%<br>(-2.3-0.12%)              | -0.27<br>(-0.76-0.039)        | -7.9<br>(-21-0.17)       |

| Location | Year | Sex    | Age      | Prevalence of current drinkers | Prevalence of abstainers | Population average of standard drinks daily | Percent of total attributable deaths | Percent of total attributable DALYs | Attributable deaths       | Attributable DALYs       |
|----------|------|--------|----------|--------------------------------|--------------------------|---------------------------------------------|--------------------------------------|-------------------------------------|---------------------------|--------------------------|
| Tonga    | 2000 | Female | 70 to 74 | 24%<br>(11-42%)                | 76%<br>(58-89%)          | 0.27<br>(0.098-0.53)                        | -0.88%<br>(-2--0.11%)                | -0.95%<br>(-2.2--0.071%)            | -0.39<br>(-0.94--0.034)   | -8.4<br>(-20--1)         |
| Tonga    | 2000 | Female | 75 to 79 | 23%<br>(10-42%)                | 77%<br>(58-90%)          | 0.25<br>(0.079-0.52)                        | -0.59%<br>(-1.5-0.028%)              | -0.6%<br>(-1.7-0.078%)              | -0.24<br>(-0.68-0.031)    | -4.2<br>(-11-0.21)       |
| Tonga    | 2000 | Female | 80 to 84 | 22%<br>(8.6-42%)               | 78%<br>(58-91%)          | 0.23<br>(0.072-0.48)                        | -0.58%<br>(-1.5--0.014%)             | -0.62%<br>(-1.6-0.013%)             | -0.25<br>(-0.64-0.0058)   | -3<br>(-7.6--0.073)      |
| Tonga    | 2000 | Female | 85 to 89 | 23%<br>(10-41%)                | 77%<br>(59-90%)          | 0.25<br>(0.087-0.53)                        | -0.63%<br>(-1.6--0.046%)             | -0.69%<br>(-1.7--0.039%)            | -0.18<br>(-0.46--0.01)    | -1.5<br>(-3.6--0.11)     |
| Tonga    | 2000 | Female | 90 to 94 | 27%<br>(11-46%)                | 73%<br>(54-89%)          | 0.29<br>(0.094-0.62)                        | -0.63%<br>(-1.5--0.049%)             | -0.7%<br>(-1.7--0.05%)              | -0.074<br>(-0.18--0.0054) | -0.4<br>(-0.94--0.029)   |
| Tonga    | 2000 | Female | 95 plus  | 32%<br>(13-55%)                | 68%<br>(45-87%)          | 0.34<br>(0.11-0.74)                         | -0.78%<br>(-2-0.061%)                | -0.92%<br>(-2.3-0.049%)             | -0.027<br>(-0.068-0.0013) | -0.089<br>(-0.23-0.0069) |
| Tonga    | 2000 | Male   | All Ages | 36%<br>(28-45%)                | 64%<br>(55-72%)          | 0.48<br>(0.38-0.6)                          | 1.2%<br>(0.79-1.7%)                  | 0.86%<br>(0.39-1.5%)                | 3.2<br>(1.4-5.3)          | 200<br>(130-290)         |
| Tonga    | 2000 | Male   | 15 to 19 | 34%<br>(19-52%)                | 66%<br>(48-81%)          | 0.33<br>(0.16-0.56)                         | 1.4%<br>(0.79-2.3%)                  | 1.7%<br>(0.74-3%)                   | 0.15<br>(0.068-0.29)      | 15<br>(8.5-25)           |
| Tonga    | 2000 | Male   | 20 to 24 | 52%<br>(33-70%)                | 48%<br>(30-67%)          | 0.88<br>(0.53-1.3)                          | 3.6%<br>(2.2-5.4%)                   | 4.1%<br>(2.2-6.6%)                  | 0.45<br>(0.24-0.74)       | 38<br>(23-57)            |
| Tonga    | 2000 | Male   | 25 to 29 | 59%<br>(39-75%)                | 41%<br>(25-61%)          | 1.2<br>(0.76-1.8)                           | 4.2%<br>(2.7-5.9%)                   | 4.8%<br>(2.8-7.2%)                  | 0.45<br>(0.24-0.71)       | 35<br>(22-52)            |
| Tonga    | 2000 | Male   | 30 to 34 | 61%<br>(39-77%)                | 39%<br>(23-61%)          | 1.3<br>(0.75-2)                             | 3.3%<br>(2.1-4.9%)                   | 3.6%<br>(2-5.7%)                    | 0.39<br>(0.2-0.65)        | 29<br>(17-46)            |
| Tonga    | 2000 | Male   | 35 to 39 | 59%<br>(41-76%)                | 41%<br>(24-59%)          | 1.1<br>(0.64-1.8)                           | 2.9%<br>(1.8-4.3%)                   | 3.1%<br>(1.7-5%)                    | 0.29<br>(0.14-0.48)       | 19<br>(11-30)            |
| Tonga    | 2000 | Male   | 40 to 44 | 57%<br>(39-74%)                | 43%<br>(26-61%)          | 1<br>(0.52-1.7)                             | 2.2%<br>(1.2-3.5%)                   | 2.4%<br>(1.1-4%)                    | 0.28<br>(0.12-0.49)       | 17<br>(8.5-28)           |
| Tonga    | 2000 | Male   | 45 to 49 | 53%<br>(32-71%)                | 47%<br>(29-68%)          | 0.86<br>(0.43-1.6)                          | 2%<br>(0.99-3.2%)                    | 2.2%<br>(0.88-3.6%)                 | 0.34<br>(0.14-0.6)        | 18<br>(8.6-30)           |
| Tonga    | 2000 | Male   | 50 to 54 | 50%<br>(31-68%)                | 50%<br>(32-69%)          | 0.71<br>(0.34-1.2)                          | 1.5%<br>(0.5-2.7%)                   | 1.6%<br>(0.33-3%)                   | 0.25<br>(0.049-0.48)      | 11<br>(3.6-20)           |
| Tonga    | 2000 | Male   | 55 to 59 | 48%<br>(30-66%)                | 52%<br>(34-70%)          | 0.57<br>(0.28-0.99)                         | 0.91%<br>(0.11-1.8%)                 | 0.93%<br>(-0.072-2%)                | 0.2<br>(-0.015-0.45)      | 7.9<br>(0.9-16)          |
| Tonga    | 2000 | Male   | 60 to 64 | 45%<br>(26-66%)                | 55%<br>(34-74%)          | 0.47<br>(0.22-0.87)                         | 0.56%<br>(-0.2-1.3%)                 | 0.57%<br>(-0.31-1.5%)               | 0.18<br>(-0.092-0.47)     | 5.7<br>(-1.8-14)         |
| Tonga    | 2000 | Male   | 65 to 69 | 43%<br>(25-62%)                | 57%<br>(38-75%)          | 0.43<br>(0.22-0.74)                         | 0.42%<br>(-0.16-1.1%)                | 0.45%<br>(-0.23-1.2%)               | 0.17<br>(-0.083-0.45)     | 4.2<br>(-1.7-11)         |
| Tonga    | 2000 | Male   | 70 to 74 | 41%<br>(24-59%)                | 59%<br>(41-76%)          | 0.38<br>(0.19-0.69)                         | 0.21%<br>(-0.35-0.81%)               | 0.21%<br>(-0.39-0.87%)              | 0.096<br>(-0.18-0.39)     | 2<br>(-3.1-7.6)          |
| Tonga    | 2000 | Male   | 75 to 79 | 37%<br>(21-56%)                | 63%<br>(44-79%)          | 0.33<br>(0.15-0.61)                         | 0.056%<br>(-0.42-0.53%)              | 0.02%<br>(-0.5-0.56%)               | 0.0077<br>(-0.19-0.2)     | 0.34<br>(-2.5-3.2)       |
| Tonga    | 2000 | Male   | 80 to 84 | 35%<br>(19-53%)                | 65%<br>(47-81%)          | 0.29<br>(0.13-0.51)                         | 0.058%<br>(-0.36-0.44%)              | 0.024%<br>(-0.44-0.44%)             | 0.0071<br>(-0.13-0.13)    | 0.21<br>(-1.3-1.6)       |
| Tonga    | 2000 | Male   | 85 to 89 | 33%<br>(19-50%)                | 67%<br>(50-81%)          | 0.27<br>(0.13-0.51)                         | -0.04%<br>(-0.46-0.3%)               | -0.094%<br>(-0.58-0.29%)            | -0.018<br>(-0.11-0.056)   | -0.065<br>(-0.75-0.49)   |

| Location | Year | Sex    | Age      | Prevalence of current drinkers | Prevalence of abstainers | Population average of standard drinks daily | Percent of total attributable deaths | Percent of total attributable DALYs | Attributable deaths       | Attributable DALYs       |
|----------|------|--------|----------|--------------------------------|--------------------------|---------------------------------------------|--------------------------------------|-------------------------------------|---------------------------|--------------------------|
| Tonga    | 2000 | Male   | 90 to 94 | 35%<br>(21-52%)                | 65%<br>(48-79%)          | 0.28<br>(0.12-0.52)                         | -0.054%<br>(-0.45-0.25%)             | -0.12%<br>(-0.6-0.23%)              | -0.0092<br>(-0.045-0.017) | -0.025<br>(-0.21-0.11)   |
| Tonga    | 2000 | Male   | 95 plus  | 38%<br>(21-59%)                | 62%<br>(41-79%)          | 0.32<br>(0.13-0.61)                         | -0.23%<br>(-0.74-0.16%)              | -0.39%<br>(-1-0.076%)               | -0.0076<br>(-0.02-0.0015) | -0.018<br>(-0.057-0.013) |
| Tonga    | 2005 | Female | All Ages | 18%<br>(13-24%)                | 82%<br>(76-87%)          | 0.26<br>(0.19-0.34)                         | 0.057%<br>(-0.31-0.39%)              | -0.34%<br>(-1-0.22%)                | -1.2<br>(-3.3-0.76)       | 8.2<br>(-44-57)          |
| Tonga    | 2005 | Female | 15 to 19 | 18%<br>(8.3-33%)               | 82%<br>(67-92%)          | 0.3<br>(0.12-0.59)                          | 0.66%<br>(0.36-1.1%)                 | 0.82%<br>(0.24-1.9%)                | 0.025<br>(0.0072-0.056)   | 3.9<br>(2-6.7)           |
| Tonga    | 2005 | Female | 20 to 24 | 22%<br>(9.1-41%)               | 78%<br>(59-91%)          | 0.47<br>(0.19-0.9)                          | 1.2%<br>(0.7-1.7%)                   | 1.1%<br>(0.39-2.2%)                 | 0.045<br>(0.017-0.093)    | 8<br>(4.7-12)            |
| Tonga    | 2005 | Female | 25 to 29 | 24%<br>(9.6-43%)               | 76%<br>(57-90%)          | 0.48<br>(0.2-0.88)                          | 1.1%<br>(0.72-1.7%)                  | 1.1%<br>(0.44-2.2%)                 | 0.048<br>(0.019-0.095)    | 6.9<br>(4.2-11)          |
| Tonga    | 2005 | Female | 30 to 34 | 25%<br>(9.1-44%)               | 75%<br>(56-91%)          | 0.5<br>(0.2-0.91)                           | 1%<br>(0.59-1.5%)                    | 1.1%<br>(0.49-2%)                   | 0.062<br>(0.026-0.12)     | 6.7<br>(3.7-10)          |
| Tonga    | 2005 | Female | 35 to 39 | 25%<br>(10-43%)                | 75%<br>(57-90%)          | 0.52<br>(0.21-0.91)                         | 0.98%<br>(0.51-1.6%)                 | 1.3%<br>(0.59-2.4%)                 | 0.1<br>(0.045-0.2)        | 7.6<br>(3.9-13)          |
| Tonga    | 2005 | Female | 40 to 44 | 24%<br>(12-41%)                | 76%<br>(59-88%)          | 0.48<br>(0.2-0.88)                          | 0.82%<br>(0.21-1.6%)                 | 1.2%<br>(0.41-2.4%)                 | 0.11<br>(0.034-0.21)      | 5.7<br>(1.5-11)          |
| Tonga    | 2005 | Female | 45 to 49 | 24%<br>(10-41%)                | 76%<br>(59-90%)          | 0.42<br>(0.15-0.79)                         | 0.38%<br>(-0.42-1.1%)                | 0.75%<br>(-0.2-1.9%)                | 0.09<br>(-0.023-0.22)     | 3.1<br>(-3.5-9.5)        |
| Tonga    | 2005 | Female | 50 to 54 | 24%<br>(11-41%)                | 76%<br>(59-89%)          | 0.36<br>(0.14-0.72)                         | -0.078%<br>(-1.1-0.78%)              | 0.17%<br>(-1.1-1.2%)                | 0.022<br>(-0.14-0.16)     | -0.6<br>(-8.8-5.7)       |
| Tonga    | 2005 | Female | 55 to 59 | 23%<br>(10-42%)                | 77%<br>(58-90%)          | 0.33<br>(0.12-0.68)                         | -0.31%<br>(-1.4-0.49%)               | -0.12%<br>(-1.3-0.91%)              | -0.019<br>(-0.21-0.13)    | -2.3<br>(-10-3.4)        |
| Tonga    | 2005 | Female | 60 to 64 | 23%<br>(10-41%)                | 77%<br>(59-90%)          | 0.32<br>(0.11-0.67)                         | -0.61%<br>(-2-0.24%)                 | -0.53%<br>(-2-0.47%)                | -0.11<br>(-0.41-0.099)    | -4.8<br>(-15-2)          |
| Tonga    | 2005 | Female | 65 to 69 | 25%<br>(11-43%)                | 75%<br>(57-89%)          | 0.32<br>(0.12-0.64)                         | -0.82%<br>(-2.2-0.085%)              | -0.82%<br>(-2.4-0.24%)              | -0.23<br>(-0.66-0.072)    | -7.1<br>(-18-0.84)       |
| Tonga    | 2005 | Female | 70 to 74 | 25%<br>(11-41%)                | 75%<br>(59-89%)          | 0.31<br>(0.11-0.61)                         | -0.88%<br>(-2.1--0.071%)             | -0.94%<br>(-2.3--0.011%)            | -0.37<br>(-0.9--0.0048)   | -8.2<br>(-19--0.65)      |
| Tonga    | 2005 | Female | 75 to 79 | 23%<br>(10-42%)                | 77%<br>(58-90%)          | 0.29<br>(0.095-0.62)                        | -0.59%<br>(-1.6-0.07%)               | -0.6%<br>(-1.8-0.14%)               | -0.29<br>(-0.85-0.068)    | -5.1<br>(-14-0.67)       |
| Tonga    | 2005 | Female | 80 to 84 | 23%<br>(9.7-41%)               | 77%<br>(59-90%)          | 0.27<br>(0.094-0.56)                        | -0.58%<br>(-1.5--0.0038%)            | -0.62%<br>(-1.7-0.052%)             | -0.3<br>(-0.83-0.023)     | -3.6<br>(-9.7--0.024)    |
| Tonga    | 2005 | Female | 85 to 89 | 23%<br>(11-41%)                | 77%<br>(59-89%)          | 0.28<br>(0.11-0.59)                         | -0.62%<br>(-1.6--0.033%)             | -0.69%<br>(-1.8--0.028%)            | -0.22<br>(-0.57--0.0091)  | -1.8<br>(-4.5--0.097)    |
| Tonga    | 2005 | Female | 90 to 94 | 27%<br>(12-46%)                | 73%<br>(54-88%)          | 0.32<br>(0.11-0.7)                          | -0.63%<br>(-1.5--0.015%)             | -0.7%<br>(-1.7--0.012%)             | -0.096<br>(-0.23--0.0015) | -0.52<br>(-1.2--0.013)   |
| Tonga    | 2005 | Female | 95 plus  | 32%<br>(13-54%)                | 68%<br>(46-87%)          | 0.38<br>(0.13-0.84)                         | -0.79%<br>(-2-0.12%)                 | -0.95%<br>(-2.4-0.1%)               | -0.034<br>(-0.088-0.0039) | -0.11<br>(-0.3-0.017)    |
| Tonga    | 2005 | Male   | All Ages | 37%<br>(29-46%)                | 63%<br>(54-71%)          | 0.56<br>(0.44-0.71)                         | 1.3%<br>(0.87-1.9%)                  | 0.99%<br>(0.46-1.6%)                | 3.9<br>(1.7-6.7)          | 230<br>(150-340)         |
| Tonga    | 2005 | Male   | 15 to 19 | 34%<br>(19-52%)                | 66%<br>(48-81%)          | 0.36<br>(0.16-0.63)                         | 1.5%<br>(0.85-2.5%)                  | 1.8%<br>(0.82-3.3%)                 | 0.14<br>(0.063-0.26)      | 14<br>(7.4-22)           |



| Location | Year | Sex    | Age      | Prevalence of current drinkers | Prevalence of abstainers | Population average of standard drinks daily | Percent of total attributable deaths | Percent of total attributable DALYs | Attributable deaths        | Attributable DALYs       |
|----------|------|--------|----------|--------------------------------|--------------------------|---------------------------------------------|--------------------------------------|-------------------------------------|----------------------------|--------------------------|
| Tonga    | 2005 | Male   | 20 to 24 | 52%<br>(33-71%)                | 48%<br>(29-67%)          | 0.99<br>(0.56-1.5)                          | 3.8%<br>(2.3-5.7%)                   | 4.4%<br>(2.4-7%)                    | 0.5<br>(0.26-0.83)         | 41<br>(25-63)            |
| Tonga    | 2005 | Male   | 25 to 29 | 60%<br>(40-76%)                | 40%<br>(24-60%)          | 1.4<br>(0.86-2.1)                           | 4.6%<br>(2.9-6.5%)                   | 5.2%<br>(3-7.9%)                    | 0.48<br>(0.25-0.76)        | 37<br>(22-55)            |
| Tonga    | 2005 | Male   | 30 to 34 | 61%<br>(40-78%)                | 39%<br>(22-60%)          | 1.5<br>(0.87-2.2)                           | 3.7%<br>(2.3-5.7%)                   | 4%<br>(2.3-6.6%)                    | 0.41<br>(0.21-0.69)        | 31<br>(19-49)            |
| Tonga    | 2005 | Male   | 35 to 39 | 59%<br>(41-76%)                | 41%<br>(24-59%)          | 1.3<br>(0.73-2)                             | 3.1%<br>(1.9-4.8%)                   | 3.5%<br>(1.8-5.6%)                  | 0.45<br>(0.22-0.75)        | 30<br>(17-47)            |
| Tonga    | 2005 | Male   | 40 to 44 | 57%<br>(39-74%)                | 43%<br>(26-61%)          | 1.1<br>(0.6-1.9)                            | 2.4%<br>(1.3-3.9%)                   | 2.6%<br>(1.2-4.4%)                  | 0.34<br>(0.14-0.6)         | 20<br>(10-34)            |
| Tonga    | 2005 | Male   | 45 to 49 | 53%<br>(32-71%)                | 47%<br>(29-68%)          | 0.97<br>(0.47-1.7)                          | 2.2%<br>(1.1-3.6%)                   | 2.4%<br>(1-4.1%)                    | 0.42<br>(0.17-0.74)        | 22<br>(10-36)            |
| Tonga    | 2005 | Male   | 50 to 54 | 50%<br>(31-69%)                | 50%<br>(31-69%)          | 0.78<br>(0.38-1.4)                          | 1.7%<br>(0.6-3.1%)                   | 1.9%<br>(0.51-3.5%)                 | 0.33<br>(0.088-0.66)       | 14<br>(5-28)             |
| Tonga    | 2005 | Male   | 55 to 59 | 48%<br>(29-67%)                | 52%<br>(33-71%)          | 0.63<br>(0.31-1.1)                          | 1.1%<br>(0.19-2.2%)                  | 1.1%<br>(0.083-2.4%)                | 0.21<br>(0.015-0.47)       | 8.2<br>(1.5-17)          |
| Tonga    | 2005 | Male   | 60 to 64 | 45%<br>(27-66%)                | 55%<br>(34-73%)          | 0.53<br>(0.25-1)                            | 0.68%<br>(-0.13-1.7%)                | 0.72%<br>(-0.18-1.9%)               | 0.2<br>(-0.05-0.54)        | 6.4<br>(-1.1-16)         |
| Tonga    | 2005 | Male   | 65 to 69 | 44%<br>(25-62%)                | 56%<br>(38-75%)          | 0.49<br>(0.24-0.85)                         | 0.52%<br>(-0.11-1.3%)                | 0.57%<br>(-0.16-1.5%)               | 0.22<br>(-0.062-0.58)      | 5.4<br>(-1.2-14)         |
| Tonga    | 2005 | Male   | 70 to 74 | 41%<br>(24-58%)                | 59%<br>(42-76%)          | 0.43<br>(0.21-0.77)                         | 0.29%<br>(-0.32-1%)                  | 0.3%<br>(-0.39-1.1%)                | 0.13<br>(-0.17-0.48)       | 2.7<br>(-2.8-9.4)        |
| Tonga    | 2005 | Male   | 75 to 79 | 37%<br>(21-56%)                | 63%<br>(44-79%)          | 0.36<br>(0.16-0.68)                         | 0.11%<br>(-0.37-0.71%)               | 0.084%<br>(-0.47-0.72%)             | 0.039<br>(-0.21-0.33)      | 0.86<br>(-2.8-5.2)       |
| Tonga    | 2005 | Male   | 80 to 84 | 34%<br>(19-53%)                | 66%<br>(47-81%)          | 0.32<br>(0.15-0.58)                         | 0.1%<br>(-0.33-0.53%)                | 0.069%<br>(-0.43-0.56%)             | 0.024<br>(-0.15-0.2)       | 0.42<br>(-1.4-2.2)       |
| Tonga    | 2005 | Male   | 85 to 89 | 33%<br>(19-49%)                | 67%<br>(51-81%)          | 0.3<br>(0.14-0.55)                          | -0.0051%<br>(-0.43-0.4%)             | -0.056%<br>(-0.56-0.39%)            | -0.012<br>(-0.11-0.08)     | -0.0085<br>(-0.78-0.7)   |
| Tonga    | 2005 | Male   | 90 to 94 | 34%<br>(20-52%)                | 66%<br>(48-80%)          | 0.31<br>(0.14-0.56)                         | -0.029%<br>(-0.41-0.33%)             | -0.096%<br>(-0.55-0.3%)             | -0.0083<br>(-0.048-0.027)  | -0.015<br>(-0.21-0.17)   |
| Tonga    | 2005 | Male   | 95 plus  | 37%<br>(20-58%)                | 63%<br>(42-80%)          | 0.34<br>(0.13-0.66)                         | -0.2%<br>(-0.71-0.22%)               | -0.36%<br>(-0.97-0.15%)             | -0.0083<br>(-0.022-0.0033) | -0.019<br>(-0.065-0.019) |
| Tonga    | 2010 | Female | All Ages | 18%<br>(13-24%)                | 82%<br>(76-87%)          | 0.28<br>(0.19-0.39)                         | 0.097%<br>(-0.29-0.48%)              | -0.31%<br>(-0.95-0.31%)             | -1.1<br>(-3.5-1.1)         | 14<br>(-40-67)           |
| Tonga    | 2010 | Female | 15 to 19 | 18%<br>(8.3-32%)               | 82%<br>(68-92%)          | 0.32<br>(0.13-0.64)                         | 0.68%<br>(0.35-1.1%)                 | 0.89%<br>(0.26-2%)                  | 0.029<br>(0.0082-0.067)    | 4.5<br>(2.3-7.6)         |
| Tonga    | 2010 | Female | 20 to 24 | 22%<br>(8.9-40%)               | 78%<br>(60-91%)          | 0.49<br>(0.2-0.97)                          | 1.2%<br>(0.72-1.9%)                  | 1.2%<br>(0.41-2.5%)                 | 0.041<br>(0.014-0.089)     | 7.2<br>(4.2-12)          |
| Tonga    | 2010 | Female | 25 to 29 | 23%<br>(10-42%)                | 77%<br>(58-90%)          | 0.51<br>(0.22-0.95)                         | 1.2%<br>(0.74-1.8%)                  | 1.2%<br>(0.47-2.3%)                 | 0.054<br>(0.021-0.11)      | 7.8<br>(4.6-12)          |
| Tonga    | 2010 | Female | 30 to 34 | 25%<br>(9.6-44%)               | 75%<br>(56-90%)          | 0.54<br>(0.22-0.99)                         | 1.1%<br>(0.61-1.7%)                  | 1.2%<br>(0.53-2.2%)                 | 0.07<br>(0.029-0.13)       | 7.5<br>(4.1-12)          |
| Tonga    | 2010 | Female | 35 to 39 | 25%<br>(9.6-43%)               | 75%<br>(57-90%)          | 0.56<br>(0.23-1)                            | 1.1%<br>(0.54-1.7%)                  | 1.5%<br>(0.66-2.6%)                 | 0.11<br>(0.045-0.21)       | 8.3<br>(4.3-14)          |

| Location | Year | Sex    | Age      | Prevalence of current drinkers | Prevalence of abstainers | Population average of standard drinks daily | Percent of total attributable deaths | Percent of total attributable DALYs | Attributable deaths      | Attributable DALYs     |
|----------|------|--------|----------|--------------------------------|--------------------------|---------------------------------------------|--------------------------------------|-------------------------------------|--------------------------|------------------------|
| Tonga    | 2010 | Female | 40 to 44 | 25%<br>(12-42%)                | 75%<br>(58-88%)          | 0.52<br>(0.22-0.99)                         | 0.89%<br>(0.23-1.7%)                 | 1.4%<br>(0.42-2.7%)                 | 0.13<br>(0.037-0.26)     | 6.9<br>(1.7-14)        |
| Tonga    | 2010 | Female | 45 to 49 | 24%<br>(10-42%)                | 76%<br>(58-90%)          | 0.45<br>(0.17-0.87)                         | 0.44%<br>(-0.42-1.3%)                | 0.83%<br>(-0.22-2.2%)               | 0.091<br>(-0.026-0.24)   | 3.4<br>(-3.3-11)       |
| Tonga    | 2010 | Female | 50 to 54 | 24%<br>(10-42%)                | 76%<br>(58-90%)          | 0.39<br>(0.14-0.77)                         | -0.032%<br>(-1.3-0.96%)              | 0.21%<br>(-1.2-1.5%)                | 0.032<br>(-0.19-0.23)    | -0.3<br>(-12-8.5)      |
| Tonga    | 2010 | Female | 55 to 59 | 23%<br>(11-42%)                | 77%<br>(58-89%)          | 0.35<br>(0.13-0.75)                         | -0.29%<br>(-1.5-0.6%)                | -0.11%<br>(-1.4-1.1%)               | -0.017<br>(-0.24-0.16)   | -2.2<br>(-11-4.3)      |
| Tonga    | 2010 | Female | 60 to 64 | 23%<br>(10-42%)                | 77%<br>(58-90%)          | 0.34<br>(0.12-0.72)                         | -0.61%<br>(-2-0.31%)                 | -0.53%<br>(-2.2-0.6%)               | -0.11<br>(-0.45-0.11)    | -4.6<br>(-16-2.3)      |
| Tonga    | 2010 | Female | 65 to 69 | 24%<br>(11-42%)                | 76%<br>(58-89%)          | 0.34<br>(0.12-0.69)                         | -0.81%<br>(-2.2-0.15%)               | -0.82%<br>(-2.4-0.31%)              | -0.2<br>(-0.6-0.072)     | -6.1<br>(-17-1)        |
| Tonga    | 2010 | Female | 70 to 74 | 24%<br>(11-40%)                | 76%<br>(60-89%)          | 0.32<br>(0.12-0.65)                         | -0.83%<br>(-2-0.0067%)               | -0.9%<br>(-2.3-0.079%)              | -0.31<br>(-0.78-0.023)   | -6.9<br>(-17-0.061)    |
| Tonga    | 2010 | Female | 75 to 79 | 23%<br>(10-40%)                | 77%<br>(60-90%)          | 0.29<br>(0.095-0.64)                        | -0.54%<br>(-1.6-0.14%)               | -0.55%<br>(-1.7-0.24%)              | -0.26<br>(-0.81-0.11)    | -4.6<br>(-13-1.3)      |
| Tonga    | 2010 | Female | 80 to 84 | 22%<br>(9.2-41%)               | 78%<br>(59-91%)          | 0.28<br>(0.094-0.6)                         | -0.54%<br>(-1.4-0.057%)              | -0.58%<br>(-1.6-0.089%)             | -0.33<br>(-0.92-0.052)   | -4<br>(-11-0.43)       |
| Tonga    | 2010 | Female | 85 to 89 | 23%<br>(10-41%)                | 77%<br>(59-90%)          | 0.3<br>(0.11-0.64)                          | -0.6%<br>(-1.6-0.01%)                | -0.66%<br>(-1.8-0.029%)             | -0.28<br>(-0.77-0.012)   | -2.2<br>(-6.1-0.04)    |
| Tonga    | 2010 | Female | 90 to 94 | 27%<br>(12-46%)                | 73%<br>(54-88%)          | 0.35<br>(0.11-0.75)                         | -0.62%<br>(-1.5-0.093%)              | -0.7%<br>(-1.7-0.1%)                | -0.13<br>(-0.3-0.017)    | -0.67<br>(-1.6-0.11)   |
| Tonga    | 2010 | Female | 95 plus  | 31%<br>(14-55%)                | 69%<br>(45-86%)          | 0.41<br>(0.13-0.94)                         | -0.78%<br>(-2.1-0.19%)               | -0.94%<br>(-2.5-0.16%)              | -0.049<br>(-0.13-0.0082) | -0.16<br>(-0.44-0.039) |
| Tonga    | 2010 | Male   | All Ages | 37%<br>(29-46%)                | 63%<br>(54-71%)          | 0.59<br>(0.44-0.8)                          | 1.4%<br>(0.89-2.1%)                  | 1.1%<br>(0.48-1.9%)                 | 4.3<br>(1.8-7.8)         | 250<br>(150-380)       |
| Tonga    | 2010 | Male   | 15 to 19 | 34%<br>(20-52%)                | 66%<br>(48-80%)          | 0.38<br>(0.17-0.69)                         | 1.5%<br>(0.86-2.6%)                  | 1.9%<br>(0.84-3.5%)                 | 0.16<br>(0.071-0.29)     | 15<br>(8.2-24)         |
| Tonga    | 2010 | Male   | 20 to 24 | 52%<br>(33-69%)                | 48%<br>(31-67%)          | 1<br>(0.56-1.7)                             | 4%<br>(2.3-6.2%)                     | 4.7%<br>(2.4-7.8%)                  | 0.45<br>(0.22-0.78)      | 38<br>(21-59)          |
| Tonga    | 2010 | Male   | 25 to 29 | 59%<br>(40-76%)                | 41%<br>(24-60%)          | 1.5<br>(0.86-2.3)                           | 4.7%<br>(2.9-6.9%)                   | 5.5%<br>(3-8.5%)                    | 0.55<br>(0.29-0.89)      | 42<br>(25-65)          |
| Tonga    | 2010 | Male   | 30 to 34 | 60%<br>(39-77%)                | 40%<br>(23-61%)          | 1.6<br>(0.88-2.4)                           | 3.8%<br>(2.4-5.9%)                   | 4.3%<br>(2.3-6.9%)                  | 0.44<br>(0.22-0.76)      | 33<br>(19-53)          |
| Tonga    | 2010 | Male   | 35 to 39 | 59%<br>(40-77%)                | 41%<br>(23-60%)          | 1.4<br>(0.77-2.2)                           | 3.3%<br>(1.9-5.1%)                   | 3.7%<br>(2-6.2%)                    | 0.47<br>(0.23-0.85)      | 32<br>(17-52)          |
| Tonga    | 2010 | Male   | 40 to 44 | 57%<br>(39-74%)                | 43%<br>(26-61%)          | 1.2<br>(0.6-2)                              | 2.6%<br>(1.3-4.3%)                   | 2.8%<br>(1.3-5%)                    | 0.39<br>(0.16-0.72)      | 24<br>(11-41)          |
| Tonga    | 2010 | Male   | 45 to 49 | 53%<br>(32-72%)                | 47%<br>(28-68%)          | 1<br>(0.49-1.8)                             | 2.3%<br>(1.1-4%)                     | 2.5%<br>(1.1-4.5%)                  | 0.41<br>(0.17-0.75)      | 21<br>(9.7-37)         |
| Tonga    | 2010 | Male   | 50 to 54 | 50%<br>(31-68%)                | 50%<br>(32-69%)          | 0.84<br>(0.4-1.5)                           | 1.8%<br>(0.68-3.4%)                  | 2%<br>(0.67-3.8%)                   | 0.46<br>(0.15-0.95)      | 20<br>(7.3-41)         |
| Tonga    | 2010 | Male   | 55 to 59 | 48%<br>(30-67%)                | 52%<br>(33-70%)          | 0.68<br>(0.32-1.2)                          | 1.2%<br>(0.24-2.5%)                  | 1.3%<br>(0.16-2.8%)                 | 0.27<br>(0.034-0.63)     | 10<br>(2.2-23)         |

| Location | Year | Sex    | Age      | Prevalence of current drinkers | Prevalence of abstainers | Population average of standard drinks daily | Percent of total attributable deaths | Percent of total attributable DALYs | Attributable deaths        | Attributable DALYs       |
|----------|------|--------|----------|--------------------------------|--------------------------|---------------------------------------------|--------------------------------------|-------------------------------------|----------------------------|--------------------------|
| Tonga    | 2010 | Male   | 60 to 64 | 45%<br>(26-65%)                | 55%<br>(35-74%)          | 0.57<br>(0.25-1.1)                          | 0.78%<br>(-0.051-2%)                 | 0.83%<br>(-0.12-2.2%)               | 0.21<br>(-0.032-0.6)       | 6.8<br>(-0.39-18)        |
| Tonga    | 2010 | Male   | 65 to 69 | 43%<br>(25-63%)                | 57%<br>(37-75%)          | 0.51<br>(0.25-0.91)                         | 0.6%<br>(-0.087-1.6%)                | 0.65%<br>(-0.12-1.8%)               | 0.23<br>(-0.043-0.63)      | 5.6<br>(-0.83-15)        |
| Tonga    | 2010 | Male   | 70 to 74 | 40%<br>(25-58%)                | 60%<br>(42-75%)          | 0.44<br>(0.22-0.84)                         | 0.34%<br>(-0.27-1.2%)                | 0.36%<br>(-0.33-1.3%)               | 0.15<br>(-0.14-0.57)       | 3.2<br>(-2.4-11)         |
| Tonga    | 2010 | Male   | 75 to 79 | 37%<br>(22-55%)                | 63%<br>(45-78%)          | 0.38<br>(0.17-0.71)                         | 0.16%<br>(-0.34-0.81%)               | 0.13%<br>(-0.43-0.84%)              | 0.056<br>(-0.19-0.37)      | 1.1<br>(-2.4-6.1)        |
| Tonga    | 2010 | Male   | 80 to 84 | 34%<br>(19-52%)                | 66%<br>(48-81%)          | 0.34<br>(0.15-0.61)                         | 0.14%<br>(-0.29-0.62%)               | 0.11%<br>(-0.38-0.65%)              | 0.041<br>(-0.15-0.25)      | 0.64<br>(-1.4-2.9)       |
| Tonga    | 2010 | Male   | 85 to 89 | 33%<br>(19-49%)                | 67%<br>(51-81%)          | 0.32<br>(0.15-0.58)                         | 0.028%<br>(-0.39-0.46%)              | -0.021%<br>(-0.5-0.47%)             | -0.0051<br>(-0.12-0.11)    | 0.06<br>(-0.84-0.99)     |
| Tonga    | 2010 | Male   | 90 to 94 | 34%<br>(21-51%)                | 66%<br>(49-79%)          | 0.33<br>(0.14-0.61)                         | 0.00034%<br>(-0.4-0.41%)             | -0.063%<br>(-0.54-0.4%)             | -0.0061<br>(-0.052-0.039)  | 0.00021<br>(-0.23-0.24)  |
| Tonga    | 2010 | Male   | 95 plus  | 37%<br>(19-58%)                | 63%<br>(42-81%)          | 0.36<br>(0.13-0.73)                         | -0.17%<br>(-0.7-0.32%)               | -0.32%<br>(-0.96-0.25%)             | -0.0087<br>(-0.026-0.0068) | -0.019<br>(-0.076-0.035) |
| Tonga    | 2016 | Female | All Ages | 18%<br>(13-24%)                | 82%<br>(76-87%)          | 0.28<br>(0.16-0.44)                         | 0.12%<br>(-0.3-0.64%)                | -0.27%<br>(-0.96-0.55%)             | -1<br>(-3.7-2)             | 18<br>(-42-93)           |
| Tonga    | 2016 | Female | 15 to 19 | 18%<br>(8.3-32%)               | 82%<br>(68-92%)          | 0.32<br>(0.11-0.67)                         | 0.71%<br>(0.37-1.2%)                 | 0.92%<br>(0.25-2.1%)                | 0.03<br>(0.0078-0.07)      | 4.7<br>(2.4-8.3)         |
| Tonga    | 2016 | Female | 20 to 24 | 22%<br>(9.3-39%)               | 78%<br>(61-91%)          | 0.5<br>(0.19-0.98)                          | 1.2%<br>(0.72-1.9%)                  | 1.2%<br>(0.39-2.7%)                 | 0.047<br>(0.015-0.1)       | 8.3<br>(4.8-13)          |
| Tonga    | 2016 | Female | 25 to 29 | 24%<br>(10-42%)                | 76%<br>(58-90%)          | 0.51<br>(0.2-0.99)                          | 1.2%<br>(0.74-1.9%)                  | 1.2%<br>(0.44-2.5%)                 | 0.046<br>(0.015-0.099)     | 6.7<br>(3.9-11)          |
| Tonga    | 2016 | Female | 30 to 34 | 25%<br>(9-45%)                 | 75%<br>(55-91%)          | 0.53<br>(0.2-1.1)                           | 1.1%<br>(0.61-1.8%)                  | 1.5%<br>(0.52-2.5%)                 | 0.063<br>(0.023-0.13)      | 6.8<br>(3.5-12)          |
| Tonga    | 2016 | Female | 35 to 39 | 26%<br>(9.7-44%)               | 74%<br>(56-90%)          | 0.56<br>(0.2-1.1)                           | 1.1%<br>(0.5-2%)                     | 1.5%<br>(0.61-3%)                   | 0.11<br>(0.039-0.22)       | 7.8<br>(3.5-15)          |
| Tonga    | 2016 | Female | 40 to 44 | 25%<br>(12-43%)                | 75%<br>(57-88%)          | 0.52<br>(0.18-1.1)                          | 0.94%<br>(0.2-2%)                    | 1.5%<br>(0.42-3.1%)                 | 0.15<br>(0.038-0.31)       | 8<br>(1.7-17)            |
| Tonga    | 2016 | Female | 45 to 49 | 24%<br>(11-42%)                | 76%<br>(58-89%)          | 0.44<br>(0.15-0.91)                         | 0.5%<br>(-0.32-1.6%)                 | 0.93%<br>(-0.13-2.4%)               | 0.11<br>(-0.015-0.29)      | 4.3<br>(-2.9-13)         |
| Tonga    | 2016 | Female | 50 to 54 | 24%<br>(11-42%)                | 76%<br>(58-89%)          | 0.38<br>(0.13-0.82)                         | 0.052%<br>(-1-1.2%)                  | 0.34%<br>(-0.99-1.8%)               | 0.049<br>(-0.15-0.28)      | 0.45<br>(-9.1-10)        |
| Tonga    | 2016 | Female | 55 to 59 | 23%<br>(10-42%)                | 77%<br>(58-90%)          | 0.35<br>(0.12-0.77)                         | -0.2%<br>(-1.4-0.76%)                | 0.018%<br>(-1.3-1.3%)               | 0.0031<br>(-0.27-0.26)     | -2<br>(-14-7.9)          |
| Tonga    | 2016 | Female | 60 to 64 | 23%<br>(10-41%)                | 77%<br>(59-90%)          | 0.33<br>(0.11-0.74)                         | -0.48%<br>(-1.8-0.46%)               | -0.38%<br>(-1.9-0.8%)               | -0.084<br>(-0.43-0.16)     | -4.2<br>(-16-4.2)        |
| Tonga    | 2016 | Female | 65 to 69 | 24%<br>(11-42%)                | 76%<br>(58-89%)          | 0.34<br>(0.12-0.7)                          | -0.7%<br>(-2-0.3%)                   | -0.69%<br>(-2.3-0.45%)              | -0.18<br>(-0.59-0.12)      | -5.8<br>(-17-2.4)        |
| Tonga    | 2016 | Female | 70 to 74 | 24%<br>(11-42%)                | 76%<br>(58-89%)          | 0.32<br>(0.11-0.72)                         | -0.76%<br>(-1.9-0.18%)               | -0.8%<br>(-2.1-0.29%)               | -0.27<br>(-0.68-0.099)     | -6<br>(-15-1.4)          |
| Tonga    | 2016 | Female | 75 to 79 | 23%<br>(10-41%)                | 77%<br>(59-90%)          | 0.3<br>(0.088-0.66)                         | -0.49%<br>(-1.5-0.35%)               | -0.48%<br>(-1.6-0.46%)              | -0.21<br>(-0.71-0.21)      | -3.8<br>(-12-2.7)        |

| Location | Year | Sex    | Age      | Prevalence of current drinkers | Prevalence of abstainers | Population average of standard drinks daily | Percent of total attributable deaths | Percent of total attributable DALYs | Attributable deaths      | Attributable DALYs       |
|----------|------|--------|----------|--------------------------------|--------------------------|---------------------------------------------|--------------------------------------|-------------------------------------|--------------------------|--------------------------|
| Tonga    | 2016 | Female | 80 to 84 | 23%<br>(9.5-41%)               | 77%<br>(59-91%)          | 0.29<br>(0.088-0.62)                        | -0.51%<br>(-1.5-0.24%)               | -0.53%<br>(-1.6-0.33%)              | -0.31<br>(-0.96-0.19)    | -3.8<br>(-11-1.7)        |
| Tonga    | 2016 | Female | 85 to 89 | 24%<br>(10-42%)                | 76%<br>(58-90%)          | 0.3<br>(0.095-0.68)                         | -0.55%<br>(-1.5-0.19%)               | -0.61%<br>(-1.7-0.25%)              | -0.33<br>(-0.92-0.13)    | -2.6<br>(-7.3-0.89)      |
| Tonga    | 2016 | Female | 90 to 94 | 27%<br>(12-46%)                | 73%<br>(54-88%)          | 0.35<br>(0.11-0.78)                         | -0.56%<br>(-1.4-0.2%)                | -0.64%<br>(-1.6-0.22%)              | -0.18<br>(-0.46-0.066)   | -0.96<br>(-2.4-0.34)     |
| Tonga    | 2016 | Female | 95 plus  | 31%<br>(13-54%)                | 69%<br>(46-87%)          | 0.41<br>(0.12-0.98)                         | -0.72%<br>(-2.1-0.27%)               | -0.87%<br>(-2.5-0.24%)              | -0.069<br>(-0.2-0.019)   | -0.22<br>(-0.65-0.089)   |
| Tonga    | 2016 | Male   | All Ages | 37%<br>(29-46%)                | 63%<br>(54-71%)          | 0.6<br>(0.37-0.9)                           | 1.6%<br>(0.86-2.5%)                  | 1.2%<br>(0.46-2.2%)                 | 4.6<br>(1.8-9)           | 270<br>(150-440)         |
| Tonga    | 2016 | Male   | 15 to 19 | 34%<br>(20-52%)                | 66%<br>(48-80%)          | 0.39<br>(0.16-0.74)                         | 1.5%<br>(0.83-2.7%)                  | 1.9%<br>(0.8-3.7%)                  | 0.17<br>(0.069-0.32)     | 16<br>(8.4-28)           |
| Tonga    | 2016 | Male   | 20 to 24 | 52%<br>(34-69%)                | 48%<br>(31-66%)          | 1.1<br>(0.51-1.8)                           | 4%<br>(2.3-6.4%)                     | 4.7%<br>(2.3-8.1%)                  | 0.54<br>(0.25-0.97)      | 45<br>(25-74)            |
| Tonga    | 2016 | Male   | 25 to 29 | 59%<br>(39-76%)                | 41%<br>(24-61%)          | 1.5<br>(0.76-2.4)                           | 4.7%<br>(2.7-7.5%)                   | 5.6%<br>(2.8-9.6%)                  | 0.51<br>(0.25-0.88)      | 39<br>(22-65)            |
| Tonga    | 2016 | Male   | 30 to 34 | 61%<br>(40-78%)                | 39%<br>(22-60%)          | 1.6<br>(0.78-2.7)                           | 3.9%<br>(2.2-6.5%)                   | 4.4%<br>(2.1-8.1%)                  | 0.42<br>(0.19-0.81)      | 32<br>(17-55)            |
| Tonga    | 2016 | Male   | 35 to 39 | 59%<br>(40-77%)                | 41%<br>(23-60%)          | 1.4<br>(0.69-2.4)                           | 3.4%<br>(1.9-5.9%)                   | 3.9%<br>(1.9-7.1%)                  | 0.43<br>(0.2-0.83)       | 29<br>(15-51)            |
| Tonga    | 2016 | Male   | 40 to 44 | 57%<br>(38-75%)                | 43%<br>(25-62%)          | 1.2<br>(0.54-2.1)                           | 2.6%<br>(1.3-4.8%)                   | 2.9%<br>(1.2-5.6%)                  | 0.44<br>(0.18-0.93)      | 27<br>(12-51)            |
| Tonga    | 2016 | Male   | 45 to 49 | 52%<br>(31-71%)                | 48%<br>(29-69%)          | 1<br>(0.43-1.9)                             | 2.4%<br>(1-4.3%)                     | 2.6%<br>(1-4.8%)                    | 0.48<br>(0.18-0.92)      | 25<br>(10-45)            |
| Tonga    | 2016 | Male   | 50 to 54 | 49%<br>(30-69%)                | 51%<br>(31-70%)          | 0.83<br>(0.36-1.6)                          | 1.9%<br>(0.71-3.8%)                  | 2.1%<br>(0.69-4.3%)                 | 0.45<br>(0.14-0.96)      | 20<br>(7.2-41)           |
| Tonga    | 2016 | Male   | 55 to 59 | 47%<br>(29-67%)                | 53%<br>(33-71%)          | 0.68<br>(0.3-1.3)                           | 1.2%<br>(0.27-2.8%)                  | 1.3%<br>(0.16-3.2%)                 | 0.41<br>(0.048-0.97)     | 16<br>(3.4-36)           |
| Tonga    | 2016 | Male   | 60 to 64 | 45%<br>(26-66%)                | 55%<br>(34-74%)          | 0.56<br>(0.22-1.1)                          | 0.85%<br>(-0.022-2.3%)               | 0.91%<br>(-0.066-2.6%)              | 0.27<br>(-0.021-0.75)    | 8.5<br>(-0.21-23)        |
| Tonga    | 2016 | Male   | 65 to 69 | 43%<br>(25-62%)                | 57%<br>(38-75%)          | 0.51<br>(0.23-0.96)                         | 0.67%<br>(-0.05-1.8%)                | 0.73%<br>(-0.091-2%)                | 0.23<br>(-0.026-0.62)    | 5.7<br>(-0.43-15)        |
| Tonga    | 2016 | Male   | 70 to 74 | 41%<br>(24-58%)                | 59%<br>(42-76%)          | 0.45<br>(0.2-0.9)                           | 0.4%<br>(-0.2-1.4%)                  | 0.43%<br>(-0.26-1.5%)               | 0.17<br>(-0.098-0.56)    | 3.4<br>(-1.6-11)         |
| Tonga    | 2016 | Male   | 75 to 79 | 37%<br>(21-55%)                | 63%<br>(45-79%)          | 0.38<br>(0.16-0.77)                         | 0.2%<br>(-0.33-1%)                   | 0.18%<br>(-0.42-1%)                 | 0.079<br>(-0.19-0.45)    | 1.5<br>(-2.2-7.2)        |
| Tonga    | 2016 | Male   | 80 to 84 | 34%<br>(19-52%)                | 66%<br>(48-81%)          | 0.34<br>(0.15-0.65)                         | 0.17%<br>(-0.27-0.72%)               | 0.15%<br>(-0.33-0.76%)              | 0.06<br>(-0.13-0.31)     | 0.85<br>(-1.3-3.6)       |
| Tonga    | 2016 | Male   | 85 to 89 | 32%<br>(18-48%)                | 68%<br>(52-82%)          | 0.32<br>(0.14-0.61)                         | 0.061%<br>(-0.39-0.56%)              | 0.016%<br>(-0.5-0.58%)              | 0.0044<br>(-0.14-0.16)   | 0.15<br>(-0.91-1.4)      |
| Tonga    | 2016 | Male   | 90 to 94 | 34%<br>(21-52%)                | 66%<br>(48-79%)          | 0.33<br>(0.14-0.66)                         | 0.026%<br>(-0.39-0.52%)              | -0.035%<br>(-0.51-0.49%)            | -0.0043<br>(-0.062-0.06) | 0.019<br>(-0.28-0.38)    |
| Tonga    | 2016 | Male   | 95 plus  | 38%<br>(19-59%)                | 62%<br>(41-81%)          | 0.37<br>(0.13-0.82)                         | -0.15%<br>(-0.68-0.48%)              | -0.29%<br>(-0.92-0.38%)             | -0.009<br>(-0.028-0.012) | -0.018<br>(-0.085-0.058) |

| Location | Year | Sex    | Age      | Prevalence of current drinkers | Prevalence of abstainers | Population average of standard drinks daily | Percent of total attributable deaths | Percent of total attributable DALYs | Attributable deaths      | Attributable DALYs      |
|----------|------|--------|----------|--------------------------------|--------------------------|---------------------------------------------|--------------------------------------|-------------------------------------|--------------------------|-------------------------|
| Vanuatu  | 1990 | Female | All Ages | 9.9%<br>(7.8-12%)              | 90%<br>(88-92%)          | 0.28<br>(0.22-0.35)                         | 0.79%<br>(0.48-1.2%)                 | 0.88%<br>(0.39-1.5%)                | 4.7<br>(2.1-8.1)         | 230<br>(140-340)        |
| Vanuatu  | 1990 | Female | 15 to 19 | 13%<br>(7.3-21%)               | 87%<br>(79-93%)          | 0.39<br>(0.19-0.66)                         | 1.1%<br>(0.54-2.1%)                  | 1.7%<br>(0.6-3.4%)                  | 0.15<br>(0.05-0.31)      | 14<br>(6.7-26)          |
| Vanuatu  | 1990 | Female | 20 to 24 | 16%<br>(9.3-26%)               | 84%<br>(74-91%)          | 0.64<br>(0.33-1.1)                          | 2.1%<br>(1.2-3.4%)                   | 2.7%<br>(1.2-4.9%)                  | 0.32<br>(0.14-0.6)       | 28<br>(16-48)           |
| Vanuatu  | 1990 | Female | 25 to 29 | 16%<br>(9.9-24%)               | 84%<br>(76-90%)          | 0.63<br>(0.37-0.94)                         | 2.1%<br>(1.3-3.2%)                   | 2.7%<br>(1.4-4.2%)                  | 0.42<br>(0.21-0.69)      | 33<br>(19-50)           |
| Vanuatu  | 1990 | Female | 30 to 34 | 16%<br>(9.4-24%)               | 84%<br>(76-91%)          | 0.63<br>(0.36-1)                            | 2%<br>(1.2-3%)                       | 2.4%<br>(1.2-4.1%)                  | 0.44<br>(0.21-0.75)      | 31<br>(18-49)           |
| Vanuatu  | 1990 | Female | 35 to 39 | 14%<br>(8.5-22%)               | 86%<br>(78-91%)          | 0.6<br>(0.33-0.99)                          | 2.1%<br>(1.2-3.5%)                   | 2.6%<br>(1.3-4.5%)                  | 0.56<br>(0.27-0.97)      | 33<br>(17-54)           |
| Vanuatu  | 1990 | Female | 40 to 44 | 13%<br>(7.9-20%)               | 87%<br>(80-92%)          | 0.51<br>(0.25-0.89)                         | 2%<br>(0.97-3.4%)                    | 2.5%<br>(1.1-4.6%)                  | 0.55<br>(0.24-1)         | 28<br>(13-49)           |
| Vanuatu  | 1990 | Female | 45 to 49 | 13%<br>(7.4-19%)               | 87%<br>(81-93%)          | 0.42<br>(0.21-0.75)                         | 1.4%<br>(0.56-2.7%)                  | 1.7%<br>(0.65-3.4%)                 | 0.43<br>(0.15-0.84)      | 19<br>(7.4-37)          |
| Vanuatu  | 1990 | Female | 50 to 54 | 12%<br>(7.7-19%)               | 88%<br>(81-92%)          | 0.36<br>(0.18-0.66)                         | 1.1%<br>(0.3-2.5%)                   | 1.4%<br>(0.32-3.1%)                 | 0.38<br>(0.089-0.85)     | 14<br>(3.8-32)          |
| Vanuatu  | 1990 | Female | 55 to 59 | 11%<br>(6.7-17%)               | 89%<br>(83-93%)          | 0.31<br>(0.14-0.58)                         | 0.94%<br>(0.2-2.1%)                  | 1.1%<br>(0.26-2.5%)                 | 0.32<br>(0.073-0.74)     | 10<br>(2.2-24)          |
| Vanuatu  | 1990 | Female | 60 to 64 | 10%<br>(6-16%)                 | 90%<br>(84-94%)          | 0.27<br>(0.13-0.51)                         | 0.56%<br>(-0.06-1.6%)                | 0.68%<br>(-0.062-1.9%)              | 0.23<br>(-0.019-0.63)    | 6.3<br>(-0.67-17)       |
| Vanuatu  | 1990 | Female | 65 to 69 | 12%<br>(6.8-19%)               | 88%<br>(81-93%)          | 0.28<br>(0.14-0.49)                         | 0.56%<br>(-0.1-1.5%)                 | 0.68%<br>(-0.12-1.7%)               | 0.28<br>(-0.05-0.73)     | 6.2<br>(-1-16)          |
| Vanuatu  | 1990 | Female | 70 to 74 | 12%<br>(7.5-20%)               | 88%<br>(80-93%)          | 0.28<br>(0.13-0.51)                         | 0.44%<br>(-0.28-1.4%)                | 0.51%<br>(-0.3-1.6%)                | 0.22<br>(-0.13-0.72)     | 3.9<br>(-2.5-13)        |
| Vanuatu  | 1990 | Female | 75 to 79 | 12%<br>(7-21%)                 | 88%<br>(79-93%)          | 0.26<br>(0.12-0.48)                         | 0.43%<br>(-0.22-1.3%)                | 0.49%<br>(-0.23-1.5%)               | 0.23<br>(-0.11-0.74)     | 3.2<br>(-1.7-10)        |
| Vanuatu  | 1990 | Female | 80 to 84 | 12%<br>(6.6-21%)               | 88%<br>(79-93%)          | 0.26<br>(0.11-0.46)                         | 0.27%<br>(-0.26-1%)                  | 0.31%<br>(-0.29-1.2%)               | 0.13<br>(-0.12-0.49)     | 1.4<br>(-1.3-5.2)       |
| Vanuatu  | 1990 | Female | 85 to 89 | 13%<br>(6.9-20%)               | 87%<br>(80-93%)          | 0.26<br>(0.12-0.49)                         | 0.19%<br>(-0.26-0.9%)                | 0.21%<br>(-0.32-0.99%)              | 0.04<br>(-0.059-0.19)    | 0.31<br>(-0.42-1.5)     |
| Vanuatu  | 1990 | Female | 90 to 94 | 14%<br>(7.9-22%)               | 86%<br>(78-92%)          | 0.28<br>(0.12-0.52)                         | 0.21%<br>(-0.25-0.96%)               | 0.22%<br>(-0.3-1.1%)                | 0.012<br>(-0.016-0.061)  | 0.067<br>(-0.082-0.32)  |
| Vanuatu  | 1990 | Female | 95 plus  | 16%<br>(7.7-27%)               | 84%<br>(73-92%)          | 0.32<br>(0.12-0.65)                         | 0.26%<br>(-0.3-1.2%)                 | 0.25%<br>(-0.39-1.3%)               | 0.003<br>(-0.0048-0.016) | 0.012<br>(-0.014-0.055) |
| Vanuatu  | 1990 | Male   | All Ages | 29%<br>(21-36%)                | 71%<br>(64-79%)          | 0.69<br>(0.55-0.83)                         | 2.1%<br>(1.4-3%)                     | 2.1%<br>(1.2-3.1%)                  | 16<br>(8.8-25)           | 800<br>(510-1100)       |
| Vanuatu  | 1990 | Male   | 15 to 19 | 28%<br>(16-45%)                | 72%<br>(55-84%)          | 0.4<br>(0.18-0.71)                          | 1.5%<br>(0.78-2.6%)                  | 1.8%<br>(0.72-3.4%)                 | 0.27<br>(0.1-0.54)       | 25<br>(12-43)           |
| Vanuatu  | 1990 | Male   | 20 to 24 | 48%<br>(29-67%)                | 52%<br>(33-71%)          | 1.2<br>(0.72-1.9)                           | 5.1%<br>(2.9-8.1%)                   | 6%<br>(3.1-10%)                     | 1.2<br>(0.6-2)           | 91<br>(51-150)          |
| Vanuatu  | 1990 | Male   | 25 to 29 | 58%<br>(42-71%)                | 42%<br>(29-58%)          | 2<br>(1.3-2.9)                              | 7.5%<br>(4.8-11%)                    | 9%<br>(5.3-13%)                     | 2<br>(1.2-3.1)           | 140<br>(83-200)         |

| Location | Year | Sex    | Age      | Prevalence of current drinkers | Prevalence of abstainers | Population average of standard drinks daily | Percent of total attributable deaths | Percent of total attributable DALYs | Attributable deaths       | Attributable DALYs       |
|----------|------|--------|----------|--------------------------------|--------------------------|---------------------------------------------|--------------------------------------|-------------------------------------|---------------------------|--------------------------|
| Vanuatu  | 1990 | Male   | 30 to 34 | 60%<br>(43-74%)                | 40%<br>(26-57%)          | 2.3<br>(1.4-3.3)                            | 7.4%<br>(4.4-11%)                    | 8.8%<br>(4.9-13%)                   | 2.1<br>(1.1-3.3)          | 130<br>(74-190)          |
| Vanuatu  | 1990 | Male   | 35 to 39 | 57%<br>(41-70%)                | 43%<br>(30-59%)          | 1.8<br>(1.1-2.8)                            | 5.6%<br>(3.1-8.7%)                   | 6.4%<br>(3.3-10%)                   | 1.7<br>(0.87-2.8)         | 98<br>(54-160)           |
| Vanuatu  | 1990 | Male   | 40 to 44 | 52%<br>(37-65%)                | 48%<br>(35-63%)          | 1.5<br>(0.78-2.4)                           | 4.5%<br>(2.2-7.5%)                   | 5%<br>(2.2-8.9%)                    | 1.7<br>(0.71-3)           | 85<br>(40-150)           |
| Vanuatu  | 1990 | Male   | 45 to 49 | 46%<br>(30-60%)                | 54%<br>(40-70%)          | 1.2<br>(0.62-2.1)                           | 3.6%<br>(1.5-6.5%)                   | 3.9%<br>(1.4-7.5%)                  | 1.5<br>(0.56-3.1)         | 69<br>(29-130)           |
| Vanuatu  | 1990 | Male   | 50 to 54 | 43%<br>(28-57%)                | 57%<br>(43-72%)          | 0.97<br>(0.5-1.7)                           | 2.9%<br>(1.1-5.8%)                   | 3.1%<br>(0.96-6.6%)                 | 1.4<br>(0.43-2.9)         | 55<br>(19-110)           |
| Vanuatu  | 1990 | Male   | 55 to 59 | 44%<br>(29-57%)                | 56%<br>(43-71%)          | 0.84<br>(0.44-1.4)                          | 2.1%<br>(0.59-4.4%)                  | 2.2%<br>(0.49-4.9%)                 | 0.97<br>(0.22-2.1)        | 33<br>(8.9-70)           |
| Vanuatu  | 1990 | Male   | 60 to 64 | 41%<br>(26-56%)                | 59%<br>(44-74%)          | 0.68<br>(0.35-1.2)                          | 1.7%<br>(0.38-3.7%)                  | 1.8%<br>(0.3-4.1%)                  | 0.96<br>(0.17-2.3)        | 28<br>(6.5-63)           |
| Vanuatu  | 1990 | Male   | 65 to 69 | 38%<br>(22-56%)                | 62%<br>(44-78%)          | 0.57<br>(0.29-1)                            | 1.4%<br>(0.34-2.9%)                  | 1.5%<br>(0.32-3.2%)                 | 0.94<br>(0.19-2)          | 22<br>(5.4-46)           |
| Vanuatu  | 1990 | Male   | 70 to 74 | 34%<br>(20-51%)                | 66%<br>(49-80%)          | 0.46<br>(0.23-0.81)                         | 0.91%<br>(0.047-2.1%)                | 0.98%<br>(0.019-2.3%)               | 0.6<br>(0.011-1.4)        | 11<br>(0.55-27)          |
| Vanuatu  | 1990 | Male   | 75 to 79 | 30%<br>(16-47%)                | 70%<br>(53-84%)          | 0.38<br>(0.17-0.71)                         | 0.64%<br>(-0.034-1.7%)               | 0.68%<br>(-0.08-1.8%)               | 0.46<br>(-0.058-1.2)      | 6.9<br>(-0.36-18)        |
| Vanuatu  | 1990 | Male   | 80 to 84 | 27%<br>(14-43%)                | 73%<br>(57-86%)          | 0.33<br>(0.16-0.6)                          | 0.49%<br>(0.012-1.2%)                | 0.51%<br>(-0.025-1.3%)              | 0.3<br>(-0.015-0.76)      | 3.4<br>(0.078-8.4)       |
| Vanuatu  | 1990 | Male   | 85 to 89 | 26%<br>(14-41%)                | 74%<br>(59-86%)          | 0.32<br>(0.14-0.59)                         | 0.36%<br>(-0.052-0.94%)              | 0.36%<br>(-0.11-1%)                 | 0.1<br>(-0.03-0.28)       | 0.83<br>(-0.12-2.2)      |
| Vanuatu  | 1990 | Male   | 90 to 94 | 27%<br>(15-43%)                | 73%<br>(57-85%)          | 0.33<br>(0.15-0.61)                         | 0.26%<br>(-0.12-0.75%)               | 0.25%<br>(-0.19-0.8%)               | 0.021<br>(-0.016-0.07)    | 0.13<br>(-0.06-0.39)     |
| Vanuatu  | 1990 | Male   | 95 plus  | 30%<br>(15-49%)                | 70%<br>(51-85%)          | 0.36<br>(0.15-0.71)                         | 0.07%<br>(-0.41-0.8%)                | -0.015%<br>(-0.58-0.8%)             | -0.0003<br>(-0.011-0.015) | 0.0055<br>(-0.032-0.061) |
| Vanuatu  | 1995 | Female | All Ages | 10%<br>(7.9-13%)               | 90%<br>(87-92%)          | 0.25<br>(0.2-0.32)                          | 0.72%<br>(0.43-1.1%)                 | 0.73%<br>(0.26-1.3%)                | 4.4<br>(1.5-7.9)          | 240<br>(140-360)         |
| Vanuatu  | 1995 | Female | 15 to 19 | 13%<br>(7.4-22%)               | 87%<br>(78-93%)          | 0.35<br>(0.17-0.59)                         | 1.1%<br>(0.56-2%)                    | 1.7%<br>(0.62-3.3%)                 | 0.17<br>(0.062-0.35)      | 16<br>(7.9-29)           |
| Vanuatu  | 1995 | Female | 20 to 24 | 16%<br>(9.4-26%)               | 84%<br>(74-91%)          | 0.57<br>(0.3-0.95)                          | 1.9%<br>(1.1-3.2%)                   | 2.5%<br>(1.1-4.5%)                  | 0.33<br>(0.15-0.61)       | 30<br>(17-49)            |
| Vanuatu  | 1995 | Female | 25 to 29 | 16%<br>(9.7-25%)               | 84%<br>(75-90%)          | 0.56<br>(0.33-0.85)                         | 2%<br>(1.2-3%)                       | 2.5%<br>(1.3-3.9%)                  | 0.44<br>(0.23-0.71)       | 35<br>(21-53)            |
| Vanuatu  | 1995 | Female | 30 to 34 | 16%<br>(9.1-23%)               | 84%<br>(77-91%)          | 0.55<br>(0.33-0.87)                         | 1.8%<br>(1-2.7%)                     | 2.1%<br>(1.1-3.6%)                  | 0.46<br>(0.22-0.78)       | 33<br>(19-52)            |
| Vanuatu  | 1995 | Female | 35 to 39 | 14%<br>(8.5-22%)               | 86%<br>(78-92%)          | 0.53<br>(0.29-0.89)                         | 1.9%<br>(1-3.1%)                     | 2.3%<br>(1.2-4%)                    | 0.59<br>(0.28-1)          | 35<br>(19-59)            |
| Vanuatu  | 1995 | Female | 40 to 44 | 13%<br>(8.1-20%)               | 87%<br>(80-92%)          | 0.45<br>(0.23-0.78)                         | 1.7%<br>(0.85-3%)                    | 2.1%<br>(0.96-3.9%)                 | 0.57<br>(0.25-1)          | 29<br>(14-51)            |
| Vanuatu  | 1995 | Female | 45 to 49 | 13%<br>(7.3-19%)               | 87%<br>(81-93%)          | 0.37<br>(0.19-0.67)                         | 1.2%<br>(0.43-2.3%)                  | 1.4%<br>(0.47-3%)                   | 0.41<br>(0.13-0.86)       | 18<br>(6.8-37)           |

| Location | Year | Sex    | Age      | Prevalence of current drinkers | Prevalence of abstainers | Population average of standard drinks daily | Percent of total attributable deaths | Percent of total attributable DALYs | Attributable deaths       | Attributable DALYs       |
|----------|------|--------|----------|--------------------------------|--------------------------|---------------------------------------------|--------------------------------------|-------------------------------------|---------------------------|--------------------------|
| Vanuatu  | 1995 | Female | 50 to 54 | 12%<br>(7.5-18%)               | 88%<br>(82-93%)          | 0.32<br>(0.16-0.59)                         | 0.91%<br>(0.16-2.1%)                 | 1.1%<br>(0.18-2.6%)                 | 0.37<br>(0.057-0.9)       | 14<br>(2.5-34)           |
| Vanuatu  | 1995 | Female | 55 to 59 | 11%<br>(6.7-16%)               | 89%<br>(84-93%)          | 0.28<br>(0.13-0.51)                         | 0.73%<br>(0.052-1.8%)                | 0.9%<br>(0.064-2.2%)                | 0.32<br>(0.023-0.81)      | 10<br>(0.7-26)           |
| Vanuatu  | 1995 | Female | 60 to 64 | 10%<br>(6-16%)                 | 90%<br>(84-94%)          | 0.25<br>(0.11-0.47)                         | 0.39%<br>(-0.2-1.3%)                 | 0.46%<br>(-0.23-1.5%)               | 0.18<br>(-0.084-0.61)     | 5<br>(-2.5-17)           |
| Vanuatu  | 1995 | Female | 65 to 69 | 12%<br>(6.6-19%)               | 88%<br>(81-93%)          | 0.25<br>(0.12-0.43)                         | 0.36%<br>(-0.25-1.2%)                | 0.44%<br>(-0.29-1.4%)               | 0.2<br>(-0.12-0.63)       | 4.4<br>(-3.1-14)         |
| Vanuatu  | 1995 | Female | 70 to 74 | 13%<br>(7.3-20%)               | 87%<br>(80-93%)          | 0.25<br>(0.12-0.45)                         | 0.22%<br>(-0.43-1.1%)                | 0.26%<br>(-0.48-1.2%)               | 0.13<br>(-0.23-0.59)      | 2.2<br>(-4.3-11)         |
| Vanuatu  | 1995 | Female | 75 to 79 | 12%<br>(7.1-21%)               | 88%<br>(79-93%)          | 0.23<br>(0.1-0.43)                          | 0.24%<br>(-0.34-1%)                  | 0.28%<br>(-0.39-1.2%)               | 0.14<br>(-0.19-0.6)       | 1.9<br>(-2.8-8.3)        |
| Vanuatu  | 1995 | Female | 80 to 84 | 12%<br>(6.7-21%)               | 88%<br>(79-93%)          | 0.23<br>(0.1-0.41)                          | 0.12%<br>(-0.37-0.79%)               | 0.13%<br>(-0.42-0.9%)               | 0.068<br>(-0.21-0.44)     | 0.73<br>(-2.2-4.7)       |
| Vanuatu  | 1995 | Female | 85 to 89 | 13%<br>(7-20%)                 | 87%<br>(80-93%)          | 0.23<br>(0.11-0.43)                         | 0.067%<br>(-0.38-0.71%)              | 0.065%<br>(-0.44-0.78%)             | 0.016<br>(-0.11-0.18)     | 0.14<br>(-0.8-1.4)       |
| Vanuatu  | 1995 | Female | 90 to 94 | 13%<br>(7.6-22%)               | 87%<br>(78-92%)          | 0.25<br>(0.11-0.47)                         | 0.092%<br>(-0.31-0.75%)              | 0.087%<br>(-0.38-0.84%)             | 0.0062<br>(-0.027-0.058)  | 0.038<br>(-0.13-0.31)    |
| Vanuatu  | 1995 | Female | 95 plus  | 15%<br>(7.9-26%)               | 85%<br>(74-92%)          | 0.28<br>(0.11-0.57)                         | 0.13%<br>(-0.39-0.97%)               | 0.1%<br>(-0.48-1.1%)                | 0.0016<br>(-0.0074-0.017) | 0.0078<br>(-0.023-0.058) |
| Vanuatu  | 1995 | Male   | All Ages | 30%<br>(22-37%)                | 70%<br>(63-78%)          | 0.62<br>(0.5-0.77)                          | 1.9%<br>(1.2-2.7%)                   | 1.8%<br>(0.94-2.7%)                 | 15<br>(7.9-24)            | 790<br>(490-1100)        |
| Vanuatu  | 1995 | Male   | 15 to 19 | 29%<br>(15-45%)                | 71%<br>(55-85%)          | 0.35<br>(0.16-0.63)                         | 1.5%<br>(0.75-2.6%)                  | 1.7%<br>(0.7-3.4%)                  | 0.31<br>(0.12-0.62)       | 28<br>(14-49)            |
| Vanuatu  | 1995 | Male   | 20 to 24 | 49%<br>(30-66%)                | 51%<br>(34-70%)          | 1.1<br>(0.63-1.7)                           | 4.8%<br>(2.8-7.4%)                   | 5.7%<br>(2.9-9.1%)                  | 1.3<br>(0.65-2.1)         | 97<br>(54-150)           |
| Vanuatu  | 1995 | Male   | 25 to 29 | 59%<br>(41-72%)                | 41%<br>(28-59%)          | 1.8<br>(1.2-2.5)                            | 6.9%<br>(4.3-9.9%)                   | 8.2%<br>(4.8-12%)                   | 2<br>(1.2-3.1)            | 140<br>(86-210)          |
| Vanuatu  | 1995 | Male   | 30 to 34 | 60%<br>(43-75%)                | 40%<br>(25-57%)          | 2<br>(1.3-2.9)                              | 6.7%<br>(4.1-9.7%)                   | 7.8%<br>(4.4-12%)                   | 2.2<br>(1.2-3.4)          | 140<br>(79-210)          |
| Vanuatu  | 1995 | Male   | 35 to 39 | 57%<br>(41-70%)                | 43%<br>(30-59%)          | 1.6<br>(0.97-2.5)                           | 4.9%<br>(2.7-7.7%)                   | 5.5%<br>(2.8-9%)                    | 1.8<br>(0.9-2.9)          | 100<br>(57-160)          |
| Vanuatu  | 1995 | Male   | 40 to 44 | 52%<br>(38-65%)                | 48%<br>(35-62%)          | 1.3<br>(0.71-2)                             | 3.8%<br>(1.8-6.7%)                   | 4.2%<br>(1.7-7.6%)                  | 1.5<br>(0.61-2.9)         | 80<br>(36-140)           |
| Vanuatu  | 1995 | Male   | 45 to 49 | 45%<br>(30-60%)                | 55%<br>(40-70%)          | 1.1<br>(0.56-1.9)                           | 3%<br>(1.1-5.7%)                     | 3.2%<br>(0.99-6.4%)                 | 1.4<br>(0.43-3)           | 66<br>(23-130)           |
| Vanuatu  | 1995 | Male   | 50 to 54 | 43%<br>(29-56%)                | 57%<br>(44-71%)          | 0.85<br>(0.43-1.5)                          | 2.4%<br>(0.72-4.7%)                  | 2.5%<br>(0.55-5.2%)                 | 1.3<br>(0.29-2.8)         | 51<br>(16-110)           |
| Vanuatu  | 1995 | Male   | 55 to 59 | 44%<br>(29-58%)                | 56%<br>(42-71%)          | 0.74<br>(0.38-1.3)                          | 1.6%<br>(0.3-3.5%)                   | 1.7%<br>(0.19-3.9%)                 | 0.89<br>(0.096-2)         | 31<br>(5.8-69)           |
| Vanuatu  | 1995 | Male   | 60 to 64 | 41%<br>(26-57%)                | 59%<br>(43-74%)          | 0.6<br>(0.31-1.1)                           | 1.3%<br>(0.21-3.1%)                  | 1.4%<br>(0.12-3.4%)                 | 0.81<br>(0.072-2)         | 24<br>(3.6-57)           |
| Vanuatu  | 1995 | Male   | 65 to 69 | 38%<br>(22-55%)                | 62%<br>(45-78%)          | 0.5<br>(0.25-0.86)                          | 1.1%<br>(0.13-2.4%)                  | 1.1%<br>(0.076-2.7%)                | 0.75<br>(0.049-1.8)       | 18<br>(2.2-41)           |

| Location | Year | Sex    | Age      | Prevalence of current drinkers | Prevalence of abstainers | Population average of standard drinks daily | Percent of total attributable deaths | Percent of total attributable DALYs | Attributable deaths       | Attributable DALYs        |
|----------|------|--------|----------|--------------------------------|--------------------------|---------------------------------------------|--------------------------------------|-------------------------------------|---------------------------|---------------------------|
| Vanuatu  | 1995 | Male   | 70 to 74 | 34%<br>(20-50%)                | 66%<br>(50-80%)          | 0.41<br>(0.21-0.72)                         | 0.66%<br>(-0.08-1.8%)                | 0.7%<br>(-0.13-2%)                  | 0.47<br>(-0.09-1.3)       | 9.1<br>(-1.1-24)          |
| Vanuatu  | 1995 | Male   | 75 to 79 | 30%<br>(17-47%)                | 70%<br>(53-83%)          | 0.34<br>(0.16-0.62)                         | 0.47%<br>(-0.12-1.4%)                | 0.48%<br>(-0.18-1.5%)               | 0.33<br>(-0.13-1)         | 5<br>(-1.3-15)            |
| Vanuatu  | 1995 | Male   | 80 to 84 | 27%<br>(15-44%)                | 73%<br>(56-85%)          | 0.3<br>(0.14-0.54)                          | 0.37%<br>(-0.064-0.96%)              | 0.37%<br>(-0.12-1%)                 | 0.24<br>(-0.079-0.68)     | 2.8<br>(-0.48-7.5)        |
| Vanuatu  | 1995 | Male   | 85 to 89 | 26%<br>(14-41%)                | 74%<br>(59-86%)          | 0.28<br>(0.13-0.51)                         | 0.24%<br>(-0.15-0.79%)               | 0.23%<br>(-0.21-0.84%)              | 0.076<br>(-0.068-0.27)    | 0.68<br>(-0.42-2.2)       |
| Vanuatu  | 1995 | Male   | 90 to 94 | 27%<br>(16-43%)                | 73%<br>(57-84%)          | 0.29<br>(0.13-0.55)                         | 0.17%<br>(-0.16-0.64%)               | 0.15%<br>(-0.25-0.67%)              | 0.015<br>(-0.026-0.069)   | 0.11<br>(-0.1-0.39)       |
| Vanuatu  | 1995 | Male   | 95 plus  | 30%<br>(15-50%)                | 70%<br>(50-85%)          | 0.32<br>(0.13-0.64)                         | -0.014%<br>(-0.46-0.55%)             | -0.11%<br>(-0.65-0.49%)             | -0.0027<br>(-0.016-0.012) | -0.0013<br>(-0.044-0.051) |
| Vanuatu  | 2000 | Female | All Ages | 10%<br>(7.9-13%)               | 90%<br>(87-92%)          | 0.22<br>(0.17-0.28)                         | 0.56%<br>(0.3-0.88%)                 | 0.49%<br>(0.089-0.99%)              | 3.2<br>(0.6-6.7)          | 200<br>(110-320)          |
| Vanuatu  | 2000 | Female | 15 to 19 | 13%<br>(7.3-21%)               | 87%<br>(79-93%)          | 0.29<br>(0.14-0.49)                         | 0.95%<br>(0.48-1.7%)                 | 1.3%<br>(0.49-2.7%)                 | 0.16<br>(0.06-0.34)       | 16<br>(8.3-30)            |
| Vanuatu  | 2000 | Female | 20 to 24 | 16%<br>(9.4-26%)               | 84%<br>(74-91%)          | 0.49<br>(0.26-0.81)                         | 1.7%<br>(0.95-2.8%)                  | 2%<br>(0.88-3.8%)                   | 0.3<br>(0.13-0.56)        | 29<br>(16-48)             |
| Vanuatu  | 2000 | Female | 25 to 29 | 16%<br>(9.9-24%)               | 84%<br>(76-90%)          | 0.48<br>(0.27-0.73)                         | 1.7%<br>(1.1-2.6%)                   | 2.1%<br>(1.1-3.4%)                  | 0.38<br>(0.19-0.65)       | 31<br>(19-49)             |
| Vanuatu  | 2000 | Female | 30 to 34 | 16%<br>(9.4-24%)               | 84%<br>(76-91%)          | 0.47<br>(0.27-0.75)                         | 1.5%<br>(0.86-2.2%)                  | 1.7%<br>(0.85-2.9%)                 | 0.39<br>(0.18-0.7)        | 29<br>(16-48)             |
| Vanuatu  | 2000 | Female | 35 to 39 | 14%<br>(8.6-22%)               | 86%<br>(78-91%)          | 0.45<br>(0.24-0.78)                         | 1.5%<br>(0.82-2.6%)                  | 1.8%<br>(0.87-3.3%)                 | 0.53<br>(0.24-1)          | 33<br>(17-57)             |
| Vanuatu  | 2000 | Female | 40 to 44 | 13%<br>(7.9-20%)               | 87%<br>(80-92%)          | 0.39<br>(0.19-0.69)                         | 1.3%<br>(0.62-2.5%)                  | 1.6%<br>(0.67-3.2%)                 | 0.5<br>(0.21-0.99)        | 27<br>(13-49)             |
| Vanuatu  | 2000 | Female | 45 to 49 | 13%<br>(7.1-19%)               | 87%<br>(81-93%)          | 0.32<br>(0.16-0.58)                         | 0.86%<br>(0.26-1.8%)                 | 1%<br>(0.24-2.3%)                   | 0.34<br>(0.078-0.79)      | 16<br>(4.7-35)            |
| Vanuatu  | 2000 | Female | 50 to 54 | 12%<br>(7.8-19%)               | 88%<br>(81-92%)          | 0.28<br>(0.13-0.5)                          | 0.6%<br>(-0.048-1.5%)                | 0.72%<br>(-0.077-1.9%)              | 0.26<br>(-0.029-0.72)     | 10<br>(-0.85-27)          |
| Vanuatu  | 2000 | Female | 55 to 59 | 11%<br>(6.7-17%)               | 89%<br>(83-93%)          | 0.23<br>(0.11-0.42)                         | 0.45%<br>(-0.15-1.3%)                | 0.56%<br>(-0.17-1.6%)               | 0.24<br>(-0.071-0.66)     | 7.6<br>(-2.5-21)          |
| Vanuatu  | 2000 | Female | 60 to 64 | 10%<br>(5.9-16%)               | 90%<br>(84-94%)          | 0.21<br>(0.095-0.38)                        | 0.16%<br>(-0.36-0.84%)               | 0.2%<br>(-0.41-1%)                  | 0.089<br>(-0.18-0.44)     | 2.4<br>(-5.2-12)          |
| Vanuatu  | 2000 | Female | 65 to 69 | 12%<br>(6.5-19%)               | 88%<br>(81-93%)          | 0.21<br>(0.1-0.37)                          | 0.13%<br>(-0.43-0.77%)               | 0.17%<br>(-0.5-0.91%)               | 0.08<br>(-0.23-0.44)      | 1.6<br>(-5.6-9.8)         |
| Vanuatu  | 2000 | Female | 70 to 74 | 13%<br>(7.3-20%)               | 87%<br>(80-93%)          | 0.21<br>(0.097-0.38)                        | -0.011%<br>(-0.57-0.67%)             | 0.00039%<br>(-0.65-0.76%)           | 0.00022<br>(-0.34-0.39)   | -0.11<br>(-6.3-7.1)       |
| Vanuatu  | 2000 | Female | 75 to 79 | 12%<br>(7-21%)                 | 88%<br>(79-93%)          | 0.2<br>(0.087-0.37)                         | 0.032%<br>(-0.5-0.64%)               | 0.044%<br>(-0.55-0.73%)             | 0.023<br>(-0.29-0.38)     | 0.27<br>(-4.2-5.4)        |
| Vanuatu  | 2000 | Female | 80 to 84 | 12%<br>(6.8-21%)               | 88%<br>(79-93%)          | 0.19<br>(0.089-0.34)                        | -0.052%<br>(-0.5-0.49%)              | -0.061%<br>(-0.57-0.54%)            | -0.032<br>(-0.3-0.29)     | -0.32<br>(-3.2-3)         |
| Vanuatu  | 2000 | Female | 85 to 89 | 13%<br>(7.1-20%)               | 87%<br>(80-93%)          | 0.2<br>(0.088-0.36)                         | -0.078%<br>(-0.48-0.45%)             | -0.098%<br>(-0.57-0.49%)            | -0.028<br>(-0.16-0.14)    | -0.19<br>(-1.2-1.1)       |



| Location | Year | Sex    | Age      | Prevalence of current drinkers | Prevalence of abstainers | Population average of standard drinks daily | Percent of total attributable deaths | Percent of total attributable DALYs | Attributable deaths        | Attributable DALYs      |
|----------|------|--------|----------|--------------------------------|--------------------------|---------------------------------------------|--------------------------------------|-------------------------------------|----------------------------|-------------------------|
| Vanuatu  | 2000 | Female | 90 to 94 | 13%<br>(7.9-22%)               | 87%<br>(78-92%)          | 0.21<br>(0.09-0.41)                         | -0.045%<br>(-0.41-0.48%)             | -0.068%<br>(-0.48-0.53%)            | -0.0061<br>(-0.045-0.047)  | -0.024<br>(-0.22-0.24)  |
| Vanuatu  | 2000 | Female | 95 plus  | 16%<br>(7.9-27%)               | 84%<br>(73-92%)          | 0.24<br>(0.096-0.49)                        | -0.028%<br>(-0.55-0.62%)             | -0.077%<br>(-0.68-0.66%)            | -0.0015<br>(-0.013-0.012)  | -0.002<br>(-0.04-0.044) |
| Vanuatu  | 2000 | Male   | All Ages | 30%<br>(23-37%)                | 70%<br>(63-77%)          | 0.55<br>(0.43-0.67)                         | 1.6%<br>(0.95-2.2%)                  | 1.4%<br>(0.63-2.2%)                 | 13<br>(5.8-20)             | 710<br>(420-1000)       |
| Vanuatu  | 2000 | Male   | 15 to 19 | 29%<br>(16-47%)                | 71%<br>(53-84%)          | 0.3<br>(0.14-0.53)                          | 1.4%<br>(0.72-2.4%)                  | 1.6%<br>(0.64-3.1%)                 | 0.32<br>(0.12-0.63)        | 30<br>(15-53)           |
| Vanuatu  | 2000 | Male   | 20 to 24 | 50%<br>(29-68%)                | 50%<br>(32-71%)          | 0.97<br>(0.55-1.5)                          | 4.3%<br>(2.5-6.7%)                   | 5%<br>(2.6-8.1%)                    | 1.3<br>(0.67-2.2)          | 100<br>(58-160)         |
| Vanuatu  | 2000 | Male   | 25 to 29 | 59%<br>(41-72%)                | 41%<br>(28-59%)          | 1.6<br>(1-2.2)                              | 6.1%<br>(3.8-8.7%)                   | 7.1%<br>(4.2-10%)                   | 1.8<br>(1-2.9)             | 130<br>(76-190)         |
| Vanuatu  | 2000 | Male   | 30 to 34 | 60%<br>(43-73%)                | 40%<br>(27-57%)          | 1.7<br>(1.1-2.5)                            | 5.6%<br>(3.3-8.3%)                   | 6.4%<br>(3.5-9.8%)                  | 1.9<br>(0.99-3)            | 120<br>(70-190)         |
| Vanuatu  | 2000 | Male   | 35 to 39 | 56%<br>(41-70%)                | 44%<br>(30-59%)          | 1.4<br>(0.83-2.1)                           | 4.1%<br>(2.2-6.6%)                   | 4.5%<br>(2.1-7.6%)                  | 1.6<br>(0.72-2.8)          | 95<br>(48-160)          |
| Vanuatu  | 2000 | Male   | 40 to 44 | 52%<br>(38-65%)                | 48%<br>(35-62%)          | 1.1<br>(0.6-1.8)                            | 3%<br>(1.3-5.3%)                     | 3.2%<br>(1.1-6%)                    | 1.3<br>(0.44-2.5)          | 70<br>(29-130)          |
| Vanuatu  | 2000 | Male   | 45 to 49 | 46%<br>(29-60%)                | 54%<br>(40-71%)          | 0.91<br>(0.47-1.6)                          | 2.3%<br>(0.74-4.3%)                  | 2.4%<br>(0.55-4.8%)                 | 1.1<br>(0.23-2.3)          | 53<br>(16-100)          |
| Vanuatu  | 2000 | Male   | 50 to 54 | 43%<br>(28-57%)                | 57%<br>(43-72%)          | 0.74<br>(0.38-1.3)                          | 1.8%<br>(0.4-3.6%)                   | 1.8%<br>(0.2-3.9%)                  | 1<br>(0.095-2.2)           | 42<br>(9-87)            |
| Vanuatu  | 2000 | Male   | 55 to 59 | 44%<br>(29-58%)                | 56%<br>(42-71%)          | 0.63<br>(0.33-1.1)                          | 1.1%<br>(0.036-2.6%)                 | 1.1%<br>(-0.14-2.8%)                | 0.67<br>(-0.089-1.6)       | 25<br>(0.81-55)         |
| Vanuatu  | 2000 | Male   | 60 to 64 | 41%<br>(26-56%)                | 59%<br>(44-74%)          | 0.52<br>(0.27-0.92)                         | 0.86%<br>(-0.059-2.2%)               | 0.87%<br>(-0.15-2.4%)               | 0.55<br>(-0.098-1.5)       | 17<br>(-1.2-44)         |
| Vanuatu  | 2000 | Male   | 65 to 69 | 38%<br>(23-54%)                | 62%<br>(46-77%)          | 0.44<br>(0.22-0.77)                         | 0.7%<br>(-0.065-1.8%)                | 0.72%<br>(-0.13-1.9%)               | 0.48<br>(-0.085-1.3)       | 12<br>(-1.1-30)         |
| Vanuatu  | 2000 | Male   | 70 to 74 | 34%<br>(20-49%)                | 66%<br>(51-80%)          | 0.35<br>(0.18-0.63)                         | 0.41%<br>(-0.23-1.3%)                | 0.42%<br>(-0.3-1.4%)                | 0.3<br>(-0.22-1)           | 6<br>(-3.4-19)          |
| Vanuatu  | 2000 | Male   | 75 to 79 | 30%<br>(17-47%)                | 70%<br>(53-83%)          | 0.29<br>(0.13-0.54)                         | 0.27%<br>(-0.25-1%)                  | 0.26%<br>(-0.34-1.1%)               | 0.19<br>(-0.24-0.78)       | 3.2<br>(-2.9-12)        |
| Vanuatu  | 2000 | Male   | 80 to 84 | 27%<br>(14-43%)                | 73%<br>(57-86%)          | 0.25<br>(0.12-0.45)                         | 0.23%<br>(-0.16-0.71%)               | 0.21%<br>(-0.22-0.75%)              | 0.14<br>(-0.14-0.49)       | 1.8<br>(-1.2-5.6)       |
| Vanuatu  | 2000 | Male   | 85 to 89 | 26%<br>(14-40%)                | 74%<br>(60-86%)          | 0.24<br>(0.11-0.43)                         | 0.13%<br>(-0.23-0.55%)               | 0.098%<br>(-0.31-0.57%)             | 0.035<br>(-0.11-0.2)       | 0.38<br>(-0.68-1.6)     |
| Vanuatu  | 2000 | Male   | 90 to 94 | 27%<br>(16-42%)                | 73%<br>(58-84%)          | 0.25<br>(0.11-0.48)                         | 0.082%<br>(-0.24-0.44%)              | 0.04%<br>(-0.34-0.45%)              | 0.0048<br>(-0.041-0.055)   | 0.058<br>(-0.17-0.31)   |
| Vanuatu  | 2000 | Male   | 95 plus  | 30%<br>(15-50%)                | 70%<br>(50-85%)          | 0.28<br>(0.11-0.56)                         | -0.095%<br>(-0.54-0.33%)             | -0.2%<br>(-0.76-0.28%)              | -0.0058<br>(-0.021-0.0077) | -0.01<br>(-0.06-0.037)  |
| Vanuatu  | 2005 | Female | All Ages | 10%<br>(8.2-13%)               | 90%<br>(87-92%)          | 0.18<br>(0.14-0.24)                         | 0.4%<br>(0.17-0.67%)                 | 0.27%<br>(-0.075-0.68%)             | 2.1<br>(-0.55-5.4)         | 170<br>(70-290)         |
| Vanuatu  | 2005 | Female | 15 to 19 | 13%<br>(7.3-21%)               | 87%<br>(79-93%)          | 0.24<br>(0.11-0.4)                          | 0.75%<br>(0.39-1.3%)                 | 0.98%<br>(0.33-2.1%)                | 0.13<br>(0.043-0.28)       | 14<br>(7.2-26)          |

| Location | Year | Sex    | Age      | Prevalence of current drinkers | Prevalence of abstainers | Population average of standard drinks daily | Percent of total attributable deaths | Percent of total attributable DALYs | Attributable deaths        | Attributable DALYs      |
|----------|------|--------|----------|--------------------------------|--------------------------|---------------------------------------------|--------------------------------------|-------------------------------------|----------------------------|-------------------------|
| Vanuatu  | 2005 | Female | 20 to 24 | 16%<br>(8.9-26%)               | 84%<br>(74-91%)          | 0.38<br>(0.2-0.63)                          | 1.3%<br>(0.74-2.2%)                  | 1.5%<br>(0.59-2.8%)                 | 0.27<br>(0.11-0.51)        | 28<br>(16-47)           |
| Vanuatu  | 2005 | Female | 25 to 29 | 16%<br>(9.9-24%)               | 84%<br>(76-90%)          | 0.38<br>(0.22-0.59)                         | 1.4%<br>(0.87-2.2%)                  | 1.6%<br>(0.8-2.8%)                  | 0.34<br>(0.16-0.62)        | 30<br>(17-48)           |
| Vanuatu  | 2005 | Female | 30 to 34 | 16%<br>(9.5-24%)               | 84%<br>(76-91%)          | 0.39<br>(0.22-0.6)                          | 1.2%<br>(0.65-1.8%)                  | 1.3%<br>(0.54-2.2%)                 | 0.31<br>(0.12-0.58)        | 25<br>(13-42)           |
| Vanuatu  | 2005 | Female | 35 to 39 | 14%<br>(8.6-22%)               | 86%<br>(78-91%)          | 0.37<br>(0.2-0.63)                          | 1.2%<br>(0.61-2%)                    | 1.4%<br>(0.6-2.5%)                  | 0.46<br>(0.19-0.89)        | 29<br>(15-52)           |
| Vanuatu  | 2005 | Female | 40 to 44 | 13%<br>(8.1-20%)               | 87%<br>(80-92%)          | 0.31<br>(0.16-0.54)                         | 0.97%<br>(0.42-1.8%)                 | 1.2%<br>(0.41-2.3%)                 | 0.44<br>(0.15-0.88)        | 24<br>(9.9-44)          |
| Vanuatu  | 2005 | Female | 45 to 49 | 13%<br>(7.1-19%)               | 87%<br>(81-93%)          | 0.26<br>(0.13-0.45)                         | 0.56%<br>(0.045-1.3%)                | 0.66%<br>(-0.02-1.6%)               | 0.28<br>(-0.0074-0.7)      | 13<br>(1.1-30)          |
| Vanuatu  | 2005 | Female | 50 to 54 | 12%<br>(7.8-18%)               | 88%<br>(82-92%)          | 0.22<br>(0.11-0.39)                         | 0.31%<br>(-0.25-1%)                  | 0.37%<br>(-0.31-1.3%)               | 0.17<br>(-0.14-0.6)        | 6.7<br>(-5.1-23)        |
| Vanuatu  | 2005 | Female | 55 to 59 | 11%<br>(6.6-17%)               | 89%<br>(83-93%)          | 0.19<br>(0.091-0.36)                        | 0.22%<br>(-0.33-0.86%)               | 0.28%<br>(-0.38-1%)                 | 0.14<br>(-0.19-0.54)       | 4.4<br>(-6.8-17)        |
| Vanuatu  | 2005 | Female | 60 to 64 | 10%<br>(6-16%)                 | 90%<br>(84-94%)          | 0.17<br>(0.078-0.32)                        | -0.0038%<br>(-0.5-0.55%)             | 0.012%<br>(-0.56-0.69%)             | 0.0069<br>(-0.32-0.39)     | -0.06<br>(-9.4-10)      |
| Vanuatu  | 2005 | Female | 65 to 69 | 12%<br>(6.8-19%)               | 88%<br>(81-93%)          | 0.17<br>(0.082-0.31)                        | -0.051%<br>(-0.59-0.49%)             | -0.033%<br>(-0.65-0.58%)            | -0.02<br>(-0.39-0.36)      | -0.83<br>(-9.4-7.9)     |
| Vanuatu  | 2005 | Female | 70 to 74 | 13%<br>(7.6-21%)               | 87%<br>(79-92%)          | 0.17<br>(0.08-0.32)                         | -0.19%<br>(-0.71-0.33%)              | -0.21%<br>(-0.79-0.4%)              | -0.13<br>(-0.49-0.26)      | -2.6<br>(-9.4-4.5)      |
| Vanuatu  | 2005 | Female | 75 to 79 | 13%<br>(7.1-21%)               | 87%<br>(79-93%)          | 0.16<br>(0.07-0.3)                          | -0.13%<br>(-0.62-0.34%)              | -0.14%<br>(-0.7-0.4%)               | -0.082<br>(-0.41-0.24)     | -1.2<br>(-5.9-3.3)      |
| Vanuatu  | 2005 | Female | 80 to 84 | 12%<br>(6.8-21%)               | 88%<br>(79-93%)          | 0.16<br>(0.071-0.28)                        | -0.19%<br>(-0.61-0.2%)               | -0.22%<br>(-0.69-0.23%)             | -0.12<br>(-0.38-0.13)      | -1.2<br>(-4-1.3)        |
| Vanuatu  | 2005 | Female | 85 to 89 | 13%<br>(7.1-21%)               | 87%<br>(79-93%)          | 0.16<br>(0.074-0.3)                         | -0.2%<br>(-0.62-0.2%)                | -0.24%<br>(-0.71-0.22%)             | -0.067<br>(-0.21-0.065)    | -0.48<br>(-1.5-0.51)    |
| Vanuatu  | 2005 | Female | 90 to 94 | 14%<br>(7.8-22%)               | 86%<br>(78-92%)          | 0.17<br>(0.075-0.35)                        | -0.16%<br>(-0.52-0.24%)              | -0.2%<br>(-0.61-0.26%)              | -0.02<br>(-0.061-0.026)    | -0.097<br>(-0.3-0.14)   |
| Vanuatu  | 2005 | Female | 95 plus  | 16%<br>(7.9-27%)               | 84%<br>(73-92%)          | 0.2<br>(0.079-0.42)                         | -0.16%<br>(-0.67-0.38%)              | -0.23%<br>(-0.81-0.4%)              | -0.0054<br>(-0.019-0.0094) | -0.015<br>(-0.06-0.034) |
| Vanuatu  | 2005 | Male   | All Ages | 31%<br>(23-38%)                | 69%<br>(62-77%)          | 0.45<br>(0.34-0.56)                         | 1.2%<br>(0.72-1.8%)                  | 1%<br>(0.36-1.7%)                   | 10<br>(3.8-18)             | 630<br>(360-930)        |
| Vanuatu  | 2005 | Male   | 15 to 19 | 28%<br>(15-45%)                | 72%<br>(55-85%)          | 0.24<br>(0.11-0.42)                         | 1.2%<br>(0.61-2%)                    | 1.3%<br>(0.49-2.6%)                 | 0.29<br>(0.11-0.57)        | 28<br>(15-47)           |
| Vanuatu  | 2005 | Male   | 20 to 24 | 48%<br>(30-66%)                | 52%<br>(34-70%)          | 0.74<br>(0.42-1.1)                          | 3.5%<br>(2.1-5.5%)                   | 3.9%<br>(2-6.5%)                    | 1.2<br>(0.61-2.2)          | 100<br>(59-160)         |
| Vanuatu  | 2005 | Male   | 25 to 29 | 58%<br>(42-72%)                | 42%<br>(28-58%)          | 1.2<br>(0.76-1.8)                           | 4.9%<br>(2.9-7.2%)                   | 5.5%<br>(3-8.5%)                    | 1.7<br>(0.91-2.8)          | 120<br>(70-190)         |
| Vanuatu  | 2005 | Male   | 30 to 34 | 60%<br>(43-74%)                | 40%<br>(26-57%)          | 1.4<br>(0.79-2)                             | 4.4%<br>(2.5-6.9%)                   | 4.9%<br>(2.5-8%)                    | 1.6<br>(0.77-2.7)          | 110<br>(59-170)         |
| Vanuatu  | 2005 | Male   | 35 to 39 | 56%<br>(42-70%)                | 44%<br>(30-58%)          | 1.1<br>(0.64-1.7)                           | 3.2%<br>(1.7-5%)                     | 3.4%<br>(1.4-5.7%)                  | 1.3<br>(0.56-2.3)          | 82<br>(43-140)          |

| Location | Year | Sex    | Age      | Prevalence of current drinkers | Prevalence of abstainers | Population average of standard drinks daily | Percent of total attributable deaths | Percent of total attributable DALYs | Attributable deaths        | Attributable DALYs      |
|----------|------|--------|----------|--------------------------------|--------------------------|---------------------------------------------|--------------------------------------|-------------------------------------|----------------------------|-------------------------|
| Vanuatu  | 2005 | Male   | 40 to 44 | 52%<br>(37-65%)                | 48%<br>(35-63%)          | 0.9<br>(0.5-1.5)                            | 2.3%<br>(0.92-4%)                    | 2.3%<br>(0.62-4.4%)                 | 1.1<br>(0.29-2.2)          | 62<br>(23-110)          |
| Vanuatu  | 2005 | Male   | 45 to 49 | 46%<br>(29-60%)                | 54%<br>(40-71%)          | 0.72<br>(0.38-1.2)                          | 1.7%<br>(0.45-3.3%)                  | 1.7%<br>(0.16-3.6%)                 | 0.94<br>(0.081-2)          | 48<br>(12-94)           |
| Vanuatu  | 2005 | Male   | 50 to 54 | 43%<br>(28-57%)                | 57%<br>(43-72%)          | 0.57<br>(0.29-0.97)                         | 1.3%<br>(0.12-2.6%)                  | 1.2%<br>(-0.15-2.9%)                | 0.78<br>(-0.085-1.8)       | 35<br>(3.2-72)          |
| Vanuatu  | 2005 | Male   | 55 to 59 | 44%<br>(29-57%)                | 56%<br>(43-71%)          | 0.49<br>(0.25-0.85)                         | 0.7%<br>(-0.18-1.8%)                 | 0.64%<br>(-0.41-1.9%)               | 0.45<br>(-0.29-1.4)        | 18<br>(-5.1-48)         |
| Vanuatu  | 2005 | Male   | 60 to 64 | 41%<br>(25-56%)                | 59%<br>(44-75%)          | 0.41<br>(0.2-0.74)                          | 0.47%<br>(-0.27-1.5%)                | 0.44%<br>(-0.41-1.6%)               | 0.33<br>(-0.31-1.2)        | 11<br>(-6.3-36)         |
| Vanuatu  | 2005 | Male   | 65 to 69 | 38%<br>(21-55%)                | 62%<br>(45-79%)          | 0.34<br>(0.17-0.61)                         | 0.38%<br>(-0.24-1.2%)                | 0.37%<br>(-0.34-1.3%)               | 0.29<br>(-0.26-1)          | 7.7<br>(-4.7-24)        |
| Vanuatu  | 2005 | Male   | 70 to 74 | 34%<br>(20-50%)                | 66%<br>(50-80%)          | 0.28<br>(0.14-0.51)                         | 0.19%<br>(-0.33-0.81%)               | 0.17%<br>(-0.41-0.86%)              | 0.13<br>(-0.32-0.67)       | 3<br>(-5.3-13)          |
| Vanuatu  | 2005 | Male   | 75 to 79 | 30%<br>(17-47%)                | 70%<br>(53-83%)          | 0.22<br>(0.1-0.41)                          | 0.11%<br>(-0.34-0.61%)               | 0.083%<br>(-0.42-0.62%)             | 0.06<br>(-0.31-0.45)       | 1.3<br>(-3.9-6.9)       |
| Vanuatu  | 2005 | Male   | 80 to 84 | 27%<br>(14-43%)                | 73%<br>(57-86%)          | 0.2<br>(0.094-0.35)                         | 0.11%<br>(-0.25-0.48%)               | 0.083%<br>(-0.32-0.49%)             | 0.052<br>(-0.21-0.31)      | 0.83<br>(-1.9-3.5)      |
| Vanuatu  | 2005 | Male   | 85 to 89 | 26%<br>(14-40%)                | 74%<br>(60-86%)          | 0.19<br>(0.087-0.34)                        | 0.017%<br>(-0.32-0.32%)              | -0.025%<br>(-0.42-0.32%)            | -0.0088<br>(-0.14-0.11)    | 0.051<br>(-0.95-0.94)   |
| Vanuatu  | 2005 | Male   | 90 to 94 | 27%<br>(15-41%)                | 73%<br>(59-85%)          | 0.19<br>(0.09-0.37)                         | -0.0014%<br>(-0.33-0.27%)            | -0.053%<br>(-0.43-0.26%)            | -0.0067<br>(-0.054-0.032)  | -0.00078<br>(-0.24-0.2) |
| Vanuatu  | 2005 | Male   | 95 plus  | 29%<br>(14-49%)                | 71%<br>(51-86%)          | 0.21<br>(0.086-0.42)                        | -0.16%<br>(-0.55-0.15%)              | -0.28%<br>(-0.76-0.091%)            | -0.0088<br>(-0.023-0.0028) | -0.02<br>(-0.069-0.019) |
| Vanuatu  | 2010 | Female | All Ages | 10%<br>(8-12%)                 | 90%<br>(88-92%)          | 0.14<br>(0.097-0.19)                        | 0.28%<br>(0.081-0.5%)                | 0.089%<br>(-0.2-0.41%)              | 0.8<br>(-1.7-3.7)          | 130<br>(38-240)         |
| Vanuatu  | 2010 | Female | 15 to 19 | 13%<br>(7.5-21%)               | 87%<br>(79-92%)          | 0.18<br>(0.085-0.32)                        | 0.6%<br>(0.3-1%)                     | 0.7%<br>(0.19-1.5%)                 | 0.092<br>(0.025-0.2)       | 12<br>(5.8-20)          |
| Vanuatu  | 2010 | Female | 20 to 24 | 16%<br>(9.2-25%)               | 84%<br>(75-91%)          | 0.29<br>(0.15-0.5)                          | 1%<br>(0.6-1.7%)                     | 1%<br>(0.35-2.1%)                   | 0.21<br>(0.074-0.43)       | 26<br>(14-42)           |
| Vanuatu  | 2010 | Female | 25 to 29 | 16%<br>(10-23%)                | 84%<br>(77-90%)          | 0.29<br>(0.16-0.46)                         | 1.1%<br>(0.69-1.7%)                  | 1.2%<br>(0.53-2.2%)                 | 0.28<br>(0.12-0.51)        | 28<br>(16-44)           |
| Vanuatu  | 2010 | Female | 30 to 34 | 15%<br>(9.4-23%)               | 85%<br>(77-91%)          | 0.29<br>(0.16-0.47)                         | 0.88%<br>(0.46-1.4%)                 | 0.85%<br>(0.3-1.6%)                 | 0.23<br>(0.077-0.44)       | 21<br>(11-36)           |
| Vanuatu  | 2010 | Female | 35 to 39 | 13%<br>(8.3-21%)               | 87%<br>(79-92%)          | 0.27<br>(0.14-0.45)                         | 0.85%<br>(0.44-1.5%)                 | 0.92%<br>(0.35-1.8%)                | 0.32<br>(0.12-0.67)        | 23<br>(11-40)           |
| Vanuatu  | 2010 | Female | 40 to 44 | 12%<br>(7.6-18%)               | 88%<br>(82-92%)          | 0.22<br>(0.11-0.4)                          | 0.67%<br>(0.26-1.3%)                 | 0.74%<br>(0.2-1.6%)                 | 0.3<br>(0.079-0.67)        | 18<br>(6.6-35)          |
| Vanuatu  | 2010 | Female | 45 to 49 | 11%<br>(6.7-16%)               | 89%<br>(84-93%)          | 0.17<br>(0.088-0.31)                        | 0.35%<br>(-0.047-0.84%)              | 0.38%<br>(-0.14-1%)                 | 0.21<br>(-0.072-0.59)      | 11<br>(-1.4-26)         |
| Vanuatu  | 2010 | Female | 50 to 54 | 11%<br>(6.8-16%)               | 89%<br>(84-93%)          | 0.15<br>(0.07-0.27)                         | 0.14%<br>(-0.27-0.62%)               | 0.15%<br>(-0.36-0.76%)              | 0.079<br>(-0.19-0.37)      | 3.6<br>(-6.6-15)        |
| Vanuatu  | 2010 | Female | 55 to 59 | 9.3%<br>(5.8-14%)              | 91%<br>(86-94%)          | 0.13<br>(0.059-0.24)                        | 0.09%<br>(-0.33-0.51%)               | 0.11%<br>(-0.37-0.62%)              | 0.077<br>(-0.26-0.42)      | 2.5<br>(-9.1-14)        |

| Location | Year | Sex    | Age      | Prevalence of current drinkers | Prevalence of abstainers | Population average of standard drinks daily | Percent of total attributable deaths | Percent of total attributable DALYs | Attributable deaths        | Attributable DALYs       |
|----------|------|--------|----------|--------------------------------|--------------------------|---------------------------------------------|--------------------------------------|-------------------------------------|----------------------------|--------------------------|
| Vanuatu  | 2010 | Female | 60 to 64 | 9%<br>(5.3-15%)                | 91%<br>(85-95%)          | 0.12<br>(0.055-0.22)                        | -0.076%<br>(-0.48-0.3%)              | -0.081%<br>(-0.57-0.38%)            | -0.049<br>(-0.34-0.23)     | -1.5<br>(-9.7-6.1)       |
| Vanuatu  | 2010 | Female | 65 to 69 | 11%<br>(6.2-17%)               | 89%<br>(83-94%)          | 0.13<br>(0.06-0.23)                         | -0.14%<br>(-0.61-0.26%)              | -0.14%<br>(-0.69-0.32%)             | -0.12<br>(-0.58-0.28)      | -3.3<br>(-14-5.9)        |
| Vanuatu  | 2010 | Female | 70 to 74 | 12%<br>(7.5-20%)               | 88%<br>(80-93%)          | 0.13<br>(0.059-0.24)                        | -0.3%<br>(-0.74-0.1%)                | -0.33%<br>(-0.84-0.14%)             | -0.33<br>(-0.86-0.14)      | -6.3<br>(-16-2.2)        |
| Vanuatu  | 2010 | Female | 75 to 79 | 12%<br>(7-21%)                 | 88%<br>(79-93%)          | 0.12<br>(0.054-0.23)                        | -0.23%<br>(-0.67-0.11%)              | -0.25%<br>(-0.76-0.14%)             | -0.18<br>(-0.53-0.094)     | -2.6<br>(-7.6-1.2)       |
| Vanuatu  | 2010 | Female | 80 to 84 | 12%<br>(6.8-21%)               | 88%<br>(79-93%)          | 0.12<br>(0.053-0.22)                        | -0.29%<br>(-0.67-0.006%)             | -0.33%<br>(-0.74-0.018%)            | -0.19<br>(-0.45-0.01)      | -2<br>(-4.7-0.037)       |
| Vanuatu  | 2010 | Female | 85 to 89 | 13%<br>(7.1-20%)               | 87%<br>(80-93%)          | 0.12<br>(0.055-0.24)                        | -0.29%<br>(-0.72-0.012%)             | -0.34%<br>(-0.83-0.011%)            | -0.096<br>(-0.24-0.0032)   | -0.7<br>(-1.8-0.031)     |
| Vanuatu  | 2010 | Female | 90 to 94 | 14%<br>(7.8-22%)               | 86%<br>(78-92%)          | 0.13<br>(0.054-0.26)                        | -0.26%<br>(-0.63-0.0092%)            | -0.31%<br>(-0.72-0.0013%)           | -0.031<br>(-0.072-0.00013) | -0.15<br>(-0.36-0.0054)  |
| Vanuatu  | 2010 | Female | 95 plus  | 16%<br>(8-27%)                 | 84%<br>(73-92%)          | 0.15<br>(0.057-0.31)                        | -0.26%<br>(-0.77-0.16%)              | -0.34%<br>(-0.93-0.14%)             | -0.0089<br>(-0.024-0.0036) | -0.026<br>(-0.076-0.016) |
| Vanuatu  | 2010 | Male   | All Ages | 34%<br>(26-41%)                | 66%<br>(59-74%)          | 0.39<br>(0.27-0.53)                         | 1%<br>(0.54-1.7%)                    | 0.77%<br>(0.17-1.4%)                | 8.6<br>(2.1-16)            | 570<br>(300-930)         |
| Vanuatu  | 2010 | Male   | 15 to 19 | 29%<br>(15-47%)                | 71%<br>(53-85%)          | 0.19<br>(0.078-0.34)                        | 1%<br>(0.54-1.7%)                    | 1.1%<br>(0.39-2.2%)                 | 0.22<br>(0.079-0.45)       | 23<br>(12-39)            |
| Vanuatu  | 2010 | Male   | 20 to 24 | 51%<br>(31-69%)                | 49%<br>(31-69%)          | 0.62<br>(0.32-1)                            | 3%<br>(1.6-4.8%)                     | 3.3%<br>(1.4-5.7%)                  | 1.1<br>(0.49-2)            | 93<br>(49-150)           |
| Vanuatu  | 2010 | Male   | 25 to 29 | 63%<br>(46-74%)                | 37%<br>(26-54%)          | 1.1<br>(0.64-1.6)                           | 4.2%<br>(2.5-6.3%)                   | 4.7%<br>(2.4-7.4%)                  | 1.8<br>(0.88-2.9)          | 130<br>(75-210)          |
| Vanuatu  | 2010 | Male   | 30 to 34 | 65%<br>(50-76%)                | 35%<br>(24-50%)          | 1.2<br>(0.69-1.8)                           | 3.6%<br>(2-5.7%)                     | 3.9%<br>(1.8-6.5%)                  | 1.5<br>(0.66-2.6)          | 100<br>(54-170)          |
| Vanuatu  | 2010 | Male   | 35 to 39 | 60%<br>(47-71%)                | 40%<br>(29-53%)          | 0.92<br>(0.54-1.5)                          | 2.5%<br>(1.2-4.3%)                   | 2.6%<br>(0.92-4.9%)                 | 1.1<br>(0.39-2.2)          | 73<br>(34-130)           |
| Vanuatu  | 2010 | Male   | 40 to 44 | 53%<br>(41-66%)                | 47%<br>(34-59%)          | 0.72<br>(0.38-1.2)                          | 1.7%<br>(0.52-3.2%)                  | 1.6%<br>(0.2-3.4%)                  | 0.83<br>(0.092-1.8)        | 51<br>(15-97)            |
| Vanuatu  | 2010 | Male   | 45 to 49 | 47%<br>(32-59%)                | 53%<br>(41-68%)          | 0.56<br>(0.31-0.99)                         | 1.3%<br>(0.2-2.5%)                   | 1.1%<br>(-0.16-2.7%)                | 0.77<br>(-0.11-1.8)        | 43<br>(6.4-87)           |
| Vanuatu  | 2010 | Male   | 50 to 54 | 42%<br>(30-55%)                | 58%<br>(45-70%)          | 0.42<br>(0.21-0.76)                         | 0.94%<br>(-0.02-2%)                  | 0.84%<br>(-0.33-2.1%)               | 0.58<br>(-0.21-1.5)        | 28<br>(-0.56-61)         |
| Vanuatu  | 2010 | Male   | 55 to 59 | 41%<br>(27-54%)                | 59%<br>(46-73%)          | 0.34<br>(0.17-0.6)                          | 0.47%<br>(-0.22-1.2%)                | 0.38%<br>(-0.45-1.2%)               | 0.32<br>(-0.38-1.1)        | 15<br>(-6.9-40)          |
| Vanuatu  | 2010 | Male   | 60 to 64 | 39%<br>(25-53%)                | 61%<br>(47-75%)          | 0.28<br>(0.14-0.51)                         | 0.26%<br>(-0.34-0.94%)               | 0.2%<br>(-0.49-0.94%)               | 0.16<br>(-0.39-0.76)       | 6.4<br>(-8.2-23)         |
| Vanuatu  | 2010 | Male   | 65 to 69 | 37%<br>(22-52%)                | 63%<br>(48-78%)          | 0.25<br>(0.12-0.46)                         | 0.19%<br>(-0.32-0.75%)               | 0.15%<br>(-0.42-0.79%)              | 0.17<br>(-0.51-0.88)       | 5.5<br>(-9.3-22)         |
| Vanuatu  | 2010 | Male   | 70 to 74 | 34%<br>(20-49%)                | 66%<br>(51-80%)          | 0.21<br>(0.099-0.39)                        | 0.061%<br>(-0.38-0.53%)              | 0.026%<br>(-0.48-0.57%)             | 0.024<br>(-0.45-0.54)      | 1.2<br>(-7.3-10)         |
| Vanuatu  | 2010 | Male   | 75 to 79 | 30%<br>(17-46%)                | 70%<br>(54-83%)          | 0.17<br>(0.076-0.33)                        | 0.025%<br>(-0.36-0.37%)              | -0.016%<br>(-0.45-0.37%)            | -0.012<br>(-0.36-0.29)     | 0.31<br>(-4.6-4.4)       |

| Location | Year | Sex    | Age      | Prevalence of current drinkers | Prevalence of abstainers | Population average of standard drinks daily | Percent of total attributable deaths | Percent of total attributable DALYs | Attributable deaths        | Attributable DALYs       |
|----------|------|--------|----------|--------------------------------|--------------------------|---------------------------------------------|--------------------------------------|-------------------------------------|----------------------------|--------------------------|
| Vanuatu  | 2010 | Male   | 80 to 84 | 27%<br>(14-42%)                | 73%<br>(58-86%)          | 0.15<br>(0.068-0.28)                        | 0.055%<br>(-0.27-0.32%)              | 0.019%<br>(-0.34-0.32%)             | 0.012<br>(-0.21-0.19)      | 0.39<br>(-1.9-2.3)       |
| Vanuatu  | 2010 | Male   | 85 to 89 | 26%<br>(14-40%)                | 74%<br>(60-86%)          | 0.14<br>(0.067-0.28)                        | -0.033%<br>(-0.35-0.2%)              | -0.083%<br>(-0.45-0.19%)            | -0.028<br>(-0.15-0.063)    | -0.092<br>(-0.99-0.59)   |
| Vanuatu  | 2010 | Male   | 90 to 94 | 27%<br>(15-42%)                | 73%<br>(58-85%)          | 0.15<br>(0.066-0.29)                        | -0.03%<br>(-0.33-0.2%)               | -0.085%<br>(-0.44-0.18%)            | -0.011<br>(-0.056-0.023)   | -0.022<br>(-0.25-0.15)   |
| Vanuatu  | 2010 | Male   | 95 plus  | 29%<br>(14-49%)                | 71%<br>(51-86%)          | 0.16<br>(0.064-0.33)                        | -0.18%<br>(-0.57-0.095%)             | -0.29%<br>(-0.77-0.044%)            | -0.0096<br>(-0.025-0.0015) | -0.023<br>(-0.075-0.012) |
| Vanuatu  | 2016 | Female | All Ages | 10%<br>(8.2-13%)               | 90%<br>(87-92%)          | 0.14<br>(0.072-0.23)                        | 0.28%<br>(0.084-0.57%)               | 0.089%<br>(-0.22-0.51%)             | 0.95<br>(-2.3-5.4)         | 150<br>(42-310)          |
| Vanuatu  | 2016 | Female | 15 to 19 | 13%<br>(7.4-21%)               | 87%<br>(79-93%)          | 0.18<br>(0.067-0.36)                        | 0.59%<br>(0.28-1.1%)                 | 0.68%<br>(0.14-1.7%)                | 0.092<br>(0.02-0.23)       | 12<br>(5.7-23)           |
| Vanuatu  | 2016 | Female | 20 to 24 | 16%<br>(9-26%)                 | 84%<br>(74-91%)          | 0.29<br>(0.12-0.55)                         | 1.1%<br>(0.58-1.8%)                  | 1%<br>(0.28-2.3%)                   | 0.19<br>(0.052-0.43)       | 25<br>(13-45)            |
| Vanuatu  | 2016 | Female | 25 to 29 | 16%<br>(10-23%)                | 84%<br>(77-90%)          | 0.28<br>(0.13-0.5)                          | 1.1%<br>(0.67-1.8%)                  | 1.1%<br>(0.44-2.2%)                 | 0.31<br>(0.12-0.61)        | 33<br>(18-52)            |
| Vanuatu  | 2016 | Female | 30 to 34 | 15%<br>(9.4-22%)               | 85%<br>(78-91%)          | 0.27<br>(0.12-0.51)                         | 0.87%<br>(0.43-1.4%)                 | 0.82%<br>(0.24-1.8%)                | 0.26<br>(0.069-0.56)       | 26<br>(12-45)            |
| Vanuatu  | 2016 | Female | 35 to 39 | 13%<br>(8.2-21%)               | 87%<br>(79-92%)          | 0.25<br>(0.11-0.49)                         | 0.84%<br>(0.42-1.6%)                 | 0.91%<br>(0.3-2%)                   | 0.35<br>(0.11-0.79)        | 25<br>(12-49)            |
| Vanuatu  | 2016 | Female | 40 to 44 | 12%<br>(7.4-18%)               | 88%<br>(82-93%)          | 0.21<br>(0.089-0.43)                        | 0.67%<br>(0.25-1.4%)                 | 0.74%<br>(0.18-1.8%)                | 0.34<br>(0.075-0.8)        | 20<br>(7.2-42)           |
| Vanuatu  | 2016 | Female | 45 to 49 | 11%<br>(6.5-17%)               | 89%<br>(83-93%)          | 0.17<br>(0.072-0.34)                        | 0.38%<br>(-0.02-0.99%)               | 0.42%<br>(-0.1-1.2%)                | 0.23<br>(-0.061-0.69)      | 12<br>(-0.59-32)         |
| Vanuatu  | 2016 | Female | 50 to 54 | 11%<br>(6.8-16%)               | 89%<br>(84-93%)          | 0.14<br>(0.059-0.3)                         | 0.17%<br>(-0.24-0.72%)               | 0.19%<br>(-0.32-0.86%)              | 0.14<br>(-0.24-0.66)       | 6.1<br>(-8-27)           |
| Vanuatu  | 2016 | Female | 55 to 59 | 9.3%<br>(5.8-14%)              | 91%<br>(86-94%)          | 0.12<br>(0.048-0.25)                        | 0.12%<br>(-0.27-0.58%)               | 0.15%<br>(-0.33-0.72%)              | 0.12<br>(-0.25-0.54)       | 3.8<br>(-8.3-18)         |
| Vanuatu  | 2016 | Female | 60 to 64 | 9%<br>(5.2-14%)                | 91%<br>(86-95%)          | 0.11<br>(0.045-0.23)                        | -0.041%<br>(-0.43-0.36%)             | -0.039%<br>(-0.49-0.45%)            | -0.035<br>(-0.43-0.38)     | -1.2<br>(-13-11)         |
| Vanuatu  | 2016 | Female | 65 to 69 | 11%<br>(6.5-17%)               | 89%<br>(83-94%)          | 0.12<br>(0.05-0.25)                         | -0.1%<br>(-0.53-0.33%)               | -0.095%<br>(-0.62-0.42%)            | -0.085<br>(-0.54-0.35)     | -2.5<br>(-13-7.7)        |
| Vanuatu  | 2016 | Female | 70 to 74 | 13%<br>(7.5-20%)               | 87%<br>(80-93%)          | 0.13<br>(0.048-0.28)                        | -0.26%<br>(-0.72-0.15%)              | -0.29%<br>(-0.8-0.2%)               | -0.34<br>(-0.97-0.24)      | -6.6<br>(-18-4.2)        |
| Vanuatu  | 2016 | Female | 75 to 79 | 12%<br>(7.2-21%)               | 88%<br>(79-93%)          | 0.12<br>(0.046-0.25)                        | -0.2%<br>(-0.65-0.21%)               | -0.21%<br>(-0.72-0.24%)             | -0.25<br>(-0.89-0.29)      | -3.8<br>(-13-3.9)        |
| Vanuatu  | 2016 | Female | 80 to 84 | 12%<br>(6.7-21%)               | 88%<br>(79-93%)          | 0.12<br>(0.044-0.24)                        | -0.27%<br>(-0.64-0.063%)             | -0.3%<br>(-0.75-0.074%)             | -0.25<br>(-0.6-0.059)      | -2.6<br>(-6.4-0.61)      |
| Vanuatu  | 2016 | Female | 85 to 89 | 13%<br>(6.9-20%)               | 87%<br>(80-93%)          | 0.12<br>(0.048-0.25)                        | -0.26%<br>(-0.7-0.08%)               | -0.31%<br>(-0.8-0.089%)             | -0.093<br>(-0.24-0.026)    | -0.68<br>(-1.8-0.2)      |
| Vanuatu  | 2016 | Female | 90 to 94 | 14%<br>(7.8-23%)               | 86%<br>(77-92%)          | 0.13<br>(0.046-0.27)                        | -0.24%<br>(-0.6-0.062%)              | -0.29%<br>(-0.71-0.056%)            | -0.028<br>(-0.068-0.0057)  | -0.14<br>(-0.34-0.036)   |
| Vanuatu  | 2016 | Female | 95 plus  | 16%<br>(7.8-27%)               | 84%<br>(73-92%)          | 0.14<br>(0.048-0.33)                        | -0.25%<br>(-0.76-0.17%)              | -0.32%<br>(-0.92-0.15%)             | -0.0076<br>(-0.022-0.0037) | -0.023<br>(-0.07-0.016)  |

| Location | Year | Sex    | Age      | Prevalence of current drinkers | Prevalence of abstainers | Population average of standard drinks daily | Percent of total attributable deaths | Percent of total attributable DALYs | Attributable deaths        | Attributable DALYs       |
|----------|------|--------|----------|--------------------------------|--------------------------|---------------------------------------------|--------------------------------------|-------------------------------------|----------------------------|--------------------------|
| Vanuatu  | 2016 | Male   | All Ages | 34%<br>(27-41%)                | 66%<br>(59-73%)          | 0.39<br>(0.2-0.63)                          | 1.1%<br>(0.49-2%)                    | 0.78%<br>(0.13-1.7%)                | 9.9<br>(1.7-22)            | 650<br>(290-1200)        |
| Vanuatu  | 2016 | Male   | 15 to 19 | 29%<br>(16-45%)                | 71%<br>(55-84%)          | 0.18<br>(0.065-0.36)                        | 1%<br>(0.51-1.8%)                    | 1.1%<br>(0.34-2.2%)                 | 0.26<br>(0.085-0.55)       | 27<br>(14-48)            |
| Vanuatu  | 2016 | Male   | 20 to 24 | 50%<br>(32-67%)                | 50%<br>(33-68%)          | 0.58<br>(0.26-1.1)                          | 2.9%<br>(1.5-5.1%)                   | 3.2%<br>(1.2-6%)                    | 1<br>(0.38-2)              | 87<br>(42-150)           |
| Vanuatu  | 2016 | Male   | 25 to 29 | 63%<br>(48-73%)                | 37%<br>(27-52%)          | 1<br>(0.51-1.7)                             | 4.1%<br>(2.1-6.7%)                   | 4.5%<br>(1.9-7.9%)                  | 1.8<br>(0.73-3.3)          | 140<br>(66-230)          |
| Vanuatu  | 2016 | Male   | 30 to 34 | 66%<br>(50-76%)                | 34%<br>(24-50%)          | 1.2<br>(0.55-2.1)                           | 3.6%<br>(1.7-6.3%)                   | 3.8%<br>(1.3-7.4%)                  | 1.8<br>(0.61-3.7)          | 130<br>(57-230)          |
| Vanuatu  | 2016 | Male   | 35 to 39 | 60%<br>(47-72%)                | 40%<br>(28-53%)          | 0.92<br>(0.44-1.7)                          | 2.6%<br>(1.1-4.9%)                   | 2.6%<br>(0.7-5.6%)                  | 1.4<br>(0.34-3)            | 90<br>(37-180)           |
| Vanuatu  | 2016 | Male   | 40 to 44 | 53%<br>(41-65%)                | 47%<br>(35-59%)          | 0.69<br>(0.31-1.3)                          | 1.7%<br>(0.45-3.7%)                  | 1.6%<br>(0.099-4%)                  | 0.97<br>(0.061-2.4)        | 60<br>(16-130)           |
| Vanuatu  | 2016 | Male   | 45 to 49 | 46%<br>(32-58%)                | 54%<br>(42-68%)          | 0.55<br>(0.24-1.1)                          | 1.3%<br>(0.2-2.9%)                   | 1.2%<br>(-0.14-3%)                  | 0.85<br>(-0.11-2.2)        | 47<br>(7.3-110)          |
| Vanuatu  | 2016 | Male   | 50 to 54 | 42%<br>(29-54%)                | 58%<br>(46-71%)          | 0.42<br>(0.18-0.85)                         | 0.96%<br>(0.0078-2.4%)               | 0.87%<br>(-0.27-2.5%)               | 0.79<br>(-0.25-2.4)        | 38<br>(0.37-95)          |
| Vanuatu  | 2016 | Male   | 55 to 59 | 41%<br>(27-54%)                | 59%<br>(46-73%)          | 0.33<br>(0.14-0.64)                         | 0.49%<br>(-0.22-1.3%)                | 0.39%<br>(-0.44-1.3%)               | 0.37<br>(-0.42-1.3)        | 17<br>(-8-49)            |
| Vanuatu  | 2016 | Male   | 60 to 64 | 38%<br>(24-52%)                | 62%<br>(48-76%)          | 0.27<br>(0.12-0.51)                         | 0.28%<br>(-0.32-0.98%)               | 0.22%<br>(-0.49-1%)                 | 0.24<br>(-0.51-1.1)        | 9.6<br>(-10-33)          |
| Vanuatu  | 2016 | Male   | 65 to 69 | 36%<br>(21-54%)                | 64%<br>(46-79%)          | 0.24<br>(0.1-0.48)                          | 0.23%<br>(-0.26-0.79%)               | 0.19%<br>(-0.35-0.86%)              | 0.21<br>(-0.39-0.95)       | 6.3<br>(-7.5-24)         |
| Vanuatu  | 2016 | Male   | 70 to 74 | 33%<br>(20-50%)                | 67%<br>(50-80%)          | 0.2<br>(0.081-0.42)                         | 0.095%<br>(-0.31-0.64%)              | 0.061%<br>(-0.42-0.68%)             | 0.08<br>(-0.55-0.91)       | 2.6<br>(-8.7-18)         |
| Vanuatu  | 2016 | Male   | 75 to 79 | 29%<br>(17-46%)                | 71%<br>(54-83%)          | 0.17<br>(0.061-0.35)                        | 0.052%<br>(-0.33-0.47%)              | 0.012%<br>(-0.44-0.47%)             | 0.013<br>(-0.46-0.5)       | 0.88<br>(-5.9-7.9)       |
| Vanuatu  | 2016 | Male   | 80 to 84 | 26%<br>(14-42%)                | 74%<br>(58-86%)          | 0.15<br>(0.055-0.29)                        | 0.084%<br>(-0.25-0.37%)              | 0.051%<br>(-0.33-0.38%)             | 0.034<br>(-0.22-0.25)      | 0.67<br>(-1.9-3)         |
| Vanuatu  | 2016 | Male   | 85 to 89 | 25%<br>(14-40%)                | 75%<br>(60-86%)          | 0.14<br>(0.057-0.3)                         | -0.012%<br>(-0.34-0.26%)             | -0.061%<br>(-0.43-0.23%)            | -0.02<br>(-0.14-0.076)     | -0.033<br>(-0.93-0.72)   |
| Vanuatu  | 2016 | Male   | 90 to 94 | 26%<br>(15-42%)                | 74%<br>(58-85%)          | 0.15<br>(0.055-0.31)                        | -0.013%<br>(-0.31-0.22%)             | -0.067%<br>(-0.41-0.21%)            | -0.0079<br>(-0.049-0.025)  | -0.0088<br>(-0.22-0.16)  |
| Vanuatu  | 2016 | Male   | 95 plus  | 30%<br>(15-49%)                | 70%<br>(51-85%)          | 0.16<br>(0.055-0.35)                        | -0.17%<br>(-0.56-0.12%)              | -0.28%<br>(-0.76-0.056%)            | -0.0092<br>(-0.025-0.0018) | -0.021<br>(-0.072-0.016) |
| Armenia  | 1990 | Female | All Ages | 30%<br>(26-35%)                | 70%<br>(65-74%)          | 1<br>(0.78-1.3)                             | 2.4%<br>(1.6-3.4%)                   | 3.8%<br>(2-6.1%)                    | 450<br>(230-730)           | 13000<br>(8200-18000)    |
| Armenia  | 1990 | Female | 15 to 19 | 25%<br>(18-34%)                | 75%<br>(66-82%)          | 0.78<br>(0.45-1.2)                          | 1.6%<br>(1-2.3%)                     | 3.2%<br>(1.9-5%)                    | 1.7<br>(0.97-2.6)          | 220<br>(140-320)         |
| Armenia  | 1990 | Female | 20 to 24 | 36%<br>(25-47%)                | 64%<br>(53-75%)          | 1.2<br>(0.73-1.9)                           | 2.8%<br>(2-3.8%)                     | 4%<br>(2.4-6.2%)                    | 3.5<br>(2.1-5.4)           | 470<br>(310-680)         |
| Armenia  | 1990 | Female | 25 to 29 | 41%<br>(29-52%)                | 59%<br>(48-71%)          | 1.5<br>(0.89-2.2)                           | 3.1%<br>(2.2-4.1%)                   | 4.6%<br>(3-6.7%)                    | 5.7<br>(3.6-8.3)           | 700<br>(480-960)         |

| Location | Year | Sex    | Age      | Prevalence of current drinkers | Prevalence of abstainers | Population average of standard drinks daily | Percent of total attributable deaths | Percent of total attributable DALYs | Attributable deaths | Attributable DALYs    |
|----------|------|--------|----------|--------------------------------|--------------------------|---------------------------------------------|--------------------------------------|-------------------------------------|---------------------|-----------------------|
| Armenia  | 1990 | Female | 30 to 34 | 44%<br>(31-56%)                | 56%<br>(44-69%)          | 1.6<br>(0.98-2.4)                           | 3.2%<br>(2.4-4.3%)                   | 5.3%<br>(3.5-7.6%)                  | 8.3<br>(5.5-12)     | 820<br>(600-1100)     |
| Armenia  | 1990 | Female | 35 to 39 | 44%<br>(32-55%)                | 56%<br>(45-68%)          | 1.7<br>(1-2.6)                              | 3.4%<br>(2.4-4.6%)                   | 6%<br>(3.9-8.3%)                    | 9.9<br>(6.5-14)     | 770<br>(540-1000)     |
| Armenia  | 1990 | Female | 40 to 44 | 43%<br>(32-54%)                | 57%<br>(46-68%)          | 1.8<br>(1.1-2.7)                            | 3.7%<br>(2.5-5.1%)                   | 6.4%<br>(4.1-9.1%)                  | 11<br>(6.9-15)      | 660<br>(450-930)      |
| Armenia  | 1990 | Female | 45 to 49 | 42%<br>(28-53%)                | 58%<br>(47-72%)          | 1.8<br>(0.99-2.8)                           | 4%<br>(2.5-5.9%)                     | 6.6%<br>(4.1-10%)                   | 12<br>(7-18)        | 590<br>(380-880)      |
| Armenia  | 1990 | Female | 50 to 54 | 39%<br>(28-52%)                | 61%<br>(48-72%)          | 1.7<br>(1-2.7)                              | 4.2%<br>(2.6-6.4%)                   | 6.4%<br>(3.9-9.9%)                  | 31<br>(18-49)       | 1300<br>(820-2100)    |
| Armenia  | 1990 | Female | 55 to 59 | 37%<br>(22-53%)                | 63%<br>(47-78%)          | 1.7<br>(0.91-2.8)                           | 4.3%<br>(2.3-7%)                     | 6.2%<br>(3.2-10%)                   | 38<br>(19-64)       | 1400<br>(710-2200)    |
| Armenia  | 1990 | Female | 60 to 64 | 34%<br>(20-51%)                | 66%<br>(49-80%)          | 1.6<br>(0.83-2.7)                           | 4.3%<br>(1.9-7.4%)                   | 5.8%<br>(2.5-10%)                   | 62<br>(27-110)      | 1800<br>(810-3200)    |
| Armenia  | 1990 | Female | 65 to 69 | 32%<br>(20-47%)                | 68%<br>(53-80%)          | 1.5<br>(0.8-2.4)                            | 4.3%<br>(2-7.4%)                     | 5.6%<br>(2.6-9.7%)                  | 56<br>(26-95)       | 1400<br>(640-2300)    |
| Armenia  | 1990 | Female | 70 to 74 | 28%<br>(18-42%)                | 72%<br>(58-82%)          | 1.3<br>(0.69-2.2)                           | 3.8%<br>(1.3-7.2%)                   | 4.8%<br>(1.6-9.1%)                  | 43<br>(14-82)       | 820<br>(280-1500)     |
| Armenia  | 1990 | Female | 75 to 79 | 24%<br>(15-38%)                | 76%<br>(62-85%)          | 1.1<br>(0.54-1.9)                           | 3.2%<br>(0.77-6.7%)                  | 3.8%<br>(0.87-8%)                   | 59<br>(13-130)      | 880<br>(210-1800)     |
| Armenia  | 1990 | Female | 80 to 84 | 22%<br>(13-33%)                | 78%<br>(67-87%)          | 0.99<br>(0.52-1.6)                          | 2.8%<br>(0.73-5.9%)                  | 3.3%<br>(0.77-7%)                   | 51<br>(12-110)      | 550<br>(140-1200)     |
| Armenia  | 1990 | Female | 85 to 89 | 21%<br>(13-32%)                | 79%<br>(68-87%)          | 0.98<br>(0.5-1.7)                           | 2.5%<br>(0.46-6%)                    | 2.9%<br>(0.4-7.2%)                  | 37<br>(5.1-93)      | 280<br>(53-690)       |
| Armenia  | 1990 | Female | 90 to 94 | 23%<br>(14-34%)                | 77%<br>(66-86%)          | 1<br>(0.52-2)                               | 2.2%<br>(0.13-6.2%)                  | 2.6%<br>(-0.034-7.4%)               | 14<br>(-0.19-41)    | 77<br>(4.3-210)       |
| Armenia  | 1990 | Female | 95 plus  | 25%<br>(14-40%)                | 75%<br>(60-86%)          | 1.1<br>(0.46-2.2)                           | 2.2%<br>(-0.32-6.8%)                 | 2.5%<br>(-0.6-8.1%)                 | 4.1<br>(-0.95-13)   | 15<br>(-2.1-46)       |
| Armenia  | 1990 | Male   | All Ages | 79%<br>(76-83%)                | 21%<br>(17-24%)          | 1.2<br>(0.95-1.6)                           | 2.5%<br>(1.4-3.7%)                   | 1.2%<br>(-0.63-3.2%)                | 160<br>(-83-420)    | 16000<br>(8900-25000) |
| Armenia  | 1990 | Male   | 15 to 19 | 68%<br>(58-76%)                | 32%<br>(24-42%)          | 0.57<br>(0.31-0.95)                         | 3.8%<br>(2.2-5.8%)                   | 4.4%<br>(1.9-7.9%)                  | 8.4<br>(3.5-15)     | 870<br>(500-1400)     |
| Armenia  | 1990 | Male   | 20 to 24 | 90%<br>(84-94%)                | 10%<br>(6.4-16%)         | 1.3<br>(0.8-2)                              | 7.9%<br>(5.3-11%)                    | 8.4%<br>(4.5-13%)                   | 22<br>(11-34)       | 2100<br>(1400-3000)   |
| Armenia  | 1990 | Male   | 25 to 29 | 93%<br>(89-95%)                | 7.4%<br>(4.9-11%)        | 2<br>(1.2-3)                                | 9.1%<br>(6.4-12%)                    | 10%<br>(6-15%)                      | 32<br>(19-50)       | 3000<br>(2000-4100)   |
| Armenia  | 1990 | Male   | 30 to 34 | 94%<br>(91-96%)                | 5.8%<br>(3.6-9.3%)       | 2.3<br>(1.5-3.3)                            | 8.3%<br>(5.6-11%)                    | 9.3%<br>(5.3-14%)                   | 37<br>(21-56)       | 3000<br>(2000-4200)   |
| Armenia  | 1990 | Male   | 35 to 39 | 95%<br>(93-97%)                | 4.9%<br>(3.1-7.5%)       | 2.3<br>(1.4-3.4)                            | 6.6%<br>(4.1-9.5%)                   | 7.3%<br>(3.5-12%)                   | 28<br>(13-44)       | 2100<br>(1200-3000)   |
| Armenia  | 1990 | Male   | 40 to 44 | 95%<br>(93-97%)                | 4.8%<br>(2.9-7.4%)       | 2.3<br>(1.4-3.5)                            | 5.2%<br>(2.8-8%)                     | 5.5%<br>(2.1-9.4%)                  | 20<br>(7.5-35)      | 1300<br>(700-2100)    |
| Armenia  | 1990 | Male   | 45 to 49 | 95%<br>(91-97%)                | 5.4%<br>(3.3-8.8%)       | 2.5<br>(1.5-3.8)                            | 4.7%<br>(1.8-8%)                     | 4.9%<br>(0.96-9.4%)                 | 18<br>(3.4-35)      | 990<br>(390-1700)     |

| Location | Year | Sex    | Age      | Prevalence of current drinkers | Prevalence of abstainers | Population average of standard drinks daily | Percent of total attributable deaths | Percent of total attributable DALYs | Attributable deaths  | Attributable DALYs    |
|----------|------|--------|----------|--------------------------------|--------------------------|---------------------------------------------|--------------------------------------|-------------------------------------|----------------------|-----------------------|
| Armenia  | 1990 | Male   | 50 to 54 | 93%<br>(90-96%)                | 6.5%<br>(4-10%)          | 2.4<br>(1.5-3.5)                            | 3.6%<br>(0.87-6.9%)                  | 3.6%<br>(-0.089-7.8%)               | 35<br>(-0.85-77)     | 1700<br>(430-3300)    |
| Armenia  | 1990 | Male   | 55 to 59 | 92%<br>(85-96%)                | 8.2%<br>(4.1-15%)        | 2.1<br>(1.3-3.1)                            | 2.4%<br>(0.13-5.1%)                  | 2.3%<br>(-0.66-5.6%)                | 25<br>(-7.1-60)      | 1100<br>(57-2300)     |
| Armenia  | 1990 | Male   | 60 to 64 | 90%<br>(82-95%)                | 9.9%<br>(4.7-18%)        | 1.8<br>(1.1-2.7)                            | 1.3%<br>(-0.97-3.9%)                 | 1%<br>(-1.7-4.2%)                   | 17<br>(-29-72)       | 720<br>(-580-2300)    |
| Armenia  | 1990 | Male   | 65 to 69 | 89%<br>(78-95%)                | 11%<br>(5-22%)           | 1.6<br>(0.99-2.3)                           | 0.4%<br>(-1.7-2.6%)                  | 0.11%<br>(-2.5-2.8%)                | 1.2<br>(-27-31)      | 120<br>(-510-800)     |
| Armenia  | 1990 | Male   | 70 to 74 | 87%<br>(77-93%)                | 13%<br>(6.9-23%)         | 1.3<br>(0.78-2.1)                           | -0.4%<br>(-2.5-1.8%)                 | -0.77%<br>(-3.3-1.9%)               | -5.4<br>(-23-13)     | -61<br>(-390-280)     |
| Armenia  | 1990 | Male   | 75 to 79 | 85%<br>(74-92%)                | 15%<br>(7.7-26%)         | 1.1<br>(0.64-1.8)                           | -1.1%<br>(-3.1-0.93%)                | -1.5%<br>(-4-0.96%)                 | -17<br>(-44-10)      | -190<br>(-580-180)    |
| Armenia  | 1990 | Male   | 80 to 84 | 83%<br>(71-91%)                | 17%<br>(9.1-29%)         | 1<br>(0.6-1.6)                              | -1.7%<br>(-3.9-0.33%)                | -2.3%<br>(-5-0.2%)                  | -23<br>(-49-1.9)     | -210<br>(-470-39)     |
| Armenia  | 1990 | Male   | 85 to 89 | 81%<br>(70-90%)                | 19%<br>(10-30%)          | 0.95<br>(0.56-1.5)                          | -2.1%<br>(-4.3--0.17%)               | -2.8%<br>(-5.6--0.49%)              | -22<br>(-43--3.7)    | -140<br>(-300--12)    |
| Armenia  | 1990 | Male   | 90 to 94 | 81%<br>(70-90%)                | 19%<br>(10-30%)          | 0.89<br>(0.51-1.5)                          | -2.2%<br>(-4.6--0.27%)               | -3.1%<br>(-6--0.64%)                | -9.2<br>(-18--1.9)   | -41<br>(-84--4.9)     |
| Armenia  | 1990 | Male   | 95 plus  | 80%<br>(66-91%)                | 20%<br>(8.9-34%)         | 0.81<br>(0.4-1.5)                           | -2.1%<br>(-4.4--0.15%)               | -3%<br>(-6--0.65%)                  | -2.5<br>(-4.9--0.53) | -7<br>(-15--0.52)     |
| Armenia  | 1995 | Female | All Ages | 27%<br>(24-30%)                | 73%<br>(70-76%)          | 0.94<br>(0.75-1.1)                          | 2.8%<br>(1.9-4%)                     | 4.2%<br>(2.3-6.8%)                  | 510<br>(280-830)     | 13000<br>(8900-19000) |
| Armenia  | 1995 | Female | 15 to 19 | 21%<br>(18-26%)                | 79%<br>(74-82%)          | 0.65<br>(0.42-0.94)                         | 1.4%<br>(0.98-1.9%)                  | 2.8%<br>(1.8-4.1%)                  | 1.3<br>(0.84-1.9)    | 190<br>(130-270)      |
| Armenia  | 1995 | Female | 20 to 24 | 29%<br>(23-35%)                | 71%<br>(65-77%)          | 0.98<br>(0.65-1.4)                          | 2.6%<br>(1.9-3.5%)                   | 3.6%<br>(2.3-5.4%)                  | 2.4<br>(1.6-3.7)     | 340<br>(240-480)      |
| Armenia  | 1995 | Female | 25 to 29 | 35%<br>(29-42%)                | 65%<br>(58-71%)          | 1.2<br>(0.85-1.7)                           | 3%<br>(2.3-3.9%)                     | 4.4%<br>(3-6.2%)                    | 3.6<br>(2.4-5.1)     | 450<br>(320-610)      |
| Armenia  | 1995 | Female | 30 to 34 | 38%<br>(32-44%)                | 62%<br>(56-68%)          | 1.4<br>(0.95-1.9)                           | 3.1%<br>(2.4-4%)                     | 5%<br>(3.6-6.8%)                    | 7<br>(4.8-9.4)       | 690<br>(510-910)      |
| Armenia  | 1995 | Female | 35 to 39 | 37%<br>(31-44%)                | 63%<br>(56-69%)          | 1.4<br>(0.95-1.9)                           | 3.2%<br>(2.4-4.1%)                   | 5.5%<br>(4-7.4%)                    | 11<br>(7.5-14)       | 810<br>(610-1100)     |
| Armenia  | 1995 | Female | 40 to 44 | 37%<br>(31-44%)                | 63%<br>(56-69%)          | 1.5<br>(1-2)                                | 3.5%<br>(2.5-4.5%)                   | 5.9%<br>(4.3-7.9%)                  | 13<br>(9.5-18)       | 800<br>(580-1100)     |
| Armenia  | 1995 | Female | 45 to 49 | 37%<br>(31-45%)                | 63%<br>(55-69%)          | 1.6<br>(1-2.3)                              | 3.8%<br>(2.6-5.4%)                   | 6.2%<br>(4.1-9.1%)                  | 14<br>(9.4-21)       | 720<br>(480-1000)     |
| Armenia  | 1995 | Female | 50 to 54 | 37%<br>(27-49%)                | 63%<br>(51-73%)          | 1.6<br>(0.99-2.5)                           | 4.3%<br>(2.6-6.4%)                   | 6.5%<br>(4-9.9%)                    | 16<br>(9.7-25)       | 680<br>(430-1000)     |
| Armenia  | 1995 | Female | 55 to 59 | 37%<br>(23-54%)                | 63%<br>(46-77%)          | 1.7<br>(0.93-2.7)                           | 4.6%<br>(2.3-7.4%)                   | 6.5%<br>(3.3-11%)                   | 49<br>(25-81)        | 1700<br>(900-2800)    |
| Armenia  | 1995 | Female | 60 to 64 | 34%<br>(21-53%)                | 66%<br>(47-79%)          | 1.6<br>(0.87-2.7)                           | 4.4%<br>(2-7.6%)                     | 5.9%<br>(2.6-10%)                   | 57<br>(25-96)        | 1700<br>(740-2800)    |
| Armenia  | 1995 | Female | 65 to 69 | 32%<br>(20-48%)                | 68%<br>(52-80%)          | 1.5<br>(0.85-2.4)                           | 4.5%<br>(2.2-7.6%)                   | 5.7%<br>(2.8-9.6%)                  | 96<br>(46-160)       | 2300<br>(1100-3800)   |



| Location | Year | Sex    | Age      | Prevalence of current drinkers | Prevalence of abstainers | Population average of standard drinks daily | Percent of total attributable deaths | Percent of total attributable DALYs | Attributable deaths | Attributable DALYs    |
|----------|------|--------|----------|--------------------------------|--------------------------|---------------------------------------------|--------------------------------------|-------------------------------------|---------------------|-----------------------|
| Armenia  | 1995 | Female | 70 to 74 | 28%<br>(18-42%)                | 72%<br>(58-82%)          | 1.3<br>(0.72-2.1)                           | 4%<br>(1.5-7.6%)                     | 4.9%<br>(1.9-9.5%)                  | 72<br>(27-140)      | 1400<br>(530-2600)    |
| Armenia  | 1995 | Female | 75 to 79 | 24%<br>(15-37%)                | 76%<br>(63-85%)          | 1.1<br>(0.57-1.9)                           | 3.3%<br>(0.9-6.9%)                   | 3.9%<br>(0.98-8.4%)                 | 48<br>(12-100)      | 710<br>(190-1500)     |
| Armenia  | 1995 | Female | 80 to 84 | 22%<br>(13-33%)                | 78%<br>(67-87%)          | 1<br>(0.53-1.7)                             | 2.9%<br>(0.79-5.8%)                  | 3.4%<br>(0.82-7%)                   | 48<br>(12-100)      | 520<br>(140-1100)     |
| Armenia  | 1995 | Female | 85 to 89 | 22%<br>(13-33%)                | 78%<br>(67-87%)          | 1<br>(0.51-1.7)                             | 2.6%<br>(0.56-5.9%)                  | 3%<br>(0.53-7%)                     | 45<br>(8.2-100)     | 340<br>(73-790)       |
| Armenia  | 1995 | Female | 90 to 94 | 23%<br>(14-33%)                | 77%<br>(67-86%)          | 1<br>(0.53-1.9)                             | 2.3%<br>(0.21-6%)                    | 2.6%<br>(0.059-7.4%)                | 20<br>(0.44-55)     | 110<br>(9.9-280)      |
| Armenia  | 1995 | Female | 95 plus  | 25%<br>(14-40%)                | 75%<br>(60-86%)          | 1.1<br>(0.5-2.2)                            | 2.3%<br>(-0.3-7.1%)                  | 2.6%<br>(-0.6-8.4%)                 | 6.6<br>(-1.5-21)    | 24<br>(-3-72)         |
| Armenia  | 1995 | Male   | All Ages | 82%<br>(79-84%)                | 18%<br>(16-21%)          | 1.3<br>(1.1-1.6)                            | 2.4%<br>(1.1-3.7%)                   | 0.93%<br>(-1.1-3%)                  | 140<br>(-160-440)   | 15000<br>(6700-23000) |
| Armenia  | 1995 | Male   | 15 to 19 | 74%<br>(67-79%)                | 26%<br>(21-33%)          | 0.66<br>(0.38-1.1)                          | 3.8%<br>(2.2-5.8%)                   | 4.4%<br>(2.1-7.4%)                  | 9.4<br>(4.3-16)     | 910<br>(520-1400)     |
| Armenia  | 1995 | Male   | 20 to 24 | 92%<br>(88-94%)                | 8.1%<br>(5.6-12%)        | 1.4<br>(0.87-2.1)                           | 7.7%<br>(5.1-11%)                    | 8.2%<br>(4.6-12%)                   | 19<br>(11-29)       | 1800<br>(1200-2500)   |
| Armenia  | 1995 | Male   | 25 to 29 | 94%<br>(91-96%)                | 6.3%<br>(4.3-9.1%)       | 2.1<br>(1.3-3.1)                            | 9%<br>(6.5-12%)                      | 9.9%<br>(6.3-14%)                   | 23<br>(15-34)       | 2000<br>(1400-2700)   |
| Armenia  | 1995 | Male   | 30 to 34 | 95%<br>(93-97%)                | 5%<br>(3.2-7.4%)         | 2.4<br>(1.7-3.4)                            | 8.3%<br>(5.7-11%)                    | 9.2%<br>(5.6-13%)                   | 34<br>(21-51)       | 2700<br>(1800-3600)   |
| Armenia  | 1995 | Male   | 35 to 39 | 96%<br>(94-97%)                | 4.2%<br>(2.8-6%)         | 2.4<br>(1.5-3.4)                            | 6.5%<br>(3.9-9.2%)                   | 7.1%<br>(3.6-11%)                   | 34<br>(16-53)       | 2400<br>(1400-3400)   |
| Armenia  | 1995 | Male   | 40 to 44 | 96%<br>(94-97%)                | 4.1%<br>(2.8-6%)         | 2.4<br>(1.5-3.4)                            | 4.9%<br>(2.4-7.7%)                   | 5.2%<br>(1.6-8.9%)                  | 28<br>(8.4-47)      | 1700<br>(830-2700)    |
| Armenia  | 1995 | Male   | 45 to 49 | 95%<br>(93-97%)                | 4.6%<br>(2.9-6.9%)       | 2.6<br>(1.7-3.9)                            | 4.4%<br>(1.4-8.1%)                   | 4.5%<br>(0.69-9.4%)                 | 24<br>(3.8-50)      | 1300<br>(420-2400)    |
| Armenia  | 1995 | Male   | 50 to 54 | 94%<br>(92-96%)                | 5.7%<br>(3.6-8.2%)       | 2.5<br>(1.6-3.7)                            | 3.5%<br>(0.53-7.1%)                  | 3.5%<br>(-0.27-8.1%)                | 19<br>(-1.4-43)     | 880<br>(130-1800)     |
| Armenia  | 1995 | Male   | 55 to 59 | 92%<br>(86-96%)                | 7.7%<br>(4.1-14%)        | 2.1<br>(1.4-2.9)                            | 2.1%<br>(-0.32-4.8%)                 | 1.9%<br>(-1.5-3%)                   | 28<br>(-15-76)      | 1200<br>(-190-2800)   |
| Armenia  | 1995 | Male   | 60 to 64 | 90%<br>(82-95%)                | 9.8%<br>(4.7-18%)        | 1.8<br>(1.1-2.6)                            | 1%<br>(-1.3-3.6%)                    | 0.8%<br>(-1.9-3.9%)                 | 14<br>(-34-68)      | 590<br>(-730-2100)    |
| Armenia  | 1995 | Male   | 65 to 69 | 89%<br>(79-95%)                | 11%<br>(5-21%)           | 1.6<br>(1-2.2)                              | 0.12%<br>(-2.1-2.4%)                 | -0.16%<br>(-2.8-2.6%)               | -3.9<br>(-68-63)    | 79<br>(-1400-1600)    |
| Armenia  | 1995 | Male   | 70 to 74 | 87%<br>(77-93%)                | 13%<br>(6.8-23%)         | 1.3<br>(0.82-2)                             | -0.68%<br>(-2.9-1.6%)                | -1%<br>(-3.6-1.6%)                  | -15<br>(-53-23)     | -210<br>(-870-460)    |
| Armenia  | 1995 | Male   | 75 to 79 | 85%<br>(75-93%)                | 15%<br>(7.3-25%)         | 1.1<br>(0.66-1.8)                           | -1.3%<br>(-3.5-0.78%)                | -1.7%<br>(-4.3-0.71%)               | -14<br>(-35-5.9)    | -180<br>(-470-100)    |
| Armenia  | 1995 | Male   | 80 to 84 | 83%<br>(71-91%)                | 17%<br>(8.9-29%)         | 1<br>(0.62-1.6)                             | -1.8%<br>(-4.2-0.25%)                | -2.5%<br>(-5.3-0.13%)               | -20<br>(-43-1.1)    | -190<br>(-420-25)     |
| Armenia  | 1995 | Male   | 85 to 89 | 82%<br>(71-90%)                | 18%<br>(10-29%)          | 0.95<br>(0.58-1.4)                          | -2.3%<br>(-4.6--0.31%)               | -3%<br>(-5.9--0.54%)                | -27<br>(-52--4.9)   | -180<br>(-360--24)    |

| Location | Year | Sex    | Age      | Prevalence of current drinkers | Prevalence of abstainers | Population average of standard drinks daily | Percent of total attributable deaths | Percent of total attributable DALYs | Attributable deaths  | Attributable DALYs    |
|----------|------|--------|----------|--------------------------------|--------------------------|---------------------------------------------|--------------------------------------|-------------------------------------|----------------------|-----------------------|
| Armenia  | 1995 | Male   | 90 to 94 | 81%<br>(70-90%)                | 19%<br>(10-30%)          | 0.89<br>(0.52-1.4)                          | -2.3%<br>(-4.7--0.35%)               | -3.2%<br>(-6.1--0.74%)              | -12<br>(-24--2.9)    | -56<br>(-110--8.1)    |
| Armenia  | 1995 | Male   | 95 plus  | 80%<br>(66-91%)                | 20%<br>(8.7-34%)         | 0.81<br>(0.4-1.4)                           | -2.2%<br>(-4.7--0.22%)               | -3.2%<br>(-6.2--0.68%)              | -3.4<br>(-6.5--0.73) | -9.7<br>(-20--0.93)   |
| Armenia  | 2000 | Female | All Ages | 27%<br>(24-31%)                | 73%<br>(69-76%)          | 0.97<br>(0.78-1.1)                          | 3%<br>(1.9-4.3%)                     | 4.1%<br>(2.2-6.9%)                  | 500<br>(260-830)     | 13000<br>(8500-19000) |
| Armenia  | 2000 | Female | 15 to 19 | 21%<br>(17-26%)                | 79%<br>(74-83%)          | 0.63<br>(0.42-0.91)                         | 1.3%<br>(0.92-1.8%)                  | 2.8%<br>(1.8-4%)                    | 1.1<br>(0.73-1.6)    | 190<br>(120-260)      |
| Armenia  | 2000 | Female | 20 to 24 | 29%<br>(24-35%)                | 71%<br>(65-76%)          | 0.97<br>(0.66-1.4)                          | 2.4%<br>(1.8-3.3%)                   | 3.7%<br>(2.4-5.4%)                  | 1.8<br>(1.2-2.7)     | 320<br>(220-460)      |
| Armenia  | 2000 | Female | 25 to 29 | 35%<br>(30-41%)                | 65%<br>(59-70%)          | 1.2<br>(0.85-1.7)                           | 2.9%<br>(2.2-3.8%)                   | 4.5%<br>(3.1-6.2%)                  | 2.8<br>(1.9-3.9)     | 370<br>(260-490)      |
| Armenia  | 2000 | Female | 30 to 34 | 38%<br>(32-44%)                | 62%<br>(56-68%)          | 1.4<br>(0.97-1.8)                           | 3%<br>(2.3-3.9%)                     | 5.1%<br>(3.7-6.9%)                  | 4.1<br>(2.9-5.5)     | 430<br>(320-580)      |
| Armenia  | 2000 | Female | 35 to 39 | 37%<br>(32-43%)                | 63%<br>(57-68%)          | 1.4<br>(0.97-1.9)                           | 3.1%<br>(2.3-3.9%)                   | 5.5%<br>(4.1-7.2%)                  | 8.4<br>(6.2-11)      | 680<br>(520-880)      |
| Armenia  | 2000 | Female | 40 to 44 | 37%<br>(32-43%)                | 63%<br>(57-68%)          | 1.4<br>(1-1.9)                              | 3.3%<br>(2.5-4.3%)                   | 5.9%<br>(4.5-7.7%)                  | 14<br>(10-18)        | 870<br>(670-1100)     |
| Armenia  | 2000 | Female | 45 to 49 | 37%<br>(31-44%)                | 63%<br>(56-69%)          | 1.5<br>(1-2.2)                              | 3.7%<br>(2.5-5.1%)                   | 6.3%<br>(4.3-8.7%)                  | 18<br>(12-26)        | 930<br>(630-1300)     |
| Armenia  | 2000 | Female | 50 to 54 | 37%<br>(27-49%)                | 63%<br>(51-73%)          | 1.6<br>(0.96-2.5)                           | 4.1%<br>(2.6-6.2%)                   | 6.5%<br>(4.1-9.7%)                  | 20<br>(12-30)        | 830<br>(530-1200)     |
| Armenia  | 2000 | Female | 55 to 59 | 36%<br>(22-54%)                | 64%<br>(46-78%)          | 1.6<br>(0.89-2.7)                           | 4.4%<br>(2.3-7.3%)                   | 6.4%<br>(3.3-10%)                   | 22<br>(11-36)        | 770<br>(400-1300)     |
| Armenia  | 2000 | Female | 60 to 64 | 34%<br>(20-52%)                | 66%<br>(48-80%)          | 1.6<br>(0.83-2.6)                           | 4.2%<br>(1.7-7.5%)                   | 5.7%<br>(2.4-10%)                   | 61<br>(26-110)       | 1800<br>(790-3300)    |
| Armenia  | 2000 | Female | 65 to 69 | 31%<br>(19-48%)                | 69%<br>(52-81%)          | 1.4<br>(0.84-2.3)                           | 4.2%<br>(2-7.2%)                     | 5.5%<br>(2.7-9.4%)                  | 71<br>(34-120)       | 1700<br>(840-2900)    |
| Armenia  | 2000 | Female | 70 to 74 | 27%<br>(17-42%)                | 73%<br>(58-83%)          | 1.2<br>(0.69-2.1)                           | 3.9%<br>(1.5-7.4%)                   | 4.8%<br>(1.8-9.2%)                  | 110<br>(40-210)      | 2100<br>(800-4000)    |
| Armenia  | 2000 | Female | 75 to 79 | 23%<br>(15-37%)                | 77%<br>(63-85%)          | 1.1<br>(0.56-1.8)                           | 3.2%<br>(0.84-6.6%)                  | 3.8%<br>(1-7.9%)                    | 69<br>(17-150)       | 1000<br>(260-2100)    |
| Armenia  | 2000 | Female | 80 to 84 | 21%<br>(13-33%)                | 79%<br>(67-87%)          | 0.97<br>(0.52-1.6)                          | 2.7%<br>(0.85-5.4%)                  | 3.2%<br>(0.94-6.6%)                 | 43<br>(13-89)        | 480<br>(150-960)      |
| Armenia  | 2000 | Female | 85 to 89 | 21%<br>(13-32%)                | 79%<br>(68-87%)          | 0.97<br>(0.5-1.7)                           | 2.4%<br>(0.52-5.5%)                  | 2.8%<br>(0.53-6.7%)                 | 33<br>(6.3-78)       | 260<br>(57-590)       |
| Armenia  | 2000 | Female | 90 to 94 | 22%<br>(14-33%)                | 78%<br>(67-86%)          | 1<br>(0.51-1.8)                             | 2.1%<br>(0.14-5.7%)                  | 2.4%<br>(-0.025-6.8%)               | 19<br>(-0.2-55)      | 100<br>(6.9-280)      |
| Armenia  | 2000 | Female | 95 plus  | 25%<br>(14-40%)                | 75%<br>(60-86%)          | 1.1<br>(0.48-2.1)                           | 2.1%<br>(-0.47-6.8%)                 | 2.4%<br>(-0.78-8.1%)                | 7.2<br>(-2.4-25)     | 26<br>(-5.8-84)       |
| Armenia  | 2000 | Male   | All Ages | 83%<br>(80-86%)                | 17%<br>(14-20%)          | 1.3<br>(1.1-1.6)                            | 2.1%<br>(0.76-3.4%)                  | 0.48%<br>(-1.5-2.5%)                | 63<br>(-200-330)     | 10000<br>(3900-17000) |
| Armenia  | 2000 | Male   | 15 to 19 | 76%<br>(71-80%)                | 24%<br>(20-29%)          | 0.68<br>(0.4-1.1)                           | 3.5%<br>(2.3-5%)                     | 4.1%<br>(2.1-6.9%)                  | 6.1<br>(3.2-10)      | 700<br>(450-1000)     |

| Location | Year | Sex    | Age      | Prevalence of current drinkers | Prevalence of abstainers | Population average of standard drinks daily | Percent of total attributable deaths | Percent of total attributable DALYs | Attributable deaths  | Attributable DALYs    |
|----------|------|--------|----------|--------------------------------|--------------------------|---------------------------------------------|--------------------------------------|-------------------------------------|----------------------|-----------------------|
| Armenia  | 2000 | Male   | 20 to 24 | 92%<br>(89-95%)                | 7.5%<br>(5.3-11%)        | 1.4<br>(0.9-2.1)                            | 7.2%<br>(5.1-9.4%)                   | 8%<br>(4.7-12%)                     | 11<br>(6.3-16)       | 1200<br>(840-1600)    |
| Armenia  | 2000 | Male   | 25 to 29 | 94%<br>(92-96%)                | 5.8%<br>(4.2-8%)         | 2.1<br>(1.3-3.1)                            | 8.4%<br>(6.2-11%)                    | 9.8%<br>(6.1-14%)                   | 13<br>(7.9-19)       | 1300<br>(920-1700)    |
| Armenia  | 2000 | Male   | 30 to 34 | 95%<br>(93-97%)                | 4.6%<br>(3.1-6.7%)       | 2.4<br>(1.7-3.5)                            | 8.1%<br>(5.8-11%)                    | 9.6%<br>(6-14%)                     | 17<br>(11-26)        | 1400<br>(1000-1900)   |
| Armenia  | 2000 | Male   | 35 to 39 | 96%<br>(95-97%)                | 4%<br>(2.7-5.3%)         | 2.4<br>(1.5-3.4)                            | 6.6%<br>(4.2-9.1%)                   | 7.5%<br>(3.9-11%)                   | 23<br>(12-36)        | 1700<br>(1100-2500)   |
| Armenia  | 2000 | Male   | 40 to 44 | 96%<br>(95-97%)                | 3.8%<br>(2.6-5.4%)       | 2.4<br>(1.5-3.4)                            | 4.9%<br>(2.5-7.6%)                   | 5.4%<br>(1.8-8.9%)                  | 26<br>(8.5-44)       | 1700<br>(820-2600)    |
| Armenia  | 2000 | Male   | 45 to 49 | 96%<br>(94-97%)                | 4.2%<br>(2.8-6.2%)       | 2.6<br>(1.8-3.8)                            | 4%<br>(1.4-7.5%)                     | 4.1%<br>(0.54-8.8%)                 | 24<br>(3-51)         | 1300<br>(460-2500)    |
| Armenia  | 2000 | Male   | 50 to 54 | 95%<br>(92-97%)                | 5.2%<br>(3.5-7.6%)       | 2.5<br>(1.6-3.6)                            | 3.2%<br>(0.4-6.6%)                   | 3.1%<br>(-0.51-7.5%)                | 18<br>(-3-45)        | 900<br>(120-1900)     |
| Armenia  | 2000 | Male   | 55 to 59 | 93%<br>(87-96%)                | 7.3%<br>(3.8-13%)        | 2.1<br>(1.4-2.9)                            | 1.8%<br>(-0.62-4.4%)                 | 1.6%<br>(-1.4-4.8%)                 | 9.1<br>(-8.2-28)     | 420<br>(-150-1000)    |
| Armenia  | 2000 | Male   | 60 to 64 | 90%<br>(82-95%)                | 9.8%<br>(4.6-18%)        | 1.7<br>(1.1-2.6)                            | 0.92%<br>(-1.3-3.4%)                 | 0.69%<br>(-2-3.7%)                  | 12<br>(-35-62)       | 520<br>(-710-1900)    |
| Armenia  | 2000 | Male   | 65 to 69 | 89%<br>(79-95%)                | 11%<br>(5.2-21%)         | 1.5<br>(1-2.2)                              | 0.072%<br>(-2-2.3%)                  | -0.21%<br>(-2.7-2.4%)               | -4<br>(-52-47)       | 38<br>(-1000-1200)    |
| Armenia  | 2000 | Male   | 70 to 74 | 87%<br>(77-93%)                | 13%<br>(6.6-23%)         | 1.3<br>(0.8-2)                              | -0.63%<br>(-2.7-1.5%)                | -0.97%<br>(-3.5-1.4%)               | -26<br>(-93-39)      | -360<br>(-1600-830)   |
| Armenia  | 2000 | Male   | 75 to 79 | 85%<br>(73-92%)                | 15%<br>(7.7-27%)         | 1.1<br>(0.67-1.8)                           | -1.2%<br>(-3.2-0.76%)                | -1.6%<br>(-4-0.73%)                 | -21<br>(-54-9.8)     | -260<br>(-720-170)    |
| Armenia  | 2000 | Male   | 80 to 84 | 83%<br>(71-91%)                | 17%<br>(9-29%)           | 1<br>(0.61-1.5)                             | -1.6%<br>(-3.8-0.31%)                | -2.3%<br>(-5.1-0.13%)               | -15<br>(-33-0.86)    | -140<br>(-320-27)     |
| Armenia  | 2000 | Male   | 85 to 89 | 82%<br>(70-90%)                | 18%<br>(10-30%)          | 0.94<br>(0.59-1.4)                          | -2.2%<br>(-4.4--0.22%)               | -3%<br>(-5.8--0.54%)                | -15<br>(-30--2.7)    | -100<br>(-210--10)    |
| Armenia  | 2000 | Male   | 90 to 94 | 81%<br>(70-90%)                | 19%<br>(10-30%)          | 0.88<br>(0.51-1.4)                          | -2.4%<br>(-4.7--0.41%)               | -3.3%<br>(-6.1--0.8%)               | -12<br>(-22--2.8)    | -52<br>(-100--8.9)    |
| Armenia  | 2000 | Male   | 95 plus  | 80%<br>(66-91%)                | 20%<br>(8.7-34%)         | 0.8<br>(0.4-1.4)                            | -2.3%<br>(-4.7--0.33%)               | -3.3%<br>(-6.3--0.74%)              | -3.8<br>(-7.3--0.86) | -11<br>(-22--1.6)     |
| Armenia  | 2005 | Female | All Ages | 28%<br>(26-32%)                | 72%<br>(68-74%)          | 1.1<br>(0.86-1.3)                           | 3.3%<br>(2.2-4.7%)                   | 4.5%<br>(2.5-7.4%)                  | 570<br>(310-940)     | 14000<br>(9200-20000) |
| Armenia  | 2005 | Female | 15 to 19 | 22%<br>(18-27%)                | 78%<br>(73-82%)          | 0.67<br>(0.43-0.94)                         | 1.4%<br>(0.98-1.9%)                  | 2.9%<br>(1.9-4.1%)                  | 1.2<br>(0.76-1.7)    | 190<br>(130-270)      |
| Armenia  | 2005 | Female | 20 to 24 | 29%<br>(24-36%)                | 71%<br>(64-76%)          | 1<br>(0.67-1.5)                             | 2.5%<br>(1.8-3.4%)                   | 3.8%<br>(2.5-5.5%)                  | 1.9<br>(1.2-2.8)     | 350<br>(240-500)      |
| Armenia  | 2005 | Female | 25 to 29 | 36%<br>(31-42%)                | 64%<br>(58-69%)          | 1.3<br>(0.9-1.7)                            | 2.9%<br>(2.2-3.7%)                   | 4.6%<br>(3.2-6.5%)                  | 2.7<br>(1.8-3.8)     | 390<br>(280-530)      |
| Armenia  | 2005 | Female | 30 to 34 | 38%<br>(33-45%)                | 62%<br>(55-67%)          | 1.4<br>(1-2)                                | 3%<br>(2.3-3.9%)                     | 5.3%<br>(3.9-7.2%)                  | 3.6<br>(2.6-5)       | 390<br>(300-530)      |
| Armenia  | 2005 | Female | 35 to 39 | 37%<br>(32-43%)                | 63%<br>(57-68%)          | 1.4<br>(1-2)                                | 3.1%<br>(2.4-4%)                     | 5.7%<br>(4.2-7.6%)                  | 5.8<br>(4.3-7.8)     | 480<br>(370-630)      |

| Location | Year | Sex    | Age      | Prevalence of current drinkers | Prevalence of abstainers | Population average of standard drinks daily | Percent of total attributable deaths | Percent of total attributable DALYs | Attributable deaths | Attributable DALYs    |
|----------|------|--------|----------|--------------------------------|--------------------------|---------------------------------------------|--------------------------------------|-------------------------------------|---------------------|-----------------------|
| Armenia  | 2005 | Female | 40 to 44 | 38%<br>(32-44%)                | 62%<br>(56-68%)          | 1.5<br>(1.1-2)                              | 3.4%<br>(2.6-4.4%)                   | 6.1%<br>(4.6-7.9%)                  | 13<br>(9.6-17)      | 820<br>(620-1100)     |
| Armenia  | 2005 | Female | 45 to 49 | 38%<br>(31-44%)                | 62%<br>(56-69%)          | 1.6<br>(1.1-2.2)                            | 3.7%<br>(2.6-5.1%)                   | 6.4%<br>(4.5-9%)                    | 21<br>(14-30)       | 1100<br>(760-1500)    |
| Armenia  | 2005 | Female | 50 to 54 | 38%<br>(27-50%)                | 62%<br>(50-73%)          | 1.7<br>(1-2.5)                              | 4.3%<br>(2.8-6.3%)                   | 6.7%<br>(4.4-9.9%)                  | 28<br>(18-42)       | 1200<br>(770-1800)    |
| Armenia  | 2005 | Female | 55 to 59 | 37%<br>(23-54%)                | 63%<br>(46-77%)          | 1.7<br>(0.92-2.9)                           | 4.7%<br>(2.4-7.8%)                   | 6.8%<br>(3.6-11%)                   | 29<br>(16-49)       | 1000<br>(560-1700)    |
| Armenia  | 2005 | Female | 60 to 64 | 34%<br>(21-52%)                | 66%<br>(48-79%)          | 1.6<br>(0.87-2.8)                           | 4.5%<br>(2-7.9%)                     | 6.2%<br>(2.8-11%)                   | 32<br>(15-56)       | 960<br>(440-1700)     |
| Armenia  | 2005 | Female | 65 to 69 | 32%<br>(20-48%)                | 68%<br>(52-80%)          | 1.5<br>(0.87-2.4)                           | 4.5%<br>(2.2-7.6%)                   | 5.9%<br>(3-9.9%)                    | 88<br>(45-150)      | 2100<br>(1100-3600)   |
| Armenia  | 2005 | Female | 70 to 74 | 28%<br>(17-42%)                | 72%<br>(58-83%)          | 1.3<br>(0.71-2.2)                           | 4.2%<br>(1.8-7.8%)                   | 5.2%<br>(2.2-9.8%)                  | 96<br>(40-180)      | 1800<br>(760-3400)    |
| Armenia  | 2005 | Female | 75 to 79 | 24%<br>(15-37%)                | 76%<br>(63-85%)          | 1.1<br>(0.58-1.9)                           | 3.5%<br>(1.1-6.8%)                   | 4.2%<br>(1.4-8.3%)                  | 110<br>(36-220)     | 1600<br>(540-3200)    |
| Armenia  | 2005 | Female | 80 to 84 | 22%<br>(13-33%)                | 78%<br>(67-87%)          | 1<br>(0.55-1.7)                             | 3.1%<br>(1.2-5.9%)                   | 3.7%<br>(1.4-7.1%)                  | 80<br>(29-150)      | 870<br>(330-1600)     |
| Armenia  | 2005 | Female | 85 to 89 | 22%<br>(13-33%)                | 78%<br>(67-87%)          | 1<br>(0.54-1.8)                             | 2.7%<br>(0.89-5.8%)                  | 3.2%<br>(0.95-7.1%)                 | 33<br>(10-75)       | 260<br>(85-580)       |
| Armenia  | 2005 | Female | 90 to 94 | 23%<br>(14-34%)                | 77%<br>(66-86%)          | 1.1<br>(0.54-1.9)                           | 2.4%<br>(0.4-6.1%)                   | 2.8%<br>(0.34-7.6%)                 | 17<br>(2-44)        | 89<br>(15-230)        |
| Armenia  | 2005 | Female | 95 plus  | 26%<br>(15-41%)                | 74%<br>(59-85%)          | 1.2<br>(0.5-2.2)                            | 2.4%<br>(-0.2-6.9%)                  | 2.8%<br>(-0.47-8.2%)                | 7.5<br>(-1.3-22)    | 27<br>(-2.3-77)       |
| Armenia  | 2005 | Male   | All Ages | 84%<br>(82-87%)                | 16%<br>(13-18%)          | 1.5<br>(1.2-1.7)                            | 2.3%<br>(1-3.7%)                     | 0.77%<br>(-1.3-2.9%)                | 110<br>(-180-400)   | 12000<br>(5200-19000) |
| Armenia  | 2005 | Male   | 15 to 19 | 76%<br>(69-80%)                | 24%<br>(20-31%)          | 0.69<br>(0.4-1.1)                           | 3.3%<br>(2.2-4.6%)                   | 4.1%<br>(2.2-6.4%)                  | 5<br>(2.6-8.1)      | 640<br>(420-910)      |
| Armenia  | 2005 | Male   | 20 to 24 | 92%<br>(89-95%)                | 7.6%<br>(5.2-11%)        | 1.5<br>(0.94-2.2)                           | 7.1%<br>(5.1-9.2%)                   | 8.1%<br>(4.9-12%)                   | 11<br>(6.6-16)      | 1300<br>(910-1800)    |
| Armenia  | 2005 | Male   | 25 to 29 | 94%<br>(92-96%)                | 5.9%<br>(4.2-8.3%)       | 2.2<br>(1.4-3.2)                            | 8.3%<br>(6-11%)                      | 9.9%<br>(6-14%)                     | 14<br>(8.3-20)      | 1400<br>(1000-1900)   |
| Armenia  | 2005 | Male   | 30 to 34 | 95%<br>(93-97%)                | 4.7%<br>(3.1-6.7%)       | 2.5<br>(1.7-3.6)                            | 8.2%<br>(5.9-11%)                    | 10%<br>(6.1-14%)                    | 17<br>(10-25)       | 1400<br>(990-1900)    |
| Armenia  | 2005 | Male   | 35 to 39 | 96%<br>(94-97%)                | 4%<br>(2.7-5.8%)         | 2.4<br>(1.6-3.6)                            | 7.1%<br>(4.6-10%)                    | 8.6%<br>(4.5-13%)                   | 20<br>(10-30)       | 1400<br>(900-2000)    |
| Armenia  | 2005 | Male   | 40 to 44 | 96%<br>(94-97%)                | 3.9%<br>(2.6-5.7%)       | 2.5<br>(1.6-3.5)                            | 5.5%<br>(3-8.2%)                     | 6.2%<br>(2.5-10%)                   | 28<br>(11-46)       | 1800<br>(930-2600)    |
| Armenia  | 2005 | Male   | 45 to 49 | 96%<br>(94-97%)                | 4.3%<br>(2.9-6.4%)       | 2.7<br>(1.8-3.8)                            | 4.6%<br>(2-7.8%)                     | 4.9%<br>(1.3-9.5%)                  | 34<br>(8.6-66)      | 1900<br>(780-3200)    |
| Armenia  | 2005 | Male   | 50 to 54 | 95%<br>(92-97%)                | 5.3%<br>(3.5-7.8%)       | 2.6<br>(1.7-3.6)                            | 3.5%<br>(0.7-6.9%)                   | 3.6%<br>(-0.15-8%)                  | 30<br>(-1.2-68)     | 1400<br>(300-2900)    |
| Armenia  | 2005 | Male   | 55 to 59 | 93%<br>(87-96%)                | 7.4%<br>(4-13%)          | 2.2<br>(1.4-3)                              | 2.1%<br>(-0.33-5%)                   | 2%<br>(-1.1-5.5%)                   | 16<br>(-8.5-45)     | 700<br>(-100-1700)    |

| Location | Year | Sex    | Age      | Prevalence of current drinkers | Prevalence of abstainers | Population average of standard drinks daily | Percent of total attributable deaths | Percent of total attributable DALYs | Attributable deaths  | Attributable DALYs     |
|----------|------|--------|----------|--------------------------------|--------------------------|---------------------------------------------|--------------------------------------|-------------------------------------|----------------------|------------------------|
| Armenia  | 2005 | Male   | 60 to 64 | 90%<br>(82-95%)                | 9.8%<br>(4.7-18%)        | 1.8<br>(1.1-2.7)                            | 1.3%<br>(-0.9-3.8%)                  | 1.1%<br>(-1.6-4.2%)                 | 9.5<br>(-14-36)      | 360<br>(-260-1100)     |
| Armenia  | 2005 | Male   | 65 to 69 | 89%<br>(79-95%)                | 11%<br>(5.1-21%)         | 1.6<br>(1.1-2.3)                            | 0.44%<br>(-1.6-2.7%)                 | 0.24%<br>(-2.2-2.9%)                | 5.2<br>(-47-63)      | 260<br>(-910-1600)     |
| Armenia  | 2005 | Male   | 70 to 74 | 87%<br>(77-93%)                | 13%<br>(6.9-23%)         | 1.4<br>(0.85-2.1)                           | -0.25%<br>(-2.3-1.9%)                | -0.51%<br>(-3-2%)                   | -12<br>(-69-48)      | -120<br>(-1100-970)    |
| Armenia  | 2005 | Male   | 75 to 79 | 85%<br>(74-92%)                | 15%<br>(7.6-26%)         | 1.2<br>(0.7-1.8)                            | -0.79%<br>(-2.7-1.2%)                | -1.1%<br>(-3.5-1.2%)                | -29<br>(-90-32)      | -340<br>(-1200-520)    |
| Armenia  | 2005 | Male   | 80 to 84 | 83%<br>(71-91%)                | 17%<br>(8.9-29%)         | 1<br>(0.65-1.6)                             | -1.3%<br>(-3.3-0.59%)                | -1.8%<br>(-4.4-0.52%)               | -23<br>(-56-6.9)     | -200<br>(-540-93)      |
| Armenia  | 2005 | Male   | 85 to 89 | 82%<br>(70-90%)                | 18%<br>(10-30%)          | 0.97<br>(0.6-1.4)                           | -1.6%<br>(-3.8-0.16%)                | -2.3%<br>(-5--0.027%)               | -9.1<br>(-20--0.1)   | -59<br>(-130-5.9)      |
| Armenia  | 2005 | Male   | 90 to 94 | 81%<br>(70-90%)                | 19%<br>(10-30%)          | 0.9<br>(0.55-1.4)                           | -2.1%<br>(-4.3--0.22%)               | -2.9%<br>(-5.6--0.53%)              | -5.7<br>(-11--1.1)   | -25<br>(-52--2.6)      |
| Armenia  | 2005 | Male   | 95 plus  | 80%<br>(66-91%)                | 20%<br>(9.4-34%)         | 0.82<br>(0.43-1.4)                          | -2.1%<br>(-4.5--0.18%)               | -3%<br>(-5.8--0.57%)                | -2.6<br>(-5.1--0.49) | -7.4<br>(-16--0.62)    |
| Armenia  | 2010 | Female | All Ages | 32%<br>(28-37%)                | 68%<br>(63-72%)          | 1.3<br>(1.1-1.7)                            | 3.7%<br>(2.5-5.3%)                   | 5.1%<br>(2.9-8.2%)                  | 670<br>(390-1100)    | 15000<br>(10000-22000) |
| Armenia  | 2010 | Female | 15 to 19 | 25%<br>(17-35%)                | 75%<br>(65-83%)          | 0.87<br>(0.51-1.3)                          | 1.6%<br>(1.1-2.2%)                   | 3.4%<br>(2.1-5.1%)                  | 1.1<br>(0.71-1.7)    | 170<br>(110-240)       |
| Armenia  | 2010 | Female | 20 to 24 | 36%<br>(25-47%)                | 64%<br>(53-75%)          | 1.4<br>(0.84-2.1)                           | 2.9%<br>(2.1-4%)                     | 4.7%<br>(2.9-7.2%)                  | 2.3<br>(1.4-3.6)     | 390<br>(260-550)       |
| Armenia  | 2010 | Female | 25 to 29 | 41%<br>(29-53%)                | 59%<br>(47-71%)          | 1.6<br>(0.99-2.4)                           | 3.1%<br>(2.3-4%)                     | 5.3%<br>(3.4-7.5%)                  | 2.8<br>(1.8-4)       | 420<br>(290-580)       |
| Armenia  | 2010 | Female | 30 to 34 | 43%<br>(31-57%)                | 57%<br>(43-69%)          | 1.8<br>(1.1-2.7)                            | 3.2%<br>(2.4-4.3%)                   | 6.1%<br>(4.1-8.5%)                  | 4<br>(2.7-5.7)       | 450<br>(320-610)       |
| Armenia  | 2010 | Female | 35 to 39 | 44%<br>(31-56%)                | 56%<br>(44-69%)          | 1.9<br>(1.2-2.9)                            | 3.5%<br>(2.5-4.8%)                   | 6.7%<br>(4.6-9.4%)                  | 5.8<br>(3.9-8.2)     | 470<br>(340-650)       |
| Armenia  | 2010 | Female | 40 to 44 | 43%<br>(32-54%)                | 57%<br>(46-68%)          | 2<br>(1.2-2.9)                              | 3.9%<br>(2.7-5.3%)                   | 7%<br>(4.7-9.6%)                    | 11<br>(7.3-15)       | 680<br>(480-940)       |
| Armenia  | 2010 | Female | 45 to 49 | 42%<br>(29-54%)                | 58%<br>(46-71%)          | 2<br>(1.2-3)                                | 4.3%<br>(2.9-6.2%)                   | 7.5%<br>(4.9-11%)                   | 22<br>(14-32)        | 1100<br>(770-1600)     |
| Armenia  | 2010 | Female | 50 to 54 | 40%<br>(27-53%)                | 60%<br>(47-73%)          | 1.9<br>(1.1-3)                              | 4.7%<br>(3-7%)                       | 7.5%<br>(4.8-11%)                   | 34<br>(22-51)        | 1500<br>(970-2200)     |
| Armenia  | 2010 | Female | 55 to 59 | 37%<br>(23-54%)                | 63%<br>(46-77%)          | 1.9<br>(1-3.2)                              | 5%<br>(2.8-8.1%)                     | 7.3%<br>(4.2-12%)                   | 40<br>(23-64)        | 1400<br>(820-2300)     |
| Armenia  | 2010 | Female | 60 to 64 | 34%<br>(20-52%)                | 66%<br>(48-80%)          | 1.8<br>(0.97-3)                             | 4.9%<br>(2.4-8.2%)                   | 6.7%<br>(3.4-11%)                   | 40<br>(19-67)        | 1200<br>(580-2000)     |
| Armenia  | 2010 | Female | 65 to 69 | 32%<br>(20-49%)                | 68%<br>(51-80%)          | 1.7<br>(0.94-2.7)                           | 5%<br>(2.7-8.2%)                     | 6.6%<br>(3.5-11%)                   | 50<br>(26-83)        | 1200<br>(640-2000)     |
| Armenia  | 2010 | Female | 70 to 74 | 28%<br>(18-43%)                | 72%<br>(57-82%)          | 1.4<br>(0.78-2.4)                           | 4.7%<br>(2.1-8.7%)                   | 5.9%<br>(2.7-11%)                   | 120<br>(55-230)      | 2300<br>(1100-4300)    |
| Armenia  | 2010 | Female | 75 to 79 | 24%<br>(15-37%)                | 76%<br>(63-85%)          | 1.2<br>(0.61-2.1)                           | 4.1%<br>(1.6-7.5%)                   | 4.9%<br>(1.9-9.1%)                  | 110<br>(43-210)      | 1600<br>(640-3000)     |

| Location | Year | Sex    | Age      | Prevalence of current drinkers | Prevalence of abstainers | Population average of standard drinks daily | Percent of total attributable deaths | Percent of total attributable DALYs | Attributable deaths  | Attributable DALYs    |
|----------|------|--------|----------|--------------------------------|--------------------------|---------------------------------------------|--------------------------------------|-------------------------------------|----------------------|-----------------------|
| Armenia  | 2010 | Female | 80 to 84 | 22%<br>(14-33%)                | 78%<br>(67-86%)          | 1.1<br>(0.59-1.9)                           | 3.9%<br>(1.7-6.9%)                   | 4.5%<br>(2-8.2%)                    | 120<br>(53-220)      | 1300<br>(590-2400)    |
| Armenia  | 2010 | Female | 85 to 89 | 21%<br>(13-32%)                | 79%<br>(68-87%)          | 1.1<br>(0.57-1.9)                           | 3.4%<br>(1.3-6.6%)                   | 4.1%<br>(1.6-8.1%)                  | 73<br>(28-150)       | 570<br>(230-1100)     |
| Armenia  | 2010 | Female | 90 to 94 | 22%<br>(14-34%)                | 78%<br>(66-86%)          | 1.2<br>(0.57-2.2)                           | 2.9%<br>(0.78-6.6%)                  | 3.5%<br>(0.85-8.3%)                 | 22<br>(5.3-52)       | 120<br>(32-270)       |
| Armenia  | 2010 | Female | 95 plus  | 25%<br>(15-40%)                | 75%<br>(60-85%)          | 1.3<br>(0.56-2.4)                           | 2.9%<br>(0.27-7.6%)                  | 3.4%<br>(0.086-9.2%)                | 7.8<br>(0.2-21)      | 29<br>(2.5-74)        |
| Armenia  | 2010 | Male   | All Ages | 83%<br>(80-85%)                | 17%<br>(15-20%)          | 1.6<br>(1.3-1.9)                            | 2.9%<br>(1.5-4.4%)                   | 1.3%<br>(-0.78-3.5%)                | 190<br>(-110-490)    | 14000<br>(7300-22000) |
| Armenia  | 2010 | Male   | 15 to 19 | 69%<br>(59-76%)                | 31%<br>(24-41%)          | 0.64<br>(0.35-1)                            | 3.2%<br>(2.2-4.5%)                   | 3.9%<br>(2-6.3%)                    | 4.1<br>(2.1-6.6)     | 540<br>(350-770)      |
| Armenia  | 2010 | Male   | 20 to 24 | 90%<br>(84-94%)                | 10%<br>(6.5-16%)         | 1.5<br>(0.92-2.2)                           | 7%<br>(5.1-9.2%)                     | 8%<br>(4.7-12%)                     | 12<br>(7.3-18)       | 1500<br>(1000-2000)   |
| Armenia  | 2010 | Male   | 25 to 29 | 93%<br>(88-95%)                | 7.4%<br>(4.8-12%)        | 2.2<br>(1.4-3.3)                            | 8.3%<br>(6.1-11%)                    | 10%<br>(6.1-15%)                    | 16<br>(9.6-24)       | 1700<br>(1200-2300)   |
| Armenia  | 2010 | Male   | 30 to 34 | 94%<br>(91-96%)                | 5.8%<br>(3.5-9.5%)       | 2.6<br>(1.7-3.8)                            | 8.3%<br>(6-11%)                      | 10%<br>(6.5-15%)                    | 18<br>(11-26)        | 1600<br>(1100-2100)   |
| Armenia  | 2010 | Male   | 35 to 39 | 95%<br>(92-97%)                | 4.9%<br>(3.1-7.5%)       | 2.5<br>(1.5-3.8)                            | 7.4%<br>(4.9-10%)                    | 9.1%<br>(4.9-14%)                   | 20<br>(10-29)        | 1400<br>(920-2000)    |
| Armenia  | 2010 | Male   | 40 to 44 | 95%<br>(93-97%)                | 4.8%<br>(2.8-7.2%)       | 2.6<br>(1.5-3.8)                            | 6.1%<br>(3.5-9.2%)                   | 7.2%<br>(3.3-12%)                   | 25<br>(12-41)        | 1500<br>(890-2300)    |
| Armenia  | 2010 | Male   | 45 to 49 | 95%<br>(91-97%)                | 5.4%<br>(3.2-8.5%)       | 2.7<br>(1.8-4)                              | 5.5%<br>(2.8-8.9%)                   | 6.3%<br>(2.4-11%)                   | 42<br>(16-73)        | 2200<br>(1100-3500)   |
| Armenia  | 2010 | Male   | 50 to 54 | 94%<br>(90-96%)                | 6.5%<br>(3.9-10%)        | 2.7<br>(1.7-3.8)                            | 4.2%<br>(1.3-7.7%)                   | 4.5%<br>(0.69-9%)                   | 44<br>(6.5-89)       | 2000<br>(640-3800)    |
| Armenia  | 2010 | Male   | 55 to 59 | 92%<br>(85-96%)                | 8.2%<br>(4.2-15%)        | 2.3<br>(1.5-3.3)                            | 2.8%<br>(0.3-5.8%)                   | 2.8%<br>(-0.35-6.7%)                | 31<br>(-3.8-73)      | 1200<br>(140-2700)    |
| Armenia  | 2010 | Male   | 60 to 64 | 90%<br>(82-95%)                | 9.8%<br>(4.6-18%)        | 2<br>(1.2-3)                                | 1.7%<br>(-0.67-4.7%)                 | 1.6%<br>(-1.3-5.1%)                 | 17<br>(-14-54)       | 610<br>(-240-1700)    |
| Armenia  | 2010 | Male   | 65 to 69 | 89%<br>(79-95%)                | 11%<br>(5.2-21%)         | 1.8<br>(1.2-2.6)                            | 1%<br>(-1-3.3%)                      | 0.89%<br>(-1.6-3.7%)                | 10<br>(-17-41)       | 310<br>(-320-1000)    |
| Armenia  | 2010 | Male   | 70 to 74 | 87%<br>(77-93%)                | 13%<br>(6.8-23%)         | 1.5<br>(0.92-2.3)                           | 0.26%<br>(-1.8-2.5%)                 | 0.078%<br>(-2.4-2.8%)               | 1.9<br>(-60-69)      | 140<br>(-960-1400)    |
| Armenia  | 2010 | Male   | 75 to 79 | 85%<br>(73-93%)                | 15%<br>(7.5-27%)         | 1.3<br>(0.75-2)                             | -0.26%<br>(-2.2-1.7%)                | -0.52%<br>(-2.9-1.8%)               | -12<br>(-67-43)      | -100<br>(-850-680)    |
| Armenia  | 2010 | Male   | 80 to 84 | 83%<br>(71-91%)                | 17%<br>(8.7-29%)         | 1.2<br>(0.7-1.7)                            | -0.86%<br>(-3-0.98%)                 | -1.2%<br>(-3.7-1%)                  | -24<br>(-73-19)      | -210<br>(-710-230)    |
| Armenia  | 2010 | Male   | 85 to 89 | 82%<br>(70-90%)                | 18%<br>(10-30%)          | 1.1<br>(0.66-1.6)                           | -1%<br>(-2.9-0.65%)                  | -1.6%<br>(-4.1-0.54%)               | -13<br>(-35-4.6)     | -80<br>(-230-51)      |
| Armenia  | 2010 | Male   | 90 to 94 | 81%<br>(69-90%)                | 19%<br>(10-31%)          | 1<br>(0.59-1.6)                             | -1.4%<br>(-3.4-0.22%)                | -2.2%<br>(-4.8--0.052%)             | -3.9<br>(-8.6--0.09) | -16<br>(-39-2.6)      |
| Armenia  | 2010 | Male   | 95 plus  | 80%<br>(66-91%)                | 20%<br>(9.1-34%)         | 0.91<br>(0.45-1.6)                          | -1.5%<br>(-3.5-0.27%)                | -2.4%<br>(-5--0.15%)                | -1.1<br>(-2.4-0.071) | -3<br>(-7.2-0.56)     |

| Location | Year | Sex    | Age      | Prevalence of current drinkers | Prevalence of abstainers | Population average of standard drinks daily | Percent of total attributable deaths | Percent of total attributable DALYs | Attributable deaths | Attributable DALYs     |
|----------|------|--------|----------|--------------------------------|--------------------------|---------------------------------------------|--------------------------------------|-------------------------------------|---------------------|------------------------|
| Armenia  | 2016 | Female | All Ages | 32%<br>(28-37%)                | 68%<br>(63-72%)          | 1.6<br>(1.2-2.2)                            | 4.1%<br>(2.7-5.9%)                   | 5.9%<br>(3.3-9.5%)                  | 780<br>(430-1300)   | 17000<br>(11000-25000) |
| Armenia  | 2016 | Female | 15 to 19 | 25%<br>(17-34%)                | 75%<br>(66-83%)          | 1<br>(0.55-1.6)                             | 1.7%<br>(1.1-2.5%)                   | 4%<br>(2.3-6.2%)                    | 0.72<br>(0.42-1.1)  | 120<br>(74-180)        |
| Armenia  | 2016 | Female | 20 to 24 | 36%<br>(25-47%)                | 64%<br>(53-75%)          | 1.6<br>(0.95-2.5)                           | 3.1%<br>(2.1-4.3%)                   | 5.4%<br>(3.3-8.4%)                  | 2<br>(1.2-3.1)      | 370<br>(240-530)       |
| Armenia  | 2016 | Female | 25 to 29 | 41%<br>(29-52%)                | 59%<br>(48-71%)          | 1.9<br>(1.1-3)                              | 3.2%<br>(2.4-4.3%)                   | 5.9%<br>(3.7-8.7%)                  | 2.9<br>(1.8-4.4)    | 510<br>(350-720)       |
| Armenia  | 2016 | Female | 30 to 34 | 43%<br>(31-56%)                | 57%<br>(44-69%)          | 2.1<br>(1.2-3.3)                            | 3.4%<br>(2.4-4.5%)                   | 6.8%<br>(4.4-10%)                   | 4.5<br>(2.9-6.8)    | 570<br>(400-780)       |
| Armenia  | 2016 | Female | 35 to 39 | 44%<br>(31-55%)                | 56%<br>(45-69%)          | 2.2<br>(1.3-3.4)                            | 3.5%<br>(2.5-4.9%)                   | 7.5%<br>(4.8-11%)                   | 6.3<br>(3.9-9.2)    | 580<br>(400-810)       |
| Armenia  | 2016 | Female | 40 to 44 | 43%<br>(31-55%)                | 57%<br>(45-69%)          | 2.3<br>(1.3-3.4)                            | 3.9%<br>(2.7-5.5%)                   | 7.8%<br>(5.1-11%)                   | 9.4<br>(5.9-14)     | 650<br>(440-930)       |
| Armenia  | 2016 | Female | 45 to 49 | 42%<br>(28-53%)                | 58%<br>(47-72%)          | 2.4<br>(1.3-3.7)                            | 4.4%<br>(2.9-6.6%)                   | 8.3%<br>(5.4-13%)                   | 15<br>(9.1-23)      | 820<br>(540-1200)      |
| Armenia  | 2016 | Female | 50 to 54 | 39%<br>(27-52%)                | 61%<br>(48-73%)          | 2.3<br>(1.3-3.6)                            | 4.8%<br>(3.1-7.3%)                   | 8.3%<br>(5.3-13%)                   | 32<br>(20-50)       | 1500<br>(940-2300)     |
| Armenia  | 2016 | Female | 55 to 59 | 36%<br>(22-54%)                | 64%<br>(46-78%)          | 2.2<br>(1.2-3.6)                            | 5.1%<br>(3-8.1%)                     | 8.2%<br>(4.8-13%)                   | 52<br>(29-84)       | 2000<br>(1200-3200)    |
| Armenia  | 2016 | Female | 60 to 64 | 34%<br>(21-53%)                | 66%<br>(47-79%)          | 2.1<br>(1.1-3.5)                            | 5.2%<br>(2.8-8.5%)                   | 7.6%<br>(4.2-12%)                   | 68<br>(36-110)      | 2200<br>(1200-3600)    |
| Armenia  | 2016 | Female | 65 to 69 | 32%<br>(20-47%)                | 68%<br>(53-80%)          | 1.9<br>(1.1-3.2)                            | 5.4%<br>(2.9-9%)                     | 7.6%<br>(4.2-13%)                   | 68<br>(36-120)      | 1700<br>(920-2900)     |
| Armenia  | 2016 | Female | 70 to 74 | 28%<br>(17-42%)                | 72%<br>(58-83%)          | 1.7<br>(0.87-2.9)                           | 5.1%<br>(2.4-9.3%)                   | 6.7%<br>(3.1-12%)                   | 56<br>(26-100)      | 1100<br>(510-2000)     |
| Armenia  | 2016 | Female | 75 to 79 | 23%<br>(15-37%)                | 77%<br>(63-85%)          | 1.4<br>(0.7-2.6)                            | 4.4%<br>(1.8-8.3%)                   | 5.6%<br>(2.3-10%)                   | 130<br>(51-240)     | 1900<br>(810-3600)     |
| Armenia  | 2016 | Female | 80 to 84 | 21%<br>(13-33%)                | 79%<br>(67-87%)          | 1.3<br>(0.68-2.2)                           | 4.4%<br>(1.9-8.2%)                   | 5.4%<br>(2.3-10%)                   | 170<br>(71-320)     | 1800<br>(790-3400)     |
| Armenia  | 2016 | Female | 85 to 89 | 21%<br>(13-32%)                | 79%<br>(68-87%)          | 1.3<br>(0.67-2.3)                           | 4.1%<br>(1.6-8.1%)                   | 5.1%<br>(1.8-10%)                   | 95<br>(35-190)      | 740<br>(290-1500)      |
| Armenia  | 2016 | Female | 90 to 94 | 23%<br>(14-33%)                | 77%<br>(67-86%)          | 1.4<br>(0.68-2.6)                           | 3.8%<br>(1.1-8.2%)                   | 4.6%<br>(1.2-10%)                   | 57<br>(15-130)      | 310<br>(89-670)        |
| Armenia  | 2016 | Female | 95 plus  | 25%<br>(14-40%)                | 75%<br>(60-86%)          | 1.5<br>(0.63-3)                             | 3.8%<br>(0.64-8.9%)                  | 4.5%<br>(0.56-11%)                  | 16<br>(1.9-39)      | 57<br>(9.6-140)        |
| Armenia  | 2016 | Male   | All Ages | 84%<br>(81-86%)                | 16%<br>(14-19%)          | 1.9<br>(1.4-2.6)                            | 3.5%<br>(1.9-5.5%)                   | 1.9%<br>(-0.34-4.5%)                | 260<br>(-46-630)    | 17000<br>(8500-26000)  |
| Armenia  | 2016 | Male   | 15 to 19 | 68%<br>(58-76%)                | 32%<br>(24-42%)          | 0.76<br>(0.4-1.3)                           | 3.5%<br>(2.4-5.1%)                   | 4.5%<br>(2.4-7.4%)                  | 2.7<br>(1.4-4.5)    | 340<br>(230-500)       |
| Armenia  | 2016 | Male   | 20 to 24 | 90%<br>(84-94%)                | 10%<br>(6.4-16%)         | 1.7<br>(1-2.8)                              | 7.8%<br>(5.6-11%)                    | 9.3%<br>(5.3-14%)                   | 10<br>(5.8-16)      | 1200<br>(810-1700)     |
| Armenia  | 2016 | Male   | 25 to 29 | 93%<br>(88-95%)                | 7.5%<br>(4.8-12%)        | 2.6<br>(1.6-4.1)                            | 9.2%<br>(6.7-12%)                    | 11%<br>(6.6-17%)                    | 17<br>(9.1-26)      | 1700<br>(1200-2400)    |

| Location   | Year | Sex    | Age      | Prevalence of current drinkers | Prevalence of abstainers | Population average of standard drinks daily | Percent of total attributable deaths | Percent of total attributable DALYs | Attributable deaths | Attributable DALYs   |
|------------|------|--------|----------|--------------------------------|--------------------------|---------------------------------------------|--------------------------------------|-------------------------------------|---------------------|----------------------|
| Armenia    | 2016 | Male   | 30 to 34 | 94%<br>(90-96%)                | 5.9%<br>(3.6-9.7%)       | 3.1<br>(2-4.5)                              | 9.1%<br>(6.3-12%)                    | 12%<br>(6.8-17%)                    | 21<br>(12-33)       | 1900<br>(1300-2600)  |
| Armenia    | 2016 | Male   | 35 to 39 | 95%<br>(92-97%)                | 5%<br>(3.1-7.6%)         | 3<br>(1.7-4.6)                              | 8%<br>(5.1-11%)                      | 10%<br>(5.3-16%)                    | 21<br>(10-34)       | 1600<br>(980-2300)   |
| Armenia    | 2016 | Male   | 40 to 44 | 95%<br>(93-97%)                | 4.8%<br>(2.9-7.3%)       | 3<br>(1.7-4.5)                              | 7%<br>(4.1-11%)                      | 8.6%<br>(4.1-14%)                   | 23<br>(10-39)       | 1400<br>(800-2200)   |
| Armenia    | 2016 | Male   | 45 to 49 | 95%<br>(91-97%)                | 5.4%<br>(3.2-8.8%)       | 3.2<br>(2-5)                                | 6.9%<br>(3.7-11%)                    | 8.2%<br>(3.6-15%)                   | 32<br>(14-58)       | 1700<br>(840-2800)   |
| Armenia    | 2016 | Male   | 50 to 54 | 93%<br>(90-96%)                | 6.6%<br>(3.9-10%)        | 3.2<br>(2-4.8)                              | 5.7%<br>(2.2-10%)                    | 6.5%<br>(1.9-12%)                   | 54<br>(16-100)      | 2400<br>(950-4400)   |
| Armenia    | 2016 | Male   | 55 to 59 | 92%<br>(85-96%)                | 8.3%<br>(4.2-15%)        | 2.7<br>(1.8-4)                              | 3.8%<br>(0.99-7.8%)                  | 4.2%<br>(0.45-9.1%)                 | 54<br>(5.8-120)     | 2100<br>(560-4100)   |
| Armenia    | 2016 | Male   | 60 to 64 | 90%<br>(82-95%)                | 9.9%<br>(4.6-18%)        | 2.3<br>(1.4-3.6)                            | 2.6%<br>(-0.067-6.5%)                | 2.7%<br>(-0.52-7.2%)                | 42<br>(-8.4-110)    | 1400<br>(-37-3300)   |
| Armenia    | 2016 | Male   | 65 to 69 | 89%<br>(79-95%)                | 11%<br>(5.3-21%)         | 2.1<br>(1.3-3.1)                            | 1.7%<br>(-0.49-4.5%)                 | 1.7%<br>(-1-5.1%)                   | 23<br>(-14-70)      | 670<br>(-200-1800)   |
| Armenia    | 2016 | Male   | 70 to 74 | 87%<br>(76-93%)                | 13%<br>(7-24%)           | 1.8<br>(1-2.7)                              | 0.89%<br>(-1.3-3.7%)                 | 0.78%<br>(-1.8-4.1%)                | 7.8<br>(-18-40)     | 200<br>(-290-800)    |
| Armenia    | 2016 | Male   | 75 to 79 | 85%<br>(73-92%)                | 15%<br>(7.6-27%)         | 1.5<br>(0.82-2.4)                           | 0.25%<br>(-1.8-2.7%)                 | 0.033%<br>(-2.4-2.9%)               | 0.66<br>(-51-62)    | 92<br>(-630-990)     |
| Armenia    | 2016 | Male   | 80 to 84 | 83%<br>(71-91%)                | 17%<br>(9.1-29%)         | 1.3<br>(0.76-2.1)                           | -0.47%<br>(-2.7-1.7%)                | -0.82%<br>(-3.6-1.7%)               | -18<br>(-80-37)     | -130<br>(-760-470)   |
| Armenia    | 2016 | Male   | 85 to 89 | 81%<br>(69-90%)                | 19%<br>(10-31%)          | 1.2<br>(0.73-1.9)                           | -0.81%<br>(-2.8-1.1%)                | -1.3%<br>(-3.9-1.1%)                | -15<br>(-45-12)     | -85<br>(-310-110)    |
| Armenia    | 2016 | Male   | 90 to 94 | 81%<br>(69-89%)                | 19%<br>(11-31%)          | 1.2<br>(0.66-1.9)                           | -1.3%<br>(-3.4-0.74%)                | -2%<br>(-4.8-0.49%)                 | -9.9<br>(-24-2.6)   | -40<br>(-110-24)     |
| Armenia    | 2016 | Male   | 95 plus  | 80%<br>(65-91%)                | 20%<br>(9.1-35%)         | 1<br>(0.5-1.9)                              | -1.3%<br>(-3.5-0.65%)                | -2.2%<br>(-5-0.23%)                 | -1.7<br>(-3.8-0.18) | -4.3<br>(-11-2.1)    |
| Azerbaijan | 1990 | Female | All Ages | 55%<br>(48-62%)                | 45%<br>(38-52%)          | 0.98<br>(0.73-1.3)                          | 0.94%<br>(0.021-2%)                  | 0.47%<br>(-2-3.2%)                  | 120<br>(-510-810)   | 13000<br>(260-27000) |
| Azerbaijan | 1990 | Female | 15 to 19 | 55%<br>(43-70%)                | 45%<br>(30-57%)          | 0.94<br>(0.54-1.5)                          | 1.7%<br>(1-2.7%)                     | 3%<br>(1.4-5.2%)                    | 5.1<br>(2.4-8.8)    | 630<br>(370-980)     |
| Azerbaijan | 1990 | Female | 20 to 24 | 62%<br>(49-75%)                | 38%<br>(25-51%)          | 1.3<br>(0.75-2.1)                           | 3%<br>(1.8-4.4%)                     | 4.3%<br>(1.9-7.4%)                  | 11<br>(4.9-19)      | 1300<br>(810-2000)   |
| Azerbaijan | 1990 | Female | 25 to 29 | 65%<br>(51-77%)                | 35%<br>(23-49%)          | 1.5<br>(0.91-2.2)                           | 3.3%<br>(2.1-4.7%)                   | 4.8%<br>(2.1-7.8%)                  | 16<br>(7-27)        | 1700<br>(1000-2500)  |
| Azerbaijan | 1990 | Female | 30 to 34 | 66%<br>(52-79%)                | 34%<br>(21-48%)          | 1.6<br>(0.99-2.3)                           | 3.4%<br>(2.1-4.9%)                   | 5.5%<br>(2.6-8.4%)                  | 19<br>(9.1-31)      | 1700<br>(1000-2400)  |
| Azerbaijan | 1990 | Female | 35 to 39 | 66%<br>(53-80%)                | 34%<br>(20-47%)          | 1.6<br>(0.97-2.5)                           | 3.4%<br>(2-5.1%)                     | 5.7%<br>(2.8-9.1%)                  | 20<br>(9.7-32)      | 1400<br>(810-2100)   |
| Azerbaijan | 1990 | Female | 40 to 44 | 66%<br>(52-79%)                | 34%<br>(21-48%)          | 1.6<br>(0.99-2.6)                           | 3.3%<br>(1.7-5.3%)                   | 5.8%<br>(2.5-9.6%)                  | 17<br>(7.3-29)      | 970<br>(480-1600)    |
| Azerbaijan | 1990 | Female | 45 to 49 | 66%<br>(52-79%)                | 34%<br>(21-48%)          | 1.7<br>(0.98-2.6)                           | 3%<br>(0.95-5.6%)                    | 5.1%<br>(1.4-9.7%)                  | 24<br>(6.2-46)      | 1100<br>(370-2200)   |



| Location   | Year | Sex    | Age      | Prevalence of current drinkers | Prevalence of abstainers | Population average of standard drinks daily | Percent of total attributable deaths | Percent of total attributable DALYs | Attributable deaths | Attributable DALYs      |
|------------|------|--------|----------|--------------------------------|--------------------------|---------------------------------------------|--------------------------------------|-------------------------------------|---------------------|-------------------------|
| Azerbaijan | 1990 | Female | 50 to 54 | 65%<br>(50-77%)                | 35%<br>(23-50%)          | 1.6<br>(0.96-2.6)                           | 2.6%<br>(0.16-5.9%)                  | 3.9%<br>(0.067-8.8%)                | 37<br>(0.58-82)     | 1500<br>(94-3400)       |
| Azerbaijan | 1990 | Female | 55 to 59 | 63%<br>(49-76%)                | 37%<br>(24-51%)          | 1.6<br>(0.95-2.6)                           | 2.2%<br>(-0.73-5.7%)                 | 3%<br>(-1.4-8%)                     | 36<br>(-17-99)      | 1300<br>(-460-3500)     |
| Azerbaijan | 1990 | Female | 60 to 64 | 61%<br>(47-76%)                | 39%<br>(24-53%)          | 1.5<br>(0.89-2.6)                           | 1.7%<br>(-1.4-5.8%)                  | 2.1%<br>(-2.3-7.6%)                 | 35<br>(-39-130)     | 1100<br>(-970-3800)     |
| Azerbaijan | 1990 | Female | 65 to 69 | 59%<br>(47-74%)                | 41%<br>(26-53%)          | 1.5<br>(0.93-2.3)                           | 1.2%<br>(-2-4.9%)                    | 1.6%<br>(-2.7-6.5%)                 | 25<br>(-42-100)     | 600<br>(-930-2400)      |
| Azerbaijan | 1990 | Female | 70 to 74 | 57%<br>(45-69%)                | 43%<br>(31-55%)          | 1.4<br>(0.85-2.2)                           | 0.16%<br>(-3.5-4.2%)                 | 0.15%<br>(-4.4-5.3%)                | 2.9<br>(-83-100)    | 72<br>(-1500-1900)      |
| Azerbaijan | 1990 | Female | 75 to 79 | 54%<br>(44-67%)                | 46%<br>(33-56%)          | 1.4<br>(0.77-2.1)                           | -0.63%<br>(-4.1-3.6%)                | -0.87%<br>(-5.2-4.2%)               | -25<br>(-150-120)   | -310<br>(-2000-1800)    |
| Azerbaijan | 1990 | Female | 80 to 84 | 52%<br>(40-66%)                | 48%<br>(34-60%)          | 1.3<br>(0.78-2)                             | -0.83%<br>(-4.3-3%)                  | -1.1%<br>(-5.4-3.4%)                | -24<br>(-120-74)    | -220<br>(-1200-810)     |
| Azerbaijan | 1990 | Female | 85 to 89 | 52%<br>(41-63%)                | 48%<br>(37-59%)          | 1.3<br>(0.77-1.9)                           | -1.6%<br>(-5-2%)                     | -2%<br>(-6-2.3%)                    | -42<br>(-130-48)    | -290<br>(-910-360)      |
| Azerbaijan | 1990 | Female | 90 to 94 | 53%<br>(42-64%)                | 47%<br>(36-58%)          | 1.3<br>(0.76-2.1)                           | -2.2%<br>(-5.6-1.8%)                 | -2.7%<br>(-6.8-2%)                  | -28<br>(-70-20)     | -130<br>(-340-110)      |
| Azerbaijan | 1990 | Female | 95 plus  | 53%<br>(40-68%)                | 47%<br>(32-60%)          | 1.2<br>(0.62-2.2)                           | -2.5%<br>(-6-1.9%)                   | -3.1%<br>(-7.4-2.1%)                | -9.6<br>(-23-6.5)   | -30<br>(-74-23)         |
| Azerbaijan | 1990 | Male   | All Ages | 48%<br>(39-58%)                | 52%<br>(42-61%)          | 1.9<br>(1.5-2.5)                            | 5.3%<br>(3.8-7%)                     | 6.2%<br>(3.7-9.1%)                  | 1800<br>(1100-2700) | 88000<br>(62000-120000) |
| Azerbaijan | 1990 | Male   | 15 to 19 | 36%<br>(22-53%)                | 64%<br>(47-78%)          | 0.47<br>(0.24-0.8)                          | 4.2%<br>(2.7-5.8%)                   | 4.8%<br>(2.3-7.3%)                  | 20<br>(9.1-30)      | 2300<br>(1400-3200)     |
| Azerbaijan | 1990 | Male   | 20 to 24 | 57%<br>(38-74%)                | 43%<br>(26-62%)          | 1.6<br>(0.98-2.4)                           | 11%<br>(8-14%)                       | 11%<br>(7.3-16%)                    | 65<br>(41-93)       | 6400<br>(4600-8500)     |
| Azerbaijan | 1990 | Male   | 25 to 29 | 68%<br>(50-82%)                | 32%<br>(18-50%)          | 3.5<br>(2.4-4.9)                            | 16%<br>(12-20%)                      | 19%<br>(14-25%)                     | 140<br>(95-190)     | 11000<br>(8300-14000)   |
| Azerbaijan | 1990 | Male   | 30 to 34 | 75%<br>(56-87%)                | 25%<br>(13-44%)          | 4.5<br>(3.1-6.3)                            | 17%<br>(13-22%)                      | 21%<br>(16-28%)                     | 170<br>(120-230)    | 12000<br>(8800-15000)   |
| Azerbaijan | 1990 | Male   | 35 to 39 | 77%<br>(61-89%)                | 23%<br>(11-39%)          | 4.1<br>(2.8-5.8)                            | 15%<br>(11-20%)                      | 19%<br>(13-26%)                     | 150<br>(100-210)    | 9400<br>(6600-12000)    |
| Azerbaijan | 1990 | Male   | 40 to 44 | 77%<br>(62-89%)                | 23%<br>(11-38%)          | 4.1<br>(2.7-5.9)                            | 14%<br>(9.9-20%)                     | 17%<br>(11-25%)                     | 120<br>(74-170)     | 6300<br>(4300-8700)     |
| Azerbaijan | 1990 | Male   | 45 to 49 | 76%<br>(58-88%)                | 24%<br>(12-42%)          | 4.6<br>(2.9-6.7)                            | 15%<br>(9.9-20%)                     | 18%<br>(11-25%)                     | 180<br>(110-270)    | 8600<br>(5600-12000)    |
| Azerbaijan | 1990 | Male   | 50 to 54 | 75%<br>(58-87%)                | 25%<br>(13-42%)          | 4.4<br>(2.8-6.3)                            | 13%<br>(8.1-18%)                     | 15%<br>(8.8-22%)                    | 290<br>(160-420)    | 12000<br>(7100-16000)   |
| Azerbaijan | 1990 | Male   | 55 to 59 | 72%<br>(54-86%)                | 28%<br>(14-46%)          | 3.4<br>(2.2-5.1)                            | 9.4%<br>(4.7-15%)                    | 11%<br>(4.7-17%)                    | 260<br>(110-420)    | 8900<br>(4300-14000)    |
| Azerbaijan | 1990 | Male   | 60 to 64 | 69%<br>(49-85%)                | 31%<br>(15-51%)          | 2.7<br>(1.6-4.4)                            | 6.5%<br>(2.3-12%)                    | 7.1%<br>(2.1-14%)                   | 200<br>(59-400)     | 6000<br>(2100-11000)    |
| Azerbaijan | 1990 | Male   | 65 to 69 | 66%<br>(47-82%)                | 34%<br>(18-53%)          | 2.4<br>(1.4-3.7)                            | 4.9%<br>(1.2-9.6%)                   | 5.2%<br>(0.95-11%)                  | 96<br>(18-200)      | 2400<br>(580-4700)      |

| Location   | Year | Sex    | Age      | Prevalence of current drinkers | Prevalence of abstainers | Population average of standard drinks daily | Percent of total attributable deaths | Percent of total attributable DALYs | Attributable deaths  | Attributable DALYs    |
|------------|------|--------|----------|--------------------------------|--------------------------|---------------------------------------------|--------------------------------------|-------------------------------------|----------------------|-----------------------|
| Azerbaijan | 1990 | Male   | 70 to 74 | 62%<br>(43-78%)                | 38%<br>(22-57%)          | 1.9<br>(1.1-3.2)                            | 3.4%<br>(0.082-8.2%)                 | 3.5%<br>(-0.26-9.2%)                | 59<br>(-4.3-150)     | 1200<br>(27-2900)     |
| Azerbaijan | 1990 | Male   | 75 to 79 | 57%<br>(38-76%)                | 43%<br>(24-62%)          | 1.6<br>(0.82-2.7)                           | 2.6%<br>(-0.33-6.9%)                 | 2.7%<br>(-0.66-7.6%)                | 58<br>(-14-160)      | 900<br>(-110-2300)    |
| Azerbaijan | 1990 | Male   | 80 to 84 | 54%<br>(35-71%)                | 46%<br>(29-65%)          | 1.4<br>(0.76-2.3)                           | 2%<br>(-0.84-5.4%)                   | 1.9%<br>(-1.4-5.8%)                 | 26<br>(-19-78)       | 310<br>(-140-860)     |
| Azerbaijan | 1990 | Male   | 85 to 89 | 52%<br>(34-69%)                | 48%<br>(31-66%)          | 1.3<br>(0.68-2.1)                           | 1.3%<br>(-1.6-4.2%)                  | 1.2%<br>(-2.2-4.6%)                 | 10<br>(-20-41)       | 100<br>(-120-320)     |
| Azerbaijan | 1990 | Male   | 90 to 94 | 51%<br>(34-68%)                | 49%<br>(32-66%)          | 1.2<br>(0.61-1.9)                           | 0.68%<br>(-2.1-3.5%)                 | 0.38%<br>(-2.9-3.7%)                | 1.4<br>(-11-14)      | 15<br>(-47-79)        |
| Azerbaijan | 1990 | Male   | 95 plus  | 52%<br>(30-72%)                | 48%<br>(28-70%)          | 1.1<br>(0.46-2)                             | 0.68%<br>(-2.1-3.5%)                 | 0.28%<br>(-3.1-3.4%)                | 0.31<br>(-3.5-3.8)   | 2.9<br>(-9.2-15)      |
| Azerbaijan | 1995 | Female | All Ages | 55%<br>(49-62%)                | 45%<br>(38-51%)          | 1<br>(0.78-1.3)                             | 1.2%<br>(0.075-2.3%)                 | 0.81%<br>(-1.8-3.6%)                | 210<br>(-470-920)    | 16000<br>(1000-32000) |
| Azerbaijan | 1995 | Female | 15 to 19 | 55%<br>(43-70%)                | 45%<br>(30-57%)          | 0.96<br>(0.57-1.5)                          | 1.8%<br>(1-2.9%)                     | 3.2%<br>(1.3-5.4%)                  | 6.7<br>(2.7-12)      | 740<br>(400-1200)     |
| Azerbaijan | 1995 | Female | 20 to 24 | 62%<br>(49-74%)                | 38%<br>(26-51%)          | 1.3<br>(0.78-2.1)                           | 3.2%<br>(2-5%)                       | 4.7%<br>(2-8.1%)                    | 14<br>(6-24)         | 1500<br>(860-2300)    |
| Azerbaijan | 1995 | Female | 25 to 29 | 64%<br>(51-77%)                | 36%<br>(23-49%)          | 1.5<br>(0.91-2.2)                           | 3.6%<br>(2.2-5.2%)                   | 5.2%<br>(2.2-8.5%)                  | 20<br>(8.8-34)       | 1900<br>(1100-2900)   |
| Azerbaijan | 1995 | Female | 30 to 34 | 66%<br>(53-79%)                | 34%<br>(21-47%)          | 1.6<br>(1-2.3)                              | 3.7%<br>(2.2-5.3%)                   | 5.8%<br>(2.9-9%)                    | 30<br>(15-46)        | 2400<br>(1400-3400)   |
| Azerbaijan | 1995 | Female | 35 to 39 | 66%<br>(53-80%)                | 34%<br>(20-47%)          | 1.6<br>(1-2.4)                              | 3.6%<br>(2.1-5.5%)                   | 6%<br>(3-9.4%)                      | 34<br>(17-54)        | 2200<br>(1300-3300)   |
| Azerbaijan | 1995 | Female | 40 to 44 | 66%<br>(52-80%)                | 34%<br>(20-48%)          | 1.6<br>(1-2.4)                              | 3.6%<br>(1.9-5.7%)                   | 6.1%<br>(3-9.7%)                    | 33<br>(15-54)        | 1800<br>(930-2800)    |
| Azerbaijan | 1995 | Female | 45 to 49 | 66%<br>(51-79%)                | 34%<br>(21-49%)          | 1.7<br>(1-2.6)                              | 3.2%<br>(0.97-6%)                    | 5.1%<br>(1.3-9.7%)                  | 26<br>(6.8-49)       | 1200<br>(360-2200)    |
| Azerbaijan | 1995 | Female | 50 to 54 | 65%<br>(51-78%)                | 35%<br>(22-49%)          | 1.6<br>(0.98-2.6)                           | 2.7%<br>(0.16-5.7%)                  | 4%<br>(0.064-9%)                    | 28<br>(0.44-62)      | 1100<br>(60-2500)     |
| Azerbaijan | 1995 | Female | 55 to 59 | 63%<br>(49-76%)                | 37%<br>(24-51%)          | 1.6<br>(0.98-2.6)                           | 2.2%<br>(-0.8-5.8%)                  | 2.9%<br>(-1.4-8.1%)                 | 46<br>(-23-130)      | 1600<br>(-610-4400)   |
| Azerbaijan | 1995 | Female | 60 to 64 | 61%<br>(48-76%)                | 39%<br>(24-52%)          | 1.6<br>(0.92-2.5)                           | 1.7%<br>(-1.7-5.9%)                  | 2%<br>(-2.5-7.6%)                   | 44<br>(-53-160)      | 1300<br>(-1400-4700)  |
| Azerbaijan | 1995 | Female | 65 to 69 | 59%<br>(47-74%)                | 41%<br>(26-53%)          | 1.5<br>(0.96-2.3)                           | 1.1%<br>(-2.4-4.9%)                  | 1.4%<br>(-3.1-6.3%)                 | 39<br>(-87-170)      | 920<br>(-1900-4000)   |
| Azerbaijan | 1995 | Female | 70 to 74 | 57%<br>(45-70%)                | 43%<br>(30-55%)          | 1.4<br>(0.85-2.2)                           | 0.028%<br>(-3.8-4.3%)                | -0.0021%<br>(-4.8-5.2%)             | -0.096<br>(-100-120) | 14<br>(-1900-2200)    |
| Azerbaijan | 1995 | Female | 75 to 79 | 54%<br>(44-67%)                | 46%<br>(33-56%)          | 1.4<br>(0.78-2.2)                           | -0.69%<br>(-4.2-3.6%)                | -0.92%<br>(-5.2-4.1%)               | -22<br>(-120-96)     | -270<br>(-1700-1400)  |
| Azerbaijan | 1995 | Female | 80 to 84 | 53%<br>(41-66%)                | 47%<br>(34-59%)          | 1.3<br>(0.81-2)                             | -0.83%<br>(-4.3-2.8%)                | -1.1%<br>(-5.2-3.3%)                | -22<br>(-110-66)     | -210<br>(-1100-700)   |
| Azerbaijan | 1995 | Female | 85 to 89 | 52%<br>(41-64%)                | 48%<br>(36-59%)          | 1.3<br>(0.77-1.9)                           | -1.6%<br>(-5.1-1.9%)                 | -2%<br>(-6.1-2.3%)                  | -31<br>(-97-35)      | -220<br>(-690-260)    |

| Location   | Year | Sex    | Age      | Prevalence of current drinkers | Prevalence of abstainers | Population average of standard drinks daily | Percent of total attributable deaths | Percent of total attributable DALYs | Attributable deaths | Attributable DALYs       |
|------------|------|--------|----------|--------------------------------|--------------------------|---------------------------------------------|--------------------------------------|-------------------------------------|---------------------|--------------------------|
| Azerbaijan | 1995 | Female | 90 to 94 | 53%<br>(42-64%)                | 47%<br>(36-58%)          | 1.3<br>(0.75-2.1)                           | -2.2%<br>(-5.8-1.8%)                 | -2.8%<br>(-7-2.1%)                  | -27<br>(-68-20)     | -130<br>(-330-100)       |
| Azerbaijan | 1995 | Female | 95 plus  | 53%<br>(41-68%)                | 47%<br>(32-59%)          | 1.3<br>(0.62-2.2)                           | -2.5%<br>(-6.2-1.6%)                 | -3.1%<br>(-7.4-1.8%)                | -10<br>(-24-5.7)    | -32<br>(-78-20)          |
| Azerbaijan | 1995 | Male   | All Ages | 50%<br>(41-59%)                | 50%<br>(41-59%)          | 2<br>(1.6-2.5)                              | 6.6%<br>(4.9-8.6%)                   | 7.5%<br>(4.9-11%)                   | 2500<br>(1600-3500) | 120000<br>(86000-150000) |
| Azerbaijan | 1995 | Male   | 15 to 19 | 36%<br>(22-53%)                | 64%<br>(47-78%)          | 0.48<br>(0.26-0.84)                         | 4.3%<br>(2.7-6.2%)                   | 4.8%<br>(2.4-7.4%)                  | 25<br>(12-39)       | 2600<br>(1600-3700)      |
| Azerbaijan | 1995 | Male   | 20 to 24 | 58%<br>(38-74%)                | 42%<br>(26-62%)          | 1.6<br>(1-2.4)                              | 11%<br>(8.3-15%)                     | 12%<br>(8-17%)                      | 99<br>(63-140)      | 8800<br>(6300-12000)     |
| Azerbaijan | 1995 | Male   | 25 to 29 | 68%<br>(50-82%)                | 32%<br>(18-50%)          | 3.5<br>(2.4-4.9)                            | 18%<br>(14-22%)                      | 21%<br>(15-26%)                     | 190<br>(130-250)    | 14000<br>(10000-18000)   |
| Azerbaijan | 1995 | Male   | 30 to 34 | 75%<br>(56-87%)                | 25%<br>(13-44%)          | 4.5<br>(3.1-6.2)                            | 19%<br>(15-24%)                      | 23%<br>(17-29%)                     | 280<br>(200-360)    | 19000<br>(14000-23000)   |
| Azerbaijan | 1995 | Male   | 35 to 39 | 77%<br>(62-88%)                | 23%<br>(12-38%)          | 4.1<br>(3-5.7)                              | 17%<br>(12-21%)                      | 20%<br>(14-26%)                     | 270<br>(190-360)    | 16000<br>(12000-21000)   |
| Azerbaijan | 1995 | Male   | 40 to 44 | 78%<br>(62-89%)                | 22%<br>(11-38%)          | 4.1<br>(2.8-5.7)                            | 15%<br>(10-20%)                      | 18%<br>(12-24%)                     | 240<br>(150-340)    | 13000<br>(8600-17000)    |
| Azerbaijan | 1995 | Male   | 45 to 49 | 77%<br>(58-88%)                | 23%<br>(12-42%)          | 4.6<br>(3-6.7)                              | 16%<br>(11-21%)                      | 18%<br>(12-25%)                     | 200<br>(130-290)    | 9300<br>(6300-13000)     |
| Azerbaijan | 1995 | Male   | 50 to 54 | 75%<br>(58-87%)                | 25%<br>(13-42%)          | 4.4<br>(2.9-6.3)                            | 14%<br>(8.8-19%)                     | 16%<br>(9.6-22%)                    | 250<br>(150-360)    | 10000<br>(6300-14000)    |
| Azerbaijan | 1995 | Male   | 55 to 59 | 73%<br>(55-86%)                | 27%<br>(14-45%)          | 3.4<br>(2.2-5)                              | 9.7%<br>(5-15%)                      | 11%<br>(5.2-17%)                    | 300<br>(140-490)    | 10000<br>(5400-16000)    |
| Azerbaijan | 1995 | Male   | 60 to 64 | 69%<br>(50-84%)                | 31%<br>(16-50%)          | 2.8<br>(1.6-4.3)                            | 6.6%<br>(2.2-12%)                    | 7.1%<br>(2.1-14%)                   | 250<br>(75-480)     | 7400<br>(2600-14000)     |
| Azerbaijan | 1995 | Male   | 65 to 69 | 66%<br>(48-82%)                | 34%<br>(18-52%)          | 2.4<br>(1.5-3.7)                            | 4.9%<br>(1.3-9.7%)                   | 5.3%<br>(1.1-11%)                   | 190<br>(40-410)     | 4700<br>(1300-9500)      |
| Azerbaijan | 1995 | Male   | 70 to 74 | 62%<br>(44-78%)                | 38%<br>(22-56%)          | 2<br>(1.1-3.3)                              | 3.3%<br>(0.024-8.2%)                 | 3.5%<br>(-0.39-9.1%)                | 74<br>(-7.8-190)    | 1500<br>(10-3600)        |
| Azerbaijan | 1995 | Male   | 75 to 79 | 58%<br>(40-75%)                | 42%<br>(25-60%)          | 1.6<br>(0.86-2.7)                           | 2.6%<br>(-0.37-6.8%)                 | 2.7%<br>(-0.79-7.5%)                | 40<br>(-11-120)     | 630<br>(-89-1700)        |
| Azerbaijan | 1995 | Male   | 80 to 84 | 54%<br>(35-71%)                | 46%<br>(29-65%)          | 1.4<br>(0.79-2.3)                           | 2%<br>(-0.98-5.4%)                   | 1.9%<br>(-1.6-5.8%)                 | 21<br>(-16-64)      | 250<br>(-120-700)        |
| Azerbaijan | 1995 | Male   | 85 to 89 | 52%<br>(34-68%)                | 48%<br>(32-66%)          | 1.3<br>(0.69-2.1)                           | 1.3%<br>(-1.6-4.3%)                  | 1.1%<br>(-2.3-4.6%)                 | 7.7<br>(-16-31)     | 74<br>(-91-250)          |
| Azerbaijan | 1995 | Male   | 90 to 94 | 51%<br>(35-68%)                | 49%<br>(32-65%)          | 1.2<br>(0.64-2)                             | 0.65%<br>(-2.2-3.5%)                 | 0.34%<br>(-2.9-3.6%)                | 1.1<br>(-9.2-11)    | 12<br>(-39-64)           |
| Azerbaijan | 1995 | Male   | 95 plus  | 52%<br>(31-72%)                | 48%<br>(28-69%)          | 1.1<br>(0.48-2)                             | 0.62%<br>(-2.3-3.6%)                 | 0.2%<br>(-3.4-3.6%)                 | 0.17<br>(-2.9-3.1)  | 2.1<br>(-7.6-12)         |
| Azerbaijan | 2000 | Female | All Ages | 56%<br>(50-63%)                | 44%<br>(37-50%)          | 1.1<br>(0.85-1.4)                           | 1.5%<br>(0.14-2.9%)                  | 1.1%<br>(-2.4-3%)                   | 300<br>(-510-1100)  | 18000<br>(1700-36000)    |
| Azerbaijan | 2000 | Female | 15 to 19 | 55%<br>(43-69%)                | 45%<br>(31-57%)          | 1<br>(0.59-1.6)                             | 1.7%<br>(0.94-2.7%)                  | 3.3%<br>(1.2-5.6%)                  | 6.2<br>(2.3-10)     | 740<br>(390-1200)        |

| Location   | Year | Sex    | Age      | Prevalence of current drinkers | Prevalence of abstainers | Population average of standard drinks daily | Percent of total attributable deaths | Percent of total attributable DALYs | Attributable deaths | Attributable DALYs       |
|------------|------|--------|----------|--------------------------------|--------------------------|---------------------------------------------|--------------------------------------|-------------------------------------|---------------------|--------------------------|
| Azerbaijan | 2000 | Female | 20 to 24 | 62%<br>(49-74%)                | 38%<br>(26-51%)          | 1.4<br>(0.8-2.2)                            | 3.3%<br>(1.9-5%)                     | 5.2%<br>(1.9-9%)                    | 13<br>(4.7-22)      | 1400<br>(790-2200)       |
| Azerbaijan | 2000 | Female | 25 to 29 | 65%<br>(51-77%)                | 35%<br>(23-49%)          | 1.6<br>(0.94-2.4)                           | 3.7%<br>(2.2-5.4%)                   | 5.9%<br>(2.5-9.6%)                  | 18<br>(7.6-29)      | 1700<br>(1000-2600)      |
| Azerbaijan | 2000 | Female | 30 to 34 | 66%<br>(52-78%)                | 34%<br>(22-48%)          | 1.7<br>(1.1-2.5)                            | 3.8%<br>(2.4-5.5%)                   | 6.6%<br>(3.3-10%)                   | 27<br>(13-42)       | 2200<br>(1300-3100)      |
| Azerbaijan | 2000 | Female | 35 to 39 | 66%<br>(52-79%)                | 34%<br>(21-48%)          | 1.7<br>(1.1-2.5)                            | 3.7%<br>(2.2-5.5%)                   | 6.7%<br>(3.6-10%)                   | 38<br>(20-60)       | 2600<br>(1500-3800)      |
| Azerbaijan | 2000 | Female | 40 to 44 | 66%<br>(52-79%)                | 34%<br>(21-48%)          | 1.7<br>(1.1-2.5)                            | 3.7%<br>(2.1-5.7%)                   | 6.7%<br>(3.6-10%)                   | 43<br>(23-68)       | 2400<br>(1300-3700)      |
| Azerbaijan | 2000 | Female | 45 to 49 | 66%<br>(51-79%)                | 34%<br>(21-49%)          | 1.7<br>(1.1-2.7)                            | 3.4%<br>(1.4-5.9%)                   | 5.9%<br>(2.3-10%)                   | 41<br>(15-70)       | 1900<br>(730-3200)       |
| Azerbaijan | 2000 | Female | 50 to 54 | 65%<br>(51-78%)                | 35%<br>(22-49%)          | 1.7<br>(1-2.7)                              | 3.1%<br>(0.39-6.3%)                  | 4.6%<br>(0.48-9.4%)                 | 30<br>(3.1-63)      | 1200<br>(160-2400)       |
| Azerbaijan | 2000 | Female | 55 to 59 | 63%<br>(49-77%)                | 37%<br>(23-51%)          | 1.7<br>(1-2.7)                              | 2.6%<br>(-0.52-6.1%)                 | 3.5%<br>(-0.98-8.5%)                | 31<br>(-8.5-75)     | 1100<br>(-220-2600)      |
| Azerbaijan | 2000 | Female | 60 to 64 | 61%<br>(48-76%)                | 39%<br>(24-52%)          | 1.6<br>(0.93-2.6)                           | 2.1%<br>(-1.5-6.5%)                  | 2.5%<br>(-2.3-8.1%)                 | 62<br>(-57-200)     | 1900<br>(-1400-5700)     |
| Azerbaijan | 2000 | Female | 65 to 69 | 59%<br>(47-73%)                | 41%<br>(27-53%)          | 1.6<br>(1-2.4)                              | 1.6%<br>(-2.1-5.6%)                  | 2%<br>(-2.7-6.9%)                   | 62<br>(-85-230)     | 1500<br>(-1900-5300)     |
| Azerbaijan | 2000 | Female | 70 to 74 | 57%<br>(45-70%)                | 43%<br>(30-55%)          | 1.5<br>(0.89-2.3)                           | 0.49%<br>(-3.4-4.9%)                 | 0.58%<br>(-4.2-6%)                  | 21<br>(-160-220)    | 400<br>(-2800-4000)      |
| Azerbaijan | 2000 | Female | 75 to 79 | 54%<br>(44-67%)                | 46%<br>(33-56%)          | 1.4<br>(0.81-2.2)                           | -0.3%<br>(-4.1-4.1%)                 | -0.44%<br>(-5-4.8%)                 | -12<br>(-130-130)   | -140<br>(-1800-1900)     |
| Azerbaijan | 2000 | Female | 80 to 84 | 53%<br>(41-66%)                | 47%<br>(34-59%)          | 1.4<br>(0.82-2.1)                           | -0.53%<br>(-4.1-3.4%)                | -0.72%<br>(-4.9-3.9%)               | -14<br>(-96-76)     | -130<br>(-960-840)       |
| Azerbaijan | 2000 | Female | 85 to 89 | 52%<br>(40-64%)                | 48%<br>(36-60%)          | 1.3<br>(0.81-2)                             | -1.3%<br>(-4.9-2.6%)                 | -1.6%<br>(-5.7-3%)                  | -32<br>(-120-59)    | -220<br>(-830-450)       |
| Azerbaijan | 2000 | Female | 90 to 94 | 53%<br>(42-64%)                | 47%<br>(36-58%)          | 1.3<br>(0.77-2.1)                           | -2%<br>(-5.6-2%)                     | -2.4%<br>(-6.8-2.4%)                | -24<br>(-68-23)     | -110<br>(-330-120)       |
| Azerbaijan | 2000 | Female | 95 plus  | 53%<br>(40-67%)                | 47%<br>(33-60%)          | 1.3<br>(0.64-2.3)                           | -2.3%<br>(-6.1-2.2%)                 | -2.9%<br>(-7.4-2.5%)                | -12<br>(-31-10)     | -38<br>(-99-35)          |
| Azerbaijan | 2000 | Male   | All Ages | 51%<br>(42-61%)                | 49%<br>(39-58%)          | 2.2<br>(1.7-2.7)                            | 7%<br>(5.1-9%)                       | 7.7%<br>(4.6-11%)                   | 2400<br>(1400-3600) | 110000<br>(79000-140000) |
| Azerbaijan | 2000 | Male   | 15 to 19 | 36%<br>(22-54%)                | 64%<br>(46-78%)          | 0.49<br>(0.27-0.85)                         | 4.2%<br>(2.9-5.8%)                   | 4.8%<br>(2.7-7.2%)                  | 20<br>(11-31)       | 2300<br>(1600-3300)      |
| Azerbaijan | 2000 | Male   | 20 to 24 | 57%<br>(38-74%)                | 43%<br>(26-62%)          | 1.6<br>(1-2.5)                              | 12%<br>(8.7-15%)                     | 13%<br>(9.1-18%)                    | 67<br>(44-94)       | 6500<br>(4700-8600)      |
| Azerbaijan | 2000 | Male   | 25 to 29 | 68%<br>(51-82%)                | 32%<br>(18-49%)          | 3.7<br>(2.5-5.1)                            | 18%<br>(14-23%)                      | 23%<br>(17-30%)                     | 130<br>(98-170)     | 11000<br>(8200-13000)    |
| Azerbaijan | 2000 | Male   | 30 to 34 | 75%<br>(56-88%)                | 25%<br>(12-44%)          | 4.7<br>(3.2-6.5)                            | 20%<br>(16-24%)                      | 26%<br>(20-32%)                     | 190<br>(140-250)    | 13000<br>(10000-17000)   |
| Azerbaijan | 2000 | Male   | 35 to 39 | 77%<br>(62-89%)                | 23%<br>(11-38%)          | 4.3<br>(3-5.7)                              | 17%<br>(13-21%)                      | 22%<br>(16-28%)                     | 240<br>(170-320)    | 15000<br>(11000-19000)   |

| Location   | Year | Sex    | Age      | Prevalence of current drinkers | Prevalence of abstainers | Population average of standard drinks daily | Percent of total attributable deaths | Percent of total attributable DALYs | Attributable deaths | Attributable DALYs     |
|------------|------|--------|----------|--------------------------------|--------------------------|---------------------------------------------|--------------------------------------|-------------------------------------|---------------------|------------------------|
| Azerbaijan | 2000 | Male   | 40 to 44 | 78%<br>(61-89%)                | 22%<br>(11-39%)          | 4.3<br>(3-5.8)                              | 15%<br>(11-20%)                      | 19%<br>(13-25%)                     | 260<br>(170-360)    | 14000<br>(10000-19000) |
| Azerbaijan | 2000 | Male   | 45 to 49 | 77%<br>(58-89%)                | 23%<br>(11-42%)          | 4.8<br>(3.2-6.8)                            | 16%<br>(11-21%)                      | 19%<br>(13-26%)                     | 270<br>(180-380)    | 13000<br>(8900-17000)  |
| Azerbaijan | 2000 | Male   | 50 to 54 | 75%<br>(57-87%)                | 25%<br>(13-43%)          | 4.6<br>(3-6.5)                              | 14%<br>(9.3-20%)                     | 16%<br>(10-23%)                     | 220<br>(130-320)    | 8900<br>(5600-12000)   |
| Azerbaijan | 2000 | Male   | 55 to 59 | 73%<br>(55-86%)                | 27%<br>(14-45%)          | 3.6<br>(2.3-5.2)                            | 10%<br>(5.2-16%)                     | 12%<br>(5.4-18%)                    | 190<br>(88-300)     | 6500<br>(3400-9800)    |
| Azerbaijan | 2000 | Male   | 60 to 64 | 69%<br>(50-85%)                | 31%<br>(15-50%)          | 2.9<br>(1.7-4.5)                            | 7.2%<br>(2.4-13%)                    | 7.8%<br>(2.2-15%)                   | 290<br>(85-560)     | 8400<br>(2900-15000)   |
| Azerbaijan | 2000 | Male   | 65 to 69 | 67%<br>(49-83%)                | 33%<br>(17-51%)          | 2.5<br>(1.5-3.8)                            | 5.5%<br>(1.6-11%)                    | 6%<br>(1.4-12%)                     | 260<br>(61-520)     | 6200<br>(1700-12000)   |
| Azerbaijan | 2000 | Male   | 70 to 74 | 62%<br>(44-78%)                | 38%<br>(22-56%)          | 2.1<br>(1.2-3.4)                            | 3.8%<br>(0.24-9.3%)                  | 4.1%<br>(-0.046-10%)                | 170<br>(-1.8-400)   | 3200<br>(200-7500)     |
| Azerbaijan | 2000 | Male   | 75 to 79 | 58%<br>(39-76%)                | 42%<br>(24-61%)          | 1.7<br>(0.9-2.9)                            | 3%<br>(-0.37-7.8%)                   | 3.2%<br>(-0.65-8.6%)                | 60<br>(-12-160)     | 910<br>(-110-2400)     |
| Azerbaijan | 2000 | Male   | 80 to 84 | 55%<br>(35-72%)                | 45%<br>(28-65%)          | 1.5<br>(0.82-2.4)                           | 2.2%<br>(-0.95-5.9%)                 | 2.2%<br>(-1.5-6.4%)                 | 21<br>(-14-62)      | 250<br>(-110-670)      |
| Azerbaijan | 2000 | Male   | 85 to 89 | 52%<br>(35-69%)                | 48%<br>(31-65%)          | 1.3<br>(0.74-2.2)                           | 1.5%<br>(-1.5-4.5%)                  | 1.4%<br>(-2.1-4.9%)                 | 10<br>(-16-37)      | 95<br>(-93-290)        |
| Azerbaijan | 2000 | Male   | 90 to 94 | 51%<br>(35-69%)                | 49%<br>(31-65%)          | 1.2<br>(0.66-2.1)                           | 0.78%<br>(-2.2-3.7%)                 | 0.5%<br>(-3-4%)                     | 1.6<br>(-9.7-13)    | 15<br>(-41-70)         |
| Azerbaijan | 2000 | Male   | 95 plus  | 52%<br>(31-72%)                | 48%<br>(28-69%)          | 1.1<br>(0.5-2.1)                            | 0.72%<br>(-2.3-3.9%)                 | 0.33%<br>(-3.3-4%)                  | 0.32<br>(-3.1-3.9)  | 2.7<br>(-8.6-15)       |
| Azerbaijan | 2005 | Female | All Ages | 57%<br>(51-65%)                | 43%<br>(35-49%)          | 1.2<br>(0.93-1.6)                           | 1.8%<br>(0.39-3.4%)                  | 1.8%<br>(-1.5-5.2%)                 | 520<br>(-430-1500)  | 24000<br>(5200-44000)  |
| Azerbaijan | 2005 | Female | 15 to 19 | 55%<br>(43-69%)                | 45%<br>(31-57%)          | 1.1<br>(0.6-1.7)                            | 1.8%<br>(0.99-2.8%)                  | 3.3%<br>(1.3-5.7%)                  | 7.6<br>(3.1-13)     | 900<br>(480-1400)      |
| Azerbaijan | 2005 | Female | 20 to 24 | 62%<br>(49-74%)                | 38%<br>(26-51%)          | 1.5<br>(0.85-2.4)                           | 3.3%<br>(1.9-4.9%)                   | 5.1%<br>(2.1-8.7%)                  | 14<br>(5.6-26)      | 1700<br>(940-2600)     |
| Azerbaijan | 2005 | Female | 25 to 29 | 65%<br>(51-77%)                | 35%<br>(23-49%)          | 1.7<br>(1-2.6)                              | 3.6%<br>(2.2-5.3%)                   | 5.8%<br>(2.7-9.4%)                  | 17<br>(7.9-29)      | 1700<br>(1000-2600)    |
| Azerbaijan | 2005 | Female | 30 to 34 | 66%<br>(52-79%)                | 34%<br>(21-48%)          | 1.8<br>(1.1-2.8)                            | 3.8%<br>(2.4-5.5%)                   | 6.4%<br>(3.3-10%)                   | 23<br>(12-38)       | 2000<br>(1200-2800)    |
| Azerbaijan | 2005 | Female | 35 to 39 | 66%<br>(53-81%)                | 34%<br>(19-47%)          | 1.8<br>(1.1-2.7)                            | 3.9%<br>(2.2-5.8%)                   | 6.8%<br>(3.5-11%)                   | 37<br>(19-58)       | 2500<br>(1400-3700)    |
| Azerbaijan | 2005 | Female | 40 to 44 | 66%<br>(52-79%)                | 34%<br>(21-48%)          | 1.8<br>(1.1-2.7)                            | 3.8%<br>(2.1-5.9%)                   | 6.9%<br>(3.6-11%)                   | 57<br>(28-90)       | 3100<br>(1700-4800)    |
| Azerbaijan | 2005 | Female | 45 to 49 | 66%<br>(51-79%)                | 34%<br>(21-49%)          | 1.9<br>(1.1-2.8)                            | 3.7%<br>(1.6-6.3%)                   | 6.4%<br>(2.7-11%)                   | 66<br>(27-110)      | 3000<br>(1300-5100)    |
| Azerbaijan | 2005 | Female | 50 to 54 | 64%<br>(50-78%)                | 36%<br>(22-50%)          | 1.8<br>(1.1-2.8)                            | 3.5%<br>(0.69-6.8%)                  | 5.3%<br>(1.1-10%)                   | 61<br>(12-120)      | 2400<br>(470-4600)     |
| Azerbaijan | 2005 | Female | 55 to 59 | 63%<br>(50-76%)                | 37%<br>(24-50%)          | 1.8<br>(1.1-2.8)                            | 3.1%<br>(-0.21-6.8%)                 | 4.3%<br>(-0.38-9.3%)                | 44<br>(-3.8-97)     | 1500<br>(-91-3300)     |

| Location   | Year | Sex    | Age      | Prevalence of current drinkers | Prevalence of abstainers | Population average of standard drinks daily | Percent of total attributable deaths | Percent of total attributable DALYs | Attributable deaths | Attributable DALYs       |
|------------|------|--------|----------|--------------------------------|--------------------------|---------------------------------------------|--------------------------------------|-------------------------------------|---------------------|--------------------------|
| Azerbaijan | 2005 | Female | 60 to 64 | 61%<br>(48-75%)                | 39%<br>(25-52%)          | 1.7<br>(0.99-2.8)                           | 2.8%<br>(-0.93-7%)                   | 3.5%<br>(-1.4-9.1%)                 | 52<br>(-20-140)     | 1500<br>(-490-4000)      |
| Azerbaijan | 2005 | Female | 65 to 69 | 59%<br>(48-73%)                | 41%<br>(27-52%)          | 1.7<br>(1.1-2.5)                            | 2.3%<br>(-1.6-6.4%)                  | 2.9%<br>(-1.9-8%)                   | 100<br>(-65-280)    | 2300<br>(-1500-6400)     |
| Azerbaijan | 2005 | Female | 70 to 74 | 57%<br>(46-70%)                | 43%<br>(30-54%)          | 1.6<br>(0.96-2.5)                           | 1.2%<br>(-3.1-5.9%)                  | 1.5%<br>(-3.8-7.1%)                 | 66<br>(-160-330)    | 1200<br>(-2900-6000)     |
| Azerbaijan | 2005 | Female | 75 to 79 | 54%<br>(44-67%)                | 46%<br>(33-56%)          | 1.5<br>(0.88-2.4)                           | 0.38%<br>(-3.6-5.1%)                 | 0.39%<br>(-4.3-5.9%)                | 15<br>(-160-230)    | 240<br>(-2300-3300)      |
| Azerbaijan | 2005 | Female | 80 to 84 | 53%<br>(40-66%)                | 47%<br>(34-60%)          | 1.5<br>(0.9-2.3)                            | 0.084%<br>(-3.6-4.2%)                | 0.017%<br>(-4.4-4.8%)               | 0.43<br>(-130-140)  | 30<br>(-1300-1500)       |
| Azerbaijan | 2005 | Female | 85 to 89 | 52%<br>(41-63%)                | 48%<br>(37-59%)          | 1.4<br>(0.86-2.2)                           | -0.61%<br>(-4.3-3.6%)                | -0.81%<br>(-5.1-4.3%)               | -13<br>(-85-70)     | -84<br>(-600-520)        |
| Azerbaijan | 2005 | Female | 90 to 94 | 53%<br>(42-64%)                | 47%<br>(36-58%)          | 1.4<br>(0.82-2.3)                           | -1.3%<br>(-5.1-3.2%)                 | -1.7%<br>(-6.2-3.7%)                | -18<br>(-66-39)     | -82<br>(-320-200)        |
| Azerbaijan | 2005 | Female | 95 plus  | 53%<br>(40-68%)                | 47%<br>(32-60%)          | 1.4<br>(0.71-2.4)                           | -1.7%<br>(-5.6-3.1%)                 | -2.2%<br>(-6.7-3.3%)                | -7.9<br>(-25-13)    | -24<br>(-79-43)          |
| Azerbaijan | 2005 | Male   | All Ages | 53%<br>(45-62%)                | 47%<br>(38-55%)          | 2.5<br>(2-3.2)                              | 8.2%<br>(5.9-11%)                    | 8.8%<br>(5.4-13%)                   | 3100<br>(1900-4600) | 130000<br>(96000-180000) |
| Azerbaijan | 2005 | Male   | 15 to 19 | 29%<br>(18-45%)                | 71%<br>(55-82%)          | 0.42<br>(0.23-0.74)                         | 4%<br>(3-5.2%)                       | 4.5%<br>(2.9-6.4%)                  | 22<br>(14-33)       | 2600<br>(1900-3600)      |
| Azerbaijan | 2005 | Male   | 20 to 24 | 54%<br>(37-69%)                | 46%<br>(31-63%)          | 1.6<br>(1.1-2.4)                            | 11%<br>(8.8-14%)                     | 13%<br>(8.9-17%)                    | 82<br>(54-120)      | 8100<br>(5900-11000)     |
| Azerbaijan | 2005 | Male   | 25 to 29 | 71%<br>(57-83%)                | 29%<br>(17-43%)          | 4.2<br>(2.9-5.7)                            | 19%<br>(15-23%)                      | 24%<br>(18-30%)                     | 160<br>(110-210)    | 12000<br>(9300-16000)    |
| Azerbaijan | 2005 | Male   | 30 to 34 | 78%<br>(64-88%)                | 22%<br>(12-36%)          | 5.4<br>(3.8-7.2)                            | 21%<br>(16-25%)                      | 27%<br>(20-33%)                     | 210<br>(150-270)    | 14000<br>(11000-18000)   |
| Azerbaijan | 2005 | Male   | 35 to 39 | 79%<br>(68-89%)                | 21%<br>(11-32%)          | 4.8<br>(3.5-6.4)                            | 18%<br>(13-23%)                      | 23%<br>(16-30%)                     | 230<br>(160-330)    | 14000<br>(10000-19000)   |
| Azerbaijan | 2005 | Male   | 40 to 44 | 79%<br>(66-89%)                | 21%<br>(11-34%)          | 4.8<br>(3.5-6.4)                            | 16%<br>(11-21%)                      | 20%<br>(13-27%)                     | 340<br>(220-490)    | 18000<br>(13000-25000)   |
| Azerbaijan | 2005 | Male   | 45 to 49 | 80%<br>(66-89%)                | 20%<br>(11-34%)          | 5.5<br>(3.9-7.4)                            | 17%<br>(12-22%)                      | 20%<br>(14-28%)                     | 420<br>(270-580)    | 19000<br>(13000-26000)   |
| Azerbaijan | 2005 | Male   | 50 to 54 | 79%<br>(64-88%)                | 21%<br>(12-36%)          | 5.3<br>(3.6-7.3)                            | 15%<br>(10-21%)                      | 18%<br>(11-25%)                     | 410<br>(250-570)    | 16000<br>(10000-22000)   |
| Azerbaijan | 2005 | Male   | 55 to 59 | 75%<br>(59-86%)                | 25%<br>(14-41%)          | 4<br>(2.7-5.8)                              | 12%<br>(6-18%)                       | 13%<br>(6.3-21%)                    | 230<br>(110-370)    | 8000<br>(4100-12000)     |
| Azerbaijan | 2005 | Male   | 60 to 64 | 70%<br>(51-84%)                | 30%<br>(16-49%)          | 3.2<br>(1.9-4.8)                            | 8.3%<br>(3.1-14%)                    | 9.2%<br>(3-16%)                     | 200<br>(62-370)     | 5900<br>(2100-10000)     |
| Azerbaijan | 2005 | Male   | 65 to 69 | 67%<br>(47-82%)                | 33%<br>(18-53%)          | 2.7<br>(1.6-4.1)                            | 6.6%<br>(2-12%)                      | 7.2%<br>(2-13%)                     | 310<br>(83-590)     | 7400<br>(2200-14000)     |
| Azerbaijan | 2005 | Male   | 70 to 74 | 63%<br>(44-78%)                | 37%<br>(22-56%)          | 2.3<br>(1.3-3.7)                            | 4.8%<br>(0.75-10%)                   | 5.2%<br>(0.61-12%)                  | 270<br>(31-590)     | 5100<br>(790-11000)      |
| Azerbaijan | 2005 | Male   | 75 to 79 | 58%<br>(39-75%)                | 42%<br>(25-61%)          | 1.9<br>(0.99-3)                             | 3.8%<br>(0.24-8.8%)                  | 4.1%<br>(-0.059-9.7%)               | 150<br>(-2.1-360)   | 2200<br>(140-5100)       |

| Location   | Year | Sex    | Age      | Prevalence of current drinkers | Prevalence of abstainers | Population average of standard drinks daily | Percent of total attributable deaths | Percent of total attributable DALYs | Attributable deaths | Attributable DALYs    |
|------------|------|--------|----------|--------------------------------|--------------------------|---------------------------------------------|--------------------------------------|-------------------------------------|---------------------|-----------------------|
| Azerbaijan | 2005 | Male   | 80 to 84 | 55%<br>(36-72%)                | 45%<br>(28-64%)          | 1.6<br>(0.9-2.6)                            | 2.9%<br>(-0.38-7.1%)                 | 3%<br>(-0.87-7.9%)                  | 56<br>(-17-150)     | 640<br>(-89-1600)     |
| Azerbaijan | 2005 | Male   | 85 to 89 | 52%<br>(34-69%)                | 48%<br>(31-66%)          | 1.5<br>(0.8-2.4)                            | 2.1%<br>(-0.7-5.7%)                  | 2.1%<br>(-1.3-6.2%)                 | 13<br>(-7.8-39)     | 110<br>(-39-300)      |
| Azerbaijan | 2005 | Male   | 90 to 94 | 51%<br>(35-69%)                | 49%<br>(31-65%)          | 1.3<br>(0.72-2.3)                           | 1.2%<br>(-1.7-4.1%)                  | 1.1%<br>(-2.4-4.4%)                 | 3.5<br>(-8-14)      | 24<br>(-32-78)        |
| Azerbaijan | 2005 | Male   | 95 plus  | 52%<br>(31-72%)                | 48%<br>(28-69%)          | 1.2<br>(0.56-2.3)                           | 1%<br>(-2-4.4%)                      | 0.72%<br>(-2.9-4.6%)                | 0.67<br>(-2.7-4.3)  | 3.7<br>(-7.1-16)      |
| Azerbaijan | 2010 | Female | All Ages | 57%<br>(51-64%)                | 43%<br>(36-49%)          | 1.4<br>(1-1.9)                              | 2.2%<br>(0.47-4.1%)                  | 2.4%<br>(-1.4-6.5%)                 | 760<br>(-440-2100)  | 30000<br>(6200-55000) |
| Azerbaijan | 2010 | Female | 15 to 19 | 55%<br>(43-70%)                | 45%<br>(30-57%)          | 1.2<br>(0.65-1.9)                           | 1.9%<br>(1-3.1%)                     | 3.5%<br>(1.5-6.2%)                  | 6.7<br>(2.9-12)     | 860<br>(470-1400)     |
| Azerbaijan | 2010 | Female | 20 to 24 | 62%<br>(49-74%)                | 38%<br>(26-51%)          | 1.7<br>(0.94-2.7)                           | 3.3%<br>(2-4.9%)                     | 5.3%<br>(2.3-9.1%)                  | 15<br>(6.2-26)      | 1900<br>(1100-2900)   |
| Azerbaijan | 2010 | Female | 25 to 29 | 64%<br>(51-77%)                | 36%<br>(23-49%)          | 1.9<br>(1.1-2.9)                            | 3.6%<br>(2.3-5.2%)                   | 6%<br>(3-9.6%)                      | 18<br>(8.7-29)      | 2000<br>(1200-2800)   |
| Azerbaijan | 2010 | Female | 30 to 34 | 66%<br>(52-78%)                | 34%<br>(22-48%)          | 2<br>(1.2-3.1)                              | 3.8%<br>(2.6-5.5%)                   | 6.7%<br>(3.8-10%)                   | 22<br>(12-35)       | 2000<br>(1300-2800)   |
| Azerbaijan | 2010 | Female | 35 to 39 | 66%<br>(53-79%)                | 34%<br>(21-47%)          | 2<br>(1.2-3.1)                              | 3.9%<br>(2.4-5.8%)                   | 7.3%<br>(4-11%)                     | 31<br>(17-50)       | 2200<br>(1300-3300)   |
| Azerbaijan | 2010 | Female | 40 to 44 | 66%<br>(52-79%)                | 34%<br>(21-48%)          | 2<br>(1.2-3.2)                              | 4%<br>(2.2-6.2%)                     | 7.4%<br>(3.9-12%)                   | 50<br>(26-81)       | 2800<br>(1600-4500)   |
| Azerbaijan | 2010 | Female | 45 to 49 | 66%<br>(51-79%)                | 34%<br>(21-49%)          | 2.1<br>(1.2-3.1)                            | 4%<br>(1.7-6.7%)                     | 7.1%<br>(3.1-12%)                   | 79<br>(34-130)      | 3700<br>(1700-6300)   |
| Azerbaijan | 2010 | Female | 50 to 54 | 64%<br>(51-78%)                | 36%<br>(22-49%)          | 2<br>(1.2-3.1)                              | 4%<br>(1.2-7.4%)                     | 6.2%<br>(1.9-11%)                   | 93<br>(28-180)      | 3700<br>(1100-6900)   |
| Azerbaijan | 2010 | Female | 55 to 59 | 63%<br>(50-76%)                | 37%<br>(24-50%)          | 2<br>(1.2-3.2)                              | 3.7%<br>(0.35-7.5%)                  | 5.2%<br>(0.41-11%)                  | 85<br>(6.5-180)     | 3000<br>(240-6200)    |
| Azerbaijan | 2010 | Female | 60 to 64 | 61%<br>(47-76%)                | 39%<br>(24-53%)          | 1.9<br>(1.1-3.2)                            | 3.6%<br>(-0.55-8.6%)                 | 4.5%<br>(-0.96-11%)                 | 72<br>(-15-180)     | 2100<br>(-320-5100)   |
| Azerbaijan | 2010 | Female | 65 to 69 | 59%<br>(48-74%)                | 41%<br>(26-52%)          | 1.9<br>(1.1-2.9)                            | 3.1%<br>(-0.97-7.5%)                 | 4%<br>(-1.2-9.7%)                   | 77<br>(-23-190)     | 1800<br>(-490-4400)   |
| Azerbaijan | 2010 | Female | 70 to 74 | 57%<br>(45-70%)                | 43%<br>(30-55%)          | 1.8<br>(1-2.8)                              | 2%<br>(-2.7-7.3%)                    | 2.4%<br>(-3.3-8.9%)                 | 120<br>(-160-440)   | 2300<br>(-2900-8200)  |
| Azerbaijan | 2010 | Female | 75 to 79 | 54%<br>(44-67%)                | 46%<br>(33-56%)          | 1.7<br>(0.94-2.7)                           | 1.2%<br>(-3.3-6.5%)                  | 1.3%<br>(-4-7.5%)                   | 68<br>(-210-390)    | 1000<br>(-2800-5600)  |
| Azerbaijan | 2010 | Female | 80 to 84 | 53%<br>(40-66%)                | 47%<br>(34-60%)          | 1.6<br>(0.95-2.6)                           | 0.81%<br>(-3.4-5.6%)                 | 0.86%<br>(-4-6.5%)                  | 36<br>(-170-280)    | 420<br>(-1700-2900)   |
| Azerbaijan | 2010 | Female | 85 to 89 | 52%<br>(40-64%)                | 48%<br>(36-60%)          | 1.6<br>(0.95-2.5)                           | 0.063%<br>(-3.9-4.8%)                | -0.057%<br>(-4.8-5.5%)              | -1.3<br>(-120-140)  | 14<br>(-830-1000)     |
| Azerbaijan | 2010 | Female | 90 to 94 | 53%<br>(42-65%)                | 47%<br>(35-58%)          | 1.6<br>(0.91-2.6)                           | -0.65%<br>(-4.9-4.7%)                | -0.89%<br>(-5.8-5.3%)               | -9.2<br>(-62-56)    | -39<br>(-300-290)     |
| Azerbaijan | 2010 | Female | 95 plus  | 53%<br>(40-68%)                | 47%<br>(32-60%)          | 1.6<br>(0.78-2.7)                           | -1.1%<br>(-5.4-5%)                   | -1.4%<br>(-6.6-5.5%)                | -6.1<br>(-27-23)    | -17<br>(-87-81)       |

| Location   | Year | Sex    | Age      | Prevalence of current drinkers | Prevalence of abstainers | Population average of standard drinks daily | Percent of total attributable deaths | Percent of total attributable DALYs | Attributable deaths | Attributable DALYs        |
|------------|------|--------|----------|--------------------------------|--------------------------|---------------------------------------------|--------------------------------------|-------------------------------------|---------------------|---------------------------|
| Azerbaijan | 2010 | Male   | All Ages | 55%<br>(46-63%)                | 45%<br>(37-54%)          | 2.9<br>(2.2-3.8)                            | 8.8%<br>(6.1-12%)                    | 9.4%<br>(5.5-14%)                   | 3600<br>(2100-5400) | 150000<br>(100000-200000) |
| Azerbaijan | 2010 | Male   | 15 to 19 | 29%<br>(18-45%)                | 71%<br>(55-82%)          | 0.46<br>(0.24-0.82)                         | 4.2%<br>(3.1-5.5%)                   | 4.7%<br>(3.1-6.8%)                  | 20<br>(13-30)       | 2500<br>(1800-3500)       |
| Azerbaijan | 2010 | Male   | 20 to 24 | 53%<br>(37-69%)                | 47%<br>(31-63%)          | 1.8<br>(1.1-2.7)                            | 11%<br>(8.8-14%)                     | 13%<br>(8.8-17%)                    | 73<br>(49-100)      | 8200<br>(6000-11000)      |
| Azerbaijan | 2010 | Male   | 25 to 29 | 71%<br>(57-82%)                | 29%<br>(18-43%)          | 4.6<br>(3-6.4)                              | 18%<br>(14-22%)                      | 23%<br>(17-30%)                     | 150<br>(100-200)    | 13000<br>(9700-16000)     |
| Azerbaijan | 2010 | Male   | 30 to 34 | 78%<br>(63-88%)                | 22%<br>(12-37%)          | 5.9<br>(4.1-8.1)                            | 20%<br>(16-25%)                      | 26%<br>(20-35%)                     | 190<br>(140-260)    | 14000<br>(11000-17000)    |
| Azerbaijan | 2010 | Male   | 35 to 39 | 79%<br>(67-88%)                | 21%<br>(12-33%)          | 5.3<br>(3.7-7.5)                            | 18%<br>(13-24%)                      | 23%<br>(16-32%)                     | 210<br>(140-290)    | 13000<br>(9200-18000)     |
| Azerbaijan | 2010 | Male   | 40 to 44 | 79%<br>(67-89%)                | 21%<br>(11-33%)          | 5.3<br>(3.7-7.3)                            | 17%<br>(12-23%)                      | 21%<br>(14-30%)                     | 280<br>(180-400)    | 15000<br>(10000-21000)    |
| Azerbaijan | 2010 | Male   | 45 to 49 | 80%<br>(64-89%)                | 20%<br>(11-36%)          | 6.1<br>(4.2-8.5)                            | 17%<br>(12-23%)                      | 21%<br>(14-29%)                     | 460<br>(310-660)    | 22000<br>(15000-30000)    |
| Azerbaijan | 2010 | Male   | 50 to 54 | 78%<br>(64-88%)                | 22%<br>(12-36%)          | 5.9<br>(4-8.2)                              | 16%<br>(11-22%)                      | 19%<br>(13-27%)                     | 560<br>(360-800)    | 22000<br>(15000-31000)    |
| Azerbaijan | 2010 | Male   | 55 to 59 | 74%<br>(60-86%)                | 26%<br>(14-40%)          | 4.5<br>(2.9-6.6)                            | 13%<br>(6.9-19%)                     | 15%<br>(7.4-22%)                    | 450<br>(220-700)    | 15000<br>(8000-23000)     |
| Azerbaijan | 2010 | Male   | 60 to 64 | 70%<br>(52-85%)                | 30%<br>(15-48%)          | 3.5<br>(2.1-5.4)                            | 9.4%<br>(3.8-16%)                    | 10%<br>(3.7-18%)                    | 260<br>(90-450)     | 7500<br>(2800-13000)      |
| Azerbaijan | 2010 | Male   | 65 to 69 | 66%<br>(48-82%)                | 34%<br>(18-52%)          | 3<br>(1.8-4.6)                              | 7.7%<br>(2.8-13%)                    | 8.5%<br>(2.8-15%)                   | 230<br>(72-410)     | 5400<br>(1900-9400)       |
| Azerbaijan | 2010 | Male   | 70 to 74 | 62%<br>(44-78%)                | 38%<br>(22-56%)          | 2.5<br>(1.4-4.2)                            | 5.8%<br>(1.1-12%)                    | 6.4%<br>(1-14%)                     | 340<br>(53-730)     | 6500<br>(1200-13000)      |
| Azerbaijan | 2010 | Male   | 75 to 79 | 58%<br>(39-76%)                | 42%<br>(24-61%)          | 2.1<br>(1-3.4)                              | 4.7%<br>(0.6-10%)                    | 5%<br>(0.46-12%)                    | 240<br>(21-560)     | 3600<br>(490-8200)        |
| Azerbaijan | 2010 | Male   | 80 to 84 | 55%<br>(36-72%)                | 45%<br>(28-64%)          | 1.8<br>(0.97-2.9)                           | 3.5%<br>(-0.016-8.6%)                | 3.8%<br>(-0.31-9.4%)                | 120<br>(-11-310)    | 1400<br>(-6.5-3300)       |
| Azerbaijan | 2010 | Male   | 85 to 89 | 52%<br>(34-69%)                | 48%<br>(31-66%)          | 1.6<br>(0.86-2.7)                           | 2.7%<br>(-0.44-7%)                   | 2.8%<br>(-0.87-7.7%)                | 39<br>(-13-110)     | 330<br>(-50-840)          |
| Azerbaijan | 2010 | Male   | 90 to 94 | 51%<br>(35-69%)                | 49%<br>(31-65%)          | 1.5<br>(0.77-2.6)                           | 1.6%<br>(-1.6-5.7%)                  | 1.5%<br>(-2.2-6%)                   | 6.5<br>(-9.2-26)    | 39<br>(-40-140)           |
| Azerbaijan | 2010 | Male   | 95 plus  | 52%<br>(31-72%)                | 48%<br>(28-69%)          | 1.4<br>(0.61-2.6)                           | 1.2%<br>(-2.2-5.8%)                  | 0.98%<br>(-2.9-6.1%)                | 0.95<br>(-2.8-5.9)  | 4.3<br>(-8-21)            |
| Azerbaijan | 2016 | Female | All Ages | 58%<br>(51-65%)                | 42%<br>(35-49%)          | 1.5<br>(0.99-2.1)                           | 2.3%<br>(0.42-4.3%)                  | 2.4%<br>(-1.4-6.9%)                 | 710<br>(-400-2100)  | 29000<br>(5200-59000)     |
| Azerbaijan | 2016 | Female | 15 to 19 | 55%<br>(43-69%)                | 45%<br>(31-57%)          | 1.2<br>(0.62-2)                             | 1.8%<br>(1-2.9%)                     | 3.5%<br>(1.6-6.5%)                  | 4.3<br>(1.9-7.8)    | 570<br>(310-930)          |
| Azerbaijan | 2016 | Female | 20 to 24 | 62%<br>(49-74%)                | 38%<br>(26-51%)          | 1.7<br>(0.89-2.8)                           | 3.2%<br>(2-4.8%)                     | 5.2%<br>(2.3-9.1%)                  | 11<br>(4.8-20)      | 1500<br>(870-2300)        |
| Azerbaijan | 2016 | Female | 25 to 29 | 64%<br>(51-78%)                | 36%<br>(22-49%)          | 1.9<br>(1-3)                                | 3.5%<br>(2.2-5%)                     | 5.7%<br>(2.7-9.6%)                  | 17<br>(7.6-31)      | 2100<br>(1300-3100)       |



| Location   | Year | Sex    | Age      | Prevalence of current drinkers | Prevalence of abstainers | Population average of standard drinks daily | Percent of total attributable deaths | Percent of total attributable DALYs | Attributable deaths | Attributable DALYs        |
|------------|------|--------|----------|--------------------------------|--------------------------|---------------------------------------------|--------------------------------------|-------------------------------------|---------------------|---------------------------|
| Azerbaijan | 2016 | Female | 30 to 34 | 66%<br>(52-79%)                | 34%<br>(21-48%)          | 2<br>(1.2-3.1)                              | 3.7%<br>(2.4-5.3%)                   | 6.7%<br>(3.7-11%)                   | 25<br>(13-42)       | 2400<br>(1500-3600)       |
| Azerbaijan | 2016 | Female | 35 to 39 | 66%<br>(53-80%)                | 34%<br>(20-47%)          | 2<br>(1.1-3.4)                              | 3.7%<br>(2.2-5.7%)                   | 7.3%<br>(4-12%)                     | 28<br>(14-47)       | 2100<br>(1200-3300)       |
| Azerbaijan | 2016 | Female | 40 to 44 | 66%<br>(52-79%)                | 34%<br>(21-48%)          | 2.1<br>(1.2-3.4)                            | 3.8%<br>(2-6.1%)                     | 7.4%<br>(3.5-12%)                   | 41<br>(17-70)       | 2400<br>(1200-4000)       |
| Azerbaijan | 2016 | Female | 45 to 49 | 66%<br>(50-79%)                | 34%<br>(21-50%)          | 2.1<br>(1.2-3.4)                            | 3.8%<br>(1.6-6.7%)                   | 7%<br>(3-12%)                       | 59<br>(24-110)      | 2900<br>(1200-5200)       |
| Azerbaijan | 2016 | Female | 50 to 54 | 64%<br>(50-77%)                | 36%<br>(23-50%)          | 2<br>(1.1-3.2)                              | 3.7%<br>(0.93-7.3%)                  | 6.1%<br>(1.5-12%)                   | 100<br>(24-210)     | 4100<br>(1000-8400)       |
| Azerbaijan | 2016 | Female | 55 to 59 | 62%<br>(50-75%)                | 38%<br>(25-50%)          | 2<br>(1.1-3.3)                              | 3.4%<br>(0.18-7.6%)                  | 5.1%<br>(0.12-12%)                  | 100<br>(2.4-230)    | 3600<br>(200-8200)        |
| Azerbaijan | 2016 | Female | 60 to 64 | 61%<br>(47-75%)                | 39%<br>(25-53%)          | 2<br>(1.1-3.3)                              | 3.3%<br>(-0.5-8.1%)                  | 4.5%<br>(-0.77-11%)                 | 130<br>(-21-320)    | 3800<br>(-560-9600)       |
| Azerbaijan | 2016 | Female | 65 to 69 | 59%<br>(47-74%)                | 41%<br>(26-53%)          | 1.9<br>(1.1-3.1)                            | 2.9%<br>(-0.96-7.6%)                 | 4%<br>(-1.4-10%)                    | 67<br>(-24-180)     | 1600<br>(-540-4300)       |
| Azerbaijan | 2016 | Female | 70 to 74 | 57%<br>(46-70%)                | 43%<br>(30-54%)          | 1.8<br>(0.95-3)                             | 1.9%<br>(-2.4-7.2%)                  | 2.5%<br>(-3.1-9.3%)                 | 53<br>(-70-200)     | 1000<br>(-1300-3800)      |
| Azerbaijan | 2016 | Female | 75 to 79 | 54%<br>(44-67%)                | 46%<br>(33-56%)          | 1.7<br>(0.89-2.9)                           | 1.2%<br>(-2.9-6.9%)                  | 1.4%<br>(-3.9-8.5%)                 | 64<br>(-180-410)    | 1000<br>(-2600-6000)      |
| Azerbaijan | 2016 | Female | 80 to 84 | 52%<br>(40-66%)                | 48%<br>(34-60%)          | 1.6<br>(0.9-2.7)                            | 0.8%<br>(-3.1-6%)                    | 0.87%<br>(-3.9-7.2%)                | 38<br>(-180-310)    | 460<br>(-1900-3400)       |
| Azerbaijan | 2016 | Female | 85 to 89 | 52%<br>(40-63%)                | 48%<br>(37-60%)          | 1.6<br>(0.89-2.6)                           | 0.051%<br>(-4-5.2%)                  | -0.094%<br>(-5.1-6.1%)              | -3<br>(-150-180)    | 12<br>(-1100-1400)        |
| Azerbaijan | 2016 | Female | 90 to 94 | 53%<br>(42-64%)                | 47%<br>(36-58%)          | 1.6<br>(0.87-2.7)                           | -0.61%<br>(-4.8-5%)                  | -0.92%<br>(-5.8-5.6%)               | -13<br>(-87-80)     | -54<br>(-420-420)         |
| Azerbaijan | 2016 | Female | 95 plus  | 53%<br>(40-68%)                | 47%<br>(32-60%)          | 1.6<br>(0.73-2.8)                           | -1%<br>(-5.2-5.6%)                   | -1.4%<br>(-6.5-6.2%)                | -5<br>(-23-21)      | -14<br>(-72-74)           |
| Azerbaijan | 2016 | Male   | All Ages | 56%<br>(47-64%)                | 44%<br>(36-53%)          | 3.1<br>(2.1-4.2)                            | 9.3%<br>(6.2-13%)                    | 9.4%<br>(5.1-14%)                   | 3800<br>(2000-6200) | 160000<br>(100000-230000) |
| Azerbaijan | 2016 | Male   | 15 to 19 | 36%<br>(22-54%)                | 64%<br>(46-78%)          | 0.59<br>(0.29-1.1)                          | 4.5%<br>(3.2-6.1%)                   | 5.2%<br>(3.2-7.8%)                  | 19<br>(11-31)       | 2200<br>(1500-3200)       |
| Azerbaijan | 2016 | Male   | 20 to 24 | 57%<br>(37-74%)                | 43%<br>(26-63%)          | 2<br>(1.1-3.2)                              | 12%<br>(8.5-15%)                     | 13%<br>(8.5-18%)                    | 90<br>(52-140)      | 9000<br>(6000-13000)      |
| Azerbaijan | 2016 | Male   | 25 to 29 | 68%<br>(49-82%)                | 32%<br>(18-51%)          | 4.4<br>(2.8-6.7)                            | 17%<br>(13-22%)                      | 22%<br>(15-29%)                     | 190<br>(120-290)    | 16000<br>(11000-21000)    |
| Azerbaijan | 2016 | Male   | 30 to 34 | 75%<br>(56-87%)                | 25%<br>(13-44%)          | 5.7<br>(3.6-8.4)                            | 19%<br>(14-24%)                      | 25%<br>(18-32%)                     | 250<br>(160-370)    | 18000<br>(13000-25000)    |
| Azerbaijan | 2016 | Male   | 35 to 39 | 77%<br>(62-88%)                | 23%<br>(12-38%)          | 5.2<br>(3.3-7.9)                            | 17%<br>(12-23%)                      | 22%<br>(14-31%)                     | 210<br>(130-330)    | 14000<br>(9000-20000)     |
| Azerbaijan | 2016 | Male   | 40 to 44 | 77%<br>(62-89%)                | 23%<br>(11-38%)          | 5.2<br>(3.3-7.7)                            | 16%<br>(11-22%)                      | 20%<br>(12-29%)                     | 250<br>(140-400)    | 14000<br>(8700-21000)     |
| Azerbaijan | 2016 | Male   | 45 to 49 | 76%<br>(57-88%)                | 24%<br>(12-43%)          | 5.7<br>(3.6-8.8)                            | 16%<br>(11-22%)                      | 20%<br>(13-28%)                     | 340<br>(200-520)    | 16000<br>(10000-24000)    |

| Location   | Year | Sex    | Age      | Prevalence of current drinkers | Prevalence of abstainers | Population average of standard drinks daily | Percent of total attributable deaths | Percent of total attributable DALYs | Attributable deaths  | Attributable DALYs     |
|------------|------|--------|----------|--------------------------------|--------------------------|---------------------------------------------|--------------------------------------|-------------------------------------|----------------------|------------------------|
| Azerbaijan | 2016 | Male   | 50 to 54 | 74%<br>(57-87%)                | 26%<br>(13-43%)          | 5.5<br>(3.4-8.3)                            | 15%<br>(9.6-21%)                     | 18%<br>(11-26%)                     | 600<br>(340-930)     | 25000<br>(15000-36000) |
| Azerbaijan | 2016 | Male   | 55 to 59 | 72%<br>(55-86%)                | 28%<br>(14-45%)          | 4.3<br>(2.6-6.7)                            | 12%<br>(6.1-18%)                     | 14%<br>(6.6-22%)                    | 530<br>(240-890)     | 19000<br>(9600-30000)  |
| Azerbaijan | 2016 | Male   | 60 to 64 | 69%<br>(49-85%)                | 31%<br>(15-51%)          | 3.5<br>(1.9-5.6)                            | 9%<br>(2.8-15%)                      | 10%<br>(2.9-18%)                    | 500<br>(150-910)     | 15000<br>(4900-26000)  |
| Azerbaijan | 2016 | Male   | 65 to 69 | 66%<br>(47-82%)                | 34%<br>(18-53%)          | 3<br>(1.7-4.8)                              | 7.3%<br>(2.5-13%)                    | 8.3%<br>(2.5-15%)                   | 220<br>(61-420)      | 5300<br>(1700-9900)    |
| Azerbaijan | 2016 | Male   | 70 to 74 | 61%<br>(43-78%)                | 39%<br>(22-57%)          | 2.5<br>(1.3-4.2)                            | 5.6%<br>(1-12%)                      | 6.2%<br>(0.72-14%)                  | 170<br>(21-370)      | 3200<br>(570-7200)     |
| Azerbaijan | 2016 | Male   | 75 to 79 | 57%<br>(37-74%)                | 43%<br>(26-63%)          | 2<br>(0.98-3.5)                             | 4.5%<br>(0.52-10%)                   | 4.9%<br>(0.15-12%)                  | 220<br>(6.5-540)     | 3400<br>(350-7800)     |
| Azerbaijan | 2016 | Male   | 80 to 84 | 53%<br>(34-70%)                | 47%<br>(30-66%)          | 1.7<br>(0.9-3)                              | 3.4%<br>(-0.19-8.7%)                 | 3.7%<br>(-0.61-9.7%)                | 160<br>(-28-440)     | 1900<br>(-110-4800)    |
| Azerbaijan | 2016 | Male   | 85 to 89 | 51%<br>(33-68%)                | 49%<br>(32-67%)          | 1.6<br>(0.8-2.7)                            | 2.6%<br>(-0.55-7.5%)                 | 2.7%<br>(-1.1-8.3%)                 | 68<br>(-26-210)      | 570<br>(-120-1600)     |
| Azerbaijan | 2016 | Male   | 90 to 94 | 50%<br>(34-67%)                | 50%<br>(33-66%)          | 1.5<br>(0.72-2.6)                           | 1.7%<br>(-1.4-5.9%)                  | 1.6%<br>(-2.1-6.5%)                 | 15<br>(-18-57)       | 92<br>(-74-300)        |
| Azerbaijan | 2016 | Male   | 95 plus  | 51%<br>(30-70%)                | 49%<br>(30-70%)          | 1.4<br>(0.57-2.6)                           | 1.5%<br>(-1.8-5.6%)                  | 1.2%<br>(-2.7-5.9%)                 | 1.3<br>(-2.8-6.4)    | 6<br>(-7.2-23)         |
| Georgia    | 1990 | Female | All Ages | 53%<br>(49-58%)                | 47%<br>(42-51%)          | 0.41<br>(0.31-0.55)                         | -0.63%<br>(-1.7-0.35%)               | -2.4%<br>(-4.5--0.46%)              | -650<br>(-1200--130) | -5800<br>(-16000-3200) |
| Georgia    | 1990 | Female | 15 to 19 | 45%<br>(33-57%)                | 55%<br>(43-67%)          | 0.33<br>(0.19-0.52)                         | 0.89%<br>(0.5-1.4%)                  | 0.99%<br>(0.13-2.1%)                | 0.81<br>(0.11-1.7)   | 180<br>(99-290)        |
| Georgia    | 1990 | Female | 20 to 24 | 61%<br>(48-71%)                | 39%<br>(29-52%)          | 0.52<br>(0.31-0.81)                         | 1.6%<br>(0.94-2.4%)                  | 1.1%<br>(-0.2-2.6%)                 | 1.4<br>(-0.28-3.3)   | 380<br>(210-590)       |
| Georgia    | 1990 | Female | 25 to 29 | 65%<br>(54-73%)                | 35%<br>(27-46%)          | 0.58<br>(0.36-0.85)                         | 1.7%<br>(1-2.5%)                     | 1.1%<br>(-0.23-2.5%)                | 2<br>(-0.41-4.5)     | 540<br>(300-810)       |
| Georgia    | 1990 | Female | 30 to 34 | 66%<br>(55-75%)                | 34%<br>(25-45%)          | 0.6<br>(0.38-0.89)                          | 1.6%<br>(0.94-2.3%)                  | 1.2%<br>(-0.24-2.6%)                | 2.6<br>(-0.53-5.7)   | 540<br>(290-830)       |
| Georgia    | 1990 | Female | 35 to 39 | 66%<br>(55-74%)                | 34%<br>(26-45%)          | 0.58<br>(0.37-0.91)                         | 1.4%<br>(0.68-2.1%)                  | 1.4%<br>(-0.12-2.9%)                | 3.4<br>(-0.28-7.5)   | 460<br>(220-730)       |
| Georgia    | 1990 | Female | 40 to 44 | 65%<br>(55-74%)                | 35%<br>(26-45%)          | 0.58<br>(0.37-0.94)                         | 1.2%<br>(0.41-2%)                    | 1.4%<br>(-0.22-3.1%)                | 4.4<br>(-0.69-10)    | 390<br>(140-690)       |
| Georgia    | 1990 | Female | 45 to 49 | 65%<br>(53-74%)                | 35%<br>(26-47%)          | 0.59<br>(0.35-0.92)                         | 0.72%<br>(-0.25-1.7%)                | 0.73%<br>(-1.2-2.6%)                | 2.9<br>(-4.5-10)     | 240<br>(-74-540)       |
| Georgia    | 1990 | Female | 50 to 54 | 63%<br>(53-72%)                | 37%<br>(28-47%)          | 0.57<br>(0.35-0.89)                         | 0.39%<br>(-0.83-1.5%)                | 0.33%<br>(-1.7-2.2%)                | 3.1<br>(-16-21)      | 230<br>(-500-900)      |
| Georgia    | 1990 | Female | 55 to 59 | 60%<br>(48-70%)                | 40%<br>(30-52%)          | 0.54<br>(0.32-0.83)                         | -0.19%<br>(-1.6-1%)                  | -0.43%<br>(-2.6-1.5%)               | -5.1<br>(-31-17)     | -120<br>(-970-620)     |
| Georgia    | 1990 | Female | 60 to 64 | 57%<br>(45-67%)                | 43%<br>(33-55%)          | 0.54<br>(0.32-0.82)                         | -1.1%<br>(-2.8-0.33%)                | -1.7%<br>(-4.1-0.49%)               | -36<br>(-89-11)      | -970<br>(-2400-280)    |
| Georgia    | 1990 | Female | 65 to 69 | 55%<br>(44-65%)                | 45%<br>(35-56%)          | 0.55<br>(0.35-0.79)                         | -1.8%<br>(-3.8-0.054%)               | -2.4%<br>(-5.1-0.016%)              | -58<br>(-120-0.36)   | -1400<br>(-2900--41)   |

| Location | Year | Sex    | Age      | Prevalence of current drinkers | Prevalence of abstainers | Population average of standard drinks daily | Percent of total attributable deaths | Percent of total attributable DALYs | Attributable deaths | Attributable DALYs      |
|----------|------|--------|----------|--------------------------------|--------------------------|---------------------------------------------|--------------------------------------|-------------------------------------|---------------------|-------------------------|
| Georgia  | 1990 | Female | 70 to 74 | 52%<br>(40-62%)                | 48%<br>(38-60%)          | 0.54<br>(0.33-0.8)                          | -2.3%<br>(-4.5--0.38%)               | -2.9%<br>(-5.8--0.39%)              | -80<br>(-160--11)   | -1500<br>(-3000--250)   |
| Georgia  | 1990 | Female | 75 to 79 | 49%<br>(36-62%)                | 51%<br>(38-64%)          | 0.5<br>(0.29-0.76)                          | -2.7%<br>(-4.9--0.84%)               | -3.4%<br>(-6.2--1%)                 | -150<br>(-270--44)  | -2100<br>(-3800--620)   |
| Georgia  | 1990 | Female | 80 to 84 | 47%<br>(33-59%)                | 53%<br>(41-67%)          | 0.46<br>(0.27-0.68)                         | -2.9%<br>(-5.2--0.96%)               | -3.6%<br>(-6.5--1.2%)               | -150<br>(-260--48)  | -1500<br>(-2700--500)   |
| Georgia  | 1990 | Female | 85 to 89 | 45%<br>(32-58%)                | 55%<br>(42-68%)          | 0.44<br>(0.25-0.68)                         | -3%<br>(-5.3--1.2%)                  | -3.7%<br>(-6.5--1.4%)               | -120<br>(-210--46)  | -870<br>(-1500--340)    |
| Georgia  | 1990 | Female | 90 to 94 | 45%<br>(33-58%)                | 55%<br>(42-67%)          | 0.44<br>(0.24-0.71)                         | -3.2%<br>(-5.5--1.2%)                | -3.8%<br>(-6.6--1.5%)               | -62<br>(-110--24)   | -310<br>(-520--120)     |
| Georgia  | 1990 | Female | 95 plus  | 47%<br>(31-63%)                | 53%<br>(37-69%)          | 0.46<br>(0.22-0.8)                          | -3.4%<br>(-5.9--1.1%)                | -4.1%<br>(-7.2--1.3%)               | -21<br>(-36--6.5)   | -66<br>(-110--21)       |
| Georgia  | 1990 | Male   | All Ages | 80%<br>(76-83%)                | 20%<br>(17-24%)          | 3<br>(2.4-3.8)                              | 8.5%<br>(5.7-12%)                    | 8.9%<br>(4.8-14%)                   | 2400<br>(1300-3800) | 94000<br>(61000-130000) |
| Georgia  | 1990 | Male   | 15 to 19 | 70%<br>(59-80%)                | 30%<br>(20-41%)          | 1.4<br>(0.94-2)                             | 5%<br>(3.6-7%)                       | 7%<br>(4.5-10%)                     | 15<br>(9.4-22)      | 1500<br>(1000-2000)     |
| Georgia  | 1990 | Male   | 20 to 24 | 85%<br>(78-90%)                | 15%<br>(10-22%)          | 3<br>(2.2-4)                                | 11%<br>(8.1-15%)                     | 14%<br>(9.4-19%)                    | 49<br>(33-69)       | 4200<br>(3000-5600)     |
| Georgia  | 1990 | Male   | 25 to 29 | 88%<br>(83-92%)                | 12%<br>(8.3-17%)         | 4.5<br>(3.2-5.9)                            | 15%<br>(11-20%)                      | 19%<br>(14-26%)                     | 99<br>(68-130)      | 7300<br>(5300-9700)     |
| Georgia  | 1990 | Male   | 30 to 34 | 90%<br>(85-93%)                | 10%<br>(7-15%)           | 5.2<br>(3.8-6.9)                            | 16%<br>(12-21%)                      | 21%<br>(15-28%)                     | 130<br>(90-170)     | 8500<br>(6300-11000)    |
| Georgia  | 1990 | Male   | 35 to 39 | 91%<br>(87-94%)                | 9.3%<br>(6.4-13%)        | 4.9<br>(3.5-6.5)                            | 15%<br>(10-19%)                      | 19%<br>(12-25%)                     | 130<br>(84-180)     | 7700<br>(5300-10000)    |
| Georgia  | 1990 | Male   | 40 to 44 | 91%<br>(87-94%)                | 9.1%<br>(6.3-13%)        | 4.8<br>(3.6-6.5)                            | 14%<br>(9.8-19%)                     | 18%<br>(12-24%)                     | 140<br>(91-200)     | 7400<br>(5000-9800)     |
| Georgia  | 1990 | Male   | 45 to 49 | 90%<br>(85-93%)                | 9.5%<br>(6.6-15%)        | 5.4<br>(3.9-7.3)                            | 15%<br>(11-20%)                      | 19%<br>(13-25%)                     | 180<br>(120-240)    | 7900<br>(5400-11000)    |
| Georgia  | 1990 | Male   | 50 to 54 | 91%<br>(87-93%)                | 9.4%<br>(6.6-13%)        | 5.4<br>(4-7.2)                              | 14%<br>(9.4-19%)                     | 17%<br>(11-23%)                     | 360<br>(220-490)    | 14000<br>(9000-19000)   |
| Georgia  | 1990 | Male   | 55 to 59 | 91%<br>(87-94%)                | 8.7%<br>(5.8-13%)        | 4.6<br>(3.4-6.1)                            | 12%<br>(7-17%)                       | 14%<br>(8.1-20%)                    | 340<br>(190-500)    | 11000<br>(6600-16000)   |
| Georgia  | 1990 | Male   | 60 to 64 | 90%<br>(85-93%)                | 10%<br>(7-15%)           | 4.1<br>(2.9-5.6)                            | 10%<br>(4.8-16%)                     | 12%<br>(5.3-18%)                    | 420<br>(190-670)    | 12000<br>(5900-19000)   |
| Georgia  | 1990 | Male   | 65 to 69 | 86%<br>(80-90%)                | 14%<br>(9.6-20%)         | 3.8<br>(2.7-5)                              | 8.5%<br>(3.4-14%)                    | 9.7%<br>(3.6-16%)                   | 260<br>(98-450)     | 6200<br>(2500-10000)    |
| Georgia  | 1990 | Male   | 70 to 74 | 83%<br>(77-88%)                | 17%<br>(12-23%)          | 3.3<br>(2.4-4.4)                            | 6.6%<br>(1.7-12%)                    | 7.3%<br>(1.6-14%)                   | 160<br>(35-300)     | 3000<br>(770-5600)      |
| Georgia  | 1990 | Male   | 75 to 79 | 82%<br>(73-88%)                | 18%<br>(12-27%)          | 2.9<br>(2-3.9)                              | 4.3%<br>(-0.099-9.8%)                | 4.6%<br>(-0.53-11%)                 | 130<br>(-16-330)    | 2100<br>(-52-4800)      |
| Georgia  | 1990 | Male   | 80 to 84 | 80%<br>(70-87%)                | 20%<br>(13-30%)          | 2.4<br>(1.6-3.2)                            | 2.1%<br>(-1.5-6.7%)                  | 2%<br>(-2.2-7.5%)                   | 49<br>(-54-180)     | 610<br>(-450-2000)      |
| Georgia  | 1990 | Male   | 85 to 89 | 79%<br>(69-86%)                | 21%<br>(14-31%)          | 2<br>(1.3-2.8)                              | 0.48%<br>(-2.7-4.2%)                 | 0.16%<br>(-3.6-4.6%)                | 2.5<br>(-56-71)     | 64<br>(-360-580)        |

| Location | Year | Sex    | Age      | Prevalence of current drinkers | Prevalence of abstainers | Population average of standard drinks daily | Percent of total attributable deaths | Percent of total attributable DALYs | Attributable deaths  | Attributable DALYs     |
|----------|------|--------|----------|--------------------------------|--------------------------|---------------------------------------------|--------------------------------------|-------------------------------------|----------------------|------------------------|
| Georgia  | 1990 | Male   | 90 to 94 | 79%<br>(69-86%)                | 21%<br>(14-31%)          | 1.8<br>(1.1-2.7)                            | -0.89%<br>(-4-2.7%)                  | -1.5%<br>(-5.3-2.7%)                | -9.9<br>(-35-19)     | -35<br>(-160-110)      |
| Georgia  | 1990 | Male   | 95 plus  | 78%<br>(65-88%)                | 22%<br>(12-35%)          | 1.5<br>(0.77-2.5)                           | -1.7%<br>(-4.8-2%)                   | -2.5%<br>(-6.3-1.8%)                | -4.5<br>(-11-3.2)    | -12<br>(-34-14)        |
| Georgia  | 1995 | Female | All Ages | 55%<br>(51-58%)                | 45%<br>(42-49%)          | 0.37<br>(0.29-0.47)                         | -0.92%<br>(-2.1-0.097%)              | -3%<br>(-5.3--0.86%)                | -730<br>(-1300--210) | -7200<br>(-16000-760)  |
| Georgia  | 1995 | Female | 15 to 19 | 53%<br>(45-61%)                | 47%<br>(39-55%)          | 0.34<br>(0.22-0.49)                         | 0.78%<br>(0.42-1.2%)                 | 0.62%<br>(-0.27-1.6%)               | 0.41<br>(-0.18-1)    | 140<br>(74-230)        |
| Georgia  | 1995 | Female | 20 to 24 | 65%<br>(58-71%)                | 35%<br>(29-42%)          | 0.48<br>(0.33-0.7)                          | 1.4%<br>(0.77-2.2%)                  | 0.5%<br>(-0.8-1.9%)                 | 0.47<br>(-0.76-1.8)  | 280<br>(140-450)       |
| Georgia  | 1995 | Female | 25 to 29 | 67%<br>(61-73%)                | 33%<br>(27-39%)          | 0.52<br>(0.36-0.72)                         | 1.3%<br>(0.63-2.1%)                  | 0.23%<br>(-1.2-1.7%)                | 0.31<br>(-1.7-2.3)   | 310<br>(140-500)       |
| Georgia  | 1995 | Female | 30 to 34 | 68%<br>(62-73%)                | 32%<br>(27-38%)          | 0.53<br>(0.37-0.74)                         | 1.3%<br>(0.55-2%)                    | 0.4%<br>(-1.2-2%)                   | 0.77<br>(-2.3-3.8)   | 400<br>(160-670)       |
| Georgia  | 1995 | Female | 35 to 39 | 66%<br>(60-72%)                | 34%<br>(28-40%)          | 0.5<br>(0.34-0.74)                          | 1.1%<br>(0.36-1.7%)                  | 0.6%<br>(-0.96-2.1%)                | 1.4<br>(-2.2-5.2)    | 350<br>(110-590)       |
| Georgia  | 1995 | Female | 40 to 44 | 65%<br>(59-72%)                | 35%<br>(28-41%)          | 0.5<br>(0.34-0.74)                          | 0.93%<br>(0.22-1.7%)                 | 0.9%<br>(-0.65-2.5%)                | 2.8<br>(-2-7.7)      | 310<br>(78-570)        |
| Georgia  | 1995 | Female | 45 to 49 | 65%<br>(59-72%)                | 35%<br>(28-41%)          | 0.51<br>(0.34-0.75)                         | 0.42%<br>(-0.49-1.3%)                | 0.15%<br>(-1.6-2%)                  | 0.57<br>(-6.1-7.2)   | 140<br>(-150-420)      |
| Georgia  | 1995 | Female | 50 to 54 | 64%<br>(57-70%)                | 36%<br>(30-43%)          | 0.49<br>(0.32-0.72)                         | 0.073%<br>(-1-1.1%)                  | -0.21%<br>(-2.2-1.6%)               | -0.99<br>(-10-7.8)   | 24<br>(-330-360)       |
| Georgia  | 1995 | Female | 55 to 59 | 59%<br>(52-65%)                | 41%<br>(35-48%)          | 0.44<br>(0.29-0.65)                         | -0.39%<br>(-1.7-0.73%)               | -0.78%<br>(-2.8-1.1%)               | -8.9<br>(-32-12)     | -240<br>(-1000-450)    |
| Georgia  | 1995 | Female | 60 to 64 | 55%<br>(49-62%)                | 45%<br>(38-51%)          | 0.44<br>(0.29-0.63)                         | -1.1%<br>(-2.6-0.17%)                | -1.7%<br>(-3.9-0.25%)               | -26<br>(-58-3.7)     | -700<br>(-1600-120)    |
| Georgia  | 1995 | Female | 65 to 69 | 55%<br>(49-61%)                | 45%<br>(39-51%)          | 0.47<br>(0.34-0.65)                         | -1.9%<br>(-3.8--0.28%)               | -2.6%<br>(-5.3--0.3%)               | -68<br>(-140--8.3)   | -1600<br>(-3200--250)  |
| Georgia  | 1995 | Female | 70 to 74 | 53%<br>(46-60%)                | 47%<br>(40-54%)          | 0.47<br>(0.33-0.67)                         | -2.3%<br>(-4.4--0.59%)               | -3%<br>(-5.7--0.66%)                | -89<br>(-170--19)    | -1700<br>(-3100--430)  |
| Georgia  | 1995 | Female | 75 to 79 | 53%<br>(44-61%)                | 47%<br>(39-56%)          | 0.47<br>(0.31-0.66)                         | -3.1%<br>(-5.2--1.2%)                | -3.9%<br>(-6.6--1.4%)               | -120<br>(-200--43)   | -1700<br>(-2800--620)  |
| Georgia  | 1995 | Female | 80 to 84 | 53%<br>(40-65%)                | 47%<br>(35-60%)          | 0.45<br>(0.29-0.67)                         | -3.5%<br>(-5.9--1.3%)                | -4.3%<br>(-7.4--1.6%)               | -160<br>(-270--60)   | -1600<br>(-2800--630)  |
| Georgia  | 1995 | Female | 85 to 89 | 51%<br>(39-62%)                | 49%<br>(38-61%)          | 0.43<br>(0.28-0.62)                         | -3.5%<br>(-6.1--1.5%)                | -4.3%<br>(-7.4--1.7%)               | -150<br>(-270--63)   | -1100<br>(-1900--460)  |
| Georgia  | 1995 | Female | 90 to 94 | 51%<br>(39-62%)                | 49%<br>(38-61%)          | 0.43<br>(0.25-0.66)                         | -3.6%<br>(-6.1--1.4%)                | -4.4%<br>(-7.4--1.7%)               | -85<br>(-140--32)    | -420<br>(-700--160)    |
| Georgia  | 1995 | Female | 95 plus  | 52%<br>(36-68%)                | 48%<br>(32-64%)          | 0.44<br>(0.22-0.73)                         | -3.8%<br>(-6.4--1.2%)                | -4.6%<br>(-7.6--1.5%)               | -29<br>(-49--9.6)    | -95<br>(-160--32)      |
| Georgia  | 1995 | Male   | All Ages | 84%<br>(82-87%)                | 16%<br>(13-18%)          | 2.9<br>(2.4-3.4)                            | 7.2%<br>(4.5-9.9%)                   | 6.6%<br>(2.7-11%)                   | 1600<br>(650-2600)   | 68000<br>(42000-97000) |
| Georgia  | 1995 | Male   | 15 to 19 | 80%<br>(74-85%)                | 20%<br>(15-26%)          | 1.5<br>(1.1-2)                              | 4.8%<br>(3.4-6.4%)                   | 6.9%<br>(4.4-9.6%)                  | 12<br>(7.4-17)       | 1200<br>(810-1600)     |

| Location | Year | Sex    | Age      | Prevalence of current drinkers | Prevalence of abstainers | Population average of standard drinks daily | Percent of total attributable deaths | Percent of total attributable DALYs | Attributable deaths  | Attributable DALYs    |
|----------|------|--------|----------|--------------------------------|--------------------------|---------------------------------------------|--------------------------------------|-------------------------------------|----------------------|-----------------------|
| Georgia  | 1995 | Male   | 20 to 24 | 89%<br>(86-92%)                | 11%<br>(8.5-14%)         | 2.9<br>(2.3-3.6)                            | 10%<br>(7.6-13%)                     | 12%<br>(8.7-17%)                    | 41<br>(28-56)        | 3500<br>(2500-4600)   |
| Georgia  | 1995 | Male   | 25 to 29 | 91%<br>(89-93%)                | 9.1%<br>(7.3-11%)        | 4.2<br>(3.3-5.3)                            | 14%<br>(10-17%)                      | 17%<br>(12-23%)                     | 70<br>(49-94)        | 5200<br>(3800-6700)   |
| Georgia  | 1995 | Male   | 30 to 34 | 92%<br>(90-94%)                | 8%<br>(6.2-10%)          | 4.8<br>(3.8-6)                              | 14%<br>(11-18%)                      | 19%<br>(13-24%)                     | 100<br>(72-140)      | 6900<br>(5100-8900)   |
| Georgia  | 1995 | Male   | 35 to 39 | 93%<br>(91-94%)                | 7.4%<br>(5.7-9.3%)       | 4.5<br>(3.5-5.6)                            | 13%<br>(9-17%)                       | 16%<br>(10-21%)                     | 110<br>(72-150)      | 6700<br>(4700-8900)   |
| Georgia  | 1995 | Male   | 40 to 44 | 93%<br>(91-95%)                | 7.1%<br>(5.5-9%)         | 4.5<br>(3.6-5.6)                            | 12%<br>(7.9-16%)                     | 15%<br>(9.1-21%)                    | 120<br>(73-170)      | 6500<br>(4200-8900)   |
| Georgia  | 1995 | Male   | 45 to 49 | 93%<br>(91-94%)                | 7.4%<br>(5.8-9.2%)       | 5.1<br>(3.9-6.4)                            | 13%<br>(8.6-18%)                     | 16%<br>(10-22%)                     | 150<br>(91-210)      | 6800<br>(4500-9300)   |
| Georgia  | 1995 | Male   | 50 to 54 | 93%<br>(91-94%)                | 7.2%<br>(5.6-8.9%)       | 5.1<br>(3.9-6.4)                            | 13%<br>(7.6-17%)                     | 15%<br>(8.6-21%)                    | 160<br>(89-230)      | 6300<br>(3800-9000)   |
| Georgia  | 1995 | Male   | 55 to 59 | 93%<br>(91-95%)                | 6.5%<br>(4.8-9%)         | 4.4<br>(3.4-5.4)                            | 10%<br>(5.2-15%)                     | 12%<br>(5.7-18%)                    | 270<br>(130-410)     | 9300<br>(4800-14000)  |
| Georgia  | 1995 | Male   | 60 to 64 | 92%<br>(90-94%)                | 7.8%<br>(6-10%)          | 3.9<br>(3-4.9)                              | 7.6%<br>(2.7-13%)                    | 8.7%<br>(2.5-15%)                   | 230<br>(66-400)      | 6700<br>(2300-12000)  |
| Georgia  | 1995 | Male   | 65 to 69 | 89%<br>(86-92%)                | 11%<br>(8.5-14%)         | 3.5<br>(2.8-4.4)                            | 6%<br>(1.4-11%)                      | 6.8%<br>(1.1-13%)                   | 250<br>(42-470)      | 6100<br>(1500-11000)  |
| Georgia  | 1995 | Male   | 70 to 74 | 87%<br>(83-89%)                | 13%<br>(11-17%)          | 3.1<br>(2.4-4)                              | 4.3%<br>(-0.11-9%)                   | 4.7%<br>(-0.66-10%)                 | 120<br>(-16-270)     | 2500<br>(-58-5200)    |
| Georgia  | 1995 | Male   | 75 to 79 | 86%<br>(81-90%)                | 14%<br>(10-19%)          | 2.8<br>(2.1-3.6)                            | 2.3%<br>(-1.9-7%)                    | 2.2%<br>(-2.8-7.7%)                 | 41<br>(-51-140)      | 670<br>(-590-2000)    |
| Georgia  | 1995 | Male   | 80 to 84 | 84%<br>(78-89%)                | 16%<br>(11-22%)          | 2.3<br>(1.7-2.9)                            | 0.38%<br>(-3.2-4.2%)                 | 0.059%<br>(-4.2-4.6%)               | 1.1<br>(-84-93)      | 91<br>(-780-1000)     |
| Georgia  | 1995 | Male   | 85 to 89 | 83%<br>(77-88%)                | 17%<br>(12-23%)          | 1.9<br>(1.4-2.6)                            | -0.89%<br>(-4.1-2.6%)                | -1.4%<br>(-5.4-2.7%)                | -25<br>(-94-48)      | -130<br>(-620-390)    |
| Georgia  | 1995 | Male   | 90 to 94 | 82%<br>(75-88%)                | 18%<br>(12-25%)          | 1.7<br>(1.1-2.4)                            | -2%<br>(-5.2-1.5%)                   | -2.8%<br>(-6.7-1.3%)                | -21<br>(-50-9.6)     | -88<br>(-230-66)      |
| Georgia  | 1995 | Male   | 95 plus  | 81%<br>(71-90%)                | 19%<br>(10-29%)          | 1.4<br>(0.78-2.3)                           | -2.5%<br>(-5.6-0.81%)                | -3.4%<br>(-7.1-0.51%)               | -7.1<br>(-15-1)      | -20<br>(-46-6.6)      |
| Georgia  | 2000 | Female | All Ages | 51%<br>(47-55%)                | 49%<br>(45-53%)          | 0.33<br>(0.26-0.42)                         | -0.74%<br>(-1.7-0.13%)               | -2.5%<br>(-4.4--0.72%)              | -580<br>(-1000--170) | -5300<br>(-12000-970) |
| Georgia  | 2000 | Female | 15 to 19 | 44%<br>(33-54%)                | 56%<br>(46-67%)          | 0.27<br>(0.17-0.4)                          | 0.78%<br>(0.46-1.2%)                 | 0.66%<br>(0.037-1.4%)               | 0.41<br>(0.02-0.88)  | 140<br>(78-220)       |
| Georgia  | 2000 | Female | 20 to 24 | 58%<br>(47-69%)                | 42%<br>(31-53%)          | 0.41<br>(0.26-0.62)                         | 1.5%<br>(0.93-2.2%)                  | 0.77%<br>(-0.33-1.9%)               | 0.59<br>(-0.26-1.5)  | 280<br>(160-450)      |
| Georgia  | 2000 | Female | 25 to 29 | 62%<br>(52-71%)                | 38%<br>(29-48%)          | 0.46<br>(0.3-0.65)                          | 1.6%<br>(0.99-2.3%)                  | 0.69%<br>(-0.51-1.9%)               | 0.64<br>(-0.48-1.8)  | 310<br>(170-470)      |
| Georgia  | 2000 | Female | 30 to 34 | 63%<br>(52-73%)                | 37%<br>(27-48%)          | 0.47<br>(0.31-0.67)                         | 1.4%<br>(0.71-2.1%)                  | 0.63%<br>(-0.87-2%)                 | 0.79<br>(-1-2.6)     | 310<br>(150-480)      |
| Georgia  | 2000 | Female | 35 to 39 | 63%<br>(52-72%)                | 37%<br>(28-48%)          | 0.45<br>(0.29-0.67)                         | 1.1%<br>(0.47-1.7%)                  | 0.64%<br>(-0.8-2%)                  | 1.3<br>(-1.6-4.1)    | 350<br>(140-550)      |

| Location | Year | Sex    | Age      | Prevalence of current drinkers | Prevalence of abstainers | Population average of standard drinks daily | Percent of total attributable deaths | Percent of total attributable DALYs | Attributable deaths | Attributable DALYs     |
|----------|------|--------|----------|--------------------------------|--------------------------|---------------------------------------------|--------------------------------------|-------------------------------------|---------------------|------------------------|
| Georgia  | 2000 | Female | 40 to 44 | 62%<br>(52-71%)                | 38%<br>(29-48%)          | 0.45<br>(0.29-0.68)                         | 1%<br>(0.41-1.6%)                    | 1.1%<br>(-0.26-2.4%)                | 2.9<br>(-0.68-6.6)  | 340<br>(130-550)       |
| Georgia  | 2000 | Female | 45 to 49 | 62%<br>(51-71%)                | 38%<br>(29-49%)          | 0.46<br>(0.29-0.68)                         | 0.6%<br>(-0.12-1.3%)                 | 0.52%<br>(-1.1-2%)                  | 1.8<br>(-3.5-6.7)   | 200<br>(-36-420)       |
| Georgia  | 2000 | Female | 50 to 54 | 60%<br>(50-69%)                | 40%<br>(31-50%)          | 0.44<br>(0.27-0.67)                         | 0.27%<br>(-0.66-1.1%)                | 0.1%<br>(-1.6-1.7%)                 | 0.44<br>(-7.4-7.1)  | 91<br>(-210-350)       |
| Georgia  | 2000 | Female | 55 to 59 | 56%<br>(46-66%)                | 44%<br>(34-54%)          | 0.41<br>(0.25-0.65)                         | -0.22%<br>(-1.3-0.75%)               | -0.54%<br>(-2.3-1.1%)               | -3.2<br>(-14-6.7)   | -72<br>(-420-240)      |
| Georgia  | 2000 | Female | 60 to 64 | 53%<br>(41-64%)                | 47%<br>(36-59%)          | 0.4<br>(0.26-0.61)                          | -0.99%<br>(-2.4-0.18%)               | -1.5%<br>(-3.7-0.32%)               | -25<br>(-60-4.9)    | -660<br>(-1600-140)    |
| Georgia  | 2000 | Female | 65 to 69 | 50%<br>(39-60%)                | 50%<br>(40-61%)          | 0.41<br>(0.28-0.58)                         | -1.6%<br>(-3.3--0.2%)                | -2.2%<br>(-4.5--0.2%)               | -46<br>(-97--3.9)   | -1100<br>(-2300--150)  |
| Georgia  | 2000 | Female | 70 to 74 | 47%<br>(37-57%)                | 53%<br>(43-63%)          | 0.4<br>(0.26-0.59)                          | -1.9%<br>(-3.7--0.38%)               | -2.4%<br>(-4.8--0.41%)              | -87<br>(-170--14)   | -1600<br>(-3200--360)  |
| Georgia  | 2000 | Female | 75 to 79 | 46%<br>(35-58%)                | 54%<br>(42-65%)          | 0.38<br>(0.23-0.57)                         | -2.3%<br>(-4.1--0.74%)               | -2.9%<br>(-5.4--0.88%)              | -110<br>(-190--33)  | -1500<br>(-2700--490)  |
| Georgia  | 2000 | Female | 80 to 84 | 45%<br>(32-57%)                | 55%<br>(43-68%)          | 0.36<br>(0.22-0.54)                         | -2.6%<br>(-4.7--0.93%)               | -3.3%<br>(-5.9--1.2%)               | -100<br>(-190--37)  | -1100<br>(-1900--390)  |
| Georgia  | 2000 | Female | 85 to 89 | 44%<br>(32-57%)                | 56%<br>(43-68%)          | 0.35<br>(0.21-0.53)                         | -2.8%<br>(-5.1--1.1%)                | -3.5%<br>(-6.3--1.4%)               | -110<br>(-200--44)  | -810<br>(-1500--320)   |
| Georgia  | 2000 | Female | 90 to 94 | 45%<br>(32-58%)                | 55%<br>(42-68%)          | 0.36<br>(0.19-0.57)                         | -2.9%<br>(-5--1.1%)                  | -3.6%<br>(-6.1--1.3%)               | -78<br>(-130--30)   | -380<br>(-650--150)    |
| Georgia  | 2000 | Female | 95 plus  | 47%<br>(30-63%)                | 53%<br>(37-70%)          | 0.37<br>(0.18-0.66)                         | -3.1%<br>(-5.3--0.97%)               | -3.7%<br>(-6.5--1.2%)               | -29<br>(-50--9.1)   | -92<br>(-160--29)      |
| Georgia  | 2000 | Male   | All Ages | 83%<br>(81-86%)                | 17%<br>(14-19%)          | 2.8<br>(2.3-3.2)                            | 6.6%<br>(4-9.1%)                     | 5.7%<br>(2-9.7%)                    | 1400<br>(490-2300)  | 56000<br>(34000-80000) |
| Georgia  | 2000 | Male   | 15 to 19 | 77%<br>(70-83%)                | 23%<br>(17-30%)          | 1.4<br>(1-1.8)                              | 4.3%<br>(3.1-5.5%)                   | 6.3%<br>(4.1-8.8%)                  | 7.9<br>(5.1-11)     | 890<br>(630-1200)      |
| Georgia  | 2000 | Male   | 20 to 24 | 88%<br>(85-91%)                | 12%<br>(9-15%)           | 2.7<br>(2.1-3.4)                            | 9.8%<br>(7.6-12%)                    | 13%<br>(9.1-17%)                    | 28<br>(20-39)       | 2600<br>(1900-3400)    |
| Georgia  | 2000 | Male   | 25 to 29 | 90%<br>(87-92%)                | 10%<br>(7.7-13%)         | 3.9<br>(3.1-4.9)                            | 13%<br>(10-16%)                      | 17%<br>(13-22%)                     | 52<br>(37-68)       | 4000<br>(3100-5100)    |
| Georgia  | 2000 | Male   | 30 to 34 | 92%<br>(89-94%)                | 8.5%<br>(6.4-11%)        | 4.6<br>(3.6-5.6)                            | 14%<br>(10-18%)                      | 18%<br>(13-24%)                     | 69<br>(49-92)       | 4700<br>(3500-6100)    |
| Georgia  | 2000 | Male   | 35 to 39 | 92%<br>(90-94%)                | 8%<br>(6.1-10%)          | 4.2<br>(3.3-5.2)                            | 12%<br>(8.8-16%)                     | 15%<br>(10-21%)                     | 92<br>(61-130)      | 5600<br>(4000-7400)    |
| Georgia  | 2000 | Male   | 40 to 44 | 92%<br>(90-94%)                | 7.8%<br>(5.7-9.8%)       | 4.2<br>(3.3-5.2)                            | 12%<br>(7.8-15%)                     | 14%<br>(8.9-20%)                    | 110<br>(68-160)     | 6100<br>(3900-8100)    |
| Georgia  | 2000 | Male   | 45 to 49 | 92%<br>(90-94%)                | 8.1%<br>(6.1-10%)        | 4.7<br>(3.7-5.9)                            | 12%<br>(8.3-17%)                     | 15%<br>(9.6-22%)                    | 150<br>(89-210)     | 6800<br>(4400-9300)    |
| Georgia  | 2000 | Male   | 50 to 54 | 92%<br>(90-94%)                | 7.8%<br>(5.9-10%)        | 4.7<br>(3.7-5.9)                            | 12%<br>(6.9-16%)                     | 14%<br>(8-20%)                      | 140<br>(80-210)     | 5900<br>(3500-8300)    |
| Georgia  | 2000 | Male   | 55 to 59 | 93%<br>(90-95%)                | 7.2%<br>(5.1-9.6%)       | 4.1<br>(3.2-5)                              | 9.2%<br>(4.7-14%)                    | 11%<br>(5-17%)                      | 130<br>(59-200)     | 4500<br>(2300-6800)    |

| Location | Year | Sex    | Age      | Prevalence of current drinkers | Prevalence of abstainers | Population average of standard drinks daily | Percent of total attributable deaths | Percent of total attributable DALYs | Attributable deaths   | Attributable DALYs     |
|----------|------|--------|----------|--------------------------------|--------------------------|---------------------------------------------|--------------------------------------|-------------------------------------|-----------------------|------------------------|
| Georgia  | 2000 | Male   | 60 to 64 | 91%<br>(89-94%)                | 8.6%<br>(6.4-11%)        | 3.6<br>(2.8-4.6)                            | 6.9%<br>(2.4-12%)                    | 7.9%<br>(2.4-14%)                   | 210<br>(60-370)       | 6100<br>(2100-11000)   |
| Georgia  | 2000 | Male   | 65 to 69 | 88%<br>(84-91%)                | 12%<br>(9-16%)           | 3.3<br>(2.6-4.1)                            | 5.4%<br>(1.2-9.9%)                   | 6%<br>(0.96-11%)                    | 200<br>(31-370)       | 4700<br>(1100-8700)    |
| Georgia  | 2000 | Male   | 70 to 74 | 86%<br>(82-89%)                | 14%<br>(11-18%)          | 2.9<br>(2.3-3.6)                            | 3.7%<br>(-0.3-8.1%)                  | 4.1%<br>(-0.77-9.2%)                | 180<br>(-34-400)      | 3500<br>(-290-7600)    |
| Georgia  | 2000 | Male   | 75 to 79 | 84%<br>(78-89%)                | 16%<br>(11-22%)          | 2.5<br>(1.9-3.2)                            | 1.9%<br>(-1.7-6.1%)                  | 1.9%<br>(-2.3-6.7%)                 | 50<br>(-63-180)       | 840<br>(-790-2700)     |
| Georgia  | 2000 | Male   | 80 to 84 | 82%<br>(73-88%)                | 18%<br>(12-27%)          | 2.1<br>(1.5-2.7)                            | 0.21%<br>(-3.1-3.6%)                 | -0.1%<br>(-4-3.9%)                  | -1.7<br>(-67-65)      | 42<br>(-610-730)       |
| Georgia  | 2000 | Male   | 85 to 89 | 81%<br>(72-87%)                | 19%<br>(13-28%)          | 1.7<br>(1.2-2.4)                            | -1%<br>(-4-2.1%)                     | -1.5%<br>(-5.1-2.1%)                | -20<br>(-64-28)       | -110<br>(-430-230)     |
| Georgia  | 2000 | Male   | 90 to 94 | 80%<br>(71-87%)                | 20%<br>(13-29%)          | 1.5<br>(0.99-2.2)                           | -1.8%<br>(-4.7-1.2%)                 | -2.5%<br>(-6.1-1%)                  | -20<br>(-49-7.9)      | -85<br>(-230-56)       |
| Georgia  | 2000 | Male   | 95 plus  | 79%<br>(67-89%)                | 21%<br>(11-33%)          | 1.3<br>(0.68-2.1)                           | -2.2%<br>(-4.9-0.77%)                | -3%<br>(-6.3-0.42%)                 | -6.3<br>(-14-0.87)    | -18<br>(-42-6.5)       |
| Georgia  | 2005 | Female | All Ages | 51%<br>(47-55%)                | 49%<br>(45-53%)          | 0.36<br>(0.28-0.46)                         | -0.56%<br>(-1.5-0.3%)                | -2%<br>(-3.8--0.34%)                | -480<br>(-930--82)    | -4000<br>(-11000-2200) |
| Georgia  | 2005 | Female | 15 to 19 | 43%<br>(33-54%)                | 57%<br>(46-67%)          | 0.28<br>(0.17-0.43)                         | 0.73%<br>(0.43-1.1%)                 | 0.5%<br>(-0.087-1.2%)               | 0.32<br>(-0.057-0.78) | 140<br>(74-220)        |
| Georgia  | 2005 | Female | 20 to 24 | 58%<br>(47-68%)                | 42%<br>(32-53%)          | 0.44<br>(0.28-0.65)                         | 1.5%<br>(0.85-2.2%)                  | 0.66%<br>(-0.4-1.8%)                | 0.52<br>(-0.33-1.4)   | 280<br>(150-430)       |
| Georgia  | 2005 | Female | 25 to 29 | 62%<br>(51-70%)                | 38%<br>(30-49%)          | 0.48<br>(0.32-0.69)                         | 1.6%<br>(1-2.1%)                     | 0.88%<br>(-0.21-2%)                 | 0.82<br>(-0.21-1.9)   | 310<br>(190-450)       |
| Georgia  | 2005 | Female | 30 to 34 | 63%<br>(51-72%)                | 37%<br>(28-49%)          | 0.49<br>(0.33-0.71)                         | 1.4%<br>(0.84-2%)                    | 0.94%<br>(-0.34-2.1%)               | 1.2<br>(-0.44-2.8)    | 310<br>(170-470)       |
| Georgia  | 2005 | Female | 35 to 39 | 62%<br>(51-72%)                | 38%<br>(28-49%)          | 0.48<br>(0.3-0.72)                          | 1.2%<br>(0.64-1.8%)                  | 1.1%<br>(-0.089-2.3%)               | 1.8<br>(-0.15-3.8)    | 300<br>(150-440)       |
| Georgia  | 2005 | Female | 40 to 44 | 61%<br>(52-71%)                | 39%<br>(29-48%)          | 0.47<br>(0.31-0.71)                         | 1.1%<br>(0.5-1.7%)                   | 1.3%<br>(0.11-2.5%)                 | 4<br>(0.33-7.7)       | 390<br>(170-600)       |
| Georgia  | 2005 | Female | 45 to 49 | 61%<br>(50-71%)                | 39%<br>(29-50%)          | 0.48<br>(0.3-0.72)                          | 0.7%<br>(0.0079-1.4%)                | 0.81%<br>(-0.63-2.2%)               | 3.5<br>(-2.7-9.3)     | 280<br>(3.2-540)       |
| Georgia  | 2005 | Female | 50 to 54 | 60%<br>(50-69%)                | 40%<br>(31-50%)          | 0.46<br>(0.29-0.72)                         | 0.37%<br>(-0.51-1.1%)                | 0.39%<br>(-1.2-1.8%)                | 2.2<br>(-6.7-10)      | 150<br>(-210-450)      |
| Georgia  | 2005 | Female | 55 to 59 | 56%<br>(45-65%)                | 44%<br>(35-55%)          | 0.43<br>(0.27-0.67)                         | -0.062%<br>(-1-0.81%)                | -0.19%<br>(-1.8-1.3%)               | -1.4<br>(-13-9.5)     | -25<br>(-420-320)      |
| Georgia  | 2005 | Female | 60 to 64 | 52%<br>(41-62%)                | 48%<br>(38-59%)          | 0.42<br>(0.27-0.65)                         | -0.74%<br>(-2-0.33%)                 | -1.1%<br>(-3.1-0.55%)               | -11<br>(-30-4.9)      | -300<br>(-830-130)     |
| Georgia  | 2005 | Female | 65 to 69 | 50%<br>(39-59%)                | 50%<br>(41-61%)          | 0.43<br>(0.3-0.62)                          | -1.2%<br>(-2.8-0.06%)                | -1.6%<br>(-3.7-0.21%)               | -40<br>(-91-5.1)      | -980<br>(-2100-45)     |
| Georgia  | 2005 | Female | 70 to 74 | 47%<br>(36-57%)                | 53%<br>(43-64%)          | 0.42<br>(0.27-0.63)                         | -1.5%<br>(-3.1--0.12%)               | -1.9%<br>(-3.9-0.014%)              | -56<br>(-120-0.42)    | -1100<br>(-2300--83)   |
| Georgia  | 2005 | Female | 75 to 79 | 45%<br>(34-57%)                | 55%<br>(43-66%)          | 0.4<br>(0.25-0.62)                          | -1.9%<br>(-3.6--0.47%)               | -2.4%<br>(-4.5--0.54%)              | -110<br>(-200--25)    | -1600<br>(-2900--400)  |

| Location | Year | Sex    | Age      | Prevalence of current drinkers | Prevalence of abstainers | Population average of standard drinks daily | Percent of total attributable deaths | Percent of total attributable DALYs | Attributable deaths | Attributable DALYs     |
|----------|------|--------|----------|--------------------------------|--------------------------|---------------------------------------------|--------------------------------------|-------------------------------------|---------------------|------------------------|
| Georgia  | 2005 | Female | 80 to 84 | 44%<br>(31-57%)                | 56%<br>(43-69%)          | 0.38<br>(0.23-0.58)                         | -2.2%<br>(-4--0.65%)                 | -2.7%<br>(-5--0.77%)                | -110<br>(-200--31)  | -1200<br>(-2100--360)  |
| Georgia  | 2005 | Female | 85 to 89 | 44%<br>(31-56%)                | 56%<br>(44-69%)          | 0.37<br>(0.22-0.57)                         | -2.4%<br>(-4.4--0.81%)               | -2.9%<br>(-5.4--0.97%)              | -84<br>(-160--28)   | -610<br>(-1100--210)   |
| Georgia  | 2005 | Female | 90 to 94 | 44%<br>(31-57%)                | 56%<br>(43-69%)          | 0.38<br>(0.21-0.61)                         | -2.5%<br>(-4.4--0.86%)               | -3.1%<br>(-5.3--1%)                 | -59<br>(-100--20)   | -290<br>(-510--100)    |
| Georgia  | 2005 | Female | 95 plus  | 46%<br>(30-63%)                | 54%<br>(37-70%)          | 0.39<br>(0.19-0.7)                          | -2.7%<br>(-4.7--0.81%)               | -3.3%<br>(-5.8--1%)                 | -29<br>(-51--9)     | -94<br>(-170--29)      |
| Georgia  | 2005 | Male   | All Ages | 84%<br>(81-86%)                | 16%<br>(14-19%)          | 3.1<br>(2.6-3.6)                            | 7.7%<br>(5.1-10%)                    | 7%<br>(3.3-11%)                     | 1900<br>(890-2900)  | 68000<br>(45000-92000) |
| Georgia  | 2005 | Male   | 15 to 19 | 77%<br>(70-83%)                | 23%<br>(17-30%)          | 1.5<br>(1.1-1.9)                            | 4.4%<br>(3.1-5.8%)                   | 6.1%<br>(3.7-8.6%)                  | 9.8<br>(5.9-14)     | 1100<br>(740-1400)     |
| Georgia  | 2005 | Male   | 20 to 24 | 88%<br>(84-91%)                | 12%<br>(9.3-16%)         | 2.9<br>(2.3-3.6)                            | 10%<br>(7.7-13%)                     | 13%<br>(9.1-17%)                    | 32<br>(22-45)       | 2900<br>(2100-3800)    |
| Georgia  | 2005 | Male   | 25 to 29 | 90%<br>(87-92%)                | 10%<br>(7.9-13%)         | 4.2<br>(3.3-5.3)                            | 14%<br>(10-17%)                      | 17%<br>(12-23%)                     | 51<br>(35-67)       | 3900<br>(2900-5000)    |
| Georgia  | 2005 | Male   | 30 to 34 | 91%<br>(89-93%)                | 8.7%<br>(6.6-11%)        | 4.9<br>(3.9-6.2)                            | 15%<br>(11-18%)                      | 19%<br>(13-24%)                     | 73<br>(52-96)       | 5000<br>(3700-6400)    |
| Georgia  | 2005 | Male   | 35 to 39 | 92%<br>(90-94%)                | 8.2%<br>(6.2-10%)        | 4.5<br>(3.5-5.7)                            | 18%<br>(9.8-17%)                     | 17%<br>(12-22%)                     | 81<br>(54-110)      | 4900<br>(3500-6500)    |
| Georgia  | 2005 | Male   | 40 to 44 | 92%<br>(90-94%)                | 8%<br>(5.9-10%)          | 4.5<br>(3.5-5.6)                            | 13%<br>(9.1-16%)                     | 16%<br>(11-21%)                     | 120<br>(82-170)     | 6600<br>(4600-8700)    |
| Georgia  | 2005 | Male   | 45 to 49 | 92%<br>(89-94%)                | 8.3%<br>(6.3-11%)        | 5.1<br>(4-6.3)                              | 14%<br>(9.8-18%)                     | 17%<br>(11-23%)                     | 190<br>(130-250)    | 8600<br>(6100-11000)   |
| Georgia  | 2005 | Male   | 50 to 54 | 92%<br>(90-94%)                | 8%<br>(6-10%)            | 5.1<br>(4-6.3)                              | 13%<br>(8.8-17%)                     | 16%<br>(10-21%)                     | 220<br>(140-290)    | 8600<br>(5700-11000)   |
| Georgia  | 2005 | Male   | 55 to 59 | 93%<br>(90-95%)                | 7.3%<br>(5.2-10%)        | 4.4<br>(3.4-5.4)                            | 11%<br>(6.2-15%)                     | 12%<br>(6.9-18%)                    | 190<br>(110-280)    | 6600<br>(3800-9400)    |
| Georgia  | 2005 | Male   | 60 to 64 | 91%<br>(88-93%)                | 8.8%<br>(6.5-12%)        | 3.9<br>(2.9-5)                              | 8.4%<br>(3.7-13%)                    | 9.6%<br>(3.9-16%)                   | 160<br>(66-270)     | 4700<br>(2100-7600)    |
| Georgia  | 2005 | Male   | 65 to 69 | 88%<br>(84-91%)                | 12%<br>(9.2-16%)         | 3.5<br>(2.8-4.4)                            | 6.9%<br>(2.4-11%)                    | 7.8%<br>(2.5-13%)                   | 290<br>(93-490)     | 6900<br>(2500-12000)   |
| Georgia  | 2005 | Male   | 70 to 74 | 85%<br>(81-88%)                | 15%<br>(12-19%)          | 3.1<br>(2.4-3.9)                            | 5.3%<br>(1-9.7%)                     | 5.9%<br>(0.85-11%)                  | 230<br>(34-440)     | 4500<br>(890-8400)     |
| Georgia  | 2005 | Male   | 75 to 79 | 84%<br>(78-88%)                | 16%<br>(12-22%)          | 2.7<br>(2.1-3.5)                            | 3.4%<br>(-0.45-8%)                   | 3.7%<br>(-0.87-9%)                  | 180<br>(-43-440)    | 2700<br>(-370-6400)    |
| Georgia  | 2005 | Male   | 80 to 84 | 82%<br>(73-88%)                | 18%<br>(12-27%)          | 2.2<br>(1.6-2.9)                            | 1.8%<br>(-1.6-5.5%)                  | 1.7%<br>(-2.1-6.2%)                 | 52<br>(-60-180)     | 620<br>(-550-1900)     |
| Georgia  | 2005 | Male   | 85 to 89 | 80%<br>(72-87%)                | 20%<br>(13-28%)          | 1.9<br>(1.3-2.6)                            | 0.32%<br>(-2.6-3.6%)                 | 0.077%<br>(-3.3-3.9%)               | 0.85<br>(-38-43)    | 30<br>(-250-350)       |
| Georgia  | 2005 | Male   | 90 to 94 | 80%<br>(71-87%)                | 20%<br>(13-29%)          | 1.7<br>(1.1-2.4)                            | -0.75%<br>(-3.6-2.3%)                | -1.2%<br>(-4.6-2.3%)                | -6.7<br>(-26-13)    | -24<br>(-120-72)       |
| Georgia  | 2005 | Male   | 95 plus  | 79%<br>(66-89%)                | 21%<br>(11-34%)          | 1.4<br>(0.75-2.3)                           | -1.4%<br>(-4.2-1.6%)                 | -2%<br>(-5.3-1.5%)                  | -4.4<br>(-12-3.3)   | -12<br>(-36-14)        |



| Location | Year | Sex    | Age      | Prevalence of current drinkers | Prevalence of abstainers | Population average of standard drinks daily | Percent of total attributable deaths | Percent of total attributable DALYs | Attributable deaths  | Attributable DALYs      |
|----------|------|--------|----------|--------------------------------|--------------------------|---------------------------------------------|--------------------------------------|-------------------------------------|----------------------|-------------------------|
| Georgia  | 2010 | Female | All Ages | 54%<br>(50-58%)                | 46%<br>(42-50%)          | 0.48<br>(0.37-0.61)                         | -0.46%<br>(-1.4-0.4%)                | -2%<br>(-3.8--0.25%)                | -450<br>(-870--55)   | -3000<br>(-9100-2700)   |
| Georgia  | 2010 | Female | 15 to 19 | 44%<br>(33-55%)                | 56%<br>(45-67%)          | 0.35<br>(0.21-0.54)                         | 0.81%<br>(0.45-1.2%)                 | 0.74%<br>(0.023-1.7%)               | 0.43<br>(0.013-0.99) | 130<br>(70-210)         |
| Georgia  | 2010 | Female | 20 to 24 | 60%<br>(48-70%)                | 40%<br>(30-52%)          | 0.55<br>(0.33-0.86)                         | 1.7%<br>(1.1-2.5%)                   | 1.2%<br>(0.13-2.5%)                 | 0.94<br>(0.1-2)      | 310<br>(190-490)        |
| Georgia  | 2010 | Female | 25 to 29 | 64%<br>(52-73%)                | 36%<br>(27-48%)          | 0.62<br>(0.4-0.91)                          | 1.8%<br>(1.2-2.5%)                   | 1.4%<br>(0.27-2.7%)                 | 1.2<br>(0.23-2.3)    | 340<br>(220-510)        |
| Georgia  | 2010 | Female | 30 to 34 | 66%<br>(54-74%)                | 34%<br>(26-46%)          | 0.63<br>(0.41-0.93)                         | 1.8%<br>(1.2-2.4%)                   | 1.8%<br>(0.7-3.1%)                  | 2<br>(0.82-3.4)      | 380<br>(240-530)        |
| Georgia  | 2010 | Female | 35 to 39 | 65%<br>(53-74%)                | 35%<br>(26-47%)          | 0.62<br>(0.39-0.93)                         | 1.5%<br>(0.99-2.1%)                  | 1.8%<br>(0.6-3%)                    | 2.6<br>(0.89-4.6)    | 340<br>(210-490)        |
| Georgia  | 2010 | Female | 40 to 44 | 65%<br>(55-73%)                | 35%<br>(27-45%)          | 0.62<br>(0.39-0.93)                         | 1.8%<br>(0.69-2%)                    | 1.8%<br>(0.6-3.2%)                  | 4.2<br>(1.3-7.5)     | 350<br>(180-560)        |
| Georgia  | 2010 | Female | 45 to 49 | 64%<br>(52-74%)                | 36%<br>(26-48%)          | 0.63<br>(0.4-0.98)                          | 0.91%<br>(0.18-1.7%)                 | 1.2%<br>(-0.13-2.8%)                | 5.3<br>(-0.58-12)    | 350<br>(72-670)         |
| Georgia  | 2010 | Female | 50 to 54 | 63%<br>(51-71%)                | 37%<br>(29-49%)          | 0.61<br>(0.37-0.94)                         | 0.6%<br>(-0.27-1.5%)                 | 0.82%<br>(-0.73-2.5%)               | 5.1<br>(-4.7-15)     | 260<br>(-120-680)       |
| Georgia  | 2010 | Female | 55 to 59 | 59%<br>(48-69%)                | 41%<br>(31-52%)          | 0.57<br>(0.35-0.87)                         | 0.056%<br>(-0.99-1.1%)               | 0.027%<br>(-1.7-1.7%)               | 0.22<br>(-14-14)     | 25<br>(-440-470)        |
| Georgia  | 2010 | Female | 60 to 64 | 57%<br>(45-67%)                | 43%<br>(33-55%)          | 0.57<br>(0.36-0.89)                         | -0.73%<br>(-2.1-0.47%)               | -1.1%<br>(-3.2-0.67%)               | -12<br>(-35-7.5)     | -340<br>(-980-230)      |
| Georgia  | 2010 | Female | 65 to 69 | 54%<br>(43-64%)                | 46%<br>(36-57%)          | 0.59<br>(0.39-0.86)                         | -1.3%<br>(-2.8-0.066%)               | -1.7%<br>(-3.9-0.27%)               | -24<br>(-55-3.7)     | -600<br>(-1300-31)      |
| Georgia  | 2010 | Female | 70 to 74 | 51%<br>(39-62%)                | 49%<br>(38-61%)          | 0.57<br>(0.36-0.84)                         | -1.5%<br>(-3.2--0.027%)              | -1.9%<br>(-4.2-0.11%)               | -60<br>(-130-4)      | -1200<br>(-2500--23)    |
| Georgia  | 2010 | Female | 75 to 79 | 48%<br>(35-61%)                | 52%<br>(39-65%)          | 0.52<br>(0.32-0.82)                         | -1.8%<br>(-3.6--0.37%)               | -2.4%<br>(-4.7--0.44%)              | -75<br>(-150--13)    | -1100<br>(-2200--220)   |
| Georgia  | 2010 | Female | 80 to 84 | 46%<br>(33-59%)                | 54%<br>(41-67%)          | 0.48<br>(0.29-0.73)                         | -2%<br>(-3.8--0.54%)                 | -2.6%<br>(-4.9--0.65%)              | -100<br>(-200--26)   | -1100<br>(-2100--300)   |
| Georgia  | 2010 | Female | 85 to 89 | 44%<br>(32-58%)                | 56%<br>(42-68%)          | 0.47<br>(0.27-0.71)                         | -2.2%<br>(-4.2--0.74%)               | -2.8%<br>(-5.3--0.9%)               | -110<br>(-210--35)   | -810<br>(-1500--270)    |
| Georgia  | 2010 | Female | 90 to 94 | 45%<br>(32-58%)                | 55%<br>(42-68%)          | 0.47<br>(0.26-0.76)                         | -2.4%<br>(-4.3--0.79%)               | -3%<br>(-5.3--0.95%)                | -58<br>(-100--19)    | -290<br>(-520--95)      |
| Georgia  | 2010 | Female | 95 plus  | 47%<br>(31-64%)                | 53%<br>(36-69%)          | 0.49<br>(0.22-0.86)                         | -2.6%<br>(-4.7--0.77%)               | -3.2%<br>(-5.9--0.95%)              | -27<br>(-49--8)      | -87<br>(-160--27)       |
| Georgia  | 2010 | Male   | All Ages | 81%<br>(78-84%)                | 19%<br>(16-22%)          | 3.5<br>(2.9-4.2)                            | 9.7%<br>(6.9-13%)                    | 9.4%<br>(5.4-14%)                   | 2500<br>(1400-3700)  | 84000<br>(59000-110000) |
| Georgia  | 2010 | Male   | 15 to 19 | 69%<br>(58-79%)                | 31%<br>(21-42%)          | 1.5<br>(1-2.1)                              | 4.6%<br>(3.3-6.2%)                   | 6.5%<br>(4.1-9.4%)                  | 8.9<br>(5.5-13)      | 940<br>(660-1300)       |
| Georgia  | 2010 | Male   | 20 to 24 | 85%<br>(77-90%)                | 15%<br>(10-23%)          | 3.2<br>(2.4-4.3)                            | 11%<br>(8.3-14%)                     | 14%<br>(9.6-19%)                    | 38<br>(26-53)        | 3400<br>(2500-4500)     |
| Georgia  | 2010 | Male   | 25 to 29 | 88%<br>(82-92%)                | 12%<br>(8.2-18%)         | 4.8<br>(3.6-6.2)                            | 15%<br>(11-19%)                      | 19%<br>(14-25%)                     | 59<br>(41-79)        | 4500<br>(3400-5800)     |

| Location | Year | Sex    | Age      | Prevalence of current drinkers | Prevalence of abstainers | Population average of standard drinks daily | Percent of total attributable deaths | Percent of total attributable DALYs | Attributable deaths  | Attributable DALYs    |
|----------|------|--------|----------|--------------------------------|--------------------------|---------------------------------------------|--------------------------------------|-------------------------------------|----------------------|-----------------------|
| Georgia  | 2010 | Male   | 30 to 34 | 90%<br>(84-93%)                | 10%<br>(7-16%)           | 5.6<br>(4.2-7.4)                            | 16%<br>(12-19%)                      | 21%<br>(16-26%)                     | 75<br>(55-96)        | 5100<br>(3900-6400)   |
| Georgia  | 2010 | Male   | 35 to 39 | 91%<br>(86-93%)                | 9.5%<br>(6.5-14%)        | 5.2<br>(3.9-6.7)                            | 15%<br>(11-18%)                      | 19%<br>(14-24%)                     | 92<br>(68-120)       | 5500<br>(4200-7000)   |
| Georgia  | 2010 | Male   | 40 to 44 | 91%<br>(87-94%)                | 9.3%<br>(6.4-13%)        | 5.2<br>(3.9-6.6)                            | 15%<br>(11-18%)                      | 18%<br>(14-23%)                     | 130<br>(91-160)      | 6500<br>(4800-8300)   |
| Georgia  | 2010 | Male   | 45 to 49 | 90%<br>(86-93%)                | 9.6%<br>(6.7-14%)        | 5.8<br>(4.4-7.6)                            | 16%<br>(12-20%)                      | 19%<br>(14-24%)                     | 230<br>(170-290)     | 10000<br>(7700-13000) |
| Georgia  | 2010 | Male   | 50 to 54 | 91%<br>(87-94%)                | 9.5%<br>(6.5-13%)        | 5.8<br>(4.3-7.5)                            | 15%<br>(11-19%)                      | 18%<br>(13-23%)                     | 290<br>(200-380)     | 11000<br>(8100-15000) |
| Georgia  | 2010 | Male   | 55 to 59 | 91%<br>(87-94%)                | 8.8%<br>(5.8-13%)        | 4.9<br>(3.7-6.5)                            | 13%<br>(8.5-17%)                     | 15%<br>(9.7-21%)                    | 290<br>(180-400)     | 9700<br>(6300-13000)  |
| Georgia  | 2010 | Male   | 60 to 64 | 90%<br>(84-93%)                | 10%<br>(7-16%)           | 4.4<br>(3.2-5.9)                            | 11%<br>(6-16%)                       | 12%<br>(6.7-19%)                    | 270<br>(140-400)     | 7600<br>(4200-11000)  |
| Georgia  | 2010 | Male   | 65 to 69 | 86%<br>(80-90%)                | 14%<br>(9.7-20%)         | 4<br>(3-5.2)                                | 9.4%<br>(5-14%)                      | 11%<br>(5.4-17%)                    | 230<br>(120-360)     | 5500<br>(2900-8600)   |
| Georgia  | 2010 | Male   | 70 to 74 | 83%<br>(77-88%)                | 17%<br>(12-23%)          | 3.5<br>(2.6-4.6)                            | 7.7%<br>(2.9-12%)                    | 8.7%<br>(3-14%)                     | 390<br>(140-660)     | 7500<br>(2800-12000)  |
| Georgia  | 2010 | Male   | 75 to 79 | 81%<br>(73-88%)                | 19%<br>(12-27%)          | 3<br>(2.2-4.1)                              | 5.8%<br>(1.3-11%)                    | 6.4%<br>(1.1-12%)                   | 260<br>(45-480)      | 3800<br>(820-7000)    |
| Georgia  | 2010 | Male   | 80 to 84 | 80%<br>(69-87%)                | 20%<br>(13-31%)          | 2.5<br>(1.7-3.4)                            | 3.8%<br>(0.14-8.1%)                  | 4.1%<br>(-0.13-9.1%)                | 150<br>(-4.6-330)    | 1600<br>(58-3500)     |
| Georgia  | 2010 | Male   | 85 to 89 | 79%<br>(69-86%)                | 21%<br>(14-31%)          | 2.1<br>(1.4-3)                              | 2%<br>(-1.3-5.9%)                    | 2%<br>(-1.9-6.7%)                   | 44<br>(-41-140)      | 370<br>(-250-1100)    |
| Georgia  | 2010 | Male   | 90 to 94 | 78%<br>(68-86%)                | 22%<br>(14-32%)          | 1.9<br>(1.2-2.7)                            | 0.63%<br>(-2.3-4.3%)                 | 0.39%<br>(-3.2-4.7%)                | 2.2<br>(-19-27)      | 21<br>(-81-150)       |
| Georgia  | 2010 | Male   | 95 plus  | 78%<br>(63-88%)                | 22%<br>(12-37%)          | 1.6<br>(0.84-2.6)                           | -0.28%<br>(-3.3-3.4%)                | -0.76%<br>(-4.5-3.5%)               | -1.3<br>(-7.7-6.1)   | -1.9<br>(-23-23)      |
| Georgia  | 2016 | Female | All Ages | 54%<br>(50-58%)                | 46%<br>(42-50%)          | 0.52<br>(0.36-0.7)                          | -0.35%<br>(-1.3-0.51%)               | -1.8%<br>(-3.6--0.16%)              | -410<br>(-800--37)   | -2100<br>(-7300-3200) |
| Georgia  | 2016 | Female | 15 to 19 | 44%<br>(33-56%)                | 56%<br>(44-67%)          | 0.38<br>(0.21-0.61)                         | 0.91%<br>(0.52-1.4%)                 | 1%<br>(0.16-2.2%)                   | 0.37<br>(0.058-0.81) | 94<br>(51-150)        |
| Georgia  | 2016 | Female | 20 to 24 | 60%<br>(48-70%)                | 40%<br>(30-52%)          | 0.6<br>(0.35-0.98)                          | 1.8%<br>(1.1-2.7%)                   | 1.5%<br>(0.31-3%)                   | 0.9<br>(0.18-1.9)    | 270<br>(160-400)      |
| Georgia  | 2016 | Female | 25 to 29 | 64%<br>(53-73%)                | 36%<br>(27-47%)          | 0.67<br>(0.41-1)                            | 2%<br>(1.4-2.7%)                     | 1.7%<br>(0.56-3.2%)                 | 1.4<br>(0.43-2.6)    | 360<br>(230-530)      |
| Georgia  | 2016 | Female | 30 to 34 | 66%<br>(54-74%)                | 34%<br>(26-46%)          | 0.69<br>(0.42-1)                            | 2%<br>(1.4-2.7%)                     | 2.3%<br>(1-3.7%)                    | 2.2<br>(1-3.8)       | 380<br>(250-560)      |
| Georgia  | 2016 | Female | 35 to 39 | 65%<br>(54-73%)                | 35%<br>(27-46%)          | 0.67<br>(0.41-1)                            | 1.7%<br>(1.1-2.3%)                   | 2.2%<br>(1.1-3.5%)                  | 2.9<br>(1.3-5)       | 360<br>(230-520)      |
| Georgia  | 2016 | Female | 40 to 44 | 65%<br>(55-73%)                | 35%<br>(27-45%)          | 0.68<br>(0.41-1)                            | 1.5%<br>(0.87-2.2%)                  | 2.3%<br>(1-3.8%)                    | 4.4<br>(1.9-7.8)     | 360<br>(210-570)      |
| Georgia  | 2016 | Female | 45 to 49 | 64%<br>(52-74%)                | 36%<br>(26-48%)          | 0.69<br>(0.41-1.1)                          | 1.1%<br>(0.41-2%)                    | 1.8%<br>(0.39-3.4%)                 | 5.3<br>(1-11)        | 330<br>(120-590)      |

| Location | Year | Sex    | Age      | Prevalence of current drinkers | Prevalence of abstainers | Population average of standard drinks daily | Percent of total attributable deaths | Percent of total attributable DALYs | Attributable deaths | Attributable DALYs      |
|----------|------|--------|----------|--------------------------------|--------------------------|---------------------------------------------|--------------------------------------|-------------------------------------|---------------------|-------------------------|
| Georgia  | 2016 | Female | 50 to 54 | 63%<br>(51-71%)                | 37%<br>(29-49%)          | 0.66<br>(0.39-1)                            | 0.85%<br>(0.041-1.8%)                | 1.4%<br>(-0.12-3.1%)                | 7.3<br>(-0.61-17)   | 340<br>(17-760)         |
| Georgia  | 2016 | Female | 55 to 59 | 59%<br>(48-69%)                | 41%<br>(31-52%)          | 0.62<br>(0.36-0.98)                         | 0.28%<br>(-0.67-1.2%)                | 0.44%<br>(-1.1-2.1%)                | 3.5<br>(-9.6-17)    | 130<br>(-330-590)       |
| Georgia  | 2016 | Female | 60 to 64 | 57%<br>(45-68%)                | 43%<br>(32-55%)          | 0.62<br>(0.37-0.96)                         | -0.51%<br>(-1.8-0.6%)                | -0.73%<br>(-2.7-0.99%)              | -8.1<br>(-30-11)    | -250<br>(-880-300)      |
| Georgia  | 2016 | Female | 65 to 69 | 54%<br>(43-64%)                | 46%<br>(36-57%)          | 0.64<br>(0.39-0.94)                         | -1%<br>(-2.4-0.27%)                  | -1.3%<br>(-3.4-0.53%)               | -17<br>(-45-7.2)    | -460<br>(-1100-120)     |
| Georgia  | 2016 | Female | 70 to 74 | 51%<br>(39-62%)                | 49%<br>(38-61%)          | 0.61<br>(0.36-0.94)                         | -1.3%<br>(-2.9-0.12%)                | -1.7%<br>(-3.9-0.34%)               | -31<br>(-73-5.8)    | -640<br>(-1400-62)      |
| Georgia  | 2016 | Female | 75 to 79 | 48%<br>(35-61%)                | 52%<br>(39-65%)          | 0.56<br>(0.32-0.87)                         | -1.6%<br>(-3.3--0.15%)               | -2.1%<br>(-4.4-0.13%)               | -75<br>(-150-4.4)   | -1100<br>(-2300--110)   |
| Georgia  | 2016 | Female | 80 to 84 | 46%<br>(33-58%)                | 54%<br>(42-67%)          | 0.52<br>(0.31-0.8)                          | -1.9%<br>(-3.6--0.42%)               | -2.4%<br>(-4.6--0.49%)              | -94<br>(-180--20)   | -1000<br>(-1900--230)   |
| Georgia  | 2016 | Female | 85 to 89 | 45%<br>(32-58%)                | 55%<br>(42-68%)          | 0.51<br>(0.29-0.8)                          | -2.1%<br>(-4--0.57%)                 | -2.6%<br>(-5--0.67%)                | -100<br>(-200--27)  | -750<br>(-1400--200)    |
| Georgia  | 2016 | Female | 90 to 94 | 45%<br>(32-59%)                | 55%<br>(41-68%)          | 0.52<br>(0.27-0.87)                         | -2.2%<br>(-4.1--0.58%)               | -2.8%<br>(-5.1--0.73%)              | -82<br>(-150--22)   | -410<br>(-760--110)     |
| Georgia  | 2016 | Female | 95 plus  | 47%<br>(31-64%)                | 53%<br>(36-69%)          | 0.54<br>(0.23-0.99)                         | -2.4%<br>(-4.6--0.51%)               | -3%<br>(-5.6--0.68%)                | -29<br>(-55--6.6)   | -92<br>(-170--19)       |
| Georgia  | 2016 | Male   | All Ages | 82%<br>(78-84%)                | 18%<br>(16-22%)          | 3.9<br>(2.9-5.3)                            | 11%<br>(7.2-14%)                     | 10%<br>(5.5-15%)                    | 2700<br>(1400-4200) | 85000<br>(54000-120000) |
| Georgia  | 2016 | Male   | 15 to 19 | 69%<br>(58-79%)                | 31%<br>(21-42%)          | 1.6<br>(1-2.4)                              | 5.4%<br>(3.6-7.5%)                   | 7.4%<br>(4.6-11%)                   | 9.1<br>(5.3-14)     | 880<br>(570-1300)       |
| Georgia  | 2016 | Male   | 20 to 24 | 85%<br>(78-90%)                | 15%<br>(10-22%)          | 3.6<br>(2.4-5.1)                            | 12%<br>(9-17%)                       | 16%<br>(10-22%)                     | 39<br>(23-58)       | 3300<br>(2200-4600)     |
| Georgia  | 2016 | Male   | 25 to 29 | 88%<br>(82-92%)                | 12%<br>(8.3-18%)         | 5.3<br>(3.7-7.5)                            | 16%<br>(12-21%)                      | 21%<br>(15-28%)                     | 67<br>(43-94)       | 5100<br>(3500-6900)     |
| Georgia  | 2016 | Male   | 30 to 34 | 90%<br>(85-93%)                | 10%<br>(7.1-15%)         | 6.2<br>(4.3-8.8)                            | 17%<br>(13-21%)                      | 22%<br>(16-28%)                     | 82<br>(54-120)      | 5600<br>(3900-7700)     |
| Georgia  | 2016 | Male   | 35 to 39 | 91%<br>(87-94%)                | 9.4%<br>(6.5-13%)        | 5.8<br>(4-8)                                | 16%<br>(12-20%)                      | 21%<br>(15-26%)                     | 95<br>(60-140)      | 5700<br>(3900-8200)     |
| Georgia  | 2016 | Male   | 40 to 44 | 91%<br>(87-94%)                | 9.3%<br>(6.4-13%)        | 5.8<br>(4-8)                                | 15%<br>(11-19%)                      | 20%<br>(14-25%)                     | 120<br>(76-180)     | 6300<br>(4200-9000)     |
| Georgia  | 2016 | Male   | 45 to 49 | 90%<br>(85-93%)                | 9.7%<br>(6.8-15%)        | 6.4<br>(4.6-8.7)                            | 16%<br>(12-20%)                      | 20%<br>(15-25%)                     | 180<br>(120-260)    | 8000<br>(5500-11000)    |
| Georgia  | 2016 | Male   | 50 to 54 | 90%<br>(86-93%)                | 9.5%<br>(6.6-14%)        | 6.4<br>(4.5-8.8)                            | 16%<br>(11-20%)                      | 19%<br>(14-24%)                     | 270<br>(170-380)    | 11000<br>(7000-15000)   |
| Georgia  | 2016 | Male   | 55 to 59 | 91%<br>(87-94%)                | 8.8%<br>(5.9-13%)        | 5.5<br>(3.7-7.6)                            | 14%<br>(8.7-18%)                     | 16%<br>(10-22%)                     | 310<br>(180-450)    | 11000<br>(6500-15000)   |
| Georgia  | 2016 | Male   | 60 to 64 | 89%<br>(84-93%)                | 11%<br>(7.2-16%)         | 4.9<br>(3.2-6.8)                            | 12%<br>(6.4-17%)                     | 14%<br>(7.2-20%)                    | 320<br>(160-480)    | 9100<br>(4800-14000)    |
| Georgia  | 2016 | Male   | 65 to 69 | 86%<br>(79-90%)                | 14%<br>(10-21%)          | 4.4<br>(3-6.2)                              | 11%<br>(5.6-16%)                     | 13%<br>(6.2-19%)                    | 280<br>(130-440)    | 6700<br>(3400-10000)    |

| Location   | Year | Sex    | Age      | Prevalence of current drinkers | Prevalence of abstainers | Population average of standard drinks daily | Percent of total attributable deaths | Percent of total attributable DALYs | Attributable deaths | Attributable DALYs       |
|------------|------|--------|----------|--------------------------------|--------------------------|---------------------------------------------|--------------------------------------|-------------------------------------|---------------------|--------------------------|
| Georgia    | 2016 | Male   | 70 to 74 | 83%<br>(77-88%)                | 17%<br>(12-23%)          | 3.9<br>(2.6-5.5)                            | 9.3%<br>(4-15%)                      | 11%<br>(4.2-17%)                    | 260<br>(100-430)    | 4900<br>(2000-8000)      |
| Georgia    | 2016 | Male   | 75 to 79 | 81%<br>(73-88%)                | 19%<br>(12-27%)          | 3.4<br>(2.1-4.9)                            | 7.4%<br>(2.2-13%)                    | 8.4%<br>(2.3-15%)                   | 330<br>(85-620)     | 4900<br>(1400-9100)      |
| Georgia    | 2016 | Male   | 80 to 84 | 80%<br>(69-87%)                | 20%<br>(13-31%)          | 2.8<br>(1.8-4)                              | 5.5%<br>(1-11%)                      | 6.1%<br>(0.91-13%)                  | 240<br>(34-510)     | 2600<br>(520-5400)       |
| Georgia    | 2016 | Male   | 85 to 89 | 79%<br>(68-86%)                | 21%<br>(14-32%)          | 2.3<br>(1.4-3.5)                            | 3.3%<br>(-0.39-8.4%)                 | 3.6%<br>(-0.79-9.4%)                | 92<br>(-19-250)     | 740<br>(-85-1900)        |
| Georgia    | 2016 | Male   | 90 to 94 | 78%<br>(68-86%)                | 22%<br>(14-32%)          | 2<br>(1.2-3.2)                              | 1.8%<br>(-1.9-6.3%)                  | 1.7%<br>(-2.7-7.2%)                 | 21<br>(-31-87)      | 130<br>(-140-460)        |
| Georgia    | 2016 | Male   | 95 plus  | 77%<br>(63-88%)                | 23%<br>(12-37%)          | 1.7<br>(0.85-2.9)                           | 0.61%<br>(-2.9-4.9%)                 | 0.28%<br>(-3.9-5.5%)                | 0.59<br>(-8-11)     | 5<br>(-24-42)            |
| Kazakhstan | 1990 | Female | All Ages | 57%<br>(51-63%)                | 43%<br>(37-49%)          | 2.3<br>(1.7-3)                              | 5.6%<br>(3.3-7.9%)                   | 8%<br>(3.9-13%)                     | 5100<br>(2400-8400) | 150000<br>(90000-210000) |
| Kazakhstan | 1990 | Female | 15 to 19 | 47%<br>(34-59%)                | 53%<br>(41-66%)          | 1.8<br>(0.96-2.9)                           | 4%<br>(2.2-6.4%)                     | 8.1%<br>(4.3-14%)                   | 41<br>(21-67)       | 3600<br>(2000-5700)      |
| Kazakhstan | 1990 | Female | 20 to 24 | 67%<br>(54-78%)                | 33%<br>(22-46%)          | 3<br>(1.8-4.8)                              | 6.8%<br>(4.3-9.9%)                   | 13%<br>(7.6-19%)                    | 78<br>(45-120)      | 6500<br>(4100-9200)      |
| Kazakhstan | 1990 | Female | 25 to 29 | 74%<br>(62-82%)                | 26%<br>(18-38%)          | 3.7<br>(2.4-5.6)                            | 7.6%<br>(5.3-11%)                    | 15%<br>(9.9-20%)                    | 110<br>(75-160)     | 8800<br>(6100-12000)     |
| Kazakhstan | 1990 | Female | 30 to 34 | 76%<br>(66-85%)                | 24%<br>(15-34%)          | 4.1<br>(2.6-5.9)                            | 7.8%<br>(5.5-10%)                    | 15%<br>(10-20%)                     | 140<br>(93-190)     | 9700<br>(6700-13000)     |
| Kazakhstan | 1990 | Female | 35 to 39 | 77%<br>(67-84%)                | 23%<br>(16-33%)          | 4.1<br>(2.6-5.9)                            | 8.1%<br>(5.5-11%)                    | 15%<br>(10-20%)                     | 160<br>(100-220)    | 9700<br>(6500-13000)     |
| Kazakhstan | 1990 | Female | 40 to 44 | 76%<br>(65-84%)                | 24%<br>(16-35%)          | 4.1<br>(2.6-5.9)                            | 8.7%<br>(5.7-12%)                    | 15%<br>(10-21%)                     | 180<br>(110-250)    | 9500<br>(6300-13000)     |
| Kazakhstan | 1990 | Female | 45 to 49 | 74%<br>(61-83%)                | 26%<br>(17-39%)          | 3.9<br>(2.4-6)                              | 9.6%<br>(6.1-13%)                    | 15%<br>(9.9-22%)                    | 200<br>(120-280)    | 8900<br>(5700-13000)     |
| Kazakhstan | 1990 | Female | 50 to 54 | 72%<br>(60-82%)                | 28%<br>(18-40%)          | 3.7<br>(2.2-5.8)                            | 9.9%<br>(5.7-14%)                    | 15%<br>(8.3-21%)                    | 460<br>(260-690)    | 18000<br>(10000-27000)   |
| Kazakhstan | 1990 | Female | 55 to 59 | 69%<br>(56-81%)                | 31%<br>(19-44%)          | 3.4<br>(2.1-5.3)                            | 9.5%<br>(5-14%)                      | 13%<br>(7.1-20%)                    | 390<br>(210-600)    | 13000<br>(7200-20000)    |
| Kazakhstan | 1990 | Female | 60 to 64 | 67%<br>(52-80%)                | 33%<br>(20-48%)          | 3.1<br>(1.8-5)                              | 8.5%<br>(3.3-14%)                    | 11%<br>(4.5-19%)                    | 640<br>(250-1100)   | 18000<br>(7500-31000)    |
| Kazakhstan | 1990 | Female | 65 to 69 | 66%<br>(50-79%)                | 34%<br>(21-50%)          | 2.9<br>(1.7-4.5)                            | 7.9%<br>(3.1-13%)                    | 10%<br>(4-17%)                      | 590<br>(220-1000)   | 14000<br>(5400-24000)    |
| Kazakhstan | 1990 | Female | 70 to 74 | 58%<br>(43-71%)                | 42%<br>(29-57%)          | 2.4<br>(1.3-4)                              | 6.4%<br>(1.3-13%)                    | 8%<br>(1.6-16%)                     | 470<br>(93-950)     | 9000<br>(1800-18000)     |
| Kazakhstan | 1990 | Female | 75 to 79 | 47%<br>(33-63%)                | 53%<br>(37-67%)          | 2<br>(1-3.5)                                | 5.1%<br>(0.65-12%)                   | 6.2%<br>(0.7-14%)                   | 570<br>(65-1300)    | 8400<br>(1000-19000)     |
| Kazakhstan | 1990 | Female | 80 to 84 | 42%<br>(28-57%)                | 58%<br>(43-72%)          | 2<br>(1-3.3)                                | 5.1%<br>(0.97-12%)                   | 6%<br>(1-14%)                       | 510<br>(85-1200)    | 5600<br>(1100-12000)     |
| Kazakhstan | 1990 | Female | 85 to 89 | 41%<br>(27-56%)                | 59%<br>(44-73%)          | 2.1<br>(1.1-3.5)                            | 5.1%<br>(0.79-12%)                   | 6.1%<br>(0.78-14%)                  | 370<br>(47-860)     | 2900<br>(430-6400)       |

| Location   | Year | Sex    | Age      | Prevalence of current drinkers | Prevalence of abstainers | Population average of standard drinks daily | Percent of total attributable deaths | Percent of total attributable DALYs | Attributable deaths  | Attributable DALYs        |
|------------|------|--------|----------|--------------------------------|--------------------------|---------------------------------------------|--------------------------------------|-------------------------------------|----------------------|---------------------------|
| Kazakhstan | 1990 | Female | 90 to 94 | 42%<br>(28-57%)                | 58%<br>(43-72%)          | 2.3<br>(1.1-3.9)                            | 5.1%<br>(0.57-12%)                   | 6.1%<br>(0.45-15%)                  | 160<br>(11-390)      | 850<br>(96-2000)          |
| Kazakhstan | 1990 | Female | 95 plus  | 45%<br>(28-64%)                | 55%<br>(36-72%)          | 2.5<br>(1.1-4.8)                            | 5.6%<br>(-0.14-14%)                  | 6.5%<br>(-0.5-17%)                  | 45<br>(-3.4-120)     | 160<br>(-3.9-390)         |
| Kazakhstan | 1990 | Male   | All Ages | 60%<br>(54-68%)                | 40%<br>(32-46%)          | 3<br>(2.2-3.9)                              | 10%<br>(7.3-13%)                     | 12%<br>(7.6-16%)                    | 8300<br>(5300-12000) | 340000<br>(240000-450000) |
| Kazakhstan | 1990 | Male   | 15 to 19 | 47%<br>(34-60%)                | 53%<br>(40-66%)          | 1.3<br>(0.66-2.2)                           | 5.5%<br>(3.2-8.6%)                   | 7.4%<br>(3.7-12%)                   | 79<br>(39-130)       | 7000<br>(4000-11000)      |
| Kazakhstan | 1990 | Male   | 20 to 24 | 74%<br>(61-84%)                | 26%<br>(16-39%)          | 3.5<br>(2.1-5.3)                            | 14%<br>(9.5-20%)                     | 18%<br>(11-26%)                     | 290<br>(180-430)     | 22000<br>(15000-31000)    |
| Kazakhstan | 1990 | Male   | 25 to 29 | 82%<br>(72-88%)                | 18%<br>(12-28%)          | 5.3<br>(3.4-7.9)                            | 19%<br>(13-25%)                      | 24%<br>(16-33%)                     | 560<br>(360-770)     | 38000<br>(26000-51000)    |
| Kazakhstan | 1990 | Male   | 30 to 34 | 86%<br>(77-91%)                | 14%<br>(8.6-23%)         | 6.1<br>(4-8.6)                              | 20%<br>(14-25%)                      | 26%<br>(18-33%)                     | 700<br>(480-930)     | 44000<br>(31000-57000)    |
| Kazakhstan | 1990 | Male   | 35 to 39 | 85%<br>(77-91%)                | 15%<br>(8.9-23%)         | 5.6<br>(3.5-8)                              | 18%<br>(12-23%)                      | 23%<br>(15-30%)                     | 660<br>(410-900)     | 37000<br>(25000-50000)    |
| Kazakhstan | 1990 | Male   | 40 to 44 | 85%<br>(77-91%)                | 15%<br>(9.2-23%)         | 5.2<br>(3.2-7.6)                            | 17%<br>(11-22%)                      | 20%<br>(13-27%)                     | 610<br>(370-850)     | 31000<br>(19000-42000)    |
| Kazakhstan | 1990 | Male   | 45 to 49 | 84%<br>(75-90%)                | 16%<br>(9.7-25%)         | 5.4<br>(3.4-8.3)                            | 17%<br>(10-22%)                      | 20%<br>(12-26%)                     | 600<br>(360-830)     | 26000<br>(17000-36000)    |
| Kazakhstan | 1990 | Male   | 50 to 54 | 83%<br>(74-89%)                | 17%<br>(11-26%)          | 5.5<br>(3.2-8.5)                            | 16%<br>(9-21%)                       | 18%<br>(10-24%)                     | 1300<br>(690-1800)   | 49000<br>(28000-68000)    |
| Kazakhstan | 1990 | Male   | 55 to 59 | 81%<br>(70-88%)                | 19%<br>(12-30%)          | 4.7<br>(2.9-7.1)                            | 13%<br>(7.4-18%)                     | 15%<br>(8.1-21%)                    | 910<br>(470-1300)    | 30000<br>(16000-43000)    |
| Kazakhstan | 1990 | Male   | 60 to 64 | 79%<br>(67-88%)                | 21%<br>(12-33%)          | 4.1<br>(2.3-6.4)                            | 11%<br>(5-16%)                       | 12%<br>(5.5-19%)                    | 1100<br>(470-1700)   | 30000<br>(14000-48000)    |
| Kazakhstan | 1990 | Male   | 65 to 69 | 78%<br>(65-88%)                | 22%<br>(12-35%)          | 3.8<br>(2.3-5.8)                            | 9.6%<br>(4.2-15%)                    | 11%<br>(4.6-18%)                    | 610<br>(260-1000)    | 14000<br>(6200-23000)     |
| Kazakhstan | 1990 | Male   | 70 to 74 | 74%<br>(61-84%)                | 26%<br>(16-39%)          | 3.3<br>(1.8-5.1)                            | 7.8%<br>(2.4-13%)                    | 8.7%<br>(2.5-15%)                   | 400<br>(120-700)     | 7500<br>(2300-13000)      |
| Kazakhstan | 1990 | Male   | 75 to 79 | 68%<br>(52-81%)                | 32%<br>(19-48%)          | 2.6<br>(1.4-4.3)                            | 5.6%<br>(0.77-11%)                   | 6.2%<br>(0.69-12%)                  | 330<br>(38-670)      | 4900<br>(710-9800)        |
| Kazakhstan | 1990 | Male   | 80 to 84 | 64%<br>(47-78%)                | 36%<br>(22-53%)          | 2.3<br>(1.2-3.6)                            | 4%<br>(-0.22-9.1%)                   | 4.3%<br>(-0.53-10%)                 | 170<br>(-23-420)     | 2000<br>(-120-4600)       |
| Kazakhstan | 1990 | Male   | 85 to 89 | 61%<br>(45-75%)                | 39%<br>(25-55%)          | 2.1<br>(1.1-3.4)                            | 2.4%<br>(-1.1-7.6%)                  | 2.4%<br>(-1.7-8.5%)                 | 57<br>(-40-200)      | 490<br>(-220-1600)        |
| Kazakhstan | 1990 | Male   | 90 to 94 | 60%<br>(44-75%)                | 40%<br>(25-56%)          | 1.9<br>(0.98-3.2)                           | 1.1%<br>(-2-5.9%)                    | 0.82%<br>(-2.9-6.4%)                | 7.3<br>(-26-59)      | 57<br>(-110-320)          |
| Kazakhstan | 1990 | Male   | 95 plus  | 60%<br>(40-77%)                | 40%<br>(23-60%)          | 1.6<br>(0.71-3.2)                           | 0.24%<br>(-2.7-5.4%)                 | -0.24%<br>(-3.8-5.9%)               | -0.56<br>(-8.8-14)   | 2.2<br>(-25-51)           |
| Kazakhstan | 1995 | Female | All Ages | 60%<br>(54-65%)                | 40%<br>(35-46%)          | 2.2<br>(1.7-2.7)                            | 5.9%<br>(3.5-8.5%)                   | 7.4%<br>(3.1-12%)                   | 5700<br>(2400-9600)  | 170000<br>(100000-250000) |
| Kazakhstan | 1995 | Female | 15 to 19 | 51%<br>(42-60%)                | 49%<br>(40-58%)          | 1.7<br>(1-2.7)                              | 4.3%<br>(2.4-6.6%)                   | 8.1%<br>(4.4-12%)                   | 49<br>(27-78)        | 4200<br>(2400-6500)       |

| Location   | Year | Sex    | Age      | Prevalence of current drinkers | Prevalence of abstainers | Population average of standard drinks daily | Percent of total attributable deaths | Percent of total attributable DALYs | Attributable deaths   | Attributable DALYs        |
|------------|------|--------|----------|--------------------------------|--------------------------|---------------------------------------------|--------------------------------------|-------------------------------------|-----------------------|---------------------------|
| Kazakhstan | 1995 | Female | 20 to 24 | 69%<br>(60-76%)                | 31%<br>(24-40%)          | 2.8<br>(1.7-4.3)                            | 7.6%<br>(4.8-11%)                    | 13%<br>(7.8-19%)                    | 110<br>(62-150)       | 8300<br>(5300-12000)      |
| Kazakhstan | 1995 | Female | 25 to 29 | 75%<br>(68-81%)                | 25%<br>(19-32%)          | 3.4<br>(2.3-4.9)                            | 8.9%<br>(6.2-12%)                    | 15%<br>(10-20%)                     | 140<br>(90-190)       | 9800<br>(6800-13000)      |
| Kazakhstan | 1995 | Female | 30 to 34 | 77%<br>(71-83%)                | 23%<br>(17-29%)          | 3.7<br>(2.5-5.1)                            | 9%<br>(6.5-12%)                      | 15%<br>(11-20%)                     | 190<br>(130-250)      | 12000<br>(8400-16000)     |
| Kazakhstan | 1995 | Female | 35 to 39 | 77%<br>(71-83%)                | 23%<br>(17-29%)          | 3.7<br>(2.5-5.2)                            | 8.8%<br>(6.1-12%)                    | 15%<br>(10-19%)                     | 230<br>(150-310)      | 13000<br>(9200-18000)     |
| Kazakhstan | 1995 | Female | 40 to 44 | 76%<br>(70-82%)                | 24%<br>(18-30%)          | 3.6<br>(2.5-5.1)                            | 9.2%<br>(6.2-13%)                    | 14%<br>(9.8-20%)                    | 280<br>(190-390)      | 14000<br>(9600-20000)     |
| Kazakhstan | 1995 | Female | 45 to 49 | 76%<br>(67-82%)                | 24%<br>(18-33%)          | 3.6<br>(2.3-5.4)                            | 9.7%<br>(6.1-14%)                    | 14%<br>(8.9-20%)                    | 310<br>(190-460)      | 14000<br>(8600-20000)     |
| Kazakhstan | 1995 | Female | 50 to 54 | 74%<br>(64-82%)                | 26%<br>(18-36%)          | 3.4<br>(2.1-5.1)                            | 10%<br>(5.5-15%)                     | 14%<br>(7.7-21%)                    | 330<br>(180-500)      | 12000<br>(7000-19000)     |
| Kazakhstan | 1995 | Female | 55 to 59 | 71%<br>(59-82%)                | 29%<br>(18-41%)          | 3.1<br>(1.9-4.8)                            | 9.3%<br>(4.6-14%)                    | 12%<br>(6-19%)                      | 680<br>(330-1100)     | 23000<br>(11000-36000)    |
| Kazakhstan | 1995 | Female | 60 to 64 | 70%<br>(56-82%)                | 30%<br>(18-44%)          | 2.9<br>(1.7-4.6)                            | 7.8%<br>(2.5-14%)                    | 9.8%<br>(3.2-17%)                   | 480<br>(160-860)      | 14000<br>(4400-24000)     |
| Kazakhstan | 1995 | Female | 65 to 69 | 68%<br>(54-80%)                | 32%<br>(20-46%)          | 2.7<br>(1.6-4)                              | 6.9%<br>(2-13%)                      | 8.4%<br>(2.3-15%)                   | 800<br>(220-1500)     | 19000<br>(5100-34000)     |
| Kazakhstan | 1995 | Female | 70 to 74 | 61%<br>(47-73%)                | 39%<br>(27-53%)          | 2.2<br>(1.2-3.6)                            | 5.4%<br>(0.26-12%)                   | 6.5%<br>(0.25-14%)                  | 590<br>(21-1300)      | 11000<br>(470-24000)      |
| Kazakhstan | 1995 | Female | 75 to 79 | 51%<br>(35-66%)                | 49%<br>(34-65%)          | 1.9<br>(0.97-3.2)                           | 4.3%<br>(-0.26-11%)                  | 5%<br>(-0.44-13%)                   | 410<br>(-32-1100)     | 6000<br>(-350-15000)      |
| Kazakhstan | 1995 | Female | 80 to 84 | 45%<br>(31-60%)                | 55%<br>(40-69%)          | 1.9<br>(1-3.1)                              | 4.2%<br>(0.058-10%)                  | 4.8%<br>(-0.16-12%)                 | 480<br>(-15-1200)     | 5200<br>(72-13000)        |
| Kazakhstan | 1995 | Female | 85 to 89 | 44%<br>(30-58%)                | 56%<br>(42-70%)          | 2<br>(1.1-3.2)                              | 4.2%<br>(-0.13-11%)                  | 4.9%<br>(-0.4-12%)                  | 380<br>(-30-1000)     | 3000<br>(-85-7400)        |
| Kazakhstan | 1995 | Female | 90 to 94 | 45%<br>(31-59%)                | 55%<br>(41-69%)          | 2.1<br>(1.1-3.6)                            | 4.3%<br>(-0.43-11%)                  | 5.1%<br>(-0.79-14%)                 | 170<br>(-27-460)      | 920<br>(-90-2400)         |
| Kazakhstan | 1995 | Female | 95 plus  | 47%<br>(30-65%)                | 53%<br>(35-70%)          | 2.4<br>(1.1-4.3)                            | 4.8%<br>(-0.91-13%)                  | 5.6%<br>(-1.3-16%)                  | 61<br>(-15-170)       | 210<br>(-42-580)          |
| Kazakhstan | 1995 | Male   | All Ages | 67%<br>(61-73%)                | 33%<br>(27-39%)          | 2.9<br>(2.3-3.6)                            | 12%<br>(8.5-15%)                     | 12%<br>(7.9-16%)                    | 11000<br>(7000-15000) | 470000<br>(340000-600000) |
| Kazakhstan | 1995 | Male   | 15 to 19 | 50%<br>(40-60%)                | 50%<br>(40-60%)          | 1.2<br>(0.67-2)                             | 5.8%<br>(3.4-9.1%)                   | 7.6%<br>(3.9-12%)                   | 97<br>(49-160)        | 8200<br>(4400-13000)      |
| Kazakhstan | 1995 | Male   | 20 to 24 | 79%<br>(71-85%)                | 21%<br>(15-29%)          | 3.4<br>(2.2-5)                              | 16%<br>(11-22%)                      | 20%<br>(13-28%)                     | 450<br>(290-640)      | 33000<br>(22000-45000)    |
| Kazakhstan | 1995 | Male   | 25 to 29 | 87%<br>(82-90%)                | 13%<br>(9.6-18%)         | 5.1<br>(3.4-7.3)                            | 22%<br>(16-28%)                      | 26%<br>(19-34%)                     | 690<br>(470-910)      | 45000<br>(32000-59000)    |
| Kazakhstan | 1995 | Male   | 30 to 34 | 89%<br>(85-92%)                | 11%<br>(7.5-15%)         | 5.7<br>(3.9-7.9)                            | 22%<br>(16-28%)                      | 27%<br>(20-34%)                     | 960<br>(670-1200)     | 58000<br>(42000-74000)    |
| Kazakhstan | 1995 | Male   | 35 to 39 | 89%<br>(84-93%)                | 11%<br>(7.4-16%)         | 5.3<br>(3.6-7.3)                            | 20%<br>(14-26%)                      | 24%<br>(16-31%)                     | 1100<br>(720-1500)    | 60000<br>(40000-80000)    |

| Location   | Year | Sex    | Age      | Prevalence of current drinkers | Prevalence of abstainers | Population average of standard drinks daily | Percent of total attributable deaths | Percent of total attributable DALYs | Attributable deaths | Attributable DALYs        |
|------------|------|--------|----------|--------------------------------|--------------------------|---------------------------------------------|--------------------------------------|-------------------------------------|---------------------|---------------------------|
| Kazakhstan | 1995 | Male   | 40 to 44 | 88%<br>(84-92%)                | 12%<br>(7.9-16%)         | 5.1<br>(3.3-7.1)                            | 19%<br>(12-24%)                      | 21%<br>(14-29%)                     | 1100<br>(710-1600)  | 56000<br>(36000-76000)    |
| Kazakhstan | 1995 | Male   | 45 to 49 | 88%<br>(82-92%)                | 12%<br>(8.1-18%)         | 5.3<br>(3.5-7.7)                            | 18%<br>(11-24%)                      | 20%<br>(12-27%)                     | 1100<br>(680-1600)  | 48000<br>(30000-67000)    |
| Kazakhstan | 1995 | Male   | 50 to 54 | 87%<br>(82-91%)                | 13%<br>(9.2-18%)         | 5.3<br>(3.3-7.8)                            | 16%<br>(9.1-23%)                     | 18%<br>(9.8-25%)                    | 950<br>(510-1400)   | 36000<br>(19000-50000)    |
| Kazakhstan | 1995 | Male   | 55 to 59 | 85%<br>(78-90%)                | 15%<br>(10-22%)          | 4.6<br>(2.9-6.6)                            | 13%<br>(6.7-19%)                     | 14%<br>(7.1-21%)                    | 1700<br>(810-2600)  | 55000<br>(28000-84000)    |
| Kazakhstan | 1995 | Male   | 60 to 64 | 81%<br>(72-88%)                | 19%<br>(12-28%)          | 3.8<br>(2.3-5.8)                            | 10%<br>(4.2-16%)                     | 11%<br>(4.4-18%)                    | 980<br>(400-1600)   | 27000<br>(12000-45000)    |
| Kazakhstan | 1995 | Male   | 65 to 69 | 79%<br>(68-88%)                | 21%<br>(12-32%)          | 3.4<br>(2.2-5)                              | 8.3%<br>(3.3-14%)                    | 9%<br>(3.4-15%)                     | 1100<br>(410-1900)  | 26000<br>(10000-43000)    |
| Kazakhstan | 1995 | Male   | 70 to 74 | 76%<br>(63-85%)                | 24%<br>(15-37%)          | 3<br>(1.7-4.4)                              | 6.5%<br>(1.6-12%)                    | 7.1%<br>(1.5-14%)                   | 480<br>(100-940)    | 9100<br>(2300-17000)      |
| Kazakhstan | 1995 | Male   | 75 to 79 | 70%<br>(55-82%)                | 30%<br>(18-45%)          | 2.4<br>(1.3-3.8)                            | 4.3%<br>(0.091-9.6%)                 | 4.6%<br>(-0.18-11%)                 | 220<br>(-7.7-510)   | 3300<br>(66-7300)         |
| Kazakhstan | 1995 | Male   | 80 to 84 | 66%<br>(50-79%)                | 34%<br>(21-50%)          | 2.1<br>(1.2-3.2)                            | 2.6%<br>(-0.97-7.5%)                 | 2.7%<br>(-1.4-8.2%)                 | 120<br>(-61-360)    | 1400<br>(-490-3800)       |
| Kazakhstan | 1995 | Male   | 85 to 89 | 63%<br>(47-77%)                | 37%<br>(23-53%)          | 1.9<br>(1.1-3)                              | 1.2%<br>(-2-5.6%)                    | 1%<br>(-2.8-6.1%)                   | 28<br>(-78-170)     | 290<br>(-480-1300)        |
| Kazakhstan | 1995 | Male   | 90 to 94 | 62%<br>(47-76%)                | 38%<br>(24-53%)          | 1.7<br>(0.93-2.8)                           | 0.19%<br>(-2.6-4.4%)                 | -0.21%<br>(-3.6-4.7%)               | -2<br>(-36-46)      | 12<br>(-160-260)          |
| Kazakhstan | 1995 | Male   | 95 plus  | 62%<br>(42-79%)                | 38%<br>(21-58%)          | 1.5<br>(0.69-2.8)                           | -0.4%<br>(-3.2-3.9%)                 | -1%<br>(-4.4-4.2%)                  | -2.6<br>(-11-11)    | -4.2<br>(-33-40)          |
| Kazakhstan | 2000 | Female | All Ages | 60%<br>(55-65%)                | 40%<br>(35-45%)          | 2.3<br>(1.8-2.8)                            | 6.3%<br>(4.1-8.8%)                   | 7.4%<br>(3.5-12%)                   | 5300<br>(2500-8800) | 170000<br>(110000-240000) |
| Kazakhstan | 2000 | Female | 15 to 19 | 50%<br>(41-60%)                | 50%<br>(40-59%)          | 1.7<br>(1.1-2.6)                            | 4.5%<br>(2.6-6.8%)                   | 8.7%<br>(4.9-14%)                   | 50<br>(28-78)       | 4200<br>(2500-6300)       |
| Kazakhstan | 2000 | Female | 20 to 24 | 69%<br>(60-76%)                | 31%<br>(24-40%)          | 2.9<br>(1.8-4.3)                            | 8.4%<br>(5.5-12%)                    | 15%<br>(9.4-21%)                    | 120<br>(73-170)     | 9100<br>(6000-13000)      |
| Kazakhstan | 2000 | Female | 25 to 29 | 76%<br>(69-81%)                | 24%<br>(19-31%)          | 3.6<br>(2.4-5)                              | 10%<br>(7.3-14%)                     | 17%<br>(12-23%)                     | 170<br>(120-230)    | 12000<br>(8400-16000)     |
| Kazakhstan | 2000 | Female | 30 to 34 | 78%<br>(72-84%)                | 22%<br>(16-28%)          | 3.9<br>(2.7-5.3)                            | 10%<br>(7.7-14%)                     | 17%<br>(13-23%)                     | 190<br>(140-260)    | 12000<br>(8900-16000)     |
| Kazakhstan | 2000 | Female | 35 to 39 | 78%<br>(72-83%)                | 22%<br>(17-28%)          | 3.8<br>(2.6-5.1)                            | 9.9%<br>(7.1-13%)                    | 16%<br>(12-21%)                     | 250<br>(170-340)    | 14000<br>(10000-19000)    |
| Kazakhstan | 2000 | Female | 40 to 44 | 77%<br>(71-82%)                | 23%<br>(18-29%)          | 3.7<br>(2.6-5.1)                            | 10%<br>(7.2-13%)                     | 16%<br>(11-21%)                     | 320<br>(220-440)    | 16000<br>(11000-22000)    |
| Kazakhstan | 2000 | Female | 45 to 49 | 75%<br>(67-82%)                | 25%<br>(18-33%)          | 3.6<br>(2.4-5.3)                            | 10%<br>(6.5-14%)                     | 15%<br>(9.8-21%)                    | 400<br>(250-560)    | 18000<br>(11000-25000)    |
| Kazakhstan | 2000 | Female | 50 to 54 | 71%<br>(62-79%)                | 29%<br>(21-38%)          | 3.2<br>(2.1-4.7)                            | 9.8%<br>(5.8-14%)                    | 14%<br>(8-20%)                      | 390<br>(220-580)    | 15000<br>(8800-22000)     |
| Kazakhstan | 2000 | Female | 55 to 59 | 70%<br>(59-80%)                | 30%<br>(20-41%)          | 3.1<br>(1.9-4.5)                            | 9.4%<br>(4.9-14%)                    | 12%<br>(6.4-19%)                    | 370<br>(190-560)    | 12000<br>(6300-19000)     |

| Location   | Year | Sex    | Age      | Prevalence of current drinkers | Prevalence of abstainers | Population average of standard drinks daily | Percent of total attributable deaths | Percent of total attributable DALYs | Attributable deaths   | Attributable DALYs        |
|------------|------|--------|----------|--------------------------------|--------------------------|---------------------------------------------|--------------------------------------|-------------------------------------|-----------------------|---------------------------|
| Kazakhstan | 2000 | Female | 60 to 64 | 69%<br>(57-80%)                | 31%<br>(20-43%)          | 2.9<br>(1.7-4.4)                            | 7.8%<br>(2.6-14%)                    | 9.9%<br>(3.3-17%)                   | 700<br>(230-1200)     | 20000<br>(6600-35000)     |
| Kazakhstan | 2000 | Female | 65 to 69 | 65%<br>(53-77%)                | 35%<br>(23-47%)          | 2.5<br>(1.6-3.7)                            | 6.6%<br>(1.8-12%)                    | 8.1%<br>(2.1-15%)                   | 470<br>(120-880)      | 11000<br>(3000-20000)     |
| Kazakhstan | 2000 | Female | 70 to 74 | 54%<br>(42-65%)                | 46%<br>(35-58%)          | 1.9<br>(1.1-3)                              | 4.8%<br>(0.64-10%)                   | 5.7%<br>(0.65-12%)                  | 620<br>(72-1300)      | 12000<br>(1600-25000)     |
| Kazakhstan | 2000 | Female | 75 to 79 | 42%<br>(29-58%)                | 58%<br>(42-71%)          | 1.5<br>(0.81-2.7)                           | 3.6%<br>(0.088-9%)                   | 4.2%<br>(0.0076-11%)                | 380<br>(0.74-980)     | 5600<br>(140-14000)       |
| Kazakhstan | 2000 | Female | 80 to 84 | 42%<br>(28-56%)                | 58%<br>(44-72%)          | 1.7<br>(0.97-2.8)                           | 3.8%<br>(0.15-9.2%)                  | 4.4%<br>(-0.08-11%)                 | 330<br>(-6-800)       | 3600<br>(150-8500)        |
| Kazakhstan | 2000 | Female | 85 to 89 | 43%<br>(30-58%)                | 57%<br>(42-70%)          | 2<br>(1.1-3.2)                              | 4.1%<br>(-0.058-10%)                 | 4.7%<br>(-0.26-12%)                 | 300<br>(-17-760)      | 2300<br>(-34-5700)        |
| Kazakhstan | 2000 | Female | 90 to 94 | 44%<br>(30-59%)                | 56%<br>(41-70%)          | 2.1<br>(1.2-3.6)                            | 4.3%<br>(-0.31-11%)                  | 4.9%<br>(-0.85-13%)                 | 180<br>(-30-480)      | 950<br>(-70-2500)         |
| Kazakhstan | 2000 | Female | 95 plus  | 46%<br>(29-65%)                | 54%<br>(35-71%)          | 2.4<br>(1.1-4.4)                            | 4.7%<br>(-0.87-13%)                  | 5.5%<br>(-1.5-16%)                  | 64<br>(-17-190)       | 220<br>(-42-620)          |
| Kazakhstan | 2000 | Male   | All Ages | 68%<br>(62-73%)                | 32%<br>(27-38%)          | 3.1<br>(2.5-3.7)                            | 13%<br>(10-16%)                      | 13%<br>(9.3-17%)                    | 12000<br>(7900-16000) | 500000<br>(370000-640000) |
| Kazakhstan | 2000 | Male   | 15 to 19 | 52%<br>(43-62%)                | 48%<br>(38-57%)          | 1.3<br>(0.74-2.1)                           | 6.2%<br>(3.6-9.6%)                   | 8.3%<br>(4.3-13%)                   | 100<br>(54-170)       | 8700<br>(4900-14000)      |
| Kazakhstan | 2000 | Male   | 20 to 24 | 80%<br>(72-85%)                | 20%<br>(15-28%)          | 3.6<br>(2.3-5.3)                            | 17%<br>(12-23%)                      | 21%<br>(14-29%)                     | 480<br>(310-670)      | 34000<br>(23000-47000)    |
| Kazakhstan | 2000 | Male   | 25 to 29 | 87%<br>(82-91%)                | 13%<br>(9.4-18%)         | 5.3<br>(3.6-7.4)                            | 24%<br>(17-30%)                      | 28%<br>(21-36%)                     | 820<br>(580-1100)     | 53000<br>(38000-69000)    |
| Kazakhstan | 2000 | Male   | 30 to 34 | 89%<br>(85-93%)                | 11%<br>(7.3-15%)         | 6<br>(4.2-8.1)                              | 24%<br>(18-30%)                      | 29%<br>(21-36%)                     | 930<br>(660-1200)     | 56000<br>(40000-71000)    |
| Kazakhstan | 2000 | Male   | 35 to 39 | 89%<br>(85-92%)                | 11%<br>(7.6-15%)         | 5.5<br>(3.8-7.4)                            | 22%<br>(16-28%)                      | 26%<br>(18-33%)                     | 1100<br>(790-1500)    | 62000<br>(44000-81000)    |
| Kazakhstan | 2000 | Male   | 40 to 44 | 88%<br>(84-92%)                | 12%<br>(8.2-16%)         | 5.2<br>(3.5-7.1)                            | 20%<br>(14-26%)                      | 23%<br>(15-30%)                     | 1300<br>(860-1800)    | 64000<br>(43000-86000)    |
| Kazakhstan | 2000 | Male   | 45 to 49 | 87%<br>(82-92%)                | 13%<br>(8.4-18%)         | 5.4<br>(3.7-7.7)                            | 19%<br>(13-25%)                      | 22%<br>(14-28%)                     | 1500<br>(910-2000)    | 62000<br>(40000-85000)    |
| Kazakhstan | 2000 | Male   | 50 to 54 | 87%<br>(82-91%)                | 13%<br>(9.3-18%)         | 5.5<br>(3.5-8)                              | 18%<br>(10-24%)                      | 20%<br>(11-27%)                     | 1300<br>(700-1800)    | 49000<br>(28000-69000)    |
| Kazakhstan | 2000 | Male   | 55 to 59 | 84%<br>(78-89%)                | 16%<br>(11-22%)          | 4.7<br>(3.1-6.8)                            | 14%<br>(7.6-20%)                     | 16%<br>(8-23%)                      | 900<br>(450-1300)     | 29000<br>(16000-44000)    |
| Kazakhstan | 2000 | Male   | 60 to 64 | 80%<br>(72-88%)                | 20%<br>(12-28%)          | 3.8<br>(2.3-5.8)                            | 10%<br>(4.5-17%)                     | 11%<br>(4.7-19%)                    | 1400<br>(580-2300)    | 39000<br>(17000-64000)    |
| Kazakhstan | 2000 | Male   | 65 to 69 | 79%<br>(69-87%)                | 21%<br>(13-31%)          | 3.5<br>(2.4-5)                              | 8.6%<br>(3.4-14%)                    | 9.4%<br>(3.5-16%)                   | 790<br>(300-1300)     | 18000<br>(7200-30000)     |
| Kazakhstan | 2000 | Male   | 70 to 74 | 74%<br>(63-83%)                | 26%<br>(17-37%)          | 2.9<br>(1.8-4.3)                            | 6.5%<br>(1.7-12%)                    | 7.1%<br>(1.7-13%)                   | 740<br>(180-1400)     | 14000<br>(3600-26000)     |
| Kazakhstan | 2000 | Male   | 75 to 79 | 66%<br>(50-78%)                | 34%<br>(22-50%)          | 2.2<br>(1.2-3.5)                            | 4.1%<br>(0.24-9.3%)                  | 4.5%<br>(0.0021-10%)                | 230<br>(0.11-550)     | 3500<br>(200-7900)        |



| Location   | Year | Sex    | Age      | Prevalence of current drinkers | Prevalence of abstainers | Population average of standard drinks daily | Percent of total attributable deaths | Percent of total attributable DALYs | Attributable deaths  | Attributable DALYs        |
|------------|------|--------|----------|--------------------------------|--------------------------|---------------------------------------------|--------------------------------------|-------------------------------------|----------------------|---------------------------|
| Kazakhstan | 2000 | Male   | 80 to 84 | 64%<br>(48-78%)                | 36%<br>(22-52%)          | 2<br>(1.2-3.1)                              | 2.6%<br>(-0.9-7.1%)                  | 2.6%<br>(-1.4-7.9%)                 | 82<br>(-45-250)      | 970<br>(-330-2800)        |
| Kazakhstan | 2000 | Male   | 85 to 89 | 64%<br>(48-76%)                | 36%<br>(24-52%)          | 2<br>(1.2-3)                                | 1.1%<br>(-2.2-5.5%)                  | 0.9%<br>(-3-6%)                     | 18<br>(-61-120)      | 200<br>(-390-960)         |
| Kazakhstan | 2000 | Male   | 90 to 94 | 63%<br>(47-76%)                | 37%<br>(24-53%)          | 1.8<br>(0.98-2.8)                           | 0.063%<br>(-3-4.2%)                  | -0.38%<br>(-4.1-4.6%)               | -3.9<br>(-42-46)     | 3.8<br>(-180-260)         |
| Kazakhstan | 2000 | Male   | 95 plus  | 62%<br>(42-78%)                | 38%<br>(22-58%)          | 1.5<br>(0.73-2.8)                           | -0.53%<br>(-3.5-3.8%)                | -1.2%<br>(-4.8-3.9%)                | -3.1<br>(-13-10)     | -5.5<br>(-37-40)          |
| Kazakhstan | 2005 | Female | All Ages | 61%<br>(57-66%)                | 39%<br>(34-43%)          | 2.5<br>(2.1-3.1)                            | 7.2%<br>(5-9.8%)                     | 8.5%<br>(4.5-13%)                   | 6300<br>(3300-10000) | 200000<br>(140000-270000) |
| Kazakhstan | 2005 | Female | 15 to 19 | 48%<br>(38-59%)                | 52%<br>(41-62%)          | 1.8<br>(1.1-2.7)                            | 4.7%<br>(2.7-7.4%)                   | 9.6%<br>(5.4-15%)                   | 59<br>(33-93)        | 5000<br>(2900-7500)       |
| Kazakhstan | 2005 | Female | 20 to 24 | 69%<br>(59-77%)                | 31%<br>(23-41%)          | 3.1<br>(2-4.5)                              | 8.9%<br>(6-13%)                      | 16%<br>(10-22%)                     | 130<br>(83-190)      | 10000<br>(6900-14000)     |
| Kazakhstan | 2005 | Female | 25 to 29 | 77%<br>(70-83%)                | 23%<br>(17-30%)          | 3.9<br>(2.6-5.3)                            | 11%<br>(7.9-14%)                     | 18%<br>(13-24%)                     | 190<br>(130-260)     | 13000<br>(9600-18000)     |
| Kazakhstan | 2005 | Female | 30 to 34 | 79%<br>(73-85%)                | 21%<br>(15-27%)          | 4.2<br>(3-5.7)                              | 12%<br>(8.6-15%)                     | 19%<br>(14-24%)                     | 250<br>(180-330)     | 16000<br>(11000-20000)    |
| Kazakhstan | 2005 | Female | 35 to 39 | 78%<br>(72-84%)                | 22%<br>(16-28%)          | 4.1<br>(2.8-5.7)                            | 11%<br>(8.2-15%)                     | 18%<br>(13-23%)                     | 280<br>(190-380)     | 16000<br>(11000-21000)    |
| Kazakhstan | 2005 | Female | 40 to 44 | 77%<br>(70-83%)                | 23%<br>(17-30%)          | 4<br>(2.7-5.6)                              | 12%<br>(8.2-15%)                     | 18%<br>(13-23%)                     | 390<br>(270-530)     | 20000<br>(14000-27000)    |
| Kazakhstan | 2005 | Female | 45 to 49 | 75%<br>(66-82%)                | 25%<br>(18-34%)          | 3.9<br>(2.6-5.6)                            | 11%<br>(7.8-15%)                     | 17%<br>(11-23%)                     | 490<br>(330-680)     | 22000<br>(15000-30000)    |
| Kazakhstan | 2005 | Female | 50 to 54 | 71%<br>(62-79%)                | 29%<br>(21-38%)          | 3.5<br>(2.3-5.3)                            | 11%<br>(7-16%)                       | 15%<br>(9.9-22%)                    | 550<br>(350-800)     | 21000<br>(14000-31000)    |
| Kazakhstan | 2005 | Female | 55 to 59 | 71%<br>(60-81%)                | 29%<br>(19-40%)          | 3.4<br>(2.1-5)                              | 10%<br>(5.9-15%)                     | 14%<br>(7.9-21%)                    | 540<br>(300-800)     | 18000<br>(10000-27000)    |
| Kazakhstan | 2005 | Female | 60 to 64 | 69%<br>(57-80%)                | 31%<br>(20-43%)          | 3.1<br>(1.9-4.8)                            | 8.9%<br>(3.7-15%)                    | 11%<br>(4.7-19%)                    | 460<br>(190-770)     | 13000<br>(5500-22000)     |
| Kazakhstan | 2005 | Female | 65 to 69 | 66%<br>(53-77%)                | 34%<br>(23-47%)          | 2.7<br>(1.7-4.1)                            | 7.5%<br>(2.7-13%)                    | 9.3%<br>(3.5-16%)                   | 810<br>(300-1400)    | 19000<br>(7200-33000)     |
| Kazakhstan | 2005 | Female | 70 to 74 | 55%<br>(42-67%)                | 45%<br>(33-58%)          | 2.1<br>(1.2-3.4)                            | 5.5%<br>(0.9-11%)                    | 6.6%<br>(1.1-13%)                   | 510<br>(82-1100)     | 9700<br>(1600-20000)      |
| Kazakhstan | 2005 | Female | 75 to 79 | 44%<br>(30-59%)                | 56%<br>(41-70%)          | 1.7<br>(0.92-2.9)                           | 4.2%<br>(0.31-10%)                   | 4.9%<br>(0.26-12%)                  | 590<br>(33-1400)     | 8600<br>(650-21000)       |
| Kazakhstan | 2005 | Female | 80 to 84 | 43%<br>(29-58%)                | 57%<br>(42-71%)          | 1.9<br>(1.1-3.1)                            | 4.4%<br>(0.33-10%)                   | 5.1%<br>(0.24-12%)                  | 470<br>(24-1200)     | 5200<br>(410-12000)       |
| Kazakhstan | 2005 | Female | 85 to 89 | 44%<br>(30-59%)                | 56%<br>(41-70%)          | 2.2<br>(1.2-3.5)                            | 4.8%<br>(0.37-12%)                   | 5.5%<br>(0.14-14%)                  | 270<br>(7.2-710)     | 2100<br>(170-5200)        |
| Kazakhstan | 2005 | Female | 90 to 94 | 45%<br>(32-60%)                | 55%<br>(40-68%)          | 2.4<br>(1.3-4.1)                            | 5%<br>(-0.22-13%)                    | 5.8%<br>(-0.61-16%)                 | 170<br>(-19-470)     | 900<br>(-41-2400)         |
| Kazakhstan | 2005 | Female | 95 plus  | 47%<br>(30-65%)                | 53%<br>(35-70%)          | 2.6<br>(1.2-4.8)                            | 5.6%<br>(-0.95-15%)                  | 6.4%<br>(-1.4-18%)                  | 78<br>(-18-210)      | 270<br>(-46-710)          |

| Location   | Year | Sex    | Age      | Prevalence of current drinkers | Prevalence of abstainers | Population average of standard drinks daily | Percent of total attributable deaths | Percent of total attributable DALYs | Attributable deaths   | Attributable DALYs        |
|------------|------|--------|----------|--------------------------------|--------------------------|---------------------------------------------|--------------------------------------|-------------------------------------|-----------------------|---------------------------|
| Kazakhstan | 2005 | Male   | All Ages | 69%<br>(64-75%)                | 31%<br>(25-36%)          | 3.4<br>(2.8-4.1)                            | 14%<br>(11-18%)                      | 15%<br>(11-19%)                     | 14000<br>(9700-18000) | 580000<br>(450000-730000) |
| Kazakhstan | 2005 | Male   | 15 to 19 | 54%<br>(44-64%)                | 46%<br>(36-56%)          | 1.5<br>(0.84-2.3)                           | 6.8%<br>(4-10%)                      | 9.3%<br>(4.9-15%)                   | 130<br>(65-200)       | 10000<br>(5900-16000)     |
| Kazakhstan | 2005 | Male   | 20 to 24 | 80%<br>(72-86%)                | 20%<br>(14-28%)          | 3.8<br>(2.5-5.5)                            | 18%<br>(12-24%)                      | 21%<br>(14-29%)                     | 530<br>(340-760)      | 38000<br>(26000-53000)    |
| Kazakhstan | 2005 | Male   | 25 to 29 | 87%<br>(83-91%)                | 13%<br>(9.4-17%)         | 5.7<br>(3.8-7.8)                            | 24%<br>(18-31%)                      | 28%<br>(20-36%)                     | 950<br>(670-1300)     | 62000<br>(45000-81000)    |
| Kazakhstan | 2005 | Male   | 30 to 34 | 90%<br>(86-93%)                | 10%<br>(7.1-14%)         | 6.4<br>(4.5-8.7)                            | 25%<br>(19-31%)                      | 29%<br>(22-36%)                     | 1200<br>(850-1500)    | 70000<br>(51000-89000)    |
| Kazakhstan | 2005 | Male   | 35 to 39 | 89%<br>(84-93%)                | 11%<br>(7.5-16%)         | 5.8<br>(4-8)                                | 23%<br>(17-29%)                      | 27%<br>(19-34%)                     | 1200<br>(820-1600)    | 65000<br>(46000-85000)    |
| Kazakhstan | 2005 | Male   | 40 to 44 | 87%<br>(82-91%)                | 13%<br>(8.6-18%)         | 5.4<br>(3.7-7.3)                            | 21%<br>(15-27%)                      | 24%<br>(17-31%)                     | 1500<br>(1000-2100)   | 74000<br>(50000-98000)    |
| Kazakhstan | 2005 | Male   | 45 to 49 | 87%<br>(81-91%)                | 13%<br>(8.5-19%)         | 5.6<br>(3.9-8)                              | 21%<br>(14-26%)                      | 23%<br>(16-29%)                     | 1800<br>(1200-2400)   | 77000<br>(51000-100000)   |
| Kazakhstan | 2005 | Male   | 50 to 54 | 87%<br>(81-91%)                | 13%<br>(9.4-19%)         | 5.8<br>(3.7-8.3)                            | 19%<br>(12-25%)                      | 21%<br>(13-27%)                     | 1800<br>(1100-2400)   | 68000<br>(41000-89000)    |
| Kazakhstan | 2005 | Male   | 55 to 59 | 83%<br>(76-89%)                | 17%<br>(11-24%)          | 4.9<br>(3.2-7.1)                            | 15%<br>(8.7-21%)                     | 17%<br>(9.1-24%)                    | 1300<br>(720-1900)    | 44000<br>(25000-62000)    |
| Kazakhstan | 2005 | Male   | 60 to 64 | 81%<br>(72-88%)                | 19%<br>(12-28%)          | 4.1<br>(2.5-6.2)                            | 12%<br>(5.4-18%)                     | 13%<br>(5.6-20%)                    | 860<br>(380-1400)     | 24000<br>(11000-38000)    |
| Kazakhstan | 2005 | Male   | 65 to 69 | 80%<br>(70-88%)                | 20%<br>(12-30%)          | 3.8<br>(2.6-5.3)                            | 9.6%<br>(4.1-15%)                    | 10%<br>(4.3-17%)                    | 1300<br>(540-2100)    | 30000<br>(13000-49000)    |
| Kazakhstan | 2005 | Male   | 70 to 74 | 75%<br>(63-84%)                | 25%<br>(16-37%)          | 3.2<br>(2-4.7)                              | 7.3%<br>(2.3-13%)                    | 7.9%<br>(2.3-14%)                   | 660<br>(180-1200)     | 12000<br>(3800-22000)     |
| Kazakhstan | 2005 | Male   | 75 to 79 | 66%<br>(50-80%)                | 34%<br>(20-50%)          | 2.4<br>(1.3-3.8)                            | 4.7%<br>(0.55-10%)                   | 5.1%<br>(0.37-11%)                  | 430<br>(32-970)       | 6500<br>(730-14000)       |
| Kazakhstan | 2005 | Male   | 80 to 84 | 65%<br>(48-78%)                | 35%<br>(22-52%)          | 2.2<br>(1.3-3.4)                            | 3.1%<br>(-0.55-8%)                   | 3.2%<br>(-1.1-8.8%)                 | 130<br>(-42-350)      | 1500<br>(-260-3900)       |
| Kazakhstan | 2005 | Male   | 85 to 89 | 64%<br>(49-77%)                | 36%<br>(23-51%)          | 2.2<br>(1.3-3.3)                            | 1.5%<br>(-2.1-6.4%)                  | 1.3%<br>(-2.9-6.9%)                 | 19<br>(-43-100)       | 190<br>(-270-800)         |
| Kazakhstan | 2005 | Male   | 90 to 94 | 63%<br>(48-77%)                | 37%<br>(23-52%)          | 1.9<br>(1.1-3.1)                            | 0.28%<br>(-3-5.1%)                   | -0.13%<br>(-4.1-5.5%)               | -0.93<br>(-29-39)     | 12<br>(-130-220)          |
| Kazakhstan | 2005 | Male   | 95 plus  | 62%<br>(44-79%)                | 38%<br>(21-56%)          | 1.7<br>(0.77-3.1)                           | -0.37%<br>(-3.8-4.9%)                | -0.97%<br>(-5-5.2%)                 | -2.3<br>(-12-13)      | -3.4<br>(-36-47)          |
| Kazakhstan | 2010 | Female | All Ages | 64%<br>(59-69%)                | 36%<br>(31-41%)          | 2.7<br>(2.2-3.4)                            | 7.5%<br>(5.1-10%)                    | 9.5%<br>(4.9-15%)                   | 6200<br>(3300-9900)   | 190000<br>(130000-260000) |
| Kazakhstan | 2010 | Female | 15 to 19 | 52%<br>(39-64%)                | 48%<br>(36-61%)          | 2<br>(1.2-3.1)                              | 4.7%<br>(2.7-7.3%)                   | 11%<br>(5.9-17%)                    | 48<br>(25-76)         | 4200<br>(2400-6400)       |
| Kazakhstan | 2010 | Female | 20 to 24 | 71%<br>(59-80%)                | 29%<br>(20-41%)          | 3.3<br>(2.1-4.9)                            | 7.8%<br>(5.2-11%)                    | 16%<br>(10-22%)                     | 110<br>(70-160)       | 9100<br>(6000-13000)      |
| Kazakhstan | 2010 | Female | 25 to 29 | 76%<br>(66-83%)                | 24%<br>(17-34%)          | 4<br>(2.6-5.6)                              | 9.5%<br>(6.9-13%)                    | 18%<br>(13-23%)                     | 150<br>(100-200)      | 11000<br>(7800-14000)     |

| Location   | Year | Sex    | Age      | Prevalence of current drinkers | Prevalence of abstainers | Population average of standard drinks daily | Percent of total attributable deaths | Percent of total attributable DALYs | Attributable deaths   | Attributable DALYs        |
|------------|------|--------|----------|--------------------------------|--------------------------|---------------------------------------------|--------------------------------------|-------------------------------------|-----------------------|---------------------------|
| Kazakhstan | 2010 | Female | 30 to 34 | 79%<br>(69-85%)                | 21%<br>(15-31%)          | 4.3<br>(2.9-6)                              | 11%<br>(7.8-13%)                     | 19%<br>(14-24%)                     | 200<br>(140-260)      | 13000<br>(9600-17000)     |
| Kazakhstan | 2010 | Female | 35 to 39 | 79%<br>(70-85%)                | 21%<br>(15-30%)          | 4.2<br>(2.8-6.1)                            | 11%<br>(8-14%)                       | 19%<br>(14-24%)                     | 250<br>(180-330)      | 15000<br>(11000-19000)    |
| Kazakhstan | 2010 | Female | 40 to 44 | 78%<br>(69-85%)                | 22%<br>(15-31%)          | 4.2<br>(2.8-6)                              | 11%<br>(8-15%)                       | 19%<br>(14-24%)                     | 310<br>(220-400)      | 16000<br>(12000-21000)    |
| Kazakhstan | 2010 | Female | 45 to 49 | 76%<br>(65-84%)                | 24%<br>(16-35%)          | 4.2<br>(2.7-6.1)                            | 11%<br>(8-15%)                       | 18%<br>(13-24%)                     | 440<br>(310-600)      | 20000<br>(14000-27000)    |
| Kazakhstan | 2010 | Female | 50 to 54 | 75%<br>(64-83%)                | 25%<br>(17-36%)          | 3.9<br>(2.5-5.9)                            | 11%<br>(7.6-16%)                     | 17%<br>(11-23%)                     | 530<br>(350-740)      | 21000<br>(14000-29000)    |
| Kazakhstan | 2010 | Female | 55 to 59 | 72%<br>(60-83%)                | 28%<br>(17-40%)          | 3.6<br>(2.2-5.5)                            | 11%<br>(6.3-15%)                     | 15%<br>(8.9-22%)                    | 580<br>(350-860)      | 20000<br>(12000-29000)    |
| Kazakhstan | 2010 | Female | 60 to 64 | 71%<br>(57-83%)                | 29%<br>(17-43%)          | 3.3<br>(2-5.2)                              | 9.3%<br>(4.3-15%)                    | 12%<br>(5.8-20%)                    | 520<br>(240-850)      | 15000<br>(7000-25000)     |
| Kazakhstan | 2010 | Female | 65 to 69 | 70%<br>(56-82%)                | 30%<br>(18-44%)          | 3.1<br>(1.9-4.7)                            | 8.3%<br>(3.4-14%)                    | 11%<br>(4.3-18%)                    | 500<br>(200-840)      | 12000<br>(4900-20000)     |
| Kazakhstan | 2010 | Female | 70 to 74 | 63%<br>(49-75%)                | 37%<br>(25-51%)          | 2.6<br>(1.5-4.3)                            | 6.6%<br>(1.3-13%)                    | 8.3%<br>(1.6-16%)                   | 790<br>(140-1600)     | 15000<br>(2800-30000)     |
| Kazakhstan | 2010 | Female | 75 to 79 | 53%<br>(38-68%)                | 47%<br>(32-62%)          | 2.2<br>(1.2-3.9)                            | 5.4%<br>(0.58-12%)                   | 6.4%<br>(0.55-14%)                  | 480<br>(39-1100)      | 7100<br>(740-16000)       |
| Kazakhstan | 2010 | Female | 80 to 84 | 48%<br>(33-63%)                | 52%<br>(37-67%)          | 2.3<br>(1.2-3.6)                            | 5.5%<br>(0.68-12%)                   | 6.2%<br>(0.53-14%)                  | 610<br>(50-1400)      | 6600<br>(800-15000)       |
| Kazakhstan | 2010 | Female | 85 to 89 | 46%<br>(32-61%)                | 54%<br>(39-68%)          | 2.4<br>(1.3-3.8)                            | 5.3%<br>(0.66-12%)                   | 6.2%<br>(0.41-15%)                  | 420<br>(27-1000)      | 3300<br>(400-7500)        |
| Kazakhstan | 2010 | Female | 90 to 94 | 47%<br>(33-61%)                | 53%<br>(39-67%)          | 2.5<br>(1.4-4.4)                            | 5.4%<br>(0.26-13%)                   | 6.4%<br>(-0.088-16%)                | 150<br>(-2.1-390)     | 830<br>(41-2000)          |
| Kazakhstan | 2010 | Female | 95 plus  | 49%<br>(32-67%)                | 51%<br>(33-68%)          | 2.8<br>(1.3-5)                              | 5.9%<br>(-0.59-15%)                  | 6.8%<br>(-1.2-18%)                  | 64<br>(-11-170)       | 220<br>(-21-560)          |
| Kazakhstan | 2010 | Male   | All Ages | 68%<br>(61-73%)                | 32%<br>(27-39%)          | 3.4<br>(2.7-4.2)                            | 14%<br>(11-17%)                      | 15%<br>(10-19%)                     | 12000<br>(8100-16000) | 490000<br>(380000-620000) |
| Kazakhstan | 2010 | Male   | 15 to 19 | 52%<br>(39-64%)                | 48%<br>(36-61%)          | 1.4<br>(0.78-2.4)                           | 6.2%<br>(3.7-9.4%)                   | 9.1%<br>(4.7-15%)                   | 81<br>(41-130)        | 7100<br>(4200-11000)      |
| Kazakhstan | 2010 | Male   | 20 to 24 | 77%<br>(65-85%)                | 23%<br>(15-35%)          | 3.6<br>(2.4-5.5)                            | 16%<br>(11-21%)                      | 20%<br>(13-29%)                     | 390<br>(240-570)      | 30000<br>(20000-42000)    |
| Kazakhstan | 2010 | Male   | 25 to 29 | 84%<br>(75-89%)                | 16%<br>(11-25%)          | 5.5<br>(3.6-7.9)                            | 22%<br>(16-28%)                      | 27%<br>(19-35%)                     | 690<br>(480-920)      | 47000<br>(34000-61000)    |
| Kazakhstan | 2010 | Male   | 30 to 34 | 87%<br>(80-92%)                | 13%<br>(7.8-20%)         | 6.2<br>(4.2-8.8)                            | 24%<br>(18-29%)                      | 28%<br>(21-35%)                     | 930<br>(660-1200)     | 57000<br>(42000-72000)    |
| Kazakhstan | 2010 | Male   | 35 to 39 | 87%<br>(80-92%)                | 13%<br>(8.2-20%)         | 5.7<br>(3.8-8)                              | 22%<br>(17-28%)                      | 27%<br>(19-33%)                     | 1000<br>(710-1300)    | 56000<br>(41000-72000)    |
| Kazakhstan | 2010 | Male   | 40 to 44 | 86%<br>(80-91%)                | 14%<br>(8.5-20%)         | 5.4<br>(3.5-7.4)                            | 21%<br>(15-26%)                      | 25%<br>(18-31%)                     | 1100<br>(770-1400)    | 54000<br>(39000-70000)    |
| Kazakhstan | 2010 | Male   | 45 to 49 | 86%<br>(78-91%)                | 14%<br>(8.9-22%)         | 5.6<br>(3.8-8.3)                            | 20%<br>(15-25%)                      | 24%<br>(17-30%)                     | 1500<br>(1000-2000)   | 65000<br>(48000-85000)    |

| Location   | Year | Sex    | Age      | Prevalence of current drinkers | Prevalence of abstainers | Population average of standard drinks daily | Percent of total attributable deaths | Percent of total attributable DALYs | Attributable deaths | Attributable DALYs        |
|------------|------|--------|----------|--------------------------------|--------------------------|---------------------------------------------|--------------------------------------|-------------------------------------|---------------------|---------------------------|
| Kazakhstan | 2010 | Male   | 50 to 54 | 85%<br>(77-90%)                | 15%<br>(10-23%)          | 5.7<br>(3.6-8.5)                            | 19%<br>(12-24%)                      | 21%<br>(14-28%)                     | 1600<br>(1000-2100) | 60000<br>(40000-80000)    |
| Kazakhstan | 2010 | Male   | 55 to 59 | 82%<br>(73-89%)                | 18%<br>(11-27%)          | 4.9<br>(3.1-7.2)                            | 15%<br>(9.5-21%)                     | 17%<br>(10-24%)                     | 1300<br>(800-1900)  | 45000<br>(28000-63000)    |
| Kazakhstan | 2010 | Male   | 60 to 64 | 81%<br>(71-89%)                | 19%<br>(11-29%)          | 4.2<br>(2.5-6.4)                            | 12%<br>(6.2-18%)                     | 13%<br>(6.5-20%)                    | 970<br>(470-1500)   | 28000<br>(14000-42000)    |
| Kazakhstan | 2010 | Male   | 65 to 69 | 80%<br>(69-89%)                | 20%<br>(11-31%)          | 3.9<br>(2.5-5.6)                            | 10%<br>(5-16%)                       | 11%<br>(5.3-18%)                    | 740<br>(330-1200)   | 17000<br>(8100-27000)     |
| Kazakhstan | 2010 | Male   | 70 to 74 | 77%<br>(65-86%)                | 23%<br>(14-35%)          | 3.4<br>(2.1-5.1)                            | 8%<br>(2.9-13%)                      | 8.9%<br>(3-15%)                     | 940<br>(300-1600)   | 18000<br>(6300-30000)     |
| Kazakhstan | 2010 | Male   | 75 to 79 | 71%<br>(57-83%)                | 29%<br>(17-43%)          | 2.8<br>(1.6-4.4)                            | 5.7%<br>(0.96-11%)                   | 6.2%<br>(0.75-13%)                  | 360<br>(44-740)     | 5400<br>(890-11000)       |
| Kazakhstan | 2010 | Male   | 80 to 84 | 68%<br>(52-80%)                | 32%<br>(20-48%)          | 2.4<br>(1.4-3.7)                            | 3.7%<br>(-0.42-9.1%)                 | 3.9%<br>(-0.92-10%)                 | 200<br>(-47-510)    | 2200<br>(-250-5500)       |
| Kazakhstan | 2010 | Male   | 85 to 89 | 65%<br>(49-78%)                | 35%<br>(22-51%)          | 2.2<br>(1.3-3.5)                            | 2%<br>(-1.6-7%)                      | 1.8%<br>(-2.5-7.8%)                 | 42<br>(-57-180)     | 410<br>(-330-1400)        |
| Kazakhstan | 2010 | Male   | 90 to 94 | 64%<br>(50-78%)                | 36%<br>(22-50%)          | 2<br>(1.1-3.3)                              | 0.72%<br>(-2.4-5.4%)                 | 0.27%<br>(-3.6-5.9%)                | 1.5<br>(-20-33)     | 25<br>(-83-190)           |
| Kazakhstan | 2010 | Male   | 95 plus  | 63%<br>(44-80%)                | 37%<br>(20-56%)          | 1.7<br>(0.81-3.2)                           | 0.057%<br>(-3.1-4.9%)                | -0.65%<br>(-4.6-5.2%)               | -1.1<br>(-7.2-8.6)  | 0.4<br>(-20-34)           |
| Kazakhstan | 2016 | Female | All Ages | 64%<br>(58-69%)                | 36%<br>(31-42%)          | 2.7<br>(2-3.5)                              | 7.1%<br>(4.4-10%)                    | 9.4%<br>(4.4-15%)                   | 5700<br>(2400-9800) | 170000<br>(100000-250000) |
| Kazakhstan | 2016 | Female | 15 to 19 | 52%<br>(40-64%)                | 48%<br>(36-60%)          | 2<br>(1.1-3.3)                              | 4.1%<br>(2.3-6.7%)                   | 11%<br>(5.5-18%)                    | 26<br>(13-45)       | 2400<br>(1300-3900)       |
| Kazakhstan | 2016 | Female | 20 to 24 | 71%<br>(59-80%)                | 29%<br>(20-41%)          | 3.3<br>(1.9-5.2)                            | 6.7%<br>(4.3-9.8%)                   | 15%<br>(9.5-23%)                    | 64<br>(37-99)       | 5800<br>(3700-8400)       |
| Kazakhstan | 2016 | Female | 25 to 29 | 76%<br>(67-83%)                | 24%<br>(17-33%)          | 3.9<br>(2.5-5.8)                            | 8.2%<br>(5.8-11%)                    | 17%<br>(12-24%)                     | 120<br>(78-180)     | 9900<br>(6900-14000)      |
| Kazakhstan | 2016 | Female | 30 to 34 | 79%<br>(69-85%)                | 21%<br>(15-31%)          | 4.3<br>(2.7-6.3)                            | 9.4%<br>(6.8-13%)                    | 19%<br>(14-25%)                     | 170<br>(110-240)    | 12000<br>(8100-16000)     |
| Kazakhstan | 2016 | Female | 35 to 39 | 79%<br>(70-86%)                | 21%<br>(14-30%)          | 4.2<br>(2.6-6.3)                            | 10%<br>(7-13%)                       | 19%<br>(14-24%)                     | 200<br>(130-290)    | 12000<br>(8400-17000)     |
| Kazakhstan | 2016 | Female | 40 to 44 | 78%<br>(70-85%)                | 22%<br>(15-30%)          | 4.2<br>(2.6-6.3)                            | 10%<br>(6.9-14%)                     | 19%<br>(13-24%)                     | 260<br>(170-380)    | 14000<br>(9500-20000)     |
| Kazakhstan | 2016 | Female | 45 to 49 | 77%<br>(66-84%)                | 23%<br>(16-34%)          | 4.1<br>(2.5-6.4)                            | 10%<br>(6.9-14%)                     | 18%<br>(12-24%)                     | 310<br>(190-450)    | 14000<br>(9500-21000)     |
| Kazakhstan | 2016 | Female | 50 to 54 | 75%<br>(64-83%)                | 25%<br>(17-36%)          | 3.9<br>(2.4-6.1)                            | 10%<br>(6.7-15%)                     | 17%<br>(11-23%)                     | 480<br>(300-720)    | 20000<br>(12000-29000)    |
| Kazakhstan | 2016 | Female | 55 to 59 | 73%<br>(60-83%)                | 27%<br>(17-40%)          | 3.6<br>(2.1-5.8)                            | 9.9%<br>(5.6-15%)                    | 15%<br>(8.7-22%)                    | 560<br>(300-850)    | 19000<br>(11000-29000)    |
| Kazakhstan | 2016 | Female | 60 to 64 | 71%<br>(57-82%)                | 29%<br>(18-43%)          | 3.4<br>(1.9-5.5)                            | 8.8%<br>(3.8-15%)                    | 12%<br>(5.4-20%)                    | 630<br>(270-1100)   | 19000<br>(8000-31000)     |
| Kazakhstan | 2016 | Female | 65 to 69 | 70%<br>(55-82%)                | 30%<br>(18-45%)          | 3.1<br>(1.8-4.8)                            | 7.9%<br>(2.7-13%)                    | 11%<br>(3.7-18%)                    | 480<br>(160-860)    | 12000<br>(3900-21000)     |

| Location   | Year | Sex    | Age      | Prevalence of current drinkers | Prevalence of abstainers | Population average of standard drinks daily | Percent of total attributable deaths | Percent of total attributable DALYs | Attributable deaths   | Attributable DALYs        |
|------------|------|--------|----------|--------------------------------|--------------------------|---------------------------------------------|--------------------------------------|-------------------------------------|-----------------------|---------------------------|
| Kazakhstan | 2016 | Female | 70 to 74 | 63%<br>(49-75%)                | 37%<br>(25-51%)          | 2.6<br>(1.4-4.3)                            | 6.5%<br>(1.3-13%)                    | 8.3%<br>(1.6-16%)                   | 470<br>(81-980)       | 9100<br>(1700-19000)      |
| Kazakhstan | 2016 | Female | 75 to 79 | 53%<br>(37-68%)                | 47%<br>(32-63%)          | 2.2<br>(1.2-4.1)                            | 5.3%<br>(0.55-12%)                   | 6.5%<br>(0.6-15%)                   | 670<br>(56-1600)      | 10000<br>(1100-23000)     |
| Kazakhstan | 2016 | Female | 80 to 84 | 48%<br>(33-63%)                | 52%<br>(37-67%)          | 2.3<br>(1.2-3.8)                            | 5.5%<br>(0.42-13%)                   | 6.4%<br>(0.29-15%)                  | 670<br>(30-1600)      | 7400<br>(550-17000)       |
| Kazakhstan | 2016 | Female | 85 to 89 | 47%<br>(33-61%)                | 53%<br>(39-67%)          | 2.4<br>(1.3-4.1)                            | 5.5%<br>(0.33-13%)                   | 6.5%<br>(0.095-16%)                 | 340<br>(5.6-820)      | 2600<br>(170-6200)        |
| Kazakhstan | 2016 | Female | 90 to 94 | 48%<br>(34-62%)                | 52%<br>(38-66%)          | 2.6<br>(1.3-4.6)                            | 5.6%<br>(-0.093-14%)                 | 6.6%<br>(-0.47-17%)                 | 200<br>(-16-520)      | 1100<br>(-18-2700)        |
| Kazakhstan | 2016 | Female | 95 plus  | 50%<br>(33-68%)                | 50%<br>(32-67%)          | 2.8<br>(1.4-5.2)                            | 6%<br>(-0.54-15%)                    | 7.1%<br>(-1.1-19%)                  | 58<br>(-9-160)        | 200<br>(-18-520)          |
| Kazakhstan | 2016 | Male   | All Ages | 67%<br>(61-73%)                | 33%<br>(27-39%)          | 3.3<br>(2.4-4.5)                            | 14%<br>(10-18%)                      | 14%<br>(9.3-19%)                    | 11000<br>(6400-16000) | 440000<br>(300000-600000) |
| Kazakhstan | 2016 | Male   | 15 to 19 | 52%<br>(39-65%)                | 48%<br>(35-61%)          | 1.4<br>(0.75-2.5)                           | 5.9%<br>(3.6-9.3%)                   | 9.4%<br>(5-16%)                     | 45<br>(22-77)         | 4300<br>(2500-6600)       |
| Kazakhstan | 2016 | Male   | 20 to 24 | 77%<br>(65-85%)                | 23%<br>(15-35%)          | 3.6<br>(2.2-5.5)                            | 15%<br>(10-20%)                      | 20%<br>(13-29%)                     | 250<br>(140-380)      | 20000<br>(12000-29000)    |
| Kazakhstan | 2016 | Male   | 25 to 29 | 84%<br>(75-89%)                | 16%<br>(11-25%)          | 5.4<br>(3.4-8.2)                            | 21%<br>(15-27%)                      | 27%<br>(19-35%)                     | 580<br>(360-840)      | 42000<br>(29000-57000)    |
| Kazakhstan | 2016 | Male   | 30 to 34 | 87%<br>(80-92%)                | 13%<br>(7.9-20%)         | 6.1<br>(3.9-9.1)                            | 23%<br>(17-28%)                      | 28%<br>(21-36%)                     | 800<br>(540-1100)     | 51000<br>(36000-69000)    |
| Kazakhstan | 2016 | Male   | 35 to 39 | 87%<br>(80-92%)                | 13%<br>(8.2-20%)         | 5.7<br>(3.6-8.4)                            | 22%<br>(16-27%)                      | 27%<br>(20-34%)                     | 840<br>(550-1200)     | 48000<br>(33000-67000)    |
| Kazakhstan | 2016 | Male   | 40 to 44 | 86%<br>(80-91%)                | 14%<br>(8.6-20%)         | 5.4<br>(3.3-7.8)                            | 21%<br>(15-26%)                      | 26%<br>(18-32%)                     | 930<br>(590-1300)     | 47000<br>(32000-66000)    |
| Kazakhstan | 2016 | Male   | 45 to 49 | 86%<br>(78-91%)                | 14%<br>(8.9-22%)         | 5.6<br>(3.5-8.8)                            | 20%<br>(14-25%)                      | 24%<br>(17-31%)                     | 1000<br>(650-1500)    | 46000<br>(31000-65000)    |
| Kazakhstan | 2016 | Male   | 50 to 54 | 85%<br>(77-90%)                | 15%<br>(10-23%)          | 5.6<br>(3.3-8.8)                            | 19%<br>(12-24%)                      | 22%<br>(14-29%)                     | 1400<br>(850-2100)    | 57000<br>(35000-82000)    |
| Kazakhstan | 2016 | Male   | 55 to 59 | 83%<br>(74-89%)                | 17%<br>(11-26%)          | 4.8<br>(2.9-7.3)                            | 15%<br>(9.3-21%)                     | 18%<br>(11-25%)                     | 1300<br>(720-2000)    | 46000<br>(26000-68000)    |
| Kazakhstan | 2016 | Male   | 60 to 64 | 81%<br>(71-88%)                | 19%<br>(12-29%)          | 4.2<br>(2.4-6.6)                            | 12%<br>(5.9-18%)                     | 13%<br>(6.5-21%)                    | 1200<br>(540-1900)    | 34000<br>(16000-54000)    |
| Kazakhstan | 2016 | Male   | 65 to 69 | 80%<br>(70-89%)                | 20%<br>(11-30%)          | 3.9<br>(2.4-5.8)                            | 10%<br>(4.9-16%)                     | 11%<br>(5.3-18%)                    | 760<br>(320-1300)     | 18000<br>(8100-29000)     |
| Kazakhstan | 2016 | Male   | 70 to 74 | 77%<br>(65-85%)                | 23%<br>(15-35%)          | 3.4<br>(1.9-5.4)                            | 8%<br>(2.7-14%)                      | 9%<br>(2.8-16%)                     | 530<br>(160-980)      | 10000<br>(3300-18000)     |
| Kazakhstan | 2016 | Male   | 75 to 79 | 72%<br>(57-83%)                | 28%<br>(17-43%)          | 2.8<br>(1.5-4.6)                            | 5.7%<br>(0.96-12%)                   | 6.4%<br>(0.87-13%)                  | 510<br>(70-1100)      | 7800<br>(1200-16000)      |
| Kazakhstan | 2016 | Male   | 80 to 84 | 68%<br>(53-80%)                | 32%<br>(20-47%)          | 2.4<br>(1.3-3.9)                            | 3.9%<br>(-0.33-9.9%)                 | 4.1%<br>(-0.71-11%)                 | 260<br>(-45-700)      | 2900<br>(-250-7500)       |
| Kazakhstan | 2016 | Male   | 85 to 89 | 65%<br>(50-78%)                | 35%<br>(22-50%)          | 2.2<br>(1.2-3.6)                            | 2.1%<br>(-1.5-7.5%)                  | 2%<br>(-2.3-8.3%)                   | 40<br>(-47-170)       | 380<br>(-270-1400)        |

| Location   | Year | Sex    | Age      | Prevalence of current drinkers | Prevalence of abstainers | Population average of standard drinks daily | Percent of total attributable deaths | Percent of total attributable DALYs | Attributable deaths | Attributable DALYs      |
|------------|------|--------|----------|--------------------------------|--------------------------|---------------------------------------------|--------------------------------------|-------------------------------------|---------------------|-------------------------|
| Kazakhstan | 2016 | Male   | 90 to 94 | 64%<br>(50-78%)                | 36%<br>(22-50%)          | 2<br>(1-3.4)                                | 0.87%<br>(-2.2-5.4%)                 | 0.46%<br>(-3.4-6.1%)                | 4.1<br>(-30-55)     | 48<br>(-120-310)        |
| Kazakhstan | 2016 | Male   | 95 plus  | 63%<br>(44-80%)                | 37%<br>(20-56%)          | 1.7<br>(0.76-3.2)                           | 0.21%<br>(-2.8-5.3%)                 | -0.47%<br>(-4.3-5.4%)               | -0.65<br>(-6-7.9)   | 1.3<br>(-16-31)         |
| Kyrgyzstan | 1990 | Female | All Ages | 53%<br>(47-61%)                | 47%<br>(39-53%)          | 1<br>(0.78-1.3)                             | 1.9%<br>(0.96-3%)                    | 1.8%<br>(-0.63-4.6%)                | 300<br>(-110-790)   | 16000<br>(7900-26000)   |
| Kyrgyzstan | 1990 | Female | 15 to 19 | 56%<br>(43-70%)                | 44%<br>(30-57%)          | 1.1<br>(0.6-1.7)                            | 2.2%<br>(1.3-3.6%)                   | 4.3%<br>(2.1-7%)                    | 6<br>(2.9-9.9)      | 590<br>(340-910)        |
| Kyrgyzstan | 1990 | Female | 20 to 24 | 62%<br>(49-75%)                | 38%<br>(25-51%)          | 1.5<br>(0.86-2.4)                           | 3.6%<br>(2.3-5.4%)                   | 5.5%<br>(2.9-8.9%)                  | 9.9<br>(5.2-16)     | 980<br>(610-1500)       |
| Kyrgyzstan | 1990 | Female | 25 to 29 | 65%<br>(51-77%)                | 35%<br>(23-49%)          | 1.7<br>(1-2.5)                              | 4.5%<br>(3.1-6.3%)                   | 6.9%<br>(4.2-10%)                   | 16<br>(9.8-24)      | 1500<br>(970-2000)      |
| Kyrgyzstan | 1990 | Female | 30 to 34 | 66%<br>(52-79%)                | 34%<br>(21-48%)          | 1.8<br>(1.1-2.7)                            | 5.2%<br>(3.8-7%)                     | 8.5%<br>(5.7-12%)                   | 22<br>(15-30)       | 1700<br>(1200-2300)     |
| Kyrgyzstan | 1990 | Female | 35 to 39 | 66%<br>(53-80%)                | 34%<br>(20-47%)          | 1.8<br>(1.1-2.8)                            | 5.7%<br>(4.2-7.7%)                   | 9.4%<br>(6.5-13%)                   | 25<br>(17-34)       | 1600<br>(1200-2200)     |
| Kyrgyzstan | 1990 | Female | 40 to 44 | 66%<br>(53-79%)                | 34%<br>(21-47%)          | 1.8<br>(1.1-2.8)                            | 6.4%<br>(4.5-8.8%)                   | 10%<br>(7.1-14%)                    | 27<br>(18-38)       | 1500<br>(1000-2000)     |
| Kyrgyzstan | 1990 | Female | 45 to 49 | 66%<br>(51-79%)                | 34%<br>(21-49%)          | 1.9<br>(1.1-2.9)                            | 6.4%<br>(4-9.3%)                     | 9.8%<br>(5.8-15%)                   | 24<br>(15-36)       | 1100<br>(710-1700)      |
| Kyrgyzstan | 1990 | Female | 50 to 54 | 65%<br>(51-77%)                | 35%<br>(23-49%)          | 1.9<br>(1.1-2.8)                            | 6.4%<br>(3.5-9.7%)                   | 9.1%<br>(4.7-14%)                   | 57<br>(30-91)       | 2300<br>(1300-3600)     |
| Kyrgyzstan | 1990 | Female | 55 to 59 | 63%<br>(50-76%)                | 37%<br>(24-50%)          | 1.8<br>(1.1-2.8)                            | 5.3%<br>(2.2-8.9%)                   | 7.4%<br>(3-13%)                     | 55<br>(22-94)       | 1900<br>(820-3200)      |
| Kyrgyzstan | 1990 | Female | 60 to 64 | 61%<br>(48-76%)                | 39%<br>(24-52%)          | 1.8<br>(1-2.8)                              | 3.8%<br>(0.51-7.6%)                  | 5%<br>(0.57-10%)                    | 61<br>(7-130)       | 1800<br>(240-3600)      |
| Kyrgyzstan | 1990 | Female | 65 to 69 | 60%<br>(48-74%)                | 40%<br>(26-52%)          | 1.7<br>(1.1-2.5)                            | 2.4%<br>(-0.64-6.1%)                 | 3.2%<br>(-0.97-8.1%)                | 40<br>(-12-100)     | 940<br>(-250-2300)      |
| Kyrgyzstan | 1990 | Female | 70 to 74 | 58%<br>(46-70%)                | 42%<br>(30-54%)          | 1.6<br>(0.95-2.5)                           | 1.3%<br>(-2.2-5.4%)                  | 1.6%<br>(-2.8-6.9%)                 | 20<br>(-35-84)      | 380<br>(-650-1600)      |
| Kyrgyzstan | 1990 | Female | 75 to 79 | 55%<br>(44-67%)                | 45%<br>(33-56%)          | 1.5<br>(0.87-2.4)                           | 0.23%<br>(-3.2-4.5%)                 | 0.21%<br>(-4-5.5%)                  | 3.8<br>(-73-98)     | 74<br>(-1000-1400)      |
| Kyrgyzstan | 1990 | Female | 80 to 84 | 53%<br>(41-66%)                | 47%<br>(34-59%)          | 1.5<br>(0.9-2.2)                            | -0.63%<br>(-3.8-3.4%)                | -0.87%<br>(-4.7-4%)                 | -16<br>(-89-75)     | -150<br>(-900-800)      |
| Kyrgyzstan | 1990 | Female | 85 to 89 | 52%<br>(41-63%)                | 48%<br>(37-59%)          | 1.4<br>(0.87-2.2)                           | -1.2%<br>(-4.4-2.7%)                 | -1.6%<br>(-5.5-3%)                  | -26<br>(-92-50)     | -180<br>(-650-400)      |
| Kyrgyzstan | 1990 | Female | 90 to 94 | 53%<br>(42-64%)                | 47%<br>(36-58%)          | 1.5<br>(0.88-2.4)                           | -1.6%<br>(-4.8-3%)                   | -2%<br>(-5.9-3.3%)                  | -17<br>(-50-28)     | -79<br>(-240-150)       |
| Kyrgyzstan | 1990 | Female | 95 plus  | 53%<br>(41-68%)                | 47%<br>(32-59%)          | 1.4<br>(0.75-2.5)                           | -1.7%<br>(-5.1-3.1%)                 | -2.3%<br>(-6.2-3.5%)                | -5.5<br>(-15-8.5)   | -17<br>(-49-30)         |
| Kyrgyzstan | 1990 | Male   | All Ages | 36%<br>(31-41%)                | 64%<br>(59-69%)          | 2.8<br>(2.2-3.4)                            | 8.6%<br>(7.2-10%)                    | 11%<br>(9-14%)                      | 2200<br>(1700-2700) | 90000<br>(75000-110000) |
| Kyrgyzstan | 1990 | Male   | 15 to 19 | 26%<br>(18-35%)                | 74%<br>(65-82%)          | 0.91<br>(0.52-1.5)                          | 4.1%<br>(2.8-6.1%)                   | 5.4%<br>(3.2-8.7%)                  | 13<br>(7.6-21)      | 1300<br>(870-1900)      |

| Location   | Year | Sex    | Age      | Prevalence of current drinkers | Prevalence of abstainers | Population average of standard drinks daily | Percent of total attributable deaths | Percent of total attributable DALYs | Attributable deaths | Attributable DALYs     |
|------------|------|--------|----------|--------------------------------|--------------------------|---------------------------------------------|--------------------------------------|-------------------------------------|---------------------|------------------------|
| Kyrgyzstan | 1990 | Male   | 20 to 24 | 51%<br>(38-64%)                | 49%<br>(36-62%)          | 3<br>(1.9-4.3)                              | 13%<br>(8.9-17%)                     | 16%<br>(11-23%)                     | 60<br>(39-85)       | 4900<br>(3500-6700)    |
| Kyrgyzstan | 1990 | Male   | 25 to 29 | 64%<br>(51-74%)                | 36%<br>(26-49%)          | 5.2<br>(3.5-7.1)                            | 19%<br>(15-24%)                      | 24%<br>(18-31%)                     | 130<br>(95-170)     | 9500<br>(7300-12000)   |
| Kyrgyzstan | 1990 | Male   | 30 to 34 | 72%<br>(60-82%)                | 28%<br>(18-40%)          | 6.5<br>(4.5-8.7)                            | 22%<br>(18-26%)                      | 27%<br>(22-33%)                     | 170<br>(140-220)    | 11000<br>(9000-14000)  |
| Kyrgyzstan | 1990 | Male   | 35 to 39 | 75%<br>(64-84%)                | 25%<br>(16-36%)          | 6.3<br>(4.3-8.9)                            | 22%<br>(18-26%)                      | 27%<br>(22-33%)                     | 170<br>(130-210)    | 9800<br>(7800-12000)   |
| Kyrgyzstan | 1990 | Male   | 40 to 44 | 75%<br>(64-84%)                | 25%<br>(16-36%)          | 6.6<br>(4.5-9.1)                            | 23%<br>(19-27%)                      | 28%<br>(23-33%)                     | 170<br>(140-200)    | 8600<br>(7100-10000)   |
| Kyrgyzstan | 1990 | Male   | 45 to 49 | 72%<br>(59-82%)                | 28%<br>(18-41%)          | 7.4<br>(4.6-11)                             | 23%<br>(20-27%)                      | 28%<br>(23-33%)                     | 160<br>(130-190)    | 7200<br>(6000-8500)    |
| Kyrgyzstan | 1990 | Male   | 50 to 54 | 68%<br>(54-80%)                | 32%<br>(20-46%)          | 6.9<br>(4.4-9.9)                            | 22%<br>(18-25%)                      | 25%<br>(21-30%)                     | 310<br>(260-380)    | 12000<br>(10000-15000) |
| Kyrgyzstan | 1990 | Male   | 55 to 59 | 64%<br>(45-80%)                | 36%<br>(20-55%)          | 5.1<br>(3-7.7)                              | 18%<br>(14-22%)                      | 21%<br>(16-25%)                     | 270<br>(200-340)    | 9200<br>(7100-11000)   |
| Kyrgyzstan | 1990 | Male   | 60 to 64 | 59%<br>(39-77%)                | 41%<br>(23-61%)          | 4<br>(2.2-6.2)                              | 14%<br>(9-18%)                       | 15%<br>(10-21%)                     | 290<br>(180-380)    | 8200<br>(5300-11000)   |
| Kyrgyzstan | 1990 | Male   | 65 to 69 | 55%<br>(35-73%)                | 45%<br>(27-65%)          | 3.4<br>(2-5.3)                              | 11%<br>(6.7-16%)                     | 13%<br>(7.5-18%)                    | 160<br>(98-230)     | 3800<br>(2300-5400)    |
| Kyrgyzstan | 1990 | Male   | 70 to 74 | 50%<br>(32-68%)                | 50%<br>(32-68%)          | 2.9<br>(1.6-4.8)                            | 8.4%<br>(3.9-13%)                    | 9.4%<br>(4.3-15%)                   | 96<br>(44-150)      | 1800<br>(860-2800)     |
| Kyrgyzstan | 1990 | Male   | 75 to 79 | 46%<br>(29-65%)                | 54%<br>(35-71%)          | 2.3<br>(1.2-4.1)                            | 6%<br>(1.9-10%)                      | 6.6%<br>(2.1-12%)                   | 81<br>(25-150)      | 1200<br>(390-2100)     |
| Kyrgyzstan | 1990 | Male   | 80 to 84 | 43%<br>(26-60%)                | 57%<br>(40-74%)          | 2<br>(1.1-3.4)                              | 4.5%<br>(1.1-8.9%)                   | 5%<br>(1-9.8%)                      | 56<br>(11-110)      | 620<br>(140-1200)      |
| Kyrgyzstan | 1990 | Male   | 85 to 89 | 41%<br>(26-57%)                | 59%<br>(43-74%)          | 1.8<br>(0.96-3)                             | 3.3%<br>(0.35-7.6%)                  | 3.6%<br>(0.13-8.4%)                 | 27<br>(0.97-64)     | 220<br>(23-490)        |
| Kyrgyzstan | 1990 | Male   | 90 to 94 | 40%<br>(26-57%)                | 60%<br>(43-74%)          | 1.7<br>(0.9-2.9)                            | 2.2%<br>(-0.39-6.4%)                 | 2.3%<br>(-0.77-7.1%)                | 8<br>(-2.7-25)      | 47<br>(-8.3-130)       |
| Kyrgyzstan | 1990 | Male   | 95 plus  | 42%<br>(24-62%)                | 58%<br>(38-76%)          | 1.6<br>(0.68-3)                             | 1.5%<br>(-1.2-5.8%)                  | 1.3%<br>(-1.8-6.2%)                 | 1.3<br>(-1.8-6.1)   | 5.9<br>(-4.5-22)       |
| Kyrgyzstan | 1995 | Female | All Ages | 54%<br>(48-61%)                | 46%<br>(39-52%)          | 0.92<br>(0.71-1.2)                          | 2%<br>(0.81-3.2%)                    | 1.3%<br>(-1.3-4.1%)                 | 230<br>(-230-750)   | 16000<br>(6600-26000)  |
| Kyrgyzstan | 1995 | Female | 15 to 19 | 56%<br>(44-70%)                | 44%<br>(30-56%)          | 0.96<br>(0.55-1.5)                          | 2.1%<br>(1.2-3.2%)                   | 3.8%<br>(1.8-6.4%)                  | 5.7<br>(2.8-9.8)    | 580<br>(320-910)       |
| Kyrgyzstan | 1995 | Female | 20 to 24 | 62%<br>(49-75%)                | 38%<br>(25-51%)          | 1.3<br>(0.77-2.1)                           | 3.5%<br>(2.1-5.4%)                   | 5.2%<br>(2.7-8.5%)                  | 11<br>(5.7-19)      | 1100<br>(660-1700)     |
| Kyrgyzstan | 1995 | Female | 25 to 29 | 65%<br>(51-77%)                | 35%<br>(23-49%)          | 1.5<br>(0.91-2.3)                           | 4.4%<br>(3-6.3%)                     | 6.6%<br>(3.8-9.9%)                  | 15<br>(8.6-23)      | 1300<br>(860-1800)     |
| Kyrgyzstan | 1995 | Female | 30 to 34 | 66%<br>(52-79%)                | 34%<br>(21-48%)          | 1.6<br>(0.97-2.4)                           | 5.2%<br>(3.7-7%)                     | 7.9%<br>(5.2-11%)                   | 27<br>(17-38)       | 2000<br>(1400-2700)    |
| Kyrgyzstan | 1995 | Female | 35 to 39 | 66%<br>(53-80%)                | 34%<br>(20-47%)          | 1.6<br>(0.97-2.4)                           | 5.7%<br>(4-7.8%)                     | 8.7%<br>(5.9-12%)                   | 35<br>(23-48)       | 2200<br>(1600-2900)    |

| Location   | Year | Sex    | Age      | Prevalence of current drinkers | Prevalence of abstainers | Population average of standard drinks daily | Percent of total attributable deaths | Percent of total attributable DALYs | Attributable deaths | Attributable DALYs       |
|------------|------|--------|----------|--------------------------------|--------------------------|---------------------------------------------|--------------------------------------|-------------------------------------|---------------------|--------------------------|
| Kyrgyzstan | 1995 | Female | 40 to 44 | 66%<br>(53-80%)                | 34%<br>(20-47%)          | 1.6<br>(0.99-2.4)                           | 6.3%<br>(4.3-8.6%)                   | 9.6%<br>(6.4-13%)                   | 41<br>(27-58)       | 2200<br>(1500-2900)      |
| Kyrgyzstan | 1995 | Female | 45 to 49 | 66%<br>(52-79%)                | 34%<br>(21-48%)          | 1.7<br>(0.98-2.6)                           | 6.1%<br>(3.7-9.2%)                   | 8.8%<br>(5-13%)                     | 40<br>(22-60)       | 1800<br>(1100-2700)      |
| Kyrgyzstan | 1995 | Female | 50 to 54 | 65%<br>(51-78%)                | 35%<br>(22-49%)          | 1.6<br>(1-2.6)                              | 6%<br>(3-9.5%)                       | 7.9%<br>(3.8-13%)                   | 35<br>(16-57)       | 1400<br>(690-2100)       |
| Kyrgyzstan | 1995 | Female | 55 to 59 | 63%<br>(50-76%)                | 37%<br>(24-50%)          | 1.6<br>(0.96-2.4)                           | 4.7%<br>(1.6-8.4%)                   | 6.1%<br>(1.9-11%)                   | 64<br>(20-120)      | 2100<br>(720-3900)       |
| Kyrgyzstan | 1995 | Female | 60 to 64 | 61%<br>(48-76%)                | 39%<br>(24-52%)          | 1.6<br>(0.91-2.5)                           | 3%<br>(-0.1-7%)                      | 3.8%<br>(-0.3-9%)                   | 47<br>(-3.8-110)    | 1300<br>(-49-3100)       |
| Kyrgyzstan | 1995 | Female | 65 to 69 | 60%<br>(48-74%)                | 40%<br>(26-52%)          | 1.5<br>(0.95-2.2)                           | 1.6%<br>(-1.5-5.4%)                  | 2%<br>(-2-6.7%)                     | 38<br>(-38-130)     | 890<br>(-840-3000)       |
| Kyrgyzstan | 1995 | Female | 70 to 74 | 58%<br>(45-70%)                | 42%<br>(30-55%)          | 1.5<br>(0.85-2.1)                           | 0.43%<br>(-2.9-4.3%)                 | 0.52%<br>(-3.6-5.4%)                | 9.7<br>(-67-99)     | 180<br>(-1200-1800)      |
| Kyrgyzstan | 1995 | Female | 75 to 79 | 55%<br>(44-68%)                | 45%<br>(32-56%)          | 1.4<br>(0.79-2.1)                           | -0.64%<br>(-3.9-3.4%)                | -0.82%<br>(-4.7-3.9%)               | -13<br>(-78-64)     | -180<br>(-1100-920)      |
| Kyrgyzstan | 1995 | Female | 80 to 84 | 53%<br>(41-66%)                | 47%<br>(34-59%)          | 1.3<br>(0.82-2)                             | -1.6%<br>(-4.8-2.1%)                 | -1.9%<br>(-5.7-2.5%)                | -37<br>(-110-48)    | -370<br>(-1100-500)      |
| Kyrgyzstan | 1995 | Female | 85 to 89 | 53%<br>(41-64%)                | 47%<br>(36-59%)          | 1.3<br>(0.78-1.9)                           | -2.2%<br>(-5.3-1.7%)                 | -2.7%<br>(-6.3-1.9%)                | -47<br>(-110-33)    | -330<br>(-800-250)       |
| Kyrgyzstan | 1995 | Female | 90 to 94 | 53%<br>(43-64%)                | 47%<br>(36-57%)          | 1.3<br>(0.78-2.1)                           | -2.5%<br>(-5.6-1.5%)                 | -3.1%<br>(-6.7-1.7%)                | -29<br>(-65-16)     | -140<br>(-320-83)        |
| Kyrgyzstan | 1995 | Female | 95 plus  | 53%<br>(41-68%)                | 47%<br>(32-59%)          | 1.3<br>(0.66-2.2)                           | -2.7%<br>(-6-1.6%)                   | -3.3%<br>(-7.1-1.8%)                | -11<br>(-24-6)      | -35<br>(-77-21)          |
| Kyrgyzstan | 1995 | Male   | All Ages | 36%<br>(31-42%)                | 64%<br>(58-69%)          | 2.5<br>(2-3)                                | 10%<br>(8.5-12%)                     | 12%<br>(9.6-15%)                    | 2700<br>(2100-3300) | 110000<br>(91000-130000) |
| Kyrgyzstan | 1995 | Male   | 15 to 19 | 26%<br>(18-35%)                | 74%<br>(65-82%)          | 0.81<br>(0.46-1.3)                          | 3.9%<br>(2.6-5.7%)                   | 4.9%<br>(2.9-7.9%)                  | 14<br>(8.3-22)      | 1400<br>(920-2100)       |
| Kyrgyzstan | 1995 | Male   | 20 to 24 | 52%<br>(39-64%)                | 48%<br>(36-61%)          | 2.7<br>(1.7-3.8)                            | 12%<br>(8.7-16%)                     | 15%<br>(10-20%)                     | 68<br>(46-94)       | 5500<br>(3900-7300)      |
| Kyrgyzstan | 1995 | Male   | 25 to 29 | 64%<br>(52-75%)                | 36%<br>(25-48%)          | 4.6<br>(3.2-6.3)                            | 19%<br>(15-23%)                      | 23%<br>(17-28%)                     | 140<br>(100-170)    | 9600<br>(7400-12000)     |
| Kyrgyzstan | 1995 | Male   | 30 to 34 | 73%<br>(61-82%)                | 27%<br>(18-39%)          | 5.8<br>(4-7.7)                              | 22%<br>(17-26%)                      | 26%<br>(20-31%)                     | 210<br>(170-260)    | 13000<br>(11000-16000)   |
| Kyrgyzstan | 1995 | Male   | 35 to 39 | 76%<br>(65-84%)                | 24%<br>(16-35%)          | 5.7<br>(3.9-7.7)                            | 22%<br>(17-26%)                      | 25%<br>(20-31%)                     | 250<br>(190-300)    | 14000<br>(11000-17000)   |
| Kyrgyzstan | 1995 | Male   | 40 to 44 | 75%<br>(65-83%)                | 25%<br>(17-35%)          | 5.9<br>(4.1-8)                              | 23%<br>(18-27%)                      | 26%<br>(21-31%)                     | 290<br>(230-350)    | 14000<br>(12000-17000)   |
| Kyrgyzstan | 1995 | Male   | 45 to 49 | 72%<br>(59-82%)                | 28%<br>(18-41%)          | 6.6<br>(4.2-9.3)                            | 23%<br>(19-28%)                      | 27%<br>(22-32%)                     | 280<br>(230-340)    | 12000<br>(9900-14000)    |
| Kyrgyzstan | 1995 | Male   | 50 to 54 | 69%<br>(55-81%)                | 31%<br>(19-45%)          | 6.1<br>(3.9-9)                              | 22%<br>(18-27%)                      | 25%<br>(20-30%)                     | 230<br>(180-280)    | 8800<br>(7000-11000)     |
| Kyrgyzstan | 1995 | Male   | 55 to 59 | 64%<br>(46-81%)                | 36%<br>(19-54%)          | 4.6<br>(2.8-6.9)                            | 18%<br>(13-22%)                      | 20%<br>(14-25%)                     | 370<br>(260-460)    | 12000<br>(8800-15000)    |



| Location   | Year | Sex    | Age      | Prevalence of current drinkers | Prevalence of abstainers | Population average of standard drinks daily | Percent of total attributable deaths | Percent of total attributable DALYs | Attributable deaths | Attributable DALYs    |
|------------|------|--------|----------|--------------------------------|--------------------------|---------------------------------------------|--------------------------------------|-------------------------------------|---------------------|-----------------------|
| Kyrgyzstan | 1995 | Male   | 60 to 64 | 59%<br>(39-77%)                | 41%<br>(23-61%)          | 3.5<br>(1.9-5.6)                            | 13%<br>(7.9-18%)                     | 14%<br>(8.6-20%)                    | 300<br>(180-410)    | 8300<br>(5100-11000)  |
| Kyrgyzstan | 1995 | Male   | 65 to 69 | 55%<br>(35-73%)                | 45%<br>(27-65%)          | 3.1<br>(1.8-4.7)                            | 10%<br>(5.7-15%)                     | 11%<br>(6.2-17%)                    | 290<br>(160-430)    | 6700<br>(3700-9900)   |
| Kyrgyzstan | 1995 | Male   | 70 to 74 | 51%<br>(32-68%)                | 49%<br>(32-68%)          | 2.5<br>(1.4-4.1)                            | 7.5%<br>(3.2-12%)                    | 8.2%<br>(3.4-13%)                   | 130<br>(54-210)     | 2400<br>(1000-3900)   |
| Kyrgyzstan | 1995 | Male   | 75 to 79 | 46%<br>(29-65%)                | 54%<br>(35-71%)          | 2.1<br>(1.1-3.5)                            | 5%<br>(1.3-9.6%)                     | 5.4%<br>(1.2-11%)                   | 55<br>(13-110)      | 800<br>(210-1600)     |
| Kyrgyzstan | 1995 | Male   | 80 to 84 | 43%<br>(26-61%)                | 57%<br>(39-74%)          | 1.8<br>(0.95-3)                             | 3.5%<br>(0.46-7.8%)                  | 3.8%<br>(0.3-8.5%)                  | 39<br>(3.2-87)      | 430<br>(57-930)       |
| Kyrgyzstan | 1995 | Male   | 85 to 89 | 41%<br>(26-57%)                | 59%<br>(43-74%)          | 1.6<br>(0.87-2.7)                           | 2.4%<br>(-0.23-6.1%)                 | 2.5%<br>(-0.53-6.7%)                | 19<br>(-4.1-51)     | 160<br>(-14-390)      |
| Kyrgyzstan | 1995 | Male   | 90 to 94 | 41%<br>(27-57%)                | 59%<br>(43-73%)          | 1.5<br>(0.83-2.7)                           | 1.5%<br>(-0.96-5.3%)                 | 1.4%<br>(-1.4-5.8%)                 | 4.6<br>(-4.7-19)    | 28<br>(-18-100)       |
| Kyrgyzstan | 1995 | Male   | 95 plus  | 42%<br>(25-62%)                | 58%<br>(38-75%)          | 1.4<br>(0.62-2.8)                           | 0.89%<br>(-1.6-5%)                   | 0.63%<br>(-2.2-5.3%)                | 0.65<br>(-2.3-5.5)  | 3.6<br>(-6.5-20)      |
| Kyrgyzstan | 2000 | Female | All Ages | 55%<br>(48-62%)                | 45%<br>(38-52%)          | 0.95<br>(0.73-1.2)                          | 2%<br>(0.96-3.3%)                    | 1.2%<br>(-1.3-4.2%)                 | 210<br>(-220-700)   | 16000<br>(7100-26000) |
| Kyrgyzstan | 2000 | Female | 15 to 19 | 56%<br>(44-70%)                | 44%<br>(30-56%)          | 0.95<br>(0.54-1.5)                          | 1.9%<br>(1.1-3.1%)                   | 3.8%<br>(1.8-6.4%)                  | 5.4<br>(2.5-9.2)    | 580<br>(320-910)      |
| Kyrgyzstan | 2000 | Female | 20 to 24 | 62%<br>(50-74%)                | 38%<br>(26-50%)          | 1.3<br>(0.76-2.1)                           | 3.6%<br>(2.2-5.5%)                   | 5.8%<br>(2.8-9.4%)                  | 11<br>(5.6-19)      | 1100<br>(670-1700)    |
| Kyrgyzstan | 2000 | Female | 25 to 29 | 65%<br>(51-77%)                | 35%<br>(23-49%)          | 1.5<br>(0.91-2.3)                           | 4.6%<br>(3.1-6.3%)                   | 7.3%<br>(4.2-11%)                   | 17<br>(9.6-25)      | 1500<br>(980-2100)    |
| Kyrgyzstan | 2000 | Female | 30 to 34 | 66%<br>(52-79%)                | 34%<br>(21-48%)          | 1.6<br>(0.95-2.4)                           | 5.3%<br>(3.9-7%)                     | 8.6%<br>(5.9-12%)                   | 23<br>(16-32)       | 1700<br>(1300-2300)   |
| Kyrgyzstan | 2000 | Female | 35 to 39 | 66%<br>(53-79%)                | 34%<br>(21-47%)          | 1.6<br>(0.95-2.4)                           | 5.7%<br>(4.2-7.7%)                   | 9.4%<br>(6.5-13%)                   | 35<br>(24-47)       | 2200<br>(1600-2900)   |
| Kyrgyzstan | 2000 | Female | 40 to 44 | 66%<br>(52-79%)                | 34%<br>(21-48%)          | 1.6<br>(1-2.4)                              | 6.2%<br>(4.3-8.2%)                   | 10%<br>(7.1-14%)                    | 45<br>(31-61)       | 2400<br>(1700-3200)   |
| Kyrgyzstan | 2000 | Female | 45 to 49 | 66%<br>(51-79%)                | 34%<br>(21-49%)          | 1.6<br>(0.97-2.5)                           | 6%<br>(3.6-8.7%)                     | 9.3%<br>(5.4-14%)                   | 47<br>(27-69)       | 2200<br>(1400-3100)   |
| Kyrgyzstan | 2000 | Female | 50 to 54 | 65%<br>(51-78%)                | 35%<br>(22-49%)          | 1.6<br>(0.97-2.5)                           | 5.7%<br>(3-8.9%)                     | 8.2%<br>(4-13%)                     | 43<br>(21-67)       | 1700<br>(880-2700)    |
| Kyrgyzstan | 2000 | Female | 55 to 59 | 63%<br>(50-77%)                | 37%<br>(23-50%)          | 1.6<br>(0.95-2.4)                           | 4.7%<br>(1.6-8.3%)                   | 6.3%<br>(1.9-11%)                   | 33<br>(9.9-59)      | 1100<br>(380-2000)    |
| Kyrgyzstan | 2000 | Female | 60 to 64 | 61%<br>(48-76%)                | 39%<br>(24-52%)          | 1.5<br>(0.91-2.5)                           | 3%<br>(-0.24-7%)                     | 3.8%<br>(-0.38-8.8%)                | 48<br>(-4.9-110)    | 1400<br>(-100-3200)   |
| Kyrgyzstan | 2000 | Female | 65 to 69 | 60%<br>(47-73%)                | 40%<br>(27-53%)          | 1.5<br>(0.93-2.2)                           | 1.6%<br>(-1.6-5.3%)                  | 2%<br>(-2-6.7%)                     | 30<br>(-30-100)     | 700<br>(-670-2400)    |
| Kyrgyzstan | 2000 | Female | 70 to 74 | 57%<br>(45-70%)                | 43%<br>(30-55%)          | 1.4<br>(0.85-2.1)                           | 0.35%<br>(-3-4.3%)                   | 0.42%<br>(-3.7-5.3%)                | 9.6<br>(-85-120)    | 190<br>(-1600-2300)   |
| Kyrgyzstan | 2000 | Female | 75 to 79 | 55%<br>(44-67%)                | 45%<br>(33-56%)          | 1.4<br>(0.79-2)                             | -0.82%<br>(-4-3%)                    | -1.1%<br>(-5-3.6%)                  | -22<br>(-100-71)    | -290<br>(-1400-1000)  |

| Location   | Year | Sex    | Age      | Prevalence of current drinkers | Prevalence of abstainers | Population average of standard drinks daily | Percent of total attributable deaths | Percent of total attributable DALYs | Attributable deaths | Attributable DALYs       |
|------------|------|--------|----------|--------------------------------|--------------------------|---------------------------------------------|--------------------------------------|-------------------------------------|---------------------|--------------------------|
| Kyrgyzstan | 2000 | Female | 80 to 84 | 53%<br>(41-66%)                | 47%<br>(34-59%)          | 1.3<br>(0.8-1.9)                            | -1.9%<br>(-5.1-1.7%)                 | -2.4%<br>(-6.3-2%)                  | -38<br>(-100-33)    | -380<br>(-1000-360)      |
| Kyrgyzstan | 2000 | Female | 85 to 89 | 52%<br>(41-64%)                | 48%<br>(36-59%)          | 1.3<br>(0.77-1.9)                           | -2.5%<br>(-5.6-1.1%)                 | -3.1%<br>(-6.8-1.1%)                | -40<br>(-88-15)     | -280<br>(-620-130)       |
| Kyrgyzstan | 2000 | Female | 90 to 94 | 53%<br>(43-64%)                | 47%<br>(36-57%)          | 1.3<br>(0.77-2)                             | -2.8%<br>(-5.9-0.94%)                | -3.4%<br>(-7.2-0.94%)               | -28<br>(-59-8)      | -140<br>(-290-48)        |
| Kyrgyzstan | 2000 | Female | 95 plus  | 53%<br>(41-68%)                | 47%<br>(32-59%)          | 1.2<br>(0.65-2.1)                           | -2.9%<br>(-6.2-1.1%)                 | -3.6%<br>(-7.6-1.1%)                | -11<br>(-23-3.5)    | -35<br>(-74-13)          |
| Kyrgyzstan | 2000 | Male   | All Ages | 37%<br>(33-43%)                | 63%<br>(57-67%)          | 2.6<br>(2.1-3.1)                            | 11%<br>(9.8-13%)                     | 13%<br>(11-16%)                     | 2700<br>(2200-3300) | 110000<br>(96000-130000) |
| Kyrgyzstan | 2000 | Male   | 15 to 19 | 26%<br>(18-34%)                | 74%<br>(66-82%)          | 0.79<br>(0.46-1.3)                          | 3.8%<br>(2.6-5.5%)                   | 5.1%<br>(3.1-8.2%)                  | 13<br>(7.7-21)      | 1400<br>(910-2000)       |
| Kyrgyzstan | 2000 | Male   | 20 to 24 | 51%<br>(38-63%)                | 49%<br>(37-62%)          | 2.6<br>(1.7-3.8)                            | 13%<br>(9.5-17%)                     | 17%<br>(12-22%)                     | 73<br>(51-98)       | 5800<br>(4200-7700)      |
| Kyrgyzstan | 2000 | Male   | 25 to 29 | 64%<br>(52-74%)                | 36%<br>(26-48%)          | 4.5<br>(3.1-6.2)                            | 20%<br>(16-24%)                      | 25%<br>(19-30%)                     | 150<br>(120-190)    | 11000<br>(8600-13000)    |
| Kyrgyzstan | 2000 | Male   | 30 to 34 | 72%<br>(60-82%)                | 28%<br>(18-40%)          | 5.6<br>(3.9-7.5)                            | 22%<br>(18-26%)                      | 27%<br>(22-32%)                     | 200<br>(160-230)    | 13000<br>(10000-15000)   |
| Kyrgyzstan | 2000 | Male   | 35 to 39 | 75%<br>(64-84%)                | 25%<br>(16-36%)          | 5.5<br>(3.9-7.6)                            | 23%<br>(19-27%)                      | 27%<br>(22-32%)                     | 270<br>(210-320)    | 15000<br>(12000-18000)   |
| Kyrgyzstan | 2000 | Male   | 40 to 44 | 75%<br>(64-83%)                | 25%<br>(17-36%)          | 5.8<br>(4.1-7.6)                            | 24%<br>(20-28%)                      | 29%<br>(24-33%)                     | 330<br>(270-390)    | 17000<br>(14000-19000)   |
| Kyrgyzstan | 2000 | Male   | 45 to 49 | 72%<br>(58-82%)                | 28%<br>(18-42%)          | 6.4<br>(4.1-9)                              | 24%<br>(20-28%)                      | 29%<br>(24-33%)                     | 340<br>(280-400)    | 15000<br>(12000-18000)   |
| Kyrgyzstan | 2000 | Male   | 50 to 54 | 68%<br>(54-80%)                | 32%<br>(20-46%)          | 6<br>(3.8-8.7)                              | 23%<br>(19-27%)                      | 27%<br>(21-32%)                     | 290<br>(230-350)    | 11000<br>(9100-14000)    |
| Kyrgyzstan | 2000 | Male   | 55 to 59 | 63%<br>(44-80%)                | 37%<br>(20-56%)          | 4.4<br>(2.6-6.9)                            | 18%<br>(13-23%)                      | 21%<br>(15-27%)                     | 210<br>(150-260)    | 6800<br>(4900-8700)      |
| Kyrgyzstan | 2000 | Male   | 60 to 64 | 59%<br>(39-77%)                | 41%<br>(23-61%)          | 3.5<br>(1.9-5.5)                            | 13%<br>(8.3-18%)                     | 15%<br>(9.2-21%)                    | 300<br>(190-430)    | 8600<br>(5300-12000)     |
| Kyrgyzstan | 2000 | Male   | 65 to 69 | 55%<br>(35-74%)                | 45%<br>(26-65%)          | 3<br>(1.8-4.7)                              | 10%<br>(5.8-15%)                     | 12%<br>(6.3-18%)                    | 240<br>(130-370)    | 5700<br>(3200-8400)      |
| Kyrgyzstan | 2000 | Male   | 70 to 74 | 51%<br>(32-68%)                | 49%<br>(32-68%)          | 2.5<br>(1.4-4)                              | 7.4%<br>(3.2-12%)                    | 8.3%<br>(3.4-14%)                   | 200<br>(82-330)     | 3700<br>(1600-6200)      |
| Kyrgyzstan | 2000 | Male   | 75 to 79 | 46%<br>(29-65%)                | 54%<br>(35-71%)          | 2.1<br>(1.1-3.5)                            | 4.8%<br>(1.2-9.3%)                   | 5.3%<br>(1.1-11%)                   | 70<br>(15-140)      | 1000<br>(260-2000)       |
| Kyrgyzstan | 2000 | Male   | 80 to 84 | 43%<br>(26-60%)                | 57%<br>(40-74%)          | 1.8<br>(0.96-3)                             | 3.2%<br>(0.28-7.5%)                  | 3.4%<br>(0.061-8.3%)                | 28<br>(0.5-67)      | 310<br>(27-720)          |
| Kyrgyzstan | 2000 | Male   | 85 to 89 | 41%<br>(26-57%)                | 59%<br>(43-74%)          | 1.6<br>(0.86-2.6)                           | 2%<br>(-0.49-5.7%)                   | 2%<br>(-0.88-6.3%)                  | 10<br>(-4.6-32)     | 86<br>(-21-250)          |
| Kyrgyzstan | 2000 | Male   | 90 to 94 | 40%<br>(26-57%)                | 60%<br>(43-74%)          | 1.5<br>(0.79-2.6)                           | 1.1%<br>(-1.2-4.7%)                  | 1%<br>(-1.7-5.1%)                   | 2.7<br>(-4.8-14)    | 18<br>(-19-74)           |
| Kyrgyzstan | 2000 | Male   | 95 plus  | 42%<br>(24-61%)                | 58%<br>(39-76%)          | 1.4<br>(0.61-2.7)                           | 0.69%<br>(-1.7-4.7%)                 | 0.36%<br>(-2.4-5%)                  | 0.29<br>(-1.9-4)    | 2.1<br>(-5.4-15)         |

| Location   | Year | Sex    | Age      | Prevalence of current drinkers | Prevalence of abstainers | Population average of standard drinks daily | Percent of total attributable deaths | Percent of total attributable DALYs | Attributable deaths | Attributable DALYs        |
|------------|------|--------|----------|--------------------------------|--------------------------|---------------------------------------------|--------------------------------------|-------------------------------------|---------------------|---------------------------|
| Kyrgyzstan | 2005 | Female | All Ages | 55%<br>(49-63%)                | 45%<br>(37-51%)          | 1<br>(0.78-1.3)                             | 2.4%<br>(1.2-3.8%)                   | 1.5%<br>(-1.4-4.6%)                 | 260<br>(-250-810)   | 19000<br>(9300-30000)     |
| Kyrgyzstan | 2005 | Female | 15 to 19 | 55%<br>(43-69%)                | 45%<br>(31-57%)          | 0.97<br>(0.55-1.5)                          | 2%<br>(1.1-3.1%)                     | 4.2%<br>(1.9-7.1%)                  | 6<br>(2.8-10)       | 650<br>(370-1000)         |
| Kyrgyzstan | 2005 | Female | 20 to 24 | 62%<br>(49-74%)                | 38%<br>(26-51%)          | 1.4<br>(0.77-2.1)                           | 3.7%<br>(2.3-5.5%)                   | 6.4%<br>(3.3-10%)                   | 13<br>(6.6-20)      | 1300<br>(780-1900)        |
| Kyrgyzstan | 2005 | Female | 25 to 29 | 65%<br>(51-78%)                | 35%<br>(22-49%)          | 1.5<br>(0.93-2.3)                           | 4.9%<br>(3.4-6.8%)                   | 8.2%<br>(5.1-12%)                   | 20<br>(12-28)       | 1700<br>(1100-2300)       |
| Kyrgyzstan | 2005 | Female | 30 to 34 | 66%<br>(52-80%)                | 34%<br>(20-48%)          | 1.6<br>(0.96-2.4)                           | 5.8%<br>(4.4-7.6%)                   | 9.7%<br>(7-13%)                     | 30<br>(21-40)       | 2100<br>(1600-2800)       |
| Kyrgyzstan | 2005 | Female | 35 to 39 | 66%<br>(53-80%)                | 34%<br>(20-47%)          | 1.6<br>(0.99-2.5)                           | 6.3%<br>(4.7-8.3%)                   | 11%<br>(7.6-14%)                    | 40<br>(29-52)       | 2400<br>(1800-3100)       |
| Kyrgyzstan | 2005 | Female | 40 to 44 | 66%<br>(52-79%)                | 34%<br>(21-48%)          | 1.7<br>(1.1-2.4)                            | 6.8%<br>(5-9%)                       | 11%<br>(8.2-15%)                    | 57<br>(41-76)       | 3000<br>(2200-3900)       |
| Kyrgyzstan | 2005 | Female | 45 to 49 | 66%<br>(51-79%)                | 34%<br>(21-49%)          | 1.7<br>(1-2.5)                              | 6.5%<br>(4.3-9.2%)                   | 10%<br>(6.7-14%)                    | 65<br>(42-93)       | 2900<br>(2000-4100)       |
| Kyrgyzstan | 2005 | Female | 50 to 54 | 64%<br>(50-78%)                | 36%<br>(22-50%)          | 1.7<br>(1-2.5)                              | 6.4%<br>(3.6-9.5%)                   | 9.2%<br>(5-14%)                     | 67<br>(37-100)      | 2600<br>(1500-3900)       |
| Kyrgyzstan | 2005 | Female | 55 to 59 | 63%<br>(50-76%)                | 37%<br>(24-50%)          | 1.6<br>(0.99-2.5)                           | 5.4%<br>(2.3-9.1%)                   | 7.4%<br>(3-13%)                     | 57<br>(23-96)       | 1900<br>(810-3200)        |
| Kyrgyzstan | 2005 | Female | 60 to 64 | 61%<br>(48-75%)                | 39%<br>(25-52%)          | 1.6<br>(0.92-2.5)                           | 3.3%<br>(-0.099-7.6%)                | 4.2%<br>(-0.23-9.6%)                | 31<br>(-1.7-71)     | 870<br>(-26-2000)         |
| Kyrgyzstan | 2005 | Female | 65 to 69 | 59%<br>(48-74%)                | 41%<br>(26-52%)          | 1.5<br>(0.97-2.3)                           | 1.6%<br>(-1.6-5.3%)                  | 2%<br>(-2.2-6.7%)                   | 34<br>(-37-110)     | 800<br>(-800-2600)        |
| Kyrgyzstan | 2005 | Female | 70 to 74 | 57%<br>(46-70%)                | 43%<br>(30-54%)          | 1.5<br>(0.88-2.2)                           | 0.26%<br>(-3.3-4.5%)                 | 0.29%<br>(-4.1-5.5%)                | 5.6<br>(-81-110)    | 120<br>(-1400-1900)       |
| Kyrgyzstan | 2005 | Female | 75 to 79 | 55%<br>(44-67%)                | 45%<br>(33-56%)          | 1.4<br>(0.8-2.1)                            | -0.96%<br>(-4.4-2.9%)                | -1.2%<br>(-5.4-3.4%)                | -34<br>(-150-94)    | -450<br>(-2100-1400)      |
| Kyrgyzstan | 2005 | Female | 80 to 84 | 53%<br>(41-66%)                | 47%<br>(34-59%)          | 1.3<br>(0.84-2)                             | -2%<br>(-5.5-1.8%)                   | -2.5%<br>(-6.6-1.9%)                | -59<br>(-160-46)    | -590<br>(-1600-500)       |
| Kyrgyzstan | 2005 | Female | 85 to 89 | 52%<br>(42-63%)                | 48%<br>(37-58%)          | 1.3<br>(0.79-2)                             | -2.5%<br>(-6-1.1%)                   | -3.1%<br>(-7.2-1.1%)                | -41<br>(-94-15)     | -280<br>(-660-120)        |
| Kyrgyzstan | 2005 | Female | 90 to 94 | 53%<br>(43-64%)                | 47%<br>(36-57%)          | 1.3<br>(0.79-2.1)                           | -2.8%<br>(-6-1.1%)                   | -3.4%<br>(-7.3-1.2%)                | -22<br>(-47-7.9)    | -110<br>(-230-44)         |
| Kyrgyzstan | 2005 | Female | 95 plus  | 53%<br>(41-68%)                | 47%<br>(32-59%)          | 1.3<br>(0.67-2.2)                           | -2.8%<br>(-6.4-1.7%)                 | -3.5%<br>(-7.7-1.8%)                | -9.7<br>(-22-5.1)   | -30<br>(-69-18)           |
| Kyrgyzstan | 2005 | Male   | All Ages | 39%<br>(34-44%)                | 61%<br>(56-66%)          | 2.8<br>(2.3-3.4)                            | 13%<br>(11-15%)                      | 14%<br>(12-17%)                     | 3200<br>(2500-3800) | 130000<br>(110000-150000) |
| Kyrgyzstan | 2005 | Male   | 15 to 19 | 26%<br>(18-34%)                | 74%<br>(66-82%)          | 0.81<br>(0.47-1.3)                          | 3.9%<br>(2.7-5.6%)                   | 5.6%<br>(3.4-8.7%)                  | 13<br>(8.2-21)      | 1400<br>(990-2100)        |
| Kyrgyzstan | 2005 | Male   | 20 to 24 | 51%<br>(38-63%)                | 49%<br>(37-62%)          | 2.7<br>(1.7-3.9)                            | 13%<br>(9.4-17%)                     | 17%<br>(12-23%)                     | 70<br>(48-94)       | 5800<br>(4200-7500)       |
| Kyrgyzstan | 2005 | Male   | 25 to 29 | 64%<br>(51-75%)                | 36%<br>(25-49%)          | 4.6<br>(3.2-6.3)                            | 20%<br>(16-24%)                      | 26%<br>(20-32%)                     | 150<br>(120-190)    | 11000<br>(8600-13000)     |

| Location   | Year | Sex    | Age      | Prevalence of current drinkers | Prevalence of abstainers | Population average of standard drinks daily | Percent of total attributable deaths | Percent of total attributable DALYs | Attributable deaths | Attributable DALYs     |
|------------|------|--------|----------|--------------------------------|--------------------------|---------------------------------------------|--------------------------------------|-------------------------------------|---------------------|------------------------|
| Kyrgyzstan | 2005 | Male   | 30 to 34 | 72%<br>(60-82%)                | 28%<br>(18-40%)          | 5.8<br>(4.1-7.7)                            | 23%<br>(19-27%)                      | 28%<br>(23-33%)                     | 240<br>(190-280)    | 15000<br>(12000-18000) |
| Kyrgyzstan | 2005 | Male   | 35 to 39 | 75%<br>(64-84%)                | 25%<br>(16-36%)          | 5.7<br>(4-7.8)                              | 24%<br>(20-28%)                      | 29%<br>(23-33%)                     | 280<br>(230-330)    | 16000<br>(13000-18000) |
| Kyrgyzstan | 2005 | Male   | 40 to 44 | 75%<br>(64-83%)                | 25%<br>(17-36%)          | 5.9<br>(4.2-7.8)                            | 25%<br>(21-29%)                      | 30%<br>(25-34%)                     | 390<br>(320-460)    | 19000<br>(16000-22000) |
| Kyrgyzstan | 2005 | Male   | 45 to 49 | 72%<br>(58-81%)                | 28%<br>(19-42%)          | 6.6<br>(4.4-9.3)                            | 25%<br>(21-29%)                      | 30%<br>(25-34%)                     | 440<br>(370-520)    | 19000<br>(16000-23000) |
| Kyrgyzstan | 2005 | Male   | 50 to 54 | 68%<br>(55-80%)                | 32%<br>(20-45%)          | 6.2<br>(4-8.8)                              | 24%<br>(19-28%)                      | 27%<br>(22-32%)                     | 420<br>(340-510)    | 16000<br>(13000-19000) |
| Kyrgyzstan | 2005 | Male   | 55 to 59 | 63%<br>(44-80%)                | 37%<br>(20-56%)          | 4.6<br>(2.7-7)                              | 19%<br>(14-24%)                      | 22%<br>(16-27%)                     | 300<br>(220-380)    | 9900<br>(7400-12000)   |
| Kyrgyzstan | 2005 | Male   | 60 to 64 | 59%<br>(39-77%)                | 41%<br>(23-61%)          | 3.5<br>(1.9-5.7)                            | 14%<br>(8.7-19%)                     | 16%<br>(9.5-21%)                    | 190<br>(120-270)    | 5300<br>(3300-7400)    |
| Kyrgyzstan | 2005 | Male   | 65 to 69 | 55%<br>(35-73%)                | 45%<br>(27-65%)          | 3.1<br>(1.8-4.9)                            | 11%<br>(6.2-16%)                     | 12%<br>(6.8-18%)                    | 290<br>(160-420)    | 6600<br>(3800-9500)    |
| Kyrgyzstan | 2005 | Male   | 70 to 74 | 50%<br>(32-68%)                | 50%<br>(32-68%)          | 2.6<br>(1.4-4.1)                            | 7.6%<br>(3.3-13%)                    | 8.4%<br>(3.5-14%)                   | 190<br>(79-320)     | 3500<br>(1500-5900)    |
| Kyrgyzstan | 2005 | Male   | 75 to 79 | 45%<br>(28-64%)                | 55%<br>(36-72%)          | 2.1<br>(1.1-3.5)                            | 4.9%<br>(1.2-9.4%)                   | 5.4%<br>(1.1-11%)                   | 130<br>(27-250)     | 1900<br>(460-3700)     |
| Kyrgyzstan | 2005 | Male   | 80 to 84 | 42%<br>(26-60%)                | 58%<br>(40-74%)          | 1.8<br>(1-3.1)                              | 3.2%<br>(0.12-7.3%)                  | 3.4%<br>(-0.071-8.2%)               | 51<br>(-1-120)      | 570<br>(22-1300)       |
| Kyrgyzstan | 2005 | Male   | 85 to 89 | 40%<br>(26-57%)                | 60%<br>(43-74%)          | 1.6<br>(0.89-2.6)                           | 2%<br>(-0.72-5.8%)                   | 2%<br>(-1.1-6.4%)                   | 8.9<br>(-5.2-29)    | 75<br>(-28-220)        |
| Kyrgyzstan | 2005 | Male   | 90 to 94 | 40%<br>(26-56%)                | 60%<br>(44-74%)          | 1.5<br>(0.81-2.6)                           | 1.2%<br>(-1.3-4.9%)                  | 1.1%<br>(-1.8-5.4%)                 | 2.1<br>(-3.4-10)    | 13<br>(-14-54)         |
| Kyrgyzstan | 2005 | Male   | 95 plus  | 41%<br>(24-61%)                | 59%<br>(39-76%)          | 1.4<br>(0.62-2.7)                           | 0.8%<br>(-1.8-5%)                    | 0.52%<br>(-2.5-5.4%)                | 0.34<br>(-1.6-3.5)  | 2<br>(-4.5-13)         |
| Kyrgyzstan | 2010 | Female | All Ages | 55%<br>(49-63%)                | 45%<br>(37-51%)          | 1<br>(0.78-1.3)                             | 2.2%<br>(1.2-3.5%)                   | 1.1%<br>(-1.6-4%)                   | 180<br>(-280-690)   | 17000<br>(8900-27000)  |
| Kyrgyzstan | 2010 | Female | 15 to 19 | 55%<br>(42-69%)                | 45%<br>(31-58%)          | 0.95<br>(0.54-1.5)                          | 1.9%<br>(1-3%)                       | 3.8%<br>(1.6-6.5%)                  | 5.8<br>(2.5-10)     | 630<br>(350-980)       |
| Kyrgyzstan | 2010 | Female | 20 to 24 | 62%<br>(48-74%)                | 38%<br>(26-52%)          | 1.3<br>(0.77-2.1)                           | 3.5%<br>(2.2-5.1%)                   | 5.9%<br>(3.1-9.4%)                  | 13<br>(6.9-22)      | 1400<br>(880-2100)     |
| Kyrgyzstan | 2010 | Female | 25 to 29 | 64%<br>(51-77%)                | 36%<br>(23-49%)          | 1.5<br>(0.91-2.3)                           | 4.5%<br>(3.1-6.1%)                   | 7.7%<br>(4.7-11%)                   | 17<br>(10-25)       | 1600<br>(1000-2200)    |
| Kyrgyzstan | 2010 | Female | 30 to 34 | 66%<br>(52-78%)                | 34%<br>(22-48%)          | 1.6<br>(0.95-2.4)                           | 5.6%<br>(4.1-7.3%)                   | 9.6%<br>(6.8-13%)                   | 27<br>(19-36)       | 2000<br>(1500-2600)    |
| Kyrgyzstan | 2010 | Female | 35 to 39 | 66%<br>(53-80%)                | 34%<br>(20-47%)          | 1.6<br>(0.98-2.5)                           | 5.9%<br>(4.4-7.8%)                   | 10%<br>(7.4-14%)                    | 35<br>(25-47)       | 2200<br>(1600-2900)    |
| Kyrgyzstan | 2010 | Female | 40 to 44 | 66%<br>(52-79%)                | 34%<br>(21-48%)          | 1.6<br>(1-2.5)                              | 6.5%<br>(4.7-8.5%)                   | 11%<br>(8.1-14%)                    | 48<br>(34-62)       | 2500<br>(1900-3300)    |
| Kyrgyzstan | 2010 | Female | 45 to 49 | 66%<br>(51-79%)                | 34%<br>(21-49%)          | 1.7<br>(1-2.6)                              | 5.9%<br>(3.9-8.5%)                   | 9.8%<br>(6.4-14%)                   | 59<br>(38-83)       | 2800<br>(1800-3800)    |

| Location   | Year | Sex    | Age      | Prevalence of current drinkers | Prevalence of abstainers | Population average of standard drinks daily | Percent of total attributable deaths | Percent of total attributable DALYs | Attributable deaths | Attributable DALYs        |
|------------|------|--------|----------|--------------------------------|--------------------------|---------------------------------------------|--------------------------------------|-------------------------------------|---------------------|---------------------------|
| Kyrgyzstan | 2010 | Female | 50 to 54 | 64%<br>(50-78%)                | 36%<br>(22-50%)          | 1.7<br>(1-2.5)                              | 5.7%<br>(3.4-8.7%)                   | 8.7%<br>(4.9-13%)                   | 68<br>(38-100)      | 2700<br>(1600-4100)       |
| Kyrgyzstan | 2010 | Female | 55 to 59 | 62%<br>(50-76%)                | 38%<br>(24-50%)          | 1.6<br>(0.98-2.5)                           | 4.8%<br>(2.1-8%)                     | 6.9%<br>(2.8-12%)                   | 60<br>(25-100)      | 2000<br>(900-3400)        |
| Kyrgyzstan | 2010 | Female | 60 to 64 | 61%<br>(47-76%)                | 39%<br>(24-53%)          | 1.6<br>(0.92-2.5)                           | 2.9%<br>(-0.063-6.3%)                | 3.8%<br>(-0.3-8.4%)                 | 33<br>(-2.6-74)     | 950<br>(-22-2100)         |
| Kyrgyzstan | 2010 | Female | 65 to 69 | 59%<br>(47-74%)                | 41%<br>(26-53%)          | 1.5<br>(0.96-2.2)                           | 1.3%<br>(-1.7-4.8%)                  | 1.7%<br>(-2.4-6.3%)                 | 14<br>(-21-53)      | 340<br>(-450-1200)        |
| Kyrgyzstan | 2010 | Female | 70 to 74 | 57%<br>(45-70%)                | 43%<br>(30-55%)          | 1.5<br>(0.85-2.2)                           | -0.02%<br>(-3.5-3.9%)                | -0.097%<br>(-4.6-4.7%)              | -1.7<br>(-85-88)    | -6.8<br>(-1500-1600)      |
| Kyrgyzstan | 2010 | Female | 75 to 79 | 54%<br>(44-67%)                | 46%<br>(33-56%)          | 1.4<br>(0.78-2.1)                           | -1.3%<br>(-4.7-2.6%)                 | -1.7%<br>(-5.8-3%)                  | -34<br>(-120-65)    | -450<br>(-1700-930)       |
| Kyrgyzstan | 2010 | Female | 80 to 84 | 53%<br>(40-66%)                | 47%<br>(34-60%)          | 1.3<br>(0.81-2)                             | -2.3%<br>(-5.7-1.4%)                 | -2.9%<br>(-7-1.5%)                  | -63<br>(-150-33)    | -610<br>(-1500-380)       |
| Kyrgyzstan | 2010 | Female | 85 to 89 | 52%<br>(41-63%)                | 48%<br>(37-59%)          | 1.3<br>(0.78-1.9)                           | -2.8%<br>(-6.3-0.63%)                | -3.5%<br>(-7.7-0.55%)               | -69<br>(-150-11)    | -480<br>(-1100-110)       |
| Kyrgyzstan | 2010 | Female | 90 to 94 | 53%<br>(42-64%)                | 47%<br>(36-58%)          | 1.3<br>(0.76-2.1)                           | -3%<br>(-6.4-0.78%)                  | -3.7%<br>(-7.8-0.65%)               | -26<br>(-54-4.6)    | -120<br>(-260-32)         |
| Kyrgyzstan | 2010 | Female | 95 plus  | 53%<br>(40-68%)                | 47%<br>(32-60%)          | 1.3<br>(0.65-2.2)                           | -3%<br>(-6.6-1.2%)                   | -3.8%<br>(-8-1.2%)                  | -8.7<br>(-19-3)     | -27<br>(-60-11)           |
| Kyrgyzstan | 2010 | Male   | All Ages | 39%<br>(35-43%)                | 61%<br>(57-65%)          | 2.8<br>(2.3-3.4)                            | 12%<br>(10-14%)                      | 13%<br>(11-16%)                     | 2900<br>(2300-3600) | 120000<br>(100000-150000) |
| Kyrgyzstan | 2010 | Male   | 15 to 19 | 19%<br>(13-28%)                | 81%<br>(72-87%)          | 0.6<br>(0.34-0.99)                          | 3.1%<br>(2.2-4.4%)                   | 3.9%<br>(2.3-6.4%)                  | 10<br>(6.1-16)      | 1200<br>(820-1700)        |
| Kyrgyzstan | 2010 | Male   | 20 to 24 | 48%<br>(39-58%)                | 52%<br>(42-61%)          | 2.5<br>(1.6-3.5)                            | 10%<br>(7.7-14%)                     | 13%<br>(9.3-19%)                    | 63<br>(43-87)       | 5500<br>(4100-7300)       |
| Kyrgyzstan | 2010 | Male   | 25 to 29 | 65%<br>(55-72%)                | 35%<br>(28-45%)          | 4.7<br>(3.3-6.3)                            | 18%<br>(14-22%)                      | 23%<br>(18-29%)                     | 130<br>(100-170)    | 9800<br>(7800-12000)      |
| Kyrgyzstan | 2010 | Male   | 30 to 34 | 73%<br>(64-81%)                | 27%<br>(19-36%)          | 5.9<br>(4.2-7.9)                            | 22%<br>(19-26%)                      | 27%<br>(22-32%)                     | 210<br>(170-250)    | 13000<br>(11000-16000)    |
| Kyrgyzstan | 2010 | Male   | 35 to 39 | 77%<br>(69-83%)                | 23%<br>(17-31%)          | 5.8<br>(4.1-7.8)                            | 23%<br>(19-27%)                      | 28%<br>(23-33%)                     | 260<br>(210-300)    | 15000<br>(12000-17000)    |
| Kyrgyzstan | 2010 | Male   | 40 to 44 | 77%<br>(70-83%)                | 23%<br>(17-30%)          | 6.1<br>(4.4-7.9)                            | 24%<br>(20-28%)                      | 29%<br>(25-34%)                     | 320<br>(270-380)    | 16000<br>(14000-19000)    |
| Kyrgyzstan | 2010 | Male   | 45 to 49 | 74%<br>(64-82%)                | 26%<br>(18-36%)          | 6.8<br>(4.8-9.3)                            | 24%<br>(21-28%)                      | 29%<br>(25-34%)                     | 420<br>(350-490)    | 18000<br>(16000-22000)    |
| Kyrgyzstan | 2010 | Male   | 50 to 54 | 69%<br>(56-80%)                | 31%<br>(20-44%)          | 6.1<br>(4-8.6)                              | 23%<br>(19-27%)                      | 27%<br>(22-32%)                     | 450<br>(370-540)    | 17000<br>(14000-21000)    |
| Kyrgyzstan | 2010 | Male   | 55 to 59 | 62%<br>(43-79%)                | 38%<br>(21-57%)          | 4.4<br>(2.6-6.9)                            | 18%<br>(13-23%)                      | 21%<br>(15-27%)                     | 360<br>(260-460)    | 12000<br>(8600-15000)     |
| Kyrgyzstan | 2010 | Male   | 60 to 64 | 57%<br>(37-75%)                | 43%<br>(25-63%)          | 3.4<br>(1.9-5.5)                            | 13%<br>(8.1-18%)                     | 15%<br>(8.8-21%)                    | 220<br>(130-310)    | 6200<br>(3800-8700)       |
| Kyrgyzstan | 2010 | Male   | 65 to 69 | 54%<br>(34-72%)                | 46%<br>(28-66%)          | 3<br>(1.7-4.8)                              | 10%<br>(5.7-15%)                     | 12%<br>(6.3-18%)                    | 140<br>(76-210)     | 3300<br>(1800-4900)       |

| Location   | Year | Sex    | Age      | Prevalence of current drinkers | Prevalence of abstainers | Population average of standard drinks daily | Percent of total attributable deaths | Percent of total attributable DALYs | Attributable deaths | Attributable DALYs    |
|------------|------|--------|----------|--------------------------------|--------------------------|---------------------------------------------|--------------------------------------|-------------------------------------|---------------------|-----------------------|
| Kyrgyzstan | 2010 | Male   | 70 to 74 | 49%<br>(31-67%)                | 51%<br>(33-69%)          | 2.5<br>(1.3-4)                              | 7.1%<br>(2.7-12%)                    | 7.9%<br>(3-14%)                     | 170<br>(63-300)     | 3200<br>(1300-5500)   |
| Kyrgyzstan | 2010 | Male   | 75 to 79 | 44%<br>(28-63%)                | 56%<br>(37-72%)          | 2<br>(1-3.4)                                | 4.5%<br>(0.82-9.2%)                  | 4.9%<br>(0.67-10%)                  | 92<br>(13-190)      | 1400<br>(240-2800)    |
| Kyrgyzstan | 2010 | Male   | 80 to 84 | 42%<br>(25-59%)                | 58%<br>(41-75%)          | 1.7<br>(0.92-2.9)                           | 2.8%<br>(-0.32-7.1%)                 | 2.9%<br>(-0.62-7.8%)                | 49<br>(-10-130)     | 550<br>(-64-1400)     |
| Kyrgyzstan | 2010 | Male   | 85 to 89 | 40%<br>(24-55%)                | 60%<br>(45-76%)          | 1.6<br>(0.8-2.6)                            | 1.6%<br>(-1.1-5.3%)                  | 1.5%<br>(-1.6-5.7%)                 | 17<br>(-18-64)      | 150<br>(-100-500)     |
| Kyrgyzstan | 2010 | Male   | 90 to 94 | 39%<br>(25-55%)                | 61%<br>(45-75%)          | 1.4<br>(0.77-2.5)                           | 0.92%<br>(-1.5-4.6%)                 | 0.75%<br>(-2-5%)                    | 1.7<br>(-4.6-11)    | 12<br>(-19-60)        |
| Kyrgyzstan | 2010 | Male   | 95 plus  | 40%<br>(23-61%)                | 60%<br>(39-77%)          | 1.3<br>(0.59-2.6)                           | 0.56%<br>(-2-4.7%)                   | 0.24%<br>(-2.7-5%)                  | 0.14<br>(-1.6-3)    | 1.3<br>(-4.6-11)      |
| Kyrgyzstan | 2016 | Female | All Ages | 55%<br>(49-62%)                | 45%<br>(38-51%)          | 0.98<br>(0.69-1.3)                          | 2.1%<br>(1-3.4%)                     | 0.93%<br>(-1.7-4.1%)                | 150<br>(-260-630)   | 16000<br>(7700-26000) |
| Kyrgyzstan | 2016 | Female | 15 to 19 | 55%<br>(42-69%)                | 45%<br>(31-58%)          | 0.91<br>(0.51-1.4)                          | 1.8%<br>(0.99-2.8%)                  | 4.1%<br>(1.6-7.2%)                  | 3.8<br>(1.4-6.7)    | 450<br>(250-710)      |
| Kyrgyzstan | 2016 | Female | 20 to 24 | 62%<br>(49-74%)                | 38%<br>(26-51%)          | 1.3<br>(0.72-2.1)                           | 3.2%<br>(2-4.7%)                     | 5.9%<br>(3-9.7%)                    | 8.9<br>(4.5-15)     | 1000<br>(640-1600)    |
| Kyrgyzstan | 2016 | Female | 25 to 29 | 65%<br>(51-77%)                | 35%<br>(23-49%)          | 1.4<br>(0.8-2.3)                            | 4%<br>(2.8-5.5%)                     | 7.4%<br>(4.6-11%)                   | 16<br>(9.7-24)      | 1600<br>(1100-2200)   |
| Kyrgyzstan | 2016 | Female | 30 to 34 | 66%<br>(52-79%)                | 34%<br>(21-48%)          | 1.5<br>(0.89-2.4)                           | 4.9%<br>(3.7-6.6%)                   | 9.4%<br>(6.7-13%)                   | 25<br>(17-34)       | 1900<br>(1400-2500)   |
| Kyrgyzstan | 2016 | Female | 35 to 39 | 66%<br>(53-80%)                | 34%<br>(20-47%)          | 1.5<br>(0.88-2.4)                           | 5.4%<br>(4-7.1%)                     | 10%<br>(7.5-14%)                    | 30<br>(21-41)       | 1900<br>(1400-2600)   |
| Kyrgyzstan | 2016 | Female | 40 to 44 | 66%<br>(52-79%)                | 34%<br>(21-48%)          | 1.6<br>(0.91-2.4)                           | 5.8%<br>(4.2-7.8%)                   | 11%<br>(7.9-15%)                    | 41<br>(29-57)       | 2200<br>(1600-3000)   |
| Kyrgyzstan | 2016 | Female | 45 to 49 | 66%<br>(51-79%)                | 34%<br>(21-49%)          | 1.6<br>(0.92-2.5)                           | 5.3%<br>(3.5-7.5%)                   | 9.6%<br>(6.2-14%)                   | 45<br>(29-65)       | 2100<br>(1400-3000)   |
| Kyrgyzstan | 2016 | Female | 50 to 54 | 64%<br>(50-77%)                | 36%<br>(23-50%)          | 1.6<br>(0.88-2.5)                           | 5.1%<br>(3-7.9%)                     | 8.3%<br>(4.6-13%)                   | 66<br>(36-100)      | 2600<br>(1500-4000)   |
| Kyrgyzstan | 2016 | Female | 55 to 59 | 63%<br>(50-75%)                | 37%<br>(25-50%)          | 1.5<br>(0.88-2.4)                           | 4.2%<br>(1.8-7.3%)                   | 6.4%<br>(2.5-11%)                   | 64<br>(25-110)      | 2200<br>(910-3800)    |
| Kyrgyzstan | 2016 | Female | 60 to 64 | 61%<br>(48-75%)                | 39%<br>(25-52%)          | 1.5<br>(0.83-2.4)                           | 2.5%<br>(-0.28-5.8%)                 | 3.5%<br>(-0.54-8.1%)                | 43<br>(-6.4-100)    | 1300<br>(-130-3000)   |
| Kyrgyzstan | 2016 | Female | 65 to 69 | 59%<br>(47-74%)                | 41%<br>(26-53%)          | 1.4<br>(0.84-2.2)                           | 1.1%<br>(-1.8-4.4%)                  | 1.5%<br>(-2.6-6.1%)                 | 15<br>(-27-64)      | 380<br>(-580-1500)    |
| Kyrgyzstan | 2016 | Female | 70 to 74 | 57%<br>(46-70%)                | 43%<br>(30-54%)          | 1.4<br>(0.75-2.2)                           | -0.22%<br>(-3.4-3.7%)                | -0.36%<br>(-4.7-4.7%)               | -3.9<br>(-49-48)    | -57<br>(-900-920)     |
| Kyrgyzstan | 2016 | Female | 75 to 79 | 54%<br>(43-67%)                | 46%<br>(33-57%)          | 1.3<br>(0.69-2.1)                           | -1.3%<br>(-4.4-2.5%)                 | -1.8%<br>(-5.8-3%)                  | -35<br>(-110-54)    | -460<br>(-1500-820)   |
| Kyrgyzstan | 2016 | Female | 80 to 84 | 52%<br>(40-66%)                | 48%<br>(34-60%)          | 1.2<br>(0.7-2)                              | -2.3%<br>(-5.5-1.3%)                 | -3%<br>(-7-1.4%)                    | -64<br>(-150-29)    | -630<br>(-1500-340)   |
| Kyrgyzstan | 2016 | Female | 85 to 89 | 52%<br>(41-63%)                | 48%<br>(37-59%)          | 1.2<br>(0.7-1.9)                            | -2.9%<br>(-6.3-0.58%)                | -3.8%<br>(-8-0.46%)                 | -57<br>(-120-6.9)   | -400<br>(-840-75)     |

| Location   | Year | Sex    | Age      | Prevalence of current drinkers | Prevalence of abstainers | Population average of standard drinks daily | Percent of total attributable deaths | Percent of total attributable DALYs | Attributable deaths  | Attributable DALYs       |
|------------|------|--------|----------|--------------------------------|--------------------------|---------------------------------------------|--------------------------------------|-------------------------------------|----------------------|--------------------------|
| Kyrgyzstan | 2016 | Female | 90 to 94 | 53%<br>(42-64%)                | 47%<br>(36-58%)          | 1.2<br>(0.7-2)                              | -3.1%<br>(-6.3-0.47%)                | -4%<br>(-7.9-0.31%)                 | -39<br>(-78-3.1)     | -190<br>(-370-28)        |
| Kyrgyzstan | 2016 | Female | 95 plus  | 53%<br>(40-68%)                | 47%<br>(32-60%)          | 1.2<br>(0.6-2.2)                            | -3.2%<br>(-6.8-0.72%)                | -4%<br>(-8.4-0.62%)                 | -11<br>(-22-1.6)     | -33<br>(-70-7.3)         |
| Kyrgyzstan | 2016 | Male   | All Ages | 39%<br>(35-44%)                | 61%<br>(56-65%)          | 2.7<br>(2-3.6)                              | 11%<br>(9.3-14%)                     | 13%<br>(9.6-16%)                    | 2600<br>(1900-3400)  | 110000<br>(90000-140000) |
| Kyrgyzstan | 2016 | Male   | 15 to 19 | 19%<br>(13-27%)                | 81%<br>(73-87%)          | 0.56<br>(0.3-0.94)                          | 3.3%<br>(2.3-4.6%)                   | 4.6%<br>(2.7-7.3%)                  | 6.9<br>(4-11)        | 920<br>(640-1300)        |
| Kyrgyzstan | 2016 | Male   | 20 to 24 | 48%<br>(38-58%)                | 52%<br>(42-62%)          | 2.3<br>(1.4-3.4)                            | 11%<br>(7.9-14%)                     | 15%<br>(10-22%)                     | 45<br>(29-64)        | 4300<br>(3100-5800)      |
| Kyrgyzstan | 2016 | Male   | 25 to 29 | 65%<br>(55-72%)                | 35%<br>(28-45%)          | 4.5<br>(3-6.3)                              | 18%<br>(14-22%)                      | 24%<br>(18-31%)                     | 130<br>(90-170)      | 9900<br>(7400-13000)     |
| Kyrgyzstan | 2016 | Male   | 30 to 34 | 73%<br>(63-80%)                | 27%<br>(20-37%)          | 5.6<br>(3.8-7.8)                            | 21%<br>(17-26%)                      | 28%<br>(22-33%)                     | 190<br>(150-240)     | 13000<br>(10000-16000)   |
| Kyrgyzstan | 2016 | Male   | 35 to 39 | 76%<br>(68-83%)                | 24%<br>(17-32%)          | 5.5<br>(3.6-8)                              | 22%<br>(18-26%)                      | 28%<br>(22-34%)                     | 210<br>(160-270)     | 13000<br>(9800-15000)    |
| Kyrgyzstan | 2016 | Male   | 40 to 44 | 77%<br>(69-83%)                | 23%<br>(17-31%)          | 5.8<br>(3.8-8.3)                            | 23%<br>(19-27%)                      | 29%<br>(24-34%)                     | 270<br>(210-330)     | 14000<br>(11000-17000)   |
| Kyrgyzstan | 2016 | Male   | 45 to 49 | 74%<br>(63-82%)                | 26%<br>(18-37%)          | 6.5<br>(4.3-9.4)                            | 23%<br>(19-26%)                      | 29%<br>(24-33%)                     | 310<br>(250-380)     | 14000<br>(11000-17000)   |
| Kyrgyzstan | 2016 | Male   | 50 to 54 | 68%<br>(55-80%)                | 32%<br>(20-45%)          | 5.8<br>(3.6-8.8)                            | 21%<br>(17-25%)                      | 26%<br>(21-31%)                     | 430<br>(330-530)     | 17000<br>(13000-21000)   |
| Kyrgyzstan | 2016 | Male   | 55 to 59 | 62%<br>(42-79%)                | 38%<br>(21-58%)          | 4.2<br>(2.4-6.8)                            | 17%<br>(12-21%)                      | 20%<br>(14-26%)                     | 380<br>(250-500)     | 13000<br>(8700-17000)    |
| Kyrgyzstan | 2016 | Male   | 60 to 64 | 57%<br>(36-75%)                | 43%<br>(25-64%)          | 3.2<br>(1.6-5.2)                            | 12%<br>(7.1-17%)                     | 14%<br>(7.8-20%)                    | 290<br>(170-430)     | 8400<br>(4900-12000)     |
| Kyrgyzstan | 2016 | Male   | 65 to 69 | 53%<br>(33-73%)                | 47%<br>(27-67%)          | 2.8<br>(1.5-4.5)                            | 9.4%<br>(4.7-14%)                    | 11%<br>(5.3-17%)                    | 150<br>(73-230)      | 3500<br>(1800-5400)      |
| Kyrgyzstan | 2016 | Male   | 70 to 74 | 48%<br>(30-67%)                | 52%<br>(33-70%)          | 2.3<br>(1.2-3.9)                            | 6.4%<br>(2.3-11%)                    | 7.2%<br>(2.4-13%)                   | 87<br>(29-160)       | 1700<br>(580-3000)       |
| Kyrgyzstan | 2016 | Male   | 75 to 79 | 44%<br>(27-63%)                | 56%<br>(37-73%)          | 1.9<br>(0.93-3.3)                           | 3.9%<br>(0.43-8.5%)                  | 4.3%<br>(0.22-9.6%)                 | 70<br>(3.3-160)      | 1100<br>(110-2300)       |
| Kyrgyzstan | 2016 | Male   | 80 to 84 | 41%<br>(24-58%)                | 59%<br>(42-76%)          | 1.6<br>(0.83-2.8)                           | 2.3%<br>(-0.72-6.5%)                 | 2.4%<br>(-1.2-7.4%)                 | 39<br>(-19-120)      | 450<br>(-150-1300)       |
| Kyrgyzstan | 2016 | Male   | 85 to 89 | 39%<br>(24-55%)                | 61%<br>(45-76%)          | 1.4<br>(0.72-2.5)                           | 1.2%<br>(-1.4-5.2%)                  | 1.1%<br>(-1.9-5.7%)                 | 9.9<br>(-18-53)      | 95<br>(-100-410)         |
| Kyrgyzstan | 2016 | Male   | 90 to 94 | 38%<br>(24-55%)                | 62%<br>(45-76%)          | 1.3<br>(0.66-2.4)                           | 0.62%<br>(-1.7-4.1%)                 | 0.39%<br>(-2.3-4.6%)                | 1.9<br>(-12-23)      | 19<br>(-50-120)          |
| Kyrgyzstan | 2016 | Male   | 95 plus  | 40%<br>(23-60%)                | 60%<br>(40-77%)          | 1.2<br>(0.52-2.4)                           | 0.29%<br>(-2.2-4.1%)                 | -0.098%<br>(-3-4.4%)                | -0.073<br>(-2.2-3.2) | 0.83<br>(-6.1-12)        |
| Mongolia   | 1990 | Female | All Ages | 43%<br>(35-51%)                | 57%<br>(49-65%)          | 0.72<br>(0.54-0.95)                         | 1.6%<br>(0.96-2.4%)                  | 2.6%<br>(1.1-4.6%)                  | 220<br>(93-410)      | 8100<br>(5000-12000)     |
| Mongolia   | 1990 | Female | 15 to 19 | 41%<br>(26-57%)                | 59%<br>(43-74%)          | 0.65<br>(0.27-1.2)                          | 1.6%<br>(0.56-3.2%)                  | 2.4%<br>(0.37-5.2%)                 | 3.1<br>(0.48-7)      | 300<br>(100-600)         |

| Location | Year | Sex    | Age      | Prevalence of current drinkers | Prevalence of abstainers | Population average of standard drinks daily | Percent of total attributable deaths | Percent of total attributable DALYs | Attributable deaths | Attributable DALYs     |
|----------|------|--------|----------|--------------------------------|--------------------------|---------------------------------------------|--------------------------------------|-------------------------------------|---------------------|------------------------|
| Mongolia | 1990 | Female | 20 to 24 | 54%<br>(37-70%)                | 46%<br>(30-63%)          | 1.1<br>(0.45-1.9)                           | 3%<br>(1.2-5.4%)                     | 3.8%<br>(0.98-7.7%)                 | 6.4<br>(1.6-14)     | 600<br>(240-1100)      |
| Mongolia | 1990 | Female | 25 to 29 | 59%<br>(39-75%)                | 41%<br>(25-61%)          | 1.3<br>(0.57-2.3)                           | 3.8%<br>(1.8-6.4%)                   | 5.1%<br>(1.8-9.5%)                  | 9<br>(3.2-17)       | 730<br>(340-1200)      |
| Mongolia | 1990 | Female | 30 to 34 | 61%<br>(41-77%)                | 39%<br>(23-59%)          | 1.4<br>(0.68-2.4)                           | 4.2%<br>(2.4-6.8%)                   | 6%<br>(2.8-11%)                     | 9.7<br>(4.5-17)     | 690<br>(380-1100)      |
| Mongolia | 1990 | Female | 35 to 39 | 62%<br>(45-78%)                | 38%<br>(22-55%)          | 1.5<br>(0.66-2.8)                           | 4.4%<br>(2.2-7.5%)                   | 6.3%<br>(2.8-11%)                   | 10<br>(4.6-19)      | 630<br>(320-1100)      |
| Mongolia | 1990 | Female | 40 to 44 | 62%<br>(46-79%)                | 38%<br>(21-54%)          | 1.5<br>(0.64-2.7)                           | 4.9%<br>(2.5-8.3%)                   | 7.2%<br>(3.2-12%)                   | 12<br>(5.3-21)      | 610<br>(300-1000)      |
| Mongolia | 1990 | Female | 45 to 49 | 61%<br>(41-77%)                | 39%<br>(23-59%)          | 1.6<br>(0.7-3)                              | 4.9%<br>(2.2-9.4%)                   | 7%<br>(2.9-13%)                     | 15<br>(6.3-29)      | 670<br>(290-1300)      |
| Mongolia | 1990 | Female | 50 to 54 | 59%<br>(41-75%)                | 41%<br>(25-59%)          | 1.5<br>(0.66-3)                             | 5.2%<br>(2-10%)                      | 7.1%<br>(2.6-14%)                   | 21<br>(7.7-42)      | 820<br>(310-1600)      |
| Mongolia | 1990 | Female | 55 to 59 | 56%<br>(39-74%)                | 44%<br>(26-61%)          | 1.5<br>(0.6-3.1)                            | 5.1%<br>(1.7-9.9%)                   | 6.7%<br>(2.2-13%)                   | 26<br>(8.2-51)      | 850<br>(280-1700)      |
| Mongolia | 1990 | Female | 60 to 64 | 53%<br>(35-71%)                | 47%<br>(29-65%)          | 1.4<br>(0.56-3.1)                           | 4.4%<br>(1.2-9.5%)                   | 5.6%<br>(1.5-12%)                   | 28<br>(8-60)        | 770<br>(220-1700)      |
| Mongolia | 1990 | Female | 65 to 69 | 50%<br>(34-68%)                | 50%<br>(32-66%)          | 1.3<br>(0.56-2.5)                           | 3.8%<br>(0.95-8.2%)                  | 4.8%<br>(1.2-10%)                   | 28<br>(7.4-61)      | 640<br>(160-1400)      |
| Mongolia | 1990 | Female | 70 to 74 | 45%<br>(30-62%)                | 55%<br>(38-70%)          | 1.1<br>(0.42-2.2)                           | 2.9%<br>(0.34-7.4%)                  | 3.6%<br>(0.45-8.7%)                 | 27<br>(3.5-67)      | 480<br>(58-1200)       |
| Mongolia | 1990 | Female | 75 to 79 | 40%<br>(26-57%)                | 60%<br>(43-74%)          | 0.92<br>(0.34-1.9)                          | 2%<br>(-0.49-5.9%)                   | 2.3%<br>(-0.58-7.1%)                | 15<br>(-3.5-45)     | 210<br>(-49-640)       |
| Mongolia | 1990 | Female | 80 to 84 | 37%<br>(23-54%)                | 63%<br>(46-77%)          | 0.92<br>(0.34-1.9)                          | 1.3%<br>(-1.1-5.2%)                  | 1.5%<br>(-1.4-6%)                   | 7.6<br>(-6.6-30)    | 82<br>(-67-310)        |
| Mongolia | 1990 | Female | 85 to 89 | 36%<br>(24-52%)                | 64%<br>(48-76%)          | 0.98<br>(0.37-2.1)                          | 0.91%<br>(-1.5-5%)                   | 0.98%<br>(-1.9-5.8%)                | 3.7<br>(-6.9-22)    | 29<br>(-49-160)        |
| Mongolia | 1990 | Female | 90 to 94 | 38%<br>(25-53%)                | 62%<br>(47-75%)          | 1.1<br>(0.34-2.4)                           | 0.73%<br>(-2-5.8%)                   | 0.75%<br>(-2.4-6.5%)                | 1.1<br>(-3.4-9.3)   | 6.2<br>(-16-48)        |
| Mongolia | 1990 | Female | 95 plus  | 41%<br>(25-60%)                | 59%<br>(40-75%)          | 1.2<br>(0.29-3)                             | 0.76%<br>(-2.6-7%)                   | 0.75%<br>(-3.1-8.1%)                | 0.31<br>(-1.3-3.3)  | 1.2<br>(-4.1-11)       |
| Mongolia | 1990 | Male   | All Ages | 51%<br>(41-61%)                | 49%<br>(39-59%)          | 1.1<br>(0.83-1.3)                           | 3.2%<br>(2.4-4.2%)                   | 4.2%<br>(2.9-5.9%)                  | 430<br>(290-630)    | 19000<br>(14000-26000) |
| Mongolia | 1990 | Male   | 15 to 19 | 42%<br>(26-60%)                | 58%<br>(40-74%)          | 0.48<br>(0.24-0.83)                         | 2.9%<br>(1.6-4.6%)                   | 3.1%<br>(1.1-6%)                    | 5.8<br>(2.1-11)     | 610<br>(330-990)       |
| Mongolia | 1990 | Male   | 20 to 24 | 63%<br>(44-79%)                | 37%<br>(21-56%)          | 1.2<br>(0.74-1.9)                           | 7.1%<br>(4.7-10%)                    | 7.8%<br>(4.2-13%)                   | 17<br>(9.1-28)      | 1600<br>(990-2400)     |
| Mongolia | 1990 | Male   | 25 to 29 | 73%<br>(56-85%)                | 27%<br>(15-44%)          | 2.1<br>(1.3-3.1)                            | 11%<br>(7.4-15%)                     | 12%<br>(7.7-18%)                    | 32<br>(19-46)       | 2500<br>(1600-3400)    |
| Mongolia | 1990 | Male   | 30 to 34 | 79%<br>(62-90%)                | 21%<br>(10-38%)          | 2.6<br>(1.6-3.7)                            | 12%<br>(8.4-16%)                     | 14%<br>(9-20%)                      | 32<br>(21-48)       | 2200<br>(1600-3100)    |
| Mongolia | 1990 | Male   | 35 to 39 | 81%<br>(68-91%)                | 19%<br>(9.1-32%)         | 2.6<br>(1.6-4)                              | 10%<br>(7.2-15%)                     | 12%<br>(7.8-18%)                    | 29<br>(18-45)       | 1800<br>(1200-2600)    |



| Location | Year | Sex    | Age      | Prevalence of current drinkers | Prevalence of abstainers | Population average of standard drinks daily | Percent of total attributable deaths | Percent of total attributable DALYs | Attributable deaths   | Attributable DALYs   |
|----------|------|--------|----------|--------------------------------|--------------------------|---------------------------------------------|--------------------------------------|-------------------------------------|-----------------------|----------------------|
| Mongolia | 1990 | Male   | 40 to 44 | 81%<br>(67-91%)                | 19%<br>(8.8-33%)         | 2.6<br>(1.5-4)                              | 9.9%<br>(6.6-15%)                    | 11%<br>(7.1-18%)                    | 29<br>(18-45)         | 1500<br>(1000-2300)  |
| Mongolia | 1990 | Male   | 45 to 49 | 80%<br>(63-91%)                | 20%<br>(9.4-37%)         | 2.7<br>(1.5-4.2)                            | 10%<br>(6.7-14%)                     | 12%<br>(7.3-17%)                    | 40<br>(24-61)         | 1800<br>(1200-2700)  |
| Mongolia | 1990 | Male   | 50 to 54 | 79%<br>(63-90%)                | 21%<br>(10-37%)          | 2.7<br>(1.5-4.1)                            | 9.6%<br>(5.9-14%)                    | 11%<br>(6.5-16%)                    | 53<br>(31-80)         | 2100<br>(1300-3100)  |
| Mongolia | 1990 | Male   | 55 to 59 | 77%<br>(61-89%)                | 23%<br>(11-39%)          | 2.3<br>(1.2-3.6)                            | 7.9%<br>(4.9-12%)                    | 8.9%<br>(5.3-14%)                   | 52<br>(31-82)         | 1800<br>(1100-2700)  |
| Mongolia | 1990 | Male   | 60 to 64 | 74%<br>(56-87%)                | 26%<br>(13-44%)          | 1.9<br>(0.99-3.1)                           | 6.3%<br>(3.7-10%)                    | 7.1%<br>(4-11%)                     | 51<br>(28-85)         | 1400<br>(820-2400)   |
| Mongolia | 1990 | Male   | 65 to 69 | 71%<br>(53-85%)                | 29%<br>(15-47%)          | 1.6<br>(0.91-2.7)                           | 4.8%<br>(2.6-7.9%)                   | 5.5%<br>(2.8-9.1%)                  | 42<br>(22-70)         | 970<br>(510-1600)    |
| Mongolia | 1990 | Male   | 70 to 74 | 67%<br>(49-82%)                | 33%<br>(18-51%)          | 1.3<br>(0.73-2.3)                           | 3.3%<br>(1.4-5.9%)                   | 3.7%<br>(1.5-6.6%)                  | 30<br>(12-56)         | 560<br>(230-1000)    |
| Mongolia | 1990 | Male   | 75 to 79 | 63%<br>(45-80%)                | 37%<br>(20-55%)          | 1.1<br>(0.54-1.9)                           | 2%<br>(0.27-4.3%)                    | 2.2%<br>(0.19-4.8%)                 | 14<br>(1.3-32)        | 210<br>(30-470)      |
| Mongolia | 1990 | Male   | 80 to 84 | 60%<br>(41-77%)                | 40%<br>(23-59%)          | 0.96<br>(0.48-1.6)                          | 1%<br>(-0.53-2.9%)                   | 1.1%<br>(-0.76-3.2%)                | 4.4<br>(-3.3-14)      | 52<br>(-26-150)      |
| Mongolia | 1990 | Male   | 85 to 89 | 58%<br>(40-74%)                | 42%<br>(26-60%)          | 0.9<br>(0.45-1.6)                           | 0.4%<br>(-1-2.1%)                    | 0.29%<br>(-1.4-2.2%)                | 0.71<br>(-3.5-5.4)    | 8.4<br>(-22-44)      |
| Mongolia | 1990 | Male   | 90 to 94 | 57%<br>(40-74%)                | 43%<br>(26-60%)          | 0.85<br>(0.41-1.6)                          | -0.087%<br>(-1.6-1.5%)               | -0.32%<br>(-2.2-1.5%)               | -0.29<br>(-2-1.3)     | -0.46<br>(-8.6-8)    |
| Mongolia | 1990 | Male   | 95 plus  | 58%<br>(36-77%)                | 42%<br>(23-64%)          | 0.82<br>(0.33-1.6)                          | -0.32%<br>(-2-1.3%)                  | -0.68%<br>(-2.7-1.2%)               | -0.16<br>(-0.61-0.28) | -0.3<br>(-1.8-1.2)   |
| Mongolia | 1995 | Female | All Ages | 44%<br>(37-53%)                | 56%<br>(47-63%)          | 0.71<br>(0.54-0.93)                         | 2.1%<br>(1.2-3.1%)                   | 2.9%<br>(1.2-5.4%)                  | 250<br>(100-460)      | 9300<br>(5600-14000) |
| Mongolia | 1995 | Female | 15 to 19 | 41%<br>(27-59%)                | 59%<br>(41-73%)          | 0.61<br>(0.25-1.1)                          | 1.6%<br>(0.56-3.1%)                  | 2.4%<br>(0.34-5.3%)                 | 2.7<br>(0.38-6.2)     | 280<br>(96-530)      |
| Mongolia | 1995 | Female | 20 to 24 | 54%<br>(37-70%)                | 46%<br>(30-63%)          | 1<br>(0.43-1.8)                             | 3%<br>(1.3-5.3%)                     | 3.9%<br>(0.89-7.9%)                 | 6.7<br>(1.5-14)       | 630<br>(260-1100)    |
| Mongolia | 1995 | Female | 25 to 29 | 59%<br>(41-75%)                | 41%<br>(25-59%)          | 1.2<br>(0.57-2.1)                           | 3.8%<br>(1.9-6.5%)                   | 5.1%<br>(1.7-9.6%)                  | 9.5<br>(3.3-18)       | 790<br>(370-1300)    |
| Mongolia | 1995 | Female | 30 to 34 | 61%<br>(42-77%)                | 39%<br>(23-58%)          | 1.3<br>(0.67-2.3)                           | 4.3%<br>(2.4-7%)                     | 6%<br>(2.9-10%)                     | 13<br>(6.1-23)        | 920<br>(520-1500)    |
| Mongolia | 1995 | Female | 35 to 39 | 62%<br>(45-78%)                | 38%<br>(22-55%)          | 1.4<br>(0.66-2.6)                           | 4.4%<br>(2.3-7.4%)                   | 6.1%<br>(2.7-11%)                   | 14<br>(5.9-24)        | 820<br>(420-1400)    |
| Mongolia | 1995 | Female | 40 to 44 | 62%<br>(45-78%)                | 38%<br>(22-55%)          | 1.4<br>(0.61-2.6)                           | 4.9%<br>(2.4-8.3%)                   | 6.9%<br>(3.1-12%)                   | 16<br>(7.3-29)        | 830<br>(400-1400)    |
| Mongolia | 1995 | Female | 45 to 49 | 61%<br>(43-76%)                | 39%<br>(24-57%)          | 1.5<br>(0.65-3)                             | 5%<br>(2-10%)                        | 6.6%<br>(2.4-13%)                   | 18<br>(6.5-38)        | 780<br>(310-1600)    |
| Mongolia | 1995 | Female | 50 to 54 | 59%<br>(42-75%)                | 41%<br>(25-58%)          | 1.5<br>(0.62-2.9)                           | 5.2%<br>(1.8-11%)                    | 6.6%<br>(2.2-14%)                   | 25<br>(8.2-52)        | 940<br>(330-1900)    |
| Mongolia | 1995 | Female | 55 to 59 | 56%<br>(39-73%)                | 44%<br>(27-61%)          | 1.4<br>(0.57-2.9)                           | 5.1%<br>(1.5-10%)                    | 6.3%<br>(1.8-13%)                   | 29<br>(8.1-60)        | 930<br>(270-1900)    |

| Location | Year | Sex    | Age      | Prevalence of current drinkers | Prevalence of abstainers | Population average of standard drinks daily | Percent of total attributable deaths | Percent of total attributable DALYs | Attributable deaths | Attributable DALYs     |
|----------|------|--------|----------|--------------------------------|--------------------------|---------------------------------------------|--------------------------------------|-------------------------------------|---------------------|------------------------|
| Mongolia | 1995 | Female | 60 to 64 | 53%<br>(35-71%)                | 47%<br>(29-65%)          | 1.4<br>(0.53-2.9)                           | 4.3%<br>(1.1-9.5%)                   | 5.2%<br>(1.3-12%)                   | 32<br>(8-71)        | 880<br>(220-2000)      |
| Mongolia | 1995 | Female | 65 to 69 | 51%<br>(34-68%)                | 49%<br>(32-66%)          | 1.2<br>(0.52-2.3)                           | 3.6%<br>(0.64-8.2%)                  | 4.3%<br>(0.83-9.8%)                 | 32<br>(5.9-73)      | 710<br>(120-1700)      |
| Mongolia | 1995 | Female | 70 to 74 | 46%<br>(30-62%)                | 54%<br>(38-70%)          | 1<br>(0.38-2.1)                             | 2.7%<br>(0.091-7.1%)                 | 3.3%<br>(0.16-8.3%)                 | 25<br>(1.1-63)      | 440<br>(15-1200)       |
| Mongolia | 1995 | Female | 75 to 79 | 40%<br>(27-57%)                | 60%<br>(43-73%)          | 0.87<br>(0.31-1.9)                          | 1.7%<br>(-0.59-5.7%)                 | 2%<br>(-0.7-6.6%)                   | 18<br>(-6.3-58)     | 250<br>(-86-820)       |
| Mongolia | 1995 | Female | 80 to 84 | 37%<br>(24-54%)                | 63%<br>(46-76%)          | 0.86<br>(0.32-1.8)                          | 1.1%<br>(-1.3-5%)                    | 1.3%<br>(-1.6-5.7%)                 | 7.3<br>(-9.1-32)    | 78<br>(-91-340)        |
| Mongolia | 1995 | Female | 85 to 89 | 37%<br>(24-51%)                | 63%<br>(49-76%)          | 0.93<br>(0.35-2)                            | 0.71%<br>(-1.7-4.9%)                 | 0.75%<br>(-2.1-5.5%)                | 2.9<br>(-8.2-22)    | 24<br>(-58-160)        |
| Mongolia | 1995 | Female | 90 to 94 | 38%<br>(25-53%)                | 62%<br>(47-75%)          | 1<br>(0.32-2.4)                             | 0.54%<br>(-2.1-5.8%)                 | 0.53%<br>(-2.6-6.6%)                | 1<br>(-4.8-12)      | 6<br>(-23-63)          |
| Mongolia | 1995 | Female | 95 plus  | 41%<br>(25-60%)                | 59%<br>(40-75%)          | 1.2<br>(0.28-2.9)                           | 0.58%<br>(-2.7-6.8%)                 | 0.54%<br>(-3.3-7.8%)                | 0.26<br>(-1.6-3.8)  | 1.1<br>(-5.2-13)       |
| Mongolia | 1995 | Male   | All Ages | 52%<br>(42-63%)                | 48%<br>(37-58%)          | 1<br>(0.81-1.3)                             | 4.3%<br>(3.3-5.6%)                   | 4.9%<br>(3.4-6.9%)                  | 520<br>(350-720)    | 24000<br>(18000-31000) |
| Mongolia | 1995 | Male   | 15 to 19 | 42%<br>(26-61%)                | 58%<br>(39-74%)          | 0.46<br>(0.23-0.81)                         | 2.9%<br>(1.5-4.5%)                   | 3.2%<br>(1.1-5.9%)                  | 5.9<br>(2.2-11)     | 620<br>(330-990)       |
| Mongolia | 1995 | Male   | 20 to 24 | 63%<br>(44-79%)                | 37%<br>(21-56%)          | 1.2<br>(0.68-1.8)                           | 7.1%<br>(4.5-11%)                    | 7.6%<br>(4-13%)                     | 23<br>(12-38)       | 2000<br>(1200-3000)    |
| Mongolia | 1995 | Male   | 25 to 29 | 74%<br>(57-85%)                | 26%<br>(15-43%)          | 2<br>(1.2-2.9)                              | 11%<br>(7.4-15%)                     | 12%<br>(7.5-18%)                    | 42<br>(26-61)       | 3200<br>(2200-4300)    |
| Mongolia | 1995 | Male   | 30 to 34 | 79%<br>(63-90%)                | 21%<br>(9.6-37%)         | 2.4<br>(1.6-3.5)                            | 12%<br>(8.5-16%)                     | 13%<br>(9-19%)                      | 53<br>(35-75)       | 3600<br>(2500-4900)    |
| Mongolia | 1995 | Male   | 35 to 39 | 81%<br>(68-91%)                | 19%<br>(9-32%)           | 2.4<br>(1.4-3.6)                            | 10%<br>(7.4-15%)                     | 12%<br>(7.6-17%)                    | 43<br>(27-64)       | 2600<br>(1800-3700)    |
| Mongolia | 1995 | Male   | 40 to 44 | 82%<br>(69-91%)                | 18%<br>(8.6-31%)         | 2.4<br>(1.4-3.7)                            | 9.8%<br>(6.6-15%)                    | 11%<br>(6.9-17%)                    | 43<br>(26-68)       | 2300<br>(1500-3400)    |
| Mongolia | 1995 | Male   | 45 to 49 | 81%<br>(64-91%)                | 19%<br>(9.1-36%)         | 2.6<br>(1.4-4)                              | 10%<br>(6.4-15%)                     | 11%<br>(6.7-17%)                    | 48<br>(28-72)       | 2200<br>(1300-3100)    |
| Mongolia | 1995 | Male   | 50 to 54 | 79%<br>(64-90%)                | 21%<br>(10-36%)          | 2.5<br>(1.4-3.9)                            | 9.4%<br>(5.7-14%)                    | 10%<br>(6.1-16%)                    | 57<br>(33-88)       | 2200<br>(1300-3300)    |
| Mongolia | 1995 | Male   | 55 to 59 | 77%<br>(61-89%)                | 23%<br>(11-39%)          | 2.1<br>(1.1-3.4)                            | 7.5%<br>(4.7-12%)                    | 8.3%<br>(4.9-13%)                   | 55<br>(32-87)       | 1900<br>(1100-2800)    |
| Mongolia | 1995 | Male   | 60 to 64 | 74%<br>(57-87%)                | 26%<br>(13-43%)          | 1.8<br>(0.91-3)                             | 6%<br>(3.2-9.8%)                     | 6.5%<br>(3.4-11%)                   | 56<br>(28-95)       | 1600<br>(830-2600)     |
| Mongolia | 1995 | Male   | 65 to 69 | 72%<br>(54-86%)                | 28%<br>(14-46%)          | 1.5<br>(0.84-2.5)                           | 4.5%<br>(2.3-7.5%)                   | 5%<br>(2.5-8.4%)                    | 44<br>(22-76)       | 1000<br>(510-1700)     |
| Mongolia | 1995 | Male   | 70 to 74 | 68%<br>(50-82%)                | 32%<br>(18-50%)          | 1.3<br>(0.69-2.2)                           | 3%<br>(1.2-5.6%)                     | 3.3%<br>(1.2-6.2%)                  | 28<br>(9.6-52)      | 520<br>(190-960)       |
| Mongolia | 1995 | Male   | 75 to 79 | 64%<br>(46-79%)                | 36%<br>(21-54%)          | 1<br>(0.52-1.8)                             | 1.8%<br>(0.13-4%)                    | 1.9%<br>(0.033-4.4%)                | 15<br>(0.26-35)     | 230<br>(16-500)        |

| Location | Year | Sex    | Age      | Prevalence of current drinkers | Prevalence of abstainers | Population average of standard drinks daily | Percent of total attributable deaths | Percent of total attributable DALYs | Attributable deaths   | Attributable DALYs    |
|----------|------|--------|----------|--------------------------------|--------------------------|---------------------------------------------|--------------------------------------|-------------------------------------|-----------------------|-----------------------|
| Mongolia | 1995 | Male   | 80 to 84 | 61%<br>(42-77%)                | 39%<br>(23-58%)          | 0.92<br>(0.46-1.5)                          | 0.91%<br>(-0.69-2.7%)                | 0.89%<br>(-0.98-3%)                 | 4.1<br>(-4.5-14)      | 49<br>(-38-150)       |
| Mongolia | 1995 | Male   | 85 to 89 | 58%<br>(40-75%)                | 42%<br>(25-60%)          | 0.85<br>(0.43-1.5)                          | 0.3%<br>(-1.1-1.9%)                  | 0.18%<br>(-1.5-2%)                  | 0.47<br>(-4.1-5.2)    | 6.8<br>(-26-42)       |
| Mongolia | 1995 | Male   | 90 to 94 | 58%<br>(40-74%)                | 42%<br>(26-60%)          | 0.8<br>(0.38-1.4)                           | -0.14%<br>(-1.7-1.4%)                | -0.38%<br>(-2.2-1.4%)               | -0.39<br>(-2.3-1.4)   | -0.87<br>(-10-8.3)    |
| Mongolia | 1995 | Male   | 95 plus  | 59%<br>(36-78%)                | 41%<br>(22-64%)          | 0.78<br>(0.32-1.5)                          | -0.38%<br>(-1.9-1.2%)                | -0.73%<br>(-2.6-1.1%)               | -0.19<br>(-0.66-0.28) | -0.38<br>(-1.9-1.2)   |
| Mongolia | 2000 | Female | All Ages | 47%<br>(39-56%)                | 53%<br>(44-61%)          | 0.82<br>(0.62-1.1)                          | 3.1%<br>(1.9-4.5%)                   | 4.2%<br>(1.9-7.3%)                  | 340<br>(160-600)      | 13000<br>(8000-18000) |
| Mongolia | 2000 | Female | 15 to 19 | 43%<br>(28-60%)                | 57%<br>(40-72%)          | 0.67<br>(0.27-1.3)                          | 1.8%<br>(0.64-3.4%)                  | 2.9%<br>(0.43-6.3%)                 | 3.1<br>(0.45-7)       | 310<br>(110-600)      |
| Mongolia | 2000 | Female | 20 to 24 | 56%<br>(39-71%)                | 44%<br>(29-61%)          | 1.1<br>(0.46-1.9)                           | 3.5%<br>(1.5-6.4%)                   | 4.8%<br>(1.3-9.6%)                  | 8<br>(2.1-16)         | 730<br>(310-1300)     |
| Mongolia | 2000 | Female | 25 to 29 | 60%<br>(42-76%)                | 40%<br>(24-58%)          | 1.3<br>(0.58-2.3)                           | 4.7%<br>(2.4-7.5%)                   | 6.3%<br>(2.4-11%)                   | 12<br>(4.5-21)        | 1000<br>(490-1600)    |
| Mongolia | 2000 | Female | 30 to 34 | 63%<br>(42-78%)                | 37%<br>(22-58%)          | 1.4<br>(0.75-2.4)                           | 5.4%<br>(3.3-8.2%)                   | 7.5%<br>(3.9-12%)                   | 16<br>(8.5-27)        | 1200<br>(700-1800)    |
| Mongolia | 2000 | Female | 35 to 39 | 63%<br>(47-79%)                | 37%<br>(21-53%)          | 1.5<br>(0.71-2.7)                           | 5.4%<br>(3-8.8%)                     | 7.5%<br>(3.6-12%)                   | 23<br>(11-38)         | 1400<br>(720-2200)    |
| Mongolia | 2000 | Female | 40 to 44 | 63%<br>(47-79%)                | 37%<br>(21-53%)          | 1.6<br>(0.67-2.7)                           | 5.9%<br>(3-9.7%)                     | 8.1%<br>(3.8-14%)                   | 27<br>(12-46)         | 1400<br>(690-2300)    |
| Mongolia | 2000 | Female | 45 to 49 | 62%<br>(44-78%)                | 38%<br>(22-56%)          | 1.6<br>(0.7-3.2)                            | 6%<br>(2.5-11%)                      | 7.8%<br>(2.9-15%)                   | 28<br>(10-54)         | 1200<br>(480-2300)    |
| Mongolia | 2000 | Female | 50 to 54 | 60%<br>(42-75%)                | 40%<br>(25-58%)          | 1.6<br>(0.68-3.2)                           | 6.4%<br>(2.3-13%)                    | 8%<br>(2.8-16%)                     | 30<br>(11-60)         | 1100<br>(420-2200)    |
| Mongolia | 2000 | Female | 55 to 59 | 57%<br>(40-74%)                | 43%<br>(26-60%)          | 1.6<br>(0.61-3.2)                           | 6.3%<br>(1.9-12%)                    | 7.8%<br>(2.4-15%)                   | 38<br>(11-76)         | 1200<br>(380-2400)    |
| Mongolia | 2000 | Female | 60 to 64 | 55%<br>(37-72%)                | 45%<br>(28-63%)          | 1.5<br>(0.57-3.1)                           | 5.5%<br>(1.6-12%)                    | 6.6%<br>(1.9-14%)                   | 40<br>(11-85)         | 1100<br>(300-2300)    |
| Mongolia | 2000 | Female | 65 to 69 | 52%<br>(36-70%)                | 48%<br>(30-64%)          | 1.3<br>(0.58-2.6)                           | 4.5%<br>(1.1-9.9%)                   | 5.4%<br>(1.4-12%)                   | 42<br>(11-92)         | 940<br>(240-2100)     |
| Mongolia | 2000 | Female | 70 to 74 | 47%<br>(32-63%)                | 53%<br>(37-68%)          | 1.1<br>(0.42-2.3)                           | 3.5%<br>(0.28-8.6%)                  | 4.1%<br>(0.4-10%)                   | 34<br>(3.3-84)        | 600<br>(50-1500)      |
| Mongolia | 2000 | Female | 75 to 79 | 42%<br>(28-59%)                | 58%<br>(41-72%)          | 0.97<br>(0.34-2.1)                          | 2.4%<br>(-0.42-7.2%)                 | 2.8%<br>(-0.49-8.3%)                | 21<br>(-3.6-63)       | 290<br>(-52-880)      |
| Mongolia | 2000 | Female | 80 to 84 | 39%<br>(25-55%)                | 61%<br>(45-75%)          | 0.97<br>(0.37-2)                            | 1.8%<br>(-1.1-6.5%)                  | 2%<br>(-1.3-7.4%)                   | 12<br>(-7.7-45)       | 130<br>(-78-460)      |
| Mongolia | 2000 | Female | 85 to 89 | 38%<br>(26-54%)                | 62%<br>(46-74%)          | 1<br>(0.39-2.2)                             | 1.3%<br>(-1.5-6.2%)                  | 1.5%<br>(-1.8-7.1%)                 | 6<br>(-7.4-29)        | 46<br>(-53-210)       |
| Mongolia | 2000 | Female | 90 to 94 | 40%<br>(26-55%)                | 60%<br>(45-74%)          | 1.1<br>(0.37-2.7)                           | 1.1%<br>(-2.7-2%)                    | 1.2%<br>(-2.5-8.3%)                 | 2.1<br>(-4.4-15)      | 11<br>(-21-75)        |
| Mongolia | 2000 | Female | 95 plus  | 43%<br>(26-61%)                | 57%<br>(39-74%)          | 1.3<br>(0.31-3.3)                           | 1.1%<br>(-2.7-7.9%)                  | 1.1%<br>(-3.3-8.9%)                 | 0.66<br>(-2.5-4)      | 2.5<br>(-6.4-19)      |

| Location | Year | Sex    | Age      | Prevalence of current drinkers | Prevalence of abstainers | Population average of standard drinks daily | Percent of total attributable deaths | Percent of total attributable DALYs | Attributable deaths   | Attributable DALYs     |
|----------|------|--------|----------|--------------------------------|--------------------------|---------------------------------------------|--------------------------------------|-------------------------------------|-----------------------|------------------------|
| Mongolia | 2000 | Male   | All Ages | 56%<br>(46-66%)                | 44%<br>(34-54%)          | 1.2<br>(0.98-1.5)                           | 6%<br>(4.7-7.5%)                     | 6.5%<br>(4.6-8.7%)                  | 660<br>(460-890)      | 31000<br>(24000-39000) |
| Mongolia | 2000 | Male   | 15 to 19 | 44%<br>(28-63%)                | 56%<br>(37-72%)          | 0.51<br>(0.26-0.91)                         | 3.2%<br>(1.9-5%)                     | 3.7%<br>(1.5-6.8%)                  | 6.7<br>(2.7-12)       | 730<br>(420-1100)      |
| Mongolia | 2000 | Male   | 20 to 24 | 65%<br>(47-80%)                | 35%<br>(20-53%)          | 1.3<br>(0.75-2)                             | 8.1%<br>(5.2-12%)                    | 8.7%<br>(4.7-14%)                   | 25<br>(13-40)         | 2300<br>(1400-3300)    |
| Mongolia | 2000 | Male   | 25 to 29 | 75%<br>(59-86%)                | 25%<br>(14-41%)          | 2.2<br>(1.3-3.2)                            | 13%<br>(8.5-17%)                     | 14%<br>(8.4-20%)                    | 51<br>(31-73)         | 3900<br>(2700-5300)    |
| Mongolia | 2000 | Male   | 30 to 34 | 80%<br>(64-91%)                | 20%<br>(9.1-36%)         | 2.7<br>(1.7-3.8)                            | 14%<br>(10-18%)                      | 15%<br>(11-21%)                     | 63<br>(43-87)         | 4300<br>(3200-5700)    |
| Mongolia | 2000 | Male   | 35 to 39 | 82%<br>(69-92%)                | 18%<br>(8.4-31%)         | 2.6<br>(1.6-3.8)                            | 12%<br>(8.9-16%)                     | 14%<br>(9.4-19%)                    | 71<br>(48-100)        | 4300<br>(3100-5800)    |
| Mongolia | 2000 | Male   | 40 to 44 | 82%<br>(69-92%)                | 18%<br>(8.3-31%)         | 2.6<br>(1.5-3.9)                            | 12%<br>(8-16%)                       | 13%<br>(8.3-18%)                    | 69<br>(44-100)        | 3600<br>(2400-5000)    |
| Mongolia | 2000 | Male   | 45 to 49 | 82%<br>(65-91%)                | 18%<br>(9-35%)           | 2.8<br>(1.6-4.4)                            | 12%<br>(7.6-16%)                     | 13%<br>(8-19%)                      | 73<br>(46-110)        | 3300<br>(2100-4700)    |
| Mongolia | 2000 | Male   | 50 to 54 | 80%<br>(64-90%)                | 20%<br>(9.8-36%)         | 2.8<br>(1.5-4.3)                            | 11%<br>(6.5-15%)                     | 12%<br>(6.8-17%)                    | 67<br>(39-100)        | 2600<br>(1600-3800)    |
| Mongolia | 2000 | Male   | 55 to 59 | 79%<br>(63-90%)                | 21%<br>(9.9-37%)         | 2.4<br>(1.2-3.8)                            | 8.5%<br>(5.1-13%)                    | 9.3%<br>(5.4-14%)                   | 65<br>(37-100)        | 2200<br>(1300-3300)    |
| Mongolia | 2000 | Male   | 60 to 64 | 76%<br>(57-88%)                | 24%<br>(12-43%)          | 2<br>(1-3.3)                                | 6.7%<br>(3.6-11%)                    | 7.3%<br>(3.7-13%)                   | 64<br>(32-110)        | 1800<br>(920-3000)     |
| Mongolia | 2000 | Male   | 65 to 69 | 73%<br>(55-87%)                | 27%<br>(13-45%)          | 1.7<br>(0.96-2.8)                           | 5.1%<br>(2.5-8.7%)                   | 5.6%<br>(2.6-9.8%)                  | 53<br>(25-91)         | 1200<br>(600-2100)     |
| Mongolia | 2000 | Male   | 70 to 74 | 70%<br>(52-83%)                | 30%<br>(17-48%)          | 1.4<br>(0.75-2.4)                           | 3.5%<br>(1.2-6.7%)                   | 3.8%<br>(1.2-7.4%)                  | 33<br>(10-63)         | 610<br>(200-1200)      |
| Mongolia | 2000 | Male   | 75 to 79 | 66%<br>(47-81%)                | 34%<br>(19-53%)          | 1.2<br>(0.58-2)                             | 2.2%<br>(0.2-5%)                     | 2.4%<br>(0.11-5.4%)                 | 17<br>(0.82-38)       | 250<br>(22-550)        |
| Mongolia | 2000 | Male   | 80 to 84 | 63%<br>(44-78%)                | 37%<br>(22-56%)          | 1<br>(0.51-1.7)                             | 1.3%<br>(-0.63-3.4%)                 | 1.3%<br>(-0.88-3.6%)                | 5.7<br>(-4-16)        | 67<br>(-33-180)        |
| Mongolia | 2000 | Male   | 85 to 89 | 60%<br>(42-76%)                | 40%<br>(24-58%)          | 0.95<br>(0.48-1.6)                          | 0.59%<br>(-1-2.5%)                   | 0.49%<br>(-1.5-2.7%)                | 1.4<br>(-4-7.4)       | 14<br>(-25-58)         |
| Mongolia | 2000 | Male   | 90 to 94 | 59%<br>(41-76%)                | 41%<br>(24-59%)          | 0.89<br>(0.42-1.6)                          | 0.032%<br>(-1.6-1.9%)                | -0.21%<br>(-2.2-1.9%)               | -0.22<br>(-2.4-2.1)   | 0.2<br>(-11-12)        |
| Mongolia | 2000 | Male   | 95 plus  | 60%<br>(38-78%)                | 40%<br>(22-62%)          | 0.85<br>(0.35-1.6)                          | -0.27%<br>(-2-1.6%)                  | -0.64%<br>(-2.6-1.5%)               | -0.19<br>(-0.76-0.42) | -0.3<br>(-2.2-1.8)     |
| Mongolia | 2005 | Female | All Ages | 51%<br>(44-60%)                | 49%<br>(40-56%)          | 1.1<br>(0.83-1.4)                           | 5%<br>(3.4-6.8%)                     | 7.2%<br>(4-11%)                     | 570<br>(310-890)      | 19000<br>(13000-27000) |
| Mongolia | 2005 | Female | 15 to 19 | 46%<br>(31-62%)                | 54%<br>(38-69%)          | 0.83<br>(0.35-1.5)                          | 2.2%<br>(0.86-4%)                    | 4.2%<br>(0.94-8.8%)                 | 4<br>(0.87-8.3)       | 400<br>(160-750)       |
| Mongolia | 2005 | Female | 20 to 24 | 58%<br>(42-73%)                | 42%<br>(27-58%)          | 1.3<br>(0.56-2.3)                           | 4.5%<br>(2.2-7.6%)                   | 7.3%<br>(2.6-14%)                   | 9.3<br>(3.3-17)       | 860<br>(430-1500)      |
| Mongolia | 2005 | Female | 25 to 29 | 62%<br>(44-77%)                | 38%<br>(23-56%)          | 1.6<br>(0.69-2.8)                           | 6.4%<br>(3.6-10%)                    | 9.8%<br>(4.4-16%)                   | 16<br>(7.1-27)        | 1300<br>(700-2000)     |

| Location | Year | Sex    | Age      | Prevalence of current drinkers | Prevalence of abstainers | Population average of standard drinks daily | Percent of total attributable deaths | Percent of total attributable DALYs | Attributable deaths | Attributable DALYs     |
|----------|------|--------|----------|--------------------------------|--------------------------|---------------------------------------------|--------------------------------------|-------------------------------------|---------------------|------------------------|
| Mongolia | 2005 | Female | 30 to 34 | 64%<br>(45-79%)                | 36%<br>(21-55%)          | 1.7<br>(0.89-2.9)                           | 7.4%<br>(4.8-11%)                    | 12%<br>(6.8-18%)                    | 22<br>(13-34)       | 1600<br>(1000-2300)    |
| Mongolia | 2005 | Female | 35 to 39 | 65%<br>(49-80%)                | 35%<br>(20-51%)          | 1.8<br>(0.89-3.2)                           | 7.6%<br>(4.7-11%)                    | 12%<br>(6.7-18%)                    | 30<br>(16-46)       | 1800<br>(1100-2700)    |
| Mongolia | 2005 | Female | 40 to 44 | 65%<br>(49-80%)                | 35%<br>(20-51%)          | 1.9<br>(0.86-3.2)                           | 8.3%<br>(4.8-13%)                    | 12%<br>(6.6-19%)                    | 45<br>(25-72)       | 2300<br>(1300-3600)    |
| Mongolia | 2005 | Female | 45 to 49 | 64%<br>(46-79%)                | 36%<br>(21-54%)          | 1.9<br>(0.88-3.7)                           | 8.4%<br>(3.8-15%)                    | 12%<br>(4.9-20%)                    | 50<br>(22-90)       | 2200<br>(1000-3900)    |
| Mongolia | 2005 | Female | 50 to 54 | 62%<br>(45-77%)                | 38%<br>(23-55%)          | 1.9<br>(0.86-3.8)                           | 9.2%<br>(3.9-16%)                    | 12%<br>(5-21%)                      | 55<br>(22-94)       | 2000<br>(850-3500)     |
| Mongolia | 2005 | Female | 55 to 59 | 59%<br>(43-75%)                | 41%<br>(25-57%)          | 1.9<br>(0.77-3.8)                           | 9.2%<br>(3.5-16%)                    | 12%<br>(4.4-20%)                    | 55<br>(21-95)       | 1800<br>(670-3100)     |
| Mongolia | 2005 | Female | 60 to 64 | 57%<br>(41-73%)                | 43%<br>(27-59%)          | 1.8<br>(0.71-3.9)                           | 8.4%<br>(3.3-15%)                    | 10%<br>(4.1-19%)                    | 61<br>(24-110)      | 1700<br>(620-2900)     |
| Mongolia | 2005 | Female | 65 to 69 | 55%<br>(39-71%)                | 45%<br>(29-61%)          | 1.7<br>(0.73-3.3)                           | 7%<br>(2.6-13%)                      | 8.6%<br>(3.2-16%)                   | 61<br>(23-110)      | 1400<br>(490-2600)     |
| Mongolia | 2005 | Female | 70 to 74 | 51%<br>(35-67%)                | 49%<br>(33-65%)          | 1.4<br>(0.53-3)                             | 5.8%<br>(1.5-12%)                    | 7.1%<br>(1.9-15%)                   | 60<br>(16-120)      | 1100<br>(290-2200)     |
| Mongolia | 2005 | Female | 75 to 79 | 45%<br>(31-63%)                | 55%<br>(37-69%)          | 1.3<br>(0.44-2.7)                           | 4.5%<br>(0.67-11%)                   | 5.4%<br>(0.8-12%)                   | 42<br>(6.6-97)      | 590<br>(86-1400)       |
| Mongolia | 2005 | Female | 80 to 84 | 43%<br>(27-60%)                | 57%<br>(40-73%)          | 1.3<br>(0.47-2.5)                           | 4.1%<br>(0.21-10%)                   | 4.8%<br>(0.26-12%)                  | 29<br>(1.6-69)      | 300<br>(15-720)        |
| Mongolia | 2005 | Female | 85 to 89 | 42%<br>(28-57%)                | 58%<br>(43-72%)          | 1.3<br>(0.5-2.8)                            | 3.6%<br>(-0.48-10%)                  | 4.2%<br>(-0.57-12%)                 | 18<br>(-2.5-51)     | 130<br>(-17-370)       |
| Mongolia | 2005 | Female | 90 to 94 | 43%<br>(30-58%)                | 57%<br>(42-70%)          | 1.5<br>(0.46-3.4)                           | 3%<br>(-1.4-10%)                     | 3.4%<br>(-1.6-12%)                  | 6.5<br>(-3.1-23)    | 34<br>(-15-120)        |
| Mongolia | 2005 | Female | 95 plus  | 46%<br>(30-63%)                | 54%<br>(37-70%)          | 1.6<br>(0.4-4.1)                            | 2.7%<br>(-2.2-11%)                   | 3%<br>(-2.7-12%)                    | 1.7<br>(-1.5-7.1)   | 6<br>(-4.9-24)         |
| Mongolia | 2005 | Male   | All Ages | 62%<br>(53-71%)                | 38%<br>(29-47%)          | 1.7<br>(1.3-2)                              | 10%<br>(7.8-12%)                     | 11%<br>(8-14%)                      | 1300<br>(890-1600)  | 57000<br>(43000-70000) |
| Mongolia | 2005 | Male   | 15 to 19 | 48%<br>(31-65%)                | 52%<br>(35-69%)          | 0.67<br>(0.33-1.1)                          | 4.6%<br>(2.8-6.9%)                   | 5.8%<br>(2.7-9.6%)                  | 12<br>(5.4-20)      | 1200<br>(700-1800)     |
| Mongolia | 2005 | Male   | 20 to 24 | 68%<br>(50-83%)                | 32%<br>(17-50%)          | 1.6<br>(0.97-2.5)                           | 11%<br>(7.3-15%)                     | 12%<br>(7.3-18%)                    | 38<br>(22-57)       | 3300<br>(2200-4600)    |
| Mongolia | 2005 | Male   | 25 to 29 | 77%<br>(62-88%)                | 23%<br>(12-38%)          | 2.7<br>(1.6-3.9)                            | 16%<br>(11-21%)                      | 19%<br>(12-25%)                     | 76<br>(50-110)      | 5600<br>(4000-7400)    |
| Mongolia | 2005 | Male   | 30 to 34 | 82%<br>(68-91%)                | 18%<br>(8.5-32%)         | 3.3<br>(2.1-4.6)                            | 19%<br>(14-24%)                      | 21%<br>(15-28%)                     | 110<br>(77-150)     | 7400<br>(5300-9600)    |
| Mongolia | 2005 | Male   | 35 to 39 | 84%<br>(72-92%)                | 16%<br>(7.9-28%)         | 3.2<br>(2-4.6)                              | 18%<br>(13-24%)                      | 21%<br>(14-27%)                     | 140<br>(88-190)     | 7700<br>(5300-10000)   |
| Mongolia | 2005 | Male   | 40 to 44 | 84%<br>(72-92%)                | 16%<br>(7.5-28%)         | 3.2<br>(1.9-4.7)                            | 17%<br>(12-22%)                      | 19%<br>(13-25%)                     | 170<br>(110-230)    | 8300<br>(5600-11000)   |
| Mongolia | 2005 | Male   | 45 to 49 | 83%<br>(69-92%)                | 17%<br>(7.8-31%)         | 3.5<br>(2-5.2)                              | 17%<br>(11-22%)                      | 18%<br>(12-25%)                     | 170<br>(110-240)    | 7600<br>(5000-10000)   |

| Location | Year | Sex    | Age      | Prevalence of current drinkers | Prevalence of abstainers | Population average of standard drinks daily | Percent of total attributable deaths | Percent of total attributable DALYs | Attributable deaths  | Attributable DALYs     |
|----------|------|--------|----------|--------------------------------|--------------------------|---------------------------------------------|--------------------------------------|-------------------------------------|----------------------|------------------------|
| Mongolia | 2005 | Male   | 50 to 54 | 82%<br>(68-91%)                | 18%<br>(8.9-32%)         | 3.4<br>(1.9-5.2)                            | 15%<br>(9.2-21%)                     | 16%<br>(9.8-23%)                    | 150<br>(87-210)      | 5500<br>(3400-7700)    |
| Mongolia | 2005 | Male   | 55 to 59 | 81%<br>(66-91%)                | 19%<br>(9.2-34%)         | 2.9<br>(1.6-4.5)                            | 12%<br>(7.2-18%)                     | 13%<br>(7.6-20%)                    | 110<br>(61-160)      | 3500<br>(2100-5200)    |
| Mongolia | 2005 | Male   | 60 to 64 | 78%<br>(62-90%)                | 22%<br>(10-38%)          | 2.4<br>(1.3-4.1)                            | 9.4%<br>(4.9-15%)                    | 10%<br>(5.2-17%)                    | 99<br>(51-160)       | 2800<br>(1500-4500)    |
| Mongolia | 2005 | Male   | 65 to 69 | 75%<br>(59-88%)                | 25%<br>(12-41%)          | 2.1<br>(1.2-3.4)                            | 7.2%<br>(3.6-12%)                    | 7.9%<br>(3.8-13%)                   | 82<br>(40-140)       | 1900<br>(940-3100)     |
| Mongolia | 2005 | Male   | 70 to 74 | 72%<br>(55-85%)                | 28%<br>(15-45%)          | 1.8<br>(0.98-2.9)                           | 5.4%<br>(2.1-10%)                    | 5.9%<br>(2.3-11%)                   | 57<br>(23-110)       | 1100<br>(430-2000)     |
| Mongolia | 2005 | Male   | 75 to 79 | 68%<br>(51-83%)                | 32%<br>(17-49%)          | 1.5<br>(0.76-2.5)                           | 4%<br>(1.2-8.8%)                     | 4.4%<br>(1.2-8.8%)                  | 32<br>(8.7-65)       | 470<br>(140-930)       |
| Mongolia | 2005 | Male   | 80 to 84 | 65%<br>(47-80%)                | 35%<br>(20-53%)          | 1.3<br>(0.66-2.1)                           | 3%<br>(0.48-6.2%)                    | 3.2%<br>(0.33-6.8%)                 | 14<br>(1.5-30)       | 160<br>(27-320)        |
| Mongolia | 2005 | Male   | 85 to 89 | 63%<br>(45-78%)                | 37%<br>(22-55%)          | 1.2<br>(0.61-2)                             | 2%<br>(-0.31-5.1%)                   | 2%<br>(-0.58-5.6%)                  | 5.6<br>(-1.6-15)     | 46<br>(-7.1-120)       |
| Mongolia | 2005 | Male   | 90 to 94 | 62%<br>(45-78%)                | 38%<br>(22-55%)          | 1.1<br>(0.54-2)                             | 1%<br>(-1-3.7%)                      | 0.89%<br>(-1.5-3.9%)                | 0.99<br>(-1.6-4.4)   | 6.5<br>(-6.8-24)       |
| Mongolia | 2005 | Male   | 95 plus  | 63%<br>(41-80%)                | 37%<br>(20-59%)          | 1.1<br>(0.44-2)                             | 0.44%<br>(-1.8-3.3%)                 | 0.14%<br>(-2.4-3.4%)                | 0.042<br>(-0.75-1.1) | 0.53<br>(-2.1-4)       |
| Mongolia | 2010 | Female | All Ages | 53%<br>(45-60%)                | 47%<br>(40-55%)          | 1.3<br>(0.97-1.7)                           | 6.2%<br>(4.3-8.3%)                   | 9.2%<br>(5.6-13%)                   | 730<br>(440-1100)    | 25000<br>(17000-33000) |
| Mongolia | 2010 | Female | 15 to 19 | 47%<br>(32-63%)                | 53%<br>(37-68%)          | 0.97<br>(0.38-1.8)                          | 2.5%<br>(1-4.6%)                     | 5.1%<br>(1.3-10%)                   | 4<br>(1.1-8.2)       | 390<br>(150-750)       |
| Mongolia | 2010 | Female | 20 to 24 | 59%<br>(44-74%)                | 41%<br>(26-56%)          | 1.5<br>(0.64-2.8)                           | 5%<br>(2.6-8.3%)                     | 8.7%<br>(3.4-15%)                   | 12<br>(4.8-22)       | 1100<br>(590-1900)     |
| Mongolia | 2010 | Female | 25 to 29 | 63%<br>(45-77%)                | 37%<br>(23-55%)          | 1.8<br>(0.83-3.3)                           | 7%<br>(4.2-10%)                      | 12%<br>(5.9-19%)                    | 17<br>(8.6-28)       | 1400<br>(840-2200)     |
| Mongolia | 2010 | Female | 30 to 34 | 65%<br>(47-79%)                | 35%<br>(21-53%)          | 2<br>(1-3.4)                                | 8.2%<br>(5.6-12%)                    | 14%<br>(8.7-20%)                    | 25<br>(15-38)        | 1800<br>(1200-2600)    |
| Mongolia | 2010 | Female | 35 to 39 | 66%<br>(50-80%)                | 34%<br>(20-50%)          | 2<br>(0.97-3.6)                             | 8.8%<br>(5.6-13%)                    | 14%<br>(8.2-20%)                    | 36<br>(21-55)        | 2200<br>(1300-3200)    |
| Mongolia | 2010 | Female | 40 to 44 | 65%<br>(50-80%)                | 35%<br>(20-50%)          | 2.1<br>(0.96-3.8)                           | 9.8%<br>(5.9-14%)                    | 15%<br>(8.6-22%)                    | 52<br>(30-81)        | 2700<br>(1500-4000)    |
| Mongolia | 2010 | Female | 45 to 49 | 64%<br>(46-79%)                | 36%<br>(21-54%)          | 2.2<br>(1-4.2)                              | 9.7%<br>(5-15%)                      | 14%<br>(6.9-22%)                    | 69<br>(33-120)       | 3100<br>(1600-5000)    |
| Mongolia | 2010 | Female | 50 to 54 | 62%<br>(46-77%)                | 38%<br>(23-54%)          | 2.2<br>(1-4.2)                              | 11%<br>(4.9-17%)                     | 14%<br>(6.5-23%)                    | 80<br>(36-130)       | 3000<br>(1400-5000)    |
| Mongolia | 2010 | Female | 55 to 59 | 60%<br>(43-75%)                | 40%<br>(25-57%)          | 2.2<br>(0.85-4.3)                           | 10%<br>(4.4-17%)                     | 14%<br>(6-22%)                      | 72<br>(31-120)       | 2300<br>(1000-3800)    |
| Mongolia | 2010 | Female | 60 to 64 | 58%<br>(41-75%)                | 42%<br>(25-59%)          | 2.1<br>(0.82-4.5)                           | 9.8%<br>(4.4-16%)                    | 13%<br>(5.8-21%)                    | 68<br>(31-110)       | 1800<br>(830-3100)     |
| Mongolia | 2010 | Female | 65 to 69 | 56%<br>(40-72%)                | 44%<br>(28-60%)          | 1.9<br>(0.83-3.8)                           | 8.6%<br>(3.7-15%)                    | 10%<br>(4.6-19%)                    | 84<br>(36-150)       | 1900<br>(800-3400)     |

| Location | Year | Sex    | Age      | Prevalence of current drinkers | Prevalence of abstainers | Population average of standard drinks daily | Percent of total attributable deaths | Percent of total attributable DALYs | Attributable deaths | Attributable DALYs     |
|----------|------|--------|----------|--------------------------------|--------------------------|---------------------------------------------|--------------------------------------|-------------------------------------|---------------------|------------------------|
| Mongolia | 2010 | Female | 70 to 74 | 51%<br>(36-67%)                | 49%<br>(33-64%)          | 1.6<br>(0.61-3.4)                           | 7.2%<br>(2.7-14%)                    | 9%<br>(3.3-17%)                     | 71<br>(27-130)      | 1300<br>(460-2500)     |
| Mongolia | 2010 | Female | 75 to 79 | 46%<br>(32-63%)                | 54%<br>(37-68%)          | 1.4<br>(0.52-3.1)                           | 5.8%<br>(1.5-12%)                    | 7.1%<br>(1.9-15%)                   | 57<br>(15-120)      | 800<br>(200-1600)      |
| Mongolia | 2010 | Female | 80 to 84 | 43%<br>(29-61%)                | 57%<br>(39-71%)          | 1.5<br>(0.54-3)                             | 5.5%<br>(1.2-12%)                    | 6.7%<br>(1.4-14%)                   | 45<br>(9.6-95)      | 470<br>(97-990)        |
| Mongolia | 2010 | Female | 85 to 89 | 43%<br>(29-57%)                | 57%<br>(43-71%)          | 1.5<br>(0.56-3.3)                           | 5%<br>(0.44-13%)                     | 5.9%<br>(0.41-15%)                  | 25<br>(1.7-63)      | 180<br>(16-460)        |
| Mongolia | 2010 | Female | 90 to 94 | 44%<br>(30-59%)                | 56%<br>(41-70%)          | 1.7<br>(0.53-3.9)                           | 4.2%<br>(-0.67-12%)                  | 4.9%<br>(-0.95-14%)                 | 8.7<br>(-1.6-24)    | 44<br>(-7-120)         |
| Mongolia | 2010 | Female | 95 plus  | 47%<br>(30-64%)                | 53%<br>(36-70%)          | 1.9<br>(0.47-4.6)                           | 3.7%<br>(-1.9-12%)                   | 4.2%<br>(-2.3-14%)                  | 2.4<br>(-1.2-7.9)   | 8.3<br>(-4-26)         |
| Mongolia | 2010 | Male   | All Ages | 64%<br>(56-73%)                | 36%<br>(27-44%)          | 2<br>(1.6-2.5)                              | 12%<br>(9.2-15%)                     | 14%<br>(9.8-17%)                    | 1600<br>(1100-2100) | 71000<br>(53000-90000) |
| Mongolia | 2010 | Male   | 15 to 19 | 49%<br>(32-67%)                | 51%<br>(33-68%)          | 0.75<br>(0.37-1.3)                          | 5.3%<br>(3.2-7.9%)                   | 6.9%<br>(3.4-11%)                   | 12<br>(5.6-20)      | 1200<br>(700-1800)     |
| Mongolia | 2010 | Male   | 20 to 24 | 69%<br>(51-83%)                | 31%<br>(17-49%)          | 1.8<br>(1.1-2.9)                            | 12%<br>(8.3-16%)                     | 14%<br>(8.4-20%)                    | 47<br>(27-70)       | 4100<br>(2700-5700)    |
| Mongolia | 2010 | Male   | 25 to 29 | 78%<br>(63-88%)                | 22%<br>(12-37%)          | 3.1<br>(1.9-4.6)                            | 18%<br>(13-24%)                      | 21%<br>(14-29%)                     | 84<br>(54-120)      | 6400<br>(4400-8400)    |
| Mongolia | 2010 | Male   | 30 to 34 | 83%<br>(68-92%)                | 17%<br>(8.3-32%)         | 3.7<br>(2.4-5.2)                            | 21%<br>(15-27%)                      | 25%<br>(17-33%)                     | 130<br>(84-180)     | 8500<br>(5900-11000)   |
| Mongolia | 2010 | Male   | 35 to 39 | 84%<br>(72-92%)                | 16%<br>(7.7-28%)         | 3.6<br>(2.3-5.3)                            | 22%<br>(14-29%)                      | 25%<br>(16-34%)                     | 170<br>(100-230)    | 9700<br>(6400-13000)   |
| Mongolia | 2010 | Male   | 40 to 44 | 85%<br>(73-92%)                | 15%<br>(7.5-27%)         | 3.7<br>(2.2-5.4)                            | 20%<br>(14-26%)                      | 23%<br>(15-30%)                     | 190<br>(120-260)    | 9600<br>(6500-13000)   |
| Mongolia | 2010 | Male   | 45 to 49 | 84%<br>(69-92%)                | 16%<br>(8-31%)           | 3.9<br>(2.3-6)                              | 20%<br>(14-26%)                      | 22%<br>(15-29%)                     | 240<br>(160-340)    | 11000<br>(7300-15000)  |
| Mongolia | 2010 | Male   | 50 to 54 | 83%<br>(69-92%)                | 17%<br>(8.4-31%)         | 3.9<br>(2.1-5.8)                            | 17%<br>(11-23%)                      | 19%<br>(12-26%)                     | 220<br>(140-310)    | 8400<br>(5400-12000)   |
| Mongolia | 2010 | Male   | 55 to 59 | 81%<br>(67-91%)                | 19%<br>(9-33%)           | 3.3<br>(1.8-5.1)                            | 14%<br>(9.2-20%)                     | 16%<br>(10-22%)                     | 150<br>(93-220)     | 5000<br>(3100-7200)    |
| Mongolia | 2010 | Male   | 60 to 64 | 79%<br>(62-90%)                | 21%<br>(9.9-38%)         | 2.8<br>(1.5-4.6)                            | 11%<br>(6.3-17%)                     | 13%<br>(6.8-19%)                    | 110<br>(58-170)     | 3000<br>(1700-4600)    |
| Mongolia | 2010 | Male   | 65 to 69 | 76%<br>(60-89%)                | 24%<br>(11-40%)          | 2.5<br>(1.4-3.9)                            | 8.8%<br>(4.5-14%)                    | 9.8%<br>(4.9-16%)                   | 100<br>(52-170)     | 2400<br>(1200-3900)    |
| Mongolia | 2010 | Male   | 70 to 74 | 73%<br>(57-85%)                | 27%<br>(15-43%)          | 2<br>(1.1-3.4)                              | 6.8%<br>(3.1-12%)                    | 7.7%<br>(3.4-13%)                   | 73<br>(33-130)      | 1300<br>(610-2300)     |
| Mongolia | 2010 | Male   | 75 to 79 | 69%<br>(52-83%)                | 31%<br>(17-48%)          | 1.7<br>(0.85-2.9)                           | 5.4%<br>(2.2-9.9%)                   | 6.1%<br>(2.3-11%)                   | 43<br>(16-79)       | 620<br>(250-1100)      |
| Mongolia | 2010 | Male   | 80 to 84 | 67%<br>(48-81%)                | 33%<br>(19-52%)          | 1.5<br>(0.76-2.5)                           | 4.3%<br>(1.5-8.3%)                   | 4.8%<br>(1.6-9.3%)                  | 22<br>(7.4-43)      | 240<br>(88-460)        |
| Mongolia | 2010 | Male   | 85 to 89 | 64%<br>(46-79%)                | 36%<br>(21-54%)          | 1.4<br>(0.7-2.3)                            | 3%<br>(0.56-6.5%)                    | 3.3%<br>(0.37-7.4%)                 | 8.4<br>(0.94-18)    | 66<br>(12-140)         |

| Location | Year | Sex    | Age      | Prevalence of current drinkers | Prevalence of abstainers | Population average of standard drinks daily | Percent of total attributable deaths | Percent of total attributable DALYs | Attributable deaths | Attributable DALYs      |
|----------|------|--------|----------|--------------------------------|--------------------------|---------------------------------------------|--------------------------------------|-------------------------------------|---------------------|-------------------------|
| Mongolia | 2010 | Male   | 90 to 94 | 63%<br>(46-78%)                | 37%<br>(22-54%)          | 1.3<br>(0.61-2.3)                           | 1.8%<br>(-0.53-5.1%)                 | 1.8%<br>(-1.1-5.6%)                 | 1.5<br>(-0.9-4.9)   | 9.1<br>(-2.7-26)        |
| Mongolia | 2010 | Male   | 95 plus  | 63%<br>(42-81%)                | 37%<br>(19-58%)          | 1.2<br>(0.5-2.2)                            | 1.1%<br>(-1.4-4.6%)                  | 0.82%<br>(-2.1-4.9%)                | 0.22<br>(-0.56-1.3) | 1.1<br>(-1.5-4.8)       |
| Mongolia | 2016 | Female | All Ages | 52%<br>(45-60%)                | 48%<br>(40-55%)          | 1.4<br>(0.93-1.9)                           | 6.5%<br>(4.4-8.8%)                   | 9.7%<br>(5.7-14%)                   | 810<br>(460-1200)   | 26000<br>(17000-36000)  |
| Mongolia | 2016 | Female | 15 to 19 | 46%<br>(31-62%)                | 54%<br>(38-69%)          | 1<br>(0.38-2)                               | 2.5%<br>(1.1-4.9%)                   | 5.3%<br>(1.6-11%)                   | 3.2<br>(0.95-6.7)   | 320<br>(130-590)        |
| Mongolia | 2016 | Female | 20 to 24 | 59%<br>(42-73%)                | 41%<br>(27-58%)          | 1.6<br>(0.65-3.1)                           | 4.9%<br>(2.6-8%)                     | 8.9%<br>(3.6-16%)                   | 8.4<br>(3.2-15)     | 820<br>(420-1300)       |
| Mongolia | 2016 | Female | 25 to 29 | 63%<br>(45-77%)                | 37%<br>(23-55%)          | 1.9<br>(0.82-3.5)                           | 6.6%<br>(4-10%)                      | 12%<br>(5.8-19%)                    | 17<br>(8-29)        | 1500<br>(850-2300)      |
| Mongolia | 2016 | Female | 30 to 34 | 65%<br>(46-79%)                | 35%<br>(21-54%)          | 2.1<br>(1-3.6)                              | 7.8%<br>(5.2-11%)                    | 14%<br>(8.4-21%)                    | 24<br>(14-38)       | 1800<br>(1200-2700)     |
| Mongolia | 2016 | Female | 35 to 39 | 65%<br>(50-79%)                | 35%<br>(21-50%)          | 2.2<br>(0.99-4)                             | 8.5%<br>(5.4-12%)                    | 14%<br>(8.4-21%)                    | 34<br>(18-54)       | 2100<br>(1300-3200)     |
| Mongolia | 2016 | Female | 40 to 44 | 65%<br>(49-80%)                | 35%<br>(20-51%)          | 2.2<br>(0.93-4.1)                           | 9.4%<br>(5.7-14%)                    | 15%<br>(8.7-22%)                    | 50<br>(27-79)       | 2600<br>(1500-4000)     |
| Mongolia | 2016 | Female | 45 to 49 | 64%<br>(46-79%)                | 36%<br>(21-54%)          | 2.3<br>(1-4.5)                              | 9.3%<br>(4.9-15%)                    | 14%<br>(7.1-22%)                    | 63<br>(31-100)      | 2800<br>(1500-4500)     |
| Mongolia | 2016 | Female | 50 to 54 | 62%<br>(45-76%)                | 38%<br>(24-55%)          | 2.3<br>(1-4.5)                              | 10%<br>(5-16%)                       | 14%<br>(6.9-23%)                    | 92<br>(43-150)      | 3500<br>(1600-5600)     |
| Mongolia | 2016 | Female | 55 to 59 | 60%<br>(43-76%)                | 40%<br>(24-57%)          | 2.3<br>(0.9-4.4)                            | 10%<br>(4.7-16%)                     | 14%<br>(6.5-22%)                    | 97<br>(43-160)      | 3200<br>(1400-5100)     |
| Mongolia | 2016 | Female | 60 to 64 | 58%<br>(40-74%)                | 42%<br>(26-60%)          | 2.2<br>(0.84-4.5)                           | 9.8%<br>(4.7-16%)                    | 13%<br>(6.5-21%)                    | 88<br>(41-140)      | 2400<br>(1100-3900)     |
| Mongolia | 2016 | Female | 65 to 69 | 55%<br>(39-72%)                | 45%<br>(28-61%)          | 2<br>(0.85-4)                               | 8.7%<br>(4.2-14%)                    | 12%<br>(5.7-19%)                    | 74<br>(36-120)      | 1700<br>(790-2800)      |
| Mongolia | 2016 | Female | 70 to 74 | 51%<br>(36-67%)                | 49%<br>(33-64%)          | 1.7<br>(0.63-3.7)                           | 7.6%<br>(3-14%)                      | 9.8%<br>(4.2-18%)                   | 74<br>(31-130)      | 1300<br>(540-2500)      |
| Mongolia | 2016 | Female | 75 to 79 | 46%<br>(31-63%)                | 54%<br>(37-69%)          | 1.5<br>(0.55-3.4)                           | 6.1%<br>(1.7-12%)                    | 7.7%<br>(2.3-15%)                   | 63<br>(19-130)      | 890<br>(270-1800)       |
| Mongolia | 2016 | Female | 80 to 84 | 43%<br>(28-59%)                | 57%<br>(41-72%)          | 1.6<br>(0.57-3.2)                           | 5.8%<br>(1.2-12%)                    | 7.1%<br>(1.6-15%)                   | 61<br>(13-130)      | 640<br>(140-1300)       |
| Mongolia | 2016 | Female | 85 to 89 | 42%<br>(28-56%)                | 58%<br>(44-72%)          | 1.6<br>(0.59-3.6)                           | 5.3%<br>(0.58-12%)                   | 6.3%<br>(0.71-15%)                  | 39<br>(4.6-92)      | 290<br>(33-680)         |
| Mongolia | 2016 | Female | 90 to 94 | 43%<br>(30-59%)                | 57%<br>(41-70%)          | 1.8<br>(0.56-4.3)                           | 4.6%<br>(-0.42-12%)                  | 5.3%<br>(-0.56-14%)                 | 15<br>(-1.5-40)     | 76<br>(-6.9-200)        |
| Mongolia | 2016 | Female | 95 plus  | 46%<br>(30-64%)                | 54%<br>(36-70%)          | 2<br>(0.49-4.9)                             | 4.1%<br>(-1.7-12%)                   | 4.6%<br>(-2.1-14%)                  | 3.4<br>(-1.5-10)    | 12<br>(-4.7-34)         |
| Mongolia | 2016 | Male   | All Ages | 64%<br>(56-73%)                | 36%<br>(27-44%)          | 2.2<br>(1.6-3)                              | 13%<br>(9.9-16%)                     | 14%<br>(10-19%)                     | 1900<br>(1300-2500) | 81000<br>(58000-110000) |
| Mongolia | 2016 | Male   | 15 to 19 | 48%<br>(31-66%)                | 52%<br>(34-69%)          | 0.81<br>(0.36-1.5)                          | 5.5%<br>(3.4-8.4%)                   | 7.2%<br>(3.6-12%)                   | 10<br>(4.9-17)      | 990<br>(590-1500)       |



| Location   | Year | Sex    | Age      | Prevalence of current drinkers | Prevalence of abstainers | Population average of standard drinks daily | Percent of total attributable deaths | Percent of total attributable DALYs | Attributable deaths | Attributable DALYs    |
|------------|------|--------|----------|--------------------------------|--------------------------|---------------------------------------------|--------------------------------------|-------------------------------------|---------------------|-----------------------|
| Mongolia   | 2016 | Male   | 20 to 24 | 69%<br>(50-83%)                | 31%<br>(17-50%)          | 2<br>(1.1-3.1)                              | 13%<br>(8.3-18%)                     | 14%<br>(8.4-21%)                    | 42<br>(24-64)       | 3700<br>(2300-5300)   |
| Mongolia   | 2016 | Male   | 25 to 29 | 78%<br>(63-88%)                | 22%<br>(12-37%)          | 3.3<br>(1.9-5.1)                            | 19%<br>(13-25%)                      | 22%<br>(14-31%)                     | 100<br>(62-140)     | 7600<br>(5200-10000)  |
| Mongolia   | 2016 | Male   | 30 to 34 | 83%<br>(69-92%)                | 17%<br>(8.3-31%)         | 4<br>(2.4-6)                                | 22%<br>(15-28%)                      | 26%<br>(17-34%)                     | 140<br>(89-200)     | 9500<br>(6500-13000)  |
| Mongolia   | 2016 | Male   | 35 to 39 | 84%<br>(72-92%)                | 16%<br>(8-28%)           | 3.9<br>(2.3-6.1)                            | 22%<br>(15-29%)                      | 26%<br>(16-35%)                     | 170<br>(110-250)    | 10000<br>(6700-14000) |
| Mongolia   | 2016 | Male   | 40 to 44 | 84%<br>(73-92%)                | 16%<br>(7.6-27%)         | 3.9<br>(2.3-6.2)                            | 21%<br>(14-27%)                      | 24%<br>(16-32%)                     | 210<br>(130-300)    | 11000<br>(7100-15000) |
| Mongolia   | 2016 | Male   | 45 to 49 | 84%<br>(69-92%)                | 16%<br>(7.8-31%)         | 4.2<br>(2.4-6.7)                            | 20%<br>(14-26%)                      | 23%<br>(15-30%)                     | 250<br>(150-360)    | 11000<br>(7300-15000) |
| Mongolia   | 2016 | Male   | 50 to 54 | 82%<br>(69-91%)                | 18%<br>(8.7-31%)         | 4.1<br>(2.2-6.5)                            | 18%<br>(12-24%)                      | 20%<br>(13-27%)                     | 270<br>(160-390)    | 11000<br>(6500-15000) |
| Mongolia   | 2016 | Male   | 55 to 59 | 81%<br>(67-91%)                | 19%<br>(9.4-33%)         | 3.5<br>(1.9-5.6)                            | 15%<br>(9.6-21%)                     | 17%<br>(11-23%)                     | 220<br>(130-330)    | 7300<br>(4500-11000)  |
| Mongolia   | 2016 | Male   | 60 to 64 | 78%<br>(61-90%)                | 22%<br>(10-39%)          | 3<br>(1.5-5)                                | 12%<br>(6.9-18%)                     | 13%<br>(7.6-21%)                    | 160<br>(86-250)     | 4400<br>(2500-6800)   |
| Mongolia   | 2016 | Male   | 65 to 69 | 76%<br>(59-89%)                | 24%<br>(11-41%)          | 2.6<br>(1.4-4.3)                            | 9.7%<br>(5.3-15%)                    | 11%<br>(5.9-18%)                    | 100<br>(55-170)     | 2400<br>(1300-4000)   |
| Mongolia   | 2016 | Male   | 70 to 74 | 72%<br>(55-85%)                | 28%<br>(15-45%)          | 2.2<br>(1.2-3.7)                            | 7.6%<br>(3.7-13%)                    | 8.6%<br>(4.3-15%)                   | 84<br>(40-140)      | 1600<br>(760-2700)    |
| Mongolia   | 2016 | Male   | 75 to 79 | 68%<br>(50-83%)                | 32%<br>(17-50%)          | 1.8<br>(0.84-3.2)                           | 6%<br>(2.6-11%)                      | 6.8%<br>(2.9-13%)                   | 61<br>(26-110)      | 880<br>(380-1600)     |
| Mongolia   | 2016 | Male   | 80 to 84 | 66%<br>(47-80%)                | 34%<br>(20-53%)          | 1.6<br>(0.77-2.8)                           | 4.7%<br>(1.7-9.3%)                   | 5.3%<br>(1.9-11%)                   | 37<br>(12-74)       | 400<br>(150-790)      |
| Mongolia   | 2016 | Male   | 85 to 89 | 63%<br>(45-78%)                | 37%<br>(22-55%)          | 1.5<br>(0.7-2.6)                            | 3.4%<br>(0.82-7.5%)                  | 3.8%<br>(0.73-8.6%)                 | 14<br>(2.6-31)      | 110<br>(24-230)       |
| Mongolia   | 2016 | Male   | 90 to 94 | 62%<br>(45-78%)                | 38%<br>(22-55%)          | 1.4<br>(0.63-2.5)                           | 2.1%<br>(-0.38-6%)                   | 2.1%<br>(-0.75-6.6%)                | 2.6<br>(-0.93-8.1)  | 15<br>(-2.7-44)       |
| Mongolia   | 2016 | Male   | 95 plus  | 63%<br>(41-80%)                | 37%<br>(20-59%)          | 1.3<br>(0.5-2.5)                            | 1.4%<br>(-1.1-5.7%)                  | 1.2%<br>(-1.8-6.1%)                 | 0.33<br>(-0.52-1.7) | 1.6<br>(-1.3-6.5)     |
| Tajikistan | 1990 | Female | All Ages | 49%<br>(43-57%)                | 51%<br>(43-57%)          | 0.53<br>(0.4-0.69)                          | 0.37%<br>(-0.055-0.82%)              | -0.2%<br>(-1.5-1.4%)                | -41<br>(-320-280)   | 4800<br>(-720-11000)  |
| Tajikistan | 1990 | Female | 15 to 19 | 52%<br>(39-68%)                | 48%<br>(32-61%)          | 0.54<br>(0.23-1)                            | 1.3%<br>(0.65-2.2%)                  | 1.8%<br>(0.51-3.6%)                 | 3.4<br>(1-6.9)      | 420<br>(210-740)      |
| Tajikistan | 1990 | Female | 20 to 24 | 61%<br>(48-74%)                | 39%<br>(26-52%)          | 0.79<br>(0.36-1.4)                          | 2.1%<br>(1.2-3.3%)                   | 2.2%<br>(0.69-4.4%)                 | 6.3<br>(1.9-13)     | 790<br>(420-1300)     |
| Tajikistan | 1990 | Female | 25 to 29 | 64%<br>(50-77%)                | 36%<br>(23-50%)          | 0.92<br>(0.44-1.6)                          | 2.5%<br>(1.5-3.9%)                   | 3%<br>(1.2-5.4%)                    | 9.3<br>(3.8-17)     | 990<br>(560-1600)     |
| Tajikistan | 1990 | Female | 30 to 34 | 65%<br>(51-78%)                | 35%<br>(22-49%)          | 1<br>(0.54-1.7)                             | 2.7%<br>(1.7-4.1%)                   | 3.6%<br>(1.8-6%)                    | 11<br>(5.6-19)      | 950<br>(580-1500)     |
| Tajikistan | 1990 | Female | 35 to 39 | 65%<br>(52-79%)                | 35%<br>(21-48%)          | 1<br>(0.5-1.9)                              | 2.7%<br>(1.6-4.5%)                   | 3.9%<br>(1.8-6.9%)                  | 12<br>(5.5-22)      | 800<br>(440-1400)     |

| Location   | Year | Sex    | Age      | Prevalence of current drinkers | Prevalence of abstainers | Population average of standard drinks daily | Percent of total attributable deaths | Percent of total attributable DALYs | Attributable deaths | Attributable DALYs     |
|------------|------|--------|----------|--------------------------------|--------------------------|---------------------------------------------|--------------------------------------|-------------------------------------|---------------------|------------------------|
| Tajikistan | 1990 | Female | 40 to 44 | 65%<br>(51-78%)                | 35%<br>(22-49%)          | 1.1<br>(0.48-1.9)                           | 2.7%<br>(1.3-4.8%)                   | 4.1%<br>(1.6-7.6%)                  | 11<br>(4.4-20)      | 610<br>(290-1100)      |
| Tajikistan | 1990 | Female | 45 to 49 | 65%<br>(50-78%)                | 35%<br>(22-50%)          | 1.1<br>(0.51-2.1)                           | 2.5%<br>(0.73-5.3%)                  | 3.7%<br>(0.85-8.2%)                 | 9.6<br>(2.4-22)     | 450<br>(140-1000)      |
| Tajikistan | 1990 | Female | 50 to 54 | 64%<br>(49-77%)                | 36%<br>(23-51%)          | 1.2<br>(0.53-2.1)                           | 2.2%<br>(0.11-5.5%)                  | 3.1%<br>(-0.025-8%)                 | 17<br>(-0.15-45)    | 700<br>(34-1700)       |
| Tajikistan | 1990 | Female | 55 to 59 | 62%<br>(47-76%)                | 38%<br>(24-53%)          | 1.2<br>(0.5-2.1)                            | 1.5%<br>(-0.93-5%)                   | 2.1%<br>(-1.4-7.2%)                 | 15<br>(-9.7-50)     | 510<br>(-300-1700)     |
| Tajikistan | 1990 | Female | 60 to 64 | 60%<br>(45-75%)                | 40%<br>(25-55%)          | 1.1<br>(0.47-2.2)                           | 0.45%<br>(-2.2-4.5%)                 | 0.57%<br>(-3.1-5.8%)                | 6<br>(-31-61)       | 180<br>(-830-1700)     |
| Tajikistan | 1990 | Female | 65 to 69 | 58%<br>(45-73%)                | 42%<br>(27-55%)          | 1<br>(0.49-1.9)                             | -0.47%<br>(-3-2.7%)                  | -0.59%<br>(-3.9-3.6%)               | -6.3<br>(-43-42)    | -150<br>(-990-960)     |
| Tajikistan | 1990 | Female | 70 to 74 | 55%<br>(43-68%)                | 45%<br>(32-57%)          | 0.93<br>(0.37-1.8)                          | -1.1%<br>(-3.7-2.3%)                 | -1.4%<br>(-4.7-2.8%)                | -16<br>(-54-33)     | -300<br>(-990-610)     |
| Tajikistan | 1990 | Female | 75 to 79 | 52%<br>(40-65%)                | 48%<br>(35-60%)          | 0.87<br>(0.32-1.7)                          | -1.7%<br>(-4.3-1.7%)                 | -2.1%<br>(-5.3-2.1%)                | -29<br>(-75-30)     | -410<br>(-1100-430)    |
| Tajikistan | 1990 | Female | 80 to 84 | 50%<br>(37-64%)                | 50%<br>(36-63%)          | 0.89<br>(0.37-1.8)                          | -2%<br>(-4.8-1.4%)                   | -2.5%<br>(-6-1.5%)                  | -37<br>(-88-23)     | -380<br>(-900-260)     |
| Tajikistan | 1990 | Female | 85 to 89 | 49%<br>(37-61%)                | 51%<br>(39-63%)          | 0.94<br>(0.37-1.9)                          | -2.2%<br>(-5-2%)                     | -2.7%<br>(-6-2.2%)                  | -34<br>(-77-27)     | -240<br>(-550-230)     |
| Tajikistan | 1990 | Female | 90 to 94 | 50%<br>(38-62%)                | 50%<br>(38-62%)          | 1<br>(0.34-2.3)                             | -2%<br>(-5-2.9%)                     | -2.6%<br>(-6.1-3.2%)                | -16<br>(-37-20)     | -74<br>(-180-100)      |
| Tajikistan | 1990 | Female | 95 plus  | 51%<br>(38-66%)                | 49%<br>(34-62%)          | 1.1<br>(0.28-2.7)                           | -1.7%<br>(-4.9-4.7%)                 | -2.2%<br>(-6-5.3%)                  | -3.7<br>(-10-8.9)   | -11<br>(-32-30)        |
| Tajikistan | 1990 | Male   | All Ages | 60%<br>(51-69%)                | 40%<br>(31-49%)          | 0.83<br>(0.66-1)                            | 1.4%<br>(0.85-1.9%)                  | 0.98%<br>(-0.14-2.2%)               | 230<br>(-31-520)    | 20000<br>(13000-29000) |
| Tajikistan | 1990 | Male   | 15 to 19 | 55%<br>(39-71%)                | 45%<br>(29-61%)          | 0.46<br>(0.26-0.76)                         | 2.6%<br>(1.7-3.6%)                   | 2.6%<br>(1.3-4.3%)                  | 6.9<br>(3.4-12)     | 950<br>(610-1400)      |
| Tajikistan | 1990 | Male   | 20 to 24 | 73%<br>(57-85%)                | 27%<br>(15-43%)          | 1<br>(0.65-1.5)                             | 6%<br>(4.2-7.9%)                     | 6.1%<br>(3.4-9%)                    | 21<br>(12-32)       | 2300<br>(1600-3200)    |
| Tajikistan | 1990 | Male   | 25 to 29 | 80%<br>(68-89%)                | 20%<br>(11-32%)          | 1.7<br>(1.1-2.4)                            | 7.9%<br>(5.6-10%)                    | 8.6%<br>(5.3-12%)                   | 42<br>(25-59)       | 3700<br>(2600-4800)    |
| Tajikistan | 1990 | Male   | 30 to 34 | 84%<br>(73-92%)                | 16%<br>(8-27%)           | 2<br>(1.4-2.7)                              | 8.3%<br>(6.1-11%)                    | 9.4%<br>(6.1-13%)                   | 45<br>(29-63)       | 3500<br>(2400-4600)    |
| Tajikistan | 1990 | Male   | 35 to 39 | 86%<br>(76-93%)                | 14%<br>(7.4-24%)         | 2<br>(1.3-2.9)                              | 7.4%<br>(5.2-10%)                    | 8.5%<br>(5.2-12%)                   | 37<br>(22-55)       | 2500<br>(1700-3500)    |
| Tajikistan | 1990 | Male   | 40 to 44 | 86%<br>(76-93%)                | 14%<br>(7.1-24%)         | 2<br>(1.3-3)                                | 6.6%<br>(4.3-9.3%)                   | 7.4%<br>(4.4-11%)                   | 30<br>(17-46)       | 1800<br>(1200-2600)    |
| Tajikistan | 1990 | Male   | 45 to 49 | 85%<br>(73-93%)                | 15%<br>(7.3-27%)         | 2.2<br>(1.3-3.2)                            | 6.1%<br>(3.4-8.8%)                   | 6.8%<br>(3.3-11%)                   | 32<br>(15-51)       | 1700<br>(910-2500)     |
| Tajikistan | 1990 | Male   | 50 to 54 | 84%<br>(73-92%)                | 16%<br>(8-27%)           | 2.2<br>(1.3-3.2)                            | 5%<br>(2.3-7.9%)                     | 5.5%<br>(1.9-9.2%)                  | 49<br>(16-86)       | 2200<br>(990-3600)     |
| Tajikistan | 1990 | Male   | 55 to 59 | 83%<br>(70-91%)                | 17%<br>(8.7-30%)         | 1.9<br>(1.1-2.9)                            | 3.4%<br>(0.81-6.3%)                  | 3.6%<br>(0.35-7.3%)                 | 37<br>(3.9-78)      | 1500<br>(370-2800)     |

| Location   | Year | Sex    | Age      | Prevalence of current drinkers | Prevalence of abstainers | Population average of standard drinks daily | Percent of total attributable deaths | Percent of total attributable DALYs | Attributable deaths  | Attributable DALYs   |
|------------|------|--------|----------|--------------------------------|--------------------------|---------------------------------------------|--------------------------------------|-------------------------------------|----------------------|----------------------|
| Tajikistan | 1990 | Male   | 60 to 64 | 81%<br>(67-91%)                | 19%<br>(9.4-33%)         | 1.6<br>(0.95-2.6)                           | 1.9%<br>(-0.69-4.9%)                 | 1.8%<br>(-1.3-5.4%)                 | 27<br>(-19-77)       | 920<br>(-330-2300)   |
| Tajikistan | 1990 | Male   | 65 to 69 | 79%<br>(64-90%)                | 21%<br>(10-36%)          | 1.5<br>(0.9-2.2)                            | 0.68%<br>(-1.7-3.3%)                 | 0.51%<br>(-2.4-3.6%)                | 5.3<br>(-25-38)      | 200<br>(-480-950)    |
| Tajikistan | 1990 | Male   | 70 to 74 | 76%<br>(62-86%)                | 24%<br>(14-38%)          | 1.2<br>(0.74-1.9)                           | -0.45%<br>(-2.8-2.2%)                | -0.76%<br>(-3.6-2.4%)               | -6.7<br>(-33-21)     | -86<br>(-560-430)    |
| Tajikistan | 1990 | Male   | 75 to 79 | 73%<br>(57-85%)                | 27%<br>(15-43%)          | 1.1<br>(0.57-1.7)                           | -1.3%<br>(-3.5-0.97%)                | -1.7%<br>(-4.4-0.95%)               | -20<br>(-51-11)      | -250<br>(-680-180)   |
| Tajikistan | 1990 | Male   | 80 to 84 | 70%<br>(53-83%)                | 30%<br>(17-47%)          | 0.96<br>(0.54-1.5)                          | -1.9%<br>(-4.2-0.16%)                | -2.5%<br>(-5.2-0.091%)              | -30<br>(-64-1)       | -280<br>(-630-23)    |
| Tajikistan | 1990 | Male   | 85 to 89 | 68%<br>(52-81%)                | 32%<br>(19-48%)          | 0.89<br>(0.51-1.4)                          | -2.3%<br>(-4.5--0.27%)               | -2.9%<br>(-5.6--0.46%)              | -28<br>(-54--4.3)    | -190<br>(-370--22)   |
| Tajikistan | 1990 | Male   | 90 to 94 | 67%<br>(52-80%)                | 33%<br>(20-48%)          | 0.82<br>(0.46-1.4)                          | -2.4%<br>(-4.7--0.53%)               | -3.1%<br>(-5.9--0.76%)              | -14<br>(-27--3.5)    | -66<br>(-130--14)    |
| Tajikistan | 1990 | Male   | 95 plus  | 66%<br>(46-82%)                | 34%<br>(18-54%)          | 0.75<br>(0.33-1.4)                          | -2.3%<br>(-4.5--0.39%)               | -3%<br>(-5.7--0.71%)                | -3.4<br>(-6.4--0.81) | -10<br>(-20--1.7)    |
| Tajikistan | 1995 | Female | All Ages | 49%<br>(43-57%)                | 51%<br>(43-57%)          | 0.51<br>(0.4-0.64)                          | 0.42%<br>(-0.076-0.93%)              | -0.24%<br>(-1.8-1.4%)               | -50<br>(-370-290)    | 5300<br>(-890-12000) |
| Tajikistan | 1995 | Female | 15 to 19 | 53%<br>(40-68%)                | 47%<br>(32-60%)          | 0.54<br>(0.23-0.98)                         | 1.2%<br>(0.58-2.1%)                  | 1.6%<br>(0.46-3.3%)                 | 4<br>(1.1-8.2)       | 480<br>(220-830)     |
| Tajikistan | 1995 | Female | 20 to 24 | 61%<br>(48-73%)                | 39%<br>(27-52%)          | 0.78<br>(0.34-1.4)                          | 2.1%<br>(1.1-3.5%)                   | 2.2%<br>(0.6-4.4%)                  | 7.4<br>(2-15)        | 880<br>(430-1500)    |
| Tajikistan | 1995 | Female | 25 to 29 | 64%<br>(50-76%)                | 36%<br>(24-50%)          | 0.9<br>(0.44-1.5)                           | 2.6%<br>(1.4-4.1%)                   | 3%<br>(1-5.5%)                      | 11<br>(3.7-21)       | 1100<br>(570-1700)   |
| Tajikistan | 1995 | Female | 30 to 34 | 65%<br>(51-79%)                | 35%<br>(21-49%)          | 0.98<br>(0.53-1.6)                          | 2.7%<br>(1.6-4.2%)                   | 3.6%<br>(1.7-6%)                    | 16<br>(7.5-27)       | 1200<br>(740-1900)   |
| Tajikistan | 1995 | Female | 35 to 39 | 65%<br>(52-80%)                | 35%<br>(20-48%)          | 1<br>(0.51-1.8)                             | 2.7%<br>(1.5-4.5%)                   | 3.8%<br>(1.7-6.7%)                  | 16<br>(7.1-29)       | 1100<br>(580-1800)   |
| Tajikistan | 1995 | Female | 40 to 44 | 65%<br>(51-79%)                | 35%<br>(21-49%)          | 1.1<br>(0.48-1.8)                           | 2.7%<br>(1.2-4.9%)                   | 4%<br>(1.5-7.6%)                    | 16<br>(5.4-31)       | 850<br>(370-1600)    |
| Tajikistan | 1995 | Female | 45 to 49 | 65%<br>(50-78%)                | 35%<br>(22-50%)          | 1.1<br>(0.51-2.2)                           | 2.3%<br>(0.47-5.4%)                  | 3.4%<br>(0.39-8.1%)                 | 12<br>(1.5-29)       | 570<br>(120-1300)    |
| Tajikistan | 1995 | Female | 50 to 54 | 64%<br>(49-77%)                | 36%<br>(23-51%)          | 1.2<br>(0.53-2.2)                           | 2%<br>(-0.25-5.7%)                   | 2.8%<br>(-0.56-7.8%)                | 10<br>(-2.1-29)      | 410<br>(-54-1100)    |
| Tajikistan | 1995 | Female | 55 to 59 | 62%<br>(48-75%)                | 38%<br>(25-52%)          | 1.2<br>(0.49-2.1)                           | 1.3%<br>(-1.3-5.2%)                  | 1.7%<br>(-1.9-6.9%)                 | 14<br>(-15-59)       | 480<br>(-480-1900)   |
| Tajikistan | 1995 | Female | 60 to 64 | 60%<br>(45-75%)                | 40%<br>(25-55%)          | 1.1<br>(0.46-2.2)                           | 0.27%<br>(-2.6-4.8%)                 | 0.31%<br>(-3.4-6.2%)                | 3.2<br>(-36-65)      | 100<br>(-980-1800)   |
| Tajikistan | 1995 | Female | 65 to 69 | 58%<br>(45-73%)                | 42%<br>(27-55%)          | 1<br>(0.48-1.9)                             | -0.73%<br>(-3.6-3%)                  | -0.92%<br>(-4.5-3.7%)               | -13<br>(-61-53)      | -300<br>(-1400-1200) |
| Tajikistan | 1995 | Female | 70 to 74 | 56%<br>(43-69%)                | 44%<br>(31-57%)          | 0.92<br>(0.36-1.8)                          | -1.3%<br>(-4.1-2.5%)                 | -1.6%<br>(-5.1-3.1%)                | -23<br>(-73-44)      | -420<br>(-1300-800)  |
| Tajikistan | 1995 | Female | 75 to 79 | 52%<br>(41-66%)                | 48%<br>(34-59%)          | 0.86<br>(0.32-1.7)                          | -1.8%<br>(-4.6-1.5%)                 | -2.2%<br>(-5.6-1.7%)                | -28<br>(-70-22)      | -400<br>(-980-310)   |

| Location   | Year | Sex    | Age      | Prevalence of current drinkers | Prevalence of abstainers | Population average of standard drinks daily | Percent of total attributable deaths | Percent of total attributable DALYs | Attributable deaths | Attributable DALYs     |
|------------|------|--------|----------|--------------------------------|--------------------------|---------------------------------------------|--------------------------------------|-------------------------------------|---------------------|------------------------|
| Tajikistan | 1995 | Female | 80 to 84 | 50%<br>(37-65%)                | 50%<br>(35-63%)          | 0.88<br>(0.35-1.7)                          | -2.2%<br>(-5.1-1.3%)                 | -2.7%<br>(-6.1-1.4%)                | -36<br>(-84-20)     | -370<br>(-860-210)     |
| Tajikistan | 1995 | Female | 85 to 89 | 50%<br>(38-62%)                | 50%<br>(38-62%)          | 0.93<br>(0.36-1.9)                          | -2.3%<br>(-5.2-1.7%)                 | -2.8%<br>(-6.2-1.8%)                | -36<br>(-80-24)     | -260<br>(-580-190)     |
| Tajikistan | 1995 | Female | 90 to 94 | 51%<br>(39-62%)                | 49%<br>(38-61%)          | 1<br>(0.35-2.3)                             | -2.2%<br>(-5.1-2.8%)                 | -2.7%<br>(-6.2-3.3%)                | -19<br>(-43-22)     | -89<br>(-210-120)      |
| Tajikistan | 1995 | Female | 95 plus  | 51%<br>(38-67%)                | 49%<br>(33-62%)          | 1<br>(0.28-2.6)                             | -1.8%<br>(-5-4.5%)                   | -2.3%<br>(-6.1-5.3%)                | -5.1<br>(-14-12)    | -16<br>(-44-41)        |
| Tajikistan | 1995 | Male   | All Ages | 61%<br>(52-70%)                | 39%<br>(30-48%)          | 0.82<br>(0.68-0.95)                         | 1.7%<br>(1.1-2.4%)                   | 1.4%<br>(0.11-2.7%)                 | 330<br>(25-640)     | 26000<br>(17000-37000) |
| Tajikistan | 1995 | Male   | 15 to 19 | 56%<br>(40-72%)                | 44%<br>(28-60%)          | 0.46<br>(0.26-0.74)                         | 2.4%<br>(1.5-3.4%)                   | 2.3%<br>(1.1-3.8%)                  | 9.4<br>(4.5-16)     | 1200<br>(710-1700)     |
| Tajikistan | 1995 | Male   | 20 to 24 | 73%<br>(58-85%)                | 27%<br>(15-42%)          | 1<br>(0.66-1.4)                             | 5.6%<br>(3.7-7.6%)                   | 5.5%<br>(3-8%)                      | 33<br>(17-50)       | 3200<br>(2100-4600)    |
| Tajikistan | 1995 | Male   | 25 to 29 | 80%<br>(69-89%)                | 20%<br>(11-31%)          | 1.7<br>(1.1-2.3)                            | 8%<br>(5.6-10%)                      | 8.4%<br>(5.4-12%)                   | 57<br>(35-81)       | 4600<br>(3100-6100)    |
| Tajikistan | 1995 | Male   | 30 to 34 | 84%<br>(73-92%)                | 16%<br>(8-27%)           | 2<br>(1.4-2.6)                              | 8.6%<br>(6.3-11%)                    | 9.5%<br>(6.4-13%)                   | 73<br>(48-100)      | 5200<br>(3700-6800)    |
| Tajikistan | 1995 | Male   | 35 to 39 | 86%<br>(75-93%)                | 14%<br>(7.2-25%)         | 2<br>(1.3-2.7)                              | 7.8%<br>(5.5-10%)                    | 8.8%<br>(5.5-12%)                   | 64<br>(39-89)       | 4100<br>(2800-5500)    |
| Tajikistan | 1995 | Male   | 40 to 44 | 86%<br>(77-93%)                | 14%<br>(7-23%)           | 2<br>(1.3-2.9)                              | 6.7%<br>(4.4-9.1%)                   | 7.4%<br>(4.4-11%)                   | 50<br>(28-73)       | 2800<br>(1800-3900)    |
| Tajikistan | 1995 | Male   | 45 to 49 | 86%<br>(74-93%)                | 14%<br>(7.2-26%)         | 2.2<br>(1.4-3.2)                            | 6.1%<br>(3.3-9.1%)                   | 6.7%<br>(3.1-11%)                   | 41<br>(19-66)       | 2000<br>(1100-3100)    |
| Tajikistan | 1995 | Male   | 50 to 54 | 85%<br>(73-92%)                | 15%<br>(8-27%)           | 2.1<br>(1.3-3.1)                            | 4.9%<br>(2.1-8.1%)                   | 5.3%<br>(1.6-9.3%)                  | 35<br>(11-65)       | 1600<br>(660-2700)     |
| Tajikistan | 1995 | Male   | 55 to 59 | 83%<br>(71-91%)                | 17%<br>(8.8-29%)         | 1.9<br>(1.1-2.7)                            | 3.1%<br>(0.32-6.1%)                  | 3.2%<br>(-0.23-7%)                  | 40<br>(-2.9-87)     | 1600<br>(160-3000)     |
| Tajikistan | 1995 | Male   | 60 to 64 | 81%<br>(67-91%)                | 19%<br>(9.4-33%)         | 1.6<br>(0.94-2.5)                           | 1.5%<br>(-1.2-4.6%)                  | 1.4%<br>(-1.9-5.1%)                 | 20<br>(-27-74)      | 720<br>(-540-2200)     |
| Tajikistan | 1995 | Male   | 65 to 69 | 79%<br>(65-89%)                | 21%<br>(11-35%)          | 1.4<br>(0.9-2.1)                            | 0.36%<br>(-2.2-3.1%)                 | 0.12%<br>(-3-3.4%)                  | 2.1<br>(-54-61)     | 170<br>(-1100-1500)    |
| Tajikistan | 1995 | Male   | 70 to 74 | 76%<br>(62-86%)                | 24%<br>(14-38%)          | 1.2<br>(0.71-1.9)                           | -0.64%<br>(-3.1-1.9%)                | -0.98%<br>(-3.9-2%)                 | -12<br>(-48-25)     | -170<br>(-810-510)     |
| Tajikistan | 1995 | Male   | 75 to 79 | 73%<br>(58-85%)                | 27%<br>(15-42%)          | 1.1<br>(0.58-1.7)                           | -1.5%<br>(-3.8-0.77%)                | -1.9%<br>(-4.6-0.8%)                | -17<br>(-41-7.2)    | -210<br>(-550-120)     |
| Tajikistan | 1995 | Male   | 80 to 84 | 71%<br>(54-83%)                | 29%<br>(17-46%)          | 0.95<br>(0.54-1.4)                          | -2%<br>(-4.4-0.14%)                  | -2.6%<br>(-5.3-0.047%)              | -24<br>(-51-0.45)   | -230<br>(-510-17)      |
| Tajikistan | 1995 | Male   | 85 to 89 | 69%<br>(53-80%)                | 31%<br>(20-47%)          | 0.87<br>(0.51-1.4)                          | -2.3%<br>(-4.5--0.34%)               | -2.9%<br>(-5.5--0.54%)              | -24<br>(-45--4.4)   | -160<br>(-310--24)     |
| Tajikistan | 1995 | Male   | 90 to 94 | 68%<br>(53-80%)                | 32%<br>(20-47%)          | 0.81<br>(0.45-1.3)                          | -2.4%<br>(-4.7--0.5%)                | -3.1%<br>(-5.8--0.74%)              | -13<br>(-25--3.1)   | -62<br>(-120--13)      |
| Tajikistan | 1995 | Male   | 95 plus  | 67%<br>(48-82%)                | 33%<br>(18-52%)          | 0.73<br>(0.33-1.3)                          | -2.3%<br>(-4.4--0.4%)                | -2.9%<br>(-5.6--0.71%)              | -4<br>(-7.7--0.98)  | -12<br>(-24--2.2)      |

| Location   | Year | Sex    | Age      | Prevalence of current drinkers | Prevalence of abstainers | Population average of standard drinks daily | Percent of total attributable deaths | Percent of total attributable DALYs | Attributable deaths | Attributable DALYs     |
|------------|------|--------|----------|--------------------------------|--------------------------|---------------------------------------------|--------------------------------------|-------------------------------------|---------------------|------------------------|
| Tajikistan | 2000 | Female | All Ages | 50%<br>(44-59%)                | 50%<br>(41-56%)          | 0.46<br>(0.37-0.58)                         | 0.4%<br>(-0.15-0.95%)                | -0.47%<br>(-2.1-1.2%)               | -91<br>(-400-240)   | 4500<br>(-1700-11000)  |
| Tajikistan | 2000 | Female | 15 to 19 | 53%<br>(40-68%)                | 47%<br>(32-60%)          | 0.48<br>(0.22-0.85)                         | 1.1%<br>(0.55-1.9%)                  | 1.5%<br>(0.41-3.1%)                 | 3.5<br>(0.91-7.1)   | 480<br>(230-820)       |
| Tajikistan | 2000 | Female | 20 to 24 | 61%<br>(49-73%)                | 39%<br>(27-51%)          | 0.69<br>(0.31-1.2)                          | 2%<br>(1-3.3%)                       | 2.2%<br>(0.5-4.6%)                  | 6.7<br>(1.6-14)     | 840<br>(420-1400)      |
| Tajikistan | 2000 | Female | 25 to 29 | 64%<br>(49-76%)                | 36%<br>(24-51%)          | 0.8<br>(0.38-1.4)                           | 2.4%<br>(1.2-3.9%)                   | 2.9%<br>(0.64-5.5%)                 | 10<br>(2.3-20)      | 1000<br>(490-1700)     |
| Tajikistan | 2000 | Female | 30 to 34 | 65%<br>(50-78%)                | 35%<br>(22-50%)          | 0.87<br>(0.46-1.5)                          | 2.7%<br>(1.5-4.1%)                   | 3.5%<br>(1.4-6%)                    | 14<br>(5.7-24)      | 1200<br>(630-1800)     |
| Tajikistan | 2000 | Female | 35 to 39 | 65%<br>(52-79%)                | 35%<br>(21-48%)          | 0.9<br>(0.45-1.5)                           | 2.6%<br>(1.4-4.3%)                   | 3.8%<br>(1.7-6.5%)                  | 18<br>(7.7-31)      | 1200<br>(630-1900)     |
| Tajikistan | 2000 | Female | 40 to 44 | 65%<br>(51-79%)                | 35%<br>(21-49%)          | 0.95<br>(0.43-1.6)                          | 2.5%<br>(1.1-4.4%)                   | 3.8%<br>(1.5-7%)                    | 18<br>(6.7-34)      | 980<br>(440-1700)      |
| Tajikistan | 2000 | Female | 45 to 49 | 65%<br>(49-79%)                | 35%<br>(21-51%)          | 0.99<br>(0.45-1.9)                          | 2%<br>(0.26-4.5%)                    | 3%<br>(0.091-7%)                    | 13<br>(0.42-32)     | 620<br>(80-1400)       |
| Tajikistan | 2000 | Female | 50 to 54 | 64%<br>(49-78%)                | 36%<br>(22-51%)          | 1<br>(0.46-1.9)                             | 1.6%<br>(-0.4-4.8%)                  | 2.3%<br>(-0.78-6.9%)                | 10<br>(-3.4-30)     | 400<br>(-110-1200)     |
| Tajikistan | 2000 | Female | 55 to 59 | 62%<br>(48-76%)                | 38%<br>(24-52%)          | 1<br>(0.44-1.9)                             | 0.85%<br>(-1.6-4.4%)                 | 1.1%<br>(-2.2-5.9%)                 | 5.5<br>(-11-29)     | 190<br>(-340-920)      |
| Tajikistan | 2000 | Female | 60 to 64 | 60%<br>(46-75%)                | 40%<br>(25-54%)          | 0.99<br>(0.41-1.9)                          | -0.19%<br>(-2.9-3.8%)                | -0.28%<br>(-3.8-4.8%)               | -3.2<br>(-43-53)    | -80<br>(-1100-1500)    |
| Tajikistan | 2000 | Female | 65 to 69 | 58%<br>(45-73%)                | 42%<br>(27-55%)          | 0.91<br>(0.42-1.7)                          | -1.2%<br>(-3.9-2.4%)                 | -1.4%<br>(-4.8-2.8%)                | -19<br>(-67-38)     | -450<br>(-1500-890)    |
| Tajikistan | 2000 | Female | 70 to 74 | 55%<br>(43-68%)                | 45%<br>(32-57%)          | 0.81<br>(0.32-1.6)                          | -1.6%<br>(-4.4-1.8%)                 | -1.9%<br>(-5.2-2.1%)                | -34<br>(-94-36)     | -620<br>(-1700-640)    |
| Tajikistan | 2000 | Female | 75 to 79 | 52%<br>(41-66%)                | 48%<br>(34-59%)          | 0.76<br>(0.28-1.5)                          | -2%<br>(-4.6-0.89%)                  | -2.4%<br>(-5.6-0.98%)               | -38<br>(-88-15)     | -540<br>(-1200-210)    |
| Tajikistan | 2000 | Female | 80 to 84 | 50%<br>(37-65%)                | 50%<br>(35-63%)          | 0.78<br>(0.31-1.5)                          | -2.4%<br>(-5.1-0.69%)                | -2.8%<br>(-6.2-0.74%)               | -36<br>(-79-9)      | -370<br>(-810-110)     |
| Tajikistan | 2000 | Female | 85 to 89 | 50%<br>(37-62%)                | 50%<br>(38-63%)          | 0.83<br>(0.32-1.8)                          | -2.5%<br>(-5.3-0.97%)                | -3%<br>(-6.2-1%)                    | -33<br>(-69-10)     | -240<br>(-490-84)      |
| Tajikistan | 2000 | Female | 90 to 94 | 51%<br>(39-62%)                | 49%<br>(38-61%)          | 0.89<br>(0.3-2.1)                           | -2.4%<br>(-5.1-2.3%)                 | -2.9%<br>(-6.2-2.5%)                | -19<br>(-41-16)     | -93<br>(-200-86)       |
| Tajikistan | 2000 | Female | 95 plus  | 51%<br>(38-66%)                | 49%<br>(34-62%)          | 0.93<br>(0.24-2.4)                          | -2%<br>(-4.9-4.1%)                   | -2.5%<br>(-5.9-4.6%)                | -6.1<br>(-14-11)    | -19<br>(-47-38)        |
| Tajikistan | 2000 | Male   | All Ages | 61%<br>(52-70%)                | 39%<br>(30-48%)          | 0.75<br>(0.62-0.85)                         | 1.8%<br>(1.1-2.5%)                   | 1.1%<br>(-0.24-2.5%)                | 250<br>(-53-570)    | 24000<br>(15000-33000) |
| Tajikistan | 2000 | Male   | 15 to 19 | 56%<br>(40-72%)                | 44%<br>(28-60%)          | 0.41<br>(0.23-0.64)                         | 2.3%<br>(1.5-3.2%)                   | 2.2%<br>(1.1-3.7%)                  | 8.1<br>(4.1-14)     | 1100<br>(740-1700)     |
| Tajikistan | 2000 | Male   | 20 to 24 | 73%<br>(57-85%)                | 27%<br>(15-43%)          | 0.91<br>(0.59-1.3)                          | 5.4%<br>(3.6-7.3%)                   | 5.3%<br>(2.7-8.1%)                  | 26<br>(13-42)       | 2800<br>(1800-4000)    |
| Tajikistan | 2000 | Male   | 25 to 29 | 80%<br>(69-89%)                | 20%<br>(11-31%)          | 1.5<br>(0.98-2)                             | 7.6%<br>(5.4-10%)                    | 8.2%<br>(5-12%)                     | 48<br>(28-71)       | 4100<br>(2800-5700)    |

| Location   | Year | Sex    | Age      | Prevalence of current drinkers | Prevalence of abstainers | Population average of standard drinks daily | Percent of total attributable deaths | Percent of total attributable DALYs | Attributable deaths  | Attributable DALYs    |
|------------|------|--------|----------|--------------------------------|--------------------------|---------------------------------------------|--------------------------------------|-------------------------------------|----------------------|-----------------------|
| Tajikistan | 2000 | Male   | 30 to 34 | 85%<br>(73-92%)                | 15%<br>(7.7-27%)         | 1.8<br>(1.3-2.4)                            | 8.2%<br>(6.1-11%)                    | 9.2%<br>(6.1-13%)                   | 59<br>(39-82)        | 4400<br>(3100-5800)   |
| Tajikistan | 2000 | Male   | 35 to 39 | 86%<br>(75-93%)                | 14%<br>(7.1-25%)         | 1.8<br>(1.2-2.4)                            | 7.5%<br>(5.3-9.9%)                   | 8.6%<br>(5.4-12%)                   | 61<br>(38-88)        | 4100<br>(2800-5600)   |
| Tajikistan | 2000 | Male   | 40 to 44 | 86%<br>(76-93%)                | 14%<br>(7-24%)           | 1.8<br>(1.2-2.5)                            | 6.4%<br>(4.1-8.6%)                   | 7.2%<br>(4-10%)                     | 51<br>(28-76)        | 3100<br>(1900-4200)   |
| Tajikistan | 2000 | Male   | 45 to 49 | 86%<br>(73-93%)                | 14%<br>(7.1-27%)         | 1.9<br>(1.2-2.8)                            | 5.6%<br>(3-8.2%)                     | 6.1%<br>(2.5-9.7%)                  | 42<br>(17-69)        | 2200<br>(1100-3400)   |
| Tajikistan | 2000 | Male   | 50 to 54 | 85%<br>(73-92%)                | 15%<br>(8-27%)           | 1.9<br>(1.1-2.8)                            | 4.3%<br>(1.6-7.4%)                   | 4.6%<br>(1.1-8.5%)                  | 31<br>(6.9-58)       | 1400<br>(520-2400)    |
| Tajikistan | 2000 | Male   | 55 to 59 | 83%<br>(71-92%)                | 17%<br>(8.1-29%)         | 1.7<br>(1-2.5)                              | 2.8%<br>(0.19-5.6%)                  | 2.8%<br>(-0.63-6.4%)                | 22<br>(-4.8-52)      | 890<br>(58-1800)      |
| Tajikistan | 2000 | Male   | 60 to 64 | 81%<br>(68-91%)                | 19%<br>(9.4-32%)         | 1.4<br>(0.83-2.3)                           | 1.1%<br>(-1.5-3.9%)                  | 0.9%<br>(-2.2-4.2%)                 | 14<br>(-35-67)       | 560<br>(-770-1900)    |
| Tajikistan | 2000 | Male   | 65 to 69 | 79%<br>(65-89%)                | 21%<br>(11-35%)          | 1.3<br>(0.79-1.9)                           | -0.075%<br>(-2.6-2.6%)               | -0.35%<br>(-3.3-2.8%)               | -6<br>(-58-48)       | -34<br>(-1200-1200)   |
| Tajikistan | 2000 | Male   | 70 to 74 | 76%<br>(62-86%)                | 24%<br>(14-38%)          | 1.1<br>(0.63-1.7)                           | -0.95%<br>(-3.4-1.3%)                | -1.3%<br>(-4.2-1.4%)                | -28<br>(-89-29)      | -430<br>(-1500-620)   |
| Tajikistan | 2000 | Male   | 75 to 79 | 73%<br>(57-85%)                | 27%<br>(15-43%)          | 0.94<br>(0.5-1.5)                           | -1.6%<br>(-3.8-0.46%)                | -2%<br>(-4.7-0.4%)                  | -26<br>(-60-5.4)     | -330<br>(-800-100)    |
| Tajikistan | 2000 | Male   | 80 to 84 | 71%<br>(54-84%)                | 29%<br>(16-46%)          | 0.85<br>(0.46-1.3)                          | -2.1%<br>(-4.5-0.033%)               | -2.6%<br>(-5.4--0.13%)              | -20<br>(-41--0.94)   | -190<br>(-400-3)      |
| Tajikistan | 2000 | Male   | 85 to 89 | 69%<br>(53-80%)                | 31%<br>(20-47%)          | 0.78<br>(0.44-1.2)                          | -2.4%<br>(-4.6--0.42%)               | -2.9%<br>(-5.6--0.58%)              | -17<br>(-33--3.4)    | -120<br>(-230--21)    |
| Tajikistan | 2000 | Male   | 90 to 94 | 68%<br>(53-80%)                | 32%<br>(20-47%)          | 0.72<br>(0.39-1.2)                          | -2.4%<br>(-4.7--0.53%)               | -3.1%<br>(-5.8--0.8%)               | -10<br>(-20--2.7)    | -48<br>(-94--11)      |
| Tajikistan | 2000 | Male   | 95 plus  | 67%<br>(48-82%)                | 33%<br>(18-52%)          | 0.65<br>(0.3-1.2)                           | -2.2%<br>(-4.5--0.38%)               | -2.9%<br>(-5.5--0.7%)               | -3.3<br>(-6.5--0.77) | -9.8<br>(-20--1.7)    |
| Tajikistan | 2005 | Female | All Ages | 51%<br>(45-60%)                | 49%<br>(40-55%)          | 0.44<br>(0.35-0.56)                         | 0.41%<br>(-0.26-1%)                  | -0.74%<br>(-2.4-1%)                 | -130<br>(-440-190)   | 4100<br>(-2300-11000) |
| Tajikistan | 2005 | Female | 15 to 19 | 52%<br>(40-67%)                | 48%<br>(33-60%)          | 0.43<br>(0.18-0.76)                         | 1.1%<br>(0.54-1.8%)                  | 1.5%<br>(0.3-3.1%)                  | 3.5<br>(0.68-7.1)    | 520<br>(260-870)      |
| Tajikistan | 2005 | Female | 20 to 24 | 61%<br>(48-73%)                | 39%<br>(27-52%)          | 0.62<br>(0.27-1.1)                          | 2%<br>(1-3.1%)                       | 2.2%<br>(0.35-4.6%)                 | 6.1<br>(0.92-13)     | 890<br>(440-1400)     |
| Tajikistan | 2005 | Female | 25 to 29 | 64%<br>(49-77%)                | 36%<br>(23-51%)          | 0.72<br>(0.34-1.3)                          | 2.4%<br>(1.2-3.9%)                   | 2.9%<br>(0.52-5.6%)                 | 8.2<br>(1.4-17)      | 960<br>(480-1500)     |
| Tajikistan | 2005 | Female | 30 to 34 | 65%<br>(51-79%)                | 35%<br>(21-49%)          | 0.79<br>(0.4-1.3)                           | 2.6%<br>(1.6-3.9%)                   | 3.6%<br>(1.5-6.1%)                  | 12<br>(5.2-20)       | 1100<br>(630-1600)    |
| Tajikistan | 2005 | Female | 35 to 39 | 65%<br>(52-80%)                | 35%<br>(20-48%)          | 0.81<br>(0.39-1.4)                          | 2.5%<br>(1.5-3.9%)                   | 4%<br>(2-6.7%)                      | 15<br>(7.3-25)       | 1100<br>(630-1600)    |
| Tajikistan | 2005 | Female | 40 to 44 | 65%<br>(51-79%)                | 35%<br>(21-49%)          | 0.84<br>(0.38-1.5)                          | 2.4%<br>(1.2-4%)                     | 3.9%<br>(1.6-6.9%)                  | 19<br>(7.9-33)       | 1100<br>(540-1800)    |
| Tajikistan | 2005 | Female | 45 to 49 | 65%<br>(49-78%)                | 35%<br>(22-51%)          | 0.89<br>(0.41-1.6)                          | 1.9%<br>(0.47-3.8%)                  | 2.9%<br>(0.4-6.4%)                  | 17<br>(2.3-37)       | 800<br>(190-1700)     |

| Location   | Year | Sex    | Age      | Prevalence of current drinkers | Prevalence of abstainers | Population average of standard drinks daily | Percent of total attributable deaths | Percent of total attributable DALYs | Attributable deaths | Attributable DALYs     |
|------------|------|--------|----------|--------------------------------|--------------------------|---------------------------------------------|--------------------------------------|-------------------------------------|---------------------|------------------------|
| Tajikistan | 2005 | Female | 50 to 54 | 63%<br>(49-77%)                | 37%<br>(23-51%)          | 0.91<br>(0.42-1.7)                          | 1.4%<br>(-0.33-3.9%)                 | 2%<br>(-0.58-5.8%)                  | 12<br>(-3.5-34)     | 480<br>(-120-1300)     |
| Tajikistan | 2005 | Female | 55 to 59 | 62%<br>(48-75%)                | 38%<br>(25-52%)          | 0.92<br>(0.39-1.7)                          | 0.64%<br>(-1.5-3.8%)                 | 0.86%<br>(-2.2-5.1%)                | 5.7<br>(-14-35)     | 190<br>(-440-1100)     |
| Tajikistan | 2005 | Female | 60 to 64 | 60%<br>(45-74%)                | 40%<br>(26-55%)          | 0.89<br>(0.36-1.8)                          | -0.45%<br>(-3-3.3%)                  | -0.6%<br>(-3.8-4.2%)                | -4.2<br>(-27-29)    | -110<br>(-730-800)     |
| Tajikistan | 2005 | Female | 65 to 69 | 58%<br>(46-73%)                | 42%<br>(27-54%)          | 0.82<br>(0.37-1.5)                          | -1.3%<br>(-3.7-1.6%)                 | -1.6%<br>(-4.6-2.1%)                | -24<br>(-71-32)     | -560<br>(-1600-730)    |
| Tajikistan | 2005 | Female | 70 to 74 | 56%<br>(43-69%)                | 44%<br>(31-57%)          | 0.73<br>(0.29-1.4)                          | -1.8%<br>(-4.4-1.1%)                 | -2.1%<br>(-5.2-1.2%)                | -40<br>(-99-26)     | -740<br>(-1800-460)    |
| Tajikistan | 2005 | Female | 75 to 79 | 52%<br>(41-65%)                | 48%<br>(35-59%)          | 0.68<br>(0.25-1.3)                          | -2.2%<br>(-4.7-0.25%)                | -2.6%<br>(-5.5-0.29%)               | -49<br>(-110-5.5)   | -690<br>(-1500-72)     |
| Tajikistan | 2005 | Female | 80 to 84 | 50%<br>(37-64%)                | 50%<br>(36-63%)          | 0.7<br>(0.28-1.3)                           | -2.5%<br>(-5.3-0.072%)               | -3%<br>(-6.2-0.044%)                | -52<br>(-110-0.76)  | -540<br>(-1100-15)     |
| Tajikistan | 2005 | Female | 85 to 89 | 50%<br>(38-62%)                | 50%<br>(38-62%)          | 0.74<br>(0.27-1.5)                          | -2.7%<br>(-5.3-0.08%)                | -3.3%<br>(-6.3-0.021%)              | -37<br>(-71-0.23)   | -260<br>(-510-7.9)     |
| Tajikistan | 2005 | Female | 90 to 94 | 51%<br>(39-62%)                | 49%<br>(38-61%)          | 0.79<br>(0.27-1.8)                          | -2.6%<br>(-5.2-1.1%)                 | -3.2%<br>(-6.3-1.1%)                | -20<br>(-39-6.9)    | -96<br>(-190-41)       |
| Tajikistan | 2005 | Female | 95 plus  | 51%<br>(38-67%)                | 49%<br>(33-62%)          | 0.83<br>(0.22-2.1)                          | -2.3%<br>(-4.9-2.6%)                 | -2.8%<br>(-5.8-2.9%)                | -7.2<br>(-15-7.3)   | -23<br>(-49-26)        |
| Tajikistan | 2005 | Male   | All Ages | 63%<br>(55-72%)                | 37%<br>(28-45%)          | 0.71<br>(0.6-0.82)                          | 1.9%<br>(1.1-2.7%)                   | 0.96%<br>(-0.67-2.4%)               | 210<br>(-140-540)   | 24000<br>(14000-33000) |
| Tajikistan | 2005 | Male   | 15 to 19 | 56%<br>(40-72%)                | 44%<br>(28-60%)          | 0.37<br>(0.21-0.58)                         | 2.3%<br>(1.6-3.1%)                   | 2.1%<br>(0.99-3.5%)                 | 7.6<br>(3.7-13)     | 1200<br>(790-1800)     |
| Tajikistan | 2005 | Male   | 20 to 24 | 73%<br>(58-85%)                | 27%<br>(15-42%)          | 0.82<br>(0.55-1.1)                          | 5.3%<br>(3.5-7.2%)                   | 5.1%<br>(2.3-7.8%)                  | 23<br>(10-37)       | 2900<br>(1800-4100)    |
| Tajikistan | 2005 | Male   | 25 to 29 | 80%<br>(69-89%)                | 20%<br>(11-31%)          | 1.3<br>(0.89-1.8)                           | 7.4%<br>(5.3-9.7%)                   | 7.9%<br>(4.6-11%)                   | 38<br>(22-56)       | 3700<br>(2600-5000)    |
| Tajikistan | 2005 | Male   | 30 to 34 | 85%<br>(73-92%)                | 15%<br>(7.9-27%)         | 1.6<br>(1.1-2.1)                            | 8%<br>(5.9-10%)                      | 9%<br>(5.8-13%)                     | 52<br>(33-74)       | 4200<br>(3000-5700)    |
| Tajikistan | 2005 | Male   | 35 to 39 | 86%<br>(76-93%)                | 14%<br>(7.3-24%)         | 1.6<br>(1-2.2)                              | 7.3%<br>(5.2-9.5%)                   | 8.5%<br>(5.4-12%)                   | 54<br>(33-79)       | 3800<br>(2600-5100)    |
| Tajikistan | 2005 | Male   | 40 to 44 | 86%<br>(77-93%)                | 14%<br>(7-23%)           | 1.6<br>(1.1-2.2)                            | 6.3%<br>(4.2-8.4%)                   | 7.2%<br>(4.2-10%)                   | 58<br>(33-86)       | 3500<br>(2400-4900)    |
| Tajikistan | 2005 | Male   | 45 to 49 | 86%<br>(74-93%)                | 14%<br>(7.3-26%)         | 1.7<br>(1.1-2.5)                            | 5.4%<br>(2.9-7.8%)                   | 6%<br>(2.6-9.4%)                    | 52<br>(23-85)       | 2800<br>(1500-4200)    |
| Tajikistan | 2005 | Male   | 50 to 54 | 85%<br>(73-92%)                | 15%<br>(7.7-27%)         | 1.7<br>(1-2.5)                              | 4.1%<br>(1.5-6.8%)                   | 4.3%<br>(0.82-7.9%)                 | 40<br>(7.9-76)      | 1900<br>(670-3200)     |
| Tajikistan | 2005 | Male   | 55 to 59 | 83%<br>(71-92%)                | 17%<br>(8.4-29%)         | 1.5<br>(0.9-2.2)                            | 2.6%<br>(0.079-5.3%)                 | 2.6%<br>(-0.68-6%)                  | 23<br>(-6-54)       | 960<br>(29-2000)       |
| Tajikistan | 2005 | Male   | 60 to 64 | 81%<br>(68-91%)                | 19%<br>(9.4-32%)         | 1.3<br>(0.71-2.1)                           | 0.9%<br>(-1.6-3.4%)                  | 0.67%<br>(-2.4-3.8%)                | 7.8<br>(-28-43)     | 340<br>(-610-1300)     |
| Tajikistan | 2005 | Male   | 65 to 69 | 79%<br>(64-89%)                | 21%<br>(11-36%)          | 1.1<br>(0.7-1.7)                            | -0.17%<br>(-2.7-2.3%)                | -0.44%<br>(-3.4-2.6%)               | -9.1<br>(-71-51)    | -92<br>(-1500-1200)    |

| Location   | Year | Sex    | Age      | Prevalence of current drinkers | Prevalence of abstainers | Population average of standard drinks daily | Percent of total attributable deaths | Percent of total attributable DALYs | Attributable deaths  | Attributable DALYs   |
|------------|------|--------|----------|--------------------------------|--------------------------|---------------------------------------------|--------------------------------------|-------------------------------------|----------------------|----------------------|
| Tajikistan | 2005 | Male   | 70 to 74 | 76%<br>(62-87%)                | 24%<br>(13-38%)          | 0.98<br>(0.57-1.5)                          | -1.1%<br>(-3.7-1.1%)                 | -1.5%<br>(-4.3-1.1%)                | -33<br>(-100-27)     | -540<br>(-1700-550)  |
| Tajikistan | 2005 | Male   | 75 to 79 | 73%<br>(58-85%)                | 27%<br>(15-42%)          | 0.84<br>(0.45-1.3)                          | -1.6%<br>(-3.9-0.38%)                | -2.1%<br>(-4.7-0.33%)               | -47<br>(-110-6.9)    | -620<br>(-1500-150)  |
| Tajikistan | 2005 | Male   | 80 to 84 | 71%<br>(55-83%)                | 29%<br>(17-45%)          | 0.75<br>(0.42-1.1)                          | -2.1%<br>(-4.5-0.011%)               | -2.6%<br>(-5.4--0.09%)              | -32<br>(-66--1)      | -310<br>(-660-1.6)   |
| Tajikistan | 2005 | Male   | 85 to 89 | 69%<br>(53-80%)                | 31%<br>(20-47%)          | 0.69<br>(0.4-1.1)                           | -2.4%<br>(-4.6--0.35%)               | -2.9%<br>(-5.6--0.52%)              | -14<br>(-27--2.3)    | -93<br>(-190--15)    |
| Tajikistan | 2005 | Male   | 90 to 94 | 68%<br>(53-80%)                | 32%<br>(20-47%)          | 0.64<br>(0.36-1.1)                          | -2.4%<br>(-4.6--0.5%)                | -3%<br>(-5.7--0.73%)                | -7<br>(-13--1.7)     | -32<br>(-63--6.6)    |
| Tajikistan | 2005 | Male   | 95 plus  | 66%<br>(48-82%)                | 34%<br>(18-52%)          | 0.58<br>(0.26-1)                            | -2.2%<br>(-4.4--0.38%)               | -2.8%<br>(-5.5--0.64%)              | -2.5<br>(-4.9--0.59) | -7.5<br>(-15--1.4)   |
| Tajikistan | 2010 | Female | All Ages | 52%<br>(45-60%)                | 48%<br>(40-55%)          | 0.41<br>(0.32-0.52)                         | 0.38%<br>(-0.16-0.91%)               | -0.86%<br>(-2.5-0.65%)              | -150<br>(-420-110)   | 3800<br>(-1600-9300) |
| Tajikistan | 2010 | Female | 15 to 19 | 52%<br>(40-67%)                | 48%<br>(33-60%)          | 0.38<br>(0.17-0.68)                         | 0.98%<br>(0.55-1.5%)                 | 1.3%<br>(0.31-2.5%)                 | 2.9<br>(0.7-6.1)     | 470<br>(250-800)     |
| Tajikistan | 2010 | Female | 20 to 24 | 61%<br>(48-74%)                | 39%<br>(26-52%)          | 0.55<br>(0.25-0.97)                         | 1.8%<br>(1-2.8%)                     | 1.8%<br>(0.31-3.6%)                 | 5.9<br>(1.1-12)      | 1000<br>(540-1600)   |
| Tajikistan | 2010 | Female | 25 to 29 | 64%<br>(49-76%)                | 36%<br>(24-51%)          | 0.64<br>(0.3-1.1)                           | 2.1%<br>(1.3-3.2%)                   | 2.3%<br>(0.66-4.5%)                 | 7.5<br>(2.1-14)      | 1000<br>(590-1600)   |
| Tajikistan | 2010 | Female | 30 to 34 | 65%<br>(51-77%)                | 35%<br>(23-49%)          | 0.69<br>(0.37-1.2)                          | 2.3%<br>(1.5-3.4%)                   | 3.1%<br>(1.5-5%)                    | 10<br>(5-17)         | 1000<br>(650-1500)   |
| Tajikistan | 2010 | Female | 35 to 39 | 65%<br>(52-79%)                | 35%<br>(21-48%)          | 0.71<br>(0.35-1.3)                          | 2.2%<br>(1.4-3.4%)                   | 3.4%<br>(1.7-5.6%)                  | 13<br>(6.6-22)       | 980<br>(610-1500)    |
| Tajikistan | 2010 | Female | 40 to 44 | 65%<br>(51-79%)                | 35%<br>(21-49%)          | 0.74<br>(0.34-1.3)                          | 2%<br>(1.1-3.3%)                     | 3.3%<br>(1.4-5.8%)                  | 16<br>(6.4-28)       | 940<br>(480-1500)    |
| Tajikistan | 2010 | Female | 45 to 49 | 65%<br>(49-78%)                | 35%<br>(22-51%)          | 0.78<br>(0.36-1.5)                          | 1.5%<br>(0.33-3.3%)                  | 2.3%<br>(0.25-5.3%)                 | 15<br>(1.6-37)       | 780<br>(170-1700)    |
| Tajikistan | 2010 | Female | 50 to 54 | 63%<br>(49-78%)                | 37%<br>(22-51%)          | 0.8<br>(0.37-1.5)                           | 1%<br>(-0.37-3%)                     | 1.4%<br>(-0.8-4.7%)                 | 11<br>(-6.3-35)      | 490<br>(-180-1400)   |
| Tajikistan | 2010 | Female | 55 to 59 | 61%<br>(48-76%)                | 39%<br>(24-52%)          | 0.81<br>(0.33-1.6)                          | 0.27%<br>(-1.6-2.6%)                 | 0.34%<br>(-2.3-3.6%)                | 2.8<br>(-19-30)      | 110<br>(-580-1000)   |
| Tajikistan | 2010 | Female | 60 to 64 | 60%<br>(46-75%)                | 40%<br>(25-54%)          | 0.78<br>(0.31-1.6)                          | -0.72%<br>(-2.8-2.1%)                | -1%<br>(-3.9-2.7%)                  | -8.3<br>(-32-23)     | -230<br>(-870-630)   |
| Tajikistan | 2010 | Female | 65 to 69 | 58%<br>(45-73%)                | 42%<br>(27-55%)          | 0.72<br>(0.33-1.4)                          | -1.5%<br>(-3.7-0.67%)                | -1.9%<br>(-4.8-0.89%)               | -16<br>(-41-8)       | -380<br>(-930-170)   |
| Tajikistan | 2010 | Female | 70 to 74 | 56%<br>(43-69%)                | 44%<br>(31-57%)          | 0.64<br>(0.25-1.3)                          | -1.9%<br>(-4.1-0.47%)                | -2.3%<br>(-5.2-0.63%)               | -39<br>(-89-10)      | -730<br>(-1600-170)  |
| Tajikistan | 2010 | Female | 75 to 79 | 52%<br>(40-66%)                | 48%<br>(34-60%)          | 0.6<br>(0.22-1.2)                           | -2.3%<br>(-4.5--0.25%)               | -2.8%<br>(-5.6--0.28%)              | -49<br>(-98--5.2)    | -690<br>(-1400--82)  |
| Tajikistan | 2010 | Female | 80 to 84 | 50%<br>(37-64%)                | 50%<br>(36-63%)          | 0.61<br>(0.24-1.2)                          | -2.6%<br>(-5.1--0.53%)               | -3.2%<br>(-6.3--0.63%)              | -51<br>(-98--10)     | -520<br>(-1000--110) |
| Tajikistan | 2010 | Female | 85 to 89 | 50%<br>(37-62%)                | 50%<br>(38-63%)          | 0.65<br>(0.25-1.3)                          | -2.8%<br>(-5.2--0.55%)               | -3.4%<br>(-6.3--0.71%)              | -47<br>(-86--9.3)    | -340<br>(-620--65)   |



| Location   | Year | Sex    | Age      | Prevalence of current drinkers | Prevalence of abstainers | Population average of standard drinks daily | Percent of total attributable deaths | Percent of total attributable DALYs | Attributable deaths  | Attributable DALYs     |
|------------|------|--------|----------|--------------------------------|--------------------------|---------------------------------------------|--------------------------------------|-------------------------------------|----------------------|------------------------|
| Tajikistan | 2010 | Female | 90 to 94 | 51%<br>(38-63%)                | 49%<br>(37-62%)          | 0.7<br>(0.24-1.6)                           | -2.7%<br>(-5-0.041%)                 | -3.4%<br>(-6.2--0.056%)             | -20<br>(-36--0.35)   | -97<br>(-180-1.5)      |
| Tajikistan | 2010 | Female | 95 plus  | 51%<br>(38-66%)                | 49%<br>(34-62%)          | 0.73<br>(0.19-1.9)                          | -2.4%<br>(-4.8-1%)                   | -3%<br>(-5.9-0.95%)                 | -7.1<br>(-14-2.3)    | -23<br>(-45-9.9)       |
| Tajikistan | 2010 | Male   | All Ages | 64%<br>(55-73%)                | 36%<br>(27-45%)          | 0.66<br>(0.55-0.77)                         | 1.9%<br>(1.2-2.7%)                   | 0.77%<br>(-0.79-2.2%)               | 180<br>(-180-500)    | 25000<br>(15000-35000) |
| Tajikistan | 2010 | Male   | 15 to 19 | 56%<br>(40-71%)                | 44%<br>(29-60%)          | 0.32<br>(0.18-0.5)                          | 2.2%<br>(1.5-3%)                     | 1.9%<br>(0.99-3.1%)                 | 7.5<br>(3.8-12)      | 1200<br>(820-1800)     |
| Tajikistan | 2010 | Male   | 20 to 24 | 73%<br>(58-85%)                | 27%<br>(15-42%)          | 0.72<br>(0.48-0.99)                         | 4.9%<br>(3.4-6.6%)                   | 4.4%<br>(2.2-6.6%)                  | 26<br>(13-40)        | 3400<br>(2300-4800)    |
| Tajikistan | 2010 | Male   | 25 to 29 | 80%<br>(69-89%)                | 20%<br>(11-31%)          | 1.2<br>(0.78-1.6)                           | 6.7%<br>(5-8.5%)                     | 6.7%<br>(4.2-9.3%)                  | 41<br>(24-58)        | 4200<br>(3000-5600)    |
| Tajikistan | 2010 | Male   | 30 to 34 | 85%<br>(73-92%)                | 15%<br>(7.7-27%)         | 1.4<br>(0.98-1.9)                           | 7.3%<br>(5.6-9.4%)                   | 7.9%<br>(5.1-11%)                   | 48<br>(31-69)        | 4100<br>(3000-5500)    |
| Tajikistan | 2010 | Male   | 35 to 39 | 86%<br>(76-93%)                | 14%<br>(7.4-24%)         | 1.4<br>(0.9-2)                              | 6.7%<br>(4.9-8.7%)                   | 7.4%<br>(4.6-10%)                   | 50<br>(31-72)        | 3700<br>(2500-4900)    |
| Tajikistan | 2010 | Male   | 40 to 44 | 86%<br>(76-93%)                | 14%<br>(7-24%)           | 1.4<br>(0.92-2)                             | 5.7%<br>(3.7-7.7%)                   | 6.4%<br>(3.4-9.6%)                  | 49<br>(25-74)        | 3200<br>(2000-4500)    |
| Tajikistan | 2010 | Male   | 45 to 49 | 85%<br>(73-93%)                | 15%<br>(7.4-27%)         | 1.5<br>(0.95-2.2)                           | 4.8%<br>(2.7-7.1%)                   | 5.2%<br>(1.9-8.5%)                  | 52<br>(19-85)        | 2900<br>(1600-4500)    |
| Tajikistan | 2010 | Male   | 50 to 54 | 85%<br>(72-92%)                | 15%<br>(8.1-28%)         | 1.5<br>(0.87-2.2)                           | 3.5%<br>(1.2-6%)                     | 3.6%<br>(0.24-6.8%)                 | 45<br>(3.2-87)       | 2200<br>(730-3800)     |
| Tajikistan | 2010 | Male   | 55 to 59 | 83%<br>(71-91%)                | 17%<br>(8.5-29%)         | 1.3<br>(0.78-2)                             | 2.2%<br>(-0.13-4.4%)                 | 2.1%<br>(-0.95-5%)                  | 25<br>(-12-60)       | 1100<br>(-66-2200)     |
| Tajikistan | 2010 | Male   | 60 to 64 | 81%<br>(68-91%)                | 19%<br>(9.3-32%)         | 1.1<br>(0.64-1.8)                           | 0.71%<br>(-1.5-2.9%)                 | 0.42%<br>(-2.4-3.3%)                | 5.2<br>(-29-41)      | 300<br>(-630-1300)     |
| Tajikistan | 2010 | Male   | 65 to 69 | 79%<br>(65-89%)                | 21%<br>(11-35%)          | 1<br>(0.62-1.5)                             | -0.26%<br>(-2.5-1.9%)                | -0.59%<br>(-3.4-2.1%)               | -7.7<br>(-44-26)     | -91<br>(-890-660)      |
| Tajikistan | 2010 | Male   | 70 to 74 | 76%<br>(63-86%)                | 24%<br>(14-37%)          | 0.86<br>(0.5-1.3)                           | -1.2%<br>(-3.5-0.99%)                | -1.6%<br>(-4.3-1.1%)                | -35<br>(-100-24)     | -570<br>(-1700-490)    |
| Tajikistan | 2010 | Male   | 75 to 79 | 73%<br>(58-85%)                | 27%<br>(15-42%)          | 0.73<br>(0.39-1.2)                          | -1.7%<br>(-4-0.29%)                  | -2.2%<br>(-4.8-0.18%)               | -43<br>(-99-3.7)     | -560<br>(-1300-95)     |
| Tajikistan | 2010 | Male   | 80 to 84 | 71%<br>(54-83%)                | 29%<br>(17-46%)          | 0.66<br>(0.37-1)                            | -2.2%<br>(-4.4--0.062%)              | -2.7%<br>(-5.4--0.19%)              | -44<br>(-89--3)      | -430<br>(-890--12)     |
| Tajikistan | 2010 | Male   | 85 to 89 | 69%<br>(53-80%)                | 31%<br>(20-47%)          | 0.6<br>(0.35-0.94)                          | -2.4%<br>(-4.7--0.39%)               | -2.9%<br>(-5.6--0.55%)              | -30<br>(-59--5.8)    | -210<br>(-410--34)     |
| Tajikistan | 2010 | Male   | 90 to 94 | 67%<br>(53-80%)                | 33%<br>(20-47%)          | 0.56<br>(0.3-0.93)                          | -2.4%<br>(-4.7--0.49%)               | -3%<br>(-5.7--0.7%)                 | -8.4<br>(-16--1.9)   | -40<br>(-77--7.8)      |
| Tajikistan | 2010 | Male   | 95 plus  | 66%<br>(47-82%)                | 34%<br>(18-53%)          | 0.5<br>(0.22-0.91)                          | -2.1%<br>(-4.5--0.33%)               | -2.7%<br>(-5.5--0.59%)              | -2.3<br>(-4.6--0.49) | -6.9<br>(-14--1)       |
| Tajikistan | 2016 | Female | All Ages | 52%<br>(46-60%)                | 48%<br>(40-54%)          | 0.4<br>(0.29-0.54)                          | 0.4%<br>(-0.14-0.92%)                | -0.74%<br>(-2.3-0.63%)              | -130<br>(-380-110)   | 4300<br>(-1400-9800)   |
| Tajikistan | 2016 | Female | 15 to 19 | 52%<br>(39-67%)                | 48%<br>(33-61%)          | 0.36<br>(0.14-0.65)                         | 0.97%<br>(0.53-1.6%)                 | 1.2%<br>(0.34-2.5%)                 | 2.5<br>(0.68-5.4)    | 440<br>(230-730)       |

| Location   | Year | Sex    | Age      | Prevalence of current drinkers | Prevalence of abstainers | Population average of standard drinks daily | Percent of total attributable deaths | Percent of total attributable DALYs | Attributable deaths | Attributable DALYs     |
|------------|------|--------|----------|--------------------------------|--------------------------|---------------------------------------------|--------------------------------------|-------------------------------------|---------------------|------------------------|
| Tajikistan | 2016 | Female | 20 to 24 | 61%<br>(48-74%)                | 39%<br>(26-52%)          | 0.52<br>(0.23-0.95)                         | 1.8%<br>(1.1-2.7%)                   | 1.7%<br>(0.47-3.4%)                 | 4.8<br>(1.2-9.4)    | 940<br>(520-1400)      |
| Tajikistan | 2016 | Female | 25 to 29 | 64%<br>(50-77%)                | 36%<br>(23-50%)          | 0.6<br>(0.28-1.1)                           | 2.1%<br>(1.4-3%)                     | 2.2%<br>(0.78-4.1%)                 | 7.9<br>(2.9-15)     | 1200<br>(760-1800)     |
| Tajikistan | 2016 | Female | 30 to 34 | 65%<br>(50-78%)                | 35%<br>(22-50%)          | 0.65<br>(0.33-1.1)                          | 2.2%<br>(1.6-3.2%)                   | 3%<br>(1.6-4.8%)                    | 11<br>(5.4-18)      | 1200<br>(770-1700)     |
| Tajikistan | 2016 | Female | 35 to 39 | 65%<br>(52-79%)                | 35%<br>(21-48%)          | 0.67<br>(0.33-1.2)                          | 2.2%<br>(1.4-3.2%)                   | 3.4%<br>(1.8-5.3%)                  | 12<br>(6.4-20)      | 980<br>(610-1400)      |
| Tajikistan | 2016 | Female | 40 to 44 | 65%<br>(52-79%)                | 35%<br>(21-48%)          | 0.7<br>(0.31-1.3)                           | 2%<br>(1.1-3.1%)                     | 3.2%<br>(1.5-5.6%)                  | 15<br>(7.2-27)      | 930<br>(510-1500)      |
| Tajikistan | 2016 | Female | 45 to 49 | 65%<br>(49-78%)                | 35%<br>(22-51%)          | 0.73<br>(0.33-1.4)                          | 1.4%<br>(0.35-2.9%)                  | 2.2%<br>(0.27-4.9%)                 | 14<br>(1.7-31)      | 730<br>(180-1500)      |
| Tajikistan | 2016 | Female | 50 to 54 | 63%<br>(49-77%)                | 37%<br>(23-51%)          | 0.74<br>(0.32-1.4)                          | 0.88%<br>(-0.37-2.6%)                | 1.3%<br>(-0.87-4.1%)                | 12<br>(-8.3-38)     | 540<br>(-240-1500)     |
| Tajikistan | 2016 | Female | 55 to 59 | 62%<br>(48-75%)                | 38%<br>(25-52%)          | 0.75<br>(0.31-1.4)                          | 0.12%<br>(-1.5-1.9%)                 | 0.13%<br>(-2.3-2.8%)                | 1.4<br>(-27-33)     | 67<br>(-860-1100)      |
| Tajikistan | 2016 | Female | 60 to 64 | 60%<br>(46-74%)                | 40%<br>(26-54%)          | 0.73<br>(0.29-1.5)                          | -0.79%<br>(-2.7-1.5%)                | -1.1%<br>(-3.8-2%)                  | -14<br>(-45-23)     | -380<br>(-1300-720)    |
| Tajikistan | 2016 | Female | 65 to 69 | 58%<br>(46-73%)                | 42%<br>(27-54%)          | 0.68<br>(0.3-1.3)                           | -1.4%<br>(-3.5-0.49%)                | -1.9%<br>(-4.7-0.72%)               | -18<br>(-45-6.9)    | -430<br>(-1000-140)    |
| Tajikistan | 2016 | Female | 70 to 74 | 55%<br>(43-69%)                | 45%<br>(31-57%)          | 0.61<br>(0.23-1.2)                          | -1.7%<br>(-3.9-0.32%)                | -2.2%<br>(-5-0.41%)                 | -22<br>(-50-3.9)    | -420<br>(-930-78)      |
| Tajikistan | 2016 | Female | 75 to 79 | 52%<br>(40-66%)                | 48%<br>(34-60%)          | 0.57<br>(0.21-1.2)                          | -2.1%<br>(-4.2--0.23%)               | -2.6%<br>(-5.4--0.25%)              | -39<br>(-80--3.5)   | -570<br>(-1100--61)    |
| Tajikistan | 2016 | Female | 80 to 84 | 50%<br>(37-65%)                | 50%<br>(35-63%)          | 0.58<br>(0.23-1.2)                          | -2.5%<br>(-4.9--0.54%)               | -3.2%<br>(-6.1--0.64%)              | -46<br>(-88--9.7)   | -480<br>(-920--100)    |
| Tajikistan | 2016 | Female | 85 to 89 | 50%<br>(37-62%)                | 50%<br>(38-63%)          | 0.61<br>(0.24-1.3)                          | -2.8%<br>(-5--0.7%)                  | -3.4%<br>(-6.2--0.88%)              | -40<br>(-72--10)    | -290<br>(-520--73)     |
| Tajikistan | 2016 | Female | 90 to 94 | 51%<br>(39-63%)                | 49%<br>(37-61%)          | 0.66<br>(0.22-1.5)                          | -2.8%<br>(-5--0.4%)                  | -3.4%<br>(-6.2--0.61%)              | -25<br>(-44--4.3)   | -120<br>(-220--18)     |
| Tajikistan | 2016 | Female | 95 plus  | 51%<br>(38-66%)                | 49%<br>(34-62%)          | 0.69<br>(0.18-1.7)                          | -2.5%<br>(-4.9-0.38%)                | -3.2%<br>(-6-0.26%)                 | -7.1<br>(-13-0.6)   | -23<br>(-43-3.5)       |
| Tajikistan | 2016 | Male   | All Ages | 65%<br>(57-73%)                | 35%<br>(27-43%)          | 0.65<br>(0.5-0.82)                          | 2.1%<br>(1.2-3%)                     | 0.95%<br>(-0.56-2.5%)               | 230<br>(-150-590)   | 29000<br>(18000-41000) |
| Tajikistan | 2016 | Male   | 15 to 19 | 56%<br>(40-72%)                | 44%<br>(28-60%)          | 0.3<br>(0.16-0.49)                          | 2.2%<br>(1.5-3.1%)                   | 1.9%<br>(0.99-3.1%)                 | 7.4<br>(3.8-12)     | 1300<br>(810-1800)     |
| Tajikistan | 2016 | Male   | 20 to 24 | 73%<br>(56-85%)                | 27%<br>(15-44%)          | 0.67<br>(0.42-0.99)                         | 5.1%<br>(3.5-6.8%)                   | 4.4%<br>(2.2-6.6%)                  | 26<br>(13-42)       | 3500<br>(2300-5000)    |
| Tajikistan | 2016 | Male   | 25 to 29 | 80%<br>(69-89%)                | 20%<br>(11-31%)          | 1.1<br>(0.7-1.6)                            | 6.7%<br>(5.1-8.7%)                   | 6.5%<br>(4.1-9.5%)                  | 50<br>(30-75)       | 5400<br>(3800-7300)    |
| Tajikistan | 2016 | Male   | 30 to 34 | 85%<br>(73-92%)                | 15%<br>(8-27%)           | 1.3<br>(0.89-1.8)                           | 7.3%<br>(5.5-9.4%)                   | 7.7%<br>(5-11%)                     | 57<br>(35-85)       | 5100<br>(3700-6800)    |
| Tajikistan | 2016 | Male   | 35 to 39 | 86%<br>(76-93%)                | 14%<br>(7.3-24%)         | 1.3<br>(0.81-1.9)                           | 6.7%<br>(4.8-8.8%)                   | 7.3%<br>(4.4-11%)                   | 51<br>(30-76)       | 4000<br>(2700-5400)    |

| Location     | Year | Sex    | Age      | Prevalence of current drinkers | Prevalence of abstainers | Population average of standard drinks daily | Percent of total attributable deaths | Percent of total attributable DALYs | Attributable deaths  | Attributable DALYs   |
|--------------|------|--------|----------|--------------------------------|--------------------------|---------------------------------------------|--------------------------------------|-------------------------------------|----------------------|----------------------|
| Tajikistan   | 2016 | Male   | 40 to 44 | 86%<br>(76-93%)                | 14%<br>(7-24%)           | 1.3<br>(0.82-2)                             | 5.6%<br>(3.6-7.8%)                   | 6.2%<br>(3.3-9.5%)                  | 50<br>(26-76)        | 3300<br>(2100-4700)  |
| Tajikistan   | 2016 | Male   | 45 to 49 | 85%<br>(72-93%)                | 15%<br>(7.5-28%)         | 1.4<br>(0.87-2.1)                           | 4.7%<br>(2.4-6.9%)                   | 5%<br>(1.7-8.3%)                    | 50<br>(16-88)        | 2900<br>(1500-4500)  |
| Tajikistan   | 2016 | Male   | 50 to 54 | 84%<br>(72-92%)                | 16%<br>(8.1-28%)         | 1.4<br>(0.82-2.1)                           | 3.5%<br>(1.3-5.9%)                   | 3.6%<br>(0.6-6.9%)                  | 51<br>(8-100)        | 2700<br>(1000-4500)  |
| Tajikistan   | 2016 | Male   | 55 to 59 | 83%<br>(71-91%)                | 17%<br>(8.6-29%)         | 1.2<br>(0.71-1.9)                           | 2.2%<br>(0.081-4.3%)                 | 2.1%<br>(-0.8-5.1%)                 | 33<br>(-13-83)       | 1500<br>(54-3100)    |
| Tajikistan   | 2016 | Male   | 60 to 64 | 81%<br>(67-91%)                | 19%<br>(9.4-33%)         | 1.1<br>(0.58-1.7)                           | 0.8%<br>(-1.3-2.9%)                  | 0.51%<br>(-2.2-3.3%)                | 8.4<br>(-36-55)      | 470<br>(-750-1800)   |
| Tajikistan   | 2016 | Male   | 65 to 69 | 79%<br>(64-90%)                | 21%<br>(10-36%)          | 0.93<br>(0.54-1.4)                          | -0.13%<br>(-2.3-1.9%)                | -0.49%<br>(-3.3-2.1%)               | -6<br>(-40-25)       | -46<br>(-810-660)    |
| Tajikistan   | 2016 | Male   | 70 to 74 | 76%<br>(62-87%)                | 24%<br>(13-38%)          | 0.8<br>(0.44-1.3)                           | -0.94%<br>(-3.2-1%)                  | -1.4%<br>(-4.1-1.1%)                | -20<br>(-62-16)      | -310<br>(-1000-330)  |
| Tajikistan   | 2016 | Male   | 75 to 79 | 73%<br>(57-84%)                | 27%<br>(16-43%)          | 0.68<br>(0.35-1.1)                          | -1.5%<br>(-3.6-0.35%)                | -2%<br>(-4.6-0.33%)                 | -35<br>(-85-5.7)     | -460<br>(-1200-120)  |
| Tajikistan   | 2016 | Male   | 80 to 84 | 70%<br>(53-82%)                | 30%<br>(18-47%)          | 0.61<br>(0.32-0.98)                         | -2%<br>(-4.2--0.013%)                | -2.5%<br>(-5.3--0.083%)             | -43<br>(-93--1.5)    | -420<br>(-920--3.1)  |
| Tajikistan   | 2016 | Male   | 85 to 89 | 68%<br>(52-80%)                | 32%<br>(20-48%)          | 0.56<br>(0.31-0.89)                         | -2.2%<br>(-4.4--0.27%)               | -2.8%<br>(-5.5--0.47%)              | -34<br>(-67--5.7)    | -230<br>(-470--28)   |
| Tajikistan   | 2016 | Male   | 90 to 94 | 67%<br>(52-80%)                | 33%<br>(20-48%)          | 0.52<br>(0.28-0.85)                         | -2.2%<br>(-4.4--0.36%)               | -2.8%<br>(-5.5--0.56%)              | -17<br>(-33--3.4)    | -78<br>(-160--13)    |
| Tajikistan   | 2016 | Male   | 95 plus  | 66%<br>(47-82%)                | 34%<br>(18-53%)          | 0.47<br>(0.21-0.86)                         | -1.9%<br>(-4.1--0.24%)               | -2.6%<br>(-5.2--0.5%)               | -2.2<br>(-4.5--0.41) | -6.4<br>(-14--0.75)  |
| Turkmenistan | 1990 | Female | All Ages | 51%<br>(44-59%)                | 49%<br>(41-56%)          | 0.69<br>(0.48-0.95)                         | 1%<br>(0.24-2%)                      | 1%<br>(-1.1-4.1%)                   | 150<br>(-160-580)    | 8500<br>(2000-17000) |
| Turkmenistan | 1990 | Female | 15 to 19 | 53%<br>(39-68%)                | 47%<br>(32-61%)          | 0.68<br>(0.27-1.3)                          | 1.8%<br>(0.93-3.1%)                  | 2.9%<br>(1.2-5.7%)                  | 4.4<br>(1.7-8.4)     | 450<br>(220-780)     |
| Turkmenistan | 1990 | Female | 20 to 24 | 61%<br>(48-74%)                | 39%<br>(26-52%)          | 0.99<br>(0.4-1.8)                           | 2.9%<br>(1.5-4.8%)                   | 3.8%<br>(1.3-7.4%)                  | 7.6<br>(2.6-15)      | 770<br>(390-1300)    |
| Turkmenistan | 1990 | Female | 25 to 29 | 64%<br>(49-77%)                | 36%<br>(23-51%)          | 1.1<br>(0.51-2.1)                           | 3.4%<br>(2-5.5%)                     | 4.5%<br>(2.1-8.1%)                  | 11<br>(5.2-20)       | 1000<br>(590-1600)   |
| Turkmenistan | 1990 | Female | 30 to 34 | 65%<br>(51-78%)                | 35%<br>(22-49%)          | 1.2<br>(0.62-2.2)                           | 3.7%<br>(2.3-5.6%)                   | 5.3%<br>(2.7-8.9%)                  | 13<br>(6.7-23)       | 1000<br>(600-1600)   |
| Turkmenistan | 1990 | Female | 35 to 39 | 65%<br>(51-79%)                | 35%<br>(21-49%)          | 1.3<br>(0.6-2.4)                            | 3.8%<br>(2.2-6.1%)                   | 5.7%<br>(2.9-10%)                   | 13<br>(6.6-24)       | 860<br>(500-1400)    |
| Turkmenistan | 1990 | Female | 40 to 44 | 65%<br>(51-78%)                | 35%<br>(22-49%)          | 1.3<br>(0.59-2.4)                           | 3.8%<br>(1.9-6.8%)                   | 5.9%<br>(2.5-11%)                   | 13<br>(5.3-24)       | 680<br>(330-1200)    |
| Turkmenistan | 1990 | Female | 45 to 49 | 65%<br>(50-78%)                | 35%<br>(22-50%)          | 1.4<br>(0.61-2.8)                           | 3.7%<br>(1.1-8.3%)                   | 5.4%<br>(1.2-13%)                   | 12<br>(2.7-28)       | 540<br>(150-1200)    |
| Turkmenistan | 1990 | Female | 50 to 54 | 64%<br>(49-77%)                | 36%<br>(23-51%)          | 1.4<br>(0.62-2.8)                           | 4%<br>(0.73-9.8%)                    | 5.7%<br>(0.94-14%)                  | 27<br>(4.4-65)       | 1000<br>(200-2500)   |
| Turkmenistan | 1990 | Female | 55 to 59 | 62%<br>(47-75%)                | 38%<br>(25-53%)          | 1.4<br>(0.6-2.9)                            | 3.7%<br>(-0.033-10%)                 | 4.9%<br>(-0.22-14%)                 | 29<br>(-1.3-80)      | 950<br>(-8.4-2600)   |

| Location     | Year | Sex    | Age      | Prevalence of current drinkers | Prevalence of abstainers | Population average of standard drinks daily | Percent of total attributable deaths | Percent of total attributable DALYs | Attributable deaths | Attributable DALYs     |
|--------------|------|--------|----------|--------------------------------|--------------------------|---------------------------------------------|--------------------------------------|-------------------------------------|---------------------|------------------------|
| Turkmenistan | 1990 | Female | 60 to 64 | 60%<br>(45-75%)                | 40%<br>(25-55%)          | 1.4<br>(0.55-3)                             | 2.7%<br>(-1.3-9.9%)                  | 3.4%<br>(-1.6-13%)                  | 31<br>(-15-120)     | 870<br>(-400-3200)     |
| Turkmenistan | 1990 | Female | 65 to 69 | 58%<br>(45-73%)                | 42%<br>(27-55%)          | 1.3<br>(0.55-2.6)                           | 1.6%<br>(-2.2-7.8%)                  | 2%<br>(-2.9-9.8%)                   | 20<br>(-27-95)      | 450<br>(-620-2200)     |
| Turkmenistan | 1990 | Female | 70 to 74 | 55%<br>(42-69%)                | 45%<br>(31-58%)          | 1.2<br>(0.43-2.3)                           | 0.67%<br>(-2.9-6.2%)                 | 0.81%<br>(-3.7-7.8%)                | 8<br>(-37-77)       | 150<br>(-660-1400)     |
| Turkmenistan | 1990 | Female | 75 to 79 | 52%<br>(40-66%)                | 48%<br>(34-60%)          | 1.1<br>(0.39-2.2)                           | -0.25%<br>(-3.7-5.2%)                | -0.38%<br>(-4.6-6.2%)               | -4.5<br>(-55-74)    | -52<br>(-760-1000)     |
| Turkmenistan | 1990 | Female | 80 to 84 | 50%<br>(37-64%)                | 50%<br>(36-63%)          | 1.1<br>(0.42-2.3)                           | -1.1%<br>(-4.6-4.2%)                 | -1.5%<br>(-5.8-4.7%)                | -15<br>(-59-49)     | -140<br>(-590-540)     |
| Turkmenistan | 1990 | Female | 85 to 89 | 49%<br>(37-62%)                | 51%<br>(38-63%)          | 1.2<br>(0.45-2.4)                           | -1.4%<br>(-4.9-4.2%)                 | -1.8%<br>(-6.1-4.8%)                | -13<br>(-46-37)     | -91<br>(-320-280)      |
| Turkmenistan | 1990 | Female | 90 to 94 | 50%<br>(39-63%)                | 50%<br>(37-61%)          | 1.2<br>(0.41-2.9)                           | -1.4%<br>(-5-5.3%)                   | -1.9%<br>(-6.3-6.3%)                | -6<br>(-20-20)      | -27<br>(-98-110)       |
| Turkmenistan | 1990 | Female | 95 plus  | 51%<br>(38-66%)                | 49%<br>(34-62%)          | 1.3<br>(0.34-3.2)                           | -1.2%<br>(-5.1-6.6%)                 | -1.6%<br>(-6.3-7.6%)                | -1.5<br>(-5.8-7)    | -4.3<br>(-19-24)       |
| Turkmenistan | 1990 | Male   | All Ages | 61%<br>(53-70%)                | 39%<br>(30-47%)          | 1.1<br>(0.77-1.4)                           | 2.5%<br>(1.5-3.6%)                   | 2.7%<br>(0.74-4.7%)                 | 430<br>(120-770)    | 25000<br>(15000-36000) |
| Turkmenistan | 1990 | Male   | 15 to 19 | 56%<br>(40-71%)                | 44%<br>(29-60%)          | 0.57<br>(0.29-0.98)                         | 3.3%<br>(2.1-4.9%)                   | 3.7%<br>(1.9-6.2%)                  | 8.9<br>(4.4-15)     | 970<br>(610-1400)      |
| Turkmenistan | 1990 | Male   | 20 to 24 | 73%<br>(57-85%)                | 27%<br>(15-43%)          | 1.3<br>(0.76-2)                             | 7.8%<br>(5.4-10%)                    | 8.4%<br>(5-12%)                     | 27<br>(16-40)       | 2600<br>(1800-3500)    |
| Turkmenistan | 1990 | Male   | 25 to 29 | 80%<br>(68-89%)                | 20%<br>(11-32%)          | 2<br>(1.3-3.1)                              | 10%<br>(7-13%)                       | 11%<br>(7.2-16%)                    | 43<br>(28-61)       | 3500<br>(2400-4700)    |
| Turkmenistan | 1990 | Male   | 30 to 34 | 84%<br>(73-92%)                | 16%<br>(7.9-27%)         | 2.5<br>(1.6-3.6)                            | 9.8%<br>(6.9-13%)                    | 11%<br>(7.4-16%)                    | 47<br>(30-66)       | 3400<br>(2400-4600)    |
| Turkmenistan | 1990 | Male   | 35 to 39 | 86%<br>(76-93%)                | 14%<br>(7.4-24%)         | 2.5<br>(1.4-3.8)                            | 9.4%<br>(6.2-13%)                    | 11%<br>(6.4-16%)                    | 46<br>(27-70)       | 2900<br>(1900-4200)    |
| Turkmenistan | 1990 | Male   | 40 to 44 | 86%<br>(76-93%)                | 14%<br>(7.1-24%)         | 2.5<br>(1.5-3.9)                            | 8.9%<br>(5.3-13%)                    | 10%<br>(5.2-16%)                    | 41<br>(21-65)       | 2200<br>(1300-3400)    |
| Turkmenistan | 1990 | Male   | 45 to 49 | 85%<br>(73-93%)                | 15%<br>(7.4-27%)         | 2.7<br>(1.5-4.2)                            | 8.6%<br>(4.2-14%)                    | 9.5%<br>(4.1-16%)                   | 42<br>(17-71)       | 2000<br>(980-3200)     |
| Turkmenistan | 1990 | Male   | 50 to 54 | 84%<br>(73-92%)                | 16%<br>(8.1-27%)         | 2.6<br>(1.5-4.2)                            | 7.7%<br>(3-13%)                      | 8.5%<br>(2.7-15%)                   | 73<br>(23-130)      | 3000<br>(1200-5100)    |
| Turkmenistan | 1990 | Male   | 55 to 59 | 83%<br>(70-91%)                | 17%<br>(8.8-30%)         | 2.3<br>(1.4-3.6)                            | 6%<br>(1.8-11%)                      | 6.6%<br>(1.5-13%)                   | 64<br>(14-130)      | 2200<br>(640-4300)     |
| Turkmenistan | 1990 | Male   | 60 to 64 | 81%<br>(67-91%)                | 19%<br>(9.4-33%)         | 2<br>(1.1-3.3)                              | 4.2%<br>(0.055-9.4%)                 | 4.5%<br>(-0.3-11%)                  | 58<br>(-3.9-140)    | 1700<br>(22-3900)      |
| Turkmenistan | 1990 | Male   | 65 to 69 | 79%<br>(64-89%)                | 21%<br>(11-36%)          | 1.8<br>(1-2.8)                              | 2.5%<br>(-1.2-6.6%)                  | 2.6%<br>(-1.7-7.3%)                 | 24<br>(-16-68)      | 600<br>(-300-1600)     |
| Turkmenistan | 1990 | Male   | 70 to 74 | 76%<br>(62-86%)                | 24%<br>(14-38%)          | 1.5<br>(0.83-2.4)                           | 0.86%<br>(-2.4-4.6%)                 | 0.78%<br>(-3-5.1%)                  | 5.8<br>(-23-38)     | 130<br>(-370-710)      |
| Turkmenistan | 1990 | Male   | 75 to 79 | 73%<br>(57-85%)                | 27%<br>(15-43%)          | 1.3<br>(0.65-2.2)                           | -0.74%<br>(-3.7-2.4%)                | -1.1%<br>(-4.5-2.7%)                | -9.2<br>(-39-23)    | -100<br>(-520-350)     |

| Location     | Year | Sex    | Age      | Prevalence of current drinkers | Prevalence of abstainers | Population average of standard drinks daily | Percent of total attributable deaths | Percent of total attributable DALYs | Attributable deaths  | Attributable DALYs    |
|--------------|------|--------|----------|--------------------------------|--------------------------|---------------------------------------------|--------------------------------------|-------------------------------------|----------------------|-----------------------|
| Turkmenistan | 1990 | Male   | 80 to 84 | 70%<br>(54-83%)                | 30%<br>(17-46%)          | 1.2<br>(0.64-1.9)                           | -1.8%<br>(-4.6-0.93%)                | -2.4%<br>(-5.6-0.91%)               | -15<br>(-36-5.7)     | -140<br>(-350-74)     |
| Turkmenistan | 1990 | Male   | 85 to 89 | 68%<br>(53-81%)                | 32%<br>(19-47%)          | 1.1<br>(0.57-1.7)                           | -2.4%<br>(-5.1-0.0088%)              | -3.2%<br>(-6.3--0.2%)               | -13<br>(-26--0.82)   | -88<br>(-180-0.31)    |
| Turkmenistan | 1990 | Male   | 90 to 94 | 67%<br>(52-81%)                | 33%<br>(19-48%)          | 0.99<br>(0.51-1.7)                          | -2.7%<br>(-5.2--0.26%)               | -3.5%<br>(-6.6--0.51%)              | -5.8<br>(-11--0.85)  | -26<br>(-51--2.6)     |
| Turkmenistan | 1990 | Male   | 95 plus  | 66%<br>(46-82%)                | 34%<br>(18-54%)          | 0.9<br>(0.39-1.7)                           | -2.6%<br>(-5.2--0.3%)                | -3.5%<br>(-6.7--0.62%)              | -1.4<br>(-2.7--0.25) | -4.1<br>(-8.3--0.48)  |
| Turkmenistan | 1995 | Female | All Ages | 51%<br>(45-59%)                | 49%<br>(41-55%)          | 0.84<br>(0.6-1.1)                           | 1.4%<br>(0.36-2.8%)                  | 1.7%<br>(-1.1-5.5%)                 | 260<br>(-170-850)    | 12000<br>(3200-24000) |
| Turkmenistan | 1995 | Female | 15 to 19 | 52%<br>(40-67%)                | 48%<br>(33-60%)          | 0.81<br>(0.34-1.5)                          | 2.1%<br>(1-3.6%)                     | 3.3%<br>(1.2-6.4%)                  | 6.2<br>(2.3-12)      | 600<br>(290-1100)     |
| Turkmenistan | 1995 | Female | 20 to 24 | 61%<br>(48-73%)                | 39%<br>(27-52%)          | 1.2<br>(0.51-2.2)                           | 3.4%<br>(1.6-5.8%)                   | 4.6%<br>(1.6-8.8%)                  | 11<br>(3.8-22)       | 1100<br>(490-1900)    |
| Turkmenistan | 1995 | Female | 25 to 29 | 64%<br>(50-76%)                | 36%<br>(24-50%)          | 1.4<br>(0.62-2.5)                           | 3.9%<br>(2.1-6.2%)                   | 5.2%<br>(2.3-9.4%)                  | 14<br>(6.2-26)       | 1200<br>(650-2000)    |
| Turkmenistan | 1995 | Female | 30 to 34 | 65%<br>(50-79%)                | 35%<br>(21-50%)          | 1.5<br>(0.75-2.6)                           | 4.1%<br>(2.4-6.7%)                   | 5.9%<br>(2.8-10%)                   | 19<br>(9.1-33)       | 1400<br>(790-2300)    |
| Turkmenistan | 1995 | Female | 35 to 39 | 65%<br>(52-80%)                | 35%<br>(20-48%)          | 1.5<br>(0.73-2.7)                           | 4.2%<br>(2.3-7%)                     | 6.5%<br>(3-11%)                     | 21<br>(9.9-37)       | 1300<br>(710-2200)    |
| Turkmenistan | 1995 | Female | 40 to 44 | 65%<br>(51-79%)                | 35%<br>(21-49%)          | 1.6<br>(0.71-2.8)                           | 4.4%<br>(2-7.8%)                     | 6.9%<br>(2.8-13%)                   | 23<br>(9.1-42)       | 1200<br>(530-2100)    |
| Turkmenistan | 1995 | Female | 45 to 49 | 65%<br>(49-79%)                | 35%<br>(21-51%)          | 1.7<br>(0.72-3.2)                           | 4.2%<br>(0.97-9.4%)                  | 6.3%<br>(1.1-14%)                   | 20<br>(3.7-46)       | 920<br>(220-2000)     |
| Turkmenistan | 1995 | Female | 50 to 54 | 63%<br>(48-77%)                | 37%<br>(23-52%)          | 1.7<br>(0.76-3.3)                           | 4.6%<br>(0.53-12%)                   | 6.4%<br>(0.54-16%)                  | 23<br>(1.9-57)       | 870<br>(110-2100)     |
| Turkmenistan | 1995 | Female | 55 to 59 | 61%<br>(48-75%)                | 39%<br>(25-52%)          | 1.7<br>(0.7-3.5)                            | 4.4%<br>(-0.39-12%)                  | 5.7%<br>(-0.65-16%)                 | 44<br>(-5-120)       | 1400<br>(-130-4000)   |
| Turkmenistan | 1995 | Female | 60 to 64 | 60%<br>(45-75%)                | 40%<br>(25-55%)          | 1.7<br>(0.67-3.5)                           | 3.3%<br>(-1.5-12%)                   | 4.2%<br>(-2.1-15%)                  | 39<br>(-19-140)      | 1100<br>(-510-3800)   |
| Turkmenistan | 1995 | Female | 65 to 69 | 58%<br>(45-73%)                | 42%<br>(27-55%)          | 1.5<br>(0.69-3)                             | 2.3%<br>(-2.5-9.5%)                  | 2.8%<br>(-3-12%)                    | 38<br>(-42-160)      | 870<br>(-930-3700)    |
| Turkmenistan | 1995 | Female | 70 to 74 | 55%<br>(43-69%)                | 45%<br>(31-57%)          | 1.4<br>(0.54-2.7)                           | 1.2%<br>(-3.3-7.9%)                  | 1.4%<br>(-4-9.5%)                   | 19<br>(-55-130)      | 360<br>(-980-2400)    |
| Turkmenistan | 1995 | Female | 75 to 79 | 52%<br>(40-66%)                | 48%<br>(34-60%)          | 1.3<br>(0.48-2.6)                           | 0.31%<br>(-3.7-6.8%)                 | 0.29%<br>(-4.5-8%)                  | 3.5<br>(-55-100)     | 64<br>(-760-1400)     |
| Turkmenistan | 1995 | Female | 80 to 84 | 50%<br>(37-65%)                | 50%<br>(35-63%)          | 1.3<br>(0.54-2.6)                           | -0.44%<br>(-4.5-5.5%)                | -0.68%<br>(-5.6-6.4%)               | -7.5<br>(-62-72)     | -61<br>(-620-760)     |
| Turkmenistan | 1995 | Female | 85 to 89 | 50%<br>(38-62%)                | 50%<br>(38-62%)          | 1.4<br>(0.53-2.9)                           | -0.64%<br>(-4.9-6.1%)                | -0.9%<br>(-6-7.2%)                  | -8.4<br>(-55-66)     | -51<br>(-390-500)     |
| Turkmenistan | 1995 | Female | 90 to 94 | 51%<br>(39-63%)                | 49%<br>(37-61%)          | 1.5<br>(0.5-3.4)                            | -0.61%<br>(-4.9-7.5%)                | -0.91%<br>(-6.1-8.8%)               | -3.6<br>(-24-36)     | -14<br>(-120-190)     |
| Turkmenistan | 1995 | Female | 95 plus  | 51%<br>(38-67%)                | 49%<br>(33-62%)          | 1.6<br>(0.4-3.9)                            | -0.37%<br>(-5.2-8.6%)                | -0.64%<br>(-6.5-10%)                | -0.81<br>(-8.2-13)   | -1.8<br>(-26-43)      |

| Location     | Year | Sex    | Age      | Prevalence of current drinkers | Prevalence of abstainers | Population average of standard drinks daily | Percent of total attributable deaths | Percent of total attributable DALYs | Attributable deaths | Attributable DALYs     |
|--------------|------|--------|----------|--------------------------------|--------------------------|---------------------------------------------|--------------------------------------|-------------------------------------|---------------------|------------------------|
| Turkmenistan | 1995 | Male   | All Ages | 62%<br>(54-71%)                | 38%<br>(29-46%)          | 1.3<br>(0.99-1.7)                           | 3.4%<br>(2.1-4.9%)                   | 3.7%<br>(1.2-6.6%)                  | 680<br>(230-1200)   | 37000<br>(22000-52000) |
| Turkmenistan | 1995 | Male   | 15 to 19 | 56%<br>(40-72%)                | 44%<br>(28-60%)          | 0.69<br>(0.36-1.2)                          | 3.6%<br>(2.2-5.3%)                   | 4%<br>(2-6.7%)                      | 13<br>(6.3-21)      | 1300<br>(800-1900)     |
| Turkmenistan | 1995 | Male   | 20 to 24 | 73%<br>(57-85%)                | 27%<br>(15-43%)          | 1.6<br>(0.95-2.3)                           | 8.8%<br>(6.1-12%)                    | 9.6%<br>(5.8-14%)                   | 40<br>(24-57)       | 3600<br>(2400-4800)    |
| Turkmenistan | 1995 | Male   | 25 to 29 | 80%<br>(68-89%)                | 20%<br>(11-32%)          | 2.5<br>(1.5-3.6)                            | 11%<br>(8-15%)                       | 13%<br>(8.3-18%)                    | 61<br>(39-85)       | 4700<br>(3300-6200)    |
| Turkmenistan | 1995 | Male   | 30 to 34 | 84%<br>(72-92%)                | 16%<br>(7.9-28%)         | 3<br>(2-4.2)                                | 11%<br>(8-15%)                       | 13%<br>(8.5-18%)                    | 71<br>(47-98)       | 4900<br>(3500-6600)    |
| Turkmenistan | 1995 | Male   | 35 to 39 | 86%<br>(75-93%)                | 14%<br>(7.3-25%)         | 3<br>(1.9-4.4)                              | 11%<br>(7.2-16%)                     | 13%<br>(7.8-19%)                    | 83<br>(50-120)      | 5000<br>(3300-7000)    |
| Turkmenistan | 1995 | Male   | 40 to 44 | 86%<br>(76-93%)                | 14%<br>(7.1-24%)         | 3.1<br>(1.8-4.6)                            | 11%<br>(6.1-16%)                     | 12%<br>(6.2-19%)                    | 82<br>(43-130)      | 4300<br>(2600-6600)    |
| Turkmenistan | 1995 | Male   | 45 to 49 | 86%<br>(74-93%)                | 14%<br>(7.4-26%)         | 3.3<br>(2-5.1)                              | 10%<br>(5.2-17%)                     | 12%<br>(5.3-20%)                    | 77<br>(35-130)      | 3600<br>(1800-5800)    |
| Turkmenistan | 1995 | Male   | 50 to 54 | 85%<br>(73-92%)                | 15%<br>(7.9-27%)         | 3.2<br>(1.8-5)                              | 9.1%<br>(3.5-16%)                    | 10%<br>(3.3-18%)                    | 68<br>(23-120)      | 2700<br>(1000-4800)    |
| Turkmenistan | 1995 | Male   | 55 to 59 | 83%<br>(71-91%)                | 17%<br>(8.8-29%)         | 2.8<br>(1.6-4.3)                            | 6.8%<br>(1.8-13%)                    | 7.4%<br>(1.5-15%)                   | 93<br>(19-190)      | 3200<br>(850-6300)     |
| Turkmenistan | 1995 | Male   | 60 to 64 | 81%<br>(67-90%)                | 19%<br>(9.5-33%)         | 2.4<br>(1.3-3.9)                            | 4.8%<br>(-0.13-11%)                  | 5.2%<br>(-0.58-13%)                 | 71<br>(-7.8-170)    | 2100<br>(-58-4800)     |
| Turkmenistan | 1995 | Male   | 65 to 69 | 79%<br>(65-89%)                | 21%<br>(11-35%)          | 2.2<br>(1.2-3.3)                            | 2.9%<br>(-1.4-8.3%)                  | 3.1%<br>(-1.9-9.2%)                 | 52<br>(-30-160)     | 1300<br>(-570-3600)    |
| Turkmenistan | 1995 | Male   | 70 to 74 | 76%<br>(62-86%)                | 24%<br>(14-38%)          | 1.8<br>(1-3)                                | 1.2%<br>(-2.8-6.2%)                  | 1.1%<br>(-3.4-6.8%)                 | 12<br>(-37-74)      | 260<br>(-620-1400)     |
| Turkmenistan | 1995 | Male   | 75 to 79 | 73%<br>(58-85%)                | 27%<br>(15-42%)          | 1.6<br>(0.84-2.6)                           | -0.5%<br>(-4.1-3.5%)                 | -0.82%<br>(-5-3.8%)                 | -6.1<br>(-37-28)    | -59<br>(-480-410)      |
| Turkmenistan | 1995 | Male   | 80 to 84 | 71%<br>(54-83%)                | 29%<br>(17-46%)          | 1.4<br>(0.79-2.2)                           | -1.7%<br>(-5-1.7%)                   | -2.3%<br>(-6.3-1.7%)                | -14<br>(-39-11)     | -130<br>(-370-130)     |
| Turkmenistan | 1995 | Male   | 85 to 89 | 68%<br>(52-80%)                | 32%<br>(20-48%)          | 1.3<br>(0.71-2.1)                           | -2.4%<br>(-5.5-0.56%)                | -3.1%<br>(-6.7-0.36%)               | -15<br>(-32-1.7)    | -97<br>(-220-22)       |
| Turkmenistan | 1995 | Male   | 90 to 94 | 67%<br>(53-80%)                | 33%<br>(20-47%)          | 1.2<br>(0.63-2)                             | -2.7%<br>(-5.5-0.042%)               | -3.5%<br>(-6.9-0.15%)               | -6.7<br>(-13--0.29) | -30<br>(-62-0.48)      |
| Turkmenistan | 1995 | Male   | 95 plus  | 66%<br>(47-82%)                | 34%<br>(18-53%)          | 1.1<br>(0.47-2)                             | -2.7%<br>(-5.5--0.016%)              | -3.5%<br>(-7--0.38%)                | -1.9<br>(-3.7--0.2) | -5.6<br>(-12--0.032)   |
| Turkmenistan | 2000 | Female | All Ages | 52%<br>(46-60%)                | 48%<br>(40-54%)          | 1<br>(0.75-1.4)                             | 2.2%<br>(0.82-4%)                    | 2.8%<br>(-0.57-7.7%)                | 430<br>(-82-1200)   | 18000<br>(6700-33000)  |
| Turkmenistan | 2000 | Female | 15 to 19 | 52%<br>(40-67%)                | 48%<br>(33-60%)          | 0.97<br>(0.41-1.8)                          | 2.5%<br>(1.1-4.5%)                   | 4.1%<br>(1.5-7.8%)                  | 9.1<br>(3.3-18)     | 830<br>(380-1500)      |
| Turkmenistan | 2000 | Female | 20 to 24 | 61%<br>(49-73%)                | 39%<br>(27-51%)          | 1.4<br>(0.61-2.6)                           | 4.2%<br>(2-7.2%)                     | 6%<br>(2.2-11%)                     | 17<br>(6.2-31)      | 1500<br>(680-2600)     |
| Turkmenistan | 2000 | Female | 25 to 29 | 64%<br>(49-76%)                | 36%<br>(24-51%)          | 1.6<br>(0.72-3)                             | 4.9%<br>(2.6-8.2%)                   | 7%<br>(3.1-13%)                     | 21<br>(9.3-38)      | 1700<br>(860-2800)     |

| Location     | Year | Sex    | Age      | Prevalence of current drinkers | Prevalence of abstainers | Population average of standard drinks daily | Percent of total attributable deaths | Percent of total attributable DALYs | Attributable deaths | Attributable DALYs     |
|--------------|------|--------|----------|--------------------------------|--------------------------|---------------------------------------------|--------------------------------------|-------------------------------------|---------------------|------------------------|
| Turkmenistan | 2000 | Female | 30 to 34 | 65%<br>(50-78%)                | 35%<br>(22-50%)          | 1.8<br>(0.89-3.1)                           | 5.1%<br>(2.9-8.2%)                   | 7.7%<br>(3.8-13%)                   | 25<br>(12-42)       | 1800<br>(940-2800)     |
| Turkmenistan | 2000 | Female | 35 to 39 | 65%<br>(52-79%)                | 35%<br>(21-48%)          | 1.8<br>(0.85-3.2)                           | 5%<br>(2.6-8.2%)                     | 8%<br>(3.7-14%)                     | 30<br>(14-52)       | 1800<br>(940-3000)     |
| Turkmenistan | 2000 | Female | 40 to 44 | 65%<br>(51-79%)                | 35%<br>(21-49%)          | 1.9<br>(0.87-3.4)                           | 5.3%<br>(2.4-9.2%)                   | 8.5%<br>(3.6-15%)                   | 36<br>(15-62)       | 1900<br>(850-3200)     |
| Turkmenistan | 2000 | Female | 45 to 49 | 65%<br>(49-79%)                | 35%<br>(21-51%)          | 2<br>(0.87-3.8)                             | 5.3%<br>(1.5-11%)                    | 7.9%<br>(1.9-17%)                   | 37<br>(9-77)        | 1700<br>(490-3400)     |
| Turkmenistan | 2000 | Female | 50 to 54 | 64%<br>(49-77%)                | 36%<br>(23-51%)          | 2<br>(0.87-3.9)                             | 5.8%<br>(0.95-13%)                   | 8.1%<br>(1.2-18%)                   | 39<br>(6.2-86)      | 1500<br>(250-3300)     |
| Turkmenistan | 2000 | Female | 55 to 59 | 62%<br>(48-76%)                | 38%<br>(24-52%)          | 2.1<br>(0.85-4.2)                           | 5.7%<br>(-0.039-14%)                 | 7.6%<br>(-0.16-19%)                 | 39<br>(-0.8-96)     | 1300<br>(-8.5-3100)    |
| Turkmenistan | 2000 | Female | 60 to 64 | 60%<br>(46-75%)                | 40%<br>(25-54%)          | 2<br>(0.8-4.2)                              | 4.6%<br>(-1.5-14%)                   | 5.7%<br>(-2-17%)                    | 62<br>(-21-190)     | 1700<br>(-530-5100)    |
| Turkmenistan | 2000 | Female | 65 to 69 | 58%<br>(45-73%)                | 42%<br>(27-55%)          | 1.9<br>(0.81-3.7)                           | 3.4%<br>(-2.2-12%)                   | 4.2%<br>(-2.7-15%)                  | 51<br>(-34-180)     | 1200<br>(-750-4100)    |
| Turkmenistan | 2000 | Female | 70 to 74 | 55%<br>(43-68%)                | 45%<br>(32-57%)          | 1.6<br>(0.65-3.3)                           | 2.1%<br>(-3.2-10%)                   | 2.4%<br>(-4-12%)                    | 42<br>(-68-210)     | 790<br>(-1200-3900)    |
| Turkmenistan | 2000 | Female | 75 to 79 | 52%<br>(40-65%)                | 48%<br>(35-60%)          | 1.5<br>(0.56-3.1)                           | 1.1%<br>(-3.7-8.8%)                  | 1.2%<br>(-4.7-10%)                  | 18<br>(-69-150)     | 280<br>(-950-2100)     |
| Turkmenistan | 2000 | Female | 80 to 84 | 50%<br>(37-65%)                | 50%<br>(35-63%)          | 1.6<br>(0.62-3.2)                           | 0.4%<br>(-4.2-7.8%)                  | 0.3%<br>(-5.3-9.3%)                 | 3.2<br>(-57-100)    | 55<br>(-550-1100)      |
| Turkmenistan | 2000 | Female | 85 to 89 | 50%<br>(37-62%)                | 50%<br>(38-63%)          | 1.7<br>(0.62-3.5)                           | 0.3%<br>(-4.5-8.6%)                  | 0.17%<br>(-5.7-10%)                 | 1.4<br>(-47-85)     | 22<br>(-330-640)       |
| Turkmenistan | 2000 | Female | 90 to 94 | 50%<br>(39-62%)                | 50%<br>(38-61%)          | 1.8<br>(0.59-4.1)                           | 0.35%<br>(-4.8-9.7%)                 | 0.21%<br>(-6-12%)                   | 0.89<br>(-26-49)    | 9.1<br>(-120-250)      |
| Turkmenistan | 2000 | Female | 95 plus  | 51%<br>(37-66%)                | 49%<br>(34-63%)          | 1.9<br>(0.45-4.8)                           | 0.56%<br>(-5-10%)                    | 0.44%<br>(-6.3-12%)                 | 0.58<br>(-8.2-16)   | 3<br>(-26-54)          |
| Turkmenistan | 2000 | Male   | All Ages | 64%<br>(55-72%)                | 36%<br>(28-45%)          | 1.7<br>(1.3-2.1)                            | 5.1%<br>(3.2-7.3%)                   | 5.6%<br>(2.5-9.4%)                  | 1100<br>(470-1800)  | 55000<br>(35000-76000) |
| Turkmenistan | 2000 | Male   | 15 to 19 | 56%<br>(40-72%)                | 44%<br>(28-60%)          | 0.83<br>(0.43-1.4)                          | 4%<br>(2.3-6.1%)                     | 4.5%<br>(2.2-7.8%)                  | 17<br>(8.4-30)      | 1700<br>(990-2600)     |
| Turkmenistan | 2000 | Male   | 20 to 24 | 73%<br>(57-85%)                | 27%<br>(15-43%)          | 1.8<br>(1.1-2.8)                            | 10%<br>(6.8-14%)                     | 11%<br>(6.9-16%)                    | 58<br>(35-85)       | 4900<br>(3300-6700)    |
| Turkmenistan | 2000 | Male   | 25 to 29 | 80%<br>(69-89%)                | 20%<br>(11-31%)          | 2.9<br>(1.8-4.4)                            | 14%<br>(9.5-18%)                     | 16%<br>(10-23%)                     | 98<br>(62-140)      | 7100<br>(4800-9600)    |
| Turkmenistan | 2000 | Male   | 30 to 34 | 84%<br>(72-92%)                | 16%<br>(7.7-28%)         | 3.5<br>(2.3-5.1)                            | 14%<br>(9.7-19%)                     | 16%<br>(11-23%)                     | 110<br>(73-160)     | 7300<br>(5100-10000)   |
| Turkmenistan | 2000 | Male   | 35 to 39 | 86%<br>(75-93%)                | 14%<br>(7.2-25%)         | 3.5<br>(2.2-5.3)                            | 13%<br>(9.1-19%)                     | 16%<br>(10-23%)                     | 130<br>(81-180)     | 7400<br>(5000-10000)   |
| Turkmenistan | 2000 | Male   | 40 to 44 | 86%<br>(76-93%)                | 14%<br>(7.1-24%)         | 3.6<br>(2.2-5.4)                            | 13%<br>(7.9-19%)                     | 15%<br>(8.6-23%)                    | 140<br>(78-220)     | 7300<br>(4300-11000)   |
| Turkmenistan | 2000 | Male   | 45 to 49 | 86%<br>(73-93%)                | 14%<br>(7.3-27%)         | 3.9<br>(2.4-6)                              | 13%<br>(7-20%)                       | 15%<br>(7.5-23%)                    | 140<br>(71-220)     | 6400<br>(3600-9800)    |

| Location     | Year | Sex    | Age      | Prevalence of current drinkers | Prevalence of abstainers | Population average of standard drinks daily | Percent of total attributable deaths | Percent of total attributable DALYs | Attributable deaths | Attributable DALYs    |
|--------------|------|--------|----------|--------------------------------|--------------------------|---------------------------------------------|--------------------------------------|-------------------------------------|---------------------|-----------------------|
| Turkmenistan | 2000 | Male   | 50 to 54 | 85%<br>(73-92%)                | 15%<br>(8-27%)           | 3.8<br>(2.2-5.9)                            | 11%<br>(4.6-19%)                     | 13%<br>(4.5-22%)                    | 110<br>(42-200)     | 4500<br>(1800-7600)   |
| Turkmenistan | 2000 | Male   | 55 to 59 | 83%<br>(71-92%)                | 17%<br>(8.3-29%)         | 3.3<br>(1.9-5.2)                            | 8.5%<br>(2.6-16%)                    | 9.4%<br>(2.4-18%)                   | 81<br>(20-160)      | 2800<br>(820-5300)    |
| Turkmenistan | 2000 | Male   | 60 to 64 | 81%<br>(68-91%)                | 19%<br>(9.3-32%)         | 2.9<br>(1.6-4.8)                            | 6.3%<br>(0.49-14%)                   | 6.8%<br>(0.12-16%)                  | 110<br>(2-260)      | 3100<br>(240-7100)    |
| Turkmenistan | 2000 | Male   | 65 to 69 | 79%<br>(65-90%)                | 21%<br>(10-35%)          | 2.6<br>(1.5-4)                              | 4.1%<br>(-1.1-11%)                   | 4.4%<br>(-1.6-12%)                  | 69<br>(-25-190)     | 1600<br>(-440-4300)   |
| Turkmenistan | 2000 | Male   | 70 to 74 | 76%<br>(61-86%)                | 24%<br>(14-39%)          | 2.2<br>(1.2-3.6)                            | 1.8%<br>(-2.9-7.8%)                  | 1.9%<br>(-3.5-8.7%)                 | 33<br>(-61-160)     | 670<br>(-1000-2900)   |
| Turkmenistan | 2000 | Male   | 75 to 79 | 73%<br>(57-85%)                | 27%<br>(15-43%)          | 1.9<br>(1-3.2)                              | 0.21%<br>(-4.1-5.2%)                 | -0.038%<br>(-4.9-5.8%)              | -0.34<br>(-47-56)   | 32<br>(-610-830)      |
| Turkmenistan | 2000 | Male   | 80 to 84 | 71%<br>(54-84%)                | 29%<br>(16-46%)          | 1.7<br>(0.94-2.7)                           | -1.2%<br>(-4.9-3.2%)                 | -1.8%<br>(-6.2-3.5%)                | -9.2<br>(-33-18)    | -75<br>(-320-210)     |
| Turkmenistan | 2000 | Male   | 85 to 89 | 69%<br>(53-81%)                | 31%<br>(19-47%)          | 1.6<br>(0.85-2.5)                           | -2%<br>(-5.5-1.5%)                   | -2.7%<br>(-6.7-1.5%)                | -11<br>(-26-5.8)    | -67<br>(-180-52)      |
| Turkmenistan | 2000 | Male   | 90 to 94 | 68%<br>(53-80%)                | 32%<br>(20-47%)          | 1.4<br>(0.75-2.5)                           | -2.5%<br>(-5.6-0.75%)                | -3.3%<br>(-7.1-0.54%)               | -6.2<br>(-13-1)     | -27<br>(-61-8.3)      |
| Turkmenistan | 2000 | Male   | 95 plus  | 67%<br>(48-82%)                | 33%<br>(18-52%)          | 1.3<br>(0.58-2.4)                           | -2.5%<br>(-5.6-0.57%)                | -3.4%<br>(-7.1-0.22%)               | -1.8<br>(-3.7-0.11) | -5.1<br>(-11-1.2)     |
| Turkmenistan | 2005 | Female | All Ages | 53%<br>(47-61%)                | 47%<br>(39-53%)          | 1.2<br>(0.83-1.6)                           | 2.7%<br>(1.1-4.6%)                   | 3.5%<br>(-0.14-8.8%)                | 520<br>(-20-1300)   | 21000<br>(8800-36000) |
| Turkmenistan | 2005 | Female | 15 to 19 | 52%<br>(40-67%)                | 48%<br>(33-60%)          | 1<br>(0.42-1.9)                             | 2.6%<br>(1.2-4.6%)                   | 4.2%<br>(1.5-8%)                    | 10<br>(3.7-20)      | 950<br>(420-1700)     |
| Turkmenistan | 2005 | Female | 20 to 24 | 61%<br>(48-73%)                | 39%<br>(27-52%)          | 1.5<br>(0.61-2.6)                           | 4.4%<br>(2.1-7.7%)                   | 6.5%<br>(2.3-12%)                   | 19<br>(6.7-36)      | 1700<br>(770-2900)    |
| Turkmenistan | 2005 | Female | 25 to 29 | 64%<br>(49-77%)                | 36%<br>(23-51%)          | 1.7<br>(0.76-3.2)                           | 5.3%<br>(2.9-8.7%)                   | 7.8%<br>(3.6-14%)                   | 24<br>(11-43)       | 1900<br>(1000-3100)   |
| Turkmenistan | 2005 | Female | 30 to 34 | 65%<br>(50-78%)                | 35%<br>(22-50%)          | 1.8<br>(0.92-3.4)                           | 5.5%<br>(3.3-8.8%)                   | 8.5%<br>(4.4-15%)                   | 28<br>(15-48)       | 2000<br>(1100-3100)   |
| Turkmenistan | 2005 | Female | 35 to 39 | 65%<br>(52-80%)                | 35%<br>(20-48%)          | 1.9<br>(0.89-3.3)                           | 5.5%<br>(2.9-8.9%)                   | 9%<br>(4.4-15%)                     | 30<br>(15-51)       | 1900<br>(1000-3000)   |
| Turkmenistan | 2005 | Female | 40 to 44 | 65%<br>(51-79%)                | 35%<br>(21-49%)          | 2<br>(0.89-3.6)                             | 5.8%<br>(2.7-9.6%)                   | 9.5%<br>(4.3-16%)                   | 43<br>(20-71)       | 2200<br>(1100-3600)   |
| Turkmenistan | 2005 | Female | 45 to 49 | 65%<br>(49-78%)                | 35%<br>(22-51%)          | 2.1<br>(0.92-4)                             | 5.7%<br>(1.9-12%)                    | 8.9%<br>(2.5-18%)                   | 51<br>(15-100)      | 2300<br>(750-4500)    |
| Turkmenistan | 2005 | Female | 50 to 54 | 63%<br>(48-77%)                | 37%<br>(23-52%)          | 2.1<br>(0.93-4.1)                           | 6.1%<br>(1.4-13%)                    | 8.9%<br>(2.1-18%)                   | 57<br>(13-120)      | 2200<br>(520-4500)    |
| Turkmenistan | 2005 | Female | 55 to 59 | 61%<br>(48-75%)                | 39%<br>(25-52%)          | 2.2<br>(0.9-4.3)                            | 6.2%<br>(0.45-14%)                   | 8.4%<br>(0.52-20%)                  | 55<br>(3.5-130)     | 1800<br>(130-4300)    |
| Turkmenistan | 2005 | Female | 60 to 64 | 60%<br>(45-74%)                | 40%<br>(26-55%)          | 2.1<br>(0.82-4.3)                           | 5.2%<br>(-1.2-15%)                   | 6.5%<br>(-1.6-18%)                  | 45<br>(-11-120)     | 1200<br>(-270-3400)   |
| Turkmenistan | 2005 | Female | 65 to 69 | 58%<br>(46-73%)                | 42%<br>(27-54%)          | 1.9<br>(0.87-3.8)                           | 4%<br>(-1.9-13%)                     | 5%<br>(-2.3-16%)                    | 69<br>(-32-220)     | 1600<br>(-710-5100)   |



| Location     | Year | Sex    | Age      | Prevalence of current drinkers | Prevalence of abstainers | Population average of standard drinks daily | Percent of total attributable deaths | Percent of total attributable DALYs | Attributable deaths | Attributable DALYs     |
|--------------|------|--------|----------|--------------------------------|--------------------------|---------------------------------------------|--------------------------------------|-------------------------------------|---------------------|------------------------|
| Turkmenistan | 2005 | Female | 70 to 74 | 55%<br>(43-69%)                | 45%<br>(31-57%)          | 1.7<br>(0.69-3.4)                           | 2.6%<br>(-3.1-11%)                   | 3.1%<br>(-3.8-14%)                  | 46<br>(-57-200)     | 860<br>(-1000-3700)    |
| Turkmenistan | 2005 | Female | 75 to 79 | 52%<br>(40-65%)                | 48%<br>(35-60%)          | 1.6<br>(0.62-3.2)                           | 1.5%<br>(-3.8-9.4%)                  | 1.7%<br>(-4.8-11%)                  | 29<br>(-85-200)     | 440<br>(-1200-2800)    |
| Turkmenistan | 2005 | Female | 80 to 84 | 50%<br>(37-64%)                | 50%<br>(36-63%)          | 1.7<br>(0.66-3.3)                           | 0.78%<br>(-3.8-8.3%)                 | 0.78%<br>(-5-10%)                   | 9.5<br>(-60-120)    | 120<br>(-590-1300)     |
| Turkmenistan | 2005 | Female | 85 to 89 | 49%<br>(38-61%)                | 51%<br>(39-62%)          | 1.7<br>(0.66-3.7)                           | 0.66%<br>(-4.3-8.8%)                 | 0.6%<br>(-5.5-11%)                  | 4.7<br>(-43-85)     | 46<br>(-300-630)       |
| Turkmenistan | 2005 | Female | 90 to 94 | 50%<br>(39-62%)                | 50%<br>(38-61%)          | 1.9<br>(0.63-4.2)                           | 0.65%<br>(-4.6-10%)                  | 0.57%<br>(-5.9-12%)                 | 2.1<br>(-21-46)     | 15<br>(-100-230)       |
| Turkmenistan | 2005 | Female | 95 plus  | 51%<br>(38-66%)                | 49%<br>(34-62%)          | 1.9<br>(0.49-4.9)                           | 0.8%<br>(-4.9-11%)                   | 0.72%<br>(-6.2-13%)                 | 0.96<br>(-8.1-17)   | 4.3<br>(-26-56)        |
| Turkmenistan | 2005 | Male   | All Ages | 65%<br>(57-74%)                | 35%<br>(26-43%)          | 1.9<br>(1.4-2.4)                            | 6.1%<br>(4-8.5%)                     | 6.7%<br>(3.2-11%)                   | 1300<br>(630-2100)  | 64000<br>(42000-88000) |
| Turkmenistan | 2005 | Male   | 15 to 19 | 56%<br>(40-72%)                | 44%<br>(28-60%)          | 0.87<br>(0.46-1.5)                          | 4.1%<br>(2.5-6.2%)                   | 4.8%<br>(2.5-7.9%)                  | 20<br>(10-33)       | 2000<br>(1200-3000)    |
| Turkmenistan | 2005 | Male   | 20 to 24 | 73%<br>(58-85%)                | 27%<br>(15-42%)          | 1.9<br>(1.2-2.9)                            | 10%<br>(7-14%)                       | 12%<br>(7.2-17%)                    | 61<br>(37-88)       | 5200<br>(3600-7100)    |
| Turkmenistan | 2005 | Male   | 25 to 29 | 80%<br>(69-89%)                | 20%<br>(11-31%)          | 3.1<br>(1.9-4.6)                            | 14%<br>(9.9-19%)                     | 16%<br>(11-23%)                     | 110<br>(68-150)     | 7700<br>(5300-10000)   |
| Turkmenistan | 2005 | Male   | 30 to 34 | 85%<br>(73-92%)                | 15%<br>(7.8-27%)         | 3.7<br>(2.4-5.3)                            | 14%<br>(10-19%)                      | 17%<br>(11-23%)                     | 130<br>(87-180)     | 8200<br>(5900-11000)   |
| Turkmenistan | 2005 | Male   | 35 to 39 | 86%<br>(76-93%)                | 14%<br>(7.3-24%)         | 3.7<br>(2.3-5.4)                            | 14%<br>(10-20%)                      | 17%<br>(11-24%)                     | 140<br>(92-200)     | 8100<br>(5600-11000)   |
| Turkmenistan | 2005 | Male   | 40 to 44 | 86%<br>(76-93%)                | 14%<br>(6.9-24%)         | 3.8<br>(2.3-5.5)                            | 14%<br>(8.8-20%)                     | 16%<br>(9.7-24%)                    | 160<br>(96-240)     | 8300<br>(5300-12000)   |
| Turkmenistan | 2005 | Male   | 45 to 49 | 86%<br>(73-93%)                | 14%<br>(7.4-27%)         | 4.1<br>(2.5-6.1)                            | 14%<br>(7.9-21%)                     | 16%<br>(8.5-25%)                    | 190<br>(100-290)    | 8500<br>(4800-13000)   |
| Turkmenistan | 2005 | Male   | 50 to 54 | 85%<br>(73-92%)                | 15%<br>(7.7-27%)         | 4<br>(2.3-6)                                | 13%<br>(5.8-20%)                     | 14%<br>(5.9-23%)                    | 170<br>(70-280)     | 6600<br>(3000-11000)   |
| Turkmenistan | 2005 | Male   | 55 to 59 | 83%<br>(70-91%)                | 17%<br>(8.5-30%)         | 3.5<br>(2.1-5.3)                            | 9.7%<br>(3.6-18%)                    | 11%<br>(3.5-21%)                    | 120<br>(38-220)     | 4000<br>(1500-7300)    |
| Turkmenistan | 2005 | Male   | 60 to 64 | 81%<br>(67-90%)                | 19%<br>(9.5-33%)         | 3<br>(1.6-5)                                | 7.4%<br>(1.3-16%)                    | 8.2%<br>(1.1-18%)                   | 86<br>(11-190)      | 2400<br>(430-5200)     |
| Turkmenistan | 2005 | Male   | 65 to 69 | 79%<br>(64-89%)                | 21%<br>(11-36%)          | 2.7<br>(1.6-4.2)                            | 4.9%<br>(-0.71-12%)                  | 5.3%<br>(-1.2-14%)                  | 93<br>(-20-240)     | 2200<br>(-320-5600)    |
| Turkmenistan | 2005 | Male   | 70 to 74 | 76%<br>(62-86%)                | 24%<br>(14-38%)          | 2.3<br>(1.3-3.8)                            | 2.5%<br>(-2.6-9.1%)                  | 2.6%<br>(-3.2-10%)                  | 42<br>(-53-170)     | 840<br>(-870-3100)     |
| Turkmenistan | 2005 | Male   | 75 to 79 | 73%<br>(58-84%)                | 27%<br>(16-42%)          | 2<br>(1.1-3.3)                              | 0.69%<br>(-3.6-6.5%)                 | 0.52%<br>(-4.5-7.4%)                | 7.9<br>(-69-110)    | 170<br>(-890-1600)     |
| Turkmenistan | 2005 | Male   | 80 to 84 | 71%<br>(55-83%)                | 29%<br>(17-45%)          | 1.8<br>(0.98-2.8)                           | -0.77%<br>(-4.7-3.6%)                | -1.3%<br>(-6.1-3.9%)                | -9.4<br>(-44-28)    | -68<br>(-420-320)      |
| Turkmenistan | 2005 | Male   | 85 to 89 | 68%<br>(53-80%)                | 32%<br>(20-47%)          | 1.6<br>(0.91-2.6)                           | -1.7%<br>(-5.1-2.3%)                 | -2.4%<br>(-6.5-2.4%)                | -7.1<br>(-19-7.1)   | -43<br>(-130-59)       |

| Location     | Year | Sex    | Age      | Prevalence of current drinkers | Prevalence of abstainers | Population average of standard drinks daily | Percent of total attributable deaths | Percent of total attributable DALYs | Attributable deaths | Attributable DALYs     |
|--------------|------|--------|----------|--------------------------------|--------------------------|---------------------------------------------|--------------------------------------|-------------------------------------|---------------------|------------------------|
| Turkmenistan | 2005 | Male   | 90 to 94 | 67%<br>(52-80%)                | 33%<br>(20-48%)          | 1.5<br>(0.79-2.6)                           | -2.3%<br>(-5.5-1.2%)                 | -3.1%<br>(-6.9-1%)                  | -4.1<br>(-9.1-1.4)  | -18<br>(-42-9)         |
| Turkmenistan | 2005 | Male   | 95 plus  | 66%<br>(47-82%)                | 34%<br>(18-53%)          | 1.4<br>(0.61-2.6)                           | -2.3%<br>(-5.5-1.2%)                 | -3.2%<br>(-7.2-0.88%)               | -1.4<br>(-3.1-0.37) | -3.9<br>(-9.3-1.9)     |
| Turkmenistan | 2010 | Female | All Ages | 54%<br>(47-61%)                | 46%<br>(39-53%)          | 1.2<br>(0.84-1.6)                           | 2.8%<br>(1.2-4.8%)                   | 3.6%<br>(-0.033-8.6%)               | 520<br>(-4.8-1200)  | 21000<br>(9400-36000)  |
| Turkmenistan | 2010 | Female | 15 to 19 | 52%<br>(39-68%)                | 48%<br>(32-61%)          | 0.96<br>(0.39-1.8)                          | 2.3%<br>(1-4.1%)                     | 3.7%<br>(1.2-7.5%)                  | 8.4<br>(2.7-17)     | 810<br>(360-1500)      |
| Turkmenistan | 2010 | Female | 20 to 24 | 61%<br>(47-74%)                | 39%<br>(26-53%)          | 1.4<br>(0.58-2.6)                           | 4.1%<br>(2-7%)                       | 6%<br>(2.2-11%)                     | 17<br>(6.1-32)      | 1600<br>(760-2800)     |
| Turkmenistan | 2010 | Female | 25 to 29 | 64%<br>(49-77%)                | 36%<br>(23-51%)          | 1.6<br>(0.76-3.1)                           | 4.9%<br>(2.8-7.8%)                   | 7.6%<br>(3.7-13%)                   | 22<br>(11-38)       | 1800<br>(1000-2900)    |
| Turkmenistan | 2010 | Female | 30 to 34 | 65%<br>(50-77%)                | 35%<br>(23-50%)          | 1.8<br>(0.91-3.3)                           | 5.3%<br>(3.3-8.4%)                   | 8.7%<br>(4.9-14%)                   | 27<br>(15-43)       | 1900<br>(1200-2900)    |
| Turkmenistan | 2010 | Female | 35 to 39 | 65%<br>(52-79%)                | 35%<br>(21-48%)          | 1.8<br>(0.85-3.3)                           | 5.4%<br>(3-8.5%)                     | 9.2%<br>(4.7-15%)                   | 31<br>(16-49)       | 1900<br>(1100-2900)    |
| Turkmenistan | 2010 | Female | 40 to 44 | 65%<br>(52-78%)                | 35%<br>(22-48%)          | 1.9<br>(0.87-3.5)                           | 5.6%<br>(3-9.2%)                     | 9.6%<br>(4.7-16%)                   | 39<br>(19-64)       | 2000<br>(1100-3300)    |
| Turkmenistan | 2010 | Female | 45 to 49 | 65%<br>(49-79%)                | 35%<br>(21-51%)          | 2<br>(0.9-3.8)                              | 5.4%<br>(2-10%)                      | 8.7%<br>(3-17%)                     | 52<br>(18-100)      | 2400<br>(860-4500)     |
| Turkmenistan | 2010 | Female | 50 to 54 | 63%<br>(49-77%)                | 37%<br>(23-51%)          | 2.1<br>(0.91-3.9)                           | 5.7%<br>(1.4-12%)                    | 8.5%<br>(2-17%)                     | 65<br>(15-130)      | 2500<br>(610-5100)     |
| Turkmenistan | 2010 | Female | 55 to 59 | 61%<br>(48-75%)                | 39%<br>(25-52%)          | 2.1<br>(0.88-4.1)                           | 5.7%<br>(0.35-13%)                   | 7.9%<br>(0.36-18%)                  | 70<br>(3.1-160)     | 2300<br>(140-5300)     |
| Turkmenistan | 2010 | Female | 60 to 64 | 60%<br>(46-75%)                | 40%<br>(25-54%)          | 2<br>(0.8-4.1)                              | 4.8%<br>(-0.92-13%)                  | 6.2%<br>(-1.3-17%)                  | 55<br>(-11-150)     | 1500<br>(-300-4200)    |
| Turkmenistan | 2010 | Female | 65 to 69 | 58%<br>(45-73%)                | 42%<br>(27-55%)          | 1.9<br>(0.85-3.6)                           | 3.8%<br>(-1.7-12%)                   | 4.8%<br>(-2.2-15%)                  | 41<br>(-19-130)     | 950<br>(-410-3100)     |
| Turkmenistan | 2010 | Female | 70 to 74 | 55%<br>(42-69%)                | 45%<br>(31-58%)          | 1.7<br>(0.65-3.2)                           | 2.6%<br>(-2.9-10%)                   | 3.1%<br>(-3.6-13%)                  | 51<br>(-59-210)     | 940<br>(-1100-3800)    |
| Turkmenistan | 2010 | Female | 75 to 79 | 52%<br>(40-65%)                | 48%<br>(35-60%)          | 1.5<br>(0.57-3.2)                           | 1.4%<br>(-3.5-8.7%)                  | 1.6%<br>(-4.5-11%)                  | 24<br>(-67-160)     | 370<br>(-930-2200)     |
| Turkmenistan | 2010 | Female | 80 to 84 | 50%<br>(37-64%)                | 50%<br>(36-63%)          | 1.6<br>(0.62-3.1)                           | 0.73%<br>(-3.7-7.6%)                 | 0.73%<br>(-4.9-9.6%)                | 8.8<br>(-58-110)    | 120<br>(-590-1200)     |
| Turkmenistan | 2010 | Female | 85 to 89 | 49%<br>(37-62%)                | 51%<br>(38-63%)          | 1.7<br>(0.63-3.5)                           | 0.57%<br>(-4.1-8.3%)                 | 0.5%<br>(-5.3-10%)                  | 5<br>(-53-100)      | 53<br>(-380-810)       |
| Turkmenistan | 2010 | Female | 90 to 94 | 50%<br>(38-62%)                | 50%<br>(38-62%)          | 1.8<br>(0.61-4)                             | 0.51%<br>(-4.4-9.3%)                 | 0.41%<br>(-5.8-11%)                 | 1.6<br>(-23-45)     | 13<br>(-110-240)       |
| Turkmenistan | 2010 | Female | 95 plus  | 51%<br>(36-66%)                | 49%<br>(34-64%)          | 1.9<br>(0.48-4.7)                           | 0.63%<br>(-4.7-9.7%)                 | 0.51%<br>(-6.1-12%)                 | 0.63<br>(-7.6-15)   | 3.3<br>(-24-50)        |
| Turkmenistan | 2010 | Male   | All Ages | 66%<br>(58-74%)                | 34%<br>(26-42%)          | 1.9<br>(1.4-2.4)                            | 6.4%<br>(4.2-8.8%)                   | 6.8%<br>(3.4-11%)                   | 1200<br>(620-2000)  | 62000<br>(42000-85000) |
| Turkmenistan | 2010 | Male   | 15 to 19 | 55%<br>(40-72%)                | 45%<br>(28-60%)          | 0.81<br>(0.42-1.4)                          | 3.8%<br>(2.5-5.5%)                   | 4.4%<br>(2.3-7.1%)                  | 15<br>(7.6-24)      | 1600<br>(990-2300)     |

| Location     | Year | Sex    | Age      | Prevalence of current drinkers | Prevalence of abstainers | Population average of standard drinks daily | Percent of total attributable deaths | Percent of total attributable DALYs | Attributable deaths | Attributable DALYs    |
|--------------|------|--------|----------|--------------------------------|--------------------------|---------------------------------------------|--------------------------------------|-------------------------------------|---------------------|-----------------------|
| Turkmenistan | 2010 | Male   | 20 to 24 | 73%<br>(57-85%)                | 27%<br>(15-43%)          | 1.8<br>(1.1-2.8)                            | 9.6%<br>(6.8-13%)                    | 11%<br>(7-15%)                      | 55<br>(35-79)       | 5100<br>(3500-6900)   |
| Turkmenistan | 2010 | Male   | 25 to 29 | 80%<br>(69-89%)                | 20%<br>(11-31%)          | 3<br>(1.8-4.4)                              | 13%<br>(9.3-17%)                     | 15%<br>(10-21%)                     | 88<br>(59-120)      | 6800<br>(4800-8800)   |
| Turkmenistan | 2010 | Male   | 30 to 34 | 84%<br>(72-92%)                | 16%<br>(7.9-28%)         | 3.6<br>(2.3-5.2)                            | 13%<br>(9.7-18%)                     | 16%<br>(11-22%)                     | 110<br>(73-150)     | 7200<br>(5200-9600)   |
| Turkmenistan | 2010 | Male   | 35 to 39 | 86%<br>(75-93%)                | 14%<br>(7.3-25%)         | 3.5<br>(2.2-5.3)                            | 14%<br>(9.9-20%)                     | 17%<br>(11-24%)                     | 130<br>(88-190)     | 7700<br>(5500-10000)  |
| Turkmenistan | 2010 | Male   | 40 to 44 | 86%<br>(76-93%)                | 14%<br>(7.1-24%)         | 3.6<br>(2.2-5.4)                            | 14%<br>(9.1-19%)                     | 16%<br>(11-24%)                     | 150<br>(95-210)     | 7700<br>(5200-11000)  |
| Turkmenistan | 2010 | Male   | 45 to 49 | 85%<br>(72-93%)                | 15%<br>(7.5-28%)         | 3.9<br>(2.4-5.8)                            | 13%<br>(7.8-20%)                     | 16%<br>(8.7-24%)                    | 180<br>(100-280)    | 8400<br>(5000-12000)  |
| Turkmenistan | 2010 | Male   | 50 to 54 | 84%<br>(73-92%)                | 16%<br>(8.2-27%)         | 3.8<br>(2.2-5.7)                            | 12%<br>(5.9-19%)                     | 14%<br>(6.1-22%)                    | 190<br>(87-320)     | 7800<br>(3800-12000)  |
| Turkmenistan | 2010 | Male   | 55 to 59 | 83%<br>(71-91%)                | 17%<br>(8.6-29%)         | 3.3<br>(2-5.1)                              | 9.3%<br>(3.5-17%)                    | 11%<br>(3.5-20%)                    | 150<br>(50-280)     | 5100<br>(1900-9200)   |
| Turkmenistan | 2010 | Male   | 60 to 64 | 81%<br>(67-91%)                | 19%<br>(9.3-33%)         | 2.9<br>(1.6-4.8)                            | 7.1%<br>(1.4-15%)                    | 7.9%<br>(1.1-18%)                   | 100<br>(14-220)     | 2900<br>(570-6100)    |
| Turkmenistan | 2010 | Male   | 65 to 69 | 79%<br>(65-89%)                | 21%<br>(11-35%)          | 2.6<br>(1.4-4)                              | 4.7%<br>(-0.43-11%)                  | 5.1%<br>(-0.87-13%)                 | 59<br>(-9.8-150)    | 1400<br>(-130-3400)   |
| Turkmenistan | 2010 | Male   | 70 to 74 | 76%<br>(62-86%)                | 24%<br>(14-38%)          | 2.2<br>(1.3-3.6)                            | 2.4%<br>(-2.4-8.8%)                  | 2.5%<br>(-3.1-10%)                  | 43<br>(-54-170)     | 870<br>(-860-3200)    |
| Turkmenistan | 2010 | Male   | 75 to 79 | 73%<br>(58-85%)                | 27%<br>(15-42%)          | 1.9<br>(1-3.2)                              | 0.75%<br>(-3.4-6.2%)                 | 0.59%<br>(-4.3-7%)                  | 8.1<br>(-60-97)     | 170<br>(-780-1400)    |
| Turkmenistan | 2010 | Male   | 80 to 84 | 71%<br>(54-83%)                | 29%<br>(17-46%)          | 1.7<br>(0.94-2.7)                           | -0.79%<br>(-4.5-3.3%)                | -1.3%<br>(-5.8-3.7%)                | -11<br>(-51-32)     | -86<br>(-490-370)     |
| Turkmenistan | 2010 | Male   | 85 to 89 | 69%<br>(53-80%)                | 31%<br>(20-47%)          | 1.6<br>(0.87-2.5)                           | -1.7%<br>(-5-2%)                     | -2.4%<br>(-6.3-2%)                  | -12<br>(-32-10)     | -74<br>(-220-86)      |
| Turkmenistan | 2010 | Male   | 90 to 94 | 67%<br>(52-80%)                | 33%<br>(20-48%)          | 1.4<br>(0.76-2.4)                           | -2.2%<br>(-5.1-1.1%)                 | -3%<br>(-6.6-0.93%)                 | -4<br>(-8.7-1.2)    | -17<br>(-40-8.5)      |
| Turkmenistan | 2010 | Male   | 95 plus  | 66%<br>(47-82%)                | 34%<br>(18-53%)          | 1.3<br>(0.57-2.5)                           | -2.2%<br>(-5.2-0.98%)                | -3.2%<br>(-6.8-0.73%)               | -1.1<br>(-2.4-0.25) | -3.2<br>(-7.5-1.4)    |
| Turkmenistan | 2016 | Female | All Ages | 54%<br>(48-62%)                | 46%<br>(38-52%)          | 1.2<br>(0.8-1.7)                            | 2.9%<br>(1.2-5.1%)                   | 3.6%<br>(-0.26-8.9%)                | 520<br>(-36-1300)   | 21000<br>(8800-37000) |
| Turkmenistan | 2016 | Female | 15 to 19 | 52%<br>(39-67%)                | 48%<br>(33-61%)          | 0.95<br>(0.36-1.9)                          | 2.1%<br>(0.98-3.7%)                  | 3.6%<br>(1.2-7.3%)                  | 5.3<br>(1.8-11)     | 550<br>(260-1000)     |
| Turkmenistan | 2016 | Female | 20 to 24 | 61%<br>(47-73%)                | 39%<br>(27-53%)          | 1.4<br>(0.56-2.7)                           | 3.7%<br>(1.9-6.2%)                   | 5.8%<br>(2.1-11%)                   | 13<br>(4.5-24)      | 1300<br>(680-2200)    |
| Turkmenistan | 2016 | Female | 25 to 29 | 64%<br>(50-77%)                | 36%<br>(23-50%)          | 1.6<br>(0.7-3)                              | 4.5%<br>(2.6-7%)                     | 7.3%<br>(3.6-13%)                   | 20<br>(9.3-34)      | 1800<br>(1000-2800)   |
| Turkmenistan | 2016 | Female | 30 to 34 | 65%<br>(51-78%)                | 35%<br>(22-49%)          | 1.8<br>(0.85-3.2)                           | 5%<br>(3.2-7.6%)                     | 8.6%<br>(4.8-14%)                   | 25<br>(14-40)       | 1900<br>(1200-2900)   |
| Turkmenistan | 2016 | Female | 35 to 39 | 65%<br>(52-79%)                | 35%<br>(21-48%)          | 1.8<br>(0.8-3.3)                            | 5.1%<br>(3-8%)                       | 9.3%<br>(5-15%)                     | 30<br>(16-48)       | 1900<br>(1100-3000)   |

| Location     | Year | Sex    | Age      | Prevalence of current drinkers | Prevalence of abstainers | Population average of standard drinks daily | Percent of total attributable deaths | Percent of total attributable DALYs | Attributable deaths | Attributable DALYs     |
|--------------|------|--------|----------|--------------------------------|--------------------------|---------------------------------------------|--------------------------------------|-------------------------------------|---------------------|------------------------|
| Turkmenistan | 2016 | Female | 40 to 44 | 65%<br>(51-79%)                | 35%<br>(21-49%)          | 1.9<br>(0.79-3.5)                           | 5.4%<br>(2.9-8.8%)                   | 9.6%<br>(4.8-16%)                   | 38<br>(19-64)       | 2000<br>(1100-3300)    |
| Turkmenistan | 2016 | Female | 45 to 49 | 65%<br>(49-79%)                | 35%<br>(21-51%)          | 2<br>(0.84-3.7)                             | 5.1%<br>(1.9-9.9%)                   | 8.5%<br>(3.1-16%)                   | 45<br>(16-86)       | 2000<br>(800-3900)     |
| Turkmenistan | 2016 | Female | 50 to 54 | 63%<br>(49-76%)                | 37%<br>(24-51%)          | 2<br>(0.9-3.9)                              | 5.2%<br>(1.3-11%)                    | 8.1%<br>(2-17%)                     | 65<br>(16-140)      | 2600<br>(610-5300)     |
| Turkmenistan | 2016 | Female | 55 to 59 | 61%<br>(48-75%)                | 39%<br>(25-52%)          | 2<br>(0.81-3.9)                             | 5.2%<br>(0.4-12%)                    | 7.5%<br>(0.54-17%)                  | 81<br>(5.7-180)     | 2700<br>(210-6200)     |
| Turkmenistan | 2016 | Female | 60 to 64 | 60%<br>(46-75%)                | 40%<br>(25-54%)          | 2<br>(0.77-4)                               | 4.3%<br>(-1-12%)                     | 5.8%<br>(-1.4-16%)                  | 72<br>(-18-200)     | 2000<br>(-470-5600)    |
| Turkmenistan | 2016 | Female | 65 to 69 | 58%<br>(45-73%)                | 42%<br>(27-55%)          | 1.8<br>(0.81-3.5)                           | 3.4%<br>(-1.7-11%)                   | 4.4%<br>(-2.2-15%)                  | 52<br>(-27-170)     | 1200<br>(-600-4000)    |
| Turkmenistan | 2016 | Female | 70 to 74 | 55%<br>(43-69%)                | 45%<br>(31-57%)          | 1.6<br>(0.62-3.2)                           | 2.3%<br>(-2.7-10%)                   | 2.9%<br>(-3.5-13%)                  | 29<br>(-36-130)     | 550<br>(-630-2400)     |
| Turkmenistan | 2016 | Female | 75 to 79 | 52%<br>(40-65%)                | 48%<br>(35-60%)          | 1.5<br>(0.56-3.2)                           | 1.3%<br>(-3.4-8.6%)                  | 1.5%<br>(-4.4-11%)                  | 23<br>(-66-160)     | 350<br>(-900-2300)     |
| Turkmenistan | 2016 | Female | 80 to 84 | 50%<br>(37-64%)                | 50%<br>(36-63%)          | 1.6<br>(0.61-3.2)                           | 0.69%<br>(-3.7-7.4%)                 | 0.69%<br>(-5-9.4%)                  | 9<br>(-67-130)      | 120<br>(-680-1400)     |
| Turkmenistan | 2016 | Female | 85 to 89 | 49%<br>(36-61%)                | 51%<br>(39-64%)          | 1.7<br>(0.63-3.6)                           | 0.56%<br>(-4.2-8.5%)                 | 0.5%<br>(-5.4-11%)                  | 5.2<br>(-57-110)    | 55<br>(-400-840)       |
| Turkmenistan | 2016 | Female | 90 to 94 | 50%<br>(39-62%)                | 50%<br>(38-61%)          | 1.8<br>(0.6-4.2)                            | 0.54%<br>(-4.4-9.4%)                 | 0.44%<br>(-5.8-11%)                 | 2.7<br>(-35-69)     | 21<br>(-170-350)       |
| Turkmenistan | 2016 | Female | 95 plus  | 51%<br>(37-66%)                | 49%<br>(34-63%)          | 1.9<br>(0.47-4.9)                           | 0.67%<br>(-4.8-9.7%)                 | 0.55%<br>(-6.1-12%)                 | 0.94<br>(-10-20)    | 4.8<br>(-33-69)        |
| Turkmenistan | 2016 | Male   | All Ages | 67%<br>(60-75%)                | 33%<br>(25-40%)          | 2<br>(1.4-2.7)                              | 6.9%<br>(4.3-9.9%)                   | 7%<br>(3.1-12%)                     | 1300<br>(590-2200)  | 65000<br>(42000-93000) |
| Turkmenistan | 2016 | Male   | 15 to 19 | 55%<br>(39-71%)                | 45%<br>(29-61%)          | 0.8<br>(0.38-1.5)                           | 3.8%<br>(2.5-5.7%)                   | 4.4%<br>(2.3-7.5%)                  | 12<br>(6-19)        | 1300<br>(810-1900)     |
| Turkmenistan | 2016 | Male   | 20 to 24 | 73%<br>(56-85%)                | 27%<br>(15-44%)          | 1.8<br>(0.99-2.9)                           | 9.5%<br>(6.7-13%)                    | 11%<br>(6.6-15%)                    | 52<br>(32-77)       | 4900<br>(3400-6800)    |
| Turkmenistan | 2016 | Male   | 25 to 29 | 80%<br>(69-89%)                | 20%<br>(11-31%)          | 2.9<br>(1.7-4.5)                            | 13%<br>(9-17%)                       | 15%<br>(9.6-21%)                    | 95<br>(61-130)      | 7500<br>(5400-10000)   |
| Turkmenistan | 2016 | Male   | 30 to 34 | 85%<br>(73-92%)                | 15%<br>(8.2-27%)         | 3.5<br>(2.2-5.3)                            | 13%<br>(9.6-17%)                     | 16%<br>(11-22%)                     | 110<br>(73-150)     | 7600<br>(5400-10000)   |
| Turkmenistan | 2016 | Male   | 35 to 39 | 86%<br>(76-93%)                | 14%<br>(7.3-24%)         | 3.5<br>(2.1-5.5)                            | 14%<br>(10-19%)                      | 17%<br>(11-24%)                     | 130<br>(87-180)     | 7800<br>(5600-11000)   |
| Turkmenistan | 2016 | Male   | 40 to 44 | 86%<br>(76-93%)                | 14%<br>(7.1-24%)         | 3.6<br>(2.1-5.6)                            | 14%<br>(9.2-19%)                     | 17%<br>(11-24%)                     | 140<br>(92-210)     | 7700<br>(5100-11000)   |
| Turkmenistan | 2016 | Male   | 45 to 49 | 85%<br>(72-92%)                | 15%<br>(7.6-28%)         | 3.8<br>(2.2-6)                              | 13%<br>(7.8-20%)                     | 16%<br>(8.8-24%)                    | 170<br>(94-270)     | 8000<br>(4700-12000)   |
| Turkmenistan | 2016 | Male   | 50 to 54 | 84%<br>(72-92%)                | 16%<br>(8.3-28%)         | 3.8<br>(2.1-6)                              | 12%<br>(5.9-19%)                     | 14%<br>(6.3-22%)                    | 200<br>(89-330)     | 8100<br>(4000-13000)   |
| Turkmenistan | 2016 | Male   | 55 to 59 | 83%<br>(71-91%)                | 17%<br>(8.6-29%)         | 3.3<br>(1.8-5.3)                            | 9.1%<br>(3.5-17%)                    | 10%<br>(3.6-20%)                    | 180<br>(61-340)     | 6200<br>(2400-11000)   |

| Location     | Year | Sex    | Age      | Prevalence of current drinkers | Prevalence of abstainers | Population average of standard drinks daily | Percent of total attributable deaths | Percent of total attributable DALYs | Attributable deaths | Attributable DALYs    |
|--------------|------|--------|----------|--------------------------------|--------------------------|---------------------------------------------|--------------------------------------|-------------------------------------|---------------------|-----------------------|
| Turkmenistan | 2016 | Male   | 60 to 64 | 81%<br>(67-90%)                | 19%<br>(9.6-33%)         | 2.8<br>(1.4-4.8)                            | 6.9%<br>(1.1-15%)                    | 7.8%<br>(0.87-18%)                  | 140<br>(16-310)     | 4000<br>(640-8600)    |
| Turkmenistan | 2016 | Male   | 65 to 69 | 79%<br>(64-89%)                | 21%<br>(11-36%)          | 2.5<br>(1.4-4.1)                            | 4.7%<br>(-0.4-11%)                   | 5.2%<br>(-0.84-13%)                 | 77<br>(-13-200)     | 1900<br>(-160-4500)   |
| Turkmenistan | 2016 | Male   | 70 to 74 | 76%<br>(62-87%)                | 24%<br>(13-38%)          | 2.2<br>(1.2-3.7)                            | 2.4%<br>(-2.2-8.7%)                  | 2.5%<br>(-2.8-10%)                  | 30<br>(-34-120)     | 600<br>(-550-2200)    |
| Turkmenistan | 2016 | Male   | 75 to 79 | 73%<br>(57-84%)                | 27%<br>(16-43%)          | 1.9<br>(0.95-3.2)                           | 0.72%<br>(-3.3-6.2%)                 | 0.54%<br>(-4.3-7.1%)                | 7.7<br>(-62-100)    | 170<br>(-800-1500)    |
| Turkmenistan | 2016 | Male   | 80 to 84 | 70%<br>(54-83%)                | 30%<br>(17-46%)          | 1.7<br>(0.86-2.7)                           | -0.91%<br>(-4.6-3.2%)                | -1.5%<br>(-5.8-3.4%)                | -15<br>(-61-36)     | -120<br>(-590-420)    |
| Turkmenistan | 2016 | Male   | 85 to 89 | 68%<br>(52-80%)                | 32%<br>(20-48%)          | 1.5<br>(0.79-2.6)                           | -1.8%<br>(-5.2-1.8%)                 | -2.5%<br>(-6.5-1.7%)                | -16<br>(-42-11)     | -100<br>(-280-100)    |
| Turkmenistan | 2016 | Male   | 90 to 94 | 67%<br>(52-80%)                | 33%<br>(20-48%)          | 1.4<br>(0.7-2.4)                            | -2.3%<br>(-5.2-0.9%)                 | -3.1%<br>(-6.7-0.73%)               | -8.5<br>(-18-2)     | -37<br>(-85-15)       |
| Turkmenistan | 2016 | Male   | 95 plus  | 66%<br>(47-82%)                | 34%<br>(18-53%)          | 1.3<br>(0.53-2.4)                           | -2.3%<br>(-5.3-0.91%)                | -3.2%<br>(-6.9-0.57%)               | -1.5<br>(-3.1-0.26) | -4.2<br>(-9.7-1.7)    |
| Uzbekistan   | 1990 | Female | All Ages | 50%<br>(44-58%)                | 50%<br>(42-56%)          | 0.66<br>(0.46-0.92)                         | 1%<br>(0.06-2.2%)                    | 0.68%<br>(-1.8-4.1%)                | 440<br>(-1200-2700) | 34000<br>(2100-75000) |
| Uzbekistan   | 1990 | Female | 15 to 19 | 52%<br>(39-68%)                | 48%<br>(32-61%)          | 0.67<br>(0.27-1.3)                          | 1.3%<br>(0.64-2.3%)                  | 2.2%<br>(0.6-4.4%)                  | 15<br>(4-30)        | 1800<br>(830-3100)    |
| Uzbekistan   | 1990 | Female | 20 to 24 | 61%<br>(48-74%)                | 39%<br>(26-52%)          | 0.97<br>(0.42-1.8)                          | 2.2%<br>(1.1-3.7%)                   | 2.8%<br>(0.72-5.6%)                 | 26<br>(6.6-54)      | 3200<br>(1500-5400)   |
| Uzbekistan   | 1990 | Female | 25 to 29 | 64%<br>(49-77%)                | 36%<br>(23-51%)          | 1.1<br>(0.51-2)                             | 2.6%<br>(1.5-4.4%)                   | 3.6%<br>(1.1-6.9%)                  | 38<br>(12-74)       | 4000<br>(2100-6600)   |
| Uzbekistan   | 1990 | Female | 30 to 34 | 65%<br>(51-78%)                | 35%<br>(22-49%)          | 1.2<br>(0.62-2.2)                           | 2.9%<br>(1.6-4.6%)                   | 4.4%<br>(1.9-7.8%)                  | 50<br>(21-89)       | 4200<br>(2400-6600)   |
| Uzbekistan   | 1990 | Female | 35 to 39 | 65%<br>(52-79%)                | 35%<br>(21-48%)          | 1.3<br>(0.55-2.4)                           | 3%<br>(1.7-5.3%)                     | 5%<br>(2.2-9.4%)                    | 54<br>(24-100)      | 3600<br>(1900-6300)   |
| Uzbekistan   | 1990 | Female | 40 to 44 | 65%<br>(52-78%)                | 35%<br>(22-48%)          | 1.3<br>(0.58-2.4)                           | 3.2%<br>(1.5-6.4%)                   | 5.4%<br>(2.2-10%)                   | 55<br>(23-110)      | 3000<br>(1400-5500)   |
| Uzbekistan   | 1990 | Female | 45 to 49 | 65%<br>(50-78%)                | 35%<br>(22-50%)          | 1.4<br>(0.6-2.7)                            | 3.4%<br>(1.2-7.2%)                   | 5.6%<br>(1.9-12%)                   | 59<br>(19-130)      | 2700<br>(920-5600)    |
| Uzbekistan   | 1990 | Female | 50 to 54 | 64%<br>(49-77%)                | 36%<br>(23-51%)          | 1.4<br>(0.61-2.7)                           | 3.6%<br>(0.84-8.3%)                  | 5.5%<br>(1.2-12%)                   | 130<br>(28-290)     | 4900<br>(1200-11000)  |
| Uzbekistan   | 1990 | Female | 55 to 59 | 62%<br>(48-76%)                | 38%<br>(24-52%)          | 1.4<br>(0.55-2.8)                           | 3.3%<br>(-0.011-8.5%)                | 4.7%<br>(-0.075-12%)                | 130<br>(-2.1-350)   | 4400<br>(-15-12000)   |
| Uzbekistan   | 1990 | Female | 60 to 64 | 60%<br>(45-75%)                | 40%<br>(25-55%)          | 1.4<br>(0.54-2.8)                           | 2.1%<br>(-1.4-8.2%)                  | 2.9%<br>(-1.9-11%)                  | 130<br>(-87-480)    | 3500<br>(-2400-13000) |
| Uzbekistan   | 1990 | Female | 65 to 69 | 58%<br>(45-73%)                | 42%<br>(27-55%)          | 1.2<br>(0.55-2.4)                           | 1.1%<br>(-2.3-6.7%)                  | 1.5%<br>(-3-8.8%)                   | 70<br>(-140-390)    | 1600<br>(-3200-9000)  |
| Uzbekistan   | 1990 | Female | 70 to 74 | 55%<br>(43-68%)                | 45%<br>(32-57%)          | 1.1<br>(0.42-2.3)                           | 0.13%<br>(-3.1-5.6%)                 | 0.17%<br>(-4.1-6.8%)                | 8<br>(-190-320)     | 150<br>(-3400-6000)   |
| Uzbekistan   | 1990 | Female | 75 to 79 | 52%<br>(39-65%)                | 48%<br>(35-61%)          | 1<br>(0.37-2.1)                             | -0.6%<br>(-3.9-4.7%)                 | -0.81%<br>(-4.9-5.7%)               | -50<br>(-300-360)   | -660<br>(-4100-5100)  |

| Location   | Year | Sex    | Age      | Prevalence of current drinkers | Prevalence of abstainers | Population average of standard drinks daily | Percent of total attributable deaths | Percent of total attributable DALYs | Attributable deaths | Attributable DALYs       |
|------------|------|--------|----------|--------------------------------|--------------------------|---------------------------------------------|--------------------------------------|-------------------------------------|---------------------|--------------------------|
| Uzbekistan | 1990 | Female | 80 to 84 | 50%<br>(36-64%)                | 50%<br>(36-64%)          | 1.1<br>(0.42-2.1)                           | -1.2%<br>(-4.5-3.9%)                 | -1.5%<br>(-5.5-4.6%)                | -110<br>(-380-310)  | -1000<br>(-3900-3400)    |
| Uzbekistan | 1990 | Female | 85 to 89 | 49%<br>(37-61%)                | 51%<br>(39-63%)          | 1.1<br>(0.42-2.4)                           | -1.3%<br>(-4.7-4.6%)                 | -1.7%<br>(-5.8-5.3%)                | -110<br>(-370-330)  | -720<br>(-2600-2600)     |
| Uzbekistan | 1990 | Female | 90 to 94 | 50%<br>(38-62%)                | 50%<br>(38-62%)          | 1.2<br>(0.41-2.8)                           | -1.1%<br>(-4.7-5.3%)                 | -1.5%<br>(-5.8-6.2%)                | -48<br>(-180-200)   | -220<br>(-880-1000)      |
| Uzbekistan | 1990 | Female | 95 plus  | 51%<br>(38-67%)                | 49%<br>(33-62%)          | 1.3<br>(0.34-3.2)                           | -0.81%<br>(-4.8-6.8%)                | -1.2%<br>(-6-7.9%)                  | -9.9<br>(-50-68)    | -27<br>(-160-230)        |
| Uzbekistan | 1990 | Male   | All Ages | 61%<br>(52-70%)                | 39%<br>(30-48%)          | 1<br>(0.76-1.4)                             | 2.8%<br>(1.7-4.2%)                   | 2.7%<br>(0.57-5%)                   | 2000<br>(400-3700)  | 120000<br>(70000-170000) |
| Uzbekistan | 1990 | Male   | 15 to 19 | 55%<br>(40-71%)                | 45%<br>(29-60%)          | 0.56<br>(0.3-0.93)                          | 2.8%<br>(1.8-4.2%)                   | 3.2%<br>(1.4-5.3%)                  | 34<br>(15-59)       | 4200<br>(2500-6400)      |
| Uzbekistan | 1990 | Male   | 20 to 24 | 73%<br>(57-85%)                | 27%<br>(15-43%)          | 1.3<br>(0.75-1.9)                           | 6.4%<br>(4.4-8.8%)                   | 7%<br>(3.9-11%)                     | 100<br>(55-160)     | 11000<br>(7000-15000)    |
| Uzbekistan | 1990 | Male   | 25 to 29 | 80%<br>(68-89%)                | 20%<br>(11-32%)          | 2<br>(1.3-3)                                | 8.7%<br>(6.1-12%)                    | 10%<br>(6.2-15%)                    | 190<br>(120-280)    | 16000<br>(11000-22000)   |
| Uzbekistan | 1990 | Male   | 30 to 34 | 84%<br>(73-92%)                | 16%<br>(7.8-27%)         | 2.4<br>(1.6-3.5)                            | 8.9%<br>(6.3-12%)                    | 11%<br>(6.7-15%)                    | 210<br>(140-310)    | 16000<br>(11000-22000)   |
| Uzbekistan | 1990 | Male   | 35 to 39 | 86%<br>(75-93%)                | 14%<br>(7.3-25%)         | 2.4<br>(1.4-3.7)                            | 8.1%<br>(5.1-12%)                    | 9.7%<br>(5.4-15%)                   | 190<br>(100-290)    | 12000<br>(7600-18000)    |
| Uzbekistan | 1990 | Male   | 40 to 44 | 86%<br>(76-93%)                | 14%<br>(7-24%)           | 2.5<br>(1.5-3.9)                            | 7.6%<br>(4.3-12%)                    | 9.1%<br>(4.4-15%)                   | 170<br>(79-280)     | 9300<br>(5200-14000)     |
| Uzbekistan | 1990 | Male   | 45 to 49 | 85%<br>(74-93%)                | 15%<br>(7.2-26%)         | 2.7<br>(1.6-4.3)                            | 7.9%<br>(4.2-13%)                    | 9.3%<br>(4.4-15%)                   | 190<br>(92-320)     | 9200<br>(5000-15000)     |
| Uzbekistan | 1990 | Male   | 50 to 54 | 84%<br>(73-92%)                | 16%<br>(7.9-27%)         | 2.6<br>(1.5-4.1)                            | 7.6%<br>(3.6-13%)                    | 8.8%<br>(3.8-15%)                   | 370<br>(160-650)    | 15000<br>(7100-25000)    |
| Uzbekistan | 1990 | Male   | 55 to 59 | 83%<br>(70-91%)                | 17%<br>(8.8-30%)         | 2.3<br>(1.2-3.7)                            | 6.2%<br>(2.4-11%)                    | 7.1%<br>(2.4-13%)                   | 330<br>(110-610)    | 11000<br>(4200-20000)    |
| Uzbekistan | 1990 | Male   | 60 to 64 | 81%<br>(67-91%)                | 19%<br>(9.3-33%)         | 2<br>(1-3.4)                                | 4.4%<br>(0.68-9.4%)                  | 5%<br>(0.5-11%)                     | 310<br>(31-700)     | 9000<br>(1400-20000)     |
| Uzbekistan | 1990 | Male   | 65 to 69 | 79%<br>(64-89%)                | 21%<br>(11-36%)          | 1.7<br>(0.98-2.8)                           | 2.9%<br>(-0.49-7%)                   | 3.2%<br>(-0.87-8.2%)                | 140<br>(-37-350)    | 3300<br>(-570-8200)      |
| Uzbekistan | 1990 | Male   | 70 to 74 | 76%<br>(62-86%)                | 24%<br>(14-38%)          | 1.5<br>(0.82-2.5)                           | 1.3%<br>(-1.8-5%)                    | 1.3%<br>(-2.3-5.7%)                 | 45<br>(-80-200)     | 940<br>(-1300-3700)      |
| Uzbekistan | 1990 | Male   | 75 to 79 | 73%<br>(57-85%)                | 27%<br>(15-43%)          | 1.3<br>(0.65-2.1)                           | -0.16%<br>(-3-3.1%)                  | -0.39%<br>(-3.7-3.4%)               | -17<br>(-170-150)   | -120<br>(-2200-2200)     |
| Uzbekistan | 1990 | Male   | 80 to 84 | 70%<br>(54-83%)                | 30%<br>(17-46%)          | 1.1<br>(0.62-1.8)                           | -1.4%<br>(-4.1-1.4%)                 | -1.8%<br>(-5-1.4%)                  | -92<br>(-250-70)    | -840<br>(-2400-820)      |
| Uzbekistan | 1990 | Male   | 85 to 89 | 68%<br>(52-81%)                | 32%<br>(19-48%)          | 1<br>(0.56-1.7)                             | -2%<br>(-4.7-0.36%)                  | -2.6%<br>(-5.8-0.26%)               | -110<br>(-250-11)   | -730<br>(-1700-130)      |
| Uzbekistan | 1990 | Male   | 90 to 94 | 67%<br>(52-81%)                | 33%<br>(19-48%)          | 0.97<br>(0.49-1.7)                          | -2.3%<br>(-4.8-0.046%)               | -3%<br>(-6-0.17%)                   | -60<br>(-120-3.4)   | -270<br>(-580-5.6)       |
| Uzbekistan | 1990 | Male   | 95 plus  | 66%<br>(46-82%)                | 34%<br>(18-54%)          | 0.87<br>(0.37-1.6)                          | -2.3%<br>(-4.6-0.023%)               | -3%<br>(-6-0.26%)                   | -15<br>(-29-1.3)    | -43<br>(-92-0.43)        |

| Location   | Year | Sex    | Age      | Prevalence of current drinkers | Prevalence of abstainers | Population average of standard drinks daily | Percent of total attributable deaths | Percent of total attributable DALYs | Attributable deaths | Attributable DALYs        |
|------------|------|--------|----------|--------------------------------|--------------------------|---------------------------------------------|--------------------------------------|-------------------------------------|---------------------|---------------------------|
| Uzbekistan | 1995 | Female | All Ages | 51%<br>(44-58%)                | 49%<br>(42-56%)          | 0.75<br>(0.54-1)                            | 1.4%<br>(0.23-2.9%)                  | 1.2%<br>(-1.6-5.3%)                 | 980<br>(-1300-4200) | 53000<br>(9000-110000)    |
| Uzbekistan | 1995 | Female | 15 to 19 | 52%<br>(40-67%)                | 48%<br>(33-60%)          | 0.74<br>(0.31-1.4)                          | 1.4%<br>(0.66-2.6%)                  | 2.3%<br>(0.58-4.9%)                 | 19<br>(4.9-40)      | 2200<br>(970-3900)        |
| Uzbekistan | 1995 | Female | 20 to 24 | 61%<br>(48-74%)                | 39%<br>(26-52%)          | 1.1<br>(0.45-2)                             | 2.5%<br>(1.2-4.6%)                   | 3.3%<br>(0.82-6.7%)                 | 39<br>(9.7-80)      | 4200<br>(1900-7500)       |
| Uzbekistan | 1995 | Female | 25 to 29 | 64%<br>(50-76%)                | 36%<br>(24-50%)          | 1.3<br>(0.58-2.2)                           | 3.1%<br>(1.5-5.4%)                   | 4.3%<br>(1.4-8.4%)                  | 56<br>(17-110)      | 5100<br>(2400-8600)       |
| Uzbekistan | 1995 | Female | 30 to 34 | 65%<br>(50-79%)                | 35%<br>(21-50%)          | 1.4<br>(0.7-2.4)                            | 3.5%<br>(2-5.6%)                     | 5.3%<br>(2.5-9.4%)                  | 83<br>(38-150)      | 6300<br>(3400-10000)      |
| Uzbekistan | 1995 | Female | 35 to 39 | 66%<br>(52-80%)                | 34%<br>(20-48%)          | 1.4<br>(0.65-2.5)                           | 3.7%<br>(2-6.4%)                     | 6%<br>(2.9-11%)                     | 100<br>(48-180)     | 6300<br>(3300-11000)      |
| Uzbekistan | 1995 | Female | 40 to 44 | 65%<br>(52-79%)                | 35%<br>(21-48%)          | 1.5<br>(0.66-2.6)                           | 3.8%<br>(1.8-7.1%)                   | 6.3%<br>(2.9-11%)                   | 110<br>(49-190)     | 5600<br>(2700-9800)       |
| Uzbekistan | 1995 | Female | 45 to 49 | 65%<br>(49-79%)                | 35%<br>(21-51%)          | 1.5<br>(0.68-3.1)                           | 4%<br>(1.4-8.4%)                     | 6.2%<br>(2-13%)                     | 110<br>(33-220)     | 4600<br>(1700-9600)       |
| Uzbekistan | 1995 | Female | 50 to 54 | 63%<br>(49-77%)                | 37%<br>(23-51%)          | 1.6<br>(0.7-3.1)                            | 4.2%<br>(0.89-9.7%)                  | 6.1%<br>(1.3-14%)                   | 110<br>(23-260)     | 4300<br>(890-9900)        |
| Uzbekistan | 1995 | Female | 55 to 59 | 61%<br>(48-75%)                | 39%<br>(25-52%)          | 1.6<br>(0.66-3.1)                           | 4%<br>(0.027-10%)                    | 5.4%<br>(0.0017-14%)                | 230<br>(0.068-560)  | 7400<br>(48-18000)        |
| Uzbekistan | 1995 | Female | 60 to 64 | 60%<br>(45-75%)                | 40%<br>(25-55%)          | 1.5<br>(0.59-3.2)                           | 2.7%<br>(-1.6-9.9%)                  | 3.4%<br>(-2.1-12%)                  | 180<br>(-110-620)   | 5000<br>(-3000-17000)     |
| Uzbekistan | 1995 | Female | 65 to 69 | 58%<br>(45-73%)                | 42%<br>(27-55%)          | 1.4<br>(0.64-2.7)                           | 1.5%<br>(-2.4-7.7%)                  | 1.9%<br>(-3-9.5%)                   | 140<br>(-230-710)   | 3200<br>(-5200-16000)     |
| Uzbekistan | 1995 | Female | 70 to 74 | 55%<br>(42-69%)                | 45%<br>(31-58%)          | 1.2<br>(0.49-2.4)                           | 0.46%<br>(-3.4-6.5%)                 | 0.55%<br>(-4.1-7.8%)                | 42<br>(-320-600)    | 780<br>(-5800-11000)      |
| Uzbekistan | 1995 | Female | 75 to 79 | 52%<br>(40-66%)                | 48%<br>(34-60%)          | 1.2<br>(0.42-2.3)                           | -0.36%<br>(-4.2-5.6%)                | -0.51%<br>(-5-6.5%)                 | -35<br>(-350-460)   | -430<br>(-4900-6500)      |
| Uzbekistan | 1995 | Female | 80 to 84 | 50%<br>(37-65%)                | 50%<br>(35-63%)          | 1.2<br>(0.47-2.3)                           | -0.74%<br>(-4.5-5.1%)                | -0.99%<br>(-5.5-5.9%)               | -78<br>(-450-470)   | -720<br>(-4500-5100)      |
| Uzbekistan | 1995 | Female | 85 to 89 | 50%<br>(37-63%)                | 50%<br>(37-63%)          | 1.3<br>(0.49-2.6)                           | -0.81%<br>(-4.8-5.9%)                | -1.1%<br>(-5.7-6.9%)                | -77<br>(-400-500)   | -490<br>(-2800-3700)      |
| Uzbekistan | 1995 | Female | 90 to 94 | 51%<br>(39-62%)                | 49%<br>(38-61%)          | 1.3<br>(0.46-3)                             | -0.63%<br>(-4.8-7.2%)                | -0.91%<br>(-5.8-8.3%)               | -37<br>(-240-340)   | -150<br>(-1100-1700)      |
| Uzbekistan | 1995 | Female | 95 plus  | 51%<br>(38-66%)                | 49%<br>(34-62%)          | 1.4<br>(0.38-3.4)                           | -0.33%<br>(-5.1-8.3%)                | -0.58%<br>(-6.1-9.5%)               | -7.8<br>(-82-130)   | -17<br>(-260-440)         |
| Uzbekistan | 1995 | Male   | All Ages | 62%<br>(54-71%)                | 38%<br>(29-46%)          | 1.2<br>(0.9-1.5)                            | 3.6%<br>(2.3-5.1%)                   | 3.7%<br>(1.2-6.2%)                  | 3100<br>(1000-5300) | 160000<br>(100000-230000) |
| Uzbekistan | 1995 | Male   | 15 to 19 | 56%<br>(40-72%)                | 44%<br>(28-60%)          | 0.63<br>(0.34-1)                            | 2.9%<br>(1.8-4.2%)                   | 3.2%<br>(1.5-5.4%)                  | 45<br>(21-76)       | 5200<br>(3100-7600)       |
| Uzbekistan | 1995 | Male   | 20 to 24 | 73%<br>(58-85%)                | 27%<br>(15-42%)          | 1.4<br>(0.87-2.1)                           | 6.9%<br>(4.8-9.4%)                   | 7.6%<br>(4.5-11%)                   | 140<br>(80-220)     | 14000<br>(9100-19000)     |
| Uzbekistan | 1995 | Male   | 25 to 29 | 80%<br>(68-89%)                | 20%<br>(11-32%)          | 2.3<br>(1.4-3.4)                            | 9.8%<br>(6.9-13%)                    | 11%<br>(7.2-16%)                    | 240<br>(150-350)    | 19000<br>(13000-26000)    |

| Location   | Year | Sex    | Age      | Prevalence of current drinkers | Prevalence of abstainers | Population average of standard drinks daily | Percent of total attributable deaths | Percent of total attributable DALYs | Attributable deaths  | Attributable DALYs      |
|------------|------|--------|----------|--------------------------------|--------------------------|---------------------------------------------|--------------------------------------|-------------------------------------|----------------------|-------------------------|
| Uzbekistan | 1995 | Male   | 30 to 34 | 84%<br>(73-92%)                | 16%<br>(7.9-27%)         | 2.7<br>(1.8-3.9)                            | 10%<br>(7.4-14%)                     | 12%<br>(8.1-17%)                    | 320<br>(210-450)     | 23000<br>(16000-30000)  |
| Uzbekistan | 1995 | Male   | 35 to 39 | 86%<br>(75-93%)                | 14%<br>(7.2-25%)         | 2.7<br>(1.7-3.9)                            | 9.3%<br>(6.2-13%)                    | 11%<br>(7-16%)                      | 340<br>(200-490)     | 21000<br>(14000-29000)  |
| Uzbekistan | 1995 | Male   | 40 to 44 | 86%<br>(76-93%)                | 14%<br>(7.1-24%)         | 2.8<br>(1.7-4.1)                            | 8.9%<br>(5.3-13%)                    | 11%<br>(5.8-16%)                    | 340<br>(180-520)     | 18000<br>(10000-26000)  |
| Uzbekistan | 1995 | Male   | 45 to 49 | 86%<br>(74-93%)                | 14%<br>(7.3-26%)         | 3<br>(1.8-4.7)                              | 9.1%<br>(5-14%)                      | 11%<br>(5.3-17%)                    | 340<br>(170-560)     | 15000<br>(8400-25000)   |
| Uzbekistan | 1995 | Male   | 50 to 54 | 85%<br>(73-92%)                | 15%<br>(8.1-27%)         | 2.9<br>(1.7-4.6)                            | 8.7%<br>(4.3-14%)                    | 10%<br>(4.4-17%)                    | 340<br>(150-600)     | 14000<br>(6600-23000)   |
| Uzbekistan | 1995 | Male   | 55 to 59 | 83%<br>(71-91%)                | 17%<br>(8.7-29%)         | 2.5<br>(1.4-4)                              | 6.9%<br>(2.6-13%)                    | 7.8%<br>(2.7-15%)                   | 520<br>(180-980)     | 17000<br>(6600-32000)   |
| Uzbekistan | 1995 | Male   | 60 to 64 | 81%<br>(67-90%)                | 19%<br>(9.6-33%)         | 2.2<br>(1.2-3.7)                            | 4.9%<br>(0.66-11%)                   | 5.4%<br>(0.48-12%)                  | 400<br>(35-900)      | 11000<br>(1500-25000)   |
| Uzbekistan | 1995 | Male   | 65 to 69 | 79%<br>(65-89%)                | 21%<br>(11-35%)          | 2<br>(1.1-3)                                | 3.1%<br>(-0.55-7.7%)                 | 3.4%<br>(-0.89-8.7%)                | 300<br>(-79-760)     | 7200<br>(-1300-18000)   |
| Uzbekistan | 1995 | Male   | 70 to 74 | 76%<br>(62-86%)                | 24%<br>(14-38%)          | 1.7<br>(0.96-2.7)                           | 1.5%<br>(-1.9-5.3%)                  | 1.5%<br>(-2.5-6%)                   | 88<br>(-140-340)     | 1800<br>(-2300-6400)    |
| Uzbekistan | 1995 | Male   | 75 to 79 | 73%<br>(58-85%)                | 27%<br>(15-42%)          | 1.4<br>(0.77-2.4)                           | -0.018%<br>(-3.2-3.6%)               | -0.23%<br>(-4-3.9%)                 | -9<br>(-160-150)     | -11<br>(-2100-2300)     |
| Uzbekistan | 1995 | Male   | 80 to 84 | 71%<br>(54-83%)                | 29%<br>(17-46%)          | 1.3<br>(0.72-2.1)                           | -1.2%<br>(-4.1-1.9%)                 | -1.6%<br>(-5.1-1.9%)                | -75<br>(-240-86)     | -660<br>(-2300-1000)    |
| Uzbekistan | 1995 | Male   | 85 to 89 | 68%<br>(53-80%)                | 32%<br>(20-47%)          | 1.2<br>(0.66-1.9)                           | -1.9%<br>(-4.8-0.95%)                | -2.4%<br>(-5.7-0.9%)                | -96<br>(-230-36)     | -620<br>(-1600-310)     |
| Uzbekistan | 1995 | Male   | 90 to 94 | 67%<br>(53-80%)                | 33%<br>(20-47%)          | 1.1<br>(0.58-1.9)                           | -2.2%<br>(-4.9-0.52%)                | -2.8%<br>(-6-0.42%)                 | -63<br>(-130-9.2)    | -280<br>(-630-68)       |
| Uzbekistan | 1995 | Male   | 95 plus  | 66%<br>(47-82%)                | 34%<br>(18-53%)          | 1<br>(0.44-1.9)                             | -2.2%<br>(-4.7-0.48%)                | -2.9%<br>(-6-0.16%)                 | -20<br>(-41-1.1)     | -59<br>(-130-13)        |
| Uzbekistan | 2000 | Female | All Ages | 52%<br>(45-59%)                | 48%<br>(41-55%)          | 0.85<br>(0.62-1.1)                          | 1.8%<br>(0.46-3.6%)                  | 1.8%<br>(-1.5-6.4%)                 | 1600<br>(-1300-5400) | 72000<br>(18000-140000) |
| Uzbekistan | 2000 | Female | 15 to 19 | 52%<br>(40-67%)                | 48%<br>(33-60%)          | 0.8<br>(0.33-1.5)                           | 1.6%<br>(0.67-3%)                    | 2.7%<br>(0.67-5.9%)                 | 26<br>(6.4-56)       | 2800<br>(1200-5200)     |
| Uzbekistan | 2000 | Female | 20 to 24 | 61%<br>(48-73%)                | 39%<br>(27-52%)          | 1.2<br>(0.49-2.2)                           | 3%<br>(1.3-5.3%)                     | 4.2%<br>(1-8.3%)                    | 56<br>(14-110)       | 5500<br>(2400-9600)     |
| Uzbekistan | 2000 | Female | 25 to 29 | 64%<br>(50-76%)                | 36%<br>(24-50%)          | 1.4<br>(0.62-2.4)                           | 3.7%<br>(1.7-6.3%)                   | 5.4%<br>(1.6-10%)                   | 80<br>(24-150)       | 6700<br>(3100-12000)    |
| Uzbekistan | 2000 | Female | 30 to 34 | 65%<br>(50-78%)                | 35%<br>(22-50%)          | 1.5<br>(0.73-2.5)                           | 4%<br>(2.3-6.6%)                     | 6.3%<br>(2.9-11%)                   | 100<br>(47-170)      | 7300<br>(4000-12000)    |
| Uzbekistan | 2000 | Female | 35 to 39 | 65%<br>(52-79%)                | 35%<br>(21-48%)          | 1.5<br>(0.7-2.7)                            | 4.3%<br>(2.3-7.1%)                   | 7%<br>(3.4-12%)                     | 140<br>(67-230)      | 8500<br>(4400-14000)    |
| Uzbekistan | 2000 | Female | 40 to 44 | 65%<br>(51-79%)                | 35%<br>(21-49%)          | 1.6<br>(0.73-2.8)                           | 4.4%<br>(2.1-7.6%)                   | 7.2%<br>(3.3-13%)                   | 170<br>(77-290)      | 8600<br>(4100-15000)    |
| Uzbekistan | 2000 | Female | 45 to 49 | 65%<br>(49-79%)                | 35%<br>(21-51%)          | 1.6<br>(0.73-3.2)                           | 4.4%<br>(1.6-9%)                     | 6.9%<br>(2.4-14%)                   | 170<br>(60-350)      | 7600<br>(2700-15000)    |



| Location   | Year | Sex    | Age      | Prevalence of current drinkers | Prevalence of abstainers | Population average of standard drinks daily | Percent of total attributable deaths | Percent of total attributable DALYs | Attributable deaths | Attributable DALYs        |
|------------|------|--------|----------|--------------------------------|--------------------------|---------------------------------------------|--------------------------------------|-------------------------------------|---------------------|---------------------------|
| Uzbekistan | 2000 | Female | 50 to 54 | 63%<br>(48-77%)                | 37%<br>(23-52%)          | 1.7<br>(0.76-3.3)                           | 4.6%<br>(1-10%)                      | 6.5%<br>(1.4-15%)                   | 170<br>(37-380)     | 6500<br>(1500-15000)      |
| Uzbekistan | 2000 | Female | 55 to 59 | 62%<br>(47-76%)                | 38%<br>(24-53%)          | 1.7<br>(0.68-3.3)                           | 4.4%<br>(0.14-11%)                   | 5.9%<br>(0.14-14%)                  | 170<br>(3.9-420)    | 5600<br>(180-13000)       |
| Uzbekistan | 2000 | Female | 60 to 64 | 60%<br>(45-75%)                | 40%<br>(25-55%)          | 1.6<br>(0.63-3.4)                           | 3.1%<br>(-1.5-11%)                   | 4%<br>(-1.9-13%)                    | 250<br>(-120-850)   | 6900<br>(-3300-24000)     |
| Uzbekistan | 2000 | Female | 65 to 69 | 58%<br>(45-73%)                | 42%<br>(27-55%)          | 1.5<br>(0.67-2.9)                           | 1.9%<br>(-2.6-8.9%)                  | 2.3%<br>(-3.2-11%)                  | 180<br>(-240-830)   | 4000<br>(-5500-19000)     |
| Uzbekistan | 2000 | Female | 70 to 74 | 55%<br>(43-68%)                | 45%<br>(32-57%)          | 1.3<br>(0.51-2.8)                           | 0.81%<br>(-3.4-7.6%)                 | 0.95%<br>(-4.2-9.1%)                | 99<br>(-430-940)    | 1900<br>(-7900-17000)     |
| Uzbekistan | 2000 | Female | 75 to 79 | 52%<br>(40-65%)                | 48%<br>(35-60%)          | 1.3<br>(0.45-2.5)                           | 0.014%<br>(-3.9-6.5%)                | -0.065%<br>(-4.8-7.4%)              | -6.2<br>(-460-700)  | 24<br>(-6300-10000)       |
| Uzbekistan | 2000 | Female | 80 to 84 | 50%<br>(37-65%)                | 50%<br>(35-63%)          | 1.3<br>(0.51-2.4)                           | -0.13%<br>(-4.2-6.4%)                | -0.27%<br>(-5.2-7.4%)               | -24<br>(-480-680)   | -150<br>(-4800-7200)      |
| Uzbekistan | 2000 | Female | 85 to 89 | 49%<br>(37-61%)                | 51%<br>(39-63%)          | 1.4<br>(0.52-2.8)                           | -0.16%<br>(-4.5-7.4%)                | -0.32%<br>(-5.5-8.6%)               | -22<br>(-370-570)   | -92<br>(-2600-4200)       |
| Uzbekistan | 2000 | Female | 90 to 94 | 50%<br>(39-62%)                | 50%<br>(38-61%)          | 1.5<br>(0.5-3.4)                            | 0.0077%<br>(-4.6-8.5%)               | -0.15%<br>(-5.6-10%)                | -5.9<br>(-220-380)  | 2<br>(-1100-1900)         |
| Uzbekistan | 2000 | Female | 95 plus  | 51%<br>(37-66%)                | 49%<br>(34-63%)          | 1.5<br>(0.4-3.7)                            | 0.28%<br>(-4.9-9.2%)                 | 0.14%<br>(-5.9-11%)                 | 2.1<br>(-91-160)    | 17<br>(-290-550)          |
| Uzbekistan | 2000 | Male   | All Ages | 63%<br>(54-72%)                | 37%<br>(28-46%)          | 1.3<br>(1-1.7)                              | 4.6%<br>(3-6.4%)                     | 4.5%<br>(1.7-7.5%)                  | 4200<br>(1500-7000) | 210000<br>(130000-300000) |
| Uzbekistan | 2000 | Male   | 15 to 19 | 55%<br>(39-71%)                | 45%<br>(29-61%)          | 0.67<br>(0.36-1.1)                          | 3%<br>(1.8-4.4%)                     | 3.3%<br>(1.5-5.6%)                  | 57<br>(27-98)       | 6400<br>(3800-9500)       |
| Uzbekistan | 2000 | Male   | 20 to 24 | 73%<br>(57-85%)                | 27%<br>(15-43%)          | 1.5<br>(0.91-2.2)                           | 7.3%<br>(4.9-10%)                    | 8.1%<br>(4.6-12%)                   | 190<br>(100-280)    | 17000<br>(11000-24000)    |
| Uzbekistan | 2000 | Male   | 25 to 29 | 80%<br>(69-89%)                | 20%<br>(11-31%)          | 2.4<br>(1.5-3.6)                            | 11%<br>(7.1-15%)                     | 12%<br>(7.6-18%)                    | 340<br>(200-490)    | 26000<br>(17000-35000)    |
| Uzbekistan | 2000 | Male   | 30 to 34 | 84%<br>(72-92%)                | 16%<br>(7.8-28%)         | 2.9<br>(1.9-4.2)                            | 11%<br>(8.1-15%)                     | 14%<br>(9.2-19%)                    | 400<br>(260-560)    | 27000<br>(19000-36000)    |
| Uzbekistan | 2000 | Male   | 35 to 39 | 86%<br>(75-93%)                | 14%<br>(7.3-25%)         | 2.9<br>(1.8-4.3)                            | 11%<br>(7.1-15%)                     | 13%<br>(8-18%)                      | 470<br>(280-680)    | 28000<br>(18000-39000)    |
| Uzbekistan | 2000 | Male   | 40 to 44 | 86%<br>(76-93%)                | 14%<br>(7.1-24%)         | 3<br>(1.9-4.4)                              | 10%<br>(6.2-15%)                     | 12%<br>(6.9-18%)                    | 520<br>(290-790)    | 27000<br>(16000-39000)    |
| Uzbekistan | 2000 | Male   | 45 to 49 | 85%<br>(73-93%)                | 15%<br>(7.2-27%)         | 3.2<br>(2-5)                                | 10%<br>(5.8-16%)                     | 12%<br>(6.4-19%)                    | 550<br>(290-900)    | 25000<br>(14000-40000)    |
| Uzbekistan | 2000 | Male   | 50 to 54 | 84%<br>(73-92%)                | 16%<br>(8.1-27%)         | 3.2<br>(1.8-4.9)                            | 9.5%<br>(4.8-16%)                    | 11%<br>(5-18%)                      | 490<br>(220-830)    | 19000<br>(9300-32000)     |
| Uzbekistan | 2000 | Male   | 55 to 59 | 83%<br>(71-92%)                | 17%<br>(8.2-29%)         | 2.7<br>(1.6-4.4)                            | 7.4%<br>(2.8-14%)                    | 8.3%<br>(2.8-16%)                   | 390<br>(130-740)    | 13000<br>(5000-25000)     |
| Uzbekistan | 2000 | Male   | 60 to 64 | 81%<br>(67-91%)                | 19%<br>(9.4-33%)         | 2.4<br>(1.3-3.9)                            | 5.2%<br>(0.64-12%)                   | 5.7%<br>(0.39-13%)                  | 520<br>(35-1200)    | 15000<br>(1800-33000)     |
| Uzbekistan | 2000 | Male   | 65 to 69 | 79%<br>(65-89%)                | 21%<br>(11-35%)          | 2.1<br>(1.2-3.3)                            | 3.2%<br>(-0.67-8.3%)                 | 3.5%<br>(-1.1-9.2%)                 | 320<br>(-100-850)   | 7700<br>(-1700-20000)     |

| Location   | Year | Sex    | Age      | Prevalence of current drinkers | Prevalence of abstainers | Population average of standard drinks daily | Percent of total attributable deaths | Percent of total attributable DALYs | Attributable deaths  | Attributable DALYs      |
|------------|------|--------|----------|--------------------------------|--------------------------|---------------------------------------------|--------------------------------------|-------------------------------------|----------------------|-------------------------|
| Uzbekistan | 2000 | Male   | 70 to 74 | 76%<br>(61-86%)                | 24%<br>(14-39%)          | 1.8<br>(1-2.9)                              | 1.5%<br>(-2.3-5.5%)                  | 1.5%<br>(-3-6.1%)                   | 160<br>(-320-650)    | 3200<br>(-5200-12000)   |
| Uzbekistan | 2000 | Male   | 75 to 79 | 73%<br>(57-85%)                | 27%<br>(15-43%)          | 1.6<br>(0.85-2.5)                           | 0.13%<br>(-3.4-4.1%)                 | -0.071%<br>(-4.2-4.5%)              | -4.3<br>(-260-260)   | 130<br>(-3400-3900)     |
| Uzbekistan | 2000 | Male   | 80 to 84 | 71%<br>(54-83%)                | 29%<br>(17-46%)          | 1.4<br>(0.78-2.2)                           | -0.9%<br>(-4-2.4%)                   | -1.3%<br>(-5-2.5%)                  | -59<br>(-230-110)    | -490<br>(-2200-1300)    |
| Uzbekistan | 2000 | Male   | 85 to 89 | 68%<br>(53-80%)                | 32%<br>(20-47%)          | 1.3<br>(0.7-2.1)                            | -1.6%<br>(-4.6-1.4%)                 | -2.1%<br>(-5.7-1.4%)                | -61<br>(-160-41)     | -390<br>(-1100-350)     |
| Uzbekistan | 2000 | Male   | 90 to 94 | 67%<br>(52-80%)                | 33%<br>(20-48%)          | 1.2<br>(0.63-2)                             | -1.9%<br>(-4.8-0.92%)                | -2.6%<br>(-5.9-0.79%)               | -43<br>(-98-13)      | -190<br>(-460-88)       |
| Uzbekistan | 2000 | Male   | 95 plus  | 66%<br>(47-82%)                | 34%<br>(18-53%)          | 1.1<br>(0.47-2)                             | -2%<br>(-4.8-0.81%)                  | -2.7%<br>(-6-0.61%)                 | -17<br>(-37-3.7)     | -48<br>(-110-20)        |
| Uzbekistan | 2005 | Female | All Ages | 52%<br>(46-60%)                | 48%<br>(40-54%)          | 0.97<br>(0.7-1.3)                           | 2.2%<br>(0.65-4.3%)                  | 2.2%<br>(-1.4-7.3%)                 | 2100<br>(-1200-6700) | 89000<br>(26000-170000) |
| Uzbekistan | 2005 | Female | 15 to 19 | 52%<br>(38-67%)                | 48%<br>(33-62%)          | 0.83<br>(0.34-1.6)                          | 1.7%<br>(0.76-3%)                    | 3%<br>(0.78-6.3%)                   | 28<br>(7.1-57)       | 3100<br>(1400-5600)     |
| Uzbekistan | 2005 | Female | 20 to 24 | 61%<br>(47-73%)                | 39%<br>(27-53%)          | 1.2<br>(0.49-2.3)                           | 3.1%<br>(1.5-5.4%)                   | 4.7%<br>(1.2-9.2%)                  | 64<br>(16-130)       | 6400<br>(2900-11000)    |
| Uzbekistan | 2005 | Female | 25 to 29 | 63%<br>(49-76%)                | 37%<br>(24-51%)          | 1.4<br>(0.64-2.7)                           | 3.8%<br>(1.8-6.6%)                   | 5.7%<br>(1.9-11%)                   | 87<br>(28-170)       | 7400<br>(3400-12000)    |
| Uzbekistan | 2005 | Female | 30 to 34 | 65%<br>(50-79%)                | 35%<br>(21-50%)          | 1.6<br>(0.79-2.8)                           | 4.3%<br>(2.3-7.1%)                   | 6.8%<br>(3.1-12%)                   | 120<br>(52-200)      | 8300<br>(4400-14000)    |
| Uzbekistan | 2005 | Female | 35 to 39 | 65%<br>(52-80%)                | 35%<br>(20-48%)          | 1.6<br>(0.74-2.9)                           | 4.6%<br>(2.4-7.7%)                   | 7.5%<br>(3.7-13%)                   | 150<br>(71-260)      | 9000<br>(4700-15000)    |
| Uzbekistan | 2005 | Female | 40 to 44 | 65%<br>(51-79%)                | 35%<br>(21-49%)          | 1.7<br>(0.77-3)                             | 4.7%<br>(2.3-8.1%)                   | 7.7%<br>(3.7-13%)                   | 210<br>(96-360)      | 11000<br>(5200-18000)   |
| Uzbekistan | 2005 | Female | 45 to 49 | 65%<br>(49-78%)                | 35%<br>(22-51%)          | 1.7<br>(0.78-3.4)                           | 4.7%<br>(1.8-9.5%)                   | 7.4%<br>(2.7-15%)                   | 250<br>(86-500)      | 11000<br>(3900-22000)   |
| Uzbekistan | 2005 | Female | 50 to 54 | 63%<br>(48-77%)                | 37%<br>(23-52%)          | 1.8<br>(0.83-3.4)                           | 4.9%<br>(1.2-11%)                    | 7%<br>(1.7-15%)                     | 280<br>(64-600)      | 11000<br>(2400-23000)   |
| Uzbekistan | 2005 | Female | 55 to 59 | 61%<br>(47-75%)                | 39%<br>(25-53%)          | 1.8<br>(0.74-3.6)                           | 4.7%<br>(0.27-11%)                   | 6.3%<br>(0.41-15%)                  | 260<br>(16-620)      | 8300<br>(470-20000)     |
| Uzbekistan | 2005 | Female | 60 to 64 | 59%<br>(45-74%)                | 41%<br>(26-55%)          | 1.7<br>(0.67-3.6)                           | 3.5%<br>(-1.4-12%)                   | 4.3%<br>(-1.9-14%)                  | 190<br>(-85-640)     | 5300<br>(-2300-18000)   |
| Uzbekistan | 2005 | Female | 65 to 69 | 58%<br>(45-73%)                | 42%<br>(27-55%)          | 1.6<br>(0.71-3.1)                           | 2.3%<br>(-2.4-9.8%)                  | 2.8%<br>(-3-12%)                    | 250<br>(-270-1100)   | 5800<br>(-6000-24000)   |
| Uzbekistan | 2005 | Female | 70 to 74 | 55%<br>(42-68%)                | 45%<br>(32-58%)          | 1.4<br>(0.54-2.9)                           | 1.1%<br>(-3.5-8.3%)                  | 1.3%<br>(-4.3-10%)                  | 130<br>(-450-1100)   | 2500<br>(-8100-19000)   |
| Uzbekistan | 2005 | Female | 75 to 79 | 52%<br>(39-65%)                | 48%<br>(35-61%)          | 1.3<br>(0.48-2.7)                           | 0.25%<br>(-4.1-7.3%)                 | 0.21%<br>(-5-8.5%)                  | 26<br>(-610-1000)    | 520<br>(-8400-15000)    |
| Uzbekistan | 2005 | Female | 80 to 84 | 50%<br>(36-64%)                | 50%<br>(36-64%)          | 1.4<br>(0.53-2.6)                           | 0.21%<br>(-4.2-7.6%)                 | 0.14%<br>(-5.1-8.7%)                | 17<br>(-600-1100)    | 320<br>(-6100-11000)    |
| Uzbekistan | 2005 | Female | 85 to 89 | 49%<br>(37-61%)                | 51%<br>(39-63%)          | 1.4<br>(0.55-3)                             | 0.26%<br>(-4.4-8.5%)                 | 0.16%<br>(-5.3-9.8%)                | 12<br>(-380-680)     | 160<br>(-2700-5200)     |

| Location   | Year | Sex    | Age      | Prevalence of current drinkers | Prevalence of abstainers | Population average of standard drinks daily | Percent of total attributable deaths | Percent of total attributable DALYs | Attributable deaths | Attributable DALYs        |
|------------|------|--------|----------|--------------------------------|--------------------------|---------------------------------------------|--------------------------------------|-------------------------------------|---------------------|---------------------------|
| Uzbekistan | 2005 | Female | 90 to 94 | 50%<br>(38-61%)                | 50%<br>(39-62%)          | 1.6<br>(0.52-3.6)                           | 0.53%<br>(-4.5-9.7%)                 | 0.46%<br>(-5.5-11%)                 | 16<br>(-190-380)    | 110<br>(-890-1900)        |
| Uzbekistan | 2005 | Female | 95 plus  | 51%<br>(36-66%)                | 49%<br>(34-64%)          | 1.6<br>(0.44-4)                             | 0.88%<br>(-4.9-11%)                  | 0.84%<br>(-5.8-12%)                 | 11<br>(-81-170)     | 47<br>(-260-570)          |
| Uzbekistan | 2005 | Male   | All Ages | 64%<br>(56-73%)                | 36%<br>(27-44%)          | 1.5<br>(1.2-1.9)                            | 5%<br>(3.1-7.1%)                     | 4.8%<br>(1.5-8.2%)                  | 5000<br>(1600-8500) | 250000<br>(150000-350000) |
| Uzbekistan | 2005 | Male   | 15 to 19 | 55%<br>(39-71%)                | 45%<br>(29-61%)          | 0.72<br>(0.38-1.2)                          | 3.2%<br>(2-4.8%)                     | 3.7%<br>(1.7-6.2%)                  | 65<br>(30-110)      | 7400<br>(4400-11000)      |
| Uzbekistan | 2005 | Male   | 20 to 24 | 73%<br>(58-85%)                | 27%<br>(15-42%)          | 1.6<br>(0.98-2.4)                           | 7.6%<br>(5.2-10%)                    | 8.7%<br>(5.1-13%)                   | 200<br>(110-300)    | 19000<br>(12000-26000)    |
| Uzbekistan | 2005 | Male   | 25 to 29 | 80%<br>(68-89%)                | 20%<br>(11-32%)          | 2.6<br>(1.6-3.8)                            | 11%<br>(7.5-15%)                     | 13%<br>(7.9-18%)                    | 350<br>(220-510)    | 27000<br>(18000-38000)    |
| Uzbekistan | 2005 | Male   | 30 to 34 | 84%<br>(73-92%)                | 16%<br>(8.1-27%)         | 3.1<br>(2-4.4)                              | 12%<br>(8.3-16%)                     | 14%<br>(9.4-20%)                    | 440<br>(290-620)    | 30000<br>(21000-41000)    |
| Uzbekistan | 2005 | Male   | 35 to 39 | 86%<br>(76-93%)                | 14%<br>(7.5-24%)         | 3.1<br>(1.9-4.5)                            | 11%<br>(7.4-16%)                     | 14%<br>(8.4-20%)                    | 480<br>(290-710)    | 28000<br>(18000-40000)    |
| Uzbekistan | 2005 | Male   | 40 to 44 | 86%<br>(76-93%)                | 14%<br>(7-24%)           | 3.2<br>(2-4.6)                              | 11%<br>(6.3-16%)                     | 13%<br>(7.2-19%)                    | 610<br>(350-930)    | 32000<br>(19000-47000)    |
| Uzbekistan | 2005 | Male   | 45 to 49 | 85%<br>(73-92%)                | 15%<br>(7.5-27%)         | 3.4<br>(2.1-5.2)                            | 10%<br>(5.8-16%)                     | 12%<br>(6.4-20%)                    | 730<br>(380-1200)   | 33000<br>(18000-52000)    |
| Uzbekistan | 2005 | Male   | 50 to 54 | 84%<br>(73-92%)                | 16%<br>(7.8-27%)         | 3.3<br>(2-5.1)                              | 9.8%<br>(4.7-16%)                    | 11%<br>(4.9-19%)                    | 740<br>(320-1300)   | 29000<br>(14000-49000)    |
| Uzbekistan | 2005 | Male   | 55 to 59 | 83%<br>(70-91%)                | 17%<br>(8.6-30%)         | 2.9<br>(1.7-4.6)                            | 7.7%<br>(2.7-14%)                    | 8.6%<br>(2.8-16%)                   | 520<br>(160-990)    | 17000<br>(6400-33000)     |
| Uzbekistan | 2005 | Male   | 60 to 64 | 81%<br>(67-90%)                | 19%<br>(9.6-33%)         | 2.5<br>(1.3-4.2)                            | 5.4%<br>(0.39-12%)                   | 5.9%<br>(0.097-14%)                 | 400<br>(6-930)      | 11000<br>(810-26000)      |
| Uzbekistan | 2005 | Male   | 65 to 69 | 79%<br>(63-89%)                | 21%<br>(11-37%)          | 2.2<br>(1.3-3.5)                            | 3.5%<br>(-0.75-9%)                   | 3.8%<br>(-1.2-10%)                  | 440<br>(-130-1100)  | 10000<br>(-2300-26000)    |
| Uzbekistan | 2005 | Male   | 70 to 74 | 76%<br>(61-86%)                | 24%<br>(14-39%)          | 1.9<br>(1.1-3.1)                            | 1.5%<br>(-2.6-6%)                    | 1.5%<br>(-3.2-6.6%)                 | 170<br>(-360-720)   | 3400<br>(-5900-14000)     |
| Uzbekistan | 2005 | Male   | 75 to 79 | 73%<br>(57-85%)                | 27%<br>(15-43%)          | 1.6<br>(0.87-2.7)                           | 0.06%<br>(-3.7-4.3%)                 | -0.16%<br>(-4.5-4.6%)               | -17<br>(-480-510)   | 100<br>(-6400-7500)       |
| Uzbekistan | 2005 | Male   | 80 to 84 | 70%<br>(54-83%)                | 30%<br>(17-46%)          | 1.5<br>(0.81-2.3)                           | -0.81%<br>(-4.3-2.8%)                | -1.2%<br>(-5.2-3%)                  | -83<br>(-370-210)   | -680<br>(-3600-2400)      |
| Uzbekistan | 2005 | Male   | 85 to 89 | 68%<br>(53-80%)                | 32%<br>(20-47%)          | 1.4<br>(0.75-2.2)                           | -1.5%<br>(-4.6-1.7%)                 | -2%<br>(-5.6-1.6%)                  | -53<br>(-150-42)    | -330<br>(-1000-370)       |
| Uzbekistan | 2005 | Male   | 90 to 94 | 67%<br>(52-80%)                | 33%<br>(20-48%)          | 1.3<br>(0.66-2.2)                           | -1.8%<br>(-4.8-1.3%)                 | -2.4%<br>(-6-1.3%)                  | -26<br>(-63-13)     | -110<br>(-300-84)         |
| Uzbekistan | 2005 | Male   | 95 plus  | 66%<br>(47-81%)                | 34%<br>(19-53%)          | 1.1<br>(0.5-2.2)                            | -1.9%<br>(-4.9-1.3%)                 | -2.6%<br>(-6.1-1.2%)                | -11<br>(-25-4.7)    | -30<br>(-77-21)           |
| Uzbekistan | 2010 | Female | All Ages | 53%<br>(46-60%)                | 47%<br>(40-54%)          | 1.2<br>(0.85-1.6)                           | 2.8%<br>(1.1-5.1%)                   | 3.5%<br>(-0.63-9.2%)                | 3100<br>(-580-8200) | 110000<br>(42000-210000)  |
| Uzbekistan | 2010 | Female | 15 to 19 | 51%<br>(37-66%)                | 49%<br>(34-63%)          | 0.96<br>(0.38-1.8)                          | 1.9%<br>(0.82-3.5%)                  | 3.7%<br>(0.83-7.7%)                 | 32<br>(7.2-68)      | 3500<br>(1400-6400)       |

| Location   | Year | Sex    | Age      | Prevalence of current drinkers | Prevalence of abstainers | Population average of standard drinks daily | Percent of total attributable deaths | Percent of total attributable DALYs | Attributable deaths  | Attributable DALYs        |
|------------|------|--------|----------|--------------------------------|--------------------------|---------------------------------------------|--------------------------------------|-------------------------------------|----------------------|---------------------------|
| Uzbekistan | 2010 | Female | 20 to 24 | 60%<br>(46-73%)                | 40%<br>(27-54%)          | 1.4<br>(0.57-2.7)                           | 3.4%<br>(1.6-5.9%)                   | 5.4%<br>(1.3-11%)                   | 71<br>(18-140)       | 7300<br>(3300-13000)      |
| Uzbekistan | 2010 | Female | 25 to 29 | 63%<br>(49-76%)                | 37%<br>(24-51%)          | 1.7<br>(0.75-3.1)                           | 3.9%<br>(1.9-6.8%)                   | 6.2%<br>(2.1-12%)                   | 89<br>(30-170)       | 8100<br>(3900-14000)      |
| Uzbekistan | 2010 | Female | 30 to 34 | 65%<br>(49-78%)                | 35%<br>(22-51%)          | 1.8<br>(0.91-3.3)                           | 4.5%<br>(2.5-7.3%)                   | 7.7%<br>(3.7-13%)                   | 120<br>(57-210)      | 8800<br>(4900-14000)      |
| Uzbekistan | 2010 | Female | 35 to 39 | 65%<br>(52-78%)                | 35%<br>(22-48%)          | 1.9<br>(0.87-3.5)                           | 4.9%<br>(2.6-8.3%)                   | 8.5%<br>(4.2-15%)                   | 160<br>(77-280)      | 9900<br>(5200-16000)      |
| Uzbekistan | 2010 | Female | 40 to 44 | 65%<br>(51-78%)                | 35%<br>(22-49%)          | 1.9<br>(0.9-3.6)                            | 5%<br>(2.3-8.8%)                     | 8.4%<br>(3.8-15%)                   | 200<br>(93-360)      | 11000<br>(5000-18000)     |
| Uzbekistan | 2010 | Female | 45 to 49 | 64%<br>(48-78%)                | 36%<br>(22-52%)          | 2<br>(0.91-3.9)                             | 5.1%<br>(1.8-10%)                    | 8.2%<br>(2.9-16%)                   | 300<br>(110-590)     | 13000<br>(4800-26000)     |
| Uzbekistan | 2010 | Female | 50 to 54 | 63%<br>(47-77%)                | 37%<br>(23-53%)          | 2.1<br>(0.93-4)                             | 5.5%<br>(1.4-11%)                    | 8%<br>(2-17%)                       | 390<br>(100-790)     | 15000<br>(3800-30000)     |
| Uzbekistan | 2010 | Female | 55 to 59 | 61%<br>(47-75%)                | 39%<br>(25-53%)          | 2.1<br>(0.86-4.1)                           | 5.5%<br>(0.44-13%)                   | 7.5%<br>(0.61-17%)                  | 400<br>(31-910)      | 13000<br>(1000-30000)     |
| Uzbekistan | 2010 | Female | 60 to 64 | 59%<br>(45-74%)                | 41%<br>(26-55%)          | 2<br>(0.79-4.3)                             | 4.4%<br>(-1.1-13%)                   | 5.7%<br>(-1.5-17%)                  | 300<br>(-74-860)     | 8300<br>(-2000-24000)     |
| Uzbekistan | 2010 | Female | 65 to 69 | 57%<br>(43-73%)                | 43%<br>(27-57%)          | 1.9<br>(0.84-3.7)                           | 3.5%<br>(-1.8-12%)                   | 4.4%<br>(-2.4-15%)                  | 220<br>(-130-760)    | 5200<br>(-2800-18000)     |
| Uzbekistan | 2010 | Female | 70 to 74 | 54%<br>(41-68%)                | 46%<br>(32-59%)          | 1.7<br>(0.62-3.4)                           | 2.2%<br>(-3.1-10%)                   | 2.7%<br>(-3.9-13%)                  | 280<br>(-410-1300)   | 5300<br>(-7300-24000)     |
| Uzbekistan | 2010 | Female | 75 to 79 | 51%<br>(39-64%)                | 49%<br>(36-61%)          | 1.5<br>(0.55-3.2)                           | 1.4%<br>(-3.5-9.2%)                  | 1.6%<br>(-4.4-11%)                  | 160<br>(-450-1100)   | 2500<br>(-6300-16000)     |
| Uzbekistan | 2010 | Female | 80 to 84 | 49%<br>(35-64%)                | 51%<br>(36-65%)          | 1.6<br>(0.6-3)                              | 1.3%<br>(-3.7-9.5%)                  | 1.4%<br>(-4.6-11%)                  | 160<br>(-540-1300)   | 1900<br>(-5500-14000)     |
| Uzbekistan | 2010 | Female | 85 to 89 | 48%<br>(35-61%)                | 52%<br>(39-65%)          | 1.6<br>(0.62-3.5)                           | 1.3%<br>(-4.1-11%)                   | 1.4%<br>(-5-12%)                    | 130<br>(-470-1100)   | 1100<br>(-3200-8600)      |
| Uzbekistan | 2010 | Female | 90 to 94 | 49%<br>(36-62%)                | 51%<br>(38-64%)          | 1.8<br>(0.59-4.2)                           | 1.7%<br>(-4-11%)                     | 1.8%<br>(-4.8-13%)                  | 69<br>(-190-510)     | 380<br>(-900-2600)        |
| Uzbekistan | 2010 | Female | 95 plus  | 50%<br>(36-65%)                | 50%<br>(35-64%)          | 1.9<br>(0.49-4.7)                           | 2%<br>(-4.3-12%)                     | 2.2%<br>(-5.3-14%)                  | 27<br>(-65-170)      | 98<br>(-210-580)          |
| Uzbekistan | 2010 | Male   | All Ages | 65%<br>(57-73%)                | 35%<br>(27-43%)          | 1.9<br>(1.4-2.4)                            | 6.2%<br>(3.8-8.6%)                   | 6.1%<br>(2.5-10%)                   | 6300<br>(2500-10000) | 300000<br>(190000-420000) |
| Uzbekistan | 2010 | Male   | 15 to 19 | 53%<br>(37-70%)                | 47%<br>(30-63%)          | 0.8<br>(0.41-1.3)                           | 3.5%<br>(2-5.3%)                     | 4.1%<br>(1.8-6.8%)                  | 82<br>(37-140)       | 8600<br>(4900-13000)      |
| Uzbekistan | 2010 | Male   | 20 to 24 | 72%<br>(55-85%)                | 28%<br>(15-45%)          | 1.8<br>(1.1-2.8)                            | 8%<br>(5.5-11%)                      | 9%<br>(5.3-13%)                     | 290<br>(170-440)     | 26000<br>(17000-36000)    |
| Uzbekistan | 2010 | Male   | 25 to 29 | 79%<br>(67-88%)                | 21%<br>(12-33%)          | 3<br>(1.8-4.4)                              | 11%<br>(7.7-15%)                     | 13%<br>(8.3-19%)                    | 430<br>(270-630)     | 33000<br>(22000-46000)    |
| Uzbekistan | 2010 | Male   | 30 to 34 | 84%<br>(71-92%)                | 16%<br>(8.1-29%)         | 3.6<br>(2.3-5.2)                            | 12%<br>(8.9-17%)                     | 15%<br>(9.9-21%)                    | 490<br>(320-690)     | 33000<br>(23000-45000)    |
| Uzbekistan | 2010 | Male   | 35 to 39 | 85%<br>(74-93%)                | 15%<br>(7.4-26%)         | 3.6<br>(2.2-5.2)                            | 12%<br>(8.2-17%)                     | 15%<br>(9.5-22%)                    | 550<br>(340-800)     | 33000<br>(21000-46000)    |

| Location   | Year | Sex    | Age      | Prevalence of current drinkers | Prevalence of abstainers | Population average of standard drinks daily | Percent of total attributable deaths | Percent of total attributable DALYs | Attributable deaths  | Attributable DALYs       |
|------------|------|--------|----------|--------------------------------|--------------------------|---------------------------------------------|--------------------------------------|-------------------------------------|----------------------|--------------------------|
| Uzbekistan | 2010 | Male   | 40 to 44 | 85%<br>(75-93%)                | 15%<br>(7.4-25%)         | 3.7<br>(2.3-5.3)                            | 12%<br>(7.2-17%)                     | 15%<br>(8.4-21%)                    | 620<br>(350-930)     | 32000<br>(19000-47000)   |
| Uzbekistan | 2010 | Male   | 45 to 49 | 85%<br>(72-92%)                | 15%<br>(7.5-28%)         | 3.9<br>(2.5-6)                              | 12%<br>(6.7-18%)                     | 14%<br>(7.6-22%)                    | 870<br>(450-1400)    | 40000<br>(22000-61000)   |
| Uzbekistan | 2010 | Male   | 50 to 54 | 84%<br>(72-92%)                | 16%<br>(8.5-28%)         | 3.8<br>(2.3-6)                              | 11%<br>(5.4-18%)                     | 13%<br>(5.9-21%)                    | 1000<br>(450-1700)   | 39000<br>(19000-64000)   |
| Uzbekistan | 2010 | Male   | 55 to 59 | 82%<br>(70-91%)                | 18%<br>(8.9-30%)         | 3.3<br>(1.9-5.3)                            | 9%<br>(3.4-16%)                      | 10%<br>(3.7-19%)                    | 790<br>(270-1500)    | 27000<br>(9800-48000)    |
| Uzbekistan | 2010 | Male   | 60 to 64 | 80%<br>(67-90%)                | 20%<br>(9.8-33%)         | 2.9<br>(1.6-4.8)                            | 6.8%<br>(1-14%)                      | 7.6%<br>(0.87-17%)                  | 530<br>(62-1200)     | 15000<br>(2400-33000)    |
| Uzbekistan | 2010 | Male   | 65 to 69 | 78%<br>(63-89%)                | 22%<br>(11-37%)          | 2.6<br>(1.5-4)                              | 5.1%<br>(0.12-11%)                   | 5.6%<br>(-0.15-13%)                 | 370<br>(-10-870)     | 8900<br>(200-20000)      |
| Uzbekistan | 2010 | Male   | 70 to 74 | 75%<br>(60-86%)                | 25%<br>(14-40%)          | 2.2<br>(1.2-3.6)                            | 2.8%<br>(-1.7-8.8%)                  | 3%<br>(-2.3-10%)                    | 350<br>(-260-1100)   | 6800<br>(-4100-21000)    |
| Uzbekistan | 2010 | Male   | 75 to 79 | 72%<br>(56-84%)                | 28%<br>(16-44%)          | 1.9<br>(1-3.1)                              | 1%<br>(-3.3-6.4%)                    | 0.91%<br>(-4.1-6.9%)                | 87<br>(-390-670)     | 1600<br>(-5000-9800)     |
| Uzbekistan | 2010 | Male   | 80 to 84 | 70%<br>(52-82%)                | 30%<br>(18-48%)          | 1.7<br>(0.92-2.7)                           | -0.082%<br>(-3.9-4.1%)               | -0.38%<br>(-4.8-4.4%)               | -31<br>(-400-370)    | -78<br>(-3800-4100)      |
| Uzbekistan | 2010 | Male   | 85 to 89 | 67%<br>(51-80%)                | 33%<br>(20-49%)          | 1.6<br>(0.84-2.5)                           | -0.95%<br>(-4.4-2.7%)                | -1.4%<br>(-5.4-2.8%)                | -66<br>(-260-130)    | -380<br>(-1700-1100)     |
| Uzbekistan | 2010 | Male   | 90 to 94 | 66%<br>(51-80%)                | 34%<br>(20-49%)          | 1.4<br>(0.75-2.5)                           | -1.3%<br>(-4.7-2.3%)                 | -1.8%<br>(-5.8-2.2%)                | -22<br>(-69-26)      | -88<br>(-320-150)        |
| Uzbekistan | 2010 | Male   | 95 plus  | 65%<br>(46-81%)                | 35%<br>(19-54%)          | 1.3<br>(0.57-2.4)                           | -1.4%<br>(-4.7-2.5%)                 | -2%<br>(-6-2.4%)                    | -6.2<br>(-19-7.4)    | -16<br>(-57-30)          |
| Uzbekistan | 2016 | Female | All Ages | 53%<br>(46-60%)                | 47%<br>(40-54%)          | 1.3<br>(0.91-1.9)                           | 3.5%<br>(1.4-6.2%)                   | 4.6%<br>(-0.0042-11%)               | 4300<br>(-3.9-11000) | 140000<br>(54000-260000) |
| Uzbekistan | 2016 | Female | 15 to 19 | 49%<br>(36-65%)                | 51%<br>(35-64%)          | 1<br>(0.41-2)                               | 2%<br>(0.84-4%)                      | 4.1%<br>(0.91-8.9%)                 | 29<br>(6.3-64)       | 3100<br>(1200-5900)      |
| Uzbekistan | 2016 | Female | 20 to 24 | 59%<br>(46-73%)                | 41%<br>(27-54%)          | 1.5<br>(0.6-3)                              | 3.5%<br>(1.6-6.2%)                   | 5.8%<br>(1.5-12%)                   | 63<br>(16-130)       | 6700<br>(3100-13000)     |
| Uzbekistan | 2016 | Female | 25 to 29 | 63%<br>(48-76%)                | 37%<br>(24-52%)          | 1.8<br>(0.77-3.5)                           | 4%<br>(2.1-6.9%)                     | 6.6%<br>(2.3-13%)                   | 98<br>(33-200)       | 9200<br>(4600-16000)     |
| Uzbekistan | 2016 | Female | 30 to 34 | 64%<br>(50-78%)                | 36%<br>(22-50%)          | 2<br>(0.95-3.7)                             | 4.6%<br>(2.7-7.6%)                   | 8.2%<br>(4.1-14%)                   | 140<br>(66-250)      | 11000<br>(6000-18000)    |
| Uzbekistan | 2016 | Female | 35 to 39 | 65%<br>(51-78%)                | 35%<br>(22-49%)          | 2<br>(0.9-3.8)                              | 5.1%<br>(2.7-8.4%)                   | 9.1%<br>(4.6-16%)                   | 180<br>(86-310)      | 11000<br>(5800-19000)    |
| Uzbekistan | 2016 | Female | 40 to 44 | 65%<br>(50-78%)                | 35%<br>(22-50%)          | 2.1<br>(0.95-3.9)                           | 5.3%<br>(2.5-9.3%)                   | 9.2%<br>(4.1-16%)                   | 230<br>(100-430)     | 12000<br>(5600-22000)    |
| Uzbekistan | 2016 | Female | 45 to 49 | 64%<br>(48-78%)                | 36%<br>(22-52%)          | 2.2<br>(0.98-4.4)                           | 5.6%<br>(2.1-11%)                    | 9%<br>(3.5-18%)                     | 300<br>(110-610)     | 14000<br>(5300-27000)    |
| Uzbekistan | 2016 | Female | 50 to 54 | 62%<br>(47-76%)                | 38%<br>(24-53%)          | 2.3<br>(1-4.3)                              | 6%<br>(1.8-12%)                      | 9%<br>(2.8-18%)                     | 460<br>(140-970)     | 18000<br>(5100-37000)    |
| Uzbekistan | 2016 | Female | 55 to 59 | 60%<br>(46-74%)                | 40%<br>(26-54%)          | 2.3<br>(0.93-4.4)                           | 6.1%<br>(0.98-13%)                   | 8.6%<br>(1.4-18%)                   | 580<br>(93-1300)     | 19000<br>(2900-43000)    |

| Location   | Year | Sex    | Age      | Prevalence of current drinkers | Prevalence of abstainers | Population average of standard drinks daily | Percent of total attributable deaths | Percent of total attributable DALYs | Attributable deaths  | Attributable DALYs        |
|------------|------|--------|----------|--------------------------------|--------------------------|---------------------------------------------|--------------------------------------|-------------------------------------|----------------------|---------------------------|
| Uzbekistan | 2016 | Female | 60 to 64 | 58%<br>(44-73%)                | 42%<br>(27-56%)          | 2.2<br>(0.86-4.6)                           | 5.1%<br>(-0.55-13%)                  | 6.9%<br>(-0.84-18%)                 | 510<br>(-64-1400)    | 14000<br>(-1700-39000)    |
| Uzbekistan | 2016 | Female | 65 to 69 | 57%<br>(43-72%)                | 43%<br>(28-57%)          | 2<br>(0.9-4)                                | 4.4%<br>(-1.2-13%)                   | 5.7%<br>(-1.6-17%)                  | 400<br>(-110-1100)   | 9200<br>(-2500-27000)     |
| Uzbekistan | 2016 | Female | 70 to 74 | 54%<br>(41-67%)                | 46%<br>(33-59%)          | 1.8<br>(0.67-3.9)                           | 3.2%<br>(-2.4-12%)                   | 4%<br>(-3.1-15%)                    | 250<br>(-190-960)    | 4700<br>(-3400-18000)     |
| Uzbekistan | 2016 | Female | 75 to 79 | 50%<br>(37-64%)                | 50%<br>(36-63%)          | 1.7<br>(0.59-3.6)                           | 2.3%<br>(-2.9-11%)                   | 2.8%<br>(-3.8-14%)                  | 300<br>(-410-1500)   | 4400<br>(-5600-22000)     |
| Uzbekistan | 2016 | Female | 80 to 84 | 48%<br>(34-62%)                | 52%<br>(38-66%)          | 1.7<br>(0.63-3.5)                           | 2.1%<br>(-3-11%)                     | 2.4%<br>(-4-13%)                    | 310<br>(-500-1800)   | 3400<br>(-5100-18000)     |
| Uzbekistan | 2016 | Female | 85 to 89 | 47%<br>(34-60%)                | 53%<br>(40-66%)          | 1.8<br>(0.68-3.8)                           | 2.1%<br>(-3.6-12%)                   | 2.3%<br>(-4.3-14%)                  | 220<br>(-440-1400)   | 1800<br>(-3100-10000)     |
| Uzbekistan | 2016 | Female | 90 to 94 | 48%<br>(36-61%)                | 52%<br>(39-64%)          | 1.9<br>(0.67-4.4)                           | 2.3%<br>(-3.7-12%)                   | 2.6%<br>(-4.6-14%)                  | 150<br>(-260-820)    | 780<br>(-1300-4200)       |
| Uzbekistan | 2016 | Female | 95 plus  | 50%<br>(35-65%)                | 50%<br>(35-65%)          | 2.1<br>(0.56-5)                             | 2.6%<br>(-4-13%)                     | 2.9%<br>(-5-15%)                    | 46<br>(-80-240)      | 170<br>(-250-830)         |
| Uzbekistan | 2016 | Male   | All Ages | 65%<br>(57-74%)                | 35%<br>(26-43%)          | 2.2<br>(1.5-2.9)                            | 7.2%<br>(4.5-11%)                    | 7.2%<br>(3.2-12%)                   | 8000<br>(3500-14000) | 370000<br>(230000-540000) |
| Uzbekistan | 2016 | Male   | 15 to 19 | 52%<br>(35-69%)                | 48%<br>(31-65%)          | 0.86<br>(0.43-1.5)                          | 3.7%<br>(2.1-5.9%)                   | 4.4%<br>(2-7.6%)                    | 77<br>(32-140)       | 7900<br>(4500-13000)      |
| Uzbekistan | 2016 | Male   | 20 to 24 | 71%<br>(53-84%)                | 29%<br>(16-47%)          | 2<br>(1.1-3.2)                              | 8.6%<br>(5.6-12%)                    | 9.7%<br>(5.4-15%)                   | 300<br>(160-470)     | 27000<br>(17000-39000)    |
| Uzbekistan | 2016 | Male   | 25 to 29 | 79%<br>(66-88%)                | 21%<br>(12-34%)          | 3.3<br>(2-5.1)                              | 12%<br>(8.2-17%)                     | 14%<br>(8.8-21%)                    | 530<br>(320-810)     | 41000<br>(27000-58000)    |
| Uzbekistan | 2016 | Male   | 30 to 34 | 84%<br>(71-92%)                | 16%<br>(8.4-29%)         | 3.9<br>(2.4-5.9)                            | 13%<br>(9.1-18%)                     | 16%<br>(11-23%)                     | 600<br>(380-900)     | 41000<br>(28000-59000)    |
| Uzbekistan | 2016 | Male   | 35 to 39 | 85%<br>(74-92%)                | 15%<br>(7.7-26%)         | 3.9<br>(2.3-5.8)                            | 13%<br>(8.4-18%)                     | 16%<br>(10-24%)                     | 620<br>(360-940)     | 37000<br>(24000-54000)    |
| Uzbekistan | 2016 | Male   | 40 to 44 | 85%<br>(75-93%)                | 15%<br>(7.4-25%)         | 4<br>(2.4-6)                                | 12%<br>(7.7-18%)                     | 16%<br>(9-23%)                      | 710<br>(400-1100)    | 37000<br>(22000-56000)    |
| Uzbekistan | 2016 | Male   | 45 to 49 | 84%<br>(71-92%)                | 16%<br>(7.9-29%)         | 4.3<br>(2.6-6.7)                            | 13%<br>(7.1-19%)                     | 16%<br>(8.4-24%)                    | 870<br>(460-1400)    | 39000<br>(22000-62000)    |
| Uzbekistan | 2016 | Male   | 50 to 54 | 83%<br>(71-91%)                | 17%<br>(8.6-29%)         | 4.2<br>(2.4-6.8)                            | 12%<br>(5.7-19%)                     | 15%<br>(6.6-24%)                    | 1200<br>(520-2000)   | 46000<br>(22000-76000)    |
| Uzbekistan | 2016 | Male   | 55 to 59 | 82%<br>(69-91%)                | 18%<br>(9-31%)           | 3.6<br>(2-5.8)                              | 10%<br>(3.9-18%)                     | 12%<br>(4.4-21%)                    | 1200<br>(430-2200)   | 40000<br>(16000-73000)    |
| Uzbekistan | 2016 | Male   | 60 to 64 | 80%<br>(65-90%)                | 20%<br>(9.9-35%)         | 3.2<br>(1.7-5.3)                            | 7.9%<br>(2-16%)                      | 9%<br>(1.9-18%)                     | 940<br>(200-1900)    | 27000<br>(6600-54000)     |
| Uzbekistan | 2016 | Male   | 65 to 69 | 77%<br>(61-89%)                | 23%<br>(11-39%)          | 2.8<br>(1.6-4.5)                            | 6.1%<br>(0.88-13%)                   | 6.9%<br>(0.7-15%)                   | 590<br>(60-1300)     | 14000<br>(2100-30000)     |
| Uzbekistan | 2016 | Male   | 70 to 74 | 74%<br>(59-86%)                | 26%<br>(14-41%)          | 2.4<br>(1.3-4.1)                            | 3.9%<br>(-1.2-11%)                   | 4.2%<br>(-1.7-13%)                  | 310<br>(-120-930)    | 6100<br>(-1900-17000)     |
| Uzbekistan | 2016 | Male   | 75 to 79 | 71%<br>(55-83%)                | 29%<br>(17-45%)          | 2<br>(1.1-3.6)                              | 1.9%<br>(-2.5-8%)                    | 1.9%<br>(-3.3-9.2%)                 | 200<br>(-340-950)    | 3300<br>(-4300-14000)     |

| Location   | Year | Sex    | Age      | Prevalence of current drinkers | Prevalence of abstainers | Population average of standard drinks daily | Percent of total attributable deaths | Percent of total attributable DALYs | Attributable deaths | Attributable DALYs   |
|------------|------|--------|----------|--------------------------------|--------------------------|---------------------------------------------|--------------------------------------|-------------------------------------|---------------------|----------------------|
| Uzbekistan | 2016 | Male   | 80 to 84 | 68%<br>(51-82%)                | 32%<br>(18-49%)          | 1.8<br>(0.94-3)                             | 0.51%<br>(-3.4-5.4%)                 | 0.28%<br>(-4.3-6%)                  | 27<br>(-430-610)    | 600<br>(-4000-6600)  |
| Uzbekistan | 2016 | Male   | 85 to 89 | 66%<br>(49-79%)                | 34%<br>(21-51%)          | 1.7<br>(0.84-2.8)                           | -0.56%<br>(-4.3-3.6%)                | -1%<br>(-5.4-3.8%)                  | -58<br>(-310-230)   | -280<br>(-2100-1800) |
| Uzbekistan | 2016 | Male   | 90 to 94 | 65%<br>(50-79%)                | 35%<br>(21-50%)          | 1.5<br>(0.77-2.7)                           | -0.96%<br>(-4.6-2.7%)                | -1.5%<br>(-5.7-2.8%)                | -38<br>(-150-72)    | -140<br>(-680-400)   |
| Uzbekistan | 2016 | Male   | 95 plus  | 65%<br>(44-81%)                | 35%<br>(19-56%)          | 1.4<br>(0.57-2.6)                           | -1.1%<br>(-4.7-3.2%)                 | -1.7%<br>(-5.9-3.2%)                | -7.1<br>(-25-14)    | -18<br>(-76-51)      |
| Albania    | 1990 | Female | All Ages | 25%<br>(22-29%)                | 75%<br>(71-78%)          | 0.51<br>(0.42-0.61)                         | 1.3%<br>(0.87-1.7%)                  | 1.8%<br>(0.75-3.1%)                 | 130<br>(54-230)     | 5000<br>(3400-6900)  |
| Albania    | 1990 | Female | 15 to 19 | 25%<br>(18-34%)                | 75%<br>(66-82%)          | 0.52<br>(0.33-0.76)                         | 1.5%<br>(0.98-2%)                    | 1.7%<br>(0.87-3%)                   | 1<br>(0.52-1.8)     | 230<br>(150-320)     |
| Albania    | 1990 | Female | 20 to 24 | 34%<br>(24-44%)                | 66%<br>(56-76%)          | 0.79<br>(0.52-1.1)                          | 2.7%<br>(1.9-3.7%)                   | 2.4%<br>(1.2-3.7%)                  | 1.8<br>(0.93-2.8)   | 460<br>(300-660)     |
| Albania    | 1990 | Female | 25 to 29 | 35%<br>(25-46%)                | 65%<br>(54-75%)          | 0.73<br>(0.49-1)                            | 2.6%<br>(2-3.5%)                     | 2.1%<br>(1.1-3.3%)                  | 1.8<br>(0.95-2.8)   | 470<br>(330-670)     |
| Albania    | 1990 | Female | 30 to 34 | 36%<br>(25-48%)                | 64%<br>(52-75%)          | 0.72<br>(0.45-1.1)                          | 2.4%<br>(1.7-3.2%)                   | 2.2%<br>(1.3-3.4%)                  | 2.1<br>(1.2-3.2)    | 430<br>(290-600)     |
| Albania    | 1990 | Female | 35 to 39 | 37%<br>(26-48%)                | 63%<br>(52-74%)          | 0.77<br>(0.49-1.1)                          | 2.2%<br>(1.6-2.9%)                   | 2.6%<br>(1.5-3.9%)                  | 2.3<br>(1.3-3.5)    | 350<br>(240-470)     |
| Albania    | 1990 | Female | 40 to 44 | 37%<br>(27-47%)                | 63%<br>(53-73%)          | 0.78<br>(0.51-1.1)                          | 2.1%<br>(1.4-2.7%)                   | 2.8%<br>(1.7-4.3%)                  | 2.8<br>(1.7-4.2)    | 290<br>(200-390)     |
| Albania    | 1990 | Female | 45 to 49 | 34%<br>(23-44%)                | 66%<br>(56-77%)          | 0.75<br>(0.44-1.1)                          | 1.9%<br>(1.3-2.6%)                   | 2.8%<br>(1.6-4.4%)                  | 3.4<br>(1.9-5.4)    | 270<br>(180-370)     |
| Albania    | 1990 | Female | 50 to 54 | 32%<br>(23-43%)                | 68%<br>(57-77%)          | 0.86<br>(0.54-1.3)                          | 2.1%<br>(1.3-3.1%)                   | 3.3%<br>(1.8-5.3%)                  | 6<br>(3.1-9.4)      | 320<br>(200-470)     |
| Albania    | 1990 | Female | 55 to 59 | 31%<br>(20-46%)                | 69%<br>(54-80%)          | 1.1<br>(0.62-1.8)                           | 2.7%<br>(1.5-4.4%)                   | 4.5%<br>(2.1-7.5%)                  | 10<br>(4.7-17)      | 400<br>(210-640)     |
| Albania    | 1990 | Female | 60 to 64 | 29%<br>(19-44%)                | 71%<br>(56-81%)          | 1.1<br>(0.64-1.8)                           | 3%<br>(1.4-4.9%)                     | 4.6%<br>(2.1-7.9%)                  | 16<br>(7-26)        | 480<br>(230-800)     |
| Albania    | 1990 | Female | 65 to 69 | 27%<br>(18-39%)                | 73%<br>(61-82%)          | 0.97<br>(0.59-1.5)                          | 2.6%<br>(1.1-4.4%)                   | 3.9%<br>(1.7-6.6%)                  | 18<br>(7.8-31)      | 450<br>(200-740)     |
| Albania    | 1990 | Female | 70 to 74 | 24%<br>(16-34%)                | 76%<br>(66-84%)          | 0.78<br>(0.42-1.3)                          | 2.1%<br>(0.59-4.1%)                  | 3%<br>(0.79-5.8%)                   | 19<br>(5-38)        | 370<br>(100-710)     |
| Albania    | 1990 | Female | 75 to 79 | 20%<br>(13-29%)                | 80%<br>(71-87%)          | 0.61<br>(0.32-1.1)                          | 1.6%<br>(0.19-3.6%)                  | 2.1%<br>(0.2-4.7%)                  | 19<br>(1.8-42)      | 270<br>(32-600)      |
| Albania    | 1990 | Female | 80 to 84 | 17%<br>(11-25%)                | 83%<br>(75-89%)          | 0.52<br>(0.3-0.91)                          | 1.3%<br>(0.087-3.2%)                 | 1.6%<br>(0.079-3.9%)                | 15<br>(0.71-35)     | 150<br>(10-360)      |
| Albania    | 1990 | Female | 85 to 89 | 17%<br>(10-24%)                | 83%<br>(76-90%)          | 0.5<br>(0.27-0.85)                          | 1.1%<br>(0.067-2.7%)                 | 1.4%<br>(0.032-3.4%)                | 8.8<br>(0.2-22)     | 67<br>(4-160)        |
| Albania    | 1990 | Female | 90 to 94 | 18%<br>(11-26%)                | 82%<br>(74-89%)          | 0.53<br>(0.27-0.91)                         | 0.9%<br>(-0.17-2.5%)                 | 1.1%<br>(-0.28-3.1%)                | 4.1<br>(-1.1-12)    | 22<br>(-4.2-62)      |
| Albania    | 1990 | Female | 95 plus  | 20%<br>(12-30%)                | 80%<br>(70-88%)          | 0.58<br>(0.25-1.1)                          | 0.81%<br>(-0.48-2.8%)                | 0.9%<br>(-0.67-3.3%)                | 1.5<br>(-1.2-5.6)   | 5.6<br>(-3.2-20)     |

| Location | Year | Sex    | Age      | Prevalence of current drinkers | Prevalence of abstainers | Population average of standard drinks daily | Percent of total attributable deaths | Percent of total attributable DALYs | Attributable deaths | Attributable DALYs    |
|----------|------|--------|----------|--------------------------------|--------------------------|---------------------------------------------|--------------------------------------|-------------------------------------|---------------------|-----------------------|
| Albania  | 1990 | Male   | All Ages | 45%<br>(40-51%)                | 55%<br>(49-60%)          | 1.2<br>(1-1.4)                              | 2.6%<br>(1.9-3.4%)                   | 2.9%<br>(1.3-4.6%)                  | 280<br>(130-450)    | 13000<br>(9200-18000) |
| Albania  | 1990 | Male   | 15 to 19 | 39%<br>(29-49%)                | 61%<br>(51-71%)          | 0.71<br>(0.44-1.1)                          | 2.9%<br>(2-4%)                       | 3.4%<br>(1.9-5.3%)                  | 4.9<br>(2.7-7.8)    | 600<br>(410-860)      |
| Albania  | 1990 | Male   | 20 to 24 | 59%<br>(48-69%)                | 41%<br>(31-52%)          | 1.6<br>(1-2.1)                              | 6.5%<br>(4.6-8.6%)                   | 7.3%<br>(4.4-11%)                   | 16<br>(9.3-23)      | 1600<br>(1100-2300)   |
| Albania  | 1990 | Male   | 25 to 29 | 65%<br>(53-74%)                | 35%<br>(26-47%)          | 1.7<br>(1.2-2.3)                            | 6.6%<br>(4.8-8.5%)                   | 7.5%<br>(4.6-11%)                   | 16<br>(9.5-22)      | 1600<br>(1200-2200)   |
| Albania  | 1990 | Male   | 30 to 34 | 67%<br>(56-76%)                | 33%<br>(24-44%)          | 1.9<br>(1.3-2.5)                            | 6.2%<br>(4.6-8%)                     | 7.5%<br>(4.7-11%)                   | 14<br>(8.8-20)      | 1400<br>(990-1800)    |
| Albania  | 1990 | Male   | 35 to 39 | 67%<br>(56-75%)                | 33%<br>(25-44%)          | 2.1<br>(1.4-2.8)                            | 5.7%<br>(4-7.5%)                     | 7.6%<br>(4.7-11%)                   | 13<br>(8.3-19)      | 1100<br>(770-1500)    |
| Albania  | 1990 | Male   | 40 to 44 | 69%<br>(57-76%)                | 31%<br>(24-43%)          | 2.2<br>(1.5-3)                              | 5.1%<br>(3.6-6.7%)                   | 6.9%<br>(4.3-9.6%)                  | 13<br>(7.9-18)      | 900<br>(620-1200)     |
| Albania  | 1990 | Male   | 45 to 49 | 72%<br>(60-80%)                | 28%<br>(20-40%)          | 2.3<br>(1.6-3.3)                            | 4.4%<br>(2.8-6.3%)                   | 5.9%<br>(3.1-9.1%)                  | 14<br>(7.5-23)      | 870<br>(530-1300)     |
| Albania  | 1990 | Male   | 50 to 54 | 69%<br>(57-79%)                | 31%<br>(21-43%)          | 2.4<br>(1.6-3.3)                            | 4.2%<br>(2.3-6.3%)                   | 5.4%<br>(2.6-8.8%)                  | 21<br>(9.8-34)      | 980<br>(550-1500)     |
| Albania  | 1990 | Male   | 55 to 59 | 62%<br>(44-79%)                | 38%<br>(21-56%)          | 2.4<br>(1.4-3.5)                            | 4.2%<br>(2.1-7%)                     | 5.3%<br>(2.3-9.4%)                  | 28<br>(12-49)       | 1100<br>(530-1800)    |
| Albania  | 1990 | Male   | 60 to 64 | 58%<br>(39-77%)                | 42%<br>(23-61%)          | 2.2<br>(1.3-3.4)                            | 4.1%<br>(1.8-7.2%)                   | 5%<br>(1.9-9%)                      | 38<br>(15-70)       | 1200<br>(500-2100)    |
| Albania  | 1990 | Male   | 65 to 69 | 56%<br>(38-74%)                | 44%<br>(26-62%)          | 2<br>(1.2-2.8)                              | 3.4%<br>(1.3-6.2%)                   | 4%<br>(1.4-7.4%)                    | 33<br>(11-61)       | 820<br>(300-1500)     |
| Albania  | 1990 | Male   | 70 to 74 | 53%<br>(36-69%)                | 47%<br>(31-64%)          | 1.7<br>(1-2.6)                              | 2.6%<br>(0.3-5.3%)                   | 3.1%<br>(0.19-6.3%)                 | 33<br>(2-69)        | 650<br>(76-1300)      |
| Albania  | 1990 | Male   | 75 to 79 | 48%<br>(33-65%)                | 52%<br>(35-67%)          | 1.4<br>(0.77-2.2)                           | 1.9%<br>(-0.23-4.6%)                 | 2.2%<br>(-0.46-5.4%)                | 24<br>(-5-58)       | 360<br>(-43-860)      |
| Albania  | 1990 | Male   | 80 to 84 | 45%<br>(29-62%)                | 55%<br>(38-71%)          | 1.2<br>(0.67-1.9)                           | 1.3%<br>(-0.68-3.4%)                 | 1.4%<br>(-0.92-3.9%)                | 12<br>(-7.6-32)     | 130<br>(-68-340)      |
| Albania  | 1990 | Male   | 85 to 89 | 44%<br>(30-59%)                | 56%<br>(41-70%)          | 1.1<br>(0.63-1.7)                           | 0.77%<br>(-0.92-2.6%)                | 0.77%<br>(-1.3-2.9%)                | 3.8<br>(-6.1-14)    | 33<br>(-39-110)       |
| Albania  | 1990 | Male   | 90 to 94 | 45%<br>(31-60%)                | 55%<br>(40-69%)          | 0.99<br>(0.57-1.6)                          | 0.2%<br>(-1.2-1.9%)                  | 0.065%<br>(-1.7-2.1%)               | 0.16<br>(-4.2-5)    | 3.1<br>(-18-28)       |
| Albania  | 1990 | Male   | 95 plus  | 46%<br>(30-63%)                | 54%<br>(37-70%)          | 0.9<br>(0.43-1.6)                           | -0.093%<br>(-1.6-1.6%)               | -0.37%<br>(-2.3-1.8%)               | -0.29<br>(-1.7-1.3) | -0.29<br>(-5.1-5.1)   |
| Albania  | 1995 | Female | All Ages | 26%<br>(22-30%)                | 74%<br>(70-78%)          | 0.61<br>(0.5-0.73)                          | 1.6%<br>(1.1-2.2%)                   | 2.6%<br>(1.3-4.3%)                  | 190<br>(95-310)     | 6200<br>(4300-8100)   |
| Albania  | 1995 | Female | 15 to 19 | 26%<br>(18-34%)                | 74%<br>(66-82%)          | 0.62<br>(0.39-0.9)                          | 1.7%<br>(1.1-2.4%)                   | 2.4%<br>(1.2-4%)                    | 1.6<br>(0.75-2.6)   | 250<br>(160-370)      |
| Albania  | 1995 | Female | 20 to 24 | 34%<br>(24-45%)                | 66%<br>(55-76%)          | 0.92<br>(0.6-1.3)                           | 3%<br>(2.1-4.1%)                     | 3.2%<br>(1.6-5%)                    | 2.3<br>(1.2-3.7)    | 470<br>(320-650)      |
| Albania  | 1995 | Female | 25 to 29 | 35%<br>(25-46%)                | 65%<br>(54-75%)          | 0.84<br>(0.56-1.2)                          | 2.9%<br>(2.1-3.7%)                   | 2.8%<br>(1.5-4.4%)                  | 2.1<br>(1.2-3.3)    | 440<br>(300-610)      |



| Location | Year | Sex    | Age      | Prevalence of current drinkers | Prevalence of abstainers | Population average of standard drinks daily | Percent of total attributable deaths | Percent of total attributable DALYs | Attributable deaths | Attributable DALYs     |
|----------|------|--------|----------|--------------------------------|--------------------------|---------------------------------------------|--------------------------------------|-------------------------------------|---------------------|------------------------|
| Albania  | 1995 | Female | 30 to 34 | 37%<br>(26-48%)                | 63%<br>(52-74%)          | 0.84<br>(0.54-1.2)                          | 2.6%<br>(1.9-3.4%)                   | 2.8%<br>(1.6-4.2%)                  | 2.6<br>(1.5-3.9)    | 450<br>(310-620)       |
| Albania  | 1995 | Female | 35 to 39 | 38%<br>(27-49%)                | 62%<br>(51-73%)          | 0.9<br>(0.57-1.3)                           | 2.4%<br>(1.8-3.1%)                   | 3.2%<br>(1.9-4.6%)                  | 3.2<br>(1.9-4.8)    | 420<br>(290-560)       |
| Albania  | 1995 | Female | 40 to 44 | 37%<br>(27-48%)                | 63%<br>(52-73%)          | 0.91<br>(0.6-1.3)                           | 2.3%<br>(1.6-3%)                     | 3.4%<br>(2-5%)                      | 3.9<br>(2.3-5.9)    | 370<br>(240-490)       |
| Albania  | 1995 | Female | 45 to 49 | 35%<br>(23-45%)                | 65%<br>(55-77%)          | 0.89<br>(0.53-1.3)                          | 2.1%<br>(1.4-2.9%)                   | 3.3%<br>(1.9-5.1%)                  | 4.2<br>(2.4-6.4)    | 300<br>(200-420)       |
| Albania  | 1995 | Female | 50 to 54 | 33%<br>(23-44%)                | 67%<br>(56-77%)          | 1<br>(0.65-1.5)                             | 2.4%<br>(1.6-3.4%)                   | 4%<br>(2.2-6.1%)                    | 7.1<br>(4-11)       | 370<br>(240-540)       |
| Albania  | 1995 | Female | 55 to 59 | 32%<br>(21-46%)                | 68%<br>(54-79%)          | 1.3<br>(0.74-2.1)                           | 3.1%<br>(1.7-4.9%)                   | 5.4%<br>(2.7-8.6%)                  | 13<br>(6.6-21)      | 530<br>(290-810)       |
| Albania  | 1995 | Female | 60 to 64 | 30%<br>(19-45%)                | 70%<br>(55-81%)          | 1.3<br>(0.77-2.1)                           | 3.5%<br>(1.8-5.7%)                   | 5.7%<br>(2.7-9.3%)                  | 20<br>(9.5-32)      | 610<br>(310-970)       |
| Albania  | 1995 | Female | 65 to 69 | 28%<br>(18-40%)                | 72%<br>(60-82%)          | 1.1<br>(0.7-1.7)                            | 3.3%<br>(1.7-5.4%)                   | 5.1%<br>(2.6-8.4%)                  | 25<br>(13-41)       | 610<br>(330-990)       |
| Albania  | 1995 | Female | 70 to 74 | 24%<br>(16-34%)                | 76%<br>(66-84%)          | 0.91<br>(0.5-1.5)                           | 2.8%<br>(1.5-4%)                     | 4%<br>(1.4-7.6%)                    | 29<br>(9.9-55)      | 550<br>(190-1000)      |
| Albania  | 1995 | Female | 75 to 79 | 20%<br>(13-30%)                | 80%<br>(70-87%)          | 0.72<br>(0.38-1.3)                          | 2.2%<br>(0.56-4.6%)                  | 3%<br>(0.68-6.2%)                   | 26<br>(6-54)        | 370<br>(94-780)        |
| Albania  | 1995 | Female | 80 to 84 | 17%<br>(11-25%)                | 83%<br>(75-89%)          | 0.62<br>(0.35-1)                            | 2%<br>(0.45-4.1%)                    | 2.4%<br>(0.54-5.1%)                 | 23<br>(4.9-48)      | 240<br>(55-510)        |
| Albania  | 1995 | Female | 85 to 89 | 17%<br>(10-25%)                | 83%<br>(75-90%)          | 0.6<br>(0.32-1)                             | 1.7%<br>(0.36-3.6%)                  | 2.1%<br>(0.42-4.6%)                 | 16<br>(3.1-35)      | 120<br>(25-260)        |
| Albania  | 1995 | Female | 90 to 94 | 18%<br>(12-27%)                | 82%<br>(73-88%)          | 0.63<br>(0.32-1.1)                          | 1.4%<br>(0.022-3.6%)                 | 1.7%<br>(-0.018-4.4%)               | 7.1<br>(-0.072-18)  | 38<br>(0.57-94)        |
| Albania  | 1995 | Female | 95 plus  | 21%<br>(12-31%)                | 79%<br>(69-88%)          | 0.69<br>(0.3-1.3)                           | 1.3%<br>(-0.32-3.9%)                 | 1.5%<br>(-0.45-4.7%)                | 2.6<br>(-0.76-7.9)  | 9.4<br>(-2.2-27)       |
| Albania  | 1995 | Male   | All Ages | 45%<br>(40-50%)                | 55%<br>(50-60%)          | 1.4<br>(1.2-1.6)                            | 3.3%<br>(2.4-4.3%)                   | 3.9%<br>(2.1-6%)                    | 380<br>(200-580)    | 16000<br>(11000-21000) |
| Albania  | 1995 | Male   | 15 to 19 | 40%<br>(30-50%)                | 60%<br>(50-70%)          | 0.85<br>(0.53-1.3)                          | 3.3%<br>(2.2-4.6%)                   | 4%<br>(2.2-6.2%)                    | 6.4<br>(3.6-10)     | 690<br>(450-980)       |
| Albania  | 1995 | Male   | 20 to 24 | 60%<br>(49-69%)                | 40%<br>(31-51%)          | 1.8<br>(1.2-2.5)                            | 7.3%<br>(5.1-9.9%)                   | 8.5%<br>(5.2-12%)                   | 20<br>(12-29)       | 1800<br>(1200-2400)    |
| Albania  | 1995 | Male   | 25 to 29 | 65%<br>(53-74%)                | 35%<br>(26-47%)          | 2<br>(1.4-2.7)                              | 7.6%<br>(5.3-10%)                    | 8.9%<br>(5.5-13%)                   | 19<br>(12-27)       | 1600<br>(1100-2200)    |
| Albania  | 1995 | Male   | 30 to 34 | 67%<br>(56-76%)                | 33%<br>(24-44%)          | 2.2<br>(1.6-3)                              | 7.1%<br>(5.2-9.4%)                   | 8.8%<br>(5.9-12%)                   | 19<br>(12-26)       | 1500<br>(1100-2000)    |
| Albania  | 1995 | Male   | 35 to 39 | 68%<br>(56-75%)                | 32%<br>(25-44%)          | 2.4<br>(1.6-3.3)                            | 6.6%<br>(4.7-8.7%)                   | 8.7%<br>(5.8-12%)                   | 17<br>(12-25)       | 1300<br>(960-1700)     |
| Albania  | 1995 | Male   | 40 to 44 | 69%<br>(59-77%)                | 31%<br>(23-41%)          | 2.6<br>(1.7-3.5)                            | 5.9%<br>(4.2-7.9%)                   | 8.1%<br>(5.2-11%)                   | 17<br>(11-24)       | 1100<br>(770-1500)     |
| Albania  | 1995 | Male   | 45 to 49 | 72%<br>(60-80%)                | 28%<br>(20-40%)          | 2.7<br>(1.9-3.8)                            | 5.2%<br>(3.3-7.6%)                   | 7.2%<br>(4-11%)                     | 16<br>(9-25)        | 930<br>(590-1400)      |

| Location | Year | Sex    | Age      | Prevalence of current drinkers | Prevalence of abstainers | Population average of standard drinks daily | Percent of total attributable deaths | Percent of total attributable DALYs | Attributable deaths | Attributable DALYs   |
|----------|------|--------|----------|--------------------------------|--------------------------|---------------------------------------------|--------------------------------------|-------------------------------------|---------------------|----------------------|
| Albania  | 1995 | Male   | 50 to 54 | 69%<br>(58-79%)                | 31%<br>(21-42%)          | 2.8<br>(1.9-3.9)                            | 5%<br>(2.8-7.5%)                     | 6.6%<br>(3.3-11%)                   | 23<br>(12-38)       | 1100<br>(630-1700)   |
| Albania  | 1995 | Male   | 55 to 59 | 63%<br>(45-79%)                | 37%<br>(21-55%)          | 2.8<br>(1.7-4)                              | 5.1%<br>(2.7-8.3%)                   | 6.6%<br>(3.1-11%)                   | 37<br>(17-62)       | 1400<br>(730-2200)   |
| Albania  | 1995 | Male   | 60 to 64 | 59%<br>(39-76%)                | 41%<br>(24-61%)          | 2.6<br>(1.6-3.9)                            | 5.1%<br>(2.3-8.8%)                   | 6.2%<br>(2.6-11%)                   | 49<br>(22-89)       | 1500<br>(680-2600)   |
| Albania  | 1995 | Male   | 65 to 69 | 57%<br>(40-74%)                | 43%<br>(26-60%)          | 2.3<br>(1.5-3.3)                            | 4.3%<br>(1.9-7.5%)                   | 5.2%<br>(2.1-9.3%)                  | 51<br>(21-92)       | 1300<br>(550-2200)   |
| Albania  | 1995 | Male   | 70 to 74 | 53%<br>(37-69%)                | 47%<br>(31-63%)          | 2<br>(1.2-3)                                | 3.5%<br>(0.85-6.8%)                  | 4.1%<br>(0.89-8.1%)                 | 43<br>(9.2-85)      | 820<br>(210-1600)    |
| Albania  | 1995 | Male   | 75 to 79 | 49%<br>(34-66%)                | 51%<br>(34-66%)          | 1.6<br>(0.9-2.6)                            | 2.7%<br>(0.15-6.1%)                  | 3.1%<br>(-0.004-7.1%)               | 34<br>(-0.045-79)   | 510<br>(28-1100)     |
| Albania  | 1995 | Male   | 80 to 84 | 46%<br>(31-63%)                | 54%<br>(37-69%)          | 1.4<br>(0.81-2.2)                           | 2%<br>(-0.24-4.6%)                   | 2.2%<br>(-0.46-5.3%)                | 20<br>(-4.2-49)     | 230<br>(-28-530)     |
| Albania  | 1995 | Male   | 85 to 89 | 45%<br>(31-59%)                | 55%<br>(41-69%)          | 1.3<br>(0.74-2)                             | 1.4%<br>(-0.52-3.6%)                 | 1.5%<br>(-0.86-4.2%)                | 8.2<br>(-4.7-23)    | 67<br>(-26-180)      |
| Albania  | 1995 | Male   | 90 to 94 | 45%<br>(31-61%)                | 55%<br>(39-69%)          | 1.2<br>(0.66-1.9)                           | 0.69%<br>(-1-2.9%)                   | 0.63%<br>(-1.5-3.2%)                | 1.5<br>(-3.5-7.6)   | 10<br>(-15-41)       |
| Albania  | 1995 | Male   | 95 plus  | 47%<br>(30-65%)                | 53%<br>(35-70%)          | 1.1<br>(0.5-2)                              | 0.33%<br>(-1.4-2.7%)                 | 0.097%<br>(-2-3%)                   | 0.07<br>(-1.5-2.2)  | 0.97<br>(-4.2-8.1)   |
| Albania  | 2000 | Female | All Ages | 26%<br>(23-30%)                | 74%<br>(70-77%)          | 0.78<br>(0.64-0.94)                         | 2.4%<br>(1.7-3.2%)                   | 4.1%<br>(2.2-6.3%)                  | 300<br>(170-470)    | 8300<br>(5800-11000) |
| Albania  | 2000 | Female | 15 to 19 | 26%<br>(18-34%)                | 74%<br>(66-82%)          | 0.76<br>(0.49-1.1)                          | 1.9%<br>(1.3-2.9%)                   | 3.1%<br>(1.5-5.4%)                  | 2.1<br>(1-3.6)      | 300<br>(190-440)     |
| Albania  | 2000 | Female | 20 to 24 | 34%<br>(24-44%)                | 66%<br>(56-76%)          | 1.1<br>(0.72-1.6)                           | 3.4%<br>(2.3-4.5%)                   | 4.1%<br>(2.1-6.6%)                  | 3<br>(1.5-4.7)      | 490<br>(330-700)     |
| Albania  | 2000 | Female | 25 to 29 | 35%<br>(25-47%)                | 65%<br>(53-75%)          | 1<br>(0.69-1.5)                             | 3.2%<br>(2.3-4.2%)                   | 3.6%<br>(2-5.7%)                    | 2.8<br>(1.5-4.4)    | 460<br>(320-640)     |
| Albania  | 2000 | Female | 30 to 34 | 37%<br>(25-49%)                | 63%<br>(51-75%)          | 1<br>(0.66-1.5)                             | 2.9%<br>(2.1-3.8%)                   | 3.6%<br>(2.1-5.6%)                  | 3<br>(1.7-4.7)      | 450<br>(310-630)     |
| Albania  | 2000 | Female | 35 to 39 | 38%<br>(27-49%)                | 62%<br>(51-73%)          | 1.1<br>(0.71-1.6)                           | 2.8%<br>(2-3.6%)                     | 4%<br>(2.5-5.9%)                    | 4.5<br>(2.8-6.7)    | 500<br>(360-670)     |
| Albania  | 2000 | Female | 40 to 44 | 37%<br>(27-48%)                | 63%<br>(52-73%)          | 1.1<br>(0.74-1.6)                           | 2.6%<br>(1.9-3.5%)                   | 4.3%<br>(2.7-6.3%)                  | 6.1<br>(3.8-8.9)    | 500<br>(340-660)     |
| Albania  | 2000 | Female | 45 to 49 | 35%<br>(24-45%)                | 65%<br>(55-76%)          | 1.1<br>(0.66-1.7)                           | 2.5%<br>(1.7-3.5%)                   | 4.2%<br>(2.6-6.4%)                  | 6.8<br>(4.1-10)     | 440<br>(300-600)     |
| Albania  | 2000 | Female | 50 to 54 | 33%<br>(23-44%)                | 67%<br>(56-77%)          | 1.3<br>(0.8-1.9)                            | 2.9%<br>(2-4.3%)                     | 5%<br>(3.2-7.6%)                    | 9.6<br>(6.1-15)     | 470<br>(320-680)     |
| Albania  | 2000 | Female | 55 to 59 | 32%<br>(21-46%)                | 68%<br>(54-79%)          | 1.6<br>(0.91-2.6)                           | 3.9%<br>(2.2-6%)                     | 6.7%<br>(3.6-10%)                   | 17<br>(8.9-26)      | 630<br>(370-950)     |
| Albania  | 2000 | Female | 60 to 64 | 30%<br>(19-45%)                | 70%<br>(55-81%)          | 1.6<br>(0.95-2.6)                           | 4.5%<br>(2.4-7.1%)                   | 7.2%<br>(3.9-11%)                   | 29<br>(15-45)       | 870<br>(480-1300)    |
| Albania  | 2000 | Female | 65 to 69 | 28%<br>(18-40%)                | 72%<br>(60-82%)          | 1.4<br>(0.87-2.1)                           | 4.4%<br>(2.5-7%)                     | 6.6%<br>(3.7-11%)                   | 36<br>(20-57)       | 870<br>(500-1400)    |

| Location | Year | Sex    | Age      | Prevalence of current drinkers | Prevalence of abstainers | Population average of standard drinks daily | Percent of total attributable deaths | Percent of total attributable DALYs | Attributable deaths | Attributable DALYs     |
|----------|------|--------|----------|--------------------------------|--------------------------|---------------------------------------------|--------------------------------------|-------------------------------------|---------------------|------------------------|
| Albania  | 2000 | Female | 70 to 74 | 24%<br>(16-35%)                | 76%<br>(65-84%)          | 1.1<br>(0.61-1.8)                           | 4%<br>(1.7-7%)                       | 5.5%<br>(2.3-9.6%)                  | 46<br>(20-81)       | 870<br>(390-1500)      |
| Albania  | 2000 | Female | 75 to 79 | 20%<br>(13-31%)                | 80%<br>(69-87%)          | 0.89<br>(0.45-1.5)                          | 3.3%<br>(1.1-6.6%)                   | 4.3%<br>(1.4-8.7%)                  | 44<br>(14-86)       | 630<br>(210-1300)      |
| Albania  | 2000 | Female | 80 to 84 | 17%<br>(11-26%)                | 83%<br>(74-89%)          | 0.76<br>(0.42-1.3)                          | 3.1%<br>(1.1-5.8%)                   | 3.8%<br>(1.3-7.2%)                  | 41<br>(14-78)       | 430<br>(150-810)       |
| Albania  | 2000 | Female | 85 to 89 | 17%<br>(10-25%)                | 83%<br>(75-90%)          | 0.73<br>(0.38-1.2)                          | 2.7%<br>(0.88-5.3%)                  | 3.4%<br>(1-6.5%)                    | 31<br>(9.6-60)      | 230<br>(73-450)        |
| Albania  | 2000 | Female | 90 to 94 | 18%<br>(12-26%)                | 82%<br>(74-88%)          | 0.77<br>(0.39-1.3)                          | 2.4%<br>(0.53-5.2%)                  | 3%<br>(0.59-6.3%)                   | 16<br>(3.3-35)      | 85<br>(18-180)         |
| Albania  | 2000 | Female | 95 plus  | 20%<br>(12-30%)                | 80%<br>(70-88%)          | 0.85<br>(0.38-1.6)                          | 2.4%<br>(0.035-5.9%)                 | 2.8%<br>(-0.084-7.1%)               | 6.1<br>(-0.19-16)   | 22<br>(0.31-53)        |
| Albania  | 2000 | Male   | All Ages | 47%<br>(42-52%)                | 53%<br>(48-58%)          | 1.8<br>(1.5-2.2)                            | 4.7%<br>(3.4-6.2%)                   | 5.8%<br>(3.3-8.7%)                  | 600<br>(340-910)    | 22000<br>(15000-29000) |
| Albania  | 2000 | Male   | 15 to 19 | 40%<br>(30-49%)                | 60%<br>(51-70%)          | 1<br>(0.65-1.5)                             | 3.6%<br>(2.4-5.1%)                   | 4.5%<br>(2.5-6.9%)                  | 7<br>(4-11)         | 720<br>(480-1000)      |
| Albania  | 2000 | Male   | 20 to 24 | 60%<br>(48-70%)                | 40%<br>(30-52%)          | 2.3<br>(1.5-3.1)                            | 8%<br>(5.6-11%)                      | 9.6%<br>(6-14%)                     | 21<br>(13-29)       | 1800<br>(1200-2400)    |
| Albania  | 2000 | Male   | 25 to 29 | 65%<br>(54-74%)                | 35%<br>(26-46%)          | 2.5<br>(1.7-3.4)                            | 8.3%<br>(5.8-11%)                    | 10%<br>(6.3-14%)                    | 22<br>(14-32)       | 1800<br>(1200-2400)    |
| Albania  | 2000 | Male   | 30 to 34 | 67%<br>(56-76%)                | 33%<br>(24-44%)          | 2.7<br>(1.9-3.7)                            | 8%<br>(5.7-11%)                      | 10%<br>(6.6-14%)                    | 22<br>(15-31)       | 1700<br>(1200-2300)    |
| Albania  | 2000 | Male   | 35 to 39 | 68%<br>(57-75%)                | 32%<br>(25-43%)          | 3<br>(2-4.1)                                | 7.5%<br>(5.2-10%)                    | 10%<br>(6.6-15%)                    | 25<br>(16-36)       | 1800<br>(1200-2400)    |
| Albania  | 2000 | Male   | 40 to 44 | 69%<br>(59-77%)                | 31%<br>(23-41%)          | 3.2<br>(2.2-4.3)                            | 6.9%<br>(4.6-9.3%)                   | 9.7%<br>(6-14%)                     | 28<br>(17-40)       | 1800<br>(1200-2400)    |
| Albania  | 2000 | Male   | 45 to 49 | 72%<br>(61-80%)                | 28%<br>(20-39%)          | 3.4<br>(2.3-4.7)                            | 6.3%<br>(3.9-9.2%)                   | 8.8%<br>(4.9-14%)                   | 28<br>(16-44)       | 1500<br>(970-2200)     |
| Albania  | 2000 | Male   | 50 to 54 | 69%<br>(57-80%)                | 31%<br>(20-43%)          | 3.4<br>(2.3-4.7)                            | 6.1%<br>(3.5-9.1%)                   | 8.3%<br>(4.1-13%)                   | 33<br>(17-52)       | 1500<br>(860-2300)     |
| Albania  | 2000 | Male   | 55 to 59 | 63%<br>(45-79%)                | 37%<br>(21-55%)          | 3.4<br>(2.2-5)                              | 6.5%<br>(3.7-10%)                    | 8.6%<br>(4.6-14%)                   | 48<br>(25-78)       | 1800<br>(1000-2800)    |
| Albania  | 2000 | Male   | 60 to 64 | 59%<br>(40-77%)                | 41%<br>(23-60%)          | 3.2<br>(2-4.8)                              | 6.6%<br>(3.2-11%)                    | 8.4%<br>(3.9-14%)                   | 74<br>(34-120)      | 2200<br>(1100-3500)    |
| Albania  | 2000 | Male   | 65 to 69 | 57%<br>(39-74%)                | 43%<br>(26-61%)          | 2.9<br>(1.8-4.1)                            | 6%<br>(2.8-9.8%)                     | 7.3%<br>(3.4-12%)                   | 82<br>(37-140)      | 2000<br>(960-3300)     |
| Albania  | 2000 | Male   | 70 to 74 | 53%<br>(37-69%)                | 47%<br>(31-63%)          | 2.4<br>(1.5-3.7)                            | 5.1%<br>(1.8-9.5%)                   | 6.1%<br>(1.9-12%)                   | 84<br>(27-160)      | 1600<br>(570-3000)     |
| Albania  | 2000 | Male   | 75 to 79 | 49%<br>(34-65%)                | 51%<br>(35-66%)          | 2<br>(1.1-3.2)                              | 4.2%<br>(0.87-8.8%)                  | 4.9%<br>(0.79-10%)                  | 58<br>(9.6-120)     | 850<br>(170-1800)      |
| Albania  | 2000 | Male   | 80 to 84 | 46%<br>(30-63%)                | 54%<br>(37-70%)          | 1.7<br>(0.98-2.8)                           | 3.5%<br>(0.57-7.6%)                  | 3.9%<br>(0.53-8.7%)                 | 40<br>(5.4-90)      | 430<br>(74-940)        |
| Albania  | 2000 | Male   | 85 to 89 | 45%<br>(31-59%)                | 55%<br>(41-69%)          | 1.6<br>(0.89-2.4)                           | 2.6%<br>(0.19-6%)                    | 2.9%<br>(-0.029-7%)                 | 19<br>(-0.19-45)    | 150<br>(11-340)        |

| Location | Year | Sex    | Age      | Prevalence of current drinkers | Prevalence of abstainers | Population average of standard drinks daily | Percent of total attributable deaths | Percent of total attributable DALYs | Attributable deaths | Attributable DALYs     |
|----------|------|--------|----------|--------------------------------|--------------------------|---------------------------------------------|--------------------------------------|-------------------------------------|---------------------|------------------------|
| Albania  | 2000 | Male   | 90 to 94 | 45%<br>(31-60%)                | 55%<br>(40-69%)          | 1.4<br>(0.79-2.4)                           | 1.6%<br>(-0.52-4.7%)                 | 1.7%<br>(-0.85-5.4%)                | 5.2<br>(-2.5-16)    | 30<br>(-9.3-84)        |
| Albania  | 2000 | Male   | 95 plus  | 46%<br>(29-65%)                | 54%<br>(35-71%)          | 1.3<br>(0.62-2.4)                           | 1.1%<br>(-1.1-4.6%)                  | 0.98%<br>(-1.7-5.1%)                | 0.83<br>(-1.5-4.4)  | 3.8<br>(-3.7-16)       |
| Albania  | 2005 | Female | All Ages | 25%<br>(23-27%)                | 75%<br>(73-77%)          | 0.94<br>(0.77-1.1)                          | 3.3%<br>(2.3-4.4%)                   | 5.4%<br>(3.1-8.2%)                  | 480<br>(270-720)    | 11000<br>(7900-15000)  |
| Albania  | 2005 | Female | 15 to 19 | 22%<br>(19-27%)                | 78%<br>(73-81%)          | 0.8<br>(0.58-1.1)                           | 2.1%<br>(1.4-2.9%)                   | 3.6%<br>(1.9-5.7%)                  | 2.3<br>(1.2-3.7)    | 330<br>(210-470)       |
| Albania  | 2005 | Female | 20 to 24 | 31%<br>(26-36%)                | 69%<br>(64-74%)          | 1.2<br>(0.9-1.6)                            | 3.7%<br>(2.7-4.9%)                   | 5%<br>(2.8-7.6%)                    | 3.5<br>(2-5.4)      | 540<br>(370-760)       |
| Albania  | 2005 | Female | 25 to 29 | 33%<br>(29-38%)                | 67%<br>(62-71%)          | 1.2<br>(0.89-1.6)                           | 3.5%<br>(2.6-4.5%)                   | 4.5%<br>(2.6-6.6%)                  | 2.9<br>(1.7-4.2)    | 440<br>(300-580)       |
| Albania  | 2005 | Female | 30 to 34 | 34%<br>(29-40%)                | 66%<br>(60-71%)          | 1.1<br>(0.84-1.5)                           | 3.1%<br>(2.3-4.1%)                   | 4.2%<br>(2.6-6.1%)                  | 3.2<br>(2-4.7)      | 430<br>(300-570)       |
| Albania  | 2005 | Female | 35 to 39 | 35%<br>(31-39%)                | 65%<br>(61-69%)          | 1.2<br>(0.91-1.6)                           | 3%<br>(2.2-3.8%)                     | 4.6%<br>(3-6.3%)                    | 4.8<br>(3.1-6.7)    | 500<br>(360-650)       |
| Albania  | 2005 | Female | 40 to 44 | 33%<br>(29-38%)                | 67%<br>(62-71%)          | 1.2<br>(0.92-1.6)                           | 2.9%<br>(2.1-3.7%)                   | 4.8%<br>(3.2-6.6%)                  | 7<br>(4.8-9.7)      | 580<br>(420-740)       |
| Albania  | 2005 | Female | 45 to 49 | 32%<br>(27-36%)                | 68%<br>(64-73%)          | 1.2<br>(0.86-1.6)                           | 2.8%<br>(2-3.7%)                     | 4.6%<br>(3.1-6.7%)                  | 9.4<br>(6.3-13)     | 600<br>(430-800)       |
| Albania  | 2005 | Female | 50 to 54 | 32%<br>(24-42%)                | 68%<br>(58-76%)          | 1.5<br>(0.98-2.1)                           | 3.4%<br>(2.4-4.7%)                   | 5.7%<br>(3.8-8.4%)                  | 14<br>(9.4-21)      | 690<br>(490-960)       |
| Albania  | 2005 | Female | 55 to 59 | 32%<br>(21-47%)                | 68%<br>(53-79%)          | 2<br>(1.1-3.1)                              | 4.7%<br>(2.7-7%)                     | 8%<br>(4.4-12%)                     | 23<br>(12-34)       | 860<br>(510-1300)      |
| Albania  | 2005 | Female | 60 to 64 | 31%<br>(19-46%)                | 69%<br>(54-81%)          | 2<br>(1.1-3.2)                              | 5.5%<br>(3.1-8.5%)                   | 8.6%<br>(4.8-13%)                   | 37<br>(20-57)       | 1100<br>(640-1700)     |
| Albania  | 2005 | Female | 65 to 69 | 28%<br>(19-41%)                | 72%<br>(59-81%)          | 1.8<br>(1.1-2.6)                            | 5.5%<br>(3.3-8.5%)                   | 8.1%<br>(4.8-13%)                   | 54<br>(32-83)       | 1300<br>(790-2000)     |
| Albania  | 2005 | Female | 70 to 74 | 25%<br>(16-36%)                | 75%<br>(64-84%)          | 1.4<br>(0.79-2.3)                           | 5.1%<br>(2.4-8.7%)                   | 7%<br>(3.2-12%)                     | 69<br>(32-110)      | 1300<br>(610-2200)     |
| Albania  | 2005 | Female | 75 to 79 | 21%<br>(13-30%)                | 79%<br>(70-87%)          | 1.1<br>(0.58-1.9)                           | 4.4%<br>(1.7-8%)                     | 5.7%<br>(2.1-11%)                   | 74<br>(27-140)      | 1100<br>(400-2000)     |
| Albania  | 2005 | Female | 80 to 84 | 18%<br>(11-26%)                | 82%<br>(74-89%)          | 0.95<br>(0.52-1.6)                          | 4.3%<br>(1.7-7.6%)                   | 5.2%<br>(2-9.2%)                    | 75<br>(29-130)      | 780<br>(310-1400)      |
| Albania  | 2005 | Female | 85 to 89 | 17%<br>(11-25%)                | 83%<br>(75-89%)          | 0.91<br>(0.49-1.5)                          | 3.9%<br>(1.5-7.5%)                   | 4.8%<br>(1.7-9.2%)                  | 54<br>(20-100)      | 400<br>(150-760)       |
| Albania  | 2005 | Female | 90 to 94 | 19%<br>(12-27%)                | 81%<br>(73-88%)          | 0.95<br>(0.48-1.6)                          | 3.5%<br>(1-7.1%)                     | 4.3%<br>(1.2-8.7%)                  | 31<br>(8.6-64)      | 160<br>(48-330)        |
| Albania  | 2005 | Female | 95 plus  | 21%<br>(12-31%)                | 79%<br>(69-88%)          | 1<br>(0.46-1.9)                             | 3.4%<br>(0.45-7.8%)                  | 4%<br>(0.43-9.3%)                   | 13<br>(1.4-30)      | 45<br>(5.8-100)        |
| Albania  | 2005 | Male   | All Ages | 51%<br>(47-54%)                | 49%<br>(46-53%)          | 2.4<br>(2-2.8)                              | 6.1%<br>(4.3-7.9%)                   | 7.6%<br>(4.4-11%)                   | 850<br>(490-1200)   | 27000<br>(19000-35000) |
| Albania  | 2005 | Male   | 15 to 19 | 38%<br>(33-44%)                | 62%<br>(56-67%)          | 1.2<br>(0.76-1.7)                           | 3.5%<br>(2.4-4.8%)                   | 4.5%<br>(2.4-6.8%)                  | 6.4<br>(3.5-9.7)    | 720<br>(480-1000)      |

| Location | Year | Sex    | Age      | Prevalence of current drinkers | Prevalence of abstainers | Population average of standard drinks daily | Percent of total attributable deaths | Percent of total attributable DALYs | Attributable deaths | Attributable DALYs    |
|----------|------|--------|----------|--------------------------------|--------------------------|---------------------------------------------|--------------------------------------|-------------------------------------|---------------------|-----------------------|
| Albania  | 2005 | Male   | 20 to 24 | 62%<br>(56-66%)                | 38%<br>(34-44%)          | 2.8<br>(1.9-3.7)                            | 8.5%<br>(5.9-11%)                    | 11%<br>(6.2-15%)                    | 18<br>(11-25)       | 1600<br>(1100-2200)   |
| Albania  | 2005 | Male   | 25 to 29 | 70%<br>(65-74%)                | 30%<br>(26-35%)          | 3.2<br>(2.2-4.3)                            | 9%<br>(6.2-12%)                      | 11%<br>(6.8-16%)                    | 17<br>(10-25)       | 1500<br>(1000-2000)   |
| Albania  | 2005 | Male   | 30 to 34 | 71%<br>(66-75%)                | 29%<br>(25-34%)          | 3.5<br>(2.4-4.6)                            | 8.5%<br>(5.9-12%)                    | 11%<br>(6.8-16%)                    | 19<br>(11-28)       | 1500<br>(1000-2100)   |
| Albania  | 2005 | Male   | 35 to 39 | 70%<br>(66-74%)                | 30%<br>(26-34%)          | 3.7<br>(2.5-5.1)                            | 8.3%<br>(5.5-11%)                    | 12%<br>(6.9-17%)                    | 22<br>(13-32)       | 1600<br>(1100-2200)   |
| Albania  | 2005 | Male   | 40 to 44 | 73%<br>(69-77%)                | 27%<br>(23-31%)          | 4.1<br>(2.9-5.4)                            | 8%<br>(5.1-11%)                      | 12%<br>(6.6-17%)                    | 32<br>(18-47)       | 2000<br>(1300-2700)   |
| Albania  | 2005 | Male   | 45 to 49 | 77%<br>(72-80%)                | 23%<br>(20-28%)          | 4.4<br>(3.2-6)                              | 7.8%<br>(4.8-11%)                    | 11%<br>(6.1-17%)                    | 41<br>(22-63)       | 2200<br>(1300-3100)   |
| Albania  | 2005 | Male   | 50 to 54 | 72%<br>(62-81%)                | 28%<br>(19-38%)          | 4.3<br>(3-5.9)                              | 7.7%<br>(4.6-11%)                    | 11%<br>(5.5-16%)                    | 52<br>(27-78)       | 2300<br>(1300-3300)   |
| Albania  | 2005 | Male   | 55 to 59 | 63%<br>(46-79%)                | 37%<br>(21-54%)          | 4.2<br>(2.6-6)                              | 7.9%<br>(4.6-12%)                    | 11%<br>(5.8-16%)                    | 62<br>(34-93)       | 2300<br>(1300-3300)   |
| Albania  | 2005 | Male   | 60 to 64 | 59%<br>(40-77%)                | 41%<br>(23-60%)          | 3.9<br>(2.4-5.8)                            | 8.1%<br>(4.3-12%)                    | 10%<br>(5.4-16%)                    | 94<br>(48-140)      | 2800<br>(1500-4200)   |
| Albania  | 2005 | Male   | 65 to 69 | 58%<br>(40-75%)                | 42%<br>(25-60%)          | 3.5<br>(2.2-4.9)                            | 7.7%<br>(4-12%)                      | 9.5%<br>(4.7-14%)                   | 120<br>(60-180)     | 2900<br>(1500-4400)   |
| Albania  | 2005 | Male   | 70 to 74 | 54%<br>(37-70%)                | 46%<br>(30-63%)          | 3<br>(1.8-4.5)                              | 6.9%<br>(2.7-12%)                    | 8.2%<br>(3.1-14%)                   | 130<br>(49-230)     | 2500<br>(1000-4200)   |
| Albania  | 2005 | Male   | 75 to 79 | 49%<br>(35-65%)                | 51%<br>(35-65%)          | 2.4<br>(1.4-3.9)                            | 5.8%<br>(1.6-11%)                    | 6.8%<br>(1.8-13%)                   | 110<br>(30-210)     | 1600<br>(470-3100)    |
| Albania  | 2005 | Male   | 80 to 84 | 47%<br>(31-64%)                | 53%<br>(36-69%)          | 2.1<br>(1.2-3.3)                            | 5.1%<br>(1.4-10%)                    | 5.8%<br>(1.6-12%)                   | 76<br>(20-160)      | 810<br>(230-1700)     |
| Albania  | 2005 | Male   | 85 to 89 | 46%<br>(32-60%)                | 54%<br>(40-68%)          | 1.9<br>(1.1-2.9)                            | 4.1%<br>(0.88-8.7%)                  | 4.7%<br>(0.84-10%)                  | 33<br>(5.9-70)      | 250<br>(55-530)       |
| Albania  | 2005 | Male   | 90 to 94 | 46%<br>(32-61%)                | 54%<br>(39-68%)          | 1.7<br>(0.99-2.8)                           | 2.9%<br>(0.11-7.2%)                  | 3.2%<br>(-0.13-8.2%)                | 12<br>(-0.49-31)    | 65<br>(2.6-160)       |
| Albania  | 2005 | Male   | 95 plus  | 47%<br>(31-66%)                | 53%<br>(34-69%)          | 1.6<br>(0.76-2.9)                           | 2.1%<br>(-0.84-6.8%)                 | 2.1%<br>(-1.4-7.8%)                 | 2.4<br>(-1.5-8.8)   | 9.4<br>(-3.8-31)      |
| Albania  | 2010 | Female | All Ages | 26%<br>(24-29%)                | 74%<br>(71-76%)          | 1.1<br>(0.88-1.3)                           | 3.6%<br>(2.5-5%)                     | 5.9%<br>(3.3-9.1%)                  | 540<br>(300-840)    | 12000<br>(8400-16000) |
| Albania  | 2010 | Female | 15 to 19 | 23%<br>(20-27%)                | 77%<br>(73-80%)          | 0.85<br>(0.62-1.1)                          | 2.1%<br>(1.4-3%)                     | 3.8%<br>(2-6.1%)                    | 1.8<br>(0.94-3)     | 270<br>(170-390)      |
| Albania  | 2010 | Female | 20 to 24 | 31%<br>(27-36%)                | 69%<br>(64-73%)          | 1.3<br>(0.93-1.8)                           | 3.8%<br>(2.7-5.1%)                   | 5.4%<br>(3.1-8.4%)                  | 2.9<br>(1.6-4.5)    | 470<br>(320-660)      |
| Albania  | 2010 | Female | 25 to 29 | 34%<br>(29-39%)                | 66%<br>(61-71%)          | 1.3<br>(0.93-1.7)                           | 3.6%<br>(2.7-4.7%)                   | 4.8%<br>(2.8-7.5%)                  | 2.5<br>(1.4-3.7)    | 400<br>(280-550)      |
| Albania  | 2010 | Female | 30 to 34 | 34%<br>(30-39%)                | 66%<br>(61-70%)          | 1.2<br>(0.88-1.7)                           | 3.2%<br>(2.3-4.3%)                   | 4.5%<br>(2.8-6.8%)                  | 2.6<br>(1.6-3.9)    | 370<br>(260-510)      |
| Albania  | 2010 | Female | 35 to 39 | 35%<br>(31-40%)                | 65%<br>(60-69%)          | 1.3<br>(0.93-1.7)                           | 3.1%<br>(2.3-3.9%)                   | 4.8%<br>(3.1-6.8%)                  | 3.9<br>(2.5-5.6)    | 430<br>(320-560)      |

| Location | Year | Sex    | Age      | Prevalence of current drinkers | Prevalence of abstainers | Population average of standard drinks daily | Percent of total attributable deaths | Percent of total attributable DALYs | Attributable deaths | Attributable DALYs     |
|----------|------|--------|----------|--------------------------------|--------------------------|---------------------------------------------|--------------------------------------|-------------------------------------|---------------------|------------------------|
| Albania  | 2010 | Female | 40 to 44 | 34%<br>(30-39%)                | 66%<br>(61-70%)          | 1.3<br>(0.95-1.8)                           | 2.9%<br>(2.2-3.9%)                   | 5.1%<br>(3.5-7%)                    | 5.8<br>(4-8)        | 490<br>(360-650)       |
| Albania  | 2010 | Female | 45 to 49 | 32%<br>(28-37%)                | 68%<br>(63-72%)          | 1.3<br>(0.9-1.8)                            | 2.9%<br>(2.1-3.9%)                   | 5%<br>(3.3-7.3%)                    | 9.8<br>(6.5-14)     | 630<br>(460-860)       |
| Albania  | 2010 | Female | 50 to 54 | 33%<br>(25-42%)                | 67%<br>(58-75%)          | 1.6<br>(1.1-2.3)                            | 3.5%<br>(2.4-4.9%)                   | 6.1%<br>(4.1-8.7%)                  | 17<br>(11-24)       | 830<br>(590-1100)      |
| Albania  | 2010 | Female | 55 to 59 | 33%<br>(22-47%)                | 67%<br>(53-78%)          | 2.1<br>(1.2-3.4)                            | 4.8%<br>(2.9-7.1%)                   | 8.4%<br>(4.8-12%)                   | 28<br>(16-43)       | 1100<br>(670-1600)     |
| Albania  | 2010 | Female | 60 to 64 | 31%<br>(20-46%)                | 69%<br>(54-80%)          | 2.2<br>(1.2-3.3)                            | 5.5%<br>(3.2-8.3%)                   | 9%<br>(5.2-14%)                     | 39<br>(23-62)       | 1200<br>(730-1900)     |
| Albania  | 2010 | Female | 65 to 69 | 29%<br>(19-40%)                | 71%<br>(60-81%)          | 1.9<br>(1.2-2.8)                            | 5.6%<br>(3.2-8.6%)                   | 8.5%<br>(4.9-13%)                   | 56<br>(32-85)       | 1400<br>(820-2100)     |
| Albania  | 2010 | Female | 70 to 74 | 25%<br>(17-35%)                | 75%<br>(65-83%)          | 1.5<br>(0.83-2.4)                           | 5.2%<br>(2.4-8.6%)                   | 7.2%<br>(3.4-12%)                   | 79<br>(37-130)      | 1500<br>(710-2500)     |
| Albania  | 2010 | Female | 75 to 79 | 21%<br>(13-31%)                | 79%<br>(69-87%)          | 1.2<br>(0.6-2)                              | 4.5%<br>(1.7-8.2%)                   | 5.9%<br>(2.1-11%)                   | 80<br>(29-150)      | 1200<br>(430-2200)     |
| Albania  | 2010 | Female | 80 to 84 | 18%<br>(12-27%)                | 82%<br>(73-88%)          | 1<br>(0.55-1.7)                             | 4.4%<br>(1.7-7.8%)                   | 5.5%<br>(2.1-9.8%)                  | 87<br>(33-150)      | 920<br>(360-1600)      |
| Albania  | 2010 | Female | 85 to 89 | 18%<br>(11-25%)                | 82%<br>(75-89%)          | 0.97<br>(0.53-1.6)                          | 4.2%<br>(1.6-7.9%)                   | 5.1%<br>(1.9-9.7%)                  | 68<br>(26-130)      | 510<br>(200-950)       |
| Albania  | 2010 | Female | 90 to 94 | 19%<br>(12-27%)                | 81%<br>(73-88%)          | 1<br>(0.53-1.7)                             | 3.9%<br>(1.2-8%)                     | 4.7%<br>(1.4-9.7%)                  | 40<br>(12-83)       | 210<br>(67-420)        |
| Albania  | 2010 | Female | 95 plus  | 21%<br>(12-32%)                | 79%<br>(68-88%)          | 1.1<br>(0.49-2.1)                           | 3.8%<br>(0.63-8.8%)                  | 4.5%<br>(0.64-11%)                  | 18<br>(2.6-42)      | 63<br>(10-140)         |
| Albania  | 2010 | Male   | All Ages | 53%<br>(48-56%)                | 47%<br>(44-52%)          | 2.7<br>(2.2-3.3)                            | 6.6%<br>(4.7-8.7%)                   | 8.2%<br>(4.7-12%)                   | 960<br>(560-1400)   | 28000<br>(20000-37000) |
| Albania  | 2010 | Male   | 15 to 19 | 38%<br>(34-44%)                | 62%<br>(56-66%)          | 1.2<br>(0.8-1.8)                            | 3.5%<br>(2.4-5%)                     | 4.5%<br>(2.4-7.2%)                  | 5.4<br>(2.9-8.6)    | 640<br>(420-910)       |
| Albania  | 2010 | Male   | 20 to 24 | 62%<br>(57-67%)                | 38%<br>(33-43%)          | 2.9<br>(2-4.1)                              | 8.6%<br>(6-12%)                      | 11%<br>(6.3-16%)                    | 18<br>(10-26)       | 1700<br>(1200-2400)    |
| Albania  | 2010 | Male   | 25 to 29 | 70%<br>(65-74%)                | 30%<br>(26-35%)          | 3.4<br>(2.3-4.6)                            | 9.1%<br>(6-12%)                      | 12%<br>(6.8-17%)                    | 17<br>(9.6-25)      | 1500<br>(1000-2000)    |
| Albania  | 2010 | Male   | 30 to 34 | 71%<br>(66-75%)                | 29%<br>(25-34%)          | 3.7<br>(2.5-5.1)                            | 8.8%<br>(6.1-12%)                    | 12%<br>(6.9-18%)                    | 15<br>(8.9-23)      | 1200<br>(820-1700)     |
| Albania  | 2010 | Male   | 35 to 39 | 70%<br>(66-74%)                | 30%<br>(26-34%)          | 3.9<br>(2.7-5.5)                            | 8.5%<br>(5.5-12%)                    | 12%<br>(7-18%)                      | 19<br>(10-28)       | 1400<br>(890-1900)     |
| Albania  | 2010 | Male   | 40 to 44 | 73%<br>(69-77%)                | 27%<br>(23-31%)          | 4.3<br>(3.1-5.9)                            | 8.4%<br>(5.3-12%)                    | 12%<br>(7.1-18%)                    | 27<br>(15-40)       | 1700<br>(1100-2300)    |
| Albania  | 2010 | Male   | 45 to 49 | 77%<br>(72-80%)                | 23%<br>(20-28%)          | 4.6<br>(3.3-6.4)                            | 8.2%<br>(5.1-12%)                    | 12%<br>(6.6-17%)                    | 41<br>(23-61)       | 2200<br>(1300-3100)    |
| Albania  | 2010 | Male   | 50 to 54 | 72%<br>(61-81%)                | 28%<br>(19-39%)          | 4.5<br>(3.1-6.3)                            | 8.2%<br>(4.9-12%)                    | 11%<br>(6.2-17%)                    | 59<br>(32-87)       | 2600<br>(1600-3700)    |
| Albania  | 2010 | Male   | 55 to 59 | 64%<br>(45-80%)                | 36%<br>(20-55%)          | 4.4<br>(2.9-6.4)                            | 8.3%<br>(4.9-12%)                    | 11%<br>(6.3-17%)                    | 72<br>(41-110)      | 2700<br>(1600-3800)    |

| Location | Year | Sex    | Age      | Prevalence of current drinkers | Prevalence of abstainers | Population average of standard drinks daily | Percent of total attributable deaths | Percent of total attributable DALYs | Attributable deaths | Attributable DALYs    |
|----------|------|--------|----------|--------------------------------|--------------------------|---------------------------------------------|--------------------------------------|-------------------------------------|---------------------|-----------------------|
| Albania  | 2010 | Male   | 60 to 64 | 59%<br>(40-78%)                | 41%<br>(22-60%)          | 4.2<br>(2.6-6.1)                            | 8.5%<br>(4.8-12%)                    | 11%<br>(5.9-16%)                    | 95<br>(51-140)      | 2900<br>(1600-4200)   |
| Albania  | 2010 | Male   | 65 to 69 | 58%<br>(40-75%)                | 42%<br>(25-60%)          | 3.7<br>(2.4-5.3)                            | 8.1%<br>(4.6-12%)                    | 10%<br>(5.6-15%)                    | 120<br>(69-190)     | 3100<br>(1700-4500)   |
| Albania  | 2010 | Male   | 70 to 74 | 54%<br>(38-70%)                | 46%<br>(30-62%)          | 3.1<br>(1.9-4.7)                            | 7.3%<br>(3.1-12%)                    | 8.8%<br>(3.5-15%)                   | 160<br>(63-270)     | 3100<br>(1300-5100)   |
| Albania  | 2010 | Male   | 75 to 79 | 50%<br>(34-67%)                | 50%<br>(33-66%)          | 2.6<br>(1.4-4.1)                            | 6.2%<br>(1.9-12%)                    | 7.4%<br>(2.1-14%)                   | 140<br>(41-270)     | 2100<br>(640-3900)    |
| Albania  | 2010 | Male   | 80 to 84 | 47%<br>(31-63%)                | 53%<br>(37-69%)          | 2.2<br>(1.3-3.6)                            | 5.5%<br>(1.7-11%)                    | 6.3%<br>(1.8-12%)                   | 99<br>(29-190)      | 1100<br>(320-2100)    |
| Albania  | 2010 | Male   | 85 to 89 | 46%<br>(32-60%)                | 54%<br>(40-68%)          | 2<br>(1.2-3.2)                              | 4.6%<br>(1.2-9.5%)                   | 5.2%<br>(1.2-11%)                   | 48<br>(11-100)      | 370<br>(93-780)       |
| Albania  | 2010 | Male   | 90 to 94 | 46%<br>(32-61%)                | 54%<br>(39-68%)          | 1.9<br>(1.1-3.1)                            | 3.3%<br>(0.2-8.2%)                   | 3.7%<br>(-0.0075-9.5%)              | 14<br>(-0.029-37)   | 78<br>(4.8-190)       |
| Albania  | 2010 | Male   | 95 plus  | 47%<br>(31-65%)                | 53%<br>(35-69%)          | 1.7<br>(0.81-3.1)                           | 2.5%<br>(-0.79-7.8%)                 | 2.6%<br>(-1.3-8.9%)                 | 3.5<br>(-1.8-12)    | 13<br>(-4.4-42)       |
| Albania  | 2016 | Female | All Ages | 29%<br>(26-33%)                | 71%<br>(67-74%)          | 1.2<br>(0.92-1.7)                           | 3.6%<br>(2.4-5.2%)                   | 5.6%<br>(2.9-9.1%)                  | 540<br>(270-900)    | 12000<br>(7900-18000) |
| Albania  | 2016 | Female | 15 to 19 | 26%<br>(19-35%)                | 74%<br>(65-81%)          | 0.99<br>(0.58-1.5)                          | 2.1%<br>(1.4-3.1%)                   | 4.3%<br>(1.8-7.4%)                  | 1.5<br>(0.65-2.6)   | 240<br>(140-350)      |
| Albania  | 2016 | Female | 20 to 24 | 36%<br>(25-46%)                | 64%<br>(54-75%)          | 1.5<br>(0.9-2.2)                            | 3.9%<br>(2.7-5.3%)                   | 5.9%<br>(3-9.7%)                    | 2.9<br>(1.5-4.9)    | 520<br>(350-740)      |
| Albania  | 2016 | Female | 25 to 29 | 37%<br>(26-48%)                | 63%<br>(52-74%)          | 1.4<br>(0.85-2.2)                           | 3.6%<br>(2.6-4.8%)                   | 5%<br>(2.6-8.1%)                    | 2.5<br>(1.3-4.1)    | 470<br>(310-660)      |
| Albania  | 2016 | Female | 30 to 34 | 37%<br>(26-50%)                | 63%<br>(50-74%)          | 1.3<br>(0.8-2.2)                            | 3.3%<br>(2.3-4.5%)                   | 4.8%<br>(2.7-7.8%)                  | 2.5<br>(1.4-4)      | 390<br>(260-560)      |
| Albania  | 2016 | Female | 35 to 39 | 39%<br>(27-50%)                | 61%<br>(50-73%)          | 1.4<br>(0.82-2.2)                           | 3.2%<br>(2.2-4.2%)                   | 5.2%<br>(3-7.7%)                    | 3.2<br>(1.8-5)      | 380<br>(260-520)      |
| Albania  | 2016 | Female | 40 to 44 | 38%<br>(27-49%)                | 62%<br>(51-73%)          | 1.5<br>(0.88-2.2)                           | 3.1%<br>(2.1-4.3%)                   | 5.6%<br>(3.5-8.2%)                  | 5.3<br>(3.2-8.2)    | 460<br>(310-640)      |
| Albania  | 2016 | Female | 45 to 49 | 36%<br>(24-46%)                | 64%<br>(54-76%)          | 1.4<br>(0.81-2.2)                           | 3%<br>(2.1-4.3%)                     | 5.4%<br>(3.3-8.1%)                  | 8.4<br>(5-14)       | 570<br>(380-820)      |
| Albania  | 2016 | Female | 50 to 54 | 34%<br>(24-45%)                | 66%<br>(55-76%)          | 1.6<br>(1-2.5)                              | 3.5%<br>(2.4-5.2%)                   | 6.2%<br>(3.9-9.4%)                  | 16<br>(10-26)       | 850<br>(560-1200)     |
| Albania  | 2016 | Female | 55 to 59 | 33%<br>(22-48%)                | 67%<br>(52-78%)          | 2.1<br>(1.2-3.4)                            | 4.6%<br>(2.7-7%)                     | 8.2%<br>(4.6-13%)                   | 31<br>(16-49)       | 1200<br>(720-1900)    |
| Albania  | 2016 | Female | 60 to 64 | 31%<br>(20-46%)                | 69%<br>(54-80%)          | 2.1<br>(1.2-3.4)                            | 5.3%<br>(2.9-8%)                     | 8.8%<br>(4.8-13%)                   | 46<br>(25-74)       | 1500<br>(830-2300)    |
| Albania  | 2016 | Female | 65 to 69 | 29%<br>(19-41%)                | 71%<br>(59-81%)          | 1.9<br>(1.1-2.9)                            | 5.2%<br>(2.8-8.2%)                   | 8.2%<br>(4.3-13%)                   | 55<br>(30-89)       | 1400<br>(790-2200)    |
| Albania  | 2016 | Female | 70 to 74 | 25%<br>(17-35%)                | 75%<br>(65-83%)          | 1.5<br>(0.77-2.5)                           | 4.7%<br>(2.1-8.2%)                   | 6.9%<br>(2.9-12%)                   | 67<br>(28-120)      | 1300<br>(560-2200)    |
| Albania  | 2016 | Female | 75 to 79 | 20%<br>(14-30%)                | 80%<br>(70-86%)          | 1.2<br>(0.57-2)                             | 4%<br>(1.4-7.6%)                     | 5.5%<br>(1.8-10%)                   | 79<br>(26-150)      | 1200<br>(400-2200)    |

| Location | Year | Sex    | Age      | Prevalence of current drinkers | Prevalence of abstainers | Population average of standard drinks daily | Percent of total attributable deaths | Percent of total attributable DALYs | Attributable deaths | Attributable DALYs     |
|----------|------|--------|----------|--------------------------------|--------------------------|---------------------------------------------|--------------------------------------|-------------------------------------|---------------------|------------------------|
| Albania  | 2016 | Female | 80 to 84 | 18%<br>(12-26%)                | 82%<br>(74-88%)          | 0.99<br>(0.52-1.7)                          | 3.9%<br>(1.3-7.3%)                   | 5%<br>(1.7-9.6%)                    | 86<br>(30-170)      | 920<br>(330-1800)      |
| Albania  | 2016 | Female | 85 to 89 | 17%<br>(11-25%)                | 83%<br>(75-89%)          | 0.96<br>(0.49-1.7)                          | 3.8%<br>(1.3-7.5%)                   | 4.8%<br>(1.6-9.4%)                  | 71<br>(24-140)      | 530<br>(190-1000)      |
| Albania  | 2016 | Female | 90 to 94 | 19%<br>(12-27%)                | 81%<br>(73-88%)          | 1<br>(0.51-1.8)                             | 3.6%<br>(1-7.8%)                     | 4.5%<br>(1.2-9.7%)                  | 44<br>(12-94)       | 230<br>(64-480)        |
| Albania  | 2016 | Female | 95 plus  | 21%<br>(13-32%)                | 79%<br>(68-87%)          | 1.1<br>(0.48-2.2)                           | 3.7%<br>(0.48-8.6%)                  | 4.4%<br>(0.45-11%)                  | 18<br>(1.8-45)      | 63<br>(8-150)          |
| Albania  | 2016 | Male   | All Ages | 53%<br>(47-58%)                | 47%<br>(42-53%)          | 2.8<br>(2.1-3.6)                            | 6.7%<br>(4.4-9.5%)                   | 7.9%<br>(4-13%)                     | 1000<br>(510-1700)  | 29000<br>(18000-42000) |
| Albania  | 2016 | Male   | 15 to 19 | 41%<br>(31-50%)                | 59%<br>(50-69%)          | 1.3<br>(0.79-2.1)                           | 3.7%<br>(2.4-5.4%)                   | 4.9%<br>(2.5-8.3%)                  | 4.5<br>(2.3-7.6)    | 540<br>(340-810)       |
| Albania  | 2016 | Male   | 20 to 24 | 61%<br>(49-70%)                | 39%<br>(30-51%)          | 2.9<br>(1.8-4.3)                            | 8.6%<br>(5.9-12%)                    | 11%<br>(6.1-16%)                    | 17<br>(9.4-27)      | 1700<br>(1100-2400)    |
| Albania  | 2016 | Male   | 25 to 29 | 66%<br>(55-75%)                | 34%<br>(25-45%)          | 3.2<br>(2-4.7)                              | 8.8%<br>(5.9-12%)                    | 11%<br>(6-17%)                      | 18<br>(9.2-27)      | 1700<br>(1100-2400)    |
| Albania  | 2016 | Male   | 30 to 34 | 68%<br>(58-77%)                | 32%<br>(23-42%)          | 3.5<br>(2.2-5.1)                            | 8.6%<br>(5.7-12%)                    | 12%<br>(6.4-18%)                    | 14<br>(7.8-22)      | 1300<br>(830-1800)     |
| Albania  | 2016 | Male   | 35 to 39 | 68%<br>(58-76%)                | 32%<br>(24-42%)          | 3.8<br>(2.3-5.8)                            | 8.6%<br>(5.5-12%)                    | 12%<br>(6.6-19%)                    | 14<br>(7.3-22)      | 1100<br>(670-1500)     |
| Albania  | 2016 | Male   | 40 to 44 | 70%<br>(60-77%)                | 30%<br>(23-40%)          | 4.1<br>(2.7-6.1)                            | 8.3%<br>(5.2-12%)                    | 12%<br>(6.8-19%)                    | 21<br>(11-32)       | 1300<br>(820-1900)     |
| Albania  | 2016 | Male   | 45 to 49 | 73%<br>(62-80%)                | 27%<br>(20-38%)          | 4.3<br>(2.8-6.5)                            | 8%<br>(4.8-12%)                      | 12%<br>(6.2-18%)                    | 32<br>(16-51)       | 1800<br>(1000-2600)    |
| Albania  | 2016 | Male   | 50 to 54 | 70%<br>(58-80%)                | 30%<br>(20-42%)          | 4.4<br>(2.9-6.5)                            | 8%<br>(4.5-12%)                      | 11%<br>(5.8-17%)                    | 55<br>(28-86)       | 2500<br>(1400-3700)    |
| Albania  | 2016 | Male   | 55 to 59 | 64%<br>(46-80%)                | 36%<br>(20-54%)          | 4.4<br>(2.7-6.6)                            | 8.3%<br>(4.8-12%)                    | 11%<br>(6.1-17%)                    | 84<br>(43-130)      | 3200<br>(1700-4700)    |
| Albania  | 2016 | Male   | 60 to 64 | 59%<br>(41-77%)                | 41%<br>(23-59%)          | 4.1<br>(2.6-6.4)                            | 8.4%<br>(4.5-12%)                    | 11%<br>(5.4-16%)                    | 110<br>(58-180)     | 3500<br>(1900-5400)    |
| Albania  | 2016 | Male   | 65 to 69 | 57%<br>(40-75%)                | 43%<br>(25-60%)          | 3.7<br>(2.3-5.6)                            | 7.9%<br>(4.2-12%)                    | 9.9%<br>(5.1-16%)                   | 130<br>(64-210)     | 3200<br>(1700-5100)    |
| Albania  | 2016 | Male   | 70 to 74 | 54%<br>(37-70%)                | 46%<br>(30-63%)          | 3.1<br>(1.8-5)                              | 7.1%<br>(2.8-12%)                    | 8.7%<br>(3.3-15%)                   | 150<br>(56-260)     | 2900<br>(1100-5100)    |
| Albania  | 2016 | Male   | 75 to 79 | 49%<br>(35-66%)                | 51%<br>(34-65%)          | 2.6<br>(1.3-4.4)                            | 6%<br>(1.6-11%)                      | 7.2%<br>(1.8-14%)                   | 150<br>(39-300)     | 2300<br>(620-4400)     |
| Albania  | 2016 | Male   | 80 to 84 | 47%<br>(31-63%)                | 53%<br>(37-69%)          | 2.2<br>(1.2-3.8)                            | 5.3%<br>(1.4-11%)                    | 6.2%<br>(1.4-13%)                   | 120<br>(25-240)     | 1300<br>(300-2600)     |
| Albania  | 2016 | Male   | 85 to 89 | 46%<br>(32-61%)                | 54%<br>(39-68%)          | 2<br>(1.1-3.4)                              | 4.4%<br>(0.97-9.9%)                  | 5.1%<br>(0.92-12%)                  | 67<br>(12-160)      | 510<br>(110-1200)      |
| Albania  | 2016 | Male   | 90 to 94 | 46%<br>(33-61%)                | 54%<br>(39-67%)          | 1.9<br>(1-3.2)                              | 3.2%<br>(0.018-8.2%)                 | 3.7%<br>(-0.26-9.6%)                | 22<br>(-1.5-58)     | 120<br>(0.63-300)      |
| Albania  | 2016 | Male   | 95 plus  | 47%<br>(31-65%)                | 53%<br>(35-69%)          | 1.7<br>(0.78-3.2)                           | 2.4%<br>(-0.78-7.8%)                 | 2.5%<br>(-1.3-8.9%)                 | 3.7<br>(-1.9-13)    | 14<br>(-4.7-46)        |



| Location               | Year | Sex    | Age      | Prevalence of current drinkers | Prevalence of abstainers | Population average of standard drinks daily | Percent of total attributable deaths | Percent of total attributable DALYs | Attributable deaths | Attributable DALYs      |
|------------------------|------|--------|----------|--------------------------------|--------------------------|---------------------------------------------|--------------------------------------|-------------------------------------|---------------------|-------------------------|
| Bosnia and Herzegovina | 1990 | Female | All Ages | 12%<br>(10-14%)                | 88%<br>(86-90%)          | 1.9<br>(1.4-2.5)                            | 4.9%<br>(3.7-6.4%)                   | 6.6%<br>(4.5-9.2%)                  | 990<br>(650-1400)   | 29000<br>(21000-37000)  |
| Bosnia and Herzegovina | 1990 | Female | 15 to 19 | 12%<br>(7.4-17%)               | 88%<br>(83-93%)          | 1.3<br>(0.64-2.3)                           | 3.3%<br>(2.2-4.7%)                   | 6.9%<br>(3.9-11%)                   | 4.6<br>(2.6-7.4)    | 620<br>(400-860)        |
| Bosnia and Herzegovina | 1990 | Female | 20 to 24 | 15%<br>(9.8-23%)               | 85%<br>(77-90%)          | 2.1<br>(1-3.7)                              | 5.4%<br>(4-7.1%)                     | 8.2%<br>(5-12%)                     | 6.6<br>(3.8-9.8)    | 1100<br>(760-1500)      |
| Bosnia and Herzegovina | 1990 | Female | 25 to 29 | 16%<br>(10-23%)                | 84%<br>(77-90%)          | 2.1<br>(1.1-3.7)                            | 5.2%<br>(3.9-6.7%)                   | 8.2%<br>(5.3-11%)                   | 8.2<br>(5-12)       | 1300<br>(880-1700)      |
| Bosnia and Herzegovina | 1990 | Female | 30 to 34 | 16%<br>(10-25%)                | 84%<br>(75-90%)          | 2.3<br>(1.2-4.1)                            | 5%<br>(3.7-6.6%)                     | 9.3%<br>(6.2-13%)                   | 11<br>(7-16)        | 1300<br>(910-1700)      |
| Bosnia and Herzegovina | 1990 | Female | 35 to 39 | 17%<br>(10-24%)                | 83%<br>(76-90%)          | 2.7<br>(1.4-4.7)                            | 5.2%<br>(3.9-7%)                     | 9.7%<br>(6.7-13%)                   | 17<br>(11-25)       | 1500<br>(1100-2000)     |
| Bosnia and Herzegovina | 1990 | Female | 40 to 44 | 16%<br>(11-23%)                | 84%<br>(77-89%)          | 3.1<br>(1.6-5)                              | 5.6%<br>(4.2-7.5%)                   | 11%<br>(7.4-14%)                    | 25<br>(16-36)       | 1600<br>(1200-2200)     |
| Bosnia and Herzegovina | 1990 | Female | 45 to 49 | 16%<br>(9.4-22%)               | 84%<br>(78-91%)          | 3.4<br>(1.7-6.1)                            | 6.7%<br>(4.8-9.2%)                   | 11%<br>(7.6-16%)                    | 38<br>(25-56)       | 1900<br>(1300-2700)     |
| Bosnia and Herzegovina | 1990 | Female | 50 to 54 | 15%<br>(9.8-21%)               | 85%<br>(79-90%)          | 3.4<br>(1.8-5.7)                            | 6.7%<br>(4.7-9.3%)                   | 10%<br>(7.1-15%)                    | 69<br>(45-100)      | 2900<br>(2000-4100)     |
| Bosnia and Herzegovina | 1990 | Female | 55 to 59 | 14%<br>(8.8-20%)               | 86%<br>(80-91%)          | 3.1<br>(1.6-5.2)                            | 6.6%<br>(4.4-9.3%)                   | 9.5%<br>(6.2-14%)                   | 94<br>(60-140)      | 3400<br>(2300-4800)     |
| Bosnia and Herzegovina | 1990 | Female | 60 to 64 | 13%<br>(7.9-19%)               | 87%<br>(81-92%)          | 2.8<br>(1.4-4.9)                            | 6.4%<br>(4.3-9.3%)                   | 8.6%<br>(5.6-13%)                   | 130<br>(82-190)     | 3800<br>(2500-5400)     |
| Bosnia and Herzegovina | 1990 | Female | 65 to 69 | 12%<br>(7.6-16%)               | 88%<br>(84-92%)          | 2.5<br>(1.3-4.2)                            | 6.3%<br>(4.1-9.3%)                   | 8%<br>(5.1-12%)                     | 150<br>(92-230)     | 3500<br>(2200-5300)     |
| Bosnia and Herzegovina | 1990 | Female | 70 to 74 | 10%<br>(6.7-14%)               | 90%<br>(86-93%)          | 2<br>(1-3.7)                                | 5.5%<br>(3.4-8.4%)                   | 6.8%<br>(4.1-11%)                   | 110<br>(63-170)     | 2000<br>(1200-3100)     |
| Bosnia and Herzegovina | 1990 | Female | 75 to 79 | 8.8%<br>(5.5-13%)              | 91%<br>(87-95%)          | 1.7<br>(0.76-3.2)                           | 4.6%<br>(2.6-7.4%)                   | 5.5%<br>(3.1-9.1%)                  | 130<br>(69-210)     | 1800<br>(1000-3000)     |
| Bosnia and Herzegovina | 1990 | Female | 80 to 84 | 7.8%<br>(4.6-11%)              | 92%<br>(89-95%)          | 1.5<br>(0.68-2.6)                           | 4%<br>(2.1-6.6%)                     | 4.8%<br>(2.4-8%)                    | 97<br>(48-170)      | 1000<br>(530-1800)      |
| Bosnia and Herzegovina | 1990 | Female | 85 to 89 | 7.5%<br>(4.4-12%)              | 93%<br>(88-96%)          | 1.4<br>(0.68-2.7)                           | 3.8%<br>(1.8-6.7%)                   | 4.5%<br>(2.1-8.1%)                  | 69<br>(31-120)      | 520<br>(250-910)        |
| Bosnia and Herzegovina | 1990 | Female | 90 to 94 | 8%<br>(4.9-12%)                | 92%<br>(88-95%)          | 1.5<br>(0.71-3)                             | 3.7%<br>(1.8-6.9%)                   | 4.4%<br>(2-8.1%)                    | 31<br>(14-58)       | 160<br>(76-290)         |
| Bosnia and Herzegovina | 1990 | Female | 95 plus  | 9.3%<br>(5.2-15%)              | 91%<br>(85-95%)          | 1.8<br>(0.69-3.6)                           | 4%<br>(1.7-7.3%)                     | 4.6%<br>(1.9-8.5%)                  | 9.4<br>(3.8-18)     | 32<br>(14-59)           |
| Bosnia and Herzegovina | 1990 | Male   | All Ages | 37%<br>(32-42%)                | 63%<br>(58-68%)          | 5<br>(3.8-6.6)                              | 13%<br>(10-15%)                      | 15%<br>(12-19%)                     | 2600<br>(2000-3400) | 90000<br>(71000-110000) |
| Bosnia and Herzegovina | 1990 | Male   | 15 to 19 | 34%<br>(23-48%)                | 66%<br>(52-77%)          | 2.4<br>(1.2-4.3)                            | 6.8%<br>(4.2-10%)                    | 11%<br>(5.5-18%)                    | 16<br>(7.8-27)      | 1700<br>(1000-2500)     |
| Bosnia and Herzegovina | 1990 | Male   | 20 to 24 | 44%<br>(30-57%)                | 56%<br>(43-70%)          | 4.7<br>(2.5-8)                              | 14%<br>(9.6-18%)                     | 19%<br>(12-27%)                     | 47<br>(29-68)       | 4300<br>(3000-5800)     |
| Bosnia and Herzegovina | 1990 | Male   | 25 to 29 | 41%<br>(29-53%)                | 59%<br>(47-71%)          | 5.3<br>(2.8-8.6)                            | 14%<br>(11-17%)                      | 20%<br>(14-26%)                     | 58<br>(40-79)       | 5000<br>(3700-6400)     |

| Location               | Year | Sex    | Age      | Prevalence of current drinkers | Prevalence of abstainers | Population average of standard drinks daily | Percent of total attributable deaths | Percent of total attributable DALYs | Attributable deaths | Attributable DALYs     |
|------------------------|------|--------|----------|--------------------------------|--------------------------|---------------------------------------------|--------------------------------------|-------------------------------------|---------------------|------------------------|
| Bosnia and Herzegovina | 1990 | Male   | 30 to 34 | 41%<br>(29-54%)                | 59%<br>(46-71%)          | 6<br>(3.3-9.6)                              | 15%<br>(12-18%)                      | 22%<br>(17-28%)                     | 74<br>(54-96)       | 5500<br>(4200-6900)    |
| Bosnia and Herzegovina | 1990 | Male   | 35 to 39 | 49%<br>(34-62%)                | 51%<br>(38-66%)          | 7<br>(3.9-11)                               | 17%<br>(14-21%)                      | 25%<br>(20-30%)                     | 100<br>(78-130)     | 6700<br>(5200-8400)    |
| Bosnia and Herzegovina | 1990 | Male   | 40 to 44 | 52%<br>(38-66%)                | 48%<br>(34-62%)          | 8.3<br>(4.8-13)                             | 18%<br>(15-22%)                      | 26%<br>(21-31%)                     | 130<br>(100-170)    | 7300<br>(5800-9200)    |
| Bosnia and Herzegovina | 1990 | Male   | 45 to 49 | 52%<br>(37-66%)                | 48%<br>(34-63%)          | 9.6<br>(5.5-15)                             | 19%<br>(15-23%)                      | 24%<br>(19-29%)                     | 160<br>(120-210)    | 7500<br>(5800-9600)    |
| Bosnia and Herzegovina | 1990 | Male   | 50 to 54 | 50%<br>(36-63%)                | 50%<br>(37-64%)          | 10<br>(6-15)                                | 18%<br>(14-22%)                      | 22%<br>(17-28%)                     | 310<br>(230-410)    | 12000<br>(9300-16000)  |
| Bosnia and Herzegovina | 1990 | Male   | 55 to 59 | 48%<br>(34-60%)                | 52%<br>(40-66%)          | 10<br>(5.7-16)                              | 16%<br>(12-20%)                      | 19%<br>(14-24%)                     | 370<br>(270-500)    | 13000<br>(9300-17000)  |
| Bosnia and Herzegovina | 1990 | Male   | 60 to 64 | 46%<br>(32-60%)                | 54%<br>(40-68%)          | 9.6<br>(5.1-16)                             | 14%<br>(10-18%)                      | 16%<br>(12-21%)                     | 370<br>(260-500)    | 11000<br>(7700-14000)  |
| Bosnia and Herzegovina | 1990 | Male   | 65 to 69 | 44%<br>(32-56%)                | 56%<br>(44-68%)          | 8.5<br>(4.9-13)                             | 14%<br>(9.5-18%)                     | 15%<br>(10-20%)                     | 290<br>(200-400)    | 6800<br>(4700-9100)    |
| Bosnia and Herzegovina | 1990 | Male   | 70 to 74 | 41%<br>(30-53%)                | 59%<br>(47-70%)          | 7<br>(3.7-11)                               | 12%<br>(8.4-17%)                     | 14%<br>(9.6-19%)                    | 180<br>(120-250)    | 3400<br>(2300-4700)    |
| Bosnia and Herzegovina | 1990 | Male   | 75 to 79 | 36%<br>(25-48%)                | 64%<br>(52-75%)          | 5.5<br>(2.7-9.8)                            | 10%<br>(6.6-14%)                     | 12%<br>(7.3-16%)                    | 210<br>(130-300)    | 3000<br>(1900-4300)    |
| Bosnia and Herzegovina | 1990 | Male   | 80 to 84 | 34%<br>(24-46%)                | 66%<br>(54-76%)          | 4.7<br>(2.5-7.9)                            | 9.2%<br>(5.5-14%)                    | 10%<br>(6.1-16%)                    | 170<br>(100-270)    | 1800<br>(1100-2800)    |
| Bosnia and Herzegovina | 1990 | Male   | 85 to 89 | 34%<br>(23-46%)                | 66%<br>(54-77%)          | 4.2<br>(2.2-7.1)                            | 8.5%<br>(4.8-13%)                    | 9.6%<br>(5.3-15%)                   | 110<br>(58-170)     | 810<br>(450-1300)      |
| Bosnia and Herzegovina | 1990 | Male   | 90 to 94 | 35%<br>(24-47%)                | 65%<br>(53-76%)          | 3.9<br>(2-6.9)                              | 7.8%<br>(4.1-12%)                    | 8.7%<br>(4.4-14%)                   | 34<br>(17-54)       | 180<br>(95-280)        |
| Bosnia and Herzegovina | 1990 | Male   | 95 plus  | 37%<br>(24-52%)                | 63%<br>(48-76%)          | 3.6<br>(1.5-6.9)                            | 7%<br>(2.6-12%)                      | 7.7%<br>(2.6-14%)                   | 6.2<br>(2.2-11)     | 22<br>(8.4-37)         |
| Bosnia and Herzegovina | 1995 | Female | All Ages | 13%<br>(11-15%)                | 87%<br>(85-89%)          | 1.9<br>(1.4-2.4)                            | 4.5%<br>(3.4-5.9%)                   | 6.1%<br>(4.1-8.7%)                  | 1000<br>(650-1500)  | 28000<br>(20000-37000) |
| Bosnia and Herzegovina | 1995 | Female | 15 to 19 | 12%<br>(7.7-17%)               | 88%<br>(83-92%)          | 1.3<br>(0.66-2.2)                           | 2.1%<br>(1.4-2.9%)                   | 2%<br>(1.1-3.4%)                    | 3.6<br>(1.9-6)      | 480<br>(310-690)       |
| Bosnia and Herzegovina | 1995 | Female | 20 to 24 | 16%<br>(9.7-23%)               | 84%<br>(77-90%)          | 2<br>(0.96-3.6)                             | 3.7%<br>(2.6-4.9%)                   | 3%<br>(1.7-4.5%)                    | 5.8<br>(3.4-8.9)    | 930<br>(630-1300)      |
| Bosnia and Herzegovina | 1995 | Female | 25 to 29 | 16%<br>(10-24%)                | 84%<br>(76-90%)          | 2<br>(1-3.5)                                | 4.1%<br>(3.1-5.2%)                   | 3.8%<br>(2.3-5.7%)                  | 6.1<br>(3.6-9.3)    | 910<br>(640-1200)      |
| Bosnia and Herzegovina | 1995 | Female | 30 to 34 | 17%<br>(10-25%)                | 83%<br>(75-90%)          | 2.2<br>(1.2-3.9)                            | 4.2%<br>(3.1-5.4%)                   | 4.9%<br>(3.2-7.1%)                  | 11<br>(6.9-16)      | 1200<br>(850-1600)     |
| Bosnia and Herzegovina | 1995 | Female | 35 to 39 | 17%<br>(11-24%)                | 83%<br>(76-89%)          | 2.6<br>(1.4-4.3)                            | 4.5%<br>(3.4-6.1%)                   | 6.3%<br>(4.2-8.9%)                  | 17<br>(11-25)       | 1400<br>(960-1800)     |
| Bosnia and Herzegovina | 1995 | Female | 40 to 44 | 17%<br>(11-24%)                | 83%<br>(76-89%)          | 2.9<br>(1.6-4.5)                            | 5.2%<br>(3.8-7.1%)                   | 8.1%<br>(5.6-12%)                   | 28<br>(18-42)       | 1800<br>(1200-2400)    |
| Bosnia and Herzegovina | 1995 | Female | 45 to 49 | 16%<br>(9.6-23%)               | 84%<br>(77-90%)          | 3.2<br>(1.7-5.5)                            | 6.1%<br>(4.4-8.5%)                   | 9.4%<br>(6.4-13%)                   | 47<br>(30-70)       | 2300<br>(1600-3200)    |

| Location               | Year | Sex    | Age      | Prevalence of current drinkers | Prevalence of abstainers | Population average of standard drinks daily | Percent of total attributable deaths | Percent of total attributable DALYs | Attributable deaths | Attributable DALYs      |
|------------------------|------|--------|----------|--------------------------------|--------------------------|---------------------------------------------|--------------------------------------|-------------------------------------|---------------------|-------------------------|
| Bosnia and Herzegovina | 1995 | Female | 50 to 54 | 15%<br>(9.9-22%)               | 85%<br>(78-90%)          | 3.2<br>(1.7-5.3)                            | 6.3%<br>(4.4-8.8%)                   | 9.2%<br>(6.3-13%)                   | 45<br>(29-66)       | 1900<br>(1300-2700)     |
| Bosnia and Herzegovina | 1995 | Female | 55 to 59 | 14%<br>(9-20%)                 | 86%<br>(80-91%)          | 3<br>(1.6-4.8)                              | 6.3%<br>(4.2-9%)                     | 8.8%<br>(5.8-13%)                   | 87<br>(55-130)      | 3100<br>(2100-4500)     |
| Bosnia and Herzegovina | 1995 | Female | 60 to 64 | 13%<br>(8.1-19%)               | 87%<br>(81-92%)          | 2.7<br>(1.4-4.5)                            | 6.3%<br>(4.2-9.1%)                   | 8.3%<br>(5.4-12%)                   | 130<br>(83-190)     | 3800<br>(2500-5600)     |
| Bosnia and Herzegovina | 1995 | Female | 65 to 69 | 12%<br>(7.9-17%)               | 88%<br>(83-92%)          | 2.4<br>(1.3-3.8)                            | 6.2%<br>(4-9.2%)                     | 7.9%<br>(4.9-12%)                   | 170<br>(100-260)    | 4000<br>(2500-6000)     |
| Bosnia and Herzegovina | 1995 | Female | 70 to 74 | 10%<br>(6.9-15%)               | 90%<br>(85-93%)          | 2<br>(1-3.4)                                | 5.5%<br>(3.3-8.5%)                   | 6.8%<br>(4-11%)                     | 150<br>(91-250)     | 2900<br>(1800-4500)     |
| Bosnia and Herzegovina | 1995 | Female | 75 to 79 | 8.9%<br>(5.5-13%)              | 91%<br>(87-94%)          | 1.6<br>(0.77-2.9)                           | 4.6%<br>(2.6-7.5%)                   | 5.5%<br>(3.1-9.1%)                  | 96<br>(52-160)      | 1400<br>(780-2300)      |
| Bosnia and Herzegovina | 1995 | Female | 80 to 84 | 7.9%<br>(4.7-11%)              | 92%<br>(89-95%)          | 1.4<br>(0.68-2.4)                           | 4.1%<br>(2.1-6.7%)                   | 4.8%<br>(2.4-8.1%)                  | 89<br>(43-150)      | 950<br>(470-1600)       |
| Bosnia and Herzegovina | 1995 | Female | 85 to 89 | 7.7%<br>(4.4-12%)              | 92%<br>(88-96%)          | 1.4<br>(0.65-2.6)                           | 3.8%<br>(1.8-6.6%)                   | 4.5%<br>(2.1-8.1%)                  | 77<br>(35-140)      | 580<br>(280-1000)       |
| Bosnia and Herzegovina | 1995 | Female | 90 to 94 | 8.3%<br>(5.1-13%)              | 92%<br>(87-95%)          | 1.5<br>(0.7-2.9)                            | 3.7%<br>(1.8-6.8%)                   | 4.4%<br>(2-8.2%)                    | 36<br>(16-68)       | 190<br>(90-350)         |
| Bosnia and Herzegovina | 1995 | Female | 95 plus  | 9.6%<br>(5.4-15%)              | 90%<br>(85-95%)          | 1.7<br>(0.69-3.5)                           | 3.9%<br>(1.7-6.9%)                   | 4.5%<br>(1.9-8.4%)                  | 12<br>(4.8-22)      | 40<br>(18-73)           |
| Bosnia and Herzegovina | 1995 | Male   | All Ages | 38%<br>(33-43%)                | 62%<br>(57-67%)          | 4.9<br>(3.8-6)                              | 9.8%<br>(7.8-12%)                    | 13%<br>(9.5-16%)                    | 2600<br>(1900-3400) | 85000<br>(66000-110000) |
| Bosnia and Herzegovina | 1995 | Male   | 15 to 19 | 34%<br>(23-49%)                | 66%<br>(51-77%)          | 2.2<br>(1.1-4)                              | 3.2%<br>(1.9-4.9%)                   | 3%<br>(1.5-5.2%)                    | 14<br>(6.5-23)      | 1300<br>(770-2100)      |
| Bosnia and Herzegovina | 1995 | Male   | 20 to 24 | 44%<br>(30-57%)                | 56%<br>(43-70%)          | 4.4<br>(2.2-7.3)                            | 4.9%<br>(3.2-6.6%)                   | 4.2%<br>(2.5-6.3%)                  | 38<br>(23-57)       | 3400<br>(2300-4700)     |
| Bosnia and Herzegovina | 1995 | Male   | 25 to 29 | 41%<br>(28-53%)                | 59%<br>(47-72%)          | 5<br>(2.5-8)                                | 6.2%<br>(4.5-7.9%)                   | 5.7%<br>(3.8-7.8%)                  | 43<br>(28-59)       | 3600<br>(2600-4700)     |
| Bosnia and Herzegovina | 1995 | Male   | 30 to 34 | 42%<br>(29-54%)                | 58%<br>(46-71%)          | 5.5<br>(3.1-8.9)                            | 8%<br>(6.2-10%)                      | 8.2%<br>(5.9-11%)                   | 65<br>(46-85)       | 4800<br>(3600-6100)     |
| Bosnia and Herzegovina | 1995 | Male   | 35 to 39 | 48%<br>(35-62%)                | 52%<br>(38-65%)          | 6.4<br>(3.7-9.9)                            | 11%<br>(8.6-14%)                     | 12%<br>(9.4-16%)                    | 93<br>(67-120)      | 5900<br>(4600-7600)     |
| Bosnia and Herzegovina | 1995 | Male   | 40 to 44 | 52%<br>(38-66%)                | 48%<br>(34-62%)          | 7.6<br>(4.5-11)                             | 14%<br>(11-17%)                      | 17%<br>(13-21%)                     | 140<br>(100-180)    | 7500<br>(5800-9700)     |
| Bosnia and Herzegovina | 1995 | Male   | 45 to 49 | 52%<br>(36-65%)                | 48%<br>(35-64%)          | 8.7<br>(5.1-13)                             | 16%<br>(13-20%)                      | 20%<br>(15-24%)                     | 200<br>(140-260)    | 9200<br>(7000-12000)    |
| Bosnia and Herzegovina | 1995 | Male   | 50 to 54 | 50%<br>(36-63%)                | 50%<br>(37-64%)          | 9.2<br>(5.6-14)                             | 16%<br>(13-21%)                      | 20%<br>(15-25%)                     | 180<br>(130-250)    | 7400<br>(5500-9800)     |
| Bosnia and Herzegovina | 1995 | Male   | 55 to 59 | 47%<br>(34-60%)                | 53%<br>(40-66%)          | 9.3<br>(5.5-14)                             | 15%<br>(11-19%)                      | 17%<br>(13-22%)                     | 320<br>(220-440)    | 11000<br>(7800-15000)   |
| Bosnia and Herzegovina | 1995 | Male   | 60 to 64 | 46%<br>(32-59%)                | 54%<br>(41-68%)          | 8.8<br>(4.8-14)                             | 13%<br>(9.8-18%)                     | 15%<br>(11-20%)                     | 380<br>(260-520)    | 11000<br>(7800-15000)   |
| Bosnia and Herzegovina | 1995 | Male   | 65 to 69 | 44%<br>(32-56%)                | 56%<br>(44-68%)          | 7.7<br>(4.6-12)                             | 13%<br>(9-17%)                       | 15%<br>(10-20%)                     | 440<br>(290-600)    | 10000<br>(6900-14000)   |

| Location               | Year | Sex    | Age      | Prevalence of current drinkers | Prevalence of abstainers | Population average of standard drinks daily | Percent of total attributable deaths | Percent of total attributable DALYs | Attributable deaths | Attributable DALYs     |
|------------------------|------|--------|----------|--------------------------------|--------------------------|---------------------------------------------|--------------------------------------|-------------------------------------|---------------------|------------------------|
| Bosnia and Herzegovina | 1995 | Male   | 70 to 74 | 41%<br>(29-53%)                | 59%<br>(47-71%)          | 6.4<br>(3.6-10)                             | 12%<br>(8.2-16%)                     | 14%<br>(9.2-19%)                    | 270<br>(170-370)    | 5000<br>(3300-7000)    |
| Bosnia and Herzegovina | 1995 | Male   | 75 to 79 | 37%<br>(25-50%)                | 63%<br>(50-75%)          | 5<br>(2.7-8.7)                              | 10%<br>(6.4-14%)                     | 11%<br>(7.2-16%)                    | 130<br>(78-190)     | 1900<br>(1200-2700)    |
| Bosnia and Herzegovina | 1995 | Male   | 80 to 84 | 34%<br>(24-47%)                | 66%<br>(53-76%)          | 4.3<br>(2.3-7.1)                            | 8.9%<br>(5.3-13%)                    | 10%<br>(6-15%)                      | 120<br>(71-190)     | 1300<br>(790-2000)     |
| Bosnia and Herzegovina | 1995 | Male   | 85 to 89 | 34%<br>(23-46%)                | 66%<br>(54-77%)          | 3.9<br>(2.1-6.4)                            | 8.1%<br>(4.5-12%)                    | 9.2%<br>(4.9-14%)                   | 110<br>(57-170)     | 810<br>(450-1300)      |
| Bosnia and Herzegovina | 1995 | Male   | 90 to 94 | 35%<br>(24-47%)                | 65%<br>(53-76%)          | 3.5<br>(1.8-6.2)                            | 7.3%<br>(3.8-12%)                    | 8.2%<br>(4.1-14%)                   | 44<br>(22-72)       | 230<br>(120-370)       |
| Bosnia and Herzegovina | 1995 | Male   | 95 plus  | 37%<br>(24-52%)                | 63%<br>(48-76%)          | 3.3<br>(1.4-6.1)                            | 6.4%<br>(2.1-11%)                    | 7.1%<br>(2.2-13%)                   | 8.7<br>(2.5-16)     | 31<br>(10-55)          |
| Bosnia and Herzegovina | 2000 | Female | All Ages | 11%<br>(9.7-13%)               | 89%<br>(87-90%)          | 1.9<br>(1.4-2.4)                            | 4.6%<br>(3.4-6.1%)                   | 6%<br>(3.9-8.5%)                    | 840<br>(550-1200)   | 23000<br>(17000-31000) |
| Bosnia and Herzegovina | 2000 | Female | 15 to 19 | 11%<br>(7.1-15%)               | 89%<br>(85-93%)          | 1.2<br>(0.63-2.2)                           | 2.9%<br>(2-4%)                       | 6.3%<br>(3.6-9.9%)                  | 2.4<br>(1.3-4)      | 400<br>(260-560)       |
| Bosnia and Herzegovina | 2000 | Female | 20 to 24 | 13%<br>(8.3-20%)               | 87%<br>(80-92%)          | 1.8<br>(0.88-3.4)                           | 5%<br>(3.7-6.6%)                     | 7.4%<br>(4.5-11%)                   | 3.4<br>(2.5-1)      | 680<br>(460-940)       |
| Bosnia and Herzegovina | 2000 | Female | 25 to 29 | 14%<br>(8.6-20%)               | 86%<br>(80-91%)          | 1.8<br>(0.89-3.3)                           | 4.9%<br>(3.7-6.2%)                   | 7.1%<br>(4.4-10%)                   | 3.6<br>(2.2-5.5)    | 730<br>(510-990)       |
| Bosnia and Herzegovina | 2000 | Female | 30 to 34 | 14%<br>(9.1-22%)               | 86%<br>(78-91%)          | 2.1<br>(1.1-3.7)                            | 4.7%<br>(3.6-6.1%)                   | 8.1%<br>(5.5-12%)                   | 5.7<br>(3.7-8.6)    | 780<br>(560-1000)      |
| Bosnia and Herzegovina | 2000 | Female | 35 to 39 | 15%<br>(9.4-22%)               | 85%<br>(78-91%)          | 2.5<br>(1.3-4.1)                            | 4.7%<br>(3.6-6.2%)                   | 8.7%<br>(5.9-12%)                   | 11<br>(7.1-17)      | 1100<br>(760-1400)     |
| Bosnia and Herzegovina | 2000 | Female | 40 to 44 | 16%<br>(11-22%)                | 84%<br>(78-89%)          | 3<br>(1.7-4.7)                              | 5.1%<br>(3.9-6.9%)                   | 9.8%<br>(6.7-14%)                   | 20<br>(13-29)       | 1400<br>(960-1900)     |
| Bosnia and Herzegovina | 2000 | Female | 45 to 49 | 15%<br>(9.1-20%)               | 85%<br>(80-91%)          | 3.1<br>(1.8-5.2)                            | 5.6%<br>(4.1-7.7%)                   | 9.8%<br>(6.8-14%)                   | 35<br>(23-51)       | 1900<br>(1300-2600)    |
| Bosnia and Herzegovina | 2000 | Female | 50 to 54 | 13%<br>(8.6-19%)               | 87%<br>(81-91%)          | 3<br>(1.6-4.8)                              | 5.6%<br>(3.9-7.7%)                   | 9%<br>(6.1-13%)                     | 43<br>(28-64)       | 1900<br>(1400-2700)    |
| Bosnia and Herzegovina | 2000 | Female | 55 to 59 | 12%<br>(8-18%)                 | 88%<br>(82-92%)          | 2.7<br>(1.5-4.5)                            | 5.4%<br>(3.7-7.7%)                   | 8.3%<br>(5.6-12%)                   | 41<br>(27-61)       | 1500<br>(1100-2200)    |
| Bosnia and Herzegovina | 2000 | Female | 60 to 64 | 11%<br>(7.3-16%)               | 89%<br>(84-93%)          | 2.5<br>(1.3-4.2)                            | 5.4%<br>(3.7-7.8%)                   | 7.5%<br>(5-11%)                     | 96<br>(61-140)      | 2900<br>(1900-4100)    |
| Bosnia and Herzegovina | 2000 | Female | 65 to 69 | 10%<br>(6.5-14%)               | 90%<br>(86-93%)          | 2.1<br>(1.2-3.4)                            | 5.3%<br>(3.4-7.8%)                   | 7%<br>(4.4-10%)                     | 140<br>(86-210)     | 3300<br>(2100-5000)    |
| Bosnia and Herzegovina | 2000 | Female | 70 to 74 | 9%<br>(5.9-13%)                | 91%<br>(87-94%)          | 1.8<br>(0.95-3.1)                           | 4.8%<br>(2.9-7.5%)                   | 6.1%<br>(3.6-9.5%)                  | 150<br>(89-240)     | 2900<br>(1700-4500)    |
| Bosnia and Herzegovina | 2000 | Female | 75 to 79 | 8.2%<br>(5.1-12%)              | 92%<br>(88-95%)          | 1.6<br>(0.75-2.8)                           | 4.2%<br>(2.4-6.8%)                   | 5.1%<br>(2.9-8.4%)                  | 130<br>(71-210)     | 1900<br>(1100-3100)    |
| Bosnia and Herzegovina | 2000 | Female | 80 to 84 | 7.5%<br>(4.5-11%)              | 93%<br>(89-96%)          | 1.4<br>(0.7-2.5)                            | 3.8%<br>(1.9-6.2%)                   | 4.6%<br>(2.3-7.8%)                  | 82<br>(40-140)      | 890<br>(440-1500)      |
| Bosnia and Herzegovina | 2000 | Female | 85 to 89 | 7.2%<br>(4.2-11%)              | 93%<br>(89-96%)          | 1.4<br>(0.65-2.5)                           | 3.3%<br>(1.7-5.8%)                   | 4.2%<br>(2-7.4%)                    | 46<br>(21-81)       | 350<br>(170-620)       |

| Location               | Year | Sex    | Age      | Prevalence of current drinkers | Prevalence of abstainers | Population average of standard drinks daily | Percent of total attributable deaths | Percent of total attributable DALYs | Attributable deaths | Attributable DALYs     |
|------------------------|------|--------|----------|--------------------------------|--------------------------|---------------------------------------------|--------------------------------------|-------------------------------------|---------------------|------------------------|
| Bosnia and Herzegovina | 2000 | Female | 90 to 94 | 7.8%<br>(4.9-12%)              | 92%<br>(88-95%)          | 1.5<br>(0.7-2.9)                            | 3.2%<br>(1.5-5.9%)                   | 4%<br>(1.8-7.5%)                    | 31<br>(14-57)       | 160<br>(79-300)        |
| Bosnia and Herzegovina | 2000 | Female | 95 plus  | 9%<br>(5.1-14%)                | 91%<br>(86-95%)          | 1.7<br>(0.66-3.5)                           | 3.4%<br>(1.5-6.2%)                   | 4.2%<br>(1.7-7.7%)                  | 11<br>(4.4-20)      | 39<br>(17-71)          |
| Bosnia and Herzegovina | 2000 | Male   | All Ages | 40%<br>(35-44%)                | 60%<br>(56-65%)          | 5.7<br>(4.5-6.9)                            | 13%<br>(10-16%)                      | 15%<br>(11-19%)                     | 2400<br>(1700-3100) | 76000<br>(58000-96000) |
| Bosnia and Herzegovina | 2000 | Male   | 15 to 19 | 36%<br>(26-49%)                | 64%<br>(51-74%)          | 2.5<br>(1.3-4.3)                            | 7.3%<br>(4.6-11%)                    | 13%<br>(6.8-20%)                    | 12<br>(6.4-21)      | 1300<br>(810-2000)     |
| Bosnia and Herzegovina | 2000 | Male   | 20 to 24 | 44%<br>(32-56%)                | 56%<br>(44-68%)          | 4.7<br>(2.6-7.9)                            | 14%<br>(10-17%)                      | 21%<br>(14-28%)                     | 26<br>(16-37)       | 2600<br>(1800-3400)    |
| Bosnia and Herzegovina | 2000 | Male   | 25 to 29 | 37%<br>(27-48%)                | 63%<br>(52-73%)          | 4.8<br>(2.6-7.8)                            | 13%<br>(10-16%)                      | 20%<br>(15-27%)                     | 31<br>(21-43)       | 2900<br>(2100-3700)    |
| Bosnia and Herzegovina | 2000 | Male   | 30 to 34 | 38%<br>(26-50%)                | 62%<br>(50-74%)          | 5.4<br>(3-8.5)                              | 13%<br>(11-17%)                      | 22%<br>(17-28%)                     | 37<br>(26-50)       | 3100<br>(2300-3900)    |
| Bosnia and Herzegovina | 2000 | Male   | 35 to 39 | 49%<br>(38-61%)                | 51%<br>(39-62%)          | 7<br>(4.1-10)                               | 16%<br>(13-20%)                      | 26%<br>(20-31%)                     | 72<br>(52-97)       | 4900<br>(3800-6300)    |
| Bosnia and Herzegovina | 2000 | Male   | 40 to 44 | 57%<br>(45-69%)                | 43%<br>(31-55%)          | 9.1<br>(5.8-13)                             | 18%<br>(15-22%)                      | 27%<br>(22-33%)                     | 110<br>(83-150)     | 6500<br>(5100-8300)    |
| Bosnia and Herzegovina | 2000 | Male   | 45 to 49 | 58%<br>(44-70%)                | 42%<br>(30-56%)          | 11<br>(6.6-16)                              | 18%<br>(15-22%)                      | 26%<br>(20-31%)                     | 180<br>(130-240)    | 8700<br>(6700-11000)   |
| Bosnia and Herzegovina | 2000 | Male   | 50 to 54 | 53%<br>(39-64%)                | 47%<br>(36-61%)          | 11<br>(6.4-15)                              | 17%<br>(14-22%)                      | 22%<br>(17-28%)                     | 220<br>(160-290)    | 9100<br>(6900-12000)   |
| Bosnia and Herzegovina | 2000 | Male   | 55 to 59 | 47%<br>(35-59%)                | 53%<br>(41-65%)          | 10<br>(6-15)                                | 15%<br>(11-19%)                      | 19%<br>(14-24%)                     | 170<br>(120-230)    | 6100<br>(4400-8000)    |
| Bosnia and Herzegovina | 2000 | Male   | 60 to 64 | 44%<br>(31-57%)                | 56%<br>(43-69%)          | 9<br>(5-14)                                 | 13%<br>(9.8-17%)                     | 16%<br>(11-20%)                     | 330<br>(230-450)    | 9600<br>(6900-13000)   |
| Bosnia and Herzegovina | 2000 | Male   | 65 to 69 | 41%<br>(31-52%)                | 59%<br>(48-69%)          | 7.6<br>(4.6-11)                             | 12%<br>(8.5-16%)                     | 14%<br>(9.9-19%)                    | 390<br>(260-540)    | 9400<br>(6400-13000)   |
| Bosnia and Herzegovina | 2000 | Male   | 70 to 74 | 38%<br>(28-50%)                | 62%<br>(50-72%)          | 6.4<br>(3.6-10)                             | 11%<br>(7.7-15%)                     | 13%<br>(8.8-18%)                    | 380<br>(240-540)    | 7300<br>(4800-10000)   |
| Bosnia and Herzegovina | 2000 | Male   | 75 to 79 | 35%<br>(25-47%)                | 65%<br>(53-75%)          | 5.2<br>(2.6-8.8)                            | 9.6%<br>(6-13%)                      | 11%<br>(6.9-16%)                    | 180<br>(110-270)    | 2700<br>(1700-4000)    |
| Bosnia and Herzegovina | 2000 | Male   | 80 to 84 | 33%<br>(23-45%)                | 67%<br>(55-77%)          | 4.4<br>(2.4-7.3)                            | 8.6%<br>(5.2-13%)                    | 9.9%<br>(5.7-15%)                   | 98<br>(56-150)      | 1100<br>(650-1700)     |
| Bosnia and Herzegovina | 2000 | Male   | 85 to 89 | 33%<br>(22-45%)                | 67%<br>(55-78%)          | 4<br>(2.1-6.5)                              | 7.7%<br>(4.3-12%)                    | 8.9%<br>(4.8-14%)                   | 57<br>(30-92)       | 450<br>(250-710)       |
| Bosnia and Herzegovina | 2000 | Male   | 90 to 94 | 34%<br>(23-46%)                | 66%<br>(54-77%)          | 3.7<br>(1.9-6.3)                            | 7.2%<br>(3.9-12%)                    | 8.2%<br>(4.3-13%)                   | 39<br>(20-65)       | 210<br>(120-340)       |
| Bosnia and Herzegovina | 2000 | Male   | 95 plus  | 36%<br>(23-51%)                | 64%<br>(49-77%)          | 3.4<br>(1.5-6.6)                            | 6.5%<br>(2.5-11%)                    | 7.3%<br>(2.4-13%)                   | 10<br>(3.5-18)      | 38<br>(15-65)          |
| Bosnia and Herzegovina | 2005 | Female | All Ages | 10%<br>(8.9-12%)               | 90%<br>(88-91%)          | 1.9<br>(1.4-2.5)                            | 4.1%<br>(3-5.4%)                     | 5.2%<br>(3.4-7.4%)                  | 820<br>(530-1200)   | 21000<br>(16000-28000) |
| Bosnia and Herzegovina | 2005 | Female | 15 to 19 | 9.8%<br>(6.3-14%)              | 90%<br>(86-94%)          | 1.2<br>(0.63-2.2)                           | 2.6%<br>(1.8-3.5%)                   | 5.4%<br>(3.2-8.5%)                  | 1.6<br>(0.94-2.5)   | 320<br>(210-450)       |

| Location               | Year | Sex    | Age      | Prevalence of current drinkers | Prevalence of abstainers | Population average of standard drinks daily | Percent of total attributable deaths | Percent of total attributable DALYs | Attributable deaths | Attributable DALYs     |
|------------------------|------|--------|----------|--------------------------------|--------------------------|---------------------------------------------|--------------------------------------|-------------------------------------|---------------------|------------------------|
| Bosnia and Herzegovina | 2005 | Female | 20 to 24 | 12%<br>(7.7-18%)               | 88%<br>(82-92%)          | 1.8<br>(0.86-3.3)                           | 4.7%<br>(3.4-6.1%)                   | 6.2%<br>(3.8-9.3%)                  | 2.8<br>(1.7-4.3)    | 700<br>(470-980)       |
| Bosnia and Herzegovina | 2005 | Female | 25 to 29 | 13%<br>(7.9-19%)               | 87%<br>(81-92%)          | 1.8<br>(0.89-3.3)                           | 4.6%<br>(3.5-5.9%)                   | 6.1%<br>(3.9-8.6%)                  | 2.6<br>(1.6-3.9)    | 650<br>(450-890)       |
| Bosnia and Herzegovina | 2005 | Female | 30 to 34 | 13%<br>(8-20%)                 | 87%<br>(80-92%)          | 2<br>(1-3.6)                                | 4.4%<br>(3.3-5.7%)                   | 6.9%<br>(4.5-10%)                   | 4.7<br>(3-7)        | 760<br>(540-1000)      |
| Bosnia and Herzegovina | 2005 | Female | 35 to 39 | 14%<br>(8.5-20%)               | 86%<br>(80-91%)          | 2.4<br>(1.2-4.2)                            | 4.3%<br>(3.3-5.7%)                   | 7.5%<br>(4.9-11%)                   | 7.1<br>(4.5-11)     | 810<br>(570-1100)      |
| Bosnia and Herzegovina | 2005 | Female | 40 to 44 | 14%<br>(9.8-20%)               | 86%<br>(80-90%)          | 2.9<br>(1.6-4.7)                            | 4.6%<br>(3.4-6.2%)                   | 8.4%<br>(5.6-12%)                   | 16<br>(9.9-23)      | 1200<br>(870-1700)     |
| Bosnia and Herzegovina | 2005 | Female | 45 to 49 | 13%<br>(8.4-19%)               | 87%<br>(81-92%)          | 3.1<br>(1.7-5.3)                            | 4.8%<br>(3.5-6.7%)                   | 8.3%<br>(5.6-12%)                   | 28<br>(18-42)       | 1600<br>(1100-2200)    |
| Bosnia and Herzegovina | 2005 | Female | 50 to 54 | 12%<br>(7.9-17%)               | 88%<br>(83-92%)          | 2.9<br>(1.6-4.9)                            | 4.7%<br>(3.3-6.5%)                   | 7.6%<br>(5.1-11%)                   | 38<br>(24-57)       | 1800<br>(1200-2600)    |
| Bosnia and Herzegovina | 2005 | Female | 55 to 59 | 11%<br>(7.2-16%)               | 89%<br>(84-93%)          | 2.7<br>(1.5-4.3)                            | 4.6%<br>(3.1-6.4%)                   | 7.1%<br>(4.7-10%)                   | 46<br>(30-68)       | 1800<br>(1200-2600)    |
| Bosnia and Herzegovina | 2005 | Female | 60 to 64 | 10%<br>(6.5-15%)               | 90%<br>(85-93%)          | 2.4<br>(1.2-4.1)                            | 4.7%<br>(3.1-6.8%)                   | 6.5%<br>(4.2-9.5%)                  | 57<br>(37-84)       | 1800<br>(1200-2500)    |
| Bosnia and Herzegovina | 2005 | Female | 65 to 69 | 9.2%<br>(5.9-13%)              | 91%<br>(87-94%)          | 2.1<br>(1.1-3.5)                            | 4.7%<br>(3-6.9%)                     | 6.1%<br>(3.8-9.1%)                  | 120<br>(75-190)     | 3000<br>(1900-4600)    |
| Bosnia and Herzegovina | 2005 | Female | 70 to 74 | 8.2%<br>(5.4-12%)              | 92%<br>(88-95%)          | 1.8<br>(0.92-3.1)                           | 4.3%<br>(2.6-6.6%)                   | 5.4%<br>(3.3-8.3%)                  | 160<br>(94-250)     | 3000<br>(1800-4700)    |
| Bosnia and Herzegovina | 2005 | Female | 75 to 79 | 7.5%<br>(4.6-11%)              | 93%<br>(89-95%)          | 1.6<br>(0.73-2.7)                           | 3.7%<br>(2.2-6%)                     | 4.6%<br>(2.6-7.3%)                  | 150<br>(87-250)     | 2200<br>(1300-3600)    |
| Bosnia and Herzegovina | 2005 | Female | 80 to 84 | 6.8%<br>(4.2-9.6%)             | 93%<br>(90-96%)          | 1.4<br>(0.69-2.4)                           | 3.4%<br>(1.8-5.5%)                   | 4.1%<br>(2.1-6.7%)                  | 110<br>(57-180)     | 1200<br>(630-1900)     |
| Bosnia and Herzegovina | 2005 | Female | 85 to 89 | 6.6%<br>(3.8-10%)              | 93%<br>(90-96%)          | 1.4<br>(0.62-2.5)                           | 2.9%<br>(1.4-4.9%)                   | 3.7%<br>(1.8-6.4%)                  | 43<br>(20-75)       | 340<br>(170-570)       |
| Bosnia and Herzegovina | 2005 | Female | 90 to 94 | 7.1%<br>(4.3-11%)              | 93%<br>(89-96%)          | 1.5<br>(0.66-2.8)                           | 2.8%<br>(1.4-4.9%)                   | 3.6%<br>(1.6-6.5%)                  | 21<br>(9.7-37)      | 110<br>(56-200)        |
| Bosnia and Herzegovina | 2005 | Female | 95 plus  | 8.2%<br>(4.7-13%)              | 92%<br>(87-95%)          | 1.7<br>(0.63-3.5)                           | 3%<br>(1.4-5.3%)                     | 3.8%<br>(1.6-7%)                    | 11<br>(4.5-20)      | 41<br>(18-72)          |
| Bosnia and Herzegovina | 2005 | Male   | All Ages | 38%<br>(34-43%)                | 62%<br>(57-66%)          | 6<br>(4.7-7.6)                              | 12%<br>(9.1-14%)                     | 13%<br>(9.6-17%)                    | 2300<br>(1600-3000) | 72000<br>(55000-90000) |
| Bosnia and Herzegovina | 2005 | Male   | 15 to 19 | 34%<br>(24-46%)                | 66%<br>(54-76%)          | 2.5<br>(1.3-4.4)                            | 6.8%<br>(4.4-9.9%)                   | 12%<br>(6.4-18%)                    | 9.1<br>(5-15)       | 1100<br>(700-1500)     |
| Bosnia and Herzegovina | 2005 | Male   | 20 to 24 | 42%<br>(30-54%)                | 58%<br>(46-70%)          | 4.7<br>(2.5-8)                              | 13%<br>(9.6-16%)                     | 19%<br>(13-26%)                     | 22<br>(14-31)       | 2500<br>(1800-3300)    |
| Bosnia and Herzegovina | 2005 | Male   | 25 to 29 | 34%<br>(25-45%)                | 66%<br>(55-75%)          | 4.8<br>(2.6-8)                              | 12%<br>(9.6-15%)                     | 18%<br>(13-24%)                     | 23<br>(16-32)       | 2400<br>(1800-3100)    |
| Bosnia and Herzegovina | 2005 | Male   | 30 to 34 | 35%<br>(25-48%)                | 65%<br>(52-75%)          | 5.4<br>(2.9-8.9)                            | 12%<br>(9.2-14%)                     | 20%<br>(15-25%)                     | 28<br>(20-37)       | 2600<br>(2000-3200)    |
| Bosnia and Herzegovina | 2005 | Male   | 35 to 39 | 47%<br>(35-59%)                | 53%<br>(41-65%)          | 7.1<br>(3.9-11)                             | 14%<br>(11-17%)                      | 23%<br>(18-29%)                     | 46<br>(34-62)       | 3400<br>(2600-4300)    |

| Location               | Year | Sex    | Age      | Prevalence of current drinkers | Prevalence of abstainers | Population average of standard drinks daily | Percent of total attributable deaths | Percent of total attributable DALYs | Attributable deaths | Attributable DALYs     |
|------------------------|------|--------|----------|--------------------------------|--------------------------|---------------------------------------------|--------------------------------------|-------------------------------------|---------------------|------------------------|
| Bosnia and Herzegovina | 2005 | Male   | 40 to 44 | 55%<br>(43-67%)                | 45%<br>(33-57%)          | 9.3<br>(5.6-13)                             | 16%<br>(13-20%)                      | 25%<br>(20-31%)                     | 95<br>(71-130)      | 5800<br>(4500-7200)    |
| Bosnia and Herzegovina | 2005 | Male   | 45 to 49 | 56%<br>(42-67%)                | 44%<br>(33-58%)          | 11<br>(6.7-16)                              | 17%<br>(13-20%)                      | 23%<br>(18-29%)                     | 150<br>(110-200)    | 7700<br>(5800-9900)    |
| Bosnia and Herzegovina | 2005 | Male   | 50 to 54 | 50%<br>(37-61%)                | 50%<br>(39-63%)          | 11<br>(6.6-15)                              | 15%<br>(12-19%)                      | 20%<br>(15-25%)                     | 210<br>(150-280)    | 9100<br>(6800-12000)   |
| Bosnia and Herzegovina | 2005 | Male   | 55 to 59 | 44%<br>(33-56%)                | 56%<br>(44-67%)          | 10<br>(6-15)                                | 13%<br>(9.9-17%)                     | 17%<br>(12-21%)                     | 210<br>(150-290)    | 7800<br>(5700-10000)   |
| Bosnia and Herzegovina | 2005 | Male   | 60 to 64 | 41%<br>(30-54%)                | 59%<br>(46-70%)          | 9<br>(4.9-15)                               | 12%<br>(8.8-16%)                     | 14%<br>(10-19%)                     | 210<br>(140-270)    | 6100<br>(4300-8100)    |
| Bosnia and Herzegovina | 2005 | Male   | 65 to 69 | 39%<br>(29-49%)                | 61%<br>(51-71%)          | 7.7<br>(4.6-12)                             | 11%<br>(7.7-15%)                     | 13%<br>(9.1-17%)                    | 370<br>(250-510)    | 9100<br>(6100-12000)   |
| Bosnia and Herzegovina | 2005 | Male   | 70 to 74 | 36%<br>(26-47%)                | 64%<br>(53-74%)          | 6.4<br>(3.7-10)                             | 10%<br>(6.9-14%)                     | 12%<br>(7.8-16%)                    | 390<br>(250-560)    | 7600<br>(4900-11000)   |
| Bosnia and Herzegovina | 2005 | Male   | 75 to 79 | 32%<br>(23-44%)                | 68%<br>(56-77%)          | 5.1<br>(2.7-8.6)                            | 8.7%<br>(5.6-12%)                    | 10%<br>(6.3-14%)                    | 290<br>(180-430)    | 4400<br>(2800-6300)    |
| Bosnia and Herzegovina | 2005 | Male   | 80 to 84 | 31%<br>(21-42%)                | 69%<br>(58-79%)          | 4.3<br>(2.4-7.2)                            | 7.9%<br>(4.7-12%)                    | 9.2%<br>(5.4-14%)                   | 150<br>(84-220)     | 1600<br>(970-2500)     |
| Bosnia and Herzegovina | 2005 | Male   | 85 to 89 | 31%<br>(21-42%)                | 69%<br>(58-79%)          | 3.9<br>(2.1-6.6)                            | 7.2%<br>(4.1-11%)                    | 8.3%<br>(4.6-13%)                   | 44<br>(24-70)       | 360<br>(200-550)       |
| Bosnia and Herzegovina | 2005 | Male   | 90 to 94 | 32%<br>(21-44%)                | 68%<br>(56-79%)          | 3.7<br>(1.9-6.5)                            | 6.8%<br>(3.8-11%)                    | 7.8%<br>(4.1-13%)                   | 22<br>(12-36)       | 120<br>(67-190)        |
| Bosnia and Herzegovina | 2005 | Male   | 95 plus  | 33%<br>(21-48%)                | 67%<br>(52-79%)          | 3.4<br>(1.4-6.8)                            | 6.3%<br>(2.8-10%)                    | 7%<br>(2.9-12%)                     | 9<br>(3.7-15)       | 34<br>(15-56)          |
| Bosnia and Herzegovina | 2010 | Female | All Ages | 11%<br>(9.4-13%)               | 89%<br>(87-91%)          | 2.1<br>(1.6-2.8)                            | 4.1%<br>(3.3-4.4%)                   | 5%<br>(3.3-7.2%)                    | 850<br>(550-1300)   | 22000<br>(16000-29000) |
| Bosnia and Herzegovina | 2010 | Female | 15 to 19 | 9.9%<br>(6.3-15%)              | 90%<br>(85-94%)          | 1.3<br>(0.64-2.4)                           | 2.7%<br>(1.9-3.6%)                   | 5.2%<br>(3.1-8.1%)                  | 1.1<br>(0.69-1.8)   | 260<br>(170-370)       |
| Bosnia and Herzegovina | 2010 | Female | 20 to 24 | 13%<br>(8.1-19%)               | 87%<br>(81-92%)          | 2<br>(0.95-3.7)                             | 5.1%<br>(3.6-6.7%)                   | 6.2%<br>(3.7-9.2%)                  | 2.3<br>(1.3-3.5)    | 670<br>(450-970)       |
| Bosnia and Herzegovina | 2010 | Female | 25 to 29 | 14%<br>(8.6-20%)               | 86%<br>(80-91%)          | 2.1<br>(1-3.8)                              | 4.9%<br>(3.7-6.2%)                   | 6.2%<br>(4-8.9%)                    | 2.7<br>(1.6-4)      | 770<br>(540-1100)      |
| Bosnia and Herzegovina | 2010 | Female | 30 to 34 | 14%<br>(8.7-22%)               | 86%<br>(78-91%)          | 2.3<br>(1.1-4.2)                            | 4.5%<br>(3.4-5.8%)                   | 7.1%<br>(4.6-10%)                   | 4.2<br>(2.6-6.5)    | 740<br>(510-1000)      |
| Bosnia and Herzegovina | 2010 | Female | 35 to 39 | 15%<br>(9.1-22%)               | 85%<br>(78-91%)          | 2.7<br>(1.3-4.7)                            | 4.3%<br>(3.3-5.7%)                   | 7.4%<br>(4.8-11%)                   | 6.9<br>(4.2-10)     | 840<br>(600-1100)      |
| Bosnia and Herzegovina | 2010 | Female | 40 to 44 | 14%<br>(9.1-21%)               | 86%<br>(79-91%)          | 3<br>(1.6-5.1)                              | 4.4%<br>(3.2-6%)                     | 7.9%<br>(5.1-12%)                   | 12<br>(7.1-18)      | 990<br>(690-1400)      |
| Bosnia and Herzegovina | 2010 | Female | 45 to 49 | 14%<br>(8.1-20%)               | 86%<br>(80-92%)          | 3.3<br>(1.7-5.8)                            | 4.7%<br>(3.3-6.4%)                   | 8%<br>(5.2-12%)                     | 25<br>(16-38)       | 1500<br>(1100-2100)    |
| Bosnia and Herzegovina | 2010 | Female | 50 to 54 | 13%<br>(8.3-19%)               | 87%<br>(81-92%)          | 3.3<br>(1.8-5.6)                            | 4.7%<br>(3.3-6.5%)                   | 7.6%<br>(5-11%)                     | 37<br>(23-56)       | 1800<br>(1200-2600)    |
| Bosnia and Herzegovina | 2010 | Female | 55 to 59 | 12%<br>(7.7-17%)               | 88%<br>(83-92%)          | 3<br>(1.6-5.1)                              | 4.6%<br>(3.1-6.5%)                   | 7.3%<br>(4.8-11%)                   | 51<br>(32-75)       | 2000<br>(1400-2900)    |

| Location               | Year | Sex    | Age      | Prevalence of current drinkers | Prevalence of abstainers | Population average of standard drinks daily | Percent of total attributable deaths | Percent of total attributable DALYs | Attributable deaths | Attributable DALYs     |
|------------------------|------|--------|----------|--------------------------------|--------------------------|---------------------------------------------|--------------------------------------|-------------------------------------|---------------------|------------------------|
| Bosnia and Herzegovina | 2010 | Female | 60 to 64 | 11%<br>(6.8-17%)               | 89%<br>(83-93%)          | 2.8<br>(1.3-4.7)                            | 4.6%<br>(3-6.7%)                     | 6.6%<br>(4.2-9.8%)                  | 73<br>(45-110)      | 2300<br>(1500-3400)    |
| Bosnia and Herzegovina | 2010 | Female | 65 to 69 | 10%<br>(6.5-15%)               | 90%<br>(85-93%)          | 2.4<br>(1.3-4.1)                            | 4.7%<br>(2.9-7%)                     | 6.4%<br>(3.9-9.6%)                  | 86<br>(52-130)      | 2100<br>(1300-3200)    |
| Bosnia and Herzegovina | 2010 | Female | 70 to 74 | 8.8%<br>(5.7-13%)              | 91%<br>(87-94%)          | 2<br>(1-3.6)                                | 4.3%<br>(2.6-6.7%)                   | 5.6%<br>(3.4-8.6%)                  | 150<br>(93-240)     | 3000<br>(1800-4700)    |
| Bosnia and Herzegovina | 2010 | Female | 75 to 79 | 7.6%<br>(4.7-12%)              | 92%<br>(88-95%)          | 1.7<br>(0.76-3)                             | 3.7%<br>(2.1-5.9%)                   | 4.6%<br>(2.6-7.3%)                  | 160<br>(95-270)     | 2400<br>(1400-4000)    |
| Bosnia and Herzegovina | 2010 | Female | 80 to 84 | 6.7%<br>(4.1-9.6%)             | 93%<br>(90-96%)          | 1.4<br>(0.69-2.5)                           | 3.3%<br>(1.8-5.3%)                   | 4%<br>(2.1-6.5%)                    | 130<br>(68-210)     | 1400<br>(760-2300)     |
| Bosnia and Herzegovina | 2010 | Female | 85 to 89 | 6.5%<br>(3.7-9.9%)             | 94%<br>(90-96%)          | 1.4<br>(0.66-2.6)                           | 2.8%<br>(1.4-4.8%)                   | 3.6%<br>(1.8-6.2%)                  | 68<br>(32-120)      | 530<br>(270-900)       |
| Bosnia and Herzegovina | 2010 | Female | 90 to 94 | 7%<br>(4.2-11%)                | 93%<br>(89-96%)          | 1.5<br>(0.68-2.9)                           | 2.7%<br>(1.3-4.8%)                   | 3.5%<br>(1.6-6.4%)                  | 26<br>(12-49)       | 140<br>(73-260)        |
| Bosnia and Herzegovina | 2010 | Female | 95 plus  | 8%<br>(4.5-13%)                | 92%<br>(87-96%)          | 1.7<br>(0.62-3.7)                           | 2.9%<br>(1.3-5.2%)                   | 3.7%<br>(1.5-6.8%)                  | 10<br>(4.3-19)      | 37<br>(17-65)          |
| Bosnia and Herzegovina | 2010 | Male   | All Ages | 36%<br>(31-40%)                | 64%<br>(60-69%)          | 6.2<br>(4.7-8)                              | 11%<br>(8.4-13%)                     | 12%<br>(8.9-16%)                    | 2200<br>(1600-2900) | 68000<br>(52000-84000) |
| Bosnia and Herzegovina | 2010 | Male   | 15 to 19 | 30%<br>(20-42%)                | 70%<br>(58-80%)          | 2.3<br>(1.1-4.2)                            | 6.3%<br>(4.2-8.9%)                   | 11%<br>(5.5-17%)                    | 6.1<br>(3.1-10)     | 770<br>(500-1100)      |
| Bosnia and Herzegovina | 2010 | Male   | 20 to 24 | 39%<br>(25-52%)                | 61%<br>(48-75%)          | 4.7<br>(2.3-7.9)                            | 12%<br>(9.2-16%)                     | 18%<br>(12-25%)                     | 18<br>(12-27)       | 2200<br>(1600-3000)    |
| Bosnia and Herzegovina | 2010 | Male   | 25 to 29 | 36%<br>(24-48%)                | 64%<br>(52-76%)          | 5.3<br>(2.8-8.9)                            | 12%<br>(9.2-15%)                     | 18%<br>(13-25%)                     | 24<br>(16-33)       | 2600<br>(1900-3300)    |
| Bosnia and Herzegovina | 2010 | Male   | 30 to 34 | 37%<br>(25-50%)                | 63%<br>(50-75%)          | 6<br>(3.1-9.9)                              | 12%<br>(9.1-14%)                     | 20%<br>(14-26%)                     | 25<br>(18-34)       | 2400<br>(1800-3000)    |
| Bosnia and Herzegovina | 2010 | Male   | 35 to 39 | 44%<br>(30-57%)                | 56%<br>(43-70%)          | 7.1<br>(3.8-11)                             | 13%<br>(10-17%)                      | 22%<br>(16-29%)                     | 42<br>(30-57)       | 3200<br>(2400-4100)    |
| Bosnia and Herzegovina | 2010 | Male   | 40 to 44 | 47%<br>(33-62%)                | 53%<br>(38-67%)          | 8.4<br>(4.9-13)                             | 14%<br>(11-18%)                      | 22%<br>(17-29%)                     | 67<br>(49-91)       | 4200<br>(3200-5500)    |
| Bosnia and Herzegovina | 2010 | Male   | 45 to 49 | 47%<br>(31-61%)                | 53%<br>(39-69%)          | 9.6<br>(5.5-15)                             | 14%<br>(11-18%)                      | 20%<br>(15-26%)                     | 130<br>(92-170)     | 6600<br>(5000-8500)    |
| Bosnia and Herzegovina | 2010 | Male   | 50 to 54 | 45%<br>(31-59%)                | 55%<br>(41-69%)          | 10<br>(6.1-15)                              | 14%<br>(11-18%)                      | 18%<br>(14-23%)                     | 190<br>(130-250)    | 8100<br>(5900-11000)   |
| Bosnia and Herzegovina | 2010 | Male   | 55 to 59 | 42%<br>(29-56%)                | 58%<br>(44-71%)          | 10<br>(5.8-16)                              | 12%<br>(9.1-16%)                     | 16%<br>(12-20%)                     | 220<br>(160-300)    | 8200<br>(6000-11000)   |
| Bosnia and Herzegovina | 2010 | Male   | 60 to 64 | 41%<br>(27-55%)                | 59%<br>(45-73%)          | 9.5<br>(5-15)                               | 11%<br>(8.2-15%)                     | 14%<br>(9.9-18%)                    | 270<br>(180-360)    | 8100<br>(5700-11000)   |
| Bosnia and Herzegovina | 2010 | Male   | 65 to 69 | 40%<br>(27-53%)                | 60%<br>(47-73%)          | 8.4<br>(4.8-13)                             | 11%<br>(7.5-15%)                     | 13%<br>(8.7-17%)                    | 240<br>(160-340)    | 6000<br>(4000-8200)    |
| Bosnia and Herzegovina | 2010 | Male   | 70 to 74 | 36%<br>(26-48%)                | 64%<br>(52-74%)          | 6.9<br>(3.8-11)                             | 10%<br>(6.6-14%)                     | 12%<br>(7.6-16%)                    | 380<br>(250-540)    | 7500<br>(4900-11000)   |
| Bosnia and Herzegovina | 2010 | Male   | 75 to 79 | 32%<br>(22-45%)                | 68%<br>(55-78%)          | 5.3<br>(2.7-9.2)                            | 8.3%<br>(5.3-12%)                    | 9.6%<br>(6.1-14%)                   | 310<br>(190-450)    | 4800<br>(3000-6800)    |



| Location               | Year | Sex    | Age      | Prevalence of current drinkers | Prevalence of abstainers | Population average of standard drinks daily | Percent of total attributable deaths | Percent of total attributable DALYs | Attributable deaths | Attributable DALYs     |
|------------------------|------|--------|----------|--------------------------------|--------------------------|---------------------------------------------|--------------------------------------|-------------------------------------|---------------------|------------------------|
| Bosnia and Herzegovina | 2010 | Male   | 80 to 84 | 29%<br>(20-41%)                | 71%<br>(59-80%)          | 4.4<br>(2.3-7.3)                            | 7.6%<br>(4.7-11%)                    | 8.8%<br>(5.3-13%)                   | 200<br>(120-300)    | 2200<br>(1300-3300)    |
| Bosnia and Herzegovina | 2010 | Male   | 85 to 89 | 29%<br>(19-41%)                | 71%<br>(59-81%)          | 4<br>(2.1-6.7)                              | 6.8%<br>(3.9-10%)                    | 8%<br>(4.4-13%)                     | 85<br>(46-130)      | 690<br>(390-1100)      |
| Bosnia and Herzegovina | 2010 | Male   | 90 to 94 | 31%<br>(20-42%)                | 69%<br>(58-80%)          | 3.8<br>(1.9-6.6)                            | 6.6%<br>(3.8-10%)                    | 7.6%<br>(4.1-12%)                   | 25<br>(13-39)       | 130<br>(76-210)        |
| Bosnia and Herzegovina | 2010 | Male   | 95 plus  | 33%<br>(20-48%)                | 67%<br>(52-80%)          | 3.5<br>(1.4-7)                              | 6.2%<br>(2.8-10%)                    | 7%<br>(2.9-12%)                     | 6.5<br>(2.7-11)     | 24<br>(11-40)          |
| Bosnia and Herzegovina | 2016 | Female | All Ages | 11%<br>(9-12%)                 | 89%<br>(88-91%)          | 2.1<br>(1.4-3)                              | 3.9%<br>(2.9-5.1%)                   | 4.7%<br>(3.1-6.7%)                  | 860<br>(540-1300)   | 21000<br>(15000-29000) |
| Bosnia and Herzegovina | 2016 | Female | 15 to 19 | 9.7%<br>(6.2-15%)              | 90%<br>(85-94%)          | 1.3<br>(0.59-2.4)                           | 2.7%<br>(1.9-3.6%)                   | 5.2%<br>(3-8.1%)                    | 1<br>(0.57-1.7)     | 230<br>(160-330)       |
| Bosnia and Herzegovina | 2016 | Female | 20 to 24 | 13%<br>(8.1-19%)               | 87%<br>(81-92%)          | 2<br>(0.89-3.8)                             | 5.2%<br>(3.7-6.9%)                   | 6.2%<br>(3.8-9.3%)                  | 1.7<br>(0.97-2.5)   | 530<br>(350-760)       |
| Bosnia and Herzegovina | 2016 | Female | 25 to 29 | 13%<br>(8.4-20%)               | 87%<br>(80-92%)          | 2.1<br>(0.93-3.7)                           | 4.9%<br>(3.7-6.2%)                   | 6.2%<br>(3.9-8.8%)                  | 2.3<br>(1.3-3.5)    | 690<br>(470-940)       |
| Bosnia and Herzegovina | 2016 | Female | 30 to 34 | 14%<br>(8.3-21%)               | 86%<br>(79-92%)          | 2.3<br>(1.1-4.2)                            | 4.5%<br>(3.3-5.8%)                   | 6.9%<br>(4.4-10%)                   | 4.4<br>(2.6-6.9)    | 830<br>(580-1100)      |
| Bosnia and Herzegovina | 2016 | Female | 35 to 39 | 14%<br>(8.5-21%)               | 86%<br>(79-92%)          | 2.7<br>(1.3-4.9)                            | 4.3%<br>(3.3-5.7%)                   | 7.2%<br>(4.7-11%)                   | 6.3<br>(3.7-10)     | 830<br>(580-1100)      |
| Bosnia and Herzegovina | 2016 | Female | 40 to 44 | 14%<br>(8.8-20%)               | 86%<br>(80-91%)          | 3<br>(1.5-5.2)                              | 4.4%<br>(3.3-6%)                     | 7.6%<br>(5-11%)                     | 11<br>(6.7-18)      | 1000<br>(690-1400)     |
| Bosnia and Herzegovina | 2016 | Female | 45 to 49 | 13%<br>(7.6-19%)               | 87%<br>(81-92%)          | 3.3<br>(1.6-5.7)                            | 4.6%<br>(3.3-6.4%)                   | 7.7%<br>(5.1-11%)                   | 19<br>(12-30)       | 1200<br>(860-1700)     |
| Bosnia and Herzegovina | 2016 | Female | 50 to 54 | 12%<br>(8-18%)                 | 88%<br>(82-92%)          | 3.2<br>(1.6-5.8)                            | 4.5%<br>(3.2-6.3%)                   | 7.3%<br>(4.8-11%)                   | 33<br>(20-51)       | 1700<br>(1200-2400)    |
| Bosnia and Herzegovina | 2016 | Female | 55 to 59 | 11%<br>(7.2-17%)               | 89%<br>(83-93%)          | 2.9<br>(1.5-5.2)                            | 4.3%<br>(3-6.2%)                     | 6.8%<br>(4.5-10%)                   | 47<br>(29-71)       | 1900<br>(1300-2900)    |
| Bosnia and Herzegovina | 2016 | Female | 60 to 64 | 11%<br>(6.9-16%)               | 89%<br>(84-93%)          | 2.7<br>(1.3-4.7)                            | 4.3%<br>(2.9-6.2%)                   | 6.3%<br>(4.1-9.3%)                  | 73<br>(46-110)      | 2400<br>(1500-3600)    |
| Bosnia and Herzegovina | 2016 | Female | 65 to 69 | 9.8%<br>(6.3-14%)              | 90%<br>(86-94%)          | 2.4<br>(1.2-4.1)                            | 4.4%<br>(2.8-6.5%)                   | 6.1%<br>(3.9-9.1%)                  | 110<br>(68-170)     | 2800<br>(1800-4200)    |
| Bosnia and Herzegovina | 2016 | Female | 70 to 74 | 8.5%<br>(5.5-13%)              | 91%<br>(87-94%)          | 2<br>(0.93-3.6)                             | 4.1%<br>(2.5-6.3%)                   | 5.4%<br>(3.3-8.3%)                  | 100<br>(62-160)     | 2000<br>(1200-3100)    |
| Bosnia and Herzegovina | 2016 | Female | 75 to 79 | 7.3%<br>(4.4-11%)              | 93%<br>(89-96%)          | 1.6<br>(0.74-3)                             | 3.4%<br>(2-5.4%)                     | 4.3%<br>(2.6-7%)                    | 140<br>(81-230)     | 2100<br>(1200-3400)    |
| Bosnia and Herzegovina | 2016 | Female | 80 to 84 | 6.4%<br>(3.8-9.4%)             | 94%<br>(91-96%)          | 1.4<br>(0.64-2.5)                           | 3%<br>(1.7-4.9%)                     | 3.8%<br>(2-6.1%)                    | 140<br>(75-240)     | 1600<br>(840-2600)     |
| Bosnia and Herzegovina | 2016 | Female | 85 to 89 | 6.3%<br>(3.6-9.7%)             | 94%<br>(90-96%)          | 1.4<br>(0.66-2.6)                           | 2.7%<br>(1.4-4.6%)                   | 3.5%<br>(1.7-6%)                    | 94<br>(43-170)      | 740<br>(360-1300)      |
| Bosnia and Herzegovina | 2016 | Female | 90 to 94 | 6.8%<br>(4.2-11%)              | 93%<br>(89-96%)          | 1.5<br>(0.7-3)                              | 2.7%<br>(1.3-4.7%)                   | 3.4%<br>(1.6-6.1%)                  | 50<br>(22-89)       | 270<br>(130-470)       |
| Bosnia and Herzegovina | 2016 | Female | 95 plus  | 8%<br>(4.6-13%)                | 92%<br>(87-95%)          | 1.7<br>(0.64-3.7)                           | 2.9%<br>(1.3-5.1%)                   | 3.6%<br>(1.5-6.6%)                  | 18<br>(7.3-33)      | 65<br>(30-120)         |

| Location               | Year | Sex    | Age      | Prevalence of current drinkers | Prevalence of abstainers | Population average of standard drinks daily | Percent of total attributable deaths | Percent of total attributable DALYs | Attributable deaths | Attributable DALYs     |
|------------------------|------|--------|----------|--------------------------------|--------------------------|---------------------------------------------|--------------------------------------|-------------------------------------|---------------------|------------------------|
| Bosnia and Herzegovina | 2016 | Male   | All Ages | 36%<br>(31-40%)                | 64%<br>(60-69%)          | 6.5<br>(4.5-9)                              | 11%<br>(8.4-13%)                     | 12%<br>(8.6-15%)                    | 2400<br>(1700-3200) | 70000<br>(53000-88000) |
| Bosnia and Herzegovina | 2016 | Male   | 15 to 19 | 30%<br>(19-42%)                | 70%<br>(58-81%)          | 2.4<br>(1.1-4.4)                            | 6.5%<br>(4.2-9.2%)                   | 11%<br>(5.6-17%)                    | 5.5<br>(2.6-8.9)    | 710<br>(460-1000)      |
| Bosnia and Herzegovina | 2016 | Male   | 20 to 24 | 39%<br>(25-52%)                | 61%<br>(48-75%)          | 4.8<br>(2.2-8.1)                            | 13%<br>(9.5-17%)                     | 19%<br>(12-26%)                     | 15<br>(8.9-21)      | 1800<br>(1300-2400)    |
| Bosnia and Herzegovina | 2016 | Male   | 25 to 29 | 35%<br>(24-48%)                | 65%<br>(52-76%)          | 5.4<br>(2.5-9)                              | 13%<br>(9.7-16%)                     | 19%<br>(13-25%)                     | 21<br>(14-30)       | 2400<br>(1700-3100)    |
| Bosnia and Herzegovina | 2016 | Male   | 30 to 34 | 36%<br>(24-50%)                | 64%<br>(50-76%)          | 6.1<br>(3-10)                               | 12%<br>(9.3-15%)                     | 20%<br>(14-25%)                     | 28<br>(19-39)       | 2800<br>(2100-3500)    |
| Bosnia and Herzegovina | 2016 | Male   | 35 to 39 | 43%<br>(30-57%)                | 57%<br>(43-70%)          | 7.3<br>(3.8-12)                             | 13%<br>(10-17%)                      | 22%<br>(17-29%)                     | 41<br>(28-57)       | 3200<br>(2400-4100)    |
| Bosnia and Herzegovina | 2016 | Male   | 40 to 44 | 47%<br>(33-62%)                | 53%<br>(38-67%)          | 8.7<br>(4.7-14)                             | 14%<br>(11-18%)                      | 23%<br>(17-29%)                     | 68<br>(49-95)       | 4400<br>(3300-5700)    |
| Bosnia and Herzegovina | 2016 | Male   | 45 to 49 | 47%<br>(31-60%)                | 53%<br>(40-69%)          | 9.9<br>(5.5-17)                             | 14%<br>(11-18%)                      | 21%<br>(16-27%)                     | 100<br>(75-140)     | 5500<br>(4200-7200)    |
| Bosnia and Herzegovina | 2016 | Male   | 50 to 54 | 45%<br>(31-58%)                | 55%<br>(42-69%)          | 10<br>(6.1-17)                              | 14%<br>(10-17%)                      | 18%<br>(14-23%)                     | 180<br>(130-250)    | 7900<br>(5700-10000)   |
| Bosnia and Herzegovina | 2016 | Male   | 55 to 59 | 42%<br>(29-56%)                | 58%<br>(44-71%)          | 10<br>(5.6-17)                              | 12%<br>(9-15%)                       | 15%<br>(12-20%)                     | 220<br>(150-300)    | 8200<br>(6000-11000)   |
| Bosnia and Herzegovina | 2016 | Male   | 60 to 64 | 40%<br>(27-55%)                | 60%<br>(45-73%)          | 9.7<br>(5-16)                               | 11%<br>(8.1-14%)                     | 14%<br>(9.8-18%)                    | 300<br>(200-400)    | 9100<br>(6500-12000)   |
| Bosnia and Herzegovina | 2016 | Male   | 65 to 69 | 39%<br>(28-52%)                | 61%<br>(48-72%)          | 8.6<br>(4.7-14)                             | 11%<br>(7.3-14%)                     | 13%<br>(8.6-17%)                    | 360<br>(240-500)    | 9100<br>(6200-12000)   |
| Bosnia and Herzegovina | 2016 | Male   | 70 to 74 | 36%<br>(25-47%)                | 64%<br>(53-75%)          | 7<br>(3.7-12)                               | 9.7%<br>(6.5-13%)                    | 11%<br>(7.7-16%)                    | 270<br>(180-380)    | 5400<br>(3600-7600)    |
| Bosnia and Herzegovina | 2016 | Male   | 75 to 79 | 32%<br>(21-44%)                | 68%<br>(56-79%)          | 5.4<br>(2.6-9.4)                            | 8.2%<br>(5.3-12%)                    | 9.5%<br>(6.1-13%)                   | 310<br>(190-440)    | 4700<br>(3000-6800)    |
| Bosnia and Herzegovina | 2016 | Male   | 80 to 84 | 29%<br>(20-41%)                | 71%<br>(59-80%)          | 4.5<br>(2.3-7.8)                            | 7.4%<br>(4.5-11%)                    | 8.6%<br>(5.2-13%)                   | 250<br>(150-370)    | 2800<br>(1700-4200)    |
| Bosnia and Herzegovina | 2016 | Male   | 85 to 89 | 30%<br>(19-41%)                | 70%<br>(59-81%)          | 4.1<br>(2.1-7.1)                            | 6.7%<br>(3.8-10%)                    | 7.8%<br>(4.3-12%)                   | 140<br>(77-230)     | 1200<br>(660-1800)     |
| Bosnia and Herzegovina | 2016 | Male   | 90 to 94 | 31%<br>(21-42%)                | 69%<br>(58-79%)          | 3.8<br>(1.9-7.3)                            | 6.5%<br>(3.7-10%)                    | 7.5%<br>(4.1-12%)                   | 65<br>(34-100)      | 360<br>(200-550)       |
| Bosnia and Herzegovina | 2016 | Male   | 95 plus  | 33%<br>(20-47%)                | 67%<br>(53-80%)          | 3.6<br>(1.4-7.4)                            | 6.1%<br>(2.7-10%)                    | 6.9%<br>(2.8-12%)                   | 11<br>(4.4-18)      | 39<br>(18-65)          |
| Bulgaria               | 1990 | Female | All Ages | 76%<br>(70-81%)                | 24%<br>(19-30%)          | 2<br>(1.7-2.3)                              | 4%<br>(1.9-6.5%)                     | 4.3%<br>(0.45-8.2%)                 | 2100<br>(220-4100)  | 58000<br>(28000-89000) |
| Bulgaria               | 1990 | Female | 15 to 19 | 76%<br>(65-85%)                | 24%<br>(15-35%)          | 1.9<br>(1.3-2.6)                            | 3.4%<br>(2.1-4.9%)                   | 7.3%<br>(3.7-11%)                   | 11<br>(5.3-16)      | 1100<br>(710-1600)     |
| Bulgaria               | 1990 | Female | 20 to 24 | 82%<br>(70-90%)                | 18%<br>(9.7-30%)         | 2.3<br>(1.6-3.3)                            | 4.6%<br>(3.1-6.2%)                   | 7.6%<br>(4-12%)                     | 12<br>(6-18)        | 1500<br>(1000-2100)    |
| Bulgaria               | 1990 | Female | 25 to 29 | 83%<br>(71-91%)                | 17%<br>(8.7-29%)         | 2.2<br>(1.5-3)                              | 4.3%<br>(2.9-5.7%)                   | 6.9%<br>(3.7-10%)                   | 12<br>(6.5-18)      | 1600<br>(1000-2100)    |

| Location | Year | Sex    | Age      | Prevalence of current drinkers | Prevalence of abstainers | Population average of standard drinks daily | Percent of total attributable deaths | Percent of total attributable DALYs | Attributable deaths   | Attributable DALYs        |
|----------|------|--------|----------|--------------------------------|--------------------------|---------------------------------------------|--------------------------------------|-------------------------------------|-----------------------|---------------------------|
| Bulgaria | 1990 | Female | 30 to 34 | 84%<br>(71-92%)                | 16%<br>(8.3-29%)         | 2.3<br>(1.6-3.1)                            | 4.2%<br>(2.9-5.7%)                   | 7.3%<br>(4.4-10%)                   | 19<br>(11-27)         | 1900<br>(1300-2600)       |
| Bulgaria | 1990 | Female | 35 to 39 | 84%<br>(72-92%)                | 16%<br>(8.4-28%)         | 2.6<br>(1.8-3.7)                            | 4.6%<br>(3.1-6.4%)                   | 8.5%<br>(5.2-12%)                   | 33<br>(20-47)         | 2500<br>(1700-3400)       |
| Bulgaria | 1990 | Female | 40 to 44 | 83%<br>(71-91%)                | 17%<br>(8.7-29%)         | 2.8<br>(2-3.9)                              | 5.1%<br>(3.3-7.2%)                   | 9.4%<br>(5.9-13%)                   | 57<br>(36-81)         | 3400<br>(2200-4800)       |
| Bulgaria | 1990 | Female | 45 to 49 | 82%<br>(67-91%)                | 18%<br>(9.1-33%)         | 2.9<br>(2-3.9)                              | 5.6%<br>(3.4-8%)                     | 9.7%<br>(6.1-14%)                   | 78<br>(48-110)        | 3800<br>(2400-5500)       |
| Bulgaria | 1990 | Female | 50 to 54 | 80%<br>(66-90%)                | 20%<br>(10-34%)          | 2.9<br>(2-3.8)                              | 5.8%<br>(3.3-8.6%)                   | 9.6%<br>(5.5-14%)                   | 120<br>(66-170)       | 4800<br>(2700-6900)       |
| Bulgaria | 1990 | Female | 55 to 59 | 79%<br>(65-89%)                | 21%<br>(11-35%)          | 2.8<br>(2-3.8)                              | 6%<br>(3.1-9%)                       | 9.1%<br>(4.9-14%)                   | 200<br>(110-300)      | 6800<br>(3700-10000)      |
| Bulgaria | 1990 | Female | 60 to 64 | 76%<br>(61-88%)                | 24%<br>(12-39%)          | 2.7<br>(1.8-3.7)                            | 5.5%<br>(1.8-9.2%)                   | 7.7%<br>(2.7-13%)                   | 270<br>(94-450)       | 7800<br>(2700-13000)      |
| Bulgaria | 1990 | Female | 65 to 69 | 73%<br>(55-86%)                | 27%<br>(14-45%)          | 2.5<br>(1.7-3.4)                            | 5.1%<br>(1.6-8.9%)                   | 6.8%<br>(2.3-12%)                   | 390<br>(130-680)      | 9200<br>(2900-16000)      |
| Bulgaria | 1990 | Female | 70 to 74 | 68%<br>(50-81%)                | 32%<br>(19-50%)          | 2.3<br>(1.5-3.3)                            | 4.5%<br>(0.32-8.9%)                  | 5.6%<br>(0.3-11%)                   | 290<br>(16-580)       | 5500<br>(420-11000)       |
| Bulgaria | 1990 | Female | 75 to 79 | 62%<br>(44-79%)                | 38%<br>(21-56%)          | 1.9<br>(1.2-3)                              | 3.1%<br>(-1.1-7.9%)                  | 3.7%<br>(-1.4-9.5%)                 | 340<br>(-130-880)     | 5100<br>(-1700-13000)     |
| Bulgaria | 1990 | Female | 80 to 84 | 57%<br>(38-74%)                | 43%<br>(26-62%)          | 1.7<br>(1-2.6)                              | 2%<br>(-1.7-6.1%)                    | 2.2%<br>(-2.2-7%)                   | 220<br>(-220-680)     | 2400<br>(-2000-7300)      |
| Bulgaria | 1990 | Female | 85 to 89 | 55%<br>(37-70%)                | 45%<br>(30-63%)          | 1.6<br>(0.96-2.5)                           | 0.97%<br>(-2.7-5%)                   | 0.94%<br>(-3.4-5.6%)                | 56<br>(-210-340)      | 500<br>(-1400-2600)       |
| Bulgaria | 1990 | Female | 90 to 94 | 56%<br>(40-72%)                | 44%<br>(28-60%)          | 1.6<br>(0.91-2.5)                           | 0.48%<br>(-3.4-5%)                   | 0.35%<br>(-4.4-5.6%)                | 7<br>(-87-110)        | 57<br>(-420-600)          |
| Bulgaria | 1990 | Female | 95 plus  | 59%<br>(38-77%)                | 41%<br>(23-62%)          | 1.6<br>(0.79-2.9)                           | 0.16%<br>(-4.3-5.9%)                 | -0.071%<br>(-5.2-6.4%)              | -0.4<br>(-30-37)      | 3.5<br>(-97-130)          |
| Bulgaria | 1990 | Male   | All Ages | 86%<br>(82-89%)                | 14%<br>(11-18%)          | 5<br>(4.5-5.6)                              | 15%<br>(12-18%)                      | 17%<br>(13-21%)                     | 10000<br>(7900-13000) | 280000<br>(230000-330000) |
| Bulgaria | 1990 | Male   | 15 to 19 | 80%<br>(70-87%)                | 20%<br>(13-30%)          | 3<br>(2-4.1)                                | 7.7%<br>(5-11%)                      | 12%<br>(7.7-18%)                    | 40<br>(25-57)         | 3400<br>(2200-4800)       |
| Bulgaria | 1990 | Male   | 20 to 24 | 88%<br>(78-94%)                | 12%<br>(6.2-22%)         | 5.1<br>(3.6-6.9)                            | 14%<br>(10-19%)                      | 21%<br>(14-28%)                     | 86<br>(59-120)        | 7000<br>(4900-9200)       |
| Bulgaria | 1990 | Male   | 25 to 29 | 90%<br>(82-95%)                | 10%<br>(5-18%)           | 5.5<br>(3.9-7.3)                            | 15%<br>(11-19%)                      | 22%<br>(15-29%)                     | 98<br>(67-130)        | 7600<br>(5500-9700)       |
| Bulgaria | 1990 | Male   | 30 to 34 | 91%<br>(83-96%)                | 8.8%<br>(4-17%)          | 5.7<br>(4.1-7.4)                            | 15%<br>(11-19%)                      | 22%<br>(16-28%)                     | 130<br>(96-180)       | 9300<br>(6900-12000)      |
| Bulgaria | 1990 | Male   | 35 to 39 | 92%<br>(85-96%)                | 8.1%<br>(3.8-15%)        | 5.7<br>(4.1-7.6)                            | 15%<br>(11-20%)                      | 21%<br>(15-28%)                     | 200<br>(140-260)      | 12000<br>(8500-15000)     |
| Bulgaria | 1990 | Male   | 40 to 44 | 92%<br>(85-96%)                | 7.8%<br>(3.7-15%)        | 6.7<br>(5-8.5)                              | 17%<br>(13-21%)                      | 23%<br>(17-29%)                     | 360<br>(270-440)      | 19000<br>(14000-23000)    |
| Bulgaria | 1990 | Male   | 45 to 49 | 92%<br>(83-96%)                | 8%<br>(3.7-17%)          | 8.3<br>(6-11)                               | 20%<br>(16-24%)                      | 26%<br>(20-31%)                     | 510<br>(400-610)      | 23000<br>(18000-27000)    |

| Location | Year | Sex    | Age      | Prevalence of current drinkers | Prevalence of abstainers | Population average of standard drinks daily | Percent of total attributable deaths | Percent of total attributable DALYs | Attributable deaths | Attributable DALYs     |
|----------|------|--------|----------|--------------------------------|--------------------------|---------------------------------------------|--------------------------------------|-------------------------------------|---------------------|------------------------|
| Bulgaria | 1990 | Male   | 50 to 54 | 91%<br>(83-96%)                | 8.6%<br>(3.8-17%)        | 8.9<br>(6.5-11)                             | 20%<br>(16-24%)                      | 25%<br>(20-30%)                     | 720<br>(570-870)    | 28000<br>(22000-34000) |
| Bulgaria | 1990 | Male   | 55 to 59 | 91%<br>(83-96%)                | 9.4%<br>(4.3-17%)        | 8.7<br>(6.6-11)                             | 19%<br>(15-24%)                      | 24%<br>(18-29%)                     | 1100<br>(840-1300)  | 37000<br>(29000-45000) |
| Bulgaria | 1990 | Male   | 60 to 64 | 90%<br>(81-95%)                | 10%<br>(4.5-19%)         | 8.1<br>(5.9-11)                             | 18%<br>(14-23%)                      | 22%<br>(17-28%)                     | 1400<br>(1100-1800) | 41000<br>(31000-51000) |
| Bulgaria | 1990 | Male   | 65 to 69 | 89%<br>(80-95%)                | 11%<br>(4.7-20%)         | 7.2<br>(5.5-9)                              | 18%<br>(14-22%)                      | 21%<br>(16-26%)                     | 1800<br>(1400-2200) | 42000<br>(32000-52000) |
| Bulgaria | 1990 | Male   | 70 to 74 | 88%<br>(78-94%)                | 12%<br>(6.1-22%)         | 6.1<br>(4.4-7.9)                            | 16%<br>(11-21%)                      | 18%<br>(12-24%)                     | 1200<br>(780-1500)  | 22000<br>(15000-29000) |
| Bulgaria | 1990 | Male   | 75 to 79 | 86%<br>(76-93%)                | 14%<br>(7-24%)           | 5.1<br>(3.4-7.1)                            | 13%<br>(6.2-19%)                     | 14%<br>(6.8-22%)                    | 1400<br>(640-2000)  | 20000<br>(9600-29000)  |
| Bulgaria | 1990 | Male   | 80 to 84 | 84%<br>(73-92%)                | 16%<br>(7.7-27%)         | 4.4<br>(3.1-6)                              | 10%<br>(4.2-16%)                     | 11%<br>(4.3-18%)                    | 900<br>(350-1500)   | 9800<br>(4100-16000)   |
| Bulgaria | 1990 | Male   | 85 to 89 | 83%<br>(72-91%)                | 17%<br>(9.3-28%)         | 3.9<br>(2.7-5.4)                            | 6.9%<br>(1-14%)                      | 7.4%<br>(0.53-15%)                  | 300<br>(22-620)     | 2400<br>(370-4700)     |
| Bulgaria | 1990 | Male   | 90 to 94 | 83%<br>(72-91%)                | 17%<br>(9-28%)           | 3.4<br>(2.2-5)                              | 4.1%<br>(-1.5-11%)                   | 4.2%<br>(-2.4-13%)                  | 53<br>(-31-160)     | 310<br>(-110-870)      |
| Bulgaria | 1990 | Male   | 95 plus  | 83%<br>(70-92%)                | 17%<br>(7.7-30%)         | 2.9<br>(1.5-4.8)                            | 2.1%<br>(-3.2-10%)                   | 1.9%<br>(-4.3-11%)                  | 5.1<br>(-12-31)     | 23<br>(-35-110)        |
| Bulgaria | 1995 | Female | All Ages | 76%<br>(71-81%)                | 24%<br>(19-29%)          | 1.7<br>(1.5-2)                              | 2.6%<br>(0.56-4.8%)                  | 2.1%<br>(-1.3-5.7%)                 | 1100<br>(-700-2900) | 37000<br>(8200-68000)  |
| Bulgaria | 1995 | Female | 15 to 19 | 77%<br>(66-85%)                | 23%<br>(15-34%)          | 1.6<br>(1.1-2.2)                            | 3%<br>(1.9-4.3%)                     | 6.2%<br>(3.3-9.5%)                  | 8.6<br>(4.6-13)     | 950<br>(590-1400)      |
| Bulgaria | 1995 | Female | 20 to 24 | 82%<br>(70-90%)                | 18%<br>(9.6-30%)         | 1.9<br>(1.3-2.7)                            | 4.1%<br>(2.7-5.7%)                   | 6.3%<br>(3-10%)                     | 9.8<br>(4.7-16)     | 1400<br>(880-1900)     |
| Bulgaria | 1995 | Female | 25 to 29 | 83%<br>(72-91%)                | 17%<br>(8.6-28%)         | 1.9<br>(1.3-2.5)                            | 3.9%<br>(2.7-5.2%)                   | 5.6%<br>(2.8-8.6%)                  | 10<br>(5-16)        | 1400<br>(910-1800)     |
| Bulgaria | 1995 | Female | 30 to 34 | 84%<br>(71-92%)                | 16%<br>(8.3-29%)         | 1.9<br>(1.3-2.6)                            | 3.6%<br>(2.4-5%)                     | 5.7%<br>(3-8.8%)                    | 14<br>(7-21)        | 1500<br>(960-2000)     |
| Bulgaria | 1995 | Female | 35 to 39 | 84%<br>(73-92%)                | 16%<br>(8.3-27%)         | 2.2<br>(1.5-3)                              | 3.9%<br>(2.5-5.4%)                   | 6.8%<br>(3.8-10%)                   | 25<br>(14-37)       | 1900<br>(1200-2700)    |
| Bulgaria | 1995 | Female | 40 to 44 | 83%<br>(72-92%)                | 17%<br>(8.5-28%)         | 2.4<br>(1.7-3.2)                            | 4.3%<br>(2.6-6.2%)                   | 7.7%<br>(4.3-11%)                   | 45<br>(25-66)       | 2700<br>(1700-3800)    |
| Bulgaria | 1995 | Female | 45 to 49 | 82%<br>(69-91%)                | 18%<br>(8.9-31%)         | 2.5<br>(1.8-3.3)                            | 4.5%<br>(2.6-6.7%)                   | 7.7%<br>(4.3-11%)                   | 74<br>(42-110)      | 3600<br>(2100-5200)    |
| Bulgaria | 1995 | Female | 50 to 54 | 81%<br>(68-90%)                | 19%<br>(10-32%)          | 2.4<br>(1.7-3.2)                            | 4.5%<br>(2.3-7%)                     | 7.2%<br>(3.6-11%)                   | 87<br>(43-130)      | 3600<br>(1800-5600)    |
| Bulgaria | 1995 | Female | 55 to 59 | 79%<br>(65-90%)                | 21%<br>(10-35%)          | 2.3<br>(1.6-3.2)                            | 4.2%<br>(1.7-7%)                     | 6.4%<br>(2.6-10%)                   | 120<br>(50-200)     | 4200<br>(1600-7000)    |
| Bulgaria | 1995 | Female | 60 to 64 | 77%<br>(62-88%)                | 23%<br>(12-38%)          | 2.2<br>(1.6-3)                              | 3.4%<br>(0.44-6.7%)                  | 4.9%<br>(0.57-9.5%)                 | 160<br>(20-330)     | 4800<br>(610-9400)     |
| Bulgaria | 1995 | Female | 65 to 69 | 74%<br>(57-87%)                | 26%<br>(13-43%)          | 2.1<br>(1.5-2.8)                            | 3%<br>(-0.097-6.2%)                  | 4%<br>(-0.1-8.2%)                   | 210<br>(-5.6-450)   | 5100<br>(-170-10000)   |

| Location | Year | Sex    | Age      | Prevalence of current drinkers | Prevalence of abstainers | Population average of standard drinks daily | Percent of total attributable deaths | Percent of total attributable DALYs | Attributable deaths  | Attributable DALYs        |
|----------|------|--------|----------|--------------------------------|--------------------------|---------------------------------------------|--------------------------------------|-------------------------------------|----------------------|---------------------------|
| Bulgaria | 1995 | Female | 70 to 74 | 69%<br>(51-82%)                | 31%<br>(18-49%)          | 1.9<br>(1.3-2.7)                            | 2.4%<br>(-1.4-6.3%)                  | 3%<br>(-1.7-7.9%)                   | 260<br>(-150-660)    | 4900<br>(-2700-12000)     |
| Bulgaria | 1995 | Female | 75 to 79 | 62%<br>(44-78%)                | 38%<br>(22-56%)          | 1.6<br>(1-2.5)                              | 1.3%<br>(-2.4-5.1%)                  | 1.5%<br>(-3.1-6%)                   | 100<br>(-220-420)    | 1600<br>(-2900-6200)      |
| Bulgaria | 1995 | Female | 80 to 84 | 57%<br>(38-75%)                | 43%<br>(25-62%)          | 1.4<br>(0.86-2.1)                           | 0.4%<br>(-3-3.9%)                    | 0.34%<br>(-3.6-4.3%)                | 35<br>(-380-450)     | 510<br>(-3800-4900)       |
| Bulgaria | 1995 | Female | 85 to 89 | 55%<br>(38-71%)                | 45%<br>(29-62%)          | 1.4<br>(0.77-2.1)                           | -0.43%<br>(-3.5-3.2%)                | -0.66%<br>(-4.3-3.5%)               | -48<br>(-310-250)    | -270<br>(-2200-1900)      |
| Bulgaria | 1995 | Female | 90 to 94 | 56%<br>(40-72%)                | 44%<br>(28-60%)          | 1.4<br>(0.75-2.2)                           | -0.85%<br>(-4.4-3.2%)                | -1.2%<br>(-5.2-3.4%)                | -32<br>(-140-93)     | -140<br>(-690-490)        |
| Bulgaria | 1995 | Female | 95 plus  | 59%<br>(38-77%)                | 41%<br>(23-62%)          | 1.4<br>(0.67-2.4)                           | -1.2%<br>(-5.1-3.7%)                 | -1.6%<br>(-6.1-4.1%)                | -9.5<br>(-37-25)     | -28<br>(-120-91)          |
| Bulgaria | 1995 | Male   | All Ages | 86%<br>(83-89%)                | 14%<br>(11-17%)          | 4.4<br>(3.9-4.9)                            | 14%<br>(11-16%)                      | 14%<br>(10-18%)                     | 9100<br>(6500-12000) | 260000<br>(210000-310000) |
| Bulgaria | 1995 | Male   | 15 to 19 | 80%<br>(70-88%)                | 20%<br>(12-30%)          | 2.6<br>(1.7-3.5)                            | 6.7%<br>(4.4-9.5%)                   | 11%<br>(6.5-16%)                    | 32<br>(19-46)        | 2800<br>(1900-3900)       |
| Bulgaria | 1995 | Male   | 20 to 24 | 88%<br>(78-94%)                | 12%<br>(6.3-22%)         | 4.3<br>(3-5.8)                              | 13%<br>(9-17%)                       | 18%<br>(12-24%)                     | 78<br>(51-110)       | 6300<br>(4500-8400)       |
| Bulgaria | 1995 | Male   | 25 to 29 | 90%<br>(81-95%)                | 10%<br>(4.9-19%)         | 4.6<br>(3.3-6.1)                            | 13%<br>(9.5-17%)                     | 19%<br>(13-25%)                     | 84<br>(57-110)       | 6500<br>(4700-8400)       |
| Bulgaria | 1995 | Male   | 30 to 34 | 91%<br>(83-96%)                | 8.7%<br>(4-17%)          | 4.8<br>(3.5-6.3)                            | 13%<br>(9.5-17%)                     | 18%<br>(13-25%)                     | 110<br>(75-150)      | 7600<br>(5400-9800)       |
| Bulgaria | 1995 | Male   | 35 to 39 | 92%<br>(85-96%)                | 8%<br>(3.7-15%)          | 4.8<br>(3.4-6.4)                            | 13%<br>(9.4-18%)                     | 18%<br>(12-25%)                     | 170<br>(110-240)     | 10000<br>(7200-14000)     |
| Bulgaria | 1995 | Male   | 40 to 44 | 92%<br>(86-96%)                | 7.8%<br>(3.6-14%)        | 5.6<br>(4.2-7.2)                            | 16%<br>(11-20%)                      | 20%<br>(14-26%)                     | 330<br>(230-420)     | 17000<br>(12000-21000)    |
| Bulgaria | 1995 | Male   | 45 to 49 | 92%<br>(84-96%)                | 8%<br>(3.7-16%)          | 7<br>(5.2-9.2)                              | 19%<br>(14-23%)                      | 23%<br>(17-28%)                     | 610<br>(450-760)     | 27000<br>(21000-34000)    |
| Bulgaria | 1995 | Male   | 50 to 54 | 91%<br>(83-96%)                | 8.7%<br>(4-17%)          | 7.5<br>(5.4-9.5)                            | 19%<br>(15-23%)                      | 23%<br>(18-28%)                     | 740<br>(570-910)     | 29000<br>(22000-35000)    |
| Bulgaria | 1995 | Male   | 55 to 59 | 91%<br>(82-96%)                | 9.5%<br>(4.3-18%)        | 7.3<br>(5.6-9.3)                            | 18%<br>(14-22%)                      | 22%<br>(17-27%)                     | 960<br>(740-1200)    | 32000<br>(25000-39000)    |
| Bulgaria | 1995 | Male   | 60 to 64 | 90%<br>(81-95%)                | 10%<br>(4.6-19%)         | 6.8<br>(5-9)                                | 17%<br>(12-21%)                      | 20%<br>(14-25%)                     | 1300<br>(950-1700)   | 38000<br>(27000-48000)    |
| Bulgaria | 1995 | Male   | 65 to 69 | 89%<br>(79-95%)                | 11%<br>(4.9-21%)         | 6.1<br>(4.7-7.7)                            | 16%<br>(11-20%)                      | 18%<br>(13-23%)                     | 1600<br>(1100-2000)  | 37000<br>(26000-47000)    |
| Bulgaria | 1995 | Male   | 70 to 74 | 88%<br>(78-94%)                | 12%<br>(6.3-22%)         | 5.1<br>(3.8-6.7)                            | 13%<br>(7.5-18%)                     | 15%<br>(8.6-21%)                    | 1600<br>(880-2200)   | 29000<br>(17000-41000)    |
| Bulgaria | 1995 | Male   | 75 to 79 | 86%<br>(76-93%)                | 14%<br>(7-24%)           | 4.3<br>(3-6)                                | 9.7%<br>(3.5-16%)                    | 11%<br>(3.6-18%)                    | 750<br>(250-1300)    | 11000<br>(4000-19000)     |
| Bulgaria | 1995 | Male   | 80 to 84 | 84%<br>(73-92%)                | 16%<br>(7.6-27%)         | 3.7<br>(2.6-5)                              | 6.8%<br>(1.4-13%)                    | 7.4%<br>(1.1-15%)                   | 620<br>(95-1200)     | 6900<br>(1500-13000)      |
| Bulgaria | 1995 | Male   | 85 to 89 | 83%<br>(73-91%)                | 17%<br>(8.8-27%)         | 3.3<br>(2.3-4.4)                            | 3.6%<br>(-1.4-9.4%)                  | 3.6%<br>(-2-10%)                    | 180<br>(-100-520)    | 1500<br>(-580-4000)       |

| Location | Year | Sex    | Age      | Prevalence of current drinkers | Prevalence of abstainers | Population average of standard drinks daily | Percent of total attributable deaths | Percent of total attributable DALYs | Attributable deaths | Attributable DALYs        |
|----------|------|--------|----------|--------------------------------|--------------------------|---------------------------------------------|--------------------------------------|-------------------------------------|---------------------|---------------------------|
| Bulgaria | 1995 | Male   | 90 to 94 | 83%<br>(73-91%)                | 17%<br>(8.7-27%)         | 2.8<br>(1.8-4.1)                            | 1.3%<br>(-3.3-7.5%)                  | 1%<br>(-4.3-8.2%)                   | 16<br>(-69-130)     | 120<br>(-300-690)         |
| Bulgaria | 1995 | Male   | 95 plus  | 83%<br>(69-93%)                | 17%<br>(7.4-31%)         | 2.4<br>(1.3-3.8)                            | -0.056%<br>(-4.4-6.4%)               | -0.61%<br>(-5.6-6.8%)               | -1.9<br>(-17-21)    | -0.7<br>(-53-77)          |
| Bulgaria | 2000 | Female | All Ages | 76%<br>(70-81%)                | 24%<br>(19-30%)          | 1.5<br>(1.4-1.8)                            | 1.7%<br>(-0.14-3.7%)                 | 0.91%<br>(-2.2-4%)                  | 490<br>(-1200-2200) | 25000<br>(-2100-52000)    |
| Bulgaria | 2000 | Female | 15 to 19 | 76%<br>(64-85%)                | 24%<br>(15-36%)          | 1.4<br>(0.95-1.9)                           | 2.6%<br>(1.7-3.7%)                   | 5.3%<br>(2.7-8.2%)                  | 5.7<br>(2.9-8.8)    | 690<br>(440-990)          |
| Bulgaria | 2000 | Female | 20 to 24 | 82%<br>(69-90%)                | 18%<br>(9.8-31%)         | 1.7<br>(1.1-2.4)                            | 3.8%<br>(2.6-5.1%)                   | 5.3%<br>(2.4-8.5%)                  | 7.5<br>(3.4-12)     | 1200<br>(770-1700)        |
| Bulgaria | 2000 | Female | 25 to 29 | 83%<br>(70-91%)                | 17%<br>(8.8-30%)         | 1.6<br>(1.1-2.2)                            | 3.5%<br>(2.5-4.7%)                   | 4.6%<br>(2.2-7.2%)                  | 7.2<br>(3.4-11)     | 1200<br>(780-1600)        |
| Bulgaria | 2000 | Female | 30 to 34 | 84%<br>(71-92%)                | 16%<br>(8.1-29%)         | 1.7<br>(1.2-2.3)                            | 3.3%<br>(2.2-4.6%)                   | 4.7%<br>(2.3-7.4%)                  | 11<br>(5.3-17)      | 1300<br>(820-1800)        |
| Bulgaria | 2000 | Female | 35 to 39 | 84%<br>(72-92%)                | 16%<br>(8.3-28%)         | 1.9<br>(1.3-2.7)                            | 3.4%<br>(2.2-4.8%)                   | 5.6%<br>(3-8.5%)                    | 19<br>(10-29)       | 1600<br>(990-2200)        |
| Bulgaria | 2000 | Female | 40 to 44 | 83%<br>(71-91%)                | 17%<br>(9-29%)           | 2.1<br>(1.5-2.8)                            | 3.6%<br>(2-5.1%)                     | 6.1%<br>(3.1-9.2%)                  | 34<br>(17-52)       | 2100<br>(1200-3000)       |
| Bulgaria | 2000 | Female | 45 to 49 | 82%<br>(67-91%)                | 18%<br>(9.5-33%)         | 2.2<br>(1.6-2.9)                            | 3.7%<br>(1.9-5.7%)                   | 6.2%<br>(3-9.6%)                    | 56<br>(27-85)       | 2800<br>(1400-4200)       |
| Bulgaria | 2000 | Female | 50 to 54 | 80%<br>(67-90%)                | 20%<br>(10-33%)          | 2.1<br>(1.6-2.8)                            | 3.6%<br>(1.6-5.8%)                   | 5.7%<br>(2.5-9.2%)                  | 80<br>(34-130)      | 3300<br>(1500-5300)       |
| Bulgaria | 2000 | Female | 55 to 59 | 78%<br>(64-89%)                | 22%<br>(11-36%)          | 2<br>(1.4-2.7)                              | 3.2%<br>(0.85-5.6%)                  | 4.8%<br>(1.3-8.4%)                  | 88<br>(24-150)      | 3000<br>(810-5300)        |
| Bulgaria | 2000 | Female | 60 to 64 | 76%<br>(59-88%)                | 24%<br>(12-41%)          | 1.9<br>(1.3-2.7)                            | 2.3%<br>(-0.25-5.3%)                 | 3.3%<br>(-0.38-7.6%)                | 95<br>(-10-210)     | 2700<br>(-300-6300)       |
| Bulgaria | 2000 | Female | 65 to 69 | 73%<br>(56-86%)                | 27%<br>(14-44%)          | 1.8<br>(1.3-2.5)                            | 1.8%<br>(-0.94-4.6%)                 | 2.5%<br>(-1.2-6.3%)                 | 130<br>(-63-320)    | 3000<br>(-1400-7600)      |
| Bulgaria | 2000 | Female | 70 to 74 | 68%<br>(50-82%)                | 32%<br>(18-50%)          | 1.6<br>(1.1-2.3)                            | 1.3%<br>(-1.9-4.6%)                  | 1.6%<br>(-2.4-5.7%)                 | 130<br>(-200-470)   | 2500<br>(-3700-8700)      |
| Bulgaria | 2000 | Female | 75 to 79 | 61%<br>(42-78%)                | 39%<br>(22-58%)          | 1.4<br>(0.86-2.1)                           | 0.34%<br>(-2.8-3.5%)                 | 0.34%<br>(-3.5-4.3%)                | 39<br>(-400-490)    | 680<br>(-5600-6900)       |
| Bulgaria | 2000 | Female | 80 to 84 | 56%<br>(36-73%)                | 44%<br>(27-64%)          | 1.2<br>(0.72-1.8)                           | -0.36%<br>(-3.3-2.4%)                | -0.52%<br>(-3.9-2.8%)               | -41<br>(-310-220)   | -360<br>(-3200-2300)      |
| Bulgaria | 2000 | Female | 85 to 89 | 53%<br>(36-69%)                | 47%<br>(31-64%)          | 1.1<br>(0.66-1.8)                           | -1.1%<br>(-3.9-1.9%)                 | -1.4%<br>(-4.6-2%)                  | -100<br>(-350-150)  | -700<br>(-2500-1200)      |
| Bulgaria | 2000 | Female | 90 to 94 | 55%<br>(38-71%)                | 45%<br>(29-62%)          | 1.1<br>(0.64-1.8)                           | -1.5%<br>(-4.6-1.9%)                 | -1.8%<br>(-5.5-2%)                  | -56<br>(-170-61)    | -260<br>(-820-340)        |
| Bulgaria | 2000 | Female | 95 plus  | 58%<br>(36-78%)                | 42%<br>(22-64%)          | 1.1<br>(0.54-2)                             | -1.8%<br>(-5.3-2.3%)                 | -2.3%<br>(-6.4-2.3%)                | -14<br>(-41-15)     | -45<br>(-130-56)          |
| Bulgaria | 2000 | Male   | All Ages | 86%<br>(83-89%)                | 14%<br>(11-17%)          | 3.9<br>(3.5-4.3)                            | 11%<br>(8.7-14%)                     | 11%<br>(7.5-15%)                    | 6900<br>(4600-9400) | 200000<br>(160000-250000) |
| Bulgaria | 2000 | Male   | 15 to 19 | 79%<br>(69-87%)                | 21%<br>(13-31%)          | 2.2<br>(1.5-3)                              | 5.7%<br>(3.8-7.9%)                   | 9.3%<br>(5.5-14%)                   | 20<br>(12-30)       | 1900<br>(1300-2700)       |

| Location | Year | Sex    | Age      | Prevalence of current drinkers | Prevalence of abstainers | Population average of standard drinks daily | Percent of total attributable deaths | Percent of total attributable DALYs | Attributable deaths | Attributable DALYs     |
|----------|------|--------|----------|--------------------------------|--------------------------|---------------------------------------------|--------------------------------------|-------------------------------------|---------------------|------------------------|
| Bulgaria | 2000 | Male   | 20 to 24 | 87%<br>(77-94%)                | 13%<br>(6.3-23%)         | 3.7<br>(2.7-5)                              | 11%<br>(7.5-14%)                     | 15%<br>(9.9-21%)                    | 54<br>(35-75)       | 4800<br>(3300-6400)    |
| Bulgaria | 2000 | Male   | 25 to 29 | 90%<br>(81-95%)                | 10%<br>(5.1-19%)         | 4<br>(2.9-5.2)                              | 11%<br>(8-14%)                       | 16%<br>(11-22%)                     | 60<br>(39-82)       | 5100<br>(3600-6600)    |
| Bulgaria | 2000 | Male   | 30 to 34 | 91%<br>(82-96%)                | 9.1%<br>(4.2-18%)        | 4.1<br>(3-5.4)                              | 11%<br>(7.9-15%)                     | 15%<br>(10-21%)                     | 77<br>(51-110)      | 5700<br>(4000-7500)    |
| Bulgaria | 2000 | Male   | 35 to 39 | 92%<br>(84-96%)                | 8.2%<br>(3.9-16%)        | 4.2<br>(3-5.7)                              | 11%<br>(7.5-15%)                     | 15%<br>(9.4-21%)                    | 110<br>(69-150)     | 6900<br>(4700-9400)    |
| Bulgaria | 2000 | Male   | 40 to 44 | 92%<br>(85-96%)                | 7.9%<br>(3.8-15%)        | 4.9<br>(3.7-6.3)                            | 13%<br>(8.8-17%)                     | 17%<br>(11-22%)                     | 210<br>(140-290)    | 11000<br>(7800-15000)  |
| Bulgaria | 2000 | Male   | 45 to 49 | 92%<br>(84-96%)                | 8.2%<br>(3.7-16%)        | 6.1<br>(4.5-7.8)                            | 16%<br>(11-20%)                      | 20%<br>(14-25%)                     | 430<br>(300-560)    | 19000<br>(14000-25000) |
| Bulgaria | 2000 | Male   | 50 to 54 | 91%<br>(83-96%)                | 8.9%<br>(4.1-17%)        | 6.5<br>(4.9-8.2)                            | 16%<br>(12-20%)                      | 20%<br>(15-25%)                     | 700<br>(510-880)    | 27000<br>(20000-34000) |
| Bulgaria | 2000 | Male   | 55 to 59 | 90%<br>(81-95%)                | 9.8%<br>(4.5-19%)        | 6.3<br>(4.8-8.1)                            | 16%<br>(12-20%)                      | 19%<br>(14-24%)                     | 780<br>(560-990)    | 26000<br>(19000-33000) |
| Bulgaria | 2000 | Male   | 60 to 64 | 89%<br>(80-95%)                | 11%<br>(4.7-20%)         | 5.9<br>(4.3-7.8)                            | 15%<br>(9.7-19%)                     | 17%<br>(11-22%)                     | 930<br>(610-1200)   | 27000<br>(18000-35000) |
| Bulgaria | 2000 | Male   | 65 to 69 | 89%<br>(80-95%)                | 11%<br>(4.8-20%)         | 5.2<br>(4.1-6.6)                            | 13%<br>(8.2-17%)                     | 15%<br>(9.4-20%)                    | 1200<br>(750-1600)  | 28000<br>(18000-38000) |
| Bulgaria | 2000 | Male   | 70 to 74 | 87%<br>(78-94%)                | 13%<br>(6.5-22%)         | 4.5<br>(3.2-5.9)                            | 10%<br>(4.9-16%)                     | 12%<br>(5.4-18%)                    | 1100<br>(540-1800)  | 22000<br>(11000-33000) |
| Bulgaria | 2000 | Male   | 75 to 79 | 86%<br>(76-92%)                | 14%<br>(7.5-24%)         | 3.7<br>(2.5-5.2)                            | 7.3%<br>(1.8-13%)                    | 8.1%<br>(1.9-15%)                   | 860<br>(200-1600)   | 13000<br>(3300-24000)  |
| Bulgaria | 2000 | Male   | 80 to 84 | 84%<br>(72-92%)                | 16%<br>(8.2-28%)         | 3.2<br>(2.3-4.3)                            | 4.6%<br>(0.11-10%)                   | 4.9%<br>(-0.28-11%)                 | 290<br>(-16-660)    | 3300<br>(79-7200)      |
| Bulgaria | 2000 | Male   | 85 to 89 | 83%<br>(72-91%)                | 17%<br>(9.4-28%)         | 2.8<br>(1.9-3.8)                            | 1.9%<br>(-2.1-6.8%)                  | 1.8%<br>(-2.8-7.3%)                 | 88<br>(-140-350)    | 810<br>(-860-2800)     |
| Bulgaria | 2000 | Male   | 90 to 94 | 83%<br>(72-91%)                | 17%<br>(9.2-28%)         | 2.5<br>(1.6-3.6)                            | 0.19%<br>(-3.8-5.2%)                 | -0.23%<br>(-4.8-5.4%)               | -4<br>(-81-91)      | 19<br>(-370-510)       |
| Bulgaria | 2000 | Male   | 95 plus  | 82%<br>(68-92%)                | 18%<br>(8.2-32%)         | 2.1<br>(1.1-3.4)                            | -0.79%<br>(-4.5-4.2%)                | -1.4%<br>(-5.8-4.4%)                | -3.9<br>(-16-12)    | -8.6<br>(-50-46)       |
| Bulgaria | 2005 | Female | All Ages | 73%<br>(67-78%)                | 27%<br>(22-33%)          | 1.5<br>(1.3-1.7)                            | 1.6%<br>(0.041-3.2%)                 | 0.89%<br>(-1.8-3.4%)                | 470<br>(-940-1800)  | 23000<br>(540-44000)   |
| Bulgaria | 2005 | Female | 15 to 19 | 75%<br>(64-83%)                | 25%<br>(17-36%)          | 1.3<br>(0.92-1.8)                           | 2.4%<br>(1.6-3.4%)                   | 5.1%<br>(2.6-8.1%)                  | 4.3<br>(2.2-6.9)    | 580<br>(370-830)       |
| Bulgaria | 2005 | Female | 20 to 24 | 81%<br>(69-89%)                | 19%<br>(11-31%)          | 1.7<br>(1.1-2.3)                            | 3.7%<br>(2.5-4.9%)                   | 5.1%<br>(2.4-8.2%)                  | 5.4<br>(2.5-8.7)    | 970<br>(630-1400)      |
| Bulgaria | 2005 | Female | 25 to 29 | 82%<br>(71-90%)                | 18%<br>(9.7-29%)         | 1.6<br>(1.1-2.1)                            | 3.4%<br>(2.4-4.4%)                   | 4.2%<br>(2.1-6.7%)                  | 5.9<br>(2.9-9.6)    | 1100<br>(730-1500)     |
| Bulgaria | 2005 | Female | 30 to 34 | 82%<br>(71-91%)                | 18%<br>(9.3-29%)         | 1.6<br>(1.2-2.2)                            | 3.1%<br>(2.2-4.2%)                   | 4.4%<br>(2.3-6.6%)                  | 8.6<br>(4.6-13)     | 1200<br>(790-1600)     |
| Bulgaria | 2005 | Female | 35 to 39 | 83%<br>(73-91%)                | 17%<br>(9.5-27%)         | 1.9<br>(1.3-2.6)                            | 3.3%<br>(2.1-4.5%)                   | 5.2%<br>(2.7-8.1%)                  | 16<br>(8.5-25)      | 1400<br>(890-2000)     |

| Location | Year | Sex    | Age      | Prevalence of current drinkers | Prevalence of abstainers | Population average of standard drinks daily | Percent of total attributable deaths | Percent of total attributable DALYs | Attributable deaths | Attributable DALYs        |
|----------|------|--------|----------|--------------------------------|--------------------------|---------------------------------------------|--------------------------------------|-------------------------------------|---------------------|---------------------------|
| Bulgaria | 2005 | Female | 40 to 44 | 83%<br>(73-91%)                | 17%<br>(9.1-27%)         | 2.1<br>(1.5-2.8)                            | 3.4%<br>(2-5%)                       | 5.8%<br>(2.9-8.9%)                  | 28<br>(14-43)       | 1800<br>(1000-2600)       |
| Bulgaria | 2005 | Female | 45 to 49 | 81%<br>(67-90%)                | 19%<br>(10-33%)          | 2.1<br>(1.6-2.8)                            | 3.6%<br>(1.9-5.6%)                   | 6%<br>(2.9-9.4%)                    | 51<br>(24-79)       | 2500<br>(1300-3800)       |
| Bulgaria | 2005 | Female | 50 to 54 | 79%<br>(63-88%)                | 21%<br>(12-37%)          | 2<br>(1.5-2.7)                              | 3.5%<br>(1.6-5.6%)                   | 5.5%<br>(2.4-8.9%)                  | 71<br>(32-110)      | 3000<br>(1400-4600)       |
| Bulgaria | 2005 | Female | 55 to 59 | 76%<br>(61-87%)                | 24%<br>(13-39%)          | 1.9<br>(1.4-2.5)                            | 3%<br>(1.1-5.3%)                     | 4.7%<br>(1.7-7.8%)                  | 92<br>(35-150)      | 3200<br>(1200-5500)       |
| Bulgaria | 2005 | Female | 60 to 64 | 73%<br>(57-85%)                | 27%<br>(15-43%)          | 1.8<br>(1.2-2.4)                            | 2.3%<br>(0.076-4.8%)                 | 3.3%<br>(0.13-7%)                   | 85<br>(3.4-180)     | 2500<br>(88-5300)         |
| Bulgaria | 2005 | Female | 65 to 69 | 66%<br>(49-82%)                | 34%<br>(18-51%)          | 1.5<br>(1.1-2)                              | 1.8%<br>(-0.42-4.2%)                 | 2.5%<br>(-0.65-5.7%)                | 99<br>(-26-230)     | 2400<br>(-590-5400)       |
| Bulgaria | 2005 | Female | 70 to 74 | 58%<br>(41-73%)                | 42%<br>(27-59%)          | 1.3<br>(0.81-1.8)                           | 1.3%<br>(-1.1-3.7%)                  | 1.6%<br>(-1.4-5%)                   | 120<br>(-100-360)   | 2200<br>(-1900-6800)      |
| Bulgaria | 2005 | Female | 75 to 79 | 55%<br>(38-72%)                | 45%<br>(28-62%)          | 1.2<br>(0.77-1.8)                           | 0.43%<br>(-2.1-3.1%)                 | 0.48%<br>(-2.7-3.8%)                | 51<br>(-280-410)    | 820<br>(-3900-5900)       |
| Bulgaria | 2005 | Female | 80 to 84 | 53%<br>(34-71%)                | 47%<br>(29-66%)          | 1.1<br>(0.66-1.7)                           | -0.21%<br>(-2.8-2.3%)                | -0.32%<br>(-3.4-2.7%)               | -39<br>(-420-330)   | -320<br>(-4400-3600)      |
| Bulgaria | 2005 | Female | 85 to 89 | 51%<br>(33-68%)                | 49%<br>(32-67%)          | 1.1<br>(0.61-1.6)                           | -0.83%<br>(-3.4-1.7%)                | -1.1%<br>(-4-1.9%)                  | -63<br>(-230-110)   | -420<br>(-1700-850)       |
| Bulgaria | 2005 | Female | 90 to 94 | 52%<br>(35-69%)                | 48%<br>(31-65%)          | 1.1<br>(0.59-1.7)                           | -1.1%<br>(-4-1.7%)                   | -1.5%<br>(-4.8-1.9%)                | -48<br>(-160-63)    | -220<br>(-760-350)        |
| Bulgaria | 2005 | Female | 95 plus  | 55%<br>(34-75%)                | 45%<br>(25-66%)          | 1.1<br>(0.5-1.9)                            | -1.4%<br>(-4.7-2.1%)                 | -1.8%<br>(-5.6-2.2%)                | -15<br>(-46-18)     | -47<br>(-150-68)          |
| Bulgaria | 2005 | Male   | All Ages | 89%<br>(86-92%)                | 11%<br>(8.5-14%)         | 4.1<br>(3.7-4.5)                            | 11%<br>(8.7-14%)                     | 11%<br>(7.5-15%)                    | 6700<br>(4500-9300) | 190000<br>(150000-240000) |
| Bulgaria | 2005 | Male   | 15 to 19 | 82%<br>(74-89%)                | 18%<br>(11-26%)          | 2.3<br>(1.5-3.1)                            | 5.5%<br>(3.7-7.4%)                   | 9.5%<br>(5.6-14%)                   | 15<br>(9-22)        | 1600<br>(1100-2200)       |
| Bulgaria | 2005 | Male   | 20 to 24 | 89%<br>(81-94%)                | 11%<br>(5.6-19%)         | 3.9<br>(2.7-5.1)                            | 11%<br>(7.6-14%)                     | 15%<br>(9.8-21%)                    | 47<br>(30-64)       | 4200<br>(2900-5600)       |
| Bulgaria | 2005 | Male   | 25 to 29 | 92%<br>(86-96%)                | 8.2%<br>(4.2-14%)        | 4.1<br>(3-5.4)                              | 11%<br>(7.8-14%)                     | 16%<br>(10-21%)                     | 58<br>(37-78)       | 4900<br>(3500-6400)       |
| Bulgaria | 2005 | Male   | 30 to 34 | 93%<br>(88-97%)                | 6.9%<br>(3.5-12%)        | 4.3<br>(3.2-5.6)                            | 10%<br>(7.3-14%)                     | 15%<br>(9.8-21%)                    | 69<br>(44-97)       | 5200<br>(3600-7000)       |
| Bulgaria | 2005 | Male   | 35 to 39 | 93%<br>(88-97%)                | 6.7%<br>(3.2-12%)        | 4.3<br>(3.1-5.7)                            | 10%<br>(6.9-14%)                     | 14%<br>(8.8-21%)                    | 93<br>(57-140)      | 6000<br>(4100-8400)       |
| Bulgaria | 2005 | Male   | 40 to 44 | 93%<br>(88-97%)                | 6.7%<br>(3.3-12%)        | 4.9<br>(3.7-6.3)                            | 12%<br>(8-16%)                       | 16%<br>(10-22%)                     | 180<br>(110-240)    | 9500<br>(6400-13000)      |
| Bulgaria | 2005 | Male   | 45 to 49 | 94%<br>(87-97%)                | 6.5%<br>(3.2-13%)        | 6.2<br>(4.7-8)                              | 15%<br>(11-19%)                      | 19%<br>(13-25%)                     | 380<br>(260-490)    | 17000<br>(12000-22000)    |
| Bulgaria | 2005 | Male   | 50 to 54 | 93%<br>(87-97%)                | 6.9%<br>(3.3-13%)        | 6.7<br>(5.1-8.3)                            | 17%<br>(12-20%)                      | 20%<br>(15-25%)                     | 660<br>(480-820)    | 26000<br>(19000-32000)    |
| Bulgaria | 2005 | Male   | 55 to 59 | 92%<br>(86-96%)                | 7.6%<br>(3.7-14%)        | 6.6<br>(5.2-8.1)                            | 16%<br>(12-20%)                      | 19%<br>(14-24%)                     | 940<br>(690-1200)   | 31000<br>(23000-39000)    |



| Location | Year | Sex    | Age      | Prevalence of current drinkers | Prevalence of abstainers | Population average of standard drinks daily | Percent of total attributable deaths | Percent of total attributable DALYs | Attributable deaths | Attributable DALYs     |
|----------|------|--------|----------|--------------------------------|--------------------------|---------------------------------------------|--------------------------------------|-------------------------------------|---------------------|------------------------|
| Bulgaria | 2005 | Male   | 60 to 64 | 92%<br>(84-96%)                | 8.4%<br>(4-16%)          | 6.1<br>(4.5-7.9)                            | 15%<br>(9.7-19%)                     | 17%<br>(11-22%)                     | 920<br>(600-1200)   | 26000<br>(17000-35000) |
| Bulgaria | 2005 | Male   | 65 to 69 | 91%<br>(83-95%)                | 9.5%<br>(4.6-17%)        | 5.4<br>(4.3-6.5)                            | 13%<br>(8.2-17%)                     | 15%<br>(9.3-20%)                    | 990<br>(620-1300)   | 23000<br>(15000-31000) |
| Bulgaria | 2005 | Male   | 70 to 74 | 90%<br>(82-95%)                | 10%<br>(5.4-18%)         | 4.6<br>(3.4-5.9)                            | 10%<br>(5.1-15%)                     | 12%<br>(5.6-18%)                    | 1100<br>(510-1600)  | 20000<br>(10000-31000) |
| Bulgaria | 2005 | Male   | 75 to 79 | 87%<br>(79-93%)                | 13%<br>(6.6-21%)         | 3.8<br>(2.7-5.1)                            | 7.2%<br>(1.8-13%)                    | 8%<br>(1.7-15%)                     | 810<br>(180-1500)   | 12000<br>(3100-22000)  |
| Bulgaria | 2005 | Male   | 80 to 84 | 84%<br>(72-91%)                | 16%<br>(8.5-28%)         | 3.1<br>(2.2-4.1)                            | 4.5%<br>(0.3-9.6%)                   | 4.9%<br>(0.078-11%)                 | 450<br>(7.3-990)    | 5100<br>(350-11000)    |
| Bulgaria | 2005 | Male   | 85 to 89 | 82%<br>(70-90%)                | 18%<br>(10-30%)          | 2.7<br>(1.8-3.7)                            | 2%<br>(-1.6-6.5%)                    | 1.9%<br>(-2.3-7.1%)                 | 71<br>(-83-260)     | 640<br>(-510-2100)     |
| Bulgaria | 2005 | Male   | 90 to 94 | 82%<br>(71-90%)                | 18%<br>(9.8-29%)         | 2.3<br>(1.5-3.4)                            | 0.43%<br>(-3.2-4.9%)                 | 0.066%<br>(-4.2-5.3%)               | 1.2<br>(-76-96)     | 46<br>(-340-530)       |
| Bulgaria | 2005 | Male   | 95 plus  | 81%<br>(66-92%)                | 19%<br>(8.5-34%)         | 2<br>(1.1-3.2)                              | -0.51%<br>(-4.1-4.3%)                | -1.1%<br>(-5.4-4.5%)                | -4.1<br>(-20-17)    | -7.6<br>(-60-63)       |
| Bulgaria | 2010 | Female | All Ages | 72%<br>(66-78%)                | 28%<br>(22-34%)          | 1.5<br>(1.3-1.7)                            | 1.8%<br>(0.26-3.4%)                  | 1.1%<br>(-1.5-3.6%)                 | 570<br>(-760-1900)  | 24000<br>(3400-43000)  |
| Bulgaria | 2010 | Female | 15 to 19 | 74%<br>(62-83%)                | 26%<br>(17-38%)          | 1.4<br>(0.94-1.9)                           | 2.5%<br>(1.6-3.5%)                   | 5.1%<br>(2.6-8%)                    | 3.4<br>(1.7-5.4)    | 460<br>(300-670)       |
| Bulgaria | 2010 | Female | 20 to 24 | 81%<br>(68-89%)                | 19%<br>(11-32%)          | 1.7<br>(1.2-2.4)                            | 3.7%<br>(2.6-5%)                     | 5.2%<br>(2.5-8.4%)                  | 4.9<br>(2.4-7.7)    | 920<br>(610-1300)      |
| Bulgaria | 2010 | Female | 25 to 29 | 82%<br>(71-90%)                | 18%<br>(9.8-29%)         | 1.7<br>(1.1-2.2)                            | 3.5%<br>(2.5-4.5%)                   | 4.3%<br>(2.2-6.6%)                  | 4.8<br>(2.4-7.4)    | 940<br>(640-1300)      |
| Bulgaria | 2010 | Female | 30 to 34 | 82%<br>(71-90%)                | 18%<br>(9.6-29%)         | 1.7<br>(1.2-2.3)                            | 3.3%<br>(2.3-4.3%)                   | 4.7%<br>(2.7-7.1%)                  | 8.5<br>(4.8-13)     | 1200<br>(780-1600)     |
| Bulgaria | 2010 | Female | 35 to 39 | 82%<br>(71-90%)                | 18%<br>(9.8-29%)         | 1.9<br>(1.4-2.6)                            | 3.4%<br>(2.3-4.5%)                   | 5.5%<br>(3.1-8.1%)                  | 16<br>(9.3-24)      | 1500<br>(940-2000)     |
| Bulgaria | 2010 | Female | 40 to 44 | 82%<br>(71-91%)                | 18%<br>(9.3-29%)         | 2.2<br>(1.6-2.8)                            | 3.5%<br>(2.3-5%)                     | 6%<br>(3.4-8.7%)                    | 27<br>(15-39)       | 1700<br>(1100-2400)    |
| Bulgaria | 2010 | Female | 45 to 49 | 81%<br>(67-90%)                | 19%<br>(9.9-33%)         | 2.2<br>(1.6-2.9)                            | 3.6%<br>(2.1-5.4%)                   | 6.1%<br>(3.3-9.2%)                  | 43<br>(23-65)       | 2200<br>(1300-3300)    |
| Bulgaria | 2010 | Female | 50 to 54 | 78%<br>(64-88%)                | 22%<br>(12-36%)          | 2.1<br>(1.6-2.8)                            | 3.6%<br>(1.9-5.7%)                   | 5.8%<br>(2.9-8.9%)                  | 66<br>(34-100)      | 2800<br>(1500-4300)    |
| Bulgaria | 2010 | Female | 55 to 59 | 75%<br>(61-87%)                | 25%<br>(13-39%)          | 2<br>(1.4-2.6)                              | 3.2%<br>(1.4-5.2%)                   | 5%<br>(2.2-7.9%)                    | 88<br>(39-140)      | 3200<br>(1400-5100)    |
| Bulgaria | 2010 | Female | 60 to 64 | 72%<br>(56-85%)                | 28%<br>(15-44%)          | 1.8<br>(1.3-2.5)                            | 2.4%<br>(0.36-4.9%)                  | 3.7%<br>(0.61-7.3%)                 | 100<br>(17-200)     | 3000<br>(470-6000)     |
| Bulgaria | 2010 | Female | 65 to 69 | 65%<br>(48-80%)                | 35%<br>(20-52%)          | 1.6<br>(1.1-2.1)                            | 2%<br>(0.02-4.2%)                    | 2.8%<br>(0.043-5.8%)                | 100<br>(1.6-210)    | 2500<br>(26-5300)      |
| Bulgaria | 2010 | Female | 70 to 74 | 57%<br>(40-73%)                | 43%<br>(27-60%)          | 1.3<br>(0.83-1.9)                           | 1.5%<br>(-0.73-4%)                   | 2%<br>(-0.97-5.3%)                  | 110<br>(-54-300)    | 2200<br>(-1000-5700)   |
| Bulgaria | 2010 | Female | 75 to 79 | 54%<br>(38-71%)                | 46%<br>(29-62%)          | 1.2<br>(0.79-1.8)                           | 0.77%<br>(-1.8-3.4%)                 | 0.9%<br>(-2.3-4.2%)                 | 87<br>(-220-400)    | 1400<br>(-3100-6000)   |

| Location | Year | Sex    | Age      | Prevalence of current drinkers | Prevalence of abstainers | Population average of standard drinks daily | Percent of total attributable deaths | Percent of total attributable DALYs | Attributable deaths | Attributable DALYs        |
|----------|------|--------|----------|--------------------------------|--------------------------|---------------------------------------------|--------------------------------------|-------------------------------------|---------------------|---------------------------|
| Bulgaria | 2010 | Female | 80 to 84 | 52%<br>(34-70%)                | 48%<br>(30-66%)          | 1.1<br>(0.68-1.7)                           | 0.14%<br>(-2.3-2.6%)                 | 0.088%<br>(-3-3%)                   | 10<br>(-350-350)    | 210<br>(-3500-3800)       |
| Bulgaria | 2010 | Female | 85 to 89 | 50%<br>(33-66%)                | 50%<br>(34-67%)          | 1.1<br>(0.63-1.6)                           | -0.48%<br>(-3-2.1%)                  | -0.68%<br>(-3.6-2.4%)               | -64<br>(-340-220)   | -400<br>(-2500-1700)      |
| Bulgaria | 2010 | Female | 90 to 94 | 51%<br>(35-67%)                | 49%<br>(33-65%)          | 1.1<br>(0.6-1.7)                            | -0.83%<br>(-3.7-2.1%)                | -1.1%<br>(-4.4-2.3%)                | -31<br>(-120-64)    | -140<br>(-610-340)        |
| Bulgaria | 2010 | Female | 95 plus  | 54%<br>(33-73%)                | 46%<br>(27-67%)          | 1.1<br>(0.51-1.9)                           | -1.1%<br>(-4.3-2.5%)                 | -1.5%<br>(-5.2-2.7%)                | -15<br>(-53-28)     | -44<br>(-170-100)         |
| Bulgaria | 2010 | Male   | All Ages | 89%<br>(86-91%)                | 11%<br>(8.9-14%)         | 4.3<br>(3.9-4.8)                            | 11%<br>(8.7-14%)                     | 11%<br>(7.7-15%)                    | 6500<br>(4400-8800) | 180000<br>(140000-230000) |
| Bulgaria | 2010 | Male   | 15 to 19 | 81%<br>(73-88%)                | 19%<br>(12-27%)          | 2.4<br>(1.6-3.3)                            | 5.7%<br>(3.9-7.9%)                   | 9.9%<br>(5.8-15%)                   | 13<br>(7.6-19)      | 1300<br>(850-1800)        |
| Bulgaria | 2010 | Male   | 20 to 24 | 89%<br>(81-94%)                | 11%<br>(6-19%)           | 4<br>(2.8-5.5)                              | 11%<br>(7.5-14%)                     | 16%<br>(9.9-22%)                    | 40<br>(25-56)       | 3700<br>(2500-4900)       |
| Bulgaria | 2010 | Male   | 25 to 29 | 91%<br>(86-95%)                | 8.6%<br>(4.7-14%)        | 4.3<br>(3.1-5.6)                            | 11%<br>(7.8-14%)                     | 16%<br>(10-22%)                     | 49<br>(31-67)       | 4200<br>(3000-5600)       |
| Bulgaria | 2010 | Male   | 30 to 34 | 93%<br>(87-97%)                | 7.2%<br>(3.4-13%)        | 4.4<br>(3.3-5.9)                            | 10%<br>(7.4-14%)                     | 15%<br>(9.8-21%)                    | 62<br>(40-85)       | 4900<br>(3500-6500)       |
| Bulgaria | 2010 | Male   | 35 to 39 | 93%<br>(88-97%)                | 7%<br>(3.4-12%)          | 4.4<br>(3.2-5.9)                            | 10%<br>(6.9-14%)                     | 15%<br>(9.3-21%)                    | 85<br>(54-120)      | 5700<br>(3900-7800)       |
| Bulgaria | 2010 | Male   | 40 to 44 | 93%<br>(87-97%)                | 7.2%<br>(3.4-13%)        | 5.1<br>(3.8-6.6)                            | 12%<br>(8-16%)                       | 16%<br>(10-22%)                     | 160<br>(100-220)    | 8600<br>(5900-12000)      |
| Bulgaria | 2010 | Male   | 45 to 49 | 93%<br>(86-97%)                | 6.8%<br>(3.2-14%)        | 6.5<br>(4.8-8.3)                            | 15%<br>(11-19%)                      | 20%<br>(14-25%)                     | 330<br>(220-420)    | 15000<br>(11000-19000)    |
| Bulgaria | 2010 | Male   | 50 to 54 | 93%<br>(86-97%)                | 7.3%<br>(3.5-14%)        | 6.9<br>(5.3-8.7)                            | 17%<br>(12-20%)                      | 21%<br>(15-26%)                     | 570<br>(420-700)    | 22000<br>(17000-27000)    |
| Bulgaria | 2010 | Male   | 55 to 59 | 92%<br>(85-96%)                | 8%<br>(4-15%)            | 6.7<br>(5.3-8.2)                            | 16%<br>(12-20%)                      | 19%<br>(14-24%)                     | 830<br>(610-1000)   | 28000<br>(21000-35000)    |
| Bulgaria | 2010 | Male   | 60 to 64 | 91%<br>(84-96%)                | 8.8%<br>(4.2-16%)        | 6.3<br>(4.7-8.1)                            | 15%<br>(10-19%)                      | 17%<br>(11-23%)                     | 1000<br>(680-1300)  | 30000<br>(20000-38000)    |
| Bulgaria | 2010 | Male   | 65 to 69 | 90%<br>(82-95%)                | 10%<br>(4.6-18%)         | 5.5<br>(4.4-6.7)                            | 13%<br>(8.6-17%)                     | 15%<br>(9.8-20%)                    | 950<br>(610-1200)   | 23000<br>(15000-30000)    |
| Bulgaria | 2010 | Male   | 70 to 74 | 89%<br>(82-94%)                | 11%<br>(5.5-18%)         | 4.7<br>(3.6-6)                              | 11%<br>(5.6-15%)                     | 12%<br>(6.3-18%)                    | 900<br>(460-1300)   | 17000<br>(9100-25000)     |
| Bulgaria | 2010 | Male   | 75 to 79 | 87%<br>(77-93%)                | 13%<br>(7-23%)           | 3.9<br>(2.8-5.3)                            | 7.9%<br>(2.5-13%)                    | 8.9%<br>(2.6-15%)                   | 820<br>(240-1400)   | 12000<br>(4100-21000)     |
| Bulgaria | 2010 | Male   | 80 to 84 | 83%<br>(70-91%)                | 17%<br>(8.9-30%)         | 3.2<br>(2.3-4.3)                            | 5.3%<br>(1.1-11%)                    | 5.9%<br>(0.86-12%)                  | 520<br>(76-1000)    | 5800<br>(1300-11000)      |
| Bulgaria | 2010 | Male   | 85 to 89 | 81%<br>(69-90%)                | 19%<br>(10-31%)          | 2.8<br>(1.9-3.8)                            | 2.9%<br>(-0.8-7.7%)                  | 3%<br>(-1.4-8.4%)                   | 170<br>(-82-480)    | 1400<br>(-400-3800)       |
| Bulgaria | 2010 | Male   | 90 to 94 | 81%<br>(70-90%)                | 19%<br>(9.9-30%)         | 2.4<br>(1.5-3.6)                            | 1.2%<br>(-2.6-6.2%)                  | 0.95%<br>(-3.4-6.7%)                | 14<br>(-51-98)      | 100<br>(-230-540)         |
| Bulgaria | 2010 | Male   | 95 plus  | 81%<br>(66-92%)                | 19%<br>(8.3-34%)         | 2.1<br>(1.1-3.5)                            | 0.12%<br>(-3.6-5.6%)                 | -0.36%<br>(-4.8-6.2%)               | -1.9<br>(-25-32)    | 2.5<br>(-74-120)          |

| Location | Year | Sex    | Age      | Prevalence of current drinkers | Prevalence of abstainers | Population average of standard drinks daily | Percent of total attributable deaths | Percent of total attributable DALYs | Attributable deaths | Attributable DALYs        |
|----------|------|--------|----------|--------------------------------|--------------------------|---------------------------------------------|--------------------------------------|-------------------------------------|---------------------|---------------------------|
| Bulgaria | 2016 | Female | All Ages | 74%<br>(68-80%)                | 26%<br>(20-32%)          | 1.7<br>(1.4-2.1)                            | 2.1%<br>(0.14-4.2%)                  | 1.4%<br>(-1.7-4.9%)                 | 770<br>(-910-2600)  | 27000<br>(1700-54000)     |
| Bulgaria | 2016 | Female | 15 to 19 | 75%<br>(62-84%)                | 25%<br>(16-38%)          | 1.5<br>(0.94-2.2)                           | 2.4%<br>(1.6-3.5%)                   | 5.3%<br>(2.8-8.7%)                  | 2<br>(1.1-3.4)      | 300<br>(190-440)          |
| Bulgaria | 2016 | Female | 20 to 24 | 81%<br>(69-90%)                | 19%<br>(10-31%)          | 1.9<br>(1.2-2.8)                            | 3.7%<br>(2.6-5%)                     | 5.5%<br>(2.7-9%)                    | 4<br>(1.9-6.8)      | 840<br>(540-1200)         |
| Bulgaria | 2016 | Female | 25 to 29 | 83%<br>(70-91%)                | 17%<br>(9-30%)           | 1.8<br>(1.2-2.5)                            | 3.5%<br>(2.6-4.7%)                   | 4.6%<br>(2.3-7.2%)                  | 3.9<br>(1.9-6.5)    | 820<br>(550-1200)         |
| Bulgaria | 2016 | Female | 30 to 34 | 83%<br>(70-91%)                | 17%<br>(8.6-30%)         | 1.9<br>(1.2-2.6)                            | 3.4%<br>(2.4-4.6%)                   | 5.1%<br>(2.9-7.7%)                  | 7<br>(3.7-11)       | 1000<br>(700-1500)        |
| Bulgaria | 2016 | Female | 35 to 39 | 83%<br>(71-91%)                | 17%<br>(8.5-29%)         | 2.1<br>(1.4-3.1)                            | 3.6%<br>(2.4-4.9%)                   | 6.1%<br>(3.4-9.2%)                  | 17<br>(8.8-28)      | 1500<br>(980-2200)        |
| Bulgaria | 2016 | Female | 40 to 44 | 83%<br>(70-91%)                | 17%<br>(8.9-30%)         | 2.3<br>(1.6-3.3)                            | 3.7%<br>(2.3-5.5%)                   | 6.6%<br>(3.7-9.8%)                  | 27<br>(14-43)       | 1800<br>(1100-2800)       |
| Bulgaria | 2016 | Female | 45 to 49 | 81%<br>(66-91%)                | 19%<br>(9.1-34%)         | 2.4<br>(1.6-3.4)                            | 3.9%<br>(2.3-6%)                     | 6.7%<br>(3.5-10%)                   | 38<br>(19-62)       | 2100<br>(1100-3200)       |
| Bulgaria | 2016 | Female | 50 to 54 | 80%<br>(65-90%)                | 20%<br>(10-35%)          | 2.3<br>(1.6-3.3)                            | 4%<br>(2.1-6.2%)                     | 6.5%<br>(3.3-10%)                   | 62<br>(30-100)      | 2700<br>(1400-4300)       |
| Bulgaria | 2016 | Female | 55 to 59 | 78%<br>(63-89%)                | 22%<br>(11-37%)          | 2.2<br>(1.5-3.1)                            | 3.6%<br>(1.6-6%)                     | 5.7%<br>(2.6-9.4%)                  | 87<br>(37-150)      | 3200<br>(1400-5300)       |
| Bulgaria | 2016 | Female | 60 to 64 | 75%<br>(59-88%)                | 25%<br>(12-41%)          | 2.1<br>(1.4-3.1)                            | 2.8%<br>(0.57-5.6%)                  | 4.4%<br>(0.94-8.6%)                 | 130<br>(27-250)     | 3900<br>(790-7700)        |
| Bulgaria | 2016 | Female | 65 to 69 | 72%<br>(55-85%)                | 28%<br>(15-45%)          | 2<br>(1.3-2.8)                              | 2.5%<br>(-0.007-5.5%)                | 3.6%<br>(0.023-7.7%)                | 130<br>(0.76-290)   | 3300<br>(-9.3-6900)       |
| Bulgaria | 2016 | Female | 70 to 74 | 66%<br>(50-81%)                | 34%<br>(19-50%)          | 1.8<br>(1.1-2.6)                            | 2.1%<br>(-0.85-5.4%)                 | 2.9%<br>(-1.1-7.2%)                 | 130<br>(-54-350)    | 2600<br>(-1100-6700)      |
| Bulgaria | 2016 | Female | 75 to 79 | 59%<br>(41-77%)                | 41%<br>(23-59%)          | 1.5<br>(0.88-2.4)                           | 1.2%<br>(-1.8-4.6%)                  | 1.5%<br>(-2.4-5.8%)                 | 140<br>(-210-530)   | 2200<br>(-3100-8000)      |
| Bulgaria | 2016 | Female | 80 to 84 | 54%<br>(35-72%)                | 46%<br>(28-65%)          | 1.3<br>(0.75-2)                             | 0.56%<br>(-2.2-3.6%)                 | 0.59%<br>(-2.8-4.3%)                | 65<br>(-310-490)    | 810<br>(-3200-5300)       |
| Bulgaria | 2016 | Female | 85 to 89 | 52%<br>(35-69%)                | 48%<br>(31-65%)          | 1.2<br>(0.66-2)                             | -0.087%<br>(-2.9-3.1%)               | -0.24%<br>(-3.5-3.7%)               | -29<br>(-420-420)   | -99<br>(-3000-3300)       |
| Bulgaria | 2016 | Female | 90 to 94 | 53%<br>(37-71%)                | 47%<br>(29-63%)          | 1.2<br>(0.66-2)                             | -0.53%<br>(-3.6-3.4%)                | -0.77%<br>(-4.5-3.8%)               | -32<br>(-180-160)   | -130<br>(-870-820)        |
| Bulgaria | 2016 | Female | 95 plus  | 57%<br>(36-76%)                | 43%<br>(24-64%)          | 1.2<br>(0.58-2.2)                           | -0.81%<br>(-4.2-3.8%)                | -1.2%<br>(-5.2-4.2%)                | -15<br>(-68-54)     | -42<br>(-220-200)         |
| Bulgaria | 2016 | Male   | All Ages | 87%<br>(83-90%)                | 13%<br>(10-17%)          | 4.4<br>(3.5-5.4)                            | 12%<br>(8.1-15%)                     | 12%<br>(6.9-16%)                    | 6500<br>(3700-9700) | 180000<br>(120000-240000) |
| Bulgaria | 2016 | Male   | 15 to 19 | 79%<br>(68-86%)                | 21%<br>(14-32%)          | 2.3<br>(1.5-3.5)                            | 5.6%<br>(3.7-8%)                     | 9.9%<br>(5.5-15%)                   | 7.9<br>(4.2-13)     | 830<br>(520-1200)         |
| Bulgaria | 2016 | Male   | 20 to 24 | 87%<br>(76-93%)                | 13%<br>(6.7-24%)         | 4<br>(2.6-5.8)                              | 11%<br>(7.3-14%)                     | 16%<br>(9.4-23%)                    | 34<br>(20-52)       | 3300<br>(2200-4700)       |
| Bulgaria | 2016 | Male   | 25 to 29 | 89%<br>(81-95%)                | 11%<br>(5.3-19%)         | 4.3<br>(2.9-6.1)                            | 11%<br>(7.7-14%)                     | 16%<br>(10-23%)                     | 38<br>(23-56)       | 3600<br>(2500-5000)       |

| Location | Year | Sex    | Age      | Prevalence of current drinkers | Prevalence of abstainers | Population average of standard drinks daily | Percent of total attributable deaths | Percent of total attributable DALYs | Attributable deaths | Attributable DALYs     |
|----------|------|--------|----------|--------------------------------|--------------------------|---------------------------------------------|--------------------------------------|-------------------------------------|---------------------|------------------------|
| Bulgaria | 2016 | Male   | 30 to 34 | 91%<br>(82-96%)                | 9.3%<br>(4.4-18%)        | 4.5<br>(3.1-6.2)                            | 11%<br>(7.5-14%)                     | 16%<br>(10-23%)                     | 55<br>(33-82)       | 4500<br>(3100-6200)    |
| Bulgaria | 2016 | Male   | 35 to 39 | 92%<br>(84-96%)                | 8.4%<br>(4-16%)          | 4.5<br>(3-6.4)                              | 10%<br>(6.9-14%)                     | 16%<br>(9.3-22%)                    | 86<br>(49-130)      | 5900<br>(3700-8300)    |
| Bulgaria | 2016 | Male   | 40 to 44 | 92%<br>(85-96%)                | 8.1%<br>(3.8-15%)        | 5.3<br>(3.8-7.2)                            | 12%<br>(8-17%)                       | 17%<br>(11-24%)                     | 160<br>(93-230)     | 8800<br>(5500-12000)   |
| Bulgaria | 2016 | Male   | 45 to 49 | 92%<br>(83-96%)                | 8.5%<br>(4-17%)          | 6.6<br>(4.5-9)                              | 15%<br>(11-19%)                      | 20%<br>(14-26%)                     | 280<br>(180-400)    | 13000<br>(8700-18000)  |
| Bulgaria | 2016 | Male   | 50 to 54 | 91%<br>(83-96%)                | 9.1%<br>(4.4-17%)        | 7<br>(4.9-9.5)                              | 16%<br>(12-21%)                      | 21%<br>(15-26%)                     | 500<br>(340-680)    | 20000<br>(14000-26000) |
| Bulgaria | 2016 | Male   | 55 to 59 | 90%<br>(82-95%)                | 10%<br>(4.6-18%)         | 6.8<br>(4.8-9)                              | 16%<br>(12-20%)                      | 20%<br>(14-25%)                     | 730<br>(510-1000)   | 25000<br>(18000-34000) |
| Bulgaria | 2016 | Male   | 60 to 64 | 89%<br>(80-95%)                | 11%<br>(4.8-20%)         | 6.3<br>(4.4-8.5)                            | 15%<br>(9.9-19%)                     | 18%<br>(12-23%)                     | 1100<br>(710-1600)  | 32000<br>(21000-45000) |
| Bulgaria | 2016 | Male   | 65 to 69 | 88%<br>(78-95%)                | 12%<br>(4.9-22%)         | 5.6<br>(4.1-7.4)                            | 13%<br>(8.4-18%)                     | 16%<br>(9.9-21%)                    | 1000<br>(620-1400)  | 24000<br>(15000-34000) |
| Bulgaria | 2016 | Male   | 70 to 74 | 87%<br>(78-94%)                | 13%<br>(6.1-22%)         | 4.8<br>(3.2-6.5)                            | 11%<br>(5.5-16%)                     | 13%<br>(6.2-19%)                    | 770<br>(340-1200)   | 15000<br>(7200-23000)  |
| Bulgaria | 2016 | Male   | 75 to 79 | 85%<br>(74-93%)                | 15%<br>(7.3-26%)         | 4<br>(2.6-5.8)                              | 8.3%<br>(2.6-14%)                    | 9.5%<br>(2.8-17%)                   | 830<br>(240-1500)   | 13000<br>(4100-22000)  |
| Bulgaria | 2016 | Male   | 80 to 84 | 83%<br>(71-91%)                | 17%<br>(8.6-29%)         | 3.4<br>(2.3-4.8)                            | 6.2%<br>(1.1-12%)                    | 6.9%<br>(0.83-14%)                  | 590<br>(65-1200)    | 6700<br>(1100-13000)   |
| Bulgaria | 2016 | Male   | 85 to 89 | 82%<br>(70-90%)                | 18%<br>(9.6-30%)         | 3<br>(1.9-4.3)                              | 3.8%<br>(-0.56-9.7%)                 | 4%<br>(-1.1-11%)                    | 290<br>(-81-780)    | 2400<br>(-340-6100)    |
| Bulgaria | 2016 | Male   | 90 to 94 | 82%<br>(71-90%)                | 18%<br>(9.7-29%)         | 2.7<br>(1.7-4)                              | 1.8%<br>(-2.5-7.6%)                  | 1.7%<br>(-3.4-8.3%)                 | 34<br>(-70-170)     | 220<br>(-300-920)      |
| Bulgaria | 2016 | Male   | 95 plus  | 82%<br>(68-92%)                | 18%<br>(7.9-32%)         | 2.2<br>(1.1-3.7)                            | 0.54%<br>(-3.5-6.3%)                 | 0.089%<br>(-4.8-7%)                 | 0.63<br>(-33-48)    | 15<br>(-100-180)       |
| Croatia  | 1990 | Female | All Ages | 63%<br>(57-68%)                | 37%<br>(32-43%)          | 1.8<br>(1.5-2.2)                            | 5.6%<br>(3.7-7.6%)                   | 6.5%<br>(3.5-10%)                   | 1700<br>(900-2600)  | 42000<br>(28000-58000) |
| Croatia  | 1990 | Female | 15 to 19 | 65%<br>(49-78%)                | 35%<br>(22-51%)          | 1.3<br>(0.82-2)                             | 3.1%<br>(2-4.4%)                     | 7.3%<br>(4-11%)                     | 4.4<br>(2.5-7)      | 500<br>(310-720)       |
| Croatia  | 1990 | Female | 20 to 24 | 74%<br>(60-84%)                | 26%<br>(16-40%)          | 1.6<br>(1.1-2.3)                            | 4.5%<br>(3-6.1%)                     | 8%<br>(4.4-13%)                     | 5.5<br>(3-8.6)      | 760<br>(510-1100)      |
| Croatia  | 1990 | Female | 25 to 29 | 74%<br>(61-84%)                | 26%<br>(16-39%)          | 1.6<br>(1.1-2.2)                            | 4.3%<br>(3-5.7%)                     | 7.4%<br>(4.1-11%)                   | 6.7<br>(3.7-10)     | 880<br>(590-1200)      |
| Croatia  | 1990 | Female | 30 to 34 | 72%<br>(59-81%)                | 28%<br>(19-41%)          | 1.8<br>(1.2-2.5)                            | 4.3%<br>(3.1-5.7%)                   | 8.2%<br>(5.2-12%)                   | 11<br>(6.6-15)      | 1100<br>(750-1500)     |
| Croatia  | 1990 | Female | 35 to 39 | 69%<br>(57-79%)                | 31%<br>(21-43%)          | 2.1<br>(1.4-3)                              | 5.1%<br>(3.6-6.7%)                   | 10%<br>(6.9-14%)                    | 21<br>(14-30)       | 1600<br>(1100-2100)    |
| Croatia  | 1990 | Female | 40 to 44 | 68%<br>(57-79%)                | 32%<br>(21-43%)          | 2.4<br>(1.7-3.3)                            | 6.3%<br>(4.7-8.2%)                   | 13%<br>(9.4-16%)                    | 37<br>(27-48)       | 2100<br>(1600-2700)    |
| Croatia  | 1990 | Female | 45 to 49 | 68%<br>(56-78%)                | 32%<br>(22-44%)          | 2.8<br>(1.9-3.9)                            | 8.1%<br>(5.9-11%)                    | 14%<br>(10-18%)                     | 57<br>(42-76)       | 2700<br>(2000-3500)    |

| Location | Year | Sex    | Age      | Prevalence of current drinkers | Prevalence of abstainers | Population average of standard drinks daily | Percent of total attributable deaths | Percent of total attributable DALYs | Attributable deaths | Attributable DALYs        |
|----------|------|--------|----------|--------------------------------|--------------------------|---------------------------------------------|--------------------------------------|-------------------------------------|---------------------|---------------------------|
| Croatia  | 1990 | Female | 50 to 54 | 68%<br>(56-78%)                | 32%<br>(22-44%)          | 3.1<br>(2.2-4.1)                            | 8.7%<br>(6.3-11%)                    | 14%<br>(10-18%)                     | 110<br>(76-140)     | 4300<br>(3200-5700)       |
| Croatia  | 1990 | Female | 55 to 59 | 68%<br>(56-78%)                | 32%<br>(22-44%)          | 3.1<br>(2.2-4.3)                            | 8.8%<br>(6.1-12%)                    | 14%<br>(9.6-18%)                    | 160<br>(110-220)    | 5600<br>(3900-7700)       |
| Croatia  | 1990 | Female | 60 to 64 | 66%<br>(52-77%)                | 34%<br>(23-48%)          | 3<br>(2.1-4.2)                              | 7.8%<br>(4.7-11%)                    | 11%<br>(6.7-16%)                    | 190<br>(120-290)    | 5800<br>(3500-8700)       |
| Croatia  | 1990 | Female | 65 to 69 | 62%<br>(47-74%)                | 38%<br>(26-53%)          | 2.7<br>(1.8-3.7)                            | 6.9%<br>(3.9-11%)                    | 9.3%<br>(5.3-14%)                   | 250<br>(140-380)    | 6100<br>(3400-9100)       |
| Croatia  | 1990 | Female | 70 to 74 | 55%<br>(41-66%)                | 45%<br>(34-59%)          | 2.2<br>(1.4-3.3)                            | 5.7%<br>(2-10%)                      | 7.2%<br>(2.5-13%)                   | 180<br>(65-320)     | 3500<br>(1300-6200)       |
| Croatia  | 1990 | Female | 75 to 79 | 46%<br>(33-61%)                | 54%<br>(39-67%)          | 1.8<br>(1.1-2.8)                            | 4.1%<br>(0.71-8.4%)                  | 4.9%<br>(0.69-10%)                  | 230<br>(34-480)     | 3500<br>(580-7000)        |
| Croatia  | 1990 | Female | 80 to 84 | 41%<br>(27-55%)                | 59%<br>(45-73%)          | 1.7<br>(0.98-2.5)                           | 3.6%<br>(0.7-7.4%)                   | 4.1%<br>(0.65-8.6%)                 | 220<br>(34-470)     | 2400<br>(470-5100)        |
| Croatia  | 1990 | Female | 85 to 89 | 40%<br>(27-54%)                | 60%<br>(46-73%)          | 1.7<br>(0.97-2.6)                           | 3.3%<br>(0.58-7.1%)                  | 3.8%<br>(0.45-8.3%)                 | 130<br>(14-280)     | 1000<br>(180-2200)        |
| Croatia  | 1990 | Female | 90 to 94 | 41%<br>(28-56%)                | 59%<br>(44-72%)          | 1.8<br>(1-2.9)                              | 3.5%<br>(0.39-8.1%)                  | 4.1%<br>(0.25-9.7%)                 | 53<br>(3.3-130)     | 290<br>(30-660)           |
| Croatia  | 1990 | Female | 95 plus  | 45%<br>(28-63%)                | 55%<br>(37-72%)          | 2<br>(0.99-3.5)                             | 4.2%<br>(0.092-10%)                  | 4.9%<br>(-0.17-12%)                 | 18<br>(-0.6-45)     | 64<br>(1.5-160)           |
| Croatia  | 1990 | Male   | All Ages | 74%<br>(69-79%)                | 26%<br>(21-31%)          | 5.4<br>(4.6-6.4)                            | 18%<br>(15-21%)                      | 21%<br>(17-25%)                     | 5700<br>(4600-7000) | 170000<br>(140000-200000) |
| Croatia  | 1990 | Male   | 15 to 19 | 66%<br>(51-80%)                | 34%<br>(20-49%)          | 3.1<br>(1.9-4.6)                            | 8.9%<br>(5.7-13%)                    | 15%<br>(8.9-22%)                    | 23<br>(13-35)       | 2000<br>(1200-2800)       |
| Croatia  | 1990 | Male   | 20 to 24 | 78%<br>(65-87%)                | 22%<br>(13-35%)          | 5.2<br>(3.5-7.4)                            | 18%<br>(12-24%)                      | 25%<br>(17-35%)                     | 68<br>(45-94)       | 5200<br>(3600-7000)       |
| Croatia  | 1990 | Male   | 25 to 29 | 81%<br>(69-89%)                | 19%<br>(11-31%)          | 5.1<br>(3.5-6.8)                            | 17%<br>(12-22%)                      | 25%<br>(18-33%)                     | 72<br>(50-97)       | 5400<br>(3900-7000)       |
| Croatia  | 1990 | Male   | 30 to 34 | 82%<br>(70-90%)                | 18%<br>(9.8-30%)         | 5.5<br>(3.8-7.3)                            | 18%<br>(13-22%)                      | 26%<br>(20-33%)                     | 100<br>(76-130)     | 6900<br>(5200-8800)       |
| Croatia  | 1990 | Male   | 35 to 39 | 82%<br>(73-90%)                | 18%<br>(9.7-27%)         | 6.5<br>(4.5-8.9)                            | 20%<br>(15-24%)                      | 29%<br>(22-35%)                     | 160<br>(120-200)    | 9600<br>(7500-12000)      |
| Croatia  | 1990 | Male   | 40 to 44 | 83%<br>(74-91%)                | 17%<br>(9.5-26%)         | 7.8<br>(5.8-10)                             | 22%<br>(18-26%)                      | 31%<br>(26-36%)                     | 230<br>(190-280)    | 12000<br>(10000-14000)    |
| Croatia  | 1990 | Male   | 45 to 49 | 84%<br>(74-91%)                | 16%<br>(9.1-26%)         | 9.5<br>(6.7-13)                             | 24%<br>(20-28%)                      | 31%<br>(27-36%)                     | 310<br>(260-370)    | 14000<br>(11000-16000)    |
| Croatia  | 1990 | Male   | 50 to 54 | 84%<br>(74-91%)                | 16%<br>(8.7-26%)         | 9.6<br>(6.8-13)                             | 23%<br>(19-27%)                      | 28%<br>(24-33%)                     | 540<br>(430-650)    | 21000<br>(17000-25000)    |
| Croatia  | 1990 | Male   | 55 to 59 | 83%<br>(72-91%)                | 17%<br>(8.8-28%)         | 8.8<br>(6.5-12)                             | 21%<br>(18-25%)                      | 25%<br>(21-30%)                     | 720<br>(580-890)    | 24000<br>(20000-29000)    |
| Croatia  | 1990 | Male   | 60 to 64 | 82%<br>(70-90%)                | 18%<br>(9.9-30%)         | 8.5<br>(6.1-12)                             | 19%<br>(16-24%)                      | 23%<br>(18-28%)                     | 760<br>(600-940)    | 22000<br>(17000-27000)    |
| Croatia  | 1990 | Male   | 65 to 69 | 81%<br>(69-89%)                | 19%<br>(11-31%)          | 8.6<br>(6.4-11)                             | 19%<br>(14-23%)                      | 22%<br>(17-27%)                     | 700<br>(530-880)    | 17000<br>(13000-21000)    |

| Location | Year | Sex    | Age      | Prevalence of current drinkers | Prevalence of abstainers | Population average of standard drinks daily | Percent of total attributable deaths | Percent of total attributable DALYs | Attributable deaths | Attributable DALYs     |
|----------|------|--------|----------|--------------------------------|--------------------------|---------------------------------------------|--------------------------------------|-------------------------------------|---------------------|------------------------|
| Croatia  | 1990 | Male   | 70 to 74 | 79%<br>(68-87%)                | 21%<br>(13-32%)          | 8.3<br>(5.9-11)                             | 18%<br>(13-22%)                      | 21%<br>(15-26%)                     | 520<br>(390-650)    | 9800<br>(7400-12000)   |
| Croatia  | 1990 | Male   | 75 to 79 | 76%<br>(63-87%)                | 24%<br>(13-37%)          | 7.4<br>(4.8-10)                             | 16%<br>(11-21%)                      | 18%<br>(13-24%)                     | 680<br>(480-910)    | 10000<br>(7000-13000)  |
| Croatia  | 1990 | Male   | 80 to 84 | 74%<br>(59-85%)                | 26%<br>(15-41%)          | 6.1<br>(4.1-8.7)                            | 14%<br>(9.5-19%)                     | 16%<br>(10-22%)                     | 550<br>(360-760)    | 5900<br>(4000-8100)    |
| Croatia  | 1990 | Male   | 85 to 89 | 72%<br>(57-83%)                | 28%<br>(17-43%)          | 5.1<br>(3.3-7.4)                            | 11%<br>(6.3-16%)                     | 12%<br>(6.9-19%)                    | 210<br>(110-320)    | 1600<br>(950-2500)     |
| Croatia  | 1990 | Male   | 90 to 94 | 71%<br>(56-82%)                | 29%<br>(18-44%)          | 4.3<br>(2.6-6.5)                            | 8.1%<br>(2.9-14%)                    | 9.2%<br>(2.9-16%)                   | 48<br>(15-82)       | 270<br>(99-450)        |
| Croatia  | 1990 | Male   | 95 plus  | 69%<br>(51-83%)                | 31%<br>(17-49%)          | 3.4<br>(1.7-5.8)                            | 5.5%<br>(0.079-12%)                  | 5.9%<br>(-0.71-14%)                 | 6.5<br>(-0.77-15)   | 26<br>(0.37-55)        |
| Croatia  | 1995 | Female | All Ages | 62%<br>(57-67%)                | 38%<br>(33-43%)          | 1.9<br>(1.6-2.2)                            | 5.5%<br>(3.9-7.4%)                   | 6.6%<br>(3.8-10%)                   | 1700<br>(970-2600)  | 42000<br>(29000-56000) |
| Croatia  | 1995 | Female | 15 to 19 | 65%<br>(50-79%)                | 35%<br>(21-50%)          | 1.3<br>(0.83-1.9)                           | 2.8%<br>(1.8-4.1%)                   | 5.2%<br>(2.7-8.7%)                  | 4.3<br>(2.3-7)      | 470<br>(300-670)       |
| Croatia  | 1995 | Female | 20 to 24 | 74%<br>(60-84%)                | 26%<br>(16-40%)          | 1.6<br>(1-2.3)                              | 4%<br>(2.7-5.4%)                     | 5.7%<br>(2.8-9.5%)                  | 4.9<br>(2.6-7.6)    | 680<br>(450-950)       |
| Croatia  | 1995 | Female | 25 to 29 | 74%<br>(61-84%)                | 26%<br>(16-39%)          | 1.6<br>(1.1-2.2)                            | 3.9%<br>(2.9-5.1%)                   | 5.8%<br>(2.9-9.1%)                  | 4.9<br>(2.6-7.4)    | 690<br>(470-940)       |
| Croatia  | 1995 | Female | 30 to 34 | 72%<br>(59-81%)                | 28%<br>(19-41%)          | 1.8<br>(1.2-2.4)                            | 3.9%<br>(2.8-5.1%)                   | 6.6%<br>(4-9.7%)                    | 8.3<br>(5-12)       | 900<br>(620-1200)      |
| Croatia  | 1995 | Female | 35 to 39 | 69%<br>(58-79%)                | 31%<br>(21-42%)          | 2.1<br>(1.4-2.9)                            | 4.7%<br>(3.4-6.1%)                   | 9%<br>(6-12%)                       | 19<br>(12-25)       | 1400<br>(960-1800)     |
| Croatia  | 1995 | Female | 40 to 44 | 67%<br>(56-79%)                | 33%<br>(21-44%)          | 2.4<br>(1.7-3.2)                            | 5.8%<br>(4.4-7.5%)                   | 11%<br>(8.6-14%)                    | 35<br>(26-45)       | 2000<br>(1600-2600)    |
| Croatia  | 1995 | Female | 45 to 49 | 68%<br>(55-78%)                | 32%<br>(22-45%)          | 2.8<br>(1.9-3.7)                            | 7.1%<br>(5.3-9.3%)                   | 13%<br>(9.6-16%)                    | 59<br>(44-76)       | 2800<br>(2100-3600)    |
| Croatia  | 1995 | Female | 50 to 54 | 68%<br>(56-78%)                | 32%<br>(22-44%)          | 3.1<br>(2.2-4)                              | 8.5%<br>(6.3-11%)                    | 14%<br>(10-18%)                     | 82<br>(60-110)      | 3300<br>(2400-4200)    |
| Croatia  | 1995 | Female | 55 to 59 | 68%<br>(55-78%)                | 32%<br>(22-45%)          | 3.1<br>(2.2-4.2)                            | 8.9%<br>(6.4-12%)                    | 14%<br>(9.9-18%)                    | 150<br>(110-190)    | 5100<br>(3600-6700)    |
| Croatia  | 1995 | Female | 60 to 64 | 66%<br>(51-77%)                | 34%<br>(23-49%)          | 3<br>(2.1-4.1)                              | 7.9%<br>(5-11%)                      | 11%<br>(7.2-16%)                    | 200<br>(130-280)    | 5900<br>(3800-8400)    |
| Croatia  | 1995 | Female | 65 to 69 | 61%<br>(47-73%)                | 39%<br>(27-53%)          | 2.7<br>(1.9-3.6)                            | 7%<br>(4.2-10%)                      | 9.5%<br>(5.8-14%)                   | 260<br>(160-380)    | 6200<br>(3800-9300)    |
| Croatia  | 1995 | Female | 70 to 74 | 54%<br>(41-66%)                | 46%<br>(34-59%)          | 2.2<br>(1.4-3.2)                            | 5.9%<br>(2.4-9.7%)                   | 7.5%<br>(3.1-12%)                   | 310<br>(120-510)    | 5900<br>(2400-9800)    |
| Croatia  | 1995 | Female | 75 to 79 | 46%<br>(32-60%)                | 54%<br>(40-68%)          | 1.8<br>(1.1-2.7)                            | 4.1%<br>(0.85-8%)                    | 4.9%<br>(0.91-9.7%)                 | 170<br>(31-340)     | 2600<br>(520-5100)     |
| Croatia  | 1995 | Female | 80 to 84 | 40%<br>(27-55%)                | 60%<br>(45-73%)          | 1.6<br>(0.97-2.4)                           | 3.5%<br>(0.77-7.2%)                  | 4%<br>(0.81-8.3%)                   | 190<br>(37-390)     | 2100<br>(450-4200)     |
| Croatia  | 1995 | Female | 85 to 89 | 39%<br>(26-53%)                | 61%<br>(47-74%)          | 1.7<br>(0.97-2.6)                           | 3.4%<br>(0.62-7.1%)                  | 3.9%<br>(0.52-8.6%)                 | 150<br>(20-320)     | 1200<br>(230-2500)     |

| Location | Year | Sex    | Age      | Prevalence of current drinkers | Prevalence of abstainers | Population average of standard drinks daily | Percent of total attributable deaths | Percent of total attributable DALYs | Attributable deaths | Attributable DALYs        |
|----------|------|--------|----------|--------------------------------|--------------------------|---------------------------------------------|--------------------------------------|-------------------------------------|---------------------|---------------------------|
| Croatia  | 1995 | Female | 90 to 94 | 41%<br>(28-55%)                | 59%<br>(45-72%)          | 1.8<br>(0.98-2.8)                           | 3.6%<br>(0.48-8%)                    | 4.2%<br>(0.25-9.8%)                 | 73<br>(4.6-170)     | 400<br>(55-880)           |
| Croatia  | 1995 | Female | 95 plus  | 44%<br>(27-62%)                | 56%<br>(38-73%)          | 2<br>(0.99-3.4)                             | 4.2%<br>(0.019-10%)                  | 5%<br>(-0.18-13%)                   | 25<br>(-0.92-61)    | 89<br>(0.38-220)          |
| Croatia  | 1995 | Male   | All Ages | 75%<br>(69-80%)                | 25%<br>(20-31%)          | 5.6<br>(4.8-6.3)                            | 17%<br>(14-20%)                      | 20%<br>(17-24%)                     | 5600<br>(4500-6900) | 160000<br>(130000-190000) |
| Croatia  | 1995 | Male   | 15 to 19 | 67%<br>(51-80%)                | 33%<br>(20-49%)          | 3.1<br>(1.9-4.6)                            | 7.7%<br>(4.8-11%)                    | 11%<br>(6.3-17%)                    | 24<br>(14-36)       | 2000<br>(1300-2900)       |
| Croatia  | 1995 | Male   | 20 to 24 | 78%<br>(64-88%)                | 22%<br>(12-36%)          | 5.2<br>(3.5-7.2)                            | 14%<br>(8.9-19%)                     | 17%<br>(10-27%)                     | 62<br>(41-86)       | 4700<br>(3300-6300)       |
| Croatia  | 1995 | Male   | 25 to 29 | 81%<br>(69-89%)                | 19%<br>(11-31%)          | 5.1<br>(3.6-6.9)                            | 14%<br>(9.7-19%)                     | 19%<br>(12-27%)                     | 60<br>(42-80)       | 4400<br>(3200-5800)       |
| Croatia  | 1995 | Male   | 30 to 34 | 82%<br>(70-90%)                | 18%<br>(10-30%)          | 5.5<br>(3.9-7.4)                            | 15%<br>(11-19%)                      | 21%<br>(14-28%)                     | 81<br>(59-100)      | 5400<br>(4100-6900)       |
| Croatia  | 1995 | Male   | 35 to 39 | 82%<br>(73-90%)                | 18%<br>(10-27%)          | 6.5<br>(4.6-8.8)                            | 18%<br>(14-22%)                      | 25%<br>(19-31%)                     | 140<br>(100-170)    | 8100<br>(6200-9800)       |
| Croatia  | 1995 | Male   | 40 to 44 | 83%<br>(73-91%)                | 17%<br>(9.4-27%)         | 7.8<br>(5.9-9.9)                            | 21%<br>(17-24%)                      | 28%<br>(24-33%)                     | 230<br>(190-280)    | 12000<br>(10000-14000)    |
| Croatia  | 1995 | Male   | 45 to 49 | 84%<br>(73-91%)                | 16%<br>(9-27%)           | 9.5<br>(6.9-12)                             | 23%<br>(19-26%)                      | 29%<br>(25-34%)                     | 330<br>(270-400)    | 15000<br>(12000-18000)    |
| Croatia  | 1995 | Male   | 50 to 54 | 84%<br>(73-91%)                | 16%<br>(9.1-27%)         | 9.6<br>(6.9-12)                             | 23%<br>(19-27%)                      | 28%<br>(23-33%)                     | 390<br>(310-460)    | 15000<br>(12000-18000)    |
| Croatia  | 1995 | Male   | 55 to 59 | 83%<br>(72-91%)                | 17%<br>(8.9-28%)         | 8.7<br>(6.4-11)                             | 21%<br>(17-25%)                      | 25%<br>(21-30%)                     | 630<br>(500-760)    | 21000<br>(17000-25000)    |
| Croatia  | 1995 | Male   | 60 to 64 | 82%<br>(70-90%)                | 18%<br>(10-30%)          | 8.5<br>(6.2-11)                             | 19%<br>(15-23%)                      | 23%<br>(18-27%)                     | 810<br>(630-1000)   | 23000<br>(18000-28000)    |
| Croatia  | 1995 | Male   | 65 to 69 | 80%<br>(69-88%)                | 20%<br>(12-31%)          | 8.5<br>(6.3-11)                             | 19%<br>(14-23%)                      | 22%<br>(16-26%)                     | 880<br>(670-1100)   | 21000<br>(16000-26000)    |
| Croatia  | 1995 | Male   | 70 to 74 | 78%<br>(67-86%)                | 22%<br>(14-33%)          | 8.2<br>(5.9-11)                             | 18%<br>(13-23%)                      | 21%<br>(15-26%)                     | 760<br>(560-950)    | 14000<br>(11000-18000)    |
| Croatia  | 1995 | Male   | 75 to 79 | 76%<br>(63-86%)                | 24%<br>(14-37%)          | 7.3<br>(4.9-10)                             | 16%<br>(11-21%)                      | 18%<br>(13-24%)                     | 470<br>(330-610)    | 6900<br>(4900-9000)       |
| Croatia  | 1995 | Male   | 80 to 84 | 74%<br>(59-85%)                | 26%<br>(15-41%)          | 6.1<br>(4.1-8.6)                            | 14%<br>(9.9-20%)                     | 16%<br>(11-22%)                     | 470<br>(310-640)    | 5100<br>(3400-6800)       |
| Croatia  | 1995 | Male   | 85 to 89 | 71%<br>(57-82%)                | 29%<br>(18-43%)          | 5.1<br>(3.4-7.2)                            | 11%<br>(6.7-16%)                     | 13%<br>(7.5-19%)                    | 230<br>(140-350)    | 1900<br>(1100-2700)       |
| Croatia  | 1995 | Male   | 90 to 94 | 70%<br>(56-82%)                | 30%<br>(18-44%)          | 4.2<br>(2.6-6.4)                            | 8.2%<br>(3.3-13%)                    | 9.3%<br>(3.3-16%)                   | 68<br>(24-110)      | 380<br>(150-620)          |
| Croatia  | 1995 | Male   | 95 plus  | 69%<br>(50-84%)                | 31%<br>(16-50%)          | 3.3<br>(1.6-5.7)                            | 5.6%<br>(0.12-12%)                   | 6%<br>(-0.56-14%)                   | 9.8<br>(-0.87-23)   | 38<br>(0.79-82)           |
| Croatia  | 2000 | Female | All Ages | 60%<br>(54-64%)                | 40%<br>(36-46%)          | 1.9<br>(1.6-2.2)                            | 5.5%<br>(4-7.3%)                     | 6.7%<br>(4-9.8%)                    | 1700<br>(1000-2600) | 39000<br>(28000-53000)    |
| Croatia  | 2000 | Female | 15 to 19 | 63%<br>(47-77%)                | 37%<br>(23-53%)          | 1.3<br>(0.84-1.9)                           | 2.9%<br>(1.8-4.1%)                   | 7%<br>(3.8-11%)                     | 3.3<br>(1.7-5.2)    | 390<br>(240-560)          |

| Location | Year | Sex    | Age      | Prevalence of current drinkers | Prevalence of abstainers | Population average of standard drinks daily | Percent of total attributable deaths | Percent of total attributable DALYs | Attributable deaths | Attributable DALYs        |
|----------|------|--------|----------|--------------------------------|--------------------------|---------------------------------------------|--------------------------------------|-------------------------------------|---------------------|---------------------------|
| Croatia  | 2000 | Female | 20 to 24 | 72%<br>(58-83%)                | 28%<br>(17-42%)          | 1.6<br>(1.1-2.3)                            | 4.2%<br>(2.9-5.7%)                   | 7.4%<br>(4.1-12%)                   | 3.7<br>(2-5.8)      | 590<br>(400-830)          |
| Croatia  | 2000 | Female | 25 to 29 | 71%<br>(58-82%)                | 29%<br>(18-42%)          | 1.6<br>(1.1-2.1)                            | 3.9%<br>(2.8-5%)                     | 6.8%<br>(3.9-10%)                   | 3.7<br>(2.1-5.5)    | 610<br>(420-830)          |
| Croatia  | 2000 | Female | 30 to 34 | 68%<br>(54-79%)                | 32%<br>(21-46%)          | 1.7<br>(1.1-2.3)                            | 3.9%<br>(2.9-5.1%)                   | 7.6%<br>(4.9-11%)                   | 6.2<br>(4-8.7)      | 720<br>(510-960)          |
| Croatia  | 2000 | Female | 35 to 39 | 65%<br>(54-76%)                | 35%<br>(24-46%)          | 2<br>(1.3-2.9)                              | 4.5%<br>(3.3-5.9%)                   | 9.6%<br>(6.6-13%)                   | 14<br>(9.4-18)      | 1100<br>(780-1400)        |
| Croatia  | 2000 | Female | 40 to 44 | 65%<br>(55-76%)                | 35%<br>(24-45%)          | 2.4<br>(1.8-3.2)                            | 5.5%<br>(4.2-7.1%)                   | 12%<br>(8.9-15%)                    | 29<br>(22-37)       | 1700<br>(1300-2200)       |
| Croatia  | 2000 | Female | 45 to 49 | 66%<br>(55-76%)                | 34%<br>(24-45%)          | 2.8<br>(2-3.7)                              | 6.8%<br>(4.9-8.9%)                   | 13%<br>(9.7-16%)                    | 52<br>(39-67)       | 2600<br>(1900-3300)       |
| Croatia  | 2000 | Female | 50 to 54 | 66%<br>(56-75%)                | 34%<br>(25-44%)          | 3.1<br>(2.2-4)                              | 8%<br>(6-10%)                        | 14%<br>(10-17%)                     | 80<br>(60-100)      | 3300<br>(2500-4300)       |
| Croatia  | 2000 | Female | 55 to 59 | 67%<br>(56-77%)                | 33%<br>(23-44%)          | 3.2<br>(2.3-4.2)                            | 8.8%<br>(6.4-12%)                    | 14%<br>(10-18%)                     | 100<br>(76-140)     | 3600<br>(2600-4800)       |
| Croatia  | 2000 | Female | 60 to 64 | 65%<br>(53-76%)                | 35%<br>(24-47%)          | 3.1<br>(2.2-4.2)                            | 7.9%<br>(5.2-11%)                    | 12%<br>(7.8-16%)                    | 180<br>(120-240)    | 5200<br>(3400-7200)       |
| Croatia  | 2000 | Female | 65 to 69 | 60%<br>(48-71%)                | 40%<br>(29-52%)          | 2.7<br>(2-3.5)                              | 7.1%<br>(4.5-9.9%)                   | 9.8%<br>(6.3-14%)                   | 250<br>(160-350)    | 6000<br>(3900-8500)       |
| Croatia  | 2000 | Female | 70 to 74 | 51%<br>(39-62%)                | 49%<br>(38-61%)          | 2.1<br>(1.4-3)                              | 6%<br>(3-9.3%)                       | 7.7%<br>(3.8-12%)                   | 290<br>(150-460)    | 5700<br>(2900-8800)       |
| Croatia  | 2000 | Female | 75 to 79 | 41%<br>(30-56%)                | 59%<br>(44-70%)          | 1.7<br>(1-2.5)                              | 4.4%<br>(1.6-7.8%)                   | 5.3%<br>(1.9-9.5%)                  | 280<br>(100-500)    | 4200<br>(1500-7500)       |
| Croatia  | 2000 | Female | 80 to 84 | 38%<br>(26-52%)                | 62%<br>(48-74%)          | 1.6<br>(0.98-2.3)                           | 3.7%<br>(1.4-6.9%)                   | 4.4%<br>(1.6-8.4%)                  | 180<br>(65-340)     | 2000<br>(750-3800)        |
| Croatia  | 2000 | Female | 85 to 89 | 39%<br>(26-52%)                | 61%<br>(48-74%)          | 1.7<br>(0.99-2.6)                           | 3.5%<br>(0.94-6.9%)                  | 4.1%<br>(0.84-8.1%)                 | 130<br>(27-250)     | 1000<br>(280-2000)        |
| Croatia  | 2000 | Female | 90 to 94 | 41%<br>(28-54%)                | 59%<br>(46-72%)          | 1.9<br>(1-2.9)                              | 3.8%<br>(0.57-8.2%)                  | 4.3%<br>(0.42-9.7%)                 | 100<br>(9.8-230)    | 540<br>(81-1200)          |
| Croatia  | 2000 | Female | 95 plus  | 44%<br>(28-62%)                | 56%<br>(38-72%)          | 2.1<br>(1-3.4)                              | 4.5%<br>(0.17-10%)                   | 5.2%<br>(0.046-12%)                 | 40<br>(0.37-94)     | 140<br>(5.4-320)          |
| Croatia  | 2000 | Male   | All Ages | 77%<br>(72-82%)                | 23%<br>(18-28%)          | 6.2<br>(5.6-6.9)                            | 18%<br>(15-21%)                      | 21%<br>(17-25%)                     | 5700<br>(4600-7000) | 150000<br>(130000-180000) |
| Croatia  | 2000 | Male   | 15 to 19 | 70%<br>(56-82%)                | 30%<br>(18-44%)          | 3.4<br>(2.2-4.8)                            | 9.5%<br>(6.3-14%)                    | 17%<br>(10-24%)                     | 22<br>(13-32)       | 1800<br>(1200-2600)       |
| Croatia  | 2000 | Male   | 20 to 24 | 80%<br>(67-88%)                | 20%<br>(12-33%)          | 5.6<br>(3.9-7.6)                            | 17%<br>(12-23%)                      | 27%<br>(18-36%)                     | 51<br>(35-72)       | 4000<br>(2900-5300)       |
| Croatia  | 2000 | Male   | 25 to 29 | 82%<br>(72-90%)                | 18%<br>(9.9-28%)         | 5.5<br>(4-7.2)                              | 16%<br>(12-20%)                      | 26%<br>(19-34%)                     | 50<br>(36-66)       | 3800<br>(2800-4900)       |
| Croatia  | 2000 | Male   | 30 to 34 | 84%<br>(73-90%)                | 16%<br>(9.5-27%)         | 5.9<br>(4.3-7.9)                            | 16%<br>(12-20%)                      | 27%<br>(21-34%)                     | 60<br>(45-77)       | 4200<br>(3200-5200)       |
| Croatia  | 2000 | Male   | 35 to 39 | 84%<br>(76-91%)                | 16%<br>(9.3-24%)         | 6.9<br>(4.9-9.3)                            | 19%<br>(14-23%)                      | 30%<br>(23-36%)                     | 110<br>(80-130)     | 6400<br>(4900-7700)       |



| Location | Year | Sex    | Age      | Prevalence of current drinkers | Prevalence of abstainers | Population average of standard drinks daily | Percent of total attributable deaths | Percent of total attributable DALYs | Attributable deaths | Attributable DALYs     |
|----------|------|--------|----------|--------------------------------|--------------------------|---------------------------------------------|--------------------------------------|-------------------------------------|---------------------|------------------------|
| Croatia  | 2000 | Male   | 40 to 44 | 84%<br>(76-91%)                | 16%<br>(9.2-24%)         | 8.4<br>(6.5-11)                             | 22%<br>(18-25%)                      | 32%<br>(27-37%)                     | 200<br>(160-240)    | 10000<br>(8600-12000)  |
| Croatia  | 2000 | Male   | 45 to 49 | 85%<br>(76-91%)                | 15%<br>(8.8-24%)         | 10<br>(7.6-13)                              | 23%<br>(19-27%)                      | 31%<br>(27-35%)                     | 330<br>(280-390)    | 15000<br>(12000-17000) |
| Croatia  | 2000 | Male   | 50 to 54 | 85%<br>(75-92%)                | 15%<br>(8.5-25%)         | 10<br>(7.6-13)                              | 22%<br>(19-27%)                      | 29%<br>(24-34%)                     | 410<br>(330-490)    | 16000<br>(13000-19000) |
| Croatia  | 2000 | Male   | 55 to 59 | 85%<br>(76-92%)                | 15%<br>(8.3-24%)         | 9.6<br>(7.4-12)                             | 22%<br>(18-26%)                      | 27%<br>(22-32%)                     | 450<br>(360-550)    | 15000<br>(12000-18000) |
| Croatia  | 2000 | Male   | 60 to 64 | 84%<br>(74-91%)                | 16%<br>(9.3-26%)         | 9.3<br>(6.8-12)                             | 20%<br>(16-24%)                      | 24%<br>(19-29%)                     | 750<br>(590-920)    | 21000<br>(17000-26000) |
| Croatia  | 2000 | Male   | 65 to 69 | 82%<br>(72-89%)                | 18%<br>(11-28%)          | 9.1<br>(7.1-11)                             | 19%<br>(15-23%)                      | 22%<br>(17-27%)                     | 950<br>(720-1200)   | 22000<br>(17000-28000) |
| Croatia  | 2000 | Male   | 70 to 74 | 80%<br>(71-87%)                | 20%<br>(13-29%)          | 8.9<br>(6.6-12)                             | 18%<br>(13-23%)                      | 21%<br>(15-26%)                     | 950<br>(700-1200)   | 18000<br>(13000-22000) |
| Croatia  | 2000 | Male   | 75 to 79 | 78%<br>(65-87%)                | 22%<br>(13-35%)          | 7.9<br>(5.5-11)                             | 17%<br>(12-22%)                      | 19%<br>(14-25%)                     | 700<br>(510-910)    | 10000<br>(7600-13000)  |
| Croatia  | 2000 | Male   | 80 to 84 | 75%<br>(61-86%)                | 25%<br>(14-39%)          | 6.5<br>(4.7-8.8)                            | 15%<br>(10-19%)                      | 17%<br>(12-22%)                     | 390<br>(270-530)    | 4300<br>(3000-5700)    |
| Croatia  | 2000 | Male   | 85 to 89 | 73%<br>(59-83%)                | 27%<br>(17-41%)          | 5.5<br>(3.8-7.6)                            | 12%<br>(7.7-17%)                     | 13%<br>(8.6-19%)                    | 210<br>(130-300)    | 1600<br>(1100-2300)    |
| Croatia  | 2000 | Male   | 90 to 94 | 72%<br>(58-83%)                | 28%<br>(17-42%)          | 4.6<br>(3-6.8)                              | 9.5%<br>(4.6-14%)                    | 11%<br>(4.9-17%)                    | 100<br>(46-160)     | 540<br>(270-830)       |
| Croatia  | 2000 | Male   | 95 plus  | 70%<br>(52-84%)                | 30%<br>(16-48%)          | 3.6<br>(1.8-6)                              | 6.7%<br>(0.97-13%)                   | 7.2%<br>(0.56-15%)                  | 19<br>(1.4-40)      | 71<br>(10-140)         |
| Croatia  | 2005 | Female | All Ages | 59%<br>(55-64%)                | 41%<br>(36-45%)          | 1.8<br>(1.5-2)                              | 4.6%<br>(3.3-6%)                     | 5.3%<br>(3-7.9%)                    | 1400<br>(780-2100)  | 32000<br>(22000-42000) |
| Croatia  | 2005 | Female | 15 to 19 | 68%<br>(54-80%)                | 32%<br>(20-46%)          | 1.4<br>(0.92-1.9)                           | 2.7%<br>(1.8-3.9%)                   | 7.1%<br>(3.9-11%)                   | 2.7<br>(1.5-4.2)    | 340<br>(220-490)       |
| Croatia  | 2005 | Female | 20 to 24 | 75%<br>(62-83%)                | 25%<br>(17-38%)          | 1.6<br>(1.1-2.2)                            | 4%<br>(2.8-5.4%)                     | 7%<br>(3.8-11%)                     | 3.3<br>(1.8-5.1)    | 560<br>(370-790)       |
| Croatia  | 2005 | Female | 25 to 29 | 72%<br>(60-81%)                | 28%<br>(19-40%)          | 1.5<br>(1-2)                                | 3.7%<br>(2.8-4.8%)                   | 6.2%<br>(3.6-9.1%)                  | 2.9<br>(1.6-4.3)    | 560<br>(390-760)       |
| Croatia  | 2005 | Female | 30 to 34 | 68%<br>(57-78%)                | 32%<br>(22-43%)          | 1.6<br>(1.1-2.2)                            | 3.6%<br>(2.7-4.8%)                   | 7.1%<br>(4.6-9.9%)                  | 4.7<br>(3.1-6.7)    | 640<br>(460-870)       |
| Croatia  | 2005 | Female | 35 to 39 | 65%<br>(56-76%)                | 35%<br>(24-44%)          | 1.9<br>(1.3-2.7)                            | 4.1%<br>(3-5.3%)                     | 9%<br>(6.2-12%)                     | 10<br>(7-14)        | 860<br>(620-1100)      |
| Croatia  | 2005 | Female | 40 to 44 | 63%<br>(53-74%)                | 37%<br>(26-47%)          | 2.2<br>(1.6-2.9)                            | 4.8%<br>(3.5-6.2%)                   | 11%<br>(8.1-14%)                    | 21<br>(16-27)       | 1300<br>(1000-1700)    |
| Croatia  | 2005 | Female | 45 to 49 | 64%<br>(54-73%)                | 36%<br>(27-46%)          | 2.5<br>(1.9-3.3)                            | 5.8%<br>(4.3-7.4%)                   | 11%<br>(8.7-14%)                    | 42<br>(32-54)       | 2100<br>(1600-2700)    |
| Croatia  | 2005 | Female | 50 to 54 | 65%<br>(55-74%)                | 35%<br>(26-45%)          | 2.8<br>(2.1-3.6)                            | 6.8%<br>(5-8.7%)                     | 12%<br>(9.1-15%)                    | 69<br>(52-89)       | 2900<br>(2200-3800)    |
| Croatia  | 2005 | Female | 55 to 59 | 65%<br>(55-75%)                | 35%<br>(25-45%)          | 2.9<br>(2.2-3.7)                            | 7.2%<br>(5.3-9.4%)                   | 12%<br>(9.1-16%)                    | 91<br>(68-120)      | 3300<br>(2500-4300)    |

| Location | Year | Sex    | Age      | Prevalence of current drinkers | Prevalence of abstainers | Population average of standard drinks daily | Percent of total attributable deaths | Percent of total attributable DALYs | Attributable deaths | Attributable DALYs        |
|----------|------|--------|----------|--------------------------------|--------------------------|---------------------------------------------|--------------------------------------|-------------------------------------|---------------------|---------------------------|
| Croatia  | 2005 | Female | 60 to 64 | 64%<br>(54-74%)                | 36%<br>(26-46%)          | 2.8<br>(2.1-3.8)                            | 6.9%<br>(4.6-9.6%)                   | 10%<br>(7.2-14%)                    | 100<br>(71-150)     | 3100<br>(2100-4400)       |
| Croatia  | 2005 | Female | 65 to 69 | 59%<br>(47-69%)                | 41%<br>(31-53%)          | 2.5<br>(1.8-3.2)                            | 6%<br>(3.9-8.5%)                     | 8.7%<br>(5.8-12%)                   | 180<br>(120-250)    | 4500<br>(2900-6200)       |
| Croatia  | 2005 | Female | 70 to 74 | 49%<br>(39-59%)                | 51%<br>(41-61%)          | 1.9<br>(1.3-2.6)                            | 4.7%<br>(2.1-7.4%)                   | 6.2%<br>(2.9-9.8%)                  | 220<br>(99-350)     | 4300<br>(2000-6800)       |
| Croatia  | 2005 | Female | 75 to 79 | 38%<br>(28-51%)                | 62%<br>(49-72%)          | 1.4<br>(0.9-2.1)                            | 3.3%<br>(1.1-6%)                     | 4.1%<br>(1.3-7.5%)                  | 210<br>(68-390)     | 3200<br>(1100-6000)       |
| Croatia  | 2005 | Female | 80 to 84 | 36%<br>(24-49%)                | 64%<br>(51-76%)          | 1.4<br>(0.86-2)                             | 3.1%<br>(1-5.8%)                     | 3.6%<br>(1.1-6.7%)                  | 210<br>(66-410)     | 2400<br>(750-4500)        |
| Croatia  | 2005 | Female | 85 to 89 | 37%<br>(25-50%)                | 63%<br>(50-75%)          | 1.5<br>(0.91-2.3)                           | 2.9%<br>(0.68-5.8%)                  | 3.3%<br>(0.58-6.9%)                 | 110<br>(19-240)     | 930<br>(220-1900)         |
| Croatia  | 2005 | Female | 90 to 94 | 39%<br>(27-52%)                | 61%<br>(48-73%)          | 1.7<br>(0.94-2.5)                           | 2.9%<br>(0.12-6.7%)                  | 3.3%<br>(-0.048-8%)                 | 58<br>(-0.85-140)   | 330<br>(14-750)           |
| Croatia  | 2005 | Female | 95 plus  | 42%<br>(27-60%)                | 58%<br>(40-73%)          | 1.9<br>(0.94-3)                             | 3.4%<br>(-0.28-8.3%)                 | 3.8%<br>(-0.66-9.8%)                | 32<br>(-5.4-80)     | 120<br>(-9.7-280)         |
| Croatia  | 2005 | Male   | All Ages | 79%<br>(74-83%)                | 21%<br>(17-26%)          | 6.1<br>(5.5-6.7)                            | 17%<br>(15-20%)                      | 21%<br>(17-24%)                     | 5500<br>(4400-6600) | 140000<br>(120000-170000) |
| Croatia  | 2005 | Male   | 15 to 19 | 72%<br>(59-83%)                | 28%<br>(17-41%)          | 3.3<br>(2.3-4.6)                            | 8.8%<br>(5.9-12%)                    | 16%<br>(10-23%)                     | 17<br>(10-24)       | 1500<br>(960-2000)        |
| Croatia  | 2005 | Male   | 20 to 24 | 82%<br>(71-89%)                | 18%<br>(11-29%)          | 5.5<br>(3.9-7.4)                            | 16%<br>(11-21%)                      | 26%<br>(17-35%)                     | 44<br>(30-61)       | 3600<br>(2500-4700)       |
| Croatia  | 2005 | Male   | 25 to 29 | 84%<br>(75-90%)                | 16%<br>(9.6-25%)         | 5.3<br>(3.9-6.8)                            | 14%<br>(11-19%)                      | 24%<br>(17-32%)                     | 42<br>(30-56)       | 3300<br>(2500-4300)       |
| Croatia  | 2005 | Male   | 30 to 34 | 85%<br>(77-91%)                | 15%<br>(9-23%)           | 5.7<br>(4.2-7.5)                            | 14%<br>(11-18%)                      | 25%<br>(19-32%)                     | 48<br>(35-62)       | 3500<br>(2600-4500)       |
| Croatia  | 2005 | Male   | 35 to 39 | 85%<br>(78-91%)                | 15%<br>(8.7-22%)         | 6.7<br>(4.8-8.9)                            | 17%<br>(13-21%)                      | 29%<br>(22-35%)                     | 75<br>(57-94)       | 4700<br>(3600-5800)       |
| Croatia  | 2005 | Male   | 40 to 44 | 85%<br>(78-92%)                | 15%<br>(8.4-22%)         | 8<br>(6.2-10)                               | 20%<br>(17-23%)                      | 31%<br>(26-36%)                     | 150<br>(130-180)    | 8200<br>(6800-9700)       |
| Croatia  | 2005 | Male   | 45 to 49 | 86%<br>(79-92%)                | 14%<br>(8.2-21%)         | 9.7<br>(7.3-12)                             | 22%<br>(19-26%)                      | 31%<br>(26-35%)                     | 280<br>(230-330)    | 13000<br>(11000-15000)    |
| Croatia  | 2005 | Male   | 50 to 54 | 86%<br>(77-92%)                | 14%<br>(8-23%)           | 9.8<br>(7.4-12)                             | 22%<br>(18-26%)                      | 28%<br>(24-33%)                     | 420<br>(350-500)    | 17000<br>(14000-20000)    |
| Croatia  | 2005 | Male   | 55 to 59 | 86%<br>(76-92%)                | 14%<br>(7.6-24%)         | 9<br>(7-11)                                 | 21%<br>(17-25%)                      | 26%<br>(22-31%)                     | 490<br>(400-580)    | 17000<br>(14000-20000)    |
| Croatia  | 2005 | Male   | 60 to 64 | 85%<br>(76-92%)                | 15%<br>(8.4-24%)         | 8.9<br>(6.7-12)                             | 20%<br>(16-24%)                      | 24%<br>(19-28%)                     | 500<br>(400-610)    | 14000<br>(12000-18000)    |
| Croatia  | 2005 | Male   | 65 to 69 | 82%<br>(74-89%)                | 18%<br>(11-26%)          | 8.7<br>(6.9-11)                             | 19%<br>(15-22%)                      | 22%<br>(17-27%)                     | 810<br>(640-990)    | 19000<br>(15000-24000)    |
| Croatia  | 2005 | Male   | 70 to 74 | 80%<br>(71-88%)                | 20%<br>(12-29%)          | 8.4<br>(6.4-11)                             | 17%<br>(13-22%)                      | 20%<br>(16-25%)                     | 960<br>(730-1200)   | 18000<br>(14000-23000)    |
| Croatia  | 2005 | Male   | 75 to 79 | 79%<br>(67-87%)                | 21%<br>(13-33%)          | 7.6<br>(5.4-10)                             | 16%<br>(12-20%)                      | 18%<br>(13-23%)                     | 840<br>(610-1100)   | 12000<br>(9200-16000)     |

| Location | Year | Sex    | Age      | Prevalence of current drinkers | Prevalence of abstainers | Population average of standard drinks daily | Percent of total attributable deaths | Percent of total attributable DALYs | Attributable deaths | Attributable DALYs     |
|----------|------|--------|----------|--------------------------------|--------------------------|---------------------------------------------|--------------------------------------|-------------------------------------|---------------------|------------------------|
| Croatia  | 2005 | Male   | 80 to 84 | 77%<br>(63-86%)                | 23%<br>(14-37%)          | 6.3<br>(4.6-8.4)                            | 14%<br>(10-19%)                      | 16%<br>(11-21%)                     | 530<br>(380-700)    | 5800<br>(4200-7600)    |
| Croatia  | 2005 | Male   | 85 to 89 | 75%<br>(63-84%)                | 25%<br>(16-37%)          | 5.3<br>(3.8-7.2)                            | 11%<br>(7.5-16%)                     | 13%<br>(8.2-18%)                    | 180<br>(120-260)    | 1500<br>(960-2000)     |
| Croatia  | 2005 | Male   | 90 to 94 | 73%<br>(61-84%)                | 27%<br>(16-39%)          | 4.5<br>(3-6.5)                              | 8.6%<br>(3.8-13%)                    | 9.5%<br>(3.7-15%)                   | 66<br>(26-110)      | 360<br>(160-570)       |
| Croatia  | 2005 | Male   | 95 plus  | 71%<br>(55-85%)                | 29%<br>(15-45%)          | 3.5<br>(1.8-5.7)                            | 5.7%<br>(0.16-12%)                   | 6%<br>(-0.37-14%)                   | 15<br>(-0.93-35)    | 59<br>(1.7-120)        |
| Croatia  | 2010 | Female | All Ages | 60%<br>(55-64%)                | 40%<br>(36-45%)          | 1.6<br>(1.4-1.8)                            | 3.6%<br>(2.4-4.8%)                   | 3.8%<br>(1.8-6.1%)                  | 1000<br>(480-1700)  | 24000<br>(16000-33000) |
| Croatia  | 2010 | Female | 15 to 19 | 68%<br>(53-80%)                | 32%<br>(20-47%)          | 1.2<br>(0.8-1.7)                            | 2.4%<br>(1.6-3.3%)                   | 6.2%<br>(3.3-9.7%)                  | 1.7<br>(0.89-2.7)   | 240<br>(150-340)       |
| Croatia  | 2010 | Female | 20 to 24 | 75%<br>(62-84%)                | 25%<br>(16-38%)          | 1.4<br>(0.96-2.1)                           | 3.8%<br>(2.7-5%)                     | 6.2%<br>(3.4-9.6%)                  | 2.2<br>(1.2-3.3)    | 460<br>(310-650)       |
| Croatia  | 2010 | Female | 25 to 29 | 72%<br>(61-82%)                | 28%<br>(18-39%)          | 1.3<br>(0.93-1.8)                           | 3.5%<br>(2.6-4.7%)                   | 5.2%<br>(2.9-7.7%)                  | 2.3<br>(1.3-3.4)    | 520<br>(360-730)       |
| Croatia  | 2010 | Female | 30 to 34 | 70%<br>(58-79%)                | 30%<br>(21-42%)          | 1.5<br>(1-2)                                | 3.4%<br>(2.4-4.4%)                   | 6.1%<br>(3.8-8.6%)                  | 3.4<br>(2.1-4.9)    | 570<br>(390-790)       |
| Croatia  | 2010 | Female | 35 to 39 | 67%<br>(58-77%)                | 33%<br>(23-42%)          | 1.8<br>(1.2-2.5)                            | 3.7%<br>(2.7-4.8%)                   | 7.9%<br>(5.5-11%)                   | 7.7<br>(5.1-10)     | 740<br>(530-960)       |
| Croatia  | 2010 | Female | 40 to 44 | 64%<br>(53-75%)                | 36%<br>(25-47%)          | 1.9<br>(1.4-2.6)                            | 4.2%<br>(3.2-5.4%)                   | 9.4%<br>(7-12%)                     | 15<br>(11-20)       | 1000<br>(750-1300)     |
| Croatia  | 2010 | Female | 45 to 49 | 64%<br>(54-75%)                | 36%<br>(25-46%)          | 2.2<br>(1.6-3)                              | 4.9%<br>(3.7-6.4%)                   | 10%<br>(7.5-13%)                    | 32<br>(24-41)       | 1700<br>(1300-2200)    |
| Croatia  | 2010 | Female | 50 to 54 | 65%<br>(54-75%)                | 35%<br>(25-46%)          | 2.5<br>(1.8-3.2)                            | 5.6%<br>(4.2-7.4%)                   | 10%<br>(7.7-13%)                    | 55<br>(42-71)       | 2400<br>(1800-3100)    |
| Croatia  | 2010 | Female | 55 to 59 | 66%<br>(54-76%)                | 34%<br>(24-46%)          | 2.6<br>(1.9-3.4)                            | 5.9%<br>(4.3-7.7%)                   | 10%<br>(7.6-13%)                    | 80<br>(60-100)      | 2900<br>(2200-3800)    |
| Croatia  | 2010 | Female | 60 to 64 | 64%<br>(52-75%)                | 36%<br>(25-48%)          | 2.5<br>(1.8-3.3)                            | 5.3%<br>(3.5-7.3%)                   | 8.5%<br>(5.9-12%)                   | 91<br>(63-130)      | 2800<br>(1900-4000)    |
| Croatia  | 2010 | Female | 65 to 69 | 59%<br>(47-70%)                | 41%<br>(30-53%)          | 2.2<br>(1.6-2.8)                            | 4.7%<br>(2.9-6.6%)                   | 7%<br>(4.4-9.7%)                    | 100<br>(64-150)     | 2600<br>(1600-3700)    |
| Croatia  | 2010 | Female | 70 to 74 | 50%<br>(39-60%)                | 50%<br>(40-61%)          | 1.7<br>(1.2-2.4)                            | 3.5%<br>(1.3-5.8%)                   | 4.8%<br>(1.8-7.8%)                  | 140<br>(54-230)     | 2900<br>(1100-4700)    |
| Croatia  | 2010 | Female | 75 to 79 | 40%<br>(29-54%)                | 60%<br>(46-71%)          | 1.3<br>(0.85-2)                             | 2.5%<br>(0.51-4.8%)                  | 3.1%<br>(0.58-6.1%)                 | 160<br>(30-300)     | 2400<br>(490-4700)     |
| Croatia  | 2010 | Female | 80 to 84 | 37%<br>(24-51%)                | 63%<br>(49-76%)          | 1.3<br>(0.79-1.9)                           | 2.2%<br>(0.32-5.5%)                  | 2.5%<br>(0.32-5.3%)                 | 160<br>(20-340)     | 1800<br>(310-3700)     |
| Croatia  | 2010 | Female | 85 to 89 | 37%<br>(25-51%)                | 63%<br>(49-75%)          | 1.4<br>(0.79-2.1)                           | 2%<br>(-0.04-4.4%)                   | 2.2%<br>(-0.27-5.3%)                | 120<br>(-15-280)    | 960<br>(-19-2200)      |
| Croatia  | 2010 | Female | 90 to 94 | 39%<br>(27-53%)                | 61%<br>(47-73%)          | 1.5<br>(0.83-2.3)                           | 1.8%<br>(-0.32-4.7%)                 | 2%<br>(-0.82-5.8%)                  | 39<br>(-16-110)     | 230<br>(-43-610)       |
| Croatia  | 2010 | Female | 95 plus  | 42%<br>(26-60%)                | 58%<br>(40-74%)          | 1.6<br>(0.82-2.8)                           | 2%<br>(-1.6-2.2%)                    | 2.2%<br>(-1.6-7.5%)                 | 14<br>(-10-49)      | 56<br>(-28-170)        |

| Location | Year | Sex    | Age      | Prevalence of current drinkers | Prevalence of abstainers | Population average of standard drinks daily | Percent of total attributable deaths | Percent of total attributable DALYs | Attributable deaths | Attributable DALYs        |
|----------|------|--------|----------|--------------------------------|--------------------------|---------------------------------------------|--------------------------------------|-------------------------------------|---------------------|---------------------------|
| Croatia  | 2010 | Male   | All Ages | 78%<br>(74-82%)                | 22%<br>(18-26%)          | 5.4<br>(4.9-6)                              | 16%<br>(14-18%)                      | 18%<br>(15-22%)                     | 4900<br>(4000-5900) | 120000<br>(110000-150000) |
| Croatia  | 2010 | Male   | 15 to 19 | 72%<br>(58-83%)                | 28%<br>(17-42%)          | 2.9<br>(2-4.1)                              | 7.5%<br>(5-10%)                      | 14%<br>(8.7-21%)                    | 10<br>(6.1-15)      | 960<br>(650-1300)         |
| Croatia  | 2010 | Male   | 20 to 24 | 82%<br>(71-90%)                | 18%<br>(10-29%)          | 4.9<br>(3.4-6.6)                            | 14%<br>(10-19%)                      | 24%<br>(16-32%)                     | 31<br>(20-42)       | 2600<br>(1900-3500)       |
| Croatia  | 2010 | Male   | 25 to 29 | 84%<br>(76-90%)                | 16%<br>(9.6-24%)         | 4.7<br>(3.4-6)                              | 13%<br>(9.6-17%)                     | 22%<br>(16-30%)                     | 31<br>(22-42)       | 2700<br>(1900-3500)       |
| Croatia  | 2010 | Male   | 30 to 34 | 85%<br>(77-91%)                | 15%<br>(9-23%)           | 5.1<br>(3.7-6.7)                            | 13%<br>(9.7-16%)                     | 23%<br>(17-30%)                     | 37<br>(27-49)       | 2900<br>(2200-3700)       |
| Croatia  | 2010 | Male   | 35 to 39 | 85%<br>(78-91%)                | 15%<br>(8.9-22%)         | 6<br>(4.3-8)                                | 15%<br>(11-18%)                      | 26%<br>(20-32%)                     | 60<br>(45-75)       | 3900<br>(3000-4900)       |
| Croatia  | 2010 | Male   | 40 to 44 | 85%<br>(77-91%)                | 15%<br>(8.9-23%)         | 7.1<br>(5.3-9)                              | 18%<br>(15-21%)                      | 29%<br>(24-33%)                     | 110<br>(89-130)     | 6000<br>(4800-7200)       |
| Croatia  | 2010 | Male   | 45 to 49 | 86%<br>(78-91%)                | 14%<br>(8.6-22%)         | 8.5<br>(6.4-11)                             | 20%<br>(17-24%)                      | 29%<br>(25-34%)                     | 220<br>(180-260)    | 10000<br>(8500-12000)     |
| Croatia  | 2010 | Male   | 50 to 54 | 85%<br>(77-91%)                | 15%<br>(8.7-23%)         | 8.6<br>(6.5-11)                             | 20%<br>(17-24%)                      | 27%<br>(23-31%)                     | 350<br>(300-420)    | 14000<br>(12000-17000)    |
| Croatia  | 2010 | Male   | 55 to 59 | 84%<br>(73-91%)                | 16%<br>(8.8-27%)         | 7.7<br>(6-9.8)                              | 19%<br>(16-23%)                      | 24%<br>(21-29%)                     | 480<br>(400-570)    | 17000<br>(14000-20000)    |
| Croatia  | 2010 | Male   | 60 to 64 | 84%<br>(74-91%)                | 16%<br>(9.4-26%)         | 7.7<br>(5.8-10)                             | 18%<br>(15-21%)                      | 22%<br>(18-26%)                     | 530<br>(430-640)    | 15000<br>(13000-19000)    |
| Croatia  | 2010 | Male   | 65 to 69 | 82%<br>(73-89%)                | 18%<br>(11-27%)          | 7.7<br>(6.2-9.4)                            | 17%<br>(14-21%)                      | 21%<br>(17-25%)                     | 550<br>(450-670)    | 13000<br>(11000-16000)    |
| Croatia  | 2010 | Male   | 70 to 74 | 80%<br>(70-87%)                | 20%<br>(13-30%)          | 7.4<br>(5.5-9.5)                            | 16%<br>(13-20%)                      | 19%<br>(15-23%)                     | 790<br>(620-980)    | 15000<br>(12000-19000)    |
| Croatia  | 2010 | Male   | 75 to 79 | 79%<br>(67-87%)                | 21%<br>(13-33%)          | 6.6<br>(4.6-8.9)                            | 14%<br>(11-18%)                      | 16%<br>(12-21%)                     | 810<br>(590-1100)   | 12000<br>(8900-16000)     |
| Croatia  | 2010 | Male   | 80 to 84 | 75%<br>(61-85%)                | 25%<br>(15-39%)          | 5.4<br>(3.8-7.2)                            | 12%<br>(8.6-16%)                     | 14%<br>(9.6-19%)                    | 570<br>(390-760)    | 6300<br>(4400-8300)       |
| Croatia  | 2010 | Male   | 85 to 89 | 72%<br>(59-83%)                | 28%<br>(17-41%)          | 4.5<br>(3.1-6.1)                            | 9.4%<br>(5.4-13%)                    | 11%<br>(5.9-15%)                    | 230<br>(130-340)    | 1800<br>(1100-2700)       |
| Croatia  | 2010 | Male   | 90 to 94 | 71%<br>(57-82%)                | 29%<br>(18-43%)          | 3.8<br>(2.5-5.5)                            | 6.3%<br>(2.1-11%)                    | 6.9%<br>(1.8-12%)                   | 46<br>(12-84)       | 260<br>(87-450)           |
| Croatia  | 2010 | Male   | 95 plus  | 70%<br>(53-83%)                | 30%<br>(17-47%)          | 3<br>(1.5-5)                                | 3.9%<br>(-0.67-9.8%)                 | 3.9%<br>(-1.5-11%)                  | 7.1<br>(-2.9-20)    | 29<br>(-5.1-74)           |
| Croatia  | 2016 | Female | All Ages | 61%<br>(56-66%)                | 39%<br>(34-44%)          | 1.6<br>(1.3-2.1)                            | 3.4%<br>(1.9-5.1%)                   | 3.5%<br>(0.97-6.6%)                 | 1000<br>(280-1900)  | 23000<br>(13000-34000)    |
| Croatia  | 2016 | Female | 15 to 19 | 65%<br>(49-78%)                | 35%<br>(22-51%)          | 1.1<br>(0.66-1.7)                           | 2.2%<br>(1.4-3.1%)                   | 5.7%<br>(3-9.2%)                    | 1.3<br>(0.68-2.2)   | 210<br>(140-300)          |
| Croatia  | 2016 | Female | 20 to 24 | 74%<br>(60-84%)                | 26%<br>(16-40%)          | 1.3<br>(0.84-2.1)                           | 3.7%<br>(2.7-4.9%)                   | 6%<br>(3.2-9.6%)                    | 1.6<br>(0.82-2.6)   | 380<br>(250-540)          |
| Croatia  | 2016 | Female | 25 to 29 | 74%<br>(61-84%)                | 26%<br>(16-39%)          | 1.3<br>(0.88-2)                             | 3.6%<br>(2.7-4.7%)                   | 5.3%<br>(2.9-8%)                    | 1.8<br>(0.95-2.9)   | 460<br>(300-650)          |

| Location | Year | Sex    | Age      | Prevalence of current drinkers | Prevalence of abstainers | Population average of standard drinks daily | Percent of total attributable deaths | Percent of total attributable DALYs | Attributable deaths | Attributable DALYs       |
|----------|------|--------|----------|--------------------------------|--------------------------|---------------------------------------------|--------------------------------------|-------------------------------------|---------------------|--------------------------|
| Croatia  | 2016 | Female | 30 to 34 | 72%<br>(59-81%)                | 28%<br>(19-41%)          | 1.5<br>(0.96-2.2)                           | 3.4%<br>(2.5-4.5%)                   | 6.1%<br>(3.8-8.9%)                  | 3.1<br>(1.8-4.7)    | 550<br>(370-770)         |
| Croatia  | 2016 | Female | 35 to 39 | 68%<br>(57-79%)                | 32%<br>(21-43%)          | 1.8<br>(1.1-2.6)                            | 3.6%<br>(2.6-4.8%)                   | 7.9%<br>(5.1-11%)                   | 6.8<br>(4.1-10)     | 700<br>(480-960)         |
| Croatia  | 2016 | Female | 40 to 44 | 67%<br>(55-78%)                | 33%<br>(22-45%)          | 2<br>(1.3-2.8)                              | 4.1%<br>(2.9-5.4%)                   | 9.4%<br>(6.8-12%)                   | 14<br>(9.3-20)      | 980<br>(670-1300)        |
| Croatia  | 2016 | Female | 45 to 49 | 68%<br>(55-78%)                | 32%<br>(22-45%)          | 2.4<br>(1.6-3.3)                            | 5%<br>(3.6-6.7%)                     | 10%<br>(7.5-14%)                    | 27<br>(19-37)       | 1400<br>(990-1900)       |
| Croatia  | 2016 | Female | 50 to 54 | 68%<br>(55-78%)                | 32%<br>(22-45%)          | 2.6<br>(1.8-3.6)                            | 5.5%<br>(3.9-7.6%)                   | 10%<br>(7.4-13%)                    | 48<br>(33-67)       | 2100<br>(1500-2900)      |
| Croatia  | 2016 | Female | 55 to 59 | 68%<br>(55-78%)                | 32%<br>(22-45%)          | 2.6<br>(1.8-3.7)                            | 5.6%<br>(3.8-7.8%)                   | 9.8%<br>(6.9-13%)                   | 73<br>(49-100)      | 2700<br>(1800-3800)      |
| Croatia  | 2016 | Female | 60 to 64 | 66%<br>(51-77%)                | 34%<br>(23-49%)          | 2.5<br>(1.7-3.5)                            | 4.9%<br>(2.9-7.1%)                   | 8.1%<br>(5.2-12%)                   | 88<br>(54-130)      | 2800<br>(1600-4100)      |
| Croatia  | 2016 | Female | 65 to 69 | 61%<br>(47-73%)                | 39%<br>(27-53%)          | 2.2<br>(1.4-3.1)                            | 4.4%<br>(2.4-6.7%)                   | 6.6%<br>(3.9-9.8%)                  | 110<br>(63-180)     | 2900<br>(1600-4500)      |
| Croatia  | 2016 | Female | 70 to 74 | 54%<br>(40-65%)                | 46%<br>(35-60%)          | 1.9<br>(1.1-2.8)                            | 3.4%<br>(1.1-6.4%)                   | 4.7%<br>(1.7-8.6%)                  | 110<br>(36-190)     | 2100<br>(730-3900)       |
| Croatia  | 2016 | Female | 75 to 79 | 46%<br>(32-60%)                | 54%<br>(40-68%)          | 1.5<br>(0.89-2.4)                           | 2.6%<br>(0.23-5.5%)                  | 3.3%<br>(0.25-7.3%)                 | 140<br>(11-310)     | 2300<br>(170-4900)       |
| Croatia  | 2016 | Female | 80 to 84 | 40%<br>(26-55%)                | 60%<br>(45-74%)          | 1.4<br>(0.8-2.1)                            | 2.2%<br>(0.056-5%)                   | 2.5%<br>(-0.05-6%)                  | 170<br>(-3.4-400)   | 2000<br>(56-4500)        |
| Croatia  | 2016 | Female | 85 to 89 | 39%<br>(26-53%)                | 61%<br>(47-74%)          | 1.4<br>(0.77-2.2)                           | 1.9%<br>(-0.42-4.7%)                 | 2.1%<br>(-0.73-5.7%)                | 130<br>(-48-360)    | 1100<br>(-260-2800)      |
| Croatia  | 2016 | Female | 90 to 94 | 41%<br>(28-54%)                | 59%<br>(46-72%)          | 1.5<br>(0.8-2.5)                            | 1.9%<br>(-0.83-5.2%)                 | 1.9%<br>(-1.3-6.3%)                 | 59<br>(-40-200)     | 360<br>(-170-1100)       |
| Croatia  | 2016 | Female | 95 plus  | 44%<br>(28-61%)                | 56%<br>(39-72%)          | 1.7<br>(0.8-2.9)                            | 2%<br>(-1.3-6.7%)                    | 2.2%<br>(-2-8.3%)                   | 23<br>(-22-87)      | 90<br>(-59-300)          |
| Croatia  | 2016 | Male   | All Ages | 76%<br>(70-80%)                | 24%<br>(20-30%)          | 5<br>(4-6.2)                                | 15%<br>(12-17%)                      | 16%<br>(13-20%)                     | 4400<br>(3300-5600) | 110000<br>(87000-140000) |
| Croatia  | 2016 | Male   | 15 to 19 | 66%<br>(49-80%)                | 34%<br>(20-51%)          | 2.5<br>(1.5-3.8)                            | 6.4%<br>(4-9.2%)                     | 13%<br>(7.3-19%)                    | 7.6<br>(4.3-12)     | 770<br>(490-1100)        |
| Croatia  | 2016 | Male   | 20 to 24 | 78%<br>(64-88%)                | 22%<br>(12-36%)          | 4.3<br>(2.8-6.3)                            | 13%<br>(9-18%)                       | 22%<br>(14-31%)                     | 21<br>(13-31)       | 1900<br>(1300-2700)      |
| Croatia  | 2016 | Male   | 25 to 29 | 81%<br>(69-89%)                | 19%<br>(11-31%)          | 4.2<br>(2.8-5.9)                            | 12%<br>(8.8-16%)                     | 21%<br>(14-29%)                     | 23<br>(14-33)       | 2100<br>(1500-2800)      |
| Croatia  | 2016 | Male   | 30 to 34 | 82%<br>(70-90%)                | 18%<br>(10-30%)          | 4.6<br>(3.1-6.4)                            | 12%<br>(8.8-16%)                     | 21%<br>(15-29%)                     | 30<br>(20-41)       | 2500<br>(1800-3300)      |
| Croatia  | 2016 | Male   | 35 to 39 | 82%<br>(72-90%)                | 18%<br>(10-28%)          | 5.4<br>(3.6-7.7)                            | 13%<br>(10-17%)                      | 24%<br>(18-31%)                     | 49<br>(33-66)       | 3400<br>(2500-4400)      |
| Croatia  | 2016 | Male   | 40 to 44 | 83%<br>(73-90%)                | 17%<br>(9.7-27%)         | 6.5<br>(4.6-8.9)                            | 16%<br>(13-20%)                      | 28%<br>(22-33%)                     | 93<br>(69-120)      | 5300<br>(4000-6600)      |
| Croatia  | 2016 | Male   | 45 to 49 | 84%<br>(73-91%)                | 16%<br>(9.2-27%)         | 7.9<br>(5.4-11)                             | 19%<br>(16-23%)                      | 28%<br>(24-33%)                     | 160<br>(120-210)    | 7800<br>(6000-9800)      |

| Location       | Year | Sex    | Age      | Prevalence of current drinkers | Prevalence of abstainers | Population average of standard drinks daily | Percent of total attributable deaths | Percent of total attributable DALYs | Attributable deaths | Attributable DALYs      |
|----------------|------|--------|----------|--------------------------------|--------------------------|---------------------------------------------|--------------------------------------|-------------------------------------|---------------------|-------------------------|
| Croatia        | 2016 | Male   | 50 to 54 | 84%<br>(73-91%)                | 16%<br>(9-27%)           | 8<br>(5.5-11)                               | 19%<br>(16-23%)                      | 26%<br>(22-31%)                     | 280<br>(220-360)    | 11000<br>(9000-14000)   |
| Croatia        | 2016 | Male   | 55 to 59 | 83%<br>(71-91%)                | 17%<br>(8.6-29%)         | 7.3<br>(5.1-9.8)                            | 18%<br>(15-22%)                      | 24%<br>(20-28%)                     | 410<br>(310-510)    | 14000<br>(11000-18000)  |
| Croatia        | 2016 | Male   | 60 to 64 | 82%<br>(70-90%)                | 18%<br>(9.7-30%)         | 7.1<br>(4.9-9.7)                            | 17%<br>(13-20%)                      | 21%<br>(17-25%)                     | 520<br>(390-650)    | 15000<br>(12000-19000)  |
| Croatia        | 2016 | Male   | 65 to 69 | 80%<br>(69-89%)                | 20%<br>(11-31%)          | 7.1<br>(5.2-9.5)                            | 16%<br>(13-19%)                      | 20%<br>(16-24%)                     | 630<br>(480-790)    | 15000<br>(12000-19000)  |
| Croatia        | 2016 | Male   | 70 to 74 | 78%<br>(66-86%)                | 22%<br>(14-34%)          | 6.8<br>(4.8-9.5)                            | 15%<br>(11-18%)                      | 18%<br>(14-22%)                     | 550<br>(410-710)    | 11000<br>(8100-14000)   |
| Croatia        | 2016 | Male   | 75 to 79 | 76%<br>(62-86%)                | 24%<br>(14-38%)          | 6<br>(3.9-8.6)                              | 13%<br>(9.2-17%)                     | 15%<br>(11-20%)                     | 660<br>(450-880)    | 10000<br>(6900-13000)   |
| Croatia        | 2016 | Male   | 80 to 84 | 73%<br>(58-85%)                | 27%<br>(15-42%)          | 5<br>(3.2-7.2)                              | 11%<br>(6.9-16%)                     | 13%<br>(7.8-18%)                    | 610<br>(370-850)    | 6700<br>(4100-9300)     |
| Croatia        | 2016 | Male   | 85 to 89 | 71%<br>(55-82%)                | 29%<br>(18-45%)          | 4.2<br>(2.7-6.3)                            | 8.5%<br>(4.2-13%)                    | 9.7%<br>(4.5-15%)                   | 300<br>(140-470)    | 2400<br>(1200-3700)     |
| Croatia        | 2016 | Male   | 90 to 94 | 70%<br>(55-82%)                | 30%<br>(18-45%)          | 3.5<br>(2.1-5.5)                            | 5.7%<br>(1.2-11%)                    | 6.3%<br>(0.88-12%)                  | 79<br>(11-160)      | 450<br>(99-840)         |
| Croatia        | 2016 | Male   | 95 plus  | 69%<br>(50-84%)                | 31%<br>(16-50%)          | 2.8<br>(1.4-5)                              | 3.5%<br>(-0.88-9.5%)                 | 3.5%<br>(-1.8-11%)                  | 9.4<br>(-4.8-29)    | 39<br>(-9.6-110)        |
| Czech Republic | 1990 | Female | All Ages | 77%<br>(74-80%)                | 23%<br>(20-26%)          | 2.3<br>(2-2.5)                              | 3.8%<br>(2.1-5.8%)                   | 3.7%<br>(0.67-7.3%)                 | 2300<br>(420-4600)  | 66000<br>(36000-100000) |
| Czech Republic | 1990 | Female | 15 to 19 | 79%<br>(69-88%)                | 21%<br>(12-31%)          | 2<br>(1.4-2.7)                              | 3.5%<br>(2.3-5.1%)                   | 9%<br>(5-14%)                       | 13<br>(7.4-21)      | 1400<br>(900-2100)      |
| Czech Republic | 1990 | Female | 20 to 24 | 88%<br>(81-93%)                | 12%<br>(7.5-19%)         | 2.3<br>(1.5-3.2)                            | 4.6%<br>(3.1-6.3%)                   | 9.5%<br>(5.1-14%)                   | 12<br>(6.6-19)      | 1600<br>(1100-2300)     |
| Czech Republic | 1990 | Female | 25 to 29 | 89%<br>(82-93%)                | 11%<br>(6.8-18%)         | 2<br>(1.4-2.8)                              | 4.1%<br>(2.9-5.6%)                   | 8.2%<br>(4.4-13%)                   | 11<br>(6.2-18)      | 1600<br>(1000-2200)     |
| Czech Republic | 1990 | Female | 30 to 34 | 89%<br>(82-93%)                | 11%<br>(7.1-18%)         | 2.3<br>(1.7-3.2)                            | 4.3%<br>(2.9-5.7%)                   | 8.9%<br>(5.4-13%)                   | 21<br>(12-29)       | 2100<br>(1400-2800)     |
| Czech Republic | 1990 | Female | 35 to 39 | 87%<br>(80-91%)                | 13%<br>(8.5-20%)         | 3.1<br>(2.2-4.1)                            | 5.1%<br>(3.5-6.7%)                   | 11%<br>(7.4-15%)                    | 45<br>(30-60)       | 3400<br>(2300-4500)     |
| Czech Republic | 1990 | Female | 40 to 44 | 85%<br>(78-89%)                | 15%<br>(11-22%)          | 3.5<br>(2.6-4.5)                            | 5.9%<br>(4.2-7.7%)                   | 12%<br>(8.4-15%)                    | 85<br>(62-110)      | 5000<br>(3700-6600)     |
| Czech Republic | 1990 | Female | 45 to 49 | 83%<br>(75-88%)                | 17%<br>(12-25%)          | 3.6<br>(2.6-4.8)                            | 6.3%<br>(4.3-8.8%)                   | 11%<br>(7.7-15%)                    | 110<br>(77-150)     | 5500<br>(3900-7500)     |
| Czech Republic | 1990 | Female | 50 to 54 | 82%<br>(75-87%)                | 18%<br>(13-25%)          | 3.7<br>(2.7-4.9)                            | 6.6%<br>(4-9.3%)                     | 11%<br>(6.7-15%)                    | 130<br>(80-180)     | 5500<br>(3500-7700)     |
| Czech Republic | 1990 | Female | 55 to 59 | 82%<br>(75-87%)                | 18%<br>(13-25%)          | 3.8<br>(2.8-5)                              | 6.8%<br>(3.9-10%)                    | 10%<br>(5.7-15%)                    | 220<br>(120-310)    | 7800<br>(4300-11000)    |
| Czech Republic | 1990 | Female | 60 to 64 | 80%<br>(73-85%)                | 20%<br>(15-27%)          | 3.5<br>(2.5-4.6)                            | 5.9%<br>(2.3-9.5%)                   | 8.1%<br>(3.3-13%)                   | 300<br>(120-490)    | 9100<br>(3600-15000)    |
| Czech Republic | 1990 | Female | 65 to 69 | 74%<br>(66-81%)                | 26%<br>(19-34%)          | 2.9<br>(2.2-3.8)                            | 4.5%<br>(1.4-7.9%)                   | 5.9%<br>(1.8-10%)                   | 380<br>(120-680)    | 9500<br>(3000-16000)    |

| Location       | Year | Sex    | Age      | Prevalence of current drinkers | Prevalence of abstainers | Population average of standard drinks daily | Percent of total attributable deaths | Percent of total attributable DALYs | Attributable deaths  | Attributable DALYs        |
|----------------|------|--------|----------|--------------------------------|--------------------------|---------------------------------------------|--------------------------------------|-------------------------------------|----------------------|---------------------------|
| Czech Republic | 1990 | Female | 70 to 74 | 66%<br>(57-74%)                | 34%<br>(26-43%)          | 2.4<br>(1.6-3.3)                            | 3%<br>(-0.52-6.7%)                   | 3.7%<br>(-0.74-8.5%)                | 210<br>(-42-490)     | 4200<br>(-740-9500)       |
| Czech Republic | 1990 | Female | 75 to 79 | 57%<br>(45-68%)                | 43%<br>(32-55%)          | 1.9<br>(1.2-2.7)                            | 1.8%<br>(-1.5-5.7%)                  | 2.2%<br>(-2-6.8%)                   | 270<br>(-250-830)    | 4100<br>(-3400-12000)     |
| Czech Republic | 1990 | Female | 80 to 84 | 52%<br>(39-63%)                | 48%<br>(37-61%)          | 1.8<br>(1.2-2.5)                            | 1.7%<br>(-1.5-5.1%)                  | 1.9%<br>(-1.5-5.9%)                 | 270<br>(-210-820)    | 3000<br>(-2000-8900)      |
| Czech Republic | 1990 | Female | 85 to 89 | 51%<br>(38-63%)                | 49%<br>(37-62%)          | 1.8<br>(1.2-2.8)                            | 1.6%<br>(-1.7-5.4%)                  | 1.8%<br>(-2.3-6.1%)                 | 160<br>(-210-570)    | 1300<br>(-1400-4500)      |
| Czech Republic | 1990 | Female | 90 to 94 | 53%<br>(41-66%)                | 47%<br>(34-59%)          | 2<br>(1.2-3)                                | 1.7%<br>(-2.1-6.5%)                  | 1.8%<br>(-2.8-7.6%)                 | 64<br>(-97-270)      | 370<br>(-470-1400)        |
| Czech Republic | 1990 | Female | 95 plus  | 57%<br>(41-72%)                | 43%<br>(28-59%)          | 2.2<br>(1.1-3.5)                            | 1.9%<br>(-3.2-8%)                    | 2.1%<br>(-4-9.4%)                   | 14<br>(-27-63)       | 54<br>(-88-220)           |
| Czech Republic | 1990 | Male   | All Ages | 88%<br>(85-90%)                | 12%<br>(10-15%)          | 4.7<br>(4.1-5.1)                            | 13%<br>(11-16%)                      | 15%<br>(11-19%)                     | 9800<br>(7200-12000) | 270000<br>(220000-330000) |
| Czech Republic | 1990 | Male   | 15 to 19 | 85%<br>(76-92%)                | 15%<br>(7.9-24%)         | 2.3<br>(1.6-3.3)                            | 6.5%<br>(4-9.4%)                     | 12%<br>(6.4-18%)                    | 39<br>(22-60)        | 3400<br>(2100-5000)       |
| Czech Republic | 1990 | Male   | 20 to 24 | 92%<br>(87-95%)                | 8.1%<br>(4.8-13%)        | 4.1<br>(3-5.4)                              | 12%<br>(8.4-17%)                     | 20%<br>(12-27%)                     | 82<br>(51-110)       | 6600<br>(4500-8900)       |
| Czech Republic | 1990 | Male   | 25 to 29 | 94%<br>(90-96%)                | 6.3%<br>(3.8-10%)        | 5<br>(3.5-6.6)                              | 14%<br>(9.5-18%)                     | 23%<br>(15-31%)                     | 97<br>(64-130)       | 7500<br>(5300-9800)       |
| Czech Republic | 1990 | Male   | 30 to 34 | 95%<br>(91-97%)                | 5.3%<br>(2.7-9.3%)       | 5.5<br>(4-7.3)                              | 14%<br>(10-18%)                      | 23%<br>(16-30%)                     | 130<br>(91-170)      | 9100<br>(6600-12000)      |
| Czech Republic | 1990 | Male   | 35 to 39 | 95%<br>(92-97%)                | 4.9%<br>(2.5-8.3%)       | 5.6<br>(4-7.7)                              | 14%<br>(10-19%)                      | 21%<br>(15-28%)                     | 220<br>(150-300)     | 14000<br>(9700-18000)     |
| Czech Republic | 1990 | Male   | 40 to 44 | 94%<br>(90-96%)                | 6.2%<br>(3.9-9.6%)       | 6.5<br>(4.9-8.2)                            | 16%<br>(12-19%)                      | 22%<br>(16-27%)                     | 390<br>(280-480)     | 20000<br>(15000-25000)    |
| Czech Republic | 1990 | Male   | 45 to 49 | 91%<br>(87-94%)                | 9%<br>(5.9-13%)          | 8<br>(6-10)                                 | 18%<br>(14-22%)                      | 23%<br>(18-28%)                     | 570<br>(450-690)     | 26000<br>(20000-31000)    |
| Czech Republic | 1990 | Male   | 50 to 54 | 90%<br>(85-93%)                | 10%<br>(7.1-15%)         | 8.5<br>(6.4-11)                             | 17%<br>(13-21%)                      | 21%<br>(16-26%)                     | 630<br>(490-780)     | 25000<br>(19000-31000)    |
| Czech Republic | 1990 | Male   | 55 to 59 | 90%<br>(86-93%)                | 9.7%<br>(6.9-14%)        | 8.5<br>(6.6-11)                             | 16%<br>(12-21%)                      | 19%<br>(14-25%)                     | 910<br>(670-1200)    | 31000<br>(23000-39000)    |
| Czech Republic | 1990 | Male   | 60 to 64 | 90%<br>(87-93%)                | 9.6%<br>(6.9-13%)        | 8.4<br>(6.4-11)                             | 16%<br>(11-21%)                      | 18%<br>(12-24%)                     | 1300<br>(900-1700)   | 37000<br>(26000-49000)    |
| Czech Republic | 1990 | Male   | 65 to 69 | 90%<br>(86-93%)                | 10%<br>(7.3-14%)         | 7.8<br>(6.1-9.4)                            | 15%<br>(11-20%)                      | 17%<br>(12-23%)                     | 1700<br>(1200-2200)  | 40000<br>(28000-52000)    |
| Czech Republic | 1990 | Male   | 70 to 74 | 88%<br>(84-91%)                | 12%<br>(9.1-16%)         | 6.7<br>(5.1-8.6)                            | 14%<br>(9-19%)                       | 16%<br>(10-21%)                     | 1000<br>(660-1400)   | 19000<br>(13000-26000)    |
| Czech Republic | 1990 | Male   | 75 to 79 | 84%<br>(77-89%)                | 16%<br>(11-23%)          | 5.5<br>(4-7.5)                              | 11%<br>(5.8-17%)                     | 13%<br>(6.3-19%)                    | 1400<br>(680-2000)   | 20000<br>(10000-29000)    |
| Czech Republic | 1990 | Male   | 80 to 84 | 81%<br>(73-87%)                | 19%<br>(13-27%)          | 4.8<br>(3.4-6.4)                            | 9.8%<br>(4.6-15%)                    | 11%<br>(4.8-17%)                    | 940<br>(420-1500)    | 10000<br>(4900-16000)     |
| Czech Republic | 1990 | Male   | 85 to 89 | 79%<br>(70-85%)                | 21%<br>(15-30%)          | 4.3<br>(3-5.8)                              | 7.8%<br>(2.3-13%)                    | 8.5%<br>(2.2-15%)                   | 340<br>(89-600)      | 2700<br>(790-4600)        |

| Location       | Year | Sex    | Age      | Prevalence of current drinkers | Prevalence of abstainers | Population average of standard drinks daily | Percent of total attributable deaths | Percent of total attributable DALYs | Attributable deaths  | Attributable DALYs        |
|----------------|------|--------|----------|--------------------------------|--------------------------|---------------------------------------------|--------------------------------------|-------------------------------------|----------------------|---------------------------|
| Czech Republic | 1990 | Male   | 90 to 94 | 78%<br>(69-85%)                | 22%<br>(15-31%)          | 3.8<br>(2.6-5.4)                            | 5.2%<br>(-0.33-12%)                  | 5.6%<br>(-0.94-13%)                 | 59<br>(-10-140)      | 330<br>(-20-750)          |
| Czech Republic | 1990 | Male   | 95 plus  | 77%<br>(64-86%)                | 23%<br>(14-36%)          | 3.2<br>(1.9-5.2)                            | 3.1%<br>(-2.6-11%)                   | 3.2%<br>(-3.6-12%)                  | 4.7<br>(-5.3-18)     | 19<br>(-16-66)            |
| Czech Republic | 1995 | Female | All Ages | 78%<br>(74-81%)                | 22%<br>(19-26%)          | 2.4<br>(2.1-2.7)                            | 4%<br>(2.3-6.1%)                     | 4%<br>(0.93-7.8%)                   | 2300<br>(540-4500)   | 65000<br>(37000-97000)    |
| Czech Republic | 1995 | Female | 15 to 19 | 79%<br>(69-87%)                | 21%<br>(13-31%)          | 2<br>(1.4-2.8)                              | 3.4%<br>(2.2-4.9%)                   | 9.3%<br>(5.2-14%)                   | 13<br>(7.1-20)       | 1400<br>(850-2000)        |
| Czech Republic | 1995 | Female | 20 to 24 | 87%<br>(80-92%)                | 13%<br>(7.7-20%)         | 2.3<br>(1.6-3.3)                            | 4.5%<br>(3.1-6.2%)                   | 9.5%<br>(5.3-14%)                   | 14<br>(7.9-22)       | 1900<br>(1300-2700)       |
| Czech Republic | 1995 | Female | 25 to 29 | 89%<br>(82-93%)                | 11%<br>(6.8-18%)         | 2.1<br>(1.4-3)                              | 4.1%<br>(2.8-5.5%)                   | 8.5%<br>(5-13%)                     | 11<br>(6.4-16)       | 1500<br>(1000-2100)       |
| Czech Republic | 1995 | Female | 30 to 34 | 89%<br>(83-93%)                | 11%<br>(7-17%)           | 2.4<br>(1.7-3.3)                            | 4.1%<br>(2.9-5.6%)                   | 9.2%<br>(5.9-13%)                   | 17<br>(11-24)        | 1800<br>(1300-2500)       |
| Czech Republic | 1995 | Female | 35 to 39 | 87%<br>(80-91%)                | 13%<br>(8.6-20%)         | 3.2<br>(2.2-4.4)                            | 5.1%<br>(3.6-6.8%)                   | 12%<br>(8-15%)                      | 37<br>(26-49)        | 2800<br>(2000-3700)       |
| Czech Republic | 1995 | Female | 40 to 44 | 84%<br>(78-90%)                | 16%<br>(10-22%)          | 3.6<br>(2.7-4.7)                            | 6%<br>(4.4-7.8%)                     | 12%<br>(9.3-16%)                    | 77<br>(58-99)        | 4700<br>(3500-6200)       |
| Czech Republic | 1995 | Female | 45 to 49 | 83%<br>(75-88%)                | 17%<br>(12-25%)          | 3.8<br>(2.7-4.9)                            | 6.3%<br>(4.3-8.5%)                   | 12%<br>(8.4-15%)                    | 120<br>(90-160)      | 6300<br>(4500-8400)       |
| Czech Republic | 1995 | Female | 50 to 54 | 82%<br>(76-87%)                | 18%<br>(13-24%)          | 3.9<br>(2.8-5)                              | 6.7%<br>(4.4-9.2%)                   | 11%<br>(7.5-15%)                    | 150<br>(100-210)     | 6700<br>(4500-9000)       |
| Czech Republic | 1995 | Female | 55 to 59 | 82%<br>(76-87%)                | 18%<br>(13-24%)          | 3.9<br>(2.9-5.2)                            | 6.9%<br>(4.4-9.8%)                   | 10%<br>(6.5-15%)                    | 180<br>(110-260)     | 6600<br>(4100-9400)       |
| Czech Republic | 1995 | Female | 60 to 64 | 80%<br>(72-85%)                | 20%<br>(15-28%)          | 3.6<br>(2.6-4.8)                            | 6%<br>(2.9-9.5%)                     | 8.5%<br>(4.1-14%)                   | 250<br>(120-400)     | 7600<br>(3600-12000)      |
| Czech Republic | 1995 | Female | 65 to 69 | 74%<br>(66-81%)                | 26%<br>(19-34%)          | 3<br>(2.2-3.9)                              | 4.7%<br>(1.8-7.8%)                   | 6.3%<br>(2.2-11%)                   | 320<br>(120-550)     | 8100<br>(3000-13000)      |
| Czech Republic | 1995 | Female | 70 to 74 | 66%<br>(57-75%)                | 34%<br>(25-43%)          | 2.5<br>(1.7-3.4)                            | 3.2%<br>(0.027-6.9%)                 | 4.1%<br>(-0.24-8.7%)                | 350<br>(-21-740)     | 6900<br>(58-15000)        |
| Czech Republic | 1995 | Female | 75 to 79 | 57%<br>(45-69%)                | 43%<br>(31-55%)          | 1.9<br>(1.2-2.9)                            | 2.1%<br>(-1.1-6.1%)                  | 2.5%<br>(-1.5-7.3%)                 | 170<br>(-110-510)    | 2700<br>(-1400-7800)      |
| Czech Republic | 1995 | Female | 80 to 84 | 52%<br>(39-63%)                | 48%<br>(37-61%)          | 1.8<br>(1.2-2.7)                            | 1.9%<br>(-0.89-5.3%)                 | 2.2%<br>(-1.2-6.4%)                 | 280<br>(-150-800)    | 3200<br>(-1500-9000)      |
| Czech Republic | 1995 | Female | 85 to 89 | 51%<br>(38-63%)                | 49%<br>(37-62%)          | 1.9<br>(1.2-2.8)                            | 1.9%<br>(-1.3-5.8%)                  | 2.1%<br>(-1.8-6.8%)                 | 220<br>(-180-700)    | 1800<br>(-1200-5200)      |
| Czech Republic | 1995 | Female | 90 to 94 | 53%<br>(41-66%)                | 47%<br>(34-59%)          | 2.1<br>(1.2-3.1)                            | 1.9%<br>(-1.9-6.8%)                  | 2.1%<br>(-2.6-7.9%)                 | 89<br>(-110-330)     | 510<br>(-510-1800)        |
| Czech Republic | 1995 | Female | 95 plus  | 57%<br>(40-71%)                | 43%<br>(29-60%)          | 2.2<br>(1.2-3.6)                            | 2.1%<br>(-3.1-8.4%)                  | 2.3%<br>(-3.9-9.9%)                 | 20<br>(-34-88)       | 77<br>(-110-310)          |
| Czech Republic | 1995 | Male   | All Ages | 88%<br>(85-90%)                | 12%<br>(9.8-15%)         | 4.9<br>(4.3-5.6)                            | 14%<br>(11-16%)                      | 15%<br>(11-20%)                     | 9000<br>(6600-11000) | 260000<br>(210000-310000) |
| Czech Republic | 1995 | Male   | 15 to 19 | 85%<br>(75-92%)                | 15%<br>(8.4-25%)         | 2.4<br>(1.6-3.3)                            | 6.8%<br>(4.1-10%)                    | 12%<br>(6.6-18%)                    | 44<br>(24-67)        | 3800<br>(2300-5500)       |



| Location       | Year | Sex    | Age      | Prevalence of current drinkers | Prevalence of abstainers | Population average of standard drinks daily | Percent of total attributable deaths | Percent of total attributable DALYs | Attributable deaths | Attributable DALYs     |
|----------------|------|--------|----------|--------------------------------|--------------------------|---------------------------------------------|--------------------------------------|-------------------------------------|---------------------|------------------------|
| Czech Republic | 1995 | Male   | 20 to 24 | 92%<br>(87-95%)                | 8.2%<br>(4.9-13%)        | 4.1<br>(3-5.5)                              | 12%<br>(8.4-17%)                     | 20%<br>(13-28%)                     | 95<br>(60-130)      | 7700<br>(5200-10000)   |
| Czech Republic | 1995 | Male   | 25 to 29 | 94%<br>(89-96%)                | 6.4%<br>(3.8-11%)        | 5.1<br>(3.5-6.8)                            | 14%<br>(9.7-18%)                     | 24%<br>(16-32%)                     | 99<br>(64-130)      | 7600<br>(5300-9900)    |
| Czech Republic | 1995 | Male   | 30 to 34 | 95%<br>(91-97%)                | 5.3%<br>(2.7-9.1%)       | 5.6<br>(4-7.5)                              | 14%<br>(10-18%)                      | 24%<br>(17-31%)                     | 120<br>(84-160)     | 8600<br>(6200-11000)   |
| Czech Republic | 1995 | Male   | 35 to 39 | 95%<br>(91-97%)                | 5%<br>(2.7-8.6%)         | 5.7<br>(4-7.8)                              | 14%<br>(10-18%)                      | 22%<br>(15-29%)                     | 180<br>(120-230)    | 11000<br>(7700-14000)  |
| Czech Republic | 1995 | Male   | 40 to 44 | 94%<br>(90-96%)                | 6.3%<br>(3.8-10%)        | 6.6<br>(4.9-8.5)                            | 16%<br>(12-20%)                      | 23%<br>(17-28%)                     | 340<br>(260-420)    | 18000<br>(14000-22000) |
| Czech Republic | 1995 | Male   | 45 to 49 | 91%<br>(86-94%)                | 9.1%<br>(6.2-14%)        | 8.1<br>(6.1-10)                             | 18%<br>(14-22%)                      | 24%<br>(19-29%)                     | 620<br>(490-740)    | 28000<br>(23000-34000) |
| Czech Republic | 1995 | Male   | 50 to 54 | 90%<br>(86-93%)                | 10%<br>(7.3-14%)         | 8.6<br>(6.5-11)                             | 18%<br>(14-21%)                      | 22%<br>(18-27%)                     | 730<br>(580-900)    | 29000<br>(23000-35000) |
| Czech Republic | 1995 | Male   | 55 to 59 | 90%<br>(86-93%)                | 9.7%<br>(7-14%)          | 8.7<br>(6.7-11)                             | 17%<br>(13-21%)                      | 20%<br>(15-26%)                     | 760<br>(570-970)    | 26000<br>(20000-33000) |
| Czech Republic | 1995 | Male   | 60 to 64 | 90%<br>(86-93%)                | 9.6%<br>(6.8-14%)        | 8.5<br>(6.4-11)                             | 15%<br>(11-20%)                      | 18%<br>(13-24%)                     | 1000<br>(730-1400)  | 30000<br>(22000-40000) |
| Czech Republic | 1995 | Male   | 65 to 69 | 90%<br>(86-93%)                | 10%<br>(7.3-14%)         | 7.8<br>(6.1-9.6)                            | 15%<br>(11-19%)                      | 17%<br>(12-23%)                     | 1400<br>(950-1800)  | 33000<br>(23000-43000) |
| Czech Republic | 1995 | Male   | 70 to 74 | 88%<br>(83-91%)                | 12%<br>(9.1-17%)         | 6.8<br>(5.1-8.8)                            | 13%<br>(8.6-18%)                     | 15%<br>(9.6-21%)                    | 1500<br>(950-2100)  | 29000<br>(19000-39000) |
| Czech Republic | 1995 | Male   | 75 to 79 | 84%<br>(77-89%)                | 16%<br>(11-23%)          | 5.5<br>(3.9-7.6)                            | 11%<br>(5.8-16%)                     | 13%<br>(6.2-18%)                    | 750<br>(370-1100)   | 11000<br>(5800-16000)  |
| Czech Republic | 1995 | Male   | 80 to 84 | 81%<br>(73-86%)                | 19%<br>(14-27%)          | 4.8<br>(3.4-6.4)                            | 9.7%<br>(4.7-15%)                    | 11%<br>(4.8-17%)                    | 860<br>(390-1400)   | 9600<br>(4600-15000)   |
| Czech Republic | 1995 | Male   | 85 to 89 | 79%<br>(70-85%)                | 21%<br>(15-30%)          | 4.4<br>(3.1-5.9)                            | 7.8%<br>(2.7-13%)                    | 8.6%<br>(2.6-15%)                   | 410<br>(120-710)    | 3200<br>(1100-5500)    |
| Czech Republic | 1995 | Male   | 90 to 94 | 78%<br>(69-84%)                | 22%<br>(16-31%)          | 3.9<br>(2.5-5.5)                            | 5.3%<br>(-0.41-12%)                  | 5.7%<br>(-1.1-13%)                  | 74<br>(-14-170)     | 410<br>(-32-910)       |
| Czech Republic | 1995 | Male   | 95 plus  | 76%<br>(64-85%)                | 24%<br>(15-36%)          | 3.3<br>(1.9-5.2)                            | 3.2%<br>(-2.5-11%)                   | 3.2%<br>(-3.7-12%)                  | 6.1<br>(-7-23)      | 25<br>(-19-83)         |
| Czech Republic | 2000 | Female | All Ages | 79%<br>(76-81%)                | 21%<br>(19-24%)          | 2.6<br>(2.3-2.8)                            | 4.2%<br>(2.8-5.9%)                   | 4.3%<br>(1.6-7.5%)                  | 2300<br>(860-4100)  | 64000<br>(42000-90000) |
| Czech Republic | 2000 | Female | 15 to 19 | 82%<br>(75-89%)                | 18%<br>(11-25%)          | 2.2<br>(1.5-3)                              | 3.4%<br>(2.1-4.9%)                   | 10%<br>(5.4-15%)                    | 9.7<br>(5.3-15)     | 1100<br>(670-1500)     |
| Czech Republic | 2000 | Female | 20 to 24 | 89%<br>(83-93%)                | 11%<br>(7.3-17%)         | 2.5<br>(1.7-3.4)                            | 4.4%<br>(3.1-5.9%)                   | 9.8%<br>(5.6-15%)                   | 13<br>(7.6-20)      | 1900<br>(1200-2600)    |
| Czech Republic | 2000 | Female | 25 to 29 | 90%<br>(85-93%)                | 10%<br>(6.7-15%)         | 2.2<br>(1.5-3)                              | 3.9%<br>(2.9-5.1%)                   | 8.7%<br>(5.3-13%)                   | 12<br>(7-17)        | 1800<br>(1200-2400)    |
| Czech Republic | 2000 | Female | 30 to 34 | 90%<br>(85-93%)                | 10%<br>(6.9-15%)         | 2.5<br>(1.9-3.4)                            | 4.1%<br>(2.9-5.3%)                   | 9.9%<br>(6.8-13%)                   | 15<br>(10-20)       | 1700<br>(1200-2200)    |
| Czech Republic | 2000 | Female | 35 to 39 | 88%<br>(83-92%)                | 12%<br>(8.1-17%)         | 3.4<br>(2.4-4.5)                            | 5.1%<br>(3.8-6.6%)                   | 12%<br>(9.2-16%)                    | 31<br>(23-40)       | 2500<br>(1800-3200)    |

| Location       | Year | Sex    | Age      | Prevalence of current drinkers | Prevalence of abstainers | Population average of standard drinks daily | Percent of total attributable deaths | Percent of total attributable DALYs | Attributable deaths  | Attributable DALYs     |
|----------------|------|--------|----------|--------------------------------|--------------------------|---------------------------------------------|--------------------------------------|-------------------------------------|----------------------|------------------------|
| Czech Republic | 2000 | Female | 40 to 44 | 86%<br>(82-90%)                | 14%<br>(10-18%)          | 3.9<br>(2.9-4.9)                            | 6.2%<br>(4.8-8%)                     | 14%<br>(11-17%)                     | 64<br>(51-79)        | 4000<br>(3100-5000)    |
| Czech Republic | 2000 | Female | 45 to 49 | 84%<br>(80-88%)                | 16%<br>(12-20%)          | 4<br>(3-5.1)                                | 6.7%<br>(4.8-8.9%)                   | 13%<br>(9.6-16%)                    | 120<br>(91-150)      | 6200<br>(4600-8000)    |
| Czech Republic | 2000 | Female | 50 to 54 | 83%<br>(78-87%)                | 17%<br>(13-22%)          | 4<br>(3-5.1)                                | 7%<br>(4.9-9.3%)                     | 12%<br>(8.7-15%)                    | 180<br>(130-240)     | 8000<br>(5700-10000)   |
| Czech Republic | 2000 | Female | 55 to 59 | 82%<br>(78-86%)                | 18%<br>(14-22%)          | 4.1<br>(3.1-5.2)                            | 7.1%<br>(4.8-9.6%)                   | 11%<br>(7.6-15%)                    | 210<br>(150-290)     | 8000<br>(5400-11000)   |
| Czech Republic | 2000 | Female | 60 to 64 | 78%<br>(73-83%)                | 22%<br>(17-27%)          | 3.5<br>(2.6-4.7)                            | 6%<br>(3.3-8.9%)                     | 8.8%<br>(4.9-13%)                   | 210<br>(110-310)     | 6500<br>(3500-9600)    |
| Czech Republic | 2000 | Female | 65 to 69 | 71%<br>(63-79%)                | 29%<br>(21-37%)          | 3<br>(2.1-3.8)                              | 4.8%<br>(2.4-7.4%)                   | 6.6%<br>(3.2-10%)                   | 260<br>(130-410)     | 6800<br>(3300-11000)   |
| Czech Republic | 2000 | Female | 70 to 74 | 63%<br>(54-72%)                | 37%<br>(28-46%)          | 2.3<br>(1.6-3.2)                            | 3.4%<br>(0.57-6.6%)                  | 4.4%<br>(0.7-8.5%)                  | 300<br>(49-590)      | 6100<br>(1100-12000)   |
| Czech Republic | 2000 | Female | 75 to 79 | 53%<br>(40-64%)                | 47%<br>(36-60%)          | 1.8<br>(1.1-2.7)                            | 2.3%<br>(-0.42-5.5%)                 | 2.7%<br>(-0.66-6.8%)                | 300<br>(-70-730)     | 4600<br>(-870-11000)   |
| Czech Republic | 2000 | Female | 80 to 84 | 49%<br>(37-61%)                | 51%<br>(39-63%)          | 1.7<br>(1.2-2.6)                            | 2.1%<br>(-0.46-5.1%)                 | 2.5%<br>(-0.7-6.2%)                 | 190<br>(-54-470)     | 2200<br>(-460-5300)    |
| Czech Republic | 2000 | Female | 85 to 89 | 50%<br>(37-62%)                | 50%<br>(38-63%)          | 1.9<br>(1.2-2.8)                            | 2.2%<br>(-0.89-5.9%)                 | 2.5%<br>(-1.3-7%)                   | 260<br>(-140-720)    | 2100<br>(-820-5600)    |
| Czech Republic | 2000 | Female | 90 to 94 | 52%<br>(40-65%)                | 48%<br>(35-60%)          | 2<br>(1.2-3.1)                              | 2.2%<br>(-1.5-6.9%)                  | 2.4%<br>(-2-8.3%)                   | 130<br>(-110-430)    | 720<br>(-480-2300)     |
| Czech Republic | 2000 | Female | 95 plus  | 56%<br>(39-71%)                | 44%<br>(29-61%)          | 2.2<br>(1.2-3.6)                            | 2.3%<br>(-2.9-8.6%)                  | 2.5%<br>(-3.6-9.9%)                 | 29<br>(-42-110)      | 110<br>(-130-400)      |
| Czech Republic | 2000 | Male   | All Ages | 90%<br>(88-92%)                | 10%<br>(8.4-12%)         | 5.4<br>(4.9-5.9)                            | 14%<br>(12-17%)                      | 16%<br>(13-20%)                     | 8800<br>(6800-11000) | 25000<br>(21000-30000) |
| Czech Republic | 2000 | Male   | 15 to 19 | 88%<br>(80-93%)                | 12%<br>(7.1-20%)         | 2.6<br>(1.8-3.6)                            | 6.7%<br>(4.1-9.8%)                   | 13%<br>(7.3-20%)                    | 31<br>(17-46)        | 2700<br>(1700-3900)    |
| Czech Republic | 2000 | Male   | 20 to 24 | 93%<br>(90-96%)                | 6.6%<br>(4.3-9.7%)       | 4.4<br>(3.1-5.9)                            | 12%<br>(8.6-17%)                     | 21%<br>(13-28%)                     | 95<br>(60-130)       | 7800<br>(5300-10000)   |
| Czech Republic | 2000 | Male   | 25 to 29 | 95%<br>(92-97%)                | 5.2%<br>(3.4-7.7%)       | 5.3<br>(3.8-7.1)                            | 13%<br>(9.6-17%)                     | 25%<br>(17-33%)                     | 110<br>(73-140)      | 8400<br>(6100-11000)   |
| Czech Republic | 2000 | Male   | 30 to 34 | 96%<br>(93-98%)                | 4.3%<br>(2.5-7.1%)       | 5.8<br>(4.3-7.7)                            | 14%<br>(10-18%)                      | 25%<br>(18-32%)                     | 110<br>(78-140)      | 7800<br>(5800-9900)    |
| Czech Republic | 2000 | Male   | 35 to 39 | 96%<br>(94-98%)                | 4.1%<br>(2.3-6.4%)       | 5.9<br>(4.3-8.1)                            | 14%<br>(10-18%)                      | 24%<br>(17-31%)                     | 150<br>(100-190)     | 9400<br>(6900-12000)   |
| Czech Republic | 2000 | Male   | 40 to 44 | 95%<br>(92-97%)                | 5.2%<br>(3.4-7.8%)       | 6.8<br>(5.2-8.8)                            | 16%<br>(13-20%)                      | 25%<br>(19-30%)                     | 280<br>(220-340)     | 15000<br>(12000-18000) |
| Czech Republic | 2000 | Male   | 45 to 49 | 92%<br>(89-95%)                | 7.8%<br>(5.4-11%)        | 8.5<br>(6.5-11)                             | 19%<br>(15-22%)                      | 26%<br>(22-30%)                     | 570<br>(470-660)     | 26000<br>(21000-30000) |
| Czech Republic | 2000 | Male   | 50 to 54 | 91%<br>(88-93%)                | 9.1%<br>(6.7-12%)        | 9<br>(7-11)                                 | 18%<br>(15-22%)                      | 24%<br>(20-28%)                     | 840<br>(690-1000)    | 34000<br>(28000-40000) |
| Czech Republic | 2000 | Male   | 55 to 59 | 92%<br>(89-93%)                | 8.5%<br>(6.6-11%)        | 9<br>(7.2-11)                               | 17%<br>(14-21%)                      | 21%<br>(17-26%)                     | 910<br>(710-1100)    | 31000<br>(25000-39000) |

| Location       | Year | Sex    | Age      | Prevalence of current drinkers | Prevalence of abstainers | Population average of standard drinks daily | Percent of total attributable deaths | Percent of total attributable DALYs | Attributable deaths | Attributable DALYs     |
|----------------|------|--------|----------|--------------------------------|--------------------------|---------------------------------------------|--------------------------------------|-------------------------------------|---------------------|------------------------|
| Czech Republic | 2000 | Male   | 60 to 64 | 92%<br>(90-94%)                | 8.2%<br>(6.4-10%)        | 8.9<br>(6.9-11)                             | 16%<br>(12-20%)                      | 19%<br>(14-24%)                     | 900<br>(670-1100)   | 26000<br>(20000-33000) |
| Czech Republic | 2000 | Male   | 65 to 69 | 91%<br>(89-93%)                | 8.5%<br>(6.6-11%)        | 8.2<br>(6.7-9.9)                            | 15%<br>(11-19%)                      | 18%<br>(13-23%)                     | 1200<br>(850-1500)  | 28000<br>(21000-35000) |
| Czech Republic | 2000 | Male   | 70 to 74 | 90%<br>(87-92%)                | 10%<br>(8.3-13%)         | 7.2<br>(5.6-9)                              | 14%<br>(9.2-18%)                     | 16%<br>(11-21%)                     | 1300<br>(890-1700)  | 26000<br>(18000-34000) |
| Czech Republic | 2000 | Male   | 75 to 79 | 86%<br>(80-90%)                | 14%<br>(10-20%)          | 5.9<br>(4.3-7.8)                            | 11%<br>(6.5-16%)                     | 13%<br>(7.1-19%)                    | 1200<br>(650-1700)  | 18000<br>(10000-26000) |
| Czech Republic | 2000 | Male   | 80 to 84 | 82%<br>(75-87%)                | 18%<br>(13-25%)          | 5<br>(3.6-6.6)                              | 10%<br>(5.1-15%)                     | 11%<br>(5.4-17%)                    | 550<br>(270-840)    | 6200<br>(3100-9200)    |
| Czech Republic | 2000 | Male   | 85 to 89 | 80%<br>(72-85%)                | 20%<br>(15-28%)          | 4.5<br>(3.3-6)                              | 8.2%<br>(3.3-14%)                    | 9.1%<br>(3.3-15%)                   | 450<br>(160-760)    | 3600<br>(1400-5900)    |
| Czech Republic | 2000 | Male   | 90 to 94 | 78%<br>(70-85%)                | 22%<br>(15-30%)          | 4<br>(2.7-5.6)                              | 5.8%<br>(0.12-12%)                   | 6.3%<br>(-0.49-13%)                 | 120<br>(-9.3-250)   | 660<br>(14-1400)       |
| Czech Republic | 2000 | Male   | 95 plus  | 77%<br>(66-86%)                | 23%<br>(14-34%)          | 3.4<br>(2-5.3)                              | 3.6%<br>(-2.4-11%)                   | 3.7%<br>(-3.3-12%)                  | 9.9<br>(-8.8-32)    | 40<br>(-25-120)        |
| Czech Republic | 2005 | Female | All Ages | 79%<br>(77-81%)                | 21%<br>(19-23%)          | 2.6<br>(2.4-2.9)                            | 4.2%<br>(2.8-5.6%)                   | 4.2%<br>(1.6-7%)                    | 2200<br>(840-3700)  | 64000<br>(43000-85000) |
| Czech Republic | 2005 | Female | 15 to 19 | 83%<br>(75-89%)                | 17%<br>(11-25%)          | 2.2<br>(1.5-3)                              | 3.2%<br>(2-4.5%)                     | 9.9%<br>(5.6-15%)                   | 7.8<br>(4.4-12)     | 940<br>(600-1300)      |
| Czech Republic | 2005 | Female | 20 to 24 | 89%<br>(83-93%)                | 11%<br>(6.9-17%)         | 2.5<br>(1.7-3.6)                            | 4.3%<br>(3-5.7%)                     | 10%<br>(5.9-15%)                    | 9.3<br>(5.4-14)     | 1400<br>(980-2000)     |
| Czech Republic | 2005 | Female | 25 to 29 | 90%<br>(86-94%)                | 9.8%<br>(6.4-14%)        | 2.2<br>(1.6-3.1)                            | 3.9%<br>(2.8-5.1%)                   | 9%<br>(5.7-13%)                     | 11<br>(7.2-16)      | 1800<br>(1300-2500)    |
| Czech Republic | 2005 | Female | 30 to 34 | 90%<br>(86-93%)                | 9.9%<br>(6.7-14%)        | 2.6<br>(2-3.5)                              | 4.1%<br>(3-5.4%)                     | 10%<br>(7.2-14%)                    | 18<br>(13-24)       | 2100<br>(1500-2800)    |
| Czech Republic | 2005 | Female | 35 to 39 | 88%<br>(84-92%)                | 12%<br>(8.1-16%)         | 3.4<br>(2.5-4.6)                            | 5.1%<br>(3.9-6.5%)                   | 13%<br>(9.8-16%)                    | 31<br>(23-39)       | 2500<br>(1900-3200)    |
| Czech Republic | 2005 | Female | 40 to 44 | 86%<br>(82-90%)                | 14%<br>(10-18%)          | 3.9<br>(3-5)                                | 6.3%<br>(4.9-7.9%)                   | 14%<br>(11-17%)                     | 58<br>(47-71)       | 3700<br>(3000-4700)    |
| Czech Republic | 2005 | Female | 45 to 49 | 84%<br>(80-88%)                | 16%<br>(12-20%)          | 4.1<br>(3-5.2)                              | 7%<br>(5.2-9.1%)                     | 14%<br>(11-17%)                     | 100<br>(81-130)     | 5400<br>(4100-6800)    |
| Czech Republic | 2005 | Female | 50 to 54 | 83%<br>(79-86%)                | 17%<br>(14-21%)          | 4.1<br>(3.1-5.3)                            | 7.3%<br>(5.3-9.5%)                   | 13%<br>(9.8-16%)                    | 170<br>(130-220)    | 7700<br>(5800-9900)    |
| Czech Republic | 2005 | Female | 55 to 59 | 83%<br>(79-86%)                | 17%<br>(14-21%)          | 4.2<br>(3.2-5.2)                            | 7.2%<br>(5-9.4%)                     | 11%<br>(8.4-15%)                    | 250<br>(180-330)    | 9500<br>(6800-13000)   |
| Czech Republic | 2005 | Female | 60 to 64 | 79%<br>(75-83%)                | 21%<br>(17-25%)          | 3.7<br>(2.8-4.7)                            | 6.2%<br>(3.7-8.8%)                   | 9.3%<br>(5.8-13%)                   | 250<br>(160-360)    | 8100<br>(4900-12000)   |
| Czech Republic | 2005 | Female | 65 to 69 | 71%<br>(65-77%)                | 29%<br>(23-35%)          | 3<br>(2.3-3.7)                              | 4.7%<br>(2.5-7%)                     | 6.7%<br>(3.7-10%)                   | 220<br>(120-330)    | 5800<br>(3200-8700)    |
| Czech Republic | 2005 | Female | 70 to 74 | 60%<br>(53-66%)                | 40%<br>(34-47%)          | 2.2<br>(1.6-3)                              | 3.2%<br>(0.73-5.7%)                  | 4.2%<br>(1.1-7.5%)                  | 230<br>(60-410)     | 4800<br>(1100-8600)    |
| Czech Republic | 2005 | Female | 75 to 79 | 51%<br>(42-61%)                | 49%<br>(39-58%)          | 1.8<br>(1.2-2.5)                            | 2.2%<br>(-0.19-5.1%)                 | 2.7%<br>(-0.36-6.6%)                | 250<br>(-33-590)    | 4000<br>(-330-9300)    |

| Location       | Year | Sex    | Age      | Prevalence of current drinkers | Prevalence of abstainers | Population average of standard drinks daily | Percent of total attributable deaths | Percent of total attributable DALYs | Attributable deaths  | Attributable DALYs        |
|----------------|------|--------|----------|--------------------------------|--------------------------|---------------------------------------------|--------------------------------------|-------------------------------------|----------------------|---------------------------|
| Czech Republic | 2005 | Female | 80 to 84 | 48%<br>(36-58%)                | 52%<br>(42-64%)          | 1.7<br>(1.1-2.4)                            | 2%<br>(-0.37-4.7%)                   | 2.4%<br>(-0.64-5.8%)                | 300<br>(-83-730)     | 3600<br>(-670-8200)       |
| Czech Republic | 2005 | Female | 85 to 89 | 47%<br>(35-58%)                | 53%<br>(42-65%)          | 1.8<br>(1.2-2.6)                            | 2%<br>(-0.75-5.1%)                   | 2.2%<br>(-1.2-6.1%)                 | 150<br>(-79-420)     | 1300<br>(-470-3400)       |
| Czech Republic | 2005 | Female | 90 to 94 | 49%<br>(38-61%)                | 51%<br>(39-62%)          | 1.9<br>(1.2-2.9)                            | 2%<br>(-1.4-6.1%)                    | 2.2%<br>(-1.9-7.2%)                 | 120<br>(-110-410)    | 710<br>(-510-2200)        |
| Czech Republic | 2005 | Female | 95 plus  | 53%<br>(37-69%)                | 47%<br>(31-63%)          | 2.1<br>(1.1-3.3)                            | 2.1%<br>(-2.7-7.6%)                  | 2.3%<br>(-3.4-8.9%)                 | 37<br>(-55-140)      | 140<br>(-170-500)         |
| Czech Republic | 2005 | Male   | All Ages | 91%<br>(89-92%)                | 9.2%<br>(7.9-11%)        | 5.6<br>(5.2-6)                              | 14%<br>(12-16%)                      | 16%<br>(13-20%)                     | 8600<br>(6700-11000) | 250000<br>(210000-290000) |
| Czech Republic | 2005 | Male   | 15 to 19 | 88%<br>(82-93%)                | 12%<br>(6.9-18%)         | 2.6<br>(1.8-3.6)                            | 6.4%<br>(3.9-9%)                     | 13%<br>(7.5-20%)                    | 25<br>(14-38)        | 2300<br>(1400-3300)       |
| Czech Republic | 2005 | Male   | 20 to 24 | 94%<br>(91-96%)                | 6.2%<br>(4.1-9.3%)       | 4.4<br>(3.2-5.9)                            | 12%<br>(8.6-16%)                     | 21%<br>(14-29%)                     | 74<br>(47-100)       | 6200<br>(4300-8100)       |
| Czech Republic | 2005 | Male   | 25 to 29 | 95%<br>(93-97%)                | 4.9%<br>(3.2-7.2%)       | 5.4<br>(3.8-6.9)                            | 13%<br>(9.4-17%)                     | 25%<br>(17-32%)                     | 100<br>(71-140)      | 8200<br>(6100-11000)      |
| Czech Republic | 2005 | Male   | 30 to 34 | 96%<br>(93-98%)                | 4.1%<br>(2.4-6.6%)       | 5.9<br>(4.3-7.5)                            | 13%<br>(10-17%)                      | 25%<br>(18-32%)                     | 120<br>(89-160)      | 9000<br>(6900-11000)      |
| Czech Republic | 2005 | Male   | 35 to 39 | 96%<br>(94-98%)                | 3.9%<br>(2.2-6.1%)       | 5.9<br>(4.3-7.9)                            | 14%<br>(10-18%)                      | 25%<br>(17-32%)                     | 140<br>(99-180)      | 9100<br>(6700-11000)      |
| Czech Republic | 2005 | Male   | 40 to 44 | 95%<br>(93-97%)                | 4.9%<br>(3.3-7.2%)       | 6.9<br>(5.3-8.6)                            | 16%<br>(13-20%)                      | 26%<br>(21-32%)                     | 240<br>(190-290)     | 13000<br>(10000-15000)    |
| Czech Republic | 2005 | Male   | 45 to 49 | 93%<br>(90-95%)                | 7.2%<br>(5.1-9.7%)       | 8.5<br>(6.6-11)                             | 19%<br>(15-22%)                      | 28%<br>(23-32%)                     | 460<br>(380-540)     | 21000<br>(18000-25000)    |
| Czech Republic | 2005 | Male   | 50 to 54 | 92%<br>(90-94%)                | 8.3%<br>(6.2-10%)        | 9.1<br>(7.2-11)                             | 19%<br>(16-22%)                      | 25%<br>(21-29%)                     | 780<br>(660-920)     | 32000<br>(27000-37000)    |
| Czech Republic | 2005 | Male   | 55 to 59 | 92%<br>(91-94%)                | 7.8%<br>(6.3-9.4%)       | 9.2<br>(7.4-11)                             | 18%<br>(14-21%)                      | 22%<br>(18-27%)                     | 1100<br>(880-1300)   | 38000<br>(31000-45000)    |
| Czech Republic | 2005 | Male   | 60 to 64 | 92%<br>(91-94%)                | 7.7%<br>(6.2-9.4%)       | 9<br>(7-11)                                 | 16%<br>(12-20%)                      | 19%<br>(15-24%)                     | 1100<br>(830-1300)   | 32000<br>(25000-39000)    |
| Czech Republic | 2005 | Male   | 65 to 69 | 92%<br>(90-94%)                | 8.2%<br>(6.5-10%)        | 8.3<br>(6.9-9.9)                            | 15%<br>(11-18%)                      | 18%<br>(13-22%)                     | 980<br>(750-1200)    | 24000<br>(19000-30000)    |
| Czech Republic | 2005 | Male   | 70 to 74 | 90%<br>(88-92%)                | 9.9%<br>(8-12%)          | 7.3<br>(5.7-9.1)                            | 13%<br>(9-17%)                       | 15%<br>(10-20%)                     | 1100<br>(750-1500)   | 22000<br>(15000-29000)    |
| Czech Republic | 2005 | Male   | 75 to 79 | 86%<br>(82-90%)                | 14%<br>(10-18%)          | 6<br>(4.4-7.8)                              | 11%<br>(6.1-16%)                     | 13%<br>(6.5-18%)                    | 1100<br>(560-1500)   | 17000<br>(9400-23000)     |
| Czech Republic | 2005 | Male   | 80 to 84 | 81%<br>(75-87%)                | 19%<br>(13-25%)          | 5<br>(3.7-6.5)                              | 9.4%<br>(4.8-14%)                    | 11%<br>(5.1-16%)                    | 880<br>(410-1300)    | 9900<br>(5000-15000)      |
| Czech Republic | 2005 | Male   | 85 to 89 | 79%<br>(71-85%)                | 21%<br>(15-29%)          | 4.5<br>(3.2-5.9)                            | 7.7%<br>(2.9-13%)                    | 8.6%<br>(2.9-14%)                   | 290<br>(98-490)      | 2400<br>(890-3900)        |
| Czech Republic | 2005 | Male   | 90 to 94 | 78%<br>(69-84%)                | 22%<br>(16-31%)          | 4<br>(2.7-5.6)                              | 5.4%<br>(0.067-12%)                  | 5.8%<br>(-0.55-13%)                 | 120<br>(-11-270)     | 690<br>(8.1-1500)         |
| Czech Republic | 2005 | Male   | 95 plus  | 76%<br>(66-85%)                | 24%<br>(15-34%)          | 3.4<br>(1.9-5.2)                            | 3.5%<br>(-2.3-11%)                   | 3.5%<br>(-3.3-12%)                  | 15<br>(-14-51)       | 60<br>(-39-180)           |

| Location       | Year | Sex    | Age      | Prevalence of current drinkers | Prevalence of abstainers | Population average of standard drinks daily | Percent of total attributable deaths | Percent of total attributable DALYs | Attributable deaths | Attributable DALYs        |
|----------------|------|--------|----------|--------------------------------|--------------------------|---------------------------------------------|--------------------------------------|-------------------------------------|---------------------|---------------------------|
| Czech Republic | 2010 | Female | All Ages | 78%<br>(76-81%)                | 22%<br>(19-24%)          | 2.6<br>(2.3-2.8)                            | 3.8%<br>(2.5-5.1%)                   | 3.4%<br>(0.75-6.2%)                 | 1800<br>(390-3300)  | 57000<br>(36000-78000)    |
| Czech Republic | 2010 | Female | 15 to 19 | 81%<br>(72-88%)                | 19%<br>(12-28%)          | 2<br>(1.4-2.8)                              | 2.9%<br>(1.9-4.1%)                   | 8.8%<br>(5-14%)                     | 5.6<br>(3.2-8.6)    | 760<br>(490-1100)         |
| Czech Republic | 2010 | Female | 20 to 24 | 89%<br>(82-93%)                | 11%<br>(7.2-18%)         | 2.4<br>(1.6-3.4)                            | 4.2%<br>(3-5.7%)                     | 9.2%<br>(5.3-13%)                   | 8.2<br>(4.7-12)     | 1400<br>(920-1900)        |
| Czech Republic | 2010 | Female | 25 to 29 | 90%<br>(85-93%)                | 10%<br>(6.6-15%)         | 2.1<br>(1.5-2.9)                            | 3.9%<br>(2.9-5.1%)                   | 8.6%<br>(5.6-12%)                   | 7.9<br>(5.2-11)     | 1500<br>(1000-2000)       |
| Czech Republic | 2010 | Female | 30 to 34 | 89%<br>(85-93%)                | 11%<br>(7-15%)           | 2.5<br>(1.8-3.3)                            | 4%<br>(2.9-5.2%)                     | 9.8%<br>(7.1-13%)                   | 17<br>(12-22)       | 2100<br>(1500-2800)       |
| Czech Republic | 2010 | Female | 35 to 39 | 88%<br>(82-92%)                | 12%<br>(8.2-18%)         | 3.3<br>(2.4-4.4)                            | 4.7%<br>(3.5-6%)                     | 12%<br>(9.4-15%)                    | 31<br>(24-38)       | 2800<br>(2100-3600)       |
| Czech Republic | 2010 | Female | 40 to 44 | 85%<br>(80-89%)                | 15%<br>(11-20%)          | 3.7<br>(2.8-4.7)                            | 5.8%<br>(4.5-7.4%)                   | 14%<br>(11-16%)                     | 51<br>(41-61)       | 3400<br>(2700-4300)       |
| Czech Republic | 2010 | Female | 45 to 49 | 83%<br>(79-87%)                | 17%<br>(13-21%)          | 3.8<br>(2.8-5)                              | 6.4%<br>(4.7-8.3%)                   | 13%<br>(11-17%)                     | 84<br>(67-110)      | 4600<br>(3500-5900)       |
| Czech Republic | 2010 | Female | 50 to 54 | 83%<br>(79-87%)                | 17%<br>(13-21%)          | 4<br>(2.9-5.1)                              | 6.8%<br>(5-8.9%)                     | 13%<br>(9.6-16%)                    | 130<br>(100-160)    | 6000<br>(4500-7800)       |
| Czech Republic | 2010 | Female | 55 to 59 | 83%<br>(79-86%)                | 17%<br>(14-21%)          | 4<br>(3.1-5)                                | 6.6%<br>(4.6-8.6%)                   | 11%<br>(8.1-14%)                    | 210<br>(150-270)    | 8100<br>(5800-11000)      |
| Czech Republic | 2010 | Female | 60 to 64 | 80%<br>(76-84%)                | 20%<br>(16-24%)          | 3.6<br>(2.7-4.6)                            | 5.6%<br>(3.4-7.9%)                   | 8.5%<br>(5.5-12%)                   | 260<br>(170-360)    | 8500<br>(5300-12000)      |
| Czech Republic | 2010 | Female | 65 to 69 | 73%<br>(68-79%)                | 27%<br>(21-32%)          | 3<br>(2.3-3.7)                              | 4.3%<br>(2.3-6.3%)                   | 6.1%<br>(3.4-9%)                    | 230<br>(130-340)    | 6300<br>(3400-9300)       |
| Czech Republic | 2010 | Female | 70 to 74 | 63%<br>(56-69%)                | 37%<br>(31-44%)          | 2.3<br>(1.7-3.1)                            | 2.8%<br>(0.51-5.1%)                  | 3.8%<br>(0.72-6.9%)                 | 170<br>(32-310)     | 3700<br>(720-7000)        |
| Czech Republic | 2010 | Female | 75 to 79 | 55%<br>(46-63%)                | 45%<br>(37-54%)          | 1.8<br>(1.2-2.6)                            | 1.8%<br>(-0.46-4.6%)                 | 2.2%<br>(-0.71-5.7%)                | 170<br>(-53-430)    | 2800<br>(-740-7100)       |
| Czech Republic | 2010 | Female | 80 to 84 | 50%<br>(39-60%)                | 50%<br>(40-61%)          | 1.7<br>(1.2-2.4)                            | 1.5%<br>(-0.84-4.1%)                 | 1.7%<br>(-1.2-4.9%)                 | 200<br>(-140-550)   | 2500<br>(-1300-6600)      |
| Czech Republic | 2010 | Female | 85 to 89 | 49%<br>(37-60%)                | 51%<br>(40-63%)          | 1.8<br>(1.2-2.6)                            | 1.4%<br>(-1.3-4.5%)                  | 1.5%<br>(-1.9-5.3%)                 | 180<br>(-230-640)   | 1600<br>(-1500-5100)      |
| Czech Republic | 2010 | Female | 90 to 94 | 51%<br>(39-62%)                | 49%<br>(38-61%)          | 1.9<br>(1.2-2.9)                            | 1.3%<br>(-2-5.3%)                    | 1.3%<br>(-2.8-6.4%)                 | 55<br>(-120-270)    | 360<br>(-550-1500)        |
| Czech Republic | 2010 | Female | 95 plus  | 55%<br>(39-71%)                | 45%<br>(29-61%)          | 2.1<br>(1.1-3.4)                            | 1.4%<br>(-3.2-7%)                    | 1.4%<br>(-4.1-8.1%)                 | 27<br>(-82-160)     | 120<br>(-260-580)         |
| Czech Republic | 2010 | Male   | All Ages | 91%<br>(89-92%)                | 9.5%<br>(8.1-11%)        | 5.4<br>(5-5.8)                              | 13%<br>(11-15%)                      | 14%<br>(11-18%)                     | 7900<br>(6100-9800) | 230000<br>(190000-270000) |
| Czech Republic | 2010 | Male   | 15 to 19 | 87%<br>(80-93%)                | 13%<br>(7.4-20%)         | 2.4<br>(1.7-3.4)                            | 5.7%<br>(3.5-8%)                     | 12%<br>(6.9-19%)                    | 18<br>(10-27)       | 1800<br>(1100-2500)       |
| Czech Republic | 2010 | Male   | 20 to 24 | 93%<br>(90-96%)                | 6.6%<br>(4.4-9.9%)       | 4.1<br>(3-5.5)                              | 11%<br>(7.9-15%)                     | 20%<br>(13-28%)                     | 59<br>(37-80)       | 5100<br>(3500-6800)       |
| Czech Republic | 2010 | Male   | 25 to 29 | 95%<br>(92-97%)                | 5.1%<br>(3.4-7.6%)       | 5.1<br>(3.5-6.6)                            | 12%<br>(9.1-16%)                     | 24%<br>(16-32%)                     | 76<br>(52-100)      | 6300<br>(4700-8200)       |

| Location       | Year | Sex    | Age      | Prevalence of current drinkers | Prevalence of abstainers | Population average of standard drinks daily | Percent of total attributable deaths | Percent of total attributable DALYs | Attributable deaths | Attributable DALYs     |
|----------------|------|--------|----------|--------------------------------|--------------------------|---------------------------------------------|--------------------------------------|-------------------------------------|---------------------|------------------------|
| Czech Republic | 2010 | Male   | 30 to 34 | 96%<br>(93-97%)                | 4.3%<br>(2.5-6.7%)       | 5.6<br>(4.1-7.1)                            | 12%<br>(9.3-16%)                     | 24%<br>(17-31%)                     | 110<br>(76-140)     | 8400<br>(6200-11000)   |
| Czech Republic | 2010 | Male   | 35 to 39 | 96%<br>(94-98%)                | 4.1%<br>(2.3-6.3%)       | 5.6<br>(4.1-7.5)                            | 13%<br>(9.4-16%)                     | 24%<br>(17-30%)                     | 150<br>(100-190)    | 9900<br>(7300-12000)   |
| Czech Republic | 2010 | Male   | 40 to 44 | 95%<br>(93-97%)                | 5%<br>(3.4-7.2%)         | 6.5<br>(5-8.2)                              | 15%<br>(12-18%)                      | 26%<br>(20-31%)                     | 210<br>(170-250)    | 12000<br>(9600-14000)  |
| Czech Republic | 2010 | Male   | 45 to 49 | 93%<br>(91-95%)                | 7.2%<br>(5.2-9.4%)       | 8.1<br>(6.2-10)                             | 17%<br>(14-21%)                      | 27%<br>(23-32%)                     | 360<br>(300-420)    | 18000<br>(15000-21000) |
| Czech Republic | 2010 | Male   | 50 to 54 | 92%<br>(90-94%)                | 8.2%<br>(6.4-10%)        | 8.7<br>(6.9-11)                             | 18%<br>(15-21%)                      | 25%<br>(21-29%)                     | 600<br>(510-700)    | 25000<br>(21000-29000) |
| Czech Republic | 2010 | Male   | 55 to 59 | 92%<br>(91-94%)                | 7.7%<br>(6.3-9.2%)       | 8.7<br>(7.1-11)                             | 17%<br>(14-20%)                      | 22%<br>(19-26%)                     | 950<br>(790-1100)   | 33000<br>(28000-39000) |
| Czech Republic | 2010 | Male   | 60 to 64 | 92%<br>(90-94%)                | 7.8%<br>(6.3-9.6%)       | 8.5<br>(6.7-10)                             | 15%<br>(12-19%)                      | 19%<br>(15-23%)                     | 1200<br>(950-1500)  | 36000<br>(29000-44000) |
| Czech Republic | 2010 | Male   | 65 to 69 | 91%<br>(89-93%)                | 8.6%<br>(6.8-11%)        | 7.8<br>(6.5-9.2)                            | 14%<br>(11-17%)                      | 17%<br>(13-21%)                     | 1100<br>(850-1400)  | 28000<br>(22000-34000) |
| Czech Republic | 2010 | Male   | 70 to 74 | 90%<br>(88-92%)                | 10%<br>(8.2-12%)         | 6.9<br>(5.4-8.5)                            | 12%<br>(8.2-16%)                     | 14%<br>(9.4-19%)                    | 880<br>(580-1200)   | 18000<br>(12000-24000) |
| Czech Republic | 2010 | Male   | 75 to 79 | 86%<br>(82-90%)                | 14%<br>(10-18%)          | 5.7<br>(4.2-7.4)                            | 9.8%<br>(5.1-14%)                    | 11%<br>(5.5-16%)                    | 870<br>(430-1300)   | 14000<br>(7200-20000)  |
| Czech Republic | 2010 | Male   | 80 to 84 | 81%<br>(75-86%)                | 19%<br>(14-25%)          | 4.7<br>(3.5-6)                              | 8%<br>(3.7-12%)                      | 9.1%<br>(3.9-15%)                   | 740<br>(310-1200)   | 8700<br>(4000-13000)   |
| Czech Republic | 2010 | Male   | 85 to 89 | 78%<br>(71-84%)                | 22%<br>(16-29%)          | 4.2<br>(3.1-5.5)                            | 6.3%<br>(1.9-11%)                    | 6.9%<br>(1.7-12%)                   | 420<br>(100-750)    | 3500<br>(1100-6000)    |
| Czech Republic | 2010 | Male   | 90 to 94 | 77%<br>(68-84%)                | 23%<br>(16-32%)          | 3.7<br>(2.5-5.1)                            | 4.1%<br>(-0.59-9.6%)                 | 4.3%<br>(-1.6-11%)                  | 69<br>(-25-180)     | 410<br>(-60-960)       |
| Czech Republic | 2010 | Male   | 95 plus  | 76%<br>(64-85%)                | 24%<br>(15-36%)          | 3.2<br>(1.9-4.9)                            | 2.4%<br>(-2.6-9.1%)                  | 2.2%<br>(-3.8-10%)                  | 12<br>(-20-54)      | 55<br>(-56-200)        |
| Czech Republic | 2016 | Female | All Ages | 78%<br>(76-81%)                | 22%<br>(19-24%)          | 2.5<br>(2-2.9)                              | 3.2%<br>(1.8-4.9%)                   | 2.7%<br>(-0.087-5.8%)               | 1500<br>(-49-3200)  | 48000<br>(26000-71000) |
| Czech Republic | 2016 | Female | 15 to 19 | 80%<br>(70-88%)                | 20%<br>(12-30%)          | 1.9<br>(1.2-2.7)                            | 2.6%<br>(1.7-3.7%)                   | 8.5%<br>(4.9-13%)                   | 3.2<br>(1.8-4.9)    | 480<br>(310-700)       |
| Czech Republic | 2016 | Female | 20 to 24 | 88%<br>(81-93%)                | 12%<br>(7.5-19%)         | 2.2<br>(1.4-3.3)                            | 3.9%<br>(2.7-5.2%)                   | 8.5%<br>(4.7-13%)                   | 5.4<br>(3-8.2)      | 1100<br>(710-1600)     |
| Czech Republic | 2016 | Female | 25 to 29 | 89%<br>(83-93%)                | 11%<br>(6.6-17%)         | 2<br>(1.3-2.9)                              | 3.8%<br>(2.8-4.9%)                   | 7.9%<br>(4.9-12%)                   | 6.5<br>(4-9.5)      | 1300<br>(890-1800)     |
| Czech Republic | 2016 | Female | 30 to 34 | 89%<br>(82-93%)                | 11%<br>(6.9-18%)         | 2.3<br>(1.6-3.2)                            | 3.8%<br>(2.8-4.9%)                   | 9.4%<br>(6.6-13%)                   | 11<br>(7.4-14)      | 1600<br>(1100-2100)    |
| Czech Republic | 2016 | Female | 35 to 39 | 87%<br>(80-92%)                | 13%<br>(8.3-20%)         | 3<br>(2.1-4.2)                              | 4.2%<br>(3.1-5.5%)                   | 11%<br>(8.5-15%)                    | 27<br>(20-35)       | 2600<br>(1900-3500)    |
| Czech Republic | 2016 | Female | 40 to 44 | 85%<br>(80-90%)                | 15%<br>(10-20%)          | 3.5<br>(2.5-4.7)                            | 4.9%<br>(3.6-6.5%)                   | 12%<br>(9.7-15%)                    | 48<br>(37-61)       | 3500<br>(2600-4600)    |
| Czech Republic | 2016 | Female | 45 to 49 | 84%<br>(78-88%)                | 16%<br>(12-22%)          | 3.6<br>(2.5-4.9)                            | 5.6%<br>(4-7.7%)                     | 13%<br>(9.6-16%)                    | 68<br>(51-88)       | 3900<br>(2800-5200)    |

| Location       | Year | Sex    | Age      | Prevalence of current drinkers | Prevalence of abstainers | Population average of standard drinks daily | Percent of total attributable deaths | Percent of total attributable DALYs | Attributable deaths | Attributable DALYs     |
|----------------|------|--------|----------|--------------------------------|--------------------------|---------------------------------------------|--------------------------------------|-------------------------------------|---------------------|------------------------|
| Czech Republic | 2016 | Female | 50 to 54 | 83%<br>(78-87%)                | 17%<br>(13-22%)          | 3.7<br>(2.7-4.9)                            | 5.9%<br>(4.2-8%)                     | 12%<br>(9-15%)                      | 100<br>(76-130)     | 4800<br>(3400-6500)    |
| Czech Republic | 2016 | Female | 55 to 59 | 84%<br>(81-88%)                | 16%<br>(12-19%)          | 3.9<br>(2.9-5.1)                            | 5.9%<br>(4.1-8.2%)                   | 10%<br>(7.7-14%)                    | 150<br>(110-190)    | 5900<br>(3900-8000)    |
| Czech Republic | 2016 | Female | 60 to 64 | 82%<br>(79-86%)                | 18%<br>(14-21%)          | 3.6<br>(2.6-4.9)                            | 5%<br>(2.9-7.6%)                     | 8.1%<br>(5-12%)                     | 210<br>(130-300)    | 7000<br>(4000-10000)   |
| Czech Republic | 2016 | Female | 65 to 69 | 77%<br>(72-81%)                | 23%<br>(19-28%)          | 3.1<br>(2.3-4)                              | 3.8%<br>(1.9-6%)                     | 5.7%<br>(2.9-8.7%)                  | 250<br>(130-380)    | 6700<br>(3300-11000)   |
| Czech Republic | 2016 | Female | 70 to 74 | 69%<br>(63-74%)                | 31%<br>(26-37%)          | 2.5<br>(1.7-3.3)                            | 2.4%<br>(0.2-4.7%)                   | 3.5%<br>(0.33-6.9%)                 | 180<br>(16-370)     | 4000<br>(340-8100)     |
| Czech Republic | 2016 | Female | 75 to 79 | 59%<br>(51-68%)                | 41%<br>(32-49%)          | 1.9<br>(1.3-2.7)                            | 1.4%<br>(-0.83-4%)                   | 1.8%<br>(-1.2-5.2%)                 | 110<br>(-71-310)    | 1900<br>(-1100-5500)   |
| Czech Republic | 2016 | Female | 80 to 84 | 53%<br>(42-64%)                | 47%<br>(36-58%)          | 1.7<br>(1.2-2.5)                            | 1.1%<br>(-1.2-3.8%)                  | 1.2%<br>(-1.7-4.6%)                 | 120<br>(-170-450)   | 1600<br>(-1700-5500)   |
| Czech Republic | 2016 | Female | 85 to 89 | 53%<br>(40-64%)                | 47%<br>(36-60%)          | 1.8<br>(1.2-2.7)                            | 0.92%<br>(-1.8-4.4%)                 | 0.88%<br>(-2.5-5.3%)                | 100<br>(-310-620)   | 1000<br>(-2100-4900)   |
| Czech Republic | 2016 | Female | 90 to 94 | 55%<br>(43-66%)                | 45%<br>(34-57%)          | 2<br>(1.2-3)                                | 0.79%<br>(-2.7-5.1%)                 | 0.66%<br>(-3.6-6%)                  | 59<br>(-330-540)    | 450<br>(-1500-2900)    |
| Czech Republic | 2016 | Female | 95 plus  | 59%<br>(43-72%)                | 41%<br>(28-57%)          | 2.1<br>(1.1-3.4)                            | 0.8%<br>(-3.8-6.7%)                  | 0.61%<br>(-5-7.9%)                  | 9<br>(-76-120)      | 49<br>(-230-410)       |
| Czech Republic | 2016 | Male   | All Ages | 89%<br>(87-91%)                | 11%<br>(9-13%)           | 5<br>(4.2-5.9)                              | 12%<br>(9-14%)                       | 13%<br>(8.7-17%)                    | 6800<br>(4600-9000) | 20000<br>(15000-24000) |
| Czech Republic | 2016 | Male   | 15 to 19 | 86%<br>(77-92%)                | 14%<br>(7.7-23%)         | 2.2<br>(1.4-3.2)                            | 5.1%<br>(3.1-7.3%)                   | 12%<br>(6.2-17%)                    | 11<br>(6-17)        | 1100<br>(710-1600)     |
| Czech Republic | 2016 | Male   | 20 to 24 | 92%<br>(87-95%)                | 7.9%<br>(4.8-13%)        | 3.7<br>(2.6-5.2)                            | 9.9%<br>(6.8-13%)                    | 9.9%<br>(12-27%)                    | 39<br>(24-56)       | 3700<br>(2500-5000)    |
| Czech Republic | 2016 | Male   | 25 to 29 | 94%<br>(90-96%)                | 6.1%<br>(3.8-10%)        | 4.6<br>(3.1-6.2)                            | 11%<br>(7.9-14%)                     | 22%<br>(14-30%)                     | 54<br>(34-75)       | 4900<br>(3400-6500)    |
| Czech Republic | 2016 | Male   | 30 to 34 | 95%<br>(91-97%)                | 5.2%<br>(2.9-9%)         | 5.1<br>(3.5-6.8)                            | 11%<br>(8.2-14%)                     | 22%<br>(16-30%)                     | 68<br>(46-92)       | 5700<br>(4100-7400)    |
| Czech Republic | 2016 | Male   | 35 to 39 | 95%<br>(92-97%)                | 4.9%<br>(2.7-8.2%)       | 5.1<br>(3.6-7.1)                            | 11%<br>(8.2-15%)                     | 22%<br>(15-29%)                     | 120<br>(83-160)     | 8700<br>(6300-11000)   |
| Czech Republic | 2016 | Male   | 40 to 44 | 94%<br>(90-96%)                | 6.2%<br>(3.8-9.8%)       | 5.9<br>(4.3-7.8)                            | 13%<br>(9.8-16%)                     | 24%<br>(18-30%)                     | 200<br>(150-250)    | 12000<br>(8900-15000)  |
| Czech Republic | 2016 | Male   | 45 to 49 | 91%<br>(87-94%)                | 8.5%<br>(5.8-13%)        | 7.3<br>(5.3-9.8)                            | 16%<br>(12-19%)                      | 26%<br>(20-30%)                     | 290<br>(220-350)    | 14000<br>(11000-18000) |
| Czech Republic | 2016 | Male   | 50 to 54 | 91%<br>(89-93%)                | 8.9%<br>(6.8-11%)        | 7.9<br>(5.8-10)                             | 16%<br>(13-20%)                      | 25%<br>(20-29%)                     | 460<br>(360-540)    | 19000<br>(16000-23000) |
| Czech Republic | 2016 | Male   | 55 to 59 | 92%<br>(90-94%)                | 8.1%<br>(6.4-10%)        | 8<br>(6-10)                                 | 16%<br>(13-19%)                      | 22%<br>(17-26%)                     | 660<br>(520-790)    | 24000<br>(19000-28000) |
| Czech Republic | 2016 | Male   | 60 to 64 | 92%<br>(90-94%)                | 8%<br>(6.4-10%)          | 7.9<br>(5.9-10)                             | 14%<br>(11-18%)                      | 18%<br>(14-22%)                     | 970<br>(710-1200)   | 30000<br>(22000-37000) |
| Czech Republic | 2016 | Male   | 65 to 69 | 91%<br>(89-93%)                | 8.6%<br>(6.8-11%)        | 7.3<br>(5.7-9)                              | 13%<br>(8.8-16%)                     | 16%<br>(11-20%)                     | 1200<br>(840-1500)  | 31000<br>(22000-39000) |

| Location       | Year | Sex    | Age      | Prevalence of current drinkers | Prevalence of abstainers | Population average of standard drinks daily | Percent of total attributable deaths | Percent of total attributable DALYs | Attributable deaths  | Attributable DALYs       |
|----------------|------|--------|----------|--------------------------------|--------------------------|---------------------------------------------|--------------------------------------|-------------------------------------|----------------------|--------------------------|
| Czech Republic | 2016 | Male   | 70 to 74 | 90%<br>(87-92%)                | 10%<br>(8.4-13%)         | 6.4<br>(4.7-8.3)                            | 10%<br>(6.5-14%)                     | 13%<br>(7.5-18%)                    | 980<br>(580-1400)    | 20000<br>(13000-28000)   |
| Czech Republic | 2016 | Male   | 75 to 79 | 86%<br>(82-90%)                | 14%<br>(10-18%)          | 5.3<br>(3.7-7.1)                            | 8.4%<br>(3.6-13%)                    | 9.8%<br>(3.8-16%)                   | 650<br>(260-1000)    | 11000<br>(4600-17000)    |
| Czech Republic | 2016 | Male   | 80 to 84 | 82%<br>(76-87%)                | 18%<br>(13-24%)          | 4.5<br>(3.2-6.1)                            | 6.8%<br>(2.3-12%)                    | 7.7%<br>(2.1-14%)                   | 610<br>(160-1100)    | 7200<br>(2500-12000)     |
| Czech Republic | 2016 | Male   | 85 to 89 | 80%<br>(73-86%)                | 20%<br>(14-27%)          | 4.1<br>(2.9-5.5)                            | 5.1%<br>(0.71-10%)                   | 5.5%<br>(0.2-12%)                   | 370<br>(14-800)      | 3100<br>(450-6300)       |
| Czech Republic | 2016 | Male   | 90 to 94 | 79%<br>(71-85%)                | 21%<br>(15-29%)          | 3.6<br>(2.4-5.1)                            | 3.1%<br>(-1.5-9%)                    | 3.1%<br>(-2.5-10%)                  | 100<br>(-88-360)     | 660<br>(-330-2000)       |
| Czech Republic | 2016 | Male   | 95 plus  | 77%<br>(67-85%)                | 23%<br>(15-33%)          | 3.1<br>(1.7-4.9)                            | 1.6%<br>(-3.3-8.3%)                  | 1.2%<br>(-4.7-9.4%)                 | 4.8<br>(-19-39)      | 26<br>(-57-140)          |
| Hungary        | 1990 | Female | All Ages | 73%<br>(69-77%)                | 27%<br>(23-31%)          | 2.7<br>(2.4-3)                              | 8.9%<br>(3.9-14%)                    | 11%<br>(3.7-20%)                    | 7700<br>(2600-13000) | 180000<br>(77000-280000) |
| Hungary        | 1990 | Female | 15 to 19 | 77%<br>(64-87%)                | 23%<br>(13-36%)          | 2.1<br>(1.4-3)                              | 3.8%<br>(1.1-6.6%)                   | 9.2%<br>(1.1-17%)                   | 14<br>(1.7-26)       | 1500<br>(460-2600)       |
| Hungary        | 1990 | Female | 20 to 24 | 85%<br>(77-90%)                | 15%<br>(9.9-23%)         | 2.5<br>(1.6-3.6)                            | 5.4%<br>(2.3-8.7%)                   | 10%<br>(1.4-20%)                    | 18<br>(2.5-35)       | 2100<br>(900-3400)       |
| Hungary        | 1990 | Female | 25 to 29 | 84%<br>(76-90%)                | 16%<br>(9.7-24%)         | 2.6<br>(1.7-3.6)                            | 5.8%<br>(2.7-8.9%)                   | 11%<br>(3.1-19%)                    | 23<br>(6.2-39)       | 2300<br>(1100-3500)      |
| Hungary        | 1990 | Female | 30 to 34 | 84%<br>(76-90%)                | 16%<br>(10-24%)          | 2.7<br>(1.8-3.7)                            | 7.1%<br>(3.8-10%)                    | 13%<br>(5.9-20%)                    | 61<br>(28-92)        | 4600<br>(2500-6700)      |
| Hungary        | 1990 | Female | 35 to 39 | 84%<br>(76-90%)                | 16%<br>(9.9-24%)         | 2.9<br>(2-4)                                | 9.1%<br>(5.3-13%)                    | 16%<br>(8.7-23%)                    | 140<br>(73-200)      | 8300<br>(4600-12000)     |
| Hungary        | 1990 | Female | 40 to 44 | 83%<br>(75-89%)                | 17%<br>(11-25%)          | 3.4<br>(2.5-4.6)                            | 11%<br>(6.6-15%)                     | 18%<br>(11-25%)                     | 200<br>(120-280)     | 11000<br>(6400-15000)    |
| Hungary        | 1990 | Female | 45 to 49 | 80%<br>(72-86%)                | 20%<br>(14-28%)          | 4.2<br>(3-5.7)                              | 12%<br>(7.6-17%)                     | 20%<br>(12-27%)                     | 300<br>(190-420)     | 14000<br>(8500-19000)    |
| Hungary        | 1990 | Female | 50 to 54 | 77%<br>(68-83%)                | 23%<br>(17-32%)          | 4.3<br>(3-5.8)                              | 13%<br>(7.4-18%)                     | 19%<br>(11-27%)                     | 400<br>(230-560)     | 16000<br>(9200-23000)    |
| Hungary        | 1990 | Female | 55 to 59 | 73%<br>(64-79%)                | 27%<br>(21-36%)          | 4.2<br>(2.9-5.7)                            | 12%<br>(6.3-18%)                     | 17%<br>(9.4-25%)                    | 530<br>(290-800)     | 18000<br>(9600-28000)    |
| Hungary        | 1990 | Female | 60 to 64 | 71%<br>(61-78%)                | 29%<br>(22-39%)          | 4.1<br>(2.9-5.7)                            | 11%<br>(4.6-18%)                     | 15%<br>(6.8-24%)                    | 710<br>(320-1100)    | 21000<br>(8900-34000)    |
| Hungary        | 1990 | Female | 65 to 69 | 70%<br>(60-79%)                | 30%<br>(21-40%)          | 4<br>(2.8-5.3)                              | 11%<br>(3.9-18%)                     | 14%<br>(5.4-24%)                    | 990<br>(380-1700)    | 24000<br>(8900-41000)    |
| Hungary        | 1990 | Female | 70 to 74 | 65%<br>(54-74%)                | 35%<br>(26-46%)          | 3.7<br>(2.4-5.1)                            | 9.9%<br>(2.5-18%)                    | 13%<br>(3.4-23%)                    | 820<br>(220-1500)    | 16000<br>(4100-29000)    |
| Hungary        | 1990 | Female | 75 to 79 | 55%<br>(42-68%)                | 45%<br>(32-58%)          | 3.1<br>(1.9-4.5)                            | 8.6%<br>(1.5-17%)                    | 10%<br>(1.8-21%)                    | 1300<br>(230-2600)   | 20000<br>(3600-38000)    |
| Hungary        | 1990 | Female | 80 to 84 | 50%<br>(36-62%)                | 50%<br>(38-64%)          | 2.6<br>(1.7-3.8)                            | 7.2%<br>(1.2-15%)                    | 8.6%<br>(1.4-18%)                   | 1200<br>(190-2400)   | 13000<br>(2200-26000)    |
| Hungary        | 1990 | Female | 85 to 89 | 49%<br>(35-62%)                | 51%<br>(38-65%)          | 2.5<br>(1.5-3.8)                            | 6.5%<br>(0.63-14%)                   | 7.7%<br>(0.65-17%)                  | 680<br>(56-1500)     | 5200<br>(520-11000)      |



| Location | Year | Sex    | Age      | Prevalence of current drinkers | Prevalence of abstainers | Population average of standard drinks daily | Percent of total attributable deaths | Percent of total attributable DALYs | Attributable deaths   | Attributable DALYs        |
|----------|------|--------|----------|--------------------------------|--------------------------|---------------------------------------------|--------------------------------------|-------------------------------------|-----------------------|---------------------------|
| Hungary  | 1990 | Female | 90 to 94 | 50%<br>(37-64%)                | 50%<br>(36-63%)          | 2.6<br>(1.5-4.1)                            | 6%<br>(-0.29-15%)                    | 7.1%<br>(-0.52-18%)                 | 260<br>(-20-680)      | 1400<br>(-71-3600)        |
| Hungary  | 1990 | Female | 95 plus  | 54%<br>(36-70%)                | 46%<br>(30-64%)          | 2.6<br>(1.3-4.6)                            | 5.6%<br>(-1.6-16%)                   | 6.6%<br>(-2.1-19%)                  | 54<br>(-17-160)       | 190<br>(-53-540)          |
| Hungary  | 1990 | Male   | All Ages | 87%<br>(84-90%)                | 13%<br>(10-16%)          | 6.6<br>(5.9-7.2)                            | 20%<br>(9.9-29%)                     | 22%<br>(9.5-33%)                    | 17000<br>(7100-25000) | 490000<br>(240000-700000) |
| Hungary  | 1990 | Male   | 15 to 19 | 84%<br>(74-91%)                | 16%<br>(8.6-26%)         | 2.4<br>(1.5-3.6)                            | 7.6%<br>(2.1-13%)                    | 12%<br>(2.1-23%)                    | 48<br>(8-87)          | 4100<br>(1200-7000)       |
| Hungary  | 1990 | Male   | 20 to 24 | 92%<br>(87-95%)                | 8.3%<br>(5.3-13%)        | 4.6<br>(3.3-6.2)                            | 15%<br>(7.1-24%)                     | 23%<br>(8.6-36%)                    | 120<br>(44-190)       | 9200<br>(4300-14000)      |
| Hungary  | 1990 | Male   | 25 to 29 | 93%<br>(88-96%)                | 7.3%<br>(4.5-12%)        | 6.7<br>(4.6-8.9)                            | 22%<br>(13-30%)                      | 32%<br>(17-45%)                     | 190<br>(100-280)      | 14000<br>(8200-19000)     |
| Hungary  | 1990 | Male   | 30 to 34 | 93%<br>(88-96%)                | 7.2%<br>(4.4-12%)        | 7.8<br>(5.7-10)                             | 25%<br>(16-33%)                      | 34%<br>(22-46%)                     | 400<br>(250-530)      | 25000<br>(16000-33000)    |
| Hungary  | 1990 | Male   | 35 to 39 | 92%<br>(88-95%)                | 7.8%<br>(4.7-12%)        | 7.9<br>(5.6-11)                             | 26%<br>(18-35%)                      | 34%<br>(23-45%)                     | 710<br>(480-930)      | 39000<br>(26000-51000)    |
| Hungary  | 1990 | Male   | 40 to 44 | 92%<br>(88-95%)                | 7.9%<br>(4.8-12%)        | 9.2<br>(6.8-12)                             | 28%<br>(19-36%)                      | 35%<br>(24-45%)                     | 930<br>(650-1200)     | 46000<br>(31000-59000)    |
| Hungary  | 1990 | Male   | 45 to 49 | 93%<br>(89-95%)                | 7.4%<br>(4.7-11%)        | 11<br>(8.7-14)                              | 28%<br>(17-37%)                      | 34%<br>(21-44%)                     | 1300<br>(780-1700)    | 54000<br>(34000-72000)    |
| Hungary  | 1990 | Male   | 50 to 54 | 93%<br>(90-96%)                | 6.9%<br>(4.4-10%)        | 12<br>(9.3-16)                              | 26%<br>(14-35%)                      | 30%<br>(16-42%)                     | 1400<br>(770-2000)    | 54000<br>(29000-75000)    |
| Hungary  | 1990 | Male   | 55 to 59 | 93%<br>(90-96%)                | 6.5%<br>(4.3-9.9%)       | 12<br>(9.6-15)                              | 24%<br>(11-34%)                      | 27%<br>(13-39%)                     | 1800<br>(850-2600)    | 59000<br>(27000-85000)    |
| Hungary  | 1990 | Male   | 60 to 64 | 91%<br>(87-94%)                | 8.7%<br>(6-13%)          | 12<br>(8.9-15)                              | 21%<br>(8.7-32%)                     | 24%<br>(10-36%)                     | 2100<br>(890-3200)    | 60000<br>(25000-89000)    |
| Hungary  | 1990 | Male   | 65 to 69 | 87%<br>(82-91%)                | 13%<br>(9-18%)           | 10<br>(8.2-13)                              | 19%<br>(6.5-31%)                     | 22%<br>(7.5-35%)                    | 2300<br>(750-3500)    | 53000<br>(17000-83000)    |
| Hungary  | 1990 | Male   | 70 to 74 | 85%<br>(79-89%)                | 15%<br>(11-21%)          | 9.1<br>(6.7-12)                             | 17%<br>(5.2-28%)                     | 20%<br>(6.1-32%)                    | 1400<br>(430-2300)    | 27000<br>(8000-44000)     |
| Hungary  | 1990 | Male   | 75 to 79 | 84%<br>(77-90%)                | 16%<br>(10-23%)          | 7.9<br>(5.5-10)                             | 16%<br>(4.5-26%)                     | 18%<br>(5.1-29%)                    | 1900<br>(550-3200)    | 29000<br>(8100-47000)     |
| Hungary  | 1990 | Male   | 80 to 84 | 84%<br>(75-90%)                | 16%<br>(10-25%)          | 6.9<br>(4.9-9.1)                            | 14%<br>(4.3-24%)                     | 16%<br>(4.7-28%)                    | 1400<br>(410-2400)    | 16000<br>(4400-27000)     |
| Hungary  | 1990 | Male   | 85 to 89 | 84%<br>(76-90%)                | 16%<br>(10-24%)          | 6.2<br>(4.3-8.4)                            | 12%<br>(3.5-23%)                     | 14%<br>(3.8-26%)                    | 640<br>(170-1200)     | 5000<br>(1400-8900)       |
| Hungary  | 1990 | Male   | 90 to 94 | 85%<br>(77-91%)                | 15%<br>(9.4-23%)         | 5.5<br>(3.6-7.8)                            | 10%<br>(2.4-20%)                     | 12%<br>(2.5-23%)                    | 170<br>(37-350)       | 940<br>(220-1800)         |
| Hungary  | 1990 | Male   | 95 plus  | 85%<br>(75-93%)                | 15%<br>(7.4-25%)         | 4.7<br>(2.7-7.4)                            | 7.8%<br>(-0.93-18%)                  | 8.7%<br>(-1.7-21%)                  | 20<br>(-3.8-47)       | 73<br>(-8.6-170)          |
| Hungary  | 1995 | Female | All Ages | 74%<br>(70-77%)                | 26%<br>(23-30%)          | 2.5<br>(2.2-2.8)                            | 8.3%<br>(3.7-13%)                    | 10%<br>(3-18%)                      | 6800<br>(2000-12000)  | 160000<br>(72000-250000)  |
| Hungary  | 1995 | Female | 15 to 19 | 77%<br>(66-87%)                | 23%<br>(13-34%)          | 1.9<br>(1.2-2.7)                            | 3.1%<br>(1.1-5.2%)                   | 8.3%<br>(0.93-16%)                  | 10<br>(1.1-19)        | 1200<br>(410-2000)        |

| Location | Year | Sex    | Age      | Prevalence of current drinkers | Prevalence of abstainers | Population average of standard drinks daily | Percent of total attributable deaths | Percent of total attributable DALYs | Attributable deaths   | Attributable DALYs        |
|----------|------|--------|----------|--------------------------------|--------------------------|---------------------------------------------|--------------------------------------|-------------------------------------|-----------------------|---------------------------|
| Hungary  | 1995 | Female | 20 to 24 | 85%<br>(77-90%)                | 15%<br>(9.5-23%)         | 2.3<br>(1.5-3.2)                            | 4.6%<br>(2.2-7.2%)                   | 9.2%<br>(1-17%)                     | 14<br>(1.5-26)        | 1900<br>(910-3000)        |
| Hungary  | 1995 | Female | 25 to 29 | 85%<br>(77-90%)                | 15%<br>(9.8-23%)         | 2.3<br>(1.6-3.2)                            | 5.2%<br>(2.7-7.8%)                   | 10%<br>(2.7-17%)                    | 19<br>(5-32)          | 2100<br>(1100-3200)       |
| Hungary  | 1995 | Female | 30 to 34 | 84%<br>(76-90%)                | 16%<br>(10-24%)          | 2.4<br>(1.7-3.4)                            | 6.5%<br>(3.7-9.4%)                   | 13%<br>(6.4-19%)                    | 40<br>(20-60)         | 3100<br>(1800-4500)       |
| Hungary  | 1995 | Female | 35 to 39 | 84%<br>(77-90%)                | 16%<br>(10-23%)          | 2.6<br>(1.8-3.7)                            | 8.9%<br>(5.5-13%)                    | 16%<br>(9.4-22%)                    | 120<br>(69-170)       | 7100<br>(4200-9900)       |
| Hungary  | 1995 | Female | 40 to 44 | 83%<br>(76-88%)                | 17%<br>(12-24%)          | 3.1<br>(2.3-4.2)                            | 11%<br>(6.8-15%)                     | 18%<br>(11-23%)                     | 240<br>(150-320)      | 12000<br>(7700-16000)     |
| Hungary  | 1995 | Female | 45 to 49 | 80%<br>(72-86%)                | 20%<br>(14-28%)          | 3.8<br>(2.7-5.2)                            | 12%<br>(7.4-17%)                     | 19%<br>(12-25%)                     | 310<br>(200-430)      | 14000<br>(8900-20000)     |
| Hungary  | 1995 | Female | 50 to 54 | 77%<br>(69-83%)                | 23%<br>(17-31%)          | 4<br>(2.8-5.2)                              | 12%<br>(7.5-17%)                     | 18%<br>(12-25%)                     | 400<br>(250-550)      | 16000<br>(9600-22000)     |
| Hungary  | 1995 | Female | 55 to 59 | 73%<br>(64-79%)                | 27%<br>(21-36%)          | 3.8<br>(2.7-5.1)                            | 11%<br>(6.3-17%)                     | 16%<br>(9.4-24%)                    | 480<br>(270-710)      | 16000<br>(9000-24000)     |
| Hungary  | 1995 | Female | 60 to 64 | 71%<br>(61-78%)                | 29%<br>(22-39%)          | 3.8<br>(2.6-5.2)                            | 10%<br>(4.4-16%)                     | 14%<br>(6.7-22%)                    | 600<br>(280-970)      | 18000<br>(8000-29000)     |
| Hungary  | 1995 | Female | 65 to 69 | 71%<br>(61-79%)                | 29%<br>(21-39%)          | 3.7<br>(2.6-4.8)                            | 9.4%<br>(3.2-16%)                    | 12%<br>(4.5-21%)                    | 810<br>(290-1400)     | 20000<br>(7000-34000)     |
| Hungary  | 1995 | Female | 70 to 74 | 66%<br>(55-74%)                | 34%<br>(26-45%)          | 3.3<br>(2.2-4.6)                            | 8.7%<br>(2-16%)                      | 11%<br>(2.6-21%)                    | 1100<br>(270-2000)    | 21000<br>(4800-39000)     |
| Hungary  | 1995 | Female | 75 to 79 | 56%<br>(43-69%)                | 44%<br>(31-57%)          | 2.8<br>(1.8-4.2)                            | 7.4%<br>(1-15%)                      | 9%<br>(1.2-18%)                     | 740<br>(96-1500)      | 11000<br>(1600-23000)     |
| Hungary  | 1995 | Female | 80 to 84 | 50%<br>(36-63%)                | 50%<br>(37-64%)          | 2.4<br>(1.6-3.5)                            | 6.1%<br>(0.34-13%)                   | 7.3%<br>(0.28-16%)                  | 980<br>(39-2100)      | 11000<br>(630-23000)      |
| Hungary  | 1995 | Female | 85 to 89 | 49%<br>(36-63%)                | 51%<br>(37-64%)          | 2.3<br>(1.4-3.6)                            | 5.5%<br>(0.04-12%)                   | 6.5%<br>(-0.063-14%)                | 670<br>(-6.3-1500)    | 5200<br>(39-12000)        |
| Hungary  | 1995 | Female | 90 to 94 | 51%<br>(38-65%)                | 49%<br>(35-62%)          | 2.4<br>(1.4-3.8)                            | 5%<br>(-0.89-13%)                    | 5.8%<br>(-1.1-16%)                  | 250<br>(-48-670)      | 1300<br>(-220-3600)       |
| Hungary  | 1995 | Female | 95 plus  | 54%<br>(37-71%)                | 46%<br>(29-63%)          | 2.5<br>(1.2-4.2)                            | 4.7%<br>(-2.2-14%)                   | 5.4%<br>(-3-17%)                    | 59<br>(-32-190)       | 210<br>(-98-640)          |
| Hungary  | 1995 | Male   | All Ages | 88%<br>(85-90%)                | 12%<br>(10-15%)          | 6.2<br>(5.6-6.8)                            | 21%<br>(11-29%)                      | 22%<br>(11-33%)                     | 17000<br>(8200-25000) | 510000<br>(270000-720000) |
| Hungary  | 1995 | Male   | 15 to 19 | 84%<br>(74-92%)                | 16%<br>(8.3-26%)         | 2.2<br>(1.4-3.2)                            | 6.5%<br>(2-11%)                      | 12%<br>(1.8-21%)                    | 36<br>(5.4-65)        | 3300<br>(1000-5500)       |
| Hungary  | 1995 | Male   | 20 to 24 | 92%<br>(87-95%)                | 8.2%<br>(5.2-13%)        | 4.2<br>(3-5.6)                              | 14%<br>(6.4-21%)                     | 21%<br>(7.6-35%)                    | 94<br>(33-150)        | 7900<br>(3700-12000)      |
| Hungary  | 1995 | Male   | 25 to 29 | 93%<br>(89-96%)                | 7.2%<br>(4.4-11%)        | 6.2<br>(4.3-8.4)                            | 19%<br>(12-27%)                      | 30%<br>(16-43%)                     | 160<br>(86-230)       | 12000<br>(7000-16000)     |
| Hungary  | 1995 | Male   | 30 to 34 | 93%<br>(88-96%)                | 7%<br>(4.3-12%)          | 7.2<br>(5.2-9.3)                            | 24%<br>(16-32%)                      | 34%<br>(22-44%)                     | 290<br>(190-390)      | 18000<br>(13000-24000)    |
| Hungary  | 1995 | Male   | 35 to 39 | 92%<br>(88-95%)                | 7.6%<br>(4.7-12%)        | 7.3<br>(5.1-9.8)                            | 27%<br>(19-35%)                      | 34%<br>(24-44%)                     | 650<br>(460-850)      | 36000<br>(25000-46000)    |

| Location | Year | Sex    | Age      | Prevalence of current drinkers | Prevalence of abstainers | Population average of standard drinks daily | Percent of total attributable deaths | Percent of total attributable DALYs | Attributable deaths | Attributable DALYs       |
|----------|------|--------|----------|--------------------------------|--------------------------|---------------------------------------------|--------------------------------------|-------------------------------------|---------------------|--------------------------|
| Hungary  | 1995 | Male   | 40 to 44 | 92%<br>(88-95%)                | 7.7%<br>(4.6-12%)        | 8.4<br>(6.3-11)                             | 29%<br>(21-36%)                      | 35%<br>(26-44%)                     | 1200<br>(880-1600)  | 59000<br>(43000-75000)   |
| Hungary  | 1995 | Male   | 45 to 49 | 93%<br>(89-95%)                | 7.3%<br>(4.6-11%)        | 11<br>(8-13)                                | 29%<br>(19-37%)                      | 34%<br>(23-44%)                     | 1500<br>(1000-1900) | 64000<br>(42000-83000)   |
| Hungary  | 1995 | Male   | 50 to 54 | 93%<br>(90-96%)                | 6.9%<br>(4.5-10%)        | 11<br>(8.5-14)                              | 27%<br>(16-36%)                      | 31%<br>(19-42%)                     | 1700<br>(1000-2300) | 65000<br>(38000-88000)   |
| Hungary  | 1995 | Male   | 55 to 59 | 93%<br>(90-96%)                | 6.5%<br>(4.4-9.6%)       | 11<br>(8.9-14)                              | 24%<br>(13-34%)                      | 28%<br>(15-39%)                     | 1800<br>(950-2500)  | 58000<br>(31000-82000)   |
| Hungary  | 1995 | Male   | 60 to 64 | 91%<br>(88-94%)                | 8.5%<br>(5.9-12%)        | 11<br>(8.1-14)                              | 21%<br>(9.8-32%)                     | 25%<br>(12-36%)                     | 2000<br>(930-3000)  | 56000<br>(25000-84000)   |
| Hungary  | 1995 | Male   | 65 to 69 | 87%<br>(82-91%)                | 13%<br>(9-18%)           | 9.5<br>(7.4-12)                             | 19%<br>(7.2-30%)                     | 22%<br>(8.4-34%)                    | 2200<br>(810-3400)  | 51000<br>(19000-80000)   |
| Hungary  | 1995 | Male   | 70 to 74 | 85%<br>(80-89%)                | 15%<br>(11-20%)          | 8.4<br>(6.2-11)                             | 17%<br>(5.8-27%)                     | 20%<br>(6.7-31%)                    | 2200<br>(750-3400)  | 41000<br>(14000-66000)   |
| Hungary  | 1995 | Male   | 75 to 79 | 84%<br>(77-90%)                | 16%<br>(10-23%)          | 7.2<br>(5-9.5)                              | 15%<br>(5.1-25%)                     | 17%<br>(5.8-28%)                    | 1200<br>(420-2000)  | 18000<br>(6200-30000)    |
| Hungary  | 1995 | Male   | 80 to 84 | 84%<br>(76-90%)                | 16%<br>(10-24%)          | 6.3<br>(4.5-8.4)                            | 14%<br>(4.5-23%)                     | 15%<br>(5-26%)                      | 1300<br>(440-2300)  | 15000<br>(4900-25000)    |
| Hungary  | 1995 | Male   | 85 to 89 | 84%<br>(77-90%)                | 16%<br>(10-23%)          | 5.7<br>(3.9-7.6)                            | 12%<br>(3.4-21%)                     | 13%<br>(3.8-24%)                    | 670<br>(190-1200)   | 5200<br>(1600-9500)      |
| Hungary  | 1995 | Male   | 90 to 94 | 85%<br>(78-91%)                | 15%<br>(9.5-22%)         | 5<br>(3.2-7.2)                              | 9.3%<br>(1.4-19%)                    | 10%<br>(1.2-22%)                    | 170<br>(19-350)     | 930<br>(140-1900)        |
| Hungary  | 1995 | Male   | 95 plus  | 86%<br>(75-93%)                | 14%<br>(7.2-25%)         | 4.3<br>(2.4-6.8)                            | 6.7%<br>(-1.9-17%)                   | 7.3%<br>(-2.9-19%)                  | 22<br>(-9-59)       | 84<br>(-26-220)          |
| Hungary  | 2000 | Female | All Ages | 73%<br>(69-76%)                | 27%<br>(24-31%)          | 2.3<br>(2-2.6)                              | 7.2%<br>(3.1-11%)                    | 8.3%<br>(2.3-15%)                   | 5400<br>(1500-9600) | 130000<br>(58000-210000) |
| Hungary  | 2000 | Female | 15 to 19 | 79%<br>(67-88%)                | 21%<br>(12-33%)          | 1.8<br>(1.2-2.6)                            | 2.9%<br>(1-4.9%)                     | 7.8%<br>(0.58-15%)                  | 6.8<br>(0.5-13)     | 870<br>(300-1400)        |
| Hungary  | 2000 | Female | 20 to 24 | 85%<br>(77-90%)                | 15%<br>(9.7-23%)         | 2.2<br>(1.4-3.1)                            | 4.3%<br>(2.2-6.5%)                   | 8.3%<br>(0.88-16%)                  | 11<br>(1.1-21)      | 1700<br>(880-2700)       |
| Hungary  | 2000 | Female | 25 to 29 | 84%<br>(77-90%)                | 16%<br>(10-23%)          | 2.2<br>(1.5-3)                              | 4.5%<br>(2.4-6.5%)                   | 8.8%<br>(1.9-16%)                   | 13<br>(2.9-24)      | 1900<br>(1000-2800)      |
| Hungary  | 2000 | Female | 30 to 34 | 84%<br>(77-89%)                | 16%<br>(11-23%)          | 2.3<br>(1.6-3.1)                            | 5.1%<br>(2.9-7.5%)                   | 11%<br>(4.5-17%)                    | 25<br>(11-40)       | 2400<br>(1300-3500)      |
| Hungary  | 2000 | Female | 35 to 39 | 83%<br>(77-89%)                | 17%<br>(11-23%)          | 2.4<br>(1.6-3.5)                            | 7.1%<br>(4.2-10%)                    | 13%<br>(7.3-19%)                    | 62<br>(33-92)       | 4000<br>(2300-5800)      |
| Hungary  | 2000 | Female | 40 to 44 | 82%<br>(75-88%)                | 18%<br>(12-25%)          | 2.9<br>(2.1-3.9)                            | 9.3%<br>(5.8-13%)                    | 16%<br>(10-21%)                     | 160<br>(100-220)    | 8500<br>(5500-12000)     |
| Hungary  | 2000 | Female | 45 to 49 | 80%<br>(73-85%)                | 20%<br>(15-27%)          | 3.5<br>(2.5-4.7)                            | 11%<br>(6.8-15%)                     | 17%<br>(11-23%)                     | 310<br>(200-420)    | 14000<br>(9000-19000)    |
| Hungary  | 2000 | Female | 50 to 54 | 75%<br>(68-82%)                | 25%<br>(18-32%)          | 3.6<br>(2.6-4.7)                            | 11%<br>(6.7-15%)                     | 16%<br>(11-22%)                     | 350<br>(230-480)    | 14000<br>(8800-20000)    |
| Hungary  | 2000 | Female | 55 to 59 | 70%<br>(61-77%)                | 30%<br>(23-39%)          | 3.3<br>(2.4-4.5)                            | 10%<br>(5.8-15%)                     | 15%<br>(9-21%)                      | 410<br>(250-590)    | 14000<br>(8200-21000)    |

| Location | Year | Sex    | Age      | Prevalence of current drinkers | Prevalence of abstainers | Population average of standard drinks daily | Percent of total attributable deaths | Percent of total attributable DALYs | Attributable deaths   | Attributable DALYs        |
|----------|------|--------|----------|--------------------------------|--------------------------|---------------------------------------------|--------------------------------------|-------------------------------------|-----------------------|---------------------------|
| Hungary  | 2000 | Female | 60 to 64 | 68%<br>(59-75%)                | 32%<br>(25-41%)          | 3.3<br>(2.3-4.6)                            | 8.8%<br>(4.1-14%)                    | 12%<br>(6.3-20%)                    | 460<br>(230-730)      | 14000<br>(6500-22000)     |
| Hungary  | 2000 | Female | 65 to 69 | 68%<br>(59-76%)                | 32%<br>(24-41%)          | 3.2<br>(2.4-4.3)                            | 8.2%<br>(2.9-14%)                    | 11%<br>(4.2-18%)                    | 620<br>(230-1000)     | 15000<br>(5500-26000)     |
| Hungary  | 2000 | Female | 70 to 74 | 62%<br>(52-72%)                | 38%<br>(28-48%)          | 2.9<br>(1.9-4)                              | 7.3%<br>(1.5-14%)                    | 9.3%<br>(2.1-17%)                   | 800<br>(180-1500)     | 16000<br>(3400-29000)     |
| Hungary  | 2000 | Female | 75 to 79 | 52%<br>(41-65%)                | 48%<br>(35-59%)          | 2.4<br>(1.5-3.5)                            | 5.9%<br>(0.44-12%)                   | 7.2%<br>(0.4-15%)                   | 880<br>(48-1800)      | 14000<br>(980-28000)      |
| Hungary  | 2000 | Female | 80 to 84 | 47%<br>(34-59%)                | 53%<br>(41-66%)          | 2.1<br>(1.3-3)                              | 4.8%<br>(-0.07-11%)                  | 5.7%<br>(-0.19-13%)                 | 500<br>(-17-1100)     | 5600<br>(-88-12000)       |
| Hungary  | 2000 | Female | 85 to 89 | 46%<br>(33-59%)                | 54%<br>(41-67%)          | 2<br>(1.2-3.1)                              | 4.3%<br>(-0.44-10%)                  | 5%<br>(-0.63-12%)                   | 530<br>(-67-1300)     | 4200<br>(-450-9800)       |
| Hungary  | 2000 | Female | 90 to 94 | 48%<br>(35-61%)                | 52%<br>(39-65%)          | 2<br>(1.1-3.3)                              | 3.9%<br>(-1.4-11%)                   | 4.4%<br>(-1.9-14%)                  | 230<br>(-96-700)      | 1300<br>(-430-3700)       |
| Hungary  | 2000 | Female | 95 plus  | 51%<br>(34-69%)                | 49%<br>(31-66%)          | 2.2<br>(1-3.7)                              | 3.7%<br>(-2.5-12%)                   | 4.2%<br>(-3.3-15%)                  | 54<br>(-43-190)       | 200<br>(-140-660)         |
| Hungary  | 2000 | Male   | All Ages | 90%<br>(88-92%)                | 10%<br>(8.5-12%)         | 6.3<br>(5.7-6.9)                            | 20%<br>(11-28%)                      | 22%<br>(11-32%)                     | 16000<br>(8100-22000) | 450000<br>(250000-620000) |
| Hungary  | 2000 | Male   | 15 to 19 | 88%<br>(80-93%)                | 12%<br>(6.9-20%)         | 2.3<br>(1.5-3.3)                            | 6%<br>(1.9-10%)                      | 12%<br>(1.9-22%)                    | 22<br>(3.4-42)        | 2200<br>(700-3700)        |
| Hungary  | 2000 | Male   | 20 to 24 | 93%<br>(90-95%)                | 6.7%<br>(4.5-9.7%)       | 4.2<br>(3-5.4)                              | 13%<br>(6-19%)                       | 21%<br>(7.3-33%)                    | 81<br>(29-130)        | 7100<br>(3300-11000)      |
| Hungary  | 2000 | Male   | 25 to 29 | 94%<br>(91-96%)                | 5.9%<br>(3.8-8.6%)       | 6.1<br>(4.3-8.1)                            | 17%<br>(10-24%)                      | 29%<br>(15-42%)                     | 130<br>(71-190)       | 10000<br>(6100-14000)     |
| Hungary  | 2000 | Male   | 30 to 34 | 94%<br>(91-96%)                | 5.8%<br>(3.8-8.5%)       | 7.1<br>(5.2-9.1)                            | 21%<br>(14-28%)                      | 33%<br>(21-43%)                     | 220<br>(140-300)      | 15000<br>(9600-19000)     |
| Hungary  | 2000 | Male   | 35 to 39 | 94%<br>(91-96%)                | 6.4%<br>(4.1-8.9%)       | 7.1<br>(5.1-9.6)                            | 24%<br>(17-32%)                      | 34%<br>(24-44%)                     | 380<br>(260-490)      | 21000<br>(15000-27000)    |
| Hungary  | 2000 | Male   | 40 to 44 | 94%<br>(91-96%)                | 6.4%<br>(4.2-9.1%)       | 8.3<br>(6.2-11)                             | 28%<br>(20-35%)                      | 35%<br>(26-44%)                     | 900<br>(660-1100)     | 44000<br>(32000-55000)    |
| Hungary  | 2000 | Male   | 45 to 49 | 94%<br>(92-96%)                | 5.9%<br>(4-8.2%)         | 10<br>(8-13)                                | 29%<br>(19-36%)                      | 35%<br>(24-43%)                     | 1500<br>(1000-1900)   | 65000<br>(44000-83000)    |
| Hungary  | 2000 | Male   | 50 to 54 | 94%<br>(92-96%)                | 5.6%<br>(3.9-7.7%)       | 11<br>(8.7-14)                              | 27%<br>(17-35%)                      | 32%<br>(20-42%)                     | 1600<br>(1000-2200)   | 62000<br>(38000-82000)    |
| Hungary  | 2000 | Male   | 55 to 59 | 95%<br>(93-96%)                | 5.4%<br>(3.9-7.3%)       | 11<br>(8.9-14)                              | 24%<br>(14-33%)                      | 29%<br>(17-39%)                     | 1700<br>(960-2400)    | 57000<br>(31000-78000)    |
| Hungary  | 2000 | Male   | 60 to 64 | 93%<br>(90-94%)                | 7.4%<br>(5.7-9.7%)       | 11<br>(8.1-13)                              | 22%<br>(11-31%)                      | 25%<br>(13-36%)                     | 1700<br>(880-2500)    | 49000<br>(24000-70000)    |
| Hungary  | 2000 | Male   | 65 to 69 | 89%<br>(85-91%)                | 11%<br>(8.7-15%)         | 9.3<br>(7.4-11)                             | 19%<br>(8-29%)                       | 22%<br>(9.3-33%)                    | 1900<br>(800-2800)    | 45000<br>(18000-67000)    |
| Hungary  | 2000 | Male   | 70 to 74 | 86%<br>(82-89%)                | 14%<br>(11-18%)          | 8.2<br>(6.1-10)                             | 17%<br>(6.5-27%)                     | 19%<br>(7.7-30%)                    | 1900<br>(770-3000)    | 37000<br>(15000-58000)    |
| Hungary  | 2000 | Male   | 75 to 79 | 85%<br>(79-90%)                | 15%<br>(10-21%)          | 6.9<br>(5-9)                                | 15%<br>(5.2-24%)                     | 17%<br>(6.1-27%)                    | 1700<br>(620-2800)    | 25000<br>(9300-41000)     |

| Location | Year | Sex    | Age      | Prevalence of current drinkers | Prevalence of abstainers | Population average of standard drinks daily | Percent of total attributable deaths | Percent of total attributable DALYs | Attributable deaths | Attributable DALYs       |
|----------|------|--------|----------|--------------------------------|--------------------------|---------------------------------------------|--------------------------------------|-------------------------------------|---------------------|--------------------------|
| Hungary  | 2000 | Male   | 80 to 84 | 84%<br>(75-90%)                | 16%<br>(10-25%)          | 5.9<br>(4.1-7.8)                            | 13%<br>(4.7-22%)                     | 15%<br>(5.3-25%)                    | 800<br>(290-1300)   | 8900<br>(3300-15000)     |
| Hungary  | 2000 | Male   | 85 to 89 | 84%<br>(76-90%)                | 16%<br>(10-24%)          | 5.3<br>(3.7-7.1)                            | 11%<br>(3.3-20%)                     | 12%<br>(3.6-22%)                    | 640<br>(190-1200)   | 5100<br>(1500-9000)      |
| Hungary  | 2000 | Male   | 90 to 94 | 85%<br>(77-90%)                | 15%<br>(9.7-23%)         | 4.7<br>(3-6.7)                              | 8.6%<br>(0.46-17%)                   | 9.5%<br>(0.071-20%)                 | 190<br>(1.4-400)    | 1000<br>(57-2100)        |
| Hungary  | 2000 | Male   | 95 plus  | 86%<br>(76-93%)                | 14%<br>(7.4-24%)         | 4<br>(2.2-6.4)                              | 6%<br>(-2.5-16%)                     | 6.4%<br>(-3.7-18%)                  | 22<br>(-13-63)      | 85<br>(-37-230)          |
| Hungary  | 2005 | Female | All Ages | 70%<br>(67-73%)                | 30%<br>(27-33%)          | 2.4<br>(2.1-2.7)                            | 6.8%<br>(3-11%)                      | 8%<br>(2.5-14%)                     | 5100<br>(1600-9100) | 120000<br>(55000-190000) |
| Hungary  | 2005 | Female | 15 to 19 | 79%<br>(68-87%)                | 21%<br>(13-32%)          | 2<br>(1.3-2.8)                              | 2.9%<br>(1-4.9%)                     | 7.9%<br>(0.86-15%)                  | 6.1<br>(0.68-12)    | 800<br>(280-1300)        |
| Hungary  | 2005 | Female | 20 to 24 | 85%<br>(77-90%)                | 15%<br>(10-23%)          | 2.3<br>(1.5-3.3)                            | 4.1%<br>(2.3-6.2%)                   | 8.4%<br>(1-16%)                     | 7.4<br>(0.85-14)    | 1300<br>(710-2000)       |
| Hungary  | 2005 | Female | 25 to 29 | 83%<br>(76-88%)                | 17%<br>(12-24%)          | 2.2<br>(1.5-3.1)                            | 4.3%<br>(2.4-6.2%)                   | 8.6%<br>(2-15%)                     | 13<br>(3-23)        | 1900<br>(1000-2900)      |
| Hungary  | 2005 | Female | 30 to 34 | 83%<br>(76-88%)                | 17%<br>(12-24%)          | 2.3<br>(1.6-3.2)                            | 4.5%<br>(2.5-6.6%)                   | 10%<br>(3.9-16%)                    | 22<br>(8.5-34)      | 2300<br>(1300-3300)      |
| Hungary  | 2005 | Female | 35 to 39 | 82%<br>(76-88%)                | 18%<br>(12-24%)          | 2.5<br>(1.7-3.6)                            | 5.9%<br>(3.4-8.7%)                   | 12%<br>(6.5-19%)                    | 48<br>(25-73)       | 3400<br>(1900-4900)      |
| Hungary  | 2005 | Female | 40 to 44 | 81%<br>(74-87%)                | 19%<br>(13-26%)          | 3<br>(2.1-4.1)                              | 8%<br>(4.9-11%)                      | 15%<br>(8.9-20%)                    | 100<br>(62-140)     | 5500<br>(3300-7700)      |
| Hungary  | 2005 | Female | 45 to 49 | 78%<br>(71-84%)                | 22%<br>(16-29%)          | 3.6<br>(2.6-4.9)                            | 10%<br>(6.2-14%)                     | 16%<br>(11-22%)                     | 240<br>(150-320)    | 11000<br>(6900-15000)    |
| Hungary  | 2005 | Female | 50 to 54 | 73%<br>(67-79%)                | 27%<br>(21-33%)          | 3.7<br>(2.6-4.8)                            | 10%<br>(6.4-14%)                     | 16%<br>(10-21%)                     | 380<br>(250-520)    | 15000<br>(9500-21000)    |
| Hungary  | 2005 | Female | 55 to 59 | 66%<br>(60-73%)                | 34%<br>(27-40%)          | 3.3<br>(2.4-4.5)                            | 9.5%<br>(5.5-14%)                    | 14%<br>(8.7-20%)                    | 390<br>(240-570)    | 14000<br>(8100-20000)    |
| Hungary  | 2005 | Female | 60 to 64 | 64%<br>(57-71%)                | 36%<br>(29-43%)          | 3.2<br>(2.3-4.5)                            | 8.5%<br>(4.1-14%)                    | 12%<br>(6.4-19%)                    | 440<br>(230-690)    | 13000<br>(6400-21000)    |
| Hungary  | 2005 | Female | 65 to 69 | 64%<br>(56-72%)                | 36%<br>(28-44%)          | 3.2<br>(2.3-4.1)                            | 8%<br>(3.2-13%)                      | 11%<br>(4.6-18%)                    | 540<br>(230-870)    | 13000<br>(5300-22000)    |
| Hungary  | 2005 | Female | 70 to 74 | 56%<br>(47-64%)                | 44%<br>(36-53%)          | 2.7<br>(1.8-3.7)                            | 6.9%<br>(1.8-13%)                    | 9%<br>(2.5-16%)                     | 670<br>(190-1200)   | 13000<br>(3500-24000)    |
| Hungary  | 2005 | Female | 75 to 79 | 47%<br>(37-58%)                | 53%<br>(42-63%)          | 2.2<br>(1.5-3.2)                            | 5.8%<br>(0.81-12%)                   | 7.1%<br>(0.94-14%)                  | 790<br>(100-1600)   | 12000<br>(1800-25000)    |
| Hungary  | 2005 | Female | 80 to 84 | 43%<br>(30-56%)                | 57%<br>(44-70%)          | 2<br>(1.3-2.9)                              | 4.8%<br>(0.2-10%)                    | 5.7%<br>(0.14-12%)                  | 780<br>(19-1700)    | 8800<br>(390-19000)      |
| Hungary  | 2005 | Female | 85 to 89 | 42%<br>(29-55%)                | 58%<br>(45-71%)          | 1.9<br>(1.1-2.9)                            | 4.2%<br>(-0.11-9.8%)                 | 5%<br>(-0.34-12%)                   | 370<br>(-26-900)    | 3000<br>(-76-7100)       |
| Hungary  | 2005 | Female | 90 to 94 | 43%<br>(31-57%)                | 57%<br>(43-69%)          | 1.9<br>(1.1-3.2)                            | 4%<br>(-1-11%)                       | 4.6%<br>(-1.4-13%)                  | 260<br>(-84-770)    | 1400<br>(-370-4100)      |
| Hungary  | 2005 | Female | 95 plus  | 47%<br>(30-65%)                | 53%<br>(35-70%)          | 2<br>(0.97-3.6)                             | 3.9%<br>(-1.8-12%)                   | 4.4%<br>(-2.5-15%)                  | 74<br>(-42-240)     | 270<br>(-130-850)        |

| Location | Year | Sex    | Age      | Prevalence of current drinkers | Prevalence of abstainers | Population average of standard drinks daily | Percent of total attributable deaths | Percent of total attributable DALYs | Attributable deaths   | Attributable DALYs        |
|----------|------|--------|----------|--------------------------------|--------------------------|---------------------------------------------|--------------------------------------|-------------------------------------|-----------------------|---------------------------|
| Hungary  | 2005 | Male   | All Ages | 90%<br>(88-92%)                | 10%<br>(8.4-12%)         | 6.8<br>(6.2-7.5)                            | 20%<br>(11-28%)                      | 22%<br>(10-32%)                     | 15000<br>(7200-22000) | 420000<br>(230000-600000) |
| Hungary  | 2005 | Male   | 15 to 19 | 88%<br>(81-93%)                | 12%<br>(6.8-19%)         | 2.5<br>(1.7-3.5)                            | 6.2%<br>(2-10%)                      | 12%<br>(2.2-23%)                    | 21<br>(3.6-39)        | 2100<br>(720-3500)        |
| Hungary  | 2005 | Male   | 20 to 24 | 93%<br>(91-95%)                | 6.7%<br>(4.7-9.5%)       | 4.4<br>(3.2-5.9)                            | 13%<br>(6.1-19%)                     | 22%<br>(8.1-36%)                    | 61<br>(22-99)         | 5500<br>(2700-8300)       |
| Hungary  | 2005 | Male   | 25 to 29 | 94%<br>(91-96%)                | 5.9%<br>(4-8.6%)         | 6.5<br>(4.6-8.6)                            | 17%<br>(9.8-24%)                     | 29%<br>(15-43%)                     | 130<br>(69-190)       | 10000<br>(6000-14000)     |
| Hungary  | 2005 | Male   | 30 to 34 | 94%<br>(92-96%)                | 5.8%<br>(3.9-8.4%)       | 7.5<br>(5.6-9.7)                            | 19%<br>(12-26%)                      | 33%<br>(20-45%)                     | 180<br>(110-250)      | 12000<br>(8100-17000)     |
| Hungary  | 2005 | Male   | 35 to 39 | 93%<br>(91-96%)                | 6.7%<br>(4.3-9.4%)       | 7.5<br>(5.4-10)                             | 22%<br>(15-30%)                      | 34%<br>(23-44%)                     | 310<br>(210-420)      | 18000<br>(12000-24000)    |
| Hungary  | 2005 | Male   | 40 to 44 | 93%<br>(91-96%)                | 6.7%<br>(4.4-9.5%)       | 8.7<br>(6.6-11)                             | 26%<br>(19-34%)                      | 35%<br>(25-44%)                     | 580<br>(420-760)      | 29000<br>(21000-37000)    |
| Hungary  | 2005 | Male   | 45 to 49 | 94%<br>(92-96%)                | 6%<br>(4.2-8.3%)         | 11<br>(8.5-14)                              | 28%<br>(18-36%)                      | 35%<br>(24-44%)                     | 1200<br>(810-1600)    | 53000<br>(35000-69000)    |
| Hungary  | 2005 | Male   | 50 to 54 | 94%<br>(92-96%)                | 5.8%<br>(4-7.8%)         | 12<br>(9.4-15)                              | 26%<br>(16-35%)                      | 32%<br>(19-42%)                     | 1800<br>(1100-2400)   | 68000<br>(41000-91000)    |
| Hungary  | 2005 | Male   | 55 to 59 | 94%<br>(92-96%)                | 5.6%<br>(4.1-7.6%)       | 12<br>(9.4-15)                              | 24%<br>(13-33%)                      | 28%<br>(16-39%)                     | 1800<br>(970-2400)    | 58000<br>(31000-81000)    |
| Hungary  | 2005 | Male   | 60 to 64 | 92%<br>(90-94%)                | 7.6%<br>(5.8-9.7%)       | 11<br>(8.6-14)                              | 21%<br>(10-31%)                      | 25%<br>(12-36%)                     | 1800<br>(880-2600)    | 50000<br>(24000-73000)    |
| Hungary  | 2005 | Male   | 65 to 69 | 88%<br>(85-91%)                | 12%<br>(8.8-15%)         | 9.9<br>(8-12)                               | 19%<br>(7.6-29%)                     | 22%<br>(9.1-33%)                    | 1700<br>(710-2600)    | 40000<br>(16000-61000)    |
| Hungary  | 2005 | Male   | 70 to 74 | 86%<br>(83-89%)                | 14%<br>(11-17%)          | 8.7<br>(6.6-11)                             | 17%<br>(5.8-26%)                     | 19%<br>(7.1-30%)                    | 1800<br>(640-2800)    | 34000<br>(12000-54000)    |
| Hungary  | 2005 | Male   | 75 to 79 | 84%<br>(79-89%)                | 16%<br>(11-21%)          | 7.3<br>(5.3-9.5)                            | 15%<br>(4.5-24%)                     | 17%<br>(5.3-27%)                    | 1600<br>(510-2700)    | 24000<br>(7600-40000)     |
| Hungary  | 2005 | Male   | 80 to 84 | 83%<br>(76-89%)                | 17%<br>(11-24%)          | 6.2<br>(4.4-8.3)                            | 13%<br>(4.2-22%)                     | 15%<br>(4.7-25%)                    | 1300<br>(400-2100)    | 14000<br>(4600-24000)     |
| Hungary  | 2005 | Male   | 85 to 89 | 84%<br>(77-90%)                | 16%<br>(10-23%)          | 5.7<br>(4-7.6)                              | 11%<br>(3.2-20%)                     | 13%<br>(3.4-23%)                    | 450<br>(120-810)      | 3600<br>(1000-6300)       |
| Hungary  | 2005 | Male   | 90 to 94 | 85%<br>(78-90%)                | 15%<br>(9.6-22%)         | 5.1<br>(3.3-7.2)                            | 9.2%<br>(1.4-18%)                    | 10%<br>(1.1-21%)                    | 220<br>(23-450)       | 1200<br>(180-2400)        |
| Hungary  | 2005 | Male   | 95 plus  | 86%<br>(75-92%)                | 14%<br>(7.6-25%)         | 4.3<br>(2.4-6.8)                            | 6.7%<br>(-1.8-16%)                   | 7.4%<br>(-3-19%)                    | 34<br>(-14-87)        | 130<br>(-37-310)          |
| Hungary  | 2010 | Female | All Ages | 68%<br>(65-71%)                | 32%<br>(29-35%)          | 2<br>(1.8-2.3)                              | 5.4%<br>(2.3-8.6%)                   | 6%<br>(1.3-11%)                     | 3900<br>(800-7300)    | 93000<br>(40000-150000)   |
| Hungary  | 2010 | Female | 15 to 19 | 77%<br>(66-87%)                | 23%<br>(13-34%)          | 1.7<br>(1.1-2.4)                            | 2.5%<br>(0.98-4.2%)                  | 6.5%<br>(0.21-13%)                  | 4.2<br>(0.13-8.3)     | 640<br>(250-1100)         |
| Hungary  | 2010 | Female | 20 to 24 | 84%<br>(76-89%)                | 16%<br>(11-24%)          | 2<br>(1.3-2.9)                              | 3.9%<br>(2.2-5.7%)                   | 7.1%<br>(0.55-14%)                  | 5<br>(0.41-9.7)       | 1100<br>(610-1700)        |
| Hungary  | 2010 | Female | 25 to 29 | 81%<br>(73-87%)                | 19%<br>(13-27%)          | 1.9<br>(1.3-2.6)                            | 3.9%<br>(2.3-5.6%)                   | 7.2%<br>(1.4-13%)                   | 7.3<br>(1.4-14)       | 1400<br>(770-2000)        |

| Location | Year | Sex    | Age      | Prevalence of current drinkers | Prevalence of abstainers | Population average of standard drinks daily | Percent of total attributable deaths | Percent of total attributable DALYs | Attributable deaths   | Attributable DALYs        |
|----------|------|--------|----------|--------------------------------|--------------------------|---------------------------------------------|--------------------------------------|-------------------------------------|-----------------------|---------------------------|
| Hungary  | 2010 | Female | 30 to 34 | 81%<br>(74-87%)                | 19%<br>(13-26%)          | 2<br>(1.4-2.8)                              | 4%<br>(2.3-5.7%)                     | 8.8%<br>(3.4-14%)                   | 16<br>(6-26)          | 2000<br>(1100-2900)       |
| Hungary  | 2010 | Female | 35 to 39 | 81%<br>(74-87%)                | 19%<br>(13-26%)          | 2.2<br>(1.5-3.1)                            | 4.7%<br>(2.6-7%)                     | 11%<br>(5.4-16%)                    | 34<br>(17-52)         | 2700<br>(1500-4000)       |
| Hungary  | 2010 | Female | 40 to 44 | 79%<br>(72-86%)                | 21%<br>(14-28%)          | 2.6<br>(1.8-3.5)                            | 5.9%<br>(3.3-8.7%)                   | 12%<br>(6.5-17%)                    | 67<br>(37-96)         | 3900<br>(2100-5600)       |
| Hungary  | 2010 | Female | 45 to 49 | 76%<br>(69-83%)                | 24%<br>(17-31%)          | 3.1<br>(2.2-4.2)                            | 8.1%<br>(4.8-12%)                    | 14%<br>(8.6-19%)                    | 140<br>(83-190)       | 6500<br>(3900-9100)       |
| Hungary  | 2010 | Female | 50 to 54 | 73%<br>(67-78%)                | 27%<br>(22-33%)          | 3.2<br>(2.3-4.3)                            | 8.8%<br>(5.2-12%)                    | 14%<br>(8.5-18%)                    | 260<br>(160-360)      | 11000<br>(6500-15000)     |
| Hungary  | 2010 | Female | 55 to 59 | 66%<br>(60-73%)                | 34%<br>(27-40%)          | 2.9<br>(2.2-3.9)                            | 8.1%<br>(4.6-12%)                    | 12%<br>(7.2-17%)                    | 370<br>(220-530)      | 13000<br>(7400-19000)     |
| Hungary  | 2010 | Female | 60 to 64 | 62%<br>(56-69%)                | 38%<br>(31-44%)          | 2.7<br>(2-3.7)                              | 7.1%<br>(3.4-11%)                    | 10%<br>(5.4-15%)                    | 370<br>(190-570)      | 11000<br>(5500-18000)     |
| Hungary  | 2010 | Female | 65 to 69 | 63%<br>(56-70%)                | 37%<br>(30-44%)          | 2.7<br>(2-3.5)                              | 6.4%<br>(2.6-11%)                    | 9%<br>(3.9-15%)                     | 420<br>(180-680)      | 11000<br>(4300-18000)     |
| Hungary  | 2010 | Female | 70 to 74 | 54%<br>(46-61%)                | 46%<br>(39-54%)          | 2.2<br>(1.5-3.1)                            | 5.3%<br>(1.3-9.9%)                   | 7%<br>(1.8-13%)                     | 460<br>(120-850)      | 9600<br>(2200-18000)      |
| Hungary  | 2010 | Female | 75 to 79 | 45%<br>(37-56%)                | 55%<br>(44-63%)          | 1.9<br>(1.2-2.7)                            | 4.4%<br>(0.36-9.3%)                  | 5.5%<br>(0.44-12%)                  | 530<br>(40-1100)      | 8500<br>(650-18000)       |
| Hungary  | 2010 | Female | 80 to 84 | 42%<br>(30-54%)                | 58%<br>(46-70%)          | 1.7<br>(1.1-2.5)                            | 3.6%<br>(-0.35-8.2%)                 | 4.3%<br>(-0.52-10%)                 | 560<br>(-67-1300)     | 6500<br>(-590-15000)      |
| Hungary  | 2010 | Female | 85 to 89 | 40%<br>(28-52%)                | 60%<br>(48-72%)          | 1.6<br>(0.95-2.5)                           | 3.1%<br>(-0.67-7.5%)                 | 3.5%<br>(-0.98-9%)                  | 440<br>(-120-1100)    | 3600<br>(-800-9000)       |
| Hungary  | 2010 | Female | 90 to 94 | 42%<br>(30-55%)                | 58%<br>(45-70%)          | 1.6<br>(0.92-2.7)                           | 2.8%<br>(-1.3-8.6%)                  | 3.2%<br>(-1.9-10%)                  | 150<br>(-86-500)      | 860<br>(-420-2700)        |
| Hungary  | 2010 | Female | 95 plus  | 45%<br>(29-62%)                | 55%<br>(38-71%)          | 1.7<br>(0.82-3)                             | 2.7%<br>(-2.2-9.6%)                  | 3.1%<br>(-2.9-11%)                  | 65<br>(-62-240)       | 240<br>(-200-860)         |
| Hungary  | 2010 | Male   | All Ages | 89%<br>(87-91%)                | 11%<br>(9.1-13%)         | 6.1<br>(5.5-6.8)                            | 18%<br>(10-25%)                      | 20%<br>(10-29%)                     | 13000<br>(6600-19000) | 360000<br>(200000-500000) |
| Hungary  | 2010 | Male   | 15 to 19 | 87%<br>(80-92%)                | 13%<br>(7.6-20%)         | 2.1<br>(1.4-3.1)                            | 5.3%<br>(1.8-8.9%)                   | 11%<br>(1.3-20%)                    | 15<br>(1.8-27)        | 1600<br>(570-2600)        |
| Hungary  | 2010 | Male   | 20 to 24 | 93%<br>(90-95%)                | 7.2%<br>(4.9-10%)        | 3.9<br>(2.8-5.2)                            | 11%<br>(5.6-17%)                     | 20%<br>(6.9-33%)                    | 42<br>(14-70)         | 4200<br>(2100-6300)       |
| Hungary  | 2010 | Male   | 25 to 29 | 93%<br>(90-96%)                | 6.6%<br>(4.3-9.7%)       | 5.7<br>(3.9-7.6)                            | 14%<br>(8.4-20%)                     | 27%<br>(14-41%)                     | 75<br>(38-110)        | 6400<br>(3900-9200)       |
| Hungary  | 2010 | Male   | 30 to 34 | 94%<br>(91-96%)                | 6.3%<br>(4.3-9.2%)       | 6.6<br>(4.9-8.6)                            | 16%<br>(10-22%)                      | 30%<br>(18-42%)                     | 140<br>(82-190)       | 10000<br>(6500-14000)     |
| Hungary  | 2010 | Male   | 35 to 39 | 93%<br>(90-95%)                | 7.2%<br>(4.6-10%)        | 6.6<br>(4.8-9)                              | 18%<br>(12-25%)                      | 31%<br>(20-41%)                     | 220<br>(150-300)      | 14000<br>(8900-19000)     |
| Hungary  | 2010 | Male   | 40 to 44 | 92%<br>(89-95%)                | 7.7%<br>(4.8-11%)        | 7.6<br>(5.7-9.8)                            | 22%<br>(15-29%)                      | 33%<br>(23-41%)                     | 430<br>(300-550)      | 22000<br>(15000-28000)    |
| Hungary  | 2010 | Male   | 45 to 49 | 93%<br>(91-96%)                | 6.6%<br>(4.5-9%)         | 9.7<br>(7.5-12)                             | 26%<br>(17-32%)                      | 33%<br>(23-42%)                     | 750<br>(510-940)      | 33000<br>(22000-42000)    |

| Location | Year | Sex    | Age      | Prevalence of current drinkers | Prevalence of abstainers | Population average of standard drinks daily | Percent of total attributable deaths | Percent of total attributable DALYs | Attributable deaths | Attributable DALYs      |
|----------|------|--------|----------|--------------------------------|--------------------------|---------------------------------------------|--------------------------------------|-------------------------------------|---------------------|-------------------------|
| Hungary  | 2010 | Male   | 50 to 54 | 94%<br>(92-96%)                | 6%<br>(4.2-8.3%)         | 11<br>(8.1-13)                              | 25%<br>(16-33%)                      | 31%<br>(19-40%)                     | 1300<br>(830-1700)  | 51000<br>(31000-67000)  |
| Hungary  | 2010 | Male   | 55 to 59 | 94%<br>(92-96%)                | 5.8%<br>(4.2-7.7%)       | 11<br>(8.3-13)                              | 23%<br>(13-31%)                      | 27%<br>(16-37%)                     | 1800<br>(1100-2500) | 60000<br>(34000-83000)  |
| Hungary  | 2010 | Male   | 60 to 64 | 92%<br>(90-94%)                | 7.7%<br>(5.9-10%)        | 9.9<br>(7.7-13)                             | 20%<br>(10-29%)                      | 24%<br>(13-34%)                     | 1700<br>(910-2400)  | 49000<br>(25000-69000)  |
| Hungary  | 2010 | Male   | 65 to 69 | 88%<br>(85-91%)                | 12%<br>(9.1-15%)         | 8.8<br>(7-11)                               | 18%<br>(8.7-27%)                     | 21%<br>(11-31%)                     | 1600<br>(810-2400)  | 39000<br>(19000-58000)  |
| Hungary  | 2010 | Male   | 70 to 74 | 86%<br>(82-89%)                | 14%<br>(11-18%)          | 7.7<br>(5.7-9.7)                            | 16%<br>(6.5-24%)                     | 18%<br>(7.9-28%)                    | 1500<br>(630-2200)  | 28000<br>(12000-43000)  |
| Hungary  | 2010 | Male   | 75 to 79 | 85%<br>(79-89%)                | 15%<br>(11-21%)          | 6.5<br>(4.6-8.5)                            | 13%<br>(5.1-22%)                     | 16%<br>(6-25%)                      | 1400<br>(530-2200)  | 21000<br>(8100-33000)   |
| Hungary  | 2010 | Male   | 80 to 84 | 84%<br>(76-90%)                | 16%<br>(10-24%)          | 5.6<br>(4-7.5)                              | 12%<br>(4.2-20%)                     | 14%<br>(4.9-22%)                    | 1100<br>(400-1900)  | 13000<br>(4600-21000)   |
| Hungary  | 2010 | Male   | 85 to 89 | 84%<br>(77-90%)                | 16%<br>(10-23%)          | 5.1<br>(3.6-6.9)                            | 10%<br>(2.8-18%)                     | 11%<br>(2.9-21%)                    | 650<br>(160-1200)   | 5200<br>(1300-9200)     |
| Hungary  | 2010 | Male   | 90 to 94 | 85%<br>(78-91%)                | 15%<br>(9.5-22%)         | 4.6<br>(2.9-6.5)                            | 7.8%<br>(-0.11-16%)                  | 8.7%<br>(-0.58-19%)                 | 150<br>(-9.9-330)   | 850<br>(-12-1800)       |
| Hungary  | 2010 | Male   | 95 plus  | 86%<br>(75-93%)                | 14%<br>(7.2-25%)         | 3.9<br>(2.2-6.3)                            | 5.5%<br>(-3-15%)                     | 5.9%<br>(-4.3-17%)                  | 34<br>(-25-100)     | 130<br>(-73-370)        |
| Hungary  | 2016 | Female | All Ages | 70%<br>(67-74%)                | 30%<br>(26-33%)          | 2<br>(1.6-2.5)                              | 4.9%<br>(1.8-8.4%)                   | 5.2%<br>(0.56-11%)                  | 3500<br>(370-7200)  | 83000<br>(29000-140000) |
| Hungary  | 2016 | Female | 15 to 19 | 75%<br>(61-86%)                | 25%<br>(14-39%)          | 1.5<br>(0.88-2.2)                           | 2.2%<br>(0.91-3.7%)                  | 5.7%<br>(0.12-12%)                  | 2.5<br>(0.052-5.2)  | 450<br>(190-750)        |
| Hungary  | 2016 | Female | 20 to 24 | 84%<br>(75-90%)                | 16%<br>(10-25%)          | 1.8<br>(1.1-2.7)                            | 3.6%<br>(2.2-5.4%)                   | 6.3%<br>(0.21-13%)                  | 3.9<br>(0.12-8.1)   | 1000<br>(560-1500)      |
| Hungary  | 2016 | Female | 25 to 29 | 84%<br>(74-90%)                | 16%<br>(10-26%)          | 1.8<br>(1.1-2.8)                            | 3.8%<br>(2.2-5.5%)                   | 6.8%<br>(0.89-13%)                  | 6<br>(0.71-12)      | 1200<br>(660-1800)      |
| Hungary  | 2016 | Female | 30 to 34 | 83%<br>(74-89%)                | 17%<br>(11-26%)          | 1.9<br>(1.2-2.8)                            | 3.8%<br>(2.2-5.6%)                   | 8.5%<br>(3.1-14%)                   | 10<br>(3.8-18)      | 1400<br>(770-2100)      |
| Hungary  | 2016 | Female | 35 to 39 | 83%<br>(75-90%)                | 17%<br>(10-25%)          | 2.1<br>(1.4-3)                              | 4.3%<br>(2.3-6.5%)                   | 10%<br>(5-16%)                      | 33<br>(16-52)       | 2700<br>(1400-4100)     |
| Hungary  | 2016 | Female | 40 to 44 | 82%<br>(74-88%)                | 18%<br>(12-26%)          | 2.5<br>(1.7-3.5)                            | 5.2%<br>(2.7-8%)                     | 11%<br>(5.7-17%)                    | 61<br>(31-94)       | 3700<br>(1900-5600)     |
| Hungary  | 2016 | Female | 45 to 49 | 79%<br>(70-85%)                | 21%<br>(15-30%)          | 3<br>(2-4.3)                                | 7.1%<br>(3.8-11%)                    | 13%<br>(7.1-18%)                    | 130<br>(72-190)     | 6200<br>(3400-9200)     |
| Hungary  | 2016 | Female | 50 to 54 | 76%<br>(68-82%)                | 24%<br>(18-32%)          | 3.1<br>(2.2-4.4)                            | 8%<br>(4.5-12%)                      | 13%<br>(7.5-18%)                    | 180<br>(110-260)    | 7500<br>(4200-11000)    |
| Hungary  | 2016 | Female | 55 to 59 | 70%<br>(62-77%)                | 30%<br>(23-38%)          | 2.9<br>(2-4.1)                              | 7.5%<br>(4.1-12%)                    | 11%<br>(6.8-17%)                    | 300<br>(170-460)    | 11000<br>(5800-17000)   |
| Hungary  | 2016 | Female | 60 to 64 | 66%<br>(57-74%)                | 34%<br>(26-43%)          | 2.7<br>(1.8-3.9)                            | 6.5%<br>(2.9-11%)                    | 9.5%<br>(4.7-15%)                   | 400<br>(200-660)    | 12000<br>(5400-20000)   |
| Hungary  | 2016 | Female | 65 to 69 | 66%<br>(57-74%)                | 34%<br>(26-43%)          | 2.7<br>(1.8-3.6)                            | 5.9%<br>(2.1-10%)                    | 8.4%<br>(3.3-14%)                   | 410<br>(150-690)    | 10000<br>(3500-18000)   |



| Location | Year | Sex    | Age      | Prevalence of current drinkers | Prevalence of abstainers | Population average of standard drinks daily | Percent of total attributable deaths | Percent of total attributable DALYs | Attributable deaths   | Attributable DALYs        |
|----------|------|--------|----------|--------------------------------|--------------------------|---------------------------------------------|--------------------------------------|-------------------------------------|-----------------------|---------------------------|
| Hungary  | 2016 | Female | 70 to 74 | 59%<br>(49-69%)                | 41%<br>(31-51%)          | 2.3<br>(1.5-3.4)                            | 5%<br>(0.84-10%)                     | 6.7%<br>(1.3-13%)                   | 450<br>(91-910)       | 9300<br>(1700-19000)      |
| Hungary  | 2016 | Female | 75 to 79 | 49%<br>(38-61%)                | 51%<br>(39-62%)          | 1.9<br>(1.2-2.9)                            | 3.9%<br>(-0.2-8.9%)                  | 4.9%<br>(-0.37-11%)                 | 450<br>(-34-1000)     | 7100<br>(-340-17000)      |
| Hungary  | 2016 | Female | 80 to 84 | 44%<br>(32-57%)                | 56%<br>(43-68%)          | 1.7<br>(0.99-2.6)                           | 3%<br>(-0.71-7.7%)                   | 3.6%<br>(-0.96-9.3%)                | 460<br>(-120-1200)    | 5300<br>(-1200-14000)     |
| Hungary  | 2016 | Female | 85 to 89 | 43%<br>(30-56%)                | 57%<br>(44-70%)          | 1.6<br>(0.89-2.5)                           | 2.5%<br>(-1.3-7.2%)                  | 2.9%<br>(-1.7-8.5%)                 | 360<br>(-210-1000)    | 3000<br>(-1500-8500)      |
| Hungary  | 2016 | Female | 90 to 94 | 45%<br>(33-58%)                | 55%<br>(42-67%)          | 1.6<br>(0.89-2.7)                           | 2.3%<br>(-1.8-8%)                    | 2.6%<br>(-2.5-9.7%)                 | 230<br>(-210-860)     | 1300<br>(-1100-4600)      |
| Hungary  | 2016 | Female | 95 plus  | 49%<br>(32-66%)                | 51%<br>(34-68%)          | 1.7<br>(0.79-3.1)                           | 2.2%<br>(-2.8-9.2%)                  | 2.5%<br>(-3.6-11%)                  | 46<br>(-68-200)       | 170<br>(-220-700)         |
| Hungary  | 2016 | Male   | All Ages | 88%<br>(86-90%)                | 12%<br>(9.7-14%)         | 5.5<br>(4.4-6.7)                            | 17%<br>(9.7-23%)                     | 18%<br>(9.7-27%)                    | 12000<br>(6000-17000) | 320000<br>(180000-450000) |
| Hungary  | 2016 | Male   | 15 to 19 | 82%<br>(71-91%)                | 18%<br>(9.4-29%)         | 1.7<br>(1-2.6)                              | 4.5%<br>(1.8-7.6%)                   | 9%<br>(0.88-17%)                    | 8.8<br>(0.81-18)      | 1100<br>(420-1800)        |
| Hungary  | 2016 | Male   | 20 to 24 | 91%<br>(86-95%)                | 9%<br>(5.5-14%)          | 3.3<br>(2.1-4.7)                            | 9.9%<br>(5.2-15%)                    | 17%<br>(4.9-30%)                    | 33<br>(9.7-58)        | 3500<br>(1800-5500)       |
| Hungary  | 2016 | Male   | 25 to 29 | 92%<br>(87-95%)                | 7.8%<br>(4.5-13%)        | 4.9<br>(3.2-7)                              | 13%<br>(7.5-18%)                     | 25%<br>(12-38%)                     | 54<br>(25-85)         | 4900<br>(2900-7200)       |
| Hungary  | 2016 | Male   | 30 to 34 | 92%<br>(87-95%)                | 7.7%<br>(4.6-13%)        | 5.7<br>(3.9-7.8)                            | 14%<br>(8.8-20%)                     | 28%<br>(16-40%)                     | 78<br>(43-110)        | 6000<br>(3800-8500)       |
| Hungary  | 2016 | Male   | 35 to 39 | 92%<br>(87-95%)                | 8.3%<br>(4.8-13%)        | 5.8<br>(3.9-8.1)                            | 16%<br>(10-22%)                      | 29%<br>(18-39%)                     | 190<br>(120-270)      | 12000<br>(7800-17000)     |
| Hungary  | 2016 | Male   | 40 to 44 | 92%<br>(87-95%)                | 8.4%<br>(5.1-13%)        | 6.7<br>(4.8-9)                              | 20%<br>(13-26%)                      | 31%<br>(22-40%)                     | 360<br>(240-480)      | 19000<br>(13000-25000)    |
| Hungary  | 2016 | Male   | 45 to 49 | 93%<br>(89-95%)                | 7.4%<br>(4.7-11%)        | 8.5<br>(6-11)                               | 23%<br>(16-30%)                      | 32%<br>(23-40%)                     | 680<br>(470-910)      | 30000<br>(21000-41000)    |
| Hungary  | 2016 | Male   | 50 to 54 | 94%<br>(91-96%)                | 6.3%<br>(4.2-9.3%)       | 9.5<br>(6.8-13)                             | 24%<br>(15-31%)                      | 30%<br>(20-39%)                     | 930<br>(600-1200)     | 36000<br>(23000-48000)    |
| Hungary  | 2016 | Male   | 55 to 59 | 94%<br>(92-96%)                | 5.7%<br>(4-7.8%)         | 9.5<br>(7.1-13)                             | 22%<br>(13-30%)                      | 27%<br>(17-36%)                     | 1500<br>(870-2000)    | 49000<br>(29000-68000)    |
| Hungary  | 2016 | Male   | 60 to 64 | 92%<br>(90-94%)                | 7.7%<br>(5.8-10%)        | 9<br>(6.5-12)                               | 19%<br>(11-28%)                      | 23%<br>(13-33%)                     | 1800<br>(1100-2600)   | 53000<br>(30000-76000)    |
| Hungary  | 2016 | Male   | 65 to 69 | 88%<br>(84-91%)                | 12%<br>(9-16%)           | 7.9<br>(5.8-10)                             | 17%<br>(9.2-25%)                     | 20%<br>(11-29%)                     | 1600<br>(860-2300)    | 38000<br>(20000-57000)    |
| Hungary  | 2016 | Male   | 70 to 74 | 85%<br>(81-89%)                | 15%<br>(11-19%)          | 6.9<br>(4.8-9.1)                            | 15%<br>(7.1-22%)                     | 18%<br>(8.6-26%)                    | 1500<br>(720-2300)    | 30000<br>(14000-46000)    |
| Hungary  | 2016 | Male   | 75 to 79 | 85%<br>(79-90%)                | 15%<br>(10-21%)          | 5.9<br>(4-8.1)                              | 12%<br>(4.7-20%)                     | 15%<br>(5.6-23%)                    | 1100<br>(430-1900)    | 17000<br>(6500-28000)     |
| Hungary  | 2016 | Male   | 80 to 84 | 84%<br>(75-90%)                | 16%<br>(10-25%)          | 5.1<br>(3.4-7)                              | 11%<br>(3.6-18%)                     | 12%<br>(4-21%)                      | 1000<br>(330-1700)    | 11000<br>(3800-19000)     |
| Hungary  | 2016 | Male   | 85 to 89 | 84%<br>(76-90%)                | 16%<br>(10-24%)          | 4.5<br>(2.8-6.4)                            | 8.4%<br>(1.2-16%)                    | 9.5%<br>(1.1-19%)                   | 540<br>(56-1100)      | 4400<br>(600-8400)        |

| Location  | Year | Sex    | Age      | Prevalence of current drinkers | Prevalence of abstainers | Population average of standard drinks daily | Percent of total attributable deaths | Percent of total attributable DALYs | Attributable deaths | Attributable DALYs    |
|-----------|------|--------|----------|--------------------------------|--------------------------|---------------------------------------------|--------------------------------------|-------------------------------------|---------------------|-----------------------|
| Hungary   | 2016 | Male   | 90 to 94 | 85%<br>(77-90%)                | 15%<br>(9.6-23%)         | 4<br>(2.5-6)                                | 6.2%<br>(-1.3-14%)                   | 6.8%<br>(-2.1-16%)                  | 220<br>(-66-540)    | 1300<br>(-260-3000)   |
| Hungary   | 2016 | Male   | 95 plus  | 85%<br>(75-92%)                | 15%<br>(7.5-25%)         | 3.4<br>(1.9-5.7)                            | 4.2%<br>(-3.6-13%)                   | 4.4%<br>(-5.1-15%)                  | 22<br>(-26-73)      | 89<br>(-77-260)       |
| Macedonia | 1990 | Female | All Ages | 54%<br>(44-63%)                | 46%<br>(37-56%)          | 0.98<br>(0.73-1.3)                          | 2.8%<br>(1.5-4.5%)                   | 4.2%<br>(1.8-7.7%)                  | 300<br>(130-550)    | 7800<br>(4200-12000)  |
| Macedonia | 1990 | Female | 15 to 19 | 53%<br>(33-72%)                | 47%<br>(28-67%)          | 0.76<br>(0.33-1.5)                          | 2%<br>(1.2-3.1%)                     | 3.8%<br>(1.6-7%)                    | 1<br>(0.42-1.9)     | 150<br>(94-240)       |
| Macedonia | 1990 | Female | 20 to 24 | 64%<br>(44-80%)                | 36%<br>(20-56%)          | 1.1<br>(0.48-2)                             | 3.5%<br>(2.2-5.1%)                   | 4.6%<br>(1.5-9%)                    | 1.7<br>(0.58-3.4)   | 310<br>(170-480)      |
| Macedonia | 1990 | Female | 25 to 29 | 65%<br>(44-81%)                | 35%<br>(19-56%)          | 1.2<br>(0.53-2.2)                           | 3.5%<br>(2.3-5.1%)                   | 4.7%<br>(1.8-8.7%)                  | 2<br>(0.77-3.8)     | 330<br>(200-490)      |
| Macedonia | 1990 | Female | 30 to 34 | 66%<br>(45-82%)                | 34%<br>(18-55%)          | 1.3<br>(0.63-2.2)                           | 3.4%<br>(2.1-5%)                     | 5.3%<br>(2.3-9.6%)                  | 3<br>(1.3-5.3)      | 360<br>(220-550)      |
| Macedonia | 1990 | Female | 35 to 39 | 67%<br>(48-83%)                | 33%<br>(17-52%)          | 1.4<br>(0.65-2.4)                           | 3.5%<br>(2.1-5.3%)                   | 5.9%<br>(2.5-10%)                   | 5.1<br>(2.1-8.9)    | 450<br>(260-690)      |
| Macedonia | 1990 | Female | 40 to 44 | 66%<br>(47-82%)                | 34%<br>(18-53%)          | 1.6<br>(0.76-2.7)                           | 3.6%<br>(1.8-5.8%)                   | 6.3%<br>(2.5-11%)                   | 7.1<br>(2.8-12)     | 460<br>(230-740)      |
| Macedonia | 1990 | Female | 45 to 49 | 64%<br>(41-81%)                | 36%<br>(19-59%)          | 1.7<br>(0.82-3.1)                           | 4%<br>(1.7-7.3%)                     | 6.7%<br>(2.4-12%)                   | 10<br>(3.6-19)      | 520<br>(210-940)      |
| Macedonia | 1990 | Female | 50 to 54 | 61%<br>(40-78%)                | 39%<br>(22-60%)          | 1.7<br>(0.87-3.1)                           | 4.4%<br>(1.6-8.2%)                   | 6.9%<br>(2.5-13%)                   | 18<br>(6.2-32)      | 750<br>(280-1300)     |
| Macedonia | 1990 | Female | 55 to 59 | 57%<br>(36-76%)                | 43%<br>(24-64%)          | 1.7<br>(0.79-3)                             | 4.5%<br>(1.2-8.6%)                   | 6.7%<br>(1.8-12%)                   | 26<br>(7.4-49)      | 910<br>(260-1700)     |
| Macedonia | 1990 | Female | 60 to 64 | 54%<br>(33-74%)                | 46%<br>(26-67%)          | 1.5<br>(0.68-2.9)                           | 3.9%<br>(0.42-8.5%)                  | 5.4%<br>(0.75-12%)                  | 32<br>(4.4-69)      | 920<br>(110-2000)     |
| Macedonia | 1990 | Female | 65 to 69 | 49%<br>(30-70%)                | 51%<br>(30-70%)          | 1.3<br>(0.65-2.3)                           | 3.4%<br>(0.41-7.7%)                  | 4.6%<br>(0.69-10%)                  | 34<br>(5.2-75)      | 780<br>(95-1800)      |
| Macedonia | 1990 | Female | 70 to 74 | 43%<br>(26-62%)                | 57%<br>(38-74%)          | 1.1<br>(0.43-2.1)                           | 3.3%<br>(0.043-8.2%)                 | 4.1%<br>(0.21-9.9%)                 | 31<br>(1.6-77)      | 570<br>(7.7-1400)     |
| Macedonia | 1990 | Female | 75 to 79 | 36%<br>(22-55%)                | 64%<br>(45-78%)          | 0.84<br>(0.31-1.7)                          | 3.1%<br>(0.081-7.5%)                 | 3.7%<br>(0.12-8.8%)                 | 46<br>(1.4-110)     | 630<br>(16-1500)      |
| Macedonia | 1990 | Female | 80 to 84 | 31%<br>(18-50%)                | 69%<br>(50-82%)          | 0.75<br>(0.31-1.4)                          | 3.2%<br>(0.6-7.3%)                   | 3.7%<br>(0.76-8.5%)                 | 42<br>(8.4-96)      | 430<br>(84-970)       |
| Macedonia | 1990 | Female | 85 to 89 | 30%<br>(18-45%)                | 70%<br>(55-82%)          | 0.75<br>(0.3-1.5)                           | 3.5%<br>(0.75-7.6%)                  | 4.3%<br>(1-9.4%)                    | 24<br>(5.5-51)      | 170<br>(37-370)       |
| Macedonia | 1990 | Female | 90 to 94 | 32%<br>(19-49%)                | 68%<br>(51-81%)          | 0.81<br>(0.28-1.8)                          | 3.9%<br>(1.2-8.2%)                   | 5%<br>(1.5-11%)                     | 12<br>(3.7-25)      | 57<br>(17-120)        |
| Macedonia | 1990 | Female | 95 plus  | 35%<br>(19-55%)                | 65%<br>(45-81%)          | 0.89<br>(0.25-2.1)                          | 4.5%<br>(1.2-9.6%)                   | 5.6%<br>(1.5-12%)                   | 4.3<br>(1.1-9.1)    | 14<br>(3.8-31)        |
| Macedonia | 1990 | Male   | All Ages | 61%<br>(50-73%)                | 39%<br>(27-50%)          | 1.5<br>(1.2-2)                              | 4.7%<br>(2.8-7%)                     | 5.6%<br>(2.4-9.2%)                  | 500<br>(220-850)    | 16000<br>(9700-24000) |
| Macedonia | 1990 | Male   | 15 to 19 | 53%<br>(31-76%)                | 47%<br>(24-69%)          | 0.74<br>(0.34-1.3)                          | 3.2%<br>(2-4.8%)                     | 4.3%<br>(2.1-7.4%)                  | 2.6<br>(1.3-4.5)    | 320<br>(200-480)      |

| Location  | Year | Sex    | Age      | Prevalence of current drinkers | Prevalence of abstainers | Population average of standard drinks daily | Percent of total attributable deaths | Percent of total attributable DALYs | Attributable deaths | Attributable DALYs   |
|-----------|------|--------|----------|--------------------------------|--------------------------|---------------------------------------------|--------------------------------------|-------------------------------------|---------------------|----------------------|
| Macedonia | 1990 | Male   | 20 to 24 | 66%<br>(43-84%)                | 34%<br>(16-57%)          | 1.4<br>(0.71-2.3)                           | 6.4%<br>(4.4-8.7%)                   | 7.6%<br>(3.9-12%)                   | 5.7<br>(2.9-8.8)    | 710<br>(470-1000)    |
| Macedonia | 1990 | Male   | 25 to 29 | 70%<br>(49-88%)                | 30%<br>(12-51%)          | 1.8<br>(0.94-2.9)                           | 7.1%<br>(5.1-9.5%)                   | 8.9%<br>(5.1-14%)                   | 7.5<br>(4.2-12)     | 810<br>(560-1200)    |
| Macedonia | 1990 | Male   | 30 to 34 | 73%<br>(51-90%)                | 27%<br>(9.7-49%)         | 2<br>(1.2-3.2)                              | 6.9%<br>(4.9-9.7%)                   | 9.3%<br>(5.4-14%)                   | 10<br>(5.8-16)      | 910<br>(620-1300)    |
| Macedonia | 1990 | Male   | 35 to 39 | 75%<br>(55-90%)                | 25%<br>(10-45%)          | 2.2<br>(1.2-3.5)                            | 6.6%<br>(4.2-9.8%)                   | 8.9%<br>(4.5-14%)                   | 14<br>(7.2-24)      | 1100<br>(660-1600)   |
| Macedonia | 1990 | Male   | 40 to 44 | 76%<br>(54-90%)                | 24%<br>(9.9-46%)         | 2.5<br>(1.4-3.9)                            | 6.7%<br>(3.9-10%)                    | 8.9%<br>(4.5-15%)                   | 19<br>(9.5-31)      | 1100<br>(640-1700)   |
| Macedonia | 1990 | Male   | 45 to 49 | 76%<br>(53-90%)                | 24%<br>(9.9-47%)         | 2.9<br>(1.6-4.5)                            | 7.2%<br>(3.7-12%)                    | 9.1%<br>(4.2-16%)                   | 27<br>(12-47)       | 1300<br>(660-2200)   |
| Macedonia | 1990 | Male   | 50 to 54 | 75%<br>(53-89%)                | 25%<br>(11-47%)          | 3<br>(1.8-4.8)                              | 7.2%<br>(3.3-12%)                    | 8.8%<br>(3.7-15%)                   | 40<br>(16-70)       | 1700<br>(750-2800)   |
| Macedonia | 1990 | Male   | 55 to 59 | 73%<br>(51-89%)                | 27%<br>(11-49%)          | 3.1<br>(1.7-5)                              | 7.4%<br>(3.1-13%)                    | 8.8%<br>(3.4-15%)                   | 62<br>(24-110)      | 2200<br>(920-3700)   |
| Macedonia | 1990 | Male   | 60 to 64 | 71%<br>(47-89%)                | 29%<br>(11-53%)          | 3<br>(1.5-5)                                | 6.8%<br>(2.4-12%)                    | 7.8%<br>(2.6-15%)                   | 70<br>(24-130)      | 2100<br>(730-3800)   |
| Macedonia | 1990 | Male   | 65 to 69 | 70%<br>(46-88%)                | 30%<br>(12-54%)          | 2.7<br>(1.5-4.2)                            | 5.9%<br>(1.7-11%)                    | 6.7%<br>(1.7-13%)                   | 72<br>(18-140)      | 1700<br>(490-3300)   |
| Macedonia | 1990 | Male   | 70 to 74 | 67%<br>(45-85%)                | 33%<br>(15-55%)          | 2.3<br>(1.2-3.9)                            | 5%<br>(0.93-10%)                     | 5.6%<br>(0.92-12%)                  | 49<br>(7.9-100)     | 930<br>(170-1900)    |
| Macedonia | 1990 | Male   | 75 to 79 | 64%<br>(41-83%)                | 36%<br>(17-59%)          | 1.9<br>(0.87-3.3)                           | 4.1%<br>(0.43-9%)                    | 4.5%<br>(0.41-10%)                  | 65<br>(5.8-150)     | 950<br>(100-2100)    |
| Macedonia | 1990 | Male   | 80 to 84 | 62%<br>(37-82%)                | 38%<br>(18-63%)          | 1.7<br>(0.79-2.8)                           | 3.4%<br>(0.063-7.7%)                 | 3.7%<br>(-0.033-8.6%)               | 42<br>(-0.36-98)    | 460<br>(8.4-1000)    |
| Macedonia | 1990 | Male   | 85 to 89 | 60%<br>(37-81%)                | 40%<br>(19-63%)          | 1.5<br>(0.75-2.7)                           | 2.3%<br>(-0.41-5.6%)                 | 2.5%<br>(-0.65-6.5%)                | 12<br>(-3.2-32)     | 99<br>(-18-240)      |
| Macedonia | 1990 | Male   | 90 to 94 | 60%<br>(38-82%)                | 40%<br>(18-62%)          | 1.4<br>(0.67-2.7)                           | 1.8%<br>(-0.88-5%)                   | 2%<br>(-1.3-5.8%)                   | 3.4<br>(-2.3-10)    | 19<br>(-9.5-53)      |
| Macedonia | 1990 | Male   | 95 plus  | 62%<br>(34-86%)                | 38%<br>(14-66%)          | 1.3<br>(0.49-2.7)                           | 1.9%<br>(-1.3-5.5%)                  | 2.1%<br>(-2.1-6.3%)                 | 0.87<br>(-0.87-2.6) | 3.3<br>(-2.3-9.4)    |
| Macedonia | 1995 | Female | All Ages | 54%<br>(45-63%)                | 46%<br>(37-55%)          | 0.97<br>(0.77-1.2)                          | 2.9%<br>(1.5-4.6%)                   | 4.1%<br>(1.7-7.5%)                  | 300<br>(130-540)    | 7700<br>(4200-12000) |
| Macedonia | 1995 | Female | 15 to 19 | 54%<br>(34-72%)                | 46%<br>(28-66%)          | 0.75<br>(0.33-1.4)                          | 1.9%<br>(1.1-2.9%)                   | 3.6%<br>(1.4-6.5%)                  | 0.88<br>(0.37-1.6)  | 140<br>(83-210)      |
| Macedonia | 1995 | Female | 20 to 24 | 64%<br>(45-80%)                | 36%<br>(20-55%)          | 1.1<br>(0.46-2)                             | 3.4%<br>(2.2-4.9%)                   | 4.3%<br>(1.4-8.7%)                  | 1.4<br>(0.47-2.8)   | 270<br>(160-420)     |
| Macedonia | 1995 | Female | 25 to 29 | 65%<br>(44-81%)                | 35%<br>(19-56%)          | 1.1<br>(0.52-2)                             | 3.4%<br>(2.3-4.7%)                   | 4.3%<br>(1.6-8.1%)                  | 1.6<br>(0.62-3.1)   | 300<br>(190-430)     |
| Macedonia | 1995 | Female | 30 to 34 | 66%<br>(45-82%)                | 34%<br>(18-55%)          | 1.2<br>(0.63-2.1)                           | 3.3%<br>(2.1-4.9%)                   | 4.9%<br>(2-8.8%)                    | 2.8<br>(1.1-5)      | 340<br>(200-510)     |
| Macedonia | 1995 | Female | 35 to 39 | 67%<br>(49-83%)                | 33%<br>(17-51%)          | 1.4<br>(0.66-2.4)                           | 3.3%<br>(1.9-5.1%)                   | 5.5%<br>(2.3-9.7%)                  | 4.4<br>(1.9-7.8)    | 390<br>(230-600)     |

| Location  | Year | Sex    | Age      | Prevalence of current drinkers | Prevalence of abstainers | Population average of standard drinks daily | Percent of total attributable deaths | Percent of total attributable DALYs | Attributable deaths | Attributable DALYs     |
|-----------|------|--------|----------|--------------------------------|--------------------------|---------------------------------------------|--------------------------------------|-------------------------------------|---------------------|------------------------|
| Macedonia | 1995 | Female | 40 to 44 | 66%<br>(48-82%)                | 34%<br>(18-52%)          | 1.5<br>(0.77-2.5)                           | 3.4%<br>(1.7-5.5%)                   | 5.9%<br>(2.4-10%)                   | 7.8<br>(3.1-13)     | 500<br>(260-800)       |
| Macedonia | 1995 | Female | 45 to 49 | 64%<br>(41-81%)                | 36%<br>(19-59%)          | 1.7<br>(0.81-3)                             | 3.8%<br>(1.6-7%)                     | 6.3%<br>(2.2-12%)                   | 11<br>(3.7-20)      | 540<br>(220-980)       |
| Macedonia | 1995 | Female | 50 to 54 | 61%<br>(41-79%)                | 39%<br>(21-59%)          | 1.7<br>(0.87-3)                             | 4.2%<br>(1.5-7.8%)                   | 6.6%<br>(2.4-12%)                   | 16<br>(5.9-29)      | 670<br>(250-1200)      |
| Macedonia | 1995 | Female | 55 to 59 | 58%<br>(38-77%)                | 42%<br>(23-62%)          | 1.6<br>(0.79-2.9)                           | 4.3%<br>(1.2-8.1%)                   | 6.4%<br>(1.8-12%)                   | 25<br>(7-47)        | 850<br>(240-1600)      |
| Macedonia | 1995 | Female | 60 to 64 | 54%<br>(33-74%)                | 46%<br>(26-67%)          | 1.5<br>(0.69-2.8)                           | 3.7%<br>(0.36-8.1%)                  | 5.1%<br>(0.65-11%)                  | 31<br>(3.9-67)      | 870<br>(88-1900)       |
| Macedonia | 1995 | Female | 65 to 69 | 50%<br>(30-70%)                | 50%<br>(30-70%)          | 1.3<br>(0.65-2.2)                           | 3.2%<br>(0.22-7.2%)                  | 4.3%<br>(0.41-9.4%)                 | 37<br>(3.5-82)      | 860<br>(62-1900)       |
| Macedonia | 1995 | Female | 70 to 74 | 43%<br>(26-62%)                | 57%<br>(38-74%)          | 1<br>(0.43-2)                               | 3.1%<br>(-0.0098-7.5%)               | 3.9%<br>(0.1-9.3%)                  | 45<br>(1.2-110)     | 810<br>(-2.6-2000)     |
| Macedonia | 1995 | Female | 75 to 79 | 36%<br>(22-56%)                | 64%<br>(44-78%)          | 0.83<br>(0.31-1.6)                          | 2.8%<br>(0.0074-7%)                  | 3.4%<br>(0.019-8.2%)                | 31<br>(0.18-76)     | 430<br>(1.2-1100)      |
| Macedonia | 1995 | Female | 80 to 84 | 32%<br>(18-50%)                | 68%<br>(50-82%)          | 0.73<br>(0.3-1.4)                           | 3%<br>(0.49-7%)                      | 3.5%<br>(0.55-8.2%)                 | 38<br>(6-89)        | 390<br>(60-900)        |
| Macedonia | 1995 | Female | 85 to 89 | 30%<br>(18-46%)                | 70%<br>(54-82%)          | 0.73<br>(0.3-1.4)                           | 3.4%<br>(0.65-7.4%)                  | 4.1%<br>(0.84-9%)                   | 30<br>(6-65)        | 210<br>(41-460)        |
| Macedonia | 1995 | Female | 90 to 94 | 32%<br>(20-49%)                | 68%<br>(51-80%)          | 0.79<br>(0.29-1.7)                          | 3.7%<br>(1-8.1%)                     | 4.7%<br>(1.3-10%)                   | 13<br>(3.8-29)      | 66<br>(18-140)         |
| Macedonia | 1995 | Female | 95 plus  | 36%<br>(19-56%)                | 64%<br>(44-81%)          | 0.88<br>(0.24-2.1)                          | 4.2%<br>(1.1-9.2%)                   | 5.3%<br>(1.4-12%)                   | 4.8<br>(1.3-11)     | 16<br>(4-35)           |
| Macedonia | 1995 | Male   | All Ages | 62%<br>(50-73%)                | 38%<br>(27-50%)          | 1.5<br>(1.3-1.8)                            | 5%<br>(3.1-7%)                       | 5.6%<br>(2.5-8.9%)                  | 510<br>(230-820)    | 16000<br>(10000-24000) |
| Macedonia | 1995 | Male   | 15 to 19 | 54%<br>(32-76%)                | 46%<br>(24-68%)          | 0.73<br>(0.35-1.3)                          | 3.1%<br>(2-4.6%)                     | 4.2%<br>(2-7.1%)                    | 2.4<br>(1.1-4)      | 300<br>(180-440)       |
| Macedonia | 1995 | Male   | 20 to 24 | 66%<br>(42-85%)                | 34%<br>(15-58%)          | 1.3<br>(0.66-2.2)                           | 6.2%<br>(4.4-8.6%)                   | 7.4%<br>(3.9-11%)                   | 5.2<br>(2.7-8.2)    | 640<br>(430-910)       |
| Macedonia | 1995 | Male   | 25 to 29 | 70%<br>(49-87%)                | 30%<br>(13-51%)          | 1.7<br>(0.97-2.8)                           | 6.9%<br>(5-9.3%)                     | 8.7%<br>(5.1-13%)                   | 6.9<br>(4.1-10)     | 770<br>(540-1100)      |
| Macedonia | 1995 | Male   | 30 to 34 | 73%<br>(50-90%)                | 27%<br>(10-50%)          | 2<br>(1.1-3.1)                              | 6.8%<br>(4.9-9.5%)                   | 9.2%<br>(5.7-14%)                   | 9.1<br>(5.5-14)     | 830<br>(580-1200)      |
| Macedonia | 1995 | Male   | 35 to 39 | 75%<br>(54-90%)                | 25%<br>(10-46%)          | 2.1<br>(1.2-3.3)                            | 6.5%<br>(4.2-9.4%)                   | 8.7%<br>(4.5-14%)                   | 13<br>(6.8-20)      | 970<br>(600-1400)      |
| Macedonia | 1995 | Male   | 40 to 44 | 76%<br>(54-91%)                | 24%<br>(9.3-46%)         | 2.4<br>(1.4-3.7)                            | 6.6%<br>(4.1-10%)                    | 8.7%<br>(4.6-14%)                   | 22<br>(12-36)       | 1300<br>(790-1900)     |
| Macedonia | 1995 | Male   | 45 to 49 | 76%<br>(51-90%)                | 24%<br>(10-49%)          | 2.8<br>(1.6-4.3)                            | 7%<br>(3.7-11%)                      | 8.8%<br>(4.2-15%)                   | 29<br>(14-49)       | 1400<br>(740-2300)     |
| Macedonia | 1995 | Male   | 50 to 54 | 75%<br>(53-89%)                | 25%<br>(11-47%)          | 3<br>(1.8-4.6)                              | 7.1%<br>(3.2-11%)                    | 8.5%<br>(3.7-14%)                   | 38<br>(16-65)       | 1600<br>(740-2600)     |
| Macedonia | 1995 | Male   | 55 to 59 | 73%<br>(51-89%)                | 27%<br>(11-49%)          | 3<br>(1.7-4.7)                              | 7.2%<br>(3.2-12%)                    | 8.5%<br>(3.5-15%)                   | 59<br>(24-100)      | 2100<br>(900-3500)     |

| Location  | Year | Sex    | Age      | Prevalence of current drinkers | Prevalence of abstainers | Population average of standard drinks daily | Percent of total attributable deaths | Percent of total attributable DALYs | Attributable deaths | Attributable DALYs   |
|-----------|------|--------|----------|--------------------------------|--------------------------|---------------------------------------------|--------------------------------------|-------------------------------------|---------------------|----------------------|
| Macedonia | 1995 | Male   | 60 to 64 | 71%<br>(46-89%)                | 29%<br>(11-54%)          | 2.9<br>(1.5-4.7)                            | 6.5%<br>(2-12%)                      | 7.5%<br>(2.2-14%)                   | 73<br>(22-140)      | 2100<br>(710-3900)   |
| Macedonia | 1995 | Male   | 65 to 69 | 70%<br>(45-88%)                | 30%<br>(12-55%)          | 2.6<br>(1.5-4)                              | 5.7%<br>(1.7-11%)                    | 6.5%<br>(1.8-12%)                   | 76<br>(21-140)      | 1800<br>(530-3400)   |
| Macedonia | 1995 | Male   | 70 to 74 | 68%<br>(44-85%)                | 32%<br>(15-56%)          | 2.2<br>(1.2-3.7)                            | 4.8%<br>(0.84-10%)                   | 5.5%<br>(0.86-11%)                  | 73<br>(11-160)      | 1400<br>(230-2900)   |
| Macedonia | 1995 | Male   | 75 to 79 | 65%<br>(41-84%)                | 35%<br>(16-59%)          | 1.8<br>(0.87-3.3)                           | 4%<br>(0.34-8.7%)                    | 4.4%<br>(0.31-9.7%)                 | 40<br>(2.9-89)      | 580<br>(51-1300)     |
| Macedonia | 1995 | Male   | 80 to 84 | 62%<br>(37-82%)                | 38%<br>(18-63%)          | 1.6<br>(0.83-2.7)                           | 3.2%<br>(-0.0044-7.3%)               | 3.5%<br>(-0.034-8.1%)               | 37<br>(-0.37-85)    | 400<br>(-0.53-900)   |
| Macedonia | 1995 | Male   | 85 to 89 | 60%<br>(39-81%)                | 40%<br>(19-61%)          | 1.5<br>(0.74-2.5)                           | 2.2%<br>(-0.43-5.4%)                 | 2.4%<br>(-0.66-6%)                  | 17<br>(-4.7-42)     | 130<br>(-26-320)     |
| Macedonia | 1995 | Male   | 90 to 94 | 60%<br>(39-82%)                | 40%<br>(18-61%)          | 1.4<br>(0.65-2.5)                           | 1.7%<br>(-0.98-4.5%)                 | 1.9%<br>(-1.4-5.2%)                 | 4.3<br>(-3.2-12)    | 24<br>(-14-62)       |
| Macedonia | 1995 | Male   | 95 plus  | 61%<br>(34-86%)                | 39%<br>(14-66%)          | 1.3<br>(0.47-2.5)                           | 1.9%<br>(-1.2-5%)                    | 2.1%<br>(-1.8-5.8%)                 | 1.2<br>(-0.98-3.3)  | 4.4<br>(-2.8-12)     |
| Macedonia | 2000 | Female | All Ages | 55%<br>(46-64%)                | 45%<br>(36-54%)          | 0.92<br>(0.76-1.1)                          | 2.6%<br>(1.2-4.2%)                   | 3.4%<br>(1.1-6.5%)                  | 280<br>(89-530)     | 7000<br>(3200-11000) |
| Macedonia | 2000 | Female | 15 to 19 | 54%<br>(34-72%)                | 46%<br>(28-66%)          | 0.67<br>(0.3-1.3)                           | 1.8%<br>(1.1-2.6%)                   | 3.1%<br>(1.2-5.8%)                  | 0.77<br>(0.31-1.4)  | 130<br>(81-200)      |
| Macedonia | 2000 | Female | 20 to 24 | 64%<br>(44-80%)                | 36%<br>(20-56%)          | 0.97<br>(0.41-1.8)                          | 3.1%<br>(2-4.6%)                     | 3.6%<br>(1.1-7.2%)                  | 1.1<br>(0.34-2.1)   | 250<br>(150-380)     |
| Macedonia | 2000 | Female | 25 to 29 | 66%<br>(45-82%)                | 34%<br>(18-55%)          | 1<br>(0.49-1.8)                             | 3.2%<br>(2.2-4.4%)                   | 3.7%<br>(1.4-7%)                    | 1.1<br>(0.42-2.2)   | 260<br>(170-380)     |
| Macedonia | 2000 | Female | 30 to 34 | 67%<br>(46-82%)                | 33%<br>(18-54%)          | 1.1<br>(0.57-1.9)                           | 3%<br>(2-4.4%)                       | 4.2%<br>(1.7-7.6%)                  | 2.1<br>(0.86-3.9)   | 310<br>(200-460)     |
| Macedonia | 2000 | Female | 35 to 39 | 67%<br>(49-83%)                | 33%<br>(17-51%)          | 1.3<br>(0.58-2.1)                           | 3%<br>(1.8-4.5%)                     | 4.7%<br>(1.9-8.5%)                  | 3.6<br>(1.5-6.5)    | 340<br>(200-520)     |
| Macedonia | 2000 | Female | 40 to 44 | 67%<br>(48-82%)                | 33%<br>(18-52%)          | 1.4<br>(0.68-2.3)                           | 3%<br>(1.5-5%)                       | 5%<br>(1.8-8.8%)                    | 6.3<br>(2.3-12)     | 430<br>(210-690)     |
| Macedonia | 2000 | Female | 45 to 49 | 65%<br>(42-81%)                | 35%<br>(19-58%)          | 1.5<br>(0.76-2.7)                           | 3.3%<br>(1.4-5.9%)                   | 5.4%<br>(1.9-10%)                   | 11<br>(3.9-21)      | 590<br>(240-1100)    |
| Macedonia | 2000 | Female | 50 to 54 | 62%<br>(41-79%)                | 38%<br>(21-59%)          | 1.6<br>(0.8-2.7)                            | 3.6%<br>(1.2-6.7%)                   | 5.6%<br>(1.8-10%)                   | 15<br>(4.6-27)      | 610<br>(210-1100)    |
| Macedonia | 2000 | Female | 55 to 59 | 58%<br>(38-77%)                | 42%<br>(23-62%)          | 1.5<br>(0.73-2.6)                           | 3.6%<br>(0.85-7.1%)                  | 5.5%<br>(1.4-10%)                   | 20<br>(5-38)        | 680<br>(160-1300)    |
| Macedonia | 2000 | Female | 60 to 64 | 55%<br>(33-75%)                | 45%<br>(25-67%)          | 1.4<br>(0.64-2.5)                           | 3%<br>(0.053-7%)                     | 4.3%<br>(0.17-9.8%)                 | 26<br>(1-60)        | 730<br>(12-1700)     |
| Macedonia | 2000 | Female | 65 to 69 | 50%<br>(30-71%)                | 50%<br>(29-70%)          | 1.2<br>(0.61-1.9)                           | 2.5%<br>(-0.29-6%)                   | 3.4%<br>(-0.31-8%)                  | 32<br>(-2.9-76)     | 730<br>(-81-1800)    |
| Macedonia | 2000 | Female | 70 to 74 | 43%<br>(26-62%)                | 57%<br>(38-74%)          | 0.94<br>(0.4-1.8)                           | 2.4%<br>(-0.36-6.3%)                 | 3%<br>(-0.39-7.8%)                  | 41<br>(-5.6-110)    | 740<br>(-110-2000)   |
| Macedonia | 2000 | Female | 75 to 79 | 36%<br>(22-56%)                | 64%<br>(44-78%)          | 0.75<br>(0.29-1.5)                          | 2.2%<br>(-0.41-5.8%)                 | 2.6%<br>(-0.4-7%)                   | 42<br>(-6-110)      | 580<br>(-100-1600)   |

| Location  | Year | Sex    | Age      | Prevalence of current drinkers | Prevalence of abstainers | Population average of standard drinks daily | Percent of total attributable deaths | Percent of total attributable DALYs | Attributable deaths | Attributable DALYs    |
|-----------|------|--------|----------|--------------------------------|--------------------------|---------------------------------------------|--------------------------------------|-------------------------------------|---------------------|-----------------------|
| Macedonia | 2000 | Female | 80 to 84 | 32%<br>(18-50%)                | 68%<br>(50-82%)          | 0.67<br>(0.27-1.2)                          | 2.4%<br>(0.17-5.9%)                  | 2.8%<br>(0.2-6.9%)                  | 32<br>(2.2-80)      | 330<br>(22-830)       |
| Macedonia | 2000 | Female | 85 to 89 | 31%<br>(19-46%)                | 69%<br>(54-81%)          | 0.67<br>(0.27-1.3)                          | 2.9%<br>(0.27-7.6%)                  | 3.4%<br>(0.36-9%)                   | 25<br>(2.6-68)      | 180<br>(16-490)       |
| Macedonia | 2000 | Female | 90 to 94 | 32%<br>(19-48%)                | 68%<br>(52-81%)          | 0.72<br>(0.27-1.5)                          | 3%<br>(0.71-7%)                      | 3.8%<br>(0.94-9.1%)                 | 12<br>(3.1-29)      | 61<br>(14-140)        |
| Macedonia | 2000 | Female | 95 plus  | 36%<br>(19-57%)                | 64%<br>(43-81%)          | 0.8<br>(0.22-1.9)                           | 3.4%<br>(0.79-8.1%)                  | 4.3%<br>(0.97-10%)                  | 4.5<br>(1-11)       | 15<br>(3.5-35)        |
| Macedonia | 2000 | Male   | All Ages | 63%<br>(51-75%)                | 37%<br>(25-49%)          | 1.5<br>(1.2-1.7)                            | 4.7%<br>(2.9-6.8%)                   | 4.9%<br>(2.1-8.1%)                  | 480<br>(210-800)    | 16000<br>(9700-22000) |
| Macedonia | 2000 | Male   | 15 to 19 | 54%<br>(32-77%)                | 46%<br>(23-68%)          | 0.67<br>(0.33-1.2)                          | 3%<br>(1.9-4.4%)                     | 3.9%<br>(1.9-6.7%)                  | 2.2<br>(1-3.6)      | 290<br>(170-420)      |
| Macedonia | 2000 | Male   | 20 to 24 | 66%<br>(43-84%)                | 34%<br>(16-57%)          | 1.2<br>(0.62-2)                             | 6%<br>(4-8.3%)                       | 6.9%<br>(3.6-11%)                   | 5.2<br>(2.7-8.5)    | 650<br>(420-920)      |
| Macedonia | 2000 | Male   | 25 to 29 | 70%<br>(48-88%)                | 30%<br>(12-52%)          | 1.6<br>(0.85-2.5)                           | 6.7%<br>(4.8-9%)                     | 8.2%<br>(4.7-12%)                   | 6.5<br>(3.8-10)     | 740<br>(510-1000)     |
| Macedonia | 2000 | Male   | 30 to 34 | 73%<br>(51-89%)                | 27%<br>(11-49%)          | 1.8<br>(1.1-2.8)                            | 6.5%<br>(4.7-8.8%)                   | 8.6%<br>(5.2-13%)                   | 8.1<br>(4.9-12)     | 790<br>(540-1100)     |
| Macedonia | 2000 | Male   | 35 to 39 | 75%<br>(54-90%)                | 25%<br>(9.9-46%)         | 2<br>(1.1-3.1)                              | 6.2%<br>(4.1-8.9%)                   | 8.3%<br>(4.5-13%)                   | 12<br>(6.3-18)      | 880<br>(570-1200)     |
| Macedonia | 2000 | Male   | 40 to 44 | 76%<br>(55-91%)                | 24%<br>(9.3-45%)         | 2.2<br>(1.4-3.3)                            | 6.2%<br>(4-9%)                       | 8.2%<br>(4.7-13%)                   | 20<br>(11-30)       | 1200<br>(730-1700)    |
| Macedonia | 2000 | Male   | 45 to 49 | 76%<br>(52-90%)                | 24%<br>(10-48%)          | 2.5<br>(1.5-3.9)                            | 6.3%<br>(3.5-10%)                    | 7.9%<br>(4-13%)                     | 32<br>(16-52)       | 1600<br>(880-2500)    |
| Macedonia | 2000 | Male   | 50 to 54 | 75%<br>(52-90%)                | 25%<br>(10-48%)          | 2.7<br>(1.7-4)                              | 6.2%<br>(3-10%)                      | 7.4%<br>(3.1-13%)                   | 38<br>(17-64)       | 1600<br>(790-2600)    |
| Macedonia | 2000 | Male   | 55 to 59 | 73%<br>(51-90%)                | 27%<br>(10-49%)          | 2.8<br>(1.6-4.2)                            | 6.4%<br>(2.7-11%)                    | 7.5%<br>(3-13%)                     | 49<br>(20-85)       | 1700<br>(750-2900)    |
| Macedonia | 2000 | Male   | 60 to 64 | 72%<br>(46-89%)                | 28%<br>(11-54%)          | 2.6<br>(1.4-4.2)                            | 5.8%<br>(1.8-10%)                    | 6.6%<br>(1.9-12%)                   | 65<br>(19-120)      | 1900<br>(600-3500)    |
| Macedonia | 2000 | Male   | 65 to 69 | 70%<br>(46-89%)                | 30%<br>(11-54%)          | 2.4<br>(1.4-3.6)                            | 4.9%<br>(1.4-9.3%)                   | 5.6%<br>(1.3-11%)                   | 76<br>(19-140)      | 1800<br>(510-3400)    |
| Macedonia | 2000 | Male   | 70 to 74 | 68%<br>(45-85%)                | 32%<br>(15-55%)          | 2<br>(1.1-3.2)                              | 4.1%<br>(0.65-8.5%)                  | 4.6%<br>(0.65-9.7%)                 | 68<br>(9.8-140)     | 1300<br>(200-2700)    |
| Macedonia | 2000 | Male   | 75 to 79 | 65%<br>(42-84%)                | 35%<br>(16-58%)          | 1.7<br>(0.82-2.9)                           | 3.3%<br>(0.01-7.6%)                  | 3.7%<br>(-0.03-8.3%)                | 56<br>(-0.44-130)   | 820<br>(2.6-1900)     |
| Macedonia | 2000 | Male   | 80 to 84 | 63%<br>(39-83%)                | 37%<br>(17-61%)          | 1.5<br>(0.75-2.5)                           | 2.6%<br>(-0.31-6.2%)                 | 2.9%<br>(-0.47-6.8%)                | 29<br>(-4.7-68)     | 310<br>(-36-740)      |
| Macedonia | 2000 | Male   | 85 to 89 | 61%<br>(39-82%)                | 39%<br>(18-61%)          | 1.4<br>(0.68-2.4)                           | 1.8%<br>(-1-4.9%)                    | 2%<br>(-1.4-5.4%)                   | 13<br>(-8.6-35)     | 100<br>(-56-260)      |
| Macedonia | 2000 | Male   | 90 to 94 | 61%<br>(38-83%)                | 39%<br>(17-62%)          | 1.3<br>(0.61-2.3)                           | 1.3%<br>(-1.3-4.1%)                  | 1.5%<br>(-1.8-4.7%)                 | 4<br>(-4.9-13)      | 22<br>(-22-68)        |
| Macedonia | 2000 | Male   | 95 plus  | 62%<br>(35-87%)                | 38%<br>(13-65%)          | 1.2<br>(0.44-2.3)                           | 1.7%<br>(-1.4-4.9%)                  | 1.9%<br>(-1.9-5.8%)                 | 1.3<br>(-1.3-4)     | 4.8<br>(-3.8-14)      |

| Location  | Year | Sex    | Age      | Prevalence of current drinkers | Prevalence of abstainers | Population average of standard drinks daily | Percent of total attributable deaths | Percent of total attributable DALYs | Attributable deaths | Attributable DALYs    |
|-----------|------|--------|----------|--------------------------------|--------------------------|---------------------------------------------|--------------------------------------|-------------------------------------|---------------------|-----------------------|
| Macedonia | 2005 | Female | All Ages | 55%<br>(46-64%)                | 45%<br>(36-54%)          | 0.8<br>(0.65-0.96)                          | 1.9%<br>(0.72-3.3%)                  | 2.3%<br>(0.43-5.2%)                 | 210<br>(41-480)     | 5300<br>(2000-9400)   |
| Macedonia | 2005 | Female | 15 to 19 | 53%<br>(34-71%)                | 47%<br>(29-66%)          | 0.58<br>(0.26-1.1)                          | 1.6%<br>(1-2.4%)                     | 2.7%<br>(0.97-5%)                   | 0.59<br>(0.21-1.1)  | 110<br>(70-170)       |
| Macedonia | 2005 | Female | 20 to 24 | 63%<br>(45-80%)                | 37%<br>(20-55%)          | 0.82<br>(0.35-1.5)                          | 3%<br>(2-4.2%)                       | 2.9%<br>(0.73-6.1%)                 | 0.72<br>(0.18-1.5)  | 230<br>(140-360)      |
| Macedonia | 2005 | Female | 25 to 29 | 65%<br>(45-81%)                | 35%<br>(19-55%)          | 0.88<br>(0.4-1.6)                           | 3%<br>(2.1-4.1%)                     | 2.8%<br>(0.84-5.6%)                 | 0.81<br>(0.24-1.6)  | 250<br>(160-360)      |
| Macedonia | 2005 | Female | 30 to 34 | 66%<br>(45-82%)                | 34%<br>(18-55%)          | 0.95<br>(0.47-1.6)                          | 2.7%<br>(1.8-3.8%)                   | 3.2%<br>(1.2-6%)                    | 1.3<br>(0.46-2.3)   | 260<br>(160-370)      |
| Macedonia | 2005 | Female | 35 to 39 | 67%<br>(49-83%)                | 33%<br>(17-51%)          | 1<br>(0.48-1.8)                             | 2.6%<br>(1.7-3.9%)                   | 3.8%<br>(1.5-6.8%)                  | 2.6<br>(1-4.7)      | 300<br>(180-450)      |
| Macedonia | 2005 | Female | 40 to 44 | 66%<br>(48-82%)                | 34%<br>(18-52%)          | 1.2<br>(0.59-1.9)                           | 2.4%<br>(1.2-3.9%)                   | 3.8%<br>(1.2-6.9%)                  | 4.1<br>(1.3-7.8)    | 320<br>(160-530)      |
| Macedonia | 2005 | Female | 45 to 49 | 64%<br>(42-81%)                | 36%<br>(19-58%)          | 1.3<br>(0.65-2.3)                           | 2.5%<br>(0.95-4.8%)                  | 4%<br>(1-7.9%)                      | 7.8<br>(2-16)       | 430<br>(160-800)      |
| Macedonia | 2005 | Female | 50 to 54 | 61%<br>(40-79%)                | 39%<br>(21-60%)          | 1.3<br>(0.69-2.2)                           | 2.7%<br>(0.81-5.2%)                  | 4.2%<br>(1-8.3%)                    | 13<br>(3.2-25)      | 560<br>(160-1100)     |
| Macedonia | 2005 | Female | 55 to 59 | 58%<br>(37-77%)                | 42%<br>(23-63%)          | 1.3<br>(0.63-2.1)                           | 2.6%<br>(0.43-5.3%)                  | 4%<br>(0.62-8.1%)                   | 16<br>(2.3-32)      | 540<br>(84-1100)      |
| Macedonia | 2005 | Female | 60 to 64 | 54%<br>(32-74%)                | 46%<br>(26-68%)          | 1.2<br>(0.55-2.1)                           | 2%<br>(-0.5-5.3%)                    | 2.9%<br>(-0.59-7.4%)                | 16<br>(-3-42)       | 450<br>(-110-1200)    |
| Macedonia | 2005 | Female | 65 to 69 | 50%<br>(30-71%)                | 50%<br>(29-70%)          | 1<br>(0.51-1.6)                             | 1.5%<br>(-0.82-4.5%)                 | 2.1%<br>(-0.84-5.9%)                | 20<br>(-7.9-56)     | 450<br>(-250-1300)    |
| Macedonia | 2005 | Female | 70 to 74 | 43%<br>(26-62%)                | 57%<br>(38-74%)          | 0.79<br>(0.34-1.5)                          | 1.4%<br>(-0.78-4.6%)                 | 1.9%<br>(-0.87-6%)                  | 27<br>(-12-86)      | 470<br>(-260-1600)    |
| Macedonia | 2005 | Female | 75 to 79 | 36%<br>(22-56%)                | 64%<br>(44-78%)          | 0.62<br>(0.24-1.2)                          | 1.4%<br>(-0.67-4.5%)                 | 1.7%<br>(-0.73-5.5%)                | 32<br>(-14-100)     | 430<br>(-210-1500)    |
| Macedonia | 2005 | Female | 80 to 84 | 32%<br>(18-49%)                | 68%<br>(51-82%)          | 0.56<br>(0.22-1.1)                          | 1.6%<br>(-0.29-5.2%)                 | 1.9%<br>(-0.24-6.5%)                | 33<br>(-4-110)      | 330<br>(-56-1100)     |
| Macedonia | 2005 | Female | 85 to 89 | 30%<br>(18-46%)                | 70%<br>(54-82%)          | 0.56<br>(0.22-1.1)                          | 2.1%<br>(0.092-6.8%)                 | 2.5%<br>(0.18-8.3%)                 | 20<br>(1.4-66)      | 140<br>(6.2-470)      |
| Macedonia | 2005 | Female | 90 to 94 | 32%<br>(19-48%)                | 68%<br>(52-81%)          | 0.6<br>(0.22-1.3)                           | 2.2%<br>(0.17-6.9%)                  | 2.7%<br>(0.27-8.2%)                 | 8<br>(0.8-25)       | 39<br>(3.1-120)       |
| Macedonia | 2005 | Female | 95 plus  | 35%<br>(19-56%)                | 65%<br>(44-81%)          | 0.67<br>(0.18-1.6)                          | 2.5%<br>(0.2-7.4%)                   | 3.1%<br>(0.31-8.8%)                 | 4.1<br>(0.39-12)    | 13<br>(1-38)          |
| Macedonia | 2005 | Male   | All Ages | 64%<br>(52-75%)                | 36%<br>(25-48%)          | 1.3<br>(1.1-1.5)                            | 3.8%<br>(2.3-5.4%)                   | 3.6%<br>(1.2-6.1%)                  | 380<br>(130-640)    | 13000<br>(7600-19000) |
| Macedonia | 2005 | Male   | 15 to 19 | 54%<br>(32-77%)                | 46%<br>(23-68%)          | 0.57<br>(0.27-1)                            | 2.8%<br>(1.8-4%)                     | 3.6%<br>(1.5-6.1%)                  | 1.6<br>(0.68-2.8)   | 240<br>(150-340)      |
| Macedonia | 2005 | Male   | 20 to 24 | 66%<br>(43-85%)                | 34%<br>(15-57%)          | 1<br>(0.54-1.7)                             | 5.6%<br>(3.8-7.7%)                   | 6%<br>(2.8-10%)                     | 4.2<br>(1.9-6.9)    | 590<br>(380-850)      |
| Macedonia | 2005 | Male   | 25 to 29 | 70%<br>(48-88%)                | 30%<br>(12-52%)          | 1.3<br>(0.71-2.2)                           | 6.1%<br>(4.4-8.2%)                   | 7%<br>(3.8-11%)                     | 5.3<br>(2.9-8.5)    | 670<br>(460-930)      |

| Location  | Year | Sex    | Age      | Prevalence of current drinkers | Prevalence of abstainers | Population average of standard drinks daily | Percent of total attributable deaths | Percent of total attributable DALYs | Attributable deaths | Attributable DALYs  |
|-----------|------|--------|----------|--------------------------------|--------------------------|---------------------------------------------|--------------------------------------|-------------------------------------|---------------------|---------------------|
| Macedonia | 2005 | Male   | 30 to 34 | 73%<br>(50-90%)                | 27%<br>(10-50%)          | 1.5<br>(0.86-2.4)                           | 5.7%<br>(4-7.7%)                     | 7.1%<br>(3.9-11%)                   | 5.9<br>(3.3-9.3)    | 660<br>(450-920)    |
| Macedonia | 2005 | Male   | 35 to 39 | 75%<br>(54-90%)                | 25%<br>(10-46%)          | 1.7<br>(0.95-2.6)                           | 5.3%<br>(3.4-7.3%)                   | 6.9%<br>(3.4-11%)                   | 8.3<br>(4.2-13)     | 720<br>(450-1000)   |
| Macedonia | 2005 | Male   | 40 to 44 | 76%<br>(54-90%)                | 24%<br>(9.7-46%)         | 1.9<br>(1.1-2.8)                            | 5%<br>(3-7.4%)                       | 6.5%<br>(3.3-11%)                   | 13<br>(6.7-21)      | 850<br>(510-1200)   |
| Macedonia | 2005 | Male   | 45 to 49 | 76%<br>(52-90%)                | 24%<br>(9.7-48%)         | 2.1<br>(1.2-3.3)                            | 5.1%<br>(2.8-8.2%)                   | 6.4%<br>(2.9-11%)                   | 24<br>(11-40)       | 1200<br>(680-2000)  |
| Macedonia | 2005 | Male   | 50 to 54 | 75%<br>(52-90%)                | 25%<br>(10-48%)          | 2.3<br>(1.4-3.4)                            | 5%<br>(2.4-8.1%)                     | 5.9%<br>(2.4-9.9%)                  | 37<br>(15-63)       | 1600<br>(750-2600)  |
| Macedonia | 2005 | Male   | 55 to 59 | 73%<br>(51-89%)                | 27%<br>(11-49%)          | 2.3<br>(1.3-3.5)                            | 5%<br>(2.2-8.7%)                     | 5.9%<br>(2.3-11%)                   | 42<br>(16-76)       | 1500<br>(640-2700)  |
| Macedonia | 2005 | Male   | 60 to 64 | 71%<br>(47-89%)                | 29%<br>(11-53%)          | 2.2<br>(1.2-3.6)                            | 4.4%<br>(1.3-8.7%)                   | 5.1%<br>(1.3-10%)                   | 46<br>(12-93)       | 1400<br>(400-2700)  |
| Macedonia | 2005 | Male   | 65 to 69 | 70%<br>(46-88%)                | 30%<br>(12-54%)          | 2<br>(1.2-3)                                | 3.6%<br>(0.83-7.1%)                  | 4.1%<br>(0.87-8.1%)                 | 54<br>(11-110)      | 1300<br>(310-2500)  |
| Macedonia | 2005 | Male   | 70 to 74 | 67%<br>(44-85%)                | 33%<br>(15-56%)          | 1.7<br>(0.89-2.8)                           | 3%<br>(0.24-6.5%)                    | 3.3%<br>(0.17-7.3%)                 | 56<br>(2.8-120)     | 1100<br>(86-2400)   |
| Macedonia | 2005 | Male   | 75 to 79 | 64%<br>(40-84%)                | 36%<br>(16-60%)          | 1.4<br>(0.7-2.4)                            | 2.3%<br>(-0.34-5.9%)                 | 2.5%<br>(-0.53-6.5%)                | 42<br>(-9-110)      | 620<br>(-91-1600)   |
| Macedonia | 2005 | Male   | 80 to 84 | 62%<br>(38-81%)                | 38%<br>(19-62%)          | 1.3<br>(0.63-2.1)                           | 1.8%<br>(-0.77-4.9%)                 | 2%<br>(-0.97-5.5%)                  | 26<br>(-13-74)      | 290<br>(-120-780)   |
| Macedonia | 2005 | Male   | 85 to 89 | 60%<br>(37-81%)                | 40%<br>(19-63%)          | 1.1<br>(0.56-2)                             | 1.3%<br>(-1.4-3.9%)                  | 1.3%<br>(-1.7-4.4%)                 | 8.5<br>(-11-28)     | 67<br>(-74-210)     |
| Macedonia | 2005 | Male   | 90 to 94 | 60%<br>(38-82%)                | 40%<br>(18-62%)          | 1.1<br>(0.51-1.9)                           | 0.86%<br>(-1.8-3.2%)                 | 0.9%<br>(-2.3-3.6%)                 | 2.1<br>(-5.3-8.6)   | 12<br>(-25-44)      |
| Macedonia | 2005 | Male   | 95 plus  | 61%<br>(35-86%)                | 39%<br>(14-65%)          | 0.98<br>(0.37-2)                            | 1.2%<br>(-1.9-3.9%)                  | 1.3%<br>(-2.5-4.4%)                 | 1.2<br>(-2.3-4.2)   | 4.4<br>(-7.1-14)    |
| Macedonia | 2010 | Female | All Ages | 54%<br>(45-63%)                | 46%<br>(37-55%)          | 0.73<br>(0.58-0.9)                          | 1.7%<br>(0.66-3.1%)                  | 2%<br>(0.37-5.2%)                   | 190<br>(35-500)     | 4800<br>(1800-8800) |
| Macedonia | 2010 | Female | 15 to 19 | 52%<br>(32-71%)                | 48%<br>(29-68%)          | 0.51<br>(0.22-0.97)                         | 1.6%<br>(1-2.3%)                     | 2.6%<br>(0.95-4.7%)                 | 0.46<br>(0.17-0.84) | 100<br>(64-160)     |
| Macedonia | 2010 | Female | 20 to 24 | 63%<br>(44-80%)                | 37%<br>(20-56%)          | 0.74<br>(0.31-1.4)                          | 3%<br>(2-4.1%)                       | 2.7%<br>(0.8-5.4%)                  | 0.49<br>(0.14-0.97) | 210<br>(130-320)    |
| Macedonia | 2010 | Female | 25 to 29 | 65%<br>(44-81%)                | 35%<br>(19-56%)          | 0.79<br>(0.34-1.4)                          | 2.9%<br>(2-4%)                       | 2.5%<br>(0.7-4.9%)                  | 0.64<br>(0.18-1.3)  | 250<br>(160-360)    |
| Macedonia | 2010 | Female | 30 to 34 | 66%<br>(44-81%)                | 34%<br>(19-56%)          | 0.85<br>(0.4-1.4)                           | 2.6%<br>(1.8-3.6%)                   | 2.8%<br>(1.1-5.2%)                  | 1<br>(0.4-1.9)      | 250<br>(160-370)    |
| Macedonia | 2010 | Female | 35 to 39 | 66%<br>(48-82%)                | 34%<br>(18-52%)          | 0.94<br>(0.42-1.7)                          | 2.5%<br>(1.6-3.6%)                   | 3.4%<br>(1.5-6.3%)                  | 2.1<br>(0.92-3.8)   | 270<br>(170-410)    |
| Macedonia | 2010 | Female | 40 to 44 | 65%<br>(47-81%)                | 35%<br>(19-53%)          | 1.1<br>(0.51-1.8)                           | 2.2%<br>(1.2-3.6%)                   | 3.5%<br>(1.2-6.6%)                  | 3.4<br>(1.2-6.5)    | 300<br>(160-490)    |
| Macedonia | 2010 | Female | 45 to 49 | 63%<br>(40-81%)                | 37%<br>(19-60%)          | 1.2<br>(0.58-2.1)                           | 2.3%<br>(0.96-4.3%)                  | 3.7%<br>(1.1-7.5%)                  | 6.4<br>(1.9-13)     | 380<br>(160-680)    |



| Location  | Year | Sex    | Age      | Prevalence of current drinkers | Prevalence of abstainers | Population average of standard drinks daily | Percent of total attributable deaths | Percent of total attributable DALYs | Attributable deaths | Attributable DALYs    |
|-----------|------|--------|----------|--------------------------------|--------------------------|---------------------------------------------|--------------------------------------|-------------------------------------|---------------------|-----------------------|
| Macedonia | 2010 | Female | 50 to 54 | 60%<br>(40-78%)                | 40%<br>(22-60%)          | 1.2<br>(0.61-2)                             | 2.3%<br>(0.71-4.4%)                  | 3.6%<br>(0.9-7.2%)                  | 10<br>(2.6-20)      | 460<br>(150-860)      |
| Macedonia | 2010 | Female | 55 to 59 | 57%<br>(37-75%)                | 43%<br>(25-63%)          | 1.1<br>(0.53-1.9)                           | 2.2%<br>(0.35-4.5%)                  | 3.5%<br>(0.64-7%)                   | 16<br>(2.9-33)      | 550<br>(86-1100)      |
| Macedonia | 2010 | Female | 60 to 64 | 53%<br>(32-73%)                | 47%<br>(27-68%)          | 1<br>(0.48-1.9)                             | 1.6%<br>(-0.35-4.5%)                 | 2.5%<br>(-0.35-6.6%)                | 14<br>(-2-38)       | 390<br>(-83-1100)     |
| Macedonia | 2010 | Female | 65 to 69 | 49%<br>(29-70%)                | 51%<br>(30-71%)          | 0.88<br>(0.45-1.5)                          | 1.2%<br>(-0.71-3.8%)                 | 1.7%<br>(-0.73-5.3%)                | 15<br>(-6.4-44)     | 320<br>(-190-1000)    |
| Macedonia | 2010 | Female | 70 to 74 | 42%<br>(25-61%)                | 58%<br>(39-75%)          | 0.7<br>(0.29-1.4)                           | 1.1%<br>(-0.71-3.8%)                 | 1.6%<br>(-0.77-5%)                  | 22<br>(-11-72)      | 380<br>(-240-1300)    |
| Macedonia | 2010 | Female | 75 to 79 | 35%<br>(21-55%)                | 65%<br>(45-79%)          | 0.55<br>(0.21-1.1)                          | 1.1%<br>(-0.72-4.2%)                 | 1.4%<br>(-0.85-5.2%)                | 27<br>(-16-99)      | 360<br>(-250-1400)    |
| Macedonia | 2010 | Female | 80 to 84 | 31%<br>(18-48%)                | 69%<br>(52-82%)          | 0.49<br>(0.2-0.93)                          | 1.4%<br>(-0.35-4.8%)                 | 1.7%<br>(-0.36-6.2%)                | 32<br>(-7.2-120)    | 330<br>(-84-1200)     |
| Macedonia | 2010 | Female | 85 to 89 | 29%<br>(17-45%)                | 71%<br>(55-83%)          | 0.49<br>(0.2-0.99)                          | 1.8%<br>(0.082-6%)                   | 2.2%<br>(0.19-7.5%)                 | 28<br>(2.4-96)      | 190<br>(8.8-670)      |
| Macedonia | 2010 | Female | 90 to 94 | 31%<br>(18-47%)                | 69%<br>(53-82%)          | 0.53<br>(0.19-1.2)                          | 1.8%<br>(0.15-5.5%)                  | 2.4%<br>(0.25-7.3%)                 | 8.3<br>(0.86-26)    | 40<br>(3.2-120)       |
| Macedonia | 2010 | Female | 95 plus  | 34%<br>(18-55%)                | 66%<br>(45-82%)          | 0.59<br>(0.16-1.4)                          | 2.1%<br>(0.22-6.2%)                  | 2.7%<br>(0.34-7.7%)                 | 2.6<br>(0.31-7.3)   | 8.3<br>(0.84-24)      |
| Macedonia | 2010 | Male   | All Ages | 64%<br>(53-75%)                | 36%<br>(25-47%)          | 1.2<br>(0.99-1.5)                           | 3.4%<br>(2-5%)                       | 3.2%<br>(1-5.4%)                    | 350<br>(110-610)    | 12000<br>(6900-17000) |
| Macedonia | 2010 | Male   | 15 to 19 | 53%<br>(31-75%)                | 47%<br>(25-69%)          | 0.51<br>(0.24-0.91)                         | 2.7%<br>(1.7-3.8%)                   | 3.3%<br>(1.3-5.8%)                  | 1.3<br>(0.51-2.3)   | 210<br>(140-310)      |
| Macedonia | 2010 | Male   | 20 to 24 | 65%<br>(42-84%)                | 35%<br>(16-58%)          | 0.94<br>(0.48-1.6)                          | 5.4%<br>(3.7-7.5%)                   | 5.6%<br>(2.4-9.3%)                  | 3.2<br>(1.4-5.4)    | 510<br>(330-730)      |
| Macedonia | 2010 | Male   | 25 to 29 | 69%<br>(49-87%)                | 31%<br>(13-51%)          | 1.2<br>(0.65-2)                             | 5.8%<br>(4.3-7.7%)                   | 6.5%<br>(3.3-10%)                   | 4.2<br>(2.2-6.9)    | 630<br>(430-870)      |
| Macedonia | 2010 | Male   | 30 to 34 | 72%<br>(50-89%)                | 28%<br>(11-50%)          | 1.4<br>(0.81-2.3)                           | 5.4%<br>(3.8-7.2%)                   | 6.4%<br>(3.2-10%)                   | 4.8<br>(2.4-7.8)    | 610<br>(420-850)      |
| Macedonia | 2010 | Male   | 35 to 39 | 75%<br>(54-89%)                | 25%<br>(11-46%)          | 1.5<br>(0.84-2.4)                           | 4.9%<br>(3.2-6.8%)                   | 6.2%<br>(2.9-10%)                   | 6.7<br>(3.2-11)     | 630<br>(400-900)      |
| Macedonia | 2010 | Male   | 40 to 44 | 76%<br>(53-90%)                | 24%<br>(9.7-47%)         | 1.7<br>(0.99-2.6)                           | 4.4%<br>(2.6-6.6%)                   | 5.8%<br>(2.7-9.5%)                  | 11<br>(4.9-18)      | 740<br>(430-1100)     |
| Macedonia | 2010 | Male   | 45 to 49 | 75%<br>(49-90%)                | 25%<br>(10-51%)          | 1.9<br>(1.1-3)                              | 4.6%<br>(2.4-7.3%)                   | 5.7%<br>(2.6-9.6%)                  | 20<br>(8.9-33)      | 1000<br>(560-1600)    |
| Macedonia | 2010 | Male   | 50 to 54 | 74%<br>(50-89%)                | 26%<br>(11-50%)          | 2<br>(1.3-3.1)                              | 4.5%<br>(2.1-7.3%)                   | 5.4%<br>(2.2-9.2%)                  | 32<br>(13-53)       | 1400<br>(650-2200)    |
| Macedonia | 2010 | Male   | 55 to 59 | 72%<br>(49-89%)                | 28%<br>(11-51%)          | 2.1<br>(1.2-3.1)                            | 4.4%<br>(1.8-7.6%)                   | 5.2%<br>(2-9.2%)                    | 46<br>(17-81)       | 1700<br>(650-2900)    |
| Macedonia | 2010 | Male   | 60 to 64 | 70%<br>(45-89%)                | 30%<br>(11-55%)          | 2<br>(1.1-3.2)                              | 3.8%<br>(1.2-7.3%)                   | 4.4%<br>(1.3-8.5%)                  | 44<br>(12-85)       | 1300<br>(410-2500)    |
| Macedonia | 2010 | Male   | 65 to 69 | 69%<br>(44-88%)                | 31%<br>(12-56%)          | 1.8<br>(1-2.7)                              | 3.1%<br>(0.59-6.1%)                  | 3.6%<br>(0.62-7%)                   | 44<br>(7.5-84)      | 1100<br>(210-2100)    |

| Location  | Year | Sex    | Age      | Prevalence of current drinkers | Prevalence of abstainers | Population average of standard drinks daily | Percent of total attributable deaths | Percent of total attributable DALYs | Attributable deaths | Attributable DALYs  |
|-----------|------|--------|----------|--------------------------------|--------------------------|---------------------------------------------|--------------------------------------|-------------------------------------|---------------------|---------------------|
| Macedonia | 2010 | Male   | 70 to 74 | 67%<br>(43-84%)                | 33%<br>(16-57%)          | 1.5<br>(0.8-2.5)                            | 2.6%<br>(0.18-5.9%)                  | 2.9%<br>(0.13-6.8%)                 | 49<br>(2.1-110)     | 930<br>(63-2200)    |
| Macedonia | 2010 | Male   | 75 to 79 | 64%<br>(40-84%)                | 36%<br>(16-60%)          | 1.3<br>(0.6-2.2)                            | 2%<br>(-0.35-5.2%)                   | 2.3%<br>(-0.55-5.8%)                | 44<br>(-9.9-110)    | 640<br>(-110-1600)  |
| Macedonia | 2010 | Male   | 80 to 84 | 61%<br>(35-82%)                | 39%<br>(18-65%)          | 1.1<br>(0.54-1.9)                           | 1.6%<br>(-0.78-4.1%)                 | 1.8%<br>(-1-4.6%)                   | 28<br>(-15-73)      | 300<br>(-140-780)   |
| Macedonia | 2010 | Male   | 85 to 89 | 59%<br>(36-81%)                | 41%<br>(19-64%)          | 1<br>(0.51-1.7)                             | 1.2%<br>(-1.4-3.5%)                  | 1.3%<br>(-1.7-4%)                   | 12<br>(-15-35)      | 90<br>(-100-270)    |
| Macedonia | 2010 | Male   | 90 to 94 | 59%<br>(38-82%)                | 41%<br>(18-62%)          | 0.95<br>(0.44-1.7)                          | 0.88%<br>(-1.7-3.3%)                 | 0.97%<br>(-2.1-3.8%)                | 2.5<br>(-5.5-9.8)   | 14<br>(-26-51)      |
| Macedonia | 2010 | Male   | 95 plus  | 61%<br>(34-85%)                | 39%<br>(15-66%)          | 0.89<br>(0.32-1.8)                          | 1.2%<br>(-1.7-3.5%)                  | 1.3%<br>(-2.3-4.1%)                 | 0.79<br>(-1.4-2.5)  | 2.9<br>(-4.1-8.6)   |
| Macedonia | 2016 | Female | All Ages | 54%<br>(45-62%)                | 46%<br>(38-55%)          | 0.76<br>(0.56-1)                            | 1.7%<br>(0.68-3.1%)                  | 2%<br>(0.44-4.9%)                   | 200<br>(44-510)     | 5000<br>(2000-9300) |
| Macedonia | 2016 | Female | 15 to 19 | 52%<br>(32-71%)                | 48%<br>(29-68%)          | 0.53<br>(0.21-1)                            | 1.6%<br>(0.99-2.3%)                  | 2.7%<br>(0.96-5.2%)                 | 0.42<br>(0.15-0.79) | 92<br>(56-150)      |
| Macedonia | 2016 | Female | 20 to 24 | 63%<br>(44-79%)                | 37%<br>(21-56%)          | 0.76<br>(0.3-1.5)                           | 3%<br>(2-4.2%)                       | 2.8%<br>(0.76-5.9%)                 | 0.5<br>(0.13-1.1)   | 200<br>(120-300)    |
| Macedonia | 2016 | Female | 25 to 29 | 64%<br>(44-80%)                | 36%<br>(20-56%)          | 0.8<br>(0.35-1.5)                           | 3%<br>(2.1-4.1%)                     | 2.6%<br>(0.84-5.1%)                 | 0.61<br>(0.19-1.2)  | 230<br>(150-340)    |
| Macedonia | 2016 | Female | 30 to 34 | 65%<br>(44-81%)                | 35%<br>(19-56%)          | 0.87<br>(0.41-1.6)                          | 2.7%<br>(1.9-3.8%)                   | 2.9%<br>(1.1-5.4%)                  | 1<br>(0.4-2)        | 270<br>(170-400)    |
| Macedonia | 2016 | Female | 35 to 39 | 66%<br>(47-82%)                | 34%<br>(18-53%)          | 0.95<br>(0.43-1.7)                          | 2.5%<br>(1.7-3.7%)                   | 3.4%<br>(1.5-6.4%)                  | 2<br>(0.86-3.8)     | 280<br>(180-420)    |
| Macedonia | 2016 | Female | 40 to 44 | 65%<br>(47-81%)                | 35%<br>(19-53%)          | 1.1<br>(0.49-1.8)                           | 2.3%<br>(1.3-3.7%)                   | 3.6%<br>(1.3-6.8%)                  | 3.3<br>(1.2-6.2)    | 300<br>(160-470)    |
| Macedonia | 2016 | Female | 45 to 49 | 63%<br>(40-80%)                | 37%<br>(20-60%)          | 1.2<br>(0.54-2.1)                           | 2.4%<br>(1.1-4.5%)                   | 3.9%<br>(1.3-7.7%)                  | 6.4<br>(2.1-13)     | 390<br>(170-720)    |
| Macedonia | 2016 | Female | 50 to 54 | 60%<br>(38-78%)                | 40%<br>(22-62%)          | 1.2<br>(0.58-2.1)                           | 2.4%<br>(0.78-4.7%)                  | 3.8%<br>(1.1-7.8%)                  | 9.8<br>(2.8-20)     | 460<br>(150-880)    |
| Macedonia | 2016 | Female | 55 to 59 | 56%<br>(36-76%)                | 44%<br>(24-64%)          | 1.1<br>(0.52-2)                             | 2.2%<br>(0.42-4.4%)                  | 3.5%<br>(0.7-7.1%)                  | 14<br>(2.7-29)      | 510<br>(95-1000)    |
| Macedonia | 2016 | Female | 60 to 64 | 53%<br>(32-73%)                | 47%<br>(27-68%)          | 1<br>(0.47-1.9)                             | 1.7%<br>(-0.22-4.5%)                 | 2.6%<br>(-0.12-6.8%)                | 17<br>(-0.82-45)    | 500<br>(-63-1300)   |
| Macedonia | 2016 | Female | 65 to 69 | 48%<br>(29-70%)                | 52%<br>(30-71%)          | 0.89<br>(0.44-1.5)                          | 1.3%<br>(-0.49-3.8%)                 | 1.9%<br>(-0.49-5.3%)                | 17<br>(-4.4-49)     | 370<br>(-150-1100)  |
| Macedonia | 2016 | Female | 70 to 74 | 42%<br>(25-61%)                | 58%<br>(39-75%)          | 0.7<br>(0.29-1.4)                           | 1.2%<br>(-0.66-3.9%)                 | 1.7%<br>(-0.69-5.2%)                | 21<br>(-8.6-64)     | 360<br>(-200-1200)  |
| Macedonia | 2016 | Female | 75 to 79 | 35%<br>(21-53%)                | 65%<br>(47-79%)          | 0.56<br>(0.22-1.2)                          | 1.2%<br>(-0.63-4%)                   | 1.5%<br>(-0.69-5.1%)                | 28<br>(-13-98)      | 380<br>(-190-1400)  |
| Macedonia | 2016 | Female | 80 to 84 | 30%<br>(17-48%)                | 70%<br>(52-83%)          | 0.5<br>(0.21-0.97)                          | 1.3%<br>(-0.34-4.3%)                 | 1.6%<br>(-0.32-5.2%)                | 33<br>(-6.3-110)    | 330<br>(-76-1100)   |
| Macedonia | 2016 | Female | 85 to 89 | 29%<br>(18-45%)                | 71%<br>(55-82%)          | 0.5<br>(0.19-1)                             | 1.6%<br>(-0.07-5%)                   | 2.1%<br>(-0.053-6.3%)               | 31<br>(-0.8-94)     | 220<br>(-10-650)    |

| Location   | Year | Sex    | Age      | Prevalence of current drinkers | Prevalence of abstainers | Population average of standard drinks daily | Percent of total attributable deaths | Percent of total attributable DALYs | Attributable deaths | Attributable DALYs    |
|------------|------|--------|----------|--------------------------------|--------------------------|---------------------------------------------|--------------------------------------|-------------------------------------|---------------------|-----------------------|
| Macedonia  | 2016 | Female | 90 to 94 | 31%<br>(19-46%)                | 69%<br>(54-81%)          | 0.54<br>(0.19-1.2)                          | 1.8%<br>(0.092-5.1%)                 | 2.3%<br>(0.23-7.1%)                 | 15<br>(1.4-44)      | 70<br>(3.5-210)       |
| Macedonia  | 2016 | Female | 95 plus  | 34%<br>(18-54%)                | 66%<br>(46-82%)          | 0.61<br>(0.17-1.5)                          | 2.1%<br>(0.28-6.1%)                  | 2.7%<br>(0.39-7.9%)                 | 4.4<br>(0.63-13)    | 14<br>(2-43)          |
| Macedonia  | 2016 | Male   | All Ages | 64%<br>(53-75%)                | 36%<br>(25-47%)          | 1.3<br>(0.96-1.7)                           | 3.6%<br>(2-5.5%)                     | 3.4%<br>(1.1-6.3%)                  | 390<br>(140-720)    | 13000<br>(7200-20000) |
| Macedonia  | 2016 | Male   | 15 to 19 | 53%<br>(31-75%)                | 47%<br>(25-69%)          | 0.52<br>(0.23-0.96)                         | 2.7%<br>(1.7-4%)                     | 3.4%<br>(1.4-6.1%)                  | 1.2<br>(0.47-2.1)   | 190<br>(120-280)      |
| Macedonia  | 2016 | Male   | 20 to 24 | 65%<br>(42-85%)                | 35%<br>(15-58%)          | 0.96<br>(0.46-1.7)                          | 5.6%<br>(3.8-7.8%)                   | 5.7%<br>(2.4-9.6%)                  | 3.2<br>(1.3-5.3)    | 510<br>(330-730)      |
| Macedonia  | 2016 | Male   | 25 to 29 | 69%<br>(47-87%)                | 31%<br>(13-53%)          | 1.2<br>(0.63-2.2)                           | 6.2%<br>(4.5-8.4%)                   | 6.7%<br>(3.1-11%)                   | 4.2<br>(2-7)        | 630<br>(430-900)      |
| Macedonia  | 2016 | Male   | 30 to 34 | 72%<br>(49-89%)                | 28%<br>(11-51%)          | 1.4<br>(0.79-2.4)                           | 5.7%<br>(4-7.8%)                     | 6.5%<br>(3.2-11%)                   | 5.2<br>(2.6-8.9)    | 690<br>(470-970)      |
| Macedonia  | 2016 | Male   | 35 to 39 | 74%<br>(53-89%)                | 26%<br>(11-47%)          | 1.5<br>(0.81-2.5)                           | 5.2%<br>(3.4-7.5%)                   | 6.5%<br>(3.1-11%)                   | 7.3<br>(3.4-13)     | 700<br>(450-1000)     |
| Macedonia  | 2016 | Male   | 40 to 44 | 76%<br>(54-90%)                | 24%<br>(10-46%)          | 1.8<br>(0.99-2.7)                           | 4.7%<br>(2.8-7.2%)                   | 6.1%<br>(2.7-10%)                   | 11<br>(4.7-19)      | 770<br>(450-1200)     |
| Macedonia  | 2016 | Male   | 45 to 49 | 75%<br>(52-90%)                | 25%<br>(10-48%)          | 2<br>(1.1-3.2)                              | 4.8%<br>(2.5-8.1%)                   | 6.1%<br>(2.6-11%)                   | 20<br>(8.6-36)      | 1100<br>(560-1800)    |
| Macedonia  | 2016 | Male   | 50 to 54 | 74%<br>(52-89%)                | 26%<br>(11-48%)          | 2.1<br>(1.2-3.3)                            | 4.8%<br>(2.3-8.1%)                   | 5.9%<br>(2.5-10%)                   | 31<br>(13-54)       | 1400<br>(670-2300)    |
| Macedonia  | 2016 | Male   | 55 to 59 | 72%<br>(50-89%)                | 28%<br>(11-50%)          | 2.1<br>(1.2-3.3)                            | 4.6%<br>(2.1-8.2%)                   | 5.6%<br>(2.2-10%)                   | 45<br>(18-80)       | 1600<br>(740-2900)    |
| Macedonia  | 2016 | Male   | 60 to 64 | 70%<br>(44-89%)                | 30%<br>(11-56%)          | 2<br>(1.1-3.3)                              | 4.1%<br>(1.3-7.8%)                   | 4.8%<br>(1.4-9.2%)                  | 58<br>(18-110)      | 1800<br>(590-3400)    |
| Macedonia  | 2016 | Male   | 65 to 69 | 69%<br>(44-88%)                | 31%<br>(12-56%)          | 1.8<br>(1-2.9)                              | 3.3%<br>(0.84-6.6%)                  | 3.9%<br>(0.89-7.9%)                 | 53<br>(12-110)      | 1300<br>(330-2600)    |
| Macedonia  | 2016 | Male   | 70 to 74 | 67%<br>(43-84%)                | 33%<br>(16-57%)          | 1.6<br>(0.78-2.7)                           | 2.7%<br>(0.35-6.4%)                  | 3.2%<br>(0.39-7.3%)                 | 48<br>(6-110)       | 920<br>(120-2100)     |
| Macedonia  | 2016 | Male   | 75 to 79 | 63%<br>(39-83%)                | 37%<br>(17-61%)          | 1.3<br>(0.6-2.4)                            | 2.2%<br>(-0.2-5.9%)                  | 2.5%<br>(-0.34-6.6%)                | 48<br>(-6.2-130)    | 700<br>(-64-1800)     |
| Macedonia  | 2016 | Male   | 80 to 84 | 61%<br>(35-82%)                | 39%<br>(18-65%)          | 1.1<br>(0.53-2)                             | 1.8%<br>(-0.64-4.7%)                 | 2%<br>(-0.95-5.3%)                  | 34<br>(-16-91)      | 370<br>(-140-960)     |
| Macedonia  | 2016 | Male   | 85 to 89 | 59%<br>(37-81%)                | 41%<br>(19-63%)          | 1<br>(0.49-1.9)                             | 1.2%<br>(-1.4-3.7%)                  | 1.3%<br>(-1.7-4.2%)                 | 15<br>(-18-46)      | 110<br>(-120-350)     |
| Macedonia  | 2016 | Male   | 90 to 94 | 59%<br>(38-81%)                | 41%<br>(19-62%)          | 0.97<br>(0.44-1.9)                          | 0.92%<br>(-1.6-3.3%)                 | 1%<br>(-2-3.8%)                     | 3.9<br>(-7.6-14)    | 21<br>(-36-74)        |
| Macedonia  | 2016 | Male   | 95 plus  | 61%<br>(34-85%)                | 39%<br>(15-66%)          | 0.9<br>(0.32-1.9)                           | 1.3%<br>(-1.5-3.8%)                  | 1.5%<br>(-2-4.5%)                   | 1.3<br>(-1.9-4)     | 4.8<br>(-5.6-14)      |
| Montenegro | 1990 | Female | All Ages | 57%<br>(49-66%)                | 43%<br>(34-51%)          | 2.1<br>(1.3-3.1)                            | 7.1%<br>(4.2-10%)                    | 11%<br>(5.5-17%)                    | 240<br>(120-380)    | 5300<br>(3200-7600)   |
| Montenegro | 1990 | Female | 15 to 19 | 58%<br>(38-75%)                | 42%<br>(25-62%)          | 1.6<br>(0.64-3.3)                           | 3.3%<br>(1.9-5.3%)                   | 8.6%<br>(4-15%)                     | 0.66<br>(0.31-1.2)  | 76<br>(45-130)        |

| Location   | Year | Sex    | Age      | Prevalence of current drinkers | Prevalence of abstainers | Population average of standard drinks daily | Percent of total attributable deaths | Percent of total attributable DALYs | Attributable deaths | Attributable DALYs   |
|------------|------|--------|----------|--------------------------------|--------------------------|---------------------------------------------|--------------------------------------|-------------------------------------|---------------------|----------------------|
| Montenegro | 1990 | Female | 20 to 24 | 68%<br>(49-82%)                | 32%<br>(18-51%)          | 2.3<br>(0.92-4.5)                           | 5.4%<br>(3.3-8.2%)                   | 11%<br>(4.6-19%)                    | 1.3<br>(0.56-2.3)   | 140<br>(85-220)      |
| Montenegro | 1990 | Female | 25 to 29 | 69%<br>(50-84%)                | 31%<br>(16-50%)          | 2.4<br>(1-4.6)                              | 5.5%<br>(3.4-8.1%)                   | 12%<br>(5.2-19%)                    | 1.5<br>(0.69-2.6)   | 160<br>(97-240)      |
| Montenegro | 1990 | Female | 30 to 34 | 70%<br>(49-84%)                | 30%<br>(16-51%)          | 2.6<br>(1.2-4.8)                            | 5.9%<br>(3.6-8.8%)                   | 13%<br>(6.6-20%)                    | 2.4<br>(1.2-3.8)    | 200<br>(120-300)     |
| Montenegro | 1990 | Female | 35 to 39 | 70%<br>(53-84%)                | 30%<br>(16-47%)          | 2.9<br>(1.3-5.4)                            | 7%<br>(3.8-11%)                      | 14%<br>(6.9-22%)                    | 4.3<br>(2.1-6.7)    | 280<br>(150-430)     |
| Montenegro | 1990 | Female | 40 to 44 | 69%<br>(51-84%)                | 31%<br>(16-49%)          | 3.2<br>(1.4-6.1)                            | 8.8%<br>(4.4-13%)                    | 16%<br>(7.5-24%)                    | 6.7<br>(3.2-11)     | 360<br>(180-550)     |
| Montenegro | 1990 | Female | 45 to 49 | 68%<br>(45-83%)                | 32%<br>(17-55%)          | 3.6<br>(1.5-7.2)                            | 8.8%<br>(4.2-14%)                    | 16%<br>(7.9-24%)                    | 7.3<br>(3.6-11)     | 350<br>(170-520)     |
| Montenegro | 1990 | Female | 50 to 54 | 65%<br>(44-81%)                | 35%<br>(19-56%)          | 3.7<br>(1.6-7.2)                            | 9%<br>(4.5-13%)                      | 16%<br>(8.1-24%)                    | 11<br>(5.4-16)      | 450<br>(230-670)     |
| Montenegro | 1990 | Female | 55 to 59 | 62%<br>(41-79%)                | 38%<br>(21-59%)          | 3.6<br>(1.6-6.7)                            | 9.3%<br>(4.5-14%)                    | 16%<br>(8-23%)                      | 14<br>(7.3-22)      | 510<br>(250-790)     |
| Montenegro | 1990 | Female | 60 to 64 | 58%<br>(37-77%)                | 42%<br>(23-63%)          | 3.3<br>(1.4-6.4)                            | 10%<br>(4.3-16%)                     | 14%<br>(6.2-23%)                    | 23<br>(9.8-37)      | 650<br>(280-1100)    |
| Montenegro | 1990 | Female | 65 to 69 | 54%<br>(34-73%)                | 46%<br>(27-66%)          | 2.8<br>(1.3-5.4)                            | 9.8%<br>(3.8-17%)                    | 13%<br>(5.3-22%)                    | 22<br>(8.4-36)      | 530<br>(200-870)     |
| Montenegro | 1990 | Female | 70 to 74 | 47%<br>(30-65%)                | 53%<br>(35-70%)          | 2.3<br>(0.89-4.7)                           | 8.5%<br>(2.4-15%)                    | 12%<br>(3.3-20%)                    | 19<br>(5.2-34)      | 360<br>(100-640)     |
| Montenegro | 1990 | Female | 75 to 79 | 40%<br>(25-59%)                | 60%<br>(41-75%)          | 1.8<br>(0.67-4.1)                           | 7.7%<br>(2.1-14%)                    | 10%<br>(2.7-19%)                    | 31<br>(8.2-58)      | 460<br>(120-860)     |
| Montenegro | 1990 | Female | 80 to 84 | 36%<br>(21-54%)                | 64%<br>(46-79%)          | 1.7<br>(0.66-3.4)                           | 7.8%<br>(2.4-14%)                    | 9.9%<br>(2.9-18%)                   | 34<br>(9.9-62)      | 370<br>(120-670)     |
| Montenegro | 1990 | Female | 85 to 89 | 34%<br>(21-50%)                | 66%<br>(50-79%)          | 1.7<br>(0.6-3.7)                            | 8.1%<br>(2.8-15%)                    | 10%<br>(3.4-19%)                    | 35<br>(12-64)       | 260<br>(90-480)      |
| Montenegro | 1990 | Female | 90 to 94 | 36%<br>(23-53%)                | 64%<br>(47-77%)          | 1.8<br>(0.61-4.3)                           | 8%<br>(2.3-16%)                      | 9.8%<br>(2.7-19%)                   | 20<br>(5.7-39)      | 100<br>(29-200)      |
| Montenegro | 1990 | Female | 95 plus  | 40%<br>(22-60%)                | 60%<br>(40-78%)          | 2<br>(0.52-5.1)                             | 7.9%<br>(1.6-16%)                    | 9.7%<br>(2.1-19%)                   | 7.1<br>(1.5-14)     | 23<br>(4.6-46)       |
| Montenegro | 1990 | Male   | All Ages | 65%<br>(54-75%)                | 35%<br>(25-46%)          | 3.1<br>(2.1-4.7)                            | 11%<br>(7.3-14%)                     | 14%<br>(8.4-20%)                    | 310<br>(180-430)    | 9300<br>(6400-12000) |
| Montenegro | 1990 | Male   | 15 to 19 | 58%<br>(36-80%)                | 42%<br>(20-64%)          | 1.6<br>(0.7-2.9)                            | 5%<br>(3-7.9%)                       | 7.9%<br>(4-14%)                     | 1.7<br>(0.87-3)     | 170<br>(99-270)      |
| Montenegro | 1990 | Male   | 20 to 24 | 70%<br>(48-87%)                | 30%<br>(13-52%)          | 2.8<br>(1.3-5.1)                            | 9%<br>(6-13%)                        | 13%<br>(7.4-22%)                    | 3.2<br>(1.8-5.3)    | 310<br>(200-470)     |
| Montenegro | 1990 | Male   | 25 to 29 | 73%<br>(54-89%)                | 27%<br>(11-46%)          | 3.6<br>(1.8-6.4)                            | 11%<br>(6.8-15%)                     | 16%<br>(9-24%)                      | 5.6<br>(3.1-8.7)    | 470<br>(290-670)     |
| Montenegro | 1990 | Male   | 30 to 34 | 76%<br>(55-91%)                | 24%<br>(8.8-45%)         | 4.2<br>(2.1-7.1)                            | 11%<br>(7.4-15%)                     | 18%<br>(11-26%)                     | 6.2<br>(3.6-8.9)    | 470<br>(300-650)     |
| Montenegro | 1990 | Male   | 35 to 39 | 78%<br>(58-91%)                | 22%<br>(8.6-42%)         | 4.4<br>(2.2-7.4)                            | 12%<br>(7.6-17%)                     | 19%<br>(11-27%)                     | 9<br>(5.2-13)       | 580<br>(350-810)     |

| Location   | Year | Sex    | Age      | Prevalence of current drinkers | Prevalence of abstainers | Population average of standard drinks daily | Percent of total attributable deaths | Percent of total attributable DALYs | Attributable deaths | Attributable DALYs  |
|------------|------|--------|----------|--------------------------------|--------------------------|---------------------------------------------|--------------------------------------|-------------------------------------|---------------------|---------------------|
| Montenegro | 1990 | Male   | 40 to 44 | 79%<br>(59-91%)                | 21%<br>(8.6-41%)         | 5<br>(2.5-8.4)                              | 14%<br>(7.9-19%)                     | 20%<br>(10-27%)                     | 14<br>(7.3-20)      | 720<br>(410-1000)   |
| Montenegro | 1990 | Male   | 45 to 49 | 79%<br>(57-91%)                | 21%<br>(8.8-43%)         | 5.8<br>(2.9-10)                             | 14%<br>(8.5-19%)                     | 20%<br>(11-27%)                     | 15<br>(8.6-21)      | 700<br>(430-950)    |
| Montenegro | 1990 | Male   | 50 to 54 | 77%<br>(57-90%)                | 23%<br>(9.6-43%)         | 6.2<br>(3.2-11)                             | 15%<br>(9.1-19%)                     | 19%<br>(12-25%)                     | 26<br>(15-36)       | 1100<br>(660-1400)  |
| Montenegro | 1990 | Male   | 55 to 59 | 76%<br>(55-90%)                | 24%<br>(9.6-45%)         | 6.3<br>(3.3-11)                             | 15%<br>(9.1-20%)                     | 18%<br>(11-24%)                     | 39<br>(24-52)       | 1300<br>(830-1800)  |
| Montenegro | 1990 | Male   | 60 to 64 | 74%<br>(51-90%)                | 26%<br>(9.6-49%)         | 6<br>(3-11)                                 | 14%<br>(7.6-19%)                     | 17%<br>(9.2-23%)                    | 42<br>(23-58)       | 1200<br>(690-1700)  |
| Montenegro | 1990 | Male   | 65 to 69 | 73%<br>(50-90%)                | 27%<br>(10-50%)          | 5.4<br>(2.8-9.2)                            | 13%<br>(6.9-18%)                     | 16%<br>(8.5-23%)                    | 36<br>(19-51)       | 860<br>(460-1200)   |
| Montenegro | 1990 | Male   | 70 to 74 | 71%<br>(49-86%)                | 29%<br>(14-51%)          | 4.6<br>(2.2-8.8)                            | 11%<br>(5-17%)                       | 14%<br>(5.9-22%)                    | 22<br>(9-33)        | 420<br>(190-640)    |
| Montenegro | 1990 | Male   | 75 to 79 | 68%<br>(45-85%)                | 32%<br>(15-55%)          | 4<br>(1.7-8)                                | 11%<br>(3.6-18%)                     | 13%<br>(3.9-21%)                    | 32<br>(9.9-53)      | 470<br>(150-770)    |
| Montenegro | 1990 | Male   | 80 to 84 | 66%<br>(42-84%)                | 34%<br>(16-58%)          | 3.5<br>(1.6-6.7)                            | 10%<br>(3.3-17%)                     | 12%<br>(3.8-21%)                    | 27<br>(8.7-49)      | 300<br>(99-520)     |
| Montenegro | 1990 | Male   | 85 to 89 | 64%<br>(43-83%)                | 36%<br>(17-57%)          | 3.2<br>(1.5-6.1)                            | 8.9%<br>(2.2-16%)                    | 10%<br>(2.4-19%)                    | 20<br>(4.9-38)      | 160<br>(40-290)     |
| Montenegro | 1990 | Male   | 90 to 94 | 64%<br>(42-85%)                | 36%<br>(15-58%)          | 3<br>(1.3-6)                                | 7.1%<br>(0.86-15%)                   | 8.3%<br>(0.86-17%)                  | 7.4<br>(0.73-15)    | 39<br>(4.7-80)      |
| Montenegro | 1990 | Male   | 95 plus  | 65%<br>(38-88%)                | 35%<br>(12-62%)          | 2.7<br>(0.92-6)                             | 5.9%<br>(-0.32-14%)                  | 6.8%<br>(-0.67-16%)                 | 1.6<br>(-0.16-4)    | 5.8<br>(-0.3-14)    |
| Montenegro | 1995 | Female | All Ages | 58%<br>(50-67%)                | 42%<br>(33-50%)          | 2<br>(1.3-3)                                | 7.3%<br>(4.2-11%)                    | 11%<br>(5.2-17%)                    | 280<br>(130-440)    | 5900<br>(3400-8700) |
| Montenegro | 1995 | Female | 15 to 19 | 58%<br>(39-75%)                | 42%<br>(25-61%)          | 1.6<br>(0.64-3)                             | 3.2%<br>(1.9-5.2%)                   | 8.3%<br>(4-15%)                     | 0.61<br>(0.29-1.1)  | 70<br>(41-110)      |
| Montenegro | 1995 | Female | 20 to 24 | 68%<br>(50-83%)                | 32%<br>(17-50%)          | 2.2<br>(0.87-4.4)                           | 5.3%<br>(3.2-8.1%)                   | 10%<br>(4.5-18%)                    | 1.2<br>(0.52-2.1)   | 140<br>(81-220)     |
| Montenegro | 1995 | Female | 25 to 29 | 69%<br>(50-84%)                | 31%<br>(16-50%)          | 2.3<br>(0.96-4.5)                           | 5.5%<br>(3.4-8.2%)                   | 11%<br>(5.1-19%)                    | 1.5<br>(0.65-2.5)   | 150<br>(91-220)     |
| Montenegro | 1995 | Female | 30 to 34 | 70%<br>(50-84%)                | 30%<br>(16-50%)          | 2.5<br>(1.2-4.5)                            | 5.7%<br>(3.5-8.5%)                   | 12%<br>(6.4-20%)                    | 2.3<br>(1.2-3.6)    | 190<br>(120-280)    |
| Montenegro | 1995 | Female | 35 to 39 | 71%<br>(54-85%)                | 29%<br>(15-46%)          | 2.8<br>(1.2-5.2)                            | 6.6%<br>(3.6-9.9%)                   | 14%<br>(6.7-21%)                    | 3.8<br>(1.8-6)      | 260<br>(140-390)    |
| Montenegro | 1995 | Female | 40 to 44 | 70%<br>(52-84%)                | 30%<br>(16-48%)          | 3.1<br>(1.3-5.7)                            | 7.6%<br>(3.9-12%)                    | 15%<br>(7.4-23%)                    | 6.3<br>(3.1-9.8)    | 350<br>(180-540)    |
| Montenegro | 1995 | Female | 45 to 49 | 68%<br>(47-83%)                | 32%<br>(17-53%)          | 3.4<br>(1.5-6.7)                            | 9%<br>(4.3-14%)                      | 16%<br>(7.8-24%)                    | 8.7<br>(4.2-13)     | 410<br>(200-630)    |
| Montenegro | 1995 | Female | 50 to 54 | 65%<br>(46-81%)                | 35%<br>(19-54%)          | 3.5<br>(1.6-6.6)                            | 9.5%<br>(4.7-14%)                    | 16%<br>(8-24%)                      | 11<br>(5.3-16)      | 440<br>(220-650)    |
| Montenegro | 1995 | Female | 55 to 59 | 62%<br>(42-79%)                | 38%<br>(21-58%)          | 3.4<br>(1.5-6.6)                            | 9.9%<br>(4.8-15%)                    | 16%<br>(7.7-24%)                    | 18<br>(8.7-28)      | 620<br>(300-960)    |

| Location   | Year | Sex    | Age      | Prevalence of current drinkers | Prevalence of abstainers | Population average of standard drinks daily | Percent of total attributable deaths | Percent of total attributable DALYs | Attributable deaths | Attributable DALYs    |
|------------|------|--------|----------|--------------------------------|--------------------------|---------------------------------------------|--------------------------------------|-------------------------------------|---------------------|-----------------------|
| Montenegro | 1995 | Female | 60 to 64 | 58%<br>(38-78%)                | 42%<br>(22-62%)          | 3.1<br>(1.4-6.5)                            | 9.4%<br>(3.8-15%)                    | 14%<br>(5.7-23%)                    | 24<br>(9.7-39)      | 690<br>(280-1100)     |
| Montenegro | 1995 | Female | 65 to 69 | 54%<br>(35-74%)                | 46%<br>(26-65%)          | 2.7<br>(1.3-5.1)                            | 9.5%<br>(3.7-16%)                    | 13%<br>(5.2-22%)                    | 30<br>(12-50)       | 710<br>(280-1200)     |
| Montenegro | 1995 | Female | 70 to 74 | 48%<br>(30-66%)                | 52%<br>(34-70%)          | 2.2<br>(0.87-4.5)                           | 9%<br>(2.3-17%)                      | 12%<br>(3-21%)                      | 32<br>(8.2-58)      | 590<br>(160-1100)     |
| Montenegro | 1995 | Female | 75 to 79 | 41%<br>(26-60%)                | 59%<br>(40-74%)          | 1.8<br>(0.62-3.7)                           | 8%<br>(1.9-15%)                      | 10%<br>(2.3-19%)                    | 29<br>(6.4-55)      | 420<br>(98-790)       |
| Montenegro | 1995 | Female | 80 to 84 | 36%<br>(21-56%)                | 64%<br>(44-79%)          | 1.6<br>(0.59-3.2)                           | 7.7%<br>(2.3-14%)                    | 9.7%<br>(2.7-18%)                   | 32<br>(8.7-61)      | 350<br>(100-650)      |
| Montenegro | 1995 | Female | 85 to 89 | 35%<br>(22-51%)                | 65%<br>(49-78%)          | 1.6<br>(0.57-3.4)                           | 8%<br>(2.5-15%)                      | 9.9%<br>(3.1-19%)                   | 41<br>(13-78)       | 310<br>(100-580)      |
| Montenegro | 1995 | Female | 90 to 94 | 36%<br>(23-53%)                | 64%<br>(47-77%)          | 1.7<br>(0.58-4)                             | 7.9%<br>(2.1-15%)                    | 9.6%<br>(2.6-19%)                   | 26<br>(7.1-51)      | 130<br>(36-250)       |
| Montenegro | 1995 | Female | 95 plus  | 40%<br>(22-61%)                | 60%<br>(39-78%)          | 1.9<br>(0.52-5)                             | 7.8%<br>(1.5-16%)                    | 9.5%<br>(1.9-20%)                   | 9.5<br>(2-19)       | 31<br>(6.2-64)        |
| Montenegro | 1995 | Male   | All Ages | 66%<br>(55-77%)                | 34%<br>(23-45%)          | 3.1<br>(2.1-4.5)                            | 11%<br>(7.3-14%)                     | 14%<br>(8.1-20%)                    | 370<br>(210-530)    | 11000<br>(7100-14000) |
| Montenegro | 1995 | Male   | 15 to 19 | 59%<br>(37-80%)                | 41%<br>(20-63%)          | 1.5<br>(0.7-2.8)                            | 5.1%<br>(3.1-8%)                     | 7.8%<br>(4-13%)                     | 1.7<br>(0.87-3)     | 160<br>(97-260)       |
| Montenegro | 1995 | Male   | 20 to 24 | 69%<br>(47-87%)                | 31%<br>(13-53%)          | 2.7<br>(1.2-4.8)                            | 9.4%<br>(5.9-14%)                    | 13%<br>(6.9-21%)                    | 4.2<br>(2.3-7.1)    | 370<br>(230-580)      |
| Montenegro | 1995 | Male   | 25 to 29 | 73%<br>(53-89%)                | 27%<br>(11-47%)          | 3.4<br>(1.6-6.2)                            | 11%<br>(6.9-16%)                     | 16%<br>(8.7-24%)                    | 5.4<br>(3-8.4)      | 440<br>(270-630)      |
| Montenegro | 1995 | Male   | 30 to 34 | 76%<br>(54-90%)                | 24%<br>(9.5-46%)         | 3.9<br>(2-6.7)                              | 11%<br>(7.4-16%)                     | 17%<br>(10-26%)                     | 7.1<br>(4.1-10)     | 520<br>(330-730)      |
| Montenegro | 1995 | Male   | 35 to 39 | 78%<br>(59-91%)                | 22%<br>(8.7-41%)         | 4.2<br>(2.1-7)                              | 12%<br>(7.5-17%)                     | 18%<br>(10-26%)                     | 9.9<br>(5.6-14)     | 620<br>(380-880)      |
| Montenegro | 1995 | Male   | 40 to 44 | 79%<br>(58-92%)                | 21%<br>(8.2-42%)         | 4.7<br>(2.5-7.9)                            | 13%<br>(7.7-19%)                     | 19%<br>(10-27%)                     | 16<br>(8.9-24)      | 870<br>(510-1200)     |
| Montenegro | 1995 | Male   | 45 to 49 | 78%<br>(55-91%)                | 22%<br>(8.6-45%)         | 5.5<br>(2.7-9.4)                            | 14%<br>(8-20%)                       | 19%<br>(11-27%)                     | 19<br>(10-26)       | 870<br>(500-1200)     |
| Montenegro | 1995 | Male   | 50 to 54 | 77%<br>(56-91%)                | 23%<br>(9.4-44%)         | 5.8<br>(3-9.9)                              | 15%<br>(8.7-19%)                     | 19%<br>(11-25%)                     | 22<br>(13-30)       | 900<br>(540-1200)     |
| Montenegro | 1995 | Male   | 55 to 59 | 76%<br>(54-91%)                | 24%<br>(9.4-46%)         | 5.9<br>(3.2-10)                             | 15%<br>(9.1-19%)                     | 18%<br>(11-24%)                     | 40<br>(24-55)       | 1400<br>(840-1900)    |
| Montenegro | 1995 | Male   | 60 to 64 | 75%<br>(50-91%)                | 25%<br>(9.4-50%)         | 5.7<br>(2.9-10)                             | 14%<br>(7.6-19%)                     | 17%<br>(9.3-23%)                    | 52<br>(28-73)       | 1500<br>(840-2100)    |
| Montenegro | 1995 | Male   | 65 to 69 | 74%<br>(49-90%)                | 26%<br>(10-51%)          | 5.2<br>(2.7-8.6)                            | 13%<br>(6.9-19%)                     | 16%<br>(8.1-23%)                    | 58<br>(30-84)       | 1400<br>(720-2000)    |
| Montenegro | 1995 | Male   | 70 to 74 | 71%<br>(49-87%)                | 29%<br>(13-51%)          | 4.5<br>(2.2-8.2)                            | 12%<br>(5.1-19%)                     | 14%<br>(5.9-22%)                    | 45<br>(19-69)       | 860<br>(370-1300)     |
| Montenegro | 1995 | Male   | 75 to 79 | 68%<br>(46-86%)                | 32%<br>(14-54%)          | 3.8<br>(1.7-7.5)                            | 11%<br>(3.2-18%)                     | 12%<br>(3.6-21%)                    | 30<br>(8.7-51)      | 440<br>(140-750)      |

| Location   | Year | Sex    | Age      | Prevalence of current drinkers | Prevalence of abstainers | Population average of standard drinks daily | Percent of total attributable deaths | Percent of total attributable DALYs | Attributable deaths | Attributable DALYs  |
|------------|------|--------|----------|--------------------------------|--------------------------|---------------------------------------------|--------------------------------------|-------------------------------------|---------------------|---------------------|
| Montenegro | 1995 | Male   | 80 to 84 | 66%<br>(42-84%)                | 34%<br>(16-58%)          | 3.4<br>(1.5-6.4)                            | 10%<br>(3.1-18%)                     | 12%<br>(3.5-21%)                    | 26<br>(7.9-47)      | 280<br>(90-500)     |
| Montenegro | 1995 | Male   | 85 to 89 | 65%<br>(43-83%)                | 35%<br>(17-57%)          | 3.1<br>(1.4-5.7)                            | 8.7%<br>(2.1-17%)                    | 10%<br>(2.3-19%)                    | 23<br>(5-43)        | 170<br>(43-330)     |
| Montenegro | 1995 | Male   | 90 to 94 | 64%<br>(44-85%)                | 36%<br>(15-56%)          | 2.8<br>(1.2-5.4)                            | 6.9%<br>(0.71-15%)                   | 7.9%<br>(0.66-17%)                  | 9.9<br>(0.83-21)    | 52<br>(5.2-110)     |
| Montenegro | 1995 | Male   | 95 plus  | 65%<br>(39-88%)                | 35%<br>(12-61%)          | 2.6<br>(0.89-5.7)                           | 5.7%<br>(-0.3-14%)                   | 6.5%<br>(-0.71-16%)                 | 2.2<br>(-0.24-5.5)  | 7.7<br>(-0.41-19)   |
| Montenegro | 2000 | Female | All Ages | 58%<br>(50-66%)                | 42%<br>(34-50%)          | 2.1<br>(1.5-3)                              | 7.5%<br>(4.6-11%)                    | 11%<br>(5.8-17%)                    | 300<br>(150-460)    | 6400<br>(3900-9200) |
| Montenegro | 2000 | Female | 15 to 19 | 58%<br>(38-74%)                | 42%<br>(26-62%)          | 1.6<br>(0.65-3)                             | 3.3%<br>(1.9-5.4%)                   | 8.3%<br>(4.1-15%)                   | 0.68<br>(0.33-1.2)  | 75<br>(44-120)      |
| Montenegro | 2000 | Female | 20 to 24 | 67%<br>(49-83%)                | 33%<br>(17-51%)          | 2.2<br>(0.91-4.3)                           | 5.2%<br>(3.2-8%)                     | 10%<br>(4.6-18%)                    | 1.1<br>(0.48-1.9)   | 130<br>(76-200)     |
| Montenegro | 2000 | Female | 25 to 29 | 69%<br>(50-84%)                | 31%<br>(16-50%)          | 2.4<br>(1-4.5)                              | 5.5%<br>(3.4-8.1%)                   | 11%<br>(5.2-19%)                    | 1.4<br>(0.65-2.3)   | 150<br>(89-220)     |
| Montenegro | 2000 | Female | 30 to 34 | 70%<br>(49-84%)                | 30%<br>(16-51%)          | 2.5<br>(1.2-4.5)                            | 5.8%<br>(3.6-8.5%)                   | 13%<br>(6.5-20%)                    | 2<br>(1-3.1)        | 170<br>(100-250)    |
| Montenegro | 2000 | Female | 35 to 39 | 70%<br>(52-84%)                | 30%<br>(16-48%)          | 2.8<br>(1.3-5.2)                            | 6.5%<br>(3.7-9.8%)                   | 14%<br>(6.8-21%)                    | 3.7<br>(1.8-5.7)    | 250<br>(140-370)    |
| Montenegro | 2000 | Female | 40 to 44 | 70%<br>(52-84%)                | 30%<br>(16-48%)          | 3.1<br>(1.5-5.6)                            | 7.6%<br>(4.1-11%)                    | 15%<br>(8-23%)                      | 6.2<br>(3.1-9.5)    | 340<br>(180-520)    |
| Montenegro | 2000 | Female | 45 to 49 | 68%<br>(46-84%)                | 32%<br>(16-54%)          | 3.4<br>(1.7-6.5)                            | 8.8%<br>(4.5-13%)                    | 16%<br>(8.3-24%)                    | 11<br>(5.4-16)      | 500<br>(270-760)    |
| Montenegro | 2000 | Female | 50 to 54 | 65%<br>(45-81%)                | 35%<br>(19-55%)          | 3.5<br>(1.7-6.2)                            | 9.7%<br>(4.9-14%)                    | 16%<br>(8.5-24%)                    | 13<br>(6.6-19)      | 520<br>(270-770)    |
| Montenegro | 2000 | Female | 55 to 59 | 62%<br>(42-80%)                | 38%<br>(20-58%)          | 3.5<br>(1.6-6.5)                            | 10%<br>(5-16%)                       | 16%<br>(8.1-24%)                    | 16<br>(7.9-24)      | 540<br>(270-830)    |
| Montenegro | 2000 | Female | 60 to 64 | 59%<br>(38-78%)                | 41%<br>(22-62%)          | 3.2<br>(1.4-6.3)                            | 9.6%<br>(4.1-15%)                    | 14%<br>(6.1-23%)                    | 25<br>(11-39)       | 720<br>(310-1100)   |
| Montenegro | 2000 | Female | 65 to 69 | 54%<br>(34-73%)                | 46%<br>(27-66%)          | 2.7<br>(1.4-5.1)                            | 9.6%<br>(4.2-16%)                    | 13%<br>(5.8-22%)                    | 35<br>(15-58)       | 840<br>(370-1400)   |
| Montenegro | 2000 | Female | 70 to 74 | 48%<br>(30-66%)                | 52%<br>(34-70%)          | 2.2<br>(0.9-4.3)                            | 9%<br>(2.7-16%)                      | 12%<br>(3.5-21%)                    | 41<br>(12-73)       | 780<br>(240-1400)   |
| Montenegro | 2000 | Female | 75 to 79 | 41%<br>(25-60%)                | 59%<br>(40-75%)          | 1.8<br>(0.67-3.6)                           | 8.1%<br>(2.2-15%)                    | 10%<br>(2.6-19%)                    | 37<br>(9.4-67)      | 530<br>(140-970)    |
| Montenegro | 2000 | Female | 80 to 84 | 36%<br>(21-54%)                | 64%<br>(46-79%)          | 1.6<br>(0.61-3.1)                           | 8.2%<br>(2.8-15%)                    | 10%<br>(3.3-18%)                    | 33<br>(11-59)       | 350<br>(120-630)    |
| Montenegro | 2000 | Female | 85 to 89 | 34%<br>(21-50%)                | 66%<br>(50-79%)          | 1.6<br>(0.61-3.3)                           | 8.5%<br>(3-15%)                      | 10%<br>(3.6-19%)                    | 38<br>(13-68)       | 280<br>(95-510)     |
| Montenegro | 2000 | Female | 90 to 94 | 36%<br>(23-53%)                | 64%<br>(47-77%)          | 1.7<br>(0.59-3.8)                           | 8.3%<br>(2.3-15%)                    | 10%<br>(2.8-19%)                    | 29<br>(8.1-55)      | 150<br>(43-280)     |
| Montenegro | 2000 | Female | 95 plus  | 40%<br>(23-61%)                | 60%<br>(39-77%)          | 1.9<br>(0.53-4.8)                           | 8.2%<br>(1.7-17%)                    | 10%<br>(2.1-20%)                    | 12<br>(2.6-24)      | 39<br>(8.3-78)      |

| Location   | Year | Sex    | Age      | Prevalence of current drinkers | Prevalence of abstainers | Population average of standard drinks daily | Percent of total attributable deaths | Percent of total attributable DALYs | Attributable deaths | Attributable DALYs    |
|------------|------|--------|----------|--------------------------------|--------------------------|---------------------------------------------|--------------------------------------|-------------------------------------|---------------------|-----------------------|
| Montenegro | 2000 | Male   | All Ages | 66%<br>(55-77%)                | 34%<br>(23-45%)          | 3.3<br>(2.3-4.6)                            | 11%<br>(7.9-15%)                     | 15%<br>(8.7-20%)                    | 430<br>(250-600)    | 12000<br>(8100-16000) |
| Montenegro | 2000 | Male   | 15 to 19 | 58%<br>(36-79%)                | 42%<br>(21-64%)          | 1.5<br>(0.71-2.7)                           | 4.7%<br>(2.9-7.3%)                   | 7.7%<br>(4-13%)                     | 1.4<br>(0.71-2.3)   | 140<br>(84-210)       |
| Montenegro | 2000 | Male   | 20 to 24 | 69%<br>(47-86%)                | 31%<br>(14-53%)          | 2.7<br>(1.3-4.8)                            | 9.1%<br>(5.8-13%)                    | 13%<br>(7.2-21%)                    | 3.2<br>(1.7-5)      | 300<br>(190-440)      |
| Montenegro | 2000 | Male   | 25 to 29 | 73%<br>(53-89%)                | 27%<br>(11-47%)          | 3.5<br>(1.7-6.3)                            | 11%<br>(7-15%)                       | 16%<br>(9.1-24%)                    | 4.5<br>(2.6-6.8)    | 380<br>(240-540)      |
| Montenegro | 2000 | Male   | 30 to 34 | 76%<br>(55-91%)                | 24%<br>(9.5-45%)         | 4<br>(2.1-7)                                | 12%<br>(7.8-16%)                     | 18%<br>(11-26%)                     | 6<br>(3.5-8.7)      | 440<br>(280-610)      |
| Montenegro | 2000 | Male   | 35 to 39 | 78%<br>(58-91%)                | 22%<br>(9.1-42%)         | 4.2<br>(2.3-7.2)                            | 12%<br>(7.6-17%)                     | 18%<br>(11-26%)                     | 9.6<br>(5.5-14)     | 600<br>(380-850)      |
| Montenegro | 2000 | Male   | 40 to 44 | 79%<br>(58-92%)                | 21%<br>(8.3-42%)         | 4.8<br>(2.7-7.7)                            | 13%<br>(8-18%)                       | 19%<br>(11-27%)                     | 15<br>(8.8-22)      | 820<br>(500-1200)     |
| Montenegro | 2000 | Male   | 45 to 49 | 79%<br>(56-91%)                | 21%<br>(8.7-44%)         | 5.6<br>(3-9.2)                              | 14%<br>(8.7-19%)                     | 20%<br>(11-26%)                     | 26<br>(15-35)       | 1200<br>(710-1600)    |
| Montenegro | 2000 | Male   | 50 to 54 | 77%<br>(56-90%)                | 23%<br>(9.6-44%)         | 5.9<br>(3.3-9.4)                            | 15%<br>(9.2-20%)                     | 19%<br>(12-25%)                     | 29<br>(17-38)       | 1100<br>(710-1500)    |
| Montenegro | 2000 | Male   | 55 to 59 | 76%<br>(54-91%)                | 24%<br>(9-46%)           | 6<br>(3.3-10)                               | 15%<br>(9.6-20%)                     | 19%<br>(12-25%)                     | 32<br>(20-43)       | 1100<br>(700-1500)    |
| Montenegro | 2000 | Male   | 60 to 64 | 74%<br>(51-91%)                | 26%<br>(9.4-49%)         | 5.8<br>(3-10)                               | 14%<br>(8.2-19%)                     | 17%<br>(9.9-24%)                    | 52<br>(31-73)       | 1500<br>(880-2100)    |
| Montenegro | 2000 | Male   | 65 to 69 | 73%<br>(50-90%)                | 27%<br>(10-50%)          | 5.2<br>(2.9-8.4)                            | 14%<br>(7.5-19%)                     | 17%<br>(8.9-23%)                    | 67<br>(37-95)       | 1600<br>(900-2200)    |
| Montenegro | 2000 | Male   | 70 to 74 | 71%<br>(49-87%)                | 29%<br>(13-51%)          | 4.5<br>(2.3-8)                              | 12%<br>(5.4-19%)                     | 15%<br>(6.4-22%)                    | 67<br>(29-100)      | 1300<br>(560-1900)    |
| Montenegro | 2000 | Male   | 75 to 79 | 68%<br>(46-86%)                | 32%<br>(14-54%)          | 3.8<br>(1.8-7.1)                            | 11%<br>(3.7-18%)                     | 13%<br>(4.1-21%)                    | 52<br>(16-87)       | 760<br>(250-1300)     |
| Montenegro | 2000 | Male   | 80 to 84 | 67%<br>(43-84%)                | 33%<br>(16-57%)          | 3.4<br>(1.6-6)                              | 11%<br>(3.6-18%)                     | 12%<br>(4.1-21%)                    | 33<br>(11-58)       | 350<br>(120-610)      |
| Montenegro | 2000 | Male   | 85 to 89 | 65%<br>(43-83%)                | 35%<br>(17-57%)          | 3.1<br>(1.5-5.6)                            | 9.2%<br>(2.5-17%)                    | 11%<br>(2.8-20%)                    | 18<br>(4.6-34)      | 140<br>(37-250)       |
| Montenegro | 2000 | Male   | 90 to 94 | 65%<br>(43-85%)                | 35%<br>(15-57%)          | 2.9<br>(1.3-5.4)                            | 7.3%<br>(1.2-15%)                    | 8.4%<br>(1.2-18%)                   | 9.1<br>(1.3-19)     | 48<br>(7.6-99)        |
| Montenegro | 2000 | Male   | 95 plus  | 65%<br>(38-88%)                | 35%<br>(12-62%)          | 2.6<br>(0.92-5.7)                           | 6%<br>(0.042-14%)                    | 6.8%<br>(-0.29-16%)                 | 2.6<br>(-0.11-6.2)  | 9.1<br>(0.064-21)     |
| Montenegro | 2005 | Female | All Ages | 58%<br>(50-66%)                | 42%<br>(34-50%)          | 2.3<br>(1.7-3)                              | 7.9%<br>(5-11%)                      | 12%<br>(6.7-18%)                    | 310<br>(170-460)    | 6700<br>(4300-9200)   |
| Montenegro | 2005 | Female | 15 to 19 | 58%<br>(38-75%)                | 42%<br>(25-62%)          | 1.7<br>(0.72-3.2)                           | 3.4%<br>(2-5.4%)                     | 8.7%<br>(4.2-15%)                   | 0.65<br>(0.32-1.1)  | 72<br>(41-110)        |
| Montenegro | 2005 | Female | 20 to 24 | 67%<br>(50-82%)                | 33%<br>(18-50%)          | 2.3<br>(0.99-4.4)                           | 5.4%<br>(3.2-8.1%)                   | 11%<br>(4.8-18%)                    | 1.2<br>(0.53-2)     | 140<br>(81-210)       |
| Montenegro | 2005 | Female | 25 to 29 | 69%<br>(50-83%)                | 31%<br>(17-50%)          | 2.5<br>(1.1-4.6)                            | 5.6%<br>(3.5-8.1%)                   | 12%<br>(5.5-19%)                    | 1.4<br>(0.65-2.3)   | 150<br>(91-220)       |



| Location   | Year | Sex    | Age      | Prevalence of current drinkers | Prevalence of abstainers | Population average of standard drinks daily | Percent of total attributable deaths | Percent of total attributable DALYs | Attributable deaths | Attributable DALYs    |
|------------|------|--------|----------|--------------------------------|--------------------------|---------------------------------------------|--------------------------------------|-------------------------------------|---------------------|-----------------------|
| Montenegro | 2005 | Female | 30 to 34 | 70%<br>(50-84%)                | 30%<br>(16-50%)          | 2.7<br>(1.3-4.8)                            | 5.7%<br>(3.6-8.4%)                   | 13%<br>(6.9-20%)                    | 2<br>(1.1-3.1)      | 170<br>(100-250)      |
| Montenegro | 2005 | Female | 35 to 39 | 70%<br>(53-84%)                | 30%<br>(16-47%)          | 2.9<br>(1.4-5.3)                            | 6.5%<br>(3.7-9.6%)                   | 14%<br>(7.2-21%)                    | 3.1<br>(1.6-4.8)    | 210<br>(120-310)      |
| Montenegro | 2005 | Female | 40 to 44 | 69%<br>(52-84%)                | 31%<br>(16-48%)          | 3.3<br>(1.6-5.6)                            | 7.6%<br>(4.4-11%)                    | 15%<br>(8.3-23%)                    | 5.7<br>(3.1-8.6)    | 320<br>(180-470)      |
| Montenegro | 2005 | Female | 45 to 49 | 68%<br>(45-83%)                | 32%<br>(17-55%)          | 3.6<br>(1.8-6.8)                            | 8.8%<br>(5-13%)                      | 16%<br>(9.1-24%)                    | 9.5<br>(5.4-14)     | 460<br>(260-670)      |
| Montenegro | 2005 | Female | 50 to 54 | 65%<br>(45-81%)                | 35%<br>(19-55%)          | 3.7<br>(1.9-6.4)                            | 9.5%<br>(5.2-14%)                    | 16%<br>(8.9-23%)                    | 15<br>(8.6-22)      | 630<br>(360-910)      |
| Montenegro | 2005 | Female | 55 to 59 | 62%<br>(41-79%)                | 38%<br>(21-59%)          | 3.6<br>(1.8-6.4)                            | 10%<br>(5.3-15%)                     | 16%<br>(8.6-23%)                    | 17<br>(9.6-26)      | 610<br>(330-910)      |
| Montenegro | 2005 | Female | 60 to 64 | 58%<br>(37-78%)                | 42%<br>(22-63%)          | 3.3<br>(1.5-6.3)                            | 9.6%<br>(4.5-15%)                    | 14%<br>(6.9-22%)                    | 19<br>(9.2-30)      | 570<br>(270-910)      |
| Montenegro | 2005 | Female | 65 to 69 | 54%<br>(34-74%)                | 46%<br>(26-66%)          | 2.9<br>(1.4-5.1)                            | 9.8%<br>(4.4-15%)                    | 14%<br>(6.3-22%)                    | 36<br>(16-56)       | 860<br>(390-1400)     |
| Montenegro | 2005 | Female | 70 to 74 | 47%<br>(29-66%)                | 53%<br>(34-71%)          | 2.3<br>(0.97-4.3)                           | 9.3%<br>(3-16%)                      | 12%<br>(4-21%)                      | 48<br>(16-84)       | 920<br>(300-1600)     |
| Montenegro | 2005 | Female | 75 to 79 | 40%<br>(26-60%)                | 60%<br>(40-74%)          | 1.9<br>(0.73-3.7)                           | 8.5%<br>(2.5-15%)                    | 11%<br>(3.1-19%)                    | 50<br>(14-89)       | 740<br>(210-1300)     |
| Montenegro | 2005 | Female | 80 to 84 | 36%<br>(21-54%)                | 64%<br>(46-79%)          | 1.7<br>(0.66-3.2)                           | 8.6%<br>(3.1-15%)                    | 11%<br>(4-19%)                      | 41<br>(15-71)       | 440<br>(160-760)      |
| Montenegro | 2005 | Female | 85 to 89 | 34%<br>(21-51%)                | 66%<br>(49-79%)          | 1.7<br>(0.64-3.4)                           | 9%<br>(3.5-16%)                      | 11%<br>(4.2-19%)                    | 30<br>(12-52)       | 230<br>(88-390)       |
| Montenegro | 2005 | Female | 90 to 94 | 36%<br>(23-53%)                | 64%<br>(47-77%)          | 1.8<br>(0.64-3.9)                           | 8.8%<br>(2.9-16%)                    | 11%<br>(3.5-19%)                    | 22<br>(7.1-39)      | 110<br>(36-200)       |
| Montenegro | 2005 | Female | 95 plus  | 40%<br>(23-61%)                | 60%<br>(39-77%)          | 2<br>(0.56-4.7)                             | 8.7%<br>(1.9-17%)                    | 11%<br>(2.5-20%)                    | 11<br>(2.7-21)      | 37<br>(8.1-71)        |
| Montenegro | 2005 | Male   | All Ages | 67%<br>(56-78%)                | 33%<br>(22-44%)          | 3.6<br>(2.7-4.7)                            | 12%<br>(8.9-15%)                     | 15%<br>(10-21%)                     | 460<br>(290-620)    | 12000<br>(8900-15000) |
| Montenegro | 2005 | Male   | 15 to 19 | 59%<br>(36-80%)                | 41%<br>(20-64%)          | 1.6<br>(0.79-2.9)                           | 4.5%<br>(2.9-6.8%)                   | 8.2%<br>(4.4-14%)                   | 0.96<br>(0.52-1.6)  | 110<br>(69-170)       |
| Montenegro | 2005 | Male   | 20 to 24 | 69%<br>(48-86%)                | 31%<br>(14-52%)          | 2.9<br>(1.4-4.9)                            | 9.6%<br>(6.3-14%)                    | 14%<br>(7.8-22%)                    | 3.8<br>(2.1-6)      | 350<br>(220-510)      |
| Montenegro | 2005 | Male   | 25 to 29 | 73%<br>(52-89%)                | 27%<br>(11-48%)          | 3.7<br>(1.9-6.4)                            | 11%<br>(7.4-16%)                     | 17%<br>(10-26%)                     | 4.7<br>(2.7-7.1)    | 390<br>(260-560)      |
| Montenegro | 2005 | Male   | 30 to 34 | 76%<br>(55-91%)                | 24%<br>(9.3-45%)         | 4.2<br>(2.3-7)                              | 11%<br>(7.9-16%)                     | 19%<br>(12-27%)                     | 4.8<br>(3-6.9)      | 370<br>(250-510)      |
| Montenegro | 2005 | Male   | 35 to 39 | 78%<br>(59-91%)                | 22%<br>(9.3-41%)         | 4.5<br>(2.4-7.3)                            | 12%<br>(7.9-17%)                     | 19%<br>(12-27%)                     | 6.9<br>(4.1-9.8)    | 450<br>(290-610)      |
| Montenegro | 2005 | Male   | 40 to 44 | 79%<br>(58-91%)                | 21%<br>(8.5-42%)         | 5<br>(2.8-7.8)                              | 13%<br>(8.3-18%)                     | 20%<br>(12-27%)                     | 12<br>(7.5-17)      | 680<br>(440-920)      |
| Montenegro | 2005 | Male   | 45 to 49 | 78%<br>(57-91%)                | 22%<br>(8.6-43%)         | 5.8<br>(3.3-9)                              | 15%<br>(9.4-19%)                     | 20%<br>(13-26%)                     | 22<br>(14-30)       | 1000<br>(690-1400)    |

| Location   | Year | Sex    | Age      | Prevalence of current drinkers | Prevalence of abstainers | Population average of standard drinks daily | Percent of total attributable deaths | Percent of total attributable DALYs | Attributable deaths | Attributable DALYs  |
|------------|------|--------|----------|--------------------------------|--------------------------|---------------------------------------------|--------------------------------------|-------------------------------------|---------------------|---------------------|
| Montenegro | 2005 | Male   | 50 to 54 | 77%<br>(56-91%)                | 23%<br>(9.4-44%)         | 6.2<br>(3.7-9.4)                            | 15%<br>(10-19%)                      | 20%<br>(13-25%)                     | 34<br>(22-45)       | 1400<br>(940-1800)  |
| Montenegro | 2005 | Male   | 55 to 59 | 76%<br>(54-91%)                | 24%<br>(9.2-46%)         | 6.4<br>(3.7-10)                             | 16%<br>(10-20%)                      | 19%<br>(13-25%)                     | 44<br>(30-58)       | 1500<br>(1000-2000) |
| Montenegro | 2005 | Male   | 60 to 64 | 74%<br>(52-91%)                | 26%<br>(9.1-48%)         | 6.2<br>(3.3-10)                             | 15%<br>(9.1-20%)                     | 18%<br>(11-24%)                     | 44<br>(27-59)       | 1300<br>(780-1700)  |
| Montenegro | 2005 | Male   | 65 to 69 | 73%<br>(50-90%)                | 27%<br>(10-50%)          | 5.5<br>(3.2-8.8)                            | 14%<br>(8.4-19%)                     | 17%<br>(10-23%)                     | 70<br>(40-95)       | 1700<br>(980-2300)  |
| Montenegro | 2005 | Male   | 70 to 74 | 71%<br>(50-86%)                | 29%<br>(14-50%)          | 4.7<br>(2.5-8)                              | 13%<br>(6-19%)                       | 15%<br>(7.1-22%)                    | 71<br>(34-100)      | 1400<br>(660-2000)  |
| Montenegro | 2005 | Male   | 75 to 79 | 68%<br>(44-86%)                | 32%<br>(14-56%)          | 4<br>(1.9-7.2)                              | 12%<br>(4.4-18%)                     | 14%<br>(5-21%)                      | 66<br>(24-110)      | 960<br>(370-1500)   |
| Montenegro | 2005 | Male   | 80 to 84 | 66%<br>(42-84%)                | 34%<br>(16-58%)          | 3.6<br>(1.7-6.1)                            | 11%<br>(4.2-18%)                     | 13%<br>(4.7-21%)                    | 42<br>(15-70)       | 450<br>(170-740)    |
| Montenegro | 2005 | Male   | 85 to 89 | 64%<br>(42-82%)                | 36%<br>(18-58%)          | 3.3<br>(1.6-5.6)                            | 10%<br>(3.5-17%)                     | 12%<br>(3.9-20%)                    | 20<br>(6.6-35)      | 150<br>(52-260)     |
| Montenegro | 2005 | Male   | 90 to 94 | 64%<br>(42-84%)                | 36%<br>(16-58%)          | 3<br>(1.4-5.5)                              | 8.1%<br>(1.6-16%)                    | 9.4%<br>(1.8-18%)                   | 6.8<br>(1.3-13)     | 35<br>(7.2-68)      |
| Montenegro | 2005 | Male   | 95 plus  | 64%<br>(38-87%)                | 36%<br>(13-62%)          | 2.8<br>(0.99-5.7)                           | 6.8%<br>(0.29-14%)                   | 7.8%<br>(0.096-17%)                 | 2.3<br>(0.028-5)    | 8<br>(0.36-17)      |
| Montenegro | 2010 | Female | All Ages | 58%<br>(50-66%)                | 42%<br>(34-50%)          | 2.4<br>(1.8-3.1)                            | 8.1%<br>(5.4-11%)                    | 12%<br>(7.4-18%)                    | 310<br>(180-460)    | 6600<br>(4400-8900) |
| Montenegro | 2010 | Female | 15 to 19 | 57%<br>(37-75%)                | 43%<br>(25-63%)          | 1.7<br>(0.74-3.3)                           | 3.2%<br>(1.9-5.1%)                   | 9%<br>(4.3-16%)                     | 0.51<br>(0.25-0.89) | 61<br>(36-98)       |
| Montenegro | 2010 | Female | 20 to 24 | 68%<br>(50-83%)                | 32%<br>(17-50%)          | 2.5<br>(1-4.6)                              | 5.3%<br>(3.2-7.9%)                   | 11%<br>(5-19%)                      | 0.86<br>(0.39-1.5)  | 110<br>(66-170)     |
| Montenegro | 2010 | Female | 25 to 29 | 69%<br>(49-84%)                | 31%<br>(16-51%)          | 2.6<br>(1.2-4.9)                            | 5.5%<br>(3.5-7.8%)                   | 12%<br>(6-19%)                      | 1.3<br>(0.61-2.1)   | 150<br>(88-210)     |
| Montenegro | 2010 | Female | 30 to 34 | 70%<br>(50-84%)                | 30%<br>(16-50%)          | 2.8<br>(1.4-5.1)                            | 5.6%<br>(3.7-8.1%)                   | 13%<br>(7.4-20%)                    | 1.8<br>(0.99-2.9)   | 170<br>(110-240)    |
| Montenegro | 2010 | Female | 35 to 39 | 70%<br>(52-85%)                | 30%<br>(15-48%)          | 3.1<br>(1.5-5.5)                            | 6.4%<br>(3.8-9.3%)                   | 14%<br>(7.6-21%)                    | 3<br>(1.6-4.7)      | 220<br>(130-310)    |
| Montenegro | 2010 | Female | 40 to 44 | 69%<br>(52-84%)                | 31%<br>(16-48%)          | 3.5<br>(1.6-5.9)                            | 7.6%<br>(4.5-11%)                    | 16%<br>(8.9-23%)                    | 5.1<br>(2.8-7.6)    | 290<br>(170-420)    |
| Montenegro | 2010 | Female | 45 to 49 | 68%<br>(46-83%)                | 32%<br>(17-54%)          | 3.8<br>(1.9-6.9)                            | 8.6%<br>(5-13%)                      | 16%<br>(9.5-23%)                    | 9.1<br>(5.4-13)     | 450<br>(270-640)    |
| Montenegro | 2010 | Female | 50 to 54 | 65%<br>(45-81%)                | 35%<br>(19-55%)          | 3.9<br>(2-6.8)                              | 9.4%<br>(5.5-14%)                    | 16%<br>(9.9-23%)                    | 13<br>(7.7-19)      | 560<br>(330-790)    |
| Montenegro | 2010 | Female | 55 to 59 | 62%<br>(42-78%)                | 38%<br>(22-58%)          | 3.8<br>(1.9-6.7)                            | 9.8%<br>(5.5-14%)                    | 16%<br>(9.1-23%)                    | 21<br>(12-30)       | 740<br>(410-1100)   |
| Montenegro | 2010 | Female | 60 to 64 | 58%<br>(37-77%)                | 42%<br>(23-63%)          | 3.5<br>(1.7-6.7)                            | 9.6%<br>(4.6-15%)                    | 15%<br>(6.9-22%)                    | 22<br>(10-33)       | 650<br>(310-1000)   |
| Montenegro | 2010 | Female | 65 to 69 | 54%<br>(34-75%)                | 46%<br>(25-66%)          | 3<br>(1.5-5.2)                              | 10%<br>(4.9-16%)                     | 15%<br>(7-22%)                      | 28<br>(14-43)       | 690<br>(330-1100)   |

| Location   | Year | Sex    | Age      | Prevalence of current drinkers | Prevalence of abstainers | Population average of standard drinks daily | Percent of total attributable deaths | Percent of total attributable DALYs | Attributable deaths | Attributable DALYs    |
|------------|------|--------|----------|--------------------------------|--------------------------|---------------------------------------------|--------------------------------------|-------------------------------------|---------------------|-----------------------|
| Montenegro | 2010 | Female | 70 to 74 | 47%<br>(30-66%)                | 53%<br>(34-70%)          | 2.4<br>(1.1-4.7)                            | 9.4%<br>(3.4-16%)                    | 13%<br>(4.7-22%)                    | 46<br>(17-79)       | 890<br>(320-1500)     |
| Montenegro | 2010 | Female | 75 to 79 | 40%<br>(26-60%)                | 60%<br>(40-74%)          | 2<br>(0.8-3.9)                              | 8.6%<br>(2.9-15%)                    | 11%<br>(3.6-20%)                    | 48<br>(15-85)       | 710<br>(220-1300)     |
| Montenegro | 2010 | Female | 80 to 84 | 36%<br>(21-54%)                | 64%<br>(46-79%)          | 1.8<br>(0.74-3.3)                           | 8.8%<br>(3.4-15%)                    | 11%<br>(4.3-19%)                    | 46<br>(17-77)       | 500<br>(190-830)      |
| Montenegro | 2010 | Female | 85 to 89 | 34%<br>(21-50%)                | 66%<br>(50-79%)          | 1.8<br>(0.7-3.5)                            | 9.1%<br>(3.6-15%)                    | 11%<br>(4.5-19%)                    | 40<br>(16-69)       | 300<br>(120-510)      |
| Montenegro | 2010 | Female | 90 to 94 | 36%<br>(22-53%)                | 64%<br>(47-78%)          | 1.9<br>(0.7-3.8)                            | 8.9%<br>(3.2-16%)                    | 11%<br>(4-19%)                      | 19<br>(6.7-34)      | 96<br>(34-170)        |
| Montenegro | 2010 | Female | 95 plus  | 39%<br>(22-60%)                | 61%<br>(40-78%)          | 2.1<br>(0.61-4.6)                           | 8.8%<br>(2.3-16%)                    | 11%<br>(2.8-20%)                    | 8.5<br>(2.3-16)     | 28<br>(7.3-53)        |
| Montenegro | 2010 | Male   | All Ages | 67%<br>(56-77%)                | 33%<br>(23-44%)          | 3.8<br>(3-4.9)                              | 12%<br>(9.4-15%)                     | 16%<br>(10-21%)                     | 460<br>(310-610)    | 12000<br>(9200-15000) |
| Montenegro | 2010 | Male   | 15 to 19 | 58%<br>(36-79%)                | 42%<br>(21-64%)          | 1.7<br>(0.83-3)                             | 4.9%<br>(3.1-7.2%)                   | 8.7%<br>(4.7-14%)                   | 1.1<br>(0.56-1.8)   | 110<br>(71-180)       |
| Montenegro | 2010 | Male   | 20 to 24 | 69%<br>(48-87%)                | 31%<br>(13-52%)          | 3.1<br>(1.6-5.3)                            | 10%<br>(6.6-15%)                     | 15%<br>(8.5-23%)                    | 3.4<br>(1.9-5.4)    | 310<br>(200-460)      |
| Montenegro | 2010 | Male   | 25 to 29 | 73%<br>(53-89%)                | 27%<br>(11-47%)          | 3.9<br>(2-6.6)                              | 12%<br>(7.7-16%)                     | 18%<br>(11-27%)                     | 5.1<br>(3.1-7.7)    | 430<br>(280-610)      |
| Montenegro | 2010 | Male   | 30 to 34 | 76%<br>(54-91%)                | 24%<br>(9.4-46%)         | 4.5<br>(2.6-7.5)                            | 12%<br>(8.4-16%)                     | 20%<br>(13-28%)                     | 5.4<br>(3.5-7.6)    | 420<br>(280-560)      |
| Montenegro | 2010 | Male   | 35 to 39 | 78%<br>(59-91%)                | 22%<br>(9-41%)           | 4.8<br>(2.6-7.6)                            | 13%<br>(8.4-17%)                     | 21%<br>(13-28%)                     | 7.8<br>(4.8-11)     | 510<br>(330-680)      |
| Montenegro | 2010 | Male   | 40 to 44 | 79%<br>(58-92%)                | 21%<br>(8.4-42%)         | 5.4<br>(3.1-8.2)                            | 14%<br>(9.3-18%)                     | 21%<br>(14-28%)                     | 12<br>(7.9-17)      | 680<br>(450-890)      |
| Montenegro | 2010 | Male   | 45 to 49 | 78%<br>(54-91%)                | 22%<br>(8.7-46%)         | 6.2<br>(3.6-9.6)                            | 15%<br>(10-19%)                      | 21%<br>(14-27%)                     | 21<br>(14-28)       | 1000<br>(700-1300)    |
| Montenegro | 2010 | Male   | 50 to 54 | 77%<br>(55-91%)                | 23%<br>(9.3-45%)         | 6.5<br>(4-9.7)                              | 15%<br>(11-19%)                      | 20%<br>(14-25%)                     | 30<br>(21-39)       | 1200<br>(860-1600)    |
| Montenegro | 2010 | Male   | 55 to 59 | 75%<br>(54-91%)                | 25%<br>(9.3-46%)         | 6.7<br>(3.9-10)                             | 15%<br>(11-20%)                      | 20%<br>(14-25%)                     | 51<br>(36-68)       | 1800<br>(1300-2300)   |
| Montenegro | 2010 | Male   | 60 to 64 | 74%<br>(50-90%)                | 26%<br>(9.5-50%)         | 6.5<br>(3.5-10)                             | 15%<br>(9.6-19%)                     | 18%<br>(12-24%)                     | 48<br>(32-64)       | 1400<br>(930-1900)    |
| Montenegro | 2010 | Male   | 65 to 69 | 73%<br>(49-89%)                | 27%<br>(11-51%)          | 5.8<br>(3.3-8.9)                            | 14%<br>(8.7-19%)                     | 18%<br>(11-23%)                     | 48<br>(29-64)       | 1200<br>(710-1500)    |
| Montenegro | 2010 | Male   | 70 to 74 | 71%<br>(48-87%)                | 29%<br>(13-52%)          | 5<br>(2.7-8.2)                              | 13%<br>(6.6-18%)                     | 16%<br>(7.8-22%)                    | 68<br>(34-98)       | 1300<br>(680-1900)    |
| Montenegro | 2010 | Male   | 75 to 79 | 68%<br>(45-86%)                | 32%<br>(14-55%)          | 4.2<br>(2.1-7.5)                            | 12%<br>(5.1-18%)                     | 14%<br>(5.8-21%)                    | 66<br>(28-100)      | 980<br>(410-1500)     |
| Montenegro | 2010 | Male   | 80 to 84 | 66%<br>(41-85%)                | 34%<br>(15-59%)          | 3.8<br>(1.8-6.3)                            | 11%<br>(4.9-18%)                     | 14%<br>(5.6-21%)                    | 49<br>(20-77)       | 530<br>(220-840)      |
| Montenegro | 2010 | Male   | 85 to 89 | 64%<br>(42-83%)                | 36%<br>(17-58%)          | 3.4<br>(1.7-5.9)                            | 10%<br>(3.6-17%)                     | 12%<br>(4.1-21%)                    | 30<br>(10-52)       | 230<br>(82-390)       |

| Location   | Year | Sex    | Age      | Prevalence of current drinkers | Prevalence of abstainers | Population average of standard drinks daily | Percent of total attributable deaths | Percent of total attributable DALYs | Attributable deaths | Attributable DALYs    |
|------------|------|--------|----------|--------------------------------|--------------------------|---------------------------------------------|--------------------------------------|-------------------------------------|---------------------|-----------------------|
| Montenegro | 2010 | Male   | 90 to 94 | 64%<br>(44-84%)                | 36%<br>(16-56%)          | 3.2<br>(1.5-5.7)                            | 8.3%<br>(1.9-15%)                    | 9.7%<br>(2.1-18%)                   | 9<br>(2-17)         | 47<br>(11-88)         |
| Montenegro | 2010 | Male   | 95 plus  | 65%<br>(39-87%)                | 35%<br>(13-61%)          | 2.9<br>(1.1-5.7)                            | 7%<br>(0.67-14%)                     | 8.1%<br>(0.54-17%)                  | 1.9<br>(0.13-3.9)   | 6.7<br>(0.66-13)      |
| Montenegro | 2016 | Female | All Ages | 57%<br>(49-66%)                | 43%<br>(34-51%)          | 2.6<br>(1.8-3.5)                            | 8.2%<br>(5.1-11%)                    | 12%<br>(7.2-18%)                    | 350<br>(190-520)    | 6900<br>(4300-9500)   |
| Montenegro | 2016 | Female | 15 to 19 | 57%<br>(38-75%)                | 43%<br>(25-62%)          | 1.8<br>(0.74-3.5)                           | 3.2%<br>(1.8-5.2%)                   | 9.3%<br>(4.4-16%)                   | 0.46<br>(0.22-0.84) | 57<br>(32-94)         |
| Montenegro | 2016 | Female | 20 to 24 | 67%<br>(48-82%)                | 33%<br>(18-52%)          | 2.6<br>(1-4.9)                              | 5.1%<br>(3.2-7.7%)                   | 11%<br>(5-19%)                      | 0.74<br>(0.32-1.3)  | 100<br>(61-160)       |
| Montenegro | 2016 | Female | 25 to 29 | 69%<br>(50-83%)                | 31%<br>(17-50%)          | 2.8<br>(1.2-5.3)                            | 5.3%<br>(3.4-7.6%)                   | 12%<br>(5.7-20%)                    | 0.91<br>(0.43-1.5)  | 120<br>(70-170)       |
| Montenegro | 2016 | Female | 30 to 34 | 70%<br>(49-83%)                | 30%<br>(17-51%)          | 3<br>(1.4-5.4)                              | 5.4%<br>(3.5-7.6%)                   | 13%<br>(7.2-20%)                    | 1.6<br>(0.83-2.4)   | 160<br>(97-220)       |
| Montenegro | 2016 | Female | 35 to 39 | 70%<br>(52-85%)                | 30%<br>(15-48%)          | 3.2<br>(1.4-5.7)                            | 6.1%<br>(3.6-8.8%)                   | 14%<br>(7.6-21%)                    | 2.7<br>(1.4-4.1)    | 200<br>(120-290)      |
| Montenegro | 2016 | Female | 40 to 44 | 69%<br>(51-83%)                | 31%<br>(17-49%)          | 3.6<br>(1.7-6.3)                            | 7.3%<br>(4.2-11%)                    | 16%<br>(8.4-23%)                    | 4.8<br>(2.6-7.2)    | 290<br>(160-420)      |
| Montenegro | 2016 | Female | 45 to 49 | 67%<br>(46-82%)                | 33%<br>(18-54%)          | 4<br>(1.8-7.6)                              | 8.5%<br>(4.9-12%)                    | 16%<br>(9.5-23%)                    | 7.7<br>(4.4-11)     | 390<br>(220-560)      |
| Montenegro | 2016 | Female | 50 to 54 | 64%<br>(44-81%)                | 36%<br>(19-56%)          | 4.1<br>(2-7.3)                              | 9.4%<br>(5.6-14%)                    | 16%<br>(9.8-23%)                    | 13<br>(7.7-19)      | 560<br>(320-810)      |
| Montenegro | 2016 | Female | 55 to 59 | 61%<br>(42-79%)                | 39%<br>(21-58%)          | 4<br>(1.9-7)                                | 9.8%<br>(5.4-14%)                    | 16%<br>(9.1-23%)                    | 18<br>(10-27)       | 660<br>(360-970)      |
| Montenegro | 2016 | Female | 60 to 64 | 58%<br>(37-77%)                | 42%<br>(23-63%)          | 3.7<br>(1.7-6.9)                            | 9.5%<br>(4.7-15%)                    | 15%<br>(7.5-23%)                    | 27<br>(13-42)       | 830<br>(410-1300)     |
| Montenegro | 2016 | Female | 65 to 69 | 54%<br>(34-74%)                | 46%<br>(26-66%)          | 3.2<br>(1.5-5.6)                            | 10%<br>(4.9-15%)                     | 15%<br>(7.2-22%)                    | 34<br>(16-53)       | 840<br>(400-1300)     |
| Montenegro | 2016 | Female | 70 to 74 | 47%<br>(30-65%)                | 53%<br>(35-70%)          | 2.6<br>(1.1-4.9)                            | 9.4%<br>(3.3-15%)                    | 13%<br>(4.9-21%)                    | 36<br>(13-62)       | 710<br>(240-1200)     |
| Montenegro | 2016 | Female | 75 to 79 | 40%<br>(25-58%)                | 60%<br>(42-75%)          | 2.1<br>(0.79-4.1)                           | 8.6%<br>(2.7-15%)                    | 11%<br>(3.6-19%)                    | 54<br>(17-94)       | 800<br>(250-1400)     |
| Montenegro | 2016 | Female | 80 to 84 | 35%<br>(21-54%)                | 65%<br>(46-79%)          | 1.9<br>(0.77-3.6)                           | 8.9%<br>(3.5-15%)                    | 11%<br>(4.4-19%)                    | 52<br>(19-87)       | 570<br>(210-950)      |
| Montenegro | 2016 | Female | 85 to 89 | 34%<br>(21-50%)                | 66%<br>(50-79%)          | 1.9<br>(0.73-3.7)                           | 9.2%<br>(3.4-15%)                    | 11%<br>(4.2-19%)                    | 51<br>(19-88)       | 390<br>(150-660)      |
| Montenegro | 2016 | Female | 90 to 94 | 36%<br>(22-52%)                | 64%<br>(48-78%)          | 2<br>(0.72-4.4)                             | 9.1%<br>(3.4-16%)                    | 11%<br>(4.1-19%)                    | 32<br>(12-58)       | 160<br>(61-290)       |
| Montenegro | 2016 | Female | 95 plus  | 39%<br>(22-60%)                | 61%<br>(40-78%)          | 2.2<br>(0.62-5)                             | 9%<br>(2.5-16%)                      | 11%<br>(3.1-21%)                    | 9.7<br>(2.8-18)     | 32<br>(8.9-59)        |
| Montenegro | 2016 | Male   | All Ages | 67%<br>(57-77%)                | 33%<br>(23-43%)          | 4.1<br>(2.9-5.6)                            | 13%<br>(9.5-16%)                     | 16%<br>(11-21%)                     | 500<br>(330-680)    | 13000<br>(9400-16000) |
| Montenegro | 2016 | Male   | 15 to 19 | 58%<br>(36-79%)                | 42%<br>(21-64%)          | 1.8<br>(0.84-3.3)                           | 5%<br>(3.1-7.8%)                     | 9.1%<br>(4.7-16%)                   | 1<br>(0.53-1.8)     | 110<br>(69-180)       |

| Location   | Year | Sex    | Age      | Prevalence of current drinkers | Prevalence of abstainers | Population average of standard drinks daily | Percent of total attributable deaths | Percent of total attributable DALYs | Attributable deaths  | Attributable DALYs       |
|------------|------|--------|----------|--------------------------------|--------------------------|---------------------------------------------|--------------------------------------|-------------------------------------|----------------------|--------------------------|
| Montenegro | 2016 | Male   | 20 to 24 | 69%<br>(47-87%)                | 31%<br>(13-53%)          | 3.2<br>(1.6-5.7)                            | 10%<br>(6.8-15%)                     | 16%<br>(8.8-25%)                    | 3.3<br>(1.8-5.2)     | 310<br>(190-460)         |
| Montenegro | 2016 | Male   | 25 to 29 | 73%<br>(53-89%)                | 27%<br>(11-47%)          | 4.1<br>(2.1-7.4)                            | 12%<br>(8-17%)                       | 19%<br>(11-29%)                     | 4.2<br>(2.5-6.5)     | 370<br>(240-520)         |
| Montenegro | 2016 | Male   | 30 to 34 | 75%<br>(54-91%)                | 25%<br>(9.4-46%)         | 4.7<br>(2.5-8)                              | 12%<br>(8.3-16%)                     | 21%<br>(13-29%)                     | 5.8<br>(3.6-8)       | 450<br>(300-610)         |
| Montenegro | 2016 | Male   | 35 to 39 | 78%<br>(58-90%)                | 22%<br>(9.6-42%)         | 5<br>(2.6-8.4)                              | 13%<br>(8.6-17%)                     | 21%<br>(13-29%)                     | 8.2<br>(5-11)        | 540<br>(360-710)         |
| Montenegro | 2016 | Male   | 40 to 44 | 79%<br>(59-92%)                | 21%<br>(8.5-41%)         | 5.7<br>(3.1-9.2)                            | 14%<br>(9.4-19%)                     | 22%<br>(14-29%)                     | 13<br>(8-17)         | 700<br>(460-900)         |
| Montenegro | 2016 | Male   | 45 to 49 | 78%<br>(57-91%)                | 22%<br>(8.8-43%)         | 6.5<br>(3.5-11)                             | 15%<br>(10-19%)                      | 22%<br>(14-27%)                     | 19<br>(12-24)        | 900<br>(600-1100)        |
| Montenegro | 2016 | Male   | 50 to 54 | 77%<br>(57-91%)                | 23%<br>(9.4-43%)         | 7<br>(4-11)                                 | 15%<br>(11-20%)                      | 21%<br>(15-26%)                     | 30<br>(21-40)        | 1200<br>(870-1600)       |
| Montenegro | 2016 | Male   | 55 to 59 | 75%<br>(54-90%)                | 25%<br>(9.7-46%)         | 7.1<br>(3.9-11)                             | 15%<br>(11-20%)                      | 20%<br>(14-26%)                     | 44<br>(31-60)        | 1600<br>(1100-2100)      |
| Montenegro | 2016 | Male   | 60 to 64 | 74%<br>(50-90%)                | 26%<br>(9.8-50%)         | 6.8<br>(3.6-11)                             | 15%<br>(9.8-19%)                     | 18%<br>(12-24%)                     | 63<br>(41-85)        | 1900<br>(1200-2500)      |
| Montenegro | 2016 | Male   | 65 to 69 | 73%<br>(49-89%)                | 27%<br>(11-51%)          | 6.2<br>(3.3-9.5)                            | 14%<br>(9-19%)                       | 18%<br>(11-24%)                     | 61<br>(38-85)        | 1500<br>(970-2000)       |
| Montenegro | 2016 | Male   | 70 to 74 | 70%<br>(48-86%)                | 30%<br>(14-52%)          | 5.3<br>(2.7-8.9)                            | 13%<br>(6.8-18%)                     | 16%<br>(8.3-23%)                    | 51<br>(26-73)        | 990<br>(510-1400)        |
| Montenegro | 2016 | Male   | 75 to 79 | 68%<br>(44-85%)                | 32%<br>(15-56%)          | 4.5<br>(2.1-7.9)                            | 12%<br>(4.8-18%)                     | 14%<br>(5.8-22%)                    | 70<br>(29-110)       | 1100<br>(450-1600)       |
| Montenegro | 2016 | Male   | 80 to 84 | 66%<br>(41-84%)                | 34%<br>(16-59%)          | 4<br>(2-6.8)                                | 12%<br>(5.1-19%)                     | 14%<br>(5.9-22%)                    | 63<br>(27-100)       | 680<br>(300-1100)        |
| Montenegro | 2016 | Male   | 85 to 89 | 64%<br>(41-83%)                | 36%<br>(17-59%)          | 3.7<br>(1.8-6.4)                            | 11%<br>(3.9-17%)                     | 13%<br>(4.3-21%)                    | 43<br>(15-73)        | 330<br>(120-550)         |
| Montenegro | 2016 | Male   | 90 to 94 | 64%<br>(43-84%)                | 36%<br>(16-57%)          | 3.4<br>(1.6-6.6)                            | 8.9%<br>(2.4-16%)                    | 10%<br>(2.8-19%)                    | 18<br>(4.6-32)       | 93<br>(25-170)           |
| Montenegro | 2016 | Male   | 95 plus  | 65%<br>(39-87%)                | 35%<br>(13-61%)          | 3.1<br>(1.1-6.3)                            | 7.6%<br>(0.78-15%)                   | 8.8%<br>(0.74-18%)                  | 3.6<br>(0.3-7.1)     | 13<br>(1.3-24)           |
| Poland     | 1990 | Female | All Ages | 76%<br>(71-81%)                | 24%<br>(19-29%)          | 1.5<br>(1.4-1.7)                            | 2%<br>(0.66-3.4%)                    | 1.1%<br>(-1.4-3.6%)                 | 2000<br>(-2600-6600) | 120000<br>(36000-190000) |
| Poland     | 1990 | Female | 15 to 19 | 76%<br>(63-87%)                | 24%<br>(13-37%)          | 1.4<br>(0.89-2.1)                           | 2.5%<br>(1.5-3.7%)                   | 6.3%<br>(3.2-9.8%)                  | 30<br>(15-47)        | 3300<br>(2000-4900)      |
| Poland     | 1990 | Female | 20 to 24 | 83%<br>(71-90%)                | 17%<br>(9.8-29%)         | 1.8<br>(1.1-2.5)                            | 3.2%<br>(2.2-4.5%)                   | 6.3%<br>(3.2-10%)                   | 29<br>(15-46)        | 4000<br>(2700-5700)      |
| Poland     | 1990 | Female | 25 to 29 | 84%<br>(71-91%)                | 16%<br>(8.7-29%)         | 1.7<br>(1.2-2.4)                            | 3.3%<br>(2.3-4.5%)                   | 6%<br>(3.4-9%)                      | 38<br>(22-57)        | 5000<br>(3400-6900)      |
| Poland     | 1990 | Female | 30 to 34 | 84%<br>(71-92%)                | 16%<br>(8.1-29%)         | 1.8<br>(1.2-2.5)                            | 3.4%<br>(2.4-4.7%)                   | 6.5%<br>(3.8-9.5%)                  | 81<br>(47-120)       | 7900<br>(5300-11000)     |
| Poland     | 1990 | Female | 35 to 39 | 84%<br>(73-92%)                | 16%<br>(8.2-27%)         | 1.9<br>(1.3-2.6)                            | 3.9%<br>(2.6-5.3%)                   | 7.2%<br>(4.5-10%)                   | 150<br>(91-210)      | 11000<br>(7400-15000)    |

| Location | Year | Sex    | Age      | Prevalence of current drinkers | Prevalence of abstainers | Population average of standard drinks daily | Percent of total attributable deaths | Percent of total attributable DALYs | Attributable deaths    | Attributable DALYs        |
|----------|------|--------|----------|--------------------------------|--------------------------|---------------------------------------------|--------------------------------------|-------------------------------------|------------------------|---------------------------|
| Poland   | 1990 | Female | 40 to 44 | 84%<br>(75-91%)                | 16%<br>(8.6-25%)         | 2.2<br>(1.5-3)                              | 4.3%<br>(2.7-6%)                     | 7.6%<br>(4.7-11%)                   | 220<br>(140-310)       | 13000<br>(8300-18000)     |
| Poland   | 1990 | Female | 45 to 49 | 85%<br>(77-90%)                | 15%<br>(9.7-23%)         | 2.6<br>(1.8-3.6)                            | 4.9%<br>(3-7.1%)                     | 8.3%<br>(5.2-12%)                   | 250<br>(160-350)       | 12000<br>(7500-17000)     |
| Poland   | 1990 | Female | 50 to 54 | 85%<br>(78-90%)                | 15%<br>(10-22%)          | 2.8<br>(1.9-3.7)                            | 4.8%<br>(2.8-7%)                     | 7.7%<br>(4.5-11%)                   | 380<br>(230-550)       | 16000<br>(9200-23000)     |
| Poland   | 1990 | Female | 55 to 59 | 84%<br>(78-89%)                | 16%<br>(11-22%)          | 2.7<br>(1.9-3.6)                            | 4.2%<br>(2.1-6.5%)                   | 6.3%<br>(3.2-9.5%)                  | 510<br>(260-780)       | 18000<br>(8900-28000)     |
| Poland   | 1990 | Female | 60 to 64 | 81%<br>(74-86%)                | 19%<br>(14-26%)          | 2.5<br>(1.7-3.4)                            | 3.1%<br>(0.52-6%)                    | 4.3%<br>(0.72-8.1%)                 | 550<br>(90-1100)       | 16000<br>(2700-32000)     |
| Poland   | 1990 | Female | 65 to 69 | 75%<br>(66-82%)                | 25%<br>(18-34%)          | 2.2<br>(1.5-3)                              | 1.9%<br>(-0.64-4.4%)                 | 2.5%<br>(-0.9-5.9%)                 | 460<br>(-170-1100)     | 11000<br>(-3700-26000)    |
| Poland   | 1990 | Female | 70 to 74 | 67%<br>(57-75%)                | 33%<br>(25-43%)          | 1.8<br>(1.2-2.6)                            | 0.92%<br>(-1.8-3.7%)                 | 1.1%<br>(-2.5-4.5%)                 | 180<br>(-420-760)      | 3800<br>(-7700-15000)     |
| Poland   | 1990 | Female | 75 to 79 | 58%<br>(46-70%)                | 42%<br>(30-54%)          | 1.5<br>(0.92-2.2)                           | 0.11%<br>(-2.6-2.9%)                 | 0.017%<br>(-3.4-3.5%)               | 5.4<br>(-1000-1100)    | 610<br>(-14000-16000)     |
| Poland   | 1990 | Female | 80 to 84 | 53%<br>(40-64%)                | 47%<br>(36-60%)          | 1.3<br>(0.83-1.9)                           | -0.52%<br>(-3-2%)                    | -0.77%<br>(-3.8-2.3%)               | -270<br>(-1300-800)    | -2400<br>(-13000-8900)    |
| Poland   | 1990 | Female | 85 to 89 | 52%<br>(39-64%)                | 48%<br>(36-61%)          | 1.2<br>(0.74-1.9)                           | -1.1%<br>(-3.7-1.4%)                 | -1.5%<br>(-4.6-1.5%)                | -370<br>(-1200-400)    | -2500<br>(-8400-3200)     |
| Poland   | 1990 | Female | 90 to 94 | 54%<br>(41-67%)                | 46%<br>(33-59%)          | 1.3<br>(0.73-2)                             | -1.5%<br>(-4.2-1.4%)                 | -2%<br>(-5.3-1.4%)                  | -210<br>(-570-150)     | -990<br>(-2700-880)       |
| Poland   | 1990 | Female | 95 plus  | 58%<br>(41-73%)                | 42%<br>(27-59%)          | 1.3<br>(0.66-2.2)                           | -1.9%<br>(-5.1-1.6%)                 | -2.5%<br>(-6.5-1.7%)                | -67<br>(-170-45)       | -210<br>(-560-180)        |
| Poland   | 1990 | Male   | All Ages | 92%<br>(89-94%)                | 8%<br>(5.7-11%)          | 2.9<br>(2.6-3.2)                            | 10%<br>(7.9-12%)                     | 10%<br>(6.8-14%)                    | 21000<br>(14000-29000) | 760000<br>(600000-920000) |
| Poland   | 1990 | Male   | 15 to 19 | 88%<br>(78-95%)                | 12%<br>(5.4-22%)         | 1.5<br>(0.99-2.3)                           | 5.5%<br>(3.3-8.2%)                   | 9%<br>(4.7-14%)                     | 130<br>(69-200)        | 11000<br>(6700-16000)     |
| Poland   | 1990 | Male   | 20 to 24 | 93%<br>(86-97%)                | 6.9%<br>(3.1-14%)        | 2.5<br>(1.7-3.6)                            | 10%<br>(6.6-14%)                     | 14%<br>(8.3-21%)                    | 290<br>(170-430)       | 23000<br>(15000-32000)    |
| Poland   | 1990 | Male   | 25 to 29 | 94%<br>(89-97%)                | 5.6%<br>(2.5-11%)        | 3.1<br>(2.1-4.3)                            | 12%<br>(8.9-16%)                     | 17%<br>(11-23%)                     | 420<br>(280-580)       | 33000<br>(23000-43000)    |
| Poland   | 1990 | Male   | 30 to 34 | 95%<br>(90-98%)                | 4.8%<br>(2.1-9.7%)       | 3.3<br>(2.4-4.6)                            | 13%<br>(9.6-16%)                     | 17%<br>(12-23%)                     | 730<br>(510-970)       | 51000<br>(38000-66000)    |
| Poland   | 1990 | Male   | 35 to 39 | 96%<br>(91-98%)                | 4.3%<br>(1.8-8.8%)       | 3.2<br>(2.1-4.3)                            | 12%<br>(8.5-15%)                     | 15%<br>(10-20%)                     | 920<br>(630-1200)      | 57000<br>(42000-74000)    |
| Poland   | 1990 | Male   | 40 to 44 | 96%<br>(92-98%)                | 3.8%<br>(1.5-8.2%)       | 3.9<br>(2.8-5.1)                            | 12%<br>(8.7-16%)                     | 15%<br>(10-21%)                     | 1200<br>(800-1600)     | 64000<br>(45000-85000)    |
| Poland   | 1990 | Male   | 45 to 49 | 97%<br>(93-99%)                | 3.1%<br>(1.4-6.6%)       | 5.5<br>(3.7-7.3)                            | 16%<br>(10-21%)                      | 19%<br>(12-25%)                     | 1500<br>(950-2000)     | 69000<br>(45000-90000)    |
| Poland   | 1990 | Male   | 50 to 54 | 97%<br>(94-98%)                | 3.3%<br>(1.8-6.2%)       | 6.2<br>(4.4-8)                              | 16%<br>(11-20%)                      | 19%<br>(13-24%)                     | 2500<br>(1700-3200)    | 99000<br>(69000-120000)   |
| Poland   | 1990 | Male   | 55 to 59 | 96%<br>(93-97%)                | 4.5%<br>(2.6-7.4%)       | 6.4<br>(4.8-8.2)                            | 15%<br>(11-19%)                      | 17%<br>(12-22%)                     | 3300<br>(2300-4300)    | 110000<br>(80000-140000)  |

| Location | Year | Sex    | Age      | Prevalence of current drinkers | Prevalence of abstainers | Population average of standard drinks daily | Percent of total attributable deaths | Percent of total attributable DALYs | Attributable deaths  | Attributable DALYs       |
|----------|------|--------|----------|--------------------------------|--------------------------|---------------------------------------------|--------------------------------------|-------------------------------------|----------------------|--------------------------|
| Poland   | 1990 | Male   | 60 to 64 | 95%<br>(92-97%)                | 5.1%<br>(3-8.4%)         | 6.1<br>(4.5-8.2)                            | 13%<br>(8-17%)                       | 14%<br>(9-20%)                      | 3600<br>(2200-4900)  | 100000<br>(65000-140000) |
| Poland   | 1990 | Male   | 65 to 69 | 95%<br>(91-97%)                | 5.3%<br>(3.1-8.5%)       | 5.5<br>(4.1-7.1)                            | 10%<br>(6-15%)                       | 12%<br>(6.6-17%)                    | 3100<br>(1700-4400)  | 73000<br>(42000-100000)  |
| Poland   | 1990 | Male   | 70 to 74 | 94%<br>(91-96%)                | 5.8%<br>(3.6-9.2%)       | 4.7<br>(3.3-6.3)                            | 7.6%<br>(2.7-12%)                    | 8.4%<br>(2.7-14%)                   | 1700<br>(530-2800)   | 32000<br>(12000-53000)   |
| Poland   | 1990 | Male   | 75 to 79 | 93%<br>(89-96%)                | 6.7%<br>(3.8-11%)        | 3.9<br>(2.6-5.5)                            | 4.9%<br>(-0.023-10%)                 | 5.2%<br>(-0.5-12%)                  | 1400<br>(-130-3200)  | 22000<br>(-100-47000)    |
| Poland   | 1990 | Male   | 80 to 84 | 93%<br>(87-96%)                | 7.5%<br>(4.1-13%)        | 3.4<br>(2.3-4.7)                            | 2.6%<br>(-1.7-7.8%)                  | 2.6%<br>(-2.5-8.7%)                 | 610<br>(-590-2100)   | 7500<br>(-4800-23000)    |
| Poland   | 1990 | Male   | 85 to 89 | 92%<br>(86-96%)                | 8%<br>(4.5-14%)          | 3<br>(2-4.3)                                | 0.4%<br>(-3.6-5.3%)                  | -0.017%<br>(-4.8-5.8%)              | -2.2<br>(-580-700)   | 420<br>(-3700-5600)      |
| Poland   | 1990 | Male   | 90 to 94 | 92%<br>(86-96%)                | 8.2%<br>(4.3-14%)        | 2.7<br>(1.7-3.9)                            | -1.2%<br>(-5.4-3.6%)                 | -2%<br>(-6.9-3.8%)                  | -73<br>(-250-140)    | -270<br>(-1200-790)      |
| Poland   | 1990 | Male   | 95 plus  | 92%<br>(84-97%)                | 8.4%<br>(3.5-16%)        | 2.3<br>(1.2-3.7)                            | -2.1%<br>(-6-3.1%)                   | -3.1%<br>(-7.9-3.1%)                | -25<br>(-65-25)      | -69<br>(-200-110)        |
| Poland   | 1995 | Female | All Ages | 77%<br>(72-81%)                | 23%<br>(19-28%)          | 1.6<br>(1.4-1.8)                            | 2.2%<br>(0.86-3.6%)                  | 1.2%<br>(-1.2-3.7%)                 | 2200<br>(-2300-6800) | 120000<br>(48000-200000) |
| Poland   | 1995 | Female | 15 to 19 | 77%<br>(63-87%)                | 23%<br>(13-37%)          | 1.4<br>(0.9-2)                              | 2.5%<br>(1.5-3.8%)                   | 6.6%<br>(3.3-10%)                   | 35<br>(17-55)        | 3800<br>(2300-5600)      |
| Poland   | 1995 | Female | 20 to 24 | 83%<br>(71-90%)                | 17%<br>(9.7-29%)         | 1.7<br>(1.1-2.5)                            | 3.3%<br>(2.2-4.6%)                   | 6.7%<br>(3.6-10%)                   | 32<br>(17-50)        | 4500<br>(3000-6400)      |
| Poland   | 1995 | Female | 25 to 29 | 84%<br>(72-91%)                | 16%<br>(8.6-28%)         | 1.7<br>(1.2-2.4)                            | 3.4%<br>(2.4-4.5%)                   | 6.6%<br>(3.7-9.7%)                  | 34<br>(19-50)        | 4500<br>(3100-6000)      |
| Poland   | 1995 | Female | 30 to 34 | 84%<br>(71-92%)                | 16%<br>(8.4-29%)         | 1.8<br>(1.2-2.5)                            | 3.6%<br>(2.6-4.8%)                   | 7.5%<br>(4.8-11%)                   | 64<br>(41-91)        | 6300<br>(4500-8400)      |
| Poland   | 1995 | Female | 35 to 39 | 84%<br>(73-92%)                | 16%<br>(8.4-27%)         | 1.9<br>(1.2-2.6)                            | 4.1%<br>(2.9-5.5%)                   | 8.2%<br>(5.4-11%)                   | 150<br>(98-210)      | 11000<br>(7700-15000)    |
| Poland   | 1995 | Female | 40 to 44 | 84%<br>(74-91%)                | 16%<br>(8.8-26%)         | 2.2<br>(1.5-2.9)                            | 4.6%<br>(3-6.3%)                     | 8.4%<br>(5.5-11%)                   | 270<br>(170-360)     | 15000<br>(11000-20000)   |
| Poland   | 1995 | Female | 45 to 49 | 85%<br>(77-91%)                | 15%<br>(9.4-23%)         | 2.6<br>(1.8-3.5)                            | 5.2%<br>(3.4-7.2%)                   | 8.9%<br>(5.9-12%)                   | 380<br>(250-530)     | 18000<br>(12000-25000)   |
| Poland   | 1995 | Female | 50 to 54 | 85%<br>(79-90%)                | 15%<br>(10-21%)          | 2.8<br>(1.9-3.6)                            | 5.2%<br>(3.3-7.3%)                   | 8.4%<br>(5.3-12%)                   | 350<br>(220-480)     | 14000<br>(9000-20000)    |
| Poland   | 1995 | Female | 55 to 59 | 85%<br>(78-89%)                | 15%<br>(11-22%)          | 2.7<br>(1.9-3.6)                            | 4.4%<br>(2.4-6.7%)                   | 6.8%<br>(3.8-10%)                   | 460<br>(260-690)     | 16000<br>(9000-25000)    |
| Poland   | 1995 | Female | 60 to 64 | 81%<br>(73-86%)                | 19%<br>(14-27%)          | 2.5<br>(1.7-3.4)                            | 3.2%<br>(0.83-6%)                    | 4.6%<br>(1.2-8.4%)                  | 520<br>(140-920)     | 15000<br>(4200-28000)    |
| Poland   | 1995 | Female | 65 to 69 | 75%<br>(66-81%)                | 25%<br>(19-34%)          | 2.2<br>(1.5-2.9)                            | 2.1%<br>(-0.44-4.6%)                 | 2.8%<br>(-0.6-6.1%)                 | 500<br>(-110-1100)   | 12000<br>(-2500-26000)   |
| Poland   | 1995 | Female | 70 to 74 | 68%<br>(58-75%)                | 32%<br>(25-42%)          | 1.8<br>(1.2-2.6)                            | 1%<br>(-1.6-3.7%)                    | 1.3%<br>(-2.2-4.7%)                 | 310<br>(-530-1200)   | 6300<br>(-10000-22000)   |
| Poland   | 1995 | Female | 75 to 79 | 59%<br>(46-70%)                | 41%<br>(30-54%)          | 1.5<br>(0.93-2.2)                           | 0.22%<br>(-2.4-3%)                   | 0.15%<br>(-3.1-3.6%)                | 34<br>(-700-810)     | 880<br>(-10000-12000)    |

| Location | Year | Sex    | Age      | Prevalence of current drinkers | Prevalence of abstainers | Population average of standard drinks daily | Percent of total attributable deaths | Percent of total attributable DALYs | Attributable deaths    | Attributable DALYs        |
|----------|------|--------|----------|--------------------------------|--------------------------|---------------------------------------------|--------------------------------------|-------------------------------------|------------------------|---------------------------|
| Poland   | 1995 | Female | 80 to 84 | 53%<br>(40-64%)                | 47%<br>(36-60%)          | 1.3<br>(0.82-1.9)                           | -0.41%<br>(-2.8-1.9%)                | -0.64%<br>(-3.6-2.2%)               | -220<br>(-1200-760)    | -1800<br>(-13000-8500)    |
| Poland   | 1995 | Female | 85 to 89 | 53%<br>(40-64%)                | 47%<br>(36-60%)          | 1.2<br>(0.76-1.9)                           | -0.98%<br>(-3.6-1.4%)                | -1.3%<br>(-4.4-1.5%)                | -400<br>(-1300-460)    | -2600<br>(-9100-3700)     |
| Poland   | 1995 | Female | 90 to 94 | 55%<br>(43-67%)                | 45%<br>(33-57%)          | 1.3<br>(0.75-2)                             | -1.4%<br>(-4.1-1.4%)                 | -1.9%<br>(-5.2-1.5%)                | -250<br>(-700-210)     | -1200<br>(-3400-1100)     |
| Poland   | 1995 | Female | 95 plus  | 58%<br>(42-73%)                | 42%<br>(27-58%)          | 1.3<br>(0.69-2.2)                           | -1.8%<br>(-5.1-1.8%)                 | -2.4%<br>(-6.4-1.9%)                | -81<br>(-220-64)       | -250<br>(-700-250)        |
| Poland   | 1995 | Male   | All Ages | 93%<br>(90-95%)                | 7.5%<br>(5.3-10%)        | 3<br>(2.7-3.3)                              | 11%<br>(8.9-13%)                     | 11%<br>(7.7-14%)                    | 22000<br>(16000-29000) | 800000<br>(650000-960000) |
| Poland   | 1995 | Male   | 15 to 19 | 89%<br>(80-95%)                | 11%<br>(5.1-20%)         | 1.6<br>(0.98-2.2)                           | 5.5%<br>(3.2-8%)                     | 9.1%<br>(4.8-14%)                   | 140<br>(73-210)        | 12000<br>(7000-17000)     |
| Poland   | 1995 | Male   | 20 to 24 | 93%<br>(87-97%)                | 6.7%<br>(3.1-13%)        | 2.5<br>(1.7-3.6)                            | 10%<br>(6.6-14%)                     | 15%<br>(8.4-21%)                    | 290<br>(170-420)       | 24000<br>(15000-33000)    |
| Poland   | 1995 | Male   | 25 to 29 | 95%<br>(89-98%)                | 5.5%<br>(2.4-11%)        | 3.1<br>(2.1-4.4)                            | 13%<br>(9.1-16%)                     | 18%<br>(11-24%)                     | 360<br>(230-500)       | 28000<br>(20000-38000)    |
| Poland   | 1995 | Male   | 30 to 34 | 95%<br>(90-98%)                | 4.8%<br>(1.9-10%)        | 3.3<br>(2.4-4.6)                            | 14%<br>(11-18%)                      | 19%<br>(13-25%)                     | 570<br>(410-770)       | 40000<br>(31000-52000)    |
| Poland   | 1995 | Male   | 35 to 39 | 96%<br>(91-98%)                | 4.3%<br>(1.7-8.6%)       | 3.2<br>(2.2-4.4)                            | 13%<br>(10-17%)                      | 17%<br>(12-22%)                     | 1000<br>(720-1300)     | 61000<br>(46000-77000)    |
| Poland   | 1995 | Male   | 40 to 44 | 96%<br>(92-99%)                | 3.7%<br>(1.5-7.9%)       | 3.9<br>(2.8-5.1)                            | 14%<br>(10-18%)                      | 18%<br>(13-23%)                     | 1600<br>(1100-2100)    | 84000<br>(62000-110000)   |
| Poland   | 1995 | Male   | 45 to 49 | 97%<br>(93-99%)                | 3.1%<br>(1.3-6.6%)       | 5.5<br>(3.8-7.3)                            | 17%<br>(11-22%)                      | 21%<br>(14-27%)                     | 2300<br>(1500-3000)    | 110000<br>(71000-130000)  |
| Poland   | 1995 | Male   | 50 to 54 | 97%<br>(94-98%)                | 3.3%<br>(1.7-6.2%)       | 6.2<br>(4.4-8)                              | 17%<br>(12-21%)                      | 21%<br>(15-25%)                     | 2200<br>(1600-2800)    | 86000<br>(63000-110000)   |
| Poland   | 1995 | Male   | 55 to 59 | 96%<br>(93-97%)                | 4.4%<br>(2.5-7.2%)       | 6.4<br>(4.8-8.3)                            | 15%<br>(11-20%)                      | 18%<br>(13-23%)                     | 3100<br>(2300-3900)    | 100000<br>(77000-130000)  |
| Poland   | 1995 | Male   | 60 to 64 | 95%<br>(91-97%)                | 5%<br>(3-8.5%)           | 6.1<br>(4.3-8.3)                            | 13%<br>(8.8-17%)                     | 15%<br>(9.9-20%)                    | 3500<br>(2300-4700)    | 100000<br>(67000-130000)  |
| Poland   | 1995 | Male   | 65 to 69 | 95%<br>(91-97%)                | 5.2%<br>(3.1-8.6%)       | 5.5<br>(4.1-7.1)                            | 11%<br>(6.4-15%)                     | 12%<br>(7-17%)                      | 3400<br>(2000-4900)    | 81000<br>(49000-120000)   |
| Poland   | 1995 | Male   | 70 to 74 | 94%<br>(91-96%)                | 5.8%<br>(3.6-9.4%)       | 4.7<br>(3.3-6.3)                            | 7.7%<br>(3.1-13%)                    | 8.6%<br>(3.1-15%)                   | 2400<br>(850-4000)     | 47000<br>(18000-77000)    |
| Poland   | 1995 | Male   | 75 to 79 | 93%<br>(89-96%)                | 6.6%<br>(3.9-11%)        | 3.9<br>(2.6-5.5)                            | 5.1%<br>(0.4-11%)                    | 5.4%<br>(-0.04-12%)                 | 1000<br>(-7.7-2300)    | 16000<br>(1300-34000)     |
| Poland   | 1995 | Male   | 80 to 84 | 93%<br>(87-96%)                | 7.3%<br>(4.1-13%)        | 3.4<br>(2.3-4.7)                            | 2.8%<br>(-1.3-7.9%)                  | 2.8%<br>(-2-8.9%)                   | 600<br>(-430-1900)     | 7400<br>(-3400-21000)     |
| Poland   | 1995 | Male   | 85 to 89 | 92%<br>(87-96%)                | 7.8%<br>(4.4-13%)        | 3<br>(2.1-4.2)                              | 0.59%<br>(-3.2-5.1%)                 | 0.19%<br>(-4.2-5.5%)                | 26<br>(-590-770)       | 720<br>(-3800-6200)       |
| Poland   | 1995 | Male   | 90 to 94 | 92%<br>(87-96%)                | 8%<br>(4.5-13%)          | 2.6<br>(1.7-3.8)                            | -1.1%<br>(-5-3.7%)                   | -1.8%<br>(-6.5-3.8%)                | -85<br>(-300-180)      | -310<br>(-1400-1100)      |
| Poland   | 1995 | Male   | 95 plus  | 92%<br>(84-96%)                | 8.2%<br>(3.7-16%)        | 2.2<br>(1.2-3.6)                            | -2%<br>(-5.9-3%)                     | -3%<br>(-7.6-3%)                    | -27<br>(-69-27)        | -74<br>(-220-110)         |



| Location | Year | Sex    | Age      | Prevalence of current drinkers | Prevalence of abstainers | Population average of standard drinks daily | Percent of total attributable deaths | Percent of total attributable DALYs | Attributable deaths    | Attributable DALYs         |
|----------|------|--------|----------|--------------------------------|--------------------------|---------------------------------------------|--------------------------------------|-------------------------------------|------------------------|----------------------------|
| Poland   | 2000 | Female | All Ages | 77%<br>(73-81%)                | 23%<br>(19-27%)          | 1.8<br>(1.6-2)                              | 2.9%<br>(1.6-4.2%)                   | 2.1%<br>(-0.19-4.6%)                | 3600<br>(-330-7900)    | 150000<br>(83000-220000)   |
| Poland   | 2000 | Female | 15 to 19 | 77%<br>(62-87%)                | 23%<br>(13-38%)          | 1.5<br>(0.95-2.1)                           | 2.6%<br>(1.5-3.8%)                   | 7.3%<br>(3.8-11%)                   | 35<br>(18-55)          | 3800<br>(2300-5600)        |
| Poland   | 2000 | Female | 20 to 24 | 83%<br>(71-91%)                | 17%<br>(9.4-29%)         | 1.9<br>(1.2-2.6)                            | 3.5%<br>(2.3-4.8%)                   | 7.7%<br>(4.2-12%)                   | 37<br>(20-57)          | 5200<br>(3300-7400)        |
| Poland   | 2000 | Female | 25 to 29 | 84%<br>(72-92%)                | 16%<br>(8.4-28%)         | 1.8<br>(1.2-2.6)                            | 3.6%<br>(2.6-4.7%)                   | 7.8%<br>(4.6-11%)                   | 40<br>(24-57)          | 5200<br>(3600-7000)        |
| Poland   | 2000 | Female | 30 to 34 | 84%<br>(72-92%)                | 16%<br>(7.9-28%)         | 1.9<br>(1.3-2.7)                            | 3.7%<br>(2.7-5%)                     | 8.9%<br>(6-12%)                     | 56<br>(38-77)          | 5700<br>(4000-7500)        |
| Poland   | 2000 | Female | 35 to 39 | 84%<br>(73-92%)                | 16%<br>(8.2-27%)         | 2<br>(1.3-2.9)                              | 4.5%<br>(3.2-5.9%)                   | 9.8%<br>(6.7-13%)                   | 120<br>(81-160)        | 8700<br>(6300-11000)       |
| Poland   | 2000 | Female | 40 to 44 | 84%<br>(74-92%)                | 16%<br>(8.3-26%)         | 2.3<br>(1.6-3.1)                            | 5.2%<br>(3.7-6.9%)                   | 10%<br>(7.1-13%)                    | 270<br>(190-360)       | 16000<br>(11000-21000)     |
| Poland   | 2000 | Female | 45 to 49 | 85%<br>(78-91%)                | 15%<br>(9.5-22%)         | 2.8<br>(2-3.7)                              | 5.8%<br>(4.1-7.6%)                   | 10%<br>(7.4-13%)                    | 460<br>(330-610)       | 22000<br>(16000-29000)     |
| Poland   | 2000 | Female | 50 to 54 | 85%<br>(79-90%)                | 15%<br>(9.7-21%)         | 2.9<br>(2-3.8)                              | 5.9%<br>(4.1-8%)                     | 9.7%<br>(6.9-13%)                   | 560<br>(400-730)       | 23000<br>(16000-30000)     |
| Poland   | 2000 | Female | 55 to 59 | 85%<br>(79-89%)                | 15%<br>(11-21%)          | 2.8<br>(2-3.9)                              | 5.3%<br>(3.4-7.5%)                   | 8.3%<br>(5.5-12%)                   | 470<br>(310-650)       | 16000<br>(11000-23000)     |
| Poland   | 2000 | Female | 60 to 64 | 81%<br>(74-86%)                | 19%<br>(14-26%)          | 2.6<br>(1.8-3.7)                            | 4%<br>(1.8-6.8%)                     | 6%<br>(2.9-9.8%)                    | 560<br>(260-910)       | 17000<br>(7500-28000)      |
| Poland   | 2000 | Female | 65 to 69 | 75%<br>(66-82%)                | 25%<br>(18-34%)          | 2.3<br>(1.6-3.1)                            | 2.9%<br>(0.67-5.3%)                  | 4.1%<br>(1-7.4%)                    | 610<br>(150-1100)      | 15000<br>(3400-27000)      |
| Poland   | 2000 | Female | 70 to 74 | 67%<br>(59-76%)                | 33%<br>(24-41%)          | 1.9<br>(1.3-2.7)                            | 1.8%<br>(-0.7-4.5%)                  | 2.3%<br>(-0.95-5.8%)                | 540<br>(-220-1300)     | 11000<br>(-4400-26000)     |
| Poland   | 2000 | Female | 75 to 79 | 59%<br>(46-70%)                | 41%<br>(30-54%)          | 1.6<br>(1-2.3)                              | 0.84%<br>(-1.7-3.5%)                 | 0.99%<br>(-2.3-4.3%)                | 300<br>(-700-1300)     | 4900<br>(-9900-20000)      |
| Poland   | 2000 | Female | 80 to 84 | 54%<br>(41-65%)                | 46%<br>(35-59%)          | 1.4<br>(0.89-2)                             | 0.19%<br>(-2.1-2.4%)                 | 0.11%<br>(-2.7-2.9%)                | 26<br>(-660-700)       | 620<br>(-6600-7900)        |
| Poland   | 2000 | Female | 85 to 89 | 53%<br>(40-65%)                | 47%<br>(35-60%)          | 1.3<br>(0.81-2)                             | -0.37%<br>(-2.7-1.9%)                | -0.61%<br>(-3.4-2.2%)               | -170<br>(-960-620)     | -950<br>(-6800-4800)       |
| Poland   | 2000 | Female | 90 to 94 | 55%<br>(43-68%)                | 45%<br>(32-57%)          | 1.3<br>(0.78-2.1)                           | -0.9%<br>(-3.5-1.8%)                 | -1.3%<br>(-4.4-2%)                  | -200<br>(-680-320)     | -860<br>(-3400-1700)       |
| Poland   | 2000 | Female | 95 plus  | 59%<br>(43-73%)                | 41%<br>(27-57%)          | 1.4<br>(0.7-2.3)                            | -1.4%<br>(-4.6-2.4%)                 | -1.9%<br>(-5.8-2.6%)                | -80<br>(-250-110)      | -240<br>(-800-410)         |
| Poland   | 2000 | Male   | All Ages | 93%<br>(90-95%)                | 7.1%<br>(5-9.8%)         | 3.4<br>(3-3.7)                              | 12%<br>(11-15%)                      | 13%<br>(9.7-16%)                    | 25000<br>(19000-32000) | 850000<br>(710000-1000000) |
| Poland   | 2000 | Male   | 15 to 19 | 89%<br>(80-95%)                | 11%<br>(5.3-20%)         | 1.6<br>(1.1-2.4)                            | 5.5%<br>(3.2-8.1%)                   | 9.7%<br>(5.2-15%)                   | 130<br>(67-200)        | 11000<br>(6700-16000)      |
| Poland   | 2000 | Male   | 20 to 24 | 93%<br>(87-97%)                | 6.7%<br>(3.1-13%)        | 2.7<br>(1.8-3.8)                            | 10%<br>(6.7-15%)                     | 16%<br>(8.9-22%)                    | 310<br>(170-440)       | 25000<br>(16000-35000)     |

| Location | Year | Sex    | Age      | Prevalence of current drinkers | Prevalence of abstainers | Population average of standard drinks daily | Percent of total attributable deaths | Percent of total attributable DALYs | Attributable deaths | Attributable DALYs        |
|----------|------|--------|----------|--------------------------------|--------------------------|---------------------------------------------|--------------------------------------|-------------------------------------|---------------------|---------------------------|
| Poland   | 2000 | Male   | 25 to 29 | 95%<br>(90-98%)                | 5.5%<br>(2.4-10%)        | 3.4<br>(2.3-4.6)                            | 13%<br>(9.4-17%)                     | 19%<br>(13-27%)                     | 370<br>(240-510)    | 30000<br>(21000-39000)    |
| Poland   | 2000 | Male   | 30 to 34 | 95%<br>(90-98%)                | 4.7%<br>(1.9-9.8%)       | 3.6<br>(2.5-5)                              | 15%<br>(11-18%)                      | 21%<br>(16-28%)                     | 490<br>(360-640)    | 35000<br>(27000-45000)    |
| Poland   | 2000 | Male   | 35 to 39 | 96%<br>(92-98%)                | 4.3%<br>(1.7-8.5%)       | 3.4<br>(2.2-4.7)                            | 15%<br>(11-19%)                      | 20%<br>(15-26%)                     | 780<br>(580-1000)   | 48000<br>(37000-60000)    |
| Poland   | 2000 | Male   | 40 to 44 | 96%<br>(92-99%)                | 3.7%<br>(1.4-7.6%)       | 4.1<br>(2.9-5.4)                            | 16%<br>(12-20%)                      | 21%<br>(16-26%)                     | 1600<br>(1200-2000) | 84000<br>(65000-100000)   |
| Poland   | 2000 | Male   | 45 to 49 | 97%<br>(94-99%)                | 3%<br>(1.3-6.4%)         | 5.8<br>(4-7.7)                              | 19%<br>(14-23%)                      | 24%<br>(18-29%)                     | 2800<br>(2000-3400) | 130000<br>(93000-150000)  |
| Poland   | 2000 | Male   | 50 to 54 | 97%<br>(94-98%)                | 3.3%<br>(1.8-6.1%)       | 6.6<br>(4.8-8.4)                            | 19%<br>(15-22%)                      | 23%<br>(18-27%)                     | 3200<br>(2500-3800) | 130000<br>(97000-150000)  |
| Poland   | 2000 | Male   | 55 to 59 | 96%<br>(93-97%)                | 4.4%<br>(2.5-6.9%)       | 6.7<br>(5-8.8)                              | 17%<br>(13-21%)                      | 20%<br>(16-25%)                     | 2600<br>(2000-3200) | 87000<br>(67000-110000)   |
| Poland   | 2000 | Male   | 60 to 64 | 95%<br>(92-97%)                | 5%<br>(3-8.1%)           | 6.5<br>(4.6-8.7)                            | 14%<br>(10-18%)                      | 17%<br>(12-21%)                     | 3300<br>(2300-4200) | 94000<br>(67000-120000)   |
| Poland   | 2000 | Male   | 65 to 69 | 95%<br>(92-97%)                | 5.2%<br>(3-8.2%)         | 5.8<br>(4.3-7.5)                            | 12%<br>(8-16%)                       | 14%<br>(9.1-19%)                    | 3500<br>(2400-4800) | 85000<br>(57000-110000)   |
| Poland   | 2000 | Male   | 70 to 74 | 94%<br>(91-96%)                | 5.7%<br>(3.6-9.1%)       | 5<br>(3.6-6.7)                              | 9%<br>(4.4-14%)                      | 10%<br>(4.8-16%)                    | 3000<br>(1400-4600) | 58000<br>(28000-88000)    |
| Poland   | 2000 | Male   | 75 to 79 | 93%<br>(89-96%)                | 6.5%<br>(3.7-11%)        | 4.2<br>(2.8-6)                              | 6.4%<br>(1.7-12%)                    | 7.1%<br>(1.5-13%)                   | 1800<br>(410-3500)  | 28000<br>(7300-52000)     |
| Poland   | 2000 | Male   | 80 to 84 | 93%<br>(87-96%)                | 7.2%<br>(4.1-13%)        | 3.6<br>(2.5-5)                              | 4.3%<br>(0.28-9.3%)                  | 4.6%<br>(-0.24-11%)                 | 700<br>(-36-1600)   | 8200<br>(520-18000)       |
| Poland   | 2000 | Male   | 85 to 89 | 92%<br>(87-96%)                | 7.7%<br>(4.4-13%)        | 3.2<br>(2.2-4.5)                            | 2.1%<br>(-1.6-6.8%)                  | 2%<br>(-2.4-7.5%)                   | 260<br>(-320-970)   | 2400<br>(-1800-7700)      |
| Poland   | 2000 | Male   | 90 to 94 | 92%<br>(87-96%)                | 7.9%<br>(4.4-13%)        | 2.8<br>(1.8-4.1)                            | 0.24%<br>(-3.6-5%)                   | -0.29%<br>(-5-5.5%)                 | -16<br>(-270-300)   | 79<br>(-1200-1700)        |
| Poland   | 2000 | Male   | 95 plus  | 92%<br>(85-97%)                | 8.1%<br>(3.5-15%)        | 2.4<br>(1.2-3.8)                            | -0.92%<br>(-4.6-4.3%)                | -1.7%<br>(-6.3-4.5%)                | -20<br>(-72-52)     | -43<br>(-220-200)         |
| Poland   | 2005 | Female | All Ages | 76%<br>(72-80%)                | 24%<br>(20-28%)          | 1.9<br>(1.7-2.1)                            | 3.2%<br>(2.3-4.3%)                   | 2.6%<br>(0.87-4.6%)                 | 4500<br>(1500-8000) | 170000<br>(120000-220000) |
| Poland   | 2005 | Female | 15 to 19 | 76%<br>(62-86%)                | 24%<br>(14-38%)          | 1.6<br>(0.99-2.2)                           | 2.5%<br>(1.5-3.6%)                   | 7.7%<br>(4-12%)                     | 27<br>(14-43)       | 3100<br>(1900-4500)       |
| Poland   | 2005 | Female | 20 to 24 | 83%<br>(72-90%)                | 17%<br>(9.8-28%)         | 2<br>(1.3-2.9)                              | 3.4%<br>(2.3-4.6%)                   | 8.3%<br>(4.6-13%)                   | 35<br>(20-54)       | 5100<br>(3400-7200)       |
| Poland   | 2005 | Female | 25 to 29 | 84%<br>(73-91%)                | 16%<br>(8.8-27%)         | 1.9<br>(1.3-2.7)                            | 3.5%<br>(2.5-4.5%)                   | 8.6%<br>(5.3-12%)                   | 41<br>(26-58)       | 5600<br>(3800-7400)       |
| Poland   | 2005 | Female | 30 to 34 | 84%<br>(73-91%)                | 16%<br>(8.6-27%)         | 2<br>(1.4-2.8)                              | 3.8%<br>(2.8-4.9%)                   | 9.9%<br>(6.9-13%)                   | 63<br>(44-85)       | 6300<br>(4700-8300)       |
| Poland   | 2005 | Female | 35 to 39 | 85%<br>(76-92%)                | 15%<br>(8.5-24%)         | 2.1<br>(1.4-3)                              | 4.7%<br>(3.4-6.2%)                   | 11%<br>(8.3-15%)                    | 110<br>(80-140)     | 8100<br>(6100-10000)      |
| Poland   | 2005 | Female | 40 to 44 | 85%<br>(76-91%)                | 15%<br>(9-24%)           | 2.5<br>(1.7-3.3)                            | 5.6%<br>(4.1-7.3%)                   | 12%<br>(8.9-15%)                    | 220<br>(160-280)    | 13000<br>(9800-17000)     |

| Location | Year | Sex    | Age      | Prevalence of current drinkers | Prevalence of abstainers | Population average of standard drinks daily | Percent of total attributable deaths | Percent of total attributable DALYs | Attributable deaths    | Attributable DALYs         |
|----------|------|--------|----------|--------------------------------|--------------------------|---------------------------------------------|--------------------------------------|-------------------------------------|------------------------|----------------------------|
| Poland   | 2005 | Female | 45 to 49 | 86%<br>(80-90%)                | 14%<br>(9.8-20%)         | 3<br>(2.2-4)                                | 6.5%<br>(4.8-8.4%)                   | 12%<br>(9.2-15%)                    | 490<br>(370-610)       | 24000<br>(18000-30000)     |
| Poland   | 2005 | Female | 50 to 54 | 85%<br>(80-89%)                | 15%<br>(11-20%)          | 3.1<br>(2.2-4)                              | 6.4%<br>(4.7-8.3%)                   | 11%<br>(8.3-14%)                    | 680<br>(520-870)       | 28000<br>(21000-37000)     |
| Poland   | 2005 | Female | 55 to 59 | 83%<br>(79-86%)                | 17%<br>(14-21%)          | 2.9<br>(2.1-3.8)                            | 5.8%<br>(4.1-7.8%)                   | 9.2%<br>(6.6-12%)                   | 720<br>(520-950)       | 26000<br>(18000-35000)     |
| Poland   | 2005 | Female | 60 to 64 | 77%<br>(72-82%)                | 23%<br>(18-28%)          | 2.5<br>(1.8-3.5)                            | 4.5%<br>(2.5-6.8%)                   | 6.9%<br>(4-10%)                     | 500<br>(290-740)       | 15000<br>(8700-23000)      |
| Poland   | 2005 | Female | 65 to 69 | 68%<br>(62-75%)                | 32%<br>(25-38%)          | 2.1<br>(1.5-2.8)                            | 3.1%<br>(1.5-5.1%)                   | 4.6%<br>(2.3-7.4%)                  | 560<br>(280-900)       | 14000<br>(6800-23000)      |
| Poland   | 2005 | Female | 70 to 74 | 59%<br>(53-65%)                | 41%<br>(35-47%)          | 1.7<br>(1.1-2.3)                            | 2%<br>(0.21-4.2%)                    | 2.8%<br>(0.38-5.6%)                 | 550<br>(74-1100)       | 11000<br>(1200-22000)      |
| Poland   | 2005 | Female | 75 to 79 | 47%<br>(38-55%)                | 53%<br>(45-62%)          | 1.2<br>(0.8-1.8)                            | 1.1%<br>(-0.57-3.1%)                 | 1.4%<br>(-0.82-4%)                  | 410<br>(-240-1200)     | 6600<br>(-3300-18000)      |
| Poland   | 2005 | Female | 80 to 84 | 42%<br>(32-53%)                | 58%<br>(47-68%)          | 1.1<br>(0.68-1.5)                           | 0.58%<br>(-0.96-2.3%)                | 0.62%<br>(-1.4-2.8%)                | 220<br>(-470-1000)     | 2800<br>(-4500-12000)      |
| Poland   | 2005 | Female | 85 to 89 | 44%<br>(33-55%)                | 56%<br>(45-67%)          | 1.1<br>(0.7-1.7)                            | 0.13%<br>(-1.6-2.1%)                 | 0.015%<br>(-2.1-2.4%)               | 3.5<br>(-460-520)      | 270<br>(-3300-4200)        |
| Poland   | 2005 | Female | 90 to 94 | 46%<br>(35-57%)                | 54%<br>(43-65%)          | 1.1<br>(0.66-1.8)                           | -0.29%<br>(-2.3-2%)                  | -0.53%<br>(-3-2.3%)                 | -87<br>(-500-380)      | -310<br>(-2400-2100)       |
| Poland   | 2005 | Female | 95 plus  | 50%<br>(34-66%)                | 50%<br>(34-66%)          | 1.2<br>(0.59-2)                             | -0.63%<br>(-3.2-2.3%)                | -0.97%<br>(-4-2.6%)                 | -56<br>(-240-150)      | -150<br>(-770-560)         |
| Poland   | 2005 | Male   | All Ages | 95%<br>(93-96%)                | 5.4%<br>(3.9-7.4%)       | 4<br>(3.6-4.4)                              | 14%<br>(12-16%)                      | 14%<br>(11-18%)                     | 28000<br>(22000-35000) | 950000<br>(810000-1100000) |
| Poland   | 2005 | Male   | 15 to 19 | 91%<br>(84-95%)                | 9.5%<br>(5-16%)          | 1.8<br>(1.2-2.6)                            | 5.6%<br>(3.4-8.1%)                   | 11%<br>(5.7-16%)                    | 100<br>(55-160)        | 9400<br>(5800-14000)       |
| Poland   | 2005 | Male   | 20 to 24 | 95%<br>(91-98%)                | 4.8%<br>(2.4-9.1%)       | 3.1<br>(2.1-4.3)                            | 11%<br>(7.3-15%)                     | 18%<br>(10-25%)                     | 320<br>(190-450)       | 27000<br>(17000-37000)     |
| Poland   | 2005 | Male   | 25 to 29 | 96%<br>(93-98%)                | 4%<br>(2-7.1%)           | 3.8<br>(2.7-5.1)                            | 14%<br>(9.8-17%)                     | 22%<br>(15-29%)                     | 420<br>(280-560)       | 34000<br>(24000-44000)     |
| Poland   | 2005 | Male   | 30 to 34 | 97%<br>(93-98%)                | 3.5%<br>(1.6-6.6%)       | 4<br>(2.9-5.5)                              | 15%<br>(12-19%)                      | 24%<br>(18-31%)                     | 550<br>(410-710)       | 39000<br>(30000-48000)     |
| Poland   | 2005 | Male   | 35 to 39 | 97%<br>(94-99%)                | 3.2%<br>(1.4-5.6%)       | 3.8<br>(2.5-5.2)                            | 16%<br>(12-20%)                      | 24%<br>(18-30%)                     | 750<br>(560-960)       | 46000<br>(35000-57000)     |
| Poland   | 2005 | Male   | 40 to 44 | 97%<br>(95-99%)                | 2.8%<br>(1.2-5.2%)       | 4.6<br>(3.3-6.1)                            | 18%<br>(14-22%)                      | 25%<br>(19-31%)                     | 1400<br>(1100-1700)    | 72000<br>(56000-88000)     |
| Poland   | 2005 | Male   | 45 to 49 | 98%<br>(96-99%)                | 2.3%<br>(1.1-4.4%)       | 6.4<br>(4.6-8.5)                            | 21%<br>(16-25%)                      | 28%<br>(21-33%)                     | 3000<br>(2300-3700)    | 140000<br>(110000-160000)  |
| Poland   | 2005 | Male   | 50 to 54 | 97%<br>(96-99%)                | 2.6%<br>(1.5-4.4%)       | 7.3<br>(5.4-9.2)                            | 21%<br>(17-24%)                      | 26%<br>(21-30%)                     | 4200<br>(3400-4900)    | 160000<br>(130000-190000)  |
| Poland   | 2005 | Male   | 55 to 59 | 96%<br>(95-98%)                | 3.5%<br>(2.3-5.2%)       | 7.5<br>(5.8-9.7)                            | 19%<br>(15-22%)                      | 23%<br>(19-27%)                     | 4200<br>(3400-4900)    | 140000<br>(110000-170000)  |

| Location | Year | Sex    | Age      | Prevalence of current drinkers | Prevalence of abstainers | Population average of standard drinks daily | Percent of total attributable deaths | Percent of total attributable DALYs | Attributable deaths | Attributable DALYs        |
|----------|------|--------|----------|--------------------------------|--------------------------|---------------------------------------------|--------------------------------------|-------------------------------------|---------------------|---------------------------|
| Poland   | 2005 | Male   | 60 to 64 | 96%<br>(94-97%)                | 4%<br>(2.6-5.8%)         | 7.3<br>(5.4-9.6)                            | 16%<br>(12-20%)                      | 19%<br>(15-23%)                     | 3000<br>(2300-3700) | 87000<br>(66000-110000)   |
| Poland   | 2005 | Male   | 65 to 69 | 95%<br>(93-97%)                | 4.7%<br>(3-7%)           | 6.4<br>(5-8.1)                              | 13%<br>(9.6-17%)                     | 16%<br>(11-20%)                     | 3400<br>(2400-4400) | 83000<br>(60000-100000)   |
| Poland   | 2005 | Male   | 70 to 74 | 94%<br>(91-96%)                | 6%<br>(4-8.7%)           | 5.2<br>(3.8-7)                              | 9.9%<br>(5.6-14%)                    | 11%<br>(6.3-17%)                    | 3100<br>(1700-4500) | 60000<br>(34000-87000)    |
| Poland   | 2005 | Male   | 75 to 79 | 93%<br>(89-96%)                | 6.8%<br>(4.2-11%)        | 4.4<br>(3-6.1)                              | 7.1%<br>(2.5-12%)                    | 8%<br>(2.5-14%)                     | 2200<br>(700-3800)  | 34000<br>(12000-58000)    |
| Poland   | 2005 | Male   | 80 to 84 | 93%<br>(87-96%)                | 7.3%<br>(4.1-13%)        | 3.8<br>(2.7-5.3)                            | 5.1%<br>(0.93-9.9%)                  | 5.6%<br>(0.59-11%)                  | 1200<br>(130-2400)  | 14000<br>(2500-27000)     |
| Poland   | 2005 | Male   | 85 to 89 | 92%<br>(87-95%)                | 7.9%<br>(4.6-13%)        | 3.4<br>(2.4-4.7)                            | 3%<br>(-0.75-7.8%)                   | 3%<br>(-1.5-8.7%)                   | 310<br>(-150-910)   | 2800<br>(-710-7300)       |
| Poland   | 2005 | Male   | 90 to 94 | 92%<br>(87-96%)                | 8%<br>(4.4-13%)          | 3<br>(2-4.2)                                | 1%<br>(-2.7-5.8%)                    | 0.61%<br>(-4.1-6.4%)                | 36<br>(-230-360)    | 370<br>(-970-2100)        |
| Poland   | 2005 | Male   | 95 plus  | 92%<br>(84-96%)                | 8.3%<br>(3.6-16%)        | 2.5<br>(1.3-4)                              | -0.27%<br>(-3.9-5%)                  | -1%<br>(-5.6-5.3%)                  | -17<br>(-91-87)     | -18<br>(-260-350)         |
| Poland   | 2010 | Female | All Ages | 77%<br>(73-81%)                | 23%<br>(19-27%)          | 1.9<br>(1.7-2.2)                            | 3.2%<br>(2.2-4.4%)                   | 2.4%<br>(0.58-4.6%)                 | 4400<br>(1000-8200) | 170000<br>(120000-230000) |
| Poland   | 2010 | Female | 15 to 19 | 76%<br>(63-87%)                | 24%<br>(13-37%)          | 1.6<br>(1-2.3)                              | 2.4%<br>(1.5-3.6%)                   | 7.7%<br>(4-12%)                     | 21<br>(11-33)       | 2500<br>(1500-3700)       |
| Poland   | 2010 | Female | 20 to 24 | 83%<br>(73-91%)                | 17%<br>(9.2-27%)         | 2<br>(1.3-2.9)                              | 3.4%<br>(2.3-4.5%)                   | 8.4%<br>(4.7-13%)                   | 28<br>(15-43)       | 4300<br>(2800-6100)       |
| Poland   | 2010 | Female | 25 to 29 | 84%<br>(73-91%)                | 16%<br>(8.7-27%)         | 1.9<br>(1.3-2.7)                            | 3.5%<br>(2.6-4.6%)                   | 8.9%<br>(5.7-12%)                   | 40<br>(26-56)       | 5700<br>(4000-7600)       |
| Poland   | 2010 | Female | 30 to 34 | 84%<br>(74-92%)                | 16%<br>(8.5-26%)         | 2<br>(1.3-2.8)                              | 3.8%<br>(2.8-5%)                     | 11%<br>(7.8-14%)                    | 66<br>(48-86)       | 6900<br>(5200-9000)       |
| Poland   | 2010 | Female | 35 to 39 | 85%<br>(76-92%)                | 15%<br>(8.3-24%)         | 2.2<br>(1.4-3.1)                            | 4.7%<br>(3.5-6.1%)                   | 12%<br>(9-16%)                      | 120<br>(86-150)     | 8900<br>(6600-11000)      |
| Poland   | 2010 | Female | 40 to 44 | 85%<br>(77-91%)                | 15%<br>(8.5-23%)         | 2.5<br>(1.7-3.4)                            | 5.6%<br>(4.2-7.3%)                   | 13%<br>(9.8-16%)                    | 190<br>(140-240)    | 11000<br>(8700-15000)     |
| Poland   | 2010 | Female | 45 to 49 | 86%<br>(80-91%)                | 14%<br>(9.2-20%)         | 3<br>(2.2-4.1)                              | 6.5%<br>(4.9-8.4%)                   | 13%<br>(10-16%)                     | 360<br>(280-450)    | 18000<br>(14000-23000)    |
| Poland   | 2010 | Female | 50 to 54 | 85%<br>(80-89%)                | 15%<br>(11-20%)          | 3.1<br>(2.2-4.1)                            | 6.6%<br>(4.9-8.5%)                   | 12%<br>(9-14%)                      | 660<br>(500-830)    | 28000<br>(21000-36000)    |
| Poland   | 2010 | Female | 55 to 59 | 84%<br>(79-87%)                | 16%<br>(13-21%)          | 2.9<br>(2.2-3.8)                            | 5.9%<br>(4.2-7.7%)                   | 9.6%<br>(7.2-12%)                   | 830<br>(630-1100)   | 30000<br>(22000-39000)    |
| Poland   | 2010 | Female | 60 to 64 | 80%<br>(75-84%)                | 20%<br>(16-25%)          | 2.7<br>(1.9-3.7)                            | 4.6%<br>(2.7-6.8%)                   | 7.1%<br>(4.4-10%)                   | 750<br>(460-1100)   | 23000<br>(14000-34000)    |
| Poland   | 2010 | Female | 65 to 69 | 72%<br>(66-78%)                | 28%<br>(22-34%)          | 2.3<br>(1.7-3)                              | 3.3%<br>(1.7-5.2%)                   | 4.9%<br>(2.6-7.6%)                  | 480<br>(250-760)    | 12000<br>(6200-20000)     |
| Poland   | 2010 | Female | 70 to 74 | 62%<br>(55-68%)                | 38%<br>(32-45%)          | 1.8<br>(1.2-2.5)                            | 2%<br>(0.29-4.2%)                    | 2.9%<br>(0.46-5.8%)                 | 470<br>(76-930)     | 9700<br>(1400-19000)      |
| Poland   | 2010 | Female | 75 to 79 | 50%<br>(40-60%)                | 50%<br>(40-60%)          | 1.3<br>(0.85-1.9)                           | 1.1%<br>(-0.56-3.2%)                 | 1.4%<br>(-0.87-4.1%)                | 370<br>(-220-1100)  | 6100<br>(-3100-17000)     |

| Location | Year | Sex    | Age      | Prevalence of current drinkers | Prevalence of abstainers | Population average of standard drinks daily | Percent of total attributable deaths | Percent of total attributable DALYs | Attributable deaths    | Attributable DALYs         |
|----------|------|--------|----------|--------------------------------|--------------------------|---------------------------------------------|--------------------------------------|-------------------------------------|------------------------|----------------------------|
| Poland   | 2010 | Female | 80 to 84 | 46%<br>(35-57%)                | 54%<br>(43-65%)          | 1.2<br>(0.76-1.7)                           | 0.52%<br>(-1.1-2.4%)                 | 0.54%<br>(-1.5-2.9%)                | 200<br>(-570-1100)     | 2700<br>(-5600-12000)      |
| Poland   | 2010 | Female | 85 to 89 | 49%<br>(37-59%)                | 51%<br>(41-63%)          | 1.3<br>(0.79-1.9)                           | 0.028%<br>(-1.9-2.1%)                | -0.14%<br>(-2.6-2.5%)               | -49<br>(-890-880)      | 92<br>(-6400-7300)         |
| Poland   | 2010 | Female | 90 to 94 | 51%<br>(39-62%)                | 49%<br>(38-61%)          | 1.3<br>(0.75-2)                             | -0.4%<br>(-2.7-2.3%)                 | -0.69%<br>(-3.5-2.6%)               | -100<br>(-510-380)     | -380<br>(-2500-2200)       |
| Poland   | 2010 | Female | 95 plus  | 54%<br>(38-69%)                | 46%<br>(31-62%)          | 1.3<br>(0.68-2.2)                           | -0.72%<br>(-3.6-2.8%)                | -1.1%<br>(-4.7-3.2%)                | -80<br>(-340-230)      | -210<br>(-1100-830)        |
| Poland   | 2010 | Male   | All Ages | 95%<br>(93-96%)                | 5.2%<br>(3.8-6.9%)       | 4.1<br>(3.7-4.6)                            | 14%<br>(12-16%)                      | 14%<br>(11-18%)                     | 29000<br>(23000-36000) | 960000<br>(820000-1100000) |
| Poland   | 2010 | Male   | 15 to 19 | 91%<br>(84-95%)                | 9.5%<br>(4.8-16%)        | 1.9<br>(1.2-2.7)                            | 5.6%<br>(3.3-8.2%)                   | 11%<br>(5.5-17%)                    | 89<br>(45-140)         | 8000<br>(4900-12000)       |
| Poland   | 2010 | Male   | 20 to 24 | 95%<br>(91-98%)                | 4.8%<br>(2.3-9%)         | 3.1<br>(2.1-4.4)                            | 11%<br>(7.2-15%)                     | 18%<br>(10-26%)                     | 280<br>(160-400)       | 23000<br>(15000-32000)     |
| Poland   | 2010 | Male   | 25 to 29 | 96%<br>(93-98%)                | 3.9%<br>(1.8-6.9%)       | 3.8<br>(2.6-5.1)                            | 13%<br>(9.8-17%)                     | 22%<br>(15-29%)                     | 410<br>(280-540)       | 33000<br>(24000-44000)     |
| Poland   | 2010 | Male   | 30 to 34 | 97%<br>(94-98%)                | 3.4%<br>(1.6-6.2%)       | 4<br>(2.9-5.4)                              | 15%<br>(12-19%)                      | 25%<br>(19-32%)                     | 590<br>(440-740)       | 42000<br>(33000-52000)     |
| Poland   | 2010 | Male   | 35 to 39 | 97%<br>(94-99%)                | 3.2%<br>(1.4-6.1%)       | 3.8<br>(2.5-5.3)                            | 17%<br>(13-21%)                      | 25%<br>(19-32%)                     | 810<br>(620-1000)      | 50000<br>(39000-61000)     |
| Poland   | 2010 | Male   | 40 to 44 | 97%<br>(95-99%)                | 2.7%<br>(1.2-5.4%)       | 4.6<br>(3.2-6.2)                            | 18%<br>(14-23%)                      | 26%<br>(21-32%)                     | 1200<br>(930-1500)     | 64000<br>(50000-78000)     |
| Poland   | 2010 | Male   | 45 to 49 | 98%<br>(96-99%)                | 2.2%<br>(1.1-4.3%)       | 6.5<br>(4.5-8.6)                            | 21%<br>(17-26%)                      | 29%<br>(22-34%)                     | 2200<br>(1700-2700)    | 100000<br>(79000-120000)   |
| Poland   | 2010 | Male   | 50 to 54 | 97%<br>(96-98%)                | 2.5%<br>(1.5-4.3%)       | 7.4<br>(5.4-9.3)                            | 21%<br>(17-25%)                      | 27%<br>(22-32%)                     | 4000<br>(3300-4700)    | 160000<br>(130000-190000)  |
| Poland   | 2010 | Male   | 55 to 59 | 97%<br>(95-98%)                | 3.5%<br>(2.2-5%)         | 7.6<br>(5.8-9.6)                            | 19%<br>(16-23%)                      | 24%<br>(20-28%)                     | 4900<br>(4000-5800)    | 170000<br>(140000-200000)  |
| Poland   | 2010 | Male   | 60 to 64 | 96%<br>(94-97%)                | 3.9%<br>(2.6-5.6%)       | 7.3<br>(5.5-9.6)                            | 16%<br>(13-20%)                      | 20%<br>(15-24%)                     | 4400<br>(3400-5300)    | 130000<br>(99000-160000)   |
| Poland   | 2010 | Male   | 65 to 69 | 96%<br>(93-97%)                | 4.5%<br>(2.9-6.6%)       | 6.4<br>(5-8.2)                              | 13%<br>(9.9-17%)                     | 16%<br>(12-20%)                     | 2900<br>(2100-3700)    | 71000<br>(52000-89000)     |
| Poland   | 2010 | Male   | 70 to 74 | 94%<br>(92-96%)                | 5.8%<br>(3.9-8.4%)       | 5.3<br>(3.8-7.1)                            | 10%<br>(5.6-14%)                     | 12%<br>(6.4-17%)                    | 2800<br>(1500-4000)    | 55000<br>(32000-78000)     |
| Poland   | 2010 | Male   | 75 to 79 | 94%<br>(90-96%)                | 6.5%<br>(4.1-10%)        | 4.5<br>(3-6.2)                              | 7.1%<br>(2.8-12%)                    | 8.1%<br>(2.7-14%)                   | 2200<br>(760-3800)     | 35000<br>(14000-59000)     |
| Poland   | 2010 | Male   | 80 to 84 | 93%<br>(88-96%)                | 7%<br>(4-12%)            | 3.9<br>(2.7-5.4)                            | 5.1%<br>(0.96-9.8%)                  | 5.6%<br>(0.58-11%)                  | 1400<br>(150-2900)     | 17000<br>(3200-33000)      |
| Poland   | 2010 | Male   | 85 to 89 | 92%<br>(87-95%)                | 7.9%<br>(4.6-13%)        | 3.4<br>(2.4-4.7)                            | 2.9%<br>(-0.69-7.5%)                 | 2.9%<br>(-1.5-8.4%)                 | 470<br>(-240-1400)     | 4300<br>(-1100-11000)      |
| Poland   | 2010 | Male   | 90 to 94 | 92%<br>(87-95%)                | 8%<br>(4.6-13%)          | 3<br>(2-4.4)                                | 1%<br>(-2.6-6%)                      | 0.6%<br>(-3.9-6.7%)                 | 33<br>(-210-370)       | 340<br>(-890-2100)         |

| Location | Year | Sex    | Age      | Prevalence of current drinkers | Prevalence of abstainers | Population average of standard drinks daily | Percent of total attributable deaths | Percent of total attributable DALYs | Attributable deaths    | Attributable DALYs         |
|----------|------|--------|----------|--------------------------------|--------------------------|---------------------------------------------|--------------------------------------|-------------------------------------|------------------------|----------------------------|
| Poland   | 2010 | Male   | 95 plus  | 92%<br>(85-96%)                | 8.1%<br>(3.6-15%)        | 2.5<br>(1.4-4)                              | -0.21%<br>(-3.9-5%)                  | -0.92%<br>(-5.5-5.4%)               | -18<br>(-110-100)      | -17<br>(-310-400)          |
| Poland   | 2016 | Female | All Ages | 78%<br>(74-81%)                | 22%<br>(19-26%)          | 2.1<br>(1.6-2.6)                            | 3.2%<br>(1.8-4.8%)                   | 2.4%<br>(-0.22-5.4%)                | 4500<br>(-400-10000)   | 170000<br>(92000-250000)   |
| Poland   | 2016 | Female | 15 to 19 | 77%<br>(62-88%)                | 23%<br>(12-38%)          | 1.6<br>(0.97-2.5)                           | 2.4%<br>(1.5-3.5%)                   | 7.8%<br>(3.9-13%)                   | 15<br>(8-25)           | 1900<br>(1100-2800)        |
| Poland   | 2016 | Female | 20 to 24 | 83%<br>(72-91%)                | 17%<br>(9.4-28%)         | 2<br>(1.2-3.1)                              | 3.3%<br>(2.3-4.6%)                   | 8.4%<br>(4.6-13%)                   | 21<br>(12-34)          | 3500<br>(2300-5000)        |
| Poland   | 2016 | Female | 25 to 29 | 84%<br>(72-92%)                | 16%<br>(8.4-28%)         | 2<br>(1.3-3)                                | 3.4%<br>(2.5-4.5%)                   | 9.2%<br>(5.7-13%)                   | 31<br>(19-45)          | 4700<br>(3200-6500)        |
| Poland   | 2016 | Female | 30 to 34 | 84%<br>(72-92%)                | 16%<br>(7.9-28%)         | 2<br>(1.3-3)                                | 3.7%<br>(2.7-5%)                     | 11%<br>(7.7-14%)                    | 62<br>(43-85)          | 6900<br>(5000-9200)        |
| Poland   | 2016 | Female | 35 to 39 | 84%<br>(74-92%)                | 16%<br>(8.3-26%)         | 2.2<br>(1.3-3.2)                            | 4.4%<br>(3.3-5.8%)                   | 12%<br>(9.2-16%)                    | 120<br>(83-160)        | 9400<br>(6900-12000)       |
| Poland   | 2016 | Female | 40 to 44 | 85%<br>(74-92%)                | 15%<br>(8.4-26%)         | 2.5<br>(1.6-3.6)                            | 5.3%<br>(3.8-7%)                     | 13%<br>(10-17%)                     | 190<br>(130-250)       | 12000<br>(8400-15000)      |
| Poland   | 2016 | Female | 45 to 49 | 86%<br>(78-91%)                | 14%<br>(9.4-22%)         | 3.1<br>(2-4.4)                              | 6.3%<br>(4.6-8.6%)                   | 14%<br>(10-18%)                     | 290<br>(220-380)       | 15000<br>(11000-20000)     |
| Poland   | 2016 | Female | 50 to 54 | 86%<br>(80-90%)                | 14%<br>(9.7-20%)         | 3.2<br>(2.2-4.5)                            | 6.6%<br>(4.6-8.9%)                   | 12%<br>(9-16%)                      | 470<br>(340-630)       | 21000<br>(15000-27000)     |
| Poland   | 2016 | Female | 55 to 59 | 85%<br>(80-89%)                | 15%<br>(11-20%)          | 3.2<br>(2.2-4.3)                            | 6%<br>(4.1-8.4%)                     | 10%<br>(7.4-13%)                    | 800<br>(560-1100)      | 29000<br>(20000-40000)     |
| Poland   | 2016 | Female | 60 to 64 | 83%<br>(78-87%)                | 17%<br>(13-22%)          | 3<br>(2-4.2)                                | 4.9%<br>(2.7-7.5%)                   | 7.7%<br>(4.6-11%)                   | 920<br>(530-1400)      | 28000<br>(15000-43000)     |
| Poland   | 2016 | Female | 65 to 69 | 78%<br>(71-83%)                | 22%<br>(17-29%)          | 2.7<br>(1.8-3.6)                            | 3.6%<br>(1.4-5.9%)                   | 5.5%<br>(2.5-8.7%)                  | 770<br>(350-1200)      | 20000<br>(7800-32000)      |
| Poland   | 2016 | Female | 70 to 74 | 70%<br>(63-77%)                | 30%<br>(23-37%)          | 2.2<br>(1.5-3.2)                            | 2.3%<br>(0.087-5.1%)                 | 3.4%<br>(0.4-7.2%)                  | 430<br>(51-910)        | 9000<br>(330-19000)        |
| Poland   | 2016 | Female | 75 to 79 | 61%<br>(49-71%)                | 39%<br>(29-51%)          | 1.8<br>(1.1-2.7)                            | 1.4%<br>(-0.91-4.3%)                 | 1.8%<br>(-1.3-5.7%)                 | 410<br>(-280-1300)     | 6900<br>(-4400-21000)      |
| Poland   | 2016 | Female | 80 to 84 | 56%<br>(43-67%)                | 44%<br>(33-57%)          | 1.6<br>(0.95-2.3)                           | 0.7%<br>(-1.4-3.2%)                  | 0.75%<br>(-2.1-4%)                  | 260<br>(-750-1400)     | 3700<br>(-7600-17000)      |
| Poland   | 2016 | Female | 85 to 89 | 55%<br>(43-67%)                | 45%<br>(33-57%)          | 1.5<br>(0.91-2.3)                           | 0.15%<br>(-2.1-3%)                   | -0.039%<br>(-3.1-3.4%)              | -17<br>(-1300-1400)    | 570<br>(-8600-11000)       |
| Poland   | 2016 | Female | 90 to 94 | 57%<br>(45-69%)                | 43%<br>(31-55%)          | 1.6<br>(0.89-2.4)                           | -0.34%<br>(-3.2-3.3%)                | -0.67%<br>(-4.2-3.7%)               | -190<br>(-1200-1000)   | -620<br>(-5900-5700)       |
| Poland   | 2016 | Female | 95 plus  | 61%<br>(44-75%)                | 39%<br>(25-56%)          | 1.6<br>(0.79-2.6)                           | -0.67%<br>(-4.1-3.9%)                | -1.1%<br>(-5.2-4.5%)                | -77<br>(-360-310)      | -190<br>(-1100-1100)       |
| Poland   | 2016 | Male   | All Ages | 94%<br>(92-95%)                | 6.2%<br>(4.5-8.2%)       | 4.2<br>(3.2-5.1)                            | 14%<br>(11-16%)                      | 14%<br>(10-18%)                     | 28000<br>(19000-36000) | 890000<br>(700000-1100000) |
| Poland   | 2016 | Male   | 15 to 19 | 89%<br>(80-95%)                | 11%<br>(5.1-20%)         | 1.8<br>(1.1-2.8)                            | 5.2%<br>(3.1-7.8%)                   | 11%<br>(5.5-17%)                    | 56<br>(28-90)          | 5300<br>(3200-7900)        |

| Location | Year | Sex    | Age      | Prevalence of current drinkers | Prevalence of abstainers | Population average of standard drinks daily | Percent of total attributable deaths | Percent of total attributable DALYs | Attributable deaths   | Attributable DALYs        |
|----------|------|--------|----------|--------------------------------|--------------------------|---------------------------------------------|--------------------------------------|-------------------------------------|-----------------------|---------------------------|
| Poland   | 2016 | Male   | 20 to 24 | 93%<br>(88-97%)                | 6.6%<br>(3-12%)          | 2.9<br>(1.9-4.3)                            | 11%<br>(7-15%)                       | 18%<br>(10-26%)                     | 190<br>(110-300)      | 17000<br>(11000-24000)    |
| Poland   | 2016 | Male   | 25 to 29 | 95%<br>(90-98%)                | 5.4%<br>(2.4-10%)        | 3.6<br>(2.4-5.3)                            | 13%<br>(9.3-17%)                     | 22%<br>(15-30%)                     | 310<br>(210-430)      | 26000<br>(19000-35000)    |
| Poland   | 2016 | Male   | 30 to 34 | 95%<br>(90-98%)                | 4.6%<br>(1.9-9.6%)       | 3.9<br>(2.6-5.6)                            | 15%<br>(11-19%)                      | 25%<br>(19-33%)                     | 530<br>(390-720)      | 40000<br>(31000-51000)    |
| Poland   | 2016 | Male   | 35 to 39 | 96%<br>(92-98%)                | 4.2%<br>(1.7-8.5%)       | 3.7<br>(2.3-5.2)                            | 16%<br>(12-20%)                      | 26%<br>(20-33%)                     | 800<br>(590-1000)     | 51000<br>(39000-64000)    |
| Poland   | 2016 | Male   | 40 to 44 | 96%<br>(92-99%)                | 3.7%<br>(1.5-7.7%)       | 4.5<br>(2.9-6.3)                            | 18%<br>(14-23%)                      | 28%<br>(22-34%)                     | 1200<br>(900-1500)    | 64000<br>(49000-81000)    |
| Poland   | 2016 | Male   | 45 to 49 | 97%<br>(94-99%)                | 3%<br>(1.2-6.3%)         | 6.3<br>(4-8.9)                              | 21%<br>(16-25%)                      | 30%<br>(22-36%)                     | 1700<br>(1300-2200)   | 79000<br>(60000-98000)    |
| Poland   | 2016 | Male   | 50 to 54 | 97%<br>(94-98%)                | 3.3%<br>(1.7-5.9%)       | 7.2<br>(4.8-9.7)                            | 21%<br>(16-25%)                      | 28%<br>(22-33%)                     | 2700<br>(2000-3300)   | 110000<br>(83000-130000)  |
| Poland   | 2016 | Male   | 55 to 59 | 96%<br>(94-98%)                | 4.1%<br>(2.4-6.5%)       | 7.5<br>(5.2-10)                             | 19%<br>(15-23%)                      | 24%<br>(20-29%)                     | 4400<br>(3400-5400)   | 150000<br>(120000-180000) |
| Poland   | 2016 | Male   | 60 to 64 | 96%<br>(93-97%)                | 4.3%<br>(2.7-6.7%)       | 7.4<br>(5-10)                               | 16%<br>(12-20%)                      | 20%<br>(15-25%)                     | 4900<br>(3600-6200)   | 140000<br>(110000-180000) |
| Poland   | 2016 | Male   | 65 to 69 | 95%<br>(93-97%)                | 4.6%<br>(2.8-6.9%)       | 6.6<br>(4.8-8.6)                            | 16%<br>(9.4-17%)                     | 16%<br>(11-21%)                     | 4200<br>(2900-5500)   | 100000<br>(72000-130000)  |
| Poland   | 2016 | Male   | 70 to 74 | 95%<br>(92-97%)                | 5.2%<br>(3.4-8.1%)       | 5.6<br>(3.8-7.8)                            | 10%<br>(5.6-14%)                     | 12%<br>(6.5-17%)                    | 2300<br>(1200-3300)   | 46000<br>(25000-65000)    |
| Poland   | 2016 | Male   | 75 to 79 | 94%<br>(90-97%)                | 6%<br>(3.5-9.9%)         | 4.7<br>(3-6.9)                              | 7.3%<br>(2.8-12%)                    | 8.5%<br>(2.8-14%)                   | 2100<br>(680-3600)    | 33000<br>(13000-55000)    |
| Poland   | 2016 | Male   | 80 to 84 | 93%<br>(88-96%)                | 6.9%<br>(3.8-12%)        | 4<br>(2.6-5.7)                              | 5.2%<br>(0.91-10%)                   | 5.8%<br>(0.56-12%)                  | 1600<br>(150-3200)    | 19000<br>(3200-36000)     |
| Poland   | 2016 | Male   | 85 to 89 | 92%<br>(87-96%)                | 7.7%<br>(4.3-13%)        | 3.5<br>(2.3-5)                              | 3.1%<br>(-0.75-8.2%)                 | 3.2%<br>(-1.5-9.5%)                 | 670<br>(-310-2000)    | 6100<br>(-1500-16000)     |
| Poland   | 2016 | Male   | 90 to 94 | 92%<br>(87-96%)                | 7.8%<br>(4.2-13%)        | 3.1<br>(1.9-4.7)                            | 1.2%<br>(-2.5-6.8%)                  | 0.88%<br>(-3.8-7.6%)                | 89<br>(-390-790)      | 790<br>(-1600-4400)       |
| Poland   | 2016 | Male   | 95 plus  | 92%<br>(85-97%)                | 8%<br>(3.4-15%)          | 2.6<br>(1.4-4.4)                            | 0.0045%<br>(-3.9-5.7%)               | -0.7%<br>(-5.6-6.3%)                | -13<br>(-110-120)     | 0.29<br>(-310-460)        |
| Romania  | 1990 | Female | All Ages | 64%<br>(55-71%)                | 36%<br>(29-45%)          | 2.6<br>(2.1-3.2)                            | 8.4%<br>(3.3-14%)                    | 12%<br>(3.6-22%)                    | 15000<br>(4200-26000) | 330000<br>(130000-530000) |
| Romania  | 1990 | Female | 15 to 19 | 65%<br>(46-80%)                | 35%<br>(20-54%)          | 2.3<br>(1.4-3.4)                            | 3.7%<br>(1.4-6.6%)                   | 8.3%<br>(1.8-16%)                   | 37<br>(8.1-70)        | 3800<br>(1400-6800)       |
| Romania  | 1990 | Female | 20 to 24 | 73%<br>(56-85%)                | 27%<br>(15-44%)          | 3<br>(1.9-4.3)                              | 5.3%<br>(2.6-8.4%)                   | 9.5%<br>(2.8-17%)                   | 54<br>(15-97)         | 6000<br>(2900-9600)       |
| Romania  | 1990 | Female | 25 to 29 | 74%<br>(57-86%)                | 26%<br>(14-43%)          | 2.9<br>(1.9-4.2)                            | 5.7%<br>(3.1-8.5%)                   | 10%<br>(3.9-17%)                    | 54<br>(20-90)         | 5300<br>(2900-7800)       |
| Romania  | 1990 | Female | 30 to 34 | 74%<br>(57-86%)                | 26%<br>(14-43%)          | 3<br>(1.9-4.4)                              | 6.2%<br>(3.5-9%)                     | 11%<br>(5.1-17%)                    | 110<br>(49-170)       | 8600<br>(4800-13000)      |
| Romania  | 1990 | Female | 35 to 39 | 75%<br>(59-86%)                | 25%<br>(14-41%)          | 3.3<br>(2.1-4.8)                            | 7.3%<br>(4.1-11%)                    | 13%<br>(6.8-20%)                    | 180<br>(93-280)       | 12000<br>(6700-18000)     |

| Location | Year | Sex    | Age      | Prevalence of current drinkers | Prevalence of abstainers | Population average of standard drinks daily | Percent of total attributable deaths | Percent of total attributable DALYs | Attributable deaths   | Attributable DALYs         |
|----------|------|--------|----------|--------------------------------|--------------------------|---------------------------------------------|--------------------------------------|-------------------------------------|-----------------------|----------------------------|
| Romania  | 1990 | Female | 40 to 44 | 74%<br>(58-86%)                | 26%<br>(14-42%)          | 3.6<br>(2.4-5.1)                            | 8.9%<br>(4.9-13%)                    | 16%<br>(8.7-23%)                    | 270<br>(150-400)      | 15000<br>(8700-22000)      |
| Romania  | 1990 | Female | 45 to 49 | 73%<br>(52-86%)                | 27%<br>(14-48%)          | 3.9<br>(2.6-5.7)                            | 10%<br>(5.6-15%)                     | 17%<br>(9.5-25%)                    | 370<br>(200-540)      | 17000<br>(9800-26000)      |
| Romania  | 1990 | Female | 50 to 54 | 70%<br>(52-84%)                | 30%<br>(16-48%)          | 4<br>(2.7-5.7)                              | 11%<br>(6.1-17%)                     | 17%<br>(9.4-26%)                    | 710<br>(390-1000)     | 29000<br>(16000-43000)     |
| Romania  | 1990 | Female | 55 to 59 | 68%<br>(49-83%)                | 32%<br>(17-51%)          | 4<br>(2.7-5.8)                              | 11%<br>(5.6-18%)                     | 17%<br>(8.4-26%)                    | 960<br>(480-1500)     | 33000<br>(16000-51000)     |
| Romania  | 1990 | Female | 60 to 64 | 65%<br>(45-82%)                | 35%<br>(18-55%)          | 4<br>(2.6-5.9)                              | 11%<br>(4.9-19%)                     | 16%<br>(6.9-26%)                    | 1400<br>(590-2200)    | 40000<br>(17000-65000)     |
| Romania  | 1990 | Female | 65 to 69 | 61%<br>(42-79%)                | 39%<br>(21-58%)          | 4<br>(2.6-5.8)                              | 12%<br>(4.4-21%)                     | 16%<br>(6.1-27%)                    | 2000<br>(730-3300)    | 47000<br>(17000-79000)     |
| Romania  | 1990 | Female | 70 to 74 | 56%<br>(38-73%)                | 44%<br>(27-62%)          | 3.8<br>(2.3-5.9)                            | 12%<br>(3.4-22%)                     | 15%<br>(4.2-28%)                    | 1700<br>(470-3100)    | 32000<br>(9000-60000)      |
| Romania  | 1990 | Female | 75 to 79 | 49%<br>(33-68%)                | 51%<br>(32-67%)          | 3.3<br>(1.9-5.3)                            | 10%<br>(1.9-21%)                     | 12%<br>(2.4-25%)                    | 2800<br>(530-5700)    | 40000<br>(7800-82000)      |
| Romania  | 1990 | Female | 80 to 84 | 45%<br>(29-63%)                | 55%<br>(37-71%)          | 2.9<br>(1.7-4.5)                            | 9.3%<br>(1.4-20%)                    | 11%<br>(1.6-23%)                    | 2400<br>(340-5000)    | 25000<br>(3900-54000)      |
| Romania  | 1990 | Female | 85 to 89 | 43%<br>(28-59%)                | 57%<br>(41-72%)          | 2.8<br>(1.6-4.5)                            | 8.1%<br>(0.85-18%)                   | 9.4%<br>(0.88-21%)                  | 1100<br>(110-2500)    | 8400<br>(870-19000)        |
| Romania  | 1990 | Female | 90 to 94 | 45%<br>(30-61%)                | 55%<br>(39-70%)          | 2.9<br>(1.5-4.7)                            | 7.7%<br>(0.2-18%)                    | 8.9%<br>(0.023-22%)                 | 440<br>(1.2-1100)     | 2300<br>(58-5500)          |
| Romania  | 1990 | Female | 95 plus  | 48%<br>(29-68%)                | 52%<br>(32-71%)          | 3<br>(1.4-5.4)                              | 7.6%<br>(-0.56-20%)                  | 8.7%<br>(-0.87-23%)                 | 130<br>(-13-350)      | 450<br>(-32-1200)          |
| Romania  | 1990 | Male   | All Ages | 70%<br>(60-79%)                | 30%<br>(21-40%)          | 8.1<br>(6.9-9.5)                            | 16%<br>(6.8-24%)                     | 21%<br>(6.8-32%)                    | 28000<br>(9000-42000) | 800000<br>(340000-1200000) |
| Romania  | 1990 | Male   | 15 to 19 | 64%<br>(43-83%)                | 36%<br>(17-57%)          | 4.2<br>(2.5-6.4)                            | 9.1%<br>(4.1-16%)                    | 16%<br>(6-29%)                      | 140<br>(51-260)       | 12000<br>(5300-20000)      |
| Romania  | 1990 | Male   | 20 to 24 | 74%<br>(55-88%)                | 26%<br>(12-45%)          | 7.4<br>(4.8-10)                             | 17%<br>(8.7-27%)                     | 27%<br>(12-43%)                     | 340<br>(160-550)      | 27000<br>(14000-42000)     |
| Romania  | 1990 | Male   | 25 to 29 | 77%<br>(60-91%)                | 23%<br>(9.5-40%)         | 8.8<br>(6-12)                               | 20%<br>(11-30%)                      | 31%<br>(15-47%)                     | 360<br>(180-540)      | 26000<br>(14000-38000)     |
| Romania  | 1990 | Male   | 30 to 34 | 79%<br>(61-92%)                | 21%<br>(7.8-39%)         | 10<br>(7.1-14)                              | 22%<br>(12-31%)                      | 32%<br>(17-47%)                     | 690<br>(360-1000)     | 44000<br>(25000-62000)     |
| Romania  | 1990 | Male   | 35 to 39 | 81%<br>(62-92%)                | 19%<br>(7.6-38%)         | 12<br>(8.3-17)                              | 23%<br>(13-32%)                      | 33%<br>(18-46%)                     | 1000<br>(580-1500)    | 59000<br>(34000-82000)     |
| Romania  | 1990 | Male   | 40 to 44 | 82%<br>(64-92%)                | 18%<br>(7.6-36%)         | 14<br>(9.7-18)                              | 24%<br>(13-33%)                      | 32%<br>(18-45%)                     | 1300<br>(710-1800)    | 64000<br>(36000-88000)     |
| Romania  | 1990 | Male   | 45 to 49 | 81%<br>(62-92%)                | 19%<br>(7.8-38%)         | 14<br>(10-20)                               | 23%<br>(13-32%)                      | 30%<br>(16-42%)                     | 1500<br>(790-2100)    | 65000<br>(35000-91000)     |
| Romania  | 1990 | Male   | 50 to 54 | 80%<br>(62-92%)                | 20%<br>(8.4-38%)         | 15<br>(10-20)                               | 22%<br>(11-32%)                      | 27%<br>(13-39%)                     | 2400<br>(1200-3400)   | 91000<br>(45000-130000)    |



| Location | Year | Sex    | Age      | Prevalence of current drinkers | Prevalence of abstainers | Population average of standard drinks daily | Percent of total attributable deaths | Percent of total attributable DALYs | Attributable deaths   | Attributable DALYs        |
|----------|------|--------|----------|--------------------------------|--------------------------|---------------------------------------------|--------------------------------------|-------------------------------------|-----------------------|---------------------------|
| Romania  | 1990 | Male   | 55 to 59 | 79%<br>(60-92%)                | 21%<br>(8.2-40%)         | 14<br>(10-19)                               | 21%<br>(8.9-30%)                     | 25%<br>(11-36%)                     | 2900<br>(1300-4300)   | 98000<br>(43000-140000)   |
| Romania  | 1990 | Male   | 60 to 64 | 78%<br>(57-92%)                | 22%<br>(8.3-43%)         | 14<br>(9.2-19)                              | 19%<br>(6.6-29%)                     | 23%<br>(8.3-35%)                    | 3400<br>(1200-5100)   | 97000<br>(34000-150000)   |
| Romania  | 1990 | Male   | 65 to 69 | 76%<br>(55-91%)                | 24%<br>(8.9-45%)         | 12<br>(8.4-17)                              | 19%<br>(5.4-29%)                     | 22%<br>(6.7-35%)                    | 3500<br>(1100-5500)   | 83000<br>(25000-130000)   |
| Romania  | 1990 | Male   | 70 to 74 | 74%<br>(54-88%)                | 26%<br>(12-46%)          | 11<br>(7-15)                                | 18%<br>(4.6-28%)                     | 20%<br>(5.4-33%)                    | 2300<br>(600-3600)    | 43000<br>(11000-69000)    |
| Romania  | 1990 | Male   | 75 to 79 | 72%<br>(52-87%)                | 28%<br>(13-48%)          | 9.1<br>(5.6-14)                             | 16%<br>(3.2-27%)                     | 18%<br>(3.5-31%)                    | 3300<br>(640-5700)    | 49000<br>(9400-84000)     |
| Romania  | 1990 | Male   | 80 to 84 | 71%<br>(48-86%)                | 29%<br>(14-52%)          | 8.2<br>(5-12)                               | 15%<br>(2.3-26%)                     | 17%<br>(2.4-30%)                    | 2800<br>(390-5000)    | 30000<br>(4500-53000)     |
| Romania  | 1990 | Male   | 85 to 89 | 69%<br>(49-85%)                | 31%<br>(15-51%)          | 7.5<br>(4.6-11)                             | 13%<br>(1.7-24%)                     | 15%<br>(1.7-27%)                    | 1200<br>(130-2200)    | 9200<br>(1200-17000)      |
| Romania  | 1990 | Male   | 90 to 94 | 69%<br>(49-87%)                | 31%<br>(13-51%)          | 6.8<br>(4-11)                               | 12%<br>(1.9-22%)                     | 13%<br>(1.9-26%)                    | 370<br>(52-700)       | 2000<br>(320-3700)        |
| Romania  | 1990 | Male   | 95 plus  | 69%<br>(43-89%)                | 31%<br>(11-57%)          | 6.1<br>(2.9-11)                             | 10%<br>(1.3-22%)                     | 12%<br>(0.95-24%)                   | 76<br>(6.3-160)       | 280<br>(34-560)           |
| Romania  | 1995 | Female | All Ages | 65%<br>(57-72%)                | 35%<br>(28-43%)          | 2.5<br>(2-3)                                | 8.7%<br>(3.5-14%)                    | 12%<br>(3.6-22%)                    | 15000<br>(4500-27000) | 340000<br>(130000-540000) |
| Romania  | 1995 | Female | 15 to 19 | 65%<br>(47-80%)                | 35%<br>(20-53%)          | 2.1<br>(1.3-3.1)                            | 3.4%<br>(1.2-6.1%)                   | 7.9%<br>(1.4-15%)                   | 33<br>(5.9-65)        | 3500<br>(1300-6200)       |
| Romania  | 1995 | Female | 20 to 24 | 73%<br>(57-85%)                | 27%<br>(15-43%)          | 2.7<br>(1.7-3.9)                            | 5.1%<br>(2.4-8.2%)                   | 9.6%<br>(2.1-18%)                   | 48<br>(11-87)         | 5400<br>(2500-8800)       |
| Romania  | 1995 | Female | 25 to 29 | 74%<br>(58-86%)                | 26%<br>(14-42%)          | 2.6<br>(1.7-3.9)                            | 5.3%<br>(2.8-8.2%)                   | 10%<br>(3.2-18%)                    | 61<br>(19-110)        | 6300<br>(3300-9700)       |
| Romania  | 1995 | Female | 30 to 34 | 75%<br>(57-87%)                | 25%<br>(13-43%)          | 2.8<br>(1.8-4)                              | 6%<br>(3.2-9%)                       | 11%<br>(4.7-18%)                    | 73<br>(30-120)        | 5900<br>(3100-8900)       |
| Romania  | 1995 | Female | 35 to 39 | 75%<br>(60-87%)                | 25%<br>(13-40%)          | 3<br>(1.9-4.4)                              | 7.5%<br>(4.1-11%)                    | 13%<br>(6.6-20%)                    | 190<br>(93-290)       | 12000<br>(6400-18000)     |
| Romania  | 1995 | Female | 40 to 44 | 74%<br>(59-86%)                | 26%<br>(14-41%)          | 3.3<br>(2.2-4.7)                            | 8.9%<br>(4.9-13%)                    | 15%<br>(8.1-22%)                    | 340<br>(180-500)      | 18000<br>(10000-27000)    |
| Romania  | 1995 | Female | 45 to 49 | 73%<br>(53-85%)                | 27%<br>(15-47%)          | 3.6<br>(2.3-5.1)                            | 10%<br>(5.7-15%)                     | 17%<br>(9.3-25%)                    | 460<br>(260-690)      | 21000<br>(12000-32000)    |
| Romania  | 1995 | Female | 50 to 54 | 71%<br>(53-84%)                | 29%<br>(16-47%)          | 3.7<br>(2.5-5.1)                            | 11%<br>(6.3-17%)                     | 17%<br>(9.4-26%)                    | 590<br>(320-880)      | 24000<br>(13000-35000)    |
| Romania  | 1995 | Female | 55 to 59 | 68%<br>(49-83%)                | 32%<br>(17-51%)          | 3.7<br>(2.4-5.3)                            | 11%<br>(5.5-18%)                     | 17%<br>(8.2-25%)                    | 1100<br>(530-1600)    | 36000<br>(18000-56000)    |
| Romania  | 1995 | Female | 60 to 64 | 65%<br>(46-82%)                | 35%<br>(18-54%)          | 3.7<br>(2.4-5.3)                            | 11%<br>(4.6-18%)                     | 16%<br>(6.6-25%)                    | 1400<br>(610-2300)    | 40000<br>(17000-66000)    |
| Romania  | 1995 | Female | 65 to 69 | 62%<br>(43-80%)                | 38%<br>(20-57%)          | 3.7<br>(2.4-5.2)                            | 12%<br>(4.1-20%)                     | 15%<br>(5.9-26%)                    | 2100<br>(800-3500)    | 49000<br>(19000-83000)    |
| Romania  | 1995 | Female | 70 to 74 | 57%<br>(38-73%)                | 43%<br>(27-62%)          | 3.5<br>(2.1-5.4)                            | 11%<br>(3.1-21%)                     | 14%<br>(4-26%)                      | 2700<br>(730-5000)    | 51000<br>(14000-95000)    |

| Location | Year | Sex    | Age      | Prevalence of current drinkers | Prevalence of abstainers | Population average of standard drinks daily | Percent of total attributable deaths | Percent of total attributable DALYs | Attributable deaths    | Attributable DALYs         |
|----------|------|--------|----------|--------------------------------|--------------------------|---------------------------------------------|--------------------------------------|-------------------------------------|------------------------|----------------------------|
| Romania  | 1995 | Female | 75 to 79 | 50%<br>(34-69%)                | 50%<br>(31-66%)          | 3.1<br>(1.8-4.9)                            | 9.9%<br>(1.8-20%)                    | 12%<br>(2.1-24%)                    | 1800<br>(310-3900)     | 27000<br>(4800-56000)      |
| Romania  | 1995 | Female | 80 to 84 | 46%<br>(30-64%)                | 54%<br>(36-70%)          | 2.7<br>(1.6-4.3)                            | 8.8%<br>(1.3-19%)                    | 10%<br>(1.2-22%)                    | 2200<br>(270-4700)     | 23000<br>(3200-50000)      |
| Romania  | 1995 | Female | 85 to 89 | 44%<br>(29-61%)                | 56%<br>(39-71%)          | 2.6<br>(1.4-4.1)                            | 7.5%<br>(0.59-17%)                   | 8.6%<br>(0.51-20%)                  | 1400<br>(84-3200)      | 11000<br>(900-25000)       |
| Romania  | 1995 | Female | 90 to 94 | 45%<br>(30-62%)                | 55%<br>(38-70%)          | 2.6<br>(1.5-4.3)                            | 6.7%<br>(-0.066-17%)                 | 7.9%<br>(-0.33-20%)                 | 460<br>(-20-1200)      | 2400<br>(-24-6100)         |
| Romania  | 1995 | Female | 95 plus  | 49%<br>(30-69%)                | 51%<br>(31-70%)          | 2.7<br>(1.3-5)                              | 6.6%<br>(-0.91-18%)                  | 7.7%<br>(-1.4-22%)                  | 130<br>(-23-360)       | 450<br>(-63-1200)          |
| Romania  | 1995 | Male   | All Ages | 71%<br>(60-80%)                | 29%<br>(20-40%)          | 7.8<br>(6.6-9.1)                            | 19%<br>(8.1-28%)                     | 22%<br>(7.9-34%)                    | 34000<br>(12000-52000) | 980000<br>(430000-1500000) |
| Romania  | 1995 | Male   | 15 to 19 | 65%<br>(44-84%)                | 35%<br>(16-56%)          | 3.9<br>(2.4-5.9)                            | 8.8%<br>(3.5-15%)                    | 15%<br>(5.4-27%)                    | 140<br>(50-260)        | 12000<br>(5000-20000)      |
| Romania  | 1995 | Male   | 20 to 24 | 74%<br>(53-89%)                | 26%<br>(11-47%)          | 6.8<br>(4.4-9.6)                            | 17%<br>(8.8-26%)                     | 26%<br>(12-42%)                     | 350<br>(160-560)       | 27000<br>(14000-42000)     |
| Romania  | 1995 | Male   | 25 to 29 | 77%<br>(59-90%)                | 23%<br>(9.8-41%)         | 8.1<br>(5.5-11)                             | 20%<br>(11-29%)                      | 30%<br>(16-45%)                     | 490<br>(250-750)       | 35000<br>(20000-51000)     |
| Romania  | 1995 | Male   | 30 to 34 | 79%<br>(60-92%)                | 21%<br>(8.1-40%)         | 9.6<br>(6.5-13)                             | 23%<br>(13-33%)                      | 33%<br>(18-48%)                     | 590<br>(320-850)       | 37000<br>(21000-52000)     |
| Romania  | 1995 | Male   | 35 to 39 | 81%<br>(62-92%)                | 19%<br>(7.7-38%)         | 11<br>(7.6-16)                              | 26%<br>(15-36%)                      | 34%<br>(19-47%)                     | 1300<br>(750-1800)     | 71000<br>(42000-98000)     |
| Romania  | 1995 | Male   | 40 to 44 | 82%<br>(64-93%)                | 18%<br>(7-36%)           | 12<br>(8.8-17)                              | 26%<br>(15-36%)                      | 34%<br>(19-46%)                     | 2000<br>(1100-2800)    | 98000<br>(55000-140000)    |
| Romania  | 1995 | Male   | 45 to 49 | 81%<br>(60-93%)                | 19%<br>(7.4-40%)         | 13<br>(9.1-18)                              | 25%<br>(14-35%)                      | 31%<br>(17-43%)                     | 2300<br>(1200-3200)    | 97000<br>(53000-140000)    |
| Romania  | 1995 | Male   | 50 to 54 | 81%<br>(62-92%)                | 19%<br>(8.3-38%)         | 13<br>(9.4-18)                              | 24%<br>(12-35%)                      | 29%<br>(14-41%)                     | 2400<br>(1200-3500)    | 91000<br>(45000-130000)    |
| Romania  | 1995 | Male   | 55 to 59 | 79%<br>(59-92%)                | 21%<br>(7.9-41%)         | 13<br>(9.3-18)                              | 23%<br>(9.7-33%)                     | 27%<br>(12-39%)                     | 3700<br>(1600-5400)    | 120000<br>(52000-180000)   |
| Romania  | 1995 | Male   | 60 to 64 | 78%<br>(56-92%)                | 22%<br>(8.1-44%)         | 13<br>(8.5-18)                              | 21%<br>(7.5-31%)                     | 24%<br>(9.1-37%)                    | 4200<br>(1500-6300)    | 120000<br>(42000-180000)   |
| Romania  | 1995 | Male   | 65 to 69 | 77%<br>(55-91%)                | 23%<br>(8.7-45%)         | 11<br>(7.8-15)                              | 20%<br>(6.1-31%)                     | 23%<br>(7.2-36%)                    | 4800<br>(1500-7500)    | 110000<br>(34000-170000)   |
| Romania  | 1995 | Male   | 70 to 74 | 75%<br>(55-89%)                | 25%<br>(11-45%)          | 9.8<br>(6.6-14)                             | 19%<br>(5.1-30%)                     | 22%<br>(5.8-34%)                    | 4500<br>(1200-7200)    | 83000<br>(23000-140000)    |
| Romania  | 1995 | Male   | 75 to 79 | 73%<br>(52-88%)                | 27%<br>(12-48%)          | 8.5<br>(5.3-12)                             | 16%<br>(3.7-28%)                     | 19%<br>(4.1-32%)                    | 2400<br>(530-4000)     | 34000<br>(7900-59000)      |
| Romania  | 1995 | Male   | 80 to 84 | 71%<br>(49-87%)                | 29%<br>(13-51%)          | 7.6<br>(4.7-11)                             | 16%<br>(2.7-28%)                     | 17%<br>(2.9-31%)                    | 2600<br>(450-4700)     | 28000<br>(5000-51000)      |
| Romania  | 1995 | Male   | 85 to 89 | 70%<br>(50-85%)                | 30%<br>(15-50%)          | 6.8<br>(4.3-10)                             | 13%<br>(2.1-24%)                     | 15%<br>(2.2-28%)                    | 1600<br>(240-3000)     | 13000<br>(2100-23000)      |

| Location | Year | Sex    | Age      | Prevalence of current drinkers | Prevalence of abstainers | Population average of standard drinks daily | Percent of total attributable deaths | Percent of total attributable DALYs | Attributable deaths    | Attributable DALYs         |
|----------|------|--------|----------|--------------------------------|--------------------------|---------------------------------------------|--------------------------------------|-------------------------------------|------------------------|----------------------------|
| Romania  | 1995 | Male   | 90 to 94 | 69%<br>(50-87%)                | 31%<br>(13-50%)          | 6.2<br>(3.7-9.7)                            | 12%<br>(2.3-22%)                     | 13%<br>(2.4-26%)                    | 480<br>(83-920)        | 2600<br>(520-4900)         |
| Romania  | 1995 | Male   | 95 plus  | 69%<br>(45-89%)                | 31%<br>(11-55%)          | 5.5<br>(2.7-9.7)                            | 9.9%<br>(1.1-21%)                    | 11%<br>(0.78-24%)                   | 95<br>(6.5-210)        | 350<br>(37-720)            |
| Romania  | 2000 | Female | All Ages | 64%<br>(56-72%)                | 36%<br>(28-44%)          | 2.3<br>(1.9-2.8)                            | 7.8%<br>(3.1-13%)                    | 11%<br>(3.1-20%)                    | 13000<br>(3700-24000)  | 290000<br>(110000-480000)  |
| Romania  | 2000 | Female | 15 to 19 | 64%<br>(45-80%)                | 36%<br>(20-55%)          | 1.9<br>(1.1-2.8)                            | 3%<br>(1.5-4%)                       | 7.3%<br>(1.1-14%)                   | 24<br>(3.3-46)         | 2600<br>(900-4600)         |
| Romania  | 2000 | Female | 20 to 24 | 72%<br>(56-84%)                | 28%<br>(16-44%)          | 2.4<br>(1.5-3.5)                            | 4.5%<br>(2.2-7.2%)                   | 8.7%<br>(1.6-17%)                   | 35<br>(6.1-66)         | 4400<br>(2100-7000)        |
| Romania  | 2000 | Female | 25 to 29 | 73%<br>(57-86%)                | 27%<br>(14-43%)          | 2.4<br>(1.6-3.4)                            | 4.7%<br>(2.4-7.3%)                   | 9.2%<br>(2.5-17%)                   | 43<br>(12-78)          | 4800<br>(2500-7400)        |
| Romania  | 2000 | Female | 30 to 34 | 74%<br>(57-86%)                | 26%<br>(14-43%)          | 2.5<br>(1.6-3.6)                            | 5.1%<br>(2.7-7.8%)                   | 10%<br>(3.9-17%)                    | 72<br>(27-120)         | 6300<br>(3300-9500)        |
| Romania  | 2000 | Female | 35 to 39 | 74%<br>(59-87%)                | 26%<br>(13-41%)          | 2.7<br>(1.7-4)                              | 6.3%<br>(3.3-9.6%)                   | 12%<br>(5.7-19%)                    | 100<br>(48-160)        | 6800<br>(3400-10000)       |
| Romania  | 2000 | Female | 40 to 44 | 74%<br>(58-86%)                | 26%<br>(14-42%)          | 2.9<br>(2-4.2)                              | 7.7%<br>(4.1-12%)                    | 14%<br>(7.3-21%)                    | 260<br>(130-390)       | 14000<br>(7500-21000)      |
| Romania  | 2000 | Female | 45 to 49 | 72%<br>(52-85%)                | 28%<br>(15-48%)          | 3.2<br>(2.1-4.6)                            | 9%<br>(5.1-14%)                      | 15%<br>(8.2-23%)                    | 440<br>(240-680)       | 21000<br>(12000-32000)     |
| Romania  | 2000 | Female | 50 to 54 | 70%<br>(51-84%)                | 30%<br>(16-49%)          | 3.3<br>(2.2-4.6)                            | 10%<br>(5.3-15%)                     | 16%<br>(8.4-24%)                    | 570<br>(300-860)       | 23000<br>(12000-35000)     |
| Romania  | 2000 | Female | 55 to 59 | 68%<br>(49-83%)                | 32%<br>(17-51%)          | 3.3<br>(2.1-4.8)                            | 10%<br>(4.9-16%)                     | 15%<br>(7.6-24%)                    | 680<br>(330-1100)      | 23000<br>(11000-37000)     |
| Romania  | 2000 | Female | 60 to 64 | 65%<br>(45-82%)                | 35%<br>(18-55%)          | 3.3<br>(2.1-4.8)                            | 9.9%<br>(4-16%)                      | 14%<br>(5.9-23%)                    | 1200<br>(500-2000)     | 34000<br>(14000-57000)     |
| Romania  | 2000 | Female | 65 to 69 | 61%<br>(42-79%)                | 39%<br>(21-58%)          | 3.3<br>(2.1-4.7)                            | 10%<br>(3.6-18%)                     | 14%<br>(5.5-24%)                    | 1700<br>(650-2900)     | 41000<br>(15000-69000)     |
| Romania  | 2000 | Female | 70 to 74 | 56%<br>(37-72%)                | 44%<br>(28-63%)          | 3.1<br>(1.9-4.8)                            | 10%<br>(2.6-19%)                     | 13%<br>(3.6-24%)                    | 2300<br>(640-4400)     | 45000<br>(12000-84000)     |
| Romania  | 2000 | Female | 75 to 79 | 49%<br>(33-68%)                | 51%<br>(32-67%)          | 2.7<br>(1.6-4.3)                            | 8.7%<br>(1.5-18%)                    | 11%<br>(1.8-22%)                    | 2400<br>(430-5100)     | 35000<br>(6500-74000)      |
| Romania  | 2000 | Female | 80 to 84 | 44%<br>(28-62%)                | 56%<br>(38-72%)          | 2.4<br>(1.4-3.7)                            | 7.4%<br>(0.99-16%)                   | 8.7%<br>(1.1-19%)                   | 1600<br>(190-3400)     | 17000<br>(2300-36000)      |
| Romania  | 2000 | Female | 85 to 89 | 42%<br>(28-58%)                | 58%<br>(42-72%)          | 2.3<br>(1.3-3.6)                            | 6.5%<br>(0.14-15%)                   | 7.4%<br>(-0.00032-17%)              | 1100<br>(-0.057-2600)  | 8400<br>(180-19000)        |
| Romania  | 2000 | Female | 90 to 94 | 44%<br>(29-61%)                | 56%<br>(39-71%)          | 2.3<br>(1.3-3.8)                            | 5.6%<br>(-0.63-14%)                  | 6.5%<br>(-1-18%)                    | 480<br>(-75-1300)      | 2600<br>(-280-6900)        |
| Romania  | 2000 | Female | 95 plus  | 48%<br>(29-68%)                | 52%<br>(32-71%)          | 2.4<br>(1.1-4.4)                            | 5.4%<br>(-1.7-16%)                   | 6.2%<br>(-2.3-19%)                  | 130<br>(-49-400)       | 450<br>(-150-1400)         |
| Romania  | 2000 | Male   | All Ages | 71%<br>(61-80%)                | 29%<br>(20-39%)          | 7.3<br>(6.2-8.4)                            | 18%<br>(8.5-27%)                     | 22%<br>(8.7-33%)                    | 30000<br>(12000-46000) | 850000<br>(400000-1200000) |

| Location | Year | Sex    | Age      | Prevalence of current drinkers | Prevalence of abstainers | Population average of standard drinks daily | Percent of total attributable deaths | Percent of total attributable DALYs | Attributable deaths   | Attributable DALYs       |
|----------|------|--------|----------|--------------------------------|--------------------------|---------------------------------------------|--------------------------------------|-------------------------------------|-----------------------|--------------------------|
| Romania  | 2000 | Male   | 15 to 19 | 63%<br>(42-83%)                | 37%<br>(17-58%)          | 3.5<br>(2.1-5.2)                            | 7.5%<br>(3.1-13%)                    | 14%<br>(4.4-25%)                    | 88<br>(29-160)        | 7800<br>(3400-13000)     |
| Romania  | 2000 | Male   | 20 to 24 | 73%<br>(53-88%)                | 27%<br>(12-47%)          | 6.1<br>(3.9-8.6)                            | 15%<br>(8.2-23%)                     | 25%<br>(12-40%)                     | 250<br>(120-410)      | 20000<br>(11000-31000)   |
| Romania  | 2000 | Male   | 25 to 29 | 76%<br>(59-90%)                | 24%<br>(9.9-41%)         | 7.3<br>(5-10)                               | 18%<br>(10-26%)                      | 29%<br>(16-43%)                     | 350<br>(190-530)      | 26000<br>(15000-38000)   |
| Romania  | 2000 | Male   | 30 to 34 | 79%<br>(60-92%)                | 21%<br>(8.2-40%)         | 8.7<br>(5.9-12)                             | 21%<br>(13-29%)                      | 32%<br>(18-45%)                     | 570<br>(330-810)      | 37000<br>(23000-51000)   |
| Romania  | 2000 | Male   | 35 to 39 | 80%<br>(62-92%)                | 20%<br>(7.9-38%)         | 10<br>(6.8-14)                              | 24%<br>(15-33%)                      | 34%<br>(20-46%)                     | 730<br>(440-1000)     | 41000<br>(25000-56000)   |
| Romania  | 2000 | Male   | 40 to 44 | 81%<br>(63-93%)                | 19%<br>(7.5-37%)         | 11<br>(7.9-15)                              | 26%<br>(15-35%)                      | 34%<br>(20-45%)                     | 1600<br>(930-2100)    | 77000<br>(46000-100000)  |
| Romania  | 2000 | Male   | 45 to 49 | 81%<br>(60-92%)                | 19%<br>(7.6-40%)         | 12<br>(8.3-16)                              | 25%<br>(14-34%)                      | 32%<br>(19-43%)                     | 2200<br>(1300-3100)   | 97000<br>(56000-130000)  |
| Romania  | 2000 | Male   | 50 to 54 | 80%<br>(60-92%)                | 20%<br>(8.5-40%)         | 12<br>(8.4-16)                              | 24%<br>(13-33%)                      | 29%<br>(16-41%)                     | 2400<br>(1300-3300)   | 91000<br>(47000-130000)  |
| Romania  | 2000 | Male   | 55 to 59 | 79%<br>(59-92%)                | 21%<br>(7.9-41%)         | 12<br>(8.3-16)                              | 22%<br>(10-32%)                      | 27%<br>(13-39%)                     | 2500<br>(1200-3600)   | 82000<br>(38000-120000)  |
| Romania  | 2000 | Male   | 60 to 64 | 77%<br>(55-92%)                | 23%<br>(8.2-45%)         | 11<br>(7.6-16)                              | 21%<br>(8.4-31%)                     | 24%<br>(10-36%)                     | 3600<br>(1500-5400)   | 100000<br>(42000-150000) |
| Romania  | 2000 | Male   | 65 to 69 | 76%<br>(54-91%)                | 24%<br>(8.7-46%)         | 10<br>(6.9-14)                              | 20%<br>(6.9-30%)                     | 23%<br>(8.3-36%)                    | 4200<br>(1500-6500)   | 98000<br>(35000-150000)  |
| Romania  | 2000 | Male   | 70 to 74 | 74%<br>(55-89%)                | 26%<br>(11-45%)          | 8.8<br>(5.8-13)                             | 18%<br>(6.1-29%)                     | 21%<br>(7.2-34%)                    | 4500<br>(1500-7100)   | 85000<br>(27000-130000)  |
| Romania  | 2000 | Male   | 75 to 79 | 73%<br>(52-88%)                | 27%<br>(12-48%)          | 7.6<br>(4.7-11)                             | 16%<br>(4.4-27%)                     | 19%<br>(5-31%)                      | 3500<br>(950-5900)    | 52000<br>(14000-88000)   |
| Romania  | 2000 | Male   | 80 to 84 | 71%<br>(50-87%)                | 29%<br>(13-50%)          | 6.8<br>(4.2-9.9)                            | 15%<br>(3.8-25%)                     | 17%<br>(4.3-29%)                    | 2000<br>(490-3400)    | 22000<br>(5600-37000)    |
| Romania  | 2000 | Male   | 85 to 89 | 69%<br>(49-86%)                | 31%<br>(14-51%)          | 6.1<br>(3.8-9.1)                            | 13%<br>(2.9-24%)                     | 15%<br>(3.2-28%)                    | 1300<br>(270-2300)    | 9700<br>(2100-17000)     |
| Romania  | 2000 | Male   | 90 to 94 | 69%<br>(49-87%)                | 31%<br>(13-51%)          | 5.6<br>(3.2-8.9)                            | 11%<br>(2.2-21%)                     | 13%<br>(2.2-25%)                    | 520<br>(89-1000)      | 2800<br>(540-5500)       |
| Romania  | 2000 | Male   | 95 plus  | 69%<br>(44-89%)                | 31%<br>(11-56%)          | 5<br>(2.3-8.9)                              | 9.2%<br>(0.49-20%)                   | 10%<br>(-0.044-23%)                 | 110<br>(-0.47-240)    | 390<br>(21-850)          |
| Romania  | 2005 | Female | All Ages | 61%<br>(54-68%)                | 39%<br>(32-46%)          | 2.1<br>(1.7-2.5)                            | 6.9%<br>(2.6-11%)                    | 9.4%<br>(2.7-17%)                   | 12000<br>(3400-21000) | 250000<br>(98000-410000) |
| Romania  | 2005 | Female | 15 to 19 | 61%<br>(43-77%)                | 39%<br>(23-57%)          | 1.7<br>(1-2.5)                              | 2.8%<br>(0.96-5.1%)                  | 6.5%<br>(0.79-13%)                  | 21<br>(2.6-42)        | 2400<br>(830-4200)       |
| Romania  | 2005 | Female | 20 to 24 | 70%<br>(54-83%)                | 30%<br>(17-46%)          | 2.2<br>(1.4-3.2)                            | 4.2%<br>(2-6.6%)                     | 8.2%<br>(1.2-16%)                   | 24<br>(3.6-47)        | 3400<br>(1700-5300)      |
| Romania  | 2005 | Female | 25 to 29 | 72%<br>(58-85%)                | 28%<br>(15-42%)          | 2.2<br>(1.5-3.1)                            | 4.3%<br>(2.3-6.6%)                   | 8.6%<br>(1.8-16%)                   | 34<br>(6.7-62)        | 4200<br>(2200-6400)      |
| Romania  | 2005 | Female | 30 to 34 | 73%<br>(58-85%)                | 27%<br>(15-42%)          | 2.3<br>(1.5-3.3)                            | 4.5%<br>(2.3-7%)                     | 9.4%<br>(3.1-16%)                   | 53<br>(17-91)         | 5000<br>(2400-7800)      |

| Location | Year | Sex    | Age      | Prevalence of current drinkers | Prevalence of abstainers | Population average of standard drinks daily | Percent of total attributable deaths | Percent of total attributable DALYs | Attributable deaths    | Attributable DALYs         |
|----------|------|--------|----------|--------------------------------|--------------------------|---------------------------------------------|--------------------------------------|-------------------------------------|------------------------|----------------------------|
| Romania  | 2005 | Female | 35 to 39 | 73%<br>(58-85%)                | 27%<br>(15-42%)          | 2.4<br>(1.6-3.6)                            | 5.3%<br>(2.7-8.3%)                   | 11%<br>(4.6-17%)                    | 100<br>(44-170)        | 7300<br>(3600-11000)       |
| Romania  | 2005 | Female | 40 to 44 | 72%<br>(57-84%)                | 28%<br>(16-43%)          | 2.7<br>(1.8-3.8)                            | 6.7%<br>(3.5-10%)                    | 13%<br>(6.4-19%)                    | 150<br>(75-230)        | 8300<br>(4400-13000)       |
| Romania  | 2005 | Female | 45 to 49 | 71%<br>(53-84%)                | 29%<br>(16-47%)          | 2.9<br>(2-4.2)                              | 8%<br>(4.3-12%)                      | 14%<br>(7.5-21%)                    | 360<br>(190-540)       | 17000<br>(8800-25000)      |
| Romania  | 2005 | Female | 50 to 54 | 68%<br>(50-81%)                | 32%<br>(19-50%)          | 2.9<br>(2-4)                                | 8.8%<br>(4.5-13%)                    | 14%<br>(7.3-21%)                    | 550<br>(280-830)       | 22000<br>(12000-34000)     |
| Romania  | 2005 | Female | 55 to 59 | 64%<br>(45-79%)                | 36%<br>(21-55%)          | 2.8<br>(1.9-4.1)                            | 8.9%<br>(4.2-14%)                    | 14%<br>(6.7-21%)                    | 660<br>(330-1000)      | 23000<br>(11000-36000)     |
| Romania  | 2005 | Female | 60 to 64 | 61%<br>(44-78%)                | 39%<br>(22-56%)          | 2.9<br>(1.9-4.2)                            | 8.8%<br>(3.5-14%)                    | 13%<br>(5.4-20%)                    | 750<br>(310-1200)      | 22000<br>(8900-36000)      |
| Romania  | 2005 | Female | 65 to 69 | 54%<br>(37-73%)                | 46%<br>(27-63%)          | 2.6<br>(1.7-3.8)                            | 8.8%<br>(3-15%)                      | 12%<br>(4.6-20%)                    | 1400<br>(530-2300)     | 34000<br>(12000-57000)     |
| Romania  | 2005 | Female | 70 to 74 | 46%<br>(30-63%)                | 54%<br>(37-70%)          | 2.3<br>(1.4-3.6)                            | 8.2%<br>(2.2-15%)                    | 11%<br>(3-20%)                      | 1800<br>(500-3300)     | 34000<br>(9300-64000)      |
| Romania  | 2005 | Female | 75 to 79 | 45%<br>(32-62%)                | 55%<br>(38-68%)          | 2.3<br>(1.4-3.6)                            | 7.7%<br>(1.5-16%)                    | 9.5%<br>(1.8-20%)                   | 2200<br>(430-4500)     | 33000<br>(6300-67000)      |
| Romania  | 2005 | Female | 80 to 84 | 43%<br>(27-61%)                | 57%<br>(39-73%)          | 2.1<br>(1.3-3.3)                            | 6.8%<br>(0.69-14%)                   | 8.1%<br>(0.76-17%)                  | 1900<br>(190-4000)     | 21000<br>(2200-44000)      |
| Romania  | 2005 | Female | 85 to 89 | 40%<br>(26-57%)                | 60%<br>(43-74%)          | 2<br>(1.1-3.2)                              | 5.6%<br>(0.057-13%)                  | 6.5%<br>(-0.073-15%)                | 890<br>(-10-2100)      | 6900<br>(71-16000)         |
| Romania  | 2005 | Female | 90 to 94 | 41%<br>(27-58%)                | 59%<br>(42-73%)          | 2<br>(1.1-3.4)                              | 5.1%<br>(-1-13%)                     | 5.8%<br>(-1.4-16%)                  | 400<br>(-99-1100)      | 2100<br>(-450-5600)        |
| Romania  | 2005 | Female | 95 plus  | 45%<br>(26-66%)                | 55%<br>(34-74%)          | 2.1<br>(0.98-3.8)                           | 4.9%<br>(-2-15%)                     | 5.5%<br>(-2.6-17%)                  | 170<br>(-79-530)       | 600<br>(-250-1900)         |
| Romania  | 2005 | Male   | All Ages | 75%<br>(65-83%)                | 25%<br>(17-35%)          | 7.6<br>(6.4-8.8)                            | 19%<br>(9-27%)                       | 22%<br>(9.4-33%)                    | 30000<br>(13000-44000) | 810000<br>(390000-1200000) |
| Romania  | 2005 | Male   | 15 to 19 | 69%<br>(50-85%)                | 31%<br>(15-50%)          | 3.6<br>(2.3-5.4)                            | 7.6%<br>(3-13%)                      | 14%<br>(4.4-25%)                    | 89<br>(29-160)         | 7900<br>(3400-13000)       |
| Romania  | 2005 | Male   | 20 to 24 | 78%<br>(61-90%)                | 22%<br>(9.6-39%)         | 6.4<br>(4.3-8.8)                            | 15%<br>(8.1-23%)                     | 26%<br>(13-41%)                     | 210<br>(100-330)       | 17000<br>(9200-25000)      |
| Romania  | 2005 | Male   | 25 to 29 | 80%<br>(65-92%)                | 20%<br>(8.5-35%)         | 7.5<br>(5.2-10)                             | 17%<br>(10-25%)                      | 29%<br>(15-44%)                     | 310<br>(160-460)       | 23000<br>(13000-33000)     |
| Romania  | 2005 | Male   | 30 to 34 | 82%<br>(67-93%)                | 18%<br>(6.9-33%)         | 8.8<br>(6.2-12)                             | 20%<br>(12-27%)                      | 32%<br>(19-45%)                     | 480<br>(280-660)       | 31000<br>(19000-42000)     |
| Romania  | 2005 | Male   | 35 to 39 | 83%<br>(67-93%)                | 17%<br>(6.9-33%)         | 10<br>(6.8-14)                              | 22%<br>(14-30%)                      | 34%<br>(21-46%)                     | 810<br>(500-1100)      | 46000<br>(29000-62000)     |
| Romania  | 2005 | Male   | 40 to 44 | 84%<br>(67-93%)                | 16%<br>(6.7-33%)         | 11<br>(8.1-15)                              | 25%<br>(15-33%)                      | 34%<br>(20-46%)                     | 1000<br>(620-1400)     | 50000<br>(30000-67000)     |
| Romania  | 2005 | Male   | 45 to 49 | 84%<br>(66-93%)                | 16%<br>(6.8-34%)         | 12<br>(8.6-16)                              | 25%<br>(14-34%)                      | 32%<br>(19-43%)                     | 2000<br>(1200-2700)    | 87000<br>(50000-120000)    |

| Location | Year | Sex    | Age      | Prevalence of current drinkers | Prevalence of abstainers | Population average of standard drinks daily | Percent of total attributable deaths | Percent of total attributable DALYs | Attributable deaths   | Attributable DALYs       |
|----------|------|--------|----------|--------------------------------|--------------------------|---------------------------------------------|--------------------------------------|-------------------------------------|-----------------------|--------------------------|
| Romania  | 2005 | Male   | 50 to 54 | 82%<br>(66-93%)                | 18%<br>(7.4-34%)         | 12<br>(8.7-16)                              | 24%<br>(13-33%)                      | 29%<br>(16-40%)                     | 2700<br>(1500-3700)   | 100000<br>(56000-140000) |
| Romania  | 2005 | Male   | 55 to 59 | 82%<br>(64-93%)                | 18%<br>(7.3-36%)         | 12<br>(8.6-16)                              | 22%<br>(11-32%)                      | 27%<br>(14-39%)                     | 2800<br>(1400-4000)   | 94000<br>(46000-130000)  |
| Romania  | 2005 | Male   | 60 to 64 | 79%<br>(61-92%)                | 21%<br>(7.7-39%)         | 11<br>(7.5-16)                              | 21%<br>(8.7-30%)                     | 25%<br>(11-36%)                     | 2800<br>(1200-4000)   | 78000<br>(33000-110000)  |
| Romania  | 2005 | Male   | 65 to 69 | 77%<br>(58-92%)                | 23%<br>(8.3-42%)         | 9.9<br>(7-13)                               | 20%<br>(7.2-30%)                     | 23%<br>(8.7-35%)                    | 4000<br>(1500-6000)   | 94000<br>(35000-140000)  |
| Romania  | 2005 | Male   | 70 to 74 | 77%<br>(60-90%)                | 23%<br>(10-40%)          | 8.8<br>(6-12)                               | 18%<br>(6.7-29%)                     | 22%<br>(7.9-34%)                    | 4400<br>(1600-6700)   | 83000<br>(30000-130000)  |
| Romania  | 2005 | Male   | 75 to 79 | 73%<br>(53-88%)                | 27%<br>(12-47%)          | 7.3<br>(4.7-11)                             | 16%<br>(4.8-26%)                     | 19%<br>(5.8-31%)                    | 4000<br>(1300-6600)   | 59000<br>(19000-96000)   |
| Romania  | 2005 | Male   | 80 to 84 | 70%<br>(46-86%)                | 30%<br>(14-54%)          | 6.3<br>(3.9-9.1)                            | 15%<br>(4.3-25%)                     | 17%<br>(4.9-29%)                    | 2700<br>(800-4600)    | 30000<br>(8700-51000)    |
| Romania  | 2005 | Male   | 85 to 89 | 69%<br>(48-85%)                | 31%<br>(15-52%)          | 5.8<br>(3.6-8.6)                            | 13%<br>(3.7-23%)                     | 15%<br>(4.1-26%)                    | 1100<br>(300-1900)    | 8600<br>(2400-15000)     |
| Romania  | 2005 | Male   | 90 to 94 | 68%<br>(48-86%)                | 32%<br>(14-52%)          | 5.3<br>(3.1-8.3)                            | 11%<br>(2.4-22%)                     | 13%<br>(2.5-25%)                    | 430<br>(82-820)       | 2300<br>(480-4400)       |
| Romania  | 2005 | Male   | 95 plus  | 68%<br>(44-88%)                | 32%<br>(12-56%)          | 4.7<br>(2.2-8.3)                            | 9.3%<br>(0.094-21%)                  | 10%<br>(-0.35-23%)                  | 140<br>(-4.9-320)     | 510<br>(5-1100)          |
| Romania  | 2010 | Female | All Ages | 60%<br>(53-67%)                | 40%<br>(33-47%)          | 2.1<br>(1.7-2.6)                            | 6.8%<br>(2.7-11%)                    | 9.4%<br>(3-17%)                     | 11000<br>(3600-21000) | 230000<br>(92000-380000) |
| Romania  | 2010 | Female | 15 to 19 | 61%<br>(42-76%)                | 39%<br>(24-58%)          | 1.7<br>(0.99-2.6)                           | 2.8%<br>(0.99-5.1%)                  | 6.9%<br>(0.72-13%)                  | 14<br>(1.4-27)        | 1600<br>(520-2700)       |
| Romania  | 2010 | Female | 20 to 24 | 69%<br>(52-82%)                | 31%<br>(18-48%)          | 2.2<br>(1.3-3.3)                            | 4.3%<br>(2.1-6.8%)                   | 8.2%<br>(1.1-16%)                   | 22<br>(2.9-42)        | 3100<br>(1500-4900)      |
| Romania  | 2010 | Female | 25 to 29 | 72%<br>(57-84%)                | 28%<br>(16-43%)          | 2.2<br>(1.5-3.2)                            | 4.3%<br>(2.3-6.5%)                   | 8.5%<br>(1.9-15%)                   | 24<br>(5.2-44)        | 3100<br>(1600-4800)      |
| Romania  | 2010 | Female | 30 to 34 | 73%<br>(57-85%)                | 27%<br>(15-43%)          | 2.3<br>(1.5-3.3)                            | 4.3%<br>(2.2-6.6%)                   | 9.2%<br>(2.9-15%)                   | 44<br>(14-75)         | 4500<br>(2300-6900)      |
| Romania  | 2010 | Female | 35 to 39 | 72%<br>(58-85%)                | 28%<br>(15-42%)          | 2.5<br>(1.6-3.6)                            | 5%<br>(2.6-7.7%)                     | 11%<br>(4.9-17%)                    | 82<br>(37-130)        | 6100<br>(3100-9200)      |
| Romania  | 2010 | Female | 40 to 44 | 72%<br>(57-84%)                | 28%<br>(16-43%)          | 2.7<br>(1.9-3.9)                            | 6%<br>(3.1-9.3%)                     | 12%<br>(6.2-18%)                    | 160<br>(84-250)       | 9600<br>(5000-14000)     |
| Romania  | 2010 | Female | 45 to 49 | 70%<br>(53-83%)                | 30%<br>(17-47%)          | 3<br>(2-4.3)                                | 7.4%<br>(4-11%)                      | 13%<br>(7.4-20%)                    | 220<br>(120-330)      | 11000<br>(5800-16000)    |
| Romania  | 2010 | Female | 50 to 54 | 67%<br>(48-80%)                | 33%<br>(20-52%)          | 3<br>(2-4.1)                                | 8.2%<br>(4.3-13%)                    | 14%<br>(7.4-20%)                    | 460<br>(250-680)      | 19000<br>(10000-28000)   |
| Romania  | 2010 | Female | 55 to 59 | 63%<br>(45-78%)                | 37%<br>(22-55%)          | 2.9<br>(1.9-4.2)                            | 8.4%<br>(4-13%)                      | 13%<br>(6.7-20%)                    | 680<br>(350-1000)     | 24000<br>(12000-37000)   |
| Romania  | 2010 | Female | 60 to 64 | 60%<br>(43-77%)                | 40%<br>(23-57%)          | 2.9<br>(1.9-4.2)                            | 8.4%<br>(3.5-14%)                    | 13%<br>(5.8-20%)                    | 800<br>(370-1300)     | 24000<br>(10000-39000)   |
| Romania  | 2010 | Female | 65 to 69 | 53%<br>(37-72%)                | 47%<br>(28-63%)          | 2.7<br>(1.7-3.8)                            | 8.6%<br>(3.3-14%)                    | 12%<br>(5-20%)                      | 960<br>(390-1600)     | 23000<br>(9100-39000)    |

| Location | Year | Sex    | Age      | Prevalence of current drinkers | Prevalence of abstainers | Population average of standard drinks daily | Percent of total attributable deaths | Percent of total attributable DALYs | Attributable deaths    | Attributable DALYs         |
|----------|------|--------|----------|--------------------------------|--------------------------|---------------------------------------------|--------------------------------------|-------------------------------------|------------------------|----------------------------|
| Romania  | 2010 | Female | 70 to 74 | 46%<br>(30-63%)                | 54%<br>(37-70%)          | 2.3<br>(1.4-3.7)                            | 8.1%<br>(2.7-15%)                    | 11%<br>(3.8-20%)                    | 1700<br>(580-3100)     | 33000<br>(11000-61000)     |
| Romania  | 2010 | Female | 75 to 79 | 44%<br>(31-61%)                | 56%<br>(39-69%)          | 2.3<br>(1.4-3.7)                            | 7.7%<br>(1.8-15%)                    | 9.8%<br>(2.3-19%)                   | 2100<br>(510-4200)     | 31000<br>(7600-62000)      |
| Romania  | 2010 | Female | 80 to 84 | 42%<br>(26-60%)                | 58%<br>(40-74%)          | 2.2<br>(1.3-3.4)                            | 7.1%<br>(1.2-14%)                    | 8.4%<br>(1.4-17%)                   | 2200<br>(350-4400)     | 23000<br>(4000-48000)      |
| Romania  | 2010 | Female | 85 to 89 | 39%<br>(25-55%)                | 61%<br>(45-75%)          | 2<br>(1.1-3.3)                              | 5.9%<br>(0.44-13%)                   | 7%<br>(0.44-15%)                    | 1400<br>(84-3000)      | 11000<br>(780-23000)       |
| Romania  | 2010 | Female | 90 to 94 | 40%<br>(27-58%)                | 60%<br>(42-73%)          | 2<br>(1.1-3.4)                              | 5.1%<br>(-0.47-13%)                  | 6.1%<br>(-0.8-16%)                  | 440<br>(-57-1100)      | 2400<br>(-240-6000)        |
| Romania  | 2010 | Female | 95 plus  | 44%<br>(27-64%)                | 56%<br>(36-73%)          | 2.1<br>(0.98-3.9)                           | 4.9%<br>(-1.4-14%)                   | 5.7%<br>(-1.9-17%)                  | 130<br>(-42-380)       | 460<br>(-130-1300)         |
| Romania  | 2010 | Male   | All Ages | 75%<br>(66-83%)                | 25%<br>(17-34%)          | 8<br>(6.7-9.6)                              | 19%<br>(8.8-27%)                     | 22%<br>(9.2-32%)                    | 30000<br>(13000-44000) | 780000<br>(380000-1100000) |
| Romania  | 2010 | Male   | 15 to 19 | 68%<br>(49-84%)                | 32%<br>(16-51%)          | 3.7<br>(2.3-5.6)                            | 8.5%<br>(3.3-14%)                    | 16%<br>(5.3-27%)                    | 69<br>(22-120)         | 5900<br>(2400-9900)        |
| Romania  | 2010 | Male   | 20 to 24 | 78%<br>(60-91%)                | 22%<br>(9.5-40%)         | 6.6<br>(4.3-9.2)                            | 16%<br>(8.3-24%)                     | 26%<br>(13-41%)                     | 210<br>(100-340)       | 17000<br>(9000-25000)      |
| Romania  | 2010 | Male   | 25 to 29 | 79%<br>(65-91%)                | 21%<br>(8.8-35%)         | 7.7<br>(5.3-11)                             | 17%<br>(10-25%)                      | 30%<br>(16-44%)                     | 240<br>(120-350)       | 18000<br>(9900-25000)      |
| Romania  | 2010 | Male   | 30 to 34 | 82%<br>(68-93%)                | 18%<br>(7.2-32%)         | 9<br>(6.4-12)                               | 19%<br>(11-27%)                      | 32%<br>(19-45%)                     | 410<br>(240-580)       | 27000<br>(16000-37000)     |
| Romania  | 2010 | Male   | 35 to 39 | 83%<br>(68-93%)                | 17%<br>(6.9-32%)         | 11<br>(7-14)                                | 21%<br>(13-29%)                      | 34%<br>(20-45%)                     | 670<br>(400-900)       | 38000<br>(23000-52000)     |
| Romania  | 2010 | Male   | 40 to 44 | 84%<br>(67-93%)                | 16%<br>(6.5-33%)         | 12<br>(8.2-16)                              | 23%<br>(14-31%)                      | 34%<br>(20-45%)                     | 1200<br>(710-1600)     | 59000<br>(35000-79000)     |
| Romania  | 2010 | Male   | 45 to 49 | 83%<br>(64-93%)                | 17%<br>(7.1-36%)         | 12<br>(8.7-17)                              | 24%<br>(13-33%)                      | 31%<br>(18-42%)                     | 1300<br>(780-1900)     | 59000<br>(34000-81000)     |
| Romania  | 2010 | Male   | 50 to 54 | 82%<br>(64-92%)                | 18%<br>(7.8-36%)         | 12<br>(8.7-17)                              | 23%<br>(13-32%)                      | 29%<br>(16-40%)                     | 2500<br>(1400-3600)    | 97000<br>(53000-140000)    |
| Romania  | 2010 | Male   | 55 to 59 | 81%<br>(63-92%)                | 19%<br>(7.7-37%)         | 12<br>(8.9-17)                              | 22%<br>(11-31%)                      | 27%<br>(14-38%)                     | 3300<br>(1700-4700)    | 110000<br>(54000-150000)   |
| Romania  | 2010 | Male   | 60 to 64 | 79%<br>(60-92%)                | 21%<br>(8.1-40%)         | 11<br>(7.9-16)                              | 20%<br>(8.8-30%)                     | 24%<br>(11-35%)                     | 3200<br>(1400-4700)    | 90000<br>(39000-130000)    |
| Romania  | 2010 | Male   | 65 to 69 | 77%<br>(57-91%)                | 23%<br>(8.8-43%)         | 10<br>(7.2-14)                              | 19%<br>(7.4-29%)                     | 23%<br>(9-35%)                      | 3100<br>(1200-4600)    | 72000<br>(28000-110000)    |
| Romania  | 2010 | Male   | 70 to 74 | 76%<br>(59-90%)                | 24%<br>(10-41%)          | 9<br>(6.2-13)                               | 18%<br>(6.8-28%)                     | 21%<br>(8.1-33%)                    | 4200<br>(1600-6500)    | 80000<br>(29000-120000)    |
| Romania  | 2010 | Male   | 75 to 79 | 73%<br>(52-88%)                | 27%<br>(12-48%)          | 7.5<br>(4.8-11)                             | 16%<br>(5.1-26%)                     | 19%<br>(6-30%)                      | 4000<br>(1300-6500)    | 58000<br>(19000-95000)     |
| Romania  | 2010 | Male   | 80 to 84 | 69%<br>(46-86%)                | 31%<br>(14-54%)          | 6.4<br>(4-9.2)                              | 15%<br>(4.5-25%)                     | 17%<br>(5.3-29%)                    | 3300<br>(1000-5500)    | 36000<br>(11000-60000)     |

| Location | Year | Sex    | Age      | Prevalence of current drinkers | Prevalence of abstainers | Population average of standard drinks daily | Percent of total attributable deaths | Percent of total attributable DALYs | Attributable deaths   | Attributable DALYs       |
|----------|------|--------|----------|--------------------------------|--------------------------|---------------------------------------------|--------------------------------------|-------------------------------------|-----------------------|--------------------------|
| Romania  | 2010 | Male   | 85 to 89 | 68%<br>(47-85%)                | 32%<br>(15-53%)          | 5.9<br>(3.7-8.7)                            | 13%<br>(3.6-22%)                     | 15%<br>(4.3-26%)                    | 1700<br>(470-3000)    | 14000<br>(3700-23000)    |
| Romania  | 2010 | Male   | 90 to 94 | 68%<br>(49-86%)                | 32%<br>(14-51%)          | 5.4<br>(3.2-8.5)                            | 11%<br>(2.7-21%)                     | 13%<br>(2.9-24%)                    | 450<br>(100-850)      | 2500<br>(600-4500)       |
| Romania  | 2010 | Male   | 95 plus  | 68%<br>(43-88%)                | 32%<br>(12-57%)          | 4.8<br>(2.3-8.5)                            | 9.2%<br>(0.64-20%)                   | 10%<br>(0.26-23%)                   | 84<br>(2.1-180)       | 310<br>(21-640)          |
| Romania  | 2016 | Female | All Ages | 62%<br>(54-70%)                | 38%<br>(30-46%)          | 2.4<br>(1.8-3.2)                            | 7.2%<br>(2.8-12%)                    | 9.9%<br>(2.9-19%)                   | 12000<br>(3400-23000) | 230000<br>(84000-390000) |
| Romania  | 2016 | Female | 15 to 19 | 62%<br>(44-78%)                | 38%<br>(22-56%)          | 1.9<br>(1.1-3)                              | 2.8%<br>(1.1-5.1%)                   | 7.4%<br>(0.9-15%)                   | 11<br>(1.2-22)        | 1300<br>(510-2400)       |
| Romania  | 2016 | Female | 20 to 24 | 71%<br>(53-84%)                | 29%<br>(16-47%)          | 2.4<br>(1.4-3.8)                            | 4.4%<br>(2.2-7%)                     | 8.8%<br>(1.4-17%)                   | 14<br>(2.1-27)        | 2100<br>(1000-3300)      |
| Romania  | 2016 | Female | 25 to 29 | 72%<br>(55-85%)                | 28%<br>(15-45%)          | 2.4<br>(1.4-3.8)                            | 4.4%<br>(2.4-6.7%)                   | 9%<br>(2.4-16%)                     | 22<br>(5.6-39)        | 2900<br>(1500-4500)      |
| Romania  | 2016 | Female | 30 to 34 | 73%<br>(55-86%)                | 27%<br>(14-45%)          | 2.5<br>(1.5-3.8)                            | 4.4%<br>(2.4-6.7%)                   | 9.7%<br>(3.6-17%)                   | 32<br>(11-54)         | 3400<br>(1800-5300)      |
| Romania  | 2016 | Female | 35 to 39 | 73%<br>(57-86%)                | 27%<br>(14-43%)          | 2.7<br>(1.6-4.1)                            | 4.9%<br>(2.5-7.6%)                   | 11%<br>(5-18%)                      | 69<br>(29-110)        | 5400<br>(2800-8400)      |
| Romania  | 2016 | Female | 40 to 44 | 73%<br>(57-85%)                | 27%<br>(15-43%)          | 3<br>(1.9-4.3)                              | 5.8%<br>(2.9-9.1%)                   | 13%<br>(6.2-19%)                    | 140<br>(65-220)       | 8200<br>(4100-13000)     |
| Romania  | 2016 | Female | 45 to 49 | 71%<br>(51-84%)                | 29%<br>(16-49%)          | 3.2<br>(2-4.8)                              | 7%<br>(3.6-11%)                      | 14%<br>(7.3-21%)                    | 260<br>(140-410)      | 13000<br>(6800-20000)    |
| Romania  | 2016 | Female | 50 to 54 | 69%<br>(50-83%)                | 31%<br>(17-50%)          | 3.3<br>(2.1-4.9)                            | 8.3%<br>(4.3-13%)                    | 14%<br>(7.9-21%)                    | 340<br>(190-510)      | 14000<br>(7400-21000)    |
| Romania  | 2016 | Female | 55 to 59 | 66%<br>(47-82%)                | 34%<br>(18-53%)          | 3.2<br>(2-5)                                | 8.5%<br>(3.9-13%)                    | 14%<br>(6.8-21%)                    | 560<br>(280-880)      | 20000<br>(9500-32000)    |
| Romania  | 2016 | Female | 60 to 64 | 63%<br>(43-80%)                | 37%<br>(20-57%)          | 3.2<br>(1.9-5.1)                            | 8.5%<br>(3.6-14%)                    | 13%<br>(5.9-22%)                    | 890<br>(390-1500)     | 27000<br>(11000-46000)   |
| Romania  | 2016 | Female | 65 to 69 | 59%<br>(40-78%)                | 41%<br>(22-60%)          | 3.2<br>(2-4.8)                              | 9.1%<br>(3.6-16%)                    | 13%<br>(5.7-23%)                    | 1200<br>(490-2000)    | 29000<br>(12000-50000)   |
| Romania  | 2016 | Female | 70 to 74 | 53%<br>(35-71%)                | 47%<br>(29-65%)          | 3<br>(1.7-4.9)                              | 9.1%<br>(2.7-17%)                    | 12%<br>(4.1-23%)                    | 1400<br>(440-2500)    | 26000<br>(8100-49000)    |
| Romania  | 2016 | Female | 75 to 79 | 46%<br>(31-65%)                | 54%<br>(35-69%)          | 2.6<br>(1.4-4.3)                            | 8%<br>(1.9-17%)                      | 10%<br>(2.6-21%)                    | 2100<br>(520-4200)    | 31000<br>(7800-63000)    |
| Romania  | 2016 | Female | 80 to 84 | 41%<br>(25-60%)                | 59%<br>(40-75%)          | 2.2<br>(1.2-3.7)                            | 7.3%<br>(1.3-15%)                    | 8.9%<br>(1.6-19%)                   | 2400<br>(410-5100)    | 26000<br>(4500-55000)    |
| Romania  | 2016 | Female | 85 to 89 | 40%<br>(26-57%)                | 60%<br>(43-74%)          | 2.2<br>(1.2-3.6)                            | 6.5%<br>(0.71-15%)                   | 7.7%<br>(0.76-18%)                  | 1800<br>(160-4000)    | 13000<br>(1500-31000)    |
| Romania  | 2016 | Female | 90 to 94 | 41%<br>(27-58%)                | 59%<br>(42-73%)          | 2.2<br>(1.1-3.8)                            | 5.7%<br>(-0.44-15%)                  | 6.9%<br>(-0.64-18%)                 | 770<br>(-73-2000)     | 4100<br>(-300-11000)     |
| Romania  | 2016 | Female | 95 plus  | 45%<br>(27-65%)                | 55%<br>(35-73%)          | 2.3<br>(1-4.3)                              | 5.5%<br>(-1.5-16%)                   | 6.5%<br>(-2-19%)                    | 230<br>(-71-670)      | 820<br>(-210-2300)       |



| Location | Year | Sex    | Age      | Prevalence of current drinkers | Prevalence of abstainers | Population average of standard drinks daily | Percent of total attributable deaths | Percent of total attributable DALYs | Attributable deaths    | Attributable DALYs         |
|----------|------|--------|----------|--------------------------------|--------------------------|---------------------------------------------|--------------------------------------|-------------------------------------|------------------------|----------------------------|
| Romania  | 2016 | Male   | All Ages | 71%<br>(62-80%)                | 29%<br>(20-38%)          | 8.2<br>(6.1-11)                             | 18%<br>(8.6-25%)                     | 21%<br>(8.7-31%)                    | 27000<br>(12000-41000) | 680000<br>(330000-1000000) |
| Romania  | 2016 | Male   | 15 to 19 | 62%<br>(40-81%)                | 38%<br>(19-60%)          | 3.5<br>(1.9-5.7)                            | 7.7%<br>(3.1-13%)                    | 15%<br>(5.2-27%)                    | 50<br>(17-92)          | 4500<br>(1900-7700)        |
| Romania  | 2016 | Male   | 20 to 24 | 72%<br>(51-88%)                | 28%<br>(12-49%)          | 6.3<br>(3.7-10)                             | 15%<br>(8-23%)                       | 26%<br>(13-41%)                     | 120<br>(59-200)        | 10000<br>(5600-16000)      |
| Romania  | 2016 | Male   | 25 to 29 | 75%<br>(57-90%)                | 25%<br>(10-43%)          | 7.6<br>(4.7-12)                             | 16%<br>(9.3-23%)                     | 29%<br>(15-43%)                     | 190<br>(96-280)        | 15000<br>(8300-21000)      |
| Romania  | 2016 | Male   | 30 to 34 | 78%<br>(58-91%)                | 22%<br>(8.7-42%)         | 8.9<br>(5.7-13)                             | 18%<br>(11-25%)                      | 31%<br>(17-44%)                     | 270<br>(150-390)       | 18000<br>(11000-26000)     |
| Romania  | 2016 | Male   | 35 to 39 | 80%<br>(61-91%)                | 20%<br>(8.8-39%)         | 10<br>(6.5-16)                              | 19%<br>(12-27%)                      | 32%<br>(19-44%)                     | 490<br>(300-690)       | 29000<br>(18000-41000)     |
| Romania  | 2016 | Male   | 40 to 44 | 81%<br>(63-92%)                | 19%<br>(7.8-37%)         | 12<br>(7.4-17)                              | 21%<br>(13-29%)                      | 32%<br>(20-44%)                     | 880<br>(540-1200)      | 45000<br>(27000-62000)     |
| Romania  | 2016 | Male   | 45 to 49 | 81%<br>(60-92%)                | 19%<br>(8-40%)           | 12<br>(8-18)                                | 22%<br>(13-30%)                      | 30%<br>(18-41%)                     | 1500<br>(880-2100)     | 67000<br>(39000-93000)     |
| Romania  | 2016 | Male   | 50 to 54 | 79%<br>(60-92%)                | 21%<br>(8.3-40%)         | 13<br>(8.2-18)                              | 22%<br>(13-31%)                      | 28%<br>(16-39%)                     | 1700<br>(970-2400)     | 66000<br>(37000-93000)     |
| Romania  | 2016 | Male   | 55 to 59 | 78%<br>(57-91%)                | 22%<br>(8.7-43%)         | 12<br>(8-18)                                | 21%<br>(11-30%)                      | 26%<br>(14-37%)                     | 2500<br>(1300-3600)    | 84000<br>(44000-120000)    |
| Romania  | 2016 | Male   | 60 to 64 | 76%<br>(53-91%)                | 24%<br>(8.9-47%)         | 12<br>(7.3-18)                              | 19%<br>(9.1-28%)                     | 24%<br>(12-34%)                     | 3300<br>(1600-4900)    | 93000<br>(44000-140000)    |
| Romania  | 2016 | Male   | 65 to 69 | 75%<br>(52-90%)                | 25%<br>(9.7-48%)         | 10<br>(6.7-15)                              | 18%<br>(7.6-28%)                     | 22%<br>(9.4-34%)                    | 3400<br>(1500-5200)    | 81000<br>(34000-120000)    |
| Romania  | 2016 | Male   | 70 to 74 | 73%<br>(52-88%)                | 27%<br>(12-48%)          | 9.1<br>(5.7-14)                             | 17%<br>(6.6-27%)                     | 21%<br>(8-32%)                      | 3100<br>(1200-4800)    | 59000<br>(22000-92000)     |
| Romania  | 2016 | Male   | 75 to 79 | 71%<br>(50-87%)                | 29%<br>(13-50%)          | 7.7<br>(4.5-12)                             | 15%<br>(5-25%)                       | 18%<br>(5.9-29%)                    | 3400<br>(1100-5500)    | 50000<br>(16000-81000)     |
| Romania  | 2016 | Male   | 80 to 84 | 69%<br>(45-86%)                | 31%<br>(14-55%)          | 6.8<br>(4-10)                               | 14%<br>(3.9-24%)                     | 17%<br>(4.4-28%)                    | 3300<br>(890-5600)     | 37000<br>(9800-61000)      |
| Romania  | 2016 | Male   | 85 to 89 | 68%<br>(45-85%)                | 32%<br>(15-55%)          | 6.2<br>(3.7-9.6)                            | 13%<br>(3.4-23%)                     | 15%<br>(3.9-26%)                    | 2100<br>(540-3600)     | 16000<br>(4300-28000)      |
| Romania  | 2016 | Male   | 90 to 94 | 68%<br>(48-86%)                | 32%<br>(14-52%)          | 5.7<br>(3.2-9.3)                            | 11%<br>(2.4-21%)                     | 13%<br>(2.7-25%)                    | 740<br>(150-1400)      | 4000<br>(890-7500)         |
| Romania  | 2016 | Male   | 95 plus  | 68%<br>(42-88%)                | 32%<br>(12-58%)          | 5<br>(2.3-9.1)                              | 9.2%<br>(0.36-19%)                   | 11%<br>(-0.021-22%)                 | 140<br>(-0.28-300)     | 520<br>(20-1100)           |
| Serbia   | 1990 | Female | All Ages | 59%<br>(50-67%)                | 41%<br>(33-50%)          | 1.8<br>(1.2-2.6)                            | 5.1%<br>(1.2-10%)                    | 7%<br>(0.95-15%)                    | 2800<br>(380-6200)     | 69000<br>(15000-140000)    |
| Serbia   | 1990 | Female | 15 to 19 | 59%<br>(39-76%)                | 41%<br>(24-61%)          | 1.4<br>(0.56-2.8)                           | 2.9%<br>(0.8-5.8%)                   | 6.7%<br>(0.043-15%)                 | 8.8<br>(0.056-21)      | 1000<br>(280-2100)         |
| Serbia   | 1990 | Female | 20 to 24 | 68%<br>(50-83%)                | 32%<br>(17-50%)          | 2<br>(0.74-3.9)                             | 4.6%<br>(1.8-8.3%)                   | 8.4%<br>(-0.058-19%)                | 12<br>(-0.077-28)      | 1700<br>(630-3100)         |

| Location | Year | Sex    | Age      | Prevalence of current drinkers | Prevalence of abstainers | Population average of standard drinks daily | Percent of total attributable deaths | Percent of total attributable DALYs | Attributable deaths | Attributable DALYs      |
|----------|------|--------|----------|--------------------------------|--------------------------|---------------------------------------------|--------------------------------------|-------------------------------------|---------------------|-------------------------|
| Serbia   | 1990 | Female | 25 to 29 | 70%<br>(50-84%)                | 30%<br>(16-50%)          | 2.1<br>(0.86-3.9)                           | 4.6%<br>(1.8-8.1%)                   | 8.3%<br>(-0.16-18%)                 | 15<br>(-0.28-33)    | 1800<br>(710-3200)      |
| Serbia   | 1990 | Female | 30 to 34 | 70%<br>(50-84%)                | 30%<br>(16-50%)          | 2.2<br>(1-3.9)                              | 4.5%<br>(1.6-7.9%)                   | 8.6%<br>(0.63-18%)                  | 21<br>(1.5-46)      | 2100<br>(720-3800)      |
| Serbia   | 1990 | Female | 35 to 39 | 71%<br>(54-85%)                | 29%<br>(15-46%)          | 2.5<br>(1.1-4.5)                            | 4.8%<br>(1.4-9.3%)                   | 9.3%<br>(1.1-20%)                   | 41<br>(5-88)        | 3100<br>(860-5900)      |
| Serbia   | 1990 | Female | 40 to 44 | 70%<br>(53-84%)                | 30%<br>(16-47%)          | 2.8<br>(1.3-4.9)                            | 5.4%<br>(1.3-11%)                    | 10%<br>(2.2-21%)                    | 63<br>(13-130)      | 3800<br>(1000-7200)     |
| Serbia   | 1990 | Female | 45 to 49 | 68%<br>(47-83%)                | 32%<br>(17-53%)          | 3.1<br>(1.4-5.7)                            | 6.4%<br>(1.7-13%)                    | 12%<br>(3-23%)                      | 79<br>(22-150)      | 3900<br>(1100-7500)     |
| Serbia   | 1990 | Female | 50 to 54 | 66%<br>(45-81%)                | 34%<br>(19-55%)          | 3.1<br>(1.5-5.8)                            | 7.2%<br>(2-14%)                      | 12%<br>(3.2-23%)                    | 150<br>(43-290)     | 6300<br>(1800-12000)    |
| Serbia   | 1990 | Female | 55 to 59 | 63%<br>(42-80%)                | 37%<br>(20-58%)          | 3.1<br>(1.4-5.3)                            | 7.5%<br>(1.7-15%)                    | 11%<br>(2.7-22%)                    | 250<br>(59-490)     | 8800<br>(2000-17000)    |
| Serbia   | 1990 | Female | 60 to 64 | 59%<br>(39-78%)                | 41%<br>(22-61%)          | 2.8<br>(1.3-5.4)                            | 6.9%<br>(0.59-15%)                   | 9.8%<br>(0.95-21%)                  | 340<br>(33-730)     | 9900<br>(820-22000)     |
| Serbia   | 1990 | Female | 65 to 69 | 55%<br>(35-74%)                | 45%<br>(26-65%)          | 2.4<br>(1.1-4.5)                            | 6.6%<br>(0.28-15%)                   | 8.8%<br>(0.54-20%)                  | 400<br>(24-920)     | 9600<br>(400-22000)     |
| Serbia   | 1990 | Female | 70 to 74 | 48%<br>(31-67%)                | 52%<br>(33-69%)          | 2<br>(0.79-3.9)                             | 5.6%<br>(-0.72-14%)                  | 7.2%<br>(-0.68-18%)                 | 270<br>(-28-690)    | 5100<br>(-700-13000)    |
| Serbia   | 1990 | Female | 75 to 79 | 41%<br>(26-61%)                | 59%<br>(39-74%)          | 1.6<br>(0.58-3.4)                           | 4.6%<br>(-0.78-12%)                  | 5.7%<br>(-0.88-15%)                 | 340<br>(-54-930)    | 5000<br>(-840-14000)    |
| Serbia   | 1990 | Female | 80 to 84 | 37%<br>(22-55%)                | 63%<br>(45-78%)          | 1.4<br>(0.56-2.8)                           | 4.5%<br>(-0.44-12%)                  | 5.4%<br>(-0.48-14%)                 | 340<br>(-32-890)    | 3600<br>(-380-9500)     |
| Serbia   | 1990 | Female | 85 to 89 | 35%<br>(22-51%)                | 65%<br>(49-78%)          | 1.4<br>(0.55-3.1)                           | 4.5%<br>(-0.37-12%)                  | 5.4%<br>(-0.4-15%)                  | 290<br>(-22-830)    | 2200<br>(-180-6200)     |
| Serbia   | 1990 | Female | 90 to 94 | 37%<br>(23-54%)                | 63%<br>(46-77%)          | 1.5<br>(0.56-3.6)                           | 4.6%<br>(-0.35-13%)                  | 5.5%<br>(-0.33-16%)                 | 150<br>(-8.8-460)   | 780<br>(-55-2300)       |
| Serbia   | 1990 | Female | 95 plus  | 41%<br>(23-62%)                | 59%<br>(38-77%)          | 1.7<br>(0.46-4.2)                           | 4.9%<br>(-0.12-14%)                  | 5.8%<br>(-0.11-17%)                 | 51<br>(-0.96-150)   | 170<br>(-4.5-490)       |
| Serbia   | 1990 | Male   | All Ages | 67%<br>(56-77%)                | 33%<br>(23-44%)          | 2.9<br>(2-3.9)                              | 9.7%<br>(4-16%)                      | 11%<br>(3.4-20%)                    | 5200<br>(1600-9000) | 16000<br>(64000-260000) |
| Serbia   | 1990 | Male   | 15 to 19 | 59%<br>(37-80%)                | 41%<br>(20-63%)          | 1.3<br>(0.58-2.6)                           | 5%<br>(1.1-9.9%)                     | 7.5%<br>(0.32-17%)                  | 26<br>(1.1-58)      | 2400<br>(540-4800)      |
| Serbia   | 1990 | Male   | 20 to 24 | 70%<br>(49-87%)                | 30%<br>(13-51%)          | 2.4<br>(1.1-4.4)                            | 9.9%<br>(3-18%)                      | 14%<br>(1.8-27%)                    | 65<br>(9-130)       | 5600<br>(1700-10000)    |
| Serbia   | 1990 | Male   | 25 to 29 | 74%<br>(54-90%)                | 26%<br>(10-46%)          | 3.1<br>(1.5-5.4)                            | 11%<br>(4-19%)                       | 16%<br>(3.3-30%)                    | 77<br>(15-150)      | 6200<br>(2200-11000)    |
| Serbia   | 1990 | Male   | 30 to 34 | 76%<br>(56-91%)                | 24%<br>(8.7-44%)         | 3.6<br>(1.8-6)                              | 12%<br>(4.4-19%)                     | 17%<br>(4.3-31%)                    | 100<br>(26-190)     | 7400<br>(2700-13000)    |
| Serbia   | 1990 | Male   | 35 to 39 | 78%<br>(59-91%)                | 22%<br>(9-41%)           | 3.8<br>(1.9-6.5)                            | 12%<br>(4.4-20%)                     | 17%<br>(4.7-31%)                    | 160<br>(41-290)     | 10000<br>(3600-17000)   |
| Serbia   | 1990 | Male   | 40 to 44 | 79%<br>(59-92%)                | 21%<br>(8.4-41%)         | 4.2<br>(2.3-7.1)                            | 12%<br>(5.2-21%)                     | 18%<br>(6.4-31%)                    | 210<br>(78-370)     | 12000<br>(4800-19000)   |

| Location | Year | Sex    | Age      | Prevalence of current drinkers | Prevalence of abstainers | Population average of standard drinks daily | Percent of total attributable deaths | Percent of total attributable DALYs | Attributable deaths | Attributable DALYs      |
|----------|------|--------|----------|--------------------------------|--------------------------|---------------------------------------------|--------------------------------------|-------------------------------------|---------------------|-------------------------|
| Serbia   | 1990 | Male   | 45 to 49 | 79%<br>(58-91%)                | 21%<br>(8.7-42%)         | 4.9<br>(2.5-8.1)                            | 14%<br>(6.2-22%)                     | 18%<br>(7.7-30%)                    | 240<br>(100-390)    | 11000<br>(5000-18000)   |
| Serbia   | 1990 | Male   | 50 to 54 | 78%<br>(57-91%)                | 22%<br>(9.2-43%)         | 5.2<br>(2.9-8.4)                            | 14%<br>(6.6-22%)                     | 18%<br>(8.2-28%)                    | 440<br>(200-680)    | 18000<br>(8400-27000)   |
| Serbia   | 1990 | Male   | 55 to 59 | 76%<br>(56-91%)                | 24%<br>(9.3-44%)         | 5.3<br>(2.9-8.5)                            | 14%<br>(5.9-22%)                     | 17%<br>(7.2-27%)                    | 690<br>(290-1100)   | 24000<br>(10000-38000)  |
| Serbia   | 1990 | Male   | 60 to 64 | 75%<br>(53-91%)                | 25%<br>(9.5-47%)         | 5.1<br>(2.7-8.8)                            | 12%<br>(4.6-21%)                     | 15%<br>(5.3-25%)                    | 820<br>(300-1400)   | 24000<br>(8900-41000)   |
| Serbia   | 1990 | Male   | 65 to 69 | 73%<br>(51-90%)                | 27%<br>(10-49%)          | 4.6<br>(2.5-7.5)                            | 11%<br>(3.4-20%)                     | 13%<br>(3.8-23%)                    | 750<br>(220-1300)   | 18000<br>(5300-33000)   |
| Serbia   | 1990 | Male   | 70 to 74 | 71%<br>(50-87%)                | 29%<br>(13-50%)          | 4<br>(2-7)                                  | 9.5%<br>(1.6-18%)                    | 11%<br>(1.9-21%)                    | 440<br>(73-870)     | 8500<br>(1400-17000)    |
| Serbia   | 1990 | Male   | 75 to 79 | 69%<br>(47-86%)                | 31%<br>(14-53%)          | 3.4<br>(1.5-6.3)                            | 7.7%<br>(0.042-17%)                  | 8.6%<br>(-0.026-19%)                | 480<br>(-1.5-1100)  | 7100<br>(37-16000)      |
| Serbia   | 1990 | Male   | 80 to 84 | 67%<br>(43-84%)                | 33%<br>(16-57%)          | 3<br>(1.4-5.5)                              | 6.4%<br>(-0.47-15%)                  | 7.1%<br>(-0.67-17%)                 | 370<br>(-36-870)    | 4100<br>(-320-9500)     |
| Serbia   | 1990 | Male   | 85 to 89 | 65%<br>(43-84%)                | 35%<br>(16-57%)          | 2.8<br>(1.3-5.1)                            | 4.8%<br>(-1.5-13%)                   | 5.3%<br>(-1.8-15%)                  | 210<br>(-72-580)    | 1700<br>(-500-4500)     |
| Serbia   | 1990 | Male   | 90 to 94 | 65%<br>(43-85%)                | 35%<br>(15-57%)          | 2.6<br>(1.2-4.9)                            | 3.6%<br>(-1.9-12%)                   | 3.9%<br>(-2.3-13%)                  | 65<br>(-38-210)     | 360<br>(-180-1100)      |
| Serbia   | 1990 | Male   | 95 plus  | 66%<br>(38-88%)                | 34%<br>(12-62%)          | 2.3<br>(0.82-5)                             | 3.3%<br>(-2-11%)                     | 3.5%<br>(-2.4-12%)                  | 14<br>(-10-49)      | 53<br>(-31-170)         |
| Serbia   | 1995 | Female | All Ages | 59%<br>(51-67%)                | 41%<br>(33-49%)          | 1.9<br>(1.3-2.5)                            | 5.2%<br>(1.2-10%)                    | 7%<br>(0.89-15%)                    | 3500<br>(430-7700)  | 82000<br>(18000-160000) |
| Serbia   | 1995 | Female | 15 to 19 | 59%<br>(40-75%)                | 41%<br>(25-60%)          | 1.4<br>(0.59-2.6)                           | 2.4%<br>(0.62-4.6%)                  | 3.7%<br>(0.042-8.7%)                | 9.1<br>(0.11-22)    | 1100<br>(290-2100)      |
| Serbia   | 1995 | Female | 20 to 24 | 68%<br>(51-83%)                | 32%<br>(17-49%)          | 2<br>(0.76-3.9)                             | 3.9%<br>(1.6-7%)                     | 5.2%<br>(-0.069-12%)                | 13<br>(-0.18-30)    | 1800<br>(710-3200)      |
| Serbia   | 1995 | Female | 25 to 29 | 70%<br>(51-84%)                | 30%<br>(16-49%)          | 2.1<br>(0.84-3.9)                           | 4.2%<br>(1.7-7.2%)                   | 6%<br>(-0.12-13%)                   | 15<br>(-0.3-34)     | 1900<br>(760-3300)      |
| Serbia   | 1995 | Female | 30 to 34 | 71%<br>(51-84%)                | 29%<br>(16-49%)          | 2.2<br>(1-4)                                | 4.1%<br>(1.5-7.3%)                   | 6.7%<br>(0.43-14%)                  | 21<br>(1.4-46)      | 2100<br>(720-3800)      |
| Serbia   | 1995 | Female | 35 to 39 | 71%<br>(55-85%)                | 29%<br>(15-45%)          | 2.5<br>(1.1-4.4)                            | 4.6%<br>(1.3-9%)                     | 8%<br>(0.71-16%)                    | 39<br>(3.3-79)      | 2800<br>(780-5200)      |
| Serbia   | 1995 | Female | 40 to 44 | 71%<br>(53-85%)                | 29%<br>(15-47%)          | 2.8<br>(1.3-4.7)                            | 5.4%<br>(1.4-10%)                    | 9.5%<br>(1.9-19%)                   | 80<br>(15-160)      | 4600<br>(1200-9000)     |
| Serbia   | 1995 | Female | 45 to 49 | 69%<br>(47-83%)                | 31%<br>(17-53%)          | 3.1<br>(1.4-5.3)                            | 6.3%<br>(1.8-13%)                    | 11%<br>(2.8-21%)                    | 120<br>(31-220)     | 5600<br>(1600-11000)    |
| Serbia   | 1995 | Female | 50 to 54 | 66%<br>(47-82%)                | 34%<br>(18-53%)          | 3.1<br>(1.5-5.4)                            | 7.3%<br>(1.9-14%)                    | 11%<br>(3.2-22%)                    | 150<br>(41-280)     | 5900<br>(1600-11000)    |
| Serbia   | 1995 | Female | 55 to 59 | 63%<br>(43-80%)                | 37%<br>(20-57%)          | 3<br>(1.5-5.3)                              | 7.7%<br>(1.6-15%)                    | 11%<br>(2.4-22%)                    | 260<br>(56-510)     | 9000<br>(1800-18000)    |
| Serbia   | 1995 | Female | 60 to 64 | 60%<br>(39-79%)                | 40%<br>(21-61%)          | 2.8<br>(1.3-5.2)                            | 7.1%<br>(0.43-15%)                   | 9.7%<br>(0.66-21%)                  | 390<br>(27-850)     | 11000<br>(650-25000)    |

| Location | Year | Sex    | Age      | Prevalence of current drinkers | Prevalence of abstainers | Population average of standard drinks daily | Percent of total attributable deaths | Percent of total attributable DALYs | Attributable deaths  | Attributable DALYs       |
|----------|------|--------|----------|--------------------------------|--------------------------|---------------------------------------------|--------------------------------------|-------------------------------------|----------------------|--------------------------|
| Serbia   | 1995 | Female | 65 to 69 | 55%<br>(36-75%)                | 45%<br>(25-64%)          | 2.4<br>(1.2-4.2)                            | 6.7%<br>(0.018-15%)                  | 8.8%<br>(0.26-19%)                  | 550<br>(15-1200)     | 13000<br>(35-30000)      |
| Serbia   | 1995 | Female | 70 to 74 | 49%<br>(31-67%)                | 51%<br>(33-69%)          | 2<br>(0.81-3.8)                             | 5.8%<br>(-1.1-15%)                   | 7.2%<br>(-1.2-18%)                  | 580<br>(-94-1400)    | 11000<br>(-2000-27000)   |
| Serbia   | 1995 | Female | 75 to 79 | 42%<br>(26-62%)                | 58%<br>(38-74%)          | 1.6<br>(0.58-3.3)                           | 4.8%<br>(-0.66-13%)                  | 5.9%<br>(-0.74-16%)                 | 330<br>(-42-880)     | 4800<br>(-700-13000)     |
| Serbia   | 1995 | Female | 80 to 84 | 37%<br>(22-56%)                | 63%<br>(44-78%)          | 1.4<br>(0.57-2.7)                           | 4.7%<br>(-0.47-12%)                  | 5.6%<br>(-0.56-14%)                 | 360<br>(-36-940)     | 3800<br>(-390-9900)      |
| Serbia   | 1995 | Female | 85 to 89 | 36%<br>(22-52%)                | 64%<br>(48-78%)          | 1.4<br>(0.57-3)                             | 4.8%<br>(-0.3-13%)                   | 5.6%<br>(-0.34-15%)                 | 370<br>(-22-1000)    | 2700<br>(-170-7600)      |
| Serbia   | 1995 | Female | 90 to 94 | 37%<br>(23-54%)                | 63%<br>(46-77%)          | 1.5<br>(0.56-3.4)                           | 4.8%<br>(-0.18-14%)                  | 5.6%<br>(-0.16-17%)                 | 210<br>(-5.9-620)    | 1000<br>(-38-3100)       |
| Serbia   | 1995 | Female | 95 plus  | 41%<br>(23-62%)                | 59%<br>(38-77%)          | 1.7<br>(0.47-4.2)                           | 5%<br>(-0.43-15%)                    | 5.8%<br>(-0.48-17%)                 | 74<br>(-6.1-220)     | 250<br>(-22-730)         |
| Serbia   | 1995 | Male   | All Ages | 67%<br>(56-77%)                | 33%<br>(23-44%)          | 2.9<br>(2.1-3.9)                            | 9.2%<br>(3.7-15%)                    | 11%<br>(3.2-19%)                    | 6200<br>(1800-11000) | 180000<br>(73000-300000) |
| Serbia   | 1995 | Male   | 15 to 19 | 59%<br>(38-80%)                | 41%<br>(20-62%)          | 1.4<br>(0.61-2.6)                           | 3.4%<br>(0.86-6.6%)                  | 3.9%<br>(0.12-8.6%)                 | 23<br>(0.69-51)      | 2300<br>(570-4300)       |
| Serbia   | 1995 | Male   | 20 to 24 | 70%<br>(47-87%)                | 30%<br>(13-53%)          | 2.4<br>(1.1-4.2)                            | 5.7%<br>(2.1-10%)                    | 5.8%<br>(0.97-12%)                  | 55<br>(9.4-110)      | 5100<br>(1800-8900)      |
| Serbia   | 1995 | Male   | 25 to 29 | 74%<br>(54-89%)                | 26%<br>(11-46%)          | 3.1<br>(1.5-5.3)                            | 7.3%<br>(2.9-12%)                    | 8.3%<br>(1.8-16%)                   | 68<br>(15-130)       | 5700<br>(2200-9700)      |
| Serbia   | 1995 | Male   | 30 to 34 | 76%<br>(56-91%)                | 24%<br>(9.4-44%)         | 3.5<br>(1.8-5.8)                            | 8.6%<br>(3.3-14%)                    | 11%<br>(2.7-20%)                    | 88<br>(22-160)       | 6500<br>(2500-11000)     |
| Serbia   | 1995 | Male   | 35 to 39 | 78%<br>(59-91%)                | 22%<br>(8.5-41%)         | 3.7<br>(1.9-6.3)                            | 10%<br>(3.6-17%)                     | 13%<br>(3.5-24%)                    | 140<br>(36-250)      | 8800<br>(3200-15000)     |
| Serbia   | 1995 | Male   | 40 to 44 | 79%<br>(59-92%)                | 21%<br>(7.8-41%)         | 4.2<br>(2.3-6.7)                            | 12%<br>(4.8-20%)                     | 15%<br>(5.5-27%)                    | 260<br>(93-450)      | 14000<br>(5700-24000)    |
| Serbia   | 1995 | Male   | 45 to 49 | 79%<br>(56-92%)                | 21%<br>(8.4-44%)         | 4.8<br>(2.6-7.8)                            | 13%<br>(5.7-21%)                     | 17%<br>(7-28%)                      | 360<br>(150-590)     | 17000<br>(7300-27000)    |
| Serbia   | 1995 | Male   | 50 to 54 | 78%<br>(57-91%)                | 22%<br>(9.3-43%)         | 5.1<br>(2.8-8)                              | 14%<br>(6.4-21%)                     | 17%<br>(7.5-27%)                    | 400<br>(180-640)     | 16000<br>(7400-25000)    |
| Serbia   | 1995 | Male   | 55 to 59 | 76%<br>(55-91%)                | 24%<br>(9-45%)           | 5.3<br>(2.9-8.2)                            | 14%<br>(5.8-22%)                     | 16%<br>(6.8-26%)                    | 700<br>(290-1100)    | 24000<br>(10000-38000)   |
| Serbia   | 1995 | Male   | 60 to 64 | 75%<br>(51-91%)                | 25%<br>(9.3-49%)         | 5.1<br>(2.6-8.5)                            | 12%<br>(4.1-21%)                     | 14%<br>(4.6-24%)                    | 970<br>(320-1700)    | 28000<br>(9200-48000)    |
| Serbia   | 1995 | Male   | 65 to 69 | 74%<br>(50-90%)                | 26%<br>(10-50%)          | 4.6<br>(2.6-7.3)                            | 11%<br>(3.2-20%)                     | 13%<br>(3.6-23%)                    | 1100<br>(310-2000)   | 26000<br>(7500-47000)    |
| Serbia   | 1995 | Male   | 70 to 74 | 72%<br>(50-87%)                | 28%<br>(13-50%)          | 3.9<br>(2.1-6.7)                            | 9.6%<br>(1.4-19%)                    | 11%<br>(1.6-22%)                    | 880<br>(130-1700)    | 17000<br>(2400-33000)    |
| Serbia   | 1995 | Male   | 75 to 79 | 69%<br>(47-87%)                | 31%<br>(13-53%)          | 3.3<br>(1.6-6.1)                            | 7.6%<br>(0.24-16%)                   | 8.6%<br>(0.18-19%)                  | 420<br>(9.1-900)     | 6200<br>(200-13000)      |
| Serbia   | 1995 | Male   | 80 to 84 | 67%<br>(44-84%)                | 33%<br>(16-56%)          | 3<br>(1.5-5.1)                              | 6.5%<br>(-0.82-15%)                  | 7.1%<br>(-1-16%)                    | 360<br>(-50-800)     | 3900<br>(-490-8700)      |

| Location | Year | Sex    | Age      | Prevalence of current drinkers | Prevalence of abstainers | Population average of standard drinks daily | Percent of total attributable deaths | Percent of total attributable DALYs | Attributable deaths  | Attributable DALYs       |
|----------|------|--------|----------|--------------------------------|--------------------------|---------------------------------------------|--------------------------------------|-------------------------------------|----------------------|--------------------------|
| Serbia   | 1995 | Male   | 85 to 89 | 65%<br>(44-83%)                | 35%<br>(17-56%)          | 2.7<br>(1.3-4.8)                            | 4.9%<br>(-1.3-13%)                   | 5.3%<br>(-1.6-14%)                  | 230<br>(-68-600)     | 1800<br>(-460-4700)      |
| Serbia   | 1995 | Male   | 90 to 94 | 65%<br>(44-85%)                | 35%<br>(15-56%)          | 2.5<br>(1.2-4.8)                            | 3.6%<br>(-1.7-11%)                   | 3.9%<br>(-2-12%)                    | 86<br>(-45-280)      | 470<br>(-220-1500)       |
| Serbia   | 1995 | Male   | 95 plus  | 65%<br>(39-88%)                | 35%<br>(12-61%)          | 2.3<br>(0.83-4.9)                           | 3.2%<br>(-1.9-10%)                   | 3.4%<br>(-2.4-12%)                  | 20<br>(-14-69)       | 75<br>(-45-250)          |
| Serbia   | 2000 | Female | All Ages | 59%<br>(50-67%)                | 41%<br>(33-50%)          | 2<br>(1.5-2.6)                              | 5.7%<br>(1.3-11%)                    | 7.5%<br>(1.1-16%)                   | 4000<br>(560-8800)   | 90000<br>(21000-180000)  |
| Serbia   | 2000 | Female | 15 to 19 | 59%<br>(39-75%)                | 41%<br>(25-61%)          | 1.4<br>(0.63-2.7)                           | 2.7%<br>(0.85-5.1%)                  | 6.1%<br>(0.23-14%)                  | 7.2<br>(0.28-16)     | 880<br>(270-1700)        |
| Serbia   | 2000 | Female | 20 to 24 | 68%<br>(50-83%)                | 32%<br>(17-50%)          | 2<br>(0.8-3.9)                              | 4.5%<br>(1.9-7.7%)                   | 7.9%<br>(0.17-17%)                  | 12<br>(0.25-26)      | 1600<br>(690-2900)       |
| Serbia   | 2000 | Female | 25 to 29 | 70%<br>(51-84%)                | 30%<br>(16-49%)          | 2.2<br>(0.93-4.1)                           | 4.5%<br>(1.9-7.5%)                   | 8.1%<br>(0.48-18%)                  | 13<br>(0.77-29)      | 1700<br>(730-3000)       |
| Serbia   | 2000 | Female | 30 to 34 | 70%<br>(51-84%)                | 30%<br>(16-49%)          | 2.3<br>(1.1-4.2)                            | 4.4%<br>(1.7-7.8%)                   | 8.5%<br>(0.81-18%)                  | 20<br>(1.8-41)       | 2000<br>(760-3400)       |
| Serbia   | 2000 | Female | 35 to 39 | 71%<br>(53-85%)                | 29%<br>(15-47%)          | 2.5<br>(1.1-4.4)                            | 4.8%<br>(1.4-8.9%)                   | 9.3%<br>(1.3-19%)                   | 33<br>(4.6-68)       | 2400<br>(730-4500)       |
| Serbia   | 2000 | Female | 40 to 44 | 70%<br>(53-84%)                | 30%<br>(16-47%)          | 2.8<br>(1.4-4.8)                            | 5.5%<br>(1.5-11%)                    | 10%<br>(2.4-20%)                    | 62<br>(14-120)       | 3600<br>(970-6800)       |
| Serbia   | 2000 | Female | 45 to 49 | 69%<br>(47-84%)                | 31%<br>(16-53%)          | 3.1<br>(1.6-5.4)                            | 6.7%<br>(1.9-13%)                    | 12%<br>(3.2-22%)                    | 140<br>(38-260)      | 6500<br>(1900-12000)     |
| Serbia   | 2000 | Female | 50 to 54 | 66%<br>(46-82%)                | 34%<br>(18-54%)          | 3.2<br>(1.6-5.3)                            | 7.3%<br>(2.2-14%)                    | 12%<br>(3.9-22%)                    | 180<br>(59-340)      | 7500<br>(2300-14000)     |
| Serbia   | 2000 | Female | 55 to 59 | 63%<br>(43-81%)                | 37%<br>(19-57%)          | 3.2<br>(1.5-5.4)                            | 8%<br>(2-15%)                        | 12%<br>(3-22%)                      | 220<br>(56-420)      | 7500<br>(1900-14000)     |
| Serbia   | 2000 | Female | 60 to 64 | 59%<br>(39-78%)                | 41%<br>(22-61%)          | 2.9<br>(1.4-5.3)                            | 7.4%<br>(0.88-16%)                   | 10%<br>(1.4-21%)                    | 370<br>(48-770)      | 11000<br>(1300-22000)    |
| Serbia   | 2000 | Female | 65 to 69 | 55%<br>(35-74%)                | 45%<br>(26-65%)          | 2.5<br>(1.3-4.3)                            | 7.1%<br>(0.6-15%)                    | 9.3%<br>(0.9-20%)                   | 590<br>(57-1300)     | 14000<br>(1100-31000)    |
| Serbia   | 2000 | Female | 70 to 74 | 49%<br>(31-66%)                | 51%<br>(34-69%)          | 2<br>(0.89-3.8)                             | 6.1%<br>(-0.55-15%)                  | 7.6%<br>(-0.61-19%)                 | 710<br>(-58-1700)    | 13000<br>(-1300-33000)   |
| Serbia   | 2000 | Female | 75 to 79 | 42%<br>(26-61%)                | 58%<br>(39-74%)          | 1.6<br>(0.66-3.2)                           | 5.2%<br>(-0.7-13%)                   | 6.2%<br>(-0.73-16%)                 | 670<br>(-81-1700)    | 9700<br>(-1300-26000)    |
| Serbia   | 2000 | Female | 80 to 84 | 37%<br>(22-55%)                | 63%<br>(45-78%)          | 1.5<br>(0.61-2.7)                           | 5%<br>(-0.19-13%)                    | 6%<br>(-0.23-15%)                   | 470<br>(-18-1200)    | 5000<br>(-180-13000)     |
| Serbia   | 2000 | Female | 85 to 89 | 35%<br>(22-51%)                | 65%<br>(49-78%)          | 1.5<br>(0.6-2.9)                            | 5.1%<br>(0.21-13%)                   | 6%<br>(0.31-16%)                    | 290<br>(14-760)      | 2200<br>(91-5600)        |
| Serbia   | 2000 | Female | 90 to 94 | 37%<br>(24-54%)                | 63%<br>(46-76%)          | 1.6<br>(0.59-3.4)                           | 5%<br>(0.065-14%)                    | 5.9%<br>(0.097-16%)                 | 190<br>(3.1-530)     | 960<br>(13-2700)         |
| Serbia   | 2000 | Female | 95 plus  | 41%<br>(24-62%)                | 59%<br>(38-76%)          | 1.8<br>(0.48-4.1)                           | 5.1%<br>(-0.26-15%)                  | 6%<br>(-0.23-18%)                   | 74<br>(-2.9-230)     | 250<br>(-12-750)         |
| Serbia   | 2000 | Male   | All Ages | 68%<br>(57-78%)                | 32%<br>(22-43%)          | 3.1<br>(2.4-3.9)                            | 11%<br>(4.7-17%)                     | 12%<br>(4.2-21%)                    | 6900<br>(2400-12000) | 190000<br>(82000-310000) |

| Location | Year | Sex    | Age      | Prevalence of current drinkers | Prevalence of abstainers | Population average of standard drinks daily | Percent of total attributable deaths | Percent of total attributable DALYs | Attributable deaths | Attributable DALYs      |
|----------|------|--------|----------|--------------------------------|--------------------------|---------------------------------------------|--------------------------------------|-------------------------------------|---------------------|-------------------------|
| Serbia   | 2000 | Male   | 15 to 19 | 59%<br>(36-80%)                | 41%<br>(20-64%)          | 1.4<br>(0.66-2.5)                           | 4.5%<br>(1.2-8.6%)                   | 6.9%<br>(0.36-15%)                  | 19<br>(0.98-42)     | 1900<br>(530-3600)      |
| Serbia   | 2000 | Male   | 20 to 24 | 70%<br>(48-87%)                | 30%<br>(13-52%)          | 2.5<br>(1.2-4.2)                            | 8.7%<br>(3.4-15%)                    | 12%<br>(2.2-23%)                    | 52<br>(9.2-100)     | 4700<br>(1800-8400)     |
| Serbia   | 2000 | Male   | 25 to 29 | 74%<br>(53-89%)                | 26%<br>(11-47%)          | 3.2<br>(1.7-5.5)                            | 9.9%<br>(4.3-17%)                    | 15%<br>(3.9-28%)                    | 62<br>(15-120)      | 5300<br>(2300-8900)     |
| Serbia   | 2000 | Male   | 30 to 34 | 76%<br>(56-91%)                | 24%<br>(9.4-44%)         | 3.7<br>(2-6)                                | 10%<br>(4.4-17%)                     | 16%<br>(4.8-29%)                    | 76<br>(22-140)      | 5800<br>(2400-9500)     |
| Serbia   | 2000 | Male   | 35 to 39 | 78%<br>(59-91%)                | 22%<br>(8.9-41%)         | 3.9<br>(2-6.4)                              | 11%<br>(4.7-20%)                     | 17%<br>(5.1-30%)                    | 110<br>(35-200)     | 7300<br>(2900-12000)    |
| Serbia   | 2000 | Male   | 40 to 44 | 79%<br>(59-92%)                | 21%<br>(8.3-41%)         | 4.4<br>(2.5-6.9)                            | 13%<br>(5.3-21%)                     | 18%<br>(6.4-31%)                    | 210<br>(77-350)     | 11000<br>(4800-19000)   |
| Serbia   | 2000 | Male   | 45 to 49 | 79%<br>(57-92%)                | 21%<br>(8.3-43%)         | 5.1<br>(2.9-7.8)                            | 14%<br>(6.6-22%)                     | 19%<br>(8-30%)                      | 420<br>(180-690)    | 19000<br>(9100-31000)   |
| Serbia   | 2000 | Male   | 50 to 54 | 78%<br>(57-91%)                | 22%<br>(9.1-43%)         | 5.4<br>(3.3-8)                              | 14%<br>(7.2-22%)                     | 18%<br>(8.8-28%)                    | 550<br>(270-860)    | 22000<br>(11000-34000)  |
| Serbia   | 2000 | Male   | 55 to 59 | 76%<br>(55-91%)                | 24%<br>(8.6-45%)         | 5.5<br>(3.2-8.4)                            | 14%<br>(6.8-22%)                     | 17%<br>(8.2-27%)                    | 590<br>(280-930)    | 20000<br>(9600-31000)   |
| Serbia   | 2000 | Male   | 60 to 64 | 75%<br>(51-91%)                | 25%<br>(9.2-49%)         | 5.3<br>(2.8-8.4)                            | 13%<br>(5-22%)                       | 15%<br>(5.9-26%)                    | 880<br>(340-1500)   | 25000<br>(9900-43000)   |
| Serbia   | 2000 | Male   | 65 to 69 | 74%<br>(50-90%)                | 26%<br>(9.7-50%)         | 4.8<br>(2.8-7.2)                            | 12%<br>(4.2-21%)                     | 14%<br>(4.8-24%)                    | 1200<br>(420-2100)  | 29000<br>(9800-50000)   |
| Serbia   | 2000 | Male   | 70 to 74 | 72%<br>(50-87%)                | 28%<br>(13-50%)          | 4.1<br>(2.2-6.9)                            | 10%<br>(2.4-19%)                     | 12%<br>(2.7-22%)                    | 1200<br>(270-2200)  | 23000<br>(5100-43000)   |
| Serbia   | 2000 | Male   | 75 to 79 | 69%<br>(47-86%)                | 31%<br>(14-53%)          | 3.5<br>(1.7-6)                              | 8.3%<br>(0.89-17%)                   | 9.4%<br>(0.96-19%)                  | 810<br>(82-1700)    | 12000<br>(1300-24000)   |
| Serbia   | 2000 | Male   | 80 to 84 | 67%<br>(44-85%)                | 33%<br>(15-56%)          | 3.1<br>(1.6-5.2)                            | 7.1%<br>(0.13-15%)                   | 7.9%<br>(0.032-17%)                 | 420<br>(1.7-900)    | 4600<br>(87-9800)       |
| Serbia   | 2000 | Male   | 85 to 89 | 66%<br>(43-83%)                | 34%<br>(17-57%)          | 2.8<br>(1.4-5)                              | 5.5%<br>(-0.57-13%)                  | 6.1%<br>(-0.74-14%)                 | 170<br>(-20-390)    | 1300<br>(-120-3000)     |
| Serbia   | 2000 | Male   | 90 to 94 | 65%<br>(44-86%)                | 35%<br>(14-56%)          | 2.6<br>(1.3-4.9)                            | 4.2%<br>(-0.99-11%)                  | 4.6%<br>(-1.4-13%)                  | 74<br>(-22-210)     | 400<br>(-98-1100)       |
| Serbia   | 2000 | Male   | 95 plus  | 66%<br>(39-88%)                | 34%<br>(12-61%)          | 2.4<br>(0.9-4.8)                            | 3.6%<br>(-1.5-11%)                   | 3.9%<br>(-1.9-12%)                  | 22<br>(-11-69)      | 79<br>(-33-240)         |
| Serbia   | 2005 | Female | All Ages | 59%<br>(51-67%)                | 41%<br>(33-49%)          | 2.2<br>(1.8-2.7)                            | 6%<br>(1.5-11%)                      | 7.8%<br>(1.1-16%)                   | 4300<br>(630-8800)  | 91000<br>(23000-170000) |
| Serbia   | 2005 | Female | 15 to 19 | 59%<br>(39-75%)                | 41%<br>(25-61%)          | 1.6<br>(0.71-2.9)                           | 2.7%<br>(0.96-4.9%)                  | 7.1%<br>(0.43-16%)                  | 5.9<br>(0.37-13)    | 800<br>(290-1500)       |
| Serbia   | 2005 | Female | 20 to 24 | 68%<br>(51-83%)                | 32%<br>(17-49%)          | 2.2<br>(0.95-4.3)                           | 4.6%<br>(2.1-7.7%)                   | 9%<br>(0.67-19%)                    | 10<br>(0.75-22)     | 1500<br>(690-2500)      |
| Serbia   | 2005 | Female | 25 to 29 | 70%<br>(51-84%)                | 30%<br>(16-49%)          | 2.4<br>(1-4.4)                              | 4.6%<br>(2.2-7.5%)                   | 9%<br>(1.2-19%)                     | 12<br>(1.6-26)      | 1700<br>(800-2900)      |
| Serbia   | 2005 | Female | 30 to 34 | 71%<br>(51-84%)                | 29%<br>(16-49%)          | 2.6<br>(1.2-4.6)                            | 4.6%<br>(2.1-7.9%)                   | 9.4%<br>(1.7-19%)                   | 19<br>(3.3-37)      | 2000<br>(840-3400)      |

| Location | Year | Sex    | Age      | Prevalence of current drinkers | Prevalence of abstainers | Population average of standard drinks daily | Percent of total attributable deaths | Percent of total attributable DALYs | Attributable deaths  | Attributable DALYs       |
|----------|------|--------|----------|--------------------------------|--------------------------|---------------------------------------------|--------------------------------------|-------------------------------------|----------------------|--------------------------|
| Serbia   | 2005 | Female | 35 to 39 | 71%<br>(55-85%)                | 29%<br>(15-45%)          | 2.8<br>(1.3-4.9)                            | 4.8%<br>(1.8-8.8%)                   | 10%<br>(2.1-20%)                    | 28<br>(5.9-55)       | 2200<br>(780-4000)       |
| Serbia   | 2005 | Female | 40 to 44 | 70%<br>(53-84%)                | 30%<br>(16-47%)          | 3.1<br>(1.5-5.2)                            | 5.8%<br>(1.9-11%)                    | 11%<br>(3-20%)                      | 57<br>(16-110)       | 3400<br>(1100-6200)      |
| Serbia   | 2005 | Female | 45 to 49 | 69%<br>(47-83%)                | 31%<br>(17-53%)          | 3.5<br>(1.7-6.1)                            | 6.9%<br>(2.3-13%)                    | 12%<br>(3.9-22%)                    | 110<br>(37-200)      | 5300<br>(1800-9700)      |
| Serbia   | 2005 | Female | 50 to 54 | 66%<br>(47-82%)                | 34%<br>(18-53%)          | 3.6<br>(1.9-5.8)                            | 7.5%<br>(2.5-14%)                    | 12%<br>(4.4-21%)                    | 200<br>(75-370)      | 8400<br>(3000-15000)     |
| Serbia   | 2005 | Female | 55 to 59 | 63%<br>(43-80%)                | 37%<br>(20-57%)          | 3.5<br>(1.8-5.9)                            | 7.8%<br>(2.5-15%)                    | 12%<br>(4.1-22%)                    | 260<br>(95-480)      | 9300<br>(3100-17000)     |
| Serbia   | 2005 | Female | 60 to 64 | 60%<br>(39-78%)                | 40%<br>(22-61%)          | 3.2<br>(1.6-5.8)                            | 7.7%<br>(1.5-15%)                    | 11%<br>(2.5-21%)                    | 280<br>(65-560)      | 8300<br>(1600-17000)     |
| Serbia   | 2005 | Female | 65 to 69 | 55%<br>(35-75%)                | 45%<br>(25-65%)          | 2.8<br>(1.4-4.6)                            | 7.5%<br>(1.1-16%)                    | 9.8%<br>(1.6-21%)                   | 500<br>(84-1000)     | 12000<br>(1800-25000)    |
| Serbia   | 2005 | Female | 70 to 74 | 49%<br>(31-67%)                | 51%<br>(33-69%)          | 2.3<br>(1-4.2)                              | 6.4%<br>(-0.36-15%)                  | 8.1%<br>(-0.29-19%)                 | 710<br>(-25-1600)    | 13000<br>(-770-32000)    |
| Serbia   | 2005 | Female | 75 to 79 | 42%<br>(26-62%)                | 58%<br>(38-74%)          | 1.8<br>(0.74-3.4)                           | 5.5%<br>(-0.61-14%)                  | 6.6%<br>(-0.65-16%)                 | 790<br>(-78-2000)    | 11000<br>(-1200-28000)   |
| Serbia   | 2005 | Female | 80 to 84 | 37%<br>(22-55%)                | 63%<br>(45-78%)          | 1.6<br>(0.68-2.9)                           | 5.4%<br>(-0.061-13%)                 | 6.4%<br>(0.01-15%)                  | 660<br>(0.99-1600)   | 7100<br>(-82-17000)      |
| Serbia   | 2005 | Female | 85 to 89 | 36%<br>(22-52%)                | 64%<br>(48-78%)          | 1.6<br>(0.66-3.2)                           | 5.5%<br>(0.45-14%)                   | 6.6%<br>(0.51-17%)                  | 380<br>(31-980)      | 2800<br>(230-7200)       |
| Serbia   | 2005 | Female | 90 to 94 | 37%<br>(24-55%)                | 63%<br>(45-76%)          | 1.8<br>(0.65-3.9)                           | 5.5%<br>(0.36-15%)                   | 6.5%<br>(0.48-18%)                  | 150<br>(11-400)      | 750<br>(47-2000)         |
| Serbia   | 2005 | Female | 95 plus  | 41%<br>(24-62%)                | 59%<br>(38-76%)          | 2<br>(0.55-4.6)                             | 5.5%<br>(-0.19-16%)                  | 6.5%<br>(-0.17-19%)                 | 66<br>(-1.7-200)     | 220<br>(-7.2-650)        |
| Serbia   | 2005 | Male   | All Ages | 68%<br>(58-79%)                | 32%<br>(21-42%)          | 3.5<br>(2.8-4.3)                            | 11%<br>(5.1-17%)                     | 13%<br>(4.9-21%)                    | 7100<br>(2700-12000) | 190000<br>(89000-300000) |
| Serbia   | 2005 | Male   | 15 to 19 | 60%<br>(37-81%)                | 40%<br>(19-63%)          | 1.6<br>(0.74-2.7)                           | 4.8%<br>(1.5-8.9%)                   | 8.2%<br>(0.92-18%)                  | 17<br>(1.9-37)       | 1800<br>(570-3300)       |
| Serbia   | 2005 | Male   | 20 to 24 | 70%<br>(49-87%)                | 30%<br>(13-51%)          | 2.8<br>(1.4-4.6)                            | 9.8%<br>(3.9-17%)                    | 15%<br>(3-28%)                      | 48<br>(10-94)        | 4400<br>(1800-7600)      |
| Serbia   | 2005 | Male   | 25 to 29 | 74%<br>(54-90%)                | 26%<br>(10-46%)          | 3.5<br>(1.9-5.9)                            | 11%<br>(5-18%)                       | 17%<br>(5-32%)                      | 64<br>(18-120)       | 5400<br>(2400-9100)      |
| Serbia   | 2005 | Male   | 30 to 34 | 76%<br>(55-91%)                | 24%<br>(9.3-45%)         | 4<br>(2.2-6.4)                              | 11%<br>(4.9-18%)                     | 19%<br>(6.2-33%)                    | 77<br>(26-140)       | 5900<br>(2600-9600)      |
| Serbia   | 2005 | Male   | 35 to 39 | 78%<br>(59-91%)                | 22%<br>(9-41%)           | 4.3<br>(2.3-6.8)                            | 12%<br>(5.5-20%)                     | 19%<br>(7.1-33%)                    | 100<br>(38-180)      | 6800<br>(3100-11000)     |
| Serbia   | 2005 | Male   | 40 to 44 | 79%<br>(59-91%)                | 21%<br>(8.5-41%)         | 4.8<br>(2.8-7.5)                            | 13%<br>(5.8-22%)                     | 20%<br>(7.8-32%)                    | 180<br>(72-300)      | 9900<br>(4300-16000)     |
| Serbia   | 2005 | Male   | 45 to 49 | 79%<br>(57-92%)                | 21%<br>(8.3-43%)         | 5.6<br>(3.2-8.5)                            | 15%<br>(7.4-23%)                     | 20%<br>(9.8-31%)                    | 350<br>(160-550)     | 16000<br>(7800-25000)    |
| Serbia   | 2005 | Male   | 50 to 54 | 78%<br>(58-91%)                | 22%<br>(9-42%)           | 5.9<br>(3.7-8.7)                            | 15%<br>(8.1-23%)                     | 19%<br>(10-29%)                     | 630<br>(340-960)     | 25000<br>(14000-38000)   |

| Location | Year | Sex    | Age      | Prevalence of current drinkers | Prevalence of abstainers | Population average of standard drinks daily | Percent of total attributable deaths | Percent of total attributable DALYs | Attributable deaths | Attributable DALYs      |
|----------|------|--------|----------|--------------------------------|--------------------------|---------------------------------------------|--------------------------------------|-------------------------------------|---------------------|-------------------------|
| Serbia   | 2005 | Male   | 55 to 59 | 76%<br>(56-91%)                | 24%<br>(8.8-44%)         | 6.1<br>(3.6-9.1)                            | 14%<br>(7.5-22%)                     | 18%<br>(9.3-28%)                    | 740<br>(390-1200)   | 26000<br>(13000-40000)  |
| Serbia   | 2005 | Male   | 60 to 64 | 75%<br>(53-91%)                | 25%<br>(9.1-47%)         | 5.8<br>(3.2-9.3)                            | 13%<br>(5.7-22%)                     | 16%<br>(6.8-26%)                    | 700<br>(300-1100)   | 20000<br>(8600-33000)   |
| Serbia   | 2005 | Male   | 65 to 69 | 74%<br>(50-90%)                | 26%<br>(10-50%)          | 5.3<br>(3.2-7.9)                            | 13%<br>(5.4-21%)                     | 15%<br>(6.2-24%)                    | 1100<br>(440-1800)  | 25000<br>(11000-42000)  |
| Serbia   | 2005 | Male   | 70 to 74 | 72%<br>(51-87%)                | 28%<br>(13-49%)          | 4.5<br>(2.6-7.5)                            | 11%<br>(3.1-20%)                     | 12%<br>(3.6-22%)                    | 1200<br>(370-2200)  | 24000<br>(7000-42000)   |
| Serbia   | 2005 | Male   | 75 to 79 | 69%<br>(47-86%)                | 31%<br>(14-53%)          | 3.8<br>(2-6.5)                              | 8.9%<br>(1.5-17%)                    | 10%<br>(1.7-19%)                    | 1000<br>(170-2000)  | 15000<br>(2400-30000)   |
| Serbia   | 2005 | Male   | 80 to 84 | 67%<br>(42-84%)                | 33%<br>(16-58%)          | 3.4<br>(1.8-5.6)                            | 7.7%<br>(0.89-15%)                   | 8.7%<br>(1.1-18%)                   | 610<br>(76-1200)    | 6700<br>(770-13000)     |
| Serbia   | 2005 | Male   | 85 to 89 | 65%<br>(43-83%)                | 35%<br>(17-57%)          | 3.1<br>(1.6-5.2)                            | 6.4%<br>(0.26-14%)                   | 7.2%<br>(0.16-16%)                  | 230<br>(5.1-490)    | 1800<br>(74-3800)       |
| Serbia   | 2005 | Male   | 90 to 94 | 65%<br>(44-84%)                | 35%<br>(16-56%)          | 2.9<br>(1.4-5.1)                            | 5.1%<br>(-0.39-13%)                  | 5.6%<br>(-0.59-15%)                 | 59<br>(-6.3-150)    | 320<br>(-25-800)        |
| Serbia   | 2005 | Male   | 95 plus  | 65%<br>(39-88%)                | 35%<br>(12-61%)          | 2.6<br>(1-5.3)                              | 4.3%<br>(-1.2-12%)                   | 4.7%<br>(-1.6-14%)                  | 19<br>(-6.5-56)     | 68<br>(-19-200)         |
| Serbia   | 2010 | Female | All Ages | 59%<br>(51-67%)                | 41%<br>(33-49%)          | 2.5<br>(2-3.1)                              | 5.9%<br>(1.6-11%)                    | 7.7%<br>(1.3-16%)                   | 4100<br>(730-8600)  | 87000<br>(25000-160000) |
| Serbia   | 2010 | Female | 15 to 19 | 59%<br>(39-76%)                | 41%<br>(24-61%)          | 1.7<br>(0.74-3.2)                           | 2.8%<br>(1-5%)                       | 7.4%<br>(0.63-16%)                  | 5.1<br>(0.36-11)    | 710<br>(260-1200)       |
| Serbia   | 2010 | Female | 20 to 24 | 68%<br>(50-83%)                | 32%<br>(17-50%)          | 2.5<br>(1-4.6)                              | 4.7%<br>(2.1-7.8%)                   | 9.4%<br>(1.1-20%)                   | 9<br>(1.1-19)       | 1400<br>(650-2300)      |
| Serbia   | 2010 | Female | 25 to 29 | 70%<br>(50-84%)                | 30%<br>(16-50%)          | 2.6<br>(1.1-4.7)                            | 4.9%<br>(2.3-7.9%)                   | 9.5%<br>(1.4-20%)                   | 12<br>(1.7-24)      | 1600<br>(740-2600)      |
| Serbia   | 2010 | Female | 30 to 34 | 71%<br>(50-84%)                | 29%<br>(16-50%)          | 2.8<br>(1.3-4.8)                            | 4.7%<br>(2.2-7.9%)                   | 9.8%<br>(2-19%)                     | 18<br>(3.8-35)      | 1900<br>(870-3200)      |
| Serbia   | 2010 | Female | 35 to 39 | 71%<br>(54-85%)                | 29%<br>(15-46%)          | 3.1<br>(1.4-5.4)                            | 4.9%<br>(2-8.7%)                     | 10%<br>(2.6-20%)                    | 28<br>(6.9-55)      | 2400<br>(970-4100)      |
| Serbia   | 2010 | Female | 40 to 44 | 70%<br>(53-84%)                | 30%<br>(16-47%)          | 3.4<br>(1.7-5.8)                            | 5.7%<br>(2.1-10%)                    | 11%<br>(3.8-20%)                    | 51<br>(17-94)       | 3200<br>(1200-5700)     |
| Serbia   | 2010 | Female | 45 to 49 | 69%<br>(47-83%)                | 31%<br>(17-53%)          | 3.8<br>(1.9-6.8)                            | 6.7%<br>(2.5-12%)                    | 12%<br>(4.6-22%)                    | 93<br>(35-170)      | 4700<br>(1700-8500)     |
| Serbia   | 2010 | Female | 50 to 54 | 66%<br>(47-81%)                | 34%<br>(19-53%)          | 3.9<br>(2.1-6.6)                            | 7.4%<br>(2.8-13%)                    | 12%<br>(4.8-21%)                    | 150<br>(63-260)     | 6500<br>(2500-11000)    |
| Serbia   | 2010 | Female | 55 to 59 | 63%<br>(44-79%)                | 37%<br>(21-56%)          | 3.8<br>(1.9-6.3)                            | 7.7%<br>(2.6-14%)                    | 12%<br>(4.5-21%)                    | 270<br>(100-490)    | 10000<br>(3500-18000)   |
| Serbia   | 2010 | Female | 60 to 64 | 59%<br>(38-78%)                | 41%<br>(22-62%)          | 3.5<br>(1.7-6.2)                            | 7.2%<br>(1.9-14%)                    | 11%<br>(3.2-20%)                    | 320<br>(95-620)     | 10000<br>(2600-19000)   |
| Serbia   | 2010 | Female | 65 to 69 | 55%<br>(36-75%)                | 45%<br>(25-64%)          | 3<br>(1.6-4.9)                              | 7.3%<br>(1.5-15%)                    | 9.9%<br>(2-20%)                     | 380<br>(75-770)     | 9300<br>(1700-19000)    |
| Serbia   | 2010 | Female | 70 to 74 | 49%<br>(31-67%)                | 51%<br>(33-69%)          | 2.5<br>(1.1-4.6)                            | 6.3%<br>(0.034-15%)                  | 8.1%<br>(0.21-19%)                  | 570<br>(15-1300)    | 11000<br>(62-26000)     |



| Location | Year | Sex    | Age      | Prevalence of current drinkers | Prevalence of abstainers | Population average of standard drinks daily | Percent of total attributable deaths | Percent of total attributable DALYs | Attributable deaths  | Attributable DALYs       |
|----------|------|--------|----------|--------------------------------|--------------------------|---------------------------------------------|--------------------------------------|-------------------------------------|----------------------|--------------------------|
| Serbia   | 2010 | Female | 75 to 79 | 42%<br>(26-60%)                | 58%<br>(40-74%)          | 2<br>(0.79-3.8)                             | 5.5%<br>(-0.45-14%)                  | 6.7%<br>(-0.52-16%)                 | 740<br>(-54-1800)    | 11000<br>(-910-27000)    |
| Serbia   | 2010 | Female | 80 to 84 | 37%<br>(22-55%)                | 63%<br>(45-78%)          | 1.8<br>(0.75-3.2)                           | 5.4%<br>(0.023-13%)                  | 6.4%<br>(0.0082-16%)                | 700<br>(0.91-1700)   | 7600<br>(36-18000)       |
| Serbia   | 2010 | Female | 85 to 89 | 35%<br>(22-51%)                | 65%<br>(49-78%)          | 1.8<br>(0.73-3.5)                           | 5.5%<br>(0.42-14%)                   | 6.5%<br>(0.52-17%)                  | 540<br>(44-1400)     | 4100<br>(300-11000)      |
| Serbia   | 2010 | Female | 90 to 94 | 37%<br>(23-54%)                | 63%<br>(46-77%)          | 1.9<br>(0.72-4)                             | 5.4%<br>(0.39-15%)                   | 6.4%<br>(0.47-18%)                  | 200<br>(14-550)      | 1000<br>(73-2800)        |
| Serbia   | 2010 | Female | 95 plus  | 40%<br>(23-61%)                | 60%<br>(39-77%)          | 2.1<br>(0.56-4.9)                           | 5.4%<br>(-0.15-15%)                  | 6.4%<br>(-0.15-18%)                 | 52<br>(-1.2-150)     | 180<br>(-4.7-500)        |
| Serbia   | 2010 | Male   | All Ages | 69%<br>(59-78%)                | 31%<br>(22-41%)          | 4<br>(3.2-4.9)                              | 11%<br>(5.3-18%)                     | 13%<br>(5-21%)                      | 7200<br>(2900-12000) | 190000<br>(90000-300000) |
| Serbia   | 2010 | Male   | 15 to 19 | 59%<br>(38-80%)                | 41%<br>(20-62%)          | 1.7<br>(0.81-3)                             | 4.9%<br>(1.7-9%)                     | 8.9%<br>(1.1-19%)                   | 14<br>(1.8-30)       | 1500<br>(550-2800)       |
| Serbia   | 2010 | Male   | 20 to 24 | 70%<br>(49-87%)                | 30%<br>(13-51%)          | 3.1<br>(1.6-5.2)                            | 10%<br>(4.3-17%)                     | 16%<br>(3.6-30%)                    | 41<br>(9.4-81)       | 4000<br>(1700-6800)      |
| Serbia   | 2010 | Male   | 25 to 29 | 74%<br>(54-89%)                | 26%<br>(11-46%)          | 3.9<br>(2-6.4)                              | 12%<br>(5.3-19%)                     | 19%<br>(6-35%)                      | 60<br>(18-110)       | 5100<br>(2300-8400)      |
| Serbia   | 2010 | Male   | 30 to 34 | 76%<br>(56-90%)                | 24%<br>(9.5-44%)         | 4.4<br>(2.4-7)                              | 12%<br>(5.5-19%)                     | 20%<br>(7-35%)                      | 81<br>(27-140)       | 6100<br>(2800-10000)     |
| Serbia   | 2010 | Male   | 35 to 39 | 79%<br>(61-91%)                | 21%<br>(8.7-39%)         | 4.7<br>(2.6-7.4)                            | 12%<br>(5.6-20%)                     | 20%<br>(8.2-35%)                    | 100<br>(42-180)      | 7000<br>(3400-11000)     |
| Serbia   | 2010 | Male   | 40 to 44 | 79%<br>(59-92%)                | 21%<br>(8.3-41%)         | 5.3<br>(3.1-8.1)                            | 13%<br>(6.3-21%)                     | 21%<br>(9.1-34%)                    | 170<br>(73-270)      | 9500<br>(4500-15000)     |
| Serbia   | 2010 | Male   | 45 to 49 | 79%<br>(55-92%)                | 21%<br>(8.4-45%)         | 6.1<br>(3.5-9.6)                            | 15%<br>(8.2-23%)                     | 21%<br>(11-32%)                     | 300<br>(160-470)     | 14000<br>(7600-22000)    |
| Serbia   | 2010 | Male   | 50 to 54 | 78%<br>(57-91%)                | 22%<br>(9.3-43%)         | 6.4<br>(3.9-9.5)                            | 15%<br>(8.2-23%)                     | 19%<br>(10-29%)                     | 500<br>(270-750)     | 20000<br>(11000-31000)   |
| Serbia   | 2010 | Male   | 55 to 59 | 76%<br>(54-91%)                | 24%<br>(9.3-46%)         | 6.6<br>(3.9-9.9)                            | 15%<br>(7.5-23%)                     | 18%<br>(9.3-27%)                    | 810<br>(440-1300)    | 28000<br>(15000-44000)   |
| Serbia   | 2010 | Male   | 60 to 64 | 75%<br>(51-91%)                | 25%<br>(9.2-49%)         | 6.3<br>(3.5-10)                             | 13%<br>(6.1-21%)                     | 16%<br>(7.5-25%)                    | 860<br>(410-1400)    | 26000<br>(12000-41000)   |
| Serbia   | 2010 | Male   | 65 to 69 | 74%<br>(50-90%)                | 26%<br>(10-50%)          | 5.7<br>(3.5-8.3)                            | 13%<br>(5.5-21%)                     | 15%<br>(6.6-24%)                    | 830<br>(360-1400)    | 20000<br>(8700-34000)    |
| Serbia   | 2010 | Male   | 70 to 74 | 71%<br>(49-87%)                | 29%<br>(13-51%)          | 4.9<br>(2.8-8.2)                            | 11%<br>(3.9-20%)                     | 13%<br>(4.4-23%)                    | 1100<br>(370-1900)   | 21000<br>(7100-37000)    |
| Serbia   | 2010 | Male   | 75 to 79 | 69%<br>(46-86%)                | 31%<br>(14-54%)          | 4.2<br>(2.2-7.4)                            | 9.2%<br>(2-18%)                      | 10%<br>(2.4-20%)                    | 1100<br>(250-2100)   | 16000<br>(3600-31000)    |
| Serbia   | 2010 | Male   | 80 to 84 | 67%<br>(42-85%)                | 33%<br>(15-58%)          | 3.8<br>(2-6.1)                              | 8.2%<br>(1.4-16%)                    | 9.2%<br>(1.5-19%)                   | 750<br>(130-1500)    | 8400<br>(1500-17000)     |
| Serbia   | 2010 | Male   | 85 to 89 | 65%<br>(43-83%)                | 35%<br>(17-57%)          | 3.4<br>(1.7-5.7)                            | 6.9%<br>(0.92-15%)                   | 7.7%<br>(0.88-17%)                  | 380<br>(44-840)      | 3000<br>(400-6500)       |
| Serbia   | 2010 | Male   | 90 to 94 | 65%<br>(44-85%)                | 35%<br>(15-56%)          | 3.2<br>(1.5-5.6)                            | 5.6%<br>(-0.29-14%)                  | 6.2%<br>(-0.51-16%)                 | 94<br>(-7.6-240)     | 510<br>(-27-1300)        |

| Location | Year | Sex    | Age      | Prevalence of current drinkers | Prevalence of abstainers | Population average of standard drinks daily | Percent of total attributable deaths | Percent of total attributable DALYs | Attributable deaths  | Attributable DALYs       |
|----------|------|--------|----------|--------------------------------|--------------------------|---------------------------------------------|--------------------------------------|-------------------------------------|----------------------|--------------------------|
| Serbia   | 2010 | Male   | 95 plus  | 66%<br>(40-88%)                | 34%<br>(12-60%)          | 2.9<br>(1.1-5.6)                            | 4.8%<br>(-0.79-13%)                  | 5.2%<br>(-1-15%)                    | 17<br>(-3.3-46)      | 61<br>(-9.8-160)         |
| Serbia   | 2016 | Female | All Ages | 58%<br>(50-67%)                | 42%<br>(33-50%)          | 2.6<br>(1.9-3.4)                            | 5.6%<br>(1.5-11%)                    | 7.1%<br>(1.1-16%)                   | 3700<br>(550-8100)   | 78000<br>(21000-150000)  |
| Serbia   | 2016 | Female | 15 to 19 | 58%<br>(39-76%)                | 42%<br>(24-61%)          | 1.8<br>(0.72-3.4)                           | 3%<br>(1.1-5.4%)                     | 7.7%<br>(0.8-16%)                   | 5.5<br>(0.59-12)     | 720<br>(260-1300)        |
| Serbia   | 2016 | Female | 20 to 24 | 68%<br>(50-82%)                | 32%<br>(18-50%)          | 2.6<br>(1-4.9)                              | 4.9%<br>(2.2-8.4%)                   | 9.7%<br>(1.1-20%)                   | 9.1<br>(1.1-19)      | 1300<br>(620-2200)       |
| Serbia   | 2016 | Female | 25 to 29 | 70%<br>(50-83%)                | 30%<br>(17-50%)          | 2.7<br>(1.2-5)                              | 5%<br>(2.5-8.1%)                     | 9.8%<br>(1.8-20%)                   | 12<br>(1.9-24)       | 1600<br>(770-2600)       |
| Serbia   | 2016 | Female | 30 to 34 | 70%<br>(50-84%)                | 30%<br>(16-50%)          | 2.9<br>(1.3-5.1)                            | 4.9%<br>(2.4-8.2%)                   | 10%<br>(2.3-20%)                    | 17<br>(3.7-33)       | 1800<br>(870-3000)       |
| Serbia   | 2016 | Female | 35 to 39 | 71%<br>(54-84%)                | 29%<br>(16-46%)          | 3.2<br>(1.5-5.8)                            | 5.1%<br>(2.2-9.3%)                   | 11%<br>(3.1-21%)                    | 29<br>(7.4-57)       | 2400<br>(990-4200)       |
| Serbia   | 2016 | Female | 40 to 44 | 70%<br>(53-84%)                | 30%<br>(16-47%)          | 3.6<br>(1.7-6.1)                            | 5.9%<br>(2.2-11%)                    | 12%<br>(3.7-22%)                    | 54<br>(17-100)       | 3500<br>(1300-6200)      |
| Serbia   | 2016 | Female | 45 to 49 | 68%<br>(46-83%)                | 32%<br>(17-54%)          | 3.9<br>(1.9-7.2)                            | 6.5%<br>(2.6-12%)                    | 12%<br>(4.7-22%)                    | 87<br>(34-160)       | 4600<br>(1800-8200)      |
| Serbia   | 2016 | Female | 50 to 54 | 65%<br>(45-81%)                | 35%<br>(19-55%)          | 4<br>(2-7)                                  | 7.1%<br>(2.7-13%)                    | 12%<br>(4.8-21%)                    | 130<br>(53-240)      | 5800<br>(2200-11000)     |
| Serbia   | 2016 | Female | 55 to 59 | 62%<br>(43-80%)                | 38%<br>(20-57%)          | 3.9<br>(1.9-6.6)                            | 7.3%<br>(2.4-13%)                    | 11%<br>(4.2-21%)                    | 190<br>(70-340)      | 7100<br>(2400-13000)     |
| Serbia   | 2016 | Female | 60 to 64 | 59%<br>(38-78%)                | 41%<br>(22-62%)          | 3.6<br>(1.7-6.6)                            | 6.9%<br>(1.7-13%)                    | 10%<br>(2.9-20%)                    | 310<br>(88-590)      | 9800<br>(2500-19000)     |
| Serbia   | 2016 | Female | 65 to 69 | 55%<br>(35-74%)                | 45%<br>(26-65%)          | 3.2<br>(1.6-5.2)                            | 6.8%<br>(1.3-14%)                    | 9.5%<br>(2.1-20%)                   | 440<br>(96-910)      | 11000<br>(2100-23000)    |
| Serbia   | 2016 | Female | 70 to 74 | 48%<br>(30-67%)                | 52%<br>(33-70%)          | 2.6<br>(1.1-4.7)                            | 6%<br>(0.1-14%)                      | 7.9%<br>(0.28-19%)                  | 420<br>(15-960)      | 8400<br>(160-19000)      |
| Serbia   | 2016 | Female | 75 to 79 | 41%<br>(26-60%)                | 59%<br>(40-74%)          | 2.1<br>(0.79-4)                             | 5.1%<br>(-0.26-13%)                  | 6.4%<br>(-0.26-17%)                 | 510<br>(-21-1300)    | 7800<br>(-370-20000)     |
| Serbia   | 2016 | Female | 80 to 84 | 36%<br>(21-55%)                | 64%<br>(45-79%)          | 1.9<br>(0.75-3.4)                           | 4.8%<br>(0.0076-12%)                 | 5.7%<br>(-0.069-15%)                | 580<br>(-7.2-1500)   | 6600<br>(12-17000)       |
| Serbia   | 2016 | Female | 85 to 89 | 35%<br>(22-51%)                | 65%<br>(49-78%)          | 1.8<br>(0.75-3.6)                           | 4.6%<br>(-0.044-12%)                 | 5.5%<br>(-0.034-15%)                | 510<br>(-3.1-1400)   | 4000<br>(-38-11000)      |
| Serbia   | 2016 | Female | 90 to 94 | 37%<br>(23-53%)                | 63%<br>(47-77%)          | 2<br>(0.75-4.3)                             | 4.6%<br>(-0.21-14%)                  | 5.5%<br>(-0.3-17%)                  | 280<br>(-15-850)     | 1500<br>(-67-4400)       |
| Serbia   | 2016 | Female | 95 plus  | 40%<br>(23-61%)                | 60%<br>(39-77%)          | 2.2<br>(0.6-5.2)                            | 4.8%<br>(-0.34-14%)                  | 5.7%<br>(-0.44-17%)                 | 82<br>(-6.3-250)     | 280<br>(-20-860)         |
| Serbia   | 2016 | Male   | All Ages | 69%<br>(59-79%)                | 31%<br>(21-41%)          | 4.3<br>(3.1-5.7)                            | 11%<br>(5.5-18%)                     | 13%<br>(4.9-22%)                    | 6800<br>(2700-12000) | 180000<br>(88000-290000) |
| Serbia   | 2016 | Male   | 15 to 19 | 59%<br>(37-80%)                | 41%<br>(20-63%)          | 1.8<br>(0.81-3.3)                           | 5.4%<br>(1.7-10%)                    | 9.1%<br>(0.97-19%)                  | 17<br>(1.9-37)       | 1700<br>(550-3200)       |
| Serbia   | 2016 | Male   | 20 to 24 | 70%<br>(49-87%)                | 30%<br>(13-51%)          | 3.2<br>(1.5-5.5)                            | 11%<br>(4.3-20%)                     | 16%<br>(3.4-32%)                    | 48<br>(10-95)        | 4400<br>(1700-7700)      |

| Location | Year | Sex    | Age      | Prevalence of current drinkers | Prevalence of abstainers | Population average of standard drinks daily | Percent of total attributable deaths | Percent of total attributable DALYs | Attributable deaths | Attributable DALYs     |
|----------|------|--------|----------|--------------------------------|--------------------------|---------------------------------------------|--------------------------------------|-------------------------------------|---------------------|------------------------|
| Serbia   | 2016 | Male   | 25 to 29 | 73%<br>(54-89%)                | 27%<br>(11-46%)          | 4.1<br>(2.1-6.9)                            | 12%<br>(5.6-21%)                     | 19%<br>(6.1-36%)                    | 69<br>(21-130)      | 5700<br>(2600-9500)    |
| Serbia   | 2016 | Male   | 30 to 34 | 76%<br>(55-91%)                | 24%<br>(9.3-45%)         | 4.7<br>(2.4-7.7)                            | 13%<br>(6.1-21%)                     | 21%<br>(7.5-36%)                    | 84<br>(30-150)      | 6300<br>(2900-10000)   |
| Serbia   | 2016 | Male   | 35 to 39 | 78%<br>(59-91%)                | 22%<br>(9.4-41%)         | 4.9<br>(2.6-8.2)                            | 13%<br>(6-21%)                       | 21%<br>(8-35%)                      | 120<br>(46-200)     | 7800<br>(3600-12000)   |
| Serbia   | 2016 | Male   | 40 to 44 | 79%<br>(60-92%)                | 21%<br>(8.3-40%)         | 5.6<br>(3.2-9)                              | 14%<br>(6.8-22%)                     | 22%<br>(9.8-35%)                    | 190<br>(85-300)     | 11000<br>(5000-16000)  |
| Serbia   | 2016 | Male   | 45 to 49 | 79%<br>(58-91%)                | 21%<br>(8.7-42%)         | 6.4<br>(3.6-11)                             | 15%<br>(8.4-23%)                     | 21%<br>(11-33%)                     | 300<br>(160-460)    | 14000<br>(7800-22000)  |
| Serbia   | 2016 | Male   | 50 to 54 | 78%<br>(57-91%)                | 22%<br>(9.3-43%)         | 6.9<br>(4.1-11)                             | 15%<br>(8.5-23%)                     | 20%<br>(11-30%)                     | 430<br>(240-650)    | 18000<br>(9700-27000)  |
| Serbia   | 2016 | Male   | 55 to 59 | 76%<br>(55-91%)                | 24%<br>(9.3-45%)         | 7<br>(4.1-11)                               | 15%<br>(7.7-23%)                     | 19%<br>(9.7-28%)                    | 590<br>(310-900)    | 21000<br>(11000-32000) |
| Serbia   | 2016 | Male   | 60 to 64 | 75%<br>(51-90%)                | 25%<br>(9.5-49%)         | 6.8<br>(3.7-11)                             | 13%<br>(6-21%)                       | 16%<br>(7.5-26%)                    | 860<br>(410-1400)   | 26000<br>(12000-42000) |
| Serbia   | 2016 | Male   | 65 to 69 | 73%<br>(49-90%)                | 27%<br>(10-51%)          | 6.1<br>(3.6-9.3)                            | 12%<br>(5.8-20%)                     | 15%<br>(6.9-24%)                    | 1100<br>(490-1700)  | 26000<br>(12000-43000) |
| Serbia   | 2016 | Male   | 70 to 74 | 71%<br>(49-87%)                | 29%<br>(13-51%)          | 5.2<br>(2.9-8.4)                            | 11%<br>(4-19%)                       | 13%<br>(4.9-23%)                    | 880<br>(330-1500)   | 17000<br>(6400-30000)  |
| Serbia   | 2016 | Male   | 75 to 79 | 69%<br>(46-85%)                | 31%<br>(15-54%)          | 4.4<br>(2.2-8)                              | 9.1%<br>(1.9-18%)                    | 10%<br>(2.1-20%)                    | 830<br>(170-1600)   | 13000<br>(2700-24000)  |
| Serbia   | 2016 | Male   | 80 to 84 | 67%<br>(43-85%)                | 33%<br>(15-57%)          | 3.9<br>(1.9-6.7)                            | 7.9%<br>(1-16%)                      | 8.9%<br>(1-19%)                     | 730<br>(86-1600)    | 8300<br>(1000-17000)   |
| Serbia   | 2016 | Male   | 85 to 89 | 65%<br>(43-84%)                | 35%<br>(16-57%)          | 3.6<br>(1.8-6.2)                            | 6.7%<br>(0.33-16%)                   | 7.4%<br>(0.055-18%)                 | 450<br>(3.4-1100)   | 3700<br>(190-8400)     |
| Serbia   | 2016 | Male   | 90 to 94 | 65%<br>(44-85%)                | 35%<br>(15-56%)          | 3.3<br>(1.6-6.1)                            | 5.4%<br>(-0.64-15%)                  | 6%<br>(-1-16%)                      | 160<br>(-28-430)    | 870<br>(-100-2300)     |
| Serbia   | 2016 | Male   | 95 plus  | 65%<br>(40-88%)                | 35%<br>(12-60%)          | 3<br>(1.1-6.1)                              | 4.9%<br>(-0.69-13%)                  | 5.4%<br>(-0.96-15%)                 | 30<br>(-5.5-87)     | 110<br>(-15-310)       |
| Slovakia | 1990 | Female | All Ages | 87%<br>(84-89%)                | 13%<br>(11-16%)          | 1.9<br>(1.6-2.2)                            | 2.6%<br>(0.82-4.6%)                  | 1.9%<br>(-1.7-5.7%)                 | 460<br>(-410-1400)  | 20000<br>(6400-35000)  |
| Slovakia | 1990 | Female | 15 to 19 | 88%<br>(81-93%)                | 12%<br>(6.9-19%)         | 2.3<br>(1.6-3.1)                            | 3.8%<br>(2.4-5.5%)                   | 9.2%<br>(4.9-14%)                   | 7<br>(3.6-11)       | 780<br>(490-1100)      |
| Slovakia | 1990 | Female | 20 to 24 | 92%<br>(87-95%)                | 8.3%<br>(5.1-13%)        | 2.9<br>(2-4)                                | 5.3%<br>(3.7-7.1%)                   | 10%<br>(6.1-15%)                    | 7.1<br>(4.1-11)     | 990<br>(670-1400)      |
| Slovakia | 1990 | Female | 25 to 29 | 93%<br>(89-96%)                | 6.9%<br>(3.9-11%)        | 2.4<br>(1.7-3.3)                            | 4.8%<br>(3.4-6.3%)                   | 8.6%<br>(5.2-12%)                   | 8.1<br>(4.9-11)     | 1100<br>(740-1500)     |
| Slovakia | 1990 | Female | 30 to 34 | 93%<br>(89-96%)                | 6.6%<br>(3.9-11%)        | 2.3<br>(1.7-3.1)                            | 4.6%<br>(3.3-6.1%)                   | 8.9%<br>(6-12%)                     | 13<br>(8.6-17)      | 1300<br>(940-1800)     |
| Slovakia | 1990 | Female | 35 to 39 | 92%<br>(88-96%)                | 7.6%<br>(4.5-12%)        | 2.7<br>(1.9-3.6)                            | 5.4%<br>(3.8-7.2%)                   | 11%<br>(7.3-14%)                    | 27<br>(19-36)       | 1900<br>(1400-2600)    |
| Slovakia | 1990 | Female | 40 to 44 | 92%<br>(87-95%)                | 8.1%<br>(4.9-13%)        | 2.9<br>(2.1-3.8)                            | 6.1%<br>(4.4-8.3%)                   | 11%<br>(8.1-15%)                    | 39<br>(27-52)       | 2300<br>(1600-3000)    |

| Location | Year | Sex    | Age      | Prevalence of current drinkers | Prevalence of abstainers | Population average of standard drinks daily | Percent of total attributable deaths | Percent of total attributable DALYs | Attributable deaths | Attributable DALYs        |
|----------|------|--------|----------|--------------------------------|--------------------------|---------------------------------------------|--------------------------------------|-------------------------------------|---------------------|---------------------------|
| Slovakia | 1990 | Female | 45 to 49 | 92%<br>(87-95%)                | 8%<br>(4.7-13%)          | 3<br>(2.1-4.1)                              | 6.6%<br>(4.5-9.4%)                   | 11%<br>(7.7-16%)                    | 52<br>(36-73)       | 2500<br>(1800-3500)       |
| Slovakia | 1990 | Female | 50 to 54 | 91%<br>(87-95%)                | 8.6%<br>(5.2-13%)        | 2.8<br>(2-3.9)                              | 6.1%<br>(3.7-9.3%)                   | 9.6%<br>(5.8-14%)                   | 64<br>(38-93)       | 2600<br>(1600-3900)       |
| Slovakia | 1990 | Female | 55 to 59 | 90%<br>(85-94%)                | 9.8%<br>(6-15%)          | 2.5<br>(1.8-3.4)                            | 4.3%<br>(1.8-7.5%)                   | 6.3%<br>(2.6-11%)                   | 68<br>(28-120)      | 2400<br>(970-4100)        |
| Slovakia | 1990 | Female | 60 to 64 | 89%<br>(82-93%)                | 11%<br>(6.8-18%)         | 2.4<br>(1.6-3.3)                            | 2.4%<br>(-0.6-6%)                    | 3.2%<br>(-1-8.2%)                   | 54<br>(-17-140)     | 1600<br>(-400-4100)       |
| Slovakia | 1990 | Female | 65 to 69 | 86%<br>(79-92%)                | 14%<br>(7.8-21%)         | 2.4<br>(1.7-3.2)                            | 1.4%<br>(-2.1-4.9%)                  | 1.7%<br>(-2.9-6.3%)                 | 47<br>(-81-170)     | 1200<br>(-1800-4000)      |
| Slovakia | 1990 | Female | 70 to 74 | 81%<br>(73-88%)                | 19%<br>(12-27%)          | 2.1<br>(1.4-3)                              | 0.88%<br>(-3-4.7%)                   | 0.96%<br>(-4-5.9%)                  | 21<br>(-88-130)     | 480<br>(-1600-2600)       |
| Slovakia | 1990 | Female | 75 to 79 | 73%<br>(61-83%)                | 27%<br>(17-39%)          | 1.8<br>(1.2-2.8)                            | 0.52%<br>(-2.9-4.3%)                 | 0.45%<br>(-3.8-5.1%)                | 19<br>(-160-220)    | 400<br>(-2300-3300)       |
| Slovakia | 1990 | Female | 80 to 84 | 69%<br>(54-80%)                | 31%<br>(20-46%)          | 1.8<br>(1.2-2.6)                            | 0.46%<br>(-2.9-4.3%)                 | 0.34%<br>(-3.7-5%)                  | 17<br>(-180-240)    | 280<br>(-1800-2700)       |
| Slovakia | 1990 | Female | 85 to 89 | 68%<br>(54-79%)                | 32%<br>(21-46%)          | 2<br>(1.2-2.9)                              | 0.45%<br>(-3.5-4.9%)                 | 0.29%<br>(-4.5-5.7%)                | 9.5<br>(-150-190)   | 130<br>(-1000-1400)       |
| Slovakia | 1990 | Female | 90 to 94 | 70%<br>(56-80%)                | 30%<br>(20-44%)          | 2.2<br>(1.3-3.3)                            | 0.67%<br>(-4.1-6.7%)                 | 0.51%<br>(-5.2-7.6%)                | 6.9<br>(-70-100)    | 55<br>(-340-540)          |
| Slovakia | 1990 | Female | 95 plus  | 72%<br>(55-85%)                | 28%<br>(15-45%)          | 2.3<br>(1.2-3.7)                            | 1.1%<br>(-4.5-8.3%)                  | 0.96%<br>(-5.6-9.5%)                | 2.5<br>(-15-25)     | 12<br>(-46-87)            |
| Slovakia | 1990 | Male   | All Ages | 84%<br>(80-88%)                | 16%<br>(12-20%)          | 5.3<br>(4.6-6.2)                            | 17%<br>(14-20%)                      | 18%<br>(14-23%)                     | 5500<br>(4200-7100) | 170000<br>(140000-200000) |
| Slovakia | 1990 | Male   | 15 to 19 | 78%<br>(66-87%)                | 22%<br>(13-34%)          | 3<br>(1.9-4.1)                              | 8.4%<br>(5.8-12%)                    | 14%<br>(8.7-21%)                    | 25<br>(15-37)       | 2300<br>(1600-3200)       |
| Slovakia | 1990 | Male   | 20 to 24 | 89%<br>(82-94%)                | 11%<br>(6-18%)           | 5.5<br>(4.1-7.2)                            | 17%<br>(13-22%)                      | 25%<br>(18-33%)                     | 60<br>(41-80)       | 5100<br>(3700-6600)       |
| Slovakia | 1990 | Male   | 25 to 29 | 92%<br>(87-96%)                | 7.6%<br>(4.3-13%)        | 7.2<br>(5.2-9.3)                            | 20%<br>(15-24%)                      | 30%<br>(22-38%)                     | 88<br>(66-110)      | 6800<br>(5200-8300)       |
| Slovakia | 1990 | Male   | 30 to 34 | 94%<br>(89-97%)                | 6%<br>(2.9-11%)          | 8<br>(6-10)                                 | 21%<br>(16-25%)                      | 31%<br>(24-37%)                     | 140<br>(110-170)    | 9500<br>(7600-11000)      |
| Slovakia | 1990 | Male   | 35 to 39 | 94%<br>(90-97%)                | 5.8%<br>(3-10%)          | 7.9<br>(5.8-10)                             | 21%<br>(17-26%)                      | 30%<br>(23-36%)                     | 220<br>(170-260)    | 13000<br>(10000-15000)    |
| Slovakia | 1990 | Male   | 40 to 44 | 94%<br>(90-97%)                | 6.1%<br>(3.4-10%)        | 8.2<br>(6.1-10)                             | 23%<br>(18-27%)                      | 30%<br>(24-35%)                     | 300<br>(240-360)    | 15000<br>(12000-18000)    |
| Slovakia | 1990 | Male   | 45 to 49 | 93%<br>(87-96%)                | 7%<br>(3.6-13%)          | 8.7<br>(6.4-12)                             | 23%<br>(19-28%)                      | 29%<br>(24-34%)                     | 370<br>(300-450)    | 16000<br>(13000-20000)    |
| Slovakia | 1990 | Male   | 50 to 54 | 92%<br>(86-96%)                | 8%<br>(4.3-14%)          | 9.3<br>(6.8-12)                             | 22%<br>(18-27%)                      | 26%<br>(21-32%)                     | 460<br>(360-560)    | 18000<br>(14000-21000)    |
| Slovakia | 1990 | Male   | 55 to 59 | 91%<br>(84-95%)                | 8.9%<br>(4.5-16%)        | 9.8<br>(7.3-13)                             | 21%<br>(16-26%)                      | 24%<br>(18-30%)                     | 600<br>(450-760)    | 20000<br>(15000-25000)    |
| Slovakia | 1990 | Male   | 60 to 64 | 90%<br>(82-95%)                | 10%<br>(5.1-18%)         | 9.2<br>(6.7-12)                             | 19%<br>(13-24%)                      | 21%<br>(15-28%)                     | 740<br>(520-990)    | 21000<br>(15000-27000)    |

| Location | Year | Sex    | Age      | Prevalence of current drinkers | Prevalence of abstainers | Population average of standard drinks daily | Percent of total attributable deaths | Percent of total attributable DALYs | Attributable deaths | Attributable DALYs     |
|----------|------|--------|----------|--------------------------------|--------------------------|---------------------------------------------|--------------------------------------|-------------------------------------|---------------------|------------------------|
| Slovakia | 1990 | Male   | 65 to 69 | 88%<br>(80-95%)                | 12%<br>(5.4-20%)         | 8<br>(6.1-10)                               | 17%<br>(12-22%)                      | 19%<br>(14-25%)                     | 820<br>(570-1100)   | 19000<br>(14000-26000) |
| Slovakia | 1990 | Male   | 70 to 74 | 87%<br>(78-92%)                | 13%<br>(7.6-22%)         | 6.9<br>(4.9-9.2)                            | 15%<br>(9.2-20%)                     | 17%<br>(10-23%)                     | 460<br>(290-640)    | 8800<br>(5600-12000)   |
| Slovakia | 1990 | Male   | 75 to 79 | 85%<br>(74-92%)                | 15%<br>(8.2-26%)         | 5.9<br>(3.9-8.5)                            | 12%<br>(5.2-19%)                     | 14%<br>(5.5-21%)                    | 580<br>(230-900)    | 8500<br>(3600-13000)   |
| Slovakia | 1990 | Male   | 80 to 84 | 83%<br>(72-91%)                | 17%<br>(8.7-28%)         | 5.3<br>(3.6-7.4)                            | 11%<br>(4.2-17%)                     | 12%<br>(4.2-19%)                    | 430<br>(150-690)    | 4700<br>(1800-7500)    |
| Slovakia | 1990 | Male   | 85 to 89 | 83%<br>(72-90%)                | 17%<br>(10-28%)          | 4.9<br>(3.4-6.7)                            | 8.8%<br>(2.1-15%)                    | 9.7%<br>(1.7-17%)                   | 180<br>(31-310)     | 1400<br>(330-2400)     |
| Slovakia | 1990 | Male   | 90 to 94 | 83%<br>(73-90%)                | 17%<br>(9.6-27%)         | 4.5<br>(2.9-6.4)                            | 6.6%<br>(-0.4-14%)                   | 7.1%<br>(-1.2-16%)                  | 41<br>(-7-90)       | 220<br>(-14-470)       |
| Slovakia | 1990 | Male   | 95 plus  | 83%<br>(71-92%)                | 17%<br>(8.1-29%)         | 4<br>(2.2-6.3)                              | 4.6%<br>(-2.7-13%)                   | 4.7%<br>(-3.9-14%)                  | 4.6<br>(-3.8-14)    | 18<br>(-11-50)         |
| Slovakia | 1995 | Female | All Ages | 89%<br>(86-91%)                | 11%<br>(9.3-14%)         | 1.9<br>(1.6-2.2)                            | 2.2%<br>(0.25-4.1%)                  | 1.1%<br>(-2.4-4.6%)                 | 280<br>(-570-1100)  | 16000<br>(1800-30000)  |
| Slovakia | 1995 | Female | 15 to 19 | 89%<br>(83-94%)                | 11%<br>(6.2-17%)         | 2.2<br>(1.5-3)                              | 3.4%<br>(2.2-4.8%)                   | 8.8%<br>(4.6-13%)                   | 6.3<br>(3.3-9.6)    | 740<br>(460-1100)      |
| Slovakia | 1995 | Female | 20 to 24 | 93%<br>(89-95%)                | 7.3%<br>(4.6-11%)        | 2.7<br>(1.9-3.7)                            | 4.8%<br>(3.3-6.4%)                   | 9.7%<br>(5.6-14%)                   | 5.9<br>(3.4-8.6)    | 960<br>(650-1400)      |
| Slovakia | 1995 | Female | 25 to 29 | 94%<br>(91-96%)                | 5.8%<br>(3.5-9%)         | 2.3<br>(1.6-3.1)                            | 4.4%<br>(3.3-5.8%)                   | 8.3%<br>(5.1-12%)                   | 5.7<br>(3.5-8.2)    | 880<br>(610-1200)      |
| Slovakia | 1995 | Female | 30 to 34 | 94%<br>(91-96%)                | 5.7%<br>(3.5-8.7%)       | 2.3<br>(1.6-3.1)                            | 4.3%<br>(3.1-5.7%)                   | 8.7%<br>(6-12%)                     | 10<br>(7.2-14)      | 1100<br>(800-1500)     |
| Slovakia | 1995 | Female | 35 to 39 | 93%<br>(90-96%)                | 6.7%<br>(4-10%)          | 2.6<br>(1.8-3.5)                            | 4.8%<br>(3.5-6.3%)                   | 10%<br>(7.1-13%)                    | 21<br>(15-28)       | 1600<br>(1100-2100)    |
| Slovakia | 1995 | Female | 40 to 44 | 93%<br>(89-95%)                | 7.1%<br>(4.6-11%)        | 2.8<br>(2-3.7)                              | 5.3%<br>(3.8-7.1%)                   | 11%<br>(7.7-14%)                    | 37<br>(26-49)       | 2200<br>(1600-2900)    |
| Slovakia | 1995 | Female | 45 to 49 | 93%<br>(89-96%)                | 7%<br>(4.3-11%)          | 2.9<br>(2.1-3.8)                            | 5.8%<br>(3.9-8%)                     | 11%<br>(7.3-15%)                    | 49<br>(34-68)       | 2400<br>(1700-3300)    |
| Slovakia | 1995 | Female | 50 to 54 | 92%<br>(89-95%)                | 7.5%<br>(4.9-11%)        | 2.7<br>(1.9-3.7)                            | 5.5%<br>(3.2-8.1%)                   | 8.9%<br>(5.2-13%)                   | 57<br>(33-84)       | 2400<br>(1400-3400)    |
| Slovakia | 1995 | Female | 55 to 59 | 91%<br>(87-95%)                | 8.6%<br>(5.4-13%)        | 2.4<br>(1.8-3.2)                            | 3.8%<br>(1.4-6.6%)                   | 5.8%<br>(2.1-10%)                   | 53<br>(19-90)       | 1800<br>(700-3200)     |
| Slovakia | 1995 | Female | 60 to 64 | 90%<br>(85-94%)                | 9.9%<br>(6.2-15%)        | 2.3<br>(1.6-3.2)                            | 1.9%<br>(-0.96-5.2%)                 | 2.7%<br>(-1.4-7.3%)                 | 41<br>(-20-110)     | 1200<br>(-590-3300)    |
| Slovakia | 1995 | Female | 65 to 69 | 88%<br>(82-93%)                | 12%<br>(7.2-18%)         | 2.3<br>(1.7-3)                              | 0.88%<br>(-2.5-4.1%)                 | 1.1%<br>(-3.5-5.5%)                 | 27<br>(-83-130)     | 690<br>(-2000-3200)    |
| Slovakia | 1995 | Female | 70 to 74 | 83%<br>(76-88%)                | 17%<br>(12-24%)          | 2.1<br>(1.4-2.8)                            | 0.29%<br>(-3.4-3.9%)                 | 0.25%<br>(-4.4-4.9%)                | 9.2<br>(-170-180)   | 270<br>(-3000-3600)    |
| Slovakia | 1995 | Female | 75 to 79 | 74%<br>(63-83%)                | 26%<br>(17-37%)          | 1.7<br>(1.1-2.5)                            | 0.025%<br>(-3.2-3.4%)                | -0.15%<br>(-4.1-4%)                 | -4.1<br>(-120-110)  | 14<br>(-1700-1800)     |
| Slovakia | 1995 | Female | 80 to 84 | 68%<br>(53-80%)                | 32%<br>(20-47%)          | 1.6<br>(1.1-2.4)                            | -0.093%<br>(-3.2-3.1%)               | -0.3%<br>(-4.2-3.7%)                | -14<br>(-200-180)   | -55<br>(-1900-2000)    |

| Location | Year | Sex    | Age      | Prevalence of current drinkers | Prevalence of abstainers | Population average of standard drinks daily | Percent of total attributable deaths | Percent of total attributable DALYs | Attributable deaths | Attributable DALYs        |
|----------|------|--------|----------|--------------------------------|--------------------------|---------------------------------------------|--------------------------------------|-------------------------------------|---------------------|---------------------------|
| Slovakia | 1995 | Female | 85 to 89 | 67%<br>(53-78%)                | 33%<br>(22-47%)          | 1.8<br>(1.1-2.7)                            | -0.23%<br>(-3.8-3.9%)                | -0.52%<br>(-5-4.5%)                 | -20<br>(-190-170)   | -78<br>(-1300-1300)       |
| Slovakia | 1995 | Female | 90 to 94 | 69%<br>(55-80%)                | 31%<br>(20-45%)          | 2<br>(1.2-3)                                | -0.11%<br>(-4.5-5.1%)                | -0.42%<br>(-5.5-5.7%)               | -6.8<br>(-89-94)    | -11<br>(-430-500)         |
| Slovakia | 1995 | Female | 95 plus  | 72%<br>(54-85%)                | 28%<br>(15-46%)          | 2.1<br>(1.1-3.4)                            | 0.19%<br>(-5-6.3%)                   | -0.11%<br>(-6.3-7.2%)               | -0.39<br>(-23-27)   | 2.8<br>(-75-97)           |
| Slovakia | 1995 | Male   | All Ages | 87%<br>(83-90%)                | 13%<br>(10-17%)          | 5.2<br>(4.5-5.9)                            | 16%<br>(13-19%)                      | 17%<br>(13-22%)                     | 4900<br>(3700-6200) | 150000<br>(130000-180000) |
| Slovakia | 1995 | Male   | 15 to 19 | 81%<br>(72-88%)                | 19%<br>(12-28%)          | 2.9<br>(2-3.9)                              | 7.9%<br>(5.4-11%)                    | 13%<br>(8.2-19%)                    | 24<br>(15-34)       | 2300<br>(1500-3200)       |
| Slovakia | 1995 | Male   | 20 to 24 | 91%<br>(85-95%)                | 9.1%<br>(5.5-15%)        | 5.3<br>(3.9-6.8)                            | 16%<br>(12-20%)                      | 24%<br>(16-31%)                     | 57<br>(39-76)       | 5000<br>(3700-6400)       |
| Slovakia | 1995 | Male   | 25 to 29 | 93%<br>(89-96%)                | 6.7%<br>(4-11%)          | 6.8<br>(4.9-8.8)                            | 18%<br>(14-23%)                      | 29%<br>(21-37%)                     | 70<br>(50-90)       | 5600<br>(4200-6900)       |
| Slovakia | 1995 | Male   | 30 to 34 | 95%<br>(91-97%)                | 5.4%<br>(2.8-9.4%)       | 7.5<br>(5.7-9.6)                            | 19%<br>(15-23%)                      | 30%<br>(23-36%)                     | 100<br>(78-120)     | 7100<br>(5700-8500)       |
| Slovakia | 1995 | Male   | 35 to 39 | 95%<br>(91-97%)                | 5.1%<br>(2.8-8.6%)       | 7.4<br>(5.5-9.6)                            | 20%<br>(16-24%)                      | 29%<br>(22-35%)                     | 170<br>(130-200)    | 10000<br>(8100-12000)     |
| Slovakia | 1995 | Male   | 40 to 44 | 95%<br>(91-97%)                | 5.3%<br>(3-8.7%)         | 7.7<br>(5.7-9.8)                            | 21%<br>(17-26%)                      | 29%<br>(23-34%)                     | 300<br>(230-350)    | 15000<br>(12000-18000)    |
| Slovakia | 1995 | Male   | 45 to 49 | 94%<br>(90-97%)                | 5.9%<br>(3.3-10%)        | 8.3<br>(6.1-11)                             | 22%<br>(18-26%)                      | 28%<br>(23-33%)                     | 370<br>(300-440)    | 16000<br>(13000-19000)    |
| Slovakia | 1995 | Male   | 50 to 54 | 93%<br>(89-96%)                | 7%<br>(4-11%)            | 8.8<br>(6.4-11)                             | 22%<br>(18-26%)                      | 26%<br>(22-32%)                     | 420<br>(340-510)    | 16000<br>(13000-20000)    |
| Slovakia | 1995 | Male   | 55 to 59 | 92%<br>(86-96%)                | 8.1%<br>(4.2-14%)        | 9.2<br>(6.9-12)                             | 20%<br>(16-25%)                      | 24%<br>(19-30%)                     | 490<br>(380-610)    | 16000<br>(13000-21000)    |
| Slovakia | 1995 | Male   | 60 to 64 | 91%<br>(84-95%)                | 9.1%<br>(4.8-16%)        | 8.7<br>(6.5-11)                             | 18%<br>(14-23%)                      | 21%<br>(16-27%)                     | 630<br>(460-810)    | 18000<br>(13000-23000)    |
| Slovakia | 1995 | Male   | 65 to 69 | 90%<br>(83-95%)                | 10%<br>(5.2-17%)         | 7.6<br>(5.8-9.7)                            | 16%<br>(12-21%)                      | 19%<br>(13-24%)                     | 690<br>(490-910)    | 16000<br>(12000-21000)    |
| Slovakia | 1995 | Male   | 70 to 74 | 88%<br>(80-93%)                | 12%<br>(7.3-20%)         | 6.5<br>(4.6-8.6)                            | 14%<br>(8.2-19%)                     | 16%<br>(9-22%)                      | 690<br>(400-970)    | 13000<br>(7800-18000)     |
| Slovakia | 1995 | Male   | 75 to 79 | 85%<br>(75-92%)                | 15%<br>(8.5-25%)         | 5.5<br>(3.7-7.7)                            | 11%<br>(4.1-17%)                     | 12%<br>(4.3-20%)                    | 320<br>(110-510)    | 4800<br>(1700-7500)       |
| Slovakia | 1995 | Male   | 80 to 84 | 83%<br>(71-91%)                | 17%<br>(9-29%)           | 4.9<br>(3.4-6.7)                            | 9.2%<br>(3-16%)                      | 10%<br>(3-18%)                      | 340<br>(100-590)    | 3800<br>(1300-6300)       |
| Slovakia | 1995 | Male   | 85 to 89 | 82%<br>(71-90%)                | 18%<br>(10-29%)          | 4.4<br>(3.1-6.1)                            | 7%<br>(0.92-14%)                     | 7.6%<br>(0.41-16%)                  | 160<br>(8.4-320)    | 1200<br>(160-2500)        |
| Slovakia | 1995 | Male   | 90 to 94 | 83%<br>(72-90%)                | 17%<br>(9.9-28%)         | 4.1<br>(2.7-5.8)                            | 4.9%<br>(-1.3-12%)                   | 5.1%<br>(-2.3-14%)                  | 34<br>(-16-92)      | 200<br>(-54-480)          |
| Slovakia | 1995 | Male   | 95 plus  | 83%<br>(70-92%)                | 17%<br>(8.1-30%)         | 3.6<br>(2-5.9)                              | 3.1%<br>(-3.5-11%)                   | 2.9%<br>(-4.9-13%)                  | 3.2<br>(-5.3-14)    | 14<br>(-15-51)            |
| Slovakia | 2000 | Female | All Ages | 89%<br>(87-91%)                | 11%<br>(9.4-13%)         | 1.9<br>(1.7-2.1)                            | 2.1%<br>(0.41-3.7%)                  | 0.92%<br>(-2.2-4%)                  | 220<br>(-550-980)   | 15000<br>(3100-28000)     |

| Location | Year | Sex    | Age      | Prevalence of current drinkers | Prevalence of abstainers | Population average of standard drinks daily | Percent of total attributable deaths | Percent of total attributable DALYs | Attributable deaths | Attributable DALYs        |
|----------|------|--------|----------|--------------------------------|--------------------------|---------------------------------------------|--------------------------------------|-------------------------------------|---------------------|---------------------------|
| Slovakia | 2000 | Female | 15 to 19 | 89%<br>(83-94%)                | 11%<br>(6.3-17%)         | 2.1<br>(1.5-2.9)                            | 3.3%<br>(2.1-4.7%)                   | 8.6%<br>(4.5-13%)                   | 5.7<br>(3.1-8.7)    | 680<br>(430-970)          |
| Slovakia | 2000 | Female | 20 to 24 | 93%<br>(88-95%)                | 7.2%<br>(4.6-12%)        | 2.6<br>(1.9-3.6)                            | 4.6%<br>(3.2-6.2%)                   | 9.3%<br>(5.4-13%)                   | 6.1<br>(3.5-8.9)    | 1000<br>(680-1500)        |
| Slovakia | 2000 | Female | 25 to 29 | 94%<br>(91-96%)                | 5.9%<br>(3.6-9%)         | 2.2<br>(1.6-2.9)                            | 4.3%<br>(3.1-5.8%)                   | 7.9%<br>(4.8-11%)                   | 6.2<br>(3.8-9)      | 980<br>(680-1300)         |
| Slovakia | 2000 | Female | 30 to 34 | 94%<br>(91-96%)                | 5.8%<br>(3.5-9.1%)       | 2.1<br>(1.6-2.9)                            | 3.9%<br>(2.9-5.1%)                   | 8.3%<br>(5.7-11%)                   | 7<br>(4.8-9.5)      | 890<br>(640-1200)         |
| Slovakia | 2000 | Female | 35 to 39 | 93%<br>(90-96%)                | 6.8%<br>(4.3-10%)        | 2.5<br>(1.8-3.3)                            | 4.5%<br>(3.2-5.8%)                   | 9.8%<br>(6.8-13%)                   | 17<br>(12-22)       | 1300<br>(950-1700)        |
| Slovakia | 2000 | Female | 40 to 44 | 93%<br>(89-95%)                | 7.2%<br>(4.7-11%)        | 2.7<br>(2-3.5)                              | 5.1%<br>(3.6-6.7%)                   | 11%<br>(7.7-14%)                    | 33<br>(24-42)       | 1900<br>(1400-2500)       |
| Slovakia | 2000 | Female | 45 to 49 | 93%<br>(89-95%)                | 7.2%<br>(4.5-11%)        | 2.7<br>(1.9-3.6)                            | 5.6%<br>(4-7.6%)                     | 10%<br>(7.6-14%)                    | 56<br>(41-73)       | 2700<br>(2000-3600)       |
| Slovakia | 2000 | Female | 50 to 54 | 92%<br>(89-95%)                | 7.8%<br>(5.1-11%)        | 2.6<br>(1.8-3.4)                            | 5.2%<br>(3.3-7.4%)                   | 9%<br>(5.7-12%)                     | 62<br>(39-85)       | 2600<br>(1600-3500)       |
| Slovakia | 2000 | Female | 55 to 59 | 91%<br>(87-94%)                | 9%<br>(5.7-13%)          | 2.3<br>(1.7-3.1)                            | 3.8%<br>(1.7-6.2%)                   | 6.2%<br>(2.8-10%)                   | 55<br>(25-87)       | 1900<br>(850-3000)        |
| Slovakia | 2000 | Female | 60 to 64 | 90%<br>(85-94%)                | 10%<br>(6.3-15%)         | 2.2<br>(1.6-3)                              | 2%<br>(-0.56-4.9%)                   | 3%<br>(-0.66-7.2%)                  | 38<br>(-8.3-93)     | 1100<br>(-300-2800)       |
| Slovakia | 2000 | Female | 65 to 69 | 88%<br>(82-93%)                | 12%<br>(7.2-18%)         | 2.2<br>(1.6-2.9)                            | 0.92%<br>(-2-3.8%)                   | 1.2%<br>(-2.8-5.3%)                 | 26<br>(-58-110)     | 640<br>(-1400-2800)       |
| Slovakia | 2000 | Female | 70 to 74 | 82%<br>(75-88%)                | 18%<br>(12-25%)          | 1.9<br>(1.3-2.7)                            | 0.15%<br>(-3-3.3%)                   | 0.084%<br>(-4.1-4.2%)               | 2.7<br>(-130-140)   | 130<br>(-2500-2700)       |
| Slovakia | 2000 | Female | 75 to 79 | 72%<br>(61-82%)                | 28%<br>(18-39%)          | 1.6<br>(1-2.2)                              | -0.15%<br>(-3.1-2.8%)                | -0.35%<br>(-4-3.3%)                 | -17<br>(-190-160)   | -140<br>(-2700-2500)      |
| Slovakia | 2000 | Female | 80 to 84 | 65%<br>(50-78%)                | 35%<br>(22-50%)          | 1.5<br>(0.97-2.1)                           | -0.32%<br>(-3.1-2.4%)                | -0.58%<br>(-4.1-2.7%)               | -19<br>(-140-88)    | -140<br>(-1400-1000)      |
| Slovakia | 2000 | Female | 85 to 89 | 64%<br>(50-77%)                | 36%<br>(23-50%)          | 1.6<br>(0.98-2.4)                           | -0.53%<br>(-3.8-3%)                  | -0.88%<br>(-4.8-3.3%)               | -34<br>(-190-130)   | -190<br>(-1300-1000)      |
| Slovakia | 2000 | Female | 90 to 94 | 67%<br>(53-79%)                | 33%<br>(21-47%)          | 1.8<br>(1-2.7)                              | -0.47%<br>(-4.4-4.1%)                | -0.84%<br>(-5.4-4.5%)               | -17<br>(-110-89)    | -57<br>(-530-490)         |
| Slovakia | 2000 | Female | 95 plus  | 70%<br>(52-84%)                | 30%<br>(16-48%)          | 1.9<br>(1-3.1)                              | -0.23%<br>(-5-5.7%)                  | -0.6%<br>(-6.2-6.3%)                | -3<br>(-31-31)      | -4.5<br>(-100-110)        |
| Slovakia | 2000 | Male   | All Ages | 87%<br>(84-90%)                | 13%<br>(9.6-16%)         | 5.3<br>(4.7-5.8)                            | 16%<br>(13-19%)                      | 17%<br>(13-21%)                     | 4800<br>(3700-6000) | 150000<br>(130000-180000) |
| Slovakia | 2000 | Male   | 15 to 19 | 80%<br>(71-88%)                | 20%<br>(12-29%)          | 2.7<br>(1.9-3.8)                            | 7.2%<br>(5-9.8%)                     | 13%<br>(7.7-19%)                    | 17<br>(11-25)       | 1800<br>(1200-2400)       |
| Slovakia | 2000 | Male   | 20 to 24 | 91%<br>(85-95%)                | 9.2%<br>(5.4-15%)        | 5.1<br>(3.8-6.6)                            | 15%<br>(11-19%)                      | 23%<br>(16-30%)                     | 58<br>(41-78)       | 5200<br>(3900-6700)       |
| Slovakia | 2000 | Male   | 25 to 29 | 93%<br>(89-96%)                | 6.6%<br>(3.8-11%)        | 6.5<br>(4.8-8.4)                            | 17%<br>(13-22%)                      | 28%<br>(20-35%)                     | 74<br>(54-95)       | 6000<br>(4600-7400)       |
| Slovakia | 2000 | Male   | 30 to 34 | 95%<br>(91-97%)                | 5.3%<br>(2.8-9.2%)       | 7.2<br>(5.5-9.1)                            | 19%<br>(15-23%)                      | 29%<br>(23-36%)                     | 90<br>(70-110)      | 6400<br>(5000-7600)       |

| Location | Year | Sex    | Age      | Prevalence of current drinkers | Prevalence of abstainers | Population average of standard drinks daily | Percent of total attributable deaths | Percent of total attributable DALYs | Attributable deaths | Attributable DALYs     |
|----------|------|--------|----------|--------------------------------|--------------------------|---------------------------------------------|--------------------------------------|-------------------------------------|---------------------|------------------------|
| Slovakia | 2000 | Male   | 35 to 39 | 95%<br>(91-97%)                | 5.1%<br>(2.8-8.6%)       | 7.2<br>(5.4-9.3)                            | 19%<br>(15-23%)                      | 28%<br>(22-34%)                     | 140<br>(110-160)    | 8400<br>(6700-10000)   |
| Slovakia | 2000 | Male   | 40 to 44 | 95%<br>(91-97%)                | 5.3%<br>(3.1-9%)         | 7.4<br>(5.6-9.4)                            | 21%<br>(17-25%)                      | 29%<br>(23-34%)                     | 260<br>(210-310)    | 14000<br>(11000-16000) |
| Slovakia | 2000 | Male   | 45 to 49 | 94%<br>(89-97%)                | 6%<br>(3.2-11%)          | 7.9<br>(6-10)                               | 22%<br>(18-26%)                      | 28%<br>(23-33%)                     | 420<br>(340-500)    | 19000<br>(16000-22000) |
| Slovakia | 2000 | Male   | 50 to 54 | 93%<br>(89-96%)                | 6.8%<br>(3.9-11%)        | 8.5<br>(6.3-11)                             | 22%<br>(18-25%)                      | 27%<br>(22-32%)                     | 510<br>(410-600)    | 20000<br>(16000-23000) |
| Slovakia | 2000 | Male   | 55 to 59 | 92%<br>(87-96%)                | 7.7%<br>(4-13%)          | 8.9<br>(6.9-11)                             | 20%<br>(16-25%)                      | 24%<br>(19-29%)                     | 510<br>(400-620)    | 17000<br>(14000-21000) |
| Slovakia | 2000 | Male   | 60 to 64 | 91%<br>(85-95%)                | 9.2%<br>(4.7-15%)        | 8.4<br>(6.3-11)                             | 18%<br>(14-23%)                      | 21%<br>(16-27%)                     | 570<br>(430-710)    | 16000<br>(12000-20000) |
| Slovakia | 2000 | Male   | 65 to 69 | 89%<br>(82-94%)                | 11%<br>(5.5-18%)         | 7.3<br>(5.6-9.1)                            | 16%<br>(12-20%)                      | 18%<br>(13-24%)                     | 630<br>(450-820)    | 15000<br>(11000-19000) |
| Slovakia | 2000 | Male   | 70 to 74 | 87%<br>(81-92%)                | 13%<br>(7.5-19%)         | 6.3<br>(4.6-8.3)                            | 13%<br>(7.7-19%)                     | 15%<br>(8.6-21%)                    | 620<br>(350-870)    | 12000<br>(6900-16000)  |
| Slovakia | 2000 | Male   | 75 to 79 | 86%<br>(77-92%)                | 14%<br>(7.8-23%)         | 5.5<br>(3.8-7.6)                            | 11%<br>(4.1-17%)                     | 12%<br>(4.4-19%)                    | 500<br>(180-800)    | 7500<br>(2900-12000)   |
| Slovakia | 2000 | Male   | 80 to 84 | 84%<br>(73-92%)                | 16%<br>(8-27%)           | 4.9<br>(3.5-6.5)                            | 8.7%<br>(2.7-14%)                    | 9.7%<br>(2.7-17%)                   | 220<br>(61-380)     | 2400<br>(760-4100)     |
| Slovakia | 2000 | Male   | 85 to 89 | 84%<br>(73-91%)                | 16%<br>(9.5-27%)         | 4.4<br>(3.1-5.9)                            | 6.5%<br>(0.36-13%)                   | 7%<br>(-0.32-14%)                   | 150<br>(-6.9-310)   | 1200<br>(68-2400)      |
| Slovakia | 2000 | Male   | 90 to 94 | 84%<br>(74-91%)                | 16%<br>(9.1-26%)         | 4<br>(2.7-5.7)                              | 4.4%<br>(-1.7-11%)                   | 4.5%<br>(-2.8-13%)                  | 37<br>(-23-110)     | 220<br>(-85-570)       |
| Slovakia | 2000 | Male   | 95 plus  | 84%<br>(71-93%)                | 16%<br>(7.4-29%)         | 3.6<br>(2-5.7)                              | 2.5%<br>(-3.6-11%)                   | 2.5%<br>(-5-12%)                    | 3.6<br>(-7.5-18)    | 16<br>(-22-67)         |
| Slovakia | 2005 | Female | All Ages | 88%<br>(85-90%)                | 12%<br>(10-15%)          | 1.8<br>(1.6-2)                              | 1.9%<br>(0.48-3.3%)                  | 0.61%<br>(-2.3-3.3%)                | 150<br>(-550-840)   | 14000<br>(3500-25000)  |
| Slovakia | 2005 | Female | 15 to 19 | 88%<br>(82-93%)                | 12%<br>(7-18%)           | 1.9<br>(1.4-2.6)                            | 2.9%<br>(1.9-4.1%)                   | 7.7%<br>(4.1-12%)                   | 4<br>(2.1-6.1)      | 530<br>(350-750)       |
| Slovakia | 2005 | Female | 20 to 24 | 92%<br>(88-95%)                | 7.8%<br>(4.9-12%)        | 2.4<br>(1.7-3.3)                            | 4.5%<br>(3.1-5.9%)                   | 8.4%<br>(5.1-12%)                   | 4.8<br>(2.9-7)      | 910<br>(610-1300)      |
| Slovakia | 2005 | Female | 25 to 29 | 94%<br>(90-96%)                | 6.5%<br>(4-10%)          | 2<br>(1.5-2.7)                              | 4.1%<br>(3-5.3%)                     | 7.1%<br>(4.4-9.9%)                  | 5.2<br>(3.2-7.3)    | 970<br>(670-1300)      |
| Slovakia | 2005 | Female | 30 to 34 | 94%<br>(90-96%)                | 6.4%<br>(3.8-10%)        | 2<br>(1.4-2.6)                              | 3.7%<br>(2.8-4.8%)                   | 7.5%<br>(5.2-9.9%)                  | 7.1<br>(4.9-9.6)    | 960<br>(690-1300)      |
| Slovakia | 2005 | Female | 35 to 39 | 93%<br>(89-96%)                | 7.4%<br>(4.4-11%)        | 2.3<br>(1.6-3.1)                            | 4.2%<br>(3-5.4%)                     | 9.2%<br>(6.3-12%)                   | 13<br>(9.2-18)      | 1100<br>(810-1500)     |
| Slovakia | 2005 | Female | 40 to 44 | 92%<br>(88-95%)                | 7.8%<br>(4.8-12%)        | 2.5<br>(1.8-3.2)                            | 4.8%<br>(3.4-6.2%)                   | 10%<br>(7.3-13%)                    | 28<br>(20-36)       | 1700<br>(1200-2200)    |
| Slovakia | 2005 | Female | 45 to 49 | 92%<br>(88-95%)                | 7.7%<br>(4.7-12%)        | 2.5<br>(1.8-3.2)                            | 5.3%<br>(3.8-7.1%)                   | 10%<br>(7.3-13%)                    | 51<br>(37-67)       | 2500<br>(1800-3300)    |
| Slovakia | 2005 | Female | 50 to 54 | 91%<br>(87-95%)                | 8.5%<br>(5.5-13%)        | 2.3<br>(1.7-3.1)                            | 4.9%<br>(3.1-6.8%)                   | 8.6%<br>(5.7-11%)                   | 68<br>(45-91)       | 2800<br>(1800-3800)    |



| Location | Year | Sex    | Age      | Prevalence of current drinkers | Prevalence of abstainers | Population average of standard drinks daily | Percent of total attributable deaths | Percent of total attributable DALYs | Attributable deaths | Attributable DALYs        |
|----------|------|--------|----------|--------------------------------|--------------------------|---------------------------------------------|--------------------------------------|-------------------------------------|---------------------|---------------------------|
| Slovakia | 2005 | Female | 55 to 59 | 90%<br>(84-94%)                | 10%<br>(6.2-16%)         | 2<br>(1.5-2.7)                              | 3.6%<br>(1.8-5.6%)                   | 6%<br>(3.1-9%)                      | 61<br>(32-92)       | 2100<br>(1100-3200)       |
| Slovakia | 2005 | Female | 60 to 64 | 88%<br>(82-93%)                | 12%<br>(7.4-18%)         | 1.9<br>(1.4-2.7)                            | 2%<br>(-0.089-4.3%)                  | 3.2%<br>(0.12-6.6%)                 | 40<br>(1.5-82)      | 1100<br>(-52-2400)        |
| Slovakia | 2005 | Female | 65 to 69 | 85%<br>(78-91%)                | 15%<br>(8.8-22%)         | 1.9<br>(1.4-2.5)                            | 0.88%<br>(-1.5-3.2%)                 | 1.3%<br>(-2.2-4.6%)                 | 23<br>(-40-83)      | 560<br>(-950-2000)        |
| Slovakia | 2005 | Female | 70 to 74 | 78%<br>(70-85%)                | 22%<br>(15-30%)          | 1.6<br>(1.1-2.3)                            | 0.068%<br>(-2.6-2.6%)                | 0.016%<br>(-3.5-3.4%)               | 0.49<br>(-100-100)  | 53<br>(-1900-2000)        |
| Slovakia | 2005 | Female | 75 to 79 | 69%<br>(56-80%)                | 31%<br>(20-44%)          | 1.4<br>(0.89-2)                             | -0.29%<br>(-2.7-2.2%)                | -0.5%<br>(-3.6-2.7%)                | -22<br>(-160-120)   | -240<br>(-2200-1800)      |
| Slovakia | 2005 | Female | 80 to 84 | 63%<br>(49-76%)                | 37%<br>(24-51%)          | 1.3<br>(0.88-1.9)                           | -0.59%<br>(-3.1-1.8%)                | -0.88%<br>(-4-2%)                   | -51<br>(-230-120)   | -440<br>(-2400-1300)      |
| Slovakia | 2005 | Female | 85 to 89 | 65%<br>(51-76%)                | 35%<br>(24-49%)          | 1.5<br>(0.94-2.2)                           | -0.94%<br>(-4-2.2%)                  | -1.3%<br>(-5.1-2.4%)                | -39<br>(-150-70)    | -240<br>(-1100-560)       |
| Slovakia | 2005 | Female | 90 to 94 | 67%<br>(54-78%)                | 33%<br>(22-46%)          | 1.7<br>(0.99-2.5)                           | -0.99%<br>(-4.7-3.2%)                | -1.4%<br>(-5.8-3.6%)                | -31<br>(-130-77)    | -130<br>(-610-420)        |
| Slovakia | 2005 | Female | 95 plus  | 70%<br>(52-84%)                | 30%<br>(16-48%)          | 1.8<br>(0.94-2.9)                           | -0.86%<br>(-5.2-4.6%)                | -1.3%<br>(-6.5-5.3%)                | -8.4<br>(-42-33)    | -22<br>(-140-120)         |
| Slovakia | 2005 | Male   | All Ages | 89%<br>(86-91%)                | 11%<br>(8.8-14%)         | 5.3<br>(4.8-5.8)                            | 16%<br>(13-18%)                      | 16%<br>(12-21%)                     | 4600<br>(3400-5800) | 150000<br>(120000-170000) |
| Slovakia | 2005 | Male   | 15 to 19 | 81%<br>(71-88%)                | 19%<br>(12-29%)          | 2.6<br>(1.8-3.6)                            | 6.9%<br>(4.8-9.5%)                   | 12%<br>(7.5-18%)                    | 14<br>(8.6-21)      | 1500<br>(1100-2100)       |
| Slovakia | 2005 | Male   | 20 to 24 | 91%<br>(86-95%)                | 8.8%<br>(5.3-14%)        | 4.9<br>(3.7-6.3)                            | 14%<br>(11-18%)                      | 22%<br>(15-29%)                     | 46<br>(33-61)       | 4400<br>(3300-5600)       |
| Slovakia | 2005 | Male   | 25 to 29 | 94%<br>(90-96%)                | 6.2%<br>(3.7-9.7%)       | 6.3<br>(4.8-7.9)                            | 16%<br>(13-20%)                      | 26%<br>(19-33%)                     | 64<br>(47-81)       | 5500<br>(4300-6800)       |
| Slovakia | 2005 | Male   | 30 to 34 | 95%<br>(92-97%)                | 5%<br>(2.6-8.3%)         | 6.9<br>(5.3-8.7)                            | 17%<br>(14-20%)                      | 28%<br>(22-34%)                     | 83<br>(65-100)      | 6200<br>(4900-7500)       |
| Slovakia | 2005 | Male   | 35 to 39 | 95%<br>(92-97%)                | 4.8%<br>(2.6-7.9%)       | 6.9<br>(5.1-9.1)                            | 18%<br>(14-22%)                      | 27%<br>(21-33%)                     | 110<br>(88-140)     | 7200<br>(5600-8600)       |
| Slovakia | 2005 | Male   | 40 to 44 | 95%<br>(92-97%)                | 5%<br>(2.9-8.2%)         | 7.1<br>(5.5-9.1)                            | 19%<br>(15-23%)                      | 28%<br>(22-33%)                     | 210<br>(160-250)    | 11000<br>(8700-13000)     |
| Slovakia | 2005 | Male   | 45 to 49 | 94%<br>(90-97%)                | 5.7%<br>(3.1-9.6%)       | 7.6<br>(5.8-9.6)                            | 21%<br>(17-25%)                      | 28%<br>(23-33%)                     | 380<br>(310-450)    | 17000<br>(14000-20000)    |
| Slovakia | 2005 | Male   | 50 to 54 | 94%<br>(89-96%)                | 6.4%<br>(3.7-11%)        | 8.1<br>(6.2-10)                             | 21%<br>(17-25%)                      | 27%<br>(22-31%)                     | 570<br>(470-670)    | 22000<br>(18000-26000)    |
| Slovakia | 2005 | Male   | 55 to 59 | 93%<br>(87-96%)                | 7.4%<br>(4-13%)          | 8.6<br>(6.8-11)                             | 20%<br>(16-24%)                      | 25%<br>(20-29%)                     | 600<br>(490-730)    | 20000<br>(17000-24000)    |
| Slovakia | 2005 | Male   | 60 to 64 | 91%<br>(85-95%)                | 8.9%<br>(4.6-15%)        | 8<br>(6.1-10)                               | 18%<br>(14-22%)                      | 22%<br>(17-26%)                     | 570<br>(430-700)    | 16000<br>(13000-20000)    |
| Slovakia | 2005 | Male   | 65 to 69 | 90%<br>(83-95%)                | 10%<br>(5.2-17%)         | 7<br>(5.4-8.6)                              | 16%<br>(11-20%)                      | 18%<br>(13-23%)                     | 540<br>(390-690)    | 13000<br>(9500-16000)     |
| Slovakia | 2005 | Male   | 70 to 74 | 88%<br>(81-93%)                | 12%<br>(7-19%)           | 6.1<br>(4.5-7.9)                            | 13%<br>(7.1-18%)                     | 15%<br>(8-21%)                      | 530<br>(290-770)    | 10000<br>(5900-15000)     |

| Location | Year | Sex    | Age      | Prevalence of current drinkers | Prevalence of abstainers | Population average of standard drinks daily | Percent of total attributable deaths | Percent of total attributable DALYs | Attributable deaths | Attributable DALYs    |
|----------|------|--------|----------|--------------------------------|--------------------------|---------------------------------------------|--------------------------------------|-------------------------------------|---------------------|-----------------------|
| Slovakia | 2005 | Male   | 75 to 79 | 86%<br>(78-93%)                | 14%<br>(7.3-22%)         | 5.2<br>(3.6-7.2)                            | 9.7%<br>(3.2-16%)                    | 11%<br>(3.3-18%)                    | 440<br>(130-730)    | 6600<br>(2200-11000)  |
| Slovakia | 2005 | Male   | 80 to 84 | 85%<br>(75-92%)                | 15%<br>(8.1-25%)         | 4.6<br>(3.4-6.2)                            | 7.7%<br>(1.9-14%)                    | 8.5%<br>(1.7-16%)                   | 320<br>(61-580)     | 3500<br>(880-6300)    |
| Slovakia | 2005 | Male   | 85 to 89 | 84%<br>(75-90%)                | 16%<br>(9.6-25%)         | 4.2<br>(3-5.6)                              | 5.4%<br>(-0.14-12%)                  | 5.8%<br>(-0.83-13%)                 | 88<br>(-13-200)     | 720<br>(-18-1500)     |
| Slovakia | 2005 | Male   | 90 to 94 | 84%<br>(75-91%)                | 16%<br>(9-25%)           | 3.9<br>(2.6-5.4)                            | 3.3%<br>(-2.4-10%)                   | 3.3%<br>(-3.6-12%)                  | 31<br>(-34-110)     | 190<br>(-140-590)     |
| Slovakia | 2005 | Male   | 95 plus  | 84%<br>(72-93%)                | 16%<br>(7.2-28%)         | 3.4<br>(1.9-5.4)                            | 1.8%<br>(-4.3-9.7%)                  | 1.4%<br>(-5.7-11%)                  | 2.8<br>(-12-23)     | 15<br>(-35-83)        |
| Slovakia | 2010 | Female | All Ages | 87%<br>(85-89%)                | 13%<br>(11-15%)          | 1.7<br>(1.5-1.9)                            | 1.8%<br>(0.58-3.1%)                  | 0.41%<br>(-2.3-3%)                  | 100<br>(-570-780)   | 13000<br>(4600-23000) |
| Slovakia | 2010 | Female | 15 to 19 | 87%<br>(80-92%)                | 13%<br>(8-20%)           | 1.7<br>(1.2-2.4)                            | 2.7%<br>(1.8-3.8%)                   | 7.1%<br>(3.8-11%)                   | 2.6<br>(1.4-4)      | 410<br>(260-580)      |
| Slovakia | 2010 | Female | 20 to 24 | 91%<br>(87-95%)                | 8.5%<br>(5.4-13%)        | 2.3<br>(1.6-3.1)                            | 4.3%<br>(3-5.8%)                     | 7.7%<br>(4.6-11%)                   | 3.8<br>(2.2-5.5)    | 810<br>(540-1200)     |
| Slovakia | 2010 | Female | 25 to 29 | 93%<br>(89-96%)                | 7%<br>(4.2-11%)          | 1.9<br>(1.4-2.5)                            | 3.9%<br>(2.9-5.2%)                   | 6.7%<br>(4.3-9.1%)                  | 4<br>(2.5-5.4)      | 890<br>(610-1200)     |
| Slovakia | 2010 | Female | 30 to 34 | 93%<br>(90-96%)                | 6.7%<br>(3.9-10%)        | 1.9<br>(1.3-2.5)                            | 3.7%<br>(2.7-4.9%)                   | 7.4%<br>(5.3-9.8%)                  | 6.7<br>(4.7-8.9)    | 1000<br>(710-1400)    |
| Slovakia | 2010 | Female | 35 to 39 | 93%<br>(89-95%)                | 7.4%<br>(4.5-11%)        | 2.2<br>(1.5-2.9)                            | 4.1%<br>(3-5.2%)                     | 9%<br>(6.4-12%)                     | 14<br>(9.7-18)      | 1200<br>(870-1600)    |
| Slovakia | 2010 | Female | 40 to 44 | 92%<br>(88-95%)                | 8.1%<br>(5.3-12%)        | 2.3<br>(1.7-3)                              | 4.6%<br>(3.4-5.9%)                   | 10%<br>(7.5-13%)                    | 23<br>(17-30)       | 1500<br>(1100-1900)   |
| Slovakia | 2010 | Female | 45 to 49 | 92%<br>(88-95%)                | 7.7%<br>(4.9-12%)        | 2.4<br>(1.7-3.2)                            | 4.9%<br>(3.5-6.5%)                   | 10%<br>(7.5-13%)                    | 40<br>(30-52)       | 2000<br>(1500-2600)   |
| Slovakia | 2010 | Female | 50 to 54 | 92%<br>(88-94%)                | 8.4%<br>(5.5-12%)        | 2.2<br>(1.6-3)                              | 4.7%<br>(3.1-6.5%)                   | 8.5%<br>(5.8-11%)                   | 63<br>(43-83)       | 2600<br>(1700-3500)   |
| Slovakia | 2010 | Female | 55 to 59 | 90%<br>(85-94%)                | 10%<br>(6.4-15%)         | 2<br>(1.4-2.6)                              | 3.5%<br>(1.9-5.2%)                   | 6.1%<br>(3.5-8.9%)                  | 67<br>(38-97)       | 2300<br>(1300-3400)   |
| Slovakia | 2010 | Female | 60 to 64 | 87%<br>(81-92%)                | 13%<br>(8-19%)           | 1.8<br>(1.3-2.5)                            | 2.1%<br>(0.35-4.2%)                  | 3.5%<br>(0.79-6.5%)                 | 49<br>(11-89)       | 1400<br>(240-2700)    |
| Slovakia | 2010 | Female | 65 to 69 | 83%<br>(75-90%)                | 17%<br>(10-25%)          | 1.7<br>(1.2-2.3)                            | 1%<br>(-0.87-2.9%)                   | 1.7%<br>(-1.3-4.4%)                 | 28<br>(-22-73)      | 660<br>(-560-1800)    |
| Slovakia | 2010 | Female | 70 to 74 | 75%<br>(67-83%)                | 25%<br>(17-33%)          | 1.4<br>(0.97-2)                             | 0.21%<br>(-1.8-2.2%)                 | 0.25%<br>(-2.6-3%)                  | 6.3<br>(-65-75)     | 140<br>(-1200-1500)   |
| Slovakia | 2010 | Female | 75 to 79 | 67%<br>(56-78%)                | 33%<br>(22-44%)          | 1.3<br>(0.82-1.8)                           | -0.28%<br>(-2.3-1.9%)                | -0.48%<br>(-3.2-2.3%)               | -19<br>(-130-89)    | -210<br>(-1800-1400)  |
| Slovakia | 2010 | Female | 80 to 84 | 65%<br>(51-77%)                | 35%<br>(23-49%)          | 1.3<br>(0.9-1.9)                            | -0.74%<br>(-3.2-1.6%)                | -1.1%<br>(-4.2-1.9%)                | -59<br>(-230-100)   | -540<br>(-2300-1200)  |
| Slovakia | 2010 | Female | 85 to 89 | 66%<br>(52-78%)                | 34%<br>(22-48%)          | 1.5<br>(0.95-2.2)                           | -1.1%<br>(-4.2-1.9%)                 | -1.6%<br>(-5.4-2.1%)                | -82<br>(-270-110)   | -530<br>(-1900-890)   |
| Slovakia | 2010 | Female | 90 to 94 | 68%<br>(55-79%)                | 32%<br>(21-45%)          | 1.7<br>(0.98-2.5)                           | -1.3%<br>(-4.8-2.8%)                 | -1.8%<br>(-6.1-3%)                  | -31<br>(-100-51)    | -130<br>(-490-290)    |

| Location | Year | Sex    | Age      | Prevalence of current drinkers | Prevalence of abstainers | Population average of standard drinks daily | Percent of total attributable deaths | Percent of total attributable DALYs | Attributable deaths | Attributable DALYs        |
|----------|------|--------|----------|--------------------------------|--------------------------|---------------------------------------------|--------------------------------------|-------------------------------------|---------------------|---------------------------|
| Slovakia | 2010 | Female | 95 plus  | 70%<br>(53-84%)                | 30%<br>(16-47%)          | 1.8<br>(0.94-2.9)                           | -1.3%<br>(-5.6-3.9%)                 | -1.8%<br>(-7-4.3%)                  | -13<br>(-50-30)     | -36<br>(-160-110)         |
| Slovakia | 2010 | Male   | All Ages | 89%<br>(86-91%)                | 11%<br>(9-14%)           | 5.2<br>(4.6-5.8)                            | 15%<br>(12-17%)                      | 16%<br>(12-20%)                     | 4300<br>(3200-5500) | 140000<br>(110000-160000) |
| Slovakia | 2010 | Male   | 15 to 19 | 80%<br>(71-88%)                | 20%<br>(12-29%)          | 2.5<br>(1.7-3.4)                            | 6.5%<br>(4.6-8.8%)                   | 12%<br>(7-17%)                      | 11<br>(6.3-15)      | 1200<br>(820-1600)        |
| Slovakia | 2010 | Male   | 20 to 24 | 91%<br>(86-95%)                | 9.1%<br>(5.3-14%)        | 4.6<br>(3.4-6)                              | 14%<br>(10-18%)                      | 21%<br>(14-28%)                     | 38<br>(26-51)       | 3700<br>(2800-4800)       |
| Slovakia | 2010 | Male   | 25 to 29 | 94%<br>(90-96%)                | 6.5%<br>(3.7-10%)        | 5.9<br>(4.4-7.6)                            | 15%<br>(12-19%)                      | 25%<br>(18-32%)                     | 54<br>(40-69)       | 4800<br>(3700-6000)       |
| Slovakia | 2010 | Male   | 30 to 34 | 95%<br>(91-97%)                | 5.4%<br>(2.8-9.2%)       | 6.5<br>(5-8.1)                              | 15%<br>(13-19%)                      | 26%<br>(21-32%)                     | 75<br>(58-91)       | 5800<br>(4600-7100)       |
| Slovakia | 2010 | Male   | 35 to 39 | 95%<br>(92-97%)                | 5.2%<br>(2.8-8.4%)       | 6.5<br>(4.8-8.4)                            | 17%<br>(13-20%)                      | 26%<br>(20-32%)                     | 110<br>(82-130)     | 7000<br>(5400-8400)       |
| Slovakia | 2010 | Male   | 40 to 44 | 95%<br>(92-97%)                | 5.2%<br>(3.1-8.4%)       | 6.8<br>(5.1-8.6)                            | 18%<br>(14-22%)                      | 27%<br>(21-32%)                     | 160<br>(130-190)    | 8700<br>(6900-10000)      |
| Slovakia | 2010 | Male   | 45 to 49 | 94%<br>(90-97%)                | 5.9%<br>(3.3-9.9%)       | 7.2<br>(5.4-9.2)                            | 20%<br>(16-24%)                      | 27%<br>(22-32%)                     | 290<br>(230-350)    | 14000<br>(11000-16000)    |
| Slovakia | 2010 | Male   | 50 to 54 | 93%<br>(89-96%)                | 6.7%<br>(3.9-11%)        | 7.7<br>(5.8-9.8)                            | 21%<br>(17-24%)                      | 27%<br>(22-31%)                     | 500<br>(400-580)    | 20000<br>(16000-23000)    |
| Slovakia | 2010 | Male   | 55 to 59 | 92%<br>(86-96%)                | 8.1%<br>(4.3-14%)        | 8<br>(6.3-10)                               | 20%<br>(16-23%)                      | 25%<br>(20-29%)                     | 660<br>(530-800)    | 23000<br>(18000-27000)    |
| Slovakia | 2010 | Male   | 60 to 64 | 90%<br>(84-95%)                | 9.5%<br>(5.1-16%)        | 7.5<br>(5.7-9.8)                            | 17%<br>(14-22%)                      | 21%<br>(16-26%)                     | 650<br>(500-800)    | 19000<br>(15000-23000)    |
| Slovakia | 2010 | Male   | 65 to 69 | 90%<br>(83-94%)                | 10%<br>(5.6-17%)         | 6.6<br>(5.2-8.5)                            | 15%<br>(11-19%)                      | 18%<br>(13-23%)                     | 530<br>(390-680)    | 13000<br>(9500-16000)     |
| Slovakia | 2010 | Male   | 70 to 74 | 88%<br>(82-93%)                | 12%<br>(7.3-18%)         | 5.8<br>(4.2-7.7)                            | 12%<br>(6.3-17%)                     | 14%<br>(7.2-20%)                    | 440<br>(230-630)    | 8600<br>(4700-12000)      |
| Slovakia | 2010 | Male   | 75 to 79 | 86%<br>(78-92%)                | 14%<br>(8.1-22%)         | 4.9<br>(3.4-6.9)                            | 8.8%<br>(2.9-15%)                    | 10%<br>(3-17%)                      | 370<br>(110-630)    | 5600<br>(1900-9500)       |
| Slovakia | 2010 | Male   | 80 to 84 | 83%<br>(72-91%)                | 17%<br>(9.3-28%)         | 4.3<br>(3-5.9)                              | 6.7%<br>(1.2-12%)                    | 7.3%<br>(0.8-14%)                   | 260<br>(28-500)     | 2900<br>(520-5400)        |
| Slovakia | 2010 | Male   | 85 to 89 | 82%<br>(69-89%)                | 18%<br>(11-31%)          | 3.8<br>(2.6-5.1)                            | 4.5%<br>(-0.39-10%)                  | 4.7%<br>(-1.1-11%)                  | 110<br>(-28-280)    | 970<br>(-84-2200)         |
| Slovakia | 2010 | Male   | 90 to 94 | 82%<br>(72-90%)                | 18%<br>(10-28%)          | 3.5<br>(2.3-5)                              | 2.5%<br>(-2.6-8.9%)                  | 2.3%<br>(-3.7-9.9%)                 | 16<br>(-26-68)      | 110<br>(-110-380)         |
| Slovakia | 2010 | Male   | 95 plus  | 82%<br>(69-92%)                | 18%<br>(8.3-31%)         | 3.1<br>(1.7-5)                              | 1.1%<br>(-4.1-8.5%)                  | 0.57%<br>(-5.8-9.4%)                | 1.2<br>(-12-19)     | 9.4<br>(-35-71)           |
| Slovakia | 2016 | Female | All Ages | 87%<br>(85-90%)                | 13%<br>(10-15%)          | 1.7<br>(1.4-2.1)                            | 1.8%<br>(0.44-3.3%)                  | 0.53%<br>(-2.4-3.6%)                | 140<br>(-630-940)   | 14000<br>(3200-25000)     |
| Slovakia | 2016 | Female | 15 to 19 | 88%<br>(81-93%)                | 12%<br>(7.1-19%)         | 1.8<br>(1.2-2.6)                            | 2.7%<br>(1.8-3.8%)                   | 7.4%<br>(3.8-11%)                   | 2.1<br>(1.1-3.4)    | 320<br>(200-470)          |
| Slovakia | 2016 | Female | 20 to 24 | 92%<br>(87-95%)                | 8.3%<br>(5.1-13%)        | 2.3<br>(1.5-3.3)                            | 4.3%<br>(3-5.9%)                     | 8%<br>(4.6-12%)                     | 3.1<br>(1.7-4.6)    | 690<br>(460-990)          |

| Location | Year | Sex    | Age      | Prevalence of current drinkers | Prevalence of abstainers | Population average of standard drinks daily | Percent of total attributable deaths | Percent of total attributable DALYs | Attributable deaths | Attributable DALYs        |
|----------|------|--------|----------|--------------------------------|--------------------------|---------------------------------------------|--------------------------------------|-------------------------------------|---------------------|---------------------------|
| Slovakia | 2016 | Female | 25 to 29 | 93%<br>(89-96%)                | 6.9%<br>(4-11%)          | 1.9<br>(1.3-2.7)                            | 4%<br>(3-5.3%)                       | 6.9%<br>(4.4-9.7%)                  | 3.3<br>(2-4.9)      | 810<br>(550-1200)         |
| Slovakia | 2016 | Female | 30 to 34 | 93%<br>(89-96%)                | 6.7%<br>(3.9-11%)        | 1.9<br>(1.3-2.6)                            | 3.9%<br>(2.8-5.1%)                   | 7.8%<br>(5.5-10%)                   | 6.3<br>(4.1-8.7)    | 970<br>(690-1400)         |
| Slovakia | 2016 | Female | 35 to 39 | 92%<br>(88-95%)                | 7.7%<br>(4.5-12%)        | 2.2<br>(1.4-3.1)                            | 4.1%<br>(3-5.4%)                     | 9.4%<br>(6.5-12%)                   | 15<br>(9.8-21)      | 1400<br>(970-1800)        |
| Slovakia | 2016 | Female | 40 to 44 | 92%<br>(87-95%)                | 8.2%<br>(5-13%)          | 2.4<br>(1.6-3.3)                            | 4.4%<br>(3.2-5.9%)                   | 10%<br>(7.5-14%)                    | 23<br>(16-32)       | 1500<br>(1100-2100)       |
| Slovakia | 2016 | Female | 45 to 49 | 92%<br>(86-95%)                | 8.1%<br>(4.8-14%)        | 2.4<br>(1.6-3.4)                            | 4.8%<br>(3.4-6.5%)                   | 10%<br>(7.5-13%)                    | 34<br>(24-47)       | 1800<br>(1200-2400)       |
| Slovakia | 2016 | Female | 50 to 54 | 91%<br>(86-95%)                | 8.8%<br>(5.3-14%)        | 2.2<br>(1.5-3.1)                            | 4.6%<br>(3.1-6.4%)                   | 8.9%<br>(6.2-12%)                   | 51<br>(33-71)       | 2200<br>(1400-3100)       |
| Slovakia | 2016 | Female | 55 to 59 | 90%<br>(84-94%)                | 10%<br>(6.2-16%)         | 2<br>(1.4-2.7)                              | 3.7%<br>(2.1-5.5%)                   | 6.5%<br>(4-9.4%)                    | 64<br>(38-96)       | 2200<br>(1300-3400)       |
| Slovakia | 2016 | Female | 60 to 64 | 88%<br>(82-93%)                | 12%<br>(7-18%)           | 1.9<br>(1.3-2.7)                            | 2.3%<br>(0.5-4.3%)                   | 4%<br>(1.2-6.9%)                    | 63<br>(19-110)      | 1800<br>(390-3400)        |
| Slovakia | 2016 | Female | 65 to 69 | 86%<br>(77-92%)                | 14%<br>(7.8-23%)         | 1.9<br>(1.3-2.6)                            | 1.3%<br>(-0.85-3.2%)                 | 2.1%<br>(-1-5.1%)                   | 40<br>(-20-96)      | 920<br>(-630-2500)        |
| Slovakia | 2016 | Female | 70 to 74 | 80%<br>(71-87%)                | 20%<br>(13-29%)          | 1.7<br>(1.1-2.5)                            | 0.41%<br>(-1.8-2.9%)                 | 0.59%<br>(-2.7-4%)                  | 15<br>(-64-99)      | 290<br>(-1300-2000)       |
| Slovakia | 2016 | Female | 75 to 79 | 72%<br>(59-83%)                | 28%<br>(17-41%)          | 1.4<br>(0.89-2.2)                           | -0.12%<br>(-2.4-2.4%)                | -0.3%<br>(-3.4-2.9%)                | -10<br>(-120-100)   | -85<br>(-1700-1600)       |
| Slovakia | 2016 | Female | 80 to 84 | 67%<br>(52-79%)                | 33%<br>(21-48%)          | 1.4<br>(0.9-2.1)                            | -0.51%<br>(-3.1-2.1%)                | -0.82%<br>(-4.1-2.6%)               | -43<br>(-210-140)   | -360<br>(-2200-1500)      |
| Slovakia | 2016 | Female | 85 to 89 | 66%<br>(52-78%)                | 34%<br>(22-48%)          | 1.5<br>(0.92-2.3)                           | -0.82%<br>(-3.9-2.4%)                | -1.2%<br>(-5-2.7%)                  | -62<br>(-250-130)   | -380<br>(-1800-1100)      |
| Slovakia | 2016 | Female | 90 to 94 | 68%<br>(55-80%)                | 32%<br>(20-45%)          | 1.7<br>(0.95-2.6)                           | -0.99%<br>(-4.4-3.2%)                | -1.5%<br>(-5.8-3.5%)                | -56<br>(-220-130)   | -230<br>(-1000-730)       |
| Slovakia | 2016 | Female | 95 plus  | 71%<br>(54-85%)                | 29%<br>(15-46%)          | 1.8<br>(0.92-3)                             | -0.98%<br>(-5.3-4.5%)                | -1.5%<br>(-6.8-5.1%)                | -8.5<br>(-38-28)    | -22<br>(-120-100)         |
| Slovakia | 2016 | Male   | All Ages | 87%<br>(84-90%)                | 13%<br>(10-16%)          | 5.1<br>(4.1-6.3)                            | 14%<br>(11-17%)                      | 15%<br>(10-20%)                     | 4100<br>(2700-5600) | 130000<br>(100000-160000) |
| Slovakia | 2016 | Male   | 15 to 19 | 77%<br>(66-87%)                | 23%<br>(13-34%)          | 2.3<br>(1.4-3.4)                            | 6.3%<br>(4.3-8.6%)                   | 12%<br>(6.6-17%)                    | 7.3<br>(4.2-11)     | 880<br>(590-1200)         |
| Slovakia | 2016 | Male   | 20 to 24 | 89%<br>(82-94%)                | 11%<br>(6.2-18%)         | 4.4<br>(3.1-6)                              | 13%<br>(9.8-17%)                     | 21%<br>(13-28%)                     | 27<br>(17-38)       | 2900<br>(2100-3800)       |
| Slovakia | 2016 | Male   | 25 to 29 | 92%<br>(86-96%)                | 8%<br>(4.3-14%)          | 5.7<br>(3.9-7.6)                            | 15%<br>(11-18%)                      | 25%<br>(17-32%)                     | 42<br>(29-57)       | 4000<br>(3000-5200)       |
| Slovakia | 2016 | Male   | 30 to 34 | 94%<br>(88-97%)                | 6.3%<br>(3-12%)          | 6.4<br>(4.5-8.3)                            | 15%<br>(12-18%)                      | 26%<br>(20-33%)                     | 61<br>(44-80)       | 5000<br>(3800-6400)       |
| Slovakia | 2016 | Male   | 35 to 39 | 94%<br>(89-97%)                | 6%<br>(3.1-11%)          | 6.4<br>(4.5-8.7)                            | 16%<br>(12-20%)                      | 27%<br>(20-33%)                     | 110<br>(76-140)     | 7200<br>(5400-9100)       |
| Slovakia | 2016 | Male   | 40 to 44 | 94%<br>(89-96%)                | 6.3%<br>(3.6-11%)        | 6.5<br>(4.6-9)                              | 17%<br>(13-21%)                      | 27%<br>(21-33%)                     | 160<br>(110-200)    | 8800<br>(6500-11000)      |

| Location | Year | Sex    | Age      | Prevalence of current drinkers | Prevalence of abstainers | Population average of standard drinks daily | Percent of total attributable deaths | Percent of total attributable DALYs | Attributable deaths | Attributable DALYs     |
|----------|------|--------|----------|--------------------------------|--------------------------|---------------------------------------------|--------------------------------------|-------------------------------------|---------------------|------------------------|
| Slovakia | 2016 | Male   | 45 to 49 | 93%<br>(87-96%)                | 7.2%<br>(3.6-13%)        | 7<br>(4.9-9.5)                              | 19%<br>(15-23%)                      | 27%<br>(21-33%)                     | 230<br>(170-290)    | 11000<br>(8200-14000)  |
| Slovakia | 2016 | Male   | 50 to 54 | 92%<br>(85-96%)                | 8.3%<br>(4.4-15%)        | 7.4<br>(5.2-10)                             | 20%<br>(15-24%)                      | 26%<br>(21-31%)                     | 390<br>(290-490)    | 16000<br>(12000-19000) |
| Slovakia | 2016 | Male   | 55 to 59 | 91%<br>(83-95%)                | 9.2%<br>(4.6-17%)        | 7.8<br>(5.5-10)                             | 19%<br>(15-23%)                      | 24%<br>(20-29%)                     | 580<br>(440-730)    | 20000<br>(16000-25000) |
| Slovakia | 2016 | Male   | 60 to 64 | 90%<br>(82-95%)                | 10%<br>(5.1-18%)         | 7.3<br>(5-10)                               | 17%<br>(13-21%)                      | 21%<br>(16-26%)                     | 730<br>(550-950)    | 21000<br>(16000-27000) |
| Slovakia | 2016 | Male   | 65 to 69 | 88%<br>(80-94%)                | 12%<br>(5.8-20%)         | 6.4<br>(4.7-8.5)                            | 14%<br>(10-18%)                      | 17%<br>(12-22%)                     | 600<br>(410-800)    | 15000<br>(10000-19000) |
| Slovakia | 2016 | Male   | 70 to 74 | 86%<br>(78-92%)                | 14%<br>(8.1-22%)         | 5.5<br>(3.7-7.6)                            | 11%<br>(5.6-16%)                     | 13%<br>(6.4-19%)                    | 450<br>(210-670)    | 8900<br>(4400-13000)   |
| Slovakia | 2016 | Male   | 75 to 79 | 84%<br>(74-91%)                | 16%<br>(8.9-26%)         | 4.7<br>(3-6.8)                              | 8.5%<br>(2.5-14%)                    | 9.8%<br>(2.6-17%)                   | 320<br>(79-560)     | 4900<br>(1400-8400)    |
| Slovakia | 2016 | Male   | 80 to 84 | 82%<br>(71-91%)                | 18%<br>(9.3-29%)         | 4.2<br>(2.7-6)                              | 6.6%<br>(1.1-13%)                    | 7.4%<br>(0.84-14%)                  | 250<br>(28-510)     | 2900<br>(500-5600)     |
| Slovakia | 2016 | Male   | 85 to 89 | 82%<br>(71-90%)                | 18%<br>(10-29%)          | 3.8<br>(2.5-5.5)                            | 4.7%<br>(-0.44-11%)                  | 5%<br>(-1.1-12%)                    | 120<br>(-27-300)    | 1000<br>(-95-2300)     |
| Slovakia | 2016 | Male   | 90 to 94 | 82%<br>(71-90%)                | 18%<br>(10-29%)          | 3.5<br>(2.2-5.3)                            | 2.8%<br>(-2.4-9.4%)                  | 2.6%<br>(-3.5-11%)                  | 39<br>(-53-150)     | 250<br>(-210-840)      |
| Slovakia | 2016 | Male   | 95 plus  | 82%<br>(69-92%)                | 18%<br>(8.2-31%)         | 3.2<br>(1.7-5.2)                            | 1.4%<br>(-3.8-8.9%)                  | 0.9%<br>(-5.4-10%)                  | 1.6<br>(-9.3-18)    | 10<br>(-26-64)         |
| Slovenia | 1990 | Female | All Ages | 67%<br>(62-71%)                | 33%<br>(29-38%)          | 2.5<br>(2.1-2.9)                            | 7.3%<br>(5.6-9.2%)                   | 9.8%<br>(6.8-14%)                   | 920<br>(630-1300)   | 21000<br>(16000-27000) |
| Slovenia | 1990 | Female | 15 to 19 | 68%<br>(53-80%)                | 32%<br>(20-47%)          | 2.3<br>(1.5-3.3)                            | 4.6%<br>(2.9-6.7%)                   | 13%<br>(7-19%)                      | 3.1<br>(1.7-4.9)    | 320<br>(190-460)       |
| Slovenia | 1990 | Female | 20 to 24 | 77%<br>(64-86%)                | 23%<br>(14-36%)          | 3<br>(1.9-4.2)                              | 6.4%<br>(4.4-8.9%)                   | 15%<br>(8.6-21%)                    | 4.9<br>(2.9-7.3)    | 540<br>(370-740)       |
| Slovenia | 1990 | Female | 25 to 29 | 79%<br>(68-87%)                | 21%<br>(13-32%)          | 2.5<br>(1.7-3.5)                            | 5.3%<br>(3.8-6.9%)                   | 12%<br>(7.3-17%)                    | 4.1<br>(2.5-5.9)    | 490<br>(330-650)       |
| Slovenia | 1990 | Female | 30 to 34 | 80%<br>(68-88%)                | 20%<br>(12-32%)          | 2.3<br>(1.6-3.2)                            | 4.9%<br>(3.6-6.5%)                   | 12%<br>(7.7-16%)                    | 5.5<br>(3.5-7.8)    | 540<br>(370-710)       |
| Slovenia | 1990 | Female | 35 to 39 | 79%<br>(67-87%)                | 21%<br>(13-33%)          | 2.5<br>(1.6-3.7)                            | 5.9%<br>(4.2-7.9%)                   | 14%<br>(9.4-18%)                    | 11<br>(7.3-15)      | 790<br>(560-1000)      |
| Slovenia | 1990 | Female | 40 to 44 | 76%<br>(64-85%)                | 24%<br>(15-36%)          | 3.1<br>(2.2-4.3)                            | 7.4%<br>(5.5-9.7%)                   | 16%<br>(12-20%)                     | 17<br>(12-22)       | 980<br>(720-1200)      |
| Slovenia | 1990 | Female | 45 to 49 | 72%<br>(61-81%)                | 28%<br>(19-39%)          | 3.9<br>(2.7-5.3)                            | 9.5%<br>(7.1-12%)                    | 18%<br>(14-23%)                     | 30<br>(23-38)       | 1500<br>(1100-1900)    |
| Slovenia | 1990 | Female | 50 to 54 | 68%<br>(59-76%)                | 32%<br>(24-41%)          | 4<br>(2.8-5.3)                              | 10%<br>(8-14%)                       | 18%<br>(14-23%)                     | 45<br>(34-57)       | 1900<br>(1400-2400)    |
| Slovenia | 1990 | Female | 55 to 59 | 66%<br>(56-74%)                | 34%<br>(26-44%)          | 3.8<br>(2.6-5)                              | 10%<br>(7.4-13%)                     | 16%<br>(12-21%)                     | 62<br>(47-81)       | 2200<br>(1700-2900)    |
| Slovenia | 1990 | Female | 60 to 64 | 65%<br>(54-73%)                | 35%<br>(27-46%)          | 3.6<br>(2.5-5)                              | 9.1%<br>(6.4-12%)                    | 14%<br>(9.8-18%)                    | 79<br>(56-110)      | 2400<br>(1700-3200)    |

| Location | Year | Sex    | Age      | Prevalence of current drinkers | Prevalence of abstainers | Population average of standard drinks daily | Percent of total attributable deaths | Percent of total attributable DALYs | Attributable deaths | Attributable DALYs     |
|----------|------|--------|----------|--------------------------------|--------------------------|---------------------------------------------|--------------------------------------|-------------------------------------|---------------------|------------------------|
| Slovenia | 1990 | Female | 65 to 69 | 64%<br>(54-72%)                | 36%<br>(28-46%)          | 3.6<br>(2.6-4.7)                            | 8.8%<br>(6.1-12%)                    | 13%<br>(8.7-17%)                    | 100<br>(71-140)     | 2600<br>(1800-3500)    |
| Slovenia | 1990 | Female | 70 to 74 | 61%<br>(50-70%)                | 39%<br>(30-50%)          | 3.4<br>(2.3-4.7)                            | 8.6%<br>(5.1-12%)                    | 11%<br>(6.8-16%)                    | 81<br>(48-120)      | 1600<br>(960-2300)     |
| Slovenia | 1990 | Female | 75 to 79 | 56%<br>(42-67%)                | 44%<br>(33-58%)          | 2.9<br>(1.9-4.2)                            | 7.4%<br>(3.9-12%)                    | 9.2%<br>(4.8-15%)                   | 160<br>(81-250)     | 2400<br>(1200-3800)    |
| Slovenia | 1990 | Female | 80 to 84 | 51%<br>(37-64%)                | 49%<br>(36-63%)          | 2.5<br>(1.6-3.7)                            | 6.4%<br>(3.5-11%)                    | 7.8%<br>(4.1-13%)                   | 150<br>(80-250)     | 1700<br>(910-2700)     |
| Slovenia | 1990 | Female | 85 to 89 | 48%<br>(35-61%)                | 52%<br>(39-65%)          | 2.4<br>(1.5-3.6)                            | 5.9%<br>(2.7-10%)                    | 6.9%<br>(3.1-12%)                   | 100<br>(45-180)     | 790<br>(360-1400)      |
| Slovenia | 1990 | Female | 90 to 94 | 48%<br>(35-61%)                | 52%<br>(39-65%)          | 2.4<br>(1.4-3.7)                            | 6%<br>(2.3-11%)                      | 7.1%<br>(2.6-13%)                   | 50<br>(18-94)       | 260<br>(100-490)       |
| Slovenia | 1990 | Female | 95 plus  | 50%<br>(33-66%)                | 50%<br>(34-67%)          | 2.5<br>(1.3-4.2)                            | 6.2%<br>(1.6-13%)                    | 7.3%<br>(1.7-15%)                   | 13<br>(3.1-26)      | 44<br>(12-89)          |
| Slovenia | 1990 | Male   | All Ages | 72%<br>(66-78%)                | 28%<br>(22-34%)          | 5.2<br>(4.5-6)                              | 17%<br>(14-20%)                      | 20%<br>(16-24%)                     | 2000<br>(1500-2400) | 59000<br>(49000-70000) |
| Slovenia | 1990 | Male   | 15 to 19 | 62%<br>(46-77%)                | 38%<br>(23-54%)          | 3<br>(2-4.3)                                | 9.4%<br>(5.9-14%)                    | 16%<br>(9.3-24%)                    | 11<br>(6.2-16)      | 900<br>(560-1300)      |
| Slovenia | 1990 | Male   | 20 to 24 | 77%<br>(63-87%)                | 23%<br>(13-37%)          | 5.4<br>(3.8-7.1)                            | 19%<br>(13-25%)                      | 29%<br>(19-39%)                     | 34<br>(22-46)       | 2500<br>(1800-3400)    |
| Slovenia | 1990 | Male   | 25 to 29 | 82%<br>(70-90%)                | 18%<br>(10-30%)          | 5.5<br>(4.1-7.3)                            | 19%<br>(14-24%)                      | 30%<br>(21-38%)                     | 35<br>(24-46)       | 2500<br>(1900-3300)    |
| Slovenia | 1990 | Male   | 30 to 34 | 85%<br>(73-92%)                | 15%<br>(8-27%)           | 5.7<br>(4.2-7.5)                            | 18%<br>(14-23%)                      | 29%<br>(22-37%)                     | 43<br>(31-56)       | 2900<br>(2200-3700)    |
| Slovenia | 1990 | Male   | 35 to 39 | 86%<br>(76-92%)                | 14%<br>(7.8-24%)         | 5.8<br>(4.3-7.5)                            | 19%<br>(14-23%)                      | 29%<br>(22-35%)                     | 65<br>(48-81)       | 3900<br>(2900-4700)    |
| Slovenia | 1990 | Male   | 40 to 44 | 85%<br>(76-92%)                | 15%<br>(8.3-24%)         | 6.4<br>(4.8-8.2)                            | 20%<br>(16-24%)                      | 30%<br>(24-35%)                     | 81<br>(64-99)       | 4200<br>(3300-5100)    |
| Slovenia | 1990 | Male   | 45 to 49 | 83%<br>(74-90%)                | 17%<br>(9.9-26%)         | 7.5<br>(5.5-9.7)                            | 22%<br>(19-26%)                      | 30%<br>(25-35%)                     | 120<br>(100-150)    | 5500<br>(4600-6600)    |
| Slovenia | 1990 | Male   | 50 to 54 | 80%<br>(72-86%)                | 20%<br>(14-28%)          | 8.4<br>(6.4-11)                             | 22%<br>(18-25%)                      | 28%<br>(24-33%)                     | 170<br>(140-210)    | 6700<br>(5600-8100)    |
| Slovenia | 1990 | Male   | 55 to 59 | 77%<br>(69-83%)                | 23%<br>(17-31%)          | 9.4<br>(7.2-12)                             | 21%<br>(17-25%)                      | 25%<br>(21-30%)                     | 250<br>(200-300)    | 8300<br>(6700-10000)   |
| Slovenia | 1990 | Male   | 60 to 64 | 77%<br>(69-82%)                | 23%<br>(18-31%)          | 10<br>(7.6-13)                              | 18%<br>(14-22%)                      | 22%<br>(17-27%)                     | 240<br>(180-300)    | 6900<br>(5300-8500)    |
| Slovenia | 1990 | Male   | 65 to 69 | 79%<br>(72-85%)                | 21%<br>(15-28%)          | 10<br>(7.8-13)                              | 17%<br>(13-21%)                      | 20%<br>(15-25%)                     | 220<br>(160-280)    | 5200<br>(3800-6700)    |
| Slovenia | 1990 | Male   | 70 to 74 | 77%<br>(69-83%)                | 23%<br>(17-31%)          | 9.4<br>(7.1-12)                             | 16%<br>(11-20%)                      | 19%<br>(13-24%)                     | 140<br>(94-180)     | 2700<br>(1900-3400)    |
| Slovenia | 1990 | Male   | 75 to 79 | 71%<br>(61-79%)                | 29%<br>(21-39%)          | 8<br>(5.8-10)                               | 14%<br>(9.6-19%)                     | 16%<br>(11-21%)                     | 250<br>(160-330)    | 3700<br>(2500-4800)    |
| Slovenia | 1990 | Male   | 80 to 84 | 68%<br>(56-77%)                | 32%<br>(23-44%)          | 6.9<br>(5-9)                                | 13%<br>(8.5-17%)                     | 14%<br>(9.5-20%)                    | 190<br>(120-270)    | 2100<br>(1400-2900)    |

| Location | Year | Sex    | Age      | Prevalence of current drinkers | Prevalence of abstainers | Population average of standard drinks daily | Percent of total attributable deaths | Percent of total attributable DALYs | Attributable deaths | Attributable DALYs     |
|----------|------|--------|----------|--------------------------------|--------------------------|---------------------------------------------|--------------------------------------|-------------------------------------|---------------------|------------------------|
| Slovenia | 1990 | Male   | 85 to 89 | 69%<br>(57-77%)                | 31%<br>(23-43%)          | 6.3<br>(4.5-8.7)                            | 12%<br>(7.5-17%)                     | 13%<br>(8.4-19%)                    | 90<br>(57-130)      | 710<br>(470-1000)      |
| Slovenia | 1990 | Male   | 90 to 94 | 70%<br>(59-79%)                | 30%<br>(21-41%)          | 5.9<br>(3.9-8.6)                            | 11%<br>(7.3-16%)                     | 13%<br>(8-19%)                      | 30<br>(19-43)       | 160<br>(100-230)       |
| Slovenia | 1990 | Male   | 95 plus  | 71%<br>(56-83%)                | 29%<br>(17-44%)          | 5.3<br>(3-8.1)                              | 11%<br>(5.2-16%)                     | 12%<br>(5.5-18%)                    | 5.4<br>(2.5-8.1)    | 19<br>(9.4-29)         |
| Slovenia | 1995 | Female | All Ages | 67%<br>(62-71%)                | 33%<br>(29-38%)          | 2.2<br>(1.9-2.6)                            | 6.5%<br>(5-8.2%)                     | 8.4%<br>(5.4-12%)                   | 790<br>(520-1100)   | 18000<br>(14000-23000) |
| Slovenia | 1995 | Female | 15 to 19 | 68%<br>(53-81%)                | 32%<br>(19-47%)          | 2.1<br>(1.3-2.9)                            | 4.2%<br>(2.6-6.1%)                   | 11%<br>(6-17%)                      | 2.9<br>(1.6-4.5)    | 300<br>(180-440)       |
| Slovenia | 1995 | Female | 20 to 24 | 77%<br>(64-86%)                | 23%<br>(14-36%)          | 2.6<br>(1.7-3.7)                            | 5.7%<br>(3.9-7.9%)                   | 13%<br>(7.1-19%)                    | 3.5<br>(2-5.3)      | 420<br>(280-580)       |
| Slovenia | 1995 | Female | 25 to 29 | 79%<br>(68-87%)                | 21%<br>(13-32%)          | 2.2<br>(1.5-3)                              | 4.9%<br>(3.5-6.4%)                   | 11%<br>(6.3-15%)                    | 3.4<br>(2-4.9)      | 430<br>(290-570)       |
| Slovenia | 1995 | Female | 30 to 34 | 80%<br>(67-88%)                | 20%<br>(12-33%)          | 2<br>(1.3-2.9)                              | 4.6%<br>(3.3-6%)                     | 10%<br>(6.7-15%)                    | 4.6<br>(2.9-6.6)    | 470<br>(330-630)       |
| Slovenia | 1995 | Female | 35 to 39 | 79%<br>(66-88%)                | 21%<br>(12-34%)          | 2.2<br>(1.4-3.2)                            | 5.4%<br>(3.9-7.2%)                   | 12%<br>(8.6-16%)                    | 9.5<br>(6.6-13)     | 680<br>(500-900)       |
| Slovenia | 1995 | Female | 40 to 44 | 76%<br>(65-85%)                | 24%<br>(15-35%)          | 2.7<br>(1.9-3.7)                            | 6.7%<br>(4.9-8.6%)                   | 14%<br>(11-18%)                     | 18<br>(14-24)       | 1100<br>(800-1400)     |
| Slovenia | 1995 | Female | 45 to 49 | 72%<br>(62-81%)                | 28%<br>(19-38%)          | 3.4<br>(2.3-4.6)                            | 8.7%<br>(6.4-11%)                    | 16%<br>(13-21%)                     | 28<br>(21-36)       | 1400<br>(1000-1700)    |
| Slovenia | 1995 | Female | 50 to 54 | 68%<br>(59-76%)                | 32%<br>(24-41%)          | 3.5<br>(2.5-4.7)                            | 9.4%<br>(7.1-12%)                    | 16%<br>(13-20%)                     | 40<br>(31-51)       | 1700<br>(1300-2100)    |
| Slovenia | 1995 | Female | 55 to 59 | 66%<br>(56-74%)                | 34%<br>(26-44%)          | 3.3<br>(2.3-4.4)                            | 8.7%<br>(6.5-11%)                    | 15%<br>(11-18%)                     | 47<br>(36-61)       | 1700<br>(1300-2200)    |
| Slovenia | 1995 | Female | 60 to 64 | 65%<br>(55-74%)                | 35%<br>(26-45%)          | 3.2<br>(2.2-4.4)                            | 8%<br>(5.6-11%)                      | 12%<br>(8.9-16%)                    | 69<br>(48-92)       | 2100<br>(1500-2800)    |
| Slovenia | 1995 | Female | 65 to 69 | 65%<br>(55-73%)                | 35%<br>(27-45%)          | 3.2<br>(2.3-4.1)                            | 7.5%<br>(5.2-10%)                    | 11%<br>(7.6-14%)                    | 90<br>(63-120)      | 2300<br>(1600-3100)    |
| Slovenia | 1995 | Female | 70 to 74 | 62%<br>(51-70%)                | 38%<br>(30-49%)          | 3<br>(2-4.1)                                | 7.2%<br>(4.1-11%)                    | 9.7%<br>(5.6-14%)                   | 120<br>(69-180)     | 2400<br>(1400-3600)    |
| Slovenia | 1995 | Female | 75 to 79 | 56%<br>(43-68%)                | 44%<br>(32-57%)          | 2.6<br>(1.7-3.7)                            | 6.1%<br>(2.9-9.9%)                   | 7.7%<br>(3.7-13%)                   | 70<br>(33-120)      | 1100<br>(510-1800)     |
| Slovenia | 1995 | Female | 80 to 84 | 52%<br>(37-64%)                | 48%<br>(36-63%)          | 2.2<br>(1.4-3.2)                            | 5.3%<br>(2.6-8.8%)                   | 6.4%<br>(3-11%)                     | 100<br>(50-170)     | 1200<br>(570-1900)     |
| Slovenia | 1995 | Female | 85 to 89 | 49%<br>(36-62%)                | 51%<br>(38-64%)          | 2.1<br>(1.3-3.1)                            | 4.8%<br>(2-8.6%)                     | 5.7%<br>(2.2-10%)                   | 110<br>(43-200)     | 880<br>(360-1500)      |
| Slovenia | 1995 | Female | 90 to 94 | 49%<br>(36-62%)                | 51%<br>(38-64%)          | 2.2<br>(1.3-3.3)                            | 4.8%<br>(1.5-9.5%)                   | 5.7%<br>(1.6-11%)                   | 53<br>(15-100)      | 280<br>(84-540)        |
| Slovenia | 1995 | Female | 95 plus  | 50%<br>(35-66%)                | 50%<br>(34-65%)          | 2.2<br>(1.1-3.6)                            | 5%<br>(0.66-11%)                     | 5.9%<br>(0.6-13%)                   | 15<br>(1.6-34)      | 54<br>(7.2-120)        |
| Slovenia | 1995 | Male   | All Ages | 73%<br>(67-78%)                | 27%<br>(22-33%)          | 4.8<br>(4.2-5.4)                            | 16%<br>(14-19%)                      | 19%<br>(16-23%)                     | 1900<br>(1500-2300) | 56000<br>(47000-66000) |

| Location | Year | Sex    | Age      | Prevalence of current drinkers | Prevalence of abstainers | Population average of standard drinks daily | Percent of total attributable deaths | Percent of total attributable DALYs | Attributable deaths | Attributable DALYs     |
|----------|------|--------|----------|--------------------------------|--------------------------|---------------------------------------------|--------------------------------------|-------------------------------------|---------------------|------------------------|
| Slovenia | 1995 | Male   | 15 to 19 | 63%<br>(47-78%)                | 37%<br>(22-53%)          | 2.7<br>(1.8-3.8)                            | 8.8%<br>(5.5-13%)                    | 15%<br>(8.5-22%)                    | 11<br>(6.2-17)      | 930<br>(560-1300)      |
| Slovenia | 1995 | Male   | 20 to 24 | 77%<br>(63-87%)                | 23%<br>(13-37%)          | 4.8<br>(3.4-6.3)                            | 17%<br>(12-23%)                      | 27%<br>(18-36%)                     | 28<br>(18-37)       | 2100<br>(1500-2800)    |
| Slovenia | 1995 | Male   | 25 to 29 | 82%<br>(71-90%)                | 18%<br>(10-29%)          | 4.9<br>(3.6-6.3)                            | 17%<br>(12-22%)                      | 27%<br>(19-35%)                     | 28<br>(19-38)       | 2100<br>(1500-2800)    |
| Slovenia | 1995 | Male   | 30 to 34 | 85%<br>(75-92%)                | 15%<br>(7.9-25%)         | 5<br>(3.7-6.5)                              | 17%<br>(13-21%)                      | 27%<br>(20-34%)                     | 35<br>(26-46)       | 2400<br>(1800-3100)    |
| Slovenia | 1995 | Male   | 35 to 39 | 86%<br>(76-92%)                | 14%<br>(7.8-24%)         | 5.1<br>(3.7-6.6)                            | 17%<br>(13-21%)                      | 26%<br>(20-33%)                     | 50<br>(37-63)       | 3000<br>(2300-3800)    |
| Slovenia | 1995 | Male   | 40 to 44 | 85%<br>(77-91%)                | 15%<br>(8.6-23%)         | 5.6<br>(4.3-7.2)                            | 19%<br>(15-23%)                      | 27%<br>(22-32%)                     | 90<br>(70-110)      | 4700<br>(3700-5700)    |
| Slovenia | 1995 | Male   | 45 to 49 | 83%<br>(74-90%)                | 17%<br>(9.7-26%)         | 6.6<br>(4.9-8.4)                            | 21%<br>(17-24%)                      | 28%<br>(24-33%)                     | 110<br>(91-140)     | 5100<br>(4200-6100)    |
| Slovenia | 1995 | Male   | 50 to 54 | 81%<br>(73-86%)                | 19%<br>(14-27%)          | 7.4<br>(5.6-9.2)                            | 21%<br>(18-24%)                      | 27%<br>(23-31%)                     | 150<br>(130-190)    | 6100<br>(5100-7300)    |
| Slovenia | 1995 | Male   | 55 to 59 | 77%<br>(70-83%)                | 23%<br>(17-30%)          | 8.2<br>(6.4-10)                             | 20%<br>(17-24%)                      | 25%<br>(21-29%)                     | 200<br>(160-240)    | 6800<br>(5600-8200)    |
| Slovenia | 1995 | Male   | 60 to 64 | 77%<br>(69-83%)                | 23%<br>(17-31%)          | 8.7<br>(6.7-11)                             | 18%<br>(15-22%)                      | 22%<br>(18-26%)                     | 260<br>(210-320)    | 7500<br>(6000-9200)    |
| Slovenia | 1995 | Male   | 65 to 69 | 79%<br>(72-85%)                | 21%<br>(15-28%)          | 8.8<br>(6.9-11)                             | 17%<br>(13-21%)                      | 20%<br>(15-24%)                     | 260<br>(200-330)    | 6300<br>(4800-7800)    |
| Slovenia | 1995 | Male   | 70 to 74 | 77%<br>(69-83%)                | 23%<br>(17-31%)          | 8.2<br>(6.3-10)                             | 15%<br>(12-19%)                      | 18%<br>(13-22%)                     | 230<br>(160-290)    | 4400<br>(3200-5600)    |
| Slovenia | 1995 | Male   | 75 to 79 | 71%<br>(61-79%)                | 29%<br>(21-39%)          | 6.9<br>(5.1-8.9)                            | 14%<br>(10-18%)                      | 16%<br>(12-20%)                     | 120<br>(85-150)     | 1800<br>(1300-2300)    |
| Slovenia | 1995 | Male   | 80 to 84 | 69%<br>(57-77%)                | 31%<br>(23-43%)          | 6<br>(4.4-7.8)                              | 12%<br>(8.8-16%)                     | 14%<br>(10-19%)                     | 150<br>(100-200)    | 1600<br>(1200-2200)    |
| Slovenia | 1995 | Male   | 85 to 89 | 69%<br>(58-77%)                | 31%<br>(23-42%)          | 5.5<br>(3.9-7.4)                            | 11%<br>(7.8-16%)                     | 13%<br>(8.6-18%)                    | 130<br>(84-180)     | 1000<br>(680-1400)     |
| Slovenia | 1995 | Male   | 90 to 94 | 70%<br>(59-79%)                | 30%<br>(21-41%)          | 5.1<br>(3.4-7.2)                            | 11%<br>(6.6-15%)                     | 12%<br>(7.3-18%)                    | 41<br>(25-59)       | 220<br>(130-310)       |
| Slovenia | 1995 | Male   | 95 plus  | 71%<br>(56-83%)                | 29%<br>(17-44%)          | 4.7<br>(2.6-7.1)                            | 9.7%<br>(3.9-15%)                    | 11%<br>(4.1-17%)                    | 7.8<br>(2.9-12)     | 28<br>(11-43)          |
| Slovenia | 2000 | Female | All Ages | 66%<br>(61-70%)                | 34%<br>(30-39%)          | 2<br>(1.8-2.3)                              | 5.6%<br>(4.4-7%)                     | 7.1%<br>(4.8-9.6%)                  | 680<br>(450-940)    | 16000<br>(12000-20000) |
| Slovenia | 2000 | Female | 15 to 19 | 67%<br>(51-81%)                | 33%<br>(19-49%)          | 1.8<br>(1.2-2.6)                            | 3.6%<br>(2.2-5.3%)                   | 9.9%<br>(5.1-15%)                   | 2.1<br>(1.1-3.3)    | 230<br>(140-340)       |
| Slovenia | 2000 | Female | 20 to 24 | 76%<br>(62-85%)                | 24%<br>(15-38%)          | 2.3<br>(1.5-3.2)                            | 4.9%<br>(3.3-6.7%)                   | 11%<br>(5.9-17%)                    | 2.6<br>(1.3-3.9)    | 360<br>(240-500)       |
| Slovenia | 2000 | Female | 25 to 29 | 77%<br>(65-86%)                | 23%<br>(14-35%)          | 1.9<br>(1.3-2.6)                            | 4.3%<br>(3.1-5.5%)                   | 9.4%<br>(5.5-14%)                   | 2.2<br>(1.2-3.2)    | 330<br>(220-440)       |
| Slovenia | 2000 | Female | 30 to 34 | 78%<br>(64-87%)                | 22%<br>(13-36%)          | 1.7<br>(1.1-2.4)                            | 4%<br>(2.9-5.1%)                     | 9.1%<br>(5.9-13%)                   | 3.3<br>(2.1-4.5)    | 380<br>(270-520)       |



| Location | Year | Sex    | Age      | Prevalence of current drinkers | Prevalence of abstainers | Population average of standard drinks daily | Percent of total attributable deaths | Percent of total attributable DALYs | Attributable deaths | Attributable DALYs     |
|----------|------|--------|----------|--------------------------------|--------------------------|---------------------------------------------|--------------------------------------|-------------------------------------|---------------------|------------------------|
| Slovenia | 2000 | Female | 35 to 39 | 77%<br>(65-87%)                | 23%<br>(13-35%)          | 2<br>(1.3-2.9)                              | 4.8%<br>(3.5-6.2%)                   | 12%<br>(8.2-15%)                    | 7<br>(5-9.4)        | 550<br>(410-710)       |
| Slovenia | 2000 | Female | 40 to 44 | 76%<br>(64-85%)                | 24%<br>(15-36%)          | 2.5<br>(1.8-3.5)                            | 5.9%<br>(4.4-7.6%)                   | 13%<br>(10-16%)                     | 14<br>(11-18)       | 850<br>(650-1100)      |
| Slovenia | 2000 | Female | 45 to 49 | 72%<br>(62-80%)                | 28%<br>(20-38%)          | 3.1<br>(2.2-4.3)                            | 7.7%<br>(5.7-9.9%)                   | 15%<br>(12-19%)                     | 29<br>(22-37)       | 1400<br>(1100-1800)    |
| Slovenia | 2000 | Female | 50 to 54 | 67%<br>(59-76%)                | 33%<br>(24-41%)          | 3.1<br>(2.2-4.1)                            | 8.4%<br>(6.4-11%)                    | 15%<br>(12-19%)                     | 35<br>(27-44)       | 1500<br>(1100-1800)    |
| Slovenia | 2000 | Female | 55 to 59 | 64%<br>(54-72%)                | 36%<br>(28-46%)          | 2.9<br>(2.1-3.8)                            | 7.7%<br>(5.8-9.8%)                   | 13%<br>(10-17%)                     | 40<br>(31-51)       | 1400<br>(1100-1800)    |
| Slovenia | 2000 | Female | 60 to 64 | 62%<br>(52-71%)                | 38%<br>(29-48%)          | 2.7<br>(1.9-3.9)                            | 6.9%<br>(4.8-9.4%)                   | 11%<br>(8.2-15%)                    | 48<br>(35-65)       | 1500<br>(1100-2000)    |
| Slovenia | 2000 | Female | 65 to 69 | 62%<br>(51-71%)                | 38%<br>(29-49%)          | 2.7<br>(1.9-3.6)                            | 6.4%<br>(4.5-8.6%)                   | 9.6%<br>(6.9-13%)                   | 70<br>(50-95)       | 1800<br>(1300-2500)    |
| Slovenia | 2000 | Female | 70 to 74 | 60%<br>(50-69%)                | 40%<br>(31-50%)          | 2.7<br>(1.9-3.7)                            | 6%<br>(3.7-8.8%)                     | 8.3%<br>(5.2-12%)                   | 95<br>(58-140)      | 1900<br>(1200-2900)    |
| Slovenia | 2000 | Female | 75 to 79 | 56%<br>(43-68%)                | 44%<br>(32-57%)          | 2.3<br>(1.6-3.4)                            | 5%<br>(2.5-8.1%)                     | 6.5%<br>(3.3-11%)                   | 110<br>(52-180)     | 1700<br>(830-2800)     |
| Slovenia | 2000 | Female | 80 to 84 | 51%<br>(37-64%)                | 49%<br>(36-63%)          | 2<br>(1.3-2.9)                              | 4.4%<br>(2.2-7%)                     | 5.4%<br>(2.6-8.9%)                  | 86<br>(42-140)      | 970<br>(480-1600)      |
| Slovenia | 2000 | Female | 85 to 89 | 49%<br>(36-61%)                | 51%<br>(39-64%)          | 1.9<br>(1.2-2.8)                            | 4%<br>(1.6-6.9%)                     | 4.7%<br>(1.8-8.5%)                  | 68<br>(25-120)      | 540<br>(210-940)       |
| Slovenia | 2000 | Female | 90 to 94 | 49%<br>(37-61%)                | 51%<br>(39-63%)          | 1.9<br>(1.2-3)                              | 3.9%<br>(1-7.7%)                     | 4.6%<br>(1.1-9.3%)                  | 53<br>(13-110)      | 290<br>(79-570)        |
| Slovenia | 2000 | Female | 95 plus  | 50%<br>(35-65%)                | 50%<br>(35-65%)          | 2<br>(1.1-3.3)                              | 4.1%<br>(0.57-9.2%)                  | 4.7%<br>(0.5-11%)                   | 16<br>(1.7-38)      | 57<br>(8-130)          |
| Slovenia | 2000 | Male   | All Ages | 76%<br>(71-80%)                | 24%<br>(20-29%)          | 4.7<br>(4.1-5.2)                            | 16%<br>(13-18%)                      | 19%<br>(16-22%)                     | 1900<br>(1500-2200) | 53000<br>(45000-62000) |
| Slovenia | 2000 | Male   | 15 to 19 | 66%<br>(51-80%)                | 34%<br>(20-49%)          | 2.6<br>(1.8-3.6)                            | 7.9%<br>(4.9-11%)                    | 14%<br>(8-21%)                      | 7.9<br>(4.3-12)     | 690<br>(420-980)       |
| Slovenia | 2000 | Male   | 20 to 24 | 79%<br>(66-87%)                | 21%<br>(13-34%)          | 4.5<br>(3.3-5.9)                            | 16%<br>(11-21%)                      | 25%<br>(16-33%)                     | 24<br>(15-32)       | 1900<br>(1300-2500)    |
| Slovenia | 2000 | Male   | 25 to 29 | 83%<br>(74-90%)                | 17%<br>(9.7-26%)         | 4.6<br>(3.4-5.8)                            | 15%<br>(11-19%)                      | 25%<br>(18-33%)                     | 21<br>(14-28)       | 1700<br>(1200-2200)    |
| Slovenia | 2000 | Male   | 30 to 34 | 86%<br>(77-93%)                | 14%<br>(7.4-23%)         | 4.7<br>(3.5-6)                              | 15%<br>(11-19%)                      | 25%<br>(18-33%)                     | 27<br>(19-35)       | 2000<br>(1400-2500)    |
| Slovenia | 2000 | Male   | 35 to 39 | 87%<br>(78-92%)                | 13%<br>(7.8-22%)         | 4.7<br>(3.5-6.1)                            | 15%<br>(12-19%)                      | 25%<br>(19-31%)                     | 40<br>(30-51)       | 2500<br>(1900-3100)    |
| Slovenia | 2000 | Male   | 40 to 44 | 86%<br>(78-92%)                | 14%<br>(8.3-22%)         | 5.2<br>(4-6.6)                              | 17%<br>(14-21%)                      | 26%<br>(21-31%)                     | 69<br>(52-84)       | 3700<br>(2900-4500)    |
| Slovenia | 2000 | Male   | 45 to 49 | 84%<br>(76-90%)                | 16%<br>(9.8-24%)         | 6.1<br>(4.7-7.7)                            | 19%<br>(16-23%)                      | 27%<br>(23-32%)                     | 130<br>(100-150)    | 5800<br>(4700-6900)    |
| Slovenia | 2000 | Male   | 50 to 54 | 82%<br>(75-87%)                | 18%<br>(13-25%)          | 6.9<br>(5.4-8.5)                            | 20%<br>(17-23%)                      | 27%<br>(23-30%)                     | 140<br>(120-160)    | 5500<br>(4600-6500)    |

| Location | Year | Sex    | Age      | Prevalence of current drinkers | Prevalence of abstainers | Population average of standard drinks daily | Percent of total attributable deaths | Percent of total attributable DALYs | Attributable deaths | Attributable DALYs    |
|----------|------|--------|----------|--------------------------------|--------------------------|---------------------------------------------|--------------------------------------|-------------------------------------|---------------------|-----------------------|
| Slovenia | 2000 | Male   | 55 to 59 | 79%<br>(72-83%)                | 21%<br>(17-28%)          | 7.7<br>(6.1-9.3)                            | 19%<br>(16-22%)                      | 25%<br>(21-28%)                     | 180<br>(140-210)    | 6100<br>(5000-7300)   |
| Slovenia | 2000 | Male   | 60 to 64 | 78%<br>(72-83%)                | 22%<br>(17-28%)          | 8.2<br>(6.4-10)                             | 18%<br>(15-21%)                      | 22%<br>(18-26%)                     | 220<br>(170-260)    | 6400<br>(5100-7700)   |
| Slovenia | 2000 | Male   | 65 to 69 | 81%<br>(75-86%)                | 19%<br>(14-25%)          | 8.3<br>(6.7-10)                             | 17%<br>(14-20%)                      | 20%<br>(17-24%)                     | 270<br>(220-330)    | 6600<br>(5200-7900)   |
| Slovenia | 2000 | Male   | 70 to 74 | 79%<br>(73-84%)                | 21%<br>(16-27%)          | 7.8<br>(6.2-9.4)                            | 15%<br>(12-18%)                      | 18%<br>(14-22%)                     | 260<br>(200-320)    | 5100<br>(3900-6200)   |
| Slovenia | 2000 | Male   | 75 to 79 | 73%<br>(65-80%)                | 27%<br>(20-35%)          | 6.6<br>(5.1-8.3)                            | 13%<br>(10-16%)                      | 15%<br>(12-19%)                     | 200<br>(150-250)    | 3000<br>(2300-3700)   |
| Slovenia | 2000 | Male   | 80 to 84 | 70%<br>(59-78%)                | 30%<br>(22-41%)          | 5.6<br>(4.2-7.2)                            | 12%<br>(8.9-15%)                     | 14%<br>(10-17%)                     | 130<br>(97-170)     | 1500<br>(1100-1900)   |
| Slovenia | 2000 | Male   | 85 to 89 | 70%<br>(60-78%)                | 30%<br>(22-40%)          | 5.1<br>(3.6-6.7)                            | 11%<br>(7.5-15%)                     | 12%<br>(8.4-17%)                    | 85<br>(59-120)      | 670<br>(470-900)      |
| Slovenia | 2000 | Male   | 90 to 94 | 71%<br>(61-80%)                | 29%<br>(20-39%)          | 4.8<br>(3.2-6.5)                            | 9.8%<br>(5.6-14%)                    | 11%<br>(6.2-16%)                    | 50<br>(28-73)       | 270<br>(150-390)      |
| Slovenia | 2000 | Male   | 95 plus  | 72%<br>(59-83%)                | 28%<br>(17-41%)          | 4.3<br>(2.4-6.5)                            | 8.8%<br>(3.2-14%)                    | 9.9%<br>(3.2-16%)                   | 9<br>(2.9-14)       | 33<br>(12-51)         |
| Slovenia | 2005 | Female | All Ages | 68%<br>(64-71%)                | 32%<br>(29-36%)          | 2<br>(1.7-2.2)                              | 4.7%<br>(3.6-5.9%)                   | 5.8%<br>(3.8-8.2%)                  | 540<br>(350-780)    | 13000<br>(9900-17000) |
| Slovenia | 2005 | Female | 15 to 19 | 71%<br>(58-83%)                | 29%<br>(17-42%)          | 1.8<br>(1.2-2.6)                            | 2.9%<br>(1.9-4.2%)                   | 9.2%<br>(4.8-14%)                   | 1.2<br>(0.61-1.9)   | 160<br>(100-230)      |
| Slovenia | 2005 | Female | 20 to 24 | 79%<br>(67-87%)                | 21%<br>(13-33%)          | 2.2<br>(1.5-3.1)                            | 4.6%<br>(3.2-6.1%)                   | 10%<br>(5.4-15%)                    | 2.2<br>(1.2-3.4)    | 320<br>(210-450)      |
| Slovenia | 2005 | Female | 25 to 29 | 80%<br>(68-87%)                | 20%<br>(13-32%)          | 1.8<br>(1.3-2.5)                            | 3.9%<br>(2.9-5.1%)                   | 8.4%<br>(4.9-12%)                   | 1.7<br>(0.94-2.5)   | 310<br>(210-420)      |
| Slovenia | 2005 | Female | 30 to 34 | 80%<br>(70-88%)                | 20%<br>(12-30%)          | 1.7<br>(1.2-2.4)                            | 3.8%<br>(2.8-4.9%)                   | 8.5%<br>(5.5-12%)                   | 2.7<br>(1.7-3.8)    | 340<br>(240-450)      |
| Slovenia | 2005 | Female | 35 to 39 | 79%<br>(69-88%)                | 21%<br>(12-31%)          | 1.8<br>(1.2-2.6)                            | 4.1%<br>(3.1-5.2%)                   | 10%<br>(7.5-13%)                    | 5.1<br>(3.6-6.8)    | 450<br>(330-580)      |
| Slovenia | 2005 | Female | 40 to 44 | 75%<br>(65-84%)                | 25%<br>(16-35%)          | 2.2<br>(1.6-3)                              | 4.9%<br>(3.7-6.4%)                   | 12%<br>(8.9-15%)                    | 10<br>(7.6-13)      | 660<br>(500-840)      |
| Slovenia | 2005 | Female | 45 to 49 | 71%<br>(63-80%)                | 29%<br>(20-37%)          | 2.8<br>(2-3.7)                              | 6.3%<br>(4.8-8%)                     | 13%<br>(10-16%)                     | 20<br>(16-26)       | 1000<br>(800-1300)    |
| Slovenia | 2005 | Female | 50 to 54 | 70%<br>(63-76%)                | 30%<br>(24-37%)          | 3<br>(2.2-3.9)                              | 7.1%<br>(5.4-9%)                     | 13%<br>(11-16%)                     | 34<br>(26-42)       | 1500<br>(1100-1800)   |
| Slovenia | 2005 | Female | 55 to 59 | 66%<br>(60-73%)                | 34%<br>(27-40%)          | 2.7<br>(2-3.6)                              | 6.7%<br>(5-8.4%)                     | 12%<br>(9.3-15%)                    | 33<br>(25-42)       | 1200<br>(930-1600)    |
| Slovenia | 2005 | Female | 60 to 64 | 64%<br>(57-71%)                | 36%<br>(29-43%)          | 2.6<br>(1.9-3.5)                            | 5.8%<br>(4.2-7.8%)                   | 10%<br>(7.5-13%)                    | 38<br>(28-50)       | 1200<br>(860-1600)    |
| Slovenia | 2005 | Female | 65 to 69 | 63%<br>(57-70%)                | 37%<br>(30-43%)          | 2.5<br>(2-3.2)                              | 5.3%<br>(3.7-6.9%)                   | 8.5%<br>(6.2-11%)                   | 47<br>(35-62)       | 1200<br>(890-1700)    |
| Slovenia | 2005 | Female | 70 to 74 | 61%<br>(53-67%)                | 39%<br>(33-47%)          | 2.4<br>(1.8-3.2)                            | 4.8%<br>(2.8-7.1%)                   | 7%<br>(4.4-10%)                     | 70<br>(43-100)      | 1500<br>(850-2100)    |

| Location | Year | Sex    | Age      | Prevalence of current drinkers | Prevalence of abstainers | Population average of standard drinks daily | Percent of total attributable deaths | Percent of total attributable DALYs | Attributable deaths | Attributable DALYs     |
|----------|------|--------|----------|--------------------------------|--------------------------|---------------------------------------------|--------------------------------------|-------------------------------------|---------------------|------------------------|
| Slovenia | 2005 | Female | 75 to 79 | 59%<br>(49-68%)                | 41%<br>(32-51%)          | 2.3<br>(1.6-3)                              | 4.2%<br>(2-6.8%)                     | 5.6%<br>(2.7-8.9%)                  | 85<br>(40-140)      | 1400<br>(630-2200)     |
| Slovenia | 2005 | Female | 80 to 84 | 54%<br>(41-66%)                | 46%<br>(34-59%)          | 1.9<br>(1.3-2.7)                            | 3.6%<br>(1.6-5.9%)                   | 4.5%<br>(1.9-7.6%)                  | 90<br>(39-150)      | 1000<br>(480-1800)     |
| Slovenia | 2005 | Female | 85 to 89 | 49%<br>(37-61%)                | 51%<br>(39-63%)          | 1.8<br>(1.1-2.6)                            | 3%<br>(0.93-5.5%)                    | 3.6%<br>(1-6.7%)                    | 56<br>(16-100)      | 460<br>(140-830)       |
| Slovenia | 2005 | Female | 90 to 94 | 50%<br>(37-60%)                | 50%<br>(40-63%)          | 1.8<br>(1.1-2.6)                            | 3%<br>(0.52-6.1%)                    | 3.5%<br>(0.45-7.4%)                 | 31<br>(4.1-65)      | 170<br>(29-350)        |
| Slovenia | 2005 | Female | 95 plus  | 51%<br>(36-66%)                | 49%<br>(34-64%)          | 1.8<br>(0.96-2.9)                           | 3.1%<br>(-0.022-7.5%)                | 3.6%<br>(-0.26-9.1%)                | 18<br>(-1.3-46)     | 64<br>(-0.44-160)      |
| Slovenia | 2005 | Male   | All Ages | 78%<br>(74-82%)                | 22%<br>(18-26%)          | 4.6<br>(4-5.1)                              | 14%<br>(12-16%)                      | 17%<br>(15-20%)                     | 1700<br>(1400-2000) | 47000<br>(40000-56000) |
| Slovenia | 2005 | Male   | 15 to 19 | 71%<br>(58-83%)                | 29%<br>(17-42%)          | 2.6<br>(1.8-3.5)                            | 7%<br>(4.3-9.7%)                     | 13%<br>(7.6-20%)                    | 5.3<br>(3-7.9)      | 500<br>(310-700)       |
| Slovenia | 2005 | Male   | 20 to 24 | 81%<br>(69-89%)                | 19%<br>(11-31%)          | 4.3<br>(3.2-5.6)                            | 14%<br>(10-19%)                      | 23%<br>(15-31%)                     | 18<br>(12-25)       | 1500<br>(1100-2000)    |
| Slovenia | 2005 | Male   | 25 to 29 | 86%<br>(78-91%)                | 14%<br>(8.8-22%)         | 4.3<br>(3.3-5.5)                            | 14%<br>(9.9-18%)                     | 23%<br>(15-30%)                     | 21<br>(14-29)       | 1700<br>(1200-2200)    |
| Slovenia | 2005 | Male   | 30 to 34 | 88%<br>(81-93%)                | 12%<br>(6.8-19%)         | 4.4<br>(3.4-5.6)                            | 13%<br>(9.7-16%)                     | 23%<br>(17-30%)                     | 19<br>(14-25)       | 1500<br>(1100-1900)    |
| Slovenia | 2005 | Male   | 35 to 39 | 88%<br>(81-93%)                | 12%<br>(7.2-19%)         | 4.4<br>(3.3-5.6)                            | 13%<br>(10-17%)                      | 23%<br>(17-29%)                     | 28<br>(20-36)       | 1900<br>(1400-2300)    |
| Slovenia | 2005 | Male   | 40 to 44 | 87%<br>(81-92%)                | 13%<br>(7.8-19%)         | 4.9<br>(3.8-6.1)                            | 15%<br>(12-19%)                      | 24%<br>(19-29%)                     | 53<br>(40-67)       | 2900<br>(2300-3600)    |
| Slovenia | 2005 | Male   | 45 to 49 | 86%<br>(80-91%)                | 14%<br>(9.2-20%)         | 5.7<br>(4.5-7.1)                            | 17%<br>(14-20%)                      | 26%<br>(21-30%)                     | 95<br>(75-120)      | 4500<br>(3600-5400)    |
| Slovenia | 2005 | Male   | 50 to 54 | 83%<br>(78-87%)                | 17%<br>(13-22%)          | 6.4<br>(5.1-7.8)                            | 18%<br>(15-21%)                      | 25%<br>(21-28%)                     | 150<br>(120-170)    | 6000<br>(4900-7100)    |
| Slovenia | 2005 | Male   | 55 to 59 | 80%<br>(75-83%)                | 20%<br>(17-25%)          | 7.2<br>(5.8-8.6)                            | 17%<br>(15-20%)                      | 23%<br>(20-26%)                     | 150<br>(120-180)    | 5300<br>(4400-6300)    |
| Slovenia | 2005 | Male   | 60 to 64 | 80%<br>(76-84%)                | 20%<br>(16-24%)          | 7.7<br>(6.1-9.4)                            | 17%<br>(14-20%)                      | 21%<br>(18-25%)                     | 180<br>(150-220)    | 5500<br>(4500-6600)    |
| Slovenia | 2005 | Male   | 65 to 69 | 83%<br>(78-86%)                | 17%<br>(14-22%)          | 7.8<br>(6.4-9.3)                            | 16%<br>(13-18%)                      | 19%<br>(16-22%)                     | 210<br>(170-260)    | 5300<br>(4400-6300)    |
| Slovenia | 2005 | Male   | 70 to 74 | 81%<br>(76-84%)                | 19%<br>(16-24%)          | 7.3<br>(5.9-8.9)                            | 14%<br>(12-17%)                      | 17%<br>(14-20%)                     | 250<br>(200-300)    | 4900<br>(4000-5900)    |
| Slovenia | 2005 | Male   | 75 to 79 | 76%<br>(69-81%)                | 24%<br>(19-31%)          | 6.3<br>(4.8-7.8)                            | 12%<br>(9.7-15%)                     | 14%<br>(11-17%)                     | 210<br>(160-260)    | 3300<br>(2600-4100)    |
| Slovenia | 2005 | Male   | 80 to 84 | 73%<br>(65-79%)                | 27%<br>(21-35%)          | 5.4<br>(4.2-6.7)                            | 11%<br>(8.3-14%)                     | 13%<br>(9.5-16%)                    | 160<br>(120-200)    | 1800<br>(1300-2300)    |
| Slovenia | 2005 | Male   | 85 to 89 | 73%<br>(65-79%)                | 27%<br>(21-35%)          | 5<br>(3.7-6.4)                              | 9.9%<br>(6.8-13%)                    | 11%<br>(7.5-15%)                    | 74<br>(48-100)      | 590<br>(400-810)       |
| Slovenia | 2005 | Male   | 90 to 94 | 74%<br>(65-81%)                | 26%<br>(19-35%)          | 4.6<br>(3.2-6.3)                            | 8.9%<br>(4.6-13%)                    | 10%<br>(4.8-15%)                    | 31<br>(15-46)       | 170<br>(85-240)        |

| Location | Year | Sex    | Age      | Prevalence of current drinkers | Prevalence of abstainers | Population average of standard drinks daily | Percent of total attributable deaths | Percent of total attributable DALYs | Attributable deaths | Attributable DALYs     |
|----------|------|--------|----------|--------------------------------|--------------------------|---------------------------------------------|--------------------------------------|-------------------------------------|---------------------|------------------------|
| Slovenia | 2005 | Male   | 95 plus  | 74%<br>(60-85%)                | 26%<br>(15-40%)          | 4.1<br>(2.3-6.2)                            | 7.8%<br>(2.3-13%)                    | 8.7%<br>(2.2-15%)                   | 11<br>(2.6-18)      | 40<br>(12-66)          |
| Slovenia | 2010 | Female | All Ages | 67%<br>(63-71%)                | 33%<br>(29-37%)          | 1.8<br>(1.5-2.1)                            | 3.9%<br>(2.9-5%)                     | 4.7%<br>(2.8-7%)                    | 450<br>(270-680)    | 11000<br>(7900-14000)  |
| Slovenia | 2010 | Female | 15 to 19 | 71%<br>(57-82%)                | 29%<br>(18-43%)          | 1.7<br>(1.1-2.4)                            | 2.5%<br>(1.7-3.5%)                   | 8%<br>(4.3-12%)                     | 0.7<br>(0.37-1.1)   | 110<br>(71-160)        |
| Slovenia | 2010 | Female | 20 to 24 | 79%<br>(67-87%)                | 21%<br>(13-33%)          | 2.1<br>(1.4-2.9)                            | 3.9%<br>(2.8-5.2%)                   | 8.6%<br>(4.7-13%)                   | 1<br>(0.54-1.5)     | 230<br>(150-320)       |
| Slovenia | 2010 | Female | 25 to 29 | 80%<br>(69-87%)                | 20%<br>(13-31%)          | 1.7<br>(1.2-2.4)                            | 3.6%<br>(2.7-4.7%)                   | 7.4%<br>(4.4-10%)                   | 0.92<br>(0.54-1.3)  | 250<br>(170-360)       |
| Slovenia | 2010 | Female | 30 to 34 | 81%<br>(71-88%)                | 19%<br>(12-29%)          | 1.6<br>(1.1-2.3)                            | 3.4%<br>(2.5-4.4%)                   | 7.8%<br>(5.2-11%)                   | 1.8<br>(1.2-2.5)    | 300<br>(220-420)       |
| Slovenia | 2010 | Female | 35 to 39 | 80%<br>(70-88%)                | 20%<br>(12-30%)          | 1.7<br>(1.2-2.6)                            | 3.8%<br>(2.8-4.9%)                   | 10%<br>(7.3-13%)                    | 3.7<br>(2.7-4.9)    | 370<br>(270-480)       |
| Slovenia | 2010 | Female | 40 to 44 | 76%<br>(66-85%)                | 24%<br>(15-34%)          | 2.1<br>(1.5-2.9)                            | 4.4%<br>(3.3-5.6%)                   | 11%<br>(8.6-14%)                    | 7.8<br>(5.9-10)     | 540<br>(410-700)       |
| Slovenia | 2010 | Female | 45 to 49 | 71%<br>(63-80%)                | 29%<br>(20-37%)          | 2.6<br>(1.8-3.5)                            | 5.4%<br>(4-6.9%)                     | 12%<br>(9.6-15%)                    | 15<br>(12-19)       | 830<br>(630-1100)      |
| Slovenia | 2010 | Female | 50 to 54 | 69%<br>(62-76%)                | 31%<br>(24-38%)          | 2.7<br>(2-3.6)                              | 5.9%<br>(4.5-7.5%)                   | 12%<br>(9.4-14%)                    | 24<br>(19-30)       | 1100<br>(860-1400)     |
| Slovenia | 2010 | Female | 55 to 59 | 65%<br>(58-72%)                | 35%<br>(28-42%)          | 2.5<br>(1.8-3.3)                            | 5.7%<br>(4.2-7.2%)                   | 11%<br>(8.5-13%)                    | 33<br>(25-41)       | 1300<br>(960-1600)     |
| Slovenia | 2010 | Female | 60 to 64 | 63%<br>(55-70%)                | 37%<br>(30-45%)          | 2.4<br>(1.7-3.2)                            | 5%<br>(3.6-6.7%)                     | 9.1%<br>(7-12%)                     | 30<br>(23-39)       | 980<br>(720-1300)      |
| Slovenia | 2010 | Female | 65 to 69 | 62%<br>(55-70%)                | 38%<br>(30-45%)          | 2.3<br>(1.8-3)                              | 4.6%<br>(3.3-6.1%)                   | 7.8%<br>(5.9-10%)                   | 38<br>(28-50)       | 1000<br>(740-1400)     |
| Slovenia | 2010 | Female | 70 to 74 | 60%<br>(52-67%)                | 40%<br>(33-48%)          | 2.2<br>(1.6-2.9)                            | 4.1%<br>(2.5-6%)                     | 6.3%<br>(4.1-8.9%)                  | 47<br>(29-67)       | 1000<br>(630-1500)     |
| Slovenia | 2010 | Female | 75 to 79 | 57%<br>(47-66%)                | 43%<br>(34-53%)          | 2<br>(1.4-2.8)                              | 3.5%<br>(1.6-5.6%)                   | 4.8%<br>(2.4-7.9%)                  | 67<br>(32-110)      | 1100<br>(520-1800)     |
| Slovenia | 2010 | Female | 80 to 84 | 52%<br>(40-64%)                | 48%<br>(36-60%)          | 1.7<br>(1.2-2.4)                            | 2.8%<br>(1.2-5%)                     | 3.7%<br>(1.6-6.5%)                  | 71<br>(30-130)      | 840<br>(360-1500)      |
| Slovenia | 2010 | Female | 85 to 89 | 48%<br>(36-59%)                | 52%<br>(41-64%)          | 1.6<br>(0.96-2.3)                           | 2.4%<br>(0.64-4.7%)                  | 2.9%<br>(0.63-5.9%)                 | 67<br>(15-140)      | 560<br>(140-1100)      |
| Slovenia | 2010 | Female | 90 to 94 | 48%<br>(36-59%)                | 52%<br>(41-64%)          | 1.6<br>(0.94-2.4)                           | 2.3%<br>(0.11-5.2%)                  | 2.7%<br>(-0.053-6.3%)               | 33<br>(-0.65-78)    | 190<br>(9.3-420)       |
| Slovenia | 2010 | Female | 95 plus  | 50%<br>(34-66%)                | 50%<br>(34-66%)          | 1.6<br>(0.84-2.7)                           | 2.4%<br>(-0.44-6.3%)                 | 2.8%<br>(-0.75-7.6%)                | 12<br>(-3.4-34)     | 46<br>(-8.3-120)       |
| Slovenia | 2010 | Male   | All Ages | 78%<br>(74-82%)                | 22%<br>(18-26%)          | 4.3<br>(3.7-5)                              | 13%<br>(11-15%)                      | 16%<br>(14-19%)                     | 1500<br>(1200-1800) | 42000<br>(36000-50000) |
| Slovenia | 2010 | Male   | 15 to 19 | 69%<br>(55-81%)                | 31%<br>(19-45%)          | 2.3<br>(1.6-3.2)                            | 5.6%<br>(3.7-7.8%)                   | 12%<br>(6.6-18%)                    | 2.7<br>(1.4-4.1)    | 290<br>(190-420)       |
| Slovenia | 2010 | Male   | 20 to 24 | 81%<br>(70-89%)                | 19%<br>(11-30%)          | 4<br>(2.9-5.3)                              | 12%<br>(8.5-16%)                     | 21%<br>(14-29%)                     | 12<br>(7.4-16)      | 1100<br>(740-1400)     |

| Location | Year | Sex    | Age      | Prevalence of current drinkers | Prevalence of abstainers | Population average of standard drinks daily | Percent of total attributable deaths | Percent of total attributable DALYs | Attributable deaths | Attributable DALYs    |
|----------|------|--------|----------|--------------------------------|--------------------------|---------------------------------------------|--------------------------------------|-------------------------------------|---------------------|-----------------------|
| Slovenia | 2010 | Male   | 25 to 29 | 86%<br>(78-91%)                | 14%<br>(8.7-22%)         | 4<br>(3-5.2)                                | 11%<br>(8.3-14%)                     | 21%<br>(14-28%)                     | 12<br>(7.7-17)      | 1100<br>(830-1500)    |
| Slovenia | 2010 | Male   | 30 to 34 | 88%<br>(81-93%)                | 12%<br>(6.9-19%)         | 4.1<br>(3-5.3)                              | 11%<br>(8.5-14%)                     | 21%<br>(15-28%)                     | 17<br>(12-22)       | 1400<br>(1000-1800)   |
| Slovenia | 2010 | Male   | 35 to 39 | 88%<br>(81-93%)                | 12%<br>(7-19%)           | 4.1<br>(3.1-5.3)                            | 11%<br>(8.7-15%)                     | 22%<br>(16-28%)                     | 20<br>(14-26)       | 1500<br>(1100-1900)   |
| Slovenia | 2010 | Male   | 40 to 44 | 87%<br>(80-93%)                | 13%<br>(7.3-20%)         | 4.5<br>(3.4-5.7)                            | 14%<br>(10-17%)                      | 24%<br>(18-29%)                     | 41<br>(31-52)       | 2400<br>(1800-2900)   |
| Slovenia | 2010 | Male   | 45 to 49 | 86%<br>(80-91%)                | 14%<br>(8.9-20%)         | 5.3<br>(4.1-6.7)                            | 16%<br>(13-19%)                      | 25%<br>(20-30%)                     | 69<br>(54-86)       | 3400<br>(2700-4200)   |
| Slovenia | 2010 | Male   | 50 to 54 | 83%<br>(77-87%)                | 17%<br>(13-23%)          | 5.8<br>(4.6-7.3)                            | 17%<br>(14-20%)                      | 24%<br>(20-28%)                     | 110<br>(92-140)     | 4800<br>(3900-5800)   |
| Slovenia | 2010 | Male   | 55 to 59 | 79%<br>(75-83%)                | 21%<br>(17-25%)          | 6.5<br>(5.2-8.1)                            | 16%<br>(14-19%)                      | 23%<br>(19-26%)                     | 170<br>(140-210)    | 6200<br>(5100-7300)   |
| Slovenia | 2010 | Male   | 60 to 64 | 79%<br>(75-83%)                | 21%<br>(17-25%)          | 7<br>(5.5-8.6)                              | 16%<br>(13-18%)                      | 21%<br>(17-24%)                     | 160<br>(130-190)    | 4900<br>(4100-5900)   |
| Slovenia | 2010 | Male   | 65 to 69 | 81%<br>(77-85%)                | 19%<br>(15-23%)          | 7<br>(5.7-8.5)                              | 14%<br>(12-17%)                      | 19%<br>(16-22%)                     | 180<br>(150-210)    | 4600<br>(3800-5400)   |
| Slovenia | 2010 | Male   | 70 to 74 | 80%<br>(75-84%)                | 20%<br>(16-25%)          | 6.7<br>(5.3-8.3)                            | 13%<br>(11-16%)                      | 16%<br>(13-19%)                     | 200<br>(170-250)    | 4200<br>(3400-5100)   |
| Slovenia | 2010 | Male   | 75 to 79 | 75%<br>(68-81%)                | 25%<br>(19-32%)          | 5.8<br>(4.4-7.3)                            | 11%<br>(9-14%)                       | 14%<br>(11-17%)                     | 200<br>(160-260)    | 3300<br>(2600-4100)   |
| Slovenia | 2010 | Male   | 80 to 84 | 72%<br>(64-79%)                | 28%<br>(21-36%)          | 5<br>(3.8-6.3)                              | 9.9%<br>(7.3-13%)                    | 12%<br>(8.5-15%)                    | 170<br>(120-220)    | 1900<br>(1400-2500)   |
| Slovenia | 2010 | Male   | 85 to 89 | 73%<br>(66-79%)                | 27%<br>(21-34%)          | 4.6<br>(3.4-6.1)                            | 8.9%<br>(5.6-12%)                    | 10%<br>(6.3-14%)                    | 99<br>(60-140)      | 810<br>(500-1100)     |
| Slovenia | 2010 | Male   | 90 to 94 | 74%<br>(66-81%)                | 26%<br>(19-34%)          | 4.3<br>(2.9-5.9)                            | 7.8%<br>(3.7-12%)                    | 8.9%<br>(3.9-14%)                   | 32<br>(14-50)       | 180<br>(84-270)       |
| Slovenia | 2010 | Male   | 95 plus  | 74%<br>(62-85%)                | 26%<br>(15-38%)          | 3.8<br>(2.2-5.6)                            | 6.7%<br>(1.7-12%)                    | 7.5%<br>(1.4-14%)                   | 7.5<br>(1.4-13)     | 28<br>(7-48)          |
| Slovenia | 2016 | Female | All Ages | 64%<br>(59-68%)                | 36%<br>(32-41%)          | 1.7<br>(1.3-2.2)                            | 3.6%<br>(2.5-5%)                     | 4.3%<br>(2.1-7%)                    | 460<br>(220-760)    | 10000<br>(7000-14000) |
| Slovenia | 2016 | Female | 15 to 19 | 67%<br>(53-80%)                | 33%<br>(20-47%)          | 1.6<br>(0.96-2.4)                           | 2.4%<br>(1.6-3.5%)                   | 7.6%<br>(3.8-12%)                   | 0.53<br>(0.27-0.84) | 90<br>(58-130)        |
| Slovenia | 2016 | Female | 20 to 24 | 77%<br>(64-86%)                | 23%<br>(14-36%)          | 2<br>(1.2-3.1)                              | 3.9%<br>(2.8-5.3%)                   | 8.5%<br>(4.5-13%)                   | 0.78<br>(0.41-1.2)  | 180<br>(120-260)      |
| Slovenia | 2016 | Female | 25 to 29 | 79%<br>(68-87%)                | 21%<br>(13-32%)          | 1.7<br>(1.1-2.6)                            | 3.6%<br>(2.7-4.7%)                   | 7.7%<br>(4.6-11%)                   | 0.79<br>(0.46-1.2)  | 220<br>(150-310)      |
| Slovenia | 2016 | Female | 30 to 34 | 80%<br>(68-88%)                | 20%<br>(12-32%)          | 1.6<br>(0.97-2.4)                           | 3.3%<br>(2.4-4.4%)                   | 7.8%<br>(5.1-11%)                   | 1.4<br>(0.88-2.1)   | 270<br>(180-380)      |
| Slovenia | 2016 | Female | 35 to 39 | 79%<br>(67-88%)                | 21%<br>(12-33%)          | 1.7<br>(1.1-2.7)                            | 3.6%<br>(2.7-4.7%)                   | 10%<br>(7.3-13%)                    | 3.4<br>(2.3-4.8)    | 360<br>(270-490)      |
| Slovenia | 2016 | Female | 40 to 44 | 75%<br>(63-85%)                | 25%<br>(15-37%)          | 2.1<br>(1.4-3.1)                            | 4.2%<br>(3.1-5.5%)                   | 11%<br>(8.8-14%)                    | 6.2<br>(4.4-8.5)    | 460<br>(340-620)      |

| Location | Year | Sex    | Age      | Prevalence of current drinkers | Prevalence of abstainers | Population average of standard drinks daily | Percent of total attributable deaths | Percent of total attributable DALYs | Attributable deaths | Attributable DALYs     |
|----------|------|--------|----------|--------------------------------|--------------------------|---------------------------------------------|--------------------------------------|-------------------------------------|---------------------|------------------------|
| Slovenia | 2016 | Female | 45 to 49 | 70%<br>(58-79%)                | 30%<br>(21-42%)          | 2.6<br>(1.7-3.7)                            | 5.1%<br>(3.7-6.9%)                   | 12%<br>(9.4-16%)                    | 13<br>(9-17)        | 730<br>(540-980)       |
| Slovenia | 2016 | Female | 50 to 54 | 65%<br>(56-74%)                | 35%<br>(26-44%)          | 2.5<br>(1.7-3.6)                            | 5.4%<br>(4-7.1%)                     | 11%<br>(8.9-14%)                    | 20<br>(14-26)       | 940<br>(700-1200)      |
| Slovenia | 2016 | Female | 55 to 59 | 61%<br>(53-71%)                | 39%<br>(29-47%)          | 2.3<br>(1.6-3.3)                            | 5.2%<br>(3.7-6.7%)                   | 10%<br>(7.7-13%)                    | 27<br>(20-36)       | 1100<br>(790-1400)     |
| Slovenia | 2016 | Female | 60 to 64 | 59%<br>(50-70%)                | 41%<br>(30-50%)          | 2.2<br>(1.5-3.2)                            | 4.6%<br>(3.2-6.3%)                   | 8.6%<br>(6.4-12%)                   | 34<br>(25-47)       | 1100<br>(800-1600)     |
| Slovenia | 2016 | Female | 65 to 69 | 59%<br>(50-69%)                | 41%<br>(31-50%)          | 2.2<br>(1.5-3.1)                            | 4.2%<br>(2.9-5.8%)                   | 7.4%<br>(5.4-9.9%)                  | 33<br>(23-46)       | 920<br>(620-1300)      |
| Slovenia | 2016 | Female | 70 to 74 | 57%<br>(47-67%)                | 43%<br>(33-53%)          | 2.1<br>(1.4-3.1)                            | 3.8%<br>(2.2-5.9%)                   | 6.2%<br>(3.8-9%)                    | 43<br>(25-65)       | 950<br>(540-1500)      |
| Slovenia | 2016 | Female | 75 to 79 | 52%<br>(41-64%)                | 48%<br>(36-59%)          | 1.8<br>(1.2-2.8)                            | 3.2%<br>(1.5-5.5%)                   | 4.6%<br>(2.3-8%)                    | 53<br>(24-93)       | 890<br>(410-1600)      |
| Slovenia | 2016 | Female | 80 to 84 | 48%<br>(35-60%)                | 52%<br>(40-65%)          | 1.6<br>(0.96-2.4)                           | 2.7%<br>(1-5%)                       | 3.6%<br>(1.3-6.6%)                  | 66<br>(24-120)      | 790<br>(300-1500)      |
| Slovenia | 2016 | Female | 85 to 89 | 46%<br>(33-57%)                | 54%<br>(43-67%)          | 1.5<br>(0.87-2.4)                           | 2.4%<br>(0.6-4.8%)                   | 3%<br>(0.63-6.1%)                   | 75<br>(15-160)      | 620<br>(160-1300)      |
| Slovenia | 2016 | Female | 90 to 94 | 46%<br>(34-59%)                | 54%<br>(41-66%)          | 1.6<br>(0.87-2.5)                           | 2.3%<br>(0.098-5.3%)                 | 2.8%<br>(-0.081-6.6%)               | 56<br>(-1.7-130)    | 310<br>(13-720)        |
| Slovenia | 2016 | Female | 95 plus  | 48%<br>(33-64%)                | 52%<br>(36-67%)          | 1.6<br>(0.79-2.8)                           | 2.4%<br>(-0.48-6.4%)                 | 2.8%<br>(-0.77-7.8%)                | 25<br>(-6.8-69)     | 90<br>(-18-240)        |
| Slovenia | 2016 | Male   | All Ages | 74%<br>(70-79%)                | 26%<br>(21-30%)          | 4.2<br>(3.3-5.4)                            | 12%<br>(10-15%)                      | 15%<br>(12-18%)                     | 1500<br>(1200-2000) | 40000<br>(32000-49000) |
| Slovenia | 2016 | Male   | 15 to 19 | 62%<br>(45-77%)                | 38%<br>(23-55%)          | 2.1<br>(1.2-3.1)                            | 5%<br>(3.3-7.1%)                     | 11%<br>(5.7-17%)                    | 1.9<br>(0.97-3)     | 220<br>(140-310)       |
| Slovenia | 2016 | Male   | 20 to 24 | 76%<br>(62-87%)                | 24%<br>(13-38%)          | 3.7<br>(2.4-5.3)                            | 11%<br>(8.1-15%)                     | 21%<br>(13-30%)                     | 6.9<br>(4-10)       | 690<br>(460-930)       |
| Slovenia | 2016 | Male   | 25 to 29 | 82%<br>(71-90%)                | 18%<br>(10-29%)          | 3.8<br>(2.6-5.4)                            | 11%<br>(8-14%)                       | 21%<br>(13-29%)                     | 8.8<br>(5.4-13)     | 880<br>(620-1200)      |
| Slovenia | 2016 | Male   | 30 to 34 | 85%<br>(74-92%)                | 15%<br>(7.8-26%)         | 3.9<br>(2.6-5.5)                            | 11%<br>(7.9-14%)                     | 21%<br>(14-29%)                     | 13<br>(8.4-18)      | 1100<br>(820-1500)     |
| Slovenia | 2016 | Male   | 35 to 39 | 86%<br>(76-92%)                | 14%<br>(8-24%)           | 3.9<br>(2.7-5.6)                            | 11%<br>(8.6-15%)                     | 23%<br>(16-30%)                     | 20<br>(14-28)       | 1500<br>(1100-2000)    |
| Slovenia | 2016 | Male   | 40 to 44 | 85%<br>(76-91%)                | 15%<br>(8.6-24%)         | 4.4<br>(3-5.9)                              | 13%<br>(9.8-16%)                     | 25%<br>(19-31%)                     | 32<br>(22-43)       | 1900<br>(1400-2500)    |
| Slovenia | 2016 | Male   | 45 to 49 | 84%<br>(75-90%)                | 16%<br>(9.9-25%)         | 5.1<br>(3.6-7.1)                            | 15%<br>(12-19%)                      | 26%<br>(21-32%)                     | 57<br>(42-77)       | 2900<br>(2200-3700)    |
| Slovenia | 2016 | Male   | 50 to 54 | 81%<br>(75-86%)                | 19%<br>(14-25%)          | 5.8<br>(4.2-7.9)                            | 16%<br>(13-20%)                      | 26%<br>(21-30%)                     | 97<br>(74-130)      | 4100<br>(3200-5200)    |
| Slovenia | 2016 | Male   | 55 to 59 | 78%<br>(73-83%)                | 22%<br>(17-27%)          | 6.5<br>(4.8-8.7)                            | 16%<br>(14-19%)                      | 24%<br>(20-27%)                     | 140<br>(110-180)    | 5200<br>(4100-6400)    |
| Slovenia | 2016 | Male   | 60 to 64 | 77%<br>(72-83%)                | 23%<br>(17-28%)          | 6.9<br>(5-9)                                | 15%<br>(13-18%)                      | 21%<br>(17-24%)                     | 200<br>(160-250)    | 6100<br>(4900-7600)    |

| Location | Year | Sex    | Age      | Prevalence of current drinkers | Prevalence of abstainers | Population average of standard drinks daily | Percent of total attributable deaths | Percent of total attributable DALYs | Attributable deaths | Attributable DALYs       |
|----------|------|--------|----------|--------------------------------|--------------------------|---------------------------------------------|--------------------------------------|-------------------------------------|---------------------|--------------------------|
| Slovenia | 2016 | Male   | 65 to 69 | 80%<br>(74-84%)                | 20%<br>(16-26%)          | 6.9<br>(5.1-9.1)                            | 14%<br>(11-17%)                      | 19%<br>(15-22%)                     | 180<br>(140-230)    | 4600<br>(3600-5800)      |
| Slovenia | 2016 | Male   | 70 to 74 | 77%<br>(71-82%)                | 23%<br>(18-29%)          | 6.5<br>(4.6-8.7)                            | 12%<br>(10-15%)                      | 16%<br>(13-19%)                     | 190<br>(140-250)    | 4000<br>(3000-5000)      |
| Slovenia | 2016 | Male   | 75 to 79 | 71%<br>(62-78%)                | 29%<br>(22-38%)          | 5.4<br>(3.7-7.4)                            | 10%<br>(7.7-13%)                     | 13%<br>(9.5-16%)                    | 180<br>(130-250)    | 3000<br>(2200-3900)      |
| Slovenia | 2016 | Male   | 80 to 84 | 67%<br>(57-76%)                | 33%<br>(24-43%)          | 4.6<br>(3.1-6.3)                            | 9%<br>(6.1-12%)                      | 11%<br>(7.1-15%)                    | 170<br>(110-250)    | 2000<br>(1400-2800)      |
| Slovenia | 2016 | Male   | 85 to 89 | 69%<br>(58-77%)                | 31%<br>(23-42%)          | 4.3<br>(2.8-6.2)                            | 8.1%<br>(4.7-12%)                    | 9.5%<br>(5.4-14%)                   | 130<br>(70-200)     | 1100<br>(590-1600)       |
| Slovenia | 2016 | Male   | 90 to 94 | 70%<br>(59-79%)                | 30%<br>(21-41%)          | 4<br>(2.5-6)                                | 7.3%<br>(3.3-11%)                    | 8.4%<br>(3.4-13%)                   | 59<br>(24-98)       | 320<br>(150-520)         |
| Slovenia | 2016 | Male   | 95 plus  | 71%<br>(57-83%)                | 29%<br>(17-43%)          | 3.7<br>(2-5.7)                              | 6.5%<br>(1.7-11%)                    | 7.4%<br>(1.5-13%)                   | 13<br>(2.6-24)      | 48<br>(12-85)            |
| Belarus  | 1990 | Female | All Ages | 69%<br>(63-75%)                | 31%<br>(25-37%)          | 2.8<br>(2.3-3.3)                            | 6.5%<br>(4.2-9%)                     | 5.9%<br>(1.8-11%)                   | 3300<br>(1000-6000) | 110000<br>(72000-160000) |
| Belarus  | 1990 | Female | 15 to 19 | 63%<br>(48-77%)                | 37%<br>(23-52%)          | 2.2<br>(1.2-3.7)                            | 5.2%<br>(3.5-7.5%)                   | 9.9%<br>(5.5-16%)                   | 18<br>(10-30)       | 2100<br>(1400-3100)      |
| Belarus  | 1990 | Female | 20 to 24 | 75%<br>(60-86%)                | 25%<br>(14-40%)          | 3.4<br>(1.8-5.5)                            | 8.5%<br>(6.1-11%)                    | 13%<br>(7.6-19%)                    | 27<br>(16-39)       | 3700<br>(2600-5000)      |
| Belarus  | 1990 | Female | 25 to 29 | 80%<br>(67-88%)                | 20%<br>(12-33%)          | 3.8<br>(2.2-5.9)                            | 9.2%<br>(7.1-12%)                    | 15%<br>(9.7-21%)                    | 40<br>(26-57)       | 5200<br>(3700-6800)      |
| Belarus  | 1990 | Female | 30 to 34 | 83%<br>(69-91%)                | 17%<br>(9.1-31%)         | 4.2<br>(2.6-6.4)                            | 9.8%<br>(7.6-12%)                    | 17%<br>(12-23%)                     | 66<br>(47-89)       | 6800<br>(5000-8800)      |
| Belarus  | 1990 | Female | 35 to 39 | 84%<br>(73-92%)                | 16%<br>(8.5-27%)         | 4.4<br>(2.5-6.7)                            | 11%<br>(8.3-13%)                     | 18%<br>(13-24%)                     | 92<br>(65-120)      | 7500<br>(5700-9500)      |
| Belarus  | 1990 | Female | 40 to 44 | 84%<br>(73-92%)                | 16%<br>(8.5-27%)         | 4.4<br>(2.5-6.8)                            | 12%<br>(8.6-15%)                     | 19%<br>(13-25%)                     | 130<br>(87-170)     | 8300<br>(6100-11000)     |
| Belarus  | 1990 | Female | 45 to 49 | 83%<br>(69-91%)                | 17%<br>(8.6-31%)         | 4.3<br>(2.6-6.8)                            | 12%<br>(8.3-16%)                     | 18%<br>(12-25%)                     | 150<br>(100-210)    | 8300<br>(5900-11000)     |
| Belarus  | 1990 | Female | 50 to 54 | 80%<br>(66-89%)                | 20%<br>(11-34%)          | 4.1<br>(2.4-6.5)                            | 11%<br>(7.4-15%)                     | 16%<br>(10-23%)                     | 300<br>(180-420)    | 14000<br>(8900-19000)    |
| Belarus  | 1990 | Female | 55 to 59 | 75%<br>(59-87%)                | 25%<br>(13-41%)          | 3.8<br>(2.2-5.8)                            | 10%<br>(5.8-15%)                     | 14%<br>(7.7-21%)                    | 370<br>(200-540)    | 14000<br>(7900-20000)    |
| Belarus  | 1990 | Female | 60 to 64 | 71%<br>(53-85%)                | 29%<br>(15-47%)          | 3.4<br>(1.9-5.5)                            | 8.4%<br>(3.4-14%)                    | 11%<br>(3.9-19%)                    | 470<br>(170-790)    | 15000<br>(5800-25000)    |
| Belarus  | 1990 | Female | 65 to 69 | 66%<br>(47-82%)                | 34%<br>(18-53%)          | 2.9<br>(1.7-4.4)                            | 6.6%<br>(1.8-12%)                    | 8.2%<br>(1.8-15%)                   | 450<br>(97-840)     | 12000<br>(3100-21000)    |
| Belarus  | 1990 | Female | 70 to 74 | 59%<br>(41-75%)                | 41%<br>(25-59%)          | 2.3<br>(1.2-4.1)                            | 4.5%<br>(-0.45-11%)                  | 5.3%<br>(-0.93-13%)                 | 270<br>(-49-670)    | 5600<br>(-580-13000)     |
| Belarus  | 1990 | Female | 75 to 79 | 49%<br>(32-68%)                | 51%<br>(32-68%)          | 1.8<br>(0.88-3.2)                           | 3%<br>(-1.5-8.8%)                    | 3.4%<br>(-2.1-11%)                  | 310<br>(-190-970)   | 5000<br>(-2400-15000)    |
| Belarus  | 1990 | Female | 80 to 84 | 43%<br>(26-61%)                | 57%<br>(39-74%)          | 1.6<br>(0.81-2.7)                           | 2.5%<br>(-1.1-7.8%)                  | 2.7%<br>(-1.7-9.1%)                 | 270<br>(-170-910)   | 3200<br>(-1400-9800)     |

| Location | Year | Sex    | Age      | Prevalence of current drinkers | Prevalence of abstainers | Population average of standard drinks daily | Percent of total attributable deaths | Percent of total attributable DALYs | Attributable deaths  | Attributable DALYs        |
|----------|------|--------|----------|--------------------------------|--------------------------|---------------------------------------------|--------------------------------------|-------------------------------------|----------------------|---------------------------|
| Belarus  | 1990 | Female | 85 to 89 | 40%<br>(24-57%)                | 60%<br>(43-76%)          | 1.6<br>(0.79-2.8)                           | 2.3%<br>(-1.2-7.9%)                  | 2.5%<br>(-1.8-9.2%)                 | 190<br>(-130-700)    | 1600<br>(-850-5300)       |
| Belarus  | 1990 | Female | 90 to 94 | 41%<br>(27-58%)                | 59%<br>(42-73%)          | 1.7<br>(0.8-3.1)                            | 2.3%<br>(-1.5-8.4%)                  | 2.5%<br>(-2.2-9.9%)                 | 84<br>(-73-320)      | 490<br>(-320-1700)        |
| Belarus  | 1990 | Female | 95 plus  | 45%<br>(26-65%)                | 55%<br>(35-74%)          | 1.8<br>(0.7-3.7)                            | 2.5%<br>(-2.1-9.8%)                  | 2.7%<br>(-2.9-12%)                  | 62<br>(-67-270)      | 230<br>(-180-900)         |
| Belarus  | 1990 | Male   | All Ages | 79%<br>(73-85%)                | 21%<br>(15-27%)          | 4.8<br>(4-5.7)                              | 15%<br>(12-18%)                      | 15%<br>(11-19%)                     | 8000<br>(5700-10000) | 310000<br>(250000-370000) |
| Belarus  | 1990 | Male   | 15 to 19 | 69%<br>(53-83%)                | 31%<br>(17-47%)          | 2.8<br>(1.5-4.4)                            | 9%<br>(5.7-13%)                      | 14%<br>(8-21%)                      | 61<br>(36-93)        | 5000<br>(3100-7400)       |
| Belarus  | 1990 | Male   | 20 to 24 | 82%<br>(69-91%)                | 18%<br>(9.4-31%)         | 5.1<br>(3.1-7.5)                            | 18%<br>(12-25%)                      | 23%<br>(15-33%)                     | 180<br>(120-250)     | 14000<br>(9300-19000)     |
| Belarus  | 1990 | Male   | 25 to 29 | 87%<br>(79-93%)                | 13%<br>(6.7-21%)         | 6.3<br>(4-9)                                | 21%<br>(16-27%)                      | 28%<br>(20-36%)                     | 300<br>(210-390)     | 22000<br>(16000-27000)    |
| Belarus  | 1990 | Male   | 30 to 34 | 90%<br>(82-96%)                | 9.7%<br>(4.3-18%)        | 7.1<br>(4.9-9.9)                            | 23%<br>(18-28%)                      | 30%<br>(22-36%)                     | 420<br>(310-530)     | 28000<br>(21000-34000)    |
| Belarus  | 1990 | Male   | 35 to 39 | 91%<br>(85-96%)                | 8.7%<br>(4-15%)          | 7.5<br>(4.9-11)                             | 23%<br>(18-29%)                      | 30%<br>(22-37%)                     | 500<br>(370-620)     | 29000<br>(22000-35000)    |
| Belarus  | 1990 | Male   | 40 to 44 | 92%<br>(85-96%)                | 8.5%<br>(3.9-15%)        | 8<br>(5.1-11)                               | 24%<br>(18-29%)                      | 30%<br>(22-36%)                     | 600<br>(450-740)     | 30000<br>(23000-37000)    |
| Belarus  | 1990 | Male   | 45 to 49 | 91%<br>(82-96%)                | 8.9%<br>(4-18%)          | 8.5<br>(5.5-12)                             | 24%<br>(18-28%)                      | 28%<br>(22-34%)                     | 650<br>(500-790)     | 29000<br>(22000-35000)    |
| Belarus  | 1990 | Male   | 50 to 54 | 90%<br>(81-95%)                | 10%<br>(5-19%)           | 8.2<br>(5.3-12)                             | 21%<br>(16-25%)                      | 25%<br>(19-30%)                     | 1100<br>(850-1400)   | 43000<br>(33000-53000)    |
| Belarus  | 1990 | Male   | 55 to 59 | 88%<br>(78-94%)                | 12%<br>(6-22%)           | 7.2<br>(4.8-10)                             | 18%<br>(13-22%)                      | 21%<br>(15-26%)                     | 1100<br>(810-1400)   | 37000<br>(28000-47000)    |
| Belarus  | 1990 | Male   | 60 to 64 | 86%<br>(74-93%)                | 14%<br>(6.6-26%)         | 6.3<br>(3.9-9.4)                            | 14%<br>(8.8-19%)                     | 16%<br>(9.8-22%)                    | 1200<br>(700-1600)   | 34000<br>(21000-46000)    |
| Belarus  | 1990 | Male   | 65 to 69 | 85%<br>(72-93%)                | 15%<br>(7.2-28%)         | 5.3<br>(3.5-7.7)                            | 12%<br>(6.4-17%)                     | 13%<br>(6.9-19%)                    | 750<br>(390-1100)    | 18000<br>(9700-26000)     |
| Belarus  | 1990 | Male   | 70 to 74 | 82%<br>(69-90%)                | 18%<br>(9.9-31%)         | 4.3<br>(2.5-6.6)                            | 8.5%<br>(2.5-14%)                    | 9.4%<br>(2.4-16%)                   | 370<br>(99-640)      | 7300<br>(2100-12000)      |
| Belarus  | 1990 | Male   | 75 to 79 | 78%<br>(63-89%)                | 22%<br>(11-37%)          | 3.6<br>(2.1-5.8)                            | 6%<br>(0.049-12%)                    | 6.4%<br>(-0.42-14%)                 | 350<br>(-24-760)     | 5500<br>(45-11000)        |
| Belarus  | 1990 | Male   | 80 to 84 | 74%<br>(57-85%)                | 26%<br>(15-43%)          | 3.3<br>(1.9-4.9)                            | 4.7%<br>(-0.73-11%)                  | 4.9%<br>(-1.3-12%)                  | 250<br>(-69-620)     | 2900<br>(-460-6800)       |
| Belarus  | 1990 | Male   | 85 to 89 | 70%<br>(54-82%)                | 30%<br>(18-46%)          | 3.1<br>(1.8-4.9)                            | 3.6%<br>(-1.1-9.9%)                  | 3.7%<br>(-1.8-11%)                  | 110<br>(-57-340)     | 990<br>(-290-2700)        |
| Belarus  | 1990 | Male   | 90 to 94 | 69%<br>(54-81%)                | 31%<br>(19-46%)          | 2.9<br>(1.6-4.7)                            | 2.7%<br>(-1.9-8.5%)                  | 2.6%<br>(-2.9-9.5%)                 | 30<br>(-34-110)      | 190<br>(-140-600)         |
| Belarus  | 1990 | Male   | 95 plus  | 67%<br>(48-83%)                | 33%<br>(17-52%)          | 2.7<br>(1.3-4.8)                            | 2.1%<br>(-2.8-8.3%)                  | 1.8%<br>(-4.9-1%)                   | 8.7<br>(-19-44)      | 41<br>(-54-160)           |
| Belarus  | 1995 | Female | All Ages | 70%<br>(63-76%)                | 30%<br>(24-37%)          | 2.7<br>(2.3-3.2)                            | 6.9%<br>(4.3-9.8%)                   | 6%<br>(1.9-11%)                     | 3900<br>(1200-7200)  | 130000<br>(82000-180000)  |



| Location | Year | Sex    | Age      | Prevalence of current drinkers | Prevalence of abstainers | Population average of standard drinks daily | Percent of total attributable deaths | Percent of total attributable DALYs | Attributable deaths   | Attributable DALYs        |
|----------|------|--------|----------|--------------------------------|--------------------------|---------------------------------------------|--------------------------------------|-------------------------------------|-----------------------|---------------------------|
| Belarus  | 1995 | Female | 15 to 19 | 64%<br>(48-79%)                | 36%<br>(21-52%)          | 2.2<br>(1.2-3.5)                            | 5.5%<br>(3.6-7.9%)                   | 10%<br>(5.9-16%)                    | 21<br>(12-33)         | 2300<br>(1500-3300)       |
| Belarus  | 1995 | Female | 20 to 24 | 76%<br>(61-87%)                | 24%<br>(13-39%)          | 3.3<br>(1.8-5.3)                            | 8.9%<br>(6.3-12%)                    | 14%<br>(8-20%)                      | 32<br>(19-47)         | 4100<br>(2800-5600)       |
| Belarus  | 1995 | Female | 25 to 29 | 80%<br>(68-89%)                | 20%<br>(11-32%)          | 3.7<br>(2.2-5.6)                            | 9.9%<br>(7.4-13%)                    | 15%<br>(9.8-22%)                    | 44<br>(27-62)         | 5000<br>(3600-6600)       |
| Belarus  | 1995 | Female | 30 to 34 | 83%<br>(70-91%)                | 17%<br>(8.8-30%)         | 4<br>(2.5-6.1)                              | 10%<br>(7.9-13%)                     | 17%<br>(12-24%)                     | 79<br>(53-110)        | 7400<br>(5400-9600)       |
| Belarus  | 1995 | Female | 35 to 39 | 84%<br>(73-92%)                | 16%<br>(8.2-27%)         | 4.2<br>(2.5-6.4)                            | 11%<br>(8.6-14%)                     | 19%<br>(13-24%)                     | 130<br>(92-180)       | 10000<br>(7500-13000)     |
| Belarus  | 1995 | Female | 40 to 44 | 84%<br>(74-92%)                | 16%<br>(7.8-26%)         | 4.3<br>(2.6-6.5)                            | 12%<br>(9-16%)                       | 19%<br>(14-25%)                     | 190<br>(130-250)      | 11000<br>(8500-15000)     |
| Belarus  | 1995 | Female | 45 to 49 | 83%<br>(68-92%)                | 17%<br>(8.4-32%)         | 4.2<br>(2.5-6.7)                            | 13%<br>(8.8-17%)                     | 19%<br>(13-26%)                     | 240<br>(160-330)      | 12000<br>(8500-16000)     |
| Belarus  | 1995 | Female | 50 to 54 | 80%<br>(67-89%)                | 20%<br>(11-33%)          | 4<br>(2.3-6.4)                              | 12%<br>(7.8-17%)                     | 17%<br>(11-24%)                     | 260<br>(160-380)      | 11000<br>(7400-16000)     |
| Belarus  | 1995 | Female | 55 to 59 | 76%<br>(61-88%)                | 24%<br>(12-39%)          | 3.7<br>(2.1-5.6)                            | 11%<br>(6.1-16%)                     | 15%<br>(7.8-22%)                    | 490<br>(260-750)      | 18000<br>(9900-27000)     |
| Belarus  | 1995 | Female | 60 to 64 | 71%<br>(54-85%)                | 29%<br>(15-46%)          | 3.4<br>(1.9-5.5)                            | 8.8%<br>(3.3-15%)                    | 11%<br>(3.7-19%)                    | 500<br>(160-870)      | 15000<br>(5600-26000)     |
| Belarus  | 1995 | Female | 65 to 69 | 67%<br>(48-82%)                | 33%<br>(18-52%)          | 2.9<br>(1.7-4.4)                            | 6.5%<br>(1.4-12%)                    | 8%<br>(1.4-15%)                     | 580<br>(98-1100)      | 15000<br>(3300-27000)     |
| Belarus  | 1995 | Female | 70 to 74 | 60%<br>(41-76%)                | 40%<br>(24-59%)          | 2.3<br>(1.2-4)                              | 4.4%<br>(-0.85-11%)                  | 5.1%<br>(-1.5-13%)                  | 450<br>(-130-1200)    | 9200<br>(-1800-23000)     |
| Belarus  | 1995 | Female | 75 to 79 | 50%<br>(33-70%)                | 50%<br>(30-67%)          | 1.8<br>(0.87-3.2)                           | 2.9%<br>(-1.8-8.8%)                  | 3.2%<br>(-2.5-10%)                  | 240<br>(-190-790)     | 3800<br>(-2300-11000)     |
| Belarus  | 1995 | Female | 80 to 84 | 44%<br>(26-62%)                | 56%<br>(38-74%)          | 1.6<br>(0.8-2.7)                            | 2.3%<br>(-1.4-7.4%)                  | 2.5%<br>(-2-8.4%)                   | 290<br>(-230-980)     | 3400<br>(-2100-11000)     |
| Belarus  | 1995 | Female | 85 to 89 | 41%<br>(26-58%)                | 59%<br>(42-74%)          | 1.6<br>(0.8-2.7)                            | 2.2%<br>(-1.5-7.8%)                  | 2.4%<br>(-2-8.8%)                   | 220<br>(-180-810)     | 1800<br>(-1200-6200)      |
| Belarus  | 1995 | Female | 90 to 94 | 42%<br>(27-59%)                | 58%<br>(41-73%)          | 1.7<br>(0.8-3.1)                            | 2.3%<br>(-2-8.8%)                    | 2.4%<br>(-2.6-10%)                  | 110<br>(-120-460)     | 610<br>(-520-2400)        |
| Belarus  | 1995 | Female | 95 plus  | 46%<br>(26-66%)                | 54%<br>(34-74%)          | 1.9<br>(0.71-3.6)                           | 2.5%<br>(-2.6-10%)                   | 2.6%<br>(-3.4-12%)                  | 55<br>(-72-250)       | 210<br>(-210-850)         |
| Belarus  | 1995 | Male   | All Ages | 80%<br>(74-85%)                | 20%<br>(15-26%)          | 4.7<br>(4.1-5.5)                            | 16%<br>(13-19%)                      | 16%<br>(11-20%)                     | 11000<br>(7900-14000) | 400000<br>(330000-480000) |
| Belarus  | 1995 | Male   | 15 to 19 | 69%<br>(54-82%)                | 31%<br>(18-46%)          | 2.7<br>(1.6-4.3)                            | 9.4%<br>(5.7-14%)                    | 14%<br>(8-21%)                      | 71<br>(41-110)        | 5800<br>(3600-8400)       |
| Belarus  | 1995 | Male   | 20 to 24 | 82%<br>(70-91%)                | 18%<br>(9.4-30%)         | 5<br>(3-7.3)                                | 19%<br>(13-25%)                      | 23%<br>(15-32%)                     | 220<br>(140-300)      | 16000<br>(11000-22000)    |
| Belarus  | 1995 | Male   | 25 to 29 | 87%<br>(79-93%)                | 13%<br>(6.9-21%)         | 6.2<br>(3.9-8.7)                            | 23%<br>(16-28%)                      | 28%<br>(20-36%)                     | 330<br>(230-430)      | 23000<br>(16000-29000)    |
| Belarus  | 1995 | Male   | 30 to 34 | 90%<br>(82-95%)                | 9.6%<br>(4.5-18%)        | 7<br>(4.6-9.6)                              | 24%<br>(19-29%)                      | 30%<br>(22-36%)                     | 540<br>(400-670)      | 34000<br>(26000-41000)    |

| Location | Year | Sex    | Age      | Prevalence of current drinkers | Prevalence of abstainers | Population average of standard drinks daily | Percent of total attributable deaths | Percent of total attributable DALYs | Attributable deaths | Attributable DALYs       |
|----------|------|--------|----------|--------------------------------|--------------------------|---------------------------------------------|--------------------------------------|-------------------------------------|---------------------|--------------------------|
| Belarus  | 1995 | Male   | 35 to 39 | 91%<br>(85-96%)                | 8.6%<br>(4.2-15%)        | 7.3<br>(4.9-10)                             | 24%<br>(19-29%)                      | 29%<br>(22-36%)                     | 790<br>(580-980)    | 44000<br>(33000-53000)   |
| Belarus  | 1995 | Male   | 40 to 44 | 92%<br>(85-96%)                | 8.4%<br>(4.1-15%)        | 7.7<br>(5.2-11)                             | 25%<br>(19-30%)                      | 30%<br>(23-35%)                     | 970<br>(730-1200)   | 47000<br>(37000-57000)   |
| Belarus  | 1995 | Male   | 45 to 49 | 91%<br>(82-96%)                | 9%<br>(4-18%)            | 8.2<br>(5.4-12)                             | 24%<br>(19-29%)                      | 28%<br>(22-34%)                     | 1100<br>(870-1400)  | 48000<br>(38000-58000)   |
| Belarus  | 1995 | Male   | 50 to 54 | 90%<br>(81-95%)                | 10%<br>(4.6-19%)         | 7.9<br>(5.1-11)                             | 22%<br>(17-27%)                      | 25%<br>(19-31%)                     | 1100<br>(790-1300)  | 40000<br>(30000-49000)   |
| Belarus  | 1995 | Male   | 55 to 59 | 88%<br>(79-94%)                | 12%<br>(5.6-21%)         | 7<br>(4.6-9.9)                              | 19%<br>(13-24%)                      | 21%<br>(15-27%)                     | 1600<br>(1100-2000) | 52000<br>(37000-67000)   |
| Belarus  | 1995 | Male   | 60 to 64 | 87%<br>(76-94%)                | 13%<br>(6.4-24%)         | 6.1<br>(3.9-9.2)                            | 15%<br>(8.6-20%)                     | 16%<br>(9.3-23%)                    | 1400<br>(800-1900)  | 39000<br>(23000-54000)   |
| Belarus  | 1995 | Male   | 65 to 69 | 85%<br>(73-93%)                | 15%<br>(7-27%)           | 5.2<br>(3.4-7.5)                            | 12%<br>(5.9-17%)                     | 13%<br>(6.1-19%)                    | 1300<br>(630-2000)  | 32000<br>(15000-46000)   |
| Belarus  | 1995 | Male   | 70 to 74 | 82%<br>(70-90%)                | 18%<br>(9.7-30%)         | 4.2<br>(2.6-6.5)                            | 8.4%<br>(2-15%)                      | 9.1%<br>(1.7-16%)                   | 670<br>(130-1200)   | 13000<br>(3100-23000)    |
| Belarus  | 1995 | Male   | 75 to 79 | 79%<br>(64-89%)                | 21%<br>(11-36%)          | 3.6<br>(2-5.6)                              | 5.9%<br>(-0.32-12%)                  | 6.3%<br>(-0.82-14%)                 | 280<br>(-37-600)    | 4300<br>(-220-8900)      |
| Belarus  | 1995 | Male   | 80 to 84 | 75%<br>(59-86%)                | 25%<br>(14-41%)          | 3.3<br>(1.9-4.9)                            | 4.5%<br>(-1-11%)                     | 4.6%<br>(-1.7-12%)                  | 240<br>(-87-620)    | 2800<br>(-630-6800)      |
| Belarus  | 1995 | Male   | 85 to 89 | 71%<br>(55-82%)                | 29%<br>(18-45%)          | 3<br>(1.8-4.7)                              | 3.4%<br>(-1.4-10%)                   | 3.4%<br>(-2.2-11%)                  | 120<br>(-79-390)    | 1000<br>(-430-3000)      |
| Belarus  | 1995 | Male   | 90 to 94 | 69%<br>(54-82%)                | 31%<br>(18-46%)          | 2.9<br>(1.6-4.6)                            | 2.4%<br>(-2.2-8.6%)                  | 2.2%<br>(-3.2-9.6%)                 | 31<br>(-45-130)     | 200<br>(-190-710)        |
| Belarus  | 1995 | Male   | 95 plus  | 68%<br>(50-84%)                | 32%<br>(16-50%)          | 2.7<br>(1.2-4.7)                            | 1.7%<br>(-3.3-8.3%)                  | 1.4%<br>(-4.5-9.2%)                 | 6<br>(-19-40)       | 30<br>(-57-140)          |
| Belarus  | 2000 | Female | All Ages | 71%<br>(64-77%)                | 29%<br>(23-36%)          | 2.9<br>(2.4-3.4)                            | 7.2%<br>(4.5-10%)                    | 6.1%<br>(1.7-11%)                   | 4000<br>(1100-7600) | 130000<br>(83000-190000) |
| Belarus  | 2000 | Female | 15 to 19 | 64%<br>(48-79%)                | 36%<br>(21-52%)          | 2.2<br>(1.2-3.6)                            | 5.4%<br>(3.6-7.7%)                   | 11%<br>(5.9-17%)                    | 21<br>(12-33)       | 2300<br>(1600-3400)      |
| Belarus  | 2000 | Female | 20 to 24 | 76%<br>(61-86%)                | 24%<br>(14-39%)          | 3.3<br>(1.8-5.2)                            | 9.1%<br>(6.4-12%)                    | 14%<br>(8.2-21%)                    | 34<br>(20-50)       | 4200<br>(2900-5700)      |
| Belarus  | 2000 | Female | 25 to 29 | 80%<br>(68-89%)                | 20%<br>(11-32%)          | 3.8<br>(2.1-5.8)                            | 10%<br>(7.7-13%)                     | 16%<br>(9.9-23%)                    | 50<br>(31-72)       | 5500<br>(3800-7200)      |
| Belarus  | 2000 | Female | 30 to 34 | 83%<br>(70-91%)                | 17%<br>(8.7-30%)         | 4.1<br>(2.5-6.3)                            | 11%<br>(8.4-14%)                     | 18%<br>(12-25%)                     | 75<br>(51-100)      | 6800<br>(5000-8700)      |
| Belarus  | 2000 | Female | 35 to 39 | 84%<br>(74-92%)                | 16%<br>(8.2-26%)         | 4.3<br>(2.6-6.5)                            | 12%<br>(9-15%)                       | 20%<br>(14-26%)                     | 130<br>(91-170)     | 9800<br>(7200-12000)     |
| Belarus  | 2000 | Female | 40 to 44 | 84%<br>(73-92%)                | 16%<br>(7.9-27%)         | 4.4<br>(2.7-6.4)                            | 13%<br>(9.6-16%)                     | 20%<br>(14-27%)                     | 210<br>(150-290)    | 13000<br>(9900-17000)    |
| Belarus  | 2000 | Female | 45 to 49 | 83%<br>(69-92%)                | 17%<br>(8.2-31%)         | 4.3<br>(2.6-6.4)                            | 13%<br>(9.1-17%)                     | 19%<br>(13-26%)                     | 280<br>(190-380)    | 14000<br>(10000-19000)   |
| Belarus  | 2000 | Female | 50 to 54 | 80%<br>(66-89%)                | 20%<br>(11-34%)          | 4<br>(2.3-6.3)                              | 13%<br>(8.3-18%)                     | 18%<br>(11-25%)                     | 340<br>(210-480)    | 14000<br>(9700-20000)    |

| Location | Year | Sex    | Age      | Prevalence of current drinkers | Prevalence of abstainers | Population average of standard drinks daily | Percent of total attributable deaths | Percent of total attributable DALYs | Attributable deaths   | Attributable DALYs        |
|----------|------|--------|----------|--------------------------------|--------------------------|---------------------------------------------|--------------------------------------|-------------------------------------|-----------------------|---------------------------|
| Belarus  | 2000 | Female | 55 to 59 | 76%<br>(60-88%)                | 24%<br>(12-40%)          | 3.7<br>(2.1-5.8)                            | 12%<br>(6.6-17%)                     | 16%<br>(8.1-23%)                    | 350<br>(190-510)      | 12000<br>(7000-18000)     |
| Belarus  | 2000 | Female | 60 to 64 | 72%<br>(55-85%)                | 28%<br>(15-45%)          | 3.4<br>(1.9-5.6)                            | 9.1%<br>(3.4-15%)                    | 12%<br>(3.9-20%)                    | 550<br>(180-950)      | 17000<br>(6300-28000)     |
| Belarus  | 2000 | Female | 65 to 69 | 67%<br>(49-83%)                | 33%<br>(17-51%)          | 2.9<br>(1.7-4.4)                            | 6.6%<br>(1.3-12%)                    | 8.1%<br>(1.1-16%)                   | 510<br>(76-1000)      | 13000<br>(2500-25000)     |
| Belarus  | 2000 | Female | 70 to 74 | 60%<br>(43-76%)                | 40%<br>(24-57%)          | 2.3<br>(1.3-4)                              | 4.3%<br>(-0.92-11%)                  | 5.1%<br>(-1.6-13%)                  | 530<br>(-160-1400)    | 11000<br>(-2300-26000)    |
| Belarus  | 2000 | Female | 75 to 79 | 51%<br>(33-69%)                | 49%<br>(31-67%)          | 1.9<br>(0.9-3.2)                            | 2.8%<br>(-1.9-8.9%)                  | 3.2%<br>(-2.6-11%)                  | 370<br>(-310-1200)    | 5900<br>(-4000-18000)     |
| Belarus  | 2000 | Female | 80 to 84 | 44%<br>(27-62%)                | 56%<br>(38-73%)          | 1.6<br>(0.79-2.7)                           | 2.3%<br>(-1.6-7.4%)                  | 2.5%<br>(-2.2-8.4%)                 | 200<br>(-180-690)     | 2400<br>(-1600-7600)      |
| Belarus  | 2000 | Female | 85 to 89 | 41%<br>(26-58%)                | 59%<br>(42-74%)          | 1.6<br>(0.78-2.7)                           | 2.3%<br>(-1.5-7.9%)                  | 2.4%<br>(-2-9.1%)                   | 220<br>(-180-820)     | 1800<br>(-1200-6200)      |
| Belarus  | 2000 | Female | 90 to 94 | 43%<br>(27-60%)                | 57%<br>(40-73%)          | 1.7<br>(0.81-3)                             | 2.3%<br>(-2-9.1%)                    | 2.5%<br>(-2.7-10%)                  | 110<br>(-120-470)     | 630<br>(-540-2400)        |
| Belarus  | 2000 | Female | 95 plus  | 47%<br>(26-68%)                | 53%<br>(32-74%)          | 1.9<br>(0.7-3.7)                            | 2.6%<br>(-2.9-11%)                   | 2.7%<br>(-3.8-12%)                  | 52<br>(-74-240)       | 190<br>(-220-810)         |
| Belarus  | 2000 | Male   | All Ages | 81%<br>(75-86%)                | 19%<br>(14-25%)          | 5<br>(4.3-5.7)                              | 17%<br>(14-20%)                      | 16%<br>(12-21%)                     | 12000<br>(8500-15000) | 430000<br>(350000-520000) |
| Belarus  | 2000 | Male   | 15 to 19 | 70%<br>(54-83%)                | 30%<br>(17-46%)          | 2.7<br>(1.5-4.4)                            | 9.1%<br>(5.6-14%)                    | 14%<br>(8.1-22%)                    | 68<br>(39-100)        | 5500<br>(3400-8100)       |
| Belarus  | 2000 | Male   | 20 to 24 | 82%<br>(70-91%)                | 18%<br>(9.3-30%)         | 5<br>(3.1-7.4)                              | 19%<br>(13-26%)                      | 24%<br>(15-33%)                     | 240<br>(160-340)      | 18000<br>(12000-24000)    |
| Belarus  | 2000 | Male   | 25 to 29 | 87%<br>(78-93%)                | 13%<br>(6.8-22%)         | 6.2<br>(3.9-9)                              | 23%<br>(17-29%)                      | 28%<br>(20-36%)                     | 370<br>(250-480)      | 25000<br>(18000-32000)    |
| Belarus  | 2000 | Male   | 30 to 34 | 90%<br>(82-96%)                | 9.5%<br>(4.5-18%)        | 7<br>(4.6-9.8)                              | 25%<br>(19-30%)                      | 30%<br>(23-37%)                     | 510<br>(370-630)      | 32000<br>(24000-38000)    |
| Belarus  | 2000 | Male   | 35 to 39 | 92%<br>(85-96%)                | 8.4%<br>(4.2-15%)        | 7.4<br>(4.9-10)                             | 25%<br>(19-30%)                      | 30%<br>(23-37%)                     | 780<br>(580-960)      | 43000<br>(33000-52000)    |
| Belarus  | 2000 | Male   | 40 to 44 | 92%<br>(85-96%)                | 8.2%<br>(3.9-15%)        | 7.8<br>(5.3-11)                             | 26%<br>(20-31%)                      | 30%<br>(24-36%)                     | 1100<br>(870-1400)    | 55000<br>(43000-66000)    |
| Belarus  | 2000 | Male   | 45 to 49 | 91%<br>(82-96%)                | 8.7%<br>(3.9-18%)        | 8.3<br>(5.6-12)                             | 25%<br>(20-30%)                      | 29%<br>(23-35%)                     | 1300<br>(1000-1600)   | 57000<br>(45000-69000)    |
| Belarus  | 2000 | Male   | 50 to 54 | 90%<br>(82-95%)                | 9.9%<br>(4.6-18%)        | 8<br>(5.2-11)                               | 23%<br>(17-28%)                      | 26%<br>(20-32%)                     | 1400<br>(1000-1700)   | 51000<br>(39000-63000)    |
| Belarus  | 2000 | Male   | 55 to 59 | 88%<br>(78-95%)                | 12%<br>(5.4-22%)         | 7.1<br>(4.7-10)                             | 19%<br>(14-25%)                      | 22%<br>(16-28%)                     | 1100<br>(810-1500)    | 37000<br>(27000-48000)    |
| Belarus  | 2000 | Male   | 60 to 64 | 87%<br>(75-94%)                | 13%<br>(6.3-25%)         | 6.2<br>(3.7-9.4)                            | 15%<br>(8.7-21%)                     | 17%<br>(9.4-24%)                    | 1600<br>(890-2300)    | 45000<br>(25000-63000)    |
| Belarus  | 2000 | Male   | 65 to 69 | 85%<br>(72-93%)                | 15%<br>(7-28%)           | 5.3<br>(3.4-7.7)                            | 12%<br>(6-18%)                       | 13%<br>(6.2-20%)                    | 1300<br>(590-2000)    | 30000<br>(15000-45000)    |
| Belarus  | 2000 | Male   | 70 to 74 | 82%<br>(70-90%)                | 18%<br>(9.7-30%)         | 4.3<br>(2.5-6.6)                            | 8.5%<br>(1.8-15%)                    | 9.3%<br>(1.6-17%)                   | 1000<br>(180-1900)    | 20000<br>(4200-35000)     |

| Location | Year | Sex    | Age      | Prevalence of current drinkers | Prevalence of abstainers | Population average of standard drinks daily | Percent of total attributable deaths | Percent of total attributable DALYs | Attributable deaths | Attributable DALYs       |
|----------|------|--------|----------|--------------------------------|--------------------------|---------------------------------------------|--------------------------------------|-------------------------------------|---------------------|--------------------------|
| Belarus  | 2000 | Male   | 75 to 79 | 79%<br>(65-89%)                | 21%<br>(11-35%)          | 3.6<br>(2-5.8)                              | 5.8%<br>(-0.64-13%)                  | 6.2%<br>(-1.1-14%)                  | 440<br>(-82-990)    | 6600<br>(-690-14000)     |
| Belarus  | 2000 | Male   | 80 to 84 | 75%<br>(60-86%)                | 25%<br>(14-40%)          | 3.3<br>(2-4.9)                              | 4.6%<br>(-1-11%)                     | 4.7%<br>(-1.7-12%)                  | 170<br>(-60-440)    | 2000<br>(-460-4800)      |
| Belarus  | 2000 | Male   | 85 to 89 | 71%<br>(56-83%)                | 29%<br>(17-44%)          | 3.1<br>(1.8-4.8)                            | 3.5%<br>(-1.7-10%)                   | 3.5%<br>(-2.5-11%)                  | 100<br>(-72-320)    | 850<br>(-420-2500)       |
| Belarus  | 2000 | Male   | 90 to 94 | 69%<br>(56-82%)                | 31%<br>(18-44%)          | 2.9<br>(1.6-4.7)                            | 2.4%<br>(-2.5-8.6%)                  | 2.2%<br>(-3.5-9.5%)                 | 28<br>(-45-120)     | 180<br>(-190-650)        |
| Belarus  | 2000 | Male   | 95 plus  | 68%<br>(50-83%)                | 32%<br>(17-50%)          | 2.7<br>(1.3-4.6)                            | 1.7%<br>(-3.5-8.5%)                  | 1.3%<br>(-4.7-9.3%)                 | 5.7<br>(-21-41)     | 29<br>(-60-150)          |
| Belarus  | 2005 | Female | All Ages | 71%<br>(65-77%)                | 29%<br>(23-35%)          | 3.1<br>(2.6-3.6)                            | 7.7%<br>(4.8-11%)                    | 6.6%<br>(2-12%)                     | 4300<br>(1300-8200) | 140000<br>(88000-200000) |
| Belarus  | 2005 | Female | 15 to 19 | 64%<br>(48-78%)                | 36%<br>(22-52%)          | 2.3<br>(1.2-3.7)                            | 5.1%<br>(3.4-7.2%)                   | 11%<br>(6.4-17%)                    | 16<br>(9.4-26)      | 2000<br>(1400-2900)      |
| Belarus  | 2005 | Female | 20 to 24 | 75%<br>(61-86%)                | 25%<br>(14-39%)          | 3.5<br>(1.9-5.5)                            | 9.2%<br>(6.6-12%)                    | 15%<br>(8.7-22%)                    | 35<br>(20-51)       | 4400<br>(3100-5900)      |
| Belarus  | 2005 | Female | 25 to 29 | 80%<br>(68-89%)                | 20%<br>(11-32%)          | 3.9<br>(2.2-6.2)                            | 11%<br>(8-14%)                       | 17%<br>(11-24%)                     | 55<br>(34-77)       | 5800<br>(4100-7700)      |
| Belarus  | 2005 | Female | 30 to 34 | 83%<br>(71-91%)                | 17%<br>(8.6-29%)         | 4.3<br>(2.6-6.4)                            | 12%<br>(9-15%)                       | 19%<br>(13-25%)                     | 86<br>(59-120)      | 7400<br>(5500-9600)      |
| Belarus  | 2005 | Female | 35 to 39 | 84%<br>(74-92%)                | 16%<br>(7.9-26%)         | 4.5<br>(2.6-6.6)                            | 13%<br>(9.7-16%)                     | 21%<br>(15-27%)                     | 130<br>(91-170)     | 9200<br>(6800-12000)     |
| Belarus  | 2005 | Female | 40 to 44 | 84%<br>(74-92%)                | 16%<br>(8-26%)           | 4.5<br>(2.7-6.8)                            | 13%<br>(9.9-17%)                     | 21%<br>(15-28%)                     | 210<br>(150-280)    | 13000<br>(9800-17000)    |
| Belarus  | 2005 | Female | 45 to 49 | 83%<br>(69-91%)                | 17%<br>(8.5-31%)         | 4.4<br>(2.8-6.7)                            | 13%<br>(9.6-17%)                     | 20%<br>(14-27%)                     | 320<br>(220-430)    | 17000<br>(12000-22000)   |
| Belarus  | 2005 | Female | 50 to 54 | 80%<br>(67-89%)                | 20%<br>(11-33%)          | 4.2<br>(2.5-6.4)                            | 13%<br>(9.1-18%)                     | 19%<br>(13-26%)                     | 400<br>(270-550)    | 17000<br>(12000-23000)   |
| Belarus  | 2005 | Female | 55 to 59 | 76%<br>(60-87%)                | 24%<br>(13-40%)          | 3.9<br>(2.2-6)                              | 13%<br>(7.4-18%)                     | 17%<br>(9.6-24%)                    | 480<br>(280-700)    | 17000<br>(10000-25000)   |
| Belarus  | 2005 | Female | 60 to 64 | 71%<br>(54-85%)                | 29%<br>(15-46%)          | 3.6<br>(2-5.8)                              | 9.9%<br>(4.2-16%)                    | 13%<br>(5-21%)                      | 390<br>(150-650)    | 12000<br>(5000-19000)    |
| Belarus  | 2005 | Female | 65 to 69 | 67%<br>(49-82%)                | 33%<br>(18-51%)          | 3<br>(1.8-4.6)                              | 7%<br>(1.7-13%)                      | 8.7%<br>(1.7-17%)                   | 550<br>(110-1100)   | 14000<br>(3400-26000)    |
| Belarus  | 2005 | Female | 70 to 74 | 61%<br>(43-76%)                | 39%<br>(24-57%)          | 2.4<br>(1.3-4.1)                            | 4.6%<br>(-1-11%)                     | 5.4%<br>(-1.8-14%)                  | 460<br>(-150-1200)  | 9500<br>(-2100-23000)    |
| Belarus  | 2005 | Female | 75 to 79 | 51%<br>(34-69%)                | 49%<br>(31-66%)          | 1.9<br>(0.92-3.3)                           | 3%<br>(-2-9.4%)                      | 3.4%<br>(-2.8-11%)                  | 450<br>(-370-1500)  | 7200<br>(-4700-22000)    |
| Belarus  | 2005 | Female | 80 to 84 | 44%<br>(27-62%)                | 56%<br>(38-73%)          | 1.7<br>(0.86-2.8)                           | 2.7%<br>(-1.4-8.5%)                  | 2.9%<br>(-1.9-9.6%)                 | 380<br>(-250-1300)  | 4400<br>(-2200-14000)    |
| Belarus  | 2005 | Female | 85 to 89 | 42%<br>(25-58%)                | 58%<br>(42-75%)          | 1.7<br>(0.85-2.9)                           | 2.7%<br>(-1.4-8.7%)                  | 2.9%<br>(-2-10%)                    | 190<br>(-130-650)   | 1500<br>(-810-4800)      |
| Belarus  | 2005 | Female | 90 to 94 | 43%<br>(28-60%)                | 57%<br>(40-72%)          | 1.8<br>(0.84-3.2)                           | 2.9%<br>(-1.9-10%)                   | 3.1%<br>(-2.5-12%)                  | 130<br>(-110-500)   | 740<br>(-500-2600)       |

| Location | Year | Sex    | Age      | Prevalence of current drinkers | Prevalence of abstainers | Population average of standard drinks daily | Percent of total attributable deaths | Percent of total attributable DALYs | Attributable deaths   | Attributable DALYs        |
|----------|------|--------|----------|--------------------------------|--------------------------|---------------------------------------------|--------------------------------------|-------------------------------------|-----------------------|---------------------------|
| Belarus  | 2005 | Female | 95 plus  | 47%<br>(27-67%)                | 53%<br>(33-73%)          | 2<br>(0.77-3.9)                             | 3.1%<br>(-2.5-12%)                   | 3.4%<br>(-3.2-14%)                  | 55<br>(-51-220)       | 200<br>(-150-740)         |
| Belarus  | 2005 | Male   | All Ages | 82%<br>(76-87%)                | 18%<br>(13-24%)          | 5.4<br>(4.6-6.2)                            | 18%<br>(14-21%)                      | 17%<br>(12-22%)                     | 12000<br>(8900-16000) | 450000<br>(370000-550000) |
| Belarus  | 2005 | Male   | 15 to 19 | 70%<br>(54-83%)                | 30%<br>(17-46%)          | 2.8<br>(1.6-4.5)                            | 9.2%<br>(5.6-13%)                    | 15%<br>(8.3-22%)                    | 62<br>(35-96)         | 5200<br>(3100-7600)       |
| Belarus  | 2005 | Male   | 20 to 24 | 82%<br>(70-90%)                | 18%<br>(9.5-30%)         | 5.2<br>(3.2-7.6)                            | 19%<br>(13-25%)                      | 25%<br>(16-34%)                     | 230<br>(150-310)      | 17000<br>(11000-22000)    |
| Belarus  | 2005 | Male   | 25 to 29 | 87%<br>(79-93%)                | 13%<br>(6.7-21%)         | 6.4<br>(4.1-9.3)                            | 23%<br>(17-29%)                      | 29%<br>(21-37%)                     | 360<br>(260-460)      | 25000<br>(18000-31000)    |
| Belarus  | 2005 | Male   | 30 to 34 | 90%<br>(82-95%)                | 9.5%<br>(4.6-18%)        | 7.3<br>(4.8-10)                             | 25%<br>(19-30%)                      | 31%<br>(23-37%)                     | 530<br>(400-650)      | 32000<br>(25000-39000)    |
| Belarus  | 2005 | Male   | 35 to 39 | 92%<br>(85-96%)                | 8.5%<br>(4.2-15%)        | 7.7<br>(5-11)                               | 26%<br>(20-31%)                      | 31%<br>(23-37%)                     | 690<br>(520-840)      | 38000<br>(29000-46000)    |
| Belarus  | 2005 | Male   | 40 to 44 | 92%<br>(85-96%)                | 8.2%<br>(3.9-15%)        | 8.1<br>(5.5-11)                             | 27%<br>(21-31%)                      | 31%<br>(25-37%)                     | 1100<br>(870-1400)    | 55000<br>(43000-66000)    |
| Belarus  | 2005 | Male   | 45 to 49 | 91%<br>(82-96%)                | 8.8%<br>(3.9-18%)        | 8.6<br>(5.8-12)                             | 26%<br>(20-31%)                      | 30%<br>(24-36%)                     | 1600<br>(1300-2000)   | 68000<br>(55000-83000)    |
| Belarus  | 2005 | Male   | 50 to 54 | 90%<br>(81-95%)                | 9.9%<br>(4.5-19%)        | 8.3<br>(5.4-12)                             | 24%<br>(18-28%)                      | 27%<br>(21-33%)                     | 1600<br>(1200-2000)   | 62000<br>(48000-76000)    |
| Belarus  | 2005 | Male   | 55 to 59 | 88%<br>(78-95%)                | 12%<br>(5.3-22%)         | 7.4<br>(4.8-11)                             | 20%<br>(15-26%)                      | 23%<br>(16-29%)                     | 1500<br>(1100-2000)   | 50000<br>(36000-64000)    |
| Belarus  | 2005 | Male   | 60 to 64 | 87%<br>(76-94%)                | 13%<br>(6.3-24%)         | 6.5<br>(3.9-9.9)                            | 16%<br>(9.4-22%)                     | 18%<br>(10-25%)                     | 1200<br>(660-1600)    | 33000<br>(19000-45000)    |
| Belarus  | 2005 | Male   | 65 to 69 | 85%<br>(72-93%)                | 15%<br>(6.9-28%)         | 5.5<br>(3.6-8)                              | 13%<br>(6.5-19%)                     | 14%<br>(6.9-22%)                    | 1500<br>(720-2200)    | 35000<br>(18000-51000)    |
| Belarus  | 2005 | Male   | 70 to 74 | 82%<br>(70-90%)                | 18%<br>(9.6-30%)         | 4.5<br>(2.7-6.7)                            | 9.1%<br>(2.3-16%)                    | 9.9%<br>(2.2-18%)                   | 970<br>(210-1700)     | 19000<br>(4600-32000)     |
| Belarus  | 2005 | Male   | 75 to 79 | 79%<br>(66-89%)                | 21%<br>(11-34%)          | 3.8<br>(2.1-6)                              | 6.3%<br>(-0.47-13%)                  | 6.7%<br>(-0.99-15%)                 | 670<br>(-100-1500)    | 10000<br>(-780-21000)     |
| Belarus  | 2005 | Male   | 80 to 84 | 75%<br>(61-86%)                | 25%<br>(14-39%)          | 3.5<br>(2-5.1)                              | 5.1%<br>(-0.92-12%)                  | 5.3%<br>(-1.6-13%)                  | 280<br>(-85-720)      | 3200<br>(-600-7800)       |
| Belarus  | 2005 | Male   | 85 to 89 | 72%<br>(57-83%)                | 28%<br>(17-43%)          | 3.2<br>(1.9-4.8)                            | 3.9%<br>(-1.7-11%)                   | 4%<br>(-2.5-12%)                    | 83<br>(-53-250)       | 700<br>(-310-1900)        |
| Belarus  | 2005 | Male   | 90 to 94 | 70%<br>(56-82%)                | 30%<br>(18-44%)          | 3<br>(1.7-4.8)                              | 2.7%<br>(-2.6-9.4%)                  | 2.6%<br>(-3.7-10%)                  | 28<br>(-40-110)       | 170<br>(-170-600)         |
| Belarus  | 2005 | Male   | 95 plus  | 68%<br>(50-83%)                | 32%<br>(17-50%)          | 2.8<br>(1.3-4.8)                            | 1.9%<br>(-3.5-8.9%)                  | 1.6%<br>(-4.8-9.7%)                 | 5.4<br>(-17-33)       | 26<br>(-48-120)           |
| Belarus  | 2010 | Female | All Ages | 71%<br>(65-77%)                | 29%<br>(23-35%)          | 3.3<br>(2.8-3.9)                            | 8.1%<br>(5.3-11%)                    | 7.1%<br>(2.3-13%)                   | 4600<br>(1500-8800)   | 140000<br>(91000-200000)  |
| Belarus  | 2010 | Female | 15 to 19 | 64%<br>(49-78%)                | 36%<br>(22-51%)          | 2.4<br>(1.3-4)                              | 5.2%<br>(3.5-7.2%)                   | 12%<br>(6.7-18%)                    | 12<br>(6.9-19)        | 1500<br>(1000-2100)       |
| Belarus  | 2010 | Female | 20 to 24 | 76%<br>(62-86%)                | 24%<br>(14-38%)          | 3.8<br>(2.1-6)                              | 8.9%<br>(6.6-12%)                    | 15%<br>(9.5-22%)                    | 26<br>(16-38)         | 3900<br>(2700-5200)       |

| Location | Year | Sex    | Age      | Prevalence of current drinkers | Prevalence of abstainers | Population average of standard drinks daily | Percent of total attributable deaths | Percent of total attributable DALYs | Attributable deaths   | Attributable DALYs        |
|----------|------|--------|----------|--------------------------------|--------------------------|---------------------------------------------|--------------------------------------|-------------------------------------|-----------------------|---------------------------|
| Belarus  | 2010 | Female | 25 to 29 | 80%<br>(68-89%)                | 20%<br>(11-32%)          | 4.2<br>(2.4-6.5)                            | 10%<br>(7.9-13%)                     | 17%<br>(11-24%)                     | 48<br>(31-67)         | 5600<br>(4000-7400)       |
| Belarus  | 2010 | Female | 30 to 34 | 83%<br>(71-91%)                | 17%<br>(8.8-29%)         | 4.5<br>(2.8-7)                              | 12%<br>(9.1-15%)                     | 19%<br>(14-25%)                     | 82<br>(59-110)        | 7200<br>(5400-9200)       |
| Belarus  | 2010 | Female | 35 to 39 | 85%<br>(74-92%)                | 15%<br>(8.2-26%)         | 4.8<br>(2.8-7.4)                            | 13%<br>(9.8-16%)                     | 21%<br>(15-27%)                     | 120<br>(87-160)       | 8900<br>(6700-11000)      |
| Belarus  | 2010 | Female | 40 to 44 | 85%<br>(74-92%)                | 15%<br>(7.9-26%)         | 4.9<br>(2.9-7.3)                            | 14%<br>(10-17%)                      | 23%<br>(16-29%)                     | 180<br>(130-240)      | 11000<br>(8200-14000)     |
| Belarus  | 2010 | Female | 45 to 49 | 83%<br>(70-92%)                | 17%<br>(8.4-30%)         | 4.7<br>(2.9-7.3)                            | 14%<br>(10-18%)                      | 22%<br>(16-28%)                     | 280<br>(200-370)      | 15000<br>(11000-19000)    |
| Belarus  | 2010 | Female | 50 to 54 | 80%<br>(67-90%)                | 20%<br>(10-33%)          | 4.5<br>(2.7-6.9)                            | 14%<br>(9.8-18%)                     | 20%<br>(14-27%)                     | 430<br>(290-570)      | 19000<br>(13000-25000)    |
| Belarus  | 2010 | Female | 55 to 59 | 76%<br>(60-88%)                | 24%<br>(12-40%)          | 4.2<br>(2.4-6.4)                            | 13%<br>(8.3-18%)                     | 18%<br>(11-26%)                     | 540<br>(340-760)      | 20000<br>(12000-27000)    |
| Belarus  | 2010 | Female | 60 to 64 | 72%<br>(55-85%)                | 28%<br>(15-45%)          | 3.8<br>(2.1-6.1)                            | 11%<br>(5.1-16%)                     | 14%<br>(6.5-22%)                    | 480<br>(220-770)      | 15000<br>(7100-23000)     |
| Belarus  | 2010 | Female | 65 to 69 | 67%<br>(49-82%)                | 33%<br>(18-51%)          | 3.3<br>(1.9-4.9)                            | 7.7%<br>(2.3-14%)                    | 9.8%<br>(2.4-19%)                   | 360<br>(90-690)       | 9300<br>(2800-17000)      |
| Belarus  | 2010 | Female | 70 to 74 | 60%<br>(43-76%)                | 40%<br>(24-57%)          | 2.6<br>(1.3-4.4)                            | 5.2%<br>(-0.44-12%)                  | 6.3%<br>(-1.1-16%)                  | 510<br>(-93-1300)     | 11000<br>(-870-25000)     |
| Belarus  | 2010 | Female | 75 to 79 | 51%<br>(34-69%)                | 49%<br>(31-66%)          | 2.1<br>(1-3.7)                              | 3.6%<br>(-1.6-11%)                   | 4.1%<br>(-2.4-13%)                  | 440<br>(-260-1400)    | 7100<br>(-3000-21000)     |
| Belarus  | 2010 | Female | 80 to 84 | 44%<br>(27-62%)                | 56%<br>(38-73%)          | 1.8<br>(0.93-3)                             | 3.2%<br>(-1-9.4%)                    | 3.6%<br>(-1.5-11%)                  | 520<br>(-220-1600)    | 6100<br>(-1900-18000)     |
| Belarus  | 2010 | Female | 85 to 89 | 42%<br>(26-58%)                | 58%<br>(42-74%)          | 1.8<br>(0.9-3.1)                            | 3.2%<br>(-1.3-9.9%)                  | 3.5%<br>(-1.8-12%)                  | 370<br>(-190-1200)    | 3000<br>(-1200-9100)      |
| Belarus  | 2010 | Female | 90 to 94 | 43%<br>(28-60%)                | 57%<br>(40-72%)          | 1.9<br>(0.9-3.5)                            | 3.3%<br>(-1.4-11%)                   | 3.6%<br>(-2.1-12%)                  | 120<br>(-71-430)      | 680<br>(-300-2200)        |
| Belarus  | 2010 | Female | 95 plus  | 47%<br>(28-67%)                | 53%<br>(33-72%)          | 2.1<br>(0.81-4.1)                           | 3.6%<br>(-2.3-12%)                   | 3.9%<br>(-3-15%)                    | 57<br>(-45-220)       | 210<br>(-140-740)         |
| Belarus  | 2010 | Male   | All Ages | 82%<br>(77-87%)                | 18%<br>(13-23%)          | 5.8<br>(4.8-6.9)                            | 18%<br>(15-22%)                      | 17%<br>(12-22%)                     | 12000<br>(8700-16000) | 430000<br>(350000-520000) |
| Belarus  | 2010 | Male   | 15 to 19 | 70%<br>(54-83%)                | 30%<br>(17-46%)          | 3<br>(1.7-4.7)                              | 9.1%<br>(5.6-13%)                    | 15%<br>(8.6-23%)                    | 44<br>(25-67)         | 3700<br>(2300-5500)       |
| Belarus  | 2010 | Male   | 20 to 24 | 82%<br>(70-91%)                | 18%<br>(9.5-30%)         | 5.5<br>(3.4-8.3)                            | 19%<br>(13-24%)                      | 26%<br>(17-35%)                     | 190<br>(120-260)      | 15000<br>(10000-19000)    |
| Belarus  | 2010 | Male   | 25 to 29 | 87%<br>(79-94%)                | 13%<br>(6.5-21%)         | 6.9<br>(4.4-10)                             | 23%<br>(17-28%)                      | 29%<br>(22-37%)                     | 320<br>(230-400)      | 22000<br>(17000-28000)    |
| Belarus  | 2010 | Male   | 30 to 34 | 90%<br>(82-96%)                | 9.5%<br>(4.5-18%)        | 7.8<br>(5.2-11)                             | 25%<br>(20-30%)                      | 31%<br>(24-37%)                     | 470<br>(360-560)      | 29000<br>(23000-35000)    |
| Belarus  | 2010 | Male   | 35 to 39 | 91%<br>(85-96%)                | 8.5%<br>(4-15%)          | 8.2<br>(5.1-12)                             | 26%<br>(20-31%)                      | 32%<br>(24-38%)                     | 630<br>(480-750)      | 35000<br>(27000-42000)    |
| Belarus  | 2010 | Male   | 40 to 44 | 92%<br>(85-96%)                | 8.2%<br>(4.1-15%)        | 8.6<br>(5.8-12)                             | 27%<br>(22-32%)                      | 32%<br>(26-38%)                     | 880<br>(700-1100)     | 43000<br>(35000-52000)    |

| Location | Year | Sex    | Age      | Prevalence of current drinkers | Prevalence of abstainers | Population average of standard drinks daily | Percent of total attributable deaths | Percent of total attributable DALYs | Attributable deaths | Attributable DALYs       |
|----------|------|--------|----------|--------------------------------|--------------------------|---------------------------------------------|--------------------------------------|-------------------------------------|---------------------|--------------------------|
| Belarus  | 2010 | Male   | 45 to 49 | 91%<br>(83-96%)                | 8.7%<br>(4-17%)          | 9.1<br>(6.2-13)                             | 26%<br>(21-31%)                      | 31%<br>(25-37%)                     | 1400<br>(1100-1600) | 59000<br>(47000-70000)   |
| Belarus  | 2010 | Male   | 50 to 54 | 90%<br>(82-95%)                | 9.9%<br>(4.8-18%)        | 8.8<br>(5.8-12)                             | 24%<br>(19-29%)                      | 28%<br>(22-34%)                     | 1800<br>(1400-2200) | 67000<br>(52000-81000)   |
| Belarus  | 2010 | Male   | 55 to 59 | 88%<br>(79-94%)                | 12%<br>(5.8-21%)         | 7.8<br>(5.2-11)                             | 21%<br>(16-26%)                      | 24%<br>(18-30%)                     | 1700<br>(1300-2100) | 56000<br>(42000-70000)   |
| Belarus  | 2010 | Male   | 60 to 64 | 87%<br>(76-94%)                | 13%<br>(6.4-24%)         | 6.9<br>(4.3-10)                             | 17%<br>(11-24%)                      | 19%<br>(12-27%)                     | 1500<br>(930-2100)  | 43000<br>(27000-59000)   |
| Belarus  | 2010 | Male   | 65 to 69 | 85%<br>(73-93%)                | 15%<br>(6.7-27%)         | 5.9<br>(3.8-8.6)                            | 14%<br>(7.5-20%)                     | 16%<br>(8.1-23%)                    | 970<br>(510-1400)   | 23000<br>(13000-33000)   |
| Belarus  | 2010 | Male   | 70 to 74 | 82%<br>(70-91%)                | 18%<br>(9.1-30%)         | 4.8<br>(2.8-7.2)                            | 10%<br>(3.1-17%)                     | 11%<br>(2.9-19%)                    | 1100<br>(280-1900)  | 21000<br>(6100-35000)    |
| Belarus  | 2010 | Male   | 75 to 79 | 79%<br>(65-89%)                | 21%<br>(11-35%)          | 4<br>(2.3-6.4)                              | 7%<br>(-0.21-14%)                    | 7.6%<br>(-0.84-15%)                 | 640<br>(-71-1300)   | 9700<br>(-290-19000)     |
| Belarus  | 2010 | Male   | 80 to 84 | 75%<br>(60-86%)                | 25%<br>(14-40%)          | 3.7<br>(2.2-5.5)                            | 5.9%<br>(-0.59-13%)                  | 6.3%<br>(-1.4-15%)                  | 470<br>(-100-1100)  | 5300<br>(-570-12000)     |
| Belarus  | 2010 | Male   | 85 to 89 | 72%<br>(56-83%)                | 28%<br>(17-44%)          | 3.4<br>(2.1-5.3)                            | 4.7%<br>(-1.1-12%)                   | 4.9%<br>(-2-13%)                    | 160<br>(-65-430)    | 1300<br>(-320-3200)      |
| Belarus  | 2010 | Male   | 90 to 94 | 70%<br>(55-82%)                | 30%<br>(18-45%)          | 3.2<br>(1.8-5.2)                            | 3.5%<br>(-2.3-11%)                   | 3.5%<br>(-3.5-12%)                  | 31<br>(-31-100)     | 190<br>(-130-560)        |
| Belarus  | 2010 | Male   | 95 plus  | 68%<br>(50-83%)                | 32%<br>(17-50%)          | 3<br>(1.5-5.2)                              | 2.6%<br>(-3.4-10%)                   | 2.3%<br>(-4.8-11%)                  | 6.7<br>(-14-32)     | 30<br>(-39-110)          |
| Belarus  | 2016 | Female | All Ages | 71%<br>(64-77%)                | 29%<br>(23-36%)          | 3.4<br>(2.6-4.4)                            | 7.7%<br>(4.8-12%)                    | 6.9%<br>(1.8-14%)                   | 4200<br>(1100-8600) | 130000<br>(75000-190000) |
| Belarus  | 2016 | Female | 15 to 19 | 64%<br>(48-78%)                | 36%<br>(22-52%)          | 2.5<br>(1.3-4.3)                            | 4.8%<br>(3.3-6.9%)                   | 12%<br>(6.8-19%)                    | 6.4<br>(3.4-11)     | 950<br>(630-1400)        |
| Belarus  | 2016 | Female | 20 to 24 | 75%<br>(61-86%)                | 25%<br>(14-39%)          | 3.8<br>(1.9-6.5)                            | 8.7%<br>(6.5-11%)                    | 15%<br>(9.2-22%)                    | 16<br>(9-25)        | 2700<br>(1900-3800)      |
| Belarus  | 2016 | Female | 25 to 29 | 80%<br>(67-88%)                | 20%<br>(12-33%)          | 4.3<br>(2.4-7.1)                            | 9.7%<br>(7.5-12%)                    | 17%<br>(11-23%)                     | 34<br>(21-52)       | 4800<br>(3400-6600)      |
| Belarus  | 2016 | Female | 30 to 34 | 83%<br>(70-91%)                | 17%<br>(8.9-30%)         | 4.7<br>(2.7-7.4)                            | 11%<br>(8.2-13%)                     | 19%<br>(13-25%)                     | 64<br>(41-95)       | 6500<br>(4700-8700)      |
| Belarus  | 2016 | Female | 35 to 39 | 84%<br>(73-92%)                | 16%<br>(8.4-27%)         | 4.9<br>(2.7-7.8)                            | 12%<br>(8.8-15%)                     | 21%<br>(15-27%)                     | 93<br>(58-140)      | 7500<br>(5300-10000)     |
| Belarus  | 2016 | Female | 40 to 44 | 84%<br>(73-92%)                | 16%<br>(8-27%)           | 5<br>(2.8-8.1)                              | 13%<br>(9.2-16%)                     | 22%<br>(16-29%)                     | 140<br>(88-200)     | 9300<br>(6400-13000)     |
| Belarus  | 2016 | Female | 45 to 49 | 83%<br>(69-91%)                | 17%<br>(8.7-31%)         | 4.9<br>(2.7-7.9)                            | 13%<br>(9.1-17%)                     | 22%<br>(15-28%)                     | 180<br>(120-270)    | 10000<br>(7100-14000)    |
| Belarus  | 2016 | Female | 50 to 54 | 80%<br>(67-89%)                | 20%<br>(11-33%)          | 4.6<br>(2.6-7.5)                            | 13%<br>(8.7-17%)                     | 20%<br>(14-27%)                     | 320<br>(200-470)    | 15000<br>(9900-21000)    |
| Belarus  | 2016 | Female | 55 to 59 | 76%<br>(60-87%)                | 24%<br>(13-40%)          | 4.3<br>(2.4-6.6)                            | 12%<br>(7.7-17%)                     | 18%<br>(11-25%)                     | 490<br>(280-730)    | 19000<br>(12000-27000)   |
| Belarus  | 2016 | Female | 60 to 64 | 71%<br>(55-85%)                | 29%<br>(15-45%)          | 3.9<br>(2-6.5)                              | 10%<br>(4.9-16%)                     | 14%<br>(6.5-23%)                    | 470<br>(210-800)    | 15000<br>(7300-24000)    |

| Location | Year | Sex    | Age      | Prevalence of current drinkers | Prevalence of abstainers | Population average of standard drinks daily | Percent of total attributable deaths | Percent of total attributable DALYs | Attributable deaths   | Attributable DALYs        |
|----------|------|--------|----------|--------------------------------|--------------------------|---------------------------------------------|--------------------------------------|-------------------------------------|-----------------------|---------------------------|
| Belarus  | 2016 | Female | 65 to 69 | 67%<br>(48-83%)                | 33%<br>(17-52%)          | 3.3<br>(1.8-5.3)                            | 7.6%<br>(2.4-14%)                    | 10%<br>(2.6-19%)                    | 410<br>(98-820)       | 11000<br>(3200-21000)     |
| Belarus  | 2016 | Female | 70 to 74 | 60%<br>(42-76%)                | 40%<br>(24-58%)          | 2.6<br>(1.3-4.7)                            | 5.2%<br>(-0.31-12%)                  | 6.6%<br>(-0.97-17%)                 | 270<br>(-40-720)      | 5800<br>(-350-14000)      |
| Belarus  | 2016 | Female | 75 to 79 | 50%<br>(33-69%)                | 50%<br>(31-67%)          | 2.1<br>(0.98-3.9)                           | 3.7%<br>(-1.3-11%)                   | 4.4%<br>(-2.1-14%)                  | 470<br>(-230-1500)    | 7700<br>(-2600-23000)     |
| Belarus  | 2016 | Female | 80 to 84 | 43%<br>(26-62%)                | 57%<br>(38-74%)          | 1.9<br>(0.92-3.3)                           | 3.4%<br>(-0.84-10%)                  | 3.9%<br>(-1.4-12%)                  | 440<br>(-160-1400)    | 5100<br>(-1300-15000)     |
| Belarus  | 2016 | Female | 85 to 89 | 41%<br>(25-58%)                | 59%<br>(42-75%)          | 1.8<br>(0.86-3.3)                           | 3.4%<br>(-0.92-10%)                  | 3.9%<br>(-1.4-12%)                  | 490<br>(-180-1500)    | 4000<br>(-1100-12000)     |
| Belarus  | 2016 | Female | 90 to 94 | 42%<br>(27-60%)                | 58%<br>(40-73%)          | 2<br>(0.9-3.8)                              | 3.6%<br>(-1.4-11%)                   | 4%<br>(-2-13%)                      | 250<br>(-130-830)     | 1400<br>(-550-4300)       |
| Belarus  | 2016 | Female | 95 plus  | 46%<br>(27-68%)                | 54%<br>(32-73%)          | 2.2<br>(0.81-4.3)                           | 3.9%<br>(-2.2-13%)                   | 4.3%<br>(-2.9-15%)                  | 53<br>(-35-190)       | 190<br>(-100-630)         |
| Belarus  | 2016 | Male   | All Ages | 82%<br>(77-87%)                | 18%<br>(13-23%)          | 6<br>(4.6-7.8)                              | 17%<br>(13-21%)                      | 17%<br>(11-22%)                     | 10000<br>(6300-14000) | 350000<br>(260000-460000) |
| Belarus  | 2016 | Male   | 15 to 19 | 70%<br>(53-83%)                | 30%<br>(17-47%)          | 3.1<br>(1.7-5.1)                            | 8.4%<br>(5.3-13%)                    | 16%<br>(9-24%)                      | 23<br>(12-37)         | 2100<br>(1300-3200)       |
| Belarus  | 2016 | Male   | 20 to 24 | 82%<br>(70-91%)                | 18%<br>(9.5-30%)         | 5.7<br>(3.3-9)                              | 18%<br>(12-23%)                      | 26%<br>(17-36%)                     | 110<br>(65-150)       | 8600<br>(5700-12000)      |
| Belarus  | 2016 | Male   | 25 to 29 | 87%<br>(79-93%)                | 13%<br>(6.8-21%)         | 7.1<br>(4.3-11)                             | 21%<br>(16-26%)                      | 30%<br>(21-37%)                     | 240<br>(160-330)      | 18000<br>(13000-24000)    |
| Belarus  | 2016 | Male   | 30 to 34 | 90%<br>(82-96%)                | 9.6%<br>(4.5-18%)        | 8<br>(5.2-12)                               | 24%<br>(19-28%)                      | 31%<br>(24-38%)                     | 380<br>(270-510)      | 25000<br>(19000-33000)    |
| Belarus  | 2016 | Male   | 35 to 39 | 91%<br>(85-96%)                | 8.5%<br>(3.9-15%)        | 8.5<br>(5.3-13)                             | 25%<br>(19-30%)                      | 32%<br>(24-38%)                     | 480<br>(340-640)      | 27000<br>(20000-36000)    |
| Belarus  | 2016 | Male   | 40 to 44 | 92%<br>(85-96%)                | 8.2%<br>(4-15%)          | 8.9<br>(5.5-13)                             | 26%<br>(20-31%)                      | 33%<br>(25-39%)                     | 640<br>(440-860)      | 32000<br>(23000-42000)    |
| Belarus  | 2016 | Male   | 45 to 49 | 91%<br>(82-96%)                | 8.7%<br>(4-18%)          | 9.4<br>(6-14)                               | 25%<br>(20-30%)                      | 32%<br>(25-38%)                     | 810<br>(580-1100)     | 36000<br>(26000-47000)    |
| Belarus  | 2016 | Male   | 50 to 54 | 90%<br>(82-95%)                | 10%<br>(4.6-18%)         | 9.1<br>(5.7-13)                             | 23%<br>(18-28%)                      | 28%<br>(22-35%)                     | 1300<br>(920-1700)    | 50000<br>(36000-66000)    |
| Belarus  | 2016 | Male   | 55 to 59 | 88%<br>(78-94%)                | 12%<br>(5.7-22%)         | 8.1<br>(5.1-12)                             | 20%<br>(15-26%)                      | 24%<br>(18-31%)                     | 1600<br>(1100-2200)   | 53000<br>(37000-71000)    |
| Belarus  | 2016 | Male   | 60 to 64 | 86%<br>(76-93%)                | 14%<br>(6.5-24%)         | 7.1<br>(4.3-11)                             | 17%<br>(11-23%)                      | 19%<br>(12-27%)                     | 1500<br>(870-2100)    | 42000<br>(26000-59000)    |
| Belarus  | 2016 | Male   | 65 to 69 | 85%<br>(71-93%)                | 15%<br>(7-29%)           | 6<br>(3.7-9.1)                              | 14%<br>(7.4-20%)                     | 16%<br>(8.2-23%)                    | 1100<br>(580-1700)    | 27000<br>(15000-40000)    |
| Belarus  | 2016 | Male   | 70 to 74 | 82%<br>(69-90%)                | 18%<br>(9.7-31%)         | 4.9<br>(2.9-7.7)                            | 10%<br>(3.1-16%)                     | 11%<br>(2.9-19%)                    | 560<br>(140-980)      | 11000<br>(3300-18000)     |
| Belarus  | 2016 | Male   | 75 to 79 | 78%<br>(64-89%)                | 22%<br>(11-36%)          | 4.1<br>(2.2-6.8)                            | 7.1%<br>(0.26-14%)                   | 7.8%<br>(-0.31-16%)                 | 660<br>(-27-1400)     | 10000<br>(340-21000)      |
| Belarus  | 2016 | Male   | 80 to 84 | 74%<br>(58-86%)                | 26%<br>(14-42%)          | 3.8<br>(2.2-5.9)                            | 6%<br>(-0.37-13%)                    | 6.5%<br>(-0.96-15%)                 | 370<br>(-59-850)      | 4200<br>(-260-9300)       |



| Location | Year | Sex    | Age      | Prevalence of current drinkers | Prevalence of abstainers | Population average of standard drinks daily | Percent of total attributable deaths | Percent of total attributable DALYs | Attributable deaths | Attributable DALYs     |
|----------|------|--------|----------|--------------------------------|--------------------------|---------------------------------------------|--------------------------------------|-------------------------------------|---------------------|------------------------|
| Belarus  | 2016 | Male   | 85 to 89 | 71%<br>(55-83%)                | 29%<br>(17-45%)          | 3.5<br>(2-5.6)                              | 4.9%<br>(-1.3-12%)                   | 5.2%<br>(-2-14%)                    | 250<br>(-93-640)    | 2100<br>(-530-5000)    |
| Belarus  | 2016 | Male   | 90 to 94 | 69%<br>(55-82%)                | 31%<br>(18-45%)          | 3.3<br>(1.8-5.5)                            | 3.7%<br>(-2.2-11%)                   | 3.8%<br>(-3.3-12%)                  | 53<br>(-46-170)     | 320<br>(-190-910)      |
| Belarus  | 2016 | Male   | 95 plus  | 68%<br>(49-84%)                | 32%<br>(16-51%)          | 3.1<br>(1.4-5.6)                            | 2.8%<br>(-3.2-10%)                   | 2.6%<br>(-4.7-11%)                  | 6.2<br>(-11-27)     | 27<br>(-31-99)         |
| Estonia  | 1990 | Female | All Ages | 80%<br>(77-83%)                | 20%<br>(17-23%)          | 1<br>(0.79-1.3)                             | 1.5%<br>(0.16-3%)                    | -1.8%<br>(-4-0.69%)                 | -180<br>(-390-66)   | 4200<br>(440-8600)     |
| Estonia  | 1990 | Female | 15 to 19 | 78%<br>(66-87%)                | 22%<br>(13-34%)          | 0.89<br>(0.55-1.3)                          | 3.9%<br>(2.6-5.2%)                   | 6.3%<br>(3.3-9.5%)                  | 1.9<br>(0.98-2.8)   | 250<br>(160-340)       |
| Estonia  | 1990 | Female | 20 to 24 | 87%<br>(80-92%)                | 13%<br>(7.9-20%)         | 1.2<br>(0.75-1.8)                           | 6.1%<br>(4.4-8%)                     | 6.6%<br>(3.5-10%)                   | 2.1<br>(1.1-3.2)    | 410<br>(290-590)       |
| Estonia  | 1990 | Female | 25 to 29 | 89%<br>(82-93%)                | 11%<br>(7.1-18%)         | 1.2<br>(0.79-1.8)                           | 6.7%<br>(5.3-8.3%)                   | 7.3%<br>(4.4-11%)                   | 3<br>(1.8-4.4)      | 560<br>(400-760)       |
| Estonia  | 1990 | Female | 30 to 34 | 89%<br>(83-93%)                | 11%<br>(6.5-17%)         | 1.3<br>(0.9-1.9)                            | 7.4%<br>(6-9.1%)                     | 10%<br>(7.2-14%)                    | 5.4<br>(3.8-7.2)    | 730<br>(550-950)       |
| Estonia  | 1990 | Female | 35 to 39 | 90%<br>(85-94%)                | 10%<br>(6.5-15%)         | 1.5<br>(0.98-2.1)                           | 8.9%<br>(7.3-11%)                    | 13%<br>(10-17%)                     | 11<br>(8.2-14)      | 1000<br>(810-1300)     |
| Estonia  | 1990 | Female | 40 to 44 | 90%<br>(85-94%)                | 9.9%<br>(6.1-15%)        | 1.6<br>(1.1-2.3)                            | 8.8%<br>(7.2-11%)                    | 12%<br>(9.1-16%)                    | 15<br>(11-19)       | 1100<br>(870-1400)     |
| Estonia  | 1990 | Female | 45 to 49 | 90%<br>(86-93%)                | 9.8%<br>(7-14%)          | 1.6<br>(1.1-2.3)                            | 7.9%<br>(6.1-9.9%)                   | 11%<br>(7.9-15%)                    | 17<br>(12-23)       | 1100<br>(800-1300)     |
| Estonia  | 1990 | Female | 50 to 54 | 88%<br>(84-91%)                | 12%<br>(8.8-16%)         | 1.5<br>(1-2.2)                              | 5.9%<br>(4.2-7.9%)                   | 7.6%<br>(4.7-11%)                   | 21<br>(13-31)       | 1100<br>(790-1500)     |
| Estonia  | 1990 | Female | 55 to 59 | 85%<br>(80-88%)                | 15%<br>(12-20%)          | 1.5<br>(1-2.1)                              | 3.7%<br>(1.9-5.7%)                   | 4.4%<br>(1.7-7.4%)                  | 17<br>(6.4-29)      | 760<br>(380-1200)      |
| Estonia  | 1990 | Female | 60 to 64 | 82%<br>(76-86%)                | 18%<br>(14-24%)          | 1.4<br>(0.94-2)                             | 0.91%<br>(-1.1-3.3%)                 | 0.64%<br>(-2.1-4%)                  | 4.2<br>(-14-27)     | 250<br>(-290-900)      |
| Estonia  | 1990 | Female | 65 to 69 | 79%<br>(72-84%)                | 21%<br>(16-28%)          | 1.2<br>(0.8-1.6)                            | -1.3%<br>(-3.4-1.1%)                 | -2.1%<br>(-5.1-0.99%)               | -19<br>(-45-8.9)    | -370<br>(-970-310)     |
| Estonia  | 1990 | Female | 70 to 74 | 71%<br>(63-78%)                | 29%<br>(22-37%)          | 0.96<br>(0.59-1.4)                          | -2.5%<br>(-4.9--0.16%)               | -3.6%<br>(-6.5--0.42%)              | -32<br>(-59--3.7)   | -560<br>(-1100--35)    |
| Estonia  | 1990 | Female | 75 to 79 | 59%<br>(48-70%)                | 41%<br>(30-52%)          | 0.78<br>(0.46-1.2)                          | -2.9%<br>(-5.1--0.67%)               | -3.8%<br>(-6.6--0.99%)              | -62<br>(-110--17)   | -850<br>(-1500--200)   |
| Estonia  | 1990 | Female | 80 to 84 | 51%<br>(40-62%)                | 49%<br>(38-60%)          | 0.69<br>(0.41-1.1)                          | -3%<br>(-5.4--0.92%)                 | -3.8%<br>(-6.6--1.2%)               | -73<br>(-130--23)   | -750<br>(-1300--220)   |
| Estonia  | 1990 | Female | 85 to 89 | 50%<br>(38-62%)                | 50%<br>(38-62%)          | 0.69<br>(0.4-1.1)                           | -3%<br>(-5.5--0.89%)                 | -3.7%<br>(-6.6--1.2%)               | -55<br>(-100--17)   | -400<br>(-720--120)    |
| Estonia  | 1990 | Female | 90 to 94 | 52%<br>(40-64%)                | 48%<br>(36-60%)          | 0.76<br>(0.41-1.2)                          | -3%<br>(-5.4--0.68%)                 | -3.8%<br>(-6.7--0.99%)              | -26<br>(-45--6.8)   | -120<br>(-220--28)     |
| Estonia  | 1990 | Female | 95 plus  | 56%<br>(41-70%)                | 44%<br>(30-59%)          | 0.84<br>(0.41-1.4)                          | -3.2%<br>(-6--0.51%)                 | -4%<br>(-7.5--0.87%)                | -7.9<br>(-15--1.7)  | -25<br>(-47--3.8)      |
| Estonia  | 1990 | Male   | All Ages | 87%<br>(83-90%)                | 13%<br>(9.8-17%)         | 2.4<br>(1.9-3)                              | 9%<br>(6.4-12%)                      | 6.7%<br>(3.2-10%)                   | 620<br>(300-960)    | 31000<br>(22000-41000) |

| Location | Year | Sex    | Age      | Prevalence of current drinkers | Prevalence of abstainers | Population average of standard drinks daily | Percent of total attributable deaths | Percent of total attributable DALYs | Attributable deaths  | Attributable DALYs   |
|----------|------|--------|----------|--------------------------------|--------------------------|---------------------------------------------|--------------------------------------|-------------------------------------|----------------------|----------------------|
| Estonia  | 1990 | Male   | 15 to 19 | 78%<br>(66-88%)                | 22%<br>(12-34%)          | 1.5<br>(0.88-2.2)                           | 7.1%<br>(4.5-10%)                    | 9.5%<br>(5.5-14%)                   | 8.5<br>(4.9-13)      | 720<br>(450-1000)    |
| Estonia  | 1990 | Male   | 20 to 24 | 88%<br>(80-93%)                | 12%<br>(6.7-20%)         | 2.6<br>(1.6-3.8)                            | 13%<br>(9.1-18%)                     | 16%<br>(10-22%)                     | 21<br>(14-30)        | 1700<br>(1200-2300)  |
| Estonia  | 1990 | Male   | 25 to 29 | 91%<br>(85-95%)                | 8.8%<br>(4.8-15%)        | 2.9<br>(1.9-4.2)                            | 15%<br>(11-19%)                      | 18%<br>(12-24%)                     | 29<br>(19-40)        | 2300<br>(1600-3000)  |
| Estonia  | 1990 | Male   | 30 to 34 | 93%<br>(87-97%)                | 6.7%<br>(3.4-13%)        | 3.2<br>(2.2-4.6)                            | 16%<br>(12-20%)                      | 19%<br>(14-25%)                     | 42<br>(31-56)        | 2900<br>(2200-3700)  |
| Estonia  | 1990 | Male   | 35 to 39 | 94%<br>(89-97%)                | 6%<br>(2.9-11%)          | 3.5<br>(2.3-5)                              | 17%<br>(13-22%)                      | 21%<br>(15-27%)                     | 58<br>(42-77)        | 3500<br>(2700-4500)  |
| Estonia  | 1990 | Male   | 40 to 44 | 95%<br>(90-98%)                | 5.3%<br>(2.4-9.9%)       | 3.7<br>(2.5-5.3)                            | 17%<br>(12-22%)                      | 20%<br>(14-26%)                     | 72<br>(50-96)        | 3800<br>(2800-4900)  |
| Estonia  | 1990 | Male   | 45 to 49 | 95%<br>(91-98%)                | 4.8%<br>(2.5-9.1%)       | 4.1<br>(2.7-5.8)                            | 16%<br>(11-21%)                      | 19%<br>(13-25%)                     | 83<br>(57-110)       | 3800<br>(2700-5000)  |
| Estonia  | 1990 | Male   | 50 to 54 | 95%<br>(91-97%)                | 4.9%<br>(2.8-8.8%)       | 4.3<br>(2.8-6)                              | 14%<br>(9.2-19%)                     | 16%<br>(10-22%)                     | 120<br>(72-160)      | 4600<br>(3000-6400)  |
| Estonia  | 1990 | Male   | 55 to 59 | 94%<br>(91-97%)                | 5.6%<br>(3.4-8.9%)       | 4.1<br>(2.8-5.6)                            | 11%<br>(6.1-15%)                     | 12%<br>(6.5-17%)                    | 110<br>(58-160)      | 3700<br>(2200-5400)  |
| Estonia  | 1990 | Male   | 60 to 64 | 93%<br>(90-96%)                | 6.5%<br>(4.1-10%)        | 3.7<br>(2.4-5.2)                            | 7.9%<br>(2.8-13%)                    | 7.9%<br>(2.7-14%)                   | 93<br>(31-160)       | 2800<br>(1100-4800)  |
| Estonia  | 1990 | Male   | 65 to 69 | 92%<br>(88-95%)                | 7.9%<br>(4.9-12%)        | 3.1<br>(2.1-4.2)                            | 3.9%<br>(0.043-8.3%)                 | 3.9%<br>(-0.62-9.2%)                | 38<br>(-6-89)        | 1000<br>(11-2200)    |
| Estonia  | 1990 | Male   | 70 to 74 | 90%<br>(86-93%)                | 9.9%<br>(6.8-14%)        | 2.5<br>(1.6-3.6)                            | 1.3%<br>(-2.4-5.7%)                  | 0.98%<br>(-3.3-6%)                  | 8.2<br>(-28-51)      | 230<br>(-440-1000)   |
| Estonia  | 1990 | Male   | 75 to 79 | 87%<br>(80-92%)                | 13%<br>(7.6-20%)         | 2.1<br>(1.3-3.1)                            | -0.43%<br>(-4-3.9%)                  | -0.97%<br>(-5.1-4%)                 | -10<br>(-53-42)      | -77<br>(-690-680)    |
| Estonia  | 1990 | Male   | 80 to 84 | 84%<br>(75-90%)                | 16%<br>(9.6-25%)         | 1.8<br>(1.2-2.7)                            | -1.7%<br>(-5-2.1%)                   | -2.4%<br>(-6.4-1.9%)                | -21<br>(-58-17)      | -180<br>(-560-230)   |
| Estonia  | 1990 | Male   | 85 to 89 | 82%<br>(73-88%)                | 18%<br>(12-27%)          | 1.7<br>(1.1-2.5)                            | -2.3%<br>(-5.6-1.2%)                 | -3.1%<br>(-7-0.89%)                 | -16<br>(-37-4.8)     | -110<br>(-260-55)    |
| Estonia  | 1990 | Male   | 90 to 94 | 80%<br>(71-88%)                | 20%<br>(12-29%)          | 1.6<br>(0.93-2.5)                           | -2.7%<br>(-5.9-0.55%)                | -3.6%<br>(-7.4-0.19%)               | -5.6<br>(-11-0.29)   | -25<br>(-54-5.1)     |
| Estonia  | 1990 | Male   | 95 plus  | 79%<br>(67-89%)                | 21%<br>(11-33%)          | 1.5<br>(0.73-2.6)                           | -2.7%<br>(-5.8-0.6%)                 | -3.7%<br>(-7.5-0.16%)               | -1.3<br>(-2.6-0.055) | -3.7<br>(-8-0.84)    |
| Estonia  | 1995 | Female | All Ages | 80%<br>(77-83%)                | 20%<br>(17-23%)          | 1.2<br>(0.99-1.4)                           | 2.3%<br>(0.87-3.9%)                  | -0.93%<br>(-3.2-1.7%)               | -94<br>(-330-170)    | 6500<br>(2300-11000) |
| Estonia  | 1995 | Female | 15 to 19 | 78%<br>(66-88%)                | 22%<br>(12-34%)          | 1<br>(0.65-1.4)                             | 4.3%<br>(3-5.7%)                     | 7.4%<br>(4.2-11%)                   | 2.1<br>(1.2-3.1)     | 260<br>(170-350)     |
| Estonia  | 1995 | Female | 20 to 24 | 87%<br>(79-92%)                | 13%<br>(7.8-21%)         | 1.4<br>(0.89-2)                             | 6.6%<br>(4.9-8.4%)                   | 7.6%<br>(4.3-11%)                   | 2.9<br>(1.7-4.4)     | 460<br>(320-620)     |
| Estonia  | 1995 | Female | 25 to 29 | 89%<br>(82-93%)                | 11%<br>(7.1-18%)         | 1.4<br>(0.94-2)                             | 7.4%<br>(5.8-9.2%)                   | 8.7%<br>(5.6-12%)                   | 3.5<br>(2.2-4.9)     | 530<br>(390-700)     |
| Estonia  | 1995 | Female | 30 to 34 | 90%<br>(84-93%)                | 10%<br>(6.5-16%)         | 1.5<br>(1.1-2.1)                            | 8.5%<br>(6.9-10%)                    | 12%<br>(9.4-16%)                    | 6.9<br>(5.3-9)       | 760<br>(600-960)     |

| Location | Year | Sex    | Age      | Prevalence of current drinkers | Prevalence of abstainers | Population average of standard drinks daily | Percent of total attributable deaths | Percent of total attributable DALYs | Attributable deaths | Attributable DALYs     |
|----------|------|--------|----------|--------------------------------|--------------------------|---------------------------------------------|--------------------------------------|-------------------------------------|---------------------|------------------------|
| Estonia  | 1995 | Female | 35 to 39 | 90%<br>(85-94%)                | 10%<br>(6.4-15%)         | 1.7<br>(1.2-2.3)                            | 11%<br>(8.6-13%)                     | 15%<br>(12-19%)                     | 17<br>(13-21)       | 1300<br>(1100-1600)    |
| Estonia  | 1995 | Female | 40 to 44 | 90%<br>(85-94%)                | 9.8%<br>(6.2-15%)        | 1.8<br>(1.3-2.5)                            | 10%<br>(8.3-12%)                     | 14%<br>(11-18%)                     | 23<br>(17-28)       | 1500<br>(1200-1800)    |
| Estonia  | 1995 | Female | 45 to 49 | 90%<br>(86-93%)                | 9.7%<br>(6.9-14%)        | 1.8<br>(1.3-2.5)                            | 9.2%<br>(7.2-11%)                    | 13%<br>(9.4-16%)                    | 28<br>(21-36)       | 1500<br>(1200-1900)    |
| Estonia  | 1995 | Female | 50 to 54 | 89%<br>(84-91%)                | 11%<br>(8.6-16%)         | 1.8<br>(1.2-2.3)                            | 7.2%<br>(5.2-9.5%)                   | 9.4%<br>(6.4-13%)                   | 26<br>(18-35)       | 1200<br>(880-1600)     |
| Estonia  | 1995 | Female | 55 to 59 | 85%<br>(80-89%)                | 15%<br>(11-20%)          | 1.7<br>(1.2-2.3)                            | 4.8%<br>(2.7-7%)                     | 5.9%<br>(2.8-9.1%)                  | 28<br>(13-44)       | 1100<br>(630-1700)     |
| Estonia  | 1995 | Female | 60 to 64 | 82%<br>(76-86%)                | 18%<br>(14-24%)          | 1.6<br>(1.1-2.2)                            | 1.8%<br>(-0.42-4.4%)                 | 1.9%<br>(-1.2-5.5%)                 | 12<br>(-7.5-35)     | 460<br>(-110-1100)     |
| Estonia  | 1995 | Female | 65 to 69 | 79%<br>(72-84%)                | 21%<br>(16-28%)          | 1.4<br>(0.96-1.8)                           | -0.66%<br>(-3.1-1.9%)                | -1.3%<br>(-4.3-2.1%)                | -13<br>(-44-21)     | -210<br>(-940-610)     |
| Estonia  | 1995 | Female | 70 to 74 | 72%<br>(64-78%)                | 28%<br>(22-36%)          | 1.1<br>(0.71-1.6)                           | -2.1%<br>(-4.4-0.5%)                 | -2.9%<br>(-5.9-0.36%)               | -38<br>(-77-4.9)    | -650<br>(-1400-160)    |
| Estonia  | 1995 | Female | 75 to 79 | 60%<br>(49-70%)                | 40%<br>(30-51%)          | 0.9<br>(0.55-1.4)                           | -2.5%<br>(-4.8--0.22%)               | -3.3%<br>(-6.1--0.44%)              | -39<br>(-73--5.2)   | -530<br>(-1000--49)    |
| Estonia  | 1995 | Female | 80 to 84 | 52%<br>(41-63%)                | 48%<br>(37-59%)          | 0.8<br>(0.5-1.2)                            | -2.7%<br>(-5-0.37%)                  | -3.4%<br>(-6.2--0.63%)              | -64<br>(-120--12)   | -650<br>(-1200--87)    |
| Estonia  | 1995 | Female | 85 to 89 | 51%<br>(39-63%)                | 49%<br>(37-61%)          | 0.8<br>(0.48-1.2)                           | -2.7%<br>(-5.1--0.41%)               | -3.4%<br>(-6.3--0.66%)              | -56<br>(-100--11)   | -390<br>(-730--61)     |
| Estonia  | 1995 | Female | 90 to 94 | 53%<br>(41-65%)                | 47%<br>(35-59%)          | 0.89<br>(0.49-1.4)                          | -2.8%<br>(-5.3--0.31%)               | -3.5%<br>(-6.5--0.53%)              | -27<br>(-50--4.1)   | -130<br>(-250--14)     |
| Estonia  | 1995 | Female | 95 plus  | 57%<br>(41-70%)                | 43%<br>(30-59%)          | 1<br>(0.5-1.7)                              | -2.9%<br>(-6-0.14%)                  | -3.7%<br>(-7.3--0.071%)             | -7.3<br>(-14-0.14)  | -23<br>(-47-1.1)       |
| Estonia  | 1995 | Male   | All Ages | 87%<br>(84-91%)                | 13%<br>(9.4-16%)         | 2.8<br>(2.3-3.3)                            | 12%<br>(9-15%)                       | 9.6%<br>(6-13%)                     | 1100<br>(660-1500)  | 46000<br>(35000-57000) |
| Estonia  | 1995 | Male   | 15 to 19 | 79%<br>(67-88%)                | 21%<br>(12-33%)          | 1.7<br>(1.1-2.5)                            | 8.1%<br>(5.4-12%)                    | 11%<br>(6.6-16%)                    | 9.7<br>(5.8-14)     | 800<br>(510-1100)      |
| Estonia  | 1995 | Male   | 20 to 24 | 88%<br>(80-93%)                | 12%<br>(6.6-20%)         | 3<br>(2-4.2)                                | 15%<br>(11-20%)                      | 18%<br>(12-24%)                     | 29<br>(19-39)       | 2200<br>(1500-2900)    |
| Estonia  | 1995 | Male   | 25 to 29 | 91%<br>(85-95%)                | 8.8%<br>(4.7-15%)        | 3.3<br>(2.2-4.6)                            | 17%<br>(13-22%)                      | 20%<br>(14-27%)                     | 36<br>(25-48)       | 2600<br>(1900-3300)    |
| Estonia  | 1995 | Male   | 30 to 34 | 93%<br>(87-97%)                | 6.7%<br>(3.2-13%)        | 3.6<br>(2.5-5)                              | 19%<br>(14-23%)                      | 22%<br>(16-28%)                     | 56<br>(42-73)       | 3600<br>(2700-4600)    |
| Estonia  | 1995 | Male   | 35 to 39 | 94%<br>(90-97%)                | 5.8%<br>(2.9-10%)        | 4<br>(2.7-5.6)                              | 21%<br>(16-26%)                      | 24%<br>(18-31%)                     | 96<br>(73-120)      | 5400<br>(4200-6700)    |
| Estonia  | 1995 | Male   | 40 to 44 | 95%<br>(90-98%)                | 5.2%<br>(2.5-9.8%)       | 4.3<br>(3-5.8)                              | 20%<br>(16-26%)                      | 23%<br>(17-29%)                     | 130<br>(93-160)     | 6300<br>(4700-7800)    |
| Estonia  | 1995 | Male   | 45 to 49 | 95%<br>(91-98%)                | 4.8%<br>(2.4-9.2%)       | 4.7<br>(3.3-6.5)                            | 20%<br>(15-25%)                      | 22%<br>(16-28%)                     | 150<br>(110-190)    | 6500<br>(4900-8300)    |
| Estonia  | 1995 | Male   | 50 to 54 | 95%<br>(91-97%)                | 4.9%<br>(2.8-8.6%)       | 4.9<br>(3.5-6.6)                            | 18%<br>(12-23%)                      | 20%<br>(13-26%)                     | 160<br>(110-210)    | 6000<br>(4200-7800)    |

| Location | Year | Sex    | Age      | Prevalence of current drinkers | Prevalence of abstainers | Population average of standard drinks daily | Percent of total attributable deaths | Percent of total attributable DALYs | Attributable deaths | Attributable DALYs   |
|----------|------|--------|----------|--------------------------------|--------------------------|---------------------------------------------|--------------------------------------|-------------------------------------|---------------------|----------------------|
| Estonia  | 1995 | Male   | 55 to 59 | 95%<br>(91-97%)                | 5.5%<br>(3.4-8.6%)       | 4.7<br>(3.4-6.1)                            | 13%<br>(8.5-19%)                     | 15%<br>(9.1-21%)                    | 180<br>(110-250)    | 5900<br>(3700-8200)  |
| Estonia  | 1995 | Male   | 60 to 64 | 94%<br>(90-96%)                | 6.4%<br>(4-10%)          | 4.2<br>(2.9-5.7)                            | 9.5%<br>(4.4-15%)                    | 10%<br>(4.4-17%)                    | 140<br>(60-230)     | 4000<br>(1800-6500)  |
| Estonia  | 1995 | Male   | 65 to 69 | 92%<br>(88-95%)                | 7.7%<br>(4.9-12%)        | 3.5<br>(2.6-4.6)                            | 5.6%<br>(1.3-10%)                    | 5.8%<br>(0.92-11%)                  | 87<br>(14-170)      | 2200<br>(500-4000)   |
| Estonia  | 1995 | Male   | 70 to 74 | 90%<br>(86-93%)                | 9.8%<br>(6.9-14%)        | 2.9<br>(2-4)                                | 2.6%<br>(-1.2-7.6%)                  | 2.5%<br>(-1.8-8.1%)                 | 29<br>(-21-92)      | 630<br>(-280-1800)   |
| Estonia  | 1995 | Male   | 75 to 79 | 88%<br>(81-92%)                | 12%<br>(7.6-19%)         | 2.4<br>(1.5-3.5)                            | 0.73%<br>(-3-5.6%)                   | 0.39%<br>(-3.9-5.9%)                | 3.3<br>(-33-50)     | 100<br>(-420-780)    |
| Estonia  | 1995 | Male   | 80 to 84 | 85%<br>(76-90%)                | 15%<br>(9.5-24%)         | 2.1<br>(1.4-3.1)                            | -0.73%<br>(-4.2-3.3%)                | -1.3%<br>(-5.5-3.4%)                | -12<br>(-49-31)     | -80<br>(-470-360)    |
| Estonia  | 1995 | Male   | 85 to 89 | 82%<br>(73-89%)                | 18%<br>(11-27%)          | 1.9<br>(1.3-2.8)                            | -1.7%<br>(-5.2-2.1%)                 | -2.4%<br>(-6.5-2%)                  | -14<br>(-37-11)     | -82<br>(-250-100)    |
| Estonia  | 1995 | Male   | 90 to 94 | 81%<br>(71-88%)                | 19%<br>(12-29%)          | 1.8<br>(1.1-2.7)                            | -2.2%<br>(-5.7-1.4%)                 | -3%<br>(-7.1-1.1%)                  | -6<br>(-14-2.2)     | -25<br>(-66-16)      |
| Estonia  | 1995 | Male   | 95 plus  | 80%<br>(67-89%)                | 20%<br>(11-33%)          | 1.7<br>(0.86-2.8)                           | -2.2%<br>(-5.6-1.5%)                 | -3.2%<br>(-7.3-1.3%)                | -1<br>(-2.3-0.4)    | -2.8<br>(-7-2)       |
| Estonia  | 2000 | Female | All Ages | 79%<br>(76-82%)                | 21%<br>(18-24%)          | 1.5<br>(1.3-1.8)                            | 3.6%<br>(2.3-5.1%)                   | 0.87%<br>(-1.5-3.3%)                | 82<br>(-140-310)    | 9400<br>(5900-14000) |
| Estonia  | 2000 | Female | 15 to 19 | 79%<br>(68-87%)                | 21%<br>(13-32%)          | 1.3<br>(0.89-1.9)                           | 4.3%<br>(3.1-5.7%)                   | 8.4%<br>(5.2-12%)                   | 1.8<br>(1.1-2.6)    | 230<br>(160-310)     |
| Estonia  | 2000 | Female | 20 to 24 | 87%<br>(81-92%)                | 13%<br>(7.9-19%)         | 1.8<br>(1.2-2.6)                            | 7%<br>(5.2-8.9%)                     | 8.9%<br>(5.4-13%)                   | 2.3<br>(1.4-3.4)    | 420<br>(290-570)     |
| Estonia  | 2000 | Female | 25 to 29 | 89%<br>(82-93%)                | 11%<br>(7.2-18%)         | 1.8<br>(1.2-2.5)                            | 7.8%<br>(6.1-9.6%)                   | 10%<br>(6.6-13%)                    | 3<br>(2-4.1)        | 520<br>(390-680)     |
| Estonia  | 2000 | Female | 30 to 34 | 89%<br>(83-93%)                | 11%<br>(6.8-17%)         | 1.9<br>(1.4-2.6)                            | 9.1%<br>(7.4-11%)                    | 14%<br>(11-17%)                     | 6.6<br>(5-8.3)      | 720<br>(560-900)     |
| Estonia  | 2000 | Female | 35 to 39 | 90%<br>(85-93%)                | 10%<br>(6.9-15%)         | 2.2<br>(1.6-2.9)                            | 11%<br>(9-13%)                       | 17%<br>(14-20%)                     | 14<br>(11-17)       | 1100<br>(890-1300)   |
| Estonia  | 2000 | Female | 40 to 44 | 90%<br>(86-94%)                | 9.7%<br>(6.2-14%)        | 2.4<br>(1.8-3.2)                            | 11%<br>(9.1-13%)                     | 17%<br>(14-20%)                     | 21<br>(17-26)       | 1400<br>(1100-1700)  |
| Estonia  | 2000 | Female | 45 to 49 | 91%<br>(87-93%)                | 9.5%<br>(7-13%)          | 2.4<br>(1.7-3.2)                            | 11%<br>(8.4-13%)                     | 15%<br>(12-18%)                     | 32<br>(25-39)       | 1700<br>(1400-2100)  |
| Estonia  | 2000 | Female | 50 to 54 | 88%<br>(84-91%)                | 12%<br>(9.2-16%)         | 2.2<br>(1.6-3)                              | 9%<br>(7-11%)                        | 12%<br>(9.5-16%)                    | 35<br>(26-44)       | 1600<br>(1200-2000)  |
| Estonia  | 2000 | Female | 55 to 59 | 83%<br>(80-87%)                | 17%<br>(13-20%)          | 2.1<br>(1.5-2.8)                            | 7%<br>(4.9-9.2%)                     | 9.3%<br>(6.3-12%)                   | 34<br>(22-45)       | 1300<br>(900-1700)   |
| Estonia  | 2000 | Female | 60 to 64 | 79%<br>(72-84%)                | 21%<br>(16-28%)          | 1.9<br>(1.3-2.7)                            | 3.9%<br>(1.7-6.6%)                   | 5.1%<br>(1.9-8.6%)                  | 28<br>(11-48)       | 930<br>(400-1500)    |
| Estonia  | 2000 | Female | 65 to 69 | 74%<br>(66-81%)                | 26%<br>(19-34%)          | 1.5<br>(1.1-2.1)                            | 1.4%<br>(-0.77-3.7%)                 | 1.4%<br>(-1.5-4.6%)                 | 11<br>(-11-35)      | 350<br>(-200-970)    |
| Estonia  | 2000 | Female | 70 to 74 | 64%<br>(54-73%)                | 36%<br>(27-46%)          | 1.2<br>(0.73-1.7)                           | -0.2%<br>(-2.4-2.1%)                 | -0.56%<br>(-3.3-2.4%)               | -7<br>(-43-30)      | -61<br>(-730-660)    |

| Location | Year | Sex    | Age      | Prevalence of current drinkers | Prevalence of abstainers | Population average of standard drinks daily | Percent of total attributable deaths | Percent of total attributable DALYs | Attributable deaths | Attributable DALYs     |
|----------|------|--------|----------|--------------------------------|--------------------------|---------------------------------------------|--------------------------------------|-------------------------------------|---------------------|------------------------|
| Estonia  | 2000 | Female | 75 to 79 | 53%<br>(43-64%)                | 47%<br>(36-57%)          | 0.96<br>(0.59-1.5)                          | -0.88%<br>(-2.9-1.3%)                | -1.3%<br>(-4-1.4%)                  | -21<br>(-63-22)     | -250<br>(-860-390)     |
| Estonia  | 2000 | Female | 80 to 84 | 49%<br>(37-59%)                | 51%<br>(41-63%)          | 0.94<br>(0.6-1.4)                           | -1.3%<br>(-3.4-0.83%)                | -1.8%<br>(-4.5-0.84%)               | -23<br>(-57-11)     | -220<br>(-570-150)     |
| Estonia  | 2000 | Female | 85 to 89 | 49%<br>(37-61%)                | 51%<br>(39-63%)          | 1<br>(0.6-1.5)                              | -1.5%<br>(-4-1%)                     | -2.1%<br>(-5.1-0.93%)               | -32<br>(-79-14)     | -210<br>(-550-140)     |
| Estonia  | 2000 | Female | 90 to 94 | 51%<br>(40-63%)                | 49%<br>(37-60%)          | 1.1<br>(0.62-1.7)                           | -1.6%<br>(-4.2-1.2%)                 | -2.1%<br>(-5.4-1.2%)                | -18<br>(-46-11)     | -81<br>(-220-63)       |
| Estonia  | 2000 | Female | 95 plus  | 55%<br>(40-69%)                | 45%<br>(31-60%)          | 1.2<br>(0.63-2.1)                           | -1.6%<br>(-4.8-1.9%)                 | -2.2%<br>(-6-1.9%)                  | -5.4<br>(-15-4.7)   | -15<br>(-46-18)        |
| Estonia  | 2000 | Male   | All Ages | 89%<br>(86-92%)                | 11%<br>(8.3-14%)         | 3.9<br>(3.4-4.6)                            | 15%<br>(12-18%)                      | 13%<br>(9.5-17%)                    | 1200<br>(880-1600)  | 48000<br>(39000-57000) |
| Estonia  | 2000 | Male   | 15 to 19 | 80%<br>(70-89%)                | 20%<br>(11-30%)          | 2.3<br>(1.5-3.3)                            | 8.6%<br>(5.8-12%)                    | 13%<br>(7.8-19%)                    | 7.9<br>(4.8-11)     | 680<br>(440-920)       |
| Estonia  | 2000 | Male   | 20 to 24 | 89%<br>(82-94%)                | 11%<br>(5.9-18%)         | 4<br>(2.7-5.6)                              | 17%<br>(13-22%)                      | 21%<br>(15-28%)                     | 25<br>(18-34)       | 2000<br>(1500-2600)    |
| Estonia  | 2000 | Male   | 25 to 29 | 92%<br>(88-96%)                | 7.7%<br>(4.2-12%)        | 4.4<br>(3-5.9)                              | 19%<br>(14-23%)                      | 24%<br>(17-31%)                     | 31<br>(23-40)       | 2300<br>(1800-2900)    |
| Estonia  | 2000 | Male   | 30 to 34 | 94%<br>(90-97%)                | 5.8%<br>(3-10%)          | 4.9<br>(3.4-6.7)                            | 21%<br>(17-26%)                      | 27%<br>(21-34%)                     | 43<br>(33-54)       | 2900<br>(2300-3500)    |
| Estonia  | 2000 | Male   | 35 to 39 | 95%<br>(91-97%)                | 5%<br>(2.7-8.6%)         | 5.3<br>(3.7-7.4)                            | 24%<br>(19-29%)                      | 29%<br>(23-36%)                     | 73<br>(56-89)       | 4200<br>(3400-5100)    |
| Estonia  | 2000 | Male   | 40 to 44 | 95%<br>(91-98%)                | 4.7%<br>(2.3-8.5%)       | 5.7<br>(4.1-7.7)                            | 25%<br>(20-29%)                      | 29%<br>(23-35%)                     | 120<br>(96-150)     | 6100<br>(4900-7200)    |
| Estonia  | 2000 | Male   | 45 to 49 | 96%<br>(92-98%)                | 4.4%<br>(2.3-8.1%)       | 6.2<br>(4.5-8.2)                            | 24%<br>(19-28%)                      | 28%<br>(22-33%)                     | 160<br>(120-190)    | 6900<br>(5500-8200)    |
| Estonia  | 2000 | Male   | 50 to 54 | 95%<br>(93-97%)                | 4.5%<br>(2.6-7.4%)       | 6.5<br>(4.6-8.7)                            | 22%<br>(17-26%)                      | 25%<br>(19-30%)                     | 170<br>(130-200)    | 6600<br>(5100-7800)    |
| Estonia  | 2000 | Male   | 55 to 59 | 95%<br>(93-97%)                | 4.9%<br>(3.1-7.4%)       | 6.3<br>(4.6-8.2)                            | 18%<br>(14-23%)                      | 21%<br>(15-26%)                     | 160<br>(110-200)    | 5400<br>(3900-6600)    |
| Estonia  | 2000 | Male   | 60 to 64 | 94%<br>(92-96%)                | 5.7%<br>(3.9-8.4%)       | 5.7<br>(4-7.7)                              | 14%<br>(8.6-20%)                     | 16%<br>(9.3-22%)                    | 180<br>(110-250)    | 5300<br>(3100-7100)    |
| Estonia  | 2000 | Male   | 65 to 69 | 93%<br>(89-95%)                | 7.3%<br>(4.9-11%)        | 4.7<br>(3.5-6.1)                            | 9.9%<br>(4.9-15%)                    | 11%<br>(4.9-17%)                    | 130<br>(60-210)     | 3200<br>(1600-4900)    |
| Estonia  | 2000 | Male   | 70 to 74 | 91%<br>(87-93%)                | 9.5%<br>(6.8-13%)        | 3.8<br>(2.6-5.3)                            | 6.2%<br>(1.2-12%)                    | 6.6%<br>(0.8-13%)                   | 89<br>(11-180)      | 1800<br>(360-3400)     |
| Estonia  | 2000 | Male   | 75 to 79 | 88%<br>(81-92%)                | 12%<br>(7.7-19%)         | 3.1<br>(2-4.6)                              | 3.6%<br>(-0.88-9.5%)                 | 3.7%<br>(-1.6-11%)                  | 34<br>(-15-97)      | 570<br>(-130-1500)     |
| Estonia  | 2000 | Male   | 80 to 84 | 84%<br>(75-91%)                | 16%<br>(9.5-25%)         | 2.7<br>(1.8-3.9)                            | 1.9%<br>(-2.1-6.9%)                  | 1.6%<br>(-3.1-7.4%)                 | 9.7<br>(-18-45)     | 140<br>(-160-520)      |
| Estonia  | 2000 | Male   | 85 to 89 | 81%<br>(72-88%)                | 19%<br>(12-28%)          | 2.5<br>(1.6-3.5)                            | 0.56%<br>(-3.2-5.4%)                 | 0.087%<br>(-4.4-5.7%)               | 0.46<br>(-23-31)    | 26<br>(-150-250)       |
| Estonia  | 2000 | Male   | 90 to 94 | 80%<br>(70-88%)                | 20%<br>(12-30%)          | 2.3<br>(1.4-3.5)                            | -0.29%<br>(-4-4.4%)                  | -0.94%<br>(-5.5-4.4%)               | -2<br>(-12-9.6)     | -3.7<br>(-52-57)       |

| Location | Year | Sex    | Age      | Prevalence of current drinkers | Prevalence of abstainers | Population average of standard drinks daily | Percent of total attributable deaths | Percent of total attributable DALYs | Attributable deaths | Attributable DALYs     |
|----------|------|--------|----------|--------------------------------|--------------------------|---------------------------------------------|--------------------------------------|-------------------------------------|---------------------|------------------------|
| Estonia  | 2000 | Male   | 95 plus  | 79%<br>(65-89%)                | 21%<br>(11-35%)          | 2.1<br>(1.1-3.4)                            | -0.66%<br>(-4.4-4.6%)                | -1.5%<br>(-6.1-4.7%)                | -0.7<br>(-2.9-2.3)  | -1.3<br>(-8.5-8.5)     |
| Estonia  | 2005 | Female | All Ages | 81%<br>(79-84%)                | 19%<br>(16-21%)          | 2.1<br>(1.8-2.3)                            | 4.8%<br>(3.4-6.3%)                   | 2.6%<br>(0.13-5.2%)                 | 230<br>(12-450)     | 11000<br>(8000-15000)  |
| Estonia  | 2005 | Female | 15 to 19 | 79%<br>(69-88%)                | 21%<br>(12-31%)          | 1.7<br>(1.1-2.4)                            | 4.5%<br>(3.2-5.8%)                   | 9.8%<br>(6.3-14%)                   | 1.6<br>(1-2.3)      | 220<br>(160-300)       |
| Estonia  | 2005 | Female | 20 to 24 | 88%<br>(82-93%)                | 12%<br>(7.4-18%)         | 2.3<br>(1.6-3.3)                            | 7.3%<br>(5.5-9.3%)                   | 9.8%<br>(6.2-14%)                   | 2.5<br>(1.6-3.6)    | 430<br>(300-590)       |
| Estonia  | 2005 | Female | 25 to 29 | 90%<br>(85-93%)                | 10%<br>(6.5-15%)         | 2.3<br>(1.6-3.2)                            | 8%<br>(6.4-9.7%)                     | 11%<br>(7.4-14%)                    | 2.4<br>(1.7-3.2)    | 480<br>(350-640)       |
| Estonia  | 2005 | Female | 30 to 34 | 90%<br>(86-94%)                | 9.6%<br>(6.2-14%)        | 2.5<br>(1.8-3.4)                            | 9.5%<br>(7.8-11%)                    | 16%<br>(13-20%)                     | 6<br>(4.7-7.4)      | 700<br>(540-870)       |
| Estonia  | 2005 | Female | 35 to 39 | 91%<br>(87-94%)                | 9.3%<br>(6.1-13%)        | 2.8<br>(2-3.7)                              | 11%<br>(9-13%)                       | 19%<br>(16-23%)                     | 10<br>(8.3-12)      | 870<br>(720-1100)      |
| Estonia  | 2005 | Female | 40 to 44 | 91%<br>(87-94%)                | 8.8%<br>(5.7-13%)        | 3<br>(2.2-3.9)                              | 12%<br>(9.7-14%)                     | 20%<br>(17-23%)                     | 19<br>(16-22)       | 1300<br>(1000-1500)    |
| Estonia  | 2005 | Female | 45 to 49 | 91%<br>(89-93%)                | 8.8%<br>(6.6-11%)        | 3.1<br>(2.2-4)                              | 11%<br>(9.3-13%)                     | 18%<br>(15-21%)                     | 29<br>(24-35)       | 1600<br>(1300-1900)    |
| Estonia  | 2005 | Female | 50 to 54 | 89%<br>(87-91%)                | 11%<br>(8.8-13%)         | 2.9<br>(2.1-3.8)                            | 11%<br>(8.6-13%)                     | 16%<br>(13-19%)                     | 40<br>(32-49)       | 1800<br>(1500-2200)    |
| Estonia  | 2005 | Female | 55 to 59 | 86%<br>(83-88%)                | 14%<br>(12-17%)          | 2.8<br>(2-3.7)                              | 9.3%<br>(7-12%)                      | 13%<br>(10-17%)                     | 46<br>(35-57)       | 1700<br>(1300-2200)    |
| Estonia  | 2005 | Female | 60 to 64 | 82%<br>(80-85%)                | 18%<br>(15-20%)          | 2.6<br>(1.8-3.5)                            | 6.3%<br>(3.9-9.1%)                   | 8.8%<br>(5.5-13%)                   | 34<br>(21-49)       | 1100<br>(670-1600)     |
| Estonia  | 2005 | Female | 65 to 69 | 79%<br>(76-82%)                | 21%<br>(18-24%)          | 2.2<br>(1.7-2.9)                            | 3.5%<br>(1.1-6%)                     | 4.5%<br>(1.2-8.1%)                  | 30<br>(7.7-54)      | 830<br>(260-1400)      |
| Estonia  | 2005 | Female | 70 to 74 | 73%<br>(69-76%)                | 27%<br>(24-31%)          | 1.8<br>(1.3-2.5)                            | 1.4%<br>(-1.4-4.2%)                  | 1.6%<br>(-2.1-5.2%)                 | 15<br>(-20-49)      | 350<br>(-340-1100)     |
| Estonia  | 2005 | Female | 75 to 79 | 61%<br>(55-66%)                | 39%<br>(34-45%)          | 1.5<br>(0.99-2.1)                           | 0.4%<br>(-2.2-3.3%)                  | 0.25%<br>(-3.1-3.9%)                | 3.7<br>(-47-58)     | 110<br>(-640-950)      |
| Estonia  | 2005 | Female | 80 to 84 | 51%<br>(42-60%)                | 49%<br>(40-58%)          | 1.3<br>(0.84-1.8)                           | 0.05%<br>(-2.3-2.5%)                 | -0.17%<br>(-3.2-2.9%)               | -2.9<br>(-56-50)    | 12<br>(-550-590)       |
| Estonia  | 2005 | Female | 85 to 89 | 47%<br>(37-57%)                | 53%<br>(43-63%)          | 1.2<br>(0.72-1.7)                           | -0.15%<br>(-2.4-2.5%)                | -0.43%<br>(-3.2-2.8%)               | -4.8<br>(-36-32)    | -15<br>(-250-260)      |
| Estonia  | 2005 | Female | 90 to 94 | 49%<br>(39-59%)                | 51%<br>(41-61%)          | 1.3<br>(0.75-2)                             | -0.12%<br>(-2.9-3.2%)                | -0.41%<br>(-3.8-3.6%)               | -3.7<br>(-34-32)    | -6.4<br>(-160-170)     |
| Estonia  | 2005 | Female | 95 plus  | 53%<br>(39-66%)                | 47%<br>(34-61%)          | 1.4<br>(0.74-2.4)                           | 0.021%<br>(-3.2-4.4%)                | -0.31%<br>(-4.2-4.8%)               | -0.97<br>(-13-15)   | 0.28<br>(-40-54)       |
| Estonia  | 2005 | Male   | All Ages | 91%<br>(88-93%)                | 9.5%<br>(7.3-12%)        | 5.1<br>(4.5-5.8)                            | 17%<br>(15-20%)                      | 16%<br>(13-20%)                     | 1400<br>(1100-1800) | 51000<br>(43000-58000) |
| Estonia  | 2005 | Male   | 15 to 19 | 83%<br>(75-90%)                | 17%<br>(10-25%)          | 3<br>(2-4.2)                                | 9.6%<br>(6.6-13%)                    | 15%<br>(9.7-22%)                    | 8.5<br>(5.4-12)     | 720<br>(490-970)       |
| Estonia  | 2005 | Male   | 20 to 24 | 91%<br>(85-95%)                | 9.4%<br>(5.4-15%)        | 5<br>(3.5-7)                                | 18%<br>(13-22%)                      | 23%<br>(17-30%)                     | 24<br>(17-32)       | 1900<br>(1400-2500)    |

| Location | Year | Sex    | Age      | Prevalence of current drinkers | Prevalence of abstainers | Population average of standard drinks daily | Percent of total attributable deaths | Percent of total attributable DALYs | Attributable deaths | Attributable DALYs    |
|----------|------|--------|----------|--------------------------------|--------------------------|---------------------------------------------|--------------------------------------|-------------------------------------|---------------------|-----------------------|
| Estonia  | 2005 | Male   | 25 to 29 | 93%<br>(89-96%)                | 6.8%<br>(4-11%)          | 5.6<br>(3.9-7.5)                            | 19%<br>(15-23%)                      | 24%<br>(18-31%)                     | 30<br>(23-38)       | 2200<br>(1800-2800)   |
| Estonia  | 2005 | Male   | 30 to 34 | 95%<br>(91-97%)                | 5.2%<br>(2.8-8.9%)       | 6.1<br>(4.5-8.5)                            | 22%<br>(18-26%)                      | 29%<br>(24-35%)                     | 43<br>(35-52)       | 2900<br>(2300-3400)   |
| Estonia  | 2005 | Male   | 35 to 39 | 95%<br>(92-98%)                | 4.7%<br>(2.3-8.4%)       | 6.7<br>(4.7-9.1)                            | 25%<br>(21-29%)                      | 32%<br>(26-38%)                     | 58<br>(47-69)       | 3400<br>(2800-4000)   |
| Estonia  | 2005 | Male   | 40 to 44 | 96%<br>(92-98%)                | 4.3%<br>(2.1-7.9%)       | 7.2<br>(5.3-9.4)                            | 27%<br>(23-31%)                      | 34%<br>(28-39%)                     | 100<br>(85-120)     | 5200<br>(4400-5900)   |
| Estonia  | 2005 | Male   | 45 to 49 | 96%<br>(93-98%)                | 3.9%<br>(2-7%)           | 8<br>(5.9-10)                               | 27%<br>(22-30%)                      | 32%<br>(27-37%)                     | 150<br>(130-170)    | 6600<br>(5600-7700)   |
| Estonia  | 2005 | Male   | 50 to 54 | 96%<br>(94-98%)                | 3.8%<br>(2.3-6.3%)       | 8.4<br>(6.1-11)                             | 25%<br>(21-29%)                      | 30%<br>(25-34%)                     | 190<br>(160-220)    | 7300<br>(6200-8400)   |
| Estonia  | 2005 | Male   | 55 to 59 | 96%<br>(94-97%)                | 4.3%<br>(2.9-6.4%)       | 8<br>(5.9-10)                               | 22%<br>(18-26%)                      | 25%<br>(21-30%)                     | 190<br>(160-230)    | 6400<br>(5300-7600)   |
| Estonia  | 2005 | Male   | 60 to 64 | 95%<br>(92-96%)                | 5.2%<br>(3.6-7.6%)       | 7.1<br>(5.1-9.6)                            | 18%<br>(13-22%)                      | 20%<br>(15-26%)                     | 180<br>(130-220)    | 5000<br>(3700-6300)   |
| Estonia  | 2005 | Male   | 65 to 69 | 94%<br>(91-96%)                | 6.5%<br>(4.4-9.3%)       | 6<br>(4.5-7.7)                              | 14%<br>(8.9-18%)                     | 15%<br>(9.9-20%)                    | 180<br>(110-240)    | 4400<br>(2900-5700)   |
| Estonia  | 2005 | Male   | 70 to 74 | 92%<br>(89-94%)                | 8.1%<br>(6.1-11%)        | 5<br>(3.6-6.6)                              | 9.9%<br>(4.5-15%)                    | 11%<br>(4.7-17%)                    | 130<br>(57-200)     | 2600<br>(1200-3900)   |
| Estonia  | 2005 | Male   | 75 to 79 | 90%<br>(85-93%)                | 10%<br>(6.7-15%)         | 4.2<br>(2.8-5.9)                            | 6.9%<br>(1.4-13%)                    | 7.5%<br>(1.1-14%)                   | 91<br>(13-170)      | 1400<br>(290-2600)    |
| Estonia  | 2005 | Male   | 80 to 84 | 87%<br>(80-92%)                | 13%<br>(8.5-20%)         | 3.6<br>(2.5-5)                              | 4.9%<br>(0.02-11%)                   | 5.2%<br>(-0.63-12%)                 | 40<br>(-4.9-91)     | 480<br>(1.9-1000)     |
| Estonia  | 2005 | Male   | 85 to 89 | 84%<br>(76-90%)                | 16%<br>(10-24%)          | 3.3<br>(2.2-4.7)                            | 3.3%<br>(-1.4-9%)                    | 3.3%<br>(-2.3-9.9%)                 | 13<br>(-9.2-40)     | 120<br>(-49-320)      |
| Estonia  | 2005 | Male   | 90 to 94 | 83%<br>(74-89%)                | 17%<br>(11-26%)          | 3.1<br>(2-4.6)                              | 2.1%<br>(-2.9-8.3%)                  | 1.8%<br>(-4.1-9.2%)                 | 4.5<br>(-10-23)     | 32<br>(-43-120)       |
| Estonia  | 2005 | Male   | 95 plus  | 81%<br>(69-90%)                | 19%<br>(9.8-31%)         | 2.8<br>(1.5-4.7)                            | 1.4%<br>(-3.7-8.6%)                  | 0.92%<br>(-5.2-9.5%)                | 0.56<br>(-3.2-5.8)  | 3.5<br>(-9.1-21)      |
| Estonia  | 2010 | Female | All Ages | 80%<br>(78-82%)                | 20%<br>(18-22%)          | 2.3<br>(1.9-2.7)                            | 5.2%<br>(3.8-6.8%)                   | 3.9%<br>(0.97-6.8%)                 | 300<br>(75-520)     | 11000<br>(7800-15000) |
| Estonia  | 2010 | Female | 15 to 19 | 78%<br>(67-87%)                | 22%<br>(13-33%)          | 1.8<br>(1.2-2.6)                            | 4.2%<br>(3.1-5.5%)                   | 10%<br>(6.5-14%)                    | 0.9<br>(0.58-1.3)   | 150<br>(110-200)      |
| Estonia  | 2010 | Female | 20 to 24 | 88%<br>(82-92%)                | 12%<br>(7.8-18%)         | 2.6<br>(1.7-3.7)                            | 7.1%<br>(5.2-9.1%)                   | 9.4%<br>(6.2-13%)                   | 1.4<br>(0.93-2)     | 370<br>(250-510)      |
| Estonia  | 2010 | Female | 25 to 29 | 89%<br>(84-93%)                | 11%<br>(6.9-16%)         | 2.6<br>(1.8-3.7)                            | 7.9%<br>(6.4-9.7%)                   | 11%<br>(7.8-14%)                    | 2.4<br>(1.7-3.1)    | 470<br>(340-620)      |
| Estonia  | 2010 | Female | 30 to 34 | 90%<br>(85-94%)                | 9.9%<br>(6.4-15%)        | 2.8<br>(2-3.8)                              | 8.8%<br>(7.1-11%)                    | 16%<br>(13-20%)                     | 4.1<br>(3.3-5)      | 550<br>(420-700)      |
| Estonia  | 2010 | Female | 35 to 39 | 90%<br>(87-94%)                | 9.7%<br>(6.3-13%)        | 3.2<br>(2.2-4.3)                            | 9.6%<br>(8-11%)                      | 19%<br>(16-22%)                     | 7.4<br>(6.1-9)      | 730<br>(580-900)      |
| Estonia  | 2010 | Female | 40 to 44 | 91%<br>(87-94%)                | 9.2%<br>(6.1-13%)        | 3.4<br>(2.5-4.6)                            | 11%<br>(8.8-12%)                     | 20%<br>(17-24%)                     | 12<br>(10-14)       | 900<br>(730-1100)     |

| Location | Year | Sex    | Age      | Prevalence of current drinkers | Prevalence of abstainers | Population average of standard drinks daily | Percent of total attributable deaths | Percent of total attributable DALYs | Attributable deaths | Attributable DALYs     |
|----------|------|--------|----------|--------------------------------|--------------------------|---------------------------------------------|--------------------------------------|-------------------------------------|---------------------|------------------------|
| Estonia  | 2010 | Female | 45 to 49 | 91%<br>(88-93%)                | 9.4%<br>(7-12%)          | 3.5<br>(2.5-4.7)                            | 11%<br>(8.9-13%)                     | 19%<br>(16-22%)                     | 20<br>(17-23)       | 1200<br>(980-1400)     |
| Estonia  | 2010 | Female | 50 to 54 | 89%<br>(86-91%)                | 11%<br>(9.1-14%)         | 3.3<br>(2.3-4.4)                            | 10%<br>(8.3-12%)                     | 17%<br>(14-20%)                     | 29<br>(24-35)       | 1400<br>(1200-1700)    |
| Estonia  | 2010 | Female | 55 to 59 | 85%<br>(83-88%)                | 15%<br>(12-17%)          | 3.2<br>(2.3-4.2)                            | 9.3%<br>(7.2-12%)                    | 15%<br>(12-18%)                     | 36<br>(29-44)       | 1400<br>(1100-1800)    |
| Estonia  | 2010 | Female | 60 to 64 | 82%<br>(79-84%)                | 18%<br>(16-21%)          | 2.9<br>(2-4)                                | 7.4%<br>(5.1-10%)                    | 11%<br>(7.8-15%)                    | 40<br>(27-53)       | 1300<br>(880-1800)     |
| Estonia  | 2010 | Female | 65 to 69 | 79%<br>(75-82%)                | 21%<br>(18-25%)          | 2.5<br>(1.9-3.3)                            | 4.9%<br>(2.7-7.3%)                   | 7.1%<br>(3.9-10%)                   | 32<br>(17-48)       | 860<br>(460-1300)      |
| Estonia  | 2010 | Female | 70 to 74 | 72%<br>(68-75%)                | 28%<br>(25-32%)          | 2<br>(1.4-2.8)                              | 2.9%<br>(0.21-5.5%)                  | 3.9%<br>(0.012-7.7%)                | 31<br>(0.099-61)    | 680<br>(52-1300)       |
| Estonia  | 2010 | Female | 75 to 79 | 60%<br>(55-65%)                | 40%<br>(35-45%)          | 1.7<br>(1.1-2.4)                            | 1.9%<br>(-0.81-4.7%)                 | 2.3%<br>(-1.5-6.2%)                 | 27<br>(-17-71)      | 450<br>(-200-1100)     |
| Estonia  | 2010 | Female | 80 to 84 | 50%<br>(41-59%)                | 50%<br>(41-59%)          | 1.4<br>(0.93-2)                             | 1.4%<br>(-1-4.1%)                    | 1.6%<br>(-1.6-5%)                   | 27<br>(-27-83)      | 340<br>(-250-960)      |
| Estonia  | 2010 | Female | 85 to 89 | 46%<br>(36-55%)                | 54%<br>(45-64%)          | 1.3<br>(0.78-2)                             | 1.1%<br>(-1.3-3.8%)                  | 1.2%<br>(-2-4.5%)                   | 18<br>(-31-70)      | 170<br>(-200-570)      |
| Estonia  | 2010 | Female | 90 to 94 | 48%<br>(37-58%)                | 52%<br>(42-63%)          | 1.4<br>(0.83-2.2)                           | 1.2%<br>(-1.8-4.9%)                  | 1.2%<br>(-2.5-5.6%)                 | 8.1<br>(-17-38)     | 52<br>(-76-210)        |
| Estonia  | 2010 | Female | 95 plus  | 52%<br>(38-65%)                | 48%<br>(35-62%)          | 1.6<br>(0.81-2.6)                           | 1.4%<br>(-2.4-6.4%)                  | 1.4%<br>(-3.3-7.4%)                 | 4.7<br>(-11-25)     | 19<br>(-33-88)         |
| Estonia  | 2010 | Male   | All Ages | 90%<br>(88-93%)                | 9.7%<br>(7.4-12%)        | 5.9<br>(5-6.9)                              | 18%<br>(15-20%)                      | 18%<br>(13-22%)                     | 1300<br>(1000-1600) | 43000<br>(37000-50000) |
| Estonia  | 2010 | Male   | 15 to 19 | 82%<br>(74-89%)                | 18%<br>(11-26%)          | 3.4<br>(2.2-4.8)                            | 8.4%<br>(5.8-11%)                    | 16%<br>(10-23%)                     | 3.9<br>(2.5-5.5)    | 370<br>(260-490)       |
| Estonia  | 2010 | Male   | 20 to 24 | 90%<br>(84-94%)                | 9.8%<br>(5.6-16%)        | 5.7<br>(3.7-7.9)                            | 16%<br>(12-20%)                      | 23%<br>(17-30%)                     | 16<br>(11-21)       | 1400<br>(1000-1700)    |
| Estonia  | 2010 | Male   | 25 to 29 | 93%<br>(89-96%)                | 7.1%<br>(4.1-11%)        | 6.3<br>(4.3-8.7)                            | 18%<br>(14-21%)                      | 23%<br>(17-29%)                     | 24<br>(18-31)       | 1900<br>(1500-2300)    |
| Estonia  | 2010 | Male   | 30 to 34 | 95%<br>(91-97%)                | 5.5%<br>(2.8-9.3%)       | 7<br>(5-9.6)                                | 20%<br>(17-24%)                      | 28%<br>(22-33%)                     | 32<br>(26-39)       | 2300<br>(1800-2700)    |
| Estonia  | 2010 | Male   | 35 to 39 | 95%<br>(92-97%)                | 5.1%<br>(2.5-8.5%)       | 7.6<br>(5.2-11)                             | 23%<br>(19-27%)                      | 33%<br>(27-38%)                     | 42<br>(34-50)       | 2600<br>(2200-3100)    |
| Estonia  | 2010 | Male   | 40 to 44 | 95%<br>(92-98%)                | 4.6%<br>(2.2-8.1%)       | 8.1<br>(5.8-11)                             | 26%<br>(22-30%)                      | 36%<br>(31-41%)                     | 62<br>(52-72)       | 3300<br>(2800-3900)    |
| Estonia  | 2010 | Male   | 45 to 49 | 96%<br>(93-98%)                | 4.1%<br>(2.2-7.3%)       | 9<br>(6.6-12)                               | 27%<br>(23-30%)                      | 36%<br>(31-40%)                     | 100<br>(89-120)     | 4800<br>(4100-5400)    |
| Estonia  | 2010 | Male   | 50 to 54 | 96%<br>(94-97%)                | 4%<br>(2.5-6.5%)         | 9.5<br>(6.7-13)                             | 26%<br>(22-30%)                      | 34%<br>(29-38%)                     | 150<br>(130-170)    | 5900<br>(5100-6800)    |
| Estonia  | 2010 | Male   | 55 to 59 | 95%<br>(93-97%)                | 4.5%<br>(3-6.8%)         | 9<br>(6.6-12)                               | 24%<br>(20-28%)                      | 29%<br>(24-34%)                     | 180<br>(150-210)    | 6100<br>(5100-7100)    |
| Estonia  | 2010 | Male   | 60 to 64 | 95%<br>(92-96%)                | 5.5%<br>(3.8-8.3%)       | 8<br>(5.8-11)                               | 20%<br>(15-24%)                      | 24%<br>(18-29%)                     | 180<br>(140-220)    | 5200<br>(4000-6200)    |



| Location | Year | Sex    | Age      | Prevalence of current drinkers | Prevalence of abstainers | Population average of standard drinks daily | Percent of total attributable deaths | Percent of total attributable DALYs | Attributable deaths | Attributable DALYs    |
|----------|------|--------|----------|--------------------------------|--------------------------|---------------------------------------------|--------------------------------------|-------------------------------------|---------------------|-----------------------|
| Estonia  | 2010 | Male   | 65 to 69 | 93%<br>(90-95%)                | 6.7%<br>(4.6-9.9%)       | 6.7<br>(5.1-8.8)                            | 16%<br>(12-20%)                      | 19%<br>(14-23%)                     | 150<br>(110-190)    | 3600<br>(2700-4500)   |
| Estonia  | 2010 | Male   | 70 to 74 | 92%<br>(89-94%)                | 8.3%<br>(6.2-11%)        | 5.6<br>(4-7.6)                              | 12%<br>(7-17%)                       | 14%<br>(7.8-20%)                    | 150<br>(87-210)     | 3000<br>(1800-4200)   |
| Estonia  | 2010 | Male   | 75 to 79 | 89%<br>(84-93%)                | 11%<br>(6.9-16%)         | 4.7<br>(3.1-6.8)                            | 9.1%<br>(3.6-14%)                    | 10%<br>(3.5-17%)                    | 110<br>(36-170)     | 1700<br>(640-2600)    |
| Estonia  | 2010 | Male   | 80 to 84 | 86%<br>(79-91%)                | 14%<br>(8.9-21%)         | 4.1<br>(2.8-5.7)                            | 7.1%<br>(1.9-12%)                    | 7.9%<br>(1.6-14%)                   | 78<br>(16-140)      | 900<br>(230-1600)     |
| Estonia  | 2010 | Male   | 85 to 89 | 83%<br>(76-89%)                | 17%<br>(11-24%)          | 3.7<br>(2.5-5.3)                            | 5.7%<br>(0.5-11%)                    | 6.1%<br>(-0.078-13%)                | 32<br>(-0.41-67)    | 270<br>(23-540)       |
| Estonia  | 2010 | Male   | 90 to 94 | 82%<br>(73-89%)                | 18%<br>(11-27%)          | 3.5<br>(2.2-5.3)                            | 4.4%<br>(-1.2-11%)                   | 4.5%<br>(-2.3-12%)                  | 8<br>(-4-22)        | 47<br>(-13-120)       |
| Estonia  | 2010 | Male   | 95 plus  | 81%<br>(69-90%)                | 19%<br>(10-31%)          | 3.2<br>(1.7-5.3)                            | 3.4%<br>(-2.4-11%)                   | 3.3%<br>(-3.9-12%)                  | 2.6<br>(-3-9.6)     | 11<br>(-7.7-34)       |
| Estonia  | 2016 | Female | All Ages | 79%<br>(77-81%)                | 21%<br>(19-23%)          | 2.4<br>(1.8-3.1)                            | 5.2%<br>(3.4-7.3%)                   | 4.1%<br>(0.65-7.9%)                 | 350<br>(53-690)     | 11000<br>(6900-16000) |
| Estonia  | 2016 | Female | 15 to 19 | 77%<br>(65-87%)                | 23%<br>(13-35%)          | 1.9<br>(1.2-3)                              | 4.1%<br>(3-5.5%)                     | 10%<br>(6.4-14%)                    | 0.57<br>(0.35-0.83) | 99<br>(69-140)        |
| Estonia  | 2016 | Female | 20 to 24 | 87%<br>(79-92%)                | 13%<br>(8.1-21%)         | 2.7<br>(1.6-4.2)                            | 7.3%<br>(5.3-9.4%)                   | 9.8%<br>(6.2-14%)                   | 1.1<br>(0.66-1.6)   | 290<br>(190-410)      |
| Estonia  | 2016 | Female | 25 to 29 | 88%<br>(82-93%)                | 12%<br>(7.1-18%)         | 2.7<br>(1.7-4)                              | 7.8%<br>(6.1-9.7%)                   | 11%<br>(7.7-15%)                    | 1.9<br>(1.2-2.7)    | 440<br>(310-610)      |
| Estonia  | 2016 | Female | 30 to 34 | 89%<br>(82-93%)                | 11%<br>(6.6-18%)         | 2.9<br>(1.9-4.2)                            | 8.4%<br>(6.6-10%)                    | 16%<br>(12-19%)                     | 3.3<br>(2.3-4.6)    | 500<br>(360-670)      |
| Estonia  | 2016 | Female | 35 to 39 | 90%<br>(85-94%)                | 10%<br>(6.4-15%)         | 3.3<br>(2.1-4.8)                            | 9.4%<br>(7.6-11%)                    | 19%<br>(15-23%)                     | 6.3<br>(4.5-8.6)    | 640<br>(480-820)      |
| Estonia  | 2016 | Female | 40 to 44 | 90%<br>(85-94%)                | 9.9%<br>(6.2-15%)        | 3.5<br>(2.3-5.1)                            | 10%<br>(8.2-13%)                     | 20%<br>(17-24%)                     | 12<br>(8.6-15)      | 880<br>(670-1100)     |
| Estonia  | 2016 | Female | 45 to 49 | 91%<br>(87-93%)                | 9.4%<br>(6.9-13%)        | 3.6<br>(2.4-5.3)                            | 10%<br>(8.4-13%)                     | 19%<br>(16-23%)                     | 16<br>(12-21)       | 960<br>(740-1200)     |
| Estonia  | 2016 | Female | 50 to 54 | 89%<br>(87-91%)                | 11%<br>(8.7-13%)         | 3.5<br>(2.4-5)                              | 10%<br>(8.1-13%)                     | 18%<br>(15-22%)                     | 26<br>(19-34)       | 1300<br>(980-1700)    |
| Estonia  | 2016 | Female | 55 to 59 | 86%<br>(83-88%)                | 14%<br>(12-17%)          | 3.4<br>(2.3-4.8)                            | 9.5%<br>(7-12%)                      | 15%<br>(12-20%)                     | 36<br>(25-47)       | 1400<br>(1000-1900)   |
| Estonia  | 2016 | Female | 60 to 64 | 83%<br>(80-86%)                | 17%<br>(14-20%)          | 3.2<br>(2.1-4.6)                            | 7.6%<br>(5-11%)                      | 12%<br>(8.2-16%)                    | 41<br>(27-59)       | 1400<br>(890-2000)    |
| Estonia  | 2016 | Female | 65 to 69 | 79%<br>(76-83%)                | 21%<br>(17-24%)          | 2.7<br>(1.9-3.8)                            | 5.2%<br>(2.7-8.1%)                   | 7.6%<br>(3.9-12%)                   | 33<br>(16-52)       | 910<br>(450-1500)     |
| Estonia  | 2016 | Female | 70 to 74 | 72%<br>(67-76%)                | 28%<br>(24-33%)          | 2.1<br>(1.4-3.2)                            | 3.3%<br>(0.55-6.6%)                  | 4.6%<br>(0.54-9.1%)                 | 31<br>(3.6-63)      | 680<br>(110-1400)     |
| Estonia  | 2016 | Female | 75 to 79 | 59%<br>(53-65%)                | 41%<br>(35-47%)          | 1.7<br>(1.1-2.6)                            | 2.3%<br>(-0.48-5.7%)                 | 3%<br>(-0.95-7.4%)                  | 36<br>(-12-91)      | 600<br>(-130-1500)    |
| Estonia  | 2016 | Female | 80 to 84 | 50%<br>(39-59%)                | 50%<br>(41-61%)          | 1.5<br>(0.9-2.3)                            | 1.9%<br>(-0.75-5.1%)                 | 2.2%<br>(-1.5-6.5%)                 | 37<br>(-23-110)     | 460<br>(-190-1300)    |

| Location | Year | Sex    | Age      | Prevalence of current drinkers | Prevalence of abstainers | Population average of standard drinks daily | Percent of total attributable deaths | Percent of total attributable DALYs | Attributable deaths | Attributable DALYs     |
|----------|------|--------|----------|--------------------------------|--------------------------|---------------------------------------------|--------------------------------------|-------------------------------------|---------------------|------------------------|
| Estonia  | 2016 | Female | 85 to 89 | 47%<br>(36-58%)                | 53%<br>(42-64%)          | 1.4<br>(0.82-2.3)                           | 1.7%<br>(-1-5.1%)                    | 1.8%<br>(-1.7-6.3%)                 | 36<br>(-33-120)     | 320<br>(-190-980)      |
| Estonia  | 2016 | Female | 90 to 94 | 50%<br>(39-60%)                | 50%<br>(40-61%)          | 1.6<br>(0.86-2.6)                           | 1.8%<br>(-1.7-6.2%)                  | 1.9%<br>(-2.4-7.3%)                 | 24<br>(-30-93)      | 140<br>(-140-500)      |
| Estonia  | 2016 | Female | 95 plus  | 54%<br>(39-68%)                | 46%<br>(32-61%)          | 1.8<br>(0.9-3.1)                            | 2%<br>(-2.5-8%)                      | 2.1%<br>(-3.3-9.3%)                 | 6.5<br>(-11-29)     | 25<br>(-31-98)         |
| Estonia  | 2016 | Male   | All Ages | 89%<br>(86-92%)                | 11%<br>(8.3-14%)         | 6<br>(4.6-7.8)                              | 17%<br>(14-21%)                      | 17%<br>(13-22%)                     | 1300<br>(900-1700)  | 40000<br>(32000-50000) |
| Estonia  | 2016 | Male   | 15 to 19 | 77%<br>(65-87%)                | 23%<br>(13-35%)          | 3.2<br>(1.9-5)                              | 7.7%<br>(5.2-11%)                    | 16%<br>(9.6-23%)                    | 2.3<br>(1.4-3.6)    | 220<br>(150-320)       |
| Estonia  | 2016 | Male   | 20 to 24 | 87%<br>(79-93%)                | 13%<br>(6.9-21%)         | 5.6<br>(3.4-8.5)                            | 15%<br>(11-20%)                      | 23%<br>(16-30%)                     | 11<br>(7.2-15)      | 930<br>(680-1200)      |
| Estonia  | 2016 | Male   | 25 to 29 | 91%<br>(85-95%)                | 9%<br>(4.9-15%)          | 6.3<br>(4-9.3)                              | 16%<br>(12-20%)                      | 23%<br>(16-29%)                     | 18<br>(13-24)       | 1500<br>(1100-2000)    |
| Estonia  | 2016 | Male   | 30 to 34 | 93%<br>(87-97%)                | 6.8%<br>(3.3-13%)        | 7<br>(4.5-10)                               | 19%<br>(15-22%)                      | 27%<br>(21-33%)                     | 25<br>(19-34)       | 1900<br>(1400-2300)    |
| Estonia  | 2016 | Male   | 35 to 39 | 94%<br>(89-97%)                | 6%<br>(2.9-11%)          | 7.6<br>(4.8-11)                             | 22%<br>(18-26%)                      | 33%<br>(27-39%)                     | 37<br>(28-49)       | 2300<br>(1800-2900)    |
| Estonia  | 2016 | Male   | 40 to 44 | 95%<br>(90-97%)                | 5.4%<br>(2.6-9.9%)       | 8.1<br>(5.5-12)                             | 25%<br>(21-29%)                      | 36%<br>(30-41%)                     | 64<br>(49-81)       | 3400<br>(2700-4200)    |
| Estonia  | 2016 | Male   | 45 to 49 | 95%<br>(92-98%)                | 4.6%<br>(2.5-8.5%)       | 9.1<br>(6.2-13)                             | 26%<br>(22-30%)                      | 36%<br>(30-40%)                     | 83<br>(65-100)      | 3800<br>(3100-4600)    |
| Estonia  | 2016 | Male   | 50 to 54 | 96%<br>(93-97%)                | 4.3%<br>(2.5-7%)         | 9.8<br>(6.7-14)                             | 26%<br>(22-31%)                      | 35%<br>(30-39%)                     | 140<br>(110-170)    | 5400<br>(4300-6500)    |
| Estonia  | 2016 | Male   | 55 to 59 | 95%<br>(93-97%)                | 4.8%<br>(3.1-6.9%)       | 9.4<br>(6.6-13)                             | 24%<br>(20-28%)                      | 30%<br>(25-35%)                     | 170<br>(130-210)    | 5800<br>(4600-7000)    |
| Estonia  | 2016 | Male   | 60 to 64 | 94%<br>(92-96%)                | 5.6%<br>(3.9-8.2%)       | 8.4<br>(5.7-12)                             | 20%<br>(16-24%)                      | 25%<br>(19-30%)                     | 190<br>(140-240)    | 5500<br>(4200-6900)    |
| Estonia  | 2016 | Male   | 65 to 69 | 93%<br>(90-95%)                | 6.8%<br>(4.6-9.8%)       | 7.1<br>(5-9.6)                              | 16%<br>(12-21%)                      | 19%<br>(14-25%)                     | 150<br>(110-200)    | 3600<br>(2700-4700)    |
| Estonia  | 2016 | Male   | 70 to 74 | 91%<br>(88-94%)                | 8.6%<br>(6.3-12%)        | 5.8<br>(3.9-8.2)                            | 12%<br>(7.1-17%)                     | 15%<br>(8-21%)                      | 130<br>(70-190)     | 2600<br>(1500-3600)    |
| Estonia  | 2016 | Male   | 75 to 79 | 89%<br>(83-93%)                | 11%<br>(7.1-17%)         | 4.8<br>(3.1-7.2)                            | 9.4%<br>(3.9-15%)                    | 11%<br>(4.1-17%)                    | 110<br>(42-180)     | 1800<br>(730-2800)     |
| Estonia  | 2016 | Male   | 80 to 84 | 85%<br>(78-91%)                | 15%<br>(9.1-22%)         | 4.2<br>(2.7-6.2)                            | 7.5%<br>(2.1-13%)                    | 8.5%<br>(1.9-16%)                   | 86<br>(19-160)      | 1000<br>(280-1800)     |
| Estonia  | 2016 | Male   | 85 to 89 | 83%<br>(75-89%)                | 17%<br>(11-25%)          | 3.9<br>(2.4-5.9)                            | 6.2%<br>(0.89-12%)                   | 6.9%<br>(0.47-14%)                  | 55<br>(4-120)       | 450<br>(65-910)        |
| Estonia  | 2016 | Male   | 90 to 94 | 82%<br>(73-89%)                | 18%<br>(11-27%)          | 3.6<br>(2.1-5.7)                            | 4.9%<br>(-0.89-12%)                  | 5.3%<br>(-1.7-14%)                  | 15<br>(-5-40)       | 88<br>(-16-220)        |
| Estonia  | 2016 | Male   | 95 plus  | 80%<br>(68-90%)                | 20%<br>(10-32%)          | 3.3<br>(1.7-5.8)                            | 4%<br>(-2-12%)                       | 4.1%<br>(-3.2-13%)                  | 2.4<br>(-2-8.1)     | 9.8<br>(-4.9-28)       |
| Latvia   | 1990 | Female | All Ages | 77%<br>(73-81%)                | 23%<br>(19-27%)          | 1.5<br>(1.3-1.8)                            | 2.4%<br>(0.85-4%)                    | 0.081%<br>(-2.5-3.1%)               | 14<br>(-450-530)    | 12000<br>(4200-20000)  |

| Location | Year | Sex    | Age      | Prevalence of current drinkers | Prevalence of abstainers | Population average of standard drinks daily | Percent of total attributable deaths | Percent of total attributable DALYs | Attributable deaths | Attributable DALYs     |
|----------|------|--------|----------|--------------------------------|--------------------------|---------------------------------------------|--------------------------------------|-------------------------------------|---------------------|------------------------|
| Latvia   | 1990 | Female | 15 to 19 | 73%<br>(60-84%)                | 27%<br>(16-40%)          | 1.6<br>(1-2.3)                              | 4.6%<br>(3.1-6.3%)                   | 7.7%<br>(4.2-12%)                   | 4.2<br>(2.3-6.7)    | 490<br>(330-700)       |
| Latvia   | 1990 | Female | 20 to 24 | 83%<br>(72-90%)                | 17%<br>(9.9-28%)         | 2.2<br>(1.5-3.2)                            | 7.4%<br>(5.5-9.5%)                   | 9.9%<br>(6.1-14%)                   | 5.6<br>(3.4-8)      | 860<br>(620-1200)      |
| Latvia   | 1990 | Female | 25 to 29 | 86%<br>(79-92%)                | 14%<br>(8.1-21%)         | 2.3<br>(1.7-3.1)                            | 7.9%<br>(6.2-9.5%)                   | 11%<br>(7.2-14%)                    | 9<br>(6.1-12)       | 1200<br>(910-1600)     |
| Latvia   | 1990 | Female | 30 to 34 | 88%<br>(80-93%)                | 12%<br>(7.1-20%)         | 2.4<br>(1.8-3.2)                            | 7.9%<br>(6.3-9.6%)                   | 12%<br>(8.4-15%)                    | 12<br>(8.9-16)      | 1400<br>(1000-1800)    |
| Latvia   | 1990 | Female | 35 to 39 | 87%<br>(80-93%)                | 13%<br>(7.3-20%)         | 2.3<br>(1.7-3.2)                            | 8.4%<br>(6.8-10%)                    | 12%<br>(9.5-15%)                    | 18<br>(14-23)       | 1600<br>(1200-2000)    |
| Latvia   | 1990 | Female | 40 to 44 | 87%<br>(80-92%)                | 13%<br>(7.9-20%)         | 2.2<br>(1.6-3)                              | 8.1%<br>(6.3-9.9%)                   | 11%<br>(8.2-14%)                    | 24<br>(17-31)       | 1700<br>(1300-2100)    |
| Latvia   | 1990 | Female | 45 to 49 | 86%<br>(78-92%)                | 14%<br>(8.4-22%)         | 2<br>(1.5-2.7)                              | 6.9%<br>(5.2-8.8%)                   | 9.3%<br>(6.6-12%)                   | 34<br>(24-45)       | 2000<br>(1500-2600)    |
| Latvia   | 1990 | Female | 50 to 54 | 84%<br>(76-90%)                | 16%<br>(10-24%)          | 1.8<br>(1.3-2.5)                            | 5.6%<br>(3.8-7.5%)                   | 7.1%<br>(4.3-10%)                   | 37<br>(23-53)       | 1900<br>(1300-2600)    |
| Latvia   | 1990 | Female | 55 to 59 | 81%<br>(73-88%)                | 19%<br>(12-27%)          | 1.8<br>(1.2-2.4)                            | 4.2%<br>(2.1-6.4%)                   | 5.1%<br>(2.2-8.4%)                  | 38<br>(16-62)       | 1600<br>(810-2500)     |
| Latvia   | 1990 | Female | 60 to 64 | 79%<br>(69-86%)                | 21%<br>(14-31%)          | 1.7<br>(1.2-2.3)                            | 2.2%<br>(-0.16-4.8%)                 | 2.4%<br>(-0.95-5.9%)                | 28<br>(-12-71)      | 1100<br>(-78-2300)     |
| Latvia   | 1990 | Female | 65 to 69 | 77%<br>(66-85%)                | 23%<br>(15-34%)          | 1.5<br>(1-2)                                | 0.26%<br>(-2.4-2.9%)                 | -0.054%<br>(-3.5-3.5%)              | -0.91<br>(-55-54)   | 130<br>(-1100-1500)    |
| Latvia   | 1990 | Female | 70 to 74 | 72%<br>(60-80%)                | 28%<br>(20-40%)          | 1.3<br>(0.82-1.9)                           | -0.89%<br>(-3.7-2.1%)                | -1.4%<br>(-5-2.4%)                  | -22<br>(-78-38)     | -350<br>(-1400-790)    |
| Latvia   | 1990 | Female | 75 to 79 | 63%<br>(48-75%)                | 37%<br>(25-52%)          | 1.1<br>(0.65-1.7)                           | -1.4%<br>(-4.2-1.6%)                 | -2%<br>(-5.3-1.7%)                  | -58<br>(-160-50)    | -760<br>(-2200-850)    |
| Latvia   | 1990 | Female | 80 to 84 | 55%<br>(39-69%)                | 45%<br>(31-61%)          | 1.1<br>(0.62-1.6)                           | -1.4%<br>(-4-1.7%)                   | -1.8%<br>(-5.1-1.7%)                | -60<br>(-170-57)    | -580<br>(-1700-690)    |
| Latvia   | 1990 | Female | 85 to 89 | 51%<br>(36-65%)                | 49%<br>(35-64%)          | 1.1<br>(0.6-1.8)                            | -1%<br>(-3.8-2.2%)                   | -1.4%<br>(-4.7-2.4%)                | -37<br>(-120-61)    | -240<br>(-880-510)     |
| Latvia   | 1990 | Female | 90 to 94 | 50%<br>(35-65%)                | 50%<br>(35-65%)          | 1.2<br>(0.64-2)                             | -0.75%<br>(-3.7-3.1%)                | -1.1%<br>(-4.8-3.4%)                | -13<br>(-57-40)     | -54<br>(-270-220)      |
| Latvia   | 1990 | Female | 95 plus  | 52%<br>(33-71%)                | 48%<br>(29-67%)          | 1.3<br>(0.63-2.4)                           | -0.52%<br>(-4.1-4.1%)                | -0.9%<br>(-5.1-4.7%)                | -3.7<br>(-21-19)    | -8.5<br>(-66-67)       |
| Latvia   | 1990 | Male   | All Ages | 82%<br>(77-86%)                | 18%<br>(14-23%)          | 4.1<br>(3.4-4.8)                            | 13%<br>(11-16%)                      | 12%<br>(8-15%)                      | 1900<br>(1300-2600) | 79000<br>(63000-96000) |
| Latvia   | 1990 | Male   | 15 to 19 | 72%<br>(59-83%)                | 28%<br>(17-41%)          | 2.6<br>(1.7-3.9)                            | 9.4%<br>(6-13%)                      | 13%<br>(7.8-19%)                    | 22<br>(13-32)       | 1700<br>(1100-2400)    |
| Latvia   | 1990 | Male   | 20 to 24 | 85%<br>(75-92%)                | 15%<br>(8.2-25%)         | 5<br>(3.5-6.9)                              | 18%<br>(13-24%)                      | 24%<br>(16-32%)                     | 55<br>(38-73)       | 4100<br>(3000-5300)    |
| Latvia   | 1990 | Male   | 25 to 29 | 89%<br>(81-94%)                | 11%<br>(5.9-19%)         | 5.9<br>(4.1-8)                              | 22%<br>(17-27%)                      | 27%<br>(20-35%)                     | 90<br>(66-120)      | 6400<br>(4800-7900)    |
| Latvia   | 1990 | Male   | 30 to 34 | 91%<br>(84-96%)                | 8.6%<br>(4.2-16%)        | 6.2<br>(4.5-8.4)                            | 22%<br>(18-27%)                      | 28%<br>(21-34%)                     | 110<br>(84-140)     | 7200<br>(5700-8700)    |

| Location | Year | Sex    | Age      | Prevalence of current drinkers | Prevalence of abstainers | Population average of standard drinks daily | Percent of total attributable deaths | Percent of total attributable DALYs | Attributable deaths | Attributable DALYs    |
|----------|------|--------|----------|--------------------------------|--------------------------|---------------------------------------------|--------------------------------------|-------------------------------------|---------------------|-----------------------|
| Latvia   | 1990 | Male   | 35 to 39 | 92%<br>(86-96%)                | 7.9%<br>(4-14%)          | 6.5<br>(4.6-8.7)                            | 22%<br>(17-27%)                      | 28%<br>(21-34%)                     | 130<br>(94-150)     | 7300<br>(5700-8900)   |
| Latvia   | 1990 | Male   | 40 to 44 | 92%<br>(86-96%)                | 7.9%<br>(4-14%)          | 6.6<br>(4.6-8.8)                            | 22%<br>(17-26%)                      | 26%<br>(20-32%)                     | 160<br>(120-190)    | 8000<br>(6100-9700)   |
| Latvia   | 1990 | Male   | 45 to 49 | 91%<br>(82-96%)                | 8.6%<br>(4-18%)          | 6.1<br>(4.4-8.3)                            | 19%<br>(15-24%)                      | 23%<br>(17-29%)                     | 210<br>(150-270)    | 9500<br>(7200-12000)  |
| Latvia   | 1990 | Male   | 50 to 54 | 91%<br>(82-95%)                | 9.4%<br>(4.5-18%)        | 5.9<br>(4.1-8.1)                            | 17%<br>(13-22%)                      | 20%<br>(14-26%)                     | 270<br>(180-350)    | 10000<br>(7400-13000) |
| Latvia   | 1990 | Male   | 55 to 59 | 90%<br>(82-94%)                | 10%<br>(5.5-18%)         | 5.7<br>(4.2-7.5)                            | 16%<br>(11-20%)                      | 18%<br>(12-23%)                     | 290<br>(200-380)    | 9900<br>(7000-13000)  |
| Latvia   | 1990 | Male   | 60 to 64 | 89%<br>(81-94%)                | 11%<br>(5.7-19%)         | 5.1<br>(3.6-7.1)                            | 13%<br>(7.7-18%)                     | 14%<br>(8-21%)                      | 280<br>(150-400)    | 8000<br>(4600-11000)  |
| Latvia   | 1990 | Male   | 65 to 69 | 88%<br>(79-94%)                | 12%<br>(6-21%)           | 4<br>(2.9-5.3)                              | 9%<br>(4.3-14%)                      | 9.8%<br>(4.5-16%)                   | 160<br>(72-250)     | 3900<br>(1900-6000)   |
| Latvia   | 1990 | Male   | 70 to 74 | 86%<br>(76-92%)                | 14%<br>(7.8-24%)         | 3<br>(2-4.3)                                | 4.9%<br>(0.57-10%)                   | 5.1%<br>(0.17-11%)                  | 73<br>(2.4-160)     | 1500<br>(170-3100)    |
| Latvia   | 1990 | Male   | 75 to 79 | 82%<br>(70-91%)                | 18%<br>(9-30%)           | 2.5<br>(1.5-3.8)                            | 2.6%<br>(-1.4-8.2%)                  | 2.6%<br>(-2.1-9.1%)                 | 49<br>(-40-170)     | 830<br>(-450-2600)    |
| Latvia   | 1990 | Male   | 80 to 84 | 77%<br>(63-86%)                | 23%<br>(14-37%)          | 2.3<br>(1.5-3.3)                            | 1.7%<br>(-2-6.8%)                    | 1.5%<br>(-2.9-7.2%)                 | 26<br>(-50-130)     | 360<br>(-420-1400)    |
| Latvia   | 1990 | Male   | 85 to 89 | 72%<br>(58-82%)                | 28%<br>(18-42%)          | 2.2<br>(1.4-3.3)                            | 1.3%<br>(-2.3-6%)                    | 1%<br>(-3.1-6.5%)                   | 11<br>(-33-69)      | 110<br>(-210-550)     |
| Latvia   | 1990 | Male   | 90 to 94 | 69%<br>(55-81%)                | 31%<br>(19-45%)          | 2.1<br>(1.2-3.5)                            | 0.87%<br>(-2.8-6.2%)                 | 0.52%<br>(-3.8-6.8%)                | 1.7<br>(-12-21)     | 16<br>(-53-120)       |
| Latvia   | 1990 | Male   | 95 plus  | 67%<br>(48-82%)                | 33%<br>(18-52%)          | 2.1<br>(0.99-3.6)                           | 0.74%<br>(-3.1-6.9%)                 | 0.28%<br>(-4.3-7.6%)                | 0.29<br>(-4.4-7.8)  | 3<br>(-13-29)         |
| Latvia   | 1995 | Female | All Ages | 78%<br>(73-82%)                | 22%<br>(18-27%)          | 1.4<br>(1.2-1.7)                            | 2.4%<br>(0.77-4.1%)                  | 0.0049%<br>(-2.6-2.9%)              | 1<br>(-490-550)     | 12000<br>(4000-22000) |
| Latvia   | 1995 | Female | 15 to 19 | 74%<br>(61-85%)                | 26%<br>(15-39%)          | 1.5<br>(0.98-2.1)                           | 4.7%<br>(3.1-6.5%)                   | 7.8%<br>(4.5-12%)                   | 4.1<br>(2.3-6.3)    | 460<br>(300-640)      |
| Latvia   | 1995 | Female | 20 to 24 | 83%<br>(72-90%)                | 17%<br>(9.7-28%)         | 2.1<br>(1.4-2.9)                            | 7.5%<br>(5.5-9.4%)                   | 9.8%<br>(6.1-14%)                   | 6.1<br>(3.8-8.6)    | 850<br>(600-1100)     |
| Latvia   | 1995 | Female | 25 to 29 | 86%<br>(79-92%)                | 14%<br>(8-21%)           | 2.2<br>(1.6-2.9)                            | 8.1%<br>(6.2-9.9%)                   | 10%<br>(7.2-14%)                    | 8.5<br>(5.8-11)     | 1100<br>(800-1400)    |
| Latvia   | 1995 | Female | 30 to 34 | 88%<br>(80-93%)                | 12%<br>(6.9-20%)         | 2.2<br>(1.7-2.9)                            | 8.2%<br>(6.5-9.9%)                   | 11%<br>(8.4-15%)                    | 14<br>(10-18)       | 1400<br>(1100-1800)   |
| Latvia   | 1995 | Female | 35 to 39 | 87%<br>(81-93%)                | 13%<br>(7-19%)           | 2.1<br>(1.6-2.9)                            | 8.8%<br>(7.1-11%)                    | 12%<br>(9.4-15%)                    | 27<br>(21-33)       | 2000<br>(1600-2400)   |
| Latvia   | 1995 | Female | 40 to 44 | 87%<br>(80-92%)                | 13%<br>(7.8-20%)         | 2<br>(1.5-2.8)                              | 8.2%<br>(6.3-10%)                    | 11%<br>(7.8-14%)                    | 35<br>(25-46)       | 2200<br>(1600-2700)   |
| Latvia   | 1995 | Female | 45 to 49 | 86%<br>(78-92%)                | 14%<br>(8-22%)           | 1.9<br>(1.4-2.5)                            | 7.1%<br>(5.1-9.4%)                   | 9%<br>(6-12%)                       | 42<br>(28-58)       | 2200<br>(1600-2900)   |
| Latvia   | 1995 | Female | 50 to 54 | 84%<br>(76-90%)                | 16%<br>(10-24%)          | 1.7<br>(1.2-2.3)                            | 5.6%<br>(3.5-7.9%)                   | 6.7%<br>(3.7-10%)                   | 43<br>(24-65)       | 2000<br>(1200-2900)   |

| Location | Year | Sex    | Age      | Prevalence of current drinkers | Prevalence of abstainers | Population average of standard drinks daily | Percent of total attributable deaths | Percent of total attributable DALYs | Attributable deaths | Attributable DALYs      |
|----------|------|--------|----------|--------------------------------|--------------------------|---------------------------------------------|--------------------------------------|-------------------------------------|---------------------|-------------------------|
| Latvia   | 1995 | Female | 55 to 59 | 82%<br>(73-88%)                | 18%<br>(12-27%)          | 1.7<br>(1.2-2.2)                            | 4%<br>(1.9-6.5%)                     | 4.7%<br>(1.6-8.2%)                  | 47<br>(17-81)       | 1900<br>(850-3000)      |
| Latvia   | 1995 | Female | 60 to 64 | 79%<br>(69-86%)                | 21%<br>(14-31%)          | 1.6<br>(1.1-2.2)                            | 1.8%<br>(-0.48-4.5%)                 | 1.9%<br>(-1.2-5.4%)                 | 23<br>(-15-65)      | 860<br>(-210-2100)      |
| Latvia   | 1995 | Female | 65 to 69 | 77%<br>(66-85%)                | 23%<br>(15-34%)          | 1.4<br>(1-1.9)                              | -0.017%<br>(-2.5-2.5%)               | -0.38%<br>(-3.7-2.8%)               | -7<br>(-68-53)      | -9.2<br>(-1400-1400)    |
| Latvia   | 1995 | Female | 70 to 74 | 72%<br>(59-81%)                | 28%<br>(19-41%)          | 1.2<br>(0.76-1.8)                           | -1.1%<br>(-3.8-1.6%)                 | -1.7%<br>(-5-1.9%)                  | -40<br>(-120-45)    | -650<br>(-2100-930)     |
| Latvia   | 1995 | Female | 75 to 79 | 64%<br>(48-76%)                | 36%<br>(24-52%)          | 1.1<br>(0.63-1.6)                           | -1.7%<br>(-4.2-1.1%)                 | -2.3%<br>(-5.5-1.1%)                | -48<br>(-120-25)    | -640<br>(-1600-420)     |
| Latvia   | 1995 | Female | 80 to 84 | 56%<br>(40-69%)                | 44%<br>(31-60%)          | 1<br>(0.6-1.5)                              | -1.7%<br>(-4.4-1.3%)                 | -2.2%<br>(-5.4-1.4%)                | -72<br>(-180-43)    | -700<br>(-1800-530)     |
| Latvia   | 1995 | Female | 85 to 89 | 51%<br>(36-66%)                | 49%<br>(34-64%)          | 1<br>(0.58-1.7)                             | -1.5%<br>(-4.1-1.6%)                 | -1.9%<br>(-5-1.7%)                  | -54<br>(-140-48)    | -360<br>(-1000-400)     |
| Latvia   | 1995 | Female | 90 to 94 | 51%<br>(37-66%)                | 49%<br>(34-63%)          | 1.1<br>(0.62-1.9)                           | -1.2%<br>(-4.4-2.4%)                 | -1.6%<br>(-5.4-2.7%)                | -23<br>(-76-38)     | -100<br>(-370-210)      |
| Latvia   | 1995 | Female | 95 plus  | 53%<br>(34-72%)                | 47%<br>(28-66%)          | 1.3<br>(0.6-2.3)                            | -0.99%<br>(-4.5-3.7%)                | -1.4%<br>(-5.6-4.1%)                | -5.7<br>(-23-17)    | -16<br>(-74-60)         |
| Latvia   | 1995 | Male   | All Ages | 83%<br>(78-87%)                | 17%<br>(13-22%)          | 3.8<br>(3.2-4.4)                            | 14%<br>(11-17%)                      | 12%<br>(8.4-16%)                    | 2400<br>(1600-3100) | 97000<br>(75000-120000) |
| Latvia   | 1995 | Male   | 15 to 19 | 73%<br>(59-84%)                | 27%<br>(16-41%)          | 2.4<br>(1.5-3.5)                            | 9.5%<br>(6-13%)                      | 13%<br>(7.8-19%)                    | 20<br>(12-29)       | 1600<br>(990-2200)      |
| Latvia   | 1995 | Male   | 20 to 24 | 85%<br>(75-92%)                | 15%<br>(8.2-25%)         | 4.6<br>(3.3-6.2)                            | 18%<br>(14-24%)                      | 23%<br>(16-29%)                     | 64<br>(45-85)       | 4700<br>(3400-6000)     |
| Latvia   | 1995 | Male   | 25 to 29 | 89%<br>(81-94%)                | 11%<br>(5.7-19%)         | 5.5<br>(3.9-7.3)                            | 22%<br>(17-28%)                      | 26%<br>(19-33%)                     | 100<br>(73-130)     | 6800<br>(5100-8600)     |
| Latvia   | 1995 | Male   | 30 to 34 | 91%<br>(85-96%)                | 8.5%<br>(4.1-15%)        | 5.8<br>(4.3-7.8)                            | 23%<br>(17-28%)                      | 26%<br>(20-33%)                     | 140<br>(100-180)    | 8500<br>(6600-11000)    |
| Latvia   | 1995 | Male   | 35 to 39 | 92%<br>(87-96%)                | 7.9%<br>(4-13%)          | 6<br>(4.2-8)                                | 22%<br>(17-28%)                      | 26%<br>(19-32%)                     | 190<br>(140-240)    | 11000<br>(7900-13000)   |
| Latvia   | 1995 | Male   | 40 to 44 | 92%<br>(86-96%)                | 7.9%<br>(4-14%)          | 6<br>(4.3-8.1)                              | 22%<br>(16-27%)                      | 25%<br>(18-31%)                     | 240<br>(170-310)    | 12000<br>(8600-15000)   |
| Latvia   | 1995 | Male   | 45 to 49 | 92%<br>(84-96%)                | 8.3%<br>(3.9-16%)        | 5.7<br>(4.1-7.7)                            | 19%<br>(14-25%)                      | 22%<br>(16-28%)                     | 270<br>(190-350)    | 12000<br>(8300-15000)   |
| Latvia   | 1995 | Male   | 50 to 54 | 91%<br>(84-96%)                | 9%<br>(4.4-16%)          | 5.5<br>(3.8-7.6)                            | 17%<br>(12-23%)                      | 19%<br>(12-26%)                     | 320<br>(210-430)    | 12000<br>(8100-16000)   |
| Latvia   | 1995 | Male   | 55 to 59 | 90%<br>(83-95%)                | 10%<br>(5.4-17%)         | 5.3<br>(3.9-7.1)                            | 16%<br>(10-21%)                      | 17%<br>(11-23%)                     | 380<br>(240-510)    | 13000<br>(8100-17000)   |
| Latvia   | 1995 | Male   | 60 to 64 | 89%<br>(81-95%)                | 11%<br>(5.4-19%)         | 4.8<br>(3.4-6.5)                            | 12%<br>(6.7-18%)                     | 13%<br>(7-20%)                      | 320<br>(170-480)    | 9200<br>(4900-13000)    |
| Latvia   | 1995 | Male   | 65 to 69 | 89%<br>(80-94%)                | 11%<br>(5.9-20%)         | 3.7<br>(2.7-4.9)                            | 8%<br>(3.5-13%)                      | 8.6%<br>(3.4-14%)                   | 220<br>(85-360)     | 5200<br>(2300-8500)     |
| Latvia   | 1995 | Male   | 70 to 74 | 86%<br>(77-92%)                | 14%<br>(7.7-23%)         | 2.8<br>(1.9-4)                              | 4%<br>(0.082-9.1%)                   | 4.2%<br>(-0.28-9.8%)                | 80<br>(-5.5-190)    | 1600<br>(33-3600)       |

| Location | Year | Sex    | Age      | Prevalence of current drinkers | Prevalence of abstainers | Population average of standard drinks daily | Percent of total attributable deaths | Percent of total attributable DALYs | Attributable deaths | Attributable DALYs    |
|----------|------|--------|----------|--------------------------------|--------------------------|---------------------------------------------|--------------------------------------|-------------------------------------|---------------------|-----------------------|
| Latvia   | 1995 | Male   | 75 to 79 | 82%<br>(70-91%)                | 18%<br>(9.5-30%)         | 2.3<br>(1.4-3.5)                            | 2%<br>(-1.8-7.1%)                    | 1.9%<br>(-2.5-7.7%)                 | 26<br>(-34-110)     | 450<br>(-410-1600)    |
| Latvia   | 1995 | Male   | 80 to 84 | 77%<br>(63-87%)                | 23%<br>(13-37%)          | 2.1<br>(1.4-3.1)                            | 1%<br>(-2.6-5.4%)                    | 0.78%<br>(-3.4-5.9%)                | 12<br>(-53-92)      | 190<br>(-480-1000)    |
| Latvia   | 1995 | Male   | 85 to 89 | 73%<br>(59-83%)                | 27%<br>(17-41%)          | 2.1<br>(1.3-3.1)                            | 0.53%<br>(-3-4.9%)                   | 0.18%<br>(-3.8-5.1%)                | 1.9<br>(-40-54)     | 48<br>(-260-440)      |
| Latvia   | 1995 | Male   | 90 to 94 | 70%<br>(55-81%)                | 30%<br>(19-45%)          | 2<br>(1.2-3.1)                              | 0.2%<br>(-3.3-5%)                    | -0.22%<br>(-4.4-5.2%)               | -0.91<br>(-18-22)   | 4.8<br>(-80-120)      |
| Latvia   | 1995 | Male   | 95 plus  | 67%<br>(49-82%)                | 33%<br>(18-51%)          | 1.9<br>(0.93-3.3)                           | 0.13%<br>(-3.5-6%)                   | -0.38%<br>(-4.7-6.4%)               | -0.27<br>(-3.3-4.4) | 0.37<br>(-9.7-16)     |
| Latvia   | 2000 | Female | All Ages | 77%<br>(72-81%)                | 23%<br>(19-28%)          | 1.5<br>(1.3-1.7)                            | 2.7%<br>(1.4-4.2%)                   | 0.51%<br>(-1.7-3%)                  | 80<br>(-260-470)    | 12000<br>(6000-19000) |
| Latvia   | 2000 | Female | 15 to 19 | 74%<br>(61-85%)                | 26%<br>(15-39%)          | 1.6<br>(1.1-2.2)                            | 4.4%<br>(3-6%)                       | 8.1%<br>(4.6-12%)                   | 3.3<br>(1.9-5.1)    | 420<br>(290-590)      |
| Latvia   | 2000 | Female | 20 to 24 | 83%<br>(72-90%)                | 17%<br>(9.7-28%)         | 2.2<br>(1.5-3)                              | 7.5%<br>(5.6-9.5%)                   | 10%<br>(6.6-14%)                    | 5<br>(3.2-6.9)      | 750<br>(530-1000)     |
| Latvia   | 2000 | Female | 25 to 29 | 87%<br>(79-92%)                | 13%<br>(8-21%)           | 2.3<br>(1.7-3.1)                            | 8%<br>(6.3-9.7%)                     | 11%<br>(7.9-15%)                    | 6.5<br>(4.7-8.5)    | 920<br>(690-1200)     |
| Latvia   | 2000 | Female | 30 to 34 | 88%<br>(81-93%)                | 12%<br>(6.8-19%)         | 2.4<br>(1.8-3.2)                            | 8.2%<br>(6.7-10%)                    | 12%<br>(9.2-15%)                    | 10<br>(7.9-13)      | 1100<br>(860-1400)    |
| Latvia   | 2000 | Female | 35 to 39 | 87%<br>(80-93%)                | 13%<br>(7.2-20%)         | 2.2<br>(1.7-3)                              | 8.6%<br>(7.1-10%)                    | 13%<br>(10-16%)                     | 19<br>(15-24)       | 1600<br>(1200-1900)   |
| Latvia   | 2000 | Female | 40 to 44 | 86%<br>(79-92%)                | 14%<br>(8.2-21%)         | 2.1<br>(1.5-2.8)                            | 8.3%<br>(6.6-10%)                    | 12%<br>(9.4-15%)                    | 28<br>(21-35)       | 1900<br>(1500-2300)   |
| Latvia   | 2000 | Female | 45 to 49 | 86%<br>(78-92%)                | 14%<br>(8.3-22%)         | 2<br>(1.5-2.6)                              | 7.5%<br>(5.8-9.5%)                   | 11%<br>(7.8-14%)                    | 35<br>(26-45)       | 1900<br>(1500-2400)   |
| Latvia   | 2000 | Female | 50 to 54 | 84%<br>(76-90%)                | 16%<br>(10-24%)          | 1.8<br>(1.3-2.4)                            | 6.3%<br>(4.6-8.3%)                   | 8.5%<br>(5.9-12%)                   | 39<br>(26-53)       | 1800<br>(1300-2400)   |
| Latvia   | 2000 | Female | 55 to 59 | 80%<br>(71-87%)                | 20%<br>(13-29%)          | 1.7<br>(1.2-2.3)                            | 4.7%<br>(2.8-7%)                     | 6.1%<br>(3.1-9.4%)                  | 39<br>(20-61)       | 1600<br>(900-2300)    |
| Latvia   | 2000 | Female | 60 to 64 | 77%<br>(66-85%)                | 23%<br>(15-34%)          | 1.6<br>(1.1-2.2)                            | 2.6%<br>(0.57-4.9%)                  | 3.1%<br>(0.21-6.3%)                 | 31<br>(2.1-62)      | 1100<br>(240-2000)    |
| Latvia   | 2000 | Female | 65 to 69 | 73%<br>(60-83%)                | 27%<br>(17-40%)          | 1.3<br>(0.9-1.8)                            | 0.68%<br>(-1.4-2.8%)                 | 0.55%<br>(-2.3-3.5%)                | 7.3<br>(-30-46)     | 300<br>(-610-1300)    |
| Latvia   | 2000 | Female | 70 to 74 | 64%<br>(50-76%)                | 36%<br>(24-50%)          | 1<br>(0.61-1.5)                             | -0.34%<br>(-2.3-1.8%)                | -0.68%<br>(-3.4-2.2%)               | -14<br>(-72-46)     | -180<br>(-1300-940)   |
| Latvia   | 2000 | Female | 75 to 79 | 56%<br>(40-70%)                | 44%<br>(30-60%)          | 0.89<br>(0.53-1.4)                          | -0.91%<br>(-2.9-1.3%)                | -1.3%<br>(-3.8-1.5%)                | -36<br>(-100-39)    | -450<br>(-1400-640)   |
| Latvia   | 2000 | Female | 80 to 84 | 52%<br>(36-66%)                | 48%<br>(34-64%)          | 0.95<br>(0.57-1.4)                          | -1.2%<br>(-3.5-1.3%)                 | -1.6%<br>(-4.4-1.3%)                | -34<br>(-94-28)     | -320<br>(-960-370)    |
| Latvia   | 2000 | Female | 85 to 89 | 50%<br>(35-65%)                | 50%<br>(35-65%)          | 1<br>(0.59-1.7)                             | -1.1%<br>(-3.6-1.7%)                 | -1.5%<br>(-4.5-1.8%)                | -39<br>(-110-45)    | -250<br>(-800-380)    |
| Latvia   | 2000 | Female | 90 to 94 | 49%<br>(34-64%)                | 51%<br>(36-66%)          | 1.1<br>(0.61-1.9)                           | -0.84%<br>(-3.7-2.6%)                | -1.2%<br>(-4.7-2.9%)                | -17<br>(-64-41)     | -71<br>(-310-220)     |

| Location | Year | Sex    | Age      | Prevalence of current drinkers | Prevalence of abstainers | Population average of standard drinks daily | Percent of total attributable deaths | Percent of total attributable DALYs | Attributable deaths | Attributable DALYs     |
|----------|------|--------|----------|--------------------------------|--------------------------|---------------------------------------------|--------------------------------------|-------------------------------------|---------------------|------------------------|
| Latvia   | 2000 | Female | 95 plus  | 51%<br>(33-71%)                | 49%<br>(29-67%)          | 1.3<br>(0.61-2.3)                           | -0.56%<br>(-4.1-3.9%)                | -0.91%<br>(-5-4.4%)                 | -3.8<br>(-21-18)    | -9.4<br>(-68-66)       |
| Latvia   | 2000 | Male   | All Ages | 84%<br>(80-88%)                | 16%<br>(12-20%)          | 4.2<br>(3.7-4.8)                            | 14%<br>(12-17%)                      | 12%<br>(9-16%)                      | 1900<br>(1400-2500) | 77000<br>(62000-92000) |
| Latvia   | 2000 | Male   | 15 to 19 | 75%<br>(63-85%)                | 25%<br>(15-37%)          | 2.7<br>(1.8-3.8)                            | 9.2%<br>(6.1-13%)                    | 14%<br>(8.6-20%)                    | 16<br>(9.9-23)      | 1300<br>(860-1800)     |
| Latvia   | 2000 | Male   | 20 to 24 | 87%<br>(78-93%)                | 13%<br>(7.2-22%)         | 5<br>(3.6-6.7)                              | 19%<br>(14-24%)                      | 24%<br>(18-31%)                     | 49<br>(35-64)       | 3600<br>(2700-4600)    |
| Latvia   | 2000 | Male   | 25 to 29 | 90%<br>(84-95%)                | 9.7%<br>(5.4-16%)        | 5.9<br>(4.2-7.7)                            | 22%<br>(17-27%)                      | 28%<br>(21-35%)                     | 69<br>(52-88)       | 4900<br>(3800-6000)    |
| Latvia   | 2000 | Male   | 30 to 34 | 92%<br>(86-96%)                | 8%<br>(4-14%)            | 6.2<br>(4.6-8.1)                            | 23%<br>(18-27%)                      | 28%<br>(22-34%)                     | 88<br>(69-110)      | 5600<br>(4500-6800)    |
| Latvia   | 2000 | Male   | 35 to 39 | 92%<br>(87-96%)                | 7.6%<br>(3.8-13%)        | 6.4<br>(4.7-8.5)                            | 23%<br>(18-27%)                      | 28%<br>(22-34%)                     | 130<br>(100-160)    | 7500<br>(6000-9000)    |
| Latvia   | 2000 | Male   | 40 to 44 | 93%<br>(88-96%)                | 7.4%<br>(3.9-12%)        | 6.4<br>(4.7-8.4)                            | 23%<br>(18-27%)                      | 27%<br>(21-33%)                     | 190<br>(150-230)    | 9400<br>(7400-11000)   |
| Latvia   | 2000 | Male   | 45 to 49 | 92%<br>(85-96%)                | 7.7%<br>(3.8-15%)        | 6.1<br>(4.4-8.1)                            | 21%<br>(16-26%)                      | 25%<br>(19-30%)                     | 210<br>(160-270)    | 9400<br>(7200-12000)   |
| Latvia   | 2000 | Male   | 50 to 54 | 92%<br>(85-96%)                | 8.3%<br>(4.3-15%)        | 5.8<br>(4.2-7.9)                            | 19%<br>(13-23%)                      | 21%<br>(15-27%)                     | 250<br>(170-310)    | 9400<br>(6800-12000)   |
| Latvia   | 2000 | Male   | 55 to 59 | 91%<br>(84-95%)                | 9.3%<br>(5.1-16%)        | 5.8<br>(4.3-7.4)                            | 17%<br>(12-22%)                      | 19%<br>(13-25%)                     | 270<br>(190-350)    | 9200<br>(6300-12000)   |
| Latvia   | 2000 | Male   | 60 to 64 | 90%<br>(82-95%)                | 10%<br>(5.5-18%)         | 5.1<br>(3.7-7)                              | 13%<br>(8-19%)                       | 15%<br>(8.9-21%)                    | 300<br>(180-430)    | 8700<br>(5300-12000)   |
| Latvia   | 2000 | Male   | 65 to 69 | 89%<br>(80-94%)                | 11%<br>(5.7-20%)         | 3.9<br>(2.9-5.1)                            | 8.8%<br>(4.5-14%)                    | 9.7%<br>(4.6-15%)                   | 200<br>(94-320)     | 4900<br>(2400-7600)    |
| Latvia   | 2000 | Male   | 70 to 74 | 85%<br>(75-92%)                | 15%<br>(8.2-25%)         | 2.8<br>(1.9-3.9)                            | 4.4%<br>(0.65-9.1%)                  | 4.7%<br>(0.27-10%)                  | 100<br>(5.9-220)    | 2100<br>(310-4300)     |
| Latvia   | 2000 | Male   | 75 to 79 | 81%<br>(68-90%)                | 19%<br>(9.8-32%)         | 2.3<br>(1.4-3.5)                            | 2.3%<br>(-1.2-6.8%)                  | 2.3%<br>(-1.9-7.6%)                 | 34<br>(-28-110)     | 580<br>(-300-1700)     |
| Latvia   | 2000 | Male   | 80 to 84 | 76%<br>(62-86%)                | 24%<br>(14-38%)          | 2.2<br>(1.4-3.1)                            | 1.4%<br>(-2.1-5.7%)                  | 1.2%<br>(-2.9-6.2%)                 | 11<br>(-28-58)      | 170<br>(-240-680)      |
| Latvia   | 2000 | Male   | 85 to 89 | 71%<br>(58-82%)                | 29%<br>(18-42%)          | 2.1<br>(1.3-3.1)                            | 0.84%<br>(-2.6-4.9%)                 | 0.5%<br>(-3.5-5.3%)                 | 4.3<br>(-30-46)     | 62<br>(-190-370)       |
| Latvia   | 2000 | Male   | 90 to 94 | 69%<br>(55-80%)                | 31%<br>(20-45%)          | 2<br>(1.2-3.2)                              | 0.58%<br>(-2.9-5.2%)                 | 0.2%<br>(-3.8-5.7%)                 | 0.83<br>(-16-23)    | 14<br>(-72-130)        |
| Latvia   | 2000 | Male   | 95 plus  | 66%<br>(48-82%)                | 34%<br>(18-52%)          | 2<br>(0.96-3.4)                             | 0.58%<br>(-2.9-6%)                   | 0.12%<br>(-4-6.4%)                  | 0.12<br>(-3.9-6.2)  | 2.2<br>(-11-23)        |
| Latvia   | 2005 | Female | All Ages | 78%<br>(75-82%)                | 22%<br>(18-25%)          | 1.7<br>(1.5-2)                              | 3%<br>(1.6-4.5%)                     | 1%<br>(-1.3-3.5%)                   | 160<br>(-210-560)   | 13000<br>(6900-20000)  |
| Latvia   | 2005 | Female | 15 to 19 | 77%<br>(66-86%)                | 23%<br>(14-34%)          | 1.8<br>(1.3-2.5)                            | 4.5%<br>(3.1-5.9%)                   | 8.4%<br>(4.9-13%)                   | 3.1<br>(1.8-4.8)    | 410<br>(280-560)       |
| Latvia   | 2005 | Female | 20 to 24 | 85%<br>(75-91%)                | 15%<br>(8.6-25%)         | 2.5<br>(1.8-3.4)                            | 7.5%<br>(5.7-9.5%)                   | 11%<br>(7.2-15%)                    | 4.4<br>(2.9-6)      | 740<br>(530-1000)      |

| Location | Year | Sex    | Age      | Prevalence of current drinkers | Prevalence of abstainers | Population average of standard drinks daily | Percent of total attributable deaths | Percent of total attributable DALYs | Attributable deaths | Attributable DALYs     |
|----------|------|--------|----------|--------------------------------|--------------------------|---------------------------------------------|--------------------------------------|-------------------------------------|---------------------|------------------------|
| Latvia   | 2005 | Female | 25 to 29 | 87%<br>(80-92%)                | 13%<br>(7.8-20%)         | 2.6<br>(1.9-3.4)                            | 8%<br>(6.5-9.7%)                     | 12%<br>(8.5-15%)                    | 5.4<br>(3.9-7.1)    | 820<br>(610-1100)      |
| Latvia   | 2005 | Female | 30 to 34 | 88%<br>(82-93%)                | 12%<br>(6.9-18%)         | 2.6<br>(2-3.5)                              | 8.3%<br>(6.7-9.9%)                   | 13%<br>(9.9-16%)                    | 9.9<br>(7.6-12)     | 1100<br>(830-1300)     |
| Latvia   | 2005 | Female | 35 to 39 | 88%<br>(82-93%)                | 12%<br>(7.1-18%)         | 2.5<br>(1.9-3.3)                            | 8.9%<br>(7.4-11%)                    | 14%<br>(11-17%)                     | 17<br>(13-20)       | 1400<br>(1100-1700)    |
| Latvia   | 2005 | Female | 40 to 44 | 88%<br>(82-92%)                | 12%<br>(7.6-18%)         | 2.4<br>(1.8-3.2)                            | 9.2%<br>(7.4-11%)                    | 14%<br>(11-17%)                     | 30<br>(24-36)       | 1900<br>(1500-2300)    |
| Latvia   | 2005 | Female | 45 to 49 | 87%<br>(80-92%)                | 13%<br>(7.9-20%)         | 2.2<br>(1.7-2.9)                            | 8.1%<br>(6.4-10%)                    | 12%<br>(9.3-15%)                    | 39<br>(31-49)       | 2100<br>(1700-2600)    |
| Latvia   | 2005 | Female | 50 to 54 | 85%<br>(78-90%)                | 15%<br>(10-22%)          | 2<br>(1.5-2.6)                              | 7%<br>(5.2-9.1%)                     | 9.7%<br>(7-13%)                     | 44<br>(32-58)       | 2000<br>(1500-2600)    |
| Latvia   | 2005 | Female | 55 to 59 | 81%<br>(73-87%)                | 19%<br>(13-27%)          | 1.9<br>(1.4-2.5)                            | 5.4%<br>(3.4-7.6%)                   | 7%<br>(4.1-10%)                     | 43<br>(26-65)       | 1700<br>(1000-2400)    |
| Latvia   | 2005 | Female | 60 to 64 | 79%<br>(70-86%)                | 21%<br>(14-30%)          | 1.8<br>(1.3-2.5)                            | 3.4%<br>(1.2-5.9%)                   | 4.3%<br>(1.2-7.8%)                  | 37<br>(10-67)       | 1200<br>(420-2100)     |
| Latvia   | 2005 | Female | 65 to 69 | 76%<br>(67-83%)                | 24%<br>(17-33%)          | 1.6<br>(1.2-2.1)                            | 1.2%<br>(-0.97-3.5%)                 | 1.3%<br>(-1.8-4.5%)                 | 18<br>(-24-60)      | 540<br>(-430-1600)     |
| Latvia   | 2005 | Female | 70 to 74 | 67%<br>(58-75%)                | 33%<br>(25-42%)          | 1.2<br>(0.81-1.7)                           | -0.0026%<br>(-2.2-2.5%)              | -0.2%<br>(-3.2-3%)                  | -3.8<br>(-60-56)    | -1.2<br>(-1100-1200)   |
| Latvia   | 2005 | Female | 75 to 79 | 55%<br>(41-68%)                | 45%<br>(32-59%)          | 0.97<br>(0.58-1.4)                          | -0.5%<br>(-2.5-1.8%)                 | -0.82%<br>(-3.3-2%)                 | -23<br>(-96-57)     | -260<br>(-1300-940)    |
| Latvia   | 2005 | Female | 80 to 84 | 50%<br>(35-65%)                | 50%<br>(35-65%)          | 1<br>(0.59-1.5)                             | -0.66%<br>(-2.9-1.8%)                | -0.98%<br>(-3.7-1.9%)               | -32<br>(-120-59)    | -280<br>(-1200-750)    |
| Latvia   | 2005 | Female | 85 to 89 | 49%<br>(34-64%)                | 51%<br>(36-66%)          | 1.1<br>(0.63-1.8)                           | -0.66%<br>(-3.2-2.2%)                | -0.99%<br>(-4-2.4%)                 | -19<br>(-76-46)     | -110<br>(-560-390)     |
| Latvia   | 2005 | Female | 90 to 94 | 49%<br>(35-64%)                | 51%<br>(36-65%)          | 1.2<br>(0.67-2.1)                           | -0.37%<br>(-3.4-3.4%)                | -0.66%<br>(-4.2-3.8%)               | -9.3<br>(-60-54)    | -32<br>(-290-280)      |
| Latvia   | 2005 | Female | 95 plus  | 51%<br>(32-70%)                | 49%<br>(30-68%)          | 1.4<br>(0.65-2.5)                           | -0.017%<br>(-3.8-4.9%)               | -0.28%<br>(-4.7-5.5%)               | -1.4<br>(-24-27)    | -0.35<br>(-76-93)      |
| Latvia   | 2005 | Male   | All Ages | 86%<br>(83-90%)                | 14%<br>(10-17%)          | 4.9<br>(4.3-5.5)                            | 15%<br>(12-18%)                      | 13%<br>(9.5-17%)                    | 2100<br>(1500-2800) | 81000<br>(66000-96000) |
| Latvia   | 2005 | Male   | 15 to 19 | 79%<br>(69-87%)                | 21%<br>(13-31%)          | 3.1<br>(2.2-4.4)                            | 9.2%<br>(6.3-13%)                    | 15%<br>(9.9-21%)                    | 13<br>(8.5-18)      | 1100<br>(760-1500)     |
| Latvia   | 2005 | Male   | 20 to 24 | 88%<br>(80-93%)                | 12%<br>(6.7-20%)         | 5.7<br>(4.1-7.4)                            | 19%<br>(15-25%)                      | 27%<br>(20-34%)                     | 43<br>(32-56)       | 3300<br>(2500-4100)    |
| Latvia   | 2005 | Male   | 25 to 29 | 91%<br>(86-95%)                | 8.7%<br>(4.8-14%)        | 6.6<br>(4.8-8.7)                            | 23%<br>(18-28%)                      | 30%<br>(23-37%)                     | 61<br>(47-75)       | 4300<br>(3400-5200)    |
| Latvia   | 2005 | Male   | 30 to 34 | 93%<br>(88-96%)                | 7.1%<br>(3.6-12%)        | 7<br>(5.2-9.2)                              | 24%<br>(20-28%)                      | 30%<br>(25-36%)                     | 89<br>(71-110)      | 5700<br>(4600-6700)    |
| Latvia   | 2005 | Male   | 35 to 39 | 93%<br>(89-96%)                | 6.9%<br>(3.6-11%)        | 7.2<br>(5.3-9.5)                            | 24%<br>(20-29%)                      | 30%<br>(24-35%)                     | 120<br>(98-150)     | 7000<br>(5600-8300)    |
| Latvia   | 2005 | Male   | 40 to 44 | 93%<br>(89-96%)                | 6.8%<br>(3.6-11%)        | 7.3<br>(5.3-9.6)                            | 24%<br>(20-28%)                      | 29%<br>(23-34%)                     | 190<br>(150-220)    | 9200<br>(7300-11000)   |



| Location | Year | Sex    | Age      | Prevalence of current drinkers | Prevalence of abstainers | Population average of standard drinks daily | Percent of total attributable deaths | Percent of total attributable DALYs | Attributable deaths | Attributable DALYs    |
|----------|------|--------|----------|--------------------------------|--------------------------|---------------------------------------------|--------------------------------------|-------------------------------------|---------------------|-----------------------|
| Latvia   | 2005 | Male   | 45 to 49 | 93%<br>(87-97%)                | 6.9%<br>(3.5-13%)        | 6.9<br>(5.1-9.1)                            | 22%<br>(17-27%)                      | 26%<br>(21-32%)                     | 240<br>(180-290)    | 10000<br>(8200-13000) |
| Latvia   | 2005 | Male   | 50 to 54 | 93%<br>(87-96%)                | 7.2%<br>(3.8-13%)        | 6.7<br>(4.8-8.9)                            | 20%<br>(15-25%)                      | 23%<br>(18-29%)                     | 270<br>(200-340)    | 10000<br>(7800-13000) |
| Latvia   | 2005 | Male   | 55 to 59 | 92%<br>(86-96%)                | 8.2%<br>(4.4-14%)        | 6.5<br>(4.9-8.5)                            | 18%<br>(14-23%)                      | 21%<br>(15-26%)                     | 290<br>(210-370)    | 9600<br>(7100-12000)  |
| Latvia   | 2005 | Male   | 60 to 64 | 91%<br>(85-95%)                | 8.9%<br>(4.7-15%)        | 5.9<br>(4.2-8)                              | 15%<br>(9.6-20%)                     | 17%<br>(10-23%)                     | 310<br>(180-420)    | 8700<br>(5500-12000)  |
| Latvia   | 2005 | Male   | 65 to 69 | 90%<br>(83-95%)                | 9.7%<br>(5-17%)          | 4.6<br>(3.5-6)                              | 11%<br>(5.6-15%)                     | 12%<br>(5.9-17%)                    | 260<br>(130-390)    | 6400<br>(3400-9200)   |
| Latvia   | 2005 | Male   | 70 to 74 | 88%<br>(80-93%)                | 12%<br>(6.9-20%)         | 3.4<br>(2.4-4.6)                            | 5.8%<br>(1.2-11%)                    | 6.2%<br>(0.89-12%)                  | 140<br>(20-270)     | 2800<br>(560-5200)    |
| Latvia   | 2005 | Male   | 75 to 79 | 82%<br>(71-91%)                | 18%<br>(9.2-29%)         | 2.6<br>(1.7-3.9)                            | 3.2%<br>(-0.85-8.2%)                 | 3.3%<br>(-1.3-8.9%)                 | 70<br>(-28-190)     | 1100<br>(-300-2900)   |
| Latvia   | 2005 | Male   | 80 to 84 | 75%<br>(60-86%)                | 25%<br>(14-40%)          | 2.3<br>(1.5-3.3)                            | 2.1%<br>(-1.4-6.3%)                  | 1.9%<br>(-2.2-6.8%)                 | 25<br>(-28-86)      | 320<br>(-230-980)     |
| Latvia   | 2005 | Male   | 85 to 89 | 71%<br>(57-82%)                | 29%<br>(18-43%)          | 2.3<br>(1.4-3.4)                            | 1.4%<br>(-2.5-5.8%)                  | 1.2%<br>(-2.8-6.3%)                 | 7.4<br>(-18-40)     | 79<br>(-110-320)      |
| Latvia   | 2005 | Male   | 90 to 94 | 68%<br>(54-80%)                | 32%<br>(20-46%)          | 2.2<br>(1.3-3.5)                            | 1%<br>(-2.5-6.2%)                    | 0.72%<br>(-3.5-6.7%)                | 2.7<br>(-13-25)     | 23<br>(-56-140)       |
| Latvia   | 2005 | Male   | 95 plus  | 66%<br>(48-81%)                | 34%<br>(19-52%)          | 2.1<br>(1-3.7)                              | 0.96%<br>(-2.9-6.7%)                 | 0.55%<br>(-4.7-3%)                  | 0.61<br>(-4.4-8.1)  | 4.3<br>(-13-30)       |
| Latvia   | 2010 | Female | All Ages | 78%<br>(74-81%)                | 22%<br>(19-26%)          | 1.9<br>(1.6-2.2)                            | 3.4%<br>(1.9-4.9%)                   | 1.6%<br>(-1-4.2%)                   | 230<br>(-150-630)   | 13000<br>(7100-20000) |
| Latvia   | 2010 | Female | 15 to 19 | 76%<br>(65-86%)                | 24%<br>(14-35%)          | 2<br>(1.4-2.7)                              | 4.1%<br>(2.9-5.4%)                   | 8.2%<br>(4.9-13%)                   | 1.5<br>(0.89-2.4)   | 250<br>(170-350)      |
| Latvia   | 2010 | Female | 20 to 24 | 84%<br>(74-91%)                | 16%<br>(8.9-26%)         | 2.7<br>(1.9-3.8)                            | 7.2%<br>(5.4-9.1%)                   | 11%<br>(7.2-15%)                    | 2.9<br>(1.9-4)      | 620<br>(430-870)      |
| Latvia   | 2010 | Female | 25 to 29 | 87%<br>(79-92%)                | 13%<br>(8.2-21%)         | 2.7<br>(2-3.6)                              | 7.7%<br>(6.1-9.4%)                   | 11%<br>(8.4-14%)                    | 4.2<br>(3.1-5.5)    | 730<br>(530-960)      |
| Latvia   | 2010 | Female | 30 to 34 | 88%<br>(81-93%)                | 12%<br>(7.2-19%)         | 2.8<br>(2-3.6)                              | 8.1%<br>(6.6-9.8%)                   | 13%<br>(11-16%)                     | 7.3<br>(5.7-9.1)    | 860<br>(670-1100)     |
| Latvia   | 2010 | Female | 35 to 39 | 88%<br>(82-93%)                | 12%<br>(7-18%)           | 2.7<br>(2-3.6)                              | 8.6%<br>(7-10%)                      | 14%<br>(11-17%)                     | 14<br>(12-18)       | 1200<br>(970-1500)    |
| Latvia   | 2010 | Female | 40 to 44 | 88%<br>(82-92%)                | 12%<br>(7.5-18%)         | 2.6<br>(1.9-3.5)                            | 9.7%<br>(7.8-12%)                    | 17%<br>(13-20%)                     | 26<br>(20-31)       | 1600<br>(1300-1900)   |
| Latvia   | 2010 | Female | 45 to 49 | 87%<br>(80-92%)                | 13%<br>(8.2-20%)         | 2.4<br>(1.8-3.1)                            | 8.9%<br>(7.1-11%)                    | 15%<br>(11-17%)                     | 37<br>(29-45)       | 2000<br>(1500-2400)   |
| Latvia   | 2010 | Female | 50 to 54 | 84%<br>(78-90%)                | 16%<br>(10-22%)          | 2.1<br>(1.6-2.8)                            | 7.8%<br>(5.9-10%)                    | 12%<br>(8.9-15%)                    | 47<br>(35-60)       | 2100<br>(1600-2700)   |
| Latvia   | 2010 | Female | 55 to 59 | 81%<br>(73-87%)                | 19%<br>(13-27%)          | 2<br>(1.5-2.7)                              | 6.4%<br>(4.3-8.5%)                   | 9.1%<br>(6-12%)                     | 49<br>(32-66)       | 1800<br>(1200-2500)   |
| Latvia   | 2010 | Female | 60 to 64 | 79%<br>(70-86%)                | 21%<br>(14-30%)          | 1.9<br>(1.4-2.7)                            | 4.5%<br>(2.2-6.9%)                   | 6.2%<br>(3-9.7%)                    | 46<br>(22-71)       | 1400<br>(720-2200)    |

| Location | Year | Sex    | Age      | Prevalence of current drinkers | Prevalence of abstainers | Population average of standard drinks daily | Percent of total attributable deaths | Percent of total attributable DALYs | Attributable deaths | Attributable DALYs     |
|----------|------|--------|----------|--------------------------------|--------------------------|---------------------------------------------|--------------------------------------|-------------------------------------|---------------------|------------------------|
| Latvia   | 2010 | Female | 65 to 69 | 76%<br>(67-84%)                | 24%<br>(16-33%)          | 1.7<br>(1.3-2.2)                            | 2%<br>(-0.14-4.3%)                   | 2.6%<br>(-0.5-5.7%)                 | 28<br>(-5.5-61)     | 760<br>(-54-1600)      |
| Latvia   | 2010 | Female | 70 to 74 | 69%<br>(59-77%)                | 31%<br>(23-41%)          | 1.4<br>(0.91-1.9)                           | 0.54%<br>(-1.7-3%)                   | 0.55%<br>(-2.4-3.8%)                | 9.4<br>(-43-67)     | 250<br>(-790-1400)     |
| Latvia   | 2010 | Female | 75 to 79 | 61%<br>(47-73%)                | 39%<br>(27-53%)          | 1.2<br>(0.76-1.8)                           | -0.24%<br>(-2.6-2.4%)                | -0.54%<br>(-3.6-2.8%)               | -13<br>(-84-65)     | -110<br>(-1200-1100)   |
| Latvia   | 2010 | Female | 80 to 84 | 54%<br>(37-68%)                | 46%<br>(32-63%)          | 1.2<br>(0.72-1.8)                           | -0.27%<br>(-2.7-2.3%)                | -0.56%<br>(-3.5-2.7%)               | -18<br>(-110-86)    | -120<br>(-1200-1000)   |
| Latvia   | 2010 | Female | 85 to 89 | 49%<br>(34-64%)                | 51%<br>(36-66%)          | 1.2<br>(0.68-1.9)                           | -0.12%<br>(-2.6-3%)                  | -0.39%<br>(-3.5-3.5%)               | -10<br>(-92-91)     | -28<br>(-650-730)      |
| Latvia   | 2010 | Female | 90 to 94 | 48%<br>(34-64%)                | 52%<br>(36-66%)          | 1.3<br>(0.71-2.3)                           | 0.17%<br>(-2.8-4.1%)                 | -0.066%<br>(-3.6-4.6%)              | -0.68<br>(-36-46)   | 11<br>(-180-250)       |
| Latvia   | 2010 | Female | 95 plus  | 50%<br>(31-70%)                | 50%<br>(30-69%)          | 1.5<br>(0.68-2.7)                           | 0.56%<br>(-3.1-5.6%)                 | 0.35%<br>(-4.2-6.5%)                | 1.6<br>(-19-29)     | 10<br>(-60-100)        |
| Latvia   | 2010 | Male   | All Ages | 86%<br>(83-89%)                | 14%<br>(11-17%)          | 5.3<br>(4.5-6.1)                            | 16%<br>(14-19%)                      | 15%<br>(11-18%)                     | 2000<br>(1500-2600) | 74000<br>(61000-86000) |
| Latvia   | 2010 | Male   | 15 to 19 | 78%<br>(69-87%)                | 22%<br>(13-31%)          | 3.4<br>(2.3-4.7)                            | 9.3%<br>(6.3-13%)                    | 16%<br>(10-22%)                     | 8.9<br>(5.7-12)     | 760<br>(520-1000)      |
| Latvia   | 2010 | Male   | 20 to 24 | 88%<br>(80-93%)                | 12%<br>(7-20%)           | 6.1<br>(4.3-8)                              | 19%<br>(14-24%)                      | 29%<br>(22-37%)                     | 32<br>(23-41)       | 2500<br>(1900-3100)    |
| Latvia   | 2010 | Male   | 25 to 29 | 91%<br>(86-95%)                | 9%<br>(5-14%)            | 7.1<br>(5-9.3)                              | 23%<br>(18-28%)                      | 33%<br>(26-40%)                     | 50<br>(39-61)       | 3600<br>(2900-4400)    |
| Latvia   | 2010 | Male   | 30 to 34 | 93%<br>(88-96%)                | 7.2%<br>(3.7-12%)        | 7.5<br>(5.5-9.8)                            | 25%<br>(21-30%)                      | 35%<br>(28-41%)                     | 69<br>(55-82)       | 4500<br>(3700-5300)    |
| Latvia   | 2010 | Male   | 35 to 39 | 93%<br>(89-96%)                | 7%<br>(3.7-11%)          | 7.7<br>(5.6-10)                             | 26%<br>(21-31%)                      | 35%<br>(29-40%)                     | 100<br>(83-120)     | 5800<br>(4700-6800)    |
| Latvia   | 2010 | Male   | 40 to 44 | 93%<br>(88-96%)                | 7%<br>(3.8-12%)          | 7.7<br>(5.6-10)                             | 26%<br>(22-31%)                      | 34%<br>(28-39%)                     | 140<br>(120-170)    | 7200<br>(5800-8300)    |
| Latvia   | 2010 | Male   | 45 to 49 | 93%<br>(86-96%)                | 7.2%<br>(3.7-14%)        | 7.3<br>(5.4-9.9)                            | 26%<br>(21-30%)                      | 32%<br>(26-37%)                     | 220<br>(180-260)    | 9700<br>(7800-11000)   |
| Latvia   | 2010 | Male   | 50 to 54 | 92%<br>(86-96%)                | 7.6%<br>(4.2-14%)        | 7.1<br>(5.1-9.7)                            | 23%<br>(18-27%)                      | 28%<br>(22-33%)                     | 270<br>(210-330)    | 10000<br>(8100-12000)  |
| Latvia   | 2010 | Male   | 55 to 59 | 91%<br>(86-95%)                | 8.6%<br>(4.9-14%)        | 7<br>(5.2-9.1)                              | 21%<br>(16-25%)                      | 24%<br>(19-29%)                     | 290<br>(230-360)    | 9700<br>(7600-12000)   |
| Latvia   | 2010 | Male   | 60 to 64 | 91%<br>(84-95%)                | 9.3%<br>(5.1-16%)        | 6.3<br>(4.4-8.5)                            | 17%<br>(12-22%)                      | 20%<br>(14-26%)                     | 290<br>(200-370)    | 8200<br>(5800-10000)   |
| Latvia   | 2010 | Male   | 65 to 69 | 90%<br>(83-95%)                | 9.9%<br>(5.1-17%)        | 4.9<br>(3.7-6.4)                            | 12%<br>(7.7-17%)                     | 14%<br>(8.5-19%)                    | 250<br>(150-340)    | 6000<br>(3700-8100)    |
| Latvia   | 2010 | Male   | 70 to 74 | 88%<br>(81-93%)                | 12%<br>(6.9-19%)         | 3.7<br>(2.6-5)                              | 7.2%<br>(2.6-12%)                    | 8%<br>(2.5-14%)                     | 170<br>(53-290)     | 3300<br>(1200-5600)    |
| Latvia   | 2010 | Male   | 75 to 79 | 83%<br>(72-91%)                | 17%<br>(9.3-28%)         | 2.9<br>(1.9-4.3)                            | 4.2%<br>(-0.076-9.4%)                | 4.4%<br>(-0.44-10%)                 | 84<br>(-8.7-200)    | 1400<br>(-25-3000)     |
| Latvia   | 2010 | Male   | 80 to 84 | 76%<br>(61-86%)                | 24%<br>(14-39%)          | 2.6<br>(1.6-3.7)                            | 2.9%<br>(-0.53-7.4%)                 | 2.9%<br>(-1.2-8.1%)                 | 46<br>(-19-130)     | 580<br>(-100-1400)     |

| Location | Year | Sex    | Age      | Prevalence of current drinkers | Prevalence of abstainers | Population average of standard drinks daily | Percent of total attributable deaths | Percent of total attributable DALYs | Attributable deaths | Attributable DALYs     |
|----------|------|--------|----------|--------------------------------|--------------------------|---------------------------------------------|--------------------------------------|-------------------------------------|---------------------|------------------------|
| Latvia   | 2010 | Male   | 85 to 89 | 71%<br>(56-82%)                | 29%<br>(18-44%)          | 2.5<br>(1.5-3.7)                            | 2.3%<br>(-1.2-6.9%)                  | 2.2%<br>(-2.1-7.7%)                 | 16<br>(-16-58)      | 150<br>(-82-470)       |
| Latvia   | 2010 | Male   | 90 to 94 | 68%<br>(54-80%)                | 32%<br>(20-46%)          | 2.4<br>(1.4-3.9)                            | 1.7%<br>(-2-7.3%)                    | 1.5%<br>(-2.9-8.1%)                 | 3.7<br>(-7.4-20)    | 27<br>(-31-110)        |
| Latvia   | 2010 | Male   | 95 plus  | 66%<br>(48-81%)                | 34%<br>(19-52%)          | 2.3<br>(1.1-4)                              | 1.6%<br>(-2.5-7.6%)                  | 1.2%<br>(-3.8-8.4%)                 | 1<br>(-3.2-7.2)     | 5.6<br>(-8.9-26)       |
| Latvia   | 2016 | Female | All Ages | 76%<br>(72-80%)                | 24%<br>(20-28%)          | 1.9<br>(1.4-2.4)                            | 3.4%<br>(1.7-5.4%)                   | 1.8%<br>(-1.1-5.5%)                 | 270<br>(-170-820)   | 13000<br>(6100-21000)  |
| Latvia   | 2016 | Female | 15 to 19 | 72%<br>(58-84%)                | 28%<br>(16-42%)          | 1.9<br>(1.2-2.9)                            | 3.9%<br>(2.7-5.2%)                   | 8.2%<br>(4.6-13%)                   | 0.62<br>(0.34-0.99) | 120<br>(83-180)        |
| Latvia   | 2016 | Female | 20 to 24 | 82%<br>(70-90%)                | 18%<br>(10-30%)          | 2.7<br>(1.7-4.2)                            | 7.3%<br>(5.5-9.5%)                   | 11%<br>(6.9-15%)                    | 1.9<br>(1.2-2.8)    | 460<br>(310-640)       |
| Latvia   | 2016 | Female | 25 to 29 | 86%<br>(77-92%)                | 14%<br>(8.4-23%)         | 2.8<br>(1.9-4)                              | 7.8%<br>(6.1-9.8%)                   | 11%<br>(8.1-15%)                    | 3.6<br>(2.3-5.1)    | 700<br>(500-930)       |
| Latvia   | 2016 | Female | 30 to 34 | 87%<br>(78-93%)                | 13%<br>(7-22%)           | 2.9<br>(1.9-4)                              | 7.9%<br>(6.3-9.8%)                   | 13%<br>(9.8-16%)                    | 5.9<br>(4.1-8.1)    | 760<br>(570-1000)      |
| Latvia   | 2016 | Female | 35 to 39 | 87%<br>(79-93%)                | 13%<br>(7.2-21%)         | 2.8<br>(1.9-4)                              | 8.7%<br>(6.9-11%)                    | 15%<br>(12-19%)                     | 11<br>(7.8-15)      | 960<br>(730-1200)      |
| Latvia   | 2016 | Female | 40 to 44 | 86%<br>(79-92%)                | 14%<br>(8-21%)           | 2.7<br>(1.8-3.9)                            | 9.5%<br>(7.5-12%)                    | 17%<br>(14-21%)                     | 22<br>(16-28)       | 1400<br>(1100-1800)    |
| Latvia   | 2016 | Female | 45 to 49 | 86%<br>(77-92%)                | 14%<br>(8.3-23%)         | 2.4<br>(1.7-3.5)                            | 8.9%<br>(6.9-11%)                    | 15%<br>(12-19%)                     | 29<br>(21-38)       | 1500<br>(1100-1900)    |
| Latvia   | 2016 | Female | 50 to 54 | 84%<br>(75-90%)                | 16%<br>(10-25%)          | 2.2<br>(1.5-3.1)                            | 8%<br>(5.9-10%)                      | 13%<br>(9.6-17%)                    | 43<br>(30-58)       | 1900<br>(1400-2500)    |
| Latvia   | 2016 | Female | 55 to 59 | 81%<br>(72-88%)                | 19%<br>(12-28%)          | 2.1<br>(1.4-3.1)                            | 6.7%<br>(4.5-9.1%)                   | 10%<br>(6.8-14%)                    | 49<br>(32-70)       | 1900<br>(1200-2600)    |
| Latvia   | 2016 | Female | 60 to 64 | 78%<br>(68-86%)                | 22%<br>(14-32%)          | 2<br>(1.3-3)                                | 4.8%<br>(2.4-7.4%)                   | 6.9%<br>(3.5-11%)                   | 47<br>(23-76)       | 1500<br>(760-2400)     |
| Latvia   | 2016 | Female | 65 to 69 | 76%<br>(64-84%)                | 24%<br>(16-36%)          | 1.8<br>(1.2-2.6)                            | 2.4%<br>(0.088-5%)                   | 3.4%<br>(-0.023-6.9%)               | 26<br>(-0.18-55)    | 720<br>(23-1500)       |
| Latvia   | 2016 | Female | 70 to 74 | 70%<br>(58-80%)                | 30%<br>(20-42%)          | 1.5<br>(0.92-2.3)                           | 0.93%<br>(-1.4-3.6%)                 | 1.1%<br>(-2.2-4.9%)                 | 16<br>(-31-70)      | 380<br>(-580-1500)     |
| Latvia   | 2016 | Female | 75 to 79 | 61%<br>(45-75%)                | 39%<br>(25-55%)          | 1.3<br>(0.75-2)                             | 0.14%<br>(-2.2-3%)                   | -0.036%<br>(-3.1-3.6%)              | -0.72<br>(-70-80)   | 66<br>(-1000-1400)     |
| Latvia   | 2016 | Female | 80 to 84 | 53%<br>(37-67%)                | 47%<br>(33-63%)          | 1.2<br>(0.71-2)                             | 0.13%<br>(-2.4-3.2%)                 | -0.064%<br>(-3.2-3.7%)              | -1.8<br>(-91-110)   | 53<br>(-950-1300)      |
| Latvia   | 2016 | Female | 85 to 89 | 49%<br>(33-64%)                | 51%<br>(36-67%)          | 1.3<br>(0.69-2.1)                           | 0.3%<br>(-2.4-4%)                    | 0.12%<br>(-3.2-4.6%)                | 4.1<br>(-110-150)   | 97<br>(-780-1300)      |
| Latvia   | 2016 | Female | 90 to 94 | 49%<br>(34-64%)                | 51%<br>(36-66%)          | 1.4<br>(0.73-2.5)                           | 0.62%<br>(-2.7-5%)                   | 0.49%<br>(-3.5-5.9%)                | 9.1<br>(-64-110)    | 73<br>(-310-590)       |
| Latvia   | 2016 | Female | 95 plus  | 51%<br>(31-70%)                | 49%<br>(30-69%)          | 1.6<br>(0.69-3.1)                           | 1.1%<br>(-3-7.5%)                    | 1%<br>(-3.7-8.4%)                   | 4.2<br>(-16-35)     | 18<br>(-49-120)        |
| Latvia   | 2016 | Male   | All Ages | 84%<br>(80-87%)                | 16%<br>(13-20%)          | 5.2<br>(3.9-6.7)                            | 16%<br>(13-19%)                      | 14%<br>(9.6-18%)                    | 1900<br>(1300-2600) | 65000<br>(49000-82000) |

| Location  | Year | Sex    | Age      | Prevalence of current drinkers | Prevalence of abstainers | Population average of standard drinks daily | Percent of total attributable deaths | Percent of total attributable DALYs | Attributable deaths | Attributable DALYs     |
|-----------|------|--------|----------|--------------------------------|--------------------------|---------------------------------------------|--------------------------------------|-------------------------------------|---------------------|------------------------|
| Latvia    | 2016 | Male   | 15 to 19 | 71%<br>(57-82%)                | 29%<br>(18-43%)          | 3.1<br>(1.9-4.7)                            | 8.1%<br>(5.4-11%)                    | 16%<br>(9.6-23%)                    | 3.6<br>(2.1-5.4)    | 330<br>(220-470)       |
| Latvia    | 2016 | Male   | 20 to 24 | 84%<br>(74-91%)                | 16%<br>(8.5-26%)         | 5.9<br>(3.9-8.7)                            | 18%<br>(13-23%)                      | 29%<br>(21-38%)                     | 19<br>(13-26)       | 1600<br>(1200-2000)    |
| Latvia    | 2016 | Male   | 25 to 29 | 89%<br>(81-94%)                | 11%<br>(6-19%)           | 7<br>(4.7-10)                               | 22%<br>(18-27%)                      | 33%<br>(25-40%)                     | 43<br>(30-55)       | 3200<br>(2400-4000)    |
| Latvia    | 2016 | Male   | 30 to 34 | 91%<br>(83-96%)                | 8.9%<br>(4.3-17%)        | 7.5<br>(5-10)                               | 25%<br>(20-30%)                      | 35%<br>(27-41%)                     | 62<br>(44-79)       | 4000<br>(3000-5000)    |
| Latvia    | 2016 | Male   | 35 to 39 | 92%<br>(86-96%)                | 8.2%<br>(4.1-14%)        | 7.8<br>(5.1-11)                             | 26%<br>(21-31%)                      | 35%<br>(28-41%)                     | 79<br>(57-100)      | 4500<br>(3400-5600)    |
| Latvia    | 2016 | Male   | 40 to 44 | 92%<br>(86-96%)                | 8.1%<br>(4-14%)          | 7.8<br>(5.1-11)                             | 26%<br>(21-31%)                      | 35%<br>(28-40%)                     | 120<br>(90-160)     | 6200<br>(4700-7700)    |
| Latvia    | 2016 | Male   | 45 to 49 | 91%<br>(83-96%)                | 8.6%<br>(4.2-17%)        | 7.4<br>(4.9-11)                             | 26%<br>(20-31%)                      | 33%<br>(26-39%)                     | 160<br>(120-210)    | 7200<br>(5400-9200)    |
| Latvia    | 2016 | Male   | 50 to 54 | 91%<br>(82-95%)                | 9.4%<br>(4.8-18%)        | 7<br>(4.6-10)                               | 23%<br>(18-28%)                      | 29%<br>(22-34%)                     | 250<br>(180-320)    | 9400<br>(7000-12000)   |
| Latvia    | 2016 | Male   | 55 to 59 | 89%<br>(82-95%)                | 11%<br>(5.3-18%)         | 6.9<br>(4.7-9.5)                            | 21%<br>(16-25%)                      | 25%<br>(20-30%)                     | 290<br>(210-380)    | 9800<br>(7200-13000)   |
| Latvia    | 2016 | Male   | 60 to 64 | 89%<br>(80-94%)                | 11%<br>(5.9-20%)         | 6.1<br>(4.1-9.1)                            | 17%<br>(12-22%)                      | 20%<br>(14-26%)                     | 280<br>(180-380)    | 8100<br>(5300-11000)   |
| Latvia    | 2016 | Male   | 65 to 69 | 88%<br>(79-94%)                | 12%<br>(6-21%)           | 4.8<br>(3.3-6.7)                            | 13%<br>(7.9-18%)                     | 15%<br>(8.8-20%)                    | 190<br>(110-280)    | 4700<br>(2900-6600)    |
| Latvia    | 2016 | Male   | 70 to 74 | 85%<br>(75-92%)                | 15%<br>(8-25%)           | 3.5<br>(2.3-5)                              | 7.6%<br>(3-12%)                      | 8.7%<br>(3.1-14%)                   | 150<br>(55-270)     | 3100<br>(1200-5100)    |
| Latvia    | 2016 | Male   | 75 to 79 | 81%<br>(68-90%)                | 19%<br>(9.9-32%)         | 2.9<br>(1.7-4.4)                            | 4.7%<br>(0.51-9.8%)                  | 5.2%<br>(0.2-11%)                   | 100<br>(3.7-220)    | 1600<br>(170-3400)     |
| Latvia    | 2016 | Male   | 80 to 84 | 76%<br>(61-86%)                | 24%<br>(14-39%)          | 2.7<br>(1.6-4.1)                            | 3.7%<br>(-0.41-8.8%)                 | 3.8%<br>(-1.1-9.9%)                 | 65<br>(-18-170)     | 790<br>(-88-2000)      |
| Latvia    | 2016 | Male   | 85 to 89 | 71%<br>(55-82%)                | 29%<br>(18-45%)          | 2.6<br>(1.5-4.1)                            | 3.1%<br>(-1-8.2%)                    | 3.1%<br>(-1.7-9.3%)                 | 38<br>(-22-120)     | 340<br>(-110-930)      |
| Latvia    | 2016 | Male   | 90 to 94 | 68%<br>(53-80%)                | 32%<br>(20-47%)          | 2.6<br>(1.4-4.3)                            | 2.4%<br>(-1.9-8.4%)                  | 2.4%<br>(-2.8-9.4%)                 | 9.6<br>(-11-39)     | 61<br>(-46-210)        |
| Latvia    | 2016 | Male   | 95 plus  | 66%<br>(48-81%)                | 34%<br>(19-52%)          | 2.5<br>(1.2-4.5)                            | 2.2%<br>(-2.4-8.5%)                  | 1.9%<br>(-3.6-9.5%)                 | 1.7<br>(-3.1-8.3)   | 7.6<br>(-8.5-30)       |
| Lithuania | 1990 | Female | All Ages | 73%<br>(66-78%)                | 27%<br>(22-34%)          | 1.6<br>(1.3-1.9)                            | 3.8%<br>(2.4-5.1%)                   | 0.6%<br>(-2-3.2%)                   | 110<br>(-390-600)   | 22000<br>(14000-31000) |
| Lithuania | 1990 | Female | 15 to 19 | 68%<br>(54-81%)                | 32%<br>(19-46%)          | 1.7<br>(1.1-2.5)                            | 4.8%<br>(3.3-6.6%)                   | 8.7%<br>(5-13%)                     | 6.3<br>(3.6-9.4)    | 750<br>(500-1000)      |
| Lithuania | 1990 | Female | 20 to 24 | 78%<br>(64-87%)                | 22%<br>(13-36%)          | 2.3<br>(1.5-3.2)                            | 7.6%<br>(5.7-9.7%)                   | 11%<br>(6.7-15%)                    | 7.6<br>(4.8-11)     | 1300<br>(870-1700)     |
| Lithuania | 1990 | Female | 25 to 29 | 81%<br>(71-89%)                | 19%<br>(11-29%)          | 2.2<br>(1.5-2.9)                            | 8%<br>(6.3-9.7%)                     | 11%<br>(7.5-14%)                    | 10<br>(7-14)        | 1600<br>(1200-2100)    |
| Lithuania | 1990 | Female | 30 to 34 | 84%<br>(73-91%)                | 16%<br>(8.6-27%)         | 2.2<br>(1.6-3)                              | 8.7%<br>(7.1-10%)                    | 13%<br>(9.8-17%)                    | 18<br>(13-23)       | 2100<br>(1600-2700)    |

| Location  | Year | Sex    | Age      | Prevalence of current drinkers | Prevalence of abstainers | Population average of standard drinks daily | Percent of total attributable deaths | Percent of total attributable DALYs | Attributable deaths | Attributable DALYs       |
|-----------|------|--------|----------|--------------------------------|--------------------------|---------------------------------------------|--------------------------------------|-------------------------------------|---------------------|--------------------------|
| Lithuania | 1990 | Female | 35 to 39 | 85%<br>(76-92%)                | 15%<br>(8-24%)           | 2.5<br>(1.8-3.3)                            | 11%<br>(8.9-13%)                     | 16%<br>(12-20%)                     | 31<br>(24-38)       | 2700<br>(2200-3300)      |
| Lithuania | 1990 | Female | 40 to 44 | 85%<br>(75-92%)                | 15%<br>(7.8-25%)         | 2.5<br>(1.8-3.4)                            | 12%<br>(9.5-14%)                     | 17%<br>(13-20%)                     | 49<br>(37-60)       | 3400<br>(2700-4100)      |
| Lithuania | 1990 | Female | 45 to 49 | 84%<br>(71-92%)                | 16%<br>(7.9-29%)         | 2.2<br>(1.6-3)                              | 10%<br>(8-12%)                       | 14%<br>(11-18%)                     | 59<br>(46-76)       | 3500<br>(2700-4300)      |
| Lithuania | 1990 | Female | 50 to 54 | 82%<br>(70-90%)                | 18%<br>(9.9-30%)         | 2.1<br>(1.4-2.8)                            | 8.1%<br>(6-10%)                      | 11%<br>(7.7-14%)                    | 64<br>(45-84)       | 3200<br>(2400-4100)      |
| Lithuania | 1990 | Female | 55 to 59 | 78%<br>(63-88%)                | 22%<br>(12-37%)          | 2.1<br>(1.4-2.9)                            | 6.7%<br>(4.5-9.1%)                   | 8.8%<br>(5.6-12%)                   | 78<br>(49-110)      | 3200<br>(2200-4300)      |
| Lithuania | 1990 | Female | 60 to 64 | 74%<br>(58-86%)                | 26%<br>(14-42%)          | 1.9<br>(1.3-2.8)                            | 4.1%<br>(1.8-6.6%)                   | 5%<br>(1.7-8.6%)                    | 64<br>(21-110)      | 2300<br>(1000-3700)      |
| Lithuania | 1990 | Female | 65 to 69 | 70%<br>(54-84%)                | 30%<br>(16-46%)          | 1.7<br>(1.1-2.4)                            | 1.4%<br>(-1.1-3.7%)                  | 1.3%<br>(-2.1-4.5%)                 | 21<br>(-36-75)      | 790<br>(-590-2100)       |
| Lithuania | 1990 | Female | 70 to 74 | 65%<br>(48-79%)                | 35%<br>(21-52%)          | 1.4<br>(0.86-2.1)                           | -0.42%<br>(-3.2-2.3%)                | -0.99%<br>(-4.6-2.5%)               | -16<br>(-73-41)     | -170<br>(-1300-960)      |
| Lithuania | 1990 | Female | 75 to 79 | 57%<br>(41-74%)                | 43%<br>(26-59%)          | 1.2<br>(0.67-1.9)                           | -1.5%<br>(-4-1.2%)                   | -2.2%<br>(-5.5-1.1%)                | -61<br>(-150-30)    | -760<br>(-2100-620)      |
| Lithuania | 1990 | Female | 80 to 84 | 51%<br>(34-69%)                | 49%<br>(31-66%)          | 1.1<br>(0.62-1.7)                           | -1.9%<br>(-4.7-0.54%)                | -2.6%<br>(-6.1-0.44%)               | -89<br>(-210-15)    | -850<br>(-2100-240)      |
| Lithuania | 1990 | Female | 85 to 89 | 49%<br>(32-65%)                | 51%<br>(35-68%)          | 1.1<br>(0.62-1.7)                           | -1.9%<br>(-4.6-0.46%)                | -2.6%<br>(-5.9-0.35%)               | -72<br>(-160-9.7)   | -480<br>(-1200-110)      |
| Lithuania | 1990 | Female | 90 to 94 | 50%<br>(34-67%)                | 50%<br>(33-66%)          | 1.2<br>(0.63-1.8)                           | -1.9%<br>(-4.7-1%)                   | -2.6%<br>(-6.3-0.94%)               | -37<br>(-89-13)     | -170<br>(-420-91)        |
| Lithuania | 1990 | Female | 95 plus  | 53%<br>(34-72%)                | 47%<br>(28-66%)          | 1.3<br>(0.62-2.1)                           | -2%<br>(-5.3-2%)                     | -2.7%<br>(-6.8-1.9%)                | -21<br>(-52-15)     | -60<br>(-160-58)         |
| Lithuania | 1990 | Male   | All Ages | 80%<br>(75-85%)                | 20%<br>(15-25%)          | 4<br>(3.4-4.7)                              | 15%<br>(13-18%)                      | 13%<br>(9.5-17%)                    | 2700<br>(2000-3400) | 110000<br>(95000-130000) |
| Lithuania | 1990 | Male   | 15 to 19 | 71%<br>(55-84%)                | 29%<br>(16-45%)          | 2.4<br>(1.5-3.4)                            | 9.1%<br>(6-12%)                      | 13%<br>(8.2-19%)                    | 25<br>(16-35)       | 2100<br>(1400-2800)      |
| Lithuania | 1990 | Male   | 20 to 24 | 83%<br>(71-91%)                | 17%<br>(9.2-29%)         | 4.2<br>(3.1-5.7)                            | 18%<br>(13-23%)                      | 23%<br>(16-29%)                     | 73<br>(52-95)       | 5700<br>(4200-7300)      |
| Lithuania | 1990 | Male   | 25 to 29 | 88%<br>(80-94%)                | 12%<br>(6.5-20%)         | 4.6<br>(3.4-6.2)                            | 21%<br>(16-26%)                      | 26%<br>(19-33%)                     | 110<br>(81-140)     | 8200<br>(6500-10000)     |
| Lithuania | 1990 | Male   | 30 to 34 | 91%<br>(84-96%)                | 9.2%<br>(4.3-16%)        | 5.4<br>(4-7)                                | 24%<br>(19-29%)                      | 30%<br>(23-36%)                     | 160<br>(120-190)    | 10000<br>(8400-13000)    |
| Lithuania | 1990 | Male   | 35 to 39 | 92%<br>(86-96%)                | 8.3%<br>(3.9-14%)        | 6.5<br>(4.6-8.6)                            | 27%<br>(22-32%)                      | 33%<br>(27-40%)                     | 210<br>(170-250)    | 12000<br>(9900-14000)    |
| Lithuania | 1990 | Male   | 40 to 44 | 92%<br>(85-96%)                | 8%<br>(3.7-15%)          | 7.6<br>(5.7-9.8)                            | 28%<br>(24-33%)                      | 35%<br>(29-40%)                     | 280<br>(230-320)    | 14000<br>(12000-16000)   |
| Lithuania | 1990 | Male   | 45 to 49 | 92%<br>(83-96%)                | 8.5%<br>(3.9-17%)        | 8.7<br>(6.2-11)                             | 28%<br>(23-33%)                      | 34%<br>(28-39%)                     | 370<br>(310-440)    | 17000<br>(14000-19000)   |
| Lithuania | 1990 | Male   | 50 to 54 | 90%<br>(82-95%)                | 9.7%<br>(4.7-18%)        | 7.9<br>(5.5-11)                             | 24%<br>(19-28%)                      | 28%<br>(23-34%)                     | 410<br>(340-500)    | 16000<br>(13000-19000)   |

| Location  | Year | Sex    | Age      | Prevalence of current drinkers | Prevalence of abstainers | Population average of standard drinks daily | Percent of total attributable deaths | Percent of total attributable DALYs | Attributable deaths | Attributable DALYs     |
|-----------|------|--------|----------|--------------------------------|--------------------------|---------------------------------------------|--------------------------------------|-------------------------------------|---------------------|------------------------|
| Lithuania | 1990 | Male   | 55 to 59 | 89%<br>(79-94%)                | 11%<br>(5.7-21%)         | 5.4<br>(4-7.1)                              | 17%<br>(12-21%)                      | 19%<br>(14-24%)                     | 360<br>(260-450)    | 12000<br>(9200-15000)  |
| Lithuania | 1990 | Male   | 60 to 64 | 87%<br>(76-94%)                | 13%<br>(6.4-24%)         | 4.2<br>(2.8-5.7)                            | 11%<br>(6.3-16%)                     | 12%<br>(6.7-18%)                    | 270<br>(150-390)    | 7900<br>(4600-11000)   |
| Lithuania | 1990 | Male   | 65 to 69 | 85%<br>(74-93%)                | 15%<br>(6.8-26%)         | 3.9<br>(2.8-5.2)                            | 8.1%<br>(3.9-13%)                    | 9%<br>(3.9-14%)                     | 190<br>(82-290)     | 4600<br>(2200-7100)    |
| Lithuania | 1990 | Male   | 70 to 74 | 83%<br>(71-91%)                | 17%<br>(9.4-29%)         | 3.6<br>(2.3-4.9)                            | 5.9%<br>(1.3-11%)                    | 6.3%<br>(0.85-12%)                  | 99<br>(13-190)      | 2000<br>(440-3700)     |
| Lithuania | 1990 | Male   | 75 to 79 | 79%<br>(66-89%)                | 21%<br>(11-34%)          | 3.2<br>(2-4.7)                              | 4%<br>(-0.56-9.3%)                   | 4.1%<br>(-1.2-10%)                  | 81<br>(-24-200)     | 1300<br>(-190-3100)    |
| Lithuania | 1990 | Male   | 80 to 84 | 76%<br>(61-86%)                | 24%<br>(14-39%)          | 2.9<br>(1.9-4)                              | 2.2%<br>(-2.1-7.2%)                  | 2%<br>(-3.1-7.9%)                   | 50<br>(-76-200)     | 690<br>(-640-2200)     |
| Lithuania | 1990 | Male   | 85 to 89 | 72%<br>(57-84%)                | 28%<br>(16-43%)          | 2.6<br>(1.7-3.8)                            | 1%<br>(-2.7-5.7%)                    | 0.59%<br>(-3.9-6.1%)                | 8.6<br>(-56-88)     | 130<br>(-350-730)      |
| Lithuania | 1990 | Male   | 90 to 94 | 71%<br>(57-83%)                | 29%<br>(17-43%)          | 2.4<br>(1.5-3.7)                            | 0.19%<br>(-3.7-5.4%)                 | -0.46%<br>(-5.2-5.8%)               | -2.6<br>(-29-32)    | 6.7<br>(-120-190)      |
| Lithuania | 1990 | Male   | 95 plus  | 69%<br>(51-84%)                | 31%<br>(16-49%)          | 2.2<br>(1.1-3.8)                            | -0.23%<br>(-4.5-8.8%)                | -1%<br>(-5.7-6.1%)                  | -3.2<br>(-18-19)    | -2.9<br>(-52-73)       |
| Lithuania | 1995 | Female | All Ages | 73%<br>(67-79%)                | 27%<br>(21-33%)          | 1.5<br>(1.3-1.7)                            | 4%<br>(2.5-5.4%)                     | 0.75%<br>(-1.8-3.3%)                | 160<br>(-390-710)   | 25000<br>(16000-35000) |
| Lithuania | 1995 | Female | 15 to 19 | 69%<br>(55-81%)                | 31%<br>(19-45%)          | 1.5<br>(0.99-2.3)                           | 4.8%<br>(3.3-6.6%)                   | 8.7%<br>(5.1-13%)                   | 5.9<br>(3.4-8.9)    | 680<br>(470-950)       |
| Lithuania | 1995 | Female | 20 to 24 | 78%<br>(65-88%)                | 22%<br>(12-35%)          | 2.1<br>(1.4-2.9)                            | 7.8%<br>(5.8-9.8%)                   | 11%<br>(6.8-15%)                    | 9.3<br>(5.8-13)     | 1300<br>(960-1800)     |
| Lithuania | 1995 | Female | 25 to 29 | 82%<br>(70-90%)                | 18%<br>(10-30%)          | 2<br>(1.4-2.7)                              | 8.4%<br>(6.7-10%)                    | 11%<br>(7.7-15%)                    | 12<br>(8.2-16)      | 1600<br>(1200-2100)    |
| Lithuania | 1995 | Female | 30 to 34 | 84%<br>(73-92%)                | 16%<br>(8.1-27%)         | 2<br>(1.5-2.7)                              | 9.4%<br>(7.6-11%)                    | 14%<br>(11-18%)                     | 23<br>(18-29)       | 2400<br>(1800-2900)    |
| Lithuania | 1995 | Female | 35 to 39 | 85%<br>(75-92%)                | 15%<br>(7.9-25%)         | 2.3<br>(1.6-3)                              | 11%<br>(9.3-13%)                     | 17%<br>(13-21%)                     | 47<br>(36-57)       | 3500<br>(2800-4200)    |
| Lithuania | 1995 | Female | 40 to 44 | 86%<br>(76-92%)                | 14%<br>(7.5-24%)         | 2.3<br>(1.6-3)                              | 12%<br>(10-15%)                      | 18%<br>(14-21%)                     | 67<br>(53-81)       | 4000<br>(3300-4800)    |
| Lithuania | 1995 | Female | 45 to 49 | 85%<br>(71-92%)                | 15%<br>(7.9-29%)         | 2<br>(1.4-2.7)                              | 11%<br>(8.6-13%)                     | 15%<br>(12-19%)                     | 82<br>(62-100)      | 4100<br>(3300-5000)    |
| Lithuania | 1995 | Female | 50 to 54 | 82%<br>(70-90%)                | 18%<br>(9.8-30%)         | 1.9<br>(1.3-2.5)                            | 9.1%<br>(7.1-11%)                    | 13%<br>(9.6-16%)                    | 89<br>(68-110)      | 3900<br>(3100-4800)    |
| Lithuania | 1995 | Female | 55 to 59 | 78%<br>(65-89%)                | 22%<br>(11-35%)          | 1.9<br>(1.3-2.7)                            | 7.4%<br>(5.3-9.6%)                   | 10%<br>(7-13%)                      | 100<br>(70-130)     | 3700<br>(2700-4900)    |
| Lithuania | 1995 | Female | 60 to 64 | 75%<br>(59-86%)                | 25%<br>(14-41%)          | 1.8<br>(1.2-2.6)                            | 4.2%<br>(1.9-6.5%)                   | 5.3%<br>(2.2-8.6%)                  | 74<br>(30-120)      | 2400<br>(1100-3800)    |
| Lithuania | 1995 | Female | 65 to 69 | 71%<br>(54-85%)                | 29%<br>(15-46%)          | 1.6<br>(1.1-2.2)                            | 1.2%<br>(-0.96-3.6%)                 | 1.2%<br>(-1.9-4.5%)                 | 24<br>(-38-89)      | 820<br>(-670-2400)     |
| Lithuania | 1995 | Female | 70 to 74 | 66%<br>(49-79%)                | 34%<br>(21-51%)          | 1.3<br>(0.81-1.9)                           | -0.67%<br>(-3.2-1.9%)                | -1.2%<br>(-4.4-2.1%)                | -31<br>(-120-55)    | -430<br>(-2100-1200)   |

| Location  | Year | Sex    | Age      | Prevalence of current drinkers | Prevalence of abstainers | Population average of standard drinks daily | Percent of total attributable deaths | Percent of total attributable DALYs | Attributable deaths | Attributable DALYs        |
|-----------|------|--------|----------|--------------------------------|--------------------------|---------------------------------------------|--------------------------------------|-------------------------------------|---------------------|---------------------------|
| Lithuania | 1995 | Female | 75 to 79 | 59%<br>(42-75%)                | 41%<br>(25-58%)          | 1.1<br>(0.63-1.8)                           | -1.7%<br>(-4.3-0.81%)                | -2.4%<br>(-5.6-0.79%)               | -56<br>(-130-18)    | -740<br>(-1800-330)       |
| Lithuania | 1995 | Female | 80 to 84 | 53%<br>(34-71%)                | 47%<br>(29-66%)          | 1<br>(0.59-1.6)                             | -2.2%<br>(-4.9-0.27%)                | -2.9%<br>(-6.3-0.19%)               | -100<br>(-230-6.5)  | -1000<br>(-2300-130)      |
| Lithuania | 1995 | Female | 85 to 89 | 50%<br>(33-66%)                | 50%<br>(34-67%)          | 1<br>(0.58-1.6)                             | -2.4%<br>(-5.1-0.15%)                | -3%<br>(-6.3-0.061%)                | -100<br>(-220-2)    | -720<br>(-1500-43)        |
| Lithuania | 1995 | Female | 90 to 94 | 51%<br>(35-68%)                | 49%<br>(32-65%)          | 1.1<br>(0.6-1.7)                            | -2.4%<br>(-5.4-0.54%)                | -3.1%<br>(-6.7-0.4%)                | -53<br>(-120-6.8)   | -250<br>(-560-56)         |
| Lithuania | 1995 | Female | 95 plus  | 54%<br>(35-72%)                | 46%<br>(28-65%)          | 1.2<br>(0.59-2)                             | -2.5%<br>(-6.1-1.3%)                 | -3.2%<br>(-7.5-1.2%)                | -26<br>(-59-9.8)    | -79<br>(-190-39)          |
| Lithuania | 1995 | Male   | All Ages | 81%<br>(76-86%)                | 19%<br>(14-24%)          | 3.7<br>(3.2-4.3)                            | 16%<br>(14-19%)                      | 14%<br>(10-17%)                     | 3300<br>(2500-4100) | 140000<br>(120000-160000) |
| Lithuania | 1995 | Male   | 15 to 19 | 71%<br>(56-84%)                | 29%<br>(16-44%)          | 2.2<br>(1.4-3.1)                            | 9.2%<br>(6-13%)                      | 13%<br>(8-19%)                      | 25<br>(16-37)       | 2100<br>(1400-2900)       |
| Lithuania | 1995 | Male   | 20 to 24 | 83%<br>(72-91%)                | 17%<br>(9-28%)           | 3.9<br>(2.8-5.1)                            | 18%<br>(14-24%)                      | 22%<br>(16-29%)                     | 89<br>(63-120)      | 6600<br>(4900-8600)       |
| Lithuania | 1995 | Male   | 25 to 29 | 88%<br>(80-93%)                | 12%<br>(6.5-20%)         | 4.2<br>(3.1-5.6)                            | 21%<br>(16-26%)                      | 26%<br>(19-32%)                     | 120<br>(93-160)     | 8800<br>(6700-11000)      |
| Lithuania | 1995 | Male   | 30 to 34 | 91%<br>(83-96%)                | 9.2%<br>(4.3-17%)        | 4.9<br>(3.7-6.4)                            | 24%<br>(20-29%)                      | 29%<br>(23-36%)                     | 210<br>(160-250)    | 13000<br>(10000-16000)    |
| Lithuania | 1995 | Male   | 35 to 39 | 92%<br>(86-96%)                | 8.2%<br>(4-14%)          | 5.9<br>(4.2-7.8)                            | 28%<br>(23-33%)                      | 33%<br>(27-40%)                     | 310<br>(240-370)    | 17000<br>(14000-20000)    |
| Lithuania | 1995 | Male   | 40 to 44 | 92%<br>(85-96%)                | 8%<br>(3.9-15%)          | 6.9<br>(5.2-8.9)                            | 30%<br>(25-34%)                      | 35%<br>(29-40%)                     | 410<br>(340-480)    | 20000<br>(17000-23000)    |
| Lithuania | 1995 | Male   | 45 to 49 | 91%<br>(83-96%)                | 8.5%<br>(3.8-17%)        | 7.8<br>(5.8-10)                             | 29%<br>(25-34%)                      | 34%<br>(29-39%)                     | 490<br>(420-570)    | 21000<br>(18000-24000)    |
| Lithuania | 1995 | Male   | 50 to 54 | 90%<br>(82-96%)                | 9.6%<br>(4.4-18%)        | 7.1<br>(5-9.5)                              | 25%<br>(20-30%)                      | 28%<br>(23-34%)                     | 540<br>(430-640)    | 20000<br>(16000-24000)    |
| Lithuania | 1995 | Male   | 55 to 59 | 89%<br>(80-95%)                | 11%<br>(5.4-20%)         | 5<br>(3.7-6.5)                              | 17%<br>(12-21%)                      | 19%<br>(14-24%)                     | 430<br>(310-550)    | 14000<br>(11000-18000)    |
| Lithuania | 1995 | Male   | 60 to 64 | 87%<br>(76-94%)                | 13%<br>(6.4-24%)         | 3.8<br>(2.6-5.3)                            | 10%<br>(5.7-15%)                     | 11%<br>(6.2-17%)                    | 300<br>(170-460)    | 8700<br>(4900-13000)      |
| Lithuania | 1995 | Male   | 65 to 69 | 86%<br>(75-93%)                | 14%<br>(6.9-25%)         | 3.6<br>(2.6-4.7)                            | 7.1%<br>(3.1-11%)                    | 7.7%<br>(3-13%)                     | 230<br>(88-370)     | 5500<br>(2400-8900)       |
| Lithuania | 1995 | Male   | 70 to 74 | 83%<br>(71-91%)                | 17%<br>(9.4-29%)         | 3.2<br>(2.2-4.4)                            | 4.7%<br>(0.57-9.2%)                  | 5%<br>(0.15-10%)                    | 130<br>(3.8-260)    | 2600<br>(320-5100)        |
| Lithuania | 1995 | Male   | 75 to 79 | 80%<br>(66-89%)                | 20%<br>(11-34%)          | 2.9<br>(1.9-4.3)                            | 3%<br>(-1.2-7.8%)                    | 3%<br>(-1.9-8.6%)                   | 51<br>(-33-150)     | 860<br>(-330-2300)        |
| Lithuania | 1995 | Male   | 80 to 84 | 76%<br>(62-87%)                | 24%<br>(13-38%)          | 2.6<br>(1.8-3.7)                            | 1.2%<br>(-2.7-5.8%)                  | 0.9%<br>(-3.6-6.1%)                 | 17<br>(-67-110)     | 280<br>(-610-1300)        |
| Lithuania | 1995 | Male   | 85 to 89 | 73%<br>(59-84%)                | 27%<br>(16-41%)          | 2.4<br>(1.6-3.5)                            | 0.041%<br>(-3.4-4.6%)                | -0.53%<br>(-4.7-4.8%)               | -9.6<br>(-85-87)    | 6.7<br>(-540-710)         |
| Lithuania | 1995 | Male   | 90 to 94 | 71%<br>(57-83%)                | 29%<br>(17-43%)          | 2.2<br>(1.4-3.4)                            | -0.65%<br>(-4.3-3.9%)                | -1.4%<br>(-5.8-4.1%)                | -10<br>(-41-29)     | -28<br>(-190-170)         |

| Location  | Year | Sex    | Age      | Prevalence of current drinkers | Prevalence of abstainers | Population average of standard drinks daily | Percent of total attributable deaths | Percent of total attributable DALYs | Attributable deaths | Attributable DALYs        |
|-----------|------|--------|----------|--------------------------------|--------------------------|---------------------------------------------|--------------------------------------|-------------------------------------|---------------------|---------------------------|
| Lithuania | 1995 | Male   | 95 plus  | 69%<br>(53-84%)                | 31%<br>(16-47%)          | 2<br>(1-3.5)                                | -0.95%<br>(-4.7-4.2%)                | -1.8%<br>(-6.4-4.4%)                | -4.4<br>(-15-11)    | -9.1<br>(-45-41)          |
| Lithuania | 2000 | Female | All Ages | 72%<br>(66-78%)                | 28%<br>(22-34%)          | 1.7<br>(1.5-2)                              | 3.9%<br>(2.7-5.3%)                   | 1.2%<br>(-1.2-3.8%)                 | 230<br>(-230-700)   | 22000<br>(15000-30000)    |
| Lithuania | 2000 | Female | 15 to 19 | 67%<br>(53-81%)                | 33%<br>(19-47%)          | 1.7<br>(1.1-2.5)                            | 4.7%<br>(3.2-6.5%)                   | 9.2%<br>(5.1-14%)                   | 5.3<br>(2.9-8.1)    | 650<br>(430-920)          |
| Lithuania | 2000 | Female | 20 to 24 | 77%<br>(63-87%)                | 23%<br>(13-37%)          | 2.4<br>(1.6-3.3)                            | 7.8%<br>(6-9.8%)                     | 11%<br>(7.2-16%)                    | 7.4<br>(4.6-11)     | 1100<br>(800-1500)        |
| Lithuania | 2000 | Female | 25 to 29 | 81%<br>(70-89%)                | 19%<br>(11-30%)          | 2.2<br>(1.6-3)                              | 8.1%<br>(6.5-10%)                    | 11%<br>(7.6-15%)                    | 9.3<br>(6.2-12)     | 1400<br>(1000-1800)       |
| Lithuania | 2000 | Female | 30 to 34 | 84%<br>(72-92%)                | 16%<br>(8.2-28%)         | 2.3<br>(1.7-3.1)                            | 8.8%<br>(7.1-11%)                    | 13%<br>(9.7-17%)                    | 16<br>(12-20)       | 1800<br>(1400-2300)       |
| Lithuania | 2000 | Female | 35 to 39 | 85%<br>(76-92%)                | 15%<br>(7.8-24%)         | 2.6<br>(1.9-3.5)                            | 10%<br>(8.2-12%)                     | 16%<br>(12-19%)                     | 31<br>(24-39)       | 2700<br>(2100-3300)       |
| Lithuania | 2000 | Female | 40 to 44 | 85%<br>(76-92%)                | 15%<br>(7.7-24%)         | 2.6<br>(1.9-3.5)                            | 10%<br>(8.3-12%)                     | 16%<br>(13-19%)                     | 46<br>(36-56)       | 3100<br>(2500-3800)       |
| Lithuania | 2000 | Female | 45 to 49 | 84%<br>(71-92%)                | 16%<br>(8-29%)           | 2.3<br>(1.6-3.1)                            | 9.4%<br>(7.5-11%)                    | 14%<br>(11-17%)                     | 57<br>(44-69)       | 3100<br>(2500-3800)       |
| Lithuania | 2000 | Female | 50 to 54 | 81%<br>(69-90%)                | 19%<br>(10-31%)          | 2.1<br>(1.5-2.9)                            | 8.6%<br>(6.7-11%)                    | 12%<br>(9.6-15%)                    | 65<br>(51-81)       | 3000<br>(2400-3700)       |
| Lithuania | 2000 | Female | 55 to 59 | 77%<br>(63-88%)                | 23%<br>(12-37%)          | 2.2<br>(1.5-3.1)                            | 7.4%<br>(5.5-9.6%)                   | 11%<br>(7.6-14%)                    | 79<br>(57-100)      | 3000<br>(2200-4000)       |
| Lithuania | 2000 | Female | 60 to 64 | 74%<br>(58-86%)                | 26%<br>(14-42%)          | 2<br>(1.3-2.9)                              | 4.8%<br>(2.7-7.2%)                   | 6.6%<br>(3.5-10%)                   | 70<br>(38-110)      | 2300<br>(1300-3500)       |
| Lithuania | 2000 | Female | 65 to 69 | 70%<br>(53-84%)                | 30%<br>(16-47%)          | 1.8<br>(1.2-2.5)                            | 2.2%<br>(0.011-4.4%)                 | 2.6%<br>(-0.5-5.8%)                 | 40<br>(-7.6-90)     | 1200<br>(6.5-2400)        |
| Lithuania | 2000 | Female | 70 to 74 | 64%<br>(47-79%)                | 36%<br>(21-53%)          | 1.5<br>(0.89-2.2)                           | 0.3%<br>(-2.2-2.9%)                  | 0.047%<br>(-3.2-3.5%)               | 1.1<br>(-77-84)     | 190<br>(-1400-1800)       |
| Lithuania | 2000 | Female | 75 to 79 | 56%<br>(39-73%)                | 44%<br>(27-61%)          | 1.2<br>(0.69-2)                             | -0.77%<br>(-3.2-1.8%)                | -1.3%<br>(-4.4-2%)                  | -39<br>(-130-59)    | -450<br>(-1800-1000)      |
| Lithuania | 2000 | Female | 80 to 84 | 50%<br>(31-67%)                | 50%<br>(33-69%)          | 1.1<br>(0.63-1.7)                           | -1.2%<br>(-3.7-1.1%)                 | -1.8%<br>(-5-1.2%)                  | -45<br>(-120-29)    | -420<br>(-1200-390)       |
| Lithuania | 2000 | Female | 85 to 89 | 47%<br>(30-64%)                | 53%<br>(36-70%)          | 1.1<br>(0.61-1.7)                           | -1.5%<br>(-4-0.92%)                  | -2%<br>(-5.2-0.92%)                 | -59<br>(-150-27)    | -390<br>(-1100-250)       |
| Lithuania | 2000 | Female | 90 to 94 | 48%<br>(32-65%)                | 52%<br>(35-68%)          | 1.2<br>(0.65-1.9)                           | -1.6%<br>(-4.5-1.4%)                 | -2.2%<br>(-5.7-1.4%)                | -39<br>(-100-24)    | -170<br>(-480-140)        |
| Lithuania | 2000 | Female | 95 plus  | 52%<br>(31-72%)                | 48%<br>(28-69%)          | 1.3<br>(0.61-2.2)                           | -1.7%<br>(-5.3-2.3%)                 | -2.3%<br>(-6.5-2.5%)                | -15<br>(-44-17)     | -44<br>(-140-61)          |
| Lithuania | 2000 | Male   | All Ages | 81%<br>(75-86%)                | 19%<br>(14-25%)          | 4.4<br>(3.9-5)                              | 16%<br>(14-19%)                      | 15%<br>(11-18%)                     | 3000<br>(2300-3700) | 120000<br>(100000-140000) |
| Lithuania | 2000 | Male   | 15 to 19 | 70%<br>(54-83%)                | 30%<br>(17-46%)          | 2.5<br>(1.6-3.5)                            | 9.5%<br>(6.1-13%)                    | 14%<br>(8.4-20%)                    | 24<br>(15-36)       | 2000<br>(1300-2800)       |
| Lithuania | 2000 | Male   | 20 to 24 | 82%<br>(69-91%)                | 18%<br>(9.3-31%)         | 4.5<br>(3.2-5.8)                            | 20%<br>(14-25%)                      | 25%<br>(17-33%)                     | 73<br>(51-98)       | 5500<br>(4000-7200)       |



| Location  | Year | Sex    | Age      | Prevalence of current drinkers | Prevalence of abstainers | Population average of standard drinks daily | Percent of total attributable deaths | Percent of total attributable DALYs | Attributable deaths | Attributable DALYs     |
|-----------|------|--------|----------|--------------------------------|--------------------------|---------------------------------------------|--------------------------------------|-------------------------------------|---------------------|------------------------|
| Lithuania | 2000 | Male   | 25 to 29 | 87%<br>(79-93%)                | 13%<br>(6.6-21%)         | 4.9<br>(3.6-6.5)                            | 22%<br>(17-27%)                      | 27%<br>(20-35%)                     | 98<br>(72-130)      | 7000<br>(5400-8800)    |
| Lithuania | 2000 | Male   | 30 to 34 | 90%<br>(82-96%)                | 9.5%<br>(4.5-18%)        | 5.7<br>(4.3-7.4)                            | 24%<br>(20-29%)                      | 30%<br>(24-37%)                     | 150<br>(110-180)    | 9400<br>(7500-11000)   |
| Lithuania | 2000 | Male   | 35 to 39 | 92%<br>(85-96%)                | 8.4%<br>(4.1-15%)        | 6.9<br>(5-9.1)                              | 27%<br>(22-32%)                      | 35%<br>(28-41%)                     | 230<br>(190-270)    | 13000<br>(11000-15000) |
| Lithuania | 2000 | Male   | 40 to 44 | 92%<br>(85-96%)                | 8.2%<br>(3.9-15%)        | 8<br>(6.1-10)                               | 29%<br>(24-33%)                      | 36%<br>(31-41%)                     | 320<br>(270-370)    | 16000<br>(14000-18000) |
| Lithuania | 2000 | Male   | 45 to 49 | 91%<br>(82-96%)                | 8.8%<br>(3.9-18%)        | 9.1<br>(6.8-12)                             | 28%<br>(24-33%)                      | 34%<br>(29-39%)                     | 380<br>(330-450)    | 17000<br>(14000-19000) |
| Lithuania | 2000 | Male   | 50 to 54 | 90%<br>(81-95%)                | 10%<br>(4.6-19%)         | 8.3<br>(5.7-11)                             | 25%<br>(21-29%)                      | 30%<br>(25-34%)                     | 400<br>(340-480)    | 15000<br>(13000-18000) |
| Lithuania | 2000 | Male   | 55 to 59 | 88%<br>(78-94%)                | 12%<br>(5.5-22%)         | 5.7<br>(4.4-7.4)                            | 18%<br>(14-22%)                      | 21%<br>(17-26%)                     | 370<br>(280-450)    | 12000<br>(9600-15000)  |
| Lithuania | 2000 | Male   | 60 to 64 | 87%<br>(75-94%)                | 13%<br>(6.3-25%)         | 4.4<br>(3-6.2)                              | 12%<br>(7.5-17%)                     | 14%<br>(8.2-19%)                    | 300<br>(180-420)    | 8600<br>(5300-12000)   |
| Lithuania | 2000 | Male   | 65 to 69 | 85%<br>(73-93%)                | 15%<br>(7.2-27%)         | 4.1<br>(3-5.5)                              | 9.1%<br>(5.1-13%)                    | 10%<br>(5.4-15%)                    | 260<br>(140-390)    | 6400<br>(3500-9300)    |
| Lithuania | 2000 | Male   | 70 to 74 | 82%<br>(69-90%)                | 18%<br>(10-31%)          | 3.7<br>(2.5-5.2)                            | 6.7%<br>(2.3-11%)                    | 7.4%<br>(2.2-13%)                   | 200<br>(58-340)     | 4000<br>(1400-6800)    |
| Lithuania | 2000 | Male   | 75 to 79 | 79%<br>(64-89%)                | 21%<br>(11-36%)          | 3.3<br>(2.2-4.9)                            | 5%<br>(0.51-9.9%)                    | 5.3%<br>(0.073-11%)                 | 120<br>(1.6-250)    | 1900<br>(190-3700)     |
| Lithuania | 2000 | Male   | 80 to 84 | 75%<br>(58-86%)                | 25%<br>(14-42%)          | 3<br>(2-4.3)                                | 3.3%<br>(-0.73-8.2%)                 | 3.3%<br>(-1.4-9.2%)                 | 45<br>(-20-130)     | 560<br>(-120-1400)     |
| Lithuania | 2000 | Male   | 85 to 89 | 71%<br>(55-83%)                | 29%<br>(17-45%)          | 2.7<br>(1.8-4)                              | 1.9%<br>(-1.9-6.7%)                  | 1.6%<br>(-2.9-7.3%)                 | 18<br>(-32-82)      | 190<br>(-190-660)      |
| Lithuania | 2000 | Male   | 90 to 94 | 69%<br>(55-82%)                | 31%<br>(18-45%)          | 2.5<br>(1.5-3.8)                            | 0.79%<br>(-3.1-5.9%)                 | 0.29%<br>(-4.4-6.5%)                | 2.4<br>(-35-53)     | 40<br>(-150-300)       |
| Lithuania | 2000 | Male   | 95 plus  | 68%<br>(50-83%)                | 32%<br>(17-50%)          | 2.3<br>(1.2-3.9)                            | 0.16%<br>(-3.9-6.2%)                 | -0.54%<br>(-5.5-6.7%)               | -1.5<br>(-15-19)    | 1.8<br>(-43-70)        |
| Lithuania | 2005 | Female | All Ages | 74%<br>(69-79%)                | 26%<br>(21-31%)          | 2.1<br>(1.8-2.5)                            | 4.8%<br>(3.3-6.4%)                   | 2.5%<br>(0.018-5.3%)                | 520<br>(3.6-1100)   | 28000<br>(19000-37000) |
| Lithuania | 2005 | Female | 15 to 19 | 71%<br>(58-82%)                | 29%<br>(18-42%)          | 2.1<br>(1.5-3.1)                            | 5.2%<br>(3.7-7.1%)                   | 11%<br>(6.2-16%)                    | 5.7<br>(3.3-8.5)    | 680<br>(470-940)       |
| Lithuania | 2005 | Female | 20 to 24 | 80%<br>(69-88%)                | 20%<br>(12-31%)          | 3<br>(2-4.1)                                | 8.3%<br>(6.2-11%)                    | 13%<br>(8.6-19%)                    | 6.8<br>(4.4-9.5)    | 1100<br>(780-1500)     |
| Lithuania | 2005 | Female | 25 to 29 | 83%<br>(74-90%)                | 17%<br>(9.5-26%)         | 2.8<br>(2-3.7)                              | 8.8%<br>(7-11%)                      | 13%<br>(9.3-18%)                    | 10<br>(7.2-14)      | 1300<br>(1000-1700)    |
| Lithuania | 2005 | Female | 30 to 34 | 86%<br>(76-93%)                | 14%<br>(7.5-24%)         | 2.8<br>(2-3.8)                              | 9.2%<br>(7.4-11%)                    | 15%<br>(11-19%)                     | 17<br>(13-22)       | 1700<br>(1400-2200)    |
| Lithuania | 2005 | Female | 35 to 39 | 86%<br>(78-93%)                | 14%<br>(7.2-22%)         | 3.1<br>(2.3-4.1)                            | 10%<br>(8.6-12%)                     | 17%<br>(14-21%)                     | 33<br>(26-40)       | 2500<br>(2000-3000)    |
| Lithuania | 2005 | Female | 40 to 44 | 87%<br>(77-93%)                | 13%<br>(7.1-23%)         | 3.1<br>(2.3-4.2)                            | 11%<br>(9.3-13%)                     | 18%<br>(15-21%)                     | 57<br>(47-68)       | 3500<br>(2900-4200)    |

| Location  | Year | Sex    | Age      | Prevalence of current drinkers | Prevalence of abstainers | Population average of standard drinks daily | Percent of total attributable deaths | Percent of total attributable DALYs | Attributable deaths | Attributable DALYs        |
|-----------|------|--------|----------|--------------------------------|--------------------------|---------------------------------------------|--------------------------------------|-------------------------------------|---------------------|---------------------------|
| Lithuania | 2005 | Female | 45 to 49 | 86%<br>(75-93%)                | 14%<br>(7.3-25%)         | 2.8<br>(2.1-3.7)                            | 10%<br>(8.5-13%)                     | 16%<br>(13-19%)                     | 77<br>(62-93)       | 4000<br>(3300-4800)       |
| Lithuania | 2005 | Female | 50 to 54 | 84%<br>(73-90%)                | 16%<br>(9.5-27%)         | 2.7<br>(1.9-3.6)                            | 10%<br>(7.9-12%)                     | 15%<br>(12-18%)                     | 88<br>(70-110)      | 3800<br>(3100-4700)       |
| Lithuania | 2005 | Female | 55 to 59 | 79%<br>(66-89%)                | 21%<br>(11-34%)          | 2.6<br>(1.9-3.7)                            | 9%<br>(6.7-12%)                      | 13%<br>(9.6-17%)                    | 100<br>(77-130)     | 3700<br>(2800-4800)       |
| Lithuania | 2005 | Female | 60 to 64 | 75%<br>(61-86%)                | 25%<br>(14-39%)          | 2.5<br>(1.7-3.5)                            | 6.5%<br>(4-9.4%)                     | 9.1%<br>(5.4-13%)                   | 98<br>(58-140)      | 3100<br>(1900-4500)       |
| Lithuania | 2005 | Female | 65 to 69 | 69%<br>(55-84%)                | 31%<br>(16-45%)          | 2<br>(1.4-2.8)                              | 3.3%<br>(0.95-5.8%)                  | 4.4%<br>(1.1-7.9%)                  | 67<br>(16-120)      | 1900<br>(540-3300)        |
| Lithuania | 2005 | Female | 70 to 74 | 63%<br>(48-77%)                | 37%<br>(23-52%)          | 1.6<br>(1.1-2.4)                            | 1.3%<br>(-1.2-4.3%)                  | 1.5%<br>(-1.9-5.3%)                 | 34<br>(-46-120)     | 830<br>(-740-2700)        |
| Lithuania | 2005 | Female | 75 to 79 | 55%<br>(40-69%)                | 45%<br>(31-60%)          | 1.4<br>(0.86-2.2)                           | 0.086%<br>(-2.5-3%)                  | -0.17%<br>(-3.4-3.5%)               | -6<br>(-120-120)    | 60<br>(-1700-2000)        |
| Lithuania | 2005 | Female | 80 to 84 | 46%<br>(29-63%)                | 54%<br>(37-71%)          | 1.2<br>(0.68-1.8)                           | -0.33%<br>(-2.5-2.2%)                | -0.67%<br>(-3.6-2.5%)               | -27<br>(-140-99)    | -180<br>(-1400-1200)      |
| Lithuania | 2005 | Female | 85 to 89 | 43%<br>(27-59%)                | 57%<br>(41-73%)          | 1.1<br>(0.65-1.8)                           | -0.49%<br>(-2.9-2.1%)                | -0.86%<br>(-3.7-2.3%)               | -22<br>(-94-58)     | -110<br>(-660-480)        |
| Lithuania | 2005 | Female | 90 to 94 | 44%<br>(29-61%)                | 56%<br>(39-71%)          | 1.2<br>(0.68-2)                             | -0.62%<br>(-3.4-2.7%)                | -1%<br>(-4.4-2.9%)                  | -19<br>(-81-53)     | -69<br>(-390-300)         |
| Lithuania | 2005 | Female | 95 plus  | 48%<br>(28-68%)                | 52%<br>(32-72%)          | 1.4<br>(0.66-2.4)                           | -0.56%<br>(-4.3-3.9%)                | -0.98%<br>(-5.3-4.3%)               | -7<br>(-38-30)      | -16<br>(-120-110)         |
| Lithuania | 2005 | Male   | All Ages | 84%<br>(79-88%)                | 16%<br>(12-21%)          | 5.8<br>(5.1-6.5)                            | 19%<br>(17-22%)                      | 18%<br>(14-22%)                     | 4200<br>(3300-5100) | 150000<br>(130000-180000) |
| Lithuania | 2005 | Male   | 15 to 19 | 74%<br>(62-85%)                | 26%<br>(15-38%)          | 3.2<br>(2.2-4.4)                            | 11%<br>(7.4-15%)                     | 17%<br>(11-24%)                     | 28<br>(18-40)       | 2200<br>(1500-3100)       |
| Lithuania | 2005 | Male   | 20 to 24 | 86%<br>(77-92%)                | 14%<br>(7.7-23%)         | 5.7<br>(4.2-7.4)                            | 22%<br>(17-28%)                      | 29%<br>(21-37%)                     | 84<br>(61-110)      | 6100<br>(4600-7700)       |
| Lithuania | 2005 | Male   | 25 to 29 | 90%<br>(84-94%)                | 10%<br>(5.8-16%)         | 6.1<br>(4.6-8)                              | 25%<br>(20-30%)                      | 31%<br>(24-39%)                     | 110<br>(83-140)     | 7400<br>(5800-9100)       |
| Lithuania | 2005 | Male   | 30 to 34 | 92%<br>(87-96%)                | 7.6%<br>(3.8-13%)        | 7.1<br>(5.4-9.2)                            | 28%<br>(23-33%)                      | 35%<br>(28-41%)                     | 170<br>(140-200)    | 11000<br>(8700-12000)     |
| Lithuania | 2005 | Male   | 35 to 39 | 93%<br>(88-97%)                | 6.9%<br>(3.4-12%)        | 8.5<br>(6.3-11)                             | 31%<br>(26-35%)                      | 38%<br>(32-43%)                     | 260<br>(220-290)    | 14000<br>(12000-16000)    |
| Lithuania | 2005 | Male   | 40 to 44 | 93%<br>(88-97%)                | 6.9%<br>(3.5-12%)        | 9.9<br>(7.6-12)                             | 32%<br>(28-36%)                      | 39%<br>(34-43%)                     | 410<br>(350-460)    | 20000<br>(17000-22000)    |
| Lithuania | 2005 | Male   | 45 to 49 | 93%<br>(86-97%)                | 7.2%<br>(3.5-14%)        | 11<br>(8.5-14)                              | 30%<br>(26-35%)                      | 36%<br>(31-41%)                     | 520<br>(440-600)    | 22000<br>(19000-26000)    |
| Lithuania | 2005 | Male   | 50 to 54 | 92%<br>(84-96%)                | 8.1%<br>(4-16%)          | 10<br>(7.5-13)                              | 28%<br>(23-32%)                      | 32%<br>(27-37%)                     | 540<br>(450-640)    | 20000<br>(17000-24000)    |
| Lithuania | 2005 | Male   | 55 to 59 | 91%<br>(83-95%)                | 9.5%<br>(4.6-17%)        | 7.3<br>(5.6-9.2)                            | 22%<br>(18-26%)                      | 25%<br>(20-30%)                     | 480<br>(390-580)    | 16000<br>(13000-19000)    |
| Lithuania | 2005 | Male   | 60 to 64 | 89%<br>(80-95%)                | 11%<br>(5.4-20%)         | 5.6<br>(4.1-7.7)                            | 15%<br>(9.9-20%)                     | 17%<br>(11-23%)                     | 410<br>(260-550)    | 12000<br>(7600-15000)     |

| Location  | Year | Sex    | Age      | Prevalence of current drinkers | Prevalence of abstainers | Population average of standard drinks daily | Percent of total attributable deaths | Percent of total attributable DALYs | Attributable deaths | Attributable DALYs     |
|-----------|------|--------|----------|--------------------------------|--------------------------|---------------------------------------------|--------------------------------------|-------------------------------------|---------------------|------------------------|
| Lithuania | 2005 | Male   | 65 to 69 | 87%<br>(78-94%)                | 13%<br>(6.1-22%)         | 5.2<br>(3.9-6.8)                            | 12%<br>(7.6-17%)                     | 14%<br>(8.4-19%)                    | 390<br>(230-540)    | 9400<br>(5800-13000)   |
| Lithuania | 2005 | Male   | 70 to 74 | 84%<br>(74-91%)                | 16%<br>(9-26%)           | 4.6<br>(3.3-6.4)                            | 9.5%<br>(5-14%)                      | 11%<br>(5.2-16%)                    | 320<br>(160-480)    | 6200<br>(3200-9300)    |
| Lithuania | 2005 | Male   | 75 to 79 | 81%<br>(69-90%)                | 19%<br>(10-31%)          | 4.2<br>(2.8-5.8)                            | 7.5%<br>(2.5-13%)                    | 8.3%<br>(2.4-14%)                   | 240<br>(69-420)     | 3700<br>(1300-6300)    |
| Lithuania | 2005 | Male   | 80 to 84 | 78%<br>(65-87%)                | 22%<br>(13-35%)          | 3.8<br>(2.6-5.3)                            | 5.8%<br>(0.93-11%)                   | 6.3%<br>(0.44-13%)                  | 130<br>(9.3-260)    | 1500<br>(240-2900)     |
| Lithuania | 2005 | Male   | 85 to 89 | 75%<br>(64-84%)                | 25%<br>(16-36%)          | 3.5<br>(2.4-4.9)                            | 4.3%<br>(-0.52-9.7%)                 | 4.4%<br>(-1.3-11%)                  | 43<br>(-13-110)     | 380<br>(-47-840)       |
| Lithuania | 2005 | Male   | 90 to 94 | 73%<br>(60-84%)                | 27%<br>(16-40%)          | 3.2<br>(2.1-4.8)                            | 2.7%<br>(-2.4-8.7%)                  | 2.5%<br>(-3.7-9.7%)                 | 14<br>(-21-55)      | 93<br>(-82-300)        |
| Lithuania | 2005 | Male   | 95 plus  | 71%<br>(54-85%)                | 29%<br>(15-46%)          | 2.9<br>(1.5-4.9)                            | 1.7%<br>(-3.5-8.6%)                  | 1.2%<br>(-4.9-9.5%)                 | 3.9<br>(-16-31)     | 22<br>(-45-110)        |
| Lithuania | 2010 | Female | All Ages | 73%<br>(67-79%)                | 27%<br>(21-33%)          | 2.4<br>(2-2.8)                              | 5%<br>(3.6-6.7%)                     | 3.1%<br>(0.49-6.1%)                 | 610<br>(100-1200)   | 27000<br>(19000-37000) |
| Lithuania | 2010 | Female | 15 to 19 | 70%<br>(57-81%)                | 30%<br>(19-43%)          | 2.4<br>(1.6-3.4)                            | 4.9%<br>(3.5-6.5%)                   | 11%<br>(6.6-17%)                    | 3.5<br>(2.1-5.2)    | 510<br>(350-690)       |
| Lithuania | 2010 | Female | 20 to 24 | 80%<br>(69-88%)                | 20%<br>(12-31%)          | 3.3<br>(2.3-4.6)                            | 8.4%<br>(6.4-11%)                    | 14%<br>(9.1-19%)                    | 6<br>(3.9-8.2)      | 1000<br>(730-1400)     |
| Lithuania | 2010 | Female | 25 to 29 | 83%<br>(74-90%)                | 17%<br>(10-26%)          | 3.1<br>(2.2-4.1)                            | 8.6%<br>(6.9-10%)                    | 13%<br>(9.4-18%)                    | 7.4<br>(5.2-10)     | 1100<br>(820-1500)     |
| Lithuania | 2010 | Female | 30 to 34 | 85%<br>(76-92%)                | 15%<br>(7.9-24%)         | 3.2<br>(2.3-4.3)                            | 9.2%<br>(7.5-11%)                    | 16%<br>(12-19%)                     | 13<br>(10-17)       | 1400<br>(1100-1800)    |
| Lithuania | 2010 | Female | 35 to 39 | 86%<br>(77-93%)                | 14%<br>(7.4-23%)         | 3.5<br>(2.6-4.8)                            | 10%<br>(8.5-12%)                     | 18%<br>(15-22%)                     | 26<br>(21-32)       | 2100<br>(1700-2500)    |
| Lithuania | 2010 | Female | 40 to 44 | 86%<br>(77-93%)                | 14%<br>(7.4-23%)         | 3.5<br>(2.6-4.7)                            | 11%<br>(9-13%)                       | 19%<br>(15-22%)                     | 45<br>(37-54)       | 2800<br>(2300-3400)    |
| Lithuania | 2010 | Female | 45 to 49 | 86%<br>(76-92%)                | 14%<br>(7.5-24%)         | 3.2<br>(2.3-4.1)                            | 10%<br>(8.3-12%)                     | 16%<br>(14-19%)                     | 67<br>(55-81)       | 3600<br>(2900-4300)    |
| Lithuania | 2010 | Female | 50 to 54 | 83%<br>(73-91%)                | 17%<br>(9.3-27%)         | 3<br>(2.1-3.9)                              | 9.7%<br>(7.7-12%)                    | 15%<br>(12-18%)                     | 88<br>(70-110)      | 3900<br>(3200-4800)    |
| Lithuania | 2010 | Female | 55 to 59 | 79%<br>(65-88%)                | 21%<br>(12-35%)          | 3<br>(2.1-4.1)                              | 9.3%<br>(6.9-12%)                    | 14%<br>(10-17%)                     | 99<br>(76-130)      | 3700<br>(2900-4800)    |
| Lithuania | 2010 | Female | 60 to 64 | 74%<br>(60-86%)                | 26%<br>(14-40%)          | 2.8<br>(1.8-3.9)                            | 7.2%<br>(4.7-10%)                    | 10%<br>(6.7-15%)                    | 95<br>(61-140)      | 3000<br>(2000-4300)    |
| Lithuania | 2010 | Female | 65 to 69 | 68%<br>(53-83%)                | 32%<br>(17-47%)          | 2.3<br>(1.6-3.1)                            | 4.1%<br>(1.8-6.9%)                   | 5.5%<br>(2.2-9.4%)                  | 71<br>(27-120)      | 2000<br>(870-3300)     |
| Lithuania | 2010 | Female | 70 to 74 | 62%<br>(47-76%)                | 38%<br>(24-53%)          | 1.8<br>(1.2-2.7)                            | 2.1%<br>(-0.37-5.1%)                 | 2.6%<br>(-0.91-6.6%)                | 51<br>(-18-130)     | 1200<br>(-220-2900)    |
| Lithuania | 2010 | Female | 75 to 79 | 54%<br>(39-69%)                | 46%<br>(31-61%)          | 1.5<br>(0.93-2.3)                           | 0.9%<br>(-1.6-3.8%)                  | 0.87%<br>(-2.5-4.8%)                | 26<br>(-76-150)     | 560<br>(-1000-2400)    |
| Lithuania | 2010 | Female | 80 to 84 | 45%<br>(28-62%)                | 55%<br>(38-72%)          | 1.3<br>(0.75-2)                             | 0.44%<br>(-1.7-3.2%)                 | 0.27%<br>(-2.5-3.7%)                | 11<br>(-110-160)    | 260<br>(-1000-1900)    |

| Location  | Year | Sex    | Age      | Prevalence of current drinkers | Prevalence of abstainers | Population average of standard drinks daily | Percent of total attributable deaths | Percent of total attributable DALYs | Attributable deaths | Attributable DALYs        |
|-----------|------|--------|----------|--------------------------------|--------------------------|---------------------------------------------|--------------------------------------|-------------------------------------|---------------------|---------------------------|
| Lithuania | 2010 | Female | 85 to 89 | 42%<br>(26-57%)                | 58%<br>(43-74%)          | 1.3<br>(0.72-2)                             | 0.29%<br>(-2.1-3.1%)                 | 0.063%<br>(-2.9-3.5%)               | 2.5<br>(-110-140)   | 110<br>(-750-1100)        |
| Lithuania | 2010 | Female | 90 to 94 | 43%<br>(29-60%)                | 57%<br>(40-71%)          | 1.4<br>(0.77-2.2)                           | 0.25%<br>(-2.6-4.2%)                 | -0.01%<br>(-3.5-4.8%)               | -0.15<br>(-56-75)   | 25<br>(-260-410)          |
| Lithuania | 2010 | Female | 95 plus  | 47%<br>(28-67%)                | 53%<br>(33-72%)          | 1.5<br>(0.76-2.7)                           | 0.44%<br>(-3.5-5.9%)                 | 0.18%<br>(-4.5-6.7%)                | 1.1<br>(-28-43)     | 11<br>(-85-150)           |
| Lithuania | 2010 | Male   | All Ages | 84%<br>(79-88%)                | 16%<br>(12-21%)          | 6.7<br>(5.9-7.5)                            | 20%<br>(17-23%)                      | 18%<br>(15-22%)                     | 3900<br>(3200-4800) | 130000<br>(120000-160000) |
| Lithuania | 2010 | Male   | 15 to 19 | 74%<br>(61-84%)                | 26%<br>(16-39%)          | 3.6<br>(2.5-4.9)                            | 11%<br>(7.3-15%)                     | 18%<br>(12-25%)                     | 21<br>(14-29)       | 1700<br>(1200-2400)       |
| Lithuania | 2010 | Male   | 20 to 24 | 86%<br>(76-92%)                | 14%<br>(7.8-24%)         | 6.4<br>(4.7-8.2)                            | 23%<br>(17-28%)                      | 32%<br>(23-40%)                     | 67<br>(49-85)       | 5000<br>(3800-6200)       |
| Lithuania | 2010 | Male   | 25 to 29 | 90%<br>(84-94%)                | 10%<br>(5.8-16%)         | 6.9<br>(5.1-9.1)                            | 24%<br>(19-29%)                      | 33%<br>(25-40%)                     | 80<br>(62-99)       | 5700<br>(4500-6900)       |
| Lithuania | 2010 | Male   | 30 to 34 | 92%<br>(86-96%)                | 7.8%<br>(3.8-14%)        | 8<br>(6.1-10)                               | 27%<br>(23-32%)                      | 36%<br>(30-41%)                     | 120<br>(100-140)    | 7800<br>(6500-9100)       |
| Lithuania | 2010 | Male   | 35 to 39 | 93%<br>(88-96%)                | 7.1%<br>(3.5-12%)        | 9.6<br>(7-13)                               | 30%<br>(26-35%)                      | 39%<br>(34-44%)                     | 200<br>(170-230)    | 11000<br>(9600-13000)     |
| Lithuania | 2010 | Male   | 40 to 44 | 93%<br>(88-96%)                | 7.1%<br>(3.6-12%)        | 11<br>(8.6-14)                              | 31%<br>(27-35%)                      | 39%<br>(35-43%)                     | 290<br>(260-330)    | 15000<br>(13000-16000)    |
| Lithuania | 2010 | Male   | 45 to 49 | 93%<br>(86-96%)                | 7.4%<br>(3.6-14%)        | 13<br>(9.5-16)                              | 30%<br>(25-34%)                      | 36%<br>(31-41%)                     | 420<br>(360-480)    | 18000<br>(16000-21000)    |
| Lithuania | 2010 | Male   | 50 to 54 | 92%<br>(85-96%)                | 8.2%<br>(4.2-15%)        | 12<br>(8.4-15)                              | 27%<br>(23-32%)                      | 33%<br>(28-38%)                     | 510<br>(420-590)    | 19000<br>(16000-23000)    |
| Lithuania | 2010 | Male   | 55 to 59 | 90%<br>(82-95%)                | 9.8%<br>(4.9-18%)        | 8.2<br>(6.4-10)                             | 23%<br>(19-27%)                      | 26%<br>(22-31%)                     | 470<br>(400-570)    | 16000<br>(13000-19000)    |
| Lithuania | 2010 | Male   | 60 to 64 | 89%<br>(81-95%)                | 11%<br>(5.5-19%)         | 6.4<br>(4.5-8.8)                            | 17%<br>(12-21%)                      | 20%<br>(14-25%)                     | 410<br>(290-520)    | 12000<br>(8300-15000)     |
| Lithuania | 2010 | Male   | 65 to 69 | 87%<br>(78-94%)                | 13%<br>(6.1-22%)         | 5.9<br>(4.4-7.7)                            | 14%<br>(10-18%)                      | 16%<br>(11-21%)                     | 390<br>(270-510)    | 9300<br>(6500-12000)      |
| Lithuania | 2010 | Male   | 70 to 74 | 83%<br>(73-91%)                | 17%<br>(8.6-27%)         | 5.2<br>(3.7-7.1)                            | 11%<br>(6.3-15%)                     | 13%<br>(7.2-18%)                    | 340<br>(190-480)    | 6600<br>(3900-9200)       |
| Lithuania | 2010 | Male   | 75 to 79 | 80%<br>(68-89%)                | 20%<br>(11-32%)          | 4.7<br>(3.1-6.5)                            | 8.9%<br>(4-14%)                      | 10%<br>(4.2-16%)                    | 280<br>(120-440)    | 4300<br>(1900-6600)       |
| Lithuania | 2010 | Male   | 80 to 84 | 77%<br>(64-87%)                | 23%<br>(13-36%)          | 4.3<br>(2.9-5.9)                            | 7.5%<br>(2.9-13%)                    | 8.4%<br>(2.9-15%)                   | 210<br>(69-370)     | 2400<br>(920-4100)        |
| Lithuania | 2010 | Male   | 85 to 89 | 75%<br>(62-84%)                | 25%<br>(16-38%)          | 3.9<br>(2.6-5.5)                            | 6%<br>(0.87-11%)                     | 6.5%<br>(0.27-13%)                  | 93<br>(3.7-180)     | 770<br>(110-1400)         |
| Lithuania | 2010 | Male   | 90 to 94 | 73%<br>(59-84%)                | 27%<br>(16-41%)          | 3.6<br>(2.3-5.4)                            | 4.4%<br>(-1.2-10%)                   | 4.6%<br>(-2.2-12%)                  | 24<br>(-11-61)      | 140<br>(-40-330)          |
| Lithuania | 2010 | Male   | 95 plus  | 71%<br>(54-85%)                | 29%<br>(15-46%)          | 3.2<br>(1.7-5.5)                            | 3.1%<br>(-2.9-10%)                   | 2.9%<br>(-4.2-11%)                  | 5.6<br>(-8.2-21)    | 24<br>(-23-79)            |
| Lithuania | 2016 | Female | All Ages | 71%<br>(65-77%)                | 29%<br>(23-35%)          | 2.5<br>(2-3.1)                              | 5%<br>(3.2-7%)                       | 3.3%<br>(0.066-7.2%)                | 670<br>(13-1400)    | 26000<br>(16000-36000)    |

| Location  | Year | Sex    | Age      | Prevalence of current drinkers | Prevalence of abstainers | Population average of standard drinks daily | Percent of total attributable deaths | Percent of total attributable DALYs | Attributable deaths | Attributable DALYs       |
|-----------|------|--------|----------|--------------------------------|--------------------------|---------------------------------------------|--------------------------------------|-------------------------------------|---------------------|--------------------------|
| Lithuania | 2016 | Female | 15 to 19 | 66%<br>(51-80%)                | 34%<br>(20-49%)          | 2.4<br>(1.5-3.7)                            | 4.7%<br>(3.3-6.4%)                   | 11%<br>(6.3-16%)                    | 2.2<br>(1.2-3.2)    | 330<br>(230-460)         |
| Lithuania | 2016 | Female | 20 to 24 | 77%<br>(63-87%)                | 23%<br>(13-37%)          | 3.4<br>(2.2-5)                              | 8.3%<br>(6.2-11%)                    | 14%<br>(8.7-20%)                    | 4.3<br>(2.6-6.2)    | 890<br>(620-1200)        |
| Lithuania | 2016 | Female | 25 to 29 | 81%<br>(70-89%)                | 19%<br>(11-30%)          | 3.2<br>(2.2-4.5)                            | 8.7%<br>(6.8-11%)                    | 14%<br>(9.2-18%)                    | 6.2<br>(4.1-8.4)    | 1000<br>(740-1300)       |
| Lithuania | 2016 | Female | 30 to 34 | 84%<br>(71-91%)                | 16%<br>(8.6-29%)         | 3.3<br>(2.2-4.7)                            | 9.2%<br>(7.4-11%)                    | 16%<br>(12-20%)                     | 10<br>(7.5-13)      | 1100<br>(870-1500)       |
| Lithuania | 2016 | Female | 35 to 39 | 85%<br>(75-92%)                | 15%<br>(8.1-25%)         | 3.7<br>(2.6-5.2)                            | 10%<br>(8.4-12%)                     | 19%<br>(15-23%)                     | 19<br>(14-24)       | 1500<br>(1200-1900)      |
| Lithuania | 2016 | Female | 40 to 44 | 85%<br>(75-92%)                | 15%<br>(7.7-25%)         | 3.7<br>(2.6-5.2)                            | 11%<br>(8.4-13%)                     | 19%<br>(15-23%)                     | 35<br>(27-44)       | 2300<br>(1800-2800)      |
| Lithuania | 2016 | Female | 45 to 49 | 84%<br>(72-92%)                | 16%<br>(8.2-28%)         | 3.3<br>(2.3-4.7)                            | 10%<br>(7.9-12%)                     | 17%<br>(14-21%)                     | 50<br>(38-62)       | 2700<br>(2100-3300)      |
| Lithuania | 2016 | Female | 50 to 54 | 81%<br>(69-90%)                | 19%<br>(10-31%)          | 3.1<br>(2.1-4.4)                            | 9.6%<br>(7.5-12%)                    | 16%<br>(12-19%)                     | 81<br>(63-100)      | 3700<br>(2900-4600)      |
| Lithuania | 2016 | Female | 55 to 59 | 77%<br>(63-88%)                | 23%<br>(12-37%)          | 3.1<br>(2.1-4.6)                            | 9.1%<br>(6.8-12%)                    | 14%<br>(10-18%)                     | 95<br>(70-120)      | 3600<br>(2700-4800)      |
| Lithuania | 2016 | Female | 60 to 64 | 73%<br>(56-86%)                | 27%<br>(14-44%)          | 2.9<br>(1.8-4.4)                            | 7.4%<br>(4.7-11%)                    | 11%<br>(6.9-15%)                    | 95<br>(59-140)      | 3100<br>(2000-4400)      |
| Lithuania | 2016 | Female | 65 to 69 | 69%<br>(51-85%)                | 31%<br>(15-49%)          | 2.5<br>(1.7-3.6)                            | 4.7%<br>(2.2-7.6%)                   | 6.4%<br>(2.7-11%)                   | 63<br>(26-110)      | 1800<br>(840-2900)       |
| Lithuania | 2016 | Female | 70 to 74 | 63%<br>(45-78%)                | 37%<br>(22-55%)          | 2.1<br>(1.2-3.2)                            | 2.7%<br>(-0.089-6.1%)                | 3.5%<br>(-0.49-8.2%)                | 57<br>(-8-130)      | 1300<br>(-44-3000)       |
| Lithuania | 2016 | Female | 75 to 79 | 55%<br>(37-71%)                | 45%<br>(29-63%)          | 1.7<br>(0.93-2.8)                           | 1.5%<br>(-1.1-4.9%)                  | 1.7%<br>(-2-6.4%)                   | 46<br>(-53-170)     | 890<br>(-620-2900)       |
| Lithuania | 2016 | Female | 80 to 84 | 48%<br>(31-66%)                | 52%<br>(34-69%)          | 1.5<br>(0.86-2.5)                           | 1.1%<br>(-1.5-4.4%)                  | 1%<br>(-2.4-5.2%)                   | 42<br>(-98-210)     | 630<br>(-900-2600)       |
| Lithuania | 2016 | Female | 85 to 89 | 45%<br>(29-62%)                | 55%<br>(38-71%)          | 1.5<br>(0.85-2.5)                           | 0.91%<br>(-1.9-4.5%)                 | 0.79%<br>(-2.8-5.2%)                | 37<br>(-130-240)    | 400<br>(-850-1900)       |
| Lithuania | 2016 | Female | 90 to 94 | 47%<br>(31-64%)                | 53%<br>(36-69%)          | 1.6<br>(0.86-2.7)                           | 0.92%<br>(-2.6-5.7%)                 | 0.76%<br>(-3.7-6.8%)                | 21<br>(-100-190)    | 160<br>(-460-1000)       |
| Lithuania | 2016 | Female | 95 plus  | 51%<br>(30-71%)                | 49%<br>(29-70%)          | 1.8<br>(0.86-3.3)                           | 1.2%<br>(-3.4-8.2%)                  | 1%<br>(-4.4-9.2%)                   | 5<br>(-22-45)       | 23<br>(-65-160)          |
| Lithuania | 2016 | Male   | All Ages | 82%<br>(77-86%)                | 18%<br>(14-23%)          | 7<br>(5.6-8.6)                              | 19%<br>(16-22%)                      | 18%<br>(14-22%)                     | 3500<br>(2700-4400) | 110000<br>(95000-130000) |
| Lithuania | 2016 | Male   | 15 to 19 | 68%<br>(52-82%)                | 32%<br>(18-48%)          | 3.5<br>(2.2-5.2)                            | 10%<br>(6.7-15%)                     | 18%<br>(11-26%)                     | 12<br>(7.3-18)      | 1000<br>(670-1500)       |
| Lithuania | 2016 | Male   | 20 to 24 | 82%<br>(69-90%)                | 18%<br>(9.8-31%)         | 6.5<br>(4.4-9)                              | 21%<br>(16-27%)                      | 32%<br>(23-41%)                     | 52<br>(36-68)       | 4000<br>(3000-5100)      |
| Lithuania | 2016 | Male   | 25 to 29 | 87%<br>(78-93%)                | 13%<br>(6.9-22%)         | 7.2<br>(4.8-10)                             | 24%<br>(18-29%)                      | 33%<br>(24-41%)                     | 68<br>(49-86)       | 4900<br>(3800-6100)      |
| Lithuania | 2016 | Male   | 30 to 34 | 90%<br>(81-95%)                | 9.8%<br>(4.5-19%)        | 8.3<br>(5.9-11)                             | 26%<br>(22-31%)                      | 36%<br>(29-42%)                     | 92<br>(73-110)      | 5900<br>(4900-7000)      |

| Location  | Year | Sex    | Age      | Prevalence of current drinkers | Prevalence of abstainers | Population average of standard drinks daily | Percent of total attributable deaths | Percent of total attributable DALYs | Attributable deaths | Attributable DALYs      |
|-----------|------|--------|----------|--------------------------------|--------------------------|---------------------------------------------|--------------------------------------|-------------------------------------|---------------------|-------------------------|
| Lithuania | 2016 | Male   | 35 to 39 | 91%<br>(84-96%)                | 8.7%<br>(4-16%)          | 10<br>(6.8-14)                              | 29%<br>(25-33%)                      | 38%<br>(33-43%)                     | 140<br>(110-160)    | 7700<br>(6400-8900)     |
| Lithuania | 2016 | Male   | 40 to 44 | 92%<br>(85-96%)                | 8.4%<br>(4-15%)          | 12<br>(8.3-16)                              | 29%<br>(26-34%)                      | 39%<br>(34-43%)                     | 220<br>(180-250)    | 11000<br>(9200-13000)   |
| Lithuania | 2016 | Male   | 45 to 49 | 91%<br>(81-96%)                | 8.9%<br>(4.1-19%)        | 13<br>(9.4-18)                              | 28%<br>(24-33%)                      | 36%<br>(31-41%)                     | 290<br>(240-340)    | 13000<br>(11000-15000)  |
| Lithuania | 2016 | Male   | 50 to 54 | 90%<br>(81-95%)                | 10%<br>(4.7-19%)         | 12<br>(8.3-16)                              | 26%<br>(22-31%)                      | 32%<br>(28-37%)                     | 440<br>(360-530)    | 17000<br>(14000-20000)  |
| Lithuania | 2016 | Male   | 55 to 59 | 88%<br>(78-94%)                | 12%<br>(5.8-22%)         | 8.5<br>(6.1-11)                             | 22%<br>(18-26%)                      | 26%<br>(22-31%)                     | 450<br>(360-550)    | 15000<br>(12000-18000)  |
| Lithuania | 2016 | Male   | 60 to 64 | 86%<br>(75-94%)                | 14%<br>(6.5-25%)         | 6.6<br>(4.3-9.4)                            | 17%<br>(13-21%)                      | 20%<br>(15-25%)                     | 400<br>(290-520)    | 12000<br>(8500-15000)   |
| Lithuania | 2016 | Male   | 65 to 69 | 84%<br>(72-93%)                | 16%<br>(7.2-28%)         | 6.1<br>(4.1-8.5)                            | 14%<br>(10-19%)                      | 17%<br>(12-22%)                     | 310<br>(220-410)    | 7500<br>(5300-9700)     |
| Lithuania | 2016 | Male   | 70 to 74 | 82%<br>(68-90%)                | 18%<br>(10-32%)          | 5.4<br>(3.6-7.8)                            | 11%<br>(6.9-16%)                     | 13%<br>(7.8-19%)                    | 300<br>(180-420)    | 5900<br>(3600-8300)     |
| Lithuania | 2016 | Male   | 75 to 79 | 78%<br>(63-89%)                | 22%<br>(11-37%)          | 4.8<br>(2.9-7.1)                            | 9.2%<br>(4.5-14%)                    | 11%<br>(4.8-17%)                    | 270<br>(120-420)    | 4200<br>(2100-6300)     |
| Lithuania | 2016 | Male   | 80 to 84 | 74%<br>(58-85%)                | 26%<br>(15-42%)          | 4.3<br>(2.7-6.4)                            | 7.9%<br>(3.2-13%)                    | 8.9%<br>(3.2-15%)                   | 240<br>(89-400)     | 2800<br>(1100-4500)     |
| Lithuania | 2016 | Male   | 85 to 89 | 70%<br>(54-83%)                | 30%<br>(17-46%)          | 3.9<br>(2.4-5.9)                            | 6.6%<br>(1.6-12%)                    | 7.3%<br>(1.1-14%)                   | 130<br>(20-250)     | 1100<br>(260-2000)      |
| Lithuania | 2016 | Male   | 90 to 94 | 68%<br>(54-82%)                | 32%<br>(18-46%)          | 3.6<br>(2.1-5.5)                            | 5.1%<br>(-0.1-11%)                   | 5.5%<br>(-0.88-13%)                 | 45<br>(-7.3-100)    | 260<br>(-5.3-580)       |
| Lithuania | 2016 | Male   | 95 plus  | 67%<br>(48-84%)                | 33%<br>(16-52%)          | 3.3<br>(1.6-5.7)                            | 3.8%<br>(-2.2-11%)                   | 3.8%<br>(-3.5-12%)                  | 6<br>(-5.5-19)      | 24<br>(-14-70)          |
| Moldova   | 1990 | Female | All Ages | 66%<br>(59-73%)                | 34%<br>(27-41%)          | 2.6<br>(1.6-3.7)                            | 8.7%<br>(5.5-12%)                    | 10%<br>(5.1-17%)                    | 2300<br>(1100-3700) | 71000<br>(45000-100000) |
| Moldova   | 1990 | Female | 15 to 19 | 59%<br>(43-74%)                | 41%<br>(26-57%)          | 1.7<br>(0.93-2.7)                           | 4.5%<br>(3-6.7%)                     | 7.5%<br>(4-12%)                     | 8.1<br>(4.2-13)     | 950<br>(610-1400)       |
| Moldova   | 1990 | Female | 20 to 24 | 73%<br>(56-85%)                | 27%<br>(15-44%)          | 2.7<br>(1.6-4.4)                            | 7.6%<br>(5.4-10%)                    | 10%<br>(6-15%)                      | 11<br>(6.6-18)      | 1500<br>(1100-2100)     |
| Moldova   | 1990 | Female | 25 to 29 | 78%<br>(63-88%)                | 22%<br>(12-37%)          | 3.5<br>(2.1-5.3)                            | 8.7%<br>(6.6-11%)                    | 13%<br>(8.5-18%)                    | 19<br>(12-28)       | 2300<br>(1700-3100)     |
| Moldova   | 1990 | Female | 30 to 34 | 81%<br>(67-90%)                | 19%<br>(9.7-33%)         | 3.9<br>(2.3-6)                              | 9.6%<br>(7.3-12%)                    | 16%<br>(11-21%)                     | 36<br>(25-50)       | 3300<br>(2400-4300)     |
| Moldova   | 1990 | Female | 35 to 39 | 83%<br>(71-91%)                | 17%<br>(9.1-29%)         | 4<br>(2.4-6.2)                              | 11%<br>(8.6-14%)                     | 18%<br>(13-23%)                     | 64<br>(46-87)       | 4500<br>(3300-5700)     |
| Moldova   | 1990 | Female | 40 to 44 | 83%<br>(71-91%)                | 17%<br>(8.8-29%)         | 4.2<br>(2.5-6.4)                            | 13%<br>(9.7-17%)                     | 20%<br>(15-26%)                     | 84<br>(61-110)      | 4800<br>(3600-6100)     |
| Moldova   | 1990 | Female | 45 to 49 | 81%<br>(65-91%)                | 19%<br>(9.1-35%)         | 4.4<br>(2.6-6.9)                            | 15%<br>(11-19%)                      | 21%<br>(16-27%)                     | 130<br>(91-170)     | 6000<br>(4400-7700)     |
| Moldova   | 1990 | Female | 50 to 54 | 78%<br>(63-88%)                | 22%<br>(12-37%)          | 4.4<br>(2.4-6.9)                            | 15%<br>(11-20%)                      | 21%<br>(15-27%)                     | 230<br>(160-300)    | 9300<br>(6700-12000)    |

| Location | Year | Sex    | Age      | Prevalence of current drinkers | Prevalence of abstainers | Population average of standard drinks daily | Percent of total attributable deaths | Percent of total attributable DALYs | Attributable deaths | Attributable DALYs        |
|----------|------|--------|----------|--------------------------------|--------------------------|---------------------------------------------|--------------------------------------|-------------------------------------|---------------------|---------------------------|
| Moldova  | 1990 | Female | 55 to 59 | 72%<br>(55-86%)                | 28%<br>(14-45%)          | 4.2<br>(2.2-7.1)                            | 15%<br>(10-20%)                      | 20%<br>(13-27%)                     | 300<br>(200-410)    | 10000<br>(6700-14000)     |
| Moldova  | 1990 | Female | 60 to 64 | 67%<br>(48-83%)                | 33%<br>(17-52%)          | 3.8<br>(2-6.3)                              | 13%<br>(7.2-19%)                     | 17%<br>(9.2-25%)                    | 360<br>(200-550)    | 10000<br>(5700-15000)     |
| Moldova  | 1990 | Female | 65 to 69 | 62%<br>(42-79%)                | 38%<br>(21-58%)          | 3.2<br>(1.7-5.3)                            | 11%<br>(4.8-18%)                     | 13%<br>(5.8-22%)                    | 370<br>(160-620)    | 8600<br>(3700-14000)      |
| Moldova  | 1990 | Female | 70 to 74 | 54%<br>(36-71%)                | 46%<br>(29-64%)          | 2.5<br>(1.2-4.4)                            | 7.6%<br>(1.8-15%)                    | 9.1%<br>(1.9-18%)                   | 220<br>(48-440)     | 4200<br>(950-8200)        |
| Moldova  | 1990 | Female | 75 to 79 | 44%<br>(28-63%)                | 56%<br>(37-72%)          | 1.9<br>(0.92-3.5)                           | 5.1%<br>(0.044-12%)                  | 5.9%<br>(-0.088-14%)                | 200<br>(-2.9-510)   | 3000<br>(26-7300)         |
| Moldova  | 1990 | Female | 80 to 84 | 38%<br>(22-56%)                | 62%<br>(44-78%)          | 1.7<br>(0.78-3)                             | 4%<br>(-0.27-10%)                    | 4.5%<br>(-0.56-12%)                 | 130<br>(-16-360)    | 1400<br>(-100-3800)       |
| Moldova  | 1990 | Female | 85 to 89 | 35%<br>(20-52%)                | 65%<br>(48-80%)          | 1.6<br>(0.72-3)                             | 3.5%<br>(-0.69-10%)                  | 3.9%<br>(-0.98-12%)                 | 73<br>(-18-220)     | 570<br>(-110-1600)        |
| Moldova  | 1990 | Female | 90 to 94 | 37%<br>(22-53%)                | 63%<br>(47-78%)          | 1.7<br>(0.77-3.2)                           | 3.4%<br>(-1.2-10%)                   | 3.8%<br>(-1.6-12%)                  | 30<br>(-13-95)      | 160<br>(-54-490)          |
| Moldova  | 1990 | Female | 95 plus  | 40%<br>(22-60%)                | 60%<br>(40-78%)          | 1.9<br>(0.72-4)                             | 3.6%<br>(-1.6-13%)                   | 3.9%<br>(-2.2-14%)                  | 8.2<br>(-4.5-30)    | 29<br>(-13-100)           |
| Moldova  | 1990 | Male   | All Ages | 78%<br>(71-84%)                | 22%<br>(16-29%)          | 5.6<br>(3.6-8.1)                            | 16%<br>(12-19%)                      | 17%<br>(12-22%)                     | 4000<br>(2700-5200) | 150000<br>(110000-180000) |
| Moldova  | 1990 | Male   | 15 to 19 | 69%<br>(54-83%)                | 31%<br>(17-46%)          | 4<br>(2.3-6.3)                              | 11%<br>(6.7-16%)                     | 17%<br>(9.7-25%)                    | 37<br>(21-55)       | 3000<br>(1800-4300)       |
| Moldova  | 1990 | Male   | 20 to 24 | 82%<br>(69-91%)                | 18%<br>(9.4-31%)         | 7.3<br>(4.4-11)                             | 22%<br>(16-29%)                      | 29%<br>(20-38%)                     | 110<br>(73-150)     | 7800<br>(5500-10000)      |
| Moldova  | 1990 | Male   | 25 to 29 | 87%<br>(79-93%)                | 13%<br>(6.8-21%)         | 8.4<br>(5.1-13)                             | 24%<br>(18-30%)                      | 31%<br>(23-39%)                     | 150<br>(110-190)    | 10000<br>(7700-13000)     |
| Moldova  | 1990 | Male   | 30 to 34 | 90%<br>(82-96%)                | 9.6%<br>(4.4-18%)        | 9.3<br>(5.6-14)                             | 24%<br>(19-29%)                      | 32%<br>(25-38%)                     | 210<br>(160-260)    | 13000<br>(10000-16000)    |
| Moldova  | 1990 | Male   | 35 to 39 | 91%<br>(85-96%)                | 8.5%<br>(4-15%)          | 9.9<br>(6.2-15)                             | 25%<br>(21-29%)                      | 33%<br>(27-38%)                     | 270<br>(210-320)    | 15000<br>(12000-18000)    |
| Moldova  | 1990 | Male   | 40 to 44 | 92%<br>(85-96%)                | 8.3%<br>(3.9-15%)        | 10<br>(6.4-15)                              | 26%<br>(22-30%)                      | 33%<br>(27-38%)                     | 270<br>(220-330)    | 13000<br>(11000-16000)    |
| Moldova  | 1990 | Male   | 45 to 49 | 91%<br>(82-96%)                | 8.9%<br>(4.1-18%)        | 10<br>(6-15)                                | 25%<br>(21-29%)                      | 31%<br>(26-35%)                     | 310<br>(250-370)    | 13000<br>(11000-16000)    |
| Moldova  | 1990 | Male   | 50 to 54 | 90%<br>(81-95%)                | 10%<br>(4.9-19%)         | 9.4<br>(5.7-14)                             | 23%<br>(19-27%)                      | 27%<br>(23-31%)                     | 470<br>(380-570)    | 18000<br>(14000-21000)    |
| Moldova  | 1990 | Male   | 55 to 59 | 88%<br>(78-94%)                | 12%<br>(5.9-22%)         | 8.5<br>(5.1-13)                             | 21%<br>(16-24%)                      | 24%<br>(19-29%)                     | 490<br>(380-590)    | 16000<br>(12000-20000)    |
| Moldova  | 1990 | Male   | 60 to 64 | 86%<br>(75-93%)                | 14%<br>(6.6-25%)         | 7.4<br>(4.4-11)                             | 18%<br>(13-23%)                      | 21%<br>(15-26%)                     | 570<br>(400-730)    | 16000<br>(11000-20000)    |
| Moldova  | 1990 | Male   | 65 to 69 | 85%<br>(73-93%)                | 15%<br>(7-27%)           | 6.1<br>(3.6-9.2)                            | 15%<br>(9.3-21%)                     | 17%<br>(10-24%)                     | 470<br>(280-640)    | 11000<br>(6500-15000)     |
| Moldova  | 1990 | Male   | 70 to 74 | 82%<br>(69-90%)                | 18%<br>(9.9-31%)         | 4.7<br>(2.6-7.6)                            | 11%<br>(3.6-17%)                     | 12%<br>(3.8-20%)                    | 260<br>(81-430)     | 4900<br>(1600-8000)       |

| Location | Year | Sex    | Age      | Prevalence of current drinkers | Prevalence of abstainers | Population average of standard drinks daily | Percent of total attributable deaths | Percent of total attributable DALYs | Attributable deaths | Attributable DALYs      |
|----------|------|--------|----------|--------------------------------|--------------------------|---------------------------------------------|--------------------------------------|-------------------------------------|---------------------|-------------------------|
| Moldova  | 1990 | Male   | 75 to 79 | 78%<br>(64-89%)                | 22%<br>(11-36%)          | 3.8<br>(2-6.5)                              | 7.2%<br>(0.26-15%)                   | 7.9%<br>(-0.12-17%)                 | 200<br>(-3.2-430)   | 3000<br>(110-6200)      |
| Moldova  | 1990 | Male   | 80 to 84 | 74%<br>(58-86%)                | 26%<br>(14-42%)          | 3.5<br>(1.9-5.8)                            | 5.5%<br>(-1.2-13%)                   | 5.9%<br>(-1.9-15%)                  | 100<br>(-33-270)    | 1200<br>(-270-2900)     |
| Moldova  | 1990 | Male   | 85 to 89 | 71%<br>(55-83%)                | 29%<br>(17-45%)          | 3.2<br>(1.7-5.4)                            | 4.2%<br>(-2.3-12%)                   | 4.3%<br>(-3.1-14%)                  | 39<br>(-29-130)     | 330<br>(-180-960)       |
| Moldova  | 1990 | Male   | 90 to 94 | 69%<br>(54-82%)                | 31%<br>(18-46%)          | 3.1<br>(1.6-5.4)                            | 3%<br>(-3-11%)                       | 2.9%<br>(-4-13%)                    | 9.6<br>(-13-40)     | 58<br>(-58-210)         |
| Moldova  | 1990 | Male   | 95 plus  | 68%<br>(49-83%)                | 32%<br>(17-51%)          | 2.8<br>(1.2-5.5)                            | 2.2%<br>(-3.5-10%)                   | 2%<br>(-4.8-11%)                    | 1.4<br>(-3.3-8.1)   | 6.2<br>(-9.7-28)        |
| Moldova  | 1995 | Female | All Ages | 67%<br>(60-74%)                | 33%<br>(26-40%)          | 2.6<br>(1.7-3.6)                            | 9.6%<br>(6.1-14%)                    | 11%<br>(5.2-17%)                    | 2900<br>(1400-4700) | 86000<br>(53000-120000) |
| Moldova  | 1995 | Female | 15 to 19 | 60%<br>(44-76%)                | 40%<br>(24-56%)          | 1.7<br>(1-2.8)                              | 4.4%<br>(2.9-6.2%)                   | 7.7%<br>(4.1-12%)                   | 7.8<br>(4.2-12)     | 950<br>(620-1400)       |
| Moldova  | 1995 | Female | 20 to 24 | 73%<br>(58-85%)                | 27%<br>(15-42%)          | 2.8<br>(1.7-4.2)                            | 7.8%<br>(5.7-10%)                    | 11%<br>(6.4-15%)                    | 13<br>(7.7-19)      | 1700<br>(1200-2300)     |
| Moldova  | 1995 | Female | 25 to 29 | 78%<br>(64-88%)                | 22%<br>(12-36%)          | 3.5<br>(2.1-5.2)                            | 9.4%<br>(7-12%)                      | 14%<br>(9.1-19%)                    | 20<br>(13-28)       | 2100<br>(1500-2800)     |
| Moldova  | 1995 | Female | 30 to 34 | 81%<br>(67-90%)                | 19%<br>(9.6-33%)         | 3.9<br>(2.4-5.8)                            | 11%<br>(8.1-13%)                     | 17%<br>(12-22%)                     | 43<br>(30-57)       | 3500<br>(2600-4500)     |
| Moldova  | 1995 | Female | 35 to 39 | 83%<br>(71-91%)                | 17%<br>(8.8-29%)         | 4<br>(2.5-5.9)                              | 12%<br>(9.1-15%)                     | 19%<br>(14-24%)                     | 82<br>(60-110)      | 5300<br>(4100-6700)     |
| Moldova  | 1995 | Female | 40 to 44 | 83%<br>(71-92%)                | 17%<br>(8.3-29%)         | 4.2<br>(2.6-6.2)                            | 14%<br>(11-18%)                      | 21%<br>(16-27%)                     | 140<br>(100-180)    | 7500<br>(5800-9500)     |
| Moldova  | 1995 | Female | 45 to 49 | 82%<br>(66-91%)                | 18%<br>(9-34%)           | 4.4<br>(2.6-6.8)                            | 15%<br>(11-20%)                      | 17%<br>(16-28%)                     | 170<br>(120-220)    | 7600<br>(5700-9900)     |
| Moldova  | 1995 | Female | 50 to 54 | 78%<br>(64-89%)                | 22%<br>(11-36%)          | 4.4<br>(2.5-6.7)                            | 17%<br>(12-22%)                      | 22%<br>(16-28%)                     | 230<br>(160-300)    | 8800<br>(6200-12000)    |
| Moldova  | 1995 | Female | 55 to 59 | 73%<br>(57-87%)                | 27%<br>(13-43%)          | 4.2<br>(2.3-7)                              | 16%<br>(10-22%)                      | 20%<br>(13-28%)                     | 390<br>(250-530)    | 13000<br>(8300-18000)   |
| Moldova  | 1995 | Female | 60 to 64 | 68%<br>(50-84%)                | 32%<br>(16-50%)          | 3.9<br>(2-6.4)                              | 14%<br>(7.7-21%)                     | 17%<br>(9.2-25%)                    | 410<br>(220-620)    | 11000<br>(6300-17000)   |
| Moldova  | 1995 | Female | 65 to 69 | 63%<br>(43-81%)                | 37%<br>(19-57%)          | 3.3<br>(1.7-5.3)                            | 12%<br>(5-19%)                       | 14%<br>(5.9-23%)                    | 480<br>(210-780)    | 11000<br>(4900-18000)   |
| Moldova  | 1995 | Female | 70 to 74 | 55%<br>(37-72%)                | 45%<br>(28-63%)          | 2.6<br>(1.3-4.4)                            | 8.2%<br>(1.9-16%)                    | 9.5%<br>(2-19%)                     | 400<br>(85-780)     | 7500<br>(1700-14000)    |
| Moldova  | 1995 | Female | 75 to 79 | 45%<br>(28-65%)                | 55%<br>(35-72%)          | 2<br>(0.95-3.5)                             | 5.3%<br>(-0.11-13%)                  | 6%<br>(-0.27-15%)                   | 200<br>(-8.6-500)   | 2900<br>(-58-7000)      |
| Moldova  | 1995 | Female | 80 to 84 | 39%<br>(23-57%)                | 61%<br>(43-77%)          | 1.7<br>(0.84-2.9)                           | 4%<br>(-0.62-11%)                    | 4.4%<br>(-0.91-12%)                 | 140<br>(-29-390)    | 1500<br>(-230-4100)     |
| Moldova  | 1995 | Female | 85 to 89 | 36%<br>(21-54%)                | 64%<br>(46-79%)          | 1.6<br>(0.75-2.9)                           | 3.4%<br>(-0.87-10%)                  | 3.8%<br>(-1.3-12%)                  | 96<br>(-33-290)     | 740<br>(-190-2200)      |
| Moldova  | 1995 | Female | 90 to 94 | 38%<br>(23-55%)                | 62%<br>(45-77%)          | 1.7<br>(0.81-3.2)                           | 3.4%<br>(-1.1-11%)                   | 3.7%<br>(-1.6-12%)                  | 38<br>(-16-120)     | 200<br>(-68-620)        |



| Location | Year | Sex    | Age      | Prevalence of current drinkers | Prevalence of abstainers | Population average of standard drinks daily | Percent of total attributable deaths | Percent of total attributable DALYs | Attributable deaths | Attributable DALYs        |
|----------|------|--------|----------|--------------------------------|--------------------------|---------------------------------------------|--------------------------------------|-------------------------------------|---------------------|---------------------------|
| Moldova  | 1995 | Female | 95 plus  | 41%<br>(22-61%)                | 59%<br>(39-78%)          | 1.9<br>(0.75-3.9)                           | 3.7%<br>(-1.7-13%)                   | 4%<br>(-2.2-14%)                    | 12<br>(-6.5-43)     | 42<br>(-20-140)           |
| Moldova  | 1995 | Male   | All Ages | 79%<br>(72-84%)                | 21%<br>(16-28%)          | 5.7<br>(3.8-8.1)                            | 18%<br>(14-21%)                      | 19%<br>(13-24%)                     | 5200<br>(3700-6800) | 190000<br>(150000-230000) |
| Moldova  | 1995 | Male   | 15 to 19 | 70%<br>(54-82%)                | 30%<br>(18-46%)          | 3.9<br>(2.3-6)                              | 11%<br>(7.1-16%)                     | 17%<br>(10-24%)                     | 43<br>(25-62)       | 3400<br>(2100-4800)       |
| Moldova  | 1995 | Male   | 20 to 24 | 82%<br>(70-90%)                | 18%<br>(9.5-30%)         | 7.3<br>(4.6-11)                             | 22%<br>(17-29%)                      | 30%<br>(22-38%)                     | 110<br>(79-150)     | 8300<br>(5900-11000)      |
| Moldova  | 1995 | Male   | 25 to 29 | 87%<br>(79-93%)                | 13%<br>(6.7-21%)         | 8.4<br>(5.3-12)                             | 25%<br>(20-31%)                      | 33%<br>(25-40%)                     | 150<br>(110-190)    | 9900<br>(7700-12000)      |
| Moldova  | 1995 | Male   | 30 to 34 | 90%<br>(82-96%)                | 9.6%<br>(4.5-18%)        | 9.2<br>(5.7-13)                             | 26%<br>(21-31%)                      | 33%<br>(26-38%)                     | 230<br>(180-280)    | 14000<br>(11000-17000)    |
| Moldova  | 1995 | Male   | 35 to 39 | 91%<br>(85-96%)                | 8.6%<br>(4.2-15%)        | 9.8<br>(6.2-14)                             | 27%<br>(23-32%)                      | 34%<br>(28-39%)                     | 370<br>(300-440)    | 20000<br>(17000-23000)    |
| Moldova  | 1995 | Male   | 40 to 44 | 92%<br>(85-96%)                | 8.4%<br>(4.1-15%)        | 10<br>(6.4-14)                              | 28%<br>(24-32%)                      | 34%<br>(29-38%)                     | 530<br>(430-620)    | 25000<br>(21000-30000)    |
| Moldova  | 1995 | Male   | 45 to 49 | 91%<br>(82-96%)                | 8.9%<br>(4.1-18%)        | 9.9<br>(6.3-14)                             | 27%<br>(23-31%)                      | 32%<br>(27-37%)                     | 500<br>(410-600)    | 21000<br>(18000-25000)    |
| Moldova  | 1995 | Male   | 50 to 54 | 90%<br>(81-95%)                | 10%<br>(4.6-19%)         | 9.4<br>(5.9-14)                             | 25%<br>(21-29%)                      | 29%<br>(24-33%)                     | 510<br>(420-620)    | 19000<br>(16000-23000)    |
| Moldova  | 1995 | Male   | 55 to 59 | 88%<br>(79-94%)                | 12%<br>(5.6-21%)         | 8.5<br>(5.2-12)                             | 23%<br>(18-27%)                      | 26%<br>(20-31%)                     | 700<br>(540-850)    | 23000<br>(17000-27000)    |
| Moldova  | 1995 | Male   | 60 to 64 | 87%<br>(76-94%)                | 13%<br>(6.4-24%)         | 7.4<br>(4.6-11)                             | 19%<br>(13-25%)                      | 22%<br>(15-27%)                     | 680<br>(470-870)    | 19000<br>(13000-24000)    |
| Moldova  | 1995 | Male   | 65 to 69 | 85%<br>(73-93%)                | 15%<br>(7-27%)           | 6<br>(3.7-8.9)                              | 16%<br>(9.7-22%)                     | 18%<br>(11-24%)                     | 670<br>(390-930)    | 15000<br>(9200-21000)     |
| Moldova  | 1995 | Male   | 70 to 74 | 82%<br>(70-90%)                | 18%<br>(9.6-30%)         | 4.7<br>(2.7-7.4)                            | 11%<br>(3.5-18%)                     | 12%<br>(3.7-21%)                    | 420<br>(120-700)    | 7700<br>(2400-13000)      |
| Moldova  | 1995 | Male   | 75 to 79 | 79%<br>(65-89%)                | 21%<br>(11-35%)          | 3.8<br>(2.1-6.3)                            | 7.2%<br>(-0.26-15%)                  | 7.8%<br>(-0.71-17%)                 | 180<br>(-16-390)    | 2700<br>(-94-5600)        |
| Moldova  | 1995 | Male   | 80 to 84 | 75%<br>(60-86%)                | 25%<br>(14-40%)          | 3.5<br>(1.9-5.5)                            | 5.2%<br>(-2-13%)                     | 5.4%<br>(-2.6-15%)                  | 99<br>(-49-280)     | 1100<br>(-430-2900)       |
| Moldova  | 1995 | Male   | 85 to 89 | 71%<br>(55-82%)                | 29%<br>(18-45%)          | 3.2<br>(1.7-5.1)                            | 3.6%<br>(-3.1-11%)                   | 3.7%<br>(-3.9-12%)                  | 45<br>(-49-150)     | 380<br>(-320-1200)        |
| Moldova  | 1995 | Male   | 90 to 94 | 70%<br>(55-82%)                | 30%<br>(18-45%)          | 3<br>(1.6-5.1)                              | 2.5%<br>(-3.6-11%)                   | 2.4%<br>(-4.7-12%)                  | 10<br>(-20-49)      | 62<br>(-86-260)           |
| Moldova  | 1995 | Male   | 95 plus  | 68%<br>(50-84%)                | 32%<br>(16-50%)          | 2.8<br>(1.2-5.3)                            | 2%<br>(-4-10%)                       | 1.7%<br>(-5.2-11%)                  | 1.7<br>(-5.3-11)    | 7.6<br>(-15-40)           |
| Moldova  | 2000 | Female | All Ages | 66%<br>(59-72%)                | 34%<br>(28-41%)          | 2.2<br>(1.5-3.1)                            | 8%<br>(5.1-12%)                      | 8.4%<br>(3.9-14%)                   | 1900<br>(900-3200)  | 60000<br>(38000-87000)    |
| Moldova  | 2000 | Female | 15 to 19 | 57%<br>(42-71%)                | 43%<br>(29-58%)          | 1.4<br>(0.83-2.1)                           | 3.8%<br>(2.6-5.1%)                   | 6.4%<br>(3.6-9.8%)                  | 5.5<br>(3.2-8.6)    | 810<br>(550-1100)         |
| Moldova  | 2000 | Female | 20 to 24 | 70%<br>(55-82%)                | 30%<br>(18-45%)          | 2.2<br>(1.4-3.2)                            | 7%<br>(5.1-9.2%)                     | 9.6%<br>(5.8-14%)                   | 8.8<br>(5.2-13)     | 1500<br>(1000-2100)       |

| Location | Year | Sex    | Age      | Prevalence of current drinkers | Prevalence of abstainers | Population average of standard drinks daily | Percent of total attributable deaths | Percent of total attributable DALYs | Attributable deaths | Attributable DALYs        |
|----------|------|--------|----------|--------------------------------|--------------------------|---------------------------------------------|--------------------------------------|-------------------------------------|---------------------|---------------------------|
| Moldova  | 2000 | Female | 25 to 29 | 76%<br>(65-86%)                | 24%<br>(14-35%)          | 2.9<br>(1.8-4.1)                            | 8.3%<br>(6.3-10%)                    | 12%<br>(8.1-17%)                    | 15<br>(9.6-21)      | 1800<br>(1300-2400)       |
| Moldova  | 2000 | Female | 30 to 34 | 80%<br>(68-89%)                | 20%<br>(11-32%)          | 3.2<br>(2-4.6)                              | 8.9%<br>(6.9-11%)                    | 14%<br>(10-19%)                     | 22<br>(15-30)       | 2000<br>(1500-2600)       |
| Moldova  | 2000 | Female | 35 to 39 | 82%<br>(71-90%)                | 18%<br>(9.9-29%)         | 3.3<br>(2.1-4.8)                            | 10%<br>(7.9-13%)                     | 17%<br>(13-22%)                     | 49<br>(36-64)       | 3500<br>(2700-4400)       |
| Moldova  | 2000 | Female | 40 to 44 | 82%<br>(71-90%)                | 18%<br>(9.6-29%)         | 3.5<br>(2.2-4.9)                            | 12%<br>(8.9-15%)                     | 19%<br>(14-24%)                     | 92<br>(69-120)      | 5300<br>(4000-6700)       |
| Moldova  | 2000 | Female | 45 to 49 | 81%<br>(69-90%)                | 19%<br>(9.9-31%)         | 3.7<br>(2.3-5.4)                            | 13%<br>(9.5-17%)                     | 20%<br>(15-25%)                     | 150<br>(110-200)    | 7100<br>(5300-9200)       |
| Moldova  | 2000 | Female | 50 to 54 | 78%<br>(63-88%)                | 22%<br>(12-37%)          | 3.7<br>(2.2-5.6)                            | 14%<br>(10-19%)                      | 20%<br>(14-26%)                     | 160<br>(120-220)    | 6600<br>(4700-8800)       |
| Moldova  | 2000 | Female | 55 to 59 | 72%<br>(55-86%)                | 28%<br>(14-45%)          | 3.5<br>(1.9-5.7)                            | 14%<br>(8.6-20%)                     | 18%<br>(11-26%)                     | 210<br>(130-310)    | 7200<br>(4500-10000)      |
| Moldova  | 2000 | Female | 60 to 64 | 67%<br>(49-83%)                | 33%<br>(17-51%)          | 3.2<br>(1.7-5.3)                            | 12%<br>(6.4-18%)                     | 15%<br>(8.1-23%)                    | 300<br>(160-470)    | 8500<br>(4500-13000)      |
| Moldova  | 2000 | Female | 65 to 69 | 62%<br>(43-80%)                | 38%<br>(20-57%)          | 2.7<br>(1.5-4.4)                            | 9.6%<br>(4.4-16%)                    | 12%<br>(5.3-20%)                    | 300<br>(130-520)    | 7100<br>(3200-12000)      |
| Moldova  | 2000 | Female | 70 to 74 | 54%<br>(36-72%)                | 46%<br>(28-64%)          | 2.1<br>(1.1-3.6)                            | 6.5%<br>(1.4-13%)                    | 7.7%<br>(1.6-16%)                   | 270<br>(55-560)     | 5100<br>(1100-10000)      |
| Moldova  | 2000 | Female | 75 to 79 | 44%<br>(28-64%)                | 56%<br>(36-72%)          | 1.6<br>(0.83-2.8)                           | 3.9%<br>(-0.39-9.8%)                 | 4.4%<br>(-0.59-12%)                 | 170<br>(-24-450)    | 2600<br>(-260-6400)       |
| Moldova  | 2000 | Female | 80 to 84 | 37%<br>(21-56%)                | 63%<br>(44-79%)          | 1.4<br>(0.71-2.4)                           | 2.5%<br>(-0.97-7.4%)                 | 2.7%<br>(-1.2-8.5%)                 | 75<br>(-33-240)     | 830<br>(-310-2500)        |
| Moldova  | 2000 | Female | 85 to 89 | 35%<br>(21-52%)                | 65%<br>(48-79%)          | 1.3<br>(0.64-2.4)                           | 1.8%<br>(-1.4-6.6%)                  | 2%<br>(-1.8-7.7%)                   | 35<br>(-33-140)     | 280<br>(-210-1000)        |
| Moldova  | 2000 | Female | 90 to 94 | 36%<br>(21-54%)                | 64%<br>(46-79%)          | 1.4<br>(0.67-2.5)                           | 1.8%<br>(-1.6-7.4%)                  | 1.9%<br>(-2.3-8.6%)                 | 19<br>(-23-87)      | 110<br>(-99-450)          |
| Moldova  | 2000 | Female | 95 plus  | 40%<br>(21-62%)                | 60%<br>(38-79%)          | 1.5<br>(0.62-3.2)                           | 2.1%<br>(-2.3-9.2%)                  | 2.2%<br>(-2.9-11%)                  | 6.2<br>(-8.3-30)    | 23<br>(-25-100)           |
| Moldova  | 2000 | Male   | All Ages | 81%<br>(75-86%)                | 19%<br>(14-25%)          | 5.2<br>(3.5-7.1)                            | 17%<br>(12-20%)                      | 17%<br>(11-22%)                     | 4000<br>(2600-5300) | 150000<br>(110000-180000) |
| Moldova  | 2000 | Male   | 15 to 19 | 72%<br>(58-83%)                | 28%<br>(17-42%)          | 3.5<br>(2.2-5.2)                            | 9.5%<br>(6.2-13%)                    | 16%<br>(9.6-22%)                    | 31<br>(19-44)       | 2600<br>(1700-3600)       |
| Moldova  | 2000 | Male   | 20 to 24 | 84%<br>(72-91%)                | 16%<br>(8.7-28%)         | 6.4<br>(4.2-9.2)                            | 20%<br>(14-25%)                      | 29%<br>(20-37%)                     | 84<br>(58-110)      | 6400<br>(4600-8400)       |
| Moldova  | 2000 | Male   | 25 to 29 | 89%<br>(82-94%)                | 11%<br>(6-18%)           | 7.4<br>(4.8-11)                             | 23%<br>(17-28%)                      | 31%<br>(23-38%)                     | 110<br>(77-130)     | 7400<br>(5400-9200)       |
| Moldova  | 2000 | Male   | 30 to 34 | 92%<br>(86-96%)                | 8%<br>(3.9-14%)          | 8.2<br>(5.3-12)                             | 23%<br>(18-28%)                      | 31%<br>(24-37%)                     | 120<br>(95-150)     | 7800<br>(6100-9500)       |
| Moldova  | 2000 | Male   | 35 to 39 | 93%<br>(88-96%)                | 7.2%<br>(3.6-12%)        | 8.6<br>(5.7-12)                             | 26%<br>(21-30%)                      | 33%<br>(27-38%)                     | 240<br>(190-290)    | 13000<br>(11000-16000)    |
| Moldova  | 2000 | Male   | 40 to 44 | 93%<br>(88-97%)                | 6.9%<br>(3.5-12%)        | 8.9<br>(5.9-13)                             | 27%<br>(22-31%)                      | 34%<br>(28-39%)                     | 400<br>(320-480)    | 20000<br>(16000-23000)    |

| Location | Year | Sex    | Age      | Prevalence of current drinkers | Prevalence of abstainers | Population average of standard drinks daily | Percent of total attributable deaths | Percent of total attributable DALYs | Attributable deaths | Attributable DALYs     |
|----------|------|--------|----------|--------------------------------|--------------------------|---------------------------------------------|--------------------------------------|-------------------------------------|---------------------|------------------------|
| Moldova  | 2000 | Male   | 45 to 49 | 93%<br>(86-96%)                | 7.3%<br>(3.5-14%)        | 8.8<br>(5.8-13)                             | 27%<br>(22-31%)                      | 32%<br>(27-37%)                     | 530<br>(430-650)    | 23000<br>(18000-28000) |
| Moldova  | 2000 | Male   | 50 to 54 | 91%<br>(83-95%)                | 9.3%<br>(4.5-17%)        | 8.1<br>(5.4-11)                             | 25%<br>(20-29%)                      | 29%<br>(24-34%)                     | 450<br>(350-540)    | 17000<br>(13000-20000) |
| Moldova  | 2000 | Male   | 55 to 59 | 88%<br>(79-94%)                | 12%<br>(5.6-21%)         | 7.2<br>(4.6-10)                             | 22%<br>(16-26%)                      | 26%<br>(19-31%)                     | 450<br>(330-550)    | 15000<br>(11000-18000) |
| Moldova  | 2000 | Male   | 60 to 64 | 87%<br>(76-94%)                | 13%<br>(6.4-24%)         | 6.3<br>(3.9-9.4)                            | 18%<br>(12-23%)                      | 21%<br>(13-27%)                     | 540<br>(340-710)    | 15000<br>(9500-20000)  |
| Moldova  | 2000 | Male   | 65 to 69 | 85%<br>(72-93%)                | 15%<br>(7.4-28%)         | 5.1<br>(3.2-7.5)                            | 14%<br>(7.5-20%)                     | 16%<br>(8.3-23%)                    | 480<br>(240-690)    | 11000<br>(5700-16000)  |
| Moldova  | 2000 | Male   | 70 to 74 | 82%<br>(69-90%)                | 18%<br>(10-31%)          | 3.9<br>(2.3-6.2)                            | 9.1%<br>(2.3-16%)                    | 10%<br>(2.4-19%)                    | 320<br>(76-600)     | 6100<br>(1600-11000)   |
| Moldova  | 2000 | Male   | 75 to 79 | 78%<br>(64-89%)                | 22%<br>(11-36%)          | 3.2<br>(1.8-5.1)                            | 5.1%<br>(-1.3-13%)                   | 5.5%<br>(-1.8-14%)                  | 150<br>(-51-400)    | 2300<br>(-590-5800)    |
| Moldova  | 2000 | Male   | 80 to 84 | 74%<br>(58-86%)                | 26%<br>(14-42%)          | 2.9<br>(1.6-4.5)                            | 2.9%<br>(-2.9-10%)                   | 2.9%<br>(-3.8-11%)                  | 47<br>(-62-180)     | 560<br>(-570-1900)     |
| Moldova  | 2000 | Male   | 85 to 89 | 71%<br>(54-83%)                | 29%<br>(17-46%)          | 2.7<br>(1.5-4.2)                            | 1.4%<br>(-3.9-8.4%)                  | 1.2%<br>(-5.1-9.2%)                 | 11<br>(-45-83)      | 110<br>(-290-640)      |
| Moldova  | 2000 | Male   | 90 to 94 | 69%<br>(54-82%)                | 31%<br>(18-46%)          | 2.5<br>(1.3-4.3)                            | 0.71%<br>(-4.3-8.2%)                 | 0.37%<br>(-5.4-9.1%)                | 1.6<br>(-24-41)     | 19<br>(-110-220)       |
| Moldova  | 2000 | Male   | 95 plus  | 68%<br>(49-83%)                | 32%<br>(17-51%)          | 2.4<br>(1.1-4.5)                            | 0.49%<br>(-4.6-8.2%)                 | 0.052%<br>(-5.8-9.1%)               | 0.056<br>(-6-9.2)   | 1.9<br>(-18-33)        |
| Moldova  | 2005 | Female | All Ages | 67%<br>(61-74%)                | 33%<br>(26-39%)          | 2<br>(1.4-2.7)                              | 7.6%<br>(4.9-11%)                    | 7.2%<br>(3.3-12%)                   | 1700<br>(740-2800)  | 56000<br>(36000-78000) |
| Moldova  | 2005 | Female | 15 to 19 | 57%<br>(43-71%)                | 43%<br>(29-57%)          | 1.2<br>(0.75-1.8)                           | 3.5%<br>(2.4-4.8%)                   | 5.9%<br>(3.3-9.1%)                  | 4.1<br>(2.3-6.3)    | 720<br>(490-1000)      |
| Moldova  | 2005 | Female | 20 to 24 | 70%<br>(56-82%)                | 30%<br>(18-44%)          | 1.9<br>(1.2-2.8)                            | 6.7%<br>(4.9-8.6%)                   | 8.4%<br>(5.1-12%)                   | 7.4<br>(4.5-11)     | 1500<br>(1000-2100)    |
| Moldova  | 2005 | Female | 25 to 29 | 77%<br>(65-87%)                | 23%<br>(13-35%)          | 2.5<br>(1.6-3.5)                            | 7.5%<br>(5.8-9.3%)                   | 11%<br>(7.5-15%)                    | 12<br>(8-17)        | 1800<br>(1300-2300)    |
| Moldova  | 2005 | Female | 30 to 34 | 81%<br>(69-90%)                | 19%<br>(10-31%)          | 2.8<br>(1.8-4.1)                            | 8.2%<br>(6.5-10%)                    | 13%<br>(9.7-17%)                    | 21<br>(15-28)       | 2100<br>(1600-2600)    |
| Moldova  | 2005 | Female | 35 to 39 | 82%<br>(71-90%)                | 18%<br>(9.6-29%)         | 2.9<br>(1.9-4.2)                            | 9.8%<br>(7.8-12%)                    | 16%<br>(12-20%)                     | 37<br>(28-48)       | 2600<br>(2000-3300)    |
| Moldova  | 2005 | Female | 40 to 44 | 83%<br>(72-91%)                | 17%<br>(9.3-28%)         | 3<br>(2-4.2)                                | 11%<br>(8.8-14%)                     | 18%<br>(14-22%)                     | 82<br>(63-100)      | 4700<br>(3600-5800)    |
| Moldova  | 2005 | Female | 45 to 49 | 82%<br>(68-90%)                | 18%<br>(9.8-32%)         | 3.2<br>(2.1-4.6)                            | 12%<br>(9.4-16%)                     | 19%<br>(14-24%)                     | 150<br>(110-190)    | 7000<br>(5300-8800)    |
| Moldova  | 2005 | Female | 50 to 54 | 78%<br>(65-88%)                | 22%<br>(12-35%)          | 3.2<br>(2-4.7)                              | 13%<br>(9.6-17%)                     | 19%<br>(14-24%)                     | 220<br>(160-290)    | 8700<br>(6300-11000)   |
| Moldova  | 2005 | Female | 55 to 59 | 73%<br>(56-86%)                | 27%<br>(14-44%)          | 3.1<br>(1.7-5)                              | 13%<br>(8.3-18%)                     | 17%<br>(11-24%)                     | 210<br>(130-310)    | 7100<br>(4500-10000)   |
| Moldova  | 2005 | Female | 60 to 64 | 68%<br>(49-83%)                | 32%<br>(17-51%)          | 2.8<br>(1.5-4.5)                            | 11%<br>(6-17%)                       | 14%<br>(7.7-21%)                    | 240<br>(130-370)    | 6800<br>(3600-11000)   |

| Location | Year | Sex    | Age      | Prevalence of current drinkers | Prevalence of abstainers | Population average of standard drinks daily | Percent of total attributable deaths | Percent of total attributable DALYs | Attributable deaths | Attributable DALYs        |
|----------|------|--------|----------|--------------------------------|--------------------------|---------------------------------------------|--------------------------------------|-------------------------------------|---------------------|---------------------------|
| Moldova  | 2005 | Female | 65 to 69 | 63%<br>(43-80%)                | 37%<br>(20-57%)          | 2.4<br>(1.3-3.8)                            | 8.2%<br>(3.6-14%)                    | 10%<br>(4.3-17%)                    | 260<br>(110-450)    | 6100<br>(2700-10000)      |
| Moldova  | 2005 | Female | 70 to 74 | 55%<br>(37-72%)                | 45%<br>(28-63%)          | 1.8<br>(1-3.1)                              | 5.2%<br>(0.93-11%)                   | 6.1%<br>(0.98-13%)                  | 200<br>(31-420)     | 3800<br>(680-7900)        |
| Moldova  | 2005 | Female | 75 to 79 | 45%<br>(28-64%)                | 55%<br>(36-72%)          | 1.4<br>(0.74-2.5)                           | 2.8%<br>(-0.72-7.5%)                 | 3.2%<br>(-1-8.9%)                   | 130<br>(-40-360)    | 2000<br>(-490-5300)       |
| Moldova  | 2005 | Female | 80 to 84 | 38%<br>(22-56%)                | 62%<br>(44-78%)          | 1.2<br>(0.63-2.1)                           | 1.6%<br>(-1.3-5.9%)                  | 1.7%<br>(-1.7-6.7%)                 | 61<br>(-60-240)     | 690<br>(-560-2600)        |
| Moldova  | 2005 | Female | 85 to 89 | 36%<br>(22-52%)                | 64%<br>(48-78%)          | 1.2<br>(0.56-2.1)                           | 1%<br>(-1.7-5.1%)                    | 1%<br>(-2.3-6%)                     | 20<br>(-44-110)     | 170<br>(-290-860)         |
| Moldova  | 2005 | Female | 90 to 94 | 37%<br>(23-55%)                | 63%<br>(45-77%)          | 1.2<br>(0.62-2.3)                           | 0.93%<br>(-2-5.6%)                   | 0.9%<br>(-2.7-6.4%)                 | 7.5<br>(-22-55)     | 47<br>(-110-280)          |
| Moldova  | 2005 | Female | 95 plus  | 41%<br>(23-62%)                | 59%<br>(38-77%)          | 1.4<br>(0.56-2.8)                           | 1.1%<br>(-2.6-7.2%)                  | 1.1%<br>(-3.4-8.5%)                 | 3.6<br>(-12-28)     | 15<br>(-34-97)            |
| Moldova  | 2005 | Male   | All Ages | 82%<br>(76-87%)                | 18%<br>(13-24%)          | 4.8<br>(3.4-6.5)                            | 17%<br>(13-21%)                      | 16%<br>(10-21%)                     | 4000<br>(2600-5500) | 150000<br>(110000-190000) |
| Moldova  | 2005 | Male   | 15 to 19 | 72%<br>(58-84%)                | 28%<br>(16-42%)          | 3.1<br>(2-4.6)                              | 8.3%<br>(5.4-12%)                    | 14%<br>(8.8-20%)                    | 24<br>(15-35)       | 2100<br>(1400-2900)       |
| Moldova  | 2005 | Male   | 20 to 24 | 84%<br>(73-91%)                | 16%<br>(8.7-27%)         | 5.7<br>(3.8-8)                              | 18%<br>(13-23%)                      | 27%<br>(19-35%)                     | 70<br>(47-95)       | 5500<br>(4000-7200)       |
| Moldova  | 2005 | Male   | 25 to 29 | 89%<br>(82-94%)                | 11%<br>(6.1-18%)         | 6.5<br>(4.3-9.2)                            | 20%<br>(15-25%)                      | 29%<br>(21-36%)                     | 98<br>(70-120)      | 7000<br>(5300-8800)       |
| Moldova  | 2005 | Male   | 30 to 34 | 92%<br>(85-96%)                | 8.3%<br>(4-15%)          | 7.2<br>(4.7-10)                             | 22%<br>(17-27%)                      | 29%<br>(23-36%)                     | 130<br>(100-170)    | 8500<br>(6500-10000)      |
| Moldova  | 2005 | Male   | 35 to 39 | 93%<br>(87-96%)                | 7.4%<br>(3.7-13%)        | 7.6<br>(5.1-11)                             | 25%<br>(20-29%)                      | 31%<br>(25-37%)                     | 200<br>(150-240)    | 11000<br>(8600-13000)     |
| Moldova  | 2005 | Male   | 40 to 44 | 93%<br>(87-97%)                | 7.1%<br>(3.4-13%)        | 7.8<br>(5.3-11)                             | 27%<br>(22-32%)                      | 33%<br>(26-38%)                     | 400<br>(310-480)    | 19000<br>(15000-23000)    |
| Moldova  | 2005 | Male   | 45 to 49 | 92%<br>(85-96%)                | 7.5%<br>(3.6-15%)        | 7.7<br>(5.2-11)                             | 26%<br>(21-31%)                      | 31%<br>(25-37%)                     | 610<br>(480-740)    | 26000<br>(20000-31000)    |
| Moldova  | 2005 | Male   | 50 to 54 | 91%<br>(83-96%)                | 9.1%<br>(4.3-17%)        | 7.2<br>(4.8-10)                             | 24%<br>(19-29%)                      | 29%<br>(22-34%)                     | 710<br>(540-880)    | 27000<br>(21000-33000)    |
| Moldova  | 2005 | Male   | 55 to 59 | 89%<br>(80-95%)                | 11%<br>(5.4-20%)         | 6.4<br>(4.1-9)                              | 21%<br>(15-26%)                      | 25%<br>(18-30%)                     | 500<br>(350-630)    | 16000<br>(11000-20000)    |
| Moldova  | 2005 | Male   | 60 to 64 | 87%<br>(76-94%)                | 13%<br>(6.2-24%)         | 5.5<br>(3.4-8.1)                            | 17%<br>(10-23%)                      | 19%<br>(12-26%)                     | 430<br>(260-590)    | 12000<br>(7300-16000)     |
| Moldova  | 2005 | Male   | 65 to 69 | 85%<br>(73-93%)                | 15%<br>(6.8-27%)         | 4.5<br>(2.9-6.5)                            | 13%<br>(6.3-19%)                     | 14%<br>(6.9-21%)                    | 440<br>(210-680)    | 10000<br>(4900-15000)     |
| Moldova  | 2005 | Male   | 70 to 74 | 82%<br>(70-90%)                | 18%<br>(9.6-30%)         | 3.4<br>(2-5.2)                              | 7.4%<br>(1.3-15%)                    | 8.2%<br>(1.2-16%)                   | 260<br>(39-520)     | 4900<br>(800-9600)        |
| Moldova  | 2005 | Male   | 75 to 79 | 79%<br>(65-89%)                | 21%<br>(11-35%)          | 2.8<br>(1.6-4.5)                            | 3.6%<br>(-1.7-10%)                   | 3.8%<br>(-2.2-12%)                  | 120<br>(-70-360)    | 1800<br>(-820-5200)       |
| Moldova  | 2005 | Male   | 80 to 84 | 75%<br>(60-86%)                | 25%<br>(14-40%)          | 2.5<br>(1.5-3.9)                            | 1.4%<br>(-3.6-7.6%)                  | 1.3%<br>(-4.6-8.2%)                 | 26<br>(-97-170)     | 360<br>(-910-1900)        |

| Location | Year | Sex    | Age      | Prevalence of current drinkers | Prevalence of abstainers | Population average of standard drinks daily | Percent of total attributable deaths | Percent of total attributable DALYs | Attributable deaths | Attributable DALYs        |
|----------|------|--------|----------|--------------------------------|--------------------------|---------------------------------------------|--------------------------------------|-------------------------------------|---------------------|---------------------------|
| Moldova  | 2005 | Male   | 85 to 89 | 71%<br>(55-83%)                | 29%<br>(17-45%)          | 2.4<br>(1.3-3.7)                            | 0.12%<br>(-4.5-6.3%)                 | -0.31%<br>(-5.7-6.7%)               | -2.9<br>(-53-63)    | 9.1<br>(-360-500)         |
| Moldova  | 2005 | Male   | 90 to 94 | 69%<br>(55-82%)                | 31%<br>(18-45%)          | 2.2<br>(1.2-3.8)                            | -0.46%<br>(-4.5-5.9%)                | -0.99%<br>(-5.9-6.3%)               | -3.5<br>(-21-23)    | -9.6<br>(-96-120)         |
| Moldova  | 2005 | Male   | 95 plus  | 68%<br>(49-83%)                | 32%<br>(17-51%)          | 2.1<br>(0.95-3.9)                           | -0.55%<br>(-4.9-6.1%)                | -1.1%<br>(-6.4-6.7%)                | -1.3<br>(-7.4-7.6)  | -2.5<br>(-22-28)          |
| Moldova  | 2010 | Female | All Ages | 69%<br>(62-75%)                | 31%<br>(25-38%)          | 2<br>(1.3-2.7)                              | 7%<br>(4.7-9.8%)                     | 6.3%<br>(2.7-11%)                   | 1400<br>(610-2400)  | 49000<br>(33000-69000)    |
| Moldova  | 2010 | Female | 15 to 19 | 58%<br>(44-72%)                | 42%<br>(28-56%)          | 1.1<br>(0.67-1.7)                           | 3.4%<br>(2.4-4.6%)                   | 5.6%<br>(3.2-8.7%)                  | 3.1<br>(1.7-4.7)    | 560<br>(370-790)          |
| Moldova  | 2010 | Female | 20 to 24 | 71%<br>(57-82%)                | 29%<br>(18-43%)          | 1.8<br>(1.1-2.6)                            | 6.5%<br>(4.7-8.5%)                   | 7.7%<br>(4.7-11%)                   | 5.8<br>(3.5-8.6)    | 1500<br>(990-2100)        |
| Moldova  | 2010 | Female | 25 to 29 | 78%<br>(66-87%)                | 22%<br>(13-34%)          | 2.3<br>(1.5-3.3)                            | 7.3%<br>(5.7-9%)                     | 10%<br>(7.1-14%)                    | 10<br>(7.1-15)      | 1700<br>(1200-2300)       |
| Moldova  | 2010 | Female | 30 to 34 | 81%<br>(70-90%)                | 19%<br>(10-30%)          | 2.6<br>(1.6-3.9)                            | 7.8%<br>(6.2-9.7%)                   | 12%<br>(9.5-16%)                    | 18<br>(13-24)       | 2000<br>(1500-2500)       |
| Moldova  | 2010 | Female | 35 to 39 | 83%<br>(71-91%)                | 17%<br>(9.4-29%)         | 2.7<br>(1.7-4)                              | 9.5%<br>(7.6-12%)                    | 16%<br>(13-20%)                     | 35<br>(27-45)       | 2600<br>(2100-3300)       |
| Moldova  | 2010 | Female | 40 to 44 | 83%<br>(72-91%)                | 17%<br>(9.3-28%)         | 2.8<br>(1.8-4.1)                            | 11%<br>(8.4-13%)                     | 18%<br>(14-22%)                     | 58<br>(44-73)       | 3400<br>(2700-4300)       |
| Moldova  | 2010 | Female | 45 to 49 | 82%<br>(70-90%)                | 18%<br>(9.8-30%)         | 3<br>(1.9-4.5)                              | 12%<br>(8.9-15%)                     | 18%<br>(15-23%)                     | 120<br>(90-150)     | 5700<br>(4400-7200)       |
| Moldova  | 2010 | Female | 50 to 54 | 79%<br>(66-89%)                | 21%<br>(11-34%)          | 3<br>(1.8-4.5)                              | 12%<br>(9.1-16%)                     | 18%<br>(14-23%)                     | 180<br>(140-240)    | 7400<br>(5500-9700)       |
| Moldova  | 2010 | Female | 55 to 59 | 73%<br>(57-87%)                | 27%<br>(13-43%)          | 2.9<br>(1.6-4.6)                            | 16%<br>(7.8-16%)                     | 16%<br>(11-23%)                     | 250<br>(160-350)    | 8400<br>(5600-12000)      |
| Moldova  | 2010 | Female | 60 to 64 | 68%<br>(50-83%)                | 32%<br>(17-50%)          | 2.6<br>(1.4-4.2)                            | 10%<br>(5.9-16%)                     | 13%<br>(7.6-20%)                    | 210<br>(120-310)    | 5900<br>(3300-9000)       |
| Moldova  | 2010 | Female | 65 to 69 | 63%<br>(44-80%)                | 37%<br>(20-56%)          | 2.2<br>(1.3-3.5)                            | 7.3%<br>(3-12%)                      | 9.1%<br>(3.8-16%)                   | 180<br>(77-320)     | 4400<br>(1800-7500)       |
| Moldova  | 2010 | Female | 70 to 74 | 56%<br>(38-73%)                | 44%<br>(27-62%)          | 1.8<br>(0.95-2.9)                           | 4.6%<br>(0.41-9.8%)                  | 5.5%<br>(0.43-12%)                  | 170<br>(14-370)     | 3200<br>(290-7000)        |
| Moldova  | 2010 | Female | 75 to 79 | 46%<br>(29-64%)                | 54%<br>(36-71%)          | 1.4<br>(0.7-2.4)                            | 2.4%<br>(-0.92-7.2%)                 | 2.8%<br>(-1.2-8.6%)                 | 100<br>(-45-310)    | 1500<br>(-590-4500)       |
| Moldova  | 2010 | Female | 80 to 84 | 39%<br>(22-57%)                | 61%<br>(43-78%)          | 1.2<br>(0.59-2)                             | 1.3%<br>(-1.4-5.2%)                  | 1.3%<br>(-1.9-6.1%)                 | 50<br>(-69-220)     | 580<br>(-640-2400)        |
| Moldova  | 2010 | Female | 85 to 89 | 36%<br>(22-53%)                | 64%<br>(47-78%)          | 1.1<br>(0.51-2)                             | 0.74%<br>(-1.8-4.4%)                 | 0.68%<br>(-2.4-5.1%)                | 19<br>(-66-140)     | 180<br>(-440-1000)        |
| Moldova  | 2010 | Female | 90 to 94 | 38%<br>(23-55%)                | 62%<br>(45-77%)          | 1.2<br>(0.57-2.1)                           | 0.59%<br>(-2.1-4.7%)                 | 0.47%<br>(-2.7-5.4%)                | 4.6<br>(-28-57)     | 36<br>(-130-300)          |
| Moldova  | 2010 | Female | 95 plus  | 42%<br>(23-62%)                | 58%<br>(38-77%)          | 1.3<br>(0.5-2.5)                            | 0.72%<br>(-2.8-6%)                   | 0.56%<br>(-3.7-7.1%)                | 1.6<br>(-11-20)     | 8.2<br>(-32-72)           |
| Moldova  | 2010 | Male   | All Ages | 83%<br>(78-88%)                | 17%<br>(12-22%)          | 4.7<br>(3.2-6.4)                            | 16%<br>(12-20%)                      | 15%<br>(9.7-20%)                    | 3700<br>(2400-5200) | 140000<br>(100000-180000) |

| Location | Year | Sex    | Age      | Prevalence of current drinkers | Prevalence of abstainers | Population average of standard drinks daily | Percent of total attributable deaths | Percent of total attributable DALYs | Attributable deaths | Attributable DALYs     |
|----------|------|--------|----------|--------------------------------|--------------------------|---------------------------------------------|--------------------------------------|-------------------------------------|---------------------|------------------------|
| Moldova  | 2010 | Male   | 15 to 19 | 73%<br>(58-84%)                | 27%<br>(16-42%)          | 2.9<br>(1.8-4.3)                            | 8%<br>(5.3-11%)                      | 14%<br>(8.6-20%)                    | 18<br>(11-27)       | 1600<br>(1100-2300)    |
| Moldova  | 2010 | Male   | 20 to 24 | 84%<br>(74-91%)                | 16%<br>(8.6-26%)         | 5.3<br>(3.5-7.6)                            | 17%<br>(12-22%)                      | 25%<br>(18-34%)                     | 67<br>(45-93)       | 5300<br>(3900-7100)    |
| Moldova  | 2010 | Male   | 25 to 29 | 89%<br>(82-94%)                | 11%<br>(6-18%)           | 6.1<br>(3.9-8.8)                            | 19%<br>(14-24%)                      | 28%<br>(20-35%)                     | 87<br>(63-110)      | 6400<br>(4800-8100)    |
| Moldova  | 2010 | Male   | 30 to 34 | 92%<br>(85-96%)                | 8.3%<br>(4-15%)          | 6.7<br>(4.4-9.6)                            | 21%<br>(16-26%)                      | 28%<br>(21-35%)                     | 130<br>(96-160)     | 8300<br>(6400-10000)   |
| Moldova  | 2010 | Male   | 35 to 39 | 93%<br>(87-96%)                | 7.4%<br>(3.7-13%)        | 7.1<br>(4.6-10)                             | 24%<br>(19-28%)                      | 30%<br>(24-36%)                     | 200<br>(150-240)    | 11000<br>(8400-13000)  |
| Moldova  | 2010 | Male   | 40 to 44 | 93%<br>(88-96%)                | 7.1%<br>(3.6-12%)        | 7.3<br>(4.8-10)                             | 26%<br>(21-30%)                      | 32%<br>(25-37%)                     | 300<br>(230-370)    | 15000<br>(11000-18000) |
| Moldova  | 2010 | Male   | 45 to 49 | 93%<br>(85-97%)                | 7.5%<br>(3.4-15%)        | 7.3<br>(4.8-10)                             | 26%<br>(20-30%)                      | 31%<br>(24-36%)                     | 500<br>(380-610)    | 21000<br>(16000-26000) |
| Moldova  | 2010 | Male   | 50 to 54 | 91%<br>(84-96%)                | 9%<br>(4.5-16%)          | 6.8<br>(4.5-9.6)                            | 24%<br>(18-29%)                      | 28%<br>(22-34%)                     | 660<br>(490-820)    | 25000<br>(19000-31000) |
| Moldova  | 2010 | Male   | 55 to 59 | 89%<br>(81-94%)                | 11%<br>(5.6-19%)         | 6<br>(3.9-8.5)                              | 21%<br>(14-26%)                      | 24%<br>(17-30%)                     | 690<br>(470-880)    | 23000<br>(15000-29000) |
| Moldova  | 2010 | Male   | 60 to 64 | 87%<br>(77-94%)                | 13%<br>(6.4-23%)         | 5.2<br>(3.3-7.6)                            | 16%<br>(9.9-22%)                     | 19%<br>(11-25%)                     | 450<br>(260-610)    | 12000<br>(7400-17000)  |
| Moldova  | 2010 | Male   | 65 to 69 | 85%<br>(73-93%)                | 15%<br>(6.8-27%)         | 4.2<br>(2.6-6)                              | 12%<br>(5.8-18%)                     | 13%<br>(6.5-21%)                    | 330<br>(160-510)    | 7700<br>(3700-12000)   |
| Moldova  | 2010 | Male   | 70 to 74 | 82%<br>(70-91%)                | 18%<br>(9.1-30%)         | 3.2<br>(1.9-4.9)                            | 6.7%<br>(1-14%)                      | 7.4%<br>(0.94-15%)                  | 230<br>(28-470)     | 4300<br>(650-8700)     |
| Moldova  | 2010 | Male   | 75 to 79 | 79%<br>(65-89%)                | 21%<br>(11-35%)          | 2.6<br>(1.4-4.3)                            | 3.1%<br>(-1.8-9.7%)                  | 3.2%<br>(-2.5-11%)                  | 94<br>(-72-320)     | 1500<br>(-860-4700)    |
| Moldova  | 2010 | Male   | 80 to 84 | 75%<br>(59-86%)                | 25%<br>(14-41%)          | 2.4<br>(1.4-3.8)                            | 0.98%<br>(-3.5-7%)                   | 0.73%<br>(-4.6-7.6%)                | 17<br>(-100-170)    | 270<br>(-960-1900)     |
| Moldova  | 2010 | Male   | 85 to 89 | 72%<br>(56-82%)                | 28%<br>(18-44%)          | 2.2<br>(1.2-3.5)                            | -0.25%<br>(-4.4-5.3%)                | -0.76%<br>(-5.7-5.7%)               | -9.9<br>(-76-78)    | -29<br>(-510-600)      |
| Moldova  | 2010 | Male   | 90 to 94 | 70%<br>(55-82%)                | 30%<br>(18-45%)          | 2.1<br>(1.1-3.5)                            | -0.82%<br>(-4.7-4.8%)                | -1.5%<br>(-6.3-5.2%)                | -6.2<br>(-26-23)    | -21<br>(-120-130)      |
| Moldova  | 2010 | Male   | 95 plus  | 68%<br>(50-83%)                | 32%<br>(17-50%)          | 2<br>(0.88-3.5)                             | -0.92%<br>(-4.8-5.3%)                | -1.7%<br>(-6.6-5.6%)                | -1.7<br>(-6.6-5.6)  | -3.7<br>(-20-21)       |
| Moldova  | 2016 | Female | All Ages | 69%<br>(62-76%)                | 31%<br>(24-38%)          | 2.1<br>(1.3-3)                              | 7%<br>(4.5-10%)                      | 6.5%<br>(2.7-11%)                   | 1300<br>(560-2300)  | 46000<br>(29000-66000) |
| Moldova  | 2016 | Female | 15 to 19 | 59%<br>(42-75%)                | 41%<br>(25-58%)          | 1.2<br>(0.64-1.9)                           | 3.3%<br>(2.3-4.6%)                   | 5.7%<br>(3.2-9%)                    | 1.6<br>(0.89-2.7)   | 360<br>(240-510)       |
| Moldova  | 2016 | Female | 20 to 24 | 73%<br>(57-85%)                | 27%<br>(15-43%)          | 1.9<br>(1.1-2.9)                            | 6.7%<br>(4.9-8.9%)                   | 7.9%<br>(4.7-12%)                   | 3.7<br>(2.1-5.8)    | 1100<br>(720-1600)     |
| Moldova  | 2016 | Female | 25 to 29 | 78%<br>(63-87%)                | 22%<br>(13-37%)          | 2.4<br>(1.4-3.7)                            | 7.3%<br>(5.7-9.1%)                   | 10%<br>(6.6-14%)                    | 8.9<br>(5.5-13)     | 1900<br>(1300-2500)    |
| Moldova  | 2016 | Female | 30 to 34 | 81%<br>(66-90%)                | 19%<br>(9.6-34%)         | 2.7<br>(1.6-4.2)                            | 7.7%<br>(6-9.6%)                     | 13%<br>(9.2-17%)                    | 16<br>(11-23)       | 2100<br>(1500-2700)    |

| Location | Year | Sex    | Age      | Prevalence of current drinkers | Prevalence of abstainers | Population average of standard drinks daily | Percent of total attributable deaths | Percent of total attributable DALYs | Attributable deaths | Attributable DALYs       |
|----------|------|--------|----------|--------------------------------|--------------------------|---------------------------------------------|--------------------------------------|-------------------------------------|---------------------|--------------------------|
| Moldova  | 2016 | Female | 35 to 39 | 83%<br>(71-91%)                | 17%<br>(8.9-29%)         | 2.8<br>(1.6-4.3)                            | 9.2%<br>(7.4-12%)                    | 16%<br>(12-21%)                     | 33<br>(23-44)       | 2700<br>(2000-3400)      |
| Moldova  | 2016 | Female | 40 to 44 | 83%<br>(72-92%)                | 17%<br>(8.4-28%)         | 2.9<br>(1.7-4.5)                            | 10%<br>(7.8-13%)                     | 18%<br>(14-22%)                     | 50<br>(36-67)       | 3100<br>(2400-4000)      |
| Moldova  | 2016 | Female | 45 to 49 | 82%<br>(66-91%)                | 18%<br>(9.1-34%)         | 3<br>(1.8-4.8)                              | 11%<br>(8.2-14%)                     | 18%<br>(14-24%)                     | 73<br>(53-99)       | 3700<br>(2700-4800)      |
| Moldova  | 2016 | Female | 50 to 54 | 78%<br>(64-88%)                | 22%<br>(12-36%)          | 3<br>(1.7-4.7)                              | 11%<br>(8.5-15%)                     | 18%<br>(14-23%)                     | 140<br>(100-190)    | 5900<br>(4300-8000)      |
| Moldova  | 2016 | Female | 55 to 59 | 73%<br>(56-86%)                | 27%<br>(14-44%)          | 2.9<br>(1.5-4.8)                            | 11%<br>(7.6-16%)                     | 17%<br>(11-23%)                     | 200<br>(140-290)    | 7200<br>(4800-10000)     |
| Moldova  | 2016 | Female | 60 to 64 | 68%<br>(49-83%)                | 32%<br>(17-51%)          | 2.7<br>(1.4-4.5)                            | 9.9%<br>(5.5-15%)                    | 13%<br>(7.8-20%)                    | 290<br>(160-450)    | 8400<br>(4800-13000)     |
| Moldova  | 2016 | Female | 65 to 69 | 63%<br>(43-81%)                | 37%<br>(19-57%)          | 2.3<br>(1.2-3.7)                            | 7.4%<br>(3.3-13%)                    | 9.5%<br>(4-17%)                     | 180<br>(78-310)     | 4200<br>(1800-7400)      |
| Moldova  | 2016 | Female | 70 to 74 | 55%<br>(37-72%)                | 45%<br>(28-63%)          | 1.8<br>(0.89-3.1)                           | 4.8%<br>(0.81-10%)                   | 5.9%<br>(0.94-13%)                  | 130<br>(21-280)     | 2600<br>(440-5400)       |
| Moldova  | 2016 | Female | 75 to 79 | 45%<br>(28-64%)                | 55%<br>(36-72%)          | 1.4<br>(0.67-2.5)                           | 2.7%<br>(-0.66-7.7%)                 | 3.2%<br>(-0.94-9.4%)                | 100<br>(-33-310)    | 1600<br>(-400-4500)      |
| Moldova  | 2016 | Female | 80 to 84 | 38%<br>(22-57%)                | 62%<br>(43-78%)          | 1.2<br>(0.55-2.1)                           | 1.6%<br>(-1.2-5.7%)                  | 1.7%<br>(-1.7-6.8%)                 | 62<br>(-64-230)     | 710<br>(-570-2500)       |
| Moldova  | 2016 | Female | 85 to 89 | 36%<br>(21-52%)                | 64%<br>(48-79%)          | 1.1<br>(0.5-2)                              | 0.97%<br>(-1.6-4.9%)                 | 0.97%<br>(-2.3-5.7%)                | 25<br>(-59-150)     | 230<br>(-390-1100)       |
| Moldova  | 2016 | Female | 90 to 94 | 37%<br>(23-54%)                | 63%<br>(46-77%)          | 1.2<br>(0.55-2.2)                           | 0.77%<br>(-1.7-4.9%)                 | 0.69%<br>(-2.6-6.1%)                | 7.8<br>(-29-70)     | 58<br>(-130-370)         |
| Moldova  | 2016 | Female | 95 plus  | 41%<br>(22-63%)                | 59%<br>(37-78%)          | 1.3<br>(0.49-2.6)                           | 0.9%<br>(-2.4-6.5%)                  | 0.77%<br>(-3.4-7.8%)                | 2.7<br>(-12-27)     | 14<br>(-37-98)           |
| Moldova  | 2016 | Male   | All Ages | 82%<br>(77-87%)                | 18%<br>(13-23%)          | 4.8<br>(3.1-7.1)                            | 16%<br>(11-20%)                      | 15%<br>(9.3-21%)                    | 3400<br>(2000-4900) | 130000<br>(87000-170000) |
| Moldova  | 2016 | Male   | 15 to 19 | 70%<br>(53-83%)                | 30%<br>(17-47%)          | 2.9<br>(1.6-4.6)                            | 7.6%<br>(5.1-11%)                    | 14%<br>(8.3-21%)                    | 11<br>(6.1-17)      | 980<br>(640-1400)        |
| Moldova  | 2016 | Male   | 20 to 24 | 82%<br>(70-91%)                | 18%<br>(9.4-30%)         | 5.3<br>(3.3-8.1)                            | 15%<br>(11-21%)                      | 25%<br>(17-34%)                     | 38<br>(24-55)       | 3200<br>(2300-4400)      |
| Moldova  | 2016 | Male   | 25 to 29 | 87%<br>(79-93%)                | 13%<br>(6.8-21%)         | 6.1<br>(3.7-9.3)                            | 17%<br>(13-22%)                      | 27%<br>(19-35%)                     | 75<br>(52-100)      | 5900<br>(4300-7600)      |
| Moldova  | 2016 | Male   | 30 to 34 | 90%<br>(82-96%)                | 9.5%<br>(4.4-18%)        | 6.6<br>(4.1-10)                             | 19%<br>(15-24%)                      | 28%<br>(21-34%)                     | 110<br>(80-150)     | 7700<br>(5700-9700)      |
| Moldova  | 2016 | Male   | 35 to 39 | 92%<br>(85-96%)                | 8.4%<br>(4-15%)          | 7.1<br>(4.4-11)                             | 22%<br>(18-27%)                      | 30%<br>(23-36%)                     | 170<br>(130-230)    | 10000<br>(7500-13000)    |
| Moldova  | 2016 | Male   | 40 to 44 | 92%<br>(85-96%)                | 8.2%<br>(3.8-15%)        | 7.3<br>(4.5-11)                             | 25%<br>(19-29%)                      | 32%<br>(25-37%)                     | 250<br>(180-330)    | 13000<br>(9400-16000)    |
| Moldova  | 2016 | Male   | 45 to 49 | 91%<br>(82-96%)                | 8.7%<br>(4-18%)          | 7.2<br>(4.4-11)                             | 25%<br>(19-29%)                      | 30%<br>(24-36%)                     | 320<br>(230-420)    | 14000<br>(10000-18000)   |
| Moldova  | 2016 | Male   | 50 to 54 | 90%<br>(82-95%)                | 9.9%<br>(4.6-18%)        | 6.8<br>(4.2-10)                             | 23%<br>(18-28%)                      | 28%<br>(21-34%)                     | 520<br>(370-680)    | 20000<br>(14000-25000)   |

| Location           | Year | Sex    | Age      | Prevalence of current drinkers | Prevalence of abstainers | Population average of standard drinks daily | Percent of total attributable deaths | Percent of total attributable DALYs | Attributable deaths   | Attributable DALYs         |
|--------------------|------|--------|----------|--------------------------------|--------------------------|---------------------------------------------|--------------------------------------|-------------------------------------|-----------------------|----------------------------|
| Moldova            | 2016 | Male   | 55 to 59 | 88%<br>(79-94%)                | 12%<br>(5.7-21%)         | 6<br>(3.7-9)                                | 20%<br>(14-25%)                      | 24%<br>(17-30%)                     | 590<br>(400-780)      | 19000<br>(13000-25000)     |
| Moldova            | 2016 | Male   | 60 to 64 | 87%<br>(76-94%)                | 13%<br>(6.4-24%)         | 5.2<br>(3.1-8.1)                            | 16%<br>(10-22%)                      | 19%<br>(12-26%)                     | 660<br>(390-930)      | 18000<br>(11000-26000)     |
| Moldova            | 2016 | Male   | 65 to 69 | 85%<br>(72-93%)                | 15%<br>(7-28%)           | 4.2<br>(2.5-6.5)                            | 12%<br>(5.8-19%)                     | 14%<br>(6.4-22%)                    | 350<br>(160-550)      | 8100<br>(3800-13000)       |
| Moldova            | 2016 | Male   | 70 to 74 | 82%<br>(70-91%)                | 18%<br>(9.5-30%)         | 3.2<br>(1.8-5.2)                            | 7.1%<br>(1.3-14%)                    | 8%<br>(1.2-16%)                     | 180<br>(29-380)       | 3500<br>(630-7000)         |
| Moldova            | 2016 | Male   | 75 to 79 | 78%<br>(64-89%)                | 22%<br>(11-36%)          | 2.6<br>(1.4-4.4)                            | 3.5%<br>(-1.5-10%)                   | 3.7%<br>(-2.1-12%)                  | 91<br>(-51-290)       | 1400<br>(-600-4300)        |
| Moldova            | 2016 | Male   | 80 to 84 | 75%<br>(59-86%)                | 25%<br>(14-41%)          | 2.4<br>(1.3-3.9)                            | 1.4%<br>(-3.2-8.1%)                  | 1.3%<br>(-4.2-9%)                   | 28<br>(-92-190)       | 380<br>(-850-2100)         |
| Moldova            | 2016 | Male   | 85 to 89 | 71%<br>(55-83%)                | 29%<br>(17-45%)          | 2.3<br>(1.2-3.7)                            | 0.27%<br>(-3.8-6.1%)                 | -0.21%<br>(-5.3-6.8%)               | -2.5<br>(-63-80)      | 29<br>(-410-640)           |
| Moldova            | 2016 | Male   | 90 to 94 | 69%<br>(56-82%)                | 31%<br>(18-44%)          | 2.1<br>(1.1-3.6)                            | -0.26%<br>(-3.8-5.2%)                | -0.99%<br>(-5.8-6%)                 | -4.5<br>(-26-27)      | -7.9<br>(-120-160)         |
| Moldova            | 2016 | Male   | 95 plus  | 68%<br>(50-84%)                | 32%<br>(16-50%)          | 2<br>(0.83-3.7)                             | -0.39%<br>(-4-5.3%)                  | -1.2%<br>(-6.6-1%)                  | -1.4<br>(-6.6-6.7)    | -1.9<br>(-19-26)           |
| Russian Federation | 1990 | Female | All Ages | 61%<br>(56-65%)                | 39%<br>(35-44%)          | 1.2<br>(0.95-1.5)                           | 3.5%<br>(2.4-4.7%)                   | 1.6%<br>(0.12-3.3%)                 | 14000<br>(1000-29000) | 910000<br>(640000-1300000) |
| Russian Federation | 1990 | Female | 15 to 19 | 47%<br>(37-58%)                | 53%<br>(42-63%)          | 0.93<br>(0.57-1.4)                          | 3.4%<br>(2.4-4.6%)                   | 5.3%<br>(3.1-8.3%)                  | 170<br>(100-260)      | 21000<br>(14000-29000)     |
| Russian Federation | 1990 | Female | 20 to 24 | 71%<br>(62-78%)                | 29%<br>(22-38%)          | 1.9<br>(1.2-2.8)                            | 6.6%<br>(5-8.5%)                     | 9.2%<br>(5.9-13%)                   | 310<br>(200-450)      | 42000<br>(30000-56000)     |
| Russian Federation | 1990 | Female | 25 to 29 | 78%<br>(71-83%)                | 22%<br>(17-29%)          | 1.9<br>(1.3-2.7)                            | 8.2%<br>(6.7-9.8%)                   | 12%<br>(8.5-15%)                    | 540<br>(390-730)      | 70000<br>(52000-89000)     |
| Russian Federation | 1990 | Female | 30 to 34 | 81%<br>(74-86%)                | 19%<br>(14-26%)          | 2<br>(1.4-2.8)                              | 9.2%<br>(7.6-11%)                    | 14%<br>(11-17%)                     | 980<br>(760-1200)     | 100000<br>(78000-130000)   |
| Russian Federation | 1990 | Female | 35 to 39 | 81%<br>(76-86%)                | 19%<br>(14-24%)          | 2.2<br>(1.6-3)                              | 10%<br>(8.4-12%)                     | 16%<br>(13-20%)                     | 1600<br>(1200-2000)   | 120000<br>(96000-150000)   |
| Russian Federation | 1990 | Female | 40 to 44 | 80%<br>(75-86%)                | 20%<br>(14-25%)          | 2.1<br>(1.5-2.9)                            | 10%<br>(8.4-13%)                     | 16%<br>(13-20%)                     | 2000<br>(1500-2500)   | 120000<br>(97000-150000)   |
| Russian Federation | 1990 | Female | 45 to 49 | 79%<br>(74-84%)                | 21%<br>(16-26%)          | 1.8<br>(1.3-2.5)                            | 9.4%<br>(7.4-12%)                    | 14%<br>(11-18%)                     | 1700<br>(1300-2200)   | 89000<br>(67000-110000)    |
| Russian Federation | 1990 | Female | 50 to 54 | 75%<br>(68-80%)                | 25%<br>(20-32%)          | 1.5<br>(1-2.1)                              | 7.7%<br>(5.7-10%)                    | 11%<br>(8.1-14%)                    | 3400<br>(2400-4500)   | 150000<br>(110000-200000)  |
| Russian Federation | 1990 | Female | 55 to 59 | 66%<br>(59-73%)                | 34%<br>(27-41%)          | 1.3<br>(0.84-1.8)                           | 5.7%<br>(3.9-7.9%)                   | 7.8%<br>(5-11%)                     | 2900<br>(1800-4100)   | 110000<br>(72000-150000)   |
| Russian Federation | 1990 | Female | 60 to 64 | 58%<br>(50-66%)                | 42%<br>(34-50%)          | 1.1<br>(0.69-1.6)                           | 2.9%<br>(1.2-5.1%)                   | 3.7%<br>(1.2-6.6%)                  | 2600<br>(860-4700)    | 83000<br>(34000-150000)    |
| Russian Federation | 1990 | Female | 65 to 69 | 50%<br>(43-59%)                | 50%<br>(41-57%)          | 0.91<br>(0.59-1.3)                          | 1.2%<br>(-0.45-3.1%)                 | 1.3%<br>(-0.81-3.8%)                | 1100<br>(-690-3100)   | 30000<br>(-11000-80000)    |



| Location           | Year | Sex    | Age      | Prevalence of current drinkers | Prevalence of abstainers | Population average of standard drinks daily | Percent of total attributable deaths | Percent of total attributable DALYs | Attributable deaths      | Attributable DALYs        |
|--------------------|------|--------|----------|--------------------------------|--------------------------|---------------------------------------------|--------------------------------------|-------------------------------------|--------------------------|---------------------------|
| Russian Federation | 1990 | Female | 70 to 74 | 42%<br>(35-51%)                | 58%<br>(49-65%)          | 0.75<br>(0.46-1.1)                          | 0.15%<br>(-1.5-2.2%)                 | 0.038%<br>(-2.1-2.5%)               | 34<br>(-1800-2300)       | 3300<br>(-31000-47000)    |
| Russian Federation | 1990 | Female | 75 to 79 | 33%<br>(25-44%)                | 67%<br>(56-75%)          | 0.56<br>(0.32-0.87)                         | -0.27%<br>(-1.6-1.4%)                | -0.45%<br>(-2.2-1.6%)               | -700<br>(-3500-2600)     | -7500<br>(-48000-40000)   |
| Russian Federation | 1990 | Female | 80 to 84 | 28%<br>(19-39%)                | 72%<br>(61-81%)          | 0.48<br>(0.28-0.76)                         | -0.56%<br>(-1.9-0.78%)               | -0.77%<br>(-2.3-0.84%)              | -1200<br>(-3600-1400)    | -11000<br>(-37000-16000)  |
| Russian Federation | 1990 | Female | 85 to 89 | 27%<br>(17-37%)                | 73%<br>(63-83%)          | 0.47<br>(0.26-0.78)                         | -0.77%<br>(-2.2-0.64%)               | -1%<br>(-2.7-0.64%)                 | -1000<br>(-2800-680)     | -7100<br>(-20000-5900)    |
| Russian Federation | 1990 | Female | 90 to 94 | 27%<br>(18-36%)                | 73%<br>(64-82%)          | 0.48<br>(0.25-0.83)                         | -0.76%<br>(-2.1-0.69%)               | -1%<br>(-2.6-0.7%)                  | -390<br>(-1000-270)      | -1800<br>(-5100-1700)     |
| Russian Federation | 1990 | Female | 95 plus  | 28%<br>(17-42%)                | 72%<br>(58-83%)          | 0.5<br>(0.22-0.93)                          | -0.72%<br>(-2.3-0.93%)               | -0.95%<br>(-2.9-0.99%)              | -140<br>(-440-150)       | -440<br>(-1400-560)       |
| Russian Federation | 1990 | Male   | All Ages | 80%<br>(75-84%)                | 20%<br>(16-25%)          | 3.3<br>(2.6-4)                              | 14%<br>(11-17%)                      | 12%<br>(9.3-16%)                    | 100000<br>(73000-130000) | 450000<br>(360000-550000) |
| Russian Federation | 1990 | Male   | 15 to 19 | 64%<br>(51-76%)                | 36%<br>(24-49%)          | 1.5<br>(0.92-2.2)                           | 7.3%<br>(5-10%)                      | 9.5%<br>(6.2-14%)                   | 790<br>(490-1200)        | 69000<br>(46000-97000)    |
| Russian Federation | 1990 | Male   | 20 to 24 | 83%<br>(76-89%)                | 17%<br>(11-24%)          | 3.3<br>(2.2-4.8)                            | 16%<br>(12-21%)                      | 19%<br>(13-25%)                     | 2400<br>(1600-3300)      | 190000<br>(140000-260000) |
| Russian Federation | 1990 | Male   | 25 to 29 | 90%<br>(85-93%)                | 10%<br>(6.6-15%)         | 4.3<br>(3-5.9)                              | 20%<br>(16-25%)                      | 24%<br>(18-31%)                     | 4900<br>(3500-6300)      | 360000<br>(280000-450000) |
| Russian Federation | 1990 | Male   | 30 to 34 | 92%<br>(88-95%)                | 7.9%<br>(4.9-12%)        | 5.1<br>(3.7-6.7)                            | 23%<br>(19-28%)                      | 28%<br>(22-34%)                     | 7900<br>(6000-9900)      | 520000<br>(410000-640000) |
| Russian Federation | 1990 | Male   | 35 to 39 | 92%<br>(89-95%)                | 8.1%<br>(5.1-11%)        | 5.7<br>(3.9-7.7)                            | 25%<br>(20-30%)                      | 30%<br>(24-36%)                     | 10000<br>(7700-13000)    | 590000<br>(460000-740000) |
| Russian Federation | 1990 | Male   | 40 to 44 | 91%<br>(88-94%)                | 8.6%<br>(5.7-12%)        | 5.7<br>(3.9-7.7)                            | 24%<br>(19-29%)                      | 29%<br>(23-35%)                     | 11000<br>(8300-14000)    | 560000<br>(430000-700000) |
| Russian Federation | 1990 | Male   | 45 to 49 | 91%<br>(86-94%)                | 9.2%<br>(5.9-14%)        | 5.7<br>(4-8)                                | 23%<br>(18-28%)                      | 27%<br>(21-33%)                     | 9100<br>(6800-12000)     | 400000<br>(310000-510000) |
| Russian Federation | 1990 | Male   | 50 to 54 | 90%<br>(86-93%)                | 10%<br>(7-14%)           | 5.5<br>(3.7-7.7)                            | 20%<br>(14-25%)                      | 23%<br>(16-29%)                     | 18000<br>(13000-24000)   | 700000<br>(500000-910000) |
| Russian Federation | 1990 | Male   | 55 to 59 | 87%<br>(81-91%)                | 13%<br>(8.7-19%)         | 4.5<br>(3.2-6.2)                            | 15%<br>(10-20%)                      | 17%<br>(12-23%)                     | 14000<br>(9000-19000)    | 460000<br>(320000-630000) |
| Russian Federation | 1990 | Male   | 60 to 64 | 85%<br>(79-91%)                | 15%<br>(9.4-21%)         | 3.7<br>(2.5-5.4)                            | 11%<br>(6.1-16%)                     | 12%<br>(6.5-18%)                    | 14000<br>(7800-23000)    | 420000<br>(240000-650000) |
| Russian Federation | 1990 | Male   | 65 to 69 | 84%<br>(77-89%)                | 16%<br>(11-23%)          | 3.1<br>(2.2-4.3)                            | 6.7%<br>(2.9-12%)                    | 7.2%<br>(2.7-13%)                   | 5500<br>(2100-10000)     | 140000<br>(58000-240000)  |
| Russian Federation | 1990 | Male   | 70 to 74 | 80%<br>(73-85%)                | 20%<br>(15-27%)          | 2.3<br>(1.5-3.3)                            | 3.2%<br>(-0.2-7.5%)                  | 3.3%<br>(-0.62-8.2%)                | 2000<br>(-380-5100)      | 42000<br>(-2700-100000)   |
| Russian Federation | 1990 | Male   | 75 to 79 | 77%<br>(67-84%)                | 23%<br>(16-33%)          | 1.9<br>(1.2-2.9)                            | 1.2%<br>(-2-5.5%)                    | 1%<br>(-2.7-5.8%)                   | 820<br>(-2200-4700)      | 16000<br>(-27000-73000)   |
| Russian Federation | 1990 | Male   | 80 to 84 | 70%<br>(58-80%)                | 30%<br>(20-42%)          | 1.6<br>(1-2.4)                              | 0.075%<br>(-2.9-3.5%)                | -0.26%<br>(-3.6-3.6%)               | -150<br>(-2100-2000)     | 510<br>(-20000-23000)     |

| Location           | Year | Sex    | Age      | Prevalence of current drinkers | Prevalence of abstainers | Population average of standard drinks daily | Percent of total attributable deaths | Percent of total attributable DALYs | Attributable deaths   | Attributable DALYs        |
|--------------------|------|--------|----------|--------------------------------|--------------------------|---------------------------------------------|--------------------------------------|-------------------------------------|-----------------------|---------------------------|
| Russian Federation | 1990 | Male   | 85 to 89 | 61%<br>(47-73%)                | 39%<br>(27-53%)          | 1.3<br>(0.83-2)                             | -0.45%<br>(-3-2.3%)                  | -0.86%<br>(-3.8-2.3%)               | -220<br>(-990-600)    | -1000<br>(-6700-5100)     |
| Russian Federation | 1990 | Male   | 90 to 94 | 57%<br>(44-70%)                | 43%<br>(30-56%)          | 1.2<br>(0.68-1.9)                           | -0.75%<br>(-2.9-1.7%)                | -1.2%<br>(-3.8-1.7%)                | -96<br>(-300-130)     | -350<br>(-1400-800)       |
| Russian Federation | 1990 | Male   | 95 plus  | 55%<br>(38-72%)                | 45%<br>(28-62%)          | 1.1<br>(0.53-1.9)                           | -0.7%<br>(-3-1.8%)                   | -1.3%<br>(-4.1-1.7%)                | -32<br>(-100-43)      | -71<br>(-300-180)         |
| Russian Federation | 1995 | Female | All Ages | 64%<br>(60-68%)                | 36%<br>(32-40%)          | 1.3<br>(1.1-1.6)                            | 4.5%<br>(3.2-5.9%)                   | 2.3%<br>(0.52-4.3%)                 | 24000<br>(5500-45000) | 140000<br>(98000-180000)  |
| Russian Federation | 1995 | Female | 15 to 19 | 50%<br>(41-61%)                | 50%<br>(39-59%)          | 1<br>(0.65-1.6)                             | 4.1%<br>(2.8-5.6%)                   | 6.4%<br>(3.9-9.5%)                  | 300<br>(180-450)      | 30000<br>(21000-42000)    |
| Russian Federation | 1995 | Female | 20 to 24 | 73%<br>(65-80%)                | 27%<br>(20-35%)          | 2<br>(1.3-3)                                | 7.8%<br>(5.8-10%)                    | 11%<br>(7.3-16%)                    | 590<br>(390-850)      | 61000<br>(45000-82000)    |
| Russian Federation | 1995 | Female | 25 to 29 | 80%<br>(74-85%)                | 20%<br>(15-26%)          | 2.1<br>(1.4-2.9)                            | 9.9%<br>(7.9-12%)                    | 14%<br>(10-18%)                     | 860<br>(610-1100)     | 82000<br>(63000-100000)   |
| Russian Federation | 1995 | Female | 30 to 34 | 83%<br>(77-87%)                | 17%<br>(13-23%)          | 2.2<br>(1.5-3)                              | 11%<br>(9.5-14%)                     | 17%<br>(14-21%)                     | 1700<br>(1300-2200)   | 140000<br>(110000-170000) |
| Russian Federation | 1995 | Female | 35 to 39 | 83%<br>(78-88%)                | 17%<br>(12-22%)          | 2.4<br>(1.7-3.2)                            | 13%<br>(11-15%)                      | 19%<br>(16-23%)                     | 3200<br>(2500-3900)   | 200000<br>(170000-250000) |
| Russian Federation | 1995 | Female | 40 to 44 | 82%<br>(77-87%)                | 18%<br>(13-23%)          | 2.2<br>(1.6-3)                              | 13%<br>(11-15%)                      | 19%<br>(16-23%)                     | 4400<br>(3400-5400)   | 240000<br>(190000-290000) |
| Russian Federation | 1995 | Female | 45 to 49 | 81%<br>(76-86%)                | 19%<br>(14-24%)          | 1.9<br>(1.4-2.6)                            | 11%<br>(9.1-14%)                     | 16%<br>(13-19%)                     | 4500<br>(3400-5700)   | 210000<br>(160000-260000) |
| Russian Federation | 1995 | Female | 50 to 54 | 77%<br>(72-82%)                | 23%<br>(18-28%)          | 1.6<br>(1.1-2.3)                            | 9.4%<br>(7.3-12%)                    | 13%<br>(9.8-16%)                    | 3300<br>(2400-4300)   | 130000<br>(100000-170000) |
| Russian Federation | 1995 | Female | 55 to 59 | 69%<br>(62-76%)                | 31%<br>(24-38%)          | 1.4<br>(0.94-2)                             | 6.8%<br>(4.6-9.1%)                   | 8.9%<br>(6-12%)                     | 5600<br>(3700-7800)   | 190000<br>(130000-270000) |
| Russian Federation | 1995 | Female | 60 to 64 | 61%<br>(53-69%)                | 39%<br>(31-47%)          | 1.2<br>(0.77-1.7)                           | 3.3%<br>(1.2-5.9%)                   | 4.1%<br>(1.4-7.6%)                  | 2900<br>(930-5200)    | 86000<br>(32000-150000)   |
| Russian Federation | 1995 | Female | 65 to 69 | 53%<br>(46-62%)                | 47%<br>(38-54%)          | 1<br>(0.67-1.4)                             | 1.2%<br>(-0.67-3.5%)                 | 1.4%<br>(-1.1-4.3%)                 | 1700<br>(-1400-5500)  | 47000<br>(-25000-140000)  |
| Russian Federation | 1995 | Female | 70 to 74 | 45%<br>(38-53%)                | 55%<br>(47-62%)          | 0.84<br>(0.52-1.3)                          | 0.078%<br>(-1.9-2.3%)                | -0.049%<br>(-2.5-2.7%)              | -66<br>(-3400-3700)   | 2400<br>(-59000-73000)    |
| Russian Federation | 1995 | Female | 75 to 79 | 36%<br>(27-46%)                | 64%<br>(54-73%)          | 0.63<br>(0.37-1)                            | -0.38%<br>(-2-1.6%)                  | -0.57%<br>(-2.6-1.7%)               | -730<br>(-3300-2300)  | -8400<br>(-45000-36000)   |
| Russian Federation | 1995 | Female | 80 to 84 | 31%<br>(21-41%)                | 69%<br>(59-79%)          | 0.54<br>(0.32-0.87)                         | -0.68%<br>(-2.2-0.99%)               | -0.89%<br>(-2.7-1%)                 | -1700<br>(-5100-2000) | -16000<br>(-53000-23000)  |
| Russian Federation | 1995 | Female | 85 to 89 | 29%<br>(19-39%)                | 71%<br>(61-81%)          | 0.54<br>(0.31-0.88)                         | -0.92%<br>(-2.5-0.77%)               | -1.2%<br>(-3-0.8%)                  | -1600<br>(-4100-1100) | -11000<br>(-29000-9000)   |
| Russian Federation | 1995 | Female | 90 to 94 | 29%<br>(20-39%)                | 71%<br>(61-80%)          | 0.54<br>(0.28-0.91)                         | -0.93%<br>(-2.5-0.88%)               | -1.2%<br>(-3-0.91%)                 | -650<br>(-1600-530)   | -3100<br>(-8100-2900)     |
| Russian Federation | 1995 | Female | 95 plus  | 31%<br>(18-44%)                | 69%<br>(56-82%)          | 0.57<br>(0.26-1)                            | -0.89%<br>(-2.8-1.3%)                | -1.1%<br>(-3.4-1.3%)                | -170<br>(-500-200)    | -540<br>(-1700-760)       |

| Location           | Year | Sex  | Age      | Prevalence of current drinkers | Prevalence of abstainers | Population average of standard drinks daily | Percent of total attributable deaths | Percent of total attributable DALYs | Attributable deaths       | Attributable DALYs           |
|--------------------|------|------|----------|--------------------------------|--------------------------|---------------------------------------------|--------------------------------------|-------------------------------------|---------------------------|------------------------------|
| Russian Federation | 1995 | Male | All Ages | 82%<br>(78-86%)                | 18%<br>(14-22%)          | 3.5<br>(2.9-4.2)                            | 17%<br>(14-21%)                      | 15%<br>(12-19%)                     | 180000<br>(130000-240000) | 7800000<br>(6200000-9700000) |
| Russian Federation | 1995 | Male | 15 to 19 | 67%<br>(55-79%)                | 33%<br>(21-45%)          | 1.6<br>(1-2.5)                              | 8.7%<br>(5.8-12%)                    | 11%<br>(6.8-16%)                    | 1400<br>(850-2100)        | 110000<br>(75000-160000)     |
| Russian Federation | 1995 | Male | 20 to 24 | 85%<br>(78-90%)                | 15%<br>(9.7-22%)         | 3.5<br>(2.4-5)                              | 18%<br>(13-23%)                      | 20%<br>(14-27%)                     | 4700<br>(3200-6500)       | 350000<br>(250000-470000)    |
| Russian Federation | 1995 | Male | 25 to 29 | 91%<br>(87-94%)                | 9.1%<br>(6-13%)          | 4.5<br>(3-6.3)                              | 24%<br>(19-29%)                      | 26%<br>(20-33%)                     | 7100<br>(5100-9200)       | 500000<br>(380000-630000)    |
| Russian Federation | 1995 | Male | 30 to 34 | 93%<br>(89-96%)                | 7.2%<br>(4.4-11%)        | 5.3<br>(3.8-7.2)                            | 27%<br>(22-32%)                      | 30%<br>(24-36%)                     | 13000<br>(10000-16000)    | 810000<br>(640000-1000000)   |
| Russian Federation | 1995 | Male | 35 to 39 | 93%<br>(89-95%)                | 7.4%<br>(4.6-11%)        | 5.9<br>(4.2-7.8)                            | 29%<br>(23-34%)                      | 32%<br>(25-38%)                     | 21000<br>(16000-26000)    | 1100000<br>(880000-1400000)  |
| Russian Federation | 1995 | Male | 40 to 44 | 92%<br>(89-95%)                | 7.8%<br>(5-11%)          | 6<br>(4.3-8)                                | 29%<br>(23-34%)                      | 32%<br>(25-38%)                     | 26000<br>(20000-33000)    | 1300000<br>(970000-1600000)  |
| Russian Federation | 1995 | Male | 45 to 49 | 92%<br>(88-95%)                | 8.3%<br>(5.3-12%)        | 6<br>(4.2-8.3)                              | 27%<br>(21-32%)                      | 29%<br>(23-35%)                     | 26000<br>(19000-34000)    | 1100000<br>(830000-1400000)  |
| Russian Federation | 1995 | Male | 50 to 54 | 91%<br>(87-94%)                | 9.5%<br>(6.5-13%)        | 5.8<br>(3.9-8)                              | 23%<br>(17-29%)                      | 25%<br>(18-32%)                     | 18000<br>(13000-24000)    | 680000<br>(490000-890000)    |
| Russian Federation | 1995 | Male | 55 to 59 | 88%<br>(84-92%)                | 12%<br>(8-16%)           | 4.8<br>(3.4-6.6)                            | 17%<br>(12-23%)                      | 19%<br>(13-26%)                     | 28000<br>(18000-39000)    | 930000<br>(610000-1300000)   |
| Russian Federation | 1995 | Male | 60 to 64 | 87%<br>(81-91%)                | 13%<br>(8.8-19%)         | 4<br>(2.7-5.7)                              | 12%<br>(6.9-19%)                     | 13%<br>(7.2-21%)                    | 18000<br>(9700-28000)     | 510000<br>(280000-790000)    |
| Russian Federation | 1995 | Male | 65 to 69 | 86%<br>(80-90%)                | 14%<br>(9.6-20%)         | 3.4<br>(2.4-4.6)                            | 7.4%<br>(2.9-13%)                    | 7.9%<br>(2.7-14%)                   | 14000<br>(4700-25000)     | 330000<br>(120000-580000)    |
| Russian Federation | 1995 | Male | 70 to 74 | 82%<br>(76-88%)                | 18%<br>(12-24%)          | 2.5<br>(1.6-3.5)                            | 3.5%<br>(-0.2-8.2%)                  | 3.6%<br>(-0.62-8.8%)                | 3500<br>(-600-8400)       | 71000<br>(-4200-160000)      |
| Russian Federation | 1995 | Male | 75 to 79 | 79%<br>(70-86%)                | 21%<br>(14-30%)          | 2.1<br>(1.3-3.2)                            | 1.4%<br>(-2.3-6%)                    | 1.2%<br>(-3-6.4%)                   | 800<br>(-2000-4300)       | 15000<br>(-25000-65000)      |
| Russian Federation | 1995 | Male | 80 to 84 | 72%<br>(61-82%)                | 28%<br>(18-39%)          | 1.8<br>(1.1-2.7)                            | 0.18%<br>(-3.1-4%)                   | -0.13%<br>(-3.9-4.2%)               | -86<br>(-2700-2900)       | 1500<br>(-26000-33000)       |
| Russian Federation | 1995 | Male | 85 to 89 | 64%<br>(51-75%)                | 36%<br>(25-49%)          | 1.5<br>(0.94-2.2)                           | -0.42%<br>(-3.4-2.7%)                | -0.8%<br>(-4.1-2.8%)                | -280<br>(-1400-970)       | -1200<br>(-9900-8000)        |
| Russian Federation | 1995 | Male | 90 to 94 | 60%<br>(47-72%)                | 40%<br>(28-53%)          | 1.3<br>(0.77-2)                             | -0.81%<br>(-3.3-2.2%)                | -1.3%<br>(-4.1-2.1%)                | -120<br>(-410-210)        | -470<br>(-1900-1300)         |
| Russian Federation | 1995 | Male | 95 plus  | 58%<br>(41-73%)                | 42%<br>(27-59%)          | 1.2<br>(0.59-2.1)                           | -0.79%<br>(-3.3-2.2%)                | -1.4%<br>(-4.3-2.1%)                | -28<br>(-89-44)           | -65<br>(-270-180)            |

| Location           | Year | Sex    | Age      | Prevalence of current drinkers | Prevalence of abstainers | Population average of standard drinks daily | Percent of total attributable deaths | Percent of total attributable DALYs | Attributable deaths       | Attributable DALYs           |
|--------------------|------|--------|----------|--------------------------------|--------------------------|---------------------------------------------|--------------------------------------|-------------------------------------|---------------------------|------------------------------|
| Russian Federation | 2000 | Female | All Ages | 64%<br>(59-68%)                | 36%<br>(32-41%)          | 1.5<br>(1.2-1.8)                            | 5.2%<br>(3.8-6.8%)                   | 2.9%<br>(0.85-5.3%)                 | 31000<br>(9100-56000)     | 1600000<br>(1100000-2100000) |
| Russian Federation | 2000 | Female | 15 to 19 | 52%<br>(41-64%)                | 48%<br>(36-59%)          | 1.2<br>(0.75-1.9)                           | 4.4%<br>(3-6.2%)                     | 7.4%<br>(4.5-11%)                   | 360<br>(220-540)          | 35000<br>(24000-50000)       |
| Russian Federation | 2000 | Female | 20 to 24 | 74%<br>(63-81%)                | 26%<br>(19-37%)          | 2.3<br>(1.5-3.4)                            | 8.8%<br>(6.7-11%)                    | 13%<br>(8.7-17%)                    | 780<br>(520-1100)         | 77000<br>(57000-100000)      |
| Russian Federation | 2000 | Female | 25 to 29 | 78%<br>(70-84%)                | 22%<br>(16-30%)          | 2.3<br>(1.5-3.1)                            | 11%<br>(8.8-13%)                     | 16%<br>(12-19%)                     | 1100<br>(800-1400)        | 100000<br>(78000-120000)     |
| Russian Federation | 2000 | Female | 30 to 34 | 80%<br>(72-86%)                | 20%<br>(14-28%)          | 2.3<br>(1.6-3.2)                            | 12%<br>(10-14%)                      | 18%<br>(15-22%)                     | 1500<br>(1200-1900)       | 120000<br>(99000-150000)     |
| Russian Federation | 2000 | Female | 35 to 39 | 81%<br>(74-87%)                | 19%<br>(13-26%)          | 2.6<br>(1.9-3.5)                            | 14%<br>(12-16%)                      | 21%<br>(18-24%)                     | 2900<br>(2300-3500)       | 190000<br>(160000-230000)    |
| Russian Federation | 2000 | Female | 40 to 44 | 81%<br>(74-87%)                | 19%<br>(13-26%)          | 2.5<br>(1.8-3.3)                            | 14%<br>(12-16%)                      | 21%<br>(18-24%)                     | 4600<br>(3700-5600)       | 250000<br>(210000-310000)    |
| Russian Federation | 2000 | Female | 45 to 49 | 80%<br>(72-85%)                | 20%<br>(15-28%)          | 2.1<br>(1.5-2.8)                            | 12%<br>(10-15%)                      | 18%<br>(15-21%)                     | 5400<br>(4300-6600)       | 260000<br>(210000-310000)    |
| Russian Federation | 2000 | Female | 50 to 54 | 74%<br>(66-81%)                | 26%<br>(19-34%)          | 1.8<br>(1.2-2.5)                            | 10%<br>(8.1-13%)                     | 14%<br>(11-17%)                     | 5200<br>(4000-6700)       | 210000<br>(160000-270000)    |
| Russian Federation | 2000 | Female | 55 to 59 | 68%<br>(59-76%)                | 32%<br>(24-41%)          | 1.6<br>(1-2.3)                              | 8.1%<br>(5.7-11%)                    | 11%<br>(7.3-14%)                    | 3600<br>(2500-4800)       | 120000<br>(88000-170000)     |
| Russian Federation | 2000 | Female | 60 to 64 | 63%<br>(53-73%)                | 37%<br>(27-47%)          | 1.4<br>(0.93-2.2)                           | 4.4%<br>(1.8-7.4%)                   | 5.5%<br>(2.1-9.6%)                  | 4600<br>(1800-8000)       | 140000<br>(58000-240000)     |
| Russian Federation | 2000 | Female | 65 to 69 | 57%<br>(47-67%)                | 43%<br>(33-53%)          | 1.3<br>(0.81-1.8)                           | 2%<br>(-0.39-4.8%)                   | 2.4%<br>(-0.87-5.9%)                | 2200<br>(-800-5500)       | 57000<br>(-12000-130000)     |
| Russian Federation | 2000 | Female | 70 to 74 | 47%<br>(36-58%)                | 53%<br>(42-64%)          | 1<br>(0.59-1.6)                             | 0.74%<br>(-1.6-3.4%)                 | 0.75%<br>(-2.3-4%)                  | 1300<br>(-3700-6700)      | 29000<br>(-63000-130000)     |
| Russian Federation | 2000 | Female | 75 to 79 | 37%<br>(26-50%)                | 63%<br>(50-74%)          | 0.76<br>(0.42-1.2)                          | 0.11%<br>(-2-2.5%)                   | 0.0018%<br>(-2.5-2.9%)              | 0.41<br>(-4100-4800)      | 3200<br>(-56000-75000)       |
| Russian Federation | 2000 | Female | 80 to 84 | 33%<br>(23-45%)                | 67%<br>(55-77%)          | 0.69<br>(0.39-1.1)                          | -0.29%<br>(-2.1-1.9%)                | -0.46%<br>(-2.6-2.1%)               | -610<br>(-3400-2800)      | -4900<br>(-34000-31000)      |
| Russian Federation | 2000 | Female | 85 to 89 | 32%<br>(21-43%)                | 68%<br>(57-79%)          | 0.69<br>(0.37-1.1)                          | -0.58%<br>(-2.4-1.5%)                | -0.78%<br>(-3-1.7%)                 | -1200<br>(-4500-2500)     | -7400<br>(-32000-20000)      |
| Russian Federation | 2000 | Female | 90 to 94 | 32%<br>(22-43%)                | 68%<br>(57-78%)          | 0.7<br>(0.36-1.2)                           | -0.67%<br>(-2.7-1.7%)                | -0.88%<br>(-3.3-1.8%)               | -560<br>(-2100-1200)      | -2500<br>(-10000-6200)       |
| Russian Federation | 2000 | Female | 95 plus  | 34%<br>(21-49%)                | 66%<br>(51-79%)          | 0.73<br>(0.34-1.3)                          | -0.66%<br>(-3.1-2.3%)                | -0.88%<br>(-3.7-2.5%)               | -140<br>(-600-410)        | -430<br>(-2000-1500)         |
| Russian Federation | 2000 | Male   | All Ages | 82%<br>(77-86%)                | 18%<br>(14-23%)          | 4.1<br>(3.4-4.8)                            | 19%<br>(16-22%)                      | 17%<br>(13-21%)                     | 200000<br>(150000-250000) | 840000<br>(680000-1000000)   |
| Russian Federation | 2000 | Male   | 15 to 19 | 73%<br>(60-83%)                | 27%<br>(17-40%)          | 2.1<br>(1.3-3.1)                            | 9.8%<br>(6.4-14%)                    | 12%<br>(7.6-18%)                    | 1600<br>(950-2400)        | 130000<br>(83000-180000)     |
| Russian Federation | 2000 | Male   | 20 to 24 | 85%<br>(78-90%)                | 15%<br>(9.6-22%)         | 4<br>(2.7-5.6)                              | 20%<br>(15-25%)                      | 22%<br>(16-29%)                     | 5700<br>(4000-7700)       | 420000<br>(310000-560000)    |

| Location           | Year | Sex    | Age      | Prevalence of current drinkers | Prevalence of abstainers | Population average of standard drinks daily | Percent of total attributable deaths | Percent of total attributable DALYs | Attributable deaths    | Attributable DALYs           |
|--------------------|------|--------|----------|--------------------------------|--------------------------|---------------------------------------------|--------------------------------------|-------------------------------------|------------------------|------------------------------|
| Russian Federation | 2000 | Male   | 25 to 29 | 90%<br>(85-93%)                | 10%<br>(6.7-15%)         | 5<br>(3.4-7)                                | 25%<br>(20-31%)                      | 28%<br>(21-35%)                     | 8500<br>(6200-11000)   | 590000<br>(440000-740000)    |
| Russian Federation | 2000 | Male   | 30 to 34 | 92%<br>(88-95%)                | 7.8%<br>(4.8-12%)        | 6<br>(4.3-8)                                | 28%<br>(23-33%)                      | 32%<br>(25-38%)                     | 11000<br>(8200-13000)  | 670000<br>(530000-820000)    |
| Russian Federation | 2000 | Male   | 35 to 39 | 92%<br>(88-95%)                | 8%<br>(4.9-12%)          | 6.6<br>(4.7-8.9)                            | 31%<br>(25-35%)                      | 35%<br>(28-40%)                     | 18000<br>(14000-22000) | 1000000<br>(800000-1200000)  |
| Russian Federation | 2000 | Male   | 40 to 44 | 91%<br>(87-94%)                | 8.7%<br>(5.7-13%)        | 6.7<br>(4.7-8.7)                            | 31%<br>(25-35%)                      | 35%<br>(28-40%)                     | 27000<br>(21000-33000) | 1300000<br>(1000000-1600000) |
| Russian Federation | 2000 | Male   | 45 to 49 | 91%<br>(85-94%)                | 9.3%<br>(5.9-15%)        | 6.7<br>(4.8-9)                              | 29%<br>(24-34%)                      | 33%<br>(27-38%)                     | 32000<br>(24000-39000) | 1300000<br>(1000000-1700000) |
| Russian Federation | 2000 | Male   | 50 to 54 | 89%<br>(85-93%)                | 11%<br>(7.1-15%)         | 6.4<br>(4.4-8.9)                            | 25%<br>(19-31%)                      | 28%<br>(21-34%)                     | 29000<br>(21000-37000) | 1100000<br>(800000-1400000)  |
| Russian Federation | 2000 | Male   | 55 to 59 | 87%<br>(81-92%)                | 13%<br>(8.3-19%)         | 5.3<br>(3.8-7.3)                            | 20%<br>(14-26%)                      | 22%<br>(15-29%)                     | 17000<br>(12000-23000) | 560000<br>(390000-730000)    |
| Russian Federation | 2000 | Male   | 60 to 64 | 86%<br>(79-91%)                | 14%<br>(9-21%)           | 4.5<br>(3-6.6)                              | 15%<br>(8.6-21%)                     | 16%<br>(9.3-23%)                    | 26000<br>(15000-38000) | 740000<br>(440000-1100000)   |
| Russian Federation | 2000 | Male   | 65 to 69 | 85%<br>(78-90%)                | 15%<br>(10-22%)          | 3.8<br>(2.7-5.3)                            | 9.7%<br>(4.6-15%)                    | 10%<br>(4.7-17%)                    | 14000<br>(6200-23000)  | 340000<br>(150000-540000)    |
| Russian Federation | 2000 | Male   | 70 to 74 | 82%<br>(75-88%)                | 18%<br>(12-25%)          | 2.9<br>(1.9-4)                              | 5.1%<br>(0.85-10%)                   | 5.4%<br>(0.55-11%)                  | 9100<br>(960-19000)    | 180000<br>(30000-370000)     |
| Russian Federation | 2000 | Male   | 75 to 79 | 79%<br>(69-87%)                | 21%<br>(13-31%)          | 2.4<br>(1.4-3.6)                            | 2.5%<br>(-1.5-7.8%)                  | 2.5%<br>(-2.1-8.4%)                 | 2100<br>(-1800-7000)   | 34000<br>(-21000-100000)     |
| Russian Federation | 2000 | Male   | 80 to 84 | 73%<br>(60-82%)                | 27%<br>(18-40%)          | 2.1<br>(1.3-3)                              | 1.2%<br>(-2.4-5.5%)                  | 0.93%<br>(-3.2-5.9%)                | 450<br>(-1500-2900)    | 6700<br>(-14000-32000)       |
| Russian Federation | 2000 | Male   | 85 to 89 | 66%<br>(53-77%)                | 34%<br>(23-47%)          | 1.8<br>(1.1-2.7)                            | 0.29%<br>(-3-4.1%)                   | -0.052%<br>(-3.9-4.3%)              | -19<br>(-1400-1600)    | 930<br>(-9700-13000)         |
| Russian Federation | 2000 | Male   | 90 to 94 | 63%<br>(48-74%)                | 37%<br>(26-52%)          | 1.6<br>(0.93-2.5)                           | -0.26%<br>(-3.2-3.4%)                | -0.68%<br>(-4.1-3.5%)               | -82<br>(-500-430)      | -180<br>(-2300-2400)         |
| Russian Federation | 2000 | Male   | 95 plus  | 60%<br>(43-74%)                | 40%<br>(26-57%)          | 1.4<br>(0.71-2.4)                           | -0.31%<br>(-3.2-3.5%)                | -0.85%<br>(-4.2-3.5%)               | -19<br>(-94-79)        | -27<br>(-280-310)            |
| Russian Federation | 2005 | Female | All Ages | 64%<br>(60-68%)                | 36%<br>(32-40%)          | 1.8<br>(1.5-2.1)                            | 6.8%<br>(5.2-8.4%)                   | 4.5%<br>(2.5-6.7%)                  | 48000<br>(26000-72000) | 2100000<br>(1600000-2700000) |
| Russian Federation | 2005 | Female | 15 to 19 | 52%<br>(41-64%)                | 48%<br>(36-59%)          | 1.4<br>(0.9-2.2)                            | 4.8%<br>(3.3-6.7%)                   | 8.8%<br>(5.5-13%)                   | 350<br>(210-530)       | 35000<br>(24000-50000)       |
| Russian Federation | 2005 | Female | 20 to 24 | 73%<br>(63-80%)                | 27%<br>(20-37%)          | 2.6<br>(1.7-3.8)                            | 9.7%<br>(7.4-12%)                    | 15%<br>(11-20%)                     | 930<br>(650-1300)      | 90000<br>(69000-120000)      |
| Russian Federation | 2005 | Female | 25 to 29 | 77%<br>(70-84%)                | 23%<br>(16-30%)          | 2.6<br>(1.7-3.6)                            | 12%<br>(10-15%)                      | 18%<br>(14-22%)                     | 1600<br>(1200-2000)    | 130000<br>(100000-160000)    |

| Location           | Year | Sex    | Age      | Prevalence of current drinkers | Prevalence of abstainers | Population average of standard drinks daily | Percent of total attributable deaths | Percent of total attributable DALYs | Attributable deaths       | Attributable DALYs         |
|--------------------|------|--------|----------|--------------------------------|--------------------------|---------------------------------------------|--------------------------------------|-------------------------------------|---------------------------|----------------------------|
| Russian Federation | 2005 | Female | 30 to 34 | 80%<br>(73-86%)                | 20%<br>(14-27%)          | 2.7<br>(1.9-3.7)                            | 15%<br>(12-17%)                      | 21%<br>(17-25%)                     | 2400<br>(1800-3000)       | 170000<br>(140000-210000)  |
| Russian Federation | 2005 | Female | 35 to 39 | 82%<br>(77-87%)                | 18%<br>(13-23%)          | 3.1<br>(2.2-4.1)                            | 16%<br>(14-19%)                      | 24%<br>(20-28%)                     | 3300<br>(2600-4100)       | 200000<br>(160000-250000)  |
| Russian Federation | 2005 | Female | 40 to 44 | 82%<br>(77-87%)                | 18%<br>(13-23%)          | 2.9<br>(2.1-3.9)                            | 16%<br>(14-19%)                      | 24%<br>(20-28%)                     | 5500<br>(4400-6700)       | 290000<br>(240000-350000)  |
| Russian Federation | 2005 | Female | 45 to 49 | 80%<br>(72-85%)                | 20%<br>(15-28%)          | 2.4<br>(1.8-3.2)                            | 14%<br>(12-17%)                      | 20%<br>(17-24%)                     | 7000<br>(5700-8600)       | 330000<br>(270000-390000)  |
| Russian Federation | 2005 | Female | 50 to 54 | 74%<br>(66-80%)                | 26%<br>(20-34%)          | 2<br>(1.4-2.8)                              | 12%<br>(9.6-15%)                     | 17%<br>(13-20%)                     | 7600<br>(5900-9600)       | 310000<br>(240000-380000)  |
| Russian Federation | 2005 | Female | 55 to 59 | 67%<br>(58-75%)                | 33%<br>(25-42%)          | 1.7<br>(1.2-2.5)                            | 9.6%<br>(7-12%)                      | 13%<br>(9.2-16%)                    | 6700<br>(4800-8900)       | 230000<br>(170000-300000)  |
| Russian Federation | 2005 | Female | 60 to 64 | 60%<br>(51-69%)                | 40%<br>(31-49%)          | 1.5<br>(1-2.3)                              | 5.8%<br>(3.2-8.7%)                   | 7.4%<br>(4.1-11%)                   | 3400<br>(1800-5100)       | 99000<br>(54000-150000)    |
| Russian Federation | 2005 | Female | 65 to 69 | 54%<br>(45-63%)                | 46%<br>(37-55%)          | 1.3<br>(0.86-1.9)                           | 3.1%<br>(0.67-5.8%)                  | 3.8%<br>(0.63-7.1%)                 | 4300<br>(700-8100)        | 110000<br>(22000-200000)   |
| Russian Federation | 2005 | Female | 70 to 74 | 43%<br>(34-53%)                | 57%<br>(47-66%)          | 1<br>(0.63-1.6)                             | 1.5%<br>(-0.75-4.1%)                 | 1.7%<br>(-1.2-4.9%)                 | 2200<br>(-1400-6100)      | 45000<br>(-23000-120000)   |
| Russian Federation | 2005 | Female | 75 to 79 | 32%<br>(22-43%)                | 68%<br>(57-78%)          | 0.74<br>(0.42-1.2)                          | 0.79%<br>(-1-2.9%)                   | 0.82%<br>(-1.4-3.3%)                | 1700<br>(-2900-7000)      | 29000<br>(-37000-110000)   |
| Russian Federation | 2005 | Female | 80 to 84 | 30%<br>(21-41%)                | 70%<br>(59-79%)          | 0.71<br>(0.4-1.1)                           | 0.42%<br>(-1.2-2.4%)                 | 0.39%<br>(-1.6-2.7%)                | 680<br>(-2800-4800)       | 9200<br>(-27000-52000)     |
| Russian Federation | 2005 | Female | 85 to 89 | 30%<br>(21-41%)                | 70%<br>(59-79%)          | 0.75<br>(0.42-1.2)                          | 0.2%<br>(-1.7-2.5%)                  | 0.13%<br>(-2-2.8%)                  | 130<br>(-2000-2800)       | 1800<br>(-15000-22000)     |
| Russian Federation | 2005 | Female | 90 to 94 | 30%<br>(21-40%)                | 70%<br>(60-79%)          | 0.76<br>(0.4-1.2)                           | 0.11%<br>(-2-2.6%)                   | 0.027%<br>(-2.5-2.9%)               | 19<br>(-1700-2000)        | 460<br>(-8400-11000)       |
| Russian Federation | 2005 | Female | 95 plus  | 32%<br>(19-46%)                | 68%<br>(54-81%)          | 0.79<br>(0.37-1.4)                          | 0.21%<br>(-2.4-3.2%)                 | 0.13%<br>(-2.9-3.6%)                | 24<br>(-520-620)          | 150<br>(-1700-2200)        |
| Russian Federation | 2005 | Male   | All Ages | 83%<br>(79-86%)                | 17%<br>(14-21%)          | 4.8<br>(4-5.6)                              | 22%<br>(19-25%)                      | 20%<br>(16-24%)                     | 240000<br>(190000-300000) | 980000<br>(810000-1200000) |
| Russian Federation | 2005 | Male   | 15 to 19 | 73%<br>(60-83%)                | 27%<br>(17-40%)          | 2.4<br>(1.5-3.5)                            | 11%<br>(7.1-15%)                     | 14%<br>(9-21%)                      | 1400<br>(900-2100)        | 120000<br>(78000-170000)   |
| Russian Federation | 2005 | Male   | 20 to 24 | 85%<br>(78-91%)                | 15%<br>(9.1-22%)         | 4.6<br>(3.2-6.3)                            | 22%<br>(16-27%)                      | 25%<br>(18-33%)                     | 5900<br>(4200-7900)       | 440000<br>(320000-570000)  |
| Russian Federation | 2005 | Male   | 25 to 29 | 90%<br>(86-94%)                | 9.6%<br>(6.3-14%)        | 5.8<br>(4-8)                                | 28%<br>(22-33%)                      | 31%<br>(24-38%)                     | 11000<br>(8100-14000)     | 710000<br>(550000-890000)  |
| Russian Federation | 2005 | Male   | 30 to 34 | 93%<br>(89-96%)                | 7.4%<br>(4.5-11%)        | 6.9<br>(5.1-9.2)                            | 31%<br>(26-36%)                      | 35%<br>(29-41%)                     | 14000<br>(11000-17000)    | 870000<br>(700000-1100000) |
| Russian Federation | 2005 | Male   | 35 to 39 | 92%<br>(89-95%)                | 7.8%<br>(4.6-11%)        | 7.6<br>(5.2-10)                             | 34%<br>(28-39%)                      | 38%<br>(31-44%)                     | 18000<br>(14000-21000)    | 960000<br>(770000-1100000) |

| Location           | Year | Sex    | Age      | Prevalence of current drinkers | Prevalence of abstainers | Population average of standard drinks daily | Percent of total attributable deaths | Percent of total attributable DALYs | Attributable deaths    | Attributable DALYs           |
|--------------------|------|--------|----------|--------------------------------|--------------------------|---------------------------------------------|--------------------------------------|-------------------------------------|------------------------|------------------------------|
| Russian Federation | 2005 | Male   | 40 to 44 | 92%<br>(88-95%)                | 8.4%<br>(5.3-12%)        | 7.6<br>(5.4-10)                             | 34%<br>(29-39%)                      | 38%<br>(32-44%)                     | 29000<br>(23000-35000) | 1400000<br>(1100000-1600000) |
| Russian Federation | 2005 | Male   | 45 to 49 | 91%<br>(86-94%)                | 9%<br>(5.7-14%)          | 7.7<br>(5.6-10)                             | 32%<br>(27-37%)                      | 36%<br>(30-41%)                     | 38000<br>(31000-47000) | 1600000<br>(1300000-1900000) |
| Russian Federation | 2005 | Male   | 50 to 54 | 90%<br>(85-93%)                | 10%<br>(7.1-15%)         | 7.4<br>(5.1-9.9)                            | 29%<br>(23-34%)                      | 32%<br>(25-37%)                     | 40000<br>(31000-50000) | 1500000<br>(1200000-1800000) |
| Russian Federation | 2005 | Male   | 55 to 59 | 87%<br>(81-92%)                | 13%<br>(8.3-19%)         | 6.1<br>(4.4-8.2)                            | 23%<br>(17-28%)                      | 25%<br>(19-31%)                     | 31000<br>(22000-39000) | 990000<br>(730000-1200000)   |
| Russian Federation | 2005 | Male   | 60 to 64 | 86%<br>(79-91%)                | 14%<br>(9.3-21%)         | 5.1<br>(3.4-7.4)                            | 17%<br>(11-23%)                      | 19%<br>(11-26%)                     | 17000<br>(9800-23000)  | 460000<br>(280000-630000)    |
| Russian Federation | 2005 | Male   | 65 to 69 | 85%<br>(79-90%)                | 15%<br>(9.7-21%)         | 4.4<br>(3.1-6)                              | 12%<br>(6.2-18%)                     | 13%<br>(6.5-20%)                    | 22000<br>(11000-33000) | 520000<br>(250000-760000)    |
| Russian Federation | 2005 | Male   | 70 to 74 | 82%<br>(75-88%)                | 18%<br>(12-25%)          | 3.3<br>(2.2-4.5)                            | 6.9%<br>(1.8-13%)                    | 7.3%<br>(1.6-14%)                   | 9600<br>(2100-18000)   | 190000<br>(49000-340000)     |
| Russian Federation | 2005 | Male   | 75 to 79 | 78%<br>(67-86%)                | 22%<br>(14-33%)          | 2.6<br>(1.7-3.9)                            | 3.7%<br>(-0.8-9.5%)                  | 3.8%<br>(-1.3-10%)                  | 5400<br>(-1900-15000)  | 85000<br>(-18000-220000)     |
| Russian Federation | 2005 | Male   | 80 to 84 | 72%<br>(59-82%)                | 28%<br>(18-41%)          | 2.3<br>(1.5-3.3)                            | 2.2%<br>(-1.7-7%)                    | 2.1%<br>(-2.3-7.6%)                 | 1200<br>(-1300-4500)   | 15000<br>(-12000-49000)      |
| Russian Federation | 2005 | Male   | 85 to 89 | 66%<br>(52-77%)                | 34%<br>(23-48%)          | 2<br>(1.3-3)                                | 1.1%<br>(-2.3-5.2%)                  | 0.83%<br>(-3.1-5.7%)                | 210<br>(-800-1400)     | 2400<br>(-5100-11000)        |
| Russian Federation | 2005 | Male   | 90 to 94 | 62%<br>(48-74%)                | 38%<br>(26-52%)          | 1.8<br>(1.1-2.8)                            | 0.42%<br>(-2.8-4.3%)                 | 0.06%<br>(-3.8-4.6%)                | 8<br>(-500-600)        | 330<br>(-2200-3300)          |
| Russian Federation | 2005 | Male   | 95 plus  | 59%<br>(42-75%)                | 41%<br>(25-58%)          | 1.6<br>(0.8-2.7)                            | 0.4%<br>(-2.7-4.6%)                  | -0.071%<br>(-3.8-4.7%)              | -1.8<br>(-99-120)      | 42<br>(-280-480)             |
| Russian Federation | 2010 | Female | All Ages | 64%<br>(60-68%)                | 36%<br>(32-40%)          | 1.9<br>(1.6-2.3)                            | 6.6%<br>(5-8.2%)                     | 4.5%<br>(2.2-6.9%)                  | 43000<br>(21000-67000) | 1800000<br>(1400000-2300000) |
| Russian Federation | 2010 | Female | 15 to 19 | 51%<br>(39-63%)                | 49%<br>(37-61%)          | 1.5<br>(0.93-2.3)                           | 4.6%<br>(3.2-6.4%)                   | 9.1%<br>(5.4-14%)                   | 200<br>(120-310)       | 22000<br>(15000-31000)       |
| Russian Federation | 2010 | Female | 20 to 24 | 71%<br>(58-80%)                | 29%<br>(20-42%)          | 2.7<br>(1.7-3.9)                            | 9.2%<br>(7.1-12%)                    | 15%<br>(10-20%)                     | 680<br>(460-930)       | 76000<br>(56000-99000)       |
| Russian Federation | 2010 | Female | 25 to 29 | 76%<br>(65-83%)                | 24%<br>(17-35%)          | 2.7<br>(1.8-3.8)                            | 12%<br>(9.5-14%)                     | 16%<br>(13-20%)                     | 1200<br>(920-1600)     | 120000<br>(94000-150000)     |
| Russian Federation | 2010 | Female | 30 to 34 | 80%<br>(71-86%)                | 20%<br>(14-29%)          | 2.9<br>(2-3.9)                              | 14%<br>(12-16%)                      | 20%<br>(16-23%)                     | 2100<br>(1600-2600)    | 160000<br>(130000-200000)    |
| Russian Federation | 2010 | Female | 35 to 39 | 82%<br>(75-87%)                | 18%<br>(13-25%)          | 3.3<br>(2.4-4.5)                            | 16%<br>(13-18%)                      | 24%<br>(20-28%)                     | 2900<br>(2300-3600)    | 190000<br>(150000-230000)    |
| Russian Federation | 2010 | Female | 40 to 44 | 81%<br>(75-87%)                | 19%<br>(13-25%)          | 3.1<br>(2.3-4.3)                            | 15%<br>(13-18%)                      | 24%<br>(20-28%)                     | 3500<br>(2800-4300)    | 200000<br>(160000-240000)    |

| Location           | Year | Sex    | Age      | Prevalence of current drinkers | Prevalence of abstainers | Population average of standard drinks daily | Percent of total attributable deaths | Percent of total attributable DALYs | Attributable deaths       | Attributable DALYs          |
|--------------------|------|--------|----------|--------------------------------|--------------------------|---------------------------------------------|--------------------------------------|-------------------------------------|---------------------------|-----------------------------|
| Russian Federation | 2010 | Female | 45 to 49 | 79%<br>(70-85%)                | 21%<br>(15-30%)          | 2.6<br>(1.8-3.5)                            | 13%<br>(11-16%)                      | 20%<br>(17-24%)                     | 4800<br>(3800-5800)       | 230000<br>(190000-280000)   |
| Russian Federation | 2010 | Female | 50 to 54 | 74%<br>(65-81%)                | 26%<br>(19-35%)          | 2.2<br>(1.5-3)                              | 11%<br>(9.3-14%)                     | 17%<br>(14-20%)                     | 6100<br>(4800-7700)       | 260000<br>(200000-320000)   |
| Russian Federation | 2010 | Female | 55 to 59 | 67%<br>(57-76%)                | 33%<br>(24-43%)          | 1.9<br>(1.3-2.7)                            | 9.4%<br>(7-12%)                      | 13%<br>(9.7-17%)                    | 6600<br>(4800-8600)       | 230000<br>(170000-300000)   |
| Russian Federation | 2010 | Female | 60 to 64 | 61%<br>(49-71%)                | 39%<br>(29-51%)          | 1.7<br>(1.1-2.5)                            | 6.1%<br>(3.6-9%)                     | 8.1%<br>(4.7-12%)                   | 4600<br>(2600-6900)       | 140000<br>(80000-210000)    |
| Russian Federation | 2010 | Female | 65 to 69 | 56%<br>(45-66%)                | 44%<br>(34-55%)          | 1.5<br>(0.98-2.2)                           | 3.7%<br>(1.2-6.4%)                   | 4.7%<br>(1.3-8.3%)                  | 2400<br>(670-4100)        | 61000<br>(20000-100000)     |
| Russian Federation | 2010 | Female | 70 to 74 | 47%<br>(36-59%)                | 53%<br>(41-64%)          | 1.3<br>(0.75-2)                             | 2.2%<br>(-0.33-4.9%)                 | 2.6%<br>(-0.63-6.1%)                | 3400<br>(-830-8200)       | 72000<br>(-11000-160000)    |
| Russian Federation | 2010 | Female | 75 to 79 | 38%<br>(26-52%)                | 62%<br>(48-74%)          | 0.97<br>(0.54-1.5)                          | 1.3%<br>(-0.91-3.8%)                 | 1.4%<br>(-1.4-4.5%)                 | 2000<br>(-1800-6400)      | 33000<br>(-23000-97000)     |
| Russian Federation | 2010 | Female | 80 to 84 | 33%<br>(23-45%)                | 67%<br>(55-77%)          | 0.86<br>(0.5-1.4)                           | 0.83%<br>(-1.1-3.1%)                 | 0.86%<br>(-1.5-3.6%)                | 1800<br>(-2900-7200)      | 22000<br>(-28000-83000)     |
| Russian Federation | 2010 | Female | 85 to 89 | 32%<br>(22-42%)                | 68%<br>(58-78%)          | 0.86<br>(0.48-1.4)                          | 0.55%<br>(-1.4-2.9%)                 | 0.52%<br>(-1.8-3.2%)                | 680<br>(-2500-4400)       | 6500<br>(-16000-34000)      |
| Russian Federation | 2010 | Female | 90 to 94 | 32%<br>(22-43%)                | 68%<br>(57-78%)          | 0.87<br>(0.46-1.5)                          | 0.4%<br>(-1.8-3.1%)                  | 0.34%<br>(-2.2-3.4%)                | 170<br>(-1100-1700)       | 1200<br>(-5300-9100)        |
| Russian Federation | 2010 | Female | 95 plus  | 34%<br>(20-48%)                | 66%<br>(52-80%)          | 0.93<br>(0.43-1.7)                          | 0.63%<br>(-2.1-4.1%)                 | 0.61%<br>(-2.6-4.5%)                | 130<br>(-540-910)         | 520<br>(-1700-3300)         |
| Russian Federation | 2010 | Male   | All Ages | 82%<br>(78-85%)                | 18%<br>(15-22%)          | 5.2<br>(4.4-6.1)                            | 21%<br>(18-24%)                      | 19%<br>(15-23%)                     | 200000<br>(150000-240000) | 780000<br>(640000-930000)   |
| Russian Federation | 2010 | Male   | 15 to 19 | 69%<br>(54-81%)                | 31%<br>(19-46%)          | 2.4<br>(1.5-3.6)                            | 9.6%<br>(6.5-13%)                    | 15%<br>(8.9-21%)                    | 740<br>(440-1100)         | 62000<br>(41000-88000)      |
| Russian Federation | 2010 | Male   | 20 to 24 | 84%<br>(75-90%)                | 16%<br>(9.9-25%)         | 4.8<br>(3.3-6.8)                            | 20%<br>(15-26%)                      | 26%<br>(18-34%)                     | 4100<br>(2900-5500)       | 310000<br>(230000-410000)   |
| Russian Federation | 2010 | Male   | 25 to 29 | 90%<br>(84-93%)                | 10%<br>(6.6-16%)         | 6.2<br>(4.3-8.7)                            | 26%<br>(21-31%)                      | 30%<br>(24-37%)                     | 8100<br>(6200-10000)      | 560000<br>(440000-690000)   |
| Russian Federation | 2010 | Male   | 30 to 34 | 92%<br>(87-95%)                | 8%<br>(4.7-13%)          | 7.4<br>(5.4-10)                             | 29%<br>(25-34%)                      | 34%<br>(28-39%)                     | 12000<br>(9600-15000)     | 740000<br>(600000-900000)   |
| Russian Federation | 2010 | Male   | 35 to 39 | 92%<br>(88-95%)                | 8.4%<br>(5.1-12%)        | 8.2<br>(5.6-11)                             | 38%<br>(27-37%)                      | 38%<br>(32-43%)                     | 15000<br>(12000-18000)    | 810000<br>(660000-970000)   |
| Russian Federation | 2010 | Male   | 40 to 44 | 91%<br>(87-94%)                | 8.9%<br>(5.7-13%)        | 8.2<br>(5.8-11)                             | 33%<br>(28-37%)                      | 39%<br>(33-44%)                     | 17000<br>(13000-20000)    | 820000<br>(660000-980000)   |
| Russian Federation | 2010 | Male   | 45 to 49 | 90%<br>(84-94%)                | 9.8%<br>(6.2-16%)        | 8.2<br>(6-11)                               | 31%<br>(27-35%)                      | 37%<br>(32-41%)                     | 25000<br>(20000-29000)    | 1100000<br>(870000-1300000) |
| Russian Federation | 2010 | Male   | 50 to 54 | 88%<br>(83-92%)                | 12%<br>(7.7-17%)         | 7.8<br>(5.3-11)                             | 28%<br>(23-33%)                      | 32%<br>(27-37%)                     | 31000<br>(24000-38000)    | 1200000<br>(910000-1400000) |



| Location           | Year | Sex    | Age      | Prevalence of current drinkers | Prevalence of abstainers | Population average of standard drinks daily | Percent of total attributable deaths | Percent of total attributable DALYs | Attributable deaths    | Attributable DALYs           |
|--------------------|------|--------|----------|--------------------------------|--------------------------|---------------------------------------------|--------------------------------------|-------------------------------------|------------------------|------------------------------|
| Russian Federation | 2010 | Male   | 55 to 59 | 86%<br>(80-91%)                | 14%<br>(8.9-20%)         | 6.4<br>(4.6-8.7)                            | 23%<br>(18-28%)                      | 26%<br>(20-32%)                     | 29000<br>(22000-37000) | 960000<br>(740000-1200000)   |
| Russian Federation | 2010 | Male   | 60 to 64 | 85%<br>(77-90%)                | 15%<br>(9.6-23%)         | 5.4<br>(3.7-7.9)                            | 18%<br>(12-23%)                      | 20%<br>(13-26%)                     | 23000<br>(15000-31000) | 640000<br>(420000-860000)    |
| Russian Federation | 2010 | Male   | 65 to 69 | 84%<br>(77-90%)                | 16%<br>(9.9-23%)         | 4.7<br>(3.3-6.4)                            | 13%<br>(7.6-19%)                     | 15%<br>(8.1-21%)                    | 11000<br>(5900-16000)  | 260000<br>(150000-370000)    |
| Russian Federation | 2010 | Male   | 70 to 74 | 81%<br>(73-87%)                | 19%<br>(13-27%)          | 3.5<br>(2.3-4.9)                            | 7.9%<br>(2.8-14%)                    | 8.6%<br>(2.8-15%)                   | 12000<br>(4000-22000)  | 240000<br>(85000-420000)     |
| Russian Federation | 2010 | Male   | 75 to 79 | 75%<br>(63-84%)                | 25%<br>(16-37%)          | 2.7<br>(1.7-4)                              | 4.6%<br>(0.27-10%)                   | 4.8%<br>(-0.067-11%)                | 4900<br>(-71-12000)    | 77000<br>(4000-170000)       |
| Russian Federation | 2010 | Male   | 80 to 84 | 70%<br>(57-81%)                | 30%<br>(19-43%)          | 2.4<br>(1.5-3.5)                            | 3%<br>(-0.76-8%)                     | 3.1%<br>(-1.3-8.8%)                 | 3000<br>(-1200-8500)   | 36000<br>(-8800-94000)       |
| Russian Federation | 2010 | Male   | 85 to 89 | 65%<br>(51-76%)                | 35%<br>(24-49%)          | 2.2<br>(1.4-3.2)                            | 1.8%<br>(-1.7-6.2%)                  | 1.6%<br>(-2.4-6.8%)                 | 510<br>(-770-2200)     | 4900<br>(-4700-18000)        |
| Russian Federation | 2010 | Male   | 90 to 94 | 61%<br>(47-73%)                | 39%<br>(27-53%)          | 1.9<br>(1.2-3)                              | 0.93%<br>(-2.5-5.1%)                 | 0.63%<br>(-3.6-5.5%)                | 63<br>(-350-550)       | 560<br>(-1500-3100)          |
| Russian Federation | 2010 | Male   | 95 plus  | 59%<br>(42-74%)                | 41%<br>(26-58%)          | 1.7<br>(0.87-2.9)                           | 0.93%<br>(-2.4-5.6%)                 | 0.56%<br>(-3.5-6%)                  | 18<br>(-110-200)       | 120<br>(-320-720)            |
| Russian Federation | 2016 | Female | All Ages | 64%<br>(60-68%)                | 36%<br>(32-40%)          | 1.9<br>(1.4-2.5)                            | 6.2%<br>(4.5-8.6%)                   | 4.3%<br>(1.8-7.2%)                  | 43000<br>(16000-86000) | 1700000<br>(1100000-2800000) |
| Russian Federation | 2016 | Female | 15 to 19 | 51%<br>(39-63%)                | 49%<br>(37-61%)          | 1.5<br>(0.88-2.4)                           | 4.4%<br>(2.9-6.3%)                   | 9.1%<br>(5.3-14%)                   | 130<br>(67-230)        | 15000<br>(9400-23000)        |
| Russian Federation | 2016 | Female | 20 to 24 | 71%<br>(59-80%)                | 29%<br>(20-41%)          | 2.8<br>(1.7-4.3)                            | 8.7%<br>(6.5-11%)                    | 15%<br>(9.8-21%)                    | 400<br>(210-690)       | 46000<br>(30000-66000)       |
| Russian Federation | 2016 | Female | 25 to 29 | 77%<br>(66-84%)                | 23%<br>(16-34%)          | 2.8<br>(1.8-4.1)                            | 11%<br>(8.6-14%)                     | 16%<br>(12-21%)                     | 1100<br>(570-1900)     | 110000<br>(73000-170000)     |
| Russian Federation | 2016 | Female | 30 to 34 | 80%<br>(70-86%)                | 20%<br>(14-30%)          | 3<br>(1.9-4.2)                              | 13%<br>(9.9-16%)                     | 19%<br>(15-23%)                     | 2000<br>(1000-3600)    | 160000<br>(100000-250000)    |
| Russian Federation | 2016 | Female | 35 to 39 | 80%<br>(72-86%)                | 20%<br>(14-28%)          | 3.2<br>(2.1-4.6)                            | 14%<br>(11-18%)                      | 22%<br>(18-27%)                     | 2900<br>(1400-5200)    | 190000<br>(120000-300000)    |
| Russian Federation | 2016 | Female | 40 to 44 | 80%<br>(72-86%)                | 20%<br>(14-28%)          | 3.1<br>(2.1-4.5)                            | 14%<br>(11-18%)                      | 23%<br>(19-27%)                     | 3500<br>(1900-5900)    | 200000<br>(120000-310000)    |
| Russian Federation | 2016 | Female | 45 to 49 | 79%<br>(69-85%)                | 21%<br>(15-31%)          | 2.6<br>(1.8-3.8)                            | 13%<br>(9.9-16%)                     | 20%<br>(17-24%)                     | 3400<br>(2000-5800)    | 170000<br>(110000-260000)    |
| Russian Federation | 2016 | Female | 50 to 54 | 75%<br>(65-82%)                | 25%<br>(18-35%)          | 2.3<br>(1.4-3.4)                            | 11%<br>(8.4-14%)                     | 17%<br>(13-21%)                     | 5100<br>(2900-8400)    | 220000<br>(140000-340000)    |
| Russian Federation | 2016 | Female | 55 to 59 | 69%<br>(58-78%)                | 31%<br>(22-42%)          | 2<br>(1.3-3.1)                              | 9.2%<br>(6.6-13%)                    | 13%<br>(9.7-18%)                    | 6600<br>(3800-11000)   | 230000<br>(150000-370000)    |
| Russian Federation | 2016 | Female | 60 to 64 | 64%<br>(53-74%)                | 36%<br>(26-47%)          | 1.9<br>(1.1-2.8)                            | 6.1%<br>(3.4-9.5%)                   | 8.5%<br>(4.7-13%)                   | 5600<br>(2800-10000)   | 170000<br>(89000-300000)     |
| Russian Federation | 2016 | Female | 65 to 69 | 60%<br>(48-70%)                | 40%<br>(30-52%)          | 1.7<br>(1.1-2.5)                            | 3.9%<br>(1.2-7%)                     | 5.1%<br>(1.4-9%)                    | 4000<br>(1100-8200)    | 100000<br>(32000-200000)     |

| Location           | Year | Sex    | Age      | Prevalence of current drinkers | Prevalence of abstainers | Population average of standard drinks daily | Percent of total attributable deaths | Percent of total attributable DALYs | Attributable deaths       | Attributable DALYs         |
|--------------------|------|--------|----------|--------------------------------|--------------------------|---------------------------------------------|--------------------------------------|-------------------------------------|---------------------------|----------------------------|
| Russian Federation | 2016 | Female | 70 to 74 | 53%<br>(42-64%)                | 47%<br>(36-58%)          | 1.5<br>(0.88-2.3)                           | 2.5%<br>(-0.48-6%)                   | 3%<br>(-0.84-7.6%)                  | 2000<br>(-480-5600)       | 42000<br>(-7600-110000)    |
| Russian Federation | 2016 | Female | 75 to 79 | 43%<br>(31-56%)                | 57%<br>(44-69%)          | 1.2<br>(0.64-1.9)                           | 1.5%<br>(-1.1-4.8%)                  | 1.7%<br>(-1.6-5.7%)                 | 3400<br>(-2900-13000)     | 55000<br>(-40000-190000)   |
| Russian Federation | 2016 | Female | 80 to 84 | 36%<br>(24-47%)                | 64%<br>(53-76%)          | 0.96<br>(0.51-1.6)                          | 0.93%<br>(-1.2-3.6%)                 | 0.98%<br>(-1.6-4.2%)                | 1500<br>(-2500-7100)      | 18000<br>(-25000-79000)    |
| Russian Federation | 2016 | Female | 85 to 89 | 33%<br>(22-44%)                | 67%<br>(56-78%)          | 0.91<br>(0.5-1.6)                           | 0.59%<br>(-1.5-3.4%)                 | 0.54%<br>(-1.9-3.9%)                | 1100<br>(-4200-7600)      | 11000<br>(-29000-60000)    |
| Russian Federation | 2016 | Female | 90 to 94 | 33%<br>(23-45%)                | 67%<br>(55-77%)          | 0.93<br>(0.48-1.6)                          | 0.4%<br>(-1.8-3.5%)                  | 0.31%<br>(-2.4-3.9%)                | 250<br>(-1900-3200)       | 1900<br>(-9300-17000)      |
| Russian Federation | 2016 | Female | 95 plus  | 36%<br>(21-52%)                | 64%<br>(48-79%)          | 0.99<br>(0.45-1.9)                          | 0.65%<br>(-2.3-4.5%)                 | 0.62%<br>(-2.8-5%)                  | 120<br>(-520-990)         | 480<br>(-1700-3400)        |
| Russian Federation | 2016 | Male   | All Ages | 80%<br>(76-84%)                | 20%<br>(16-24%)          | 5.1<br>(3.8-6.5)                            | 20%<br>(16-24%)                      | 18%<br>(14-23%)                     | 180000<br>(110000-270000) | 710000<br>(450000-1000000) |
| Russian Federation | 2016 | Male   | 15 to 19 | 69%<br>(54-81%)                | 31%<br>(19-46%)          | 2.5<br>(1.4-3.8)                            | 9.3%<br>(6-14%)                      | 15%<br>(8.8-23%)                    | 500<br>(250-840)          | 43000<br>(25000-68000)     |
| Russian Federation | 2016 | Male   | 20 to 24 | 82%<br>(72-89%)                | 18%<br>(11-28%)          | 4.8<br>(3.1-7)                              | 20%<br>(15-26%)                      | 26%<br>(18-35%)                     | 2500<br>(1400-3900)       | 190000<br>(120000-280000)  |
| Russian Federation | 2016 | Male   | 25 to 29 | 88%<br>(81-92%)                | 12%<br>(7.6-19%)         | 6.1<br>(4-8.5)                              | 25%<br>(20-31%)                      | 30%<br>(23-38%)                     | 7300<br>(4400-11000)      | 510000<br>(330000-730000)  |
| Russian Federation | 2016 | Male   | 30 to 34 | 91%<br>(84-95%)                | 9.5%<br>(5.2-16%)        | 7.2<br>(5-9.9)                              | 28%<br>(22-33%)                      | 33%<br>(26-39%)                     | 12000<br>(6800-18000)     | 730000<br>(460000-1100000) |
| Russian Federation | 2016 | Male   | 35 to 39 | 90%<br>(85-95%)                | 9.6%<br>(5.4-15%)        | 8.1<br>(5.2-12)                             | 30%<br>(24-35%)                      | 36%<br>(29-41%)                     | 14000<br>(8200-21000)     | 770000<br>(480000-1100000) |
| Russian Federation | 2016 | Male   | 40 to 44 | 90%<br>(85-94%)                | 10%<br>(6-15%)           | 8.2<br>(5.4-12)                             | 31%<br>(26-36%)                      | 38%<br>(32-43%)                     | 16000<br>(9600-24000)     | 780000<br>(490000-1100000) |
| Russian Federation | 2016 | Male   | 45 to 49 | 89%<br>(82-94%)                | 11%<br>(6.4-18%)         | 8.1<br>(5.5-12)                             | 30%<br>(25-35%)                      | 36%<br>(31-41%)                     | 17000<br>(10000-25000)    | 730000<br>(460000-1100000) |
| Russian Federation | 2016 | Male   | 50 to 54 | 87%<br>(81-92%)                | 13%<br>(7.9-19%)         | 7.8<br>(5-11)                               | 27%<br>(22-32%)                      | 33%<br>(26-38%)                     | 25000<br>(15000-38000)    | 950000<br>(590000-1400000) |
| Russian Federation | 2016 | Male   | 55 to 59 | 85%<br>(77-91%)                | 15%<br>(9-23%)           | 6.4<br>(4.2-9.1)                            | 23%<br>(17-28%)                      | 26%<br>(20-32%)                     | 28000<br>(17000-42000)    | 940000<br>(580000-1400000) |
| Russian Federation | 2016 | Male   | 60 to 64 | 84%<br>(75-90%)                | 16%<br>(9.9-25%)         | 5.4<br>(3.5-8.1)                            | 18%<br>(12-23%)                      | 20%<br>(13-27%)                     | 25000<br>(14000-40000)    | 720000<br>(420000-1100000) |
| Russian Federation | 2016 | Male   | 65 to 69 | 84%<br>(75-90%)                | 16%<br>(10-25%)          | 4.7<br>(3.1-6.5)                            | 13%<br>(7.3-19%)                     | 15%<br>(7.9-21%)                    | 17000<br>(8400-29000)     | 420000<br>(210000-680000)  |

| Location           | Year | Sex    | Age      | Prevalence of current drinkers | Prevalence of abstainers | Population average of standard drinks daily | Percent of total attributable deaths | Percent of total attributable DALYs | Attributable deaths   | Attributable DALYs        |
|--------------------|------|--------|----------|--------------------------------|--------------------------|---------------------------------------------|--------------------------------------|-------------------------------------|-----------------------|---------------------------|
| Russian Federation | 2016 | Male   | 70 to 74 | 81%<br>(71-87%)                | 19%<br>(13-29%)          | 3.5<br>(2.2-5.1)                            | 8.3%<br>(2.8-14%)                    | 9.2%<br>(2.7-16%)                   | 6200<br>(1800-12000)  | 120000<br>(39000-220000)  |
| Russian Federation | 2016 | Male   | 75 to 79 | 77%<br>(65-86%)                | 23%<br>(14-35%)          | 2.8<br>(1.7-4.4)                            | 5.2%<br>(0.37-11%)                   | 5.6%<br>(-0.00041-12%)              | 7500<br>(-0.65-17000) | 120000<br>(8500-260000)   |
| Russian Federation | 2016 | Male   | 80 to 84 | 71%<br>(58-81%)                | 29%<br>(19-42%)          | 2.5<br>(1.5-3.8)                            | 3.5%<br>(-0.78-8.8%)                 | 3.6%<br>(-1.4-9.7%)                 | 2600<br>(-1100-7200)  | 32000<br>(-7600-81000)    |
| Russian Federation | 2016 | Male   | 85 to 89 | 65%<br>(51-77%)                | 35%<br>(23-49%)          | 2.2<br>(1.3-3.4)                            | 2%<br>(-1.7-6.8%)                    | 1.9%<br>(-2.4-7.6%)                 | 1300<br>(-1600-5200)  | 12000<br>(-9800-41000)    |
| Russian Federation | 2016 | Male   | 90 to 94 | 61%<br>(47-74%)                | 39%<br>(26-53%)          | 2<br>(1.1-3.2)                              | 1.1%<br>(-2.4-5.9%)                  | 0.84%<br>(-3.3-6.5%)                | 120<br>(-500-990)     | 1000<br>(-2200-5400)      |
| Russian Federation | 2016 | Male   | 95 plus  | 59%<br>(42-74%)                | 41%<br>(26-58%)          | 1.7<br>(0.84-3)                             | 1%<br>(-2.3-6%)                      | 0.61%<br>(-3.5-6.4%)                | 20<br>(-110-210)      | 130<br>(-310-760)         |
| Ukraine            | 1990 | Female | All Ages | 64%<br>(60-68%)                | 36%<br>(32-40%)          | 2.8<br>(2.2-3.4)                            | 5.5%<br>(3.4-8%)                     | 4%<br>(0.83-7.7%)                   | 14000<br>(2700-26000) | 540000<br>(320000-770000) |
| Ukraine            | 1990 | Female | 15 to 19 | 56%<br>(45-67%)                | 44%<br>(33-55%)          | 2.4<br>(1.7-3.4)                            | 5.9%<br>(4.2-7.8%)                   | 10%<br>(6.4-15%)                    | 100<br>(62-150)       | 12000<br>(8500-17000)     |
| Ukraine            | 1990 | Female | 20 to 24 | 74%<br>(64-81%)                | 26%<br>(19-36%)          | 4.3<br>(3.1-5.8)                            | 10%<br>(7.8-13%)                     | 14%<br>(10-19%)                     | 150<br>(110-200)      | 22000<br>(16000-29000)    |
| Ukraine            | 1990 | Female | 25 to 29 | 79%<br>(71-85%)                | 21%<br>(15-29%)          | 4.1<br>(3-5.4)                              | 10%<br>(7.9-12%)                     | 14%<br>(10-19%)                     | 190<br>(140-260)      | 27000<br>(20000-35000)    |
| Ukraine            | 1990 | Female | 30 to 34 | 83%<br>(75-88%)                | 17%<br>(12-25%)          | 4.3<br>(3.1-5.6)                            | 9.9%<br>(7.9-12%)                    | 15%<br>(12-20%)                     | 300<br>(230-390)      | 33000<br>(25000-41000)    |
| Ukraine            | 1990 | Female | 35 to 39 | 85%<br>(79-89%)                | 15%<br>(11-21%)          | 4.8<br>(3.6-6.3)                            | 11%<br>(9.1-13%)                     | 18%<br>(14-22%)                     | 490<br>(370-610)      | 41000<br>(32000-51000)    |
| Ukraine            | 1990 | Female | 40 to 44 | 86%<br>(80-90%)                | 14%<br>(10-20%)          | 4.8<br>(3.5-6.1)                            | 12%<br>(9.7-14%)                     | 18%<br>(15-23%)                     | 680<br>(530-850)      | 46000<br>(36000-57000)    |
| Ukraine            | 1990 | Female | 45 to 49 | 85%<br>(77-90%)                | 15%<br>(9.9-23%)         | 4.4<br>(3.2-5.8)                            | 12%<br>(9.1-15%)                     | 17%<br>(13-22%)                     | 870<br>(650-1100)     | 48000<br>(37000-60000)    |
| Ukraine            | 1990 | Female | 50 to 54 | 78%<br>(69-85%)                | 22%<br>(15-31%)          | 3.7<br>(2.6-5)                              | 11%<br>(7.8-13%)                     | 15%<br>(10-19%)                     | 1700<br>(1200-2200)   | 80000<br>(59000-100000)   |
| Ukraine            | 1990 | Female | 55 to 59 | 67%<br>(54-78%)                | 33%<br>(22-46%)          | 3.1<br>(1.9-4.6)                            | 8.9%<br>(5.4-13%)                    | 12%<br>(6.6-17%)                    | 1400<br>(800-2100)    | 56000<br>(33000-81000)    |
| Ukraine            | 1990 | Female | 60 to 64 | 60%<br>(47-72%)                | 40%<br>(28-53%)          | 2.7<br>(1.6-4.3)                            | 6.7%<br>(2.7-11%)                    | 8.5%<br>(2.9-15%)                   | 2100<br>(730-3800)    | 69000<br>(28000-120000)   |
| Ukraine            | 1990 | Female | 65 to 69 | 57%<br>(44-68%)                | 43%<br>(32-56%)          | 2.3<br>(1.4-3.3)                            | 4.7%<br>(0.88-9%)                    | 5.6%<br>(0.62-11%)                  | 1900<br>(210-3700)    | 49000<br>(9500-91000)     |
| Ukraine            | 1990 | Female | 70 to 74 | 50%<br>(37-61%)                | 50%<br>(39-63%)          | 1.8<br>(1.1-2.7)                            | 2.7%<br>(-0.94-7.2%)                 | 3.1%<br>(-1.6-8.7%)                 | 1000<br>(-520-2900)   | 22000<br>(-7800-57000)    |
| Ukraine            | 1990 | Female | 75 to 79 | 40%<br>(27-54%)                | 60%<br>(46-73%)          | 1.4<br>(0.78-2.3)                           | 1.6%<br>(-1.7-5.9%)                  | 1.6%<br>(-2.3-6.8%)                 | 1000<br>(-1500-4400)  | 18000<br>(-19000-67000)   |
| Ukraine            | 1990 | Female | 80 to 84 | 34%<br>(22-47%)                | 66%<br>(53-78%)          | 1.2<br>(0.66-1.9)                           | 1.2%<br>(-1.5-4.7%)                  | 1.3%<br>(-1.9-5.4%)                 | 810<br>(-1200-3500)   | 10000<br>(-12000-38000)   |
| Ukraine            | 1990 | Female | 85 to 89 | 33%<br>(21-48%)                | 67%<br>(52-79%)          | 1.2<br>(0.61-1.9)                           | 1.1%<br>(-1.4-4.6%)                  | 1.1%<br>(-1.8-5.1%)                 | 480<br>(-770-2200)    | 4200<br>(-5000-17000)     |

| Location | Year | Sex    | Age      | Prevalence of current drinkers | Prevalence of abstainers | Population average of standard drinks daily | Percent of total attributable deaths | Percent of total attributable DALYs | Attributable deaths    | Attributable DALYs           |
|----------|------|--------|----------|--------------------------------|--------------------------|---------------------------------------------|--------------------------------------|-------------------------------------|------------------------|------------------------------|
| Ukraine  | 1990 | Female | 90 to 94 | 36%<br>(24-51%)                | 64%<br>(49-76%)          | 1.3<br>(0.66-2.1)                           | 1.1%<br>(-1.9-5.1%)                  | 1.1%<br>(-2.4-5.8%)                 | 190<br>(-400-960)      | 1200<br>(-1900-5000)         |
| Ukraine  | 1990 | Female | 95 plus  | 41%<br>(24-60%)                | 59%<br>(40-76%)          | 1.5<br>(0.65-2.6)                           | 1.3%<br>(-2.4-6.7%)                  | 1.3%<br>(-3.1-7.5%)                 | 89<br>(-220-520)       | 370<br>(-670-1800)           |
| Ukraine  | 1990 | Male   | All Ages | 75%<br>(71-78%)                | 25%<br>(22-29%)          | 4.5<br>(3.6-5.5)                            | 14%<br>(11-17%)                      | 12%<br>(8.5-17%)                    | 37000<br>(26000-51000) | 1500000<br>(1200000-1900000) |
| Ukraine  | 1990 | Male   | 15 to 19 | 60%<br>(49-69%)                | 40%<br>(31-51%)          | 2.5<br>(1.6-3.7)                            | 8.1%<br>(5.6-12%)                    | 12%<br>(8-18%)                      | 280<br>(180-410)       | 23000<br>(15000-33000)       |
| Ukraine  | 1990 | Male   | 20 to 24 | 83%<br>(76-88%)                | 17%<br>(12-24%)          | 5.6<br>(3.8-7.8)                            | 19%<br>(14-25%)                      | 25%<br>(17-33%)                     | 930<br>(650-1200)      | 70000<br>(50000-91000)       |
| Ukraine  | 1990 | Male   | 25 to 29 | 89%<br>(84-92%)                | 11%<br>(7.8-16%)         | 6.9<br>(4.7-9.4)                            | 22%<br>(17-28%)                      | 29%<br>(21-37%)                     | 1500<br>(1100-1900)    | 100000<br>(80000-130000)     |
| Ukraine  | 1990 | Male   | 30 to 34 | 92%<br>(88-95%)                | 7.7%<br>(5.1-12%)        | 7.3<br>(5.2-9.7)                            | 23%<br>(18-29%)                      | 30%<br>(23-38%)                     | 2100<br>(1600-2700)    | 130000<br>(100000-170000)    |
| Ukraine  | 1990 | Male   | 35 to 39 | 93%<br>(89-95%)                | 7.1%<br>(4.8-11%)        | 7.4<br>(5.1-10)                             | 24%<br>(18-31%)                      | 31%<br>(23-41%)                     | 2700<br>(1900-3500)    | 150000<br>(110000-200000)    |
| Ukraine  | 1990 | Male   | 40 to 44 | 93%<br>(90-95%)                | 6.6%<br>(4.5-9.6%)       | 7.7<br>(5.5-11)                             | 25%<br>(19-33%)                      | 31%<br>(23-41%)                     | 3200<br>(2400-4300)    | 160000<br>(120000-210000)    |
| Ukraine  | 1990 | Male   | 45 to 49 | 94%<br>(90-96%)                | 6.2%<br>(4.1-9.5%)       | 7.8<br>(5.5-11)                             | 24%<br>(18-31%)                      | 29%<br>(22-38%)                     | 3800<br>(2800-5100)    | 170000<br>(120000-220000)    |
| Ukraine  | 1990 | Male   | 50 to 54 | 90%<br>(85-93%)                | 9.9%<br>(6.7-15%)        | 6.6<br>(4.4-9)                              | 20%<br>(14-26%)                      | 24%<br>(17-31%)                     | 6500<br>(4600-8700)    | 250000<br>(180000-330000)    |
| Ukraine  | 1990 | Male   | 55 to 59 | 83%<br>(75-90%)                | 17%<br>(10-25%)          | 5.1<br>(3.4-7.2)                            | 15%<br>(10-20%)                      | 18%<br>(12-24%)                     | 4500<br>(2900-6200)    | 150000<br>(100000-210000)    |
| Ukraine  | 1990 | Male   | 60 to 64 | 80%<br>(71-87%)                | 20%<br>(13-29%)          | 4.4<br>(2.8-6.6)                            | 11%<br>(5.6-17%)                     | 13%<br>(6-19%)                      | 5200<br>(2500-8000)    | 150000<br>(75000-230000)     |
| Ukraine  | 1990 | Male   | 65 to 69 | 80%<br>(71-87%)                | 20%<br>(13-29%)          | 3.9<br>(2.6-5.4)                            | 8.3%<br>(3.3-14%)                    | 9.1%<br>(3.4-15%)                   | 3100<br>(1100-5100)    | 74000<br>(30000-120000)      |
| Ukraine  | 1990 | Male   | 70 to 74 | 76%<br>(66-84%)                | 24%<br>(16-34%)          | 3.3<br>(2.2-4.8)                            | 5.7%<br>(0.97-11%)                   | 6.1%<br>(0.75-13%)                  | 1500<br>(190-3200)     | 30000<br>(5200-60000)        |
| Ukraine  | 1990 | Male   | 75 to 79 | 70%<br>(57-82%)                | 30%<br>(18-43%)          | 2.8<br>(1.7-4.4)                            | 3.6%<br>(-0.83-9.6%)                 | 3.8%<br>(-1.3-11%)                  | 1400<br>(-470-3800)    | 22000<br>(-4700-57000)       |
| Ukraine  | 1990 | Male   | 80 to 84 | 64%<br>(50-76%)                | 36%<br>(24-50%)          | 2.4<br>(1.5-3.7)                            | 2.1%<br>(-1.7-7.5%)                  | 2%<br>(-2.4-8.2%)                   | 570<br>(-680-2400)     | 7300<br>(-5700-26000)        |
| Ukraine  | 1990 | Male   | 85 to 89 | 59%<br>(45-71%)                | 41%<br>(29-55%)          | 2.1<br>(1.3-3.2)                            | 0.91%<br>(-2.5-5.3%)                 | 0.64%<br>(-3.3-5.7%)                | 98<br>(-500-870)       | 1200<br>(-3200-7000)         |
| Ukraine  | 1990 | Male   | 90 to 94 | 56%<br>(42-69%)                | 44%<br>(31-58%)          | 1.9<br>(1-2.9)                              | 0.02%<br>(-3.1-4.2%)                 | -0.4%<br>(-4.1-4.5%)                | -20<br>(-200-230)      | 6.1<br>(-930-1300)           |
| Ukraine  | 1990 | Male   | 95 plus  | 54%<br>(37-70%)                | 46%<br>(30-63%)          | 1.7<br>(0.8-2.9)                            | -0.4%<br>(-3.6-3.8%)                 | -0.97%<br>(-4.8-3.9%)               | -15<br>(-73-60)        | -24<br>(-220-230)            |
| Ukraine  | 1995 | Female | All Ages | 65%<br>(61-69%)                | 35%<br>(31-39%)          | 2.7<br>(2.2-3.3)                            | 5.9%<br>(3.5-8.3%)                   | 4%<br>(0.74-7.7%)                   | 16000<br>(3000-31000)  | 640000<br>(380000-920000)    |

| Location | Year | Sex    | Age      | Prevalence of current drinkers | Prevalence of abstainers | Population average of standard drinks daily | Percent of total attributable deaths | Percent of total attributable DALYs | Attributable deaths    | Attributable DALYs        |
|----------|------|--------|----------|--------------------------------|--------------------------|---------------------------------------------|--------------------------------------|-------------------------------------|------------------------|---------------------------|
| Ukraine  | 1995 | Female | 15 to 19 | 57%<br>(46-67%)                | 43%<br>(33-54%)          | 2.4<br>(1.6-3.3)                            | 6.1%<br>(4.3-8.2%)                   | 10%<br>(6.4-15%)                    | 120<br>(74-170)        | 13000<br>(9200-18000)     |
| Ukraine  | 1995 | Female | 20 to 24 | 75%<br>(66-82%)                | 25%<br>(18-34%)          | 4.1<br>(2.8-5.6)                            | 10%<br>(8.1-13%)                     | 15%<br>(10-20%)                     | 220<br>(150-290)       | 26000<br>(19000-34000)    |
| Ukraine  | 1995 | Female | 25 to 29 | 80%<br>(72-85%)                | 20%<br>(15-28%)          | 4<br>(2.8-5.2)                              | 11%<br>(8.2-13%)                     | 14%<br>(10-19%)                     | 260<br>(180-350)       | 29000<br>(22000-37000)    |
| Ukraine  | 1995 | Female | 30 to 34 | 83%<br>(76-88%)                | 17%<br>(12-24%)          | 4.1<br>(3.1-5.4)                            | 11%<br>(8.5-13%)                     | 15%<br>(12-20%)                     | 410<br>(310-530)       | 38000<br>(29000-48000)    |
| Ukraine  | 1995 | Female | 35 to 39 | 85%<br>(79-90%)                | 15%<br>(10-21%)          | 4.7<br>(3.5-6.1)                            | 12%<br>(9.8-15%)                     | 18%<br>(14-22%)                     | 760<br>(580-940)       | 55000<br>(44000-68000)    |
| Ukraine  | 1995 | Female | 40 to 44 | 86%<br>(81-90%)                | 14%<br>(9.6-19%)         | 4.6<br>(3.4-5.9)                            | 13%<br>(10-16%)                      | 19%<br>(15-23%)                     | 1100<br>(870-1400)     | 68000<br>(54000-83000)    |
| Ukraine  | 1995 | Female | 45 to 49 | 85%<br>(78-90%)                | 15%<br>(10-22%)          | 4.2<br>(3-5.6)                              | 13%<br>(9.8-16%)                     | 18%<br>(13-22%)                     | 1400<br>(1100-1800)    | 71000<br>(54000-89000)    |
| Ukraine  | 1995 | Female | 50 to 54 | 78%<br>(69-85%)                | 22%<br>(15-31%)          | 3.6<br>(2.5-4.9)                            | 11%<br>(8.1-15%)                     | 15%<br>(10-20%)                     | 1500<br>(1000-2000)    | 66000<br>(46000-85000)    |
| Ukraine  | 1995 | Female | 55 to 59 | 67%<br>(54-78%)                | 33%<br>(22-46%)          | 3<br>(1.8-4.5)                              | 9.3%<br>(5.3-14%)                    | 12%<br>(6.3-19%)                    | 2700<br>(1400-4200)    | 98000<br>(56000-150000)   |
| Ukraine  | 1995 | Female | 60 to 64 | 61%<br>(48-72%)                | 39%<br>(28-52%)          | 2.7<br>(1.6-4.2)                            | 6.9%<br>(2.5-13%)                    | 8.4%<br>(2.6-16%)                   | 1900<br>(580-3600)     | 59000<br>(21000-110000)   |
| Ukraine  | 1995 | Female | 65 to 69 | 58%<br>(45-69%)                | 42%<br>(31-55%)          | 2.2<br>(1.5-3.2)                            | 4.5%<br>(0.55-9.2%)                  | 5.3%<br>(0.27-11%)                  | 2400<br>(120-5000)     | 62000<br>(7500-120000)    |
| Ukraine  | 1995 | Female | 70 to 74 | 51%<br>(38-63%)                | 49%<br>(37-62%)          | 1.8<br>(1.1-2.6)                            | 2.4%<br>(-1.4-7%)                    | 2.6%<br>(-2.1-8.1%)                 | 1500<br>(-1200-4700)   | 31000<br>(-18000-91000)   |
| Ukraine  | 1995 | Female | 75 to 79 | 41%<br>(28-55%)                | 59%<br>(45-72%)          | 1.4<br>(0.77-2.3)                           | 1.2%<br>(-2.1-5.5%)                  | 1.2%<br>(-2.8-6.4%)                 | 620<br>(-1400-3300)    | 11000<br>(-19000-48000)   |
| Ukraine  | 1995 | Female | 80 to 84 | 35%<br>(23-49%)                | 65%<br>(51-77%)          | 1.2<br>(0.66-1.9)                           | 0.97%<br>(-1.8-4.4%)                 | 0.93%<br>(-2.2-5%)                  | 740<br>(-1800-4000)    | 9500<br>(-18000-43000)    |
| Ukraine  | 1995 | Female | 85 to 89 | 34%<br>(22-49%)                | 66%<br>(51-78%)          | 1.2<br>(0.61-1.9)                           | 0.88%<br>(-1.7-4.3%)                 | 0.83%<br>(-2.2-4.8%)                | 470<br>(-1200-2600)    | 4200<br>(-8400-20000)     |
| Ukraine  | 1995 | Female | 90 to 94 | 37%<br>(24-52%)                | 63%<br>(48-76%)          | 1.3<br>(0.64-2.1)                           | 0.91%<br>(-2.2-5%)                   | 0.85%<br>(-2.7-5.6%)                | 190<br>(-610-1300)     | 1200<br>(-2900-6600)      |
| Ukraine  | 1995 | Female | 95 plus  | 42%<br>(24-62%)                | 58%<br>(38-76%)          | 1.4<br>(0.63-2.6)                           | 1.1%<br>(-2.8-6.5%)                  | 0.98%<br>(-3.5-7.2%)                | 59<br>(-210-430)       | 250<br>(-660-1500)        |
| Ukraine  | 1995 | Male   | All Ages | 76%<br>(72-79%)                | 24%<br>(21-28%)          | 4.4<br>(3.6-5.3)                            | 15%<br>(11-19%)                      | 13%<br>(9-17%)                      | 52000<br>(35000-70000) | 210000<br>(160000-260000) |
| Ukraine  | 1995 | Male   | 15 to 19 | 60%<br>(50-69%)                | 40%<br>(31-50%)          | 2.5<br>(1.6-3.6)                            | 8.6%<br>(5.8-12%)                    | 12%<br>(7.9-18%)                    | 350<br>(220-520)       | 28000<br>(19000-40000)    |
| Ukraine  | 1995 | Male   | 20 to 24 | 83%<br>(77-88%)                | 17%<br>(12-23%)          | 5.5<br>(3.8-7.7)                            | 20%<br>(14-25%)                      | 25%<br>(17-32%)                     | 1300<br>(910-1700)     | 95000<br>(67000-120000)   |
| Ukraine  | 1995 | Male   | 25 to 29 | 89%<br>(84-92%)                | 11%<br>(7.9-16%)         | 6.7<br>(4.6-8.9)                            | 23%<br>(18-29%)                      | 29%<br>(21-36%)                     | 1900<br>(1300-2400)    | 120000<br>(92000-160000)  |

| Location | Year | Sex    | Age      | Prevalence of current drinkers | Prevalence of abstainers | Population average of standard drinks daily | Percent of total attributable deaths | Percent of total attributable DALYs | Attributable deaths   | Attributable DALYs        |
|----------|------|--------|----------|--------------------------------|--------------------------|---------------------------------------------|--------------------------------------|-------------------------------------|-----------------------|---------------------------|
| Ukraine  | 1995 | Male   | 30 to 34 | 92%<br>(88-95%)                | 7.7%<br>(5.3-12%)        | 7.1<br>(5.1-9.4)                            | 24%<br>(19-29%)                      | 29%<br>(22-36%)                     | 2900<br>(2200-3700)   | 180000<br>(140000-220000) |
| Ukraine  | 1995 | Male   | 35 to 39 | 93%<br>(90-95%)                | 7%<br>(4.9-10%)          | 7.3<br>(5.1-9.9)                            | 25%<br>(19-31%)                      | 30%<br>(22-37%)                     | 4300<br>(3200-5500)   | 230000<br>(170000-290000) |
| Ukraine  | 1995 | Male   | 40 to 44 | 93%<br>(91-96%)                | 6.6%<br>(4.5-9.4%)       | 7.5<br>(5.4-10)                             | 26%<br>(20-32%)                      | 30%<br>(23-37%)                     | 5900<br>(4400-7500)   | 280000<br>(220000-350000) |
| Ukraine  | 1995 | Male   | 45 to 49 | 94%<br>(90-96%)                | 6.2%<br>(4.1-9.9%)       | 7.5<br>(5.3-10)                             | 25%<br>(19-31%)                      | 29%<br>(21-36%)                     | 6600<br>(4900-8200)   | 280000<br>(210000-350000) |
| Ukraine  | 1995 | Male   | 50 to 54 | 90%<br>(86-93%)                | 9.8%<br>(6.6-14%)        | 6.4<br>(4.2-8.7)                            | 21%<br>(15-27%)                      | 24%<br>(16-31%)                     | 6200<br>(4200-8000)   | 230000<br>(160000-290000) |
| Ukraine  | 1995 | Male   | 55 to 59 | 84%<br>(75-90%)                | 16%<br>(10-25%)          | 5<br>(3.3-6.9)                              | 15%<br>(9.9-21%)                     | 17%<br>(11-24%)                     | 8600<br>(5400-12000)  | 280000<br>(180000-380000) |
| Ukraine  | 1995 | Male   | 60 to 64 | 81%<br>(72-87%)                | 19%<br>(13-28%)          | 4.3<br>(2.8-6.4)                            | 11%<br>(5-17%)                       | 12%<br>(5.2-19%)                    | 5100<br>(2200-8100)   | 140000<br>(66000-230000)  |
| Ukraine  | 1995 | Male   | 65 to 69 | 80%<br>(71-88%)                | 20%<br>(12-29%)          | 3.8<br>(2.6-5.3)                            | 7.8%<br>(2.7-13%)                    | 8.4%<br>(2.7-15%)                   | 5100<br>(1600-9000)   | 120000<br>(41000-210000)  |
| Ukraine  | 1995 | Male   | 70 to 74 | 77%<br>(68-84%)                | 23%<br>(16-32%)          | 3.2<br>(2.1-4.6)                            | 5.1%<br>(0.19-11%)                   | 5.4%<br>(-0.11-12%)                 | 2300<br>(-53-5200)    | 45000<br>(1700-97000)     |
| Ukraine  | 1995 | Male   | 75 to 79 | 71%<br>(57-81%)                | 29%<br>(19-43%)          | 2.7<br>(1.7-4.2)                            | 3.1%<br>(-1.1-9.1%)                  | 3.1%<br>(-1.6-9.9%)                 | 890<br>(-480-2800)    | 14000<br>(-5200-41000)    |
| Ukraine  | 1995 | Male   | 80 to 84 | 65%<br>(51-76%)                | 35%<br>(24-49%)          | 2.4<br>(1.5-3.6)                            | 1.6%<br>(-2.3-6.8%)                  | 1.4%<br>(-3-7.5%)                   | 470<br>(-960-2400)    | 6200<br>(-8800-27000)     |
| Ukraine  | 1995 | Male   | 85 to 89 | 60%<br>(46-72%)                | 40%<br>(28-54%)          | 2.1<br>(1.2-3.1)                            | 0.46%<br>(-3-5%)                     | 0.17%<br>(-3.9-5.3%)                | 32<br>(-730-1000)     | 730<br>(-4800-7900)       |
| Ukraine  | 1995 | Male   | 90 to 94 | 57%<br>(43-70%)                | 43%<br>(30-57%)          | 1.8<br>(1-2.9)                              | -0.41%<br>(-3.7-3.8%)                | -0.83%<br>(-4.6-4.1%)               | -50<br>(-280-250)     | -140<br>(-1300-1300)      |
| Ukraine  | 1995 | Male   | 95 plus  | 55%<br>(39-71%)                | 45%<br>(29-61%)          | 1.6<br>(0.8-2.9)                            | -0.79%<br>(-4.1-3.4%)                | -1.3%<br>(-5.3-3.5%)                | -18<br>(-71-47)       | -42<br>(-220-180)         |
| Ukraine  | 2000 | Female | All Ages | 63%<br>(59-67%)                | 37%<br>(33-41%)          | 3<br>(2.4-3.7)                              | 6.4%<br>(4.2-8.7%)                   | 4.7%<br>(1.4-8.4%)                  | 17000<br>(5300-32000) | 650000<br>(420000-910000) |
| Ukraine  | 2000 | Female | 15 to 19 | 57%<br>(48-66%)                | 43%<br>(34-52%)          | 2.7<br>(1.8-3.7)                            | 6.3%<br>(4.5-8.4%)                   | 12%<br>(7.7-16%)                    | 120<br>(77-170)       | 14000<br>(9400-18000)     |
| Ukraine  | 2000 | Female | 20 to 24 | 75%<br>(67-81%)                | 25%<br>(19-33%)          | 4.6<br>(3.3-6.2)                            | 11%<br>(8.8-14%)                     | 17%<br>(12-22%)                     | 230<br>(160-310)      | 27000<br>(20000-35000)    |
| Ukraine  | 2000 | Female | 25 to 29 | 80%<br>(74-85%)                | 20%<br>(15-26%)          | 4.6<br>(3.4-5.9)                            | 11%<br>(8.9-14%)                     | 16%<br>(12-21%)                     | 290<br>(210-380)      | 31000<br>(24000-39000)    |
| Ukraine  | 2000 | Female | 30 to 34 | 84%<br>(79-88%)                | 16%<br>(12-21%)          | 4.8<br>(3.6-6.2)                            | 12%<br>(9.4-14%)                     | 17%<br>(13-22%)                     | 410<br>(310-520)      | 36000<br>(28000-45000)    |
| Ukraine  | 2000 | Female | 35 to 39 | 85%<br>(80-89%)                | 15%<br>(11-20%)          | 5.3<br>(4-6.8)                              | 13%<br>(11-16%)                      | 20%<br>(16-25%)                     | 730<br>(570-910)      | 53000<br>(43000-64000)    |
| Ukraine  | 2000 | Female | 40 to 44 | 86%<br>(81-90%)                | 14%<br>(10-19%)          | 5.2<br>(3.8-6.6)                            | 14%<br>(11-17%)                      | 21%<br>(17-26%)                     | 1200<br>(910-1500)    | 71000<br>(57000-87000)    |
| Ukraine  | 2000 | Female | 45 to 49 | 85%<br>(79-90%)                | 15%<br>(10-21%)          | 4.7<br>(3.5-6.2)                            | 14%<br>(11-17%)                      | 20%<br>(15-24%)                     | 1600<br>(1200-2000)   | 80000<br>(62000-100000)   |

| Location | Year | Sex    | Age      | Prevalence of current drinkers | Prevalence of abstainers | Population average of standard drinks daily | Percent of total attributable deaths | Percent of total attributable DALYs | Attributable deaths    | Attributable DALYs        |
|----------|------|--------|----------|--------------------------------|--------------------------|---------------------------------------------|--------------------------------------|-------------------------------------|------------------------|---------------------------|
| Ukraine  | 2000 | Female | 50 to 54 | 76%<br>(68-83%)                | 24%<br>(17-32%)          | 3.8<br>(2.7-5.2)                            | 12%<br>(9-16%)                       | 17%<br>(12-22%)                     | 1700<br>(1200-2300)    | 76000<br>(55000-99000)    |
| Ukraine  | 2000 | Female | 55 to 59 | 62%<br>(50-73%)                | 38%<br>(27-50%)          | 3<br>(1.9-4.6)                              | 10%<br>(6.2-15%)                     | 13%<br>(7.4-20%)                    | 1700<br>(960-2600)     | 63000<br>(38000-93000)    |
| Ukraine  | 2000 | Female | 60 to 64 | 52%<br>(39-65%)                | 48%<br>(35-61%)          | 2.4<br>(1.4-3.9)                            | 7.1%<br>(3.2-12%)                    | 8.8%<br>(3.6-16%)                   | 2600<br>(1000-4800)    | 81000<br>(35000-140000)   |
| Ukraine  | 2000 | Female | 65 to 69 | 46%<br>(34-59%)                | 54%<br>(41-66%)          | 1.9<br>(1.2-2.9)                            | 4.7%<br>(1.4-8.7%)                   | 5.5%<br>(1.3-11%)                   | 1600<br>(350-3200)     | 42000<br>(13000-79000)    |
| Ukraine  | 2000 | Female | 70 to 74 | 40%<br>(29-52%)                | 60%<br>(48-71%)          | 1.5<br>(0.88-2.3)                           | 2.7%<br>(-0.4-6.6%)                  | 3%<br>(-0.89-8%)                    | 1800<br>(-530-4700)    | 7000<br>(-5500-91000)     |
| Ukraine  | 2000 | Female | 75 to 79 | 35%<br>(24-47%)                | 65%<br>(53-76%)          | 1.3<br>(0.7-2.1)                            | 1.7%<br>(-1.4-5.7%)                  | 1.8%<br>(-1.9-6.7%)                 | 1200<br>(-1300-4500)   | 20000<br>(-16000-67000)   |
| Ukraine  | 2000 | Female | 80 to 84 | 33%<br>(22-46%)                | 67%<br>(54-78%)          | 1.3<br>(0.7-2)                              | 1.6%<br>(-1.4-5.4%)                  | 1.6%<br>(-1.8-6.2%)                 | 830<br>(-920-3100)     | 10000<br>(-8700-34000)    |
| Ukraine  | 2000 | Female | 85 to 89 | 34%<br>(22-48%)                | 66%<br>(52-78%)          | 1.3<br>(0.68-2.1)                           | 1.6%<br>(-1.3-5.6%)                  | 1.6%<br>(-1.8-6.3%)                 | 920<br>(-1000-3500)    | 7700<br>(-6200-27000)     |
| Ukraine  | 2000 | Female | 90 to 94 | 37%<br>(24-52%)                | 63%<br>(48-76%)          | 1.4<br>(0.73-2.4)                           | 1.7%<br>(-1.8-6.3%)                  | 1.7%<br>(-2.3-7.2%)                 | 420<br>(-560-1800)     | 2400<br>(-2600-9100)      |
| Ukraine  | 2000 | Female | 95 plus  | 42%<br>(23-61%)                | 58%<br>(39-77%)          | 1.6<br>(0.72-2.9)                           | 2%<br>(-2.6-8.6%)                    | 2%<br>(-3.2-9.7%)                   | 120<br>(-190-590)      | 460<br>(-590-2000)        |
| Ukraine  | 2000 | Male   | All Ages | 79%<br>(76-81%)                | 21%<br>(19-24%)          | 5.2<br>(4.3-6.3)                            | 16%<br>(13-20%)                      | 15%<br>(10-19%)                     | 56000<br>(39000-74000) | 220000<br>(170000-270000) |
| Ukraine  | 2000 | Male   | 15 to 19 | 65%<br>(57-72%)                | 35%<br>(28-43%)          | 3<br>(2-4.3)                                | 9.5%<br>(6.4-13%)                    | 14%<br>(9.3-20%)                    | 370<br>(230-530)       | 30000<br>(19000-41000)    |
| Ukraine  | 2000 | Male   | 20 to 24 | 86%<br>(81-89%)                | 14%<br>(11-19%)          | 6.4<br>(4.5-8.8)                            | 22%<br>(16-28%)                      | 28%<br>(20-36%)                     | 1400<br>(1000-1800)    | 100000<br>(73000-130000)  |
| Ukraine  | 2000 | Male   | 25 to 29 | 91%<br>(87-93%)                | 9.4%<br>(7.2-13%)        | 7.6<br>(5.3-10)                             | 24%<br>(19-30%)                      | 30%<br>(23-37%)                     | 2000<br>(1500-2500)    | 130000<br>(100000-160000) |
| Ukraine  | 2000 | Male   | 30 to 34 | 93%<br>(91-95%)                | 6.7%<br>(4.9-9.3%)       | 8.1<br>(5.8-11)                             | 24%<br>(20-29%)                      | 29%<br>(23-35%)                     | 2500<br>(1900-3000)    | 150000<br>(120000-180000) |
| Ukraine  | 2000 | Male   | 35 to 39 | 94%<br>(92-95%)                | 6.1%<br>(4.5-8%)         | 8.3<br>(5.8-11)                             | 26%<br>(20-31%)                      | 31%<br>(24-37%)                     | 4000<br>(3100-4900)    | 220000<br>(170000-260000) |
| Ukraine  | 2000 | Male   | 40 to 44 | 94%<br>(92-96%)                | 5.6%<br>(4.1-7.6%)       | 8.6<br>(6.2-12)                             | 28%<br>(22-33%)                      | 32%<br>(26-39%)                     | 6200<br>(4900-7600)    | 300000<br>(240000-360000) |
| Ukraine  | 2000 | Male   | 45 to 49 | 95%<br>(92-96%)                | 5.4%<br>(3.8-8%)         | 8.7<br>(6.1-12)                             | 27%<br>(21-32%)                      | 31%<br>(24-37%)                     | 7700<br>(6000-9400)    | 330000<br>(260000-400000) |
| Ukraine  | 2000 | Male   | 50 to 54 | 91%<br>(88-94%)                | 9%<br>(6.2-12%)          | 7.3<br>(5-9.9)                              | 23%<br>(17-28%)                      | 27%<br>(20-33%)                     | 7200<br>(5300-9100)    | 270000<br>(200000-340000) |
| Ukraine  | 2000 | Male   | 55 to 59 | 85%<br>(78-90%)                | 15%<br>(9.6-22%)         | 5.7<br>(3.9-7.9)                            | 18%<br>(12-23%)                      | 20%<br>(13-27%)                     | 5700<br>(3700-7600)    | 190000<br>(120000-240000) |
| Ukraine  | 2000 | Male   | 60 to 64 | 82%<br>(76-88%)                | 18%<br>(12-24%)          | 5<br>(3.2-7.4)                              | 13%<br>(6-19%)                       | 14%<br>(6.4-22%)                    | 7800<br>(3500-12000)   | 220000<br>(100000-330000) |

| Location | Year | Sex    | Age      | Prevalence of current drinkers | Prevalence of abstainers | Population average of standard drinks daily | Percent of total attributable deaths | Percent of total attributable DALYs | Attributable deaths    | Attributable DALYs         |
|----------|------|--------|----------|--------------------------------|--------------------------|---------------------------------------------|--------------------------------------|-------------------------------------|------------------------|----------------------------|
| Ukraine  | 2000 | Male   | 65 to 69 | 81%<br>(73-87%)                | 19%<br>(13-27%)          | 4.3<br>(3-6)                                | 9.4%<br>(3.7-15%)                    | 10%<br>(3.9-17%)                    | 4500<br>(1700-7400)    | 110000<br>(43000-170000)   |
| Ukraine  | 2000 | Male   | 70 to 74 | 76%<br>(66-83%)                | 24%<br>(17-34%)          | 3.5<br>(2.3-5)                              | 6.3%<br>(0.47-13%)                   | 6.9%<br>(0.17-14%)                  | 4000<br>(110-8200)     | 78000<br>(6100-150000)     |
| Ukraine  | 2000 | Male   | 75 to 79 | 70%<br>(56-81%)                | 30%<br>(19-44%)          | 3<br>(1.8-4.5)                              | 4.1%<br>(-1-10%)                     | 4.3%<br>(-1.6-11%)                  | 1600<br>(-580-4300)    | 25000<br>(-6100-62000)     |
| Ukraine  | 2000 | Male   | 80 to 84 | 64%<br>(49-75%)                | 36%<br>(25-51%)          | 2.6<br>(1.6-3.8)                            | 2.6%<br>(-1.7-8.1%)                  | 2.5%<br>(-2.4-8.8%)                 | 510<br>(-490-1800)     | 6300<br>(-4300-20000)      |
| Ukraine  | 2000 | Male   | 85 to 89 | 58%<br>(44-71%)                | 42%<br>(29-56%)          | 2.2<br>(1.3-3.3)                            | 1.3%<br>(-2.5-6.4%)                  | 1%<br>(-3.2-6.9%)                   | 180<br>(-550-1200)     | 1800<br>(-3600-9100)       |
| Ukraine  | 2000 | Male   | 90 to 94 | 56%<br>(41-69%)                | 44%<br>(31-59%)          | 2<br>(1.1-3.1)                              | 0.2%<br>(-3.4-4.9%)                  | -0.16%<br>(-4.2-5.2%)               | -10<br>(-270-330)      | 72<br>(-1200-1800)         |
| Ukraine  | 2000 | Male   | 95 plus  | 54%<br>(37-71%)                | 46%<br>(29-63%)          | 1.8<br>(0.88-3.2)                           | -0.36%<br>(-4-4.7%)                  | -0.87%<br>(-5.2-4.8%)               | -11<br>(-63-59)        | -17<br>(-190-220)          |
| Ukraine  | 2005 | Female | All Ages | 63%<br>(59-66%)                | 37%<br>(34-41%)          | 3.7<br>(3-4.5)                              | 8.3%<br>(5.8-11%)                    | 6.9%<br>(3.1-12%)                   | 26000<br>(12000-44000) | 850000<br>(590000-1200000) |
| Ukraine  | 2005 | Female | 15 to 19 | 56%<br>(49-63%)                | 44%<br>(37-51%)          | 3.2<br>(2.3-4.3)                            | 6.9%<br>(5.1-9%)                     | 14%<br>(9.5-19%)                    | 120<br>(78-160)        | 13000<br>(9600-17000)      |
| Ukraine  | 2005 | Female | 20 to 24 | 73%<br>(67-79%)                | 27%<br>(21-33%)          | 5.5<br>(4.1-7.3)                            | 12%<br>(9.5-15%)                     | 19%<br>(14-24%)                     | 250<br>(190-320)       | 30000<br>(22000-37000)     |
| Ukraine  | 2005 | Female | 25 to 29 | 79%<br>(75-83%)                | 21%<br>(17-25%)          | 5.4<br>(4.1-6.9)                            | 12%<br>(9.8-14%)                     | 17%<br>(13-21%)                     | 370<br>(280-470)       | 36000<br>(28000-45000)     |
| Ukraine  | 2005 | Female | 30 to 34 | 83%<br>(78-86%)                | 17%<br>(14-22%)          | 5.7<br>(4.3-7.3)                            | 13%<br>(11-15%)                      | 18%<br>(15-22%)                     | 570<br>(450-720)       | 46000<br>(37000-56000)     |
| Ukraine  | 2005 | Female | 35 to 39 | 85%<br>(82-88%)                | 15%<br>(12-18%)          | 6.3<br>(4.9-8.1)                            | 15%<br>(13-18%)                      | 23%<br>(19-27%)                     | 920<br>(740-1100)      | 61000<br>(50000-72000)     |
| Ukraine  | 2005 | Female | 40 to 44 | 86%<br>(83-89%)                | 14%<br>(11-17%)          | 6.3<br>(4.8-8)                              | 17%<br>(14-20%)                      | 25%<br>(20-29%)                     | 1500<br>(1200-1800)    | 86000<br>(70000-100000)    |
| Ukraine  | 2005 | Female | 45 to 49 | 85%<br>(81-89%)                | 15%<br>(11-19%)          | 5.8<br>(4.4-7.5)                            | 16%<br>(13-20%)                      | 23%<br>(19-28%)                     | 2100<br>(1700-2600)    | 100000<br>(83000-130000)   |
| Ukraine  | 2005 | Female | 50 to 54 | 76%<br>(69-83%)                | 24%<br>(17-31%)          | 4.7<br>(3.4-6.2)                            | 15%<br>(11-19%)                      | 20%<br>(15-26%)                     | 2500<br>(1900-3200)    | 110000<br>(82000-130000)   |
| Ukraine  | 2005 | Female | 55 to 59 | 61%<br>(51-72%)                | 39%<br>(28-49%)          | 3.6<br>(2.3-5.4)                            | 12%<br>(8-17%)                       | 16%<br>(9.9-23%)                    | 2600<br>(1600-3700)    | 92000<br>(59000-130000)    |
| Ukraine  | 2005 | Female | 60 to 64 | 50%<br>(38-62%)                | 50%<br>(38-62%)          | 2.8<br>(1.7-4.4)                            | 9.1%<br>(4.3-15%)                    | 11%<br>(5.1-19%)                    | 2200<br>(960-3700)     | 66000<br>(32000-110000)    |
| Ukraine  | 2005 | Female | 65 to 69 | 44%<br>(33-55%)                | 56%<br>(45-67%)          | 2.2<br>(1.4-3.2)                            | 6.3%<br>(2.6-11%)                    | 7.6%<br>(2.7-14%)                   | 3200<br>(1200-5800)    | 81000<br>(34000-140000)    |
| Ukraine  | 2005 | Female | 70 to 74 | 39%<br>(28-50%)                | 61%<br>(50-72%)          | 1.7<br>(1-2.6)                              | 4.2%<br>(0.57-9.1%)                  | 4.9%<br>(0.32-11%)                  | 2000<br>(130-4700)     | 41000<br>(5800-90000)      |
| Ukraine  | 2005 | Female | 75 to 79 | 34%<br>(24-46%)                | 66%<br>(54-76%)          | 1.5<br>(0.85-2.5)                           | 3.2%<br>(-0.51-8.1%)                 | 3.5%<br>(-0.95-9.5%)                | 2700<br>(-740-7300)    | 42000<br>(-6900-110000)    |



| Location | Year | Sex    | Age      | Prevalence of current drinkers | Prevalence of abstainers | Population average of standard drinks daily | Percent of total attributable deaths | Percent of total attributable DALYs | Attributable deaths    | Attributable DALYs           |
|----------|------|--------|----------|--------------------------------|--------------------------|---------------------------------------------|--------------------------------------|-------------------------------------|------------------------|------------------------------|
| Ukraine  | 2005 | Female | 80 to 84 | 33%<br>(21-47%)                | 67%<br>(53-79%)          | 1.6<br>(0.87-2.5)                           | 3.2%<br>(-0.47-8.2%)                 | 3.5%<br>(-0.76-9.4%)                | 2500<br>(-540-6900)    | 29000<br>(-4100-74000)       |
| Ukraine  | 2005 | Female | 85 to 89 | 35%<br>(22-50%)                | 65%<br>(50-78%)          | 1.6<br>(0.84-2.7)                           | 3.3%<br>(-0.3-8.7%)                  | 3.7%<br>(-0.61-10%)                 | 1400<br>(-230-3900)    | 11000<br>(-990-29000)        |
| Ukraine  | 2005 | Female | 90 to 94 | 37%<br>(25-53%)                | 63%<br>(47-75%)          | 1.8<br>(0.91-3)                             | 3.6%<br>(-0.73-10%)                  | 4%<br>(-1-12%)                      | 1000<br>(-270-3100)    | 5600<br>(-1100-16000)        |
| Ukraine  | 2005 | Female | 95 plus  | 43%<br>(25-62%)                | 57%<br>(38-75%)          | 2.1<br>(0.93-3.7)                           | 4.2%<br>(-1.5-12%)                   | 4.6%<br>(-2.1-14%)                  | 300<br>(-140-930)      | 1100<br>(-390-3100)          |
| Ukraine  | 2005 | Male   | All Ages | 80%<br>(78-83%)                | 20%<br>(17-22%)          | 6.6<br>(5.4-8)                              | 19%<br>(16-23%)                      | 18%<br>(13-22%)                     | 71000<br>(53000-90000) | 2600000<br>(2100000-3100000) |
| Ukraine  | 2005 | Male   | 15 to 19 | 64%<br>(58-70%)                | 36%<br>(30-42%)          | 3.6<br>(2.4-5.1)                            | 10%<br>(7.2-15%)                     | 17%<br>(11-24%)                     | 360<br>(230-500)       | 28000<br>(19000-39000)       |
| Ukraine  | 2005 | Male   | 20 to 24 | 86%<br>(82-89%)                | 14%<br>(11-18%)          | 7.8<br>(5.4-11)                             | 24%<br>(18-30%)                      | 32%<br>(24-40%)                     | 1500<br>(1100-1900)    | 100000<br>(80000-130000)     |
| Ukraine  | 2005 | Male   | 25 to 29 | 91%<br>(89-93%)                | 8.7%<br>(6.9-11%)        | 9.4<br>(6.6-12)                             | 26%<br>(21-30%)                      | 32%<br>(25-37%)                     | 2300<br>(1800-2700)    | 150000<br>(120000-180000)    |
| Ukraine  | 2005 | Male   | 30 to 34 | 94%<br>(92-95%)                | 6.2%<br>(4.7-8.2%)       | 10<br>(7.2-13)                              | 26%<br>(22-30%)                      | 30%<br>(26-35%)                     | 3100<br>(2600-3700)    | 190000<br>(150000-220000)    |
| Ukraine  | 2005 | Male   | 35 to 39 | 94%<br>(92-95%)                | 6%<br>(4.5-7.7%)         | 10<br>(7.2-14)                              | 28%<br>(23-32%)                      | 33%<br>(27-38%)                     | 4200<br>(3400-5000)    | 220000<br>(180000-260000)    |
| Ukraine  | 2005 | Male   | 40 to 44 | 95%<br>(93-96%)                | 5.5%<br>(4-7.1%)         | 11<br>(7.5-14)                              | 30%<br>(26-35%)                      | 35%<br>(30-40%)                     | 7000<br>(5800-8300)    | 330000<br>(280000-390000)    |
| Ukraine  | 2005 | Male   | 45 to 49 | 95%<br>(93-96%)                | 5%<br>(3.5-7.2%)         | 11<br>(7.5-14)                              | 29%<br>(25-35%)                      | 34%<br>(28-40%)                     | 9400<br>(7700-11000)   | 400000<br>(320000-470000)    |
| Ukraine  | 2005 | Male   | 50 to 54 | 91%<br>(88-94%)                | 8.6%<br>(6.2-12%)        | 8.9<br>(6.2-12)                             | 26%<br>(21-31%)                      | 29%<br>(24-35%)                     | 9900<br>(7700-12000)   | 370000<br>(290000-440000)    |
| Ukraine  | 2005 | Male   | 55 to 59 | 85%<br>(79-91%)                | 15%<br>(9.5-21%)         | 6.9<br>(4.7-9.6)                            | 21%<br>(15-26%)                      | 23%<br>(17-30%)                     | 8100<br>(5800-10000)   | 260000<br>(190000-330000)    |
| Ukraine  | 2005 | Male   | 60 to 64 | 83%<br>(76-88%)                | 17%<br>(12-24%)          | 6.1<br>(3.9-8.9)                            | 16%<br>(8.8-22%)                     | 18%<br>(9.6-25%)                    | 6300<br>(3400-9000)    | 170000<br>(96000-250000)     |
| Ukraine  | 2005 | Male   | 65 to 69 | 81%<br>(73-88%)                | 19%<br>(12-27%)          | 5.3<br>(3.6-7.2)                            | 13%<br>(6.1-18%)                     | 14%<br>(6.5-21%)                    | 8500<br>(4000-13000)   | 200000<br>(96000-290000)     |
| Ukraine  | 2005 | Male   | 70 to 74 | 76%<br>(66-83%)                | 24%<br>(17-34%)          | 4.3<br>(2.8-6.1)                            | 9%<br>(2.3-15%)                      | 9.9%<br>(2.2-17%)                   | 4500<br>(1000-7700)    | 85000<br>(22000-140000)      |
| Ukraine  | 2005 | Male   | 75 to 79 | 70%<br>(56-80%)                | 30%<br>(20-44%)          | 3.6<br>(2.2-5.5)                            | 6.4%<br>(-0.15-13%)                  | 6.9%<br>(-0.58-15%)                 | 3800<br>(-330-7900)    | 57000<br>(-1300-110000)      |
| Ukraine  | 2005 | Male   | 80 to 84 | 64%<br>(49-75%)                | 36%<br>(25-51%)          | 3.1<br>(1.9-4.7)                            | 4.8%<br>(-0.63-11%)                  | 5%<br>(-1.2-12%)                    | 1500<br>(-370-3600)    | 16000<br>(-2200-39000)       |
| Ukraine  | 2005 | Male   | 85 to 89 | 58%<br>(44-70%)                | 42%<br>(30-56%)          | 2.7<br>(1.6-4.1)                            | 3.2%<br>(-1.5-9.1%)                  | 3.2%<br>(-2.3-10%)                  | 380<br>(-260-1100)     | 3200<br>(-1500-8800)         |
| Ukraine  | 2005 | Male   | 90 to 94 | 55%<br>(41-69%)                | 45%<br>(31-59%)          | 2.4<br>(1.4-3.8)                            | 1.8%<br>(-2.6-7.4%)                  | 1.6%<br>(-3.5-8.1%)                 | 96<br>(-210-490)       | 620<br>(-930-2700)           |

| Location | Year | Sex    | Age      | Prevalence of current drinkers | Prevalence of abstainers | Population average of standard drinks daily | Percent of total attributable deaths | Percent of total attributable DALYs | Attributable deaths    | Attributable DALYs         |
|----------|------|--------|----------|--------------------------------|--------------------------|---------------------------------------------|--------------------------------------|-------------------------------------|------------------------|----------------------------|
| Ukraine  | 2005 | Male   | 95 plus  | 54%<br>(37-71%)                | 46%<br>(29-63%)          | 2.1<br>(1-3.8)                              | 0.83%<br>(-3.7-6.6%)                 | 0.43%<br>(-4.8-7.2%)                | 5.5<br>(-61-91)        | 42<br>(-180-330)           |
| Ukraine  | 2010 | Female | All Ages | 65%<br>(61-68%)                | 35%<br>(32-39%)          | 4.2<br>(3.3-5.1)                            | 8.8%<br>(5.9-12%)                    | 7.8%<br>(3.3-14%)                   | 27000<br>(11000-47000) | 810000<br>(540000-1100000) |
| Ukraine  | 2010 | Female | 15 to 19 | 55%<br>(48-63%)                | 45%<br>(37-52%)          | 3.4<br>(2.4-4.6)                            | 6.8%<br>(5-8.9%)                     | 15%<br>(10-20%)                     | 76<br>(50-110)         | 9400<br>(6800-12000)       |
| Ukraine  | 2010 | Female | 20 to 24 | 72%<br>(66-78%)                | 28%<br>(22-34%)          | 5.9<br>(4.3-7.8)                            | 12%<br>(9.3-14%)                     | 19%<br>(15-24%)                     | 180<br>(140-230)       | 25000<br>(19000-32000)     |
| Ukraine  | 2010 | Female | 25 to 29 | 78%<br>(73-82%)                | 22%<br>(18-27%)          | 5.8<br>(4.4-7.4)                            | 12%<br>(9.3-14%)                     | 17%<br>(13-20%)                     | 290<br>(220-370)       | 33000<br>(26000-41000)     |
| Ukraine  | 2010 | Female | 30 to 34 | 82%<br>(77-85%)                | 18%<br>(15-23%)          | 6<br>(4.6-7.8)                              | 12%<br>(10-14%)                      | 17%<br>(14-21%)                     | 450<br>(350-560)       | 40000<br>(31000-48000)     |
| Ukraine  | 2010 | Female | 35 to 39 | 84%<br>(81-88%)                | 16%<br>(12-19%)          | 6.9<br>(5.2-8.9)                            | 15%<br>(12-17%)                      | 22%<br>(19-26%)                     | 770<br>(620-920)       | 54000<br>(44000-64000)     |
| Ukraine  | 2010 | Female | 40 to 44 | 86%<br>(82-89%)                | 14%<br>(11-18%)          | 6.8<br>(5.2-8.7)                            | 16%<br>(13-19%)                      | 24%<br>(20-29%)                     | 1100<br>(870-1300)     | 64000<br>(52000-75000)     |
| Ukraine  | 2010 | Female | 45 to 49 | 85%<br>(80-89%)                | 15%<br>(11-20%)          | 6.2<br>(4.6-8.1)                            | 15%<br>(13-19%)                      | 24%<br>(19-29%)                     | 1600<br>(1200-1900)    | 82000<br>(65000-98000)     |
| Ukraine  | 2010 | Female | 50 to 54 | 78%<br>(70-84%)                | 22%<br>(16-30%)          | 5.3<br>(3.7-7.1)                            | 15%<br>(11-18%)                      | 22%<br>(16-27%)                     | 2100<br>(1600-2700)    | 95000<br>(73000-120000)    |
| Ukraine  | 2010 | Female | 55 to 59 | 67%<br>(54-78%)                | 33%<br>(22-46%)          | 4.4<br>(2.7-6.7)                            | 13%<br>(8.6-18%)                     | 18%<br>(12-26%)                     | 2500<br>(1600-3600)    | 94000<br>(63000-130000)    |
| Ukraine  | 2010 | Female | 60 to 64 | 60%<br>(47-72%)                | 40%<br>(28-53%)          | 3.9<br>(2.3-6)                              | 11%<br>(5.6-17%)                     | 14%<br>(6.9-24%)                    | 2500<br>(1200-4200)    | 79000<br>(40000-120000)    |
| Ukraine  | 2010 | Female | 65 to 69 | 57%<br>(44-68%)                | 43%<br>(32-56%)          | 3.2<br>(2.1-4.7)                            | 8.5%<br>(3.7-15%)                    | 11%<br>(4.1-20%)                    | 2400<br>(920-4300)     | 61000<br>(26000-110000)    |
| Ukraine  | 2010 | Female | 70 to 74 | 50%<br>(37-61%)                | 50%<br>(39-63%)          | 2.6<br>(1.5-3.9)                            | 5.9%<br>(1.1-12%)                    | 7.1%<br>(0.78-15%)                  | 3700<br>(410-8100)     | 75000<br>(14000-160000)    |
| Ukraine  | 2010 | Female | 75 to 79 | 40%<br>(28-55%)                | 60%<br>(45-72%)          | 2<br>(1.1-3.3)                              | 4.3%<br>(-0.15-11%)                  | 5%<br>(-0.68-13%)                   | 2400<br>(-330-6400)    | 38000<br>(-1300-94000)     |
| Ukraine  | 2010 | Female | 80 to 84 | 34%<br>(22-48%)                | 66%<br>(52-78%)          | 1.7<br>(0.99-2.8)                           | 3.9%<br>(0.1-9.5%)                   | 4.4%<br>(-0.26-12%)                 | 3400<br>(-190-8800)    | 38000<br>(1100-94000)      |
| Ukraine  | 2010 | Female | 85 to 89 | 33%<br>(21-48%)                | 67%<br>(52-79%)          | 1.7<br>(0.89-2.8)                           | 3.8%<br>(0.076-9.9%)                 | 4.3%<br>(-0.33-11%)                 | 2300<br>(-170-6300)    | 18000<br>(380-47000)       |
| Ukraine  | 2010 | Female | 90 to 94 | 36%<br>(23-51%)                | 64%<br>(49-77%)          | 1.9<br>(0.93-3.2)                           | 4.1%<br>(-0.41-11%)                  | 4.6%<br>(-0.73-13%)                 | 840<br>(-130-2300)     | 4500<br>(-400-12000)       |
| Ukraine  | 2010 | Female | 95 plus  | 41%<br>(23-61%)                | 59%<br>(39-77%)          | 2.1<br>(0.95-3.9)                           | 4.8%<br>(-1.1-14%)                   | 5.2%<br>(-1.7-16%)                  | 380<br>(-120-1200)     | 1300<br>(-320-3900)        |
| Ukraine  | 2010 | Male   | All Ages | 80%<br>(77-82%)                | 20%<br>(18-23%)          | 7.1<br>(5.7-8.6)                            | 18%<br>(15-22%)                      | 17%<br>(13-22%)                     | 57000<br>(41000-73000) | 200000<br>(160000-240000)  |
| Ukraine  | 2010 | Male   | 15 to 19 | 60%<br>(53-66%)                | 40%<br>(34-47%)          | 3.5<br>(2.3-5.1)                            | 9.6%<br>(6.5-13%)                    | 17%<br>(11-24%)                     | 200<br>(130-290)       | 17000<br>(11000-23000)     |

| Location | Year | Sex    | Age      | Prevalence of current drinkers | Prevalence of abstainers | Population average of standard drinks daily | Percent of total attributable deaths | Percent of total attributable DALYs | Attributable deaths   | Attributable DALYs         |
|----------|------|--------|----------|--------------------------------|--------------------------|---------------------------------------------|--------------------------------------|-------------------------------------|-----------------------|----------------------------|
| Ukraine  | 2010 | Male   | 20 to 24 | 85%<br>(80-88%)                | 15%<br>(12-20%)          | 8.2<br>(5.6-11)                             | 22%<br>(17-28%)                      | 32%<br>(25-40%)                     | 1000<br>(760-1300)    | 76000<br>(59000-95000)     |
| Ukraine  | 2010 | Male   | 25 to 29 | 91%<br>(88-93%)                | 9%<br>(7.1-12%)          | 10<br>(6.9-13)                              | 24%<br>(20-28%)                      | 32%<br>(27-37%)                     | 1700<br>(1400-2100)   | 120000<br>(99000-140000)   |
| Ukraine  | 2010 | Male   | 30 to 34 | 94%<br>(91-95%)                | 6.4%<br>(4.8-8.6%)       | 11<br>(7.6-14)                              | 24%<br>(21-28%)                      | 29%<br>(25-33%)                     | 2300<br>(1900-2700)   | 140000<br>(120000-170000)  |
| Ukraine  | 2010 | Male   | 35 to 39 | 94%<br>(92-95%)                | 6.5%<br>(5-8.2%)         | 11<br>(7.6-14)                              | 26%<br>(23-30%)                      | 32%<br>(28-37%)                     | 3100<br>(2600-3700)   | 170000<br>(150000-200000)  |
| Ukraine  | 2010 | Male   | 40 to 44 | 94%<br>(92-96%)                | 6%<br>(4.4-7.8%)         | 11<br>(7.9-15)                              | 29%<br>(25-33%)                      | 35%<br>(30-40%)                     | 4200<br>(3500-4900)   | 200000<br>(170000-240000)  |
| Ukraine  | 2010 | Male   | 45 to 49 | 95%<br>(92-96%)                | 5.2%<br>(3.6-7.5%)       | 11<br>(7.9-15)                              | 29%<br>(24-33%)                      | 35%<br>(29-40%)                     | 6200<br>(5100-7300)   | 270000<br>(220000-310000)  |
| Ukraine  | 2010 | Male   | 50 to 54 | 91%<br>(87-94%)                | 9%<br>(6.3-13%)          | 9.5<br>(6.4-13)                             | 26%<br>(21-31%)                      | 31%<br>(25-36%)                     | 7500<br>(6000-9100)   | 280000<br>(230000-340000)  |
| Ukraine  | 2010 | Male   | 55 to 59 | 83%<br>(75-90%)                | 17%<br>(10-25%)          | 7.2<br>(4.8-10)                             | 21%<br>(16-26%)                      | 25%<br>(19-31%)                     | 7300<br>(5400-9200)   | 240000<br>(180000-300000)  |
| Ukraine  | 2010 | Male   | 60 to 64 | 80%<br>(71-87%)                | 20%<br>(13-29%)          | 6.3<br>(4-9.3)                              | 17%<br>(10-23%)                      | 19%<br>(12-26%)                     | 6200<br>(3700-8600)   | 170000<br>(110000-240000)  |
| Ukraine  | 2010 | Male   | 65 to 69 | 80%<br>(71-87%)                | 20%<br>(13-29%)          | 5.5<br>(3.8-7.7)                            | 14%<br>(7.5-19%)                     | 15%<br>(8.2-22%)                    | 4700<br>(2500-6800)   | 110000<br>(63000-160000)   |
| Ukraine  | 2010 | Male   | 70 to 74 | 76%<br>(67-84%)                | 24%<br>(16-33%)          | 4.6<br>(3.1-6.6)                            | 10%<br>(3.5-16%)                     | 11%<br>(3.5-18%)                    | 6100<br>(1900-10000)  | 120000<br>(41000-190000)   |
| Ukraine  | 2010 | Male   | 75 to 79 | 70%<br>(57-81%)                | 30%<br>(19-43%)          | 4<br>(2.5-6.1)                              | 7.4%<br>(0.49-14%)                   | 8.1%<br>(0.0056-16%)                | 3000<br>(2.2-5900)    | 45000<br>(3000-87000)      |
| Ukraine  | 2010 | Male   | 80 to 84 | 64%<br>(50-76%)                | 36%<br>(24-50%)          | 3.4<br>(2.1-5.3)                            | 5.7%<br>(-0.39-12%)                  | 6.1%<br>(-1-14%)                    | 2400<br>(-400-5300)   | 27000<br>(-1800-57000)     |
| Ukraine  | 2010 | Male   | 85 to 89 | 59%<br>(44-71%)                | 41%<br>(29-56%)          | 3<br>(1.8-4.5)                              | 4.1%<br>(-1.2-10%)                   | 4.2%<br>(-1.9-11%)                  | 690<br>(-310-1800)    | 5700<br>(-1700-14000)      |
| Ukraine  | 2010 | Male   | 90 to 94 | 56%<br>(42-69%)                | 44%<br>(31-58%)          | 2.6<br>(1.5-4.1)                            | 2.5%<br>(-2.3-8.6%)                  | 2.4%<br>(-3.3-9.4%)                 | 110<br>(-140-420)     | 650<br>(-610-2200)         |
| Ukraine  | 2010 | Male   | 95 plus  | 54%<br>(37-71%)                | 46%<br>(29-63%)          | 2.4<br>(1.2-4.2)                            | 1.4%<br>(-3.5-7.9%)                  | 1.1%<br>(-4.6-8.7%)                 | 15<br>(-62-120)       | 76<br>(-180-420)           |
| Ukraine  | 2016 | Female | All Ages | 66%<br>(61-70%)                | 34%<br>(30-39%)          | 4.2<br>(3-5.6)                              | 8.5%<br>(5.4-12%)                    | 7.5%<br>(2.8-14%)                   | 25000<br>(8600-49000) | 750000<br>(430000-1200000) |
| Ukraine  | 2016 | Female | 15 to 19 | 57%<br>(45-67%)                | 43%<br>(33-55%)          | 3.5<br>(2.1-5.2)                            | 6.6%<br>(4.6-8.8%)                   | 15%<br>(9.6-22%)                    | 47<br>(26-75)         | 6300<br>(4300-9100)        |
| Ukraine  | 2016 | Female | 20 to 24 | 75%<br>(65-82%)                | 25%<br>(18-35%)          | 6.1<br>(4-8.7)                              | 12%<br>(9-14%)                       | 20%<br>(14-25%)                     | 120<br>(72-190)       | 18000<br>(13000-25000)     |
| Ukraine  | 2016 | Female | 25 to 29 | 79%<br>(71-85%)                | 21%<br>(15-29%)          | 5.9<br>(3.9-8.1)                            | 12%<br>(9.1-14%)                     | 17%<br>(12-22%)                     | 260<br>(140-430)      | 32000<br>(23000-44000)     |
| Ukraine  | 2016 | Female | 30 to 34 | 83%<br>(76-88%)                | 17%<br>(12-24%)          | 6.2<br>(4.2-8.5)                            | 12%<br>(9.4-15%)                     | 18%<br>(14-23%)                     | 430<br>(240-700)      | 40000<br>(27000-56000)     |

| Location | Year | Sex    | Age      | Prevalence of current drinkers | Prevalence of abstainers | Population average of standard drinks daily | Percent of total attributable deaths | Percent of total attributable DALYs | Attributable deaths    | Attributable DALYs           |
|----------|------|--------|----------|--------------------------------|--------------------------|---------------------------------------------|--------------------------------------|-------------------------------------|------------------------|------------------------------|
| Ukraine  | 2016 | Female | 35 to 39 | 85%<br>(79-89%)                | 15%<br>(11-21%)          | 6.9<br>(4.8-9.5)                            | 14%<br>(11-18%)                      | 23%<br>(18-27%)                     | 690<br>(370-1100)      | 50000<br>(32000-73000)       |
| Ukraine  | 2016 | Female | 40 to 44 | 86%<br>(81-90%)                | 14%<br>(9.9-19%)         | 6.9<br>(4.8-9.5)                            | 15%<br>(12-19%)                      | 24%<br>(19-29%)                     | 950<br>(550-1500)      | 59000<br>(39000-85000)       |
| Ukraine  | 2016 | Female | 45 to 49 | 85%<br>(78-90%)                | 15%<br>(10-22%)          | 6.3<br>(4.1-8.8)                            | 15%<br>(11-19%)                      | 24%<br>(18-29%)                     | 1100<br>(680-1700)     | 59000<br>(41000-83000)       |
| Ukraine  | 2016 | Female | 50 to 54 | 78%<br>(70-85%)                | 22%<br>(15-30%)          | 5.4<br>(3.4-7.7)                            | 14%<br>(10-18%)                      | 21%<br>(15-27%)                     | 1900<br>(1100-2900)    | 85000<br>(57000-120000)      |
| Ukraine  | 2016 | Female | 55 to 59 | 67%<br>(54-77%)                | 33%<br>(23-46%)          | 4.5<br>(2.6-7.2)                            | 13%<br>(8.2-18%)                     | 18%<br>(11-26%)                     | 2400<br>(1300-3800)    | 90000<br>(55000-140000)      |
| Ukraine  | 2016 | Female | 60 to 64 | 60%<br>(47-72%)                | 40%<br>(28-53%)          | 3.9<br>(2.3-6.4)                            | 11%<br>(5.6-16%)                     | 14%<br>(7-24%)                      | 2900<br>(1300-5200)    | 92000<br>(46000-150000)      |
| Ukraine  | 2016 | Female | 65 to 69 | 57%<br>(44-68%)                | 43%<br>(32-56%)          | 3.3<br>(2-5)                                | 8.3%<br>(3.3-15%)                    | 11%<br>(3.7-20%)                    | 2200<br>(750-4300)     | 58000<br>(23000-110000)      |
| Ukraine  | 2016 | Female | 70 to 74 | 50%<br>(38-62%)                | 50%<br>(38-62%)          | 2.6<br>(1.4-4.1)                            | 5.8%<br>(1-13%)                      | 7.2%<br>(0.67-17%)                  | 2400<br>(180-5600)     | 49000<br>(8400-110000)       |
| Ukraine  | 2016 | Female | 75 to 79 | 40%<br>(27-54%)                | 60%<br>(46-73%)          | 2<br>(1.1-3.5)                              | 4.2%<br>(-0.18-11%)                  | 4.9%<br>(-0.72-14%)                 | 3300<br>(-460-9300)    | 52000<br>(-2300-140000)      |
| Ukraine  | 2016 | Female | 80 to 84 | 34%<br>(22-48%)                | 66%<br>(52-78%)          | 1.7<br>(0.9-2.9)                            | 3.7%<br>(-0.027-9.9%)                | 4.3%<br>(-0.33-12%)                 | 2200<br>(-170-6500)    | 26000<br>(-170-70000)        |
| Ukraine  | 2016 | Female | 85 to 89 | 33%<br>(21-47%)                | 67%<br>(53-79%)          | 1.7<br>(0.88-2.8)                           | 3.7%<br>(-0.043-9.8%)                | 4.2%<br>(-0.45-12%)                 | 2900<br>(-300-8000)    | 23000<br>(-260-61000)        |
| Ukraine  | 2016 | Female | 90 to 94 | 36%<br>(23-50%)                | 64%<br>(50-77%)          | 1.8<br>(0.92-3.2)                           | 4%<br>(-0.5-11%)                     | 4.5%<br>(-0.88-13%)                 | 1300<br>(-240-3900)    | 6900<br>(-790-20000)         |
| Ukraine  | 2016 | Female | 95 plus  | 41%<br>(23-60%)                | 59%<br>(40-77%)          | 2.1<br>(0.93-4.1)                           | 4.5%<br>(-1.3-14%)                   | 5%<br>(-1.8-16%)                    | 320<br>(-110-1000)     | 1100<br>(-310-3500)          |
| Ukraine  | 2016 | Male   | All Ages | 79%<br>(75-82%)                | 21%<br>(18-25%)          | 7<br>(5.2-9.2)                              | 18%<br>(14-22%)                      | 16%<br>(11-22%)                     | 53000<br>(32000-83000) | 1900000<br>(1200000-2600000) |
| Ukraine  | 2016 | Male   | 15 to 19 | 60%<br>(49-69%)                | 40%<br>(31-51%)          | 3.6<br>(2.1-5.5)                            | 9.3%<br>(6-14%)                      | 18%<br>(11-26%)                     | 130<br>(71-220)        | 11000<br>(6800-18000)        |
| Ukraine  | 2016 | Male   | 20 to 24 | 83%<br>(76-88%)                | 17%<br>(12-24%)          | 8<br>(5.2-12)                               | 21%<br>(16-27%)                      | 32%<br>(24-40%)                     | 670<br>(410-990)       | 51000<br>(34000-72000)       |
| Ukraine  | 2016 | Male   | 25 to 29 | 89%<br>(84-92%)                | 11%<br>(7.8-16%)         | 9.7<br>(6.3-14)                             | 24%<br>(19-29%)                      | 33%<br>(26-38%)                     | 1600<br>(1100-2300)    | 110000<br>(80000-150000)     |
| Ukraine  | 2016 | Male   | 30 to 34 | 92%<br>(88-95%)                | 7.7%<br>(5.2-12%)        | 10<br>(7-15)                                | 24%<br>(20-29%)                      | 31%<br>(26-36%)                     | 2400<br>(1500-3400)    | 150000<br>(100000-200000)    |
| Ukraine  | 2016 | Male   | 35 to 39 | 93%<br>(90-95%)                | 7.1%<br>(4.9-10%)        | 11<br>(7-15)                                | 26%<br>(21-31%)                      | 33%<br>(27-38%)                     | 3000<br>(1900-4300)    | 170000<br>(110000-230000)    |
| Ukraine  | 2016 | Male   | 40 to 44 | 93%<br>(90-96%)                | 6.6%<br>(4.5-9.5%)       | 11<br>(7.2-15)                              | 28%<br>(23-33%)                      | 35%<br>(30-40%)                     | 4000<br>(2500-5700)    | 200000<br>(130000-280000)    |
| Ukraine  | 2016 | Male   | 45 to 49 | 94%<br>(90-96%)                | 6.2%<br>(4-9.8%)         | 11<br>(7.2-16)                              | 28%<br>(23-33%)                      | 34%<br>(29-40%)                     | 4600<br>(2900-6500)    | 200000<br>(130000-280000)    |

| Location | Year | Sex    | Age      | Prevalence of current drinkers | Prevalence of abstainers | Population average of standard drinks daily | Percent of total attributable deaths | Percent of total attributable DALYs | Attributable deaths     | Attributable DALYs        |
|----------|------|--------|----------|--------------------------------|--------------------------|---------------------------------------------|--------------------------------------|-------------------------------------|-------------------------|---------------------------|
| Ukraine  | 2016 | Male   | 50 to 54 | 90%<br>(85-93%)                | 9.9%<br>(6.7-15%)        | 9.2<br>(5.9-13)                             | 25%<br>(20-30%)                      | 30%<br>(24-36%)                     | 6800<br>(4300-9900)     | 260000<br>(170000-370000) |
| Ukraine  | 2016 | Male   | 55 to 59 | 83%<br>(75-90%)                | 17%<br>(10-25%)          | 7.2<br>(4.6-11)                             | 21%<br>(15-26%)                      | 24%<br>(18-31%)                     | 7000<br>(4400-10000)    | 230000<br>(150000-330000) |
| Ukraine  | 2016 | Male   | 60 to 64 | 80%<br>(72-87%)                | 20%<br>(13-28%)          | 6.3<br>(3.8-9.7)                            | 16%<br>(10-23%)                      | 19%<br>(11-26%)                     | 7300<br>(3900-11000)    | 210000<br>(110000-310000) |
| Ukraine  | 2016 | Male   | 65 to 69 | 80%<br>(71-87%)                | 20%<br>(13-29%)          | 5.5<br>(3.5-8.2)                            | 13%<br>(6.4-19%)                     | 15%<br>(7-22%)                      | 4700<br>(2000-7600)     | 110000<br>(50000-180000)  |
| Ukraine  | 2016 | Male   | 70 to 74 | 77%<br>(66-84%)                | 23%<br>(16-34%)          | 4.7<br>(2.9-6.9)                            | 10%<br>(3-16%)                       | 11%<br>(3-19%)                      | 3700<br>(940-6800)      | 72000<br>(20000-130000)   |
| Ukraine  | 2016 | Male   | 75 to 79 | 70%<br>(57-81%)                | 30%<br>(19-43%)          | 4<br>(2.4-6.4)                              | 7.3%<br>(0.47-14%)                   | 8.1%<br>(-0.038-16%)                | 4200<br>(-19-8800)      | 64000<br>(3900-130000)    |
| Ukraine  | 2016 | Male   | 80 to 84 | 64%<br>(50-76%)                | 36%<br>(24-50%)          | 3.4<br>(2.1-5.5)                            | 5.6%<br>(-0.45-12%)                  | 6.1%<br>(-1.1-14%)                  | 1900<br>(-320-4400)     | 21000<br>(-1600-47000)    |
| Ukraine  | 2016 | Male   | 85 to 89 | 59%<br>(45-71%)                | 41%<br>(29-55%)          | 3<br>(1.8-4.7)                              | 4.1%<br>(-1.2-11%)                   | 4.3%<br>(-1.9-12%)                  | 1200<br>(-520-3300)     | 9700<br>(-2900-25000)     |
| Ukraine  | 2016 | Male   | 90 to 94 | 56%<br>(42-69%)                | 44%<br>(31-58%)          | 2.7<br>(1.5-4.3)                            | 2.5%<br>(-2.3-8.7%)                  | 2.5%<br>(-3.3-9.6%)                 | 170<br>(-240-680)       | 1100<br>(-990-3700)       |
| Ukraine  | 2016 | Male   | 95 plus  | 54%<br>(38-71%)                | 46%<br>(29-62%)          | 2.4<br>(1.1-4.3)                            | 1.5%<br>(-3.3-8%)                    | 1.2%<br>(-4.6-8.7%)                 | 12<br>(-46-86)          | 58<br>(-130-320)          |
| Brunei   | 1990 | Female | All Ages | 73%<br>(66-80%)                | 27%<br>(20-34%)          | 0.36<br>(0.25-0.49)                         | -0.13%<br>(-0.84-0.51%)              | -0.9%<br>(-2.2-0.19%)               | -3.2<br>(-7.6-0.72)     | -31<br>(-190-120)         |
| Brunei   | 1990 | Female | 15 to 19 | 71%<br>(56-83%)                | 29%<br>(17-44%)          | 0.36<br>(0.2-0.58)                          | 1.1%<br>(0.45-2%)                    | 2.7%<br>(0.73-5%)                   | 0.15<br>(0.04-0.28)     | 14<br>(6-24)              |
| Brunei   | 1990 | Female | 20 to 24 | 80%<br>(68-90%)                | 20%<br>(10-32%)          | 0.62<br>(0.37-0.93)                         | 1.3%<br>(0.43-2.4%)                  | 2.5%<br>(0.22-5%)                   | 0.21<br>(0.019-0.43)    | 23<br>(7.6-40)            |
| Brunei   | 1990 | Female | 25 to 29 | 84%<br>(74-91%)                | 16%<br>(8.7-26%)         | 0.65<br>(0.42-0.93)                         | 0.87%<br>(-0.0062-1.8%)              | 1.7%<br>(-0.2-3.9%)                 | 0.2<br>(-0.024-0.46)    | 18<br>(-0.13-36)          |
| Brunei   | 1990 | Female | 30 to 34 | 86%<br>(75-93%)                | 14%<br>(7.4-25%)         | 0.64<br>(0.41-0.92)                         | 0.45%<br>(-0.45-1.4%)                | 1.2%<br>(-0.54-3.1%)                | 0.2<br>(-0.09-0.52)     | 10<br>(-11-31)            |
| Brunei   | 1990 | Female | 35 to 39 | 86%<br>(76-93%)                | 14%<br>(7.2-24%)         | 0.59<br>(0.36-0.9)                          | 0.29%<br>(-0.7-1.2%)                 | 1.2%<br>(-0.51-2.7%)                | 0.22<br>(-0.099-0.53)   | 6.1<br>(-14-26)           |
| Brunei   | 1990 | Female | 40 to 44 | 85%<br>(76-92%)                | 15%<br>(8.1-24%)         | 0.56<br>(0.32-0.9)                          | 0.11%<br>(-0.98-1.1%)                | 0.95%<br>(-0.76-2.5%)               | 0.17<br>(-0.13-0.46)    | 1.7<br>(-16-18)           |
| Brunei   | 1990 | Female | 45 to 49 | 84%<br>(72-92%)                | 16%<br>(8.2-28%)         | 0.53<br>(0.3-0.87)                          | -0.36%<br>(-1.7-0.82%)               | 0.25%<br>(-1.6-1.9%)                | 0.04<br>(-0.23-0.3)     | -4.1<br>(-19-8.9)         |
| Brunei   | 1990 | Female | 50 to 54 | 82%<br>(71-90%)                | 18%<br>(10-29%)          | 0.5<br>(0.28-0.84)                          | -0.85%<br>(-2.4-0.43%)               | -0.4%<br>(-2.3-1.2%)                | -0.077<br>(-0.45-0.24)  | -9.8<br>(-29-4.9)         |
| Brunei   | 1990 | Female | 55 to 59 | 80%<br>(66-89%)                | 20%<br>(11-34%)          | 0.47<br>(0.27-0.76)                         | -1.5%<br>(-3.3--0.09%)               | -1.2%<br>(-3.3-0.46%)               | -0.28<br>(-0.77-0.1)    | -17<br>(-37--0.98)        |
| Brunei   | 1990 | Female | 60 to 64 | 77%<br>(62-88%)                | 23%<br>(12-38%)          | 0.42<br>(0.23-0.71)                         | -2.2%<br>(-4.2--0.56%)               | -2.2%<br>(-4.4--0.31%)              | -0.47<br>(-0.98--0.068) | -19<br>(-35--4.7)         |
| Brunei   | 1990 | Female | 65 to 69 | 74%<br>(57-87%)                | 26%<br>(13-43%)          | 0.35<br>(0.2-0.57)                          | -2.2%<br>(-4.1--0.62%)               | -2.3%<br>(-4.4-0.46%)               | -0.56<br>(-1.1--0.11)   | -17<br>(-31--4.8)         |

| Location | Year | Sex    | Age      | Prevalence of current drinkers | Prevalence of abstainers | Population average of standard drinks daily | Percent of total attributable deaths | Percent of total attributable DALYs | Attributable deaths     | Attributable DALYs     |
|----------|------|--------|----------|--------------------------------|--------------------------|---------------------------------------------|--------------------------------------|-------------------------------------|-------------------------|------------------------|
| Brunei   | 1990 | Female | 70 to 74 | 73%<br>(57-84%)                | 27%<br>(16-43%)          | 0.29<br>(0.15-0.47)                         | -1.8%<br>(-3.6--0.44%)               | -1.9%<br>(-4--0.35%)                | -0.49<br>(-0.99--0.087) | -11<br>(-22--2.7)      |
| Brunei   | 1990 | Female | 75 to 79 | 72%<br>(56-84%)                | 28%<br>(16-44%)          | 0.26<br>(0.13-0.44)                         | -1.8%<br>(-3.7--0.47%)               | -2.1%<br>(-4.2--0.52%)              | -0.63<br>(-1.3--0.16)   | -10<br>(-21--2.6)      |
| Brunei   | 1990 | Female | 80 to 84 | 70%<br>(53-83%)                | 30%<br>(17-47%)          | 0.28<br>(0.15-0.45)                         | -2.1%<br>(-3.9--0.66%)               | -2.4%<br>(-4.5--0.74%)              | -0.82<br>(-1.6--0.25)   | -9.3<br>(-18--3)       |
| Brunei   | 1990 | Female | 85 to 89 | 68%<br>(52-80%)                | 32%<br>(20-48%)          | 0.29<br>(0.16-0.48)                         | -2.1%<br>(-3.7--0.78%)               | -2.4%<br>(-4.3--0.88%)              | -0.62<br>(-1.1--0.22)   | -4.9<br>(-8.6--1.8)    |
| Brunei   | 1990 | Female | 90 to 94 | 68%<br>(52-81%)                | 32%<br>(19-48%)          | 0.31<br>(0.16-0.52)                         | -2.2%<br>(-3.9--0.75%)               | -2.5%<br>(-4.6--0.87%)              | -0.36<br>(-0.66--0.13)  | -1.9<br>(-3.5--0.67)   |
| Brunei   | 1990 | Female | 95 plus  | 68%<br>(48-83%)                | 32%<br>(17-52%)          | 0.33<br>(0.16-0.57)                         | -2.1%<br>(-4--0.64%)                 | -2.6%<br>(-4.9--0.78%)              | -0.11<br>(-0.21--0.034) | -0.39<br>(-0.73--0.11) |
| Brunei   | 1990 | Male   | All Ages | 88%<br>(84-92%)                | 12%<br>(8.2-16%)         | 0.36<br>(0.25-0.48)                         | 1.5%<br>(0.39-2.6%)                  | 0.68%<br>(-0.83-2%)                 | 3.6<br>(-4.1-11)        | 430<br>(110-780)       |
| Brunei   | 1990 | Male   | 15 to 19 | 84%<br>(73-92%)                | 16%<br>(7.9-27%)         | 0.29<br>(0.16-0.46)                         | 2.1%<br>(0.88-3.8%)                  | 2.8%<br>(0.52-5.7%)                 | 0.36<br>(0.064-0.76)    | 37<br>(15-67)          |
| Brunei   | 1990 | Male   | 20 to 24 | 91%<br>(84-95%)                | 9.2%<br>(4.7-16%)        | 0.52<br>(0.32-0.76)                         | 4%<br>(1.8-6.9%)                     | 4.3%<br>(0.84-8.5%)                 | 0.88<br>(0.16-1.8)      | 91<br>(40-160)         |
| Brunei   | 1990 | Male   | 25 to 29 | 93%<br>(88-97%)                | 6.9%<br>(3.5-12%)        | 0.6<br>(0.39-0.87)                          | 3.7%<br>(1.8-5.9%)                   | 3.8%<br>(0.79-7.3%)                 | 0.86<br>(0.18-1.7)      | 91<br>(43-150)         |
| Brunei   | 1990 | Male   | 30 to 34 | 94%<br>(89-97%)                | 5.6%<br>(2.6-11%)        | 0.62<br>(0.41-0.89)                         | 2.8%<br>(1.3-4.5%)                   | 2.7%<br>(0.35-5.6%)                 | 0.71<br>(0.097-1.5)     | 74<br>(33-130)         |
| Brunei   | 1990 | Male   | 35 to 39 | 95%<br>(91-98%)                | 5%<br>(2.4-9.1%)         | 0.58<br>(0.35-0.89)                         | 2.3%<br>(0.97-3.8%)                  | 2.4%<br>(0.39-4.7%)                 | 0.65<br>(0.097-1.4)     | 58<br>(23-100)         |
| Brunei   | 1990 | Male   | 40 to 44 | 95%<br>(91-98%)                | 4.7%<br>(2-8.7%)         | 0.57<br>(0.34-0.89)                         | 2%<br>(0.5-3.5%)                     | 2.2%<br>(0.016-4.3%)                | 0.57<br>(0.0044-1.2)    | 40<br>(10-73)          |
| Brunei   | 1990 | Male   | 45 to 49 | 95%<br>(90-98%)                | 4.6%<br>(2-9.8%)         | 0.59<br>(0.34-0.93)                         | 1.5%<br>(-0.39-3%)                   | 1.6%<br>(-0.79-3.6%)                | 0.37<br>(-0.2-0.86)     | 22<br>(-5.9-46)        |
| Brunei   | 1990 | Male   | 50 to 54 | 95%<br>(90-98%)                | 4.9%<br>(2.1-9.8%)       | 0.57<br>(0.31-0.94)                         | 0.97%<br>(-0.95-2.6%)                | 1%<br>(-1.4-2.9%)                   | 0.28<br>(-0.39-0.84)    | 14<br>(-14-36)         |
| Brunei   | 1990 | Male   | 55 to 59 | 95%<br>(90-98%)                | 5.3%<br>(2.5-10%)        | 0.53<br>(0.3-0.86)                          | 0.64%<br>(-1.2-2.1%)                 | 0.66%<br>(-1.5-2.4%)                | 0.2<br>(-0.45-0.73)     | 8.6<br>(-16-28)        |
| Brunei   | 1990 | Male   | 60 to 64 | 94%<br>(88-98%)                | 5.9%<br>(2.5-12%)        | 0.5<br>(0.27-0.82)                          | 0.2%<br>(-1.6-1.5%)                  | 0.11%<br>(-1.9-1.6%)                | 0.043<br>(-0.72-0.62)   | 2.6<br>(-20-21)        |
| Brunei   | 1990 | Male   | 65 to 69 | 94%<br>(88-97%)                | 6.5%<br>(2.6-12%)        | 0.46<br>(0.28-0.74)                         | -0.08%<br>(-1.8-1.3%)                | -0.21%<br>(-2.1-1.3%)               | -0.086<br>(-0.84-0.54)  | -0.94<br>(-20-15)      |
| Brunei   | 1990 | Male   | 70 to 74 | 93%<br>(87-97%)                | 7%<br>(3.2-13%)          | 0.42<br>(0.24-0.67)                         | -0.31%<br>(-1.9-0.9%)                | -0.46%<br>(-2.2-0.87%)              | -0.2<br>(-0.97-0.39)    | -3.1<br>(-19-9)        |
| Brunei   | 1990 | Male   | 75 to 79 | 93%<br>(87-96%)                | 7.3%<br>(3.5-13%)        | 0.39<br>(0.21-0.65)                         | -0.52%<br>(-2-0.62%)                 | -0.73%<br>(-2.4-0.54%)              | -0.31<br>(-1-0.23)      | -3.9<br>(-14-4.5)      |
| Brunei   | 1990 | Male   | 80 to 84 | 92%<br>(85-96%)                | 7.9%<br>(3.8-15%)        | 0.36<br>(0.21-0.58)                         | -0.61%<br>(-1.9-0.48%)               | -0.84%<br>(-2.3-0.38%)              | -0.36<br>(-1-0.16)      | -3.3<br>(-11-2.5)      |
| Brunei   | 1990 | Male   | 85 to 89 | 91%<br>(85-96%)                | 8.6%<br>(4.4-15%)        | 0.33<br>(0.19-0.54)                         | -0.65%<br>(-1.8-0.34%)               | -0.92%<br>(-2.2-0.2%)               | -0.25<br>(-0.62-0.056)  | -1.6<br>(-4.6-0.82)    |

| Location | Year | Sex    | Age      | Prevalence of current drinkers | Prevalence of abstainers | Population average of standard drinks daily | Percent of total attributable deaths | Percent of total attributable DALYs | Attributable deaths          | Attributable DALYs      |
|----------|------|--------|----------|--------------------------------|--------------------------|---------------------------------------------|--------------------------------------|-------------------------------------|------------------------------|-------------------------|
| Brunei   | 1990 | Male   | 90 to 94 | 91%<br>(84-96%)                | 9%<br>(4.3-16%)          | 0.31<br>(0.18-0.5)                          | -0.68%<br>(-1.9-0.25%)               | -0.99%<br>(-2.4-0.065%)             | -0.13<br>(-0.31-0.0083)      | -0.54<br>(-1.5-0.2)     |
| Brunei   | 1990 | Male   | 95 plus  | 91%<br>(82-96%)                | 9.1%<br>(3.5-18%)        | 0.29<br>(0.15-0.5)                          | -0.67%<br>(-1.9-0.22%)               | -1%<br>(-2.6--0.00057%)             | -0.035<br>(-0.086--0.000019) | -0.093<br>(-0.27-0.031) |
| Brunei   | 1995 | Female | All Ages | 73%<br>(66-80%)                | 27%<br>(20-34%)          | 0.18<br>(0.11-0.27)                         | 0.23%<br>(-0.28-0.66%)               | -0.076%<br>(-0.93-0.62%)            | -0.29<br>(-3.5-2.5)          | 59<br>(-70-170)         |
| Brunei   | 1995 | Female | 15 to 19 | 70%<br>(55-83%)                | 30%<br>(17-45%)          | 0.17<br>(0.085-0.29)                        | 0.85%<br>(0.47-1.4%)                 | 1.8%<br>(0.77-3.2%)                 | 0.11<br>(0.048-0.2)          | 13<br>(7-20)            |
| Brunei   | 1995 | Female | 20 to 24 | 80%<br>(68-89%)                | 20%<br>(11-32%)          | 0.3<br>(0.16-0.48)                          | 1.1%<br>(0.56-1.8%)                  | 1.7%<br>(0.32-3.2%)                 | 0.15<br>(0.03-0.29)          | 20<br>(10-34)           |
| Brunei   | 1995 | Female | 25 to 29 | 84%<br>(74-92%)                | 16%<br>(8.4-26%)         | 0.33<br>(0.18-0.5)                          | 0.85%<br>(0.27-1.5%)                 | 1.4%<br>(0.041-2.8%)                | 0.2<br>(0.0063-0.41)         | 22<br>(6.8-38)          |
| Brunei   | 1995 | Female | 30 to 34 | 86%<br>(76-93%)                | 14%<br>(7.2-24%)         | 0.32<br>(0.18-0.5)                          | 0.63%<br>(0.011-1.2%)                | 1.2%<br>(0.039-2.5%)                | 0.2<br>(0.0063-0.42)         | 14<br>(0.34-29)         |
| Brunei   | 1995 | Female | 35 to 39 | 86%<br>(76-93%)                | 14%<br>(7.3-24%)         | 0.29<br>(0.15-0.47)                         | 0.55%<br>(-0.16-1.2%)                | 1.2%<br>(0.16-2.2%)                 | 0.26<br>(0.038-0.49)         | 13<br>(-3.8-28)         |
| Brunei   | 1995 | Female | 40 to 44 | 86%<br>(76-92%)                | 14%<br>(7.7-24%)         | 0.27<br>(0.13-0.46)                         | 0.46%<br>(-0.38-1.2%)                | 1.2%<br>(0.041-2.2%)                | 0.27<br>(0.011-0.53)         | 9.7<br>(-8.6-25)        |
| Brunei   | 1995 | Female | 45 to 49 | 84%<br>(72-92%)                | 16%<br>(8.2-28%)         | 0.27<br>(0.14-0.45)                         | 0.2%<br>(-0.77-0.94%)                | 0.74%<br>(-0.47-1.7%)               | 0.15<br>(-0.1-0.37)          | 3.1<br>(-12-14)         |
| Brunei   | 1995 | Female | 50 to 54 | 82%<br>(70-90%)                | 18%<br>(9.8-30%)         | 0.25<br>(0.12-0.43)                         | -0.049%<br>(-1.2-0.8%)               | 0.37%<br>(-1-1.4%)                  | 0.068<br>(-0.17-0.27)        | -0.53<br>(-14-8.9)      |
| Brunei   | 1995 | Female | 55 to 59 | 80%<br>(66-89%)                | 20%<br>(11-34%)          | 0.23<br>(0.12-0.39)                         | -0.37%<br>(-1.7-0.53%)               | -0.043%<br>(-1.5-0.95%)             | -0.0078<br>(-0.29-0.19)      | -3.5<br>(-16-5.2)       |
| Brunei   | 1995 | Female | 60 to 64 | 77%<br>(61-88%)                | 23%<br>(12-39%)          | 0.21<br>(0.1-0.37)                          | -0.77%<br>(-2.2-0.21%)               | -0.65%<br>(-2.2-0.44%)              | -0.19<br>(-0.63-0.13)        | -9<br>(-26-2.6)         |
| Brunei   | 1995 | Female | 65 to 69 | 74%<br>(59-87%)                | 26%<br>(13-41%)          | 0.19<br>(0.094-0.32)                        | -0.85%<br>(-2.2-0.099%)              | -0.81%<br>(-2.3-0.24%)              | -0.22<br>(-0.63-0.068)       | -7.3<br>(-19-0.85)      |
| Brunei   | 1995 | Female | 70 to 74 | 72%<br>(57-84%)                | 28%<br>(16-43%)          | 0.17<br>(0.081-0.28)                        | -0.78%<br>(-2.1-0.091%)              | -0.78%<br>(-2.3-0.19%)              | -0.24<br>(-0.69-0.057)       | -6<br>(-16-0.7)         |
| Brunei   | 1995 | Female | 75 to 79 | 71%<br>(56-83%)                | 29%<br>(17-44%)          | 0.15<br>(0.071-0.27)                        | -0.84%<br>(-2.1-0.037%)              | -0.92%<br>(-2.4-0.12%)              | -0.27<br>(-0.72-0.035)       | -4.6<br>(-12-0.21)      |
| Brunei   | 1995 | Female | 80 to 84 | 70%<br>(52-83%)                | 30%<br>(17-48%)          | 0.14<br>(0.072-0.25)                        | -0.85%<br>(-2-0.017%)                | -0.97%<br>(-2.3-0.0032%)            | -0.32<br>(-0.79-0.0011)      | -3.7<br>(-9-0.073)      |
| Brunei   | 1995 | Female | 85 to 89 | 68%<br>(51-80%)                | 32%<br>(20-49%)          | 0.13<br>(0.066-0.23)                        | -0.75%<br>(-1.8--0.054%)             | -0.85%<br>(-2.1--0.051%)            | -0.28<br>(-0.69--0.016)      | -2.2<br>(-5.3--0.15)    |
| Brunei   | 1995 | Female | 90 to 94 | 67%<br>(51-81%)                | 33%<br>(19-49%)          | 0.13<br>(0.064-0.23)                        | -0.69%<br>(-1.7--0.043%)             | -0.8%<br>(-2--0.02%)                | -0.13<br>(-0.32--0.0032)     | -0.69<br>(-1.7--0.044)  |
| Brunei   | 1995 | Female | 95 plus  | 68%<br>(48-83%)                | 32%<br>(17-52%)          | 0.12<br>(0.054-0.24)                        | -0.6%<br>(-1.6-0.26%)                | -0.72%<br>(-1.9-0.3%)               | -0.042<br>(-0.12-0.018)      | -0.14<br>(-0.4-0.061)   |
| Brunei   | 1995 | Male   | All Ages | 88%<br>(84-92%)                | 12%<br>(7.9-16%)         | 0.17<br>(0.11-0.26)                         | 1.4%<br>(0.75-2.1%)                  | 0.96%<br>(0.11-1.8%)                | 5.6<br>(0.62-11)             | 460<br>(240-700)        |

| Location | Year | Sex    | Age      | Prevalence of current drinkers | Prevalence of abstainers | Population average of standard drinks daily | Percent of total attributable deaths | Percent of total attributable DALYs | Attributable deaths       | Attributable DALYs      |
|----------|------|--------|----------|--------------------------------|--------------------------|---------------------------------------------|--------------------------------------|-------------------------------------|---------------------------|-------------------------|
| Brunei   | 1995 | Male   | 15 to 19 | 84%<br>(73-92%)                | 16%<br>(8-27%)           | 0.14<br>(0.067-0.23)                        | 1.4%<br>(0.74-2.4%)                  | 1.5%<br>(0.36-3.2%)                 | 0.22<br>(0.053-0.46)      | 28<br>(15-48)           |
| Brunei   | 1995 | Male   | 20 to 24 | 91%<br>(83-95%)                | 9.3%<br>(4.6-17%)        | 0.25<br>(0.13-0.4)                          | 2.9%<br>(1.6-4.5%)                   | 2.5%<br>(0.61-5.2%)                 | 0.53<br>(0.13-1.1)        | 69<br>(38-110)          |
| Brunei   | 1995 | Male   | 25 to 29 | 93%<br>(88-96%)                | 7%<br>(3.6-12%)          | 0.3<br>(0.16-0.46)                          | 2.8%<br>(1.7-4.2%)                   | 2.5%<br>(0.75-4.7%)                 | 0.63<br>(0.2-1.3)         | 78<br>(45-120)          |
| Brunei   | 1995 | Male   | 30 to 34 | 94%<br>(89-97%)                | 5.6%<br>(2.7-11%)        | 0.31<br>(0.17-0.48)                         | 2.4%<br>(1.4-3.6%)                   | 2.2%<br>(0.76-4.1%)                 | 0.56<br>(0.19-1.1)        | 63<br>(35-98)           |
| Brunei   | 1995 | Male   | 35 to 39 | 95%<br>(91-98%)                | 5%<br>(2.3-9.5%)         | 0.28<br>(0.15-0.45)                         | 2.2%<br>(1.3-3.2%)                   | 2.3%<br>(0.97-3.7%)                 | 0.75<br>(0.31-1.3)        | 65<br>(37-98)           |
| Brunei   | 1995 | Male   | 40 to 44 | 95%<br>(91-98%)                | 4.7%<br>(2.1-9%)         | 0.27<br>(0.14-0.45)                         | 2%<br>(1.1-3%)                       | 2.3%<br>(0.96-3.6%)                 | 0.85<br>(0.34-1.5)        | 57<br>(30-88)           |
| Brunei   | 1995 | Male   | 45 to 49 | 95%<br>(90-98%)                | 4.6%<br>(2-9.6%)         | 0.29<br>(0.14-0.48)                         | 1.7%<br>(0.49-2.7%)                  | 1.9%<br>(0.44-3.2%)                 | 0.69<br>(0.16-1.2)        | 39<br>(11-64)           |
| Brunei   | 1995 | Male   | 50 to 54 | 95%<br>(91-98%)                | 4.8%<br>(2.2-9.2%)       | 0.28<br>(0.14-0.47)                         | 1.4%<br>(0.2-2.4%)                   | 1.6%<br>(0.2-2.8%)                  | 0.53<br>(0.072-0.94)      | 24<br>(3.3-42)          |
| Brunei   | 1995 | Male   | 55 to 59 | 95%<br>(90-98%)                | 5.4%<br>(2.4-9.8%)       | 0.26<br>(0.13-0.45)                         | 1.1%<br>(-0.097-2%)                  | 1.2%<br>(-0.061-2.3%)               | 0.44<br>(-0.021-0.83)     | 17<br>(-1.5-33)         |
| Brunei   | 1995 | Male   | 60 to 64 | 94%<br>(88-97%)                | 5.9%<br>(2.6-12%)        | 0.24<br>(0.12-0.42)                         | 0.71%<br>(-0.36-1.6%)                | 0.77%<br>(-0.48-1.7%)               | 0.31<br>(-0.2-0.69)       | 10<br>(-5.4-23)         |
| Brunei   | 1995 | Male   | 65 to 69 | 94%<br>(87-97%)                | 6.5%<br>(2.7-13%)        | 0.23<br>(0.12-0.37)                         | 0.43%<br>(-0.55-1.2%)                | 0.45%<br>(-0.62-1.3%)               | 0.22<br>(-0.3-0.62)       | 6.1<br>(-7.4-17)        |
| Brunei   | 1995 | Male   | 70 to 74 | 93%<br>(87-97%)                | 6.9%<br>(3.2-13%)        | 0.21<br>(0.11-0.36)                         | 0.18%<br>(-0.73-0.94%)               | 0.16%<br>(-0.84-0.96%)              | 0.075<br>(-0.41-0.45)     | 2<br>(-8-10)            |
| Brunei   | 1995 | Male   | 75 to 79 | 93%<br>(87-97%)                | 7.2%<br>(3.5-13%)        | 0.2<br>(0.096-0.33)                         | -0.025%<br>(-0.85-0.62%)             | -0.093%<br>(-1.1-0.63%)             | -0.04<br>(-0.45-0.27)     | -0.18<br>(-6.3-4.7)     |
| Brunei   | 1995 | Male   | 80 to 84 | 92%<br>(86-96%)                | 7.8%<br>(3.6-14%)        | 0.17<br>(0.091-0.29)                        | -0.12%<br>(-0.86-0.45%)              | -0.2%<br>(-1-0.41%)                 | -0.076<br>(-0.38-0.15)    | -0.56<br>(-4.1-2.1)     |
| Brunei   | 1995 | Male   | 85 to 89 | 91%<br>(85-96%)                | 8.7%<br>(4.4-15%)        | 0.15<br>(0.082-0.26)                        | -0.15%<br>(-0.73-0.34%)              | -0.25%<br>(-0.95-0.29%)             | -0.083<br>(-0.31-0.094)   | -0.44<br>(-2.2-1)       |
| Brunei   | 1995 | Male   | 90 to 94 | 91%<br>(84-96%)                | 9%<br>(4.4-16%)          | 0.14<br>(0.069-0.23)                        | -0.17%<br>(-0.74-0.26%)              | -0.29%<br>(-0.98-0.21%)             | -0.042<br>(-0.15-0.031)   | -0.15<br>(-0.68-0.23)   |
| Brunei   | 1995 | Male   | 95 plus  | 91%<br>(82-96%)                | 9.3%<br>(3.7-18%)        | 0.12<br>(0.053-0.22)                        | -0.13%<br>(-0.74-0.26%)              | -0.27%<br>(-0.98-0.21%)             | -0.011<br>(-0.041-0.0088) | -0.023<br>(-0.13-0.045) |
| Brunei   | 2000 | Female | All Ages | 74%<br>(67-80%)                | 26%<br>(20-33%)          | 0.065<br>(0.023-0.12)                       | 0.57%<br>(0.31-0.73%)                | 0.67%<br>(0.16-0.91%)               | 2.5<br>(0.64-3.6)         | 160<br>(85-220)         |
| Brunei   | 2000 | Female | 15 to 19 | 70%<br>(54-83%)                | 30%<br>(17-46%)          | 0.059<br>(0.019-0.12)                       | 0.66%<br>(0.43-0.99%)                | 1.2%<br>(0.61-2.1%)                 | 0.073<br>(0.037-0.13)     | 10<br>(6.4-15)          |
| Brunei   | 2000 | Female | 20 to 24 | 80%<br>(67-89%)                | 20%<br>(11-33%)          | 0.1<br>(0.035-0.2)                          | 1%<br>(0.67-1.5%)                    | 1.2%<br>(0.61-2%)                   | 0.11<br>(0.056-0.19)      | 22<br>(14-33)           |
| Brunei   | 2000 | Female | 25 to 29 | 84%<br>(74-91%)                | 16%<br>(8.6-26%)         | 0.11<br>(0.038-0.21)                        | 0.91%<br>(0.59-1.2%)                 | 1.2%<br>(0.6-2%)                    | 0.15<br>(0.068-0.25)      | 23<br>(14-32)           |
| Brunei   | 2000 | Female | 30 to 34 | 86%<br>(76-93%)                | 14%<br>(7.2-24%)         | 0.11<br>(0.038-0.2)                         | 0.8%<br>(0.45-1.2%)                  | 1.3%<br>(0.73-2.1%)                 | 0.21<br>(0.11-0.35)       | 22<br>(13-32)           |



| Location | Year | Sex    | Age      | Prevalence of current drinkers | Prevalence of abstainers | Population average of standard drinks daily | Percent of total attributable deaths | Percent of total attributable DALYs | Attributable deaths     | Attributable DALYs    |
|----------|------|--------|----------|--------------------------------|--------------------------|---------------------------------------------|--------------------------------------|-------------------------------------|-------------------------|-----------------------|
| Brunei   | 2000 | Female | 35 to 39 | 86%<br>(76-93%)                | 14%<br>(7-24%)           | 0.1<br>(0.032-0.19)                         | 0.76%<br>(0.43-1.1%)                 | 1.4%<br>(0.87-2%)                   | 0.26<br>(0.15-0.4)      | 20<br>(11-28)         |
| Brunei   | 2000 | Female | 40 to 44 | 85%<br>(76-92%)                | 15%<br>(7.9-24%)         | 0.094<br>(0.029-0.19)                       | 0.75%<br>(0.36-1.1%)                 | 1.4%<br>(0.84-2%)                   | 0.31<br>(0.18-0.47)     | 18<br>(9-27)          |
| Brunei   | 2000 | Female | 45 to 49 | 84%<br>(70-92%)                | 16%<br>(8.2-30%)         | 0.092<br>(0.03-0.19)                        | 0.67%<br>(0.21-1%)                   | 1.1%<br>(0.6-1.7%)                  | 0.28<br>(0.14-0.43)     | 14<br>(4.3-22)        |
| Brunei   | 2000 | Female | 50 to 54 | 82%<br>(69-90%)                | 18%<br>(9.9-31%)         | 0.087<br>(0.028-0.17)                       | 0.63%<br>(0.1-1%)                    | 1%<br>(0.38-1.5%)                   | 0.24<br>(0.082-0.39)    | 9.8<br>(1.5-16)       |
| Brunei   | 2000 | Female | 55 to 59 | 79%<br>(64-89%)                | 21%<br>(11-36%)          | 0.08<br>(0.027-0.17)                        | 0.51%<br>(-0.14-0.96%)               | 0.86%<br>(0.13-1.4%)                | 0.17<br>(0.026-0.29)    | 5.4<br>(-1.4-10)      |
| Brunei   | 2000 | Female | 60 to 64 | 76%<br>(60-87%)                | 24%<br>(13-40%)          | 0.072<br>(0.024-0.16)                       | 0.31%<br>(-0.49-0.78%)               | 0.51%<br>(-0.34-1.1%)               | 0.14<br>(-0.093-0.29)   | 3.5<br>(-5.4-8.8)     |
| Brunei   | 2000 | Female | 65 to 69 | 74%<br>(58-86%)                | 26%<br>(14-42%)          | 0.062<br>(0.022-0.13)                       | 0.32%<br>(-0.48-0.77%)               | 0.49%<br>(-0.42-1%)                 | 0.16<br>(-0.14-0.33)    | 3.5<br>(-5.2-8.2)     |
| Brunei   | 2000 | Female | 70 to 74 | 72%<br>(56-84%)                | 28%<br>(16-44%)          | 0.053<br>(0.018-0.11)                       | 0.35%<br>(-0.43-0.73%)               | 0.49%<br>(-0.42-0.96%)              | 0.089<br>(-0.079-0.17)  | 1.6<br>(-2.1-3.4)     |
| Brunei   | 2000 | Female | 75 to 79 | 71%<br>(56-83%)                | 29%<br>(17-44%)          | 0.048<br>(0.016-0.1)                        | 0.31%<br>(-0.44-0.67%)               | 0.41%<br>(-0.48-0.86%)              | 0.095<br>(-0.11-0.2)    | 1.4<br>(-2-3)         |
| Brunei   | 2000 | Female | 80 to 84 | 69%<br>(52-83%)                | 31%<br>(17-48%)          | 0.047<br>(0.016-0.097)                      | 0.26%<br>(-0.45-0.59%)               | 0.31%<br>(-0.53-0.72%)              | 0.097<br>(-0.17-0.23)   | 1.1<br>(-2-2.5)       |
| Brunei   | 2000 | Female | 85 to 89 | 67%<br>(51-80%)                | 33%<br>(20-49%)          | 0.047<br>(0.016-0.095)                      | 0.22%<br>(-0.45-0.55%)               | 0.27%<br>(-0.51-0.7%)               | 0.08<br>(-0.15-0.2)     | 0.59<br>(-1.2-1.5)    |
| Brunei   | 2000 | Female | 90 to 94 | 67%<br>(51-81%)                | 33%<br>(19-49%)          | 0.047<br>(0.015-0.098)                      | 0.18%<br>(-0.46-0.52%)               | 0.23%<br>(-0.52-0.64%)              | 0.046<br>(-0.1-0.13)    | 0.23<br>(-0.58-0.64)  |
| Brunei   | 2000 | Female | 95 plus  | 67%<br>(48-83%)                | 33%<br>(17-52%)          | 0.047<br>(0.013-0.1)                        | 0.18%<br>(-0.48-0.54%)               | 0.24%<br>(-0.58-0.7%)               | 0.015<br>(-0.036-0.045) | 0.049<br>(-0.13-0.14) |
| Brunei   | 2000 | Male   | All Ages | 88%<br>(84-92%)                | 12%<br>(8.3-16%)         | 0.061<br>(0.022-0.11)                       | 1.3%<br>(1-1.6%)                     | 1%<br>(0.72-1.4%)                   | 5.7<br>(3.9-7.6)        | 420<br>(320-550)      |
| Brunei   | 2000 | Male   | 15 to 19 | 84%<br>(73-92%)                | 16%<br>(8.2-27%)         | 0.048<br>(0.015-0.097)                      | 0.89%<br>(0.59-1.4%)                 | 0.52%<br>(0.25-1.4%)                | 0.067<br>(0.031-0.19)   | 17<br>(10-27)         |
| Brunei   | 2000 | Male   | 20 to 24 | 91%<br>(84-95%)                | 9.3%<br>(4.8-16%)        | 0.087<br>(0.03-0.17)                        | 2%<br>(1.2-3.1%)                     | 0.91%<br>(0.31-2.4%)                | 0.19<br>(0.062-0.49)    | 48<br>(28-77)         |
| Brunei   | 2000 | Male   | 25 to 29 | 93%<br>(88-96%)                | 7%<br>(3.7-12%)          | 0.1<br>(0.034-0.19)                         | 2.1%<br>(1.4-3%)                     | 1.2%<br>(0.49-2.5%)                 | 0.3<br>(0.12-0.61)      | 61<br>(38-89)         |
| Brunei   | 2000 | Male   | 30 to 34 | 94%<br>(90-97%)                | 5.6%<br>(2.7-10%)        | 0.1<br>(0.035-0.2)                          | 2%<br>(1.4-2.8%)                     | 1.5%<br>(0.83-2.5%)                 | 0.39<br>(0.2-0.66)      | 57<br>(38-82)         |
| Brunei   | 2000 | Male   | 35 to 39 | 95%<br>(91-98%)                | 5%<br>(2.3-9.1%)         | 0.097<br>(0.031-0.19)                       | 2%<br>(1.5-2.6%)                     | 2%<br>(1.3-2.9%)                    | 0.58<br>(0.35-0.89)     | 56<br>(39-77)         |
| Brunei   | 2000 | Male   | 40 to 44 | 95%<br>(91-98%)                | 4.6%<br>(2.1-8.8%)       | 0.096<br>(0.03-0.19)                        | 1.9%<br>(1.4-2.6%)                   | 2.3%<br>(1.6-3.2%)                  | 0.84<br>(0.53-1.2)      | 57<br>(40-78)         |
| Brunei   | 2000 | Male   | 45 to 49 | 95%<br>(91-98%)                | 4.5%<br>(2-8.9%)         | 0.097<br>(0.031-0.19)                       | 1.7%<br>(1.2-2.3%)                   | 2.1%<br>(1.5-2.9%)                  | 0.83<br>(0.53-1.2)      | 46<br>(32-63)         |
| Brunei   | 2000 | Male   | 50 to 54 | 95%<br>(91-98%)                | 4.8%<br>(2.2-8.8%)       | 0.095<br>(0.031-0.19)                       | 1.5%<br>(1-2%)                       | 1.9%<br>(1.2-2.5%)                  | 0.69<br>(0.43-0.96)     | 31<br>(20-41)         |

| Location | Year | Sex    | Age      | Prevalence of current drinkers | Prevalence of abstainers | Population average of standard drinks daily | Percent of total attributable deaths | Percent of total attributable DALYs | Attributable deaths      | Attributable DALYs     |
|----------|------|--------|----------|--------------------------------|--------------------------|---------------------------------------------|--------------------------------------|-------------------------------------|--------------------------|------------------------|
| Brunei   | 2000 | Male   | 55 to 59 | 95%<br>(90-98%)                | 5.4%<br>(2.4-10%)        | 0.089<br>(0.03-0.19)                        | 1.2%<br>(0.73-1.7%)                  | 1.5%<br>(0.91-2.1%)                 | 0.49<br>(0.28-0.69)      | 18<br>(11-26)          |
| Brunei   | 2000 | Male   | 60 to 64 | 94%<br>(88-97%)                | 6%<br>(2.6-12%)          | 0.082<br>(0.027-0.17)                       | 0.94%<br>(0.5-1.3%)                  | 1.1%<br>(0.63-1.6%)                 | 0.43<br>(0.23-0.61)      | 13<br>(6.9-19)         |
| Brunei   | 2000 | Male   | 65 to 69 | 93%<br>(87-97%)                | 6.6%<br>(2.8-13%)        | 0.075<br>(0.027-0.15)                       | 0.71%<br>(0.33-0.98%)                | 0.84%<br>(0.37-1.2%)                | 0.36<br>(0.16-0.51)      | 9.2<br>(4.1-13)        |
| Brunei   | 2000 | Male   | 70 to 74 | 93%<br>(87-97%)                | 7.1%<br>(3.3-13%)        | 0.067<br>(0.022-0.14)                       | 0.48%<br>(0.13-0.69%)                | 0.56%<br>(0.14-0.83%)               | 0.19<br>(0.047-0.28)     | 3.8<br>(0.99-5.5)      |
| Brunei   | 2000 | Male   | 75 to 79 | 93%<br>(86-97%)                | 7.5%<br>(3.4-14%)        | 0.061<br>(0.02-0.12)                        | 0.33%<br>(-0.023-0.51%)              | 0.38%<br>(-0.044-0.62%)             | 0.15<br>(-0.018-0.24)    | 2.3<br>(-0.16-3.6)     |
| Brunei   | 2000 | Male   | 80 to 84 | 92%<br>(85-96%)                | 8.1%<br>(3.9-15%)        | 0.057<br>(0.02-0.11)                        | 0.22%<br>(-0.098-0.36%)              | 0.24%<br>(-0.14-0.42%)              | 0.1<br>(-0.056-0.17)     | 1.2<br>(-0.52-1.9)     |
| Brunei   | 2000 | Male   | 85 to 89 | 91%<br>(84-95%)                | 8.9%<br>(4.6-16%)        | 0.053<br>(0.02-0.11)                        | 0.17%<br>(-0.14-0.28%)               | 0.18%<br>(-0.22-0.32%)              | 0.054<br>(-0.066-0.097)  | 0.46<br>(-0.39-0.78)   |
| Brunei   | 2000 | Male   | 90 to 94 | 91%<br>(84-96%)                | 9.1%<br>(4.4-16%)        | 0.051<br>(0.018-0.1)                        | 0.13%<br>(-0.19-0.24%)               | 0.13%<br>(-0.25-0.27%)              | 0.024<br>(-0.046-0.048)  | 0.14<br>(-0.21-0.27)   |
| Brunei   | 2000 | Male   | 95 plus  | 91%<br>(82-96%)                | 9.2%<br>(3.7-18%)        | 0.049<br>(0.014-0.1)                        | 0.12%<br>(-0.2-0.23%)                | 0.12%<br>(-0.31-0.24%)              | 0.0057<br>(-0.015-0.012) | 0.025<br>(-0.04-0.047) |
| Brunei   | 2005 | Female | All Ages | 75%<br>(68-81%)                | 25%<br>(19-32%)          | 0.052<br>(0.014-0.1)                        | 0.6%<br>(0.37-0.74%)                 | 0.71%<br>(0.27-0.9%)                | 3.2<br>(1.2-4.2)         | 180<br>(110-240)       |
| Brunei   | 2005 | Female | 15 to 19 | 70%<br>(53-83%)                | 30%<br>(17-47%)          | 0.046<br>(0.0094-0.1)                       | 0.63%<br>(0.4-0.91%)                 | 1.1%<br>(0.59-1.8%)                 | 0.069<br>(0.037-0.12)    | 11<br>(6.8-16)         |
| Brunei   | 2005 | Female | 20 to 24 | 80%<br>(66-90%)                | 20%<br>(10-34%)          | 0.081<br>(0.019-0.17)                       | 0.99%<br>(0.68-1.4%)                 | 1.1%<br>(0.6-1.8%)                  | 0.096<br>(0.052-0.16)    | 22<br>(14-33)          |
| Brunei   | 2005 | Female | 25 to 29 | 84%<br>(74-91%)                | 16%<br>(8.5-26%)         | 0.087<br>(0.022-0.18)                       | 0.92%<br>(0.63-1.2%)                 | 1.2%<br>(0.66-1.9%)                 | 0.13<br>(0.069-0.21)     | 23<br>(15-32)          |
| Brunei   | 2005 | Female | 30 to 34 | 86%<br>(76-93%)                | 14%<br>(7.4-24%)         | 0.085<br>(0.023-0.18)                       | 0.81%<br>(0.52-1.1%)                 | 1.3%<br>(0.78-2%)                   | 0.18<br>(0.1-0.31)       | 22<br>(13-32)          |
| Brunei   | 2005 | Female | 35 to 39 | 86%<br>(76-93%)                | 14%<br>(7-24%)           | 0.078<br>(0.02-0.17)                        | 0.78%<br>(0.5-1.1%)                  | 1.3%<br>(0.89-1.9%)                 | 0.25<br>(0.15-0.36)      | 21<br>(13-29)          |
| Brunei   | 2005 | Female | 40 to 44 | 86%<br>(76-92%)                | 14%<br>(7.8-24%)         | 0.073<br>(0.018-0.16)                       | 0.77%<br>(0.42-1.1%)                 | 1.4%<br>(0.89-2%)                   | 0.33<br>(0.2-0.48)       | 21<br>(11-29)          |
| Brunei   | 2005 | Female | 45 to 49 | 84%<br>(72-92%)                | 16%<br>(8.2-28%)         | 0.071<br>(0.017-0.15)                       | 0.71%<br>(0.31-1%)                   | 1.2%<br>(0.68-1.7%)                 | 0.32<br>(0.17-0.47)      | 17<br>(7.9-25)         |
| Brunei   | 2005 | Female | 50 to 54 | 82%<br>(71-90%)                | 18%<br>(9.9-29%)         | 0.067<br>(0.016-0.14)                       | 0.68%<br>(0.19-1%)                   | 1.1%<br>(0.52-1.5%)                 | 0.32<br>(0.15-0.48)      | 14<br>(4.2-21)         |
| Brunei   | 2005 | Female | 55 to 59 | 79%<br>(65-89%)                | 21%<br>(11-35%)          | 0.062<br>(0.013-0.14)                       | 0.61%<br>(-0.0052-0.94%)             | 0.96%<br>(0.29-1.4%)                | 0.29<br>(0.096-0.44)     | 10<br>(-0.086-16)      |
| Brunei   | 2005 | Female | 60 to 64 | 76%<br>(61-88%)                | 24%<br>(12-39%)          | 0.056<br>(0.011-0.13)                       | 0.45%<br>(-0.27-0.8%)                | 0.66%<br>(-0.15-1.1%)               | 0.22<br>(-0.048-0.38)    | 6.4<br>(-4-11)         |
| Brunei   | 2005 | Female | 65 to 69 | 73%<br>(58-86%)                | 27%<br>(14-42%)          | 0.048<br>(0.01-0.1)                         | 0.46%<br>(-0.23-0.77%)               | 0.64%<br>(-0.14-1%)                 | 0.22<br>(-0.05-0.36)     | 5.3<br>(-2.7-8.8)      |
| Brunei   | 2005 | Female | 70 to 74 | 72%<br>(57-83%)                | 28%<br>(17-43%)          | 0.041<br>(0.0092-0.087)                     | 0.44%<br>(-0.25-0.71%)               | 0.59%<br>(-0.19-0.95%)              | 0.2<br>(-0.066-0.33)     | 3.9<br>(-2.1-6.3)      |

| Location | Year | Sex    | Age      | Prevalence of current drinkers | Prevalence of abstainers | Population average of standard drinks daily | Percent of total attributable deaths | Percent of total attributable DALYs | Attributable deaths     | Attributable DALYs   |
|----------|------|--------|----------|--------------------------------|--------------------------|---------------------------------------------|--------------------------------------|-------------------------------------|-------------------------|----------------------|
| Brunei   | 2005 | Female | 75 to 79 | 70%<br>(55-82%)                | 30%<br>(18-45%)          | 0.037<br>(0.0082-0.081)                     | 0.39%<br>(-0.27-0.64%)               | 0.5%<br>(-0.26-0.83%)               | 0.19<br>(-0.1-0.32)     | 2.9<br>(-2-4.7)      |
| Brunei   | 2005 | Female | 80 to 84 | 69%<br>(51-83%)                | 31%<br>(17-49%)          | 0.036<br>(0.0077-0.08)                      | 0.33%<br>(-0.29-0.55%)               | 0.39%<br>(-0.33-0.68%)              | 0.14<br>(-0.12-0.24)    | 1.6<br>(-1.3-2.6)    |
| Brunei   | 2005 | Female | 85 to 89 | 67%<br>(49-80%)                | 33%<br>(20-51%)          | 0.036<br>(0.0078-0.08)                      | 0.29%<br>(-0.3-0.53%)                | 0.35%<br>(-0.34-0.67%)              | 0.13<br>(-0.13-0.25)    | 0.99<br>(-1.1-1.9)   |
| Brunei   | 2005 | Female | 90 to 94 | 67%<br>(51-80%)                | 33%<br>(20-49%)          | 0.037<br>(0.0082-0.08)                      | 0.25%<br>(-0.35-0.48%)               | 0.31%<br>(-0.4-0.61%)               | 0.072<br>(-0.092-0.14)  | 0.36<br>(-0.52-0.71) |
| Brunei   | 2005 | Female | 95 plus  | 67%<br>(47-83%)                | 33%<br>(17-53%)          | 0.037<br>(0.0073-0.085)                     | 0.24%<br>(-0.34-0.51%)               | 0.31%<br>(-0.4-0.65%)               | 0.031<br>(-0.041-0.066) | 0.1<br>(-0.15-0.22)  |
| Brunei   | 2005 | Male   | All Ages | 89%<br>(85-92%)                | 11%<br>(7.7-15%)         | 0.049<br>(0.013-0.098)                      | 1.3%<br>(1-1.5%)                     | 0.98%<br>(0.75-1.2%)                | 6.2<br>(4.6-8)          | 450<br>(350-570)     |
| Brunei   | 2005 | Male   | 15 to 19 | 84%<br>(73-92%)                | 16%<br>(8-27%)           | 0.036<br>(0.0077-0.078)                     | 0.91%<br>(0.62-1.3%)                 | 0.5%<br>(0.26-1.1%)                 | 0.066<br>(0.033-0.14)   | 19<br>(12-28)        |
| Brunei   | 2005 | Male   | 20 to 24 | 91%<br>(83-95%)                | 9.3%<br>(4.8-17%)        | 0.066<br>(0.016-0.14)                       | 2%<br>(1.3-3%)                       | 0.72%<br>(0.33-1.8%)                | 0.14<br>(0.058-0.37)    | 50<br>(30-78)        |
| Brunei   | 2005 | Male   | 25 to 29 | 93%<br>(88-96%)                | 7%<br>(3.6-12%)          | 0.078<br>(0.019-0.16)                       | 2.2%<br>(1.5-3%)                     | 1.1%<br>(0.49-2.1%)                 | 0.23<br>(0.097-0.45)    | 59<br>(38-86)        |
| Brunei   | 2005 | Male   | 30 to 34 | 94%<br>(89-97%)                | 5.7%<br>(2.7-11%)        | 0.081<br>(0.022-0.17)                       | 2%<br>(1.5-2.7%)                     | 1.4%<br>(0.87-2.2%)                 | 0.31<br>(0.18-0.53)     | 55<br>(37-78)        |
| Brunei   | 2005 | Male   | 35 to 39 | 95%<br>(91-98%)                | 5.1%<br>(2.4-9.5%)       | 0.075<br>(0.019-0.16)                       | 2%<br>(1.5-2.6%)                     | 2%<br>(1.4-2.8%)                    | 0.51<br>(0.32-0.75)     | 54<br>(39-72)        |
| Brunei   | 2005 | Male   | 40 to 44 | 95%<br>(91-98%)                | 4.7%<br>(2.1-9.1%)       | 0.073<br>(0.018-0.16)                       | 1.9%<br>(1.5-2.4%)                   | 2.3%<br>(1.7-3.2%)                  | 0.77<br>(0.52-1.1)      | 56<br>(40-74)        |
| Brunei   | 2005 | Male   | 45 to 49 | 95%<br>(91-98%)                | 4.6%<br>(1.9-9.5%)       | 0.075<br>(0.017-0.16)                       | 1.7%<br>(1.3-2.2%)                   | 2.1%<br>(1.6-2.8%)                  | 0.85<br>(0.58-1.2)      | 49<br>(36-66)        |
| Brunei   | 2005 | Male   | 50 to 54 | 95%<br>(91-98%)                | 4.9%<br>(2.1-9.3%)       | 0.073<br>(0.016-0.15)                       | 1.5%<br>(1.1-1.9%)                   | 1.9%<br>(1.4-2.5%)                  | 0.86<br>(0.58-1.2)      | 39<br>(28-52)        |
| Brunei   | 2005 | Male   | 55 to 59 | 95%<br>(90-97%)                | 5.4%<br>(2.6-10%)        | 0.067<br>(0.014-0.15)                       | 1.2%<br>(0.8-1.6%)                   | 1.5%<br>(0.98-2%)                   | 0.7<br>(0.46-0.98)      | 26<br>(18-36)        |
| Brunei   | 2005 | Male   | 60 to 64 | 94%<br>(88-97%)                | 6%<br>(2.5-12%)          | 0.063<br>(0.013-0.14)                       | 0.94%<br>(0.58-1.3%)                 | 1.2%<br>(0.74-1.6%)                 | 0.55<br>(0.34-0.76)     | 17<br>(10-23)        |
| Brunei   | 2005 | Male   | 65 to 69 | 94%<br>(88-97%)                | 6.5%<br>(2.7-12%)        | 0.06<br>(0.013-0.12)                        | 0.72%<br>(0.42-0.95%)                | 0.87%<br>(0.51-1.2%)                | 0.44<br>(0.26-0.59)     | 11<br>(6.4-14)       |
| Brunei   | 2005 | Male   | 70 to 74 | 93%<br>(87-97%)                | 7%<br>(3.3-13%)          | 0.056<br>(0.013-0.12)                       | 0.5%<br>(0.18-0.68%)                 | 0.59%<br>(0.22-0.84%)               | 0.3<br>(0.11-0.43)      | 5.9<br>(2.2-8.2)     |
| Brunei   | 2005 | Male   | 75 to 79 | 93%<br>(87-96%)                | 7.4%<br>(3.6-13%)        | 0.051<br>(0.011-0.12)                       | 0.35%<br>(0.056-0.51%)               | 0.41%<br>(0.055-0.62%)              | 0.23<br>(0.031-0.35)    | 3.5<br>(0.59-5.1)    |
| Brunei   | 2005 | Male   | 80 to 84 | 92%<br>(85-96%)                | 8.1%<br>(3.9-15%)        | 0.045<br>(0.01-0.098)                       | 0.24%<br>(0.0036-0.35%)              | 0.27%<br>(-0.011-0.42%)             | 0.14<br>(-0.0054-0.21)  | 1.5<br>(0.023-2.3)   |
| Brunei   | 2005 | Male   | 85 to 89 | 91%<br>(84-95%)                | 9%<br>(4.6-16%)          | 0.039<br>(0.0087-0.086)                     | 0.19%<br>(0.035-0.27%)               | 0.21%<br>(-0.006-0.32%)             | 0.09<br>(-0.0025-0.13)  | 0.73<br>(0.13-1.1)   |
| Brunei   | 2005 | Male   | 90 to 94 | 91%<br>(84-95%)                | 9.2%<br>(4.7-16%)        | 0.035<br>(0.0074-0.075)                     | 0.15%<br>(0.098-0.24%)               | 0.18%<br>(0.088-0.28%)              | 0.037<br>(0.018-0.058)  | 0.2<br>(0.13-0.31)   |

| Location | Year | Sex    | Age      | Prevalence of current drinkers | Prevalence of abstainers | Population average of standard drinks daily | Percent of total attributable deaths | Percent of total attributable DALYs | Attributable deaths     | Attributable DALYs   |
|----------|------|--------|----------|--------------------------------|--------------------------|---------------------------------------------|--------------------------------------|-------------------------------------|-------------------------|----------------------|
| Brunei   | 2005 | Male   | 95 plus  | 91%<br>(82-96%)                | 9.3%<br>(4-18%)          | 0.03<br>(0.0058-0.067)                      | 0.15%<br>(0.098-0.22%)               | 0.16%<br>(0.1-0.26%)                | 0.012<br>(0.0076-0.019) | 0.046<br>(0.03-0.07) |
| Brunei   | 2010 | Female | All Ages | 75%<br>(69-81%)                | 25%<br>(19-31%)          | 0.052<br>(0.0042-0.12)                      | 0.58%<br>(0.31-0.73%)                | 0.67%<br>(0.2-0.87%)                | 3.5<br>(1-4.7)          | 200<br>(110-250)     |
| Brunei   | 2010 | Female | 15 to 19 | 70%<br>(55-84%)                | 30%<br>(16-45%)          | 0.044<br>(0.0033-0.11)                      | 0.63%<br>(0.41-0.9%)                 | 1.1%<br>(0.63-1.9%)                 | 0.073<br>(0.04-0.13)    | 11<br>(7.4-17)       |
| Brunei   | 2010 | Female | 20 to 24 | 80%<br>(68-89%)                | 20%<br>(11-32%)          | 0.078<br>(0.0061-0.19)                      | 1%<br>(0.68-1.4%)                    | 1.1%<br>(0.62-1.8%)                 | 0.094<br>(0.051-0.16)   | 22<br>(14-33)        |
| Brunei   | 2010 | Female | 25 to 29 | 84%<br>(74-91%)                | 16%<br>(8.7-26%)         | 0.086<br>(0.0062-0.21)                      | 0.91%<br>(0.64-1.2%)                 | 1.1%<br>(0.65-1.8%)                 | 0.12<br>(0.063-0.21)    | 22<br>(15-32)        |
| Brunei   | 2010 | Female | 30 to 34 | 86%<br>(76-93%)                | 14%<br>(7.2-24%)         | 0.084<br>(0.0068-0.21)                      | 0.79%<br>(0.5-1.1%)                  | 1.2%<br>(0.74-1.9%)                 | 0.16<br>(0.096-0.27)    | 21<br>(13-30)        |
| Brunei   | 2010 | Female | 35 to 39 | 86%<br>(76-93%)                | 14%<br>(6.9-24%)         | 0.074<br>(0.006-0.19)                       | 0.76%<br>(0.49-1%)                   | 1.3%<br>(0.85-2%)                   | 0.24<br>(0.15-0.37)     | 21<br>(14-30)        |
| Brunei   | 2010 | Female | 40 to 44 | 85%<br>(76-92%)                | 15%<br>(7.6-24%)         | 0.07<br>(0.0059-0.18)                       | 0.75%<br>(0.4-1%)                    | 1.4%<br>(0.89-1.9%)                 | 0.34<br>(0.21-0.5)      | 22<br>(12-31)        |
| Brunei   | 2010 | Female | 45 to 49 | 84%<br>(70-92%)                | 16%<br>(8.3-30%)         | 0.07<br>(0.0056-0.18)                       | 0.71%<br>(0.35-0.99%)                | 1.2%<br>(0.75-1.7%)                 | 0.36<br>(0.22-0.52)     | 19<br>(9.7-27)       |
| Brunei   | 2010 | Female | 50 to 54 | 82%<br>(70-90%)                | 18%<br>(9.8-30%)         | 0.066<br>(0.005-0.17)                       | 0.67%<br>(0.22-0.97%)                | 1.1%<br>(0.63-1.5%)                 | 0.4<br>(0.23-0.58)      | 17<br>(6-26)         |
| Brunei   | 2010 | Female | 55 to 59 | 79%<br>(66-89%)                | 21%<br>(11-34%)          | 0.059<br>(0.0046-0.15)                      | 0.59%<br>(0.033-0.93%)               | 0.95%<br>(0.37-1.4%)                | 0.39<br>(0.15-0.6)      | 14<br>(0.82-22)      |
| Brunei   | 2010 | Female | 60 to 64 | 76%<br>(61-88%)                | 24%<br>(12-39%)          | 0.053<br>(0.0043-0.14)                      | 0.44%<br>(-0.26-0.76%)               | 0.66%<br>(-0.095-1.1%)              | 0.26<br>(-0.038-0.45)   | 7.7<br>(-4.6-14)     |
| Brunei   | 2010 | Female | 65 to 69 | 74%<br>(58-86%)                | 26%<br>(14-42%)          | 0.048<br>(0.0037-0.12)                      | 0.42%<br>(-0.3-0.74%)                | 0.6%<br>(-0.19-1%)                  | 0.22<br>(-0.065-0.37)   | 5.2<br>(-3.7-9.1)    |
| Brunei   | 2010 | Female | 70 to 74 | 72%<br>(56-83%)                | 28%<br>(17-44%)          | 0.043<br>(0.0032-0.11)                      | 0.38%<br>(-0.35-0.69%)               | 0.53%<br>(-0.31-0.92%)              | 0.25<br>(-0.15-0.44)    | 4.9<br>(-4.4-8.7)    |
| Brunei   | 2010 | Female | 75 to 79 | 71%<br>(55-83%)                | 29%<br>(17-45%)          | 0.039<br>(0.0028-0.096)                     | 0.32%<br>(-0.38-0.61%)               | 0.42%<br>(-0.38-0.79%)              | 0.22<br>(-0.2-0.42)     | 3.3<br>(-3.8-6.2)    |
| Brunei   | 2010 | Female | 80 to 84 | 69%<br>(51-83%)                | 31%<br>(17-49%)          | 0.037<br>(0.0029-0.09)                      | 0.27%<br>(-0.39-0.52%)               | 0.33%<br>(-0.45-0.64%)              | 0.17<br>(-0.24-0.33)    | 1.9<br>(-2.8-3.6)    |
| Brunei   | 2010 | Female | 85 to 89 | 67%<br>(50-80%)                | 33%<br>(20-50%)          | 0.035<br>(0.0025-0.086)                     | 0.24%<br>(-0.38-0.47%)               | 0.29%<br>(-0.43-0.59%)              | 0.11<br>(-0.16-0.22)    | 0.82<br>(-1.3-1.6)   |
| Brunei   | 2010 | Female | 90 to 94 | 67%<br>(52-80%)                | 33%<br>(20-48%)          | 0.034<br>(0.0023-0.088)                     | 0.22%<br>(-0.36-0.44%)               | 0.27%<br>(-0.42-0.55%)              | 0.071<br>(-0.11-0.14)   | 0.36<br>(-0.6-0.72)  |
| Brunei   | 2010 | Female | 95 plus  | 67%<br>(48-83%)                | 33%<br>(17-52%)          | 0.032<br>(0.0021-0.085)                     | 0.24%<br>(-0.37-0.45%)               | 0.3%<br>(-0.43-0.58%)               | 0.031<br>(-0.044-0.06)  | 0.1<br>(-0.15-0.2)   |
| Brunei   | 2010 | Male   | All Ages | 89%<br>(86-93%)                | 11%<br>(7.4-14%)         | 0.049<br>(0.0038-0.12)                      | 1.3%<br>(1-1.5%)                     | 0.98%<br>(0.72-1.3%)                | 7.3<br>(5.3-9.8)        | 510<br>(400-660)     |
| Brunei   | 2010 | Male   | 15 to 19 | 84%<br>(73-92%)                | 16%<br>(8.4-27%)         | 0.034<br>(0.0027-0.088)                     | 0.94%<br>(0.63-1.4%)                 | 0.54%<br>(0.27-1.2%)                | 0.078<br>(0.037-0.17)   | 21<br>(13-33)        |
| Brunei   | 2010 | Male   | 20 to 24 | 91%<br>(84-95%)                | 9.4%<br>(4.8-16%)        | 0.064<br>(0.005-0.16)                       | 2%<br>(1.3-3%)                       | 0.77%<br>(0.33-2.1%)                | 0.17<br>(0.066-0.47)    | 57<br>(35-89)        |

| Location | Year | Sex    | Age      | Prevalence of current drinkers | Prevalence of abstainers | Population average of standard drinks daily | Percent of total attributable deaths | Percent of total attributable DALYs | Attributable deaths     | Attributable DALYs      |
|----------|------|--------|----------|--------------------------------|--------------------------|---------------------------------------------|--------------------------------------|-------------------------------------|-------------------------|-------------------------|
| Brunei   | 2010 | Male   | 25 to 29 | 93%<br>(88-97%)                | 7%<br>(3.5-12%)          | 0.076<br>(0.0056-0.18)                      | 2.2%<br>(1.6-3%)                     | 1.1%<br>(0.53-2.3%)                 | 0.24<br>(0.11-0.53)     | 64<br>(42-94)           |
| Brunei   | 2010 | Male   | 30 to 34 | 94%<br>(89-98%)                | 5.7%<br>(2.4-11%)        | 0.078<br>(0.0063-0.19)                      | 2%<br>(1.5-2.8%)                     | 1.4%<br>(0.86-2.3%)                 | 0.33<br>(0.19-0.56)     | 60<br>(40-84)           |
| Brunei   | 2010 | Male   | 35 to 39 | 95%<br>(90-98%)                | 5%<br>(2.3-9.7%)         | 0.072<br>(0.0055-0.18)                      | 2%<br>(1.5-2.6%)                     | 2%<br>(1.4-2.8%)                    | 0.54<br>(0.35-0.82)     | 59<br>(43-79)           |
| Brunei   | 2010 | Male   | 40 to 44 | 95%<br>(91-98%)                | 4.7%<br>(2-9%)           | 0.07<br>(0.0057-0.17)                       | 1.9%<br>(1.4-2.5%)                   | 2.3%<br>(1.7-3.3%)                  | 0.82<br>(0.54-1.2)      | 60<br>(43-81)           |
| Brunei   | 2010 | Male   | 45 to 49 | 95%<br>(91-98%)                | 4.5%<br>(2-9%)           | 0.072<br>(0.0057-0.18)                      | 1.7%<br>(1.3-2.2%)                   | 2.1%<br>(1.5-2.9%)                  | 0.96<br>(0.66-1.4)      | 56<br>(40-75)           |
| Brunei   | 2010 | Male   | 50 to 54 | 95%<br>(91-98%)                | 4.8%<br>(2.1-8.9%)       | 0.071<br>(0.0053-0.17)                      | 1.5%<br>(1-2%)                       | 1.9%<br>(1.2-2.6%)                  | 1.1<br>(0.69-1.5)       | 50<br>(34-67)           |
| Brunei   | 2010 | Male   | 55 to 59 | 95%<br>(90-98%)                | 5.4%<br>(2.5-10%)        | 0.066<br>(0.0053-0.17)                      | 1.2%<br>(0.75-1.6%)                  | 1.5%<br>(0.93-2.1%)                 | 0.93<br>(0.58-1.3)      | 35<br>(22-49)           |
| Brunei   | 2010 | Male   | 60 to 64 | 94%<br>(88-97%)                | 5.9%<br>(2.6-12%)        | 0.061<br>(0.0048-0.16)                      | 0.93%<br>(0.56-1.3%)                 | 1.2%<br>(0.67-1.6%)                 | 0.67<br>(0.38-0.95)     | 21<br>(12-29)           |
| Brunei   | 2010 | Male   | 65 to 69 | 94%<br>(88-97%)                | 6.5%<br>(2.8-12%)        | 0.057<br>(0.0046-0.14)                      | 0.72%<br>(0.41-0.99%)                | 0.87%<br>(0.49-1.2%)                | 0.52<br>(0.29-0.73)     | 13<br>(7.3-18)          |
| Brunei   | 2010 | Male   | 70 to 74 | 93%<br>(87-97%)                | 7.1%<br>(3.3-13%)        | 0.052<br>(0.0041-0.13)                      | 0.5%<br>(0.19-0.69%)                 | 0.6%<br>(0.23-0.83%)                | 0.41<br>(0.15-0.57)     | 8.1<br>(3-11)           |
| Brunei   | 2010 | Male   | 75 to 79 | 93%<br>(86-96%)                | 7.5%<br>(3.7-14%)        | 0.047<br>(0.0035-0.12)                      | 0.35%<br>(0.076-0.5%)                | 0.41%<br>(0.062-0.6%)               | 0.3<br>(0.046-0.44)     | 4.5<br>(0.97-6.6)       |
| Brunei   | 2010 | Male   | 80 to 84 | 92%<br>(85-96%)                | 8.1%<br>(3.9-15%)        | 0.042<br>(0.0033-0.1)                       | 0.23%<br>(-0.036-0.34%)              | 0.26%<br>(-0.068-0.41%)             | 0.18<br>(-0.047-0.28)   | 2<br>(-0.31-3)          |
| Brunei   | 2010 | Male   | 85 to 89 | 91%<br>(84-96%)                | 8.9%<br>(4.4-16%)        | 0.039<br>(0.0029-0.093)                     | 0.18%<br>(-0.079-0.28%)              | 0.2%<br>(-0.13-0.32%)               | 0.084<br>(-0.057-0.14)  | 0.69<br>(-0.31-1.1)     |
| Brunei   | 2010 | Male   | 90 to 94 | 91%<br>(84-95%)                | 9.2%<br>(4.5-16%)        | 0.036<br>(0.0025-0.09)                      | 0.14%<br>(-0.12-0.23%)               | 0.16%<br>(-0.19-0.27%)              | 0.037<br>(-0.045-0.065) | 0.21<br>(-0.18-0.34)    |
| Brunei   | 2010 | Male   | 95 plus  | 91%<br>(81-96%)                | 9.4%<br>(3.7-19%)        | 0.033<br>(0.0022-0.088)                     | 0.14%<br>(-0.11-0.22%)               | 0.14%<br>(-0.2-0.26%)               | 0.01<br>(-0.014-0.018)  | 0.041<br>(-0.031-0.068) |
| Brunei   | 2016 | Female | All Ages | 76%<br>(70-81%)                | 24%<br>(19-30%)          | 0.069<br>(0.0075-0.15)                      | 0.52%<br>(0.22-0.7%)                 | 0.56%<br>(0.041-0.8%)               | 3.8<br>(0.3-6.1)        | 200<br>(83-290)         |
| Brunei   | 2016 | Female | 15 to 19 | 70%<br>(54-83%)                | 30%<br>(17-46%)          | 0.057<br>(0.0057-0.13)                      | 0.63%<br>(0.41-0.92%)                | 1.1%<br>(0.57-2%)                   | 0.071<br>(0.031-0.13)   | 11<br>(6.8-17)          |
| Brunei   | 2016 | Female | 20 to 24 | 80%<br>(68-89%)                | 20%<br>(11-32%)          | 0.1<br>(0.011-0.23)                         | 1%<br>(0.68-1.4%)                    | 1.1%<br>(0.58-2%)                   | 0.086<br>(0.042-0.16)   | 21<br>(13-31)           |
| Brunei   | 2016 | Female | 25 to 29 | 84%<br>(74-91%)                | 16%<br>(8.7-26%)         | 0.11<br>(0.011-0.24)                        | 0.9%<br>(0.61-1.2%)                  | 1.1%<br>(0.61-1.8%)                 | 0.11<br>(0.052-0.19)    | 21<br>(14-31)           |
| Brunei   | 2016 | Female | 30 to 34 | 86%<br>(76-92%)                | 14%<br>(7.5-24%)         | 0.11<br>(0.011-0.25)                        | 0.76%<br>(0.46-1.1%)                 | 1.2%<br>(0.68-1.9%)                 | 0.16<br>(0.079-0.28)    | 21<br>(12-30)           |
| Brunei   | 2016 | Female | 35 to 39 | 86%<br>(77-93%)                | 14%<br>(7.4-23%)         | 0.097<br>(0.011-0.23)                       | 0.72%<br>(0.44-1%)                   | 1.3%<br>(0.8-2%)                    | 0.24<br>(0.13-0.41)     | 22<br>(13-32)           |
| Brunei   | 2016 | Female | 40 to 44 | 85%<br>(76-92%)                | 15%<br>(7.9-24%)         | 0.092<br>(0.01-0.22)                        | 0.69%<br>(0.35-0.99%)                | 1.3%<br>(0.82-2%)                   | 0.35<br>(0.19-0.57)     | 23<br>(11-35)           |

| Location | Year | Sex    | Age      | Prevalence of current drinkers | Prevalence of abstainers | Population average of standard drinks daily | Percent of total attributable deaths | Percent of total attributable DALYs | Attributable deaths     | Attributable DALYs   |
|----------|------|--------|----------|--------------------------------|--------------------------|---------------------------------------------|--------------------------------------|-------------------------------------|-------------------------|----------------------|
| Brunei   | 2016 | Female | 45 to 49 | 84%<br>(72-92%)                | 16%<br>(8.3-28%)         | 0.09<br>(0.0099-0.21)                       | 0.66%<br>(0.26-0.96%)                | 1.2%<br>(0.71-1.8%)                 | 0.43<br>(0.23-0.71)     | 23<br>(8.8-36)       |
| Brunei   | 2016 | Female | 50 to 54 | 82%<br>(70-90%)                | 18%<br>(10-30%)          | 0.085<br>(0.0089-0.2)                       | 0.61%<br>(0.17-0.94%)                | 1%<br>(0.51-1.5%)                   | 0.47<br>(0.21-0.75)     | 20<br>(5.3-33)       |
| Brunei   | 2016 | Female | 55 to 59 | 79%<br>(65-89%)                | 21%<br>(11-35%)          | 0.078<br>(0.0078-0.18)                      | 0.5%<br>(-0.077-0.88%)               | 0.86%<br>(0.28-1.4%)                | 0.47<br>(0.15-0.83)     | 16<br>(-2.5-29)      |
| Brunei   | 2016 | Female | 60 to 64 | 76%<br>(60-88%)                | 24%<br>(12-40%)          | 0.07<br>(0.0071-0.16)                       | 0.33%<br>(-0.4-0.75%)                | 0.55%<br>(-0.21-1%)                 | 0.35<br>(-0.12-0.69)    | 9.3<br>(-12-22)      |
| Brunei   | 2016 | Female | 65 to 69 | 73%<br>(57-86%)                | 27%<br>(14-43%)          | 0.06<br>(0.0059-0.13)                       | 0.32%<br>(-0.39-0.71%)               | 0.5%<br>(-0.32-0.97%)               | 0.32<br>(-0.21-0.64)    | 7.1<br>(-8.7-16)     |
| Brunei   | 2016 | Female | 70 to 74 | 72%<br>(56-83%)                | 28%<br>(17-44%)          | 0.051<br>(0.0047-0.12)                      | 0.32%<br>(-0.41-0.68%)               | 0.45%<br>(-0.38-0.89%)              | 0.26<br>(-0.22-0.52)    | 4.8<br>(-5.9-10)     |
| Brunei   | 2016 | Female | 75 to 79 | 70%<br>(56-83%)                | 30%<br>(17-44%)          | 0.046<br>(0.0044-0.11)                      | 0.25%<br>(-0.48-0.56%)               | 0.33%<br>(-0.53-0.73%)              | 0.22<br>(-0.36-0.5)     | 3.3<br>(-6.3-7.5)    |
| Brunei   | 2016 | Female | 80 to 84 | 69%<br>(51-82%)                | 31%<br>(18-49%)          | 0.046<br>(0.0043-0.1)                       | 0.17%<br>(-0.51-0.48%)               | 0.2%<br>(-0.6-0.58%)                | 0.15<br>(-0.45-0.43)    | 1.7<br>(-5.2-4.8)    |
| Brunei   | 2016 | Female | 85 to 89 | 67%<br>(50-80%)                | 33%<br>(20-50%)          | 0.046<br>(0.0046-0.1)                       | 0.11%<br>(-0.55-0.43%)               | 0.14%<br>(-0.62-0.53%)              | 0.084<br>(-0.39-0.33)   | 0.64<br>(-3.1-2.5)   |
| Brunei   | 2016 | Female | 90 to 94 | 67%<br>(52-80%)                | 33%<br>(20-48%)          | 0.047<br>(0.0047-0.11)                      | 0.089%<br>(-0.57-0.38%)              | 0.11%<br>(-0.65-0.47%)              | 0.035<br>(-0.2-0.15)    | 0.17<br>(-1.1-0.75)  |
| Brunei   | 2016 | Female | 95 plus  | 68%<br>(48-83%)                | 32%<br>(17-52%)          | 0.048<br>(0.0047-0.12)                      | 0.086%<br>(-0.6-0.4%)                | 0.11%<br>(-0.71-0.51%)              | 0.013<br>(-0.083-0.059) | 0.041<br>(-0.29-0.2) |
| Brunei   | 2016 | Male   | All Ages | 90%<br>(87-93%)                | 9.8%<br>(6.9-13%)        | 0.065<br>(0.007-0.14)                       | 1.3%<br>(1-1.6%)                     | 1%<br>(0.66-1.3%)                   | 10<br>(6-15)            | 630<br>(460-850)     |
| Brunei   | 2016 | Male   | 15 to 19 | 84%<br>(73-92%)                | 16%<br>(8.4-27%)         | 0.043<br>(0.0046-0.1)                       | 0.98%<br>(0.62-1.5%)                 | 0.097<br>(0.29-1.7%)                | 0.097<br>(0.038-0.27)   | 23<br>(14-38)        |
| Brunei   | 2016 | Male   | 20 to 24 | 91%<br>(83-95%)                | 9.3%<br>(4.8-17%)        | 0.08<br>(0.0088-0.18)                       | 2.1%<br>(1.3-3.2%)                   | 0.95%<br>(0.33-2.4%)                | 0.2<br>(0.059-0.56)     | 55<br>(33-91)        |
| Brunei   | 2016 | Male   | 25 to 29 | 93%<br>(88-96%)                | 7%<br>(3.6-12%)          | 0.096<br>(0.01-0.21)                        | 2.3%<br>(1.5-3.1%)                   | 1.3%<br>(0.53-2.5%)                 | 0.29<br>(0.11-0.67)     | 66<br>(43-100)       |
| Brunei   | 2016 | Male   | 30 to 34 | 94%<br>(90-97%)                | 5.6%<br>(2.6-10%)        | 0.099<br>(0.0098-0.22)                      | 2.1%<br>(1.5-2.9%)                   | 1.5%<br>(0.87-2.5%)                 | 0.41<br>(0.2-0.81)      | 69<br>(46-100)       |
| Brunei   | 2016 | Male   | 35 to 39 | 95%<br>(91-98%)                | 5%<br>(2.3-9.3%)         | 0.09<br>(0.0095-0.21)                       | 2.1%<br>(1.6-2.7%)                   | 2%<br>(1.3-2.9%)                    | 0.67<br>(0.36-1.2)      | 71<br>(50-100)       |
| Brunei   | 2016 | Male   | 40 to 44 | 95%<br>(91-98%)                | 4.7%<br>(2-8.7%)         | 0.088<br>(0.0096-0.21)                      | 2%<br>(1.5-2.6%)                     | 2.3%<br>(1.6-3.2%)                  | 0.99<br>(0.55-1.7)      | 73<br>(49-110)       |
| Brunei   | 2016 | Male   | 45 to 49 | 95%<br>(91-98%)                | 4.6%<br>(2-9.3%)         | 0.092<br>(0.0097-0.21)                      | 1.8%<br>(1.3-2.3%)                   | 2.1%<br>(1.4-3%)                    | 1.2<br>(0.7-2)          | 71<br>(48-100)       |
| Brunei   | 2016 | Male   | 50 to 54 | 95%<br>(91-98%)                | 4.9%<br>(2.2-9.1%)       | 0.09<br>(0.009-0.21)                        | 1.5%<br>(1-2%)                       | 1.9%<br>(1.1-2.6%)                  | 1.4<br>(0.78-2.3)       | 66<br>(41-97)        |
| Brunei   | 2016 | Male   | 55 to 59 | 95%<br>(90-98%)                | 5.4%<br>(2.4-10%)        | 0.082<br>(0.0085-0.19)                      | 1.2%<br>(0.73-1.7%)                  | 1.5%<br>(0.86-2.1%)                 | 1.4<br>(0.77-2.2)       | 54<br>(32-82)        |
| Brunei   | 2016 | Male   | 60 to 64 | 94%<br>(88-98%)                | 6%<br>(2.4-12%)          | 0.077<br>(0.0074-0.18)                      | 0.93%<br>(0.49-1.3%)                 | 1.1%<br>(0.55-1.6%)                 | 1.2<br>(0.58-1.9)       | 38<br>(19-57)        |

| Location | Year | Sex    | Age      | Prevalence of current drinkers | Prevalence of abstainers | Population average of standard drinks daily | Percent of total attributable deaths | Percent of total attributable DALYs | Attributable deaths      | Attributable DALYs       |
|----------|------|--------|----------|--------------------------------|--------------------------|---------------------------------------------|--------------------------------------|-------------------------------------|--------------------------|--------------------------|
| Brunei   | 2016 | Male   | 65 to 69 | 93%<br>(87-97%)                | 6.5%<br>(2.7-13%)        | 0.073<br>(0.0082-0.16)                      | 0.71%<br>(0.35-1%)                   | 0.85%<br>(0.4-1.2%)                 | 0.85<br>(0.39-1.3)       | 21<br>(10-32)            |
| Brunei   | 2016 | Male   | 70 to 74 | 93%<br>(87-97%)                | 7%<br>(3.3-13%)          | 0.068<br>(0.0069-0.15)                      | 0.48%<br>(0.12-0.71%)                | 0.57%<br>(0.12-0.86%)               | 0.51<br>(0.12-0.79)      | 10<br>(2.6-15)           |
| Brunei   | 2016 | Male   | 75 to 79 | 93%<br>(87-96%)                | 7.4%<br>(3.7-13%)        | 0.061<br>(0.0064-0.14)                      | 0.33%<br>(-0.022-0.51%)              | 0.38%<br>(-0.063-0.6%)              | 0.34<br>(-0.059-0.56)    | 5.3<br>(-0.36-8.3)       |
| Brunei   | 2016 | Male   | 80 to 84 | 92%<br>(85-96%)                | 8%<br>(3.9-15%)          | 0.055<br>(0.0055-0.12)                      | 0.2%<br>(-0.12-0.35%)                | 0.23%<br>(-0.17-0.41%)              | 0.19<br>(-0.15-0.35)     | 2.2<br>(-1.3-3.8)        |
| Brunei   | 2016 | Male   | 85 to 89 | 91%<br>(84-96%)                | 8.9%<br>(4.5-16%)        | 0.049<br>(0.005-0.11)                       | 0.17%<br>(-0.16-0.28%)               | 0.18%<br>(-0.21-0.33%)              | 0.1<br>(-0.12-0.19)      | 0.88<br>(-0.83-1.5)      |
| Brunei   | 2016 | Male   | 90 to 94 | 91%<br>(84-95%)                | 9.2%<br>(4.5-16%)        | 0.044<br>(0.0044-0.1)                       | 0.13%<br>(-0.18-0.24%)               | 0.14%<br>(-0.25-0.27%)              | 0.036<br>(-0.063-0.069)  | 0.21<br>(-0.29-0.37)     |
| Brunei   | 2016 | Male   | 95 plus  | 91%<br>(82-96%)                | 9.3%<br>(3.8-18%)        | 0.039<br>(0.0036-0.096)                     | 0.13%<br>(-0.13-0.24%)               | 0.13%<br>(-0.23-0.26%)              | 0.0099<br>(-0.017-0.019) | 0.044<br>(-0.042-0.074)  |
| Japan    | 1990 | Female | All Ages | 79%<br>(75-82%)                | 21%<br>(18-25%)          | 1.9<br>(1.9-2)                              | 0.99%<br>(0.1-1.9%)                  | 0.1%<br>(-1.6-2%)                   | 400<br>(-6100-7500)      | 130000<br>(13000-250000) |
| Japan    | 1990 | Female | 15 to 19 | 77%<br>(68-85%)                | 23%<br>(15-32%)          | 2<br>(1.3-2.9)                              | 2%<br>(1.1-3.1%)                     | 8.7%<br>(4.6-14%)                   | 98<br>(52-150)           | 9100<br>(5000-14000)     |
| Japan    | 1990 | Female | 20 to 24 | 87%<br>(80-92%)                | 13%<br>(8.2-20%)         | 3.2<br>(2.1-4.4)                            | 3.3%<br>(1.8-4.9%)                   | 13%<br>(6.8-20%)                    | 180<br>(91-260)          | 15000<br>(9000-22000)    |
| Japan    | 1990 | Female | 25 to 29 | 90%<br>(85-94%)                | 9.9%<br>(6.3-15%)        | 3.2<br>(2.2-4.3)                            | 2.9%<br>(1.6-4.3%)                   | 12%<br>(6.2-18%)                    | 170<br>(86-250)          | 14000<br>(7300-20000)    |
| Japan    | 1990 | Female | 30 to 34 | 92%<br>(86-95%)                | 8.4%<br>(4.9-14%)        | 3<br>(2.1-4.2)                              | 2.5%<br>(1.3-3.8%)                   | 10%<br>(5.5-15%)                    | 180<br>(98-270)          | 13000<br>(6900-20000)    |
| Japan    | 1990 | Female | 35 to 39 | 91%<br>(86-95%)                | 8.9%<br>(5-14%)          | 2.8<br>(2-3.8)                              | 2.5%<br>(1.3-3.9%)                   | 9.3%<br>(5.5-13%)                   | 290<br>(170-400)         | 17000<br>(8600-25000)    |
| Japan    | 1990 | Female | 40 to 44 | 89%<br>(84-93%)                | 11%<br>(6.6-16%)         | 2.7<br>(1.9-3.6)                            | 2.7%<br>(1.2-4.3%)                   | 8.9%<br>(5-12%)                     | 500<br>(280-700)         | 24000<br>(12000-37000)   |
| Japan    | 1990 | Female | 45 to 49 | 87%<br>(79-92%)                | 13%<br>(7.9-21%)         | 2.5<br>(1.7-3.4)                            | 2.7%<br>(1.1-4.5%)                   | 7.9%<br>(4.3-11%)                   | 590<br>(330-860)         | 24000<br>(11000-38000)   |
| Japan    | 1990 | Female | 50 to 54 | 82%<br>(75-88%)                | 18%<br>(12-25%)          | 2.3<br>(1.5-3.1)                            | 2.6%<br>(0.92-4.6%)                  | 6.7%<br>(3.5-10%)                   | 700<br>(360-1000)        | 24000<br>(8600-41000)    |
| Japan    | 1990 | Female | 55 to 59 | 78%<br>(68-86%)                | 22%<br>(14-32%)          | 2.2<br>(1.5-2.9)                            | 2.3%<br>(0.73-4.1%)                  | 5.4%<br>(2.8-8.3%)                  | 800<br>(410-1200)        | 23000<br>(7400-41000)    |
| Japan    | 1990 | Female | 60 to 64 | 73%<br>(62-81%)                | 27%<br>(19-38%)          | 1.9<br>(1.2-2.7)                            | 1.5%<br>(-0.14-3.5%)                 | 3.4%<br>(0.94-6.3%)                 | 700<br>(190-1300)        | 16000<br>(-1500-36000)   |
| Japan    | 1990 | Female | 65 to 69 | 68%<br>(58-78%)                | 32%<br>(22-42%)          | 1.5<br>(1-2)                                | 0.4%<br>(-0.92-1.9%)                 | 1.4%<br>(-0.52-3.5%)                | 390<br>(-150-970)        | 4300<br>(-9900-21000)    |
| Japan    | 1990 | Female | 70 to 74 | 67%<br>(57-76%)                | 33%<br>(24-43%)          | 1.2<br>(0.74-1.7)                           | -0.58%<br>(-1.9-0.89%)               | -0.27%<br>(-2.1-1.7%)               | -100<br>(-810-650)       | -6400<br>(-21000-9800)   |
| Japan    | 1990 | Female | 75 to 79 | 70%<br>(60-79%)                | 30%<br>(21-40%)          | 1.1<br>(0.68-1.6)                           | -1.3%<br>(-2.8-0.3%)                 | -1.5%<br>(-3.4-0.6%)                | -860<br>(-2000-360)      | -16000<br>(-33000-3700)  |
| Japan    | 1990 | Female | 80 to 84 | 72%<br>(60-81%)                | 28%<br>(19-40%)          | 1.2<br>(0.82-1.7)                           | -1.7%<br>(-3.4-0.2%)                 | -1.9%<br>(-4.1-0.27%)               | -1400<br>(-3000-190)     | -17000<br>(-34000-1800)  |

| Location | Year | Sex    | Age      | Prevalence of current drinkers | Prevalence of abstainers | Population average of standard drinks daily | Percent of total attributable deaths | Percent of total attributable DALYs | Attributable deaths   | Attributable DALYs        |
|----------|------|--------|----------|--------------------------------|--------------------------|---------------------------------------------|--------------------------------------|-------------------------------------|-----------------------|---------------------------|
| Japan    | 1990 | Female | 85 to 89 | 71%<br>(60-79%)                | 29%<br>(21-40%)          | 1.4<br>(0.89-1.9)                           | -1.5%<br>(-3.5-0.81%)                | -1.8%<br>(-4.2-0.9%)                | -1200<br>(-2800-590)  | -9100<br>(-21000-4700)    |
| Japan    | 1990 | Female | 90 to 94 | 71%<br>(61-80%)                | 29%<br>(20-39%)          | 1.5<br>(0.94-2.2)                           | -1.2%<br>(-3.3-1.5%)                 | -1.5%<br>(-4.1-1.6%)                | -520<br>(-1400-560)   | -2600<br>(-7300-3100)     |
| Japan    | 1990 | Female | 95 plus  | 71%<br>(58-82%)                | 29%<br>(18-42%)          | 1.6<br>(0.91-2.5)                           | -0.73%<br>(-3.3-2.5%)                | -1%<br>(-4.1-2.7%)                  | -110<br>(-440-300)    | -320<br>(-1500-1100)      |
| Japan    | 1990 | Male   | All Ages | 89%<br>(86-91%)                | 11%<br>(9.1-14%)         | 1.8<br>(1.8-1.9)                            | 3.5%<br>(2.3-4.6%)                   | 2.8%<br>(1.1-4.4%)                  | 12000<br>(4900-20000) | 530000<br>(350000-700000) |
| Japan    | 1990 | Male   | 15 to 19 | 80%<br>(70-88%)                | 20%<br>(12-30%)          | 1.2<br>(0.7-1.7)                            | 3.7%<br>(1.6-5.8%)                   | 7.4%<br>(2.6-12%)                   | 240<br>(84-390)       | 21000<br>(9500-32000)     |
| Japan    | 1990 | Male   | 20 to 24 | 89%<br>(81-94%)                | 11%<br>(6.5-19%)         | 2.2<br>(1.5-3)                              | 7.1%<br>(4.3-10%)                    | 12%<br>(6.4-19%)                    | 430<br>(220-650)      | 37000<br>(22000-53000)    |
| Japan    | 1990 | Male   | 25 to 29 | 92%<br>(86-95%)                | 8.4%<br>(4.8-14%)        | 2.7<br>(1.9-3.7)                            | 7.1%<br>(4.3-9.9%)                   | 13%<br>(6.8-20%)                    | 400<br>(200-580)      | 33000<br>(20000-47000)    |
| Japan    | 1990 | Male   | 30 to 34 | 93%<br>(88-96%)                | 6.7%<br>(3.5-12%)        | 2.8<br>(2-3.9)                              | 6.1%<br>(3.7-8.7%)                   | 12%<br>(6.2-18%)                    | 390<br>(200-580)      | 31000<br>(19000-44000)    |
| Japan    | 1990 | Male   | 35 to 39 | 94%<br>(91-97%)                | 5.6%<br>(2.9-9.5%)       | 2.6<br>(1.8-3.5)                            | 5.5%<br>(3.2-7.6%)                   | 10%<br>(5.3-15%)                    | 540<br>(290-800)      | 37000<br>(22000-52000)    |
| Japan    | 1990 | Male   | 40 to 44 | 95%<br>(91-97%)                | 5.2%<br>(2.7-9%)         | 2.5<br>(1.7-3.4)                            | 5.4%<br>(3.2-7.7%)                   | 9.3%<br>(5-13%)                     | 940<br>(510-1300)     | 52000<br>(31000-73000)    |
| Japan    | 1990 | Male   | 45 to 49 | 94%<br>(90-97%)                | 5.5%<br>(2.9-10%)        | 2.6<br>(1.8-3.6)                            | 5.9%<br>(3.7-8.4%)                   | 9.2%<br>(5.5-13%)                   | 1300<br>(780-1800)    | 61000<br>(38000-85000)    |
| Japan    | 1990 | Male   | 50 to 54 | 93%<br>(89-96%)                | 6.5%<br>(3.6-11%)        | 2.5<br>(1.7-3.4)                            | 5.6%<br>(3.4-8%)                     | 8.2%<br>(5-12%)                     | 1700<br>(1000-2400)   | 67000<br>(41000-96000)    |
| Japan    | 1990 | Male   | 55 to 59 | 92%<br>(86-96%)                | 8.1%<br>(4.4-14%)        | 2.3<br>(1.5-3.1)                            | 4.6%<br>(2.9-6.7%)                   | 6.3%<br>(3.9-9.1%)                  | 2100<br>(1300-3000)   | 70000<br>(44000-100000)   |
| Japan    | 1990 | Male   | 60 to 64 | 90%<br>(84-94%)                | 9.9%<br>(5.5-16%)        | 2.1<br>(1.4-3)                              | 3.4%<br>(1.7-5.5%)                   | 4.5%<br>(2.4-7.1%)                  | 1900<br>(1000-3000)   | 55000<br>(28000-89000)    |
| Japan    | 1990 | Male   | 65 to 69 | 88%<br>(82-93%)                | 12%<br>(6.8-18%)         | 2<br>(1.4-2.6)                              | 2.5%<br>(0.98-4.1%)                  | 3.1%<br>(1.3-5.2%)                  | 1400<br>(570-2300)    | 33000<br>(13000-55000)    |
| Japan    | 1990 | Male   | 70 to 74 | 88%<br>(80-93%)                | 12%<br>(7.3-20%)         | 1.8<br>(1.2-2.5)                            | 1.7%<br>(0.074-3.6%)                 | 2%<br>(0.032-4.2%)                  | 1000<br>(16-2200)     | 20000<br>(900-43000)      |
| Japan    | 1990 | Male   | 75 to 79 | 88%<br>(82-93%)                | 12%<br>(6.5-18%)         | 1.7<br>(1-2.4)                              | 0.92%<br>(-0.74-2.9%)                | 0.97%<br>(-1-3.2%)                  | 680<br>(-710-2200)    | 11000<br>(-9300-36000)    |
| Japan    | 1990 | Male   | 80 to 84 | 89%<br>(81-94%)                | 11%<br>(6.2-19%)         | 1.4<br>(0.95-2)                             | 0.17%<br>(-1.4-1.9%)                 | 0.032%<br>(-1.9-2%)                 | 22<br>(-1300-1400)    | 1500<br>(-13000-16000)    |
| Japan    | 1990 | Male   | 85 to 89 | 88%<br>(80-93%)                | 12%<br>(6.9-20%)         | 1.2<br>(0.82-1.8)                           | -0.37%<br>(-2-1.3%)                  | -0.67%<br>(-2.5-1.1%)               | -310<br>(-1200-520)   | -1500<br>(-8000-5000)     |
| Japan    | 1990 | Male   | 90 to 94 | 88%<br>(81-93%)                | 12%<br>(6.9-19%)         | 1.1<br>(0.68-1.6)                           | -0.76%<br>(-2.3-0.8%)                | -1.2%<br>(-3.1-0.6%)                | -220<br>(-550-110)    | -830<br>(-2500-890)       |
| Japan    | 1990 | Male   | 95 plus  | 89%<br>(80-95%)                | 11%<br>(5.5-20%)         | 0.95<br>(0.51-1.6)                          | -1.1%<br>(-2.6-0.52%)                | -1.7%<br>(-3.8-0.17%)               | -71<br>(-150-6.8)     | -180<br>(-440-88)         |
| Japan    | 1995 | Female | All Ages | 78%<br>(75-82%)                | 22%<br>(18-25%)          | 2<br>(2-2.1)                                | 1.2%<br>(0.28-2%)                    | 0.5%<br>(-1.1-2.3%)                 | 2100<br>(-4700-9600)  | 160000<br>(39000-280000)  |



| Location | Year | Sex    | Age      | Prevalence of current drinkers | Prevalence of abstainers | Population average of standard drinks daily | Percent of total attributable deaths | Percent of total attributable DALYs | Attributable deaths   | Attributable DALYs      |
|----------|------|--------|----------|--------------------------------|--------------------------|---------------------------------------------|--------------------------------------|-------------------------------------|-----------------------|-------------------------|
| Japan    | 1995 | Female | 15 to 19 | 77%<br>(67-85%)                | 23%<br>(15-33%)          | 2<br>(1.3-2.9)                              | 1.9%<br>(1-2.9%)                     | 8.1%<br>(4.1-13%)                   | 79<br>(40-120)        | 7300<br>(4000-11000)    |
| Japan    | 1995 | Female | 20 to 24 | 87%<br>(79-92%)                | 13%<br>(8.3-21%)         | 3.2<br>(2.1-4.4)                            | 3.1%<br>(1.8-4.7%)                   | 13%<br>(6.8-19%)                    | 190<br>(100-280)      | 17000<br>(9800-24000)   |
| Japan    | 1995 | Female | 25 to 29 | 90%<br>(84-94%)                | 10%<br>(6.4-16%)         | 3.3<br>(2.3-4.5)                            | 2.9%<br>(1.6-4.3%)                   | 12%<br>(6.8-18%)                    | 180<br>(99-270)       | 15000<br>(8400-21000)   |
| Japan    | 1995 | Female | 30 to 34 | 91%<br>(86-95%)                | 8.6%<br>(5.1-14%)        | 3.2<br>(2.2-4.4)                            | 2.7%<br>(1.4-4.1%)                   | 11%<br>(6.2-16%)                    | 200<br>(110-290)      | 14000<br>(7700-21000)   |
| Japan    | 1995 | Female | 35 to 39 | 91%<br>(86-95%)                | 8.9%<br>(5.2-14%)        | 2.9<br>(2-3.9)                              | 2.4%<br>(1.2-3.8%)                   | 9.5%<br>(5.6-13%)                   | 240<br>(140-330)      | 14000<br>(6800-21000)   |
| Japan    | 1995 | Female | 40 to 44 | 89%<br>(84-93%)                | 11%<br>(6.5-16%)         | 2.7<br>(1.9-3.7)                            | 2.6%<br>(1.1-4.2%)                   | 8.9%<br>(5.1-12%)                   | 410<br>(230-570)      | 20000<br>(8700-31000)   |
| Japan    | 1995 | Female | 45 to 49 | 87%<br>(79-92%)                | 13%<br>(7.9-21%)         | 2.6<br>(1.8-3.6)                            | 2.9%<br>(1.3-4.6%)                   | 8.3%<br>(4.9-12%)                   | 710<br>(410-1000)     | 29000<br>(13000-45000)  |
| Japan    | 1995 | Female | 50 to 54 | 82%<br>(75-88%)                | 18%<br>(12-25%)          | 2.4<br>(1.6-3.3)                            | 2.8%<br>(1.1-4.8%)                   | 7.4%<br>(4-11%)                     | 800<br>(440-1200)     | 28000<br>(11000-46000)  |
| Japan    | 1995 | Female | 55 to 59 | 78%<br>(68-86%)                | 22%<br>(14-32%)          | 2.2<br>(1.5-3)                              | 2.2%<br>(0.72-3.9%)                  | 5.6%<br>(3-8.3%)                    | 790<br>(420-1200)     | 22000<br>(7200-39000)   |
| Japan    | 1995 | Female | 60 to 64 | 73%<br>(62-81%)                | 27%<br>(19-38%)          | 1.9<br>(1.2-2.8)                            | 1.6%<br>(-0.028-3.5%)                | 3.8%<br>(1.3-6.6%)                  | 790<br>(280-1400)     | 17000<br>(-320-39000)   |
| Japan    | 1995 | Female | 65 to 69 | 69%<br>(57-78%)                | 31%<br>(22-43%)          | 1.6<br>(1.1-2.2)                            | 0.81%<br>(-0.49-2.3%)                | 2.2%<br>(0.29-4.2%)                 | 640<br>(85-1200)      | 9700<br>(-6100-27000)   |
| Japan    | 1995 | Female | 70 to 74 | 68%<br>(57-77%)                | 32%<br>(23-43%)          | 1.4<br>(0.94-2)                             | 0.15%<br>(-1.2-1.8%)                 | 0.87%<br>(-1-3%)                    | 360<br>(-420-1200)    | 1900<br>(-15000-22000)  |
| Japan    | 1995 | Female | 75 to 79 | 71%<br>(60-79%)                | 29%<br>(21-40%)          | 1.4<br>(0.84-2)                             | -0.51%<br>(-2-1.3%)                  | -0.32%<br>(-2.3-2%)                 | -180<br>(-1300-1100)  | -6000<br>(-24000-16000) |
| Japan    | 1995 | Female | 80 to 84 | 71%<br>(59-81%)                | 29%<br>(19-41%)          | 1.4<br>(0.9-1.9)                            | -1%<br>(-2.6-0.71%)                  | -1.1%<br>(-3.2-0.99%)               | -910<br>(-2500-790)   | -12000<br>(-30000-8000) |
| Japan    | 1995 | Female | 85 to 89 | 70%<br>(59-79%)                | 30%<br>(21-41%)          | 1.4<br>(0.91-1.9)                           | -1.2%<br>(-2.9-0.68%)                | -1.5%<br>(-3.6-0.8%)                | -1100<br>(-2800-620)  | -9300<br>(-22000-5000)  |
| Japan    | 1995 | Female | 90 to 94 | 71%<br>(60-79%)                | 29%<br>(21-40%)          | 1.4<br>(0.87-2)                             | -1.3%<br>(-3.1-0.78%)                | -1.6%<br>(-3.7-0.89%)               | -770<br>(-1800-410)   | -4000<br>(-9200-2400)   |
| Japan    | 1995 | Female | 95 plus  | 71%<br>(58-82%)                | 29%<br>(18-42%)          | 1.4<br>(0.75-2.2)                           | -1.3%<br>(-3.4-1.3%)                 | -1.7%<br>(-4.1-1.4%)                | -300<br>(-730-240)    | -950<br>(-2400-950)     |
| Japan    | 1995 | Male   | All Ages | 89%<br>(87-91%)                | 11%<br>(9-13%)           | 1.9<br>(1.8-2)                              | 3.4%<br>(2.3-4.5%)                   | 2.8%<br>(1.3-4.3%)                  | 14000<br>(6300-22000) | 56000<br>(37000-73000)  |
| Japan    | 1995 | Male   | 15 to 19 | 80%<br>(69-88%)                | 20%<br>(12-31%)          | 1.2<br>(0.7-1.7)                            | 3.3%<br>(1.5-5.1%)                   | 6.7%<br>(2.4-11%)                   | 170<br>(62-280)       | 15000<br>(7600-24000)   |
| Japan    | 1995 | Male   | 20 to 24 | 88%<br>(81-94%)                | 12%<br>(6.5-19%)         | 2.3<br>(1.5-3.1)                            | 6.5%<br>(4-9.4%)                     | 11%<br>(5.7-18%)                    | 430<br>(220-670)      | 38000<br>(23000-55000)  |
| Japan    | 1995 | Male   | 25 to 29 | 91%<br>(86-95%)                | 8.5%<br>(4.8-14%)        | 2.7<br>(1.9-3.7)                            | 6.8%<br>(4-9.5%)                     | 13%<br>(6.2-19%)                    | 420<br>(210-620)      | 36000<br>(21000-51000)  |
| Japan    | 1995 | Male   | 30 to 34 | 93%<br>(87-97%)                | 6.8%<br>(3.4-13%)        | 2.9<br>(2-3.9)                              | 6%<br>(3.6-8.6%)                     | 11%<br>(5.9-18%)                    | 400<br>(200-610)      | 31000<br>(19000-45000)  |

| Location | Year | Sex    | Age      | Prevalence of current drinkers | Prevalence of abstainers | Population average of standard drinks daily | Percent of total attributable deaths | Percent of total attributable DALYs | Attributable deaths  | Attributable DALYs       |
|----------|------|--------|----------|--------------------------------|--------------------------|---------------------------------------------|--------------------------------------|-------------------------------------|----------------------|--------------------------|
| Japan    | 1995 | Male   | 35 to 39 | 94%<br>(90-97%)                | 5.7%<br>(3.1-9.6%)       | 2.6<br>(1.8-3.6)                            | 5.4%<br>(3.2-7.7%)                   | 10%<br>(5.1-15%)                    | 460<br>(240-690)     | 31000<br>(18000-44000)   |
| Japan    | 1995 | Male   | 40 to 44 | 95%<br>(91-97%)                | 5.3%<br>(2.8-9.1%)       | 2.6<br>(1.8-3.5)                            | 5.3%<br>(3.1-7.6%)                   | 9.2%<br>(5-13%)                     | 770<br>(420-1100)    | 43000<br>(26000-61000)   |
| Japan    | 1995 | Male   | 45 to 49 | 94%<br>(90-97%)                | 5.6%<br>(2.8-10%)        | 2.6<br>(1.8-3.6)                            | 5.7%<br>(3.4-8.2%)                   | 9.1%<br>(5.2-13%)                   | 1500<br>(830-2000)   | 68000<br>(41000-95000)   |
| Japan    | 1995 | Male   | 50 to 54 | 93%<br>(89-96%)                | 6.5%<br>(3.6-11%)        | 2.5<br>(1.7-3.4)                            | 5.5%<br>(3.3-7.8%)                   | 8.2%<br>(4.9-12%)                   | 1800<br>(1100-2500)  | 72000<br>(43000-100000)  |
| Japan    | 1995 | Male   | 55 to 59 | 92%<br>(87-96%)                | 8.1%<br>(4.4-13%)        | 2.3<br>(1.6-3.2)                            | 4.6%<br>(2.9-6.7%)                   | 6.5%<br>(4.1-9.4%)                  | 2000<br>(1300-2800)  | 67000<br>(43000-97000)   |
| Japan    | 1995 | Male   | 60 to 64 | 90%<br>(84-94%)                | 9.9%<br>(5.6-16%)        | 2.1<br>(1.4-3)                              | 3.6%<br>(2-5.7%)                     | 4.9%<br>(2.8-7.5%)                  | 2300<br>(1300-3500)  | 65000<br>(35000-100000)  |
| Japan    | 1995 | Male   | 65 to 69 | 88%<br>(81-93%)                | 12%<br>(6.7-19%)         | 2<br>(1.4-2.6)                              | 2.7%<br>(1.3-4.2%)                   | 3.5%<br>(1.8-5.3%)                  | 2100<br>(1100-3200)  | 49000<br>(24000-77000)   |
| Japan    | 1995 | Male   | 70 to 74 | 87%<br>(80-93%)                | 13%<br>(7.5-20%)         | 1.8<br>(1.3-2.5)                            | 1.8%<br>(0.36-3.5%)                  | 2.3%<br>(0.49-4.3%)                 | 1400<br>(300-2600)   | 27000<br>(5100-51000)    |
| Japan    | 1995 | Male   | 75 to 79 | 88%<br>(81-93%)                | 12%<br>(6.7-19%)         | 1.7<br>(1.1-2.4)                            | 1.1%<br>(-0.45-2.9%)                 | 1.2%<br>(-0.61-3.3%)                | 810<br>(-410-2200)   | 13000<br>(-5600-35000)   |
| Japan    | 1995 | Male   | 80 to 84 | 88%<br>(81-94%)                | 12%<br>(6.4-19%)         | 1.5<br>(0.97-2)                             | 0.37%<br>(-1.1-1.9%)                 | 0.29%<br>(-1.4-2.1%)                | 220<br>(-1100-1600)  | 3600<br>(-11000-19000)   |
| Japan    | 1995 | Male   | 85 to 89 | 88%<br>(80-93%)                | 12%<br>(7-20%)           | 1.3<br>(0.84-1.8)                           | -0.12%<br>(-1.6-1.4%)                | -0.36%<br>(-2.1-1.4%)               | -200<br>(-1100-750)  | -600<br>(-7800-7000)     |
| Japan    | 1995 | Male   | 90 to 94 | 88%<br>(81-93%)                | 12%<br>(6.8-19%)         | 1.1<br>(0.72-1.7)                           | -0.49%<br>(-1.9-1%)                  | -0.9%<br>(-2.7-0.94%)               | -220<br>(-650-230)   | -740<br>(-2900-1600)     |
| Japan    | 1995 | Male   | 95 plus  | 89%<br>(81-95%)                | 11%<br>(5.3-19%)         | 1<br>(0.55-1.6)                             | -0.76%<br>(-2.2-0.82%)               | -1.4%<br>(-3.2-0.59%)               | -86<br>(-200-38)     | -200<br>(-590-220)       |
| Japan    | 2000 | Female | All Ages | 78%<br>(75-81%)                | 22%<br>(19-25%)          | 2<br>(1.9-2.1)                              | 1.2%<br>(0.35-2%)                    | 0.59%<br>(-0.84-2.2%)               | 2600<br>(-3800-9700) | 160000<br>(50000-280000) |
| Japan    | 2000 | Female | 15 to 19 | 78%<br>(69-86%)                | 22%<br>(14-31%)          | 2<br>(1.3-2.9)                              | 1.8%<br>(0.95-2.9%)                  | 9.2%<br>(4.4-14%)                   | 65<br>(31-100)       | 6100<br>(3200-9400)      |
| Japan    | 2000 | Female | 20 to 24 | 87%<br>(80-92%)                | 13%<br>(7.7-20%)         | 3.2<br>(2.1-4.4)                            | 3.3%<br>(1.8-5%)                     | 15%<br>(7.4-22%)                    | 170<br>(85-260)      | 15000<br>(8300-21000)    |
| Japan    | 2000 | Female | 25 to 29 | 91%<br>(86-94%)                | 9.5%<br>(5.9-14%)        | 3.3<br>(2.3-4.4)                            | 3.1%<br>(1.6-4.6%)                   | 14%<br>(7.1-21%)                    | 220<br>(110-320)     | 17000<br>(9100-25000)    |
| Japan    | 2000 | Female | 30 to 34 | 92%<br>(87-95%)                | 8.1%<br>(4.9-13%)        | 3.1<br>(2.2-4.3)                            | 2.8%<br>(1.4-4.2%)                   | 12%<br>(6.6-18%)                    | 230<br>(120-340)     | 16000<br>(8200-24000)    |
| Japan    | 2000 | Female | 35 to 39 | 91%<br>(87-95%)                | 8.6%<br>(4.8-13%)        | 2.9<br>(2-3.9)                              | 2.6%<br>(1.2-4%)                     | 10%<br>(6.2-15%)                    | 250<br>(150-360)     | 15000<br>(7100-22000)    |
| Japan    | 2000 | Female | 40 to 44 | 90%<br>(85-94%)                | 10%<br>(6.4-15%)         | 2.7<br>(1.8-3.8)                            | 2.6%<br>(1.1-4.2%)                   | 9.6%<br>(5.6-13%)                   | 350<br>(200-490)     | 17000<br>(7400-26000)    |
| Japan    | 2000 | Female | 45 to 49 | 87%<br>(79-92%)                | 13%<br>(7.8-21%)         | 2.6<br>(1.8-3.5)                            | 2.8%<br>(1.2-4.6%)                   | 8.7%<br>(5.3-12%)                   | 580<br>(350-820)     | 24000<br>(11000-37000)   |
| Japan    | 2000 | Female | 50 to 54 | 82%<br>(75-88%)                | 18%<br>(12-25%)          | 2.4<br>(1.6-3.2)                            | 2.9%<br>(1.1-4.8%)                   | 7.6%<br>(4.3-11%)                   | 910<br>(520-1300)    | 31000<br>(13000-50000)   |

| Location | Year | Sex    | Age      | Prevalence of current drinkers | Prevalence of abstainers | Population average of standard drinks daily | Percent of total attributable deaths | Percent of total attributable DALYs | Attributable deaths   | Attributable DALYs        |
|----------|------|--------|----------|--------------------------------|--------------------------|---------------------------------------------|--------------------------------------|-------------------------------------|-----------------------|---------------------------|
| Japan    | 2000 | Female | 55 to 59 | 77%<br>(67-85%)                | 23%<br>(15-33%)          | 2.1<br>(1.5-2.9)                            | 2.3%<br>(0.84-4%)                    | 6%<br>(3.5-8.6%)                    | 860<br>(500-1200)     | 24000<br>(9400-41000)     |
| Japan    | 2000 | Female | 60 to 64 | 71%<br>(60-81%)                | 29%<br>(19-40%)          | 1.8<br>(1.2-2.6)                            | 1.6%<br>(0.11-3.3%)                  | 4%<br>(1.7-6.6%)                    | 760<br>(320-1200)     | 17000<br>(1200-36000)     |
| Japan    | 2000 | Female | 65 to 69 | 66%<br>(54-77%)                | 34%<br>(23-46%)          | 1.5<br>(1-2)                                | 0.8%<br>(-0.3-2.1%)                  | 2.3%<br>(0.68-4%)                   | 660<br>(190-1200)     | 9800<br>(-4000-25000)     |
| Japan    | 2000 | Female | 70 to 74 | 66%<br>(55-75%)                | 34%<br>(25-45%)          | 1.3<br>(0.85-1.8)                           | 0.15%<br>(-1-1.4%)                   | 1%<br>(-0.55-2.7%)                  | 420<br>(-220-1100)    | 2000<br>(-14000-19000)    |
| Japan    | 2000 | Female | 75 to 79 | 70%<br>(60-78%)                | 30%<br>(22-40%)          | 1.3<br>(0.77-1.8)                           | -0.44%<br>(-1.7-1%)                  | -0.12%<br>(-1.8-1.8%)               | -68<br>(-1000-1000)   | -5800<br>(-22000-13000)   |
| Japan    | 2000 | Female | 80 to 84 | 71%<br>(59-81%)                | 29%<br>(19-41%)          | 1.3<br>(0.88-1.8)                           | -0.87%<br>(-2.2-0.57%)               | -0.9%<br>(-2.6-0.87%)               | -680<br>(-2000-660)   | -10000<br>(-25000-6600)   |
| Japan    | 2000 | Female | 85 to 89 | 70%<br>(60-79%)                | 30%<br>(21-40%)          | 1.3<br>(0.89-1.9)                           | -0.94%<br>(-2.4-0.66%)               | -1.1%<br>(-2.8-0.84%)               | -980<br>(-2500-750)   | -8600<br>(-21000-6000)    |
| Japan    | 2000 | Female | 90 to 94 | 71%<br>(61-79%)                | 29%<br>(21-39%)          | 1.4<br>(0.88-2)                             | -0.96%<br>(-2.5-0.88%)               | -1.2%<br>(-3.1-0.95%)               | -760<br>(-1900-600)   | -4100<br>(-11000-3800)    |
| Japan    | 2000 | Female | 95 plus  | 71%<br>(57-81%)                | 29%<br>(19-43%)          | 1.4<br>(0.79-2.3)                           | -0.88%<br>(-2.8-1.5%)                | -1.2%<br>(-3.4-1.7%)                | -340<br>(-970-480)    | -1000<br>(-3300-1800)     |
| Japan    | 2000 | Male   | All Ages | 91%<br>(89-92%)                | 9.5%<br>(7.8-11%)        | 1.9<br>(1.8-2)                              | 3.4%<br>(2.1-4.6%)                   | 2.9%<br>(1.3-4.3%)                  | 15000<br>(7200-23000) | 570000<br>(360000-760000) |
| Japan    | 2000 | Male   | 15 to 19 | 83%<br>(75-90%)                | 17%<br>(10-25%)          | 1.2<br>(0.73-1.7)                           | 3.2%<br>(1.5-5%)                     | 7.5%<br>(2.8-12%)                   | 130<br>(48-220)       | 12000<br>(5900-19000)     |
| Japan    | 2000 | Male   | 20 to 24 | 91%<br>(85-95%)                | 9%<br>(5.3-15%)          | 2.3<br>(1.6-3.1)                            | 6.8%<br>(4-9.8%)                     | 13%<br>(5.9-20%)                    | 360<br>(170-570)      | 32000<br>(19000-47000)    |
| Japan    | 2000 | Male   | 25 to 29 | 93%<br>(88-96%)                | 7%<br>(4-12%)            | 2.7<br>(1.9-3.7)                            | 7%<br>(4-10%)                        | 14%<br>(6-21%)                      | 470<br>(200-720)      | 39000<br>(22000-57000)    |
| Japan    | 2000 | Male   | 30 to 34 | 94%<br>(90-97%)                | 5.7%<br>(3-10%)          | 2.8<br>(2-3.8)                              | 6.3%<br>(3.5-9.4%)                   | 13%<br>(5.4-20%)                    | 470<br>(200-740)      | 36000<br>(20000-53000)    |
| Japan    | 2000 | Male   | 35 to 39 | 95%<br>(92-97%)                | 4.8%<br>(2.6-8%)         | 2.6<br>(1.8-3.6)                            | 5.6%<br>(3-8.3%)                     | 11%<br>(4.8-17%)                    | 510<br>(230-780)      | 33000<br>(17000-49000)    |
| Japan    | 2000 | Male   | 40 to 44 | 96%<br>(92-98%)                | 4.5%<br>(2.4-7.7%)       | 2.5<br>(1.7-3.5)                            | 5.4%<br>(2.8-8%)                     | 9.8%<br>(4.7-15%)                   | 680<br>(330-1000)     | 38000<br>(20000-55000)    |
| Japan    | 2000 | Male   | 45 to 49 | 95%<br>(92-98%)                | 4.7%<br>(2.5-8.2%)       | 2.6<br>(1.8-3.6)                            | 5.7%<br>(3.1-8.4%)                   | 9.4%<br>(4.8-13%)                   | 1200<br>(630-1800)    | 58000<br>(32000-82000)    |
| Japan    | 2000 | Male   | 50 to 54 | 94%<br>(91-97%)                | 5.6%<br>(3.2-9.2%)       | 2.5<br>(1.7-3.4)                            | 5.4%<br>(3-7.9%)                     | 8.2%<br>(4.4-12%)                   | 2000<br>(1100-3000)   | 80000<br>(44000-120000)   |
| Japan    | 2000 | Male   | 55 to 59 | 93%<br>(88-96%)                | 7.1%<br>(4-12%)          | 2.3<br>(1.6-3.1)                            | 4.6%<br>(2.6-6.8%)                   | 6.6%<br>(3.9-9.5%)                  | 2100<br>(1300-3000)   | 71000<br>(42000-110000)   |
| Japan    | 2000 | Male   | 60 to 64 | 91%<br>(86-95%)                | 8.8%<br>(5-14%)          | 2.1<br>(1.4-3)                              | 3.6%<br>(1.9-5.8%)                   | 5.1%<br>(2.9-7.9%)                  | 2200<br>(1200-3300)   | 61000<br>(33000-97000)    |
| Japan    | 2000 | Male   | 65 to 69 | 89%<br>(82-94%)                | 11%<br>(6.4-18%)         | 2<br>(1.4-2.6)                              | 2.8%<br>(1.4-4.3%)                   | 3.7%<br>(2-5.6%)                    | 2300<br>(1200-3400)   | 53000<br>(27000-83000)    |
| Japan    | 2000 | Male   | 70 to 74 | 88%<br>(81-93%)                | 12%<br>(7.1-19%)         | 1.8<br>(1.2-2.5)                            | 1.9%<br>(0.55-3.5%)                  | 2.5%<br>(0.8-4.3%)                  | 1900<br>(620-3400)    | 37000<br>(10000-66000)    |

| Location | Year | Sex    | Age      | Prevalence of current drinkers | Prevalence of abstainers | Population average of standard drinks daily | Percent of total attributable deaths | Percent of total attributable DALYs | Attributable deaths   | Attributable DALYs       |
|----------|------|--------|----------|--------------------------------|--------------------------|---------------------------------------------|--------------------------------------|-------------------------------------|-----------------------|--------------------------|
| Japan    | 2000 | Male   | 75 to 79 | 88%<br>(81-93%)                | 12%<br>(6.9-19%)         | 1.6<br>(1-2.3)                              | 1.2%<br>(-0.22-2.7%)                 | 1.4%<br>(-0.27-3.2%)                | 1000<br>(-210-2500)   | 16000<br>(-3200-39000)   |
| Japan    | 2000 | Male   | 80 to 84 | 88%<br>(80-94%)                | 12%<br>(6.4-20%)         | 1.4<br>(0.94-1.9)                           | 0.48%<br>(-0.78-1.9%)                | 0.46%<br>(-1.1-2.1%)                | 340<br>(-790-1600)    | 4700<br>(-7800-18000)    |
| Japan    | 2000 | Male   | 85 to 89 | 87%<br>(80-93%)                | 13%<br>(7.1-20%)         | 1.2<br>(0.82-1.7)                           | 0.039%<br>(-1.2-1.3%)                | -0.17%<br>(-1.7-1.4%)               | -110<br>(-1100-870)   | 230<br>(-7100-8000)      |
| Japan    | 2000 | Male   | 90 to 94 | 88%<br>(80-93%)                | 12%<br>(7.3-20%)         | 1.1<br>(0.69-1.6)                           | -0.28%<br>(-1.5-1%)                  | -0.66%<br>(-2.2-0.92%)              | -210<br>(-710-300)    | -580<br>(-3100-2100)     |
| Japan    | 2000 | Male   | 95 plus  | 89%<br>(80-94%)                | 11%<br>(5.6-20%)         | 0.96<br>(0.53-1.6)                          | -0.5%<br>(-1.8-0.87%)                | -1%<br>(-2.7-0.66%)                 | -96<br>(-250-60)      | -190<br>(-680-330)       |
| Japan    | 2005 | Female | All Ages | 78%<br>(74-81%)                | 22%<br>(19-26%)          | 1.9<br>(1.8-2)                              | 1%<br>(0.26-1.8%)                    | 0.5%<br>(-0.82-2%)                  | 2500<br>(-4200-10000) | 150000<br>(38000-260000) |
| Japan    | 2005 | Female | 15 to 19 | 78%<br>(69-86%)                | 22%<br>(14-31%)          | 2<br>(1.3-2.8)                              | 1.8%<br>(0.84-2.8%)                  | 9.3%<br>(3.9-15%)                   | 55<br>(23-88)         | 5100<br>(2600-8100)      |
| Japan    | 2005 | Female | 20 to 24 | 87%<br>(80-92%)                | 13%<br>(8-20%)           | 3.1<br>(2.1-4.4)                            | 3.3%<br>(1.7-5.3%)                   | 15%<br>(6.8-24%)                    | 160<br>(69-240)       | 13000<br>(6900-20000)    |
| Japan    | 2005 | Female | 25 to 29 | 90%<br>(85-94%)                | 9.7%<br>(6.2-15%)        | 3.1<br>(2.2-4.2)                            | 3%<br>(1.5-4.6%)                     | 15%<br>(6.5-22%)                    | 190<br>(85-290)       | 15000<br>(7300-22000)    |
| Japan    | 2005 | Female | 30 to 34 | 92%<br>(87-95%)                | 8.3%<br>(4.9-13%)        | 3<br>(2.1-4.1)                              | 2.7%<br>(1.3-4.1%)                   | 12%<br>(6-19%)                      | 250<br>(120-380)      | 17000<br>(8300-26000)    |
| Japan    | 2005 | Female | 35 to 39 | 91%<br>(86-95%)                | 8.7%<br>(5.1-14%)        | 2.8<br>(1.9-3.8)                            | 2.6%<br>(1.2-4%)                     | 11%<br>(6-15%)                      | 280<br>(160-400)      | 16000<br>(7500-24000)    |
| Japan    | 2005 | Female | 40 to 44 | 90%<br>(85-93%)                | 10%<br>(6.5-15%)         | 2.6<br>(1.8-3.6)                            | 2.6%<br>(1.1-4.2%)                   | 9.9%<br>(5.5-14%)                   | 340<br>(190-480)      | 17000<br>(7300-26000)    |
| Japan    | 2005 | Female | 45 to 49 | 87%<br>(79-92%)                | 13%<br>(7.8-21%)         | 2.5<br>(1.7-3.4)                            | 2.7%<br>(1.2-4.3%)                   | 8.8%<br>(5.2-12%)                   | 460<br>(270-650)      | 19000<br>(8700-30000)    |
| Japan    | 2005 | Female | 50 to 54 | 82%<br>(74-88%)                | 18%<br>(12-26%)          | 2.3<br>(1.5-3.1)                            | 2.7%<br>(1.1-4.5%)                   | 7.6%<br>(4.5-11%)                   | 720<br>(420-1000)     | 25000<br>(10000-39000)   |
| Japan    | 2005 | Female | 55 to 59 | 77%<br>(67-86%)                | 23%<br>(14-33%)          | 2.1<br>(1.5-2.8)                            | 2.3%<br>(0.92-3.8%)                  | 6.1%<br>(3.8-8.6%)                  | 950<br>(580-1300)     | 27000<br>(11000-44000)   |
| Japan    | 2005 | Female | 60 to 64 | 71%<br>(60-81%)                | 29%<br>(19-40%)          | 1.8<br>(1.2-2.5)                            | 1.5%<br>(0.17-3%)                    | 4.1%<br>(2-6.4%)                    | 770<br>(370-1200)     | 17000<br>(2000-34000)    |
| Japan    | 2005 | Female | 65 to 69 | 66%<br>(54-77%)                | 34%<br>(23-46%)          | 1.4<br>(0.99-1.9)                           | 0.66%<br>(-0.27-1.8%)                | 2.3%<br>(0.9-3.9%)                  | 600<br>(230-1000)     | 7800<br>(-3700-21000)    |
| Japan    | 2005 | Female | 70 to 74 | 66%<br>(55-76%)                | 34%<br>(24-45%)          | 1.2<br>(0.77-1.6)                           | 0.042%<br>(-0.94-1.1%)               | 1%<br>(-0.32-2.5%)                  | 410<br>(-130-1000)    | 510<br>(-13000-15000)    |
| Japan    | 2005 | Female | 75 to 79 | 70%<br>(60-78%)                | 30%<br>(22-40%)          | 1.1<br>(0.69-1.6)                           | -0.48%<br>(-1.5-0.71%)               | -0.042%<br>(-1.4-1.5%)              | -26<br>(-860-890)     | -6900<br>(-21000-9900)   |
| Japan    | 2005 | Female | 80 to 84 | 71%<br>(59-81%)                | 29%<br>(19-41%)          | 1.2<br>(0.82-1.7)                           | -0.85%<br>(-2-0.37%)                 | -0.81%<br>(-2.3-0.78%)              | -700<br>(-2000-670)   | -12000<br>(-27000-5300)  |
| Japan    | 2005 | Female | 85 to 89 | 70%<br>(59-79%)                | 30%<br>(21-41%)          | 1.3<br>(0.87-1.8)                           | -0.76%<br>(-2-0.61%)                 | -0.83%<br>(-2.4-0.86%)              | -800<br>(-2300-820)   | -7700<br>(-20000-6300)   |
| Japan    | 2005 | Female | 90 to 94 | 71%<br>(60-79%)                | 29%<br>(21-40%)          | 1.4<br>(0.89-2)                             | -0.7%<br>(-2.1-1%)                   | -0.88%<br>(-2.6-1.2%)               | -750<br>(-2300-1000)  | -4200<br>(-13000-5800)   |

| Location | Year | Sex    | Age      | Prevalence of current drinkers | Prevalence of abstainers | Population average of standard drinks daily | Percent of total attributable deaths | Percent of total attributable DALYs | Attributable deaths   | Attributable DALYs        |
|----------|------|--------|----------|--------------------------------|--------------------------|---------------------------------------------|--------------------------------------|-------------------------------------|-----------------------|---------------------------|
| Japan    | 2005 | Female | 95 plus  | 71%<br>(57-82%)                | 29%<br>(18-43%)          | 1.5<br>(0.84-2.3)                           | -0.54%<br>(-2.4-1.8%)                | -0.78%<br>(-3-2.1%)                 | -380<br>(-1500-1000)  | -1100<br>(-5000-3700)     |
| Japan    | 2005 | Male   | All Ages | 91%<br>(89-92%)                | 9.4%<br>(7.7-11%)        | 1.8<br>(1.8-1.9)                            | 3%<br>(1.7-4.2%)                     | 2.5%<br>(1-3.9%)                    | 14000<br>(6000-23000) | 520000<br>(300000-710000) |
| Japan    | 2005 | Male   | 15 to 19 | 83%<br>(75-90%)                | 17%<br>(10-25%)          | 1.1<br>(0.68-1.7)                           | 2.8%<br>(1.3-4.3%)                   | 7%<br>(2.3-12%)                     | 88<br>(29-150)        | 8700<br>(4200-13000)      |
| Japan    | 2005 | Male   | 20 to 24 | 91%<br>(85-95%)                | 9.1%<br>(5.3-15%)        | 2.2<br>(1.5-3)                              | 6.3%<br>(3.4-9.5%)                   | 12%<br>(5.1-20%)                    | 290<br>(120-460)      | 26000<br>(14000-38000)    |
| Japan    | 2005 | Male   | 25 to 29 | 93%<br>(89-96%)                | 7%<br>(4.1-11%)          | 2.6<br>(1.8-3.5)                            | 6.7%<br>(3.5-9.8%)                   | 14%<br>(5.4-22%)                    | 390<br>(150-620)      | 33000<br>(17000-48000)    |
| Japan    | 2005 | Male   | 30 to 34 | 94%<br>(90-97%)                | 5.8%<br>(3-10%)          | 2.7<br>(1.9-3.6)                            | 6%<br>(3-8.9%)                       | 12%<br>(4.3-20%)                    | 490<br>(170-790)      | 37000<br>(20000-56000)    |
| Japan    | 2005 | Male   | 35 to 39 | 95%<br>(92-97%)                | 4.8%<br>(2.6-8%)         | 2.5<br>(1.7-3.4)                            | 5.3%<br>(2.7-8.1%)                   | 11%<br>(4.1-17%)                    | 520<br>(200-840)      | 34000<br>(17000-52000)    |
| Japan    | 2005 | Male   | 40 to 44 | 96%<br>(92-98%)                | 4.5%<br>(2.4-7.6%)       | 2.4<br>(1.7-3.3)                            | 5.1%<br>(2.4-7.7%)                   | 9.5%<br>(3.9-15%)                   | 650<br>(270-1000)     | 36000<br>(17000-54000)    |
| Japan    | 2005 | Male   | 45 to 49 | 95%<br>(92-98%)                | 4.7%<br>(2.5-8.3%)       | 2.5<br>(1.7-3.4)                            | 5.4%<br>(2.7-8.2%)                   | 9.1%<br>(4.3-14%)                   | 970<br>(450-1400)     | 45000<br>(23000-65000)    |
| Japan    | 2005 | Male   | 50 to 54 | 94%<br>(91-97%)                | 5.6%<br>(3.2-9.1%)       | 2.4<br>(1.6-3.2)                            | 5%<br>(2.6-7.4%)                     | 7.8%<br>(3.9-12%)                   | 1500<br>(760-2200)    | 60000<br>(31000-88000)    |
| Japan    | 2005 | Male   | 55 to 59 | 93%<br>(89-96%)                | 7.1%<br>(4-11%)          | 2.2<br>(1.6-2.9)                            | 4.2%<br>(2.3-6.2%)                   | 6.2%<br>(3.4-9.1%)                  | 2100<br>(1200-3200)   | 72000<br>(40000-110000)   |
| Japan    | 2005 | Male   | 60 to 64 | 91%<br>(86-95%)                | 8.7%<br>(4.9-14%)        | 2<br>(1.3-2.8)                              | 3.4%<br>(1.7-5.3%)                   | 4.8%<br>(2.6-7.4%)                  | 2100<br>(1100-3200)   | 59000<br>(31000-92000)    |
| Japan    | 2005 | Male   | 65 to 69 | 89%<br>(83-94%)                | 11%<br>(6.2-17%)         | 1.8<br>(1.3-2.4)                            | 2.5%<br>(1.3-3.9%)                   | 3.6%<br>(1.9-5.4%)                  | 2000<br>(1100-3000)   | 46000<br>(24000-71000)    |
| Japan    | 2005 | Male   | 70 to 74 | 88%<br>(81-93%)                | 12%<br>(7.2-19%)         | 1.7<br>(1.1-2.3)                            | 1.8%<br>(0.58-3.2%)                  | 2.4%<br>(0.89-4.1%)                 | 1900<br>(710-3300)    | 36000<br>(12000-63000)    |
| Japan    | 2005 | Male   | 75 to 79 | 88%<br>(81-93%)                | 12%<br>(6.9-19%)         | 1.5<br>(0.94-2.1)                           | 1%<br>(-0.15-2.4%)                   | 1.3%<br>(-0.18-2.9%)                | 1300<br>(-180-2900)   | 19000<br>(-2800-45000)    |
| Japan    | 2005 | Male   | 80 to 84 | 88%<br>(80-93%)                | 12%<br>(6.6-20%)         | 1.3<br>(0.88-1.8)                           | 0.46%<br>(-0.84-1.6%)                | 0.49%<br>(-0.88-1.9%)               | 440<br>(-800-1800)    | 5600<br>(-7900-20000)     |
| Japan    | 2005 | Male   | 85 to 89 | 87%<br>(80-93%)                | 13%<br>(7.2-20%)         | 1.2<br>(0.8-1.6)                            | 0.09%<br>(-1-1.3%)                   | -0.06%<br>(-1.4-1.4%)               | -42<br>(-980-940)     | 590<br>(-6800-8300)       |
| Japan    | 2005 | Male   | 90 to 94 | 88%<br>(81-93%)                | 12%<br>(7-19%)           | 1.1<br>(0.7-1.6)                            | -0.18%<br>(-1.3-1%)                  | -0.48%<br>(-1.9-1%)                 | -210<br>(-810-440)    | -480<br>(-3700-2900)      |
| Japan    | 2005 | Male   | 95 plus  | 89%<br>(80-95%)                | 11%<br>(5.4-20%)         | 1<br>(0.56-1.6)                             | -0.34%<br>(-1.6-1%)                  | -0.81%<br>(-2.4-0.92%)              | -120<br>(-350-130)    | -210<br>(-970-630)        |
| Japan    | 2010 | Female | All Ages | 77%<br>(74-81%)                | 23%<br>(19-26%)          | 1.8<br>(1.7-2)                              | 0.86%<br>(0.16-1.6%)                 | 0.37%<br>(-0.87-1.8%)               | 2100<br>(-5000-10000) | 130000<br>(24000-240000)  |
| Japan    | 2010 | Female | 15 to 19 | 77%<br>(67-84%)                | 23%<br>(16-33%)          | 1.9<br>(1.2-2.7)                            | 1.6%<br>(0.74-2.7%)                  | 9%<br>(3.3-15%)                     | 45<br>(17-74)         | 4300<br>(2000-6800)       |
| Japan    | 2010 | Female | 20 to 24 | 87%<br>(79-92%)                | 13%<br>(8.4-21%)         | 3<br>(2-4.3)                                | 3.2%<br>(1.5-5.2%)                   | 15%<br>(6.4-24%)                    | 130<br>(54-200)       | 11000<br>(5400-16000)     |

| Location | Year | Sex    | Age      | Prevalence of current drinkers | Prevalence of abstainers | Population average of standard drinks daily | Percent of total attributable deaths | Percent of total attributable DALYs | Attributable deaths   | Attributable DALYs        |
|----------|------|--------|----------|--------------------------------|--------------------------|---------------------------------------------|--------------------------------------|-------------------------------------|-----------------------|---------------------------|
| Japan    | 2010 | Female | 25 to 29 | 90%<br>(85-94%)                | 10%<br>(6.2-15%)         | 3.1<br>(2.2-4.2)                            | 3%<br>(1.4-4.7%)                     | 15%<br>(6.3-22%)                    | 160<br>(70-250)       | 13000<br>(6000-19000)     |
| Japan    | 2010 | Female | 30 to 34 | 91%<br>(86-95%)                | 8.6%<br>(4.8-14%)        | 3<br>(2.1-4.1)                              | 2.6%<br>(1.2-4.1%)                   | 13%<br>(6.1-19%)                    | 210<br>(100-320)      | 14000<br>(6900-22000)     |
| Japan    | 2010 | Female | 35 to 39 | 91%<br>(86-95%)                | 8.9%<br>(5.1-14%)        | 2.7<br>(1.9-3.7)                            | 2.4%<br>(1.1-3.9%)                   | 11%<br>(5.8-16%)                    | 300<br>(160-430)      | 17000<br>(7900-26000)     |
| Japan    | 2010 | Female | 40 to 44 | 89%<br>(84-94%)                | 11%<br>(6.5-16%)         | 2.6<br>(1.7-3.5)                            | 2.4%<br>(0.94-4%)                    | 9.9%<br>(5.4-14%)                   | 360<br>(200-510)      | 17000<br>(7100-27000)     |
| Japan    | 2010 | Female | 45 to 49 | 87%<br>(79-92%)                | 13%<br>(7.9-21%)         | 2.4<br>(1.6-3.4)                            | 2.6%<br>(1.1-4.3%)                   | 8.9%<br>(5.2-13%)                   | 450<br>(270-640)      | 18000<br>(8400-29000)     |
| Japan    | 2010 | Female | 50 to 54 | 82%<br>(75-88%)                | 18%<br>(12-25%)          | 2.2<br>(1.5-3.1)                            | 2.5%<br>(0.98-4.3%)                  | 7.7%<br>(4.6-11%)                   | 570<br>(340-820)      | 20000<br>(8000-32000)     |
| Japan    | 2010 | Female | 55 to 59 | 77%<br>(68-86%)                | 23%<br>(14-32%)          | 2<br>(1.4-2.7)                              | 2.1%<br>(0.75-3.6%)                  | 6.1%<br>(3.8-8.7%)                  | 750<br>(460-1100)     | 21000<br>(8200-35000)     |
| Japan    | 2010 | Female | 60 to 64 | 73%<br>(63-81%)                | 27%<br>(19-37%)          | 1.8<br>(1.2-2.5)                            | 1.4%<br>(0.11-2.9%)                  | 4.2%<br>(2.2-6.5%)                  | 850<br>(440-1300)     | 18000<br>(1500-36000)     |
| Japan    | 2010 | Female | 65 to 69 | 68%<br>(58-78%)                | 32%<br>(22-42%)          | 1.5<br>(1.1-2)                              | 0.65%<br>(-0.28-1.7%)                | 2.6%<br>(1.2-4.1%)                  | 660<br>(300-1000)     | 8200<br>(-3600-21000)     |
| Japan    | 2010 | Female | 70 to 74 | 68%<br>(57-76%)                | 32%<br>(24-43%)          | 1.3<br>(0.84-1.7)                           | 0.15%<br>(-0.8-1.2%)                 | 1.4%<br>(0.094-2.8%)                | 510<br>(35-1000)      | 2000<br>(-11000-16000)    |
| Japan    | 2010 | Female | 75 to 79 | 70%<br>(60-79%)                | 30%<br>(21-40%)          | 1.2<br>(0.74-1.7)                           | -0.27%<br>(-1.2-0.84%)               | 0.36%<br>(-0.89-1.8%)               | 220<br>(-550-1100)    | -4100<br>(-18000-13000)   |
| Japan    | 2010 | Female | 80 to 84 | 71%<br>(59-81%)                | 29%<br>(19-41%)          | 1.2<br>(0.83-1.7)                           | -0.69%<br>(-1.7-0.45%)               | -0.55%<br>(-1.9-0.86%)              | -510<br>(-1800-810)   | -11000<br>(-27000-6800)   |
| Japan    | 2010 | Female | 85 to 89 | 70%<br>(59-79%)                | 30%<br>(21-41%)          | 1.3<br>(0.83-1.8)                           | -0.67%<br>(-1.8-0.54%)               | -0.67%<br>(-2-0.82%)                | -800<br>(-2400-980)   | -8800<br>(-23000-7000)    |
| Japan    | 2010 | Female | 90 to 94 | 71%<br>(60-79%)                | 29%<br>(21-40%)          | 1.3<br>(0.83-1.9)                           | -0.77%<br>(-2-0.7%)                  | -0.92%<br>(-2.4-0.88%)              | -960<br>(-2500-920)   | -5700<br>(-15000-5100)    |
| Japan    | 2010 | Female | 95 plus  | 71%<br>(58-82%)                | 29%<br>(18-42%)          | 1.3<br>(0.73-2.1)                           | -0.82%<br>(-2.5-1.2%)                | -1.1%<br>(-3-1.4%)                  | -820<br>(-2300-1000)  | -2600<br>(-7900-4000)     |
| Japan    | 2010 | Male   | All Ages | 89%<br>(87-91%)                | 11%<br>(8.7-13%)         | 1.7<br>(1.6-1.9)                            | 2.7%<br>(1.5-3.7%)                   | 2.1%<br>(0.81-3.4%)                 | 14000<br>(5200-22000) | 470000<br>(270000-650000) |
| Japan    | 2010 | Male   | 15 to 19 | 80%<br>(70-88%)                | 20%<br>(12-30%)          | 1<br>(0.62-1.5)                             | 2.4%<br>(1.1-3.9%)                   | 6.4%<br>(1.7-12%)                   | 64<br>(17-120)        | 6800<br>(3300-11000)      |
| Japan    | 2010 | Male   | 20 to 24 | 89%<br>(81-94%)                | 11%<br>(6.3-19%)         | 2<br>(1.4-2.8)                              | 6.1%<br>(3.1-9.4%)                   | 12%<br>(4.2-20%)                    | 240<br>(81-400)       | 22000<br>(11000-33000)    |
| Japan    | 2010 | Male   | 25 to 29 | 92%<br>(86-95%)                | 8.4%<br>(4.7-14%)        | 2.5<br>(1.7-3.4)                            | 6.4%<br>(3.2-9.7%)                   | 14%<br>(4.5-22%)                    | 320<br>(110-520)      | 27000<br>(14000-40000)    |
| Japan    | 2010 | Male   | 30 to 34 | 93%<br>(88-97%)                | 6.7%<br>(3.4-12%)        | 2.6<br>(1.8-3.5)                            | 5.7%<br>(2.8-8.6%)                   | 12%<br>(4-20%)                      | 390<br>(130-640)      | 31000<br>(15000-46000)    |
| Japan    | 2010 | Male   | 35 to 39 | 94%<br>(90-97%)                | 5.6%<br>(3-9.6%)         | 2.4<br>(1.6-3.3)                            | 4.9%<br>(2.4-7.6%)                   | 10%<br>(3.6-17%)                    | 510<br>(180-850)      | 35000<br>(17000-52000)    |
| Japan    | 2010 | Male   | 40 to 44 | 95%<br>(91-97%)                | 5.2%<br>(2.7-9.1%)       | 2.3<br>(1.6-3.2)                            | 4.7%<br>(2.2-7.2%)                   | 9.2%<br>(3.5-15%)                   | 620<br>(240-1000)     | 35000<br>(17000-53000)    |

| Location | Year | Sex    | Age      | Prevalence of current drinkers | Prevalence of abstainers | Population average of standard drinks daily | Percent of total attributable deaths | Percent of total attributable DALYs | Attributable deaths   | Attributable DALYs       |
|----------|------|--------|----------|--------------------------------|--------------------------|---------------------------------------------|--------------------------------------|-------------------------------------|-----------------------|--------------------------|
| Japan    | 2010 | Male   | 45 to 49 | 95%<br>(90-97%)                | 5.5%<br>(2.8-10%)        | 2.4<br>(1.6-3.3)                            | 4.9%<br>(2.4-7.6%)                   | 8.8%<br>(3.9-13%)                   | 850<br>(380-1300)     | 40000<br>(20000-60000)   |
| Japan    | 2010 | Male   | 50 to 54 | 94%<br>(89-96%)                | 6.4%<br>(3.6-11%)        | 2.3<br>(1.6-3.2)                            | 4.6%<br>(2.4-7%)                     | 7.6%<br>(3.8-11%)                   | 1100<br>(570-1700)    | 45000<br>(23000-68000)   |
| Japan    | 2010 | Male   | 55 to 59 | 92%<br>(87-96%)                | 8%<br>(4.5-13%)          | 2.1<br>(1.5-2.8)                            | 3.8%<br>(2.1-5.7%)                   | 5.9%<br>(3.3-8.7%)                  | 1600<br>(880-2300)    | 54000<br>(30000-81000)   |
| Japan    | 2010 | Male   | 60 to 64 | 90%<br>(84-94%)                | 9.8%<br>(5.7-16%)        | 1.9<br>(1.3-2.6)                            | 3.1%<br>(1.6-4.8%)                   | 4.5%<br>(2.4-6.9%)                  | 2100<br>(1100-3300)   | 61000<br>(31000-95000)   |
| Japan    | 2010 | Male   | 65 to 69 | 88%<br>(81-93%)                | 12%<br>(6.9-19%)         | 1.8<br>(1.3-2.3)                            | 2.4%<br>(1.3-3.7%)                   | 3.5%<br>(2-5.2%)                    | 2000<br>(1100-3000)   | 48000<br>(25000-72000)   |
| Japan    | 2010 | Male   | 70 to 74 | 87%<br>(80-92%)                | 13%<br>(7.5-20%)         | 1.6<br>(1.1-2.2)                            | 1.8%<br>(0.67-3.1%)                  | 2.5%<br>(1.1-4.1%)                  | 1900<br>(820-3100)    | 35000<br>(13000-60000)   |
| Japan    | 2010 | Male   | 75 to 79 | 88%<br>(82-93%)                | 12%<br>(6.8-18%)         | 1.5<br>(0.96-2.1)                           | 1.1%<br>(0.013-2.4%)                 | 1.4%<br>(0.069-3%)                  | 1500<br>(72-3100)     | 23000<br>(270-48000)     |
| Japan    | 2010 | Male   | 80 to 84 | 88%<br>(80-94%)                | 12%<br>(6.3-20%)         | 1.3<br>(0.88-1.8)                           | 0.49%<br>(-0.54-1.5%)                | 0.56%<br>(-0.7-1.9%)                | 680<br>(-850-2300)    | 8100<br>(-9000-26000)    |
| Japan    | 2010 | Male   | 85 to 89 | 88%<br>(80-93%)                | 12%<br>(7-20%)           | 1.1<br>(0.76-1.6)                           | 0.081%<br>(-0.93-1.2%)               | -0.02%<br>(-1.3-1.3%)               | -18<br>(-1200-1200)   | 710<br>(-8200-10000)     |
| Japan    | 2010 | Male   | 90 to 94 | 88%<br>(81-93%)                | 12%<br>(6.8-19%)         | 1<br>(0.65-1.5)                             | -0.23%<br>(-1.2-0.86%)               | -0.48%<br>(-1.8-0.88%)              | -230<br>(-870-430)    | -720<br>(-4000-2700)     |
| Japan    | 2010 | Male   | 95 plus  | 89%<br>(81-95%)                | 11%<br>(5.2-19%)         | 0.89<br>(0.48-1.4)                          | -0.4%<br>(-1.5-0.81%)                | -0.78%<br>(-2.3-0.67%)              | -160<br>(-470-140)    | -350<br>(-1300-710)      |
| Japan    | 2016 | Female | All Ages | 77%<br>(73-80%)                | 23%<br>(20-27%)          | 1.9<br>(1.5-2.3)                            | 0.86%<br>(0.062-1.8%)                | 0.36%<br>(-1-2%)                    | 2400<br>(-6800-13000) | 140000<br>(10000-270000) |
| Japan    | 2016 | Female | 15 to 19 | 77%<br>(67-85%)                | 23%<br>(15-33%)          | 1.9<br>(1.2-3)                              | 1.5%<br>(0.72-2.4%)                  | 9.2%<br>(3.6-15%)                   | 37<br>(15-61)         | 3800<br>(1900-6100)      |
| Japan    | 2016 | Female | 20 to 24 | 87%<br>(79-92%)                | 13%<br>(8.1-21%)         | 3.1<br>(2-4.7)                              | 2.9%<br>(1.4-4.6%)                   | 16%<br>(6.5-25%)                    | 100<br>(43-170)       | 9300<br>(4800-14000)     |
| Japan    | 2016 | Female | 25 to 29 | 90%<br>(84-94%)                | 10%<br>(6.2-16%)         | 3.2<br>(2.1-4.7)                            | 2.8%<br>(1.3-4.4%)                   | 15%<br>(6.2-24%)                    | 130<br>(51-200)       | 10000<br>(5000-16000)    |
| Japan    | 2016 | Female | 30 to 34 | 91%<br>(87-95%)                | 8.5%<br>(4.9-13%)        | 3.1<br>(2-4.5)                              | 2.5%<br>(1.2-4%)                     | 13%<br>(5.8-21%)                    | 160<br>(70-260)       | 12000<br>(5700-18000)    |
| Japan    | 2016 | Female | 35 to 39 | 91%<br>(86-95%)                | 8.8%<br>(5-14%)          | 2.8<br>(1.9-4)                              | 2.4%<br>(1.1-3.8%)                   | 11%<br>(6-17%)                      | 220<br>(120-330)      | 14000<br>(6300-21000)    |
| Japan    | 2016 | Female | 40 to 44 | 89%<br>(84-93%)                | 11%<br>(6.6-16%)         | 2.7<br>(1.7-3.9)                            | 2.4%<br>(1-4%)                       | 10%<br>(5.6-15%)                    | 380<br>(210-550)      | 19000<br>(8400-30000)    |
| Japan    | 2016 | Female | 45 to 49 | 86%<br>(78-92%)                | 14%<br>(8-22%)           | 2.5<br>(1.7-3.7)                            | 2.6%<br>(1.2-4.3%)                   | 9.2%<br>(5.2-13%)                   | 470<br>(270-690)      | 20000<br>(9200-32000)    |
| Japan    | 2016 | Female | 50 to 54 | 82%<br>(74-88%)                | 18%<br>(12-26%)          | 2.3<br>(1.5-3.4)                            | 2.6%<br>(1.1-4.4%)                   | 8%<br>(4.7-12%)                     | 550<br>(320-800)      | 20000<br>(8800-33000)    |
| Japan    | 2016 | Female | 55 to 59 | 78%<br>(68-86%)                | 22%<br>(14-32%)          | 2.1<br>(1.4-3)                              | 2.2%<br>(0.86-3.9%)                  | 6.4%<br>(3.8-9.3%)                  | 600<br>(360-860)      | 18000<br>(7200-30000)    |
| Japan    | 2016 | Female | 60 to 64 | 73%<br>(63-81%)                | 27%<br>(19-37%)          | 1.9<br>(1.2-2.7)                            | 1.6%<br>(0.28-3.2%)                  | 4.4%<br>(2.2-7.1%)                  | 710<br>(350-1100)     | 17000<br>(3100-33000)    |

| Location | Year | Sex    | Age      | Prevalence of current drinkers | Prevalence of abstainers | Population average of standard drinks daily | Percent of total attributable deaths | Percent of total attributable DALYs | Attributable deaths   | Attributable DALYs        |
|----------|------|--------|----------|--------------------------------|--------------------------|---------------------------------------------|--------------------------------------|-------------------------------------|-----------------------|---------------------------|
| Japan    | 2016 | Female | 65 to 69 | 68%<br>(57-78%)                | 32%<br>(22-43%)          | 1.5<br>(1.1-2.1)                            | 0.85%<br>(-0.11-2%)                  | 2.8%<br>(1.3-4.3%)                  | 760<br>(350-1200)     | 12000<br>(-1700-27000)    |
| Japan    | 2016 | Female | 70 to 74 | 67%<br>(55-76%)                | 33%<br>(24-45%)          | 1.3<br>(0.83-1.8)                           | 0.31%<br>(-0.6-1.4%)                 | 1.5%<br>(0.2-2.9%)                  | 590<br>(79-1200)      | 4600<br>(-9500-20000)     |
| Japan    | 2016 | Female | 75 to 79 | 70%<br>(60-78%)                | 30%<br>(22-40%)          | 1.2<br>(0.71-1.8)                           | -0.094%<br>(-1-1.1%)                 | 0.54%<br>(-0.75-2%)                 | 310<br>(-440-1200)    | -1500<br>(-16000-16000)   |
| Japan    | 2016 | Female | 80 to 84 | 71%<br>(59-81%)                | 29%<br>(19-41%)          | 1.3<br>(0.8-1.8)                            | -0.48%<br>(-1.5-0.66%)               | -0.34%<br>(-1.7-1.2%)               | -340<br>(-1700-1200)  | -8200<br>(-26000-11000)   |
| Japan    | 2016 | Female | 85 to 89 | 70%<br>(59-79%)                | 30%<br>(21-41%)          | 1.3<br>(0.85-1.9)                           | -0.44%<br>(-1.5-0.84%)               | -0.43%<br>(-1.9-1.2%)               | -620<br>(-2600-1600)  | -7100<br>(-24000-13000)   |
| Japan    | 2016 | Female | 90 to 94 | 71%<br>(60-79%)                | 29%<br>(21-40%)          | 1.4<br>(0.85-2.1)                           | -0.51%<br>(-1.8-1.1%)                | -0.66%<br>(-2.2-1.3%)               | -940<br>(-3100-1800)  | -5200<br>(-18000-12000)   |
| Japan    | 2016 | Female | 95 plus  | 71%<br>(57-82%)                | 29%<br>(18-43%)          | 1.4<br>(0.75-2.4)                           | -0.51%<br>(-2.3-1.9%)                | -0.75%<br>(-2.8-2.2%)               | -750<br>(-2800-2100)  | -2100<br>(-9400-7600)     |
| Japan    | 2016 | Male   | All Ages | 89%<br>(87-91%)                | 11%<br>(8.7-13%)         | 1.8<br>(1.4-2.1)                            | 2.5%<br>(1.5-3.6%)                   | 2%<br>(0.63-3.3%)                   | 14000<br>(4300-22000) | 450000<br>(260000-630000) |
| Japan    | 2016 | Male   | 15 to 19 | 80%<br>(69-88%)                | 20%<br>(12-31%)          | 1<br>(0.59-1.6)                             | 2.2%<br>(1.1-3.6%)                   | 6.4%<br>(1.6-12%)                   | 52<br>(13-97)         | 5900<br>(2900-9400)       |
| Japan    | 2016 | Male   | 20 to 24 | 89%<br>(81-94%)                | 11%<br>(6.4-19%)         | 2.1<br>(1.3-3.1)                            | 5.8%<br>(2.8-8.9%)                   | 12%<br>(3.7-21%)                    | 190<br>(57-320)       | 18000<br>(9100-28000)     |
| Japan    | 2016 | Male   | 25 to 29 | 92%<br>(86-95%)                | 8.4%<br>(4.8-14%)        | 2.5<br>(1.6-3.7)                            | 6.2%<br>(3.2-9.5%)                   | 14%<br>(4.5-23%)                    | 250<br>(78-410)       | 22000<br>(11000-33000)    |
| Japan    | 2016 | Male   | 30 to 34 | 93%<br>(87-97%)                | 6.8%<br>(3.4-13%)        | 2.6<br>(1.7-3.8)                            | 5.6%<br>(2.8-8.3%)                   | 13%<br>(4.2-21%)                    | 300<br>(97-490)       | 24000<br>(12000-37000)    |
| Japan    | 2016 | Male   | 35 to 39 | 94%<br>(90-97%)                | 5.6%<br>(2.9-9.6%)       | 2.4<br>(1.6-3.4)                            | 4.8%<br>(2.3-7.2%)                   | 11%<br>(3.5-18%)                    | 370<br>(120-610)      | 27000<br>(13000-40000)    |
| Japan    | 2016 | Male   | 40 to 44 | 95%<br>(91-97%)                | 5.2%<br>(2.7-8.8%)       | 2.4<br>(1.5-3.4)                            | 4.5%<br>(2.1-7.1%)                   | 9.5%<br>(3.3-15%)                   | 630<br>(210-1000)     | 37000<br>(18000-56000)    |
| Japan    | 2016 | Male   | 45 to 49 | 95%<br>(90-97%)                | 5.4%<br>(2.8-10%)        | 2.5<br>(1.6-3.5)                            | 4.8%<br>(2.4-7.4%)                   | 9.2%<br>(4-14%)                     | 830<br>(370-1300)     | 41000<br>(21000-61000)    |
| Japan    | 2016 | Male   | 50 to 54 | 94%<br>(89-96%)                | 6.4%<br>(3.6-11%)        | 2.4<br>(1.5-3.4)                            | 4.6%<br>(2.4-7%)                     | 8%<br>(4.1-12%)                     | 1000<br>(520-1500)    | 42000<br>(23000-63000)    |
| Japan    | 2016 | Male   | 55 to 59 | 92%<br>(86-96%)                | 8%<br>(4.3-14%)          | 2.1<br>(1.4-3)                              | 3.9%<br>(2.3-5.9%)                   | 6.3%<br>(3.6-9.3%)                  | 1200<br>(690-1800)    | 42000<br>(24000-62000)    |
| Japan    | 2016 | Male   | 60 to 64 | 90%<br>(84-94%)                | 9.9%<br>(5.6-16%)        | 1.9<br>(1.2-2.8)                            | 3.3%<br>(1.8-5.2%)                   | 5%<br>(2.9-7.5%)                    | 1800<br>(1000-2600)   | 51000<br>(29000-78000)    |
| Japan    | 2016 | Male   | 65 to 69 | 88%<br>(81-93%)                | 12%<br>(6.8-19%)         | 1.8<br>(1.3-2.5)                            | 2.6%<br>(1.4-3.9%)                   | 3.9%<br>(2.2-5.6%)                  | 2400<br>(1400-3400)   | 56000<br>(31000-83000)    |
| Japan    | 2016 | Male   | 70 to 74 | 87%<br>(80-93%)                | 13%<br>(7.4-20%)         | 1.7<br>(1.1-2.4)                            | 2%<br>(0.81-3.2%)                    | 2.8%<br>(1.2-4.4%)                  | 2200<br>(970-3400)    | 42000<br>(17000-69000)    |
| Japan    | 2016 | Male   | 75 to 79 | 88%<br>(81-93%)                | 12%<br>(6.9-19%)         | 1.5<br>(0.95-2.2)                           | 1.3%<br>(0.2-2.5%)                   | 1.7%<br>(0.3-3.3%)                  | 1700<br>(290-3300)    | 26000<br>(4100-52000)     |
| Japan    | 2016 | Male   | 80 to 84 | 88%<br>(80-94%)                | 12%<br>(6.4-20%)         | 1.3<br>(0.87-1.8)                           | 0.63%<br>(-0.37-1.7%)                | 0.73%<br>(-0.51-2.1%)               | 970<br>(-660-2700)    | 12000<br>(-6800-32000)    |



| Location    | Year | Sex    | Age      | Prevalence of current drinkers | Prevalence of abstainers | Population average of standard drinks daily | Percent of total attributable deaths | Percent of total attributable DALYs | Attributable deaths   | Attributable DALYs        |
|-------------|------|--------|----------|--------------------------------|--------------------------|---------------------------------------------|--------------------------------------|-------------------------------------|-----------------------|---------------------------|
| Japan       | 2016 | Male   | 85 to 89 | 88%<br>(80-93%)                | 12%<br>(7.2-20%)         | 1.1<br>(0.75-1.6)                           | 0.2%<br>(-0.81-1.3%)                 | 0.11%<br>(-1.1-1.5%)                | 140<br>(-1400-1900)   | 2600<br>(-10000-16000)    |
| Japan       | 2016 | Male   | 90 to 94 | 88%<br>(81-93%)                | 12%<br>(7.1-19%)         | 0.99<br>(0.61-1.5)                          | -0.12%<br>(-1.1-0.95%)               | -0.38%<br>(-1.6-0.97%)              | -250<br>(-1100-650)   | -530<br>(-4900-4100)      |
| Japan       | 2016 | Male   | 95 plus  | 89%<br>(80-95%)                | 11%<br>(5.4-20%)         | 0.87<br>(0.45-1.5)                          | -0.31%<br>(-1.4-0.85%)               | -0.71%<br>(-2.1-0.77%)              | -170<br>(-520-190)    | -320<br>(-1400-860)       |
| South Korea | 1990 | Female | All Ages | 76%<br>(70-82%)                | 24%<br>(18-30%)          | 1.9<br>(1.7-2.2)                            | 2.9%<br>(1.5-4.5%)                   | 1.9%<br>(-0.78-5%)                  | 1900<br>(-700-4900)   | 140000<br>(71000-210000)  |
| South Korea | 1990 | Female | 15 to 19 | 70%<br>(54-84%)                | 30%<br>(16-46%)          | 1.7<br>(1-2.6)                              | 3.3%<br>(1.8-5%)                     | 7.7%<br>(3.5-13%)                   | 85<br>(38-140)        | 8500<br>(4600-13000)      |
| South Korea | 1990 | Female | 20 to 24 | 81%<br>(69-90%)                | 19%<br>(10-31%)          | 3<br>(2.1-4.2)                              | 6.3%<br>(4.3-8.7%)                   | 13%<br>(7.6-19%)                    | 190<br>(110-280)      | 19000<br>(13000-26000)    |
| South Korea | 1990 | Female | 25 to 29 | 85%<br>(75-92%)                | 15%<br>(7.7-25%)         | 3.2<br>(2.2-4.2)                            | 6%<br>(4.1-7.9%)                     | 13%<br>(8.5-18%)                    | 220<br>(130-310)      | 19000<br>(13000-26000)    |
| South Korea | 1990 | Female | 30 to 34 | 87%<br>(76-94%)                | 13%<br>(6.5-24%)         | 3.1<br>(2.1-4)                              | 5.5%<br>(3.7-7.6%)                   | 13%<br>(8.2-17%)                    | 250<br>(160-340)      | 19000<br>(13000-26000)    |
| South Korea | 1990 | Female | 35 to 39 | 87%<br>(78-94%)                | 13%<br>(6.3-22%)         | 2.9<br>(2-3.9)                              | 5.4%<br>(3.4-7.7%)                   | 12%<br>(7.5-17%)                    | 250<br>(150-360)      | 16000<br>(9800-22000)     |
| South Korea | 1990 | Female | 40 to 44 | 86%<br>(77-93%)                | 14%<br>(6.9-23%)         | 2.7<br>(1.7-3.8)                            | 5.6%<br>(3.1-8.2%)                   | 12%<br>(6.6-17%)                    | 280<br>(160-420)      | 15000<br>(8300-22000)     |
| South Korea | 1990 | Female | 45 to 49 | 85%<br>(72-93%)                | 15%<br>(7.4-28%)         | 2.6<br>(1.7-3.7)                            | 5.3%<br>(2.4-8.4%)                   | 9.8%<br>(4.6-15%)                   | 340<br>(160-530)      | 15000<br>(7000-24000)     |
| South Korea | 1990 | Female | 50 to 54 | 83%<br>(71-91%)                | 17%<br>(9.2-29%)         | 2.4<br>(1.5-3.5)                            | 5%<br>(1.7-8.6%)                     | 8.4%<br>(3.1-14%)                   | 400<br>(140-690)      | 15000<br>(5300-27000)     |
| South Korea | 1990 | Female | 55 to 59 | 80%<br>(66-90%)                | 20%<br>(10-34%)          | 2.3<br>(1.4-3.4)                            | 4.1%<br>(0.89-7.8%)                  | 6.7%<br>(1.7-12%)                   | 390<br>(99-730)       | 13000<br>(2600-24000)     |
| South Korea | 1990 | Female | 60 to 64 | 77%<br>(62-88%)                | 23%<br>(12-38%)          | 2<br>(1.2-3.2)                              | 2.4%<br>(-0.99-6.7%)                 | 3.7%<br>(-1-9.5%)                   | 270<br>(-72-690)      | 7100<br>(-2900-20000)     |
| South Korea | 1990 | Female | 65 to 69 | 75%<br>(58-87%)                | 25%<br>(13-42%)          | 1.7<br>(1.1-2.4)                            | 0.66%<br>(-2.3-4.4%)                 | 1.1%<br>(-2.8-6.1%)                 | 110<br>(-280-570)     | 2000<br>(-7100-13000)     |
| South Korea | 1990 | Female | 70 to 74 | 73%<br>(57-85%)                | 27%<br>(15-43%)          | 1.3<br>(0.81-2)                             | -0.8%<br>(-3.6-2.5%)                 | -0.86%<br>(-4.4-3.3%)               | -100<br>(-520-390)    | -2300<br>(-10000-6800)    |
| South Korea | 1990 | Female | 75 to 79 | 72%<br>(55-84%)                | 28%<br>(16-45%)          | 1.2<br>(0.7-1.9)                            | -1.7%<br>(-4.6-1.6%)                 | -2.1%<br>(-5.5-1.9%)                | -300<br>(-800-260)    | -4400<br>(-12000-3800)    |
| South Korea | 1990 | Female | 80 to 84 | 70%<br>(51-83%)                | 30%<br>(17-49%)          | 1.3<br>(0.77-1.9)                           | -1.7%<br>(-4.4-1.3%)                 | -2.1%<br>(-5.3-1.3%)                | -290<br>(-720-180)    | -3000<br>(-7500-2100)     |
| South Korea | 1990 | Female | 85 to 89 | 67%<br>(49-80%)                | 33%<br>(20-51%)          | 1.3<br>(0.77-2)                             | -1.4%<br>(-4-1.6%)                   | -1.8%<br>(-4.9-1.8%)                | -150<br>(-410-140)    | -1000<br>(-2900-1200)     |
| South Korea | 1990 | Female | 90 to 94 | 67%<br>(50-80%)                | 33%<br>(20-50%)          | 1.4<br>(0.81-2.2)                           | -1.1%<br>(-3.8-2%)                   | -1.6%<br>(-4.7-2.2%)                | -46<br>(-140-60)      | -200<br>(-660-340)        |
| South Korea | 1990 | Female | 95 plus  | 67%<br>(46-83%)                | 33%<br>(17-54%)          | 1.5<br>(0.76-2.5)                           | -0.79%<br>(-3.8-3%)                  | -1.3%<br>(-4.9-3.2%)                | -8.4<br>(-32-21)      | -21<br>(-100-80)          |
| South Korea | 1990 | Male   | All Ages | 89%<br>(85-93%)                | 11%<br>(7.4-15%)         | 1.9<br>(1.7-2.1)                            | 8.2%<br>(6.4-10%)                    | 8.1%<br>(5.4-11%)                   | 11000<br>(7200-15000) | 520000<br>(390000-660000) |

| Location    | Year | Sex    | Age      | Prevalence of current drinkers | Prevalence of abstainers | Population average of standard drinks daily | Percent of total attributable deaths | Percent of total attributable DALYs | Attributable deaths | Attributable DALYs       |
|-------------|------|--------|----------|--------------------------------|--------------------------|---------------------------------------------|--------------------------------------|-------------------------------------|---------------------|--------------------------|
| South Korea | 1990 | Male   | 15 to 19 | 83%<br>(71-91%)                | 17%<br>(8.5-29%)         | 1.4<br>(0.83-2)                             | 5.6%<br>(3-8.2%)                     | 7.7%<br>(3.2-12%)                   | 200<br>(81-320)     | 20000<br>(11000-29000)   |
| South Korea | 1990 | Male   | 20 to 24 | 91%<br>(83-96%)                | 9.4%<br>(4.4-17%)        | 2.5<br>(1.8-3.4)                            | 11%<br>(7.8-15%)                     | 14%<br>(7.7-21%)                    | 440<br>(240-680)    | 44000<br>(29000-60000)   |
| South Korea | 1990 | Male   | 25 to 29 | 93%<br>(88-97%)                | 6.8%<br>(3.3-12%)        | 2.9<br>(2.1-3.9)                            | 12%<br>(8.4-16%)                     | 15%<br>(8.5-21%)                    | 610<br>(350-890)    | 52000<br>(35000-71000)   |
| South Korea | 1990 | Male   | 30 to 34 | 95%<br>(89-98%)                | 5.5%<br>(2.4-11%)        | 3<br>(2.1-4.1)                              | 12%<br>(8.5-16%)                     | 15%<br>(9.4-21%)                    | 780<br>(480-1100)   | 57000<br>(39000-75000)   |
| South Korea | 1990 | Male   | 35 to 39 | 95%<br>(90-98%)                | 4.8%<br>(2.1-9.7%)       | 2.8<br>(2-3.9)                              | 12%<br>(9-16%)                       | 16%<br>(11-20%)                     | 890<br>(600-1200)   | 55000<br>(39000-70000)   |
| South Korea | 1990 | Male   | 40 to 44 | 96%<br>(91-98%)                | 4.5%<br>(1.9-9%)         | 2.8<br>(1.8-3.9)                            | 13%<br>(9.3-16%)                     | 16%<br>(11-20%)                     | 1100<br>(770-1400)  | 57000<br>(41000-74000)   |
| South Korea | 1990 | Male   | 45 to 49 | 96%<br>(91-98%)                | 4.4%<br>(2-9.2%)         | 2.8<br>(1.9-4)                              | 13%<br>(9.2-16%)                     | 15%<br>(11-20%)                     | 1500<br>(1000-1900) | 66000<br>(46000-85000)   |
| South Korea | 1990 | Male   | 50 to 54 | 95%<br>(90-98%)                | 4.7%<br>(2.2-9.6%)       | 2.8<br>(1.8-3.9)                            | 11%<br>(7.8-15%)                     | 13%<br>(9.2-18%)                    | 1700<br>(1100-2300) | 64000<br>(44000-87000)   |
| South Korea | 1990 | Male   | 55 to 59 | 95%<br>(90-98%)                | 5.3%<br>(2.3-10%)        | 2.6<br>(1.7-3.7)                            | 9%<br>(5.8-12%)                      | 11%<br>(6.7-15%)                    | 1300<br>(830-1900)  | 45000<br>(28000-64000)   |
| South Korea | 1990 | Male   | 60 to 64 | 94%<br>(88-97%)                | 5.8%<br>(2.5-12%)        | 2.4<br>(1.4-3.6)                            | 7.6%<br>(3.5-11%)                    | 7.6%<br>(3.9-12%)                   | 980<br>(490-1600)   | 28000<br>(14000-44000)   |
| South Korea | 1990 | Male   | 65 to 69 | 94%<br>(88-97%)                | 6.3%<br>(2.5-12%)        | 2.2<br>(1.5-3.1)                            | 4.9%<br>(1.8-8.3%)                   | 5.5%<br>(2-9.5%)                    | 830<br>(290-1400)   | 20000<br>(7200-34000)    |
| South Korea | 1990 | Male   | 70 to 74 | 93%<br>(87-97%)                | 7%<br>(3.3-13%)          | 2<br>(1.3-2.9)                              | 3.3%<br>(0.23-7.1%)                  | 3.6%<br>(0.095-7.9%)                | 540<br>(13-1200)    | 10000<br>(730-22000)     |
| South Korea | 1990 | Male   | 75 to 79 | 92%<br>(86-97%)                | 7.6%<br>(3.5-14%)        | 1.8<br>(1.1-2.7)                            | 1.9%<br>(-1.1-5.7%)                  | 1.9%<br>(-1.4-6.2%)                 | 240<br>(-180-780)   | 3800<br>(-2200-12000)    |
| South Korea | 1990 | Male   | 80 to 84 | 92%<br>(84-96%)                | 8.4%<br>(3.9-16%)        | 1.6<br>(1.1-2.4)                            | 0.84%<br>(-1.9-4%)                   | 0.7%<br>(-2.4-4.3%)                 | 59<br>(-200-360)    | 850<br>(-1900-4100)      |
| South Korea | 1990 | Male   | 85 to 89 | 91%<br>(83-95%)                | 9.4%<br>(4.6-17%)        | 1.5<br>(0.99-2.2)                           | 0.08%<br>(-2.3-2.6%)                 | -0.28%<br>(-3-2.5%)                 | -10<br>(-110-91)    | 25<br>(-740-800)         |
| South Korea | 1990 | Male   | 90 to 94 | 90%<br>(83-95%)                | 9.7%<br>(4.7-17%)        | 1.4<br>(0.87-2.2)                           | -0.48%<br>(-2.7-1.8%)                | -1.1%<br>(-3.8-1.6%)                | -11<br>(-37-16)     | -28<br>(-160-100)        |
| South Korea | 1990 | Male   | 95 plus  | 90%<br>(81-96%)                | 9.6%<br>(3.8-19%)        | 1.3<br>(0.73-2.2)                           | -0.77%<br>(-3.1-1.8%)                | -1.6%<br>(-4.4-1.5%)                | -3.2<br>(-8.8-3)    | -6.2<br>(-25-15)         |
| South Korea | 1995 | Female | All Ages | 77%<br>(70-82%)                | 23%<br>(18-30%)          | 2.2<br>(2-2.5)                              | 3.3%<br>(1.9-5%)                     | 2.9%<br>(0.068-6.1%)                | 3000<br>(71-6500)   | 150000<br>(87000-230000) |
| South Korea | 1995 | Female | 15 to 19 | 69%<br>(52-83%)                | 31%<br>(17-48%)          | 1.8<br>(1.1-2.8)                            | 3.4%<br>(2-5.2%)                     | 9.1%<br>(4.5-15%)                   | 75<br>(36-120)      | 7300<br>(4200-11000)     |
| South Korea | 1995 | Female | 20 to 24 | 81%<br>(67-90%)                | 19%<br>(10-33%)          | 3.3<br>(2.2-4.7)                            | 6%<br>(4.1-8.4%)                     | 15%<br>(8.6-21%)                    | 170<br>(93-240)     | 17000<br>(11000-23000)   |
| South Korea | 1995 | Female | 25 to 29 | 85%<br>(75-92%)                | 15%<br>(8-25%)           | 3.6<br>(2.5-4.9)                            | 6%<br>(4-8.1%)                       | 15%<br>(9.4-21%)                    | 190<br>(120-270)    | 18000<br>(12000-24000)   |
| South Korea | 1995 | Female | 30 to 34 | 87%<br>(76-93%)                | 13%<br>(6.6-24%)         | 3.5<br>(2.4-4.7)                            | 5.4%<br>(3.7-7.5%)                   | 14%<br>(9.3-19%)                    | 220<br>(140-310)    | 17000<br>(12000-23000)   |

| Location    | Year | Sex    | Age      | Prevalence of current drinkers | Prevalence of abstainers | Population average of standard drinks daily | Percent of total attributable deaths | Percent of total attributable DALYs | Attributable deaths   | Attributable DALYs        |
|-------------|------|--------|----------|--------------------------------|--------------------------|---------------------------------------------|--------------------------------------|-------------------------------------|-----------------------|---------------------------|
| South Korea | 1995 | Female | 35 to 39 | 87%<br>(77-94%)                | 13%<br>(6.4-23%)         | 3.1<br>(2.2-4.3)                            | 5.1%<br>(3.3-7.2%)                   | 13%<br>(8.4-17%)                    | 280<br>(180-390)      | 18000<br>(12000-25000)    |
| South Korea | 1995 | Female | 40 to 44 | 86%<br>(77-93%)                | 14%<br>(7.3-23%)         | 3<br>(1.9-4.1)                              | 5.1%<br>(2.9-7.4%)                   | 12%<br>(7.5-17%)                    | 280<br>(160-390)      | 15000<br>(8800-22000)     |
| South Korea | 1995 | Female | 45 to 49 | 85%<br>(71-92%)                | 15%<br>(7.7-29%)         | 2.9<br>(1.9-4.3)                            | 5.3%<br>(2.8-7.9%)                   | 11%<br>(6.4-16%)                    | 310<br>(170-450)      | 15000<br>(7800-22000)     |
| South Korea | 1995 | Female | 50 to 54 | 83%<br>(70-90%)                | 17%<br>(9.6-30%)         | 2.8<br>(1.7-4)                              | 5.5%<br>(2.4-8.9%)                   | 10%<br>(5-15%)                      | 390<br>(190-600)      | 15000<br>(6800-24000)     |
| South Korea | 1995 | Female | 55 to 59 | 80%<br>(66-90%)                | 20%<br>(10-34%)          | 2.5<br>(1.6-3.7)                            | 4.5%<br>(1.4-8.1%)                   | 7.8%<br>(2.9-13%)                   | 430<br>(160-730)      | 14000<br>(4300-25000)     |
| South Korea | 1995 | Female | 60 to 64 | 77%<br>(62-88%)                | 23%<br>(12-38%)          | 2.2<br>(1.3-3.5)                            | 3%<br>(-0.19-7.2%)                   | 4.9%<br>(0.37-11%)                  | 350<br>(27-770)       | 9600<br>(-620-23000)      |
| South Korea | 1995 | Female | 65 to 69 | 74%<br>(57-87%)                | 26%<br>(13-43%)          | 2<br>(1.3-2.9)                              | 2%<br>(-1.2-5.8%)                    | 3%<br>(-1.2-8.2%)                   | 290<br>(-110-740)     | 6300<br>(-3600-18000)     |
| South Korea | 1995 | Female | 70 to 74 | 72%<br>(55-85%)                | 28%<br>(15-45%)          | 1.8<br>(1.1-2.7)                            | 1.1%<br>(-2.1-5.3%)                  | 1.6%<br>(-2.6-6.7%)                 | 210<br>(-330-880)     | 3500<br>(-7000-17000)     |
| South Korea | 1995 | Female | 75 to 79 | 71%<br>(55-84%)                | 29%<br>(16-45%)          | 1.6<br>(0.95-2.6)                           | 0.16%<br>(-3.2-4.3%)                 | 0.23%<br>(-3.7-5.2%)                | 35<br>(-550-830)      | 430<br>(-8300-12000)      |
| South Korea | 1995 | Female | 80 to 84 | 69%<br>(51-83%)                | 31%<br>(17-49%)          | 1.5<br>(0.9-2.3)                            | -0.41%<br>(-3.1-2.9%)                | -0.53%<br>(-3.8-3.4%)               | -85<br>(-600-540)     | -850<br>(-6500-5900)      |
| South Korea | 1995 | Female | 85 to 89 | 67%<br>(49-80%)                | 33%<br>(20-51%)          | 1.4<br>(0.82-2.1)                           | -0.58%<br>(-3.1-2.5%)                | -0.8%<br>(-3.7-2.7%)                | -94<br>(-430-320)     | -620<br>(-3200-2600)      |
| South Korea | 1995 | Female | 90 to 94 | 66%<br>(49-80%)                | 34%<br>(20-51%)          | 1.3<br>(0.79-2.1)                           | -0.88%<br>(-3.3-2.1%)                | -1.2%<br>(-4-2.2%)                  | -60<br>(-200-110)     | -270<br>(-990-600)        |
| South Korea | 1995 | Female | 95 plus  | 67%<br>(46-83%)                | 33%<br>(17-54%)          | 1.3<br>(0.65-2.2)                           | -1.1%<br>(-3.5-2.2%)                 | -1.5%<br>(-4.5-2.3%)                | -16<br>(-48-25)       | -46<br>(-150-95)          |
| South Korea | 1995 | Male   | All Ages | 90%<br>(86-93%)                | 10%<br>(6.9-14%)         | 2.1<br>(1.9-2.4)                            | 9.2%<br>(7.3-11%)                    | 9.2%<br>(6.7-12%)                   | 13000<br>(9000-17000) | 560000<br>(440000-690000) |
| South Korea | 1995 | Male   | 15 to 19 | 83%<br>(70-91%)                | 17%<br>(8.6-30%)         | 1.4<br>(0.86-2.1)                           | 6.1%<br>(3.4-8.9%)                   | 9%<br>(4.1-14%)                     | 180<br>(81-290)       | 17000<br>(9900-25000)     |
| South Korea | 1995 | Male   | 20 to 24 | 91%<br>(83-96%)                | 9.4%<br>(4.5-17%)        | 2.7<br>(1.9-3.7)                            | 12%<br>(8.2-16%)                     | 15%<br>(8.2-22%)                    | 420<br>(220-640)      | 43000<br>(28000-59000)    |
| South Korea | 1995 | Male   | 25 to 29 | 93%<br>(88-97%)                | 6.8%<br>(3.3-12%)        | 3.3<br>(2.3-4.4)                            | 13%<br>(8.9-17%)                     | 17%<br>(9.5-24%)                    | 580<br>(320-840)      | 50000<br>(34000-68000)    |
| South Korea | 1995 | Male   | 30 to 34 | 95%<br>(89-98%)                | 5.5%<br>(2.5-11%)        | 3.4<br>(2.4-4.5)                            | 13%<br>(9.1-17%)                     | 17%<br>(11-22%)                     | 740<br>(460-1000)     | 55000<br>(39000-74000)    |
| South Korea | 1995 | Male   | 35 to 39 | 95%<br>(90-98%)                | 4.8%<br>(2-9.7%)         | 3.1<br>(2.2-4.2)                            | 13%<br>(9.8-16%)                     | 17%<br>(12-22%)                     | 1100<br>(740-1400)    | 66000<br>(49000-85000)    |
| South Korea | 1995 | Male   | 40 to 44 | 95%<br>(91-98%)                | 4.5%<br>(1.9-8.6%)       | 3<br>(2-4.2)                                | 14%<br>(10-17%)                      | 17%<br>(13-22%)                     | 1200<br>(870-1600)    | 64000<br>(47000-82000)    |
| South Korea | 1995 | Male   | 45 to 49 | 96%<br>(91-98%)                | 4.5%<br>(2-9%)           | 3.1<br>(2.1-4.3)                            | 14%<br>(10-17%)                      | 17%<br>(13-21%)                     | 1400<br>(1000-1800)   | 64000<br>(48000-83000)    |
| South Korea | 1995 | Male   | 50 to 54 | 95%<br>(91-98%)                | 4.7%<br>(2.1-8.9%)       | 3<br>(1.9-4.4)                              | 12%<br>(8.9-16%)                     | 15%<br>(11-19%)                     | 1600<br>(1100-2100)   | 62000<br>(44000-80000)    |

| Location    | Year | Sex    | Age      | Prevalence of current drinkers | Prevalence of abstainers | Population average of standard drinks daily | Percent of total attributable deaths | Percent of total attributable DALYs | Attributable deaths | Attributable DALYs       |
|-------------|------|--------|----------|--------------------------------|--------------------------|---------------------------------------------|--------------------------------------|-------------------------------------|---------------------|--------------------------|
| South Korea | 1995 | Male   | 55 to 59 | 95%<br>(90-98%)                | 5.2%<br>(2.3-10%)        | 2.8<br>(1.8-4)                              | 9.9%<br>(6.7-13%)                    | 12%<br>(8-16%)                      | 1600<br>(1100-2300) | 55000<br>(37000-76000)   |
| South Korea | 1995 | Male   | 60 to 64 | 94%<br>(89-97%)                | 5.8%<br>(2.6-11%)        | 2.6<br>(1.6-4)                              | 7.5%<br>(4.5-11%)                    | 8.9%<br>(5.3-13%)                   | 1300<br>(740-1900)  | 36000<br>(21000-54000)   |
| South Korea | 1995 | Male   | 65 to 69 | 94%<br>(87-97%)                | 6.5%<br>(2.7-13%)        | 2.5<br>(1.7-3.4)                            | 6%<br>(3.2-9.1%)                     | 6.9%<br>(3.7-11%)                   | 960<br>(510-1500)   | 23000<br>(12000-35000)   |
| South Korea | 1995 | Male   | 70 to 74 | 93%<br>(86-97%)                | 7.2%<br>(3.2-14%)        | 2.3<br>(1.5-3.3)                            | 4.7%<br>(1.8-8.2%)                   | 5.3%<br>(2-9.2%)                    | 840<br>(320-1500)   | 16000<br>(6000-28000)    |
| South Korea | 1995 | Male   | 75 to 79 | 92%<br>(86-97%)                | 7.7%<br>(3.4-14%)        | 2.1<br>(1.3-3.1)                            | 3.2%<br>(0.31-7%)                    | 3.5%<br>(0.21-7.8%)                 | 480<br>(27-1100)    | 7200<br>(680-16000)      |
| South Korea | 1995 | Male   | 80 to 84 | 92%<br>(84-96%)                | 8.4%<br>(3.8-16%)        | 1.8<br>(1.2-2.7)                            | 2%<br>(-0.59-5.2%)                   | 2.1%<br>(-0.89-5.6%)                | 200<br>(-87-550)    | 2400<br>(-740-6100)      |
| South Korea | 1995 | Male   | 85 to 89 | 91%<br>(83-95%)                | 9.4%<br>(4.6-17%)        | 1.6<br>(1.1-2.4)                            | 1%<br>(-1.2-3.4%)                    | 0.84%<br>(-1.7-3.6%)                | 41<br>(-86-180)     | 440<br>(-520-1500)       |
| South Korea | 1995 | Male   | 90 to 94 | 90%<br>(83-95%)                | 9.7%<br>(4.6-17%)        | 1.4<br>(0.89-2.2)                           | 0.23%<br>(-1.8-2.3%)                 | -0.24%<br>(-2.6-2.2%)               | -3.3<br>(-36-30)    | 20<br>(-150-200)         |
| South Korea | 1995 | Male   | 95 plus  | 91%<br>(81-96%)                | 9.4%<br>(3.7-19%)        | 1.3<br>(0.69-2.1)                           | -0.33%<br>(-2.4-2%)                  | -1.1%<br>(-3.5-1.6%)                | -2.7<br>(-8.5-3.8)  | -3.3<br>(-23-20)         |
| South Korea | 2000 | Female | All Ages | 77%<br>(71-82%)                | 23%<br>(18-29%)          | 2.4<br>(2.1-2.6)                            | 3.1%<br>(1.7-4.7%)                   | 2.7%<br>(-0.059-6%)                 | 3000<br>(-67-6700)  | 150000<br>(80000-220000) |
| South Korea | 2000 | Female | 15 to 19 | 68%<br>(52-83%)                | 32%<br>(17-48%)          | 1.9<br>(1.1-2.9)                            | 3.1%<br>(1.7-4.8%)                   | 9.9%<br>(4.6-16%)                   | 56<br>(26-93)       | 5800<br>(3300-8800)      |
| South Korea | 2000 | Female | 20 to 24 | 81%<br>(67-90%)                | 19%<br>(10-33%)          | 3.5<br>(2.3-4.9)                            | 5.7%<br>(3.7-8%)                     | 17%<br>(9.2-24%)                    | 120<br>(67-190)     | 13000<br>(8300-18000)    |
| South Korea | 2000 | Female | 25 to 29 | 85%<br>(74-92%)                | 15%<br>(8-26%)           | 3.8<br>(2.6-5.1)                            | 5.6%<br>(3.7-7.7%)                   | 17%<br>(10-24%)                     | 170<br>(98-240)     | 15000<br>(10000-21000)   |
| South Korea | 2000 | Female | 30 to 34 | 87%<br>(75-93%)                | 13%<br>(6.7-25%)         | 3.7<br>(2.5-4.9)                            | 5.3%<br>(3.5-7.2%)                   | 15%<br>(9.7-21%)                    | 210<br>(130-290)    | 16000<br>(11000-22000)   |
| South Korea | 2000 | Female | 35 to 39 | 87%<br>(77-93%)                | 13%<br>(6.5-23%)         | 3.3<br>(2.3-4.5)                            | 5.1%<br>(3.2-7%)                     | 14%<br>(9.1-18%)                    | 260<br>(170-360)    | 17000<br>(11000-24000)   |
| South Korea | 2000 | Female | 40 to 44 | 86%<br>(76-93%)                | 14%<br>(7-24%)           | 3.1<br>(2.1-4.4)                            | 5.1%<br>(3-7.3%)                     | 13%<br>(8.3-17%)                    | 330<br>(200-460)    | 19000<br>(11000-26000)   |
| South Korea | 2000 | Female | 45 to 49 | 85%<br>(71-92%)                | 15%<br>(7.5-29%)         | 3.1<br>(2-4.3)                              | 5%<br>(2.8-7.4%)                     | 12%<br>(7.2-16%)                    | 310<br>(190-440)    | 15000<br>(8600-22000)    |
| South Korea | 2000 | Female | 50 to 54 | 82%<br>(70-91%)                | 18%<br>(9.3-30%)         | 2.9<br>(1.8-4.1)                            | 4.9%<br>(2.3-7.8%)                   | 10%<br>(5.7-15%)                    | 330<br>(180-490)    | 13000<br>(6600-21000)    |
| South Korea | 2000 | Female | 55 to 59 | 80%<br>(65-89%)                | 20%<br>(11-35%)          | 2.6<br>(1.7-3.8)                            | 4.5%<br>(1.7-7.6%)                   | 8.2%<br>(3.8-13%)                   | 390<br>(180-620)    | 13000<br>(5000-22000)    |
| South Korea | 2000 | Female | 60 to 64 | 76%<br>(61-88%)                | 24%<br>(12-39%)          | 2.3<br>(1.4-3.7)                            | 3.2%<br>(0.03-6.9%)                  | 5.5%<br>(0.92-11%)                  | 380<br>(61-760)     | 11000<br>(85-23000)      |
| South Korea | 2000 | Female | 65 to 69 | 73%<br>(56-87%)                | 27%<br>(13-44%)          | 2<br>(1.3-2.9)                              | 1.8%<br>(-0.99-5.3%)                 | 3.1%<br>(-0.83-7.7%)                | 300<br>(-79-770)    | 6500<br>(-3600-18000)    |
| South Korea | 2000 | Female | 70 to 74 | 71%<br>(55-84%)                | 29%<br>(16-45%)          | 1.7<br>(1-2.6)                              | 0.74%<br>(-2.2-4.4%)                 | 1.2%<br>(-2.7-5.8%)                 | 170<br>(-360-800)   | 2600<br>(-7900-15000)    |

| Location    | Year | Sex    | Age      | Prevalence of current drinkers | Prevalence of abstainers | Population average of standard drinks daily | Percent of total attributable deaths | Percent of total attributable DALYs | Attributable deaths   | Attributable DALYs        |
|-------------|------|--------|----------|--------------------------------|--------------------------|---------------------------------------------|--------------------------------------|-------------------------------------|-----------------------|---------------------------|
| South Korea | 2000 | Female | 75 to 79 | 70%<br>(53-83%)                | 30%<br>(17-47%)          | 1.6<br>(0.89-2.5)                           | -0.071%<br>(-3-3.5%)                 | -0.0035%<br>(-3.6-4.5%)             | -0.62<br>(-640-790)   | -240<br>(-9800-12000)     |
| South Korea | 2000 | Female | 80 to 84 | 68%<br>(49-83%)                | 32%<br>(17-51%)          | 1.5<br>(0.92-2.3)                           | -0.23%<br>(-2.8-3.1%)                | -0.28%<br>(-3.4-3.8%)               | -51<br>(-620-690)     | -540<br>(-7000-7600)      |
| South Korea | 2000 | Female | 85 to 89 | 66%<br>(47-79%)                | 34%<br>(21-53%)          | 1.5<br>(0.86-2.3)                           | -0.029%<br>(-2.5-3.1%)               | -0.11%<br>(-3.1-3.6%)               | -16<br>(-430-530)     | -38<br>(-3300-4200)       |
| South Korea | 2000 | Female | 90 to 94 | 66%<br>(49-80%)                | 34%<br>(20-51%)          | 1.5<br>(0.88-2.4)                           | 0.031%<br>(-2.4-3%)                  | -0.12%<br>(-3.1-3.4%)               | -8.8<br>(-220-250)    | 14<br>(-1100-1300)        |
| South Korea | 2000 | Female | 95 plus  | 67%<br>(45-83%)                | 33%<br>(17-55%)          | 1.6<br>(0.77-2.6)                           | 0.029%<br>(-2.7-3.7%)                | -0.26%<br>(-3.5-4.1%)               | -4.8<br>(-67-78)      | 2.4<br>(-210-290)         |
| South Korea | 2000 | Male   | All Ages | 90%<br>(87-93%)                | 9.7%<br>(6.8-13%)        | 2.3<br>(2-2.5)                              | 9%<br>(7.1-11%)                      | 8.9%<br>(6.6-11%)                   | 12000<br>(9100-16000) | 540000<br>(420000-660000) |
| South Korea | 2000 | Male   | 15 to 19 | 82%<br>(70-91%)                | 18%<br>(8.6-30%)         | 1.5<br>(0.89-2.2)                           | 5.7%<br>(3.5-8.2%)                   | 9.6%<br>(4.5-15%)                   | 120<br>(56-200)       | 13000<br>(7800-19000)     |
| South Korea | 2000 | Male   | 20 to 24 | 90%<br>(83-95%)                | 9.6%<br>(4.6-17%)        | 2.9<br>(1.9-3.9)                            | 12%<br>(8.4-16%)                     | 16%<br>(8.8-24%)                    | 290<br>(160-430)      | 32000<br>(22000-44000)    |
| South Korea | 2000 | Male   | 25 to 29 | 93%<br>(88-97%)                | 6.9%<br>(3.4-12%)        | 3.3<br>(2.3-4.6)                            | 13%<br>(9.2-17%)                     | 18%<br>(10-25%)                     | 420<br>(230-600)      | 40000<br>(27000-53000)    |
| South Korea | 2000 | Male   | 30 to 34 | 94%<br>(89-98%)                | 5.6%<br>(2.4-11%)        | 3.4<br>(2.4-4.6)                            | 12%<br>(8.9-16%)                     | 17%<br>(11-24%)                     | 540<br>(330-760)      | 43000<br>(30000-57000)    |
| South Korea | 2000 | Male   | 35 to 39 | 95%<br>(90-98%)                | 4.9%<br>(2.1-9.6%)       | 3.2<br>(2.3-4.4)                            | 13%<br>(9.6-16%)                     | 18%<br>(13-23%)                     | 880<br>(610-1200)     | 57000<br>(42000-74000)    |
| South Korea | 2000 | Male   | 40 to 44 | 95%<br>(91-98%)                | 4.6%<br>(1.9-9%)         | 3.1<br>(2.1-4.3)                            | 13%<br>(10-17%)                      | 18%<br>(13-22%)                     | 1400<br>(1000-1800)   | 74000<br>(56000-95000)    |
| South Korea | 2000 | Male   | 45 to 49 | 95%<br>(91-98%)                | 4.5%<br>(1.9-9.5%)       | 3.2<br>(2.1-4.4)                            | 13%<br>(10-17%)                      | 17%<br>(13-21%)                     | 1500<br>(1100-1900)   | 68000<br>(50000-86000)    |
| South Korea | 2000 | Male   | 50 to 54 | 95%<br>(90-98%)                | 4.8%<br>(2.1-9.8%)       | 3.1<br>(2.1-4.4)                            | 12%<br>(8.8-15%)                     | 15%<br>(11-19%)                     | 1400<br>(1000-1900)   | 57000<br>(41000-74000)    |
| South Korea | 2000 | Male   | 55 to 59 | 95%<br>(90-98%)                | 5.3%<br>(2.4-10%)        | 2.9<br>(1.9-4.2)                            | 10%<br>(7.1-13%)                     | 12%<br>(8.7-16%)                    | 1500<br>(1100-2100)   | 52000<br>(36000-71000)    |
| South Korea | 2000 | Male   | 60 to 64 | 94%<br>(88-97%)                | 5.8%<br>(2.5-12%)        | 2.7<br>(1.7-4)                              | 7.8%<br>(4.9-12%)                    | 9.4%<br>(5.9-14%)                   | 1500<br>(930-2300)    | 44000<br>(27000-65000)    |
| South Korea | 2000 | Male   | 65 to 69 | 94%<br>(87-97%)                | 6.5%<br>(2.7-13%)        | 2.5<br>(1.6-3.4)                            | 5.9%<br>(3.3-8.9%)                   | 7.1%<br>(4.1-11%)                   | 1100<br>(660-1700)    | 27000<br>(15000-42000)    |
| South Korea | 2000 | Male   | 70 to 74 | 93%<br>(86-97%)                | 7.3%<br>(3.3-14%)        | 2.2<br>(1.4-3.2)                            | 4.3%<br>(1.9-7.4%)                   | 5.1%<br>(2.2-8.7%)                  | 800<br>(340-1400)     | 15000<br>(6300-26000)     |
| South Korea | 2000 | Male   | 75 to 79 | 92%<br>(85-96%)                | 7.9%<br>(3.6-15%)        | 2<br>(1.2-3)                                | 3%<br>(0.49-6.3%)                    | 3.4%<br>(0.52-7.1%)                 | 550<br>(84-1200)      | 8200<br>(1400-17000)      |
| South Korea | 2000 | Male   | 80 to 84 | 91%<br>(83-96%)                | 8.8%<br>(4-17%)          | 1.8<br>(1.2-2.7)                            | 2.2%<br>(-0.041-5.1%)                | 2.4%<br>(-0.21-5.7%)                | 290<br>(-27-680)      | 3300<br>(-60-7700)        |
| South Korea | 2000 | Male   | 85 to 89 | 90%<br>(81-95%)                | 10%<br>(4.6-19%)         | 1.7<br>(1.1-2.5)                            | 1.7%<br>(-0.45-4.1%)                 | 1.7%<br>(-0.75-4.4%)                | 110<br>(-49-280)      | 950<br>(-240-2300)        |
| South Korea | 2000 | Male   | 90 to 94 | 90%<br>(81-95%)                | 10%<br>(4.8-19%)         | 1.6<br>(0.99-2.5)                           | 1.2%<br>(-0.79-3.6%)                 | 0.99%<br>(-1.3-3.8%)                | 22<br>(-29-84)        | 160<br>(-110-500)         |

| Location    | Year | Sex    | Age      | Prevalence of current drinkers | Prevalence of abstainers | Population average of standard drinks daily | Percent of total attributable deaths | Percent of total attributable DALYs | Attributable deaths   | Attributable DALYs        |
|-------------|------|--------|----------|--------------------------------|--------------------------|---------------------------------------------|--------------------------------------|-------------------------------------|-----------------------|---------------------------|
| South Korea | 2000 | Male   | 95 plus  | 90%<br>(79-96%)                | 10%<br>(3.9-21%)         | 1.6<br>(0.86-2.5)                           | 0.71%<br>(-1.4-3.4%)                 | 0.16%<br>(-2.3-3.3%)                | 0.71<br>(-9.9-15)     | 13<br>(-26-62)            |
| South Korea | 2005 | Female | All Ages | 77%<br>(71-82%)                | 23%<br>(18-29%)          | 2.4<br>(2.2-2.7)                            | 3%<br>(1.8-4.4%)                     | 2.6%<br>(0.23-5.4%)                 | 2900<br>(280-6200)    | 150000<br>(84000-210000)  |
| South Korea | 2005 | Female | 15 to 19 | 67%<br>(50-82%)                | 33%<br>(18-50%)          | 1.9<br>(1.1-2.9)                            | 2.6%<br>(1.6-3.9%)                   | 10%<br>(4.2-17%)                    | 35<br>(14-60)         | 4400<br>(2600-6500)       |
| South Korea | 2005 | Female | 20 to 24 | 80%<br>(67-90%)                | 20%<br>(10-33%)          | 3.5<br>(2.3-5.1)                            | 6.3%<br>(4-8.9%)                     | 18%<br>(9.3-28%)                    | 120<br>(60-180)       | 13000<br>(8200-18000)     |
| South Korea | 2005 | Female | 25 to 29 | 85%<br>(73-92%)                | 15%<br>(8.2-27%)         | 3.8<br>(2.6-5.2)                            | 6.1%<br>(4-8.4%)                     | 19%<br>(10-28%)                     | 160<br>(85-230)       | 15000<br>(9800-21000)     |
| South Korea | 2005 | Female | 30 to 34 | 86%<br>(74-93%)                | 14%<br>(6.8-26%)         | 3.7<br>(2.5-5.1)                            | 5.5%<br>(3.6-7.6%)                   | 17%<br>(9.7-24%)                    | 190<br>(110-290)      | 16000<br>(10000-22000)    |
| South Korea | 2005 | Female | 35 to 39 | 87%<br>(76-93%)                | 13%<br>(6.9-24%)         | 3.4<br>(2.4-4.5)                            | 5.1%<br>(3.3-7.1%)                   | 15%<br>(9.1-20%)                    | 250<br>(150-350)      | 17000<br>(11000-23000)    |
| South Korea | 2005 | Female | 40 to 44 | 86%<br>(75-93%)                | 14%<br>(7.1-25%)         | 3.2<br>(2.1-4.4)                            | 5%<br>(3.1-7.2%)                     | 14%<br>(8.6-18%)                    | 320<br>(200-450)      | 18000<br>(11000-25000)    |
| South Korea | 2005 | Female | 45 to 49 | 84%<br>(70-92%)                | 16%<br>(7.7-30%)         | 3.1<br>(2-4.4)                              | 5.1%<br>(3.1-7.6%)                   | 12%<br>(7.8-17%)                    | 380<br>(240-540)      | 18000<br>(11000-26000)    |
| South Korea | 2005 | Female | 50 to 54 | 82%<br>(69-91%)                | 18%<br>(9.3-31%)         | 2.9<br>(1.9-4.1)                            | 4.4%<br>(2.3-6.9%)                   | 10%<br>(6.4-15%)                    | 350<br>(210-490)      | 15000<br>(7800-22000)     |
| South Korea | 2005 | Female | 55 to 59 | 79%<br>(65-90%)                | 21%<br>(10-35%)          | 2.6<br>(1.7-3.8)                            | 3.8%<br>(1.5-6.4%)                   | 8.3%<br>(4.7-12%)                   | 320<br>(180-490)      | 11000<br>(4800-18000)     |
| South Korea | 2005 | Female | 60 to 64 | 76%<br>(60-88%)                | 24%<br>(12-40%)          | 2.4<br>(1.4-3.6)                            | 3%<br>(0.31-6.1%)                    | 5.7%<br>(1.9-10%)                   | 340<br>(110-620)      | 9500<br>(1100-19000)      |
| South Korea | 2005 | Female | 65 to 69 | 73%<br>(55-86%)                | 27%<br>(14-45%)          | 2<br>(1.3-2.9)                              | 1.8%<br>(-0.56-4.7%)                 | 3.4%<br>(-0.054-7.3%)               | 310<br>(-5.2-670)     | 6500<br>(-2100-16000)     |
| South Korea | 2005 | Female | 70 to 74 | 71%<br>(54-84%)                | 29%<br>(16-46%)          | 1.7<br>(1-2.6)                              | 0.77%<br>(-1.7-3.7%)                 | 1.5%<br>(-1.8-5.3%)                 | 200<br>(-250-730)     | 2900<br>(-6300-14000)     |
| South Korea | 2005 | Female | 75 to 79 | 69%<br>(53-83%)                | 31%<br>(17-47%)          | 1.6<br>(0.89-2.4)                           | -0.017%<br>(-2.5-3%)                 | 0.13%<br>(-3-4.1%)                  | 24<br>(-550-740)      | -74<br>(-9400-11000)      |
| South Korea | 2005 | Female | 80 to 84 | 67%<br>(48-82%)                | 33%<br>(18-52%)          | 1.5<br>(0.89-2.3)                           | -0.19%<br>(-2.4-2.6%)                | -0.22%<br>(-3-3.2%)                 | -45<br>(-610-650)     | -550<br>(-6900-7400)      |
| South Korea | 2005 | Female | 85 to 89 | 64%<br>(46-79%)                | 36%<br>(21-54%)          | 1.5<br>(0.86-2.3)                           | 0.016%<br>(-2.2-2.8%)                | -0.049%<br>(-2.6-3.3%)              | -8.5<br>(-440-540)    | 24<br>(-3300-4500)        |
| South Korea | 2005 | Female | 90 to 94 | 64%<br>(47-79%)                | 36%<br>(21-53%)          | 1.5<br>(0.86-2.3)                           | 0.15%<br>(-2.1-3%)                   | 0.021%<br>(-2.7-3.4%)               | 1.8<br>(-250-300)     | 88<br>(-1300-1700)        |
| South Korea | 2005 | Female | 95 plus  | 65%<br>(43-82%)                | 35%<br>(18-57%)          | 1.6<br>(0.77-2.6)                           | 0.25%<br>(-2.4-3.6%)                 | 0.013%<br>(-3.1-4.1%)               | 0.36<br>(-94-120)     | 33<br>(-300-460)          |
| South Korea | 2005 | Male   | All Ages | 91%<br>(87-93%)                | 9.4%<br>(6.5-13%)        | 2.4<br>(2.1-2.6)                            | 8.3%<br>(6.6-10%)                    | 8.3%<br>(6-10%)                     | 12000<br>(8200-15000) | 490000<br>(370000-600000) |
| South Korea | 2005 | Male   | 15 to 19 | 82%<br>(69-91%)                | 18%<br>(9.1-31%)         | 1.5<br>(0.86-2.2)                           | 4.9%<br>(3.2-6.8%)                   | 9.2%<br>(4.1-15%)                   | 65<br>(30-110)        | 9100<br>(5800-13000)      |
| South Korea | 2005 | Male   | 20 to 24 | 90%<br>(83-95%)                | 9.8%<br>(4.7-17%)        | 2.8<br>(1.9-3.9)                            | 12%<br>(8.3-15%)                     | 16%<br>(8.3-24%)                    | 190<br>(95-290)       | 25000<br>(17000-35000)    |

| Location    | Year | Sex    | Age      | Prevalence of current drinkers | Prevalence of abstainers | Population average of standard drinks daily | Percent of total attributable deaths | Percent of total attributable DALYs | Attributable deaths | Attributable DALYs       |
|-------------|------|--------|----------|--------------------------------|--------------------------|---------------------------------------------|--------------------------------------|-------------------------------------|---------------------|--------------------------|
| South Korea | 2005 | Male   | 25 to 29 | 93%<br>(87-97%)                | 7%<br>(3.4-13%)          | 3.4<br>(2.3-4.6)                            | 13%<br>(9.1-16%)                     | 18%<br>(9.6-27%)                    | 290<br>(150-430)    | 32000<br>(22000-43000)   |
| South Korea | 2005 | Male   | 30 to 34 | 94%<br>(88-98%)                | 5.7%<br>(2.4-12%)        | 3.5<br>(2.4-4.7)                            | 12%<br>(8.3-16%)                     | 18%<br>(9.8-25%)                    | 400<br>(230-580)    | 35000<br>(24000-48000)   |
| South Korea | 2005 | Male   | 35 to 39 | 95%<br>(90-98%)                | 5%<br>(2.3-9.7%)         | 3.2<br>(2.3-4.4)                            | 12%<br>(8.3-15%)                     | 17%<br>(11-23%)                     | 620<br>(400-850)    | 44000<br>(32000-57000)   |
| South Korea | 2005 | Male   | 40 to 44 | 95%<br>(91-98%)                | 4.7%<br>(2-9.4%)         | 3.1<br>(2.1-4.3)                            | 12%<br>(9.3-16%)                     | 17%<br>(12-22%)                     | 1100<br>(750-1400)  | 60000<br>(45000-78000)   |
| South Korea | 2005 | Male   | 45 to 49 | 95%<br>(90-98%)                | 4.6%<br>(2-9.8%)         | 3.2<br>(2.2-4.5)                            | 13%<br>(9.5-16%)                     | 17%<br>(12-21%)                     | 1500<br>(1100-2000) | 72000<br>(53000-92000)   |
| South Korea | 2005 | Male   | 50 to 54 | 95%<br>(90-98%)                | 4.9%<br>(2.2-10%)        | 3.1<br>(2.1-4.4)                            | 11%<br>(8.1-14%)                     | 15%<br>(11-19%)                     | 1500<br>(1000-1900) | 60000<br>(43000-79000)   |
| South Korea | 2005 | Male   | 55 to 59 | 95%<br>(90-98%)                | 5.4%<br>(2.4-10%)        | 2.9<br>(1.9-4.1)                            | 8.9%<br>(6.3-12%)                    | 12%<br>(8.4-15%)                    | 1300<br>(870-1700)  | 44000<br>(31000-60000)   |
| South Korea | 2005 | Male   | 60 to 64 | 94%<br>(88-97%)                | 6%<br>(2.7-12%)          | 2.7<br>(1.7-4)                              | 7.3%<br>(4.6-11%)                    | 9.2%<br>(5.9-13%)                   | 1300<br>(830-1900)  | 39000<br>(24000-57000)   |
| South Korea | 2005 | Male   | 65 to 69 | 93%<br>(87-97%)                | 6.7%<br>(2.6-13%)        | 2.5<br>(1.8-3.5)                            | 5.8%<br>(3.5-8.7%)                   | 7.2%<br>(4.4-10%)                   | 1300<br>(790-1900)  | 31000<br>(19000-46000)   |
| South Korea | 2005 | Male   | 70 to 74 | 92%<br>(85-97%)                | 7.5%<br>(3.2-15%)        | 2.4<br>(1.5-3.4)                            | 4.6%<br>(2.1-7.4%)                   | 5.6%<br>(2.7-8.8%)                  | 1000<br>(490-1600)  | 20000<br>(9300-33000)    |
| South Korea | 2005 | Male   | 75 to 79 | 92%<br>(84-96%)                | 8.3%<br>(3.6-16%)        | 2.1<br>(1.3-3.2)                            | 3.2%<br>(1-6.1%)                     | 3.8%<br>(1.2-7.2%)                  | 650<br>(210-1200)   | 10000<br>(3000-19000)    |
| South Korea | 2005 | Male   | 80 to 84 | 91%<br>(82-96%)                | 9.1%<br>(4.2-18%)        | 1.9<br>(1.2-2.7)                            | 2.1%<br>(0.16-4.6%)                  | 2.3%<br>(0.032-5.3%)                | 320<br>(4.6-730)    | 3800<br>(270-8300)       |
| South Korea | 2005 | Male   | 85 to 89 | 90%<br>(81-95%)                | 10%<br>(4.8-19%)         | 1.6<br>(1-2.3)                              | 1.3%<br>(-0.4-3.5%)                  | 1.3%<br>(-0.75-3.8%)                | 110<br>(-59-310)    | 1000<br>(-300-2600)      |
| South Korea | 2005 | Male   | 90 to 94 | 89%<br>(81-95%)                | 11%<br>(5-19%)           | 1.4<br>(0.9-2.2)                            | 0.78%<br>(-0.87-2.8%)                | 0.51%<br>(-1.5-2.8%)                | 16<br>(-45-85)      | 150<br>(-170-540)        |
| South Korea | 2005 | Male   | 95 plus  | 90%<br>(79-96%)                | 10%<br>(4-21%)           | 1.3<br>(0.69-2.2)                           | 0.28%<br>(-1.4-2.3%)                 | -0.31%<br>(-2.4-2.2%)               | -2.1<br>(-16-15)    | 8<br>(-41-68)            |
| South Korea | 2010 | Female | All Ages | 77%<br>(71-82%)                | 23%<br>(18-29%)          | 2.3<br>(2-2.7)                              | 2.8%<br>(1.6-4.2%)                   | 2.3%<br>(0.17-4.7%)                 | 2800<br>(210-5800)  | 140000<br>(78000-210000) |
| South Korea | 2010 | Female | 15 to 19 | 67%<br>(50-82%)                | 33%<br>(18-50%)          | 1.8<br>(1-2.8)                              | 2.5%<br>(1.4-3.9%)                   | 9.8%<br>(3.3-18%)                   | 32<br>(11-57)       | 4000<br>(2300-6300)      |
| South Korea | 2010 | Female | 20 to 24 | 80%<br>(66-89%)                | 20%<br>(11-34%)          | 3.3<br>(2.1-4.9)                            | 5.8%<br>(3.6-8.5%)                   | 18%<br>(7.9-28%)                    | 92<br>(40-150)      | 11000<br>(6600-15000)    |
| South Korea | 2010 | Female | 25 to 29 | 85%<br>(74-92%)                | 15%<br>(8.1-26%)         | 3.6<br>(2.5-5.1)                            | 6.4%<br>(3.8-9.3%)                   | 20%<br>(9.1-30%)                    | 170<br>(79-270)     | 15000<br>(9000-22000)    |
| South Korea | 2010 | Female | 30 to 34 | 86%<br>(74-93%)                | 14%<br>(6.8-26%)         | 3.6<br>(2.4-4.9)                            | 5.5%<br>(3.3-8.1%)                   | 17%<br>(9-26%)                      | 190<br>(96-290)     | 15000<br>(8900-21000)    |
| South Korea | 2010 | Female | 35 to 39 | 86%<br>(75-93%)                | 14%<br>(6.9-25%)         | 3.2<br>(2.2-4.3)                            | 4.9%<br>(2.8-7%)                     | 15%<br>(8.3-21%)                    | 240<br>(130-350)    | 16000<br>(9500-22000)    |
| South Korea | 2010 | Female | 40 to 44 | 86%<br>(75-93%)                | 14%<br>(7.2-25%)         | 3<br>(1.9-4.2)                              | 4.6%<br>(2.6-6.6%)                   | 14%<br>(7.9-19%)                    | 290<br>(170-410)    | 16000<br>(9400-23000)    |

| Location    | Year | Sex    | Age      | Prevalence of current drinkers | Prevalence of abstainers | Population average of standard drinks daily | Percent of total attributable deaths | Percent of total attributable DALYs | Attributable deaths   | Attributable DALYs        |
|-------------|------|--------|----------|--------------------------------|--------------------------|---------------------------------------------|--------------------------------------|-------------------------------------|-----------------------|---------------------------|
| South Korea | 2010 | Female | 45 to 49 | 84%<br>(71-92%)                | 16%<br>(8.1-29%)         | 2.9<br>(1.9-4.2)                            | 4.6%<br>(2.6-6.7%)                   | 12%<br>(7.4-17%)                    | 370<br>(230-520)      | 18000<br>(10000-26000)    |
| South Korea | 2010 | Female | 50 to 54 | 82%<br>(69-90%)                | 18%<br>(9.6-31%)         | 2.8<br>(1.7-4)                              | 4.1%<br>(2.1-6.5%)                   | 10%<br>(6.2-15%)                    | 390<br>(230-560)      | 16000<br>(8600-25000)     |
| South Korea | 2010 | Female | 55 to 59 | 79%<br>(64-89%)                | 21%<br>(11-36%)          | 2.5<br>(1.6-3.6)                            | 3.2%<br>(1.3-5.4%)                   | 7.9%<br>(4.6-12%)                   | 300<br>(170-450)      | 10000<br>(4300-17000)     |
| South Korea | 2010 | Female | 60 to 64 | 76%<br>(59-88%)                | 24%<br>(12-41%)          | 2.2<br>(1.3-3.5)                            | 2.4%<br>(0.32-5%)                    | 5.5%<br>(2.3-9.5%)                  | 270<br>(110-460)      | 7300<br>(900-15000)       |
| South Korea | 2010 | Female | 65 to 69 | 72%<br>(54-86%)                | 28%<br>(14-46%)          | 2<br>(1.2-2.9)                              | 1.7%<br>(-0.2-4.1%)                  | 3.7%<br>(0.94-6.9%)                 | 290<br>(73-550)       | 6000<br>(-650-14000)      |
| South Korea | 2010 | Female | 70 to 74 | 70%<br>(53-83%)                | 30%<br>(17-47%)          | 1.8<br>(1-2.6)                              | 1.1%<br>(-1.1-3.6%)                  | 2.1%<br>(-0.76-5.5%)                | 270<br>(-100-710)     | 4300<br>(-4200-15000)     |
| South Korea | 2010 | Female | 75 to 79 | 69%<br>(52-83%)                | 31%<br>(17-48%)          | 1.6<br>(0.89-2.5)                           | 0.34%<br>(-1.8-3.1%)                 | 0.7%<br>(-2-4.2%)                   | 130<br>(-360-780)     | 1400<br>(-7200-12000)     |
| South Korea | 2010 | Female | 80 to 84 | 67%<br>(48-82%)                | 33%<br>(18-52%)          | 1.5<br>(0.84-2.2)                           | -0.19%<br>(-2.1-2.3%)                | -0.19%<br>(-2.6-2.9%)               | -44<br>(-580-630)     | -640<br>(-7200-7900)      |
| South Korea | 2010 | Female | 85 to 89 | 64%<br>(45-79%)                | 36%<br>(21-55%)          | 1.4<br>(0.78-2.1)                           | -0.29%<br>(-2.1-2%)                  | -0.42%<br>(-2.7-2.3%)               | -89<br>(-580-500)     | -610<br>(-4500-4200)      |
| South Korea | 2010 | Female | 90 to 94 | 64%<br>(47-79%)                | 36%<br>(21-53%)          | 1.3<br>(0.75-2.1)                           | -0.38%<br>(-2.3-1.9%)                | -0.61%<br>(-3-2.1%)                 | -78<br>(-380-270)     | -320<br>(-1900-1600)      |
| South Korea | 2010 | Female | 95 plus  | 65%<br>(43-83%)                | 35%<br>(17-57%)          | 1.3<br>(0.62-2.2)                           | -0.39%<br>(-2.6-2.1%)                | -0.76%<br>(-3.4-2.4%)               | -34<br>(-150-110)     | -76<br>(-490-430)         |
| South Korea | 2010 | Male   | All Ages | 91%<br>(88-94%)                | 9.1%<br>(6.3-12%)        | 2.3<br>(1.9-2.6)                            | 7.4%<br>(5.5-9.1%)                   | 7%<br>(4.8-9.3%)                    | 11000<br>(6900-14000) | 440000<br>(320000-560000) |
| South Korea | 2010 | Male   | 15 to 19 | 81%<br>(68-91%)                | 19%<br>(9.5-32%)         | 1.4<br>(0.82-2.1)                           | 4.8%<br>(3-6.8%)                     | 8.7%<br>(3.6-15%)                   | 61<br>(25-110)        | 8600<br>(5400-12000)      |
| South Korea | 2010 | Male   | 20 to 24 | 90%<br>(82-95%)                | 9.9%<br>(4.8-18%)        | 2.7<br>(1.8-3.8)                            | 11%<br>(7.9-15%)                     | 16%<br>(7.3-25%)                    | 140<br>(68-230)       | 21000<br>(14000-29000)    |
| South Korea | 2010 | Male   | 25 to 29 | 93%<br>(87-97%)                | 7.1%<br>(3.4-13%)        | 3.2<br>(2.1-4.5)                            | 12%<br>(8.3-16%)                     | 18%<br>(8.1-27%)                    | 270<br>(120-410)      | 29000<br>(19000-40000)    |
| South Korea | 2010 | Male   | 30 to 34 | 94%<br>(88-98%)                | 5.8%<br>(2.4-12%)        | 3.3<br>(2.2-4.6)                            | 11%<br>(7.1-15%)                     | 17%<br>(8.4-26%)                    | 320<br>(150-490)      | 29000<br>(19000-41000)    |
| South Korea | 2010 | Male   | 35 to 39 | 95%<br>(90-98%)                | 5.1%<br>(2.2-9.9%)       | 3<br>(2.1-4.1)                              | 10%<br>(7.1-14%)                     | 16%<br>(9.5-23%)                    | 500<br>(280-720)      | 37000<br>(25000-49000)    |
| South Korea | 2010 | Male   | 40 to 44 | 95%<br>(90-98%)                | 4.7%<br>(1.9-9.5%)       | 3<br>(2-4.1)                                | 11%<br>(7.9-14%)                     | 16%<br>(11-22%)                     | 820<br>(540-1200)     | 48000<br>(34000-65000)    |
| South Korea | 2010 | Male   | 45 to 49 | 95%<br>(90-98%)                | 4.7%<br>(2-10%)          | 3<br>(2-4.1)                                | 11%<br>(8.3-15%)                     | 16%<br>(12-21%)                     | 1300<br>(920-1800)    | 64000<br>(46000-84000)    |
| South Korea | 2010 | Male   | 50 to 54 | 95%<br>(90-98%)                | 4.9%<br>(2.2-10%)        | 2.9<br>(1.9-4.1)                            | 10%<br>(7.3-13%)                     | 14%<br>(9.9-18%)                    | 1600<br>(1100-2100)   | 64000<br>(45000-86000)    |
| South Korea | 2010 | Male   | 55 to 59 | 95%<br>(89-98%)                | 5.5%<br>(2.3-11%)        | 2.7<br>(1.8-3.8)                            | 8.2%<br>(5.7-11%)                    | 11%<br>(7.7-15%)                    | 1200<br>(830-1700)    | 44000<br>(30000-59000)    |
| South Korea | 2010 | Male   | 60 to 64 | 94%<br>(87-97%)                | 6.1%<br>(2.5-13%)        | 2.5<br>(1.6-3.8)                            | 6.5%<br>(4.1-9.4%)                   | 8.7%<br>(5.6-12%)                   | 1100<br>(690-1600)    | 32000<br>(20000-47000)    |



| Location    | Year | Sex    | Age      | Prevalence of current drinkers | Prevalence of abstainers | Population average of standard drinks daily | Percent of total attributable deaths | Percent of total attributable DALYs | Attributable deaths  | Attributable DALYs       |
|-------------|------|--------|----------|--------------------------------|--------------------------|---------------------------------------------|--------------------------------------|-------------------------------------|----------------------|--------------------------|
| South Korea | 2010 | Male   | 65 to 69 | 93%<br>(86-97%)                | 6.9%<br>(2.8-14%)        | 2.3<br>(1.6-3.2)                            | 5.1%<br>(3.1-7.5%)                   | 6.6%<br>(4.1-9.5%)                  | 1100<br>(670-1600)   | 26000<br>(16000-40000)   |
| South Korea | 2010 | Male   | 70 to 74 | 92%<br>(85-97%)                | 7.7%<br>(3.3-15%)        | 2.1<br>(1.4-3)                              | 3.9%<br>(1.9-6.3%)                   | 4.8%<br>(2.5-7.7%)                  | 1100<br>(530-1700)   | 20000<br>(10000-34000)   |
| South Korea | 2010 | Male   | 75 to 79 | 92%<br>(84-96%)                | 8.4%<br>(3.7-16%)        | 1.9<br>(1.2-2.9)                            | 2.6%<br>(0.74-5.1%)                  | 3.1%<br>(0.95-5.9%)                 | 640<br>(190-1200)    | 9900<br>(2700-19000)     |
| South Korea | 2010 | Male   | 80 to 84 | 91%<br>(83-96%)                | 9.4%<br>(4.2-17%)        | 1.7<br>(1.1-2.5)                            | 1.6%<br>(-0.047-3.8%)                | 1.8%<br>(-0.23-4.3%)                | 300<br>(-37-720)     | 3700<br>(-110-8500)      |
| South Korea | 2010 | Male   | 85 to 89 | 90%<br>(81-95%)                | 10%<br>(5-19%)           | 1.6<br>(1-2.3)                              | 1.1%<br>(-0.47-3%)                   | 1%<br>(-0.83-3.3%)                  | 110<br>(-93-360)     | 1100<br>(-500-3100)      |
| South Korea | 2010 | Male   | 90 to 94 | 89%<br>(81-95%)                | 11%<br>(5-19%)           | 1.4<br>(0.88-2.1)                           | 0.66%<br>(-0.85-2.4%)                | 0.39%<br>(-1.4-2.5%)                | 18<br>(-62-110)      | 190<br>(-240-720)        |
| South Korea | 2010 | Male   | 95 plus  | 90%<br>(79-96%)                | 10%<br>(4.1-21%)         | 1.3<br>(0.71-2.2)                           | 0.33%<br>(-1.4-2.3%)                 | -0.24%<br>(-2.2-2.1%)               | -2.6<br>(-24-22)     | 15<br>(-62-100)          |
| South Korea | 2016 | Female | All Ages | 77%<br>(71-82%)                | 23%<br>(18-29%)          | 2.2<br>(1.7-2.9)                            | 2.2%<br>(0.89-3.9%)                  | 1.4%<br>(-0.68-3.9%)                | 2200<br>(-1100-6700) | 120000<br>(46000-210000) |
| South Korea | 2016 | Female | 15 to 19 | 67%<br>(50-82%)                | 33%<br>(18-50%)          | 1.7<br>(0.89-2.8)                           | 2.4%<br>(1.3-3.9%)                   | 9.6%<br>(3.2-17%)                   | 26<br>(7.9-52)       | 3400<br>(1800-5600)      |
| South Korea | 2016 | Female | 20 to 24 | 80%<br>(66-89%)                | 20%<br>(11-34%)          | 3.2<br>(1.9-5)                              | 5.4%<br>(3.2-8%)                     | 17%<br>(6.9-28%)                    | 85<br>(31-150)       | 10000<br>(6000-16000)    |
| South Korea | 2016 | Female | 25 to 29 | 84%<br>(73-92%)                | 16%<br>(8.3-27%)         | 3.5<br>(2.2-5)                              | 5.8%<br>(3.3-8.6%)                   | 19%<br>(7.6-29%)                    | 120<br>(42-210)      | 12000<br>(6400-18000)    |
| South Korea | 2016 | Female | 30 to 34 | 86%<br>(74-93%)                | 14%<br>(6.8-26%)         | 3.4<br>(2.2-5)                              | 5.1%<br>(2.8-7.8%)                   | 17%<br>(7.9-26%)                    | 160<br>(64-280)      | 13000<br>(6700-20000)    |
| South Korea | 2016 | Female | 35 to 39 | 86%<br>(76-93%)                | 14%<br>(6.8-24%)         | 3.1<br>(1.9-4.5)                            | 4.4%<br>(2.3-7%)                     | 15%<br>(7.7-21%)                    | 180<br>(74-330)      | 13000<br>(6400-21000)    |
| South Korea | 2016 | Female | 40 to 44 | 86%<br>(76-93%)                | 14%<br>(7.2-24%)         | 2.9<br>(1.7-4.3)                            | 4.2%<br>(2.1-6.6%)                   | 13%<br>(7.3-19%)                    | 250<br>(110-440)     | 15000<br>(7000-24000)    |
| South Korea | 2016 | Female | 45 to 49 | 84%<br>(71-92%)                | 16%<br>(7.9-29%)         | 2.8<br>(1.7-4.2)                            | 4%<br>(2-6.4%)                       | 12%<br>(6.8-17%)                    | 320<br>(160-550)     | 16000<br>(7700-27000)    |
| South Korea | 2016 | Female | 50 to 54 | 82%<br>(69-91%)                | 18%<br>(9.3-31%)         | 2.6<br>(1.6-3.9)                            | 3.7%<br>(1.7-6.3%)                   | 9.7%<br>(5.8-14%)                   | 370<br>(180-630)     | 15000<br>(6800-28000)    |
| South Korea | 2016 | Female | 55 to 59 | 79%<br>(65-90%)                | 21%<br>(10-35%)          | 2.4<br>(1.5-3.6)                            | 2.9%<br>(1-5.3%)                     | 7.5%<br>(4.4-11%)                   | 360<br>(180-620)     | 12000<br>(4400-23000)    |
| South Korea | 2016 | Female | 60 to 64 | 76%<br>(60-88%)                | 24%<br>(12-40%)          | 2.2<br>(1.3-3.4)                            | 2.1%<br>(-0.027-4.8%)                | 5.2%<br>(2-9.6%)                    | 300<br>(99-580)      | 8000<br>(-110-18000)     |
| South Korea | 2016 | Female | 65 to 69 | 73%<br>(55-86%)                | 27%<br>(14-45%)          | 1.9<br>(1.1-2.8)                            | 1.3%<br>(-0.62-3.9%)                 | 3.2%<br>(0.57-6.6%)                 | 260<br>(37-600)      | 5000<br>(-2300-15000)    |
| South Korea | 2016 | Female | 70 to 74 | 70%<br>(54-83%)                | 30%<br>(17-46%)          | 1.6<br>(0.9-2.5)                            | 0.58%<br>(-1.3-3.2%)                 | 1.5%<br>(-1.1-5%)                   | 190<br>(-140-670)    | 2400<br>(-5300-13000)    |
| South Korea | 2016 | Female | 75 to 79 | 69%<br>(51-83%)                | 31%<br>(17-49%)          | 1.4<br>(0.76-2.3)                           | -0.064%<br>(-1.9-2.5%)               | 0.2%<br>(-2.3-3.7%)                 | 43<br>(-500-740)     | -290<br>(-9400-12000)    |
| South Korea | 2016 | Female | 80 to 84 | 67%<br>(48-82%)                | 33%<br>(18-52%)          | 1.4<br>(0.75-2.2)                           | -0.44%<br>(-2.4-1.8%)                | -0.51%<br>(-3-2.3%)                 | -140<br>(-860-660)   | -1900<br>(-10000-8000)   |

| Location    | Year | Sex    | Age      | Prevalence of current drinkers | Prevalence of abstainers | Population average of standard drinks daily | Percent of total attributable deaths | Percent of total attributable DALYs | Attributable deaths   | Attributable DALYs        |
|-------------|------|--------|----------|--------------------------------|--------------------------|---------------------------------------------|--------------------------------------|-------------------------------------|-----------------------|---------------------------|
| South Korea | 2016 | Female | 85 to 89 | 64%<br>(45-79%)                | 36%<br>(21-55%)          | 1.3<br>(0.73-2.1)                           | -0.33%<br>(-2.2-2.1%)                | -0.48%<br>(-2.8-2.4%)               | -150<br>(-870-730)    | -1000<br>(-7000-6200)     |
| South Korea | 2016 | Female | 90 to 94 | 64%<br>(47-79%)                | 36%<br>(21-53%)          | 1.4<br>(0.71-2.2)                           | -0.25%<br>(-2.3-2.3%)                | -0.46%<br>(-2.9-2.6%)               | -100<br>(-630-550)    | -360<br>(-3300-3300)      |
| South Korea | 2016 | Female | 95 plus  | 65%<br>(43-83%)                | 35%<br>(17-57%)          | 1.4<br>(0.67-2.5)                           | -0.075%<br>(-2.2-3%)                 | -0.38%<br>(-3-3.4%)                 | -32<br>(-260-270)     | -28<br>(-830-1100)        |
| South Korea | 2016 | Male   | All Ages | 91%<br>(88-94%)                | 8.7%<br>(6-12%)          | 2.2<br>(1.7-2.8)                            | 6.7%<br>(4.8-8.9%)                   | 6%<br>(3.7-8.6%)                    | 11000<br>(5800-18000) | 440000<br>(290000-640000) |
| South Korea | 2016 | Male   | 15 to 19 | 81%<br>(68-91%)                | 19%<br>(9.3-32%)         | 1.3<br>(0.72-2.1)                           | 4.5%<br>(2.8-6.4%)                   | 8.4%<br>(3-14%)                     | 45<br>(16-83)         | 7000<br>(4200-10000)      |
| South Korea | 2016 | Male   | 20 to 24 | 90%<br>(82-95%)                | 10%<br>(4.8-18%)         | 2.5<br>(1.5-3.7)                            | 11%<br>(7.4-14%)                     | 15%<br>(6.6-24%)                    | 130<br>(56-240)       | 21000<br>(14000-30000)    |
| South Korea | 2016 | Male   | 25 to 29 | 93%<br>(87-97%)                | 7.2%<br>(3.4-13%)        | 3<br>(1.9-4.3)                              | 12%<br>(7.9-16%)                     | 17%<br>(7.6-27%)                    | 210<br>(85-370)       | 25000<br>(16000-36000)    |
| South Korea | 2016 | Male   | 30 to 34 | 94%<br>(88-98%)                | 5.8%<br>(2.4-12%)        | 3.1<br>(2-4.6)                              | 10%<br>(6.6-14%)                     | 17%<br>(7.8-26%)                    | 270<br>(110-470)      | 26000<br>(16000-38000)    |
| South Korea | 2016 | Male   | 35 to 39 | 95%<br>(90-98%)                | 5.1%<br>(2.2-10%)        | 2.8<br>(1.8-4.1)                            | 9.8%<br>(6.5-13%)                    | 16%<br>(8.6-22%)                    | 390<br>(190-650)      | 30000<br>(19000-44000)    |
| South Korea | 2016 | Male   | 40 to 44 | 95%<br>(90-98%)                | 4.7%<br>(1.9-9.5%)       | 2.7<br>(1.7-4.1)                            | 10%<br>(7-14%)                       | 16%<br>(9.8-21%)                    | 710<br>(380-1200)     | 42000<br>(27000-64000)    |
| South Korea | 2016 | Male   | 45 to 49 | 95%<br>(90-98%)                | 4.7%<br>(2.1-9.8%)       | 2.8<br>(1.8-4.1)                            | 11%<br>(7.6-15%)                     | 16%<br>(11-21%)                     | 1200<br>(690-1900)    | 58000<br>(36000-86000)    |
| South Korea | 2016 | Male   | 50 to 54 | 95%<br>(90-98%)                | 5%<br>(2.2-9.8%)         | 2.8<br>(1.7-4.2)                            | 9.7%<br>(6.7-13%)                    | 14%<br>(9.6-18%)                    | 1500<br>(890-2400)    | 64000<br>(40000-97000)    |
| South Korea | 2016 | Male   | 55 to 59 | 94%<br>(89-98%)                | 5.6%<br>(2.4-11%)        | 2.6<br>(1.6-3.7)                            | 7.7%<br>(5.1-11%)                    | 11%<br>(7.3-15%)                    | 1500<br>(870-2400)    | 54000<br>(32000-84000)    |
| South Korea | 2016 | Male   | 60 to 64 | 94%<br>(87-97%)                | 6.2%<br>(2.7-13%)        | 2.4<br>(1.4-3.7)                            | 6.1%<br>(3.7-9.1%)                   | 8.4%<br>(5.4-12%)                   | 1300<br>(650-2100)    | 38000<br>(21000-62000)    |
| South Korea | 2016 | Male   | 65 to 69 | 93%<br>(86-97%)                | 6.9%<br>(2.8-14%)        | 2.2<br>(1.4-3.3)                            | 4.9%<br>(2.7-7.5%)                   | 6.5%<br>(3.8-9.6%)                  | 1200<br>(640-2000)    | 29000<br>(15000-48000)    |
| South Korea | 2016 | Male   | 70 to 74 | 92%<br>(85-96%)                | 7.8%<br>(3.6-15%)        | 2.1<br>(1.3-3.2)                            | 3.8%<br>(1.7-6.6%)                   | 4.7%<br>(2.3-7.9%)                  | 1100<br>(500-2100)    | 22000<br>(9200-41000)     |
| South Korea | 2016 | Male   | 75 to 79 | 91%<br>(84-96%)                | 8.6%<br>(4-16%)          | 1.9<br>(1-2.9)                              | 2.5%<br>(0.69-5.3%)                  | 3%<br>(0.91-6.2%)                   | 830<br>(200-1800)     | 13000<br>(3200-28000)     |
| South Korea | 2016 | Male   | 80 to 84 | 90%<br>(82-96%)                | 9.6%<br>(4.5-18%)        | 1.6<br>(0.99-2.5)                           | 1.5%<br>(-0.2-3.7%)                  | 1.6%<br>(-0.3-4.1%)                 | 400<br>(-73-1000)     | 4900<br>(-640-12000)      |
| South Korea | 2016 | Male   | 85 to 89 | 89%<br>(80-95%)                | 11%<br>(5.1-20%)         | 1.4<br>(0.85-2.2)                           | 0.88%<br>(-0.55-2.7%)                | 0.76%<br>(-0.96-3%)                 | 130<br>(-180-510)     | 1400<br>(-920-4400)       |
| South Korea | 2016 | Male   | 90 to 94 | 89%<br>(81-95%)                | 11%<br>(5-19%)           | 1.3<br>(0.74-2)                             | 0.45%<br>(-0.91-2.2%)                | 0.09%<br>(-1.5-2.2%)                | 7.2<br>(-130-170)     | 240<br>(-490-1100)        |
| South Korea | 2016 | Male   | 95 plus  | 89%<br>(78-96%)                | 11%<br>(4.1-22%)         | 1.1<br>(0.58-2)                             | 0.17%<br>(-1.3-2%)                   | -0.52%<br>(-2.4-1.5%)               | -10<br>(-46-30)       | 15<br>(-110-170)          |
| Singapore   | 1990 | Female | All Ages | 63%<br>(55-71%)                | 37%<br>(29-45%)          | 0.51<br>(0.44-0.59)                         | -0.24%<br>(-0.82-0.28%)              | -1.1%<br>(-2.2--0.14%)              | -62<br>(-130--8)      | -640<br>(-2200-720)       |

| Location  | Year | Sex    | Age      | Prevalence of current drinkers | Prevalence of abstainers | Population average of standard drinks daily | Percent of total attributable deaths | Percent of total attributable DALYs | Attributable deaths   | Attributable DALYs   |
|-----------|------|--------|----------|--------------------------------|--------------------------|---------------------------------------------|--------------------------------------|-------------------------------------|-----------------------|----------------------|
| Singapore | 1990 | Female | 15 to 19 | 50%<br>(32-69%)                | 50%<br>(31-68%)          | 0.39<br>(0.2-0.63)                          | 0.67%<br>(0.24-1.3%)                 | 1.9%<br>(0.0049-4.5%)               | 0.58<br>(0.0015-1.4)  | 73<br>(26-130)       |
| Singapore | 1990 | Female | 20 to 24 | 68%<br>(50-83%)                | 32%<br>(17-50%)          | 0.78<br>(0.48-1.2)                          | 1.4%<br>(0.43-2.5%)                  | 3.6%<br>(-0.12-7.7%)                | 1.9<br>(-0.064-4.1)   | 200<br>(62-350)      |
| Singapore | 1990 | Female | 25 to 29 | 76%<br>(59-87%)                | 24%<br>(13-41%)          | 0.84<br>(0.56-1.2)                          | 1.2%<br>(0.35-2.1%)                  | 3.4%<br>(-0.099-7%)                 | 2.4<br>(-0.069-5)     | 220<br>(67-390)      |
| Singapore | 1990 | Female | 30 to 34 | 78%<br>(61-90%)                | 22%<br>(10-39%)          | 0.81<br>(0.53-1.1)                          | 0.99%<br>(0.23-1.9%)                 | 3.1%<br>(0.4-6%)                    | 2.9<br>(0.38-6)       | 210<br>(50-380)      |
| Singapore | 1990 | Female | 35 to 39 | 78%<br>(64-90%)                | 22%<br>(10-36%)          | 0.76<br>(0.5-1.1)                           | 0.86%<br>(0.2-1.6%)                  | 2.8%<br>(0.9-5.1%)                  | 3.4<br>(1.1-6.3)      | 180<br>(41-320)      |
| Singapore | 1990 | Female | 40 to 44 | 77%<br>(63-89%)                | 23%<br>(11-37%)          | 0.72<br>(0.42-1.1)                          | 0.58%<br>(-0.073-1.4%)               | 2.1%<br>(0.45-3.9%)                 | 3.1<br>(0.64-6)       | 110<br>(-14-250)     |
| Singapore | 1990 | Female | 45 to 49 | 75%<br>(56-88%)                | 25%<br>(12-44%)          | 0.68<br>(0.4-1)                             | 0.087%<br>(-0.66-0.9%)               | 0.87%<br>(-0.58-2.6%)               | 1.3<br>(-0.89-3.9)    | 12<br>(-94-130)      |
| Singapore | 1990 | Female | 50 to 54 | 71%<br>(53-85%)                | 29%<br>(15-47%)          | 0.62<br>(0.36-0.97)                         | -0.52%<br>(-1.5-0.44%)               | -0.31%<br>(-1.9-1.2%)               | -0.77<br>(-4.9-3.1)   | -86<br>(-240-72)     |
| Singapore | 1990 | Female | 55 to 59 | 67%<br>(48-83%)                | 33%<br>(17-52%)          | 0.57<br>(0.33-0.89)                         | -1.2%<br>(-2.3--0.2%)                | -1.3%<br>(-3-0.22%)                 | -4.6<br>(-11-0.85)    | -210<br>(-430-36)    |
| Singapore | 1990 | Female | 60 to 64 | 62%<br>(42-79%)                | 38%<br>(21-58%)          | 0.48<br>(0.26-0.81)                         | -1.7%<br>(-3.1--0.61%)               | -2%<br>(-3.9--0.56%)                | -9.8<br>(-19--2.7)    | -320<br>(-590--110)  |
| Singapore | 1990 | Female | 65 to 69 | 58%<br>(38-76%)                | 42%<br>(24-62%)          | 0.37<br>(0.21-0.59)                         | -1.7%<br>(-3--0.66%)                 | -2%<br>(-3.7--0.67%)                | -12<br>(-22--4.1)     | -310<br>(-560--120)  |
| Singapore | 1990 | Female | 70 to 74 | 55%<br>(36-72%)                | 45%<br>(28-64%)          | 0.28<br>(0.15-0.48)                         | -1.5%<br>(-2.8--0.56%)               | -1.7%<br>(-3.2--0.59%)              | -13<br>(-25--4.5)     | -270<br>(-500--100)  |
| Singapore | 1990 | Female | 75 to 79 | 53%<br>(34-70%)                | 47%<br>(30-66%)          | 0.25<br>(0.13-0.42)                         | -1.4%<br>(-2.6--0.51%)               | -1.6%<br>(-3.1--0.55%)              | -14<br>(-28-5)        | -220<br>(-420--82)   |
| Singapore | 1990 | Female | 80 to 84 | 50%<br>(31-68%)                | 50%<br>(32-69%)          | 0.25<br>(0.13-0.39)                         | -1.3%<br>(-2.3--0.46%)               | -1.5%<br>(-2.8--0.51%)              | -12<br>(-22--4.1)     | -140<br>(-250--50)   |
| Singapore | 1990 | Female | 85 to 89 | 46%<br>(30-63%)                | 54%<br>(37-70%)          | 0.25<br>(0.13-0.41)                         | -1.2%<br>(-2.2--0.44%)               | -1.3%<br>(-2.6--0.46%)              | -7.8<br>(-15--2.7)    | -62<br>(-110--23)    |
| Singapore | 1990 | Female | 90 to 94 | 45%<br>(29-63%)                | 55%<br>(37-71%)          | 0.26<br>(0.13-0.46)                         | -1.1%<br>(-2.1--0.36%)               | -1.3%<br>(-2.5--0.41%)              | -3<br>(-5.7--0.93)    | -16<br>(-31--5.5)    |
| Singapore | 1990 | Female | 95 plus  | 47%<br>(26-68%)                | 53%<br>(32-74%)          | 0.29<br>(0.13-0.53)                         | -1.1%<br>(-2.1--0.29%)               | -1.3%<br>(-2.6--0.33%)              | -0.83<br>(-1.7--0.21) | -2.9<br>(-5.6--0.78) |
| Singapore | 1990 | Male   | All Ages | 84%<br>(79-89%)                | 16%<br>(11-21%)          | 0.58<br>(0.5-0.67)                          | 0.66%<br>(-0.42-1.7%)                | -0.24%<br>(-1.7-1.2%)               | -18<br>(-130-89)      | 2100<br>(-1300-5600) |
| Singapore | 1990 | Male   | 15 to 19 | 71%<br>(54-85%)                | 29%<br>(15-46%)          | 0.36<br>(0.21-0.57)                         | 1.6%<br>(0.66-2.8%)                  | 2.7%<br>(0.45-5.5%)                 | 1.9<br>(0.34-4)       | 210<br>(85-370)      |
| Singapore | 1990 | Male   | 20 to 24 | 85%<br>(72-93%)                | 15%<br>(7.2-28%)         | 0.74<br>(0.49-1.1)                          | 3.7%<br>(1.4-6.3%)                   | 5.3%<br>(0.91-10%)                  | 6.2<br>(0.96-12)      | 590<br>(230-1000)    |
| Singapore | 1990 | Male   | 25 to 29 | 89%<br>(79-95%)                | 11%<br>(5.1-21%)         | 0.89<br>(0.63-1.2)                          | 3.5%<br>(1.4-5.8%)                   | 5%<br>(0.55-9.6%)                   | 7.5<br>(0.85-15)      | 700<br>(280-1200)    |
| Singapore | 1990 | Male   | 30 to 34 | 91%<br>(82-96%)                | 8.9%<br>(3.6-18%)        | 0.92<br>(0.66-1.2)                          | 2.7%<br>(1.1-4.6%)                   | 3.8%<br>(0.22-7.6%)                 | 6.4<br>(0.36-13)      | 590<br>(230-1000)    |

| Location  | Year | Sex    | Age      | Prevalence of current drinkers | Prevalence of abstainers | Population average of standard drinks daily | Percent of total attributable deaths | Percent of total attributable DALYs | Attributable deaths     | Attributable DALYs   |
|-----------|------|--------|----------|--------------------------------|--------------------------|---------------------------------------------|--------------------------------------|-------------------------------------|-------------------------|----------------------|
| Singapore | 1990 | Male   | 35 to 39 | 92%<br>(85-97%)                | 7.6%<br>(3.1-15%)        | 0.86<br>(0.6-1.2)                           | 2.2%<br>(0.84-3.8%)                  | 2.9%<br>(0.12-6%)                   | 5.7<br>(0.25-12)        | 470<br>(180-810)     |
| Singapore | 1990 | Male   | 40 to 44 | 93%<br>(86-97%)                | 7.1%<br>(2.8-14%)        | 0.84<br>(0.55-1.2)                          | 1.6%<br>(0.21-3.1%)                  | 1.9%<br>(-0.38-4.4%)                | 4.9<br>(-0.95-11)       | 340<br>(43-660)      |
| Singapore | 1990 | Male   | 45 to 49 | 93%<br>(84-97%)                | 7.2%<br>(2.9-16%)        | 0.85<br>(0.55-1.3)                          | 0.98%<br>(-0.56-2.5%)                | 1%<br>(-1.3-3.4%)                   | 2.8<br>(-3.6-9.1)       | 170<br>(-96-440)     |
| Singapore | 1990 | Male   | 50 to 54 | 92%<br>(84-97%)                | 7.6%<br>(3.3-16%)        | 0.82<br>(0.49-1.2)                          | 0.19%<br>(-1.5-1.8%)                 | -0.0035%<br>(-2.2-2.2%)             | -0.038<br>(-9.7-9.3)    | 41<br>(-320-390)     |
| Singapore | 1990 | Male   | 55 to 59 | 91%<br>(83-96%)                | 8.5%<br>(3.5-17%)        | 0.75<br>(0.46-1.1)                          | -0.5%<br>(-2.4-1.1%)                 | -0.79%<br>(-3.2-1.3%)               | -5.1<br>(-21-8.4)       | -130<br>(-640-300)   |
| Singapore | 1990 | Male   | 60 to 64 | 90%<br>(80-96%)                | 9.5%<br>(3.9-20%)        | 0.68<br>(0.41-1)                            | -0.87%<br>(-2.6-0.56%)               | -1.2%<br>(-3.2-0.62%)               | -10<br>(-30-5.5)        | -260<br>(-770-170)   |
| Singapore | 1990 | Male   | 65 to 69 | 89%<br>(80-96%)                | 11%<br>(4.4-20%)         | 0.61<br>(0.38-0.92)                         | -0.93%<br>(-2.5-0.38%)               | -1.2%<br>(-3-0.38%)                 | -11<br>(-28-4)          | -240<br>(-630-100)   |
| Singapore | 1990 | Male   | 70 to 74 | 88%<br>(78-95%)                | 12%<br>(5.3-22%)         | 0.52<br>(0.31-0.82)                         | -0.78%<br>(-2.1-0.31%)               | -0.96%<br>(-2.5-0.3%)               | -9.8<br>(-26-3.1)       | -170<br>(-470-70)    |
| Singapore | 1990 | Male   | 75 to 79 | 86%<br>(76-94%)                | 14%<br>(6.1-24%)         | 0.45<br>(0.26-0.72)                         | -0.67%<br>(-1.8-0.26%)               | -0.84%<br>(-2.1-0.22%)              | -8.2<br>(-21-2.2)       | -110<br>(-290-43)    |
| Singapore | 1990 | Male   | 80 to 84 | 85%<br>(73-93%)                | 15%<br>(7.2-27%)         | 0.39<br>(0.23-0.6)                          | -0.6%<br>(-1.5-0.2%)                 | -0.78%<br>(-1.9-0.16%)              | -5.5<br>(-14-1.1)       | -55<br>(-140-18)     |
| Singapore | 1990 | Male   | 85 to 89 | 83%<br>(71-92%)                | 17%<br>(8.3-29%)         | 0.36<br>(0.21-0.56)                         | -0.57%<br>(-1.5-0.18%)               | -0.75%<br>(-1.8-0.14%)              | -2.7<br>(-6.6-0.52)     | -19<br>(-48-5.7)     |
| Singapore | 1990 | Male   | 90 to 94 | 83%<br>(70-92%)                | 17%<br>(8.2-30%)         | 0.33<br>(0.18-0.55)                         | -0.57%<br>(-1.5-0.15%)               | -0.81%<br>(-1.9-0.056%)             | -0.83<br>(-2-0.055)     | -3.7<br>(-9.8-0.98)  |
| Singapore | 1990 | Male   | 95 plus  | 83%<br>(67-93%)                | 17%<br>(6.8-33%)         | 0.32<br>(0.15-0.56)                         | -0.71%<br>(-1.8-0.09%)               | -1.1%<br>(-2.4--0.07%)              | -0.19<br>(-0.44--0.013) | -0.54<br>(-1.4-0.07) |
| Singapore | 1995 | Female | All Ages | 62%<br>(53-70%)                | 38%<br>(30-47%)          | 0.58<br>(0.49-0.67)                         | -0.21%<br>(-0.74-0.28%)              | -1%<br>(-2.1--0.12%)                | -64<br>(-130--7.2)      | -600<br>(-2100-810)  |
| Singapore | 1995 | Female | 15 to 19 | 49%<br>(31-67%)                | 51%<br>(33-69%)          | 0.41<br>(0.22-0.68)                         | 0.67%<br>(0.28-1.2%)                 | 2%<br>(0.11-4.7%)                   | 0.48<br>(0.028-1.1)     | 63<br>(27-110)       |
| Singapore | 1995 | Female | 20 to 24 | 66%<br>(47-81%)                | 34%<br>(19-53%)          | 0.84<br>(0.5-1.3)                           | 1.3%<br>(0.57-2.2%)                  | 3.9%<br>(0.3-8.1%)                  | 1.4<br>(0.091-2.9)      | 170<br>(75-280)      |
| Singapore | 1995 | Female | 25 to 29 | 74%<br>(56-86%)                | 26%<br>(14-44%)          | 0.95<br>(0.62-1.3)                          | 1.1%<br>(0.46-1.9%)                  | 3.8%<br>(0.7-7.3%)                  | 1.8<br>(0.35-3.7)       | 180<br>(77-310)      |
| Singapore | 1995 | Female | 30 to 34 | 77%<br>(59-89%)                | 23%<br>(11-41%)          | 0.92<br>(0.59-1.3)                          | 0.95%<br>(0.35-1.7%)                 | 3.6%<br>(1.2-6.4%)                  | 2.5<br>(0.79-4.7)       | 190<br>(70-330)      |
| Singapore | 1995 | Female | 35 to 39 | 77%<br>(61-89%)                | 23%<br>(11-39%)          | 0.83<br>(0.54-1.2)                          | 0.87%<br>(0.25-1.6%)                 | 3.3%<br>(1.4-5.5%)                  | 3.7<br>(1.5-6.5)        | 200<br>(62-340)      |
| Singapore | 1995 | Female | 40 to 44 | 76%<br>(61-88%)                | 24%<br>(12-39%)          | 0.79<br>(0.47-1.1)                          | 0.66%<br>(0.064-1.4%)                | 2.6%<br>(1-4.6%)                    | 3.9<br>(1.5-7.1)        | 150<br>(14-310)      |
| Singapore | 1995 | Female | 45 to 49 | 74%<br>(53-87%)                | 26%<br>(13-47%)          | 0.77<br>(0.47-1.2)                          | 0.33%<br>(-0.41-1.2%)                | 1.6%<br>(0.016-3.4%)                | 3.2<br>(0.028-7.1)      | 69<br>(-89-240)      |
| Singapore | 1995 | Female | 50 to 54 | 70%<br>(51-83%)                | 30%<br>(17-49%)          | 0.7<br>(0.42-1.1)                           | -0.19%<br>(-1.1-0.79%)               | 0.32%<br>(-1.3-2%)                  | 0.72<br>(-2.7-4.6)      | -32<br>(-180-120)    |

| Location  | Year | Sex    | Age      | Prevalence of current drinkers | Prevalence of abstainers | Population average of standard drinks daily | Percent of total attributable deaths | Percent of total attributable DALYs | Attributable deaths  | Attributable DALYs   |
|-----------|------|--------|----------|--------------------------------|--------------------------|---------------------------------------------|--------------------------------------|-------------------------------------|----------------------|----------------------|
| Singapore | 1995 | Female | 55 to 59 | 65%<br>(47-81%)                | 35%<br>(19-53%)          | 0.6<br>(0.34-0.95)                          | -0.84%<br>(-1.9-0.084%)              | -0.81%<br>(-2.4-0.65%)              | -2.8<br>(-8.6-2.4)   | -160<br>(-360-16)    |
| Singapore | 1995 | Female | 60 to 64 | 60%<br>(40-78%)                | 40%<br>(22-60%)          | 0.51<br>(0.28-0.86)                         | -1.5%<br>(-2.7--0.42%)               | -1.7%<br>(-3.4--0.3%)               | -8.4<br>(-17--1.4)   | -290<br>(-550--88)   |
| Singapore | 1995 | Female | 65 to 69 | 56%<br>(36-74%)                | 44%<br>(26-64%)          | 0.44<br>(0.25-0.68)                         | -1.6%<br>(-2.9--0.62%)               | -2%<br>(-3.6--0.63%)                | -13<br>(-25--4)      | -340<br>(-660--130)  |
| Singapore | 1995 | Female | 70 to 74 | 54%<br>(35-71%)                | 46%<br>(29-65%)          | 0.38<br>(0.2-0.64)                          | -1.6%<br>(-2.8--0.58%)               | -1.8%<br>(-3.2--0.6%)               | -14<br>(-26--4.7)    | -290<br>(-520--100)  |
| Singapore | 1995 | Female | 75 to 79 | 52%<br>(34-70%)                | 48%<br>(30-66%)          | 0.33<br>(0.18-0.57)                         | -1.5%<br>(-2.8--0.58%)               | -1.8%<br>(-3.3--0.63%)              | -16<br>(-30--5.7)    | -250<br>(-460--96)   |
| Singapore | 1995 | Female | 80 to 84 | 49%<br>(30-67%)                | 51%<br>(33-70%)          | 0.29<br>(0.16-0.48)                         | -1.3%<br>(-2.3--0.46%)               | -1.5%<br>(-2.8--0.48%)              | -13<br>(-25--4.1)    | -160<br>(-290--56)   |
| Singapore | 1995 | Female | 85 to 89 | 45%<br>(28-63%)                | 55%<br>(37-72%)          | 0.26<br>(0.13-0.44)                         | -1.1%<br>(-2--0.38%)                 | -1.2%<br>(-2.4--0.4%)               | -8.7<br>(-17--2.7)   | -74<br>(-140--26)    |
| Singapore | 1995 | Female | 90 to 94 | 44%<br>(28-63%)                | 56%<br>(37-72%)          | 0.25<br>(0.12-0.44)                         | -0.98%<br>(-1.9--0.31%)              | -1.1%<br>(-2.2--0.31%)              | -4.1<br>(-8--1.1)    | -23<br>(-45--7.3)    |
| Singapore | 1995 | Female | 95 plus  | 46%<br>(25-67%)                | 54%<br>(33-75%)          | 0.25<br>(0.11-0.46)                         | -0.9%<br>(-1.8--0.2%)                | -1.1%<br>(-2.2--0.21%)              | -1.1<br>(-2.4--0.23) | -4.1<br>(-8.1--0.9)  |
| Singapore | 1995 | Male   | All Ages | 85%<br>(80-90%)                | 15%<br>(10-20%)          | 0.67<br>(0.58-0.76)                         | -0.28%<br>(-0.43-1.6%)               | -0.28%<br>(-1.7-1.1%)               | -22<br>(-140-89)     | 2000<br>(-1300-5300) |
| Singapore | 1995 | Male   | 15 to 19 | 72%<br>(55-85%)                | 28%<br>(15-45%)          | 0.4<br>(0.22-0.63)                          | 1.6%<br>(0.66-2.7%)                  | 2.9%<br>(0.51-6%)                   | 1.5<br>(0.27-3)      | 170<br>(70-290)      |
| Singapore | 1995 | Male   | 20 to 24 | 85%<br>(72-93%)                | 15%<br>(7.1-28%)         | 0.83<br>(0.54-1.2)                          | 3.6%<br>(1.6-5.9%)                   | 5.7%<br>(1.1-11%)                   | 4.8<br>(0.94-9.2)    | 490<br>(220-810)     |
| Singapore | 1995 | Male   | 25 to 29 | 89%<br>(80-95%)                | 11%<br>(5-20%)           | 1<br>(0.7-1.4)                              | 3.4%<br>(1.6-5.2%)                   | 5.6%<br>(0.94-10%)                  | 4.6<br>(0.75-8.5)    | 500<br>(230-770)     |
| Singapore | 1995 | Male   | 30 to 34 | 91%<br>(82-96%)                | 8.6%<br>(3.5-18%)        | 1.1<br>(0.75-1.4)                           | 2.8%<br>(1.2-4.4%)                   | 4.3%<br>(0.64-8.2%)                 | 5.4<br>(0.76-10)     | 540<br>(250-860)     |
| Singapore | 1995 | Male   | 35 to 39 | 93%<br>(85-97%)                | 7.4%<br>(3-15%)          | 0.96<br>(0.68-1.3)                          | 2.2%<br>(0.78-3.7%)                  | 3.2%<br>(0.11-6.5%)                 | 6<br>(0.22-13)       | 500<br>(190-830)     |
| Singapore | 1995 | Male   | 40 to 44 | 93%<br>(86-97%)                | 6.9%<br>(2.6-14%)        | 0.94<br>(0.62-1.3)                          | 1.7%<br>(0.45-3.1%)                  | 2.4%<br>(0.066-4.8%)                | 5.9<br>(0.14-13)     | 400<br>(110-720)     |
| Singapore | 1995 | Male   | 45 to 49 | 93%<br>(86-97%)                | 7%<br>(2.9-14%)          | 0.97<br>(0.64-1.4)                          | 1.2%<br>(-0.29-2.7%)                 | 1.5%<br>(-0.99-3.8%)                | 5.2<br>(-3.4-14)     | 300<br>(-73-680)     |
| Singapore | 1995 | Male   | 50 to 54 | 93%<br>(85-97%)                | 7.3%<br>(3.1-15%)        | 0.93<br>(0.58-1.4)                          | 0.55%<br>(-0.98-2.1%)                | 0.57%<br>(-1.7-2.9%)                | 2.1<br>(-6.1-11)     | 110<br>(-200-430)    |
| Singapore | 1995 | Male   | 55 to 59 | 92%<br>(85-97%)                | 8.1%<br>(3.4-15%)        | 0.84<br>(0.52-1.3)                          | -0.23%<br>(-1.9-1.3%)                | -0.43%<br>(-2.7-1.7%)               | -2.5<br>(-16-9.8)    | -58<br>(-480-340)    |
| Singapore | 1995 | Male   | 60 to 64 | 91%<br>(81-96%)                | 9.3%<br>(4-19%)          | 0.77<br>(0.46-1.2)                          | -0.76%<br>(-2.5-0.75%)               | -1%<br>(-3.2-0.87%)                 | -8.6<br>(-27-7.3)    | -220<br>(-700-210)   |
| Singapore | 1995 | Male   | 65 to 69 | 89%<br>(79-95%)                | 11%<br>(4.6-21%)         | 0.71<br>(0.46-1)                            | -0.94%<br>(-2.5-0.42%)               | -1.2%<br>(-3.1-0.45%)               | -12<br>(-33-4.9)     | -280<br>(-740-130)   |
| Singapore | 1995 | Male   | 70 to 74 | 88%<br>(77-95%)                | 12%<br>(5.5-23%)         | 0.63<br>(0.37-0.96)                         | -0.87%<br>(-2.2-0.33%)               | -1.1%<br>(-2.7-0.36%)               | -11<br>(-29-3.7)     | -200<br>(-520-81)    |

| Location  | Year | Sex    | Age      | Prevalence of current drinkers | Prevalence of abstainers | Population average of standard drinks daily | Percent of total attributable deaths | Percent of total attributable DALYs | Attributable deaths      | Attributable DALYs   |
|-----------|------|--------|----------|--------------------------------|--------------------------|---------------------------------------------|--------------------------------------|-------------------------------------|--------------------------|----------------------|
| Singapore | 1995 | Male   | 75 to 79 | 86%<br>(75-94%)                | 14%<br>(6.1-25%)         | 0.53<br>(0.31-0.85)                         | -0.82%<br>(-2-0.25%)                 | -0.99%<br>(-2.4-0.25%)              | -10<br>(-25-2.7)         | -140<br>(-360-46)    |
| Singapore | 1995 | Male   | 80 to 84 | 85%<br>(72-93%)                | 15%<br>(6.9-28%)         | 0.45<br>(0.26-0.69)                         | -0.67%<br>(-1.7-0.2%)                | -0.84%<br>(-2.1-0.18%)              | -7.1<br>(-18-1.6)        | -73<br>(-190-22)     |
| Singapore | 1995 | Male   | 85 to 89 | 83%<br>(71-92%)                | 17%<br>(8.3-29%)         | 0.39<br>(0.23-0.61)                         | -0.52%<br>(-1.4-0.21%)               | -0.71%<br>(-1.7-0.17%)              | -3.6<br>(-9-0.88)        | -25<br>(-69-10)      |
| Singapore | 1995 | Male   | 90 to 94 | 83%<br>(71-92%)                | 17%<br>(8.2-29%)         | 0.34<br>(0.19-0.58)                         | -0.55%<br>(-1.5-0.15%)               | -0.77%<br>(-1.9-0.089%)             | -1.4<br>(-3.4-0.16)      | -6.5<br>(-17-1.8)    |
| Singapore | 1995 | Male   | 95 plus  | 83%<br>(68-93%)                | 17%<br>(6.5-32%)         | 0.31<br>(0.14-0.55)                         | -0.59%<br>(-1.6-0.14%)               | -0.91%<br>(-2.2--0.0055%)           | -0.32<br>(-0.76--0.0019) | -0.89<br>(-2.3-0.22) |
| Singapore | 2000 | Female | All Ages | 61%<br>(53-69%)                | 39%<br>(31-47%)          | 0.65<br>(0.57-0.75)                         | -0.098%<br>(-0.61-0.39%)             | -0.86%<br>(-1.9-0.04%)              | -56<br>(-120-2.9)        | -290<br>(-1800-1200) |
| Singapore | 2000 | Female | 15 to 19 | 48%<br>(30-67%)                | 52%<br>(33-70%)          | 0.46<br>(0.24-0.79)                         | 0.71%<br>(0.26-1.3%)                 | 2.2%<br>(0.033-5%)                  | 0.56<br>(0.0084-1.3)     | 71<br>(26-130)       |
| Singapore | 2000 | Female | 20 to 24 | 66%<br>(47-81%)                | 34%<br>(19-53%)          | 0.97<br>(0.57-1.5)                          | 1.3%<br>(0.59-2.1%)                  | 4.5%<br>(0.75-8.9%)                 | 1.2<br>(0.2-2.4)         | 150<br>(69-250)      |
| Singapore | 2000 | Female | 25 to 29 | 73%<br>(56-86%)                | 27%<br>(14-44%)          | 1.1<br>(0.69-1.6)                           | 1.2%<br>(0.54-1.9%)                  | 4.5%<br>(1-8.4%)                    | 1.7<br>(0.38-3.4)        | 180<br>(83-290)      |
| Singapore | 2000 | Female | 30 to 34 | 76%<br>(58-88%)                | 24%<br>(12-42%)          | 1<br>(0.66-1.5)                             | 1.1%<br>(0.47-1.8%)                  | 4.1%<br>(1.6-7.4%)                  | 2.7<br>(1-4.8)           | 210<br>(92-350)      |
| Singapore | 2000 | Female | 35 to 39 | 77%<br>(61-89%)                | 23%<br>(11-39%)          | 0.95<br>(0.62-1.3)                          | 0.93%<br>(0.34-1.6%)                 | 3.8%<br>(1.7-6.1%)                  | 3.8<br>(1.7-6.5)         | 210<br>(78-370)      |
| Singapore | 2000 | Female | 40 to 44 | 76%<br>(59-88%)                | 24%<br>(12-41%)          | 0.91<br>(0.57-1.3)                          | 0.74%<br>(0.097-1.5%)                | 3.1%<br>(1.3-5.3%)                  | 4.6<br>(1.9-8.3)         | 190<br>(26-380)      |
| Singapore | 2000 | Female | 45 to 49 | 73%<br>(52-87%)                | 27%<br>(13-48%)          | 0.88<br>(0.55-1.3)                          | 0.56%<br>(-0.17-1.5%)                | 2.3%<br>(0.54-4.4%)                 | 4.9<br>(1.1-9.9)         | 140<br>(-43-360)     |
| Singapore | 2000 | Female | 50 to 54 | 69%<br>(50-83%)                | 31%<br>(17-50%)          | 0.8<br>(0.49-1.2)                           | 0.16%<br>(-0.65-1.2%)                | 1.1%<br>(-0.46-3%)                  | 3.2<br>(-1.3-8.7)        | 36<br>(-160-260)     |
| Singapore | 2000 | Female | 55 to 59 | 65%<br>(46-81%)                | 35%<br>(19-54%)          | 0.7<br>(0.4-1.1)                            | -0.48%<br>(-1.5-0.44%)               | -0.19%<br>(-1.7-1.4%)               | -0.53<br>(-5-4.3)        | -84<br>(-250-77)     |
| Singapore | 2000 | Female | 60 to 64 | 59%<br>(39-77%)                | 41%<br>(23-61%)          | 0.59<br>(0.32-0.97)                         | -1.2%<br>(-2.3--0.14%)               | -1.4%<br>(-3-0.13%)                 | -6.3<br>(-14-0.63)       | -240<br>(-480--28)   |
| Singapore | 2000 | Female | 65 to 69 | 55%<br>(35-74%)                | 45%<br>(26-65%)          | 0.49<br>(0.28-0.76)                         | -1.5%<br>(-2.7--0.55%)               | -1.8%<br>(-3.5--0.51%)              | -12<br>(-24--3.5)        | -340<br>(-620--120)  |
| Singapore | 2000 | Female | 70 to 74 | 52%<br>(32-70%)                | 48%<br>(30-68%)          | 0.4<br>(0.21-0.69)                          | -1.4%<br>(-2.6--0.52%)               | -1.7%<br>(-3.1--0.56%)              | -14<br>(-26--4.6)        | -300<br>(-530--110)  |
| Singapore | 2000 | Female | 75 to 79 | 49%<br>(31-68%)                | 51%<br>(32-69%)          | 0.34<br>(0.18-0.59)                         | -1.4%<br>(-2.5--0.52%)               | -1.6%<br>(-3--0.56%)                | -15<br>(-28--4.9)        | -240<br>(-440--84)   |
| Singapore | 2000 | Female | 80 to 84 | 47%<br>(28-65%)                | 53%<br>(35-72%)          | 0.32<br>(0.17-0.52)                         | -1.2%<br>(-2.2--0.42%)               | -1.4%<br>(-2.7--0.47%)              | -14<br>(-25--4.3)        | -160<br>(-290--59)   |
| Singapore | 2000 | Female | 85 to 89 | 44%<br>(27-61%)                | 56%<br>(39-73%)          | 0.3<br>(0.16-0.5)                           | -1%<br>(-1.9--0.37%)                 | -1.2%<br>(-2.3--0.38%)              | -10<br>(-20--3.2)        | -89<br>(-170--32)    |
| Singapore | 2000 | Female | 90 to 94 | 43%<br>(27-61%)                | 57%<br>(39-73%)          | 0.3<br>(0.15-0.51)                          | -0.91%<br>(-1.8--0.25%)              | -1.1%<br>(-2.1--0.23%)              | -5.1<br>(-10--1.2)       | -30<br>(-59--9)      |

| Location  | Year | Sex    | Age      | Prevalence of current drinkers | Prevalence of abstainers | Population average of standard drinks daily | Percent of total attributable deaths | Percent of total attributable DALYs | Attributable deaths   | Attributable DALYs   |
|-----------|------|--------|----------|--------------------------------|--------------------------|---------------------------------------------|--------------------------------------|-------------------------------------|-----------------------|----------------------|
| Singapore | 2000 | Female | 95 plus  | 45%<br>(24-66%)                | 55%<br>(34-76%)          | 0.31<br>(0.14-0.57)                         | -0.89%<br>(-1.8--0.16%)              | -1.1%<br>(-2.3--0.16%)              | -1.5<br>(-3.2--0.22)  | -5.6<br>(-11--1.1)   |
| Singapore | 2000 | Male   | All Ages | 85%<br>(81-90%)                | 15%<br>(10-19%)          | 0.76<br>(0.67-0.87)                         | 0.73%<br>(-0.35-1.7%)                | -0.16%<br>(-1.6-1.2%)               | -13<br>(-130-99)      | 2400<br>(-1200-5600) |
| Singapore | 2000 | Male   | 15 to 19 | 71%<br>(54-85%)                | 29%<br>(15-46%)          | 0.46<br>(0.25-0.73)                         | 1.5%<br>(0.74-2.5%)                  | 3.1%<br>(0.62-6.4%)                 | 1.2<br>(0.23-2.5)     | 150<br>(72-260)      |
| Singapore | 2000 | Male   | 20 to 24 | 84%<br>(72-93%)                | 16%<br>(7.3-28%)         | 0.96<br>(0.61-1.4)                          | 3.9%<br>(1.8-6.2%)                   | 6.3%<br>(1.6-11%)                   | 4.7<br>(1.2-8.4)      | 470<br>(220-750)     |
| Singapore | 2000 | Male   | 25 to 29 | 89%<br>(80-95%)                | 11%<br>(5.2-20%)         | 1.1<br>(0.77-1.6)                           | 3.5%<br>(1.8-5.4%)                   | 6%<br>(1.3-11%)                     | 4.7<br>(1-8.7)        | 500<br>(260-770)     |
| Singapore | 2000 | Male   | 30 to 34 | 91%<br>(82-96%)                | 8.7%<br>(3.6-18%)        | 1.2<br>(0.83-1.6)                           | 2.9%<br>(1.3-4.6%)                   | 4.8%<br>(0.79-9%)                   | 5.1<br>(0.81-9.8)     | 500<br>(230-790)     |
| Singapore | 2000 | Male   | 35 to 39 | 93%<br>(85-97%)                | 7.5%<br>(3-15%)          | 1.1<br>(0.78-1.5)                           | 2.4%<br>(0.94-4%)                    | 3.6%<br>(0.33-7.2%)                 | 6.6<br>(0.56-14)      | 540<br>(220-920)     |
| Singapore | 2000 | Male   | 40 to 44 | 93%<br>(86-97%)                | 7%<br>(2.7-14%)          | 1.1<br>(0.73-1.5)                           | 1.9%<br>(0.59-3.3%)                  | 2.8%<br>(0.21-5.5%)                 | 7.6<br>(0.59-15)      | 510<br>(150-880)     |
| Singapore | 2000 | Male   | 45 to 49 | 93%<br>(85-97%)                | 7%<br>(2.9-15%)          | 1.1<br>(0.74-1.5)                           | 1.3%<br>(-0.17-2.7%)                 | 1.8%<br>(-0.79-4.2%)                | 6.2<br>(-2.9-15)      | 360<br>(-51-750)     |
| Singapore | 2000 | Male   | 50 to 54 | 93%<br>(85-97%)                | 7.3%<br>(3.1-15%)        | 1<br>(0.67-1.5)                             | 0.62%<br>(-0.98-2.1%)                | 0.69%<br>(-1.8-2.9%)                | 3.2<br>(-8.3-14)      | 180<br>(-270-580)    |
| Singapore | 2000 | Male   | 55 to 59 | 92%<br>(84-97%)                | 8.1%<br>(3.3-16%)        | 0.98<br>(0.61-1.4)                          | 0.043%<br>(-1.5-1.5%)                | -0.083%<br>(-2.3-2%)                | -0.4<br>(-12-9.9)     | 10<br>(-370-350)     |
| Singapore | 2000 | Male   | 60 to 64 | 91%<br>(81-96%)                | 9.3%<br>(3.9-19%)        | 0.89<br>(0.53-1.4)                          | -0.49%<br>(-2.1-0.97%)               | -0.73%<br>(-2.9-1.2%)               | -5.7<br>(-23-9.4)     | -140<br>(-610-280)   |
| Singapore | 2000 | Male   | 65 to 69 | 89%<br>(79-95%)                | 11%<br>(4.5-21%)         | 0.78<br>(0.49-1.1)                          | -0.78%<br>(-2.3-0.55%)               | -1%<br>(-2.8-0.64%)                 | -10<br>(-29-6.7)      | -230<br>(-660-160)   |
| Singapore | 2000 | Male   | 70 to 74 | 87%<br>(76-94%)                | 13%<br>(5.9-24%)         | 0.65<br>(0.39-0.99)                         | -0.78%<br>(-2.1-0.36%)               | -0.98%<br>(-2.6-0.42%)              | -11<br>(-30-4.3)      | -200<br>(-550-100)   |
| Singapore | 2000 | Male   | 75 to 79 | 86%<br>(74-93%)                | 14%<br>(6.6-26%)         | 0.54<br>(0.32-0.87)                         | -0.76%<br>(-1.9-0.24%)               | -0.95%<br>(-2.3-0.22%)              | -10<br>(-25-2.4)      | -140<br>(-350-45)    |
| Singapore | 2000 | Male   | 80 to 84 | 84%<br>(71-92%)                | 16%<br>(7.6-29%)         | 0.48<br>(0.28-0.73)                         | -0.68%<br>(-1.7-0.17%)               | -0.88%<br>(-2.2-0.16%)              | -7.6<br>(-19-1.4)     | -79<br>(-200-21)     |
| Singapore | 2000 | Male   | 85 to 89 | 82%<br>(68-91%)                | 18%<br>(8.9-32%)         | 0.44<br>(0.25-0.7)                          | -0.55%<br>(-1.4-0.21%)               | -0.76%<br>(-1.9-0.17%)              | -4.3<br>(-11-0.98)    | -30<br>(-79-12)      |
| Singapore | 2000 | Male   | 90 to 94 | 81%<br>(68-91%)                | 19%<br>(9.2-32%)         | 0.42<br>(0.23-0.7)                          | -0.52%<br>(-1.4-0.21%)               | -0.79%<br>(-2-0.1%)                 | -2<br>(-4.9-0.27)     | -9.1<br>(-25-3.6)    |
| Singapore | 2000 | Male   | 95 plus  | 82%<br>(64-93%)                | 18%<br>(7.3-36%)         | 0.41<br>(0.19-0.71)                         | -0.55%<br>(-1.6-0.2%)                | -0.95%<br>(-2.2-0.063%)             | -0.48<br>(-1.1-0.031) | -1.3<br>(-3.5-0.46)  |
| Singapore | 2005 | Female | All Ages | 61%<br>(52-68%)                | 39%<br>(32-48%)          | 0.64<br>(0.55-0.74)                         | -0.0034%<br>(-0.45-0.45%)            | -0.67%<br>(-1.6-0.13%)              | -49<br>(-110-8.8)     | -12<br>(-1500-1400)  |
| Singapore | 2005 | Female | 15 to 19 | 47%<br>(29-66%)                | 53%<br>(34-71%)          | 0.44<br>(0.23-0.75)                         | 0.61%<br>(0.26-1.1%)                 | 2.1%<br>(0.22-4.7%)                 | 0.44<br>(0.048-0.99)  | 65<br>(28-110)       |
| Singapore | 2005 | Female | 20 to 24 | 65%<br>(46-80%)                | 35%<br>(20-54%)          | 0.94<br>(0.54-1.5)                          | 1.2%<br>(0.61-2.1%)                  | 4.3%<br>(0.75-8.5%)                 | 1.2<br>(0.2-2.4)      | 150<br>(67-240)      |

| Location  | Year | Sex    | Age      | Prevalence of current drinkers | Prevalence of abstainers | Population average of standard drinks daily | Percent of total attributable deaths | Percent of total attributable DALYs | Attributable deaths  | Attributable DALYs   |
|-----------|------|--------|----------|--------------------------------|--------------------------|---------------------------------------------|--------------------------------------|-------------------------------------|----------------------|----------------------|
| Singapore | 2005 | Female | 25 to 29 | 72%<br>(55-85%)                | 28%<br>(15-45%)          | 1.1<br>(0.67-1.6)                           | 1.1%<br>(0.54-1.8%)                  | 4.3%<br>(1-8.2%)                    | 1.4<br>(0.33-2.7)    | 160<br>(80-260)      |
| Singapore | 2005 | Female | 30 to 34 | 75%<br>(57-88%)                | 25%<br>(12-43%)          | 1<br>(0.64-1.5)                             | 1%<br>(0.46-1.7%)                    | 4%<br>(1.5-7.2%)                    | 2.3<br>(0.85-4.2)    | 190<br>(89-320)      |
| Singapore | 2005 | Female | 35 to 39 | 76%<br>(59-88%)                | 24%<br>(12-41%)          | 0.93<br>(0.59-1.3)                          | 0.85%<br>(0.34-1.5%)                 | 3.7%<br>(1.6-6%)                    | 2.9<br>(1.3-5)       | 180<br>(78-300)      |
| Singapore | 2005 | Female | 40 to 44 | 75%<br>(58-87%)                | 25%<br>(13-42%)          | 0.88<br>(0.54-1.3)                          | 0.78%<br>(0.18-1.5%)                 | 3%<br>(1.2-5.2%)                    | 4.4<br>(1.7-7.7)     | 200<br>(47-370)      |
| Singapore | 2005 | Female | 45 to 49 | 72%<br>(52-86%)                | 28%<br>(14-48%)          | 0.85<br>(0.53-1.3)                          | 0.61%<br>(-0.061-1.4%)               | 2.3%<br>(0.66-4.3%)                 | 5.1<br>(1.4-9.6)     | 170<br>(-16-380)     |
| Singapore | 2005 | Female | 50 to 54 | 68%<br>(49-83%)                | 32%<br>(17-51%)          | 0.77<br>(0.48-1.1)                          | 0.38%<br>(-0.34-1.2%)                | 1.5%<br>(0.016-3.1%)                | 4.6<br>(0.045-9.9)   | 100<br>(-90-330)     |
| Singapore | 2005 | Female | 55 to 59 | 64%<br>(44-81%)                | 36%<br>(19-56%)          | 0.68<br>(0.39-1.1)                          | -0.16%<br>(-1-0.68%)                 | 0.27%<br>(-1.2-1.7%)                | 1.1<br>(-4.6-6.7)    | -42<br>(-260-170)    |
| Singapore | 2005 | Female | 60 to 64 | 58%<br>(37-77%)                | 42%<br>(23-63%)          | 0.57<br>(0.31-0.93)                         | -0.77%<br>(-1.7-0.062%)              | -0.86%<br>(-2.4-0.43%)              | -3.5<br>(-9.5-1.7)   | -150<br>(-350-11)    |
| Singapore | 2005 | Female | 65 to 69 | 54%<br>(33-74%)                | 46%<br>(26-67%)          | 0.47<br>(0.26-0.73)                         | -1.1%<br>(-2.1--0.32%)               | -1.4%<br>(-2.8--0.24%)              | -8<br>(-16--1.5)     | -240<br>(-460--68)   |
| Singapore | 2005 | Female | 70 to 74 | 51%<br>(32-69%)                | 49%<br>(31-68%)          | 0.38<br>(0.2-0.63)                          | -1.1%<br>(-2.1--0.41%)               | -1.4%<br>(-2.6--0.4%)               | -11<br>(-22--3.1)    | -250<br>(-450--86)   |
| Singapore | 2005 | Female | 75 to 79 | 49%<br>(31-69%)                | 51%<br>(31-69%)          | 0.33<br>(0.18-0.56)                         | -1.2%<br>(-2.1--0.42%)               | -1.4%<br>(-2.6--0.44%)              | -14<br>(-27--4.7)    | -230<br>(-440--83)   |
| Singapore | 2005 | Female | 80 to 84 | 46%<br>(28-65%)                | 54%<br>(35-72%)          | 0.3<br>(0.16-0.48)                          | -0.99%<br>(-1.8--0.36%)              | -1.2%<br>(-2.3--0.38%)              | -13<br>(-24--4.1)    | -160<br>(-300--57)   |
| Singapore | 2005 | Female | 85 to 89 | 42%<br>(26-59%)                | 58%<br>(41-74%)          | 0.29<br>(0.15-0.47)                         | -0.91%<br>(-1.7--0.3%)               | -1.1%<br>(-2.1--0.34%)              | -11<br>(-22--3.5)    | -96<br>(-180--32)    |
| Singapore | 2005 | Female | 90 to 94 | 42%<br>(26-59%)                | 58%<br>(41-74%)          | 0.29<br>(0.15-0.48)                         | -0.87%<br>(-1.7--0.24%)              | -1%<br>(-2.1--0.24%)                | -7.6<br>(-15--1.8)   | -43<br>(-84--12)     |
| Singapore | 2005 | Female | 95 plus  | 44%<br>(24-65%)                | 56%<br>(35-76%)          | 0.3<br>(0.13-0.57)                          | -0.87%<br>(-1.8--0.15%)              | -1.1%<br>(-2.2--0.15%)              | -3.1<br>(-6.4--0.41) | -11<br>(-23--1.9)    |
| Singapore | 2005 | Male   | All Ages | 86%<br>(81-90%)                | 14%<br>(10-19%)          | 0.76<br>(0.66-0.87)                         | 0.61%<br>(-0.4-1.6%)                 | -0.23%<br>(-1.6-1.1%)               | -20<br>(-140-94)     | 2100<br>(-1300-5400) |
| Singapore | 2005 | Male   | 15 to 19 | 70%<br>(54-85%)                | 30%<br>(15-46%)          | 0.44<br>(0.24-0.7)                          | 1.4%<br>(0.71-2.3%)                  | 3%<br>(0.6-6.1%)                    | 1.1<br>(0.22-2.3)    | 150<br>(76-250)      |
| Singapore | 2005 | Male   | 20 to 24 | 84%<br>(72-92%)                | 16%<br>(7.6-28%)         | 0.92<br>(0.58-1.4)                          | 3.6%<br>(1.8-5.7%)                   | 6.1%<br>(1.4-11%)                   | 4.1<br>(0.9-7.4)     | 430<br>(210-670)     |
| Singapore | 2005 | Male   | 25 to 29 | 89%<br>(80-95%)                | 11%<br>(5.3-20%)         | 1.1<br>(0.75-1.6)                           | 3.4%<br>(1.8-5.1%)                   | 6%<br>(1.3-11%)                     | 3.6<br>(0.82-6.8)    | 410<br>(210-630)     |
| Singapore | 2005 | Male   | 30 to 34 | 91%<br>(82-96%)                | 8.8%<br>(3.5-18%)        | 1.2<br>(0.81-1.6)                           | 2.8%<br>(1.3-4.4%)                   | 4.8%<br>(0.84-9.2%)                 | 4.1<br>(0.69-8.1)    | 440<br>(220-690)     |
| Singapore | 2005 | Male   | 35 to 39 | 92%<br>(85-97%)                | 7.7%<br>(3.4-15%)        | 1.1<br>(0.74-1.5)                           | 2.1%<br>(0.89-3.6%)                  | 3.3%<br>(0.13-6.8%)                 | 4.5<br>(0.18-9.5)    | 420<br>(180-690)     |
| Singapore | 2005 | Male   | 40 to 44 | 93%<br>(85-97%)                | 7.2%<br>(2.9-15%)        | 1<br>(0.7-1.4)                              | 1.6%<br>(0.38-3%)                    | 2.3%<br>(-0.36-5.2%)                | 5.7<br>(-0.92-13)    | 430<br>(98-790)      |



| Location  | Year | Sex    | Age      | Prevalence of current drinkers | Prevalence of abstainers | Population average of standard drinks daily | Percent of total attributable deaths | Percent of total attributable DALYs | Attributable deaths  | Attributable DALYs  |
|-----------|------|--------|----------|--------------------------------|--------------------------|---------------------------------------------|--------------------------------------|-------------------------------------|----------------------|---------------------|
| Singapore | 2005 | Male   | 45 to 49 | 93%<br>(84-97%)                | 7.3%<br>(3.1-16%)        | 1.1<br>(0.73-1.5)                           | 1.2%<br>(-0.25-2.5%)                 | 1.4%<br>(-1.2-3.8%)                 | 5.4<br>(-4.5-14)     | 360<br>(-76-750)    |
| Singapore | 2005 | Male   | 50 to 54 | 92%<br>(84-97%)                | 7.6%<br>(3.3-16%)        | 1<br>(0.67-1.5)                             | 0.56%<br>(-0.98-1.9%)                | 0.5%<br>(-1.9-2.7%)                 | 2.7<br>(-11-15)      | 190<br>(-330-650)   |
| Singapore | 2005 | Male   | 55 to 59 | 92%<br>(84-96%)                | 8.4%<br>(3.6-16%)        | 0.93<br>(0.59-1.4)                          | -0.029%<br>(-1.6-1.4%)               | -0.26%<br>(-2.6-1.8%)               | -1.8<br>(-19-13)     | -11<br>(-550-480)   |
| Singapore | 2005 | Male   | 60 to 64 | 90%<br>(81-96%)                | 9.6%<br>(4.2-19%)        | 0.85<br>(0.51-1.3)                          | -0.37%<br>(-1.8-0.96%)               | -0.62%<br>(-2.8-1.2%)               | -4.2<br>(-18-8.2)    | -95<br>(-460-250)   |
| Singapore | 2005 | Male   | 65 to 69 | 89%<br>(78-95%)                | 11%<br>(4.6-22%)         | 0.78<br>(0.5-1.1)                           | -0.61%<br>(-1.9-0.6%)                | -0.84%<br>(-2.6-0.71%)              | -8.4<br>(-26-7.3)    | -180<br>(-600-190)  |
| Singapore | 2005 | Male   | 70 to 74 | 87%<br>(75-94%)                | 13%<br>(5.7-25%)         | 0.69<br>(0.41-1.1)                          | -0.61%<br>(-1.8-0.48%)               | -0.8%<br>(-2.3-0.55%)               | -9.1<br>(-26-6.2)    | -160<br>(-480-130)  |
| Singapore | 2005 | Male   | 75 to 79 | 85%<br>(73-94%)                | 15%<br>(6.5-27%)         | 0.58<br>(0.34-0.92)                         | -0.61%<br>(-1.7-0.35%)               | -0.81%<br>(-2.1-0.36%)              | -9.4<br>(-25-4.2)    | -130<br>(-350-73)   |
| Singapore | 2005 | Male   | 80 to 84 | 84%<br>(70-92%)                | 16%<br>(7.9-30%)         | 0.49<br>(0.29-0.73)                         | -0.58%<br>(-1.5-0.21%)               | -0.79%<br>(-2-0.21%)                | -8.4<br>(-21-2.2)    | -86<br>(-230-30)    |
| Singapore | 2005 | Male   | 85 to 89 | 82%<br>(69-91%)                | 18%<br>(8.8-31%)         | 0.42<br>(0.24-0.66)                         | -0.54%<br>(-1.4-0.17%)               | -0.75%<br>(-1.8-0.14%)              | -5.8<br>(-14-1.1)    | -40<br>(-100-13)    |
| Singapore | 2005 | Male   | 90 to 94 | 81%<br>(68-91%)                | 19%<br>(8.9-32%)         | 0.36<br>(0.2-0.59)                          | -0.54%<br>(-1.4-0.16%)               | -0.78%<br>(-1.9-0.11%)              | -3.3<br>(-7.9-0.48)  | -15<br>(-39-4.5)    |
| Singapore | 2005 | Male   | 95 plus  | 82%<br>(65-93%)                | 18%<br>(7-35%)           | 0.32<br>(0.15-0.57)                         | -0.49%<br>(-1.4-0.19%)               | -0.77%<br>(-1.9-0.097%)             | -1<br>(-2.5-0.13)    | -2.8<br>(-8-1.1)    |
| Singapore | 2010 | Female | All Ages | 61%<br>(53-68%)                | 39%<br>(32-47%)          | 0.59<br>(0.51-0.68)                         | 0.053%<br>(-0.34-0.43%)              | -0.4%<br>(-1.2-0.29%)               | -30<br>(-90-22)      | 180<br>(-1100-1500) |
| Singapore | 2010 | Female | 15 to 19 | 47%<br>(29-65%)                | 53%<br>(35-71%)          | 0.4<br>(0.2-0.68)                           | 0.55%<br>(0.26-0.94%)                | 2.1%<br>(0.16-4.6%)                 | 0.36<br>(0.029-0.78) | 63<br>(30-100)      |
| Singapore | 2010 | Female | 20 to 24 | 65%<br>(46-80%)                | 35%<br>(20-54%)          | 0.85<br>(0.51-1.3)                          | 1.1%<br>(0.55-1.9%)                  | 3.9%<br>(0.51-7.9%)                 | 1<br>(0.13-2.2)      | 140<br>(66-240)     |
| Singapore | 2010 | Female | 25 to 29 | 73%<br>(55-86%)                | 27%<br>(14-45%)          | 0.98<br>(0.61-1.4)                          | 0.97%<br>(0.49-1.5%)                 | 4%<br>(1-7.2%)                      | 1.1<br>(0.27-2.1)    | 150<br>(74-230)     |
| Singapore | 2010 | Female | 30 to 34 | 76%<br>(57-88%)                | 24%<br>(12-43%)          | 0.95<br>(0.6-1.4)                           | 0.83%<br>(0.41-1.4%)                 | 3.7%<br>(1.5-6.5%)                  | 1.6<br>(0.64-2.8)    | 150<br>(73-240)     |
| Singapore | 2010 | Female | 35 to 39 | 76%<br>(60-88%)                | 24%<br>(12-40%)          | 0.85<br>(0.54-1.2)                          | 0.76%<br>(0.32-1.3%)                 | 3.4%<br>(1.5-5.6%)                  | 2.6<br>(1.1-4.4)     | 160<br>(72-270)     |
| Singapore | 2010 | Female | 40 to 44 | 75%<br>(58-87%)                | 25%<br>(13-42%)          | 0.8<br>(0.49-1.1)                           | 0.64%<br>(0.14-1.3%)                 | 2.9%<br>(1.2-5%)                    | 3.3<br>(1.3-5.7)     | 150<br>(33-280)     |
| Singapore | 2010 | Female | 45 to 49 | 72%<br>(53-86%)                | 28%<br>(14-47%)          | 0.79<br>(0.5-1.2)                           | 0.54%<br>(-0.017-1.2%)               | 2.3%<br>(0.74-4%)                   | 4.4<br>(1.4-8)       | 140<br>(-4.5-320)   |
| Singapore | 2010 | Female | 50 to 54 | 68%<br>(50-82%)                | 32%<br>(18-50%)          | 0.72<br>(0.45-1.1)                          | 0.41%<br>(-0.22-1.1%)                | 1.6%<br>(0.29-3.2%)                 | 5.1<br>(0.92-10)     | 120<br>(-65-330)    |
| Singapore | 2010 | Female | 55 to 59 | 63%<br>(44-81%)                | 37%<br>(19-56%)          | 0.62<br>(0.37-0.94)                         | 0.065%<br>(-0.63-0.75%)              | 0.77%<br>(-0.45-2%)                 | 3.2<br>(-1.9-8.5)    | 18<br>(-180-210)    |
| Singapore | 2010 | Female | 60 to 64 | 58%<br>(37-76%)                | 42%<br>(24-63%)          | 0.52<br>(0.29-0.83)                         | -0.39%<br>(-1.2-0.28%)               | -0.18%<br>(-1.4-0.96%)              | -0.93<br>(-7.1-4.9)  | -110<br>(-320-72)   |

| Location  | Year | Sex    | Age      | Prevalence of current drinkers | Prevalence of abstainers | Population average of standard drinks daily | Percent of total attributable deaths | Percent of total attributable DALYs | Attributable deaths  | Attributable DALYs   |
|-----------|------|--------|----------|--------------------------------|--------------------------|---------------------------------------------|--------------------------------------|-------------------------------------|----------------------|----------------------|
| Singapore | 2010 | Female | 65 to 69 | 54%<br>(34-73%)                | 46%<br>(27-66%)          | 0.44<br>(0.24-0.68)                         | -0.67%<br>(-1.5--0.053%)             | -0.7%<br>(-1.8-0.22%)               | -3.8<br>(-10-1.2)    | -140<br>(-320--9.8)  |
| Singapore | 2010 | Female | 70 to 74 | 51%<br>(32-69%)                | 49%<br>(31-68%)          | 0.37<br>(0.19-0.63)                         | -0.79%<br>(-1.6--0.18%)              | -0.9%<br>(-2--0.052%)               | -7<br>(-16--0.4)     | -180<br>(-350--40)   |
| Singapore | 2010 | Female | 75 to 79 | 49%<br>(31-68%)                | 51%<br>(32-69%)          | 0.32<br>(0.17-0.54)                         | -0.9%<br>(-1.7--0.25%)               | -1.1%<br>(-2.1--0.22%)              | -11<br>(-22--2.4)    | -190<br>(-370--54)   |
| Singapore | 2010 | Female | 80 to 84 | 46%<br>(27-65%)                | 54%<br>(35-73%)          | 0.29<br>(0.15-0.46)                         | -0.8%<br>(-1.5--0.24%)               | -0.97%<br>(-1.9--0.24%)             | -12<br>(-23--2.8)    | -160<br>(-300--49)   |
| Singapore | 2010 | Female | 85 to 89 | 43%<br>(26-61%)                | 57%<br>(39-74%)          | 0.26<br>(0.13-0.43)                         | -0.73%<br>(-1.5--0.22%)              | -0.86%<br>(-1.8--0.19%)             | -11<br>(-23--2.4)    | -100<br>(-200--30)   |
| Singapore | 2010 | Female | 90 to 94 | 42%<br>(26-60%)                | 58%<br>(40-74%)          | 0.25<br>(0.12-0.42)                         | -0.65%<br>(-1.3--0.16%)              | -0.77%<br>(-1.6--0.13%)             | -5<br>(-11--0.89)    | -33<br>(-66--7.7)    |
| Singapore | 2010 | Female | 95 plus  | 44%<br>(24-66%)                | 56%<br>(34-76%)          | 0.25<br>(0.11-0.47)                         | -0.65%<br>(-1.3--0.11%)              | -0.8%<br>(-1.7--0.075%)             | -2.2<br>(-4.8--0.21) | -8.9<br>(-18--1.5)   |
| Singapore | 2010 | Male   | All Ages | 86%<br>(81-90%)                | 14%<br>(10-19%)          | 0.7<br>(0.61-0.79)                          | 0.56%<br>(-0.35-1.4%)                | -0.17%<br>(-1.5-1.1%)               | -15<br>(-130-97)     | 2100<br>(-1400-5400) |
| Singapore | 2010 | Male   | 15 to 19 | 70%<br>(53-84%)                | 30%<br>(16-47%)          | 0.39<br>(0.22-0.63)                         | 1.3%<br>(0.68-2%)                    | 2.7%<br>(0.53-5.6%)                 | 0.91<br>(0.18-1.9)   | 150<br>(76-240)      |
| Singapore | 2010 | Male   | 20 to 24 | 84%<br>(71-92%)                | 16%<br>(7.5-29%)         | 0.83<br>(0.52-1.2)                          | 3.2%<br>(1.5-5.1%)                   | 5.5%<br>(1-10%)                     | 3.2<br>(0.57-6.2)    | 390<br>(180-620)     |
| Singapore | 2010 | Male   | 25 to 29 | 89%<br>(79-95%)                | 11%<br>(5.4-21%)         | 1<br>(0.67-1.4)                             | 3.1%<br>(1.7-4.8%)                   | 5.6%<br>(0.91-11%)                  | 3.2<br>(0.52-6.1)    | 400<br>(220-620)     |
| Singapore | 2010 | Male   | 30 to 34 | 91%<br>(81-96%)                | 9.2%<br>(3.7-19%)        | 1<br>(0.72-1.5)                             | 2.5%<br>(1.3-3.9%)                   | 4.3%<br>(0.46-8.5%)                 | 3<br>(0.31-5.9)      | 380<br>(190-580)     |
| Singapore | 2010 | Male   | 35 to 39 | 92%<br>(84-97%)                | 8%<br>(3.3-16%)          | 0.97<br>(0.65-1.3)                          | 2%<br>(0.85-3.2%)                    | 3%<br>(-0.078-6.2%)                 | 3.5<br>(-0.086-7.4)  | 370<br>(160-610)     |
| Singapore | 2010 | Male   | 40 to 44 | 93%<br>(85-97%)                | 7.5%<br>(2.8-15%)        | 0.94<br>(0.62-1.3)                          | 1.5%<br>(0.3-2.7%)                   | 1.9%<br>(-0.81-4.7%)                | 3.6<br>(-1.4-8.9)    | 330<br>(72-600)      |
| Singapore | 2010 | Male   | 45 to 49 | 92%<br>(83-97%)                | 7.6%<br>(3.1-17%)        | 0.96<br>(0.65-1.3)                          | 1%<br>(-0.33-2.3%)                   | 1.1%<br>(-1.6-3.6%)                 | 3.8<br>(-5.5-13)     | 300<br>(-100-670)    |
| Singapore | 2010 | Male   | 50 to 54 | 92%<br>(84-97%)                | 7.9%<br>(3.3-16%)        | 0.92<br>(0.61-1.3)                          | 0.51%<br>(-0.89-1.8%)                | 0.36%<br>(-2-2.5%)                  | 2.1<br>(-11-15)      | 190<br>(-340-680)    |
| Singapore | 2010 | Male   | 55 to 59 | 91%<br>(83-96%)                | 8.7%<br>(3.6-17%)        | 0.84<br>(0.55-1.2)                          | 0.16%<br>(-1.2-1.4%)                 | -0.014%<br>(-2.1-1.9%)              | -0.054<br>(-16-14)   | 61<br>(-490-540)     |
| Singapore | 2010 | Male   | 60 to 64 | 90%<br>(79-96%)                | 10%<br>(4.2-21%)         | 0.76<br>(0.46-1.1)                          | -0.17%<br>(-1.5-0.98%)               | -0.38%<br>(-2.4-1.3%)               | -3.4<br>(-21-12)     | -62<br>(-560-380)    |
| Singapore | 2010 | Male   | 65 to 69 | 89%<br>(77-95%)                | 11%<br>(4.7-23%)         | 0.69<br>(0.44-1)                            | -0.39%<br>(-1.6-0.72%)               | -0.58%<br>(-2.2-0.87%)              | -5.2<br>(-20-8.3)    | -110<br>(-460-210)   |
| Singapore | 2010 | Male   | 70 to 74 | 87%<br>(75-94%)                | 13%<br>(5.7-25%)         | 0.59<br>(0.35-0.89)                         | -0.42%<br>(-1.5-0.51%)               | -0.58%<br>(-2-0.61%)                | -6.8<br>(-22-7.2)    | -120<br>(-410-150)   |
| Singapore | 2010 | Male   | 75 to 79 | 85%<br>(74-93%)                | 15%<br>(6.9-26%)         | 0.5<br>(0.3-0.79)                           | -0.47%<br>(-1.4-0.39%)               | -0.63%<br>(-1.8-0.43%)              | -8.2<br>(-23-5.8)    | -110<br>(-330-92)    |
| Singapore | 2010 | Male   | 80 to 84 | 84%<br>(71-92%)                | 16%<br>(7.6-29%)         | 0.43<br>(0.26-0.66)                         | -0.42%<br>(-1.2-0.26%)               | -0.61%<br>(-1.6-0.26%)              | -6.9<br>(-19-3)      | -71<br>(-200-42)     |

| Location  | Year | Sex    | Age      | Prevalence of current drinkers | Prevalence of abstainers | Population average of standard drinks daily | Percent of total attributable deaths | Percent of total attributable DALYs | Attributable deaths   | Attributable DALYs   |
|-----------|------|--------|----------|--------------------------------|--------------------------|---------------------------------------------|--------------------------------------|-------------------------------------|-----------------------|----------------------|
| Singapore | 2010 | Male   | 85 to 89 | 82%<br>(69-91%)                | 18%<br>(9.2-31%)         | 0.38<br>(0.22-0.6)                          | -0.38%<br>(-1.1-0.24%)               | -0.57%<br>(-1.5-0.23%)              | -5.3<br>(-14-2.1)     | -36<br>(-100-22)     |
| Singapore | 2010 | Male   | 90 to 94 | 81%<br>(68-91%)                | 19%<br>(8.9-32%)         | 0.35<br>(0.19-0.57)                         | -0.35%<br>(-1.1-0.23%)               | -0.58%<br>(-1.5-0.17%)              | -2.2<br>(-5.6-0.61)   | -9.5<br>(-29-6.4)    |
| Singapore | 2010 | Male   | 95 plus  | 82%<br>(65-93%)                | 18%<br>(7.1-35%)         | 0.33<br>(0.16-0.58)                         | -0.3%<br>(-1.1-0.29%)                | -0.59%<br>(-1.6-0.18%)              | -0.68<br>(-1.8-0.22)  | -1.7<br>(-5.8-1.6)   |
| Singapore | 2016 | Female | All Ages | 62%<br>(53-69%)                | 38%<br>(31-47%)          | 0.59<br>(0.46-0.74)                         | 0.08%<br>(-0.31-0.46%)               | -0.28%<br>(-0.97-0.34%)             | -25<br>(-90-32)       | 290<br>(-1100-1700)  |
| Singapore | 2016 | Female | 15 to 19 | 47%<br>(30-66%)                | 53%<br>(34-70%)          | 0.4<br>(0.2-0.71)                           | 0.55%<br>(0.26-0.93%)                | 2%<br>(0.15-4.6%)                   | 0.35<br>(0.03-0.83)   | 63<br>(29-110)       |
| Singapore | 2016 | Female | 20 to 24 | 65%<br>(47-81%)                | 35%<br>(19-53%)          | 0.86<br>(0.49-1.4)                          | 1%<br>(0.54-1.7%)                    | 3.9%<br>(0.48-8.2%)                 | 0.82<br>(0.11-1.7)    | 140<br>(71-220)      |
| Singapore | 2016 | Female | 25 to 29 | 73%<br>(55-86%)                | 27%<br>(14-45%)          | 0.96<br>(0.59-1.5)                          | 0.88%<br>(0.47-1.4%)                 | 4%<br>(0.99-7.3%)                   | 0.81<br>(0.2-1.6)     | 120<br>(65-190)      |
| Singapore | 2016 | Female | 30 to 34 | 76%<br>(57-88%)                | 24%<br>(12-43%)          | 0.94<br>(0.57-1.4)                          | 0.79%<br>(0.34-1.4%)                 | 3.8%<br>(1.4-6.8%)                  | 1.5<br>(0.52-2.9)     | 140<br>(60-240)      |
| Singapore | 2016 | Female | 35 to 39 | 77%<br>(62-89%)                | 23%<br>(11-38%)          | 0.86<br>(0.54-1.3)                          | 0.65%<br>(0.24-1.1%)                 | 3.5%<br>(1.6-5.8%)                  | 2<br>(0.87-3.7)       | 130<br>(51-230)      |
| Singapore | 2016 | Female | 40 to 44 | 76%<br>(61-88%)                | 24%<br>(12-39%)          | 0.82<br>(0.47-1.2)                          | 0.65%<br>(0.15-1.3%)                 | 3.2%<br>(1.3-5.5%)                  | 3.2<br>(1.2-6)        | 150<br>(32-290)      |
| Singapore | 2016 | Female | 45 to 49 | 73%<br>(54-87%)                | 27%<br>(13-46%)          | 0.79<br>(0.48-1.2)                          | 0.57%<br>(0.014-1.3%)                | 2.5%<br>(0.88-4.4%)                 | 4.5<br>(1.5-8.6)      | 150<br>(3.5-350)     |
| Singapore | 2016 | Female | 50 to 54 | 69%<br>(51-84%)                | 31%<br>(16-49%)          | 0.72<br>(0.41-1.1)                          | 0.47%<br>(-0.13-1.2%)                | 1.9%<br>(0.51-3.5%)                 | 5.5<br>(1.4-11)       | 140<br>(-39-360)     |
| Singapore | 2016 | Female | 55 to 59 | 65%<br>(46-82%)                | 35%<br>(18-54%)          | 0.63<br>(0.36-1)                            | 0.18%<br>(-0.44-0.88%)               | 1%<br>(-0.2-2.4%)                   | 4.4<br>(-0.85-11)     | 57<br>(-140-270)     |
| Singapore | 2016 | Female | 60 to 64 | 59%<br>(38-77%)                | 41%<br>(23-62%)          | 0.53<br>(0.29-0.9)                          | -0.21%<br>(-0.88-0.39%)              | 0.16%<br>(-0.98-1.3%)               | 0.94<br>(-5.3-7.8)    | -70<br>(-290-130)    |
| Singapore | 2016 | Female | 65 to 69 | 55%<br>(34-74%)                | 45%<br>(26-66%)          | 0.43<br>(0.24-0.69)                         | -0.49%<br>(-1.2-0.083%)              | -0.43%<br>(-1.6-0.46%)              | -2.3<br>(-8.3-2.4)    | -100<br>(-260-19)    |
| Singapore | 2016 | Female | 70 to 74 | 51%<br>(33-69%)                | 49%<br>(31-67%)          | 0.34<br>(0.17-0.59)                         | -0.57%<br>(-1.2--0.063%)             | -0.58%<br>(-1.5-0.14%)              | -4.8<br>(-13-1.3)     | -140<br>(-310--14)   |
| Singapore | 2016 | Female | 75 to 79 | 49%<br>(31-68%)                | 51%<br>(32-69%)          | 0.29<br>(0.15-0.51)                         | -0.67%<br>(-1.4--0.13%)              | -0.77%<br>(-1.7--0.07%)             | -8.1<br>(-19--0.75)   | -150<br>(-310--28)   |
| Singapore | 2016 | Female | 80 to 84 | 46%<br>(28-65%)                | 54%<br>(35-72%)          | 0.28<br>(0.14-0.45)                         | -0.65%<br>(-1.3--0.19%)              | -0.78%<br>(-1.6--0.14%)             | -11<br>(-24--2.1)     | -170<br>(-330--47)   |
| Singapore | 2016 | Female | 85 to 89 | 43%<br>(26-61%)                | 57%<br>(39-74%)          | 0.26<br>(0.13-0.46)                         | -0.59%<br>(-1.2--0.14%)              | -0.68%<br>(-1.5--0.086%)            | -13<br>(-28--1.5)     | -120<br>(-250--27)   |
| Singapore | 2016 | Female | 90 to 94 | 42%<br>(27-60%)                | 58%<br>(40-73%)          | 0.27<br>(0.13-0.47)                         | -0.54%<br>(-1.1--0.071%)             | -0.62%<br>(-1.4--0.0053%)           | -7.1<br>(-16--0.056)  | -48<br>(-99--6.9)    |
| Singapore | 2016 | Female | 95 plus  | 44%<br>(24-65%)                | 56%<br>(35-76%)          | 0.28<br>(0.12-0.54)                         | -0.54%<br>(-1.1--0.035%)             | -0.66%<br>(-1.4--0.015%)            | -2.9<br>(-6.2--0.068) | -12<br>(-25--0.68)   |
| Singapore | 2016 | Male   | All Ages | 85%<br>(80-90%)                | 15%<br>(10-20%)          | 0.68<br>(0.52-0.85)                         | 0.59%<br>(-0.27-1.4%)                | -0.077%<br>(-1.2-1%)                | -8<br>(-130-110)      | 2300<br>(-1000-5600) |

| Location  | Year | Sex    | Age      | Prevalence of current drinkers | Prevalence of abstainers | Population average of standard drinks daily | Percent of total attributable deaths | Percent of total attributable DALYs | Attributable deaths  | Attributable DALYs     |
|-----------|------|--------|----------|--------------------------------|--------------------------|---------------------------------------------|--------------------------------------|-------------------------------------|----------------------|------------------------|
| Singapore | 2016 | Male   | 15 to 19 | 69%<br>(52-84%)                | 31%<br>(16-48%)          | 0.38<br>(0.2-0.62)                          | 1.2%<br>(0.63-1.9%)                  | 2.5%<br>(0.39-5.6%)                 | 0.79<br>(0.12-1.8)   | 140<br>(71-220)        |
| Singapore | 2016 | Male   | 20 to 24 | 83%<br>(70-92%)                | 17%<br>(7.8-30%)         | 0.8<br>(0.48-1.2)                           | 3%<br>(1.5-4.8%)                     | 5.1%<br>(0.51-10%)                  | 2.9<br>(0.28-6.2)    | 380<br>(190-620)       |
| Singapore | 2016 | Male   | 25 to 29 | 88%<br>(79-94%)                | 12%<br>(5.5-21%)         | 0.98<br>(0.6-1.4)                           | 3%<br>(1.6-4.6%)                     | 5.6%<br>(0.62-11%)                  | 2.6<br>(0.28-5.2)    | 360<br>(190-550)       |
| Singapore | 2016 | Male   | 30 to 34 | 91%<br>(81-96%)                | 9.5%<br>(3.7-19%)        | 1<br>(0.65-1.5)                             | 2.5%<br>(1.3-3.8%)                   | 4.4%<br>(0.21-8.7%)                 | 2.9<br>(0.14-6.2)    | 370<br>(190-590)       |
| Singapore | 2016 | Male   | 35 to 39 | 92%<br>(84-97%)                | 8.2%<br>(3.3-16%)        | 0.93<br>(0.58-1.4)                          | 1.9%<br>(0.86-3.1%)                  | 3%<br>(-0.018-6.5%)                 | 3<br>(-0.02-6.8)     | 350<br>(160-570)       |
| Singapore | 2016 | Male   | 40 to 44 | 92%<br>(85-97%)                | 7.7%<br>(2.8-15%)        | 0.91<br>(0.56-1.4)                          | 1.5%<br>(0.36-2.7%)                  | 2%<br>(-0.73-5%)                    | 3.4<br>(-1.2-8.7)    | 310<br>(80-580)        |
| Singapore | 2016 | Male   | 45 to 49 | 92%<br>(84-97%)                | 7.8%<br>(3.2-16%)        | 0.93<br>(0.59-1.3)                          | 1.2%<br>(-0.0013-2.3%)               | 1.6%<br>(-1-4.1%)                   | 4.4<br>(-2.9-12)     | 330<br>(-0.38-660)     |
| Singapore | 2016 | Male   | 50 to 54 | 92%<br>(84-96%)                | 8.2%<br>(3.6-16%)        | 0.89<br>(0.54-1.3)                          | 0.73%<br>(-0.53-1.9%)                | 0.76%<br>(-1.4-2.9%)                | 3.7<br>(-8.2-15)     | 260<br>(-200-690)      |
| Singapore | 2016 | Male   | 55 to 59 | 91%<br>(82-96%)                | 9.2%<br>(3.8-18%)        | 0.8<br>(0.48-1.2)                           | 0.29%<br>(-0.94-1.5%)                | 0.18%<br>(-1.7-2.1%)                | 1.4<br>(-14-16)      | 120<br>(-390-610)      |
| Singapore | 2016 | Male   | 60 to 64 | 90%<br>(79-96%)                | 10%<br>(4.2-21%)         | 0.73<br>(0.42-1.2)                          | -0.013%<br>(-1.2-1.1%)               | -0.18%<br>(-1.9-1.4%)               | -1.9<br>(-20-15)     | -6.8<br>(-520-470)     |
| Singapore | 2016 | Male   | 65 to 69 | 88%<br>(77-95%)                | 12%<br>(5-23%)           | 0.67<br>(0.41-1)                            | -0.28%<br>(-1.4-0.78%)               | -0.45%<br>(-2-1%)                   | -4.2<br>(-20-9.1)    | -82<br>(-440-220)      |
| Singapore | 2016 | Male   | 70 to 74 | 87%<br>(75-94%)                | 13%<br>(6.1-25%)         | 0.59<br>(0.33-0.92)                         | -0.26%<br>(-1.2-0.59%)               | -0.39%<br>(-1.7-0.76%)              | -4.9<br>(-22-9.2)    | -82<br>(-420-190)      |
| Singapore | 2016 | Male   | 75 to 79 | 85%<br>(73-93%)                | 15%<br>(7-27%)           | 0.5<br>(0.28-0.81)                          | -0.35%<br>(-1.2-0.4%)                | -0.5%<br>(-1.6-0.46%)               | -6.6<br>(-22-6.2)    | -87<br>(-300-100)      |
| Singapore | 2016 | Male   | 80 to 84 | 83%<br>(70-92%)                | 17%<br>(8.1-30%)         | 0.42<br>(0.24-0.66)                         | -0.29%<br>(-0.98-0.29%)              | -0.46%<br>(-1.3-0.33%)              | -6.8<br>(-20-4.7)    | -66<br>(-210-63)       |
| Singapore | 2016 | Male   | 85 to 89 | 81%<br>(68-91%)                | 19%<br>(9.4-32%)         | 0.36<br>(0.2-0.59)                          | -0.24%<br>(-0.87-0.3%)               | -0.41%<br>(-1.2-0.29%)              | -5.2<br>(-16-3.6)    | -32<br>(-120-40)       |
| Singapore | 2016 | Male   | 90 to 94 | 81%<br>(68-91%)                | 19%<br>(9.1-32%)         | 0.32<br>(0.17-0.56)                         | -0.2%<br>(-0.81-0.28%)               | -0.41%<br>(-1.2-0.21%)              | -2.8<br>(-8-1.4)     | -10<br>(-41-15)        |
| Singapore | 2016 | Male   | 95 plus  | 82%<br>(65-93%)                | 18%<br>(7.3-35%)         | 0.29<br>(0.14-0.54)                         | -0.14%<br>(-0.77-0.36%)              | -0.41%<br>(-1.3-0.21%)              | -0.76<br>(-2.3-0.38) | -1.3<br>(-7.1-3.4)     |
| Australia | 1990 | Female | All Ages | 84%<br>(81-86%)                | 16%<br>(14-19%)          | 2.2<br>(1.9-2.5)                            | 2.4%<br>(1.2-3.7%)                   | 1.4%<br>(-1.5-4%)                   | 750<br>(-820-2200)   | 48000<br>(23000-73000) |
| Australia | 1990 | Female | 15 to 19 | 87%<br>(81-92%)                | 13%<br>(7.7-19%)         | 2.2<br>(1.7-2.8)                            | 3.3%<br>(2-4.7%)                     | 11%<br>(5.2-16%)                    | 27<br>(13-41)        | 2700<br>(1600-3900)    |
| Australia | 1990 | Female | 20 to 24 | 92%<br>(88-95%)                | 8.2%<br>(5.5-12%)        | 3<br>(2.3-3.6)                              | 4.5%<br>(3.1-6%)                     | 12%<br>(7.1-17%)                    | 37<br>(21-52)        | 4300<br>(2900-5700)    |
| Australia | 1990 | Female | 25 to 29 | 93%<br>(90-95%)                | 7.3%<br>(5.1-10%)        | 2.5<br>(2.1-2.9)                            | 3.6%<br>(2.5-4.7%)                   | 10%<br>(6-14%)                      | 33<br>(19-47)        | 3700<br>(2500-4800)    |
| Australia | 1990 | Female | 30 to 34 | 93%<br>(90-95%)                | 7.1%<br>(5-10%)          | 2.5<br>(2.1-3)                              | 3.2%<br>(2.2-4.1%)                   | 10%<br>(6.4-14%)                    | 38<br>(25-52)        | 3400<br>(2400-4400)    |

| Location  | Year | Sex    | Age      | Prevalence of current drinkers | Prevalence of abstainers | Population average of standard drinks daily | Percent of total attributable deaths | Percent of total attributable DALYs | Attributable deaths | Attributable DALYs        |
|-----------|------|--------|----------|--------------------------------|--------------------------|---------------------------------------------|--------------------------------------|-------------------------------------|---------------------|---------------------------|
| Australia | 1990 | Female | 35 to 39 | 92%<br>(89-95%)                | 7.8%<br>(5.4-11%)        | 3.1<br>(2.6-3.6)                            | 3.8%<br>(2.8-4.8%)                   | 12%<br>(9.2-15%)                    | 60<br>(46-74)       | 4200<br>(3200-5200)       |
| Australia | 1990 | Female | 40 to 44 | 91%<br>(89-94%)                | 8.6%<br>(6.1-11%)        | 3.3<br>(2.8-3.9)                            | 4.4%<br>(3.3-5.5%)                   | 13%<br>(10-15%)                     | 90<br>(72-110)      | 5200<br>(4100-6300)       |
| Australia | 1990 | Female | 45 to 49 | 90%<br>(87-93%)                | 9.5%<br>(6.7-13%)        | 3.3<br>(2.8-3.8)                            | 4.7%<br>(3.6-6%)                     | 11%<br>(9-14%)                      | 110<br>(83-130)     | 5100<br>(3900-6200)       |
| Australia | 1990 | Female | 50 to 54 | 87%<br>(84-91%)                | 13%<br>(9.5-16%)         | 3.2<br>(2.7-3.7)                            | 4.9%<br>(3.5-6.4%)                   | 9.8%<br>(7.2-12%)                   | 130<br>(92-160)     | 5200<br>(3800-6500)       |
| Australia | 1990 | Female | 55 to 59 | 83%<br>(78-87%)                | 17%<br>(13-22%)          | 3.1<br>(2.6-3.6)                            | 4.3%<br>(2.8-6%)                     | 7.7%<br>(5.1-10%)                   | 140<br>(91-180)     | 4800<br>(3200-6500)       |
| Australia | 1990 | Female | 60 to 64 | 79%<br>(74-84%)                | 21%<br>(16-26%)          | 2.9<br>(2.4-3.5)                            | 3.5%<br>(1.7-5.5%)                   | 5.4%<br>(2.7-8.5%)                  | 160<br>(81-250)     | 4900<br>(2400-7600)       |
| Australia | 1990 | Female | 65 to 69 | 77%<br>(71-82%)                | 23%<br>(18-29%)          | 2.7<br>(2.3-3.2)                            | 2.4%<br>(0.39-4.5%)                  | 3.4%<br>(0.37-6.5%)                 | 160<br>(17-300)     | 3900<br>(600-7200)        |
| Australia | 1990 | Female | 70 to 74 | 73%<br>(66-78%)                | 27%<br>(22-34%)          | 2.4<br>(2-2.9)                              | 1.3%<br>(-0.93-3.6%)                 | 1.7%<br>(-1.5-4.8%)                 | 100<br>(-93-300)    | 2200<br>(-1500-5900)      |
| Australia | 1990 | Female | 75 to 79 | 67%<br>(58-76%)                | 33%<br>(24-42%)          | 2<br>(1.6-2.5)                              | 0.33%<br>(-2.2-2.7%)                 | 0.21%<br>(-3.2-3.3%)                | 18<br>(-280-290)    | 550<br>(-3600-4500)       |
| Australia | 1990 | Female | 80 to 84 | 65%<br>(52-75%)                | 35%<br>(25-48%)          | 1.8<br>(1.4-2.3)                            | -0.44%<br>(-3.1-2%)                  | -0.77%<br>(-4.1-2.4%)               | -73<br>(-390-220)   | -560<br>(-3900-2600)      |
| Australia | 1990 | Female | 85 to 89 | 64%<br>(52-74%)                | 36%<br>(26-48%)          | 1.7<br>(1.2-2.3)                            | -0.95%<br>(-3.6-1.6%)                | -1.4%<br>(-4.7-1.8%)                | -120<br>(-400-150)  | -740<br>(-2800-1300)      |
| Australia | 1990 | Female | 90 to 94 | 64%<br>(51-75%)                | 36%<br>(25-49%)          | 1.6<br>(1-2.3)                              | -1.4%<br>(-4-1.6%)                   | -1.9%<br>(-5.1-1.6%)                | -100<br>(-270-82)   | -440<br>(-1300-510)       |
| Australia | 1990 | Female | 95 plus  | 65%<br>(49-79%)                | 35%<br>(21-51%)          | 1.5<br>(0.81-2.4)                           | -1.7%<br>(-4.7-1.8%)                 | -2.4%<br>(-6.1-1.8%)                | -55<br>(-140-42)    | -160<br>(-440-160)        |
| Australia | 1990 | Male   | All Ages | 88%<br>(85-91%)                | 12%<br>(9.5-15%)         | 5.2<br>(4.6-5.9)                            | 11%<br>(8.8-13%)                     | 12%<br>(8.8-15%)                    | 7700<br>(5700-9800) | 260000<br>(210000-310000) |
| Australia | 1990 | Male   | 15 to 19 | 81%<br>(72-88%)                | 19%<br>(12-28%)          | 3.1<br>(2.3-3.9)                            | 7.9%<br>(4.7-11%)                    | 16%<br>(8.6-22%)                    | 100<br>(56-140)     | 8400<br>(5100-12000)      |
| Australia | 1990 | Male   | 20 to 24 | 90%<br>(85-94%)                | 10%<br>(6.5-15%)         | 5.4<br>(4.3-6.5)                            | 15%<br>(11-19%)                      | 25%<br>(17-33%)                     | 230<br>(160-300)    | 18000<br>(13000-24000)    |
| Australia | 1990 | Male   | 25 to 29 | 92%<br>(89-94%)                | 8%<br>(5.8-11%)          | 5.9<br>(5-6.9)                              | 14%<br>(10-18%)                      | 25%<br>(18-32%)                     | 240<br>(170-300)    | 18000<br>(14000-22000)    |
| Australia | 1990 | Male   | 30 to 34 | 94%<br>(91-96%)                | 6.4%<br>(4.3-9.1%)       | 6.6<br>(5.6-7.8)                            | 13%<br>(10-16%)                      | 24%<br>(18-30%)                     | 230<br>(170-280)    | 16000<br>(13000-20000)    |
| Australia | 1990 | Male   | 35 to 39 | 95%<br>(94-97%)                | 4.6%<br>(3-6.2%)         | 7.5<br>(6.4-8.8)                            | 13%<br>(10-16%)                      | 25%<br>(20-30%)                     | 250<br>(200-300)    | 16000<br>(13000-19000)    |
| Australia | 1990 | Male   | 40 to 44 | 96%<br>(95-98%)                | 3.7%<br>(2.4-5.2%)       | 8.1<br>(6.9-9.3)                            | 13%<br>(11-16%)                      | 24%<br>(20-29%)                     | 320<br>(260-370)    | 18000<br>(15000-21000)    |
| Australia | 1990 | Male   | 45 to 49 | 96%<br>(94-97%)                | 4.1%<br>(2.7-5.7%)       | 8.3<br>(7.1-9.7)                            | 14%<br>(11-17%)                      | 23%<br>(19-27%)                     | 360<br>(290-430)    | 18000<br>(14000-21000)    |
| Australia | 1990 | Male   | 50 to 54 | 95%<br>(94-97%)                | 4.7%<br>(3.3-6.3%)       | 8.6<br>(7.3-10)                             | 15%<br>(12-18%)                      | 21%<br>(17-25%)                     | 480<br>(380-570)    | 20000<br>(16000-23000)    |

| Location  | Year | Sex    | Age      | Prevalence of current drinkers | Prevalence of abstainers | Population average of standard drinks daily | Percent of total attributable deaths | Percent of total attributable DALYs | Attributable deaths | Attributable DALYs     |
|-----------|------|--------|----------|--------------------------------|--------------------------|---------------------------------------------|--------------------------------------|-------------------------------------|---------------------|------------------------|
| Australia | 1990 | Male   | 55 to 59 | 94%<br>(92-96%)                | 5.5%<br>(3.9-7.5%)       | 9<br>(7.7-10)                               | 15%<br>(12-18%)                      | 20%<br>(16-25%)                     | 680<br>(530-840)    | 24000<br>(19000-29000) |
| Australia | 1990 | Male   | 60 to 64 | 93%<br>(91-95%)                | 6.9%<br>(4.9-9.2%)       | 8.7<br>(7.3-10)                             | 14%<br>(11-18%)                      | 18%<br>(13-22%)                     | 1000<br>(760-1300)  | 30000<br>(23000-38000) |
| Australia | 1990 | Male   | 65 to 69 | 91%<br>(88-94%)                | 8.7%<br>(6.2-12%)        | 7.6<br>(6.5-8.9)                            | 13%<br>(9.4-16%)                     | 15%<br>(11-19%)                     | 1200<br>(890-1600)  | 30000<br>(22000-37000) |
| Australia | 1990 | Male   | 70 to 74 | 90%<br>(86-93%)                | 9.8%<br>(6.9-14%)        | 6.4<br>(5.3-7.7)                            | 10%<br>(6.6-14%)                     | 12%<br>(7.3-16%)                    | 1100<br>(660-1500)  | 21000<br>(13000-28000) |
| Australia | 1990 | Male   | 75 to 79 | 90%<br>(84-94%)                | 9.9%<br>(6.3-16%)        | 5.4<br>(4.3-6.7)                            | 7.7%<br>(3.2-12%)                    | 8.4%<br>(3.1-13%)                   | 880<br>(320-1400)   | 14000<br>(5700-21000)  |
| Australia | 1990 | Male   | 80 to 84 | 89%<br>(83-94%)                | 11%<br>(6.4-17%)         | 4.6<br>(3.6-5.7)                            | 5.4%<br>(1.3-9.3%)                   | 5.7%<br>(0.95-10%)                  | 490<br>(82-900)     | 5800<br>(1400-10000)   |
| Australia | 1990 | Male   | 85 to 89 | 88%<br>(81-92%)                | 12%<br>(7.6-19%)         | 3.8<br>(2.9-4.8)                            | 3%<br>(-0.44-6.6%)                   | 2.9%<br>(-1.2-7%)                   | 150<br>(-61-370)    | 1400<br>(-200-3000)    |
| Australia | 1990 | Male   | 90 to 94 | 87%<br>(79-92%)                | 13%<br>(8-21%)           | 3.1<br>(2.2-4.2)                            | 1%<br>(-2.1-4.8%)                    | 0.63%<br>(-3-4.9%)                  | 12<br>(-59-97)      | 120<br>(-250-560)      |
| Australia | 1990 | Male   | 95 plus  | 86%<br>(76-93%)                | 14%<br>(7-24%)           | 2.4<br>(1.3-3.8)                            | -0.36%<br>(-3.4-3.6%)                | -0.99%<br>(-4.6-3.7%)               | -5.6<br>(-26-21)    | -8.1<br>(-77-84)       |
| Australia | 1995 | Female | All Ages | 85%<br>(82-87%)                | 15%<br>(13-18%)          | 2<br>(1.7-2.2)                              | 2%<br>(0.87-3.1%)                    | 0.48%<br>(-2.1-3.2%)                | 280<br>(-1300-1900) | 41000<br>(18000-64000) |
| Australia | 1995 | Female | 15 to 19 | 87%<br>(81-92%)                | 13%<br>(7.8-19%)         | 1.9<br>(1.5-2.5)                            | 2.8%<br>(1.8-3.9%)                   | 9.3%<br>(4.8-14%)                   | 19<br>(9.7-28)      | 2100<br>(1300-2900)    |
| Australia | 1995 | Female | 20 to 24 | 92%<br>(88-95%)                | 8%<br>(5.4-12%)          | 2.6<br>(2.1-3.2)                            | 4%<br>(2.8-5.2%)                     | 11%<br>(5.8-16%)                    | 29<br>(16-42)       | 3900<br>(2700-5200)    |
| Australia | 1995 | Female | 25 to 29 | 93%<br>(90-95%)                | 6.8%<br>(4.7-9.6%)       | 2.2<br>(1.9-2.6)                            | 3.2%<br>(2.3-4.2%)                   | 9.1%<br>(5.1-13%)                   | 26<br>(15-36)       | 3200<br>(2300-4300)    |
| Australia | 1995 | Female | 30 to 34 | 93%<br>(91-95%)                | 6.5%<br>(4.6-8.9%)       | 2.3<br>(1.9-2.7)                            | 2.9%<br>(2-3.8%)                     | 8.8%<br>(5.7-12%)                   | 35<br>(22-48)       | 3200<br>(2300-4300)    |
| Australia | 1995 | Female | 35 to 39 | 93%<br>(91-95%)                | 7.1%<br>(4.9-9.4%)       | 2.8<br>(2.4-3.2)                            | 3.4%<br>(2.5-4.4%)                   | 11%<br>(8.1-14%)                    | 58<br>(42-73)       | 4100<br>(3100-5200)    |
| Australia | 1995 | Female | 40 to 44 | 92%<br>(90-94%)                | 7.8%<br>(5.6-10%)        | 3<br>(2.6-3.5)                              | 3.9%<br>(2.9-5%)                     | 12%<br>(8.8-14%)                    | 85<br>(64-100)      | 4900<br>(3800-6000)    |
| Australia | 1995 | Female | 45 to 49 | 91%<br>(89-94%)                | 8.6%<br>(6.1-11%)        | 3<br>(2.5-3.5)                              | 4.2%<br>(3.1-5.3%)                   | 11%<br>(8.3-13%)                    | 110<br>(86-140)     | 5600<br>(4200-6900)    |
| Australia | 1995 | Female | 50 to 54 | 89%<br>(86-92%)                | 11%<br>(8.2-14%)         | 2.9<br>(2.5-3.4)                            | 4.4%<br>(3.1-5.7%)                   | 9.5%<br>(7.2-12%)                   | 130<br>(95-160)     | 5200<br>(3800-6600)    |
| Australia | 1995 | Female | 55 to 59 | 85%<br>(81-89%)                | 15%<br>(11-19%)          | 2.9<br>(2.4-3.4)                            | 4%<br>(2.6-5.5%)                     | 7.5%<br>(5.3-9.8%)                  | 130<br>(92-170)     | 4600<br>(3100-6100)    |
| Australia | 1995 | Female | 60 to 64 | 81%<br>(76-86%)                | 19%<br>(14-24%)          | 2.7<br>(2.2-3.2)                            | 3%<br>(1.5-4.7%)                     | 5.1%<br>(2.7-7.6%)                  | 130<br>(70-190)     | 3800<br>(1900-5900)    |
| Australia | 1995 | Female | 65 to 69 | 80%<br>(74-84%)                | 20%<br>(16-26%)          | 2.5<br>(2.1-2.9)                            | 1.9%<br>(0.16-3.7%)                  | 3%<br>(0.25-5.6%)                   | 120<br>(10-230)     | 3000<br>(220-5600)     |
| Australia | 1995 | Female | 70 to 74 | 76%<br>(70-81%)                | 24%<br>(19-30%)          | 2.2<br>(1.8-2.7)                            | 0.85%<br>(-1.3-3%)                   | 1.2%<br>(-1.8-4.2%)                 | 77<br>(-110-270)    | 1500<br>(-2300-5300)   |

| Location  | Year | Sex    | Age      | Prevalence of current drinkers | Prevalence of abstainers | Population average of standard drinks daily | Percent of total attributable deaths | Percent of total attributable DALYs | Attributable deaths | Attributable DALYs        |
|-----------|------|--------|----------|--------------------------------|--------------------------|---------------------------------------------|--------------------------------------|-------------------------------------|---------------------|---------------------------|
| Australia | 1995 | Female | 75 to 79 | 71%<br>(63-79%)                | 29%<br>(21-37%)          | 1.9<br>(1.5-2.4)                            | -0.22%<br>(-2.5-2.2%)                | -0.39%<br>(-3.6-2.8%)               | -32<br>(-290-230)   | -350<br>(-4100-3500)      |
| Australia | 1995 | Female | 80 to 84 | 68%<br>(56-77%)                | 32%<br>(23-44%)          | 1.7<br>(1.3-2.1)                            | -1.1%<br>(-3.5-1.4%)                 | -1.5%<br>(-4.6-1.8%)                | -160<br>(-510-200)  | -1600<br>(-5200-2200)     |
| Australia | 1995 | Female | 85 to 89 | 66%<br>(54-75%)                | 34%<br>(25-46%)          | 1.5<br>(1.1-2)                              | -1.6%<br>(-4-0.89%)                  | -2.1%<br>(-5.1-0.96%)               | -220<br>(-520-97)   | -1500<br>(-3800-830)      |
| Australia | 1995 | Female | 90 to 94 | 66%<br>(54-76%)                | 34%<br>(24-46%)          | 1.4<br>(0.94-1.9)                           | -2%<br>(-4.4-0.56%)                  | -2.6%<br>(-5.7-0.55%)               | -170<br>(-360-35)   | -810<br>(-1800-230)       |
| Australia | 1995 | Female | 95 plus  | 66%<br>(51-79%)                | 34%<br>(21-49%)          | 1.3<br>(0.74-2.1)                           | -2.4%<br>(-5-0.58%)                  | -3.1%<br>(-6.3-0.44%)               | -91<br>(-190-13)    | -280<br>(-590-68)         |
| Australia | 1995 | Male   | All Ages | 88%<br>(85-90%)                | 12%<br>(9.7-15%)         | 4.6<br>(4.1-5.2)                            | 9.2%<br>(7.4-11%)                    | 9.5%<br>(6.5-13%)                   | 6300<br>(4300-8400) | 220000<br>(180000-270000) |
| Australia | 1995 | Male   | 15 to 19 | 79%<br>(68-87%)                | 21%<br>(13-32%)          | 2.6<br>(1.9-3.4)                            | 6.5%<br>(3.9-9.2%)                   | 13%<br>(7.1-20%)                    | 68<br>(36-99)       | 6000<br>(3600-8300)       |
| Australia | 1995 | Male   | 20 to 24 | 88%<br>(82-93%)                | 12%<br>(7.1-18%)         | 4.6<br>(3.6-5.5)                            | 13%<br>(9-17%)                       | 21%<br>(14-29%)                     | 190<br>(120-250)    | 16000<br>(11000-21000)    |
| Australia | 1995 | Male   | 25 to 29 | 91%<br>(87-94%)                | 9%<br>(6-13%)            | 5.1<br>(4.3-6)                              | 12%<br>(8.9-15%)                     | 21%<br>(15-28%)                     | 180<br>(130-240)    | 15000<br>(11000-18000)    |
| Australia | 1995 | Male   | 30 to 34 | 93%<br>(90-96%)                | 6.9%<br>(4.4-10%)        | 5.8<br>(4.8-6.8)                            | 11%<br>(8.4-14%)                     | 20%<br>(15-26%)                     | 210<br>(150-260)    | 15000<br>(11000-18000)    |
| Australia | 1995 | Male   | 35 to 39 | 95%<br>(93-97%)                | 4.8%<br>(3.2-6.8%)       | 6.5<br>(5.5-7.6)                            | 11%<br>(8.7-14%)                     | 21%<br>(16-26%)                     | 230<br>(180-290)    | 15000<br>(12000-18000)    |
| Australia | 1995 | Male   | 40 to 44 | 96%<br>(94-97%)                | 4%<br>(2.5-5.9%)         | 7<br>(6-8.1)                                | 12%<br>(9.3-14%)                     | 22%<br>(18-26%)                     | 280<br>(220-330)    | 16000<br>(13000-19000)    |
| Australia | 1995 | Male   | 45 to 49 | 96%<br>(94-97%)                | 4.3%<br>(2.8-6.4%)       | 7.2<br>(6.2-8.4)                            | 12%<br>(9.7-15%)                     | 21%<br>(17-25%)                     | 360<br>(290-430)    | 18000<br>(14000-21000)    |
| Australia | 1995 | Male   | 50 to 54 | 95%<br>(93-97%)                | 4.8%<br>(3.3-6.8%)       | 7.5<br>(6.4-8.7)                            | 13%<br>(10-15%)                      | 19%<br>(16-23%)                     | 430<br>(340-510)    | 18000<br>(15000-21000)    |
| Australia | 1995 | Male   | 55 to 59 | 95%<br>(92-96%)                | 5.5%<br>(3.7-7.8%)       | 7.8<br>(6.7-9.1)                            | 13%<br>(11-16%)                      | 18%<br>(15-22%)                     | 570<br>(450-680)    | 20000<br>(17000-24000)    |
| Australia | 1995 | Male   | 60 to 64 | 93%<br>(91-95%)                | 6.7%<br>(4.6-9.5%)       | 7.6<br>(6.4-9)                              | 13%<br>(9.9-16%)                     | 16%<br>(12-20%)                     | 760<br>(590-950)    | 23000<br>(18000-28000)    |
| Australia | 1995 | Male   | 65 to 69 | 91%<br>(88-94%)                | 8.5%<br>(5.8-12%)        | 6.7<br>(5.6-7.8)                            | 11%<br>(7.8-14%)                     | 13%<br>(9-17%)                      | 980<br>(670-1300)   | 24000<br>(17000-31000)    |
| Australia | 1995 | Male   | 70 to 74 | 91%<br>(87-93%)                | 9.3%<br>(6.6-13%)        | 5.7<br>(4.6-6.8)                            | 8.3%<br>(4.7-12%)                    | 9.6%<br>(5.2-14%)                   | 950<br>(520-1300)   | 19000<br>(11000-27000)    |
| Australia | 1995 | Male   | 75 to 79 | 91%<br>(87-94%)                | 9%<br>(5.8-13%)          | 4.8<br>(3.8-6)                              | 5.8%<br>(1.8-9.5%)                   | 6.2%<br>(1.5-11%)                   | 630<br>(150-1100)   | 10000<br>(3200-17000)     |
| Australia | 1995 | Male   | 80 to 84 | 90%<br>(84-94%)                | 10%<br>(6.1-16%)         | 4.1<br>(3.2-5)                              | 3.7%<br>(0.24-7.3%)                  | 3.8%<br>(-0.35-8%)                  | 390<br>(-36-820)    | 4700<br>(300-9300)        |
| Australia | 1995 | Male   | 85 to 89 | 88%<br>(82-93%)                | 12%<br>(7.5-18%)         | 3.3<br>(2.6-4.2)                            | 1.8%<br>(-1.3-5.1%)                  | 1.5%<br>(-2.1-5.4%)                 | 100<br>(-140-360)   | 1000<br>(-750-3000)       |
| Australia | 1995 | Male   | 90 to 94 | 87%<br>(80-92%)                | 13%<br>(7.8-20%)         | 2.8<br>(2-3.8)                              | 0.27%<br>(-2.5-3.5%)                 | -0.2%<br>(-3.5-3.7%)                | -5.5<br>(-98-100)   | 46<br>(-430-590)          |

| Location  | Year | Sex    | Age      | Prevalence of current drinkers | Prevalence of abstainers | Population average of standard drinks daily | Percent of total attributable deaths | Percent of total attributable DALYs | Attributable deaths | Attributable DALYs        |
|-----------|------|--------|----------|--------------------------------|--------------------------|---------------------------------------------|--------------------------------------|-------------------------------------|---------------------|---------------------------|
| Australia | 1995 | Male   | 95 plus  | 86%<br>(76-93%)                | 14%<br>(6.9-24%)         | 2.2<br>(1.2-3.4)                            | -0.8%<br>(-3.5-2.5%)                 | -1.5%<br>(-4.7-2.4%)                | -10<br>(-34-17)     | -23<br>(-100-72)          |
| Australia | 2000 | Female | All Ages | 85%<br>(82-87%)                | 15%<br>(13-18%)          | 1.9<br>(1.7-2.1)                            | 1.8%<br>(0.82-2.8%)                  | 0.27%<br>(-2.1-2.6%)                | 160<br>(-1300-1600) | 39000<br>(17000-60000)    |
| Australia | 2000 | Female | 15 to 19 | 85%<br>(77-92%)                | 15%<br>(8.3-23%)         | 1.8<br>(1.3-2.2)                            | 2.6%<br>(1.6-3.6%)                   | 8.6%<br>(4.4-13%)                   | 17<br>(8.9-27)      | 2000<br>(1200-2800)       |
| Australia | 2000 | Female | 20 to 24 | 91%<br>(87-94%)                | 8.6%<br>(5.6-13%)        | 2.4<br>(1.9-3)                              | 3.7%<br>(2.6-4.9%)                   | 9.7%<br>(5.2-14%)                   | 23<br>(12-34)       | 3300<br>(2300-4400)       |
| Australia | 2000 | Female | 25 to 29 | 93%<br>(90-95%)                | 6.9%<br>(4.6-10%)        | 2.1<br>(1.7-2.4)                            | 3.1%<br>(2.2-4%)                     | 8.3%<br>(4.6-12%)                   | 25<br>(14-36)       | 3200<br>(2200-4200)       |
| Australia | 2000 | Female | 30 to 34 | 94%<br>(91-95%)                | 6.5%<br>(4.5-9.1%)       | 2.1<br>(1.8-2.5)                            | 2.7%<br>(1.8-3.6%)                   | 8.2%<br>(5-11%)                     | 30<br>(18-42)       | 2900<br>(2000-3900)       |
| Australia | 2000 | Female | 35 to 39 | 93%<br>(91-95%)                | 7%<br>(4.9-9.4%)         | 2.6<br>(2.2-3)                              | 3.1%<br>(2.2-4.2%)                   | 10%<br>(7-13%)                      | 55<br>(38-71)       | 3900<br>(2900-5000)       |
| Australia | 2000 | Female | 40 to 44 | 92%<br>(90-94%)                | 7.6%<br>(5.6-10%)        | 2.8<br>(2.4-3.3)                            | 3.6%<br>(2.7-4.7%)                   | 11%<br>(8.3-14%)                    | 84<br>(63-100)      | 4900<br>(3700-6100)       |
| Australia | 2000 | Female | 45 to 49 | 92%<br>(89-94%)                | 8.4%<br>(5.8-11%)        | 2.8<br>(2.4-3.2)                            | 3.8%<br>(2.7-4.9%)                   | 10%<br>(7.9-13%)                    | 110<br>(83-130)     | 5300<br>(4000-6600)       |
| Australia | 2000 | Female | 50 to 54 | 89%<br>(86-92%)                | 11%<br>(7.9-14%)         | 2.7<br>(2.3-3.2)                            | 3.9%<br>(2.7-5.1%)                   | 9.3%<br>(6.9-11%)                   | 140<br>(100-170)    | 5700<br>(4200-7200)       |
| Australia | 2000 | Female | 55 to 59 | 85%<br>(81-89%)                | 15%<br>(11-19%)          | 2.7<br>(2.3-3.2)                            | 3.7%<br>(2.4-5%)                     | 7.4%<br>(5.1-9.5%)                  | 140<br>(96-170)     | 4700<br>(3200-6200)       |
| Australia | 2000 | Female | 60 to 64 | 82%<br>(77-86%)                | 18%<br>(14-23%)          | 2.5<br>(2.1-3)                              | 2.8%<br>(1.5-4.2%)                   | 5.3%<br>(2.9-7.4%)                  | 120<br>(70-180)     | 3600<br>(1800-5300)       |
| Australia | 2000 | Female | 65 to 69 | 80%<br>(75-85%)                | 20%<br>(15-25%)          | 2.4<br>(2-2.7)                              | 1.9%<br>(0.36-3.3%)                  | 3.2%<br>(0.96-5.4%)                 | 110<br>(33-180)     | 2500<br>(480-4500)        |
| Australia | 2000 | Female | 70 to 74 | 78%<br>(72-82%)                | 22%<br>(18-28%)          | 2.1<br>(1.8-2.6)                            | 0.88%<br>(-0.88-2.7%)                | 1.4%<br>(-1.2-4.1%)                 | 80<br>(-67-230)     | 1400<br>(-1500-4600)      |
| Australia | 2000 | Female | 75 to 79 | 73%<br>(66-81%)                | 27%<br>(19-34%)          | 1.9<br>(1.5-2.3)                            | -0.13%<br>(-2-1.8%)                  | -0.19%<br>(-2.8-2.5%)               | -16<br>(-240-210)   | -230<br>(-3500-3300)      |
| Australia | 2000 | Female | 80 to 84 | 70%<br>(59-79%)                | 30%<br>(21-41%)          | 1.6<br>(1.3-2.1)                            | -1%<br>(-3.1-1%)                     | -1.4%<br>(-4.2-1.3%)                | -150<br>(-440-130)  | -1600<br>(-4700-1500)     |
| Australia | 2000 | Female | 85 to 89 | 68%<br>(57-76%)                | 32%<br>(24-43%)          | 1.5<br>(1.1-1.9)                            | -1.6%<br>(-3.8-0.59%)                | -2.2%<br>(-4.9-0.65%)               | -260<br>(-590-78)   | -1900<br>(-4300-660)      |
| Australia | 2000 | Female | 90 to 94 | 68%<br>(57-78%)                | 32%<br>(22-43%)          | 1.4<br>(0.93-1.9)                           | -2.1%<br>(-4.3-0.34%)                | -2.7%<br>(-5.5-0.24%)               | -220<br>(-450-20)   | -1100<br>(-2200-180)      |
| Australia | 2000 | Female | 95 plus  | 68%<br>(53-81%)                | 32%<br>(19-47%)          | 1.3<br>(0.72-2)                             | -2.5%<br>(-5-0.32%)                  | -3.2%<br>(-6.3-0.14%)               | -120<br>(-230-5)    | -360<br>(-730-48)         |
| Australia | 2000 | Male   | All Ages | 88%<br>(85-91%)                | 12%<br>(9.4-15%)         | 4.3<br>(3.8-4.9)                            | 8.5%<br>(6.8-10%)                    | 8.3%<br>(5.8-11%)                   | 5600<br>(3900-7500) | 200000<br>(160000-250000) |
| Australia | 2000 | Male   | 15 to 19 | 79%<br>(68-87%)                | 21%<br>(13-32%)          | 2.4<br>(1.8-3.1)                            | 6.1%<br>(3.6-8.7%)                   | 13%<br>(6.6-19%)                    | 63<br>(32-92)       | 5600<br>(3400-7800)       |
| Australia | 2000 | Male   | 20 to 24 | 88%<br>(82-93%)                | 12%<br>(7-18%)           | 4.2<br>(3.4-5.2)                            | 12%<br>(8.1-15%)                     | 20%<br>(13-27%)                     | 140<br>(88-200)     | 12000<br>(8700-16000)     |



| Location  | Year | Sex    | Age      | Prevalence of current drinkers | Prevalence of abstainers | Population average of standard drinks daily | Percent of total attributable deaths | Percent of total attributable DALYs | Attributable deaths | Attributable DALYs     |
|-----------|------|--------|----------|--------------------------------|--------------------------|---------------------------------------------|--------------------------------------|-------------------------------------|---------------------|------------------------|
| Australia | 2000 | Male   | 25 to 29 | 91%<br>(87-94%)                | 9%<br>(6-13%)            | 4.7<br>(4-5.5)                              | 12%<br>(8.4-15%)                     | 20%<br>(14-27%)                     | 180<br>(120-240)    | 14000<br>(10000-18000) |
| Australia | 2000 | Male   | 30 to 34 | 93%<br>(90-96%)                | 6.8%<br>(4.3-10%)        | 5.3<br>(4.5-6.2)                            | 11%<br>(8.1-14%)                     | 20%<br>(15-26%)                     | 190<br>(130-240)    | 13000<br>(10000-17000) |
| Australia | 2000 | Male   | 35 to 39 | 95%<br>(93-97%)                | 4.8%<br>(3-6.8%)         | 6<br>(5.1-7.1)                              | 11%<br>(8.4-13%)                     | 21%<br>(16-26%)                     | 220<br>(170-280)    | 15000<br>(11000-18000) |
| Australia | 2000 | Male   | 40 to 44 | 96%<br>(94-98%)                | 4%<br>(2.5-5.8%)         | 6.5<br>(5.6-7.5)                            | 11%<br>(9.1-14%)                     | 21%<br>(17-26%)                     | 280<br>(220-340)    | 16000<br>(13000-19000) |
| Australia | 2000 | Male   | 45 to 49 | 96%<br>(94-97%)                | 4.3%<br>(2.7-6.5%)       | 6.6<br>(5.7-7.7)                            | 12%<br>(9.3-14%)                     | 20%<br>(16-24%)                     | 330<br>(260-400)    | 17000<br>(13000-20000) |
| Australia | 2000 | Male   | 50 to 54 | 95%<br>(93-97%)                | 4.8%<br>(3.2-6.8%)       | 6.9<br>(5.9-8)                              | 12%<br>(9.4-14%)                     | 19%<br>(15-22%)                     | 450<br>(360-540)    | 19000<br>(16000-23000) |
| Australia | 2000 | Male   | 55 to 59 | 95%<br>(92-96%)                | 5.5%<br>(3.8-7.7%)       | 7.2<br>(6.1-8.5)                            | 12%<br>(9.8-15%)                     | 18%<br>(14-21%)                     | 550<br>(430-660)    | 20000<br>(16000-24000) |
| Australia | 2000 | Male   | 60 to 64 | 93%<br>(91-95%)                | 6.7%<br>(4.7-9.4%)       | 7<br>(5.9-8.3)                              | 12%<br>(9.2-14%)                     | 16%<br>(12-19%)                     | 660<br>(500-800)    | 20000<br>(16000-25000) |
| Australia | 2000 | Male   | 65 to 69 | 92%<br>(88-94%)                | 8.5%<br>(5.9-12%)        | 6.2<br>(5.3-7.2)                            | 9.9%<br>(7.2-13%)                    | 12%<br>(8.6-16%)                    | 730<br>(520-940)    | 19000<br>(13000-24000) |
| Australia | 2000 | Male   | 70 to 74 | 91%<br>(87-93%)                | 9.2%<br>(6.6-13%)        | 5.2<br>(4.3-6.3)                            | 7.5%<br>(4.2-11%)                    | 8.8%<br>(4.8-13%)                   | 800<br>(440-1200)   | 16000<br>(9500-24000)  |
| Australia | 2000 | Male   | 75 to 79 | 91%<br>(87-94%)                | 8.9%<br>(5.8-13%)        | 4.5<br>(3.5-5.5)                            | 5.1%<br>(1.8-8.6%)                   | 5.5%<br>(1.6-9.7%)                  | 620<br>(180-1100)   | 10000<br>(3600-17000)  |
| Australia | 2000 | Male   | 80 to 84 | 90%<br>(84-94%)                | 9.9%<br>(6-16%)          | 3.8<br>(3-4.6)                              | 3.1%<br>(0.27-6.2%)                  | 3.1%<br>(-0.28-7%)                  | 320<br>(-29-700)    | 4000<br>(340-8100)     |
| Australia | 2000 | Male   | 85 to 89 | 88%<br>(82-93%)                | 12%<br>(7.2-18%)         | 3.1<br>(2.4-3.9)                            | 1.3%<br>(-1.1-4.3%)                  | 1.1%<br>(-1.9-4.7%)                 | 89<br>(-160-380)    | 980<br>(-840-3200)     |
| Australia | 2000 | Male   | 90 to 94 | 87%<br>(81-92%)                | 13%<br>(7.6-19%)         | 2.6<br>(1.8-3.5)                            | 0.022%<br>(-2.6-3%)                  | -0.45%<br>(-3.6-3.1%)               | -17<br>(-130-110)   | 5.2<br>(-590-680)      |
| Australia | 2000 | Male   | 95 plus  | 86%<br>(77-93%)                | 14%<br>(6.8-23%)         | 2<br>(1.1-3.2)                              | -0.94%<br>(-3.5-2.1%)                | -1.6%<br>(-4.6-2%)                  | -16<br>(-46-20)     | -37<br>(-140-85)       |
| Australia | 2005 | Female | All Ages | 84%<br>(81-86%)                | 16%<br>(14-19%)          | 1.9<br>(1.7-2.2)                            | 1.9%<br>(1.1-2.8%)                   | 0.73%<br>(-1.2-2.9%)                | 480<br>(-790-1900)  | 42000<br>(23000-62000) |
| Australia | 2005 | Female | 15 to 19 | 88%<br>(81-92%)                | 12%<br>(7.5-19%)         | 1.8<br>(1.4-2.3)                            | 2.3%<br>(1.5-3.2%)                   | 9.2%<br>(4.6-14%)                   | 15<br>(7.6-23)      | 1800<br>(1100-2500)    |
| Australia | 2005 | Female | 20 to 24 | 92%<br>(88-94%)                | 8.4%<br>(5.7-12%)        | 2.5<br>(2-3)                                | 3.3%<br>(2.3-4.4%)                   | 10%<br>(5.4-15%)                    | 22<br>(11-31)       | 3100<br>(2100-4200)    |
| Australia | 2005 | Female | 25 to 29 | 92%<br>(89-95%)                | 7.8%<br>(5.4-11%)        | 2.1<br>(1.7-2.4)                            | 2.8%<br>(2-3.7%)                     | 8.7%<br>(4.9-13%)                   | 20<br>(11-29)       | 2600<br>(1800-3600)    |
| Australia | 2005 | Female | 30 to 34 | 93%<br>(89-95%)                | 7.5%<br>(5.2-11%)        | 2.1<br>(1.8-2.5)                            | 2.5%<br>(1.7-3.3%)                   | 8.4%<br>(5.2-12%)                   | 27<br>(17-38)       | 2800<br>(1900-3700)    |
| Australia | 2005 | Female | 35 to 39 | 92%<br>(90-95%)                | 7.8%<br>(5.4-10%)        | 2.6<br>(2.2-3)                              | 3%<br>(2.1-3.9%)                     | 10%<br>(7.3-14%)                    | 49<br>(35-64)       | 3600<br>(2600-4600)    |
| Australia | 2005 | Female | 40 to 44 | 92%<br>(89-94%)                | 8.2%<br>(5.9-11%)        | 2.8<br>(2.5-3.3)                            | 3.4%<br>(2.5-4.4%)                   | 11%<br>(8.4-14%)                    | 82<br>(63-100)      | 4800<br>(3700-6000)    |

| Location  | Year | Sex    | Age      | Prevalence of current drinkers | Prevalence of abstainers | Population average of standard drinks daily | Percent of total attributable deaths | Percent of total attributable DALYs | Attributable deaths | Attributable DALYs        |
|-----------|------|--------|----------|--------------------------------|--------------------------|---------------------------------------------|--------------------------------------|-------------------------------------|---------------------|---------------------------|
| Australia | 2005 | Female | 45 to 49 | 91%<br>(88-94%)                | 9.2%<br>(6.4-12%)        | 2.8<br>(2.4-3.3)                            | 3.6%<br>(2.6-4.7%)                   | 10%<br>(7.9-13%)                    | 110<br>(85-140)     | 5500<br>(4100-6800)       |
| Australia | 2005 | Female | 50 to 54 | 88%<br>(84-91%)                | 12%<br>(9-16%)           | 2.7<br>(2.3-3.2)                            | 3.8%<br>(2.6-4.9%)                   | 9.5%<br>(7.3-11%)                   | 140<br>(110-170)    | 5700<br>(4200-7100)       |
| Australia | 2005 | Female | 55 to 59 | 84%<br>(80-88%)                | 16%<br>(12-20%)          | 2.7<br>(2.3-3.2)                            | 3.5%<br>(2.5-4.7%)                   | 7.8%<br>(5.9-9.6%)                  | 160<br>(120-200)    | 5500<br>(4000-7200)       |
| Australia | 2005 | Female | 60 to 64 | 82%<br>(78-86%)                | 18%<br>(14-22%)          | 2.6<br>(2.2-3.1)                            | 3.1%<br>(1.8-4.4%)                   | 6%<br>(4-7.8%)                      | 150<br>(100-200)    | 4400<br>(2700-6100)       |
| Australia | 2005 | Female | 65 to 69 | 78%<br>(73-84%)                | 22%<br>(16-27%)          | 2.3<br>(2-2.7)                              | 2.2%<br>(1-3.5%)                     | 4.1%<br>(2.2-5.8%)                  | 130<br>(73-190)     | 3100<br>(1400-4800)       |
| Australia | 2005 | Female | 70 to 74 | 74%<br>(68-79%)                | 26%<br>(21-32%)          | 2<br>(1.7-2.5)                              | 1.3%<br>(0.0017-2.7%)                | 2.3%<br>(0.3-4.2%)                  | 110<br>(14-200)     | 1900<br>(2.3-3900)        |
| Australia | 2005 | Female | 75 to 79 | 68%<br>(59-77%)                | 32%<br>(23-41%)          | 1.7<br>(1.3-2.2)                            | 0.44%<br>(-1-2%)                     | 0.67%<br>(-1.4-2.7%)                | 52<br>(-110-210)    | 730<br>(-1700-3400)       |
| Australia | 2005 | Female | 80 to 84 | 65%<br>(53-75%)                | 35%<br>(25-47%)          | 1.5<br>(1.1-2)                              | -0.39%<br>(-2-1.3%)                  | -0.54%<br>(-2.7-1.7%)               | -63<br>(-320-200)   | -670<br>(-3500-2200)      |
| Australia | 2005 | Female | 85 to 89 | 66%<br>(55-76%)                | 34%<br>(24-45%)          | 1.5<br>(1.1-1.9)                            | -1.1%<br>(-2.9-0.89%)                | -1.4%<br>(-3.8-1.1%)                | -180<br>(-470-130)  | -1300<br>(-3500-1100)     |
| Australia | 2005 | Female | 90 to 94 | 66%<br>(54-77%)                | 34%<br>(23-46%)          | 1.4<br>(0.91-1.9)                           | -1.6%<br>(-3.6-0.72%)                | -2.1%<br>(-4.7-0.79%)               | -220<br>(-480-82)   | -1100<br>(-2400-480)      |
| Australia | 2005 | Female | 95 plus  | 66%<br>(51-80%)                | 34%<br>(20-49%)          | 1.3<br>(0.71-2)                             | -2%<br>(-4.3-0.71%)                  | -2.7%<br>(-5.5-0.57%)               | -130<br>(-270-27)   | -390<br>(-840-130)        |
| Australia | 2005 | Male   | All Ages | 89%<br>(86-91%)                | 11%<br>(8.6-14%)         | 4.5<br>(4-5.1)                              | 8.4%<br>(6.9-10%)                    | 8.2%<br>(6-11%)                     | 5600<br>(4100-7400) | 200000<br>(160000-240000) |
| Australia | 2005 | Male   | 15 to 19 | 83%<br>(74-89%)                | 17%<br>(11-26%)          | 2.6<br>(1.9-3.3)                            | 5.5%<br>(3.4-7.8%)                   | 14%<br>(7.3-20%)                    | 49<br>(26-73)       | 4600<br>(2900-6400)       |
| Australia | 2005 | Male   | 20 to 24 | 91%<br>(85-94%)                | 9.5%<br>(6-15%)          | 4.4<br>(3.5-5.4)                            | 11%<br>(7.9-14%)                     | 21%<br>(14-29%)                     | 130<br>(82-170)     | 11000<br>(8000-15000)     |
| Australia | 2005 | Male   | 25 to 29 | 92%<br>(89-94%)                | 8.2%<br>(5.8-11%)        | 4.8<br>(4.1-5.7)                            | 11%<br>(8.1-14%)                     | 21%<br>(15-28%)                     | 130<br>(91-170)     | 11000<br>(8200-14000)     |
| Australia | 2005 | Male   | 30 to 34 | 94%<br>(91-96%)                | 6.5%<br>(4.4-9.2%)       | 5.4<br>(4.6-6.3)                            | 11%<br>(8-13%)                       | 22%<br>(15-28%)                     | 170<br>(120-220)    | 13000<br>(9700-16000)     |
| Australia | 2005 | Male   | 35 to 39 | 96%<br>(94-97%)                | 4.5%<br>(3-6%)           | 6.1<br>(5.3-7.1)                            | 11%<br>(8.3-13%)                     | 22%<br>(17-27%)                     | 190<br>(150-240)    | 13000<br>(10000-16000)    |
| Australia | 2005 | Male   | 40 to 44 | 96%<br>(95-98%)                | 3.7%<br>(2.4-5.3%)       | 6.6<br>(5.7-7.6)                            | 11%<br>(9-14%)                       | 22%<br>(18-26%)                     | 280<br>(220-330)    | 16000<br>(13000-19000)    |
| Australia | 2005 | Male   | 45 to 49 | 96%<br>(94-97%)                | 4%<br>(2.6-5.6%)         | 6.8<br>(5.8-7.9)                            | 12%<br>(9.4-14%)                     | 21%<br>(17-25%)                     | 360<br>(290-430)    | 18000<br>(15000-22000)    |
| Australia | 2005 | Male   | 50 to 54 | 96%<br>(94-97%)                | 4.4%<br>(3.1-5.9%)       | 7.1<br>(6.1-8.2)                            | 12%<br>(9.5-14%)                     | 19%<br>(16-23%)                     | 450<br>(360-530)    | 20000<br>(16000-23000)    |
| Australia | 2005 | Male   | 55 to 59 | 95%<br>(93-96%)                | 5.2%<br>(3.6-7.3%)       | 7.4<br>(6.3-8.5)                            | 12%<br>(9.7-14%)                     | 18%<br>(15-21%)                     | 610<br>(500-720)    | 23000<br>(19000-27000)    |
| Australia | 2005 | Male   | 60 to 64 | 93%<br>(91-95%)                | 6.7%<br>(4.7-9.2%)       | 7.1<br>(6-8.3)                              | 11%<br>(9-14%)                       | 16%<br>(12-19%)                     | 670<br>(530-790)    | 21000<br>(17000-25000)    |

| Location  | Year | Sex    | Age      | Prevalence of current drinkers | Prevalence of abstainers | Population average of standard drinks daily | Percent of total attributable deaths | Percent of total attributable DALYs | Attributable deaths | Attributable DALYs     |
|-----------|------|--------|----------|--------------------------------|--------------------------|---------------------------------------------|--------------------------------------|-------------------------------------|---------------------|------------------------|
| Australia | 2005 | Male   | 65 to 69 | 91%<br>(88-94%)                | 8.8%<br>(5.9-12%)        | 6.2<br>(5.3-7.1)                            | 9.7%<br>(7.4-12%)                    | 12%<br>(9.4-15%)                    | 700<br>(530-860)    | 18000<br>(14000-22000) |
| Australia | 2005 | Male   | 70 to 74 | 91%<br>(88-93%)                | 9.2%<br>(6.8-12%)        | 5.3<br>(4.4-6.3)                            | 7.5%<br>(4.9-10%)                    | 9.1%<br>(5.7-12%)                   | 680<br>(420-920)    | 14000<br>(9300-19000)  |
| Australia | 2005 | Male   | 75 to 79 | 91%<br>(87-94%)                | 8.9%<br>(5.9-13%)        | 4.5<br>(3.6-5.6)                            | 5.4%<br>(2.6-8.3%)                   | 6.1%<br>(2.7-9.7%)                  | 650<br>(290-1000)   | 11000<br>(5400-17000)  |
| Australia | 2005 | Male   | 80 to 84 | 90%<br>(84-94%)                | 10%<br>(6.3-16%)         | 3.8<br>(3-4.6)                              | 3.5%<br>(1.1-6.2%)                   | 3.7%<br>(0.74-7%)                   | 440<br>(90-830)     | 5500<br>(1700-9800)    |
| Australia | 2005 | Male   | 85 to 89 | 88%<br>(81-92%)                | 12%<br>(7.5-19%)         | 3.1<br>(2.4-4)                              | 1.8%<br>(-0.59-4.4%)                 | 1.6%<br>(-1.3-4.7%)                 | 140<br>(-120-420)   | 1400<br>(-510-3500)    |
| Australia | 2005 | Male   | 90 to 94 | 87%<br>(80-92%)                | 13%<br>(8-20%)           | 2.6<br>(1.9-3.5)                            | 0.37%<br>(-2-3.2%)                   | -0.042%<br>(-2.9-3.3%)              | -2.1<br>(-140-170)  | 110<br>(-620-990)      |
| Australia | 2005 | Male   | 95 plus  | 86%<br>(76-93%)                | 14%<br>(6.9-24%)         | 2.1<br>(1.1-3.2)                            | -0.59%<br>(-3.1-2.6%)                | -1.2%<br>(-4.1-2.6%)                | -17<br>(-60-37)     | -34<br>(-170-150)      |
| Australia | 2010 | Female | All Ages | 84%<br>(82-86%)                | 16%<br>(14-18%)          | 2<br>(1.7-2.3)                              | 2.1%<br>(1.3-3%)                     | 1.2%<br>(-0.73-3.1%)                | 830<br>(-510-2200)  | 50000<br>(31000-69000) |
| Australia | 2010 | Female | 15 to 19 | 88%<br>(82-93%)                | 12%<br>(7.4-18%)         | 1.9<br>(1.4-2.4)                            | 2.3%<br>(1.5-3.2%)                   | 9.4%<br>(4.7-14%)                   | 15<br>(7.5-23)      | 1900<br>(1200-2600)    |
| Australia | 2010 | Female | 20 to 24 | 92%<br>(88-94%)                | 8.4%<br>(5.7-12%)        | 2.6<br>(2.1-3.2)                            | 3.4%<br>(2.4-4.6%)                   | 11%<br>(5.6-16%)                    | 23<br>(12-34)       | 3500<br>(2400-4700)    |
| Australia | 2010 | Female | 25 to 29 | 92%<br>(89-95%)                | 7.6%<br>(5.2-11%)        | 2.2<br>(1.8-2.6)                            | 2.8%<br>(2-3.7%)                     | 9%<br>(5-13%)                       | 22<br>(12-32)       | 3100<br>(2200-4100)    |
| Australia | 2010 | Female | 30 to 34 | 93%<br>(90-95%)                | 7.3%<br>(5.1-10%)        | 2.2<br>(1.8-2.6)                            | 2.5%<br>(1.7-3.3%)                   | 8.8%<br>(5.4-12%)                   | 27<br>(16-37)       | 2800<br>(1900-3700)    |
| Australia | 2010 | Female | 35 to 39 | 92%<br>(90-95%)                | 7.7%<br>(5.3-10%)        | 2.7<br>(2.2-3.2)                            | 3%<br>(2.1-4%)                       | 11%<br>(7.4-14%)                    | 53<br>(36-69)       | 3900<br>(2900-5100)    |
| Australia | 2010 | Female | 40 to 44 | 92%<br>(89-94%)                | 8.1%<br>(5.9-11%)        | 2.9<br>(2.5-3.5)                            | 3.4%<br>(2.5-4.4%)                   | 11%<br>(8.7-14%)                    | 81<br>(62-99)       | 4900<br>(3700-6100)    |
| Australia | 2010 | Female | 45 to 49 | 91%<br>(88-94%)                | 9.1%<br>(6.4-12%)        | 2.9<br>(2.4-3.4)                            | 3.6%<br>(2.6-4.7%)                   | 11%<br>(8.2-13%)                    | 120<br>(92-140)     | 5900<br>(4300-7300)    |
| Australia | 2010 | Female | 50 to 54 | 88%<br>(85-91%)                | 12%<br>(9-15%)           | 2.8<br>(2.3-3.3)                            | 3.8%<br>(2.7-5%)                     | 9.8%<br>(7.6-12%)                   | 150<br>(120-190)    | 6400<br>(4700-8000)    |
| Australia | 2010 | Female | 55 to 59 | 85%<br>(80-88%)                | 15%<br>(12-20%)          | 2.8<br>(2.3-3.3)                            | 3.6%<br>(2.5-4.8%)                   | 8.2%<br>(6.2-10%)                   | 170<br>(130-210)    | 6000<br>(4300-7800)    |
| Australia | 2010 | Female | 60 to 64 | 82%<br>(77-86%)                | 18%<br>(14-23%)          | 2.7<br>(2.2-3.2)                            | 3.1%<br>(2-4.4%)                     | 6.5%<br>(4.7-8.3%)                  | 190<br>(130-240)    | 5500<br>(3600-7400)    |
| Australia | 2010 | Female | 65 to 69 | 78%<br>(72-84%)                | 22%<br>(16-28%)          | 2.4<br>(2-2.9)                              | 2.4%<br>(1.3-3.6%)                   | 4.7%<br>(3-6.3%)                    | 170<br>(100-220)    | 3900<br>(2100-5700)    |
| Australia | 2010 | Female | 70 to 74 | 74%<br>(67-80%)                | 26%<br>(20-33%)          | 2.1<br>(1.7-2.6)                            | 1.7%<br>(0.43-3%)                    | 3%<br>(1.2-4.8%)                    | 150<br>(58-230)     | 2700<br>(710-4600)     |
| Australia | 2010 | Female | 75 to 79 | 68%<br>(59-77%)                | 32%<br>(23-41%)          | 1.8<br>(1.4-2.3)                            | 0.89%<br>(-0.41-2.3%)                | 1.4%<br>(-0.46-3.2%)                | 97<br>(-31-220)     | 1400<br>(-640-3500)    |
| Australia | 2010 | Female | 80 to 84 | 65%<br>(54-76%)                | 35%<br>(24-46%)          | 1.6<br>(1.2-2.1)                            | 0.16%<br>(-1.3-1.6%)                 | 0.22%<br>(-1.7-2.1%)                | 26<br>(-200-250)    | 280<br>(-2300-2800)    |

| Location  | Year | Sex    | Age      | Prevalence of current drinkers | Prevalence of abstainers | Population average of standard drinks daily | Percent of total attributable deaths | Percent of total attributable DALYs | Attributable deaths | Attributable DALYs        |
|-----------|------|--------|----------|--------------------------------|--------------------------|---------------------------------------------|--------------------------------------|-------------------------------------|---------------------|---------------------------|
| Australia | 2010 | Female | 85 to 89 | 66%<br>(54-76%)                | 34%<br>(24-46%)          | 1.5<br>(1.1-2)                              | -0.53%<br>(-2.3-1.2%)                | -0.77%<br>(-3-1.5%)                 | -120<br>(-460-220)  | -800<br>(-3500-1800)      |
| Australia | 2010 | Female | 90 to 94 | 66%<br>(55-76%)                | 34%<br>(24-45%)          | 1.4<br>(0.97-2)                             | -1.2%<br>(-3.1-1.1%)                 | -1.6%<br>(-4-1.2%)                  | -190<br>(-470-140)  | -870<br>(-2400-840)       |
| Australia | 2010 | Female | 95 plus  | 67%<br>(51-80%)                | 33%<br>(20-49%)          | 1.4<br>(0.75-2.2)                           | -1.6%<br>(-3.9-1.2%)                 | -2.2%<br>(-5-1.1%)                  | -150<br>(-340-75)   | -440<br>(-1100-320)       |
| Australia | 2010 | Male   | All Ages | 89%<br>(87-91%)                | 11%<br>(8.6-13%)         | 4.7<br>(4.1-5.4)                            | 8.5%<br>(6.9-10%)                    | 8.4%<br>(6.2-11%)                   | 6200<br>(4600-8000) | 220000<br>(180000-260000) |
| Australia | 2010 | Male   | 15 to 19 | 82%<br>(74-89%)                | 18%<br>(11-26%)          | 2.7<br>(2-3.4)                              | 5.5%<br>(3.5-7.8%)                   | 14%<br>(7.4-20%)                    | 48<br>(26-69)       | 4800<br>(3100-6500)       |
| Australia | 2010 | Male   | 20 to 24 | 90%<br>(85-94%)                | 9.7%<br>(6.2-15%)        | 4.6<br>(3.6-5.7)                            | 11%<br>(7.8-14%)                     | 22%<br>(14-30%)                     | 120<br>(75-160)     | 11000<br>(8200-15000)     |
| Australia | 2010 | Male   | 25 to 29 | 92%<br>(89-94%)                | 8.2%<br>(5.8-11%)        | 5<br>(4.1-6)                                | 10%<br>(7.9-13%)                     | 22%<br>(15-28%)                     | 130<br>(93-170)     | 12000<br>(9000-15000)     |
| Australia | 2010 | Male   | 30 to 34 | 94%<br>(91-96%)                | 6.4%<br>(4.2-9.2%)       | 5.6<br>(4.7-6.7)                            | 10%<br>(8-13%)                       | 22%<br>(16-28%)                     | 150<br>(110-190)    | 12000<br>(9200-15000)     |
| Australia | 2010 | Male   | 35 to 39 | 96%<br>(94-97%)                | 4.4%<br>(3-5.9%)         | 6.3<br>(5.3-7.4)                            | 11%<br>(8.4-13%)                     | 23%<br>(18-28%)                     | 210<br>(170-260)    | 14000<br>(11000-17000)    |
| Australia | 2010 | Male   | 40 to 44 | 96%<br>(95-98%)                | 3.7%<br>(2.4-5%)         | 6.8<br>(5.8-7.9)                            | 11%<br>(8.9-14%)                     | 23%<br>(18-27%)                     | 270<br>(220-320)    | 16000<br>(13000-19000)    |
| Australia | 2010 | Male   | 45 to 49 | 96%<br>(95-97%)                | 4%<br>(2.6-5.5%)         | 7<br>(6-8.2)                                | 12%<br>(9.6-14%)                     | 22%<br>(18-26%)                     | 380<br>(310-460)    | 19000<br>(16000-23000)    |
| Australia | 2010 | Male   | 50 to 54 | 96%<br>(94-97%)                | 4.4%<br>(3.1-6%)         | 7.3<br>(6.2-8.5)                            | 12%<br>(9.8-14%)                     | 20%<br>(17-23%)                     | 500<br>(410-590)    | 22000<br>(18000-26000)    |
| Australia | 2010 | Male   | 55 to 59 | 95%<br>(93-96%)                | 5.2%<br>(3.6-7.2%)       | 7.6<br>(6.4-9)                              | 12%<br>(10-14%)                      | 19%<br>(16-22%)                     | 640<br>(540-750)    | 24000<br>(20000-28000)    |
| Australia | 2010 | Male   | 60 to 64 | 93%<br>(91-95%)                | 6.7%<br>(4.8-9.1%)       | 7.4<br>(6.1-8.7)                            | 11%<br>(9.2-13%)                     | 16%<br>(13-19%)                     | 780<br>(640-920)    | 25000<br>(21000-30000)    |
| Australia | 2010 | Male   | 65 to 69 | 91%<br>(88-94%)                | 8.7%<br>(6.1-12%)        | 6.4<br>(5.4-7.5)                            | 9.7%<br>(7.6-12%)                    | 13%<br>(10-16%)                     | 770<br>(600-940)    | 21000<br>(16000-25000)    |
| Australia | 2010 | Male   | 70 to 74 | 91%<br>(88-93%)                | 9.1%<br>(6.7-12%)        | 5.5<br>(4.4-6.6)                            | 7.8%<br>(5.3-10%)                    | 9.8%<br>(6.6-13%)                   | 730<br>(500-970)    | 16000<br>(11000-21000)    |
| Australia | 2010 | Male   | 75 to 79 | 91%<br>(87-94%)                | 9%<br>(6-13%)            | 4.7<br>(3.6-5.7)                            | 5.8%<br>(3-8.4%)                     | 6.7%<br>(3.3-9.9%)                  | 650<br>(320-960)    | 11000<br>(5800-16000)     |
| Australia | 2010 | Male   | 80 to 84 | 90%<br>(84-94%)                | 10%<br>(6.3-16%)         | 3.9<br>(3-4.8)                              | 3.9%<br>(1.5-6.5%)                   | 4.2%<br>(1.3-7.4%)                  | 550<br>(170-950)    | 6900<br>(2700-11000)      |
| Australia | 2010 | Male   | 85 to 89 | 88%<br>(81-92%)                | 12%<br>(7.6-19%)         | 3.2<br>(2.4-4.1)                            | 2.3%<br>(-0.074-4.7%)                | 2.2%<br>(-0.57-5.2%)                | 260<br>(-68-620)    | 2500<br>(-86-5300)        |
| Australia | 2010 | Male   | 90 to 94 | 87%<br>(80-92%)                | 13%<br>(7.8-20%)         | 2.7<br>(1.9-3.7)                            | 0.85%<br>(-1.5-3.7%)                 | 0.52%<br>(-2.3-3.9%)                | 33<br>(-150-250)    | 340<br>(-590-1500)        |
| Australia | 2010 | Male   | 95 plus  | 86%<br>(77-93%)                | 14%<br>(7.1-23%)         | 2.1<br>(1.2-3.4)                            | -0.17%<br>(-2.6-3%)                  | -0.69%<br>(-3.6-3.1%)               | -15<br>(-76-65)     | -14<br>(-220-260)         |
| Australia | 2016 | Female | All Ages | 83%<br>(80-86%)                | 17%<br>(14-20%)          | 2.1<br>(1.6-2.7)                            | 2.2%<br>(1.2-3.3%)                   | 1.4%<br>(-0.81-3.6%)                | 1100<br>(-640-2900) | 58000<br>(32000-85000)    |

| Location  | Year | Sex    | Age      | Prevalence of current drinkers | Prevalence of abstainers | Population average of standard drinks daily | Percent of total attributable deaths | Percent of total attributable DALYs | Attributable deaths | Attributable DALYs        |
|-----------|------|--------|----------|--------------------------------|--------------------------|---------------------------------------------|--------------------------------------|-------------------------------------|---------------------|---------------------------|
| Australia | 2016 | Female | 15 to 19 | 85%<br>(77-92%)                | 15%<br>(8.2-23%)         | 2.1<br>(1.2-3.1)                            | 2.4%<br>(1.5-3.5%)                   | 9.8%<br>(4.5-16%)                   | 15<br>(7.1-24)      | 1900<br>(1200-2700)       |
| Australia | 2016 | Female | 20 to 24 | 91%<br>(86-94%)                | 9.1%<br>(5.8-14%)        | 2.9<br>(1.7-4.3)                            | 3.6%<br>(2.4-4.9%)                   | 12%<br>(6.4-18%)                    | 25<br>(13-37)       | 3900<br>(2600-5400)       |
| Australia | 2016 | Female | 25 to 29 | 92%<br>(88-95%)                | 7.9%<br>(5.1-12%)        | 2.4<br>(1.7-3.2)                            | 2.9%<br>(2.1-3.9%)                   | 9.4%<br>(5.3-14%)                   | 25<br>(14-37)       | 3700<br>(2600-5100)       |
| Australia | 2016 | Female | 30 to 34 | 92%<br>(89-95%)                | 7.5%<br>(5-11%)          | 2.4<br>(1.8-3.2)                            | 2.6%<br>(1.8-3.6%)                   | 9.3%<br>(5.8-13%)                   | 31<br>(19-45)       | 3200<br>(2300-4400)       |
| Australia | 2016 | Female | 35 to 39 | 92%<br>(88-95%)                | 8.1%<br>(5.4-12%)        | 3<br>(2.2-3.9)                              | 3.2%<br>(2.2-4.3%)                   | 11%<br>(7.8-15%)                    | 53<br>(35-71)       | 4000<br>(2800-5300)       |
| Australia | 2016 | Female | 40 to 44 | 91%<br>(88-94%)                | 8.8%<br>(6.1-12%)        | 3.1<br>(2.3-4.1)                            | 3.6%<br>(2.5-4.7%)                   | 12%<br>(8.7-15%)                    | 92<br>(67-120)      | 5600<br>(4100-7300)       |
| Australia | 2016 | Female | 45 to 49 | 90%<br>(85-94%)                | 9.8%<br>(6.4-15%)        | 2.9<br>(2.1-3.9)                            | 3.7%<br>(2.5-5%)                     | 11%<br>(8-14%)                      | 110<br>(83-150)     | 5800<br>(4100-7700)       |
| Australia | 2016 | Female | 50 to 54 | 88%<br>(83-91%)                | 12%<br>(8.7-17%)         | 2.7<br>(2-3.6)                              | 3.7%<br>(2.4-5.1%)                   | 9.5%<br>(6.9-12%)                   | 160<br>(120-210)    | 6900<br>(4600-9200)       |
| Australia | 2016 | Female | 55 to 59 | 84%<br>(77-89%)                | 16%<br>(11-23%)          | 2.7<br>(2-3.5)                              | 3.6%<br>(2.3-5%)                     | 8.1%<br>(5.8-10%)                   | 180<br>(130-230)    | 6500<br>(4200-8800)       |
| Australia | 2016 | Female | 60 to 64 | 81%<br>(74-86%)                | 19%<br>(14-26%)          | 2.6<br>(1.9-3.5)                            | 3.1%<br>(1.8-4.6%)                   | 6.4%<br>(4.2-8.5%)                  | 210<br>(140-290)    | 6300<br>(3600-9300)       |
| Australia | 2016 | Female | 65 to 69 | 79%<br>(72-85%)                | 21%<br>(15-28%)          | 2.4<br>(1.8-3.2)                            | 2.5%<br>(1.2-4%)                     | 4.9%<br>(2.9-6.7%)                  | 210<br>(130-300)    | 5100<br>(2400-7900)       |
| Australia | 2016 | Female | 70 to 74 | 76%<br>(69-82%)                | 24%<br>(18-31%)          | 2.3<br>(1.6-3)                              | 1.9%<br>(0.41-3.5%)                  | 3.4%<br>(1.2-5.5%)                  | 180<br>(64-300)     | 3400<br>(710-6300)        |
| Australia | 2016 | Female | 75 to 79 | 72%<br>(61-80%)                | 28%<br>(20-39%)          | 2<br>(1.4-2.7)                              | 1.2%<br>(-0.42-3%)                   | 1.9%<br>(-0.31-4.3%)                | 130<br>(-20-300)    | 1900<br>(-690-4800)       |
| Australia | 2016 | Female | 80 to 84 | 69%<br>(57-78%)                | 31%<br>(22-43%)          | 1.8<br>(1.2-2.4)                            | 0.46%<br>(-1.3-2.2%)                 | 0.63%<br>(-1.6-2.9%)                | 73<br>(-190-340)    | 820<br>(-2200-3900)       |
| Australia | 2016 | Female | 85 to 89 | 67%<br>(56-76%)                | 33%<br>(24-44%)          | 1.6<br>(1.1-2.3)                            | -0.16%<br>(-2.1-1.9%)                | -0.31%<br>(-2.8-2.3%)               | -56<br>(-500-400)   | -290<br>(-3700-3300)      |
| Australia | 2016 | Female | 90 to 94 | 67%<br>(56-77%)                | 33%<br>(23-44%)          | 1.6<br>(0.96-2.3)                           | -0.78%<br>(-2.9-1.6%)                | -1.2%<br>(-3.8-1.9%)                | -170<br>(-550-270)  | -740<br>(-2800-1500)      |
| Australia | 2016 | Female | 95 plus  | 68%<br>(53-81%)                | 32%<br>(19-47%)          | 1.5<br>(0.76-2.4)                           | -1.2%<br>(-3.6-1.9%)                 | -1.7%<br>(-4.8-2%)                  | -160<br>(-430-180)  | -440<br>(-1300-710)       |
| Australia | 2016 | Male   | All Ages | 88%<br>(85-90%)                | 12%<br>(9.8-15%)         | 4.8<br>(3.7-6.1)                            | 8.4%<br>(6.4-10%)                    | 8.2%<br>(5.4-11%)                   | 7000<br>(4500-9800) | 240000<br>(180000-290000) |
| Australia | 2016 | Male   | 15 to 19 | 79%<br>(68-88%)                | 21%<br>(12-32%)          | 2.2<br>(1.3-3.4)                            | 4.6%<br>(2.8-6.8%)                   | 12%<br>(5.8-19%)                    | 36<br>(17-57)       | 3900<br>(2400-5600)       |
| Australia | 2016 | Male   | 20 to 24 | 88%<br>(81-93%)                | 12%<br>(7.3-19%)         | 4<br>(2.6-6.1)                              | 9.8%<br>(6.7-13%)                    | 20%<br>(12-30%)                     | 110<br>(64-160)     | 11000<br>(7600-15000)     |
| Australia | 2016 | Male   | 25 to 29 | 90%<br>(85-94%)                | 10%<br>(6.3-15%)         | 5.4<br>(3.7-7.5)                            | 10%<br>(7.7-14%)                     | 23%<br>(15-31%)                     | 150<br>(98-210)     | 14000<br>(10000-18000)    |
| Australia | 2016 | Male   | 30 to 34 | 92%<br>(87-95%)                | 7.8%<br>(4.8-13%)        | 6.2<br>(4.4-8.3)                            | 10%<br>(7.8-14%)                     | 24%<br>(17-31%)                     | 170<br>(120-220)    | 13000<br>(9700-17000)     |

| Location    | Year | Sex    | Age      | Prevalence of current drinkers | Prevalence of abstainers | Population average of standard drinks daily | Percent of total attributable deaths | Percent of total attributable DALYs | Attributable deaths | Attributable DALYs     |
|-------------|------|--------|----------|--------------------------------|--------------------------|---------------------------------------------|--------------------------------------|-------------------------------------|---------------------|------------------------|
| Australia   | 2016 | Male   | 35 to 39 | 95%<br>(92-97%)                | 5.4%<br>(3.4-8.4%)       | 6.5<br>(4.7-8.7)                            | 11%<br>(7.8-14%)                     | 23%<br>(17-30%)                     | 200<br>(140-270)    | 13000<br>(10000-17000) |
| Australia   | 2016 | Male   | 40 to 44 | 96%<br>(93-97%)                | 4.5%<br>(2.6-7%)         | 6.7<br>(4.8-9)                              | 11%<br>(8.1-14%)                     | 23%<br>(17-28%)                     | 300<br>(210-380)    | 17000<br>(13000-22000) |
| Australia   | 2016 | Male   | 45 to 49 | 95%<br>(92-97%)                | 4.9%<br>(3-8%)           | 6.9<br>(5-9.4)                              | 11%<br>(8.5-15%)                     | 21%<br>(16-27%)                     | 360<br>(260-460)    | 18000<br>(14000-23000) |
| Australia   | 2016 | Male   | 50 to 54 | 95%<br>(92-96%)                | 5.5%<br>(3.6-8.2%)       | 7.3<br>(5.3-9.8)                            | 12%<br>(9-15%)                       | 20%<br>(15-24%)                     | 540<br>(400-670)    | 24000<br>(18000-29000) |
| Australia   | 2016 | Male   | 55 to 59 | 94%<br>(91-96%)                | 6.2%<br>(4-9.2%)         | 7.8<br>(5.6-10)                             | 12%<br>(9.6-15%)                     | 19%<br>(15-23%)                     | 680<br>(530-830)    | 26000<br>(20000-31000) |
| Australia   | 2016 | Male   | 60 to 64 | 92%<br>(89-95%)                | 7.5%<br>(4.9-11%)        | 7.6<br>(5.4-10)                             | 11%<br>(8.6-14%)                     | 16%<br>(13-20%)                     | 880<br>(660-1100)   | 28000<br>(21000-35000) |
| Australia   | 2016 | Male   | 65 to 69 | 91%<br>(86-94%)                | 9.4%<br>(6.2-14%)        | 6.6<br>(4.8-8.6)                            | 9.8%<br>(7-12%)                      | 13%<br>(9.2-17%)                    | 960<br>(680-1200)   | 26000<br>(18000-33000) |
| Australia   | 2016 | Male   | 70 to 74 | 90%<br>(86-93%)                | 10%<br>(7-14%)           | 5.4<br>(3.7-7.2)                            | 7.7%<br>(4.4-11%)                    | 9.8%<br>(5.5-13%)                   | 840<br>(460-1200)   | 18000<br>(10000-25000) |
| Australia   | 2016 | Male   | 75 to 79 | 90%<br>(85-94%)                | 9.8%<br>(6.3-15%)        | 4.6<br>(3.1-6.2)                            | 5.7%<br>(2.6-9%)                     | 6.7%<br>(2.8-11%)                   | 660<br>(270-1100)   | 11000<br>(4900-17000)  |
| Australia   | 2016 | Male   | 80 to 84 | 89%<br>(83-94%)                | 11%<br>(6.4-17%)         | 3.9<br>(2.7-5.3)                            | 4.2%<br>(1.3-7.5%)                   | 4.6%<br>(1.1-8.7%)                  | 640<br>(160-1200)   | 7900<br>(2500-14000)   |
| Australia   | 2016 | Male   | 85 to 89 | 88%<br>(81-92%)                | 12%<br>(7.7-19%)         | 3.3<br>(2.2-4.5)                            | 2.6%<br>(-0.027-5.7%)                | 2.6%<br>(-0.48-6.4%)                | 390<br>(-68-970)    | 3600<br>(-38-8000)     |
| Australia   | 2016 | Male   | 90 to 94 | 87%<br>(80-92%)                | 13%<br>(7.9-20%)         | 2.7<br>(1.8-4)                              | 1.2%<br>(-1.3-4.4%)                  | 0.98%<br>(-2.1-4.7%)                | 91<br>(-190-440)    | 710<br>(-750-2500)     |
| Australia   | 2016 | Male   | 95 plus  | 86%<br>(76-93%)                | 14%<br>(7-24%)           | 2.2<br>(1.2-3.7)                            | 0.21%<br>(-2.3-3.9%)                 | -0.24%<br>(-3.2-4.2%)               | -7.4<br>(-99-130)   | 26<br>(-280-500)       |
| New Zealand | 1990 | Female | All Ages | 88%<br>(86-91%)                | 12%<br>(9-14%)           | 1.8<br>(1.6-2)                              | 1.5%<br>(0.16-2.7%)                  | -0.93%<br>(-3.6-1.8%)               | -120<br>(-450-230)  | 6300<br>(740-12000)    |
| New Zealand | 1990 | Female | 15 to 19 | 89%<br>(80-95%)                | 11%<br>(5.3-20%)         | 1.6<br>(0.97-2.3)                           | 3.8%<br>(2-5.6%)                     | 9.7%<br>(4.1-15%)                   | 7.6<br>(3.2-12)     | 730<br>(400-1100)      |
| New Zealand | 1990 | Female | 20 to 24 | 93%<br>(88-96%)                | 7.2%<br>(3.9-12%)        | 2.4<br>(1.5-3.4)                            | 5.1%<br>(3.4-7%)                     | 11%<br>(5.9-18%)                    | 8.8<br>(4.6-14)     | 1100<br>(690-1500)     |
| New Zealand | 1990 | Female | 25 to 29 | 93%<br>(89-96%)                | 6.8%<br>(3.8-11%)        | 2.4<br>(1.6-3.4)                            | 4.4%<br>(3.1-5.9%)                   | 11%<br>(6.2-16%)                    | 8.7<br>(4.9-13)     | 960<br>(660-1300)      |
| New Zealand | 1990 | Female | 30 to 34 | 93%<br>(89-96%)                | 6.5%<br>(3.8-11%)        | 2.5<br>(1.7-3.5)                            | 3.7%<br>(2.5-5.1%)                   | 9.9%<br>(6.1-14%)                   | 9.2<br>(5.8-13)     | 820<br>(560-1100)      |
| New Zealand | 1990 | Female | 35 to 39 | 94%<br>(90-96%)                | 6.4%<br>(3.6-10%)        | 2.6<br>(1.7-3.6)                            | 3.8%<br>(2.4-5.2%)                   | 10%<br>(6.3-14%)                    | 12<br>(7.3-16)      | 830<br>(540-1100)      |
| New Zealand | 1990 | Female | 40 to 44 | 94%<br>(90-96%)                | 6.3%<br>(3.6-10%)        | 2.6<br>(1.7-3.7)                            | 4.1%<br>(2.5-5.8%)                   | 9.5%<br>(5.6-13%)                   | 17<br>(10-24)       | 980<br>(610-1400)      |
| New Zealand | 1990 | Female | 45 to 49 | 94%<br>(89-96%)                | 6.4%<br>(3.5-11%)        | 2.7<br>(1.8-3.9)                            | 4.3%<br>(2.3-6.4%)                   | 8.7%<br>(4.6-13%)                   | 21<br>(11-31)       | 1000<br>(560-1400)     |
| New Zealand | 1990 | Female | 50 to 54 | 92%<br>(87-95%)                | 7.7%<br>(4.5-13%)        | 2.7<br>(1.8-3.8)                            | 4.1%<br>(1.8-6.5%)                   | 7%<br>(3-11%)                       | 24<br>(10-38)       | 970<br>(440-1500)      |

| Location    | Year | Sex    | Age      | Prevalence of current drinkers | Prevalence of abstainers | Population average of standard drinks daily | Percent of total attributable deaths | Percent of total attributable DALYs | Attributable deaths | Attributable DALYs     |
|-------------|------|--------|----------|--------------------------------|--------------------------|---------------------------------------------|--------------------------------------|-------------------------------------|---------------------|------------------------|
| New Zealand | 1990 | Female | 55 to 59 | 90%<br>(84-94%)                | 9.9%<br>(5.9-16%)        | 2.7<br>(1.9-3.7)                            | 3.4%<br>(1-5.8%)                     | 5.3%<br>(1.6-9.1%)                  | 24<br>(7.4-42)      | 850<br>(250-1500)      |
| New Zealand | 1990 | Female | 60 to 64 | 88%<br>(81-93%)                | 12%<br>(7.2-19%)         | 2.5<br>(1.6-3.7)                            | 2.1%<br>(-0.48-5.1%)                 | 3%<br>(-0.85-7.3%)                  | 21<br>(-6.1-52)     | 640<br>(-140-1500)     |
| New Zealand | 1990 | Female | 65 to 69 | 87%<br>(78-92%)                | 13%<br>(7.6-22%)         | 2.1<br>(1.5-2.9)                            | 0.42%<br>(-2.1-3.1%)                 | 0.52%<br>(-3.1-4.3%)                | 5.4<br>(-33-44)     | 150<br>(-720-1100)     |
| New Zealand | 1990 | Female | 70 to 74 | 85%<br>(76-91%)                | 15%<br>(9.3-24%)         | 1.8<br>(1.2-2.6)                            | -1.1%<br>(-3.9-1.9%)                 | -1.6%<br>(-5.3-2.4%)                | -23<br>(-76-34)     | -410<br>(-1400-660)    |
| New Zealand | 1990 | Female | 75 to 79 | 83%<br>(72-91%)                | 17%<br>(9.2-28%)         | 1.5<br>(0.93-2.3)                           | -2.2%<br>(-4.8-0.88%)                | -3%<br>(-6.5-1%)                    | -55<br>(-120-19)    | -770<br>(-1700-300)    |
| New Zealand | 1990 | Female | 80 to 84 | 81%<br>(68-90%)                | 19%<br>(10-32%)          | 1.4<br>(0.94-2)                             | -2.8%<br>(-5.4-0.086%)               | -3.5%<br>(-6.8-0.092%)              | -76<br>(-150-2)     | -780<br>(-1500-24)     |
| New Zealand | 1990 | Female | 85 to 89 | 80%<br>(67-89%)                | 20%<br>(11-33%)          | 1.3<br>(0.87-1.9)                           | -2.9%<br>(-5.4--0.4%)                | -3.7%<br>(-6.7--0.59%)              | -65<br>(-120--10)   | -470<br>(-870--67)     |
| New Zealand | 1990 | Female | 90 to 94 | 80%<br>(68-88%)                | 20%<br>(12-32%)          | 1.2<br>(0.77-1.9)                           | -3.1%<br>(-5.5--0.65%)               | -3.8%<br>(-6.8--0.9%)               | -40<br>(-70--9.2)   | -200<br>(-360--43)     |
| New Zealand | 1990 | Female | 95 plus  | 80%<br>(65-91%)                | 20%<br>(9.3-35%)         | 1.2<br>(0.59-2)                             | -3%<br>(-5.5--0.44%)                 | -3.8%<br>(-6.9--0.67%)              | -17<br>(-31--3)     | -54<br>(-99--8)        |
| New Zealand | 1990 | Male   | All Ages | 89%<br>(85-92%)                | 11%<br>(8.4-15%)         | 5<br>(4.4-5.5)                              | 11%<br>(8.3-13%)                     | 11%<br>(7.2-16%)                    | 1600<br>(990-2100)  | 54000<br>(42000-66000) |
| New Zealand | 1990 | Male   | 15 to 19 | 81%<br>(70-89%)                | 19%<br>(11-30%)          | 3.1<br>(1.9-4.5)                            | 10%<br>(6.4-15%)                     | 17%<br>(9.7-25%)                    | 34<br>(19-51)       | 2700<br>(1700-4000)    |
| New Zealand | 1990 | Male   | 20 to 24 | 88%<br>(80-93%)                | 12%<br>(6.6-20%)         | 5.2<br>(3.5-7.1)                            | 19%<br>(13-25%)                      | 26%<br>(17-37%)                     | 71<br>(45-100)      | 5600<br>(3800-7500)    |
| New Zealand | 1990 | Male   | 25 to 29 | 92%<br>(87-96%)                | 7.9%<br>(4.4-13%)        | 6.2<br>(4.2-8.5)                            | 18%<br>(13-23%)                      | 28%<br>(19-38%)                     | 58<br>(39-77)       | 4500<br>(3200-5700)    |
| New Zealand | 1990 | Male   | 30 to 34 | 95%<br>(90-97%)                | 5.4%<br>(2.5-10%)        | 6.9<br>(4.9-9.4)                            | 15%<br>(11-19%)                      | 26%<br>(19-34%)                     | 48<br>(35-62)       | 3400<br>(2600-4300)    |
| New Zealand | 1990 | Male   | 35 to 39 | 95%<br>(92-98%)                | 4.7%<br>(2.3-8.3%)       | 7.3<br>(4.9-10)                             | 14%<br>(9.8-18%)                     | 25%<br>(17-32%)                     | 48<br>(32-63)       | 3100<br>(2200-3900)    |
| New Zealand | 1990 | Male   | 40 to 44 | 96%<br>(92-98%)                | 4.5%<br>(2.2-8.1%)       | 7.7<br>(5.4-10)                             | 13%<br>(9.4-17%)                     | 22%<br>(15-29%)                     | 58<br>(39-75)       | 3200<br>(2300-4100)    |
| New Zealand | 1990 | Male   | 45 to 49 | 95%<br>(92-98%)                | 4.6%<br>(2.3-8.5%)       | 8.2<br>(5.5-12)                             | 14%<br>(9.5-18%)                     | 21%<br>(14-28%)                     | 70<br>(46-92)       | 3400<br>(2300-4400)    |
| New Zealand | 1990 | Male   | 50 to 54 | 95%<br>(92-98%)                | 4.9%<br>(2.5-8.4%)       | 8.5<br>(5.7-12)                             | 14%<br>(9.5-19%)                     | 19%<br>(13-26%)                     | 93<br>(60-120)      | 3800<br>(2600-5000)    |
| New Zealand | 1990 | Male   | 55 to 59 | 95%<br>(91-97%)                | 5.3%<br>(2.7-9.2%)       | 8.5<br>(6-12)                               | 14%<br>(9.6-19%)                     | 18%<br>(12-24%)                     | 130<br>(88-180)     | 4700<br>(3200-6100)    |
| New Zealand | 1990 | Male   | 60 to 64 | 94%<br>(89-97%)                | 6.3%<br>(3.3-11%)        | 8.1<br>(5.3-11)                             | 13%<br>(7.5-18%)                     | 16%<br>(8.7-22%)                    | 190<br>(110-270)    | 5600<br>(3300-7700)    |
| New Zealand | 1990 | Male   | 65 to 69 | 92%<br>(87-96%)                | 7.6%<br>(3.8-13%)        | 7.1<br>(5-9.5)                              | 12%<br>(6.7-17%)                     | 14%<br>(7.5-19%)                    | 230<br>(120-330)    | 5600<br>(3100-7800)    |
| New Zealand | 1990 | Male   | 70 to 74 | 92%<br>(86-96%)                | 8.3%<br>(4.4-14%)        | 5.9<br>(4.1-8.1)                            | 9.1%<br>(3.7-14%)                    | 10%<br>(3.8-16%)                    | 200<br>(73-320)     | 3900<br>(1600-6100)    |

| Location    | Year | Sex    | Age      | Prevalence of current drinkers | Prevalence of abstainers | Population average of standard drinks daily | Percent of total attributable deaths | Percent of total attributable DALYs | Attributable deaths | Attributable DALYs   |
|-------------|------|--------|----------|--------------------------------|--------------------------|---------------------------------------------|--------------------------------------|-------------------------------------|---------------------|----------------------|
| New Zealand | 1990 | Male   | 75 to 79 | 92%<br>(85-96%)                | 8.2%<br>(4.1-15%)        | 4.9<br>(3.1-7)                              | 6.7%<br>(1-13%)                      | 7.2%<br>(0.6-14%)                   | 160<br>(13-320)     | 2500<br>(370-4700)   |
| New Zealand | 1990 | Male   | 80 to 84 | 91%<br>(83-96%)                | 8.8%<br>(4.1-17%)        | 4.3<br>(2.9-6)                              | 5.4%<br>(0.83-11%)                   | 5.7%<br>(0.44-12%)                  | 110<br>(8.3-220)    | 1200<br>(190-2500)   |
| New Zealand | 1990 | Male   | 85 to 89 | 90%<br>(82-95%)                | 9.7%<br>(4.9-18%)        | 3.7<br>(2.5-5.3)                            | 3.9%<br>(0.13-8.9%)                  | 3.9%<br>(-0.35-9.9%)                | 43<br>(-3.9-110)    | 370<br>(12-850)      |
| New Zealand | 1990 | Male   | 90 to 94 | 90%<br>(83-95%)                | 10%<br>(5-17%)           | 3.3<br>(2.1-4.9)                            | 2.5%<br>(-0.84-7.3%)                 | 2.4%<br>(-1.5-7.8%)                 | 9.4<br>(-5.8-30)    | 60<br>(-20-170)      |
| New Zealand | 1990 | Male   | 95 plus  | 89%<br>(79-96%)                | 11%<br>(4.4-21%)         | 2.8<br>(1.5-4.8)                            | 1.5%<br>(-2.1-7.4%)                  | 1.2%<br>(-3.1-8.2%)                 | 1.3<br>(-3.3-8.9)   | 6.6<br>(-9.2-32)     |
| New Zealand | 1995 | Female | All Ages | 88%<br>(86-91%)                | 12%<br>(9.1-14%)         | 1.3<br>(1.1-1.5)                            | 0.67%<br>(-0.36-1.7%)                | -1.9%<br>(-4.3-0.34%)               | -260<br>(-570-45)   | 3000<br>(-1600-7400) |
| New Zealand | 1995 | Female | 15 to 19 | 89%<br>(80-95%)                | 11%<br>(5.5-20%)         | 1.2<br>(0.71-1.7)                           | 3.1%<br>(1.5-4.8%)                   | 7.8%<br>(2.5-13%)                   | 5.3<br>(1.7-9)      | 550<br>(270-830)     |
| New Zealand | 1995 | Female | 20 to 24 | 93%<br>(87-96%)                | 7.3%<br>(3.9-13%)        | 1.7<br>(1.1-2.6)                            | 4.4%<br>(2.9-6%)                     | 8.9%<br>(3.9-15%)                   | 6.7<br>(3-11)       | 930<br>(610-1300)    |
| New Zealand | 1995 | Female | 25 to 29 | 93%<br>(88-96%)                | 6.9%<br>(3.9-12%)        | 1.8<br>(1.2-2.6)                            | 3.7%<br>(2.6-5%)                     | 8.5%<br>(4.3-13%)                   | 6.2<br>(3.2-9.4)    | 800<br>(530-1100)    |
| New Zealand | 1995 | Female | 30 to 34 | 93%<br>(89-96%)                | 6.6%<br>(3.6-11%)        | 1.9<br>(1.3-2.7)                            | 3.1%<br>(2.1-4.2%)                   | 7.7%<br>(4.4-11%)                   | 7.7<br>(4.5-11)     | 750<br>(500-1000)    |
| New Zealand | 1995 | Female | 35 to 39 | 94%<br>(90-96%)                | 6.4%<br>(3.6-10%)        | 1.9<br>(1.2-2.6)                            | 2.9%<br>(1.8-4%)                     | 7.6%<br>(4.5-11%)                   | 9.4<br>(5.5-14)     | 720<br>(470-1000)    |
| New Zealand | 1995 | Female | 40 to 44 | 94%<br>(89-96%)                | 6.4%<br>(3.6-11%)        | 1.9<br>(1.2-2.6)                            | 2.8%<br>(1.7-4.2%)                   | 7%<br>(3.9-10%)                     | 12<br>(6.6-18)      | 720<br>(450-1000)    |
| New Zealand | 1995 | Female | 45 to 49 | 94%<br>(89-96%)                | 6.5%<br>(3.6-11%)        | 1.9<br>(1.3-2.8)                            | 3%<br>(1.6-4.7%)                     | 6.4%<br>(3.4-9.8%)                  | 17<br>(8.8-26)      | 830<br>(460-1200)    |
| New Zealand | 1995 | Female | 50 to 54 | 92%<br>(87-95%)                | 7.7%<br>(4.6-13%)        | 1.9<br>(1.3-2.7)                            | 2.7%<br>(1.1-4.5%)                   | 4.9%<br>(1.9-8.3%)                  | 18<br>(6.8-30)      | 720<br>(300-1200)    |
| New Zealand | 1995 | Female | 55 to 59 | 90%<br>(84-94%)                | 10%<br>(5.8-16%)         | 1.9<br>(1.3-2.7)                            | 1.9%<br>(0.3-3.8%)                   | 3.2%<br>(0.54-6.2%)                 | 15<br>(2.5-28)      | 490<br>(81-1000)     |
| New Zealand | 1995 | Female | 60 to 64 | 88%<br>(81-93%)                | 12%<br>(7.2-19%)         | 1.8<br>(1.1-2.6)                            | 0.77%<br>(-0.95-2.9%)                | 1.3%<br>(-1.4-4.3%)                 | 8<br>(-9-27)        | 220<br>(-270-790)    |
| New Zealand | 1995 | Female | 65 to 69 | 87%<br>(78-92%)                | 13%<br>(7.7-22%)         | 1.5<br>(1-2.1)                              | -0.55%<br>(-2.3-1.2%)                | -0.7%<br>(-3.3-1.8%)                | -6.8<br>(-32-18)    | -180<br>(-770-400)   |
| New Zealand | 1995 | Female | 70 to 74 | 85%<br>(76-91%)                | 15%<br>(9.1-24%)         | 1.3<br>(0.81-1.8)                           | -1.7%<br>(-3.7-0.26%)                | -2.2%<br>(-4.9-0.48%)               | -32<br>(-70-7.1)    | -630<br>(-1300-100)  |
| New Zealand | 1995 | Female | 75 to 79 | 83%<br>(72-91%)                | 17%<br>(9.3-28%)         | 1.1<br>(0.65-1.6)                           | -2.6%<br>(-4.8--0.51%)               | -3.4%<br>(-6.3--0.71%)              | -62<br>(-110-13)    | -900<br>(-1700--180) |
| New Zealand | 1995 | Female | 80 to 84 | 81%<br>(68-90%)                | 19%<br>(10-32%)          | 1<br>(0.66-1.4)                             | -3.2%<br>(-5.5--1%)                  | -4%<br>(-6.9--1.2%)                 | -93<br>(-160--29)   | -990<br>(-1700--310) |
| New Zealand | 1995 | Female | 85 to 89 | 79%<br>(67-88%)                | 21%<br>(12-33%)          | 0.93<br>(0.61-1.3)                          | -3.3%<br>(-5.6--1.1%)                | -4.1%<br>(-7--1.5%)                 | -88<br>(-150--31)   | -660<br>(-1100--230) |
| New Zealand | 1995 | Female | 90 to 94 | 79%<br>(67-88%)                | 21%<br>(12-33%)          | 0.88<br>(0.53-1.3)                          | -3.4%<br>(-5.8--1.2%)                | -4.2%<br>(-7.1--1.4%)               | -56<br>(-95--19)    | -280<br>(-480--98)   |



| Location    | Year | Sex    | Age      | Prevalence of current drinkers | Prevalence of abstainers | Population average of standard drinks daily | Percent of total attributable deaths | Percent of total attributable DALYs | Attributable deaths | Attributable DALYs     |
|-------------|------|--------|----------|--------------------------------|--------------------------|---------------------------------------------|--------------------------------------|-------------------------------------|---------------------|------------------------|
| New Zealand | 1995 | Female | 95 plus  | 79%<br>(64-90%)                | 21%<br>(9.9-36%)         | 0.83<br>(0.42-1.5)                          | -3.3%<br>(-5.8--0.99%)               | -4.1%<br>(-7--1.2%)                 | -24<br>(-41--7)     | -76<br>(-130--23)      |
| New Zealand | 1995 | Male   | All Ages | 89%<br>(85-92%)                | 11%<br>(8.2-15%)         | 4.8<br>(4.3-5.3)                            | 10%<br>(7.8-12%)                     | 9.9%<br>(6.1-14%)                   | 1400<br>(870-2000)  | 50000<br>(39000-61000) |
| New Zealand | 1995 | Male   | 15 to 19 | 81%<br>(70-90%)                | 19%<br>(10-30%)          | 2.9<br>(1.8-4.4)                            | 9.4%<br>(5.9-13%)                    | 16%<br>(8.7-24%)                    | 25<br>(14-37)       | 2100<br>(1300-3000)    |
| New Zealand | 1995 | Male   | 20 to 24 | 88%<br>(80-93%)                | 12%<br>(6.6-20%)         | 4.9<br>(3.2-7)                              | 17%<br>(12-23%)                      | 26%<br>(16-36%)                     | 57<br>(36-79)       | 4700<br>(3200-6300)    |
| New Zealand | 1995 | Male   | 25 to 29 | 92%<br>(86-95%)                | 8%<br>(4.5-14%)          | 5.8<br>(3.9-8.1)                            | 17%<br>(12-22%)                      | 27%<br>(18-36%)                     | 55<br>(36-73)       | 4200<br>(3000-5500)    |
| New Zealand | 1995 | Male   | 30 to 34 | 95%<br>(89-97%)                | 5.5%<br>(2.6-11%)        | 6.5<br>(4.7-8.9)                            | 14%<br>(10-18%)                      | 25%<br>(17-33%)                     | 48<br>(33-63)       | 3500<br>(2600-4400)    |
| New Zealand | 1995 | Male   | 35 to 39 | 95%<br>(92-98%)                | 4.7%<br>(2.3-8.3%)       | 6.9<br>(4.7-9.6)                            | 13%<br>(9-16%)                       | 24%<br>(16-30%)                     | 47<br>(32-61)       | 3100<br>(2200-4000)    |
| New Zealand | 1995 | Male   | 40 to 44 | 96%<br>(92-98%)                | 4.5%<br>(2.2-8%)         | 7.3<br>(5.1-9.8)                            | 12%<br>(8.7-16%)                     | 21%<br>(14-28%)                     | 53<br>(36-68)       | 3000<br>(2100-3900)    |
| New Zealand | 1995 | Male   | 45 to 49 | 95%<br>(91-98%)                | 4.6%<br>(2.4-8.7%)       | 7.8<br>(5.2-11)                             | 13%<br>(8.6-17%)                     | 20%<br>(13-27%)                     | 76<br>(48-98)       | 3700<br>(2500-4800)    |
| New Zealand | 1995 | Male   | 50 to 54 | 95%<br>(91-97%)                | 4.9%<br>(2.5-9%)         | 8.1<br>(5.4-11)                             | 13%<br>(8.8-17%)                     | 19%<br>(12-24%)                     | 94<br>(61-120)      | 3900<br>(2700-5000)    |
| New Zealand | 1995 | Male   | 55 to 59 | 95%<br>(90-97%)                | 5.4%<br>(2.8-9.6%)       | 8.1<br>(5.6-11)                             | 13%<br>(9.1-18%)                     | 18%<br>(12-23%)                     | 120<br>(80-160)     | 4300<br>(2900-5700)    |
| New Zealand | 1995 | Male   | 60 to 64 | 94%<br>(89-97%)                | 6.4%<br>(3.2-11%)        | 7.6<br>(4.9-11)                             | 12%<br>(6.8-16%)                     | 15%<br>(8.1-20%)                    | 150<br>(83-210)     | 4600<br>(2600-6200)    |
| New Zealand | 1995 | Male   | 65 to 69 | 92%<br>(87-96%)                | 7.7%<br>(3.7-13%)        | 6.7<br>(4.7-9)                              | 11%<br>(5.8-15%)                     | 13%<br>(6.5-18%)                    | 200<br>(110-290)    | 5000<br>(2700-7100)    |
| New Zealand | 1995 | Male   | 70 to 74 | 92%<br>(86-96%)                | 8.3%<br>(4.4-14%)        | 5.5<br>(3.8-7.7)                            | 8.1%<br>(3.1-13%)                    | 9.1%<br>(3.2-15%)                   | 190<br>(64-310)     | 3700<br>(1400-5900)    |
| New Zealand | 1995 | Male   | 75 to 79 | 92%<br>(86-96%)                | 8.2%<br>(4.2-14%)        | 4.6<br>(3-6.7)                              | 5.8%<br>(0.77-11%)                   | 6.2%<br>(0.4-12%)                   | 130<br>(8.5-270)    | 2100<br>(280-4000)     |
| New Zealand | 1995 | Male   | 80 to 84 | 91%<br>(84-96%)                | 8.7%<br>(4.2-16%)        | 4.1<br>(2.7-5.6)                            | 4.4%<br>(0.43-9.4%)                  | 4.6%<br>(-0.11-10%)                 | 96<br>(-2.2-210)    | 1100<br>(110-2400)     |
| New Zealand | 1995 | Male   | 85 to 89 | 90%<br>(82-95%)                | 9.7%<br>(4.9-18%)        | 3.5<br>(2.4-5.1)                            | 3.2%<br>(-0.23-7.5%)                 | 3.1%<br>(-0.74-8.3%)                | 43<br>(-10-110)     | 380<br>(-28-920)       |
| New Zealand | 1995 | Male   | 90 to 94 | 90%<br>(82-95%)                | 10%<br>(5-18%)           | 3.1<br>(2-4.7)                              | 2.1%<br>(-1-6.7%)                    | 1.9%<br>(-1.7-7.2%)                 | 12<br>(-10-44)      | 76<br>(-38-250)        |
| New Zealand | 1995 | Male   | 95 plus  | 89%<br>(79-96%)                | 11%<br>(4.4-21%)         | 2.7<br>(1.4-4.7)                            | 1.2%<br>(-2.2-7%)                    | 0.91%<br>(-3.1-7.5%)                | 1.3<br>(-4.5-11)    | 7.1<br>(-13-41)        |
| New Zealand | 2000 | Female | All Ages | 88%<br>(86-91%)                | 12%<br>(9-14%)           | 1.3<br>(1.1-1.5)                            | 0.73%<br>(-0.19-1.6%)                | -1.8%<br>(-4-0.34%)                 | -240<br>(-530-45)   | 3300<br>(-850-7400)    |
| New Zealand | 2000 | Female | 15 to 19 | 89%<br>(80-95%)                | 11%<br>(5.4-20%)         | 1.1<br>(0.69-1.7)                           | 2.7%<br>(1.3-4.2%)                   | 7.5%<br>(2.2-13%)                   | 4.4<br>(1.2-7.5)    | 470<br>(230-720)       |
| New Zealand | 2000 | Female | 20 to 24 | 93%<br>(87-96%)                | 7.4%<br>(4-13%)          | 1.7<br>(1.1-2.6)                            | 3.7%<br>(2.5-5.1%)                   | 8.7%<br>(3.8-14%)                   | 4.2<br>(1.8-6.8)    | 670<br>(440-940)       |

| Location    | Year | Sex    | Age      | Prevalence of current drinkers | Prevalence of abstainers | Population average of standard drinks daily | Percent of total attributable deaths | Percent of total attributable DALYs | Attributable deaths | Attributable DALYs     |
|-------------|------|--------|----------|--------------------------------|--------------------------|---------------------------------------------|--------------------------------------|-------------------------------------|---------------------|------------------------|
| New Zealand | 2000 | Female | 25 to 29 | 93%<br>(89-96%)                | 6.9%<br>(3.8-11%)        | 1.8<br>(1.2-2.6)                            | 3.4%<br>(2.4-4.6%)                   | 8.3%<br>(3.8-13%)                   | 5.4<br>(2.5-8.4)    | 700<br>(470-970)       |
| New Zealand | 2000 | Female | 30 to 34 | 93%<br>(89-96%)                | 6.5%<br>(3.6-11%)        | 1.9<br>(1.2-2.7)                            | 2.8%<br>(1.9-3.9%)                   | 7.7%<br>(4.2-11%)                   | 6.5<br>(3.5-9.9)    | 670<br>(440-930)       |
| New Zealand | 2000 | Female | 35 to 39 | 94%<br>(90-96%)                | 6.3%<br>(3.6-10%)        | 1.9<br>(1.2-2.6)                            | 2.6%<br>(1.7-3.7%)                   | 7.6%<br>(4.3-11%)                   | 8.8<br>(4.9-13)     | 700<br>(460-970)       |
| New Zealand | 2000 | Female | 40 to 44 | 94%<br>(90-97%)                | 6.3%<br>(3.5-10%)        | 1.9<br>(1.2-2.6)                            | 2.7%<br>(1.6-4%)                     | 7%<br>(3.9-10%)                     | 13<br>(7.1-19)      | 770<br>(480-1100)      |
| New Zealand | 2000 | Female | 45 to 49 | 94%<br>(89-97%)                | 6.5%<br>(3.4-11%)        | 2<br>(1.3-2.8)                              | 2.8%<br>(1.5-4.3%)                   | 6.5%<br>(3.6-9.9%)                  | 16<br>(9-25)        | 800<br>(450-1200)      |
| New Zealand | 2000 | Female | 50 to 54 | 92%<br>(88-95%)                | 7.7%<br>(4.5-12%)        | 1.9<br>(1.3-2.7)                            | 2.6%<br>(1.2-4.3%)                   | 5.4%<br>(2.5-8.5%)                  | 20<br>(9.3-32)      | 810<br>(370-1300)      |
| New Zealand | 2000 | Female | 55 to 59 | 90%<br>(84-94%)                | 9.9%<br>(5.8-16%)        | 1.9<br>(1.3-2.7)                            | 2.1%<br>(0.69-3.8%)                  | 3.8%<br>(1.4-6.9%)                  | 18<br>(6.4-32)      | 600<br>(200-1100)      |
| New Zealand | 2000 | Female | 60 to 64 | 88%<br>(81-93%)                | 12%<br>(7.1-19%)         | 1.8<br>(1.1-2.6)                            | 1.2%<br>(-0.34-3.1%)                 | 2%<br>(-0.4-5.1%)                   | 13<br>(-2.5-32)     | 340<br>(-99-930)       |
| New Zealand | 2000 | Female | 65 to 69 | 87%<br>(78-92%)                | 13%<br>(7.6-22%)         | 1.5<br>(1-2.1)                              | -0.00076%<br>(-1.5-1.6%)             | 0.19%<br>(-2-2.5%)                  | 1.5<br>(-17-20)     | -0.55<br>(-440-460)    |
| New Zealand | 2000 | Female | 70 to 74 | 85%<br>(76-91%)                | 15%<br>(9.4-24%)         | 1.3<br>(0.81-1.8)                           | -1.4%<br>(-2.8-0.54%)                | -1.4%<br>(-3.8-0.93%)               | -18<br>(-47-11)     | -380<br>(-920-180)     |
| New Zealand | 2000 | Female | 75 to 79 | 83%<br>(71-91%)                | 17%<br>(9.4-29%)         | 1.1<br>(0.65-1.7)                           | -2.1%<br>(-3.9--0.23%)               | -2.7%<br>(-5.2--0.31%)              | -49<br>(-94--5.5)   | -740<br>(-1400--77)    |
| New Zealand | 2000 | Female | 80 to 84 | 81%<br>(67-90%)                | 19%<br>(10-33%)          | 1<br>(0.64-1.4)                             | -2.9%<br>(-5.1--0.91%)               | -3.7%<br>(-6.5--1.1%)               | -82<br>(-140--24)   | -890<br>(-1500--280)   |
| New Zealand | 2000 | Female | 85 to 89 | 79%<br>(67-88%)                | 21%<br>(12-33%)          | 0.93<br>(0.6-1.4)                           | -3.3%<br>(-5.5--1.2%)                | -4.1%<br>(-6.9--1.5%)               | -99<br>(-170--37)   | -750<br>(-1200--260)   |
| New Zealand | 2000 | Female | 90 to 94 | 79%<br>(67-88%)                | 21%<br>(12-33%)          | 0.89<br>(0.54-1.4)                          | -3.5%<br>(-5.9--1.2%)                | -4.3%<br>(-7.2--1.6%)               | -70<br>(-120--26)   | -360<br>(-600--130)    |
| New Zealand | 2000 | Female | 95 plus  | 79%<br>(64-90%)                | 21%<br>(9.6-36%)         | 0.84<br>(0.42-1.5)                          | -3.5%<br>(-6.1--1.1%)                | -4.4%<br>(-7.4--1.4%)               | -32<br>(-54--10)    | -100<br>(-170--33)     |
| New Zealand | 2000 | Male   | All Ages | 89%<br>(86-92%)                | 11%<br>(8.2-14%)         | 4.3<br>(3.8-4.9)                            | 8.5%<br>(6.6-11%)                    | 8.1%<br>(4.9-12%)                   | 1100<br>(680-1600)  | 42000<br>(33000-51000) |
| New Zealand | 2000 | Male   | 15 to 19 | 81%<br>(70-89%)                | 19%<br>(11-30%)          | 2.6<br>(1.6-4)                              | 7.9%<br>(4.8-11%)                    | 15%<br>(7.8-22%)                    | 18<br>(9.8-28)      | 1600<br>(990-2300)     |
| New Zealand | 2000 | Male   | 20 to 24 | 88%<br>(80-93%)                | 12%<br>(6.5-20%)         | 4.4<br>(2.9-6.3)                            | 15%<br>(10-20%)                      | 24%<br>(15-33%)                     | 36<br>(22-52)       | 3200<br>(2200-4200)    |
| New Zealand | 2000 | Male   | 25 to 29 | 92%<br>(87-96%)                | 7.9%<br>(4.4-13%)        | 5.2<br>(3.5-7.4)                            | 15%<br>(11-20%)                      | 25%<br>(16-34%)                     | 41<br>(26-56)       | 3300<br>(2300-4300)    |
| New Zealand | 2000 | Male   | 30 to 34 | 95%<br>(90-97%)                | 5.4%<br>(2.6-10%)        | 5.8<br>(4.1-7.9)                            | 13%<br>(9.1-17%)                     | 24%<br>(16-32%)                     | 42<br>(28-57)       | 3100<br>(2200-4000)    |
| New Zealand | 2000 | Male   | 35 to 39 | 95%<br>(92-98%)                | 4.7%<br>(2.3-8.4%)       | 6.1<br>(4.2-8.4)                            | 11%<br>(8-15%)                       | 22%<br>(14-29%)                     | 45<br>(29-59)       | 3000<br>(2000-3800)    |
| New Zealand | 2000 | Male   | 40 to 44 | 96%<br>(92-98%)                | 4.5%<br>(2.2-8.1%)       | 6.5<br>(4.5-8.7)                            | 11%<br>(7.5-14%)                     | 20%<br>(13-26%)                     | 52<br>(33-68)       | 3000<br>(2000-3900)    |

| Location    | Year | Sex    | Age      | Prevalence of current drinkers | Prevalence of abstainers | Population average of standard drinks daily | Percent of total attributable deaths | Percent of total attributable DALYs | Attributable deaths | Attributable DALYs  |
|-------------|------|--------|----------|--------------------------------|--------------------------|---------------------------------------------|--------------------------------------|-------------------------------------|---------------------|---------------------|
| New Zealand | 2000 | Male   | 45 to 49 | 95%<br>(92-98%)                | 4.6%<br>(2.3-8.4%)       | 6.9<br>(4.7-9.6)                            | 11%<br>(7.3-15%)                     | 19%<br>(12-25%)                     | 65<br>(40-86)       | 3200<br>(2200-4300) |
| New Zealand | 2000 | Male   | 50 to 54 | 95%<br>(91-98%)                | 4.9%<br>(2.5-8.5%)       | 7.2<br>(4.9-9.8)                            | 11%<br>(7.3-15%)                     | 17%<br>(11-22%)                     | 87<br>(54-110)      | 3700<br>(2400-4800) |
| New Zealand | 2000 | Male   | 55 to 59 | 95%<br>(91-97%)                | 5.3%<br>(2.7-9.5%)       | 7.2<br>(5-10)                               | 12%<br>(7.6-15%)                     | 16%<br>(11-21%)                     | 110<br>(70-140)     | 3900<br>(2600-5100) |
| New Zealand | 2000 | Male   | 60 to 64 | 94%<br>(89-97%)                | 6.3%<br>(3.3-11%)        | 6.8<br>(4.4-10)                             | 11%<br>(6.1-15%)                     | 14%<br>(7.5-19%)                    | 120<br>(68-170)     | 3800<br>(2200-5200) |
| New Zealand | 2000 | Male   | 65 to 69 | 92%<br>(87-96%)                | 7.7%<br>(3.8-13%)        | 6<br>(4.2-8.1)                              | 9.2%<br>(4.8-13%)                    | 11%<br>(5.5-16%)                    | 150<br>(72-210)     | 3700<br>(2000-5300) |
| New Zealand | 2000 | Male   | 70 to 74 | 92%<br>(86-96%)                | 8.3%<br>(4.3-14%)        | 4.9<br>(3.3-6.9)                            | 6.7%<br>(2.5-11%)                    | 7.7%<br>(2.6-13%)                   | 150<br>(49-240)     | 3000<br>(1100-4800) |
| New Zealand | 2000 | Male   | 75 to 79 | 92%<br>(85-96%)                | 8.2%<br>(4-15%)          | 4.2<br>(2.6-6.1)                            | 4.6%<br>(0.61-9.5%)                  | 5%<br>(0.23-11%)                    | 110<br>(5.3-240)    | 1800<br>(250-3800)  |
| New Zealand | 2000 | Male   | 80 to 84 | 91%<br>(83-96%)                | 8.8%<br>(4.2-17%)        | 3.6<br>(2.4-5)                              | 3.2%<br>(-0.2-7.5%)                  | 3.3%<br>(-0.73-8.3%)                | 66<br>(-15-170)     | 820<br>(-51-1900)   |
| New Zealand | 2000 | Male   | 85 to 89 | 90%<br>(82-95%)                | 9.8%<br>(4.9-18%)        | 3.2<br>(2.1-4.5)                            | 2%<br>(-0.9-5.6%)                    | 1.9%<br>(-1.6-6%)                   | 30<br>(-26-99)      | 290<br>(-130-810)   |
| New Zealand | 2000 | Male   | 90 to 94 | 90%<br>(82-95%)                | 10%<br>(5-18%)           | 2.8<br>(1.8-4.2)                            | 1.1%<br>(-1.7-5.1%)                  | 0.81%<br>(-2.5-5.5%)                | 5.9<br>(-18-40)     | 49<br>(-72-230)     |
| New Zealand | 2000 | Male   | 95 plus  | 89%<br>(80-96%)                | 11%<br>(4.5-20%)         | 2.4<br>(1.2-4.2)                            | 0.34%<br>(-2.7-5%)                   | -0.11%<br>(-3.8-5.4%)               | -0.22<br>(-7.5-11)  | 2.7<br>(-21-39)     |
| New Zealand | 2005 | Female | All Ages | 90%<br>(87-92%)                | 10%<br>(8.3-13%)         | 1.4<br>(1.2-1.6)                            | 0.99%<br>(0.14-1.8%)                 | -1.4%<br>(-3.5-0.55%)               | -200<br>(-500-77)   | 4700<br>(650-8500)  |
| New Zealand | 2005 | Female | 15 to 19 | 90%<br>(82-95%)                | 10%<br>(4.9-18%)         | 1.2<br>(0.74-1.8)                           | 2.6%<br>(1.3-4.1%)                   | 7.5%<br>(2.2-13%)                   | 4.7<br>(1.4-8.1)    | 510<br>(260-780)    |
| New Zealand | 2005 | Female | 20 to 24 | 94%<br>(90-96%)                | 6.3%<br>(3.7-10%)        | 1.8<br>(1.2-2.7)                            | 3.7%<br>(2.5-5.1%)                   | 9%<br>(3.9-15%)                     | 4.8<br>(2.1-7.8)    | 740<br>(480-1100)   |
| New Zealand | 2005 | Female | 25 to 29 | 94%<br>(91-96%)                | 6%<br>(3.6-9.4%)         | 1.9<br>(1.2-2.8)                            | 3.2%<br>(2.2-4.3%)                   | 8.7%<br>(4.1-14%)                   | 4<br>(1.9-6.4)      | 600<br>(410-830)    |
| New Zealand | 2005 | Female | 30 to 34 | 94%<br>(91-96%)                | 5.9%<br>(3.7-9.2%)       | 1.9<br>(1.3-2.8)                            | 2.9%<br>(1.9-4%)                     | 8%<br>(4.4-12%)                     | 6.6<br>(3.7-10)     | 680<br>(440-940)    |
| New Zealand | 2005 | Female | 35 to 39 | 94%<br>(91-97%)                | 5.8%<br>(3.5-8.7%)       | 2<br>(1.3-2.8)                              | 2.7%<br>(1.7-3.9%)                   | 7.9%<br>(4.5-12%)                   | 9.7<br>(5.5-15)     | 750<br>(490-1100)   |
| New Zealand | 2005 | Female | 40 to 44 | 94%<br>(92-97%)                | 5.6%<br>(3.4-8.5%)       | 2<br>(1.3-2.8)                              | 2.7%<br>(1.6-4%)                     | 7.4%<br>(4.3-11%)                   | 14<br>(8.1-21)      | 860<br>(530-1200)   |
| New Zealand | 2005 | Female | 45 to 49 | 94%<br>(91-97%)                | 5.7%<br>(3.2-9.1%)       | 2.1<br>(1.4-2.9)                            | 2.9%<br>(1.6-4.4%)                   | 7.1%<br>(4-10%)                     | 20<br>(11-29)       | 970<br>(570-1400)   |
| New Zealand | 2005 | Female | 50 to 54 | 93%<br>(90-96%)                | 6.9%<br>(4.3-10%)        | 2.1<br>(1.4-2.9)                            | 2.7%<br>(1.4-4.2%)                   | 6%<br>(3-8.8%)                      | 21<br>(11-32)       | 870<br>(450-1300)   |
| New Zealand | 2005 | Female | 55 to 59 | 91%<br>(86-95%)                | 8.8%<br>(5.4-14%)        | 2<br>(1.4-2.9)                              | 2.3%<br>(0.99-3.9%)                  | 4.5%<br>(2.1-7.3%)                  | 23<br>(11-37)       | 780<br>(340-1300)   |
| New Zealand | 2005 | Female | 60 to 64 | 89%<br>(84-93%)                | 11%<br>(6.7-16%)         | 1.9<br>(1.2-2.8)                            | 1.6%<br>(0.19-3.4%)                  | 2.9%<br>(0.6-5.6%)                  | 18<br>(3.7-35)      | 500<br>(61-1000)    |

| Location    | Year | Sex    | Age      | Prevalence of current drinkers | Prevalence of abstainers | Population average of standard drinks daily | Percent of total attributable deaths | Percent of total attributable DALYs | Attributable deaths | Attributable DALYs     |
|-------------|------|--------|----------|--------------------------------|--------------------------|---------------------------------------------|--------------------------------------|-------------------------------------|---------------------|------------------------|
| New Zealand | 2005 | Female | 65 to 69 | 87%<br>(79-92%)                | 13%<br>(7.6-21%)         | 1.6<br>(1.1-2.2)                            | 0.62%<br>(-0.72-2.1%)                | 1.2%<br>(-0.81-3.4%)                | 9.8<br>(-6.6-28)    | 190<br>(-220-630)      |
| New Zealand | 2005 | Female | 70 to 74 | 85%<br>(77-91%)                | 15%<br>(9-23%)           | 1.3<br>(0.85-2)                             | -0.53%<br>(-1.9-1%)                  | -0.6%<br>(-2.6-1.7%)                | -6.6<br>(-30-19)    | -170<br>(-600-320)     |
| New Zealand | 2005 | Female | 75 to 79 | 83%<br>(72-91%)                | 17%<br>(9.4-28%)         | 1.2<br>(0.68-1.8)                           | -1.5%<br>(-3.1-0.13%)                | -2%<br>(-4.2-0.23%)                 | -33<br>(-70-4)      | -500<br>(-1000-47)     |
| New Zealand | 2005 | Female | 80 to 84 | 81%<br>(68-90%)                | 19%<br>(10-32%)          | 1.1<br>(0.68-1.5)                           | -2.4%<br>(-4.4--0.6%)                | -3.1%<br>(-5.6--0.76%)              | -76<br>(-140--18)   | -820<br>(-1500--210)   |
| New Zealand | 2005 | Female | 85 to 89 | 80%<br>(67-88%)                | 20%<br>(12-33%)          | 0.99<br>(0.63-1.4)                          | -3%<br>(-5.1--0.92%)                 | -3.8%<br>(-6.4--1.2%)               | -98<br>(-170--30)   | -720<br>(-1200--220)   |
| New Zealand | 2005 | Female | 90 to 94 | 80%<br>(68-89%)                | 20%<br>(11-32%)          | 0.94<br>(0.57-1.4)                          | -3.3%<br>(-5.7--1.1%)                | -4.2%<br>(-7.1--1.4%)               | -84<br>(-140--29)   | -420<br>(-710--140)    |
| New Zealand | 2005 | Female | 95 plus  | 80%<br>(65-91%)                | 20%<br>(9.3-35%)         | 0.89<br>(0.43-1.5)                          | -3.5%<br>(-6.1--1%)                  | -4.3%<br>(-7.5--1.4%)               | -41<br>(-71--13)    | -130<br>(-230--41)     |
| New Zealand | 2005 | Male   | All Ages | 91%<br>(88-93%)                | 9.2%<br>(6.9-12%)        | 4.6<br>(4-5.2)                              | 8.5%<br>(6.7-10%)                    | 8.2%<br>(5.1-12%)                   | 1100<br>(700-1600)  | 42000<br>(33000-51000) |
| New Zealand | 2005 | Male   | 15 to 19 | 85%<br>(77-91%)                | 15%<br>(8.8-23%)         | 2.8<br>(1.8-4.3)                            | 8%<br>(5-12%)                        | 15%<br>(8.4-23%)                    | 21<br>(11-32)       | 1800<br>(1100-2600)    |
| New Zealand | 2005 | Male   | 20 to 24 | 90%<br>(83-94%)                | 10%<br>(5.9-17%)         | 4.6<br>(3-6.6)                              | 14%<br>(9.7-19%)                     | 24%<br>(15-34%)                     | 35<br>(21-49)       | 3200<br>(2200-4200)    |
| New Zealand | 2005 | Male   | 25 to 29 | 93%<br>(90-96%)                | 6.8%<br>(4-10%)          | 5.4<br>(3.6-7.6)                            | 14%<br>(10-18%)                      | 26%<br>(17-35%)                     | 32<br>(20-43)       | 2700<br>(1900-3500)    |
| New Zealand | 2005 | Male   | 30 to 34 | 96%<br>(92-98%)                | 4.4%<br>(2.2-7.8%)       | 6<br>(4.2-8.2)                              | 12%<br>(8.8-16%)                     | 24%<br>(16-32%)                     | 34<br>(23-45)       | 2600<br>(1900-3300)    |
| New Zealand | 2005 | Male   | 35 to 39 | 96%<br>(94-98%)                | 3.7%<br>(1.9-6%)         | 6.4<br>(4.4-8.8)                            | 11%<br>(7.9-15%)                     | 22%<br>(15-30%)                     | 43<br>(27-57)       | 2900<br>(1900-3700)    |
| New Zealand | 2005 | Male   | 40 to 44 | 97%<br>(94-98%)                | 3.5%<br>(1.8-6%)         | 6.8<br>(4.7-9.1)                            | 11%<br>(7.6-14%)                     | 21%<br>(13-27%)                     | 56<br>(36-73)       | 3200<br>(2200-4200)    |
| New Zealand | 2005 | Male   | 45 to 49 | 96%<br>(94-98%)                | 3.6%<br>(1.9-6.1%)       | 7.2<br>(4.9-10)                             | 11%<br>(7.6-15%)                     | 19%<br>(12-25%)                     | 70<br>(45-91)       | 3500<br>(2400-4500)    |
| New Zealand | 2005 | Male   | 50 to 54 | 96%<br>(94-98%)                | 3.9%<br>(2-6.1%)         | 7.5<br>(5.1-10)                             | 11%<br>(7.6-15%)                     | 18%<br>(12-23%)                     | 87<br>(56-110)      | 3800<br>(2600-4700)    |
| New Zealand | 2005 | Male   | 55 to 59 | 96%<br>(93-98%)                | 4.4%<br>(2.4-7.4%)       | 7.6<br>(5.3-11)                             | 12%<br>(7.9-15%)                     | 17%<br>(11-21%)                     | 120<br>(80-150)     | 4400<br>(3100-5600)    |
| New Zealand | 2005 | Male   | 60 to 64 | 95%<br>(91-97%)                | 5.4%<br>(3-8.6%)         | 7.2<br>(4.7-10)                             | 11%<br>(6.4-14%)                     | 14%<br>(8.4-19%)                    | 130<br>(75-160)     | 3900<br>(2400-5100)    |
| New Zealand | 2005 | Male   | 65 to 69 | 93%<br>(89-97%)                | 6.7%<br>(3.4-11%)        | 6.2<br>(4.4-8.3)                            | 9.2%<br>(5.3-13%)                    | 12%<br>(6.4-16%)                    | 130<br>(75-190)     | 3500<br>(2100-4800)    |
| New Zealand | 2005 | Male   | 70 to 74 | 92%<br>(88-96%)                | 7.9%<br>(4.2-12%)        | 5.1<br>(3.4-7)                              | 7%<br>(3-11%)                        | 8.3%<br>(3.2-13%)                   | 130<br>(50-200)     | 2700<br>(1200-4100)    |
| New Zealand | 2005 | Male   | 75 to 79 | 92%<br>(86-96%)                | 8.1%<br>(4-14%)          | 4.2<br>(2.7-6.2)                            | 5%<br>(1.2-9.2%)                     | 5.5%<br>(0.81-11%)                  | 120<br>(17-230)     | 1900<br>(470-3600)     |
| New Zealand | 2005 | Male   | 80 to 84 | 91%<br>(84-96%)                | 8.6%<br>(4-16%)          | 3.7<br>(2.5-5.1)                            | 3.5%<br>(0.11-7.5%)                  | 3.7%<br>(-0.3-8.5%)                 | 87<br>(-7.1-200)    | 1100<br>(35-2300)      |

| Location    | Year | Sex    | Age      | Prevalence of current drinkers | Prevalence of abstainers | Population average of standard drinks daily | Percent of total attributable deaths | Percent of total attributable DALYs | Attributable deaths | Attributable DALYs     |
|-------------|------|--------|----------|--------------------------------|--------------------------|---------------------------------------------|--------------------------------------|-------------------------------------|---------------------|------------------------|
| New Zealand | 2005 | Male   | 85 to 89 | 90%<br>(82-95%)                | 9.6%<br>(4.9-18%)        | 3.2<br>(2.2-4.6)                            | 2.2%<br>(-0.74-5.9%)                 | 2.1%<br>(-1.4-6.5%)                 | 36<br>(-24-110)     | 340<br>(-110-920)      |
| New Zealand | 2005 | Male   | 90 to 94 | 90%<br>(83-95%)                | 10%<br>(4.9-17%)         | 2.8<br>(1.8-4.2)                            | 1.2%<br>(-1.7-5.1%)                  | 0.86%<br>(-2.6-5.4%)                | 7.8<br>(-23-49)     | 64<br>(-95-280)        |
| New Zealand | 2005 | Male   | 95 plus  | 90%<br>(79-96%)                | 10%<br>(4.4-21%)         | 2.5<br>(1.3-4.2)                            | 0.43%<br>(-2.6-5.3%)                 | -0.029%<br>(-3.7-5.7%)              | -0.072<br>(-9.2-14) | 4.3<br>(-26-53)        |
| New Zealand | 2010 | Female | All Ages | 90%<br>(87-92%)                | 10%<br>(8.3-13%)         | 1.6<br>(1.4-1.8)                            | 1.4%<br>(0.56-2.2%)                  | -0.78%<br>(-2.8-1.1%)               | -110<br>(-400-160)  | 6700<br>(2700-11000)   |
| New Zealand | 2010 | Female | 15 to 19 | 90%<br>(83-95%)                | 10%<br>(5-17%)           | 1.3<br>(0.81-1.9)                           | 2.6%<br>(1.4-4%)                     | 8%<br>(2.4-14%)                     | 4.3<br>(1.3-7.4)    | 500<br>(270-740)       |
| New Zealand | 2010 | Female | 20 to 24 | 94%<br>(90-96%)                | 6.3%<br>(3.7-10%)        | 2<br>(1.2-3)                                | 4%<br>(2.8-5.4%)                     | 9.6%<br>(4.3-16%)                   | 5.2<br>(2.3-8.4)    | 810<br>(540-1100)      |
| New Zealand | 2010 | Female | 25 to 29 | 94%<br>(91-96%)                | 5.9%<br>(3.6-9.3%)       | 2.1<br>(1.3-3)                              | 3.6%<br>(2.5-4.8%)                   | 9.3%<br>(4.4-14%)                   | 5.2<br>(2.4-8.1)    | 710<br>(480-990)       |
| New Zealand | 2010 | Female | 30 to 34 | 94%<br>(91-97%)                | 5.8%<br>(3.5-9.1%)       | 2.1<br>(1.4-3.1)                            | 3%<br>(2.1-4.2%)                     | 8.8%<br>(5-13%)                     | 6.4<br>(3.6-9.5)    | 660<br>(450-900)       |
| New Zealand | 2010 | Female | 35 to 39 | 94%<br>(91-97%)                | 5.7%<br>(3.3-8.6%)       | 2.2<br>(1.4-3.2)                            | 3%<br>(1.9-4.1%)                     | 9%<br>(5.6-13%)                     | 9.8<br>(6-14)       | 780<br>(510-1100)      |
| New Zealand | 2010 | Female | 40 to 44 | 95%<br>(92-97%)                | 5.5%<br>(3.3-8.4%)       | 2.3<br>(1.4-3.2)                            | 3.1%<br>(1.9-4.4%)                   | 8.5%<br>(5.1-12%)                   | 15<br>(9.1-22)      | 950<br>(600-1300)      |
| New Zealand | 2010 | Female | 45 to 49 | 94%<br>(91-97%)                | 5.6%<br>(3.3-8.9%)       | 2.3<br>(1.5-3.3)                            | 3.3%<br>(2-4.8%)                     | 8.3%<br>(4.9-12%)                   | 23<br>(14-32)       | 1100<br>(700-1600)     |
| New Zealand | 2010 | Female | 50 to 54 | 93%<br>(90-96%)                | 6.8%<br>(4.3-10%)        | 2.3<br>(1.5-3.2)                            | 3.1%<br>(1.7-4.5%)                   | 6.9%<br>(3.9-9.8%)                  | 26<br>(15-37)       | 1100<br>(620-1600)     |
| New Zealand | 2010 | Female | 55 to 59 | 91%<br>(87-95%)                | 8.6%<br>(5.4-13%)        | 2.3<br>(1.6-3.2)                            | 2.7%<br>(1.4-4.3%)                   | 5.6%<br>(3.2-8.2%)                  | 26<br>(15-39)       | 920<br>(480-1400)      |
| New Zealand | 2010 | Female | 60 to 64 | 89%<br>(84-93%)                | 11%<br>(6.6-16%)         | 2.1<br>(1.4-3.1)                            | 2.1%<br>(0.64-3.8%)                  | 4%<br>(1.5-6.6%)                    | 27<br>(10-45)       | 780<br>(230-1400)      |
| New Zealand | 2010 | Female | 65 to 69 | 88%<br>(80-93%)                | 12%<br>(7.2-20%)         | 1.8<br>(1.3-2.4)                            | 1.2%<br>(-0.1-2.6%)                  | 2.2%<br>(0.23-4.3%)                 | 19<br>(1.9-38)      | 410<br>(-37-890)       |
| New Zealand | 2010 | Female | 70 to 74 | 85%<br>(77-91%)                | 15%<br>(8.9-23%)         | 1.5<br>(0.99-2.2)                           | 0.083%<br>(-1.3-1.7%)                | 0.36%<br>(-1.6-2.7%)                | 4<br>(-19-30)       | 27<br>(-420-550)       |
| New Zealand | 2010 | Female | 75 to 79 | 83%<br>(72-91%)                | 17%<br>(9.4-28%)         | 1.3<br>(0.78-2)                             | -0.81%<br>(-2.3-0.87%)               | -1%<br>(-3.1-1.3%)                  | -15<br>(-45-19)     | -260<br>(-710-280)     |
| New Zealand | 2010 | Female | 80 to 84 | 81%<br>(68-90%)                | 19%<br>(10-32%)          | 1.2<br>(0.77-1.7)                           | -1.7%<br>(-3.4-0.019%)               | -2.2%<br>(-4.5-0.025%)              | -51<br>(-100-0.56)  | -570<br>(-1100-6.6)    |
| New Zealand | 2010 | Female | 85 to 89 | 80%<br>(67-88%)                | 20%<br>(12-33%)          | 1.1<br>(0.72-1.6)                           | -2.4%<br>(-4.4--0.53%)               | -3.1%<br>(-5.6--0.68%)              | -91<br>(-160--20)   | -670<br>(-1200--150)   |
| New Zealand | 2010 | Female | 90 to 94 | 79%<br>(67-89%)                | 21%<br>(11-33%)          | 1<br>(0.64-1.6)                             | -2.9%<br>(-5.1--0.88%)               | -3.7%<br>(-6.4--1.2%)               | -82<br>(-140--26)   | -410<br>(-720--120)    |
| New Zealand | 2010 | Female | 95 plus  | 79%<br>(64-90%)                | 21%<br>(9.6-36%)         | 0.96<br>(0.5-1.6)                           | -3.2%<br>(-5.7--0.97%)               | -4%<br>(-7.1--1.2%)                 | -46<br>(-80--14)    | -150<br>(-260--44)     |
| New Zealand | 2010 | Male   | All Ages | 91%<br>(88-93%)                | 9.1%<br>(6.8-12%)        | 4.7<br>(4.1-5.4)                            | 8.5%<br>(6.7-10%)                    | 8.2%<br>(5.2-11%)                   | 1200<br>(760-1700)  | 43000<br>(34000-52000) |

| Location    | Year | Sex    | Age      | Prevalence of current drinkers | Prevalence of abstainers | Population average of standard drinks daily | Percent of total attributable deaths | Percent of total attributable DALYs | Attributable deaths | Attributable DALYs   |
|-------------|------|--------|----------|--------------------------------|--------------------------|---------------------------------------------|--------------------------------------|-------------------------------------|---------------------|----------------------|
| New Zealand | 2010 | Male   | 15 to 19 | 85%<br>(78-91%)                | 15%<br>(8.7-22%)         | 2.9<br>(1.8-4.3)                            | 8%<br>(4.8-11%)                      | 16%<br>(8.4-24%)                    | 19<br>(10-29)       | 1700<br>(1100-2500)  |
| New Zealand | 2010 | Male   | 20 to 24 | 90%<br>(84-94%)                | 10%<br>(5.6-16%)         | 4.7<br>(3-6.7)                              | 14%<br>(9.7-19%)                     | 25%<br>(15-35%)                     | 35<br>(21-49)       | 3200<br>(2200-4300)  |
| New Zealand | 2010 | Male   | 25 to 29 | 93%<br>(90-96%)                | 6.8%<br>(4-10%)          | 5.5<br>(3.6-7.9)                            | 13%<br>(9.6-17%)                     | 26%<br>(17-35%)                     | 27<br>(18-37)       | 2500<br>(1800-3200)  |
| New Zealand | 2010 | Male   | 30 to 34 | 96%<br>(92-98%)                | 4.4%<br>(2.2-7.8%)       | 6.2<br>(4.2-8.6)                            | 12%<br>(8.6-15%)                     | 24%<br>(17-32%)                     | 28<br>(19-37)       | 2200<br>(1600-2900)  |
| New Zealand | 2010 | Male   | 35 to 39 | 96%<br>(94-98%)                | 3.7%<br>(1.9-6.2%)       | 6.6<br>(4.4-9.2)                            | 11%<br>(8-15%)                       | 23%<br>(15-30%)                     | 38<br>(25-50)       | 2600<br>(1900-3400)  |
| New Zealand | 2010 | Male   | 40 to 44 | 96%<br>(94-98%)                | 3.5%<br>(1.9-5.9%)       | 6.9<br>(4.8-9.5)                            | 11%<br>(7.9-15%)                     | 21%<br>(14-28%)                     | 52<br>(34-67)       | 3100<br>(2100-3900)  |
| New Zealand | 2010 | Male   | 45 to 49 | 96%<br>(94-98%)                | 3.7%<br>(2-6.2%)         | 7.3<br>(5-10)                               | 11%<br>(8-15%)                       | 20%<br>(13-26%)                     | 74<br>(51-96)       | 3800<br>(2700-4800)  |
| New Zealand | 2010 | Male   | 50 to 54 | 96%<br>(94-98%)                | 3.9%<br>(2.1-6.4%)       | 7.6<br>(5.1-10)                             | 11%<br>(7.9-15%)                     | 18%<br>(12-23%)                     | 92<br>(64-120)      | 4100<br>(2900-5200)  |
| New Zealand | 2010 | Male   | 55 to 59 | 96%<br>(93-98%)                | 4.4%<br>(2.3-7.2%)       | 7.7<br>(5.4-10)                             | 12%<br>(7.8-15%)                     | 17%<br>(11-22%)                     | 120<br>(79-150)     | 4400<br>(3100-5600)  |
| New Zealand | 2010 | Male   | 60 to 64 | 95%<br>(91-97%)                | 5.3%<br>(2.9-8.5%)       | 7.2<br>(4.7-10)                             | 14%<br>(6.3-14%)                     | 14%<br>(8.4-18%)                    | 140<br>(81-180)     | 4400<br>(2800-5700)  |
| New Zealand | 2010 | Male   | 65 to 69 | 93%<br>(89-97%)                | 6.6%<br>(3.3-11%)        | 6.3<br>(4.5-8.3)                            | 9.1%<br>(5.6-12%)                    | 12%<br>(7-16%)                      | 140<br>(84-190)     | 3700<br>(2300-5100)  |
| New Zealand | 2010 | Male   | 70 to 74 | 92%<br>(87-96%)                | 7.8%<br>(4.2-13%)        | 5.2<br>(3.5-7.1)                            | 7.3%<br>(3.7-11%)                    | 8.9%<br>(4.2-13%)                   | 140<br>(65-200)     | 2900<br>(1500-4300)  |
| New Zealand | 2010 | Male   | 75 to 79 | 92%<br>(86-96%)                | 8.1%<br>(4.1-14%)        | 4.4<br>(2.8-6.4)                            | 5.4%<br>(1.7-9.5%)                   | 6.2%<br>(1.6-11%)                   | 120<br>(31-220)     | 2000<br>(630-3500)   |
| New Zealand | 2010 | Male   | 80 to 84 | 91%<br>(84-96%)                | 8.6%<br>(4.2-16%)        | 3.8<br>(2.5-5.4)                            | 3.9%<br>(0.66-7.8%)                  | 4.3%<br>(0.24-8.9%)                 | 110<br>(6-220)      | 1300<br>(220-2600)   |
| New Zealand | 2010 | Male   | 85 to 89 | 90%<br>(82-95%)                | 9.6%<br>(4.8-18%)        | 3.3<br>(2.2-4.8)                            | 2.6%<br>(-0.28-6.4%)                 | 2.5%<br>(-0.88-7%)                  | 56<br>(-19-150)     | 520<br>(-58-1300)    |
| New Zealand | 2010 | Male   | 90 to 94 | 90%<br>(83-95%)                | 9.9%<br>(4.7-17%)        | 2.9<br>(1.8-4.4)                            | 1.5%<br>(-1.4-5.3%)                  | 1.2%<br>(-2.2-5.7%)                 | 13<br>(-23-61)      | 96<br>(-84-350)      |
| New Zealand | 2010 | Male   | 95 plus  | 90%<br>(80-96%)                | 10%<br>(4.3-20%)         | 2.5<br>(1.3-4.3)                            | 0.68%<br>(-2.4-5.6%)                 | 0.27%<br>(-3.4-6%)                  | 0.99<br>(-12-22)    | 9.8<br>(-35-81)      |
| New Zealand | 2016 | Female | All Ages | 89%<br>(86-91%)                | 11%<br>(9.1-14%)         | 1.7<br>(1.3-2.2)                            | 1.6%<br>(0.68-2.6%)                  | -0.31%<br>(-2.2-1.9%)               | -49<br>(-360-310)   | 8300<br>(3500-14000) |
| New Zealand | 2016 | Female | 15 to 19 | 89%<br>(80-95%)                | 11%<br>(5.3-20%)         | 1.4<br>(0.79-2.2)                           | 2.7%<br>(1.4-4.1%)                   | 8.3%<br>(2.4-15%)                   | 4<br>(1.2-7)        | 490<br>(270-750)     |
| New Zealand | 2016 | Female | 20 to 24 | 93%<br>(87-96%)                | 7.3%<br>(4-13%)          | 2.1<br>(1.2-3.3)                            | 4.1%<br>(2.8-5.6%)                   | 10%<br>(4.5-16%)                    | 5.3<br>(2.3-9)      | 900<br>(590-1300)    |
| New Zealand | 2016 | Female | 25 to 29 | 93%<br>(89-96%)                | 6.8%<br>(3.8-11%)        | 2.2<br>(1.3-3.4)                            | 3.5%<br>(2.5-4.7%)                   | 9.7%<br>(4.7-15%)                   | 4.4<br>(2.2-7.2)    | 710<br>(480-990)     |
| New Zealand | 2016 | Female | 30 to 34 | 93%<br>(89-96%)                | 6.5%<br>(3.8-11%)        | 2.3<br>(1.4-3.5)                            | 3.1%<br>(2.1-4.4%)                   | 9.3%<br>(5.3-14%)                   | 6.4<br>(3.5-9.9)    | 690<br>(450-960)     |

| Location    | Year | Sex    | Age      | Prevalence of current drinkers | Prevalence of abstainers | Population average of standard drinks daily | Percent of total attributable deaths | Percent of total attributable DALYs | Attributable deaths | Attributable DALYs     |
|-------------|------|--------|----------|--------------------------------|--------------------------|---------------------------------------------|--------------------------------------|-------------------------------------|---------------------|------------------------|
| New Zealand | 2016 | Female | 35 to 39 | 94%<br>(90-96%)                | 6.3%<br>(3.6-10%)        | 2.3<br>(1.4-3.6)                            | 3.1%<br>(2-4.3%)                     | 9.7%<br>(5.9-14%)                   | 8.2<br>(4.7-12)     | 680<br>(450-950)       |
| New Zealand | 2016 | Female | 40 to 44 | 94%<br>(90-96%)                | 6.3%<br>(3.6-10%)        | 2.4<br>(1.5-3.7)                            | 3.3%<br>(2-4.7%)                     | 9.3%<br>(5.6-13%)                   | 16<br>(8.9-23)      | 1000<br>(610-1400)     |
| New Zealand | 2016 | Female | 45 to 49 | 94%<br>(89-96%)                | 6.5%<br>(3.6-11%)        | 2.5<br>(1.5-3.8)                            | 3.5%<br>(2-5.2%)                     | 9%<br>(5.6-13%)                     | 23<br>(13-33)       | 1200<br>(700-1700)     |
| New Zealand | 2016 | Female | 50 to 54 | 92%<br>(88-95%)                | 7.7%<br>(4.7-12%)        | 2.5<br>(1.5-3.7)                            | 3.4%<br>(1.9-5.2%)                   | 7.6%<br>(4.3-11%)                   | 32<br>(18-48)       | 1400<br>(760-2100)     |
| New Zealand | 2016 | Female | 55 to 59 | 90%<br>(84-94%)                | 10%<br>(5.9-16%)         | 2.5<br>(1.6-3.5)                            | 3%<br>(1.5-4.7%)                     | 6.3%<br>(3.6-9.1%)                  | 33<br>(18-48)       | 1200<br>(600-1800)     |
| New Zealand | 2016 | Female | 60 to 64 | 88%<br>(82-93%)                | 12%<br>(7.2-18%)         | 2.3<br>(1.4-3.4)                            | 2.5%<br>(0.89-4.3%)                  | 4.7%<br>(1.9-7.5%)                  | 34<br>(14-55)       | 980<br>(350-1700)      |
| New Zealand | 2016 | Female | 65 to 69 | 87%<br>(78-93%)                | 13%<br>(7.3-22%)         | 2<br>(1.3-2.8)                              | 1.6%<br>(0.13-3.2%)                  | 2.9%<br>(0.67-5.3%)                 | 31<br>(6.8-59)      | 690<br>(52-1500)       |
| New Zealand | 2016 | Female | 70 to 74 | 85%<br>(76-91%)                | 15%<br>(9.2-24%)         | 1.6<br>(1-2.5)                              | 0.46%<br>(-0.94-2.2%)                | 1%<br>(-1.1-3.5%)                   | 13<br>(-14-46)      | 180<br>(-390-890)      |
| New Zealand | 2016 | Female | 75 to 79 | 83%<br>(72-91%)                | 17%<br>(9.3-28%)         | 1.4<br>(0.79-2.2)                           | -0.44%<br>(-1.9-1.5%)                | -0.45%<br>(-2.5-2.1%)               | -7.1<br>(-40-33)    | -150<br>(-680-470)     |
| New Zealand | 2016 | Female | 80 to 84 | 81%<br>(67-90%)                | 19%<br>(10-33%)          | 1.3<br>(0.78-2)                             | -1.3%<br>(-3-0.65%)                  | -1.7%<br>(-3.9-0.86%)               | -38<br>(-91-18)     | -430<br>(-1000-210)    |
| New Zealand | 2016 | Female | 85 to 89 | 79%<br>(67-88%)                | 21%<br>(12-33%)          | 1.2<br>(0.73-1.9)                           | -2%<br>(-3.9-0.068%)                 | -2.6%<br>(-4.9-0.0073%)             | -79<br>(-150-0.22)  | -590<br>(-1200-21)     |
| New Zealand | 2016 | Female | 90 to 94 | 79%<br>(66-89%)                | 21%<br>(11-34%)          | 1.1<br>(0.64-1.8)                           | -2.5%<br>(-4.6--0.42%)               | -3.2%<br>(-5.9--0.61%)              | -87<br>(-160--17)   | -430<br>(-810--73)     |
| New Zealand | 2016 | Female | 95 plus  | 79%<br>(64-90%)                | 21%<br>(9.6-36%)         | 1.1<br>(0.51-1.9)                           | -2.8%<br>(-5.2--0.34%)               | -3.6%<br>(-6.5--0.58%)              | -48<br>(-88--7.8)   | -150<br>(-280--18)     |
| New Zealand | 2016 | Male   | All Ages | 89%<br>(86-92%)                | 11%<br>(7.9-14%)         | 4.7<br>(3.6-6)                              | 8.2%<br>(6-11%)                      | 7.8%<br>(4.3-12%)                   | 1300<br>(710-2000)  | 45000<br>(32000-59000) |
| New Zealand | 2016 | Male   | 15 to 19 | 81%<br>(71-89%)                | 19%<br>(11-29%)          | 2.7<br>(1.6-4.2)                            | 7.5%<br>(4.6-11%)                    | 15%<br>(7.8-24%)                    | 17<br>(8.9-27)      | 1600<br>(940-2300)     |
| New Zealand | 2016 | Male   | 20 to 24 | 88%<br>(80-94%)                | 12%<br>(6.5-20%)         | 4.6<br>(2.7-7)                              | 14%<br>(9.5-19%)                     | 24%<br>(13-35%)                     | 35<br>(19-50)       | 3400<br>(2300-4700)    |
| New Zealand | 2016 | Male   | 25 to 29 | 92%<br>(87-96%)                | 8%<br>(4.4-13%)          | 5.5<br>(3.3-8.5)                            | 13%<br>(9.5-17%)                     | 26%<br>(17-35%)                     | 28<br>(18-40)       | 2600<br>(1800-3500)    |
| New Zealand | 2016 | Male   | 30 to 34 | 95%<br>(90-97%)                | 5.5%<br>(2.5-10%)        | 6.1<br>(3.9-9.3)                            | 11%<br>(8.3-15%)                     | 24%<br>(16-33%)                     | 27<br>(17-37)       | 2200<br>(1600-2900)    |
| New Zealand | 2016 | Male   | 35 to 39 | 95%<br>(92-98%)                | 4.7%<br>(2.3-8.4%)       | 6.5<br>(4-9.6)                              | 11%<br>(7.5-15%)                     | 23%<br>(14-30%)                     | 30<br>(19-42)       | 2100<br>(1500-2800)    |
| New Zealand | 2016 | Male   | 40 to 44 | 96%<br>(92-98%)                | 4.5%<br>(2.2-7.9%)       | 6.8<br>(4.4-9.9)                            | 11%<br>(7.5-15%)                     | 21%<br>(14-28%)                     | 48<br>(31-66)       | 2900<br>(2000-3800)    |
| New Zealand | 2016 | Male   | 45 to 49 | 95%<br>(91-98%)                | 4.6%<br>(2.3-8.5%)       | 7.2<br>(4.5-11)                             | 11%<br>(7.3-15%)                     | 20%<br>(12-26%)                     | 66<br>(40-90)       | 3400<br>(2200-4500)    |
| New Zealand | 2016 | Male   | 50 to 54 | 95%<br>(91-97%)                | 4.9%<br>(2.6-8.7%)       | 7.5<br>(4.6-11)                             | 11%<br>(6.9-14%)                     | 17%<br>(11-23%)                     | 94<br>(57-130)      | 4200<br>(2700-5600)    |

| Location    | Year | Sex    | Age      | Prevalence of current drinkers | Prevalence of abstainers | Population average of standard drinks daily | Percent of total attributable deaths | Percent of total attributable DALYs | Attributable deaths    | Attributable DALYs  |
|-------------|------|--------|----------|--------------------------------|--------------------------|---------------------------------------------|--------------------------------------|-------------------------------------|------------------------|---------------------|
| New Zealand | 2016 | Male   | 55 to 59 | 95%<br>(90-97%)                | 5.3%<br>(2.8-9.5%)       | 7.5<br>(5-11)                               | 11%<br>(7.7-14%)                     | 17%<br>(11-21%)                     | 120<br>(81-170)        | 4700<br>(3200-6200) |
| New Zealand | 2016 | Male   | 60 to 64 | 94%<br>(89-97%)                | 6.3%<br>(3.2-11%)        | 7.1<br>(4.3-10)                             | 9.9%<br>(6.2-13%)                    | 14%<br>(8.2-18%)                    | 140<br>(82-190)        | 4500<br>(2800-6100) |
| New Zealand | 2016 | Male   | 65 to 69 | 92%<br>(87-96%)                | 7.7%<br>(3.8-13%)        | 6.2<br>(4.1-8.8)                            | 8.8%<br>(5.2-12%)                    | 11%<br>(6.5-16%)                    | 180<br>(100-260)       | 4700<br>(2800-6600) |
| New Zealand | 2016 | Male   | 70 to 74 | 92%<br>(86-96%)                | 8.2%<br>(4.4-14%)        | 5.2<br>(3.3-7.6)                            | 7.2%<br>(3.3-11%)                    | 8.9%<br>(3.8-14%)                   | 170<br>(73-270)        | 3600<br>(1700-5500) |
| New Zealand | 2016 | Male   | 75 to 79 | 92%<br>(86-96%)                | 8.1%<br>(4.2-14%)        | 4.4<br>(2.6-6.8)                            | 5.5%<br>(1.5-9.8%)                   | 6.4%<br>(1.4-12%)                   | 130<br>(30-250)        | 2200<br>(590-4000)  |
| New Zealand | 2016 | Male   | 80 to 84 | 91%<br>(84-96%)                | 8.6%<br>(4-16%)          | 3.8<br>(2.4-5.6)                            | 4.1%<br>(0.57-8.5%)                  | 4.5%<br>(0.29-9.7%)                 | 120<br>(7.1-260)       | 1500<br>(200-3100)  |
| New Zealand | 2016 | Male   | 85 to 89 | 90%<br>(83-95%)                | 9.6%<br>(4.9-17%)        | 3.3<br>(2-5)                                | 2.8%<br>(-0.32-7.4%)                 | 2.8%<br>(-0.81-8.2%)                | 80<br>(-25-230)        | 720<br>(-85-1900)   |
| New Zealand | 2016 | Male   | 90 to 94 | 90%<br>(82-95%)                | 10%<br>(5-18%)           | 2.9<br>(1.7-4.6)                            | 1.7%<br>(-1.2-6.1%)                  | 1.5%<br>(-1.9-6.8%)                 | 24<br>(-31-110)        | 170<br>(-120-610)   |
| New Zealand | 2016 | Male   | 95 plus  | 90%<br>(80-96%)                | 10%<br>(4.3-20%)         | 2.5<br>(1.2-4.4)                            | 0.91%<br>(-2.3-6%)                   | 0.56%<br>(-3.1-6.5%)                | 2.9<br>(-16-34)        | 19<br>(-48-120)     |
| Andorra     | 1990 | Female | All Ages | 73%<br>(65-81%)                | 27%<br>(19-35%)          | 4.6<br>(3-6.7)                              | 6.7%<br>(4-9.8%)                     | 11%<br>(5.1-17%)                    | 22<br>(8.9-36)         | 420<br>(240-640)    |
| Andorra     | 1990 | Female | 15 to 19 | 69%<br>(49-85%)                | 31%<br>(15-51%)          | 3.3<br>(1.5-6.2)                            | 3%<br>(1.6-5%)                       | 12%<br>(6-20%)                      | 0.048<br>(0.022-0.086) | 5.3<br>(2.9-8.8)    |
| Andorra     | 1990 | Female | 20 to 24 | 75%<br>(56-88%)                | 25%<br>(12-44%)          | 4.3<br>(1.9-8.1)                            | 4.1%<br>(2.4-6.1%)                   | 15%<br>(7-23%)                      | 0.087<br>(0.038-0.14)  | 9.9<br>(5.7-15)     |
| Andorra     | 1990 | Female | 25 to 29 | 77%<br>(60-89%)                | 23%<br>(11-40%)          | 4.5<br>(2.1-8.3)                            | 3.8%<br>(2.2-5.6%)                   | 15%<br>(7.4-22%)                    | 0.1<br>(0.047-0.16)    | 10<br>(5.9-15)      |
| Andorra     | 1990 | Female | 30 to 34 | 79%<br>(61-90%)                | 21%<br>(9.7-39%)         | 4.8<br>(2.3-8.7)                            | 3.9%<br>(2.3-5.9%)                   | 16%<br>(9-23%)                      | 0.13<br>(0.069-0.21)   | 11<br>(6.6-16)      |
| Andorra     | 1990 | Female | 35 to 39 | 80%<br>(65-91%)                | 20%<br>(8.6-35%)         | 5.2<br>(2.4-10)                             | 4.6%<br>(2.7-7%)                     | 18%<br>(11-25%)                     | 0.2<br>(0.1-0.31)      | 14<br>(7.7-20)      |
| Andorra     | 1990 | Female | 40 to 44 | 81%<br>(63-92%)                | 19%<br>(8.3-37%)         | 5.9<br>(2.9-10)                             | 5.7%<br>(3.4-8.6%)                   | 19%<br>(12-26%)                     | 0.33<br>(0.18-0.51)    | 19<br>(11-29)       |
| Andorra     | 1990 | Female | 45 to 49 | 81%<br>(60-91%)                | 19%<br>(8.7-40%)         | 6.7<br>(3.1-12)                             | 7%<br>(4.4-10%)                      | 19%<br>(13-27%)                     | 0.45<br>(0.26-0.72)    | 23<br>(13-35)       |
| Andorra     | 1990 | Female | 50 to 54 | 80%<br>(62-91%)                | 20%<br>(8.7-38%)         | 7.1<br>(3.5-13)                             | 7.8%<br>(4.8-11%)                    | 18%<br>(12-26%)                     | 0.66<br>(0.37-1)       | 29<br>(17-44)       |
| Andorra     | 1990 | Female | 55 to 59 | 79%<br>(62-91%)                | 21%<br>(8.9-38%)         | 7.3<br>(3.8-12)                             | 8.4%<br>(5-12%)                      | 17%<br>(11-24%)                     | 0.87<br>(0.48-1.4)     | 33<br>(19-50)       |
| Andorra     | 1990 | Female | 60 to 64 | 78%<br>(57-91%)                | 22%<br>(8.9-43%)         | 7<br>(3.5-12)                               | 8.3%<br>(4.6-12%)                    | 15%<br>(8.9-22%)                    | 1.2<br>(0.61-1.9)      | 38<br>(20-60)       |
| Andorra     | 1990 | Female | 65 to 69 | 76%<br>(55-90%)                | 24%<br>(10-45%)          | 6.3<br>(3.5-10)                             | 8.4%<br>(4.7-12%)                    | 14%<br>(8.1-20%)                    | 1.7<br>(0.83-2.9)      | 46<br>(23-75)       |
| Andorra     | 1990 | Female | 70 to 74 | 73%<br>(52-86%)                | 27%<br>(14-48%)          | 5.4<br>(2.7-9.9)                            | 8%<br>(3.3-13%)                      | 12%<br>(5-19%)                      | 1.8<br>(0.67-3.2)      | 37<br>(14-65)       |



| Location | Year | Sex    | Age      | Prevalence of current drinkers | Prevalence of abstainers | Population average of standard drinks daily | Percent of total attributable deaths | Percent of total attributable DALYs | Attributable deaths | Attributable DALYs |
|----------|------|--------|----------|--------------------------------|--------------------------|---------------------------------------------|--------------------------------------|-------------------------------------|---------------------|--------------------|
| Andorra  | 1990 | Female | 75 to 79 | 69%<br>(49-85%)                | 31%<br>(15-51%)          | 4.9<br>(2.2-9.2)                            | 7.7%<br>(2.1-13%)                    | 10%<br>(2.5-18%)                    | 3<br>(0.72-5.6)     | 48<br>(12-87)      |
| Andorra  | 1990 | Female | 80 to 84 | 66%<br>(44-83%)                | 34%<br>(17-56%)          | 4.6<br>(2.2-8.6)                            | 8.3%<br>(2.4-14%)                    | 11%<br>(3-19%)                      | 3.8<br>(0.94-7.1)   | 44<br>(12-79)      |
| Andorra  | 1990 | Female | 85 to 89 | 63%<br>(43-80%)                | 37%<br>(20-57%)          | 4.3<br>(2-8.1)                              | 8.3%<br>(2.3-15%)                    | 10%<br>(2.6-18%)                    | 3.9<br>(0.96-7.3)   | 32<br>(8.4-58)     |
| Andorra  | 1990 | Female | 90 to 94 | 62%<br>(43-81%)                | 38%<br>(19-57%)          | 4.2<br>(1.9-8.1)                            | 7.6%<br>(1.6-14%)                    | 9.1%<br>(1.7-17%)                   | 2.4<br>(0.45-4.7)   | 13<br>(2.7-25)     |
| Andorra  | 1990 | Female | 95 plus  | 63%<br>(39-83%)                | 37%<br>(17-61%)          | 4.2<br>(1.5-8.8)                            | 7%<br>(0.47-14%)                     | 8.5%<br>(0.4-17%)                   | 1<br>(0.052-2.1)    | 3.6<br>(0.25-7.3)  |
| Andorra  | 1990 | Male   | All Ages | 80%<br>(71-87%)                | 20%<br>(13-29%)          | 5.6<br>(3.6-8.2)                            | 11%<br>(7.7-14%)                     | 14%<br>(8.1-19%)                    | 27<br>(16-39)       | 720<br>(470-1000)  |
| Andorra  | 1990 | Male   | 15 to 19 | 72%<br>(51-88%)                | 28%<br>(12-49%)          | 3.6<br>(1.7-6.3)                            | 7.4%<br>(4.1-11%)                    | 16%<br>(7.9-25%)                    | 0.17<br>(0.08-0.29) | 16<br>(8.5-25)     |
| Andorra  | 1990 | Male   | 20 to 24 | 78%<br>(58-90%)                | 22%<br>(10-42%)          | 5.3<br>(2.6-9.3)                            | 13%<br>(8.4-19%)                     | 23%<br>(13-33%)                     | 0.41<br>(0.2-0.67)  | 37<br>(22-54)      |
| Andorra  | 1990 | Male   | 25 to 29 | 81%<br>(67-92%)                | 19%<br>(8.3-33%)         | 5.9<br>(3-9.9)                              | 12%<br>(7.3-17%)                     | 23%<br>(11-34%)                     | 0.43<br>(0.17-0.71) | 36<br>(20-53)      |
| Andorra  | 1990 | Male   | 30 to 34 | 84%<br>(68-94%)                | 16%<br>(6.1-32%)         | 6.2<br>(3.2-11)                             | 11%<br>(5.9-16%)                     | 22%<br>(9.3-32%)                    | 0.43<br>(0.17-0.74) | 32<br>(17-50)      |
| Andorra  | 1990 | Male   | 35 to 39 | 87%<br>(73-95%)                | 13%<br>(5.1-27%)         | 6.3<br>(3.3-11)                             | 11%<br>(5.8-16%)                     | 22%<br>(9.7-31%)                    | 0.53<br>(0.21-0.93) | 34<br>(16-55)      |
| Andorra  | 1990 | Male   | 40 to 44 | 88%<br>(74-96%)                | 12%<br>(4.2-26%)         | 6.9<br>(3.7-11)                             | 12%<br>(6.7-17%)                     | 22%<br>(12-30%)                     | 0.78<br>(0.36-1.3)  | 43<br>(22-68)      |
| Andorra  | 1990 | Male   | 45 to 49 | 89%<br>(71-96%)                | 11%<br>(4-29%)           | 8.2<br>(4.3-14)                             | 13%<br>(7.8-18%)                     | 22%<br>(12-29%)                     | 1.1<br>(0.52-1.7)   | 51<br>(28-78)      |
| Andorra  | 1990 | Male   | 50 to 54 | 89%<br>(74-96%)                | 11%<br>(3.9-26%)         | 9.1<br>(4.8-15)                             | 14%<br>(9-18%)                       | 21%<br>(14-27%)                     | 1.6<br>(0.92-2.4)   | 65<br>(40-95)      |
| Andorra  | 1990 | Male   | 55 to 59 | 89%<br>(76-96%)                | 11%<br>(3.8-24%)         | 9.5<br>(5.4-15)                             | 13%<br>(9.1-18%)                     | 19%<br>(13-25%)                     | 2.1<br>(1.2-3)      | 73<br>(45-100)     |
| Andorra  | 1990 | Male   | 60 to 64 | 88%<br>(73-96%)                | 12%<br>(3.9-27%)         | 9.2<br>(4.9-15)                             | 12%<br>(7.9-17%)                     | 16%<br>(10-22%)                     | 2.6<br>(1.5-3.8)    | 78<br>(46-110)     |
| Andorra  | 1990 | Male   | 65 to 69 | 88%<br>(73-96%)                | 12%<br>(4.2-27%)         | 8.3<br>(5-13)                               | 12%<br>(7.3-16%)                     | 15%<br>(8.8-20%)                    | 3.2<br>(1.8-4.5)    | 79<br>(46-110)     |
| Andorra  | 1990 | Male   | 70 to 74 | 86%<br>(72-95%)                | 14%<br>(5.4-28%)         | 7.3<br>(4-12)                               | 11%<br>(5.1-15%)                     | 13%<br>(5.9-18%)                    | 2.7<br>(1.2-4.1)    | 55<br>(26-82)      |
| Andorra  | 1990 | Male   | 75 to 79 | 85%<br>(70-94%)                | 15%<br>(5.8-30%)         | 6.6<br>(3.4-12)                             | 9.6%<br>(3.4-15%)                    | 11%<br>(3.6-17%)                    | 3.6<br>(1.2-5.7)    | 57<br>(20-87)      |
| Andorra  | 1990 | Male   | 80 to 84 | 83%<br>(67-93%)                | 17%<br>(6.9-33%)         | 6.3<br>(3.4-11)                             | 9.8%<br>(3.7-15%)                    | 11%<br>(3.8-17%)                    | 3.4<br>(1.2-5.4)    | 39<br>(15-61)      |
| Andorra  | 1990 | Male   | 85 to 89 | 81%<br>(65-92%)                | 19%<br>(7.6-35%)         | 6<br>(3.2-10)                               | 9.7%<br>(3.6-15%)                    | 11%<br>(3.9-17%)                    | 2.6<br>(0.92-4.1)   | 20<br>(8-33)       |
| Andorra  | 1990 | Male   | 90 to 94 | 82%<br>(66-93%)                | 18%<br>(7-34%)           | 5.8<br>(3.1-10)                             | 9.2%<br>(3-15%)                      | 10%<br>(3-17%)                      | 1.1<br>(0.33-1.8)   | 5.9<br>(2-9.6)     |

| Location | Year | Sex    | Age      | Prevalence of current drinkers | Prevalence of abstainers | Population average of standard drinks daily | Percent of total attributable deaths | Percent of total attributable DALYs | Attributable deaths    | Attributable DALYs |
|----------|------|--------|----------|--------------------------------|--------------------------|---------------------------------------------|--------------------------------------|-------------------------------------|------------------------|--------------------|
| Andorra  | 1990 | Male   | 95 plus  | 82%<br>(64-94%)                | 18%<br>(5.6-36%)         | 5.8<br>(2.6-11)                             | 8.9%<br>(2-15%)                      | 10%<br>(2-18%)                      | 0.27<br>(0.054-0.47)   | 0.99<br>(0.23-1.7) |
| Andorra  | 1995 | Female | All Ages | 73%<br>(65-80%)                | 27%<br>(20-35%)          | 4.7<br>(3.3-6.5)                            | 6.7%<br>(4.3-9.5%)                   | 11%<br>(5.5-17%)                    | 27<br>(12-45)          | 500<br>(310-750)   |
| Andorra  | 1995 | Female | 15 to 19 | 69%<br>(49-85%)                | 31%<br>(15-51%)          | 3.4<br>(1.6-6.3)                            | 2.8%<br>(1.6-4.6%)                   | 12%<br>(6.2-20%)                    | 0.047<br>(0.022-0.083) | 5.4<br>(3-8.7)     |
| Andorra  | 1995 | Female | 20 to 24 | 74%<br>(56-88%)                | 26%<br>(12-44%)          | 4.4<br>(2-8.1)                              | 4%<br>(2.4-5.8%)                     | 15%<br>(7.1-22%)                    | 0.084<br>(0.039-0.13)  | 10<br>(5.9-15)     |
| Andorra  | 1995 | Female | 25 to 29 | 77%<br>(60-89%)                | 23%<br>(11-40%)          | 4.6<br>(2.2-8.1)                            | 3.6%<br>(2.2-5.3%)                   | 14%<br>(6.9-22%)                    | 0.11<br>(0.051-0.17)   | 11<br>(6.9-16)     |
| Andorra  | 1995 | Female | 30 to 34 | 79%<br>(61-91%)                | 21%<br>(9.2-39%)         | 4.9<br>(2.5-8.4)                            | 3.7%<br>(2.2-5.4%)                   | 15%<br>(8.5-22%)                    | 0.15<br>(0.081-0.24)   | 13<br>(8-19)       |
| Andorra  | 1995 | Female | 35 to 39 | 80%<br>(64-91%)                | 20%<br>(9-36%)           | 5.3<br>(2.6-9.4)                            | 4.5%<br>(2.6-6.8%)                   | 17%<br>(10-24%)                     | 0.24<br>(0.12-0.36)    | 16<br>(9.8-24)     |
| Andorra  | 1995 | Female | 40 to 44 | 81%<br>(64-92%)                | 19%<br>(8.2-36%)         | 6<br>(3.1-10)                               | 5.7%<br>(3.6-8.6%)                   | 19%<br>(13-25%)                     | 0.37<br>(0.22-0.61)    | 22<br>(14-34)      |
| Andorra  | 1995 | Female | 45 to 49 | 81%<br>(61-91%)                | 19%<br>(8.6-39%)         | 6.9<br>(3.3-12)                             | 7%<br>(4.5-10%)                      | 19%<br>(14-27%)                     | 0.6<br>(0.36-0.96)     | 30<br>(18-46)      |
| Andorra  | 1995 | Female | 50 to 54 | 80%<br>(62-91%)                | 20%<br>(8.9-38%)         | 7.3<br>(3.8-12)                             | 8%<br>(5.1-11%)                      | 19%<br>(13-26%)                     | 0.77<br>(0.45-1.2)     | 34<br>(21-51)      |
| Andorra  | 1995 | Female | 55 to 59 | 79%<br>(62-91%)                | 21%<br>(8.7-38%)         | 7.5<br>(4-12)                               | 8.5%<br>(5.4-12%)                    | 18%<br>(12-24%)                     | 1.1<br>(0.61-1.7)      | 41<br>(25-62)      |
| Andorra  | 1995 | Female | 60 to 64 | 78%<br>(57-91%)                | 22%<br>(8.9-43%)         | 7.2<br>(3.8-12)                             | 8.3%<br>(5.1-12%)                    | 15%<br>(9.7-21%)                    | 1.3<br>(0.74-2.2)      | 43<br>(25-68)      |
| Andorra  | 1995 | Female | 65 to 69 | 76%<br>(55-90%)                | 24%<br>(10-45%)          | 6.4<br>(3.6-10)                             | 8.3%<br>(4.8-12%)                    | 14%<br>(8.5-19%)                    | 1.8<br>(0.97-3.1)      | 50<br>(27-80)      |
| Andorra  | 1995 | Female | 70 to 74 | 73%<br>(54-87%)                | 27%<br>(13-46%)          | 5.6<br>(2.8-9.6)                            | 7.9%<br>(3.4-12%)                    | 12%<br>(5.3-18%)                    | 2.6<br>(1-4.6)         | 56<br>(22-94)      |
| Andorra  | 1995 | Female | 75 to 79 | 69%<br>(49-86%)                | 31%<br>(14-51%)          | 5<br>(2.3-9.3)                              | 7.6%<br>(2.1-13%)                    | 11%<br>(3-17%)                      | 2.6<br>(0.72-4.9)      | 43<br>(11-77)      |
| Andorra  | 1995 | Female | 80 to 84 | 66%<br>(44-83%)                | 34%<br>(17-56%)          | 4.7<br>(2.2-8.6)                            | 8.2%<br>(2.7-14%)                    | 11%<br>(3.3-18%)                    | 4.3<br>(1.3-7.8)       | 50<br>(15-90)      |
| Andorra  | 1995 | Female | 85 to 89 | 63%<br>(43-80%)                | 37%<br>(20-57%)          | 4.5<br>(2.2-8.1)                            | 8.4%<br>(2.8-14%)                    | 10%<br>(3.1-18%)                    | 5.5<br>(1.7-10)        | 44<br>(14-78)      |
| Andorra  | 1995 | Female | 90 to 94 | 62%<br>(42-80%)                | 38%<br>(20-58%)          | 4.4<br>(2.1-8.1)                            | 7.8%<br>(2.1-14%)                    | 9.4%<br>(2.3-17%)                   | 3.9<br>(0.93-7.5)      | 22<br>(5.6-40)     |
| Andorra  | 1995 | Female | 95 plus  | 63%<br>(38-83%)                | 37%<br>(17-62%)          | 4.3<br>(1.6-8.8)                            | 7.4%<br>(0.86-14%)                   | 8.9%<br>(0.74-17%)                  | 1.6<br>(0.14-3.3)      | 5.9<br>(0.66-11)   |
| Andorra  | 1995 | Male   | All Ages | 80%<br>(72-87%)                | 20%<br>(13-28%)          | 5.8<br>(4.1-8.1)                            | 11%<br>(8-14%)                       | 14%<br>(9.1-18%)                    | 33<br>(21-47)          | 860<br>(600-1200)  |
| Andorra  | 1995 | Male   | 15 to 19 | 72%<br>(52-87%)                | 28%<br>(13-48%)          | 3.7<br>(1.8-6.3)                            | 6.8%<br>(4.2-10%)                    | 16%<br>(8.5-25%)                    | 0.15<br>(0.071-0.26)   | 14<br>(8.3-23)     |
| Andorra  | 1995 | Male   | 20 to 24 | 77%<br>(58-91%)                | 23%<br>(9.4-42%)         | 5.4<br>(2.7-9.5)                            | 13%<br>(8.3-18%)                     | 23%<br>(13-33%)                     | 0.38<br>(0.2-0.61)     | 36<br>(23-51)      |

| Location | Year | Sex    | Age      | Prevalence of current drinkers | Prevalence of abstainers | Population average of standard drinks daily | Percent of total attributable deaths | Percent of total attributable DALYs | Attributable deaths    | Attributable DALYs |
|----------|------|--------|----------|--------------------------------|--------------------------|---------------------------------------------|--------------------------------------|-------------------------------------|------------------------|--------------------|
| Andorra  | 1995 | Male   | 25 to 29 | 81%<br>(66-93%)                | 19%<br>(7.3-34%)         | 6<br>(3.2-9.7)                              | 12%<br>(7.3-16%)                     | 23%<br>(12-33%)                     | 0.44<br>(0.21-0.72)    | 39<br>(23-55)      |
| Andorra  | 1995 | Male   | 30 to 34 | 84%<br>(68-94%)                | 16%<br>(5.9-32%)         | 6.4<br>(3.4-10)                             | 10%<br>(5.9-15%)                     | 21%<br>(8.7-31%)                    | 0.5<br>(0.18-0.85)     | 38<br>(20-59)      |
| Andorra  | 1995 | Male   | 35 to 39 | 86%<br>(72-95%)                | 14%<br>(5-28%)           | 6.4<br>(3.6-10)                             | 11%<br>(5.3-16%)                     | 21%<br>(8.1-30%)                    | 0.62<br>(0.19-1.1)     | 41<br>(18-64)      |
| Andorra  | 1995 | Male   | 40 to 44 | 88%<br>(73-96%)                | 12%<br>(4.1-27%)         | 7.1<br>(4-11)                               | 12%<br>(6.4-17%)                     | 22%<br>(11-30%)                     | 0.9<br>(0.38-1.5)      | 50<br>(24-78)      |
| Andorra  | 1995 | Male   | 45 to 49 | 88%<br>(71-96%)                | 12%<br>(4.1-29%)         | 8.4<br>(4.6-14)                             | 13%<br>(8.2-18%)                     | 23%<br>(14-29%)                     | 1.4<br>(0.76-2.2)      | 68<br>(40-100)     |
| Andorra  | 1995 | Male   | 50 to 54 | 89%<br>(75-96%)                | 11%<br>(4-25%)           | 9.3<br>(5.4-15)                             | 14%<br>(9.5-18%)                     | 22%<br>(15-27%)                     | 1.9<br>(1.1-2.7)       | 77<br>(50-110)     |
| Andorra  | 1995 | Male   | 55 to 59 | 89%<br>(76-96%)                | 11%<br>(3.9-24%)         | 9.8<br>(5.5-15)                             | 14%<br>(9.8-18%)                     | 20%<br>(14-25%)                     | 2.5<br>(1.6-3.6)       | 90<br>(59-120)     |
| Andorra  | 1995 | Male   | 60 to 64 | 88%<br>(73-96%)                | 12%<br>(4.2-27%)         | 9.5<br>(5.4-15)                             | 13%<br>(8.7-17%)                     | 17%<br>(12-22%)                     | 3<br>(1.9-4.3)         | 90<br>(58-130)     |
| Andorra  | 1995 | Male   | 65 to 69 | 88%<br>(73-96%)                | 12%<br>(4.3-27%)         | 8.6<br>(5.2-13)                             | 12%<br>(8-16%)                       | 15%<br>(9.9-20%)                    | 3.7<br>(2.3-5.4)       | 94<br>(60-130)     |
| Andorra  | 1995 | Male   | 70 to 74 | 87%<br>(73-95%)                | 13%<br>(5.3-27%)         | 7.5<br>(4.2-12)                             | 11%<br>(5.6-15%)                     | 13%<br>(6.6-18%)                    | 4.1<br>(2-6.1)         | 83<br>(42-120)     |
| Andorra  | 1995 | Male   | 75 to 79 | 85%<br>(71-94%)                | 15%<br>(5.8-29%)         | 6.9<br>(3.5-11)                             | 9.8%<br>(4-14%)                      | 11%<br>(4.3-17%)                    | 3.3<br>(1.3-5.1)       | 53<br>(22-80)      |
| Andorra  | 1995 | Male   | 80 to 84 | 84%<br>(67-93%)                | 16%<br>(6.7-33%)         | 6.5<br>(3.6-11)                             | 10%<br>(4.5-15%)                     | 11%<br>(4.7-17%)                    | 4<br>(1.6-6.1)         | 46<br>(20-69)      |
| Andorra  | 1995 | Male   | 85 to 89 | 82%<br>(64-93%)                | 18%<br>(7.4-36%)         | 6.1<br>(3.4-10)                             | 10%<br>(4.5-16%)                     | 11%<br>(4.7-18%)                    | 3.6<br>(1.5-5.8)       | 29<br>(13-46)      |
| Andorra  | 1995 | Male   | 90 to 94 | 82%<br>(65-93%)                | 18%<br>(6.8-35%)         | 6<br>(3.3-10)                               | 9.4%<br>(3.8-15%)                    | 11%<br>(3.9-17%)                    | 1.8<br>(0.66-2.9)      | 9.9<br>(3.8-16)    |
| Andorra  | 1995 | Male   | 95 plus  | 82%<br>(62-95%)                | 18%<br>(5.4-38%)         | 5.9<br>(2.7-11)                             | 9.2%<br>(2.6-15%)                    | 10%<br>(2.6-18%)                    | 0.48<br>(0.12-0.82)    | 1.7<br>(0.49-2.9)  |
| Andorra  | 2000 | Female | All Ages | 73%<br>(65-80%)                | 27%<br>(20-35%)          | 4.5<br>(3.6-5.7)                            | 6%<br>(4.1-8.3%)                     | 10%<br>(5.4-15%)                    | 23<br>(11-39)          | 430<br>(280-650)   |
| Andorra  | 2000 | Female | 15 to 19 | 69%<br>(50-85%)                | 31%<br>(15-50%)          | 3.2<br>(1.6-5.7)                            | 2.5%<br>(1.4-3.9%)                   | 12%<br>(5.9-19%)                    | 0.037<br>(0.018-0.063) | 4.6<br>(2.7-7.4)   |
| Andorra  | 2000 | Female | 20 to 24 | 75%<br>(57-88%)                | 25%<br>(12-43%)          | 4.2<br>(2-7.4)                              | 3.7%<br>(2.3-5.3%)                   | 14%<br>(7.1-22%)                    | 0.066<br>(0.03-0.11)   | 8.4<br>(5.1-12)    |
| Andorra  | 2000 | Female | 25 to 29 | 77%<br>(60-89%)                | 23%<br>(11-40%)          | 4.4<br>(2.2-7.6)                            | 3.3%<br>(2.1-4.9%)                   | 14%<br>(7-21%)                      | 0.082<br>(0.04-0.13)   | 9.4<br>(5.8-14)    |
| Andorra  | 2000 | Female | 30 to 34 | 79%<br>(61-91%)                | 21%<br>(9.4-39%)         | 4.7<br>(2.5-7.8)                            | 3.4%<br>(2.1-4.8%)                   | 15%<br>(9.2-22%)                    | 0.13<br>(0.07-0.2)     | 12<br>(7.5-17)     |
| Andorra  | 2000 | Female | 35 to 39 | 80%<br>(64-91%)                | 20%<br>(9.3-36%)         | 5.1<br>(2.6-8.5)                            | 4.1%<br>(2.5-6%)                     | 17%<br>(11-24%)                     | 0.22<br>(0.12-0.33)    | 16<br>(9.8-23)     |
| Andorra  | 2000 | Female | 40 to 44 | 81%<br>(64-92%)                | 19%<br>(8.3-36%)         | 5.7<br>(3.2-9)                              | 5.1%<br>(3.2-7.8%)                   | 18%<br>(13-25%)                     | 0.33<br>(0.21-0.5)     | 21<br>(13-30)      |

| Location | Year | Sex    | Age      | Prevalence of current drinkers | Prevalence of abstainers | Population average of standard drinks daily | Percent of total attributable deaths | Percent of total attributable DALYs | Attributable deaths  | Attributable DALYs |
|----------|------|--------|----------|--------------------------------|--------------------------|---------------------------------------------|--------------------------------------|-------------------------------------|----------------------|--------------------|
| Andorra  | 2000 | Female | 45 to 49 | 81%<br>(61-92%)                | 19%<br>(8.4-39%)         | 6.5<br>(3.5-11)                             | 6.3%<br>(4.1-9.4%)                   | 19%<br>(14-27%)                     | 0.52<br>(0.32-0.81)  | 27<br>(17-41)      |
| Andorra  | 2000 | Female | 50 to 54 | 80%<br>(62-91%)                | 20%<br>(8.9-38%)         | 7<br>(4-11)                                 | 7.2%<br>(4.7-10%)                    | 18%<br>(13-25%)                     | 0.74<br>(0.45-1.2)   | 34<br>(21-50)      |
| Andorra  | 2000 | Female | 55 to 59 | 79%<br>(63-91%)                | 21%<br>(8.6-37%)         | 7.2<br>(4-11)                               | 7.7%<br>(5-11%)                      | 17%<br>(12-23%)                     | 0.87<br>(0.52-1.4)   | 35<br>(22-52)      |
| Andorra  | 2000 | Female | 60 to 64 | 78%<br>(58-91%)                | 22%<br>(8.9-42%)         | 6.9<br>(3.7-11)                             | 7.5%<br>(4.6-11%)                    | 15%<br>(9.7-20%)                    | 1.1<br>(0.65-1.8)    | 38<br>(22-59)      |
| Andorra  | 2000 | Female | 65 to 69 | 76%<br>(54-90%)                | 24%<br>(10-46%)          | 6.2<br>(3.6-9.4)                            | 7.4%<br>(4.5-10%)                    | 13%<br>(8.3-18%)                    | 1.4<br>(0.8-2.3)     | 40<br>(23-63)      |
| Andorra  | 2000 | Female | 70 to 74 | 73%<br>(54-87%)                | 27%<br>(13-46%)          | 5.4<br>(2.7-8.9)                            | 7%<br>(3.2-11%)                      | 11%<br>(5.2-17%)                    | 1.9<br>(0.87-3.4)    | 44<br>(20-74)      |
| Andorra  | 2000 | Female | 75 to 79 | 69%<br>(49-86%)                | 31%<br>(14-51%)          | 4.8<br>(2.3-8.5)                            | 6.8%<br>(2.3-11%)                    | 9.6%<br>(3.2-16%)                   | 2.7<br>(0.88-5.1)    | 47<br>(15-84)      |
| Andorra  | 2000 | Female | 80 to 84 | 66%<br>(44-83%)                | 34%<br>(17-56%)          | 4.5<br>(2.3-7.5)                            | 7.3%<br>(2.6-12%)                    | 9.6%<br>(3.1-16%)                   | 3.2<br>(1-5.9)       | 39<br>(13-69)      |
| Andorra  | 2000 | Female | 85 to 89 | 63%<br>(43-80%)                | 37%<br>(20-57%)          | 4.3<br>(2.2-7.4)                            | 7.6%<br>(2.6-13%)                    | 9.5%<br>(3.1-17%)                   | 4.1<br>(1.3-7.6)     | 34<br>(11-61)      |
| Andorra  | 2000 | Female | 90 to 94 | 62%<br>(43-80%)                | 38%<br>(20-57%)          | 4.2<br>(1.9-7.4)                            | 7.1%<br>(1.9-13%)                    | 8.6%<br>(2.2-16%)                   | 3.7<br>(0.89-7)      | 21<br>(5.5-38)     |
| Andorra  | 2000 | Female | 95 plus  | 63%<br>(39-83%)                | 37%<br>(17-61%)          | 4.1<br>(1.5-8.5)                            | 6.7%<br>(0.84-13%)                   | 8.2%<br>(0.69-16%)                  | 1.8<br>(0.15-3.6)    | 6.6<br>(0.77-13)   |
| Andorra  | 2000 | Male   | All Ages | 81%<br>(72-87%)                | 19%<br>(13-28%)          | 5.7<br>(4.4-7.1)                            | 11%<br>(8.5-13%)                     | 14%<br>(9.4-18%)                    | 31<br>(21-43)        | 830<br>(620-1100)  |
| Andorra  | 2000 | Male   | 15 to 19 | 72%<br>(52-87%)                | 28%<br>(13-48%)          | 3.5<br>(1.8-5.8)                            | 6%<br>(3.8-9%)                       | 15%<br>(8-24%)                      | 0.11<br>(0.056-0.19) | 12<br>(7-18)       |
| Andorra  | 2000 | Male   | 20 to 24 | 78%<br>(58-90%)                | 22%<br>(10-42%)          | 5.2<br>(2.8-8.5)                            | 12%<br>(8.3-17%)                     | 23%<br>(13-33%)                     | 0.3<br>(0.16-0.47)   | 30<br>(20-42)      |
| Andorra  | 2000 | Male   | 25 to 29 | 81%<br>(66-92%)                | 19%<br>(8.3-34%)         | 5.8<br>(3.2-9)                              | 11%<br>(7.6-15%)                     | 23%<br>(13-32%)                     | 0.36<br>(0.19-0.56)  | 33<br>(22-45)      |
| Andorra  | 2000 | Male   | 30 to 34 | 84%<br>(67-94%)                | 16%<br>(6.2-33%)         | 6.1<br>(3.5-9.2)                            | 10%<br>(6.6-14%)                     | 23%<br>(14-32%)                     | 0.47<br>(0.26-0.73)  | 37<br>(23-52)      |
| Andorra  | 2000 | Male   | 35 to 39 | 87%<br>(73-95%)                | 13%<br>(5.2-27%)         | 6.2<br>(3.7-9.5)                            | 10%<br>(6.7-14%)                     | 23%<br>(13-31%)                     | 0.64<br>(0.32-0.99)  | 42<br>(25-61)      |
| Andorra  | 2000 | Male   | 40 to 44 | 88%<br>(74-96%)                | 12%<br>(4.1-26%)         | 6.8<br>(4.2-10)                             | 12%<br>(7.5-16%)                     | 24%<br>(15-31%)                     | 0.91<br>(0.48-1.4)   | 51<br>(30-74)      |
| Andorra  | 2000 | Male   | 45 to 49 | 89%<br>(72-96%)                | 11%<br>(4.1-28%)         | 8.1<br>(4.8-12)                             | 13%<br>(9.1-18%)                     | 24%<br>(16-30%)                     | 1.4<br>(0.81-2)      | 65<br>(41-91)      |
| Andorra  | 2000 | Male   | 50 to 54 | 89%<br>(75-96%)                | 11%<br>(3.8-25%)         | 8.9<br>(5.6-13)                             | 14%<br>(10-18%)                      | 23%<br>(17-28%)                     | 2<br>(1.3-2.9)       | 83<br>(56-110)     |
| Andorra  | 2000 | Male   | 55 to 59 | 89%<br>(76-96%)                | 11%<br>(3.7-24%)         | 9.4<br>(5.7-14)                             | 14%<br>(10-17%)                      | 20%<br>(15-25%)                     | 2.3<br>(1.6-3.2)     | 84<br>(57-110)     |
| Andorra  | 2000 | Male   | 60 to 64 | 88%<br>(74-96%)                | 12%<br>(3.9-26%)         | 9.1<br>(5.4-14)                             | 12%<br>(8.7-16%)                     | 17%<br>(12-22%)                     | 2.9<br>(1.9-4)       | 88<br>(61-120)     |

| Location | Year | Sex    | Age      | Prevalence of current drinkers | Prevalence of abstainers | Population average of standard drinks daily | Percent of total attributable deaths | Percent of total attributable DALYs | Attributable deaths    | Attributable DALYs |
|----------|------|--------|----------|--------------------------------|--------------------------|---------------------------------------------|--------------------------------------|-------------------------------------|------------------------|--------------------|
| Andorra  | 2000 | Male   | 65 to 69 | 87%<br>(73-96%)                | 13%<br>(4.3-27%)         | 8.2<br>(5.2-12)                             | 12%<br>(8.1-15%)                     | 15%<br>(11-20%)                     | 3.3<br>(2.2-4.8)       | 86<br>(59-120)     |
| Andorra  | 2000 | Male   | 70 to 74 | 87%<br>(72-95%)                | 13%<br>(5.4-28%)         | 7.2<br>(4.1-11)                             | 10%<br>(5.8-14%)                     | 13%<br>(6.9-18%)                    | 3.8<br>(2-5.6)         | 79<br>(46-110)     |
| Andorra  | 2000 | Male   | 75 to 79 | 85%<br>(70-94%)                | 15%<br>(5.8-30%)         | 6.5<br>(3.5-10)                             | 9.3%<br>(4.2-13%)                    | 11%<br>(4.5-16%)                    | 4<br>(1.8-6.1)         | 65<br>(29-94)      |
| Andorra  | 2000 | Male   | 80 to 84 | 83%<br>(67-93%)                | 17%<br>(7-33%)           | 6.2<br>(3.6-9.6)                            | 9.4%<br>(4.5-14%)                    | 11%<br>(5-16%)                      | 3.5<br>(1.6-5.3)       | 41<br>(19-60)      |
| Andorra  | 2000 | Male   | 85 to 89 | 82%<br>(65-92%)                | 18%<br>(7.9-35%)         | 5.9<br>(3.5-9.2)                            | 9.5%<br>(4.5-15%)                    | 11%<br>(4.9-17%)                    | 3<br>(1.4-4.7)         | 25<br>(12-38)      |
| Andorra  | 2000 | Male   | 90 to 94 | 82%<br>(67-93%)                | 18%<br>(7.1-33%)         | 5.7<br>(3.2-9.5)                            | 9%<br>(3.9-14%)                      | 10%<br>(4-16%)                      | 1.8<br>(0.72-3)        | 10<br>(4.3-16)     |
| Andorra  | 2000 | Male   | 95 plus  | 82%<br>(63-94%)                | 18%<br>(5.7-37%)         | 5.6<br>(2.7-10)                             | 8.8%<br>(2.7-15%)                    | 10%<br>(2.6-17%)                    | 0.56<br>(0.15-0.98)    | 2.1<br>(0.64-3.5)  |
| Andorra  | 2005 | Female | All Ages | 73%<br>(65-81%)                | 27%<br>(19-35%)          | 4.1<br>(3.4-4.7)                            | 5.1%<br>(3.7-7%)                     | 8.5%<br>(4.3-13%)                   | 22<br>(11-36)          | 420<br>(290-600)   |
| Andorra  | 2005 | Female | 15 to 19 | 69%<br>(49-85%)                | 31%<br>(15-51%)          | 2.8<br>(1.4-4.9)                            | 2.2%<br>(1.3-3.4%)                   | 10%<br>(5.1-17%)                    | 0.033<br>(0.016-0.058) | 4.5<br>(2.7-7)     |
| Andorra  | 2005 | Female | 20 to 24 | 75%<br>(56-88%)                | 25%<br>(12-44%)          | 3.7<br>(1.8-6.3)                            | 3.3%<br>(2.1-4.9%)                   | 13%<br>(6.3-20%)                    | 0.061<br>(0.027-0.1)   | 8.5<br>(5.2-13)    |
| Andorra  | 2005 | Female | 25 to 29 | 77%<br>(60-90%)                | 23%<br>(10-40%)          | 3.9<br>(2.1-6.6)                            | 3%<br>(1.9-4.4%)                     | 13%<br>(6.9-20%)                    | 0.074<br>(0.036-0.12)  | 9.1<br>(5.6-13)    |
| Andorra  | 2005 | Female | 30 to 34 | 79%<br>(61-90%)                | 21%<br>(9.7-39%)         | 4.1<br>(2.3-6.8)                            | 3%<br>(1.9-4.3%)                     | 14%<br>(8.7-20%)                    | 0.11<br>(0.063-0.18)   | 11<br>(6.9-16)     |
| Andorra  | 2005 | Female | 35 to 39 | 80%<br>(65-91%)                | 20%<br>(8.8-35%)         | 4.5<br>(2.4-7.2)                            | 3.6%<br>(2.2-5.4%)                   | 16%<br>(11-22%)                     | 0.21<br>(0.12-0.33)    | 16<br>(9.5-23)     |
| Andorra  | 2005 | Female | 40 to 44 | 81%<br>(63-92%)                | 19%<br>(8.3-37%)         | 5<br>(2.9-7.7)                              | 4.4%<br>(2.8-6.7%)                   | 17%<br>(12-23%)                     | 0.35<br>(0.22-0.51)    | 22<br>(13-32)      |
| Andorra  | 2005 | Female | 45 to 49 | 81%<br>(61-91%)                | 19%<br>(8.7-39%)         | 5.7<br>(3.2-9.2)                            | 5.6%<br>(3.6-8.1%)                   | 18%<br>(13-25%)                     | 0.52<br>(0.33-0.8)     | 28<br>(18-42)      |
| Andorra  | 2005 | Female | 50 to 54 | 80%<br>(62-91%)                | 20%<br>(8.8-38%)         | 6.2<br>(3.6-9.3)                            | 6.3%<br>(4.2-9.1%)                   | 17%<br>(12-24%)                     | 0.7<br>(0.45-1.1)      | 33<br>(22-51)      |
| Andorra  | 2005 | Female | 55 to 59 | 79%<br>(62-91%)                | 21%<br>(8.7-38%)         | 6.3<br>(3.7-9.5)                            | 6.7%<br>(4.3-9.7%)                   | 16%<br>(11-21%)                     | 0.91<br>(0.58-1.4)     | 37<br>(24-54)      |
| Andorra  | 2005 | Female | 60 to 64 | 78%<br>(57-91%)                | 22%<br>(8.8-43%)         | 6.1<br>(3.3-9.7)                            | 6.5%<br>(3.9-9.5%)                   | 13%<br>(8.6-19%)                    | 0.98<br>(0.6-1.5)      | 35<br>(21-51)      |
| Andorra  | 2005 | Female | 65 to 69 | 76%<br>(56-90%)                | 24%<br>(10-44%)          | 5.4<br>(3.3-8.1)                            | 6.2%<br>(3.8-9.1%)                   | 11%<br>(7.4-16%)                    | 1.3<br>(0.77-2)        | 38<br>(23-59)      |
| Andorra  | 2005 | Female | 70 to 74 | 73%<br>(53-86%)                | 27%<br>(14-47%)          | 4.7<br>(2.5-7.6)                            | 5.8%<br>(2.8-9.3%)                   | 9.5%<br>(4.9-15%)                   | 1.6<br>(0.78-2.8)      | 39<br>(18-66)      |
| Andorra  | 2005 | Female | 75 to 79 | 69%<br>(49-85%)                | 31%<br>(15-51%)          | 4.2<br>(2.1-7.3)                            | 5.6%<br>(1.9-9.4%)                   | 8%<br>(2.9-14%)                     | 2.3<br>(0.77-4.2)      | 41<br>(13-73)      |
| Andorra  | 2005 | Female | 80 to 84 | 66%<br>(44-83%)                | 34%<br>(17-56%)          | 3.9<br>(2.1-6.5)                            | 5.9%<br>(2-10%)                      | 7.9%<br>(2.6-14%)                   | 3.1<br>(1-5.7)         | 39<br>(13-69)      |

| Location | Year | Sex    | Age      | Prevalence of current drinkers | Prevalence of abstainers | Population average of standard drinks daily | Percent of total attributable deaths | Percent of total attributable DALYs | Attributable deaths  | Attributable DALYs |
|----------|------|--------|----------|--------------------------------|--------------------------|---------------------------------------------|--------------------------------------|-------------------------------------|----------------------|--------------------|
| Andorra  | 2005 | Female | 85 to 89 | 63%<br>(43-80%)                | 37%<br>(20-57%)          | 3.7<br>(1.9-6.3)                            | 6.2%<br>(1.8-11%)                    | 7.7%<br>(2.2-14%)                   | 4.1<br>(1.2-7.8)     | 35<br>(10-64)      |
| Andorra  | 2005 | Female | 90 to 94 | 62%<br>(43-80%)                | 38%<br>(20-57%)          | 3.6<br>(1.7-6.5)                            | 5.8%<br>(1.3-11%)                    | 7%<br>(1.4-14%)                     | 3.7<br>(0.75-7.2)    | 21<br>(4.9-40)     |
| Andorra  | 2005 | Female | 95 plus  | 63%<br>(39-83%)                | 37%<br>(17-61%)          | 3.6<br>(1.3-7.3)                            | 5.6%<br>(0.32-12%)                   | 6.8%<br>(0.28-15%)                  | 2.2<br>(0.091-4.8)   | 8.3<br>(0.52-17)   |
| Andorra  | 2005 | Male   | All Ages | 81%<br>(73-88%)                | 19%<br>(12-27%)          | 5.1<br>(4.3-6)                              | 10%<br>(7.9-12%)                     | 12%<br>(8.3-16%)                    | 34<br>(23-47)        | 900<br>(680-1100)  |
| Andorra  | 2005 | Male   | 15 to 19 | 72%<br>(51-88%)                | 28%<br>(12-49%)          | 3.1<br>(1.7-4.9)                            | 5.5%<br>(3.4-8.1%)                   | 14%<br>(7.1-21%)                    | 0.11<br>(0.054-0.18) | 12<br>(7.2-18)     |
| Andorra  | 2005 | Male   | 20 to 24 | 78%<br>(60-91%)                | 22%<br>(9.4-40%)         | 4.6<br>(2.5-7.3)                            | 11%<br>(7.6-16%)                     | 21%<br>(12-32%)                     | 0.3<br>(0.16-0.46)   | 31<br>(20-43)      |
| Andorra  | 2005 | Male   | 25 to 29 | 81%<br>(66-92%)                | 19%<br>(7.5-34%)         | 5.1<br>(3.1-7.7)                            | 11%<br>(7.5-14%)                     | 22%<br>(13-31%)                     | 0.35<br>(0.19-0.53)  | 33<br>(22-45)      |
| Andorra  | 2005 | Male   | 30 to 34 | 84%<br>(67-94%)                | 16%<br>(6-33%)           | 5.4<br>(3.3-8)                              | 9.6%<br>(6.6-13%)                    | 22%<br>(13-30%)                     | 0.43<br>(0.25-0.68)  | 35<br>(24-49)      |
| Andorra  | 2005 | Male   | 35 to 39 | 86%<br>(72-95%)                | 14%<br>(5.3-28%)         | 5.4<br>(3.4-8.2)                            | 9.8%<br>(6.4-13%)                    | 22%<br>(14-29%)                     | 0.64<br>(0.37-0.99)  | 44<br>(28-62)      |
| Andorra  | 2005 | Male   | 40 to 44 | 88%<br>(74-96%)                | 12%<br>(4.3-26%)         | 6<br>(3.9-8.5)                              | 11%<br>(7.3-15%)                     | 23%<br>(16-29%)                     | 1<br>(0.59-1.5)      | 57<br>(36-80)      |
| Andorra  | 2005 | Male   | 45 to 49 | 88%<br>(73-96%)                | 12%<br>(4-27%)           | 7.1<br>(4.5-10)                             | 12%<br>(8.5-16%)                     | 23%<br>(16-29%)                     | 1.4<br>(0.89-2.1)    | 70<br>(46-97)      |
| Andorra  | 2005 | Male   | 50 to 54 | 89%<br>(75-96%)                | 11%<br>(4.1-25%)         | 7.9<br>(5.3-11)                             | 13%<br>(9.5-17%)                     | 22%<br>(16-27%)                     | 2<br>(1.3-2.8)       | 85<br>(58-110)     |
| Andorra  | 2005 | Male   | 55 to 59 | 89%<br>(77-96%)                | 11%<br>(3.8-23%)         | 8.3<br>(5.5-12)                             | 13%<br>(9.5-17%)                     | 20%<br>(14-24%)                     | 2.7<br>(1.9-3.7)     | 99<br>(69-130)     |
| Andorra  | 2005 | Male   | 60 to 64 | 88%<br>(73-96%)                | 12%<br>(3.8-27%)         | 8.1<br>(5-12)                               | 12%<br>(8.1-15%)                     | 16%<br>(11-21%)                     | 2.9<br>(1.9-4)       | 91<br>(61-120)     |
| Andorra  | 2005 | Male   | 65 to 69 | 88%<br>(73-96%)                | 12%<br>(4-27%)           | 7.2<br>(4.9-10)                             | 11%<br>(7.3-14%)                     | 14%<br>(9.4-18%)                    | 3.6<br>(2.4-5)       | 94<br>(64-130)     |
| Andorra  | 2005 | Male   | 70 to 74 | 87%<br>(73-95%)                | 13%<br>(5.4-27%)         | 6.3<br>(3.9-9.2)                            | 9.2%<br>(5-13%)                      | 11%<br>(6-16%)                      | 3.9<br>(2.1-5.6)     | 83<br>(45-120)     |
| Andorra  | 2005 | Male   | 75 to 79 | 85%<br>(71-94%)                | 15%<br>(5.7-29%)         | 5.7<br>(3.3-8.9)                            | 8.2%<br>(3.4-13%)                    | 9.6%<br>(3.7-15%)                   | 4.3<br>(1.7-6.8)     | 70<br>(29-110)     |
| Andorra  | 2005 | Male   | 80 to 84 | 84%<br>(67-93%)                | 16%<br>(6.7-33%)         | 5.4<br>(3.3-8)                              | 8.2%<br>(3.5-12%)                    | 9.3%<br>(3.7-14%)                   | 4.2<br>(1.7-6.7)     | 50<br>(21-77)      |
| Andorra  | 2005 | Male   | 85 to 89 | 82%<br>(65-93%)                | 18%<br>(7.3-35%)         | 5.2<br>(3.1-7.9)                            | 8.2%<br>(3.6-13%)                    | 9.2%<br>(3.7-15%)                   | 3.7<br>(1.4-6)       | 30<br>(13-48)      |
| Andorra  | 2005 | Male   | 90 to 94 | 82%<br>(65-93%)                | 18%<br>(6.7-35%)         | 5.1<br>(2.9-8.2)                            | 7.8%<br>(2.9-13%)                    | 8.7%<br>(2.9-15%)                   | 2.1<br>(0.68-3.5)    | 11<br>(4.2-19)     |
| Andorra  | 2005 | Male   | 95 plus  | 83%<br>(64-95%)                | 17%<br>(5.3-36%)         | 5<br>(2.3-8.7)                              | 7.7%<br>(1.5-14%)                    | 8.7%<br>(1.4-16%)                   | 0.77<br>(0.13-1.4)   | 2.9<br>(0.59-5.2)  |
| Andorra  | 2010 | Female | All Ages | 73%<br>(65-80%)                | 27%<br>(20-35%)          | 3.6<br>(2.9-4.4)                            | 4.5%<br>(3-6.3%)                     | 7%<br>(3-12%)                       | 22<br>(9.1-38)       | 420<br>(270-610)   |

| Location | Year | Sex    | Age      | Prevalence of current drinkers | Prevalence of abstainers | Population average of standard drinks daily | Percent of total attributable deaths | Percent of total attributable DALYs | Attributable deaths    | Attributable DALYs |
|----------|------|--------|----------|--------------------------------|--------------------------|---------------------------------------------|--------------------------------------|-------------------------------------|------------------------|--------------------|
| Andorra  | 2010 | Female | 15 to 19 | 69%<br>(50-85%)                | 31%<br>(15-50%)          | 2.4<br>(1.2-4.3)                            | 2%<br>(1.2-3.1%)                     | 9.1%<br>(4.4-15%)                   | 0.03<br>(0.014-0.053)  | 4.3<br>(2.5-6.8)   |
| Andorra  | 2010 | Female | 20 to 24 | 74%<br>(57-88%)                | 26%<br>(12-43%)          | 3.2<br>(1.5-5.6)                            | 3.1%<br>(1.9-4.5%)                   | 11%<br>(5.2-19%)                    | 0.057<br>(0.025-0.099) | 8.4<br>(5.3-13)    |
| Andorra  | 2010 | Female | 25 to 29 | 77%<br>(61-89%)                | 23%<br>(11-39%)          | 3.4<br>(1.8-5.9)                            | 2.8%<br>(1.7-4.1%)                   | 12%<br>(6.1-18%)                    | 0.071<br>(0.035-0.12)  | 9.1<br>(5.6-13)    |
| Andorra  | 2010 | Female | 30 to 34 | 79%<br>(61-91%)                | 21%<br>(9.2-39%)         | 3.6<br>(2-6.1)                              | 2.8%<br>(1.8-4.2%)                   | 13%<br>(8.2-19%)                    | 0.11<br>(0.058-0.17)   | 10<br>(6.4-15)     |
| Andorra  | 2010 | Female | 35 to 39 | 80%<br>(64-91%)                | 20%<br>(8.9-36%)         | 3.9<br>(2-6.3)                              | 3.3%<br>(1.9-4.9%)                   | 15%<br>(9.5-21%)                    | 0.19<br>(0.11-0.3)     | 15<br>(8.7-21)     |
| Andorra  | 2010 | Female | 40 to 44 | 81%<br>(64-92%)                | 19%<br>(8.1-36%)         | 4.4<br>(2.4-6.9)                            | 4.1%<br>(2.6-6.1%)                   | 16%<br>(11-22%)                     | 0.35<br>(0.21-0.52)    | 22<br>(14-32)      |
| Andorra  | 2010 | Female | 45 to 49 | 81%<br>(61-92%)                | 19%<br>(8.4-39%)         | 5<br>(2.8-8)                                | 5.1%<br>(3.2-7.6%)                   | 16%<br>(12-22%)                     | 0.57<br>(0.35-0.89)    | 31<br>(19-46)      |
| Andorra  | 2010 | Female | 50 to 54 | 80%<br>(62-91%)                | 20%<br>(8.9-38%)         | 5.4<br>(3.2-8.3)                            | 5.7%<br>(3.7-8.4%)                   | 15%<br>(11-21%)                     | 0.74<br>(0.48-1.2)     | 35<br>(23-53)      |
| Andorra  | 2010 | Female | 55 to 59 | 79%<br>(62-91%)                | 21%<br>(8.8-38%)         | 5.5<br>(3.2-8.4)                            | 6.1%<br>(3.8-8.9%)                   | 14%<br>(9.8-20%)                    | 0.91<br>(0.57-1.4)     | 37<br>(22-57)      |
| Andorra  | 2010 | Female | 60 to 64 | 78%<br>(58-91%)                | 22%<br>(8.8-42%)         | 5.3<br>(2.9-8.4)                            | 5.8%<br>(3.4-8.8%)                   | 12%<br>(7.6-17%)                    | 1.1<br>(0.65-1.8)      | 39<br>(22-62)      |
| Andorra  | 2010 | Female | 65 to 69 | 76%<br>(55-90%)                | 24%<br>(10-45%)          | 4.7<br>(2.8-7)                              | 5.4%<br>(3.2-8.1%)                   | 9.9%<br>(6.3-14%)                   | 1.2<br>(0.68-2.1)      | 35<br>(19-56)      |
| Andorra  | 2010 | Female | 70 to 74 | 73%<br>(53-86%)                | 27%<br>(14-47%)          | 4.1<br>(2.2-6.6)                            | 5%<br>(2.2-8.4%)                     | 8.1%<br>(4-13%)                     | 1.6<br>(0.71-2.8)      | 37<br>(16-66)      |
| Andorra  | 2010 | Female | 75 to 79 | 69%<br>(48-86%)                | 31%<br>(14-52%)          | 3.6<br>(1.8-6.2)                            | 4.6%<br>(1.4-8.3%)                   | 6.6%<br>(2.1-12%)                   | 2<br>(0.65-4.1)        | 37<br>(11-72)      |
| Andorra  | 2010 | Female | 80 to 84 | 66%<br>(44-83%)                | 34%<br>(17-56%)          | 3.4<br>(1.8-5.5)                            | 4.8%<br>(1.4-8.6%)                   | 6.3%<br>(1.7-12%)                   | 2.9<br>(0.8-5.8)       | 37<br>(9.8-71)     |
| Andorra  | 2010 | Female | 85 to 89 | 63%<br>(44-80%)                | 37%<br>(20-56%)          | 3.3<br>(1.6-5.3)                            | 4.9%<br>(1-9.7%)                     | 6%<br>(1.2-12%)                     | 4<br>(0.8-8.4)         | 34<br>(7.3-69)     |
| Andorra  | 2010 | Female | 90 to 94 | 62%<br>(43-81%)                | 38%<br>(19-57%)          | 3.2<br>(1.5-5.8)                            | 4.7%<br>(0.58-9.9%)                  | 5.6%<br>(0.5-12%)                   | 3.7<br>(0.32-8.2)      | 21<br>(2.6-45)     |
| Andorra  | 2010 | Female | 95 plus  | 63%<br>(39-84%)                | 37%<br>(16-61%)          | 3.1<br>(1.2-6.2)                            | 4.5%<br>(-0.11-10%)                  | 5.5%<br>(-0.29-13%)                 | 2.2<br>(-0.12-5.1)     | 8.1<br>(-0.19-18)  |
| Andorra  | 2010 | Male   | All Ages | 81%<br>(73-87%)                | 19%<br>(13-27%)          | 4.5<br>(3.7-5.5)                            | 8.8%<br>(6.6-11%)                    | 10%<br>(6.3-14%)                    | 34<br>(20-49)          | 890<br>(640-1200)  |
| Andorra  | 2010 | Male   | 15 to 19 | 72%<br>(50-87%)                | 28%<br>(13-50%)          | 2.7<br>(1.4-4.5)                            | 5%<br>(3.1-7.2%)                     | 12%<br>(6.1-20%)                    | 0.097<br>(0.045-0.16)  | 11<br>(6.9-17)     |
| Andorra  | 2010 | Male   | 20 to 24 | 78%<br>(59-90%)                | 22%<br>(10-41%)          | 4<br>(2.2-6.6)                              | 10%<br>(6.9-14%)                     | 19%<br>(9.8-29%)                    | 0.28<br>(0.14-0.44)    | 30<br>(19-43)      |
| Andorra  | 2010 | Male   | 25 to 29 | 81%<br>(66-92%)                | 19%<br>(8.4-34%)         | 4.5<br>(2.6-6.9)                            | 9.8%<br>(6.6-13%)                    | 20%<br>(11-29%)                     | 0.32<br>(0.17-0.5)     | 32<br>(21-45)      |
| Andorra  | 2010 | Male   | 30 to 34 | 84%<br>(68-94%)                | 16%<br>(6.1-32%)         | 4.7<br>(2.8-7.2)                            | 8.8%<br>(5.8-12%)                    | 20%<br>(12-28%)                     | 0.39<br>(0.22-0.61)    | 32<br>(21-46)      |

| Location | Year | Sex    | Age      | Prevalence of current drinkers | Prevalence of abstainers | Population average of standard drinks daily | Percent of total attributable deaths | Percent of total attributable DALYs | Attributable deaths    | Attributable DALYs |
|----------|------|--------|----------|--------------------------------|--------------------------|---------------------------------------------|--------------------------------------|-------------------------------------|------------------------|--------------------|
| Andorra  | 2010 | Male   | 35 to 39 | 87%<br>(73-95%)                | 13%<br>(5.1-27%)         | 4.7<br>(2.9-7.3)                            | 8.7%<br>(5.7-12%)                    | 20%<br>(12-27%)                     | 0.55<br>(0.31-0.89)    | 39<br>(25-57)      |
| Andorra  | 2010 | Male   | 40 to 44 | 88%<br>(74-96%)                | 12%<br>(4.2-26%)         | 5.2<br>(3.4-7.8)                            | 9.7%<br>(6.3-14%)                    | 21%<br>(14-28%)                     | 0.94<br>(0.54-1.5)     | 55<br>(35-81)      |
| Andorra  | 2010 | Male   | 45 to 49 | 89%<br>(72-96%)                | 11%<br>(4-28%)           | 6.2<br>(3.9-9.2)                            | 11%<br>(7.6-16%)                     | 21%<br>(14-27%)                     | 1.5<br>(0.89-2.3)      | 74<br>(48-110)     |
| Andorra  | 2010 | Male   | 50 to 54 | 89%<br>(74-96%)                | 11%<br>(3.9-26%)         | 6.8<br>(4.5-9.8)                            | 12%<br>(8.1-16%)                     | 20%<br>(14-25%)                     | 2<br>(1.2-3)           | 86<br>(56-120)     |
| Andorra  | 2010 | Male   | 55 to 59 | 89%<br>(76-96%)                | 11%<br>(3.7-24%)         | 7.1<br>(4.8-10)                             | 12%<br>(8-15%)                       | 18%<br>(12-23%)                     | 2.6<br>(1.6-3.7)       | 95<br>(63-130)     |
| Andorra  | 2010 | Male   | 60 to 64 | 88%<br>(73-96%)                | 12%<br>(3.8-27%)         | 7<br>(4.3-10)                               | 11%<br>(6.5-14%)                     | 15%<br>(9.1-20%)                    | 3.2<br>(1.8-4.5)       | 100<br>(60-140)    |
| Andorra  | 2010 | Male   | 65 to 69 | 88%<br>(73-96%)                | 12%<br>(4.2-27%)         | 6.3<br>(4.2-8.8)                            | 9.5%<br>(5.9-13%)                    | 12%<br>(7.8-17%)                    | 3.3<br>(1.9-4.8)       | 88<br>(52-120)     |
| Andorra  | 2010 | Male   | 70 to 74 | 87%<br>(73-95%)                | 13%<br>(5.4-27%)         | 5.5<br>(3.4-8.3)                            | 8%<br>(3.9-12%)                      | 9.9%<br>(4.7-14%)                   | 3.9<br>(1.7-6)         | 82<br>(38-120)     |
| Andorra  | 2010 | Male   | 75 to 79 | 85%<br>(70-94%)                | 15%<br>(5.8-30%)         | 5<br>(2.8-7.9)                              | 6.9%<br>(2.5-11%)                    | 8.1%<br>(2.7-13%)                   | 4.1<br>(1.3-7.1)       | 68<br>(24-110)     |
| Andorra  | 2010 | Male   | 80 to 84 | 83%<br>(67-93%)                | 17%<br>(7-33%)           | 4.7<br>(2.8-7)                              | 6.7%<br>(2.4-11%)                    | 7.6%<br>(2.5-13%)                   | 4.5<br>(1.4-7.6)       | 53<br>(19-89)      |
| Andorra  | 2010 | Male   | 85 to 89 | 82%<br>(66-92%)                | 18%<br>(7.8-34%)         | 4.5<br>(2.7-6.9)                            | 6.6%<br>(2.2-11%)                    | 7.3%<br>(2.2-13%)                   | 3.8<br>(1.1-6.8)       | 31<br>(11-55)      |
| Andorra  | 2010 | Male   | 90 to 94 | 82%<br>(66-93%)                | 18%<br>(6.9-34%)         | 4.4<br>(2.5-7.2)                            | 6.2%<br>(1.6-11%)                    | 6.9%<br>(1.5-13%)                   | 2.2<br>(0.46-4.1)      | 12<br>(3-22)       |
| Andorra  | 2010 | Male   | 95 plus  | 82%<br>(63-94%)                | 18%<br>(5.7-37%)         | 4.3<br>(2-7.7)                              | 6.2%<br>(0.96-12%)                   | 6.9%<br>(0.68-14%)                  | 0.74<br>(0.075-1.5)    | 2.8<br>(0.44-5.4)  |
| Andorra  | 2016 | Female | All Ages | 73%<br>(65-81%)                | 27%<br>(19-35%)          | 3.4<br>(2.5-4.6)                            | 4.3%<br>(2.6-6.4%)                   | 6.3%<br>(2.4-11%)                   | 22<br>(7.7-41)         | 420<br>(240-680)   |
| Andorra  | 2016 | Female | 15 to 19 | 69%<br>(51-85%)                | 31%<br>(15-49%)          | 2.3<br>(1.1-4.1)                            | 1.9%<br>(1.1-2.9%)                   | 8.4%<br>(3.9-14%)                   | 0.026<br>(0.012-0.047) | 3.8<br>(2.2-6)     |
| Andorra  | 2016 | Female | 20 to 24 | 75%<br>(57-88%)                | 25%<br>(12-43%)          | 3<br>(1.3-5.4)                              | 3%<br>(1.9-4.4%)                     | 11%<br>(4.9-18%)                    | 0.053<br>(0.023-0.093) | 8<br>(4.9-12)      |
| Andorra  | 2016 | Female | 25 to 29 | 77%<br>(60-89%)                | 23%<br>(11-40%)          | 3.2<br>(1.6-5.6)                            | 2.7%<br>(1.7-4%)                     | 11%<br>(5.8-18%)                    | 0.065<br>(0.031-0.12)  | 8.5<br>(5.3-13)    |
| Andorra  | 2016 | Female | 30 to 34 | 79%<br>(61-91%)                | 21%<br>(9.1-39%)         | 3.4<br>(1.8-6)                              | 2.7%<br>(1.7-4.1%)                   | 12%<br>(7.5-18%)                    | 0.099<br>(0.052-0.17)  | 9.7<br>(5.9-15)    |
| Andorra  | 2016 | Female | 35 to 39 | 80%<br>(64-91%)                | 20%<br>(8.9-36%)         | 3.7<br>(1.9-6.4)                            | 3.2%<br>(1.8-5%)                     | 14%<br>(9.3-20%)                    | 0.17<br>(0.089-0.28)   | 13<br>(7.7-20)     |
| Andorra  | 2016 | Female | 40 to 44 | 81%<br>(64-92%)                | 19%<br>(8.1-36%)         | 4.1<br>(2.2-7)                              | 4%<br>(2.4-6.1%)                     | 15%<br>(11-21%)                     | 0.33<br>(0.2-0.51)     | 21<br>(13-32)      |
| Andorra  | 2016 | Female | 45 to 49 | 81%<br>(62-92%)                | 19%<br>(8.3-38%)         | 4.7<br>(2.5-8.1)                            | 5%<br>(3-7.7%)                       | 16%<br>(11-22%)                     | 0.6<br>(0.35-0.98)     | 32<br>(19-51)      |
| Andorra  | 2016 | Female | 50 to 54 | 80%<br>(62-91%)                | 20%<br>(8.9-38%)         | 5.1<br>(2.8-8.3)                            | 5.6%<br>(3.5-8.5%)                   | 15%<br>(10-21%)                     | 0.77<br>(0.47-1.3)     | 36<br>(22-58)      |



| Location | Year | Sex    | Age      | Prevalence of current drinkers | Prevalence of abstainers | Population average of standard drinks daily | Percent of total attributable deaths | Percent of total attributable DALYs | Attributable deaths   | Attributable DALYs |
|----------|------|--------|----------|--------------------------------|--------------------------|---------------------------------------------|--------------------------------------|-------------------------------------|-----------------------|--------------------|
| Andorra  | 2016 | Female | 55 to 59 | 79%<br>(63-91%)                | 21%<br>(8.7-37%)         | 5.2<br>(2.9-8)                              | 5.9%<br>(3.5-8.8%)                   | 14%<br>(8.9-19%)                    | 0.89<br>(0.5-1.5)     | 36<br>(20-57)      |
| Andorra  | 2016 | Female | 60 to 64 | 78%<br>(58-91%)                | 22%<br>(8.9-42%)         | 5<br>(2.6-7.9)                              | 5.6%<br>(3-8.6%)                     | 11%<br>(7-16%)                      | 1.3<br>(0.69-2.2)     | 45<br>(23-73)      |
| Andorra  | 2016 | Female | 65 to 69 | 76%<br>(54-90%)                | 24%<br>(10-46%)          | 4.4<br>(2.5-6.8)                            | 5.1%<br>(2.8-8.1%)                   | 9.3%<br>(5.4-14%)                   | 1.1<br>(0.6-2)        | 33<br>(17-58)      |
| Andorra  | 2016 | Female | 70 to 74 | 73%<br>(54-87%)                | 27%<br>(13-46%)          | 3.8<br>(2-6.6)                              | 4.6%<br>(1.8-8%)                     | 7.5%<br>(3.4-13%)                   | 1.6<br>(0.67-3)       | 37<br>(14-69)      |
| Andorra  | 2016 | Female | 75 to 79 | 70%<br>(49-86%)                | 30%<br>(14-51%)          | 3.4<br>(1.7-6.1)                            | 4.2%<br>(1.1-8.1%)                   | 6.1%<br>(1.9-11%)                   | 1.9<br>(0.56-3.9)     | 34<br>(8.8-70)     |
| Andorra  | 2016 | Female | 80 to 84 | 66%<br>(44-83%)                | 34%<br>(17-56%)          | 3.2<br>(1.6-5.5)                            | 4.3%<br>(0.98-8.6%)                  | 5.6%<br>(1.3-11%)                   | 2.6<br>(0.57-5.7)     | 33<br>(7.3-70)     |
| Andorra  | 2016 | Female | 85 to 89 | 63%<br>(44-80%)                | 37%<br>(20-56%)          | 3.1<br>(1.5-5.3)                            | 4.3%<br>(0.66-9%)                    | 5.4%<br>(0.75-11%)                  | 4<br>(0.53-8.8)       | 34<br>(5.1-72)     |
| Andorra  | 2016 | Female | 90 to 94 | 63%<br>(43-81%)                | 37%<br>(19-57%)          | 3<br>(1.3-5.6)                              | 4.2%<br>(0.22-9.3%)                  | 5%<br>(0.084-12%)                   | 3.9<br>(0.069-9.1)    | 23<br>(1-50)       |
| Andorra  | 2016 | Female | 95 plus  | 63%<br>(38-83%)                | 37%<br>(17-62%)          | 3<br>(1-6.3)                                | 4.1%<br>(-0.38-9.9%)                 | 4.9%<br>(-0.53-12%)                 | 2.6<br>(-0.26-6.3)    | 9.5<br>(-0.86-23)  |
| Andorra  | 2016 | Male   | All Ages | 82%<br>(74-88%)                | 18%<br>(12-26%)          | 4.3<br>(3.1-5.8)                            | 8.2%<br>(5.5-11%)                    | 9.1%<br>(4.7-14%)                   | 35<br>(17-55)         | 890<br>(560-1200)  |
| Andorra  | 2016 | Male   | 15 to 19 | 72%<br>(51-88%)                | 28%<br>(12-49%)          | 2.5<br>(1.3-4.3)                            | 4.8%<br>(3-7.2%)                     | 12%<br>(5.6-19%)                    | 0.087<br>(0.039-0.15) | 10<br>(6-15)       |
| Andorra  | 2016 | Male   | 20 to 24 | 78%<br>(60-90%)                | 22%<br>(9.6-40%)         | 3.8<br>(1.9-6.4)                            | 10%<br>(6.6-14%)                     | 18%<br>(8.8-28%)                    | 0.26<br>(0.12-0.42)   | 29<br>(18-42)      |
| Andorra  | 2016 | Male   | 25 to 29 | 82%<br>(67-92%)                | 18%<br>(7.9-33%)         | 4.2<br>(2.3-6.8)                            | 9.5%<br>(6.3-13%)                    | 19%<br>(10-28%)                     | 0.3<br>(0.15-0.49)    | 30<br>(19-43)      |
| Andorra  | 2016 | Male   | 30 to 34 | 84%<br>(69-94%)                | 16%<br>(6-31%)           | 4.4<br>(2.5-7.2)                            | 8.5%<br>(5.6-12%)                    | 19%<br>(11-27%)                     | 0.37<br>(0.19-0.6)    | 31<br>(19-44)      |
| Andorra  | 2016 | Male   | 35 to 39 | 87%<br>(74-95%)                | 13%<br>(5.1-26%)         | 4.5<br>(2.5-7.2)                            | 8.6%<br>(5.4-12%)                    | 19%<br>(12-27%)                     | 0.5<br>(0.25-0.85)    | 35<br>(21-53)      |
| Andorra  | 2016 | Male   | 40 to 44 | 88%<br>(75-96%)                | 12%<br>(4.3-25%)         | 5<br>(2.9-7.9)                              | 9.4%<br>(6.1-14%)                    | 20%<br>(13-27%)                     | 0.89<br>(0.47-1.5)    | 52<br>(31-81)      |
| Andorra  | 2016 | Male   | 45 to 49 | 89%<br>(74-96%)                | 11%<br>(3.9-26%)         | 5.9<br>(3.5-9.4)                            | 11%<br>(6.8-15%)                     | 20%<br>(13-27%)                     | 1.6<br>(0.85-2.6)     | 77<br>(46-120)     |
| Andorra  | 2016 | Male   | 50 to 54 | 89%<br>(77-96%)                | 11%<br>(4-23%)           | 6.4<br>(3.9-9.8)                            | 11%<br>(7.1-15%)                     | 19%<br>(12-24%)                     | 2.1<br>(1.2-3.3)      | 88<br>(54-130)     |
| Andorra  | 2016 | Male   | 55 to 59 | 89%<br>(77-97%)                | 11%<br>(3.5-23%)         | 6.7<br>(4.1-10)                             | 11%<br>(7-15%)                       | 17%<br>(11-22%)                     | 2.4<br>(1.4-3.6)      | 89<br>(53-130)     |
| Andorra  | 2016 | Male   | 60 to 64 | 88%<br>(73-96%)                | 12%<br>(3.8-27%)         | 6.5<br>(3.8-9.9)                            | 10%<br>(5.7-14%)                     | 14%<br>(7.7-19%)                    | 3.6<br>(1.8-5.4)      | 110<br>(60-160)    |
| Andorra  | 2016 | Male   | 65 to 69 | 88%<br>(72-96%)                | 12%<br>(4.3-28%)         | 5.9<br>(3.7-8.9)                            | 8.8%<br>(4.9-12%)                    | 12%<br>(6.2-16%)                    | 3.1<br>(1.6-4.7)      | 82<br>(42-120)     |
| Andorra  | 2016 | Male   | 70 to 74 | 87%<br>(74-95%)                | 13%<br>(5.2-26%)         | 5.2<br>(3-8.1)                              | 7.3%<br>(3.3-11%)                    | 9%<br>(3.8-14%)                     | 3.9<br>(1.5-6.5)      | 82<br>(35-130)     |

| Location | Year | Sex    | Age      | Prevalence of current drinkers | Prevalence of abstainers | Population average of standard drinks daily | Percent of total attributable deaths | Percent of total attributable DALYs | Attributable deaths | Attributable DALYs     |
|----------|------|--------|----------|--------------------------------|--------------------------|---------------------------------------------|--------------------------------------|-------------------------------------|---------------------|------------------------|
| Andorra  | 2016 | Male   | 75 to 79 | 86%<br>(72-95%)                | 14%<br>(5.5-28%)         | 4.7<br>(2.6-7.9)                            | 6.3%<br>(2-11%)                      | 7.3%<br>(2.1-13%)                   | 4<br>(1.1-7.3)      | 65<br>(20-120)         |
| Andorra  | 2016 | Male   | 80 to 84 | 84%<br>(67-93%)                | 16%<br>(6.8-33%)         | 4.5<br>(2.5-7.1)                            | 6%<br>(1.6-11%)                      | 6.7%<br>(1.5-12%)                   | 4.2<br>(0.98-7.9)   | 51<br>(14-93)          |
| Andorra  | 2016 | Male   | 85 to 89 | 82%<br>(65-92%)                | 18%<br>(7.7-35%)         | 4.2<br>(2.3-6.9)                            | 5.9%<br>(1.4-11%)                    | 6.5%<br>(1.4-13%)                   | 4.3<br>(0.82-8.3)   | 36<br>(8.7-67)         |
| Andorra  | 2016 | Male   | 90 to 94 | 82%<br>(66-94%)                | 18%<br>(6.5-34%)         | 4.1<br>(2.3-7.2)                            | 5.6%<br>(0.87-11%)                   | 6.2%<br>(0.71-13%)                  | 2.5<br>(0.28-5.3)   | 14<br>(2.2-29)         |
| Andorra  | 2016 | Male   | 95 plus  | 82%<br>(64-95%)                | 18%<br>(5.2-36%)         | 4.1<br>(1.8-7.5)                            | 5.6%<br>(0.37-12%)                   | 6.2%<br>(-0.056-14%)                | 0.92<br>(-0.008-2)  | 3.4<br>(0.21-7.2)      |
| Austria  | 1990 | Female | All Ages | 81%<br>(78-84%)                | 19%<br>(16-22%)          | 3<br>(2.7-3.4)                              | 5.7%<br>(3.8-7.7%)                   | 6.6%<br>(3-11%)                     | 2900<br>(1300-4800) | 67000<br>(45000-91000) |
| Austria  | 1990 | Female | 15 to 19 | 79%<br>(71-85%)                | 21%<br>(15-29%)          | 2.4<br>(1.7-3.3)                            | 3.7%<br>(2.2-5.3%)                   | 12%<br>(5.9-18%)                    | 9.7<br>(4.8-15)     | 1000<br>(610-1500)     |
| Austria  | 1990 | Female | 20 to 24 | 84%<br>(75-91%)                | 16%<br>(8.9-25%)         | 2.9<br>(2-4.1)                              | 4.8%<br>(3.3-6.4%)                   | 13%<br>(6.9-19%)                    | 15<br>(8.2-23)      | 1900<br>(1300-2600)    |
| Austria  | 1990 | Female | 25 to 29 | 86%<br>(76-92%)                | 14%<br>(7.7-24%)         | 2.8<br>(1.9-3.7)                            | 4%<br>(2.7-5.3%)                     | 12%<br>(6.1-17%)                    | 15<br>(8.1-22)      | 1800<br>(1200-2400)    |
| Austria  | 1990 | Female | 30 to 34 | 87%<br>(77-93%)                | 13%<br>(6.8-23%)         | 3<br>(2.1-4)                                | 4.2%<br>(2.9-5.6%)                   | 13%<br>(8.2-18%)                    | 22<br>(14-30)       | 1900<br>(1300-2500)    |
| Austria  | 1990 | Female | 35 to 39 | 87%<br>(80-94%)                | 13%<br>(6.5-20%)         | 3.6<br>(2.6-4.9)                            | 5.5%<br>(4-7.3%)                     | 16%<br>(12-21%)                     | 37<br>(27-47)       | 2400<br>(1800-3100)    |
| Austria  | 1990 | Female | 40 to 44 | 87%<br>(80-92%)                | 13%<br>(7.9-20%)         | 4<br>(3-5.2)                                | 6.9%<br>(5.2-8.8%)                   | 17%<br>(13-21%)                     | 65<br>(50-80)       | 3600<br>(2800-4500)    |
| Austria  | 1990 | Female | 45 to 49 | 86%<br>(80-91%)                | 14%<br>(9-20%)           | 4.2<br>(2.9-5.5)                            | 7.8%<br>(5.8-10%)                    | 17%<br>(13-21%)                     | 100<br>(77-120)     | 4700<br>(3600-5900)    |
| Austria  | 1990 | Female | 50 to 54 | 86%<br>(81-91%)                | 14%<br>(9-19%)           | 4.4<br>(3.2-5.8)                            | 8.3%<br>(6-11%)                      | 16%<br>(12-19%)                     | 120<br>(91-150)     | 5000<br>(3800-6300)    |
| Austria  | 1990 | Female | 55 to 59 | 87%<br>(82-91%)                | 13%<br>(8.9-18%)         | 4.8<br>(3.5-6.3)                            | 8.5%<br>(6-11%)                      | 14%<br>(10-18%)                     | 150<br>(110-200)    | 5300<br>(3900-7000)    |
| Austria  | 1990 | Female | 60 to 64 | 86%<br>(80-91%)                | 14%<br>(9.4-20%)         | 4.7<br>(3.4-6.3)                            | 7.9%<br>(4.8-11%)                    | 12%<br>(7.6-17%)                    | 210<br>(130-300)    | 6500<br>(4100-9200)    |
| Austria  | 1990 | Female | 65 to 69 | 84%<br>(78-89%)                | 16%<br>(11-22%)          | 4.4<br>(3.3-5.5)                            | 7.2%<br>(4.2-10%)                    | 10%<br>(5.9-15%)                    | 340<br>(200-500)    | 8600<br>(5200-12000)   |
| Austria  | 1990 | Female | 70 to 74 | 80%<br>(73-86%)                | 20%<br>(14-27%)          | 3.8<br>(2.8-5.1)                            | 6.3%<br>(2.8-10%)                    | 8.1%<br>(3.4-14%)                   | 280<br>(120-470)    | 5700<br>(2500-9200)    |
| Austria  | 1990 | Female | 75 to 79 | 75%<br>(65-84%)                | 25%<br>(16-35%)          | 3.4<br>(2.3-4.7)                            | 5.4%<br>(1.6-9.8%)                   | 6.4%<br>(1.7-12%)                   | 480<br>(130-900)    | 7600<br>(2300-14000)   |
| Austria  | 1990 | Female | 80 to 84 | 73%<br>(61-83%)                | 27%<br>(17-39%)          | 3.2<br>(2.3-4.3)                            | 4.7%<br>(1.1-8.9%)                   | 5.4%<br>(1-10%)                     | 560<br>(110-1100)   | 6500<br>(1500-12000)   |
| Austria  | 1990 | Female | 85 to 89 | 72%<br>(60-82%)                | 28%<br>(18-40%)          | 3<br>(2-4.3)                                | 3.8%<br>(0.27-8%)                    | 4.1%<br>(-0.13-9.2%)                | 370<br>(-11-830)    | 3100<br>(220-6600)     |
| Austria  | 1990 | Female | 90 to 94 | 71%<br>(59-82%)                | 29%<br>(18-41%)          | 2.9<br>(1.8-4.3)                            | 3.1%<br>(-0.74-8%)                   | 3.3%<br>(-1.4-9.1%)                 | 140<br>(-57-380)    | 790<br>(-190-2100)     |

| Location | Year | Sex    | Age      | Prevalence of current drinkers | Prevalence of abstainers | Population average of standard drinks daily | Percent of total attributable deaths | Percent of total attributable DALYs | Attributable deaths | Attributable DALYs        |
|----------|------|--------|----------|--------------------------------|--------------------------|---------------------------------------------|--------------------------------------|-------------------------------------|---------------------|---------------------------|
| Austria  | 1990 | Female | 95 plus  | 71%<br>(55-85%)                | 29%<br>(15-45%)          | 2.8<br>(1.5-4.5)                            | 2.8%<br>(-1.8-8.6%)                  | 3%<br>(-2.5-9.9%)                   | 32<br>(-27-110)     | 130<br>(-80-390)          |
| Austria  | 1990 | Male   | All Ages | 88%<br>(85-91%)                | 12%<br>(9.3-15%)         | 5.2<br>(4.6-5.8)                            | 15%<br>(12-17%)                      | 17%<br>(13-20%)                     | 6400<br>(4900-7900) | 180000<br>(150000-210000) |
| Austria  | 1990 | Male   | 15 to 19 | 82%<br>(75-88%)                | 18%<br>(12-25%)          | 3.4<br>(2.4-4.6)                            | 10%<br>(6.5-14%)                     | 17%<br>(9.8-25%)                    | 46<br>(26-67)       | 3900<br>(2500-5400)       |
| Austria  | 1990 | Male   | 20 to 24 | 88%<br>(79-94%)                | 12%<br>(6.3-21%)         | 4.9<br>(3.5-6.7)                            | 17%<br>(12-22%)                      | 24%<br>(16-34%)                     | 110<br>(70-150)     | 9300<br>(6700-12000)      |
| Austria  | 1990 | Male   | 25 to 29 | 90%<br>(83-95%)                | 9.6%<br>(5.1-17%)        | 5.1<br>(3.8-6.6)                            | 16%<br>(12-20%)                      | 25%<br>(17-33%)                     | 100<br>(70-140)     | 8700<br>(6400-11000)      |
| Austria  | 1990 | Male   | 30 to 34 | 92%<br>(85-96%)                | 8.1%<br>(3.8-15%)        | 5.5<br>(4-7)                                | 15%<br>(11-19%)                      | 25%<br>(18-32%)                     | 110<br>(78-140)     | 7800<br>(5800-9800)       |
| Austria  | 1990 | Male   | 35 to 39 | 93%<br>(87-97%)                | 7.1%<br>(3.1-13%)        | 6<br>(4.2-8)                                | 16%<br>(12-20%)                      | 27%<br>(19-33%)                     | 130<br>(91-160)     | 7900<br>(5900-9700)       |
| Austria  | 1990 | Male   | 40 to 44 | 93%<br>(88-97%)                | 6.8%<br>(3.3-12%)        | 6.8<br>(5.1-8.7)                            | 18%<br>(14-22%)                      | 28%<br>(21-33%)                     | 220<br>(170-260)    | 11000<br>(8900-14000)     |
| Austria  | 1990 | Male   | 45 to 49 | 93%<br>(88-96%)                | 7.2%<br>(3.8-12%)        | 8<br>(5.9-10)                               | 20%<br>(16-24%)                      | 29%<br>(23-34%)                     | 350<br>(280-420)    | 16000<br>(13000-19000)    |
| Austria  | 1990 | Male   | 50 to 54 | 93%<br>(89-96%)                | 7%<br>(4-11%)            | 8.6<br>(6.3-11)                             | 20%<br>(16-23%)                      | 27%<br>(22-31%)                     | 430<br>(350-500)    | 17000<br>(14000-20000)    |
| Austria  | 1990 | Male   | 55 to 59 | 94%<br>(91-96%)                | 6.2%<br>(3.9-9.3%)       | 8.7<br>(6.7-11)                             | 19%<br>(15-23%)                      | 24%<br>(19-29%)                     | 540<br>(430-650)    | 18000<br>(15000-22000)    |
| Austria  | 1990 | Male   | 60 to 64 | 94%<br>(91-97%)                | 5.8%<br>(3.5-9.2%)       | 8.4<br>(6.4-11)                             | 17%<br>(13-21%)                      | 21%<br>(16-26%)                     | 720<br>(550-890)    | 21000<br>(16000-25000)    |
| Austria  | 1990 | Male   | 65 to 69 | 94%<br>(91-96%)                | 5.9%<br>(3.6-9.4%)       | 7.7<br>(6.1-9.5)                            | 15%<br>(11-19%)                      | 18%<br>(13-22%)                     | 790<br>(570-990)    | 19000<br>(14000-24000)    |
| Austria  | 1990 | Male   | 70 to 74 | 94%<br>(90-96%)                | 6.1%<br>(3.8-9.8%)       | 7<br>(5.3-9.1)                              | 14%<br>(8.7-18%)                     | 16%<br>(9.8-21%)                    | 560<br>(360-760)    | 11000<br>(7100-15000)     |
| Austria  | 1990 | Male   | 75 to 79 | 93%<br>(89-96%)                | 6.8%<br>(4-11%)          | 6.4<br>(4.7-8.6)                            | 12%<br>(6.6-17%)                     | 13%<br>(7.2-19%)                    | 860<br>(460-1200)   | 13000<br>(7200-18000)     |
| Austria  | 1990 | Male   | 80 to 84 | 92%<br>(86-96%)                | 7.9%<br>(4.3-14%)        | 6.1<br>(4.6-7.9)                            | 11%<br>(6.5-16%)                     | 12%<br>(6.8-18%)                    | 800<br>(440-1100)   | 8900<br>(5100-13000)      |
| Austria  | 1990 | Male   | 85 to 89 | 91%<br>(85-95%)                | 9.2%<br>(5.2-15%)        | 5.8<br>(4.1-7.9)                            | 10%<br>(5.3-15%)                     | 11%<br>(5.4-17%)                    | 450<br>(220-670)    | 3600<br>(1800-5300)       |
| Austria  | 1990 | Male   | 90 to 94 | 91%<br>(84-95%)                | 9.5%<br>(5.3-16%)        | 5.7<br>(3.8-8.2)                            | 9.1%<br>(3.6-15%)                    | 9.9%<br>(3.5-16%)                   | 130<br>(46-220)     | 720<br>(280-1100)         |
| Austria  | 1990 | Male   | 95 plus  | 90%<br>(82-96%)                | 9.8%<br>(4.4-18%)        | 5.5<br>(3.2-8.7)                            | 8.5%<br>(1.5-15%)                    | 9.1%<br>(1.1-16%)                   | 23<br>(2.9-42)      | 87<br>(16-150)            |
| Austria  | 1995 | Female | All Ages | 82%<br>(78-85%)                | 18%<br>(15-22%)          | 2.9<br>(2.6-3.3)                            | 5.2%<br>(3.4-7.2%)                   | 5.7%<br>(1.9-9.9%)                  | 2500<br>(850-4300)  | 59000<br>(38000-82000)    |
| Austria  | 1995 | Female | 15 to 19 | 79%<br>(70-85%)                | 21%<br>(15-30%)          | 2.3<br>(1.6-3.2)                            | 3.5%<br>(2.1-5.1%)                   | 11%<br>(5.6-17%)                    | 8<br>(4.1-12)       | 850<br>(510-1200)         |
| Austria  | 1995 | Female | 20 to 24 | 85%<br>(75-91%)                | 15%<br>(8.9-25%)         | 2.8<br>(2-4)                                | 4.4%<br>(3-5.9%)                     | 12%<br>(6.5-18%)                    | 10<br>(5.5-16)      | 1500<br>(980-2000)        |

| Location | Year | Sex    | Age      | Prevalence of current drinkers | Prevalence of abstainers | Population average of standard drinks daily | Percent of total attributable deaths | Percent of total attributable DALYs | Attributable deaths | Attributable DALYs        |
|----------|------|--------|----------|--------------------------------|--------------------------|---------------------------------------------|--------------------------------------|-------------------------------------|---------------------|---------------------------|
| Austria  | 1995 | Female | 25 to 29 | 86%<br>(77-93%)                | 14%<br>(7.3-23%)         | 2.7<br>(1.9-3.6)                            | 3.8%<br>(2.6-5%)                     | 11%<br>(6-16%)                      | 14<br>(7.6-20)      | 1700<br>(1200-2300)       |
| Austria  | 1995 | Female | 30 to 34 | 87%<br>(78-93%)                | 13%<br>(6.7-22%)         | 2.9<br>(2.1-3.9)                            | 3.8%<br>(2.6-5%)                     | 12%<br>(7.5-17%)                    | 22<br>(13-30)       | 1900<br>(1300-2600)       |
| Austria  | 1995 | Female | 35 to 39 | 88%<br>(80-93%)                | 12%<br>(6.6-20%)         | 3.5<br>(2.5-4.8)                            | 5%<br>(3.6-6.6%)                     | 15%<br>(11-20%)                     | 37<br>(27-48)       | 2500<br>(1900-3300)       |
| Austria  | 1995 | Female | 40 to 44 | 87%<br>(80-92%)                | 13%<br>(7.6-20%)         | 3.9<br>(2.8-5)                              | 6.2%<br>(4.7-8.1%)                   | 16%<br>(13-20%)                     | 57<br>(43-70)       | 3200<br>(2500-4000)       |
| Austria  | 1995 | Female | 45 to 49 | 86%<br>(80-91%)                | 14%<br>(8.8-20%)         | 4<br>(2.9-5.3)                              | 7.6%<br>(5.7-10%)                    | 16%<br>(13-20%)                     | 95<br>(73-120)      | 4500<br>(3400-5600)       |
| Austria  | 1995 | Female | 50 to 54 | 86%<br>(81-91%)                | 14%<br>(8.9-19%)         | 4.3<br>(3.1-5.6)                            | 8.1%<br>(5.9-10%)                    | 15%<br>(12-19%)                     | 130<br>(100-170)    | 5500<br>(4100-6900)       |
| Austria  | 1995 | Female | 55 to 59 | 87%<br>(82-91%)                | 13%<br>(8.7-18%)         | 4.6<br>(3.4-6)                              | 8%<br>(5.8-11%)                      | 14%<br>(10-18%)                     | 140<br>(110-190)    | 5300<br>(3900-6900)       |
| Austria  | 1995 | Female | 60 to 64 | 86%<br>(81-91%)                | 14%<br>(9.2-19%)         | 4.5<br>(3.3-6)                              | 7.5%<br>(4.8-11%)                    | 12%<br>(7.5-16%)                    | 170<br>(110-240)    | 5200<br>(3400-7400)       |
| Austria  | 1995 | Female | 65 to 69 | 85%<br>(79-90%)                | 15%<br>(10-21%)          | 4.2<br>(3.2-5.3)                            | 6.6%<br>(3.9-9.4%)                   | 9.4%<br>(5.4-13%)                   | 240<br>(140-340)    | 6200<br>(3700-8800)       |
| Austria  | 1995 | Female | 70 to 74 | 81%<br>(74-86%)                | 19%<br>(14-26%)          | 3.7<br>(2.7-5)                              | 5.7%<br>(2.4-9.5%)                   | 7.4%<br>(2.9-12%)                   | 360<br>(140-610)    | 7500<br>(3100-12000)      |
| Austria  | 1995 | Female | 75 to 79 | 76%<br>(66-84%)                | 24%<br>(16-34%)          | 3.3<br>(2.2-4.6)                            | 4.7%<br>(1-9%)                       | 5.6%<br>(0.88-11%)                  | 270<br>(42-540)     | 4400<br>(930-8500)        |
| Austria  | 1995 | Female | 80 to 84 | 74%<br>(62-83%)                | 26%<br>(17-38%)          | 3.1<br>(2.2-4.3)                            | 4%<br>(0.42-8.3%)                    | 4.4%<br>(0.079-9.8%)                | 420<br>(7.6-940)    | 5100<br>(500-11000)       |
| Austria  | 1995 | Female | 85 to 89 | 72%<br>(59-82%)                | 28%<br>(18-41%)          | 3<br>(2-4.2)                                | 3.2%<br>(-0.48-7.5%)                 | 3.3%<br>(-1-8.4%)                   | 320<br>(-99-830)    | 2800<br>(-450-6800)       |
| Austria  | 1995 | Female | 90 to 94 | 71%<br>(59-82%)                | 29%<br>(18-41%)          | 2.8<br>(1.8-4.2)                            | 2.5%<br>(-1.5-7.5%)                  | 2.5%<br>(-2.1-8.6%)                 | 130<br>(-110-450)   | 800<br>(-460-2500)        |
| Austria  | 1995 | Female | 95 plus  | 72%<br>(55-85%)                | 28%<br>(15-45%)          | 2.7<br>(1.4-4.4)                            | 2.3%<br>(-2.5-8.1%)                  | 2.2%<br>(-3.3-9.3%)                 | 35<br>(-52-150)     | 140<br>(-160-510)         |
| Austria  | 1995 | Male   | All Ages | 88%<br>(86-91%)                | 12%<br>(9.2-14%)         | 5<br>(4.4-5.6)                              | 14%<br>(11-17%)                      | 16%<br>(12-20%)                     | 5900<br>(4400-7500) | 170000<br>(140000-200000) |
| Austria  | 1995 | Male   | 15 to 19 | 82%<br>(75-88%)                | 18%<br>(12-25%)          | 3.2<br>(2.2-4.3)                            | 9.6%<br>(5.8-14%)                    | 16%<br>(8.6-24%)                    | 37<br>(20-54)       | 3100<br>(2000-4400)       |
| Austria  | 1995 | Male   | 20 to 24 | 88%<br>(80-94%)                | 12%<br>(6.3-20%)         | 4.7<br>(3.4-6.4)                            | 16%<br>(12-21%)                      | 23%<br>(15-32%)                     | 82<br>(52-110)      | 7200<br>(5100-9600)       |
| Austria  | 1995 | Male   | 25 to 29 | 90%<br>(84-95%)                | 9.6%<br>(4.8-16%)        | 5<br>(3.6-6.5)                              | 14%<br>(11-18%)                      | 23%<br>(15-31%)                     | 88<br>(58-120)      | 7700<br>(5600-9900)       |
| Austria  | 1995 | Male   | 30 to 34 | 92%<br>(85-96%)                | 8.1%<br>(3.8-15%)        | 5.3<br>(3.9-6.8)                            | 13%<br>(10-17%)                      | 23%<br>(16-30%)                     | 100<br>(73-140)     | 7900<br>(5800-9900)       |
| Austria  | 1995 | Male   | 35 to 39 | 93%<br>(87-97%)                | 7.2%<br>(3.4-13%)        | 5.7<br>(4.1-7.6)                            | 15%<br>(11-18%)                      | 25%<br>(17-31%)                     | 140<br>(97-170)     | 8600<br>(6400-11000)      |
| Austria  | 1995 | Male   | 40 to 44 | 93%<br>(88-97%)                | 6.9%<br>(3.3-12%)        | 6.5<br>(4.9-8.3)                            | 17%<br>(13-20%)                      | 27%<br>(21-32%)                     | 190<br>(150-230)    | 10000<br>(8100-12000)     |

| Location | Year | Sex    | Age      | Prevalence of current drinkers | Prevalence of abstainers | Population average of standard drinks daily | Percent of total attributable deaths | Percent of total attributable DALYs | Attributable deaths | Attributable DALYs     |
|----------|------|--------|----------|--------------------------------|--------------------------|---------------------------------------------|--------------------------------------|-------------------------------------|---------------------|------------------------|
| Austria  | 1995 | Male   | 45 to 49 | 93%<br>(88-96%)                | 7.2%<br>(3.8-12%)        | 7.7<br>(5.7-10)                             | 19%<br>(15-23%)                      | 28%<br>(23-33%)                     | 320<br>(250-370)    | 14000<br>(12000-17000) |
| Austria  | 1995 | Male   | 50 to 54 | 93%<br>(88-96%)                | 7%<br>(4-12%)            | 8.3<br>(6.1-11)                             | 20%<br>(16-23%)                      | 27%<br>(22-31%)                     | 460<br>(370-540)    | 18000<br>(15000-22000) |
| Austria  | 1995 | Male   | 55 to 59 | 94%<br>(91-96%)                | 6.2%<br>(3.9-9.3%)       | 8.4<br>(6.5-11)                             | 19%<br>(15-22%)                      | 24%<br>(19-29%)                     | 530<br>(430-630)    | 18000<br>(15000-22000) |
| Austria  | 1995 | Male   | 60 to 64 | 94%<br>(90-96%)                | 5.9%<br>(3.5-9.6%)       | 8.1<br>(6.2-11)                             | 17%<br>(13-21%)                      | 21%<br>(16-26%)                     | 630<br>(480-770)    | 18000<br>(14000-23000) |
| Austria  | 1995 | Male   | 65 to 69 | 94%<br>(90-96%)                | 6%<br>(3.6-9.7%)         | 7.4<br>(5.9-9.1)                            | 15%<br>(11-19%)                      | 17%<br>(13-22%)                     | 760<br>(540-970)    | 18000<br>(13000-23000) |
| Austria  | 1995 | Male   | 70 to 74 | 94%<br>(90-96%)                | 6.2%<br>(3.9-9.8%)       | 6.7<br>(5-8.6)                              | 13%<br>(7.8-17%)                     | 15%<br>(8.7-20%)                    | 760<br>(450-1000)   | 15000<br>(9000-20000)  |
| Austria  | 1995 | Male   | 75 to 79 | 93%<br>(89-96%)                | 6.8%<br>(3.8-11%)        | 6.2<br>(4.5-8.3)                            | 11%<br>(5.7-16%)                     | 12%<br>(5.9-18%)                    | 500<br>(240-750)    | 7800<br>(4000-11000)   |
| Austria  | 1995 | Male   | 80 to 84 | 92%<br>(86-96%)                | 7.9%<br>(4.2-14%)        | 5.9<br>(4.4-7.7)                            | 10%<br>(5.3-15%)                     | 11%<br>(5.4-17%)                    | 680<br>(330-1000)   | 7800<br>(4000-12000)   |
| Austria  | 1995 | Male   | 85 to 89 | 91%<br>(84-95%)                | 9.3%<br>(5.2-16%)        | 5.6<br>(4-7.6)                              | 9.4%<br>(4.4-15%)                    | 10%<br>(4.3-16%)                    | 460<br>(200-740)    | 3700<br>(1700-5800)    |
| Austria  | 1995 | Male   | 90 to 94 | 90%<br>(84-95%)                | 9.6%<br>(5.3-16%)        | 5.5<br>(3.6-7.9)                            | 8.4%<br>(2.6-14%)                    | 9%<br>(2.3-16%)                     | 160<br>(41-280)     | 910<br>(280-1500)      |
| Austria  | 1995 | Male   | 95 plus  | 90%<br>(82-95%)                | 9.9%<br>(4.5-18%)        | 5.3<br>(3.1-8.3)                            | 7.8%<br>(1.1-14%)                    | 8.3%<br>(0.45-16%)                  | 30<br>(1.6-57)      | 110<br>(16-200)        |
| Austria  | 2000 | Female | All Ages | 81%<br>(77-84%)                | 19%<br>(16-23%)          | 2.8<br>(2.5-3.2)                            | 4.8%<br>(3.2-6.5%)                   | 4.9%<br>(1.4-8.9%)                  | 2100<br>(600-3700)  | 52000<br>(34000-72000) |
| Austria  | 2000 | Female | 15 to 19 | 79%<br>(70-87%)                | 21%<br>(13-30%)          | 2.2<br>(1.5-3.1)                            | 3.3%<br>(2-4.6%)                     | 10%<br>(5.2-16%)                    | 7.3<br>(3.9-11)     | 820<br>(520-1200)      |
| Austria  | 2000 | Female | 20 to 24 | 82%<br>(70-91%)                | 18%<br>(9.4-30%)         | 2.6<br>(1.7-3.7)                            | 4.3%<br>(3-5.7%)                     | 11%<br>(5.6-17%)                    | 8<br>(4.2-12)       | 1200<br>(830-1700)     |
| Austria  | 2000 | Female | 25 to 29 | 84%<br>(72-92%)                | 16%<br>(8-28%)           | 2.5<br>(1.7-3.4)                            | 3.6%<br>(2.5-4.6%)                   | 10%<br>(5.7-15%)                    | 9.1<br>(5-13)       | 1300<br>(890-1700)     |
| Austria  | 2000 | Female | 30 to 34 | 85%<br>(73-92%)                | 15%<br>(7.6-27%)         | 2.7<br>(1.9-3.8)                            | 3.4%<br>(2.5-4.6%)                   | 12%<br>(7.3-16%)                    | 17<br>(11-23)       | 1600<br>(1200-2200)    |
| Austria  | 2000 | Female | 35 to 39 | 86%<br>(76-93%)                | 14%<br>(7.3-24%)         | 3.3<br>(2.3-4.5)                            | 4.6%<br>(3.3-6%)                     | 15%<br>(11-19%)                     | 35<br>(25-44)       | 2500<br>(1900-3200)    |
| Austria  | 2000 | Female | 40 to 44 | 85%<br>(76-91%)                | 15%<br>(8.6-24%)         | 3.6<br>(2.7-4.8)                            | 5.9%<br>(4.5-7.7%)                   | 16%<br>(12-20%)                     | 58<br>(45-72)       | 3400<br>(2600-4200)    |
| Austria  | 2000 | Female | 45 to 49 | 84%<br>(76-90%)                | 16%<br>(9.7-24%)         | 3.8<br>(2.7-5)                              | 6.9%<br>(5.2-9%)                     | 16%<br>(12-20%)                     | 80<br>(61-99)       | 3900<br>(3000-4800)    |
| Austria  | 2000 | Female | 50 to 54 | 84%<br>(77-90%)                | 16%<br>(10-23%)          | 4<br>(2.9-5.2)                              | 7.7%<br>(5.7-9.8%)                   | 15%<br>(11-19%)                     | 120<br>(89-140)     | 4800<br>(3700-6100)    |
| Austria  | 2000 | Female | 55 to 59 | 86%<br>(80-91%)                | 14%<br>(9.2-20%)         | 4.3<br>(3.1-5.7)                            | 7.7%<br>(5.5-10%)                    | 14%<br>(10-17%)                     | 150<br>(110-190)    | 5400<br>(4000-7000)    |
| Austria  | 2000 | Female | 60 to 64 | 86%<br>(80-91%)                | 14%<br>(8.9-20%)         | 4.4<br>(3.2-5.9)                            | 7.1%<br>(4.7-10%)                    | 12%<br>(7.9-16%)                    | 160<br>(110-220)    | 5000<br>(3300-7200)    |

| Location | Year | Sex    | Age      | Prevalence of current drinkers | Prevalence of abstainers | Population average of standard drinks daily | Percent of total attributable deaths | Percent of total attributable DALYs | Attributable deaths | Attributable DALYs        |
|----------|------|--------|----------|--------------------------------|--------------------------|---------------------------------------------|--------------------------------------|-------------------------------------|---------------------|---------------------------|
| Austria  | 2000 | Female | 65 to 69 | 85%<br>(78-90%)                | 15%<br>(9.8-22%)         | 4<br>(3.1-5.2)                              | 6.1%<br>(3.6-8.6%)                   | 9%<br>(5.4-13%)                     | 170<br>(100-240)    | 4500<br>(2700-6400)       |
| Austria  | 2000 | Female | 70 to 74 | 81%<br>(73-88%)                | 19%<br>(12-27%)          | 3.6<br>(2.6-4.8)                            | 5.2%<br>(2.3-8.7%)                   | 7%<br>(2.9-12%)                     | 250<br>(100-410)    | 5300<br>(2300-8700)       |
| Austria  | 2000 | Female | 75 to 79 | 78%<br>(68-86%)                | 22%<br>(14-32%)          | 3.3<br>(2.2-4.6)                            | 4.3%<br>(0.86-8.4%)                  | 5.2%<br>(0.77-10%)                  | 350<br>(53-700)     | 5800<br>(1100-11000)      |
| Austria  | 2000 | Female | 80 to 84 | 75%<br>(63-85%)                | 25%<br>(15-37%)          | 3.1<br>(2.2-4.2)                            | 3.5%<br>(0.084-7.1%)                 | 3.9%<br>(-0.46-8.5%)                | 250<br>(-29-540)    | 3000<br>(72-6300)         |
| Austria  | 2000 | Female | 85 to 89 | 73%<br>(60-83%)                | 27%<br>(17-40%)          | 2.9<br>(1.9-4)                              | 2.6%<br>(-0.84-6.6%)                 | 2.7%<br>(-1.6-7.6%)                 | 260<br>(-160-730)   | 2400<br>(-750-6000)       |
| Austria  | 2000 | Female | 90 to 94 | 72%<br>(60-83%)                | 28%<br>(17-40%)          | 2.7<br>(1.7-4)                              | 2%<br>(-1.9-6.9%)                    | 1.9%<br>(-2.8-8%)                   | 120<br>(-180-510)   | 770<br>(-740-2800)        |
| Austria  | 2000 | Female | 95 plus  | 72%<br>(55-85%)                | 28%<br>(15-45%)          | 2.6<br>(1.4-4.3)                            | 1.6%<br>(-2.9-7.7%)                  | 1.4%<br>(-4-8.6%)                   | 30<br>(-84-180)     | 130<br>(-250-640)         |
| Austria  | 2000 | Male   | All Ages | 88%<br>(86-91%)                | 12%<br>(9.3-14%)         | 4.9<br>(4.3-5.5)                            | 13%<br>(11-16%)                      | 15%<br>(11-19%)                     | 5300<br>(3900-6700) | 150000<br>(120000-180000) |
| Austria  | 2000 | Male   | 15 to 19 | 78%<br>(68-85%)                | 22%<br>(15-32%)          | 2.9<br>(2-4)                                | 8.5%<br>(5.3-12%)                    | 15%<br>(7.7-22%)                    | 29<br>(16-44)       | 2700<br>(1700-3800)       |
| Austria  | 2000 | Male   | 20 to 24 | 86%<br>(77-93%)                | 14%<br>(7.3-23%)         | 4.4<br>(3-6)                                | 15%<br>(11-20%)                      | 21%<br>(13-30%)                     | 53<br>(33-75)       | 5200<br>(3700-6900)       |
| Austria  | 2000 | Male   | 25 to 29 | 90%<br>(82-95%)                | 10%<br>(5.2-18%)         | 4.7<br>(3.3-6.2)                            | 14%<br>(11-18%)                      | 22%<br>(14-30%)                     | 61<br>(39-83)       | 5700<br>(4100-7400)       |
| Austria  | 2000 | Male   | 30 to 34 | 92%<br>(85-96%)                | 8.2%<br>(3.8-15%)        | 5<br>(3.7-6.5)                              | 13%<br>(9.4-16%)                     | 23%<br>(15-30%)                     | 77<br>(52-100)      | 6400<br>(4700-8200)       |
| Austria  | 2000 | Male   | 35 to 39 | 93%<br>(87-97%)                | 7.2%<br>(3.2-13%)        | 5.4<br>(4-7.3)                              | 14%<br>(10-17%)                      | 24%<br>(17-31%)                     | 120<br>(87-160)     | 8100<br>(6100-10000)      |
| Austria  | 2000 | Male   | 40 to 44 | 93%<br>(87-97%)                | 6.9%<br>(3.4-13%)        | 6.2<br>(4.7-7.8)                            | 16%<br>(12-19%)                      | 26%<br>(20-32%)                     | 190<br>(150-230)    | 10000<br>(8200-12000)     |
| Austria  | 2000 | Male   | 45 to 49 | 93%<br>(88-96%)                | 7.2%<br>(3.8-12%)        | 7.3<br>(5.4-9.5)                            | 18%<br>(14-22%)                      | 28%<br>(22-33%)                     | 260<br>(210-310)    | 12000<br>(9900-14000)     |
| Austria  | 2000 | Male   | 50 to 54 | 93%<br>(89-96%)                | 7%<br>(4.1-11%)          | 7.9<br>(5.9-10)                             | 19%<br>(15-22%)                      | 26%<br>(21-31%)                     | 410<br>(330-470)    | 16000<br>(13000-19000)    |
| Austria  | 2000 | Male   | 55 to 59 | 94%<br>(91-96%)                | 6.2%<br>(3.9-9.1%)       | 8<br>(6.2-10)                               | 18%<br>(14-21%)                      | 24%<br>(19-28%)                     | 530<br>(430-620)    | 18000<br>(15000-22000)    |
| Austria  | 2000 | Male   | 60 to 64 | 94%<br>(91-97%)                | 5.7%<br>(3.4-8.8%)       | 7.8<br>(5.9-10)                             | 16%<br>(12-20%)                      | 21%<br>(16-25%)                     | 570<br>(440-700)    | 17000<br>(13000-21000)    |
| Austria  | 2000 | Male   | 65 to 69 | 94%<br>(91-96%)                | 5.8%<br>(3.7-8.8%)       | 7.1<br>(5.7-8.7)                            | 14%<br>(10-18%)                      | 17%<br>(13-22%)                     | 620<br>(450-770)    | 15000<br>(11000-19000)    |
| Austria  | 2000 | Male   | 70 to 74 | 94%<br>(90-96%)                | 6.2%<br>(4-9.6%)         | 6.4<br>(4.7-8.3)                            | 12%<br>(7.3-16%)                     | 14%<br>(8.1-19%)                    | 690<br>(400-950)    | 14000<br>(8400-19000)     |
| Austria  | 2000 | Male   | 75 to 79 | 93%<br>(89-96%)                | 6.9%<br>(4.1-11%)        | 5.8<br>(4.2-7.9)                            | 10%<br>(4.9-15%)                     | 11%<br>(5-17%)                      | 630<br>(280-960)    | 10000<br>(5000-15000)     |
| Austria  | 2000 | Male   | 80 to 84 | 92%<br>(86-95%)                | 8.1%<br>(4.5-14%)        | 5.6<br>(4.1-7.3)                            | 9.2%<br>(4.6-14%)                    | 10%<br>(4.6-16%)                    | 400<br>(180-620)    | 4600<br>(2300-7100)       |

| Location | Year | Sex    | Age      | Prevalence of current drinkers | Prevalence of abstainers | Population average of standard drinks daily | Percent of total attributable deaths | Percent of total attributable DALYs | Attributable deaths | Attributable DALYs        |
|----------|------|--------|----------|--------------------------------|--------------------------|---------------------------------------------|--------------------------------------|-------------------------------------|---------------------|---------------------------|
| Austria  | 2000 | Male   | 85 to 89 | 91%<br>(85-95%)                | 9.2%<br>(5.2-15%)        | 5.4<br>(3.8-7.2)                            | 8.4%<br>(3.6-14%)                    | 9%<br>(3.3-15%)                     | 410<br>(150-680)    | 3300<br>(1400-5400)       |
| Austria  | 2000 | Male   | 90 to 94 | 90%<br>(84-95%)                | 9.5%<br>(5.3-16%)        | 5.3<br>(3.5-7.5)                            | 7.6%<br>(1.9-13%)                    | 8.1%<br>(1.5-15%)                   | 180<br>(33-330)     | 1000<br>(260-1800)        |
| Austria  | 2000 | Male   | 95 plus  | 90%<br>(82-96%)                | 9.8%<br>(4.3-18%)        | 5.1<br>(2.9-8)                              | 7%<br>(0.35-14%)                     | 7.4%<br>(-0.41-15%)                 | 35<br>(-2-71)       | 130<br>(6.7-260)          |
| Austria  | 2005 | Female | All Ages | 81%<br>(78-84%)                | 19%<br>(16-22%)          | 2.7<br>(2.4-3.1)                            | 4.2%<br>(2.8-5.8%)                   | 4.2%<br>(0.97-7.7%)                 | 1700<br>(390-3100)  | 45000<br>(29000-62000)    |
| Austria  | 2005 | Female | 15 to 19 | 79%<br>(71-86%)                | 21%<br>(14-29%)          | 2.1<br>(1.5-2.9)                            | 2.9%<br>(1.8-4%)                     | 8.6%<br>(4.5-13%)                   | 5.8<br>(3-9.1)      | 710<br>(450-1000)         |
| Austria  | 2005 | Female | 20 to 24 | 84%<br>(73-91%)                | 16%<br>(9.2-27%)         | 2.6<br>(1.7-3.7)                            | 4%<br>(2.8-5.3%)                     | 9.6%<br>(4.9-15%)                   | 7.1<br>(3.7-11)     | 1200<br>(820-1700)        |
| Austria  | 2005 | Female | 25 to 29 | 85%<br>(75-92%)                | 15%<br>(8-25%)           | 2.4<br>(1.6-3.4)                            | 3.3%<br>(2.4-4.3%)                   | 9.5%<br>(5.3-14%)                   | 6.8<br>(3.8-9.8)    | 1100<br>(750-1500)        |
| Austria  | 2005 | Female | 30 to 34 | 85%<br>(74-93%)                | 15%<br>(7.5-26%)         | 2.6<br>(1.8-3.6)                            | 3.1%<br>(2.2-4.1%)                   | 11%<br>(7.4-15%)                    | 12<br>(7.8-16)      | 1300<br>(890-1700)        |
| Austria  | 2005 | Female | 35 to 39 | 86%<br>(78-93%)                | 14%<br>(6.9-22%)         | 3.2<br>(2.3-4.2)                            | 4%<br>(2.9-5.2%)                     | 14%<br>(10-18%)                     | 28<br>(20-35)       | 2100<br>(1600-2700)       |
| Austria  | 2005 | Female | 40 to 44 | 86%<br>(77-92%)                | 14%<br>(8.5-23%)         | 3.5<br>(2.6-4.5)                            | 5%<br>(3.8-6.4%)                     | 15%<br>(12-18%)                     | 50<br>(39-60)       | 3000<br>(2400-3700)       |
| Austria  | 2005 | Female | 45 to 49 | 85%<br>(78-90%)                | 15%<br>(9.9-22%)         | 3.6<br>(2.6-4.8)                            | 6%<br>(4.6-7.7%)                     | 15%<br>(12-18%)                     | 73<br>(58-89)       | 3700<br>(2900-4600)       |
| Austria  | 2005 | Female | 50 to 54 | 85%<br>(79-90%)                | 15%<br>(9.7-21%)         | 3.9<br>(2.8-5)                              | 6.7%<br>(5-8.5%)                     | 14%<br>(11-17%)                     | 94<br>(74-120)      | 4000<br>(3100-5000)       |
| Austria  | 2005 | Female | 55 to 59 | 86%<br>(80-90%)                | 14%<br>(9.6-20%)         | 4.1<br>(3.1-5.5)                            | 7.2%<br>(5.3-9.3%)                   | 13%<br>(10-16%)                     | 130<br>(100-170)    | 4900<br>(3800-6300)       |
| Austria  | 2005 | Female | 60 to 64 | 86%<br>(80-91%)                | 14%<br>(9.4-20%)         | 4.1<br>(3-5.5)                              | 6.6%<br>(4.5-9.2%)                   | 11%<br>(8-15%)                      | 160<br>(120-220)    | 5200<br>(3600-7000)       |
| Austria  | 2005 | Female | 65 to 69 | 84%<br>(78-89%)                | 16%<br>(11-22%)          | 3.9<br>(2.9-4.9)                            | 5.6%<br>(3.6-7.8%)                   | 8.6%<br>(5.6-12%)                   | 160<br>(110-230)    | 4400<br>(2800-6200)       |
| Austria  | 2005 | Female | 70 to 74 | 80%<br>(73-86%)                | 20%<br>(14-27%)          | 3.4<br>(2.4-4.6)                            | 4.6%<br>(2.2-7.7%)                   | 6.5%<br>(3-10%)                     | 180<br>(81-280)     | 3800<br>(1700-6300)       |
| Austria  | 2005 | Female | 75 to 79 | 76%<br>(66-84%)                | 24%<br>(16-34%)          | 3.1<br>(2-4.4)                              | 3.7%<br>(0.72-7.2%)                  | 4.6%<br>(0.63-9.2%)                 | 230<br>(32-470)     | 4000<br>(770-7700)        |
| Austria  | 2005 | Female | 80 to 84 | 74%<br>(62-84%)                | 26%<br>(16-38%)          | 2.9<br>(2-3.9)                              | 2.9%<br>(-0.065-6%)                  | 3.2%<br>(-0.57-7.2%)                | 300<br>(-53-670)    | 3800<br>(-86-7900)        |
| Austria  | 2005 | Female | 85 to 89 | 72%<br>(61-82%)                | 28%<br>(18-39%)          | 2.7<br>(1.8-3.8)                            | 2.1%<br>(-1.8-5.5%)                  | 2.1%<br>(-1.8-6.5%)                 | 150<br>(-130-460)   | 1400<br>(-720-3800)       |
| Austria  | 2005 | Female | 90 to 94 | 72%<br>(60-82%)                | 28%<br>(18-40%)          | 2.6<br>(1.6-3.8)                            | 1.5%<br>(-2-5.7%)                    | 1.3%<br>(-3-6.5%)                   | 92<br>(-200-450)    | 640<br>(-870-2500)        |
| Austria  | 2005 | Female | 95 plus  | 72%<br>(56-86%)                | 28%<br>(14-44%)          | 2.5<br>(1.3-4)                              | 1.2%<br>(-3-6.4%)                    | 0.93%<br>(-4.1-7.3%)                | 26<br>(-110-200)    | 130<br>(-320-710)         |
| Austria  | 2005 | Male   | All Ages | 89%<br>(86-91%)                | 11%<br>(8.9-14%)         | 4.8<br>(4.2-5.4)                            | 12%<br>(10-15%)                      | 14%<br>(10-17%)                     | 4800<br>(3600-6100) | 140000<br>(110000-160000) |

| Location | Year | Sex    | Age      | Prevalence of current drinkers | Prevalence of abstainers | Population average of standard drinks daily | Percent of total attributable deaths | Percent of total attributable DALYs | Attributable deaths | Attributable DALYs     |
|----------|------|--------|----------|--------------------------------|--------------------------|---------------------------------------------|--------------------------------------|-------------------------------------|---------------------|------------------------|
| Austria  | 2005 | Male   | 15 to 19 | 79%<br>(72-85%)                | 21%<br>(15-28%)          | 2.8<br>(2-3.8)                              | 7.7%<br>(5-11%)                      | 14%<br>(7.3-20%)                    | 24<br>(13-36)       | 2300<br>(1500-3200)    |
| Austria  | 2005 | Male   | 20 to 24 | 88%<br>(80-93%)                | 12%<br>(6.6-20%)         | 4.3<br>(3-5.8)                              | 14%<br>(10-18%)                      | 20%<br>(12-28%)                     | 48<br>(29-67)       | 5100<br>(3700-6600)    |
| Austria  | 2005 | Male   | 25 to 29 | 91%<br>(85-95%)                | 9%<br>(4.7-15%)          | 4.5<br>(3.3-6)                              | 13%<br>(9.6-16%)                     | 21%<br>(13-29%)                     | 42<br>(26-59)       | 4400<br>(3300-5700)    |
| Austria  | 2005 | Male   | 30 to 34 | 93%<br>(87-96%)                | 7.5%<br>(3.6-13%)        | 4.8<br>(3.6-6.3)                            | 12%<br>(8.8-15%)                     | 22%<br>(15-29%)                     | 55<br>(37-74)       | 4700<br>(3500-6000)    |
| Austria  | 2005 | Male   | 35 to 39 | 93%<br>(88-97%)                | 6.8%<br>(3.1-12%)        | 5.2<br>(3.8-7.1)                            | 12%<br>(9.4-16%)                     | 23%<br>(17-30%)                     | 98<br>(71-130)      | 6800<br>(5200-8600)    |
| Austria  | 2005 | Male   | 40 to 44 | 93%<br>(88-97%)                | 6.6%<br>(3.3-12%)        | 6<br>(4.6-7.6)                              | 14%<br>(11-17%)                      | 26%<br>(20-31%)                     | 160<br>(130-200)    | 9300<br>(7400-11000)   |
| Austria  | 2005 | Male   | 45 to 49 | 93%<br>(88-96%)                | 6.9%<br>(3.7-12%)        | 7.1<br>(5.3-9.2)                            | 17%<br>(13-20%)                      | 27%<br>(22-32%)                     | 260<br>(210-300)    | 12000<br>(10000-15000) |
| Austria  | 2005 | Male   | 50 to 54 | 93%<br>(89-96%)                | 6.7%<br>(4-11%)          | 7.7<br>(5.8-9.8)                            | 18%<br>(15-21%)                      | 26%<br>(21-30%)                     | 350<br>(280-410)    | 14000<br>(12000-17000) |
| Austria  | 2005 | Male   | 55 to 59 | 94%<br>(92-96%)                | 5.9%<br>(3.8-8.5%)       | 7.8<br>(6-9.8)                              | 17%<br>(14-21%)                      | 23%<br>(19-28%)                     | 480<br>(390-560)    | 17000<br>(14000-20000) |
| Austria  | 2005 | Male   | 60 to 64 | 94%<br>(91-97%)                | 5.5%<br>(3.4-8.5%)       | 7.5<br>(5.7-9.8)                            | 15%<br>(12-19%)                      | 20%<br>(15-24%)                     | 570<br>(440-680)    | 17000<br>(13000-21000) |
| Austria  | 2005 | Male   | 65 to 69 | 94%<br>(91-96%)                | 5.8%<br>(3.6-8.9%)       | 6.8<br>(5.3-8.4)                            | 13%<br>(10-17%)                      | 17%<br>(13-21%)                     | 580<br>(440-710)    | 15000<br>(11000-18000) |
| Austria  | 2005 | Male   | 70 to 74 | 94%<br>(91-96%)                | 6.2%<br>(4.1-9.3%)       | 6.1<br>(4.5-8)                              | 11%<br>(7.1-15%)                     | 13%<br>(8.3-18%)                    | 560<br>(340-760)    | 11000<br>(7300-15000)  |
| Austria  | 2005 | Male   | 75 to 79 | 93%<br>(88-96%)                | 7.1%<br>(4.1-12%)        | 5.6<br>(4-7.5)                              | 9.1%<br>(4.6-14%)                    | 10%<br>(5-16%)                      | 590<br>(280-890)    | 9400<br>(4900-14000)   |
| Austria  | 2005 | Male   | 80 to 84 | 92%<br>(86-96%)                | 8.3%<br>(4.5-14%)        | 5.3<br>(3.9-6.8)                            | 8.1%<br>(3.7-13%)                    | 8.9%<br>(3.6-14%)                   | 530<br>(220-850)    | 6200<br>(2800-9600)    |
| Austria  | 2005 | Male   | 85 to 89 | 91%<br>(85-95%)                | 9.3%<br>(5.3-15%)        | 5.1<br>(3.6-6.8)                            | 7.4%<br>(2.9-12%)                    | 7.9%<br>(2.6-13%)                   | 260<br>(88-450)     | 2200<br>(850-3600)     |
| Austria  | 2005 | Male   | 90 to 94 | 90%<br>(84-95%)                | 9.6%<br>(5.3-16%)        | 5<br>(3.3-7.2)                              | 6.7%<br>(1.4-12%)                    | 7.1%<br>(0.8-14%)                   | 180<br>(20-340)     | 1000<br>(210-1800)     |
| Austria  | 2005 | Male   | 95 plus  | 90%<br>(82-95%)                | 10%<br>(4.6-18%)         | 4.9<br>(2.8-7.8)                            | 6.3%<br>(0.067-13%)                  | 6.5%<br>(-0.87-14%)                 | 43<br>(-5.8-96)     | 170<br>(1.8-340)       |
| Austria  | 2010 | Female | All Ages | 83%<br>(80-85%)                | 17%<br>(15-20%)          | 2.8<br>(2.3-3.2)                            | 3.9%<br>(2.5-5.5%)                   | 3.9%<br>(0.61-7.3%)                 | 1600<br>(250-3000)  | 42000<br>(27000-59000) |
| Austria  | 2010 | Female | 15 to 19 | 81%<br>(73-87%)                | 19%<br>(13-27%)          | 2.1<br>(1.4-2.9)                            | 2.4%<br>(1.6-3.4%)                   | 8%<br>(4.1-12%)                     | 3.9<br>(2-6.2)      | 590<br>(380-840)       |
| Austria  | 2010 | Female | 20 to 24 | 86%<br>(77-92%)                | 14%<br>(7.8-23%)         | 2.6<br>(1.7-3.7)                            | 3.7%<br>(2.7-5%)                     | 8.9%<br>(4.6-13%)                   | 5.8<br>(3-8.8)      | 1100<br>(770-1600)     |
| Austria  | 2010 | Female | 25 to 29 | 86%<br>(77-93%)                | 14%<br>(7.2-23%)         | 2.4<br>(1.6-3.2)                            | 3.1%<br>(2.3-4.1%)                   | 8.8%<br>(4.8-13%)                   | 6.5<br>(3.6-9.3)    | 1100<br>(770-1500)     |
| Austria  | 2010 | Female | 30 to 34 | 86%<br>(76-92%)                | 14%<br>(7.6-24%)         | 2.5<br>(1.7-3.4)                            | 2.8%<br>(2.1-3.8%)                   | 10%<br>(6.7-14%)                    | 8.8<br>(5.7-12)     | 1000<br>(720-1300)     |



| Location | Year | Sex    | Age      | Prevalence of current drinkers | Prevalence of abstainers | Population average of standard drinks daily | Percent of total attributable deaths | Percent of total attributable DALYs | Attributable deaths | Attributable DALYs        |
|----------|------|--------|----------|--------------------------------|--------------------------|---------------------------------------------|--------------------------------------|-------------------------------------|---------------------|---------------------------|
| Austria  | 2010 | Female | 35 to 39 | 87%<br>(79-93%)                | 13%<br>(7.1-21%)         | 3<br>(2.1-4.2)                              | 3.6%<br>(2.6-4.7%)                   | 13%<br>(9.5-17%)                    | 20<br>(14-25)       | 1600<br>(1200-2000)       |
| Austria  | 2010 | Female | 40 to 44 | 86%<br>(78-92%)                | 14%<br>(8.1-22%)         | 3.4<br>(2.4-4.5)                            | 4.4%<br>(3.2-5.6%)                   | 14%<br>(11-17%)                     | 40<br>(31-49)       | 2600<br>(2000-3200)       |
| Austria  | 2010 | Female | 45 to 49 | 85%<br>(79-91%)                | 15%<br>(9.4-21%)         | 3.5<br>(2.5-4.7)                            | 5.5%<br>(4.1-7.1%)                   | 14%<br>(11-17%)                     | 75<br>(58-91)       | 3800<br>(2900-4700)       |
| Austria  | 2010 | Female | 50 to 54 | 87%<br>(81-91%)                | 13%<br>(8.9-19%)         | 3.8<br>(2.7-5)                              | 6.3%<br>(4.7-8%)                     | 14%<br>(11-17%)                     | 100<br>(79-120)     | 4300<br>(3300-5400)       |
| Austria  | 2010 | Female | 55 to 59 | 87%<br>(83-91%)                | 13%<br>(8.7-17%)         | 4.1<br>(3.1-5.4)                            | 6.5%<br>(4.8-8.3%)                   | 12%<br>(9.6-15%)                    | 120<br>(91-140)     | 4300<br>(3300-5500)       |
| Austria  | 2010 | Female | 60 to 64 | 87%<br>(82-91%)                | 13%<br>(8.6-18%)         | 4.1<br>(3-5.4)                              | 6.3%<br>(4.3-8.6%)                   | 11%<br>(7.7-14%)                    | 150<br>(110-200)    | 4800<br>(3300-6400)       |
| Austria  | 2010 | Female | 65 to 69 | 86%<br>(81-91%)                | 14%<br>(9.2-19%)         | 3.8<br>(2.9-5)                              | 5.3%<br>(3.3-7.4%)                   | 8.4%<br>(5.7-11%)                   | 170<br>(120-240)    | 4600<br>(3000-6400)       |
| Austria  | 2010 | Female | 70 to 74 | 84%<br>(79-89%)                | 16%<br>(11-21%)          | 3.5<br>(2.5-4.8)                            | 4.3%<br>(2.1-7.2%)                   | 6.3%<br>(3.1-10%)                   | 170<br>(83-280)     | 3800<br>(1800-6100)       |
| Austria  | 2010 | Female | 75 to 79 | 80%<br>(72-87%)                | 20%<br>(13-28%)          | 3.2<br>(2.2-4.5)                            | 3.4%<br>(0.65-6.5%)                  | 4.4%<br>(0.75-8.6%)                 | 180<br>(30-340)     | 3100<br>(630-5900)        |
| Austria  | 2010 | Female | 80 to 84 | 78%<br>(67-86%)                | 22%<br>(14-33%)          | 3<br>(2.1-4.1)                              | 2.6%<br>(-0.21-5.9%)                 | 3%<br>(-0.68-7.1%)                  | 220<br>(-50-520)    | 2900<br>(-210-6200)       |
| Austria  | 2010 | Female | 85 to 89 | 77%<br>(67-85%)                | 23%<br>(15-33%)          | 2.8<br>(1.9-3.9)                            | 1.9%<br>(-1.2-5.3%)                  | 1.9%<br>(-2.1-6.1%)                 | 210<br>(-240-680)   | 2000<br>(-1300-5600)      |
| Austria  | 2010 | Female | 90 to 94 | 76%<br>(65-84%)                | 24%<br>(16-35%)          | 2.7<br>(1.7-3.9)                            | 1.3%<br>(-2.2-5.6%)                  | 1.1%<br>(-3.2-6.4%)                 | 63<br>(-180-360)    | 470<br>(-770-2000)        |
| Austria  | 2010 | Female | 95 plus  | 76%<br>(60-87%)                | 24%<br>(13-40%)          | 2.6<br>(1.4-4.1)                            | 1%<br>(-3.2-6.2%)                    | 0.78%<br>(-4.4-7.1%)                | 26<br>(-140-230)    | 140<br>(-430-840)         |
| Austria  | 2010 | Male   | All Ages | 90%<br>(88-92%)                | 10%<br>(8.2-12%)         | 4.7<br>(4-5.5)                              | 11%<br>(9.3-14%)                     | 13%<br>(8.8-16%)                    | 4600<br>(3200-5900) | 130000<br>(100000-150000) |
| Austria  | 2010 | Male   | 15 to 19 | 82%<br>(76-87%)                | 18%<br>(13-24%)          | 2.8<br>(1.9-3.7)                            | 6.8%<br>(4.4-9.3%)                   | 13%<br>(7-20%)                      | 18<br>(9.4-26)      | 1900<br>(1200-2600)       |
| Austria  | 2010 | Male   | 20 to 24 | 89%<br>(82-94%)                | 11%<br>(5.9-18%)         | 4.2<br>(2.9-5.7)                            | 13%<br>(9.7-17%)                     | 19%<br>(11-27%)                     | 40<br>(24-58)       | 4500<br>(3200-6000)       |
| Austria  | 2010 | Male   | 25 to 29 | 91%<br>(85-95%)                | 8.8%<br>(4.7-15%)        | 4.3<br>(3.1-5.8)                            | 12%<br>(8.8-15%)                     | 19%<br>(11-27%)                     | 36<br>(21-51)       | 4200<br>(3100-5400)       |
| Austria  | 2010 | Male   | 30 to 34 | 93%<br>(87-97%)                | 7.4%<br>(3.4-13%)        | 4.6<br>(3.3-6.2)                            | 11%<br>(7.9-14%)                     | 20%<br>(13-28%)                     | 41<br>(27-57)       | 3800<br>(2800-4900)       |
| Austria  | 2010 | Male   | 35 to 39 | 93%<br>(88-97%)                | 6.7%<br>(2.9-12%)        | 5<br>(3.5-6.7)                              | 11%<br>(8.2-14%)                     | 22%<br>(15-29%)                     | 67<br>(45-88)       | 4900<br>(3600-6200)       |
| Austria  | 2010 | Male   | 40 to 44 | 94%<br>(89-97%)                | 6.5%<br>(3.2-11%)        | 5.7<br>(4.2-7.4)                            | 12%<br>(9.5-15%)                     | 24%<br>(18-30%)                     | 130<br>(99-160)     | 7700<br>(6000-9400)       |
| Austria  | 2010 | Male   | 45 to 49 | 93%<br>(89-96%)                | 6.8%<br>(3.7-11%)        | 6.7<br>(5-8.7)                              | 15%<br>(12-18%)                      | 25%<br>(20-30%)                     | 250<br>(200-300)    | 12000<br>(9900-15000)     |
| Austria  | 2010 | Male   | 50 to 54 | 94%<br>(90-96%)                | 6.4%<br>(3.8-10%)        | 7.2<br>(5.4-9.2)                            | 17%<br>(13-20%)                      | 25%<br>(20-29%)                     | 360<br>(290-420)    | 15000<br>(12000-17000)    |

| Location | Year | Sex    | Age      | Prevalence of current drinkers | Prevalence of abstainers | Population average of standard drinks daily | Percent of total attributable deaths | Percent of total attributable DALYs | Attributable deaths | Attributable DALYs     |
|----------|------|--------|----------|--------------------------------|--------------------------|---------------------------------------------|--------------------------------------|-------------------------------------|---------------------|------------------------|
| Austria  | 2010 | Male   | 55 to 59 | 94%<br>(92-96%)                | 5.6%<br>(3.7-8%)         | 7.4<br>(5.6-9.3)                            | 16%<br>(13-19%)                      | 22%<br>(18-26%)                     | 420<br>(340-480)    | 15000<br>(12000-17000) |
| Austria  | 2010 | Male   | 60 to 64 | 95%<br>(92-97%)                | 5.4%<br>(3.4-8.2%)       | 7.1<br>(5.3-9.2)                            | 15%<br>(11-18%)                      | 19%<br>(15-23%)                     | 530<br>(410-640)    | 16000<br>(12000-19000) |
| Austria  | 2010 | Male   | 65 to 69 | 95%<br>(92-96%)                | 5.5%<br>(3.5-8.4%)       | 6.5<br>(5-8.1)                              | 13%<br>(9.4-16%)                     | 16%<br>(12-20%)                     | 590<br>(440-730)    | 15000<br>(11000-18000) |
| Austria  | 2010 | Male   | 70 to 74 | 94%<br>(92-96%)                | 5.7%<br>(3.8-8.5%)       | 5.9<br>(4.3-7.8)                            | 10%<br>(6.4-14%)                     | 12%<br>(7.7-17%)                    | 540<br>(330-760)    | 11000<br>(7000-15000)  |
| Austria  | 2010 | Male   | 75 to 79 | 94%<br>(90-96%)                | 6.1%<br>(3.6-9.6%)       | 5.5<br>(3.9-7.4)                            | 8.6%<br>(4.4-13%)                    | 10%<br>(4.8-15%)                    | 500<br>(240-770)    | 8000<br>(4100-12000)   |
| Austria  | 2010 | Male   | 80 to 84 | 93%<br>(89-96%)                | 6.9%<br>(4-11%)          | 5.3<br>(3.8-6.9)                            | 7.3%<br>(3-12%)                      | 8.1%<br>(2.7-13%)                   | 510<br>(170-840)    | 6200<br>(2600-9700)    |
| Austria  | 2010 | Male   | 85 to 89 | 92%<br>(88-95%)                | 7.8%<br>(4.8-12%)        | 5.1<br>(3.6-6.8)                            | 6.6%<br>(2.1-11%)                    | 7.1%<br>(1.7-12%)                   | 380<br>(91-660)     | 3200<br>(1000-5300)    |
| Austria  | 2010 | Male   | 90 to 94 | 92%<br>(87-95%)                | 8.2%<br>(4.8-13%)        | 5<br>(3.3-7.1)                              | 6%<br>(0.93-11%)                     | 6.3%<br>(0.34-12%)                  | 130<br>(7-260)      | 760<br>(120-1500)      |
| Austria  | 2010 | Male   | 95 plus  | 91%<br>(84-96%)                | 8.9%<br>(4.1-16%)        | 4.8<br>(2.9-7.7)                            | 5.7%<br>(-0.42-12%)                  | 5.9%<br>(-1.2-14%)                  | 50<br>(-11-120)     | 190<br>(-14-420)       |
| Austria  | 2016 | Female | All Ages | 83%<br>(80-86%)                | 17%<br>(14-20%)          | 2.8<br>(2.1-3.7)                            | 3.8%<br>(2.1-5.9%)                   | 3.7%<br>(0.13-8%)                   | 1600<br>(59-3500)   | 42000<br>(24000-65000) |
| Austria  | 2016 | Female | 15 to 19 | 82%<br>(74-89%)                | 18%<br>(11-26%)          | 2.1<br>(1.3-3.2)                            | 2.3%<br>(1.5-3.3%)                   | 8%<br>(4.1-13%)                     | 3.1<br>(1.6-5)      | 490<br>(320-700)       |
| Austria  | 2016 | Female | 20 to 24 | 85%<br>(75-92%)                | 15%<br>(8-25%)           | 2.5<br>(1.5-3.8)                            | 3.5%<br>(2.5-4.7%)                   | 8.8%<br>(4.3-14%)                   | 5<br>(2.5-8)        | 1100<br>(730-1600)     |
| Austria  | 2016 | Female | 25 to 29 | 86%<br>(76-93%)                | 14%<br>(6.9-24%)         | 2.3<br>(1.5-3.5)                            | 3%<br>(2.1-4%)                       | 8.8%<br>(4.4-13%)                   | 5.9<br>(3-9.3)      | 1100<br>(720-1500)     |
| Austria  | 2016 | Female | 30 to 34 | 86%<br>(75-93%)                | 14%<br>(7.1-25%)         | 2.5<br>(1.6-3.7)                            | 2.8%<br>(1.9-3.7%)                   | 10%<br>(6.6-15%)                    | 10<br>(6.3-14)      | 1100<br>(800-1600)     |
| Austria  | 2016 | Female | 35 to 39 | 86%<br>(77-93%)                | 14%<br>(7.1-23%)         | 3<br>(1.9-4.5)                              | 3.3%<br>(2.3-4.5%)                   | 13%<br>(9.2-17%)                    | 16<br>(11-21)       | 1300<br>(950-1800)     |
| Austria  | 2016 | Female | 40 to 44 | 86%<br>(77-92%)                | 14%<br>(8.1-23%)         | 3.3<br>(2.2-4.8)                            | 4.1%<br>(3-5.6%)                     | 14%<br>(11-18%)                     | 32<br>(24-41)       | 2100<br>(1500-2700)    |
| Austria  | 2016 | Female | 45 to 49 | 86%<br>(79-91%)                | 14%<br>(9-21%)           | 3.5<br>(2.4-5.1)                            | 5.1%<br>(3.7-6.9%)                   | 14%<br>(11-18%)                     | 68<br>(52-87)       | 3500<br>(2600-4500)    |
| Austria  | 2016 | Female | 50 to 54 | 86%<br>(80-91%)                | 14%<br>(9-20%)           | 3.7<br>(2.5-5.4)                            | 5.8%<br>(4.1-7.8%)                   | 13%<br>(10-17%)                     | 110<br>(81-130)     | 4600<br>(3400-6000)    |
| Austria  | 2016 | Female | 55 to 59 | 88%<br>(84-92%)                | 12%<br>(8-16%)           | 4.1<br>(2.8-5.9)                            | 6.2%<br>(4.3-8.4%)                   | 12%<br>(9.1-16%)                    | 130<br>(97-170)     | 4900<br>(3400-6500)    |
| Austria  | 2016 | Female | 60 to 64 | 88%<br>(84-92%)                | 12%<br>(7.6-16%)         | 4.1<br>(2.7-5.9)                            | 6%<br>(3.7-8.8%)                     | 10%<br>(7-14%)                      | 140<br>(96-200)     | 4600<br>(2900-6600)    |
| Austria  | 2016 | Female | 65 to 69 | 87%<br>(82-92%)                | 13%<br>(8.5-18%)         | 3.9<br>(2.7-5.4)                            | 5.1%<br>(2.9-7.8%)                   | 8.2%<br>(5.1-12%)                   | 160<br>(100-230)    | 4200<br>(2500-6500)    |
| Austria  | 2016 | Female | 70 to 74 | 85%<br>(80-90%)                | 15%<br>(10-20%)          | 3.6<br>(2.5-5)                              | 4.2%<br>(1.7-7.2%)                   | 6.3%<br>(2.7-11%)                   | 210<br>(90-350)     | 4600<br>(1800-8100)    |

| Location | Year | Sex    | Age      | Prevalence of current drinkers | Prevalence of abstainers | Population average of standard drinks daily | Percent of total attributable deaths | Percent of total attributable DALYs | Attributable deaths | Attributable DALYs       |
|----------|------|--------|----------|--------------------------------|--------------------------|---------------------------------------------|--------------------------------------|-------------------------------------|---------------------|--------------------------|
| Austria  | 2016 | Female | 75 to 79 | 82%<br>(74-88%)                | 18%<br>(12-26%)          | 3.3<br>(2.1-4.8)                            | 3.4%<br>(0.47-7.1%)                  | 4.4%<br>(0.62-9.4%)                 | 180<br>(24-380)     | 3100<br>(440-6500)       |
| Austria  | 2016 | Female | 80 to 84 | 79%<br>(68-86%)                | 21%<br>(14-32%)          | 3<br>(1.9-4.3)                              | 2.6%<br>(-0.54-6.7%)                 | 3%<br>(-1-8.2%)                     | 190<br>(-66-520)    | 2500<br>(-520-6400)      |
| Austria  | 2016 | Female | 85 to 89 | 77%<br>(66-85%)                | 23%<br>(15-34%)          | 2.8<br>(1.8-4.1)                            | 1.9%<br>(-1.4-6%)                    | 1.9%<br>(-2.3-6.9%)                 | 190<br>(-230-660)   | 1800<br>(-1400-5600)     |
| Austria  | 2016 | Female | 90 to 94 | 76%<br>(65-85%)                | 24%<br>(15-35%)          | 2.7<br>(1.6-4.2)                            | 1.4%<br>(-2.3-6%)                    | 1.2%<br>(-3.4-6.8%)                 | 120<br>(-360-710)   | 910<br>(-1600-4000)      |
| Austria  | 2016 | Female | 95 plus  | 76%<br>(61-87%)                | 24%<br>(13-39%)          | 2.5<br>(1.3-4.2)                            | 1.1%<br>(-3.4-6.8%)                  | 0.83%<br>(-4.6-7.7%)                | 24<br>(-130-220)    | 130<br>(-400-780)        |
| Austria  | 2016 | Male   | All Ages | 89%<br>(87-91%)                | 11%<br>(8.7-13%)         | 4.7<br>(3.5-6.1)                            | 11%<br>(8-14%)                       | 12%<br>(7-16%)                      | 4600<br>(2700-6300) | 120000<br>(93000-160000) |
| Austria  | 2016 | Male   | 15 to 19 | 81%<br>(73-88%)                | 19%<br>(12-27%)          | 2.7<br>(1.7-4.1)                            | 6.2%<br>(4-8.6%)                     | 13%<br>(6.4-20%)                    | 13<br>(6.4-20)      | 1500<br>(940-2100)       |
| Austria  | 2016 | Male   | 20 to 24 | 87%<br>(78-93%)                | 13%<br>(6.8-22%)         | 4<br>(2.5-5.9)                              | 12%<br>(8.7-15%)                     | 18%<br>(10-27%)                     | 31<br>(17-46)       | 4000<br>(2800-5300)      |
| Austria  | 2016 | Male   | 25 to 29 | 89%<br>(82-95%)                | 11%<br>(5.4-18%)         | 4.1<br>(2.7-6)                              | 11%<br>(7.8-14%)                     | 18%<br>(10-27%)                     | 31<br>(17-46)       | 3800<br>(2700-5100)      |
| Austria  | 2016 | Male   | 30 to 34 | 91%<br>(83-96%)                | 8.9%<br>(4.2-17%)        | 4.4<br>(2.9-6.4)                            | 9.6%<br>(6.9-13%)                    | 20%<br>(12-28%)                     | 39<br>(24-55)       | 3800<br>(2700-5000)      |
| Austria  | 2016 | Male   | 35 to 39 | 92%<br>(85-96%)                | 7.9%<br>(3.8-15%)        | 4.8<br>(3.1-7.1)                            | 10%<br>(7.1-13%)                     | 22%<br>(14-30%)                     | 51<br>(34-70)       | 3900<br>(2800-5100)      |
| Austria  | 2016 | Male   | 40 to 44 | 92%<br>(86-96%)                | 7.6%<br>(3.7-14%)        | 5.5<br>(3.7-8)                              | 12%<br>(8.5-15%)                     | 24%<br>(17-31%)                     | 93<br>(67-120)      | 5600<br>(4200-7200)      |
| Austria  | 2016 | Male   | 45 to 49 | 92%<br>(87-96%)                | 7.6%<br>(4.1-13%)        | 6.4<br>(4.5-9)                              | 14%<br>(11-18%)                      | 25%<br>(19-31%)                     | 210<br>(160-270)    | 11000<br>(8200-13000)    |
| Austria  | 2016 | Male   | 50 to 54 | 93%<br>(89-96%)                | 6.9%<br>(4-11%)          | 7<br>(4.9-9.8)                              | 16%<br>(12-19%)                      | 25%<br>(19-30%)                     | 370<br>(280-450)    | 16000<br>(12000-19000)   |
| Austria  | 2016 | Male   | 55 to 59 | 94%<br>(91-96%)                | 5.9%<br>(3.8-8.8%)       | 7.2<br>(5-9.8)                              | 15%<br>(12-19%)                      | 22%<br>(17-27%)                     | 450<br>(340-540)    | 16000<br>(12000-19000)   |
| Austria  | 2016 | Male   | 60 to 64 | 95%<br>(91-97%)                | 5.5%<br>(3.4-8.6%)       | 7<br>(4.7-9.9)                              | 14%<br>(10-18%)                      | 19%<br>(14-23%)                     | 470<br>(340-590)    | 14000<br>(11000-18000)   |
| Austria  | 2016 | Male   | 65 to 69 | 94%<br>(91-97%)                | 5.5%<br>(3.4-8.7%)       | 6.4<br>(4.5-8.7)                            | 12%<br>(8.5-16%)                     | 16%<br>(11-20%)                     | 520<br>(360-670)    | 13000<br>(9200-17000)    |
| Austria  | 2016 | Male   | 70 to 74 | 94%<br>(91-96%)                | 5.7%<br>(3.7-8.8%)       | 5.8<br>(4-8.2)                              | 9.8%<br>(5.9-14%)                    | 12%<br>(7.1-17%)                    | 610<br>(360-890)    | 13000<br>(7600-19000)    |
| Austria  | 2016 | Male   | 75 to 79 | 94%<br>(90-96%)                | 6.2%<br>(3.5-10%)        | 5.4<br>(3.6-7.8)                            | 8%<br>(3.8-12%)                      | 9.3%<br>(4.2-15%)                   | 490<br>(220-790)    | 8200<br>(3900-13000)     |
| Austria  | 2016 | Male   | 80 to 84 | 93%<br>(88-96%)                | 7.3%<br>(3.9-12%)        | 5.1<br>(3.5-7.3)                            | 7%<br>(2.5-12%)                      | 7.7%<br>(2.4-14%)                   | 480<br>(150-830)    | 5900<br>(2100-9700)      |
| Austria  | 2016 | Male   | 85 to 89 | 92%<br>(86-95%)                | 8.5%<br>(5-14%)          | 4.9<br>(3.2-7.3)                            | 6.2%<br>(1.3-11%)                    | 6.6%<br>(0.78-12%)                  | 430<br>(51-810)     | 3700<br>(780-6600)       |
| Austria  | 2016 | Male   | 90 to 94 | 91%<br>(86-95%)                | 8.9%<br>(5-14%)          | 4.8<br>(2.9-7.5)                            | 5.5%<br>(0.26-11%)                   | 5.8%<br>(-0.4-12%)                  | 230<br>(-15-470)    | 1300<br>(63-2600)        |

| Location | Year | Sex    | Age      | Prevalence of current drinkers | Prevalence of abstainers | Population average of standard drinks daily | Percent of total attributable deaths | Percent of total attributable DALYs | Attributable deaths | Attributable DALYs        |
|----------|------|--------|----------|--------------------------------|--------------------------|---------------------------------------------|--------------------------------------|-------------------------------------|---------------------|---------------------------|
| Austria  | 2016 | Male   | 95 plus  | 90%<br>(83-96%)                | 9.5%<br>(4.5-17%)        | 4.6<br>(2.6-7.8)                            | 5.3%<br>(-0.75-12%)                  | 5.5%<br>(-1.7-13%)                  | 39<br>(-12-95)      | 150<br>(-22-340)          |
| Belgium  | 1990 | Female | All Ages | 80%<br>(77-83%)                | 20%<br>(17-23%)          | 2<br>(1.9-2.2)                              | 3.2%<br>(1.8-4.6%)                   | 2.9%<br>(0.3-5.6%)                  | 1500<br>(160-2900)  | 47000<br>(27000-67000)    |
| Belgium  | 1990 | Female | 15 to 19 | 77%<br>(68-84%)                | 23%<br>(16-32%)          | 1.6<br>(1.2-2.1)                            | 2.6%<br>(1.5-4%)                     | 8.3%<br>(4-13%)                     | 8.7<br>(4.2-14)     | 910<br>(540-1300)         |
| Belgium  | 1990 | Female | 20 to 24 | 83%<br>(73-91%)                | 17%<br>(9.4-27%)         | 1.8<br>(1.3-2.6)                            | 3.5%<br>(2.2-4.9%)                   | 8.7%<br>(4.2-13%)                   | 14<br>(7-22)        | 1600<br>(1000-2300)       |
| Belgium  | 1990 | Female | 25 to 29 | 84%<br>(73-92%)                | 16%<br>(8.1-27%)         | 1.7<br>(1.2-2.3)                            | 2.9%<br>(1.8-4.1%)                   | 8.3%<br>(4.1-13%)                   | 15<br>(7.3-23)      | 1600<br>(1000-2200)       |
| Belgium  | 1990 | Female | 30 to 34 | 84%<br>(73-92%)                | 16%<br>(8.3-27%)         | 1.9<br>(1.4-2.5)                            | 3.1%<br>(2-4.4%)                     | 9.4%<br>(5.5-13%)                   | 24<br>(14-35)       | 1900<br>(1200-2600)       |
| Belgium  | 1990 | Female | 35 to 39 | 83%<br>(75-91%)                | 17%<br>(9.5-25%)         | 2.3<br>(1.7-2.9)                            | 4.2%<br>(2.8-5.7%)                   | 12%<br>(8.1-16%)                    | 44<br>(29-58)       | 2700<br>(1900-3600)       |
| Belgium  | 1990 | Female | 40 to 44 | 84%<br>(75-90%)                | 16%<br>(9.6-25%)         | 2.7<br>(2.1-3.3)                            | 5.7%<br>(4.1-7.4%)                   | 14%<br>(10-17%)                     | 80<br>(58-99)       | 4200<br>(3100-5200)       |
| Belgium  | 1990 | Female | 45 to 49 | 85%<br>(79-90%)                | 15%<br>(9.5-21%)         | 3.2<br>(2.5-4.1)                            | 6.8%<br>(5-8.7%)                     | 15%<br>(12-18%)                     | 97<br>(75-120)      | 4400<br>(3400-5500)       |
| Belgium  | 1990 | Female | 50 to 54 | 87%<br>(81-92%)                | 13%<br>(8.2-19%)         | 3.4<br>(2.6-4.3)                            | 6.9%<br>(5-8.8%)                     | 14%<br>(11-17%)                     | 130<br>(100-160)    | 5200<br>(4000-6500)       |
| Belgium  | 1990 | Female | 55 to 59 | 89%<br>(84-93%)                | 11%<br>(7.4-16%)         | 3.3<br>(2.6-4.1)                            | 6.5%<br>(4.7-8.2%)                   | 12%<br>(9-14%)                      | 180<br>(140-220)    | 6100<br>(4600-7700)       |
| Belgium  | 1990 | Female | 60 to 64 | 89%<br>(83-92%)                | 11%<br>(7.6-17%)         | 3.2<br>(2.4-4)                              | 5.1%<br>(3-7.2%)                     | 8.2%<br>(5.2-11%)                   | 190<br>(120-270)    | 5600<br>(3400-8000)       |
| Belgium  | 1990 | Female | 65 to 69 | 87%<br>(81-91%)                | 13%<br>(8.9-19%)         | 2.9<br>(2.3-3.5)                            | 3.7%<br>(1.6-5.9%)                   | 5.6%<br>(2.6-8.6%)                  | 210<br>(98-320)     | 5000<br>(2100-7900)       |
| Belgium  | 1990 | Female | 70 to 74 | 84%<br>(77-88%)                | 16%<br>(12-23%)          | 2.6<br>(1.9-3.3)                            | 2.4%<br>(-0.35-5%)                   | 3.3%<br>(-0.6-6.9%)                 | 130<br>(-25-280)    | 2600<br>(-410-5400)       |
| Belgium  | 1990 | Female | 75 to 79 | 80%<br>(70-87%)                | 20%<br>(13-30%)          | 2.4<br>(1.7-3.1)                            | 1.3%<br>(-1.6-4.2%)                  | 1.6%<br>(-2.2-5.3%)                 | 130<br>(-180-440)   | 2100<br>(-2500-6600)      |
| Belgium  | 1990 | Female | 80 to 84 | 76%<br>(65-84%)                | 24%<br>(16-35%)          | 2.3<br>(1.7-2.9)                            | 1%<br>(-1.6-3.6%)                    | 1.1%<br>(-2.2-4.3%)                 | 120<br>(-240-460)   | 1500<br>(-2300-5300)      |
| Belgium  | 1990 | Female | 85 to 89 | 73%<br>(62-82%)                | 27%<br>(18-38%)          | 2.2<br>(1.5-3)                              | 1%<br>(-1.4-3.5%)                    | 1%<br>(-2-4.1%)                     | 100<br>(-210-420)   | 960<br>(-1400-3300)       |
| Belgium  | 1990 | Female | 90 to 94 | 72%<br>(60-82%)                | 28%<br>(18-40%)          | 2.2<br>(1.4-3.1)                            | 0.88%<br>(-1.8-3.9%)                 | 0.79%<br>(-2.4-4.3%)                | 43<br>(-130-230)    | 300<br>(-590-1300)        |
| Belgium  | 1990 | Female | 95 plus  | 71%<br>(56-83%)                | 29%<br>(17-44%)          | 2.2<br>(1.3-3.4)                            | 0.95%<br>(-2.3-4.7%)                 | 0.81%<br>(-3-5.3%)                  | 14<br>(-50-89)      | 67<br>(-150-330)          |
| Belgium  | 1990 | Male   | All Ages | 88%<br>(85-90%)                | 12%<br>(9.8-15%)         | 3.5<br>(3.3-3.7)                            | 7.9%<br>(6.3-9.5%)                   | 7.1%<br>(4.7-9.4%)                  | 3700<br>(2500-5000) | 130000<br>(100000-160000) |
| Belgium  | 1990 | Male   | 15 to 19 | 80%<br>(71-86%)                | 20%<br>(14-29%)          | 2.7<br>(2-3.4)                              | 7.9%<br>(4.7-11%)                    | 14%<br>(7.2-21%)                    | 41<br>(21-60)       | 3500<br>(2100-5000)       |
| Belgium  | 1990 | Male   | 20 to 24 | 87%<br>(78-93%)                | 13%<br>(6.8-22%)         | 4<br>(3-5)                                  | 14%<br>(9.4-19%)                     | 21%<br>(12-29%)                     | 100<br>(61-140)     | 8500<br>(5600-11000)      |

| Location | Year | Sex    | Age      | Prevalence of current drinkers | Prevalence of abstainers | Population average of standard drinks daily | Percent of total attributable deaths | Percent of total attributable DALYs | Attributable deaths | Attributable DALYs     |
|----------|------|--------|----------|--------------------------------|--------------------------|---------------------------------------------|--------------------------------------|-------------------------------------|---------------------|------------------------|
| Belgium  | 1990 | Male   | 25 to 29 | 90%<br>(81-95%)                | 10%<br>(5.2-19%)         | 3.2<br>(2.5-4)                              | 11%<br>(7.6-15%)                     | 18%<br>(10-25%)                     | 89<br>(51-130)      | 7400<br>(4900-9900)    |
| Belgium  | 1990 | Male   | 30 to 34 | 91%<br>(83-96%)                | 8.6%<br>(4-17%)          | 3.3<br>(2.6-4.1)                            | 10%<br>(6.9-14%)                     | 17%<br>(9.9-24%)                    | 93<br>(54-130)      | 6800<br>(4500-8900)    |
| Belgium  | 1990 | Male   | 35 to 39 | 93%<br>(86-97%)                | 7.5%<br>(3.1-14%)        | 4.2<br>(3.3-5.1)                            | 12%<br>(8.2-15%)                     | 20%<br>(14-26%)                     | 130<br>(89-170)     | 8000<br>(5800-10000)   |
| Belgium  | 1990 | Male   | 40 to 44 | 93%<br>(87-97%)                | 6.8%<br>(3.1-13%)        | 4.9<br>(3.9-5.8)                            | 12%<br>(9.2-16%)                     | 20%<br>(15-25%)                     | 190<br>(140-240)    | 10000<br>(7600-13000)  |
| Belgium  | 1990 | Male   | 45 to 49 | 94%<br>(88-96%)                | 6.5%<br>(3.6-12%)        | 5.3<br>(4.4-6.4)                            | 13%<br>(10-16%)                      | 19%<br>(15-24%)                     | 220<br>(170-270)    | 10000<br>(7900-13000)  |
| Belgium  | 1990 | Male   | 50 to 54 | 94%<br>(90-97%)                | 5.8%<br>(3.3-9.8%)       | 5.7<br>(4.7-6.7)                            | 12%<br>(9.3-15%)                     | 17%<br>(13-21%)                     | 290<br>(220-360)    | 12000<br>(9200-15000)  |
| Belgium  | 1990 | Male   | 55 to 59 | 95%<br>(93-97%)                | 4.8%<br>(2.9-7.5%)       | 5.9<br>(5-6.9)                              | 12%<br>(8.7-14%)                     | 15%<br>(11-18%)                     | 440<br>(320-550)    | 15000<br>(12000-19000) |
| Belgium  | 1990 | Male   | 60 to 64 | 95%<br>(93-97%)                | 4.5%<br>(2.5-7.4%)       | 5.7<br>(4.7-6.9)                            | 9.6%<br>(6.6-12%)                    | 11%<br>(7.6-15%)                    | 540<br>(360-700)    | 16000<br>(11000-21000) |
| Belgium  | 1990 | Male   | 65 to 69 | 95%<br>(92-97%)                | 5%<br>(2.9-7.9%)         | 5<br>(4.2-5.7)                              | 7.1%<br>(4.4-9.8%)                   | 8.1%<br>(4.7-11%)                   | 560<br>(330-770)    | 14000<br>(8500-19000)  |
| Belgium  | 1990 | Male   | 70 to 74 | 94%<br>(91-96%)                | 6%<br>(3.8-9.3%)         | 4.2<br>(3.5-5.1)                            | 4.9%<br>(2-7.6%)                     | 5.3%<br>(2-8.5%)                    | 320<br>(120-510)    | 6500<br>(2700-10000)   |
| Belgium  | 1990 | Male   | 75 to 79 | 92%<br>(88-96%)                | 7.6%<br>(4.3-12%)        | 3.7<br>(2.9-4.6)                            | 3.5%<br>(0.86-6.3%)                  | 3.7%<br>(0.54-6.8%)                 | 330<br>(50-620)     | 5300<br>(1300-9600)    |
| Belgium  | 1990 | Male   | 80 to 84 | 91%<br>(85-95%)                | 8.9%<br>(5-15%)          | 3.5<br>(2.7-4.2)                            | 2.9%<br>(0.47-5.6%)                  | 3%<br>(0.21-6.1%)                   | 250<br>(18-500)     | 3000<br>(500-5700)     |
| Belgium  | 1990 | Male   | 85 to 89 | 90%<br>(84-94%)                | 9.6%<br>(5.6-16%)        | 3.2<br>(2.5-4)                              | 2.3%<br>(-0.03-4.8%)                 | 2.3%<br>(-0.37-5.2%)                | 120<br>(-20-280)    | 1100<br>(-14-2300)     |
| Belgium  | 1990 | Male   | 90 to 94 | 91%<br>(85-95%)                | 9.4%<br>(5.4-15%)        | 3.1<br>(2.2-4)                              | 1.6%<br>(-0.87-4.4%)                 | 1.5%<br>(-1.5-4.6%)                 | 31<br>(-31-96)      | 200<br>(-110-540)      |
| Belgium  | 1990 | Male   | 95 plus  | 91%<br>(84-96%)                | 9%<br>(4.2-16%)          | 2.9<br>(1.9-4.1)                            | 1.2%<br>(-1.6-4.7%)                  | 0.98%<br>(-2.3-5%)                  | 4.9<br>(-11-25)     | 25<br>(-31-93)         |
| Belgium  | 1995 | Female | All Ages | 81%<br>(77-84%)                | 19%<br>(16-23%)          | 1.9<br>(1.7-2.1)                            | 3.1%<br>(1.8-4.4%)                   | 2.7%<br>(0.38-5.1%)                 | 1400<br>(200-2700)  | 44000<br>(27000-62000) |
| Belgium  | 1995 | Female | 15 to 19 | 77%<br>(69-84%)                | 23%<br>(16-31%)          | 1.5<br>(1.1-2)                              | 2.6%<br>(1.5-3.8%)                   | 7.9%<br>(3.9-12%)                   | 8.1<br>(4-13)       | 840<br>(490-1200)      |
| Belgium  | 1995 | Female | 20 to 24 | 84%<br>(73-91%)                | 16%<br>(9.2-27%)         | 1.7<br>(1.2-2.4)                            | 3.3%<br>(2.1-4.7%)                   | 8.5%<br>(4.2-13%)                   | 11<br>(5.6-18)      | 1400<br>(860-2000)     |
| Belgium  | 1995 | Female | 25 to 29 | 85%<br>(73-92%)                | 15%<br>(7.9-27%)         | 1.6<br>(1.1-2.2)                            | 2.7%<br>(1.7-3.8%)                   | 8%<br>(4-12%)                       | 13<br>(6.2-20)      | 1400<br>(910-1900)     |
| Belgium  | 1995 | Female | 30 to 34 | 84%<br>(72-92%)                | 16%<br>(8.2-28%)         | 1.7<br>(1.3-2.3)                            | 2.8%<br>(1.8-4%)                     | 8.9%<br>(5.1-13%)                   | 22<br>(12-31)       | 1700<br>(1100-2400)    |
| Belgium  | 1995 | Female | 35 to 39 | 83%<br>(74-91%)                | 17%<br>(9.1-26%)         | 2.1<br>(1.6-2.8)                            | 3.9%<br>(2.6-5.4%)                   | 12%<br>(7.8-16%)                    | 42<br>(28-56)       | 2700<br>(1900-3500)    |
| Belgium  | 1995 | Female | 40 to 44 | 84%<br>(75-91%)                | 16%<br>(9.5-25%)         | 2.5<br>(1.9-3.1)                            | 5.4%<br>(3.9-7.1%)                   | 14%<br>(10-17%)                     | 77<br>(58-97)       | 4100<br>(3100-5100)    |

| Location | Year | Sex    | Age      | Prevalence of current drinkers | Prevalence of abstainers | Population average of standard drinks daily | Percent of total attributable deaths | Percent of total attributable DALYs | Attributable deaths | Attributable DALYs       |
|----------|------|--------|----------|--------------------------------|--------------------------|---------------------------------------------|--------------------------------------|-------------------------------------|---------------------|--------------------------|
| Belgium  | 1995 | Female | 45 to 49 | 86%<br>(78-91%)                | 14%<br>(9.4-22%)         | 3<br>(2.3-3.8)                              | 6.5%<br>(4.8-8.3%)                   | 15%<br>(11-18%)                     | 120<br>(89-140)     | 5300<br>(4100-6600)      |
| Belgium  | 1995 | Female | 50 to 54 | 87%<br>(81-92%)                | 13%<br>(8.2-19%)         | 3.2<br>(2.5-4)                              | 6.8%<br>(5-8.5%)                     | 14%<br>(11-16%)                     | 120<br>(96-150)     | 4900<br>(3800-6100)      |
| Belgium  | 1995 | Female | 55 to 59 | 89%<br>(84-92%)                | 11%<br>(7.6-16%)         | 3.1<br>(2.5-3.9)                            | 6.2%<br>(4.5-8%)                     | 11%<br>(8.9-14%)                    | 150<br>(120-190)    | 5300<br>(3900-6700)      |
| Belgium  | 1995 | Female | 60 to 64 | 89%<br>(83-92%)                | 11%<br>(7.7-17%)         | 2.9<br>(2.3-3.7)                            | 4.8%<br>(2.9-6.7%)                   | 8.2%<br>(5.4-11%)                   | 170<br>(110-230)    | 5100<br>(3100-7100)      |
| Belgium  | 1995 | Female | 65 to 69 | 87%<br>(81-91%)                | 13%<br>(8.9-19%)         | 2.7<br>(2.1-3.3)                            | 3.5%<br>(1.5-5.3%)                   | 5.5%<br>(2.6-8%)                    | 180<br>(86-270)     | 4400<br>(1900-6600)      |
| Belgium  | 1995 | Female | 70 to 74 | 84%<br>(77-88%)                | 16%<br>(12-23%)          | 2.4<br>(1.8-3)                              | 2.2%<br>(-0.27-4.5%)                 | 3.3%<br>(-0.25-6.4%)                | 180<br>(-14-350)    | 3400<br>(-420-6800)      |
| Belgium  | 1995 | Female | 75 to 79 | 80%<br>(70-87%)                | 20%<br>(13-30%)          | 2.2<br>(1.6-2.9)                            | 1.2%<br>(-1.3-3.6%)                  | 1.6%<br>(-1.6-4.6%)                 | 91<br>(-90-260)     | 1400<br>(-1400-4100)     |
| Belgium  | 1995 | Female | 80 to 84 | 76%<br>(66-85%)                | 24%<br>(15-34%)          | 2.1<br>(1.5-2.7)                            | 0.83%<br>(-1.5-3.1%)                 | 0.94%<br>(-1.9-3.8%)                | 99<br>(-200-400)    | 1200<br>(-2200-4500)     |
| Belgium  | 1995 | Female | 85 to 89 | 73%<br>(62-82%)                | 27%<br>(18-38%)          | 2.1<br>(1.4-2.8)                            | 0.73%<br>(-1.5-3%)                   | 0.73%<br>(-2-3.4%)                  | 81<br>(-220-370)    | 770<br>(-1600-3100)      |
| Belgium  | 1995 | Female | 90 to 94 | 72%<br>(60-82%)                | 28%<br>(18-40%)          | 2.1<br>(1.3-2.9)                            | 0.65%<br>(-1.8-3.2%)                 | 0.56%<br>(-2.4-3.6%)                | 39<br>(-160-250)    | 280<br>(-780-1400)       |
| Belgium  | 1995 | Female | 95 plus  | 71%<br>(56-83%)                | 29%<br>(17-44%)          | 2.1<br>(1.2-3.1)                            | 0.71%<br>(-2-3.8%)                   | 0.57%<br>(-2.6-4.1%)                | 13<br>(-58-95)      | 67<br>(-190-370)         |
| Belgium  | 1995 | Male   | All Ages | 88%<br>(85-90%)                | 12%<br>(9.5-15%)         | 3.3<br>(3-3.6)                              | 7.6%<br>(6-9.3%)                     | 6.5%<br>(4.5-8.8%)                  | 3500<br>(2300-4700) | 120000<br>(96000-150000) |
| Belgium  | 1995 | Male   | 15 to 19 | 80%<br>(71-86%)                | 20%<br>(14-29%)          | 2.4<br>(1.8-3.1)                            | 7.3%<br>(4.2-10%)                    | 13%<br>(6.7-20%)                    | 32<br>(16-47)       | 2800<br>(1700-4100)      |
| Belgium  | 1995 | Male   | 20 to 24 | 87%<br>(78-93%)                | 13%<br>(7-22%)           | 3.6<br>(2.8-4.7)                            | 13%<br>(9.1-18%)                     | 20%<br>(11-27%)                     | 84<br>(50-120)      | 7300<br>(4900-9800)      |
| Belgium  | 1995 | Male   | 25 to 29 | 90%<br>(81-95%)                | 10%<br>(5-19%)           | 3<br>(2.3-3.8)                              | 11%<br>(7.1-15%)                     | 17%<br>(9-24%)                      | 77<br>(40-110)      | 6500<br>(4300-8800)      |
| Belgium  | 1995 | Male   | 30 to 34 | 92%<br>(83-96%)                | 8.5%<br>(3.8-17%)        | 3<br>(2.3-3.9)                              | 9.5%<br>(6.2-13%)                    | 16%<br>(8.8-23%)                    | 87<br>(47-120)      | 6500<br>(4200-8800)      |
| Belgium  | 1995 | Male   | 35 to 39 | 93%<br>(86-97%)                | 7.5%<br>(3.3-14%)        | 3.9<br>(3-4.8)                              | 11%<br>(7.8-14%)                     | 19%<br>(13-25%)                     | 130<br>(90-180)     | 8400<br>(6100-11000)     |
| Belgium  | 1995 | Male   | 40 to 44 | 93%<br>(87-97%)                | 6.8%<br>(3.1-13%)        | 4.5<br>(3.6-5.5)                            | 12%<br>(9.3-15%)                     | 20%<br>(15-25%)                     | 190<br>(140-250)    | 10000<br>(8000-13000)    |
| Belgium  | 1995 | Male   | 45 to 49 | 94%<br>(88-96%)                | 6.5%<br>(3.5-12%)        | 4.9<br>(4.1-5.9)                            | 13%<br>(9.9-16%)                     | 19%<br>(15-23%)                     | 280<br>(210-340)    | 13000<br>(10000-16000)   |
| Belgium  | 1995 | Male   | 50 to 54 | 94%<br>(90-97%)                | 5.8%<br>(3.2-10%)        | 5.3<br>(4.3-6.2)                            | 12%<br>(9.6-15%)                     | 17%<br>(13-21%)                     | 290<br>(230-360)    | 12000<br>(9400-15000)    |
| Belgium  | 1995 | Male   | 55 to 59 | 95%<br>(93-97%)                | 4.8%<br>(2.8-7.4%)       | 5.5<br>(4.6-6.4)                            | 11%<br>(8.4-14%)                     | 14%<br>(11-18%)                     | 370<br>(280-470)    | 13000<br>(10000-16000)   |
| Belgium  | 1995 | Male   | 60 to 64 | 96%<br>(93-98%)                | 4.5%<br>(2.5-7.3%)       | 5.3<br>(4.3-6.4)                            | 8.9%<br>(6.2-12%)                    | 11%<br>(7.3-14%)                    | 450<br>(300-600)    | 14000<br>(9400-18000)    |

| Location | Year | Sex    | Age      | Prevalence of current drinkers | Prevalence of abstainers | Population average of standard drinks daily | Percent of total attributable deaths | Percent of total attributable DALYs | Attributable deaths | Attributable DALYs     |
|----------|------|--------|----------|--------------------------------|--------------------------|---------------------------------------------|--------------------------------------|-------------------------------------|---------------------|------------------------|
| Belgium  | 1995 | Male   | 65 to 69 | 95%<br>(92-97%)                | 4.9%<br>(2.8-8.3%)       | 4.6<br>(3.8-5.4)                            | 6.5%<br>(3.9-8.8%)                   | 7.5%<br>(4.3-10%)                   | 460<br>(270-640)    | 12000<br>(7000-16000)  |
| Belgium  | 1995 | Male   | 70 to 74 | 94%<br>(91-96%)                | 5.9%<br>(3.7-9.2%)       | 3.9<br>(3.2-4.8)                            | 4.4%<br>(2-6.9%)                     | 4.8%<br>(2-7.8%)                    | 410<br>(170-670)    | 8400<br>(3900-14000)   |
| Belgium  | 1995 | Male   | 75 to 79 | 93%<br>(88-96%)                | 7.5%<br>(4.2-12%)        | 3.5<br>(2.7-4.3)                            | 3.1%<br>(0.86-5.7%)                  | 3.3%<br>(0.63-6.2%)                 | 220<br>(42-430)     | 3600<br>(1000-6600)    |
| Belgium  | 1995 | Male   | 80 to 84 | 91%<br>(85-95%)                | 8.8%<br>(4.9-15%)        | 3.2<br>(2.6-3.9)                            | 2.5%<br>(0.4-5%)                     | 2.5%<br>(0.15-5.4%)                 | 220<br>(13-460)     | 2600<br>(420-5200)     |
| Belgium  | 1995 | Male   | 85 to 89 | 90%<br>(84-94%)                | 9.5%<br>(5.6-16%)        | 3<br>(2.3-3.8)                              | 2%<br>(-0.046-4.4%)                  | 2%<br>(-0.42-4.8%)                  | 110<br>(-25-280)    | 1000<br>(-23-2300)     |
| Belgium  | 1995 | Male   | 90 to 94 | 91%<br>(85-95%)                | 9.4%<br>(5.3-15%)        | 2.9<br>(2-3.7)                              | 1.3%<br>(-0.89-3.9%)                 | 1.2%<br>(-1.5-4.1%)                 | 29<br>(-36-100)     | 200<br>(-140-580)      |
| Belgium  | 1995 | Male   | 95 plus  | 91%<br>(83-96%)                | 9.1%<br>(4.2-17%)        | 2.7<br>(1.7-3.9)                            | 1%<br>(-1.4-4%)                      | 0.72%<br>(-2.1-4.2%)                | 4.4<br>(-13-26)     | 25<br>(-34-100)        |
| Belgium  | 2000 | Female | All Ages | 80%<br>(77-83%)                | 20%<br>(17-23%)          | 1.9<br>(1.7-2.2)                            | 3.1%<br>(1.9-4.4%)                   | 2.8%<br>(0.6-5%)                    | 1500<br>(320-2700)  | 45000<br>(28000-62000) |
| Belgium  | 2000 | Female | 15 to 19 | 74%<br>(65-82%)                | 26%<br>(18-35%)          | 1.4<br>(0.98-1.9)                           | 2.4%<br>(1.4-3.5%)                   | 7.8%<br>(4-12%)                     | 7<br>(3.5-11)       | 750<br>(450-1100)      |
| Belgium  | 2000 | Female | 20 to 24 | 81%<br>(69-90%)                | 19%<br>(10-31%)          | 1.6<br>(1.1-2.3)                            | 3.2%<br>(2.1-4.5%)                   | 8.4%<br>(4.1-13%)                   | 10<br>(4.9-16)      | 1300<br>(780-1800)     |
| Belgium  | 2000 | Female | 25 to 29 | 84%<br>(71-92%)                | 16%<br>(8.3-29%)         | 1.6<br>(1.1-2.2)                            | 2.6%<br>(1.6-3.6%)                   | 8.3%<br>(4.1-13%)                   | 11<br>(5.4-17)      | 1200<br>(790-1700)     |
| Belgium  | 2000 | Female | 30 to 34 | 84%<br>(73-92%)                | 16%<br>(8.3-27%)         | 1.7<br>(1.2-2.3)                            | 2.7%<br>(1.8-3.7%)                   | 9.1%<br>(5.3-13%)                   | 18<br>(11-26)       | 1500<br>(1000-2100)    |
| Belgium  | 2000 | Female | 35 to 39 | 84%<br>(76-91%)                | 16%<br>(8.9-24%)         | 2.1<br>(1.6-2.8)                            | 3.7%<br>(2.5-5.2%)                   | 12%<br>(7.8-16%)                    | 40<br>(26-53)       | 2600<br>(1800-3400)    |
| Belgium  | 2000 | Female | 40 to 44 | 84%<br>(76-91%)                | 16%<br>(9.2-24%)         | 2.5<br>(2-3.2)                              | 5%<br>(3.5-6.6%)                     | 14%<br>(10-17%)                     | 74<br>(54-92)       | 3900<br>(2900-5000)    |
| Belgium  | 2000 | Female | 45 to 49 | 86%<br>(79-91%)                | 14%<br>(9.5-21%)         | 3<br>(2.3-3.8)                              | 6.4%<br>(4.7-8.1%)                   | 15%<br>(12-18%)                     | 120<br>(91-140)     | 5300<br>(4100-6500)    |
| Belgium  | 2000 | Female | 50 to 54 | 88%<br>(82-92%)                | 12%<br>(8.2-18%)         | 3.2<br>(2.5-4.1)                            | 6.9%<br>(5.2-8.8%)                   | 14%<br>(11-17%)                     | 160<br>(120-190)    | 6200<br>(4800-7600)    |
| Belgium  | 2000 | Female | 55 to 59 | 89%<br>(85-93%)                | 11%<br>(7.5-15%)         | 3.1<br>(2.5-3.9)                            | 6.3%<br>(4.7-8%)                     | 12%<br>(9.3-14%)                    | 150<br>(120-180)    | 5100<br>(3900-6400)    |
| Belgium  | 2000 | Female | 60 to 64 | 88%<br>(84-92%)                | 12%<br>(7.9-16%)         | 2.9<br>(2.2-3.7)                            | 5%<br>(3.3-6.8%)                     | 8.7%<br>(6.2-11%)                   | 160<br>(110-210)    | 4700<br>(3100-6300)    |
| Belgium  | 2000 | Female | 65 to 69 | 86%<br>(81-91%)                | 14%<br>(9.4-19%)         | 2.6<br>(2.1-3.3)                            | 3.6%<br>(1.9-5.3%)                   | 5.9%<br>(3.4-8.3%)                  | 170<br>(100-250)    | 4100<br>(2200-6100)    |
| Belgium  | 2000 | Female | 70 to 74 | 83%<br>(76-88%)                | 17%<br>(12-24%)          | 2.3<br>(1.7-3)                              | 2.4%<br>(0.29-4.6%)                  | 3.6%<br>(0.56-6.6%)                 | 180<br>(26-320)     | 3300<br>(400-6300)     |
| Belgium  | 2000 | Female | 75 to 79 | 78%<br>(70-86%)                | 22%<br>(14-30%)          | 2.1<br>(1.5-2.8)                            | 1.4%<br>(-0.69-3.6%)                 | 1.9%<br>(-0.88-4.7%)                | 150<br>(-70-370)    | 2300<br>(-1100-5800)   |
| Belgium  | 2000 | Female | 80 to 84 | 75%<br>(65-84%)                | 25%<br>(16-35%)          | 2<br>(1.5-2.8)                              | 0.94%<br>(-1.3-3.1%)                 | 1.1%<br>(-1.7-3.8%)                 | 88<br>(-130-300)    | 1000<br>(-1400-3400)   |

| Location | Year | Sex    | Age      | Prevalence of current drinkers | Prevalence of abstainers | Population average of standard drinks daily | Percent of total attributable deaths | Percent of total attributable DALYs | Attributable deaths | Attributable DALYs       |
|----------|------|--------|----------|--------------------------------|--------------------------|---------------------------------------------|--------------------------------------|-------------------------------------|---------------------|--------------------------|
| Belgium  | 2000 | Female | 85 to 89 | 73%<br>(62-81%)                | 27%<br>(19-38%)          | 2<br>(1.4-2.8)                              | 0.77%<br>(-1.4-3%)                   | 0.8%<br>(-1.8-3.5%)                 | 91<br>(-210-390)    | 840<br>(-1500-3200)      |
| Belgium  | 2000 | Female | 90 to 94 | 71%<br>(59-81%)                | 29%<br>(19-41%)          | 2<br>(1.3-2.9)                              | 0.64%<br>(-1.6-3.1%)                 | 0.57%<br>(-2.1-3.6%)                | 46<br>(-170-280)    | 330<br>(-840-1600)       |
| Belgium  | 2000 | Female | 95 plus  | 71%<br>(55-82%)                | 29%<br>(18-45%)          | 2<br>(1.1-3.1)                              | 0.71%<br>(-1.8-3.8%)                 | 0.6%<br>(-2.4-4.2%)                 | 19<br>(-75-140)     | 95<br>(-240-500)         |
| Belgium  | 2000 | Male   | All Ages | 89%<br>(87-91%)                | 11%<br>(8.8-13%)         | 3.3<br>(2.9-3.7)                            | 7.8%<br>(6-9.6%)                     | 6.8%<br>(4.4-9.2%)                  | 3500<br>(2400-4800) | 120000<br>(96000-150000) |
| Belgium  | 2000 | Male   | 15 to 19 | 78%<br>(70-85%)                | 22%<br>(15-30%)          | 2.4<br>(1.7-3)                              | 7%<br>(4.2-10%)                      | 13%<br>(6.6-20%)                    | 29<br>(15-44)       | 2700<br>(1600-3800)      |
| Belgium  | 2000 | Male   | 20 to 24 | 88%<br>(80-93%)                | 12%<br>(6.6-20%)         | 3.6<br>(2.7-4.7)                            | 13%<br>(8.9-18%)                     | 20%<br>(12-27%)                     | 76<br>(44-110)      | 6600<br>(4400-8900)      |
| Belgium  | 2000 | Male   | 25 to 29 | 91%<br>(84-95%)                | 9.1%<br>(4.8-16%)        | 3<br>(2.3-3.8)                              | 11%<br>(7-14%)                       | 17%<br>(9.3-24%)                    | 68<br>(37-97)       | 5900<br>(3900-7900)      |
| Belgium  | 2000 | Male   | 30 to 34 | 92%<br>(86-96%)                | 7.6%<br>(3.6-14%)        | 3<br>(2.3-3.9)                              | 9.5%<br>(6.2-13%)                    | 17%<br>(9.1-24%)                    | 78<br>(43-110)      | 5900<br>(3800-7900)      |
| Belgium  | 2000 | Male   | 35 to 39 | 93%<br>(88-97%)                | 6.6%<br>(2.9-12%)        | 3.9<br>(2.9-4.9)                            | 11%<br>(7.8-14%)                     | 20%<br>(13-26%)                     | 130<br>(83-170)     | 8200<br>(5800-11000)     |
| Belgium  | 2000 | Male   | 40 to 44 | 94%<br>(89-97%)                | 5.9%<br>(2.8-11%)        | 4.5<br>(3.6-5.5)                            | 13%<br>(9.4-16%)                     | 21%<br>(16-27%)                     | 200<br>(150-250)    | 11000<br>(8200-13000)    |
| Belgium  | 2000 | Male   | 45 to 49 | 94%<br>(91-97%)                | 5.6%<br>(3.1-9.4%)       | 4.9<br>(4.1-6)                              | 13%<br>(10-17%)                      | 20%<br>(16-25%)                     | 290<br>(230-360)    | 14000<br>(11000-17000)   |
| Belgium  | 2000 | Male   | 50 to 54 | 95%<br>(92-97%)                | 4.9%<br>(2.9-7.9%)       | 5.3<br>(4.3-6.4)                            | 13%<br>(9.8-16%)                     | 18%<br>(14-22%)                     | 380<br>(290-470)    | 15000<br>(12000-19000)   |
| Belgium  | 2000 | Male   | 55 to 59 | 96%<br>(94-97%)                | 4%<br>(2.6-5.9%)         | 5.5<br>(4.5-6.6)                            | 12%<br>(9.1-15%)                     | 16%<br>(12-19%)                     | 380<br>(290-480)    | 13000<br>(10000-17000)   |
| Belgium  | 2000 | Male   | 60 to 64 | 96%<br>(94-98%)                | 3.9%<br>(2.3-6%)         | 5.3<br>(4.3-6.5)                            | 9.5%<br>(6.7-12%)                    | 12%<br>(8.2-16%)                    | 420<br>(290-550)    | 13000<br>(8900-16000)    |
| Belgium  | 2000 | Male   | 65 to 69 | 96%<br>(93-97%)                | 4.4%<br>(2.6-6.7%)       | 4.6<br>(3.8-5.5)                            | 6.8%<br>(4.3-9.3%)                   | 8.1%<br>(4.9-11%)                   | 450<br>(270-630)    | 11000<br>(6900-16000)    |
| Belgium  | 2000 | Male   | 70 to 74 | 95%<br>(92-97%)                | 5.2%<br>(3.5-7.6%)       | 4<br>(3.2-4.9)                              | 4.6%<br>(2.2-7.1%)                   | 5.1%<br>(2.4-8.1%)                  | 390<br>(180-630)    | 8100<br>(3900-13000)     |
| Belgium  | 2000 | Male   | 75 to 79 | 93%<br>(90-96%)                | 6.6%<br>(4-10%)          | 3.5<br>(2.8-4.4)                            | 3.2%<br>(0.88-5.9%)                  | 3.4%<br>(0.77-6.4%)                 | 330<br>(73-620)     | 5300<br>(1500-9500)      |
| Belgium  | 2000 | Male   | 80 to 84 | 92%<br>(87-95%)                | 8%<br>(4.6-13%)          | 3.2<br>(2.6-4)                              | 2.5%<br>(0.28-5%)                    | 2.5%<br>(-0.042-5.4%)               | 170<br>(-2.7-360)   | 2100<br>(240-4200)       |
| Belgium  | 2000 | Male   | 85 to 89 | 91%<br>(86-95%)                | 8.6%<br>(5.1-14%)        | 3<br>(2.3-3.8)                              | 1.9%<br>(-0.29-4.4%)                 | 1.9%<br>(-0.69-4.7%)                | 120<br>(-43-290)    | 1100<br>(-170-2400)      |
| Belgium  | 2000 | Male   | 90 to 94 | 92%<br>(86-95%)                | 8.5%<br>(5.1-14%)        | 2.9<br>(2-3.8)                              | 1.4%<br>(-0.89-4%)                   | 1.2%<br>(-1.4-4.2%)                 | 33<br>(-40-120)     | 230<br>(-150-660)        |
| Belgium  | 2000 | Male   | 95 plus  | 91%<br>(85-96%)                | 8.5%<br>(4-15%)          | 2.7<br>(1.7-3.9)                            | 1.1%<br>(-1.5-4.1%)                  | 0.76%<br>(-2.2-4.2%)                | 5.5<br>(-16-31)     | 31<br>(-43-120)          |
| Belgium  | 2005 | Female | All Ages | 81%<br>(78-83%)                | 19%<br>(17-22%)          | 2.2<br>(1.9-2.4)                            | 3.5%<br>(2.4-4.7%)                   | 3.7%<br>(1.7-5.8%)                  | 1900<br>(850-3000)  | 50000<br>(34000-66000)   |



| Location | Year | Sex    | Age      | Prevalence of current drinkers | Prevalence of abstainers | Population average of standard drinks daily | Percent of total attributable deaths | Percent of total attributable DALYs | Attributable deaths | Attributable DALYs        |
|----------|------|--------|----------|--------------------------------|--------------------------|---------------------------------------------|--------------------------------------|-------------------------------------|---------------------|---------------------------|
| Belgium  | 2005 | Female | 15 to 19 | 77%<br>(70-83%)                | 23%<br>(17-30%)          | 1.6<br>(1.2-2.1)                            | 2.2%<br>(1.3-3.1%)                   | 8.2%<br>(4.2-12%)                   | 5.6<br>(2.9-8.7)    | 660<br>(410-940)          |
| Belgium  | 2005 | Female | 20 to 24 | 82%<br>(71-90%)                | 18%<br>(10-29%)          | 1.9<br>(1.3-2.6)                            | 2.8%<br>(1.9-3.8%)                   | 8.9%<br>(4.4-14%)                   | 7.2<br>(3.6-11)     | 1100<br>(700-1500)        |
| Belgium  | 2005 | Female | 25 to 29 | 84%<br>(73-91%)                | 16%<br>(8.6-27%)         | 1.7<br>(1.2-2.4)                            | 2.5%<br>(1.6-3.4%)                   | 8.6%<br>(4.4-13%)                   | 9.4<br>(4.7-14)     | 1100<br>(730-1500)        |
| Belgium  | 2005 | Female | 30 to 34 | 84%<br>(75-91%)                | 16%<br>(8.7-25%)         | 1.9<br>(1.4-2.5)                            | 2.6%<br>(1.7-3.6%)                   | 9.7%<br>(5.9-14%)                   | 16<br>(9.7-22)      | 1400<br>(930-1900)        |
| Belgium  | 2005 | Female | 35 to 39 | 84%<br>(76-91%)                | 16%<br>(9.4-24%)         | 2.3<br>(1.7-3.1)                            | 3.5%<br>(2.4-4.8%)                   | 12%<br>(8.1-16%)                    | 33<br>(22-45)       | 2200<br>(1600-3000)       |
| Belgium  | 2005 | Female | 40 to 44 | 84%<br>(77-91%)                | 16%<br>(9.4-23%)         | 2.8<br>(2.2-3.5)                            | 4.8%<br>(3.5-6.3%)                   | 14%<br>(11-18%)                     | 68<br>(51-85)       | 3700<br>(2800-4700)       |
| Belgium  | 2005 | Female | 45 to 49 | 86%<br>(81-90%)                | 14%<br>(9.5-19%)         | 3.3<br>(2.6-4.2)                            | 6.2%<br>(4.7-7.8%)                   | 15%<br>(12-18%)                     | 110<br>(90-140)     | 5400<br>(4100-6700)       |
| Belgium  | 2005 | Female | 50 to 54 | 88%<br>(84-92%)                | 12%<br>(7.9-16%)         | 3.6<br>(2.8-4.5)                            | 7.1%<br>(5.3-9%)                     | 15%<br>(12-17%)                     | 160<br>(130-200)    | 6700<br>(5300-8100)       |
| Belgium  | 2005 | Female | 55 to 59 | 90%<br>(87-93%)                | 10%<br>(7.3-13%)         | 3.5<br>(2.8-4.3)                            | 6.6%<br>(5-8.4%)                     | 13%<br>(10-15%)                     | 190<br>(150-230)    | 6600<br>(5100-8100)       |
| Belgium  | 2005 | Female | 60 to 64 | 89%<br>(85-92%)                | 11%<br>(7.8-15%)         | 3.2<br>(2.5-4.1)                            | 5.6%<br>(4-7.5%)                     | 9.9%<br>(7.6-12%)                   | 170<br>(130-210)    | 4900<br>(3600-6400)       |
| Belgium  | 2005 | Female | 65 to 69 | 87%<br>(83-91%)                | 13%<br>(9.1-17%)         | 3<br>(2.4-3.6)                              | 4.3%<br>(2.7-5.9%)                   | 7.3%<br>(5-9.4%)                    | 180<br>(120-230)    | 4400<br>(2900-6000)       |
| Belgium  | 2005 | Female | 70 to 74 | 84%<br>(79-88%)                | 16%<br>(12-21%)          | 2.6<br>(2-3.4)                              | 3.2%<br>(1.3-5.1%)                   | 4.9%<br>(2.3-7.5%)                  | 210<br>(96-320)     | 4000<br>(1700-6500)       |
| Belgium  | 2005 | Female | 75 to 79 | 78%<br>(70-85%)                | 22%<br>(15-30%)          | 2.3<br>(1.7-3.1)                            | 2.2%<br>(0.21-4.3%)                  | 3%<br>(0.47-5.7%)                   | 210<br>(33-400)     | 3300<br>(310-6400)        |
| Belgium  | 2005 | Female | 80 to 84 | 74%<br>(64-83%)                | 26%<br>(17-36%)          | 2.2<br>(1.6-2.9)                            | 1.7%<br>(-0.18-3.7%)                 | 2.1%<br>(-0.36-4.7%)                | 230<br>(-40-500)    | 2700<br>(-290-5800)       |
| Belgium  | 2005 | Female | 85 to 89 | 72%<br>(62-81%)                | 28%<br>(19-38%)          | 2.2<br>(1.5-2.9)                            | 1.5%<br>(-0.54-3.6%)                 | 1.7%<br>(-0.74-4.3%)                | 150<br>(-64-360)    | 1300<br>(-450-3000)       |
| Belgium  | 2005 | Female | 90 to 94 | 71%<br>(59-80%)                | 29%<br>(20-41%)          | 2.2<br>(1.4-3)                              | 1.3%<br>(-0.95-3.7%)                 | 1.3%<br>(-1.4-4.3%)                 | 110<br>(-110-360)   | 680<br>(-510-2000)        |
| Belgium  | 2005 | Female | 95 plus  | 70%<br>(55-82%)                | 30%<br>(18-45%)          | 2.2<br>(1.2-3.3)                            | 1.3%<br>(-1.3-4.4%)                  | 1.3%<br>(-1.8-5.1%)                 | 49<br>(-67-190)     | 210<br>(-200-710)         |
| Belgium  | 2005 | Male   | All Ages | 90%<br>(87-92%)                | 10%<br>(8.4-13%)         | 3.7<br>(3.3-4.1)                            | 8.6%<br>(7.1-10%)                    | 8%<br>(5.8-10%)                     | 4100<br>(3000-5300) | 130000<br>(110000-160000) |
| Belgium  | 2005 | Male   | 15 to 19 | 80%<br>(74-85%)                | 20%<br>(15-26%)          | 2.6<br>(2-3.4)                              | 6.5%<br>(4.1-9%)                     | 14%<br>(7.3-20%)                    | 24<br>(12-35)       | 2300<br>(1400-3100)       |
| Belgium  | 2005 | Male   | 20 to 24 | 89%<br>(83-94%)                | 11%<br>(6.1-17%)         | 4.1<br>(3.1-5.2)                            | 13%<br>(9-17%)                       | 21%<br>(13-29%)                     | 62<br>(38-87)       | 5700<br>(3900-7400)       |
| Belgium  | 2005 | Male   | 25 to 29 | 91%<br>(86-95%)                | 8.7%<br>(4.7-14%)        | 3.3<br>(2.5-4.2)                            | 11%<br>(7.2-14%)                     | 18%<br>(10-26%)                     | 58<br>(33-82)       | 5100<br>(3400-6700)       |
| Belgium  | 2005 | Male   | 30 to 34 | 92%<br>(86-96%)                | 7.6%<br>(3.6-14%)        | 3.3<br>(2.6-4.2)                            | 9.3%<br>(6.3-12%)                    | 18%<br>(10-25%)                     | 64<br>(36-91)       | 5100<br>(3400-6600)       |

| Location | Year | Sex    | Age      | Prevalence of current drinkers | Prevalence of abstainers | Population average of standard drinks daily | Percent of total attributable deaths | Percent of total attributable DALYs | Attributable deaths | Attributable DALYs     |
|----------|------|--------|----------|--------------------------------|--------------------------|---------------------------------------------|--------------------------------------|-------------------------------------|---------------------|------------------------|
| Belgium  | 2005 | Male   | 35 to 39 | 94%<br>(88-97%)                | 6.5%<br>(2.9-12%)        | 4.3<br>(3.3-5.3)                            | 11%<br>(7.7-14%)                     | 21%<br>(14-28%)                     | 110<br>(72-140)     | 7000<br>(5000-9000)    |
| Belgium  | 2005 | Male   | 40 to 44 | 94%<br>(90-97%)                | 5.7%<br>(2.7-10%)        | 5<br>(4-6)                                  | 13%<br>(9.5-16%)                     | 23%<br>(17-28%)                     | 190<br>(150-240)    | 11000<br>(8300-13000)  |
| Belgium  | 2005 | Male   | 45 to 49 | 95%<br>(91-97%)                | 5.4%<br>(3.1-8.9%)       | 5.4<br>(4.5-6.6)                            | 14%<br>(11-17%)                      | 23%<br>(18-27%)                     | 300<br>(240-370)    | 14000<br>(12000-17000) |
| Belgium  | 2005 | Male   | 50 to 54 | 95%<br>(93-97%)                | 4.7%<br>(2.8-7.3%)       | 5.8<br>(4.7-6.9)                            | 14%<br>(12-17%)                      | 21%<br>(17-25%)                     | 400<br>(330-480)    | 17000<br>(14000-20000) |
| Belgium  | 2005 | Male   | 55 to 59 | 96%<br>(95-98%)                | 3.8%<br>(2.4-5.3%)       | 6.1<br>(5.1-7.3)                            | 13%<br>(11-16%)                      | 18%<br>(15-22%)                     | 520<br>(420-620)    | 18000<br>(15000-22000) |
| Belgium  | 2005 | Male   | 60 to 64 | 96%<br>(95-98%)                | 3.6%<br>(2.2-5.5%)       | 5.9<br>(4.8-7.2)                            | 11%<br>(8.5-14%)                     | 14%<br>(11-18%)                     | 460<br>(340-560)    | 14000<br>(11000-17000) |
| Belgium  | 2005 | Male   | 65 to 69 | 96%<br>(94-97%)                | 4.2%<br>(2.5-6.3%)       | 5.1<br>(4.3-6)                              | 8.4%<br>(6.1-11%)                    | 10%<br>(7.5-13%)                    | 460<br>(330-590)    | 12000<br>(8600-15000)  |
| Belgium  | 2005 | Male   | 70 to 74 | 95%<br>(93-96%)                | 5.1%<br>(3.5-7.3%)       | 4.4<br>(3.6-5.4)                            | 5.9%<br>(3.5-8.3%)                   | 6.9%<br>(4-9.8%)                    | 460<br>(270-650)    | 9500<br>(5700-13000)   |
| Belgium  | 2005 | Male   | 75 to 79 | 93%<br>(90-96%)                | 6.6%<br>(4.2-9.9%)       | 3.8<br>(3.1-4.8)                            | 4.2%<br>(1.9-6.8%)                   | 4.7%<br>(1.9-7.7%)                  | 410<br>(160-670)    | 6700<br>(3000-11000)   |
| Belgium  | 2005 | Male   | 80 to 84 | 92%<br>(88-95%)                | 7.5%<br>(4.5-12%)        | 3.6<br>(2.9-4.4)                            | 3.4%<br>(1.2-5.9%)                   | 3.6%<br>(0.99-6.5%)                 | 350<br>(96-630)     | 4200<br>(1500-7300)    |
| Belgium  | 2005 | Male   | 85 to 89 | 92%<br>(89-95%)                | 7.7%<br>(4.8-11%)        | 3.5<br>(2.7-4.3)                            | 2.7%<br>(0.54-5.3%)                  | 2.8%<br>(0.18-5.8%)                 | 140<br>(9.5-300)    | 1300<br>(260-2500)     |
| Belgium  | 2005 | Male   | 90 to 94 | 92%<br>(88-95%)                | 7.7%<br>(4.7-12%)        | 3.3<br>(2.4-4.2)                            | 2.1%<br>(-0.3-4.9%)                  | 2.1%<br>(-0.77-5.2%)                | 65<br>(-24-170)     | 420<br>(-60-960)       |
| Belgium  | 2005 | Male   | 95 plus  | 92%<br>(86-96%)                | 8%<br>(3.7-14%)          | 3.1<br>(2-4.2)                              | 1.9%<br>(-0.96-5.2%)                 | 1.7%<br>(-1.6-5.5%)                 | 13<br>(-13-44)      | 61<br>(-32-170)        |
| Belgium  | 2010 | Female | All Ages | 82%<br>(79-84%)                | 18%<br>(16-21%)          | 2.3<br>(2.1-2.6)                            | 3.9%<br>(2.8-5.1%)                   | 4.3%<br>(2.4-6.5%)                  | 2300<br>(1300-3500) | 57000<br>(41000-73000) |
| Belgium  | 2010 | Female | 15 to 19 | 80%<br>(74-85%)                | 20%<br>(15-26%)          | 1.8<br>(1.3-2.4)                            | 2.1%<br>(1.3-3.1%)                   | 8.6%<br>(4.5-13%)                   | 5.6<br>(2.9-8.6)    | 670<br>(430-990)       |
| Belgium  | 2010 | Female | 20 to 24 | 85%<br>(76-91%)                | 15%<br>(8.9-24%)         | 2<br>(1.4-2.9)                              | 3%<br>(2-4.1%)                       | 9.4%<br>(4.7-14%)                   | 8.4<br>(4.2-13)     | 1200<br>(740-1700)     |
| Belgium  | 2010 | Female | 25 to 29 | 84%<br>(74-92%)                | 16%<br>(8.3-26%)         | 1.9<br>(1.3-2.6)                            | 2.6%<br>(1.8-3.7%)                   | 9%<br>(4.6-14%)                     | 11<br>(5.5-17)      | 1200<br>(800-1700)     |
| Belgium  | 2010 | Female | 30 to 34 | 85%<br>(75-92%)                | 15%<br>(8.2-25%)         | 2<br>(1.5-2.7)                              | 2.7%<br>(1.8-3.7%)                   | 10%<br>(6.2-14%)                    | 15<br>(9.5-22)      | 1400<br>(910-1900)     |
| Belgium  | 2010 | Female | 35 to 39 | 84%<br>(75-91%)                | 16%<br>(9-25%)           | 2.4<br>(1.8-3.2)                            | 3.5%<br>(2.4-4.8%)                   | 13%<br>(8.8-17%)                    | 32<br>(22-41)       | 2100<br>(1500-2800)    |
| Belgium  | 2010 | Female | 40 to 44 | 84%<br>(77-91%)                | 16%<br>(9.4-23%)         | 3<br>(2.2-3.7)                              | 4.7%<br>(3.4-6.1%)                   | 15%<br>(11-18%)                     | 63<br>(47-77)       | 3500<br>(2600-4300)    |
| Belgium  | 2010 | Female | 45 to 49 | 87%<br>(82-91%)                | 13%<br>(9.1-18%)         | 3.6<br>(2.8-4.5)                            | 6.2%<br>(4.6-8%)                     | 16%<br>(12-19%)                     | 120<br>(92-140)     | 5500<br>(4300-6900)    |
| Belgium  | 2010 | Female | 50 to 54 | 89%<br>(84-92%)                | 11%<br>(7.7-16%)         | 3.8<br>(3-4.7)                              | 7.1%<br>(5.4-9%)                     | 15%<br>(12-18%)                     | 170<br>(140-210)    | 7100<br>(5600-8800)    |

| Location | Year | Sex    | Age      | Prevalence of current drinkers | Prevalence of abstainers | Population average of standard drinks daily | Percent of total attributable deaths | Percent of total attributable DALYs | Attributable deaths | Attributable DALYs        |
|----------|------|--------|----------|--------------------------------|--------------------------|---------------------------------------------|--------------------------------------|-------------------------------------|---------------------|---------------------------|
| Belgium  | 2010 | Female | 55 to 59 | 90%<br>(87-93%)                | 9.7%<br>(7-13%)          | 3.7<br>(3-4.6)                              | 6.9%<br>(5.3-8.7%)                   | 13%<br>(11-16%)                     | 200<br>(170-240)    | 7200<br>(5700-8800)       |
| Belgium  | 2010 | Female | 60 to 64 | 90%<br>(86-93%)                | 10%<br>(7.5-14%)         | 3.5<br>(2.7-4.5)                            | 6%<br>(4.3-7.8%)                     | 11%<br>(8.1-13%)                    | 220<br>(170-280)    | 6700<br>(4900-8700)       |
| Belgium  | 2010 | Female | 65 to 69 | 88%<br>(84-91%)                | 12%<br>(8.8-16%)         | 3.2<br>(2.6-4)                              | 4.8%<br>(3.4-6.4%)                   | 8.1%<br>(6-10%)                     | 190<br>(140-240)    | 4800<br>(3300-6300)       |
| Belgium  | 2010 | Female | 70 to 74 | 85%<br>(81-89%)                | 15%<br>(11-19%)          | 2.9<br>(2.2-3.7)                            | 3.6%<br>(1.9-5.5%)                   | 5.8%<br>(3.4-8.5%)                  | 210<br>(120-310)    | 4200<br>(2200-6300)       |
| Belgium  | 2010 | Female | 75 to 79 | 80%<br>(73-86%)                | 20%<br>(14-27%)          | 2.6<br>(1.9-3.4)                            | 2.8%<br>(0.89-4.9%)                  | 4%<br>(1.5-6.8%)                    | 250<br>(94-420)     | 3900<br>(1300-6900)       |
| Belgium  | 2010 | Female | 80 to 84 | 77%<br>(67-84%)                | 23%<br>(16-33%)          | 2.5<br>(1.9-3.2)                            | 2.3%<br>(0.53-4.2%)                  | 3%<br>(0.66-5.4%)                   | 300<br>(66-560)     | 3500<br>(780-6500)        |
| Belgium  | 2010 | Female | 85 to 89 | 74%<br>(64-81%)                | 26%<br>(19-36%)          | 2.4<br>(1.7-3.2)                            | 2%<br>(0.12-4.2%)                    | 2.4%<br>(-0.0015-5%)                | 300<br>(-0.2-650)   | 2600<br>(160-5300)        |
| Belgium  | 2010 | Female | 90 to 94 | 72%<br>(61-81%)                | 28%<br>(19-39%)          | 2.4<br>(1.6-3.3)                            | 1.7%<br>(-0.46-4.4%)                 | 1.9%<br>(-0.66-5.1%)                | 130<br>(-46-360)    | 790<br>(-200-2100)        |
| Belgium  | 2010 | Female | 95 plus  | 71%<br>(56-83%)                | 29%<br>(17-44%)          | 2.4<br>(1.4-3.6)                            | 1.8%<br>(-0.92-5%)                   | 1.9%<br>(-1.3-5.8%)                 | 81<br>(-57-250)     | 320<br>(-170-910)         |
| Belgium  | 2010 | Male   | All Ages | 90%<br>(88-92%)                | 10%<br>(8.2-12%)         | 4<br>(3.5-4.5)                              | 9.1%<br>(7.5-11%)                    | 8.7%<br>(6.5-11%)                   | 4600<br>(3400-5900) | 140000<br>(120000-170000) |
| Belgium  | 2010 | Male   | 15 to 19 | 82%<br>(76-87%)                | 18%<br>(13-24%)          | 2.9<br>(2.1-3.7)                            | 6.2%<br>(3.9-8.6%)                   | 15%<br>(8.1-21%)                    | 20<br>(11-29)       | 2000<br>(1300-2800)       |
| Belgium  | 2010 | Male   | 20 to 24 | 90%<br>(84-94%)                | 10%<br>(5.7-16%)         | 4.3<br>(3.3-5.5)                            | 13%<br>(9.1-17%)                     | 22%<br>(14-30%)                     | 57<br>(35-77)       | 5400<br>(3800-7100)       |
| Belgium  | 2010 | Male   | 25 to 29 | 91%<br>(85-95%)                | 8.7%<br>(4.6-15%)        | 3.5<br>(2.6-4.5)                            | 11%<br>(7.2-14%)                     | 19%<br>(10-27%)                     | 56<br>(30-79)       | 5000<br>(3400-6700)       |
| Belgium  | 2010 | Male   | 30 to 34 | 92%<br>(86-96%)                | 7.8%<br>(3.9-14%)        | 3.5<br>(2.6-4.5)                            | 9.4%<br>(6.2-13%)                    | 19%<br>(11-26%)                     | 60<br>(33-84)       | 4800<br>(3200-6400)       |
| Belgium  | 2010 | Male   | 35 to 39 | 93%<br>(89-97%)                | 6.5%<br>(3-11%)          | 4.5<br>(3.3-5.6)                            | 11%<br>(7.7-14%)                     | 22%<br>(15-29%)                     | 100<br>(68-130)     | 6700<br>(4800-8600)       |
| Belgium  | 2010 | Male   | 40 to 44 | 94%<br>(90-97%)                | 5.6%<br>(2.6-10%)        | 5.2<br>(4.1-6.4)                            | 12%<br>(9.5-16%)                     | 24%<br>(18-30%)                     | 170<br>(130-210)    | 9600<br>(7400-12000)      |
| Belgium  | 2010 | Male   | 45 to 49 | 95%<br>(91-97%)                | 5.4%<br>(3.1-8.9%)       | 5.7<br>(4.7-6.9)                            | 14%<br>(11-17%)                      | 24%<br>(19-29%)                     | 290<br>(230-350)    | 14000<br>(11000-17000)    |
| Belgium  | 2010 | Male   | 50 to 54 | 95%<br>(93-97%)                | 4.6%<br>(2.8-7.3%)       | 6.1<br>(5-7.3)                              | 15%<br>(12-18%)                      | 23%<br>(19-26%)                     | 430<br>(360-510)    | 18000<br>(15000-21000)    |
| Belgium  | 2010 | Male   | 55 to 59 | 96%<br>(95-98%)                | 3.7%<br>(2.4-5.3%)       | 6.5<br>(5.4-7.7)                            | 14%<br>(12-17%)                      | 20%<br>(17-23%)                     | 550<br>(450-650)    | 19000<br>(16000-23000)    |
| Belgium  | 2010 | Male   | 60 to 64 | 97%<br>(95-98%)                | 3.5%<br>(2.1-5.4%)       | 6.2<br>(5.1-7.6)                            | 12%<br>(9.7-15%)                     | 16%<br>(13-19%)                     | 620<br>(490-750)    | 19000<br>(15000-23000)    |
| Belgium  | 2010 | Male   | 65 to 69 | 96%<br>(94-97%)                | 4%<br>(2.5-6%)           | 5.4<br>(4.5-6.4)                            | 9.4%<br>(7.1-12%)                    | 12%<br>(9-15%)                      | 480<br>(370-600)    | 12000<br>(9500-15000)     |
| Belgium  | 2010 | Male   | 70 to 74 | 95%<br>(93-97%)                | 5%<br>(3.4-6.9%)         | 4.6<br>(3.8-5.5)                            | 6.7%<br>(4.5-9.1%)                   | 8.1%<br>(5.4-11%)                   | 470<br>(310-640)    | 9700<br>(6500-13000)      |

| Location | Year | Sex    | Age      | Prevalence of current drinkers | Prevalence of abstainers | Population average of standard drinks daily | Percent of total attributable deaths | Percent of total attributable DALYs | Attributable deaths | Attributable DALYs     |
|----------|------|--------|----------|--------------------------------|--------------------------|---------------------------------------------|--------------------------------------|-------------------------------------|---------------------|------------------------|
| Belgium  | 2010 | Male   | 75 to 79 | 94%<br>(90-96%)                | 6.4%<br>(4-9.6%)         | 4.1<br>(3.2-5)                              | 4.9%<br>(2.7-7.3%)                   | 5.6%<br>(3-8.5%)                    | 460<br>(240-700)    | 7500<br>(4000-11000)   |
| Belgium  | 2010 | Male   | 80 to 84 | 93%<br>(89-96%)                | 7.1%<br>(4.5-11%)        | 3.8<br>(3.1-4.6)                            | 4%<br>(1.8-6.4%)                     | 4.4%<br>(1.8-7.3%)                  | 420<br>(170-690)    | 5000<br>(2300-8100)    |
| Belgium  | 2010 | Male   | 85 to 89 | 93%<br>(89-95%)                | 7.3%<br>(4.7-11%)        | 3.7<br>(2.8-4.5)                            | 3.3%<br>(1-5.8%)                     | 3.4%<br>(0.78-6.5%)                 | 290<br>(66-540)     | 2500<br>(800-4500)     |
| Belgium  | 2010 | Male   | 90 to 94 | 93%<br>(89-95%)                | 7.4%<br>(4.6-11%)        | 3.5<br>(2.6-4.5)                            | 2.6%<br>(0.045-5.5%)                 | 2.6%<br>(-0.4-6%)                   | 78<br>(-12-180)     | 480<br>(8.3-1000)      |
| Belgium  | 2010 | Male   | 95 plus  | 92%<br>(87-96%)                | 7.7%<br>(3.7-13%)        | 3.3<br>(2-4.5)                              | 2.3%<br>(-0.65-6%)                   | 2.2%<br>(-1.2-6.4%)                 | 22<br>(-12-67)      | 95<br>(-27-250)        |
| Belgium  | 2016 | Female | All Ages | 82%<br>(79-85%)                | 18%<br>(15-21%)          | 2.4<br>(1.8-3)                              | 3.8%<br>(2.4-5.4%)                   | 4.3%<br>(1.8-7.6%)                  | 2400<br>(1000-4400) | 57000<br>(37000-82000) |
| Belgium  | 2016 | Female | 15 to 19 | 78%<br>(69-84%)                | 22%<br>(16-31%)          | 1.7<br>(1.1-2.4)                            | 1.9%<br>(1.2-2.7%)                   | 8.3%<br>(4.4-13%)                   | 4.4<br>(2.3-7)      | 580<br>(370-850)       |
| Belgium  | 2016 | Female | 20 to 24 | 84%<br>(74-91%)                | 16%<br>(9.2-26%)         | 2<br>(1.3-2.9)                              | 2.8%<br>(1.9-3.8%)                   | 9.3%<br>(4.7-15%)                   | 7<br>(3.5-11)       | 1100<br>(710-1500)     |
| Belgium  | 2016 | Female | 25 to 29 | 85%<br>(74-92%)                | 15%<br>(7.9-26%)         | 1.9<br>(1.3-2.7)                            | 2.5%<br>(1.6-3.4%)                   | 9.2%<br>(4.7-14%)                   | 9<br>(4.6-14)       | 1200<br>(750-1600)     |
| Belgium  | 2016 | Female | 30 to 34 | 85%<br>(73-92%)                | 15%<br>(8.1-27%)         | 2<br>(1.3-2.9)                              | 2.5%<br>(1.6-3.5%)                   | 10%<br>(6.4-15%)                    | 14<br>(8.6-21)      | 1300<br>(860-1800)     |
| Belgium  | 2016 | Female | 35 to 39 | 84%<br>(75-91%)                | 16%<br>(9-25%)           | 2.5<br>(1.6-3.5)                            | 3.4%<br>(2.3-4.6%)                   | 13%<br>(9-17%)                      | 29<br>(19-39)       | 2000<br>(1400-2600)    |
| Belgium  | 2016 | Female | 40 to 44 | 84%<br>(76-91%)                | 16%<br>(9.1-24%)         | 3<br>(2.1-4.1)                              | 4.5%<br>(3.1-6.1%)                   | 15%<br>(11-19%)                     | 54<br>(39-72)       | 3100<br>(2200-4100)    |
| Belgium  | 2016 | Female | 45 to 49 | 87%<br>(81-91%)                | 13%<br>(9-19%)           | 3.6<br>(2.5-4.9)                            | 5.9%<br>(4.2-7.8%)                   | 16%<br>(12-20%)                     | 100<br>(74-130)     | 4900<br>(3600-6400)    |
| Belgium  | 2016 | Female | 50 to 54 | 89%<br>(84-92%)                | 11%<br>(7.7-16%)         | 3.8<br>(2.7-5.1)                            | 6.7%<br>(4.8-8.7%)                   | 15%<br>(12-19%)                     | 160<br>(120-210)    | 6700<br>(5000-8700)    |
| Belgium  | 2016 | Female | 55 to 59 | 90%<br>(87-93%)                | 9.7%<br>(7-13%)          | 3.7<br>(2.6-5)                              | 6.8%<br>(4.9-8.8%)                   | 13%<br>(10-16%)                     | 210<br>(160-270)    | 7500<br>(5500-9700)    |
| Belgium  | 2016 | Female | 60 to 64 | 90%<br>(87-93%)                | 9.8%<br>(6.9-13%)        | 3.6<br>(2.5-4.8)                            | 6%<br>(3.9-8.2%)                     | 11%<br>(7.8-14%)                    | 230<br>(160-300)    | 6800<br>(4500-9400)    |
| Belgium  | 2016 | Female | 65 to 69 | 89%<br>(85-92%)                | 11%<br>(8.2-15%)         | 3.3<br>(2.4-4.4)                            | 4.8%<br>(3-7%)                       | 8.2%<br>(5.8-11%)                   | 240<br>(160-330)    | 5900<br>(3700-8500)    |
| Belgium  | 2016 | Female | 70 to 74 | 86%<br>(82-90%)                | 14%<br>(10-18%)          | 2.9<br>(2.1-4.1)                            | 3.7%<br>(1.8-6.1%)                   | 6%<br>(3.4-9.2%)                    | 200<br>(110-310)    | 4000<br>(1900-6600)    |
| Belgium  | 2016 | Female | 75 to 79 | 83%<br>(76-88%)                | 17%<br>(12-24%)          | 2.7<br>(1.8-3.9)                            | 2.9%<br>(0.8-5.5%)                   | 4.2%<br>(1.6-7.7%)                  | 230<br>(79-420)     | 3600<br>(1000-7000)    |
| Belgium  | 2016 | Female | 80 to 84 | 79%<br>(70-86%)                | 21%<br>(14-30%)          | 2.6<br>(1.8-3.7)                            | 2.4%<br>(0.29-5.3%)                  | 3.1%<br>(0.45-6.9%)                 | 300<br>(41-650)     | 3500<br>(460-7800)     |
| Belgium  | 2016 | Female | 85 to 89 | 76%<br>(67-83%)                | 24%<br>(17-33%)          | 2.5<br>(1.6-3.5)                            | 2.1%<br>(-0.087-5.2%)                | 2.5%<br>(-0.22-6.4%)                | 330<br>(-27-830)    | 2800<br>(-110-7000)    |
| Belgium  | 2016 | Female | 90 to 94 | 74%<br>(64-83%)                | 26%<br>(17-36%)          | 2.5<br>(1.5-3.7)                            | 1.8%<br>(-0.67-5.1%)                 | 2%<br>(-1-6%)                       | 240<br>(-120-710)   | 1400<br>(-510-4000)    |

| Location | Year | Sex    | Age      | Prevalence of current drinkers | Prevalence of abstainers | Population average of standard drinks daily | Percent of total attributable deaths | Percent of total attributable DALYs | Attributable deaths | Attributable DALYs        |
|----------|------|--------|----------|--------------------------------|--------------------------|---------------------------------------------|--------------------------------------|-------------------------------------|---------------------|---------------------------|
| Belgium  | 2016 | Female | 95 plus  | 73%<br>(59-84%)                | 27%<br>(16-41%)          | 2.5<br>(1.4-3.9)                            | 1.9%<br>(-1.5-5.9%)                  | 2%<br>(-1.5-6.9%)                   | 93<br>(-68-320)     | 370<br>(-200-1100)        |
| Belgium  | 2016 | Male   | All Ages | 89%<br>(87-91%)                | 11%<br>(8.7-13%)         | 3.9<br>(3-5)                                | 8.9%<br>(6.6-11%)                    | 8.4%<br>(5.4-12%)                   | 4700<br>(3000-6700) | 140000<br>(100000-180000) |
| Belgium  | 2016 | Male   | 15 to 19 | 80%<br>(72-86%)                | 20%<br>(14-28%)          | 2.8<br>(2-4)                                | 5.6%<br>(3.6-7.8%)                   | 14%<br>(7.6-22%)                    | 16<br>(8-24)        | 1700<br>(1100-2500)       |
| Belgium  | 2016 | Male   | 20 to 24 | 87%<br>(78-93%)                | 13%<br>(6.6-22%)         | 4.2<br>(2.9-5.9)                            | 12%<br>(8.4-16%)                     | 22%<br>(13-31%)                     | 50<br>(29-73)       | 5000<br>(3400-6800)       |
| Belgium  | 2016 | Male   | 25 to 29 | 90%<br>(82-95%)                | 10%<br>(5.1-18%)         | 3.4<br>(2.3-4.7)                            | 10%<br>(6.8-13%)                     | 19%<br>(9.4-27%)                    | 46<br>(23-69)       | 4600<br>(3000-6200)       |
| Belgium  | 2016 | Male   | 30 to 34 | 92%<br>(84-96%)                | 8.3%<br>(3.8-16%)        | 3.4<br>(2.4-4.8)                            | 9.1%<br>(6.1-12%)                    | 19%<br>(10-26%)                     | 57<br>(31-81)       | 4700<br>(3000-6300)       |
| Belgium  | 2016 | Male   | 35 to 39 | 93%<br>(86-97%)                | 7.4%<br>(3.2-14%)        | 4.4<br>(3-6.1)                              | 10%<br>(7.4-14%)                     | 22%<br>(14-30%)                     | 90<br>(58-120)      | 6100<br>(4200-8100)       |
| Belgium  | 2016 | Male   | 40 to 44 | 93%<br>(88-97%)                | 6.7%<br>(3.1-12%)        | 5.1<br>(3.7-7)                              | 12%<br>(8.8-15%)                     | 24%<br>(18-31%)                     | 150<br>(100-200)    | 8300<br>(6100-11000)      |
| Belgium  | 2016 | Male   | 45 to 49 | 94%<br>(90-97%)                | 6.1%<br>(3.3-10%)        | 5.7<br>(4.1-7.6)                            | 13%<br>(10-17%)                      | 24%<br>(19-30%)                     | 250<br>(180-320)    | 12000<br>(9100-15000)     |
| Belgium  | 2016 | Male   | 50 to 54 | 95%<br>(92-97%)                | 5%<br>(2.8-8%)           | 6.1<br>(4.5-7.9)                            | 14%<br>(11-18%)                      | 23%<br>(18-28%)                     | 400<br>(310-520)    | 17000<br>(13000-21000)    |
| Belgium  | 2016 | Male   | 55 to 59 | 96%<br>(94-98%)                | 3.9%<br>(2.5-5.8%)       | 6.4<br>(4.8-8.4)                            | 14%<br>(11-17%)                      | 20%<br>(16-24%)                     | 560<br>(430-710)    | 20000<br>(15000-25000)    |
| Belgium  | 2016 | Male   | 60 to 64 | 96%<br>(94-98%)                | 3.7%<br>(2.2-5.6%)       | 6.2<br>(4.6-8.1)                            | 12%<br>(8.7-15%)                     | 16%<br>(12-20%)                     | 600<br>(440-780)    | 18000<br>(13000-23000)    |
| Belgium  | 2016 | Male   | 65 to 69 | 96%<br>(94-98%)                | 4.1%<br>(2.5-6.4%)       | 5.4<br>(4.1-7)                              | 9.3%<br>(6.5-12%)                    | 12%<br>(8.2-16%)                    | 610<br>(420-830)    | 16000<br>(11000-21000)    |
| Belgium  | 2016 | Male   | 70 to 74 | 95%<br>(93-97%)                | 5%<br>(3.3-7.4%)         | 4.6<br>(3.4-6.2)                            | 6.8%<br>(4.1-10%)                    | 8.3%<br>(5-12%)                     | 440<br>(260-660)    | 9200<br>(5500-14000)      |
| Belgium  | 2016 | Male   | 75 to 79 | 94%<br>(90-96%)                | 6.4%<br>(3.8-9.9%)       | 4.1<br>(3-5.5)                              | 5%<br>(2.3-8.2%)                     | 5.8%<br>(2.6-9.8%)                  | 430<br>(190-720)    | 7100<br>(3200-12000)      |
| Belgium  | 2016 | Male   | 80 to 84 | 92%<br>(87-96%)                | 7.7%<br>(4.4-13%)        | 3.8<br>(2.7-5.1)                            | 4.1%<br>(1.5-7.2%)                   | 4.6%<br>(1.5-8.2%)                  | 450<br>(140-820)    | 5400<br>(2000-9500)       |
| Belgium  | 2016 | Male   | 85 to 89 | 92%<br>(87-95%)                | 8.4%<br>(5.1-13%)        | 3.6<br>(2.5-4.9)                            | 3.4%<br>(0.8-6.6%)                   | 3.6%<br>(0.57-7.3%)                 | 350<br>(55-680)     | 3000<br>(690-5700)        |
| Belgium  | 2016 | Male   | 90 to 94 | 92%<br>(86-95%)                | 8.4%<br>(4.8-14%)        | 3.4<br>(2.3-4.7)                            | 2.8%<br>(-0.11-6.2%)                 | 2.8%<br>(-0.55-6.9%)                | 160<br>(-31-400)    | 990<br>(-38-2300)         |
| Belgium  | 2016 | Male   | 95 plus  | 92%<br>(85-96%)                | 8.4%<br>(3.9-15%)        | 3.2<br>(2-4.8)                              | 2.5%<br>(-0.76-6.6%)                 | 2.5%<br>(-1.3-7.4%)                 | 31<br>(-16-94)      | 130<br>(-39-350)          |
| Cyprus   | 1990 | Female | All Ages | 71%<br>(62-79%)                | 29%<br>(21-38%)          | 1<br>(0.86-1.2)                             | -0.18%<br>(-1.4-1.1%)                | -2%<br>(-4.3-0.32%)                 | -59<br>(-120-9.6)   | -150<br>(-1200-910)       |
| Cyprus   | 1990 | Female | 15 to 19 | 69%<br>(49-85%)                | 31%<br>(15-51%)          | 1<br>(0.66-1.5)                             | 1.7%<br>(0.88-2.6%)                  | 5.6%<br>(2-10%)                     | 0.4<br>(0.15-0.72)  | 51<br>(28-79)             |
| Cyprus   | 1990 | Female | 20 to 24 | 75%<br>(56-88%)                | 25%<br>(12-44%)          | 1.4<br>(0.91-1.9)                           | 2.3%<br>(1.5-3.2%)                   | 5.7%<br>(2.7-9.1%)                  | 0.45<br>(0.2-0.71)  | 73<br>(47-100)            |

| Location | Year | Sex    | Age      | Prevalence of current drinkers | Prevalence of abstainers | Population average of standard drinks daily | Percent of total attributable deaths | Percent of total attributable DALYs | Attributable deaths | Attributable DALYs  |
|----------|------|--------|----------|--------------------------------|--------------------------|---------------------------------------------|--------------------------------------|-------------------------------------|---------------------|---------------------|
| Cyprus   | 1990 | Female | 25 to 29 | 77%<br>(60-90%)                | 23%<br>(10-40%)          | 1.3<br>(0.94-1.8)                           | 2.1%<br>(1.3-2.8%)                   | 5.1%<br>(2.4-7.9%)                  | 0.55<br>(0.27-0.87) | 71<br>(45-99)       |
| Cyprus   | 1990 | Female | 30 to 34 | 78%<br>(60-90%)                | 22%<br>(9.6-40%)         | 1.2<br>(0.82-1.7)                           | 1.8%<br>(1.1-2.5%)                   | 4.8%<br>(2.5-7.3%)                  | 0.62<br>(0.32-0.94) | 61<br>(38-87)       |
| Cyprus   | 1990 | Female | 35 to 39 | 80%<br>(64-91%)                | 20%<br>(9-36%)           | 1.1<br>(0.72-1.6)                           | 1.7%<br>(0.96-2.4%)                  | 4.8%<br>(2.6-7.1%)                  | 0.88<br>(0.47-1.3)  | 65<br>(39-94)       |
| Cyprus   | 1990 | Female | 40 to 44 | 81%<br>(63-92%)                | 19%<br>(8.3-37%)         | 1.3<br>(0.87-1.8)                           | 1.7%<br>(0.9-2.7%)                   | 5.1%<br>(2.9-7.7%)                  | 1.3<br>(0.72-1.9)   | 72<br>(38-110)      |
| Cyprus   | 1990 | Female | 45 to 49 | 81%<br>(61-91%)                | 19%<br>(8.8-39%)         | 1.8<br>(1.2-2.5)                            | 2.5%<br>(1.2-3.9%)                   | 6.4%<br>(3.3-9.6%)                  | 2.5<br>(1.3-3.8)    | 110<br>(53-180)     |
| Cyprus   | 1990 | Female | 50 to 54 | 80%<br>(61-91%)                | 20%<br>(8.9-39%)         | 1.9<br>(1.3-2.6)                            | 2.5%<br>(1-4.1%)                     | 5.6%<br>(2.8-8.3%)                  | 3.1<br>(1.5-4.6)    | 120<br>(45-180)     |
| Cyprus   | 1990 | Female | 55 to 59 | 79%<br>(62-91%)                | 21%<br>(9.1-38%)         | 1.7<br>(1.1-2.3)                            | 1.5%<br>(-0.23-3.2%)                 | 3.5%<br>(0.71-6.3%)                 | 2.7<br>(0.54-4.8)   | 71<br>(-10-150)     |
| Cyprus   | 1990 | Female | 60 to 64 | 78%<br>(58-91%)                | 22%<br>(8.8-42%)         | 1.5<br>(0.94-2.1)                           | 0.027%<br>(-1.8-2%)                  | 0.98%<br>(-1.9-3.9%)                | 1.1<br>(-2.2-4.6)   | 1.1<br>(-100-110)   |
| Cyprus   | 1990 | Female | 65 to 69 | 76%<br>(55-90%)                | 24%<br>(10-45%)          | 1.4<br>(0.89-1.9)                           | -1.2%<br>(-3.5-1%)                   | -1.1%<br>(-4-1.7%)                  | -2<br>(-7.2-3)      | -73<br>(-200-60)    |
| Cyprus   | 1990 | Female | 70 to 74 | 73%<br>(53-86%)                | 27%<br>(14-47%)          | 1.2<br>(0.78-1.8)                           | -2.2%<br>(-4.6-0.24%)                | -2.5%<br>(-5.5-0.39%)               | -7.8<br>(-18-1.2)   | -160<br>(-350-17)   |
| Cyprus   | 1990 | Female | 75 to 79 | 69%<br>(49-85%)                | 31%<br>(15-51%)          | 1.2<br>(0.71-1.8)                           | -3%<br>(-5.8--0.23%)                 | -3.4%<br>(-6.8--0.27%)              | -16<br>(-32--1.3)   | -230<br>(-450--18)  |
| Cyprus   | 1990 | Female | 80 to 84 | 66%<br>(44-83%)                | 34%<br>(17-56%)          | 1.1<br>(0.7-1.7)                            | -2.9%<br>(-5.7--0.54%)               | -3.4%<br>(-6.5--0.62%)              | -22<br>(-43--4.1)   | -240<br>(-450--43)  |
| Cyprus   | 1990 | Female | 85 to 89 | 63%<br>(43-80%)                | 37%<br>(20-57%)          | 1.1<br>(0.65-1.7)                           | -2.5%<br>(-5--0.33%)                 | -3%<br>(-5.8--0.48%)                | -15<br>(-30--2.4)   | -110<br>(-220--15)  |
| Cyprus   | 1990 | Female | 90 to 94 | 62%<br>(43-80%)                | 38%<br>(20-57%)          | 1.1<br>(0.61-1.8)                           | -2.1%<br>(-4.4-0.13%)                | -2.6%<br>(-5.4-0.045%)              | -6.6<br>(-14-0.11)  | -32<br>(-67-1.9)    |
| Cyprus   | 1990 | Female | 95 plus  | 63%<br>(38-83%)                | 37%<br>(17-62%)          | 1.2<br>(0.54-2)                             | -1.9%<br>(-4.6-0.55%)                | -2.4%<br>(-5.7-0.47%)               | -2.1<br>(-5-0.4)    | -6.5<br>(-16-2)     |
| Cyprus   | 1990 | Male   | All Ages | 78%<br>(68-86%)                | 22%<br>(14-32%)          | 3.6<br>(3.1-4.1)                            | 8%<br>(5.6-10%)                      | 8.4%<br>(4.7-12%)                   | 260<br>(140-380)    | 7500<br>(5300-9600) |
| Cyprus   | 1990 | Male   | 15 to 19 | 73%<br>(52-88%)                | 27%<br>(12-48%)          | 3.4<br>(2.2-4.8)                            | 7.9%<br>(4.8-11%)                    | 15%<br>(8.2-23%)                    | 3.4<br>(1.8-5.2)    | 300<br>(180-440)    |
| Cyprus   | 1990 | Male   | 20 to 24 | 78%<br>(60-90%)                | 22%<br>(9.6-40%)         | 5.3<br>(3.8-7.1)                            | 15%<br>(10-21%)                      | 23%<br>(14-33%)                     | 7.6<br>(4.8-11)     | 620<br>(430-850)    |
| Cyprus   | 1990 | Male   | 25 to 29 | 82%<br>(68-92%)                | 18%<br>(8-32%)           | 4.8<br>(3.6-6.3)                            | 13%<br>(8.8-17%)                     | 21%<br>(13-29%)                     | 5.9<br>(3.7-8.2)    | 470<br>(320-620)    |
| Cyprus   | 1990 | Male   | 30 to 34 | 85%<br>(69-94%)                | 15%<br>(6.1-31%)         | 4.4<br>(3.1-5.9)                            | 10%<br>(6.8-13%)                     | 17%<br>(11-24%)                     | 4.6<br>(2.9-6.4)    | 340<br>(230-450)    |
| Cyprus   | 1990 | Male   | 35 to 39 | 87%<br>(74-95%)                | 13%<br>(4.9-26%)         | 4<br>(2.8-5.5)                              | 8.3%<br>(5.6-11%)                    | 15%<br>(9.2-21%)                    | 4.5<br>(2.8-6.5)    | 310<br>(200-420)    |
| Cyprus   | 1990 | Male   | 40 to 44 | 88%<br>(75-96%)                | 12%<br>(4.1-25%)         | 4.5<br>(3.3-5.9)                            | 8.4%<br>(5.4-12%)                    | 14%<br>(8.1-20%)                    | 6<br>(3.5-8.7)      | 350<br>(220-480)    |

| Location | Year | Sex    | Age      | Prevalence of current drinkers | Prevalence of abstainers | Population average of standard drinks daily | Percent of total attributable deaths | Percent of total attributable DALYs | Attributable deaths | Attributable DALYs |
|----------|------|--------|----------|--------------------------------|--------------------------|---------------------------------------------|--------------------------------------|-------------------------------------|---------------------|--------------------|
| Cyprus   | 1990 | Male   | 45 to 49 | 89%<br>(72-96%)                | 11%<br>(4-28%)           | 6<br>(4.4-8)                                | 11%<br>(7.4-15%)                     | 17%<br>(11-23%)                     | 11<br>(6.6-14)      | 520<br>(340-690)   |
| Cyprus   | 1990 | Male   | 50 to 54 | 89%<br>(75-96%)                | 11%<br>(3.8-25%)         | 6.6<br>(4.7-8.7)                            | 12%<br>(7.5-16%)                     | 17%<br>(10-23%)                     | 17<br>(9.9-23)      | 700<br>(430-930)   |
| Cyprus   | 1990 | Male   | 55 to 59 | 89%<br>(77-96%)                | 11%<br>(3.6-23%)         | 6.2<br>(4.6-8.1)                            | 11%<br>(6.4-15%)                     | 14%<br>(7.9-20%)                    | 19<br>(11-27)       | 700<br>(420-970)   |
| Cyprus   | 1990 | Male   | 60 to 64 | 89%<br>(75-96%)                | 11%<br>(3.8-25%)         | 5.8<br>(4.1-7.9)                            | 10%<br>(5-15%)                       | 12%<br>(5.7-18%)                    | 25<br>(12-38)       | 760<br>(390-1100)  |
| Cyprus   | 1990 | Male   | 65 to 69 | 88%<br>(74-96%)                | 12%<br>(4.1-26%)         | 5.3<br>(4-6.9)                              | 8.9%<br>(4.4-13%)                    | 10%<br>(4.8-16%)                    | 28<br>(13-43)       | 690<br>(340-1000)  |
| Cyprus   | 1990 | Male   | 70 to 74 | 87%<br>(74-95%)                | 13%<br>(5.1-26%)         | 4.8<br>(3.5-6.4)                            | 7.5%<br>(3-12%)                      | 8.3%<br>(3-14%)                     | 30<br>(11-51)       | 600<br>(250-990)   |
| Cyprus   | 1990 | Male   | 75 to 79 | 86%<br>(72-94%)                | 14%<br>(5.6-28%)         | 4.4<br>(3-6.1)                              | 6.5%<br>(1.6-12%)                    | 7%<br>(1.4-13%)                     | 32<br>(6.5-60)      | 490<br>(120-880)   |
| Cyprus   | 1990 | Male   | 80 to 84 | 84%<br>(69-93%)                | 16%<br>(6.6-31%)         | 4.2<br>(2.9-5.6)                            | 5.8%<br>(1.5-10%)                    | 6.1%<br>(1.3-11%)                   | 33<br>(6.7-61)      | 370<br>(95-670)    |
| Cyprus   | 1990 | Male   | 85 to 89 | 82%<br>(67-93%)                | 18%<br>(7.4-33%)         | 3.9<br>(2.6-5.5)                            | 5%<br>(1.1-9.6%)                     | 5.3%<br>(0.84-10%)                  | 21<br>(3.3-41)      | 170<br>(36-330)    |
| Cyprus   | 1990 | Male   | 90 to 94 | 83%<br>(68-93%)                | 17%<br>(6.7-32%)         | 3.8<br>(2.3-5.7)                            | 4.3%<br>(0.15-9.1%)                  | 4.4%<br>(-0.29-9.9%)                | 8.7<br>(-0.57-20)   | 50<br>(1.8-110)    |
| Cyprus   | 1990 | Male   | 95 plus  | 83%<br>(65-95%)                | 17%<br>(5.3-35%)         | 3.8<br>(2.1-6.1)                            | 4%<br>(-0.5-9.5%)                    | 4.1%<br>(-1-10%)                    | 2.5<br>(-0.6-6.3)   | 9.6<br>(-1.2-23)   |
| Cyprus   | 1995 | Female | All Ages | 71%<br>(63-79%)                | 29%<br>(21-37%)          | 1.1<br>(0.92-1.3)                           | 0.068%<br>(-1.1-1.2%)                | -1.6%<br>(-3.8-0.51%)               | -50<br>(-120-16)    | 60<br>(-910-1000)  |
| Cyprus   | 1995 | Female | 15 to 19 | 69%<br>(50-85%)                | 31%<br>(15-50%)          | 1.1<br>(0.67-1.5)                           | 1.9%<br>(1-3.1%)                     | 5.9%<br>(2.1-10%)                   | 0.52<br>(0.18-0.91) | 59<br>(32-91)      |
| Cyprus   | 1995 | Female | 20 to 24 | 74%<br>(56-88%)                | 26%<br>(12-44%)          | 1.4<br>(0.94-2)                             | 2.6%<br>(1.7-3.6%)                   | 5.9%<br>(2.5-9.5%)                  | 0.62<br>(0.26-0.99) | 84<br>(53-120)     |
| Cyprus   | 1995 | Female | 25 to 29 | 77%<br>(60-90%)                | 23%<br>(10-40%)          | 1.4<br>(0.97-1.9)                           | 2.3%<br>(1.4-3.2%)                   | 5.3%<br>(2.3-8.3%)                  | 0.74<br>(0.31-1.2)  | 83<br>(51-120)     |
| Cyprus   | 1995 | Female | 30 to 34 | 79%<br>(61-91%)                | 21%<br>(9.3-39%)         | 1.3<br>(0.86-1.8)                           | 1.9%<br>(1.2-2.7%)                   | 5%<br>(2.7-7.5%)                    | 0.76<br>(0.4-1.1)   | 71<br>(44-100)     |
| Cyprus   | 1995 | Female | 35 to 39 | 80%<br>(64-91%)                | 20%<br>(9.1-36%)         | 1.1<br>(0.74-1.7)                           | 1.8%<br>(1.1-2.6%)                   | 5%<br>(2.7-7.5%)                    | 1.1<br>(0.59-1.6)   | 77<br>(45-110)     |
| Cyprus   | 1995 | Female | 40 to 44 | 81%<br>(64-92%)                | 19%<br>(8.2-36%)         | 1.3<br>(0.94-1.9)                           | 1.8%<br>(0.94-2.8%)                  | 5.4%<br>(3.1-8%)                    | 1.4<br>(0.76-2)     | 77<br>(43-120)     |
| Cyprus   | 1995 | Female | 45 to 49 | 81%<br>(61-92%)                | 19%<br>(8.4-39%)         | 1.9<br>(1.3-2.6)                            | 2.8%<br>(1.4-4.3%)                   | 6.8%<br>(3.8-10%)                   | 2.9<br>(1.6-4.3)    | 130<br>(67-200)    |
| Cyprus   | 1995 | Female | 50 to 54 | 80%<br>(62-91%)                | 20%<br>(9.1-38%)         | 2<br>(1.4-2.7)                              | 2.6%<br>(1.1-4.2%)                   | 6%<br>(3-8.8%)                      | 3.3<br>(1.6-4.8)    | 130<br>(51-200)    |
| Cyprus   | 1995 | Female | 55 to 59 | 79%<br>(62-91%)                | 21%<br>(8.8-38%)         | 1.7<br>(1.2-2.4)                            | 1.7%<br>(0.0076-3.4%)                | 3.8%<br>(1.1-6.4%)                  | 3.1<br>(0.88-5.3)   | 88<br>(0.46-180)   |
| Cyprus   | 1995 | Female | 60 to 64 | 78%<br>(57-91%)                | 22%<br>(8.8-43%)         | 1.5<br>(0.97-2.2)                           | 0.31%<br>(-1.5-2.4%)                 | 1.3%<br>(-1.3-4.3%)                 | 1.5<br>(-1.5-5)     | 17<br>(-83-130)    |

| Location | Year | Sex    | Age      | Prevalence of current drinkers | Prevalence of abstainers | Population average of standard drinks daily | Percent of total attributable deaths | Percent of total attributable DALYs | Attributable deaths | Attributable DALYs   |
|----------|------|--------|----------|--------------------------------|--------------------------|---------------------------------------------|--------------------------------------|-------------------------------------|---------------------|----------------------|
| Cyprus   | 1995 | Female | 65 to 69 | 76%<br>(55-90%)                | 24%<br>(10-45%)          | 1.4<br>(0.94-2)                             | -0.88%<br>(-3-1.3%)                  | -0.71%<br>(-3.5-2.1%)               | -1.3<br>(-6.6-4.1)  | -56<br>(-190-82)     |
| Cyprus   | 1995 | Female | 70 to 74 | 73%<br>(54-87%)                | 27%<br>(13-46%)          | 1.3<br>(0.83-1.9)                           | -1.8%<br>(-4.2-0.51%)                | -2.1%<br>(-5-0.85%)                 | -6.6<br>(-16-2.6)   | -140<br>(-330-40)    |
| Cyprus   | 1995 | Female | 75 to 79 | 69%<br>(48-86%)                | 31%<br>(14-52%)          | 1.2<br>(0.76-1.9)                           | -2.5%<br>(-5--0.013%)                | -2.9%<br>(-6.1-0.037%)              | -13<br>(-26-0.16)   | -190<br>(-380--0.97) |
| Cyprus   | 1995 | Female | 80 to 84 | 66%<br>(44-83%)                | 34%<br>(17-56%)          | 1.2<br>(0.73-1.7)                           | -2.5%<br>(-5--0.21%)                 | -3%<br>(-6--0.27%)                  | -20<br>(-41--1.8)   | -210<br>(-430--18)   |
| Cyprus   | 1995 | Female | 85 to 89 | 63%<br>(44-80%)                | 37%<br>(20-56%)          | 1.2<br>(0.68-1.8)                           | -2.2%<br>(-4.6--0.068%)              | -2.7%<br>(-5.4--0.13%)              | -16<br>(-31--0.76)  | -110<br>(-230--3.4)  |
| Cyprus   | 1995 | Female | 90 to 94 | 62%<br>(43-80%)                | 38%<br>(20-57%)          | 1.2<br>(0.65-1.9)                           | -1.9%<br>(-4.1-0.26%)                | -2.4%<br>(-5-0.13%)                 | -7.2<br>(-16-0.4)   | -35<br>(-77-4.7)     |
| Cyprus   | 1995 | Female | 95 plus  | 63%<br>(39-83%)                | 37%<br>(17-61%)          | 1.2<br>(0.59-2.1)                           | -1.6%<br>(-4.2-0.75%)                | -2.1%<br>(-5.3-0.64%)               | -2.4<br>(-5.9-0.71) | -7.3<br>(-19-3.4)    |
| Cyprus   | 1995 | Male   | All Ages | 79%<br>(69-86%)                | 21%<br>(14-31%)          | 3.8<br>(3.4-4.4)                            | 8.9%<br>(6.4-12%)                    | 9.3%<br>(5.5-13%)                   | 300<br>(180-440)    | 8600<br>(6300-11000) |
| Cyprus   | 1995 | Male   | 15 to 19 | 73%<br>(53-88%)                | 27%<br>(12-47%)          | 3.6<br>(2.3-5.1)                            | 9.3%<br>(5.4-14%)                    | 16%<br>(8.6-24%)                    | 4.7<br>(2.6-7.2)    | 390<br>(230-570)     |
| Cyprus   | 1995 | Male   | 20 to 24 | 78%<br>(60-91%)                | 22%<br>(9.2-40%)         | 5.6<br>(3.9-7.7)                            | 16%<br>(11-23%)                      | 24%<br>(15-34%)                     | 8.7<br>(5.5-12)     | 690<br>(480-940)     |
| Cyprus   | 1995 | Male   | 25 to 29 | 82%<br>(68-93%)                | 18%<br>(7.2-32%)         | 5.1<br>(3.7-6.6)                            | 14%<br>(9.4-18%)                     | 22%<br>(14-30%)                     | 6.6<br>(4.1-9.2)    | 510<br>(350-680)     |
| Cyprus   | 1995 | Male   | 30 to 34 | 85%<br>(69-94%)                | 15%<br>(5.6-31%)         | 4.6<br>(3.2-6.2)                            | 11%<br>(7.4-15%)                     | 18%<br>(12-25%)                     | 5.9<br>(3.7-8.1)    | 410<br>(280-560)     |
| Cyprus   | 1995 | Male   | 35 to 39 | 87%<br>(73-95%)                | 13%<br>(5-27%)           | 4.2<br>(2.9-5.8)                            | 9%<br>(6-12%)                        | 15%<br>(9.5-22%)                    | 6<br>(3.7-8.6)      | 390<br>(260-540)     |
| Cyprus   | 1995 | Male   | 40 to 44 | 88%<br>(74-96%)                | 12%<br>(4-26%)           | 4.8<br>(3.4-6.3)                            | 9.1%<br>(5.8-12%)                    | 15%<br>(9.2-21%)                    | 7.4<br>(4.5-10)     | 420<br>(280-590)     |
| Cyprus   | 1995 | Male   | 45 to 49 | 89%<br>(72-96%)                | 11%<br>(3.9-28%)         | 6.3<br>(4.5-8.3)                            | 12%<br>(8.1-16%)                     | 18%<br>(12-24%)                     | 13<br>(8-17)        | 610<br>(410-800)     |
| Cyprus   | 1995 | Male   | 50 to 54 | 89%<br>(75-96%)                | 11%<br>(4-25%)           | 6.9<br>(5-8.9)                              | 12%<br>(8.4-16%)                     | 18%<br>(12-23%)                     | 17<br>(11-22)       | 710<br>(470-930)     |
| Cyprus   | 1995 | Male   | 55 to 59 | 89%<br>(77-96%)                | 11%<br>(3.7-23%)         | 6.6<br>(5-8.6)                              | 12%<br>(7.4-16%)                     | 15%<br>(9.4-21%)                    | 22<br>(13-31)       | 800<br>(500-1100)    |
| Cyprus   | 1995 | Male   | 60 to 64 | 89%<br>(75-96%)                | 11%<br>(3.9-25%)         | 6.1<br>(4.5-8.3)                            | 11%<br>(6-15%)                       | 13%<br>(7.1-19%)                    | 25<br>(14-37)       | 780<br>(430-1100)    |
| Cyprus   | 1995 | Male   | 65 to 69 | 88%<br>(75-96%)                | 12%<br>(4-25%)           | 5.6<br>(4.2-7.3)                            | 9.6%<br>(5.4-14%)                    | 11%<br>(5.8-16%)                    | 31<br>(16-45)       | 760<br>(430-1100)    |
| Cyprus   | 1995 | Male   | 70 to 74 | 87%<br>(74-95%)                | 13%<br>(5.2-26%)         | 5.1<br>(3.7-6.7)                            | 8.3%<br>(3.7-13%)                    | 9.3%<br>(3.7-15%)                   | 37<br>(15-59)       | 730<br>(310-1200)    |
| Cyprus   | 1995 | Male   | 75 to 79 | 86%<br>(72-95%)                | 14%<br>(5.4-28%)         | 4.6<br>(3.2-6.5)                            | 7.2%<br>(2.4-12%)                    | 7.8%<br>(2.3-14%)                   | 36<br>(10-64)       | 560<br>(190-960)     |
| Cyprus   | 1995 | Male   | 80 to 84 | 84%<br>(68-94%)                | 16%<br>(6.3-32%)         | 4.4<br>(3.2-6)                              | 6.5%<br>(2.2-11%)                    | 6.9%<br>(2-12%)                     | 42<br>(12-73)       | 480<br>(170-820)     |



| Location | Year | Sex    | Age      | Prevalence of current drinkers | Prevalence of abstainers | Population average of standard drinks daily | Percent of total attributable deaths | Percent of total attributable DALYs | Attributable deaths | Attributable DALYs   |
|----------|------|--------|----------|--------------------------------|--------------------------|---------------------------------------------|--------------------------------------|-------------------------------------|---------------------|----------------------|
| Cyprus   | 1995 | Male   | 85 to 89 | 82%<br>(66-93%)                | 18%<br>(7.1-34%)         | 4.1<br>(2.7-5.9)                            | 5.7%<br>(1.7-10%)                    | 6%<br>(1.5-11%)                     | 27<br>(6.5-49)      | 220<br>(65-390)      |
| Cyprus   | 1995 | Male   | 90 to 94 | 82%<br>(66-94%)                | 18%<br>(6.5-34%)         | 4<br>(2.5-6)                                | 4.9%<br>(0.8-9.8%)                   | 5.1%<br>(0.47-11%)                  | 11<br>(1-24)        | 65<br>(11-130)       |
| Cyprus   | 1995 | Male   | 95 plus  | 83%<br>(63-95%)                | 17%<br>(5.2-37%)         | 4<br>(2.2-6.3)                              | 4.6%<br>(-0.062-10%)                 | 4.7%<br>(-0.58-11%)                 | 3.5<br>(-0.42-8)    | 13<br>(-0.19-29)     |
| Cyprus   | 2000 | Female | All Ages | 72%<br>(63-79%)                | 28%<br>(21-37%)          | 1.1<br>(0.93-1.3)                           | 0.15%<br>(-0.89-1.2%)                | -1.5%<br>(-3.5-0.53%)               | -45<br>(-100-15)    | 130<br>(-770-1100)   |
| Cyprus   | 2000 | Female | 15 to 19 | 69%<br>(50-85%)                | 31%<br>(15-50%)          | 1<br>(0.65-1.5)                             | 2%<br>(0.99-3.1%)                    | 5.8%<br>(2-11%)                     | 0.57<br>(0.2-1)     | 61<br>(31-97)        |
| Cyprus   | 2000 | Female | 20 to 24 | 74%<br>(56-88%)                | 26%<br>(12-44%)          | 1.4<br>(0.92-2)                             | 2.7%<br>(1.6-3.8%)                   | 5.8%<br>(2.4-9.6%)                  | 0.73<br>(0.3-1.2)   | 92<br>(57-130)       |
| Cyprus   | 2000 | Female | 25 to 29 | 77%<br>(60-89%)                | 23%<br>(11-40%)          | 1.4<br>(0.94-1.8)                           | 2.2%<br>(1.4-3.1%)                   | 5.3%<br>(2.4-8.3%)                  | 0.64<br>(0.29-1)    | 76<br>(48-110)       |
| Cyprus   | 2000 | Female | 30 to 34 | 79%<br>(61-91%)                | 21%<br>(9.2-39%)         | 1.3<br>(0.84-1.8)                           | 1.9%<br>(1.2-2.8%)                   | 4.9%<br>(2.5-7.6%)                  | 0.86<br>(0.44-1.3)  | 77<br>(47-110)       |
| Cyprus   | 2000 | Female | 35 to 39 | 80%<br>(63-91%)                | 20%<br>(9-37%)           | 1.1<br>(0.73-1.6)                           | 1.7%<br>(1-2.5%)                     | 5%<br>(2.7-7.3%)                    | 1<br>(0.56-1.5)     | 76<br>(45-110)       |
| Cyprus   | 2000 | Female | 40 to 44 | 81%<br>(64-92%)                | 19%<br>(8.4-36%)         | 1.3<br>(0.91-1.8)                           | 1.7%<br>(0.96-2.6%)                  | 5.5%<br>(3.2-8%)                    | 1.3<br>(0.77-1.9)   | 77<br>(45-110)       |
| Cyprus   | 2000 | Female | 45 to 49 | 81%<br>(61-91%)                | 19%<br>(8.5-39%)         | 1.8<br>(1.3-2.5)                            | 2.6%<br>(1.4-3.9%)                   | 6.8%<br>(4-9.7%)                    | 2.7<br>(1.6-3.8)    | 120<br>(68-180)      |
| Cyprus   | 2000 | Female | 50 to 54 | 80%<br>(62-91%)                | 20%<br>(8.8-38%)         | 2<br>(1.4-2.6)                              | 2.7%<br>(1.2-4.2%)                   | 6%<br>(3.1-8.7%)                    | 3.7<br>(1.9-5.4)    | 140<br>(64-210)      |
| Cyprus   | 2000 | Female | 55 to 59 | 79%<br>(62-91%)                | 21%<br>(8.6-38%)         | 1.7<br>(1.1-2.3)                            | 1.6%<br>(0.16-3.2%)                  | 3.9%<br>(1.4-6.6%)                  | 2.9<br>(1-5)        | 83<br>(7.8-160)      |
| Cyprus   | 2000 | Female | 60 to 64 | 78%<br>(58-91%)                | 22%<br>(9-42%)           | 1.5<br>(0.95-2.2)                           | 0.38%<br>(-1.3-2.3%)                 | 1.5%<br>(-0.99-4.3%)                | 1.6<br>(-1.1-4.6)   | 20<br>(-69-120)      |
| Cyprus   | 2000 | Female | 65 to 69 | 76%<br>(55-89%)                | 24%<br>(11-45%)          | 1.4<br>(0.93-1.9)                           | -0.75%<br>(-2.7-1.2%)                | -0.53%<br>(-3.2-2.2%)               | -0.99<br>(-6-4)     | -49<br>(-170-81)     |
| Cyprus   | 2000 | Female | 70 to 74 | 72%<br>(53-87%)                | 28%<br>(13-47%)          | 1.3<br>(0.8-1.9)                            | -1.7%<br>(-3.8-0.48%)                | -2%<br>(-4.7-0.78%)                 | -6.1<br>(-14-2.3)   | -130<br>(-290-38)    |
| Cyprus   | 2000 | Female | 75 to 79 | 69%<br>(48-86%)                | 31%<br>(14-52%)          | 1.2<br>(0.72-1.8)                           | -2.2%<br>(-4.4--0.043%)              | -2.7%<br>(-5.5--0.068%)             | -11<br>(-23--0.27)  | -170<br>(-340--3.3)  |
| Cyprus   | 2000 | Female | 80 to 84 | 66%<br>(44-83%)                | 34%<br>(17-56%)          | 1.1<br>(0.73-1.7)                           | -2.3%<br>(-4.4--0.24%)               | -2.8%<br>(-5.5--0.34%)              | -17<br>(-33--2.1)   | -180<br>(-350--19)   |
| Cyprus   | 2000 | Female | 85 to 89 | 63%<br>(44-80%)                | 37%<br>(20-56%)          | 1.1<br>(0.67-1.7)                           | -2.2%<br>(-4.3--0.11%)               | -2.7%<br>(-5.2--0.22%)              | -16<br>(-31--1.3)   | -120<br>(-230--6)    |
| Cyprus   | 2000 | Female | 90 to 94 | 62%<br>(42-80%)                | 38%<br>(20-58%)          | 1.1<br>(0.62-1.8)                           | -1.8%<br>(-4-0.12%)                  | -2.3%<br>(-4.9--0.051%)             | -7.5<br>(-16--0.17) | -36<br>(-81-2.3)     |
| Cyprus   | 2000 | Female | 95 plus  | 63%<br>(39-83%)                | 37%<br>(17-61%)          | 1.2<br>(0.57-2)                             | -1.6%<br>(-4.1-0.66%)                | -2.1%<br>(-5.1-0.53%)               | -2.6<br>(-6.2-0.64) | -7.8<br>(-20-3.3)    |
| Cyprus   | 2000 | Male   | All Ages | 80%<br>(70-87%)                | 20%<br>(13-30%)          | 3.9<br>(3.4-4.5)                            | 8.6%<br>(6.3-11%)                    | 8.8%<br>(5.4-13%)                   | 290<br>(180-420)    | 8400<br>(6200-11000) |

| Location | Year | Sex    | Age      | Prevalence of current drinkers | Prevalence of abstainers | Population average of standard drinks daily | Percent of total attributable deaths | Percent of total attributable DALYs | Attributable deaths | Attributable DALYs |
|----------|------|--------|----------|--------------------------------|--------------------------|---------------------------------------------|--------------------------------------|-------------------------------------|---------------------|--------------------|
| Cyprus   | 2000 | Male   | 15 to 19 | 73%<br>(52-88%)                | 27%<br>(12-48%)          | 3.5<br>(2.2-5.1)                            | 9.1%<br>(5.4-14%)                    | 15%<br>(8.4-24%)                    | 4.7<br>(2.5-7.1)    | 380<br>(230-550)   |
| Cyprus   | 2000 | Male   | 20 to 24 | 78%<br>(61-90%)                | 22%<br>(9.9-39%)         | 5.5<br>(3.8-7.4)                            | 16%<br>(11-22%)                      | 24%<br>(15-34%)                     | 8.4<br>(5.3-12)     | 670<br>(460-910)   |
| Cyprus   | 2000 | Male   | 25 to 29 | 82%<br>(67-92%)                | 18%<br>(8-33%)           | 5<br>(3.6-6.5)                              | 14%<br>(9.4-18%)                     | 21%<br>(13-29%)                     | 6.9<br>(4.3-9.6)    | 520<br>(350-700)   |
| Cyprus   | 2000 | Male   | 30 to 34 | 85%<br>(69-94%)                | 15%<br>(6.1-31%)         | 4.5<br>(3.2-6)                              | 10%<br>(7.2-14%)                     | 18%<br>(11-24%)                     | 5.7<br>(3.7-7.9)    | 410<br>(280-560)   |
| Cyprus   | 2000 | Male   | 35 to 39 | 87%<br>(75-95%)                | 13%<br>(5-25%)           | 4.1<br>(2.9-5.6)                            | 8.9%<br>(5.9-12%)                    | 15%<br>(9.1-21%)                    | 6.3<br>(3.9-8.9)    | 410<br>(270-560)   |
| Cyprus   | 2000 | Male   | 40 to 44 | 88%<br>(75-96%)                | 12%<br>(4-25%)           | 4.7<br>(3.4-6.1)                            | 8.4%<br>(5.5-12%)                    | 14%<br>(8.6-20%)                    | 7<br>(4.2-9.9)      | 410<br>(270-570)   |
| Cyprus   | 2000 | Male   | 45 to 49 | 89%<br>(73-96%)                | 11%<br>(3.9-27%)         | 6.2<br>(4.4-8.2)                            | 11%<br>(7.8-15%)                     | 18%<br>(12-23%)                     | 12<br>(8.1-17)      | 610<br>(420-810)   |
| Cyprus   | 2000 | Male   | 50 to 54 | 89%<br>(75-96%)                | 11%<br>(3.7-25%)         | 6.7<br>(4.9-8.8)                            | 12%<br>(7.7-15%)                     | 17%<br>(11-23%)                     | 16<br>(10-22)       | 690<br>(460-920)   |
| Cyprus   | 2000 | Male   | 55 to 59 | 89%<br>(77-96%)                | 11%<br>(3.6-23%)         | 6.4<br>(4.7-8.3)                            | 11%<br>(6.8-16%)                     | 15%<br>(8.6-21%)                    | 24<br>(13-33)       | 850<br>(520-1200)  |
| Cyprus   | 2000 | Male   | 60 to 64 | 89%<br>(74-96%)                | 11%<br>(3.9-26%)         | 6<br>(4.3-8)                                | 10%<br>(5.4-15%)                     | 13%<br>(6.3-18%)                    | 25<br>(12-37)       | 760<br>(410-1100)  |
| Cyprus   | 2000 | Male   | 65 to 69 | 88%<br>(74-96%)                | 12%<br>(4.1-26%)         | 5.4<br>(4.1-6.9)                            | 9%<br>(4.9-13%)                      | 10%<br>(5.2-16%)                    | 29<br>(14-44)       | 720<br>(400-1100)  |
| Cyprus   | 2000 | Male   | 70 to 74 | 87%<br>(74-95%)                | 13%<br>(5.2-26%)         | 4.9<br>(3.5-6.5)                            | 7.7%<br>(3.2-13%)                    | 8.6%<br>(3.3-14%)                   | 33<br>(13-55)       | 670<br>(280-1100)  |
| Cyprus   | 2000 | Male   | 75 to 79 | 86%<br>(72-94%)                | 14%<br>(5.5-28%)         | 4.5<br>(3.1-6.1)                            | 6.6%<br>(2-11%)                      | 7.2%<br>(1.9-13%)                   | 33<br>(8.9-58)      | 520<br>(160-890)   |
| Cyprus   | 2000 | Male   | 80 to 84 | 84%<br>(69-93%)                | 16%<br>(6.6-31%)         | 4.3<br>(3-5.7)                              | 5.9%<br>(2.1-10%)                    | 6.4%<br>(1.9-11%)                   | 36<br>(10-63)       | 420<br>(150-720)   |
| Cyprus   | 2000 | Male   | 85 to 89 | 83%<br>(67-93%)                | 17%<br>(7.4-33%)         | 4<br>(2.7-5.6)                              | 5.4%<br>(1.5-9.9%)                   | 5.7%<br>(1.2-11%)                   | 27<br>(5.9-52)      | 220<br>(61-410)    |
| Cyprus   | 2000 | Male   | 90 to 94 | 83%<br>(67-93%)                | 17%<br>(6.7-33%)         | 3.9<br>(2.5-5.9)                            | 4.7%<br>(0.54-9.8%)                  | 4.9%<br>(0.11-11%)                  | 11<br>(0.26-25)     | 65<br>(7.5-140)    |
| Cyprus   | 2000 | Male   | 95 plus  | 83%<br>(64-95%)                | 17%<br>(5.4-36%)         | 3.9<br>(2.1-6.4)                            | 4.4%<br>(-0.19-10%)                  | 4.6%<br>(-0.69-11%)                 | 3.4<br>(-0.5-8.5)   | 13<br>(-0.55-30)   |
| Cyprus   | 2005 | Female | All Ages | 70%<br>(62-79%)                | 30%<br>(21-38%)          | 1<br>(0.87-1.2)                             | 0.27%<br>(-0.63-1.2%)                | -1.2%<br>(-3-0.57%)                 | -37<br>(-89-17)     | 250<br>(-580-1100) |
| Cyprus   | 2005 | Female | 15 to 19 | 70%<br>(51-85%)                | 30%<br>(15-49%)          | 0.98<br>(0.63-1.4)                          | 1.9%<br>(0.88-3%)                    | 5.8%<br>(1.6-10%)                   | 0.51<br>(0.15-0.92) | 57<br>(28-91)      |
| Cyprus   | 2005 | Female | 20 to 24 | 77%<br>(60-89%)                | 23%<br>(11-40%)          | 1.3<br>(0.89-1.9)                           | 2.5%<br>(1.6-3.6%)                   | 5.8%<br>(2.3-9.5%)                  | 0.64<br>(0.25-1)    | 90<br>(56-130)     |
| Cyprus   | 2005 | Female | 25 to 29 | 77%<br>(62-89%)                | 23%<br>(11-38%)          | 1.3<br>(0.9-1.7)                            | 2.1%<br>(1.3-2.9%)                   | 5.2%<br>(2.2-8.3%)                  | 0.6<br>(0.27-0.96)  | 78<br>(51-110)     |
| Cyprus   | 2005 | Female | 30 to 34 | 76%<br>(58-89%)                | 24%<br>(11-42%)          | 1.1<br>(0.73-1.6)                           | 1.8%<br>(1.1-2.5%)                   | 4.7%<br>(2.4-7.1%)                  | 0.75<br>(0.39-1.1)  | 73<br>(47-100)     |

| Location | Year | Sex    | Age      | Prevalence of current drinkers | Prevalence of abstainers | Population average of standard drinks daily | Percent of total attributable deaths | Percent of total attributable DALYs | Attributable deaths | Attributable DALYs   |
|----------|------|--------|----------|--------------------------------|--------------------------|---------------------------------------------|--------------------------------------|-------------------------------------|---------------------|----------------------|
| Cyprus   | 2005 | Female | 35 to 39 | 76%<br>(60-89%)                | 24%<br>(11-40%)          | 0.98<br>(0.63-1.4)                          | 1.5%<br>(0.95-2.2%)                  | 4.9%<br>(2.8-7.1%)                  | 0.85<br>(0.5-1.2)   | 67<br>(43-95)        |
| Cyprus   | 2005 | Female | 40 to 44 | 78%<br>(60-90%)                | 22%<br>(9.9-40%)         | 1.2<br>(0.8-1.6)                            | 1.7%<br>(0.97-2.5%)                  | 5.3%<br>(3.3-7.6%)                  | 1.4<br>(0.9-2.1)    | 85<br>(52-120)       |
| Cyprus   | 2005 | Female | 45 to 49 | 78%<br>(58-90%)                | 22%<br>(10-42%)          | 1.6<br>(1.1-2.2)                            | 2.2%<br>(1.2-3.3%)                   | 6.5%<br>(4.1-9%)                    | 2.6<br>(1.6-3.6)    | 120<br>(69-180)      |
| Cyprus   | 2005 | Female | 50 to 54 | 77%<br>(58-89%)                | 23%<br>(11-42%)          | 1.7<br>(1.2-2.3)                            | 2.4%<br>(1.2-3.7%)                   | 5.7%<br>(3.3-8.2%)                  | 3.5<br>(2-5.1)      | 130<br>(68-200)      |
| Cyprus   | 2005 | Female | 55 to 59 | 76%<br>(58-89%)                | 24%<br>(11-42%)          | 1.5<br>(1-2.1)                              | 1.6%<br>(0.38-2.9%)                  | 3.9%<br>(1.7-6.1%)                  | 3.3<br>(1.5-5.2)    | 94<br>(24-170)       |
| Cyprus   | 2005 | Female | 60 to 64 | 74%<br>(54-90%)                | 26%<br>(10-46%)          | 1.3<br>(0.83-1.9)                           | 0.56%<br>(-0.86-2.1%)                | 1.8%<br>(-0.46-4.1%)                | 2<br>(-0.51-4.6)    | 32<br>(-50-120)      |
| Cyprus   | 2005 | Female | 65 to 69 | 70%<br>(49-86%)                | 30%<br>(14-51%)          | 1.2<br>(0.75-1.6)                           | -0.31%<br>(-1.7-1.2%)                | 0.086%<br>(-1.9-2.1%)               | 0.16<br>(-3.6-3.9)  | -21<br>(-120-82)     |
| Cyprus   | 2005 | Female | 70 to 74 | 68%<br>(48-84%)                | 32%<br>(16-52%)          | 1.1<br>(0.66-1.6)                           | -1.2%<br>(-2.8-0.42%)                | -1.3%<br>(-3.4-0.78%)               | -3.7<br>(-9.5-2.2)  | -90<br>(-210-33)     |
| Cyprus   | 2005 | Female | 75 to 79 | 67%<br>(46-83%)                | 33%<br>(17-54%)          | 1<br>(0.63-1.6)                             | -1.9%<br>(-3.9--0.15%)               | -2.3%<br>(-4.8--0.072%)             | -11<br>(-22--0.32)  | -160<br>(-330--12)   |
| Cyprus   | 2005 | Female | 80 to 84 | 64%<br>(42-81%)                | 36%<br>(19-58%)          | 1<br>(0.63-1.5)                             | -2.1%<br>(-4--0.3%)                  | -2.6%<br>(-4.8--0.38%)              | -15<br>(-29--2.2)   | -170<br>(-320--23)   |
| Cyprus   | 2005 | Female | 85 to 89 | 61%<br>(41-78%)                | 39%<br>(22-59%)          | 1<br>(0.59-1.5)                             | -1.9%<br>(-3.8--0.23%)               | -2.4%<br>(-4.8--0.29%)              | -14<br>(-27--1.7)   | -100<br>(-200--12)   |
| Cyprus   | 2005 | Female | 90 to 94 | 60%<br>(40-79%)                | 40%<br>(21-60%)          | 1<br>(0.56-1.7)                             | -1.7%<br>(-3.7--0.0055%)             | -2.2%<br>(-4.5--0.13%)              | -7.4<br>(-16--0.46) | -36<br>(-77--0.12)   |
| Cyprus   | 2005 | Female | 95 plus  | 61%<br>(36-82%)                | 39%<br>(18-64%)          | 1.1<br>(0.51-1.9)                           | -1.5%<br>(-3.8-0.55%)                | -2%<br>(-4.7-0.38%)                 | -2.7<br>(-6.3-0.52) | -8.2<br>(-20-3)      |
| Cyprus   | 2005 | Male   | All Ages | 83%<br>(74-89%)                | 17%<br>(11-26%)          | 4<br>(3.4-4.5)                              | 8.1%<br>(5.9-10%)                    | 8%<br>(4.6-12%)                     | 260<br>(150-390)    | 8200<br>(6100-11000) |
| Cyprus   | 2005 | Male   | 15 to 19 | 76%<br>(59-89%)                | 24%<br>(11-41%)          | 3.4<br>(2.2-4.8)                            | 8.5%<br>(4.9-13%)                    | 15%<br>(8.1-23%)                    | 4<br>(2.1-6.1)      | 340<br>(200-490)     |
| Cyprus   | 2005 | Male   | 20 to 24 | 82%<br>(67-92%)                | 18%<br>(7.9-33%)         | 5.4<br>(3.9-7.1)                            | 15%<br>(11-21%)                      | 23%<br>(14-33%)                     | 9.2<br>(5.7-13)     | 750<br>(510-1000)    |
| Cyprus   | 2005 | Male   | 25 to 29 | 86%<br>(75-94%)                | 14%<br>(6-25%)           | 4.9<br>(3.7-6.3)                            | 13%<br>(9-17%)                       | 21%<br>(13-28%)                     | 7.6<br>(4.7-11)     | 590<br>(390-780)     |
| Cyprus   | 2005 | Male   | 30 to 34 | 88%<br>(77-95%)                | 12%<br>(4.7-23%)         | 4.4<br>(3.2-5.9)                            | 10%<br>(7.1-14%)                     | 17%<br>(11-24%)                     | 5.8<br>(3.7-8.1)    | 420<br>(290-570)     |
| Cyprus   | 2005 | Male   | 35 to 39 | 88%<br>(77-95%)                | 12%<br>(4.5-23%)         | 3.9<br>(2.8-5.3)                            | 8.5%<br>(5.8-12%)                    | 14%<br>(9.2-20%)                    | 5.3<br>(3.3-7.4)    | 350<br>(240-480)     |
| Cyprus   | 2005 | Male   | 40 to 44 | 90%<br>(78-96%)                | 10%<br>(3.9-22%)         | 4.4<br>(3.3-5.8)                            | 8%<br>(5.2-11%)                      | 13%<br>(8-19%)                      | 6.7<br>(4-9.6)      | 400<br>(260-560)     |
| Cyprus   | 2005 | Male   | 45 to 49 | 91%<br>(80-97%)                | 9.1%<br>(3.5-20%)        | 6<br>(4.4-7.8)                              | 10%<br>(6.8-14%)                     | 17%<br>(10-22%)                     | 13<br>(7.9-17)      | 630<br>(400-840)     |
| Cyprus   | 2005 | Male   | 50 to 54 | 90%<br>(79-97%)                | 9.5%<br>(3.4-21%)        | 6.5<br>(4.8-8.3)                            | 11%<br>(7-15%)                       | 16%<br>(9.9-22%)                    | 17<br>(10-23)       | 720<br>(480-970)     |

| Location | Year | Sex    | Age      | Prevalence of current drinkers | Prevalence of abstainers | Population average of standard drinks daily | Percent of total attributable deaths | Percent of total attributable DALYs | Attributable deaths | Attributable DALYs |
|----------|------|--------|----------|--------------------------------|--------------------------|---------------------------------------------|--------------------------------------|-------------------------------------|---------------------|--------------------|
| Cyprus   | 2005 | Male   | 55 to 59 | 90%<br>(80-96%)                | 9.8%<br>(3.5-20%)        | 6.1<br>(4.7-7.9)                            | 10%<br>(6.1-14%)                     | 14%<br>(7.8-19%)                    | 23<br>(13-33)       | 850<br>(510-1200)  |
| Cyprus   | 2005 | Male   | 60 to 64 | 90%<br>(79-97%)                | 9.8%<br>(3.4-21%)        | 5.8<br>(4.2-7.6)                            | 9.3%<br>(4.6-14%)                    | 11%<br>(5.5-17%)                    | 24<br>(11-36)       | 750<br>(370-1100)  |
| Cyprus   | 2005 | Male   | 65 to 69 | 89%<br>(78-96%)                | 11%<br>(3.5-22%)         | 5.3<br>(4-6.7)                              | 8%<br>(3.9-12%)                      | 9.3%<br>(4.3-14%)                   | 28<br>(13-43)       | 730<br>(360-1100)  |
| Cyprus   | 2005 | Male   | 70 to 74 | 88%<br>(77-95%)                | 12%<br>(4.6-23%)         | 4.7<br>(3.4-6.2)                            | 6.7%<br>(2.6-11%)                    | 7.5%<br>(2.7-13%)                   | 28<br>(9.9-47)      | 580<br>(230-960)   |
| Cyprus   | 2005 | Male   | 75 to 79 | 87%<br>(75-95%)                | 13%<br>(5-25%)           | 4.3<br>(3-5.9)                              | 5.7%<br>(1.7-10%)                    | 6.2%<br>(1.6-12%)                   | 30<br>(7.4-54)      | 470<br>(140-840)   |
| Cyprus   | 2005 | Male   | 80 to 84 | 85%<br>(70-94%)                | 15%<br>(6.4-30%)         | 4<br>(2.9-5.4)                              | 5%<br>(1.6-8.7%)                     | 5.3%<br>(1.3-9.7%)                  | 28<br>(7-51)        | 340<br>(110-600)   |
| Cyprus   | 2005 | Male   | 85 to 89 | 82%<br>(67-93%)                | 18%<br>(7.4-33%)         | 3.7<br>(2.5-5.3)                            | 4.4%<br>(1.2-8.5%)                   | 4.6%<br>(0.97-9.3%)                 | 21<br>(4.3-42)      | 180<br>(48-340)    |
| Cyprus   | 2005 | Male   | 90 to 94 | 82%<br>(67-93%)                | 18%<br>(6.7-33%)         | 3.7<br>(2.3-5.4)                            | 4%<br>(0.14-8.9%)                    | 4.1%<br>(-0.29-9.5%)                | 11<br>(-0.76-25)    | 61<br>(2.1-140)    |
| Cyprus   | 2005 | Male   | 95 plus  | 83%<br>(64-95%)                | 17%<br>(5.3-36%)         | 3.6<br>(1.9-6)                              | 3.8%<br>(-0.41-9.4%)                 | 3.8%<br>(-0.92-10%)                 | 2.9<br>(-0.71-7.9)  | 11<br>(-1.3-29)    |
| Cyprus   | 2010 | Female | All Ages | 70%<br>(62-78%)                | 30%<br>(22-38%)          | 1<br>(0.85-1.2)                             | 0.38%<br>(-0.39-1.2%)                | -0.94%<br>(-2.6-0.68%)              | -29<br>(-79-21)     | 370<br>(-380-1100) |
| Cyprus   | 2010 | Female | 15 to 19 | 69%<br>(51-85%)                | 31%<br>(15-49%)          | 0.96<br>(0.62-1.4)                          | 1.5%<br>(0.8-2.1%)                   | 5.2%<br>(1.5-9.5%)                  | 0.3<br>(0.087-0.55) | 44<br>(25-67)      |
| Cyprus   | 2010 | Female | 20 to 24 | 76%<br>(59-88%)                | 24%<br>(12-41%)          | 1.3<br>(0.88-1.9)                           | 2.1%<br>(1.4-2.9%)                   | 5.3%<br>(2.3-8.3%)                  | 0.41<br>(0.17-0.65) | 84<br>(54-120)     |
| Cyprus   | 2010 | Female | 25 to 29 | 77%<br>(61-89%)                | 23%<br>(11-39%)          | 1.3<br>(0.87-1.7)                           | 1.8%<br>(1.2-2.5%)                   | 4.6%<br>(2.3-7.2%)                  | 0.52<br>(0.25-0.81) | 85<br>(56-120)     |
| Cyprus   | 2010 | Female | 30 to 34 | 75%<br>(57-89%)                | 25%<br>(11-43%)          | 1.1<br>(0.68-1.5)                           | 1.5%<br>(1-2.1%)                     | 4.4%<br>(2.5-6.4%)                  | 0.6<br>(0.34-0.9)   | 72<br>(48-100)     |
| Cyprus   | 2010 | Female | 35 to 39 | 76%<br>(59-89%)                | 24%<br>(11-41%)          | 0.95<br>(0.6-1.4)                           | 1.4%<br>(0.87-2%)                    | 4.7%<br>(2.9-6.7%)                  | 0.75<br>(0.46-1.1)  | 67<br>(43-93)      |
| Cyprus   | 2010 | Female | 40 to 44 | 77%<br>(59-90%)                | 23%<br>(10-41%)          | 1.1<br>(0.74-1.6)                           | 1.6%<br>(0.94-2.3%)                  | 5.3%<br>(3.4-7.4%)                  | 1.3<br>(0.84-1.9)   | 82<br>(51-120)     |
| Cyprus   | 2010 | Female | 45 to 49 | 78%<br>(56-90%)                | 22%<br>(10-44%)          | 1.6<br>(1.1-2.3)                            | 2.1%<br>(1.2-3.2%)                   | 6.6%<br>(4.3-9.3%)                  | 2.5<br>(1.6-3.5)    | 120<br>(72-180)    |
| Cyprus   | 2010 | Female | 50 to 54 | 76%<br>(57-89%)                | 24%<br>(11-43%)          | 1.7<br>(1.2-2.4)                            | 2.3%<br>(1.2-3.5%)                   | 5.9%<br>(3.6-8.3%)                  | 3.6<br>(2.2-5.2)    | 140<br>(75-220)    |
| Cyprus   | 2010 | Female | 55 to 59 | 76%<br>(58-89%)                | 24%<br>(11-42%)          | 1.4<br>(0.97-2.1)                           | 1.5%<br>(0.37-2.7%)                  | 4.1%<br>(2.1-6.4%)                  | 3.2<br>(1.6-5)      | 94<br>(24-170)     |
| Cyprus   | 2010 | Female | 60 to 64 | 74%<br>(54-89%)                | 26%<br>(11-46%)          | 1.3<br>(0.79-1.9)                           | 0.62%<br>(-0.61-2%)                  | 2.1%<br>(0.053-4.3%)                | 2.5<br>(0.064-5.1)  | 42<br>(-44-130)    |
| Cyprus   | 2010 | Female | 65 to 69 | 69%<br>(46-86%)                | 31%<br>(14-54%)          | 1.1<br>(0.72-1.7)                           | -0.071%<br>(-1.3-1.2%)               | 0.6%<br>(-1.2-2.3%)                 | 0.96<br>(-1.8-3.7)  | -5.1<br>(-89-77)   |
| Cyprus   | 2010 | Female | 70 to 74 | 67%<br>(47-83%)                | 33%<br>(17-53%)          | 1<br>(0.64-1.6)                             | -0.75%<br>(-2.1-0.62%)               | -0.68%<br>(-2.6-1.2%)               | -1.7<br>(-6.3-3)    | -56<br>(-160-46)   |

| Location | Year | Sex    | Age      | Prevalence of current drinkers | Prevalence of abstainers | Population average of standard drinks daily | Percent of total attributable deaths | Percent of total attributable DALYs | Attributable deaths | Attributable DALYs   |
|----------|------|--------|----------|--------------------------------|--------------------------|---------------------------------------------|--------------------------------------|-------------------------------------|---------------------|----------------------|
| Cyprus   | 2010 | Female | 75 to 79 | 66%<br>(44-83%)                | 34%<br>(17-56%)          | 1<br>(0.6-1.6)                              | -1.4%<br>(-3.1-0.1%)                 | -1.7%<br>(-3.9-0.24%)               | -7.2<br>(-16-1)     | -120<br>(-260-8.8)   |
| Cyprus   | 2010 | Female | 80 to 84 | 63%<br>(41-81%)                | 37%<br>(19-59%)          | 1<br>(0.61-1.5)                             | -1.8%<br>(-3.5--0.17%)               | -2.2%<br>(-4.4--0.25%)              | -14<br>(-27--1.5)   | -150<br>(-300--14)   |
| Cyprus   | 2010 | Female | 85 to 89 | 60%<br>(40-78%)                | 40%<br>(22-60%)          | 0.99<br>(0.56-1.6)                          | -1.6%<br>(-3.3--0.039%)              | -2%<br>(-4.2--0.1%)                 | -13<br>(-26--0.64)  | -95<br>(-190--2.4)   |
| Cyprus   | 2010 | Female | 90 to 94 | 59%<br>(39-78%)                | 41%<br>(22-61%)          | 1<br>(0.54-1.6)                             | -1.3%<br>(-3-0.13%)                  | -1.8%<br>(-3.9-0.036%)              | -7<br>(-15-0.14)    | -34<br>(-76-3.3)     |
| Cyprus   | 2010 | Female | 95 plus  | 61%<br>(36-82%)                | 39%<br>(18-64%)          | 1<br>(0.49-1.9)                             | -1.2%<br>(-3.1-0.53%)                | -1.7%<br>(-4.1-0.42%)               | -2.7<br>(-6.6-0.66) | -8<br>(-21-3.7)      |
| Cyprus   | 2010 | Male   | All Ages | 83%<br>(75-89%)                | 17%<br>(11-25%)          | 4.1<br>(3.4-4.8)                            | 7.5%<br>(5.4-9.8%)                   | 7.4%<br>(4.2-11%)                   | 250<br>(140-380)    | 7900<br>(5600-10000) |
| Cyprus   | 2010 | Male   | 15 to 19 | 76%<br>(57-89%)                | 24%<br>(11-43%)          | 3.4<br>(2.2-4.9)                            | 6.8%<br>(4.1-9.8%)                   | 14%<br>(7.8-22%)                    | 2.6<br>(1.4-3.9)    | 240<br>(150-340)     |
| Cyprus   | 2010 | Male   | 20 to 24 | 82%<br>(66-92%)                | 18%<br>(8.3-34%)         | 5.4<br>(3.8-7.2)                            | 14%<br>(9.4-18%)                     | 21%<br>(14-30%)                     | 7.3<br>(4.7-10)     | 650<br>(460-870)     |
| Cyprus   | 2010 | Male   | 25 to 29 | 86%<br>(75-93%)                | 14%<br>(6.5-25%)         | 4.9<br>(3.6-6.3)                            | 11%<br>(7.9-15%)                     | 19%<br>(12-26%)                     | 6.4<br>(4.1-8.8)    | 550<br>(390-730)     |
| Cyprus   | 2010 | Male   | 30 to 34 | 88%<br>(77-95%)                | 12%<br>(5-23%)           | 4.4<br>(3.1-5.9)                            | 9%<br>(6.3-12%)                      | 16%<br>(10-21%)                     | 5.3<br>(3.4-7.3)    | 420<br>(290-560)     |
| Cyprus   | 2010 | Male   | 35 to 39 | 88%<br>(77-95%)                | 12%<br>(4.6-23%)         | 3.9<br>(2.8-5.4)                            | 7.5%<br>(5.1-10%)                    | 13%<br>(8.7-19%)                    | 4.5<br>(2.9-6.4)    | 320<br>(220-440)     |
| Cyprus   | 2010 | Male   | 40 to 44 | 90%<br>(77-96%)                | 10%<br>(3.8-23%)         | 4.4<br>(3.2-5.9)                            | 7.6%<br>(4.9-10%)                    | 13%<br>(7.6-19%)                    | 5.9<br>(3.5-8.7)    | 360<br>(240-510)     |
| Cyprus   | 2010 | Male   | 45 to 49 | 91%<br>(77-96%)                | 9.1%<br>(3.6-23%)        | 5.9<br>(4.3-8)                              | 9.7%<br>(6.2-13%)                    | 16%<br>(9.5-21%)                    | 11<br>(6.7-15)      | 580<br>(370-770)     |
| Cyprus   | 2010 | Male   | 50 to 54 | 90%<br>(78-96%)                | 9.6%<br>(3.6-22%)        | 6.4<br>(4.8-8.5)                            | 10%<br>(6.7-14%)                     | 15%<br>(9.5-20%)                    | 16<br>(10-22)       | 730<br>(480-970)     |
| Cyprus   | 2010 | Male   | 55 to 59 | 90%<br>(79-97%)                | 10%<br>(3.4-21%)         | 6.1<br>(4.6-8)                              | 9.5%<br>(5.9-13%)                    | 13%<br>(7.5-18%)                    | 20<br>(12-29)       | 780<br>(490-1100)    |
| Cyprus   | 2010 | Male   | 60 to 64 | 90%<br>(78-97%)                | 10%<br>(3.5-22%)         | 5.7<br>(4.2-7.8)                            | 8.5%<br>(4.5-13%)                    | 11%<br>(5.3-16%)                    | 25<br>(13-38)       | 820<br>(450-1200)    |
| Cyprus   | 2010 | Male   | 65 to 69 | 89%<br>(77-96%)                | 11%<br>(3.9-23%)         | 5.2<br>(4-6.8)                              | 7.4%<br>(3.8-11%)                    | 8.8%<br>(4.1-14%)                   | 26<br>(13-41)       | 710<br>(370-1100)    |
| Cyprus   | 2010 | Male   | 70 to 74 | 88%<br>(76-95%)                | 12%<br>(4.8-24%)         | 4.7<br>(3.3-6.3)                            | 6.2%<br>(2.6-10%)                    | 7%<br>(2.6-12%)                     | 29<br>(11-49)       | 610<br>(260-1000)    |
| Cyprus   | 2010 | Male   | 75 to 79 | 87%<br>(74-95%)                | 13%<br>(5.3-26%)         | 4.2<br>(3-6)                                | 5.4%<br>(1.8-9.6%)                   | 5.9%<br>(1.7-11%)                   | 28<br>(7.9-52)      | 460<br>(160-840)     |
| Cyprus   | 2010 | Male   | 80 to 84 | 84%<br>(68-93%)                | 16%<br>(6.8-32%)         | 3.9<br>(2.7-5.4)                            | 4.7%<br>(1.5-8.7%)                   | 5.1%<br>(1.3-9.9%)                  | 28<br>(6.9-53)      | 340<br>(110-630)     |
| Cyprus   | 2010 | Male   | 85 to 89 | 82%<br>(66-92%)                | 18%<br>(7.9-34%)         | 3.7<br>(2.4-5.4)                            | 4.3%<br>(1.2-8.5%)                   | 4.5%<br>(0.94-9.4%)                 | 23<br>(4.8-47)      | 190<br>(55-390)      |
| Cyprus   | 2010 | Male   | 90 to 94 | 82%<br>(67-93%)                | 18%<br>(7.1-33%)         | 3.6<br>(2.3-5.5)                            | 3.9%<br>(0.31-8.5%)                  | 4%<br>(-0.12-9.2%)                  | 11<br>(-0.34-26)    | 66<br>(5.3-140)      |

| Location | Year | Sex    | Age      | Prevalence of current drinkers | Prevalence of abstainers | Population average of standard drinks daily | Percent of total attributable deaths | Percent of total attributable DALYs | Attributable deaths  | Attributable DALYs   |
|----------|------|--------|----------|--------------------------------|--------------------------|---------------------------------------------|--------------------------------------|-------------------------------------|----------------------|----------------------|
| Cyprus   | 2010 | Male   | 95 plus  | 82%<br>(64-94%)                | 18%<br>(5.6-36%)         | 3.5<br>(1.9-5.9)                            | 3.8%<br>(-0.3-9.2%)                  | 3.9%<br>(-0.95-10%)                 | 3.2<br>(-0.79-8.5)   | 13<br>(-0.99-31)     |
| Cyprus   | 2016 | Female | All Ages | 72%<br>(64-80%)                | 28%<br>(20-36%)          | 1.1<br>(0.77-1.5)                           | 0.38%<br>(-0.51-1.3%)                | -0.93%<br>(-2.7-0.86%)              | -33<br>(-95-30)      | 400<br>(-510-1400)   |
| Cyprus   | 2016 | Female | 15 to 19 | 68%<br>(48-84%)                | 32%<br>(16-52%)          | 0.92<br>(0.54-1.4)                          | 1.4%<br>(0.77-2.1%)                  | 5%<br>(1.4-9%)                      | 0.25<br>(0.071-0.45) | 40<br>(23-61)        |
| Cyprus   | 2016 | Female | 20 to 24 | 73%<br>(55-87%)                | 27%<br>(13-45%)          | 1.3<br>(0.75-2)                             | 2.1%<br>(1.4-2.9%)                   | 5.1%<br>(2.1-8.1%)                  | 0.4<br>(0.16-0.64)   | 87<br>(56-120)       |
| Cyprus   | 2016 | Female | 25 to 29 | 76%<br>(59-89%)                | 24%<br>(11-41%)          | 1.2<br>(0.78-1.9)                           | 1.8%<br>(1.2-2.4%)                   | 4.5%<br>(2-7.3%)                    | 0.52<br>(0.23-0.83)  | 92<br>(61-130)       |
| Cyprus   | 2016 | Female | 30 to 34 | 78%<br>(60-90%)                | 22%<br>(9.6-40%)         | 1.1<br>(0.69-1.8)                           | 1.5%<br>(0.99-2.1%)                  | 4.5%<br>(2.4-6.8%)                  | 0.66<br>(0.36-1)     | 83<br>(55-120)       |
| Cyprus   | 2016 | Female | 35 to 39 | 79%<br>(63-91%)                | 21%<br>(9.3-37%)         | 1<br>(0.62-1.6)                             | 1.4%<br>(0.9-1.9%)                   | 4.9%<br>(3.1-7.2%)                  | 0.81<br>(0.51-1.2)   | 75<br>(48-110)       |
| Cyprus   | 2016 | Female | 40 to 44 | 80%<br>(63-91%)                | 20%<br>(8.5-37%)         | 1.2<br>(0.72-1.8)                           | 1.6%<br>(0.94-2.3%)                  | 5.6%<br>(3.5-8.1%)                  | 1.4<br>(0.86-2)      | 88<br>(55-130)       |
| Cyprus   | 2016 | Female | 45 to 49 | 80%<br>(60-91%)                | 20%<br>(8.6-40%)         | 1.7<br>(1-2.5)                              | 2.1%<br>(1.1-3.3%)                   | 6.9%<br>(4.3-10%)                   | 2.6<br>(1.6-3.7)     | 120<br>(71-190)      |
| Cyprus   | 2016 | Female | 50 to 54 | 79%<br>(61-91%)                | 21%<br>(9.2-39%)         | 1.8<br>(1.1-2.6)                            | 2.3%<br>(1.1-3.7%)                   | 6.2%<br>(3.6-9.1%)                  | 3.9<br>(2.2-5.8)     | 150<br>(75-240)      |
| Cyprus   | 2016 | Female | 55 to 59 | 78%<br>(62-91%)                | 22%<br>(8.8-38%)         | 1.5<br>(0.94-2.3)                           | 1.6%<br>(0.42-3.1%)                  | 4.4%<br>(2.1-7.1%)                  | 3.5<br>(1.7-5.7)     | 100<br>(26-190)      |
| Cyprus   | 2016 | Female | 60 to 64 | 77%<br>(56-91%)                | 23%<br>(9.2-44%)         | 1.4<br>(0.81-2.2)                           | 0.69%<br>(-0.64-2.3%)                | 2.3%<br>(0.17-4.8%)                 | 3<br>(0.21-6.2)      | 52<br>(-51-170)      |
| Cyprus   | 2016 | Female | 65 to 69 | 75%<br>(53-89%)                | 25%<br>(11-47%)          | 1.3<br>(0.77-2)                             | -0.096%<br>(-1.5-1.5%)               | 0.59%<br>(-1.5-2.7%)                | 1<br>(-2.5-5)        | -7.3<br>(-110-110)   |
| Cyprus   | 2016 | Female | 70 to 74 | 71%<br>(51-86%)                | 29%<br>(14-49%)          | 1.1<br>(0.66-1.8)                           | -0.77%<br>(-2.2-0.84%)               | -0.69%<br>(-2.8-1.5%)               | -1.8<br>(-7.4-4)     | -62<br>(-180-67)     |
| Cyprus   | 2016 | Female | 75 to 79 | 68%<br>(46-85%)                | 32%<br>(15-54%)          | 1<br>(0.59-1.7)                             | -1.3%<br>(-3-0.55%)                  | -1.6%<br>(-3.7-0.74%)               | -6.7<br>(-16-3.2)    | -110<br>(-250-46)    |
| Cyprus   | 2016 | Female | 80 to 84 | 64%<br>(42-82%)                | 36%<br>(18-58%)          | 1<br>(0.56-1.6)                             | -1.6%<br>(-3.4-0.092%)               | -2.1%<br>(-4.3-0.1%)                | -14<br>(-29-0.69)    | -150<br>(-310-9)     |
| Cyprus   | 2016 | Female | 85 to 89 | 62%<br>(42-79%)                | 38%<br>(21-58%)          | 1<br>(0.54-1.7)                             | -1.5%<br>(-3.3-0.12%)                | -1.9%<br>(-4.1-0.087%)              | -15<br>(-32-0.65)    | -110<br>(-240-8.8)   |
| Cyprus   | 2016 | Female | 90 to 94 | 61%<br>(41-79%)                | 39%<br>(21-59%)          | 1<br>(0.53-1.8)                             | -1.3%<br>(-2.9-0.4%)                 | -1.7%<br>(-3.8-0.3%)                | -9.6<br>(-21-1.7)    | -46<br>(-110-15)     |
| Cyprus   | 2016 | Female | 95 plus  | 62%<br>(37-83%)                | 38%<br>(17-63%)          | 1.1<br>(0.5-1.9)                            | -1.1%<br>(-3-0.66%)                  | -1.6%<br>(-4-0.56%)                 | -4.2<br>(-10-1.5)    | -12<br>(-33-7.2)     |
| Cyprus   | 2016 | Male   | All Ages | 81%<br>(73-87%)                | 19%<br>(13-27%)          | 4<br>(2.9-5.2)                              | 7.1%<br>(4.4-10%)                    | 7.1%<br>(3.2-12%)                   | 260<br>(120-430)     | 7900<br>(4900-11000) |
| Cyprus   | 2016 | Male   | 15 to 19 | 72%<br>(52-88%)                | 28%<br>(12-48%)          | 3.2<br>(1.9-5)                              | 6.4%<br>(4-9.3%)                     | 14%<br>(7.7-22%)                    | 2.2<br>(1.2-3.4)     | 210<br>(140-320)     |
| Cyprus   | 2016 | Male   | 20 to 24 | 78%<br>(60-90%)                | 22%<br>(9.7-40%)         | 5<br>(3.3-7.4)                              | 13%<br>(8.8-17%)                     | 20%<br>(12-29%)                     | 6.7<br>(4-9.8)       | 620<br>(420-860)     |

| Location | Year | Sex    | Age      | Prevalence of current drinkers | Prevalence of abstainers | Population average of standard drinks daily | Percent of total attributable deaths | Percent of total attributable DALYs | Attributable deaths | Attributable DALYs     |
|----------|------|--------|----------|--------------------------------|--------------------------|---------------------------------------------|--------------------------------------|-------------------------------------|---------------------|------------------------|
| Cyprus   | 2016 | Male   | 25 to 29 | 82%<br>(67-92%)                | 18%<br>(7.7-33%)         | 4.6<br>(3.1-6.5)                            | 11%<br>(7.5-14%)                     | 18%<br>(12-26%)                     | 6.1<br>(3.9-8.8)    | 560<br>(390-750)       |
| Cyprus   | 2016 | Male   | 30 to 34 | 84%<br>(68-94%)                | 16%<br>(6-32%)           | 4.2<br>(2.7-6.2)                            | 8.4%<br>(5.8-11%)                    | 15%<br>(9.2-22%)                    | 5.3<br>(3.2-7.6)    | 440<br>(300-600)       |
| Cyprus   | 2016 | Male   | 35 to 39 | 87%<br>(73-95%)                | 13%<br>(5.2-27%)         | 3.8<br>(2.5-5.7)                            | 7.2%<br>(4.9-10%)                    | 13%<br>(7.9-19%)                    | 4.5<br>(2.7-6.7)    | 330<br>(220-470)       |
| Cyprus   | 2016 | Male   | 40 to 44 | 88%<br>(75-96%)                | 12%<br>(4.2-25%)         | 4.3<br>(2.8-6.3)                            | 7.3%<br>(4.6-11%)                    | 13%<br>(7.3-19%)                    | 5.6<br>(3.1-8.6)    | 350<br>(220-510)       |
| Cyprus   | 2016 | Male   | 45 to 49 | 89%<br>(75-96%)                | 11%<br>(4-25%)           | 5.7<br>(3.6-8.4)                            | 9.2%<br>(5.2-13%)                    | 15%<br>(8.3-22%)                    | 10<br>(5.4-14)      | 530<br>(310-740)       |
| Cyprus   | 2016 | Male   | 50 to 54 | 89%<br>(76-96%)                | 11%<br>(4-24%)           | 6.2<br>(4.1-8.9)                            | 9.5%<br>(5.5-13%)                    | 15%<br>(8-20%)                      | 16<br>(8.3-22)      | 710<br>(400-980)       |
| Cyprus   | 2016 | Male   | 55 to 59 | 89%<br>(77-96%)                | 11%<br>(3.6-23%)         | 5.9<br>(4-8.5)                              | 9.1%<br>(5-13%)                      | 13%<br>(6.5-18%)                    | 19<br>(10-29)       | 750<br>(420-1100)      |
| Cyprus   | 2016 | Male   | 60 to 64 | 88%<br>(73-96%)                | 12%<br>(3.8-27%)         | 5.6<br>(3.7-8)                              | 8.1%<br>(3.8-12%)                    | 10%<br>(4.7-16%)                    | 26<br>(12-40)       | 850<br>(400-1300)      |
| Cyprus   | 2016 | Male   | 65 to 69 | 88%<br>(73-96%)                | 12%<br>(4.2-27%)         | 5.1<br>(3.4-7.2)                            | 7.2%<br>(3.4-11%)                    | 8.5%<br>(3.7-14%)                   | 27<br>(12-44)       | 730<br>(330-1100)      |
| Cyprus   | 2016 | Male   | 70 to 74 | 87%<br>(74-95%)                | 13%<br>(5.3-26%)         | 4.5<br>(2.9-6.6)                            | 6%<br>(2.3-10%)                      | 6.9%<br>(2.3-12%)                   | 30<br>(10-52)       | 640<br>(240-1100)      |
| Cyprus   | 2016 | Male   | 75 to 79 | 86%<br>(72-94%)                | 14%<br>(5.6-28%)         | 4.1<br>(2.6-6.2)                            | 5.2%<br>(1.3-9.6%)                   | 5.7%<br>(1.2-11%)                   | 29<br>(6.1-56)      | 480<br>(120-910)       |
| Cyprus   | 2016 | Male   | 80 to 84 | 84%<br>(67-93%)                | 16%<br>(6.8-33%)         | 3.9<br>(2.5-5.7)                            | 4.6%<br>(1.2-8.8%)                   | 5%<br>(0.96-9.9%)                   | 30<br>(5.5-60)      | 370<br>(91-720)        |
| Cyprus   | 2016 | Male   | 85 to 89 | 82%<br>(65-92%)                | 18%<br>(7.6-35%)         | 3.7<br>(2.2-5.9)                            | 4.3%<br>(0.89-9.1%)                  | 4.5%<br>(0.59-10%)                  | 26<br>(3.5-59)      | 220<br>(46-470)        |
| Cyprus   | 2016 | Male   | 90 to 94 | 82%<br>(66-93%)                | 18%<br>(6.6-34%)         | 3.6<br>(2-5.9)                              | 3.8%<br>(0.19-8.9%)                  | 4%<br>(-0.24-9.9%)                  | 14<br>(-0.83-33)    | 79<br>(3.8-180)        |
| Cyprus   | 2016 | Male   | 95 plus  | 82%<br>(64-95%)                | 18%<br>(5.1-36%)         | 3.5<br>(1.8-6.2)                            | 3.7%<br>(-0.5-9.2%)                  | 3.8%<br>(-1.1-10%)                  | 4.2<br>(-1.2-11)    | 16<br>(-2.2-41)        |
| Denmark  | 1990 | Female | All Ages | 95%<br>(94-96%)                | 4.9%<br>(3.8-6.3%)       | 3.2<br>(2.8-3.6)                            | 5.4%<br>(3.3-7.5%)                   | 5.8%<br>(1.5-10%)                   | 1700<br>(480-3100)  | 44000<br>(26000-62000) |
| Denmark  | 1990 | Female | 15 to 19 | 94%<br>(88-97%)                | 6.4%<br>(3.1-12%)        | 3<br>(2.2-3.9)                              | 3.4%<br>(2-4.9%)                     | 13%<br>(6.5-19%)                    | 6.6<br>(3.4-9.7)    | 650<br>(390-910)       |
| Denmark  | 1990 | Female | 20 to 24 | 95%<br>(92-98%)                | 4.5%<br>(2.3-8.4%)       | 3.5<br>(2.4-4.6)                            | 4.2%<br>(2.8-5.8%)                   | 14%<br>(7.7-20%)                    | 9.4<br>(5.2-14)     | 1000<br>(670-1400)     |
| Denmark  | 1990 | Female | 25 to 29 | 96%<br>(94-98%)                | 3.6%<br>(1.8-6.3%)       | 3<br>(2.2-3.8)                              | 3.5%<br>(2.1-4.8%)                   | 12%<br>(5.6-17%)                    | 9.4<br>(4.4-14)     | 920<br>(560-1300)      |
| Denmark  | 1990 | Female | 30 to 34 | 97%<br>(94-98%)                | 3.3%<br>(1.6-6%)         | 2.8<br>(2.1-3.7)                            | 3.5%<br>(2.2-5%)                     | 11%<br>(6.2-16%)                    | 13<br>(6.9-18)      | 970<br>(590-1400)      |
| Denmark  | 1990 | Female | 35 to 39 | 96%<br>(94-98%)                | 3.6%<br>(1.7-6%)         | 2.9<br>(2.1-4)                              | 4.9%<br>(3.1-6.8%)                   | 14%<br>(8.5-18%)                    | 27<br>(17-37)       | 1600<br>(1100-2200)    |
| Denmark  | 1990 | Female | 40 to 44 | 96%<br>(94-98%)                | 3.6%<br>(1.9-6%)         | 3.5<br>(2.7-4.4)                            | 6.7%<br>(4.8-8.7%)                   | 16%<br>(11-20%)                     | 58<br>(42-73)       | 3000<br>(2200-3800)    |

| Location | Year | Sex    | Age      | Prevalence of current drinkers | Prevalence of abstainers | Population average of standard drinks daily | Percent of total attributable deaths | Percent of total attributable DALYs | Attributable deaths | Attributable DALYs      |
|----------|------|--------|----------|--------------------------------|--------------------------|---------------------------------------------|--------------------------------------|-------------------------------------|---------------------|-------------------------|
| Denmark  | 1990 | Female | 45 to 49 | 97%<br>(95-98%)                | 3.3%<br>(2-5.2%)         | 4.4<br>(3.4-5.5)                            | 8.4%<br>(6.4-10%)                    | 17%<br>(13-21%)                     | 90<br>(70-110)      | 4100<br>(3200-5000)     |
| Denmark  | 1990 | Female | 50 to 54 | 97%<br>(95-98%)                | 2.9%<br>(1.8-4.5%)       | 4.9<br>(3.8-6.1)                            | 9.5%<br>(7.2-12%)                    | 16%<br>(13-20%)                     | 120<br>(90-140)     | 4600<br>(3500-5700)     |
| Denmark  | 1990 | Female | 55 to 59 | 97%<br>(96-98%)                | 2.6%<br>(1.7-3.8%)       | 5.1<br>(4-6.3)                              | 9.1%<br>(6.6-12%)                    | 14%<br>(10-17%)                     | 140<br>(100-180)    | 4900<br>(3500-6300)     |
| Denmark  | 1990 | Female | 60 to 64 | 97%<br>(96-98%)                | 2.7%<br>(1.7-4.1%)       | 5.1<br>(4-6.3)                              | 7.8%<br>(4.8-11%)                    | 11%<br>(6.8-15%)                    | 160<br>(100-230)    | 4900<br>(3000-6800)     |
| Denmark  | 1990 | Female | 65 to 69 | 97%<br>(95-98%)                | 3.1%<br>(1.9-4.9%)       | 4.8<br>(3.9-5.7)                            | 6.4%<br>(3.2-9.3%)                   | 8.5%<br>(4.2-12%)                   | 190<br>(94-290)     | 4800<br>(2400-7100)     |
| Denmark  | 1990 | Female | 70 to 74 | 96%<br>(94-97%)                | 3.8%<br>(2.5-5.8%)       | 4.3<br>(3.3-5.5)                            | 5.4%<br>(1.9-9.3%)                   | 6.8%<br>(1.9-12%)                   | 210<br>(58-370)     | 4200<br>(1300-7200)     |
| Denmark  | 1990 | Female | 75 to 79 | 95%<br>(92-97%)                | 4.8%<br>(2.7-8.3%)       | 4<br>(2.9-5.2)                              | 4.3%<br>(0.05-9.1%)                  | 5.1%<br>(-0.45-11%)                 | 220<br>(-19-470)    | 3500<br>(43-7300)       |
| Denmark  | 1990 | Female | 80 to 84 | 93%<br>(88-96%)                | 7.2%<br>(4.5-12%)        | 3.7<br>(2.9-4.8)                            | 3.6%<br>(-0.89-8.4%)                 | 4.1%<br>(-1.8-10%)                  | 220<br>(-94-550)    | 2600<br>(-640-6100)     |
| Denmark  | 1990 | Female | 85 to 89 | 89%<br>(83-93%)                | 11%<br>(7.2-17%)         | 3.6<br>(2.7-4.6)                            | 2.8%<br>(-1.7-7.7%)                  | 3%<br>(-2.7-9.2%)                   | 150<br>(-140-470)   | 1300<br>(-800-3700)     |
| Denmark  | 1990 | Female | 90 to 94 | 86%<br>(79-91%)                | 14%<br>(8.7-21%)         | 3.4<br>(2.3-4.6)                            | 2%<br>(-2.5-7.2%)                    | 2%<br>(-3.6-8.6%)                   | 60<br>(-110-260)    | 390<br>(-470-1400)      |
| Denmark  | 1990 | Female | 95 plus  | 83%<br>(74-90%)                | 17%<br>(9.7-26%)         | 3.2<br>(1.9-4.8)                            | 1.5%<br>(-3.6-7.8%)                  | 1.3%<br>(-4.9-9.1%)                 | 14<br>(-52-98)      | 67<br>(-160-350)        |
| Denmark  | 1990 | Male   | All Ages | 97%<br>(96-98%)                | 3.2%<br>(2.2-4.5%)       | 4.6<br>(4.1-5.1)                            | 11%<br>(8.3-14%)                     | 11%<br>(7-16%)                      | 3400<br>(2100-4800) | 97000<br>(72000-120000) |
| Denmark  | 1990 | Male   | 15 to 19 | 94%<br>(89-97%)                | 5.9%<br>(2.8-11%)        | 4<br>(3-5.1)                                | 8.1%<br>(5.3-11%)                    | 18%<br>(10-25%)                     | 19<br>(11-27)       | 1700<br>(1100-2400)     |
| Denmark  | 1990 | Male   | 20 to 24 | 96%<br>(92-98%)                | 4.2%<br>(2-7.7%)         | 5.7<br>(4.4-7)                              | 15%<br>(11-19%)                      | 26%<br>(17-34%)                     | 48<br>(32-64)       | 4100<br>(3000-5300)     |
| Denmark  | 1990 | Male   | 25 to 29 | 97%<br>(94-99%)                | 3%<br>(1.5-5.6%)         | 4.9<br>(3.9-6.1)                            | 13%<br>(9-16%)                       | 22%<br>(14-29%)                     | 48<br>(30-65)       | 3900<br>(2800-5000)     |
| Denmark  | 1990 | Male   | 30 to 34 | 98%<br>(95-99%)                | 2.2%<br>(0.93-4.6%)      | 4.3<br>(3.3-5.5)                            | 11%<br>(7.7-15%)                     | 19%<br>(12-26%)                     | 54<br>(33-75)       | 3800<br>(2500-5100)     |
| Denmark  | 1990 | Male   | 35 to 39 | 98%<br>(96-99%)                | 1.8%<br>(0.83-3.6%)      | 4<br>(3-5.2)                                | 11%<br>(8-15%)                       | 19%<br>(13-25%)                     | 70<br>(46-93)       | 4400<br>(3100-5600)     |
| Denmark  | 1990 | Male   | 40 to 44 | 98%<br>(97-99%)                | 1.6%<br>(0.63-3.1%)      | 4.8<br>(3.8-6)                              | 13%<br>(10-17%)                      | 21%<br>(15-26%)                     | 130<br>(92-160)     | 6900<br>(5200-8500)     |
| Denmark  | 1990 | Male   | 45 to 49 | 99%<br>(97-99%)                | 1.4%<br>(0.63-2.8%)      | 6.7<br>(5.4-8.1)                            | 17%<br>(13-20%)                      | 25%<br>(20-31%)                     | 200<br>(150-250)    | 9300<br>(7300-11000)    |
| Denmark  | 1990 | Male   | 50 to 54 | 99%<br>(98-99%)                | 1.2%<br>(0.57-2.4%)      | 7.6<br>(6.2-9)                              | 18%<br>(14-21%)                      | 24%<br>(19-29%)                     | 250<br>(190-300)    | 9800<br>(7600-12000)    |
| Denmark  | 1990 | Male   | 55 to 59 | 99%<br>(98-100%)               | 1.1%<br>(0.49-1.9%)      | 7.5<br>(6.1-8.9)                            | 16%<br>(12-20%)                      | 20%<br>(14-25%)                     | 300<br>(210-380)    | 10000<br>(7400-13000)   |
| Denmark  | 1990 | Male   | 60 to 64 | 99%<br>(98-100%)               | 1.2%<br>(0.47-2.2%)      | 7.2<br>(5.9-8.7)                            | 13%<br>(9-18%)                       | 16%<br>(10-21%)                     | 360<br>(230-490)    | 11000<br>(6900-14000)   |



| Location | Year | Sex    | Age      | Prevalence of current drinkers | Prevalence of abstainers | Population average of standard drinks daily | Percent of total attributable deaths | Percent of total attributable DALYs | Attributable deaths | Attributable DALYs     |
|----------|------|--------|----------|--------------------------------|--------------------------|---------------------------------------------|--------------------------------------|-------------------------------------|---------------------|------------------------|
| Denmark  | 1990 | Male   | 65 to 69 | 99%<br>(97-99%)                | 1.4%<br>(0.54-3%)        | 6.8<br>(5.7-7.9)                            | 11%<br>(7-16%)                       | 13%<br>(7.7-18%)                    | 450<br>(260-620)    | 11000<br>(6700-15000)  |
| Denmark  | 1990 | Male   | 70 to 74 | 98%<br>(97-99%)                | 1.7%<br>(0.74-3.4%)      | 6.4<br>(5.3-7.6)                            | 9.6%<br>(5-14%)                      | 11%<br>(5.3-16%)                    | 460<br>(220-680)    | 9000<br>(4600-13000)   |
| Denmark  | 1990 | Male   | 75 to 79 | 98%<br>(96-99%)                | 2%<br>(0.84-3.8%)        | 5.9<br>(4.8-7.1)                            | 8.2%<br>(3.6-13%)                    | 8.8%<br>(3.4-14%)                   | 450<br>(180-740)    | 7000<br>(3100-11000)   |
| Denmark  | 1990 | Male   | 80 to 84 | 98%<br>(96-99%)                | 2.4%<br>(1.1-4.5%)       | 5.4<br>(4.4-6.6)                            | 6.9%<br>(2.3-12%)                    | 7.3%<br>(1.8-13%)                   | 340<br>(86-600)     | 3900<br>(1300-6700)    |
| Denmark  | 1990 | Male   | 85 to 89 | 97%<br>(95-99%)                | 2.7%<br>(1.3-4.8%)       | 5<br>(4-6.2)                                | 5.3%<br>(0.71-10%)                   | 5.5%<br>(0.12-11%)                  | 170<br>(3.6-340)    | 1400<br>(190-2700)     |
| Denmark  | 1990 | Male   | 90 to 94 | 97%<br>(95-99%)                | 2.7%<br>(1.2-4.9%)       | 4.7<br>(3.5-6.1)                            | 3.6%<br>(-1.3-9.2%)                  | 3.6%<br>(-2.3-10%)                  | 48<br>(-31-140)     | 300<br>(-110-760)      |
| Denmark  | 1990 | Male   | 95 plus  | 97%<br>(95-99%)                | 2.7%<br>(1-5.5%)         | 4.4<br>(2.9-6.1)                            | 2.4%<br>(-2.9-8.4%)                  | 2.1%<br>(-4.1-9.3%)                 | 8.2<br>(-16-36)     | 38<br>(-46-130)        |
| Denmark  | 1995 | Female | All Ages | 96%<br>(94-97%)                | 4.5%<br>(3.5-5.7%)       | 3.2<br>(2.9-3.6)                            | 5.5%<br>(3.6-7.5%)                   | 6%<br>(2.1-10%)                     | 1900<br>(650-3200)  | 45000<br>(30000-62000) |
| Denmark  | 1995 | Female | 15 to 19 | 94%<br>(90-97%)                | 5.7%<br>(2.8-10%)        | 3<br>(2.2-4)                                | 3.1%<br>(1.9-4.4%)                   | 12%<br>(6.4-18%)                    | 4.8<br>(2.6-7)      | 500<br>(310-710)       |
| Denmark  | 1995 | Female | 20 to 24 | 96%<br>(93-98%)                | 4%<br>(2-7.4%)           | 3.5<br>(2.4-4.7)                            | 3.9%<br>(2.7-5.3%)                   | 13%<br>(7.4-18%)                    | 7.8<br>(4.6-11)     | 890<br>(610-1200)      |
| Denmark  | 1995 | Female | 25 to 29 | 97%<br>(95-98%)                | 3.3%<br>(1.7-5.4%)       | 3<br>(2.3-3.8)                              | 3.2%<br>(2.1-4.4%)                   | 10%<br>(5.5-15%)                    | 8.2<br>(4.4-12)     | 850<br>(550-1200)      |
| Denmark  | 1995 | Female | 30 to 34 | 97%<br>(95-99%)                | 2.9%<br>(1.4-4.7%)       | 2.8<br>(2.1-3.7)                            | 3.3%<br>(2.2-4.6%)                   | 11%<br>(6.6-15%)                    | 13<br>(7.8-18)      | 1000<br>(650-1400)     |
| Denmark  | 1995 | Female | 35 to 39 | 97%<br>(95-98%)                | 3.1%<br>(1.6-5%)         | 3<br>(2.1-4.1)                              | 4.8%<br>(3.2-6.4%)                   | 14%<br>(9.1-18%)                    | 26<br>(18-35)       | 1600<br>(1100-2100)    |
| Denmark  | 1995 | Female | 40 to 44 | 97%<br>(95-98%)                | 3.2%<br>(1.7-5.1%)       | 3.5<br>(2.7-4.5)                            | 6.5%<br>(4.8-8.5%)                   | 16%<br>(12-20%)                     | 51<br>(38-64)       | 2700<br>(2000-3400)    |
| Denmark  | 1995 | Female | 45 to 49 | 97%<br>(96-98%)                | 2.8%<br>(1.9-4%)         | 4.5<br>(3.5-5.7)                            | 8.3%<br>(6.5-10%)                    | 17%<br>(14-21%)                     | 97<br>(78-120)      | 4400<br>(3500-5400)    |
| Denmark  | 1995 | Female | 50 to 54 | 97%<br>(97-98%)                | 2.5%<br>(1.8-3.4%)       | 5<br>(3.9-6.3)                              | 9.3%<br>(7.2-11%)                    | 17%<br>(14-20%)                     | 130<br>(110-160)    | 5300<br>(4200-6500)    |
| Denmark  | 1995 | Female | 55 to 59 | 98%<br>(97-98%)                | 2.3%<br>(1.6-3.1%)       | 5.2<br>(4.1-6.5)                            | 9%<br>(6.7-11%)                      | 14%<br>(11-17%)                     | 140<br>(110-170)    | 4900<br>(3700-6100)    |
| Denmark  | 1995 | Female | 60 to 64 | 98%<br>(97-98%)                | 2.3%<br>(1.6-3.3%)       | 5.2<br>(4-6.5)                              | 7.9%<br>(5.4-11%)                    | 11%<br>(7.6-15%)                    | 170<br>(110-220)    | 4900<br>(3300-6500)    |
| Denmark  | 1995 | Female | 65 to 69 | 97%<br>(96-98%)                | 2.7%<br>(1.8-4%)         | 4.9<br>(4-5.8)                              | 6.7%<br>(4-9.3%)                     | 8.7%<br>(5.2-12%)                   | 200<br>(120-280)    | 4800<br>(2800-6800)    |
| Denmark  | 1995 | Female | 70 to 74 | 97%<br>(95-98%)                | 3.4%<br>(2.4-4.8%)       | 4.4<br>(3.5-5.6)                            | 5.7%<br>(2.4-9.1%)                   | 7.2%<br>(2.8-12%)                   | 230<br>(95-380)     | 4700<br>(2000-7400)    |
| Denmark  | 1995 | Female | 75 to 79 | 96%<br>(93-97%)                | 4.5%<br>(2.6-7.2%)       | 4<br>(3.1-5.2)                              | 4.6%<br>(0.7-8.7%)                   | 5.4%<br>(0.48-11%)                  | 230<br>(21-440)     | 3600<br>(570-6800)     |
| Denmark  | 1995 | Female | 80 to 84 | 93%<br>(90-96%)                | 6.8%<br>(4.3-10%)        | 3.8<br>(3-4.8)                              | 3.9%<br>(-0.14-8.2%)                 | 4.4%<br>(-0.75-9.9%)                | 240<br>(-39-560)    | 2900<br>(-100-6300)    |

| Location | Year | Sex    | Age      | Prevalence of current drinkers | Prevalence of abstainers | Population average of standard drinks daily | Percent of total attributable deaths | Percent of total attributable DALYs | Attributable deaths | Attributable DALYs       |
|----------|------|--------|----------|--------------------------------|--------------------------|---------------------------------------------|--------------------------------------|-------------------------------------|---------------------|--------------------------|
| Denmark  | 1995 | Female | 85 to 89 | 90%<br>(86-93%)                | 9.7%<br>(6.7-14%)        | 3.7<br>(2.8-4.7)                            | 3.2%<br>(-1.1-8.1%)                  | 3.4%<br>(-1.9-9.5%)                 | 190<br>(-110-540)   | 1700<br>(-580-4200)      |
| Denmark  | 1995 | Female | 90 to 94 | 87%<br>(82-92%)                | 13%<br>(8.1-18%)         | 3.5<br>(2.5-4.8)                            | 2.3%<br>(-2.2-7.8%)                  | 2.3%<br>(-3.2-9.1%)                 | 86<br>(-120-330)    | 540<br>(-500-1800)       |
| Denmark  | 1995 | Female | 95 plus  | 85%<br>(77-91%)                | 15%<br>(9.1-23%)         | 3.3<br>(2-5)                                | 1.8%<br>(-3.5-8.3%)                  | 1.7%<br>(-4.7-9.7%)                 | 22<br>(-63-130)     | 100<br>(-190-450)        |
| Denmark  | 1995 | Male   | All Ages | 97%<br>(96-98%)                | 2.7%<br>(1.9-3.7%)       | 4.7<br>(4.1-5.3)                            | 11%<br>(8.7-14%)                     | 12%<br>(7.4-16%)                    | 3500<br>(2200-4900) | 100000<br>(78000-120000) |
| Denmark  | 1995 | Male   | 15 to 19 | 95%<br>(92-98%)                | 4.6%<br>(2.3-8.1%)       | 4.1<br>(3.2-5.2)                            | 8.6%<br>(5.5-12%)                    | 18%<br>(11-26%)                     | 19<br>(11-27)       | 1700<br>(1100-2200)      |
| Denmark  | 1995 | Male   | 20 to 24 | 96%<br>(94-98%)                | 3.5%<br>(1.8-6.2%)       | 5.8<br>(4.4-7.2)                            | 14%<br>(10-18%)                      | 25%<br>(17-34%)                     | 42<br>(28-55)       | 3700<br>(2700-4700)      |
| Denmark  | 1995 | Male   | 25 to 29 | 97%<br>(95-99%)                | 2.7%<br>(1.4-4.6%)       | 4.9<br>(4-6.1)                              | 12%<br>(8.5-15%)                     | 20%<br>(13-27%)                     | 44<br>(28-60)       | 3700<br>(2600-4800)      |
| Denmark  | 1995 | Male   | 30 to 34 | 98%<br>(96-99%)                | 1.9%<br>(0.89-3.6%)      | 4.4<br>(3.4-5.5)                            | 10%<br>(7-13%)                       | 17%<br>(11-23%)                     | 48<br>(30-67)       | 3600<br>(2500-4700)      |
| Denmark  | 1995 | Male   | 35 to 39 | 98%<br>(97-99%)                | 1.5%<br>(0.69-2.7%)      | 4.1<br>(3-5.4)                              | 11%<br>(7.9-13%)                     | 18%<br>(12-22%)                     | 65<br>(44-85)       | 4200<br>(3100-5300)      |
| Denmark  | 1995 | Male   | 40 to 44 | 99%<br>(98-99%)                | 1.3%<br>(0.59-2.5%)      | 4.9<br>(3.8-6.1)                            | 13%<br>(10-17%)                      | 21%<br>(16-26%)                     | 120<br>(88-150)     | 6400<br>(5000-7900)      |
| Denmark  | 1995 | Male   | 45 to 49 | 99%<br>(98-99%)                | 1.2%<br>(0.58-2.2%)      | 6.8<br>(5.5-8.2)                            | 17%<br>(14-20%)                      | 26%<br>(21-30%)                     | 220<br>(170-260)    | 10000<br>(8200-12000)    |
| Denmark  | 1995 | Male   | 50 to 54 | 99%<br>(98-100%)               | 1%<br>(0.48-1.9%)        | 7.7<br>(6.3-9.2)                            | 17%<br>(14-21%)                      | 25%<br>(20-29%)                     | 290<br>(230-350)    | 12000<br>(9400-14000)    |
| Denmark  | 1995 | Male   | 55 to 59 | 99%<br>(99-100%)               | 0.9%<br>(0.44-1.5%)      | 7.6<br>(6.3-9.2)                            | 16%<br>(12-19%)                      | 21%<br>(16-26%)                     | 310<br>(240-390)    | 11000<br>(8500-13000)    |
| Denmark  | 1995 | Male   | 60 to 64 | 99%<br>(98-100%)               | 0.98%<br>(0.43-1.7%)     | 7.4<br>(6-9)                                | 14%<br>(10-18%)                      | 17%<br>(12-22%)                     | 370<br>(250-470)    | 11000<br>(7600-14000)    |
| Denmark  | 1995 | Male   | 65 to 69 | 99%<br>(98-100%)               | 1.2%<br>(0.46-2.5%)      | 6.9<br>(5.9-8.1)                            | 12%<br>(7.8-15%)                     | 14%<br>(8.8-18%)                    | 430<br>(270-570)    | 10000<br>(6800-14000)    |
| Denmark  | 1995 | Male   | 70 to 74 | 99%<br>(97-99%)                | 1.5%<br>(0.68-2.8%)      | 6.5<br>(5.3-7.7)                            | 9.9%<br>(5.6-14%)                    | 11%<br>(6-16%)                      | 490<br>(260-710)    | 9600<br>(5300-14000)     |
| Denmark  | 1995 | Male   | 75 to 79 | 98%<br>(97-99%)                | 1.8%<br>(0.77-3.3%)      | 6<br>(4.9-7.3)                              | 8.4%<br>(3.8-13%)                    | 9.1%<br>(3.6-14%)                   | 450<br>(180-710)    | 6900<br>(3100-11000)     |
| Denmark  | 1995 | Male   | 80 to 84 | 98%<br>(96-99%)                | 2%<br>(0.95-3.7%)        | 5.6<br>(4.6-6.7)                            | 7.2%<br>(2.6-12%)                    | 7.6%<br>(2.4-13%)                   | 370<br>(110-640)    | 4300<br>(1600-7100)      |
| Denmark  | 1995 | Male   | 85 to 89 | 98%<br>(97-99%)                | 2.1%<br>(1.1-3.5%)       | 5.2<br>(4.2-6.4)                            | 5.7%<br>(0.82-10%)                   | 5.9%<br>(0.24-11%)                  | 200<br>(8.5-400)    | 1700<br>(250-3200)       |
| Denmark  | 1995 | Male   | 90 to 94 | 98%<br>(96-99%)                | 2.1%<br>(1-3.6%)         | 4.9<br>(3.6-6.3)                            | 4.1%<br>(-1.2-9.6%)                  | 4%<br>(-2.1-11%)                    | 62<br>(-32-160)     | 380<br>(-110-900)        |
| Denmark  | 1995 | Male   | 95 plus  | 98%<br>(96-99%)                | 2.3%<br>(0.84-4.4%)      | 4.5<br>(2.9-6.3)                            | 2.8%<br>(-3-9.3%)                    | 2.5%<br>(-4.3-10%)                  | 10<br>(-17-41)      | 46<br>(-50-150)          |
| Denmark  | 2000 | Female | All Ages | 96%<br>(94-96%)                | 4.4%<br>(3.5-5.6%)       | 3.4<br>(3-3.9)                              | 6%<br>(4.3-7.9%)                     | 7%<br>(3.4-11%)                     | 2100<br>(980-3300)  | 48000<br>(34000-62000)   |

| Location | Year | Sex    | Age      | Prevalence of current drinkers | Prevalence of abstainers | Population average of standard drinks daily | Percent of total attributable deaths | Percent of total attributable DALYs | Attributable deaths | Attributable DALYs       |
|----------|------|--------|----------|--------------------------------|--------------------------|---------------------------------------------|--------------------------------------|-------------------------------------|---------------------|--------------------------|
| Denmark  | 2000 | Female | 15 to 19 | 94%<br>(90-97%)                | 5.7%<br>(2.8-10%)        | 3.2<br>(2.3-4.2)                            | 3.1%<br>(1.9-4.5%)                   | 12%<br>(6.7-18%)                    | 4.2<br>(2.4-6.2)    | 440<br>(280-630)         |
| Denmark  | 2000 | Female | 20 to 24 | 96%<br>(92-98%)                | 4%<br>(2-7.6%)           | 3.7<br>(2.6-5.1)                            | 3.7%<br>(2.6-5%)                     | 13%<br>(7.8-18%)                    | 5.7<br>(3.5-7.9)    | 710<br>(500-960)         |
| Denmark  | 2000 | Female | 25 to 29 | 97%<br>(95-98%)                | 3.2%<br>(1.7-5.2%)       | 3.2<br>(2.3-4.1)                            | 3.1%<br>(2.1-4.1%)                   | 11%<br>(6.2-15%)                    | 7<br>(3.9-9.9)      | 770<br>(520-1000)        |
| Denmark  | 2000 | Female | 30 to 34 | 97%<br>(95-99%)                | 2.9%<br>(1.4-4.8%)       | 3<br>(2.2-3.9)                              | 3.1%<br>(2.2-4.3%)                   | 11%<br>(7.5-15%)                    | 11<br>(7-15)        | 910<br>(620-1200)        |
| Denmark  | 2000 | Female | 35 to 39 | 97%<br>(95-98%)                | 3.1%<br>(1.6-5%)         | 3.1<br>(2.3-4.2)                            | 4.4%<br>(3.1-6%)                     | 14%<br>(10-18%)                     | 24<br>(16-31)       | 1500<br>(1100-2000)      |
| Denmark  | 2000 | Female | 40 to 44 | 97%<br>(95-98%)                | 3.1%<br>(1.7-4.9%)       | 3.7<br>(2.9-4.8)                            | 6.3%<br>(4.7-8.2%)                   | 17%<br>(13-20%)                     | 45<br>(35-56)       | 2400<br>(1900-3100)      |
| Denmark  | 2000 | Female | 45 to 49 | 97%<br>(96-98%)                | 2.8%<br>(1.9-4%)         | 4.7<br>(3.6-5.9)                            | 8.5%<br>(6.7-11%)                    | 18%<br>(15-22%)                     | 84<br>(68-100)      | 3900<br>(3200-4800)      |
| Denmark  | 2000 | Female | 50 to 54 | 97%<br>(97-98%)                | 2.5%<br>(1.7-3.4%)       | 5.3<br>(4.1-6.6)                            | 9.4%<br>(7.4-12%)                    | 17%<br>(14-21%)                     | 130<br>(110-160)    | 5500<br>(4400-6700)      |
| Denmark  | 2000 | Female | 55 to 59 | 98%<br>(97-98%)                | 2.2%<br>(1.5-3%)         | 5.5<br>(4.4-6.8)                            | 9.7%<br>(7.7-12%)                    | 16%<br>(13-19%)                     | 170<br>(140-210)    | 6000<br>(4800-7400)      |
| Denmark  | 2000 | Female | 60 to 64 | 98%<br>(97-98%)                | 2.3%<br>(1.5-3.3%)       | 5.5<br>(4.3-6.8)                            | 8.8%<br>(6.5-11%)                    | 13%<br>(9.7-16%)                    | 180<br>(130-230)    | 5300<br>(3900-6800)      |
| Denmark  | 2000 | Female | 65 to 69 | 97%<br>(96-98%)                | 2.7%<br>(1.8-4%)         | 5.1<br>(4.1-6.2)                            | 7.5%<br>(5.1-9.7%)                   | 9.9%<br>(6.8-13%)                   | 200<br>(140-260)    | 4900<br>(3300-6600)      |
| Denmark  | 2000 | Female | 70 to 74 | 97%<br>(95-98%)                | 3.3%<br>(2.3-4.8%)       | 4.7<br>(3.6-5.9)                            | 6.4%<br>(3.2-9.4%)                   | 8.1%<br>(4.1-12%)                   | 230<br>(120-340)    | 4600<br>(2400-6800)      |
| Denmark  | 2000 | Female | 75 to 79 | 96%<br>(93-97%)                | 4.4%<br>(2.6-7.4%)       | 4.3<br>(3.2-5.6)                            | 5.4%<br>(1.8-9%)                     | 6.5%<br>(1.9-11%)                   | 270<br>(79-450)     | 4200<br>(1400-7000)      |
| Denmark  | 2000 | Female | 80 to 84 | 93%<br>(89-96%)                | 7%<br>(4.5-11%)          | 4<br>(3.1-5)                                | 4.7%<br>(0.83-8.6%)                  | 5.5%<br>(0.6-10%)                   | 270<br>(30-510)     | 3200<br>(570-5800)       |
| Denmark  | 2000 | Female | 85 to 89 | 90%<br>(86-93%)                | 10%<br>(6.8-14%)         | 3.9<br>(2.9-5)                              | 4.1%<br>(0.037-8.6%)                 | 4.7%<br>(-0.42-10%)                 | 260<br>(-24-580)    | 2200<br>(18-4600)        |
| Denmark  | 2000 | Female | 90 to 94 | 87%<br>(81-92%)                | 13%<br>(8.3-19%)         | 3.7<br>(2.6-5.1)                            | 3.3%<br>(-0.99-8.7%)                 | 3.6%<br>(-1.8-10%)                  | 140<br>(-71-410)    | 860<br>(-250-2200)       |
| Denmark  | 2000 | Female | 95 plus  | 84%<br>(76-91%)                | 16%<br>(9.2-24%)         | 3.5<br>(2.2-5.3)                            | 2.9%<br>(-2.1-9.2%)                  | 3.1%<br>(-2.9-11%)                  | 49<br>(-46-170)     | 200<br>(-140-620)        |
| Denmark  | 2000 | Male   | All Ages | 97%<br>(97-98%)                | 2.6%<br>(1.7-3.5%)       | 5<br>(4.3-5.6)                              | 13%<br>(10-15%)                      | 13%<br>(9.8-17%)                    | 3800<br>(2700-4800) | 100000<br>(86000-120000) |
| Denmark  | 2000 | Male   | 15 to 19 | 95%<br>(92-98%)                | 4.7%<br>(2.4-8.5%)       | 4.3<br>(3.2-5.6)                            | 8.6%<br>(5.6-12%)                    | 19%<br>(11-26%)                     | 16<br>(9.5-22)      | 1400<br>(930-1900)       |
| Denmark  | 2000 | Male   | 20 to 24 | 97%<br>(94-98%)                | 3.4%<br>(1.8-6%)         | 6.1<br>(4.6-7.9)                            | 14%<br>(11-19%)                      | 26%<br>(18-34%)                     | 35<br>(24-47)       | 3200<br>(2300-4000)      |
| Denmark  | 2000 | Male   | 25 to 29 | 98%<br>(96-99%)                | 2.4%<br>(1.3-4.1%)       | 5.2<br>(4.1-6.5)                            | 12%<br>(8.9-15%)                     | 22%<br>(15-29%)                     | 35<br>(24-47)       | 3100<br>(2300-4000)      |
| Denmark  | 2000 | Male   | 30 to 34 | 98%<br>(97-99%)                | 1.8%<br>(0.8-3.3%)       | 4.6<br>(3.5-5.8)                            | 10%<br>(7.7-13%)                     | 20%<br>(14-27%)                     | 42<br>(28-57)       | 3300<br>(2400-4200)      |

| Location | Year | Sex    | Age      | Prevalence of current drinkers | Prevalence of abstainers | Population average of standard drinks daily | Percent of total attributable deaths | Percent of total attributable DALYs | Attributable deaths | Attributable DALYs     |
|----------|------|--------|----------|--------------------------------|--------------------------|---------------------------------------------|--------------------------------------|-------------------------------------|---------------------|------------------------|
| Denmark  | 2000 | Male   | 35 to 39 | 99%<br>(97-99%)                | 1.5%<br>(0.65-2.6%)      | 4.3<br>(3.2-5.5)                            | 11%<br>(8.6-14%)                     | 21%<br>(15-26%)                     | 63<br>(45-80)       | 4200<br>(3200-5200)    |
| Denmark  | 2000 | Male   | 40 to 44 | 99%<br>(98-99%)                | 1.2%<br>(0.53-2.3%)      | 5.1<br>(4-6.4)                              | 15%<br>(12-18%)                      | 25%<br>(20-30%)                     | 120<br>(91-140)     | 6400<br>(5200-7700)    |
| Denmark  | 2000 | Male   | 45 to 49 | 99%<br>(98-99%)                | 1.1%<br>(0.55-2.1%)      | 7.1<br>(5.8-8.7)                            | 19%<br>(16-22%)                      | 30%<br>(26-35%)                     | 220<br>(180-260)    | 10000<br>(8500-12000)  |
| Denmark  | 2000 | Male   | 50 to 54 | 99%<br>(98-100%)               | 0.97%<br>(0.46-1.8%)     | 8.1<br>(6.6-9.8)                            | 20%<br>(17-23%)                      | 29%<br>(25-33%)                     | 330<br>(280-390)    | 14000<br>(11000-16000) |
| Denmark  | 2000 | Male   | 55 to 59 | 99%<br>(99-100%)               | 0.85%<br>(0.41-1.5%)     | 8<br>(6.6-9.5)                              | 18%<br>(15-21%)                      | 25%<br>(21-28%)                     | 410<br>(340-490)    | 14000<br>(12000-17000) |
| Denmark  | 2000 | Male   | 60 to 64 | 99%<br>(98-100%)               | 0.91%<br>(0.4-1.6%)      | 7.8<br>(6.3-9.3)                            | 16%<br>(12-19%)                      | 20%<br>(16-23%)                     | 380<br>(300-460)    | 11000<br>(8900-14000)  |
| Denmark  | 2000 | Male   | 65 to 69 | 99%<br>(98-100%)               | 1.2%<br>(0.44-2.3%)      | 7.3<br>(6.2-8.6)                            | 13%<br>(10-16%)                      | 16%<br>(12-20%)                     | 420<br>(310-520)    | 10000<br>(7600-13000)  |
| Denmark  | 2000 | Male   | 70 to 74 | 99%<br>(97-99%)                | 1.4%<br>(0.63-2.6%)      | 6.9<br>(5.6-8.3)                            | 11%<br>(7.4-15%)                     | 13%<br>(8.5-17%)                    | 450<br>(300-610)    | 9000<br>(6100-12000)   |
| Denmark  | 2000 | Male   | 75 to 79 | 98%<br>(97-99%)                | 1.6%<br>(0.72-3%)        | 6.4<br>(5.2-7.8)                            | 9.6%<br>(5.6-14%)                    | 11%<br>(5.9-15%)                    | 490<br>(280-710)    | 7600<br>(4500-11000)   |
| Denmark  | 2000 | Male   | 80 to 84 | 98%<br>(96-99%)                | 1.9%<br>(0.9-3.6%)       | 5.9<br>(4.9-7.1)                            | 8.3%<br>(4-12%)                      | 9%<br>(3.9-14%)                     | 400<br>(170-620)    | 4600<br>(2200-6900)    |
| Denmark  | 2000 | Male   | 85 to 89 | 98%<br>(96-99%)                | 2.1%<br>(1.1-3.6%)       | 5.5<br>(4.4-6.7)                            | 6.8%<br>(2.3-11%)                    | 7.2%<br>(2.1-12%)                   | 250<br>(73-440)     | 2100<br>(720-3500)     |
| Denmark  | 2000 | Male   | 90 to 94 | 98%<br>(96-99%)                | 2.2%<br>(1.1-4%)         | 5.1<br>(3.8-6.6)                            | 5.2%<br>(0.19-11%)                   | 5.5%<br>(-0.33-12%)                 | 91<br>(-5.2-200)    | 530<br>(19-1100)       |
| Denmark  | 2000 | Male   | 95 plus  | 98%<br>(95-99%)                | 2.4%<br>(0.9-4.6%)       | 4.7<br>(3-6.6)                              | 4%<br>(-1.6-11%)                     | 3.9%<br>(-2.6-12%)                  | 17<br>(-11-50)      | 69<br>(-28-180)        |
| Denmark  | 2005 | Female | All Ages | 96%<br>(95-97%)                | 4.3%<br>(3.3-5.4%)       | 3.4<br>(3-3.9)                              | 6.2%<br>(4.6-7.9%)                   | 7.6%<br>(4.2-11%)                   | 2200<br>(1200-3300) | 48000<br>(35000-62000) |
| Denmark  | 2005 | Female | 15 to 19 | 94%<br>(90-97%)                | 5.6%<br>(2.7-9.7%)       | 3.2<br>(2.3-4.2)                            | 2.7%<br>(1.7-3.9%)                   | 12%<br>(6.4-17%)                    | 3.6<br>(2-5.2)      | 410<br>(260-580)       |
| Denmark  | 2005 | Female | 20 to 24 | 96%<br>(93-98%)                | 3.9%<br>(2-6.9%)         | 3.7<br>(2.6-5.1)                            | 3.3%<br>(2.4-4.5%)                   | 13%<br>(7.8-18%)                    | 4<br>(2.4-5.6)      | 560<br>(390-780)       |
| Denmark  | 2005 | Female | 25 to 29 | 97%<br>(95-98%)                | 3.1%<br>(1.6-5.2%)       | 3.2<br>(2.4-4.1)                            | 2.9%<br>(2-3.8%)                     | 11%<br>(6.4-15%)                    | 5.6<br>(3.2-7.7)    | 650<br>(440-870)       |
| Denmark  | 2005 | Female | 30 to 34 | 97%<br>(95-99%)                | 2.8%<br>(1.5-4.8%)       | 3<br>(2.2-4)                                | 2.8%<br>(2-3.8%)                     | 12%<br>(8-15%)                      | 8.7<br>(5.9-12)     | 780<br>(550-1000)      |
| Denmark  | 2005 | Female | 35 to 39 | 97%<br>(95-98%)                | 3.1%<br>(1.6-5%)         | 3.2<br>(2.3-4.3)                            | 3.9%<br>(2.7-5.2%)                   | 14%<br>(10-18%)                     | 19<br>(14-25)       | 1300<br>(950-1700)     |
| Denmark  | 2005 | Female | 40 to 44 | 97%<br>(95-98%)                | 3%<br>(1.6-4.7%)         | 3.7<br>(2.8-4.9)                            | 5.7%<br>(4.3-7.3%)                   | 17%<br>(14-20%)                     | 41<br>(33-51)       | 2300<br>(1800-2800)    |
| Denmark  | 2005 | Female | 45 to 49 | 97%<br>(96-98%)                | 2.7%<br>(1.8-3.9%)       | 4.7<br>(3.6-6.1)                            | 8.4%<br>(6.6-11%)                    | 19%<br>(16-23%)                     | 80<br>(65-95)       | 3700<br>(3000-4500)    |
| Denmark  | 2005 | Female | 50 to 54 | 98%<br>(97-98%)                | 2.4%<br>(1.7-3.3%)       | 5.3<br>(4.1-6.7)                            | 9.7%<br>(7.8-12%)                    | 18%<br>(16-21%)                     | 120<br>(100-150)    | 5000<br>(4100-6100)    |

| Location | Year | Sex    | Age      | Prevalence of current drinkers | Prevalence of abstainers | Population average of standard drinks daily | Percent of total attributable deaths | Percent of total attributable DALYs | Attributable deaths | Attributable DALYs       |
|----------|------|--------|----------|--------------------------------|--------------------------|---------------------------------------------|--------------------------------------|-------------------------------------|---------------------|--------------------------|
| Denmark  | 2005 | Female | 55 to 59 | 98%<br>(97-98%)                | 2.2%<br>(1.5-2.9%)       | 5.5<br>(4.3-6.8)                            | 9.9%<br>(7.8-12%)                    | 17%<br>(14-20%)                     | 180<br>(150-210)    | 6300<br>(5100-7700)      |
| Denmark  | 2005 | Female | 60 to 64 | 98%<br>(97-98%)                | 2.2%<br>(1.5-3.2%)       | 5.5<br>(4.2-6.9)                            | 9%<br>(6.9-11%)                      | 14%<br>(11-17%)                     | 200<br>(150-250)    | 6000<br>(4600-7600)      |
| Denmark  | 2005 | Female | 65 to 69 | 97%<br>(96-98%)                | 2.6%<br>(1.7-3.9%)       | 5.2<br>(4.2-6.2)                            | 7.9%<br>(5.8-10%)                    | 11%<br>(8.3-14%)                    | 200<br>(150-250)    | 5000<br>(3600-6400)      |
| Denmark  | 2005 | Female | 70 to 74 | 97%<br>(96-98%)                | 3.2%<br>(2.3-4.4%)       | 4.7<br>(3.6-6)                              | 6.7%<br>(3.9-9.6%)                   | 8.8%<br>(5.3-12%)                   | 220<br>(130-310)    | 4400<br>(2600-6300)      |
| Denmark  | 2005 | Female | 75 to 79 | 96%<br>(93-98%)                | 4.1%<br>(2.5-6.7%)       | 4.3<br>(3.2-5.6)                            | 5.8%<br>(2.4-9.1%)                   | 7.1%<br>(3-11%)                     | 250<br>(100-400)    | 4000<br>(1700-6300)      |
| Denmark  | 2005 | Female | 80 to 84 | 94%<br>(90-96%)                | 6.5%<br>(4.4-9.6%)       | 4.1<br>(3.1-5.2)                            | 5.2%<br>(1.8-8.7%)                   | 6.3%<br>(2-11%)                     | 310<br>(97-520)     | 3600<br>(1200-5800)      |
| Denmark  | 2005 | Female | 85 to 89 | 90%<br>(86-93%)                | 9.7%<br>(6.7-14%)        | 3.9<br>(2.9-5)                              | 4.7%<br>(1-8.7%)                     | 5.4%<br>(0.85-11%)                  | 280<br>(44-560)     | 2300<br>(520-4400)       |
| Denmark  | 2005 | Female | 90 to 94 | 88%<br>(83-92%)                | 12%<br>(8.4-17%)         | 3.7<br>(2.6-5.1)                            | 3.8%<br>(-0.35-8.5%)                 | 4.3%<br>(-0.77-10%)                 | 180<br>(-32-420)    | 1000<br>(-91-2300)       |
| Denmark  | 2005 | Female | 95 plus  | 85%<br>(78-91%)                | 15%<br>(9-22%)           | 3.5<br>(2.1-5.2)                            | 3.3%<br>(-1.8-9.8%)                  | 3.5%<br>(-2.5-11%)                  | 68<br>(-48-220)     | 260<br>(-140-770)        |
| Denmark  | 2005 | Male   | All Ages | 98%<br>(97-98%)                | 2.5%<br>(1.7-3.4%)       | 5<br>(4.3-5.7)                              | 13%<br>(11-15%)                      | 14%<br>(11-18%)                     | 3900<br>(3000-4900) | 110000<br>(89000-130000) |
| Denmark  | 2005 | Male   | 15 to 19 | 96%<br>(92-98%)                | 4.5%<br>(2.3-7.8%)       | 4.3<br>(3.2-5.6)                            | 7.8%<br>(5.2-11%)                    | 18%<br>(11-25%)                     | 15<br>(8.7-21)      | 1300<br>(900-1800)       |
| Denmark  | 2005 | Male   | 20 to 24 | 97%<br>(94-98%)                | 3.2%<br>(1.7-5.6%)       | 6.1<br>(4.7-7.8)                            | 13%<br>(10-17%)                      | 26%<br>(18-34%)                     | 26<br>(18-35)       | 2500<br>(1800-3100)      |
| Denmark  | 2005 | Male   | 25 to 29 | 98%<br>(96-99%)                | 2.3%<br>(1.2-3.9%)       | 5.3<br>(4.1-6.6)                            | 11%<br>(8.4-14%)                     | 22%<br>(15-30%)                     | 28<br>(19-38)       | 2600<br>(1900-3300)      |
| Denmark  | 2005 | Male   | 30 to 34 | 98%<br>(97-99%)                | 1.7%<br>(0.78-3.2%)      | 4.6<br>(3.6-5.9)                            | 9.8%<br>(7.4-13%)                    | 20%<br>(14-27%)                     | 35<br>(24-47)       | 2800<br>(2100-3600)      |
| Denmark  | 2005 | Male   | 35 to 39 | 99%<br>(97-99%)                | 1.4%<br>(0.65-2.6%)      | 4.3<br>(3.2-5.6)                            | 11%<br>(8.1-13%)                     | 21%<br>(15-26%)                     | 54<br>(39-68)       | 3700<br>(2900-4600)      |
| Denmark  | 2005 | Male   | 40 to 44 | 99%<br>(98-99%)                | 1.2%<br>(0.55-2.3%)      | 5.1<br>(4-6.4)                              | 14%<br>(11-17%)                      | 26%<br>(21-31%)                     | 110<br>(87-140)     | 6200<br>(5000-7500)      |
| Denmark  | 2005 | Male   | 45 to 49 | 99%<br>(98-99%)                | 1.1%<br>(0.54-2.1%)      | 7.1<br>(5.7-8.9)                            | 20%<br>(16-23%)                      | 32%<br>(27-36%)                     | 210<br>(180-250)    | 10000<br>(8400-12000)    |
| Denmark  | 2005 | Male   | 50 to 54 | 99%<br>(98-100%)               | 0.96%<br>(0.45-1.8%)     | 8.1<br>(6.5-9.9)                            | 21%<br>(18-25%)                      | 31%<br>(28-35%)                     | 330<br>(280-390)    | 13000<br>(12000-16000)   |
| Denmark  | 2005 | Male   | 55 to 59 | 99%<br>(99-100%)               | 0.84%<br>(0.41-1.4%)     | 8<br>(6.6-9.6)                              | 19%<br>(16-22%)                      | 27%<br>(23-30%)                     | 440<br>(370-510)    | 15000<br>(13000-18000)   |
| Denmark  | 2005 | Male   | 60 to 64 | 99%<br>(98-100%)               | 0.89%<br>(0.39-1.6%)     | 7.8<br>(6.3-9.4)                            | 17%<br>(13-19%)                      | 21%<br>(17-25%)                     | 470<br>(380-560)    | 14000<br>(11000-17000)   |
| Denmark  | 2005 | Male   | 65 to 69 | 99%<br>(98-100%)               | 1.1%<br>(0.44-2.2%)      | 7.3<br>(6.1-8.7)                            | 14%<br>(11-17%)                      | 17%<br>(13-20%)                     | 440<br>(340-530)    | 11000<br>(8400-13000)    |
| Denmark  | 2005 | Male   | 70 to 74 | 99%<br>(98-99%)                | 1.4%<br>(0.64-2.5%)      | 6.8<br>(5.6-8.3)                            | 11%<br>(8-15%)                       | 13%<br>(9.4-17%)                    | 430<br>(300-550)    | 8500<br>(6100-11000)     |

| Location | Year | Sex    | Age      | Prevalence of current drinkers | Prevalence of abstainers | Population average of standard drinks daily | Percent of total attributable deaths | Percent of total attributable DALYs | Attributable deaths | Attributable DALYs     |
|----------|------|--------|----------|--------------------------------|--------------------------|---------------------------------------------|--------------------------------------|-------------------------------------|---------------------|------------------------|
| Denmark  | 2005 | Male   | 75 to 79 | 98%<br>(97-99%)                | 1.6%<br>(0.72-3%)        | 6.4<br>(5.1-7.8)                            | 9.8%<br>(6.4-13%)                    | 11%<br>(7-15%)                      | 450<br>(280-610)    | 7000<br>(4600-9400)    |
| Denmark  | 2005 | Male   | 80 to 84 | 98%<br>(97-99%)                | 1.8%<br>(0.88-3.3%)      | 6<br>(4.8-7.2)                              | 8.7%<br>(4.8-12%)                    | 9.5%<br>(5.1-14%)                   | 430<br>(230-620)    | 4900<br>(2700-7000)    |
| Denmark  | 2005 | Male   | 85 to 89 | 98%<br>(97-99%)                | 1.9%<br>(1-3.2%)         | 5.6<br>(4.4-6.8)                            | 7.4%<br>(3.3-12%)                    | 8.1%<br>(3.3-13%)                   | 280<br>(110-450)    | 2300<br>(1000-3600)    |
| Denmark  | 2005 | Male   | 90 to 94 | 98%<br>(96-99%)                | 2%<br>(0.99-3.6%)        | 5.2<br>(3.8-6.7)                            | 6%<br>(1.3-11%)                      | 6.4%<br>(0.86-12%)                  | 120<br>(16-230)     | 680<br>(140-1300)      |
| Denmark  | 2005 | Male   | 95 plus  | 98%<br>(96-99%)                | 2.2%<br>(0.8-4.2%)       | 4.8<br>(3.1-6.6)                            | 4.8%<br>(-0.75-11%)                  | 4.9%<br>(-1.5-12%)                  | 26<br>(-8-64)       | 100<br>(-16-230)       |
| Denmark  | 2010 | Female | All Ages | 96%<br>(95-97%)                | 4.3%<br>(3.4-5.5%)       | 3.3<br>(2.8-3.9)                            | 5.7%<br>(4.2-7.4%)                   | 7.2%<br>(4.1-11%)                   | 1900<br>(1100-2800) | 43000<br>(32000-55000) |
| Denmark  | 2010 | Female | 15 to 19 | 94%<br>(90-97%)                | 5.7%<br>(2.7-10%)        | 3<br>(2.1-4)                                | 2.3%<br>(1.5-3.3%)                   | 11%<br>(5.8-16%)                    | 3.1<br>(1.7-4.6)    | 390<br>(250-560)       |
| Denmark  | 2010 | Female | 20 to 24 | 96%<br>(93-98%)                | 3.8%<br>(1.9-7.2%)       | 3.6<br>(2.5-4.9)                            | 3.2%<br>(2.2-4.2%)                   | 12%<br>(7-16%)                      | 4.3<br>(2.6-6)      | 610<br>(420-830)       |
| Denmark  | 2010 | Female | 25 to 29 | 97%<br>(95-98%)                | 3.1%<br>(1.6-5.1%)       | 3<br>(2.2-4)                                | 2.5%<br>(1.7-3.3%)                   | 10%<br>(5.9-14%)                    | 3.5<br>(2.1-5)      | 490<br>(340-670)       |
| Denmark  | 2010 | Female | 30 to 34 | 97%<br>(95-98%)                | 3%<br>(1.5-5%)           | 2.8<br>(2-3.8)                              | 2.6%<br>(1.8-3.6%)                   | 11%<br>(7.7-15%)                    | 7.1<br>(4.7-9.6)    | 660<br>(460-880)       |
| Denmark  | 2010 | Female | 35 to 39 | 97%<br>(95-98%)                | 3.2%<br>(1.6-5.1%)       | 3<br>(2.1-4.1)                              | 3.1%<br>(2.2-4.2%)                   | 13%<br>(9.5-17%)                    | 13<br>(9.3-17)      | 960<br>(680-1300)      |
| Denmark  | 2010 | Female | 40 to 44 | 97%<br>(95-98%)                | 3%<br>(1.7-4.7%)         | 3.5<br>(2.6-4.6)                            | 4.8%<br>(3.6-6.3%)                   | 16%<br>(12-19%)                     | 32<br>(25-41)       | 1900<br>(1400-2400)    |
| Denmark  | 2010 | Female | 45 to 49 | 97%<br>(96-98%)                | 2.8%<br>(1.9-3.9%)       | 4.5<br>(3.3-5.8)                            | 7.3%<br>(5.8-9.4%)                   | 19%<br>(16-22%)                     | 70<br>(57-85)       | 3400<br>(2700-4200)    |
| Denmark  | 2010 | Female | 50 to 54 | 98%<br>(97-98%)                | 2.4%<br>(1.7-3.3%)       | 5<br>(3.8-6.5)                              | 8.9%<br>(7.1-11%)                    | 18%<br>(15-22%)                     | 110<br>(87-130)     | 4500<br>(3600-5500)    |
| Denmark  | 2010 | Female | 55 to 59 | 98%<br>(97-99%)                | 2.2%<br>(1.5-2.9%)       | 5.2<br>(4-6.6)                              | 9.3%<br>(7.3-11%)                    | 17%<br>(14-19%)                     | 150<br>(120-180)    | 5300<br>(4200-6400)    |
| Denmark  | 2010 | Female | 60 to 64 | 98%<br>(97-98%)                | 2.3%<br>(1.5-3.2%)       | 5.2<br>(3.9-6.6)                            | 8.5%<br>(6.3-11%)                    | 14%<br>(11-17%)                     | 190<br>(150-240)    | 5900<br>(4500-7500)    |
| Denmark  | 2010 | Female | 65 to 69 | 97%<br>(96-98%)                | 2.6%<br>(1.8-3.8%)       | 4.9<br>(3.9-6.1)                            | 7.4%<br>(5.5-9.4%)                   | 11%<br>(8.5-14%)                    | 210<br>(160-270)    | 5300<br>(3900-6800)    |
| Denmark  | 2010 | Female | 70 to 74 | 97%<br>(96-98%)                | 3.1%<br>(2.2-4.4%)       | 4.5<br>(3.4-5.8)                            | 6.2%<br>(3.7-8.8%)                   | 8.5%<br>(5.5-12%)                   | 200<br>(130-280)    | 4000<br>(2400-5700)    |
| Denmark  | 2010 | Female | 75 to 79 | 96%<br>(94-98%)                | 4%<br>(2.4-6.5%)         | 4.1<br>(3-5.4)                              | 5.2%<br>(2.3-8.4%)                   | 6.6%<br>(3.1-10%)                   | 210<br>(97-340)     | 3400<br>(1500-5300)    |
| Denmark  | 2010 | Female | 80 to 84 | 94%<br>(90-96%)                | 6.4%<br>(4.2-9.7%)       | 3.9<br>(2.9-5)                              | 4.7%<br>(1.8-8%)                     | 5.7%<br>(2.1-9.7%)                  | 250<br>(89-420)     | 2900<br>(1100-4800)    |
| Denmark  | 2010 | Female | 85 to 89 | 90%<br>(86-93%)                | 9.8%<br>(6.8-14%)        | 3.7<br>(2.8-4.8)                            | 4.1%<br>(0.95-7.7%)                  | 4.9%<br>(0.98-9.4%)                 | 250<br>(49-480)     | 2100<br>(470-3900)     |
| Denmark  | 2010 | Female | 90 to 94 | 88%<br>(82-92%)                | 12%<br>(8.1-18%)         | 3.5<br>(2.4-4.9)                            | 3.5%<br>(-0.27-7.8%)                 | 4%<br>(-0.51-9.3%)                  | 160<br>(-20-370)    | 920<br>(-70-2000)      |

| Location | Year | Sex    | Age      | Prevalence of current drinkers | Prevalence of abstainers | Population average of standard drinks daily | Percent of total attributable deaths | Percent of total attributable DALYs | Attributable deaths | Attributable DALYs      |
|----------|------|--------|----------|--------------------------------|--------------------------|---------------------------------------------|--------------------------------------|-------------------------------------|---------------------|-------------------------|
| Denmark  | 2010 | Female | 95 plus  | 85%<br>(77-91%)                | 15%<br>(9.1-23%)         | 3.3<br>(2-5.1)                              | 3%<br>(-1.6-8.9%)                    | 3.3%<br>(-2.2-10%)                  | 71<br>(-48-220)     | 270<br>(-140-780)       |
| Denmark  | 2010 | Male   | All Ages | 98%<br>(97-98%)                | 2.5%<br>(1.7-3.3%)       | 4.7<br>(4-5.6)                              | 12%<br>(10-15%)                      | 13%<br>(10-17%)                     | 3500<br>(2600-4500) | 96000<br>(79000-120000) |
| Denmark  | 2010 | Male   | 15 to 19 | 96%<br>(92-98%)                | 4.4%<br>(2.3-7.6%)       | 4.1<br>(3-5.3)                              | 6.3%<br>(4.2-8.5%)                   | 17%<br>(10-24%)                     | 10<br>(6.1-15)      | 1100<br>(730-1500)      |
| Denmark  | 2010 | Male   | 20 to 24 | 97%<br>(94-98%)                | 3.2%<br>(1.7-5.6%)       | 5.7<br>(4.2-7.3)                            | 12%<br>(8.7-15%)                     | 23%<br>(15-31%)                     | 21<br>(14-29)       | 2200<br>(1700-2900)     |
| Denmark  | 2010 | Male   | 25 to 29 | 98%<br>(96-99%)                | 2.3%<br>(1.2-4%)         | 4.9<br>(3.8-6.2)                            | 9.9%<br>(7.4-13%)                    | 20%<br>(13-28%)                     | 19<br>(13-27)       | 2000<br>(1400-2500)     |
| Denmark  | 2010 | Male   | 30 to 34 | 98%<br>(97-99%)                | 1.8%<br>(0.82-3.4%)      | 4.3<br>(3.2-5.6)                            | 8.5%<br>(6.2-11%)                    | 18%<br>(12-25%)                     | 23<br>(15-31)       | 2100<br>(1500-2700)     |
| Denmark  | 2010 | Male   | 35 to 39 | 99%<br>(97-99%)                | 1.5%<br>(0.68-2.7%)      | 4<br>(2.9-5.2)                              | 9.3%<br>(7.1-12%)                    | 19%<br>(14-25%)                     | 40<br>(28-52)       | 3000<br>(2300-3700)     |
| Denmark  | 2010 | Male   | 40 to 44 | 99%<br>(98-99%)                | 1.2%<br>(0.52-2.3%)      | 4.8<br>(3.7-6.2)                            | 12%<br>(9.7-15%)                     | 24%<br>(19-29%)                     | 85<br>(67-110)      | 5000<br>(4000-6100)     |
| Denmark  | 2010 | Male   | 45 to 49 | 99%<br>(98-99%)                | 1.1%<br>(0.54-2%)        | 6.7<br>(5.2-8.5)                            | 17%<br>(14-20%)                      | 30%<br>(26-35%)                     | 180<br>(150-210)    | 8700<br>(7300-10000)    |
| Denmark  | 2010 | Male   | 50 to 54 | 99%<br>(98-100%)               | 0.95%<br>(0.44-1.8%)     | 7.6<br>(5.9-9.6)                            | 20%<br>(17-23%)                      | 31%<br>(26-35%)                     | 290<br>(240-340)    | 12000<br>(10000-14000)  |
| Denmark  | 2010 | Male   | 55 to 59 | 99%<br>(99-100%)               | 0.84%<br>(0.41-1.4%)     | 7.5<br>(6.1-9.4)                            | 19%<br>(16-22%)                      | 27%<br>(23-31%)                     | 380<br>(320-440)    | 13000<br>(11000-15000)  |
| Denmark  | 2010 | Male   | 60 to 64 | 99%<br>(98-100%)               | 0.89%<br>(0.39-1.6%)     | 7.3<br>(5.7-9.2)                            | 16%<br>(13-19%)                      | 22%<br>(18-25%)                     | 470<br>(380-560)    | 14000<br>(11000-17000)  |
| Denmark  | 2010 | Male   | 65 to 69 | 99%<br>(98-100%)               | 1.1%<br>(0.43-2.2%)      | 6.9<br>(5.6-8.4)                            | 13%<br>(11-16%)                      | 17%<br>(14-20%)                     | 460<br>(360-560)    | 12000<br>(9200-14000)   |
| Denmark  | 2010 | Male   | 70 to 74 | 99%<br>(97-99%)                | 1.4%<br>(0.63-2.6%)      | 6.4<br>(5.1-7.9)                            | 11%<br>(7.8-14%)                     | 13%<br>(9.4-17%)                    | 410<br>(290-530)    | 8200<br>(5900-11000)    |
| Denmark  | 2010 | Male   | 75 to 79 | 98%<br>(97-99%)                | 1.6%<br>(0.72-3%)        | 5.9<br>(4.7-7.4)                            | 8.9%<br>(5.6-12%)                    | 10%<br>(6.5-14%)                    | 370<br>(230-520)    | 5900<br>(3700-8200)     |
| Denmark  | 2010 | Male   | 80 to 84 | 98%<br>(97-99%)                | 1.8%<br>(0.85-3.3%)      | 5.6<br>(4.4-6.8)                            | 7.6%<br>(4.2-11%)                    | 8.5%<br>(4.5-13%)                   | 350<br>(180-530)    | 4100<br>(2200-6100)     |
| Denmark  | 2010 | Male   | 85 to 89 | 98%<br>(97-99%)                | 1.9%<br>(1-3%)           | 5.2<br>(4.1-6.6)                            | 6.5%<br>(2.8-10%)                    | 7%<br>(2.8-12%)                     | 260<br>(100-430)    | 2100<br>(940-3500)      |
| Denmark  | 2010 | Male   | 90 to 94 | 98%<br>(97-99%)                | 2%<br>(0.99-3.5%)        | 4.9<br>(3.5-6.4)                            | 5.4%<br>(1.1-10%)                    | 5.8%<br>(0.85-12%)                  | 110<br>(16-220)     | 630<br>(130-1200)       |
| Denmark  | 2010 | Male   | 95 plus  | 98%<br>(96-99%)                | 2.2%<br>(0.84-4.2%)      | 4.5<br>(2.8-6.4)                            | 4.4%<br>(-0.6-10%)                   | 4.6%<br>(-1.3-12%)                  | 29<br>(-15-74)      | 110<br>(-15-270)        |
| Denmark  | 2016 | Female | All Ages | 95%<br>(94-96%)                | 4.7%<br>(3.7-6%)         | 3.2<br>(2.3-4.1)                            | 5%<br>(3.2-7%)                       | 6.3%<br>(3-10%)                     | 1700<br>(750-2800)  | 37000<br>(24000-53000)  |
| Denmark  | 2016 | Female | 15 to 19 | 94%<br>(88-97%)                | 6.2%<br>(3-12%)          | 2.8<br>(1.8-3.9)                            | 2%<br>(1.2-2.8%)                     | 9.9%<br>(5.1-15%)                   | 2.2<br>(1.1-3.4)    | 320<br>(200-480)        |
| Denmark  | 2016 | Female | 20 to 24 | 96%<br>(92-98%)                | 4.5%<br>(2.2-8.4%)       | 3.3<br>(2.1-4.8)                            | 2.9%<br>(2-3.9%)                     | 11%<br>(6.3-16%)                    | 3.8<br>(2.1-5.7)    | 630<br>(420-880)        |

| Location | Year | Sex    | Age      | Prevalence of current drinkers | Prevalence of abstainers | Population average of standard drinks daily | Percent of total attributable deaths | Percent of total attributable DALYs | Attributable deaths | Attributable DALYs      |
|----------|------|--------|----------|--------------------------------|--------------------------|---------------------------------------------|--------------------------------------|-------------------------------------|---------------------|-------------------------|
| Denmark  | 2016 | Female | 25 to 29 | 96%<br>(94-98%)                | 3.5%<br>(1.8-6%)         | 2.8<br>(1.9-4)                              | 2.3%<br>(1.6-3.1%)                   | 9.3%<br>(5.2-13%)                   | 3.2<br>(1.7-4.9)    | 500<br>(330-690)        |
| Denmark  | 2016 | Female | 30 to 34 | 97%<br>(94-98%)                | 3.2%<br>(1.6-5.7%)       | 2.7<br>(1.8-3.8)                            | 2.4%<br>(1.6-3.3%)                   | 11%<br>(7.2-15%)                    | 5.4<br>(3.4-7.7)    | 530<br>(360-720)        |
| Denmark  | 2016 | Female | 35 to 39 | 96%<br>(94-98%)                | 3.5%<br>(1.7-5.8%)       | 2.8<br>(1.9-4)                              | 2.8%<br>(1.8-3.9%)                   | 13%<br>(8.8-17%)                    | 10<br>(6.7-14)      | 770<br>(520-1000)       |
| Denmark  | 2016 | Female | 40 to 44 | 97%<br>(94-98%)                | 3.5%<br>(1.8-5.8%)       | 3.3<br>(2.3-4.6)                            | 4.1%<br>(2.8-5.7%)                   | 15%<br>(12-19%)                     | 25<br>(18-33)       | 1500<br>(1000-2000)     |
| Denmark  | 2016 | Female | 45 to 49 | 97%<br>(95-98%)                | 3.1%<br>(2-4.7%)         | 4.2<br>(2.9-6)                              | 6.3%<br>(4.6-8.4%)                   | 18%<br>(14-22%)                     | 56<br>(42-73)       | 2800<br>(2000-3600)     |
| Denmark  | 2016 | Female | 50 to 54 | 97%<br>(96-98%)                | 2.7%<br>(1.8-3.9%)       | 4.7<br>(3.3-6.8)                            | 7.8%<br>(5.7-10%)                    | 17%<br>(14-21%)                     | 94<br>(71-120)      | 4000<br>(3000-5200)     |
| Denmark  | 2016 | Female | 55 to 59 | 98%<br>(97-98%)                | 2.4%<br>(1.6-3.3%)       | 4.9<br>(3.4-6.7)                            | 8.2%<br>(6-11%)                      | 16%<br>(12-19%)                     | 120<br>(92-160)     | 4400<br>(3200-5700)     |
| Denmark  | 2016 | Female | 60 to 64 | 97%<br>(96-98%)                | 2.5%<br>(1.7-3.8%)       | 4.9<br>(3.3-6.7)                            | 7.6%<br>(5.3-10%)                    | 13%<br>(9.9-16%)                    | 150<br>(110-200)    | 4600<br>(3200-6100)     |
| Denmark  | 2016 | Female | 65 to 69 | 97%<br>(95-98%)                | 3.1%<br>(1.9-4.7%)       | 4.5<br>(3.3-6.2)                            | 6.5%<br>(4.4-9%)                     | 10%<br>(7.6-14%)                    | 200<br>(140-270)    | 5200<br>(3400-7200)     |
| Denmark  | 2016 | Female | 70 to 74 | 96%<br>(94-98%)                | 3.7%<br>(2.5-5.5%)       | 4.1<br>(2.8-5.8)                            | 5.3%<br>(2.9-8.3%)                   | 7.8%<br>(4.7-12%)                   | 200<br>(120-310)    | 4100<br>(2200-6400)     |
| Denmark  | 2016 | Female | 75 to 79 | 95%<br>(92-97%)                | 4.7%<br>(2.6-8.1%)       | 3.8<br>(2.5-5.5)                            | 4.5%<br>(1.7-8%)                     | 5.9%<br>(2.5-10%)                   | 190<br>(78-340)     | 3000<br>(1100-5400)     |
| Denmark  | 2016 | Female | 80 to 84 | 93%<br>(89-96%)                | 7%<br>(4.4-11%)          | 3.6<br>(2.4-5.1)                            | 4%<br>(1-7.6%)                       | 5%<br>(1.3-9.6%)                    | 190<br>(51-370)     | 2300<br>(570-4300)      |
| Denmark  | 2016 | Female | 85 to 89 | 89%<br>(84-93%)                | 11%<br>(6.9-16%)         | 3.4<br>(2.3-4.8)                            | 3.5%<br>(0.27-7.4%)                  | 4.1%<br>(0.2-9%)                    | 190<br>(9-420)      | 1600<br>(120-3400)      |
| Denmark  | 2016 | Female | 90 to 94 | 87%<br>(80-91%)                | 13%<br>(8.5-20%)         | 3.3<br>(2.1-4.8)                            | 2.9%<br>(-0.77-7.7%)                 | 3.3%<br>(-1.3-8.9%)                 | 150<br>(-54-400)    | 850<br>(-230-2200)      |
| Denmark  | 2016 | Female | 95 plus  | 84%<br>(76-91%)                | 16%<br>(9.3-24%)         | 3.1<br>(1.8-4.9)                            | 2.5%<br>(-1.8-8.5%)                  | 2.8%<br>(-2.5-10%)                  | 64<br>(-57-230)     | 240<br>(-170-790)       |
| Denmark  | 2016 | Male   | All Ages | 97%<br>(96-98%)                | 2.9%<br>(2-4%)           | 4.5<br>(3.4-5.8)                            | 11%<br>(8.3-14%)                     | 12%<br>(8-16%)                      | 3200<br>(2100-4500) | 87000<br>(64000-110000) |
| Denmark  | 2016 | Male   | 15 to 19 | 94%<br>(89-97%)                | 5.7%<br>(2.6-11%)        | 3.8<br>(2.5-5.3)                            | 5.4%<br>(3.5-7.5%)                   | 16%<br>(8.7-23%)                    | 7.8<br>(4.1-12)     | 900<br>(600-1300)       |
| Denmark  | 2016 | Male   | 20 to 24 | 96%<br>(93-98%)                | 4.1%<br>(2-7.5%)         | 5.4<br>(3.6-7.3)                            | 10%<br>(7.5-13%)                     | 21%<br>(13-31%)                     | 18<br>(11-27)       | 2200<br>(1600-2900)     |
| Denmark  | 2016 | Male   | 25 to 29 | 97%<br>(95-99%)                | 2.9%<br>(1.4-5.4%)       | 4.6<br>(3.3-6.3)                            | 8.8%<br>(6.4-11%)                    | 19%<br>(11-27%)                     | 17<br>(10-25)       | 1900<br>(1400-2600)     |
| Denmark  | 2016 | Male   | 30 to 34 | 98%<br>(96-99%)                | 2.2%<br>(0.99-4.3%)      | 4<br>(2.8-5.7)                              | 7.9%<br>(5.6-10%)                    | 18%<br>(11-25%)                     | 18<br>(11-26)       | 1700<br>(1200-2300)     |
| Denmark  | 2016 | Male   | 35 to 39 | 98%<br>(97-99%)                | 1.8%<br>(0.8-3.5%)       | 3.8<br>(2.5-5.4)                            | 8.5%<br>(6.2-11%)                    | 19%<br>(12-25%)                     | 30<br>(20-41)       | 2300<br>(1700-3000)     |
| Denmark  | 2016 | Male   | 40 to 44 | 98%<br>(97-99%)                | 1.6%<br>(0.61-3.2%)      | 4.5<br>(3.2-6.1)                            | 11%<br>(8.5-14%)                     | 23%<br>(18-29%)                     | 65<br>(48-85)       | 4000<br>(3000-5000)     |



| Location | Year | Sex    | Age      | Prevalence of current drinkers | Prevalence of abstainers | Population average of standard drinks daily | Percent of total attributable deaths | Percent of total attributable DALYs | Attributable deaths | Attributable DALYs    |
|----------|------|--------|----------|--------------------------------|--------------------------|---------------------------------------------|--------------------------------------|-------------------------------------|---------------------|-----------------------|
| Denmark  | 2016 | Male   | 45 to 49 | 99%<br>(97-99%)                | 1.4%<br>(0.59-2.8%)      | 6.2<br>(4.4-8.5)                            | 16%<br>(12-19%)                      | 29%<br>(24-35%)                     | 150<br>(120-190)    | 7500<br>(5900-9500)   |
| Denmark  | 2016 | Male   | 50 to 54 | 99%<br>(98-99%)                | 1.2%<br>(0.54-2.4%)      | 7.1<br>(5-9.6)                              | 18%<br>(15-22%)                      | 29%<br>(24-34%)                     | 260<br>(200-320)    | 11000<br>(8500-13000) |
| Denmark  | 2016 | Male   | 55 to 59 | 99%<br>(98-100%)               | 1.1%<br>(0.49-1.8%)      | 7<br>(5.1-9.5)                              | 17%<br>(14-21%)                      | 26%<br>(21-30%)                     | 320<br>(250-400)    | 11000<br>(8800-14000) |
| Denmark  | 2016 | Male   | 60 to 64 | 99%<br>(98-100%)               | 1.1%<br>(0.47-2.2%)      | 6.8<br>(4.9-9.1)                            | 15%<br>(11-18%)                      | 21%<br>(16-25%)                     | 360<br>(270-460)    | 11000<br>(8200-14000) |
| Denmark  | 2016 | Male   | 65 to 69 | 99%<br>(97-99%)                | 1.4%<br>(0.52-2.9%)      | 6.4<br>(4.7-8.4)                            | 12%<br>(8.8-15%)                     | 16%<br>(12-20%)                     | 470<br>(340-600)    | 12000<br>(8500-15000) |
| Denmark  | 2016 | Male   | 70 to 74 | 98%<br>(97-99%)                | 1.7%<br>(0.71-3.3%)      | 6<br>(4.2-8)                                | 9.7%<br>(6.2-13%)                    | 12%<br>(7.7-16%)                    | 440<br>(270-610)    | 9000<br>(5600-12000)  |
| Denmark  | 2016 | Male   | 75 to 79 | 98%<br>(96-99%)                | 1.9%<br>(0.76-3.6%)      | 5.5<br>(3.9-7.6)                            | 8%<br>(4.3-12%)                      | 9.3%<br>(4.9-14%)                   | 370<br>(190-560)    | 5900<br>(3100-9000)   |
| Denmark  | 2016 | Male   | 80 to 84 | 98%<br>(96-99%)                | 2.2%<br>(0.98-4%)        | 5.1<br>(3.6-6.9)                            | 6.7%<br>(2.9-11%)                    | 7.5%<br>(3.1-12%)                   | 300<br>(130-510)    | 3600<br>(1500-5900)   |
| Denmark  | 2016 | Male   | 85 to 89 | 98%<br>(96-99%)                | 2.4%<br>(1.1-4.3%)       | 4.8<br>(3.4-6.4)                            | 5.6%<br>(1.7-11%)                    | 6.1%<br>(1.5-12%)                   | 230<br>(59-450)     | 1900<br>(590-3600)    |
| Denmark  | 2016 | Male   | 90 to 94 | 98%<br>(96-99%)                | 2.4%<br>(1.1-4.3%)       | 4.5<br>(3-6.3)                              | 4.5%<br>(0.35-10%)                   | 4.9%<br>(-0.057-11%)                | 110<br>(-1.3-260)   | 640<br>(50-1400)      |
| Denmark  | 2016 | Male   | 95 plus  | 97%<br>(95-99%)                | 2.5%<br>(0.95-4.9%)      | 4.1<br>(2.5-6.3)                            | 3.7%<br>(-1.1-10%)                   | 3.8%<br>(-1.8-12%)                  | 27<br>(-13-81)      | 100<br>(-31-290)      |
| Finland  | 1990 | Female | All Ages | 74%<br>(66-81%)                | 26%<br>(19-34%)          | 2.2<br>(1.8-2.5)                            | 2%<br>(0.28-3.7%)                    | 0.43%<br>(-2.8-3.8%)                | 110<br>(-680-940)   | 14000<br>(2100-27000) |
| Finland  | 1990 | Female | 15 to 19 | 71%<br>(51-86%)                | 29%<br>(14-49%)          | 2.6<br>(1.7-3.6)                            | 4.1%<br>(2.6-5.8%)                   | 13%<br>(6.7-19%)                    | 7.2<br>(3.8-11)     | 710<br>(450-1000)     |
| Finland  | 1990 | Female | 20 to 24 | 76%<br>(58-89%)                | 24%<br>(11-42%)          | 3.3<br>(2.2-4.7)                            | 5.7%<br>(3.9-7.6%)                   | 16%<br>(8.8-23%)                    | 12<br>(6.6-17)      | 1300<br>(920-1800)    |
| Finland  | 1990 | Female | 25 to 29 | 78%<br>(62-90%)                | 22%<br>(10-38%)          | 2.7<br>(2-3.5)                              | 4.1%<br>(2.8-5.5%)                   | 12%<br>(6.6-18%)                    | 9.5<br>(5.1-14)     | 1100<br>(750-1500)    |
| Finland  | 1990 | Female | 30 to 34 | 80%<br>(63-91%)                | 20%<br>(9.2-37%)         | 2.4<br>(1.7-3.2)                            | 3.7%<br>(2.4-5.1%)                   | 11%<br>(6.3-16%)                    | 13<br>(7.3-19)      | 1100<br>(730-1500)    |
| Finland  | 1990 | Female | 35 to 39 | 81%<br>(66-92%)                | 19%<br>(8.1-34%)         | 2.5<br>(1.8-3.4)                            | 4.3%<br>(2.8-5.9%)                   | 13%<br>(8-17%)                      | 23<br>(15-32)       | 1600<br>(1000-2100)   |
| Finland  | 1990 | Female | 40 to 44 | 82%<br>(65-92%)                | 18%<br>(7.9-35%)         | 2.9<br>(2.1-3.8)                            | 5.5%<br>(3.8-7.5%)                   | 14%<br>(10-19%)                     | 46<br>(33-60)       | 2500<br>(1800-3300)   |
| Finland  | 1990 | Female | 45 to 49 | 82%<br>(63-92%)                | 18%<br>(8.4-37%)         | 3.5<br>(2.5-4.5)                            | 6.8%<br>(5-9.1%)                     | 16%<br>(11-20%)                     | 54<br>(40-69)       | 2600<br>(1900-3300)   |
| Finland  | 1990 | Female | 50 to 54 | 81%<br>(64-91%)                | 19%<br>(8.5-36%)         | 3.4<br>(2.5-4.5)                            | 6.7%<br>(4.5-9.1%)                   | 13%<br>(9.6-17%)                    | 62<br>(44-80)       | 2600<br>(1800-3400)   |
| Finland  | 1990 | Female | 55 to 59 | 80%<br>(63-92%)                | 20%<br>(8.4-37%)         | 2.8<br>(2-3.8)                              | 4.6%<br>(2.7-6.9%)                   | 8.6%<br>(5.4-12%)                   | 53<br>(33-75)       | 1900<br>(1100-2700)   |
| Finland  | 1990 | Female | 60 to 64 | 79%<br>(59-92%)                | 21%<br>(8.4-41%)         | 2.4<br>(1.6-3.3)                            | 2.5%<br>(0.19-5.3%)                  | 4.1%<br>(0.54-8.1%)                 | 45<br>(6-88)        | 1300<br>(97-2700)     |

| Location | Year | Sex    | Age      | Prevalence of current drinkers | Prevalence of abstainers | Population average of standard drinks daily | Percent of total attributable deaths | Percent of total attributable DALYs | Attributable deaths | Attributable DALYs       |
|----------|------|--------|----------|--------------------------------|--------------------------|---------------------------------------------|--------------------------------------|-------------------------------------|---------------------|--------------------------|
| Finland  | 1990 | Female | 65 to 69 | 77%<br>(57-91%)                | 23%<br>(9.5-43%)         | 2.1<br>(1.4-2.9)                            | 0.67%<br>(-2.2-3.4%)                 | 0.97%<br>(-3-4.7%)                  | 18<br>(-57-88)      | 440<br>(-1400-2200)      |
| Finland  | 1990 | Female | 70 to 74 | 74%<br>(55-87%)                | 26%<br>(13-45%)          | 1.8<br>(1.2-2.6)                            | -0.72%<br>(-3.7-2.4%)                | -0.99%<br>(-5-3.3%)                 | -27<br>(-140-87)    | -500<br>(-2600-1600)     |
| Finland  | 1990 | Female | 75 to 79 | 71%<br>(51-86%)                | 29%<br>(14-49%)          | 1.7<br>(1.1-2.5)                            | -1.3%<br>(-4.4-2%)                   | -1.8%<br>(-5.7-2.4%)                | -78<br>(-250-110)   | -1100<br>(-3600-1600)    |
| Finland  | 1990 | Female | 80 to 84 | 68%<br>(47-84%)                | 32%<br>(16-53%)          | 1.8<br>(1.1-2.6)                            | -1.1%<br>(-4.4-2.1%)                 | -1.5%<br>(-5.4-2.4%)                | -85<br>(-300-130)   | -830<br>(-3200-1500)     |
| Finland  | 1990 | Female | 85 to 89 | 65%<br>(46-81%)                | 35%<br>(19-54%)          | 1.8<br>(1.1-2.7)                            | -0.57%<br>(-3.6-2.8%)                | -0.88%<br>(-4.5-3.2%)               | -38<br>(-200-140)   | -230<br>(-1400-1100)     |
| Finland  | 1990 | Female | 90 to 94 | 64%<br>(45-82%)                | 36%<br>(18-55%)          | 1.9<br>(1.1-3)                              | -0.12%<br>(-3.3-3.7%)                | -0.4%<br>(-4.1-4.2%)                | -8.2<br>(-85-85)    | -16<br>(-420-470)        |
| Finland  | 1990 | Female | 95 plus  | 65%<br>(41-84%)                | 35%<br>(16-59%)          | 2<br>(1-3.4)                                | 0.38%<br>(-3.3-4.9%)                 | 0.15%<br>(-4.1-5.5%)                | 0.83<br>(-23-31)    | 8.7<br>(-76-110)         |
| Finland  | 1990 | Male   | All Ages | 80%<br>(71-87%)                | 20%<br>(13-29%)          | 4.6<br>(4-5.2)                              | 12%<br>(9.9-15%)                     | 11%<br>(7-15%)                      | 2700<br>(1700-3700) | 110000<br>(84000-130000) |
| Finland  | 1990 | Male   | 15 to 19 | 72%<br>(51-88%)                | 28%<br>(12-49%)          | 3.3<br>(2.2-4.7)                            | 10%<br>(6.4-15%)                     | 18%<br>(10-27%)                     | 28<br>(16-42)       | 2400<br>(1500-3400)      |
| Finland  | 1990 | Male   | 20 to 24 | 78%<br>(59-90%)                | 22%<br>(10-41%)          | 5.3<br>(3.6-7.1)                            | 28%<br>(14-25%)                      | 28%<br>(19-38%)                     | 74<br>(49-100)      | 6100<br>(4400-8000)      |
| Finland  | 1990 | Male   | 25 to 29 | 82%<br>(66-92%)                | 18%<br>(8.2-34%)         | 5.2<br>(3.7-6.9)                            | 18%<br>(13-23%)                      | 28%<br>(19-37%)                     | 80<br>(54-110)      | 6400<br>(4800-8100)      |
| Finland  | 1990 | Male   | 30 to 34 | 85%<br>(68-94%)                | 15%<br>(6-32%)           | 5.4<br>(4-7.1)                              | 18%<br>(14-23%)                      | 28%<br>(20-36%)                     | 110<br>(80-140)     | 7600<br>(5900-9600)      |
| Finland  | 1990 | Male   | 35 to 39 | 87%<br>(74-95%)                | 13%<br>(5.2-26%)         | 6<br>(4.3-8)                                | 20%<br>(15-24%)                      | 29%<br>(22-37%)                     | 170<br>(130-210)    | 10000<br>(8000-13000)    |
| Finland  | 1990 | Male   | 40 to 44 | 88%<br>(75-96%)                | 12%<br>(4.2-25%)         | 6.6<br>(5-8.6)                              | 20%<br>(16-25%)                      | 30%<br>(23-35%)                     | 270<br>(210-320)    | 14000<br>(11000-17000)   |
| Finland  | 1990 | Male   | 45 to 49 | 89%<br>(71-96%)                | 11%<br>(4-29%)           | 7.4<br>(5.4-9.5)                            | 21%<br>(16-25%)                      | 28%<br>(22-34%)                     | 250<br>(200-310)    | 12000<br>(9200-14000)    |
| Finland  | 1990 | Male   | 50 to 54 | 89%<br>(75-96%)                | 11%<br>(3.8-25%)         | 7.5<br>(5.5-9.9)                            | 19%<br>(14-23%)                      | 25%<br>(18-31%)                     | 280<br>(210-360)    | 11000<br>(8700-14000)    |
| Finland  | 1990 | Male   | 55 to 59 | 89%<br>(77-96%)                | 11%<br>(3.7-23%)         | 7.2<br>(5.5-9.3)                            | 16%<br>(12-21%)                      | 20%<br>(14-26%)                     | 330<br>(230-420)    | 11000<br>(8000-14000)    |
| Finland  | 1990 | Male   | 60 to 64 | 88%<br>(73-96%)                | 12%<br>(3.9-27%)         | 6.4<br>(4.6-8.6)                            | 13%<br>(7.6-18%)                     | 15%<br>(8.4-21%)                    | 370<br>(210-520)    | 11000<br>(6400-15000)    |
| Finland  | 1990 | Male   | 65 to 69 | 88%<br>(73-96%)                | 12%<br>(4.2-27%)         | 5.3<br>(3.9-6.9)                            | 8.8%<br>(3.6-14%)                    | 9.7%<br>(3.5-16%)                   | 290<br>(100-480)    | 7300<br>(3000-12000)     |
| Finland  | 1990 | Male   | 70 to 74 | 87%<br>(73-95%)                | 13%<br>(5.4-27%)         | 4.1<br>(2.9-5.4)                            | 4.5%<br>(-0.24-10%)                  | 4.6%<br>(-0.83-11%)                 | 140<br>(-26-350)    | 3000<br>(-170-6900)      |
| Finland  | 1990 | Male   | 75 to 79 | 85%<br>(71-94%)                | 15%<br>(5.8-29%)         | 3.4<br>(2.3-5)                              | 2.6%<br>(-1.5-8.2%)                  | 2.5%<br>(-2.3-9%)                   | 96<br>(-86-340)     | 1700<br>(-940-5300)      |
| Finland  | 1990 | Male   | 80 to 84 | 84%<br>(67-93%)                | 16%<br>(7.2-33%)         | 3.4<br>(2.3-4.7)                            | 2.7%<br>(-1.7-5.5%)                  | 2.7%<br>(-1.7-8.2%)                 | 88<br>(-56-270)     | 1100<br>(-410-3100)      |

| Location | Year | Sex    | Age      | Prevalence of current drinkers | Prevalence of abstainers | Population average of standard drinks daily | Percent of total attributable deaths | Percent of total attributable DALYs | Attributable deaths | Attributable DALYs       |
|----------|------|--------|----------|--------------------------------|--------------------------|---------------------------------------------|--------------------------------------|-------------------------------------|---------------------|--------------------------|
| Finland  | 1990 | Male   | 85 to 89 | 82%<br>(66-92%)                | 18%<br>(7.7-34%)         | 3.3<br>(2.2-4.7)                            | 3.1%<br>(-0.64-7.8%)                 | 3.1%<br>(-1.1-8.4%)                 | 57<br>(-21-160)     | 500<br>(-110-1300)       |
| Finland  | 1990 | Male   | 90 to 94 | 82%<br>(67-93%)                | 18%<br>(7-33%)           | 3.4<br>(2.1-5)                              | 3.2%<br>(-1-8.9%)                    | 3.3%<br>(-1.6-9.9%)                 | 22<br>(-11-66)      | 130<br>(-41-370)         |
| Finland  | 1990 | Male   | 95 plus  | 83%<br>(64-94%)                | 17%<br>(5.7-36%)         | 3.5<br>(1.9-5.6)                            | 3.8%<br>(-1.5-11%)                   | 3.9%<br>(-2.1-12%)                  | 5.1<br>(-2.7-16)    | 20<br>(-7.7-56)          |
| Finland  | 1995 | Female | All Ages | 75%<br>(67-82%)                | 25%<br>(18-33%)          | 2.2<br>(1.9-2.5)                            | 2.3%<br>(0.72-3.9%)                  | 0.66%<br>(-2.2-3.8%)                | 170<br>(-550-940)   | 16000<br>(4900-28000)    |
| Finland  | 1995 | Female | 15 to 19 | 72%<br>(55-86%)                | 28%<br>(14-45%)          | 2.6<br>(1.8-3.7)                            | 3.5%<br>(2.2-4.8%)                   | 13%<br>(6.8-19%)                    | 4.9<br>(2.6-7.4)    | 600<br>(400-850)         |
| Finland  | 1995 | Female | 20 to 24 | 77%<br>(62-89%)                | 23%<br>(11-38%)          | 3.4<br>(2.3-4.8)                            | 5.8%<br>(4.1-7.6%)                   | 16%<br>(8.9-24%)                    | 7.8<br>(4.4-12)     | 1100<br>(790-1500)       |
| Finland  | 1995 | Female | 25 to 29 | 79%<br>(66-90%)                | 21%<br>(10-34%)          | 2.7<br>(2-3.5)                              | 4.6%<br>(3.2-5.9%)                   | 13%<br>(6.5-19%)                    | 8.8<br>(4.4-13)     | 1100<br>(790-1500)       |
| Finland  | 1995 | Female | 30 to 34 | 82%<br>(69-92%)                | 18%<br>(8.1-31%)         | 2.5<br>(1.8-3.2)                            | 3.8%<br>(2.5-5.1%)                   | 12%<br>(6.7-18%)                    | 12<br>(6.5-17)      | 1100<br>(730-1500)       |
| Finland  | 1995 | Female | 35 to 39 | 83%<br>(68-93%)                | 17%<br>(7.4-32%)         | 2.6<br>(1.8-3.4)                            | 4.6%<br>(3.1-6.2%)                   | 14%<br>(8.8-18%)                    | 23<br>(15-30)       | 1600<br>(1100-2100)      |
| Finland  | 1995 | Female | 40 to 44 | 83%<br>(67-92%)                | 17%<br>(7.9-33%)         | 2.9<br>(2.2-3.8)                            | 5.9%<br>(4.3-7.7%)                   | 16%<br>(12-20%)                     | 42<br>(31-53)       | 2400<br>(1800-3100)      |
| Finland  | 1995 | Female | 45 to 49 | 83%<br>(67-92%)                | 17%<br>(8-33%)           | 3.5<br>(2.7-4.6)                            | 7.2%<br>(5.3-9.4%)                   | 17%<br>(13-21%)                     | 73<br>(55-92)       | 3600<br>(2700-4500)      |
| Finland  | 1995 | Female | 50 to 54 | 83%<br>(68-92%)                | 17%<br>(7.8-32%)         | 3.5<br>(2.6-4.5)                            | 7.1%<br>(5.2-9.2%)                   | 15%<br>(11-18%)                     | 68<br>(51-86)       | 2900<br>(2100-3700)      |
| Finland  | 1995 | Female | 55 to 59 | 82%<br>(67-92%)                | 18%<br>(8.2-33%)         | 2.9<br>(2.1-3.7)                            | 5.2%<br>(3.4-7.3%)                   | 9.9%<br>(6.9-13%)                   | 58<br>(40-78)       | 2100<br>(1400-2800)      |
| Finland  | 1995 | Female | 60 to 64 | 79%<br>(62-91%)                | 21%<br>(9-38%)           | 2.3<br>(1.6-3.3)                            | 3%<br>(0.97-5.3%)                    | 5.2%<br>(1.9-8.7%)                  | 44<br>(16-74)       | 1300<br>(410-2300)       |
| Finland  | 1995 | Female | 65 to 69 | 77%<br>(57-90%)                | 23%<br>(9.6-43%)         | 2.1<br>(1.4-2.9)                            | 1.1%<br>(-1.2-3.4%)                  | 1.8%<br>(-1.7-5%)                   | 27<br>(-26-78)      | 670<br>(-670-2000)       |
| Finland  | 1995 | Female | 70 to 74 | 75%<br>(57-88%)                | 25%<br>(12-43%)          | 1.8<br>(1.2-2.6)                            | -0.29%<br>(-2.8-2.5%)                | -0.39%<br>(-3.9-3.5%)               | -10<br>(-100-90)    | -210<br>(-2000-1700)     |
| Finland  | 1995 | Female | 75 to 79 | 72%<br>(51-87%)                | 28%<br>(13-49%)          | 1.7<br>(1.1-2.5)                            | -1.1%<br>(-3.9-1.9%)                 | -1.5%<br>(-5.1-2.3%)                | -54<br>(-190-84)    | -760<br>(-2700-1300)     |
| Finland  | 1995 | Female | 80 to 84 | 69%<br>(48-85%)                | 31%<br>(15-52%)          | 1.8<br>(1.1-2.6)                            | -1%<br>(-4.1-2%)                     | -1.4%<br>(-5.2-2.2%)                | -76<br>(-280-110)   | -750<br>(-3000-1400)     |
| Finland  | 1995 | Female | 85 to 89 | 66%<br>(47-82%)                | 34%<br>(18-53%)          | 1.8<br>(1.1-2.7)                            | -0.62%<br>(-3.5-2.6%)                | -0.95%<br>(-4.4-2.9%)               | -49<br>(-230-150)   | -300<br>(-1700-1200)     |
| Finland  | 1995 | Female | 90 to 94 | 65%<br>(46-82%)                | 35%<br>(18-54%)          | 1.9<br>(1.1-2.9)                            | -0.19%<br>(-3.3-3.4%)                | -0.48%<br>(-4.3-3.7%)               | -13<br>(-110-97)    | -31<br>(-550-540)        |
| Finland  | 1995 | Female | 95 plus  | 66%<br>(42-85%)                | 34%<br>(15-58%)          | 2<br>(1-3.3)                                | 0.29%<br>(-3.1-4.6%)                 | 0.051%<br>(-4.5-2%)                 | 0.41<br>(-32-42)    | 9.4<br>(-100-150)        |
| Finland  | 1995 | Male   | All Ages | 83%<br>(75-89%)                | 17%<br>(11-25%)          | 4.7<br>(4.1-5.3)                            | 12%<br>(9.9-15%)                     | 11%<br>(6.9-15%)                    | 2500<br>(1600-3500) | 100000<br>(81000-120000) |

| Location | Year | Sex    | Age      | Prevalence of current drinkers | Prevalence of abstainers | Population average of standard drinks daily | Percent of total attributable deaths | Percent of total attributable DALYs | Attributable deaths | Attributable DALYs     |
|----------|------|--------|----------|--------------------------------|--------------------------|---------------------------------------------|--------------------------------------|-------------------------------------|---------------------|------------------------|
| Finland  | 1995 | Male   | 15 to 19 | 77%<br>(61-89%)                | 23%<br>(11-39%)          | 3.5<br>(2.4-4.9)                            | 9.8%<br>(6.3-14%)                    | 18%<br>(11-27%)                     | 24<br>(14-35)       | 2200<br>(1400-3100)    |
| Finland  | 1995 | Male   | 20 to 24 | 82%<br>(67-93%)                | 18%<br>(7.5-33%)         | 5.4<br>(3.9-7.3)                            | 19%<br>(14-24%)                      | 29%<br>(20-38%)                     | 50<br>(34-66)       | 4600<br>(3400-5900)    |
| Finland  | 1995 | Male   | 25 to 29 | 85%<br>(75-94%)                | 15%<br>(6.2-25%)         | 5.3<br>(3.8-6.9)                            | 18%<br>(14-23%)                      | 28%<br>(19-37%)                     | 64<br>(43-84)       | 5600<br>(4200-7100)    |
| Finland  | 1995 | Male   | 30 to 34 | 88%<br>(77-95%)                | 12%<br>(4.6-23%)         | 5.5<br>(4.1-7.2)                            | 17%<br>(13-22%)                      | 29%<br>(21-37%)                     | 87<br>(63-110)      | 6400<br>(4900-8000)    |
| Finland  | 1995 | Male   | 35 to 39 | 89%<br>(77-96%)                | 11%<br>(4.1-23%)         | 6<br>(4.4-8.1)                              | 20%<br>(15-24%)                      | 31%<br>(24-38%)                     | 140<br>(110-180)    | 8800<br>(6900-11000)   |
| Finland  | 1995 | Male   | 40 to 44 | 90%<br>(78-96%)                | 10%<br>(3.5-22%)         | 6.7<br>(5-8.5)                              | 21%<br>(17-25%)                      | 32%<br>(25-37%)                     | 230<br>(180-270)    | 12000<br>(9600-14000)  |
| Finland  | 1995 | Male   | 45 to 49 | 91%<br>(78-97%)                | 9.3%<br>(3.4-22%)        | 7.4<br>(5.7-9.6)                            | 22%<br>(17-25%)                      | 31%<br>(25-36%)                     | 340<br>(270-400)    | 16000<br>(13000-19000) |
| Finland  | 1995 | Male   | 50 to 54 | 91%<br>(80-97%)                | 9%<br>(3.4-20%)          | 7.6<br>(5.7-9.7)                            | 20%<br>(15-23%)                      | 26%<br>(21-32%)                     | 290<br>(230-350)    | 12000<br>(9400-14000)  |
| Finland  | 1995 | Male   | 55 to 59 | 91%<br>(81-97%)                | 9.1%<br>(3.4-19%)        | 7.3<br>(5.7-9.3)                            | 17%<br>(12-21%)                      | 21%<br>(15-27%)                     | 300<br>(220-380)    | 11000<br>(8000-13000)  |
| Finland  | 1995 | Male   | 60 to 64 | 90%<br>(79-97%)                | 9.7%<br>(3.4-21%)        | 6.5<br>(4.8-8.5)                            | 13%<br>(8-18%)                       | 16%<br>(9.3-21%)                    | 310<br>(190-420)    | 9200<br>(5800-13000)   |
| Finland  | 1995 | Male   | 65 to 69 | 89%<br>(77-96%)                | 11%<br>(3.7-23%)         | 5.2<br>(3.9-6.7)                            | 8.7%<br>(3.9-13%)                    | 9.8%<br>(3.8-16%)                   | 290<br>(110-460)    | 7200<br>(3300-11000)   |
| Finland  | 1995 | Male   | 70 to 74 | 87%<br>(75-95%)                | 13%<br>(5.2-25%)         | 4<br>(2.8-5.3)                              | 4.3%<br>(0.12-9.3%)                  | 4.5%<br>(-0.52-10%)                 | 160<br>(-18-360)    | 3300<br>(87-7200)      |
| Finland  | 1995 | Male   | 75 to 79 | 86%<br>(72-95%)                | 14%<br>(5.4-28%)         | 3.4<br>(2.3-4.9)                            | 2.5%<br>(-1.4-7.4%)                  | 2.4%<br>(-2.3-8.1%)                 | 76<br>(-74-260)     | 1400<br>(-830-4200)    |
| Finland  | 1995 | Male   | 80 to 84 | 84%<br>(68-94%)                | 16%<br>(6.4-32%)         | 3.3<br>(2.3-4.7)                            | 2.5%<br>(-1.2-6.9%)                  | 2.4%<br>(-1.9-7.5%)                 | 80<br>(-61-250)     | 1000<br>(-490-2900)    |
| Finland  | 1995 | Male   | 85 to 89 | 82%<br>(65-93%)                | 18%<br>(7.2-35%)         | 3.3<br>(2.2-4.6)                            | 2.8%<br>(-0.85-7.1%)                 | 2.7%<br>(-1.4-7.8%)                 | 61<br>(-31-170)     | 550<br>(-170-1400)     |
| Finland  | 1995 | Male   | 90 to 94 | 82%<br>(65-93%)                | 18%<br>(6.6-35%)         | 3.3<br>(2-4.9)                              | 3%<br>(-1-8.5%)                      | 3%<br>(-1.6-9.5%)                   | 25<br>(-14-78)      | 150<br>(-52-430)       |
| Finland  | 1995 | Male   | 95 plus  | 83%<br>(63-95%)                | 17%<br>(5.4-37%)         | 3.4<br>(1.8-5.4)                            | 3.5%<br>(-1.4-10%)                   | 3.6%<br>(-2.1-11%)                  | 6.7<br>(-3.9-21)    | 27<br>(-10-77)         |
| Finland  | 2000 | Female | All Ages | 75%<br>(67-82%)                | 25%<br>(18-33%)          | 2.3<br>(2-2.7)                              | 3.2%<br>(1.8-4.6%)                   | 1.7%<br>(-1.1-4.6%)                 | 420<br>(-280-1100)  | 22000<br>(13000-32000) |
| Finland  | 2000 | Female | 15 to 19 | 70%<br>(52-85%)                | 30%<br>(15-48%)          | 2.6<br>(1.7-3.6)                            | 3.7%<br>(2.5-5.1%)                   | 13%<br>(7.3-19%)                    | 5.7<br>(3.3-8.6)    | 660<br>(440-920)       |
| Finland  | 2000 | Female | 20 to 24 | 76%<br>(60-89%)                | 24%<br>(11-40%)          | 3.5<br>(2.3-4.9)                            | 6.1%<br>(4.5-8%)                     | 17%<br>(10-24%)                     | 9.7<br>(5.8-14)     | 1300<br>(940-1700)     |
| Finland  | 2000 | Female | 25 to 29 | 80%<br>(66-91%)                | 20%<br>(9.2-34%)         | 2.9<br>(2.1-3.8)                            | 4.9%<br>(3.4-6.2%)                   | 14%<br>(8.1-20%)                    | 8.1<br>(4.6-11)     | 1000<br>(710-1300)     |
| Finland  | 2000 | Female | 30 to 34 | 82%<br>(68-92%)                | 18%<br>(7.9-32%)         | 2.6<br>(1.9-3.4)                            | 4.4%<br>(3.1-6%)                     | 15%<br>(9.3-20%)                    | 14<br>(8.7-18)      | 1200<br>(820-1500)     |

| Location | Year | Sex    | Age      | Prevalence of current drinkers | Prevalence of abstainers | Population average of standard drinks daily | Percent of total attributable deaths | Percent of total attributable DALYs | Attributable deaths | Attributable DALYs       |
|----------|------|--------|----------|--------------------------------|--------------------------|---------------------------------------------|--------------------------------------|-------------------------------------|---------------------|--------------------------|
| Finland  | 2000 | Female | 35 to 39 | 83%<br>(69-93%)                | 17%<br>(7.3-31%)         | 2.7<br>(1.9-3.7)                            | 5.2%<br>(3.8-6.9%)                   | 16%<br>(11-21%)                     | 24<br>(17-31)       | 1700<br>(1300-2200)      |
| Finland  | 2000 | Female | 40 to 44 | 84%<br>(69-93%)                | 16%<br>(7.3-31%)         | 3.1<br>(2.3-4)                              | 7%<br>(5.5-9%)                       | 19%<br>(15-23%)                     | 47<br>(38-57)       | 2700<br>(2100-3200)      |
| Finland  | 2000 | Female | 45 to 49 | 84%<br>(67-93%)                | 16%<br>(7.5-33%)         | 3.7<br>(2.8-4.8)                            | 8.5%<br>(6.6-11%)                    | 20%<br>(16-24%)                     | 79<br>(64-95)       | 3900<br>(3100-4700)      |
| Finland  | 2000 | Female | 50 to 54 | 83%<br>(68-92%)                | 17%<br>(7.7-32%)         | 3.7<br>(2.7-4.7)                            | 8.2%<br>(6.2-10%)                    | 17%<br>(13-20%)                     | 100<br>(83-130)     | 4400<br>(3400-5400)      |
| Finland  | 2000 | Female | 55 to 59 | 82%<br>(67-92%)                | 18%<br>(7.8-33%)         | 3<br>(2.2-4)                                | 6.4%<br>(4.6-8.3%)                   | 12%<br>(9.7-15%)                    | 75<br>(58-93)       | 2700<br>(2000-3400)      |
| Finland  | 2000 | Female | 60 to 64 | 80%<br>(62-92%)                | 20%<br>(8.4-38%)         | 2.5<br>(1.7-3.4)                            | 4.2%<br>(2.4-6.4%)                   | 7.4%<br>(4.5-10%)                   | 63<br>(38-89)       | 1900<br>(1100-2800)      |
| Finland  | 2000 | Female | 65 to 69 | 76%<br>(55-90%)                | 24%<br>(10-45%)          | 2.1<br>(1.4-2.9)                            | 2.3%<br>(0.35-4.2%)                  | 3.8%<br>(0.9-6.5%)                  | 46<br>(11-81)       | 1100<br>(180-2100)       |
| Finland  | 2000 | Female | 70 to 74 | 73%<br>(54-86%)                | 27%<br>(14-46%)          | 1.8<br>(1.2-2.6)                            | 0.72%<br>(-1.3-2.9%)                 | 1.1%<br>(-1.8-4.1%)                 | 25<br>(-40-93)      | 470<br>(-860-1900)       |
| Finland  | 2000 | Female | 75 to 79 | 69%<br>(48-85%)                | 31%<br>(15-52%)          | 1.7<br>(1.1-2.5)                            | -0.2%<br>(-2.6-2.3%)                 | -0.35%<br>(-3.5-2.8%)               | -13<br>(-130-110)   | -150<br>(-2000-1700)     |
| Finland  | 2000 | Female | 80 to 84 | 68%<br>(47-84%)                | 32%<br>(16-53%)          | 1.8<br>(1.1-2.6)                            | -0.47%<br>(-3.2-2.2%)                | -0.78%<br>(-4.1-2.6%)               | -37<br>(-190-120)   | -310<br>(-2000-1400)     |
| Finland  | 2000 | Female | 85 to 89 | 67%<br>(48-82%)                | 33%<br>(18-52%)          | 1.9<br>(1.2-2.8)                            | -0.29%<br>(-3-2.8%)                  | -0.61%<br>(-3.9-3.1%)               | -33<br>(-210-160)   | -150<br>(-1600-1400)     |
| Finland  | 2000 | Female | 90 to 94 | 66%<br>(48-83%)                | 34%<br>(17-52%)          | 2<br>(1.2-3.1)                              | 0.067%<br>(-2.9-3.7%)                | -0.21%<br>(-3.9-4.1%)               | -7.3<br>(-130-140)  | 14<br>(-630-790)         |
| Finland  | 2000 | Female | 95 plus  | 66%<br>(43-85%)                | 34%<br>(15-57%)          | 2.1<br>(1.1-3.5)                            | 0.62%<br>(-2.9-5.4%)                 | 0.42%<br>(-3.8-6%)                  | 4.5<br>(-41-64)     | 27<br>(-130-240)         |
| Finland  | 2000 | Male   | All Ages | 83%<br>(76-89%)                | 17%<br>(11-24%)          | 4.9<br>(4.2-5.5)                            | 13%<br>(11-16%)                      | 12%<br>(8.2-15%)                    | 2800<br>(1900-3700) | 110000<br>(89000-130000) |
| Finland  | 2000 | Male   | 15 to 19 | 75%<br>(55-89%)                | 25%<br>(11-45%)          | 3.5<br>(2.3-4.8)                            | 9.3%<br>(6.1-13%)                    | 18%<br>(11-27%)                     | 21<br>(12-31)       | 2000<br>(1300-2800)      |
| Finland  | 2000 | Male   | 20 to 24 | 81%<br>(65-91%)                | 19%<br>(8.7-35%)         | 5.5<br>(3.9-7.3)                            | 19%<br>(14-24%)                      | 28%<br>(20-37%)                     | 53<br>(37-69)       | 5000<br>(3800-6400)      |
| Finland  | 2000 | Male   | 25 to 29 | 85%<br>(74-93%)                | 15%<br>(6.6-26%)         | 5.4<br>(3.9-7.1)                            | 19%<br>(14-23%)                      | 29%<br>(21-37%)                     | 54<br>(38-69)       | 4800<br>(3700-6100)      |
| Finland  | 2000 | Male   | 30 to 34 | 88%<br>(77-95%)                | 12%<br>(4.9-23%)         | 5.6<br>(4.2-7.3)                            | 19%<br>(15-23%)                      | 31%<br>(24-39%)                     | 80<br>(60-99)       | 6000<br>(4700-7300)      |
| Finland  | 2000 | Male   | 35 to 39 | 89%<br>(78-96%)                | 11%<br>(4-22%)           | 6.2<br>(4.4-8.2)                            | 20%<br>(17-25%)                      | 35%<br>(28-41%)                     | 130<br>(100-150)    | 8100<br>(6600-9600)      |
| Finland  | 2000 | Male   | 40 to 44 | 90%<br>(79-96%)                | 9.6%<br>(3.6-21%)        | 6.8<br>(5.1-8.8)                            | 23%<br>(19-27%)                      | 36%<br>(30-42%)                     | 220<br>(180-250)    | 11000<br>(9600-13000)    |
| Finland  | 2000 | Male   | 45 to 49 | 91%<br>(77-97%)                | 9%<br>(3.4-23%)          | 7.6<br>(5.8-9.6)                            | 24%<br>(20-28%)                      | 35%<br>(30-40%)                     | 330<br>(270-370)    | 15000<br>(13000-17000)   |
| Finland  | 2000 | Male   | 50 to 54 | 91%<br>(79-97%)                | 8.8%<br>(3.2-21%)        | 7.7<br>(5.8-9.8)                            | 22%<br>(18-25%)                      | 30%<br>(24-35%)                     | 440<br>(360-510)    | 18000<br>(15000-21000)   |

| Location | Year | Sex    | Age      | Prevalence of current drinkers | Prevalence of abstainers | Population average of standard drinks daily | Percent of total attributable deaths | Percent of total attributable DALYs | Attributable deaths | Attributable DALYs     |
|----------|------|--------|----------|--------------------------------|--------------------------|---------------------------------------------|--------------------------------------|-------------------------------------|---------------------|------------------------|
| Finland  | 2000 | Male   | 55 to 59 | 91%<br>(81-97%)                | 9.1%<br>(3.1-19%)        | 7.4<br>(5.8-9.4)                            | 18%<br>(14-22%)                      | 24%<br>(19-28%)                     | 340<br>(270-410)    | 12000<br>(9600-14000)  |
| Finland  | 2000 | Male   | 60 to 64 | 90%<br>(79-97%)                | 9.7%<br>(3.3-21%)        | 6.6<br>(5-8.5)                              | 14%<br>(10-18%)                      | 18%<br>(12-23%)                     | 320<br>(220-420)    | 9800<br>(6900-13000)   |
| Finland  | 2000 | Male   | 65 to 69 | 89%<br>(78-96%)                | 11%<br>(3.7-22%)         | 5.3<br>(4.1-6.8)                            | 9.8%<br>(5.6-14%)                    | 11%<br>(6.2-17%)                    | 280<br>(150-410)    | 7100<br>(4100-10000)   |
| Finland  | 2000 | Male   | 70 to 74 | 88%<br>(76-95%)                | 12%<br>(4.7-24%)         | 4.1<br>(2.9-5.5)                            | 5.2%<br>(1.2-9.6%)                   | 5.6%<br>(0.89-11%)                  | 190<br>(31-370)     | 4100<br>(1000-7600)    |
| Finland  | 2000 | Male   | 75 to 79 | 87%<br>(75-95%)                | 13%<br>(5-25%)           | 3.6<br>(2.4-5.1)                            | 3%<br>(-0.75-7.7%)                   | 2.9%<br>(-1.6-8.5%)                 | 110<br>(-58-310)    | 1900<br>(-500-5000)    |
| Finland  | 2000 | Male   | 80 to 84 | 85%<br>(71-94%)                | 15%<br>(6.2-29%)         | 3.5<br>(2.4-4.8)                            | 2.8%<br>(-0.7-6.9%)                  | 2.7%<br>(-1.4-7.5%)                 | 82<br>(-42-230)     | 1100<br>(-270-2800)    |
| Finland  | 2000 | Male   | 85 to 89 | 83%<br>(68-93%)                | 17%<br>(7.1-32%)         | 3.4<br>(2.3-4.8)                            | 3%<br>(-0.52-7.2%)                   | 2.9%<br>(-1.1-7.8%)                 | 72<br>(-26-190)     | 660<br>(-120-1600)     |
| Finland  | 2000 | Male   | 90 to 94 | 83%<br>(69-93%)                | 17%<br>(6.7-31%)         | 3.5<br>(2.2-5.1)                            | 3.3%<br>(-0.7-8.7%)                  | 3.3%<br>(-1.3-9.7%)                 | 37<br>(-14-110)     | 220<br>(-48-600)       |
| Finland  | 2000 | Male   | 95 plus  | 83%<br>(66-95%)                | 17%<br>(5.3-34%)         | 3.6<br>(2-5.7)                              | 4%<br>(-1.2-10%)                     | 4.1%<br>(-1.9-12%)                  | 10<br>(-4.6-29)     | 41<br>(-12-110)        |
| Finland  | 2005 | Female | All Ages | 76%<br>(68-83%)                | 24%<br>(17-32%)          | 2.4<br>(2.1-2.8)                            | 3.7%<br>(2.5-5%)                     | 2.5%<br>(0.13-5.1%)                 | 610<br>(32-1200)    | 26000<br>(17000-35000) |
| Finland  | 2005 | Female | 15 to 19 | 71%<br>(53-85%)                | 29%<br>(15-47%)          | 2.7<br>(1.8-3.8)                            | 3.7%<br>(2.5-5.1%)                   | 13%<br>(7.5-20%)                    | 5.7<br>(3.2-8.4)    | 640<br>(430-880)       |
| Finland  | 2005 | Female | 20 to 24 | 78%<br>(62-90%)                | 22%<br>(10-38%)          | 3.7<br>(2.5-5.2)                            | 6%<br>(4.4-7.9%)                     | 18%<br>(11-25%)                     | 9.6<br>(6-14)       | 1300<br>(920-1700)     |
| Finland  | 2005 | Female | 25 to 29 | 81%<br>(68-91%)                | 19%<br>(8.9-32%)         | 3<br>(2.2-3.9)                              | 4.6%<br>(3.4-6%)                     | 15%<br>(8.5-21%)                    | 8.1<br>(4.7-11)     | 1000<br>(740-1300)     |
| Finland  | 2005 | Female | 30 to 34 | 82%<br>(70-92%)                | 18%<br>(7.9-30%)         | 2.7<br>(1.9-3.5)                            | 4.2%<br>(3-5.5%)                     | 16%<br>(10-20%)                     | 11<br>(7.1-14)      | 950<br>(690-1200)      |
| Finland  | 2005 | Female | 35 to 39 | 84%<br>(71-93%)                | 16%<br>(6.9-29%)         | 2.8<br>(2-3.8)                              | 5.2%<br>(3.9-6.7%)                   | 17%<br>(13-22%)                     | 22<br>(17-28)       | 1500<br>(1100-1900)    |
| Finland  | 2005 | Female | 40 to 44 | 84%<br>(71-93%)                | 16%<br>(7-29%)           | 3.2<br>(2.4-4.2)                            | 7%<br>(5.4-8.7%)                     | 20%<br>(17-25%)                     | 44<br>(36-54)       | 2500<br>(2000-3100)    |
| Finland  | 2005 | Female | 45 to 49 | 85%<br>(70-93%)                | 15%<br>(7.2-30%)         | 3.9<br>(3-5)                                | 8.8%<br>(6.9-11%)                    | 21%<br>(18-25%)                     | 76<br>(63-90)       | 3700<br>(3000-4500)    |
| Finland  | 2005 | Female | 50 to 54 | 84%<br>(70-93%)                | 16%<br>(7.5-30%)         | 3.9<br>(2.9-5)                              | 9.2%<br>(7.2-11%)                    | 19%<br>(16-22%)                     | 110<br>(92-130)     | 4700<br>(3800-5600)    |
| Finland  | 2005 | Female | 55 to 59 | 83%<br>(69-92%)                | 17%<br>(7.5-31%)         | 3.1<br>(2.4-4.2)                            | 7.5%<br>(5.8-9.5%)                   | 14%<br>(12-17%)                     | 130<br>(110-150)    | 4500<br>(3600-5600)    |
| Finland  | 2005 | Female | 60 to 64 | 80%<br>(64-92%)                | 20%<br>(8.4-36%)         | 2.6<br>(1.8-3.6)                            | 5.1%<br>(3.5-7.1%)                   | 9.3%<br>(6.9-12%)                   | 81<br>(60-110)      | 2400<br>(1700-3400)    |
| Finland  | 2005 | Female | 65 to 69 | 77%<br>(59-90%)                | 23%<br>(10-41%)          | 2.3<br>(1.6-3)                              | 3.1%<br>(1.5-4.9%)                   | 5.5%<br>(2.9-8.1%)                  | 63<br>(34-93)       | 1500<br>(710-2300)     |
| Finland  | 2005 | Female | 70 to 74 | 74%<br>(57-87%)                | 26%<br>(13-43%)          | 1.9<br>(1.3-2.8)                            | 1.4%<br>(-0.47-3.4%)                 | 2.3%<br>(-0.38-5.1%)                | 40<br>(-6.8-90)     | 760<br>(-260-1900)     |

| Location | Year | Sex    | Age      | Prevalence of current drinkers | Prevalence of abstainers | Population average of standard drinks daily | Percent of total attributable deaths | Percent of total attributable DALYs | Attributable deaths | Attributable DALYs       |
|----------|------|--------|----------|--------------------------------|--------------------------|---------------------------------------------|--------------------------------------|-------------------------------------|---------------------|--------------------------|
| Finland  | 2005 | Female | 75 to 79 | 68%<br>(48-84%)                | 32%<br>(16-52%)          | 1.7<br>(1.1-2.5)                            | 0.42%<br>(-1.5-2.6%)                 | 0.55%<br>(-2-3.5%)                  | 17<br>(-64-110)     | 290<br>(-1100-1800)      |
| Finland  | 2005 | Female | 80 to 84 | 65%<br>(43-81%)                | 35%<br>(19-57%)          | 1.7<br>(1.1-2.5)                            | 0.038%<br>(-2.3-2.3%)                | -0.14%<br>(-3-2.7%)                 | -7.1<br>(-150-130)  | 27<br>(-1600-1600)       |
| Finland  | 2005 | Female | 85 to 89 | 64%<br>(45-80%)                | 36%<br>(20-55%)          | 1.9<br>(1.2-2.7)                            | 0.046%<br>(-2.5-2.7%)                | -0.23%<br>(-3.3-2.9%)               | -11<br>(-160-140)   | 22<br>(-1200-1300)       |
| Finland  | 2005 | Female | 90 to 94 | 63%<br>(44-81%)                | 37%<br>(19-56%)          | 2<br>(1.2-3)                                | 0.28%<br>(-2.6-3.4%)                 | 0.0095%<br>(-3.4-3.8%)              | 0.36<br>(-130-140)  | 67<br>(-620-820)         |
| Finland  | 2005 | Female | 95 plus  | 64%<br>(40-83%)                | 36%<br>(17-60%)          | 2.1<br>(1.1-3.4)                            | 0.71%<br>(-2.9-4.8%)                 | 0.5%<br>(-3.8-5.3%)                 | 7.2<br>(-54-76)     | 43<br>(-170-290)         |
| Finland  | 2005 | Male   | All Ages | 84%<br>(77-90%)                | 16%<br>(10-23%)          | 5.1<br>(4.5-5.7)                            | 14%<br>(12-16%)                      | 13%<br>(9.5-16%)                    | 3000<br>(2300-3900) | 110000<br>(97000-130000) |
| Finland  | 2005 | Male   | 15 to 19 | 75%<br>(57-89%)                | 25%<br>(11-43%)          | 3.6<br>(2.4-5)                              | 9.1%<br>(6.3-12%)                    | 18%<br>(11-26%)                     | 18<br>(11-25)       | 1800<br>(1200-2400)      |
| Finland  | 2005 | Male   | 20 to 24 | 82%<br>(67-92%)                | 18%<br>(7.8-33%)         | 5.7<br>(4.1-7.6)                            | 19%<br>(15-23%)                      | 28%<br>(20-37%)                     | 49<br>(35-64)       | 5000<br>(3900-6300)      |
| Finland  | 2005 | Male   | 25 to 29 | 86%<br>(76-94%)                | 14%<br>(5.9-24%)         | 5.6<br>(4.1-7.5)                            | 18%<br>(15-22%)                      | 29%<br>(21-37%)                     | 48<br>(35-61)       | 4800<br>(3700-6000)      |
| Finland  | 2005 | Male   | 30 to 34 | 89%<br>(78-96%)                | 11%<br>(4.5-22%)         | 5.8<br>(4.2-7.7)                            | 18%<br>(15-22%)                      | 31%<br>(24-39%)                     | 61<br>(47-76)       | 4800<br>(3900-5900)      |
| Finland  | 2005 | Male   | 35 to 39 | 90%<br>(79-96%)                | 10%<br>(4-21%)           | 6.3<br>(4.6-8.5)                            | 20%<br>(17-24%)                      | 35%<br>(28-41%)                     | 110<br>(91-130)     | 7200<br>(5900-8500)      |
| Finland  | 2005 | Male   | 40 to 44 | 91%<br>(81-96%)                | 9.4%<br>(3.6-19%)        | 7<br>(5.3-9)                                | 23%<br>(19-26%)                      | 37%<br>(31-42%)                     | 190<br>(160-220)    | 10000<br>(8600-12000)    |
| Finland  | 2005 | Male   | 45 to 49 | 91%<br>(80-97%)                | 8.7%<br>(3.2-20%)        | 7.8<br>(6-10)                               | 25%<br>(21-28%)                      | 37%<br>(31-41%)                     | 300<br>(260-340)    | 14000<br>(12000-16000)   |
| Finland  | 2005 | Male   | 50 to 54 | 92%<br>(82-97%)                | 8.3%<br>(3-18%)          | 8<br>(6-10)                                 | 24%<br>(20-27%)                      | 33%<br>(28-37%)                     | 430<br>(370-500)    | 18000<br>(15000-20000)   |
| Finland  | 2005 | Male   | 55 to 59 | 91%<br>(82-97%)                | 8.6%<br>(3-18%)          | 7.7<br>(6.1-9.5)                            | 20%<br>(17-24%)                      | 26%<br>(22-31%)                     | 540<br>(440-630)    | 19000<br>(16000-22000)   |
| Finland  | 2005 | Male   | 60 to 64 | 91%<br>(81-97%)                | 9%<br>(3.1-19%)          | 6.9<br>(5.2-8.9)                            | 16%<br>(12-19%)                      | 20%<br>(15-25%)                     | 390<br>(280-480)    | 12000<br>(8800-14000)    |
| Finland  | 2005 | Male   | 65 to 69 | 90%<br>(79-97%)                | 9.9%<br>(3.4-21%)        | 5.6<br>(4.4-7)                              | 11%<br>(7.4-15%)                     | 13%<br>(8.6-18%)                    | 310<br>(200-420)    | 8000<br>(5300-11000)     |
| Finland  | 2005 | Male   | 70 to 74 | 89%<br>(78-95%)                | 11%<br>(4.7-22%)         | 4.3<br>(3.1-5.8)                            | 6.2%<br>(2.3-11%)                    | 7%<br>(2.2-12%)                     | 200<br>(66-360)     | 4400<br>(1700-7500)      |
| Finland  | 2005 | Male   | 75 to 79 | 87%<br>(74-95%)                | 13%<br>(5-26%)           | 3.7<br>(2.5-5.3)                            | 3.7%<br>(0.12-8.5%)                  | 3.9%<br>(-0.47-9.5%)                | 150<br>(-18-370)    | 2600<br>(85-5900)        |
| Finland  | 2005 | Male   | 80 to 84 | 85%<br>(70-94%)                | 15%<br>(6.2-30%)         | 3.6<br>(2.5-4.9)                            | 3.3%<br>(0.13-7.3%)                  | 3.2%<br>(-0.55-8%)                  | 120<br>(-20-290)    | 1600<br>(62-3500)        |
| Finland  | 2005 | Male   | 85 to 89 | 83%<br>(68-93%)                | 17%<br>(7.2-32%)         | 3.5<br>(2.4-4.9)                            | 3.1%<br>(-0.31-7.2%)                 | 3%<br>(-1-7.8%)                     | 69<br>(-23-180)     | 660<br>(-67-1600)        |
| Finland  | 2005 | Male   | 90 to 94 | 83%<br>(68-93%)                | 17%<br>(6.5-32%)         | 3.6<br>(2.3-5.2)                            | 3.4%<br>(-0.69-8.6%)                 | 3.3%<br>(-1.4-9.6%)                 | 42<br>(-17-120)     | 260<br>(-54-660)         |

| Location | Year | Sex    | Age      | Prevalence of current drinkers | Prevalence of abstainers | Population average of standard drinks daily | Percent of total attributable deaths | Percent of total attributable DALYs | Attributable deaths | Attributable DALYs       |
|----------|------|--------|----------|--------------------------------|--------------------------|---------------------------------------------|--------------------------------------|-------------------------------------|---------------------|--------------------------|
| Finland  | 2005 | Male   | 95 plus  | 83%<br>(66-95%)                | 17%<br>(5.1-34%)         | 3.6<br>(2-5.7)                              | 3.9%<br>(-1.1-10%)                   | 4%<br>(-1.9-12%)                    | 13<br>(-6.2-37)     | 53<br>(-15-140)          |
| Finland  | 2010 | Female | All Ages | 76%<br>(68-82%)                | 24%<br>(18-32%)          | 2.4<br>(2-2.8)                              | 3.5%<br>(2.3-4.7%)                   | 2.5%<br>(0.18-5.1%)                 | 640<br>(47-1300)    | 25000<br>(17000-33000)   |
| Finland  | 2010 | Female | 15 to 19 | 72%<br>(56-86%)                | 28%<br>(14-44%)          | 2.7<br>(1.9-3.7)                            | 3.2%<br>(2.1-4.4%)                   | 13%<br>(7.2-19%)                    | 4.5<br>(2.5-6.7)    | 540<br>(350-750)         |
| Finland  | 2010 | Female | 20 to 24 | 78%<br>(63-89%)                | 22%<br>(11-37%)          | 3.7<br>(2.5-5.1)                            | 5.6%<br>(4-7.5%)                     | 17%<br>(10-25%)                     | 9.4<br>(5.5-14)     | 1100<br>(800-1600)       |
| Finland  | 2010 | Female | 25 to 29 | 80%<br>(67-91%)                | 20%<br>(9.3-33%)         | 2.9<br>(2.1-3.9)                            | 4.5%<br>(3.2-5.9%)                   | 14%<br>(8.1-20%)                    | 8.7<br>(5-12)       | 1000<br>(720-1400)       |
| Finland  | 2010 | Female | 30 to 34 | 82%<br>(69-92%)                | 18%<br>(8-31%)           | 2.6<br>(1.8-3.5)                            | 4.1%<br>(3-5.4%)                     | 15%<br>(9.7-20%)                    | 11<br>(6.7-14)      | 990<br>(710-1300)        |
| Finland  | 2010 | Female | 35 to 39 | 83%<br>(69-93%)                | 17%<br>(7.2-31%)         | 2.8<br>(2-3.7)                              | 4.7%<br>(3.5-6.1%)                   | 17%<br>(12-21%)                     | 15<br>(11-19)       | 1100<br>(870-1400)       |
| Finland  | 2010 | Female | 40 to 44 | 84%<br>(69-93%)                | 16%<br>(7.3-31%)         | 3.2<br>(2.3-4.1)                            | 6.2%<br>(4.8-7.9%)                   | 20%<br>(16-23%)                     | 33<br>(27-40)       | 2000<br>(1600-2500)      |
| Finland  | 2010 | Female | 45 to 49 | 85%<br>(70-93%)                | 15%<br>(7.1-30%)         | 3.8<br>(2.9-5)                              | 8.2%<br>(6.4-10%)                    | 21%<br>(18-25%)                     | 64<br>(53-76)       | 3200<br>(2600-3900)      |
| Finland  | 2010 | Female | 50 to 54 | 84%<br>(69-93%)                | 16%<br>(7.4-31%)         | 3.8<br>(2.8-4.9)                            | 8.7%<br>(6.7-11%)                    | 19%<br>(16-22%)                     | 93<br>(78-110)      | 4000<br>(3200-4800)      |
| Finland  | 2010 | Female | 55 to 59 | 82%<br>(69-92%)                | 18%<br>(7.9-31%)         | 3.1<br>(2.3-4)                              | 7.4%<br>(5.7-9.4%)                   | 15%<br>(12-18%)                     | 110<br>(93-130)     | 4000<br>(3200-4900)      |
| Finland  | 2010 | Female | 60 to 64 | 80%<br>(63-91%)                | 20%<br>(8.6-37%)         | 2.5<br>(1.8-3.5)                            | 5.2%<br>(3.6-7.2%)                   | 9.9%<br>(7.6-13%)                   | 120<br>(88-150)     | 3400<br>(2400-4500)      |
| Finland  | 2010 | Female | 65 to 69 | 78%<br>(60-90%)                | 22%<br>(9.6-40%)         | 2.2<br>(1.6-3)                              | 3.2%<br>(1.7-5%)                     | 6%<br>(3.7-8.3%)                    | 72<br>(45-100)      | 1700<br>(940-2500)       |
| Finland  | 2010 | Female | 70 to 74 | 75%<br>(59-87%)                | 25%<br>(13-41%)          | 1.9<br>(1.3-2.7)                            | 1.6%<br>(-0.13-3.6%)                 | 2.9%<br>(0.48-5.4%)                 | 49<br>(8.2-91)      | 880<br>(-74-1900)        |
| Finland  | 2010 | Female | 75 to 79 | 68%<br>(49-85%)                | 32%<br>(15-51%)          | 1.7<br>(1.1-2.5)                            | 0.64%<br>(-1.1-2.7%)                 | 1%<br>(-1.4-3.7%)                   | 28<br>(-37-99)      | 390<br>(-700-1600)       |
| Finland  | 2010 | Female | 80 to 84 | 65%<br>(42-82%)                | 35%<br>(18-58%)          | 1.7<br>(1.1-2.4)                            | 0.18%<br>(-1.8-2.3%)                 | 0.15%<br>(-2.4-2.8%)                | 6.8<br>(-110-130)   | 130<br>(-1300-1600)      |
| Finland  | 2010 | Female | 85 to 89 | 62%<br>(44-79%)                | 38%<br>(21-56%)          | 1.8<br>(1.1-2.6)                            | 0.16%<br>(-2.1-2.7%)                 | -0.014%<br>(-2.8-3.1%)              | -0.85<br>(-170-180) | 97<br>(-1200-1600)       |
| Finland  | 2010 | Female | 90 to 94 | 62%<br>(42-80%)                | 38%<br>(20-58%)          | 1.8<br>(1.1-2.9)                            | 0.31%<br>(-2.5-3.6%)                 | 0.095%<br>(-3.3-4%)                 | 3.8<br>(-130-160)   | 82<br>(-650-910)         |
| Finland  | 2010 | Female | 95 plus  | 62%<br>(38-83%)                | 38%<br>(17-62%)          | 2<br>(0.97-3.3)                             | 0.7%<br>(-2.9-4.7%)                  | 0.53%<br>(-3.7-5.4%)                | 10<br>(-73-100)     | 57<br>(-240-380)         |
| Finland  | 2010 | Male   | All Ages | 84%<br>(77-89%)                | 16%<br>(11-23%)          | 4.9<br>(4.3-5.7)                            | 13%<br>(11-15%)                      | 11%<br>(8.6-15%)                    | 2900<br>(2200-3800) | 110000<br>(90000-120000) |
| Finland  | 2010 | Male   | 15 to 19 | 74%<br>(54-88%)                | 26%<br>(12-46%)          | 3.4<br>(2.3-4.8)                            | 8.4%<br>(5.6-11%)                    | 18%<br>(10-26%)                     | 16<br>(9.2-23)      | 1600<br>(1100-2200)      |
| Finland  | 2010 | Male   | 20 to 24 | 82%<br>(67-92%)                | 18%<br>(8-33%)           | 5.6<br>(4-7.4)                              | 18%<br>(14-23%)                      | 28%<br>(19-36%)                     | 47<br>(33-62)       | 4600<br>(3500-5800)      |



| Location | Year | Sex    | Age      | Prevalence of current drinkers | Prevalence of abstainers | Population average of standard drinks daily | Percent of total attributable deaths | Percent of total attributable DALYs | Attributable deaths | Attributable DALYs     |
|----------|------|--------|----------|--------------------------------|--------------------------|---------------------------------------------|--------------------------------------|-------------------------------------|---------------------|------------------------|
| Finland  | 2010 | Male   | 25 to 29 | 86%<br>(76-94%)                | 14%<br>(6.4-24%)         | 5.5<br>(4-7.2)                              | 17%<br>(14-21%)                      | 27%<br>(19-35%)                     | 52<br>(37-67)       | 4900<br>(3700-6100)    |
| Finland  | 2010 | Male   | 30 to 34 | 89%<br>(78-95%)                | 11%<br>(4.7-22%)         | 5.7<br>(4.1-7.6)                            | 17%<br>(14-20%)                      | 29%<br>(22-36%)                     | 60<br>(45-75)       | 4900<br>(3800-6000)    |
| Finland  | 2010 | Male   | 35 to 39 | 89%<br>(79-96%)                | 11%<br>(4.1-21%)         | 6.2<br>(4.4-8.1)                            | 19%<br>(15-22%)                      | 33%<br>(27-39%)                     | 79<br>(63-94)       | 5400<br>(4400-6400)    |
| Finland  | 2010 | Male   | 40 to 44 | 90%<br>(78-96%)                | 9.9%<br>(3.6-22%)        | 6.8<br>(5-8.7)                              | 21%<br>(18-25%)                      | 36%<br>(30-41%)                     | 140<br>(120-160)    | 8100<br>(6700-9300)    |
| Finland  | 2010 | Male   | 45 to 49 | 91%<br>(79-97%)                | 8.6%<br>(3.3-21%)        | 7.7<br>(5.9-9.9)                            | 23%<br>(19-27%)                      | 36%<br>(31-40%)                     | 240<br>(210-280)    | 12000<br>(10000-13000) |
| Finland  | 2010 | Male   | 50 to 54 | 92%<br>(81-97%)                | 8.2%<br>(2.9-19%)        | 7.9<br>(6-10)                               | 23%<br>(19-26%)                      | 33%<br>(28-38%)                     | 350<br>(290-400)    | 15000<br>(12000-17000) |
| Finland  | 2010 | Male   | 55 to 59 | 91%<br>(82-97%)                | 8.8%<br>(3.1-18%)        | 7.5<br>(5.9-9.3)                            | 20%<br>(17-24%)                      | 27%<br>(23-32%)                     | 460<br>(380-530)    | 16000<br>(13000-19000) |
| Finland  | 2010 | Male   | 60 to 64 | 91%<br>(80-97%)                | 9.2%<br>(3-20%)          | 6.7<br>(5-8.7)                              | 16%<br>(12-20%)                      | 21%<br>(16-25%)                     | 520<br>(390-640)    | 16000<br>(12000-19000) |
| Finland  | 2010 | Male   | 65 to 69 | 90%<br>(80-96%)                | 10%<br>(3.5-20%)         | 5.4<br>(4.3-6.9)                            | 11%<br>(7.8-15%)                     | 14%<br>(9.3-18%)                    | 330<br>(220-440)    | 8600<br>(6000-11000)   |
| Finland  | 2010 | Male   | 70 to 74 | 88%<br>(76-95%)                | 12%<br>(4.9-24%)         | 4.1<br>(3-5.6)                              | 6.3%<br>(3-9.9%)                     | 7.3%<br>(3.1-12%)                   | 210<br>(89-350)     | 4600<br>(2100-7400)    |
| Finland  | 2010 | Male   | 75 to 79 | 86%<br>(73-94%)                | 14%<br>(5.9-27%)         | 3.5<br>(2.4-4.9)                            | 3.8%<br>(0.56-7.6%)                  | 4%<br>(0.18-8.7%)                   | 140<br>(6.4-310)    | 2500<br>(370-5000)     |
| Finland  | 2010 | Male   | 80 to 84 | 84%<br>(68-93%)                | 16%<br>(6.7-32%)         | 3.4<br>(2.4-4.7)                            | 3.1%<br>(0.16-6.7%)                  | 3.1%<br>(-0.54-7.4%)                | 130<br>(-23-310)    | 1800<br>(93-3800)      |
| Finland  | 2010 | Male   | 85 to 89 | 83%<br>(68-93%)                | 17%<br>(7.2-32%)         | 3.4<br>(2.4-4.8)                            | 2.9%<br>(-0.19-6.9%)                 | 2.8%<br>(-1-7.5%)                   | 89<br>(-32-240)     | 860<br>(-60-2100)      |
| Finland  | 2010 | Male   | 90 to 94 | 83%<br>(68-93%)                | 17%<br>(6.7-32%)         | 3.5<br>(2.2-5.2)                            | 3.1%<br>(-0.67-8.2%)                 | 3.1%<br>(-1.5-9.2%)                 | 44<br>(-22-130)     | 280<br>(-63-750)       |
| Finland  | 2010 | Male   | 95 plus  | 83%<br>(66-95%)                | 17%<br>(5.4-34%)         | 3.5<br>(2-5.5)                              | 3.7%<br>(-1.1-9.7%)                  | 3.7%<br>(-1.9-11%)                  | 16<br>(-8.4-49)     | 67<br>(-20-180)        |
| Finland  | 2016 | Female | All Ages | 75%<br>(67-81%)                | 25%<br>(19-33%)          | 2.3<br>(1.8-2.9)                            | 2.9%<br>(1.6-4.4%)                   | 2.1%<br>(-0.57-5.4%)                | 540<br>(-150-1400)  | 20000<br>(11000-31000) |
| Finland  | 2016 | Female | 15 to 19 | 72%<br>(53-87%)                | 28%<br>(13-47%)          | 2.6<br>(1.7-3.8)                            | 3%<br>(1.9-4.1%)                     | 13%<br>(6.9-19%)                    | 3.6<br>(1.9-5.5)    | 450<br>(290-630)       |
| Finland  | 2016 | Female | 20 to 24 | 76%<br>(59-89%)                | 24%<br>(11-41%)          | 3.5<br>(2.3-5)                              | 4.6%<br>(3.2-6.1%)                   | 16%<br>(9.5-24%)                    | 6<br>(3.4-8.9)      | 930<br>(640-1300)      |
| Finland  | 2016 | Female | 25 to 29 | 79%<br>(64-90%)                | 21%<br>(9.8-36%)         | 2.8<br>(1.9-4)                              | 3.8%<br>(2.7-4.9%)                   | 13%<br>(7.4-19%)                    | 5.7<br>(3.1-8.2)    | 830<br>(580-1100)      |
| Finland  | 2016 | Female | 30 to 34 | 80%<br>(65-92%)                | 20%<br>(8.4-35%)         | 2.5<br>(1.7-3.6)                            | 3.6%<br>(2.5-4.7%)                   | 14%<br>(8.9-19%)                    | 8.7<br>(5.7-12)     | 890<br>(630-1200)      |
| Finland  | 2016 | Female | 35 to 39 | 82%<br>(66-92%)                | 18%<br>(8.2-34%)         | 2.6<br>(1.7-3.9)                            | 3.7%<br>(2.7-4.9%)                   | 15%<br>(11-20%)                     | 12<br>(8.4-16)      | 990<br>(710-1300)      |
| Finland  | 2016 | Female | 40 to 44 | 82%<br>(66-92%)                | 18%<br>(7.8-34%)         | 3<br>(2-4.2)                                | 4.9%<br>(3.5-6.4%)                   | 18%<br>(14-22%)                     | 20<br>(16-25)       | 1300<br>(970-1700)     |

| Location | Year | Sex    | Age      | Prevalence of current drinkers | Prevalence of abstainers | Population average of standard drinks daily | Percent of total attributable deaths | Percent of total attributable DALYs | Attributable deaths | Attributable DALYs      |
|----------|------|--------|----------|--------------------------------|--------------------------|---------------------------------------------|--------------------------------------|-------------------------------------|---------------------|-------------------------|
| Finland  | 2016 | Female | 45 to 49 | 82%<br>(65-92%)                | 18%<br>(7.8-35%)         | 3.6<br>(2.5-4.9)                            | 6.8%<br>(5.2-8.8%)                   | 20%<br>(16-24%)                     | 44<br>(35-54)       | 2300<br>(1700-2900)     |
| Finland  | 2016 | Female | 50 to 54 | 82%<br>(65-92%)                | 18%<br>(8.2-35%)         | 3.5<br>(2.5-4.9)                            | 7.3%<br>(5.5-9.4%)                   | 18%<br>(14-21%)                     | 69<br>(54-84)       | 3100<br>(2400-3800)     |
| Finland  | 2016 | Female | 55 to 59 | 81%<br>(65-92%)                | 19%<br>(8.1-35%)         | 2.9<br>(2-4.1)                              | 6.4%<br>(4.7-8.5%)                   | 14%<br>(12-17%)                     | 83<br>(66-100)      | 3000<br>(2300-3900)     |
| Finland  | 2016 | Female | 60 to 64 | 79%<br>(60-92%)                | 21%<br>(8.3-40%)         | 2.5<br>(1.6-3.6)                            | 4.7%<br>(3-6.9%)                     | 9.5%<br>(6.9-12%)                   | 88<br>(63-120)      | 2600<br>(1700-3800)     |
| Finland  | 2016 | Female | 65 to 69 | 78%<br>(58-91%)                | 22%<br>(9.4-42%)         | 2.2<br>(1.4-3.1)                            | 3%<br>(1.4-4.9%)                     | 5.8%<br>(3.4-8.4%)                  | 92<br>(53-140)      | 2200<br>(1000-3500)     |
| Finland  | 2016 | Female | 70 to 74 | 75%<br>(57-88%)                | 25%<br>(12-43%)          | 1.9<br>(1.2-2.8)                            | 1.5%<br>(-0.13-3.5%)                 | 2.9%<br>(0.61-5.6%)                 | 47<br>(9.7-92)      | 840<br>(-71-1900)       |
| Finland  | 2016 | Female | 75 to 79 | 72%<br>(53-87%)                | 28%<br>(13-47%)          | 1.8<br>(1.1-2.7)                            | 0.64%<br>(-1.2-2.9%)                 | 1.2%<br>(-1.4-4%)                   | 29<br>(-35-100)     | 390<br>(-730-1800)      |
| Finland  | 2016 | Female | 80 to 84 | 70%<br>(49-85%)                | 30%<br>(15-51%)          | 1.8<br>(1.1-2.8)                            | 0.21%<br>(-1.9-2.7%)                 | 0.23%<br>(-2.5-3.5%)                | 8.8<br>(-100-140)   | 130<br>(-1200-1700)     |
| Finland  | 2016 | Female | 85 to 89 | 67%<br>(49-83%)                | 33%<br>(17-51%)          | 1.9<br>(1.1-2.9)                            | 0.2%<br>(-2.2-3.2%)                  | 0.045%<br>(-3-3.8%)                 | 2.6<br>(-180-220)   | 120<br>(-1400-1900)     |
| Finland  | 2016 | Female | 90 to 94 | 66%<br>(48-83%)                | 34%<br>(17-52%)          | 2<br>(1.1-3.1)                              | 0.35%<br>(-2.6-4.1%)                 | 0.16%<br>(-3.3-4.6%)                | 8.4<br>(-170-250)   | 120<br>(-870-1400)      |
| Finland  | 2016 | Female | 95 plus  | 66%<br>(43-85%)                | 34%<br>(15-57%)          | 2.1<br>(1-3.5)                              | 0.73%<br>(-3.2-5.3%)                 | 0.58%<br>(-4.1-6.1%)                | 13<br>(-92-140)     | 68<br>(-300-490)        |
| Finland  | 2016 | Male   | All Ages | 82%<br>(75-88%)                | 18%<br>(12-25%)          | 4.6<br>(3.6-5.8)                            | 11%<br>(9.1-14%)                     | 9.9%<br>(6.4-14%)                   | 2600<br>(1600-3700) | 89000<br>(69000-110000) |
| Finland  | 2016 | Male   | 15 to 19 | 74%<br>(54-89%)                | 26%<br>(11-46%)          | 3.3<br>(2.1-4.9)                            | 7%<br>(4.8-9.5%)                     | 17%<br>(9.2-24%)                    | 9.2<br>(4.9-14)     | 1100<br>(750-1500)      |
| Finland  | 2016 | Male   | 20 to 24 | 79%<br>(62-91%)                | 21%<br>(9.2-38%)         | 5.2<br>(3.5-7.3)                            | 16%<br>(12-20%)                      | 25%<br>(17-35%)                     | 32<br>(21-45)       | 3700<br>(2700-4800)     |
| Finland  | 2016 | Male   | 25 to 29 | 82%<br>(68-93%)                | 18%<br>(7.3-32%)         | 5.1<br>(3.4-7.2)                            | 15%<br>(12-19%)                      | 25%<br>(17-33%)                     | 37<br>(24-51)       | 3900<br>(3000-5100)     |
| Finland  | 2016 | Male   | 30 to 34 | 85%<br>(70-94%)                | 15%<br>(5.8-30%)         | 5.3<br>(3.5-7.7)                            | 15%<br>(12-18%)                      | 27%<br>(19-35%)                     | 47<br>(34-61)       | 4200<br>(3300-5300)     |
| Finland  | 2016 | Male   | 35 to 39 | 87%<br>(75-95%)                | 13%<br>(4.9-25%)         | 5.8<br>(3.8-8.4)                            | 16%<br>(13-20%)                      | 31%<br>(24-38%)                     | 66<br>(51-82)       | 4800<br>(3900-5900)     |
| Finland  | 2016 | Male   | 40 to 44 | 89%<br>(76-96%)                | 11%<br>(4.1-24%)         | 6.5<br>(4.5-9)                              | 18%<br>(15-22%)                      | 35%<br>(28-40%)                     | 92<br>(73-110)      | 5500<br>(4500-6600)     |
| Finland  | 2016 | Male   | 45 to 49 | 89%<br>(76-96%)                | 11%<br>(3.8-24%)         | 7.2<br>(5.1-9.8)                            | 21%<br>(17-24%)                      | 35%<br>(29-40%)                     | 170<br>(140-200)    | 8400<br>(7000-10000)    |
| Finland  | 2016 | Male   | 50 to 54 | 90%<br>(77-96%)                | 10%<br>(3.7-23%)         | 7.4<br>(5.2-10)                             | 20%<br>(17-24%)                      | 32%<br>(27-37%)                     | 250<br>(210-300)    | 11000<br>(9000-13000)   |
| Finland  | 2016 | Male   | 55 to 59 | 89%<br>(78-97%)                | 11%<br>(3.3-22%)         | 7<br>(5.1-9.4)                              | 19%<br>(15-22%)                      | 27%<br>(22-31%)                     | 340<br>(270-410)    | 12000<br>(10000-15000)  |
| Finland  | 2016 | Male   | 60 to 64 | 89%<br>(74-97%)                | 11%<br>(3.5-26%)         | 6.3<br>(4.4-8.6)                            | 15%<br>(11-19%)                      | 20%<br>(15-25%)                     | 390<br>(290-500)    | 12000<br>(8900-15000)   |

| Location | Year | Sex    | Age      | Prevalence of current drinkers | Prevalence of abstainers | Population average of standard drinks daily | Percent of total attributable deaths | Percent of total attributable DALYs | Attributable deaths    | Attributable DALYs        |
|----------|------|--------|----------|--------------------------------|--------------------------|---------------------------------------------|--------------------------------------|-------------------------------------|------------------------|---------------------------|
| Finland  | 2016 | Male   | 65 to 69 | 88%<br>(74-96%)                | 12%<br>(4-26%)           | 5.2<br>(3.7-7)                              | 11%<br>(7.2-14%)                     | 13%<br>(8.9-18%)                    | 420<br>(270-560)       | 11000<br>(7300-15000)     |
| Finland  | 2016 | Male   | 70 to 74 | 88%<br>(75-95%)                | 12%<br>(5-25%)           | 4<br>(2.7-5.6)                              | 6.2%<br>(3-10%)                      | 7.5%<br>(3.3-12%)                   | 220<br>(94-370)        | 4700<br>(2200-7800)       |
| Finland  | 2016 | Male   | 75 to 79 | 87%<br>(73-95%)                | 13%<br>(5.2-27%)         | 3.4<br>(2.3-5.1)                            | 3.8%<br>(0.68-8%)                    | 4.2%<br>(0.47-9.5%)                 | 150<br>(17-340)        | 2700<br>(460-5600)        |
| Finland  | 2016 | Male   | 80 to 84 | 85%<br>(70-94%)                | 15%<br>(6.3-30%)         | 3.4<br>(2.2-4.9)                            | 3.2%<br>(0.15-7.2%)                  | 3.3%<br>(-0.38-8%)                  | 130<br>(-15-330)       | 1800<br>(76-4100)         |
| Finland  | 2016 | Male   | 85 to 89 | 83%<br>(68-93%)                | 17%<br>(6.9-32%)         | 3.4<br>(2.1-4.9)                            | 2.9%<br>(-0.29-7.6%)                 | 2.9%<br>(-0.85-8.3%)                | 120<br>(-35-330)       | 1100<br>(-110-2900)       |
| Finland  | 2016 | Male   | 90 to 94 | 83%<br>(68-94%)                | 17%<br>(6-32%)           | 3.4<br>(2-5.4)                              | 3.1%<br>(-0.72-8.5%)                 | 3.1%<br>(-1.3-9.5%)                 | 67<br>(-29-200)        | 420<br>(-98-1100)         |
| Finland  | 2016 | Male   | 95 plus  | 83%<br>(66-95%)                | 17%<br>(4.9-34%)         | 3.5<br>(1.9-5.8)                            | 3.5%<br>(-1.3-10%)                   | 3.7%<br>(-2-12%)                    | 21<br>(-11-66)         | 84<br>(-30-240)           |
| France   | 1990 | Female | All Ages | 86%<br>(83-89%)                | 14%<br>(11-17%)          | 3.7<br>(3-4.4)                              | 7.5%<br>(5.6-9.5%)                   | 10%<br>(6.6-15%)                    | 26000<br>(16000-37000) | 550000<br>(420000-690000) |
| France   | 1990 | Female | 15 to 19 | 86%<br>(77-92%)                | 14%<br>(7.5-23%)         | 3.1<br>(2.1-4.3)                            | 3.9%<br>(2.4-5.7%)                   | 14%<br>(7.5-21%)                    | 96<br>(53-140)         | 9300<br>(5600-13000)      |
| France   | 1990 | Female | 20 to 24 | 90%<br>(84-94%)                | 10%<br>(5.7-16%)         | 3.6<br>(2.4-5.2)                            | 5.1%<br>(3.3-7.1%)                   | 15%<br>(8.8-22%)                    | 140<br>(82-200)        | 14000<br>(9300-19000)     |
| France   | 1990 | Female | 25 to 29 | 91%<br>(85-95%)                | 8.9%<br>(5-15%)          | 3.5<br>(2.4-4.8)                            | 4.6%<br>(3.1-6.3%)                   | 14%<br>(8.1-20%)                    | 160<br>(93-230)        | 15000<br>(9700-20000)     |
| France   | 1990 | Female | 30 to 34 | 90%<br>(84-94%)                | 10%<br>(5.7-16%)         | 3.6<br>(2.5-4.9)                            | 4.9%<br>(3.4-6.6%)                   | 15%<br>(10-20%)                     | 220<br>(150-300)       | 17000<br>(12000-22000)    |
| France   | 1990 | Female | 35 to 39 | 87%<br>(80-92%)                | 13%<br>(7.8-20%)         | 4<br>(2.8-5.5)                              | 6.4%<br>(4.7-8.3%)                   | 19%<br>(14-24%)                     | 390<br>(290-480)       | 24000<br>(18000-30000)    |
| France   | 1990 | Female | 40 to 44 | 86%<br>(80-91%)                | 14%<br>(8.7-20%)         | 4.5<br>(3.3-6.1)                            | 8.1%<br>(6.3-10%)                    | 21%<br>(17-26%)                     | 630<br>(510-760)       | 34000<br>(27000-42000)    |
| France   | 1990 | Female | 45 to 49 | 88%<br>(82-92%)                | 12%<br>(8-18%)           | 5.3<br>(3.9-7.1)                            | 10%<br>(7.7-13%)                     | 23%<br>(19-28%)                     | 680<br>(560-820)       | 32000<br>(26000-39000)    |
| France   | 1990 | Female | 50 to 54 | 90%<br>(84-93%)                | 10%<br>(6.6-16%)         | 5.9<br>(4.4-7.7)                            | 11%<br>(8.7-14%)                     | 23%<br>(19-27%)                     | 1000<br>(820-1200)     | 41000<br>(34000-51000)    |
| France   | 1990 | Female | 55 to 59 | 92%<br>(88-95%)                | 8.3%<br>(5.5-12%)        | 6.2<br>(4.6-7.9)                            | 11%<br>(8.8-14%)                     | 21%<br>(17-25%)                     | 1400<br>(1200-1700)    | 51000<br>(41000-63000)    |
| France   | 1990 | Female | 60 to 64 | 92%<br>(88-95%)                | 7.8%<br>(4.9-12%)        | 6.1<br>(4.5-8)                              | 11%<br>(7.9-14%)                     | 18%<br>(14-23%)                     | 1800<br>(1400-2300)    | 56000<br>(42000-71000)    |
| France   | 1990 | Female | 65 to 69 | 91%<br>(86-94%)                | 9.1%<br>(5.7-14%)        | 5.7<br>(4.4-7.2)                            | 10%<br>(7.3-13%)                     | 15%<br>(12-20%)                     | 2300<br>(1700-2900)    | 59000<br>(44000-76000)    |
| France   | 1990 | Female | 70 to 74 | 88%<br>(83-92%)                | 12%<br>(8-17%)           | 5.2<br>(3.8-6.9)                            | 9%<br>(5.6-13%)                      | 13%<br>(8.2-18%)                    | 1800<br>(1100-2500)    | 37000<br>(24000-52000)    |
| France   | 1990 | Female | 75 to 79 | 85%<br>(77-91%)                | 15%<br>(9.3-23%)         | 4.7<br>(3.3-6.4)                            | 7.9%<br>(3.9-12%)                    | 10%<br>(5-16%)                      | 3400<br>(1600-5300)    | 54000<br>(27000-83000)    |
| France   | 1990 | Female | 80 to 84 | 82%<br>(72-89%)                | 18%<br>(11-28%)          | 4.4<br>(3.2-5.8)                            | 7.3%<br>(3.6-12%)                    | 8.9%<br>(4.1-14%)                   | 4500<br>(2100-7300)    | 52000<br>(25000-83000)    |

| Location | Year | Sex    | Age      | Prevalence of current drinkers | Prevalence of abstainers | Population average of standard drinks daily | Percent of total attributable deaths | Percent of total attributable DALYs | Attributable deaths    | Attributable DALYs         |
|----------|------|--------|----------|--------------------------------|--------------------------|---------------------------------------------|--------------------------------------|-------------------------------------|------------------------|----------------------------|
| France   | 1990 | Female | 85 to 89 | 80%<br>(70-87%)                | 20%<br>(13-30%)          | 4.2<br>(2.9-5.7)                            | 6.6%<br>(2.9-11%)                    | 7.7%<br>(3.2-13%)                   | 4100<br>(1700-7100)    | 34000<br>(15000-56000)     |
| France   | 1990 | Female | 90 to 94 | 79%<br>(69-87%)                | 21%<br>(13-31%)          | 4.1<br>(2.7-5.8)                            | 6%<br>(1.9-11%)                      | 6.8%<br>(1.9-13%)                   | 2300<br>(630-4200)     | 13000<br>(4100-23000)      |
| France   | 1990 | Female | 95 plus  | 78%<br>(64-88%)                | 22%<br>(12-36%)          | 4<br>(2.3-6.2)                              | 5.8%<br>(0.68-11%)                   | 6.5%<br>(0.34-13%)                  | 820<br>(44-1700)       | 3000<br>(340-6000)         |
| France   | 1990 | Male   | All Ages | 92%<br>(90-94%)                | 7.6%<br>(5.6-10%)        | 7.1<br>(5.8-8.4)                            | 18%<br>(16-21%)                      | 21%<br>(18-25%)                     | 57000<br>(49000-65000) | 160000<br>(140000-1800000) |
| France   | 1990 | Male   | 15 to 19 | 89%<br>(82-94%)                | 11%<br>(5.7-18%)         | 5.2<br>(3.7-7)                              | 12%<br>(8-16%)                       | 23%<br>(15-31%)                     | 420<br>(270-580)       | 34000<br>(23000-45000)     |
| France   | 1990 | Male   | 20 to 24 | 94%<br>(89-97%)                | 6.2%<br>(3.3-11%)        | 7.8<br>(5.8-10)                             | 22%<br>(16-28%)                      | 33%<br>(23-43%)                     | 1000<br>(730-1400)     | 79000<br>(58000-100000)    |
| France   | 1990 | Male   | 25 to 29 | 95%<br>(91-97%)                | 4.9%<br>(2.6-8.6%)       | 7.6<br>(5.6-9.7)                            | 19%<br>(15-25%)                      | 30%<br>(22-38%)                     | 1000<br>(740-1300)     | 74000<br>(56000-92000)     |
| France   | 1990 | Male   | 30 to 34 | 96%<br>(92-98%)                | 4.3%<br>(2.2-8%)         | 7.7<br>(5.9-9.9)                            | 18%<br>(14-23%)                      | 29%<br>(22-36%)                     | 1100<br>(860-1400)     | 74000<br>(58000-90000)     |
| France   | 1990 | Male   | 35 to 39 | 96%<br>(93-98%)                | 4.3%<br>(2.1-7.4%)       | 8<br>(6.2-10)                               | 20%<br>(16-24%)                      | 31%<br>(25-37%)                     | 1600<br>(1200-1800)    | 91000<br>(74000-110000)    |
| France   | 1990 | Male   | 40 to 44 | 96%<br>(92-98%)                | 4.3%<br>(2.2-7.5%)       | 9.1<br>(7.1-11)                             | 22%<br>(18-26%)                      | 33%<br>(28-37%)                     | 2300<br>(2000-2700)    | 120000<br>(100000-140000)  |
| France   | 1990 | Male   | 45 to 49 | 96%<br>(93-98%)                | 4.1%<br>(2.2-7.4%)       | 11<br>(8.4-13)                              | 24%<br>(21-27%)                      | 34%<br>(30-38%)                     | 2500<br>(2200-2800)    | 110000<br>(98000-120000)   |
| France   | 1990 | Male   | 50 to 54 | 96%<br>(93-98%)                | 3.9%<br>(2.2-6.7%)       | 12<br>(9.2-14)                              | 25%<br>(21-28%)                      | 33%<br>(29-36%)                     | 3600<br>(3100-4000)    | 140000<br>(120000-160000)  |
| France   | 1990 | Male   | 55 to 59 | 96%<br>(94-98%)                | 3.7%<br>(2.2-5.9%)       | 12<br>(9.6-15)                              | 24%<br>(20-27%)                      | 30%<br>(26-33%)                     | 5100<br>(4500-5700)    | 170000<br>(150000-190000)  |
| France   | 1990 | Male   | 60 to 64 | 96%<br>(94-98%)                | 3.7%<br>(2.1-6.1%)       | 12<br>(9.3-14)                              | 22%<br>(18-25%)                      | 26%<br>(23-30%)                     | 6200<br>(5300-7100)    | 180000<br>(150000-210000)  |
| France   | 1990 | Male   | 65 to 69 | 96%<br>(94-98%)                | 4%<br>(2.3-6.3%)         | 11<br>(8.9-14)                              | 19%<br>(16-22%)                      | 23%<br>(19-27%)                     | 6800<br>(5700-7900)    | 170000<br>(140000-190000)  |
| France   | 1990 | Male   | 70 to 74 | 96%<br>(93-97%)                | 4.4%<br>(2.7-7.1%)       | 10<br>(8-13)                                | 17%<br>(14-21%)                      | 21%<br>(17-24%)                     | 4700<br>(3800-5500)    | 91000<br>(75000-110000)    |
| France   | 1990 | Male   | 75 to 79 | 95%<br>(91-97%)                | 4.9%<br>(2.5-8.5%)       | 9.4<br>(7.2-12)                             | 18%<br>(13-19%)                      | 18%<br>(14-22%)                     | 7100<br>(5600-8600)    | 110000<br>(86000-130000)   |
| France   | 1990 | Male   | 80 to 84 | 94%<br>(89-97%)                | 5.9%<br>(3.1-11%)        | 8.5<br>(6.6-11)                             | 15%<br>(12-18%)                      | 17%<br>(13-20%)                     | 7000<br>(5400-8500)    | 78000<br>(61000-95000)     |
| France   | 1990 | Male   | 85 to 89 | 93%<br>(87-96%)                | 7.4%<br>(4.1-13%)        | 7.8<br>(5.9-9.9)                            | 13%<br>(9.6-16%)                     | 15%<br>(11-19%)                     | 4500<br>(3200-5600)    | 35000<br>(26000-44000)     |
| France   | 1990 | Male   | 90 to 94 | 92%<br>(87-96%)                | 8.1%<br>(4.3-13%)        | 7.2<br>(5.2-9.6)                            | 12%<br>(7.7-15%)                     | 13%<br>(8.4-17%)                    | 1500<br>(1000-2000)    | 8400<br>(5500-11000)       |
| France   | 1990 | Male   | 95 plus  | 91%<br>(84-96%)                | 8.7%<br>(3.9-16%)        | 6.5<br>(4.4-9.3)                            | 10%<br>(4.8-15%)                     | 11%<br>(4.9-17%)                    | 290<br>(130-420)       | 1100<br>(500-1500)         |

| Location | Year | Sex    | Age      | Prevalence of current drinkers | Prevalence of abstainers | Population average of standard drinks daily | Percent of total attributable deaths | Percent of total attributable DALYs | Attributable deaths    | Attributable DALYs        |
|----------|------|--------|----------|--------------------------------|--------------------------|---------------------------------------------|--------------------------------------|-------------------------------------|------------------------|---------------------------|
| France   | 1995 | Female | All Ages | 87%<br>(84-89%)                | 13%<br>(11-16%)          | 3.2<br>(2.7-3.9)                            | 6.4%<br>(4.7-8.2%)                   | 8.1%<br>(4.7-12%)                   | 20000<br>(12000-30000) | 460000<br>(350000-590000) |
| France   | 1995 | Female | 15 to 19 | 87%<br>(79-92%)                | 13%<br>(7.6-21%)         | 2.7<br>(1.8-3.7)                            | 3.4%<br>(2-4.9%)                     | 12%<br>(6.1-18%)                    | 67<br>(34-100)         | 6800<br>(4000-9900)       |
| France   | 1995 | Female | 20 to 24 | 91%<br>(86-95%)                | 9.2%<br>(5.4-14%)        | 3.1<br>(2.1-4.5)                            | 4.6%<br>(2.9-6.4%)                   | 13%<br>(7.1-20%)                    | 110<br>(60-170)        | 12000<br>(7800-17000)     |
| France   | 1995 | Female | 25 to 29 | 92%<br>(87-95%)                | 8.1%<br>(4.8-13%)        | 3<br>(2.1-4.1)                              | 4%<br>(2.6-5.5%)                     | 12%<br>(6.5-17%)                    | 130<br>(70-180)        | 12000<br>(8100-17000)     |
| France   | 1995 | Female | 30 to 34 | 91%<br>(86-94%)                | 9.3%<br>(5.9-14%)        | 3.1<br>(2.2-4.1)                            | 4.1%<br>(2.8-5.7%)                   | 12%<br>(7.7-16%)                    | 180<br>(120-250)       | 14000<br>(10000-19000)    |
| France   | 1995 | Female | 35 to 39 | 88%<br>(83-92%)                | 12%<br>(7.6-17%)         | 3.5<br>(2.5-4.7)                            | 5.5%<br>(4-7.2%)                     | 16%<br>(12-20%)                     | 330<br>(240-420)       | 21000<br>(15000-27000)    |
| France   | 1995 | Female | 40 to 44 | 87%<br>(83-92%)                | 13%<br>(8.5-17%)         | 4<br>(2.9-5.2)                              | 7.2%<br>(5.5-9.3%)                   | 19%<br>(15-23%)                     | 560<br>(450-680)       | 31000<br>(24000-38000)    |
| France   | 1995 | Female | 45 to 49 | 89%<br>(85-92%)                | 11%<br>(7.7-15%)         | 4.7<br>(3.4-6.2)                            | 9%<br>(7-12%)                        | 21%<br>(17-25%)                     | 880<br>(720-1100)      | 42000<br>(34000-51000)    |
| France   | 1995 | Female | 50 to 54 | 91%<br>(87-94%)                | 9.2%<br>(6.1-13%)        | 5.2<br>(3.9-6.8)                            | 10%<br>(7.8-13%)                     | 21%<br>(17-25%)                     | 850<br>(700-1000)      | 35000<br>(29000-43000)    |
| France   | 1995 | Female | 55 to 59 | 92%<br>(90-95%)                | 7.5%<br>(5.2-10%)        | 5.4<br>(4.1-7)                              | 10%<br>(7.7-13%)                     | 19%<br>(15-23%)                     | 1100<br>(890-1300)     | 39000<br>(31000-48000)    |
| France   | 1995 | Female | 60 to 64 | 93%<br>(90-95%)                | 7.2%<br>(4.7-10%)        | 5.4<br>(4-7.1)                              | 9.6%<br>(7.1-12%)                    | 16%<br>(13-20%)                     | 1500<br>(1200-1900)    | 46000<br>(35000-58000)    |
| France   | 1995 | Female | 65 to 69 | 92%<br>(88-95%)                | 8.1%<br>(5.5-12%)        | 5.1<br>(3.9-6.4)                            | 8.6%<br>(6.3-11%)                    | 13%<br>(9.9-17%)                    | 1800<br>(1400-2400)    | 48000<br>(35000-62000)    |
| France   | 1995 | Female | 70 to 74 | 90%<br>(86-93%)                | 10%<br>(7.5-14%)         | 4.6<br>(3.4-6)                              | 7.4%<br>(4.4-11%)                    | 11%<br>(6.6-15%)                    | 2300<br>(1400-3300)    | 49000<br>(29000-71000)    |
| France   | 1995 | Female | 75 to 79 | 86%<br>(80-91%)                | 14%<br>(8.9-20%)         | 4.1<br>(2.9-5.6)                            | 6.3%<br>(2.8-10%)                    | 8.1%<br>(3.6-13%)                   | 1700<br>(750-2700)     | 28000<br>(13000-44000)    |
| France   | 1995 | Female | 80 to 84 | 82%<br>(73-89%)                | 18%<br>(11-27%)          | 3.8<br>(2.8-5)                              | 5.5%<br>(2.4-8.9%)                   | 6.6%<br>(2.6-11%)                   | 3100<br>(1200-5100)    | 37000<br>(16000-60000)    |
| France   | 1995 | Female | 85 to 89 | 79%<br>(69-87%)                | 21%<br>(13-31%)          | 3.6<br>(2.5-4.8)                            | 4.8%<br>(1.7-8.6%)                   | 5.5%<br>(1.7-10%)                   | 3200<br>(990-5800)     | 27000<br>(9800-48000)     |
| France   | 1995 | Female | 90 to 94 | 79%<br>(68-87%)                | 21%<br>(13-32%)          | 3.5<br>(2.3-4.9)                            | 4.3%<br>(0.76-8.6%)                  | 4.7%<br>(0.5-9.9%)                  | 2000<br>(210-4000)     | 11000<br>(2000-22000)     |
| France   | 1995 | Female | 95 plus  | 78%<br>(64-88%)                | 22%<br>(12-36%)          | 3.4<br>(1.9-5.2)                            | 4.2%<br>(-0.31-9.1%)                 | 4.5%<br>(-0.8-10%)                  | 780<br>(-140-1800)     | 3000<br>(-220-6600)       |
| France   | 1995 | Male   | All Ages | 94%<br>(92-95%)                | 6.1%<br>(4.6-7.9%)       | 6.3<br>(5.3-7.4)                            | 17%<br>(14-19%)                      | 19%<br>(16-22%)                     | 52000<br>(43000-60000) | 140000<br>(120000-160000) |
| France   | 1995 | Male   | 15 to 19 | 91%<br>(86-95%)                | 8.9%<br>(4.9-14%)        | 4.6<br>(3.4-6.1)                            | 10%<br>(6.7-14%)                     | 21%<br>(13-29%)                     | 290<br>(180-400)       | 24000<br>(16000-32000)    |
| France   | 1995 | Male   | 20 to 24 | 95%<br>(92-97%)                | 4.7%<br>(2.7-7.7%)       | 6.8<br>(5.1-9)                              | 19%<br>(14-25%)                      | 30%<br>(21-40%)                     | 810<br>(560-1100)      | 63000<br>(46000-81000)    |

| Location | Year | Sex    | Age      | Prevalence of current drinkers | Prevalence of abstainers | Population average of standard drinks daily | Percent of total attributable deaths | Percent of total attributable DALYs | Attributable deaths   | Attributable DALYs        |
|----------|------|--------|----------|--------------------------------|--------------------------|---------------------------------------------|--------------------------------------|-------------------------------------|-----------------------|---------------------------|
| France   | 1995 | Male   | 25 to 29 | 96%<br>(94-98%)                | 3.8%<br>(2.2-6%)         | 6.6<br>(5-8.6)                              | 17%<br>(13-22%)                      | 27%<br>(19-36%)                     | 850<br>(600-1100)     | 63000<br>(47000-79000)    |
| France   | 1995 | Male   | 30 to 34 | 97%<br>(95-98%)                | 3.4%<br>(1.9-5.4%)       | 6.7<br>(5.1-8.6)                            | 15%<br>(11-19%)                      | 23%<br>(17-29%)                     | 910<br>(660-1200)     | 62000<br>(47000-77000)    |
| France   | 1995 | Male   | 35 to 39 | 96%<br>(94-98%)                | 3.5%<br>(1.9-5.6%)       | 7<br>(5.5-8.9)                              | 17%<br>(13-20%)                      | 25%<br>(20-31%)                     | 1300<br>(990-1600)    | 76000<br>(61000-92000)    |
| France   | 1995 | Male   | 40 to 44 | 97%<br>(94-98%)                | 3.4%<br>(1.9-5.6%)       | 7.9<br>(6.3-10)                             | 20%<br>(17-24%)                      | 30%<br>(25-35%)                     | 2100<br>(1800-2500)   | 110000<br>(92000-130000)  |
| France   | 1995 | Male   | 45 to 49 | 97%<br>(95-98%)                | 3.2%<br>(1.9-5%)         | 9.4<br>(7.5-12)                             | 22%<br>(19-25%)                      | 31%<br>(27-35%)                     | 3200<br>(2800-3600)   | 140000<br>(130000-160000) |
| France   | 1995 | Male   | 50 to 54 | 97%<br>(95-98%)                | 3%<br>(1.9-4.8%)         | 10<br>(8.1-13)                              | 22%<br>(19-25%)                      | 30%<br>(26-33%)                     | 3000<br>(2600-3300)   | 120000<br>(110000-130000) |
| France   | 1995 | Male   | 55 to 59 | 97%<br>(96-98%)                | 2.9%<br>(1.9-4.3%)       | 10<br>(8.5-13)                              | 22%<br>(19-24%)                      | 28%<br>(24-31%)                     | 3900<br>(3500-4400)   | 130000<br>(120000-150000) |
| France   | 1995 | Male   | 60 to 64 | 97%<br>(95-98%)                | 3%<br>(1.8-4.5%)         | 10<br>(8.3-13)                              | 20%<br>(17-23%)                      | 25%<br>(21-28%)                     | 5400<br>(4700-6000)   | 160000<br>(140000-180000) |
| France   | 1995 | Male   | 65 to 69 | 97%<br>(95-98%)                | 3.3%<br>(2-5%)           | 9.6<br>(7.8-12)                             | 18%<br>(15-21%)                      | 22%<br>(18-25%)                     | 6200<br>(5300-7200)   | 150000<br>(130000-170000) |
| France   | 1995 | Male   | 70 to 74 | 96%<br>(95-98%)                | 3.5%<br>(2.2-5.1%)       | 9<br>(7-11)                                 | 16%<br>(13-19%)                      | 19%<br>(16-22%)                     | 6900<br>(5700-8100)   | 140000<br>(110000-160000) |
| France   | 1995 | Male   | 75 to 79 | 96%<br>(94-98%)                | 3.8%<br>(2.1-6.2%)       | 8.3<br>(6.5-10)                             | 14%<br>(11-17%)                      | 16%<br>(13-20%)                     | 4400<br>(3400-5400)   | 68000<br>(54000-82000)    |
| France   | 1995 | Male   | 80 to 84 | 95%<br>(91-97%)                | 5.2%<br>(3-8.5%)         | 7.5<br>(5.8-9.1)                            | 13%<br>(9.8-16%)                     | 15%<br>(11-18%)                     | 6100<br>(4500-7600)   | 69000<br>(52000-86000)    |
| France   | 1995 | Male   | 85 to 89 | 93%<br>(87-96%)                | 7.4%<br>(4.1-13%)        | 6.6<br>(5.1-8.3)                            | 11%<br>(7.7-15%)                     | 13%<br>(8.2-16%)                    | 4300<br>(2900-5600)   | 35000<br>(24000-45000)    |
| France   | 1995 | Male   | 90 to 94 | 92%<br>(86-96%)                | 8.1%<br>(4.4-14%)        | 6.1<br>(4.5-8)                              | 9.7%<br>(5.7-13%)                    | 11%<br>(5.9-15%)                    | 1700<br>(960-2500)    | 9700<br>(5600-14000)      |
| France   | 1995 | Male   | 95 plus  | 91%<br>(84-96%)                | 8.7%<br>(3.9-16%)        | 5.6<br>(3.8-7.8)                            | 8.5%<br>(3.5-13%)                    | 9.1%<br>(3.4-15%)                   | 360<br>(130-570)      | 1300<br>(550-2100)        |
| France   | 2000 | Female | All Ages | 86%<br>(83-89%)                | 14%<br>(11-17%)          | 2.9<br>(2.4-3.4)                            | 5.4%<br>(4-7%)                       | 6.4%<br>(3.8-9.8%)                  | 17000<br>(9900-25000) | 400000<br>(300000-520000) |
| France   | 2000 | Female | 15 to 19 | 85%<br>(76-92%)                | 15%<br>(8.5-24%)         | 2.3<br>(1.6-3.1)                            | 2.9%<br>(1.7-4.3%)                   | 10%<br>(5.1-16%)                    | 57<br>(28-86)         | 6000<br>(3600-8700)       |
| France   | 2000 | Female | 20 to 24 | 90%<br>(84-94%)                | 10%<br>(6-16%)           | 2.7<br>(1.8-3.9)                            | 3.9%<br>(2.6-5.4%)                   | 12%<br>(6-18%)                      | 77<br>(39-110)        | 9000<br>(5800-12000)      |
| France   | 2000 | Female | 25 to 29 | 91%<br>(86-95%)                | 8.7%<br>(5-14%)          | 2.6<br>(1.9-3.5)                            | 3.4%<br>(2.3-4.6%)                   | 11%<br>(6.2-17%)                    | 89<br>(48-130)        | 9500<br>(6200-13000)      |
| France   | 2000 | Female | 30 to 34 | 90%<br>(85-94%)                | 9.8%<br>(6.1-15%)        | 2.7<br>(1.9-3.7)                            | 3.6%<br>(2.4-5%)                     | 12%<br>(7.4-17%)                    | 140<br>(86-200)       | 12000<br>(8000-16000)     |
| France   | 2000 | Female | 35 to 39 | 87%<br>(82-92%)                | 13%<br>(7.9-18%)         | 3<br>(2.2-4.1)                              | 4.9%<br>(3.5-6.5%)                   | 15%<br>(11-19%)                     | 290<br>(210-370)      | 19000<br>(14000-24000)    |
| France   | 2000 | Female | 40 to 44 | 87%<br>(81-91%)                | 13%<br>(8.8-19%)         | 3.5<br>(2.6-4.6)                            | 6.5%<br>(4.9-8.4%)                   | 17%<br>(14-21%)                     | 510<br>(400-620)      | 28000<br>(22000-34000)    |

| Location | Year | Sex    | Age      | Prevalence of current drinkers | Prevalence of abstainers | Population average of standard drinks daily | Percent of total attributable deaths | Percent of total attributable DALYs | Attributable deaths    | Attributable DALYs           |
|----------|------|--------|----------|--------------------------------|--------------------------|---------------------------------------------|--------------------------------------|-------------------------------------|------------------------|------------------------------|
| France   | 2000 | Female | 45 to 49 | 88%<br>(84-92%)                | 12%<br>(8.1-16%)         | 4.1<br>(3.1-5.4)                            | 8.2%<br>(6.4-10%)                    | 19%<br>(15-22%)                     | 820<br>(670-990)       | 39000<br>(31000-47000)       |
| France   | 2000 | Female | 50 to 54 | 90%<br>(86-94%)                | 9.8%<br>(6.4-14%)        | 4.5<br>(3.4-5.9)                            | 9%<br>(7-11%)                        | 19%<br>(15-22%)                     | 1100<br>(900-1300)     | 45000<br>(37000-55000)       |
| France   | 2000 | Female | 55 to 59 | 92%<br>(89-95%)                | 8%<br>(5.4-11%)          | 4.7<br>(3.6-6.2)                            | 9%<br>(7-11%)                        | 17%<br>(14-20%)                     | 940<br>(780-1100)      | 34000<br>(27000-42000)       |
| France   | 2000 | Female | 60 to 64 | 92%<br>(89-95%)                | 7.7%<br>(4.9-11%)        | 4.7<br>(3.5-6.2)                            | 8.3%<br>(6-11%)                      | 15%<br>(12-18%)                     | 1100<br>(890-1400)     | 35000<br>(26000-45000)       |
| France   | 2000 | Female | 65 to 69 | 91%<br>(86-94%)                | 9.1%<br>(5.9-14%)        | 4.4<br>(3.4-5.5)                            | 7.1%<br>(5.1-9.3%)                   | 12%<br>(8.6-15%)                    | 1400<br>(1100-1800)    | 38000<br>(27000-50000)       |
| France   | 2000 | Female | 70 to 74 | 88%<br>(84-91%)                | 12%<br>(8.5-16%)         | 3.9<br>(2.8-5.1)                            | 6%<br>(3.5-8.7%)                     | 8.9%<br>(5.4-13%)                   | 1800<br>(1100-2600)    | 38000<br>(22000-55000)       |
| France   | 2000 | Female | 75 to 79 | 85%<br>(78-90%)                | 15%<br>(9.8-22%)         | 3.5<br>(2.5-4.8)                            | 4.9%<br>(2-8%)                       | 6.5%<br>(2.5-11%)                   | 2200<br>(850-3600)     | 36000<br>(15000-59000)       |
| France   | 2000 | Female | 80 to 84 | 81%<br>(70-88%)                | 19%<br>(12-30%)          | 3.3<br>(2.4-4.3)                            | 4.1%<br>(1.6-7%)                     | 4.9%<br>(1.8-8.7%)                  | 1500<br>(570-2700)     | 19000<br>(7100-32000)        |
| France   | 2000 | Female | 85 to 89 | 78%<br>(68-86%)                | 22%<br>(14-32%)          | 3.1<br>(2.2-4.2)                            | 3.6%<br>(0.88-6.8%)                  | 4%<br>(0.73-8%)                     | 2300<br>(420-4700)     | 20000<br>(5000-39000)        |
| France   | 2000 | Female | 90 to 94 | 77%<br>(67-86%)                | 23%<br>(14-33%)          | 3<br>(1.9-4.3)                              | 3%<br>(-0.088-6.8%)                  | 3.2%<br>(-0.37-7.8%)                | 1600<br>(-180-3800)    | 9600<br>(-270-22000)         |
| France   | 2000 | Female | 95 plus  | 77%<br>(63-88%)                | 23%<br>(12-37%)          | 3<br>(1.6-4.6)                              | 2.8%<br>(-0.92-7.7%)                 | 2.9%<br>(-1.4-8.7%)                 | 690<br>(-340-2000)     | 2800<br>(-880-7400)          |
| France   | 2000 | Male   | All Ages | 94%<br>(92-95%)                | 6.4%<br>(4.8-8.2%)       | 5.6<br>(4.7-6.6)                            | 15%<br>(13-18%)                      | 17%<br>(14-20%)                     | 46000<br>(37000-54000) | 1300000<br>(1100000-1500000) |
| France   | 2000 | Male   | 15 to 19 | 89%<br>(83-94%)                | 11%<br>(6-17%)           | 4<br>(2.9-5.2)                              | 9.2%<br>(5.7-13%)                    | 19%<br>(10-26%)                     | 250<br>(140-350)       | 22000<br>(14000-29000)       |
| France   | 2000 | Male   | 20 to 24 | 95%<br>(91-97%)                | 5.2%<br>(2.9-8.7%)       | 6<br>(4.4-7.9)                              | 17%<br>(12-22%)                      | 28%<br>(19-37%)                     | 560<br>(370-750)       | 46000<br>(33000-59000)       |
| France   | 2000 | Male   | 25 to 29 | 96%<br>(94-98%)                | 3.9%<br>(2.2-6.2%)       | 5.8<br>(4.4-7.4)                            | 16%<br>(12-20%)                      | 27%<br>(18-36%)                     | 630<br>(420-850)       | 49000<br>(36000-63000)       |
| France   | 2000 | Male   | 30 to 34 | 97%<br>(94-98%)                | 3.5%<br>(1.9-5.7%)       | 5.8<br>(4.4-7.5)                            | 15%<br>(11-19%)                      | 26%<br>(19-34%)                     | 720<br>(510-940)       | 51000<br>(37000-64000)       |
| France   | 2000 | Male   | 35 to 39 | 96%<br>(94-98%)                | 3.6%<br>(1.9-5.7%)       | 6.2<br>(4.6-7.8)                            | 16%<br>(12-20%)                      | 27%<br>(20-34%)                     | 1100<br>(800-1300)     | 66000<br>(51000-81000)       |
| France   | 2000 | Male   | 40 to 44 | 97%<br>(94-98%)                | 3.5%<br>(1.8-5.5%)       | 7<br>(5.4-8.7)                              | 19%<br>(15-23%)                      | 29%<br>(24-35%)                     | 1800<br>(1500-2200)    | 96000<br>(78000-110000)      |
| France   | 2000 | Male   | 45 to 49 | 97%<br>(95-98%)                | 3.3%<br>(1.9-5.2%)       | 8.3<br>(6.6-10)                             | 21%<br>(18-25%)                      | 30%<br>(26-34%)                     | 2900<br>(2500-3400)    | 130000<br>(120000-150000)    |
| France   | 2000 | Male   | 50 to 54 | 97%<br>(95-98%)                | 3.1%<br>(1.8-4.8%)       | 9<br>(7.2-11)                               | 21%<br>(18-24%)                      | 28%<br>(25-32%)                     | 3800<br>(3300-4300)    | 150000<br>(130000-170000)    |
| France   | 2000 | Male   | 55 to 59 | 97%<br>(95-98%)                | 3%<br>(1.9-4.5%)         | 9.2<br>(7.4-11)                             | 20%<br>(17-22%)                      | 26%<br>(22-28%)                     | 3300<br>(2900-3700)    | 120000<br>(100000-130000)    |

| Location | Year | Sex    | Age      | Prevalence of current drinkers | Prevalence of abstainers | Population average of standard drinks daily | Percent of total attributable deaths | Percent of total attributable DALYs | Attributable deaths   | Attributable DALYs        |
|----------|------|--------|----------|--------------------------------|--------------------------|---------------------------------------------|--------------------------------------|-------------------------------------|-----------------------|---------------------------|
| France   | 2000 | Male   | 60 to 64 | 97%<br>(95-98%)                | 3.2%<br>(1.9-4.8%)       | 9<br>(7.1-11)                               | 18%<br>(15-21%)                      | 22%<br>(19-25%)                     | 4000<br>(3400-4500)   | 120000<br>(100000-130000) |
| France   | 2000 | Male   | 65 to 69 | 97%<br>(95-98%)                | 3.4%<br>(2.1-5.1%)       | 8.4<br>(6.7-10)                             | 16%<br>(14-19%)                      | 20%<br>(17-23%)                     | 5200<br>(4400-5900)   | 130000<br>(110000-150000) |
| France   | 2000 | Male   | 70 to 74 | 96%<br>(95-98%)                | 3.6%<br>(2.3-5.4%)       | 7.9<br>(6.2-9.7)                            | 14%<br>(11-17%)                      | 17%<br>(14-20%)                     | 5900<br>(4700-7100)   | 120000<br>(94000-140000)  |
| France   | 2000 | Male   | 75 to 79 | 96%<br>(93-98%)                | 4%<br>(2.2-6.6%)         | 7.2<br>(5.7-9.1)                            | 12%<br>(9.3-16%)                     | 14%<br>(11-18%)                     | 6200<br>(4600-7800)   | 97000<br>(72000-120000)   |
| France   | 2000 | Male   | 80 to 84 | 95%<br>(91-97%)                | 5.3%<br>(2.9-8.9%)       | 6.5<br>(5.1-8)                              | 11%<br>(7.6-14%)                     | 12%<br>(8.3-16%)                    | 3700<br>(2400-4800)   | 42000<br>(29000-55000)    |
| France   | 2000 | Male   | 85 to 89 | 93%<br>(88-96%)                | 6.9%<br>(3.8-12%)        | 5.9<br>(4.6-7.4)                            | 9.4%<br>(5.9-13%)                    | 10%<br>(6.2-14%)                    | 3700<br>(2200-5200)   | 30000<br>(19000-42000)    |
| France   | 2000 | Male   | 90 to 94 | 92%<br>(88-96%)                | 7.6%<br>(4.2-12%)        | 5.5<br>(4.1-7)                              | 7.8%<br>(3.9-12%)                    | 8.4%<br>(3.8-13%)                   | 1700<br>(750-2600)    | 9400<br>(4600-14000)      |
| France   | 2000 | Male   | 95 plus  | 92%<br>(85-96%)                | 8.5%<br>(3.9-15%)        | 5<br>(3.3-7)                                | 6.6%<br>(2-11%)                      | 6.9%<br>(1.5-12%)                   | 380<br>(82-680)       | 1500<br>(440-2500)        |
| France   | 2005 | Female | All Ages | 85%<br>(83-88%)                | 15%<br>(12-17%)          | 2.7<br>(2.2-3.3)                            | 4.9%<br>(3.7-6.4%)                   | 5.7%<br>(3.3-8.8%)                  | 15000<br>(8500-23000) | 360000<br>(270000-460000) |
| France   | 2005 | Female | 15 to 19 | 82%<br>(73-90%)                | 18%<br>(9.8-27%)         | 2.1<br>(1.4-2.8)                            | 2.3%<br>(1.4-3.4%)                   | 9.1%<br>(4.6-14%)                   | 38<br>(19-59)         | 4800<br>(2900-6900)       |
| France   | 2005 | Female | 20 to 24 | 89%<br>(82-94%)                | 11%<br>(6.4-18%)         | 2.6<br>(1.6-3.7)                            | 3.5%<br>(2.3-4.7%)                   | 11%<br>(5.5-16%)                    | 59<br>(30-88)         | 8100<br>(5300-11000)      |
| France   | 2005 | Female | 25 to 29 | 91%<br>(86-95%)                | 9.1%<br>(5.4-14%)        | 2.5<br>(1.8-3.4)                            | 3%<br>(2-4.1%)                       | 10%<br>(5.4-15%)                    | 60<br>(32-89)         | 7400<br>(5000-10000)      |
| France   | 2005 | Female | 30 to 34 | 89%<br>(84-93%)                | 11%<br>(6.6-16%)         | 2.5<br>(1.8-3.5)                            | 3.2%<br>(2.1-4.3%)                   | 11%<br>(6.8-16%)                    | 110<br>(65-150)       | 9600<br>(6600-13000)      |
| France   | 2005 | Female | 35 to 39 | 87%<br>(81-92%)                | 13%<br>(8.1-19%)         | 2.9<br>(2-3.8)                              | 4.3%<br>(3-5.8%)                     | 14%<br>(9.5-18%)                    | 230<br>(150-300)      | 15000<br>(11000-20000)    |
| France   | 2005 | Female | 40 to 44 | 86%<br>(81-91%)                | 14%<br>(9-19%)           | 3.3<br>(2.4-4.3)                            | 5.7%<br>(4.2-7.3%)                   | 16%<br>(12-19%)                     | 430<br>(320-530)      | 24000<br>(18000-30000)    |
| France   | 2005 | Female | 45 to 49 | 88%<br>(83-91%)                | 12%<br>(8.7-17%)         | 3.9<br>(2.8-5.1)                            | 7.4%<br>(5.7-9.4%)                   | 17%<br>(14-21%)                     | 720<br>(580-880)      | 34000<br>(27000-43000)    |
| France   | 2005 | Female | 50 to 54 | 90%<br>(85-93%)                | 10%<br>(6.9-15%)         | 4.3<br>(3.2-5.6)                            | 8.4%<br>(6.5-10%)                    | 17%<br>(14-21%)                     | 1000<br>(830-1200)    | 43000<br>(34000-52000)    |
| France   | 2005 | Female | 55 to 59 | 92%<br>(88-94%)                | 8.4%<br>(5.8-12%)        | 4.5<br>(3.4-5.9)                            | 8.3%<br>(6.4-10%)                    | 16%<br>(13-19%)                     | 1200<br>(1000-1500)   | 44000<br>(35000-55000)    |
| France   | 2005 | Female | 60 to 64 | 92%<br>(88-94%)                | 8.4%<br>(5.6-12%)        | 4.4<br>(3.3-5.7)                            | 7.6%<br>(5.7-9.8%)                   | 14%<br>(11-17%)                     | 1000<br>(790-1200)    | 31000<br>(24000-40000)    |
| France   | 2005 | Female | 65 to 69 | 90%<br>(86-93%)                | 10%<br>(6.8-14%)         | 4.1<br>(3.2-5.2)                            | 6.4%<br>(4.6-8.4%)                   | 11%<br>(8.3-13%)                    | 1100<br>(870-1400)    | 30000<br>(22000-39000)    |
| France   | 2005 | Female | 70 to 74 | 87%<br>(83-91%)                | 13%<br>(9.3-17%)         | 3.6<br>(2.6-4.8)                            | 5.3%<br>(3.1-7.6%)                   | 8.1%<br>(5.2-11%)                   | 1500<br>(940-2000)    | 31000<br>(18000-45000)    |
| France   | 2005 | Female | 75 to 79 | 83%<br>(76-89%)                | 17%<br>(11-24%)          | 3.2<br>(2.3-4.3)                            | 4.2%<br>(1.9-7%)                     | 5.8%<br>(2.6-9.3%)                  | 1700<br>(760-2800)    | 29000<br>(13000-48000)    |



| Location | Year | Sex    | Age      | Prevalence of current drinkers | Prevalence of abstainers | Population average of standard drinks daily | Percent of total attributable deaths | Percent of total attributable DALYs | Attributable deaths    | Attributable DALYs          |
|----------|------|--------|----------|--------------------------------|--------------------------|---------------------------------------------|--------------------------------------|-------------------------------------|------------------------|-----------------------------|
| France   | 2005 | Female | 80 to 84 | 79%<br>(69-86%)                | 21%<br>(14-31%)          | 2.9<br>(2.1-3.8)                            | 3.5%<br>(1.2-6.2%)                   | 4.3%<br>(1.4-7.8%)                  | 2100<br>(650-3700)     | 26000<br>(9300-46000)       |
| France   | 2005 | Female | 85 to 89 | 76%<br>(67-84%)                | 24%<br>(16-33%)          | 2.8<br>(2-3.8)                              | 3.1%<br>(0.77-5.9%)                  | 3.5%<br>(0.64-6.9%)                 | 1400<br>(250-2700)     | 12000<br>(3000-23000)       |
| France   | 2005 | Female | 90 to 94 | 75%<br>(65-84%)                | 25%<br>(16-35%)          | 2.8<br>(1.8-3.9)                            | 2.6%<br>(-0.017-6%)                  | 2.8%<br>(-0.37-6.9%)                | 1400<br>(-180-3400)    | 8500<br>(-56-20000)         |
| France   | 2005 | Female | 95 plus  | 75%<br>(60-86%)                | 25%<br>(14-40%)          | 2.7<br>(1.6-4.2)                            | 2.5%<br>(-0.75-6.8%)                 | 2.5%<br>(-1.3-7.7%)                 | 720<br>(-380-2200)     | 2900<br>(-910-8000)         |
| France   | 2005 | Male   | All Ages | 94%<br>(92-95%)                | 6.3%<br>(4.8-8.2%)       | 5.3<br>(4.4-6.4)                            | 14%<br>(12-16%)                      | 16%<br>(13-18%)                     | 42000<br>(34000-50000) | 1200000<br>(990000-1300000) |
| France   | 2005 | Male   | 15 to 19 | 89%<br>(83-94%)                | 11%<br>(6-17%)           | 3.7<br>(2.7-5)                              | 7.8%<br>(5.1-11%)                    | 17%<br>(10-25%)                     | 180<br>(110-260)       | 17000<br>(11000-23000)      |
| France   | 2005 | Male   | 20 to 24 | 95%<br>(91-97%)                | 5.3%<br>(3-8.9%)         | 5.6<br>(4.1-7.4)                            | 15%<br>(11-20%)                      | 26%<br>(17-35%)                     | 450<br>(300-610)       | 39000<br>(28000-51000)      |
| France   | 2005 | Male   | 25 to 29 | 96%<br>(94-98%)                | 4%<br>(2.2-6.4%)         | 5.5<br>(4.1-7.1)                            | 14%<br>(11-18%)                      | 26%<br>(18-35%)                     | 440<br>(290-590)       | 37000<br>(27000-47000)      |
| France   | 2005 | Male   | 30 to 34 | 96%<br>(94-98%)                | 3.6%<br>(2-5.9%)         | 5.5<br>(4.2-7.1)                            | 14%<br>(10-18%)                      | 26%<br>(17-33%)                     | 590<br>(400-770)       | 43000<br>(32000-55000)      |
| France   | 2005 | Male   | 35 to 39 | 96%<br>(94-98%)                | 3.7%<br>(1.9-5.9%)       | 5.8<br>(4.4-7.4)                            | 15%<br>(11-18%)                      | 26%<br>(19-33%)                     | 870<br>(630-1100)      | 55000<br>(42000-68000)      |
| France   | 2005 | Male   | 40 to 44 | 96%<br>(94-98%)                | 3.5%<br>(1.8-5.9%)       | 6.6<br>(5.1-8.3)                            | 17%<br>(14-21%)                      | 28%<br>(22-33%)                     | 1500<br>(1200-1800)    | 80000<br>(64000-96000)      |
| France   | 2005 | Male   | 45 to 49 | 97%<br>(95-98%)                | 3.3%<br>(1.9-5.3%)       | 7.8<br>(6.2-9.7)                            | 20%<br>(17-23%)                      | 29%<br>(25-33%)                     | 2600<br>(2200-2900)    | 120000<br>(100000-130000)   |
| France   | 2005 | Male   | 50 to 54 | 97%<br>(95-98%)                | 3.2%<br>(1.9-4.9%)       | 8.5<br>(6.7-10)                             | 20%<br>(17-23%)                      | 28%<br>(24-31%)                     | 3600<br>(3100-4000)    | 140000<br>(130000-160000)   |
| France   | 2005 | Male   | 55 to 59 | 97%<br>(96-98%)                | 3.1%<br>(1.9-4.5%)       | 8.7<br>(7-11)                               | 19%<br>(16-21%)                      | 24%<br>(21-27%)                     | 4300<br>(3800-4900)    | 150000<br>(130000-170000)   |
| France   | 2005 | Male   | 60 to 64 | 97%<br>(95-98%)                | 3.2%<br>(1.9-4.7%)       | 8.4<br>(6.7-11)                             | 17%<br>(14-19%)                      | 21%<br>(18-24%)                     | 3400<br>(2900-3900)    | 100000<br>(88000-120000)    |
| France   | 2005 | Male   | 65 to 69 | 97%<br>(95-98%)                | 3.4%<br>(2.1-5%)         | 7.9<br>(6.5-9.6)                            | 15%<br>(12-17%)                      | 18%<br>(15-21%)                     | 3900<br>(3300-4600)    | 99000<br>(83000-110000)     |
| France   | 2005 | Male   | 70 to 74 | 96%<br>(95-98%)                | 3.6%<br>(2.3-5.2%)       | 7.4<br>(5.9-9.1)                            | 13%<br>(10-16%)                      | 16%<br>(13-19%)                     | 4900<br>(3900-6000)    | 100000<br>(79000-120000)    |
| France   | 2005 | Male   | 75 to 79 | 96%<br>(93-98%)                | 4.1%<br>(2.1-6.7%)       | 6.8<br>(5.3-8.6)                            | 11%<br>(8.2-14%)                     | 13%<br>(9.6-17%)                    | 5300<br>(3900-6700)    | 84000<br>(62000-110000)     |
| France   | 2005 | Male   | 80 to 84 | 95%<br>(91-97%)                | 5.2%<br>(2.9-8.8%)       | 6.2<br>(4.9-7.7)                            | 10%<br>(6.7-13%)                     | 11%<br>(7.4-15%)                    | 5300<br>(3500-7000)    | 62000<br>(42000-80000)      |
| France   | 2005 | Male   | 85 to 89 | 93%<br>(90-96%)                | 6.5%<br>(3.9-10%)        | 5.6<br>(4.4-7.1)                            | 8.4%<br>(5-12%)                      | 9.2%<br>(5.2-13%)                   | 2500<br>(1400-3500)    | 20000<br>(12000-28000)      |
| France   | 2005 | Male   | 90 to 94 | 93%<br>(88-96%)                | 7.3%<br>(4-12%)          | 5.2<br>(3.9-6.7)                            | 6.9%<br>(3-11%)                      | 7.4%<br>(2.9-12%)                   | 1600<br>(630-2500)     | 9100<br>(4100-14000)        |

| Location | Year | Sex    | Age      | Prevalence of current drinkers | Prevalence of abstainers | Population average of standard drinks daily | Percent of total attributable deaths | Percent of total attributable DALYs | Attributable deaths    | Attributable DALYs          |
|----------|------|--------|----------|--------------------------------|--------------------------|---------------------------------------------|--------------------------------------|-------------------------------------|------------------------|-----------------------------|
| France   | 2005 | Male   | 95 plus  | 92%<br>(86-96%)                | 8.1%<br>(3.8-14%)        | 4.7<br>(3.2-6.6)                            | 5.8%<br>(1.5-11%)                    | 6%<br>(1.1-12%)                     | 420<br>(76-820)        | 1600<br>(420-3000)          |
| France   | 2010 | Female | All Ages | 86%<br>(83-88%)                | 14%<br>(12-17%)          | 2.6<br>(2.1-3.2)                            | 4.4%<br>(3.1-5.9%)                   | 5.2%<br>(2.7-8%)                    | 14000<br>(7100-22000)  | 330000<br>(240000-440000)   |
| France   | 2010 | Female | 15 to 19 | 85%<br>(77-92%)                | 15%<br>(8.3-23%)         | 2<br>(1.4-2.8)                              | 2.1%<br>(1.3-3%)                     | 8.9%<br>(4.3-14%)                   | 29<br>(14-44)          | 4000<br>(2500-5800)         |
| France   | 2010 | Female | 20 to 24 | 90%<br>(84-94%)                | 10%<br>(5.7-16%)         | 2.5<br>(1.5-3.5)                            | 3.3%<br>(2.3-4.4%)                   | 10%<br>(5.1-15%)                    | 47<br>(24-71)          | 7400<br>(4900-10000)        |
| France   | 2010 | Female | 25 to 29 | 91%<br>(86-95%)                | 8.8%<br>(5-14%)          | 2.4<br>(1.6-3.3)                            | 2.9%<br>(2-3.9%)                     | 9.4%<br>(5-14%)                     | 54<br>(29-82)          | 7300<br>(4800-9900)         |
| France   | 2010 | Female | 30 to 34 | 90%<br>(84-94%)                | 10%<br>(6.4-16%)         | 2.4<br>(1.6-3.3)                            | 2.8%<br>(1.9-3.8%)                   | 11%<br>(6.5-15%)                    | 79<br>(47-110)         | 7700<br>(5300-10000)        |
| France   | 2010 | Female | 35 to 39 | 87%<br>(81-92%)                | 13%<br>(8-19%)           | 2.7<br>(1.9-3.8)                            | 3.7%<br>(2.6-5%)                     | 13%<br>(9.1-17%)                    | 180<br>(120-240)       | 13000<br>(9200-17000)       |
| France   | 2010 | Female | 40 to 44 | 86%<br>(81-91%)                | 14%<br>(9.1-19%)         | 3.1<br>(2.2-4.3)                            | 5%<br>(3.6-6.5%)                     | 15%<br>(11-19%)                     | 350<br>(260-440)       | 20000<br>(15000-25000)      |
| France   | 2010 | Female | 45 to 49 | 88%<br>(83-91%)                | 12%<br>(8.5-17%)         | 3.6<br>(2.7-4.9)                            | 6.4%<br>(4.9-8.2%)                   | 16%<br>(13-19%)                     | 620<br>(490-760)       | 30000<br>(24000-37000)      |
| France   | 2010 | Female | 50 to 54 | 90%<br>(86-93%)                | 10%<br>(6.8-14%)         | 4<br>(3-5.4)                                | 7.4%<br>(5.7-9.4%)                   | 16%<br>(13-19%)                     | 910<br>(730-1100)      | 38000<br>(30000-47000)      |
| France   | 2010 | Female | 55 to 59 | 92%<br>(89-94%)                | 7.9%<br>(5.5-11%)        | 4.2<br>(3.1-5.7)                            | 7.5%<br>(5.6-9.5%)                   | 15%<br>(12-18%)                     | 1200<br>(930-1400)     | 42000<br>(32000-52000)      |
| France   | 2010 | Female | 60 to 64 | 92%<br>(89-95%)                | 7.7%<br>(5-11%)          | 4.2<br>(3-5.7)                              | 6.9%<br>(5.1-8.8%)                   | 13%<br>(10-16%)                     | 1300<br>(1000-1600)    | 41000<br>(30000-53000)      |
| France   | 2010 | Female | 65 to 69 | 91%<br>(87-94%)                | 9.4%<br>(6.2-13%)        | 3.9<br>(2.9-5.1)                            | 5.8%<br>(4.2-7.8%)                   | 10%<br>(7.8-13%)                    | 1000<br>(760-1300)     | 26000<br>(19000-35000)      |
| France   | 2010 | Female | 70 to 74 | 88%<br>(84-91%)                | 12%<br>(8.8-16%)         | 3.5<br>(2.5-4.8)                            | 4.8%<br>(2.8-7.1%)                   | 7.8%<br>(4.8-11%)                   | 1100<br>(710-1600)     | 25000<br>(14000-36000)      |
| France   | 2010 | Female | 75 to 79 | 84%<br>(77-90%)                | 16%<br>(10-23%)          | 3.1<br>(2.2-4.4)                            | 3.8%<br>(1.5-6.4%)                   | 5.5%<br>(2.5-8.8%)                  | 1400<br>(630-2300)     | 24000<br>(9300-41000)       |
| France   | 2010 | Female | 80 to 84 | 80%<br>(71-87%)                | 20%<br>(13-29%)          | 2.9<br>(2.1-3.9)                            | 3.1%<br>(0.87-5.6%)                  | 4%<br>(1-7.4%)                      | 1800<br>(470-3300)     | 22000<br>(6000-41000)       |
| France   | 2010 | Female | 85 to 89 | 78%<br>(69-85%)                | 22%<br>(15-31%)          | 2.8<br>(1.9-3.8)                            | 2.8%<br>(0.46-5.5%)                  | 3.2%<br>(0.39-6.7%)                 | 2100<br>(250-4300)     | 18000<br>(3000-36000)       |
| France   | 2010 | Female | 90 to 94 | 77%<br>(67-86%)                | 23%<br>(14-33%)          | 2.7<br>(1.7-3.9)                            | 2.3%<br>(-0.36-5.6%)                 | 2.5%<br>(-0.68-6.5%)                | 940<br>(-260-2500)     | 5900<br>(-920-15000)        |
| France   | 2010 | Female | 95 plus  | 77%<br>(63-88%)                | 23%<br>(12-37%)          | 2.6<br>(1.5-4.2)                            | 2.1%<br>(-1.1-6.5%)                  | 2.1%<br>(-1.7-7.4%)                 | 740<br>(-610-2600)     | 3000<br>(-1600-9400)        |
| France   | 2010 | Male   | All Ages | 94%<br>(92-95%)                | 6.2%<br>(4.7-8%)         | 5.1<br>(4.1-6.3)                            | 13%<br>(11-15%)                      | 14%<br>(11-17%)                     | 39000<br>(30000-47000) | 1100000<br>(870000-1300000) |
| France   | 2010 | Male   | 15 to 19 | 91%<br>(86-95%)                | 8.8%<br>(5-14%)          | 3.6<br>(2.5-4.9)                            | 7.1%<br>(4.6-9.8%)                   | 17%<br>(9.5-24%)                    | 140<br>(79-200)        | 14000<br>(9000-19000)       |

| Location | Year | Sex    | Age      | Prevalence of current drinkers | Prevalence of abstainers | Population average of standard drinks daily | Percent of total attributable deaths | Percent of total attributable DALYs | Attributable deaths   | Attributable DALYs        |
|----------|------|--------|----------|--------------------------------|--------------------------|---------------------------------------------|--------------------------------------|-------------------------------------|-----------------------|---------------------------|
| France   | 2010 | Male   | 20 to 24 | 95%<br>(92-97%)                | 5%<br>(2.8-8.2%)         | 5.3<br>(3.9-7.1)                            | 14%<br>(10-19%)                      | 25%<br>(16-34%)                     | 360<br>(230-490)      | 34000<br>(24000-43000)    |
| France   | 2010 | Male   | 25 to 29 | 96%<br>(94-98%)                | 4.1%<br>(2.3-6.4%)       | 5.2<br>(3.9-6.8)                            | 13%<br>(9.9-17%)                     | 25%<br>(16-33%)                     | 400<br>(260-530)      | 35000<br>(25000-44000)    |
| France   | 2010 | Male   | 30 to 34 | 96%<br>(94-98%)                | 3.8%<br>(2-6.1%)         | 5.2<br>(3.9-6.8)                            | 12%<br>(9.2-16%)                     | 25%<br>(17-32%)                     | 450<br>(310-590)      | 35000<br>(25000-44000)    |
| France   | 2010 | Male   | 35 to 39 | 96%<br>(94-98%)                | 3.7%<br>(2-5.8%)         | 5.4<br>(4-7.1)                              | 13%<br>(9.9-17%)                     | 25%<br>(18-32%)                     | 750<br>(530-960)      | 49000<br>(37000-61000)    |
| France   | 2010 | Male   | 40 to 44 | 96%<br>(94-98%)                | 3.6%<br>(1.9-5.8%)       | 6.2<br>(4.6-8)                              | 15%<br>(12-19%)                      | 27%<br>(21-33%)                     | 1200<br>(940-1500)    | 68000<br>(53000-82000)    |
| France   | 2010 | Male   | 45 to 49 | 97%<br>(94-98%)                | 3.4%<br>(2-5.5%)         | 7.3<br>(5.7-9.4)                            | 18%<br>(15-21%)                      | 28%<br>(23-33%)                     | 2100<br>(1700-2400)   | 99000<br>(82000-110000)   |
| France   | 2010 | Male   | 50 to 54 | 97%<br>(95-98%)                | 3.2%<br>(1.9-5%)         | 8<br>(6.1-10)                               | 19%<br>(16-22%)                      | 27%<br>(22-30%)                     | 3100<br>(2600-3600)   | 130000<br>(110000-140000) |
| France   | 2010 | Male   | 55 to 59 | 97%<br>(96-98%)                | 3%<br>(1.9-4.4%)         | 8.2<br>(6.4-10)                             | 18%<br>(15-20%)                      | 23%<br>(20-27%)                     | 4000<br>(3400-4600)   | 140000<br>(120000-160000) |
| France   | 2010 | Male   | 60 to 64 | 97%<br>(95-98%)                | 3.1%<br>(1.9-4.6%)       | 8<br>(6.1-10)                               | 16%<br>(13-18%)                      | 20%<br>(17-23%)                     | 4400<br>(3700-5100)   | 130000<br>(110000-150000) |
| France   | 2010 | Male   | 65 to 69 | 97%<br>(95-98%)                | 3.3%<br>(2-4.9%)         | 7.5<br>(5.9-9.4)                            | 14%<br>(11-16%)                      | 17%<br>(14-20%)                     | 3400<br>(2700-3900)   | 86000<br>(69000-100000)   |
| France   | 2010 | Male   | 70 to 74 | 96%<br>(95-98%)                | 3.5%<br>(2.2-5.2%)       | 7<br>(5.4-9)                                | 12%<br>(8.9-15%)                     | 15%<br>(11-18%)                     | 3800<br>(2900-4600)   | 79000<br>(60000-97000)    |
| France   | 2010 | Male   | 75 to 79 | 96%<br>(93-98%)                | 4%<br>(2.1-6.6%)         | 6.4<br>(4.9-8.3)                            | 10%<br>(7.2-13%)                     | 12%<br>(8.4-16%)                    | 4500<br>(3100-5700)   | 73000<br>(50000-94000)    |
| France   | 2010 | Male   | 80 to 84 | 95%<br>(92-97%)                | 5%<br>(2.9-8.2%)         | 5.9<br>(4.6-7.4)                            | 8.9%<br>(5.7-12%)                    | 10%<br>(6.2-14%)                    | 4600<br>(2800-6300)   | 55000<br>(35000-75000)    |
| France   | 2010 | Male   | 85 to 89 | 94%<br>(91-96%)                | 6.1%<br>(3.7-9.3%)       | 5.4<br>(4.2-6.9)                            | 7.5%<br>(4.1-11%)                    | 8.2%<br>(4.2-12%)                   | 3800<br>(1900-5600)   | 32000<br>(17000-46000)    |
| France   | 2010 | Male   | 90 to 94 | 93%<br>(89-96%)                | 6.9%<br>(3.8-11%)        | 4.9<br>(3.7-6.6)                            | 6%<br>(2.4-9.8%)                     | 6.5%<br>(2-11%)                     | 1200<br>(370-2000)    | 7000<br>(2700-11000)      |
| France   | 2010 | Male   | 95 plus  | 92%<br>(87-96%)                | 7.8%<br>(3.6-13%)        | 4.5<br>(3-6.3)                              | 5%<br>(1.1-9.7%)                     | 5.2%<br>(0.51-11%)                  | 470<br>(45-960)       | 1800<br>(380-3500)        |
| France   | 2016 | Female | All Ages | 87%<br>(84-89%)                | 13%<br>(11-16%)          | 2.6<br>(1.9-3.5)                            | 4.1%<br>(2.6-5.8%)                   | 4.6%<br>(1.7-8.1%)                  | 14000<br>(4900-24000) | 320000<br>(200000-450000) |
| France   | 2016 | Female | 15 to 19 | 86%<br>(76-92%)                | 14%<br>(7.9-24%)         | 2<br>(1.2-2.9)                              | 1.9%<br>(1.3-2.8%)                   | 8.6%<br>(4.3-13%)                   | 25<br>(12-39)         | 3700<br>(2300-5400)       |
| France   | 2016 | Female | 20 to 24 | 90%<br>(83-94%)                | 10%<br>(5.6-17%)         | 2.4<br>(1.4-3.5)                            | 3.1%<br>(2.1-4.1%)                   | 9.9%<br>(5.1-15%)                   | 36<br>(19-56)         | 6200<br>(4100-8800)       |
| France   | 2016 | Female | 25 to 29 | 91%<br>(85-95%)                | 9%<br>(4.9-15%)          | 2.3<br>(1.4-3.3)                            | 2.7%<br>(1.8-3.7%)                   | 9.3%<br>(4.9-14%)                   | 47<br>(25-73)         | 6600<br>(4400-9200)       |
| France   | 2016 | Female | 30 to 34 | 90%<br>(84-94%)                | 10%<br>(6-16%)           | 2.3<br>(1.5-3.4)                            | 2.6%<br>(1.8-3.6%)                   | 10%<br>(6.3-15%)                    | 74<br>(45-110)        | 7400<br>(5000-10000)      |
| France   | 2016 | Female | 35 to 39 | 87%<br>(81-92%)                | 13%<br>(8-19%)           | 2.6<br>(1.6-3.8)                            | 3.5%<br>(2.4-4.8%)                   | 13%<br>(8.7-17%)                    | 140<br>(96-190)       | 10000<br>(7200-14000)     |

| Location | Year | Sex    | Age      | Prevalence of current drinkers | Prevalence of abstainers | Population average of standard drinks daily | Percent of total attributable deaths | Percent of total attributable DALYs | Attributable deaths    | Attributable DALYs          |
|----------|------|--------|----------|--------------------------------|--------------------------|---------------------------------------------|--------------------------------------|-------------------------------------|------------------------|-----------------------------|
| France   | 2016 | Female | 40 to 44 | 86%<br>(80-91%)                | 14%<br>(8.8-20%)         | 3<br>(2-4.3)                                | 4.6%<br>(3.2-6.1%)                   | 15%<br>(11-19%)                     | 310<br>(230-410)       | 18000<br>(13000-24000)      |
| France   | 2016 | Female | 45 to 49 | 88%<br>(83-92%)                | 12%<br>(8.1-17%)         | 3.5<br>(2.4-5)                              | 6%<br>(4.3-8%)                       | 16%<br>(12-19%)                     | 550<br>(420-690)       | 27000<br>(20000-34000)      |
| France   | 2016 | Female | 50 to 54 | 90%<br>(86-94%)                | 9.5%<br>(6.3-14%)        | 3.9<br>(2.7-5.5)                            | 6.9%<br>(5.1-9.1%)                   | 15%<br>(12-19%)                     | 840<br>(650-1100)      | 36000<br>(27000-46000)      |
| France   | 2016 | Female | 55 to 59 | 93%<br>(90-95%)                | 7.2%<br>(5-9.9%)         | 4.2<br>(2.8-5.8)                            | 7.1%<br>(5-9.3%)                     | 14%<br>(11-18%)                     | 1100<br>(810-1300)     | 39000<br>(28000-50000)      |
| France   | 2016 | Female | 60 to 64 | 93%<br>(91-96%)                | 6.7%<br>(4.3-9.5%)       | 4.2<br>(2.8-5.9)                            | 6.5%<br>(4.4-8.9%)                   | 12%<br>(9.2-16%)                    | 1200<br>(910-1600)     | 39000<br>(26000-53000)      |
| France   | 2016 | Female | 65 to 69 | 92%<br>(88-95%)                | 7.9%<br>(5.3-12%)        | 3.9<br>(2.7-5.4)                            | 5.4%<br>(3.4-7.9%)                   | 9.9%<br>(7-13%)                     | 1400<br>(980-1900)     | 36000<br>(23000-52000)      |
| France   | 2016 | Female | 70 to 74 | 90%<br>(86-93%)                | 10%<br>(7.2-14%)         | 3.5<br>(2.3-5.1)                            | 4.4%<br>(2.2-7.1%)                   | 7.5%<br>(4.3-11%)                   | 1000<br>(580-1500)     | 21000<br>(11000-34000)      |
| France   | 2016 | Female | 75 to 79 | 87%<br>(81-92%)                | 13%<br>(8.4-19%)         | 3.2<br>(2-4.7)                              | 3.5%<br>(1-6.4%)                     | 5.2%<br>(2-9%)                      | 1200<br>(450-2000)     | 20000<br>(5900-36000)       |
| France   | 2016 | Female | 80 to 84 | 84%<br>(76-90%)                | 16%<br>(10-24%)          | 3<br>(2-4.3)                                | 2.8%<br>(0.36-5.8%)                  | 3.7%<br>(0.51-7.6%)                 | 1500<br>(220-3100)     | 20000<br>(2400-40000)       |
| France   | 2016 | Female | 85 to 89 | 82%<br>(74-88%)                | 18%<br>(12-26%)          | 2.9<br>(1.9-4.1)                            | 2.5%<br>(-0.086-5.5%)                | 3%<br>(-0.24-6.7%)                  | 1900<br>(-160-4300)    | 17000<br>(-590-37000)       |
| France   | 2016 | Female | 90 to 94 | 81%<br>(72-88%)                | 19%<br>(12-28%)          | 2.8<br>(1.8-4.2)                            | 2%<br>(-0.73-5.5%)                   | 2.2%<br>(-1.2-6.4%)                 | 1600<br>(-910-4800)    | 10000<br>(-3700-27000)      |
| France   | 2016 | Female | 95 plus  | 80%<br>(68-90%)                | 20%<br>(10-32%)          | 2.7<br>(1.5-4.4)                            | 1.9%<br>(-1.4-6.4%)                  | 1.9%<br>(-2-7.2%)                   | 570<br>(-600-2100)     | 2300<br>(-1700-7600)        |
| France   | 2016 | Male   | All Ages | 93%<br>(91-95%)                | 6.8%<br>(5.1-8.8%)       | 4.9<br>(3.5-6.6)                            | 12%<br>(9.3-15%)                     | 13%<br>(8.9-17%)                    | 38000<br>(26000-50000) | 1000000<br>(780000-1200000) |
| France   | 2016 | Male   | 15 to 19 | 89%<br>(81-94%)                | 11%<br>(5.8-19%)         | 3.4<br>(2.1-4.9)                            | 6.1%<br>(4-8.6%)                     | 16%<br>(8.7-24%)                    | 110<br>(60-170)        | 12000<br>(7400-17000)       |
| France   | 2016 | Male   | 20 to 24 | 94%<br>(89-97%)                | 6.2%<br>(3.5-11%)        | 5<br>(3.4-7.1)                              | 13%<br>(9.3-17%)                     | 24%<br>(15-34%)                     | 280<br>(170-390)       | 27000<br>(19000-36000)      |
| France   | 2016 | Male   | 25 to 29 | 95%<br>(91-97%)                | 5%<br>(2.8-8.6%)         | 4.9<br>(3.4-6.8)                            | 13%<br>(9-17%)                       | 24%<br>(15-33%)                     | 340<br>(210-470)       | 30000<br>(21000-40000)      |
| France   | 2016 | Male   | 30 to 34 | 96%<br>(92-98%)                | 4.4%<br>(2.3-8.2%)       | 4.9<br>(3.4-6.9)                            | 12%<br>(8.6-16%)                     | 24%<br>(15-33%)                     | 410<br>(270-580)       | 32000<br>(23000-42000)      |
| France   | 2016 | Male   | 35 to 39 | 96%<br>(92-98%)                | 4.4%<br>(2.2-7.5%)       | 5.2<br>(3.5-7.3)                            | 13%<br>(9.2-17%)                     | 25%<br>(17-33%)                     | 560<br>(380-740)       | 38000<br>(27000-48000)      |
| France   | 2016 | Male   | 40 to 44 | 96%<br>(92-98%)                | 4.2%<br>(2.1-7.5%)       | 5.8<br>(4-8.1)                              | 15%<br>(11-18%)                      | 26%<br>(20-33%)                     | 1100<br>(790-1400)     | 61000<br>(46000-75000)      |
| France   | 2016 | Male   | 45 to 49 | 96%<br>(93-98%)                | 3.8%<br>(2.1-6.6%)       | 7<br>(5-9.7)                                | 17%<br>(14-21%)                      | 28%<br>(22-33%)                     | 1800<br>(1400-2300)    | 88000<br>(69000-110000)     |
| France   | 2016 | Male   | 50 to 54 | 97%<br>(95-98%)                | 3.4%<br>(2-5.5%)         | 7.7<br>(5.4-11)                             | 18%<br>(15-21%)                      | 26%<br>(21-31%)                     | 2800<br>(2300-3400)    | 120000<br>(94000-140000)    |

| Location | Year | Sex    | Age      | Prevalence of current drinkers | Prevalence of abstainers | Population average of standard drinks daily | Percent of total attributable deaths | Percent of total attributable DALYs | Attributable deaths    | Attributable DALYs         |
|----------|------|--------|----------|--------------------------------|--------------------------|---------------------------------------------|--------------------------------------|-------------------------------------|------------------------|----------------------------|
| France   | 2016 | Male   | 55 to 59 | 97%<br>(95-98%)                | 3.2%<br>(2-4.8%)         | 7.8<br>(5.6-11)                             | 17%<br>(14-20%)                      | 23%<br>(19-27%)                     | 3600<br>(2800-4200)    | 130000<br>(100000-150000)  |
| France   | 2016 | Male   | 60 to 64 | 97%<br>(95-98%)                | 3.2%<br>(2-5%)           | 7.7<br>(5.5-11)                             | 15%<br>(12-18%)                      | 20%<br>(16-23%)                     | 4100<br>(3300-4900)    | 120000<br>(99000-150000)   |
| France   | 2016 | Male   | 65 to 69 | 97%<br>(95-98%)                | 3.5%<br>(2.1-5.2%)       | 7.1<br>(5.1-9.9)                            | 13%<br>(9.6-16%)                     | 17%<br>(13-20%)                     | 4700<br>(3600-5700)    | 120000<br>(91000-150000)   |
| France   | 2016 | Male   | 70 to 74 | 96%<br>(94-98%)                | 3.8%<br>(2.3-5.8%)       | 6.7<br>(4.7-9.2)                            | 11%<br>(7.9-14%)                     | 14%<br>(10-18%)                     | 3400<br>(2400-4400)    | 72000<br>(52000-93000)     |
| France   | 2016 | Male   | 75 to 79 | 96%<br>(93-98%)                | 4.2%<br>(2.3-6.9%)       | 6.1<br>(4.3-8.4)                            | 9.5%<br>(6.1-13%)                    | 11%<br>(7.3-16%)                    | 3800<br>(2400-5200)    | 62000<br>(39000-84000)     |
| France   | 2016 | Male   | 80 to 84 | 95%<br>(91-97%)                | 5.2%<br>(2.9-8.9%)       | 5.6<br>(4-7.8)                              | 8.1%<br>(4.5-12%)                    | 9.3%<br>(4.9-14%)                   | 4400<br>(2300-6600)    | 53000<br>(29000-77000)     |
| France   | 2016 | Male   | 85 to 89 | 93%<br>(89-96%)                | 6.6%<br>(3.7-11%)        | 5.1<br>(3.5-7.1)                            | 6.8%<br>(3.1-11%)                    | 7.6%<br>(3.2-12%)                   | 3700<br>(1600-6100)    | 32000<br>(14000-51000)     |
| France   | 2016 | Male   | 90 to 94 | 93%<br>(88-96%)                | 7.3%<br>(4-12%)          | 4.7<br>(3.2-6.6)                            | 5.5%<br>(1.8-9.7%)                   | 5.9%<br>(1.6-11%)                   | 2300<br>(580-4200)     | 13000<br>(4200-24000)      |
| France   | 2016 | Male   | 95 plus  | 92%<br>(85-96%)                | 8.1%<br>(3.7-15%)        | 4.3<br>(2.7-6.5)                            | 4.5%<br>(0.62-9.6%)                  | 4.7%<br>(0.13-11%)                  | 390<br>(10-900)        | 1500<br>(210-3300)         |
| Germany  | 1990 | Female | All Ages | 90%<br>(88-92%)                | 9.6%<br>(8-12%)          | 3.6<br>(3.2-4)                              | 6.8%<br>(4.4-9.6%)                   | 8.1%<br>(3.1-14%)                   | 40000<br>(15000-67000) | 880000<br>(570000-1200000) |
| Germany  | 1990 | Female | 15 to 19 | 90%<br>(84-95%)                | 9.6%<br>(5.1-16%)        | 2.8<br>(2-3.8)                              | 3.8%<br>(2.2-5.3%)                   | 12%<br>(6.1-19%)                    | 86<br>(42-130)         | 9000<br>(5400-13000)       |
| Germany  | 1990 | Female | 20 to 24 | 93%<br>(89-96%)                | 6.6%<br>(3.9-11%)        | 3.1<br>(2-4.4)                              | 4.5%<br>(3.1-6.1%)                   | 12%<br>(6.2-17%)                    | 140<br>(74-210)        | 18000<br>(12000-25000)     |
| Germany  | 1990 | Female | 25 to 29 | 95%<br>(91-97%)                | 5.4%<br>(3.2-8.9%)       | 2.9<br>(2-3.8)                              | 3.9%<br>(2.7-5.2%)                   | 11%<br>(6.5-16%)                    | 160<br>(94-230)        | 18000<br>(13000-25000)     |
| Germany  | 1990 | Female | 30 to 34 | 95%<br>(92-97%)                | 4.7%<br>(2.5-8.1%)       | 3.1<br>(2.3-4.2)                            | 4.6%<br>(3.3-6.1%)                   | 14%<br>(9.8-18%)                    | 270<br>(190-350)       | 21000<br>(15000-28000)     |
| Germany  | 1990 | Female | 35 to 39 | 96%<br>(93-98%)                | 4.4%<br>(2.4-7.2%)       | 3.9<br>(2.7-5.3)                            | 6.5%<br>(4.8-8.3%)                   | 18%<br>(14-23%)                     | 500<br>(370-630)       | 32000<br>(24000-41000)     |
| Germany  | 1990 | Female | 40 to 44 | 95%<br>(93-97%)                | 4.6%<br>(2.7-7.3%)       | 4.5<br>(3.3-5.9)                            | 8.1%<br>(6.2-10%)                    | 20%<br>(16-24%)                     | 730<br>(580-890)       | 40000<br>(32000-50000)     |
| Germany  | 1990 | Female | 45 to 49 | 95%<br>(92-97%)                | 5.3%<br>(3.2-8.4%)       | 5<br>(3.6-6.6)                              | 9.3%<br>(7.1-12%)                    | 20%<br>(16-24%)                     | 1300<br>(990-1500)     | 60000<br>(47000-73000)     |
| Germany  | 1990 | Female | 50 to 54 | 94%<br>(91-96%)                | 5.9%<br>(3.9-8.8%)       | 5.3<br>(4-6.8)                              | 10%<br>(7.5-13%)                     | 19%<br>(15-23%)                     | 2000<br>(1600-2500)    | 83000<br>(64000-100000)    |
| Germany  | 1990 | Female | 55 to 59 | 94%<br>(91-96%)                | 6.2%<br>(4.1-9.4%)       | 5.7<br>(4.4-7.3)                            | 10%<br>(7.4-14%)                     | 17%<br>(13-23%)                     | 2300<br>(1700-3000)    | 80000<br>(58000-110000)    |
| Germany  | 1990 | Female | 60 to 64 | 92%<br>(88-94%)                | 8.4%<br>(5.6-12%)        | 5.6<br>(4.2-7.4)                            | 9.8%<br>(6.2-14%)                    | 15%<br>(9.4-21%)                    | 3100<br>(1900-4400)    | 94000<br>(57000-130000)    |
| Germany  | 1990 | Female | 65 to 69 | 88%<br>(83-92%)                | 12%<br>(7.9-17%)         | 5<br>(4-6.3)                                | 8.6%<br>(5-13%)                      | 12%<br>(6.8-17%)                    | 4300<br>(2400-6300)    | 110000<br>(63000-160000)   |

| Location | Year | Sex    | Age      | Prevalence of current drinkers | Prevalence of abstainers | Population average of standard drinks daily | Percent of total attributable deaths | Percent of total attributable DALYs | Attributable deaths    | Attributable DALYs           |
|----------|------|--------|----------|--------------------------------|--------------------------|---------------------------------------------|--------------------------------------|-------------------------------------|------------------------|------------------------------|
| Germany  | 1990 | Female | 70 to 74 | 85%<br>(79-90%)                | 15%<br>(10-21%)          | 4.5<br>(3.3-6)                              | 7.5%<br>(3-12%)                      | 9.7%<br>(3.6-16%)                   | 3700<br>(1400-6300)    | 74000<br>(29000-130000)      |
| Germany  | 1990 | Female | 75 to 79 | 83%<br>(74-89%)                | 17%<br>(11-26%)          | 4.2<br>(2.9-5.7)                            | 6.3%<br>(0.95-12%)                   | 7.5%<br>(0.84-15%)                  | 6500<br>(720-13000)    | 100000<br>(15000-200000)     |
| Germany  | 1990 | Female | 80 to 84 | 81%<br>(71-88%)                | 19%<br>(12-29%)          | 4<br>(3-5.3)                                | 5.6%<br>(0.68-11%)                   | 6.3%<br>(0.29-13%)                  | 7200<br>(330-15000)    | 83000<br>(10000-170000)      |
| Germany  | 1990 | Female | 85 to 89 | 80%<br>(69-87%)                | 20%<br>(13-31%)          | 3.9<br>(2.8-5.2)                            | 4.8%<br>(-0.3-11%)                   | 5.3%<br>(-0.89-12%)                 | 5000<br>(-840-12000)   | 41000<br>(-2600-91000)       |
| Germany  | 1990 | Female | 90 to 94 | 79%<br>(69-87%)                | 21%<br>(13-31%)          | 3.8<br>(2.6-5.4)                            | 4.1%<br>(-1.2-11%)                   | 4.4%<br>(-2-12%)                    | 2000<br>(-920-5400)    | 11000<br>(-3400-29000)       |
| Germany  | 1990 | Female | 95 plus  | 79%<br>(66-89%)                | 21%<br>(11-34%)          | 3.8<br>(2.2-5.7)                            | 3.9%<br>(-2.5-12%)                   | 4.1%<br>(-3.4-14%)                  | 500<br>(-420-1700)     | 1900<br>(-1200-5800)         |
| Germany  | 1990 | Male   | All Ages | 94%<br>(92-96%)                | 6%<br>(4.5-7.8%)         | 5<br>(4.4-5.6)                              | 15%<br>(12-17%)                      | 16%<br>(12-20%)                     | 67000<br>(50000-85000) | 1900000<br>(1600000-2200000) |
| Germany  | 1990 | Male   | 15 to 19 | 90%<br>(83-95%)                | 10%<br>(5.4-17%)         | 3.2<br>(2.2-4.2)                            | 8.8%<br>(5.5-12%)                    | 16%<br>(8.1-23%)                    | 280<br>(150-410)       | 26000<br>(16000-36000)       |
| Germany  | 1990 | Male   | 20 to 24 | 94%<br>(89-97%)                | 6.2%<br>(3.5-11%)        | 4.5<br>(3.2-5.9)                            | 15%<br>(11-19%)                      | 21%<br>(13-29%)                     | 740<br>(440-1000)      | 73000<br>(50000-97000)       |
| Germany  | 1990 | Male   | 25 to 29 | 96%<br>(92-97%)                | 4.4%<br>(2.5-7.5%)       | 4.6<br>(3.4-6.1)                            | 14%<br>(11-18%)                      | 21%<br>(14-28%)                     | 840<br>(550-1100)      | 80000<br>(60000-100000)      |
| Germany  | 1990 | Male   | 30 to 34 | 97%<br>(94-98%)                | 3.3%<br>(1.7-6.1%)       | 4.7<br>(3.4-6.1)                            | 14%<br>(11-18%)                      | 22%<br>(16-29%)                     | 990<br>(720-1300)      | 79000<br>(59000-98000)       |
| Germany  | 1990 | Male   | 35 to 39 | 97%<br>(95-99%)                | 2.7%<br>(1.4-4.8%)       | 4.5<br>(3.2-5.9)                            | 15%<br>(11-18%)                      | 23%<br>(17-28%)                     | 1300<br>(960-1600)     | 85000<br>(66000-100000)      |
| Germany  | 1990 | Male   | 40 to 44 | 98%<br>(96-99%)                | 2.3%<br>(1.2-4.3%)       | 5<br>(3.7-6.4)                              | 16%<br>(12-19%)                      | 24%<br>(18-29%)                     | 1700<br>(1300-2100)    | 94000<br>(72000-110000)      |
| Germany  | 1990 | Male   | 45 to 49 | 98%<br>(96-99%)                | 2.2%<br>(1-4.2%)         | 6.3<br>(4.6-8)                              | 18%<br>(14-22%)                      | 26%<br>(20-31%)                     | 3200<br>(2400-4000)    | 150000<br>(120000-180000)    |
| Germany  | 1990 | Male   | 50 to 54 | 98%<br>(96-99%)                | 2.4%<br>(1.3-4.3%)       | 7.8<br>(6.2-9.5)                            | 20%<br>(16-23%)                      | 26%<br>(21-30%)                     | 6000<br>(4800-7200)    | 240000<br>(190000-280000)    |
| Germany  | 1990 | Male   | 55 to 59 | 97%<br>(95-98%)                | 3%<br>(1.7-5.3%)         | 9.6<br>(7.7-12)                             | 20%<br>(16-24%)                      | 25%<br>(20-30%)                     | 7200<br>(5800-8700)    | 250000<br>(200000-290000)    |
| Germany  | 1990 | Male   | 60 to 64 | 96%<br>(94-98%)                | 3.8%<br>(2.1-6.2%)       | 9.8<br>(7.7-12)                             | 18%<br>(14-23%)                      | 22%<br>(17-27%)                     | 8600<br>(6600-11000)   | 250000<br>(190000-310000)    |
| Germany  | 1990 | Male   | 65 to 69 | 95%<br>(92-98%)                | 4.7%<br>(2.5-7.8%)       | 8.4<br>(6.8-10)                             | 16%<br>(12-20%)                      | 19%<br>(13-23%)                     | 8300<br>(6000-10000)   | 200000<br>(150000-250000)    |
| Germany  | 1990 | Male   | 70 to 74 | 94%<br>(91-97%)                | 5.6%<br>(3.4-8.9%)       | 7.1<br>(5.6-8.8)                            | 13%<br>(8.6-18%)                     | 15%<br>(9.4-21%)                    | 5900<br>(3700-8100)    | 120000<br>(75000-160000)     |
| Germany  | 1990 | Male   | 75 to 79 | 93%<br>(88-97%)                | 6.6%<br>(3.3-12%)        | 6.3<br>(4.7-8)                              | 11%<br>(5.5-17%)                     | 12%<br>(5.7-18%)                    | 8600<br>(3900-13000)   | 130000<br>(63000-190000)     |
| Germany  | 1990 | Male   | 80 to 84 | 92%<br>(85-96%)                | 8.1%<br>(4.3-15%)        | 5.9<br>(4.5-7.4)                            | 10%<br>(4.8-16%)                     | 11%<br>(4.9-17%)                    | 8000<br>(3500-12000)   | 89000<br>(42000-130000)      |

| Location | Year | Sex    | Age      | Prevalence of current drinkers | Prevalence of abstainers | Population average of standard drinks daily | Percent of total attributable deaths | Percent of total attributable DALYs | Attributable deaths    | Attributable DALYs         |
|----------|------|--------|----------|--------------------------------|--------------------------|---------------------------------------------|--------------------------------------|-------------------------------------|------------------------|----------------------------|
| Germany  | 1990 | Male   | 85 to 89 | 90%<br>(84-94%)                | 10%<br>(5.8-16%)         | 5.5<br>(4.1-7.1)                            | 9.1%<br>(3.5-14%)                    | 9.8%<br>(3.4-16%)                   | 4400<br>(1500-7100)    | 35000<br>(14000-55000)     |
| Germany  | 1990 | Male   | 90 to 94 | 89%<br>(82-94%)                | 11%<br>(6.1-18%)         | 5.3<br>(3.6-7.2)                            | 7.6%<br>(1.3-14%)                    | 8.2%<br>(0.96-15%)                  | 1200<br>(140-2200)     | 6600<br>(1200-12000)       |
| Germany  | 1990 | Male   | 95 plus  | 88%<br>(80-95%)                | 12%<br>(5.3-20%)         | 5<br>(2.9-7.3)                              | 6.7%<br>(-0.31-14%)                  | 7.1%<br>(-1.1-15%)                  | 210<br>(-32-460)       | 800<br>(-37-1700)          |
| Germany  | 1995 | Female | All Ages | 91%<br>(90-93%)                | 8.6%<br>(7.2-10%)        | 3.3<br>(3-3.7)                              | 6%<br>(3.8-8.4%)                     | 6.5%<br>(2.2-11%)                   | 31000<br>(10000-54000) | 740000<br>(470000-1000000) |
| Germany  | 1995 | Female | 15 to 19 | 92%<br>(87-96%)                | 8.1%<br>(4.4-13%)        | 2.6<br>(1.8-3.6)                            | 3.7%<br>(2.3-5.2%)                   | 12%<br>(5.7-18%)                    | 78<br>(37-120)         | 8600<br>(5300-12000)       |
| Germany  | 1995 | Female | 20 to 24 | 95%<br>(91-97%)                | 5.5%<br>(3.4-8.8%)       | 2.9<br>(1.9-4.2)                            | 4.4%<br>(3.1-5.8%)                   | 12%<br>(6.3-17%)                    | 96<br>(51-140)         | 13000<br>(8900-18000)      |
| Germany  | 1995 | Female | 25 to 29 | 95%<br>(93-97%)                | 4.5%<br>(2.8-6.9%)       | 2.7<br>(1.9-3.6)                            | 3.6%<br>(2.6-4.7%)                   | 11%<br>(6.2-15%)                    | 130<br>(77-180)        | 16000<br>(11000-22000)     |
| Germany  | 1995 | Female | 30 to 34 | 96%<br>(94-98%)                | 3.9%<br>(2.3-6.3%)       | 2.9<br>(2.1-3.8)                            | 4%<br>(2.9-5.2%)                     | 13%<br>(9.3-17%)                    | 250<br>(170-330)       | 21000<br>(16000-28000)     |
| Germany  | 1995 | Female | 35 to 39 | 96%<br>(94-98%)                | 3.7%<br>(2.2-5.8%)       | 3.6<br>(2.5-4.9)                            | 5.8%<br>(4.3-7.4%)                   | 18%<br>(13-22%)                     | 480<br>(360-600)       | 31000<br>(24000-39000)     |
| Germany  | 1995 | Female | 40 to 44 | 96%<br>(94-98%)                | 3.9%<br>(2.5-6.2%)       | 4.2<br>(3.1-5.5)                            | 7.7%<br>(5.8-9.6%)                   | 20%<br>(16-23%)                     | 810<br>(650-980)       | 44000<br>(35000-54000)     |
| Germany  | 1995 | Female | 45 to 49 | 95%<br>(93-97%)                | 4.6%<br>(2.9-7%)         | 4.7<br>(3.4-6)                              | 8.8%<br>(6.8-11%)                    | 20%<br>(16-23%)                     | 1100<br>(860-1300)     | 50000<br>(40000-62000)     |
| Germany  | 1995 | Female | 50 to 54 | 95%<br>(93-97%)                | 5.1%<br>(3.4-7.2%)       | 5<br>(3.8-6.3)                              | 9.7%<br>(7.4-12%)                    | 19%<br>(16-23%)                     | 1700<br>(1400-2000)    | 69000<br>(55000-85000)     |
| Germany  | 1995 | Female | 55 to 59 | 95%<br>(92-96%)                | 5.4%<br>(3.7-7.7%)       | 5.3<br>(4.1-6.7)                            | 9.7%<br>(7.2-12%)                    | 17%<br>(14-21%)                     | 2500<br>(1900-3100)    | 89000<br>(68000-110000)    |
| Germany  | 1995 | Female | 60 to 64 | 93%<br>(90-95%)                | 7.5%<br>(5.2-10%)        | 5.2<br>(3.9-6.8)                            | 8.9%<br>(5.7-12%)                    | 14%<br>(9.4-19%)                    | 2500<br>(1700-3600)    | 77000<br>(51000-110000)    |
| Germany  | 1995 | Female | 65 to 69 | 89%<br>(84-92%)                | 11%<br>(7.6-16%)         | 4.7<br>(3.7-5.8)                            | 7.4%<br>(4.2-11%)                    | 11%<br>(6.1-15%)                    | 3100<br>(1800-4500)    | 79000<br>(45000-110000)    |
| Germany  | 1995 | Female | 70 to 74 | 85%<br>(79-90%)                | 15%<br>(10-21%)          | 4.2<br>(3.1-5.5)                            | 6.2%<br>(2.2-10%)                    | 8.2%<br>(2.8-14%)                   | 4100<br>(1400-7000)    | 84000<br>(30000-140000)    |
| Germany  | 1995 | Female | 75 to 79 | 83%<br>(74-89%)                | 17%<br>(11-26%)          | 3.9<br>(2.7-5.2)                            | 4.9%<br>(0.22-10%)                   | 5.9%<br>(-0.048-13%)                | 3100<br>(-25-6600)     | 50000<br>(2300-100000)     |
| Germany  | 1995 | Female | 80 to 84 | 81%<br>(71-89%)                | 19%<br>(11-29%)          | 3.7<br>(2.7-4.9)                            | 4.2%<br>(-0.22-9.2%)                 | 4.8%<br>(-0.76-11%)                 | 5000<br>(-790-11000)   | 59000<br>(-2900-130000)    |
| Germany  | 1995 | Female | 85 to 89 | 80%<br>(69-87%)                | 20%<br>(13-31%)          | 3.6<br>(2.6-4.8)                            | 3.5%<br>(-0.95-8.6%)                 | 3.8%<br>(-1.7-10%)                  | 4000<br>(-1800-11000)  | 34000<br>(-9400-85000)     |
| Germany  | 1995 | Female | 90 to 94 | 79%<br>(68-87%)                | 21%<br>(13-32%)          | 3.5<br>(2.4-5)                              | 2.9%<br>(-1.8-8.8%)                  | 3%<br>(-2.8-10%)                    | 1700<br>(-1500-5700)   | 10000<br>(-6200-30000)     |
| Germany  | 1995 | Female | 95 plus  | 79%<br>(66-90%)                | 21%<br>(10-34%)          | 3.5<br>(2.1-5.4)                            | 2.7%<br>(-3-10%)                     | 2.7%<br>(-4.1-11%)                  | 460<br>(-690-1900)     | 1900<br>(-2000-6800)       |

| Location | Year | Sex    | Age      | Prevalence of current drinkers | Prevalence of abstainers | Population average of standard drinks daily | Percent of total attributable deaths | Percent of total attributable DALYs | Attributable deaths    | Attributable DALYs           |
|----------|------|--------|----------|--------------------------------|--------------------------|---------------------------------------------|--------------------------------------|-------------------------------------|------------------------|------------------------------|
| Germany  | 1995 | Male   | All Ages | 95%<br>(94-96%)                | 4.7%<br>(3.6-6%)         | 4.7<br>(4.2-5.2)                            | 14%<br>(12-17%)                      | 15%<br>(11-19%)                     | 62000<br>(46000-77000) | 1800000<br>(1500000-2100000) |
| Germany  | 1995 | Male   | 15 to 19 | 92%<br>(88-95%)                | 7.9%<br>(4.6-12%)        | 3<br>(2.1-4)                                | 8.7%<br>(5.4-12%)                    | 15%<br>(7.3-22%)                    | 250<br>(120-370)       | 24000<br>(15000-33000)       |
| Germany  | 1995 | Male   | 20 to 24 | 95%<br>(93-97%)                | 4.7%<br>(2.8-7.5%)       | 4.1<br>(3-5.5)                              | 15%<br>(11-19%)                      | 20%<br>(12-28%)                     | 510<br>(290-710)       | 55000<br>(38000-72000)       |
| Germany  | 1995 | Male   | 25 to 29 | 97%<br>(95-98%)                | 3.3%<br>(2.1-5.2%)       | 4.3<br>(3.2-5.6)                            | 14%<br>(11-17%)                      | 20%<br>(13-27%)                     | 680<br>(430-930)       | 72000<br>(53000-92000)       |
| Germany  | 1995 | Male   | 30 to 34 | 98%<br>(96-99%)                | 2.4%<br>(1.3-3.9%)       | 4.3<br>(3.2-5.7)                            | 13%<br>(10-16%)                      | 21%<br>(15-27%)                     | 990<br>(710-1300)      | 81000<br>(61000-100000)      |
| Germany  | 1995 | Male   | 35 to 39 | 98%<br>(97-99%)                | 2%<br>(1.2-3.4%)         | 4.1<br>(3-5.5)                              | 14%<br>(11-18%)                      | 23%<br>(17-28%)                     | 1400<br>(1100-1800)    | 92000<br>(72000-110000)      |
| Germany  | 1995 | Male   | 40 to 44 | 98%<br>(97-99%)                | 1.8%<br>(0.95-3.1%)      | 4.7<br>(3.4-6)                              | 16%<br>(13-19%)                      | 24%<br>(19-29%)                     | 2000<br>(1600-2500)    | 110000<br>(91000-140000)     |
| Germany  | 1995 | Male   | 45 to 49 | 98%<br>(97-99%)                | 1.6%<br>(0.83-2.8%)      | 5.8<br>(4.3-7.6)                            | 18%<br>(14-22%)                      | 26%<br>(20-31%)                     | 2800<br>(2100-3400)    | 130000<br>(100000-160000)    |
| Germany  | 1995 | Male   | 50 to 54 | 98%<br>(97-99%)                | 1.8%<br>(1-2.9%)         | 7.3<br>(5.7-9)                              | 19%<br>(16-23%)                      | 26%<br>(21-30%)                     | 4800<br>(3900-5700)    | 190000<br>(160000-230000)    |
| Germany  | 1995 | Male   | 55 to 59 | 98%<br>(96-99%)                | 2.3%<br>(1.3-3.6%)       | 8.9<br>(7.2-11)                             | 20%<br>(17-23%)                      | 26%<br>(21-30%)                     | 8200<br>(6800-9600)    | 280000<br>(240000-330000)    |
| Germany  | 1995 | Male   | 60 to 64 | 97%<br>(96-98%)                | 2.9%<br>(1.8-4.4%)       | 9.1<br>(7.2-11)                             | 18%<br>(14-22%)                      | 22%<br>(17-27%)                     | 8500<br>(6700-10000)   | 250000<br>(200000-300000)    |
| Germany  | 1995 | Male   | 65 to 69 | 96%<br>(94-98%)                | 4.1%<br>(2.4-6.3%)       | 7.8<br>(6.4-9.4)                            | 15%<br>(11-19%)                      | 18%<br>(13-22%)                     | 8900<br>(6600-11000)   | 220000<br>(160000-270000)    |
| Germany  | 1995 | Male   | 70 to 74 | 94%<br>(91-97%)                | 5.5%<br>(3.4-8.5%)       | 6.5<br>(5-8.2)                              | 12%<br>(7.1-16%)                     | 14%<br>(7.9-19%)                    | 7200<br>(4100-9900)    | 140000<br>(83000-190000)     |
| Germany  | 1995 | Male   | 75 to 79 | 93%<br>(89-97%)                | 6.5%<br>(3.4-11%)        | 5.7<br>(4.2-7.4)                            | 9.5%<br>(3.7-14%)                    | 10%<br>(3.7-16%)                    | 4400<br>(1600-6900)    | 68000<br>(27000-110000)      |
| Germany  | 1995 | Male   | 80 to 84 | 92%<br>(86-96%)                | 8%<br>(4.3-14%)          | 5.4<br>(4.1-6.7)                            | 8.6%<br>(3.3-13%)                    | 9.3%<br>(3.2-15%)                   | 5900<br>(2000-9500)    | 67000<br>(26000-100000)      |
| Germany  | 1995 | Male   | 85 to 89 | 90%<br>(83-94%)                | 9.9%<br>(5.6-17%)        | 5<br>(3.8-6.6)                              | 7.3%<br>(2.3-12%)                    | 7.8%<br>(2-14%)                     | 3700<br>(950-6300)     | 30000<br>(9500-49000)        |
| Germany  | 1995 | Male   | 90 to 94 | 89%<br>(82-94%)                | 11%<br>(5.9-18%)         | 4.8<br>(3.3-6.6)                            | 6.1%<br>(0.32-12%)                   | 6.4%<br>(-0.34-13%)                 | 1200<br>(-64-2500)     | 6900<br>(360-13000)          |
| Germany  | 1995 | Male   | 95 plus  | 88%<br>(80-95%)                | 12%<br>(5.3-20%)         | 4.6<br>(2.7-6.8)                            | 5.3%<br>(-1.2-12%)                   | 5.5%<br>(-1.9-13%)                  | 210<br>(-75-510)       | 800<br>(-1800-1800)          |
| Germany  | 2000 | Female | All Ages | 90%<br>(89-92%)                | 9.5%<br>(7.9-11%)        | 3.1<br>(2.8-3.5)                            | 5.2%<br>(3.3-7.3%)                   | 5.5%<br>(1.5-10%)                   | 25000<br>(7000-46000)  | 620000<br>(380000-870000)    |
| Germany  | 2000 | Female | 15 to 19 | 90%<br>(83-95%)                | 10%<br>(5.4-17%)         | 2.3<br>(1.6-3.3)                            | 3.2%<br>(1.9-4.5%)                   | 11%<br>(5.2-17%)                    | 66<br>(33-100)         | 7600<br>(4700-11000)         |
| Germany  | 2000 | Female | 20 to 24 | 93%<br>(89-96%)                | 6.7%<br>(4.1-11%)        | 2.7<br>(1.7-3.9)                            | 4.1%<br>(3-5.4%)                     | 11%<br>(5.8-17%)                    | 75<br>(40-110)         | 11000<br>(7500-15000)        |



| Location | Year | Sex    | Age      | Prevalence of current drinkers | Prevalence of abstainers | Population average of standard drinks daily | Percent of total attributable deaths | Percent of total attributable DALYs | Attributable deaths    | Attributable DALYs        |
|----------|------|--------|----------|--------------------------------|--------------------------|---------------------------------------------|--------------------------------------|-------------------------------------|------------------------|---------------------------|
| Germany  | 2000 | Female | 25 to 29 | 95%<br>(92-97%)                | 5.1%<br>(3.1-8.2%)       | 2.5<br>(1.8-3.4)                            | 3.4%<br>(2.4-4.4%)                   | 10%<br>(6-15%)                      | 81<br>(46-120)         | 11000<br>(7800-15000)     |
| Germany  | 2000 | Female | 30 to 34 | 96%<br>(93-98%)                | 4.3%<br>(2.4-7%)         | 2.7<br>(2-3.6)                              | 3.4%<br>(2.5-4.5%)                   | 12%<br>(8.6-16%)                    | 170<br>(120-230)       | 16000<br>(12000-21000)    |
| Germany  | 2000 | Female | 35 to 39 | 96%<br>(93-98%)                | 4.1%<br>(2.3-6.7%)       | 3.4<br>(2.4-4.6)                            | 5%<br>(3.7-6.4%)                     | 16%<br>(12-20%)                     | 420<br>(310-520)       | 29000<br>(21000-36000)    |
| Germany  | 2000 | Female | 40 to 44 | 96%<br>(93-97%)                | 4.4%<br>(2.7-6.7%)       | 3.9<br>(2.9-5.1)                            | 6.7%<br>(5.1-8.4%)                   | 18%<br>(15-22%)                     | 710<br>(570-860)       | 40000<br>(32000-49000)    |
| Germany  | 2000 | Female | 45 to 49 | 95%<br>(92-97%)                | 5.1%<br>(3.1-7.9%)       | 4.3<br>(3.2-5.6)                            | 8%<br>(6.1-10%)                      | 18%<br>(15-22%)                     | 1100<br>(860-1300)     | 51000<br>(40000-62000)    |
| Germany  | 2000 | Female | 50 to 54 | 94%<br>(92-96%)                | 5.6%<br>(3.7-8.1%)       | 4.7<br>(3.5-6)                              | 8.9%<br>(6.7-11%)                    | 18%<br>(15-21%)                     | 1300<br>(1100-1600)    | 55000<br>(43000-68000)    |
| Germany  | 2000 | Female | 55 to 59 | 94%<br>(92-96%)                | 5.9%<br>(3.9-8.5%)       | 4.9<br>(3.8-6.2)                            | 8.9%<br>(6.7-11%)                    | 16%<br>(13-20%)                     | 1900<br>(1500-2300)    | 68000<br>(52000-87000)    |
| Germany  | 2000 | Female | 60 to 64 | 92%<br>(89-94%)                | 8.1%<br>(5.6-11%)        | 4.8<br>(3.6-6.2)                            | 8%<br>(5.4-11%)                      | 13%<br>(9.4-17%)                    | 2600<br>(1900-3400)    | 80000<br>(55000-110000)   |
| Germany  | 2000 | Female | 65 to 69 | 88%<br>(83-92%)                | 12%<br>(7.8-17%)         | 4.3<br>(3.4-5.4)                            | 6.6%<br>(3.9-9.4%)                   | 9.9%<br>(6.1-14%)                   | 2500<br>(1500-3400)    | 63000<br>(37000-88000)    |
| Germany  | 2000 | Female | 70 to 74 | 84%<br>(78-89%)                | 16%<br>(11-22%)          | 3.9<br>(2.8-5.1)                            | 5.4%<br>(2-8.8%)                     | 7.3%<br>(2.8-12%)                   | 3000<br>(1100-4900)    | 62000<br>(22000-100000)   |
| Germany  | 2000 | Female | 75 to 79 | 82%<br>(73-89%)                | 18%<br>(11-27%)          | 3.6<br>(2.5-4.9)                            | 4.2%<br>(0.068-8.5%)                 | 5.1%<br>(-0.15-11%)                 | 3500<br>(-100-7400)    | 57000<br>(940-120000)     |
| Germany  | 2000 | Female | 80 to 84 | 80%<br>(69-88%)                | 20%<br>(12-31%)          | 3.4<br>(2.5-4.5)                            | 3.5%<br>(-0.41-7.6%)                 | 3.9%<br>(-0.86-9.2%)                | 2600<br>(-570-6100)    | 32000<br>(-4000-70000)    |
| Germany  | 2000 | Female | 85 to 89 | 79%<br>(68-86%)                | 21%<br>(14-32%)          | 3.3<br>(2.4-4.5)                            | 2.8%<br>(-1.2-7.3%)                  | 2.9%<br>(-1.9-8.4%)                 | 3100<br>(-2000-8800)   | 27000<br>(-12000-72000)   |
| Germany  | 2000 | Female | 90 to 94 | 79%<br>(68-87%)                | 21%<br>(13-32%)          | 3.3<br>(2.2-4.6)                            | 2.2%<br>(-2.2-7.3%)                  | 2.1%<br>(-3.3-8.4%)                 | 1500<br>(-2200-5900)   | 9500<br>(-9400-32000)     |
| Germany  | 2000 | Female | 95 plus  | 79%<br>(65-89%)                | 21%<br>(11-35%)          | 3.2<br>(1.9-4.9)                            | 1.8%<br>(-3.5-8.2%)                  | 1.6%<br>(-4.6-9.2%)                 | 370<br>(-1100-2100)    | 1700<br>(-3300-7700)      |
| Germany  | 2000 | Male   | All Ages | 95%<br>(93-96%)                | 5.3%<br>(4-6.6%)         | 4.4<br>(3.9-4.9)                            | 13%<br>(11-15%)                      | 14%<br>(10-17%)                     | 54000<br>(40000-69000) | 160000<br>(130000-190000) |
| Germany  | 2000 | Male   | 15 to 19 | 90%<br>(84-95%)                | 10%<br>(5.5-16%)         | 2.7<br>(1.8-3.7)                            | 7.7%<br>(4.9-11%)                    | 14%<br>(6.7-21%)                    | 200<br>(98-300)        | 21000<br>(13000-29000)    |
| Germany  | 2000 | Male   | 20 to 24 | 94%<br>(90-97%)                | 5.9%<br>(3.4-9.6%)       | 3.8<br>(2.7-5.2)                            | 14%<br>(10-18%)                      | 19%<br>(10-27%)                     | 390<br>(220-560)       | 44000<br>(31000-58000)    |
| Germany  | 2000 | Male   | 25 to 29 | 96%<br>(94-98%)                | 3.9%<br>(2.4-6.1%)       | 4<br>(2.9-5.3)                              | 13%<br>(9.9-16%)                     | 20%<br>(12-27%)                     | 410<br>(240-560)       | 46000<br>(33000-59000)    |
| Germany  | 2000 | Male   | 30 to 34 | 97%<br>(95-98%)                | 2.7%<br>(1.5-4.6%)       | 4<br>(2.9-5.3)                              | 12%<br>(9.2-15%)                     | 21%<br>(14-27%)                     | 680<br>(470-890)       | 61000<br>(45000-76000)    |
| Germany  | 2000 | Male   | 35 to 39 | 98%<br>(96-99%)                | 2.3%<br>(1.3-3.9%)       | 3.8<br>(2.7-5.1)                            | 13%<br>(10-16%)                      | 22%<br>(17-27%)                     | 1200<br>(860-1500)     | 82000<br>(63000-100000)   |

| Location | Year | Sex    | Age      | Prevalence of current drinkers | Prevalence of abstainers | Population average of standard drinks daily | Percent of total attributable deaths | Percent of total attributable DALYs | Attributable deaths   | Attributable DALYs        |
|----------|------|--------|----------|--------------------------------|--------------------------|---------------------------------------------|--------------------------------------|-------------------------------------|-----------------------|---------------------------|
| Germany  | 2000 | Male   | 40 to 44 | 98%<br>(96-99%)                | 2%<br>(1.1-3.6%)         | 4.3<br>(3.2-5.5)                            | 15%<br>(12-18%)                      | 24%<br>(19-29%)                     | 1900<br>(1500-2300)   | 110000<br>(85000-130000)  |
| Germany  | 2000 | Male   | 45 to 49 | 98%<br>(97-99%)                | 1.8%<br>(0.92-3.3%)      | 5.4<br>(4.1-7)                              | 17%<br>(13-21%)                      | 25%<br>(20-30%)                     | 2800<br>(2200-3500)   | 130000<br>(110000-160000) |
| Germany  | 2000 | Male   | 50 to 54 | 98%<br>(97-99%)                | 2%<br>(1.1-3.4%)         | 6.7<br>(5.3-8.3)                            | 18%<br>(15-21%)                      | 25%<br>(20-30%)                     | 3700<br>(3000-4400)   | 150000<br>(120000-180000) |
| Germany  | 2000 | Male   | 55 to 59 | 97%<br>(96-99%)                | 2.5%<br>(1.5-4.2%)       | 8.2<br>(6.7-9.9)                            | 19%<br>(16-22%)                      | 25%<br>(21-29%)                     | 6000<br>(5000-7000)   | 210000<br>(180000-240000) |
| Germany  | 2000 | Male   | 60 to 64 | 97%<br>(95-98%)                | 3.2%<br>(2-5.1%)         | 8.4<br>(6.7-10)                             | 17%<br>(14-21%)                      | 22%<br>(18-26%)                     | 8900<br>(7100-11000)  | 260000<br>(210000-310000) |
| Germany  | 2000 | Male   | 65 to 69 | 96%<br>(93-98%)                | 4.2%<br>(2.3-6.8%)       | 7.2<br>(5.9-8.7)                            | 14%<br>(11-18%)                      | 17%<br>(13-22%)                     | 8000<br>(6000-10000)  | 200000<br>(150000-250000) |
| Germany  | 2000 | Male   | 70 to 74 | 95%<br>(92-97%)                | 5.2%<br>(3.3-8.1%)       | 6<br>(4.7-7.6)                              | 11%<br>(6.2-15%)                     | 12%<br>(7-18%)                      | 7300<br>(4100-10000)  | 140000<br>(84000-200000)  |
| Germany  | 2000 | Male   | 75 to 79 | 94%<br>(89-97%)                | 6.2%<br>(3.3-11%)        | 5.3<br>(4-6.9)                              | 8.3%<br>(3.2-13%)                    | 9.2%<br>(3.2-15%)                   | 5200<br>(1800-8600)   | 82000<br>(32000-130000)   |
| Germany  | 2000 | Male   | 80 to 84 | 92%<br>(86-96%)                | 7.9%<br>(4.3-14%)        | 5<br>(3.9-6.3)                              | 7.2%<br>(2.6-12%)                    | 7.8%<br>(2.4-13%)                   | 3200<br>(970-5300)    | 37000<br>(13000-60000)    |
| Germany  | 2000 | Male   | 85 to 89 | 90%<br>(85-94%)                | 9.8%<br>(5.8-15%)        | 4.7<br>(3.6-6)                              | 6.2%<br>(1.6-11%)                    | 6.5%<br>(1.2-12%)                   | 3000<br>(550-5500)    | 25000<br>(6300-44000)     |
| Germany  | 2000 | Male   | 90 to 94 | 89%<br>(83-94%)                | 11%<br>(6.1-17%)         | 4.5<br>(3.1-6.1)                            | 5%<br>(-0.16-11%)                    | 5.1%<br>(-0.83-12%)                 | 1100<br>(-180-2600)   | 6600<br>(-220-14000)      |
| Germany  | 2000 | Male   | 95 plus  | 88%<br>(80-95%)                | 12%<br>(5.3-20%)         | 4.3<br>(2.6-6.4)                            | 4.3%<br>(-1.7-11%)                   | 4.2%<br>(-2.7-12%)                  | 210<br>(-140-630)     | 860<br>(-330-2300)        |
| Germany  | 2005 | Female | All Ages | 90%<br>(89-92%)                | 9.6%<br>(8.1-11%)        | 3.1<br>(2.7-3.5)                            | 4.8%<br>(3.1-6.5%)                   | 4.9%<br>(1.5-8.5%)                  | 22000<br>(6600-38000) | 550000<br>(370000-750000) |
| Germany  | 2005 | Female | 15 to 19 | 90%<br>(83-94%)                | 10%<br>(5.6-17%)         | 2.2<br>(1.5-3.2)                            | 2.6%<br>(1.7-3.8%)                   | 10%<br>(5-16%)                      | 48<br>(24-75)         | 6300<br>(4000-9300)       |
| Germany  | 2005 | Female | 20 to 24 | 93%<br>(89-96%)                | 6.6%<br>(4-11%)          | 2.6<br>(1.6-3.8)                            | 3.7%<br>(2.7-5%)                     | 10%<br>(5.4-16%)                    | 60<br>(32-90)         | 10000<br>(7100-15000)     |
| Germany  | 2005 | Female | 25 to 29 | 95%<br>(92-97%)                | 5%<br>(3.1-7.6%)         | 2.4<br>(1.7-3.3)                            | 3.1%<br>(2.2-4%)                     | 9.6%<br>(5.5-14%)                   | 58<br>(33-85)         | 9200<br>(6400-13000)      |
| Germany  | 2005 | Female | 30 to 34 | 96%<br>(93-98%)                | 4.3%<br>(2.5-7%)         | 2.6<br>(1.9-3.6)                            | 3%<br>(2.2-4%)                       | 11%<br>(7.8-15%)                    | 100<br>(71-140)       | 11000<br>(7500-14000)     |
| Germany  | 2005 | Female | 35 to 39 | 96%<br>(94-98%)                | 4.2%<br>(2.4-6.4%)       | 3.2<br>(2.3-4.4)                            | 4.1%<br>(2.9-5.3%)                   | 15%<br>(11-19%)                     | 290<br>(220-370)      | 21000<br>(16000-27000)    |
| Germany  | 2005 | Female | 40 to 44 | 96%<br>(93-97%)                | 4.3%<br>(2.6-6.5%)       | 3.8<br>(2.8-4.9)                            | 5.6%<br>(4.2-7.2%)                   | 17%<br>(13-20%)                     | 620<br>(500-750)      | 36000<br>(28000-45000)    |
| Germany  | 2005 | Female | 45 to 49 | 95%<br>(93-97%)                | 4.9%<br>(3.2-7.2%)       | 4.2<br>(3.1-5.4)                            | 7.2%<br>(5.5-9.1%)                   | 17%<br>(14-21%)                     | 1000<br>(810-1200)    | 48000<br>(38000-60000)    |
| Germany  | 2005 | Female | 50 to 54 | 95%<br>(92-96%)                | 5.4%<br>(3.8-7.6%)       | 4.5<br>(3.4-5.7)                            | 8%<br>(6.2-10%)                      | 17%<br>(14-20%)                     | 1300<br>(1100-1600)   | 57000<br>(45000-70000)    |
| Germany  | 2005 | Female | 55 to 59 | 94%<br>(92-96%)                | 5.8%<br>(3.9-8.3%)       | 4.8<br>(3.6-6)                              | 8.3%<br>(6.3-11%)                    | 15%<br>(12-19%)                     | 1600<br>(1200-1900)   | 57000<br>(44000-71000)    |

| Location | Year | Sex    | Age      | Prevalence of current drinkers | Prevalence of abstainers | Population average of standard drinks daily | Percent of total attributable deaths | Percent of total attributable DALYs | Attributable deaths    | Attributable DALYs           |
|----------|------|--------|----------|--------------------------------|--------------------------|---------------------------------------------|--------------------------------------|-------------------------------------|------------------------|------------------------------|
| Germany  | 2005 | Female | 60 to 64 | 92%<br>(89-94%)                | 7.9%<br>(5.6-11%)        | 4.7<br>(3.5-6.1)                            | 7.6%<br>(5.3-10%)                    | 13%<br>(9.8-17%)                    | 2000<br>(1500-2700)    | 64000<br>(44000-84000)       |
| Germany  | 2005 | Female | 65 to 69 | 88%<br>(83-92%)                | 12%<br>(8.3-17%)         | 4.2<br>(3.3-5.2)                            | 6.2%<br>(4-8.6%)                     | 9.9%<br>(6.7-13%)                   | 2600<br>(1800-3600)    | 69000<br>(45000-93000)       |
| Germany  | 2005 | Female | 70 to 74 | 84%<br>(79-88%)                | 16%<br>(12-21%)          | 3.7<br>(2.7-4.8)                            | 4.9%<br>(2.2-7.8%)                   | 7%<br>(3.2-11%)                     | 2400<br>(1100-3900)    | 51000<br>(22000-81000)       |
| Germany  | 2005 | Female | 75 to 79 | 81%<br>(73-87%)                | 19%<br>(13-27%)          | 3.4<br>(2.4-4.5)                            | 3.8%<br>(0.59-7.4%)                  | 4.8%<br>(0.66-9.4%)                 | 2800<br>(380-5600)     | 46000<br>(7200-90000)        |
| Germany  | 2005 | Female | 80 to 84 | 79%<br>(68-87%)                | 21%<br>(13-32%)          | 3.2<br>(2.4-4.1)                            | 3.1%<br>(-0.12-6.6%)                 | 3.5%<br>(-0.51-7.8%)                | 3300<br>(-500-7300)    | 40000<br>(-1600-86000)       |
| Germany  | 2005 | Female | 85 to 89 | 78%<br>(67-86%)                | 22%<br>(14-33%)          | 3.1<br>(2.3-4.2)                            | 2.4%<br>(-1.2-6.1%)                  | 2.6%<br>(-1.8-7.1%)                 | 1900<br>(-1400-5200)   | 17000<br>(-8500-43000)       |
| Germany  | 2005 | Female | 90 to 94 | 77%<br>(66-86%)                | 23%<br>(14-34%)          | 3.1<br>(2.1-4.4)                            | 1.8%<br>(-2.2-6.6%)                  | 1.8%<br>(-3.1-7.5%)                 | 1400<br>(-2400-5800)   | 8900<br>(-11000-32000)       |
| Germany  | 2005 | Female | 95 plus  | 77%<br>(63-88%)                | 23%<br>(12-37%)          | 3<br>(1.8-4.7)                              | 1.5%<br>(-3.2-7.5%)                  | 1.4%<br>(-4.4-8.5%)                 | 440<br>(-1400-2800)    | 2000<br>(-4200-9900)         |
| Germany  | 2005 | Male   | All Ages | 95%<br>(94-96%)                | 5%<br>(3.8-6.2%)         | 4.3<br>(3.8-4.8)                            | 12%<br>(9.8-14%)                     | 13%<br>(9.2-16%)                    | 49000<br>(36000-64000) | 1400000<br>(1200000-1700000) |
| Germany  | 2005 | Male   | 15 to 19 | 90%<br>(85-94%)                | 9.7%<br>(5.7-15%)        | 2.6<br>(1.8-3.6)                            | 6.5%<br>(4.2-8.9%)                   | 13%<br>(6.5-20%)                    | 140<br>(71-220)        | 17000<br>(11000-23000)       |
| Germany  | 2005 | Male   | 20 to 24 | 94%<br>(91-97%)                | 5.5%<br>(3.3-9.1%)       | 3.6<br>(2.5-5.1)                            | 12%<br>(9-16%)                       | 18%<br>(10-26%)                     | 290<br>(160-420)       | 36000<br>(26000-48000)       |
| Germany  | 2005 | Male   | 25 to 29 | 96%<br>(94-98%)                | 3.6%<br>(2.2-5.8%)       | 3.8<br>(2.8-5.1)                            | 12%<br>(8.8-14%)                     | 19%<br>(11-26%)                     | 300<br>(170-410)       | 35000<br>(26000-46000)       |
| Germany  | 2005 | Male   | 30 to 34 | 97%<br>(96-99%)                | 2.6%<br>(1.5-4.3%)       | 3.8<br>(2.8-5.1)                            | 10%<br>(8.1-13%)                     | 19%<br>(13-26%)                     | 390<br>(250-520)       | 37000<br>(27000-47000)       |
| Germany  | 2005 | Male   | 35 to 39 | 98%<br>(96-99%)                | 2.2%<br>(1.3-3.5%)       | 3.7<br>(2.6-5)                              | 11%<br>(8.5-13%)                     | 20%<br>(15-26%)                     | 800<br>(570-1000)      | 59000<br>(46000-73000)       |
| Germany  | 2005 | Male   | 40 to 44 | 98%<br>(97-99%)                | 1.9%<br>(1-3.5%)         | 4.1<br>(3-5.3)                              | 13%<br>(10-16%)                      | 22%<br>(17-27%)                     | 1600<br>(1300-2000)    | 93000<br>(74000-110000)      |
| Germany  | 2005 | Male   | 45 to 49 | 98%<br>(97-99%)                | 1.8%<br>(0.89-3.3%)      | 5.1<br>(3.8-6.7)                            | 15%<br>(12-19%)                      | 24%<br>(18-29%)                     | 2600<br>(2000-3300)    | 130000<br>(100000-150000)    |
| Germany  | 2005 | Male   | 50 to 54 | 98%<br>(97-99%)                | 1.9%<br>(1.1-3.2%)       | 6.4<br>(5-8)                                | 17%<br>(14-20%)                      | 24%<br>(19-29%)                     | 3900<br>(3100-4600)    | 160000<br>(130000-190000)    |
| Germany  | 2005 | Male   | 55 to 59 | 98%<br>(96-99%)                | 2.4%<br>(1.4-3.9%)       | 7.9<br>(6.2-9.7)                            | 18%<br>(15-21%)                      | 24%<br>(20-28%)                     | 4800<br>(4000-5600)    | 170000<br>(140000-200000)    |
| Germany  | 2005 | Male   | 60 to 64 | 97%<br>(95-98%)                | 3.1%<br>(1.9-4.7%)       | 8<br>(6.2-10)                               | 16%<br>(13-20%)                      | 21%<br>(17-25%)                     | 6600<br>(5300-7900)    | 200000<br>(160000-240000)    |
| Germany  | 2005 | Male   | 65 to 69 | 96%<br>(94-98%)                | 4%<br>(2.4-6%)           | 6.9<br>(5.7-8.3)                            | 14%<br>(10-17%)                      | 17%<br>(13-21%)                     | 8500<br>(6500-11000)   | 210000<br>(160000-260000)    |
| Germany  | 2005 | Male   | 70 to 74 | 95%<br>(93-97%)                | 4.8%<br>(3.3-7%)         | 5.8<br>(4.6-7.2)                            | 10%<br>(6.4-14%)                     | 12%<br>(7.3-17%)                    | 6700<br>(4000-9400)    | 130000<br>(84000-190000)     |

| Location | Year | Sex    | Age      | Prevalence of current drinkers | Prevalence of abstainers | Population average of standard drinks daily | Percent of total attributable deaths | Percent of total attributable DALYs | Attributable deaths   | Attributable DALYs        |
|----------|------|--------|----------|--------------------------------|--------------------------|---------------------------------------------|--------------------------------------|-------------------------------------|-----------------------|---------------------------|
| Germany  | 2005 | Male   | 75 to 79 | 94%<br>(91-97%)                | 5.7%<br>(3.2-9.2%)       | 5.2<br>(3.8-6.6)                            | 7.7%<br>(3.3-12%)                    | 8.6%<br>(3.4-14%)                   | 5700<br>(2200-9200)   | 90000<br>(40000-140000)   |
| Germany  | 2005 | Male   | 80 to 84 | 93%<br>(88-96%)                | 7.4%<br>(4.3-12%)        | 4.8<br>(3.8-6.1)                            | 6.5%<br>(2.3-11%)                    | 7%<br>(2.1-12%)                     | 4100<br>(1300-6900)   | 48000<br>(17000-80000)    |
| Germany  | 2005 | Male   | 85 to 89 | 91%<br>(86-94%)                | 9.2%<br>(5.6-14%)        | 4.5<br>(3.4-5.7)                            | 5.4%<br>(1.3-9.7%)                   | 5.6%<br>(0.8-11%)                   | 1800<br>(260-3500)    | 16000<br>(3900-28000)     |
| Germany  | 2005 | Male   | 90 to 94 | 90%<br>(84-94%)                | 10%<br>(5.8-16%)         | 4.3<br>(3-5.9)                              | 4.3%<br>(-0.36-9.5%)                 | 4.3%<br>(-1.1-10%)                  | 1000<br>(-270-2500)   | 6200<br>(-490-14000)      |
| Germany  | 2005 | Male   | 95 plus  | 89%<br>(80-95%)                | 11%<br>(5.1-20%)         | 4.1<br>(2.5-6.1)                            | 3.8%<br>(-1.5-10%)                   | 3.7%<br>(-2.5-11%)                  | 250<br>(-170-750)     | 1000<br>(-410-2700)       |
| Germany  | 2010 | Female | All Ages | 90%<br>(89-92%)                | 9.7%<br>(8.2-11%)        | 3<br>(2.5-3.5)                              | 4.3%<br>(2.7-6%)                     | 4.4%<br>(1.2-7.9%)                  | 20000<br>(5700-36000) | 500000<br>(320000-680000) |
| Germany  | 2010 | Female | 15 to 19 | 90%<br>(84-95%)                | 9.9%<br>(5.4-16%)        | 2.1<br>(1.4-3)                              | 2.5%<br>(1.6-3.5%)                   | 9.4%<br>(4.9-15%)                   | 34<br>(18-52)         | 5000<br>(3200-7100)       |
| Germany  | 2010 | Female | 20 to 24 | 94%<br>(90-96%)                | 6.1%<br>(3.7-9.9%)       | 2.4<br>(1.6-3.6)                            | 3.7%<br>(2.7-4.9%)                   | 9.7%<br>(5-15%)                     | 50<br>(27-77)         | 10000<br>(7000-14000)     |
| Germany  | 2010 | Female | 25 to 29 | 95%<br>(92-97%)                | 4.9%<br>(3.1-7.5%)       | 2.3<br>(1.5-3.2)                            | 3.1%<br>(2.2-4%)                     | 8.8%<br>(4.8-13%)                   | 53<br>(29-79)         | 9300<br>(6400-13000)      |
| Germany  | 2010 | Female | 30 to 34 | 95%<br>(92-97%)                | 4.7%<br>(2.6-7.6%)       | 2.4<br>(1.7-3.4)                            | 2.9%<br>(2-3.7%)                     | 11%<br>(7.1-15%)                    | 84<br>(55-120)        | 9300<br>(6500-12000)      |
| Germany  | 2010 | Female | 35 to 39 | 95%<br>(93-97%)                | 4.5%<br>(2.6-7%)         | 3<br>(2.1-4.4)                              | 3.7%<br>(2.6-4.9%)                   | 14%<br>(10-18%)                     | 180<br>(130-230)      | 14000<br>(10000-18000)    |
| Germany  | 2010 | Female | 40 to 44 | 96%<br>(93-97%)                | 4.3%<br>(2.7-6.7%)       | 3.6<br>(2.6-4.7)                            | 4.9%<br>(3.5-6.4%)                   | 16%<br>(12-19%)                     | 470<br>(360-580)      | 28000<br>(21000-36000)    |
| Germany  | 2010 | Female | 45 to 49 | 95%<br>(93-97%)                | 4.8%<br>(3.1-7.3%)       | 4<br>(2.9-5.2)                              | 6.3%<br>(4.7-8.1%)                   | 16%<br>(13-20%)                     | 920<br>(740-1100)     | 45000<br>(35000-57000)    |
| Germany  | 2010 | Female | 50 to 54 | 94%<br>(92-96%)                | 5.6%<br>(3.8-8%)         | 4.2<br>(3.2-5.5)                            | 7.3%<br>(5.4-9.2%)                   | 16%<br>(13-19%)                     | 1300<br>(1100-1500)   | 54000<br>(42000-68000)    |
| Germany  | 2010 | Female | 55 to 59 | 94%<br>(92-96%)                | 5.7%<br>(3.8-8%)         | 4.5<br>(3.4-5.9)                            | 7.5%<br>(5.5-9.8%)                   | 14%<br>(11-17%)                     | 1600<br>(1200-2000)   | 59000<br>(44000-75000)    |
| Germany  | 2010 | Female | 60 to 64 | 92%<br>(90-95%)                | 7.5%<br>(5.2-10%)        | 4.5<br>(3.3-5.9)                            | 7.1%<br>(4.9-9.6%)                   | 12%<br>(9.3-16%)                    | 1700<br>(1300-2200)   | 54000<br>(38000-72000)    |
| Germany  | 2010 | Female | 65 to 69 | 88%<br>(83-92%)                | 12%<br>(8.2-17%)         | 3.9<br>(3.1-5)                              | 5.8%<br>(3.8-8%)                     | 9.4%<br>(6.7-12%)                   | 2100<br>(1500-2800)   | 54000<br>(37000-74000)    |
| Germany  | 2010 | Female | 70 to 74 | 85%<br>(80-88%)                | 15%<br>(12-20%)          | 3.5<br>(2.6-4.6)                            | 4.5%<br>(2.1-7.1%)                   | 6.7%<br>(3.5-10%)                   | 2600<br>(1400-4000)   | 55000<br>(26000-86000)    |
| Germany  | 2010 | Female | 75 to 79 | 80%<br>(72-87%)                | 20%<br>(13-28%)          | 3.2<br>(2.2-4.3)                            | 3.4%<br>(0.63-6.4%)                  | 4.5%<br>(0.87-8.2%)                 | 2300<br>(450-4500)    | 38000<br>(7300-72000)     |
| Germany  | 2010 | Female | 80 to 84 | 77%<br>(66-86%)                | 23%<br>(14-34%)          | 2.9<br>(2.1-3.9)                            | 2.6%<br>(-0.13-5.7%)                 | 3%<br>(-0.48-6.9%)                  | 2500<br>(-400-5700)   | 31000<br>(-1400-68000)    |
| Germany  | 2010 | Female | 85 to 89 | 77%<br>(68-85%)                | 23%<br>(15-32%)          | 2.9<br>(2.1-3.9)                            | 2.1%<br>(-1.1-5.7%)                  | 2.2%<br>(-1.7-6.5%)                 | 2500<br>(-1900-7400)  | 22000<br>(-11000-59000)   |
| Germany  | 2010 | Female | 90 to 94 | 77%<br>(67-86%)                | 23%<br>(14-33%)          | 2.9<br>(1.9-4.1)                            | 1.6%<br>(-2.1-5.9%)                  | 1.6%<br>(-2.9-6.8%)                 | 930<br>(-1700-4000)   | 6100<br>(-8000-22000)     |

| Location | Year | Sex    | Age      | Prevalence of current drinkers | Prevalence of abstainers | Population average of standard drinks daily | Percent of total attributable deaths | Percent of total attributable DALYs | Attributable deaths    | Attributable DALYs        |
|----------|------|--------|----------|--------------------------------|--------------------------|---------------------------------------------|--------------------------------------|-------------------------------------|------------------------|---------------------------|
| Germany  | 2010 | Female | 95 plus  | 77%<br>(64-89%)                | 23%<br>(11-36%)          | 2.8<br>(1.6-4.4)                            | 1.4%<br>(-3.3-7%)                    | 1.2%<br>(-4.6-7.8%)                 | 470<br>(-1800-3000)    | 2200<br>(-5200-11000)     |
| Germany  | 2010 | Male   | All Ages | 95%<br>(94-96%)                | 4.9%<br>(3.7-6.1%)       | 4.1<br>(3.5-4.8)                            | 11%<br>(8.7-13%)                     | 11%<br>(7.7-15%)                    | 45000<br>(31000-60000) | 130000<br>(100000-160000) |
| Germany  | 2010 | Male   | 15 to 19 | 91%<br>(86-95%)                | 9%<br>(5.1-14%)          | 2.4<br>(1.7-3.4)                            | 5.9%<br>(3.9-8.1%)                   | 12%<br>(6.2-19%)                    | 95<br>(46-140)         | 12000<br>(8300-17000)     |
| Germany  | 2010 | Male   | 20 to 24 | 95%<br>(92-97%)                | 5%<br>(3-8%)             | 3.4<br>(2.3-4.7)                            | 12%<br>(8.9-15%)                     | 18%<br>(9.1-25%)                    | 230<br>(120-340)       | 34000<br>(24000-44000)    |
| Germany  | 2010 | Male   | 25 to 29 | 97%<br>(94-98%)                | 3.5%<br>(2.2-5.5%)       | 3.6<br>(2.5-4.8)                            | 11%<br>(8.4-14%)                     | 18%<br>(9.9-25%)                    | 260<br>(150-380)       | 34000<br>(24000-44000)    |
| Germany  | 2010 | Male   | 30 to 34 | 97%<br>(96-99%)                | 2.7%<br>(1.5-4.5%)       | 3.6<br>(2.5-4.8)                            | 9.8%<br>(7.3-12%)                    | 18%<br>(11-25%)                     | 310<br>(200-430)       | 31000<br>(22000-39000)    |
| Germany  | 2010 | Male   | 35 to 39 | 98%<br>(96-99%)                | 2.2%<br>(1.2-3.8%)       | 3.5<br>(2.5-4.8)                            | 10%<br>(7.6-12%)                     | 19%<br>(13-25%)                     | 480<br>(340-620)       | 38000<br>(29000-47000)    |
| Germany  | 2010 | Male   | 40 to 44 | 98%<br>(96-99%)                | 2%<br>(1-3.6%)           | 3.9<br>(2.9-5.1)                            | 11%<br>(8.7-14%)                     | 21%<br>(16-26%)                     | 1100<br>(860-1400)     | 69000<br>(54000-85000)    |
| Germany  | 2010 | Male   | 45 to 49 | 98%<br>(97-99%)                | 1.8%<br>(0.92-3.2%)      | 4.8<br>(3.5-6.3)                            | 14%<br>(11-17%)                      | 22%<br>(17-28%)                     | 2300<br>(1800-2900)    | 120000<br>(91000-140000)  |
| Germany  | 2010 | Male   | 50 to 54 | 98%<br>(97-99%)                | 1.9%<br>(1-3.1%)         | 6<br>(4.7-7.6)                              | 16%<br>(13-19%)                      | 23%<br>(19-28%)                     | 3700<br>(2900-4400)    | 150000<br>(120000-180000) |
| Germany  | 2010 | Male   | 55 to 59 | 98%<br>(96-99%)                | 2.5%<br>(1.5-4%)         | 7.4<br>(5.7-9.3)                            | 17%<br>(14-20%)                      | 23%<br>(19-27%)                     | 5000<br>(4000-5900)    | 180000<br>(150000-210000) |
| Germany  | 2010 | Male   | 60 to 64 | 97%<br>(95-98%)                | 3.1%<br>(1.9-4.8%)       | 7.5<br>(5.8-9.6)                            | 15%<br>(12-19%)                      | 20%<br>(16-24%)                     | 5400<br>(4200-6400)    | 160000<br>(130000-200000) |
| Germany  | 2010 | Male   | 65 to 69 | 96%<br>(94-98%)                | 3.9%<br>(2.3-6.1%)       | 6.5<br>(5.2-8)                              | 13%<br>(9.4-16%)                     | 16%<br>(12-20%)                     | 6300<br>(4700-7900)    | 160000<br>(120000-200000) |
| Germany  | 2010 | Male   | 70 to 74 | 95%<br>(93-97%)                | 4.7%<br>(3.1-6.9%)       | 5.5<br>(4.2-6.9)                            | 9.4%<br>(6-13%)                      | 11%<br>(6.9-16%)                    | 7100<br>(4400-10000)   | 150000<br>(93000-200000)  |
| Germany  | 2010 | Male   | 75 to 79 | 94%<br>(91-97%)                | 5.5%<br>(3-9.2%)         | 4.9<br>(3.6-6.3)                            | 7%<br>(3.3-11%)                      | 7.9%<br>(3.3-13%)                   | 5200<br>(2200-8500)    | 84000<br>(40000-130000)   |
| Germany  | 2010 | Male   | 80 to 84 | 93%<br>(88-96%)                | 7.1%<br>(4.1-12%)        | 4.6<br>(3.5-5.7)                            | 5.5%<br>(2.1-9.4%)                   | 5.9%<br>(1.7-11%)                   | 4200<br>(1300-7600)    | 52000<br>(20000-90000)    |
| Germany  | 2010 | Male   | 85 to 89 | 91%<br>(87-94%)                | 8.8%<br>(5.6-13%)        | 4.3<br>(3.2-5.7)                            | 4.5%<br>(0.78-8.7%)                  | 4.6%<br>(0.18-9.6%)                 | 2400<br>(92-5000)      | 21000<br>(3600-40000)     |
| Germany  | 2010 | Male   | 90 to 94 | 90%<br>(85-94%)                | 9.9%<br>(5.7-15%)        | 4.1<br>(2.8-5.7)                            | 3.6%<br>(-0.58-8.7%)                 | 3.5%<br>(-1.3-9.4%)                 | 680<br>(-250-1800)     | 4300<br>(-670-10000)      |
| Germany  | 2010 | Male   | 95 plus  | 89%<br>(81-95%)                | 11%<br>(5.1-19%)         | 3.9<br>(2.4-5.9)                            | 3.3%<br>(-1.8-9.6%)                  | 3.1%<br>(-2.8-10%)                  | 240<br>(-220-820)      | 1000<br>(-560-3000)       |
| Germany  | 2016 | Female | All Ages | 90%<br>(88-92%)                | 9.3%<br>(8.3-12%)        | 2.9<br>(2.2-3.8)                            | 4%<br>(2.1-6.2%)                     | 4%<br>(0.45-8%)                     | 19000<br>(2000-38000)  | 470000<br>(250000-720000) |
| Germany  | 2016 | Female | 15 to 19 | 90%<br>(83-95%)                | 9.8%<br>(5-17%)          | 2<br>(1.3-3)                                | 2.2%<br>(1.4-3.2%)                   | 9%<br>(4.3-14%)                     | 27<br>(13-42)          | 4300<br>(2700-6100)       |

| Location | Year | Sex    | Age      | Prevalence of current drinkers | Prevalence of abstainers | Population average of standard drinks daily | Percent of total attributable deaths | Percent of total attributable DALYs | Attributable deaths    | Attributable DALYs          |
|----------|------|--------|----------|--------------------------------|--------------------------|---------------------------------------------|--------------------------------------|-------------------------------------|------------------------|-----------------------------|
| Germany  | 2016 | Female | 20 to 24 | 93%<br>(89-96%)                | 6.6%<br>(3.9-11%)        | 2.3<br>(1.4-3.6)                            | 3.3%<br>(2.3-4.4%)                   | 9.4%<br>(4.8-15%)                   | 40<br>(20-65)          | 8400<br>(5500-12000)        |
| Germany  | 2016 | Female | 25 to 29 | 95%<br>(91-97%)                | 5.4%<br>(3.1-9.2%)       | 2.2<br>(1.4-3.2)                            | 2.7%<br>(1.9-3.6%)                   | 8.5%<br>(4.4-13%)                   | 47<br>(24-72)          | 8500<br>(5600-12000)        |
| Germany  | 2016 | Female | 30 to 34 | 95%<br>(92-98%)                | 4.7%<br>(2.5-8%)         | 2.4<br>(1.5-3.5)                            | 2.6%<br>(1.8-3.6%)                   | 10%<br>(6.6-14%)                    | 83<br>(52-120)         | 9200<br>(6300-13000)        |
| Germany  | 2016 | Female | 35 to 39 | 96%<br>(92-98%)                | 4.4%<br>(2.4-7.5%)       | 2.9<br>(1.9-4.4)                            | 3.3%<br>(2.2-4.6%)                   | 14%<br>(9.5-18%)                    | 150<br>(100-200)       | 12000<br>(7900-16000)       |
| Germany  | 2016 | Female | 40 to 44 | 95%<br>(92-97%)                | 4.7%<br>(2.8-7.7%)       | 3.4<br>(2.3-4.8)                            | 4.5%<br>(3.1-6.1%)                   | 16%<br>(12-19%)                     | 320<br>(230-410)       | 19000<br>(14000-26000)      |
| Germany  | 2016 | Female | 45 to 49 | 95%<br>(91-97%)                | 5.4%<br>(3.2-8.9%)       | 3.8<br>(2.6-5.3)                            | 5.7%<br>(3.9-7.6%)                   | 16%<br>(12-19%)                     | 790<br>(600-1000)      | 39000<br>(28000-52000)      |
| Germany  | 2016 | Female | 50 to 54 | 94%<br>(91-96%)                | 5.9%<br>(3.8-9.2%)       | 4.1<br>(2.7-5.6)                            | 6.7%<br>(4.7-8.9%)                   | 15%<br>(12-18%)                     | 1300<br>(1000-1700)    | 57000<br>(41000-74000)      |
| Germany  | 2016 | Female | 55 to 59 | 94%<br>(91-96%)                | 6%<br>(3.9-8.8%)         | 4.4<br>(3-6.1)                              | 6.9%<br>(4.7-9.5%)                   | 14%<br>(10-17%)                     | 1600<br>(1100-2100)    | 57000<br>(39000-78000)      |
| Germany  | 2016 | Female | 60 to 64 | 92%<br>(88-95%)                | 8.2%<br>(5.4-12%)        | 4.2<br>(2.9-6.1)                            | 6.5%<br>(4-9.3%)                     | 11%<br>(8-16%)                      | 2000<br>(1400-2800)    | 62000<br>(38000-90000)      |
| Germany  | 2016 | Female | 65 to 69 | 88%<br>(83-92%)                | 12%<br>(7.6-17%)         | 3.8<br>(2.7-5.3)                            | 5.4%<br>(3.2-8%)                     | 8.9%<br>(5.9-13%)                   | 1600<br>(1000-2400)    | 42000<br>(24000-64000)      |
| Germany  | 2016 | Female | 70 to 74 | 86%<br>(80-90%)                | 14%<br>(10-20%)          | 3.5<br>(2.4-4.8)                            | 4.2%<br>(1.6-7.1%)                   | 6.4%<br>(3-10%)                     | 2300<br>(1000-3800)    | 48000<br>(18000-83000)      |
| Germany  | 2016 | Female | 75 to 79 | 83%<br>(74-89%)                | 17%<br>(11-26%)          | 3.2<br>(2.1-4.6)                            | 3.2%<br>(0.25-6.5%)                  | 4.3%<br>(0.44-8.5%)                 | 2700<br>(270-5400)     | 45000<br>(3400-92000)       |
| Germany  | 2016 | Female | 80 to 84 | 80%<br>(69-88%)                | 20%<br>(12-31%)          | 3<br>(2.1-4.2)                              | 2.4%<br>(-0.62-6%)                   | 2.8%<br>(-1.1-7.4%)                 | 2100<br>(-770-5500)    | 26000<br>(-6500-65000)      |
| Germany  | 2016 | Female | 85 to 89 | 79%<br>(68-86%)                | 21%<br>(14-32%)          | 2.9<br>(1.9-4.2)                            | 1.9%<br>(-1.6-5.8%)                  | 2%<br>(-2.3-6.8%)                   | 2100<br>(-2400-7300)   | 19000<br>(-16000-59000)     |
| Germany  | 2016 | Female | 90 to 94 | 78%<br>(68-87%)                | 22%<br>(13-32%)          | 2.8<br>(1.8-4.4)                            | 1.4%<br>(-2.3-6.1%)                  | 1.3%<br>(-3.3-7.1%)                 | 1300<br>(-3400-7000)   | 9300<br>(-15000-39000)      |
| Germany  | 2016 | Female | 95 plus  | 79%<br>(65-89%)                | 21%<br>(11-35%)          | 2.8<br>(1.5-4.6)                            | 1.2%<br>(-3.5-7.1%)                  | 0.97%<br>(-4.6-7.9%)                | 240<br>(-1100-1900)    | 1200<br>(-3300-6700)        |
| Germany  | 2016 | Male   | All Ages | 94%<br>(93-96%)                | 5.7%<br>(4.3-7.2%)       | 4<br>(3-5.2)                                | 9.9%<br>(7.2-13%)                    | 9.7%<br>(5.6-14%)                   | 43000<br>(25000-64000) | 1200000<br>(890000-1600000) |
| Germany  | 2016 | Male   | 15 to 19 | 90%<br>(82-95%)                | 10%<br>(5.5-18%)         | 2.3<br>(1.5-3.4)                            | 5.2%<br>(3.4-7.3%)                   | 12%<br>(5.8-18%)                    | 78<br>(37-120)         | 10000<br>(6700-15000)       |
| Germany  | 2016 | Male   | 20 to 24 | 94%<br>(89-97%)                | 6.3%<br>(3.4-11%)        | 3.2<br>(2.1-4.7)                            | 11%<br>(7.5-14%)                     | 17%<br>(8.2-24%)                    | 190<br>(93-290)        | 27000<br>(19000-37000)      |
| Germany  | 2016 | Male   | 25 to 29 | 95%<br>(92-98%)                | 4.5%<br>(2.5-7.6%)       | 3.4<br>(2.2-4.8)                            | 9.9%<br>(7.3-13%)                    | 17%<br>(9-24%)                      | 240<br>(120-360)       | 31000<br>(22000-41000)      |
| Germany  | 2016 | Male   | 30 to 34 | 97%<br>(94-98%)                | 3.4%<br>(1.7-6%)         | 3.4<br>(2.3-5)                              | 8.9%<br>(6.5-11%)                    | 17%<br>(10-24%)                     | 300<br>(180-440)       | 31000<br>(22000-41000)      |

| Location | Year | Sex    | Age      | Prevalence of current drinkers | Prevalence of abstainers | Population average of standard drinks daily | Percent of total attributable deaths | Percent of total attributable DALYs | Attributable deaths  | Attributable DALYs        |
|----------|------|--------|----------|--------------------------------|--------------------------|---------------------------------------------|--------------------------------------|-------------------------------------|----------------------|---------------------------|
| Germany  | 2016 | Male   | 35 to 39 | 97%<br>(95-99%)                | 2.8%<br>(1.4-5.1%)       | 3.3<br>(2.1-4.8)                            | 9.2%<br>(6.9-12%)                    | 19%<br>(13-24%)                     | 400<br>(270-530)     | 31000<br>(23000-41000)    |
| Germany  | 2016 | Male   | 40 to 44 | 98%<br>(95-99%)                | 2.4%<br>(1.2-4.8%)       | 3.7<br>(2.5-5.2)                            | 11%<br>(8-14%)                       | 21%<br>(15-26%)                     | 760<br>(540-970)     | 46000<br>(35000-58000)    |
| Germany  | 2016 | Male   | 45 to 49 | 98%<br>(96-99%)                | 2.2%<br>(1.1-4.5%)       | 4.6<br>(3.1-6.5)                            | 13%<br>(9.7-16%)                     | 22%<br>(17-28%)                     | 2000<br>(1500-2600)  | 100000<br>(77000-130000)  |
| Germany  | 2016 | Male   | 50 to 54 | 98%<br>(95-99%)                | 2.5%<br>(1.3-4.5%)       | 5.7<br>(3.9-7.8)                            | 15%<br>(11-18%)                      | 23%<br>(17-28%)                     | 3700<br>(2800-4700)  | 160000<br>(120000-200000) |
| Germany  | 2016 | Male   | 55 to 59 | 97%<br>(95-98%)                | 3%<br>(1.7-5%)           | 7<br>(5-9.5)                                | 16%<br>(12-19%)                      | 22%<br>(17-27%)                     | 4900<br>(3600-6100)  | 180000<br>(130000-220000) |
| Germany  | 2016 | Male   | 60 to 64 | 96%<br>(94-98%)                | 3.6%<br>(2.1-5.7%)       | 7.1<br>(5.1-9.8)                            | 15%<br>(11-18%)                      | 19%<br>(14-24%)                     | 6100<br>(4400-7600)  | 190000<br>(130000-230000) |
| Germany  | 2016 | Male   | 65 to 69 | 96%<br>(93-98%)                | 4.4%<br>(2.5-7.2%)       | 6.1<br>(4.5-8.4)                            | 12%<br>(8-15%)                       | 15%<br>(10-19%)                     | 4400<br>(2900-5800)  | 110000<br>(75000-150000)  |
| Germany  | 2016 | Male   | 70 to 74 | 95%<br>(92-97%)                | 5.3%<br>(3.3-8.1%)       | 5.2<br>(3.7-7.1)                            | 8.7%<br>(4.9-13%)                    | 11%<br>(5.8-15%)                    | 6200<br>(3400-9300)  | 130000<br>(72000-190000)  |
| Germany  | 2016 | Male   | 75 to 79 | 94%<br>(89-97%)                | 6.4%<br>(3.3-11%)        | 4.6<br>(3.1-6.3)                            | 6.4%<br>(2.7-11%)                    | 7.3%<br>(2.9-13%)                   | 6200<br>(2400-11000) | 100000<br>(44000-180000)  |
| Germany  | 2016 | Male   | 80 to 84 | 92%<br>(86-96%)                | 8.2%<br>(4.4-14%)        | 4.3<br>(3-5.8)                              | 5%<br>(1.3-9.3%)                     | 5.3%<br>(0.97-10%)                  | 4000<br>(760-8000)   | 49000<br>(12000-94000)    |
| Germany  | 2016 | Male   | 85 to 89 | 90%<br>(83-94%)                | 10%<br>(5.7-17%)         | 4<br>(2.7-5.7)                              | 4%<br>(0.086-8.4%)                   | 4.1%<br>(-0.4-9.2%)                 | 2800<br>(-270-6400)  | 25000<br>(530-53000)      |
| Germany  | 2016 | Male   | 90 to 94 | 89%<br>(82-94%)                | 11%<br>(5.8-18%)         | 3.9<br>(2.4-5.7)                            | 3.2%<br>(-1.1-8.4%)                  | 3.1%<br>(-1.7-9.3%)                 | 1100<br>(-620-3300)  | 7000<br>(-2400-19000)     |
| Germany  | 2016 | Male   | 95 plus  | 88%<br>(79-95%)                | 12%<br>(5.2-21%)         | 3.7<br>(2.1-5.9)                            | 2.8%<br>(-2.2-9.2%)                  | 2.7%<br>(-3.1-10%)                  | 140<br>(-160-530)    | 600<br>(-440-1900)        |
| Greece   | 1990 | Female | All Ages | 78%<br>(73-82%)                | 22%<br>(18-27%)          | 2.5<br>(2.2-2.9)                            | 4.2%<br>(2.3-6.1%)                   | 5.2%<br>(1.1-9.5%)                  | 2300<br>(490-4200)   | 55000<br>(31000-82000)    |
| Greece   | 1990 | Female | 15 to 19 | 74%<br>(59-86%)                | 26%<br>(14-41%)          | 1.9<br>(1.3-2.7)                            | 2.4%<br>(1.3-3.6%)                   | 8.3%<br>(3.7-14%)                   | 8.3<br>(3.6-14)      | 920<br>(540-1400)         |
| Greece   | 1990 | Female | 20 to 24 | 79%<br>(66-89%)                | 21%<br>(11-34%)          | 2.3<br>(1.5-3.3)                            | 3.2%<br>(2.1-4.5%)                   | 8.7%<br>(4.1-14%)                   | 12<br>(5.9-20)       | 1500<br>(950-2200)        |
| Greece   | 1990 | Female | 25 to 29 | 81%<br>(69-90%)                | 19%<br>(10-31%)          | 2.2<br>(1.5-3.2)                            | 2.7%<br>(1.7-3.8%)                   | 7.9%<br>(3.8-12%)                   | 12<br>(5.8-19)       | 1300<br>(820-1900)        |
| Greece   | 1990 | Female | 30 to 34 | 82%<br>(69-90%)                | 18%<br>(10-31%)          | 2.5<br>(1.8-3.5)                            | 2.6%<br>(1.7-3.7%)                   | 8.5%<br>(5.1-12%)                   | 16<br>(9.6-23)       | 1400<br>(930-1900)        |
| Greece   | 1990 | Female | 35 to 39 | 81%<br>(72-88%)                | 19%<br>(12-28%)          | 3.2<br>(2.2-4.5)                            | 3.3%<br>(2.3-4.6%)                   | 11%<br>(7.5-15%)                    | 25<br>(17-34)        | 1800<br>(1200-2400)       |
| Greece   | 1990 | Female | 40 to 44 | 82%<br>(75-88%)                | 18%<br>(12-25%)          | 3.6<br>(2.6-4.8)                            | 4.2%<br>(2.9-5.7%)                   | 12%<br>(8.8-16%)                    | 44<br>(31-57)        | 2600<br>(1900-3400)       |
| Greece   | 1990 | Female | 45 to 49 | 85%<br>(79-89%)                | 15%<br>(11-21%)          | 3.8<br>(2.7-5)                              | 4.9%<br>(3.4-6.8%)                   | 12%<br>(8.9-16%)                    | 57<br>(40-74)        | 2900<br>(2000-3800)       |
| Greece   | 1990 | Female | 50 to 54 | 87%<br>(82-90%)                | 13%<br>(9.9-18%)         | 3.9<br>(2.8-5.1)                            | 5.5%<br>(3.6-7.6%)                   | 12%<br>(8.5-16%)                    | 100<br>(71-140)      | 4400<br>(3000-6000)       |

| Location | Year | Sex    | Age      | Prevalence of current drinkers | Prevalence of abstainers | Population average of standard drinks daily | Percent of total attributable deaths | Percent of total attributable DALYs | Attributable deaths | Attributable DALYs        |
|----------|------|--------|----------|--------------------------------|--------------------------|---------------------------------------------|--------------------------------------|-------------------------------------|---------------------|---------------------------|
| Greece   | 1990 | Female | 55 to 59 | 86%<br>(81-90%)                | 14%<br>(10-19%)          | 4<br>(2.9-5.1)                              | 6%<br>(3.7-8.4%)                     | 11%<br>(7.6-15%)                    | 150<br>(100-210)    | 5600<br>(3600-7700)       |
| Greece   | 1990 | Female | 60 to 64 | 84%<br>(78-88%)                | 16%<br>(12-22%)          | 3.8<br>(2.8-5.1)                            | 6%<br>(3-8.9%)                       | 9.9%<br>(5.3-15%)                   | 230<br>(120-330)    | 6900<br>(3500-10000)      |
| Greece   | 1990 | Female | 65 to 69 | 80%<br>(73-85%)                | 20%<br>(15-27%)          | 3.5<br>(2.6-4.4)                            | 5.8%<br>(2.8-8.8%)                   | 8.6%<br>(4.1-13%)                   | 260<br>(120-390)    | 6400<br>(3100-9600)       |
| Greece   | 1990 | Female | 70 to 74 | 78%<br>(72-83%)                | 22%<br>(17-28%)          | 3.2<br>(2.2-4.2)                            | 5.7%<br>(1.9-9.8%)                   | 7.6%<br>(2.4-13%)                   | 370<br>(110-630)    | 7000<br>(2300-12000)      |
| Greece   | 1990 | Female | 75 to 79 | 79%<br>(71-85%)                | 21%<br>(15-29%)          | 2.9<br>(2-4.2)                              | 4.6%<br>(-0.023-9.8%)                | 5.7%<br>(-0.14-12%)                 | 450<br>(-11-960)    | 6700<br>(-33-14000)       |
| Greece   | 1990 | Female | 80 to 84 | 77%<br>(68-84%)                | 23%<br>(16-32%)          | 2.7<br>(1.9-3.7)                            | 3.5%<br>(-0.84-7.9%)                 | 4.1%<br>(-1.2-9.5%)                 | 370<br>(-110-850)   | 4100<br>(-970-9300)       |
| Greece   | 1990 | Female | 85 to 89 | 74%<br>(63-81%)                | 26%<br>(19-37%)          | 2.4<br>(1.6-3.4)                            | 2.2%<br>(-1.5-6.3%)                  | 2.5%<br>(-2-7.3%)                   | 190<br>(-150-560)   | 1500<br>(-1000-4400)      |
| Greece   | 1990 | Female | 90 to 94 | 71%<br>(59-80%)                | 29%<br>(20-41%)          | 2.1<br>(1.3-3.2)                            | 1.1%<br>(-2.5-5.3%)                  | 1.1%<br>(-3.2-6.1%)                 | 47<br>(-140-260)    | 290<br>(-660-1400)        |
| Greece   | 1990 | Female | 95 plus  | 69%<br>(56-80%)                | 31%<br>(20-44%)          | 1.9<br>(1-3.2)                              | 0.47%<br>(-3.3-5.3%)                 | 0.3%<br>(-4.2-6.1%)                 | 4.5<br>(-63-92)     | 28<br>(-200-320)          |
| Greece   | 1990 | Male   | All Ages | 90%<br>(86-93%)                | 10%<br>(7.3-14%)         | 5<br>(4.3-5.6)                              | 12%<br>(9.2-14%)                     | 15%<br>(11-19%)                     | 7400<br>(5600-9500) | 170000<br>(140000-210000) |
| Greece   | 1990 | Male   | 15 to 19 | 84%<br>(72-92%)                | 16%<br>(8.3-28%)         | 2.8<br>(1.9-3.9)                            | 7.1%<br>(3.9-10%)                    | 13%<br>(6.1-20%)                    | 39<br>(18-61)       | 3400<br>(2000-5100)       |
| Greece   | 1990 | Male   | 20 to 24 | 89%<br>(79-94%)                | 11%<br>(5.6-21%)         | 4.1<br>(2.9-5.7)                            | 13%<br>(8.3-18%)                     | 19%<br>(10-27%)                     | 93<br>(52-140)      | 8000<br>(5100-11000)      |
| Greece   | 1990 | Male   | 25 to 29 | 91%<br>(83-96%)                | 9.1%<br>(4.4-17%)        | 4.9<br>(3.5-6.6)                            | 12%<br>(8.1-17%)                     | 20%<br>(12-29%)                     | 82<br>(48-120)      | 6600<br>(4300-8900)       |
| Greece   | 1990 | Male   | 30 to 34 | 93%<br>(85-97%)                | 7.4%<br>(3.2-15%)        | 5.3<br>(3.9-6.9)                            | 10%<br>(6.9-14%)                     | 18%<br>(11-26%)                     | 76<br>(47-110)      | 5700<br>(3700-7700)       |
| Greece   | 1990 | Male   | 35 to 39 | 94%<br>(88-97%)                | 6.3%<br>(2.7-12%)        | 5.3<br>(3.8-7.2)                            | 9.1%<br>(5.8-13%)                    | 16%<br>(9-23%)                      | 77<br>(44-110)      | 5200<br>(3300-7300)       |
| Greece   | 1990 | Male   | 40 to 44 | 95%<br>(89-98%)                | 5.3%<br>(2.2-11%)        | 6.2<br>(4.6-7.9)                            | 10%<br>(6.6-14%)                     | 16%<br>(10-23%)                     | 120<br>(73-170)     | 6800<br>(4500-9100)       |
| Greece   | 1990 | Male   | 45 to 49 | 96%<br>(92-98%)                | 4.2%<br>(2.2-7.9%)       | 8<br>(5.9-10)                               | 13%<br>(9-16%)                       | 19%<br>(13-25%)                     | 180<br>(120-230)    | 8600<br>(6200-11000)      |
| Greece   | 1990 | Male   | 50 to 54 | 96%<br>(93-98%)                | 3.7%<br>(2-6.6%)         | 8.8<br>(6.6-11)                             | 14%<br>(10-17%)                      | 20%<br>(15-25%)                     | 320<br>(250-410)    | 13000<br>(10000-17000)    |
| Greece   | 1990 | Male   | 55 to 59 | 96%<br>(93-98%)                | 4.1%<br>(2.4-6.6%)       | 8.8<br>(6.9-11)                             | 14%<br>(11-18%)                      | 19%<br>(14-24%)                     | 520<br>(380-660)    | 18000<br>(14000-23000)    |
| Greece   | 1990 | Male   | 60 to 64 | 95%<br>(92-97%)                | 5%<br>(3.1-7.8%)         | 8.4<br>(6.3-11)                             | 14%<br>(10-18%)                      | 17%<br>(12-23%)                     | 760<br>(540-1000)   | 23000<br>(16000-29000)    |
| Greece   | 1990 | Male   | 65 to 69 | 93%<br>(90-96%)                | 6.6%<br>(4-9.8%)         | 7.7<br>(5.9-9.5)                            | 14%<br>(10-18%)                      | 17%<br>(12-21%)                     | 830<br>(590-1100)   | 20000<br>(15000-25000)    |
| Greece   | 1990 | Male   | 70 to 74 | 93%<br>(90-95%)                | 6.9%<br>(4.7-10%)        | 7<br>(5.2-9)                                | 14%<br>(9.3-18%)                     | 16%<br>(11-21%)                     | 930<br>(630-1200)   | 18000<br>(12000-24000)    |



| Location | Year | Sex    | Age      | Prevalence of current drinkers | Prevalence of abstainers | Population average of standard drinks daily | Percent of total attributable deaths | Percent of total attributable DALYs | Attributable deaths | Attributable DALYs     |
|----------|------|--------|----------|--------------------------------|--------------------------|---------------------------------------------|--------------------------------------|-------------------------------------|---------------------|------------------------|
| Greece   | 1990 | Male   | 75 to 79 | 94%<br>(90-96%)                | 6.2%<br>(3.6-10%)        | 6.4<br>(4.6-8.7)                            | 13%<br>(8-17%)                       | 15%<br>(9.1-20%)                    | 1200<br>(740-1700)  | 18000<br>(11000-25000) |
| Greece   | 1990 | Male   | 80 to 84 | 93%<br>(88-96%)                | 6.9%<br>(3.8-12%)        | 5.9<br>(4.4-7.8)                            | 12%<br>(7.6-17%)                     | 14%<br>(8.5-19%)                    | 1100<br>(680-1500)  | 12000<br>(7700-17000)  |
| Greece   | 1990 | Male   | 85 to 89 | 91%<br>(85-95%)                | 8.8%<br>(5-15%)          | 5.4<br>(3.8-7.3)                            | 11%<br>(5.9-16%)                     | 12%<br>(6.5-18%)                    | 700<br>(380-1000)   | 5500<br>(3000-8000)    |
| Greece   | 1990 | Male   | 90 to 94 | 90%<br>(84-94%)                | 9.8%<br>(5.6-16%)        | 5<br>(3.3-7.1)                              | 8.9%<br>(3.2-15%)                    | 10%<br>(3.3-17%)                    | 280<br>(92-470)     | 1500<br>(550-2500)     |
| Greece   | 1990 | Male   | 95 plus  | 90%<br>(82-95%)                | 10%<br>(5.1-18%)         | 4.7<br>(2.6-7.3)                            | 7.9%<br>(1.2-15%)                    | 8.7%<br>(0.9-16%)                   | 74<br>(7.8-140)     | 270<br>(39-490)        |
| Greece   | 1995 | Female | All Ages | 78%<br>(74-82%)                | 22%<br>(18-26%)          | 2.4<br>(2.1-2.8)                            | 3.4%<br>(1.8-5.4%)                   | 3.9%<br>(0.16-7.9%)                 | 1800<br>(74-3700)   | 47000<br>(24000-73000) |
| Greece   | 1995 | Female | 15 to 19 | 74%<br>(59-85%)                | 26%<br>(15-41%)          | 1.8<br>(1.2-2.5)                            | 2.3%<br>(1.3-3.4%)                   | 7.8%<br>(3.5-13%)                   | 7.9<br>(3.5-13)     | 890<br>(510-1300)      |
| Greece   | 1995 | Female | 20 to 24 | 79%<br>(66-88%)                | 21%<br>(12-34%)          | 2.1<br>(1.4-3)                              | 2.9%<br>(1.8-4.1%)                   | 8%<br>(3.7-13%)                     | 9.9<br>(4.7-16)     | 1400<br>(830-1900)     |
| Greece   | 1995 | Female | 25 to 29 | 81%<br>(69-90%)                | 19%<br>(10-31%)          | 2.1<br>(1.4-2.9)                            | 2.4%<br>(1.6-3.5%)                   | 7.3%<br>(3.6-11%)                   | 11<br>(5.5-17)      | 1300<br>(840-1900)     |
| Greece   | 1995 | Female | 30 to 34 | 82%<br>(69-89%)                | 18%<br>(11-31%)          | 2.4<br>(1.7-3.3)                            | 2.4%<br>(1.5-3.4%)                   | 7.6%<br>(4.6-11%)                   | 14<br>(8.1-20)      | 1300<br>(850-1900)     |
| Greece   | 1995 | Female | 35 to 39 | 81%<br>(73-87%)                | 19%<br>(13-27%)          | 3<br>(2.1-4.3)                              | 3%<br>(2-4.3%)                       | 9.6%<br>(6.3-13%)                   | 24<br>(16-34)       | 1800<br>(1200-2500)    |
| Greece   | 1995 | Female | 40 to 44 | 82%<br>(74-88%)                | 18%<br>(12-26%)          | 3.4<br>(2.4-4.5)                            | 3.8%<br>(2.6-5.2%)                   | 11%<br>(7.7-15%)                    | 39<br>(27-51)       | 2400<br>(1700-3200)    |
| Greece   | 1995 | Female | 45 to 49 | 85%<br>(78-89%)                | 15%<br>(11-22%)          | 3.6<br>(2.5-4.8)                            | 4.3%<br>(2.9-6.1%)                   | 11%<br>(7.8-15%)                    | 60<br>(41-81)       | 3100<br>(2100-4200)    |
| Greece   | 1995 | Female | 50 to 54 | 86%<br>(81-90%)                | 14%<br>(9.8-19%)         | 3.7<br>(2.6-4.9)                            | 4.9%<br>(3.2-6.9%)                   | 11%<br>(7.5-15%)                    | 74<br>(50-100)      | 3200<br>(2100-4500)    |
| Greece   | 1995 | Female | 55 to 59 | 86%<br>(81-90%)                | 14%<br>(10-19%)          | 3.7<br>(2.7-4.9)                            | 5.2%<br>(3.2-7.3%)                   | 10%<br>(6.5-14%)                    | 130<br>(79-170)     | 4700<br>(2900-6600)    |
| Greece   | 1995 | Female | 60 to 64 | 84%<br>(78-88%)                | 16%<br>(12-22%)          | 3.6<br>(2.5-4.8)                            | 5%<br>(2.5-7.7%)                     | 8.7%<br>(4.5-13%)                   | 180<br>(91-260)     | 5500<br>(2700-8300)    |
| Greece   | 1995 | Female | 65 to 69 | 80%<br>(73-85%)                | 20%<br>(15-27%)          | 3.2<br>(2.4-4.2)                            | 4.8%<br>(2.2-7.5%)                   | 7.4%<br>(3.4-11%)                   | 260<br>(120-410)    | 6600<br>(3000-10000)   |
| Greece   | 1995 | Female | 70 to 74 | 78%<br>(71-84%)                | 22%<br>(16-29%)          | 2.9<br>(2.1-4)                              | 4.6%<br>(1.1-8.4%)                   | 6.3%<br>(1.5-11%)                   | 300<br>(73-540)     | 5800<br>(1500-11000)   |
| Greece   | 1995 | Female | 75 to 79 | 79%<br>(70-85%)                | 21%<br>(15-30%)          | 2.7<br>(1.9-3.9)                            | 3.6%<br>(-0.75-8.3%)                 | 4.5%<br>(-1.1-11%)                  | 310<br>(-74-730)    | 4700<br>(-950-11000)   |
| Greece   | 1995 | Female | 80 to 84 | 77%<br>(68-84%)                | 23%<br>(16-32%)          | 2.5<br>(1.7-3.5)                            | 2.6%<br>(-1.2-6.6%)                  | 3%<br>(-1.9-8%)                     | 270<br>(-170-730)   | 3100<br>(-1500-8000)   |
| Greece   | 1995 | Female | 85 to 89 | 73%<br>(63-81%)                | 27%<br>(19-37%)          | 2.2<br>(1.5-3.1)                            | 1.4%<br>(-2.5-3%)                    | 1.5%<br>(-2.6-6.1%)                 | 140<br>(-230-540)   | 1200<br>(-1700-4200)   |
| Greece   | 1995 | Female | 90 to 94 | 71%<br>(60-80%)                | 29%<br>(20-40%)          | 2<br>(1.2-3)                                | 0.51%<br>(-2.8-4%)                   | 0.37%<br>(-3.8-4.7%)                | 19<br>(-190-240)    | 160<br>(-920-1300)     |

| Location | Year | Sex    | Age      | Prevalence of current drinkers | Prevalence of abstainers | Population average of standard drinks daily | Percent of total attributable deaths | Percent of total attributable DALYs | Attributable deaths | Attributable DALYs        |
|----------|------|--------|----------|--------------------------------|--------------------------|---------------------------------------------|--------------------------------------|-------------------------------------|---------------------|---------------------------|
| Greece   | 1995 | Female | 95 plus  | 69%<br>(55-80%)                | 31%<br>(20-45%)          | 1.8<br>(0.92-3)                             | -0.079%<br>(-3.6-4.1%)               | -0.37%<br>(-4.5-4.6%)               | -8<br>(-98-100)     | -6.8<br>(-310-350)        |
| Greece   | 1995 | Male   | All Ages | 90%<br>(86-93%)                | 10%<br>(7.4-14%)         | 4.8<br>(4.2-5.5)                            | 11%<br>(8.5-13%)                     | 14%<br>(9.8-18%)                    | 7200<br>(5100-9400) | 170000<br>(140000-210000) |
| Greece   | 1995 | Male   | 15 to 19 | 83%<br>(72-92%)                | 17%<br>(8.3-28%)         | 2.6<br>(1.8-3.7)                            | 6.8%<br>(3.7-10%)                    | 12%<br>(5.6-19%)                    | 38<br>(17-59)       | 3400<br>(1900-5000)       |
| Greece   | 1995 | Male   | 20 to 24 | 88%<br>(79-94%)                | 12%<br>(5.8-21%)         | 3.9<br>(2.7-5.5)                            | 12%<br>(7.7-17%)                     | 17%<br>(9.5-26%)                    | 87<br>(48-130)      | 7700<br>(4900-11000)      |
| Greece   | 1995 | Male   | 25 to 29 | 91%<br>(83-95%)                | 9.2%<br>(4.5-17%)        | 4.7<br>(3.3-6.3)                            | 11%<br>(7.5-15%)                     | 18%<br>(11-26%)                     | 93<br>(54-130)      | 7600<br>(4900-10000)      |
| Greece   | 1995 | Male   | 30 to 34 | 93%<br>(85-97%)                | 7.5%<br>(3.3-15%)        | 5<br>(3.7-6.6)                              | 9.8%<br>(6.4-13%)                    | 17%<br>(9.8-24%)                    | 82<br>(49-120)      | 6100<br>(3900-8300)       |
| Greece   | 1995 | Male   | 35 to 39 | 94%<br>(88-97%)                | 6.4%<br>(2.7-12%)        | 5.1<br>(3.7-7)                              | 8.6%<br>(5.3-12%)                    | 14%<br>(8-22%)                      | 84<br>(47-130)      | 5700<br>(3600-8100)       |
| Greece   | 1995 | Male   | 40 to 44 | 95%<br>(90-98%)                | 5.4%<br>(2.2-10%)        | 5.9<br>(4.4-7.8)                            | 9.4%<br>(6.1-13%)                    | 15%<br>(9.1-21%)                    | 120<br>(69-170)     | 6800<br>(4300-9300)       |
| Greece   | 1995 | Male   | 45 to 49 | 96%<br>(92-98%)                | 4.3%<br>(2.1-8.1%)       | 7.6<br>(5.6-9.9)                            | 12%<br>(8.2-16%)                     | 18%<br>(12-24%)                     | 210<br>(140-280)    | 10000<br>(7100-13000)     |
| Greece   | 1995 | Male   | 50 to 54 | 96%<br>(93-98%)                | 3.8%<br>(2.1-6.8%)       | 8.4<br>(6.3-11)                             | 13%<br>(9.6-17%)                     | 19%<br>(13-24%)                     | 270<br>(200-350)    | 11000<br>(8400-14000)     |
| Greece   | 1995 | Male   | 55 to 59 | 96%<br>(93-98%)                | 4.1%<br>(2.4-6.6%)       | 8.4<br>(6.4-11)                             | 13%<br>(9.7-17%)                     | 18%<br>(13-23%)                     | 460<br>(340-590)    | 16000<br>(12000-21000)    |
| Greece   | 1995 | Male   | 60 to 64 | 95%<br>(92-97%)                | 5.1%<br>(3.2-7.8%)       | 8<br>(5.9-10)                               | 13%<br>(8.9-17%)                     | 16%<br>(11-21%)                     | 690<br>(470-890)    | 21000<br>(14000-26000)    |
| Greece   | 1995 | Male   | 65 to 69 | 93%<br>(90-96%)                | 6.6%<br>(4-10%)          | 7.3<br>(5.7-9.2)                            | 13%<br>(9.1-16%)                     | 16%<br>(11-20%)                     | 970<br>(680-1300)   | 24000<br>(17000-31000)    |
| Greece   | 1995 | Male   | 70 to 74 | 93%<br>(89-95%)                | 7%<br>(4.6-11%)          | 6.6<br>(4.9-8.6)                            | 12%<br>(8.3-17%)                     | 15%<br>(9.3-20%)                    | 950<br>(600-1300)   | 19000<br>(12000-25000)    |
| Greece   | 1995 | Male   | 75 to 79 | 94%<br>(89-96%)                | 6.4%<br>(3.5-11%)        | 6.1<br>(4.3-8.2)                            | 12%<br>(6.6-16%)                     | 13%<br>(7.5-19%)                    | 930<br>(520-1300)   | 14000<br>(8100-20000)     |
| Greece   | 1995 | Male   | 80 to 84 | 93%<br>(88-96%)                | 7.1%<br>(3.7-12%)        | 5.6<br>(4.1-7.5)                            | 11%<br>(6.7-16%)                     | 13%<br>(7.5-18%)                    | 1000<br>(600-1500)  | 11000<br>(6600-16000)     |
| Greece   | 1995 | Male   | 85 to 89 | 91%<br>(85-95%)                | 9%<br>(5.1-15%)          | 5.1<br>(3.6-6.9)                            | 9.6%<br>(4.9-15%)                    | 11%<br>(5.4-17%)                    | 770<br>(390-1200)   | 6000<br>(3100-9300)       |
| Greece   | 1995 | Male   | 90 to 94 | 90%<br>(84-94%)                | 10%<br>(5.6-16%)         | 4.8<br>(3.1-6.8)                            | 8%<br>(2.8-13%)                      | 8.9%<br>(2.8-15%)                   | 310<br>(97-540)     | 1700<br>(600-2900)        |
| Greece   | 1995 | Male   | 95 plus  | 89%<br>(82-95%)                | 11%<br>(5.2-18%)         | 4.4<br>(2.4-6.9)                            | 7.1%<br>(0.86-14%)                   | 7.7%<br>(0.4-16%)                   | 94<br>(4.8-190)     | 340<br>(41-660)           |
| Greece   | 2000 | Female | All Ages | 77%<br>(72-81%)                | 23%<br>(19-28%)          | 2.2<br>(1.9-2.5)                            | 2.7%<br>(1.2-4.4%)                   | 2.7%<br>(-0.41-6%)                  | 1300<br>(-200-2900) | 38000<br>(18000-60000)    |
| Greece   | 2000 | Female | 15 to 19 | 71%<br>(56-84%)                | 29%<br>(16-44%)          | 1.5<br>(0.99-2.2)                           | 2.1%<br>(1.1-3.2%)                   | 7.1%<br>(3.2-12%)                   | 6.2<br>(2.8-11)     | 730<br>(420-1100)         |
| Greece   | 2000 | Female | 20 to 24 | 77%<br>(63-87%)                | 23%<br>(13-37%)          | 1.9<br>(1.2-2.7)                            | 2.7%<br>(1.8-3.7%)                   | 7.1%<br>(3.2-11%)                   | 8.6<br>(3.8-14)     | 1300<br>(810-1900)        |

| Location | Year | Sex    | Age      | Prevalence of current drinkers | Prevalence of abstainers | Population average of standard drinks daily | Percent of total attributable deaths | Percent of total attributable DALYs | Attributable deaths | Attributable DALYs        |
|----------|------|--------|----------|--------------------------------|--------------------------|---------------------------------------------|--------------------------------------|-------------------------------------|---------------------|---------------------------|
| Greece   | 2000 | Female | 25 to 29 | 81%<br>(69-90%)                | 19%<br>(10-31%)          | 1.9<br>(1.3-2.7)                            | 2.2%<br>(1.5-3.1%)                   | 6.5%<br>(3.1-10%)                   | 8.7<br>(4.2-14)     | 1200<br>(770-1700)        |
| Greece   | 2000 | Female | 30 to 34 | 82%<br>(69-89%)                | 18%<br>(11-31%)          | 2.2<br>(1.5-3)                              | 2.1%<br>(1.3-3%)                     | 6.7%<br>(3.8-10%)                   | 12<br>(6.8-18)      | 1300<br>(800-1800)        |
| Greece   | 2000 | Female | 35 to 39 | 80%<br>(72-87%)                | 20%<br>(13-28%)          | 2.7<br>(1.9-3.9)                            | 2.6%<br>(1.7-3.7%)                   | 8.4%<br>(5.1-12%)                   | 20<br>(12-29)       | 1600<br>(1000-2200)       |
| Greece   | 2000 | Female | 40 to 44 | 81%<br>(73-87%)                | 19%<br>(13-27%)          | 3.1<br>(2.2-4.2)                            | 3.2%<br>(2.1-4.5%)                   | 9.6%<br>(6.3-13%)                   | 35<br>(23-48)       | 2200<br>(1500-3100)       |
| Greece   | 2000 | Female | 45 to 49 | 84%<br>(78-88%)                | 16%<br>(12-22%)          | 3.2<br>(2.3-4.4)                            | 3.7%<br>(2.3-5.4%)                   | 9.6%<br>(6.2-13%)                   | 52<br>(33-72)       | 2700<br>(1700-3800)       |
| Greece   | 2000 | Female | 50 to 54 | 85%<br>(80-89%)                | 15%<br>(11-20%)          | 3.3<br>(2.3-4.4)                            | 4.1%<br>(2.4-6%)                     | 9.3%<br>(5.9-13%)                   | 74<br>(47-100)      | 3300<br>(2000-4600)       |
| Greece   | 2000 | Female | 55 to 59 | 84%<br>(79-88%)                | 16%<br>(12-21%)          | 3.3<br>(2.4-4.4)                            | 4.3%<br>(2.4-6.2%)                   | 8.7%<br>(5.2-12%)                   | 84<br>(51-120)      | 3200<br>(1900-4600)       |
| Greece   | 2000 | Female | 60 to 64 | 81%<br>(75-86%)                | 19%<br>(14-25%)          | 3.1<br>(2.2-4.3)                            | 4.1%<br>(2-6.5%)                     | 7.4%<br>(3.7-11%)                   | 130<br>(68-210)     | 4300<br>(2100-6600)       |
| Greece   | 2000 | Female | 65 to 69 | 76%<br>(69-83%)                | 24%<br>(17-31%)          | 2.8<br>(2.1-3.6)                            | 3.8%<br>(1.7-6.1%)                   | 6%<br>(2.7-9.6%)                    | 190<br>(87-310)     | 4800<br>(2100-7800)       |
| Greece   | 2000 | Female | 70 to 74 | 74%<br>(66-81%)                | 26%<br>(19-34%)          | 2.5<br>(1.7-3.4)                            | 3.5%<br>(0.81-6.4%)                  | 5%<br>(1.2-8.9%)                    | 280<br>(70-510)     | 5600<br>(1300-10000)      |
| Greece   | 2000 | Female | 75 to 79 | 75%<br>(67-82%)                | 25%<br>(18-33%)          | 2.3<br>(1.6-3.3)                            | 2.6%<br>(-0.72-6.2%)                 | 3.3%<br>(-1.1-7.9%)                 | 230<br>(-77-550)    | 3600<br>(-1000-8300)      |
| Greece   | 2000 | Female | 80 to 84 | 74%<br>(64-82%)                | 26%<br>(18-36%)          | 2.1<br>(1.5-3)                              | 1.6%<br>(-1.6-5%)                    | 1.9%<br>(-2.3-6%)                   | 170<br>(-210-540)   | 1900<br>(-1900-6000)      |
| Greece   | 2000 | Female | 85 to 89 | 71%<br>(59-79%)                | 29%<br>(21-41%)          | 1.9<br>(1.3-2.7)                            | 0.67%<br>(-2.4-3.8%)                 | 0.63%<br>(-3.1-4.4%)                | 58<br>(-280-410)    | 570<br>(-2000-3200)       |
| Greece   | 2000 | Female | 90 to 94 | 68%<br>(57-78%)                | 32%<br>(22-43%)          | 1.7<br>(1.1-2.6)                            | -0.1%<br>(-3-3.1%)                   | -0.35%<br>(-3.8-3.5%)               | -22<br>(-230-210)   | -39<br>(-1100-1200)       |
| Greece   | 2000 | Female | 95 plus  | 67%<br>(53-79%)                | 33%<br>(21-47%)          | 1.5<br>(0.8-2.6)                            | -0.66%<br>(-3.6-2.9%)                | -1%<br>(-4.6-3.2%)                  | -27<br>(-120-85)    | -69<br>(-380-300)         |
| Greece   | 2000 | Male   | All Ages | 91%<br>(87-93%)                | 9.2%<br>(6.8-13%)        | 4.6<br>(4-5.3)                              | 10%<br>(7.5-13%)                     | 12%<br>(8-16%)                      | 6600<br>(4400-8800) | 160000<br>(120000-200000) |
| Greece   | 2000 | Male   | 15 to 19 | 83%<br>(72-91%)                | 17%<br>(8.8-28%)         | 2.4<br>(1.6-3.3)                            | 6.3%<br>(3.5-9.3%)                   | 12%<br>(5.1-18%)                    | 31<br>(14-49)       | 2800<br>(1600-4100)       |
| Greece   | 2000 | Male   | 20 to 24 | 89%<br>(80-94%)                | 11%<br>(5.7-20%)         | 3.6<br>(2.5-5)                              | 11%<br>(6.9-15%)                     | 15%<br>(8-23%)                      | 77<br>(40-120)      | 7100<br>(4600-9700)       |
| Greece   | 2000 | Male   | 25 to 29 | 92%<br>(86-96%)                | 8.4%<br>(4.1-14%)        | 4.4<br>(3.1-5.9)                            | 10%<br>(6.8-14%)                     | 16%<br>(8.7-23%)                    | 79<br>(43-120)      | 6800<br>(4300-9400)       |
| Greece   | 2000 | Male   | 30 to 34 | 93%<br>(87-97%)                | 6.6%<br>(3-13%)          | 4.7<br>(3.5-6.2)                            | 8.7%<br>(5.6-12%)                    | 14%<br>(8.1-21%)                    | 74<br>(42-110)      | 5900<br>(3700-8100)       |
| Greece   | 2000 | Male   | 35 to 39 | 94%<br>(89-97%)                | 5.8%<br>(2.6-11%)        | 4.7<br>(3.4-6.6)                            | 7.7%<br>(4.6-11%)                    | 13%<br>(6.5-20%)                    | 72<br>(37-110)      | 5100<br>(3100-7400)       |
| Greece   | 2000 | Male   | 40 to 44 | 95%<br>(90-98%)                | 4.9%<br>(2.1-9.5%)       | 5.5<br>(4.2-7.4)                            | 8.5%<br>(5.1-12%)                    | 14%<br>(7.1-20%)                    | 110<br>(59-170)     | 6600<br>(3800-9500)       |

| Location | Year | Sex    | Age      | Prevalence of current drinkers | Prevalence of abstainers | Population average of standard drinks daily | Percent of total attributable deaths | Percent of total attributable DALYs | Attributable deaths | Attributable DALYs     |
|----------|------|--------|----------|--------------------------------|--------------------------|---------------------------------------------|--------------------------------------|-------------------------------------|---------------------|------------------------|
| Greece   | 2000 | Male   | 45 to 49 | 96%<br>(93-98%)                | 3.9%<br>(2.1-7.2%)       | 7.1<br>(5.2-9.2)                            | 11%<br>(7.1-15%)                     | 17%<br>(10-22%)                     | 200<br>(130-270)    | 9900<br>(6400-13000)   |
| Greece   | 2000 | Male   | 50 to 54 | 97%<br>(94-98%)                | 3.4%<br>(2-5.7%)         | 7.9<br>(5.9-10)                             | 12%<br>(8.7-16%)                     | 17%<br>(12-22%)                     | 310<br>(220-410)    | 13000<br>(9400-17000)  |
| Greece   | 2000 | Male   | 55 to 59 | 96%<br>(95-98%)                | 3.6%<br>(2.3-5.4%)       | 7.9<br>(6-10)                               | 12%<br>(8.7-16%)                     | 17%<br>(12-21%)                     | 360<br>(250-460)    | 13000<br>(9200-17000)  |
| Greece   | 2000 | Male   | 60 to 64 | 95%<br>(93-97%)                | 4.6%<br>(3-6.7%)         | 7.5<br>(5.5-9.8)                            | 12%<br>(7.7-16%)                     | 15%<br>(9.4-20%)                    | 570<br>(360-750)    | 17000<br>(11000-22000) |
| Greece   | 2000 | Male   | 65 to 69 | 94%<br>(91-96%)                | 6.2%<br>(4-8.8%)         | 6.8<br>(5.3-8.6)                            | 12%<br>(7.8-15%)                     | 14%<br>(9.5-19%)                    | 830<br>(560-1100)   | 21000<br>(14000-27000) |
| Greece   | 2000 | Male   | 70 to 74 | 93%<br>(90-95%)                | 6.7%<br>(4.6-9.8%)       | 6.2<br>(4.7-7.9)                            | 11%<br>(6.8-15%)                     | 13%<br>(7.9-18%)                    | 1100<br>(660-1500)  | 21000<br>(13000-29000) |
| Greece   | 2000 | Male   | 75 to 79 | 94%<br>(90-96%)                | 6.2%<br>(3.7-9.8%)       | 5.6<br>(4.1-7.5)                            | 10%<br>(5.3-15%)                     | 12%<br>(5.9-17%)                    | 930<br>(470-1400)   | 14000<br>(7300-20000)  |
| Greece   | 2000 | Male   | 80 to 84 | 93%<br>(88-96%)                | 7%<br>(3.9-12%)          | 5.2<br>(3.8-6.8)                            | 9.4%<br>(5-14%)                      | 11%<br>(5.4-16%)                    | 840<br>(430-1200)   | 9400<br>(5000-14000)   |
| Greece   | 2000 | Male   | 85 to 89 | 91%<br>(85-95%)                | 9.1%<br>(5.3-15%)        | 4.7<br>(3.3-6.4)                            | 8.1%<br>(3.8-13%)                    | 9.1%<br>(4-15%)                     | 620<br>(270-1000)   | 4900<br>(2300-7900)    |
| Greece   | 2000 | Male   | 90 to 94 | 90%<br>(84-94%)                | 10%<br>(5.8-16%)         | 4.4<br>(2.9-6.3)                            | 6.7%<br>(1.8-12%)                    | 7.4%<br>(1.5-14%)                   | 310<br>(67-580)     | 1700<br>(450-3100)     |
| Greece   | 2000 | Male   | 95 plus  | 89%<br>(82-95%)                | 11%<br>(5.3-18%)         | 4<br>(2.3-6.4)                              | 5.9%<br>(0.28-13%)                   | 6.4%<br>(-0.3-14%)                  | 92<br>(-4.4-210)    | 340<br>(16-720)        |
| Greece   | 2005 | Female | All Ages | 77%<br>(73-80%)                | 23%<br>(20-27%)          | 2.1<br>(1.8-2.5)                            | 2.3%<br>(1-3.8%)                     | 2.2%<br>(-0.59-5%)                  | 1100<br>(-290-2500) | 33000<br>(14000-54000) |
| Greece   | 2005 | Female | 15 to 19 | 73%<br>(58-85%)                | 27%<br>(15-42%)          | 1.5<br>(1-2.1)                              | 1.9%<br>(1.1-2.7%)                   | 7.1%<br>(3.2-12%)                   | 4.5<br>(2.1-7.5)    | 570<br>(340-830)       |
| Greece   | 2005 | Female | 20 to 24 | 80%<br>(66-88%)                | 20%<br>(12-34%)          | 1.9<br>(1.2-2.8)                            | 2.5%<br>(1.6-3.4%)                   | 6.8%<br>(3-11%)                     | 6.7<br>(3-11)       | 1100<br>(700-1600)     |
| Greece   | 2005 | Female | 25 to 29 | 83%<br>(72-90%)                | 17%<br>(9.7-28%)         | 1.9<br>(1.3-2.7)                            | 2.1%<br>(1.4-2.9%)                   | 6.1%<br>(3-9.6%)                    | 7.8<br>(3.8-12)     | 1100<br>(710-1600)     |
| Greece   | 2005 | Female | 30 to 34 | 83%<br>(73-90%)                | 17%<br>(10-27%)          | 2.2<br>(1.5-3)                              | 2%<br>(1.3-2.8%)                     | 6.4%<br>(3.6-9.9%)                  | 10<br>(5.8-16)      | 1100<br>(730-1600)     |
| Greece   | 2005 | Female | 35 to 39 | 81%<br>(74-88%)                | 19%<br>(12-26%)          | 2.7<br>(1.9-3.8)                            | 2.4%<br>(1.6-3.4%)                   | 8%<br>(4.8-12%)                     | 19<br>(12-28)       | 1600<br>(1000-2300)    |
| Greece   | 2005 | Female | 40 to 44 | 82%<br>(76-87%)                | 18%<br>(13-24%)          | 3.1<br>(2.2-4.1)                            | 3%<br>(1.9-4.2%)                     | 9%<br>(5.9-13%)                     | 32<br>(21-45)       | 2100<br>(1400-2900)    |
| Greece   | 2005 | Female | 45 to 49 | 85%<br>(81-88%)                | 15%<br>(12-19%)          | 3.2<br>(2.3-4.2)                            | 3.4%<br>(2-4.9%)                     | 8.8%<br>(5.5-12%)                   | 50<br>(31-70)       | 2600<br>(1600-3700)    |
| Greece   | 2005 | Female | 50 to 54 | 85%<br>(82-89%)                | 15%<br>(11-18%)          | 3.2<br>(2.3-4.3)                            | 3.7%<br>(2.1-5.4%)                   | 8.4%<br>(5-12%)                     | 63<br>(38-88)       | 2800<br>(1700-4000)    |
| Greece   | 2005 | Female | 55 to 59 | 84%<br>(80-88%)                | 16%<br>(12-20%)          | 3.2<br>(2.3-4.2)                            | 3.9%<br>(2.2-5.7%)                   | 7.9%<br>(4.7-11%)                   | 89<br>(53-130)      | 3400<br>(2000-5000)    |
| Greece   | 2005 | Female | 60 to 64 | 80%<br>(76-84%)                | 20%<br>(16-24%)          | 3<br>(2.1-4)                                | 3.5%<br>(1.5-5.6%)                   | 6.5%<br>(3.1-10%)                   | 88<br>(42-140)      | 2800<br>(1300-4600)    |

| Location | Year | Sex    | Age      | Prevalence of current drinkers | Prevalence of abstainers | Population average of standard drinks daily | Percent of total attributable deaths | Percent of total attributable DALYs | Attributable deaths | Attributable DALYs        |
|----------|------|--------|----------|--------------------------------|--------------------------|---------------------------------------------|--------------------------------------|-------------------------------------|---------------------|---------------------------|
| Greece   | 2005 | Female | 65 to 69 | 74%<br>(68-79%)                | 26%<br>(21-32%)          | 2.6<br>(1.9-3.3)                            | 3.2%<br>(1.4-5%)                     | 5.4%<br>(2.4-8.5%)                  | 150<br>(65-230)     | 3800<br>(1600-5900)       |
| Greece   | 2005 | Female | 70 to 74 | 70%<br>(64-76%)                | 30%<br>(24-36%)          | 2.3<br>(1.6-3)                              | 2.9%<br>(0.68-5.3%)                  | 4.4%<br>(1.1-7.8%)                  | 210<br>(53-380)     | 4300<br>(1000-7600)       |
| Greece   | 2005 | Female | 75 to 79 | 72%<br>(63-78%)                | 28%<br>(22-37%)          | 2.1<br>(1.4-2.9)                            | 2.1%<br>(-0.56-5.1%)                 | 2.8%<br>(-0.84-6.7%)                | 240<br>(-75-590)    | 3800<br>(-980-9100)       |
| Greece   | 2005 | Female | 80 to 84 | 69%<br>(58-78%)                | 31%<br>(22-42%)          | 1.9<br>(1.3-2.7)                            | 1.3%<br>(-1.4-4%)                    | 1.5%<br>(-2.1-5%)                   | 160<br>(-210-530)   | 1900<br>(-2100-5900)      |
| Greece   | 2005 | Female | 85 to 89 | 65%<br>(53-74%)                | 35%<br>(26-47%)          | 1.6<br>(1.1-2.3)                            | 0.52%<br>(-2-3.1%)                   | 0.47%<br>(-2.6-3.7%)                | 42<br>(-240-340)    | 440<br>(-1700-2600)       |
| Greece   | 2005 | Female | 90 to 94 | 62%<br>(50-72%)                | 38%<br>(28-50%)          | 1.5<br>(0.91-2.2)                           | -0.17%<br>(-2.5-2.5%)                | -0.41%<br>(-3.4-2.9%)               | -26<br>(-210-180)   | -67<br>(-1000-1000)       |
| Greece   | 2005 | Female | 95 plus  | 61%<br>(47-74%)                | 39%<br>(26-53%)          | 1.3<br>(0.67-2.2)                           | -0.65%<br>(-3.3-2.3%)                | -1%<br>(-4-2.5%)                    | -31<br>(-130-78)    | -80<br>(-400-280)         |
| Greece   | 2005 | Male   | All Ages | 92%<br>(89-94%)                | 8.2%<br>(6.2-11%)        | 4.6<br>(4-5.3)                              | 9.4%<br>(7-12%)                      | 11%<br>(7.1-15%)                    | 6100<br>(3900-8500) | 150000<br>(110000-190000) |
| Greece   | 2005 | Male   | 15 to 19 | 85%<br>(75-92%)                | 15%<br>(8.1-25%)         | 2.4<br>(1.6-3.4)                            | 6.1%<br>(3.5-9.1%)                   | 12%<br>(5.2-18%)                    | 23<br>(10-36)       | 2200<br>(1200-3200)       |
| Greece   | 2005 | Male   | 20 to 24 | 90%<br>(83-95%)                | 9.8%<br>(5.2-17%)        | 3.6<br>(2.5-5)                              | 11%<br>(6.8-15%)                     | 15%<br>(7.8-22%)                    | 65<br>(34-99)       | 6100<br>(4000-8500)       |
| Greece   | 2005 | Male   | 25 to 29 | 93%<br>(87-96%)                | 7.4%<br>(3.9-13%)        | 4.3<br>(3.1-5.7)                            | 9.8%<br>(6.3-13%)                    | 15%<br>(7.8-22%)                    | 72<br>(38-100)      | 6300<br>(4100-8700)       |
| Greece   | 2005 | Male   | 30 to 34 | 94%<br>(89-97%)                | 6.1%<br>(2.8-11%)        | 4.6<br>(3.5-6)                              | 8.2%<br>(5.4-11%)                    | 14%<br>(7.9-20%)                    | 64<br>(36-93)       | 5300<br>(3300-7200)       |
| Greece   | 2005 | Male   | 35 to 39 | 95%<br>(90-98%)                | 5.3%<br>(2.4-9.6%)       | 4.6<br>(3.3-6.4)                            | 7.3%<br>(4.5-11%)                    | 12%<br>(6.1-19%)                    | 72<br>(37-110)      | 5200<br>(3200-7700)       |
| Greece   | 2005 | Male   | 40 to 44 | 95%<br>(91-98%)                | 4.5%<br>(2-8.5%)         | 5.4<br>(4-7.2)                              | 8.1%<br>(4.8-12%)                    | 13%<br>(6.6-20%)                    | 100<br>(52-160)     | 6200<br>(3700-9100)       |
| Greece   | 2005 | Male   | 45 to 49 | 96%<br>(94-98%)                | 3.5%<br>(2-6.3%)         | 6.9<br>(5.1-8.9)                            | 11%<br>(6.8-14%)                     | 16%<br>(9.5-22%)                    | 200<br>(110-270)    | 9800<br>(6100-13000)      |
| Greece   | 2005 | Male   | 50 to 54 | 97%<br>(95-98%)                | 3%<br>(1.8-5.1%)         | 7.7<br>(5.7-9.7)                            | 12%<br>(8-15%)                       | 17%<br>(11-22%)                     | 290<br>(190-380)    | 12000<br>(8300-16000)     |
| Greece   | 2005 | Male   | 55 to 59 | 97%<br>(95-98%)                | 3.3%<br>(2.2-4.9%)       | 7.7<br>(5.9-9.8)                            | 12%<br>(7.9-15%)                     | 16%<br>(10-21%)                     | 420<br>(270-550)    | 15000<br>(10000-20000)    |
| Greece   | 2005 | Male   | 60 to 64 | 96%<br>(94-97%)                | 4.3%<br>(3-6.1%)         | 7.3<br>(5.4-9.4)                            | 11%<br>(6.9-15%)                     | 14%<br>(8.6-19%)                    | 440<br>(270-590)    | 14000<br>(8500-18000)     |
| Greece   | 2005 | Male   | 65 to 69 | 94%<br>(92-96%)                | 5.8%<br>(3.9-8.1%)       | 6.7<br>(5.2-8.3)                            | 11%<br>(7-14%)                       | 13%<br>(8.5-18%)                    | 680<br>(430-910)    | 17000<br>(11000-23000)    |
| Greece   | 2005 | Male   | 70 to 74 | 94%<br>(91-96%)                | 6.3%<br>(4.5-8.6%)       | 6<br>(4.5-7.7)                              | 10%<br>(6-14%)                       | 12%<br>(7-17%)                      | 940<br>(540-1300)   | 19000<br>(11000-26000)    |
| Greece   | 2005 | Male   | 75 to 79 | 94%<br>(91-97%)                | 5.8%<br>(3.4-9.2%)       | 5.5<br>(4-7.2)                              | 9.1%<br>(4.5-14%)                    | 11%<br>(5.1-16%)                    | 1100<br>(520-1600)  | 17000<br>(8300-25000)     |
| Greece   | 2005 | Male   | 80 to 84 | 93%<br>(88-96%)                | 6.7%<br>(3.7-12%)        | 5<br>(3.7-6.6)                              | 8.4%<br>(4.2-13%)                    | 9.5%<br>(4.3-15%)                   | 870<br>(400-1300)   | 10000<br>(4900-15000)     |

| Location | Year | Sex    | Age      | Prevalence of current drinkers | Prevalence of abstainers | Population average of standard drinks daily | Percent of total attributable deaths | Percent of total attributable DALYs | Attributable deaths | Attributable DALYs       |
|----------|------|--------|----------|--------------------------------|--------------------------|---------------------------------------------|--------------------------------------|-------------------------------------|---------------------|--------------------------|
| Greece   | 2005 | Male   | 85 to 89 | 91%<br>(86-95%)                | 8.8%<br>(5.1-14%)        | 4.6<br>(3.2-6.1)                            | 7.2%<br>(3.2-12%)                    | 8.1%<br>(3.3-13%)                   | 500<br>(210-840)    | 4100<br>(1800-6700)      |
| Greece   | 2005 | Male   | 90 to 94 | 90%<br>(85-94%)                | 9.8%<br>(5.7-15%)        | 4.2<br>(2.8-6.1)                            | 6%<br>(1.4-11%)                      | 6.5%<br>(1.1-13%)                   | 250<br>(43-490)     | 1400<br>(330-2600)       |
| Greece   | 2005 | Male   | 95 plus  | 89%<br>(82-95%)                | 11%<br>(5.2-18%)         | 3.9<br>(2.3-6.2)                            | 5.2%<br>(-0.15-12%)                  | 5.5%<br>(-0.71-13%)                 | 86<br>(-11-210)     | 320<br>(-9.5-740)        |
| Greece   | 2010 | Female | All Ages | 78%<br>(74-81%)                | 22%<br>(19-26%)          | 2.1<br>(1.8-2.5)                            | 2.1%<br>(0.76-3.4%)                  | 1.7%<br>(-1.1-4.5%)                 | 940<br>(-580-2400)  | 30000<br>(11000-50000)   |
| Greece   | 2010 | Female | 15 to 19 | 76%<br>(64-86%)                | 24%<br>(14-36%)          | 1.6<br>(1.1-2.3)                            | 1.8%<br>(1.1-2.5%)                   | 6.9%<br>(3.3-11%)                   | 3.7<br>(1.7-5.9)    | 500<br>(310-740)         |
| Greece   | 2010 | Female | 20 to 24 | 82%<br>(70-90%)                | 18%<br>(10-30%)          | 2<br>(1.3-2.9)                              | 2.5%<br>(1.6-3.4%)                   | 6.7%<br>(3.1-11%)                   | 5.5<br>(2.5-8.9)    | 920<br>(580-1300)        |
| Greece   | 2010 | Female | 25 to 29 | 84%<br>(74-91%)                | 16%<br>(9.5-26%)         | 1.9<br>(1.3-2.7)                            | 2%<br>(1.3-2.7%)                     | 5.8%<br>(2.8-9.1%)                  | 6.1<br>(3-9.7)      | 990<br>(620-1400)        |
| Greece   | 2010 | Female | 30 to 34 | 84%<br>(75-90%)                | 16%<br>(9.6-25%)         | 2.2<br>(1.5-3.1)                            | 1.9%<br>(1.2-2.7%)                   | 6%<br>(3.1-9.5%)                    | 9.4<br>(4.9-15)     | 1100<br>(680-1600)       |
| Greece   | 2010 | Female | 35 to 39 | 82%<br>(76-87%)                | 18%<br>(13-24%)          | 2.7<br>(1.8-3.9)                            | 2.3%<br>(1.5-3.3%)                   | 7.8%<br>(4.4-11%)                   | 17<br>(9.8-25)      | 1500<br>(920-2200)       |
| Greece   | 2010 | Female | 40 to 44 | 82%<br>(77-87%)                | 18%<br>(13-23%)          | 3<br>(2.1-4.1)                              | 2.8%<br>(1.8-4%)                     | 8.6%<br>(5.3-12%)                   | 31<br>(19-44)       | 2100<br>(1300-3000)      |
| Greece   | 2010 | Female | 45 to 49 | 85%<br>(81-88%)                | 15%<br>(12-19%)          | 3.2<br>(2.3-4.2)                            | 3.2%<br>(1.9-4.7%)                   | 8.4%<br>(5.2-12%)                   | 46<br>(29-65)       | 2500<br>(1500-3600)      |
| Greece   | 2010 | Female | 50 to 54 | 86%<br>(83-89%)                | 14%<br>(11-17%)          | 3.2<br>(2.3-4.2)                            | 3.5%<br>(2-5.2%)                     | 7.9%<br>(4.7-11%)                   | 66<br>(39-95)       | 3000<br>(1700-4400)      |
| Greece   | 2010 | Female | 55 to 59 | 85%<br>(82-88%)                | 15%<br>(12-18%)          | 3.2<br>(2.3-4.3)                            | 3.7%<br>(1.9-5.4%)                   | 7.4%<br>(4.2-11%)                   | 81<br>(46-120)      | 3100<br>(1700-4600)      |
| Greece   | 2010 | Female | 60 to 64 | 80%<br>(76-83%)                | 20%<br>(17-24%)          | 2.9<br>(2.1-3.9)                            | 3.2%<br>(1.3-5.1%)                   | 6%<br>(2.7-9.3%)                    | 97<br>(44-150)      | 3200<br>(1300-5100)      |
| Greece   | 2010 | Female | 65 to 69 | 74%<br>(68-78%)                | 26%<br>(22-32%)          | 2.5<br>(1.8-3.3)                            | 2.9%<br>(1.1-4.7%)                   | 5%<br>(2.2-7.9%)                    | 100<br>(44-160)     | 2700<br>(1100-4300)      |
| Greece   | 2010 | Female | 70 to 74 | 70%<br>(64-75%)                | 30%<br>(25-36%)          | 2.2<br>(1.5-3)                              | 2.5%<br>(0.49-4.6%)                  | 4%<br>(0.87-7.2%)                   | 170<br>(37-300)     | 3400<br>(680-6300)       |
| Greece   | 2010 | Female | 75 to 79 | 71%<br>(64-77%)                | 29%<br>(23-36%)          | 2<br>(1.4-2.9)                              | 1.8%<br>(-0.59-4.6%)                 | 2.5%<br>(-0.88-6.1%)                | 190<br>(-69-490)    | 3100<br>(-990-7800)      |
| Greece   | 2010 | Female | 80 to 84 | 68%<br>(58-77%)                | 32%<br>(23-42%)          | 1.8<br>(1.2-2.5)                            | 1.1%<br>(-1.5-3.7%)                  | 1.2%<br>(-2.1-4.6%)                 | 150<br>(-250-550)   | 1800<br>(-2600-6300)     |
| Greece   | 2010 | Female | 85 to 89 | 63%<br>(52-72%)                | 37%<br>(28-48%)          | 1.5<br>(0.98-2.2)                           | 0.36%<br>(-2-2.9%)                   | 0.29%<br>(-2.7-3.4%)                | 34<br>(-320-410)    | 410<br>(-2300-3200)      |
| Greece   | 2010 | Female | 90 to 94 | 60%<br>(49-70%)                | 40%<br>(30-51%)          | 1.4<br>(0.84-2.1)                           | -0.28%<br>(-2.4-2.2%)                | -0.54%<br>(-3.1-2.5%)               | -37<br>(-210-170)   | -120<br>(-1000-930)      |
| Greece   | 2010 | Female | 95 plus  | 59%<br>(45-73%)                | 41%<br>(27-55%)          | 1.2<br>(0.62-2.1)                           | -0.74%<br>(-3.2-2.2%)                | -1.1%<br>(-4.1-2.4%)                | -39<br>(-140-81)    | -100<br>(-440-300)       |
| Greece   | 2010 | Male   | All Ages | 92%<br>(89-94%)                | 8%<br>(6-11%)            | 4.6<br>(3.9-5.3)                            | 8.7%<br>(6.3-12%)                    | 10%<br>(5.9-14%)                    | 5800<br>(3500-8300) | 140000<br>(99000-180000) |

| Location | Year | Sex    | Age      | Prevalence of current drinkers | Prevalence of abstainers | Population average of standard drinks daily | Percent of total attributable deaths | Percent of total attributable DALYs | Attributable deaths | Attributable DALYs    |
|----------|------|--------|----------|--------------------------------|--------------------------|---------------------------------------------|--------------------------------------|-------------------------------------|---------------------|-----------------------|
| Greece   | 2010 | Male   | 15 to 19 | 86%<br>(77-92%)                | 14%<br>(7.7-23%)         | 2.4<br>(1.6-3.4)                            | 5.7%<br>(3.4-8.2%)                   | 12%<br>(5.5-18%)                    | 18<br>(8.3-27)      | 1800<br>(1100-2500)   |
| Greece   | 2010 | Male   | 20 to 24 | 91%<br>(84-95%)                | 9%<br>(4.6-16%)          | 3.6<br>(2.5-5.1)                            | 10%<br>(6.7-14%)                     | 16%<br>(8.4-23%)                    | 47<br>(25-68)       | 4600<br>(3000-6300)   |
| Greece   | 2010 | Male   | 25 to 29 | 93%<br>(88-96%)                | 7.3%<br>(3.7-12%)        | 4.2<br>(3-5.7)                              | 9.3%<br>(6-13%)                      | 15%<br>(7.9-21%)                    | 61<br>(32-90)       | 5600<br>(3500-7600)   |
| Greece   | 2010 | Male   | 30 to 34 | 94%<br>(89-97%)                | 6%<br>(2.7-11%)          | 4.5<br>(3.3-6.1)                            | 7.7%<br>(5-11%)                      | 13%<br>(7.1-19%)                    | 60<br>(34-91)       | 5100<br>(3300-7000)   |
| Greece   | 2010 | Male   | 35 to 39 | 95%<br>(90-98%)                | 5.2%<br>(2.3-9.9%)       | 4.5<br>(3.1-6.5)                            | 6.7%<br>(4.1-10%)                    | 11%<br>(5.3-19%)                    | 60<br>(28-98)       | 4600<br>(2800-6900)   |
| Greece   | 2010 | Male   | 40 to 44 | 96%<br>(92-98%)                | 4.3%<br>(1.9-8%)         | 5.3<br>(3.8-7.1)                            | 7.7%<br>(4.5-11%)                    | 13%<br>(6.2-20%)                    | 100<br>(51-160)     | 6300<br>(3800-9300)   |
| Greece   | 2010 | Male   | 45 to 49 | 97%<br>(94-98%)                | 3.3%<br>(1.8-5.7%)       | 6.8<br>(5-8.7)                              | 11%<br>(6.6-14%)                     | 16%<br>(9.3-22%)                    | 190<br>(110-260)    | 9600<br>(5900-13000)  |
| Greece   | 2010 | Male   | 50 to 54 | 97%<br>(95-98%)                | 2.9%<br>(1.7-4.6%)       | 7.6<br>(5.7-9.5)                            | 11%<br>(7.7-15%)                     | 16%<br>(10-22%)                     | 300<br>(190-390)    | 13000<br>(8300-16000) |
| Greece   | 2010 | Male   | 55 to 59 | 97%<br>(95-98%)                | 3.3%<br>(2.2-4.7%)       | 7.5<br>(5.6-9.8)                            | 11%<br>(7.6-15%)                     | 15%<br>(9.6-20%)                    | 380<br>(240-510)    | 14000<br>(9200-18000) |
| Greece   | 2010 | Male   | 60 to 64 | 96%<br>(94-97%)                | 4.4%<br>(3-6.2%)         | 7.1<br>(5.2-9.4)                            | 11%<br>(6.4-14%)                     | 13%<br>(7.8-18%)                    | 480<br>(280-650)    | 15000<br>(9200-20000) |
| Greece   | 2010 | Male   | 65 to 69 | 94%<br>(92-96%)                | 5.7%<br>(3.9-7.7%)       | 6.5<br>(5-8.2)                              | 9.8%<br>(6.3-13%)                    | 12%<br>(7.6-17%)                    | 500<br>(310-680)    | 13000<br>(8300-18000) |
| Greece   | 2010 | Male   | 70 to 74 | 94%<br>(92-96%)                | 6.2%<br>(4.5-8.3%)       | 5.9<br>(4.4-7.7)                            | 9.2%<br>(5.2-13%)                    | 11%<br>(6-16%)                      | 750<br>(410-1100)   | 16000<br>(8800-23000) |
| Greece   | 2010 | Male   | 75 to 79 | 94%<br>(91-96%)                | 5.7%<br>(3.5-8.9%)       | 5.4<br>(3.9-7.3)                            | 8.3%<br>(4.1-13%)                    | 9.7%<br>(4.6-15%)                   | 950<br>(450-1500)   | 15000<br>(7400-23000) |
| Greece   | 2010 | Male   | 80 to 84 | 94%<br>(89-96%)                | 6.4%<br>(3.7-11%)        | 5<br>(3.6-6.7)                              | 7.7%<br>(3.6-12%)                    | 8.8%<br>(3.7-14%)                   | 960<br>(400-1600)   | 11000<br>(5200-18000) |
| Greece   | 2010 | Male   | 85 to 89 | 91%<br>(86-95%)                | 8.9%<br>(5.4-14%)        | 4.5<br>(3.1-6)                              | 6.5%<br>(2.2-11%)                    | 7.3%<br>(2.2-13%)                   | 610<br>(180-1100)   | 5000<br>(1800-8500)   |
| Greece   | 2010 | Male   | 90 to 94 | 90%<br>(85-94%)                | 9.9%<br>(5.8-15%)        | 4.2<br>(2.7-5.9)                            | 5.4%<br>(0.84-11%)                   | 5.9%<br>(0.39-12%)                  | 250<br>(17-500)     | 1400<br>(220-2800)    |
| Greece   | 2010 | Male   | 95 plus  | 89%<br>(82-95%)                | 11%<br>(5.1-18%)         | 3.9<br>(2.2-6.2)                            | 4.7%<br>(-0.53-11%)                  | 5%<br>(-1.2-12%)                    | 81<br>(-20-200)     | 310<br>(-34-720)      |
| Greece   | 2016 | Female | All Ages | 78%<br>(75-82%)                | 22%<br>(18-25%)          | 2.2<br>(1.6-2.9)                            | 1.9%<br>(0.15-3.9%)                  | 1.3%<br>(-2.3-5.2%)                 | 810<br>(-1400-3200) | 29000<br>(1900-59000) |
| Greece   | 2016 | Female | 15 to 19 | 74%<br>(59-85%)                | 26%<br>(15-41%)          | 1.5<br>(0.91-2.3)                           | 1.6%<br>(1-2.5%)                     | 6.6%<br>(3-11%)                     | 2.8<br>(1.3-4.6)    | 400<br>(250-610)      |
| Greece   | 2016 | Female | 20 to 24 | 79%<br>(65-88%)                | 21%<br>(12-35%)          | 1.9<br>(1.1-3)                              | 2.4%<br>(1.6-3.4%)                   | 6.5%<br>(3.2-11%)                   | 4.4<br>(2.1-7.4)    | 800<br>(520-1100)     |
| Greece   | 2016 | Female | 25 to 29 | 81%<br>(69-90%)                | 19%<br>(10-31%)          | 1.8<br>(1.1-2.7)                            | 2%<br>(1.3-2.8%)                     | 5.9%<br>(2.9-9.6%)                  | 4.2<br>(2.1-6.6)    | 700<br>(440-990)      |
| Greece   | 2016 | Female | 30 to 34 | 82%<br>(69-89%)                | 18%<br>(11-31%)          | 2.1<br>(1.3-3.1)                            | 1.8%<br>(1.1-2.6%)                   | 5.8%<br>(2.8-9.3%)                  | 7.6<br>(3.6-12)     | 920<br>(540-1400)     |

| Location | Year | Sex    | Age      | Prevalence of current drinkers | Prevalence of abstainers | Population average of standard drinks daily | Percent of total attributable deaths | Percent of total attributable DALYs | Attributable deaths | Attributable DALYs       |
|----------|------|--------|----------|--------------------------------|--------------------------|---------------------------------------------|--------------------------------------|-------------------------------------|---------------------|--------------------------|
| Greece   | 2016 | Female | 35 to 39 | 81%<br>(72-87%)                | 19%<br>(13-28%)          | 2.6<br>(1.6-4)                              | 2.2%<br>(1.3-3.3%)                   | 7.7%<br>(3.8-12%)                   | 15<br>(7.3-23)      | 1300<br>(760-2000)       |
| Greece   | 2016 | Female | 40 to 44 | 82%<br>(74-88%)                | 18%<br>(12-26%)          | 3<br>(1.8-4.3)                              | 2.7%<br>(1.6-4.1%)                   | 8.6%<br>(4.7-12%)                   | 28<br>(15-42)       | 1900<br>(1100-2800)      |
| Greece   | 2016 | Female | 45 to 49 | 85%<br>(78-89%)                | 15%<br>(11-22%)          | 3.1<br>(2-4.5)                              | 3.1%<br>(1.7-4.8%)                   | 8.3%<br>(4.7-12%)                   | 45<br>(26-68)       | 2500<br>(1400-3700)      |
| Greece   | 2016 | Female | 50 to 54 | 86%<br>(81-90%)                | 14%<br>(9.9-19%)         | 3.2<br>(2.1-4.6)                            | 3.4%<br>(1.7-5.2%)                   | 7.8%<br>(4.3-12%)                   | 64<br>(34-96)       | 2900<br>(1600-4500)      |
| Greece   | 2016 | Female | 55 to 59 | 86%<br>(80-89%)                | 14%<br>(11-20%)          | 3.2<br>(2.1-4.6)                            | 3.5%<br>(1.6-5.7%)                   | 7.2%<br>(3.6-11%)                   | 85<br>(42-130)      | 3300<br>(1600-5300)      |
| Greece   | 2016 | Female | 60 to 64 | 84%<br>(78-88%)                | 16%<br>(12-22%)          | 3.1<br>(2-4.5)                              | 3.2%<br>(1-5.6%)                     | 6%<br>(2.2-10%)                     | 89<br>(33-150)      | 2900<br>(950-5200)       |
| Greece   | 2016 | Female | 65 to 69 | 80%<br>(72-85%)                | 20%<br>(15-28%)          | 2.8<br>(1.8-3.9)                            | 2.9%<br>(0.83-5.4%)                  | 5.1%<br>(1.7-9.2%)                  | 130<br>(44-230)     | 3400<br>(1000-6300)      |
| Greece   | 2016 | Female | 70 to 74 | 78%<br>(71-83%)                | 22%<br>(17-29%)          | 2.5<br>(1.6-3.7)                            | 2.6%<br>(0.13-5.4%)                  | 4.1%<br>(0.27-8.2%)                 | 140<br>(9.4-280)    | 2900<br>(140-6000)       |
| Greece   | 2016 | Female | 75 to 79 | 78%<br>(70-85%)                | 22%<br>(15-30%)          | 2.3<br>(1.5-3.5)                            | 1.9%<br>(-1.2-5.5%)                  | 2.5%<br>(-1.8-7.4%)                 | 190<br>(-140-560)   | 3100<br>(-1900-8800)     |
| Greece   | 2016 | Female | 80 to 84 | 77%<br>(67-84%)                | 23%<br>(16-33%)          | 2.1<br>(1.3-3.1)                            | 1%<br>(-2.2-4.5%)                    | 1.2%<br>(-3-5.5%)                   | 160<br>(-410-750)   | 1900<br>(-4100-8400)     |
| Greece   | 2016 | Female | 85 to 89 | 73%<br>(62-81%)                | 27%<br>(19-38%)          | 1.9<br>(1.1-2.9)                            | 0.24%<br>(-2.9-3.6%)                 | 0.099%<br>(-3.8-4.3%)               | 15<br>(-600-680)    | 360<br>(-4300-5400)      |
| Greece   | 2016 | Female | 90 to 94 | 70%<br>(59-79%)                | 30%<br>(21-41%)          | 1.7<br>(1-2.7)                              | -0.51%<br>(-3.4-2.7%)                | -0.87%<br>(-4.3-3%)                 | -95<br>(-480-330)   | -350<br>(-2300-1900)     |
| Greece   | 2016 | Female | 95 plus  | 69%<br>(56-80%)                | 31%<br>(20-44%)          | 1.5<br>(0.74-2.6)                           | -1.1%<br>(-4-2.6%)                   | -1.6%<br>(-5.1-2.8%)                | -71<br>(-240-120)   | -190<br>(-730-480)       |
| Greece   | 2016 | Male   | All Ages | 91%<br>(88-93%)                | 9.2%<br>(7-12%)          | 4.5<br>(3.3-5.9)                            | 8.1%<br>(4.8-11%)                    | 9%<br>(4-14%)                       | 5800<br>(2600-9300) | 130000<br>(74000-190000) |
| Greece   | 2016 | Male   | 15 to 19 | 84%<br>(72-92%)                | 16%<br>(8.3-28%)         | 2.3<br>(1.4-3.5)                            | 5.3%<br>(3.2-7.7%)                   | 11%<br>(5.5-18%)                    | 13<br>(6.3-21)      | 1400<br>(850-2000)       |
| Greece   | 2016 | Male   | 20 to 24 | 88%<br>(79-94%)                | 12%<br>(5.8-21%)         | 3.4<br>(2.1-5.1)                            | 9.9%<br>(6.5-14%)                    | 15%<br>(7.9-23%)                    | 38<br>(20-58)       | 3900<br>(2500-5500)      |
| Greece   | 2016 | Male   | 25 to 29 | 91%<br>(83-95%)                | 9.2%<br>(4.5-17%)        | 4<br>(2.5-5.7)                              | 9.2%<br>(5.9-13%)                    | 15%<br>(8-22%)                      | 40<br>(22-62)       | 3800<br>(2500-5300)      |
| Greece   | 2016 | Male   | 30 to 34 | 92%<br>(85-97%)                | 7.5%<br>(3.3-15%)        | 4.3<br>(2.8-6.1)                            | 7.4%<br>(4.6-10%)                    | 13%<br>(6.5-20%)                    | 46<br>(23-74)       | 4100<br>(2500-5900)      |
| Greece   | 2016 | Male   | 35 to 39 | 94%<br>(88-97%)                | 6.5%<br>(2.9-12%)        | 4.4<br>(2.7-6.6)                            | 6.6%<br>(3.8-10%)                    | 11%<br>(4.9-19%)                    | 51<br>(22-89)       | 4100<br>(2400-6400)      |
| Greece   | 2016 | Male   | 40 to 44 | 95%<br>(89-98%)                | 5.4%<br>(2.3-11%)        | 5.1<br>(3.3-7.4)                            | 7.5%<br>(4-12%)                      | 12%<br>(5.2-21%)                    | 89<br>(36-150)      | 5700<br>(2900-8900)      |
| Greece   | 2016 | Male   | 45 to 49 | 96%<br>(92-98%)                | 4.3%<br>(2.2-7.9%)       | 6.5<br>(4.4-9.2)                            | 9.9%<br>(5.7-14%)                    | 16%<br>(8-23%)                      | 180<br>(94-270)     | 9300<br>(5100-13000)     |
| Greece   | 2016 | Male   | 50 to 54 | 96%<br>(93-98%)                | 3.8%<br>(2.1-7%)         | 7.2<br>(5-10)                               | 11%<br>(6.3-15%)                     | 16%<br>(8.7-22%)                    | 260<br>(150-370)    | 11000<br>(6700-16000)    |



| Location | Year | Sex    | Age      | Prevalence of current drinkers | Prevalence of abstainers | Population average of standard drinks daily | Percent of total attributable deaths | Percent of total attributable DALYs | Attributable deaths  | Attributable DALYs    |
|----------|------|--------|----------|--------------------------------|--------------------------|---------------------------------------------|--------------------------------------|-------------------------------------|----------------------|-----------------------|
| Greece   | 2016 | Male   | 55 to 59 | 96%<br>(93-98%)                | 4.2%<br>(2.5-6.7%)       | 7.2<br>(4.9-10)                             | 11%<br>(5.9-15%)                     | 14%<br>(7.6-20%)                    | 360<br>(190-510)     | 13000<br>(7600-18000) |
| Greece   | 2016 | Male   | 60 to 64 | 95%<br>(92-97%)                | 5.1%<br>(3.2-7.9%)       | 6.8<br>(4.6-9.7)                            | 9.8%<br>(5.4-14%)                    | 13%<br>(6.6-18%)                    | 390<br>(200-570)     | 12000<br>(6500-18000) |
| Greece   | 2016 | Male   | 65 to 69 | 93%<br>(90-96%)                | 6.7%<br>(4.1-10%)        | 6.2<br>(4.3-8.6)                            | 9.1%<br>(5-13%)                      | 11%<br>(6.2-16%)                    | 550<br>(290-800)     | 14000<br>(7800-21000) |
| Greece   | 2016 | Male   | 70 to 74 | 93%<br>(89-95%)                | 7.1%<br>(4.6-11%)        | 5.6<br>(3.7-8)                              | 8.5%<br>(4.2-13%)                    | 10%<br>(5-16%)                      | 590<br>(270-920)     | 12000<br>(6000-19000) |
| Greece   | 2016 | Male   | 75 to 79 | 94%<br>(89-96%)                | 6.4%<br>(3.5-11%)        | 5.2<br>(3.3-7.6)                            | 7.7%<br>(3.2-12%)                    | 9.1%<br>(3.6-15%)                   | 820<br>(320-1400)    | 13000<br>(5500-22000) |
| Greece   | 2016 | Male   | 80 to 84 | 93%<br>(88-96%)                | 7.1%<br>(3.8-12%)        | 4.8<br>(3.1-7)                              | 7.2%<br>(2.5-12%)                    | 8.2%<br>(2.6-14%)                   | 1000<br>(300-1800)   | 12000<br>(4200-20000) |
| Greece   | 2016 | Male   | 85 to 89 | 91%<br>(85-95%)                | 9%<br>(5.2-15%)          | 4.4<br>(2.8-6.5)                            | 6.1%<br>(1.5-11%)                    | 6.9%<br>(1.3-14%)                   | 820<br>(160-1600)    | 6700<br>(1600-13000)  |
| Greece   | 2016 | Male   | 90 to 94 | 90%<br>(84-94%)                | 10%<br>(5.7-16%)         | 4.1<br>(2.5-6.1)                            | 5.1%<br>(0.25-11%)                   | 5.6%<br>(-0.22-12%)                 | 410<br>(-16-880)     | 2300<br>(110-4800)    |
| Greece   | 2016 | Male   | 95 plus  | 89%<br>(82-95%)                | 11%<br>(5.3-18%)         | 3.8<br>(2-6.2)                              | 4.4%<br>(-1.2-11%)                   | 4.6%<br>(-1.9-12%)                  | 120<br>(-52-320)     | 460<br>(-120-1100)    |
| Iceland  | 1990 | Female | All Ages | 85%<br>(81-88%)                | 15%<br>(12-19%)          | 1.4<br>(1.2-1.6)                            | 1.2%<br>(0.023-2.4%)                 | -0.29%<br>(-2.9-2.5%)               | -2.4<br>(-24-20)     | 330<br>(5.6-670)      |
| Iceland  | 1990 | Female | 15 to 19 | 85%<br>(76-92%)                | 15%<br>(8.1-24%)         | 1.2<br>(0.73-2)                             | 1.9%<br>(0.96-2.9%)                  | 6.3%<br>(2.1-11%)                   | 0.2<br>(0.065-0.35)  | 22<br>(11-34)         |
| Iceland  | 1990 | Female | 20 to 24 | 90%<br>(83-95%)                | 9.5%<br>(5-17%)          | 1.6<br>(0.84-2.4)                           | 2.3%<br>(1.5-3.3%)                   | 6.8%<br>(2.6-11%)                   | 0.17<br>(0.065-0.28) | 28<br>(17-41)         |
| Iceland  | 1990 | Female | 25 to 29 | 92%<br>(86-96%)                | 7.8%<br>(4.2-14%)        | 1.6<br>(0.94-2.5)                           | 2.1%<br>(1.2-3%)                     | 5.9%<br>(1.9-9.9%)                  | 0.23<br>(0.074-0.4)  | 30<br>(18-45)         |
| Iceland  | 1990 | Female | 30 to 34 | 93%<br>(88-97%)                | 6.9%<br>(3.4-12%)        | 1.7<br>(1.1-2.5)                            | 1.8%<br>(1.1-2.6%)                   | 6.2%<br>(2.9-10%)                   | 0.26<br>(0.12-0.42)  | 27<br>(17-39)         |
| Iceland  | 1990 | Female | 35 to 39 | 93%<br>(88-97%)                | 6.7%<br>(3.3-12%)        | 1.8<br>(0.98-2.8)                           | 2.3%<br>(1.3-3.5%)                   | 7.1%<br>(3.6-11%)                   | 0.51<br>(0.25-0.79)  | 36<br>(21-54)         |
| Iceland  | 1990 | Female | 40 to 44 | 93%<br>(88-96%)                | 6.9%<br>(3.6-12%)        | 2<br>(1.2-3)                                | 2.5%<br>(1.4-3.9%)                   | 7.8%<br>(4.3-12%)                   | 0.62<br>(0.34-0.94)  | 36<br>(21-54)         |
| Iceland  | 1990 | Female | 45 to 49 | 93%<br>(86-96%)                | 7.4%<br>(3.7-14%)        | 2.3<br>(1.3-3.7)                            | 3.6%<br>(1.9-5.9%)                   | 8.3%<br>(4.4-13%)                   | 1.2<br>(0.6-1.9)     | 54<br>(27-90)         |
| Iceland  | 1990 | Female | 50 to 54 | 91%<br>(84-94%)                | 9.3%<br>(5.5-16%)        | 2.5<br>(1.4-3.9)                            | 3.9%<br>(1.9-6.3%)                   | 7.7%<br>(4-12%)                     | 1.4<br>(0.7-2.1)     | 54<br>(26-86)         |
| Iceland  | 1990 | Female | 55 to 59 | 88%<br>(81-93%)                | 12%<br>(7-19%)           | 2.4<br>(1.4-3.7)                            | 3.5%<br>(1.4-6%)                     | 6.2%<br>(2.6-10%)                   | 1.8<br>(0.77-3)      | 61<br>(24-100)        |
| Iceland  | 1990 | Female | 60 to 64 | 84%<br>(76-91%)                | 16%<br>(9.2-24%)         | 2.3<br>(1.2-3.6)                            | 2.3%<br>(0.0082-5.2%)                | 3.8%<br>(0.19-8%)                   | 1.6<br>(0.08-3.5)    | 47<br>(0.16-100)      |
| Iceland  | 1990 | Female | 65 to 69 | 79%<br>(70-88%)                | 21%<br>(12-30%)          | 2<br>(1.3-2.9)                              | 0.98%<br>(-1.1-3.4%)                 | 1.5%<br>(-1.6-5.1%)                 | 0.86<br>(-0.94-2.9)  | 20<br>(-23-73)        |
| Iceland  | 1990 | Female | 70 to 74 | 77%<br>(66-85%)                | 23%<br>(15-34%)          | 1.8<br>(0.99-2.8)                           | -0.087%<br>(-2.5-2.9%)               | -0.13%<br>(-3.4-3.9%)               | -0.11<br>(-2.8-3.1)  | -1.8<br>(-55-62)      |

| Location | Year | Sex    | Age      | Prevalence of current drinkers | Prevalence of abstainers | Population average of standard drinks daily | Percent of total attributable deaths | Percent of total attributable DALYs | Attributable deaths | Attributable DALYs |
|----------|------|--------|----------|--------------------------------|--------------------------|---------------------------------------------|--------------------------------------|-------------------------------------|---------------------|--------------------|
| Iceland  | 1990 | Female | 75 to 79 | 76%<br>(64-85%)                | 24%<br>(15-36%)          | 1.6<br>(0.86-2.7)                           | -1%<br>(-3.7-2.1%)                   | -1.5%<br>(-4.8-2.7%)                | -1.7<br>(-5.7-3.1)  | -23<br>(-81-50)    |
| Iceland  | 1990 | Female | 80 to 84 | 75%<br>(62-85%)                | 25%<br>(15-38%)          | 1.6<br>(0.9-2.5)                            | -1.5%<br>(-4.1-1.5%)                 | -2.1%<br>(-5.3-1.6%)                | -2.8<br>(-7.1-2.1)  | -28<br>(-74-28)    |
| Iceland  | 1990 | Female | 85 to 89 | 74%<br>(61-84%)                | 26%<br>(16-39%)          | 1.5<br>(0.86-2.5)                           | -1.7%<br>(-4.3-1.4%)                 | -2.3%<br>(-5.3-1.4%)                | -3.5<br>(-8.4-2.2)  | -25<br>(-61-20)    |
| Iceland  | 1990 | Female | 90 to 94 | 75%<br>(62-85%)                | 25%<br>(15-38%)          | 1.5<br>(0.78-2.7)                           | -1.6%<br>(-4.1-1.6%)                 | -2.2%<br>(-5.3-1.7%)                | -2<br>(-4.9-1.6)    | -9.7<br>(-24-9.3)  |
| Iceland  | 1990 | Female | 95 plus  | 76%<br>(60-88%)                | 24%<br>(12-40%)          | 1.5<br>(0.64-2.8)                           | -1.6%<br>(-4.5-2.6%)                 | -2.2%<br>(-5.8-2.7%)                | -1<br>(-2.8-1.3)    | -3.1<br>(-9-5)     |
| Iceland  | 1990 | Male   | All Ages | 89%<br>(86-92%)                | 11%<br>(7.8-14%)         | 1.6<br>(1.4-1.8)                            | 2.4%<br>(0.79-4.1%)                  | 0.22%<br>(-2.6-3.1%)                | 2<br>(-24-28)       | 750<br>(240-1300)  |
| Iceland  | 1990 | Male   | 15 to 19 | 86%<br>(77-92%)                | 14%<br>(7.8-23%)         | 1.3<br>(0.77-1.9)                           | 5%<br>(2.6-7.7%)                     | 7.9%<br>(2.9-13%)                   | 0.88<br>(0.33-1.5)  | 80<br>(39-120)     |
| Iceland  | 1990 | Male   | 20 to 24 | 90%<br>(83-94%)                | 9.8%<br>(5.6-17%)        | 1.8<br>(1.1-2.7)                            | 8.3%<br>(5.1-12%)                    | 11%<br>(5-18%)                      | 1.3<br>(0.59-2.1)   | 130<br>(81-190)    |
| Iceland  | 1990 | Male   | 25 to 29 | 93%<br>(88-96%)                | 7.3%<br>(4.1-12%)        | 2<br>(1.3-2.8)                              | 7.4%<br>(4.9-10%)                    | 11%<br>(5.1-17%)                    | 1.3<br>(0.61-2)     | 120<br>(79-170)    |
| Iceland  | 1990 | Male   | 30 to 34 | 94%<br>(89-97%)                | 5.6%<br>(2.9-11%)        | 2.1<br>(1.4-2.9)                            | 5.9%<br>(3.7-8.1%)                   | 9.8%<br>(4.6-15%)                   | 0.96<br>(0.46-1.5)  | 90<br>(57-130)     |
| Iceland  | 1990 | Male   | 35 to 39 | 95%<br>(92-98%)                | 4.7%<br>(2.5-8.4%)       | 2.1<br>(1.3-2.9)                            | 5.3%<br>(3.4-7.5%)                   | 9%<br>(4.2-14%)                     | 1<br>(0.49-1.7)     | 83<br>(54-120)     |
| Iceland  | 1990 | Male   | 40 to 44 | 96%<br>(93-98%)                | 4.2%<br>(2-7.5%)         | 2.2<br>(1.4-3.1)                            | 5.1%<br>(3.1-7.4%)                   | 8.4%<br>(3.9-13%)                   | 1.3<br>(0.6-2)      | 82<br>(49-120)     |
| Iceland  | 1990 | Male   | 45 to 49 | 96%<br>(92-98%)                | 3.9%<br>(1.9-7.5%)       | 2.6<br>(1.6-3.8)                            | 4.9%<br>(2.4-7.8%)                   | 7%<br>(2.7-12%)                     | 1.4<br>(0.52-2.3)   | 75<br>(38-120)     |
| Iceland  | 1990 | Male   | 50 to 54 | 96%<br>(92-98%)                | 4.4%<br>(2.2-7.7%)       | 2.8<br>(1.8-4.1)                            | 3.7%<br>(1.1-6.8%)                   | 4.7%<br>(0.26-9.5%)                 | 1.2<br>(0.066-2.5)  | 59<br>(17-110)     |
| Iceland  | 1990 | Male   | 55 to 59 | 94%<br>(90-97%)                | 5.6%<br>(2.9-9.8%)       | 2.9<br>(1.9-4.1)                            | 2.7%<br>(-0.37-6.3%)                 | 2.9%<br>(-1.7-8.1%)                 | 1.3<br>(-0.69-3.6)  | 57<br>(-8.5-130)   |
| Iceland  | 1990 | Male   | 60 to 64 | 93%<br>(89-97%)                | 6.6%<br>(3.4-11%)        | 2.8<br>(1.7-4.2)                            | 1.7%<br>(-1.5-5.7%)                  | 1.6%<br>(-2.8-6.8%)                 | 1<br>(-1.8-4.4)     | 42<br>(-38-140)    |
| Iceland  | 1990 | Male   | 65 to 69 | 93%<br>(88-97%)                | 7.1%<br>(3.4-12%)        | 2.5<br>(1.7-3.5)                            | 0.29%<br>(-2.6-3.4%)                 | -0.12%<br>(-3.9-3.8%)               | -0.11<br>(-3.6-3.7) | 8.2<br>(-76-95)    |
| Iceland  | 1990 | Male   | 70 to 74 | 92%<br>(87-96%)                | 7.9%<br>(4.3-13%)        | 2.2<br>(1.4-3.3)                            | -0.46%<br>(-3.3-2.5%)                | -0.94%<br>(-4.5-2.7%)               | -1.1<br>(-5.1-2.9)  | -12<br>(-86-67)    |
| Iceland  | 1990 | Male   | 75 to 79 | 91%<br>(85-95%)                | 9.1%<br>(4.8-15%)        | 2<br>(1.1-3.1)                              | -1%<br>(-3.8-2.1%)                   | -1.6%<br>(-4.9-2.1%)                | -2.1<br>(-6.6-2.8)  | -24<br>(-87-48)    |
| Iceland  | 1990 | Male   | 80 to 84 | 90%<br>(83-95%)                | 10%<br>(5.1-17%)         | 1.9<br>(1.2-2.8)                            | -1.3%<br>(-3.9-1.4%)                 | -1.9%<br>(-5-1.5%)                  | -2.6<br>(-6.7-2)    | -23<br>(-67-25)    |
| Iceland  | 1990 | Male   | 85 to 89 | 89%<br>(82-94%)                | 11%<br>(5.6-18%)         | 1.8<br>(1.1-2.8)                            | -1.3%<br>(-3.6-1.2%)                 | -1.8%<br>(-4.6-1.1%)                | -2.2<br>(-5.4-1.3)  | -14<br>(-38-12)    |
| Iceland  | 1990 | Male   | 90 to 94 | 90%<br>(83-95%)                | 10%<br>(4.9-17%)         | 1.8<br>(1-2.9)                              | -1.4%<br>(-3.6-1.2%)                 | -2%<br>(-4.8-1.1%)                  | -1.1<br>(-2.7-0.62) | -4.8<br>(-13-4.2)  |

| Location | Year | Sex    | Age      | Prevalence of current drinkers | Prevalence of abstainers | Population average of standard drinks daily | Percent of total attributable deaths | Percent of total attributable DALYs | Attributable deaths  | Attributable DALYs |
|----------|------|--------|----------|--------------------------------|--------------------------|---------------------------------------------|--------------------------------------|-------------------------------------|----------------------|--------------------|
| Iceland  | 1990 | Male   | 95 plus  | 91%<br>(82-96%)                | 9.5%<br>(3.9-18%)        | 1.7<br>(0.85-3.1)                           | -1.4%<br>(-3.9-1.9%)                 | -2.1%<br>(-5.1-1.7%)                | -0.41<br>(-1-0.33)   | -1.1<br>(-3.1-1.5) |
| Iceland  | 1995 | Female | All Ages | 85%<br>(81-88%)                | 15%<br>(12-19%)          | 1.3<br>(1.2-1.5)                            | 1.1%<br>(0.18-2.2%)                  | -0.19%<br>(-2.5-2.5%)               | -1.7<br>(-22-23)     | 340<br>(55-660)    |
| Iceland  | 1995 | Female | 15 to 19 | 85%<br>(76-92%)                | 15%<br>(8.3-24%)         | 1.2<br>(0.69-1.9)                           | 1.7%<br>(0.84-2.7%)                  | 4.8%<br>(1.4-8.1%)                  | 0.18<br>(0.055-0.3)  | 20<br>(10-31)      |
| Iceland  | 1995 | Female | 20 to 24 | 90%<br>(83-95%)                | 9.6%<br>(5-17%)          | 1.5<br>(0.82-2.4)                           | 2.2%<br>(1.4-3.2%)                   | 5.1%<br>(1.8-8.8%)                  | 0.18<br>(0.066-0.31) | 29<br>(18-43)      |
| Iceland  | 1995 | Female | 25 to 29 | 92%<br>(86-96%)                | 8%<br>(4.3-14%)          | 1.5<br>(0.89-2.4)                           | 1.8%<br>(1.2-2.6%)                   | 4.6%<br>(1.7-7.8%)                  | 0.17<br>(0.059-0.28) | 25<br>(16-38)      |
| Iceland  | 1995 | Female | 30 to 34 | 93%<br>(88-96%)                | 7%<br>(3.6-12%)          | 1.6<br>(1-2.4)                              | 1.7%<br>(1-2.3%)                     | 4.9%<br>(2.3-8.1%)                  | 0.23<br>(0.11-0.38)  | 26<br>(16-37)      |
| Iceland  | 1995 | Female | 35 to 39 | 93%<br>(88-97%)                | 6.7%<br>(3.4-12%)        | 1.7<br>(0.96-2.6)                           | 1.9%<br>(1.2-2.8%)                   | 6.1%<br>(3.4-9.2%)                  | 0.42<br>(0.23-0.65)  | 32<br>(20-48)      |
| Iceland  | 1995 | Female | 40 to 44 | 93%<br>(88-96%)                | 7%<br>(3.7-12%)          | 1.9<br>(1.1-2.9)                            | 2.3%<br>(1.3-3.5%)                   | 6.9%<br>(3.9-10%)                   | 0.66<br>(0.38-0.97)  | 39<br>(23-59)      |
| Iceland  | 1995 | Female | 45 to 49 | 92%<br>(86-96%)                | 7.6%<br>(3.8-14%)        | 2.2<br>(1.3-3.5)                            | 3.2%<br>(1.7-5.1%)                   | 7.7%<br>(4.3-12%)                   | 1.2<br>(0.68-1.9)    | 57<br>(31-91)      |
| Iceland  | 1995 | Female | 50 to 54 | 91%<br>(84-94%)                | 9.4%<br>(5.7-16%)        | 2.3<br>(1.4-3.6)                            | 3.7%<br>(2-5.8%)                     | 7.3%<br>(4.1-11%)                   | 1.6<br>(0.9-2.5)     | 64<br>(34-100)     |
| Iceland  | 1995 | Female | 55 to 59 | 88%<br>(81-93%)                | 12%<br>(6.9-19%)         | 2.3<br>(1.4-3.5)                            | 3.5%<br>(1.6-5.6%)                   | 6.3%<br>(3.2-9.6%)                  | 1.7<br>(0.86-2.6)    | 56<br>(26-92)      |
| Iceland  | 1995 | Female | 60 to 64 | 84%<br>(76-90%)                | 16%<br>(9.6-24%)         | 2.2<br>(1.2-3.5)                            | 2.4%<br>(0.35-4.8%)                  | 4%<br>(0.83-7.7%)                   | 1.5<br>(0.32-3)      | 45<br>(7-90)       |
| Iceland  | 1995 | Female | 65 to 69 | 79%<br>(69-88%)                | 21%<br>(12-31%)          | 1.9<br>(1.2-2.9)                            | 1.2%<br>(-0.66-3.4%)                 | 1.9%<br>(-0.83-4.9%)                | 1.1<br>(-0.51-3)     | 26<br>(-14-75)     |
| Iceland  | 1995 | Female | 70 to 74 | 77%<br>(66-85%)                | 23%<br>(15-34%)          | 1.7<br>(0.96-2.7)                           | 0.13%<br>(-1.9-2.6%)                 | 0.24%<br>(-2.7-3.7%)                | 0.21<br>(-2.3-3.2)   | 3.2<br>(-46-63)    |
| Iceland  | 1995 | Female | 75 to 79 | 76%<br>(64-85%)                | 24%<br>(15-36%)          | 1.5<br>(0.82-2.6)                           | -0.75%<br>(-3.1-2.2%)                | -1%<br>(-4-2.7%)                    | -1.2<br>(-4.8-3.3)   | -18<br>(-69-50)    |
| Iceland  | 1995 | Female | 80 to 84 | 75%<br>(61-86%)                | 25%<br>(14-39%)          | 1.5<br>(0.85-2.4)                           | -1.4%<br>(-3.9-1.5%)                 | -1.9%<br>(-5-1.7%)                  | -2.9<br>(-7.5-2.6)   | -30<br>(-79-32)    |
| Iceland  | 1995 | Female | 85 to 89 | 74%<br>(60-84%)                | 26%<br>(16-40%)          | 1.5<br>(0.81-2.4)                           | -1.6%<br>(-4-1.4%)                   | -2.1%<br>(-5-1.5%)                  | -3.5<br>(-8.3-2.4)   | -25<br>(-61-22)    |
| Iceland  | 1995 | Female | 90 to 94 | 75%<br>(62-85%)                | 25%<br>(15-38%)          | 1.5<br>(0.76-2.6)                           | -1.6%<br>(-3.9-1.9%)                 | -2.1%<br>(-5-2.1%)                  | -2.4<br>(-5.7-2.4)   | -12<br>(-29-14)    |
| Iceland  | 1995 | Female | 95 plus  | 76%<br>(59-88%)                | 24%<br>(12-41%)          | 1.5<br>(0.59-2.9)                           | -1.4%<br>(-4.2-3%)                   | -1.9%<br>(-5.2-3.2%)                | -0.98<br>(-2.7-1.7)  | -3<br>(-8.7-6.1)   |
| Iceland  | 1995 | Male   | All Ages | 90%<br>(87-92%)                | 10%<br>(7.7-13%)         | 1.5<br>(1.3-1.8)                            | 2.2%<br>(0.77-3.6%)                  | 0.16%<br>(-2.4-2.7%)                | 1.5<br>(-23-26)      | 700<br>(230-1200)  |
| Iceland  | 1995 | Male   | 15 to 19 | 86%<br>(77-92%)                | 14%<br>(7.6-23%)         | 1.2<br>(0.74-1.8)                           | 4.1%<br>(2.1-6.2%)                   | 6.2%<br>(2.3-10%)                   | 0.61<br>(0.22-1)     | 61<br>(31-91)      |
| Iceland  | 1995 | Male   | 20 to 24 | 90%<br>(83-94%)                | 9.8%<br>(5.6-17%)        | 1.8<br>(1.1-2.6)                            | 7.1%<br>(4.6-9.9%)                   | 8.8%<br>(3.6-14%)                   | 0.92<br>(0.38-1.5)   | 110<br>(66-150)    |

| Location | Year | Sex    | Age      | Prevalence of current drinkers | Prevalence of abstainers | Population average of standard drinks daily | Percent of total attributable deaths | Percent of total attributable DALYs | Attributable deaths  | Attributable DALYs |
|----------|------|--------|----------|--------------------------------|--------------------------|---------------------------------------------|--------------------------------------|-------------------------------------|----------------------|--------------------|
| Iceland  | 1995 | Male   | 25 to 29 | 93%<br>(87-96%)                | 7.4%<br>(4.2-13%)        | 1.9<br>(1.2-2.8)                            | 6.4%<br>(4.2-8.8%)                   | 8.5%<br>(3.8-14%)                   | 0.85<br>(0.37-1.4)   | 94<br>(61-130)     |
| Iceland  | 1995 | Male   | 30 to 34 | 94%<br>(89-97%)                | 5.7%<br>(2.9-11%)        | 2<br>(1.3-2.9)                              | 5.2%<br>(3.3-7.2%)                   | 7.8%<br>(3.4-13%)                   | 0.86<br>(0.39-1.4)   | 84<br>(53-120)     |
| Iceland  | 1995 | Male   | 35 to 39 | 95%<br>(92-98%)                | 4.7%<br>(2.5-8.4%)       | 1.9<br>(1.2-2.8)                            | 4.8%<br>(3-6.7%)                     | 7.5%<br>(3.3-11%)                   | 0.99<br>(0.45-1.5)   | 82<br>(53-110)     |
| Iceland  | 1995 | Male   | 40 to 44 | 96%<br>(92-98%)                | 4.2%<br>(2-7.8%)         | 2.1<br>(1.4-2.9)                            | 4.8%<br>(2.9-7%)                     | 7.4%<br>(3.6-12%)                   | 1.3<br>(0.64-2.1)    | 88<br>(53-130)     |
| Iceland  | 1995 | Male   | 45 to 49 | 96%<br>(92-98%)                | 4%<br>(1.9-7.7%)         | 2.5<br>(1.6-3.6)                            | 4.5%<br>(2.4-6.8%)                   | 6.6%<br>(2.7-11%)                   | 1.5<br>(0.57-2.4)    | 83<br>(45-120)     |
| Iceland  | 1995 | Male   | 50 to 54 | 96%<br>(92-98%)                | 4.5%<br>(2.3-8.4%)       | 2.7<br>(1.7-3.8)                            | 3.7%<br>(1.5-6.3%)                   | 4.9%<br>(1.3-9.2%)                  | 1.3<br>(0.34-2.3)    | 64<br>(25-110)     |
| Iceland  | 1995 | Male   | 55 to 59 | 94%<br>(90-97%)                | 5.7%<br>(2.9-9.7%)       | 2.8<br>(1.8-4)                              | 3%<br>(0.35-5.9%)                    | 3.5%<br>(-0.42-7.7%)                | 1.3<br>(-0.17-2.9)   | 56<br>(6.7-110)    |
| Iceland  | 1995 | Male   | 60 to 64 | 93%<br>(89-97%)                | 6.6%<br>(3.4-11%)        | 2.7<br>(1.6-4)                              | 1.9%<br>(-0.81-5%)                   | 1.9%<br>(-1.9-6.2%)                 | 1.2<br>(-1.2-3.7)    | 44<br>(-20-120)    |
| Iceland  | 1995 | Male   | 65 to 69 | 93%<br>(87-97%)                | 7.1%<br>(3.4-13%)        | 2.4<br>(1.6-3.4)                            | 0.56%<br>(-1.9-3.3%)                 | 0.26%<br>(-3.1-3.8%)                | 0.24<br>(-2.8-3.4)   | 16<br>(-55-90)     |
| Iceland  | 1995 | Male   | 70 to 74 | 92%<br>(87-96%)                | 8%<br>(4.4-13%)          | 2.1<br>(1.3-3.1)                            | -0.32%<br>(-2.7-2.4%)                | -0.74%<br>(-3.8-2.6%)               | -0.92<br>(-4.8-3.3)  | -9.2<br>(-82-69)   |
| Iceland  | 1995 | Male   | 75 to 79 | 91%<br>(85-95%)                | 9%<br>(4.8-15%)          | 1.9<br>(1.1-2.9)                            | -0.88%<br>(-3.3-1.8%)                | -1.4%<br>(-4.3-1.9%)                | -2<br>(-6.1-2.7)     | -22<br>(-82-44)    |
| Iceland  | 1995 | Male   | 80 to 84 | 90%<br>(82-95%)                | 10%<br>(5-18%)           | 1.8<br>(1.1-2.6)                            | -1.3%<br>(-3.7-1.4%)                 | -1.9%<br>(-4.6-1.4%)                | -2.6<br>(-6.6-2)     | -24<br>(-66-24)    |
| Iceland  | 1995 | Male   | 85 to 89 | 90%<br>(81-95%)                | 10%<br>(5.4-19%)         | 1.7<br>(1.1-2.6)                            | -1.3%<br>(-3.5-1.1%)                 | -1.9%<br>(-4.5-1.1%)                | -2.2<br>(-5.3-1.3)   | -14<br>(-37-12)    |
| Iceland  | 1995 | Male   | 90 to 94 | 90%<br>(83-95%)                | 10%<br>(4.9-17%)         | 1.7<br>(0.98-2.7)                           | -1.3%<br>(-3.4-1.1%)                 | -1.9%<br>(-4.4-0.93%)               | -1.3<br>(-3.1-0.65)  | -5.7<br>(-15-4.8)  |
| Iceland  | 1995 | Male   | 95 plus  | 90%<br>(82-96%)                | 9.5%<br>(3.9-18%)        | 1.7<br>(0.82-2.9)                           | -1.3%<br>(-3.7-1.7%)                 | -1.9%<br>(-4.8-1.4%)                | -0.5<br>(-1.3-0.38)  | -1.4<br>(-3.9-1.8) |
| Iceland  | 2000 | Female | All Ages | 86%<br>(83-89%)                | 14%<br>(11-17%)          | 1.4<br>(1.2-1.6)                            | 1.3%<br>(0.41-2.3%)                  | 0.18%<br>(-2-2.8%)                  | 1.6<br>(-18-25)      | 390<br>(120-690)   |
| Iceland  | 2000 | Female | 15 to 19 | 87%<br>(79-92%)                | 13%<br>(7.6-21%)         | 1.2<br>(0.71-1.9)                           | 1.8%<br>(0.88-2.7%)                  | 5.9%<br>(1.8-9.9%)                  | 0.17<br>(0.056-0.29) | 20<br>(10-30)      |
| Iceland  | 2000 | Female | 20 to 24 | 92%<br>(85-95%)                | 8.3%<br>(4.5-15%)        | 1.6<br>(0.86-2.5)                           | 2.4%<br>(1.5-3.4%)                   | 6%<br>(2.2-10%)                     | 0.22<br>(0.079-0.37) | 32<br>(19-47)      |
| Iceland  | 2000 | Female | 25 to 29 | 93%<br>(89-96%)                | 6.9%<br>(3.8-11%)        | 1.6<br>(0.92-2.5)                           | 1.9%<br>(1.2-2.7%)                   | 5.8%<br>(2.1-9.7%)                  | 0.18<br>(0.067-0.31) | 27<br>(16-38)      |
| Iceland  | 2000 | Female | 30 to 34 | 94%<br>(90-97%)                | 6.2%<br>(3.2-10%)        | 1.7<br>(1-2.6)                              | 1.8%<br>(1.2-2.6%)                   | 6.3%<br>(3.1-10%)                   | 0.25<br>(0.13-0.4)   | 26<br>(16-39)      |
| Iceland  | 2000 | Female | 35 to 39 | 94%<br>(90-97%)                | 6%<br>(3.2-9.9%)         | 1.8<br>(0.97-2.8)                           | 1.8%<br>(1.1-2.6%)                   | 7.1%<br>(4.1-10%)                   | 0.35<br>(0.2-0.52)   | 29<br>(17-42)      |
| Iceland  | 2000 | Female | 40 to 44 | 94%<br>(90-97%)                | 6.1%<br>(3.4-9.8%)       | 2<br>(1.2-2.9)                              | 2.5%<br>(1.4-3.8%)                   | 7.9%<br>(4.7-11%)                   | 0.8<br>(0.48-1.1)    | 47<br>(28-68)      |

| Location | Year | Sex    | Age      | Prevalence of current drinkers | Prevalence of abstainers | Population average of standard drinks daily | Percent of total attributable deaths | Percent of total attributable DALYs | Attributable deaths  | Attributable DALYs |
|----------|------|--------|----------|--------------------------------|--------------------------|---------------------------------------------|--------------------------------------|-------------------------------------|----------------------|--------------------|
| Iceland  | 2000 | Female | 45 to 49 | 93%<br>(88-97%)                | 6.5%<br>(3.4-12%)        | 2.3<br>(1.4-3.7)                            | 3%<br>(1.6-4.6%)                     | 8.3%<br>(4.8-12%)                   | 1.1<br>(0.66-1.7)    | 55<br>(31-85)      |
| Iceland  | 2000 | Female | 50 to 54 | 91%<br>(86-95%)                | 8.6%<br>(5.4-14%)        | 2.4<br>(1.5-3.8)                            | 3.4%<br>(1.8-5.2%)                   | 7.6%<br>(4.5-11%)                   | 1.6<br>(0.93-2.3)    | 63<br>(35-96)      |
| Iceland  | 2000 | Female | 55 to 59 | 88%<br>(82-93%)                | 12%<br>(7.3-18%)         | 2.4<br>(1.4-3.5)                            | 3.4%<br>(1.5-5.3%)                   | 6.3%<br>(3.3-9.5%)                  | 1.8<br>(0.95-2.8)    | 63<br>(30-99)      |
| Iceland  | 2000 | Female | 60 to 64 | 84%<br>(78-90%)                | 16%<br>(9.7-22%)         | 2.3<br>(1.2-3.5)                            | 2.4%<br>(0.51-4.8%)                  | 4.2%<br>(1.1-7.9%)                  | 1.4<br>(0.38-2.7)    | 42<br>(8.7-82)     |
| Iceland  | 2000 | Female | 65 to 69 | 77%<br>(68-87%)                | 23%<br>(13-32%)          | 1.9<br>(1.2-2.8)                            | 1.5%<br>(-0.092-3.4%)                | 2.5%<br>(0.00052-5.3%)              | 1.4<br>(0.00029-2.8) | 32<br>(-2.1-71)    |
| Iceland  | 2000 | Female | 70 to 74 | 73%<br>(63-83%)                | 27%<br>(17-37%)          | 1.6<br>(0.91-2.6)                           | 0.64%<br>(-1.1-2.9%)                 | 1%<br>(-1.5-4%)                     | 0.87<br>(-1.2-3.4)   | 15<br>(-27-68)     |
| Iceland  | 2000 | Female | 75 to 79 | 75%<br>(63-84%)                | 25%<br>(16-37%)          | 1.6<br>(0.8-2.6)                            | -0.27%<br>(-2.3-2.5%)                | -0.38%<br>(-3.1-3.2%)               | -0.43<br>(-3.5-3.7)  | -6.6<br>(-53-60)   |
| Iceland  | 2000 | Female | 80 to 84 | 74%<br>(61-85%)                | 26%<br>(15-39%)          | 1.5<br>(0.86-2.4)                           | -0.93%<br>(-3.1-1.8%)                | -1.2%<br>(-4-2.2%)                  | -1.9<br>(-6.2-3.6)   | -20<br>(-67-41)    |
| Iceland  | 2000 | Female | 85 to 89 | 74%<br>(60-84%)                | 26%<br>(16-40%)          | 1.5<br>(0.83-2.4)                           | -1.3%<br>(-3.6-1.3%)                 | -1.8%<br>(-4.5-1.4%)                | -2.9<br>(-7.4-2.5)   | -21<br>(-56-20)    |
| Iceland  | 2000 | Female | 90 to 94 | 75%<br>(62-85%)                | 25%<br>(15-38%)          | 1.5<br>(0.77-2.6)                           | -1.5%<br>(-3.8-1.6%)                 | -2%<br>(-4.9-1.7%)                  | -2.3<br>(-5.6-2)     | -11<br>(-28-12)    |
| Iceland  | 2000 | Female | 95 plus  | 76%<br>(59-88%)                | 24%<br>(12-41%)          | 1.5<br>(0.6-2.7)                            | -1.2%<br>(-3.9-3%)                   | -1.7%<br>(-4.8-3.3%)                | -1<br>(-2.9-2)       | -3<br>(-9.5-7.3)   |
| Iceland  | 2000 | Male   | All Ages | 91%<br>(89-93%)                | 8.7%<br>(6.5-11%)        | 1.7<br>(1.5-1.9)                            | 2.6%<br>(1.2-4.2%)                   | 0.71%<br>(-1.8-3.2%)                | 6.7<br>(-17-30)      | 830<br>(370-1300)  |
| Iceland  | 2000 | Male   | 15 to 19 | 89%<br>(82-93%)                | 11%<br>(6.7-18%)         | 1.3<br>(0.79-1.9)                           | 4.3%<br>(2.3-6.4%)                   | 7.7%<br>(2.8-13%)                   | 0.52<br>(0.19-0.87)  | 55<br>(29-81)      |
| Iceland  | 2000 | Male   | 20 to 24 | 92%<br>(87-95%)                | 7.9%<br>(4.8-13%)        | 1.9<br>(1.1-2.8)                            | 8%<br>(5-11%)                        | 11%<br>(4.5-17%)                    | 1.1<br>(0.45-1.8)    | 120<br>(73-170)    |
| Iceland  | 2000 | Male   | 25 to 29 | 94%<br>(91-96%)                | 5.8%<br>(3.6-8.8%)       | 2<br>(1.3-3)                                | 7.1%<br>(4.6-9.9%)                   | 11%<br>(4.8-17%)                    | 0.99<br>(0.45-1.6)   | 100<br>(68-150)    |
| Iceland  | 2000 | Male   | 30 to 34 | 95%<br>(93-98%)                | 4.5%<br>(2.5-7.5%)       | 2.1<br>(1.3-3)                              | 5.7%<br>(3.7-7.9%)                   | 10%<br>(4.5-16%)                    | 0.82<br>(0.38-1.3)   | 80<br>(51-110)     |
| Iceland  | 2000 | Male   | 35 to 39 | 96%<br>(94-98%)                | 3.8%<br>(2.2-6.1%)       | 2<br>(1.3-2.9)                              | 5%<br>(3.2-7%)                       | 9.1%<br>(4.2-14%)                   | 0.93<br>(0.43-1.4)   | 79<br>(51-110)     |
| Iceland  | 2000 | Male   | 40 to 44 | 97%<br>(94-98%)                | 3.4%<br>(1.7-5.7%)       | 2.2<br>(1.5-3)                              | 4.9%<br>(3.1-6.9%)                   | 8.5%<br>(4.3-13%)                   | 1.4<br>(0.7-2.1)     | 92<br>(58-130)     |
| Iceland  | 2000 | Male   | 45 to 49 | 97%<br>(94-98%)                | 3.3%<br>(1.7-5.9%)       | 2.6<br>(1.7-3.7)                            | 4.8%<br>(2.7-7.3%)                   | 7.8%<br>(3.6-12%)                   | 1.7<br>(0.75-2.7)    | 94<br>(54-140)     |
| Iceland  | 2000 | Male   | 50 to 54 | 96%<br>(94-98%)                | 3.6%<br>(2-6%)           | 2.9<br>(1.9-4)                              | 4.2%<br>(2.1-6.7%)                   | 6.2%<br>(2.5-10%)                   | 1.8<br>(0.73-3.1)    | 89<br>(44-140)     |
| Iceland  | 2000 | Male   | 55 to 59 | 95%<br>(92-97%)                | 4.9%<br>(2.7-8%)         | 2.9<br>(1.9-4.1)                            | 3.5%<br>(0.99-6.4%)                  | 4.5%<br>(0.57-8.6%)                 | 1.9<br>(0.23-3.6)    | 75<br>(21-130)     |
| Iceland  | 2000 | Male   | 60 to 64 | 94%<br>(90-97%)                | 6.1%<br>(3.4-9.6%)       | 2.8<br>(1.8-4.1)                            | 2.6%<br>(-0.015-5.7%)                | 3%<br>(-0.81-7.3%)                  | 1.5<br>(-0.39-3.6)   | 52<br>(-0.33-110)  |

| Location | Year | Sex    | Age      | Prevalence of current drinkers | Prevalence of abstainers | Population average of standard drinks daily | Percent of total attributable deaths | Percent of total attributable DALYs | Attributable deaths  | Attributable DALYs |
|----------|------|--------|----------|--------------------------------|--------------------------|---------------------------------------------|--------------------------------------|-------------------------------------|----------------------|--------------------|
| Iceland  | 2000 | Male   | 65 to 69 | 93%<br>(89-97%)                | 6.6%<br>(3.5-11%)        | 2.5<br>(1.7-3.5)                            | 1.1%<br>(-1.3-3.5%)                  | 1%<br>(-2.3-4.2%)                   | 0.79<br>(-1.8-3.3)   | 28<br>(-32-93)     |
| Iceland  | 2000 | Male   | 70 to 74 | 92%<br>(88-96%)                | 7.7%<br>(4.5-12%)        | 2.2<br>(1.3-3.1)                            | 0.26%<br>(-2.1-2.8%)                 | -0.0088%<br>(-3-3.2%)               | -0.011<br>(-3.6-3.8) | 7.7<br>(-61-81)    |
| Iceland  | 2000 | Male   | 75 to 79 | 91%<br>(85-95%)                | 9.2%<br>(5.1-15%)        | 1.9<br>(1.2-3)                              | -0.32%<br>(-2.5-2.2%)                | -0.71%<br>(-3.4-2.4%)               | -1.1<br>(-5.1-3.5)   | -8.8<br>(-68-60)   |
| Iceland  | 2000 | Male   | 80 to 84 | 90%<br>(82-95%)                | 10%<br>(5.1-18%)         | 1.8<br>(1.2-2.7)                            | -0.82%<br>(-2.9-1.7%)                | -1.3%<br>(-4-1.7%)                  | -1.9<br>(-5.9-2.5)   | -16<br>(-59-33)    |
| Iceland  | 2000 | Male   | 85 to 89 | 90%<br>(82-94%)                | 10%<br>(5.6-18%)         | 1.8<br>(1.1-2.7)                            | -1.1%<br>(-3.1-1.3%)                 | -1.6%<br>(-4.1-1.1%)                | -1.9<br>(-4.9-1.4)   | -11<br>(-34-14)    |
| Iceland  | 2000 | Male   | 90 to 94 | 90%<br>(83-95%)                | 10%<br>(4.9-17%)         | 1.7<br>(1-2.8)                              | -1.2%<br>(-3.5-1.3%)                 | -1.8%<br>(-4.4-1.2%)                | -1.2<br>(-3.1-0.79)  | -5.2<br>(-15-5.4)  |
| Iceland  | 2000 | Male   | 95 plus  | 90%<br>(82-96%)                | 9.6%<br>(3.9-18%)        | 1.7<br>(0.88-2.9)                           | -1.3%<br>(-3.8-1.7%)                 | -1.9%<br>(-4.9-1.6%)                | -0.58<br>(-1.5-0.47) | -1.6<br>(-4.6-2.1) |
| Iceland  | 2005 | Female | All Ages | 86%<br>(83-89%)                | 14%<br>(11-17%)          | 1.6<br>(1.4-1.8)                            | 1.6%<br>(0.76-2.6%)                  | 0.93%<br>(-1.3-3.5%)                | 8.4<br>(-12-33)      | 500<br>(230-790)   |
| Iceland  | 2005 | Female | 15 to 19 | 87%<br>(79-92%)                | 13%<br>(7.6-21%)         | 1.4<br>(0.77-2.1)                           | 1.6%<br>(0.88-2.5%)                  | 6%<br>(2.2-9.9%)                    | 0.13<br>(0.047-0.22) | 17<br>(9.4-26)     |
| Iceland  | 2005 | Female | 20 to 24 | 92%<br>(86-95%)                | 8.2%<br>(4.6-14%)        | 1.7<br>(0.94-2.8)                           | 2.3%<br>(1.5-3.3%)                   | 6.2%<br>(2.4-10%)                   | 0.18<br>(0.069-0.3)  | 29<br>(18-42)      |
| Iceland  | 2005 | Female | 25 to 29 | 93%<br>(89-96%)                | 6.8%<br>(3.7-11%)        | 1.8<br>(1-2.9)                              | 1.8%<br>(1.2-2.6%)                   | 6.1%<br>(2.7-9.9%)                  | 0.16<br>(0.068-0.26) | 26<br>(16-36)      |
| Iceland  | 2005 | Female | 30 to 34 | 94%<br>(90-97%)                | 6.1%<br>(3.2-10%)        | 1.9<br>(1.1-2.9)                            | 1.9%<br>(1.2-2.8%)                   | 6.9%<br>(3.7-11%)                   | 0.27<br>(0.14-0.42)  | 28<br>(18-40)      |
| Iceland  | 2005 | Female | 35 to 39 | 94%<br>(90-97%)                | 6%<br>(3.1-10%)          | 2<br>(1.1-3.2)                              | 2%<br>(1.2-3%)                       | 8%<br>(4.7-12%)                     | 0.38<br>(0.22-0.57)  | 31<br>(20-45)      |
| Iceland  | 2005 | Female | 40 to 44 | 94%<br>(90-97%)                | 6.1%<br>(3.3-10%)        | 2.2<br>(1.4-3.3)                            | 2.6%<br>(1.5-3.8%)                   | 8.8%<br>(5.5-12%)                   | 0.82<br>(0.5-1.1)    | 49<br>(30-70)      |
| Iceland  | 2005 | Female | 45 to 49 | 94%<br>(88-97%)                | 6.4%<br>(3.4-12%)        | 2.6<br>(1.6-4)                              | 3.1%<br>(1.8-4.7%)                   | 9.3%<br>(6-13%)                     | 1.3<br>(0.8-1.8)     | 62<br>(37-92)      |
| Iceland  | 2005 | Female | 50 to 54 | 91%<br>(86-95%)                | 8.5%<br>(5.4-14%)        | 2.7<br>(1.7-4)                              | 3.6%<br>(2.1-5.4%)                   | 8.7%<br>(5.6-12%)                   | 1.8<br>(1.2-2.5)     | 75<br>(44-110)     |
| Iceland  | 2005 | Female | 55 to 59 | 88%<br>(81-93%)                | 12%<br>(7.3-19%)         | 2.7<br>(1.6-3.9)                            | 3.7%<br>(2-5.6%)                     | 7.4%<br>(4.6-10%)                   | 2.3<br>(1.4-3.2)     | 79<br>(45-120)     |
| Iceland  | 2005 | Female | 60 to 64 | 84%<br>(77-90%)                | 16%<br>(9.7-23%)         | 2.5<br>(1.4-3.9)                            | 2.8%<br>(0.99-5.2%)                  | 5.3%<br>(2.3-8.8%)                  | 1.8<br>(0.81-3.1)    | 55<br>(19-96)      |
| Iceland  | 2005 | Female | 65 to 69 | 77%<br>(67-86%)                | 23%<br>(14-33%)          | 2.1<br>(1.3-3.1)                            | 2.1%<br>(0.53-3.9%)                  | 3.5%<br>(1.1-6.1%)                  | 1.6<br>(0.54-2.9)    | 39<br>(10-74)      |
| Iceland  | 2005 | Female | 70 to 74 | 73%<br>(62-83%)                | 27%<br>(17-38%)          | 1.8<br>(1-2.8)                              | 1.2%<br>(-0.55-3.5%)                 | 1.9%<br>(-0.58-5%)                  | 1.5<br>(-0.44-3.8)   | 27<br>(-13-81)     |
| Iceland  | 2005 | Female | 75 to 79 | 74%<br>(63-84%)                | 26%<br>(16-37%)          | 1.7<br>(0.88-2.9)                           | 0.31%<br>(-1.7-3.1%)                 | 0.45%<br>(-2.3-4.1%)                | 0.54<br>(-2.7-5)     | 8<br>(-44-79)      |
| Iceland  | 2005 | Female | 80 to 84 | 74%<br>(60-85%)                | 26%<br>(15-40%)          | 1.7<br>(0.94-2.6)                           | -0.22%<br>(-2.3-2.5%)                | -0.31%<br>(-3-3.1%)                 | -0.51<br>(-4.9-5)    | -5.3<br>(-54-59)   |

| Location | Year | Sex    | Age      | Prevalence of current drinkers | Prevalence of abstainers | Population average of standard drinks daily | Percent of total attributable deaths | Percent of total attributable DALYs | Attributable deaths  | Attributable DALYs  |
|----------|------|--------|----------|--------------------------------|--------------------------|---------------------------------------------|--------------------------------------|-------------------------------------|----------------------|---------------------|
| Iceland  | 2005 | Female | 85 to 89 | 74%<br>(61-84%)                | 26%<br>(16-39%)          | 1.7<br>(0.94-2.6)                           | -0.65%<br>(-2.9-2.1%)                | -0.92%<br>(-3.7-2.4%)               | -1.6<br>(-6.4-4.3)   | -11<br>(-49-35)     |
| Iceland  | 2005 | Female | 90 to 94 | 75%<br>(62-85%)                | 25%<br>(15-38%)          | 1.7<br>(0.86-2.9)                           | -0.85%<br>(-3.3-2.6%)                | -1.2%<br>(-4.2-2.9%)                | -1.5<br>(-5.3-3.6)   | -6.9<br>(-27-22)    |
| Iceland  | 2005 | Female | 95 plus  | 76%<br>(60-88%)                | 24%<br>(12-40%)          | 1.7<br>(0.68-3.1)                           | -0.66%<br>(-3.5-3.9%)                | -0.99%<br>(-4.3-4.4%)               | -0.67<br>(-2.9-3)    | -1.8<br>(-9.7-11)   |
| Iceland  | 2005 | Male   | All Ages | 91%<br>(89-93%)                | 8.6%<br>(6.5-11%)        | 1.9<br>(1.7-2.2)                            | 3.2%<br>(1.9-4.6%)                   | 1.6%<br>(-0.91-4%)                  | 15<br>(-8.6-38)      | 1000<br>(600-1500)  |
| Iceland  | 2005 | Male   | 15 to 19 | 89%<br>(82-93%)                | 11%<br>(7-18%)           | 1.4<br>(0.88-2.2)                           | 4.2%<br>(2.4-6%)                     | 8.1%<br>(3.1-13%)                   | 0.43<br>(0.16-0.71)  | 49<br>(28-71)       |
| Iceland  | 2005 | Male   | 20 to 24 | 92%<br>(87-95%)                | 8%<br>(4.9-13%)          | 2.1<br>(1.3-3.1)                            | 8%<br>(5.1-11%)                      | 11%<br>(5-18%)                      | 1<br>(0.46-1.7)      | 120<br>(73-160)     |
| Iceland  | 2005 | Male   | 25 to 29 | 94%<br>(91-96%)                | 5.8%<br>(3.6-9%)         | 2.2<br>(1.4-3.3)                            | 6.9%<br>(4.6-9.5%)                   | 11%<br>(5.3-18%)                    | 0.88<br>(0.42-1.4)   | 99<br>(65-140)      |
| Iceland  | 2005 | Male   | 30 to 34 | 95%<br>(92-97%)                | 4.6%<br>(2.6-7.7%)       | 2.3<br>(1.5-3.4)                            | 5.7%<br>(3.7-7.8%)                   | 11%<br>(4.7-17%)                    | 0.77<br>(0.34-1.2)   | 81<br>(52-110)      |
| Iceland  | 2005 | Male   | 35 to 39 | 96%<br>(94-98%)                | 3.9%<br>(2.2-6.2%)       | 2.3<br>(1.5-3.2)                            | 5.1%<br>(3.5-6.9%)                   | 10%<br>(5-15%)                      | 0.79<br>(0.38-1.2)   | 73<br>(49-98)       |
| Iceland  | 2005 | Male   | 40 to 44 | 97%<br>(94-98%)                | 3.4%<br>(1.8-6%)         | 2.5<br>(1.7-3.4)                            | 5.2%<br>(3.4-7.2%)                   | 10%<br>(5.6-15%)                    | 1.4<br>(0.75-2)      | 93<br>(62-130)      |
| Iceland  | 2005 | Male   | 45 to 49 | 97%<br>(94-98%)                | 3.3%<br>(1.7-6.2%)       | 2.9<br>(1.8-4)                              | 5.3%<br>(3.2-7.8%)                   | 9.2%<br>(4.7-14%)                   | 2<br>(1-3.1)         | 110<br>(69-170)     |
| Iceland  | 2005 | Male   | 50 to 54 | 96%<br>(94-98%)                | 3.7%<br>(2-6.2%)         | 3.2<br>(2.1-4.2)                            | 5.1%<br>(2.9-7.4%)                   | 8%<br>(3.9-12%)                     | 2.4<br>(1.2-3.6)     | 110<br>(64-170)     |
| Iceland  | 2005 | Male   | 55 to 59 | 95%<br>(92-97%)                | 5%<br>(2.8-8.2%)         | 3.3<br>(2.2-4.5)                            | 4.5%<br>(2.2-7.4%)                   | 6.4%<br>(2.5-11%)                   | 2.7<br>(1.1-4.7)     | 110<br>(54-180)     |
| Iceland  | 2005 | Male   | 60 to 64 | 94%<br>(90-97%)                | 6.2%<br>(3.5-9.8%)       | 3.1<br>(1.9-4.5)                            | 3.5%<br>(0.84-6.9%)                  | 4.4%<br>(0.56-9.1%)                 | 2.4<br>(0.31-5.1)    | 83<br>(19-160)      |
| Iceland  | 2005 | Male   | 65 to 69 | 93%<br>(89-96%)                | 6.7%<br>(3.5-11%)        | 2.8<br>(1.9-3.8)                            | 2%<br>(-0.19-4.6%)                   | 2.3%<br>(-0.81-5.7%)                | 1.5<br>(-0.52-3.6)   | 45<br>(-4.5-100)    |
| Iceland  | 2005 | Male   | 70 to 74 | 92%<br>(88-95%)                | 7.8%<br>(4.5-12%)        | 2.4<br>(1.5-3.5)                            | 1.2%<br>(-1-3.9%)                    | 1.2%<br>(-1.6-4.6%)                 | 1.3<br>(-1.7-5)      | 33<br>(-26-110)     |
| Iceland  | 2005 | Male   | 75 to 79 | 91%<br>(85-95%)                | 9.3%<br>(5-15%)          | 2.1<br>(1.3-3.3)                            | 0.52%<br>(-1.6-3.2%)                 | 0.33%<br>(-2.4-3.5%)                | 0.48<br>(-3.5-5.2)   | 14<br>(-45-87)      |
| Iceland  | 2005 | Male   | 80 to 84 | 90%<br>(82-95%)                | 10%<br>(5.2-18%)         | 2.1<br>(1.3-3)                              | -0.14%<br>(-2.4-2.3%)                | -0.5%<br>(-3.3-2.3%)                | -0.85<br>(-5.5-4)    | -3.1<br>(-54-52)    |
| Iceland  | 2005 | Male   | 85 to 89 | 89%<br>(81-95%)                | 11%<br>(5.4-19%)         | 2<br>(1.2-3)                                | -0.46%<br>(-2.5-2%)                  | -0.89%<br>(-3.4-2%)                 | -1.2<br>(-4.8-2.8)   | -5.8<br>(-33-25)    |
| Iceland  | 2005 | Male   | 90 to 94 | 90%<br>(83-95%)                | 10%<br>(5.2-17%)         | 2<br>(1.1-3.1)                              | -0.8%<br>(-3.2-2%)                   | -1.3%<br>(-4.3-1.8%)                | -1<br>(-3.3-1.4)     | -3.8<br>(-16-9.2)   |
| Iceland  | 2005 | Male   | 95 plus  | 90%<br>(82-96%)                | 9.6%<br>(4.1-18%)        | 1.9<br>(0.99-3.4)                           | -0.66%<br>(-3.3-2.9%)                | -1.2%<br>(-4.3-3%)                  | -0.29<br>(-1.1-0.72) | -0.65<br>(-3.3-2.9) |
| Iceland  | 2010 | Female | All Ages | 85%<br>(82-88%)                | 15%<br>(12-18%)          | 1.8<br>(1.5-2.2)                            | 1.9%<br>(1-3.1%)                     | 1.7%<br>(-0.64-4.6%)                | 16<br>(-6.3-44)      | 620<br>(320-970)    |

| Location | Year | Sex    | Age      | Prevalence of current drinkers | Prevalence of abstainers | Population average of standard drinks daily | Percent of total attributable deaths | Percent of total attributable DALYs | Attributable deaths  | Attributable DALYs |
|----------|------|--------|----------|--------------------------------|--------------------------|---------------------------------------------|--------------------------------------|-------------------------------------|----------------------|--------------------|
| Iceland  | 2010 | Female | 15 to 19 | 85%<br>(75-92%)                | 15%<br>(8.3-25%)         | 1.5<br>(0.82-2.4)                           | 1.5%<br>(0.92-2.2%)                  | 5.9%<br>(2.3-9.6%)                  | 0.12<br>(0.048-0.2)  | 17<br>(10-26)      |
| Iceland  | 2010 | Female | 20 to 24 | 90%<br>(83-95%)                | 9.7%<br>(5.2-17%)        | 1.9<br>(1-3.1)                              | 2.3%<br>(1.5-3.2%)                   | 6.3%<br>(2.6-11%)                   | 0.17<br>(0.074-0.3)  | 31<br>(20-46)      |
| Iceland  | 2010 | Female | 25 to 29 | 92%<br>(86-96%)                | 8.1%<br>(4.3-14%)        | 2<br>(1.1-3.2)                              | 1.8%<br>(1.2-2.5%)                   | 6.3%<br>(3-10%)                     | 0.14<br>(0.066-0.22) | 27<br>(17-38)      |
| Iceland  | 2010 | Female | 30 to 34 | 93%<br>(88-96%)                | 7.1%<br>(3.5-12%)        | 2<br>(1.2-3.3)                              | 1.7%<br>(1.1-2.4%)                   | 7.2%<br>(4.2-11%)                   | 0.2<br>(0.11-0.31)   | 25<br>(17-36)      |
| Iceland  | 2010 | Female | 35 to 39 | 93%<br>(88-97%)                | 6.8%<br>(3.5-12%)        | 2.2<br>(1.2-3.6)                            | 2.2%<br>(1.4-3.3%)                   | 8.6%<br>(5.3-13%)                   | 0.45<br>(0.27-0.66)  | 36<br>(22-52)      |
| Iceland  | 2010 | Female | 40 to 44 | 93%<br>(88-96%)                | 7%<br>(3.7-12%)          | 2.4<br>(1.4-3.8)                            | 2.7%<br>(1.6-3.9%)                   | 9.4%<br>(6-13%)                     | 0.76<br>(0.48-1.1)   | 48<br>(29-69)      |
| Iceland  | 2010 | Female | 45 to 49 | 92%<br>(85-96%)                | 7.6%<br>(3.8-15%)        | 2.8<br>(1.6-4.4)                            | 3.2%<br>(1.8-4.8%)                   | 10%<br>(6.6-14%)                    | 1.3<br>(0.83-1.8)    | 65<br>(39-97)      |
| Iceland  | 2010 | Female | 50 to 54 | 91%<br>(84-94%)                | 9.5%<br>(5.7-16%)        | 2.9<br>(1.8-4.5)                            | 3.5%<br>(1.9-5.2%)                   | 9.3%<br>(6.1-13%)                   | 1.7<br>(1.1-2.3)     | 75<br>(44-110)     |
| Iceland  | 2010 | Female | 55 to 59 | 88%<br>(81-93%)                | 12%<br>(7.1-19%)         | 3<br>(1.8-4.4)                              | 3.7%<br>(2.1-5.6%)                   | 8.1%<br>(5.3-11%)                   | 2.3<br>(1.5-3.3)     | 85<br>(48-130)     |
| Iceland  | 2010 | Female | 60 to 64 | 84%<br>(76-91%)                | 16%<br>(9.5-24%)         | 2.8<br>(1.5-4.5)                            | 3.3%<br>(1.4-5.9%)                   | 6.2%<br>(3.2-9.8%)                  | 2.6<br>(1.3-4)       | 78<br>(33-130)     |
| Iceland  | 2010 | Female | 65 to 69 | 79%<br>(70-88%)                | 21%<br>(12-30%)          | 2.4<br>(1.5-3.7)                            | 2.5%<br>(0.91-4.5%)                  | 4.4%<br>(2-7.2%)                    | 2.3<br>(1-3.7)       | 56<br>(21-100)     |
| Iceland  | 2010 | Female | 70 to 74 | 77%<br>(66-85%)                | 23%<br>(15-34%)          | 2.1<br>(1.2-3.4)                            | 1.8%<br>(-0.076-4.2%)                | 2.9%<br>(0.29-6.1%)                 | 2<br>(0.2-4.1)       | 38<br>(-1.7-87)    |
| Iceland  | 2010 | Female | 75 to 79 | 75%<br>(63-85%)                | 25%<br>(15-37%)          | 1.9<br>(0.99-3.3)                           | 1.5%<br>(-1.1-3.9%)                  | 1.5%<br>(-1.3-5.3%)                 | 1.7<br>(-1.5-6)      | 26<br>(-27-98)     |
| Iceland  | 2010 | Female | 80 to 84 | 74%<br>(60-85%)                | 26%<br>(15-40%)          | 1.9<br>(1.1-3)                              | 0.51%<br>(-1.7-3.5%)                 | 0.67%<br>(-2.1-4.4%)                | 1.1<br>(-3.7-7.3)    | 13<br>(-43-88)     |
| Iceland  | 2010 | Female | 85 to 89 | 74%<br>(59-84%)                | 26%<br>(16-41%)          | 1.8<br>(1-3.1)                              | 0.076%<br>(-2.3-3.2%)                | -0.022%<br>(-2.8-3.7%)              | -0.043<br>(-5.7-7.4) | 1.5<br>(-44-62)    |
| Iceland  | 2010 | Female | 90 to 94 | 74%<br>(62-85%)                | 26%<br>(15-38%)          | 1.9<br>(0.94-3.3)                           | -0.2%<br>(-2.9-3.7%)                 | -0.43%<br>(-3.6-4.2%)               | -0.62<br>(-5.3-6.2)  | -1.8<br>(-27-36)   |
| Iceland  | 2010 | Female | 95 plus  | 75%<br>(59-88%)                | 25%<br>(12-41%)          | 1.9<br>(0.74-3.6)                           | -0.12%<br>(-3.2-5.1%)                | -0.39%<br>(-4.1-5.9%)               | -0.29<br>(-3.1-4.4)  | -0.38<br>(-10-16)  |
| Iceland  | 2010 | Male   | All Ages | 90%<br>(87-93%)                | 9.8%<br>(7.4-13%)        | 2.1<br>(1.7-2.5)                            | 3.8%<br>(2.4-5.3%)                   | 2.4%<br>(-0.08-5.1%)                | 24<br>(-0.8-51)      | 1300<br>(800-1800) |
| Iceland  | 2010 | Male   | 15 to 19 | 86%<br>(77-92%)                | 14%<br>(7.8-23%)         | 1.5<br>(0.9-2.4)                            | 3.9%<br>(2.4-5.6%)                   | 8.1%<br>(3.1-13%)                   | 0.38<br>(0.15-0.64)  | 47<br>(29-67)      |
| Iceland  | 2010 | Male   | 20 to 24 | 90%<br>(83-94%)                | 10%<br>(5.7-17%)         | 2.2<br>(1.3-3.4)                            | 7.7%<br>(5.2-11%)                    | 11%<br>(5.1-19%)                    | 0.8<br>(0.36-1.3)    | 110<br>(69-150)    |
| Iceland  | 2010 | Male   | 25 to 29 | 93%<br>(87-96%)                | 7.4%<br>(4.2-13%)        | 2.4<br>(1.5-3.6)                            | 6.9%<br>(4.6-9.5%)                   | 12%<br>(5.2-19%)                    | 0.9<br>(0.41-1.5)    | 110<br>(69-150)    |
| Iceland  | 2010 | Male   | 30 to 34 | 94%<br>(89-97%)                | 5.7%<br>(2.9-11%)        | 2.5<br>(1.5-3.7)                            | 6.5%<br>(4.1-9.2%)                   | 12%<br>(5.4-18%)                    | 1.2<br>(0.55-1.9)    | 110<br>(67-150)    |



| Location | Year | Sex    | Age      | Prevalence of current drinkers | Prevalence of abstainers | Population average of standard drinks daily | Percent of total attributable deaths | Percent of total attributable DALYs | Attributable deaths  | Attributable DALYs |
|----------|------|--------|----------|--------------------------------|--------------------------|---------------------------------------------|--------------------------------------|-------------------------------------|----------------------|--------------------|
| Iceland  | 2010 | Male   | 35 to 39 | 95%<br>(92-97%)                | 4.8%<br>(2.5-8.4%)       | 2.5<br>(1.6-3.6)                            | 5.6%<br>(3.8-7.7%)                   | 11%<br>(5.6-17%)                    | 1<br>(0.51-1.5)      | 88<br>(59-120)     |
| Iceland  | 2010 | Male   | 40 to 44 | 96%<br>(92-98%)                | 4.2%<br>(2-7.6%)         | 2.7<br>(1.7-3.8)                            | 5.9%<br>(3.9-8.1%)                   | 11%<br>(6.6-17%)                    | 1.5<br>(0.89-2.2)    | 100<br>(68-140)    |
| Iceland  | 2010 | Male   | 45 to 49 | 96%<br>(92-98%)                | 4%<br>(1.9-7.6%)         | 3.1<br>(1.9-4.5)                            | 6%<br>(3.6-8.6%)                     | 11%<br>(5.9-16%)                    | 2.2<br>(1.2-3.4)     | 130<br>(78-180)    |
| Iceland  | 2010 | Male   | 50 to 54 | 96%<br>(92-98%)                | 4.4%<br>(2.2-7.9%)       | 3.4<br>(2.3-4.7)                            | 5.9%<br>(3.7-8.6%)                   | 9.8%<br>(5.7-14%)                   | 3.1<br>(1.8-4.6)     | 150<br>(91-210)    |
| Iceland  | 2010 | Male   | 55 to 59 | 94%<br>(90-97%)                | 5.7%<br>(3-9.6%)         | 3.6<br>(2.3-4.9)                            | 5.4%<br>(3.1-8.3%)                   | 8.1%<br>(4.2-13%)                   | 3.4<br>(1.8-5.5)     | 140<br>(82-220)    |
| Iceland  | 2010 | Male   | 60 to 64 | 93%<br>(89-97%)                | 6.6%<br>(3.4-11%)        | 3.4<br>(2.1-5)                              | 4.7%<br>(2-8%)                       | 6.4%<br>(2.5-11%)                   | 3.9<br>(1.5-7)       | 130<br>(57-230)    |
| Iceland  | 2010 | Male   | 65 to 69 | 93%<br>(88-97%)                | 7.1%<br>(3.4-12%)        | 3.1<br>(2-4.3)                              | 3%<br>(0.75-5.6%)                    | 3.7%<br>(0.56-7.4%)                 | 2.8<br>(0.43-5.4)    | 79<br>(19-150)     |
| Iceland  | 2010 | Male   | 70 to 74 | 92%<br>(86-96%)                | 8%<br>(4.4-14%)          | 2.6<br>(1.6-3.9)                            | 2.1%<br>(-0.21-5%)                   | 2.4%<br>(-0.51-6.1%)                | 2.2<br>(-0.5-5.6)    | 51<br>(-5.2-120)   |
| Iceland  | 2010 | Male   | 75 to 79 | 91%<br>(85-95%)                | 9.1%<br>(4.8-15%)        | 2.4<br>(1.4-3.7)                            | 1.3%<br>(-1.1-4.2%)                  | 1.3%<br>(-1.7-4.8%)                 | 1.8<br>(-2.5-7.1)    | 35<br>(-30-120)    |
| Iceland  | 2010 | Male   | 80 to 84 | 90%<br>(82-95%)                | 10%<br>(5.1-18%)         | 2.3<br>(1.4-3.4)                            | 0.51%<br>(-1.9-3.1%)                 | 0.24%<br>(-2.7-3.3%)                | 0.44<br>(-5-6.2)     | 13<br>(-47-79)     |
| Iceland  | 2010 | Male   | 85 to 89 | 89%<br>(82-94%)                | 11%<br>(5.6-18%)         | 2.2<br>(1.3-3.4)                            | 0.096%<br>(-2.2-2.8%)                | -0.27%<br>(-3.1-2.9%)               | -0.45<br>(-5.1-4.9)  | 1.5<br>(-34-45)    |
| Iceland  | 2010 | Male   | 90 to 94 | 90%<br>(83-95%)                | 10%<br>(5-17%)           | 2.2<br>(1.3-3.6)                            | -0.32%<br>(-2.9-3%)                  | -0.79%<br>(-3.8-2.8%)               | -0.75<br>(-3.6-2.7)  | -1.9<br>(-17-17)   |
| Iceland  | 2010 | Male   | 95 plus  | 90%<br>(81-96%)                | 9.7%<br>(4-19%)          | 2.1<br>(1.1-3.7)                            | -0.33%<br>(-3.2-3.9%)                | -0.87%<br>(-4.3-4%)                 | -0.22<br>(-1.1-1)    | -0.33<br>(-3.2-4)  |
| Iceland  | 2016 | Female | All Ages | 85%<br>(81-88%)                | 15%<br>(12-19%)          | 2<br>(1.4-2.6)                              | 2.3%<br>(1.2-3.9%)                   | 2.4%<br>(-0.24-6.3%)                | 26<br>(-2.7-68)      | 820<br>(400-1300)  |
| Iceland  | 2016 | Female | 15 to 19 | 85%<br>(75-92%)                | 15%<br>(8.4-25%)         | 1.5<br>(0.79-2.7)                           | 1.5%<br>(0.9-2.3%)                   | 5.8%<br>(2.3-10%)                   | 0.11<br>(0.043-0.19) | 16<br>(9.5-25)     |
| Iceland  | 2016 | Female | 20 to 24 | 90%<br>(83-95%)                | 9.7%<br>(5.1-17%)        | 2<br>(1-3.4)                                | 2.4%<br>(1.6-3.4%)                   | 6.4%<br>(2.8-11%)                   | 0.19<br>(0.083-0.33) | 34<br>(22-51)      |
| Iceland  | 2016 | Female | 25 to 29 | 92%<br>(86-96%)                | 8.1%<br>(4.4-14%)        | 2.1<br>(1.1-3.6)                            | 2%<br>(1.3-2.8%)                     | 6.7%<br>(3.3-11%)                   | 0.15<br>(0.07-0.24)  | 27<br>(17-39)      |
| Iceland  | 2016 | Female | 30 to 34 | 93%<br>(87-96%)                | 7.1%<br>(3.6-13%)        | 2.2<br>(1.1-3.6)                            | 1.8%<br>(1.2-2.6%)                   | 7.9%<br>(4.6-12%)                   | 0.24<br>(0.14-0.36)  | 29<br>(19-42)      |
| Iceland  | 2016 | Female | 35 to 39 | 93%<br>(88-96%)                | 6.8%<br>(3.5-12%)        | 2.3<br>(1.2-4.1)                            | 2.3%<br>(1.4-3.5%)                   | 9.3%<br>(5.6-13%)                   | 0.47<br>(0.28-0.68)  | 37<br>(23-55)      |
| Iceland  | 2016 | Female | 40 to 44 | 93%<br>(88-96%)                | 7%<br>(3.7-12%)          | 2.6<br>(1.4-4.4)                            | 3%<br>(1.8-4.5%)                     | 10%<br>(6.8-14%)                    | 0.9<br>(0.58-1.3)    | 55<br>(35-82)      |
| Iceland  | 2016 | Female | 45 to 49 | 92%<br>(86-96%)                | 7.6%<br>(3.8-14%)        | 3<br>(1.6-5)                                | 3.4%<br>(1.8-5.3%)                   | 11%<br>(7.2-15%)                    | 1.3<br>(0.82-1.8)    | 68<br>(39-100)     |
| Iceland  | 2016 | Female | 50 to 54 | 90%<br>(84-94%)                | 9.5%<br>(5.7-16%)        | 3.1<br>(1.7-5)                              | 3.9%<br>(2.1-5.9%)                   | 10%<br>(6.8-14%)                    | 2.1<br>(1.4-3)       | 93<br>(54-140)     |

| Location | Year | Sex    | Age      | Prevalence of current drinkers | Prevalence of abstainers | Population average of standard drinks daily | Percent of total attributable deaths | Percent of total attributable DALYs | Attributable deaths | Attributable DALYs |
|----------|------|--------|----------|--------------------------------|--------------------------|---------------------------------------------|--------------------------------------|-------------------------------------|---------------------|--------------------|
| Iceland  | 2016 | Female | 55 to 59 | 88%<br>(81-93%)                | 12%<br>(7.1-19%)         | 3.1<br>(1.8-5)                              | 4.1%<br>(2.3-6.4%)                   | 8.9%<br>(5.9-13%)                   | 3<br>(2-4.4)        | 110<br>(64-170)    |
| Iceland  | 2016 | Female | 60 to 64 | 84%<br>(75-91%)                | 16%<br>(9.4-25%)         | 2.9<br>(1.6-5)                              | 3.8%<br>(1.8-6.7%)                   | 7.1%<br>(3.9-11%)                   | 3.6<br>(2-5.6)      | 110<br>(52-180)    |
| Iceland  | 2016 | Female | 65 to 69 | 79%<br>(69-88%)                | 21%<br>(12-31%)          | 2.6<br>(1.5-4.1)                            | 3%<br>(1.2-5.5%)                     | 5.2%<br>(2.6-8.4%)                  | 3.5<br>(1.8-5.7)    | 86<br>(37-160)     |
| Iceland  | 2016 | Female | 70 to 74 | 77%<br>(66-85%)                | 23%<br>(15-34%)          | 2.3<br>(1.2-3.8)                            | 2.3%<br>(0.27-5.1%)                  | 3.7%<br>(0.91-7.1%)                 | 2.9<br>(0.71-5.8)   | 58<br>(6.7-130)    |
| Iceland  | 2016 | Female | 75 to 79 | 75%<br>(64-85%)                | 25%<br>(15-36%)          | 2.1<br>(0.98-3.6)                           | 1.6%<br>(-0.67-5%)                   | 2.3%<br>(-0.72-6.6%)                | 2.4<br>(-0.76-7)    | 37<br>(-16-110)    |
| Iceland  | 2016 | Female | 80 to 84 | 74%<br>(60-86%)                | 26%<br>(14-40%)          | 2<br>(1-3.4)                                | 1.2%<br>(-1.2-4.8%)                  | 1.5%<br>(-1.5-5.9%)                 | 2.7<br>(-2.8-11)    | 31<br>(-34-130)    |
| Iceland  | 2016 | Female | 85 to 89 | 74%<br>(60-84%)                | 26%<br>(16-40%)          | 2<br>(1-3.4)                                | 0.73%<br>(-1.9-4.8%)                 | 0.79%<br>(-2.4-5.7%)                | 1.8<br>(-5.6-13)    | 17<br>(-43-110)    |
| Iceland  | 2016 | Female | 90 to 94 | 74%<br>(61-85%)                | 26%<br>(15-39%)          | 2<br>(0.94-3.7)                             | 0.47%<br>(-2.5-5.4%)                 | 0.37%<br>(-3.2-6.1%)                | 0.74<br>(-6.6-12)   | 6.1<br>(-34-66)    |
| Iceland  | 2016 | Female | 95 plus  | 75%<br>(59-88%)                | 25%<br>(12-41%)          | 2<br>(0.76-4.1)                             | 0.44%<br>(-3-6.8%)                   | 0.27%<br>(-3.9-8%)                  | 0.23<br>(-3.3-6.7)  | 1.5<br>(-10-24)    |
| Iceland  | 2016 | Male   | All Ages | 90%<br>(88-93%)                | 9.7%<br>(7.3-12%)        | 2.3<br>(1.6-3.1)                            | 4.4%<br>(2.7-6.5%)                   | 3.3%<br>(0.46-7%)                   | 38<br>(5.6-80)      | 1600<br>(970-2300) |
| Iceland  | 2016 | Male   | 15 to 19 | 86%<br>(77-92%)                | 14%<br>(8.1-23%)         | 1.6<br>(0.87-2.6)                           | 3.9%<br>(2.4-5.6%)                   | 8.5%<br>(3.4-14%)                   | 0.33<br>(0.13-0.56) | 42<br>(26-61)      |
| Iceland  | 2016 | Male   | 20 to 24 | 90%<br>(83-94%)                | 10%<br>(5.6-17%)         | 2.4<br>(1.3-3.8)                            | 7.8%<br>(5.3-11%)                    | 12%<br>(5.2-20%)                    | 0.83<br>(0.35-1.4)  | 110<br>(74-160)    |
| Iceland  | 2016 | Male   | 25 to 29 | 93%<br>(87-96%)                | 7.4%<br>(4.2-13%)        | 2.6<br>(1.5-4.2)                            | 7.5%<br>(5-11%)                      | 12%<br>(5.5-20%)                    | 0.9<br>(0.4-1.5)    | 110<br>(70-150)    |
| Iceland  | 2016 | Male   | 30 to 34 | 94%<br>(89-97%)                | 5.7%<br>(2.8-11%)        | 2.7<br>(1.5-4.3)                            | 7%<br>(4.5-9.9%)                     | 13%<br>(6.1-20%)                    | 1.4<br>(0.66-2.2)   | 120<br>(76-180)    |
| Iceland  | 2016 | Male   | 35 to 39 | 95%<br>(92-97%)                | 4.8%<br>(2.5-8.5%)       | 2.7<br>(1.5-4.2)                            | 6.1%<br>(4.1-8.5%)                   | 13%<br>(6.4-19%)                    | 1.1<br>(0.53-1.7)   | 90<br>(61-130)     |
| Iceland  | 2016 | Male   | 40 to 44 | 96%<br>(92-98%)                | 4.2%<br>(2.1-7.7%)       | 2.9<br>(1.7-4.5)                            | 6.5%<br>(4.3-9.2%)                   | 13%<br>(7.7-19%)                    | 1.8<br>(1-2.6)      | 120<br>(76-160)    |
| Iceland  | 2016 | Male   | 45 to 49 | 96%<br>(92-98%)                | 3.9%<br>(1.9-7.9%)       | 3.3<br>(1.9-5.2)                            | 6.9%<br>(4.4-10%)                    | 13%<br>(7.4-20%)                    | 2.4<br>(1.3-3.6)    | 130<br>(82-190)    |
| Iceland  | 2016 | Male   | 50 to 54 | 96%<br>(92-98%)                | 4.5%<br>(2.3-8%)         | 3.7<br>(2.2-5.4)                            | 6.9%<br>(4.2-10%)                    | 12%<br>(6.9-17%)                    | 3.7<br>(2.1-5.5)    | 170<br>(100-250)   |
| Iceland  | 2016 | Male   | 55 to 59 | 94%<br>(90-97%)                | 5.7%<br>(2.9-9.7%)       | 3.8<br>(2.4-5.7)                            | 6.4%<br>(3.6-9.9%)                   | 9.9%<br>(5.5-15%)                   | 4.9<br>(2.7-7.8)    | 190<br>(110-300)   |
| Iceland  | 2016 | Male   | 60 to 64 | 93%<br>(89-97%)                | 6.6%<br>(3.4-11%)        | 3.6<br>(2.1-5.7)                            | 5.6%<br>(2.6-9.6%)                   | 8%<br>(3.7-14%)                     | 5.4<br>(2.5-9.4)    | 180<br>(87-300)    |
| Iceland  | 2016 | Male   | 65 to 69 | 93%<br>(87-97%)                | 7.2%<br>(3.4-13%)        | 3.3<br>(2-5)                                | 4%<br>(1.5-7.4%)                     | 5.2%<br>(1.8-9.8%)                  | 5.3<br>(1.8-10)     | 150<br>(55-270)    |
| Iceland  | 2016 | Male   | 70 to 74 | 92%<br>(87-95%)                | 8%<br>(4.5-13%)          | 2.8<br>(1.6-4.4)                            | 2.9%<br>(0.48-6.3%)                  | 3.6%<br>(0.44-7.7%)                 | 3.9<br>(0.5-8.4)    | 85<br>(14-180)     |

| Location | Year | Sex    | Age      | Prevalence of current drinkers | Prevalence of abstainers | Population average of standard drinks daily | Percent of total attributable deaths | Percent of total attributable DALYs | Attributable deaths | Attributable DALYs     |
|----------|------|--------|----------|--------------------------------|--------------------------|---------------------------------------------|--------------------------------------|-------------------------------------|---------------------|------------------------|
| Iceland  | 2016 | Male   | 75 to 79 | 91%<br>(85-95%)                | 9%<br>(4.6-15%)          | 2.6<br>(1.3-4.2)                            | 1.9%<br>(-0.67-5.8%)                 | 2.1%<br>(-1.1-6.6%)                 | 2.8<br>(-1.5-9.2)   | 51<br>(-17-150)        |
| Iceland  | 2016 | Male   | 80 to 84 | 90%<br>(82-95%)                | 10%<br>(5-18%)           | 2.4<br>(1.3-3.9)                            | 1.2%<br>(-1.3-4.7%)                  | 1.1%<br>(-2-5.2%)                   | 2.2<br>(-4.1-11)    | 34<br>(-37-130)        |
| Iceland  | 2016 | Male   | 85 to 89 | 90%<br>(82-94%)                | 10%<br>(5.8-18%)         | 2.3<br>(1.3-3.9)                            | 0.74%<br>(-1.8-4.5%)                 | 0.51%<br>(-2.6-5%)                  | 1<br>(-5.4-10)      | 14<br>(-35-88)         |
| Iceland  | 2016 | Male   | 90 to 94 | 90%<br>(83-95%)                | 10%<br>(5-17%)           | 2.3<br>(1.2-4)                              | 0.37%<br>(-2.5-5%)                   | 0.034%<br>(-3.3-5.3%)               | 0.04<br>(-4.4-6.9)  | 2.9<br>(-20-39)        |
| Iceland  | 2016 | Male   | 95 plus  | 90%<br>(82-96%)                | 9.5%<br>(3.9-18%)        | 2.3<br>(1.1-4.3)                            | 0.2%<br>(-3.1-5.6%)                  | -0.25%<br>(-4.2-6.3%)               | -0.1<br>(-1.7-2.5)  | 0.31<br>(-5-9.2)       |
| Ireland  | 1990 | Female | All Ages | 66%<br>(61-71%)                | 34%<br>(29-39%)          | 2.3<br>(2.1-2.6)                            | 3.7%<br>(2.2-5.2%)                   | 4.1%<br>(1.3-7.3%)                  | 610<br>(190-1100)   | 17000<br>(10000-24000) |
| Ireland  | 1990 | Female | 15 to 19 | 69%<br>(55-81%)                | 31%<br>(19-45%)          | 2.6<br>(1.8-3.6)                            | 3.3%<br>(2.2-4.6%)                   | 10%<br>(5.8-16%)                    | 4.8<br>(2.7-7.3)    | 590<br>(390-820)       |
| Ireland  | 1990 | Female | 20 to 24 | 79%<br>(67-87%)                | 21%<br>(13-33%)          | 3.6<br>(2.5-4.8)                            | 5.2%<br>(3.8-6.8%)                   | 14%<br>(8.6-19%)                    | 6.1<br>(3.9-8.5)    | 870<br>(610-1200)      |
| Ireland  | 1990 | Female | 25 to 29 | 78%<br>(67-87%)                | 22%<br>(13-33%)          | 3.1<br>(2.2-4.1)                            | 4.3%<br>(3-5.5%)                     | 12%<br>(7.1-17%)                    | 5.8<br>(3.4-8.2)    | 750<br>(530-1000)      |
| Ireland  | 1990 | Female | 30 to 34 | 78%<br>(67-85%)                | 22%<br>(15-33%)          | 2.9<br>(2.1-4.1)                            | 3.7%<br>(2.6-5%)                     | 11%<br>(7.1-15%)                    | 7.2<br>(4.6-10)     | 690<br>(480-940)       |
| Ireland  | 1990 | Female | 35 to 39 | 77%<br>(66-84%)                | 23%<br>(16-34%)          | 3<br>(2.1-4.3)                              | 4.2%<br>(3-5.6%)                     | 12%<br>(8.8-16%)                    | 12<br>(8.2-15)      | 850<br>(600-1100)      |
| Ireland  | 1990 | Female | 40 to 44 | 76%<br>(67-84%)                | 24%<br>(16-33%)          | 3.3<br>(2.4-4.4)                            | 5.2%<br>(3.7-6.8%)                   | 13%<br>(10-17%)                     | 19<br>(14-25)       | 1100<br>(840-1400)     |
| Ireland  | 1990 | Female | 45 to 49 | 77%<br>(66-84%)                | 23%<br>(16-34%)          | 3.8<br>(2.7-5.1)                            | 6.5%<br>(4.8-8.8%)                   | 14%<br>(10-18%)                     | 29<br>(21-37)       | 1400<br>(1000-1800)    |
| Ireland  | 1990 | Female | 50 to 54 | 76%<br>(67-83%)                | 24%<br>(17-33%)          | 4<br>(2.9-5.2)                              | 7%<br>(4.8-9.6%)                     | 12%<br>(8.8-17%)                    | 37<br>(26-51)       | 1500<br>(1100-2100)    |
| Ireland  | 1990 | Female | 55 to 59 | 75%<br>(66-82%)                | 25%<br>(18-34%)          | 3.9<br>(2.9-5.2)                            | 6.7%<br>(4.2-9.6%)                   | 10%<br>(6.6-15%)                    | 49<br>(31-68)       | 1700<br>(1100-2400)    |
| Ireland  | 1990 | Female | 60 to 64 | 72%<br>(62-80%)                | 28%<br>(20-38%)          | 3.6<br>(2.5-4.9)                            | 5.5%<br>(2.5-9.2%)                   | 7.7%<br>(3.4-13%)                   | 60<br>(27-99)       | 1800<br>(830-2900)     |
| Ireland  | 1990 | Female | 65 to 69 | 68%<br>(58-76%)                | 32%<br>(24-42%)          | 3<br>(2.2-4)                                | 3.9%<br>(1.4-6.8%)                   | 5.1%<br>(1.5-8.9%)                  | 66<br>(20-120)      | 1600<br>(570-2800)     |
| Ireland  | 1990 | Female | 70 to 74 | 63%<br>(53-72%)                | 37%<br>(28-47%)          | 2.5<br>(1.7-3.4)                            | 2.7%<br>(-0.23-5.9%)                 | 3.3%<br>(-0.41-7.3%)                | 61<br>(-7.3-140)    | 1200<br>(-100-2600)    |
| Ireland  | 1990 | Female | 75 to 79 | 59%<br>(45-71%)                | 41%<br>(29-55%)          | 2.2<br>(1.4-3.2)                            | 2.1%<br>(-0.99-5.5%)                 | 2.4%<br>(-1.4-6.5%)                 | 62<br>(-34-170)     | 970<br>(-440-2600)     |
| Ireland  | 1990 | Female | 80 to 84 | 55%<br>(41-67%)                | 45%<br>(33-59%)          | 2.2<br>(1.5-3.1)                            | 2.4%<br>(-0.34-5.6%)                 | 2.7%<br>(-0.57-6.6%)                | 73<br>(-15-180)     | 840<br>(-120-2000)     |
| Ireland  | 1990 | Female | 85 to 89 | 52%<br>(38-64%)                | 48%<br>(36-62%)          | 2.2<br>(1.4-3.3)                            | 2.7%<br>(-0.13-6.3%)                 | 3%<br>(-0.36-7.1%)                  | 70<br>(-8.2-160)    | 560<br>(-26-1300)      |
| Ireland  | 1990 | Female | 90 to 94 | 50%<br>(37-62%)                | 50%<br>(38-63%)          | 2.3<br>(1.4-3.6)                            | 2.9%<br>(-0.33-7.4%)                 | 3.2%<br>(-0.58-8.4%)                | 35<br>(-6.6-94)     | 200<br>(-23-500)       |

| Location | Year | Sex    | Age      | Prevalence of current drinkers | Prevalence of abstainers | Population average of standard drinks daily | Percent of total attributable deaths | Percent of total attributable DALYs | Attributable deaths | Attributable DALYs     |
|----------|------|--------|----------|--------------------------------|--------------------------|---------------------------------------------|--------------------------------------|-------------------------------------|---------------------|------------------------|
| Ireland  | 1990 | Female | 95 plus  | 51%<br>(34-66%)                | 49%<br>(34-66%)          | 2.5<br>(1.3-4.1)                            | 3.4%<br>(-0.7-8.9%)                  | 3.8%<br>(-0.93-10%)                 | 15<br>(-3.7-41)     | 55<br>(-11-140)        |
| Ireland  | 1990 | Male   | All Ages | 68%<br>(61-74%)                | 32%<br>(26-39%)          | 3.3<br>(2.9-3.7)                            | 7.9%<br>(5.8-10%)                    | 8%<br>(4.4-12%)                     | 1300<br>(740-2000)  | 41000<br>(30000-54000) |
| Ireland  | 1990 | Male   | 15 to 19 | 65%<br>(49-79%)                | 35%<br>(21-51%)          | 2.8<br>(1.8-3.9)                            | 7.5%<br>(5.1-11%)                    | 14%<br>(7.9-21%)                    | 17<br>(9.5-25)      | 1600<br>(1100-2300)    |
| Ireland  | 1990 | Male   | 20 to 24 | 76%<br>(63-86%)                | 24%<br>(14-37%)          | 4.7<br>(3.2-6.2)                            | 15%<br>(11-20%)                      | 23%<br>(15-31%)                     | 34<br>(22-47)       | 3200<br>(2300-4200)    |
| Ireland  | 1990 | Male   | 25 to 29 | 79%<br>(69-87%)                | 21%<br>(13-31%)          | 4.5<br>(3.2-5.8)                            | 14%<br>(10-17%)                      | 22%<br>(14-29%)                     | 29<br>(19-39)       | 2600<br>(1900-3400)    |
| Ireland  | 1990 | Male   | 30 to 34 | 81%<br>(70-89%)                | 19%<br>(11-30%)          | 4.2<br>(2.9-5.6)                            | 11%<br>(7.6-14%)                     | 19%<br>(12-25%)                     | 25<br>(16-34)       | 2000<br>(1500-2700)    |
| Ireland  | 1990 | Male   | 35 to 39 | 83%<br>(73-90%)                | 17%<br>(10-27%)          | 3.9<br>(2.7-5.3)                            | 8.7%<br>(6.1-12%)                    | 15%<br>(9.4-21%)                    | 24<br>(15-34)       | 1700<br>(1200-2300)    |
| Ireland  | 1990 | Male   | 40 to 44 | 84%<br>(74-91%)                | 16%<br>(9.3-26%)         | 4.4<br>(3.2-5.7)                            | 8.4%<br>(5.3-12%)                    | 13%<br>(7.6-20%)                    | 31<br>(17-45)       | 1900<br>(1200-2600)    |
| Ireland  | 1990 | Male   | 45 to 49 | 84%<br>(74-91%)                | 16%<br>(9.4-26%)         | 5.7<br>(4.1-7.5)                            | 11%<br>(6.9-15%)                     | 16%<br>(9.4-22%)                    | 53<br>(31-73)       | 2600<br>(1700-3500)    |
| Ireland  | 1990 | Male   | 50 to 54 | 83%<br>(75-89%)                | 17%<br>(11-25%)          | 6.4<br>(4.7-8.1)                            | 12%<br>(7.8-16%)                     | 16%<br>(10-22%)                     | 80<br>(50-110)      | 3300<br>(2100-4300)    |
| Ireland  | 1990 | Male   | 55 to 59 | 82%<br>(73-88%)                | 18%<br>(12-27%)          | 6.4<br>(4.9-8.3)                            | 12%<br>(8.1-16%)                     | 15%<br>(9.7-21%)                    | 120<br>(79-170)     | 4300<br>(2800-5800)    |
| Ireland  | 1990 | Male   | 60 to 64 | 79%<br>(69-85%)                | 21%<br>(15-31%)          | 5.9<br>(4.3-8)                              | 11%<br>(5.8-15%)                     | 13%<br>(6.6-18%)                    | 170<br>(86-240)     | 4900<br>(2600-6900)    |
| Ireland  | 1990 | Male   | 65 to 69 | 76%<br>(66-83%)                | 24%<br>(17-34%)          | 5<br>(3.7-6.4)                              | 8.6%<br>(4.4-13%)                    | 9.7%<br>(4.6-15%)                   | 200<br>(95-310)     | 4900<br>(2400-7400)    |
| Ireland  | 1990 | Male   | 70 to 74 | 74%<br>(64-81%)                | 26%<br>(19-36%)          | 4.1<br>(3.1-5.4)                            | 6.2%<br>(1.8-11%)                    | 6.8%<br>(1.7-12%)                   | 180<br>(45-340)     | 3600<br>(1000-6300)    |
| Ireland  | 1990 | Male   | 75 to 79 | 73%<br>(62-82%)                | 27%<br>(18-38%)          | 3.7<br>(2.5-5.1)                            | 4.8%<br>(0.67-10%)                   | 5.1%<br>(0.46-11%)                  | 160<br>(15-350)     | 2400<br>(340-5100)     |
| Ireland  | 1990 | Male   | 80 to 84 | 72%<br>(58-82%)                | 28%<br>(18-42%)          | 3.5<br>(2.4-4.8)                            | 4.6%<br>(0.95-9.1%)                  | 4.9%<br>(0.72-9.9%)                 | 120<br>(18-250)     | 1400<br>(290-2800)     |
| Ireland  | 1990 | Male   | 85 to 89 | 71%<br>(57-81%)                | 29%<br>(19-43%)          | 3.4<br>(2.2-4.6)                            | 4.4%<br>(0.59-8.7%)                  | 4.6%<br>(0.32-9.5%)                 | 65<br>(4.5-140)     | 530<br>(74-1100)       |
| Ireland  | 1990 | Male   | 90 to 94 | 73%<br>(60-83%)                | 27%<br>(17-40%)          | 3.4<br>(2.1-4.9)                            | 4%<br>(0.089-8.9%)                   | 4.3%<br>(-0.2-9.9%)                 | 23<br>(-1.1-53)     | 130<br>(2.8-280)       |
| Ireland  | 1990 | Male   | 95 plus  | 75%<br>(60-87%)                | 25%<br>(13-40%)          | 3.5<br>(2-5.3)                              | 4.2%<br>(-0.48-10%)                  | 4.4%<br>(-0.93-11%)                 | 5.1<br>(-1.1-13)    | 19<br>(-2.2-47)        |
| Ireland  | 1995 | Female | All Ages | 68%<br>(63-73%)                | 32%<br>(27-37%)          | 2.8<br>(2.5-3.2)                            | 4.7%<br>(3.2-6.4%)                   | 5.8%<br>(2.6-9.4%)                  | 870<br>(380-1400)   | 21000<br>(14000-29000) |
| Ireland  | 1995 | Female | 15 to 19 | 71%<br>(57-82%)                | 29%<br>(18-43%)          | 3.1<br>(2.1-4.1)                            | 3.5%<br>(2.4-4.8%)                   | 11%<br>(6.8-17%)                    | 5.3<br>(3.1-7.8)    | 640<br>(430-870)       |
| Ireland  | 1995 | Female | 20 to 24 | 80%<br>(69-87%)                | 20%<br>(13-31%)          | 4.1<br>(2.9-5.5)                            | 5.6%<br>(4.1-7.2%)                   | 15%<br>(10-21%)                     | 7.4<br>(4.7-10)     | 1000<br>(730-1300)     |

| Location | Year | Sex    | Age      | Prevalence of current drinkers | Prevalence of abstainers | Population average of standard drinks daily | Percent of total attributable deaths | Percent of total attributable DALYs | Attributable deaths | Attributable DALYs     |
|----------|------|--------|----------|--------------------------------|--------------------------|---------------------------------------------|--------------------------------------|-------------------------------------|---------------------|------------------------|
| Ireland  | 1995 | Female | 25 to 29 | 79%<br>(69-87%)                | 21%<br>(13-31%)          | 3.6<br>(2.6-4.8)                            | 4.7%<br>(3.4-6%)                     | 13%<br>(8.6-18%)                    | 6.7<br>(4.2-9.2)    | 820<br>(580-1100)      |
| Ireland  | 1995 | Female | 30 to 34 | 78%<br>(68-86%)                | 22%<br>(14-32%)          | 3.4<br>(2.4-4.8)                            | 4%<br>(2.9-5.3%)                     | 12%<br>(8.4-17%)                    | 8.4<br>(5.9-12)     | 800<br>(580-1100)      |
| Ireland  | 1995 | Female | 35 to 39 | 77%<br>(68-85%)                | 23%<br>(15-32%)          | 3.5<br>(2.4-4.8)                            | 4.6%<br>(3.4-6.1%)                   | 14%<br>(10-18%)                     | 14<br>(9.9-18)      | 1000<br>(740-1300)     |
| Ireland  | 1995 | Female | 40 to 44 | 77%<br>(68-84%)                | 23%<br>(16-32%)          | 3.8<br>(2.8-5.1)                            | 5.7%<br>(4.3-7.3%)                   | 15%<br>(12-18%)                     | 22<br>(17-28)       | 1300<br>(1000-1700)    |
| Ireland  | 1995 | Female | 45 to 49 | 78%<br>(68-85%)                | 22%<br>(15-32%)          | 4.4<br>(3.1-5.9)                            | 7.2%<br>(5.4-9.5%)                   | 16%<br>(12-20%)                     | 37<br>(28-48)       | 1800<br>(1400-2300)    |
| Ireland  | 1995 | Female | 50 to 54 | 77%<br>(69-84%)                | 23%<br>(16-31%)          | 4.6<br>(3.3-6.2)                            | 8%<br>(5.8-11%)                      | 15%<br>(11-19%)                     | 46<br>(35-61)       | 1900<br>(1500-2600)    |
| Ireland  | 1995 | Female | 55 to 59 | 76%<br>(67-83%)                | 24%<br>(17-33%)          | 4.6<br>(3.3-6)                              | 7.9%<br>(5.4-11%)                    | 13%<br>(8.9-18%)                    | 55<br>(38-75)       | 2000<br>(1400-2700)    |
| Ireland  | 1995 | Female | 60 to 64 | 73%<br>(64-80%)                | 27%<br>(20-36%)          | 4.2<br>(3-5.7)                              | 6.8%<br>(3.8-10%)                    | 9.9%<br>(5.4-15%)                   | 66<br>(36-99)       | 2000<br>(1100-3000)    |
| Ireland  | 1995 | Female | 65 to 69 | 69%<br>(60-77%)                | 31%<br>(23-40%)          | 3.6<br>(2.6-4.6)                            | 5.3%<br>(2.6-8.4%)                   | 7%<br>(3.2-11%)                     | 78<br>(36-130)      | 2000<br>(940-3100)     |
| Ireland  | 1995 | Female | 70 to 74 | 65%<br>(55-73%)                | 35%<br>(27-45%)          | 3<br>(2-4.1)                                | 3.9%<br>(0.95-7.3%)                  | 4.9%<br>(1-9.3%)                    | 88<br>(18-170)      | 1800<br>(440-3300)     |
| Ireland  | 1995 | Female | 75 to 79 | 60%<br>(47-72%)                | 40%<br>(28-53%)          | 2.7<br>(1.7-3.8)                            | 3.4%<br>(0.15-7.1%)                  | 3.9%<br>(-0.019-8.7%)               | 95<br>(-0.47-210)   | 1500<br>(66-3200)      |
| Ireland  | 1995 | Female | 80 to 84 | 56%<br>(43-68%)                | 44%<br>(32-57%)          | 2.6<br>(1.7-3.7)                            | 3.7%<br>(0.61-7.4%)                  | 4.3%<br>(0.53-8.7%)                 | 130<br>(17-270)     | 1500<br>(230-3000)     |
| Ireland  | 1995 | Female | 85 to 89 | 53%<br>(41-65%)                | 47%<br>(35-59%)          | 2.7<br>(1.7-3.9)                            | 4.1%<br>(0.69-8.4%)                  | 4.6%<br>(0.54-9.7%)                 | 120<br>(13-240)     | 930<br>(160-1900)      |
| Ireland  | 1995 | Female | 90 to 94 | 52%<br>(39-64%)                | 48%<br>(36-61%)          | 2.8<br>(1.7-4.2)                            | 4.3%<br>(0.44-9.6%)                  | 4.8%<br>(0.22-11%)                  | 64<br>(3-150)       | 360<br>(36-760)        |
| Ireland  | 1995 | Female | 95 plus  | 52%<br>(35-69%)                | 48%<br>(31-65%)          | 3<br>(1.5-4.8)                              | 5%<br>(0.063-11%)                    | 5.7%<br>(-0.13-14%)                 | 26<br>(-0.62-63)    | 95<br>(1.1-220)        |
| Ireland  | 1995 | Male   | All Ages | 71%<br>(64-76%)                | 29%<br>(24-36%)          | 4<br>(3.5-4.5)                              | 9.7%<br>(7.6-12%)                    | 10%<br>(6.4-14%)                    | 1700<br>(1000-2400) | 50000<br>(38000-63000) |
| Ireland  | 1995 | Male   | 15 to 19 | 67%<br>(50-80%)                | 33%<br>(20-50%)          | 3.3<br>(2.2-4.5)                            | 8.3%<br>(5.5-12%)                    | 16%<br>(9.2-23%)                    | 19<br>(11-29)       | 1800<br>(1200-2600)    |
| Ireland  | 1995 | Male   | 20 to 24 | 78%<br>(65-87%)                | 22%<br>(13-35%)          | 5.4<br>(3.8-7.1)                            | 17%<br>(12-22%)                      | 25%<br>(17-34%)                     | 47<br>(31-65)       | 4200<br>(3000-5400)    |
| Ireland  | 1995 | Male   | 25 to 29 | 80%<br>(70-88%)                | 20%<br>(12-30%)          | 5.1<br>(3.6-6.8)                            | 15%<br>(12-19%)                      | 24%<br>(17-32%)                     | 36<br>(25-48)       | 3100<br>(2300-4000)    |
| Ireland  | 1995 | Male   | 30 to 34 | 82%<br>(71-89%)                | 18%<br>(11-29%)          | 4.8<br>(3.4-6.5)                            | 12%<br>(8.9-15%)                     | 20%<br>(14-27%)                     | 31<br>(21-42)       | 2500<br>(1800-3200)    |
| Ireland  | 1995 | Male   | 35 to 39 | 84%<br>(75-90%)                | 16%<br>(9.7-25%)         | 4.4<br>(3.1-6.1)                            | 10%<br>(7.3-13%)                     | 18%<br>(12-24%)                     | 30<br>(20-41)       | 2200<br>(1500-2800)    |
| Ireland  | 1995 | Male   | 40 to 44 | 85%<br>(75-91%)                | 15%<br>(8.7-25%)         | 5<br>(3.7-6.5)                              | 10%<br>(7-13%)                       | 17%<br>(11-23%)                     | 40<br>(26-54)       | 2400<br>(1700-3200)    |

| Location | Year | Sex    | Age      | Prevalence of current drinkers | Prevalence of abstainers | Population average of standard drinks daily | Percent of total attributable deaths | Percent of total attributable DALYs | Attributable deaths | Attributable DALYs     |
|----------|------|--------|----------|--------------------------------|--------------------------|---------------------------------------------|--------------------------------------|-------------------------------------|---------------------|------------------------|
| Ireland  | 1995 | Male   | 45 to 49 | 85%<br>(76-91%)                | 15%<br>(9-24%)           | 6.6<br>(4.7-8.6)                            | 13%<br>(9.1-16%)                     | 20%<br>(14-25%)                     | 72<br>(49-93)       | 3600<br>(2600-4500)    |
| Ireland  | 1995 | Male   | 50 to 54 | 84%<br>(76-90%)                | 16%<br>(10-24%)          | 7.3<br>(5.4-9.4)                            | 14%<br>(10-17%)                      | 19%<br>(14-25%)                     | 97<br>(69-130)      | 4100<br>(3000-5100)    |
| Ireland  | 1995 | Male   | 55 to 59 | 82%<br>(74-88%)                | 18%<br>(12-26%)          | 7.4<br>(5.6-9.5)                            | 14%<br>(9.9-18%)                     | 17%<br>(12-23%)                     | 130<br>(95-170)     | 4700<br>(3400-6000)    |
| Ireland  | 1995 | Male   | 60 to 64 | 80%<br>(72-86%)                | 20%<br>(14-28%)          | 6.8<br>(4.9-9.1)                            | 12%<br>(8.2-17%)                     | 15%<br>(9.6-20%)                    | 180<br>(110-240)    | 5200<br>(3400-7100)    |
| Ireland  | 1995 | Male   | 65 to 69 | 77%<br>(68-84%)                | 23%<br>(16-32%)          | 5.8<br>(4.3-7.4)                            | 10%<br>(6.3-15%)                     | 12%<br>(7-17%)                      | 220<br>(130-310)    | 5300<br>(3200-7500)    |
| Ireland  | 1995 | Male   | 70 to 74 | 75%<br>(66-82%)                | 25%<br>(18-34%)          | 4.8<br>(3.5-6.4)                            | 8.1%<br>(3.6-13%)                    | 9%<br>(3.8-14%)                     | 230<br>(99-370)     | 4500<br>(2000-7100)    |
| Ireland  | 1995 | Male   | 75 to 79 | 74%<br>(63-83%)                | 26%<br>(17-37%)          | 4.3<br>(2.8-5.9)                            | 6.7%<br>(1.8-12%)                    | 7.2%<br>(1.7-13%)                   | 210<br>(51-380)     | 3100<br>(870-5500)     |
| Ireland  | 1995 | Male   | 80 to 84 | 73%<br>(61-83%)                | 27%<br>(17-39%)          | 4.1<br>(2.8-5.5)                            | 6.5%<br>(2.1-11%)                    | 6.9%<br>(2.1-12%)                   | 190<br>(57-340)     | 2200<br>(750-3700)     |
| Ireland  | 1995 | Male   | 85 to 89 | 72%<br>(60-82%)                | 28%<br>(18-40%)          | 3.9<br>(2.6-5.4)                            | 6.1%<br>(1.8-11%)                    | 6.5%<br>(1.6-12%)                   | 100<br>(27-190)     | 830<br>(240-1500)      |
| Ireland  | 1995 | Male   | 90 to 94 | 74%<br>(62-84%)                | 26%<br>(16-38%)          | 4<br>(2.6-5.7)                              | 5.8%<br>(1.1-11%)                    | 6.2%<br>(0.96-12%)                  | 37<br>(5.8-73)      | 200<br>(39-390)        |
| Ireland  | 1995 | Male   | 95 plus  | 76%<br>(61-87%)                | 24%<br>(13-39%)          | 4<br>(2.2-6.2)                              | 5.9%<br>(0.39-12%)                   | 6.3%<br>(-0.0027-14%)               | 9.4<br>(-0.0042-20) | 35<br>(2.3-72)         |
| Ireland  | 2000 | Female | All Ages | 70%<br>(65-74%)                | 30%<br>(26-35%)          | 3.4<br>(3-3.9)                              | 5.6%<br>(4.1-7.5%)                   | 7.4%<br>(4.2-12%)                   | 1100<br>(620-1800)  | 26000<br>(19000-35000) |
| Ireland  | 2000 | Female | 15 to 19 | 70%<br>(57-81%)                | 30%<br>(19-43%)          | 3.4<br>(2.3-4.7)                            | 4%<br>(2.8-5.5%)                     | 13%<br>(7.6-18%)                    | 6.3<br>(3.8-9)      | 710<br>(480-970)       |
| Ireland  | 2000 | Female | 20 to 24 | 82%<br>(73-88%)                | 18%<br>(12-27%)          | 4.9<br>(3.4-6.7)                            | 6.3%<br>(4.7-8%)                     | 17%<br>(12-23%)                     | 9.8<br>(6.5-13)     | 1200<br>(910-1600)     |
| Ireland  | 2000 | Female | 25 to 29 | 82%<br>(75-88%)                | 18%<br>(12-25%)          | 4.3<br>(3.1-5.7)                            | 5%<br>(3.8-6.3%)                     | 15%<br>(11-20%)                     | 7.9<br>(5.4-11)     | 980<br>(710-1300)      |
| Ireland  | 2000 | Female | 30 to 34 | 80%<br>(74-86%)                | 20%<br>(14-26%)          | 4<br>(3-5.5)                                | 4.5%<br>(3.4-5.9%)                   | 15%<br>(11-19%)                     | 10<br>(7.5-13)      | 950<br>(700-1200)      |
| Ireland  | 2000 | Female | 35 to 39 | 79%<br>(73-85%)                | 21%<br>(15-27%)          | 4.1<br>(2.9-5.6)                            | 5.5%<br>(4.1-7.1%)                   | 16%<br>(12-20%)                     | 19<br>(14-24)       | 1300<br>(1000-1700)    |
| Ireland  | 2000 | Female | 40 to 44 | 78%<br>(71-85%)                | 22%<br>(15-29%)          | 4.4<br>(3.2-5.8)                            | 6.4%<br>(4.8-8.2%)                   | 17%<br>(13-21%)                     | 27<br>(21-34)       | 1600<br>(1300-2100)    |
| Ireland  | 2000 | Female | 45 to 49 | 79%<br>(72-85%)                | 21%<br>(15-28%)          | 5.1<br>(3.7-6.7)                            | 7.9%<br>(5.9-10%)                    | 17%<br>(14-23%)                     | 42<br>(33-54)       | 2100<br>(1600-2800)    |
| Ireland  | 2000 | Female | 50 to 54 | 78%<br>(72-84%)                | 22%<br>(16-28%)          | 5.3<br>(3.9-7)                              | 9%<br>(6.8-12%)                      | 17%<br>(13-22%)                     | 62<br>(48-83)       | 2600<br>(2000-3500)    |
| Ireland  | 2000 | Female | 55 to 59 | 75%<br>(69-81%)                | 25%<br>(19-31%)          | 5.1<br>(3.8-6.7)                            | 8.7%<br>(6.2-12%)                    | 15%<br>(10-19%)                     | 65<br>(47-88)       | 2400<br>(1700-3200)    |
| Ireland  | 2000 | Female | 60 to 64 | 70%<br>(63-77%)                | 30%<br>(23-37%)          | 4.6<br>(3.2-6.2)                            | 7.8%<br>(5-11%)                      | 12%<br>(7.5-17%)                    | 74<br>(47-110)      | 2300<br>(1400-3200)    |

| Location | Year | Sex    | Age      | Prevalence of current drinkers | Prevalence of abstainers | Population average of standard drinks daily | Percent of total attributable deaths | Percent of total attributable DALYs | Attributable deaths | Attributable DALYs     |
|----------|------|--------|----------|--------------------------------|--------------------------|---------------------------------------------|--------------------------------------|-------------------------------------|---------------------|------------------------|
| Ireland  | 2000 | Female | 65 to 69 | 65%<br>(58-73%)                | 35%<br>(27-42%)          | 3.8<br>(2.8-5)                              | 6.3%<br>(3.7-9.1%)                   | 8.6%<br>(5-13%)                     | 82<br>(47-120)      | 2100<br>(1200-3100)    |
| Ireland  | 2000 | Female | 70 to 74 | 62%<br>(52-71%)                | 38%<br>(29-48%)          | 3.2<br>(2.2-4.4)                            | 5%<br>(2.1-8.4%)                     | 6.4%<br>(2.5-11%)                   | 99<br>(39-170)      | 2000<br>(820-3400)     |
| Ireland  | 2000 | Female | 75 to 79 | 61%<br>(50-71%)                | 39%<br>(29-50%)          | 3.1<br>(2-4.4)                              | 4.7%<br>(1.3-9.1%)                   | 5.6%<br>(1.4-11%)                   | 130<br>(34-260)     | 2100<br>(570-4100)     |
| Ireland  | 2000 | Female | 80 to 84 | 57%<br>(44-68%)                | 43%<br>(32-56%)          | 3<br>(2-4.3)                                | 5.1%<br>(1.7-9.2%)                   | 5.9%<br>(1.8-11%)                   | 170<br>(53-320)     | 1900<br>(650-3500)     |
| Ireland  | 2000 | Female | 85 to 89 | 53%<br>(40-64%)                | 47%<br>(36-60%)          | 3<br>(1.9-4.4)                              | 5.4%<br>(1.9-10%)                    | 6.2%<br>(2-12%)                     | 170<br>(56-340)     | 1400<br>(500-2600)     |
| Ireland  | 2000 | Female | 90 to 94 | 51%<br>(39-64%)                | 49%<br>(36-61%)          | 3.1<br>(1.8-4.9)                            | 5.7%<br>(1.5-11%)                    | 6.5%<br>(1.5-13%)                   | 97<br>(22-200)      | 530<br>(130-1100)      |
| Ireland  | 2000 | Female | 95 plus  | 51%<br>(34-68%)                | 49%<br>(32-66%)          | 3.3<br>(1.7-5.5)                            | 6.4%<br>(1.2-13%)                    | 7.4%<br>(1-15%)                     | 41<br>(5.7-85)      | 140<br>(26-300)        |
| Ireland  | 2000 | Male   | All Ages | 74%<br>(69-79%)                | 26%<br>(21-31%)          | 4.9<br>(4.3-5.5)                            | 12%<br>(9.4-14%)                     | 13%<br>(9-16%)                      | 2000<br>(1500-2700) | 60000<br>(50000-73000) |
| Ireland  | 2000 | Male   | 15 to 19 | 69%<br>(55-81%)                | 31%<br>(19-45%)          | 3.9<br>(2.6-5.4)                            | 9.8%<br>(6.5-13%)                    | 18%<br>(11-26%)                     | 24<br>(14-35)       | 2200<br>(1400-2900)    |
| Ireland  | 2000 | Male   | 20 to 24 | 81%<br>(71-88%)                | 19%<br>(12-29%)          | 6.5<br>(4.7-8.7)                            | 29%<br>(14-24%)                      | 29%<br>(20-37%)                     | 57<br>(39-75)       | 4900<br>(3700-6300)    |
| Ireland  | 2000 | Male   | 25 to 29 | 84%<br>(77-89%)                | 16%<br>(11-23%)          | 6.2<br>(4.6-8)                              | 17%<br>(13-21%)                      | 27%<br>(20-35%)                     | 49<br>(35-64)       | 4100<br>(3100-5100)    |
| Ireland  | 2000 | Male   | 30 to 34 | 85%<br>(78-90%)                | 15%<br>(9.8-22%)         | 5.7<br>(4.2-7.6)                            | 14%<br>(11-18%)                      | 25%<br>(18-32%)                     | 42<br>(30-54)       | 3200<br>(2500-4000)    |
| Ireland  | 2000 | Male   | 35 to 39 | 86%<br>(79-91%)                | 14%<br>(8.9-21%)         | 5.3<br>(3.8-7.2)                            | 12%<br>(9.2-16%)                     | 22%<br>(16-29%)                     | 43<br>(31-55)       | 2900<br>(2200-3700)    |
| Ireland  | 2000 | Male   | 40 to 44 | 86%<br>(80-92%)                | 14%<br>(8.5-20%)         | 6<br>(4.3-7.8)                              | 13%<br>(9.6-16%)                     | 23%<br>(16-28%)                     | 60<br>(42-76)       | 3400<br>(2600-4300)    |
| Ireland  | 2000 | Male   | 45 to 49 | 87%<br>(80-92%)                | 13%<br>(8.5-20%)         | 7.7<br>(5.5-10)                             | 15%<br>(12-19%)                      | 24%<br>(18-29%)                     | 91<br>(69-110)      | 4400<br>(3500-5400)    |
| Ireland  | 2000 | Male   | 50 to 54 | 86%<br>(80-90%)                | 14%<br>(9.5-20%)         | 8.6<br>(6.4-11)                             | 15%<br>(12-19%)                      | 22%<br>(18-28%)                     | 130<br>(100-170)    | 5500<br>(4300-6800)    |
| Ireland  | 2000 | Male   | 55 to 59 | 83%<br>(78-88%)                | 17%<br>(12-22%)          | 8.6<br>(6.4-11)                             | 15%<br>(11-19%)                      | 20%<br>(15-25%)                     | 160<br>(120-200)    | 5500<br>(4200-7100)    |
| Ireland  | 2000 | Male   | 60 to 64 | 79%<br>(72-85%)                | 21%<br>(15-28%)          | 7.8<br>(5.7-10)                             | 13%<br>(9.9-18%)                     | 17%<br>(12-22%)                     | 180<br>(130-250)    | 5500<br>(4000-7300)    |
| Ireland  | 2000 | Male   | 65 to 69 | 76%<br>(68-83%)                | 24%<br>(17-32%)          | 6.5<br>(5-8.3)                              | 12%<br>(8.4-16%)                     | 14%<br>(9.8-18%)                    | 230<br>(160-300)    | 5600<br>(4000-7400)    |
| Ireland  | 2000 | Male   | 70 to 74 | 74%<br>(66-81%)                | 26%<br>(19-34%)          | 5.4<br>(3.9-7.4)                            | 9.8%<br>(5.4-14%)                    | 11%<br>(5.9-16%)                    | 250<br>(130-360)    | 4800<br>(2800-6900)    |
| Ireland  | 2000 | Male   | 75 to 79 | 74%<br>(64-82%)                | 26%<br>(18-36%)          | 4.9<br>(3.3-6.8)                            | 8.4%<br>(3.6-13%)                    | 9.2%<br>(3.8-14%)                   | 260<br>(100-410)    | 3900<br>(1700-6000)    |
| Ireland  | 2000 | Male   | 80 to 84 | 75%<br>(63-84%)                | 25%<br>(16-37%)          | 4.8<br>(3.3-6.5)                            | 8.4%<br>(4-13%)                      | 9.2%<br>(4.1-14%)                   | 240<br>(110-370)    | 2600<br>(1300-4100)    |

| Location | Year | Sex    | Age      | Prevalence of current drinkers | Prevalence of abstainers | Population average of standard drinks daily | Percent of total attributable deaths | Percent of total attributable DALYs | Attributable deaths | Attributable DALYs     |
|----------|------|--------|----------|--------------------------------|--------------------------|---------------------------------------------|--------------------------------------|-------------------------------------|---------------------|------------------------|
| Ireland  | 2000 | Male   | 85 to 89 | 75%<br>(64-83%)                | 25%<br>(17-36%)          | 4.7<br>(3.3-6.5)                            | 8.1%<br>(3.6-13%)                    | 8.8%<br>(3.7-14%)                   | 160<br>(67-260)     | 1300<br>(550-2000)     |
| Ireland  | 2000 | Male   | 90 to 94 | 76%<br>(66-85%)                | 24%<br>(15-34%)          | 4.7<br>(3.1-6.7)                            | 7.7%<br>(2.6-13%)                    | 8.4%<br>(2.5-15%)                   | 58<br>(17-99)       | 310<br>(100-530)       |
| Ireland  | 2000 | Male   | 95 plus  | 78%<br>(63-88%)                | 22%<br>(12-37%)          | 4.7<br>(2.6-7.1)                            | 7.7%<br>(1.3-14%)                    | 8.4%<br>(0.99-16%)                  | 12<br>(1.4-23)      | 45<br>(7.4-82)         |
| Ireland  | 2005 | Female | All Ages | 70%<br>(66-74%)                | 30%<br>(26-34%)          | 3.6<br>(3-4.1)                              | 5.6%<br>(4.3-7.2%)                   | 7.7%<br>(4.7-11%)                   | 1100<br>(650-1600)  | 26000<br>(20000-33000) |
| Ireland  | 2005 | Female | 15 to 19 | 69%<br>(57-80%)                | 31%<br>(20-43%)          | 3.5<br>(2.4-4.8)                            | 3.8%<br>(2.6-5.3%)                   | 13%<br>(7.9-18%)                    | 5.1<br>(3.2-7.3)    | 600<br>(410-800)       |
| Ireland  | 2005 | Female | 20 to 24 | 83%<br>(74-88%)                | 17%<br>(12-26%)          | 5.1<br>(3.5-6.9)                            | 5.7%<br>(4.3-7.4%)                   | 17%<br>(12-23%)                     | 8.5<br>(5.8-11)     | 1200<br>(880-1600)     |
| Ireland  | 2005 | Female | 25 to 29 | 82%<br>(75-88%)                | 18%<br>(12-25%)          | 4.5<br>(3.2-5.9)                            | 4.8%<br>(3.6-6.1%)                   | 15%<br>(11-20%)                     | 8.7<br>(6.1-11)     | 1100<br>(810-1500)     |
| Ireland  | 2005 | Female | 30 to 34 | 80%<br>(74-86%)                | 20%<br>(14-26%)          | 4.2<br>(3-5.6)                              | 4.2%<br>(3.2-5.5%)                   | 15%<br>(11-19%)                     | 10<br>(7.5-14)      | 1000<br>(760-1300)     |
| Ireland  | 2005 | Female | 35 to 39 | 79%<br>(73-85%)                | 21%<br>(15-27%)          | 4.3<br>(3-5.9)                              | 5%<br>(3.7-6.5%)                     | 16%<br>(13-20%)                     | 17<br>(13-21)       | 1300<br>(960-1600)     |
| Ireland  | 2005 | Female | 40 to 44 | 78%<br>(72-84%)                | 22%<br>(16-28%)          | 4.6<br>(3.4-6.2)                            | 6.1%<br>(4.7-7.8%)                   | 17%<br>(14-21%)                     | 27<br>(22-33)       | 1700<br>(1300-2100)    |
| Ireland  | 2005 | Female | 45 to 49 | 79%<br>(73-84%)                | 21%<br>(16-27%)          | 5.3<br>(3.9-7.1)                            | 7.7%<br>(5.9-9.9%)                   | 18%<br>(14-23%)                     | 43<br>(34-55)       | 2200<br>(1700-2800)    |
| Ireland  | 2005 | Female | 50 to 54 | 77%<br>(71-83%)                | 23%<br>(17-29%)          | 5.4<br>(4-7.2)                              | 8.5%<br>(6.3-11%)                    | 17%<br>(13-22%)                     | 57<br>(44-75)       | 2500<br>(1900-3300)    |
| Ireland  | 2005 | Female | 55 to 59 | 75%<br>(69-80%)                | 25%<br>(20-31%)          | 5.3<br>(3.9-6.9)                            | 8.4%<br>(6.1-11%)                    | 15%<br>(11-19%)                     | 71<br>(53-95)       | 2700<br>(2000-3500)    |
| Ireland  | 2005 | Female | 60 to 64 | 72%<br>(67-78%)                | 28%<br>(22-33%)          | 4.9<br>(3.5-6.6)                            | 7.8%<br>(5.3-11%)                    | 12%<br>(8.4-17%)                    | 75<br>(52-100)      | 2400<br>(1600-3300)    |
| Ireland  | 2005 | Female | 65 to 69 | 66%<br>(59-73%)                | 34%<br>(27-41%)          | 4<br>(3-5.2)                                | 6.3%<br>(4-8.7%)                     | 9.1%<br>(6-13%)                     | 74<br>(48-100)      | 1900<br>(1200-2800)    |
| Ireland  | 2005 | Female | 70 to 74 | 61%<br>(54-67%)                | 39%<br>(33-46%)          | 3.2<br>(2.2-4.5)                            | 5%<br>(2.5-8.1%)                     | 6.7%<br>(3.3-11%)                   | 82<br>(41-130)      | 1700<br>(850-2700)     |
| Ireland  | 2005 | Female | 75 to 79 | 58%<br>(48-67%)                | 42%<br>(33-52%)          | 3<br>(2-4.4)                                | 4.6%<br>(1.7-8.2%)                   | 5.7%<br>(2.1-11%)                   | 110<br>(40-200)     | 1700<br>(640-3100)     |
| Ireland  | 2005 | Female | 80 to 84 | 53%<br>(40-66%)                | 47%<br>(34-60%)          | 2.9<br>(2-4.1)                              | 4.9%<br>(1.9-8.6%)                   | 5.8%<br>(2.2-10%)                   | 160<br>(59-290)     | 1800<br>(740-3200)     |
| Ireland  | 2005 | Female | 85 to 89 | 50%<br>(38-62%)                | 50%<br>(38-62%)          | 3<br>(1.9-4.3)                              | 5.3%<br>(2.2-9.6%)                   | 6.2%<br>(2.3-11%)                   | 160<br>(59-290)     | 1300<br>(520-2300)     |
| Ireland  | 2005 | Female | 90 to 94 | 49%<br>(37-60%)                | 51%<br>(40-63%)          | 3.1<br>(1.8-4.8)                            | 5.6%<br>(1.8-11%)                    | 6.5%<br>(1.9-13%)                   | 110<br>(32-220)     | 620<br>(200-1200)      |
| Ireland  | 2005 | Female | 95 plus  | 50%<br>(34-66%)                | 50%<br>(34-66%)          | 3.3<br>(1.8-5.5)                            | 6.6%<br>(1.4-13%)                    | 7.6%<br>(1.4-15%)                   | 50<br>(9.2-100)     | 180<br>(38-340)        |
| Ireland  | 2005 | Male   | All Ages | 75%<br>(70-80%)                | 25%<br>(20-30%)          | 5.2<br>(4.5-6)                              | 11%<br>(9.6-13%)                     | 13%<br>(9.8-16%)                    | 1900<br>(1400-2400) | 58000<br>(49000-69000) |



| Location | Year | Sex    | Age      | Prevalence of current drinkers | Prevalence of abstainers | Population average of standard drinks daily | Percent of total attributable deaths | Percent of total attributable DALYs | Attributable deaths | Attributable DALYs     |
|----------|------|--------|----------|--------------------------------|--------------------------|---------------------------------------------|--------------------------------------|-------------------------------------|---------------------|------------------------|
| Ireland  | 2005 | Male   | 15 to 19 | 68%<br>(55-80%)                | 32%<br>(20-45%)          | 4<br>(2.6-5.6)                              | 9.2%<br>(6.3-13%)                    | 18%<br>(11-26%)                     | 18<br>(11-26)       | 1700<br>(1200-2300)    |
| Ireland  | 2005 | Male   | 20 to 24 | 82%<br>(72-88%)                | 18%<br>(12-28%)          | 6.8<br>(4.8-9.2)                            | 18%<br>(14-23%)                      | 29%<br>(20-37%)                     | 50<br>(34-65)       | 4600<br>(3400-5700)    |
| Ireland  | 2005 | Male   | 25 to 29 | 84%<br>(77-90%)                | 16%<br>(10-23%)          | 6.4<br>(4.7-8.2)                            | 15%<br>(12-19%)                      | 26%<br>(19-34%)                     | 45<br>(32-59)       | 4100<br>(3200-5200)    |
| Ireland  | 2005 | Male   | 30 to 34 | 85%<br>(79-90%)                | 15%<br>(9.7-21%)         | 5.9<br>(4.3-7.9)                            | 13%<br>(10-16%)                      | 24%<br>(17-30%)                     | 41<br>(30-53)       | 3400<br>(2600-4200)    |
| Ireland  | 2005 | Male   | 35 to 39 | 86%<br>(80-91%)                | 14%<br>(9-20%)           | 5.5<br>(3.9-7.5)                            | 12%<br>(9.1-15%)                     | 23%<br>(17-29%)                     | 43<br>(31-56)       | 3100<br>(2300-3800)    |
| Ireland  | 2005 | Male   | 40 to 44 | 87%<br>(80-91%)                | 13%<br>(8.6-20%)         | 6.2<br>(4.5-8.1)                            | 13%<br>(10-16%)                      | 24%<br>(18-29%)                     | 61<br>(45-76)       | 3600<br>(2700-4400)    |
| Ireland  | 2005 | Male   | 45 to 49 | 87%<br>(81-92%)                | 13%<br>(8.3-19%)         | 8.1<br>(5.9-11)                             | 15%<br>(12-18%)                      | 25%<br>(20-30%)                     | 89<br>(70-110)      | 4500<br>(3600-5300)    |
| Ireland  | 2005 | Male   | 50 to 54 | 86%<br>(81-91%)                | 14%<br>(9.4-19%)         | 9.1<br>(6.7-12)                             | 15%<br>(12-19%)                      | 24%<br>(19-28%)                     | 130<br>(100-150)    | 5300<br>(4300-6400)    |
| Ireland  | 2005 | Male   | 55 to 59 | 84%<br>(79-88%)                | 16%<br>(12-21%)          | 8.9<br>(6.8-12)                             | 15%<br>(11-18%)                      | 20%<br>(16-25%)                     | 160<br>(120-200)    | 5800<br>(4600-7100)    |
| Ireland  | 2005 | Male   | 60 to 64 | 80%<br>(74-85%)                | 20%<br>(15-26%)          | 8.1<br>(6-11)                               | 13%<br>(10-16%)                      | 17%<br>(13-21%)                     | 170<br>(130-220)    | 5200<br>(4000-6600)    |
| Ireland  | 2005 | Male   | 65 to 69 | 77%<br>(70-83%)                | 23%<br>(17-30%)          | 6.8<br>(5.2-8.7)                            | 12%<br>(8.9-15%)                     | 15%<br>(11-18%)                     | 190<br>(140-250)    | 4900<br>(3700-6200)    |
| Ireland  | 2005 | Male   | 70 to 74 | 74%<br>(66-80%)                | 26%<br>(20-34%)          | 5.6<br>(4-7.5)                              | 9.6%<br>(6-13%)                      | 11%<br>(6.8-15%)                    | 210<br>(120-290)    | 4200<br>(2500-5700)    |
| Ireland  | 2005 | Male   | 75 to 79 | 74%<br>(66-81%)                | 26%<br>(19-34%)          | 5<br>(3.4-7)                                | 8.4%<br>(4.1-12%)                    | 9.5%<br>(4.4-14%)                   | 210<br>(100-320)    | 3300<br>(1600-5000)    |
| Ireland  | 2005 | Male   | 80 to 84 | 75%<br>(63-84%)                | 25%<br>(16-37%)          | 5<br>(3.5-6.7)                              | 8.5%<br>(4.5-13%)                    | 9.4%<br>(4.7-14%)                   | 230<br>(110-340)    | 2600<br>(1400-3800)    |
| Ireland  | 2005 | Male   | 85 to 89 | 74%<br>(62-83%)                | 26%<br>(17-38%)          | 4.8<br>(3.3-6.7)                            | 8.2%<br>(4-13%)                      | 9%<br>(4.1-14%)                     | 150<br>(71-240)     | 1200<br>(620-1900)     |
| Ireland  | 2005 | Male   | 90 to 94 | 76%<br>(64-85%)                | 24%<br>(15-36%)          | 4.9<br>(3.2-7)                              | 7.9%<br>(3.2-13%)                    | 8.7%<br>(3.1-14%)                   | 68<br>(24-110)      | 370<br>(150-600)       |
| Ireland  | 2005 | Male   | 95 plus  | 77%<br>(63-88%)                | 23%<br>(12-37%)          | 4.9<br>(2.8-7.5)                            | 8%<br>(1.9-14%)                      | 8.8%<br>(1.7-16%)                   | 16<br>(3-28)        | 57<br>(14-100)         |
| Ireland  | 2010 | Female | All Ages | 69%<br>(65-73%)                | 31%<br>(27-35%)          | 3.3<br>(2.7-4)                              | 5%<br>(3.8-6.5%)                     | 6.9%<br>(4.1-10%)                   | 970<br>(570-1500)   | 25000<br>(19000-32000) |
| Ireland  | 2010 | Female | 15 to 19 | 71%<br>(59-82%)                | 29%<br>(18-41%)          | 3.3<br>(2.2-4.8)                            | 3.6%<br>(2.4-5%)                     | 12%<br>(7.3-18%)                    | 4.3<br>(2.6-6.3)    | 540<br>(370-740)       |
| Ireland  | 2010 | Female | 20 to 24 | 82%<br>(74-88%)                | 18%<br>(12-26%)          | 4.8<br>(3.3-6.7)                            | 5.4%<br>(4-6.8%)                     | 17%<br>(11-23%)                     | 6.1<br>(3.9-8.5)    | 1000<br>(740-1400)     |
| Ireland  | 2010 | Female | 25 to 29 | 82%<br>(75-88%)                | 18%<br>(12-25%)          | 4.1<br>(3-5.6)                              | 4.6%<br>(3.5-5.9%)                   | 14%<br>(9.2-19%)                    | 8.4<br>(5.4-11)     | 1200<br>(850-1500)     |
| Ireland  | 2010 | Female | 30 to 34 | 80%<br>(74-86%)                | 20%<br>(14-26%)          | 3.9<br>(2.7-5.3)                            | 3.9%<br>(2.9-5.1%)                   | 13%<br>(9.7-17%)                    | 10<br>(7.2-13)      | 1100<br>(790-1400)     |

| Location | Year | Sex    | Age      | Prevalence of current drinkers | Prevalence of abstainers | Population average of standard drinks daily | Percent of total attributable deaths | Percent of total attributable DALYs | Attributable deaths | Attributable DALYs     |
|----------|------|--------|----------|--------------------------------|--------------------------|---------------------------------------------|--------------------------------------|-------------------------------------|---------------------|------------------------|
| Ireland  | 2010 | Female | 35 to 39 | 79%<br>(72-85%)                | 21%<br>(15-28%)          | 4<br>(2.8-5.7)                              | 4.5%<br>(3.4-5.8%)                   | 15%<br>(12-19%)                     | 16<br>(12-20)       | 1300<br>(980-1700)     |
| Ireland  | 2010 | Female | 40 to 44 | 78%<br>(71-84%)                | 22%<br>(16-29%)          | 4.3<br>(3-5.8)                              | 5.5%<br>(4.2-7.2%)                   | 17%<br>(13-20%)                     | 25<br>(20-31)       | 1600<br>(1300-2000)    |
| Ireland  | 2010 | Female | 45 to 49 | 79%<br>(73-84%)                | 21%<br>(16-27%)          | 4.9<br>(3.5-6.6)                            | 7.2%<br>(5.5-9.2%)                   | 18%<br>(14-22%)                     | 44<br>(35-55)       | 2300<br>(1800-2900)    |
| Ireland  | 2010 | Female | 50 to 54 | 76%<br>(70-81%)                | 24%<br>(19-30%)          | 5<br>(3.6-6.7)                              | 7.4%<br>(5.5-9.7%)                   | 16%<br>(13-20%)                     | 52<br>(40-67)       | 2300<br>(1800-3100)    |
| Ireland  | 2010 | Female | 55 to 59 | 74%<br>(68-79%)                | 26%<br>(21-32%)          | 4.9<br>(3.6-6.5)                            | 7.5%<br>(5.5-9.9%)                   | 14%<br>(11-18%)                     | 64<br>(50-84)       | 2500<br>(1800-3300)    |
| Ireland  | 2010 | Female | 60 to 64 | 73%<br>(67-79%)                | 27%<br>(21-33%)          | 4.6<br>(3.3-6.3)                            | 7.1%<br>(5-9.8%)                     | 12%<br>(8.5-16%)                    | 77<br>(56-100)      | 2500<br>(1700-3400)    |
| Ireland  | 2010 | Female | 65 to 69 | 67%<br>(61-74%)                | 33%<br>(26-39%)          | 3.8<br>(2.8-5.1)                            | 5.7%<br>(3.8-8%)                     | 8.7%<br>(6-12%)                     | 70<br>(48-95)       | 1900<br>(1200-2600)    |
| Ireland  | 2010 | Female | 70 to 74 | 61%<br>(53-68%)                | 39%<br>(32-47%)          | 3<br>(2.1-4.2)                              | 4.5%<br>(2.3-7%)                     | 6.4%<br>(3.5-9.9%)                  | 71<br>(39-110)      | 1500<br>(790-2400)     |
| Ireland  | 2010 | Female | 75 to 79 | 56%<br>(45-67%)                | 44%<br>(33-55%)          | 2.6<br>(1.7-3.9)                            | 3.9%<br>(1.6-7%)                     | 5%<br>(2.1-9.2%)                    | 85<br>(35-160)      | 1400<br>(550-2600)     |
| Ireland  | 2010 | Female | 80 to 84 | 53%<br>(40-65%)                | 47%<br>(35-60%)          | 2.7<br>(1.7-3.8)                            | 4.1%<br>(1.7-7.2%)                   | 5%<br>(1.9-9%)                      | 120<br>(46-220)     | 1400<br>(580-2500)     |
| Ireland  | 2010 | Female | 85 to 89 | 51%<br>(38-61%)                | 49%<br>(39-62%)          | 2.8<br>(1.7-4.1)                            | 4.5%<br>(1.7-8.1%)                   | 5.3%<br>(1.8-9.8%)                  | 150<br>(51-280)     | 1200<br>(450-2200)     |
| Ireland  | 2010 | Female | 90 to 94 | 49%<br>(36-62%)                | 51%<br>(38-64%)          | 2.9<br>(1.6-4.5)                            | 4.7%<br>(1.3-9.4%)                   | 5.5%<br>(1.3-11%)                   | 100<br>(25-210)     | 580<br>(160-1100)      |
| Ireland  | 2010 | Female | 95 plus  | 50%<br>(33-66%)                | 50%<br>(34-67%)          | 3.1<br>(1.6-5.2)                            | 5.7%<br>(0.82-12%)                   | 6.6%<br>(0.7-14%)                   | 61<br>(6.5-130)     | 220<br>(31-440)        |
| Ireland  | 2010 | Male   | All Ages | 74%<br>(69-79%)                | 26%<br>(21-31%)          | 4.9<br>(4-5.8)                              | 11%<br>(8.8-13%)                     | 12%<br>(9.1-16%)                    | 1800<br>(1300-2300) | 56000<br>(46000-67000) |
| Ireland  | 2010 | Male   | 15 to 19 | 68%<br>(54-80%)                | 32%<br>(20-46%)          | 3.7<br>(2.4-5.3)                            | 8.2%<br>(5.6-11%)                    | 17%<br>(10-26%)                     | 13<br>(7.8-20)      | 1400<br>(920-1900)     |
| Ireland  | 2010 | Male   | 20 to 24 | 81%<br>(71-88%)                | 19%<br>(12-29%)          | 6.4<br>(4.5-8.9)                            | 17%<br>(13-21%)                      | 27%<br>(18-35%)                     | 37<br>(25-49)       | 3700<br>(2800-4700)    |
| Ireland  | 2010 | Male   | 25 to 29 | 84%<br>(77-89%)                | 16%<br>(11-23%)          | 6<br>(4.4-8)                                | 14%<br>(11-18%)                      | 24%<br>(17-32%)                     | 39<br>(27-51)       | 3800<br>(2900-4800)    |
| Ireland  | 2010 | Male   | 30 to 34 | 86%<br>(79-90%)                | 14%<br>(9.7-21%)         | 5.6<br>(4-7.6)                              | 12%<br>(9.4-15%)                     | 22%<br>(16-28%)                     | 40<br>(29-53)       | 3500<br>(2600-4300)    |
| Ireland  | 2010 | Male   | 35 to 39 | 86%<br>(80-91%)                | 14%<br>(9-20%)           | 5.2<br>(3.7-7.3)                            | 11%<br>(8.7-14%)                     | 22%<br>(16-28%)                     | 46<br>(33-60)       | 3300<br>(2500-4200)    |
| Ireland  | 2010 | Male   | 40 to 44 | 86%<br>(79-91%)                | 14%<br>(8.7-21%)         | 5.8<br>(4.3-7.9)                            | 12%<br>(9.5-15%)                     | 23%<br>(18-29%)                     | 61<br>(46-76)       | 3700<br>(2800-4500)    |
| Ireland  | 2010 | Male   | 45 to 49 | 87%<br>(81-92%)                | 13%<br>(8.4-19%)         | 7.6<br>(5.4-10)                             | 14%<br>(11-17%)                      | 25%<br>(20-30%)                     | 92<br>(71-110)      | 4600<br>(3700-5600)    |
| Ireland  | 2010 | Male   | 50 to 54 | 86%<br>(81-91%)                | 14%<br>(9.3-19%)         | 8.5<br>(6.2-11)                             | 15%<br>(12-18%)                      | 24%<br>(19-28%)                     | 120<br>(97-140)     | 5200<br>(4200-6300)    |

| Location | Year | Sex    | Age      | Prevalence of current drinkers | Prevalence of abstainers | Population average of standard drinks daily | Percent of total attributable deaths | Percent of total attributable DALYs | Attributable deaths | Attributable DALYs     |
|----------|------|--------|----------|--------------------------------|--------------------------|---------------------------------------------|--------------------------------------|-------------------------------------|---------------------|------------------------|
| Ireland  | 2010 | Male   | 55 to 59 | 84%<br>(79-88%)                | 16%<br>(12-21%)          | 8.4<br>(6.3-11)                             | 14%<br>(11-17%)                      | 21%<br>(17-25%)                     | 150<br>(120-180)    | 5600<br>(4600-6800)    |
| Ireland  | 2010 | Male   | 60 to 64 | 81%<br>(75-86%)                | 19%<br>(14-25%)          | 7.8<br>(5.7-11)                             | 13%<br>(9.8-16%)                     | 17%<br>(13-21%)                     | 180<br>(140-230)    | 5700<br>(4500-7000)    |
| Ireland  | 2010 | Male   | 65 to 69 | 77%<br>(70-83%)                | 23%<br>(17-30%)          | 6.5<br>(4.9-8.5)                            | 11%<br>(8.3-14%)                     | 14%<br>(11-18%)                     | 190<br>(140-240)    | 4800<br>(3600-6100)    |
| Ireland  | 2010 | Male   | 70 to 74 | 74%<br>(66-80%)                | 26%<br>(20-34%)          | 5.2<br>(3.8-7.1)                            | 8.8%<br>(5.6-12%)                    | 11%<br>(6.5-15%)                    | 180<br>(110-250)    | 3700<br>(2300-5000)    |
| Ireland  | 2010 | Male   | 75 to 79 | 74%<br>(66-82%)                | 26%<br>(18-34%)          | 4.8<br>(3.2-6.7)                            | 7.6%<br>(3.8-11%)                    | 8.7%<br>(4.2-13%)                   | 190<br>(89-280)     | 3000<br>(1500-4500)    |
| Ireland  | 2010 | Male   | 80 to 84 | 74%<br>(62-83%)                | 26%<br>(17-38%)          | 4.6<br>(3.2-6.3)                            | 7.5%<br>(3.9-11%)                    | 8.4%<br>(4.1-13%)                   | 200<br>(96-300)     | 2300<br>(1200-3500)    |
| Ireland  | 2010 | Male   | 85 to 89 | 72%<br>(60-82%)                | 28%<br>(18-40%)          | 4.4<br>(2.9-6.1)                            | 7%<br>(3.3-11%)                      | 7.8%<br>(3.4-12%)                   | 150<br>(67-250)     | 1300<br>(580-2000)     |
| Ireland  | 2010 | Male   | 90 to 94 | 74%<br>(63-84%)                | 26%<br>(16-37%)          | 4.4<br>(2.8-6.5)                            | 6.7%<br>(2.3-11%)                    | 7.4%<br>(2.2-13%)                   | 67<br>(20-120)      | 370<br>(130-620)       |
| Ireland  | 2010 | Male   | 95 plus  | 76%<br>(61-87%)                | 24%<br>(13-39%)          | 4.4<br>(2.5-7)                              | 6.9%<br>(1.5-13%)                    | 7.6%<br>(1.3-14%)                   | 18<br>(3.2-34)      | 67<br>(15-120)         |
| Ireland  | 2016 | Female | All Ages | 68%<br>(64-73%)                | 32%<br>(27-36%)          | 3.1<br>(2.3-4.2)                            | 4.7%<br>(3.2-6.7%)                   | 6.7%<br>(3.3-11%)                   | 990<br>(480-1600)   | 24000<br>(16000-34000) |
| Ireland  | 2016 | Female | 15 to 19 | 71%<br>(57-82%)                | 29%<br>(18-43%)          | 3.2<br>(1.9-4.9)                            | 3.3%<br>(2.2-4.7%)                   | 12%<br>(6.4-18%)                    | 3.6<br>(1.9-5.6)    | 480<br>(320-710)       |
| Ireland  | 2016 | Female | 20 to 24 | 80%<br>(68-87%)                | 20%<br>(13-32%)          | 4.4<br>(2.7-6.8)                            | 5.1%<br>(3.8-6.7%)                   | 16%<br>(9.5-23%)                    | 3.4<br>(2-5.1)      | 640<br>(440-880)       |
| Ireland  | 2016 | Female | 25 to 29 | 79%<br>(69-87%)                | 21%<br>(13-31%)          | 3.8<br>(2.4-5.6)                            | 4.3%<br>(3.2-5.7%)                   | 13%<br>(8.2-19%)                    | 5<br>(2.9-7.4)      | 800<br>(550-1100)      |
| Ireland  | 2016 | Female | 30 to 34 | 78%<br>(67-86%)                | 22%<br>(14-33%)          | 3.6<br>(2.3-5.4)                            | 3.7%<br>(2.7-4.8%)                   | 13%<br>(8.8-17%)                    | 8.5<br>(5.5-12)     | 1000<br>(690-1400)     |
| Ireland  | 2016 | Female | 35 to 39 | 77%<br>(68-85%)                | 23%<br>(15-32%)          | 3.7<br>(2.4-5.6)                            | 4.1%<br>(3-5.5%)                     | 15%<br>(11-19%)                     | 14<br>(10-20)       | 1200<br>(910-1700)     |
| Ireland  | 2016 | Female | 40 to 44 | 77%<br>(68-85%)                | 23%<br>(15-32%)          | 4.1<br>(2.6-5.9)                            | 5.1%<br>(3.6-6.7%)                   | 16%<br>(12-20%)                     | 24<br>(17-33)       | 1600<br>(1200-2200)    |
| Ireland  | 2016 | Female | 45 to 49 | 78%<br>(68-85%)                | 22%<br>(15-32%)          | 4.6<br>(3-6.7)                              | 6.5%<br>(4.6-8.7%)                   | 17%<br>(13-21%)                     | 39<br>(28-54)       | 2100<br>(1500-2900)    |
| Ireland  | 2016 | Female | 50 to 54 | 77%<br>(69-84%)                | 23%<br>(16-31%)          | 4.9<br>(3.1-7)                              | 6.9%<br>(4.8-9.3%)                   | 15%<br>(11-20%)                     | 52<br>(37-71)       | 2400<br>(1700-3300)    |
| Ireland  | 2016 | Female | 55 to 59 | 76%<br>(67-83%)                | 24%<br>(17-33%)          | 4.8<br>(3.2-7)                              | 7%<br>(4.9-9.8%)                     | 13%<br>(9.8-18%)                    | 63<br>(43-91)       | 2400<br>(1700-3500)    |
| Ireland  | 2016 | Female | 60 to 64 | 73%<br>(64-80%)                | 27%<br>(20-36%)          | 4.4<br>(2.9-6.5)                            | 6.5%<br>(4.1-9.7%)                   | 11%<br>(7.2-16%)                    | 73<br>(46-110)      | 2400<br>(1500-3600)    |
| Ireland  | 2016 | Female | 65 to 69 | 69%<br>(60-77%)                | 31%<br>(23-40%)          | 3.8<br>(2.5-5.4)                            | 5.3%<br>(3.1-8.1%)                   | 8.3%<br>(5.2-12%)                   | 79<br>(49-120)      | 2200<br>(1200-3300)    |
| Ireland  | 2016 | Female | 70 to 74 | 65%<br>(55-72%)                | 35%<br>(28-45%)          | 3.1<br>(1.9-4.7)                            | 4.3%<br>(2-7.4%)                     | 6.3%<br>(3.2-10%)                   | 76<br>(37-130)      | 1600<br>(740-2800)     |

| Location | Year | Sex    | Age      | Prevalence of current drinkers | Prevalence of abstainers | Population average of standard drinks daily | Percent of total attributable deaths | Percent of total attributable DALYs | Attributable deaths | Attributable DALYs     |
|----------|------|--------|----------|--------------------------------|--------------------------|---------------------------------------------|--------------------------------------|-------------------------------------|---------------------|------------------------|
| Ireland  | 2016 | Female | 75 to 79 | 60%<br>(47-72%)                | 40%<br>(28-53%)          | 2.8<br>(1.6-4.4)                            | 3.8%<br>(1.2-7.6%)                   | 5%<br>(1.8-10%)                     | 87<br>(30-170)      | 1400<br>(460-2800)     |
| Ireland  | 2016 | Female | 80 to 84 | 56%<br>(42-69%)                | 44%<br>(31-58%)          | 2.8<br>(1.7-4.3)                            | 4%<br>(1.3-7.5%)                     | 4.9%<br>(1.5-9.4%)                  | 120<br>(36-230)     | 1400<br>(470-2700)     |
| Ireland  | 2016 | Female | 85 to 89 | 53%<br>(40-65%)                | 47%<br>(35-60%)          | 2.8<br>(1.6-4.4)                            | 4.3%<br>(1.1-8.3%)                   | 5.1%<br>(1.1-10%)                   | 140<br>(32-280)     | 1200<br>(280-2300)     |
| Ireland  | 2016 | Female | 90 to 94 | 52%<br>(38-64%)                | 48%<br>(36-62%)          | 3<br>(1.6-4.8)                              | 4.6%<br>(0.79-9.4%)                  | 5.3%<br>(0.7-11%)                   | 130<br>(17-280)     | 720<br>(120-1500)      |
| Ireland  | 2016 | Female | 95 plus  | 52%<br>(35-68%)                | 48%<br>(32-65%)          | 3.1<br>(1.5-5.4)                            | 5.4%<br>(0.48-11%)                   | 6.3%<br>(0.35-14%)                  | 75<br>(4-160)       | 260<br>(22-550)        |
| Ireland  | 2016 | Male   | All Ages | 71%<br>(66-77%)                | 29%<br>(23-34%)          | 4.5<br>(3.3-6.1)                            | 9.9%<br>(7.3-12%)                    | 11%<br>(6.9-15%)                    | 1800<br>(1100-2600) | 53000<br>(39000-70000) |
| Ireland  | 2016 | Male   | 15 to 19 | 66%<br>(49-80%)                | 34%<br>(20-51%)          | 3.5<br>(2-5.7)                              | 7.4%<br>(4.9-11%)                    | 16%<br>(9.1-26%)                    | 11<br>(5.8-18)      | 1200<br>(790-1700)     |
| Ireland  | 2016 | Male   | 20 to 24 | 77%<br>(63-87%)                | 23%<br>(13-37%)          | 5.9<br>(3.7-8.9)                            | 16%<br>(12-20%)                      | 25%<br>(16-35%)                     | 23<br>(14-34)       | 2400<br>(1700-3200)    |
| Ireland  | 2016 | Male   | 25 to 29 | 80%<br>(69-87%)                | 20%<br>(13-31%)          | 5.5<br>(3.6-8.1)                            | 14%<br>(10-17%)                      | 23%<br>(15-31%)                     | 24<br>(15-34)       | 2500<br>(1800-3300)    |
| Ireland  | 2016 | Male   | 30 to 34 | 82%<br>(71-89%)                | 18%<br>(11-29%)          | 5.2<br>(3.3-7.4)                            | 11%<br>(8.3-14%)                     | 21%<br>(14-29%)                     | 32<br>(20-45)       | 2800<br>(2000-3700)    |
| Ireland  | 2016 | Male   | 35 to 39 | 83%<br>(74-90%)                | 17%<br>(9.7-26%)         | 4.8<br>(3.1-7.2)                            | 11%<br>(7.8-14%)                     | 21%<br>(14-28%)                     | 39<br>(25-56)       | 3000<br>(2100-4000)    |
| Ireland  | 2016 | Male   | 40 to 44 | 84%<br>(75-91%)                | 16%<br>(9.1-25%)         | 5.5<br>(3.6-7.7)                            | 12%<br>(8.4-15%)                     | 23%<br>(16-29%)                     | 59<br>(40-82)       | 3600<br>(2700-4800)    |
| Ireland  | 2016 | Male   | 45 to 49 | 85%<br>(75-91%)                | 15%<br>(9.2-25%)         | 7.1<br>(4.6-10)                             | 13%<br>(10-17%)                      | 24%<br>(18-30%)                     | 88<br>(62-120)      | 4500<br>(3400-5900)    |
| Ireland  | 2016 | Male   | 50 to 54 | 84%<br>(75-90%)                | 16%<br>(10-25%)          | 8<br>(5.3-11)                               | 14%<br>(11-17%)                      | 23%<br>(17-28%)                     | 120<br>(87-150)     | 5200<br>(4000-6700)    |
| Ireland  | 2016 | Male   | 55 to 59 | 82%<br>(74-88%)                | 18%<br>(12-26%)          | 8<br>(5.4-11)                               | 13%<br>(10-16%)                      | 20%<br>(16-25%)                     | 150<br>(110-190)    | 5500<br>(4000-7000)    |
| Ireland  | 2016 | Male   | 60 to 64 | 80%<br>(71-86%)                | 20%<br>(14-29%)          | 7.4<br>(4.9-11)                             | 12%<br>(8.7-15%)                     | 17%<br>(12-21%)                     | 170<br>(120-230)    | 5500<br>(3900-7100)    |
| Ireland  | 2016 | Male   | 65 to 69 | 76%<br>(67-84%)                | 24%<br>(16-33%)          | 6.2<br>(4.1-8.7)                            | 10%<br>(7.1-14%)                     | 14%<br>(9.1-18%)                    | 210<br>(140-290)    | 5600<br>(3700-7400)    |
| Ireland  | 2016 | Male   | 70 to 74 | 75%<br>(65-82%)                | 25%<br>(18-35%)          | 5.2<br>(3.2-7.6)                            | 8.4%<br>(4.5-12%)                    | 10%<br>(5.4-15%)                    | 190<br>(100-280)    | 4100<br>(2100-5900)    |
| Ireland  | 2016 | Male   | 75 to 79 | 74%<br>(63-83%)                | 26%<br>(17-37%)          | 4.6<br>(2.8-7)                              | 7.1%<br>(3-11%)                      | 8.2%<br>(3.4-13%)                   | 190<br>(77-320)     | 3100<br>(1300-5000)    |
| Ireland  | 2016 | Male   | 80 to 84 | 73%<br>(60-83%)                | 27%<br>(17-40%)          | 4.4<br>(2.7-6.4)                            | 6.8%<br>(3-11%)                      | 7.7%<br>(3.1-13%)                   | 210<br>(86-350)     | 2500<br>(1100-4100)    |
| Ireland  | 2016 | Male   | 85 to 89 | 72%<br>(59-82%)                | 28%<br>(18-41%)          | 4.2<br>(2.6-6.4)                            | 6.5%<br>(2.3-11%)                    | 7.2%<br>(2.2-12%)                   | 160<br>(47-280)     | 1300<br>(440-2200)     |
| Ireland  | 2016 | Male   | 90 to 94 | 74%<br>(62-83%)                | 26%<br>(17-38%)          | 4.3<br>(2.5-6.6)                            | 6.2%<br>(1.6-11%)                    | 6.8%<br>(1.4-13%)                   | 94<br>(19-180)      | 530<br>(130-950)       |

| Location | Year | Sex    | Age      | Prevalence of current drinkers | Prevalence of abstainers | Population average of standard drinks daily | Percent of total attributable deaths | Percent of total attributable DALYs | Attributable deaths | Attributable DALYs  |
|----------|------|--------|----------|--------------------------------|--------------------------|---------------------------------------------|--------------------------------------|-------------------------------------|---------------------|---------------------|
| Ireland  | 2016 | Male   | 95 plus  | 76%<br>(60-87%)                | 24%<br>(13-40%)          | 4.3<br>(2.3-7.3)                            | 6.4%<br>(0.77-12%)                   | 7.1%<br>(0.48-14%)                  | 27<br>(1.8-54)      | 97<br>(12-190)      |
| Israel   | 1990 | Female | All Ages | 39%<br>(34-44%)                | 61%<br>(56-66%)          | 0.45<br>(0.38-0.52)                         | 0.15%<br>(-0.38-0.65%)               | -0.63%<br>(-1.7-0.4%)               | -92<br>(-260-59)    | 800<br>(-1900-3400) |
| Israel   | 1990 | Female | 15 to 19 | 41%<br>(29-54%)                | 59%<br>(46-71%)          | 0.46<br>(0.27-0.71)                         | 0.86%<br>(0.46-1.4%)                 | 2.5%<br>(0.84-4.6%)                 | 1.5<br>(0.49-2.6)   | 190<br>(100-300)    |
| Israel   | 1990 | Female | 20 to 24 | 46%<br>(32-61%)                | 54%<br>(39-68%)          | 0.62<br>(0.35-0.97)                         | 1.2%<br>(0.73-1.8%)                  | 2.8%<br>(1.1-5%)                    | 1.8<br>(0.69-3.2)   | 260<br>(160-390)    |
| Israel   | 1990 | Female | 25 to 29 | 48%<br>(33-64%)                | 52%<br>(36-67%)          | 0.62<br>(0.37-0.95)                         | 1.1%<br>(0.66-1.5%)                  | 2.7%<br>(1.2-4.4%)                  | 1.7<br>(0.74-2.8)   | 220<br>(140-320)    |
| Israel   | 1990 | Female | 30 to 34 | 49%<br>(33-66%)                | 51%<br>(34-67%)          | 0.64<br>(0.38-0.95)                         | 1.1%<br>(0.68-1.5%)                  | 3.1%<br>(1.7-4.7%)                  | 2.6<br>(1.4-4.1)    | 240<br>(150-350)    |
| Israel   | 1990 | Female | 35 to 39 | 50%<br>(35-66%)                | 50%<br>(34-65%)          | 0.69<br>(0.42-1)                            | 1.2%<br>(0.73-1.7%)                  | 3.6%<br>(2.2-5.2%)                  | 4.5<br>(2.7-6.8)    | 310<br>(200-440)    |
| Israel   | 1990 | Female | 40 to 44 | 49%<br>(35-65%)                | 51%<br>(35-65%)          | 0.77<br>(0.48-1.1)                          | 1.4%<br>(0.85-2.1%)                  | 3.8%<br>(2.3-5.6%)                  | 7<br>(4.3-11)       | 380<br>(240-550)    |
| Israel   | 1990 | Female | 45 to 49 | 47%<br>(34-58%)                | 53%<br>(42-66%)          | 0.85<br>(0.56-1.2)                          | 1.5%<br>(0.84-2.3%)                  | 3.7%<br>(2.1-5.3%)                  | 7.1<br>(4.1-11)     | 320<br>(180-470)    |
| Israel   | 1990 | Female | 50 to 54 | 45%<br>(34-56%)                | 55%<br>(44-66%)          | 0.83<br>(0.54-1.2)                          | 1.3%<br>(0.57-2.2%)                  | 2.8%<br>(1.3-4.3%)                  | 8.4<br>(3.8-14)     | 310<br>(130-510)    |
| Israel   | 1990 | Female | 55 to 59 | 44%<br>(33-53%)                | 56%<br>(47-67%)          | 0.72<br>(0.46-1)                            | 0.69%<br>(-0.094-1.6%)               | 1.4%<br>(0.057-2.8%)                | 6.9<br>(0.29-14)    | 200<br>(-28-440)    |
| Israel   | 1990 | Female | 60 to 64 | 43%<br>(32-53%)                | 57%<br>(47-68%)          | 0.66<br>(0.42-0.96)                         | -0.048%<br>(-1-0.87%)                | 0.099%<br>(-1.3-1.4%)               | 0.83<br>(-12-13)    | -18<br>(-370-320)   |
| Israel   | 1990 | Female | 65 to 69 | 42%<br>(32-52%)                | 58%<br>(48-68%)          | 0.64<br>(0.42-0.94)                         | -0.44%<br>(-1.5-0.56%)               | -0.48%<br>(-1.9-0.88%)              | -6.3<br>(-26-12)    | -190<br>(-630-230)  |
| Israel   | 1990 | Female | 70 to 74 | 40%<br>(31-50%)                | 60%<br>(50-69%)          | 0.61<br>(0.38-0.89)                         | -0.74%<br>(-2-0.3%)                  | -0.89%<br>(-2.4-0.47%)              | -15<br>(-41-8)      | -300<br>(-790-120)  |
| Israel   | 1990 | Female | 75 to 79 | 37%<br>(27-49%)                | 63%<br>(51-73%)          | 0.55<br>(0.33-0.82)                         | -1%<br>(-2.2--0.025%)                | -1.3%<br>(-2.8-0.0021%)             | -33<br>(-74-0.056)  | -480<br>(-1100--10) |
| Israel   | 1990 | Female | 80 to 84 | 35%<br>(24-45%)                | 65%<br>(55-76%)          | 0.49<br>(0.3-0.71)                          | -1.1%<br>(-2.2--0.21%)               | -1.3%<br>(-2.7--0.22%)              | -36<br>(-73--5.9)   | -380<br>(-770--72)  |
| Israel   | 1990 | Female | 85 to 89 | 33%<br>(23-43%)                | 67%<br>(57-77%)          | 0.44<br>(0.26-0.69)                         | -1.1%<br>(-2.2--0.28%)               | -1.3%<br>(-2.6--0.33%)              | -27<br>(-53--6.6)   | -200<br>(-390--48)  |
| Israel   | 1990 | Female | 90 to 94 | 33%<br>(23-43%)                | 67%<br>(57-77%)          | 0.42<br>(0.23-0.69)                         | -1.1%<br>(-2.1--0.3%)                | -1.4%<br>(-2.6--0.37%)              | -13<br>(-25--3.5)   | -66<br>(-130--17)   |
| Israel   | 1990 | Female | 95 plus  | 34%<br>(23-47%)                | 66%<br>(53-77%)          | 0.42<br>(0.21-0.71)                         | -1.2%<br>(-2.5--0.32%)               | -1.5%<br>(-3.1--0.41%)              | -4.6<br>(-9.3--1.3) | -15<br>(-31--3.8)   |
| Israel   | 1990 | Male   | All Ages | 44%<br>(38-50%)                | 56%<br>(50-62%)          | 0.54<br>(0.47-0.62)                         | 0.87%<br>(0.043-1.7%)                | -0.17%<br>(-1.5-1.2%)               | -27<br>(-240-200)   | 4800<br>(230-9400)  |
| Israel   | 1990 | Male   | 15 to 19 | 41%<br>(30-54%)                | 59%<br>(46-70%)          | 0.37<br>(0.21-0.57)                         | 1.9%<br>(0.99-3.1%)                  | 3.2%<br>(1.1-6.1%)                  | 4.8<br>(1.7-9.3)    | 510<br>(260-840)    |
| Israel   | 1990 | Male   | 20 to 24 | 48%<br>(33-63%)                | 52%<br>(37-67%)          | 0.59<br>(0.34-0.89)                         | 3.6%<br>(2.1-5.4%)                   | 4.6%<br>(1.7-8.2%)                  | 8<br>(2.9-14)       | 880<br>(500-1300)   |

| Location | Year | Sex    | Age      | Prevalence of current drinkers | Prevalence of abstainers | Population average of standard drinks daily | Percent of total attributable deaths | Percent of total attributable DALYs | Attributable deaths | Attributable DALYs   |
|----------|------|--------|----------|--------------------------------|--------------------------|---------------------------------------------|--------------------------------------|-------------------------------------|---------------------|----------------------|
| Israel   | 1990 | Male   | 25 to 29 | 52%<br>(35-68%)                | 48%<br>(32-65%)          | 0.67<br>(0.41-1)                            | 3.4%<br>(2.1-4.8%)                   | 4.8%<br>(2-7.8%)                    | 7.1<br>(3-12)       | 770<br>(470-1100)    |
| Israel   | 1990 | Male   | 30 to 34 | 56%<br>(38-74%)                | 44%<br>(26-62%)          | 0.71<br>(0.42-1.1)                          | 3.2%<br>(2.1-4.3%)                   | 4.9%<br>(2.5-7.5%)                  | 7.9<br>(4-12)       | 730<br>(470-1000)    |
| Israel   | 1990 | Male   | 35 to 39 | 59%<br>(42-76%)                | 41%<br>(24-58%)          | 0.73<br>(0.44-1.1)                          | 2.8%<br>(1.8-3.8%)                   | 4.6%<br>(2.3-6.8%)                  | 8.9<br>(4.7-13)     | 720<br>(470-970)     |
| Israel   | 1990 | Male   | 40 to 44 | 61%<br>(44-77%)                | 39%<br>(23-56%)          | 0.87<br>(0.55-1.2)                          | 2.6%<br>(1.6-3.7%)                   | 4.1%<br>(1.8-6.2%)                  | 10<br>(4.7-16)      | 670<br>(400-940)     |
| Israel   | 1990 | Male   | 45 to 49 | 61%<br>(43-76%)                | 39%<br>(24-57%)          | 1.2<br>(0.71-1.7)                           | 2.4%<br>(1.2-3.7%)                   | 3.4%<br>(1.3-5.5%)                  | 9.7<br>(3.5-16)     | 540<br>(260-820)     |
| Israel   | 1990 | Male   | 50 to 54 | 61%<br>(46-75%)                | 39%<br>(25-54%)          | 1.3<br>(0.82-1.9)                           | 2%<br>(0.44-3.4%)                    | 2.5%<br>(-0.018-4.7%)               | 11<br>(-0.068-21)   | 520<br>(110-890)     |
| Israel   | 1990 | Male   | 55 to 59 | 60%<br>(49-70%)                | 40%<br>(30-51%)          | 1.3<br>(0.88-1.8)                           | 1.1%<br>(-0.46-2.6%)                 | 1.2%<br>(-0.99-3.3%)                | 8.7<br>(-7.6-25)    | 380<br>(-160-900)    |
| Israel   | 1990 | Male   | 60 to 64 | 60%<br>(48-70%)                | 40%<br>(30-52%)          | 1.2<br>(0.83-1.7)                           | 0.53%<br>(-1.1-2.2%)                 | 0.46%<br>(-1.7-2.6%)                | 5<br>(-19-29)       | 210<br>(-440-860)    |
| Israel   | 1990 | Male   | 65 to 69 | 61%<br>(49-70%)                | 39%<br>(30-51%)          | 1.1<br>(0.78-1.6)                           | -0.11%<br>(-1.6-1.5%)                | -0.27%<br>(-2.2-1.7%)               | -4.4<br>(-37-30)    | -50<br>(-800-730)    |
| Israel   | 1990 | Male   | 70 to 74 | 60%<br>(49-68%)                | 40%<br>(32-51%)          | 0.97<br>(0.64-1.4)                          | -0.49%<br>(-1.9-0.89%)               | -0.69%<br>(-2.5-1%)                 | -12<br>(-43-18)     | -200<br>(-760-370)   |
| Israel   | 1990 | Male   | 75 to 79 | 57%<br>(44-69%)                | 43%<br>(31-56%)          | 0.84<br>(0.53-1.2)                          | -0.85%<br>(-2.3-0.43%)               | -1.1%<br>(-2.8-0.45%)               | -29<br>(-74-11)     | -380<br>(-1000-180)  |
| Israel   | 1990 | Male   | 80 to 84 | 53%<br>(41-65%)                | 47%<br>(35-59%)          | 0.73<br>(0.46-1)                            | -0.91%<br>(-2.2-0.26%)               | -1.1%<br>(-2.7-0.27%)               | -30<br>(-71-7.2)    | -290<br>(-730-84)    |
| Israel   | 1990 | Male   | 85 to 89 | 50%<br>(38-62%)                | 50%<br>(38-62%)          | 0.64<br>(0.38-0.96)                         | -0.87%<br>(-2.1-0.17%)               | -1.1%<br>(-2.5-0.13%)               | -19<br>(-45-2.4)    | -140<br>(-320-26)    |
| Israel   | 1990 | Male   | 90 to 94 | 50%<br>(38-62%)                | 50%<br>(38-62%)          | 0.6<br>(0.35-0.94)                          | -1%<br>(-2.3-0.021%)                 | -1.3%<br>(-2.8-0.038%)              | -10<br>(-22-0.3)    | -49<br>(-110-0.99)   |
| Israel   | 1990 | Male   | 95 plus  | 52%<br>(37-66%)                | 48%<br>(34-63%)          | 0.58<br>(0.3-0.98)                          | -1.1%<br>(-2.5--0.0044%)             | -1.5%<br>(-3.1-0.098%)              | -3.7<br>(-7.8-0.25) | -11<br>(-25-0.043)   |
| Israel   | 1995 | Female | All Ages | 37%<br>(33-43%)                | 63%<br>(57-67%)          | 0.42<br>(0.36-0.49)                         | 0.22%<br>(-0.23-0.64%)               | -0.44%<br>(-1.4-0.41%)              | -78<br>(-240-69)    | 1300<br>(-1400-3800) |
| Israel   | 1995 | Female | 15 to 19 | 39%<br>(28-52%)                | 61%<br>(48-72%)          | 0.42<br>(0.24-0.65)                         | 0.81%<br>(0.43-1.3%)                 | 2.4%<br>(0.7-4.4%)                  | 1.4<br>(0.42-2.7)   | 200<br>(100-310)     |
| Israel   | 1995 | Female | 20 to 24 | 45%<br>(31-60%)                | 55%<br>(40-69%)          | 0.57<br>(0.33-0.9)                          | 1.2%<br>(0.7-1.7%)                   | 2.8%<br>(0.97-5%)                   | 1.9<br>(0.63-3.5)   | 310<br>(180-460)     |
| Israel   | 1995 | Female | 25 to 29 | 47%<br>(31-63%)                | 53%<br>(37-69%)          | 0.57<br>(0.33-0.88)                         | 1%<br>(0.65-1.4%)                    | 2.6%<br>(1.1-4.2%)                  | 1.6<br>(0.68-2.8)   | 250<br>(150-360)     |
| Israel   | 1995 | Female | 30 to 34 | 48%<br>(31-65%)                | 52%<br>(35-69%)          | 0.59<br>(0.35-0.88)                         | 0.98%<br>(0.64-1.4%)                 | 2.9%<br>(1.6-4.4%)                  | 2.5<br>(1.4-3.9)    | 250<br>(160-360)     |
| Israel   | 1995 | Female | 35 to 39 | 49%<br>(33-65%)                | 51%<br>(35-67%)          | 0.64<br>(0.38-0.96)                         | 1.1%<br>(0.66-1.5%)                  | 3.4%<br>(2-4.9%)                    | 4.1<br>(2.4-6.1)    | 300<br>(190-420)     |
| Israel   | 1995 | Female | 40 to 44 | 48%<br>(34-64%)                | 52%<br>(36-66%)          | 0.7<br>(0.43-1)                             | 1.2%<br>(0.74-1.8%)                  | 3.6%<br>(2.3-5.5%)                  | 7.5<br>(4.5-11)     | 410<br>(250-610)     |

| Location | Year | Sex    | Age      | Prevalence of current drinkers | Prevalence of abstainers | Population average of standard drinks daily | Percent of total attributable deaths | Percent of total attributable DALYs | Attributable deaths | Attributable DALYs   |
|----------|------|--------|----------|--------------------------------|--------------------------|---------------------------------------------|--------------------------------------|-------------------------------------|---------------------|----------------------|
| Israel   | 1995 | Female | 45 to 49 | 45%<br>(31-57%)                | 55%<br>(43-69%)          | 0.76<br>(0.49-1.1)                          | 1.4%<br>(0.79-2%)                    | 3.5%<br>(2.2-5.2%)                  | 10<br>(5.9-15)      | 450<br>(270-670)     |
| Israel   | 1995 | Female | 50 to 54 | 43%<br>(32-55%)                | 57%<br>(45-68%)          | 0.74<br>(0.48-1.1)                          | 1.2%<br>(0.6-2%)                     | 2.8%<br>(1.5-4.3%)                  | 8.4<br>(4.5-13)     | 310<br>(150-500)     |
| Israel   | 1995 | Female | 55 to 59 | 42%<br>(31-52%)                | 58%<br>(48-69%)          | 0.64<br>(0.41-0.92)                         | 0.76%<br>(0.091-1.5%)                | 1.6%<br>(0.51-2.9%)                 | 8.4<br>(2.6-15)     | 240<br>(28-460)      |
| Israel   | 1995 | Female | 60 to 64 | 41%<br>(30-52%)                | 59%<br>(48-70%)          | 0.59<br>(0.36-0.87)                         | 0.11%<br>(-0.66-0.88%)               | 0.44%<br>(-0.78-1.6%)               | 3.8<br>(-6.9-14)    | 43<br>(-270-340)     |
| Israel   | 1995 | Female | 65 to 69 | 40%<br>(29-50%)                | 60%<br>(50-71%)          | 0.57<br>(0.37-0.83)                         | -0.24%<br>(-1.1-0.57%)               | -0.13%<br>(-1.3-1%)                 | -1.9<br>(-20-14)    | -120<br>(-530-270)   |
| Israel   | 1995 | Female | 70 to 74 | 38%<br>(29-48%)                | 62%<br>(52-71%)          | 0.54<br>(0.34-0.79)                         | -0.47%<br>(-1.4-0.37%)               | -0.49%<br>(-1.7-0.63%)              | -11<br>(-38-14)     | -260<br>(-780-200)   |
| Israel   | 1995 | Female | 75 to 79 | 36%<br>(25-47%)                | 64%<br>(53-75%)          | 0.48<br>(0.29-0.72)                         | -0.69%<br>(-1.7-0.1%)                | -0.82%<br>(-2.1-0.2%)               | -20<br>(-51-5.2)    | -330<br>(-780-47)    |
| Israel   | 1995 | Female | 80 to 84 | 33%<br>(23-43%)                | 67%<br>(57-77%)          | 0.43<br>(0.26-0.64)                         | -0.9%<br>(-1.9--0.11%)               | -1.1%<br>(-2.3--0.12%)              | -35<br>(-76--3.8)   | -380<br>(-800--47)   |
| Israel   | 1995 | Female | 85 to 89 | 31%<br>(21-41%)                | 69%<br>(59-79%)          | 0.39<br>(0.22-0.61)                         | -0.94%<br>(-1.9--0.21%)              | -1.1%<br>(-2.3--0.25%)              | -33<br>(-67--7.2)   | -250<br>(-500--56)   |
| Israel   | 1995 | Female | 90 to 94 | 31%<br>(22-42%)                | 69%<br>(58-78%)          | 0.37<br>(0.2-0.63)                          | -0.99%<br>(-1.9--0.24%)              | -1.2%<br>(-2.3--0.29%)              | -19<br>(-37--4.4)   | -95<br>(-190--23)    |
| Israel   | 1995 | Female | 95 plus  | 33%<br>(21-45%)                | 67%<br>(55-79%)          | 0.37<br>(0.18-0.64)                         | -1.1%<br>(-2.2--0.24%)               | -1.4%<br>(-2.7--0.33%)              | -7.6<br>(-15--1.9)  | -25<br>(-50--5.7)    |
| Israel   | 1995 | Male   | All Ages | 43%<br>(37-49%)                | 57%<br>(51-63%)          | 0.52<br>(0.45-0.6)                          | 1%<br>(0.31-1.8%)                    | 0.14%<br>(-1-1.3%)                  | 26<br>(-200-250)    | 6500<br>(1900-11000) |
| Israel   | 1995 | Male   | 15 to 19 | 39%<br>(28-52%)                | 61%<br>(48-72%)          | 0.34<br>(0.19-0.53)                         | 1.7%<br>(0.87-2.9%)                  | 2.9%<br>(0.89-5.7%)                 | 4.6<br>(1.4-9.3)    | 510<br>(250-850)     |
| Israel   | 1995 | Male   | 20 to 24 | 46%<br>(31-62%)                | 54%<br>(38-69%)          | 0.54<br>(0.31-0.82)                         | 3.4%<br>(1.9-5.4%)                   | 4.4%<br>(1.5-8.2%)                  | 11<br>(3.4-20)      | 1100<br>(600-1800)   |
| Israel   | 1995 | Male   | 25 to 29 | 50%<br>(33-67%)                | 50%<br>(33-67%)          | 0.61<br>(0.35-0.93)                         | 3.3%<br>(1.9-4.8%)                   | 4.6%<br>(1.7-8%)                    | 8.1<br>(2.9-14)     | 860<br>(500-1300)    |
| Israel   | 1995 | Male   | 30 to 34 | 54%<br>(35-72%)                | 46%<br>(28-65%)          | 0.65<br>(0.38-0.98)                         | 3%<br>(1.9-4.3%)                     | 4.7%<br>(2.2-7.4%)                  | 8.6<br>(4-14)       | 800<br>(490-1100)    |
| Israel   | 1995 | Male   | 35 to 39 | 58%<br>(40-74%)                | 42%<br>(26-60%)          | 0.67<br>(0.41-1)                            | 2.8%<br>(1.8-4%)                     | 4.5%<br>(2.4-6.7%)                  | 10<br>(5.3-15)      | 790<br>(510-1100)    |
| Israel   | 1995 | Male   | 40 to 44 | 60%<br>(42-76%)                | 40%<br>(24-58%)          | 0.81<br>(0.51-1.2)                          | 2.5%<br>(1.5-3.5%)                   | 3.8%<br>(1.8-5.7%)                  | 12<br>(5.7-19)      | 820<br>(500-1200)    |
| Israel   | 1995 | Male   | 45 to 49 | 60%<br>(41-76%)                | 40%<br>(24-59%)          | 1.1<br>(0.64-1.6)                           | 2.3%<br>(1.2-3.4%)                   | 3.3%<br>(1.3-5.2%)                  | 15<br>(6.2-24)      | 820<br>(410-1200)    |
| Israel   | 1995 | Male   | 50 to 54 | 60%<br>(43-74%)                | 40%<br>(26-57%)          | 1.2<br>(0.76-1.8)                           | 1.9%<br>(0.72-3.2%)                  | 2.6%<br>(0.61-4.5%)                 | 13<br>(2.9-22)      | 580<br>(230-950)     |
| Israel   | 1995 | Male   | 55 to 59 | 59%<br>(46-69%)                | 41%<br>(31-54%)          | 1.2<br>(0.8-1.6)                            | 1.3%<br>(0.071-2.5%)                 | 1.6%<br>(-0.2-3.4%)                 | 13<br>(-1.5-27)     | 490<br>(27-970)      |
| Israel   | 1995 | Male   | 60 to 64 | 58%<br>(46-69%)                | 42%<br>(31-54%)          | 1.2<br>(0.76-1.6)                           | 0.85%<br>(-0.5-2.1%)                 | 0.95%<br>(-0.89-2.7%)               | 12<br>(-11-33)      | 380<br>(-220-980)    |

| Location | Year | Sex    | Age      | Prevalence of current drinkers | Prevalence of abstainers | Population average of standard drinks daily | Percent of total attributable deaths | Percent of total attributable DALYs | Attributable deaths | Attributable DALYs |
|----------|------|--------|----------|--------------------------------|--------------------------|---------------------------------------------|--------------------------------------|-------------------------------------|---------------------|--------------------|
| Israel   | 1995 | Male   | 65 to 69 | 59%<br>(48-68%)                | 41%<br>(32-52%)          | 1<br>(0.71-1.4)                             | 0.23%<br>(-1.1-1.6%)                 | 0.19%<br>(-1.5-1.9%)                | 3.4<br>(-26-33)     | 120<br>(-560-810)  |
| Israel   | 1995 | Male   | 70 to 74 | 58%<br>(47-67%)                | 42%<br>(33-53%)          | 0.9<br>(0.6-1.3)                            | -0.22%<br>(-1.4-1%)                  | -0.32%<br>(-1.8-1.2%)               | -7.9<br>(-44-29)    | -120<br>(-790-580) |
| Israel   | 1995 | Male   | 75 to 79 | 55%<br>(43-67%)                | 45%<br>(33-57%)          | 0.77<br>(0.48-1.1)                          | -0.49%<br>(-1.7-0.6%)                | -0.65%<br>(-2.1-0.67%)              | -16<br>(-52-17)     | -210<br>(-730-270) |
| Israel   | 1995 | Male   | 80 to 84 | 51%<br>(38-63%)                | 49%<br>(37-62%)          | 0.66<br>(0.41-0.95)                         | -0.64%<br>(-1.8-0.36%)               | -0.81%<br>(-2.1-0.39%)              | -23<br>(-62-11)     | -230<br>(-640-130) |
| Israel   | 1995 | Male   | 85 to 89 | 48%<br>(35-60%)                | 52%<br>(40-65%)          | 0.57<br>(0.34-0.86)                         | -0.64%<br>(-1.7-0.25%)               | -0.81%<br>(-2.1-0.23%)              | -19<br>(-49-5.7)    | -130<br>(-360-51)  |
| Israel   | 1995 | Male   | 90 to 94 | 48%<br>(36-61%)                | 52%<br>(39-64%)          | 0.54<br>(0.31-0.84)                         | -0.8%<br>(-2.0-0.99%)                | -1%<br>(-2.4-0.076%)                | -12<br>(-28-0.93)   | -58<br>(-140-7.6)  |
| Israel   | 1995 | Male   | 95 plus  | 50%<br>(35-65%)                | 50%<br>(35-65%)          | 0.53<br>(0.27-0.91)                         | -0.9%<br>(-2.1-0.093%)               | -1.2%<br>(-2.7-0.018%)              | -5<br>(-11-0.07)    | -15<br>(-37-1.5)   |
| Israel   | 2000 | Female | All Ages | 36%<br>(32-41%)                | 64%<br>(59-68%)          | 0.45<br>(0.39-0.51)                         | 0.45%<br>(0.11-0.82%)                | 0.082%<br>(-0.6-0.74%)              | 15<br>(-110-130)    | 2900<br>(750-5100) |
| Israel   | 2000 | Female | 15 to 19 | 41%<br>(30-53%)                | 59%<br>(47-70%)          | 0.47<br>(0.29-0.72)                         | 0.84%<br>(0.47-1.3%)                 | 2.6%<br>(0.94-4.6%)                 | 1.7<br>(0.6-3.1)    | 220<br>(120-340)   |
| Israel   | 2000 | Female | 20 to 24 | 46%<br>(33-60%)                | 54%<br>(40-67%)          | 0.65<br>(0.39-1)                            | 1.2%<br>(0.76-1.8%)                  | 3.2%<br>(1.3-5.5%)                  | 2.2<br>(0.87-3.8)   | 340<br>(210-510)   |
| Israel   | 2000 | Female | 25 to 29 | 47%<br>(33-62%)                | 53%<br>(38-67%)          | 0.64<br>(0.38-0.96)                         | 1%<br>(0.65-1.4%)                    | 3%<br>(1.4-4.7%)                    | 2.1<br>(0.96-3.3)   | 290<br>(190-420)   |
| Israel   | 2000 | Female | 30 to 34 | 48%<br>(33-64%)                | 52%<br>(36-67%)          | 0.65<br>(0.4-0.97)                          | 1%<br>(0.66-1.5%)                    | 3.3%<br>(2-4.9%)                    | 3.1<br>(1.9-4.8)    | 290<br>(190-420)   |
| Israel   | 2000 | Female | 35 to 39 | 48%<br>(35-64%)                | 52%<br>(36-65%)          | 0.7<br>(0.42-1.1)                           | 1.1%<br>(0.7-1.6%)                   | 3.8%<br>(2.4-5.5%)                  | 4.8<br>(2.9-7)      | 340<br>(220-470)   |
| Israel   | 2000 | Female | 40 to 44 | 46%<br>(33-61%)                | 54%<br>(39-67%)          | 0.74<br>(0.46-1.1)                          | 1.2%<br>(0.78-1.8%)                  | 4.1%<br>(2.7-5.9%)                  | 7.5<br>(4.8-11)     | 410<br>(260-600)   |
| Israel   | 2000 | Female | 45 to 49 | 41%<br>(28-52%)                | 59%<br>(48-72%)          | 0.74<br>(0.49-1)                            | 1.3%<br>(0.81-2%)                    | 3.8%<br>(2.4-5.3%)                  | 12<br>(7.5-17)      | 530<br>(330-780)   |
| Israel   | 2000 | Female | 50 to 54 | 38%<br>(28-49%)                | 62%<br>(51-72%)          | 0.7<br>(0.45-1)                             | 1.3%<br>(0.7-2%)                     | 3.1%<br>(1.9-4.4%)                  | 14<br>(8.3-20)      | 500<br>(280-770)   |
| Israel   | 2000 | Female | 55 to 59 | 37%<br>(28-48%)                | 63%<br>(52-72%)          | 0.61<br>(0.4-0.91)                          | 0.86%<br>(0.32-1.5%)                 | 2%<br>(1.1-3.2%)                    | 9.6<br>(5.1-16)     | 270<br>(100-490)   |
| Israel   | 2000 | Female | 60 to 64 | 36%<br>(26-46%)                | 64%<br>(54-74%)          | 0.56<br>(0.35-0.85)                         | 0.44%<br>(-0.19-1.2%)                | 1.1%<br>(0.11-2.1%)                 | 8.4<br>(0.89-17)    | 170<br>(-74-440)   |
| Israel   | 2000 | Female | 65 to 69 | 35%<br>(26-45%)                | 65%<br>(55-74%)          | 0.54<br>(0.34-0.8)                          | 0.21%<br>(-0.42-0.9%)                | 0.6%<br>(-0.31-1.6%)                | 7.7<br>(-3.9-21)    | 96<br>(-210-420)   |
| Israel   | 2000 | Female | 70 to 74 | 34%<br>(25-43%)                | 66%<br>(57-75%)          | 0.51<br>(0.33-0.77)                         | 0.031%<br>(-0.67-0.74%)              | 0.25%<br>(-0.63-1.2%)               | 5.3<br>(-13-26)     | 17<br>(-370-420)   |
| Israel   | 2000 | Female | 75 to 79 | 31%<br>(23-42%)                | 69%<br>(58-77%)          | 0.46<br>(0.28-0.7)                          | -0.25%<br>(-1-0.4%)                  | -0.22%<br>(-1.2-0.66%)              | -6.4<br>(-35-19)    | -140<br>(-580-220) |
| Israel   | 2000 | Female | 80 to 84 | 30%<br>(21-39%)                | 70%<br>(61-79%)          | 0.42<br>(0.26-0.63)                         | -0.44%<br>(-1.1-0.14%)               | -0.49%<br>(-1.4-0.24%)              | -16<br>(-44-7.7)    | -190<br>(-500-61)  |



| Location | Year | Sex    | Age      | Prevalence of current drinkers | Prevalence of abstainers | Population average of standard drinks daily | Percent of total attributable deaths | Percent of total attributable DALYs | Attributable deaths | Attributable DALYs    |
|----------|------|--------|----------|--------------------------------|--------------------------|---------------------------------------------|--------------------------------------|-------------------------------------|---------------------|-----------------------|
| Israel   | 2000 | Female | 85 to 89 | 29%<br>(20-39%)                | 71%<br>(61-80%)          | 0.39<br>(0.23-0.61)                         | -0.56%<br>(-1.3-0.002%)              | -0.68%<br>(-1.6-0.017%)             | -19<br>(-44-0.49)   | -150<br>(-340-0.49)   |
| Israel   | 2000 | Female | 90 to 94 | 29%<br>(20-39%)                | 71%<br>(61-80%)          | 0.38<br>(0.21-0.62)                         | -0.63%<br>(-1.3--0.068%)             | -0.78%<br>(-1.6--0.084%)            | -15<br>(-30--1.7)   | -75<br>(-160--8.1)    |
| Israel   | 2000 | Female | 95 plus  | 30%<br>(20-41%)                | 70%<br>(59-80%)          | 0.38<br>(0.18-0.63)                         | -0.69%<br>(-1.5--0.023%)             | -0.88%<br>(-1.9--0.079%)            | -7.4<br>(-16--0.69) | -24<br>(-52--0.79)    |
| Israel   | 2000 | Male   | All Ages | 47%<br>(41-53%)                | 53%<br>(47-59%)          | 0.62<br>(0.54-0.7)                          | 1.7%<br>(1-2.5%)                     | 1.1%<br>(0.13-2.1%)                 | 210<br>(23-400)     | 12000<br>(6800-17000) |
| Israel   | 2000 | Male   | 15 to 19 | 48%<br>(39-59%)                | 52%<br>(41-61%)          | 0.46<br>(0.28-0.67)                         | 2.1%<br>(1-3.5%)                     | 3.7%<br>(1.2-7%)                    | 6.5<br>(2.1-12)     | 650<br>(320-1100)     |
| Israel   | 2000 | Male   | 20 to 24 | 55%<br>(44-68%)                | 45%<br>(32-56%)          | 0.72<br>(0.45-1)                            | 3.9%<br>(2.2-6%)                     | 5.5%<br>(2.1-9.5%)                  | 15<br>(5.6-26)      | 1500<br>(800-2300)    |
| Israel   | 2000 | Male   | 25 to 29 | 59%<br>(45-72%)                | 41%<br>(28-55%)          | 0.8<br>(0.51-1.1)                           | 3.8%<br>(2.3-5.5%)                   | 5.8%<br>(2.4-9.3%)                  | 13<br>(5.6-22)      | 1200<br>(710-1800)    |
| Israel   | 2000 | Male   | 30 to 34 | 60%<br>(45-75%)                | 40%<br>(25-55%)          | 0.81<br>(0.51-1.2)                          | 3.6%<br>(2.3-5%)                     | 6.2%<br>(3.3-9.2%)                  | 13<br>(6.6-19)      | 1000<br>(650-1400)    |
| Israel   | 2000 | Male   | 35 to 39 | 62%<br>(47-76%)                | 38%<br>(24-53%)          | 0.8<br>(0.51-1.2)                           | 3.7%<br>(2.5-5.1%)                   | 6.3%<br>(3.8-8.9%)                  | 17<br>(10-24)       | 1100<br>(770-1500)    |
| Israel   | 2000 | Male   | 40 to 44 | 63%<br>(47-78%)                | 37%<br>(22-53%)          | 0.97<br>(0.64-1.4)                          | 3.6%<br>(2.5-4.8%)                   | 6%<br>(3.8-8.2%)                    | 21<br>(13-30)       | 1200<br>(820-1600)    |
| Israel   | 2000 | Male   | 45 to 49 | 59%<br>(43-74%)                | 41%<br>(26-57%)          | 1.2<br>(0.73-1.8)                           | 3.3%<br>(2.1-4.5%)                   | 5.3%<br>(3.3-7.2%)                  | 27<br>(17-39)       | 1400<br>(870-1900)    |
| Israel   | 2000 | Male   | 50 to 54 | 56%<br>(42-69%)                | 44%<br>(31-58%)          | 1.2<br>(0.79-1.8)                           | 2.7%<br>(1.6-3.8%)                   | 3.9%<br>(2.2-5.7%)                  | 28<br>(15-41)       | 1200<br>(680-1700)    |
| Israel   | 2000 | Male   | 55 to 59 | 57%<br>(50-65%)                | 43%<br>(35-50%)          | 1.3<br>(0.92-1.7)                           | 2%<br>(0.9-3.2%)                     | 2.8%<br>(1.1-4.4%)                  | 21<br>(7.6-33)      | 770<br>(330-1200)     |
| Israel   | 2000 | Male   | 60 to 64 | 57%<br>(49-65%)                | 43%<br>(35-51%)          | 1.3<br>(0.87-1.8)                           | 1.6%<br>(0.36-2.8%)                  | 2%<br>(0.4-3.7%)                    | 23<br>(4.8-43)      | 710<br>(160-1300)     |
| Israel   | 2000 | Male   | 65 to 69 | 56%<br>(48-64%)                | 44%<br>(36-52%)          | 1.1<br>(0.79-1.5)                           | 0.97%<br>(-0.08-2.1%)                | 1.2%<br>(-0.16-2.7%)                | 21<br>(-2.8-48)     | 520<br>(-47-1200)     |
| Israel   | 2000 | Male   | 70 to 74 | 54%<br>(46-62%)                | 46%<br>(38-54%)          | 0.93<br>(0.65-1.3)                          | 0.46%<br>(-0.44-1.5%)                | 0.56%<br>(-0.57-1.8%)               | 13<br>(-14-43)      | 260<br>(-240-830)     |
| Israel   | 2000 | Male   | 75 to 79 | 49%<br>(40-60%)                | 51%<br>(40-60%)          | 0.75<br>(0.49-1.1)                          | 0.15%<br>(-0.67-1.1%)                | 0.16%<br>(-0.84-1.3%)               | 4.8<br>(-24-38)     | 81<br>(-360-560)      |
| Israel   | 2000 | Male   | 80 to 84 | 45%<br>(34-57%)                | 55%<br>(43-66%)          | 0.64<br>(0.4-0.92)                          | -0.0069%<br>(-0.82-0.73%)            | -0.04%<br>(-1-0.86%)                | -1.1<br>(-27-24)    | -2.3<br>(-290-260)    |
| Israel   | 2000 | Male   | 85 to 89 | 43%<br>(31-54%)                | 57%<br>(46-69%)          | 0.56<br>(0.33-0.86)                         | -0.14%<br>(-0.92-0.5%)               | -0.22%<br>(-1.1-0.54%)              | -4.7<br>(-24-12)    | -27<br>(-180-97)      |
| Israel   | 2000 | Male   | 90 to 94 | 43%<br>(31-54%)                | 57%<br>(46-69%)          | 0.52<br>(0.3-0.82)                          | -0.3%<br>(-1.1-0.34%)                | -0.43%<br>(-1.4-0.34%)              | -5.8<br>(-19-4.7)   | -25<br>(-92-28)       |
| Israel   | 2000 | Male   | 95 plus  | 45%<br>(31-61%)                | 55%<br>(39-69%)          | 0.51<br>(0.26-0.89)                         | -0.37%<br>(-1.3-0.36%)               | -0.55%<br>(-1.7-0.33%)              | -3.1<br>(-9.2-1.9)  | -8.3<br>(-29-8.2)     |
| Israel   | 2005 | Female | All Ages | 35%<br>(31-39%)                | 65%<br>(61-69%)          | 0.5<br>(0.43-0.58)                          | 0.64%<br>(0.34-0.97%)                | 0.42%<br>(-0.18-1%)                 | 82<br>(-35-200)     | 4400<br>(2300-6400)   |

| Location | Year | Sex    | Age      | Prevalence of current drinkers | Prevalence of abstainers | Population average of standard drinks daily | Percent of total attributable deaths | Percent of total attributable DALYs | Attributable deaths | Attributable DALYs    |
|----------|------|--------|----------|--------------------------------|--------------------------|---------------------------------------------|--------------------------------------|-------------------------------------|---------------------|-----------------------|
| Israel   | 2005 | Female | 15 to 19 | 40%<br>(30-53%)                | 60%<br>(47-70%)          | 0.54<br>(0.32-0.83)                         | 0.86%<br>(0.5-1.3%)                  | 2.7%<br>(1.1-4.7%)                  | 1.6<br>(0.68-2.8)   | 220<br>(130-340)      |
| Israel   | 2005 | Female | 20 to 24 | 46%<br>(33-60%)                | 54%<br>(40-67%)          | 0.74<br>(0.44-1.2)                          | 1.3%<br>(0.84-1.9%)                  | 3.4%<br>(1.6-5.5%)                  | 2.5<br>(1.2-4.2)    | 390<br>(240-570)      |
| Israel   | 2005 | Female | 25 to 29 | 47%<br>(33-62%)                | 53%<br>(38-67%)          | 0.73<br>(0.44-1.1)                          | 1.1%<br>(0.71-1.5%)                  | 3.3%<br>(1.7-5%)                    | 2.4<br>(1.2-3.7)    | 350<br>(220-500)      |
| Israel   | 2005 | Female | 30 to 34 | 48%<br>(32-63%)                | 52%<br>(37-68%)          | 0.75<br>(0.45-1.1)                          | 1.1%<br>(0.71-1.5%)                  | 3.7%<br>(2.2-5.3%)                  | 3.4<br>(2-5.2)      | 350<br>(240-480)      |
| Israel   | 2005 | Female | 35 to 39 | 48%<br>(34-64%)                | 52%<br>(36-66%)          | 0.8<br>(0.46-1.2)                           | 1.2%<br>(0.77-1.7%)                  | 4.2%<br>(2.7-6%)                    | 5.2<br>(3.2-7.8)    | 380<br>(240-530)      |
| Israel   | 2005 | Female | 40 to 44 | 45%<br>(33-61%)                | 55%<br>(39-67%)          | 0.85<br>(0.52-1.2)                          | 1.4%<br>(0.87-2.1%)                  | 4.6%<br>(3-6.6%)                    | 8.6<br>(5.5-12)     | 480<br>(310-690)      |
| Israel   | 2005 | Female | 45 to 49 | 39%<br>(28-51%)                | 61%<br>(49-72%)          | 0.84<br>(0.55-1.2)                          | 1.5%<br>(0.93-2.1%)                  | 4.2%<br>(2.8-5.7%)                  | 12<br>(8.1-17)      | 560<br>(370-800)      |
| Israel   | 2005 | Female | 50 to 54 | 35%<br>(26-46%)                | 65%<br>(54-74%)          | 0.74<br>(0.48-1.1)                          | 1.3%<br>(0.77-2%)                    | 3.4%<br>(2.2-4.6%)                  | 15<br>(9.8-22)      | 580<br>(350-850)      |
| Israel   | 2005 | Female | 55 to 59 | 33%<br>(25-42%)                | 67%<br>(58-75%)          | 0.62<br>(0.4-0.89)                          | 1.1%<br>(0.55-1.7%)                  | 2.5%<br>(1.5-3.7%)                  | 16<br>(9.8-24)      | 490<br>(250-780)      |
| Israel   | 2005 | Female | 60 to 64 | 32%<br>(24-42%)                | 68%<br>(58-76%)          | 0.56<br>(0.35-0.87)                         | 0.73%<br>(0.19-1.4%)                 | 1.7%<br>(0.86-2.7%)                 | 12<br>(5.7-19)      | 270<br>(77-500)       |
| Israel   | 2005 | Female | 65 to 69 | 32%<br>(24-40%)                | 68%<br>(60-76%)          | 0.56<br>(0.36-0.83)                         | 0.6%<br>(0.046-1.3%)                 | 1.3%<br>(0.5-2.2%)                  | 14<br>(5.5-25)      | 260<br>(21-550)       |
| Israel   | 2005 | Female | 70 to 74 | 30%<br>(22-39%)                | 70%<br>(61-78%)          | 0.51<br>(0.32-0.78)                         | 0.41%<br>(-0.17-1%)                  | 0.84%<br>(0.058-1.7%)               | 15<br>(1.1-30)      | 210<br>(-82-520)      |
| Israel   | 2005 | Female | 75 to 79 | 28%<br>(20-38%)                | 72%<br>(62-80%)          | 0.46<br>(0.28-0.71)                         | 0.13%<br>(-0.46-0.72%)               | 0.31%<br>(-0.45-1.1%)               | 8.8<br>(-12-31)     | 74<br>(-260-410)      |
| Israel   | 2005 | Female | 80 to 84 | 28%<br>(19-37%)                | 72%<br>(63-81%)          | 0.45<br>(0.27-0.68)                         | -0.15%<br>(-0.8-0.41%)               | -0.11%<br>(-0.9-0.58%)              | -4.3<br>(-35-22)    | -79<br>(-430-210)     |
| Israel   | 2005 | Female | 85 to 89 | 27%<br>(18-37%)                | 73%<br>(63-82%)          | 0.43<br>(0.26-0.67)                         | -0.33%<br>(-0.95-0.2%)               | -0.39%<br>(-1.2-0.26%)              | -14<br>(-41-9.1)    | -110<br>(-330-67)     |
| Israel   | 2005 | Female | 90 to 94 | 27%<br>(19-36%)                | 73%<br>(64-81%)          | 0.41<br>(0.23-0.67)                         | -0.41%<br>(-1-0.14%)                 | -0.51%<br>(-1.2-0.16%)              | -11<br>(-27-3.3)    | -56<br>(-140-20)      |
| Israel   | 2005 | Female | 95 plus  | 29%<br>(19-40%)                | 71%<br>(60-81%)          | 0.42<br>(0.21-0.7)                          | -0.48%<br>(-1.2-0.16%)               | -0.62%<br>(-1.5-0.14%)              | -6.3<br>(-15-1.4)   | -20<br>(-50-6.7)      |
| Israel   | 2005 | Male   | All Ages | 47%<br>(42-52%)                | 53%<br>(48-58%)          | 0.72<br>(0.62-0.82)                         | 2%<br>(1.3-2.6%)                     | 1.5%<br>(0.65-2.4%)                 | 290<br>(120-470)    | 14000<br>(9200-19000) |
| Israel   | 2005 | Male   | 15 to 19 | 49%<br>(41-60%)                | 51%<br>(40-59%)          | 0.54<br>(0.33-0.8)                          | 2.1%<br>(1.1-3.3%)                   | 3.9%<br>(1.4-6.9%)                  | 6.1<br>(2.1-11)     | 630<br>(330-990)      |
| Israel   | 2005 | Male   | 20 to 24 | 56%<br>(46-68%)                | 44%<br>(32-54%)          | 0.84<br>(0.54-1.2)                          | 4%<br>(2.3-5.9%)                     | 5.7%<br>(2.3-9.3%)                  | 15<br>(6.1-26)      | 1500<br>(860-2300)    |
| Israel   | 2005 | Male   | 25 to 29 | 60%<br>(48-73%)                | 40%<br>(27-52%)          | 0.94<br>(0.63-1.3)                          | 3.8%<br>(2.4-5.2%)                   | 6%<br>(2.7-9.4%)                    | 14<br>(6-22)        | 1300<br>(830-1900)    |
| Israel   | 2005 | Male   | 30 to 34 | 61%<br>(47-74%)                | 39%<br>(26-53%)          | 0.95<br>(0.6-1.3)                           | 3.6%<br>(2.4-4.8%)                   | 6.3%<br>(3.4-9.4%)                  | 14<br>(7.7-21)      | 1200<br>(790-1600)    |

| Location | Year | Sex    | Age      | Prevalence of current drinkers | Prevalence of abstainers | Population average of standard drinks daily | Percent of total attributable deaths | Percent of total attributable DALYs | Attributable deaths | Attributable DALYs  |
|----------|------|--------|----------|--------------------------------|--------------------------|---------------------------------------------|--------------------------------------|-------------------------------------|---------------------|---------------------|
| Israel   | 2005 | Male   | 35 to 39 | 61%<br>(47-75%)                | 39%<br>(25-53%)          | 0.92<br>(0.58-1.3)                          | 3.6%<br>(2.4-4.8%)                   | 6.5%<br>(3.9-9%)                    | 16<br>(9.1-22)      | 1100<br>(750-1500)  |
| Israel   | 2005 | Male   | 40 to 44 | 64%<br>(49-77%)                | 36%<br>(23-51%)          | 1.1<br>(0.73-1.6)                           | 3.7%<br>(2.6-5%)                     | 6.5%<br>(4.2-8.7%)                  | 22<br>(14-31)       | 1300<br>(880-1700)  |
| Israel   | 2005 | Male   | 45 to 49 | 58%<br>(42-73%)                | 42%<br>(27-58%)          | 1.3<br>(0.84-2)                             | 3.6%<br>(2.4-5%)                     | 6%<br>(3.9-8.2%)                    | 29<br>(18-41)       | 1400<br>(960-2000)  |
| Israel   | 2005 | Male   | 50 to 54 | 54%<br>(40-67%)                | 46%<br>(33-60%)          | 1.4<br>(0.93-2)                             | 3.1%<br>(2-4.5%)                     | 4.9%<br>(3.1-6.8%)                  | 37<br>(23-53)       | 1600<br>(1000-2200) |
| Israel   | 2005 | Male   | 55 to 59 | 55%<br>(49-62%)                | 45%<br>(38-51%)          | 1.5<br>(1-1.9)                              | 2.5%<br>(1.4-3.6%)                   | 3.6%<br>(2.1-5.3%)                  | 36<br>(20-53)       | 1300<br>(730-1900)  |
| Israel   | 2005 | Male   | 60 to 64 | 56%<br>(49-62%)                | 44%<br>(38-51%)          | 1.4<br>(0.98-2)                             | 2%<br>(0.87-3.2%)                    | 2.7%<br>(1.2-4.3%)                  | 29<br>(12-47)       | 880<br>(390-1400)   |
| Israel   | 2005 | Male   | 65 to 69 | 55%<br>(48-61%)                | 45%<br>(39-52%)          | 1.2<br>(0.9-1.7)                            | 1.4%<br>(0.44-2.5%)                  | 1.8%<br>(0.53-3.2%)                 | 29<br>(8.7-53)      | 710<br>(210-1300)   |
| Israel   | 2005 | Male   | 70 to 74 | 53%<br>(46-59%)                | 47%<br>(41-54%)          | 1<br>(0.73-1.4)                             | 0.87%<br>(0.045-1.9%)                | 1.1%<br>(0.064-2.3%)                | 24<br>(1.3-51)      | 470<br>(24-990)     |
| Israel   | 2005 | Male   | 75 to 79 | 48%<br>(39-56%)                | 52%<br>(44-61%)          | 0.83<br>(0.54-1.2)                          | 0.51%<br>(-0.19-1.4%)                | 0.61%<br>(-0.23-1.6%)               | 17<br>(-6.6-45)     | 260<br>(-95-680)    |
| Israel   | 2005 | Male   | 80 to 84 | 42%<br>(31-53%)                | 58%<br>(47-69%)          | 0.67<br>(0.42-0.96)                         | 0.3%<br>(-0.35-0.99%)                | 0.34%<br>(-0.45-1.2%)               | 10<br>(-13-37)      | 120<br>(-140-410)   |
| Israel   | 2005 | Male   | 85 to 89 | 38%<br>(28-49%)                | 62%<br>(51-72%)          | 0.57<br>(0.35-0.87)                         | 0.094%<br>(-0.51-0.69%)              | 0.062%<br>(-0.65-0.76%)             | 1.7<br>(-18-20)     | 23<br>(-130-170)    |
| Israel   | 2005 | Male   | 90 to 94 | 38%<br>(28-49%)                | 62%<br>(51-72%)          | 0.54<br>(0.31-0.83)                         | -0.072%<br>(-0.69-0.54%)             | -0.16%<br>(-0.9-0.55%)              | -2.3<br>(-13-8)     | -6.4<br>(-63-48)    |
| Israel   | 2005 | Male   | 95 plus  | 40%<br>(26-55%)                | 60%<br>(45-74%)          | 0.53<br>(0.26-0.92)                         | -0.13%<br>(-0.89-0.52%)              | -0.27%<br>(-1.2-0.51%)              | -1.7<br>(-7.5-3.2)  | -3.3<br>(-23-13)    |
| Israel   | 2010 | Female | All Ages | 34%<br>(29-38%)                | 66%<br>(62-71%)          | 0.58<br>(0.48-0.69)                         | 0.78%<br>(0.47-1.2%)                 | 0.77%<br>(0.17-1.5%)                | 160<br>(32-290)     | 5700<br>(3300-8200) |
| Israel   | 2010 | Female | 15 to 19 | 38%<br>(27-51%)                | 62%<br>(49-73%)          | 0.59<br>(0.33-0.95)                         | 0.78%<br>(0.46-1.2%)                 | 2.8%<br>(1.3-4.9%)                  | 1.2<br>(0.54-2.2)   | 200<br>(120-310)    |
| Israel   | 2010 | Female | 20 to 24 | 43%<br>(29-58%)                | 57%<br>(42-71%)          | 0.82<br>(0.45-1.3)                          | 1.2%<br>(0.82-1.8%)                  | 3.7%<br>(1.8-6.1%)                  | 2.1<br>(0.98-3.5)   | 370<br>(240-550)    |
| Israel   | 2010 | Female | 25 to 29 | 45%<br>(30-61%)                | 55%<br>(39-70%)          | 0.83<br>(0.48-1.3)                          | 1.1%<br>(0.73-1.5%)                  | 3.6%<br>(1.8-5.5%)                  | 2.3<br>(1.1-3.6)    | 360<br>(230-510)    |
| Israel   | 2010 | Female | 30 to 34 | 47%<br>(30-64%)                | 53%<br>(36-70%)          | 0.86<br>(0.5-1.3)                           | 1.1%<br>(0.69-1.5%)                  | 4.1%<br>(2.5-5.9%)                  | 3.7<br>(2.2-5.6)    | 380<br>(260-560)    |
| Israel   | 2010 | Female | 35 to 39 | 47%<br>(31-63%)                | 53%<br>(37-69%)          | 0.91<br>(0.52-1.4)                          | 1.2%<br>(0.77-1.8%)                  | 4.8%<br>(3-6.9%)                    | 6.3<br>(3.7-9.4)    | 460<br>(300-660)    |
| Israel   | 2010 | Female | 40 to 44 | 44%<br>(29-59%)                | 56%<br>(41-71%)          | 0.95<br>(0.55-1.4)                          | 1.4%<br>(0.84-2.1%)                  | 5.2%<br>(3.4-7.2%)                  | 8.8<br>(5.4-13)     | 510<br>(310-720)    |
| Israel   | 2010 | Female | 45 to 49 | 39%<br>(27-50%)                | 61%<br>(50-73%)          | 0.97<br>(0.62-1.4)                          | 1.6%<br>(0.99-2.3%)                  | 4.9%<br>(3.4-6.6%)                  | 13<br>(8.3-18)      | 610<br>(390-850)    |
| Israel   | 2010 | Female | 50 to 54 | 35%<br>(26-46%)                | 65%<br>(54-74%)          | 0.89<br>(0.58-1.3)                          | 1.5%<br>(0.93-2.2%)                  | 4%<br>(2.7-5.4%)                    | 16<br>(11-23)       | 640<br>(390-930)    |

| Location | Year | Sex    | Age      | Prevalence of current drinkers | Prevalence of abstainers | Population average of standard drinks daily | Percent of total attributable deaths | Percent of total attributable DALYs | Attributable deaths | Attributable DALYs     |
|----------|------|--------|----------|--------------------------------|--------------------------|---------------------------------------------|--------------------------------------|-------------------------------------|---------------------|------------------------|
| Israel   | 2010 | Female | 55 to 59 | 33%<br>(25-42%)                | 67%<br>(58-75%)          | 0.75<br>(0.48-1.1)                          | 1.3%<br>(0.67-1.9%)                  | 3.1%<br>(2-4.3%)                    | 21<br>(13-30)       | 660<br>(370-990)       |
| Israel   | 2010 | Female | 60 to 64 | 32%<br>(23-42%)                | 68%<br>(58-77%)          | 0.68<br>(0.41-1)                            | 0.93%<br>(0.37-1.6%)                 | 2.2%<br>(1.2-3.3%)                  | 19<br>(11-30)       | 480<br>(200-840)       |
| Israel   | 2010 | Female | 65 to 69 | 32%<br>(24-40%)                | 68%<br>(60-76%)          | 0.66<br>(0.42-0.98)                         | 0.82%<br>(0.27-1.5%)                 | 1.8%<br>(0.98-2.7%)                 | 17<br>(9.6-27)      | 350<br>(120-610)       |
| Israel   | 2010 | Female | 70 to 74 | 30%<br>(22-38%)                | 70%<br>(62-78%)          | 0.61<br>(0.38-0.93)                         | 0.72%<br>(0.17-1.4%)                 | 1.4%<br>(0.56-2.2%)                 | 22<br>(8.9-37)      | 360<br>(79-690)        |
| Israel   | 2010 | Female | 75 to 79 | 28%<br>(20-38%)                | 72%<br>(62-80%)          | 0.56<br>(0.33-0.88)                         | 0.43%<br>(-0.11-1.1%)                | 0.79%<br>(0.072-1.6%)               | 20<br>(1.8-42)      | 240<br>(-60-590)       |
| Israel   | 2010 | Female | 80 to 84 | 28%<br>(19-36%)                | 72%<br>(64-81%)          | 0.53<br>(0.32-0.8)                          | 0.15%<br>(-0.44-0.76%)               | 0.29%<br>(-0.44-1.1%)               | 11<br>(-18-41)      | 85<br>(-240-430)       |
| Israel   | 2010 | Female | 85 to 89 | 27%<br>(18-36%)                | 73%<br>(64-82%)          | 0.5<br>(0.3-0.79)                           | -0.041%<br>(-0.64-0.55%)             | -0.029%<br>(-0.76-0.69%)            | -1.2<br>(-32-29)    | -17<br>(-270-230)      |
| Israel   | 2010 | Female | 90 to 94 | 27%<br>(18-37%)                | 73%<br>(63-82%)          | 0.48<br>(0.25-0.8)                          | -0.12%<br>(-0.63-0.47%)              | -0.16%<br>(-0.78-0.55%)             | -4.2<br>(-20-14)    | -21<br>(-110-82)       |
| Israel   | 2010 | Female | 95 plus  | 28%<br>(18-39%)                | 72%<br>(61-82%)          | 0.49<br>(0.23-0.86)                         | -0.2%<br>(-0.88-0.53%)               | -0.3%<br>(-1.1-0.56%)               | -3.6<br>(-13-6.8)   | -9.9<br>(-44-26)       |
| Israel   | 2010 | Male   | All Ages | 41%<br>(35-47%)                | 59%<br>(53-65%)          | 0.77<br>(0.66-0.93)                         | 1.8%<br>(1.4-2.7%)                   | 1.8%<br>(0.91-2.6%)                 | 360<br>(180-550)    | 15000<br>(10000-20000) |
| Israel   | 2010 | Male   | 15 to 19 | 38%<br>(27-51%)                | 62%<br>(49-73%)          | 0.49<br>(0.26-0.81)                         | 1.8%<br>(1-2.9%)                     | 3.5%<br>(1.4-6.6%)                  | 4.7<br>(1.8-8.6)    | 550<br>(310-850)       |
| Israel   | 2010 | Male   | 20 to 24 | 45%<br>(30-60%)                | 55%<br>(40-70%)          | 0.79<br>(0.44-1.3)                          | 3.7%<br>(2.3-5.6%)                   | 5.5%<br>(2.3-9.5%)                  | 12<br>(5-21)        | 1300<br>(760-2000)     |
| Israel   | 2010 | Male   | 25 to 29 | 49%<br>(32-65%)                | 51%<br>(35-68%)          | 0.89<br>(0.53-1.4)                          | 3.5%<br>(2.3-4.9%)                   | 6%<br>(2.7-9.7%)                    | 11<br>(5.1-18)      | 1200<br>(740-1700)     |
| Israel   | 2010 | Male   | 30 to 34 | 53%<br>(34-71%)                | 47%<br>(29-66%)          | 0.96<br>(0.56-1.5)                          | 3.3%<br>(2.2-4.5%)                   | 6.3%<br>(3.5-9.6%)                  | 13<br>(6.9-20)      | 1200<br>(770-1600)     |
| Israel   | 2010 | Male   | 35 to 39 | 56%<br>(39-74%)                | 44%<br>(26-61%)          | 0.99<br>(0.58-1.5)                          | 3.2%<br>(2.1-4.4%)                   | 6.2%<br>(3.7-9%)                    | 16<br>(9.1-23)      | 1200<br>(820-1600)     |
| Israel   | 2010 | Male   | 40 to 44 | 58%<br>(40-75%)                | 42%<br>(25-60%)          | 1.2<br>(0.73-1.7)                           | 3.4%<br>(2.5-4.7%)                   | 6.5%<br>(4.3-9.1%)                  | 21<br>(14-30)       | 1300<br>(900-1700)     |
| Israel   | 2010 | Male   | 45 to 49 | 55%<br>(39-72%)                | 45%<br>(28-61%)          | 1.5<br>(0.87-2.3)                           | 3.6%<br>(2.5-5.1%)                   | 6.5%<br>(4.4-9.1%)                  | 28<br>(19-42)       | 1400<br>(980-2000)     |
| Israel   | 2010 | Male   | 50 to 54 | 53%<br>(40-66%)                | 47%<br>(34-60%)          | 1.6<br>(0.99-2.3)                           | 3.3%<br>(2.1-4.7%)                   | 5.4%<br>(3.5-7.6%)                  | 34<br>(21-49)       | 1500<br>(940-2100)     |
| Israel   | 2010 | Male   | 55 to 59 | 54%<br>(47-60%)                | 46%<br>(40-53%)          | 1.7<br>(1.2-2.2)                            | 2.9%<br>(1.7-4.1%)                   | 4.3%<br>(2.6-6%)                    | 44<br>(26-64)       | 1700<br>(970-2400)     |
| Israel   | 2010 | Male   | 60 to 64 | 54%<br>(47-61%)                | 46%<br>(39-53%)          | 1.6<br>(1.1-2.2)                            | 2.4%<br>(1.3-3.7%)                   | 3.4%<br>(1.8-5.1%)                  | 48<br>(25-73)       | 1500<br>(790-2400)     |
| Israel   | 2010 | Male   | 65 to 69 | 53%<br>(47-60%)                | 47%<br>(40-53%)          | 1.4<br>(0.99-1.9)                           | 1.8%<br>(0.83-3%)                    | 2.4%<br>(1.2-3.9%)                  | 39<br>(18-64)       | 980<br>(440-1700)      |
| Israel   | 2010 | Male   | 70 to 74 | 51%<br>(44-58%)                | 49%<br>(42-56%)          | 1.2<br>(0.82-1.6)                           | 1.2%<br>(0.36-2.3%)                  | 1.6%<br>(0.5-2.9%)                  | 33<br>(11-60)       | 650<br>(200-1200)      |

| Location | Year | Sex    | Age      | Prevalence of current drinkers | Prevalence of abstainers | Population average of standard drinks daily | Percent of total attributable deaths | Percent of total attributable DALYs | Attributable deaths | Attributable DALYs   |
|----------|------|--------|----------|--------------------------------|--------------------------|---------------------------------------------|--------------------------------------|-------------------------------------|---------------------|----------------------|
| Israel   | 2010 | Male   | 75 to 79 | 47%<br>(38-56%)                | 53%<br>(44-62%)          | 0.95<br>(0.62-1.3)                          | 0.82%<br>(0.11-1.7%)                 | 1%<br>(0.14-2%)                     | 28<br>(4.2-59)      | 440<br>(63-910)      |
| Israel   | 2010 | Male   | 80 to 84 | 41%<br>(30-52%)                | 59%<br>(48-70%)          | 0.78<br>(0.49-1.1)                          | 0.54%<br>(-0.071-1.3%)               | 0.63%<br>(-0.12-1.5%)               | 20<br>(-3.7-47)     | 230<br>(-31-550)     |
| Israel   | 2010 | Male   | 85 to 89 | 38%<br>(27-49%)                | 62%<br>(51-73%)          | 0.66<br>(0.38-1.1)                          | 0.3%<br>(-0.26-0.94%)                | 0.31%<br>(-0.39-1.1%)               | 9.2<br>(-12-33)     | 86<br>(-73-270)      |
| Israel   | 2010 | Male   | 90 to 94 | 38%<br>(27-48%)                | 62%<br>(52-73%)          | 0.62<br>(0.35-0.98)                         | 0.13%<br>(-0.46-0.78%)               | 0.066%<br>(-0.66-0.8%)              | 1.3<br>(-13-16)     | 16<br>(-58-96)       |
| Israel   | 2010 | Male   | 95 plus  | 39%<br>(26-55%)                | 61%<br>(45-74%)          | 0.61<br>(0.3-1.1)                           | 0.075%<br>(-0.67-0.8%)               | -0.046%<br>(-0.93-0.79%)            | -0.35<br>(-7.1-6)   | 2.3<br>(-20-24)      |
| Israel   | 2016 | Female | All Ages | 36%<br>(32-41%)                | 64%<br>(59-68%)          | 0.64<br>(0.49-0.85)                         | 0.82%<br>(0.39-1.3%)                 | 0.76%<br>(0.018-1.6%)               | 170<br>(4.4-380)    | 6300<br>(2900-10000) |
| Israel   | 2016 | Female | 15 to 19 | 38%<br>(27-51%)                | 62%<br>(49-73%)          | 0.6<br>(0.33-1)                             | 0.76%<br>(0.47-1.1%)                 | 2.8%<br>(1.2-5.1%)                  | 1.2<br>(0.48-2.2)   | 220<br>(130-340)     |
| Israel   | 2016 | Female | 20 to 24 | 43%<br>(29-59%)                | 57%<br>(41-71%)          | 0.84<br>(0.45-1.4)                          | 1.2%<br>(0.83-1.8%)                  | 3.7%<br>(1.7-6.3%)                  | 1.9<br>(0.84-3.3)   | 380<br>(230-560)     |
| Israel   | 2016 | Female | 25 to 29 | 46%<br>(30-62%)                | 54%<br>(38-70%)          | 0.85<br>(0.46-1.4)                          | 1.1%<br>(0.73-1.6%)                  | 3.6%<br>(1.9-5.7%)                  | 2.1<br>(1-3.5)      | 360<br>(240-520)     |
| Israel   | 2016 | Female | 30 to 34 | 47%<br>(30-65%)                | 53%<br>(35-70%)          | 0.88<br>(0.47-1.4)                          | 1.1%<br>(0.7-1.6%)                   | 4.2%<br>(2.4-6.2%)                  | 3.5<br>(1.9-5.6)    | 400<br>(250-580)     |
| Israel   | 2016 | Female | 35 to 39 | 48%<br>(32-64%)                | 52%<br>(36-68%)          | 0.95<br>(0.53-1.5)                          | 1.3%<br>(0.78-1.9%)                  | 5%<br>(3-7.4%)                      | 6.7<br>(3.9-11)     | 510<br>(320-780)     |
| Israel   | 2016 | Female | 40 to 44 | 46%<br>(32-62%)                | 54%<br>(38-68%)          | 1<br>(0.59-1.6)                             | 1.4%<br>(0.84-2.2%)                  | 5.6%<br>(3.5-7.9%)                  | 10<br>(6-17)        | 610<br>(380-920)     |
| Israel   | 2016 | Female | 45 to 49 | 44%<br>(30-56%)                | 56%<br>(44-70%)          | 1.1<br>(0.69-1.7)                           | 1.7%<br>(1-2.5%)                     | 5.4%<br>(3.5-7.4%)                  | 14<br>(8.6-22)      | 690<br>(420-1000)    |
| Israel   | 2016 | Female | 50 to 54 | 42%<br>(30-54%)                | 58%<br>(46-70%)          | 1.1<br>(0.66-1.7)                           | 1.7%<br>(0.9-2.6%)                   | 4.5%<br>(2.8-6.3%)                  | 18<br>(10-27)       | 710<br>(390-1100)    |
| Israel   | 2016 | Female | 55 to 59 | 41%<br>(30-52%)                | 59%<br>(48-70%)          | 0.96<br>(0.58-1.5)                          | 1.4%<br>(0.69-2.3%)                  | 3.6%<br>(2.2-5.2%)                  | 21<br>(12-32)       | 660<br>(320-1100)    |
| Israel   | 2016 | Female | 60 to 64 | 40%<br>(29-51%)                | 60%<br>(49-71%)          | 0.88<br>(0.52-1.4)                          | 1%<br>(0.31-1.9%)                    | 2.5%<br>(1.2-4%)                    | 23<br>(11-39)       | 580<br>(170-1100)    |
| Israel   | 2016 | Female | 65 to 69 | 39%<br>(28-49%)                | 61%<br>(51-72%)          | 0.85<br>(0.53-1.3)                          | 0.86%<br>(0.13-1.7%)                 | 2%<br>(0.93-3.3%)                   | 27<br>(12-45)       | 530<br>(82-1000)     |
| Israel   | 2016 | Female | 70 to 74 | 37%<br>(28-47%)                | 63%<br>(53-72%)          | 0.79<br>(0.48-1.3)                          | 0.73%<br>(-0.023-1.7%)               | 1.5%<br>(0.47-2.7%)                 | 24<br>(7.3-46)      | 380<br>(-11-860)     |
| Israel   | 2016 | Female | 75 to 79 | 34%<br>(24-46%)                | 66%<br>(54-76%)          | 0.71<br>(0.4-1.2)                           | 0.45%<br>(-0.25-1.3%)                | 0.85%<br>(-0.066-2%)                | 19<br>(-1.4-44)     | 230<br>(-130-690)    |
| Israel   | 2016 | Female | 80 to 84 | 32%<br>(22-42%)                | 68%<br>(58-78%)          | 0.63<br>(0.36-0.98)                         | 0.17%<br>(-0.51-0.96%)               | 0.32%<br>(-0.53-1.3%)               | 12<br>(-19-49)      | 92<br>(-280-540)     |
| Israel   | 2016 | Female | 85 to 89 | 30%<br>(21-40%)                | 70%<br>(60-79%)          | 0.57<br>(0.32-0.93)                         | -0.02%<br>(-0.73-0.7%)               | -0.008%<br>(-0.88-0.86%)            | -0.41<br>(-43-44)   | -10<br>(-350-350)    |
| Israel   | 2016 | Female | 90 to 94 | 30%<br>(20-40%)                | 70%<br>(60-80%)          | 0.55<br>(0.28-0.93)                         | -0.1%<br>(-0.73-0.6%)                | -0.15%<br>(-0.93-0.69%)             | -5.4<br>(-32-23)    | -25<br>(-180-140)    |

| Location | Year | Sex    | Age      | Prevalence of current drinkers | Prevalence of abstainers | Population average of standard drinks daily | Percent of total attributable deaths | Percent of total attributable DALYs | Attributable deaths    | Attributable DALYs        |
|----------|------|--------|----------|--------------------------------|--------------------------|---------------------------------------------|--------------------------------------|-------------------------------------|------------------------|---------------------------|
| Israel   | 2016 | Female | 95 plus  | 32%<br>(20-44%)                | 68%<br>(56-80%)          | 0.56<br>(0.26-1)                            | -0.18%<br>(-1-0.72%)                 | -0.29%<br>(-1.3-0.74%)              | -6.2<br>(-27-15)       | -16<br>(-87-61)           |
| Israel   | 2016 | Male   | All Ages | 43%<br>(37-49%)                | 57%<br>(51-63%)          | 0.84<br>(0.63-1.1)                          | 2.1%<br>(1.4-3%)                     | 1.8%<br>(0.72-3%)                   | 410<br>(170-710)       | 17000<br>(11000-25000)    |
| Israel   | 2016 | Male   | 15 to 19 | 38%<br>(26-51%)                | 62%<br>(49-74%)          | 0.5<br>(0.25-0.85)                          | 1.8%<br>(1-2.9%)                     | 3.6%<br>(1.3-6.6%)                  | 4.8<br>(1.7-9.3)       | 580<br>(330-940)          |
| Israel   | 2016 | Male   | 20 to 24 | 45%<br>(30-61%)                | 55%<br>(39-70%)          | 0.8<br>(0.42-1.3)                           | 3.7%<br>(2.3-5.6%)                   | 5.6%<br>(2.2-9.8%)                  | 12<br>(4.7-22)         | 1300<br>(760-2000)        |
| Israel   | 2016 | Male   | 25 to 29 | 49%<br>(32-66%)                | 51%<br>(34-68%)          | 0.91<br>(0.52-1.4)                          | 3.5%<br>(2.2-5.1%)                   | 6.1%<br>(2.7-10%)                   | 11<br>(4.7-20)         | 1200<br>(730-1800)        |
| Israel   | 2016 | Male   | 30 to 34 | 53%<br>(34-70%)                | 47%<br>(30-66%)          | 0.98<br>(0.55-1.5)                          | 3.3%<br>(2.1-4.6%)                   | 6.5%<br>(3.5-10%)                   | 13<br>(6.8-21)         | 1200<br>(760-1700)        |
| Israel   | 2016 | Male   | 35 to 39 | 57%<br>(38-74%)                | 43%<br>(26-62%)          | 1<br>(0.57-1.6)                             | 3.2%<br>(2.2-4.6%)                   | 6.5%<br>(3.7-9.5%)                  | 17<br>(9.2-27)         | 1300<br>(840-1900)        |
| Israel   | 2016 | Male   | 40 to 44 | 59%<br>(41-76%)                | 41%<br>(24-59%)          | 1.2<br>(0.72-1.9)                           | 3.4%<br>(2.3-4.9%)                   | 6.8%<br>(4.3-9.6%)                  | 25<br>(14-39)          | 1500<br>(960-2200)        |
| Israel   | 2016 | Male   | 45 to 49 | 59%<br>(40-75%)                | 41%<br>(25-60%)          | 1.6<br>(0.88-2.6)                           | 3.8%<br>(2.4-5.6%)                   | 7.1%<br>(4.7-10%)                   | 32<br>(18-51)          | 1600<br>(1000-2500)       |
| Israel   | 2016 | Male   | 50 to 54 | 59%<br>(43-73%)                | 41%<br>(27-57%)          | 1.8<br>(1.1-2.8)                            | 3.5%<br>(2.1-5.3%)                   | 6%<br>(3.7-8.8%)                    | 37<br>(21-59)          | 1600<br>(950-2600)        |
| Israel   | 2016 | Male   | 55 to 59 | 58%<br>(45-68%)                | 42%<br>(32-55%)          | 1.8<br>(1.2-2.7)                            | 3%<br>(1.8-4.7%)                     | 4.7%<br>(2.8-7.2%)                  | 41<br>(23-67)          | 1600<br>(870-2500)        |
| Israel   | 2016 | Male   | 60 to 64 | 57%<br>(45-68%)                | 43%<br>(32-55%)          | 1.7<br>(1.1-2.6)                            | 2.6%<br>(1.3-4.3%)                   | 3.7%<br>(1.9-6%)                    | 55<br>(26-91)          | 1700<br>(830-2900)        |
| Israel   | 2016 | Male   | 65 to 69 | 58%<br>(46-67%)                | 42%<br>(33-54%)          | 1.6<br>(1-2.3)                              | 2%<br>(0.82-3.6%)                    | 2.7%<br>(1.2-4.7%)                  | 62<br>(25-110)         | 1600<br>(570-2800)        |
| Israel   | 2016 | Male   | 70 to 74 | 56%<br>(46-66%)                | 44%<br>(34-54%)          | 1.4<br>(0.83-2)                             | 1.4%<br>(0.3-2.7%)                   | 1.8%<br>(0.47-3.4%)                 | 41<br>(11-81)          | 830<br>(180-1700)         |
| Israel   | 2016 | Male   | 75 to 79 | 54%<br>(42-66%)                | 46%<br>(34-58%)          | 1.2<br>(0.69-1.8)                           | 0.93%<br>(0.0064-2.2%)               | 1.1%<br>(0.0032-2.6%)               | 31<br>(0.083-70)       | 480<br>(2.8-1100)         |
| Israel   | 2016 | Male   | 80 to 84 | 50%<br>(37-62%)                | 50%<br>(38-63%)          | 1<br>(0.61-1.5)                             | 0.59%<br>(-0.23-1.7%)                | 0.68%<br>(-0.3-1.8%)                | 22<br>(-10-62)         | 270<br>(-100-740)         |
| Israel   | 2016 | Male   | 85 to 89 | 47%<br>(34-59%)                | 53%<br>(41-66%)          | 0.87<br>(0.49-1.4)                          | 0.32%<br>(-0.42-1.2%)                | 0.3%<br>(-0.62-1.3%)                | 11<br>(-21-46)         | 110<br>(-140-400)         |
| Israel   | 2016 | Male   | 90 to 94 | 47%<br>(35-60%)                | 53%<br>(40-65%)          | 0.82<br>(0.44-1.4)                          | 0.11%<br>(-0.64-1%)                  | 0.013%<br>(-0.9-1%)                 | 0.28<br>(-23-26)       | 17<br>(-110-160)          |
| Israel   | 2016 | Male   | 95 plus  | 49%<br>(34-64%)                | 51%<br>(36-66%)          | 0.81<br>(0.38-1.5)                          | 0.032%<br>(-0.89-0.97%)              | -0.13%<br>(-1.2-0.95%)              | -1.8<br>(-17-13)       | 1.7<br>(-50-54)           |
| Italy    | 1990 | Female | All Ages | 62%<br>(57-66%)                | 38%<br>(34-43%)          | 3.5<br>(2.8-4.2)                            | 6.6%<br>(4.8-8.9%)                   | 10%<br>(6.8-15%)                    | 27000<br>(18000-39000) | 510000<br>(370000-690000) |
| Italy    | 1990 | Female | 15 to 19 | 64%<br>(49-77%)                | 36%<br>(23-51%)          | 2.6<br>(1.6-3.6)                            | 2.4%<br>(1.3-3.7%)                   | 10%<br>(5-15%)                      | 55<br>(28-86)          | 5400<br>(3100-8100)       |
| Italy    | 1990 | Female | 20 to 24 | 72%<br>(60-82%)                | 28%<br>(18-40%)          | 3.2<br>(2-4.6)                              | 2.8%<br>(1.7-4.1%)                   | 11%<br>(5.9-16%)                    | 80<br>(43-120)         | 7900<br>(5000-12000)      |

| Location | Year | Sex    | Age      | Prevalence of current drinkers | Prevalence of abstainers | Population average of standard drinks daily | Percent of total attributable deaths | Percent of total attributable DALYs | Attributable deaths    | Attributable DALYs          |
|----------|------|--------|----------|--------------------------------|--------------------------|---------------------------------------------|--------------------------------------|-------------------------------------|------------------------|-----------------------------|
| Italy    | 1990 | Female | 25 to 29 | 75%<br>(63-83%)                | 25%<br>(17-37%)          | 3.5<br>(2.3-4.9)                            | 2.8%<br>(1.7-3.9%)                   | 10%<br>(6.1-14%)                    | 93<br>(57-130)         | 8500<br>(5500-12000)        |
| Italy    | 1990 | Female | 30 to 34 | 75%<br>(62-83%)                | 25%<br>(17-38%)          | 3.8<br>(2.6-5.3)                            | 3.2%<br>(2.1-4.3%)                   | 11%<br>(7.7-15%)                    | 120<br>(81-160)        | 9400<br>(6300-13000)        |
| Italy    | 1990 | Female | 35 to 39 | 73%<br>(62-81%)                | 27%<br>(19-38%)          | 4.2<br>(2.9-5.9)                            | 3.9%<br>(2.7-5.4%)                   | 13%<br>(9.6-17%)                    | 180<br>(130-240)       | 12000<br>(8600-16000)       |
| Italy    | 1990 | Female | 40 to 44 | 70%<br>(60-78%)                | 30%<br>(22-40%)          | 4.4<br>(3.2-6)                              | 4.9%<br>(3.5-6.6%)                   | 14%<br>(11-18%)                     | 320<br>(240-410)       | 18000<br>(13000-24000)      |
| Italy    | 1990 | Female | 45 to 49 | 65%<br>(54-73%)                | 35%<br>(27-46%)          | 4.5<br>(3.2-6.2)                            | 6.1%<br>(4.3-8.2%)                   | 14%<br>(11-19%)                     | 460<br>(340-600)       | 23000<br>(16000-30000)      |
| Italy    | 1990 | Female | 50 to 54 | 63%<br>(54-71%)                | 37%<br>(29-46%)          | 4.8<br>(3.5-6.5)                            | 7.2%<br>(5.2-9.9%)                   | 14%<br>(11-19%)                     | 760<br>(570-1000)      | 33000<br>(24000-45000)      |
| Italy    | 1990 | Female | 55 to 59 | 63%<br>(53-71%)                | 37%<br>(29-47%)          | 5.3<br>(3.9-7)                              | 8.5%<br>(6.1-12%)                    | 15%<br>(11-20%)                     | 1200<br>(900-1600)     | 44000<br>(32000-61000)      |
| Italy    | 1990 | Female | 60 to 64 | 63%<br>(52-71%)                | 37%<br>(29-48%)          | 5.3<br>(3.7-7.3)                            | 9%<br>(6.1-12%)                      | 14%<br>(9.9-19%)                    | 1800<br>(1300-2400)    | 56000<br>(38000-78000)      |
| Italy    | 1990 | Female | 65 to 69 | 61%<br>(51-70%)                | 39%<br>(30-49%)          | 4.8<br>(3.5-6.3)                            | 9.1%<br>(6.1-13%)                    | 13%<br>(9-18%)                      | 2600<br>(1800-3600)    | 68000<br>(45000-92000)      |
| Italy    | 1990 | Female | 70 to 74 | 59%<br>(49-67%)                | 41%<br>(33-51%)          | 4.2<br>(3-5.8)                              | 8.7%<br>(5.5-13%)                    | 12%<br>(7.4-17%)                    | 2500<br>(1600-3600)    | 51000<br>(32000-74000)      |
| Italy    | 1990 | Female | 75 to 79 | 55%<br>(42-66%)                | 45%<br>(34-58%)          | 3.8<br>(2.5-5.6)                            | 8.1%<br>(4.3-13%)                    | 10%<br>(5.5-16%)                    | 4500<br>(2500-7100)    | 70000<br>(38000-110000)     |
| Italy    | 1990 | Female | 80 to 84 | 51%<br>(39-63%)                | 49%<br>(37-61%)          | 3.7<br>(2.5-5.2)                            | 7.9%<br>(4.5-13%)                    | 9.6%<br>(5.4-15%)                   | 5400<br>(3000-8600)    | 60000<br>(34000-96000)      |
| Italy    | 1990 | Female | 85 to 89 | 48%<br>(35-60%)                | 52%<br>(40-65%)          | 3.5<br>(2.2-5.2)                            | 7.4%<br>(3.7-13%)                    | 8.7%<br>(4.1-15%)                   | 4200<br>(2000-7200)    | 33000<br>(16000-56000)      |
| Italy    | 1990 | Female | 90 to 94 | 47%<br>(35-59%)                | 53%<br>(41-65%)          | 3.5<br>(2-5.3)                              | 7.2%<br>(2.8-13%)                    | 8.4%<br>(3.2-15%)                   | 2200<br>(820-4000)     | 12000<br>(4600-21000)       |
| Italy    | 1990 | Female | 95 plus  | 48%<br>(33-63%)                | 52%<br>(37-67%)          | 3.6<br>(1.9-5.8)                            | 7.6%<br>(2.3-14%)                    | 8.8%<br>(2.5-17%)                   | 740<br>(210-1400)      | 2600<br>(780-4800)          |
| Italy    | 1990 | Male   | All Ages | 78%<br>(73-82%)                | 22%<br>(18-27%)          | 6.1<br>(5.1-7.4)                            | 12%<br>(10-15%)                      | 16%<br>(12-20%)                     | 46000<br>(35000-57000) | 1100000<br>(890000-1300000) |
| Italy    | 1990 | Male   | 15 to 19 | 69%<br>(54-82%)                | 31%<br>(18-46%)          | 2.8<br>(1.8-4)                              | 6.4%<br>(3.4-9.6%)                   | 13%<br>(6.2-20%)                    | 230<br>(110-350)       | 18000<br>(10000-28000)      |
| Italy    | 1990 | Male   | 20 to 24 | 80%<br>(69-88%)                | 20%<br>(12-31%)          | 4.7<br>(3.3-6.4)                            | 11%<br>(7.1-15%)                     | 20%<br>(12-27%)                     | 510<br>(320-720)       | 39000<br>(26000-54000)      |
| Italy    | 1990 | Male   | 25 to 29 | 84%<br>(74-90%)                | 16%<br>(9.9-26%)         | 6.5<br>(4.8-8.6)                            | 11%<br>(7.9-15%)                     | 20%<br>(14-27%)                     | 610<br>(410-810)       | 43000<br>(31000-57000)      |
| Italy    | 1990 | Male   | 30 to 34 | 87%<br>(78-93%)                | 13%<br>(7.1-22%)         | 7<br>(5.2-9.2)                              | 11%<br>(8-14%)                       | 20%<br>(14-26%)                     | 560<br>(400-720)       | 37000<br>(28000-47000)      |
| Italy    | 1990 | Male   | 35 to 39 | 89%<br>(82-94%)                | 11%<br>(6-18%)           | 6<br>(4.4-8.2)                              | 9.8%<br>(7-13%)                      | 18%<br>(13-24%)                     | 520<br>(360-690)       | 32000<br>(23000-42000)      |

| Location | Year | Sex    | Age      | Prevalence of current drinkers | Prevalence of abstainers | Population average of standard drinks daily | Percent of total attributable deaths | Percent of total attributable DALYs | Attributable deaths    | Attributable DALYs        |
|----------|------|--------|----------|--------------------------------|--------------------------|---------------------------------------------|--------------------------------------|-------------------------------------|------------------------|---------------------------|
| Italy    | 1990 | Male   | 40 to 44 | 89%<br>(83-94%)                | 11%<br>(6.1-17%)         | 6.6<br>(4.8-8.7)                            | 11%<br>(7.8-14%)                     | 19%<br>(14-24%)                     | 780<br>(560-1000)      | 42000<br>(31000-54000)    |
| Italy    | 1990 | Male   | 45 to 49 | 88%<br>(81-93%)                | 12%<br>(7.1-19%)         | 8.7<br>(6.4-11)                             | 14%<br>(11-17%)                      | 21%<br>(17-25%)                     | 1300<br>(1000-1500)    | 59000<br>(48000-71000)    |
| Italy    | 1990 | Male   | 50 to 54 | 86%<br>(79-91%)                | 14%<br>(9.3-21%)         | 10<br>(7.6-13)                              | 15%<br>(12-18%)                      | 21%<br>(17-25%)                     | 2100<br>(1800-2500)    | 87000<br>(71000-100000)   |
| Italy    | 1990 | Male   | 55 to 59 | 83%<br>(77-88%)                | 17%<br>(12-23%)          | 11<br>(8.2-13)                              | 15%<br>(12-18%)                      | 19%<br>(15-24%)                     | 3300<br>(2500-4000)    | 110000<br>(88000-140000)  |
| Italy    | 1990 | Male   | 60 to 64 | 83%<br>(76-88%)                | 17%<br>(12-24%)          | 11<br>(8.1-14)                              | 15%<br>(11-18%)                      | 18%<br>(13-22%)                     | 4700<br>(3500-5800)    | 140000<br>(100000-170000) |
| Italy    | 1990 | Male   | 65 to 69 | 84%<br>(78-89%)                | 16%<br>(11-22%)          | 10<br>(8-13)                                | 15%<br>(11-19%)                      | 17%<br>(13-22%)                     | 6100<br>(4500-7700)    | 150000<br>(110000-190000) |
| Italy    | 1990 | Male   | 70 to 74 | 84%<br>(78-88%)                | 16%<br>(12-22%)          | 9.5<br>(7.4-12)                             | 15%<br>(11-18%)                      | 17%<br>(12-21%)                     | 5100<br>(3800-6500)    | 100000<br>(77000-130000)  |
| Italy    | 1990 | Male   | 75 to 79 | 81%<br>(73-88%)                | 19%<br>(12-27%)          | 8.6<br>(6.5-11)                             | 14%<br>(10-18%)                      | 15%<br>(11-20%)                     | 7700<br>(5700-10000)   | 120000<br>(89000-150000)  |
| Italy    | 1990 | Male   | 80 to 84 | 79%<br>(69-86%)                | 21%<br>(14-31%)          | 7.9<br>(6.1-10)                             | 13%<br>(9.6-17%)                     | 15%<br>(10-19%)                     | 6700<br>(4800-8700)    | 75000<br>(54000-97000)    |
| Italy    | 1990 | Male   | 85 to 89 | 78%<br>(67-86%)                | 22%<br>(14-33%)          | 7.4<br>(5.4-9.9)                            | 12%<br>(8.8-17%)                     | 14%<br>(9.5-19%)                    | 3700<br>(2500-5000)    | 29000<br>(20000-39000)    |
| Italy    | 1990 | Male   | 90 to 94 | 79%<br>(69-86%)                | 21%<br>(14-31%)          | 7.2<br>(4.8-9.9)                            | 12%<br>(7.4-16%)                     | 13%<br>(8.2-18%)                    | 1400<br>(860-1900)     | 7400<br>(4800-10000)      |
| Italy    | 1990 | Male   | 95 plus  | 80%<br>(67-89%)                | 20%<br>(11-33%)          | 6.9<br>(4.1-10)                             | 11%<br>(5.8-16%)                     | 13%<br>(6.1-18%)                    | 330<br>(160-480)       | 1200<br>(610-1700)        |
| Italy    | 1995 | Female | All Ages | 64%<br>(61-68%)                | 36%<br>(32-39%)          | 3.1<br>(2.6-3.7)                            | 5.3%<br>(3.6-7.2%)                   | 7.8%<br>(4.7-12%)                   | 21000<br>(13000-32000) | 410000<br>(290000-560000) |
| Italy    | 1995 | Female | 15 to 19 | 66%<br>(53-77%)                | 34%<br>(23-47%)          | 2.2<br>(1.4-3.2)                            | 2.1%<br>(1.2-3.2%)                   | 8.9%<br>(4.3-14%)                   | 39<br>(19-61)          | 4000<br>(2200-6100)       |
| Italy    | 1995 | Female | 20 to 24 | 75%<br>(65-83%)                | 25%<br>(17-35%)          | 2.8<br>(1.8-4.1)                            | 2.5%<br>(1.5-3.7%)                   | 9.6%<br>(5.1-14%)                   | 62<br>(32-92)          | 6500<br>(4000-9600)       |
| Italy    | 1995 | Female | 25 to 29 | 77%<br>(68-84%)                | 23%<br>(16-32%)          | 3<br>(2.1-4.2)                              | 2.3%<br>(1.5-3.3%)                   | 8%<br>(4.6-11%)                     | 75<br>(43-110)         | 7300<br>(4600-10000)      |
| Italy    | 1995 | Female | 30 to 34 | 77%<br>(68-84%)                | 23%<br>(16-32%)          | 3.3<br>(2.4-4.5)                            | 2.5%<br>(1.7-3.4%)                   | 7.6%<br>(5.2-10%)                   | 100<br>(70-140)        | 8500<br>(5800-12000)      |
| Italy    | 1995 | Female | 35 to 39 | 73%<br>(65-81%)                | 27%<br>(19-35%)          | 3.6<br>(2.4-5)                              | 3.1%<br>(2.2-4.4%)                   | 10%<br>(7.2-13%)                    | 150<br>(110-200)       | 10000<br>(7200-14000)     |
| Italy    | 1995 | Female | 40 to 44 | 72%<br>(66-78%)                | 28%<br>(22-34%)          | 3.9<br>(2.8-5.2)                            | 4.1%<br>(2.8-5.6%)                   | 12%<br>(8.9-15%)                    | 240<br>(180-310)       | 14000<br>(10000-19000)    |
| Italy    | 1995 | Female | 45 to 49 | 70%<br>(65-75%)                | 30%<br>(25-35%)          | 4.1<br>(2.9-5.5)                            | 5.3%<br>(3.7-7.1%)                   | 13%<br>(9.7-16%)                    | 440<br>(330-560)       | 22000<br>(16000-29000)    |
| Italy    | 1995 | Female | 50 to 54 | 66%<br>(61-72%)                | 34%<br>(28-39%)          | 4.3<br>(3.1-5.7)                            | 6.1%<br>(4.3-8.4%)                   | 13%<br>(9.5-16%)                    | 580<br>(440-760)       | 25000<br>(18000-34000)    |
| Italy    | 1995 | Female | 55 to 59 | 65%<br>(59-71%)                | 35%<br>(29-41%)          | 4.6<br>(3.5-6.1)                            | 7.1%<br>(5-9.6%)                     | 13%<br>(9.7-17%)                    | 960<br>(710-1300)      | 36000<br>(26000-48000)    |



| Location | Year | Sex    | Age      | Prevalence of current drinkers | Prevalence of abstainers | Population average of standard drinks daily | Percent of total attributable deaths | Percent of total attributable DALYs | Attributable deaths    | Attributable DALYs         |
|----------|------|--------|----------|--------------------------------|--------------------------|---------------------------------------------|--------------------------------------|-------------------------------------|------------------------|----------------------------|
| Italy    | 1995 | Female | 60 to 64 | 67%<br>(62-72%)                | 33%<br>(28-38%)          | 4.8<br>(3.6-6.4)                            | 7.6%<br>(5.1-10%)                    | 12%<br>(8.7-16%)                    | 1400<br>(970-1900)     | 44000<br>(29000-60000)     |
| Italy    | 1995 | Female | 65 to 69 | 65%<br>(57-71%)                | 35%<br>(29-43%)          | 4.3<br>(3.3-5.6)                            | 7.3%<br>(4.8-10%)                    | 11%<br>(7.3-15%)                    | 2000<br>(1300-2700)    | 51000<br>(34000-71000)     |
| Italy    | 1995 | Female | 70 to 74 | 59%<br>(48-67%)                | 41%<br>(33-52%)          | 3.5<br>(2.5-4.9)                            | 6.6%<br>(3.6-10%)                    | 9%<br>(5-13%)                       | 2600<br>(1500-4000)    | 55000<br>(30000-84000)     |
| Italy    | 1995 | Female | 75 to 79 | 54%<br>(42-66%)                | 46%<br>(34-58%)          | 3.2<br>(2.1-4.5)                            | 5.9%<br>(2.7-9.9%)                   | 7.5%<br>(3.3-13%)                   | 2300<br>(1000-3900)    | 37000<br>(16000-61000)     |
| Italy    | 1995 | Female | 80 to 84 | 51%<br>(38-62%)                | 49%<br>(38-62%)          | 3<br>(2-4.3)                                | 5.7%<br>(2.7-9.5%)                   | 7%<br>(3.2-12%)                     | 4100<br>(1900-6800)    | 47000<br>(22000-77000)     |
| Italy    | 1995 | Female | 85 to 89 | 48%<br>(36-60%)                | 52%<br>(40-64%)          | 2.9<br>(1.8-4.3)                            | 5.4%<br>(2.3-9.5%)                   | 6.3%<br>(2.6-12%)                   | 3600<br>(1500-6600)    | 29000<br>(12000-53000)     |
| Italy    | 1995 | Female | 90 to 94 | 47%<br>(35-60%)                | 53%<br>(40-65%)          | 2.9<br>(1.7-4.4)                            | 5.2%<br>(1.8-10%)                    | 6.1%<br>(2-12%)                     | 2000<br>(640-4000)     | 11000<br>(3800-21000)      |
| Italy    | 1995 | Female | 95 plus  | 48%<br>(32-63%)                | 52%<br>(37-68%)          | 3<br>(1.6-4.9)                              | 5.7%<br>(1.3-11%)                    | 6.6%<br>(1.4-13%)                   | 790<br>(160-1600)      | 2800<br>(670-5600)         |
| Italy    | 1995 | Male   | All Ages | 81%<br>(77-85%)                | 19%<br>(15-23%)          | 5.5<br>(4.6-6.6)                            | 11%<br>(9.2-13%)                     | 14%<br>(12-17%)                     | 41000<br>(33000-50000) | 970000<br>(810000-1200000) |
| Italy    | 1995 | Male   | 15 to 19 | 74%<br>(61-84%)                | 26%<br>(16-39%)          | 2.4<br>(1.6-3.4)                            | 5.7%<br>(2.8-8.6%)                   | 12%<br>(5.4-18%)                    | 160<br>(72-240)        | 13000<br>(6900-19000)      |
| Italy    | 1995 | Male   | 20 to 24 | 84%<br>(76-90%)                | 16%<br>(9.9-24%)         | 4.1<br>(3-5.6)                              | 9.9%<br>(6.1-14%)                    | 18%<br>(11-25%)                     | 400<br>(240-570)       | 32000<br>(20000-43000)     |
| Italy    | 1995 | Male   | 25 to 29 | 87%<br>(81-92%)                | 13%<br>(8.5-19%)         | 5.7<br>(4.3-7.5)                            | 9.9%<br>(6.8-13%)                    | 18%<br>(12-24%)                     | 490<br>(320-660)       | 36000<br>(25000-47000)     |
| Italy    | 1995 | Male   | 30 to 34 | 89%<br>(83-94%)                | 11%<br>(6.4-17%)         | 6.1<br>(4.5-7.9)                            | 8.1%<br>(5.8-11%)                    | 13%<br>(9.2-18%)                    | 490<br>(330-650)       | 34000<br>(24000-44000)     |
| Italy    | 1995 | Male   | 35 to 39 | 91%<br>(86-95%)                | 8.9%<br>(5.4-14%)        | 5.1<br>(3.7-6.9)                            | 7.3%<br>(5-10%)                      | 12%<br>(8.2-17%)                    | 430<br>(280-590)       | 27000<br>(19000-37000)     |
| Italy    | 1995 | Male   | 40 to 44 | 91%<br>(86-95%)                | 8.8%<br>(5.4-14%)        | 5.5<br>(4.2-7.3)                            | 8.5%<br>(5.9-11%)                    | 15%<br>(10-20%)                     | 560<br>(390-760)       | 31000<br>(22000-42000)     |
| Italy    | 1995 | Male   | 45 to 49 | 90%<br>(85-94%)                | 10%<br>(6.3-15%)         | 7.4<br>(5.6-9.5)                            | 12%<br>(8.9-14%)                     | 19%<br>(14-23%)                     | 1100<br>(870-1400)     | 55000<br>(42000-66000)     |
| Italy    | 1995 | Male   | 50 to 54 | 88%<br>(83-92%)                | 12%<br>(8.5-17%)         | 8.7<br>(6.6-11)                             | 13%<br>(11-16%)                      | 19%<br>(16-23%)                     | 1700<br>(1400-2000)    | 69000<br>(57000-82000)     |
| Italy    | 1995 | Male   | 55 to 59 | 86%<br>(82-89%)                | 14%<br>(11-18%)          | 9.5<br>(7.4-12)                             | 14%<br>(11-17%)                      | 18%<br>(15-22%)                     | 2800<br>(2300-3300)    | 98000<br>(80000-120000)    |
| Italy    | 1995 | Male   | 60 to 64 | 86%<br>(82-89%)                | 14%<br>(11-18%)          | 9.6<br>(7.4-13)                             | 14%<br>(11-17%)                      | 17%<br>(14-21%)                     | 3900<br>(3100-4800)    | 120000<br>(95000-140000)   |
| Italy    | 1995 | Male   | 65 to 69 | 86%<br>(81-90%)                | 14%<br>(10-19%)          | 9<br>(7-11)                                 | 14%<br>(11-17%)                      | 16%<br>(13-20%)                     | 5500<br>(4300-6800)    | 140000<br>(110000-170000)  |
| Italy    | 1995 | Male   | 70 to 74 | 84%<br>(77-88%)                | 16%<br>(12-23%)          | 8<br>(6.2-10)                               | 13%<br>(10-16%)                      | 15%<br>(12-19%)                     | 6500<br>(5100-8100)    | 130000<br>(100000-160000)  |

| Location | Year | Sex    | Age      | Prevalence of current drinkers | Prevalence of abstainers | Population average of standard drinks daily | Percent of total attributable deaths | Percent of total attributable DALYs | Attributable deaths   | Attributable DALYs        |
|----------|------|--------|----------|--------------------------------|--------------------------|---------------------------------------------|--------------------------------------|-------------------------------------|-----------------------|---------------------------|
| Italy    | 1995 | Male   | 75 to 79 | 81%<br>(72-88%)                | 19%<br>(12-28%)          | 7.2<br>(5.5-9.4)                            | 12%<br>(9.2-15%)                     | 14%<br>(10-17%)                     | 4800<br>(3600-6100)   | 74000<br>(56000-94000)    |
| Italy    | 1995 | Male   | 80 to 84 | 79%<br>(68-87%)                | 21%<br>(13-32%)          | 6.7<br>(5-8.5)                              | 12%<br>(8.4-15%)                     | 13%<br>(9.3-17%)                    | 6500<br>(4700-8400)   | 73000<br>(54000-94000)    |
| Italy    | 1995 | Male   | 85 to 89 | 78%<br>(67-85%)                | 22%<br>(15-33%)          | 6.3<br>(4.5-8.2)                            | 11%<br>(7.2-14%)                     | 12%<br>(7.9-16%)                    | 4200<br>(2800-5600)   | 33000<br>(23000-45000)    |
| Italy    | 1995 | Male   | 90 to 94 | 79%<br>(69-86%)                | 21%<br>(14-31%)          | 6.1<br>(4.1-8.2)                            | 10%<br>(5.5-14%)                     | 11%<br>(5.9-16%)                    | 1500<br>(810-2200)    | 8300<br>(4600-12000)      |
| Italy    | 1995 | Male   | 95 plus  | 80%<br>(67-89%)                | 20%<br>(11-33%)          | 5.9<br>(3.6-8.7)                            | 9.7%<br>(3.8-15%)                    | 11%<br>(4-16%)                      | 380<br>(140-590)      | 1400<br>(550-2100)        |
| Italy    | 2000 | Female | All Ages | 60%<br>(57-64%)                | 40%<br>(36-43%)          | 2.6<br>(2.1-3.1)                            | 4%<br>(2.6-5.6%)                     | 5.8%<br>(3.2-9.1%)                  | 16000<br>(9200-25000) | 310000<br>(200000-430000) |
| Italy    | 2000 | Female | 15 to 19 | 61%<br>(47-74%)                | 39%<br>(26-53%)          | 1.8<br>(1.1-2.6)                            | 1.7%<br>(0.91-2.6%)                  | 7.5%<br>(3.5-12%)                   | 25<br>(12-42)         | 2600<br>(1400-4000)       |
| Italy    | 2000 | Female | 20 to 24 | 71%<br>(58-80%)                | 29%<br>(20-42%)          | 2.3<br>(1.4-3.4)                            | 2.1%<br>(1.3-3.2%)                   | 8.6%<br>(4.4-13%)                   | 42<br>(21-66)         | 4400<br>(2600-6700)       |
| Italy    | 2000 | Female | 25 to 29 | 75%<br>(65-83%)                | 25%<br>(17-35%)          | 2.6<br>(1.8-3.6)                            | 2%<br>(1.3-2.9%)                     | 8.7%<br>(4.9-13%)                   | 58<br>(32-85)         | 5700<br>(3600-8000)       |
| Italy    | 2000 | Female | 30 to 34 | 75%<br>(66-83%)                | 25%<br>(17-34%)          | 2.8<br>(2-3.9)                              | 2.2%<br>(1.4-3.1%)                   | 9%<br>(5.9-12%)                     | 84<br>(55-120)        | 7000<br>(4700-9500)       |
| Italy    | 2000 | Female | 35 to 39 | 72%<br>(63-80%)                | 28%<br>(20-37%)          | 3<br>(2.1-4.3)                              | 2.7%<br>(1.8-3.7%)                   | 9.9%<br>(7.1-13%)                   | 140<br>(99-180)       | 9500<br>(6600-13000)      |
| Italy    | 2000 | Female | 40 to 44 | 70%<br>(62-77%)                | 30%<br>(23-38%)          | 3.3<br>(2.4-4.4)                            | 3.4%<br>(2.4-4.7%)                   | 11%<br>(7.9-14%)                    | 210<br>(150-270)      | 12000<br>(8600-16000)     |
| Italy    | 2000 | Female | 45 to 49 | 66%<br>(59-73%)                | 34%<br>(27-41%)          | 3.4<br>(2.4-4.6)                            | 4.2%<br>(2.9-5.8%)                   | 11%<br>(8.2-14%)                    | 310<br>(230-400)      | 16000<br>(11000-21000)    |
| Italy    | 2000 | Female | 50 to 54 | 62%<br>(55-69%)                | 38%<br>(31-45%)          | 3.5<br>(2.5-4.7)                            | 4.9%<br>(3.4-6.7%)                   | 11%<br>(8.1-14%)                    | 500<br>(380-660)      | 22000<br>(16000-29000)    |
| Italy    | 2000 | Female | 55 to 59 | 62%<br>(55-69%)                | 38%<br>(31-45%)          | 3.8<br>(2.9-5)                              | 5.6%<br>(3.9-7.8%)                   | 11%<br>(8-14%)                      | 660<br>(500-870)      | 25000<br>(18000-34000)    |
| Italy    | 2000 | Female | 60 to 64 | 61%<br>(53-67%)                | 39%<br>(33-47%)          | 3.7<br>(2.7-5.1)                            | 5.7%<br>(3.7-8.2%)                   | 9.7%<br>(6.8-13%)                   | 980<br>(690-1300)     | 31000<br>(21000-44000)    |
| Italy    | 2000 | Female | 65 to 69 | 57%<br>(48-65%)                | 43%<br>(35-52%)          | 3.2<br>(2.4-4.3)                            | 5.2%<br>(3.2-7.5%)                   | 8.1%<br>(5.4-11%)                   | 1300<br>(850-1800)    | 34000<br>(21000-48000)    |
| Italy    | 2000 | Female | 70 to 74 | 54%<br>(46-62%)                | 46%<br>(38-54%)          | 2.8<br>(2-3.9)                              | 4.8%<br>(2.4-7.5%)                   | 6.8%<br>(3.6-11%)                   | 1800<br>(940-2700)    | 36000<br>(19000-57000)    |
| Italy    | 2000 | Female | 75 to 79 | 49%<br>(39-60%)                | 51%<br>(40-61%)          | 2.5<br>(1.6-3.6)                            | 4.2%<br>(1.8-7.3%)                   | 5.5%<br>(2.4-9.4%)                  | 2300<br>(1000-4000)   | 37000<br>(16000-63000)    |
| Italy    | 2000 | Female | 80 to 84 | 47%<br>(35-58%)                | 53%<br>(42-65%)          | 2.4<br>(1.6-3.4)                            | 4.1%<br>(1.7-7%)                     | 5.1%<br>(2.1-8.9%)                  | 2100<br>(870-3700)    | 24000<br>(11000-42000)    |
| Italy    | 2000 | Female | 85 to 89 | 46%<br>(34-58%)                | 54%<br>(42-66%)          | 2.4<br>(1.5-3.6)                            | 4%<br>(1.5-7.3%)                     | 4.8%<br>(1.6-8.9%)                  | 3100<br>(1000-5700)   | 25000<br>(9500-46000)     |
| Italy    | 2000 | Female | 90 to 94 | 45%<br>(33-57%)                | 55%<br>(43-67%)          | 2.4<br>(1.4-3.7)                            | 3.9%<br>(1-7.7%)                     | 4.6%<br>(1-9.2%)                    | 2000<br>(460-4100)    | 11000<br>(2900-22000)     |

| Location | Year | Sex    | Age      | Prevalence of current drinkers | Prevalence of abstainers | Population average of standard drinks daily | Percent of total attributable deaths | Percent of total attributable DALYs | Attributable deaths    | Attributable DALYs        |
|----------|------|--------|----------|--------------------------------|--------------------------|---------------------------------------------|--------------------------------------|-------------------------------------|------------------------|---------------------------|
| Italy    | 2000 | Female | 95 plus  | 46%<br>(31-61%)                | 54%<br>(39-69%)          | 2.5<br>(1.3-4.1)                            | 4.4%<br>(0.59-9.2%)                  | 5.1%<br>(0.42-11%)                  | 850<br>(70-1800)       | 3000<br>(390-6300)        |
| Italy    | 2000 | Male   | All Ages | 81%<br>(77-85%)                | 19%<br>(15-23%)          | 4.8<br>(4-5.8)                              | 9.9%<br>(8-12%)                      | 13%<br>(9.6-16%)                    | 35000<br>(27000-44000) | 810000<br>(650000-970000) |
| Italy    | 2000 | Male   | 15 to 19 | 71%<br>(58-82%)                | 29%<br>(18-42%)          | 2<br>(1.4-2.9)                              | 4.7%<br>(2.3-7.1%)                   | 11%<br>(4.7-17%)                    | 97<br>(44-150)         | 8200<br>(4200-12000)      |
| Italy    | 2000 | Male   | 20 to 24 | 82%<br>(74-89%)                | 18%<br>(11-26%)          | 3.5<br>(2.5-4.7)                            | 9%<br>(5.5-13%)                      | 17%<br>(9.3-25%)                    | 280<br>(160-410)       | 22000<br>(14000-31000)    |
| Italy    | 2000 | Male   | 25 to 29 | 87%<br>(81-91%)                | 13%<br>(8.8-19%)         | 4.9<br>(3.6-6.4)                            | 9.6%<br>(6.2-13%)                    | 20%<br>(12-27%)                     | 410<br>(250-570)       | 30000<br>(20000-40000)    |
| Italy    | 2000 | Male   | 30 to 34 | 89%<br>(83-93%)                | 11%<br>(6.5-17%)         | 5.2<br>(3.9-6.9)                            | 8.2%<br>(5.5-11%)                    | 17%<br>(11-23%)                     | 410<br>(270-560)       | 29000<br>(20000-38000)    |
| Italy    | 2000 | Male   | 35 to 39 | 91%<br>(86-95%)                | 9.2%<br>(5.4-14%)        | 4.5<br>(3.3-6.1)                            | 6.8%<br>(4.5-9.3%)                   | 13%<br>(8.7-18%)                    | 390<br>(260-550)       | 25000<br>(17000-35000)    |
| Italy    | 2000 | Male   | 40 to 44 | 91%<br>(86-95%)                | 9%<br>(5.4-14%)          | 4.9<br>(3.7-6.4)                            | 7.3%<br>(5-10%)                      | 13%<br>(9.1-19%)                    | 470<br>(320-650)       | 27000<br>(18000-37000)    |
| Italy    | 2000 | Male   | 45 to 49 | 90%<br>(85-94%)                | 10%<br>(6.3-15%)         | 6.5<br>(4.8-8.3)                            | 10%<br>(7.2-13%)                     | 17%<br>(12-21%)                     | 850<br>(600-1100)      | 41000<br>(30000-52000)    |
| Italy    | 2000 | Male   | 50 to 54 | 88%<br>(84-91%)                | 12%<br>(8.6-16%)         | 7.5<br>(5.7-9.4)                            | 12%<br>(9.1-14%)                     | 18%<br>(14-21%)                     | 1500<br>(1200-1800)    | 63000<br>(49000-76000)    |
| Italy    | 2000 | Male   | 55 to 59 | 85%<br>(82-89%)                | 15%<br>(11-18%)          | 7.9<br>(6.2-9.9)                            | 12%<br>(9.8-15%)                     | 17%<br>(14-20%)                     | 2000<br>(1700-2400)    | 73000<br>(59000-87000)    |
| Italy    | 2000 | Male   | 60 to 64 | 85%<br>(82-89%)                | 15%<br>(11-18%)          | 7.9<br>(6.1-10)                             | 12%<br>(9.8-15%)                     | 16%<br>(12-19%)                     | 3100<br>(2500-3700)    | 94000<br>(76000-110000)   |
| Italy    | 2000 | Male   | 65 to 69 | 86%<br>(82-90%)                | 14%<br>(10-18%)          | 7.6<br>(6.1-9.5)                            | 12%<br>(9.4-15%)                     | 14%<br>(11-18%)                     | 4200<br>(3300-5100)    | 110000<br>(85000-130000)  |
| Italy    | 2000 | Male   | 70 to 74 | 85%<br>(81-89%)                | 15%<br>(11-19%)          | 7<br>(5.4-8.8)                              | 11%<br>(8.5-14%)                     | 13%<br>(10-17%)                     | 5400<br>(4000-6800)    | 110000<br>(81000-140000)  |
| Italy    | 2000 | Male   | 75 to 79 | 83%<br>(77-88%)                | 17%<br>(12-23%)          | 6.4<br>(4.8-8.2)                            | 10%<br>(7.4-14%)                     | 12%<br>(8.3-15%)                    | 5900<br>(4100-7700)    | 92000<br>(65000-120000)   |
| Italy    | 2000 | Male   | 80 to 84 | 80%<br>(71-87%)                | 20%<br>(13-29%)          | 5.8<br>(4.5-7.5)                            | 9.7%<br>(6.7-13%)                    | 11%<br>(7.4-15%)                    | 3900<br>(2700-5300)    | 44000<br>(31000-59000)    |
| Italy    | 2000 | Male   | 85 to 89 | 78%<br>(68-85%)                | 22%<br>(15-32%)          | 5.4<br>(4-7.1)                              | 8.9%<br>(5.4-12%)                    | 10%<br>(5.9-14%)                    | 4200<br>(2400-5800)    | 33000<br>(20000-47000)    |
| Italy    | 2000 | Male   | 90 to 94 | 79%<br>(69-86%)                | 21%<br>(14-31%)          | 5.2<br>(3.5-7.2)                            | 8.2%<br>(4-12%)                      | 9.1%<br>(4.2-14%)                   | 1800<br>(820-2700)     | 9700<br>(4700-15000)      |
| Italy    | 2000 | Male   | 95 plus  | 80%<br>(67-89%)                | 20%<br>(11-33%)          | 5<br>(3-7.4)                                | 7.9%<br>(2.2-13%)                    | 8.7%<br>(2.1-14%)                   | 400<br>(95-650)        | 1400<br>(410-2300)        |
| Italy    | 2005 | Female | All Ages | 59%<br>(55-62%)                | 41%<br>(38-45%)          | 2.3<br>(1.9-2.8)                            | 3.3%<br>(2.1-4.6%)                   | 4.8%<br>(2.5-7.6%)                  | 14000<br>(7100-22000)  | 250000<br>(170000-350000) |
| Italy    | 2005 | Female | 15 to 19 | 61%<br>(47-74%)                | 39%<br>(26-53%)          | 1.6<br>(0.99-2.4)                           | 1.4%<br>(0.79-2.1%)                  | 6.8%<br>(3.2-11%)                   | 17<br>(8-27)           | 1900<br>(1100-3000)       |
| Italy    | 2005 | Female | 20 to 24 | 71%<br>(60-79%)                | 29%<br>(21-40%)          | 2.1<br>(1.3-3.1)                            | 1.8%<br>(1.1-2.6%)                   | 7.8%<br>(4.1-12%)                   | 26<br>(14-41)          | 3200<br>(1900-4600)       |

| Location | Year | Sex    | Age      | Prevalence of current drinkers | Prevalence of abstainers | Population average of standard drinks daily | Percent of total attributable deaths | Percent of total attributable DALYs | Attributable deaths    | Attributable DALYs        |
|----------|------|--------|----------|--------------------------------|--------------------------|---------------------------------------------|--------------------------------------|-------------------------------------|------------------------|---------------------------|
| Italy    | 2005 | Female | 25 to 29 | 75%<br>(66-82%)                | 25%<br>(18-34%)          | 2.3<br>(1.6-3.2)                            | 1.7%<br>(1-2.4%)                     | 7.7%<br>(4.4-11%)                   | 35<br>(20-51)          | 4000<br>(2500-5600)       |
| Italy    | 2005 | Female | 30 to 34 | 75%<br>(66-82%)                | 25%<br>(18-34%)          | 2.5<br>(1.8-3.5)                            | 1.8%<br>(1.2-2.5%)                   | 8.1%<br>(5.3-11%)                   | 58<br>(38-80)          | 5400<br>(3600-7700)       |
| Italy    | 2005 | Female | 35 to 39 | 71%<br>(62-79%)                | 29%<br>(21-38%)          | 2.7<br>(1.9-3.8)                            | 2.2%<br>(1.4-3.1%)                   | 9%<br>(6.4-12%)                     | 110<br>(76-140)        | 7800<br>(5300-11000)      |
| Italy    | 2005 | Female | 40 to 44 | 68%<br>(60-75%)                | 32%<br>(25-40%)          | 2.9<br>(2.1-3.9)                            | 2.9%<br>(2-4%)                       | 9.6%<br>(7.1-12%)                   | 190<br>(140-250)       | 11000<br>(7900-15000)     |
| Italy    | 2005 | Female | 45 to 49 | 65%<br>(57-71%)                | 35%<br>(29-43%)          | 3<br>(2.1-4)                                | 3.6%<br>(2.5-4.9%)                   | 9.8%<br>(7.5-13%)                   | 280<br>(210-350)       | 14000<br>(9900-19000)     |
| Italy    | 2005 | Female | 50 to 54 | 61%<br>(54-67%)                | 39%<br>(33-46%)          | 3.1<br>(2.2-4.1)                            | 4.2%<br>(2.8-5.7%)                   | 9.5%<br>(7.2-12%)                   | 390<br>(300-500)       | 17000<br>(12000-23000)    |
| Italy    | 2005 | Female | 55 to 59 | 62%<br>(56-67%)                | 38%<br>(33-44%)          | 3.4<br>(2.6-4.6)                            | 4.8%<br>(3.3-6.6%)                   | 9.6%<br>(7.3-13%)                   | 620<br>(470-810)       | 23000<br>(17000-32000)    |
| Italy    | 2005 | Female | 60 to 64 | 59%<br>(53-66%)                | 41%<br>(34-47%)          | 3.3<br>(2.4-4.4)                            | 4.8%<br>(3-6.8%)                     | 8.5%<br>(6-12%)                     | 730<br>(510-990)       | 23000<br>(15000-33000)    |
| Italy    | 2005 | Female | 65 to 69 | 55%<br>(48-62%)                | 45%<br>(38-52%)          | 2.9<br>(2.1-3.7)                            | 4.3%<br>(2.7-6.1%)                   | 7%<br>(4.7-9.6%)                    | 1000<br>(670-1400)     | 27000<br>(17000-37000)    |
| Italy    | 2005 | Female | 70 to 74 | 53%<br>(46-59%)                | 47%<br>(41-54%)          | 2.5<br>(1.8-3.4)                            | 3.9%<br>(2.1-6%)                     | 5.9%<br>(3.3-8.8%)                  | 1300<br>(730-2000)     | 28000<br>(15000-43000)    |
| Italy    | 2005 | Female | 75 to 79 | 47%<br>(38-57%)                | 53%<br>(43-62%)          | 2.1<br>(1.4-3)                              | 3.4%<br>(1.4-5.7%)                   | 4.6%<br>(2-7.6%)                    | 1700<br>(760-2900)     | 28000<br>(12000-47000)    |
| Italy    | 2005 | Female | 80 to 84 | 45%<br>(34-56%)                | 55%<br>(44-66%)          | 2.1<br>(1.4-3)                              | 3.3%<br>(1.3-5.7%)                   | 4.2%<br>(1.6-7.5%)                  | 2500<br>(950-4400)     | 29000<br>(12000-51000)    |
| Italy    | 2005 | Female | 85 to 89 | 46%<br>(34-57%)                | 54%<br>(43-66%)          | 2.2<br>(1.3-3.2)                            | 3.2%<br>(1-5.9%)                     | 3.9%<br>(1.1-7.2%)                  | 1900<br>(520-3500)     | 16000<br>(4700-29000)     |
| Italy    | 2005 | Female | 90 to 94 | 45%<br>(33-56%)                | 55%<br>(44-67%)          | 2.2<br>(1.3-3.3)                            | 3.1%<br>(0.56-6.3%)                  | 3.6%<br>(0.49-7.6%)                 | 1900<br>(260-4100)     | 11000<br>(2000-23000)     |
| Italy    | 2005 | Female | 95 plus  | 46%<br>(31-60%)                | 54%<br>(40-69%)          | 2.2<br>(1.2-3.7)                            | 3.4%<br>(0.039-7.7%)                 | 3.9%<br>(-0.2-9.1%)                 | 950<br>(-48-2200)      | 3500<br>(39-7600)         |
| Italy    | 2005 | Male   | All Ages | 81%<br>(78-85%)                | 19%<br>(15-22%)          | 4.4<br>(3.6-5.2)                            | 8.7%<br>(6.7-11%)                    | 11%<br>(7.9-14%)                    | 31000<br>(22000-40000) | 690000<br>(530000-840000) |
| Italy    | 2005 | Male   | 15 to 19 | 71%<br>(58-82%)                | 29%<br>(18-42%)          | 1.8<br>(1.2-2.6)                            | 4%<br>(2.1-6.1%)                     | 9.8%<br>(4.4-16%)                   | 70<br>(31-110)         | 6200<br>(3400-9400)       |
| Italy    | 2005 | Male   | 20 to 24 | 83%<br>(74-89%)                | 17%<br>(11-26%)          | 3.2<br>(2.2-4.4)                            | 7.8%<br>(4.6-11%)                    | 16%<br>(8.3-24%)                    | 180<br>(96-270)        | 15000<br>(9100-22000)     |
| Italy    | 2005 | Male   | 25 to 29 | 87%<br>(80-91%)                | 13%<br>(8.5-20%)         | 4.4<br>(3.2-5.8)                            | 8.4%<br>(5.5-11%)                    | 19%<br>(11-26%)                     | 270<br>(170-390)       | 21000<br>(14000-29000)    |
| Italy    | 2005 | Male   | 30 to 34 | 89%<br>(83-94%)                | 11%<br>(6.4-17%)         | 4.7<br>(3.4-6.2)                            | 7.2%<br>(4.8-9.8%)                   | 17%<br>(11-23%)                     | 300<br>(190-430)       | 22000<br>(15000-30000)    |
| Italy    | 2005 | Male   | 35 to 39 | 91%<br>(86-94%)                | 9.3%<br>(5.6-14%)        | 4<br>(2.9-5.4)                              | 5.9%<br>(3.9-8.3%)                   | 13%<br>(8-18%)                      | 310<br>(200-440)       | 21000<br>(14000-29000)    |
| Italy    | 2005 | Male   | 40 to 44 | 91%<br>(86-94%)                | 9.1%<br>(5.6-14%)        | 4.3<br>(3.3-5.7)                            | 6.3%<br>(4.3-8.8%)                   | 12%<br>(8-17%)                      | 430<br>(280-610)       | 25000<br>(17000-35000)    |

| Location | Year | Sex    | Age      | Prevalence of current drinkers | Prevalence of abstainers | Population average of standard drinks daily | Percent of total attributable deaths | Percent of total attributable DALYs | Attributable deaths   | Attributable DALYs        |
|----------|------|--------|----------|--------------------------------|--------------------------|---------------------------------------------|--------------------------------------|-------------------------------------|-----------------------|---------------------------|
| Italy    | 2005 | Male   | 45 to 49 | 90%<br>(85-94%)                | 9.9%<br>(6.5-15%)        | 5.8<br>(4.3-7.4)                            | 8.8%<br>(6.1-12%)                    | 15%<br>(11-20%)                     | 740<br>(510-950)      | 37000<br>(26000-47000)    |
| Italy    | 2005 | Male   | 50 to 54 | 88%<br>(84-91%)                | 12%<br>(8.6-16%)         | 6.7<br>(5.1-8.3)                            | 10%<br>(7.7-13%)                     | 16%<br>(12-20%)                     | 1200<br>(860-1400)    | 49000<br>(37000-60000)    |
| Italy    | 2005 | Male   | 55 to 59 | 85%<br>(82-88%)                | 15%<br>(12-18%)          | 7<br>(5.5-8.7)                              | 11%<br>(8.4-13%)                     | 15%<br>(12-19%)                     | 1900<br>(1400-2300)   | 68000<br>(53000-82000)    |
| Italy    | 2005 | Male   | 60 to 64 | 85%<br>(82-89%)                | 15%<br>(11-18%)          | 7.1<br>(5.5-8.9)                            | 11%<br>(8.3-13%)                     | 14%<br>(11-18%)                     | 2300<br>(1800-2900)   | 72000<br>(56000-90000)    |
| Italy    | 2005 | Male   | 65 to 69 | 86%<br>(83-90%)                | 14%<br>(10-17%)          | 6.8<br>(5.3-8.5)                            | 11%<br>(8.1-13%)                     | 13%<br>(10-16%)                     | 3400<br>(2600-4200)   | 88000<br>(68000-110000)   |
| Italy    | 2005 | Male   | 70 to 74 | 85%<br>(81-88%)                | 15%<br>(12-19%)          | 6.2<br>(4.8-7.8)                            | 9.9%<br>(6.9-13%)                    | 12%<br>(8.3-15%)                    | 4400<br>(3000-5600)   | 89000<br>(63000-110000)   |
| Italy    | 2005 | Male   | 75 to 79 | 83%<br>(76-88%)                | 17%<br>(12-24%)          | 5.6<br>(4.3-7.1)                            | 9.1%<br>(5.9-12%)                    | 10%<br>(6.8-14%)                    | 5100<br>(3300-6800)   | 80000<br>(52000-110000)   |
| Italy    | 2005 | Male   | 80 to 84 | 81%<br>(72-87%)                | 19%<br>(13-28%)          | 5.2<br>(4-6.7)                              | 8.5%<br>(5.3-12%)                    | 9.6%<br>(5.9-14%)                   | 5200<br>(3200-7200)   | 59000<br>(38000-81000)    |
| Italy    | 2005 | Male   | 85 to 89 | 79%<br>(71-86%)                | 21%<br>(14-29%)          | 4.9<br>(3.6-6.5)                            | 7.8%<br>(4.3-11%)                    | 8.7%<br>(4.6-13%)                   | 2700<br>(1400-4000)   | 22000<br>(12000-32000)    |
| Italy    | 2005 | Male   | 90 to 94 | 80%<br>(71-87%)                | 20%<br>(13-29%)          | 4.8<br>(3.3-6.5)                            | 7%<br>(3-11%)                        | 7.8%<br>(3.1-12%)                   | 2000<br>(770-3100)    | 11000<br>(4600-17000)     |
| Italy    | 2005 | Male   | 95 plus  | 81%<br>(68-89%)                | 19%<br>(11-32%)          | 4.6<br>(2.8-6.7)                            | 6.8%<br>(1.7-12%)                    | 7.4%<br>(1.3-13%)                   | 520<br>(93-930)       | 1900<br>(470-3300)        |
| Italy    | 2010 | Female | All Ages | 54%<br>(51-58%)                | 46%<br>(42-49%)          | 2.1<br>(1.6-2.6)                            | 3%<br>(1.9-4.2%)                     | 4.3%<br>(1.9-7.1%)                  | 13000<br>(6000-22000) | 230000<br>(140000-330000) |
| Italy    | 2010 | Female | 15 to 19 | 58%<br>(44-71%)                | 42%<br>(29-56%)          | 1.4<br>(0.87-2.2)                           | 1.2%<br>(0.68-1.8%)                  | 5.9%<br>(2.8-9.5%)                  | 13<br>(6.4-21)        | 1700<br>(970-2500)        |
| Italy    | 2010 | Female | 20 to 24 | 69%<br>(57-78%)                | 31%<br>(22-43%)          | 1.9<br>(1.2-3)                              | 1.6%<br>(1-2.4%)                     | 7.2%<br>(3.8-11%)                   | 20<br>(10-31)         | 2700<br>(1700-4000)       |
| Italy    | 2010 | Female | 25 to 29 | 71%<br>(61-79%)                | 29%<br>(21-39%)          | 2.1<br>(1.4-3)                              | 1.5%<br>(0.96-2.1%)                  | 7.1%<br>(4.1-11%)                   | 23<br>(13-34)         | 3000<br>(1900-4400)       |
| Italy    | 2010 | Female | 30 to 34 | 71%<br>(63-79%)                | 29%<br>(21-37%)          | 2.3<br>(1.6-3.3)                            | 1.6%<br>(1-2.3%)                     | 7.7%<br>(4.9-11%)                   | 44<br>(28-60)         | 4300<br>(2700-6000)       |
| Italy    | 2010 | Female | 35 to 39 | 66%<br>(58-75%)                | 34%<br>(25-42%)          | 2.4<br>(1.6-3.5)                            | 1.9%<br>(1.3-2.8%)                   | 8.5%<br>(5.9-11%)                   | 88<br>(61-120)        | 6700<br>(4500-9400)       |
| Italy    | 2010 | Female | 40 to 44 | 62%<br>(53-69%)                | 38%<br>(31-47%)          | 2.5<br>(1.7-3.4)                            | 2.5%<br>(1.7-3.4%)                   | 8.8%<br>(6.3-11%)                   | 160<br>(120-210)      | 10000<br>(6900-14000)     |
| Italy    | 2010 | Female | 45 to 49 | 59%<br>(52-65%)                | 41%<br>(35-48%)          | 2.6<br>(1.8-3.6)                            | 3.1%<br>(2.1-4.4%)                   | 8.9%<br>(6.7-11%)                   | 270<br>(200-350)      | 14000<br>(9700-19000)     |
| Italy    | 2010 | Female | 50 to 54 | 57%<br>(51-63%)                | 43%<br>(37-49%)          | 2.8<br>(1.9-3.7)                            | 3.7%<br>(2.5-5.1%)                   | 8.6%<br>(6.4-11%)                   | 370<br>(270-480)      | 16000<br>(11000-22000)    |
| Italy    | 2010 | Female | 55 to 59 | 58%<br>(53-63%)                | 42%<br>(37-47%)          | 3.1<br>(2.2-4.2)                            | 4.3%<br>(2.8-6%)                     | 8.7%<br>(6.2-12%)                   | 510<br>(370-690)      | 20000<br>(13000-27000)    |
| Italy    | 2010 | Female | 60 to 64 | 55%<br>(49-60%)                | 45%<br>(40-51%)          | 2.9<br>(2.1-4)                              | 4.1%<br>(2.5-5.9%)                   | 7.6%<br>(5.1-10%)                   | 700<br>(480-960)      | 23000<br>(14000-32000)    |

| Location | Year | Sex    | Age      | Prevalence of current drinkers | Prevalence of abstainers | Population average of standard drinks daily | Percent of total attributable deaths | Percent of total attributable DALYs | Attributable deaths    | Attributable DALYs        |
|----------|------|--------|----------|--------------------------------|--------------------------|---------------------------------------------|--------------------------------------|-------------------------------------|------------------------|---------------------------|
| Italy    | 2010 | Female | 65 to 69 | 54%<br>(48-60%)                | 46%<br>(40-52%)          | 2.7<br>(2-3.5)                              | 3.8%<br>(2.3-5.4%)                   | 6.4%<br>(4.2-8.8%)                  | 790<br>(530-1100)      | 21000<br>(13000-30000)    |
| Italy    | 2010 | Female | 70 to 74 | 51%<br>(45-57%)                | 49%<br>(43-55%)          | 2.3<br>(1.6-3.2)                            | 3.4%<br>(1.8-5.3%)                   | 5.3%<br>(2.9-7.8%)                  | 1100<br>(620-1700)     | 24000<br>(12000-37000)    |
| Italy    | 2010 | Female | 75 to 79 | 44%<br>(36-52%)                | 56%<br>(48-64%)          | 1.9<br>(1.2-2.8)                            | 2.9%<br>(1.2-5%)                     | 4.1%<br>(1.8-6.7%)                  | 1400<br>(640-2400)     | 23000<br>(9800-40000)     |
| Italy    | 2010 | Female | 80 to 84 | 44%<br>(34-55%)                | 56%<br>(45-66%)          | 2<br>(1.3-2.8)                              | 3%<br>(1.2-5.3%)                     | 3.9%<br>(1.5-6.9%)                  | 2200<br>(850-4000)     | 26000<br>(10000-46000)    |
| Italy    | 2010 | Female | 85 to 89 | 44%<br>(34-54%)                | 56%<br>(46-66%)          | 2<br>(1.3-3)                                | 3%<br>(0.91-5.5%)                    | 3.6%<br>(1-6.8%)                    | 2800<br>(760-5200)     | 23000<br>(6700-41000)     |
| Italy    | 2010 | Female | 90 to 94 | 43%<br>(32-54%)                | 57%<br>(46-68%)          | 2<br>(1.2-3.1)                              | 2.9%<br>(0.42-5.9%)                  | 3.4%<br>(0.3-7.1%)                  | 1500<br>(130-3200)     | 8400<br>(1200-17000)      |
| Italy    | 2010 | Female | 95 plus  | 44%<br>(30-60%)                | 56%<br>(40-70%)          | 2.1<br>(1.1-3.6)                            | 3.3%<br>(0.13-7.6%)                  | 3.8%<br>(-0.026-9.1%)               | 1300<br>(-8.7-3100)    | 4600<br>(170-11000)       |
| Italy    | 2010 | Male   | All Ages | 80%<br>(77-84%)                | 20%<br>(16-23%)          | 4.2<br>(3.3-5.3)                            | 8.1%<br>(5.9-10%)                    | 10%<br>(6.7-14%)                    | 30000<br>(19000-40000) | 640000<br>(470000-810000) |
| Italy    | 2010 | Male   | 15 to 19 | 69%<br>(55-81%)                | 31%<br>(19-45%)          | 1.7<br>(1.1-2.5)                            | 3.4%<br>(1.9-5.1%)                   | 9%<br>(4.2-14%)                     | 53<br>(25-85)          | 5100<br>(2900-7600)       |
| Italy    | 2010 | Male   | 20 to 24 | 82%<br>(73-89%)                | 18%<br>(11-27%)          | 3<br>(2.1-4.4)                              | 6.9%<br>(4.3-9.9%)                   | 15%<br>(8-23%)                      | 130<br>(69-200)        | 12000<br>(7400-17000)     |
| Italy    | 2010 | Male   | 25 to 29 | 86%<br>(79-91%)                | 14%<br>(9.3-21%)         | 4.2<br>(2.9-5.8)                            | 7.4%<br>(4.8-10%)                    | 18%<br>(11-26%)                     | 180<br>(110-260)       | 15000<br>(9500-20000)     |
| Italy    | 2010 | Male   | 30 to 34 | 88%<br>(81-93%)                | 12%<br>(7.1-19%)         | 4.5<br>(3.2-6.1)                            | 6.6%<br>(4.3-9.2%)                   | 16%<br>(10-23%)                     | 220<br>(140-310)       | 17000<br>(11000-23000)    |
| Italy    | 2010 | Male   | 35 to 39 | 89%<br>(84-94%)                | 11%<br>(6.2-16%)         | 3.8<br>(2.7-5.2)                            | 5.5%<br>(3.6-7.7%)                   | 13%<br>(7.7-18%)                    | 250<br>(160-360)       | 18000<br>(12000-24000)    |
| Italy    | 2010 | Male   | 40 to 44 | 90%<br>(85-94%)                | 9.9%<br>(5.9-15%)        | 4.1<br>(2.9-5.5)                            | 5.9%<br>(3.9-8.3%)                   | 12%<br>(8-17%)                      | 390<br>(250-540)       | 23000<br>(15000-32000)    |
| Italy    | 2010 | Male   | 45 to 49 | 90%<br>(85-93%)                | 10%<br>(6.6-15%)         | 5.5<br>(4-7.4)                              | 8.2%<br>(5.5-11%)                    | 15%<br>(10-20%)                     | 750<br>(500-990)       | 38000<br>(26000-49000)    |
| Italy    | 2010 | Male   | 50 to 54 | 88%<br>(84-91%)                | 12%<br>(8.7-16%)         | 6.4<br>(4.7-8.4)                            | 9.8%<br>(7-13%)                      | 16%<br>(11-20%)                     | 1100<br>(800-1400)     | 48000<br>(34000-60000)    |
| Italy    | 2010 | Male   | 55 to 59 | 85%<br>(82-88%)                | 15%<br>(12-18%)          | 6.7<br>(5.1-8.7)                            | 10%<br>(7.7-13%)                     | 15%<br>(11-18%)                     | 1600<br>(1200-1900)    | 57000<br>(43000-71000)    |
| Italy    | 2010 | Male   | 60 to 64 | 84%<br>(80-88%)                | 16%<br>(12-20%)          | 6.7<br>(5-8.6)                              | 10%<br>(7.4-13%)                     | 13%<br>(10-17%)                     | 2300<br>(1700-2900)    | 72000<br>(53000-91000)    |
| Italy    | 2010 | Male   | 65 to 69 | 86%<br>(83-90%)                | 14%<br>(10-17%)          | 6.5<br>(5-8.4)                              | 9.8%<br>(7.1-12%)                    | 12%<br>(9.1-16%)                    | 2800<br>(2000-3500)    | 72000<br>(53000-91000)    |
| Italy    | 2010 | Male   | 70 to 74 | 85%<br>(82-88%)                | 15%<br>(12-18%)          | 6<br>(4.5-7.9)                              | 9.2%<br>(6.2-12%)                    | 11%<br>(7.5-15%)                    | 3900<br>(2600-5100)    | 81000<br>(55000-110000)   |
| Italy    | 2010 | Male   | 75 to 79 | 82%<br>(76-87%)                | 18%<br>(13-24%)          | 5.4<br>(3.9-7.1)                            | 8.3%<br>(5.1-11%)                    | 9.6%<br>(5.9-13%)                   | 4500<br>(2700-6200)    | 72000<br>(45000-98000)    |
| Italy    | 2010 | Male   | 80 to 84 | 82%<br>(74-88%)                | 18%<br>(12-26%)          | 5.1<br>(3.8-6.7)                            | 7.9%<br>(4.6-11%)                    | 8.9%<br>(5-13%)                     | 5100<br>(2900-7500)    | 60000<br>(35000-86000)    |

| Location | Year | Sex    | Age      | Prevalence of current drinkers | Prevalence of abstainers | Population average of standard drinks daily | Percent of total attributable deaths | Percent of total attributable DALYs | Attributable deaths    | Attributable DALYs        |
|----------|------|--------|----------|--------------------------------|--------------------------|---------------------------------------------|--------------------------------------|-------------------------------------|------------------------|---------------------------|
| Italy    | 2010 | Male   | 85 to 89 | 81%<br>(74-87%)                | 19%<br>(13-26%)          | 4.9<br>(3.5-6.5)                            | 7.4%<br>(3.6-11%)                    | 8.2%<br>(3.8-13%)                   | 4200<br>(1900-6400)    | 34000<br>(17000-51000)    |
| Italy    | 2010 | Male   | 90 to 94 | 81%<br>(73-88%)                | 19%<br>(12-27%)          | 4.7<br>(3.1-6.4)                            | 6.6%<br>(2.4-11%)                    | 7.3%<br>(2.3-12%)                   | 1500<br>(480-2500)     | 8500<br>(3100-14000)      |
| Italy    | 2010 | Male   | 95 plus  | 81%<br>(69-90%)                | 19%<br>(9.9-31%)         | 4.5<br>(2.6-6.6)                            | 6.4%<br>(0.92-12%)                   | 7%<br>(0.56-13%)                    | 720<br>(58-1400)       | 2700<br>(380-4800)        |
| Italy    | 2016 | Female | All Ages | 59%<br>(55-63%)                | 41%<br>(37-45%)          | 2.1<br>(1.5-2.9)                            | 2.8%<br>(1.4-4.5%)                   | 3.9%<br>(1.2-7.2%)                  | 13000<br>(4300-26000)  | 230000<br>(110000-370000) |
| Italy    | 2016 | Female | 15 to 19 | 63%<br>(48-76%)                | 37%<br>(24-52%)          | 1.5<br>(0.82-2.3)                           | 1.1%<br>(0.65-1.8%)                  | 6%<br>(2.8-10%)                     | 12<br>(5.7-21)         | 1500<br>(880-2400)        |
| Italy    | 2016 | Female | 20 to 24 | 72%<br>(59-82%)                | 28%<br>(18-41%)          | 1.9<br>(1.1-3)                              | 1.5%<br>(0.93-2.3%)                  | 7.1%<br>(3.5-11%)                   | 19<br>(9.5-31)         | 2700<br>(1600-4000)       |
| Italy    | 2016 | Female | 25 to 29 | 74%<br>(62-83%)                | 26%<br>(17-38%)          | 2.1<br>(1.3-3.3)                            | 1.4%<br>(0.88-2.1%)                  | 7%<br>(3.8-11%)                     | 21<br>(11-32)          | 2700<br>(1600-4000)       |
| Italy    | 2016 | Female | 30 to 34 | 74%<br>(63-83%)                | 26%<br>(17-37%)          | 2.3<br>(1.4-3.6)                            | 1.5%<br>(0.89-2.3%)                  | 7.5%<br>(4.4-11%)                   | 34<br>(19-51)          | 3400<br>(1900-5000)       |
| Italy    | 2016 | Female | 35 to 39 | 72%<br>(61-81%)                | 28%<br>(19-39%)          | 2.5<br>(1.5-3.8)                            | 1.9%<br>(1.1-2.8%)                   | 8.5%<br>(5.5-12%)                   | 79<br>(49-110)         | 5900<br>(3600-8700)       |
| Italy    | 2016 | Female | 40 to 44 | 69%<br>(58-77%)                | 31%<br>(23-42%)          | 2.6<br>(1.6-3.9)                            | 2.4%<br>(1.5-3.6%)                   | 9.1%<br>(6.1-12%)                   | 160<br>(100-220)       | 9600<br>(6000-14000)      |
| Italy    | 2016 | Female | 45 to 49 | 63%<br>(52-72%)                | 37%<br>(28-48%)          | 2.7<br>(1.6-4)                              | 3%<br>(1.8-4.4%)                     | 9%<br>(6-12%)                       | 290<br>(190-410)       | 15000<br>(9100-22000)     |
| Italy    | 2016 | Female | 50 to 54 | 60%<br>(51-68%)                | 40%<br>(32-49%)          | 2.8<br>(1.7-4.1)                            | 3.5%<br>(2.1-5.2%)                   | 8.5%<br>(5.8-12%)                   | 390<br>(270-560)       | 17000<br>(11000-26000)    |
| Italy    | 2016 | Female | 55 to 59 | 58%<br>(50-66%)                | 42%<br>(34-50%)          | 2.9<br>(1.8-4.3)                            | 3.9%<br>(2.3-6%)                     | 8.2%<br>(5.3-12%)                   | 500<br>(320-730)       | 19000<br>(11000-29000)    |
| Italy    | 2016 | Female | 60 to 64 | 57%<br>(48-66%)                | 43%<br>(34-52%)          | 2.9<br>(1.8-4.3)                            | 3.9%<br>(2.1-6.1%)                   | 7.3%<br>(4.6-11%)                   | 650<br>(390-990)       | 21000<br>(11000-33000)    |
| Italy    | 2016 | Female | 65 to 69 | 58%<br>(50-66%)                | 42%<br>(34-50%)          | 2.7<br>(1.8-4)                              | 3.6%<br>(1.9-5.8%)                   | 6.2%<br>(3.6-9.5%)                  | 810<br>(460-1200)      | 22000<br>(11000-34000)    |
| Italy    | 2016 | Female | 70 to 74 | 55%<br>(47-64%)                | 45%<br>(36-53%)          | 2.4<br>(1.5-3.5)                            | 3.2%<br>(1.3-5.7%)                   | 5%<br>(2.3-8.3%)                    | 1100<br>(470-1800)     | 22000<br>(8900-39000)     |
| Italy    | 2016 | Female | 75 to 79 | 52%<br>(41-62%)                | 48%<br>(38-59%)          | 2.1<br>(1.3-3.2)                            | 2.8%<br>(0.8-5.5%)                   | 3.9%<br>(1.2-7.5%)                  | 1300<br>(410-2500)     | 22000<br>(6200-42000)     |
| Italy    | 2016 | Female | 80 to 84 | 49%<br>(37-60%)                | 51%<br>(40-63%)          | 2.1<br>(1.2-3.1)                            | 2.8%<br>(0.63-5.5%)                  | 3.6%<br>(0.87-7.2%)                 | 2100<br>(520-4200)     | 25000<br>(5500-49000)     |
| Italy    | 2016 | Female | 85 to 89 | 46%<br>(34-58%)                | 54%<br>(42-66%)          | 2<br>(1.1-3.1)                              | 2.6%<br>(0.35-5.6%)                  | 3.2%<br>(0.38-6.9%)                 | 2700<br>(310-5800)     | 22000<br>(2900-46000)     |
| Italy    | 2016 | Female | 90 to 94 | 45%<br>(33-57%)                | 55%<br>(43-67%)          | 2<br>(1.1-3.1)                              | 2.5%<br>(-0.0012-5.8%)               | 3%<br>(-0.15-7%)                    | 2400<br>(-120-5700)    | 13000<br>(-6.3-31000)     |
| Italy    | 2016 | Female | 95 plus  | 46%<br>(31-62%)                | 54%<br>(38-69%)          | 2<br>(0.95-3.6)                             | 2.8%<br>(-0.39-7.2%)                 | 3.2%<br>(-0.75-8.7%)                | 1000<br>(-230-2700)    | 3600<br>(-470-9100)       |
| Italy    | 2016 | Male   | All Ages | 80%<br>(76-83%)                | 20%<br>(17-24%)          | 4<br>(2.7-5.4)                              | 7.2%<br>(4.4-9.9%)                   | 8.7%<br>(4.5-13%)                   | 28000<br>(14000-41000) | 580000<br>(360000-800000) |

| Location   | Year | Sex    | Age      | Prevalence of current drinkers | Prevalence of abstainers | Population average of standard drinks daily | Percent of total attributable deaths | Percent of total attributable DALYs | Attributable deaths | Attributable DALYs      |
|------------|------|--------|----------|--------------------------------|--------------------------|---------------------------------------------|--------------------------------------|-------------------------------------|---------------------|-------------------------|
| Italy      | 2016 | Male   | 15 to 19 | 69%<br>(55-82%)                | 31%<br>(18-45%)          | 1.6<br>(0.95-2.6)                           | 3.1%<br>(1.8-4.8%)                   | 8.6%<br>(4-14%)                     | 44<br>(20-72)       | 4300<br>(2500-6400)     |
| Italy      | 2016 | Male   | 20 to 24 | 80%<br>(68-88%)                | 20%<br>(12-32%)          | 2.7<br>(1.7-4.1)                            | 6.3%<br>(3.8-9.2%)                   | 14%<br>(7-21%)                      | 120<br>(59-180)     | 11000<br>(6700-16000)   |
| Italy      | 2016 | Male   | 25 to 29 | 84%<br>(74-90%)                | 16%<br>(9.8-26%)         | 3.8<br>(2.4-5.7)                            | 6.9%<br>(4.2-9.8%)                   | 17%<br>(9.2-25%)                    | 150<br>(81-230)     | 13000<br>(7800-18000)   |
| Italy      | 2016 | Male   | 30 to 34 | 87%<br>(78-93%)                | 13%<br>(7.3-22%)         | 4.1<br>(2.6-6.1)                            | 6.1%<br>(3.8-8.7%)                   | 15%<br>(8.8-23%)                    | 160<br>(91-240)     | 13000<br>(7900-18000)   |
| Italy      | 2016 | Male   | 35 to 39 | 89%<br>(82-94%)                | 11%<br>(6.2-18%)         | 3.5<br>(2.3-5.1)                            | 5%<br>(3-7.3%)                       | 12%<br>(6.6-18%)                    | 200<br>(110-310)    | 15000<br>(9000-21000)   |
| Italy      | 2016 | Male   | 40 to 44 | 89%<br>(82-94%)                | 11%<br>(6.2-18%)         | 3.8<br>(2.5-5.5)                            | 5.3%<br>(3.3-7.9%)                   | 11%<br>(6.9-17%)                    | 330<br>(200-500)    | 20000<br>(13000-30000)  |
| Italy      | 2016 | Male   | 45 to 49 | 88%<br>(81-93%)                | 12%<br>(7.1-19%)         | 5.1<br>(3.3-7.4)                            | 7.4%<br>(4.5-10%)                    | 14%<br>(8.7-19%)                    | 720<br>(440-1000)   | 37000<br>(23000-51000)  |
| Italy      | 2016 | Male   | 50 to 54 | 87%<br>(82-91%)                | 13%<br>(9.1-18%)         | 5.9<br>(3.9-8.3)                            | 8.7%<br>(5.7-12%)                    | 15%<br>(9.7-20%)                    | 1100<br>(680-1400)  | 46000<br>(30000-62000)  |
| Italy      | 2016 | Male   | 55 to 59 | 84%<br>(80-88%)                | 16%<br>(12-20%)          | 6.2<br>(4.1-8.8)                            | 9.2%<br>(6.1-12%)                    | 14%<br>(9.2-18%)                    | 1400<br>(930-1900)  | 53000<br>(35000-70000)  |
| Italy      | 2016 | Male   | 60 to 64 | 84%<br>(79-88%)                | 16%<br>(12-21%)          | 6.2<br>(4.2-8.8)                            | 9.1%<br>(5.9-12%)                    | 12%<br>(8.1-16%)                    | 1900<br>(1300-2600) | 62000<br>(40000-82000)  |
| Italy      | 2016 | Male   | 65 to 69 | 86%<br>(81-89%)                | 14%<br>(11-19%)          | 6<br>(4.1-8.4)                              | 8.8%<br>(5.6-12%)                    | 11%<br>(7.3-15%)                    | 2600<br>(1600-3500) | 68000<br>(44000-93000)  |
| Italy      | 2016 | Male   | 70 to 74 | 85%<br>(81-89%)                | 15%<br>(11-19%)          | 5.6<br>(3.7-7.9)                            | 8.2%<br>(4.8-12%)                    | 10%<br>(5.8-14%)                    | 3400<br>(2000-4800) | 72000<br>(42000-100000) |
| Italy      | 2016 | Male   | 75 to 79 | 83%<br>(76-88%)                | 17%<br>(12-24%)          | 5<br>(3.3-7.2)                              | 7.3%<br>(3.7-11%)                    | 8.5%<br>(4.3-13%)                   | 3900<br>(2000-5900) | 64000<br>(32000-96000)  |
| Italy      | 2016 | Male   | 80 to 84 | 81%<br>(71-88%)                | 19%<br>(12-29%)          | 4.7<br>(3.1-6.7)                            | 6.7%<br>(3-11%)                      | 7.6%<br>(3.3-12%)                   | 4700<br>(2000-7500) | 56000<br>(24000-87000)  |
| Italy      | 2016 | Male   | 85 to 89 | 80%<br>(70-86%)                | 20%<br>(14-30%)          | 4.4<br>(2.8-6.5)                            | 6.1%<br>(2.1-10%)                    | 6.8%<br>(2.1-12%)                   | 4100<br>(1200-7000) | 34000<br>(12000-57000)  |
| Italy      | 2016 | Male   | 90 to 94 | 80%<br>(72-87%)                | 20%<br>(13-28%)          | 4.3<br>(2.6-6.4)                            | 5.5%<br>(1.1-10%)                    | 6.1%<br>(0.83-11%)                  | 2300<br>(310-4400)  | 13000<br>(2500-24000)   |
| Italy      | 2016 | Male   | 95 plus  | 81%<br>(69-89%)                | 19%<br>(11-31%)          | 4.1<br>(2.3-6.5)                            | 5.4%<br>(0.18-11%)                   | 5.8%<br>(-0.3-12%)                  | 520<br>(-28-1100)   | 1900<br>(64-4000)       |
| Luxembourg | 1990 | Female | All Ages | 75%<br>(67-83%)                | 25%<br>(17-33%)          | 2.1<br>(2-2.3)                              | 3.9%<br>(2.4-5.5%)                   | 4%<br>(0.9-7.3%)                    | 77<br>(17-140)      | 2300<br>(1400-3200)     |
| Luxembourg | 1990 | Female | 15 to 19 | 72%<br>(53-86%)                | 28%<br>(14-47%)          | 1.6<br>(1-2.3)                              | 2.6%<br>(1.4-4%)                     | 8.5%<br>(4-14%)                     | 0.31<br>(0.15-0.51) | 32<br>(18-48)           |
| Luxembourg | 1990 | Female | 20 to 24 | 77%<br>(59-89%)                | 23%<br>(11-41%)          | 2<br>(1.3-2.9)                              | 3.5%<br>(2.2-5%)                     | 9.3%<br>(4.9-14%)                   | 0.61<br>(0.31-0.95) | 66<br>(42-93)           |
| Luxembourg | 1990 | Female | 25 to 29 | 79%<br>(64-90%)                | 21%<br>(9.6-36%)         | 2.2<br>(1.5-2.9)                            | 3.2%<br>(2.1-4.4%)                   | 9.7%<br>(5.6-14%)                   | 0.79<br>(0.45-1.1)  | 77<br>(51-110)          |
| Luxembourg | 1990 | Female | 30 to 34 | 81%<br>(65-91%)                | 19%<br>(8.6-35%)         | 2.3<br>(1.6-3.1)                            | 3.4%<br>(2.3-4.5%)                   | 11%<br>(7.7-15%)                    | 1.1<br>(0.7-1.4)    | 85<br>(59-110)          |



| Location   | Year | Sex    | Age      | Prevalence of current drinkers | Prevalence of abstainers | Population average of standard drinks daily | Percent of total attributable deaths | Percent of total attributable DALYs | Attributable deaths | Attributable DALYs  |
|------------|------|--------|----------|--------------------------------|--------------------------|---------------------------------------------|--------------------------------------|-------------------------------------|---------------------|---------------------|
| Luxembourg | 1990 | Female | 35 to 39 | 82%<br>(67-92%)                | 18%<br>(8.1-33%)         | 2.4<br>(1.6-3.5)                            | 4.3%<br>(3-5.8%)                     | 13%<br>(9.2-17%)                    | 1.8<br>(1.2-2.3)    | 110<br>(80-150)     |
| Luxembourg | 1990 | Female | 40 to 44 | 82%<br>(66-92%)                | 18%<br>(7.7-34%)         | 2.6<br>(1.8-3.5)                            | 5.6%<br>(3.9-7.3%)                   | 14%<br>(10-17%)                     | 3<br>(2.2-3.8)      | 160<br>(120-200)    |
| Luxembourg | 1990 | Female | 45 to 49 | 82%<br>(64-92%)                | 18%<br>(7.8-36%)         | 2.9<br>(2-3.9)                              | 6.6%<br>(4.8-8.7%)                   | 15%<br>(11-18%)                     | 4.2<br>(3.1-5.3)    | 190<br>(140-240)    |
| Luxembourg | 1990 | Female | 50 to 54 | 82%<br>(65-92%)                | 18%<br>(8-35%)           | 3.2<br>(2.3-4.2)                            | 7.3%<br>(5.4-9.4%)                   | 14%<br>(11-17%)                     | 6.1<br>(4.7-7.7)    | 240<br>(180-320)    |
| Luxembourg | 1990 | Female | 55 to 59 | 81%<br>(65-92%)                | 19%<br>(7.9-35%)         | 3.6<br>(2.6-4.8)                            | 7.7%<br>(5.4-10%)                    | 13%<br>(9.6-17%)                    | 8.4<br>(6.1-11)     | 290<br>(210-390)    |
| Luxembourg | 1990 | Female | 60 to 64 | 80%<br>(61-92%)                | 20%<br>(8.2-39%)         | 3.5<br>(2.5-4.9)                            | 6.8%<br>(4.2-9.8%)                   | 10%<br>(6.7-14%)                    | 11<br>(7-15)        | 320<br>(200-460)    |
| Luxembourg | 1990 | Female | 65 to 69 | 78%<br>(59-91%)                | 22%<br>(9.4-41%)         | 3<br>(2.2-4)                                | 5%<br>(2.5-7.9%)                     | 7.2%<br>(3.6-11%)                   | 11<br>(5.6-17)      | 270<br>(130-420)    |
| Luxembourg | 1990 | Female | 70 to 74 | 75%<br>(57-88%)                | 25%<br>(12-43%)          | 2.5<br>(1.7-3.5)                            | 3.4%<br>(0.27-6.8%)                  | 4.7%<br>(0.49-9.1%)                 | 8.3<br>(0.85-16)    | 160<br>(13-310)     |
| Luxembourg | 1990 | Female | 75 to 79 | 73%<br>(53-87%)                | 27%<br>(13-47%)          | 2.2<br>(1.4-3.2)                            | 1.8%<br>(-1.7-5.7%)                  | 2.2%<br>(-2.2-7%)                   | 7.3<br>(-7.4-23)    | 110<br>(-110-350)   |
| Luxembourg | 1990 | Female | 80 to 84 | 70%<br>(49-85%)                | 30%<br>(15-51%)          | 2.1<br>(1.4-3.1)                            | 1.5%<br>(-1.8-5.1%)                  | 1.7%<br>(-2.5-6.2%)                 | 7.1<br>(-10-25)     | 83<br>(-99-280)     |
| Luxembourg | 1990 | Female | 85 to 89 | 68%<br>(49-82%)                | 32%<br>(18-51%)          | 2.1<br>(1.3-3)                              | 1.2%<br>(-1.8-4.6%)                  | 1.2%<br>(-2.4-5.3%)                 | 4.1<br>(-8-17)      | 36<br>(-55-140)     |
| Luxembourg | 1990 | Female | 90 to 94 | 67%<br>(48-83%)                | 33%<br>(17-52%)          | 2.1<br>(1.2-3.1)                            | 1.1%<br>(-2.1-4.6%)                  | 1%<br>(-2.9-5.3%)                   | 1.6<br>(-4.5-8.6)   | 10<br>(-21-45)      |
| Luxembourg | 1990 | Female | 95 plus  | 67%<br>(43-85%)                | 33%<br>(15-57%)          | 2<br>(1.1-3.4)                              | 1.1%<br>(-2.6-5.5%)                  | 0.98%<br>(-3.5-6.3%)                | 0.34<br>(-1.2-2.2)  | 1.6<br>(-3.8-7.9)   |
| Luxembourg | 1990 | Male   | All Ages | 82%<br>(75-89%)                | 18%<br>(11-25%)          | 4.6<br>(4.3-5)                              | 13%<br>(11-15%)                      | 15%<br>(11-18%)                     | 280<br>(220-350)    | 8100<br>(6900-9500) |
| Luxembourg | 1990 | Male   | 15 to 19 | 75%<br>(55-89%)                | 25%<br>(11-45%)          | 2.9<br>(1.9-4.1)                            | 8.4%<br>(4.9-12%)                    | 14%<br>(7.6-22%)                    | 1.8<br>(0.97-2.7)   | 150<br>(83-220)     |
| Luxembourg | 1990 | Male   | 20 to 24 | 80%<br>(63-91%)                | 20%<br>(9.1-37%)         | 4.4<br>(3.1-6)                              | 14%<br>(9.8-19%)                     | 21%<br>(13-30%)                     | 4.3<br>(2.7-6)      | 350<br>(240-480)    |
| Luxembourg | 1990 | Male   | 25 to 29 | 83%<br>(70-93%)                | 17%<br>(7.4-30%)         | 5<br>(3.7-6.6)                              | 14%<br>(10-18%)                      | 22%<br>(15-30%)                     | 5.3<br>(3.6-7.1)    | 410<br>(300-530)    |
| Luxembourg | 1990 | Male   | 30 to 34 | 86%<br>(72-94%)                | 14%<br>(5.8-28%)         | 5.4<br>(3.9-7)                              | 13%<br>(10-17%)                      | 23%<br>(16-29%)                     | 5.6<br>(4-7.2)      | 400<br>(300-500)    |
| Luxembourg | 1990 | Male   | 35 to 39 | 88%<br>(76-95%)                | 12%<br>(4.5-24%)         | 5.4<br>(3.9-7.2)                            | 14%<br>(11-18%)                      | 23%<br>(17-29%)                     | 7.5<br>(5.4-9.6)    | 460<br>(350-580)    |
| Luxembourg | 1990 | Male   | 40 to 44 | 89%<br>(77-96%)                | 11%<br>(3.9-23%)         | 5.8<br>(4.3-7.4)                            | 14%<br>(11-18%)                      | 23%<br>(17-28%)                     | 9.5<br>(7-12)       | 510<br>(390-630)    |
| Luxembourg | 1990 | Male   | 45 to 49 | 90%<br>(74-96%)                | 10%<br>(3.7-26%)         | 6.6<br>(4.8-8.7)                            | 17%<br>(12-20%)                      | 23%<br>(18-28%)                     | 14<br>(11-18)       | 660<br>(510-800)    |
| Luxembourg | 1990 | Male   | 50 to 54 | 90%<br>(77-97%)                | 9.9%<br>(3.4-23%)        | 7.1<br>(5.2-9.2)                            | 17%<br>(13-20%)                      | 22%<br>(18-27%)                     | 20<br>(16-24)       | 800<br>(630-950)    |

| Location   | Year | Sex    | Age      | Prevalence of current drinkers | Prevalence of abstainers | Population average of standard drinks daily | Percent of total attributable deaths | Percent of total attributable DALYs | Attributable deaths | Attributable DALYs  |
|------------|------|--------|----------|--------------------------------|--------------------------|---------------------------------------------|--------------------------------------|-------------------------------------|---------------------|---------------------|
| Luxembourg | 1990 | Male   | 55 to 59 | 90%<br>(79-97%)                | 10%<br>(3.4-21%)         | 7.4<br>(5.6-9.4)                            | 16%<br>(13-20%)                      | 21%<br>(16-25%)                     | 27<br>(21-33)       | 940<br>(730-1100)   |
| Luxembourg | 1990 | Male   | 60 to 64 | 89%<br>(76-97%)                | 11%<br>(3.5-24%)         | 7.3<br>(5.4-9.5)                            | 15%<br>(11-18%)                      | 18%<br>(13-22%)                     | 35<br>(24-44)       | 1000<br>(730-1300)  |
| Luxembourg | 1990 | Male   | 65 to 69 | 89%<br>(76-96%)                | 11%<br>(3.8-24%)         | 6.6<br>(5.1-8.3)                            | 13%<br>(9.5-17%)                     | 15%<br>(11-19%)                     | 32<br>(22-40)       | 770<br>(550-960)    |
| Luxembourg | 1990 | Male   | 70 to 74 | 88%<br>(76-95%)                | 12%<br>(4.7-24%)         | 5.9<br>(4.2-7.7)                            | 11%<br>(6.5-16%)                     | 13%<br>(7.3-18%)                    | 30<br>(17-42)       | 590<br>(340-820)    |
| Luxembourg | 1990 | Male   | 75 to 79 | 87%<br>(74-95%)                | 13%<br>(5.1-26%)         | 5.4<br>(3.6-7.4)                            | 10%<br>(4.8-15%)                     | 11%<br>(5.4-17%)                    | 36<br>(17-53)       | 550<br>(260-800)    |
| Luxembourg | 1990 | Male   | 80 to 84 | 86%<br>(71-94%)                | 14%<br>(5.9-29%)         | 5.2<br>(3.7-6.9)                            | 10%<br>(5.4-14%)                     | 11%<br>(5.7-16%)                    | 32<br>(17-47)       | 350<br>(190-520)    |
| Luxembourg | 1990 | Male   | 85 to 89 | 84%<br>(71-93%)                | 16%<br>(6.7-29%)         | 4.9<br>(3.5-6.7)                            | 9.2%<br>(4.7-14%)                    | 10%<br>(4.9-16%)                    | 18<br>(8.5-28)      | 140<br>(70-220)     |
| Luxembourg | 1990 | Male   | 90 to 94 | 84%<br>(71-94%)                | 16%<br>(6.2-29%)         | 4.8<br>(3.2-6.9)                            | 8.3%<br>(3.2-14%)                    | 9.1%<br>(3-15%)                     | 5.9<br>(2-9.9)      | 33<br>(12-53)       |
| Luxembourg | 1990 | Male   | 95 plus  | 84%<br>(67-95%)                | 16%<br>(4.9-33%)         | 4.6<br>(2.6-7.3)                            | 7.7%<br>(1.4-14%)                    | 8.4%<br>(1.2-16%)                   | 0.8<br>(0.12-1.5)   | 3<br>(0.56-5.3)     |
| Luxembourg | 1995 | Female | All Ages | 75%<br>(67-82%)                | 25%<br>(18-33%)          | 2<br>(1.8-2.3)                              | 3.6%<br>(2.3-5%)                     | 3.5%<br>(0.76-6.6%)                 | 65<br>(14-120)      | 2000<br>(1300-2800) |
| Luxembourg | 1995 | Female | 15 to 19 | 72%<br>(54-87%)                | 28%<br>(13-46%)          | 1.5<br>(1-2.2)                              | 2.8%<br>(1.5-4.3%)                   | 7.7%<br>(3.7-12%)                   | 0.43<br>(0.21-0.68) | 39<br>(21-60)       |
| Luxembourg | 1995 | Female | 20 to 24 | 77%<br>(60-89%)                | 23%<br>(11-40%)          | 1.9<br>(1.3-2.8)                            | 3.3%<br>(2.2-4.7%)                   | 8.7%<br>(4.6-13%)                   | 0.54<br>(0.28-0.85) | 59<br>(37-83)       |
| Luxembourg | 1995 | Female | 25 to 29 | 79%<br>(64-90%)                | 21%<br>(9.7-36%)         | 2.1<br>(1.5-2.8)                            | 2.8%<br>(1.9-3.8%)                   | 9.1%<br>(5.5-13%)                   | 0.58<br>(0.35-0.85) | 64<br>(44-90)       |
| Luxembourg | 1995 | Female | 30 to 34 | 81%<br>(66-91%)                | 19%<br>(8.5-34%)         | 2.2<br>(1.5-3)                              | 3.6%<br>(2.5-4.8%)                   | 11%<br>(7.3-15%)                    | 1.4<br>(0.94-1.9)   | 110<br>(73-140)     |
| Luxembourg | 1995 | Female | 35 to 39 | 82%<br>(66-92%)                | 18%<br>(8.2-34%)         | 2.3<br>(1.6-3.2)                            | 3.8%<br>(2.7-5.1%)                   | 13%<br>(9.1-16%)                    | 1.7<br>(1.2-2.2)    | 110<br>(80-140)     |
| Luxembourg | 1995 | Female | 40 to 44 | 82%<br>(66-92%)                | 18%<br>(7.7-34%)         | 2.5<br>(1.7-3.4)                            | 5%<br>(3.5-6.6%)                     | 14%<br>(10-17%)                     | 2.8<br>(2.1-3.6)    | 160<br>(120-200)    |
| Luxembourg | 1995 | Female | 45 to 49 | 82%<br>(65-92%)                | 18%<br>(7.9-35%)         | 2.7<br>(1.9-3.7)                            | 6.1%<br>(4.4-8%)                     | 14%<br>(11-17%)                     | 4.3<br>(3.3-5.3)    | 200<br>(150-250)    |
| Luxembourg | 1995 | Female | 50 to 54 | 82%<br>(65-92%)                | 18%<br>(8-35%)           | 3.1<br>(2.2-4.1)                            | 6.6%<br>(4.6-8.4%)                   | 13%<br>(10-16%)                     | 5.1<br>(3.9-6.3)    | 210<br>(150-260)    |
| Luxembourg | 1995 | Female | 55 to 59 | 81%<br>(65-92%)                | 19%<br>(8-35%)           | 3.5<br>(2.5-4.6)                            | 6.8%<br>(4.7-8.9%)                   | 13%<br>(9.5-16%)                    | 6.5<br>(4.9-8.2)    | 230<br>(170-300)    |
| Luxembourg | 1995 | Female | 60 to 64 | 80%<br>(61-92%)                | 20%<br>(8.1-39%)         | 3.4<br>(2.4-4.7)                            | 6.2%<br>(3.7-8.8%)                   | 10%<br>(6.6-14%)                    | 8.7<br>(5.7-12)     | 260<br>(160-370)    |
| Luxembourg | 1995 | Female | 65 to 69 | 78%<br>(59-90%)                | 22%<br>(9.6-41%)         | 2.9<br>(2.1-3.9)                            | 4.6%<br>(2.4-7.1%)                   | 7%<br>(3.9-10%)                     | 9.2<br>(5-14)       | 230<br>(120-350)    |
| Luxembourg | 1995 | Female | 70 to 74 | 75%<br>(58-88%)                | 25%<br>(12-42%)          | 2.4<br>(1.6-3.4)                            | 3.1%<br>(0.4-6%)                     | 4.4%<br>(0.74-8.4%)                 | 8.6<br>(1.4-16)     | 170<br>(21-320)     |

| Location   | Year | Sex    | Age      | Prevalence of current drinkers | Prevalence of abstainers | Population average of standard drinks daily | Percent of total attributable deaths | Percent of total attributable DALYs | Attributable deaths | Attributable DALYs  |
|------------|------|--------|----------|--------------------------------|--------------------------|---------------------------------------------|--------------------------------------|-------------------------------------|---------------------|---------------------|
| Luxembourg | 1995 | Female | 75 to 79 | 73%<br>(53-87%)                | 27%<br>(13-47%)          | 2.1<br>(1.3-3.1)                            | 1.7%<br>(-1.2-4.9%)                  | 2.1%<br>(-1.5-6.2%)                 | 4.8<br>(-3.5-14)    | 76<br>(-55-220)     |
| Luxembourg | 1995 | Female | 80 to 84 | 70%<br>(49-85%)                | 30%<br>(15-51%)          | 2.1<br>(1.3-3)                              | 1.2%<br>(-1.7-4.6%)                  | 1.4%<br>(-2.3-5.5%)                 | 5.1<br>(-8.5-20)    | 62<br>(-87-230)     |
| Luxembourg | 1995 | Female | 85 to 89 | 68%<br>(49-83%)                | 32%<br>(17-51%)          | 2<br>(1.3-2.9)                              | 0.95%<br>(-1.7-3.9%)                 | 0.93%<br>(-2.2-4.4%)                | 3.5<br>(-8.4-17)    | 33<br>(-59-140)     |
| Luxembourg | 1995 | Female | 90 to 94 | 67%<br>(48-83%)                | 33%<br>(17-52%)          | 2<br>(1.2-3)                                | 0.81%<br>(-2.1-4%)                   | 0.71%<br>(-2.7-4.5%)                | 1.3<br>(-5.1-8.6)   | 9.6<br>(-25-48)     |
| Luxembourg | 1995 | Female | 95 plus  | 67%<br>(44-85%)                | 33%<br>(15-56%)          | 2<br>(1-3.3)                                | 0.86%<br>(-2.6-5%)                   | 0.71%<br>(-3.3-5.6%)                | 0.39<br>(-1.9-3.1)  | 2<br>(-5.8-11)      |
| Luxembourg | 1995 | Male   | All Ages | 82%<br>(74-89%)                | 18%<br>(11-26%)          | 4.4<br>(4-4.9)                              | 12%<br>(9.8-14%)                     | 14%<br>(10-17%)                     | 260<br>(190-320)    | 7400<br>(6200-8700) |
| Luxembourg | 1995 | Male   | 15 to 19 | 75%<br>(55-89%)                | 25%<br>(11-45%)          | 2.8<br>(1.8-3.9)                            | 6.7%<br>(4.2-9.6%)                   | 14%<br>(7.6-21%)                    | 1<br>(0.56-1.6)     | 95<br>(58-140)      |
| Luxembourg | 1995 | Male   | 20 to 24 | 80%<br>(62-91%)                | 20%<br>(8.9-38%)         | 4.2<br>(2.9-5.8)                            | 13%<br>(8.9-17%)                     | 20%<br>(12-28%)                     | 2.9<br>(1.8-4.2)    | 260<br>(180-350)    |
| Luxembourg | 1995 | Male   | 25 to 29 | 83%<br>(69-93%)                | 17%<br>(7-31%)           | 4.9<br>(3.5-6.4)                            | 12%<br>(9.2-16%)                     | 20%<br>(14-27%)                     | 4.4<br>(3-5.9)      | 360<br>(260-470)    |
| Luxembourg | 1995 | Male   | 30 to 34 | 86%<br>(72-95%)                | 14%<br>(5.1-28%)         | 5.2<br>(3.8-6.8)                            | 12%<br>(9.1-15%)                     | 21%<br>(15-27%)                     | 5.2<br>(3.7-6.9)    | 390<br>(290-490)    |
| Luxembourg | 1995 | Male   | 35 to 39 | 88%<br>(74-95%)                | 12%<br>(4.6-26%)         | 5.2<br>(3.7-6.9)                            | 13%<br>(9.7-17%)                     | 22%<br>(16-28%)                     | 7.5<br>(5.4-9.5)    | 460<br>(350-580)    |
| Luxembourg | 1995 | Male   | 40 to 44 | 89%<br>(76-96%)                | 11%<br>(3.8-24%)         | 5.6<br>(4.1-7.3)                            | 14%<br>(10-17%)                      | 22%<br>(17-28%)                     | 9.2<br>(6.8-12)     | 500<br>(380-620)    |
| Luxembourg | 1995 | Male   | 45 to 49 | 90%<br>(75-96%)                | 10%<br>(3.7-25%)         | 6.3<br>(4.6-8.4)                            | 15%<br>(11-19%)                      | 23%<br>(17-28%)                     | 13<br>(9.6-16)      | 610<br>(460-740)    |
| Luxembourg | 1995 | Male   | 50 to 54 | 90%<br>(77-96%)                | 10%<br>(3.7-23%)         | 6.8<br>(4.9-8.8)                            | 16%<br>(12-19%)                      | 22%<br>(17-26%)                     | 18<br>(14-21)       | 720<br>(560-860)    |
| Luxembourg | 1995 | Male   | 55 to 59 | 90%<br>(78-97%)                | 10%<br>(3.5-22%)         | 7.1<br>(5.4-9.1)                            | 16%<br>(12-19%)                      | 20%<br>(16-24%)                     | 24<br>(19-29)       | 840<br>(660-1000)   |
| Luxembourg | 1995 | Male   | 60 to 64 | 90%<br>(76-96%)                | 10%<br>(3.6-24%)         | 6.9<br>(5.1-9.1)                            | 14%<br>(10-17%)                      | 17%<br>(12-22%)                     | 30<br>(21-37)       | 880<br>(640-1100)   |
| Luxembourg | 1995 | Male   | 65 to 69 | 89%<br>(76-96%)                | 11%<br>(3.8-24%)         | 6.3<br>(4.9-8)                              | 12%<br>(8.7-15%)                     | 15%<br>(10-18%)                     | 36<br>(25-46)       | 890<br>(640-1100)   |
| Luxembourg | 1995 | Male   | 70 to 74 | 88%<br>(77-95%)                | 12%<br>(4.8-23%)         | 5.7<br>(4-7.4)                              | 10%<br>(6.1-14%)                     | 12%<br>(6.8-17%)                    | 27<br>(16-38)       | 540<br>(320-750)    |
| Luxembourg | 1995 | Male   | 75 to 79 | 87%<br>(74-95%)                | 13%<br>(4.9-26%)         | 5.2<br>(3.5-7.2)                            | 9.3%<br>(4.3-14%)                    | 10%<br>(4.5-15%)                    | 25<br>(11-37)       | 380<br>(170-560)    |
| Luxembourg | 1995 | Male   | 80 to 84 | 86%<br>(71-94%)                | 14%<br>(5.8-29%)         | 5<br>(3.5-6.6)                              | 9%<br>(4.4-13%)                      | 9.9%<br>(4.5-15%)                   | 28<br>(13-42)       | 320<br>(160-470)    |
| Luxembourg | 1995 | Male   | 85 to 89 | 84%<br>(70-93%)                | 16%<br>(6.6-30%)         | 4.7<br>(3.3-6.5)                            | 8.3%<br>(4.1-13%)                    | 9.1%<br>(4.4-15%)                   | 18<br>(8.6-29)      | 150<br>(73-230)     |
| Luxembourg | 1995 | Male   | 90 to 94 | 84%<br>(69-94%)                | 16%<br>(5.8-31%)         | 4.6<br>(3-6.6)                              | 7.6%<br>(2.7-13%)                    | 8.3%<br>(2.7-14%)                   | 6.5<br>(2-11)       | 36<br>(13-60)       |

| Location   | Year | Sex    | Age      | Prevalence of current drinkers | Prevalence of abstainers | Population average of standard drinks daily | Percent of total attributable deaths | Percent of total attributable DALYs | Attributable deaths | Attributable DALYs  |
|------------|------|--------|----------|--------------------------------|--------------------------|---------------------------------------------|--------------------------------------|-------------------------------------|---------------------|---------------------|
| Luxembourg | 1995 | Male   | 95 plus  | 84%<br>(66-95%)                | 16%<br>(5-34%)           | 4.5<br>(2.5-7)                              | 7.1%<br>(1.4-13%)                    | 7.8%<br>(1-15%)                     | 1.2<br>(0.16-2.3)   | 4.6<br>(0.86-8.5)   |
| Luxembourg | 2000 | Female | All Ages | 75%<br>(67-82%)                | 25%<br>(18-33%)          | 2.3<br>(2-2.7)                              | 4.1%<br>(2.8-5.7%)                   | 4.8%<br>(2-8%)                      | 84<br>(34-140)      | 2300<br>(1600-3100) |
| Luxembourg | 2000 | Female | 15 to 19 | 69%<br>(50-85%)                | 31%<br>(15-50%)          | 1.7<br>(1-2.4)                              | 2%<br>(1.2-2.9%)                     | 8%<br>(4-13%)                       | 0.21<br>(0.1-0.33)  | 25<br>(15-37)       |
| Luxembourg | 2000 | Female | 20 to 24 | 74%<br>(56-88%)                | 26%<br>(12-44%)          | 2.1<br>(1.4-3.2)                            | 2.7%<br>(1.9-3.7%)                   | 9.5%<br>(5.3-15%)                   | 0.28<br>(0.15-0.42) | 42<br>(27-59)       |
| Luxembourg | 2000 | Female | 25 to 29 | 78%<br>(64-90%)                | 22%<br>(9.9-36%)         | 2.4<br>(1.6-3.3)                            | 2.9%<br>(2-3.9%)                     | 10%<br>(6.3-14%)                    | 0.57<br>(0.36-0.81) | 63<br>(44-85)       |
| Luxembourg | 2000 | Female | 30 to 34 | 81%<br>(66-92%)                | 19%<br>(8.5-34%)         | 2.5<br>(1.8-3.5)                            | 3.3%<br>(2.4-4.5%)                   | 12%<br>(8.5-16%)                    | 1.2<br>(0.82-1.6)   | 96<br>(70-130)      |
| Luxembourg | 2000 | Female | 35 to 39 | 83%<br>(69-92%)                | 17%<br>(7.7-31%)         | 2.7<br>(1.9-3.8)                            | 3.5%<br>(2.5-4.6%)                   | 14%<br>(10-17%)                     | 1.5<br>(1.1-1.8)    | 110<br>(78-140)     |
| Luxembourg | 2000 | Female | 40 to 44 | 83%<br>(67-92%)                | 17%<br>(7.5-33%)         | 2.9<br>(2-4)                                | 5.3%<br>(3.9-7%)                     | 15%<br>(12-18%)                     | 3.3<br>(2.6-4.1)    | 180<br>(140-230)    |
| Luxembourg | 2000 | Female | 45 to 49 | 83%<br>(66-92%)                | 17%<br>(7.6-34%)         | 3.2<br>(2.2-4.5)                            | 6.2%<br>(4.5-8.1%)                   | 15%<br>(12-19%)                     | 4.4<br>(3.4-5.5)    | 210<br>(160-270)    |
| Luxembourg | 2000 | Female | 50 to 54 | 82%<br>(66-92%)                | 18%<br>(7.7-34%)         | 3.6<br>(2.5-4.8)                            | 7%<br>(5-9%)                         | 15%<br>(11-18%)                     | 5.7<br>(4.3-7.1)    | 240<br>(180-300)    |
| Luxembourg | 2000 | Female | 55 to 59 | 82%<br>(66-92%)                | 18%<br>(7.7-34%)         | 4<br>(2.8-5.6)                              | 7.9%<br>(5.5-10%)                    | 14%<br>(11-18%)                     | 7.5<br>(5.7-9.5)    | 270<br>(190-350)    |
| Luxembourg | 2000 | Female | 60 to 64 | 81%<br>(63-92%)                | 19%<br>(7.9-37%)         | 4<br>(2.7-5.7)                              | 6.8%<br>(4.4-9.7%)                   | 12%<br>(8.1-16%)                    | 8<br>(5.4-11)       | 250<br>(160-350)    |
| Luxembourg | 2000 | Female | 65 to 69 | 78%<br>(60-91%)                | 22%<br>(9.3-40%)         | 3.4<br>(2.3-4.7)                            | 5.3%<br>(3.2-8.1%)                   | 8.5%<br>(5.4-12%)                   | 8.8<br>(5.6-13)     | 230<br>(130-340)    |
| Luxembourg | 2000 | Female | 70 to 74 | 75%<br>(58-88%)                | 25%<br>(12-42%)          | 2.7<br>(1.8-3.9)                            | 4%<br>(1.3-7.1%)                     | 5.8%<br>(2.1-10%)                   | 10<br>(3.7-18)      | 210<br>(68-360)     |
| Luxembourg | 2000 | Female | 75 to 79 | 72%<br>(53-87%)                | 28%<br>(13-47%)          | 2.4<br>(1.4-3.6)                            | 2.8%<br>(-0.14-6.1%)                 | 3.7%<br>(-0.086-8.1%)               | 9.5<br>(-0.21-20)   | 150<br>(-7.7-320)   |
| Luxembourg | 2000 | Female | 80 to 84 | 70%<br>(49-85%)                | 30%<br>(15-51%)          | 2.3<br>(1.5-3.4)                            | 2.4%<br>(-0.54-5.8%)                 | 2.9%<br>(-0.83-7%)                  | 8.2<br>(-2.3-20)    | 96<br>(-22-230)     |
| Luxembourg | 2000 | Female | 85 to 89 | 67%<br>(48-82%)                | 33%<br>(18-52%)          | 2.2<br>(1.4-3.3)                            | 2.1%<br>(-0.69-5.3%)                 | 2.3%<br>(-1-6.2%)                   | 8.3<br>(-3.6-23)    | 71<br>(-23-180)     |
| Luxembourg | 2000 | Female | 90 to 94 | 66%<br>(47-83%)                | 34%<br>(17-53%)          | 2.2<br>(1.3-3.4)                            | 1.8%<br>(-1.1-5.5%)                  | 1.9%<br>(-1.6-6.2%)                 | 4.6<br>(-3.8-15)    | 28<br>(-16-82)      |
| Luxembourg | 2000 | Female | 95 plus  | 66%<br>(42-85%)                | 34%<br>(15-58%)          | 2.2<br>(1.1-3.8)                            | 1.9%<br>(-1.7-6.5%)                  | 1.9%<br>(-2.4-7.5%)                 | 1.5<br>(-1.8-5.6)   | 5.9<br>(-5.3-21)    |
| Luxembourg | 2000 | Male   | All Ages | 83%<br>(75-89%)                | 17%<br>(11-25%)          | 5.1<br>(4.4-5.9)                            | 13%<br>(11-15%)                      | 15%<br>(12-19%)                     | 280<br>(210-340)    | 7800<br>(6600-9100) |
| Luxembourg | 2000 | Male   | 15 to 19 | 74%<br>(54-89%)                | 26%<br>(11-46%)          | 3.1<br>(2-4.5)                              | 6.4%<br>(4.1-9.1%)                   | 15%<br>(8.5-22%)                    | 0.94<br>(0.54-1.4)  | 90<br>(58-130)      |
| Luxembourg | 2000 | Male   | 20 to 24 | 80%<br>(63-91%)                | 20%<br>(9.2-37%)         | 4.8<br>(3.3-6.8)                            | 13%<br>(9.5-18%)                     | 22%<br>(14-31%)                     | 2.9<br>(1.9-4.1)    | 250<br>(180-340)    |

| Location   | Year | Sex    | Age      | Prevalence of current drinkers | Prevalence of abstainers | Population average of standard drinks daily | Percent of total attributable deaths | Percent of total attributable DALYs | Attributable deaths | Attributable DALYs  |
|------------|------|--------|----------|--------------------------------|--------------------------|---------------------------------------------|--------------------------------------|-------------------------------------|---------------------|---------------------|
| Luxembourg | 2000 | Male   | 25 to 29 | 84%<br>(72-93%)                | 16%<br>(7.2-28%)         | 5.6<br>(3.8-7.5)                            | 14%<br>(10-18%)                      | 23%<br>(16-31%)                     | 4.5<br>(3-6.1)      | 360<br>(260-470)    |
| Luxembourg | 2000 | Male   | 30 to 34 | 87%<br>(75-95%)                | 13%<br>(5.4-25%)         | 6<br>(4.2-8)                                | 13%<br>(9.5-16%)                     | 24%<br>(17-31%)                     | 5.2<br>(3.8-6.8)    | 390<br>(290-490)    |
| Luxembourg | 2000 | Male   | 35 to 39 | 89%<br>(78-96%)                | 11%<br>(4.3-22%)         | 6<br>(4.4-8.1)                              | 13%<br>(10-16%)                      | 25%<br>(19-31%)                     | 7<br>(5.3-8.8)      | 450<br>(350-570)    |
| Luxembourg | 2000 | Male   | 40 to 44 | 90%<br>(78-96%)                | 9.9%<br>(3.6-22%)        | 6.4<br>(4.7-8.6)                            | 14%<br>(11-18%)                      | 25%<br>(20-31%)                     | 9.7<br>(7.7-12)     | 540<br>(430-650)    |
| Luxembourg | 2000 | Male   | 45 to 49 | 91%<br>(77-97%)                | 9.2%<br>(3.4-23%)        | 7.3<br>(5.1-9.9)                            | 16%<br>(13-20%)                      | 26%<br>(20-30%)                     | 14<br>(11-17)       | 690<br>(540-820)    |
| Luxembourg | 2000 | Male   | 50 to 54 | 91%<br>(79-97%)                | 9.1%<br>(3.2-21%)        | 7.9<br>(5.6-10)                             | 16%<br>(13-20%)                      | 24%<br>(20-29%)                     | 18<br>(14-21)       | 750<br>(600-890)    |
| Luxembourg | 2000 | Male   | 55 to 59 | 91%<br>(80-97%)                | 9.4%<br>(3.3-20%)        | 8.2<br>(6-11)                               | 16%<br>(13-20%)                      | 22%<br>(18-26%)                     | 23<br>(18-27)       | 800<br>(660-950)    |
| Luxembourg | 2000 | Male   | 60 to 64 | 90%<br>(78-97%)                | 9.9%<br>(3.3-22%)        | 7.9<br>(5.8-11)                             | 15%<br>(12-19%)                      | 19%<br>(15-24%)                     | 28<br>(22-34)       | 840<br>(650-1000)   |
| Luxembourg | 2000 | Male   | 65 to 69 | 89%<br>(78-96%)                | 11%<br>(3.6-22%)         | 7.3<br>(5.5-9.4)                            | 13%<br>(10-17%)                      | 16%<br>(13-20%)                     | 33<br>(26-41)       | 830<br>(650-1000)   |
| Luxembourg | 2000 | Male   | 70 to 74 | 89%<br>(77-95%)                | 11%<br>(4.6-23%)         | 6.5<br>(4.5-8.8)                            | 12%<br>(7.6-16%)                     | 14%<br>(8.9-19%)                    | 39<br>(25-51)       | 770<br>(500-1000)   |
| Luxembourg | 2000 | Male   | 75 to 79 | 87%<br>(75-95%)                | 13%<br>(5-25%)           | 6<br>(3.9-8.5)                              | 11%<br>(5.6-15%)                     | 12%<br>(6.3-17%)                    | 30<br>(16-42)       | 470<br>(250-650)    |
| Luxembourg | 2000 | Male   | 80 to 84 | 86%<br>(71-94%)                | 14%<br>(6-29%)           | 5.6<br>(3.9-7.7)                            | 11%<br>(6.2-15%)                     | 12%<br>(6.8-17%)                    | 26<br>(15-37)       | 290<br>(170-410)    |
| Luxembourg | 2000 | Male   | 85 to 89 | 84%<br>(71-93%)                | 16%<br>(6.5-29%)         | 5.4<br>(3.7-7.6)                            | 9.9%<br>(5.3-15%)                    | 11%<br>(5.7-16%)                    | 23<br>(12-34)       | 180<br>(100-270)    |
| Luxembourg | 2000 | Male   | 90 to 94 | 84%<br>(71-94%)                | 16%<br>(6.2-29%)         | 5.2<br>(3.3-7.6)                            | 9.1%<br>(3.9-14%)                    | 10%<br>(4.1-16%)                    | 9.5<br>(3.9-15)     | 52<br>(22-81)       |
| Luxembourg | 2000 | Male   | 95 plus  | 84%<br>(67-95%)                | 16%<br>(5.1-33%)         | 5.1<br>(2.8-8.2)                            | 8.5%<br>(2.5-14%)                    | 9.4%<br>(2.3-16%)                   | 1.9<br>(0.48-3.3)   | 7.1<br>(2.1-12)     |
| Luxembourg | 2005 | Female | All Ages | 76%<br>(68-83%)                | 24%<br>(17-32%)          | 3<br>(2.5-3.5)                              | 5.1%<br>(3.7-6.7%)                   | 7%<br>(4-11%)                       | 120<br>(70-190)     | 2900<br>(2100-3800) |
| Luxembourg | 2005 | Female | 15 to 19 | 69%<br>(50-85%)                | 31%<br>(15-50%)          | 2.1<br>(1.3-3.1)                            | 2.2%<br>(1.4-3.3%)                   | 9.1%<br>(4.8-14%)                   | 0.27<br>(0.14-0.42) | 31<br>(19-46)       |
| Luxembourg | 2005 | Female | 20 to 24 | 75%<br>(56-88%)                | 25%<br>(12-44%)          | 2.7<br>(1.7-4.1)                            | 3.1%<br>(2.1-4.3%)                   | 11%<br>(6.4-16%)                    | 0.37<br>(0.22-0.56) | 51<br>(34-71)       |
| Luxembourg | 2005 | Female | 25 to 29 | 79%<br>(65-90%)                | 21%<br>(9.8-35%)         | 3<br>(2-4.3)                                | 3.2%<br>(2.2-4.3%)                   | 12%<br>(7.6-16%)                    | 0.63<br>(0.41-0.87) | 67<br>(47-90)       |
| Luxembourg | 2005 | Female | 30 to 34 | 81%<br>(68-92%)                | 19%<br>(8.4-32%)         | 3.3<br>(2.2-4.6)                            | 3.2%<br>(2.3-4.3%)                   | 14%<br>(10-18%)                     | 0.95<br>(0.7-1.2)   | 84<br>(62-110)      |
| Luxembourg | 2005 | Female | 35 to 39 | 83%<br>(70-93%)                | 17%<br>(7.2-30%)         | 3.4<br>(2.3-4.8)                            | 4.1%<br>(3.1-5.4%)                   | 16%<br>(12-19%)                     | 1.9<br>(1.5-2.4)    | 130<br>(100-170)    |
| Luxembourg | 2005 | Female | 40 to 44 | 83%<br>(69-93%)                | 17%<br>(7.5-31%)         | 3.7<br>(2.6-5)                              | 4.8%<br>(3.6-6.3%)                   | 17%<br>(13-20%)                     | 2.9<br>(2.3-3.5)    | 170<br>(130-210)    |

| Location   | Year | Sex    | Age      | Prevalence of current drinkers | Prevalence of abstainers | Population average of standard drinks daily | Percent of total attributable deaths | Percent of total attributable DALYs | Attributable deaths | Attributable DALYs  |
|------------|------|--------|----------|--------------------------------|--------------------------|---------------------------------------------|--------------------------------------|-------------------------------------|---------------------|---------------------|
| Luxembourg | 2005 | Female | 45 to 49 | 83%<br>(67-92%)                | 17%<br>(7.9-33%)         | 4<br>(2.7-5.6)                              | 6.7%<br>(4.9-8.8%)                   | 17%<br>(14-21%)                     | 5.1<br>(4-6.2)      | 250<br>(190-320)    |
| Luxembourg | 2005 | Female | 50 to 54 | 83%<br>(68-92%)                | 17%<br>(8-32%)           | 4.5<br>(3.2-6.1)                            | 7.8%<br>(5.8-10%)                    | 17%<br>(13-21%)                     | 6.8<br>(5.2-8.4)    | 290<br>(220-360)    |
| Luxembourg | 2005 | Female | 55 to 59 | 82%<br>(67-92%)                | 18%<br>(7.7-33%)         | 5.1<br>(3.6-7.1)                            | 8.4%<br>(6.1-11%)                    | 16%<br>(13-20%)                     | 8.2<br>(6.4-10)     | 310<br>(230-400)    |
| Luxembourg | 2005 | Female | 60 to 64 | 81%<br>(65-92%)                | 19%<br>(7.8-35%)         | 5<br>(3.4-7.1)                              | 8.4%<br>(5.8-11%)                    | 14%<br>(10-19%)                     | 9.5<br>(6.9-13)     | 300<br>(210-410)    |
| Luxembourg | 2005 | Female | 65 to 69 | 79%<br>(62-91%)                | 21%<br>(8.9-38%)         | 4.3<br>(3-5.8)                              | 6.9%<br>(4.5-9.7%)                   | 11%<br>(7.4-15%)                    | 10<br>(7-14)        | 280<br>(180-390)    |
| Luxembourg | 2005 | Female | 70 to 74 | 75%<br>(57-88%)                | 25%<br>(12-43%)          | 3.4<br>(2.2-4.8)                            | 5.5%<br>(2.8-8.8%)                   | 8.3%<br>(4.4-13%)                   | 12<br>(6.4-19)      | 260<br>(130-410)    |
| Luxembourg | 2005 | Female | 75 to 79 | 72%<br>(52-87%)                | 28%<br>(13-48%)          | 3<br>(1.8-4.4)                              | 4.5%<br>(1.3-8.2%)                   | 6%<br>(1.9-11%)                     | 15<br>(4.7-28)      | 240<br>(72-460)     |
| Luxembourg | 2005 | Female | 80 to 84 | 70%<br>(49-85%)                | 30%<br>(15-51%)          | 2.9<br>(1.8-4.2)                            | 4.3%<br>(1.4-7.7%)                   | 5.3%<br>(1.6-9.7%)                  | 18<br>(5.6-33)      | 210<br>(67-390)     |
| Luxembourg | 2005 | Female | 85 to 89 | 68%<br>(50-82%)                | 32%<br>(18-50%)          | 2.9<br>(1.8-4.2)                            | 4%<br>(0.97-7.9%)                    | 4.7%<br>(0.98-9.4%)                 | 14<br>(3-29)        | 120<br>(30-230)     |
| Luxembourg | 2005 | Female | 90 to 94 | 68%<br>(49-84%)                | 32%<br>(16-51%)          | 2.9<br>(1.7-4.3)                            | 3.8%<br>(0.39-8.2%)                  | 4.2%<br>(0.071-9.7%)                | 11<br>(0.19-25)     | 64<br>(6.5-140)     |
| Luxembourg | 2005 | Female | 95 plus  | 67%<br>(45-86%)                | 33%<br>(14-55%)          | 2.9<br>(1.5-4.8)                            | 3.8%<br>(-0.49-9.6%)                 | 4.3%<br>(-0.78-11%)                 | 4.6<br>(-0.84-12)   | 17<br>(-2.3-43)     |
| Luxembourg | 2005 | Male   | All Ages | 84%<br>(77-90%)                | 16%<br>(10-23%)          | 6.5<br>(5.5-7.6)                            | 14%<br>(12-16%)                      | 18%<br>(14-21%)                     | 300<br>(240-360)    | 8300<br>(7100-9600) |
| Luxembourg | 2005 | Male   | 15 to 19 | 75%<br>(55-89%)                | 25%<br>(11-45%)          | 3.9<br>(2.5-5.8)                            | 6.5%<br>(4.5-9.2%)                   | 17%<br>(11-26%)                     | 0.92<br>(0.57-1.3)  | 92<br>(63-130)      |
| Luxembourg | 2005 | Male   | 20 to 24 | 81%<br>(64-91%)                | 19%<br>(8.7-36%)         | 6.1<br>(4.1-8.7)                            | 14%<br>(11-19%)                      | 25%<br>(17-35%)                     | 3.2<br>(2.1-4.3)    | 280<br>(210-370)    |
| Luxembourg | 2005 | Male   | 25 to 29 | 85%<br>(74-94%)                | 15%<br>(6.2-26%)         | 7.1<br>(5-9.7)                              | 13%<br>(10-17%)                      | 27%<br>(20-35%)                     | 3.3<br>(2.4-4.4)    | 290<br>(220-360)    |
| Luxembourg | 2005 | Male   | 30 to 34 | 88%<br>(77-95%)                | 12%<br>(4.6-23%)         | 7.6<br>(5.4-10)                             | 13%<br>(9.9-16%)                     | 27%<br>(21-34%)                     | 4.4<br>(3.3-5.5)    | 340<br>(270-410)    |
| Luxembourg | 2005 | Male   | 35 to 39 | 90%<br>(79-96%)                | 10%<br>(3.9-21%)         | 7.6<br>(5.5-10)                             | 14%<br>(11-17%)                      | 28%<br>(22-34%)                     | 7.1<br>(5.5-8.6)    | 460<br>(370-560)    |
| Luxembourg | 2005 | Male   | 40 to 44 | 91%<br>(81-96%)                | 9.4%<br>(3.6-19%)        | 8.1<br>(5.9-11)                             | 15%<br>(12-18%)                      | 29%<br>(24-34%)                     | 10<br>(8.4-12)      | 590<br>(480-690)    |
| Luxembourg | 2005 | Male   | 45 to 49 | 91%<br>(80-97%)                | 8.8%<br>(3.3-20%)        | 9.2<br>(6.4-12)                             | 17%<br>(14-20%)                      | 29%<br>(24-33%)                     | 15<br>(13-18)       | 730<br>(610-850)    |
| Luxembourg | 2005 | Male   | 50 to 54 | 92%<br>(81-97%)                | 8.5%<br>(3.1-19%)        | 10<br>(7.1-13)                              | 18%<br>(15-21%)                      | 27%<br>(23-31%)                     | 21<br>(17-24)       | 860<br>(730-1000)   |
| Luxembourg | 2005 | Male   | 55 to 59 | 91%<br>(82-97%)                | 8.7%<br>(3.1-18%)        | 10<br>(7.7-14)                              | 17%<br>(14-20%)                      | 24%<br>(20-28%)                     | 24<br>(20-28)       | 870<br>(730-1000)   |
| Luxembourg | 2005 | Male   | 60 to 64 | 91%<br>(80-97%)                | 9.1%<br>(3.2-20%)        | 10<br>(7.2-14)                              | 16%<br>(13-19%)                      | 21%<br>(17-25%)                     | 27<br>(22-32)       | 830<br>(660-990)    |

| Location   | Year | Sex    | Age      | Prevalence of current drinkers | Prevalence of abstainers | Population average of standard drinks daily | Percent of total attributable deaths | Percent of total attributable DALYs | Attributable deaths | Attributable DALYs  |
|------------|------|--------|----------|--------------------------------|--------------------------|---------------------------------------------|--------------------------------------|-------------------------------------|---------------------|---------------------|
| Luxembourg | 2005 | Male   | 65 to 69 | 90%<br>(80-97%)                | 9.6%<br>(3.2-20%)        | 9.3<br>(6.8-12)                             | 15%<br>(12-18%)                      | 19%<br>(15-23%)                     | 31<br>(25-38)       | 790<br>(640-970)    |
| Luxembourg | 2005 | Male   | 70 to 74 | 90%<br>(80-96%)                | 10%<br>(3.9-20%)         | 8.4<br>(5.9-11)                             | 14%<br>(10-17%)                      | 17%<br>(12-20%)                     | 38<br>(29-48)       | 780<br>(590-970)    |
| Luxembourg | 2005 | Male   | 75 to 79 | 89%<br>(78-96%)                | 11%<br>(4.3-22%)         | 7.7<br>(5.1-11)                             | 13%<br>(8.4-16%)                     | 15%<br>(9.7-19%)                    | 44<br>(28-57)       | 690<br>(460-900)    |
| Luxembourg | 2005 | Male   | 80 to 84 | 87%<br>(73-95%)                | 13%<br>(5.5-27%)         | 7.2<br>(5-9.6)                              | 13%<br>(8.6-16%)                     | 14%<br>(9.7-19%)                    | 35<br>(24-46)       | 400<br>(280-520)    |
| Luxembourg | 2005 | Male   | 85 to 89 | 84%<br>(70-94%)                | 16%<br>(6.5-30%)         | 6.7<br>(4.5-9.3)                            | 12%<br>(7.7-16%)                     | 13%<br>(8.5-18%)                    | 21<br>(13-29)       | 170<br>(110-230)    |
| Luxembourg | 2005 | Male   | 90 to 94 | 84%<br>(69-94%)                | 16%<br>(6-31%)           | 6.5<br>(4-9.5)                              | 11%<br>(6.4-16%)                     | 13%<br>(6.9-18%)                    | 13<br>(7-18)        | 70<br>(40-96)       |
| Luxembourg | 2005 | Male   | 95 plus  | 84%<br>(67-95%)                | 16%<br>(4.9-33%)         | 6.3<br>(3.4-10)                             | 11%<br>(4.7-16%)                     | 12%<br>(4.9-18%)                    | 3.4<br>(1.4-5.1)    | 12<br>(5.4-18)      |
| Luxembourg | 2010 | Female | All Ages | 76%<br>(68-82%)                | 24%<br>(18-32%)          | 3.4<br>(2.8-4.2)                            | 5.7%<br>(4.2-7.5%)                   | 8.3%<br>(5.2-12%)                   | 150<br>(94-230)     | 3400<br>(2600-4400) |
| Luxembourg | 2010 | Female | 15 to 19 | 72%<br>(55-86%)                | 28%<br>(14-45%)          | 2.5<br>(1.6-3.7)                            | 2.4%<br>(1.5-3.6%)                   | 9.9%<br>(5.6-15%)                   | 0.32<br>(0.18-0.49) | 37<br>(24-54)       |
| Luxembourg | 2010 | Female | 20 to 24 | 77%<br>(61-89%)                | 23%<br>(11-39%)          | 3.2<br>(2.1-4.9)                            | 3.1%<br>(2.2-4.2%)                   | 12%<br>(7.4-18%)                    | 0.37<br>(0.23-0.55) | 54<br>(37-76)       |
| Luxembourg | 2010 | Female | 25 to 29 | 80%<br>(66-90%)                | 20%<br>(9.6-34%)         | 3.5<br>(2.3-5)                              | 3.2%<br>(2.2-4.2%)                   | 13%<br>(8.1-17%)                    | 0.68<br>(0.44-0.91) | 76<br>(52-99)       |
| Luxembourg | 2010 | Female | 30 to 34 | 81%<br>(67-92%)                | 19%<br>(8-33%)           | 3.7<br>(2.4-5.2)                            | 3.4%<br>(2.5-4.5%)                   | 15%<br>(11-19%)                     | 1<br>(0.75-1.3)     | 93<br>(68-120)      |
| Luxembourg | 2010 | Female | 35 to 39 | 83%<br>(69-93%)                | 17%<br>(7.2-31%)         | 3.9<br>(2.6-5.5)                            | 3.9%<br>(2.9-5.2%)                   | 17%<br>(13-21%)                     | 1.6<br>(1.2-2)      | 120<br>(91-150)     |
| Luxembourg | 2010 | Female | 40 to 44 | 82%<br>(66-92%)                | 18%<br>(8.1-34%)         | 4.1<br>(2.7-5.7)                            | 4.7%<br>(3.5-6.3%)                   | 17%<br>(14-21%)                     | 2.7<br>(2.2-3.4)    | 170<br>(130-220)    |
| Luxembourg | 2010 | Female | 45 to 49 | 82%<br>(65-91%)                | 18%<br>(8.6-35%)         | 4.5<br>(3-6.5)                              | 7.1%<br>(5.3-9.3%)                   | 18%<br>(15-23%)                     | 6.1<br>(4.8-7.7)    | 300<br>(230-390)    |
| Luxembourg | 2010 | Female | 50 to 54 | 83%<br>(68-92%)                | 17%<br>(7.7-32%)         | 5.2<br>(3.7-7.3)                            | 8.1%<br>(6.1-10%)                    | 18%<br>(14-22%)                     | 7.7<br>(6.1-9.7)    | 340<br>(260-440)    |
| Luxembourg | 2010 | Female | 55 to 59 | 81%<br>(67-92%)                | 19%<br>(8.4-33%)         | 5.8<br>(4.1-8.1)                            | 8.9%<br>(6.6-12%)                    | 17%<br>(14-22%)                     | 9.3<br>(7.4-12)     | 360<br>(270-470)    |
| Luxembourg | 2010 | Female | 60 to 64 | 80%<br>(63-91%)                | 20%<br>(8.8-37%)         | 5.6<br>(3.8-8.2)                            | 8.8%<br>(6.2-12%)                    | 15%<br>(11-20%)                     | 11<br>(8.5-15)      | 360<br>(260-490)    |
| Luxembourg | 2010 | Female | 65 to 69 | 79%<br>(61-91%)                | 21%<br>(8.9-39%)         | 4.9<br>(3.4-6.6)                            | 7.6%<br>(5.2-10%)                    | 12%<br>(8.8-16%)                    | 11<br>(7.8-14)      | 290<br>(200-400)    |
| Luxembourg | 2010 | Female | 70 to 74 | 75%<br>(59-88%)                | 25%<br>(12-41%)          | 3.9<br>(2.5-5.7)                            | 6.2%<br>(3.5-9.6%)                   | 9.5%<br>(5.7-14%)                   | 12<br>(7.4-18)      | 270<br>(150-410)    |
| Luxembourg | 2010 | Female | 75 to 79 | 72%<br>(52-87%)                | 28%<br>(13-48%)          | 3.4<br>(2-5.2)                              | 5.3%<br>(2.3-9.1%)                   | 7.3%<br>(3.3-12%)                   | 16<br>(7.2-27)      | 260<br>(110-470)    |
| Luxembourg | 2010 | Female | 80 to 84 | 71%<br>(50-86%)                | 29%<br>(14-50%)          | 3.4<br>(2.2-4.9)                            | 5.5%<br>(2.5-9.3%)                   | 6.9%<br>(3.2-12%)                   | 24<br>(11-40)       | 290<br>(130-490)    |

| Location   | Year | Sex    | Age      | Prevalence of current drinkers | Prevalence of abstainers | Population average of standard drinks daily | Percent of total attributable deaths | Percent of total attributable DALYs | Attributable deaths | Attributable DALYs  |
|------------|------|--------|----------|--------------------------------|--------------------------|---------------------------------------------|--------------------------------------|-------------------------------------|---------------------|---------------------|
| Luxembourg | 2010 | Female | 85 to 89 | 70%<br>(52-84%)                | 30%<br>(16-48%)          | 3.4<br>(2.1-5.1)                            | 5.3%<br>(2.2-9.5%)                   | 6.3%<br>(2.4-12%)                   | 26<br>(9.6-47)      | 220<br>(86-390)     |
| Luxembourg | 2010 | Female | 90 to 94 | 69%<br>(51-84%)                | 31%<br>(16-49%)          | 3.4<br>(2-5.3)                              | 5.1%<br>(1.2-10%)                    | 5.9%<br>(1.1-12%)                   | 15<br>(2.6-30)      | 84<br>(20-160)      |
| Luxembourg | 2010 | Female | 95 plus  | 68%<br>(47-86%)                | 32%<br>(14-53%)          | 3.3<br>(1.7-5.9)                            | 5.3%<br>(0.24-11%)                   | 6%<br>(0.085-13%)                   | 7.7<br>(0.11-17)    | 28<br>(1.3-60)      |
| Luxembourg | 2010 | Male   | All Ages | 84%<br>(76-90%)                | 16%<br>(10-24%)          | 7.4<br>(6-9)                                | 13%<br>(11-16%)                      | 18%<br>(15-21%)                     | 310<br>(250-370)    | 8100<br>(6900-9400) |
| Luxembourg | 2010 | Male   | 15 to 19 | 75%<br>(55-89%)                | 25%<br>(11-45%)          | 4.4<br>(2.8-6.6)                            | 6%<br>(4.1-8.4%)                     | 19%<br>(11-28%)                     | 0.78<br>(0.48-1.2)  | 87<br>(60-120)      |
| Luxembourg | 2010 | Male   | 20 to 24 | 81%<br>(64-91%)                | 19%<br>(8.6-36%)         | 6.9<br>(4.5-10)                             | 14%<br>(10-18%)                      | 27%<br>(19-37%)                     | 2.7<br>(1.9-3.6)    | 260<br>(190-330)    |
| Luxembourg | 2010 | Male   | 25 to 29 | 85%<br>(74-93%)                | 15%<br>(6.6-26%)         | 8<br>(5.5-11)                               | 12%<br>(9.2-15%)                     | 28%<br>(21-36%)                     | 2.6<br>(1.9-3.4)    | 260<br>(200-320)    |
| Luxembourg | 2010 | Male   | 30 to 34 | 88%<br>(77-95%)                | 12%<br>(4.9-23%)         | 8.5<br>(6-12)                               | 12%<br>(9-14%)                       | 29%<br>(22-35%)                     | 3.4<br>(2.6-4.2)    | 290<br>(220-350)    |
| Luxembourg | 2010 | Male   | 35 to 39 | 90%<br>(79-96%)                | 10%<br>(3.9-21%)         | 8.5<br>(5.9-12)                             | 13%<br>(10-16%)                      | 30%<br>(24-36%)                     | 5.5<br>(4.3-6.6)    | 380<br>(310-450)    |
| Luxembourg | 2010 | Male   | 40 to 44 | 90%<br>(79-96%)                | 9.9%<br>(3.6-21%)        | 9<br>(6.5-12)                               | 13%<br>(11-16%)                      | 30%<br>(25-35%)                     | 8<br>(6.6-9.4)      | 480<br>(400-570)    |
| Luxembourg | 2010 | Male   | 45 to 49 | 91%<br>(77-97%)                | 9.2%<br>(3.5-23%)        | 10<br>(7.2-14)                              | 16%<br>(14-19%)                      | 30%<br>(26-34%)                     | 15<br>(13-17)       | 750<br>(640-870)    |
| Luxembourg | 2010 | Male   | 50 to 54 | 91%<br>(80-97%)                | 8.5%<br>(3.1-20%)        | 11<br>(7.9-15)                              | 17%<br>(14-20%)                      | 28%<br>(24-32%)                     | 20<br>(17-23)       | 860<br>(740-990)    |
| Luxembourg | 2010 | Male   | 55 to 59 | 91%<br>(81-97%)                | 9.1%<br>(3.2-19%)        | 12<br>(8.4-16)                              | 17%<br>(14-20%)                      | 25%<br>(21-29%)                     | 25<br>(21-29)       | 900<br>(770-1100)   |
| Luxembourg | 2010 | Male   | 60 to 64 | 91%<br>(79-97%)                | 9.4%<br>(3.2-21%)        | 11<br>(7.9-16)                              | 16%<br>(13-18%)                      | 21%<br>(18-25%)                     | 27<br>(22-32)       | 850<br>(690-1000)   |
| Luxembourg | 2010 | Male   | 65 to 69 | 90%<br>(80-96%)                | 9.8%<br>(3.6-20%)        | 10<br>(7.6-14)                              | 15%<br>(12-18%)                      | 19%<br>(16-23%)                     | 29<br>(23-34)       | 750<br>(610-900)    |
| Luxembourg | 2010 | Male   | 70 to 74 | 90%<br>(79-96%)                | 10%<br>(4.1-21%)         | 9.3<br>(6.4-13)                             | 14%<br>(11-17%)                      | 17%<br>(13-21%)                     | 34<br>(27-42)       | 720<br>(560-900)    |
| Luxembourg | 2010 | Male   | 75 to 79 | 89%<br>(77-95%)                | 11%<br>(4.6-23%)         | 8.6<br>(5.7-12)                             | 13%<br>(9.3-16%)                     | 15%<br>(11-19%)                     | 39<br>(28-50)       | 640<br>(470-800)    |
| Luxembourg | 2010 | Male   | 80 to 84 | 86%<br>(73-94%)                | 14%<br>(5.9-27%)         | 8.1<br>(5.7-11)                             | 13%<br>(9.5-16%)                     | 15%<br>(11-19%)                     | 48<br>(36-63)       | 570<br>(430-730)    |
| Luxembourg | 2010 | Male   | 85 to 89 | 84%<br>(70-93%)                | 16%<br>(6.8-30%)         | 7.5<br>(4.8-11)                             | 12%<br>(8.7-16%)                     | 14%<br>(9.6-18%)                    | 30<br>(21-40)       | 240<br>(170-320)    |
| Luxembourg | 2010 | Male   | 90 to 94 | 84%<br>(70-94%)                | 16%<br>(6.3-30%)         | 7.4<br>(4.5-11)                             | 12%<br>(7.2-16%)                     | 13%<br>(8-18%)                      | 11<br>(7-16)        | 63<br>(40-85)       |
| Luxembourg | 2010 | Male   | 95 plus  | 84%<br>(68-95%)                | 16%<br>(5.2-32%)         | 7.2<br>(3.9-12)                             | 11%<br>(5.8-16%)                     | 13%<br>(6.4-18%)                    | 4<br>(2-5.8)        | 15<br>(7.6-21)      |
| Luxembourg | 2016 | Female | All Ages | 75%<br>(67-82%)                | 25%<br>(18-33%)          | 3.4<br>(2.5-4.6)                            | 5.5%<br>(3.7-7.7%)                   | 7.8%<br>(4.4-13%)                   | 170<br>(92-270)     | 3700<br>(2500-5100) |



| Location   | Year | Sex    | Age      | Prevalence of current drinkers | Prevalence of abstainers | Population average of standard drinks daily | Percent of total attributable deaths | Percent of total attributable DALYs | Attributable deaths | Attributable DALYs   |
|------------|------|--------|----------|--------------------------------|--------------------------|---------------------------------------------|--------------------------------------|-------------------------------------|---------------------|----------------------|
| Luxembourg | 2016 | Female | 15 to 19 | 72%<br>(53-86%)                | 28%<br>(14-47%)          | 2.5<br>(1.4-3.9)                            | 2.2%<br>(1.4-3.4%)                   | 9.6%<br>(5.2-15%)                   | 0.32<br>(0.17-0.5)  | 38<br>(23-56)        |
| Luxembourg | 2016 | Female | 20 to 24 | 76%<br>(59-89%)                | 24%<br>(11-41%)          | 3.2<br>(1.9-5.1)                            | 3.1%<br>(2.1-4.3%)                   | 12%<br>(7-18%)                      | 0.46<br>(0.26-0.69) | 65<br>(44-91)        |
| Luxembourg | 2016 | Female | 25 to 29 | 79%<br>(64-90%)                | 21%<br>(10-36%)          | 3.4<br>(2-5.2)                              | 3.1%<br>(2.2-4.2%)                   | 12%<br>(7.9-17%)                    | 0.71<br>(0.46-1)    | 84<br>(59-110)       |
| Luxembourg | 2016 | Female | 30 to 34 | 80%<br>(64-92%)                | 20%<br>(8.5-36%)         | 3.6<br>(2.2-5.6)                            | 3.3%<br>(2.4-4.6%)                   | 15%<br>(11-20%)                     | 1.2<br>(0.85-1.7)   | 110<br>(76-150)      |
| Luxembourg | 2016 | Female | 35 to 39 | 81%<br>(66-92%)                | 19%<br>(8.3-34%)         | 3.7<br>(2.2-5.8)                            | 3.9%<br>(2.8-5.4%)                   | 17%<br>(12-21%)                     | 1.9<br>(1.3-2.4)    | 140<br>(99-180)      |
| Luxembourg | 2016 | Female | 40 to 44 | 82%<br>(66-92%)                | 18%<br>(7.8-34%)         | 4.1<br>(2.5-6)                              | 4.7%<br>(3.4-6.4%)                   | 18%<br>(14-22%)                     | 2.9<br>(2.2-3.8)    | 180<br>(130-240)     |
| Luxembourg | 2016 | Female | 45 to 49 | 82%<br>(64-92%)                | 18%<br>(7.9-36%)         | 4.5<br>(2.8-6.8)                            | 6.6%<br>(4.6-8.8%)                   | 18%<br>(14-23%)                     | 6.1<br>(4.5-7.9)    | 310<br>(220-410)     |
| Luxembourg | 2016 | Female | 50 to 54 | 81%<br>(64-92%)                | 19%<br>(8.1-36%)         | 5<br>(3.2-7.2)                              | 7.6%<br>(5.5-10%)                    | 17%<br>(14-22%)                     | 8.7<br>(6.4-12)     | 390<br>(280-520)     |
| Luxembourg | 2016 | Female | 55 to 59 | 81%<br>(64-92%)                | 19%<br>(8.3-36%)         | 5.6<br>(3.7-8.4)                            | 8.4%<br>(6.1-11%)                    | 17%<br>(13-22%)                     | 10<br>(7.6-14)      | 400<br>(290-560)     |
| Luxembourg | 2016 | Female | 60 to 64 | 79%<br>(60-92%)                | 21%<br>(8.2-40%)         | 5.5<br>(3.5-8.6)                            | 8.3%<br>(5.7-12%)                    | 15%<br>(11-19%)                     | 12<br>(8.6-17)      | 390<br>(270-550)     |
| Luxembourg | 2016 | Female | 65 to 69 | 78%<br>(59-90%)                | 22%<br>(9.5-41%)         | 4.7<br>(3-7)                                | 7.2%<br>(4.6-10%)                    | 12%<br>(8-16%)                      | 12<br>(8.4-18)      | 340<br>(220-490)     |
| Luxembourg | 2016 | Female | 70 to 74 | 75%<br>(57-88%)                | 25%<br>(12-43%)          | 3.9<br>(2.3-6.1)                            | 6.1%<br>(3.1-9.9%)                   | 9.3%<br>(5.3-15%)                   | 13<br>(7.1-20)      | 270<br>(140-450)     |
| Luxembourg | 2016 | Female | 75 to 79 | 72%<br>(52-87%)                | 28%<br>(13-48%)          | 3.4<br>(1.9-5.7)                            | 5.3%<br>(2.1-9.9%)                   | 7.2%<br>(3.1-13%)                   | 16<br>(6.6-30)      | 270<br>(100-500)     |
| Luxembourg | 2016 | Female | 80 to 84 | 70%<br>(48-85%)                | 30%<br>(15-52%)          | 3.3<br>(1.9-5.2)                            | 5.2%<br>(2-9.7%)                     | 6.6%<br>(2.5-12%)                   | 23<br>(9.2-44)      | 280<br>(110-530)     |
| Luxembourg | 2016 | Female | 85 to 89 | 67%<br>(48-82%)                | 33%<br>(18-52%)          | 3.2<br>(1.8-5)                              | 4.9%<br>(1.7-9.6%)                   | 5.9%<br>(1.8-11%)                   | 29<br>(8.9-58)      | 240<br>(80-470)      |
| Luxembourg | 2016 | Female | 90 to 94 | 66%<br>(47-83%)                | 34%<br>(17-53%)          | 3.1<br>(1.7-5.4)                            | 4.6%<br>(0.97-9.7%)                  | 5.3%<br>(0.83-11%)                  | 21<br>(3.2-46)      | 120<br>(24-250)      |
| Luxembourg | 2016 | Female | 95 plus  | 66%<br>(43-85%)                | 34%<br>(15-57%)          | 3.1<br>(1.5-5.7)                            | 4.8%<br>(0.14-11%)                   | 5.4%<br>(-0.078-13%)                | 7.7<br>(-0.11-18)   | 28<br>(0.85-62)      |
| Luxembourg | 2016 | Male   | All Ages | 83%<br>(76-89%)                | 17%<br>(11-24%)          | 7.3<br>(5.3-9.8)                            | 13%<br>(11-15%)                      | 17%<br>(13-20%)                     | 330<br>(260-410)    | 8600<br>(7000-10000) |
| Luxembourg | 2016 | Male   | 15 to 19 | 75%<br>(55-89%)                | 25%<br>(11-45%)          | 4.4<br>(2.5-6.8)                            | 5.9%<br>(3.9-8.4%)                   | 18%<br>(10-28%)                     | 0.84<br>(0.47-1.3)  | 94<br>(61-130)       |
| Luxembourg | 2016 | Male   | 20 to 24 | 80%<br>(63-91%)                | 20%<br>(8.9-37%)         | 6.7<br>(4.1-10)                             | 12%<br>(8.8-16%)                     | 26%<br>(17-35%)                     | 2.2<br>(1.4-3.1)    | 240<br>(170-320)     |
| Luxembourg | 2016 | Male   | 25 to 29 | 83%<br>(70-93%)                | 17%<br>(7.3-30%)         | 7.7<br>(4.8-12)                             | 11%<br>(8.8-14%)                     | 27%<br>(19-35%)                     | 2.8<br>(1.9-3.8)    | 280<br>(220-370)     |
| Luxembourg | 2016 | Male   | 30 to 34 | 86%<br>(71-94%)                | 14%<br>(5.6-29%)         | 8.2<br>(5.1-12)                             | 11%<br>(8.6-14%)                     | 27%<br>(20-34%)                     | 4<br>(2.8-5.2)      | 330<br>(250-430)     |

| Location   | Year | Sex    | Age      | Prevalence of current drinkers | Prevalence of abstainers | Population average of standard drinks daily | Percent of total attributable deaths | Percent of total attributable DALYs | Attributable deaths   | Attributable DALYs |
|------------|------|--------|----------|--------------------------------|--------------------------|---------------------------------------------|--------------------------------------|-------------------------------------|-----------------------|--------------------|
| Luxembourg | 2016 | Male   | 35 to 39 | 88%<br>(75-95%)                | 12%<br>(4.7-25%)         | 8.1<br>(5.3-12)                             | 12%<br>(9.2-15%)                     | 29%<br>(22-35%)                     | 5.4<br>(4-7)          | 380<br>(290-480)   |
| Luxembourg | 2016 | Male   | 40 to 44 | 89%<br>(77-96%)                | 11%<br>(3.9-23%)         | 8.7<br>(5.8-13)                             | 13%<br>(10-16%)                      | 30%<br>(24-35%)                     | 8.2<br>(6.3-10)       | 490<br>(390-600)   |
| Luxembourg | 2016 | Male   | 45 to 49 | 90%<br>(76-96%)                | 10%<br>(3.8-24%)         | 10<br>(6.4-15)                              | 15%<br>(12-18%)                      | 29%<br>(25-34%)                     | 14<br>(11-18)         | 720<br>(580-870)   |
| Luxembourg | 2016 | Male   | 50 to 54 | 90%<br>(79-96%)                | 9.9%<br>(3.6-21%)        | 11<br>(6.9-16)                              | 16%<br>(13-19%)                      | 28%<br>(24-31%)                     | 22<br>(18-27)         | 960<br>(780-1100)  |
| Luxembourg | 2016 | Male   | 55 to 59 | 90%<br>(79-97%)                | 10%<br>(3.2-21%)         | 11<br>(7.5-16)                              | 16%<br>(13-19%)                      | 24%<br>(21-28%)                     | 26<br>(21-32)         | 980<br>(800-1200)  |
| Luxembourg | 2016 | Male   | 60 to 64 | 89%<br>(76-97%)                | 11%<br>(3.3-24%)         | 11<br>(7.2-16)                              | 15%<br>(12-18%)                      | 21%<br>(17-24%)                     | 29<br>(23-35)         | 910<br>(720-1100)  |
| Luxembourg | 2016 | Male   | 65 to 69 | 89%<br>(75-96%)                | 11%<br>(3.9-25%)         | 10<br>(6.7-14)                              | 14%<br>(11-17%)                      | 19%<br>(15-22%)                     | 33<br>(26-40)         | 860<br>(680-1000)  |
| Luxembourg | 2016 | Male   | 70 to 74 | 88%<br>(76-95%)                | 12%<br>(4.7-24%)         | 8.9<br>(5.8-13)                             | 13%<br>(9.8-16%)                     | 16%<br>(13-20%)                     | 33<br>(25-42)         | 700<br>(520-880)   |
| Luxembourg | 2016 | Male   | 75 to 79 | 87%<br>(74-95%)                | 13%<br>(5.4-26%)         | 8.2<br>(5.1-13)                             | 12%<br>(8.5-15%)                     | 14%<br>(10-19%)                     | 37<br>(26-48)         | 610<br>(440-780)   |
| Luxembourg | 2016 | Male   | 80 to 84 | 86%<br>(71-94%)                | 14%<br>(6-29%)           | 7.8<br>(5-12)                               | 12%<br>(8.3-15%)                     | 14%<br>(9.7-18%)                    | 47<br>(32-63)         | 560<br>(390-740)   |
| Luxembourg | 2016 | Male   | 85 to 89 | 84%<br>(69-93%)                | 16%<br>(6.7-31%)         | 7.5<br>(4.7-11)                             | 11%<br>(7.6-15%)                     | 13%<br>(8.6-18%)                    | 45<br>(29-60)         | 370<br>(250-490)   |
| Luxembourg | 2016 | Male   | 90 to 94 | 84%<br>(70-94%)                | 16%<br>(5.8-30%)         | 7.3<br>(4.3-12)                             | 11%<br>(6.6-15%)                     | 12%<br>(7.3-17%)                    | 19<br>(11-26)         | 100<br>(62-140)    |
| Luxembourg | 2016 | Male   | 95 plus  | 84%<br>(67-95%)                | 16%<br>(4.5-33%)         | 7.1<br>(3.5-12)                             | 11%<br>(4.7-15%)                     | 13%<br>(5-18%)                      | 3.9<br>(1.6-5.7)      | 14<br>(6.3-20)     |
| Malta      | 1990 | Female | All Ages | 73%<br>(64-81%)                | 27%<br>(19-36%)          | 0.98<br>(0.87-1.1)                          | -0.18%<br>(-1.4-1.2%)                | -1.8%<br>(-4.5-0.89%)               | -24<br>(-60-11)       | -78<br>(-630-500)  |
| Malta      | 1990 | Female | 15 to 19 | 70%<br>(50-86%)                | 30%<br>(14-50%)          | 0.97<br>(0.63-1.4)                          | 1.2%<br>(0.7-1.7%)                   | 4.1%<br>(1.5-7.1%)                  | 0.068<br>(0.025-0.12) | 14<br>(8.1-21)     |
| Malta      | 1990 | Female | 20 to 24 | 75%<br>(57-88%)                | 25%<br>(12-43%)          | 1.3<br>(0.85-1.7)                           | 1.9%<br>(1.3-2.6%)                   | 3.9%<br>(1.7-6.3%)                  | 0.11<br>(0.048-0.19)  | 26<br>(16-38)      |
| Malta      | 1990 | Female | 25 to 29 | 78%<br>(62-90%)                | 22%<br>(10-38%)          | 1.2<br>(0.82-1.5)                           | 1.5%<br>(0.99-2%)                    | 3.1%<br>(1.2-5.3%)                  | 0.11<br>(0.042-0.19)  | 27<br>(18-39)      |
| Malta      | 1990 | Female | 30 to 34 | 79%<br>(62-91%)                | 21%<br>(9.4-38%)         | 1.1<br>(0.77-1.5)                           | 1.2%<br>(0.78-1.7%)                  | 3.3%<br>(1.5-5.2%)                  | 0.19<br>(0.083-0.31)  | 27<br>(17-38)      |
| Malta      | 1990 | Female | 35 to 39 | 81%<br>(65-92%)                | 19%<br>(8.1-35%)         | 1.2<br>(0.82-1.6)                           | 1.4%<br>(0.82-2.1%)                  | 4.2%<br>(2.1-6.3%)                  | 0.43<br>(0.21-0.66)   | 33<br>(20-48)      |
| Malta      | 1990 | Female | 40 to 44 | 81%<br>(65-92%)                | 19%<br>(8-35%)           | 1.2<br>(0.88-1.7)                           | 1.6%<br>(0.77-2.5%)                  | 4.6%<br>(2.1-7.1%)                  | 0.84<br>(0.41-1.3)    | 46<br>(23-72)      |
| Malta      | 1990 | Female | 45 to 49 | 81%<br>(63-92%)                | 19%<br>(8.4-37%)         | 1.3<br>(0.89-1.8)                           | 1.7%<br>(0.76-3%)                    | 4.8%<br>(2.4-7.4%)                  | 0.74<br>(0.37-1.2)    | 32<br>(14-54)      |
| Malta      | 1990 | Female | 50 to 54 | 81%<br>(63-91%)                | 19%<br>(8.7-37%)         | 1.4<br>(1-1.9)                              | 1.6%<br>(0.37-3%)                    | 3.9%<br>(1.4-6.7%)                  | 1.3<br>(0.44-2.1)     | 43<br>(9.5-80)     |

| Location | Year | Sex    | Age      | Prevalence of current drinkers | Prevalence of abstainers | Population average of standard drinks daily | Percent of total attributable deaths | Percent of total attributable DALYs | Attributable deaths   | Attributable DALYs  |
|----------|------|--------|----------|--------------------------------|--------------------------|---------------------------------------------|--------------------------------------|-------------------------------------|-----------------------|---------------------|
| Malta    | 1990 | Female | 55 to 59 | 80%<br>(63-91%)                | 20%<br>(8.8-37%)         | 1.6<br>(1.1-2.2)                            | 1.2%<br>(-0.56-3%)                   | 2.4%<br>(-0.44-5.5%)                | 1.2<br>(-0.22-2.8)    | 34<br>(-18-86)      |
| Malta    | 1990 | Female | 60 to 64 | 78%<br>(59-91%)                | 22%<br>(8.6-41%)         | 1.6<br>(1.1-2.3)                            | -0.19%<br>(-2.5-2.2%)                | 0.027%<br>(-3.4-3.5%)               | 0.02<br>(-2.8-2.8)    | -6.3<br>(-85-73)    |
| Malta    | 1990 | Female | 65 to 69 | 76%<br>(56-90%)                | 24%<br>(9.8-44%)         | 1.5<br>(1.1-2.1)                            | -1.2%<br>(-3.9-1.4%)                 | -1.5%<br>(-5-2%)                    | -1.9<br>(-6.4-2.5)    | -51<br>(-150-55)    |
| Malta    | 1990 | Female | 70 to 74 | 74%<br>(54-87%)                | 26%<br>(13-46%)          | 1.4<br>(0.92-2.1)                           | -1.8%<br>(-4.5-0.91%)                | -2.3%<br>(-5.8-1.3%)                | -3.7<br>(-9.6-2.2)    | -72<br>(-180-36)    |
| Malta    | 1990 | Female | 75 to 79 | 71%<br>(51-86%)                | 29%<br>(14-49%)          | 1.3<br>(0.83-2)                             | -2.3%<br>(-4.8-0.58%)                | -2.8%<br>(-6.1-0.61%)               | -6.2<br>(-14-1.4)     | -89<br>(-200-21)    |
| Malta    | 1990 | Female | 80 to 84 | 68%<br>(46-84%)                | 32%<br>(16-54%)          | 1.3<br>(0.79-1.8)                           | -2.7%<br>(-5.5-0.047%)               | -3.2%<br>(-6.6-0.06%)               | -8.7<br>(-18-0.15)    | -90<br>(-190-1.6)   |
| Malta    | 1990 | Female | 85 to 89 | 65%<br>(45-81%)                | 35%<br>(19-55%)          | 1.2<br>(0.7-1.8)                            | -2.3%<br>(-4.8-0.016%)               | -2.9%<br>(-5.8-0.023%)              | -5.4<br>(-11-0.043)   | -39<br>(-80-0.3)    |
| Malta    | 1990 | Female | 90 to 94 | 64%<br>(45-81%)                | 36%<br>(19-55%)          | 1.2<br>(0.63-1.8)                           | -2.1%<br>(-4.3-0.23%)                | -2.7%<br>(-5.4-0.065%)              | -2.2<br>(-4.4-0.055)  | -11<br>(-22-1.2)    |
| Malta    | 1990 | Female | 95 plus  | 64%<br>(40-84%)                | 36%<br>(16-60%)          | 1.1<br>(0.55-2)                             | -2%<br>(-4.4-0.46%)                  | -2.7%<br>(-5.7-0.3%)                | -0.83<br>(-1.8-0.092) | -2.6<br>(-5.7-0.62) |
| Malta    | 1990 | Male   | All Ages | 78%<br>(68-86%)                | 22%<br>(14-32%)          | 1.7<br>(1.6-1.9)                            | 2.1%<br>(0.43-3.8%)                  | 0.64%<br>(-2.3-3.5%)                | 9<br>(-32-50)         | 980<br>(200-1800)   |
| Malta    | 1990 | Male   | 15 to 19 | 72%<br>(51-88%)                | 28%<br>(12-49%)          | 1.4<br>(0.9-2)                              | 3.9%<br>(2.5-5.5%)                   | 6.9%<br>(3.3-11%)                   | 0.49<br>(0.24-0.79)   | 57<br>(37-81)       |
| Malta    | 1990 | Male   | 20 to 24 | 78%<br>(59-90%)                | 22%<br>(10-41%)          | 2.1<br>(1.4-2.9)                            | 7.4%<br>(5.1-9.9%)                   | 9.8%<br>(5.1-15%)                   | 0.9<br>(0.48-1.4)     | 110<br>(77-160)     |
| Malta    | 1990 | Male   | 25 to 29 | 81%<br>(67-92%)                | 19%<br>(8.3-33%)         | 2<br>(1.4-2.6)                              | 5.9%<br>(4.3-7.8%)                   | 8.1%<br>(4.4-13%)                   | 0.87<br>(0.46-1.3)    | 120<br>(80-160)     |
| Malta    | 1990 | Male   | 30 to 34 | 84%<br>(68-94%)                | 16%<br>(6.2-32%)         | 2<br>(1.4-2.6)                              | 4.6%<br>(3.2-6.2%)                   | 7%<br>(3.8-11%)                     | 0.85<br>(0.46-1.3)    | 97<br>(66-130)      |
| Malta    | 1990 | Male   | 35 to 39 | 87%<br>(74-95%)                | 13%<br>(5.2-26%)         | 2<br>(1.4-2.7)                              | 3.9%<br>(2.7-5.3%)                   | 6.1%<br>(3.1-9.4%)                  | 0.82<br>(0.41-1.3)    | 80<br>(54-110)      |
| Malta    | 1990 | Male   | 40 to 44 | 88%<br>(74-96%)                | 12%<br>(4.2-26%)         | 2.4<br>(1.8-3.1)                            | 3.7%<br>(2.2-5.4%)                   | 5.6%<br>(2.1-9%)                    | 1.4<br>(0.49-2.2)     | 99<br>(55-140)      |
| Malta    | 1990 | Male   | 45 to 49 | 89%<br>(71-96%)                | 11%<br>(4.1-29%)         | 3<br>(2.1-4.1)                              | 4.4%<br>(2-7.2%)                     | 6%<br>(2-11%)                       | 1.5<br>(0.48-2.7)     | 80<br>(34-130)      |
| Malta    | 1990 | Male   | 50 to 54 | 89%<br>(75-96%)                | 11%<br>(4-25%)           | 3.3<br>(2.4-4.5)                            | 4.3%<br>(1.4-7.4%)                   | 5.7%<br>(1.2-10%)                   | 2.7<br>(0.52-5)       | 120<br>(40-210)     |
| Malta    | 1990 | Male   | 55 to 59 | 89%<br>(76-96%)                | 11%<br>(3.7-24%)         | 3.3<br>(2.4-4.3)                            | 3.6%<br>(0.72-6.8%)                  | 4.2%<br>(0.2-8.7%)                  | 3.1<br>(0.16-6.5)     | 120<br>(24-240)     |
| Malta    | 1990 | Male   | 60 to 64 | 88%<br>(74-96%)                | 12%<br>(3.9-26%)         | 3.1<br>(2.2-4.3)                            | 2.4%<br>(-0.98-6.1%)                 | 2.5%<br>(-1.9-7.2%)                 | 3.1<br>(-2.2-9)       | 100<br>(-43-270)    |
| Malta    | 1990 | Male   | 65 to 69 | 88%<br>(73-96%)                | 12%<br>(4.2-27%)         | 2.8<br>(2.1-3.6)                            | 1%<br>(-2.3-4.3%)                    | 0.87%<br>(-3.1-4.9%)                | 1.5<br>(-5.3-8.2)     | 48<br>(-110-200)    |
| Malta    | 1990 | Male   | 70 to 74 | 87%<br>(72-94%)                | 13%<br>(5.6-28%)         | 2.4<br>(1.7-3.3)                            | 0.13%<br>(-2.9-3.2%)                 | -0.12%<br>(-3.7-3.5%)               | -0.23<br>(-7.5-7.2)   | 6<br>(-130-140)     |

| Location | Year | Sex    | Age      | Prevalence of current drinkers | Prevalence of abstainers | Population average of standard drinks daily | Percent of total attributable deaths | Percent of total attributable DALYs | Attributable deaths   | Attributable DALYs  |
|----------|------|--------|----------|--------------------------------|--------------------------|---------------------------------------------|--------------------------------------|-------------------------------------|-----------------------|---------------------|
| Malta    | 1990 | Male   | 75 to 79 | 85%<br>(70-94%)                | 15%<br>(5.8-30%)         | 2.2<br>(1.4-3.1)                            | -0.53%<br>(-3.4-2.5%)                | -0.87%<br>(-4.3-2.6%)               | -2<br>(-9.9-6.1)      | -20<br>(-130-95)    |
| Malta    | 1990 | Male   | 80 to 84 | 83%<br>(68-93%)                | 17%<br>(7-32%)           | 2<br>(1.4-2.8)                              | -0.99%<br>(-3.7-1.7%)                | -1.4%<br>(-4.7-1.7%)                | -3<br>(-10-3.9)       | -26<br>(-99-45)     |
| Malta    | 1990 | Male   | 85 to 89 | 81%<br>(66-92%)                | 19%<br>(7.8-34%)         | 1.9<br>(1.3-2.7)                            | -1%<br>(-3.4-1.3%)                   | -1.6%<br>(-4.5-1.2%)                | -1.8<br>(-5.2-1.4)    | -11<br>(-36-13)     |
| Malta    | 1990 | Male   | 90 to 94 | 82%<br>(66-93%)                | 18%<br>(7.1-34%)         | 1.8<br>(1.1-2.7)                            | -1.2%<br>(-3.5-1.2%)                 | -1.8%<br>(-4.7-1.2%)                | -0.87<br>(-2.3-0.56)  | -3.5<br>(-11-3.7)   |
| Malta    | 1990 | Male   | 95 plus  | 83%<br>(64-94%)                | 17%<br>(5.6-36%)         | 1.8<br>(0.95-2.9)                           | -1.1%<br>(-3.4-1.5%)                 | -1.8%<br>(-4.8-1.3%)                | -0.24<br>(-0.63-0.18) | -0.6<br>(-1.9-0.84) |
| Malta    | 1995 | Female | All Ages | 73%<br>(65-80%)                | 27%<br>(20-35%)          | 1.1<br>(0.94-1.2)                           | 0.2%<br>(-0.93-1.4%)                 | -1.1%<br>(-3.5-1.5%)                | -14<br>(-47-19)       | 90<br>(-400-600)    |
| Malta    | 1995 | Female | 15 to 19 | 70%<br>(51-85%)                | 30%<br>(15-49%)          | 1<br>(0.67-1.4)                             | 1.2%<br>(0.77-1.7%)                  | 3.6%<br>(1.4-6%)                    | 0.099<br>(0.038-0.17) | 17<br>(10-26)       |
| Malta    | 1995 | Female | 20 to 24 | 75%<br>(57-88%)                | 25%<br>(12-43%)          | 1.3<br>(0.9-1.8)                            | 1.9%<br>(1.3-2.6%)                   | 4%<br>(1.8-6.4%)                    | 0.1<br>(0.045-0.17)   | 27<br>(17-40)       |
| Malta    | 1995 | Female | 25 to 29 | 77%<br>(61-90%)                | 23%<br>(10-39%)          | 1.2<br>(0.84-1.7)                           | 1.5%<br>(1-2%)                       | 3.3%<br>(1.5-5.4%)                  | 0.081<br>(0.036-0.13) | 21<br>(14-30)       |
| Malta    | 1995 | Female | 30 to 34 | 79%<br>(62-91%)                | 21%<br>(8.9-38%)         | 1.2<br>(0.81-1.6)                           | 1.2%<br>(0.77-1.7%)                  | 3.3%<br>(1.8-5.1%)                  | 0.15<br>(0.077-0.24)  | 24<br>(15-34)       |
| Malta    | 1995 | Female | 35 to 39 | 81%<br>(65-91%)                | 19%<br>(8.6-35%)         | 1.2<br>(0.86-1.7)                           | 1.3%<br>(0.81-1.8%)                  | 4.3%<br>(2.4-6.4%)                  | 0.35<br>(0.19-0.54)   | 30<br>(19-44)       |
| Malta    | 1995 | Female | 40 to 44 | 81%<br>(64-92%)                | 19%<br>(8.1-36%)         | 1.3<br>(0.91-1.8)                           | 1.6%<br>(0.87-2.5%)                  | 5%<br>(2.8-7.5%)                    | 0.71<br>(0.4-1.1)     | 41<br>(24-63)       |
| Malta    | 1995 | Female | 45 to 49 | 81%<br>(62-92%)                | 19%<br>(8.4-38%)         | 1.4<br>(0.94-1.9)                           | 1.7%<br>(0.83-2.8%)                  | 5.3%<br>(3-7.8%)                    | 1.2<br>(0.69-1.8)     | 53<br>(26-84)       |
| Malta    | 1995 | Female | 50 to 54 | 81%<br>(63-91%)                | 19%<br>(8.5-37%)         | 1.5<br>(1.1-2)                              | 2%<br>(0.77-3.3%)                    | 4.9%<br>(2.5-7.4%)                  | 1.2<br>(0.6-1.9)      | 43<br>(17-70)       |
| Malta    | 1995 | Female | 55 to 59 | 80%<br>(63-91%)                | 20%<br>(8.6-37%)         | 1.7<br>(1.2-2.3)                            | 1.6%<br>(-0.0049-3.2%)               | 3.4%<br>(0.78-6.3%)                 | 1.7<br>(0.37-3.1)     | 48<br>(-0.14-99)    |
| Malta    | 1995 | Female | 60 to 64 | 78%<br>(60-91%)                | 22%<br>(8.6-40%)         | 1.7<br>(1.2-2.4)                            | 0.66%<br>(-1.4-2.6%)                 | 1.4%<br>(-1.7-4.5%)                 | 0.98<br>(-1.2-3.1)    | 21<br>(-42-86)      |
| Malta    | 1995 | Female | 65 to 69 | 76%<br>(56-90%)                | 24%<br>(9.7-44%)         | 1.6<br>(1.1-2.2)                            | -0.47%<br>(-2.8-1.9%)                | -0.46%<br>(-3.7-2.9%)               | -0.5<br>(-4.1-3.1)    | -17<br>(-100-69)    |
| Malta    | 1995 | Female | 70 to 74 | 74%<br>(55-87%)                | 26%<br>(13-45%)          | 1.5<br>(0.98-2.2)                           | -1.1%<br>(-3.6-1.4%)                 | -1.4%<br>(-4.8-2%)                  | -2.5<br>(-8.3-3.5)    | -50<br>(-160-64)    |
| Malta    | 1995 | Female | 75 to 79 | 70%<br>(50-86%)                | 30%<br>(14-50%)          | 1.4<br>(0.85-2.1)                           | -1.6%<br>(-4.1-0.93%)                | -2.1%<br>(-5.3-1.2%)                | -4.1<br>(-10-2.4)     | -60<br>(-150-34)    |
| Malta    | 1995 | Female | 80 to 84 | 67%<br>(45-84%)                | 33%<br>(16-55%)          | 1.3<br>(0.82-1.9)                           | -2%<br>(-4.5-0.43%)                  | -2.4%<br>(-5.5-0.47%)               | -5.8<br>(-13-1.1)     | -60<br>(-140-13)    |
| Malta    | 1995 | Female | 85 to 89 | 65%<br>(45-81%)                | 35%<br>(19-55%)          | 1.3<br>(0.75-1.9)                           | -1.7%<br>(-3.9-0.49%)                | -2.2%<br>(-4.8-0.44%)               | -5<br>(-11-0.99)      | -36<br>(-82-10)     |
| Malta    | 1995 | Female | 90 to 94 | 64%<br>(44-81%)                | 36%<br>(19-56%)          | 1.2<br>(0.66-1.9)                           | -1.5%<br>(-3.5-0.48%)                | -2.1%<br>(-4.5-0.34%)               | -2.2<br>(-4.8-0.36)   | -11<br>(-24-3.3)    |

| Location | Year | Sex    | Age      | Prevalence of current drinkers | Prevalence of abstainers | Population average of standard drinks daily | Percent of total attributable deaths | Percent of total attributable DALYs | Attributable deaths   | Attributable DALYs  |
|----------|------|--------|----------|--------------------------------|--------------------------|---------------------------------------------|--------------------------------------|-------------------------------------|-----------------------|---------------------|
| Malta    | 1995 | Female | 95 plus  | 64%<br>(41-84%)                | 36%<br>(16-59%)          | 1.2<br>(0.58-2.1)                           | -1.5%<br>(-3.6-0.79%)                | -2.2%<br>(-4.9-0.55%)               | -0.73<br>(-1.7-0.19)  | -2.2<br>(-5.2-1.1)  |
| Malta    | 1995 | Male   | All Ages | 78%<br>(69-86%)                | 22%<br>(14-31%)          | 1.9<br>(1.7-2.1)                            | 2.6%<br>(0.99-4.2%)                  | 1.3%<br>(-1.4-4%)                   | 19<br>(-20-58)        | 1200<br>(470-2000)  |
| Malta    | 1995 | Male   | 15 to 19 | 71%<br>(51-87%)                | 29%<br>(13-49%)          | 1.5<br>(0.95-2.1)                           | 3.8%<br>(2.5-5.4%)                   | 6.8%<br>(3.3-11%)                   | 0.54<br>(0.26-0.84)   | 64<br>(41-92)       |
| Malta    | 1995 | Male   | 20 to 24 | 77%<br>(58-90%)                | 23%<br>(9.7-42%)         | 2.2<br>(1.5-3)                              | 7.4%<br>(5.1-9.9%)                   | 9.8%<br>(5.3-15%)                   | 0.96<br>(0.52-1.4)    | 120<br>(81-170)     |
| Malta    | 1995 | Male   | 25 to 29 | 81%<br>(65-92%)                | 19%<br>(7.6-35%)         | 2.1<br>(1.5-2.7)                            | 6.2%<br>(4.3-8.1%)                   | 8.3%<br>(4.5-12%)                   | 0.84<br>(0.45-1.3)    | 100<br>(69-140)     |
| Malta    | 1995 | Male   | 30 to 34 | 84%<br>(67-94%)                | 16%<br>(6.1-33%)         | 2.1<br>(1.5-2.7)                            | 4.7%<br>(3.3-6.3%)                   | 7.1%<br>(3.8-11%)                   | 0.86<br>(0.47-1.3)    | 96<br>(66-130)      |
| Malta    | 1995 | Male   | 35 to 39 | 86%<br>(72-95%)                | 14%<br>(5.1-28%)         | 2.1<br>(1.5-3)                              | 4.2%<br>(2.8-5.6%)                   | 6.5%<br>(3.5-9.7%)                  | 1.1<br>(0.57-1.7)     | 97<br>(64-130)      |
| Malta    | 1995 | Male   | 40 to 44 | 88%<br>(74-96%)                | 12%<br>(4.1-26%)         | 2.5<br>(1.8-3.3)                            | 3.9%<br>(2.5-5.5%)                   | 6.4%<br>(3-9.6%)                    | 1.2<br>(0.57-1.9)     | 92<br>(57-130)      |
| Malta    | 1995 | Male   | 45 to 49 | 88%<br>(72-96%)                | 12%<br>(4.1-28%)         | 3.2<br>(2.3-4.4)                            | 4.8%<br>(2.7-7.3%)                   | 7.2%<br>(3.4-12%)                   | 2.8<br>(1.3-4.7)      | 160<br>(86-240)     |
| Malta    | 1995 | Male   | 50 to 54 | 89%<br>(74-96%)                | 11%<br>(4-26%)           | 3.5<br>(2.5-4.7)                            | 4.9%<br>(2.2-8%)                     | 6.7%<br>(2.3-12%)                   | 2.4<br>(0.81-4.1)     | 110<br>(47-170)     |
| Malta    | 1995 | Male   | 55 to 59 | 88%<br>(76-96%)                | 12%<br>(4-24%)           | 3.5<br>(2.6-4.6)                            | 4.3%<br>(1.8-7.5%)                   | 5.4%<br>(1.7-9.9%)                  | 4<br>(1.3-7.3)        | 150<br>(63-260)     |
| Malta    | 1995 | Male   | 60 to 64 | 88%<br>(73-96%)                | 12%<br>(4.1-27%)         | 3.3<br>(2.4-4.5)                            | 3.2%<br>(0.28-6.9%)                  | 3.7%<br>(-0.2-8.5%)                 | 3.9<br>(-0.2-9)       | 130<br>(11-270)     |
| Malta    | 1995 | Male   | 65 to 69 | 88%<br>(73-96%)                | 12%<br>(4.2-27%)         | 3<br>(2.2-3.9)                              | 1.8%<br>(-1.4-6%)                    | 1.9%<br>(-1.7-5.5%)                 | 3.1<br>(-2.8-9.2)     | 88<br>(-46-230)     |
| Malta    | 1995 | Male   | 70 to 74 | 87%<br>(73-95%)                | 13%<br>(5.4-27%)         | 2.6<br>(1.8-3.5)                            | 0.73%<br>(-2.3-3.8%)                 | 0.56%<br>(-3-4.3%)                  | 1.2<br>(-6.5-9.3)     | 35<br>(-110-180)    |
| Malta    | 1995 | Male   | 75 to 79 | 85%<br>(70-94%)                | 15%<br>(5.9-30%)         | 2.3<br>(1.5-3.2)                            | 0.041%<br>(-2.8-3%)                  | -0.23%<br>(-3.6-3.2%)               | -0.52<br>(-8-7.1)     | 1.6<br>(-110-110)   |
| Malta    | 1995 | Male   | 80 to 84 | 83%<br>(67-93%)                | 17%<br>(6.6-33%)         | 2.1<br>(1.4-2.9)                            | -0.33%<br>(-2.9-2%)                  | -0.63%<br>(-3.6-2.1%)               | -1.4<br>(-8-4.6)      | -8.6<br>(-77-55)    |
| Malta    | 1995 | Male   | 85 to 89 | 82%<br>(65-92%)                | 18%<br>(7.5-35%)         | 2<br>(1.3-2.8)                              | -0.53%<br>(-2.9-1.7%)                | -0.93%<br>(-3.8-1.7%)               | -1.4<br>(-5.6-2.5)    | -7<br>(-38-22)      |
| Malta    | 1995 | Male   | 90 to 94 | 82%<br>(64-93%)                | 18%<br>(6.8-36%)         | 1.9<br>(1.2-2.9)                            | -0.65%<br>(-2.8-1.6%)                | -1.2%<br>(-3.9-1.5%)                | -0.73<br>(-2.4-0.93)  | -2.6<br>(-11-5.8)   |
| Malta    | 1995 | Male   | 95 plus  | 82%<br>(63-95%)                | 18%<br>(5.3-37%)         | 1.9<br>(1-3)                                | -0.7%<br>(-3-2%)                     | -1.3%<br>(-4.3-1.9%)                | -0.24<br>(-0.77-0.34) | -0.53<br>(-2.3-1.5) |
| Malta    | 2000 | Female | All Ages | 73%<br>(65-81%)                | 27%<br>(19-35%)          | 1<br>(0.91-1.2)                             | 0.16%<br>(-0.91-1.3%)                | -1.2%<br>(-3.5-1.1%)                | -18<br>(-52-17)       | 74<br>(-410-580)    |
| Malta    | 2000 | Female | 15 to 19 | 70%<br>(51-86%)                | 30%<br>(14-49%)          | 0.96<br>(0.64-1.3)                          | 1.2%<br>(0.73-1.8%)                  | 3.3%<br>(1.2-5.6%)                  | 0.1<br>(0.036-0.18)   | 17<br>(9.9-26)      |
| Malta    | 2000 | Female | 20 to 24 | 75%<br>(57-88%)                | 25%<br>(12-43%)          | 1.3<br>(0.84-1.7)                           | 1.9%<br>(1.3-2.5%)                   | 3.6%<br>(1.5-5.7%)                  | 0.13<br>(0.056-0.21)  | 32<br>(20-45)       |

| Location | Year | Sex    | Age      | Prevalence of current drinkers | Prevalence of abstainers | Population average of standard drinks daily | Percent of total attributable deaths | Percent of total attributable DALYs | Attributable deaths   | Attributable DALYs |
|----------|------|--------|----------|--------------------------------|--------------------------|---------------------------------------------|--------------------------------------|-------------------------------------|-----------------------|--------------------|
| Malta    | 2000 | Female | 25 to 29 | 78%<br>(62-90%)                | 22%<br>(10-38%)          | 1.2<br>(0.78-1.6)                           | 1.4%<br>(1-1.9%)                     | 3%<br>(1.2-4.9%)                    | 0.096<br>(0.039-0.16) | 23<br>(16-34)      |
| Malta    | 2000 | Female | 30 to 34 | 80%<br>(63-91%)                | 20%<br>(9-37%)           | 1.1<br>(0.75-1.6)                           | 1.2%<br>(0.81-1.7%)                  | 3.4%<br>(1.7-5.2%)                  | 0.15<br>(0.076-0.23)  | 20<br>(13-29)      |
| Malta    | 2000 | Female | 35 to 39 | 81%<br>(65-91%)                | 19%<br>(8.7-35%)         | 1.2<br>(0.79-1.6)                           | 1.3%<br>(0.83-1.8%)                  | 4.3%<br>(2.5-6.3%)                  | 0.33<br>(0.19-0.5)    | 29<br>(19-41)      |
| Malta    | 2000 | Female | 40 to 44 | 81%<br>(65-92%)                | 19%<br>(8.1-35%)         | 1.2<br>(0.86-1.6)                           | 1.4%<br>(0.74-2.1%)                  | 4.8%<br>(2.8-7.2%)                  | 0.59<br>(0.33-0.9)    | 36<br>(20-54)      |
| Malta    | 2000 | Female | 45 to 49 | 81%<br>(62-92%)                | 19%<br>(8.3-38%)         | 1.3<br>(0.9-1.8)                            | 1.7%<br>(0.77-2.7%)                  | 4.7%<br>(2.5-7.2%)                  | 1.1<br>(0.6-1.8)      | 50<br>(24-79)      |
| Malta    | 2000 | Female | 50 to 54 | 81%<br>(63-92%)                | 19%<br>(8.5-37%)         | 1.4<br>(1-1.9)                              | 1.8%<br>(0.75-3%)                    | 4.6%<br>(2.5-7%)                    | 1.9<br>(1-2.9)        | 67<br>(28-110)     |
| Malta    | 2000 | Female | 55 to 59 | 80%<br>(63-91%)                | 20%<br>(8.6-37%)         | 1.6<br>(1.1-2.2)                            | 1.6%<br>(0.031-3.1%)                 | 3.4%<br>(0.81-6.1%)                 | 1.4<br>(0.31-2.5)     | 39<br>(0.83-79)    |
| Malta    | 2000 | Female | 60 to 64 | 78%<br>(59-91%)                | 22%<br>(8.6-41%)         | 1.6<br>(1.1-2.3)                            | 0.71%<br>(-1-2.4%)                   | 1.6%<br>(-1.1-4.4%)                 | 1.2<br>(-0.85-3.4)    | 26<br>(-36-90)     |
| Malta    | 2000 | Female | 65 to 69 | 77%<br>(55-90%)                | 23%<br>(9.8-45%)         | 1.5<br>(1.1-2.1)                            | -0.28%<br>(-2.2-1.7%)                | -0.13%<br>(-2.9-2.9%)               | -0.14<br>(-3.1-3)     | -10<br>(-82-65)    |
| Malta    | 2000 | Female | 70 to 74 | 74%<br>(55-87%)                | 26%<br>(13-45%)          | 1.4<br>(0.93-2)                             | -1%<br>(-3.3-1.2%)                   | -1.3%<br>(-4.3-1.7%)                | -2.1<br>(-7.2-3)      | -44<br>(-140-53)   |
| Malta    | 2000 | Female | 75 to 79 | 71%<br>(50-86%)                | 29%<br>(14-50%)          | 1.3<br>(0.83-2)                             | -1.7%<br>(-4-0.62%)                  | -2.1%<br>(-5.3-0.75%)               | -5.4<br>(-13-2)       | -79<br>(-190-31)   |
| Malta    | 2000 | Female | 80 to 84 | 68%<br>(45-84%)                | 32%<br>(16-55%)          | 1.3<br>(0.78-1.8)                           | -2%<br>(-4.3-0.3%)                   | -2.5%<br>(-5.3-0.29%)               | -6.7<br>(-14-0.83)    | -70<br>(-150-10)   |
| Malta    | 2000 | Female | 85 to 89 | 65%<br>(45-81%)                | 35%<br>(19-55%)          | 1.2<br>(0.69-1.8)                           | -1.9%<br>(-4.1-0.27%)                | -2.4%<br>(-5-0.29%)                 | -5.8<br>(-12-0.64)    | -42<br>(-91-6.1)   |
| Malta    | 2000 | Female | 90 to 94 | 64%<br>(45-82%)                | 36%<br>(18-55%)          | 1.2<br>(0.64-1.8)                           | -1.7%<br>(-3.6-0.27%)                | -2.3%<br>(-4.7-0.2%)                | -3.3<br>(-6.8-0.28)   | -16<br>(-34-2.6)   |
| Malta    | 2000 | Female | 95 plus  | 64%<br>(40-84%)                | 36%<br>(16-60%)          | 1.1<br>(0.54-2)                             | -1.7%<br>(-3.7-0.56%)                | -2.3%<br>(-4.9-0.4%)                | -1.3<br>(-2.9-0.22)   | -4.2<br>(-9.4-1.4) |
| Malta    | 2000 | Male   | All Ages | 80%<br>(70-87%)                | 20%<br>(13-30%)          | 1.9<br>(1.7-2.1)                            | 2.4%<br>(0.79-4%)                    | 1%<br>(-1.9-3.7%)                   | 17<br>(-28-58)        | 1200<br>(400-2000) |
| Malta    | 2000 | Male   | 15 to 19 | 72%<br>(51-88%)                | 28%<br>(12-49%)          | 1.4<br>(0.89-2)                             | 3.8%<br>(2.4-5.3%)                   | 6.6%<br>(3.2-11%)                   | 0.51<br>(0.25-0.82)   | 59<br>(38-85)      |
| Malta    | 2000 | Male   | 20 to 24 | 78%<br>(59-90%)                | 22%<br>(10-41%)          | 2.1<br>(1.4-2.9)                            | 7%<br>(4.9-9.4%)                     | 9.2%<br>(4.9-14%)                   | 0.99<br>(0.54-1.5)    | 130<br>(90-180)    |
| Malta    | 2000 | Male   | 25 to 29 | 82%<br>(67-92%)                | 18%<br>(8.1-33%)         | 2<br>(1.4-2.6)                              | 5.9%<br>(4.2-7.8%)                   | 7.9%<br>(4.1-12%)                   | 0.95<br>(0.51-1.5)    | 110<br>(77-150)    |
| Malta    | 2000 | Male   | 30 to 34 | 85%<br>(69-94%)                | 15%<br>(6.1-31%)         | 2<br>(1.4-2.6)                              | 4.5%<br>(3.2-6%)                     | 7.1%<br>(3.9-11%)                   | 0.62<br>(0.34-0.95)   | 74<br>(52-100)     |
| Malta    | 2000 | Male   | 35 to 39 | 87%<br>(74-95%)                | 13%<br>(5.1-26%)         | 2<br>(1.4-2.8)                              | 4%<br>(2.7-5.4%)                     | 6.4%<br>(3.5-9.8%)                  | 0.99<br>(0.52-1.6)    | 92<br>(61-130)     |
| Malta    | 2000 | Male   | 40 to 44 | 88%<br>(74-96%)                | 12%<br>(4.2-26%)         | 2.4<br>(1.8-3.1)                            | 3.8%<br>(2.4-5.2%)                   | 6.2%<br>(2.9-9.5%)                  | 1.3<br>(0.61-2)       | 99<br>(60-140)     |

| Location | Year | Sex    | Age      | Prevalence of current drinkers | Prevalence of abstainers | Population average of standard drinks daily | Percent of total attributable deaths | Percent of total attributable DALYs | Attributable deaths   | Attributable DALYs |
|----------|------|--------|----------|--------------------------------|--------------------------|---------------------------------------------|--------------------------------------|-------------------------------------|-----------------------|--------------------|
| Malta    | 2000 | Male   | 45 to 49 | 89%<br>(71-96%)                | 11%<br>(4.1-29%)         | 3<br>(2.2-4.1)                              | 4.6%<br>(2.5-6.9%)                   | 6.9%<br>(3.3-11%)                   | 2.6<br>(1.2-4.3)      | 140<br>(77-220)    |
| Malta    | 2000 | Male   | 50 to 54 | 89%<br>(75-96%)                | 11%<br>(3.9-25%)         | 3.4<br>(2.4-4.4)                            | 4.7%<br>(2.2-7.3%)                   | 6.6%<br>(2.6-11%)                   | 4.4<br>(1.6-7.3)      | 200<br>(91-310)    |
| Malta    | 2000 | Male   | 55 to 59 | 89%<br>(77-96%)                | 11%<br>(3.6-23%)         | 3.3<br>(2.5-4.3)                            | 4%<br>(1.5-6.8%)                     | 5%<br>(1.5-8.9%)                    | 3.1<br>(0.9-5.6)      | 120<br>(44-200)    |
| Malta    | 2000 | Male   | 60 to 64 | 88%<br>(73-96%)                | 12%<br>(3.8-27%)         | 3.1<br>(2.2-4.2)                            | 2.9%<br>(0.084-5.9%)                 | 3.3%<br>(-0.5-7.1%)                 | 3.8<br>(-0.62-8.4)    | 130<br>(3.6-260)   |
| Malta    | 2000 | Male   | 65 to 69 | 88%<br>(73-96%)                | 12%<br>(4.1-27%)         | 2.8<br>(2.1-3.6)                            | 1.5%<br>(-1.4-4.2%)                  | 1.5%<br>(-2.1-4.9%)                 | 2.6<br>(-3.6-8.6)     | 76<br>(-68-220)    |
| Malta    | 2000 | Male   | 70 to 74 | 87%<br>(73-95%)                | 13%<br>(5.4-27%)         | 2.4<br>(1.7-3.3)                            | 0.57%<br>(-2.3-3.4%)                 | 0.41%<br>(-3.1-3.8%)                | 0.99<br>(-7.1-9)      | 31<br>(-120-180)   |
| Malta    | 2000 | Male   | 75 to 79 | 85%<br>(70-94%)                | 15%<br>(5.7-30%)         | 2.2<br>(1.4-3.1)                            | -0.16%<br>(-3-2.6%)                  | -0.44%<br>(-3.7-2.8%)               | -1.2<br>(-10-7.8)     | -7.5<br>(-130-120) |
| Malta    | 2000 | Male   | 80 to 84 | 84%<br>(68-93%)                | 16%<br>(6.9-32%)         | 2<br>(1.4-2.8)                              | -0.5%<br>(-3.1-1.9%)                 | -0.82%<br>(-3.8-2%)                 | -2<br>(-9.2-4.7)      | -15<br>(-88-57)    |
| Malta    | 2000 | Male   | 85 to 89 | 82%<br>(66-92%)                | 18%<br>(7.8-34%)         | 1.9<br>(1.2-2.7)                            | -0.69%<br>(-2.9-1.6%)                | -1.1%<br>(-3.8-1.5%)                | -1.8<br>(-6.5-2.6)    | -10<br>(-44-23)    |
| Malta    | 2000 | Male   | 90 to 94 | 82%<br>(67-93%)                | 18%<br>(7.1-33%)         | 1.8<br>(1.1-2.7)                            | -0.84%<br>(-3-1.3%)                  | -1.3%<br>(-4-1.3%)                  | -1<br>(-3.2-1)        | -4.1<br>(-15-6.5)  |
| Malta    | 2000 | Male   | 95 plus  | 82%<br>(63-94%)                | 18%<br>(5.6-37%)         | 1.8<br>(0.97-2.9)                           | -0.87%<br>(-3.1-1.5%)                | -1.5%<br>(-4.4-1.4%)                | -0.36<br>(-1.1-0.34)  | -0.9<br>(-3.3-1.6) |
| Malta    | 2005 | Female | All Ages | 73%<br>(64-80%)                | 27%<br>(20-36%)          | 1<br>(0.88-1.2)                             | 0.27%<br>(-0.6-1.2%)                 | -0.89%<br>(-2.8-0.99%)              | -14<br>(-44-16)       | 130<br>(-280-570)  |
| Malta    | 2005 | Female | 15 to 19 | 74%<br>(56-87%)                | 26%<br>(13-44%)          | 0.99<br>(0.65-1.3)                          | 1.1%<br>(0.69-1.6%)                  | 3.6%<br>(1.3-6%)                    | 0.067<br>(0.024-0.11) | 14<br>(8.3-21)     |
| Malta    | 2005 | Female | 20 to 24 | 78%<br>(62-90%)                | 22%<br>(10-38%)          | 1.3<br>(0.87-1.7)                           | 1.9%<br>(1.3-2.6%)                   | 3.5%<br>(1.6-5.5%)                  | 0.11<br>(0.047-0.18)  | 27<br>(17-39)      |
| Malta    | 2005 | Female | 25 to 29 | 80%<br>(66-91%)                | 20%<br>(9.5-34%)         | 1.2<br>(0.8-1.6)                            | 1.4%<br>(0.98-2%)                    | 2.9%<br>(1.3-4.6%)                  | 0.099<br>(0.041-0.16) | 25<br>(16-35)      |
| Malta    | 2005 | Female | 30 to 34 | 80%<br>(65-91%)                | 20%<br>(9.3-35%)         | 1.1<br>(0.74-1.5)                           | 1.2%<br>(0.82-1.7%)                  | 3.4%<br>(1.9-5.1%)                  | 0.15<br>(0.081-0.24)  | 22<br>(14-32)      |
| Malta    | 2005 | Female | 35 to 39 | 80%<br>(65-91%)                | 20%<br>(9.2-35%)         | 1.1<br>(0.76-1.6)                           | 1.3%<br>(0.81-1.8%)                  | 4.3%<br>(2.6-6.3%)                  | 0.28<br>(0.16-0.42)   | 25<br>(16-36)      |
| Malta    | 2005 | Female | 40 to 44 | 79%<br>(62-91%)                | 21%<br>(9.3-38%)         | 1.2<br>(0.81-1.6)                           | 1.3%<br>(0.74-2%)                    | 4.8%<br>(2.8-7.1%)                  | 0.49<br>(0.28-0.74)   | 31<br>(18-47)      |
| Malta    | 2005 | Female | 45 to 49 | 79%<br>(60-90%)                | 21%<br>(10-40%)          | 1.2<br>(0.84-1.6)                           | 1.6%<br>(0.8-2.5%)                   | 4.6%<br>(2.7-6.7%)                  | 1<br>(0.59-1.6)       | 47<br>(24-72)      |
| Malta    | 2005 | Female | 50 to 54 | 79%<br>(61-90%)                | 21%<br>(10-39%)          | 1.3<br>(0.94-1.8)                           | 1.7%<br>(0.74-2.7%)                  | 4.5%<br>(2.6-6.7%)                  | 1.5<br>(0.8-2.2)      | 53<br>(25-84)      |
| Malta    | 2005 | Female | 55 to 59 | 77%<br>(59-89%)                | 23%<br>(11-41%)          | 1.4<br>(1-2)                                | 1.7%<br>(0.48-3%)                    | 3.7%<br>(1.6-6%)                    | 2.3<br>(0.98-3.8)     | 68<br>(20-120)     |
| Malta    | 2005 | Female | 60 to 64 | 75%<br>(55-89%)                | 25%<br>(11-45%)          | 1.5<br>(1-2.1)                              | 1%<br>(-0.34-2.4%)                   | 2.3%<br>(0.0071-4.6%)               | 1.6<br>(0.0048-3.2)   | 36<br>(-11-88)     |

| Location | Year | Sex    | Age      | Prevalence of current drinkers | Prevalence of abstainers | Population average of standard drinks daily | Percent of total attributable deaths | Percent of total attributable DALYs | Attributable deaths | Attributable DALYs |
|----------|------|--------|----------|--------------------------------|--------------------------|---------------------------------------------|--------------------------------------|-------------------------------------|---------------------|--------------------|
| Malta    | 2005 | Female | 65 to 69 | 74%<br>(54-88%)                | 26%<br>(12-46%)          | 1.4<br>(1-1.9)                              | 0.031%<br>(-1.4-1.5%)                | 0.44%<br>(-1.7-2.7%)                | 0.5<br>(-2-3)       | 1.4<br>(-61-67)    |
| Malta    | 2005 | Female | 70 to 74 | 69%<br>(50-84%)                | 31%<br>(16-50%)          | 1.2<br>(0.78-1.8)                           | -0.57%<br>(-2.2-1.1%)                | -0.65%<br>(-3-1.6%)                 | -1.1<br>(-5-2.7)    | -25<br>(-100-48)   |
| Malta    | 2005 | Female | 75 to 79 | 62%<br>(41-81%)                | 38%<br>(19-59%)          | 1.1<br>(0.66-1.6)                           | -1.1%<br>(-2.9-0.55%)                | -1.4%<br>(-3.8-0.73%)               | -3.9<br>(-10-1.9)   | -57<br>(-150-28)   |
| Malta    | 2005 | Female | 80 to 84 | 63%<br>(40-80%)                | 37%<br>(20-60%)          | 1.1<br>(0.66-1.6)                           | -1.6%<br>(-3.6-0.13%)                | -2.1%<br>(-4.5-0.1%)                | -6.7<br>(-14-0.34)  | -70<br>(-150-5.5)  |
| Malta    | 2005 | Female | 85 to 89 | 63%<br>(43-80%)                | 37%<br>(20-57%)          | 1.1<br>(0.67-1.7)                           | -1.7%<br>(-3.6-0.18%)                | -2.2%<br>(-4.7-0.13%)               | -5.9<br>(-12-0.38)  | -43<br>(-92-4.7)   |
| Malta    | 2005 | Female | 90 to 94 | 62%<br>(43-80%)                | 38%<br>(20-57%)          | 1.1<br>(0.61-1.7)                           | -1.5%<br>(-3.3-0.2%)                 | -2.1%<br>(-4.2-0.15%)               | -3.1<br>(-6.5-0.24) | -15<br>(-33-2.1)   |
| Malta    | 2005 | Female | 95 plus  | 63%<br>(39-83%)                | 37%<br>(17-61%)          | 1.1<br>(0.52-1.9)                           | -1.5%<br>(-3.5-0.38%)                | -2.1%<br>(-4.6-0.26%)               | -1.6<br>(-3.5-0.2)  | -5<br>(-11-1.4)    |
| Malta    | 2005 | Male   | All Ages | 82%<br>(74-89%)                | 18%<br>(11-26%)          | 2<br>(1.8-2.2)                              | 2.5%<br>(0.98-3.9%)                  | 1.1%<br>(-1.5-3.5%)                 | 17<br>(-23-54)      | 1200<br>(490-1900) |
| Malta    | 2005 | Male   | 15 to 19 | 74%<br>(54-88%)                | 26%<br>(12-46%)          | 1.4<br>(0.92-2)                             | 3.6%<br>(2.3-5%)                     | 6.5%<br>(3.2-10%)                   | 0.44<br>(0.21-0.7)  | 56<br>(36-80)      |
| Malta    | 2005 | Male   | 20 to 24 | 81%<br>(64-91%)                | 19%<br>(8.6-36%)         | 2.1<br>(1.5-2.9)                            | 7%<br>(4.8-9.2%)                     | 9.2%<br>(4.8-14%)                   | 0.91<br>(0.48-1.4)  | 120<br>(82-170)    |
| Malta    | 2005 | Male   | 25 to 29 | 85%<br>(73-93%)                | 15%<br>(6.6-27%)         | 2<br>(1.5-2.7)                              | 5.7%<br>(4.1-7.4%)                   | 7.9%<br>(4.3-12%)                   | 0.84<br>(0.44-1.3)  | 110<br>(78-150)    |
| Malta    | 2005 | Male   | 30 to 34 | 88%<br>(76-95%)                | 12%<br>(4.7-24%)         | 2<br>(1.4-2.7)                              | 4.5%<br>(3.2-6.1%)                   | 7.2%<br>(4-11%)                     | 0.72<br>(0.38-1.1)  | 83<br>(57-110)     |
| Malta    | 2005 | Male   | 35 to 39 | 89%<br>(78-96%)                | 11%<br>(4.2-22%)         | 2<br>(1.4-2.8)                              | 4%<br>(2.8-5.4%)                     | 6.9%<br>(3.8-10%)                   | 0.73<br>(0.38-1.1)  | 71<br>(48-97)      |
| Malta    | 2005 | Male   | 40 to 44 | 90%<br>(78-96%)                | 10%<br>(4-22%)           | 2.4<br>(1.7-3.1)                            | 3.8%<br>(2.5-5.3%)                   | 6.5%<br>(3.3-9.8%)                  | 1.3<br>(0.66-2)     | 97<br>(64-140)     |
| Malta    | 2005 | Male   | 45 to 49 | 89%<br>(76-96%)                | 11%<br>(3.9-24%)         | 3<br>(2.2-4.1)                              | 4.3%<br>(2.6-6.4%)                   | 7.2%<br>(3.7-11%)                   | 2.1<br>(1.1-3.4)    | 130<br>(75-190)    |
| Malta    | 2005 | Male   | 50 to 54 | 90%<br>(78-96%)                | 9.8%<br>(3.6-22%)        | 3.4<br>(2.5-4.4)                            | 4.6%<br>(2.2-7.2%)                   | 6.8%<br>(2.7-11%)                   | 3.6<br>(1.4-6)      | 170<br>(80-260)    |
| Malta    | 2005 | Male   | 55 to 59 | 90%<br>(80-97%)                | 9.5%<br>(3.3-20%)        | 3.4<br>(2.6-4.2)                            | 3.9%<br>(1.7-6.5%)                   | 5.2%<br>(1.9-9.1%)                  | 4.8<br>(1.7-8.5)    | 190<br>(82-320)    |
| Malta    | 2005 | Male   | 60 to 64 | 88%<br>(75-96%)                | 12%<br>(3.9-25%)         | 3.1<br>(2.2-4.1)                            | 3%<br>(0.5-5.7%)                     | 3.5%<br>(0.17-7.1%)                 | 3<br>(0.14-6.1)     | 98<br>(16-190)     |
| Malta    | 2005 | Male   | 65 to 69 | 88%<br>(75-96%)                | 12%<br>(4.2-25%)         | 2.7<br>(2.1-3.5)                            | 1.7%<br>(-0.79-4.2%)                 | 1.8%<br>(-1.5-5%)                   | 2.9<br>(-2.3-7.8)   | 84<br>(-37-200)    |
| Malta    | 2005 | Male   | 70 to 74 | 88%<br>(75-95%)                | 12%<br>(5.1-25%)         | 2.4<br>(1.7-3.3)                            | 0.7%<br>(-1.7-3.1%)                  | 0.56%<br>(-2.4-3.5%)                | 1.2<br>(-5.2-7.5)   | 35<br>(-85-160)    |
| Malta    | 2005 | Male   | 75 to 79 | 85%<br>(71-94%)                | 15%<br>(5.8-29%)         | 2.1<br>(1.4-3)                              | 0.08%<br>(-2.3-2.6%)                 | -0.18%<br>(-2.9-2.8%)               | -0.47<br>(-8-7.2)   | 3.7<br>(-110-120)  |
| Malta    | 2005 | Male   | 80 to 84 | 84%<br>(68-93%)                | 16%<br>(6.6-32%)         | 2<br>(1.3-2.7)                              | -0.4%<br>(-2.7-1.9%)                 | -0.71%<br>(-3.5-2%)                 | -1.9<br>(-9.9-5.4)  | -13<br>(-95-64)    |



| Location | Year | Sex    | Age      | Prevalence of current drinkers | Prevalence of abstainers | Population average of standard drinks daily | Percent of total attributable deaths | Percent of total attributable DALYs | Attributable deaths   | Attributable DALYs |
|----------|------|--------|----------|--------------------------------|--------------------------|---------------------------------------------|--------------------------------------|-------------------------------------|-----------------------|--------------------|
| Malta    | 2005 | Male   | 85 to 89 | 83%<br>(67-93%)                | 17%<br>(7-33%)           | 1.9<br>(1.2-2.6)                            | -0.55%<br>(-2.7-1.6%)                | -0.93%<br>(-3.6-1.5%)               | -1.6<br>(-6.3-2.7)    | -8.7<br>(-43-24)   |
| Malta    | 2005 | Male   | 90 to 94 | 83%<br>(68-93%)                | 17%<br>(6.6-32%)         | 1.8<br>(1.2-2.7)                            | -0.69%<br>(-2.8-1.4%)                | -1.2%<br>(-3.7-1.3%)                | -0.98<br>(-3.2-1.1)   | -3.7<br>(-15-7.2)  |
| Malta    | 2005 | Male   | 95 plus  | 83%<br>(66-95%)                | 17%<br>(5.1-34%)         | 1.8<br>(0.95-2.9)                           | -0.62%<br>(-2.7-1.7%)                | -1.2%<br>(-3.8-1.6%)                | -0.33<br>(-1.1-0.45)  | -0.76<br>(-3.3-2)  |
| Malta    | 2010 | Female | All Ages | 72%<br>(64-80%)                | 28%<br>(20-36%)          | 1.1<br>(0.92-1.3)                           | 0.44%<br>(-0.39-1.3%)                | -0.53%<br>(-2.4-1.4%)               | -8.3<br>(-37-22)      | 220<br>(-190-640)  |
| Malta    | 2010 | Female | 15 to 19 | 73%<br>(57-87%)                | 27%<br>(13-43%)          | 1<br>(0.68-1.4)                             | 1.1%<br>(0.71-1.6%)                  | 3.6%<br>(1.5-6%)                    | 0.063<br>(0.025-0.11) | 15<br>(9.3-23)     |
| Malta    | 2010 | Female | 20 to 24 | 78%<br>(62-89%)                | 22%<br>(11-38%)          | 1.4<br>(0.91-1.9)                           | 1.8%<br>(1.2-2.5%)                   | 3.7%<br>(1.8-5.8%)                  | 0.081<br>(0.039-0.13) | 22<br>(14-32)      |
| Malta    | 2010 | Female | 25 to 29 | 80%<br>(66-91%)                | 20%<br>(9.4-34%)         | 1.2<br>(0.86-1.6)                           | 1.5%<br>(1-2.1%)                     | 2.9%<br>(1.2-4.7%)                  | 0.13<br>(0.054-0.21)  | 23<br>(15-32)      |
| Malta    | 2010 | Female | 30 to 34 | 80%<br>(65-91%)                | 20%<br>(9.3-35%)         | 1.2<br>(0.79-1.6)                           | 1.2%<br>(0.77-1.6%)                  | 3.6%<br>(2.1-5.2%)                  | 0.16<br>(0.091-0.24)  | 26<br>(17-37)      |
| Malta    | 2010 | Female | 35 to 39 | 79%<br>(63-91%)                | 21%<br>(9.4-37%)         | 1.2<br>(0.8-1.7)                            | 1.2%<br>(0.76-1.7%)                  | 4.6%<br>(2.8-6.5%)                  | 0.24<br>(0.15-0.36)   | 25<br>(16-35)      |
| Malta    | 2010 | Female | 40 to 44 | 79%<br>(61-91%)                | 21%<br>(9.4-39%)         | 1.2<br>(0.84-1.7)                           | 1.3%<br>(0.76-2%)                    | 5.1%<br>(3.1-7.4%)                  | 0.44<br>(0.27-0.66)   | 29<br>(17-43)      |
| Malta    | 2010 | Female | 45 to 49 | 79%<br>(59-90%)                | 21%<br>(10-41%)          | 1.3<br>(0.86-1.8)                           | 1.5%<br>(0.77-2.3%)                  | 4.9%<br>(3-7.1%)                    | 0.86<br>(0.51-1.3)    | 40<br>(21-63)      |
| Malta    | 2010 | Female | 50 to 54 | 78%<br>(60-90%)                | 22%<br>(10-40%)          | 1.4<br>(0.96-1.8)                           | 1.7%<br>(0.74-2.8%)                  | 4.8%<br>(2.7-6.9%)                  | 1.5<br>(0.83-2.2)     | 54<br>(25-87)      |
| Malta    | 2010 | Female | 55 to 59 | 76%<br>(60-89%)                | 24%<br>(11-40%)          | 1.5<br>(1.1-2.1)                            | 1.7%<br>(0.49-2.9%)                  | 4.2%<br>(2-6.5%)                    | 2<br>(0.91-3)         | 59<br>(17-100)     |
| Malta    | 2010 | Female | 60 to 64 | 75%<br>(55-89%)                | 25%<br>(11-45%)          | 1.5<br>(1.1-2.2)                            | 1.2%<br>(-0.094-2.7%)                | 2.8%<br>(0.61-5%)                   | 2.5<br>(0.56-4.5)     | 60<br>(-4.5-120)   |
| Malta    | 2010 | Female | 65 to 69 | 73%<br>(53-88%)                | 27%<br>(12-47%)          | 1.5<br>(1.1-2)                              | 0.43%<br>(-0.75-1.7%)                | 1.3%<br>(-0.62-3.2%)                | 1.3<br>(-0.6-3.2)     | 19<br>(-33-75)     |
| Malta    | 2010 | Female | 70 to 74 | 69%<br>(50-84%)                | 31%<br>(16-50%)          | 1.3<br>(0.85-1.9)                           | -0.15%<br>(-1.5-1.4%)                | 0.018%<br>(-2.1-2.3%)               | 0.023<br>(-3.2-3.4)   | -7.1<br>(-70-63)   |
| Malta    | 2010 | Female | 75 to 79 | 63%<br>(41-81%)                | 37%<br>(19-59%)          | 1.1<br>(0.69-1.7)                           | -0.85%<br>(-2.5-0.89%)               | -1.1%<br>(-3.5-1.1%)                | -2.2<br>(-6.6-2.2)    | -33<br>(-98-33)    |
| Malta    | 2010 | Female | 80 to 84 | 63%<br>(41-81%)                | 37%<br>(19-59%)          | 1.2<br>(0.72-1.7)                           | -1.2%<br>(-3.2-0.62%)                | -1.6%<br>(-4.1-0.69%)               | -5.1<br>(-13-2.3)     | -54<br>(-140-28)   |
| Malta    | 2010 | Female | 85 to 89 | 63%<br>(44-80%)                | 37%<br>(20-56%)          | 1.2<br>(0.71-1.8)                           | -1.4%<br>(-3.2-0.43%)                | -1.8%<br>(-4.1-0.46%)               | -5.9<br>(-14-1.5)     | -43<br>(-100-14)   |
| Malta    | 2010 | Female | 90 to 94 | 62%<br>(43-80%)                | 38%<br>(20-57%)          | 1.2<br>(0.65-1.9)                           | -1.2%<br>(-2.9-0.51%)                | -1.7%<br>(-3.9-0.5%)                | -3.1<br>(-7-0.84)     | -15<br>(-36-6.1)   |
| Malta    | 2010 | Female | 95 plus  | 63%<br>(39-83%)                | 37%<br>(17-61%)          | 1.1<br>(0.54-2)                             | -1.1%<br>(-3-0.86%)                  | -1.7%<br>(-4.1-0.86%)               | -1.2<br>(-3.1-0.64)   | -3.8<br>(-10-2.9)  |
| Malta    | 2010 | Male   | All Ages | 83%<br>(75-89%)                | 17%<br>(11-25%)          | 2.2<br>(1.9-2.5)                            | 2.8%<br>(1.4-4.2%)                   | 1.7%<br>(-0.76-4%)                  | 28<br>(-13-68)        | 1500<br>(730-2300) |

| Location | Year | Sex    | Age      | Prevalence of current drinkers | Prevalence of abstainers | Population average of standard drinks daily | Percent of total attributable deaths | Percent of total attributable DALYs | Attributable deaths  | Attributable DALYs  |
|----------|------|--------|----------|--------------------------------|--------------------------|---------------------------------------------|--------------------------------------|-------------------------------------|----------------------|---------------------|
| Malta    | 2010 | Male   | 15 to 19 | 73%<br>(53-88%)                | 27%<br>(12-47%)          | 1.5<br>(0.92-2.1)                           | 3.4%<br>(2.3-4.8%)                   | 6.4%<br>(3.2-10%)                   | 0.33<br>(0.16-0.53)  | 45<br>(30-64)       |
| Malta    | 2010 | Male   | 20 to 24 | 81%<br>(65-91%)                | 19%<br>(8.8-35%)         | 2.3<br>(1.5-3.1)                            | 6.9%<br>(4.9-9.2%)                   | 9.3%<br>(4.8-14%)                   | 0.83<br>(0.42-1.3)   | 120<br>(82-170)     |
| Malta    | 2010 | Male   | 25 to 29 | 85%<br>(73-93%)                | 15%<br>(6.9-27%)         | 2.2<br>(1.5-2.8)                            | 5.7%<br>(4.1-7.5%)                   | 8.2%<br>(4.3-12%)                   | 0.79<br>(0.41-1.2)   | 110<br>(77-150)     |
| Malta    | 2010 | Male   | 30 to 34 | 88%<br>(76-95%)                | 12%<br>(5-24%)           | 2.1<br>(1.5-2.9)                            | 4.8%<br>(3.3-6.4%)                   | 7.5%<br>(4.2-11%)                   | 1<br>(0.56-1.5)      | 110<br>(73-150)     |
| Malta    | 2010 | Male   | 35 to 39 | 89%<br>(78-96%)                | 11%<br>(4.1-22%)         | 2.2<br>(1.5-3.1)                            | 4.3%<br>(2.9-5.7%)                   | 7.3%<br>(4.1-11%)                   | 1<br>(0.54-1.5)      | 89<br>(59-120)      |
| Malta    | 2010 | Male   | 40 to 44 | 90%<br>(78-96%)                | 10%<br>(3.8-22%)         | 2.5<br>(1.8-3.4)                            | 4.2%<br>(2.8-5.8%)                   | 7.3%<br>(3.7-11%)                   | 1.3<br>(0.68-2)      | 93<br>(60-130)      |
| Malta    | 2010 | Male   | 45 to 49 | 90%<br>(75-96%)                | 10%<br>(4-25%)           | 3.2<br>(2.3-4.3)                            | 4.7%<br>(2.9-6.9%)                   | 8.1%<br>(4.4-12%)                   | 2.3<br>(1.3-3.6)     | 130<br>(81-190)     |
| Malta    | 2010 | Male   | 50 to 54 | 90%<br>(77-96%)                | 9.7%<br>(3.6-23%)        | 3.6<br>(2.6-4.7)                            | 5%<br>(2.8-7.6%)                     | 7.6%<br>(3.6-12%)                   | 3.9<br>(1.9-6.3)     | 180<br>(98-270)     |
| Malta    | 2010 | Male   | 55 to 59 | 90%<br>(80-97%)                | 9.5%<br>(3.3-20%)        | 3.6<br>(2.7-4.5)                            | 4.4%<br>(2.1-6.9%)                   | 6%<br>(2.3-9.8%)                    | 4.9<br>(1.9-8.2)     | 200<br>(92-310)     |
| Malta    | 2010 | Male   | 60 to 64 | 88%<br>(75-96%)                | 12%<br>(3.9-25%)         | 3.3<br>(2.4-4.3)                            | 3.5%<br>(1-6.2%)                     | 4.3%<br>(0.93-8%)                   | 6.8<br>(1.4-12)      | 220<br>(64-400)     |
| Malta    | 2010 | Male   | 65 to 69 | 87%<br>(74-96%)                | 13%<br>(4.2-26%)         | 2.9<br>(2.2-3.7)                            | 2.3%<br>(-0.012-4.5%)                | 2.6%<br>(-0.46-5.5%)                | 4.3<br>(-0.68-9.1)   | 120<br>(-0.65-240)  |
| Malta    | 2010 | Male   | 70 to 74 | 87%<br>(75-95%)                | 13%<br>(5.1-25%)         | 2.6<br>(1.8-3.5)                            | 1.4%<br>(-0.87-3.7%)                 | 1.4%<br>(-1.5-4.4%)                 | 3.2<br>(-3.4-9.9)    | 79<br>(-49-210)     |
| Malta    | 2010 | Male   | 75 to 79 | 85%<br>(70-94%)                | 15%<br>(6-30%)           | 2.3<br>(1.5-3.2)                            | 0.49%<br>(-1.8-3.1%)                 | 0.28%<br>(-2.5-3.4%)                | 0.68<br>(-5.7-7.9)   | 21<br>(-73-130)     |
| Malta    | 2010 | Male   | 80 to 84 | 83%<br>(67-93%)                | 17%<br>(7.1-33%)         | 2.1<br>(1.4-2.9)                            | -0.016%<br>(-2.4-2.3%)               | -0.3%<br>(-3.2-2.5%)                | -0.78<br>(-8.2-6.7)  | -0.44<br>(-80-78)   |
| Malta    | 2010 | Male   | 85 to 89 | 82%<br>(67-93%)                | 18%<br>(7.3-33%)         | 2<br>(1.3-2.8)                              | -0.29%<br>(-2.5-1.9%)                | -0.63%<br>(-3.3-1.9%)               | -1.5<br>(-7.7-4.5)   | -5.9<br>(-51-39)    |
| Malta    | 2010 | Male   | 90 to 94 | 83%<br>(68-93%)                | 17%<br>(6.8-32%)         | 1.9<br>(1.2-2.8)                            | -0.32%<br>(-2.4-1.8%)                | -0.74%<br>(-3.3-1.9%)               | -0.75<br>(-3.3-1.9)  | -2.1<br>(-15-12)    |
| Malta    | 2010 | Male   | 95 plus  | 83%<br>(65-95%)                | 17%<br>(5.3-35%)         | 1.9<br>(1-3)                                | -0.32%<br>(-2.4-2.1%)                | -0.82%<br>(-3.3-2.1%)               | -0.26<br>(-1.1-0.7)  | -0.45<br>(-3.2-2.9) |
| Malta    | 2016 | Female | All Ages | 74%<br>(66-81%)                | 26%<br>(19-34%)          | 1.3<br>(0.92-1.7)                           | 0.6%<br>(-0.42-1.8%)                 | -0.21%<br>(-2.3-2.1%)               | -3.3<br>(-38-36)     | 300<br>(-220-920)   |
| Malta    | 2016 | Female | 15 to 19 | 70%<br>(51-85%)                | 30%<br>(15-49%)          | 1.1<br>(0.64-1.7)                           | 1.1%<br>(0.71-1.6%)                  | 3.7%<br>(1.5-6.2%)                  | 0.059<br>(0.023-0.1) | 14<br>(8.7-21)      |
| Malta    | 2016 | Female | 20 to 24 | 75%<br>(57-88%)                | 25%<br>(12-43%)          | 1.4<br>(0.86-2.1)                           | 1.9%<br>(1.3-2.6%)                   | 3.9%<br>(1.9-6.5%)                  | 0.11<br>(0.047-0.19) | 31<br>(20-47)       |
| Malta    | 2016 | Female | 25 to 29 | 78%<br>(62-90%)                | 22%<br>(10-38%)          | 1.3<br>(0.83-1.9)                           | 1.6%<br>(1.1-2.2%)                   | 3.4%<br>(1.5-5.5%)                  | 0.12<br>(0.053-0.2)  | 24<br>(15-34)       |
| Malta    | 2016 | Female | 30 to 34 | 79%<br>(62-91%)                | 21%<br>(9.1-38%)         | 1.3<br>(0.76-1.9)                           | 1.3%<br>(0.81-1.8%)                  | 4.2%<br>(2.4-6.4%)                  | 0.11<br>(0.058-0.18) | 18<br>(11-27)       |

| Location | Year | Sex    | Age      | Prevalence of current drinkers | Prevalence of abstainers | Population average of standard drinks daily | Percent of total attributable deaths | Percent of total attributable DALYs | Attributable deaths | Attributable DALYs |
|----------|------|--------|----------|--------------------------------|--------------------------|---------------------------------------------|--------------------------------------|-------------------------------------|---------------------|--------------------|
| Malta    | 2016 | Female | 35 to 39 | 81%<br>(64-91%)                | 19%<br>(8.8-36%)         | 1.3<br>(0.8-2)                              | 1.2%<br>(0.77-1.8%)                  | 5.2%<br>(3.1-7.7%)                  | 0.27<br>(0.15-0.45) | 28<br>(18-41)      |
| Malta    | 2016 | Female | 40 to 44 | 81%<br>(65-92%)                | 19%<br>(8.1-35%)         | 1.4<br>(0.85-2.1)                           | 1.4%<br>(0.8-2.2%)                   | 5.8%<br>(3.5-8.9%)                  | 0.53<br>(0.29-0.86) | 35<br>(20-54)      |
| Malta    | 2016 | Female | 45 to 49 | 81%<br>(63-92%)                | 19%<br>(8.3-37%)         | 1.5<br>(0.88-2.3)                           | 1.6%<br>(0.82-2.6%)                  | 5.8%<br>(3.5-8.7%)                  | 0.81<br>(0.45-1.3)  | 39<br>(21-65)      |
| Malta    | 2016 | Female | 50 to 54 | 80%<br>(63-91%)                | 20%<br>(8.6-37%)         | 1.6<br>(0.94-2.4)                           | 1.8%<br>(0.78-3.1%)                  | 5.4%<br>(3-8.4%)                    | 1.4<br>(0.7-2.2)    | 53<br>(23-90)      |
| Malta    | 2016 | Female | 55 to 59 | 80%<br>(63-91%)                | 20%<br>(8.7-37%)         | 1.8<br>(1.1-2.7)                            | 1.8%<br>(0.52-3.4%)                  | 4.8%<br>(2.2-7.6%)                  | 2<br>(0.88-3.4)     | 63<br>(19-120)     |
| Malta    | 2016 | Female | 60 to 64 | 78%<br>(59-91%)                | 22%<br>(8.6-41%)         | 1.8<br>(1.1-2.8)                            | 1.5%<br>(0.011-3.3%)                 | 3.3%<br>(0.78-6.2%)                 | 2.2<br>(0.51-4.4)   | 57<br>(0.48-130)   |
| Malta    | 2016 | Female | 65 to 69 | 76%<br>(56-90%)                | 24%<br>(9.8-44%)         | 1.7<br>(1.1-2.6)                            | 0.75%<br>(-0.65-2.4%)                | 1.8%<br>(-0.52-4.3%)                | 1.9<br>(-0.55-4.6)  | 37<br>(-32-120)    |
| Malta    | 2016 | Female | 70 to 74 | 74%<br>(55-87%)                | 26%<br>(13-45%)          | 1.6<br>(0.97-2.5)                           | 0.21%<br>(-1.4-2.3%)                 | 0.58%<br>(-2.1-3.5%)                | 0.91<br>(-3.1-5.4)  | 11<br>(-72-110)    |
| Malta    | 2016 | Female | 75 to 79 | 70%<br>(50-86%)                | 30%<br>(14-50%)          | 1.5<br>(0.87-2.4)                           | -0.54%<br>(-2.5-1.8%)                | -0.78%<br>(-3.5-2.2%)               | -2.1<br>(-9.9-6.1)  | -31<br>(-150-100)  |
| Malta    | 2016 | Female | 80 to 84 | 68%<br>(46-84%)                | 32%<br>(16-54%)          | 1.4<br>(0.82-2.2)                           | -0.85%<br>(-2.9-1.4%)                | -1.2%<br>(-3.8-1.7%)                | -3.4<br>(-11-4.9)   | -35<br>(-120-60)   |
| Malta    | 2016 | Female | 85 to 89 | 65%<br>(45-81%)                | 35%<br>(19-55%)          | 1.3<br>(0.74-2.1)                           | -0.93%<br>(-2.9-1%)                  | -1.3%<br>(-3.7-1.2%)                | -3.6<br>(-10-3.2)   | -25<br>(-77-28)    |
| Malta    | 2016 | Female | 90 to 94 | 64%<br>(44-81%)                | 36%<br>(19-56%)          | 1.3<br>(0.69-2.1)                           | -0.91%<br>(-2.8-1.1%)                | -1.4%<br>(-3.8-1.1%)                | -3.1<br>(-8.5-2.4)  | -14<br>(-43-16)    |
| Malta    | 2016 | Female | 95 plus  | 64%<br>(40-84%)                | 36%<br>(16-60%)          | 1.3<br>(0.56-2.4)                           | -0.88%<br>(-2.8-1.2%)                | -1.4%<br>(-4-1.3%)                  | -1.5<br>(-4.1-1.3)  | -4.1<br>(-13-5.8)  |
| Malta    | 2016 | Male   | All Ages | 82%<br>(74-88%)                | 18%<br>(12-26%)          | 2.4<br>(1.7-3.2)                            | 3.3%<br>(1.3-5.7%)                   | 2.3%<br>(-0.46-5.8%)                | 43<br>(-8.9-110)    | 1800<br>(780-3200) |
| Malta    | 2016 | Male   | 15 to 19 | 72%<br>(51-87%)                | 28%<br>(13-49%)          | 1.6<br>(0.87-2.5)                           | 3.4%<br>(2.3-4.8%)                   | 6.5%<br>(3.1-11%)                   | 0.27<br>(0.13-0.47) | 40<br>(26-58)      |
| Malta    | 2016 | Male   | 20 to 24 | 78%<br>(59-90%)                | 22%<br>(9.7-41%)         | 2.4<br>(1.4-3.5)                            | 7.2%<br>(5.1-9.6%)                   | 9.6%<br>(5-15%)                     | 0.69<br>(0.33-1.2)  | 110<br>(72-150)    |
| Malta    | 2016 | Male   | 25 to 29 | 81%<br>(67-92%)                | 19%<br>(7.8-33%)         | 2.3<br>(1.4-3.3)                            | 6%<br>(4.4-7.9%)                     | 8.4%<br>(4.4-14%)                   | 0.71<br>(0.34-1.2)  | 110<br>(72-150)    |
| Malta    | 2016 | Male   | 30 to 34 | 84%<br>(69-94%)                | 16%<br>(5.9-31%)         | 2.2<br>(1.4-3.3)                            | 5%<br>(3.5-6.8%)                     | 7.9%<br>(4.2-12%)                   | 0.91<br>(0.45-1.5)  | 100<br>(69-150)    |
| Malta    | 2016 | Male   | 35 to 39 | 86%<br>(73-95%)                | 14%<br>(5.2-27%)         | 2.3<br>(1.4-3.5)                            | 4.5%<br>(3-6.2%)                     | 7.9%<br>(4.2-12%)                   | 1.1<br>(0.59-1.8)   | 100<br>(69-150)    |
| Malta    | 2016 | Male   | 40 to 44 | 88%<br>(74-96%)                | 12%<br>(4.4-26%)         | 2.7<br>(1.7-4)                              | 4.7%<br>(2.9-6.8%)                   | 8.4%<br>(4.7-13%)                   | 1.6<br>(0.81-2.5)   | 110<br>(69-170)    |
| Malta    | 2016 | Male   | 45 to 49 | 89%<br>(73-96%)                | 11%<br>(4.1-27%)         | 3.5<br>(2.1-5.2)                            | 5.5%<br>(3.2-8.4%)                   | 9.8%<br>(5.3-16%)                   | 2.3<br>(1.2-3.8)    | 130<br>(76-210)    |
| Malta    | 2016 | Male   | 50 to 54 | 89%<br>(76-96%)                | 11%<br>(4.1-24%)         | 3.8<br>(2.4-5.6)                            | 5.9%<br>(3.2-9.3%)                   | 9.3%<br>(4.7-15%)                   | 4.4<br>(2.1-7.4)    | 200<br>(110-320)   |

| Location    | Year | Sex    | Age      | Prevalence of current drinkers | Prevalence of abstainers | Population average of standard drinks daily | Percent of total attributable deaths | Percent of total attributable DALYs | Attributable deaths | Attributable DALYs     |
|-------------|------|--------|----------|--------------------------------|--------------------------|---------------------------------------------|--------------------------------------|-------------------------------------|---------------------|------------------------|
| Malta       | 2016 | Male   | 55 to 59 | 89%<br>(77-96%)                | 11%<br>(3.5-23%)         | 3.8<br>(2.4-5.6)                            | 5.3%<br>(2.4-9%)                     | 7.6%<br>(3.2-13%)                   | 6<br>(2.3-11)       | 230<br>(110-400)       |
| Malta       | 2016 | Male   | 60 to 64 | 88%<br>(72-96%)                | 12%<br>(4-28%)           | 3.6<br>(2.2-5.3)                            | 4.4%<br>(1.3-8.3%)                   | 5.7%<br>(1.4-11%)                   | 7<br>(1.7-14)       | 230<br>(69-440)        |
| Malta       | 2016 | Male   | 65 to 69 | 88%<br>(72-96%)                | 12%<br>(4.3-28%)         | 3.2<br>(2.1-4.6)                            | 3.1%<br>(0.55-6.7%)                  | 3.7%<br>(0.22-8.3%)                 | 8<br>(0.53-18)      | 220<br>(41-470)        |
| Malta       | 2016 | Male   | 70 to 74 | 87%<br>(73-95%)                | 13%<br>(5.3-27%)         | 2.7<br>(1.8-4.2)                            | 2%<br>(-0.28-5.6%)                   | 2.3%<br>(-0.72-6.7%)                | 5.2<br>(-1.6-15)    | 120<br>(-16-330)       |
| Malta       | 2016 | Male   | 75 to 79 | 85%<br>(71-94%)                | 15%<br>(5.6-29%)         | 2.4<br>(1.5-3.8)                            | 1.2%<br>(-1.2-4.8%)                  | 1.1%<br>(-1.7-5.3%)                 | 4<br>(-6-19)        | 79<br>(-72-300)        |
| Malta       | 2016 | Male   | 80 to 84 | 84%<br>(66-93%)                | 16%<br>(6.9-34%)         | 2.3<br>(1.4-3.5)                            | 0.64%<br>(-1.9-3.8%)                 | 0.41%<br>(-2.6-4%)                  | 1.3<br>(-8-13)      | 27<br>(-75-160)        |
| Malta       | 2016 | Male   | 85 to 89 | 82%<br>(65-92%)                | 18%<br>(7.7-35%)         | 2.1<br>(1.3-3.2)                            | 0.32%<br>(-1.9-3%)                   | 0.025%<br>(-2.7-3.1%)               | 0.065<br>(-5.7-7.1) | 6.2<br>(-38-61)        |
| Malta       | 2016 | Male   | 90 to 94 | 82%<br>(66-93%)                | 18%<br>(6.5-34%)         | 2.1<br>(1.2-3.2)                            | 0.15%<br>(-2.1-2.9%)                 | -0.2%<br>(-2.9-3.1%)                | -0.26<br>(-3.7-4.1) | 1.3<br>(-17-23)        |
| Malta       | 2016 | Male   | 95 plus  | 82%<br>(64-95%)                | 18%<br>(5.1-36%)         | 2<br>(0.99-3.4)                             | 0.15%<br>(-2.1-3.3%)                 | -0.29%<br>(-3.3-6%)                 | -0.12<br>(-1.3-1.5) | 0.27<br>(-3.8-5.9)     |
| Netherlands | 1990 | Female | All Ages | 79%<br>(76-83%)                | 21%<br>(17-24%)          | 1.8<br>(1.7-2)                              | 2.7%<br>(1.6-3.8%)                   | 2.9%<br>(0.86-5.1%)                 | 1800<br>(530-3200)  | 52000<br>(31000-73000) |
| Netherlands | 1990 | Female | 15 to 19 | 77%<br>(65-87%)                | 23%<br>(13-35%)          | 1.6<br>(1.2-2.2)                            | 2%<br>(1.2-2.9%)                     | 7.6%<br>(3.9-12%)                   | 11<br>(5.2-16)      | 1100<br>(660-1600)     |
| Netherlands | 1990 | Female | 20 to 24 | 81%<br>(71-88%)                | 19%<br>(12-29%)          | 1.7<br>(1.2-2.3)                            | 2.3%<br>(1.5-3.3%)                   | 7.5%<br>(3.6-12%)                   | 14<br>(6.9-23)      | 1800<br>(1200-2500)    |
| Netherlands | 1990 | Female | 25 to 29 | 83%<br>(73-89%)                | 17%<br>(11-27%)          | 1.4<br>(0.98-1.9)                           | 1.8%<br>(1.1-2.6%)                   | 5.8%<br>(2.1-9.5%)                  | 14<br>(5-23)        | 1600<br>(950-2200)     |
| Netherlands | 1990 | Female | 30 to 34 | 83%<br>(73-90%)                | 17%<br>(10-27%)          | 1.5<br>(1.1-2)                              | 1.9%<br>(1.1-2.8%)                   | 6.6%<br>(3.2-10%)                   | 22<br>(11-34)       | 1800<br>(1100-2500)    |
| Netherlands | 1990 | Female | 35 to 39 | 84%<br>(76-90%)                | 16%<br>(10-24%)          | 2.2<br>(1.6-2.9)                            | 2.9%<br>(1.9-4%)                     | 9.8%<br>(6.3-13%)                   | 45<br>(29-61)       | 2800<br>(1900-3700)    |
| Netherlands | 1990 | Female | 40 to 44 | 84%<br>(76-90%)                | 16%<br>(9.6-24%)         | 2.7<br>(2.1-3.3)                            | 3.9%<br>(2.7-5.2%)                   | 11%<br>(8.5-14%)                    | 86<br>(64-110)      | 4500<br>(3400-5900)    |
| Netherlands | 1990 | Female | 45 to 49 | 84%<br>(76-90%)                | 16%<br>(10-24%)          | 3<br>(2.3-3.7)                              | 4.7%<br>(3.4-6.2%)                   | 11%<br>(8.6-14%)                    | 110<br>(81-140)     | 4900<br>(3700-6200)    |
| Netherlands | 1990 | Female | 50 to 54 | 85%<br>(78-90%)                | 15%<br>(9.7-22%)         | 3.1<br>(2.4-3.9)                            | 5%<br>(3.6-6.7%)                     | 11%<br>(8-13%)                      | 130<br>(100-170)    | 5300<br>(3900-6700)    |
| Netherlands | 1990 | Female | 55 to 59 | 87%<br>(82-92%)                | 13%<br>(8.3-18%)         | 3.2<br>(2.5-3.9)                            | 4.9%<br>(3.3-6.7%)                   | 8.9%<br>(6.4-12%)                   | 170<br>(120-220)    | 5800<br>(4000-7800)    |
| Netherlands | 1990 | Female | 60 to 64 | 87%<br>(81-92%)                | 13%<br>(8.4-19%)         | 3.1<br>(2.4-3.9)                            | 4.2%<br>(2.4-6.3%)                   | 6.8%<br>(4.1-10%)                   | 190<br>(120-280)    | 5800<br>(3300-8500)    |
| Netherlands | 1990 | Female | 65 to 69 | 84%<br>(78-90%)                | 16%<br>(10-22%)          | 2.8<br>(2.2-3.4)                            | 3.4%<br>(1.5-5.4%)                   | 5.1%<br>(2.3-8.1%)                  | 220<br>(100-350)    | 5500<br>(2500-8700)    |
| Netherlands | 1990 | Female | 70 to 74 | 81%<br>(73-87%)                | 19%<br>(13-27%)          | 2.5<br>(1.8-3.2)                            | 2.7%<br>(0.51-5%)                    | 3.8%<br>(0.73-7%)                   | 220<br>(43-410)     | 4500<br>(810-8300)     |

| Location    | Year | Sex    | Age      | Prevalence of current drinkers | Prevalence of abstainers | Population average of standard drinks daily | Percent of total attributable deaths | Percent of total attributable DALYs | Attributable deaths | Attributable DALYs        |
|-------------|------|--------|----------|--------------------------------|--------------------------|---------------------------------------------|--------------------------------------|-------------------------------------|---------------------|---------------------------|
| Netherlands | 1990 | Female | 75 to 79 | 77%<br>(65-85%)                | 23%<br>(15-35%)          | 2.2<br>(1.5-2.9)                            | 1.9%<br>(-0.29-4.3%)                 | 2.4%<br>(-0.47-5.6%)                | 220<br>(-43-500)    | 3500<br>(-550-7800)       |
| Netherlands | 1990 | Female | 80 to 84 | 74%<br>(61-83%)                | 26%<br>(17-39%)          | 1.9<br>(1.4-2.6)                            | 1.3%<br>(-0.59-3.6%)                 | 1.5%<br>(-0.84-4.3%)                | 190<br>(-100-510)   | 2200<br>(-970-5800)       |
| Netherlands | 1990 | Female | 85 to 89 | 72%<br>(60-81%)                | 28%<br>(19-40%)          | 1.8<br>(1.2-2.5)                            | 1.1%<br>(-0.72-3%)                   | 1.1%<br>(-1-3.4%)                   | 140<br>(-120-410)   | 1200<br>(-800-3300)       |
| Netherlands | 1990 | Female | 90 to 94 | 71%<br>(58-82%)                | 29%<br>(18-42%)          | 1.7<br>(1.1-2.4)                            | 0.67%<br>(-1.3-2.8%)                 | 0.65%<br>(-1.6-3.1%)                | 45<br>(-110-220)    | 290<br>(-530-1200)        |
| Netherlands | 1990 | Female | 95 plus  | 71%<br>(54-84%)                | 29%<br>(16-46%)          | 1.6<br>(0.9-2.5)                            | 0.46%<br>(-1.8-3%)                   | 0.36%<br>(-2.3-3.3%)                | 9.1<br>(-57-84)     | 48<br>(-180-300)          |
| Netherlands | 1990 | Male   | All Ages | 87%<br>(84-90%)                | 13%<br>(10-16%)          | 3.5<br>(3.2-3.8)                            | 6.4%<br>(4.7-8.1%)                   | 6.7%<br>(4.1-9.2%)                  | 4400<br>(2700-6200) | 140000<br>(100000-170000) |
| Netherlands | 1990 | Male   | 15 to 19 | 80%<br>(70-87%)                | 20%<br>(13-30%)          | 2.7<br>(2-3.5)                              | 5.5%<br>(3.4-7.8%)                   | 13%<br>(7.1-18%)                    | 37<br>(20-54)       | 3300<br>(2100-4600)       |
| Netherlands | 1990 | Male   | 20 to 24 | 87%<br>(79-92%)                | 13%<br>(7.8-21%)         | 4.2<br>(3.3-5.2)                            | 10%<br>(7.3-14%)                     | 20%<br>(13-27%)                     | 89<br>(57-120)      | 8000<br>(5700-10000)      |
| Netherlands | 1990 | Male   | 25 to 29 | 89%<br>(82-93%)                | 11%<br>(6.6-18%)         | 3.7<br>(2.9-4.5)                            | 8.5%<br>(6-11%)                      | 17%<br>(11-23%)                     | 85<br>(55-120)      | 7300<br>(5200-9500)       |
| Netherlands | 1990 | Male   | 30 to 34 | 91%<br>(85-95%)                | 9%<br>(5.2-15%)          | 3.6<br>(2.8-4.5)                            | 7.1%<br>(5-9.3%)                     | 15%<br>(9.1-20%)                    | 82<br>(52-110)      | 6400<br>(4300-8400)       |
| Netherlands | 1990 | Male   | 35 to 39 | 93%<br>(89-96%)                | 7.1%<br>(4.1-11%)        | 4.1<br>(3.2-5)                              | 7%<br>(5-9.1%)                       | 14%<br>(8.9-18%)                    | 99<br>(64-130)      | 6700<br>(4800-8700)       |
| Netherlands | 1990 | Male   | 40 to 44 | 94%<br>(90-97%)                | 5.8%<br>(3.1-10%)        | 4.5<br>(3.6-5.4)                            | 7.3%<br>(5-9.7%)                     | 13%<br>(8.2-18%)                    | 150<br>(97-210)     | 8800<br>(6000-12000)      |
| Netherlands | 1990 | Male   | 45 to 49 | 95%<br>(91-97%)                | 5.2%<br>(3.1-8.7%)       | 4.9<br>(4-6)                                | 7.8%<br>(5.1-11%)                    | 12%<br>(7.9-17%)                    | 180<br>(110-260)    | 9100<br>(6100-12000)      |
| Netherlands | 1990 | Male   | 50 to 54 | 95%<br>(92-97%)                | 4.9%<br>(3-7.8%)         | 5.4<br>(4.4-6.3)                            | 8.4%<br>(5.5-11%)                    | 12%<br>(7.7-16%)                    | 260<br>(170-360)    | 11000<br>(7400-15000)     |
| Netherlands | 1990 | Male   | 55 to 59 | 95%<br>(92-97%)                | 5.2%<br>(3.3-7.9%)       | 5.9<br>(4.9-6.9)                            | 9.3%<br>(6.1-12%)                    | 12%<br>(7.6-16%)                    | 430<br>(270-570)    | 15000<br>(10000-20000)    |
| Netherlands | 1990 | Male   | 60 to 64 | 94%<br>(91-96%)                | 6%<br>(3.8-8.9%)         | 5.7<br>(4.7-6.8)                            | 8.6%<br>(5.3-12%)                    | 10%<br>(6.1-15%)                    | 560<br>(330-770)    | 17000<br>(10000-23000)    |
| Netherlands | 1990 | Male   | 65 to 69 | 93%<br>(89-95%)                | 7.2%<br>(4.5-11%)        | 4.9<br>(4.1-5.7)                            | 7%<br>(4-9.9%)                       | 8.1%<br>(4.3-12%)                   | 650<br>(350-930)    | 16000<br>(9200-23000)     |
| Netherlands | 1990 | Male   | 70 to 74 | 91%<br>(87-94%)                | 8.7%<br>(5.9-13%)        | 4.3<br>(3.4-5.1)                            | 5.5%<br>(2.6-8.4%)                   | 6.1%<br>(2.6-9.5%)                  | 580<br>(250-910)    | 12000<br>(5400-18000)     |
| Netherlands | 1990 | Male   | 75 to 79 | 89%<br>(84-94%)                | 11%<br>(6.4-16%)         | 3.8<br>(2.9-4.7)                            | 4.4%<br>(1.7-7.4%)                   | 4.7%<br>(1.6-8%)                    | 520<br>(170-900)    | 8100<br>(3300-14000)      |
| Netherlands | 1990 | Male   | 80 to 84 | 88%<br>(81-93%)                | 12%<br>(7-19%)           | 3.4<br>(2.6-4.3)                            | 3.8%<br>(1.4-6.4%)                   | 4%<br>(1.1-7%)                      | 400<br>(110-690)    | 4600<br>(1700-7800)       |
| Netherlands | 1990 | Male   | 85 to 89 | 87%<br>(80-92%)                | 13%<br>(7.8-20%)         | 3.2<br>(2.3-4.1)                            | 3.2%<br>(0.98-5.7%)                  | 3.4%<br>(0.76-6.1%)                 | 220<br>(50-410)     | 1900<br>(570-3300)        |
| Netherlands | 1990 | Male   | 90 to 94 | 87%<br>(80-92%)                | 13%<br>(7.6-20%)         | 3<br>(2.1-4)                                | 2.6%<br>(0.32-5.5%)                  | 2.6%<br>(-0.092-6%)                 | 79<br>(-2.7-180)    | 470<br>(58-980)           |

| Location    | Year | Sex    | Age      | Prevalence of current drinkers | Prevalence of abstainers | Population average of standard drinks daily | Percent of total attributable deaths | Percent of total attributable DALYs | Attributable deaths | Attributable DALYs        |
|-------------|------|--------|----------|--------------------------------|--------------------------|---------------------------------------------|--------------------------------------|-------------------------------------|---------------------|---------------------------|
| Netherlands | 1990 | Male   | 95 plus  | 88%<br>(79-94%)                | 12%<br>(5.7-21%)         | 2.9<br>(1.9-4.1)                            | 2.3%<br>(-0.48-5.8%)                 | 2.2%<br>(-1-6.3%)                   | 20<br>(-9.1-58)     | 83<br>(-17-210)           |
| Netherlands | 1995 | Female | All Ages | 78%<br>(75-82%)                | 22%<br>(18-25%)          | 1.8<br>(1.6-1.9)                            | 2.7%<br>(1.7-3.8%)                   | 3.1%<br>(1.2-5.1%)                  | 2100<br>(790-3400)  | 56000<br>(36000-76000)    |
| Netherlands | 1995 | Female | 15 to 19 | 79%<br>(69-88%)                | 21%<br>(12-31%)          | 1.7<br>(1.2-2.2)                            | 1.9%<br>(1.2-2.9%)                   | 7.6%<br>(4-12%)                     | 8.4<br>(4.2-13)     | 910<br>(560-1300)         |
| Netherlands | 1995 | Female | 20 to 24 | 81%<br>(72-87%)                | 19%<br>(13-28%)          | 1.7<br>(1.2-2.3)                            | 2.2%<br>(1.4-3.1%)                   | 7.3%<br>(3.6-11%)                   | 12<br>(5.7-19)      | 1500<br>(980-2100)        |
| Netherlands | 1995 | Female | 25 to 29 | 81%<br>(72-88%)                | 19%<br>(12-28%)          | 1.3<br>(0.95-1.7)                           | 1.7%<br>(1.1-2.4%)                   | 5.4%<br>(2.2-8.7%)                  | 13<br>(5-21)        | 1500<br>(920-2200)        |
| Netherlands | 1995 | Female | 30 to 34 | 82%<br>(73-89%)                | 18%<br>(11-27%)          | 1.4<br>(1.1-1.9)                            | 1.7%<br>(1.1-2.5%)                   | 6%<br>(3-9%)                        | 20<br>(10-30)       | 1700<br>(1100-2400)       |
| Netherlands | 1995 | Female | 35 to 39 | 83%<br>(76-89%)                | 17%<br>(11-24%)          | 2.1<br>(1.6-2.8)                            | 2.7%<br>(1.8-3.8%)                   | 9.2%<br>(5.8-12%)                   | 47<br>(30-63)       | 3000<br>(2000-3900)       |
| Netherlands | 1995 | Female | 40 to 44 | 84%<br>(77-90%)                | 16%<br>(10-23%)          | 2.6<br>(2.1-3.2)                            | 3.8%<br>(2.7-5%)                     | 11%<br>(7.8-14%)                    | 84<br>(62-110)      | 4500<br>(3300-5700)       |
| Netherlands | 1995 | Female | 45 to 49 | 83%<br>(77-88%)                | 17%<br>(12-23%)          | 2.9<br>(2.3-3.6)                            | 4.6%<br>(3.3-6.1%)                   | 11%<br>(8.7-14%)                    | 140<br>(110-170)    | 6300<br>(4800-7900)       |
| Netherlands | 1995 | Female | 50 to 54 | 84%<br>(78-89%)                | 16%<br>(11-22%)          | 3<br>(2.4-3.7)                              | 5.1%<br>(3.8-6.6%)                   | 11%<br>(8.5-13%)                    | 150<br>(120-190)    | 6100<br>(4600-7600)       |
| Netherlands | 1995 | Female | 55 to 59 | 85%<br>(80-90%)                | 15%<br>(10-20%)          | 3<br>(2.4-3.6)                              | 4.8%<br>(3.5-6.5%)                   | 8.9%<br>(6.9-11%)                   | 170<br>(130-210)    | 5800<br>(4400-7600)       |
| Netherlands | 1995 | Female | 60 to 64 | 83%<br>(77-89%)                | 17%<br>(11-23%)          | 2.6<br>(2-3.3)                              | 4%<br>(2.6-5.7%)                     | 6.6%<br>(4.4-9%)                    | 180<br>(120-260)    | 5400<br>(3500-7700)       |
| Netherlands | 1995 | Female | 65 to 69 | 78%<br>(71-86%)                | 22%<br>(14-29%)          | 2.3<br>(1.8-3)                              | 3.2%<br>(1.7-4.8%)                   | 4.8%<br>(2.6-7%)                    | 210<br>(110-300)    | 5100<br>(2600-7600)       |
| Netherlands | 1995 | Female | 70 to 74 | 79%<br>(71-85%)                | 21%<br>(15-29%)          | 2.3<br>(1.7-3)                              | 2.8%<br>(0.89-4.8%)                  | 4%<br>(1.3-6.7%)                    | 260<br>(87-450)     | 5200<br>(1500-8800)       |
| Netherlands | 1995 | Female | 75 to 79 | 77%<br>(67-86%)                | 23%<br>(14-33%)          | 2.2<br>(1.5-2.9)                            | 2.2%<br>(0.057-4.4%)                 | 2.8%<br>(0.078-5.7%)                | 250<br>(7-510)      | 3800<br>(110-7900)        |
| Netherlands | 1995 | Female | 80 to 84 | 74%<br>(63-84%)                | 26%<br>(16-37%)          | 1.9<br>(1.4-2.6)                            | 1.6%<br>(-0.27-3.7%)                 | 1.9%<br>(-0.43-4.5%)                | 240<br>(-54-570)    | 2700<br>(-480-6400)       |
| Netherlands | 1995 | Female | 85 to 89 | 72%<br>(60-82%)                | 28%<br>(18-40%)          | 1.8<br>(1.2-2.4)                            | 1.3%<br>(-0.52-3.2%)                 | 1.4%<br>(-0.75-3.8%)                | 190<br>(-100-510)   | 1600<br>(-660-4000)       |
| Netherlands | 1995 | Female | 90 to 94 | 72%<br>(60-82%)                | 28%<br>(18-40%)          | 1.7<br>(1.1-2.4)                            | 0.88%<br>(-1.1-3%)                   | 0.92%<br>(-1.3-3.4%)                | 79<br>(-120-300)    | 470<br>(-570-1600)        |
| Netherlands | 1995 | Female | 95 plus  | 72%<br>(57-84%)                | 28%<br>(16-43%)          | 1.6<br>(0.95-2.5)                           | 0.69%<br>(-1.5-3.3%)                 | 0.64%<br>(-1.9-3.6%)                | 20<br>(-62-120)     | 89<br>(-190-430)          |
| Netherlands | 1995 | Male   | All Ages | 89%<br>(86-91%)                | 11%<br>(9.2-14%)         | 3.4<br>(3.2-3.7)                            | 6.4%<br>(4.7-7.9%)                   | 6.6%<br>(4.1-8.9%)                  | 4500<br>(2800-6100) | 140000<br>(100000-170000) |
| Netherlands | 1995 | Male   | 15 to 19 | 81%<br>(74-87%)                | 19%<br>(13-26%)          | 2.7<br>(2.1-3.3)                            | 5.5%<br>(3.4-7.7%)                   | 13%<br>(6.9-18%)                    | 31<br>(17-44)       | 2800<br>(1700-3900)       |
| Netherlands | 1995 | Male   | 20 to 24 | 89%<br>(83-93%)                | 11%<br>(7.4-17%)         | 4.1<br>(3.3-5.1)                            | 10%<br>(7.1-13%)                     | 20%<br>(13-27%)                     | 76<br>(48-100)      | 6900<br>(4800-8900)       |

| Location    | Year | Sex    | Age      | Prevalence of current drinkers | Prevalence of abstainers | Population average of standard drinks daily | Percent of total attributable deaths | Percent of total attributable DALYs | Attributable deaths | Attributable DALYs     |
|-------------|------|--------|----------|--------------------------------|--------------------------|---------------------------------------------|--------------------------------------|-------------------------------------|---------------------|------------------------|
| Netherlands | 1995 | Male   | 25 to 29 | 90%<br>(86-93%)                | 9.5%<br>(6.5-14%)        | 3.6<br>(2.9-4.4)                            | 8%<br>(5.6-10%)                      | 17%<br>(11-23%)                     | 75<br>(47-100)      | 6700<br>(4700-8800)    |
| Netherlands | 1995 | Male   | 30 to 34 | 92%<br>(88-95%)                | 7.9%<br>(5-12%)          | 3.5<br>(2.8-4.4)                            | 6.8%<br>(4.6-9%)                     | 14%<br>(8.5-19%)                    | 85<br>(51-120)      | 6600<br>(4500-8700)    |
| Netherlands | 1995 | Male   | 35 to 39 | 94%<br>(91-96%)                | 5.9%<br>(3.6-8.9%)       | 4<br>(3.2-4.8)                              | 6.7%<br>(4.7-8.7%)                   | 13%<br>(8.7-17%)                    | 100<br>(65-130)     | 6900<br>(4900-8800)    |
| Netherlands | 1995 | Male   | 40 to 44 | 95%<br>(92-97%)                | 4.8%<br>(2.7-7.8%)       | 4.5<br>(3.6-5.3)                            | 7.4%<br>(5.2-9.7%)                   | 13%<br>(9-18%)                      | 150<br>(99-200)     | 8500<br>(6000-11000)   |
| Netherlands | 1995 | Male   | 45 to 49 | 96%<br>(93-97%)                | 4.3%<br>(2.9-6.5%)       | 4.9<br>(4.1-5.7)                            | 8%<br>(5.6-11%)                      | 13%<br>(8.9-17%)                    | 240<br>(160-320)    | 12000<br>(8400-15000)  |
| Netherlands | 1995 | Male   | 50 to 54 | 96%<br>(94-97%)                | 4.2%<br>(2.8-6.1%)       | 5.3<br>(4.4-6.1)                            | 8.6%<br>(6.1-11%)                    | 13%<br>(8.8-16%)                    | 290<br>(200-370)    | 12000<br>(8800-15000)  |
| Netherlands | 1995 | Male   | 55 to 59 | 95%<br>(94-97%)                | 4.6%<br>(3.2-6.2%)       | 5.8<br>(4.9-6.7)                            | 9.3%<br>(6.6-12%)                    | 13%<br>(8.6-16%)                    | 410<br>(280-530)    | 15000<br>(10000-19000) |
| Netherlands | 1995 | Male   | 60 to 64 | 94%<br>(93-96%)                | 5.5%<br>(3.9-7.4%)       | 5.5<br>(4.7-6.6)                            | 8.6%<br>(5.5-11%)                    | 11%<br>(6.4-14%)                    | 550<br>(330-750)    | 17000<br>(10000-22000) |
| Netherlands | 1995 | Male   | 65 to 69 | 93%<br>(90-95%)                | 7.2%<br>(5-9.7%)         | 4.7<br>(4-5.4)                              | 6.9%<br>(4.4-9.3%)                   | 8%<br>(4.8-11%)                     | 610<br>(360-840)    | 15000<br>(9400-20000)  |
| Netherlands | 1995 | Male   | 70 to 74 | 91%<br>(87-94%)                | 8.7%<br>(6-13%)          | 4<br>(3.2-4.8)                              | 5.3%<br>(2.7-7.9%)                   | 5.9%<br>(2.8-9%)                    | 610<br>(280-920)    | 12000<br>(6300-18000)  |
| Netherlands | 1995 | Male   | 75 to 79 | 90%<br>(84-94%)                | 10%<br>(6.2-16%)         | 3.6<br>(2.8-4.5)                            | 4.2%<br>(1.6-6.7%)                   | 4.5%<br>(1.5-7.5%)                  | 490<br>(170-820)    | 7800<br>(3000-12000)   |
| Netherlands | 1995 | Male   | 80 to 84 | 88%<br>(82-93%)                | 12%<br>(6.8-18%)         | 3.3<br>(2.6-4.1)                            | 3.7%<br>(1.3-6%)                     | 3.9%<br>(1.1-6.5%)                  | 420<br>(120-710)    | 4800<br>(1700-7900)    |
| Netherlands | 1995 | Male   | 85 to 89 | 87%<br>(80-92%)                | 13%<br>(7.7-20%)         | 3.1<br>(2.3-3.9)                            | 3.2%<br>(0.98-5.6%)                  | 3.3%<br>(0.84-6%)                   | 240<br>(61-440)     | 2000<br>(640-3500)     |
| Netherlands | 1995 | Male   | 90 to 94 | 88%<br>(80-93%)                | 12%<br>(7.3-20%)         | 3<br>(2.1-3.9)                              | 2.6%<br>(0.3-5.3%)                   | 2.7%<br>(-0.037-5.7%)               | 86<br>(-1.2-180)    | 500<br>(57-1000)       |
| Netherlands | 1995 | Male   | 95 plus  | 88%<br>(79-94%)                | 12%<br>(5.7-21%)         | 2.8<br>(1.8-4)                              | 2.4%<br>(-0.2-5.8%)                  | 2.4%<br>(-0.66-6.3%)                | 21<br>(-5.8-57)     | 85<br>(-7.1-210)       |
| Netherlands | 2000 | Female | All Ages | 80%<br>(76-83%)                | 20%<br>(17-24%)          | 1.8<br>(1.7-2)                              | 2.7%<br>(1.8-3.7%)                   | 3%<br>(1.4-4.7%)                    | 2200<br>(970-3500)  | 58000<br>(39000-77000) |
| Netherlands | 2000 | Female | 15 to 19 | 79%<br>(68-87%)                | 21%<br>(13-32%)          | 1.6<br>(1.2-2.1)                            | 1.8%<br>(1.1-2.6%)                   | 7.2%<br>(3.8-11%)                   | 7.8<br>(4.1-12)     | 860<br>(520-1300)      |
| Netherlands | 2000 | Female | 20 to 24 | 81%<br>(72-88%)                | 19%<br>(12-28%)          | 1.6<br>(1.1-2.2)                            | 2.1%<br>(1.4-2.9%)                   | 6.9%<br>(3.4-11%)                   | 8.8<br>(4.3-14)     | 1200<br>(780-1700)     |
| Netherlands | 2000 | Female | 25 to 29 | 82%<br>(73-89%)                | 18%<br>(11-27%)          | 1.3<br>(0.92-1.7)                           | 1.6%<br>(1-2.2%)                     | 5.2%<br>(2.3-8.4%)                  | 9.9<br>(4.3-16)     | 1200<br>(800-1700)     |
| Netherlands | 2000 | Female | 30 to 34 | 83%<br>(74-89%)                | 17%<br>(11-26%)          | 1.4<br>(1-1.8)                              | 1.6%<br>(1-2.3%)                     | 5.8%<br>(3-8.6%)                    | 18<br>(9-26)        | 1600<br>(1000-2200)    |
| Netherlands | 2000 | Female | 35 to 39 | 84%<br>(77-90%)                | 16%<br>(10-23%)          | 2.1<br>(1.5-2.7)                            | 2.5%<br>(1.6-3.5%)                   | 8.9%<br>(5.8-12%)                   | 45<br>(29-61)       | 2900<br>(1900-3800)    |
| Netherlands | 2000 | Female | 40 to 44 | 85%<br>(78-90%)                | 15%<br>(9.8-22%)         | 2.6<br>(2.1-3.2)                            | 3.6%<br>(2.4-4.8%)                   | 10%<br>(7.6-13%)                    | 84<br>(62-110)      | 4400<br>(3200-5700)    |

| Location    | Year | Sex    | Age      | Prevalence of current drinkers | Prevalence of abstainers | Population average of standard drinks daily | Percent of total attributable deaths | Percent of total attributable DALYs | Attributable deaths | Attributable DALYs        |
|-------------|------|--------|----------|--------------------------------|--------------------------|---------------------------------------------|--------------------------------------|-------------------------------------|---------------------|---------------------------|
| Netherlands | 2000 | Female | 45 to 49 | 85%<br>(79-89%)                | 15%<br>(11-21%)          | 2.9<br>(2.3-3.6)                            | 4.6%<br>(3.3-6.1%)                   | 11%<br>(8.4-14%)                    | 140<br>(110-180)    | 6300<br>(4700-8000)       |
| Netherlands | 2000 | Female | 50 to 54 | 86%<br>(81-90%)                | 14%<br>(10-19%)          | 3<br>(2.4-3.7)                              | 5.1%<br>(3.7-6.6%)                   | 11%<br>(8.8-13%)                    | 200<br>(160-250)    | 8000<br>(6200-10000)      |
| Netherlands | 2000 | Female | 55 to 59 | 88%<br>(84-91%)                | 12%<br>(8.6-16%)         | 3.1<br>(2.5-3.7)                            | 5%<br>(3.7-6.6%)                     | 9.5%<br>(7.6-12%)                   | 200<br>(160-250)    | 6800<br>(5100-8700)       |
| Netherlands | 2000 | Female | 60 to 64 | 87%<br>(83-91%)                | 13%<br>(9.1-17%)         | 2.9<br>(2.3-3.5)                            | 4.3%<br>(2.8-6%)                     | 7.3%<br>(5.1-9.5%)                  | 200<br>(140-270)    | 5900<br>(3900-8100)       |
| Netherlands | 2000 | Female | 65 to 69 | 82%<br>(76-88%)                | 18%<br>(12-24%)          | 2.5<br>(2-3.1)                              | 3.3%<br>(1.9-4.9%)                   | 5.2%<br>(3.2-7.2%)                  | 210<br>(130-300)    | 5100<br>(2900-7500)       |
| Netherlands | 2000 | Female | 70 to 74 | 80%<br>(73-85%)                | 20%<br>(15-27%)          | 2.3<br>(1.7-2.9)                            | 2.8%<br>(1.4-6%)                     | 4%<br>(1.7-6.6%)                    | 250<br>(110-420)    | 4900<br>(1800-8200)       |
| Netherlands | 2000 | Female | 75 to 79 | 77%<br>(67-84%)                | 23%<br>(16-33%)          | 2<br>(1.5-2.7)                              | 2.1%<br>(0.19-4.1%)                  | 2.7%<br>(0.35-5.3%)                 | 270<br>(35-550)     | 4200<br>(360-8500)        |
| Netherlands | 2000 | Female | 80 to 84 | 73%<br>(62-83%)                | 27%<br>(17-38%)          | 1.8<br>(1.3-2.5)                            | 1.5%<br>(-0.26-3.3%)                 | 1.8%<br>(-0.36-4%)                  | 230<br>(-46-520)    | 2600<br>(-430-5800)       |
| Netherlands | 2000 | Female | 85 to 89 | 72%<br>(60-81%)                | 28%<br>(19-40%)          | 1.7<br>(1.2-2.3)                            | 1.2%<br>(-0.59-2.9%)                 | 1.3%<br>(-0.77-3.5%)                | 190<br>(-110-500)   | 1600<br>(-820-3900)       |
| Netherlands | 2000 | Female | 90 to 94 | 71%<br>(60-81%)                | 29%<br>(19-40%)          | 1.6<br>(1.1-2.3)                            | 0.75%<br>(-1-2.6%)                   | 0.79%<br>(-1.3-3%)                  | 79<br>(-120-300)    | 460<br>(-620-1600)        |
| Netherlands | 2000 | Female | 95 plus  | 71%<br>(55-84%)                | 29%<br>(16-45%)          | 1.5<br>(0.87-2.3)                           | 0.58%<br>(-1.4-2.9%)                 | 0.53%<br>(-1.8-3.2%)                | 20<br>(-68-120)     | 90<br>(-210-440)          |
| Netherlands | 2000 | Male   | All Ages | 89%<br>(87-91%)                | 11%<br>(8.5-13%)         | 3.3<br>(3.1-3.6)                            | 6.3%<br>(4.8-7.8%)                   | 6.5%<br>(4.3-8.6%)                  | 4500<br>(3000-6000) | 140000<br>(110000-170000) |
| Netherlands | 2000 | Male   | 15 to 19 | 82%<br>(76-88%)                | 18%<br>(12-24%)          | 2.6<br>(2-3.3)                              | 5.4%<br>(3.3-7.6%)                   | 13%<br>(6.8-18%)                    | 29<br>(16-43)       | 2700<br>(1700-3700)       |
| Netherlands | 2000 | Male   | 20 to 24 | 89%<br>(84-93%)                | 11%<br>(6.9-16%)         | 4<br>(3.1-4.9)                              | 9.9%<br>(6.8-13%)                    | 19%<br>(12-27%)                     | 63<br>(40-86)       | 5700<br>(3900-7400)       |
| Netherlands | 2000 | Male   | 25 to 29 | 91%<br>(87-94%)                | 8.8%<br>(5.7-13%)        | 3.5<br>(2.8-4.3)                            | 7.7%<br>(5.2-10%)                    | 17%<br>(10-23%)                     | 62<br>(37-86)       | 5600<br>(3800-7200)       |
| Netherlands | 2000 | Male   | 30 to 34 | 93%<br>(89-95%)                | 7.3%<br>(4.6-11%)        | 3.4<br>(2.7-4.2)                            | 6.5%<br>(4.4-8.7%)                   | 15%<br>(8.8-20%)                    | 75<br>(44-110)      | 6000<br>(4000-8000)       |
| Netherlands | 2000 | Male   | 35 to 39 | 94%<br>(92-97%)                | 5.8%<br>(3.5-8.5%)       | 3.8<br>(3.1-4.6)                            | 6.6%<br>(4.7-8.5%)                   | 14%<br>(9.5-19%)                    | 100<br>(66-140)     | 6900<br>(4900-9000)       |
| Netherlands | 2000 | Male   | 40 to 44 | 95%<br>(93-97%)                | 4.7%<br>(2.6-7.5%)       | 4.2<br>(3.5-5)                              | 7.4%<br>(5.4-9.7%)                   | 14%<br>(9.9-19%)                    | 150<br>(110-210)    | 8800<br>(6300-12000)      |
| Netherlands | 2000 | Male   | 45 to 49 | 96%<br>(94-97%)                | 4.1%<br>(2.7-6.1%)       | 4.6<br>(3.9-5.4)                            | 8.2%<br>(5.9-11%)                    | 14%<br>(9.9-18%)                    | 230<br>(160-300)    | 11000<br>(8200-15000)     |
| Netherlands | 2000 | Male   | 50 to 54 | 96%<br>(94-97%)                | 3.9%<br>(2.5-5.5%)       | 5<br>(4.3-5.9)                              | 8.8%<br>(6.4-11%)                    | 13%<br>(9.7-17%)                    | 370<br>(270-470)    | 16000<br>(12000-20000)    |
| Netherlands | 2000 | Male   | 55 to 59 | 96%<br>(94-97%)                | 4.1%<br>(2.9-5.7%)       | 5.5<br>(4.8-6.4)                            | 9.5%<br>(6.9-12%)                    | 13%<br>(9.5-17%)                    | 460<br>(330-580)    | 16000<br>(12000-21000)    |
| Netherlands | 2000 | Male   | 60 to 64 | 95%<br>(93-97%)                | 5%<br>(3.5-6.7%)         | 5.4<br>(4.6-6.3)                            | 8.7%<br>(6-11%)                      | 11%<br>(7.5-15%)                    | 540<br>(350-710)    | 16000<br>(11000-21000)    |



| Location    | Year | Sex    | Age      | Prevalence of current drinkers | Prevalence of abstainers | Population average of standard drinks daily | Percent of total attributable deaths | Percent of total attributable DALYs | Attributable deaths | Attributable DALYs     |
|-------------|------|--------|----------|--------------------------------|--------------------------|---------------------------------------------|--------------------------------------|-------------------------------------|---------------------|------------------------|
| Netherlands | 2000 | Male   | 65 to 69 | 94%<br>(91-96%)                | 6.2%<br>(4.3-8.5%)       | 4.6<br>(4-5.3)                              | 6.9%<br>(4.5-9.1%)                   | 8.2%<br>(5.4-11%)                   | 580<br>(380-790)    | 15000<br>(9900-19000)  |
| Netherlands | 2000 | Male   | 70 to 74 | 93%<br>(90-95%)                | 7.2%<br>(5.3-9.6%)       | 4.1<br>(3.4-4.8)                            | 5.2%<br>(2.7-7.6%)                   | 5.9%<br>(2.8-8.7%)                  | 570<br>(280-850)    | 12000<br>(6200-17000)  |
| Netherlands | 2000 | Male   | 75 to 79 | 91%<br>(87-94%)                | 9.1%<br>(5.8-13%)        | 3.6<br>(2.9-4.3)                            | 4%<br>(1.6-6.3%)                     | 4.3%<br>(1.5-7%)                    | 520<br>(180-850)    | 8200<br>(3400-13000)   |
| Netherlands | 2000 | Male   | 80 to 84 | 89%<br>(83-93%)                | 11%<br>(7-17%)           | 3.2<br>(2.5-3.9)                            | 3.4%<br>(1.3-5.6%)                   | 3.6%<br>(1.1-6.1%)                  | 390<br>(120-660)    | 4500<br>(1700-7500)    |
| Netherlands | 2000 | Male   | 85 to 89 | 88%<br>(81-92%)                | 12%<br>(7.5-19%)         | 3<br>(2.2-3.7)                              | 2.9%<br>(1.1-5.1%)                   | 3.1%<br>(0.89-5.5%)                 | 240<br>(71-430)     | 2000<br>(750-3500)     |
| Netherlands | 2000 | Male   | 90 to 94 | 88%<br>(82-93%)                | 12%<br>(7.1-18%)         | 2.9<br>(2-3.7)                              | 2.4%<br>(0.34-4.8%)                  | 2.5%<br>(0.12-5.2%)                 | 85<br>(4.1-180)     | 500<br>(69-1000)       |
| Netherlands | 2000 | Male   | 95 plus  | 88%<br>(80-94%)                | 12%<br>(5.6-20%)         | 2.7<br>(1.8-3.8)                            | 2.2%<br>(-0.2-5.1%)                  | 2.2%<br>(-0.66-5.5%)                | 21<br>(-6.4-54)     | 85<br>(-7.6-200)       |
| Netherlands | 2005 | Female | All Ages | 81%<br>(78-84%)                | 19%<br>(16-22%)          | 1.8<br>(1.7-2)                              | 2.7%<br>(1.9-3.6%)                   | 3.1%<br>(1.7-4.7%)                  | 2200<br>(1100-3300) | 57000<br>(40000-74000) |
| Netherlands | 2005 | Female | 15 to 19 | 79%<br>(69-87%)                | 21%<br>(13-31%)          | 1.5<br>(1.1-2)                              | 1.5%<br>(0.95-2.2%)                  | 6.8%<br>(3.6-10%)                   | 5.7<br>(3-8.8)      | 730<br>(470-1100)      |
| Netherlands | 2005 | Female | 20 to 24 | 82%<br>(74-89%)                | 18%<br>(11-26%)          | 1.6<br>(1.1-2.2)                            | 2%<br>(1.3-2.7%)                     | 6.8%<br>(3.1-11%)                   | 7.6<br>(3.5-12)     | 1100<br>(720-1600)     |
| Netherlands | 2005 | Female | 25 to 29 | 84%<br>(76-90%)                | 16%<br>(10-24%)          | 1.3<br>(0.94-1.7)                           | 1.5%<br>(0.93-2%)                    | 5.3%<br>(2.1-8.5%)                  | 7.1<br>(2.9-11)     | 960<br>(620-1300)      |
| Netherlands | 2005 | Female | 30 to 34 | 84%<br>(77-90%)                | 16%<br>(9.8-23%)         | 1.4<br>(1-1.9)                              | 1.5%<br>(0.94-2.1%)                  | 6%<br>(3.2-8.8%)                    | 15<br>(7.5-22)      | 1300<br>(800-1800)     |
| Netherlands | 2005 | Female | 35 to 39 | 84%<br>(77-90%)                | 16%<br>(9.8-23%)         | 2<br>(1.5-2.7)                              | 2.2%<br>(1.4-3.1%)                   | 8.8%<br>(5.8-12%)                   | 37<br>(25-51)       | 2400<br>(1600-3300)    |
| Netherlands | 2005 | Female | 40 to 44 | 85%<br>(78-91%)                | 15%<br>(9.2-22%)         | 2.6<br>(2.1-3.2)                            | 3.2%<br>(2.2-4.4%)                   | 10%<br>(7.5-13%)                    | 77<br>(55-98)       | 4100<br>(3000-5300)    |
| Netherlands | 2005 | Female | 45 to 49 | 86%<br>(81-90%)                | 14%<br>(10-19%)          | 2.9<br>(2.3-3.4)                            | 4.2%<br>(3-5.5%)                     | 11%<br>(8.1-13%)                    | 130<br>(97-160)     | 5800<br>(4400-7300)    |
| Netherlands | 2005 | Female | 50 to 54 | 87%<br>(82-91%)                | 13%<br>(9.3-18%)         | 3<br>(2.4-3.6)                              | 4.8%<br>(3.5-6.2%)                   | 10%<br>(8.3-13%)                    | 180<br>(140-220)    | 7100<br>(5400-8800)    |
| Netherlands | 2005 | Female | 55 to 59 | 89%<br>(86-92%)                | 11%<br>(8.1-14%)         | 3.1<br>(2.5-3.7)                            | 4.9%<br>(3.6-6.4%)                   | 9.5%<br>(7.6-11%)                   | 240<br>(190-300)    | 8300<br>(6200-10000)   |
| Netherlands | 2005 | Female | 60 to 64 | 89%<br>(85-92%)                | 11%<br>(8.2-15%)         | 3<br>(2.4-3.7)                              | 4.3%<br>(3-5.9%)                     | 7.7%<br>(5.7-9.7%)                  | 220<br>(160-280)    | 6400<br>(4500-8500)    |
| Netherlands | 2005 | Female | 65 to 69 | 85%<br>(80-89%)                | 15%<br>(11-20%)          | 2.7<br>(2.2-3.2)                            | 3.4%<br>(2.2-4.8%)                   | 5.7%<br>(4-7.4%)                    | 210<br>(150-280)    | 5100<br>(3200-7000)    |
| Netherlands | 2005 | Female | 70 to 74 | 82%<br>(76-86%)                | 18%<br>(14-24%)          | 2.4<br>(1.8-3)                              | 2.9%<br>(1.3-4.5%)                   | 4.3%<br>(2.2-6.5%)                  | 250<br>(120-360)    | 4800<br>(2200-7400)    |
| Netherlands | 2005 | Female | 75 to 79 | 77%<br>(68-84%)                | 23%<br>(16-32%)          | 2<br>(1.5-2.6)                              | 2.1%<br>(0.43-3.8%)                  | 2.9%<br>(0.75-5.1%)                 | 260<br>(65-450)     | 3900<br>(800-6900)     |
| Netherlands | 2005 | Female | 80 to 84 | 72%<br>(60-81%)                | 28%<br>(19-40%)          | 1.7<br>(1.2-2.3)                            | 1.6%<br>(0.092-3.1%)                 | 2%<br>(0.16-3.9%)                   | 270<br>(21-520)     | 3000<br>(180-5900)     |

| Location    | Year | Sex    | Age      | Prevalence of current drinkers | Prevalence of abstainers | Population average of standard drinks daily | Percent of total attributable deaths | Percent of total attributable DALYs | Attributable deaths | Attributable DALYs       |
|-------------|------|--------|----------|--------------------------------|--------------------------|---------------------------------------------|--------------------------------------|-------------------------------------|---------------------|--------------------------|
| Netherlands | 2005 | Female | 85 to 89 | 71%<br>(60-80%)                | 29%<br>(20-40%)          | 1.6<br>(1.1-2.2)                            | 1.2%<br>(-0.34-2.9%)                 | 1.4%<br>(-0.41-3.4%)                | 200<br>(-55-480)    | 1600<br>(-440-3700)      |
| Netherlands | 2005 | Female | 90 to 94 | 70%<br>(58-80%)                | 30%<br>(20-42%)          | 1.5<br>(0.98-2.1)                           | 0.79%<br>(-0.87-2.5%)                | 0.86%<br>(-1.1-2.9%)                | 89<br>(-110-300)    | 510<br>(-550-1600)       |
| Netherlands | 2005 | Female | 95 plus  | 70%<br>(54-84%)                | 30%<br>(16-46%)          | 1.4<br>(0.82-2.2)                           | 0.61%<br>(-1.2-2.7%)                 | 0.58%<br>(-1.5-3%)                  | 25<br>(-65-130)     | 110<br>(-210-480)        |
| Netherlands | 2005 | Male   | All Ages | 90%<br>(88-92%)                | 10%<br>(8.1-12%)         | 3.2<br>(3-3.5)                              | 6%<br>(4.7-7.5%)                     | 6.4%<br>(4.4-8.4%)                  | 4200<br>(2900-5600) | 130000<br>(99000-160000) |
| Netherlands | 2005 | Male   | 15 to 19 | 84%<br>(77-89%)                | 16%<br>(11-23%)          | 2.5<br>(2-3.2)                              | 4.4%<br>(2.7-6.1%)                   | 12%<br>(6.4-18%)                    | 21<br>(11-31)       | 2100<br>(1400-3000)      |
| Netherlands | 2005 | Male   | 20 to 24 | 90%<br>(84-93%)                | 10%<br>(6.6-16%)         | 3.8<br>(3-4.7)                              | 8.4%<br>(5.9-11%)                    | 19%<br>(11-26%)                     | 45<br>(27-62)       | 4400<br>(3100-5900)      |
| Netherlands | 2005 | Male   | 25 to 29 | 91%<br>(88-94%)                | 8.5%<br>(5.8-12%)        | 3.3<br>(2.6-4.2)                            | 6.8%<br>(4.8-9%)                     | 16%<br>(9.7-23%)                    | 43<br>(25-59)       | 3900<br>(2700-5100)      |
| Netherlands | 2005 | Male   | 30 to 34 | 93%<br>(90-96%)                | 6.9%<br>(4.4-10%)        | 3.3<br>(2.6-4.1)                            | 5.8%<br>(3.8-8%)                     | 14%<br>(8.2-20%)                    | 54<br>(31-77)       | 4400<br>(2900-5800)      |
| Netherlands | 2005 | Male   | 35 to 39 | 94%<br>(92-97%)                | 5.5%<br>(3.4-8.2%)       | 3.6<br>(2.9-4.4)                            | 6%<br>(4.1-7.9%)                     | 14%<br>(8.9-19%)                    | 85<br>(53-120)      | 5900<br>(4100-7800)      |
| Netherlands | 2005 | Male   | 40 to 44 | 95%<br>(93-97%)                | 4.6%<br>(2.6-7.4%)       | 4<br>(3.3-4.8)                              | 6.8%<br>(4.9-9%)                     | 15%<br>(10-19%)                     | 140<br>(94-180)     | 7900<br>(5700-10000)     |
| Netherlands | 2005 | Male   | 45 to 49 | 96%<br>(94-97%)                | 4%<br>(2.7-5.9%)         | 4.4<br>(3.7-5.3)                            | 7.8%<br>(5.7-10%)                    | 14%<br>(10-18%)                     | 210<br>(150-270)    | 10000<br>(7700-13000)    |
| Netherlands | 2005 | Male   | 50 to 54 | 96%<br>(95-98%)                | 3.7%<br>(2.5-5.2%)       | 4.9<br>(4.1-5.7)                            | 8.6%<br>(6.5-11%)                    | 14%<br>(10-17%)                     | 320<br>(240-400)    | 14000<br>(10000-17000)   |
| Netherlands | 2005 | Male   | 55 to 59 | 96%<br>(95-97%)                | 3.9%<br>(2.8-5.3%)       | 5.3<br>(4.6-6.1)                            | 9.2%<br>(7.1-11%)                    | 14%<br>(10-17%)                     | 510<br>(400-640)    | 19000<br>(15000-23000)   |
| Netherlands | 2005 | Male   | 60 to 64 | 95%<br>(94-97%)                | 4.7%<br>(3.3-6.3%)       | 5.2<br>(4.4-6.1)                            | 8.5%<br>(6.2-11%)                    | 11%<br>(8.3-14%)                    | 530<br>(390-680)    | 16000<br>(12000-20000)   |
| Netherlands | 2005 | Male   | 65 to 69 | 94%<br>(92-96%)                | 5.9%<br>(4.1-8%)         | 4.5<br>(3.9-5.1)                            | 6.7%<br>(4.6-8.6%)                   | 8.3%<br>(5.7-11%)                   | 520<br>(360-690)    | 13000<br>(9400-17000)    |
| Netherlands | 2005 | Male   | 70 to 74 | 93%<br>(91-95%)                | 7%<br>(5.2-9.1%)         | 3.9<br>(3.3-4.6)                            | 5.1%<br>(3-7.1%)                     | 5.9%<br>(3.4-8.4%)                  | 520<br>(290-730)    | 11000<br>(6300-15000)    |
| Netherlands | 2005 | Male   | 75 to 79 | 92%<br>(88-94%)                | 8.2%<br>(5.5-12%)        | 3.5<br>(2.9-4.2)                            | 3.9%<br>(1.9-6%)                     | 4.3%<br>(2-6.8%)                    | 480<br>(210-750)    | 7700<br>(3700-12000)     |
| Netherlands | 2005 | Male   | 80 to 84 | 90%<br>(85-94%)                | 9.9%<br>(6.2-15%)        | 3.2<br>(2.6-3.8)                            | 3.3%<br>(1.3-5.3%)                   | 3.5%<br>(1.2-5.8%)                  | 410<br>(150-700)    | 4900<br>(2000-8000)      |
| Netherlands | 2005 | Male   | 85 to 89 | 89%<br>(84-93%)                | 11%<br>(7-16%)           | 3<br>(2.3-3.6)                              | 2.8%<br>(0.98-4.9%)                  | 2.9%<br>(0.88-5.3%)                 | 230<br>(70-420)     | 2000<br>(700-3500)       |
| Netherlands | 2005 | Male   | 90 to 94 | 89%<br>(83-93%)                | 11%<br>(6.7-17%)         | 2.8<br>(2.1-3.6)                            | 2.3%<br>(0.36-4.6%)                  | 2.3%<br>(0.11-5%)                   | 91<br>(4.3-190)     | 540<br>(84-1100)         |
| Netherlands | 2005 | Male   | 95 plus  | 89%<br>(81-95%)                | 11%<br>(5.2-19%)         | 2.7<br>(1.7-3.7)                            | 2.1%<br>(-0.23-4.9%)                 | 2%<br>(-0.57-5.2%)                  | 21<br>(-5.8-52)     | 84<br>(-8.8-200)         |
| Netherlands | 2010 | Female | All Ages | 82%<br>(79-85%)                | 18%<br>(15-21%)          | 1.9<br>(1.7-2.1)                            | 2.6%<br>(1.8-3.4%)                   | 3.1%<br>(1.7-4.5%)                  | 2200<br>(1200-3200) | 55000<br>(39000-71000)   |

| Location    | Year | Sex    | Age      | Prevalence of current drinkers | Prevalence of abstainers | Population average of standard drinks daily | Percent of total attributable deaths | Percent of total attributable DALYs | Attributable deaths | Attributable DALYs       |
|-------------|------|--------|----------|--------------------------------|--------------------------|---------------------------------------------|--------------------------------------|-------------------------------------|---------------------|--------------------------|
| Netherlands | 2010 | Female | 15 to 19 | 81%<br>(71-88%)                | 19%<br>(12-29%)          | 1.5<br>(1.1-2)                              | 1.4%<br>(0.87-2%)                    | 6.6%<br>(3.5-10%)                   | 4.7<br>(2.5-7.4)    | 680<br>(430-970)         |
| Netherlands | 2010 | Female | 20 to 24 | 84%<br>(76-90%)                | 16%<br>(10-24%)          | 1.6<br>(1.1-2.2)                            | 1.9%<br>(1.3-2.5%)                   | 6.8%<br>(3-11%)                     | 6.1<br>(2.7-9.8)    | 1100<br>(710-1600)       |
| Netherlands | 2010 | Female | 25 to 29 | 85%<br>(77-90%)                | 15%<br>(9.7-23%)         | 1.3<br>(0.93-1.7)                           | 1.4%<br>(0.93-2%)                    | 5.4%<br>(1.9-8.8%)                  | 6.3<br>(2.3-10)     | 940<br>(590-1300)        |
| Netherlands | 2010 | Female | 30 to 34 | 85%<br>(78-91%)                | 15%<br>(9.4-22%)         | 1.4<br>(1.1-1.9)                            | 1.4%<br>(0.91-2%)                    | 6.1%<br>(3.1-9.1%)                  | 11<br>(5.5-16)      | 1000<br>(670-1400)       |
| Netherlands | 2010 | Female | 35 to 39 | 85%<br>(78-90%)                | 15%<br>(9.7-22%)         | 2<br>(1.5-2.6)                              | 2%<br>(1.3-2.9%)                     | 8.8%<br>(5.8-12%)                   | 28<br>(18-38)       | 1900<br>(1300-2600)      |
| Netherlands | 2010 | Female | 40 to 44 | 86%<br>(79-91%)                | 14%<br>(9.3-21%)         | 2.5<br>(2-3.1)                              | 2.9%<br>(2-3.9%)                     | 10%<br>(7.4-13%)                    | 63<br>(45-80)       | 3500<br>(2500-4600)      |
| Netherlands | 2010 | Female | 45 to 49 | 86%<br>(81-90%)                | 14%<br>(10-19%)          | 2.8<br>(2.3-3.5)                            | 3.7%<br>(2.6-5%)                     | 10%<br>(7.9-13%)                    | 110<br>(85-140)     | 5200<br>(3800-6700)      |
| Netherlands | 2010 | Female | 50 to 54 | 87%<br>(82-91%)                | 13%<br>(9.5-18%)         | 3<br>(2.4-3.6)                              | 4.4%<br>(3.2-5.7%)                   | 9.8%<br>(7.8-12%)                   | 170<br>(130-200)    | 6700<br>(5000-8400)      |
| Netherlands | 2010 | Female | 55 to 59 | 89%<br>(86-92%)                | 11%<br>(7.8-14%)         | 3.1<br>(2.5-3.8)                            | 4.6%<br>(3.4-5.9%)                   | 9%<br>(7.3-11%)                     | 210<br>(170-260)    | 7300<br>(5500-9300)      |
| Netherlands | 2010 | Female | 60 to 64 | 89%<br>(86-92%)                | 11%<br>(7.9-14%)         | 3<br>(2.4-3.7)                              | 4.1%<br>(2.8-5.5%)                   | 7.5%<br>(5.9-9.3%)                  | 260<br>(200-320)    | 7600<br>(5300-10000)     |
| Netherlands | 2010 | Female | 65 to 69 | 86%<br>(82-90%)                | 14%<br>(9.8-18%)         | 2.7<br>(2.2-3.2)                            | 3.4%<br>(2.2-4.7%)                   | 5.9%<br>(4.3-7.4%)                  | 230<br>(170-290)    | 5500<br>(3700-7400)      |
| Netherlands | 2010 | Female | 70 to 74 | 83%<br>(78-87%)                | 17%<br>(13-22%)          | 2.4<br>(1.9-3)                              | 2.7%<br>(1.4-4.2%)                   | 4.4%<br>(2.6-6.3%)                  | 230<br>(140-330)    | 4500<br>(2300-6700)      |
| Netherlands | 2010 | Female | 75 to 79 | 78%<br>(70-85%)                | 22%<br>(15-30%)          | 2<br>(1.5-2.6)                              | 2.1%<br>(0.59-3.6%)                  | 3%<br>(1.2-4.9%)                    | 240<br>(91-390)     | 3600<br>(1000-6200)      |
| Netherlands | 2010 | Female | 80 to 84 | 74%<br>(63-83%)                | 26%<br>(17-37%)          | 1.8<br>(1.3-2.4)                            | 1.6%<br>(0.19-3.1%)                  | 2.1%<br>(0.42-4%)                   | 260<br>(54-490)     | 2800<br>(350-5500)       |
| Netherlands | 2010 | Female | 85 to 89 | 73%<br>(62-82%)                | 27%<br>(18-38%)          | 1.7<br>(1.2-2.3)                            | 1.2%<br>(-0.26-2.7%)                 | 1.5%<br>(-0.24-3.2%)                | 220<br>(-36-500)    | 1800<br>(-370-4000)      |
| Netherlands | 2010 | Female | 90 to 94 | 72%<br>(61-82%)                | 28%<br>(18-39%)          | 1.6<br>(1-2.2)                              | 0.79%<br>(-0.75-2.4%)                | 0.89%<br>(-0.9-2.8%)                | 96<br>(-100-300)    | 550<br>(-510-1700)       |
| Netherlands | 2010 | Female | 95 plus  | 72%<br>(57-84%)                | 28%<br>(16-43%)          | 1.5<br>(0.87-2.2)                           | 0.6%<br>(-1.2-2.7%)                  | 0.58%<br>(-1.4-3%)                  | 30<br>(-74-150)     | 130<br>(-250-570)        |
| Netherlands | 2010 | Male   | All Ages | 90%<br>(88-92%)                | 10%<br>(8.1-12%)         | 3.2<br>(2.9-3.5)                            | 5.8%<br>(4.5-7.2%)                   | 6.2%<br>(4.4-8%)                    | 4100<br>(2900-5400) | 120000<br>(95000-150000) |
| Netherlands | 2010 | Male   | 15 to 19 | 84%<br>(77-89%)                | 16%<br>(11-23%)          | 2.5<br>(1.9-3.1)                            | 3.8%<br>(2.5-5.4%)                   | 11%<br>(6.1-17%)                    | 17<br>(8.8-25)      | 1900<br>(1200-2600)      |
| Netherlands | 2010 | Male   | 20 to 24 | 89%<br>(84-93%)                | 11%<br>(6.9-16%)         | 3.7<br>(2.8-4.6)                            | 7.8%<br>(5.5-10%)                    | 18%<br>(11-25%)                     | 41<br>(24-58)       | 4200<br>(2900-5600)      |
| Netherlands | 2010 | Male   | 25 to 29 | 91%<br>(87-94%)                | 9%<br>(5.9-13%)          | 3.2<br>(2.5-4)                              | 6.3%<br>(4.3-8.2%)                   | 16%<br>(8.6-22%)                    | 35<br>(20-50)       | 3500<br>(2400-4600)      |
| Netherlands | 2010 | Male   | 30 to 34 | 93%<br>(89-95%)                | 7.1%<br>(4.5-11%)        | 3.1<br>(2.4-4)                              | 5.3%<br>(3.6-7.2%)                   | 14%<br>(7.4-20%)                    | 39<br>(21-56)       | 3300<br>(2200-4500)      |

| Location    | Year | Sex    | Age      | Prevalence of current drinkers | Prevalence of abstainers | Population average of standard drinks daily | Percent of total attributable deaths | Percent of total attributable DALYs | Attributable deaths | Attributable DALYs     |
|-------------|------|--------|----------|--------------------------------|--------------------------|---------------------------------------------|--------------------------------------|-------------------------------------|---------------------|------------------------|
| Netherlands | 2010 | Male   | 35 to 39 | 94%<br>(92-97%)                | 5.5%<br>(3.4-8%)         | 3.5<br>(2.8-4.3)                            | 5.6%<br>(3.8-7.4%)                   | 14%<br>(8.5-19%)                    | 63<br>(40-88)       | 4500<br>(3200-6000)    |
| Netherlands | 2010 | Male   | 40 to 44 | 95%<br>(93-97%)                | 4.6%<br>(2.6-7.4%)       | 3.9<br>(3.2-4.7)                            | 6.2%<br>(4.4-8.3%)                   | 14%<br>(9.8-19%)                    | 110<br>(77-150)     | 6700<br>(4900-8800)    |
| Netherlands | 2010 | Male   | 45 to 49 | 96%<br>(94-97%)                | 4.1%<br>(2.7-6.1%)       | 4.3<br>(3.6-5.1)                            | 7.2%<br>(5.3-9.4%)                   | 14%<br>(10-18%)                     | 190<br>(140-250)    | 9500<br>(7100-12000)   |
| Netherlands | 2010 | Male   | 50 to 54 | 96%<br>(95-98%)                | 3.7%<br>(2.5-5.2%)       | 4.7<br>(4-5.5)                              | 8.2%<br>(6.2-10%)                    | 14%<br>(10-17%)                     | 290<br>(220-370)    | 13000<br>(9700-16000)  |
| Netherlands | 2010 | Male   | 55 to 59 | 96%<br>(95-97%)                | 3.9%<br>(2.8-5.3%)       | 5.1<br>(4.4-6)                              | 9%<br>(7-11%)                        | 14%<br>(11-17%)                     | 450<br>(350-550)    | 16000<br>(13000-20000) |
| Netherlands | 2010 | Male   | 60 to 64 | 95%<br>(94-97%)                | 4.7%<br>(3.3-6.3%)       | 5<br>(4.2-5.9)                              | 8.3%<br>(6.3-10%)                    | 12%<br>(8.6-14%)                    | 610<br>(460-760)    | 19000<br>(14000-24000) |
| Netherlands | 2010 | Male   | 65 to 69 | 94%<br>(92-96%)                | 6%<br>(4.2-8.1%)         | 4.3<br>(3.7-5)                              | 6.6%<br>(4.7-8.4%)                   | 8.5%<br>(6-11%)                     | 530<br>(380-680)    | 14000<br>(9900-18000)  |
| Netherlands | 2010 | Male   | 70 to 74 | 93%<br>(91-95%)                | 7%<br>(5.3-9.2%)         | 3.8<br>(3.1-4.5)                            | 5%<br>(3.2-6.8%)                     | 6.1%<br>(3.8-8.3%)                  | 480<br>(310-650)    | 10000<br>(6300-14000)  |
| Netherlands | 2010 | Male   | 75 to 79 | 92%<br>(88-95%)                | 8%<br>(5.3-12%)          | 3.4<br>(2.7-4.1)                            | 3.9%<br>(2.2-5.7%)                   | 4.4%<br>(2.4-6.6%)                  | 470<br>(250-690)    | 7600<br>(4200-11000)   |
| Netherlands | 2010 | Male   | 80 to 84 | 90%<br>(86-94%)                | 9.5%<br>(6-14%)          | 3.1<br>(2.5-3.8)                            | 3.2%<br>(1.5-5%)                     | 3.4%<br>(1.5-5.5%)                  | 400<br>(170-640)    | 4800<br>(2300-7500)    |
| Netherlands | 2010 | Male   | 85 to 89 | 90%<br>(85-93%)                | 10%<br>(6.8-15%)         | 2.9<br>(2.3-3.6)                            | 2.6%<br>(0.91-4.4%)                  | 2.7%<br>(0.8-4.8%)                  | 260<br>(77-460)     | 2300<br>(820-3800)     |
| Netherlands | 2010 | Male   | 90 to 94 | 90%<br>(84-94%)                | 10%<br>(6.4-16%)         | 2.8<br>(2-3.6)                              | 2.1%<br>(0.22-4.2%)                  | 2.1%<br>(-0.11-4.6%)                | 93<br>(-4.8-200)    | 560<br>(58-1100)       |
| Netherlands | 2010 | Male   | 95 plus  | 89%<br>(81-95%)                | 11%<br>(5.3-19%)         | 2.6<br>(1.7-3.5)                            | 1.9%<br>(-0.27-4.4%)                 | 1.8%<br>(-0.71-4.7%)                | 23<br>(-8.9-59)     | 96<br>(-14-220)        |
| Netherlands | 2016 | Female | All Ages | 82%<br>(78-84%)                | 18%<br>(16-22%)          | 1.9<br>(1.5-2.5)                            | 2.7%<br>(1.6-4%)                     | 3.3%<br>(1.4-5.4%)                  | 2400<br>(1100-4000) | 58000<br>(36000-85000) |
| Netherlands | 2016 | Female | 15 to 19 | 78%<br>(67-87%)                | 22%<br>(13-33%)          | 1.5<br>(0.96-2.1)                           | 1.3%<br>(0.83-1.9%)                  | 6.5%<br>(3.3-10%)                   | 4.2<br>(2.1-6.8)    | 630<br>(390-940)       |
| Netherlands | 2016 | Female | 20 to 24 | 82%<br>(72-89%)                | 18%<br>(11-28%)          | 1.6<br>(1-2.3)                              | 1.8%<br>(1.2-2.6%)                   | 6.8%<br>(2.7-11%)                   | 6.2<br>(2.5-10)     | 1100<br>(740-1700)     |
| Netherlands | 2016 | Female | 25 to 29 | 83%<br>(74-90%)                | 17%<br>(10-26%)          | 1.3<br>(0.84-1.8)                           | 1.5%<br>(0.95-2.1%)                  | 5.4%<br>(1.9-9.1%)                  | 5.8<br>(2-9.9)      | 960<br>(610-1400)      |
| Netherlands | 2016 | Female | 30 to 34 | 84%<br>(74-91%)                | 16%<br>(9.5-26%)         | 1.4<br>(0.92-2)                             | 1.4%<br>(0.94-2.1%)                  | 6.2%<br>(3.2-9.4%)                  | 9.9<br>(5.2-16)     | 1000<br>(670-1500)     |
| Netherlands | 2016 | Female | 35 to 39 | 84%<br>(77-90%)                | 16%<br>(9.7-23%)         | 2<br>(1.4-2.9)                              | 2%<br>(1.3-2.9%)                     | 9.1%<br>(5.8-13%)                   | 20<br>(12-29)       | 1500<br>(950-2100)     |
| Netherlands | 2016 | Female | 40 to 44 | 85%<br>(77-91%)                | 15%<br>(9.5-23%)         | 2.5<br>(1.8-3.5)                            | 2.8%<br>(1.8-4%)                     | 10%<br>(7.3-14%)                    | 56<br>(39-76)       | 3200<br>(2100-4500)    |
| Netherlands | 2016 | Female | 45 to 49 | 85%<br>(78-90%)                | 15%<br>(10-22%)          | 2.8<br>(2-3.8)                              | 3.7%<br>(2.4-5.1%)                   | 11%<br>(7.7-14%)                    | 110<br>(75-140)     | 5000<br>(3400-6900)    |
| Netherlands | 2016 | Female | 50 to 54 | 86%<br>(81-91%)                | 14%<br>(9.5-19%)         | 3<br>(2.2-4.1)                              | 4.3%<br>(3-5.9%)                     | 10%<br>(7.8-13%)                    | 170<br>(130-220)    | 6900<br>(4800-9400)    |

| Location    | Year | Sex    | Age      | Prevalence of current drinkers | Prevalence of abstainers | Population average of standard drinks daily | Percent of total attributable deaths | Percent of total attributable DALYs | Attributable deaths | Attributable DALYs       |
|-------------|------|--------|----------|--------------------------------|--------------------------|---------------------------------------------|--------------------------------------|-------------------------------------|---------------------|--------------------------|
| Netherlands | 2016 | Female | 55 to 59 | 89%<br>(86-92%)                | 11%<br>(7.7-14%)         | 3.1<br>(2.3-4.2)                            | 4.5%<br>(3-6.1%)                     | 9.1%<br>(7.1-12%)                   | 200<br>(150-260)    | 7200<br>(5000-9900)      |
| Netherlands | 2016 | Female | 60 to 64 | 89%<br>(86-92%)                | 11%<br>(7.6-14%)         | 3.1<br>(2.2-4.1)                            | 4.1%<br>(2.6-5.9%)                   | 7.6%<br>(5.6-10%)                   | 240<br>(170-320)    | 7200<br>(4600-10000)     |
| Netherlands | 2016 | Female | 65 to 69 | 87%<br>(82-91%)                | 13%<br>(9.4-18%)         | 2.8<br>(2.1-3.7)                            | 3.5%<br>(2.1-5.2%)                   | 6.2%<br>(4.3-8.5%)                  | 310<br>(210-430)    | 7600<br>(4600-12000)     |
| Netherlands | 2016 | Female | 70 to 74 | 84%<br>(79-88%)                | 16%<br>(12-21%)          | 2.5<br>(1.8-3.4)                            | 3%<br>(1.4-5%)                       | 4.9%<br>(2.7-7.4%)                  | 250<br>(140-390)    | 5100<br>(2300-8300)      |
| Netherlands | 2016 | Female | 75 to 79 | 80%<br>(72-87%)                | 20%<br>(13-28%)          | 2.2<br>(1.5-3)                              | 2.4%<br>(0.62-4.5%)                  | 3.5%<br>(1.2-6%)                    | 250<br>(90-440)     | 3900<br>(1100-7500)      |
| Netherlands | 2016 | Female | 80 to 84 | 77%<br>(66-85%)                | 23%<br>(15-34%)          | 2<br>(1.3-2.8)                              | 1.9%<br>(0.21-4%)                    | 2.5%<br>(0.47-5.1%)                 | 300<br>(53-590)     | 3400<br>(390-7100)       |
| Netherlands | 2016 | Female | 85 to 89 | 75%<br>(65-83%)                | 25%<br>(17-35%)          | 1.8<br>(1.2-2.6)                            | 1.4%<br>(-0.22-3.4%)                 | 1.8%<br>(-0.24-4.2%)                | 270<br>(-36-640)    | 2200<br>(-350-5300)      |
| Netherlands | 2016 | Female | 90 to 94 | 74%<br>(64-83%)                | 26%<br>(17-36%)          | 1.7<br>(1.1-2.5)                            | 1%<br>(-0.65-3.2%)                   | 1.2%<br>(-0.8-3.7%)                 | 160<br>(-110-510)   | 910<br>(-560-2900)       |
| Netherlands | 2016 | Female | 95 plus  | 74%<br>(58-85%)                | 26%<br>(15-42%)          | 1.6<br>(0.86-2.5)                           | 0.78%<br>(-1.1-3.4%)                 | 0.78%<br>(-1.4-3.8%)                | 48<br>(-90-230)     | 200<br>(-280-820)        |
| Netherlands | 2016 | Male   | All Ages | 89%<br>(87-91%)                | 11%<br>(8.8-13%)         | 3.2<br>(2.5-4)                              | 6%<br>(4.1-8.1%)                     | 6.4%<br>(3.9-9.4%)                  | 4700<br>(2800-6900) | 130000<br>(90000-180000) |
| Netherlands | 2016 | Male   | 15 to 19 | 80%<br>(72-88%)                | 20%<br>(12-28%)          | 2.4<br>(1.6-3.3)                            | 3.5%<br>(2.2-4.9%)                   | 11%<br>(5.7-17%)                    | 14<br>(7.4-22)      | 1600<br>(1000-2300)      |
| Netherlands | 2016 | Male   | 20 to 24 | 87%<br>(80-92%)                | 13%<br>(7.7-20%)         | 3.6<br>(2.5-4.9)                            | 7.5%<br>(5.1-10%)                    | 18%<br>(10-25%)                     | 40<br>(23-59)       | 4300<br>(2900-5900)      |
| Netherlands | 2016 | Male   | 25 to 29 | 89%<br>(84-93%)                | 11%<br>(6.6-16%)         | 3.1<br>(2.2-4.3)                            | 6.4%<br>(4.3-8.4%)                   | 16%<br>(8.3-23%)                    | 35<br>(18-51)       | 3700<br>(2500-5100)      |
| Netherlands | 2016 | Male   | 30 to 34 | 91%<br>(86-95%)                | 8.6%<br>(5-14%)          | 3.1<br>(2.2-4.3)                            | 5.6%<br>(3.6-7.5%)                   | 14%<br>(7.5-21%)                    | 39<br>(21-57)       | 3500<br>(2300-4800)      |
| Netherlands | 2016 | Male   | 35 to 39 | 93%<br>(89-96%)                | 6.8%<br>(3.9-11%)        | 3.5<br>(2.5-4.6)                            | 5.8%<br>(3.9-7.9%)                   | 15%<br>(8.9-21%)                    | 47<br>(27-68)       | 3500<br>(2400-4800)      |
| Netherlands | 2016 | Male   | 40 to 44 | 94%<br>(90-97%)                | 5.6%<br>(3-9.7%)         | 3.9<br>(2.8-5.1)                            | 6.5%<br>(4.4-8.8%)                   | 15%<br>(10-21%)                     | 100<br>(67-150)     | 6400<br>(4300-8700)      |
| Netherlands | 2016 | Male   | 45 to 49 | 95%<br>(92-97%)                | 4.8%<br>(2.9-7.9%)       | 4.3<br>(3.2-5.5)                            | 7.4%<br>(5.1-10%)                    | 15%<br>(10-20%)                     | 180<br>(120-250)    | 9400<br>(6400-13000)     |
| Netherlands | 2016 | Male   | 50 to 54 | 96%<br>(93-97%)                | 4.3%<br>(2.7-6.5%)       | 4.7<br>(3.4-6.2)                            | 8.4%<br>(5.8-11%)                    | 15%<br>(10-19%)                     | 310<br>(210-410)    | 13000<br>(9200-18000)    |
| Netherlands | 2016 | Male   | 55 to 59 | 96%<br>(94-97%)                | 4.3%<br>(3-6%)           | 5.1<br>(3.8-6.7)                            | 9.2%<br>(6.7-12%)                    | 14%<br>(11-18%)                     | 440<br>(310-600)    | 16000<br>(12000-22000)   |
| Netherlands | 2016 | Male   | 60 to 64 | 95%<br>(93-97%)                | 4.9%<br>(3.5-6.9%)       | 5<br>(3.7-6.6)                              | 8.6%<br>(6-11%)                      | 12%<br>(8.6-16%)                    | 580<br>(400-790)    | 18000<br>(12000-25000)   |
| Netherlands | 2016 | Male   | 65 to 69 | 94%<br>(91-96%)                | 6.1%<br>(4.1-8.5%)       | 4.3<br>(3.2-5.6)                            | 7.1%<br>(4.7-9.6%)                   | 9.3%<br>(6.3-13%)                   | 760<br>(490-1100)   | 20000<br>(13000-28000)   |
| Netherlands | 2016 | Male   | 70 to 74 | 93%<br>(90-95%)                | 7.3%<br>(5.2-10%)        | 3.8<br>(2.8-4.9)                            | 5.4%<br>(3.2-8.1%)                   | 6.7%<br>(3.9-10%)                   | 580<br>(340-880)    | 12000<br>(7000-18000)    |

| Location    | Year | Sex    | Age      | Prevalence of current drinkers | Prevalence of abstainers | Population average of standard drinks daily | Percent of total attributable deaths | Percent of total attributable DALYs | Attributable deaths | Attributable DALYs    |
|-------------|------|--------|----------|--------------------------------|--------------------------|---------------------------------------------|--------------------------------------|-------------------------------------|---------------------|-----------------------|
| Netherlands | 2016 | Male   | 75 to 79 | 91%<br>(87-94%)                | 8.9%<br>(5.7-13%)        | 3.4<br>(2.5-4.5)                            | 4.2%<br>(2.1-6.9%)                   | 4.9%<br>(2.4-8.1%)                  | 530<br>(260-880)    | 8700<br>(4200-14000)  |
| Netherlands | 2016 | Male   | 80 to 84 | 89%<br>(83-93%)                | 11%<br>(6.5-17%)         | 3<br>(2.2-4.2)                              | 3.5%<br>(1.5-6.3%)                   | 3.9%<br>(1.6-7.1%)                  | 520<br>(210-950)    | 6200<br>(2700-11000)  |
| Netherlands | 2016 | Male   | 85 to 89 | 88%<br>(81-93%)                | 12%<br>(7.5-19%)         | 2.8<br>(1.9-3.8)                            | 2.9%<br>(0.98-5.4%)                  | 3.1%<br>(0.91-5.9%)                 | 350<br>(100-690)    | 3000<br>(1000-5600)   |
| Netherlands | 2016 | Male   | 90 to 94 | 88%<br>(81-93%)                | 12%<br>(7-19%)           | 2.6<br>(1.8-3.7)                            | 2.4%<br>(0.26-4.9%)                  | 2.5%<br>(0.031-5.6%)                | 160<br>(2.1-360)    | 960<br>(99-2000)      |
| Netherlands | 2016 | Male   | 95 plus  | 88%<br>(79-94%)                | 12%<br>(5.6-21%)         | 2.5<br>(1.5-3.8)                            | 2.1%<br>(-0.18-5.1%)                 | 2.1%<br>(-0.55-5.7%)                | 34<br>(-8.5-89)     | 140<br>(-11-330)      |
| Norway      | 1990 | Female | All Ages | 92%<br>(90-93%)                | 8.4%<br>(6.6-10%)        | 1.7<br>(1.5-2)                              | 1.2%<br>(-0.43-3%)                   | -0.24%<br>(-3.5-3.3%)               | -51<br>(-740-700)   | 7300<br>(-2500-17000) |
| Norway      | 1990 | Female | 15 to 19 | 90%<br>(85-95%)                | 9.5%<br>(5.4-15%)        | 1.4<br>(0.85-2.2)                           | 2.7%<br>(1.5-4.2%)                   | 8.6%<br>(3.4-14%)                   | 3.9<br>(1.5-6.6)    | 440<br>(230-660)      |
| Norway      | 1990 | Female | 20 to 24 | 94%<br>(89-97%)                | 6%<br>(3.2-11%)          | 1.8<br>(0.98-2.9)                           | 3.6%<br>(2.4-5%)                     | 8.8%<br>(3.6-14%)                   | 4.2<br>(1.7-7)      | 710<br>(450-1000)     |
| Norway      | 1990 | Female | 25 to 29 | 95%<br>(92-97%)                | 4.7%<br>(2.6-8.3%)       | 1.8<br>(1-2.9)                              | 3.3%<br>(2.1-4.7%)                   | 8.3%<br>(3.1-14%)                   | 5.3<br>(2-8.8)      | 690<br>(420-980)      |
| Norway      | 1990 | Female | 30 to 34 | 96%<br>(93-98%)                | 4.1%<br>(2.1-7.4%)       | 1.9<br>(1.2-3)                              | 2.9%<br>(1.7-4.2%)                   | 8.4%<br>(3.8-13%)                   | 7<br>(3.2-11)       | 650<br>(390-940)      |
| Norway      | 1990 | Female | 35 to 39 | 96%<br>(92-98%)                | 4.3%<br>(2.2-7.8%)       | 2<br>(1.1-3.2)                              | 3.2%<br>(1.8-4.7%)                   | 9.2%<br>(4.9-14%)                   | 11<br>(5.7-16)      | 770<br>(460-1100)     |
| Norway      | 1990 | Female | 40 to 44 | 95%<br>(92-98%)                | 4.7%<br>(2.4-8.4%)       | 2.3<br>(1.3-3.3)                            | 3.8%<br>(2.2-5.6%)                   | 10%<br>(5.9-14%)                    | 19<br>(11-27)       | 1100<br>(660-1600)    |
| Norway      | 1990 | Female | 45 to 49 | 95%<br>(91-97%)                | 5%<br>(2.5-9.4%)         | 2.6<br>(1.5-4.2)                            | 4.6%<br>(2.5-7.1%)                   | 11%<br>(6.1-15%)                    | 26<br>(15-38)       | 1200<br>(710-1900)    |
| Norway      | 1990 | Female | 50 to 54 | 94%<br>(90-97%)                | 5.5%<br>(3.1-9.6%)       | 2.8<br>(1.7-4.3)                            | 4.5%<br>(2.4-7.1%)                   | 9.2%<br>(5.2-14%)                   | 27<br>(15-40)       | 1100<br>(600-1700)    |
| Norway      | 1990 | Female | 55 to 59 | 94%<br>(89-97%)                | 6.1%<br>(3.3-11%)        | 2.9<br>(1.7-4.3)                            | 4%<br>(1.5-6.9%)                     | 7.1%<br>(2.8-12%)                   | 33<br>(13-54)       | 1100<br>(430-1900)    |
| Norway      | 1990 | Female | 60 to 64 | 93%<br>(88-96%)                | 6.9%<br>(3.7-12%)        | 2.7<br>(1.6-4.2)                            | 2.8%<br>(-0.019-6.4%)                | 4.5%<br>(0.18-9.8%)                 | 36<br>(1.5-79)      | 1100<br>(-6.8-2400)   |
| Norway      | 1990 | Female | 65 to 69 | 92%<br>(86-96%)                | 8.1%<br>(4.1-14%)        | 2.4<br>(1.6-3.4)                            | 1.2%<br>(-1.6-4.4%)                  | 1.9%<br>(-2.3-6.4%)                 | 27<br>(-32-88)      | 630<br>(-840-2200)    |
| Norway      | 1990 | Female | 70 to 74 | 90%<br>(84-94%)                | 9.7%<br>(5.8-16%)        | 2.1<br>(1.2-3.2)                            | -0.00048%<br>(-3.1-3.6%)             | 0.08%<br>(-4.2-5%)                  | 1.8<br>(-92-110)    | 0.66<br>(-1800-2100)  |
| Norway      | 1990 | Female | 75 to 79 | 88%<br>(81-94%)                | 12%<br>(6.3-19%)         | 1.9<br>(1.1-3.1)                            | -1.1%<br>(-4.3-2.9%)                 | -1.4%<br>(-5.6-3.7%)                | -47<br>(-190-120)   | -680<br>(-2800-1900)  |
| Norway      | 1990 | Female | 80 to 84 | 86%<br>(78-92%)                | 14%<br>(7.9-22%)         | 1.9<br>(1.2-2.9)                            | -1.4%<br>(-4.6-2.3%)                 | -1.7%<br>(-5.7-2.7%)                | -75<br>(-240-120)   | -810<br>(-2600-1400)  |
| Norway      | 1990 | Female | 85 to 89 | 84%<br>(75-91%)                | 16%<br>(9.5-25%)         | 1.9<br>(1.1-2.8)                            | -1.4%<br>(-4.3-2.2%)                 | -1.8%<br>(-5.2-2.3%)                | -75<br>(-220-99)    | -550<br>(-1700-850)   |
| Norway      | 1990 | Female | 90 to 94 | 83%<br>(73-90%)                | 17%<br>(9.8-27%)         | 1.8<br>(0.96-3)                             | -1.3%<br>(-4.2-2.6%)                 | -1.7%<br>(-5.2-2.9%)                | -43<br>(-130-73)    | -210<br>(-660-420)    |

| Location | Year | Sex    | Age      | Prevalence of current drinkers | Prevalence of abstainers | Population average of standard drinks daily | Percent of total attributable deaths | Percent of total attributable DALYs | Attributable deaths | Attributable DALYs    |
|----------|------|--------|----------|--------------------------------|--------------------------|---------------------------------------------|--------------------------------------|-------------------------------------|---------------------|-----------------------|
| Norway   | 1990 | Female | 95 plus  | 82%<br>(69-91%)                | 18%<br>(8.5-31%)         | 1.8<br>(0.77-3.3)                           | -1.1%<br>(-4.3-3.9%)                 | -1.4%<br>(-5.2-4.3%)                | -13<br>(-47-39)     | -41<br>(-160-140)     |
| Norway   | 1990 | Male   | All Ages | 94%<br>(93-96%)                | 5.9%<br>(4.3-7.5%)       | 2<br>(1.7-2.3)                              | 3.3%<br>(1.2-5.3%)                   | 0.82%<br>(-2.5-4.1%)                | 190<br>(-580-950)   | 22000<br>(7900-36000) |
| Norway   | 1990 | Male   | 15 to 19 | 90%<br>(84-94%)                | 9.8%<br>(5.7-16%)        | 1.4<br>(0.92-2.1)                           | 6.3%<br>(3.3-9.3%)                   | 10%<br>(4-16%)                      | 14<br>(5.5-22)      | 1300<br>(710-2000)    |
| Norway   | 1990 | Male   | 20 to 24 | 94%<br>(90-97%)                | 5.7%<br>(3.1-10%)        | 2.1<br>(1.3-3.1)                            | 11%<br>(7.2-15%)                     | 13%<br>(6.4-22%)                    | 24<br>(11-38)       | 2700<br>(1700-3700)   |
| Norway   | 1990 | Male   | 25 to 29 | 96%<br>(93-98%)                | 3.9%<br>(2.1-6.9%)       | 2.3<br>(1.4-3.3)                            | 10%<br>(7.2-14%)                     | 14%<br>(7-20%)                      | 23<br>(12-35)       | 2600<br>(1700-3500)   |
| Norway   | 1990 | Male   | 30 to 34 | 97%<br>(94-99%)                | 2.9%<br>(1.4-5.5%)       | 2.3<br>(1.5-3.5)                            | 9%<br>(6.3-12%)                      | 13%<br>(7.2-19%)                    | 26<br>(14-38)       | 2400<br>(1700-3200)   |
| Norway   | 1990 | Male   | 35 to 39 | 97%<br>(95-99%)                | 2.6%<br>(1.2-4.6%)       | 2.3<br>(1.4-3.4)                            | 8.6%<br>(6.1-11%)                    | 13%<br>(7.6-18%)                    | 32<br>(19-46)       | 2500<br>(1800-3300)   |
| Norway   | 1990 | Male   | 40 to 44 | 98%<br>(95-99%)                | 2.5%<br>(1.2-4.6%)       | 2.5<br>(1.6-3.5)                            | 8.3%<br>(5.9-11%)                    | 12%<br>(7.5-16%)                    | 44<br>(28-61)       | 2900<br>(2000-3800)   |
| Norway   | 1990 | Male   | 45 to 49 | 98%<br>(95-99%)                | 2.4%<br>(1.1-5.1%)       | 3<br>(1.8-4.3)                              | 7.7%<br>(4.7-11%)                    | 10%<br>(5.3-15%)                    | 47<br>(24-72)       | 2600<br>(1600-3800)   |
| Norway   | 1990 | Male   | 50 to 54 | 97%<br>(95-99%)                | 2.6%<br>(1.1-4.9%)       | 3.2<br>(2.1-4.6)                            | 6.5%<br>(3.4-10%)                    | 7.9%<br>(3.4-13%)                   | 44<br>(19-74)       | 2100<br>(1100-3300)   |
| Norway   | 1990 | Male   | 55 to 59 | 97%<br>(95-99%)                | 2.8%<br>(1.3-5.2%)       | 3.4<br>(2.3-4.8)                            | 4.6%<br>(1.1-8.6%)                   | 5%<br>(0.077-10%)                   | 46<br>(0.71-97)     | 1900<br>(450-3600)    |
| Norway   | 1990 | Male   | 60 to 64 | 97%<br>(94-98%)                | 3.3%<br>(1.5-6.2%)       | 3.3<br>(2.1-4.8)                            | 2.8%<br>(-0.9-7.2%)                  | 2.7%<br>(-2.1-8.3%)                 | 42<br>(-34-130)     | 1600<br>(-520-4200)   |
| Norway   | 1990 | Male   | 65 to 69 | 96%<br>(93-98%)                | 3.9%<br>(1.8-7.2%)       | 2.9<br>(2.1-4)                              | 0.91%<br>(-2.7-4.6%)                 | 0.5%<br>(-3.9-5.1%)                 | 13<br>(-100-130)    | 690<br>(-2000-3500)   |
| Norway   | 1990 | Male   | 70 to 74 | 96%<br>(92-98%)                | 4.4%<br>(2.4-7.7%)       | 2.5<br>(1.7-3.7)                            | -0.19%<br>(-3.5-3.4%)                | -0.66%<br>(-4.7-3.7%)               | -23<br>(-160-130)   | -150<br>(-2800-2700)  |
| Norway   | 1990 | Male   | 75 to 79 | 95%<br>(91-98%)                | 4.9%<br>(2.4-8.6%)       | 2.3<br>(1.4-3.4)                            | -0.64%<br>(-3.8-2.9%)                | -1.1%<br>(-4.8-3%)                  | -44<br>(-200-120)   | -440<br>(-2600-2000)  |
| Norway   | 1990 | Male   | 80 to 84 | 94%<br>(90-97%)                | 5.5%<br>(2.6-10%)        | 2.2<br>(1.5-3.1)                            | -0.82%<br>(-3.7-2.3%)                | -1.2%<br>(-4.7-2.3%)                | -47<br>(-180-88)    | -380<br>(-1800-1100)  |
| Norway   | 1990 | Male   | 85 to 89 | 94%<br>(89-97%)                | 6%<br>(3.1-11%)          | 2.2<br>(1.4-3.1)                            | -0.76%<br>(-3.4-2%)                  | -1.1%<br>(-4.3-2.1%)                | -30<br>(-110-55)    | -170<br>(-790-460)    |
| Norway   | 1990 | Male   | 90 to 94 | 94%<br>(89-97%)                | 5.9%<br>(2.9-11%)        | 2.1<br>(1.3-3.2)                            | -0.86%<br>(-3.4-2.2%)                | -1.3%<br>(-4.3-2.3%)                | -15<br>(-51-27)     | -63<br>(-250-170)     |
| Norway   | 1990 | Male   | 95 plus  | 94%<br>(89-98%)                | 5.8%<br>(2.3-11%)        | 2.1<br>(1.1-3.5)                            | -0.77%<br>(-3.6-3%)                  | -1.2%<br>(-4.5-3.2%)                | -41<br>(-15-11)     | -11<br>(-50-43)       |
| Norway   | 1995 | Female | All Ages | 92%<br>(90-94%)                | 7.8%<br>(6.2-9.7%)       | 1.7<br>(1.5-2)                              | 1.3%<br>(-0.096-2.9%)                | -0.1%<br>(-3-3.3%)                  | -23<br>(-660-720)   | 7700<br>(-530-17000)  |
| Norway   | 1995 | Female | 15 to 19 | 92%<br>(87-95%)                | 8.5%<br>(4.8-13%)        | 1.4<br>(0.84-2.2)                           | 2.6%<br>(1.4-3.9%)                   | 8.1%<br>(2.9-14%)                   | 3.1<br>(1.1-5.2)    | 360<br>(190-530)      |
| Norway   | 1995 | Female | 20 to 24 | 95%<br>(91-97%)                | 5.2%<br>(2.9-8.9%)       | 1.8<br>(0.96-2.9)                           | 3.5%<br>(2.3-4.8%)                   | 8.1%<br>(2.9-14%)                   | 3.7<br>(1.3-6.1)    | 650<br>(400-920)      |

| Location | Year | Sex    | Age      | Prevalence of current drinkers | Prevalence of abstainers | Population average of standard drinks daily | Percent of total attributable deaths | Percent of total attributable DALYs | Attributable deaths | Attributable DALYs    |
|----------|------|--------|----------|--------------------------------|--------------------------|---------------------------------------------|--------------------------------------|-------------------------------------|---------------------|-----------------------|
| Norway   | 1995 | Female | 25 to 29 | 96%<br>(93-98%)                | 4%<br>(2.2-6.9%)         | 1.8<br>(1.1-2.9)                            | 2.8%<br>(1.9-3.9%)                   | 7.6%<br>(2.8-13%)                   | 3.9<br>(1.4-6.6)    | 610<br>(390-860)      |
| Norway   | 1995 | Female | 30 to 34 | 96%<br>(94-98%)                | 3.5%<br>(1.7-6.1%)       | 1.9<br>(1.2-3)                              | 2.6%<br>(1.5-3.7%)                   | 7.8%<br>(3.7-12%)                   | 6.1<br>(2.8-9.8)    | 590<br>(350-860)      |
| Norway   | 1995 | Female | 35 to 39 | 96%<br>(93-98%)                | 3.7%<br>(1.8-6.5%)       | 2<br>(1.1-3.1)                              | 2.8%<br>(1.7-4.2%)                   | 8.9%<br>(4.8-13%)                   | 9.7<br>(5.1-14)     | 700<br>(410-1000)     |
| Norway   | 1995 | Female | 40 to 44 | 96%<br>(93-98%)                | 4%<br>(2.1-6.9%)         | 2.3<br>(1.3-3.3)                            | 3.6%<br>(2-5.3%)                     | 10%<br>(6.1-14%)                    | 18<br>(11-25)       | 1000<br>(600-1400)    |
| Norway   | 1995 | Female | 45 to 49 | 96%<br>(92-98%)                | 4.4%<br>(2.1-7.8%)       | 2.6<br>(1.6-4.2)                            | 4.4%<br>(2.4-6.8%)                   | 11%<br>(6.5-15%)                    | 31<br>(19-44)       | 1500<br>(840-2200)    |
| Norway   | 1995 | Female | 50 to 54 | 95%<br>(92-97%)                | 4.9%<br>(2.7-8.4%)       | 2.8<br>(1.7-4.3)                            | 4.6%<br>(2.5-7.2%)                   | 9.5%<br>(5.7-14%)                   | 34<br>(21-49)       | 1400<br>(780-2100)    |
| Norway   | 1995 | Female | 55 to 59 | 95%<br>(91-97%)                | 5.4%<br>(3.1-9.3%)       | 2.9<br>(1.7-4.4)                            | 4.2%<br>(1.8-6.9%)                   | 7.8%<br>(3.9-12%)                   | 35<br>(18-52)       | 1200<br>(520-1900)    |
| Norway   | 1995 | Female | 60 to 64 | 94%<br>(89-96%)                | 6.4%<br>(3.6-11%)        | 2.8<br>(1.6-4.3)                            | 3%<br>(0.3-6.4%)                     | 5.1%<br>(0.95-9.9%)                 | 35<br>(6.7-68)      | 1000<br>(100-2000)    |
| Norway   | 1995 | Female | 65 to 69 | 92%<br>(87-96%)                | 8.1%<br>(4.3-13%)        | 2.4<br>(1.6-3.4)                            | 1.5%<br>(-1-4.4%)                    | 2.5%<br>(-1.2-6.4%)                 | 29<br>(-14-74)      | 660<br>(-440-1900)    |
| Norway   | 1995 | Female | 70 to 74 | 90%<br>(84-94%)                | 10%<br>(6.1-16%)         | 2.1<br>(1.2-3.2)                            | 0.27%<br>(-2.3-3.4%)                 | 0.54%<br>(-3.1-4.7%)                | 11<br>(-67-100)     | 160<br>(-1400-2000)   |
| Norway   | 1995 | Female | 75 to 79 | 87%<br>(80-93%)                | 13%<br>(7.1-20%)         | 1.9<br>(1-3)                                | -0.76%<br>(-3.6-2.9%)                | -0.98%<br>(-4.6-3.7%)               | -32<br>(-150-120)   | -490<br>(-2300-1900)  |
| Norway   | 1995 | Female | 80 to 84 | 85%<br>(76-92%)                | 15%<br>(8.5-24%)         | 1.8<br>(1.1-2.7)                            | -1.2%<br>(-4-2.1%)                   | -1.5%<br>(-4.9-2.5%)                | -65<br>(-220-110)   | -710<br>(-2400-1300)  |
| Norway   | 1995 | Female | 85 to 89 | 83%<br>(74-90%)                | 17%<br>(10-26%)          | 1.8<br>(1-2.8)                              | -1.4%<br>(-4-2.1%)                   | -1.7%<br>(-5-2.3%)                  | -79<br>(-240-110)   | -590<br>(-1800-900)   |
| Norway   | 1995 | Female | 90 to 94 | 81%<br>(71-89%)                | 19%<br>(11-29%)          | 1.8<br>(0.92-2.9)                           | -1.3%<br>(-4.1-2.5%)                 | -1.7%<br>(-5-2.7%)                  | -51<br>(-150-82)    | -250<br>(-770-470)    |
| Norway   | 1995 | Female | 95 plus  | 80%<br>(66-91%)                | 20%<br>(9.2-34%)         | 1.7<br>(0.71-3.2)                           | -1.1%<br>(-4.1-3.7%)                 | -1.4%<br>(-5-4.2%)                  | -17<br>(-58-49)     | -52<br>(-190-180)     |
| Norway   | 1995 | Male   | All Ages | 95%<br>(94-96%)                | 4.8%<br>(3.6-6%)         | 2<br>(1.8-2.3)                              | 3.2%<br>(1.3-5.1%)                   | 0.85%<br>(-2.3-4.2%)                | 190<br>(-510-920)   | 21000<br>(8300-34000) |
| Norway   | 1995 | Male   | 15 to 19 | 92%<br>(88-95%)                | 7.8%<br>(4.6-12%)        | 1.5<br>(0.94-2.2)                           | 5.7%<br>(3.1-8.4%)                   | 9.7%<br>(3.7-16%)                   | 9.2<br>(3.6-15)     | 940<br>(500-1400)     |
| Norway   | 1995 | Male   | 20 to 24 | 96%<br>(93-97%)                | 4.4%<br>(2.6-7.1%)       | 2.1<br>(1.3-3.2)                            | 9.7%<br>(6.4-13%)                    | 13%<br>(5.5-20%)                    | 18<br>(7.4-28)      | 2100<br>(1400-3000)   |
| Norway   | 1995 | Male   | 25 to 29 | 97%<br>(95-98%)                | 3%<br>(1.8-4.6%)         | 2.3<br>(1.4-3.4)                            | 8.8%<br>(6.2-12%)                    | 12%<br>(5.5-19%)                    | 19<br>(9-30)        | 2300<br>(1500-3000)   |
| Norway   | 1995 | Male   | 30 to 34 | 98%<br>(96-99%)                | 2.2%<br>(1.1-3.7%)       | 2.4<br>(1.5-3.5)                            | 7.4%<br>(5-9.8%)                     | 11%<br>(5.4-16%)                    | 19<br>(10-29)       | 1900<br>(1300-2600)   |
| Norway   | 1995 | Male   | 35 to 39 | 98%<br>(97-99%)                | 2%<br>(0.99-3.4%)        | 2.3<br>(1.4-3.4)                            | 7.1%<br>(5.1-9.3%)                   | 11%<br>(6.3-15%)                    | 24<br>(14-34)       | 2000<br>(1400-2600)   |
| Norway   | 1995 | Male   | 40 to 44 | 98%<br>(97-99%)                | 1.9%<br>(0.93-3.4%)      | 2.5<br>(1.6-3.5)                            | 7.4%<br>(5.4-9.6%)                   | 11%<br>(7.3-16%)                    | 34<br>(21-47)       | 2300<br>(1600-3000)   |



| Location | Year | Sex    | Age      | Prevalence of current drinkers | Prevalence of abstainers | Population average of standard drinks daily | Percent of total attributable deaths | Percent of total attributable DALYs | Attributable deaths | Attributable DALYs   |
|----------|------|--------|----------|--------------------------------|--------------------------|---------------------------------------------|--------------------------------------|-------------------------------------|---------------------|----------------------|
| Norway   | 1995 | Male   | 45 to 49 | 98%<br>(97-99%)                | 1.9%<br>(0.84-3.4%)      | 3<br>(1.9-4.3)                              | 7.6%<br>(4.9-11%)                    | 11%<br>(5.9-15%)                    | 55<br>(30-80)       | 3000<br>(1900-4200)  |
| Norway   | 1995 | Male   | 50 to 54 | 98%<br>(96-99%)                | 2%<br>(0.93-3.6%)        | 3.3<br>(2.1-4.6)                            | 6.5%<br>(3.7-9.8%)                   | 8.3%<br>(4-13%)                     | 51<br>(24-81)       | 2500<br>(1400-3600)  |
| Norway   | 1995 | Male   | 55 to 59 | 98%<br>(96-99%)                | 2.3%<br>(1-4.2%)         | 3.4<br>(2.2-4.9)                            | 5.2%<br>(2-8.9%)                     | 6.1%<br>(1.4-11%)                   | 48<br>(11-91)       | 2000<br>(770-3500)   |
| Norway   | 1995 | Male   | 60 to 64 | 97%<br>(95-99%)                | 2.6%<br>(1.2-4.7%)       | 3.4<br>(2-5)                                | 3.4%<br>(-0.19-7.5%)                 | 3.6%<br>(-1.2-9%)                   | 43<br>(-15-110)     | 1600<br>(-87-3500)   |
| Norway   | 1995 | Male   | 65 to 69 | 97%<br>(94-98%)                | 3.3%<br>(1.6-5.8%)       | 3<br>(2.1-4.1)                              | 1.4%<br>(-1.9-5%)                    | 1.1%<br>(-3-5.6%)                   | 24<br>(-63-120)     | 860<br>(-1200-3100)  |
| Norway   | 1995 | Male   | 70 to 74 | 96%<br>(93-98%)                | 4%<br>(2.2-6.6%)         | 2.6<br>(1.7-3.7)                            | 0.23%<br>(-2.8-3.8%)                 | -0.14%<br>(-3.8-4%)                 | -4.6<br>(-130-130)  | 180<br>(-2100-2800)  |
| Norway   | 1995 | Male   | 75 to 79 | 95%<br>(92-98%)                | 4.6%<br>(2.2-7.8%)       | 2.3<br>(1.4-3.4)                            | -0.53%<br>(-3.4-3%)                  | -0.98%<br>(-4.5-3%)                 | -40<br>(-180-120)   | -370<br>(-2400-2100) |
| Norway   | 1995 | Male   | 80 to 84 | 95%<br>(91-98%)                | 5.1%<br>(2.5-9.4%)       | 2.3<br>(1.5-3.2)                            | -0.83%<br>(-3.8-2.3%)                | -1.3%<br>(-4.7-2.3%)                | -51<br>(-190-91)    | -420<br>(-1900-1200) |
| Norway   | 1995 | Male   | 85 to 89 | 94%<br>(90-97%)                | 5.5%<br>(3-9.6%)         | 2.2<br>(1.4-3.2)                            | -0.84%<br>(-3.4-2.1%)                | -1.3%<br>(-4.3-2%)                  | -36<br>(-120-58)    | -210<br>(-860-530)   |
| Norway   | 1995 | Male   | 90 to 94 | 94%<br>(90-97%)                | 5.5%<br>(2.8-9.9%)       | 2.2<br>(1.3-3.3)                            | -0.92%<br>(-3.4-2.2%)                | -1.3%<br>(-4.3-2.2%)                | -18<br>(-57-29)     | -74<br>(-280-180)    |
| Norway   | 1995 | Male   | 95 plus  | 94%<br>(89-98%)                | 5.6%<br>(2.2-11%)        | 2.1<br>(1.1-3.5)                            | -0.71%<br>(-3.6-3.2%)                | -1.1%<br>(-4.5-3.3%)                | -4.2<br>(-16-12)    | -11<br>(-53-49)      |
| Norway   | 2000 | Female | All Ages | 92%<br>(90-94%)                | 8%<br>(6.3-9.8%)         | 1.9<br>(1.7-2.1)                            | 1.7%<br>(0.39-3.3%)                  | 0.45%<br>(-2.4-3.8%)                | 100<br>(-530-850)   | 9900<br>(2100-19000) |
| Norway   | 2000 | Female | 15 to 19 | 91%<br>(87-95%)                | 8.7%<br>(5-13%)          | 1.5<br>(0.88-2.4)                           | 2.7%<br>(1.4-4.1%)                   | 7.9%<br>(3.1-13%)                   | 3.2<br>(1.2-5.4)    | 360<br>(190-550)     |
| Norway   | 2000 | Female | 20 to 24 | 95%<br>(91-97%)                | 5.3%<br>(2.9-9%)         | 1.9<br>(1-3.2)                              | 3.6%<br>(2.3-5%)                     | 7.9%<br>(2.9-13%)                   | 3.6<br>(1.3-6.1)    | 590<br>(380-850)     |
| Norway   | 2000 | Female | 25 to 29 | 96%<br>(93-98%)                | 4%<br>(2.2-7%)           | 2<br>(1.1-3.1)                              | 3%<br>(1.9-4.2%)                     | 7.6%<br>(2.7-13%)                   | 4.5<br>(1.6-7.5)    | 640<br>(400-900)     |
| Norway   | 2000 | Female | 30 to 34 | 96%<br>(94-98%)                | 3.5%<br>(1.8-6.2%)       | 2.1<br>(1.3-3.2)                            | 2.5%<br>(1.6-3.8%)                   | 7.5%<br>(3.7-12%)                   | 6.2<br>(3.1-9.8)    | 620<br>(380-900)     |
| Norway   | 2000 | Female | 35 to 39 | 96%<br>(93-98%)                | 3.8%<br>(1.8-6.6%)       | 2.2<br>(1.2-3.4)                            | 2.8%<br>(1.7-4.2%)                   | 8.5%<br>(4.6-13%)                   | 9.7<br>(5.3-14)     | 720<br>(420-1000)    |
| Norway   | 2000 | Female | 40 to 44 | 96%<br>(93-98%)                | 4.1%<br>(2.1-7%)         | 2.5<br>(1.4-3.6)                            | 3.4%<br>(1.9-5.1%)                   | 9.7%<br>(5.8-14%)                   | 16<br>(9.6-23)      | 940<br>(560-1400)    |
| Norway   | 2000 | Female | 45 to 49 | 96%<br>(92-98%)                | 4.4%<br>(2.2-8.1%)       | 2.8<br>(1.6-4.4)                            | 4.4%<br>(2.5-6.6%)                   | 11%<br>(6.8-15%)                    | 28<br>(18-40)       | 1400<br>(810-2100)   |
| Norway   | 2000 | Female | 50 to 54 | 95%<br>(91-97%)                | 5%<br>(2.8-8.6%)         | 3<br>(1.8-4.6)                              | 4.7%<br>(2.5-7.2%)                   | 9.7%<br>(5.9-14%)                   | 42<br>(26-61)       | 1700<br>(1000-2700)  |
| Norway   | 2000 | Female | 55 to 59 | 94%<br>(91-97%)                | 5.5%<br>(3.2-9.3%)       | 3.1<br>(1.8-4.7)                            | 4.6%<br>(2.2-7.4%)                   | 8.4%<br>(4.8-12%)                   | 45<br>(26-65)       | 1600<br>(800-2400)   |
| Norway   | 2000 | Female | 60 to 64 | 93%<br>(89-96%)                | 6.6%<br>(3.6-11%)        | 3<br>(1.7-4.6)                              | 3.6%<br>(0.99-6.8%)                  | 6.1%<br>(2.3-10%)                   | 41<br>(15-69)       | 1200<br>(330-2100)   |

| Location | Year | Sex    | Age      | Prevalence of current drinkers | Prevalence of abstainers | Population average of standard drinks daily | Percent of total attributable deaths | Percent of total attributable DALYs | Attributable deaths | Attributable DALYs     |
|----------|------|--------|----------|--------------------------------|--------------------------|---------------------------------------------|--------------------------------------|-------------------------------------|---------------------|------------------------|
| Norway   | 2000 | Female | 65 to 69 | 92%<br>(86-95%)                | 8.3%<br>(4.5-14%)        | 2.6<br>(1.7-3.7)                            | 2.2%<br>(-0.057-4.8%)                | 3.7%<br>(0.37-7.1%)                 | 34<br>(3.4-67)      | 800<br>(-22-1700)      |
| Norway   | 2000 | Female | 70 to 74 | 90%<br>(84-94%)                | 10%<br>(6.4-16%)         | 2.2<br>(1.3-3.5)                            | 0.99%<br>(-1.6-3.9%)                 | 1.6%<br>(-1.8-5.4%)                 | 26<br>(-31-92)      | 470<br>(-740-1900)     |
| Norway   | 2000 | Female | 75 to 79 | 87%<br>(79-93%)                | 13%<br>(7.5-21%)         | 2<br>(1.1-3.3)                              | -0.028%<br>(-2.8-3.5%)               | -0.012%<br>(-3.5-4.5%)              | -0.32<br>(-110-140) | -18<br>(-1700-2300)    |
| Norway   | 2000 | Female | 80 to 84 | 85%<br>(75-91%)                | 15%<br>(8.6-25%)         | 2<br>(1.2-3)                                | -0.63%<br>(-3.5-2.7%)                | -0.82%<br>(-4.2-3.3%)               | -37<br>(-190-150)   | -390<br>(-2200-1800)   |
| Norway   | 2000 | Female | 85 to 89 | 82%<br>(73-89%)                | 18%<br>(11-27%)          | 1.9<br>(1.1-3)                              | -0.92%<br>(-3.7-2.7%)                | -1.2%<br>(-4.5-3%)                  | -60<br>(-230-140)   | -430<br>(-1700-1200)   |
| Norway   | 2000 | Female | 90 to 94 | 81%<br>(71-89%)                | 19%<br>(11-29%)          | 1.9<br>(0.98-3.2)                           | -1%<br>(-3.9-3.2%)                   | -1.4%<br>(-4.8-3.5%)                | -47<br>(-160-120)   | -220<br>(-830-690)     |
| Norway   | 2000 | Female | 95 plus  | 80%<br>(65-91%)                | 20%<br>(9.3-35%)         | 1.9<br>(0.77-3.5)                           | -0.82%<br>(-3.9-4.5%)                | -1.2%<br>(-4.9-5.1%)                | -16<br>(-65-68)     | -46<br>(-220-240)      |
| Norway   | 2000 | Male   | All Ages | 95%<br>(94-96%)                | 4.9%<br>(3.7-6.2%)       | 2.2<br>(1.9-2.5)                            | 4%<br>(2.3-5.7%)                     | 1.8%<br>(-1-4.9%)                   | 380<br>(-220-1000)  | 25000<br>(14000-36000) |
| Norway   | 2000 | Male   | 15 to 19 | 92%<br>(88-95%)                | 7.9%<br>(4.8-12%)        | 1.6<br>(1-2.4)                              | 5.8%<br>(3.2-8.5%)                   | 9.8%<br>(3.8-16%)                   | 9.5<br>(3.7-15)     | 960<br>(530-1400)      |
| Norway   | 2000 | Male   | 20 to 24 | 96%<br>(93-97%)                | 4.4%<br>(2.6-7.3%)       | 2.3<br>(1.4-3.4)                            | 9.8%<br>(6.3-13%)                    | 12%<br>(5.6-19%)                    | 19<br>(8.6-30)      | 2100<br>(1300-2900)    |
| Norway   | 2000 | Male   | 25 to 29 | 97%<br>(95-98%)                | 3%<br>(1.8-4.8%)         | 2.5<br>(1.5-3.5)                            | 8.6%<br>(5.8-12%)                    | 11%<br>(5.4-17%)                    | 21<br>(9.9-31)      | 2200<br>(1500-3100)    |
| Norway   | 2000 | Male   | 30 to 34 | 98%<br>(96-99%)                | 2.2%<br>(1.1-3.8%)       | 2.6<br>(1.7-3.7)                            | 7%<br>(4.8-9.5%)                     | 10%<br>(5.1-16%)                    | 20<br>(10-32)       | 2000<br>(1300-2700)    |
| Norway   | 2000 | Male   | 35 to 39 | 98%<br>(97-99%)                | 2.1%<br>(1-3.3%)         | 2.5<br>(1.6-3.6)                            | 6.7%<br>(4.6-9%)                     | 10%<br>(5.3-15%)                    | 25<br>(13-36)       | 2000<br>(1300-2700)    |
| Norway   | 2000 | Male   | 40 to 44 | 98%<br>(97-99%)                | 1.9%<br>(0.94-3.3%)      | 2.7<br>(1.8-3.8)                            | 7.1%<br>(4.8-9.5%)                   | 11%<br>(6.6-15%)                    | 34<br>(20-47)       | 2300<br>(1600-3000)    |
| Norway   | 2000 | Male   | 45 to 49 | 98%<br>(96-99%)                | 1.9%<br>(0.89-3.7%)      | 3.2<br>(2.1-4.6)                            | 7.9%<br>(5.3-11%)                    | 12%<br>(7.5-17%)                    | 51<br>(32-71)       | 2800<br>(2000-3800)    |
| Norway   | 2000 | Male   | 50 to 54 | 98%<br>(96-99%)                | 2.1%<br>(0.89-3.7%)      | 3.5<br>(2.3-4.8)                            | 7.5%<br>(4.9-11%)                    | 10%<br>(6.1-15%)                    | 74<br>(44-110)      | 3500<br>(2200-4900)    |
| Norway   | 2000 | Male   | 55 to 59 | 98%<br>(96-99%)                | 2.3%<br>(1.1-4.2%)       | 3.7<br>(2.4-5.1)                            | 6.5%<br>(3.8-10%)                    | 8.3%<br>(4.4-13%)                   | 71<br>(38-110)      | 2900<br>(1600-4400)    |
| Norway   | 2000 | Male   | 60 to 64 | 97%<br>(95-99%)                | 2.7%<br>(1.4-4.7%)       | 3.6<br>(2.3-5.3)                            | 4.8%<br>(1.6-8.7%)                   | 5.7%<br>(1.2-11%)                   | 61<br>(13-120)      | 2100<br>(670-3700)     |
| Norway   | 2000 | Male   | 65 to 69 | 97%<br>(94-98%)                | 3.4%<br>(1.6-5.8%)       | 3.2<br>(2.2-4.3)                            | 2.7%<br>(-0.12-6%)                   | 2.9%<br>(-0.79-7%)                  | 47<br>(-13-110)     | 1400<br>(-61-3000)     |
| Norway   | 2000 | Male   | 70 to 74 | 96%<br>(93-98%)                | 4.1%<br>(2.3-6.7%)       | 2.8<br>(1.8-4)                              | 1.3%<br>(-1.4-4.6%)                  | 1.2%<br>(-2.2-5.2%)                 | 30<br>(-57-130)     | 800<br>(-880-2800)     |
| Norway   | 2000 | Male   | 75 to 79 | 95%<br>(92-98%)                | 4.6%<br>(2.3-7.9%)       | 2.5<br>(1.5-3.8)                            | 0.33%<br>(-2.4-3.7%)                 | 0.013%<br>(-3.3-4%)                 | 0.54<br>(-130-150)  | 230<br>(-1700-2600)    |
| Norway   | 2000 | Male   | 80 to 84 | 95%<br>(91-98%)                | 5.2%<br>(2.5-9.4%)       | 2.4<br>(1.6-3.5)                            | -0.28%<br>(-3.1-2.7%)                | -0.68%<br>(-3.9-2.7%)               | -28<br>(-160-110)   | -150<br>(-1600-1400)   |

| Location | Year | Sex    | Age      | Prevalence of current drinkers | Prevalence of abstainers | Population average of standard drinks daily | Percent of total attributable deaths | Percent of total attributable DALYs | Attributable deaths | Attributable DALYs     |
|----------|------|--------|----------|--------------------------------|--------------------------|---------------------------------------------|--------------------------------------|-------------------------------------|---------------------|------------------------|
| Norway   | 2000 | Male   | 85 to 89 | 94%<br>(90-97%)                | 5.6%<br>(3-9.5%)         | 2.4<br>(1.5-3.4)                            | -0.54%<br>(-3.2-2.4%)                | -0.97%<br>(-4.1-2.4%)               | -30<br>(-130-76)    | -150<br>(-890-680)     |
| Norway   | 2000 | Male   | 90 to 94 | 94%<br>(90-97%)                | 5.5%<br>(2.8-9.9%)       | 2.3<br>(1.4-3.5)                            | -0.75%<br>(-3.4-2.6%)                | -1.2%<br>(-4.4-2.6%)                | -18<br>(-64-38)     | -66<br>(-310-230)      |
| Norway   | 2000 | Male   | 95 plus  | 94%<br>(89-98%)                | 5.6%<br>(2.2-11%)        | 2.3<br>(1.2-3.8)                            | -0.55%<br>(-3.4-3.5%)                | -1%<br>(-4.3-3.6%)                  | -3.9<br>(-17-14)    | -8.6<br>(-53-54)       |
| Norway   | 2005 | Female | All Ages | 91%<br>(89-93%)                | 8.5%<br>(6.6-11%)        | 2.1<br>(1.8-2.4)                            | 2.3%<br>(0.97-3.8%)                  | 1.4%<br>(-1.4-4.8%)                 | 300<br>(-300-1000)  | 13000<br>(5400-21000)  |
| Norway   | 2005 | Female | 15 to 19 | 90%<br>(84-95%)                | 9.7%<br>(5.4-16%)        | 1.6<br>(0.95-2.6)                           | 2.4%<br>(1.4-3.6%)                   | 8%<br>(3.3-13%)                     | 2.8<br>(1.2-4.7)    | 350<br>(200-520)       |
| Norway   | 2005 | Female | 20 to 24 | 94%<br>(89-97%)                | 6.1%<br>(3.3-11%)        | 2.1<br>(1-3.5)                              | 3.5%<br>(2.2-5.1%)                   | 8.4%<br>(3-15%)                     | 3.9<br>(1.4-6.8)    | 580<br>(350-840)       |
| Norway   | 2005 | Female | 25 to 29 | 95%<br>(92-97%)                | 4.7%<br>(2.6-8.3%)       | 2.1<br>(1.2-3.5)                            | 3%<br>(1.9-4.3%)                     | 8.1%<br>(3.2-13%)                   | 4.2<br>(1.6-6.8)    | 550<br>(330-780)       |
| Norway   | 2005 | Female | 30 to 34 | 96%<br>(93-98%)                | 4.1%<br>(2.1-7.5%)       | 2.2<br>(1.4-3.5)                            | 2.5%<br>(1.5-3.8%)                   | 8.3%<br>(4.1-13%)                   | 6<br>(3-9.4)        | 580<br>(340-860)       |
| Norway   | 2005 | Female | 35 to 39 | 96%<br>(92-98%)                | 4.4%<br>(2.2-7.9%)       | 2.4<br>(1.3-3.8)                            | 2.8%<br>(1.6-4.2%)                   | 9.2%<br>(5.1-13%)                   | 10<br>(5.7-15)      | 750<br>(440-1100)      |
| Norway   | 2005 | Female | 40 to 44 | 95%<br>(91-98%)                | 4.7%<br>(2.4-8.5%)       | 2.7<br>(1.6-4)                              | 3.4%<br>(1.8-5.1%)                   | 10%<br>(6-14%)                      | 16<br>(9.7-23)      | 960<br>(540-1400)      |
| Norway   | 2005 | Female | 45 to 49 | 95%<br>(90-97%)                | 5.1%<br>(2.5-9.6%)       | 3.1<br>(1.8-4.8)                            | 4.5%<br>(2.6-6.7%)                   | 11%<br>(7.5-16%)                    | 29<br>(19-42)       | 1400<br>(860-2100)     |
| Norway   | 2005 | Female | 50 to 54 | 94%<br>(90-97%)                | 5.6%<br>(3.1-9.7%)       | 3.3<br>(2-5)                                | 5%<br>(2.8-7.4%)                     | 11%<br>(7.1-15%)                    | 41<br>(27-57)       | 1700<br>(1000-2600)    |
| Norway   | 2005 | Female | 55 to 59 | 94%<br>(89-97%)                | 6.1%<br>(3.4-11%)        | 3.4<br>(2-5)                                | 4.9%<br>(2.7-7.5%)                   | 9.1%<br>(5.8-13%)                   | 55<br>(35-77)       | 2000<br>(1100-3000)    |
| Norway   | 2005 | Female | 60 to 64 | 93%<br>(88-96%)                | 7%<br>(3.7-12%)          | 3.2<br>(1.8-4.9)                            | 4.2%<br>(1.7-7%)                     | 7.1%<br>(3.6-11%)                   | 53<br>(27-82)       | 1600<br>(650-2600)     |
| Norway   | 2005 | Female | 65 to 69 | 92%<br>(86-96%)                | 8.2%<br>(4.2-14%)        | 2.9<br>(1.9-4.1)                            | 3%<br>(0.85-5.3%)                    | 5%<br>(2.1-8%)                      | 44<br>(18-70)       | 1100<br>(290-1900)     |
| Norway   | 2005 | Female | 70 to 74 | 90%<br>(84-94%)                | 9.8%<br>(6-16%)          | 2.5<br>(1.4-3.8)                            | 1.9%<br>(-0.59-5%)                   | 2.9%<br>(-0.32-6.9%)                | 39<br>(-4.2-91)     | 730<br>(-240-1900)     |
| Norway   | 2005 | Female | 75 to 79 | 88%<br>(81-94%)                | 12%<br>(6.4-19%)         | 2.3<br>(1.3-3.8)                            | 0.92%<br>(-1.9-4.5%)                 | 1.3%<br>(-2.2-5.7%)                 | 31<br>(-52-140)     | 460<br>(-920-2200)     |
| Norway   | 2005 | Female | 80 to 84 | 86%<br>(77-92%)                | 14%<br>(7.8-23%)         | 2.2<br>(1.4-3.5)                            | 0.23%<br>(-2.7-3.7%)                 | 0.26%<br>(-3.3-4.4%)                | 11<br>(-130-180)    | 140<br>(-1500-2200)    |
| Norway   | 2005 | Female | 85 to 89 | 84%<br>(75-91%)                | 16%<br>(9.4-25%)         | 2.2<br>(1.3-3.4)                            | -0.14%<br>(-3-3.5%)                  | -0.29%<br>(-3.8-4%)                 | -14<br>(-190-200)   | -67<br>(-1500-1700)    |
| Norway   | 2005 | Female | 90 to 94 | 83%<br>(72-90%)                | 17%<br>(10-28%)          | 2.2<br>(1.2-3.7)                            | -0.37%<br>(-3.4-4%)                  | -0.63%<br>(-4.3-4.5%)               | -23<br>(-160-170)   | -87<br>(-790-940)      |
| Norway   | 2005 | Female | 95 plus  | 81%<br>(69-91%)                | 19%<br>(8.7-31%)         | 2.1<br>(0.92-4)                             | -0.2%<br>(-3.6-5.7%)                 | -0.46%<br>(-4.3-6.5%)               | -7.3<br>(-69-100)   | -13<br>(-240-370)      |
| Norway   | 2005 | Male   | All Ages | 94%<br>(92-96%)                | 5.9%<br>(4.3-7.6%)       | 2.4<br>(2.1-2.8)                            | 4.6%<br>(3.1-6.3%)                   | 3%<br>(0.47-5.9%)                   | 600<br>(93-1200)    | 27000<br>(18000-37000) |

| Location | Year | Sex    | Age      | Prevalence of current drinkers | Prevalence of abstainers | Population average of standard drinks daily | Percent of total attributable deaths | Percent of total attributable DALYs | Attributable deaths | Attributable DALYs    |
|----------|------|--------|----------|--------------------------------|--------------------------|---------------------------------------------|--------------------------------------|-------------------------------------|---------------------|-----------------------|
| Norway   | 2005 | Male   | 15 to 19 | 90%<br>(83-94%)                | 10%<br>(5.6-17%)         | 1.7<br>(1-2.6)                              | 5.2%<br>(3.1-7.4%)                   | 9.7%<br>(4-16%)                     | 7.5<br>(3.2-12)     | 840<br>(500-1200)     |
| Norway   | 2005 | Male   | 20 to 24 | 94%<br>(90-97%)                | 5.9%<br>(3.2-10%)        | 2.5<br>(1.5-3.8)                            | 9.3%<br>(6.1-13%)                    | 12%<br>(5.5-19%)                    | 16<br>(7.5-26)      | 1800<br>(1100-2600)   |
| Norway   | 2005 | Male   | 25 to 29 | 96%<br>(93-98%)                | 4%<br>(2.2-7.1%)         | 2.7<br>(1.6-4)                              | 8.2%<br>(5.7-11%)                    | 12%<br>(5.7-18%)                    | 16<br>(7.8-24)      | 1700<br>(1100-2400)   |
| Norway   | 2005 | Male   | 30 to 34 | 97%<br>(94-99%)                | 3%<br>(1.4-5.9%)         | 2.7<br>(1.8-4)                              | 6.7%<br>(4.6-9%)                     | 11%<br>(5.7-17%)                    | 17<br>(8.7-26)      | 1600<br>(1100-2200)   |
| Norway   | 2005 | Male   | 35 to 39 | 97%<br>(95-99%)                | 2.7%<br>(1.3-4.9%)       | 2.7<br>(1.7-4)                              | 6.3%<br>(4.3-8.6%)                   | 11%<br>(5.9-15%)                    | 23<br>(13-33)       | 1800<br>(1200-2500)   |
| Norway   | 2005 | Male   | 40 to 44 | 97%<br>(95-99%)                | 2.5%<br>(1.2-4.7%)       | 3<br>(1.9-4.2)                              | 6.5%<br>(4.4-8.9%)                   | 11%<br>(6.6-16%)                    | 28<br>(17-40)       | 1900<br>(1300-2600)   |
| Norway   | 2005 | Male   | 45 to 49 | 98%<br>(95-99%)                | 2.5%<br>(1.1-5%)         | 3.5<br>(2.3-5)                              | 7.8%<br>(5.4-11%)                    | 13%<br>(8.1-17%)                    | 48<br>(31-68)       | 2700<br>(1900-3600)   |
| Norway   | 2005 | Male   | 50 to 54 | 97%<br>(95-99%)                | 2.6%<br>(1.1-5.2%)       | 3.8<br>(2.5-5.2)                            | 8.1%<br>(5.5-11%)                    | 12%<br>(8-17%)                      | 70<br>(46-100)      | 3300<br>(2200-4600)   |
| Norway   | 2005 | Male   | 55 to 59 | 97%<br>(94-99%)                | 2.9%<br>(1.3-5.6%)       | 4<br>(2.7-5.4)                              | 7.5%<br>(4.9-11%)                    | 10%<br>(6.3-15%)                    | 96<br>(59-140)      | 3800<br>(2400-5500)   |
| Norway   | 2005 | Male   | 60 to 64 | 97%<br>(93-98%)                | 3.4%<br>(1.5-6.6%)       | 3.9<br>(2.4-5.6)                            | 6.1%<br>(3.1-9.5%)                   | 7.7%<br>(3.5-12%)                   | 90<br>(43-150)      | 3000<br>(1500-4700)   |
| Norway   | 2005 | Male   | 65 to 69 | 96%<br>(92-98%)                | 4%<br>(1.8-7.7%)         | 3.5<br>(2.4-4.7)                            | 4.1%<br>(1.5-7.1%)                   | 4.9%<br>(1.7-8.5%)                  | 69<br>(23-120)      | 1900<br>(710-3300)    |
| Norway   | 2005 | Male   | 70 to 74 | 95%<br>(92-98%)                | 4.5%<br>(2.4-8%)         | 3<br>(1.9-4.3)                              | 2.6%<br>(-0.1-5.7%)                  | 2.8%<br>(-0.43-6.7%)                | 57<br>(-8.2-130)    | 1300<br>(-52-2800)    |
| Norway   | 2005 | Male   | 75 to 79 | 95%<br>(91-98%)                | 5%<br>(2.4-9%)           | 2.8<br>(1.6-4.1)                            | 1.5%<br>(-1.2-4.8%)                  | 1.5%<br>(-1.8-5.3%)                 | 44<br>(-52-160)     | 840<br>(-640-2700)    |
| Norway   | 2005 | Male   | 80 to 84 | 94%<br>(90-97%)                | 5.6%<br>(2.6-10%)        | 2.7<br>(1.7-3.9)                            | 0.76%<br>(-1.8-3.8%)                 | 0.52%<br>(-2.5-3.9%)                | 21<br>(-99-160)     | 390<br>(-940-2000)    |
| Norway   | 2005 | Male   | 85 to 89 | 94%<br>(89-97%)                | 6.1%<br>(3-11%)          | 2.6<br>(1.7-3.8)                            | 0.33%<br>(-2.1-3.4%)                 | 0.011%<br>(-2.8-3.5%)               | 0.33<br>(-94-120)   | 99<br>(-620-1000)     |
| Norway   | 2005 | Male   | 90 to 94 | 94%<br>(89-97%)                | 6%<br>(2.8-11%)          | 2.5<br>(1.6-3.9)                            | 0.017%<br>(-2.6-3.6%)                | -0.38%<br>(-3.4-3.6%)               | -6.2<br>(-56-59)    | 1.8<br>(-260-350)     |
| Norway   | 2005 | Male   | 95 plus  | 94%<br>(89-98%)                | 5.9%<br>(2.3-11%)        | 2.5<br>(1.3-4.2)                            | 0.16%<br>(-2.8-4.9%)                 | -0.25%<br>(-3.7-5.1%)               | -1.1<br>(-17-22)    | 2.9<br>(-53-88)       |
| Norway   | 2010 | Female | All Ages | 91%<br>(89-93%)                | 8.6%<br>(6.8-11%)        | 2.1<br>(1.8-2.5)                            | 2.4%<br>(1.1-3.9%)                   | 1.7%<br>(-1-5%)                     | 380<br>(-210-1100)  | 14000<br>(6400-22000) |
| Norway   | 2010 | Female | 15 to 19 | 90%<br>(84-95%)                | 9.8%<br>(5.4-16%)        | 1.6<br>(0.92-2.6)                           | 2.4%<br>(1.4-3.6%)                   | 7.9%<br>(3.3-13%)                   | 3.2<br>(1.3-5.4)    | 390<br>(230-580)      |
| Norway   | 2010 | Female | 20 to 24 | 94%<br>(89-97%)                | 6.2%<br>(3.3-11%)        | 2.1<br>(1.1-3.5)                            | 3.4%<br>(2.2-4.9%)                   | 8.5%<br>(3.1-15%)                   | 3.9<br>(1.4-6.7)    | 630<br>(380-900)      |
| Norway   | 2010 | Female | 25 to 29 | 95%<br>(91-97%)                | 4.8%<br>(2.6-8.7%)       | 2.2<br>(1.2-3.6)                            | 3%<br>(1.8-4.2%)                     | 8.3%<br>(3.2-14%)                   | 4.2<br>(1.6-6.9)    | 570<br>(340-840)      |
| Norway   | 2010 | Female | 30 to 34 | 96%<br>(92-98%)                | 4.2%<br>(2.1-7.5%)       | 2.3<br>(1.3-3.7)                            | 2.5%<br>(1.5-3.7%)                   | 8.8%<br>(4.4-14%)                   | 5.1<br>(2.6-8.2)    | 520<br>(320-770)      |

| Location | Year | Sex    | Age      | Prevalence of current drinkers | Prevalence of abstainers | Population average of standard drinks daily | Percent of total attributable deaths | Percent of total attributable DALYs | Attributable deaths | Attributable DALYs     |
|----------|------|--------|----------|--------------------------------|--------------------------|---------------------------------------------|--------------------------------------|-------------------------------------|---------------------|------------------------|
| Norway   | 2010 | Female | 35 to 39 | 96%<br>(92-98%)                | 4.4%<br>(2.1-8.3%)       | 2.4<br>(1.3-3.9)                            | 2.6%<br>(1.5-3.9%)                   | 9.5%<br>(5.3-14%)                   | 8.6<br>(4.8-12)     | 670<br>(390-990)       |
| Norway   | 2010 | Female | 40 to 44 | 95%<br>(91-98%)                | 4.8%<br>(2.4-8.6%)       | 2.7<br>(1.5-4.2)                            | 3%<br>(1.6-4.5%)                     | 10%<br>(5.9-14%)                    | 14<br>(8.5-20)      | 890<br>(510-1300)      |
| Norway   | 2010 | Female | 45 to 49 | 95%<br>(90-98%)                | 5.2%<br>(2.5-9.9%)       | 3.1<br>(1.8-4.9)                            | 4.1%<br>(2.4-6.4%)                   | 11%<br>(7.5-16%)                    | 26<br>(17-37)       | 1300<br>(780-2000)     |
| Norway   | 2010 | Female | 50 to 54 | 94%<br>(90-97%)                | 5.7%<br>(3-10%)          | 3.3<br>(2-5.1)                              | 4.9%<br>(2.9-7.4%)                   | 11%<br>(7.4-15%)                    | 41<br>(28-57)       | 1800<br>(1100-2600)    |
| Norway   | 2010 | Female | 55 to 59 | 94%<br>(89-97%)                | 6.2%<br>(3.4-11%)        | 3.5<br>(2-5.2)                              | 4.8%<br>(2.7-7.2%)                   | 9.4%<br>(6.2-13%)                   | 51<br>(33-70)       | 1800<br>(1000-2800)    |
| Norway   | 2010 | Female | 60 to 64 | 93%<br>(87-96%)                | 7%<br>(3.8-13%)          | 3.3<br>(1.8-5.1)                            | 4.1%<br>(1.8-7.1%)                   | 7.2%<br>(3.8-11%)                   | 62<br>(33-96)       | 1900<br>(810-3100)     |
| Norway   | 2010 | Female | 65 to 69 | 92%<br>(86-96%)                | 8.2%<br>(4.3-14%)        | 2.9<br>(1.9-4.2)                            | 3.2%<br>(1.1-5.6%)                   | 5.3%<br>(2.6-8.3%)                  | 55<br>(27-85)       | 1300<br>(480-2300)     |
| Norway   | 2010 | Female | 70 to 74 | 90%<br>(84-94%)                | 9.8%<br>(5.8-16%)        | 2.5<br>(1.4-3.9)                            | 2.1%<br>(-0.25-5%)                   | 3.4%<br>(0.38-7%)                   | 43<br>(4.9-88)      | 820<br>(-97-1900)      |
| Norway   | 2010 | Female | 75 to 79 | 88%<br>(80-93%)                | 12%<br>(6.5-20%)         | 2.3<br>(1.2-3.9)                            | 1.3%<br>(-1.3-4.5%)                  | 1.9%<br>(-1.4-5.8%)                 | 37<br>(-27-120)     | 540<br>(-560-2000)     |
| Norway   | 2010 | Female | 80 to 84 | 86%<br>(77-92%)                | 14%<br>(7.8-23%)         | 2.3<br>(1.4-3.6)                            | 0.58%<br>(-2.1-3.9%)                 | 0.78%<br>(-2.6-4.7%)                | 27<br>(-87-170)     | 300<br>(-1000-2000)    |
| Norway   | 2010 | Female | 85 to 89 | 84%<br>(75-90%)                | 16%<br>(9.8-25%)         | 2.3<br>(1.3-3.6)                            | 0.2%<br>(-2.6-3.6%)                  | 0.15%<br>(-3.2-4.3%)                | 7.7<br>(-160-220)   | 99<br>(-1300-1900)     |
| Norway   | 2010 | Female | 90 to 94 | 83%<br>(73-90%)                | 17%<br>(9.9-27%)         | 2.2<br>(1.2-3.8)                            | -0.067%<br>(-3-4.4%)                 | -0.26%<br>(-3.9-4.9%)               | -11<br>(-160-210)   | -17<br>(-830-1200)     |
| Norway   | 2010 | Female | 95 plus  | 81%<br>(68-91%)                | 19%<br>(8.7-32%)         | 2.2<br>(0.91-4.1)                           | 0.04%<br>(-3.4-6.1%)                 | -0.18%<br>(-4.2-7%)                 | -3.5<br>(-83-140)   | 3.5<br>(-270-490)      |
| Norway   | 2010 | Male   | All Ages | 94%<br>(93-96%)                | 5.8%<br>(4.3-7.4%)       | 2.5<br>(2.1-2.9)                            | 4.8%<br>(3.4-6.4%)                   | 3.5%<br>(1.2-6.2%)                  | 700<br>(240-1200)   | 29000<br>(20000-39000) |
| Norway   | 2010 | Male   | 15 to 19 | 90%<br>(84-94%)                | 10%<br>(5.8-16%)         | 1.7<br>(1-2.7)                              | 4.8%<br>(3-7%)                       | 9.5%<br>(3.9-16%)                   | 6.8<br>(2.8-11)     | 820<br>(490-1200)      |
| Norway   | 2010 | Male   | 20 to 24 | 94%<br>(90-97%)                | 5.9%<br>(3.2-10%)        | 2.5<br>(1.5-3.9)                            | 9.2%<br>(6.2-13%)                    | 12%<br>(5.5-20%)                    | 15<br>(6.7-25)      | 1900<br>(1200-2700)    |
| Norway   | 2010 | Male   | 25 to 29 | 96%<br>(93-98%)                | 4%<br>(2.2-7.1%)         | 2.7<br>(1.6-4.1)                            | 8.3%<br>(5.7-11%)                    | 12%<br>(5.9-18%)                    | 16<br>(7.9-25)      | 1800<br>(1200-2500)    |
| Norway   | 2010 | Male   | 30 to 34 | 97%<br>(94-99%)                | 2.9%<br>(1.4-5.7%)       | 2.8<br>(1.8-4.1)                            | 6.7%<br>(4.6-9.1%)                   | 11%<br>(5.7-18%)                    | 15<br>(7.8-24)      | 1500<br>(1000-2100)    |
| Norway   | 2010 | Male   | 35 to 39 | 97%<br>(95-99%)                | 2.7%<br>(1.2-4.7%)       | 2.7<br>(1.6-4.1)                            | 6%<br>(4.1-8.2%)                     | 11%<br>(5.7-16%)                    | 19<br>(10-28)       | 1600<br>(1100-2200)    |
| Norway   | 2010 | Male   | 40 to 44 | 97%<br>(95-99%)                | 2.5%<br>(1.2-4.7%)       | 3<br>(1.9-4.3)                              | 6.2%<br>(4.3-8.5%)                   | 11%<br>(6.9-16%)                    | 29<br>(18-42)       | 2000<br>(1300-2700)    |
| Norway   | 2010 | Male   | 45 to 49 | 98%<br>(95-99%)                | 2.5%<br>(1.1-5.1%)       | 3.5<br>(2.2-5)                              | 7.4%<br>(5-10%)                      | 12%<br>(7.9-17%)                    | 46<br>(29-65)       | 2600<br>(1800-3600)    |
| Norway   | 2010 | Male   | 50 to 54 | 97%<br>(95-99%)                | 2.6%<br>(1.1-5.2%)       | 3.8<br>(2.6-5.3)                            | 8%<br>(5.5-11%)                      | 12%<br>(8.1-17%)                    | 70<br>(46-97)       | 3300<br>(2300-4500)    |

| Location | Year | Sex    | Age      | Prevalence of current drinkers | Prevalence of abstainers | Population average of standard drinks daily | Percent of total attributable deaths | Percent of total attributable DALYs | Attributable deaths | Attributable DALYs    |
|----------|------|--------|----------|--------------------------------|--------------------------|---------------------------------------------|--------------------------------------|-------------------------------------|---------------------|-----------------------|
| Norway   | 2010 | Male   | 55 to 59 | 97%<br>(95-99%)                | 2.9%<br>(1.3-5.4%)       | 4<br>(2.7-5.7)                              | 7.9%<br>(5.2-11%)                    | 11%<br>(7.3-16%)                    | 96<br>(62-140)      | 3800<br>(2500-5300)   |
| Norway   | 2010 | Male   | 60 to 64 | 97%<br>(94-98%)                | 3.3%<br>(1.6-6.3%)       | 4<br>(2.5-5.8)                              | 6.5%<br>(3.7-10%)                    | 8.5%<br>(4.7-13%)                   | 120<br>(65-180)     | 3900<br>(2200-6000)   |
| Norway   | 2010 | Male   | 65 to 69 | 96%<br>(93-98%)                | 3.9%<br>(1.8-7.4%)       | 3.5<br>(2.4-4.8)                            | 4.7%<br>(2.3-7.3%)                   | 5.7%<br>(2.7-9.2%)                  | 96<br>(45-150)      | 2600<br>(1300-4100)   |
| Norway   | 2010 | Male   | 70 to 74 | 96%<br>(92-98%)                | 4.5%<br>(2.4-7.6%)       | 3.1<br>(2-4.5)                              | 3%<br>(0.5-5.8%)                     | 3.5%<br>(0.51-6.8%)                 | 66<br>(9.7-130)     | 1500<br>(250-2900)    |
| Norway   | 2010 | Male   | 75 to 79 | 95%<br>(91-98%)                | 5%<br>(2.4-8.9%)         | 2.8<br>(1.7-4.3)                            | 2%<br>(-0.56-5.1%)                   | 2.1%<br>(-0.98-5.8%)                | 54<br>(-25-150)     | 970<br>(-270-2500)    |
| Norway   | 2010 | Male   | 80 to 84 | 94%<br>(90-97%)                | 5.6%<br>(2.6-10%)        | 2.7<br>(1.8-4)                              | 1.2%<br>(-1.2-3.9%)                  | 1.1%<br>(-1.8-4.2%)                 | 37<br>(-64-150)     | 560<br>(-580-1900)    |
| Norway   | 2010 | Male   | 85 to 89 | 94%<br>(89-97%)                | 6.1%<br>(3.1-11%)        | 2.6<br>(1.7-3.9)                            | 0.74%<br>(-1.5-3.6%)                 | 0.51%<br>(-2.2-3.8%)                | 18<br>(-79-140)     | 250<br>(-510-1200)    |
| Norway   | 2010 | Male   | 90 to 94 | 94%<br>(89-97%)                | 6%<br>(3-11%)            | 2.6<br>(1.6-4)                              | 0.37%<br>(-2.1-3.9%)                 | 0.049%<br>(-2.9-4%)                 | 0.97<br>(-58-80)    | 46<br>(-260-470)      |
| Norway   | 2010 | Male   | 95 plus  | 94%<br>(88-98%)                | 5.9%<br>(2.3-12%)        | 2.6<br>(1.3-4.4)                            | 0.37%<br>(-2.7-5.5%)                 | -0.0011%<br>(-3.4-5.8%)             | -0.0028<br>(-19-33) | 8.5<br>(-62-130)      |
| Norway   | 2016 | Female | All Ages | 91%<br>(89-93%)                | 8.6%<br>(6.7-11%)        | 2.1<br>(1.6-2.8)                            | 2.4%<br>(1.1-4%)                     | 1.8%<br>(-0.9-5.4%)                 | 380<br>(-200-1200)  | 14000<br>(6200-23000) |
| Norway   | 2016 | Female | 15 to 19 | 90%<br>(84-95%)                | 9.9%<br>(5.5-16%)        | 1.6<br>(0.84-2.8)                           | 2.1%<br>(1.3-3.3%)                   | 7.9%<br>(3-14%)                     | 2.3<br>(0.84-4.1)   | 330<br>(200-500)      |
| Norway   | 2016 | Female | 20 to 24 | 94%<br>(89-97%)                | 6.3%<br>(3.3-11%)        | 2.1<br>(1-3.5)                              | 3.3%<br>(2.1-4.7%)                   | 8.7%<br>(3.2-15%)                   | 3.3<br>(1.1-5.8)    | 630<br>(390-930)      |
| Norway   | 2016 | Female | 25 to 29 | 95%<br>(91-97%)                | 4.8%<br>(2.6-8.7%)       | 2.1<br>(1.1-3.6)                            | 2.7%<br>(1.8-3.9%)                   | 8.3%<br>(3.2-14%)                   | 3.5<br>(1.3-5.9)    | 600<br>(370-870)      |
| Norway   | 2016 | Female | 30 to 34 | 96%<br>(92-98%)                | 4.2%<br>(2.1-7.7%)       | 2.3<br>(1.2-3.7)                            | 2.4%<br>(1.5-3.6%)                   | 8.9%<br>(4.4-14%)                   | 4.9<br>(2.4-8)      | 550<br>(330-820)      |
| Norway   | 2016 | Female | 35 to 39 | 96%<br>(92-98%)                | 4.4%<br>(2.1-8.3%)       | 2.4<br>(1.2-4.1)                            | 2.5%<br>(1.5-3.9%)                   | 9.6%<br>(5.3-14%)                   | 7.2<br>(3.9-11)     | 600<br>(340-890)      |
| Norway   | 2016 | Female | 40 to 44 | 95%<br>(91-98%)                | 4.8%<br>(2.4-8.8%)       | 2.7<br>(1.5-4.3)                            | 2.9%<br>(1.6-4.6%)                   | 10%<br>(6.2-15%)                    | 13<br>(7.5-19)      | 860<br>(470-1300)     |
| Norway   | 2016 | Female | 45 to 49 | 95%<br>(90-97%)                | 5.2%<br>(2.5-9.9%)       | 3.1<br>(1.7-5)                              | 4%<br>(2.2-6.2%)                     | 11%<br>(7.2-16%)                    | 27<br>(16-40)       | 1400<br>(780-2100)    |
| Norway   | 2016 | Female | 50 to 54 | 94%<br>(90-97%)                | 5.7%<br>(3.1-10%)        | 3.3<br>(2-5.3)                              | 4.7%<br>(2.8-7.3%)                   | 11%<br>(7.4-15%)                    | 40<br>(26-56)       | 1700<br>(1000-2600)   |
| Norway   | 2016 | Female | 55 to 59 | 94%<br>(89-97%)                | 6.2%<br>(3.4-11%)        | 3.4<br>(2-5.4)                              | 4.7%<br>(2.5-7.5%)                   | 9.6%<br>(6.2-13%)                   | 50<br>(31-72)       | 1800<br>(970-2900)    |
| Norway   | 2016 | Female | 60 to 64 | 93%<br>(87-96%)                | 7.1%<br>(3.8-13%)        | 3.3<br>(1.7-5.3)                            | 4%<br>(1.7-7%)                       | 7.3%<br>(3.9-11%)                   | 56<br>(30-90)       | 1700<br>(740-3000)    |
| Norway   | 2016 | Female | 65 to 69 | 92%<br>(86-96%)                | 8.2%<br>(4.3-14%)        | 2.9<br>(1.7-4.4)                            | 3.1%<br>(0.94-5.7%)                  | 5.3%<br>(2.4-8.6%)                  | 68<br>(31-110)      | 1700<br>(490-3100)    |
| Norway   | 2016 | Female | 70 to 74 | 90%<br>(84-94%)                | 9.9%<br>(5.9-16%)        | 2.5<br>(1.3-4.1)                            | 2%<br>(-0.27-5%)                     | 3.4%<br>(0.45-7.1%)                 | 49<br>(6-110)       | 940<br>(-120-2300)    |

| Location | Year | Sex    | Age      | Prevalence of current drinkers | Prevalence of abstainers | Population average of standard drinks daily | Percent of total attributable deaths | Percent of total attributable DALYs | Attributable deaths | Attributable DALYs     |
|----------|------|--------|----------|--------------------------------|--------------------------|---------------------------------------------|--------------------------------------|-------------------------------------|---------------------|------------------------|
| Norway   | 2016 | Female | 75 to 79 | 88%<br>(80-93%)                | 12%<br>(6.7-20%)         | 2.3<br>(1.2-3.9)                            | 1.3%<br>(-1.1-4.7%)                  | 2%<br>(-1.1-6.3%)                   | 38<br>(-20-120)     | 560<br>(-480-2000)     |
| Norway   | 2016 | Female | 80 to 84 | 86%<br>(77-92%)                | 14%<br>(8-23%)           | 2.2<br>(1.2-3.6)                            | 0.66%<br>(-1.8-3.9%)                 | 0.89%<br>(-2.2-4.8%)                | 26<br>(-64-140)     | 290<br>(-810-1700)     |
| Norway   | 2016 | Female | 85 to 89 | 84%<br>(74-90%)                | 16%<br>(9.8-26%)         | 2.2<br>(1.2-3.6)                            | 0.25%<br>(-2.4-3.9%)                 | 0.23%<br>(-2.9-4.6%)                | 9.5<br>(-120-200)   | 110<br>(-1000-1600)    |
| Norway   | 2016 | Female | 90 to 94 | 82%<br>(73-90%)                | 18%<br>(10-27%)          | 2.2<br>(1.1-3.8)                            | -0.038%<br>(-2.8-4.4%)               | -0.22%<br>(-3.6-5%)                 | -11<br>(-170-230)   | -11<br>(-880-1300)     |
| Norway   | 2016 | Female | 95 plus  | 81%<br>(67-91%)                | 19%<br>(8.8-33%)         | 2.1<br>(0.84-4.1)                           | 0.0068%<br>(-3.2-5.5%)               | -0.22%<br>(-4-6.3%)                 | -5.4<br>(-95-150)   | 0.86<br>(-310-540)     |
| Norway   | 2016 | Male   | All Ages | 94%<br>(93-96%)                | 5.7%<br>(4.2-7.3%)       | 2.5<br>(1.9-3.3)                            | 4.9%<br>(3.2-6.9%)                   | 3.7%<br>(1.2-6.7%)                  | 760<br>(250-1400)   | 31000<br>(20000-44000) |
| Norway   | 2016 | Male   | 15 to 19 | 90%<br>(83-94%)                | 10%<br>(5.7-17%)         | 1.7<br>(0.99-2.8)                           | 4.4%<br>(2.8-6.3%)                   | 9.2%<br>(3.7-16%)                   | 5.1<br>(2-8.8)      | 710<br>(430-1000)      |
| Norway   | 2016 | Male   | 20 to 24 | 94%<br>(89-97%)                | 5.9%<br>(3.2-11%)        | 2.5<br>(1.4-4)                              | 9%<br>(6-12%)                        | 12%<br>(5.3-19%)                    | 13<br>(6-22)        | 1900<br>(1200-2800)    |
| Norway   | 2016 | Male   | 25 to 29 | 96%<br>(93-98%)                | 4%<br>(2.2-7.2%)         | 2.7<br>(1.6-4.1)                            | 8.2%<br>(5.7-11%)                    | 12%<br>(5.6-19%)                    | 15<br>(7.5-25)      | 2000<br>(1300-2700)    |
| Norway   | 2016 | Male   | 30 to 34 | 97%<br>(94-99%)                | 3%<br>(1.4-5.8%)         | 2.8<br>(1.7-4.3)                            | 6.7%<br>(4.5-9.1%)                   | 11%<br>(5.5-18%)                    | 15<br>(7.5-25)      | 1700<br>(1100-2300)    |
| Norway   | 2016 | Male   | 35 to 39 | 97%<br>(95-99%)                | 2.7%<br>(1.3-4.9%)       | 2.7<br>(1.5-4.3)                            | 6.2%<br>(4.1-8.5%)                   | 11%<br>(6-17%)                      | 18<br>(9.5-28)      | 1600<br>(1000-2200)    |
| Norway   | 2016 | Male   | 40 to 44 | 97%<br>(95-99%)                | 2.6%<br>(1.2-4.8%)       | 3<br>(1.8-4.6)                              | 6.2%<br>(4.3-8.6%)                   | 12%<br>(7.2-18%)                    | 27<br>(16-41)       | 1900<br>(1300-2700)    |
| Norway   | 2016 | Male   | 45 to 49 | 97%<br>(95-99%)                | 2.5%<br>(1.2-5.3%)       | 3.5<br>(2.1-5.2)                            | 7.2%<br>(4.9-10%)                    | 13%<br>(8.1-18%)                    | 46<br>(29-69)       | 2700<br>(1800-3900)    |
| Norway   | 2016 | Male   | 50 to 54 | 97%<br>(95-99%)                | 2.6%<br>(1.1-5.2%)       | 3.8<br>(2.4-5.6)                            | 7.9%<br>(5.4-11%)                    | 13%<br>(8.2-18%)                    | 68<br>(42-100)      | 3300<br>(2200-4800)    |
| Norway   | 2016 | Male   | 55 to 59 | 97%<br>(94-99%)                | 2.9%<br>(1.3-5.6%)       | 4<br>(2.5-6.1)                              | 7.9%<br>(5.2-11%)                    | 12%<br>(7.5-17%)                    | 95<br>(60-150)      | 3800<br>(2500-5700)    |
| Norway   | 2016 | Male   | 60 to 64 | 97%<br>(94-99%)                | 3.4%<br>(1.5-6.4%)       | 3.9<br>(2.3-6.2)                            | 6.6%<br>(3.8-11%)                    | 9%<br>(5.1-14%)                     | 110<br>(59-180)     | 3600<br>(2000-5700)    |
| Norway   | 2016 | Male   | 65 to 69 | 96%<br>(93-98%)                | 3.9%<br>(1.7-7.1%)       | 3.5<br>(2.2-5.2)                            | 4.8%<br>(2.4-8%)                     | 6.1%<br>(3.1-10%)                   | 120<br>(61-210)     | 3400<br>(1700-5800)    |
| Norway   | 2016 | Male   | 70 to 74 | 95%<br>(92-98%)                | 4.5%<br>(2.4-7.8%)       | 3.1<br>(1.8-4.7)                            | 3.2%<br>(0.78-6.5%)                  | 3.8%<br>(0.85-7.9%)                 | 86<br>(19-180)      | 1900<br>(450-4000)     |
| Norway   | 2016 | Male   | 75 to 79 | 95%<br>(91-98%)                | 5.1%<br>(2.4-8.8%)       | 2.8<br>(1.6-4.4)                            | 2.2%<br>(-0.26-5.8%)                 | 2.4%<br>(-0.5-6.5%)                 | 62<br>(-13-170)     | 1100<br>(-130-2800)    |
| Norway   | 2016 | Male   | 80 to 84 | 94%<br>(89-97%)                | 5.7%<br>(2.6-11%)        | 2.7<br>(1.6-4.2)                            | 1.4%<br>(-0.82-4.6%)                 | 1.3%<br>(-1.4-5%)                   | 43<br>(-46-160)     | 610<br>(-370-2000)     |
| Norway   | 2016 | Male   | 85 to 89 | 94%<br>(89-97%)                | 6.2%<br>(3.1-11%)        | 2.6<br>(1.5-4.1)                            | 0.93%<br>(-1.3-4.1%)                 | 0.75%<br>(-1.9-4.4%)                | 26<br>(-64-150)     | 300<br>(-430-1300)     |
| Norway   | 2016 | Male   | 90 to 94 | 94%<br>(89-97%)                | 6.1%<br>(2.9-11%)        | 2.6<br>(1.5-4.1)                            | 0.53%<br>(-2.4-2%)                   | 0.26%<br>(-2.7-4.5%)                | 6.5<br>(-67-110)    | 83<br>(-300-660)       |

| Location | Year | Sex    | Age      | Prevalence of current drinkers | Prevalence of abstainers | Population average of standard drinks daily | Percent of total attributable deaths | Percent of total attributable DALYs | Attributable deaths   | Attributable DALYs        |
|----------|------|--------|----------|--------------------------------|--------------------------|---------------------------------------------|--------------------------------------|-------------------------------------|-----------------------|---------------------------|
| Norway   | 2016 | Male   | 95 plus  | 94%<br>(88-98%)                | 5.9%<br>(2.2-12%)        | 2.5<br>(1.3-4.3)                            | 0.43%<br>(-2.5-5.2%)                 | 0.091%<br>(-3.3-5.7%)               | 0.68<br>(-25-43)      | 13<br>(-75-160)           |
| Portugal | 1990 | Female | All Ages | 47%<br>(41-53%)                | 53%<br>(47-59%)          | 3<br>(2.4-3.6)                              | 8.7%<br>(6.7-11%)                    | 14%<br>(10-18%)                     | 6700<br>(4900-8800)   | 130000<br>(100000-160000) |
| Portugal | 1990 | Female | 15 to 19 | 44%<br>(31-60%)                | 56%<br>(40-69%)          | 2<br>(1.1-3)                                | 2.9%<br>(1.7-4.4%)                   | 9%<br>(4.9-14%)                     | 15<br>(8.3-24)        | 1400<br>(810-2100)        |
| Portugal | 1990 | Female | 20 to 24 | 51%<br>(35-67%)                | 49%<br>(33-65%)          | 2.2<br>(1.2-3.4)                            | 3.4%<br>(2.1-5.1%)                   | 9.8%<br>(5.6-15%)                   | 20<br>(12-31)         | 1800<br>(1200-2600)       |
| Portugal | 1990 | Female | 25 to 29 | 54%<br>(35-70%)                | 46%<br>(30-65%)          | 2.1<br>(1.3-3.2)                            | 3.3%<br>(2.1-4.6%)                   | 9.9%<br>(6.2-14%)                   | 23<br>(14-33)         | 1900<br>(1200-2600)       |
| Portugal | 1990 | Female | 30 to 34 | 57%<br>(37-73%)                | 43%<br>(27-63%)          | 2.7<br>(1.7-4)                              | 4.2%<br>(3-5.7%)                     | 13%<br>(9.6-17%)                    | 36<br>(27-47)         | 2500<br>(1800-3300)       |
| Portugal | 1990 | Female | 35 to 39 | 59%<br>(42-74%)                | 41%<br>(26-58%)          | 4.1<br>(2.6-5.9)                            | 6.3%<br>(4.7-8.4%)                   | 18%<br>(14-23%)                     | 67<br>(52-85)         | 4000<br>(3100-5000)       |
| Portugal | 1990 | Female | 40 to 44 | 60%<br>(45-75%)                | 40%<br>(25-55%)          | 4.9<br>(3.4-6.8)                            | 8.3%<br>(6.3-11%)                    | 21%<br>(17-25%)                     | 110<br>(88-140)       | 5800<br>(4600-7200)       |
| Portugal | 1990 | Female | 45 to 49 | 62%<br>(48-72%)                | 38%<br>(28-52%)          | 5.2<br>(3.6-6.9)                            | 9.9%<br>(7.5-13%)                    | 21%<br>(17-27%)                     | 160<br>(130-200)      | 7200<br>(5600-9100)       |
| Portugal | 1990 | Female | 50 to 54 | 58%<br>(47-68%)                | 42%<br>(32-53%)          | 5.1<br>(3.7-6.9)                            | 11%<br>(8.2-14%)                     | 21%<br>(17-26%)                     | 230<br>(180-280)      | 9100<br>(7200-11000)      |
| Portugal | 1990 | Female | 55 to 59 | 51%<br>(39-60%)                | 49%<br>(40-61%)          | 4.8<br>(3.4-6.5)                            | 11%<br>(8.4-15%)                     | 20%<br>(15-25%)                     | 320<br>(240-400)      | 11000<br>(8500-14000)     |
| Portugal | 1990 | Female | 60 to 64 | 48%<br>(35-59%)                | 52%<br>(41-65%)          | 4.6<br>(3.1-6.6)                            | 11%<br>(8.1-15%)                     | 18%<br>(13-23%)                     | 420<br>(310-550)      | 13000<br>(9100-16000)     |
| Portugal | 1990 | Female | 65 to 69 | 51%<br>(39-61%)                | 49%<br>(39-61%)          | 4.6<br>(3.2-6.2)                            | 12%<br>(8.8-16%)                     | 17%<br>(13-22%)                     | 640<br>(470-830)      | 16000<br>(11000-20000)    |
| Portugal | 1990 | Female | 70 to 74 | 48%<br>(38-58%)                | 52%<br>(42-62%)          | 4.1<br>(2.8-5.7)                            | 12%<br>(8.4-17%)                     | 16%<br>(11-22%)                     | 820<br>(570-1100)     | 16000<br>(11000-22000)    |
| Portugal | 1990 | Female | 75 to 79 | 41%<br>(29-53%)                | 59%<br>(47-71%)          | 3.4<br>(2.1-5)                              | 11%<br>(7.2-16%)                     | 13%<br>(8.8-19%)                    | 1100<br>(730-1600)    | 16000<br>(11000-24000)    |
| Portugal | 1990 | Female | 80 to 84 | 37%<br>(26-48%)                | 63%<br>(52-74%)          | 3.1<br>(1.9-4.4)                            | 10%<br>(6.4-15%)                     | 12%<br>(7.7-18%)                    | 1300<br>(780-1800)    | 13000<br>(8400-19000)     |
| Portugal | 1990 | Female | 85 to 89 | 38%<br>(26-50%)                | 62%<br>(50-74%)          | 3.1<br>(1.9-4.7)                            | 9.7%<br>(5.7-15%)                    | 11%<br>(6.6-17%)                    | 950<br>(550-1400)     | 7200<br>(4200-11000)      |
| Portugal | 1990 | Female | 90 to 94 | 39%<br>(28-51%)                | 61%<br>(49-72%)          | 3.1<br>(1.7-4.9)                            | 9.2%<br>(4.9-14%)                    | 11%<br>(5.7-17%)                    | 400<br>(210-630)      | 2100<br>(1100-3300)       |
| Portugal | 1990 | Female | 95 plus  | 43%<br>(28-60%)                | 57%<br>(40-72%)          | 3.3<br>(1.6-5.7)                            | 9.6%<br>(4.3-16%)                    | 11%<br>(5-18%)                      | 130<br>(57-210)       | 440<br>(200-710)          |
| Portugal | 1990 | Male   | All Ages | 71%<br>(65-77%)                | 29%<br>(23-35%)          | 8.6<br>(7.1-10)                             | 19%<br>(16-22%)                      | 24%<br>(18-29%)                     | 13000<br>(9700-15000) | 330000<br>(270000-380000) |
| Portugal | 1990 | Male   | 15 to 19 | 61%<br>(45-76%)                | 39%<br>(24-55%)          | 3.7<br>(2.3-5.5)                            | 12%<br>(7.4-17%)                     | 18%<br>(11-26%)                     | 110<br>(66-160)       | 8600<br>(5500-12000)      |
| Portugal | 1990 | Male   | 20 to 24 | 70%<br>(55-83%)                | 30%<br>(17-45%)          | 6.3<br>(4.1-8.8)                            | 21%<br>(14-28%)                      | 29%<br>(19-40%)                     | 220<br>(150-300)      | 17000<br>(12000-22000)    |



| Location | Year | Sex    | Age      | Prevalence of current drinkers | Prevalence of abstainers | Population average of standard drinks daily | Percent of total attributable deaths | Percent of total attributable DALYs | Attributable deaths | Attributable DALYs       |
|----------|------|--------|----------|--------------------------------|--------------------------|---------------------------------------------|--------------------------------------|-------------------------------------|---------------------|--------------------------|
| Portugal | 1990 | Male   | 25 to 29 | 75%<br>(60-86%)                | 25%<br>(14-40%)          | 8.9<br>(6.3-12)                             | 22%<br>(17-29%)                      | 33%<br>(24-43%)                     | 250<br>(180-320)    | 17000<br>(13000-22000)   |
| Portugal | 1990 | Male   | 30 to 34 | 79%<br>(64-89%)                | 21%<br>(11-36%)          | 11<br>(7.8-14)                              | 22%<br>(17-27%)                      | 34%<br>(27-41%)                     | 260<br>(210-320)    | 17000<br>(13000-20000)   |
| Portugal | 1990 | Male   | 35 to 39 | 82%<br>(70-90%)                | 18%<br>(9.6-30%)         | 12<br>(8.4-16)                              | 22%<br>(18-26%)                      | 34%<br>(28-40%)                     | 290<br>(230-340)    | 16000<br>(13000-19000)   |
| Portugal | 1990 | Male   | 40 to 44 | 83%<br>(71-92%)                | 17%<br>(8.3-29%)         | 13<br>(9.9-18)                              | 22%<br>(18-26%)                      | 34%<br>(29-39%)                     | 360<br>(300-410)    | 18000<br>(15000-21000)   |
| Portugal | 1990 | Male   | 45 to 49 | 84%<br>(73-91%)                | 16%<br>(9.5-27%)         | 15<br>(12-20)                               | 23%<br>(19-27%)                      | 33%<br>(28-38%)                     | 450<br>(380-520)    | 20000<br>(17000-23000)   |
| Portugal | 1990 | Male   | 50 to 54 | 85%<br>(76-90%)                | 15%<br>(9.5-24%)         | 16<br>(12-20)                               | 24%<br>(20-28%)                      | 32%<br>(27-37%)                     | 670<br>(560-780)    | 26000<br>(22000-30000)   |
| Portugal | 1990 | Male   | 55 to 59 | 87%<br>(80-91%)                | 13%<br>(8.7-20%)         | 15<br>(11-19)                               | 23%<br>(19-28%)                      | 30%<br>(24-35%)                     | 960<br>(770-1100)   | 32000<br>(26000-38000)   |
| Portugal | 1990 | Male   | 60 to 64 | 86%<br>(78-90%)                | 14%<br>(9.5-22%)         | 14<br>(10-18)                               | 22%<br>(17-26%)                      | 27%<br>(21-32%)                     | 1200<br>(940-1500)  | 35000<br>(27000-42000)   |
| Portugal | 1990 | Male   | 65 to 69 | 82%<br>(75-87%)                | 18%<br>(13-25%)          | 13<br>(9.7-16)                              | 21%<br>(16-26%)                      | 25%<br>(19-30%)                     | 1500<br>(1100-1900) | 36000<br>(27000-44000)   |
| Portugal | 1990 | Male   | 70 to 74 | 80%<br>(72-85%)                | 20%<br>(15-28%)          | 12<br>(8.8-16)                              | 20%<br>(15-25%)                      | 24%<br>(17-29%)                     | 1600<br>(1200-2000) | 31000<br>(22000-38000)   |
| Portugal | 1990 | Male   | 75 to 79 | 78%<br>(69-86%)                | 22%<br>(14-31%)          | 11<br>(8-15)                                | 19%<br>(13-25%)                      | 22%<br>(15-28%)                     | 1900<br>(1300-2400) | 28000<br>(19000-35000)   |
| Portugal | 1990 | Male   | 80 to 84 | 77%<br>(66-85%)                | 23%<br>(15-34%)          | 10<br>(7.1-13)                              | 19%<br>(13-24%)                      | 21%<br>(14-27%)                     | 1600<br>(1100-2100) | 17000<br>(12000-23000)   |
| Portugal | 1990 | Male   | 85 to 89 | 75%<br>(64-84%)                | 25%<br>(16-36%)          | 9<br>(6.2-12)                               | 18%<br>(12-23%)                      | 20%<br>(13-26%)                     | 890<br>(610-1200)   | 6800<br>(4700-8900)      |
| Portugal | 1990 | Male   | 90 to 94 | 77%<br>(66-85%)                | 23%<br>(15-34%)          | 8.3<br>(5.4-12)                             | 17%<br>(12-22%)                      | 19%<br>(13-24%)                     | 280<br>(190-360)    | 1500<br>(1000-1900)      |
| Portugal | 1990 | Male   | 95 plus  | 78%<br>(65-88%)                | 22%<br>(12-35%)          | 7.7<br>(4.4-12)                             | 16%<br>(10-22%)                      | 18%<br>(11-24%)                     | 58<br>(36-79)       | 200<br>(130-280)         |
| Portugal | 1995 | Female | All Ages | 47%<br>(42-53%)                | 53%<br>(47-58%)          | 2.8<br>(2.3-3.4)                            | 7.8%<br>(6-10%)                      | 12%<br>(9-16%)                      | 6200<br>(4500-8000) | 110000<br>(91000-140000) |
| Portugal | 1995 | Female | 15 to 19 | 44%<br>(30-59%)                | 56%<br>(41-70%)          | 1.8<br>(1-2.7)                              | 2.5%<br>(1.4-3.9%)                   | 8.1%<br>(4.3-13%)                   | 12<br>(6.3-19)      | 1100<br>(650-1700)       |
| Portugal | 1995 | Female | 20 to 24 | 50%<br>(34-67%)                | 50%<br>(33-66%)          | 1.9<br>(1.1-3.1)                            | 2.8%<br>(1.7-4.2%)                   | 7.9%<br>(4.5-12%)                   | 16<br>(9-25)        | 1500<br>(980-2300)       |
| Portugal | 1995 | Female | 25 to 29 | 54%<br>(35-70%)                | 46%<br>(30-65%)          | 1.9<br>(1.2-2.8)                            | 2.7%<br>(1.7-3.8%)                   | 7.7%<br>(4.7-11%)                   | 18<br>(11-25)       | 1500<br>(1000-2100)      |
| Portugal | 1995 | Female | 30 to 34 | 56%<br>(36-73%)                | 44%<br>(27-64%)          | 2.5<br>(1.6-3.6)                            | 3.7%<br>(2.6-4.9%)                   | 11%<br>(8-14%)                      | 33<br>(24-43)       | 2300<br>(1700-3000)      |
| Portugal | 1995 | Female | 35 to 39 | 58%<br>(42-73%)                | 42%<br>(27-58%)          | 3.7<br>(2.4-5.2)                            | 5.4%<br>(3.9-7.2%)                   | 16%<br>(12-19%)                     | 58<br>(44-73)       | 3500<br>(2700-4400)      |
| Portugal | 1995 | Female | 40 to 44 | 60%<br>(45-74%)                | 40%<br>(26-55%)          | 4.5<br>(3.1-6.2)                            | 7.3%<br>(5.6-9.5%)                   | 19%<br>(15-23%)                     | 99<br>(79-120)      | 5300<br>(4100-6500)      |

| Location | Year | Sex    | Age      | Prevalence of current drinkers | Prevalence of abstainers | Population average of standard drinks daily | Percent of total attributable deaths | Percent of total attributable DALYs | Attributable deaths    | Attributable DALYs        |
|----------|------|--------|----------|--------------------------------|--------------------------|---------------------------------------------|--------------------------------------|-------------------------------------|------------------------|---------------------------|
| Portugal | 1995 | Female | 45 to 49 | 61%<br>(48-72%)                | 39%<br>(28-52%)          | 4.8<br>(3.3-6.4)                            | 8.5%<br>(6.4-11%)                    | 19%<br>(15-24%)                     | 140<br>(110-170)       | 6500<br>(5100-8100)       |
| Portugal | 1995 | Female | 50 to 54 | 58%<br>(46-68%)                | 42%<br>(32-54%)          | 4.7<br>(3.3-6.3)                            | 9.7%<br>(7.2-12%)                    | 19%<br>(15-24%)                     | 190<br>(150-240)       | 7600<br>(5900-9700)       |
| Portugal | 1995 | Female | 55 to 59 | 50%<br>(39-60%)                | 50%<br>(40-61%)          | 4.4<br>(3.1-6.1)                            | 9.9%<br>(7.3-13%)                    | 18%<br>(14-23%)                     | 250<br>(190-330)       | 8900<br>(6800-12000)      |
| Portugal | 1995 | Female | 60 to 64 | 48%<br>(35-59%)                | 52%<br>(41-65%)          | 4.2<br>(2.8-6)                              | 10%<br>(7.1-13%)                     | 16%<br>(12-21%)                     | 360<br>(270-470)       | 11000<br>(7800-14000)     |
| Portugal | 1995 | Female | 65 to 69 | 50%<br>(38-60%)                | 50%<br>(40-62%)          | 4.2<br>(2.9-5.6)                            | 11%<br>(7.6-14%)                     | 16%<br>(12-20%)                     | 550<br>(400-710)       | 14000<br>(9800-18000)     |
| Portugal | 1995 | Female | 70 to 74 | 48%<br>(37-58%)                | 52%<br>(42-63%)          | 3.8<br>(2.6-5.2)                            | 11%<br>(7.4-15%)                     | 15%<br>(10-20%)                     | 810<br>(560-1100)      | 16000<br>(11000-22000)    |
| Portugal | 1995 | Female | 75 to 79 | 40%<br>(30-53%)                | 60%<br>(47-70%)          | 3.1<br>(2-4.6)                              | 9.6%<br>(6.1-14%)                    | 12%<br>(7.8-18%)                    | 890<br>(580-1300)      | 13000<br>(8600-19000)     |
| Portugal | 1995 | Female | 80 to 84 | 37%<br>(26-49%)                | 63%<br>(51-74%)          | 2.8<br>(1.8-4.1)                            | 9%<br>(5.5-13%)                      | 11%<br>(6.6-16%)                    | 1100<br>(690-1700)     | 12000<br>(7500-18000)     |
| Portugal | 1995 | Female | 85 to 89 | 37%<br>(26-49%)                | 63%<br>(51-74%)          | 2.8<br>(1.7-4.2)                            | 8.7%<br>(5-13%)                      | 10%<br>(5.8-16%)                    | 960<br>(550-1500)      | 7300<br>(4200-11000)      |
| Portugal | 1995 | Female | 90 to 94 | 39%<br>(28-52%)                | 61%<br>(48-72%)          | 2.8<br>(1.6-4.5)                            | 8.2%<br>(4.1-13%)                    | 9.7%<br>(4.7-15%)                   | 470<br>(230-750)       | 2500<br>(1200-3900)       |
| Portugal | 1995 | Female | 95 plus  | 43%<br>(27-60%)                | 57%<br>(40-73%)          | 3.1<br>(1.5-5.3)                            | 8.7%<br>(3.6-14%)                    | 10%<br>(4.1-17%)                    | 150<br>(61-250)        | 520<br>(210-870)          |
| Portugal | 1995 | Male   | All Ages | 72%<br>(65-78%)                | 28%<br>(22-35%)          | 8.3<br>(7-10)                               | 18%<br>(15-21%)                      | 23%<br>(18-27%)                     | 13000<br>(10000-15000) | 320000<br>(260000-370000) |
| Portugal | 1995 | Male   | 15 to 19 | 61%<br>(44-76%)                | 39%<br>(24-56%)          | 3.5<br>(2.1-5.2)                            | 10%<br>(6.4-15%)                     | 16%<br>(9.5-25%)                    | 80<br>(47-120)         | 6500<br>(4100-9400)       |
| Portugal | 1995 | Male   | 20 to 24 | 70%<br>(55-83%)                | 30%<br>(17-45%)          | 5.9<br>(4-8.2)                              | 18%<br>(13-24%)                      | 25%<br>(16-35%)                     | 190<br>(130-270)       | 15000<br>(11000-20000)    |
| Portugal | 1995 | Male   | 25 to 29 | 76%<br>(62-86%)                | 24%<br>(14-38%)          | 8.2<br>(5.8-11)                             | 18%<br>(14-23%)                      | 25%<br>(18-33%)                     | 210<br>(160-280)       | 15000<br>(12000-19000)    |
| Portugal | 1995 | Male   | 30 to 34 | 79%<br>(64-89%)                | 21%<br>(11-36%)          | 10<br>(7.3-13)                              | 18%<br>(14-22%)                      | 27%<br>(21-32%)                     | 240<br>(190-300)       | 16000<br>(12000-19000)    |
| Portugal | 1995 | Male   | 35 to 39 | 82%<br>(69-90%)                | 18%<br>(9.7-31%)         | 11<br>(7.9-15)                              | 20%<br>(16-24%)                      | 29%<br>(24-34%)                     | 290<br>(240-350)       | 17000<br>(14000-20000)    |
| Portugal | 1995 | Male   | 40 to 44 | 83%<br>(71-91%)                | 17%<br>(8.6-29%)         | 12<br>(9.3-16)                              | 21%<br>(17-25%)                      | 32%<br>(27-36%)                     | 370<br>(310-430)       | 19000<br>(16000-22000)    |
| Portugal | 1995 | Male   | 45 to 49 | 84%<br>(73-91%)                | 16%<br>(9.3-27%)         | 14<br>(11-18)                               | 22%<br>(18-26%)                      | 32%<br>(27-36%)                     | 480<br>(400-560)       | 22000<br>(18000-25000)    |
| Portugal | 1995 | Male   | 50 to 54 | 85%<br>(76-91%)                | 15%<br>(9.3-24%)         | 15<br>(11-19)                               | 22%<br>(18-26%)                      | 31%<br>(26-35%)                     | 580<br>(480-670)       | 23000<br>(19000-26000)    |
| Portugal | 1995 | Male   | 55 to 59 | 86%<br>(79-91%)                | 14%<br>(8.7-21%)         | 14<br>(11-18)                               | 22%<br>(18-26%)                      | 29%<br>(24-34%)                     | 840<br>(680-980)       | 28000<br>(23000-33000)    |
| Portugal | 1995 | Male   | 60 to 64 | 85%<br>(78-90%)                | 15%<br>(9.7-22%)         | 13<br>(9.6-17)                              | 21%<br>(17-25%)                      | 26%<br>(20-31%)                     | 1100<br>(900-1400)     | 33000<br>(26000-39000)    |

| Location | Year | Sex    | Age      | Prevalence of current drinkers | Prevalence of abstainers | Population average of standard drinks daily | Percent of total attributable deaths | Percent of total attributable DALYs | Attributable deaths | Attributable DALYs      |
|----------|------|--------|----------|--------------------------------|--------------------------|---------------------------------------------|--------------------------------------|-------------------------------------|---------------------|-------------------------|
| Portugal | 1995 | Male   | 65 to 69 | 82%<br>(74-87%)                | 18%<br>(13-26%)          | 12<br>(9.2-15)                              | 20%<br>(15-24%)                      | 24%<br>(18-29%)                     | 1500<br>(1100-1800) | 35000<br>(27000-42000)  |
| Portugal | 1995 | Male   | 70 to 74 | 79%<br>(71-85%)                | 21%<br>(15-29%)          | 11<br>(8.2-14)                              | 20%<br>(14-24%)                      | 23%<br>(17-28%)                     | 1800<br>(1300-2200) | 34000<br>(26000-42000)  |
| Portugal | 1995 | Male   | 75 to 79 | 78%<br>(68-86%)                | 22%<br>(14-32%)          | 10<br>(7.5-14)                              | 19%<br>(13-23%)                      | 21%<br>(15-26%)                     | 1700<br>(1200-2100) | 25000<br>(18000-31000)  |
| Portugal | 1995 | Male   | 80 to 84 | 76%<br>(65-85%)                | 24%<br>(15-35%)          | 9.3<br>(6.5-12)                             | 18%<br>(13-23%)                      | 20%<br>(14-26%)                     | 1700<br>(1200-2200) | 19000<br>(13000-24000)  |
| Portugal | 1995 | Male   | 85 to 89 | 75%<br>(63-84%)                | 25%<br>(16-37%)          | 8.3<br>(5.7-11)                             | 17%<br>(12-22%)                      | 19%<br>(14-25%)                     | 1000<br>(750-1400)  | 8000<br>(5800-10000)    |
| Portugal | 1995 | Male   | 90 to 94 | 76%<br>(65-85%)                | 24%<br>(15-35%)          | 7.7<br>(5.1-11)                             | 16%<br>(11-21%)                      | 18%<br>(13-23%)                     | 370<br>(270-480)    | 1900<br>(1400-2500)     |
| Portugal | 1995 | Male   | 95 plus  | 78%<br>(63-89%)                | 22%<br>(11-37%)          | 7.1<br>(4.1-11)                             | 15%<br>(9.7-21%)                     | 17%<br>(11-24%)                     | 75<br>(47-100)      | 260<br>(170-360)        |
| Portugal | 2000 | Female | All Ages | 45%<br>(40-51%)                | 55%<br>(49-60%)          | 2.4<br>(2-2.9)                              | 6.4%<br>(4.8-8.3%)                   | 9.9%<br>(6.9-14%)                   | 5100<br>(3500-7000) | 93000<br>(72000-120000) |
| Portugal | 2000 | Female | 15 to 19 | 38%<br>(26-54%)                | 62%<br>(46-74%)          | 1.4<br>(0.77-2.1)                           | 1.8%<br>(1.1-2.8%)                   | 6.1%<br>(3.2-9.9%)                  | 6.7<br>(3.5-11)     | 680<br>(400-1000)       |
| Portugal | 2000 | Female | 20 to 24 | 45%<br>(30-62%)                | 55%<br>(38-70%)          | 1.5<br>(0.87-2.5)                           | 2.2%<br>(1.4-3.2%)                   | 6%<br>(3.4-9.5%)                    | 9.8<br>(5.4-15)     | 1100<br>(700-1600)      |
| Portugal | 2000 | Female | 25 to 29 | 51%<br>(34-68%)                | 49%<br>(32-66%)          | 1.6<br>(0.95-2.4)                           | 2.1%<br>(1.3-2.8%)                   | 6.1%<br>(3.7-8.6%)                  | 12<br>(6.8-16)      | 1100<br>(770-1600)      |
| Portugal | 2000 | Female | 30 to 34 | 56%<br>(38-72%)                | 44%<br>(28-62%)          | 2.2<br>(1.4-3.1)                            | 2.9%<br>(2.1-3.9%)                   | 8.8%<br>(6.4-11%)                   | 24<br>(17-31)       | 1700<br>(1300-2300)     |
| Portugal | 2000 | Female | 35 to 39 | 59%<br>(44-74%)                | 41%<br>(26-56%)          | 3.3<br>(2.2-4.6)                            | 4.6%<br>(3.4-6.1%)                   | 14%<br>(10-17%)                     | 52<br>(40-65)       | 3200<br>(2400-4000)     |
| Portugal | 2000 | Female | 40 to 44 | 59%<br>(45-73%)                | 41%<br>(27-55%)          | 3.9<br>(2.7-5.4)                            | 6.2%<br>(4.7-8.1%)                   | 16%<br>(13-19%)                     | 86<br>(69-110)      | 4600<br>(3600-5600)     |
| Portugal | 2000 | Female | 45 to 49 | 59%<br>(46-70%)                | 41%<br>(30-54%)          | 4.1<br>(2.9-5.3)                            | 7.2%<br>(5.4-9.4%)                   | 17%<br>(13-21%)                     | 120<br>(97-150)     | 5700<br>(4600-7300)     |
| Portugal | 2000 | Female | 50 to 54 | 55%<br>(45-66%)                | 45%<br>(34-55%)          | 4<br>(2.8-5.4)                              | 7.9%<br>(6-10%)                      | 16%<br>(13-21%)                     | 160<br>(130-210)    | 6700<br>(5100-8600)     |
| Portugal | 2000 | Female | 55 to 59 | 48%<br>(38-57%)                | 52%<br>(43-62%)          | 3.7<br>(2.6-5.1)                            | 8%<br>(5.9-11%)                      | 15%<br>(12-20%)                     | 190<br>(140-240)    | 6800<br>(5100-8900)     |
| Portugal | 2000 | Female | 60 to 64 | 45%<br>(34-56%)                | 55%<br>(44-66%)          | 3.5<br>(2.4-5)                              | 8%<br>(5.7-11%)                      | 14%<br>(9.7-18%)                    | 270<br>(190-360)    | 8200<br>(5600-11000)    |
| Portugal | 2000 | Female | 65 to 69 | 47%<br>(36-57%)                | 53%<br>(43-64%)          | 3.5<br>(2.4-4.8)                            | 8.3%<br>(5.8-11%)                    | 13%<br>(9.2-17%)                    | 410<br>(290-540)    | 10000<br>(7300-14000)   |
| Portugal | 2000 | Female | 70 to 74 | 44%<br>(34-55%)                | 56%<br>(45-66%)          | 3.1<br>(2.1-4.2)                            | 8.5%<br>(5.5-12%)                    | 12%<br>(7.9-16%)                    | 630<br>(420-880)    | 12000<br>(8200-18000)   |
| Portugal | 2000 | Female | 75 to 79 | 39%<br>(28-51%)                | 61%<br>(49-72%)          | 2.6<br>(1.7-3.9)                            | 7.6%<br>(4.7-12%)                    | 9.8%<br>(6-15%)                     | 790<br>(480-1200)   | 12000<br>(7300-18000)   |
| Portugal | 2000 | Female | 80 to 84 | 37%<br>(26-47%)                | 63%<br>(53-74%)          | 2.5<br>(1.6-3.6)                            | 7.3%<br>(4.3-11%)                    | 9%<br>(5.3-14%)                     | 840<br>(490-1300)   | 9200<br>(5400-14000)    |

| Location | Year | Sex    | Age      | Prevalence of current drinkers | Prevalence of abstainers | Population average of standard drinks daily | Percent of total attributable deaths | Percent of total attributable DALYs | Attributable deaths    | Attributable DALYs        |
|----------|------|--------|----------|--------------------------------|--------------------------|---------------------------------------------|--------------------------------------|-------------------------------------|------------------------|---------------------------|
| Portugal | 2000 | Female | 85 to 89 | 37%<br>(26-48%)                | 63%<br>(52-74%)          | 2.4<br>(1.5-3.7)                            | 7.1%<br>(3.8-11%)                    | 8.4%<br>(4.5-13%)                   | 870<br>(470-1400)      | 6700<br>(3600-11000)      |
| Portugal | 2000 | Female | 90 to 94 | 39%<br>(27-51%)                | 61%<br>(49-73%)          | 2.5<br>(1.4-4)                              | 6.7%<br>(3-11%)                      | 7.8%<br>(3.4-13%)                   | 460<br>(200-770)       | 2400<br>(1100-4000)       |
| Portugal | 2000 | Female | 95 plus  | 43%<br>(27-60%)                | 57%<br>(40-73%)          | 2.7<br>(1.3-4.6)                            | 7%<br>(2.3-13%)                      | 8.1%<br>(2.5-15%)                   | 170<br>(50-300)        | 570<br>(180-1000)         |
| Portugal | 2000 | Male   | All Ages | 74%<br>(68-80%)                | 26%<br>(20-32%)          | 7.8<br>(6.5-9.3)                            | 18%<br>(15-21%)                      | 22%<br>(18-26%)                     | 12000<br>(10000-14000) | 300000<br>(250000-340000) |
| Portugal | 2000 | Male   | 15 to 19 | 60%<br>(44-75%)                | 40%<br>(25-56%)          | 3<br>(1.8-4.5)                              | 8.4%<br>(5.3-12%)                    | 15%<br>(8.4-22%)                    | 47<br>(27-70)          | 4000<br>(2600-5700)       |
| Portugal | 2000 | Male   | 20 to 24 | 71%<br>(56-83%)                | 29%<br>(17-44%)          | 5.2<br>(3.6-7.3)                            | 16%<br>(11-22%)                      | 23%<br>(15-32%)                     | 140<br>(91-190)        | 11000<br>(8100-15000)     |
| Portugal | 2000 | Male   | 25 to 29 | 77%<br>(65-87%)                | 23%<br>(13-35%)          | 7.5<br>(5.3-9.8)                            | 17%<br>(13-21%)                      | 24%<br>(18-32%)                     | 180<br>(130-240)       | 13000<br>(10000-17000)    |
| Portugal | 2000 | Male   | 30 to 34 | 82%<br>(69-90%)                | 18%<br>(9.7-31%)         | 9.2<br>(6.8-12)                             | 17%<br>(14-21%)                      | 26%<br>(20-31%)                     | 220<br>(170-270)       | 14000<br>(12000-17000)    |
| Portugal | 2000 | Male   | 35 to 39 | 84%<br>(74-91%)                | 16%<br>(8.6-26%)         | 10<br>(7.2-13)                              | 18%<br>(15-22%)                      | 28%<br>(23-33%)                     | 290<br>(240-340)       | 17000<br>(14000-19000)    |
| Portugal | 2000 | Male   | 40 to 44 | 85%<br>(75-92%)                | 15%<br>(7.9-25%)         | 11<br>(8.5-15)                              | 21%<br>(17-24%)                      | 31%<br>(27-36%)                     | 390<br>(330-440)       | 20000<br>(17000-23000)    |
| Portugal | 2000 | Male   | 45 to 49 | 86%<br>(78-91%)                | 14%<br>(8.6-22%)         | 13<br>(9.9-17)                              | 22%<br>(18-26%)                      | 32%<br>(27-36%)                     | 500<br>(430-570)       | 22000<br>(19000-26000)    |
| Portugal | 2000 | Male   | 50 to 54 | 86%<br>(79-91%)                | 14%<br>(8.9-21%)         | 13<br>(10-17)                               | 22%<br>(18-25%)                      | 30%<br>(25-34%)                     | 590<br>(490-680)       | 23000<br>(19000-27000)    |
| Portugal | 2000 | Male   | 55 to 59 | 87%<br>(82-92%)                | 13%<br>(8.4-18%)         | 12<br>(9.3-16)                              | 21%<br>(17-25%)                      | 28%<br>(23-32%)                     | 700<br>(590-820)       | 24000<br>(20000-28000)    |
| Portugal | 2000 | Male   | 60 to 64 | 86%<br>(81-91%)                | 14%<br>(9.2-19%)         | 12<br>(8.6-15)                              | 20%<br>(16-23%)                      | 25%<br>(21-29%)                     | 960<br>(780-1100)      | 28000<br>(23000-33000)    |
| Portugal | 2000 | Male   | 65 to 69 | 83%<br>(78-88%)                | 17%<br>(12-22%)          | 11<br>(8.3-14)                              | 19%<br>(15-23%)                      | 23%<br>(19-28%)                     | 1300<br>(1100-1600)    | 32000<br>(26000-39000)    |
| Portugal | 2000 | Male   | 70 to 74 | 81%<br>(75-86%)                | 19%<br>(14-25%)          | 10<br>(7.6-13)                              | 19%<br>(15-23%)                      | 22%<br>(17-26%)                     | 1700<br>(1300-2000)    | 32000<br>(25000-39000)    |
| Portugal | 2000 | Male   | 75 to 79 | 79%<br>(71-86%)                | 21%<br>(14-29%)          | 9.3<br>(6.7-12)                             | 18%<br>(13-22%)                      | 20%<br>(15-25%)                     | 1900<br>(1400-2300)    | 28000<br>(21000-34000)    |
| Portugal | 2000 | Male   | 80 to 84 | 77%<br>(67-85%)                | 23%<br>(15-33%)          | 8.2<br>(5.8-11)                             | 17%<br>(12-21%)                      | 19%<br>(14-24%)                     | 1500<br>(1200-2000)    | 17000<br>(13000-21000)    |
| Portugal | 2000 | Male   | 85 to 89 | 76%<br>(64-85%)                | 24%<br>(15-36%)          | 7.4<br>(5-9.8)                              | 16%<br>(11-20%)                      | 18%<br>(13-23%)                     | 1100<br>(830-1500)     | 8700<br>(6500-11000)      |
| Portugal | 2000 | Male   | 90 to 94 | 77%<br>(66-85%)                | 23%<br>(15-34%)          | 6.8<br>(4.5-9.6)                            | 15%<br>(10-19%)                      | 16%<br>(11-22%)                     | 440<br>(310-580)       | 2300<br>(1600-3000)       |
| Portugal | 2000 | Male   | 95 plus  | 78%<br>(64-88%)                | 22%<br>(12-36%)          | 6.3<br>(3.6-9.7)                            | 14%<br>(7.5-19%)                     | 15%<br>(8.3-22%)                    | 90<br>(48-130)         | 320<br>(170-450)          |
| Portugal | 2005 | Female | All Ages | 44%<br>(40-49%)                | 56%<br>(51-60%)          | 2.2<br>(1.8-2.7)                            | 5.2%<br>(3.7-6.8%)                   | 7.8%<br>(5.1-11%)                   | 4000<br>(2600-5500)    | 74000<br>(54000-95000)    |

| Location | Year | Sex    | Age      | Prevalence of current drinkers | Prevalence of abstainers | Population average of standard drinks daily | Percent of total attributable deaths | Percent of total attributable DALYs | Attributable deaths   | Attributable DALYs        |
|----------|------|--------|----------|--------------------------------|--------------------------|---------------------------------------------|--------------------------------------|-------------------------------------|-----------------------|---------------------------|
| Portugal | 2005 | Female | 15 to 19 | 35%<br>(25-49%)                | 65%<br>(51-75%)          | 1.1<br>(0.66-1.8)                           | 1.5%<br>(0.91-2.2%)                  | 5.4%<br>(2.9-8.5%)                  | 4<br>(2.1-6.4)        | 440<br>(270-670)          |
| Portugal | 2005 | Female | 20 to 24 | 45%<br>(32-60%)                | 55%<br>(40-68%)          | 1.4<br>(0.83-2.3)                           | 1.9%<br>(1.3-2.7%)                   | 5.8%<br>(3.3-8.8%)                  | 6.4<br>(3.6-9.8)      | 800<br>(530-1100)         |
| Portugal | 2005 | Female | 25 to 29 | 53%<br>(38-68%)                | 47%<br>(32-62%)          | 1.6<br>(0.99-2.3)                           | 1.8%<br>(1.2-2.4%)                   | 5.9%<br>(3.7-8.4%)                  | 8.9<br>(5.5-13)       | 960<br>(660-1300)         |
| Portugal | 2005 | Female | 30 to 34 | 58%<br>(42-72%)                | 42%<br>(28-58%)          | 2.1<br>(1.4-2.9)                            | 2.4%<br>(1.7-3.2%)                   | 8.1%<br>(5.9-11%)                   | 19<br>(13-24)         | 1500<br>(1100-1900)       |
| Portugal | 2005 | Female | 35 to 39 | 59%<br>(46-73%)                | 41%<br>(27-54%)          | 3.1<br>(2.1-4.3)                            | 3.9%<br>(2.9-5.2%)                   | 13%<br>(9.8-16%)                    | 41<br>(31-51)         | 2600<br>(2000-3300)       |
| Portugal | 2005 | Female | 40 to 44 | 58%<br>(45-71%)                | 42%<br>(29-55%)          | 3.6<br>(2.5-4.8)                            | 5.1%<br>(3.8-6.6%)                   | 15%<br>(12-18%)                     | 71<br>(56-87)         | 3900<br>(3000-4800)       |
| Portugal | 2005 | Female | 45 to 49 | 57%<br>(47-66%)                | 43%<br>(34-53%)          | 3.6<br>(2.7-4.9)                            | 6.1%<br>(4.6-8.2%)                   | 15%<br>(12-19%)                     | 100<br>(83-130)       | 5000<br>(4000-6300)       |
| Portugal | 2005 | Female | 50 to 54 | 53%<br>(45-61%)                | 47%<br>(39-55%)          | 3.5<br>(2.6-4.7)                            | 6.6%<br>(4.9-8.8%)                   | 14%<br>(11-18%)                     | 130<br>(100-170)      | 5600<br>(4300-7100)       |
| Portugal | 2005 | Female | 55 to 59 | 46%<br>(39-53%)                | 54%<br>(47-61%)          | 3.3<br>(2.4-4.5)                            | 6.7%<br>(4.9-8.8%)                   | 13%<br>(10-17%)                     | 160<br>(130-210)      | 6000<br>(4500-7800)       |
| Portugal | 2005 | Female | 60 to 64 | 43%<br>(36-50%)                | 57%<br>(50-64%)          | 3.1<br>(2.2-4.2)                            | 6.6%<br>(4.6-9%)                     | 12%<br>(8.7-16%)                    | 200<br>(140-260)      | 6200<br>(4400-8300)       |
| Portugal | 2005 | Female | 65 to 69 | 43%<br>(36-51%)                | 57%<br>(49-64%)          | 3<br>(2.2-3.9)                              | 6.6%<br>(4.6-9.1%)                   | 11%<br>(7.8-14%)                    | 300<br>(220-390)      | 7600<br>(5400-10000)      |
| Portugal | 2005 | Female | 70 to 74 | 40%<br>(33-48%)                | 60%<br>(52-67%)          | 2.6<br>(1.8-3.5)                            | 6.5%<br>(4.9-3%)                     | 9.5%<br>(6-13%)                     | 450<br>(290-630)      | 9100<br>(5800-13000)      |
| Portugal | 2005 | Female | 75 to 79 | 35%<br>(27-43%)                | 65%<br>(57-73%)          | 2.2<br>(1.4-3)                              | 5.7%<br>(3.4-8.6%)                   | 7.6%<br>(4.5-11%)                   | 580<br>(340-860)      | 8900<br>(5200-13000)      |
| Portugal | 2005 | Female | 80 to 84 | 32%<br>(23-42%)                | 68%<br>(58-77%)          | 2<br>(1.2-2.8)                              | 5.5%<br>(3-8.3%)                     | 6.8%<br>(3.8-10%)                   | 730<br>(400-1100)     | 8100<br>(4500-12000)      |
| Portugal | 2005 | Female | 85 to 89 | 33%<br>(23-44%)                | 67%<br>(56-77%)          | 2<br>(1.2-3.1)                              | 5.3%<br>(2.8-8.6%)                   | 6.4%<br>(3.3-10%)                   | 610<br>(310-990)      | 4800<br>(2500-7700)       |
| Portugal | 2005 | Female | 90 to 94 | 35%<br>(24-47%)                | 65%<br>(53-76%)          | 2.1<br>(1.2-3.4)                            | 5%<br>(2.2-8.8%)                     | 5.9%<br>(2.5-11%)                   | 410<br>(170-720)      | 2200<br>(930-3800)        |
| Portugal | 2005 | Female | 95 plus  | 39%<br>(25-55%)                | 61%<br>(45-75%)          | 2.3<br>(1.1-4)                              | 5.4%<br>(1.6-10%)                    | 6.3%<br>(1.7-12%)                   | 170<br>(45-320)       | 580<br>(170-1100)         |
| Portugal | 2005 | Male   | All Ages | 76%<br>(71-81%)                | 24%<br>(19-29%)          | 7.7<br>(6.3-9.2)                            | 17%<br>(14-20%)                      | 21%<br>(17-24%)                     | 11000<br>(9500-13000) | 270000<br>(240000-310000) |
| Portugal | 2005 | Male   | 15 to 19 | 61%<br>(48-75%)                | 39%<br>(25-52%)          | 2.9<br>(1.8-4.3)                            | 7.5%<br>(4.9-10%)                    | 15%<br>(8.7-21%)                    | 29<br>(17-42)         | 2600<br>(1700-3600)       |
| Portugal | 2005 | Male   | 20 to 24 | 73%<br>(60-84%)                | 27%<br>(16-40%)          | 5.2<br>(3.6-7.1)                            | 16%<br>(11-21%)                      | 25%<br>(17-35%)                     | 87<br>(58-120)        | 7600<br>(5600-10000)      |
| Portugal | 2005 | Male   | 25 to 29 | 79%<br>(67-88%)                | 21%<br>(12-33%)          | 7.2<br>(5.2-9.6)                            | 16%<br>(12-21%)                      | 28%<br>(20-36%)                     | 130<br>(90-160)       | 9900<br>(7500-12000)      |
| Portugal | 2005 | Male   | 30 to 34 | 82%<br>(70-91%)                | 18%<br>(9.2-30%)         | 8.8<br>(6.4-11)                             | 15%<br>(12-19%)                      | 26%<br>(20-31%)                     | 170<br>(130-210)      | 12000<br>(9200-14000)     |

| Location | Year | Sex    | Age      | Prevalence of current drinkers | Prevalence of abstainers | Population average of standard drinks daily | Percent of total attributable deaths | Percent of total attributable DALYs | Attributable deaths | Attributable DALYs     |
|----------|------|--------|----------|--------------------------------|--------------------------|---------------------------------------------|--------------------------------------|-------------------------------------|---------------------|------------------------|
| Portugal | 2005 | Male   | 35 to 39 | 85%<br>(74-92%)                | 15%<br>(8-26%)           | 9.6<br>(6.9-13)                             | 17%<br>(13-20%)                      | 27%<br>(22-32%)                     | 230<br>(190-280)    | 14000<br>(11000-16000) |
| Portugal | 2005 | Male   | 40 to 44 | 86%<br>(76-92%)                | 14%<br>(7.6-24%)         | 11<br>(8-14)                                | 19%<br>(16-22%)                      | 30%<br>(26-33%)                     | 370<br>(320-420)    | 19000<br>(16000-21000) |
| Portugal | 2005 | Male   | 45 to 49 | 87%<br>(80-92%)                | 13%<br>(8.1-20%)         | 13<br>(9.5-16)                              | 21%<br>(18-25%)                      | 31%<br>(27-35%)                     | 510<br>(440-580)    | 23000<br>(20000-26000) |
| Portugal | 2005 | Male   | 50 to 54 | 87%<br>(82-92%)                | 13%<br>(8.2-18%)         | 13<br>(9.6-17)                              | 22%<br>(18-25%)                      | 30%<br>(26-34%)                     | 630<br>(530-710)    | 25000<br>(21000-28000) |
| Portugal | 2005 | Male   | 55 to 59 | 89%<br>(84-92%)                | 11%<br>(7.8-16%)         | 12<br>(9-15)                                | 20%<br>(17-24%)                      | 27%<br>(23-31%)                     | 730<br>(620-840)    | 25000<br>(21000-29000) |
| Portugal | 2005 | Male   | 60 to 64 | 87%<br>(83-91%)                | 13%<br>(9-17%)           | 11<br>(8.1-14)                              | 19%<br>(16-22%)                      | 25%<br>(21-28%)                     | 810<br>(690-930)    | 24000<br>(20000-28000) |
| Portugal | 2005 | Male   | 65 to 69 | 84%<br>(78-88%)                | 16%<br>(12-22%)          | 10<br>(7.9-13)                              | 18%<br>(15-21%)                      | 23%<br>(19-26%)                     | 1100<br>(930-1300)  | 27000<br>(23000-32000) |
| Portugal | 2005 | Male   | 70 to 74 | 82%<br>(77-86%)                | 18%<br>(14-23%)          | 9.8<br>(7.4-12)                             | 18%<br>(14-21%)                      | 21%<br>(17-25%)                     | 1500<br>(1200-1800) | 29000<br>(24000-35000) |
| Portugal | 2005 | Male   | 75 to 79 | 81%<br>(74-87%)                | 19%<br>(13-26%)          | 9.1<br>(6.8-12)                             | 17%<br>(13-20%)                      | 19%<br>(15-23%)                     | 1700<br>(1400-2100) | 26000<br>(21000-32000) |
| Portugal | 2005 | Male   | 80 to 84 | 79%<br>(69-86%)                | 21%<br>(14-31%)          | 8<br>(5.7-10)                               | 16%<br>(12-19%)                      | 18%<br>(14-22%)                     | 1700<br>(1300-2100) | 19000<br>(14000-23000) |
| Portugal | 2005 | Male   | 85 to 89 | 76%<br>(65-85%)                | 24%<br>(15-35%)          | 7<br>(4.8-9.4)                              | 14%<br>(11-18%)                      | 16%<br>(12-21%)                     | 1000<br>(740-1300)  | 7800<br>(5900-10000)   |
| Portugal | 2005 | Male   | 90 to 94 | 77%<br>(67-86%)                | 23%<br>(14-33%)          | 6.5<br>(4.3-9.1)                            | 13%<br>(9-17%)                       | 15%<br>(9.9-20%)                    | 480<br>(320-640)    | 2600<br>(1800-3400)    |
| Portugal | 2005 | Male   | 95 plus  | 79%<br>(65-89%)                | 21%<br>(11-35%)          | 6<br>(3.4-9.3)                              | 12%<br>(6.1-18%)                     | 14%<br>(6.6-20%)                    | 110<br>(53-160)     | 400<br>(190-570)       |
| Portugal | 2010 | Female | All Ages | 46%<br>(42-50%)                | 54%<br>(50-58%)          | 2.2<br>(1.7-2.8)                            | 4.5%<br>(3.1-6.2%)                   | 6.6%<br>(4.1-9.5%)                  | 3400<br>(2100-5000) | 64000<br>(45000-85000) |
| Portugal | 2010 | Female | 15 to 19 | 39%<br>(28-54%)                | 61%<br>(46-72%)          | 1.2<br>(0.7-2)                              | 1.3%<br>(0.8-1.9%)                   | 5.3%<br>(3-8.4%)                    | 2.9<br>(1.7-4.6)    | 370<br>(230-540)       |
| Portugal | 2010 | Female | 20 to 24 | 49%<br>(36-64%)                | 51%<br>(36-64%)          | 1.5<br>(0.88-2.4)                           | 1.9%<br>(1.3-2.7%)                   | 6.1%<br>(3.6-9.5%)                  | 5.4<br>(3.1-8.3)    | 680<br>(460-960)       |
| Portugal | 2010 | Female | 25 to 29 | 57%<br>(42-71%)                | 43%<br>(29-58%)          | 1.6<br>(1-2.4)                              | 1.7%<br>(1.2-2.3%)                   | 6.2%<br>(3.9-8.8%)                  | 6.3<br>(4-8.9)      | 750<br>(510-1000)      |
| Portugal | 2010 | Female | 30 to 34 | 60%<br>(45-74%)                | 40%<br>(26-55%)          | 2.1<br>(1.4-3)                              | 2.2%<br>(1.5-3%)                     | 8.5%<br>(6.1-11%)                   | 16<br>(11-20)       | 1300<br>(920-1700)     |
| Portugal | 2010 | Female | 35 to 39 | 60%<br>(47-73%)                | 40%<br>(27-53%)          | 3<br>(2-4.2)                                | 3.3%<br>(2.5-4.5%)                   | 12%<br>(9-15%)                      | 35<br>(27-44)       | 2300<br>(1700-3000)    |
| Portugal | 2010 | Female | 40 to 44 | 59%<br>(47-71%)                | 41%<br>(29-53%)          | 3.5<br>(2.4-4.7)                            | 4.5%<br>(3.3-5.9%)                   | 14%<br>(11-17%)                     | 60<br>(46-74)       | 3400<br>(2500-4200)    |
| Portugal | 2010 | Female | 45 to 49 | 60%<br>(52-68%)                | 40%<br>(32-48%)          | 3.7<br>(2.6-5)                              | 5.6%<br>(4.1-7.4%)                   | 15%<br>(11-19%)                     | 97<br>(76-120)      | 4700<br>(3600-6000)    |
| Portugal | 2010 | Female | 50 to 54 | 55%<br>(48-62%)                | 45%<br>(38-52%)          | 3.6<br>(2.6-4.8)                            | 6%<br>(4.4-8%)                       | 14%<br>(11-18%)                     | 120<br>(97-160)     | 5200<br>(4000-6700)    |

| Location | Year | Sex    | Age      | Prevalence of current drinkers | Prevalence of abstainers | Population average of standard drinks daily | Percent of total attributable deaths | Percent of total attributable DALYs | Attributable deaths   | Attributable DALYs        |
|----------|------|--------|----------|--------------------------------|--------------------------|---------------------------------------------|--------------------------------------|-------------------------------------|-----------------------|---------------------------|
| Portugal | 2010 | Female | 55 to 59 | 45%<br>(39-51%)                | 55%<br>(49-61%)          | 3.1<br>(2.2-4.2)                            | 5.8%<br>(4.2-7.7%)                   | 12%<br>(9.4-16%)                    | 140<br>(110-180)      | 5200<br>(3900-7000)       |
| Portugal | 2010 | Female | 60 to 64 | 43%<br>(37-49%)                | 57%<br>(51-63%)          | 3<br>(2.1-4.1)                              | 5.7%<br>(3.9-7.9%)                   | 11%<br>(7.9-14%)                    | 170<br>(130-230)      | 5600<br>(3800-7600)       |
| Portugal | 2010 | Female | 65 to 69 | 45%<br>(38-51%)                | 55%<br>(49-62%)          | 2.9<br>(2.1-4)                              | 5.8%<br>(3.9-8.1%)                   | 9.9%<br>(7-13%)                     | 230<br>(160-300)      | 6000<br>(4100-8200)       |
| Portugal | 2010 | Female | 70 to 74 | 40%<br>(34-47%)                | 60%<br>(53-66%)          | 2.5<br>(1.7-3.5)                            | 5.5%<br>(3.4-8.2%)                   | 8.4%<br>(5.4-12%)                   | 340<br>(220-490)      | 7000<br>(4400-10000)      |
| Portugal | 2010 | Female | 75 to 79 | 33%<br>(26-41%)                | 67%<br>(59-74%)          | 2<br>(1.3-2.8)                              | 4.7%<br>(2.7-7.3%)                   | 6.5%<br>(3.8-9.8%)                  | 450<br>(260-690)      | 7100<br>(4000-11000)      |
| Portugal | 2010 | Female | 80 to 84 | 31%<br>(22-40%)                | 69%<br>(60-78%)          | 1.8<br>(1.1-2.6)                            | 4.5%<br>(2.3-7.1%)                   | 5.7%<br>(2.9-9%)                    | 600<br>(310-950)      | 6800<br>(3400-11000)      |
| Portugal | 2010 | Female | 85 to 89 | 31%<br>(22-42%)                | 69%<br>(58-78%)          | 1.8<br>(1.1-2.8)                            | 4.4%<br>(2-7.4%)                     | 5.3%<br>(2.3-9.1%)                  | 620<br>(280-1100)     | 4900<br>(2200-8300)       |
| Portugal | 2010 | Female | 90 to 94 | 33%<br>(23-44%)                | 67%<br>(56-77%)          | 1.9<br>(1-3)                                | 4.2%<br>(1.6-7.5%)                   | 4.9%<br>(1.8-9%)                    | 350<br>(130-640)      | 1900<br>(710-3400)        |
| Portugal | 2010 | Female | 95 plus  | 37%<br>(23-52%)                | 63%<br>(48-77%)          | 2<br>(0.98-3.5)                             | 4.5%<br>(1.2-8.8%)                   | 5.3%<br>(1.3-10%)                   | 190<br>(47-380)       | 670<br>(180-1300)         |
| Portugal | 2010 | Male   | All Ages | 76%<br>(72-81%)                | 24%<br>(19-28%)          | 7.4<br>(5.8-9.2)                            | 16%<br>(14-18%)                      | 19%<br>(17-22%)                     | 11000<br>(9000-12000) | 250000<br>(210000-280000) |
| Portugal | 2010 | Male   | 15 to 19 | 62%<br>(48-76%)                | 38%<br>(24-52%)          | 2.8<br>(1.7-4.3)                            | 5.9%<br>(4.1-8.2%)                   | 14%<br>(8.4-20%)                    | 16<br>(9.9-23)        | 1700<br>(1200-2300)       |
| Portugal | 2010 | Male   | 20 to 24 | 75%<br>(61-85%)                | 25%<br>(15-39%)          | 5<br>(3.3-7.1)                              | 14%<br>(10-18%)                      | 24%<br>(16-33%)                     | 49<br>(32-68)         | 4800<br>(3500-6200)       |
| Portugal | 2010 | Male   | 25 to 29 | 79%<br>(68-87%)                | 21%<br>(13-32%)          | 6.8<br>(4.7-9.3)                            | 14%<br>(11-18%)                      | 28%<br>(20-36%)                     | 74<br>(53-96)         | 6300<br>(4800-7900)       |
| Portugal | 2010 | Male   | 30 to 34 | 82%<br>(70-90%)                | 18%<br>(9.8-30%)         | 8.1<br>(5.6-11)                             | 14%<br>(11-17%)                      | 27%<br>(21-33%)                     | 120<br>(90-140)       | 8400<br>(6700-10000)      |
| Portugal | 2010 | Male   | 35 to 39 | 84%<br>(74-91%)                | 16%<br>(8.8-26%)         | 8.9<br>(6.2-12)                             | 15%<br>(12-18%)                      | 27%<br>(23-32%)                     | 180<br>(150-220)      | 11000<br>(9200-13000)     |
| Portugal | 2010 | Male   | 40 to 44 | 85%<br>(76-92%)                | 15%<br>(8.1-24%)         | 10<br>(7.3-14)                              | 18%<br>(15-21%)                      | 30%<br>(26-34%)                     | 310<br>(260-350)      | 16000<br>(14000-18000)    |
| Portugal | 2010 | Male   | 45 to 49 | 86%<br>(80-91%)                | 14%<br>(8.6-20%)         | 12<br>(8.7-15)                              | 20%<br>(17-23%)                      | 31%<br>(27-34%)                     | 470<br>(420-530)      | 21000<br>(19000-24000)    |
| Portugal | 2010 | Male   | 50 to 54 | 88%<br>(82-92%)                | 12%<br>(8.3-18%)         | 12<br>(8.9-16)                              | 21%<br>(18-24%)                      | 29%<br>(26-33%)                     | 630<br>(550-700)      | 25000<br>(22000-28000)    |
| Portugal | 2010 | Male   | 55 to 59 | 89%<br>(85-92%)                | 11%<br>(7.7-15%)         | 11<br>(8.4-15)                              | 19%<br>(17-23%)                      | 27%<br>(23-30%)                     | 720<br>(630-820)      | 25000<br>(22000-28000)    |
| Portugal | 2010 | Male   | 60 to 64 | 88%<br>(83-91%)                | 12%<br>(9.1-17%)         | 10<br>(7.6-14)                              | 18%<br>(15-21%)                      | 24%<br>(20-27%)                     | 810<br>(690-930)      | 24000<br>(20000-28000)    |
| Portugal | 2010 | Male   | 65 to 69 | 83%<br>(78-87%)                | 17%<br>(13-22%)          | 9.6<br>(7.1-12)                             | 17%<br>(14-20%)                      | 21%<br>(18-25%)                     | 920<br>(780-1100)     | 23000<br>(19000-27000)    |
| Portugal | 2010 | Male   | 70 to 74 | 82%<br>(77-86%)                | 18%<br>(14-23%)          | 9.2<br>(6.8-12)                             | 16%<br>(13-19%)                      | 20%<br>(17-23%)                     | 1200<br>(1000-1500)   | 25000<br>(20000-29000)    |

| Location | Year | Sex    | Age      | Prevalence of current drinkers | Prevalence of abstainers | Population average of standard drinks daily | Percent of total attributable deaths | Percent of total attributable DALYs | Attributable deaths | Attributable DALYs     |
|----------|------|--------|----------|--------------------------------|--------------------------|---------------------------------------------|--------------------------------------|-------------------------------------|---------------------|------------------------|
| Portugal | 2010 | Male   | 75 to 79 | 82%<br>(76-87%)                | 18%<br>(13-24%)          | 8.7<br>(6.4-12)                             | 15%<br>(12-19%)                      | 18%<br>(15-22%)                     | 1600<br>(1300-1900) | 24000<br>(19000-29000) |
| Portugal | 2010 | Male   | 80 to 84 | 79%<br>(71-86%)                | 21%<br>(14-29%)          | 7.7<br>(5.5-10)                             | 14%<br>(11-18%)                      | 17%<br>(13-21%)                     | 1600<br>(1200-2000) | 18000<br>(14000-22000) |
| Portugal | 2010 | Male   | 85 to 89 | 77%<br>(67-85%)                | 23%<br>(15-33%)          | 6.7<br>(4.5-9.3)                            | 13%<br>(9.4-17%)                     | 15%<br>(11-20%)                     | 1200<br>(850-1600)  | 9500<br>(6700-12000)   |
| Portugal | 2010 | Male   | 90 to 94 | 78%<br>(68-86%)                | 22%<br>(14-32%)          | 6.2<br>(4-9)                                | 12%<br>(7.5-16%)                     | 14%<br>(8.3-19%)                    | 480<br>(290-660)    | 2600<br>(1600-3500)    |
| Portugal | 2010 | Male   | 95 plus  | 79%<br>(66-89%)                | 21%<br>(11-34%)          | 5.7<br>(3.2-8.9)                            | 12%<br>(5.4-17%)                     | 13%<br>(5.8-19%)                    | 150<br>(66-210)     | 520<br>(240-750)       |
| Portugal | 2016 | Female | All Ages | 47%<br>(42-52%)                | 53%<br>(48-58%)          | 2.3<br>(1.6-3.2)                            | 4.2%<br>(2.6-6.3%)                   | 6.4%<br>(3.4-10%)                   | 3500<br>(1800-5600) | 61000<br>(38000-90000) |
| Portugal | 2016 | Female | 15 to 19 | 44%<br>(31-59%)                | 56%<br>(41-69%)          | 1.3<br>(0.71-2.3)                           | 1.2%<br>(0.76-1.8%)                  | 5.5%<br>(3-8.8%)                    | 2.4<br>(1.3-3.8)    | 320<br>(190-490)       |
| Portugal | 2016 | Female | 20 to 24 | 51%<br>(35-66%)                | 49%<br>(34-65%)          | 1.5<br>(0.79-2.5)                           | 1.7%<br>(1.2-2.5%)                   | 6%<br>(3.4-9.7%)                    | 3.8<br>(2.2-6.2)    | 550<br>(350-790)       |
| Portugal | 2016 | Female | 25 to 29 | 54%<br>(36-70%)                | 46%<br>(30-64%)          | 1.5<br>(0.82-2.4)                           | 1.5%<br>(1-2.1%)                     | 6%<br>(3.6-8.9%)                    | 4<br>(2.4-6)        | 520<br>(340-710)       |
| Portugal | 2016 | Female | 30 to 34 | 57%<br>(36-73%)                | 43%<br>(27-64%)          | 2<br>(1.1-3)                                | 1.9%<br>(1.3-2.6%)                   | 7.9%<br>(5.2-11%)                   | 9.9<br>(6.4-14)     | 880<br>(600-1200)      |
| Portugal | 2016 | Female | 35 to 39 | 59%<br>(44-73%)                | 41%<br>(27-56%)          | 2.9<br>(1.7-4.4)                            | 2.9%<br>(1.9-4.1%)                   | 11%<br>(8-15%)                      | 29<br>(20-40)       | 2000<br>(1400-2800)    |
| Portugal | 2016 | Female | 40 to 44 | 61%<br>(47-74%)                | 39%<br>(26-53%)          | 3.5<br>(2.2-5.2)                            | 4.1%<br>(2.9-5.7%)                   | 14%<br>(10-17%)                     | 52<br>(38-69)       | 3000<br>(2100-4000)    |
| Portugal | 2016 | Female | 45 to 49 | 62%<br>(50-72%)                | 38%<br>(28-50%)          | 3.7<br>(2.3-5.5)                            | 5%<br>(3.5-7%)                       | 14%<br>(11-19%)                     | 84<br>(62-110)      | 4200<br>(2900-5600)    |
| Portugal | 2016 | Female | 50 to 54 | 57%<br>(47-66%)                | 43%<br>(34-53%)          | 3.6<br>(2.3-5.2)                            | 5.4%<br>(3.7-7.5%)                   | 13%<br>(9.8-18%)                    | 110<br>(81-150)     | 4900<br>(3400-6700)    |
| Portugal | 2016 | Female | 55 to 59 | 45%<br>(37-55%)                | 55%<br>(45-63%)          | 3<br>(1.9-4.5)                              | 5.3%<br>(3.5-7.5%)                   | 12%<br>(8.3-16%)                    | 130<br>(90-170)     | 4700<br>(3200-6800)    |
| Portugal | 2016 | Female | 60 to 64 | 42%<br>(32-52%)                | 58%<br>(48-68%)          | 2.9<br>(1.8-4.4)                            | 5.1%<br>(3.2-7.5%)                   | 10%<br>(6.7-14%)                    | 160<br>(110-230)    | 5200<br>(3300-7700)    |
| Portugal | 2016 | Female | 65 to 69 | 46%<br>(37-55%)                | 54%<br>(45-63%)          | 3<br>(1.9-4.5)                              | 5.4%<br>(3.2-8.2%)                   | 9.6%<br>(6.2-14%)                   | 220<br>(140-320)    | 6000<br>(3600-8800)    |
| Portugal | 2016 | Female | 70 to 74 | 43%<br>(33-53%)                | 57%<br>(47-67%)          | 2.6<br>(1.6-4)                              | 5.2%<br>(2.7-8%)                     | 8.2%<br>(4.5-12%)                   | 270<br>(150-420)    | 5700<br>(3000-9100)    |
| Portugal | 2016 | Female | 75 to 79 | 35%<br>(26-47%)                | 65%<br>(53-74%)          | 2<br>(1.2-3.2)                              | 4.4%<br>(2.1-7.4%)                   | 6.3%<br>(3.1-10%)                   | 420<br>(200-690)    | 6700<br>(3200-11000)   |
| Portugal | 2016 | Female | 80 to 84 | 34%<br>(24-45%)                | 66%<br>(55-76%)          | 2<br>(1.1-3.1)                              | 4.4%<br>(1.9-7.7%)                   | 5.7%<br>(2.6-9.9%)                  | 650<br>(290-1100)   | 7300<br>(3300-13000)   |
| Portugal | 2016 | Female | 85 to 89 | 35%<br>(24-46%)                | 65%<br>(54-76%)          | 2<br>(1.1-3.2)                              | 4.4%<br>(1.7-7.9%)                   | 5.4%<br>(2-9.7%)                    | 690<br>(270-1300)   | 5400<br>(2100-9900)    |
| Portugal | 2016 | Female | 90 to 94 | 37%<br>(26-49%)                | 63%<br>(51-74%)          | 2<br>(1.1-3.4)                              | 4.2%<br>(1.3-8.2%)                   | 5%<br>(1.5-9.8%)                    | 460<br>(130-900)    | 2500<br>(760-4800)     |



| Location | Year | Sex    | Age      | Prevalence of current drinkers | Prevalence of abstainers | Population average of standard drinks daily | Percent of total attributable deaths | Percent of total attributable DALYs | Attributable deaths    | Attributable DALYs        |
|----------|------|--------|----------|--------------------------------|--------------------------|---------------------------------------------|--------------------------------------|-------------------------------------|------------------------|---------------------------|
| Portugal | 2016 | Female | 95 plus  | 41%<br>(26-57%)                | 59%<br>(43-74%)          | 2.2<br>(1-4)                                | 4.6%<br>(0.95-9.2%)                  | 5.4%<br>(0.96-11%)                  | 240<br>(43-490)        | 820<br>(170-1600)         |
| Portugal | 2016 | Male   | All Ages | 75%<br>(70-80%)                | 25%<br>(20-30%)          | 7.3<br>(5.1-10)                             | 15%<br>(12-17%)                      | 18%<br>(14-21%)                     | 10000<br>(8100-12000)  | 230000<br>(190000-260000) |
| Portugal | 2016 | Male   | 15 to 19 | 61%<br>(45-76%)                | 39%<br>(24-55%)          | 2.7<br>(1.4-4.3)                            | 5.5%<br>(3.8-7.9%)                   | 13%<br>(7.7-20%)                    | 13<br>(7.5-21)         | 1500<br>(990-2100)        |
| Portugal | 2016 | Male   | 20 to 24 | 70%<br>(55-83%)                | 30%<br>(17-45%)          | 4.5<br>(2.7-6.9)                            | 13%<br>(9.1-17%)                     | 22%<br>(14-33%)                     | 39<br>(24-58)          | 4100<br>(2900-5400)       |
| Portugal | 2016 | Male   | 25 to 29 | 76%<br>(61-87%)                | 24%<br>(13-39%)          | 6.4<br>(3.9-9.7)                            | 14%<br>(10-18%)                      | 27%<br>(18-36%)                     | 52<br>(35-71)          | 4600<br>(3300-5900)       |
| Portugal | 2016 | Male   | 30 to 34 | 79%<br>(63-90%)                | 21%<br>(10-37%)          | 7.7<br>(4.8-11)                             | 14%<br>(10-17%)                      | 27%<br>(20-34%)                     | 86<br>(61-110)         | 6200<br>(4700-7800)       |
| Portugal | 2016 | Male   | 35 to 39 | 82%<br>(69-91%)                | 18%<br>(9-31%)           | 8.5<br>(5.2-13)                             | 14%<br>(11-18%)                      | 28%<br>(21-33%)                     | 170<br>(130-210)       | 11000<br>(8100-13000)     |
| Portugal | 2016 | Male   | 40 to 44 | 83%<br>(71-92%)                | 17%<br>(8.3-29%)         | 9.6<br>(6.2-14)                             | 16%<br>(13-20%)                      | 29%<br>(24-33%)                     | 270<br>(220-320)       | 14000<br>(11000-16000)    |
| Portugal | 2016 | Male   | 45 to 49 | 84%<br>(75-91%)                | 16%<br>(8.9-25%)         | 11<br>(7.3-16)                              | 18%<br>(15-22%)                      | 30%<br>(26-34%)                     | 410<br>(340-470)       | 18000<br>(16000-21000)    |
| Portugal | 2016 | Male   | 50 to 54 | 86%<br>(80-91%)                | 14%<br>(8.7-20%)         | 12<br>(7.7-17)                              | 19%<br>(16-22%)                      | 29%<br>(25-32%)                     | 580<br>(490-670)       | 23000<br>(20000-27000)    |
| Portugal | 2016 | Male   | 55 to 59 | 89%<br>(84-92%)                | 11%<br>(7.8-16%)         | 11<br>(7.5-16)                              | 18%<br>(16-21%)                      | 26%<br>(23-30%)                     | 640<br>(550-740)       | 22000<br>(19000-26000)    |
| Portugal | 2016 | Male   | 60 to 64 | 87%<br>(82-91%)                | 13%<br>(9-18%)           | 10<br>(6.8-15)                              | 17%<br>(14-20%)                      | 23%<br>(20-26%)                     | 800<br>(660-940)       | 24000<br>(20000-28000)    |
| Portugal | 2016 | Male   | 65 to 69 | 84%<br>(78-88%)                | 16%<br>(12-22%)          | 9.5<br>(6.4-14)                             | 16%<br>(13-19%)                      | 21%<br>(17-24%)                     | 900<br>(740-1100)      | 22000<br>(18000-27000)    |
| Portugal | 2016 | Male   | 70 to 74 | 81%<br>(75-86%)                | 19%<br>(14-25%)          | 8.9<br>(5.9-13)                             | 15%<br>(12-18%)                      | 19%<br>(16-22%)                     | 1000<br>(810-1200)     | 20000<br>(16000-24000)    |
| Portugal | 2016 | Male   | 75 to 79 | 80%<br>(71-86%)                | 20%<br>(14-29%)          | 8.1<br>(5.2-12)                             | 14%<br>(11-17%)                      | 17%<br>(13-20%)                     | 1400<br>(1100-1800)    | 22000<br>(17000-27000)    |
| Portugal | 2016 | Male   | 80 to 84 | 77%<br>(66-85%)                | 23%<br>(15-34%)          | 7.2<br>(4.5-11)                             | 13%<br>(9.5-17%)                     | 15%<br>(11-20%)                     | 1700<br>(1200-2200)    | 19000<br>(13000-24000)    |
| Portugal | 2016 | Male   | 85 to 89 | 76%<br>(65-85%)                | 24%<br>(15-35%)          | 6.4<br>(3.8-9.7)                            | 12%<br>(7.7-16%)                     | 14%<br>(8.7-19%)                    | 1300<br>(800-1700)     | 10000<br>(6300-13000)     |
| Portugal | 2016 | Male   | 90 to 94 | 77%<br>(66-86%)                | 23%<br>(14-34%)          | 6<br>(3.4-9.1)                              | 11%<br>(6.1-15%)                     | 13%<br>(6.6-18%)                    | 630<br>(320-880)       | 3300<br>(1800-4600)       |
| Portugal | 2016 | Male   | 95 plus  | 79%<br>(65-89%)                | 21%<br>(11-35%)          | 5.5<br>(2.8-9)                              | 11%<br>(4-16%)                       | 12%<br>(4.3-18%)                    | 160<br>(60-250)        | 580<br>(220-860)          |
| Spain    | 1990 | Female | All Ages | 55%<br>(51-60%)                | 45%<br>(40-49%)          | 3.2<br>(2.7-3.8)                            | 6.8%<br>(5.1-8.8%)                   | 10%<br>(7.1-14%)                    | 16000<br>(11000-22000) | 330000<br>(250000-410000) |
| Spain    | 1990 | Female | 15 to 19 | 56%<br>(43-68%)                | 44%<br>(32-57%)          | 2.8<br>(1.8-3.9)                            | 3.2%<br>(1.9-4.7%)                   | 11%<br>(6.1-17%)                    | 59<br>(33-91)          | 5600<br>(3400-8100)       |
| Spain    | 1990 | Female | 20 to 24 | 67%<br>(54-77%)                | 33%<br>(23-46%)          | 3.6<br>(2.5-5)                              | 4.2%<br>(2.8-5.8%)                   | 13%<br>(8.4-18%)                    | 86<br>(56-120)         | 8300<br>(5800-11000)      |

| Location | Year | Sex    | Age      | Prevalence of current drinkers | Prevalence of abstainers | Population average of standard drinks daily | Percent of total attributable deaths | Percent of total attributable DALYs | Attributable deaths    | Attributable DALYs        |
|----------|------|--------|----------|--------------------------------|--------------------------|---------------------------------------------|--------------------------------------|-------------------------------------|------------------------|---------------------------|
| Spain    | 1990 | Female | 25 to 29 | 68%<br>(55-77%)                | 32%<br>(23-45%)          | 3.6<br>(2.5-4.9)                            | 3.9%<br>(2.8-5.3%)                   | 12%<br>(8-16%)                      | 95<br>(66-130)         | 8300<br>(5800-11000)      |
| Spain    | 1990 | Female | 30 to 34 | 67%<br>(54-77%)                | 33%<br>(23-46%)          | 3.6<br>(2.3-5)                              | 4.1%<br>(3-5.5%)                     | 13%<br>(9.7-17%)                    | 110<br>(84-150)        | 8600<br>(6200-11000)      |
| Spain    | 1990 | Female | 35 to 39 | 64%<br>(53-73%)                | 36%<br>(27-47%)          | 3.8<br>(2.6-5.3)                            | 4.7%<br>(3.5-6.3%)                   | 15%<br>(11-19%)                     | 150<br>(110-190)       | 9600<br>(7200-12000)      |
| Spain    | 1990 | Female | 40 to 44 | 64%<br>(52-74%)                | 36%<br>(26-48%)          | 4.2<br>(2.9-5.7)                            | 5.9%<br>(4.4-7.9%)                   | 17%<br>(13-21%)                     | 230<br>(180-300)       | 13000<br>(9900-17000)     |
| Spain    | 1990 | Female | 45 to 49 | 65%<br>(53-74%)                | 35%<br>(26-47%)          | 4.9<br>(3.4-6.5)                            | 7.4%<br>(5.5-10%)                    | 18%<br>(14-24%)                     | 330<br>(260-450)       | 16000<br>(12000-22000)    |
| Spain    | 1990 | Female | 50 to 54 | 65%<br>(54-73%)                | 35%<br>(27-46%)          | 5.2<br>(3.8-7)                              | 8.8%<br>(6.5-12%)                    | 18%<br>(14-24%)                     | 490<br>(380-650)       | 21000<br>(16000-27000)    |
| Spain    | 1990 | Female | 55 to 59 | 62%<br>(50-71%)                | 38%<br>(29-50%)          | 5.2<br>(3.7-6.8)                            | 9.4%<br>(6.9-12%)                    | 17%<br>(13-23%)                     | 800<br>(600-1100)      | 30000<br>(22000-39000)    |
| Spain    | 1990 | Female | 60 to 64 | 59%<br>(48-69%)                | 41%<br>(31-52%)          | 4.8<br>(3.4-6.5)                            | 9.6%<br>(7-13%)                      | 16%<br>(12-21%)                     | 1100<br>(830-1400)     | 34000<br>(25000-46000)    |
| Spain    | 1990 | Female | 65 to 69 | 56%<br>(46-65%)                | 44%<br>(35-54%)          | 4.3<br>(3.1-5.8)                            | 9.5%<br>(6.7-13%)                    | 14%<br>(10-19%)                     | 1500<br>(1100-1900)    | 38000<br>(27000-50000)    |
| Spain    | 1990 | Female | 70 to 74 | 51%<br>(41-61%)                | 49%<br>(39-59%)          | 3.7<br>(2.6-5.2)                            | 8.9%<br>(6.1-12%)                    | 12%<br>(8.6-17%)                    | 1800<br>(1300-2500)    | 37000<br>(25000-51000)    |
| Spain    | 1990 | Female | 75 to 79 | 46%<br>(34-57%)                | 54%<br>(43-66%)          | 3.2<br>(2.1-4.6)                            | 7.9%<br>(4.9-12%)                    | 10%<br>(6.2-15%)                    | 2400<br>(1500-3600)    | 37000<br>(22000-55000)    |
| Spain    | 1990 | Female | 80 to 84 | 42%<br>(30-52%)                | 58%<br>(48-70%)          | 2.9<br>(1.8-4.1)                            | 7.3%<br>(4.4-11%)                    | 9%<br>(5.3-14%)                     | 2900<br>(1700-4500)    | 32000<br>(19000-50000)    |
| Spain    | 1990 | Female | 85 to 89 | 39%<br>(28-51%)                | 61%<br>(49-72%)          | 2.7<br>(1.6-4.1)                            | 6.8%<br>(3.6-11%)                    | 8.1%<br>(4.1-13%)                   | 2400<br>(1200-4000)    | 19000<br>(9800-30000)     |
| Spain    | 1990 | Female | 90 to 94 | 39%<br>(27-51%)                | 61%<br>(49-73%)          | 2.7<br>(1.5-4.2)                            | 6.4%<br>(2.9-11%)                    | 7.4%<br>(3.2-13%)                   | 1100<br>(480-2000)     | 6000<br>(2700-10000)      |
| Spain    | 1990 | Female | 95 plus  | 40%<br>(26-54%)                | 60%<br>(46-74%)          | 2.8<br>(1.4-4.7)                            | 6.5%<br>(2.3-12%)                    | 7.6%<br>(2.5-14%)                   | 410<br>(140-750)       | 1400<br>(500-2500)        |
| Spain    | 1990 | Male   | All Ages | 74%<br>(69-79%)                | 26%<br>(21-31%)          | 6.8<br>(5.8-8)                              | 15%<br>(12-17%)                      | 17%<br>(14-21%)                     | 30000<br>(24000-36000) | 830000<br>(680000-970000) |
| Spain    | 1990 | Male   | 15 to 19 | 67%<br>(54-79%)                | 33%<br>(21-46%)          | 4.8<br>(3.3-6.7)                            | 11%<br>(6.7-15%)                     | 20%<br>(12-29%)                     | 300<br>(180-440)       | 24000<br>(16000-34000)    |
| Spain    | 1990 | Male   | 20 to 24 | 75%<br>(63-84%)                | 25%<br>(16-37%)          | 7.5<br>(5.5-9.9)                            | 18%<br>(13-24%)                      | 28%<br>(19-38%)                     | 690<br>(460-940)       | 52000<br>(36000-69000)    |
| Spain    | 1990 | Male   | 25 to 29 | 78%<br>(67-86%)                | 22%<br>(14-33%)          | 7.4<br>(5.6-9.6)                            | 16%<br>(11-20%)                      | 24%<br>(17-31%)                     | 660<br>(470-860)       | 46000<br>(34000-59000)    |
| Spain    | 1990 | Male   | 30 to 34 | 80%<br>(68-87%)                | 20%<br>(13-32%)          | 7.5<br>(5.5-9.7)                            | 14%<br>(11-18%)                      | 23%<br>(17-29%)                     | 610<br>(460-760)       | 39000<br>(31000-49000)    |
| Spain    | 1990 | Male   | 35 to 39 | 81%<br>(72-88%)                | 19%<br>(12-28%)          | 8<br>(5.8-10)                               | 16%<br>(12-19%)                      | 26%<br>(21-31%)                     | 650<br>(510-780)       | 38000<br>(30000-45000)    |
| Spain    | 1990 | Male   | 40 to 44 | 83%<br>(75-90%)                | 17%<br>(9.9-25%)         | 9.1<br>(6.9-12)                             | 17%<br>(14-21%)                      | 28%<br>(23-32%)                     | 890<br>(750-1000)      | 46000<br>(39000-54000)    |

| Location | Year | Sex    | Age      | Prevalence of current drinkers | Prevalence of abstainers | Population average of standard drinks daily | Percent of total attributable deaths | Percent of total attributable DALYs | Attributable deaths   | Attributable DALYs        |
|----------|------|--------|----------|--------------------------------|--------------------------|---------------------------------------------|--------------------------------------|-------------------------------------|-----------------------|---------------------------|
| Spain    | 1990 | Male   | 45 to 49 | 86%<br>(78-91%)                | 14%<br>(8.8-22%)         | 11<br>(8.1-14)                              | 19%<br>(16-22%)                      | 28%<br>(24-33%)                     | 1200<br>(1000-1400)   | 55000<br>(47000-64000)    |
| Spain    | 1990 | Male   | 50 to 54 | 87%<br>(81-92%)                | 13%<br>(8.3-19%)         | 11<br>(8.9-15)                              | 19%<br>(16-23%)                      | 27%<br>(22-31%)                     | 1600<br>(1400-1900)   | 65000<br>(54000-75000)    |
| Spain    | 1990 | Male   | 55 to 59 | 88%<br>(82-92%)                | 12%<br>(8-18%)           | 12<br>(9.2-15)                              | 19%<br>(15-22%)                      | 24%<br>(19-29%)                     | 2600<br>(2100-3100)   | 89000<br>(72000-110000)   |
| Spain    | 1990 | Male   | 60 to 64 | 87%<br>(81-92%)                | 13%<br>(8.3-19%)         | 11<br>(8.9-14)                              | 17%<br>(13-21%)                      | 22%<br>(17-26%)                     | 3200<br>(2500-3900)   | 94000<br>(74000-110000)   |
| Spain    | 1990 | Male   | 65 to 69 | 86%<br>(79-91%)                | 14%<br>(9.3-21%)         | 10<br>(7.9-13)                              | 16%<br>(12-20%)                      | 19%<br>(14-24%)                     | 3800<br>(2800-4700)   | 92000<br>(69000-110000)   |
| Spain    | 1990 | Male   | 70 to 74 | 84%<br>(77-89%)                | 16%<br>(11-23%)          | 8.8<br>(6.7-11)                             | 14%<br>(11-18%)                      | 17%<br>(12-21%)                     | 3600<br>(2600-4400)   | 69000<br>(51000-85000)    |
| Spain    | 1990 | Male   | 75 to 79 | 81%<br>(71-88%)                | 19%<br>(12-29%)          | 7.6<br>(5.6-10)                             | 13%<br>(9.4-16%)                     | 15%<br>(11-19%)                     | 3800<br>(2700-4800)   | 57000<br>(41000-71000)    |
| Spain    | 1990 | Male   | 80 to 84 | 77%<br>(66-85%)                | 23%<br>(15-34%)          | 6.6<br>(4.8-8.6)                            | 12%<br>(8.4-15%)                     | 13%<br>(9.4-17%)                    | 3500<br>(2500-4600)   | 38000<br>(27000-50000)    |
| Spain    | 1990 | Male   | 85 to 89 | 73%<br>(61-82%)                | 27%<br>(18-39%)          | 5.8<br>(3.9-8.2)                            | 11%<br>(7.5-14%)                     | 12%<br>(8.4-16%)                    | 2100<br>(1500-2900)   | 17000<br>(12000-22000)    |
| Spain    | 1990 | Male   | 90 to 94 | 72%<br>(60-81%)                | 28%<br>(19-40%)          | 5.4<br>(3.5-7.6)                            | 9.7%<br>(6.6-13%)                    | 11%<br>(7.3-15%)                    | 760<br>(510-1000)     | 4000<br>(2800-5500)       |
| Spain    | 1990 | Male   | 95 plus  | 72%<br>(57-83%)                | 28%<br>(17-43%)          | 5<br>(2.9-7.6)                              | 9.2%<br>(5-13%)                      | 10%<br>(5.4-15%)                    | 190<br>(97-270)       | 660<br>(360-940)          |
| Spain    | 1995 | Female | All Ages | 56%<br>(51-60%)                | 44%<br>(40-49%)          | 3<br>(2.5-3.6)                              | 5.8%<br>(4.4-7.6%)                   | 8.7%<br>(5.9-12%)                   | 14000<br>(9600-19000) | 280000<br>(210000-360000) |
| Spain    | 1995 | Female | 15 to 19 | 55%<br>(43-67%)                | 45%<br>(33-57%)          | 2.5<br>(1.6-3.6)                            | 2.5%<br>(1.5-3.6%)                   | 9.8%<br>(5.3-15%)                   | 38<br>(20-58)         | 4000<br>(2500-5700)       |
| Spain    | 1995 | Female | 20 to 24 | 67%<br>(54-77%)                | 33%<br>(23-46%)          | 3.3<br>(2.3-4.5)                            | 3.4%<br>(2.3-4.6%)                   | 11%<br>(7-16%)                      | 59<br>(37-84)         | 6600<br>(4500-9000)       |
| Spain    | 1995 | Female | 25 to 29 | 68%<br>(55-78%)                | 32%<br>(22-45%)          | 3.3<br>(2.2-4.5)                            | 3.1%<br>(2.2-4.1%)                   | 8.5%<br>(5.7-12%)                   | 69<br>(47-95)         | 6800<br>(4700-9100)       |
| Spain    | 1995 | Female | 30 to 34 | 67%<br>(53-76%)                | 33%<br>(24-47%)          | 3.3<br>(2.2-4.6)                            | 3.1%<br>(2.2-4.1%)                   | 8.3%<br>(5.9-11%)                   | 90<br>(64-120)        | 7400<br>(5300-9800)       |
| Spain    | 1995 | Female | 35 to 39 | 64%<br>(52-74%)                | 36%<br>(26-48%)          | 3.4<br>(2.4-4.8)                            | 4%<br>(2.9-5.2%)                     | 12%<br>(8.7-15%)                    | 140<br>(100-180)      | 9300<br>(6800-12000)      |
| Spain    | 1995 | Female | 40 to 44 | 64%<br>(53-74%)                | 36%<br>(26-47%)          | 3.8<br>(2.7-5.3)                            | 5.2%<br>(3.9-6.9%)                   | 14%<br>(11-18%)                     | 200<br>(160-260)      | 12000<br>(9000-15000)     |
| Spain    | 1995 | Female | 45 to 49 | 65%<br>(53-74%)                | 35%<br>(26-47%)          | 4.5<br>(3.2-6)                              | 6.5%<br>(4.8-8.7%)                   | 16%<br>(12-21%)                     | 310<br>(240-400)      | 16000<br>(12000-20000)    |
| Spain    | 1995 | Female | 50 to 54 | 65%<br>(54-73%)                | 35%<br>(27-46%)          | 4.8<br>(3.4-6.4)                            | 7.6%<br>(5.5-10%)                    | 16%<br>(12-22%)                     | 420<br>(320-560)      | 18000<br>(14000-25000)    |
| Spain    | 1995 | Female | 55 to 59 | 62%<br>(51-71%)                | 38%<br>(29-49%)          | 4.7<br>(3.3-6.3)                            | 8.2%<br>(6-11%)                      | 16%<br>(12-21%)                     | 560<br>(420-750)      | 21000<br>(16000-29000)    |
| Spain    | 1995 | Female | 60 to 64 | 59%<br>(47-69%)                | 41%<br>(31-53%)          | 4.4<br>(3.1-6)                              | 8.3%<br>(6-11%)                      | 14%<br>(11-19%)                     | 900<br>(670-1200)     | 29000<br>(21000-39000)    |

| Location | Year | Sex    | Age      | Prevalence of current drinkers | Prevalence of abstainers | Population average of standard drinks daily | Percent of total attributable deaths | Percent of total attributable DALYs | Attributable deaths    | Attributable DALYs        |
|----------|------|--------|----------|--------------------------------|--------------------------|---------------------------------------------|--------------------------------------|-------------------------------------|------------------------|---------------------------|
| Spain    | 1995 | Female | 65 to 69 | 56%<br>(45-65%)                | 44%<br>(35-55%)          | 4<br>(2.8-5.2)                              | 8.2%<br>(5.7-11%)                    | 13%<br>(9.2-17%)                    | 1200<br>(900-1600)     | 33000<br>(23000-44000)    |
| Spain    | 1995 | Female | 70 to 74 | 51%<br>(41-61%)                | 49%<br>(39-59%)          | 3.4<br>(2.4-4.7)                            | 7.6%<br>(5-11%)                      | 11%<br>(7.4-15%)                    | 1700<br>(1100-2300)    | 34000<br>(23000-49000)    |
| Spain    | 1995 | Female | 75 to 79 | 45%<br>(34-57%)                | 55%<br>(43-66%)          | 2.9<br>(1.8-4.2)                            | 6.7%<br>(4.1-10%)                    | 8.8%<br>(5.3-13%)                   | 1900<br>(1200-2900)    | 30000<br>(18000-45000)    |
| Spain    | 1995 | Female | 80 to 84 | 41%<br>(30-52%)                | 59%<br>(48-70%)          | 2.6<br>(1.6-3.7)                            | 6.1%<br>(3.6-9.5%)                   | 7.6%<br>(4.5-12%)                   | 2500<br>(1500-3800)    | 28000<br>(17000-43000)    |
| Spain    | 1995 | Female | 85 to 89 | 39%<br>(28-50%)                | 61%<br>(50-72%)          | 2.5<br>(1.5-3.7)                            | 5.7%<br>(3-9.2%)                     | 6.8%<br>(3.5-11%)                   | 2300<br>(1200-3800)    | 18000<br>(9700-30000)     |
| Spain    | 1995 | Female | 90 to 94 | 39%<br>(28-50%)                | 61%<br>(50-72%)          | 2.5<br>(1.4-3.8)                            | 5.4%<br>(2.4-9.2%)                   | 6.3%<br>(2.6-11%)                   | 1300<br>(560-2300)     | 7200<br>(3100-12000)      |
| Spain    | 1995 | Female | 95 plus  | 40%<br>(26-53%)                | 60%<br>(47-74%)          | 2.6<br>(1.3-4.3)                            | 5.7%<br>(1.8-10%)                    | 6.6%<br>(1.9-12%)                   | 480<br>(130-890)       | 1700<br>(510-3000)        |
| Spain    | 1995 | Male   | All Ages | 75%<br>(70-80%)                | 25%<br>(20-30%)          | 6.4<br>(5.4-7.5)                            | 13%<br>(11-15%)                      | 15%<br>(13-18%)                     | 29000<br>(24000-34000) | 750000<br>(640000-890000) |
| Spain    | 1995 | Male   | 15 to 19 | 67%<br>(53-79%)                | 33%<br>(21-47%)          | 4.3<br>(3-6)                                | 8.2%<br>(5.4-12%)                    | 18%<br>(11-26%)                     | 180<br>(110-260)       | 16000<br>(11000-22000)    |
| Spain    | 1995 | Male   | 20 to 24 | 75%<br>(63-84%)                | 25%<br>(16-37%)          | 6.8<br>(4.9-9)                              | 15%<br>(10-20%)                      | 25%<br>(17-34%)                     | 450<br>(300-610)       | 36000<br>(26000-48000)    |
| Spain    | 1995 | Male   | 25 to 29 | 77%<br>(66-85%)                | 23%<br>(15-34%)          | 6.7<br>(5-8.6)                              | 12%<br>(8.8-15%)                     | 18%<br>(13-23%)                     | 470<br>(340-620)       | 35000<br>(26000-45000)    |
| Spain    | 1995 | Male   | 30 to 34 | 80%<br>(68-87%)                | 20%<br>(13-32%)          | 6.8<br>(5-8.9)                              | 9.7%<br>(7.5-12%)                    | 14%<br>(10-17%)                     | 490<br>(360-620)       | 33000<br>(26000-41000)    |
| Spain    | 1995 | Male   | 35 to 39 | 81%<br>(72-88%)                | 19%<br>(12-28%)          | 7.2<br>(5.3-9.4)                            | 12%<br>(9.1-15%)                     | 18%<br>(14-22%)                     | 590<br>(460-730)       | 36000<br>(28000-43000)    |
| Spain    | 1995 | Male   | 40 to 44 | 83%<br>(74-90%)                | 17%<br>(9.9-26%)         | 8.1<br>(6.1-10)                             | 15%<br>(12-18%)                      | 24%<br>(20-27%)                     | 790<br>(660-920)       | 41000<br>(34000-49000)    |
| Spain    | 1995 | Male   | 45 to 49 | 86%<br>(78-91%)                | 14%<br>(8.7-22%)         | 9.6<br>(7.3-12)                             | 17%<br>(14-20%)                      | 25%<br>(22-29%)                     | 1200<br>(1000-1400)    | 56000<br>(47000-65000)    |
| Spain    | 1995 | Male   | 50 to 54 | 87%<br>(81-92%)                | 13%<br>(7.9-19%)         | 10<br>(8.1-13)                              | 18%<br>(14-21%)                      | 25%<br>(21-29%)                     | 1500<br>(1300-1800)    | 62000<br>(52000-72000)    |
| Spain    | 1995 | Male   | 55 to 59 | 88%<br>(82-92%)                | 12%<br>(8.2-18%)         | 11<br>(8.4-13)                              | 17%<br>(14-21%)                      | 23%<br>(19-27%)                     | 2000<br>(1600-2400)    | 69000<br>(56000-82000)    |
| Spain    | 1995 | Male   | 60 to 64 | 87%<br>(81-92%)                | 13%<br>(8.3-19%)         | 10<br>(8-13)                                | 16%<br>(13-20%)                      | 20%<br>(16-24%)                     | 3000<br>(2400-3600)    | 89000<br>(71000-110000)   |
| Spain    | 1995 | Male   | 65 to 69 | 86%<br>(80-91%)                | 14%<br>(9.2-20%)         | 9.2<br>(7.1-12)                             | 15%<br>(12-18%)                      | 18%<br>(14-22%)                     | 3700<br>(2800-4500)    | 89000<br>(71000-110000)   |
| Spain    | 1995 | Male   | 70 to 74 | 84%<br>(77-89%)                | 16%<br>(11-23%)          | 8<br>(6.1-10)                               | 13%<br>(10-16%)                      | 16%<br>(12-19%)                     | 4000<br>(3100-5000)    | 79000<br>(61000-98000)    |
| Spain    | 1995 | Male   | 75 to 79 | 81%<br>(72-88%)                | 19%<br>(12-28%)          | 6.9<br>(5.1-9.2)                            | 12%<br>(9.1-15%)                     | 13%<br>(10-17%)                     | 3400<br>(2700-4400)    | 52000<br>(40000-65000)    |
| Spain    | 1995 | Male   | 80 to 84 | 77%<br>(66-85%)                | 23%<br>(15-34%)          | 6<br>(4.2-7.9)                              | 11%<br>(8.1-14%)                     | 12%<br>(9.1-16%)                    | 3300<br>(2500-4200)    | 37000<br>(27000-47000)    |

| Location | Year | Sex    | Age      | Prevalence of current drinkers | Prevalence of abstainers | Population average of standard drinks daily | Percent of total attributable deaths | Percent of total attributable DALYs | Attributable deaths    | Attributable DALYs        |
|----------|------|--------|----------|--------------------------------|--------------------------|---------------------------------------------|--------------------------------------|-------------------------------------|------------------------|---------------------------|
| Spain    | 1995 | Male   | 85 to 89 | 73%<br>(62-82%)                | 27%<br>(18-38%)          | 5.2<br>(3.5-7.2)                            | 9.5%<br>(6.9-13%)                    | 11%<br>(7.6-14%)                    | 2300<br>(1600-3000)    | 18000<br>(13000-24000)    |
| Spain    | 1995 | Male   | 90 to 94 | 72%<br>(60-81%)                | 28%<br>(19-40%)          | 4.8<br>(3.1-6.7)                            | 8.4%<br>(5.5-11%)                    | 9.5%<br>(6.1-13%)                   | 910<br>(580-1300)      | 4900<br>(3200-6800)       |
| Spain    | 1995 | Male   | 95 plus  | 71%<br>(56-83%)                | 29%<br>(17-44%)          | 4.5<br>(2.6-6.8)                            | 8%<br>(3.9-12%)                      | 8.9%<br>(4-13%)                     | 210<br>(96-320)        | 760<br>(370-1100)         |
| Spain    | 2000 | Female | All Ages | 51%<br>(48-55%)                | 49%<br>(45-52%)          | 2.5<br>(2.1-3)                              | 4.4%<br>(3.4-5.7%)                   | 6.2%<br>(4.3-8.6%)                  | 11000<br>(7400-15000)  | 220000<br>(170000-270000) |
| Spain    | 2000 | Female | 15 to 19 | 51%<br>(41-62%)                | 49%<br>(38-59%)          | 2<br>(1.4-2.9)                              | 2.1%<br>(1.3-3.1%)                   | 8.4%<br>(4.6-13%)                   | 26<br>(14-41)          | 2900<br>(1800-4200)       |
| Spain    | 2000 | Female | 20 to 24 | 65%<br>(55-74%)                | 35%<br>(26-45%)          | 2.9<br>(2.1-4)                              | 3%<br>(2.1-4.1%)                     | 11%<br>(6.8-15%)                    | 46<br>(29-65)          | 5600<br>(3900-7600)       |
| Spain    | 2000 | Female | 25 to 29 | 68%<br>(59-75%)                | 32%<br>(25-41%)          | 3<br>(2.1-3.9)                              | 2.9%<br>(2-3.9%)                     | 10%<br>(7-14%)                      | 56<br>(37-77)          | 6000<br>(4200-8000)       |
| Spain    | 2000 | Female | 30 to 34 | 65%<br>(56-72%)                | 35%<br>(28-44%)          | 2.9<br>(2-3.9)                              | 3%<br>(2.2-3.9%)                     | 10%<br>(7.4-13%)                    | 80<br>(58-100)         | 6800<br>(4900-9000)       |
| Spain    | 2000 | Female | 35 to 39 | 62%<br>(54-69%)                | 38%<br>(31-46%)          | 3<br>(2.1-4)                                | 3.5%<br>(2.6-4.6%)                   | 11%<br>(8.7-14%)                    | 120<br>(97-160)        | 8600<br>(6600-11000)      |
| Spain    | 2000 | Female | 40 to 44 | 63%<br>(55-71%)                | 37%<br>(29-45%)          | 3.4<br>(2.5-4.5)                            | 4.6%<br>(3.5-5.9%)                   | 13%<br>(10-16%)                     | 200<br>(160-250)       | 12000<br>(9000-15000)     |
| Spain    | 2000 | Female | 45 to 49 | 64%<br>(58-71%)                | 36%<br>(29-42%)          | 4<br>(3-5.2)                                | 5.8%<br>(4.4-7.6%)                   | 15%<br>(12-18%)                     | 280<br>(220-350)       | 14000<br>(11000-18000)    |
| Spain    | 2000 | Female | 50 to 54 | 60%<br>(53-67%)                | 40%<br>(33-47%)          | 4<br>(3-5.1)                                | 6.3%<br>(4.7-8.4%)                   | 14%<br>(11-18%)                     | 370<br>(290-480)       | 16000<br>(13000-22000)    |
| Spain    | 2000 | Female | 55 to 59 | 54%<br>(47-60%)                | 46%<br>(40-53%)          | 3.5<br>(2.6-4.7)                            | 6.4%<br>(4.8-8.5%)                   | 13%<br>(10-17%)                     | 440<br>(340-570)       | 17000<br>(13000-22000)    |
| Spain    | 2000 | Female | 60 to 64 | 47%<br>(41-54%)                | 53%<br>(46-59%)          | 3<br>(2.2-4.2)                              | 6.1%<br>(4.5-8.3%)                   | 11%<br>(8.4-14%)                    | 540<br>(410-710)       | 17000<br>(13000-23000)    |
| Spain    | 2000 | Female | 65 to 69 | 43%<br>(36-50%)                | 57%<br>(50-64%)          | 2.6<br>(1.9-3.4)                            | 5.8%<br>(4.2-7.7%)                   | 9.4%<br>(7-12%)                     | 860<br>(640-1100)      | 23000<br>(17000-30000)    |
| Spain    | 2000 | Female | 70 to 74 | 37%<br>(31-44%)                | 63%<br>(56-69%)          | 2.1<br>(1.5-2.9)                            | 5.2%<br>(3.6-7.1%)                   | 7.6%<br>(5.4-11%)                   | 1100<br>(810-1600)     | 24000<br>(16000-33000)    |
| Spain    | 2000 | Female | 75 to 79 | 30%<br>(23-38%)                | 70%<br>(62-77%)          | 1.6<br>(1.1-2.3)                            | 4.3%<br>(2.8-6.2%)                   | 5.7%<br>(3.7-8.4%)                  | 1400<br>(880-2000)     | 22000<br>(14000-32000)    |
| Spain    | 2000 | Female | 80 to 84 | 31%<br>(22-39%)                | 69%<br>(61-78%)          | 1.7<br>(1.1-2.4)                            | 4.1%<br>(2.5-6.3%)                   | 5.2%<br>(3.1-8.1%)                  | 1700<br>(1000-2600)    | 19000<br>(11000-29000)    |
| Spain    | 2000 | Female | 85 to 89 | 32%<br>(22-42%)                | 68%<br>(58-78%)          | 1.8<br>(1.1-2.6)                            | 4.1%<br>(2.2-6.8%)                   | 4.9%<br>(2.6-8.1%)                  | 1800<br>(980-3000)     | 15000<br>(7900-24000)     |
| Spain    | 2000 | Female | 90 to 94 | 32%<br>(23-41%)                | 68%<br>(59-77%)          | 1.8<br>(1-2.7)                              | 3.8%<br>(1.6-6.6%)                   | 4.5%<br>(1.8-8%)                    | 1200<br>(460-2100)     | 6300<br>(2600-11000)      |
| Spain    | 2000 | Female | 95 plus  | 33%<br>(21-45%)                | 67%<br>(55-79%)          | 1.8<br>(0.93-3.1)                           | 4.1%<br>(1.3-7.8%)                   | 4.7%<br>(1.4-9.1%)                  | 500<br>(150-960)       | 1800<br>(570-3300)        |
| Spain    | 2000 | Male   | All Ages | 78%<br>(75-82%)                | 22%<br>(18-25%)          | 6.2<br>(5.3-7.3)                            | 13%<br>(11-15%)                      | 15%<br>(12-17%)                     | 27000<br>(23000-33000) | 720000<br>(620000-840000) |

| Location | Year | Sex    | Age      | Prevalence of current drinkers | Prevalence of abstainers | Population average of standard drinks daily | Percent of total attributable deaths | Percent of total attributable DALYs | Attributable deaths  | Attributable DALYs        |
|----------|------|--------|----------|--------------------------------|--------------------------|---------------------------------------------|--------------------------------------|-------------------------------------|----------------------|---------------------------|
| Spain    | 2000 | Male   | 15 to 19 | 68%<br>(56-79%)                | 32%<br>(21-44%)          | 4<br>(2.8-5.4)                              | 7.7%<br>(5-11%)                      | 17%<br>(10-25%)                     | 140<br>(80-200)      | 12000<br>(7700-16000)     |
| Spain    | 2000 | Male   | 20 to 24 | 77%<br>(67-84%)                | 23%<br>(16-33%)          | 6.4<br>(4.7-8.2)                            | 15%<br>(10-19%)                      | 26%<br>(17-36%)                     | 380<br>(250-510)     | 32000<br>(23000-41000)    |
| Spain    | 2000 | Male   | 25 to 29 | 81%<br>(74-86%)                | 19%<br>(14-26%)          | 6.4<br>(4.9-8.1)                            | 13%<br>(9.8-17%)                     | 24%<br>(17-31%)                     | 410<br>(280-530)     | 32000<br>(24000-41000)    |
| Spain    | 2000 | Male   | 30 to 34 | 83%<br>(76-88%)                | 17%<br>(12-24%)          | 6.6<br>(5-8.2)                              | 12%<br>(8.6-15%)                     | 20%<br>(15-26%)                     | 460<br>(340-590)     | 32000<br>(24000-39000)    |
| Spain    | 2000 | Male   | 35 to 39 | 84%<br>(78-89%)                | 16%<br>(11-22%)          | 6.8<br>(5.2-8.7)                            | 12%<br>(9.4-15%)                     | 21%<br>(16-26%)                     | 600<br>(460-740)     | 36000<br>(28000-44000)    |
| Spain    | 2000 | Male   | 40 to 44 | 86%<br>(79-91%)                | 14%<br>(9.1-21%)         | 7.8<br>(5.9-9.8)                            | 14%<br>(12-17%)                      | 24%<br>(20-28%)                     | 840<br>(700-1000)    | 44000<br>(37000-53000)    |
| Spain    | 2000 | Male   | 45 to 49 | 88%<br>(84-92%)                | 12%<br>(7.8-16%)         | 9.2<br>(7.4-11)                             | 17%<br>(14-20%)                      | 26%<br>(22-29%)                     | 1200<br>(1000-1300)  | 54000<br>(46000-62000)    |
| Spain    | 2000 | Male   | 50 to 54 | 90%<br>(86-93%)                | 10%<br>(7-14%)           | 10<br>(8-12)                                | 17%<br>(14-20%)                      | 24%<br>(21-28%)                     | 1600<br>(1400-1900)  | 64000<br>(55000-75000)    |
| Spain    | 2000 | Male   | 55 to 59 | 90%<br>(86-93%)                | 10%<br>(7.3-14%)         | 10<br>(8.1-12)                              | 17%<br>(14-20%)                      | 22%<br>(19-26%)                     | 1900<br>(1600-2300)  | 68000<br>(57000-80000)    |
| Spain    | 2000 | Male   | 60 to 64 | 89%<br>(85-92%)                | 11%<br>(8-15%)           | 9.7<br>(7.7-12)                             | 16%<br>(13-19%)                      | 20%<br>(16-24%)                     | 2300<br>(1900-2800)  | 70000<br>(58000-83000)    |
| Spain    | 2000 | Male   | 65 to 69 | 87%<br>(83-91%)                | 13%<br>(9.4-17%)         | 8.5<br>(6.8-10)                             | 14%<br>(11-17%)                      | 17%<br>(14-21%)                     | 3400<br>(2800-4100)  | 85000<br>(69000-100000)   |
| Spain    | 2000 | Male   | 70 to 74 | 84%<br>(78-88%)                | 16%<br>(12-22%)          | 7.1<br>(5.6-9)                              | 12%<br>(10-15%)                      | 15%<br>(12-18%)                     | 3900<br>(3100-4700)  | 77000<br>(62000-93000)    |
| Spain    | 2000 | Male   | 75 to 79 | 79%<br>(72-86%)                | 21%<br>(14-28%)          | 6<br>(4.6-7.9)                              | 11%<br>(8.6-13%)                     | 12%<br>(9.8-15%)                    | 3900<br>(3100-4900)  | 60000<br>(48000-75000)    |
| Spain    | 2000 | Male   | 80 to 84 | 75%<br>(64-83%)                | 25%<br>(17-36%)          | 5.1<br>(3.7-6.8)                            | 9.5%<br>(7.1-12%)                    | 11%<br>(8-14%)                      | 2900<br>(2200-3800)  | 33000<br>(24000-42000)    |
| Spain    | 2000 | Male   | 85 to 89 | 71%<br>(60-80%)                | 29%<br>(20-40%)          | 4.5<br>(3.1-6.1)                            | 8.4%<br>(6-11%)                      | 9.4%<br>(6.5-13%)                   | 2200<br>(1500-2900)  | 17000<br>(12000-23000)    |
| Spain    | 2000 | Male   | 90 to 94 | 70%<br>(59-80%)                | 30%<br>(20-41%)          | 4.1<br>(2.7-5.8)                            | 7.3%<br>(4.5-10%)                    | 8.2%<br>(5-11%)                     | 990<br>(600-1400)    | 5300<br>(3300-7500)       |
| Spain    | 2000 | Male   | 95 plus  | 70%<br>(55-82%)                | 30%<br>(18-45%)          | 3.9<br>(2.2-5.9)                            | 6.9%<br>(2.9-11%)                    | 7.6%<br>(2.9-12%)                   | 260<br>(100-410)     | 950<br>(400-1500)         |
| Spain    | 2005 | Female | All Ages | 52%<br>(49-55%)                | 48%<br>(45-51%)          | 2.5<br>(2.1-2.9)                            | 4%<br>(3-5%)                         | 5.3%<br>(3.7-7.3%)                  | 9800<br>(6800-13000) | 200000<br>(160000-260000) |
| Spain    | 2005 | Female | 15 to 19 | 53%<br>(44-63%)                | 47%<br>(37-56%)          | 2<br>(1.4-2.9)                              | 1.9%<br>(1.2-2.7%)                   | 8.1%<br>(4.5-12%)                   | 18<br>(10-28)        | 2200<br>(1400-3200)       |
| Spain    | 2005 | Female | 20 to 24 | 68%<br>(60-76%)                | 32%<br>(24-40%)          | 3<br>(2.1-4)                                | 2.9%<br>(2-3.9%)                     | 11%<br>(6.6-15%)                    | 34<br>(21-48)        | 4600<br>(3100-6300)       |
| Spain    | 2005 | Female | 25 to 29 | 69%<br>(61-76%)                | 31%<br>(24-39%)          | 2.9<br>(2.1-3.9)                            | 2.6%<br>(1.8-3.5%)                   | 10%<br>(6.7-14%)                    | 46<br>(30-62)        | 5600<br>(3900-7700)       |
| Spain    | 2005 | Female | 30 to 34 | 66%<br>(58-73%)                | 34%<br>(27-42%)          | 2.8<br>(2-3.8)                              | 2.6%<br>(1.9-3.5%)                   | 10%<br>(7.2-13%)                    | 68<br>(49-89)        | 6400<br>(4600-8400)       |

| Location | Year | Sex    | Age      | Prevalence of current drinkers | Prevalence of abstainers | Population average of standard drinks daily | Percent of total attributable deaths | Percent of total attributable DALYs | Attributable deaths    | Attributable DALYs        |
|----------|------|--------|----------|--------------------------------|--------------------------|---------------------------------------------|--------------------------------------|-------------------------------------|------------------------|---------------------------|
| Spain    | 2005 | Female | 35 to 39 | 63%<br>(56-70%)                | 37%<br>(30-44%)          | 3<br>(2.2-3.9)                              | 3.2%<br>(2.4-4.2%)                   | 11%<br>(8.6-14%)                    | 120<br>(92-150)        | 8600<br>(6400-11000)      |
| Spain    | 2005 | Female | 40 to 44 | 65%<br>(58-71%)                | 35%<br>(29-42%)          | 3.4<br>(2.5-4.4)                            | 4.2%<br>(3.2-5.5%)                   | 12%<br>(10-15%)                     | 200<br>(160-240)       | 12000<br>(9200-15000)     |
| Spain    | 2005 | Female | 45 to 49 | 65%<br>(59-70%)                | 35%<br>(30-41%)          | 3.9<br>(3-5.1)                              | 5.5%<br>(4.1-7.3%)                   | 14%<br>(11-17%)                     | 310<br>(250-390)       | 16000<br>(12000-20000)    |
| Spain    | 2005 | Female | 50 to 54 | 60%<br>(54-66%)                | 40%<br>(34-46%)          | 3.8<br>(2.8-5)                              | 6%<br>(4.5-7.9%)                     | 13%<br>(10-17%)                     | 360<br>(280-470)       | 16000<br>(13000-22000)    |
| Spain    | 2005 | Female | 55 to 59 | 56%<br>(50-61%)                | 44%<br>(39-50%)          | 3.6<br>(2.7-4.6)                            | 6%<br>(4.5-8.1%)                     | 12%<br>(9.9-16%)                    | 450<br>(360-580)       | 18000<br>(14000-23000)    |
| Spain    | 2005 | Female | 60 to 64 | 49%<br>(44-55%)                | 51%<br>(45-56%)          | 3<br>(2.3-4)                                | 5.6%<br>(4.1-7.6%)                   | 10%<br>(8-14%)                      | 500<br>(390-660)       | 17000<br>(12000-22000)    |
| Spain    | 2005 | Female | 65 to 69 | 43%<br>(38-49%)                | 57%<br>(51-62%)          | 2.5<br>(1.9-3.2)                            | 5.1%<br>(3.8-6.8%)                   | 8.7%<br>(6.6-11%)                   | 620<br>(470-790)       | 17000<br>(12000-22000)    |
| Spain    | 2005 | Female | 70 to 74 | 37%<br>(31-42%)                | 63%<br>(58-69%)          | 2<br>(1.4-2.7)                              | 4.6%<br>(3.1-6.2%)                   | 7%<br>(4.9-9.3%)                    | 980<br>(700-1300)      | 21000<br>(15000-29000)    |
| Spain    | 2005 | Female | 75 to 79 | 29%<br>(24-36%)                | 71%<br>(64-76%)          | 1.5<br>(1.1-2.2)                            | 3.8%<br>(2.4-5.4%)                   | 5.2%<br>(3.4-7.4%)                  | 1200<br>(800-1800)     | 20000<br>(13000-28000)    |
| Spain    | 2005 | Female | 80 to 84 | 28%<br>(20-36%)                | 72%<br>(64-80%)          | 1.5<br>(0.95-2.1)                           | 3.5%<br>(2.2-5.3%)                   | 4.5%<br>(2.8-6.8%)                  | 1600<br>(1000-2500)    | 19000<br>(12000-28000)    |
| Spain    | 2005 | Female | 85 to 89 | 28%<br>(20-36%)                | 72%<br>(64-80%)          | 1.5<br>(0.93-2.2)                           | 3.4%<br>(1.9-5.5%)                   | 4.1%<br>(2.2-6.7%)                  | 1600<br>(860-2600)     | 13000<br>(7000-20000)     |
| Spain    | 2005 | Female | 90 to 94 | 28%<br>(20-36%)                | 72%<br>(64-80%)          | 1.5<br>(0.87-2.3)                           | 3.1%<br>(1.4-5.5%)                   | 3.6%<br>(1.5-6.5%)                  | 1100<br>(470-2000)     | 6000<br>(2700-11000)      |
| Spain    | 2005 | Female | 95 plus  | 29%<br>(19-41%)                | 71%<br>(59-81%)          | 1.5<br>(0.79-2.5)                           | 3.3%<br>(1-6.3%)                     | 3.8%<br>(1.1-7.5%)                  | 530<br>(150-1000)      | 1900<br>(580-3600)        |
| Spain    | 2005 | Male   | All Ages | 79%<br>(76-83%)                | 21%<br>(17-24%)          | 6.1<br>(5.2-7.2)                            | 12%<br>(10-14%)                      | 13%<br>(11-16%)                     | 27000<br>(22000-31000) | 700000<br>(600000-810000) |
| Spain    | 2005 | Male   | 15 to 19 | 70%<br>(58-80%)                | 30%<br>(20-42%)          | 3.9<br>(2.8-5.3)                            | 7.2%<br>(4.7-9.9%)                   | 16%<br>(9.8-24%)                    | 100<br>(61-150)        | 9400<br>(6200-13000)      |
| Spain    | 2005 | Male   | 20 to 24 | 78%<br>(69-85%)                | 22%<br>(15-31%)          | 6.3<br>(4.7-8.2)                            | 14%<br>(9.8-18%)                     | 26%<br>(18-35%)                     | 270<br>(180-360)       | 24000<br>(17000-31000)    |
| Spain    | 2005 | Male   | 25 to 29 | 82%<br>(75-87%)                | 18%<br>(13-25%)          | 6.3<br>(4.8-7.9)                            | 12%<br>(8.9-15%)                     | 24%<br>(17-32%)                     | 340<br>(230-440)       | 29000<br>(21000-37000)    |
| Spain    | 2005 | Male   | 30 to 34 | 84%<br>(77-89%)                | 16%<br>(11-23%)          | 6.4<br>(4.9-8)                              | 11%<br>(8.1-14%)                     | 22%<br>(16-28%)                     | 390<br>(290-510)       | 29000<br>(22000-37000)    |
| Spain    | 2005 | Male   | 35 to 39 | 84%<br>(79-90%)                | 16%<br>(10-21%)          | 6.7<br>(5-8.5)                              | 11%<br>(8.7-14%)                     | 21%<br>(16-26%)                     | 540<br>(410-670)       | 34000<br>(26000-43000)    |
| Spain    | 2005 | Male   | 40 to 44 | 86%<br>(80-91%)                | 14%<br>(8.6-20%)         | 7.5<br>(5.9-9.5)                            | 13%<br>(10-16%)                      | 23%<br>(19-26%)                     | 820<br>(680-960)       | 44000<br>(36000-53000)    |
| Spain    | 2005 | Male   | 45 to 49 | 89%<br>(85-92%)                | 11%<br>(7.6-15%)         | 8.9<br>(7-11)                               | 16%<br>(13-18%)                      | 25%<br>(21-28%)                     | 1200<br>(1100-1400)    | 57000<br>(49000-66000)    |
| Spain    | 2005 | Male   | 50 to 54 | 90%<br>(86-93%)                | 10%<br>(6.7-14%)         | 9.6<br>(7.6-12)                             | 16%<br>(14-19%)                      | 24%<br>(20-27%)                     | 1600<br>(1400-1800)    | 64000<br>(55000-74000)    |

| Location | Year | Sex    | Age      | Prevalence of current drinkers | Prevalence of abstainers | Population average of standard drinks daily | Percent of total attributable deaths | Percent of total attributable DALYs | Attributable deaths  | Attributable DALYs        |
|----------|------|--------|----------|--------------------------------|--------------------------|---------------------------------------------|--------------------------------------|-------------------------------------|----------------------|---------------------------|
| Spain    | 2005 | Male   | 55 to 59 | 90%<br>(87-93%)                | 10%<br>(7.4-13%)         | 9.7<br>(7.8-12)                             | 16%<br>(13-19%)                      | 22%<br>(19-25%)                     | 2000<br>(1700-2300)  | 72000<br>(61000-84000)    |
| Spain    | 2005 | Male   | 60 to 64 | 89%<br>(86-92%)                | 11%<br>(8.2-14%)         | 9.3<br>(7.3-12)                             | 15%<br>(12-18%)                      | 19%<br>(16-23%)                     | 2300<br>(1900-2700)  | 69000<br>(58000-82000)    |
| Spain    | 2005 | Male   | 65 to 69 | 87%<br>(83-90%)                | 13%<br>(9.6-17%)         | 8.2<br>(6.5-10)                             | 14%<br>(11-16%)                      | 17%<br>(14-20%)                     | 2700<br>(2200-3200)  | 67000<br>(55000-80000)    |
| Spain    | 2005 | Male   | 70 to 74 | 84%<br>(80-88%)                | 16%<br>(12-20%)          | 6.9<br>(5.4-8.6)                            | 12%<br>(9.8-14%)                     | 14%<br>(12-17%)                     | 3700<br>(3000-4400)  | 74000<br>(61000-89000)    |
| Spain    | 2005 | Male   | 75 to 79 | 79%<br>(72-86%)                | 21%<br>(14-28%)          | 5.7<br>(4.4-7.5)                            | 10%<br>(8.1-13%)                     | 12%<br>(9.4-15%)                    | 3900<br>(3100-4800)  | 60000<br>(48000-74000)    |
| Spain    | 2005 | Male   | 80 to 84 | 73%<br>(62-81%)                | 27%<br>(19-38%)          | 4.6<br>(3.3-6.3)                            | 8.7%<br>(6.4-11%)                    | 9.9%<br>(7.3-13%)                   | 3500<br>(2600-4500)  | 40000<br>(30000-51000)    |
| Spain    | 2005 | Male   | 85 to 89 | 69%<br>(58-78%)                | 31%<br>(22-42%)          | 4<br>(2.8-5.5)                              | 7.4%<br>(5.1-9.9%)                   | 8.4%<br>(5.7-11%)                   | 2000<br>(1400-2700)  | 16000<br>(11000-21000)    |
| Spain    | 2005 | Male   | 90 to 94 | 68%<br>(56-78%)                | 32%<br>(22-44%)          | 3.7<br>(2.4-5.3)                            | 6.4%<br>(3.9-9.3%)                   | 7.2%<br>(4.2-10%)                   | 990<br>(580-1400)    | 5400<br>(3200-7700)       |
| Spain    | 2005 | Male   | 95 plus  | 68%<br>(53-81%)                | 32%<br>(19-47%)          | 3.5<br>(2.5-5.4)                            | 6%<br>(2.5-9.4%)                     | 6.6%<br>(2.5-11%)                   | 300<br>(110-480)     | 1100<br>(460-1700)        |
| Spain    | 2010 | Female | All Ages | 54%<br>(51-57%)                | 46%<br>(43-49%)          | 2.6<br>(2-3.2)                              | 3.8%<br>(2.8-4.9%)                   | 5.1%<br>(3.5-7.2%)                  | 9600<br>(6500-13000) | 200000<br>(150000-270000) |
| Spain    | 2010 | Female | 15 to 19 | 57%<br>(47-68%)                | 43%<br>(32-53%)          | 2.2<br>(1.5-3.2)                            | 1.7%<br>(1.1-2.4%)                   | 7.8%<br>(4.4-12%)                   | 13<br>(7.1-19)       | 1800<br>(1200-2700)       |
| Spain    | 2010 | Female | 20 to 24 | 71%<br>(62-78%)                | 29%<br>(22-38%)          | 3.1<br>(2.1-4.3)                            | 2.6%<br>(1.8-3.5%)                   | 10%<br>(6.7-15%)                    | 23<br>(15-32)        | 3600<br>(2400-4900)       |
| Spain    | 2010 | Female | 25 to 29 | 70%<br>(62-77%)                | 30%<br>(23-38%)          | 3<br>(2-4.2)                                | 2.3%<br>(1.7-3.2%)                   | 9.9%<br>(6.5-14%)                   | 32<br>(21-45)        | 4400<br>(3000-6100)       |
| Spain    | 2010 | Female | 30 to 34 | 67%<br>(59-74%)                | 33%<br>(26-41%)          | 2.9<br>(2-4.1)                              | 2.3%<br>(1.6-3.1%)                   | 9.9%<br>(7-13%)                     | 55<br>(38-74)        | 5700<br>(4000-7800)       |
| Spain    | 2010 | Female | 35 to 39 | 66%<br>(59-73%)                | 34%<br>(27-41%)          | 3.1<br>(2.2-4.1)                            | 2.8%<br>(2.1-3.8%)                   | 11%<br>(8.5-14%)                    | 100<br>(78-130)      | 8000<br>(5700-10000)      |
| Spain    | 2010 | Female | 40 to 44 | 66%<br>(60-73%)                | 34%<br>(27-40%)          | 3.5<br>(2.5-4.6)                            | 3.9%<br>(2.9-5.1%)                   | 13%<br>(9.9-16%)                    | 190<br>(150-240)     | 12000<br>(9000-15000)     |
| Spain    | 2010 | Female | 45 to 49 | 66%<br>(59-71%)                | 34%<br>(29-41%)          | 3.9<br>(2.8-5.3)                            | 5%<br>(3.6-6.7%)                     | 13%<br>(10-17%)                     | 310<br>(240-410)     | 16000<br>(12000-22000)    |
| Spain    | 2010 | Female | 50 to 54 | 63%<br>(57-68%)                | 37%<br>(32-43%)          | 4<br>(2.8-5.4)                              | 5.7%<br>(4.1-7.8%)                   | 13%<br>(10-17%)                     | 410<br>(320-540)     | 19000<br>(14000-25000)    |
| Spain    | 2010 | Female | 55 to 59 | 60%<br>(55-65%)                | 40%<br>(35-45%)          | 3.9<br>(2.8-5.3)                            | 6%<br>(4.3-8.1%)                     | 12%<br>(9.7-16%)                    | 470<br>(370-630)     | 19000<br>(14000-25000)    |
| Spain    | 2010 | Female | 60 to 64 | 54%<br>(48-60%)                | 46%<br>(40-52%)          | 3.4<br>(2.4-4.6)                            | 5.5%<br>(3.8-7.6%)                   | 10%<br>(7.8-14%)                    | 530<br>(400-710)     | 18000<br>(13000-25000)    |
| Spain    | 2010 | Female | 65 to 69 | 47%<br>(42-54%)                | 53%<br>(46-58%)          | 2.8<br>(2-3.7)                              | 4.9%<br>(3.4-6.7%)                   | 8.6%<br>(6.4-11%)                   | 590<br>(430-760)     | 17000<br>(12000-23000)    |
| Spain    | 2010 | Female | 70 to 74 | 39%<br>(33-46%)                | 61%<br>(54-67%)          | 2.1<br>(1.5-2.9)                            | 4.3%<br>(2.9-6%)                     | 6.8%<br>(4.7-9.2%)                  | 730<br>(510-990)     | 16000<br>(11000-23000)    |



| Location | Year | Sex    | Age      | Prevalence of current drinkers | Prevalence of abstainers | Population average of standard drinks daily | Percent of total attributable deaths | Percent of total attributable DALYs | Attributable deaths    | Attributable DALYs        |
|----------|------|--------|----------|--------------------------------|--------------------------|---------------------------------------------|--------------------------------------|-------------------------------------|------------------------|---------------------------|
| Spain    | 2010 | Female | 75 to 79 | 32%<br>(26-39%)                | 68%<br>(61-74%)          | 1.7<br>(1.1-2.4)                            | 3.7%<br>(2.3-5.4%)                   | 5.2%<br>(3.4-7.6%)                  | 1100<br>(740-1600)     | 19000<br>(12000-28000)    |
| Spain    | 2010 | Female | 80 to 84 | 30%<br>(22-38%)                | 70%<br>(62-78%)          | 1.5<br>(0.97-2.2)                           | 3.4%<br>(2-5.2%)                     | 4.4%<br>(2.7-6.8%)                  | 1600<br>(970-2400)     | 18000<br>(11000-29000)    |
| Spain    | 2010 | Female | 85 to 89 | 29%<br>(21-38%)                | 71%<br>(62-79%)          | 1.5<br>(0.9-2.2)                            | 3.1%<br>(1.7-5.1%)                   | 3.8%<br>(2-6.3%)                    | 1700<br>(910-2800)     | 14000<br>(7500-23000)     |
| Spain    | 2010 | Female | 90 to 94 | 28%<br>(20-37%)                | 72%<br>(63-80%)          | 1.5<br>(0.85-2.3)                           | 2.9%<br>(1.3-5.1%)                   | 3.4%<br>(1.4-6.2%)                  | 1100<br>(460-2000)     | 6100<br>(2700-11000)      |
| Spain    | 2010 | Female | 95 plus  | 30%<br>(20-42%)                | 70%<br>(58-80%)          | 1.6<br>(0.81-2.6)                           | 3.2%<br>(1-6%)                       | 3.7%<br>(1.1-7.1%)                  | 650<br>(190-1300)      | 2300<br>(750-4300)        |
| Spain    | 2010 | Male   | All Ages | 79%<br>(76-83%)                | 21%<br>(17-24%)          | 6<br>(4.8-7.4)                              | 11%<br>(9.3-13%)                     | 13%<br>(10-15%)                     | 25000<br>(21000-30000) | 640000<br>(540000-740000) |
| Spain    | 2010 | Male   | 15 to 19 | 71%<br>(60-81%)                | 29%<br>(19-40%)          | 3.9<br>(2.7-5.4)                            | 5.6%<br>(3.7-7.6%)                   | 15%<br>(9.4-22%)                    | 55<br>(34-79)          | 6100<br>(4100-8200)       |
| Spain    | 2010 | Male   | 20 to 24 | 79%<br>(71-86%)                | 21%<br>(14-29%)          | 6.2<br>(4.4-8.3)                            | 12%<br>(8.7-15%)                     | 25%<br>(17-34%)                     | 150<br>(100-200)       | 16000<br>(12000-20000)    |
| Spain    | 2010 | Male   | 25 to 29 | 82%<br>(76-88%)                | 18%<br>(12-24%)          | 6.2<br>(4.5-8.2)                            | 11%<br>(7.9-13%)                     | 23%<br>(16-31%)                     | 200<br>(140-260)       | 19000<br>(14000-25000)    |
| Spain    | 2010 | Male   | 30 to 34 | 83%<br>(76-89%)                | 17%<br>(11-24%)          | 6.2<br>(4.5-8.1)                            | 9.2%<br>(6.7-12%)                    | 21%<br>(15-28%)                     | 270<br>(190-360)       | 23000<br>(17000-29000)    |
| Spain    | 2010 | Male   | 35 to 39 | 84%<br>(79-89%)                | 16%<br>(11-21%)          | 6.4<br>(4.7-8.4)                            | 9.7%<br>(7.2-12%)                    | 21%<br>(15-26%)                     | 400<br>(290-500)       | 28000<br>(20000-35000)    |
| Spain    | 2010 | Male   | 40 to 44 | 86%<br>(80-91%)                | 14%<br>(8.9-20%)         | 7.3<br>(5.4-9.4)                            | 12%<br>(9-14%)                       | 22%<br>(18-27%)                     | 690<br>(540-820)       | 39000<br>(31000-47000)    |
| Spain    | 2010 | Male   | 45 to 49 | 89%<br>(84-92%)                | 11%<br>(7.9-16%)         | 8.6<br>(6.5-11)                             | 14%<br>(12-17%)                      | 24%<br>(20-27%)                     | 1200<br>(980-1300)     | 55000<br>(47000-64000)    |
| Spain    | 2010 | Male   | 50 to 54 | 90%<br>(86-93%)                | 9.9%<br>(6.9-14%)        | 9.4<br>(7-12)                               | 15%<br>(13-18%)                      | 23%<br>(20-27%)                     | 1600<br>(1400-1900)    | 67000<br>(57000-76000)    |
| Spain    | 2010 | Male   | 55 to 59 | 90%<br>(86-92%)                | 10%<br>(7.6-14%)         | 9.5<br>(7.3-12)                             | 15%<br>(13-18%)                      | 21%<br>(18-24%)                     | 1900<br>(1600-2200)    | 68000<br>(58000-79000)    |
| Spain    | 2010 | Male   | 60 to 64 | 89%<br>(85-92%)                | 11%<br>(8.2-15%)         | 9<br>(6.8-12)                               | 14%<br>(12-17%)                      | 18%<br>(16-21%)                     | 2300<br>(1900-2600)    | 70000<br>(58000-82000)    |
| Spain    | 2010 | Male   | 65 to 69 | 87%<br>(84-91%)                | 13%<br>(9.1-16%)         | 8<br>(6.1-10)                               | 13%<br>(11-15%)                      | 16%<br>(14-19%)                     | 2500<br>(2100-3000)    | 65000<br>(54000-76000)    |
| Spain    | 2010 | Male   | 70 to 74 | 85%<br>(81-89%)                | 15%<br>(11-19%)          | 6.9<br>(5.1-8.9)                            | 11%<br>(9.2-14%)                     | 14%<br>(11-17%)                     | 2800<br>(2300-3300)    | 57000<br>(47000-69000)    |
| Spain    | 2010 | Male   | 75 to 79 | 81%<br>(74-87%)                | 19%<br>(13-26%)          | 5.8<br>(4.3-7.8)                            | 9.8%<br>(7.5-12%)                    | 12%<br>(8.9-14%)                    | 3600<br>(2800-4500)    | 57000<br>(44000-71000)    |
| Spain    | 2010 | Male   | 80 to 84 | 75%<br>(64-83%)                | 25%<br>(17-36%)          | 4.7<br>(3.3-6.5)                            | 8.3%<br>(5.9-11%)                    | 9.6%<br>(6.7-12%)                   | 3500<br>(2500-4500)    | 40000<br>(28000-52000)    |
| Spain    | 2010 | Male   | 85 to 89 | 70%<br>(59-79%)                | 30%<br>(21-41%)          | 4<br>(2.7-5.8)                              | 7%<br>(4.7-9.4%)                     | 7.9%<br>(5.2-11%)                   | 2500<br>(1700-3400)    | 20000<br>(14000-28000)    |
| Spain    | 2010 | Male   | 90 to 94 | 69%<br>(57-78%)                | 31%<br>(22-43%)          | 3.7<br>(2.3-5.4)                            | 6%<br>(3.4-8.5%)                     | 6.7%<br>(3.7-9.6%)                  | 990<br>(540-1400)      | 5500<br>(3100-7900)       |

| Location | Year | Sex    | Age      | Prevalence of current drinkers | Prevalence of abstainers | Population average of standard drinks daily | Percent of total attributable deaths | Percent of total attributable DALYs | Attributable deaths    | Attributable DALYs        |
|----------|------|--------|----------|--------------------------------|--------------------------|---------------------------------------------|--------------------------------------|-------------------------------------|------------------------|---------------------------|
| Spain    | 2010 | Male   | 95 plus  | 69%<br>(53-81%)                | 31%<br>(19-47%)          | 3.5<br>(2-5.5)                              | 5.7%<br>(2.4-9.1%)                   | 6.2%<br>(2.4-10%)                   | 340<br>(130-560)       | 1300<br>(530-2000)        |
| Spain    | 2016 | Female | All Ages | 55%<br>(51-59%)                | 45%<br>(41-49%)          | 2.7<br>(1.9-3.7)                            | 3.9%<br>(2.6-5.6%)                   | 5.5%<br>(3.2-8.4%)                  | 12000<br>(6700-18000)  | 210000<br>(140000-300000) |
| Spain    | 2016 | Female | 15 to 19 | 55%<br>(42-67%)                | 45%<br>(33-58%)          | 2.1<br>(1.2-3.4)                            | 1.5%<br>(0.98-2.2%)                  | 7.3%<br>(3.9-12%)                   | 9.6<br>(5.1-15)        | 1500<br>(950-2200)        |
| Spain    | 2016 | Female | 20 to 24 | 66%<br>(53-77%)                | 34%<br>(23-47%)          | 2.8<br>(1.7-4.4)                            | 2.4%<br>(1.6-3.2%)                   | 9.9%<br>(5.7-15%)                   | 16<br>(9.3-25)         | 2800<br>(1900-4000)       |
| Spain    | 2016 | Female | 25 to 29 | 67%<br>(55-77%)                | 33%<br>(23-45%)          | 2.8<br>(1.7-4.3)                            | 2.1%<br>(1.4-3%)                     | 9.6%<br>(5.9-14%)                   | 21<br>(12-31)          | 3000<br>(2000-4300)       |
| Spain    | 2016 | Female | 30 to 34 | 66%<br>(54-76%)                | 34%<br>(24-46%)          | 2.8<br>(1.7-4.3)                            | 2.1%<br>(1.4-3%)                     | 10%<br>(6.5-14%)                    | 38<br>(24-55)          | 4100<br>(2800-5700)       |
| Spain    | 2016 | Female | 35 to 39 | 64%<br>(52-74%)                | 36%<br>(26-48%)          | 2.9<br>(1.8-4.4)                            | 2.6%<br>(1.8-3.6%)                   | 11%<br>(7.8-15%)                    | 90<br>(63-120)         | 7200<br>(4900-9700)       |
| Spain    | 2016 | Female | 40 to 44 | 64%<br>(53-73%)                | 36%<br>(27-47%)          | 3.3<br>(2.2-4.9)                            | 3.4%<br>(2.4-4.9%)                   | 12%<br>(9.1-16%)                    | 170<br>(130-220)       | 11000<br>(7600-14000)     |
| Spain    | 2016 | Female | 45 to 49 | 67%<br>(56-74%)                | 33%<br>(26-44%)          | 4<br>(2.5-5.8)                              | 4.7%<br>(3.2-6.6%)                   | 13%<br>(10-18%)                     | 310<br>(230-420)       | 16000<br>(11000-22000)    |
| Spain    | 2016 | Female | 50 to 54 | 67%<br>(59-74%)                | 33%<br>(26-41%)          | 4.3<br>(2.8-6.3)                            | 5.6%<br>(3.9-7.8%)                   | 13%<br>(9.9-18%)                    | 450<br>(320-610)       | 20000<br>(14000-28000)    |
| Spain    | 2016 | Female | 55 to 59 | 64%<br>(57-70%)                | 36%<br>(30-43%)          | 4.2<br>(2.7-6.2)                            | 5.9%<br>(4-8.3%)                     | 12%<br>(9.2-17%)                    | 540<br>(390-740)       | 21000<br>(15000-29000)    |
| Spain    | 2016 | Female | 60 to 64 | 59%<br>(51-67%)                | 41%<br>(33-49%)          | 3.8<br>(2.5-5.5)                            | 5.6%<br>(3.6-7.8%)                   | 11%<br>(7.6-15%)                    | 540<br>(380-740)       | 18000<br>(12000-26000)    |
| Spain    | 2016 | Female | 65 to 69 | 54%<br>(46-62%)                | 46%<br>(38-54%)          | 3.2<br>(2-4.7)                              | 5.1%<br>(3.2-7.4%)                   | 9.2%<br>(6.2-13%)                   | 690<br>(470-970)       | 20000<br>(12000-28000)    |
| Spain    | 2016 | Female | 70 to 74 | 46%<br>(37-56%)                | 54%<br>(44-63%)          | 2.6<br>(1.5-4)                              | 4.6%<br>(2.6-6.9%)                   | 7.5%<br>(4.6-11%)                   | 810<br>(510-1200)      | 18000<br>(11000-27000)    |
| Spain    | 2016 | Female | 75 to 79 | 39%<br>(29-49%)                | 61%<br>(51-71%)          | 2.1<br>(1.3-3.3)                            | 4%<br>(2.2-6.4%)                     | 5.7%<br>(3.3-8.8%)                  | 970<br>(560-1500)      | 16000<br>(9100-26000)     |
| Spain    | 2016 | Female | 80 to 84 | 36%<br>(26-46%)                | 64%<br>(54-74%)          | 1.9<br>(1.1-3)                              | 3.7%<br>(2-6.3%)                     | 4.9%<br>(2.6-8.2%)                  | 1800<br>(980-3100)     | 22000<br>(12000-37000)    |
| Spain    | 2016 | Female | 85 to 89 | 35%<br>(24-45%)                | 65%<br>(55-76%)          | 1.8<br>(1-3.1)                              | 3.6%<br>(1.6-6.3%)                   | 4.4%<br>(2-7.9%)                    | 2200<br>(1000-3900)    | 18000<br>(8200-32000)     |
| Spain    | 2016 | Female | 90 to 94 | 35%<br>(25-45%)                | 65%<br>(55-75%)          | 1.8<br>(0.98-3.2)                           | 3.4%<br>(1.3-6.3%)                   | 4%<br>(1.5-7.7%)                    | 1800<br>(670-3500)     | 10000<br>(3900-19000)     |
| Spain    | 2016 | Female | 95 plus  | 36%<br>(23-49%)                | 64%<br>(51-77%)          | 1.9<br>(0.92-3.4)                           | 3.7%<br>(1-7.2%)                     | 4.3%<br>(1-8.4%)                    | 980<br>(230-1900)      | 3400<br>(910-6600)        |
| Spain    | 2016 | Male   | All Ages | 78%<br>(74-82%)                | 22%<br>(18-26%)          | 5.8<br>(4.2-8)                              | 10%<br>(8.3-13%)                     | 12%<br>(9-15%)                      | 25000<br>(19000-31000) | 600000<br>(490000-710000) |
| Spain    | 2016 | Male   | 15 to 19 | 67%<br>(52-79%)                | 33%<br>(21-48%)          | 3.6<br>(2.2-5.5)                            | 4.8%<br>(3.2-6.6%)                   | 14%<br>(8.2-22%)                    | 37<br>(21-57)          | 4600<br>(3100-6400)       |
| Spain    | 2016 | Male   | 20 to 24 | 74%<br>(63-84%)                | 26%<br>(16-37%)          | 5.6<br>(3.6-8.3)                            | 11%<br>(7.5-14%)                     | 23%<br>(15-32%)                     | 100<br>(62-140)        | 12000<br>(8300-15000)     |

| Location | Year | Sex    | Age      | Prevalence of current drinkers | Prevalence of abstainers | Population average of standard drinks daily | Percent of total attributable deaths | Percent of total attributable DALYs | Attributable deaths | Attributable DALYs     |
|----------|------|--------|----------|--------------------------------|--------------------------|---------------------------------------------|--------------------------------------|-------------------------------------|---------------------|------------------------|
| Spain    | 2016 | Male   | 25 to 29 | 77%<br>(67-85%)                | 23%<br>(15-33%)          | 5.6<br>(3.6-8.1)                            | 9.5%<br>(6.8-12%)                    | 22%<br>(14-31%)                     | 110<br>(71-150)     | 12000<br>(8600-16000)  |
| Spain    | 2016 | Male   | 30 to 34 | 79%<br>(67-87%)                | 21%<br>(13-33%)          | 5.7<br>(3.7-8.2)                            | 8.3%<br>(5.9-11%)                    | 20%<br>(13-27%)                     | 160<br>(110-220)    | 14000<br>(10000-19000) |
| Spain    | 2016 | Male   | 35 to 39 | 81%<br>(72-88%)                | 19%<br>(12-28%)          | 6<br>(4-8.7)                                | 8.5%<br>(6.1-11%)                    | 20%<br>(14-26%)                     | 290<br>(200-380)    | 22000<br>(16000-28000) |
| Spain    | 2016 | Male   | 40 to 44 | 83%<br>(74-90%)                | 17%<br>(10-26%)          | 6.8<br>(4.6-9.7)                            | 10%<br>(7.6-13%)                     | 22%<br>(17-26%)                     | 560<br>(420-690)    | 32000<br>(25000-40000) |
| Spain    | 2016 | Male   | 45 to 49 | 86%<br>(80-91%)                | 14%<br>(8.5-20%)         | 8.1<br>(5.6-12)                             | 13%<br>(10-16%)                      | 23%<br>(19-27%)                     | 1000<br>(830-1200)  | 49000<br>(40000-58000) |
| Spain    | 2016 | Male   | 50 to 54 | 89%<br>(84-93%)                | 11%<br>(7.2-16%)         | 9<br>(6.2-13)                               | 14%<br>(12-17%)                      | 23%<br>(19-26%)                     | 1500<br>(1300-1800) | 64000<br>(53000-74000) |
| Spain    | 2016 | Male   | 55 to 59 | 90%<br>(86-93%)                | 10%<br>(7.2-14%)         | 9.3<br>(6.4-13)                             | 14%<br>(12-17%)                      | 21%<br>(18-24%)                     | 2000<br>(1600-2300) | 70000<br>(58000-83000) |
| Spain    | 2016 | Male   | 60 to 64 | 89%<br>(86-92%)                | 11%<br>(7.5-14%)         | 9<br>(6.1-13)                               | 14%<br>(11-16%)                      | 19%<br>(16-22%)                     | 2100<br>(1700-2500) | 65000<br>(53000-77000) |
| Spain    | 2016 | Male   | 65 to 69 | 88%<br>(84-91%)                | 12%<br>(8.7-16%)         | 8<br>(5.6-11)                               | 12%<br>(10-15%)                      | 16%<br>(13-19%)                     | 2600<br>(2100-3200) | 68000<br>(55000-81000) |
| Spain    | 2016 | Male   | 70 to 74 | 86%<br>(82-90%)                | 14%<br>(10-18%)          | 7<br>(4.7-10)                               | 11%<br>(8.3-13%)                     | 14%<br>(11-17%)                     | 2800<br>(2100-3500) | 58000<br>(45000-71000) |
| Spain    | 2016 | Male   | 75 to 79 | 83%<br>(76-89%)                | 17%<br>(11-24%)          | 6.1<br>(4.1-8.9)                            | 9.6%<br>(6.8-12%)                    | 11%<br>(8.3-15%)                    | 2800<br>(2000-3600) | 45000<br>(32000-57000) |
| Spain    | 2016 | Male   | 80 to 84 | 79%<br>(69-86%)                | 21%<br>(14-31%)          | 5.2<br>(3.3-7.6)                            | 8.3%<br>(5.4-11%)                    | 9.6%<br>(6.3-13%)                   | 3800<br>(2500-5200) | 45000<br>(29000-59000) |
| Spain    | 2016 | Male   | 85 to 89 | 74%<br>(63-83%)                | 26%<br>(17-37%)          | 4.4<br>(2.7-6.9)                            | 7.1%<br>(4-9.9%)                     | 8.1%<br>(4.5-11%)                   | 3100<br>(1700-4300) | 25000<br>(14000-35000) |
| Spain    | 2016 | Male   | 90 to 94 | 73%<br>(62-82%)                | 27%<br>(18-38%)          | 4.1<br>(2.4-6.4)                            | 6.2%<br>(3-9.3%)                     | 7%<br>(3.3-11%)                     | 1700<br>(800-2700)  | 9500<br>(4700-14000)   |
| Spain    | 2016 | Male   | 95 plus  | 73%<br>(58-83%)                | 27%<br>(17-42%)          | 3.8<br>(2.1-6.2)                            | 5.9%<br>(2-9.7%)                     | 6.5%<br>(2-11%)                     | 450<br>(140-760)    | 1600<br>(550-2700)     |
| Sweden   | 1990 | Female | All Ages | 86%<br>(84-88%)                | 14%<br>(12-16%)          | 3<br>(2.5-3.4)                              | 4.5%<br>(2.4-7%)                     | 5.5%<br>(1.2-11%)                   | 2600<br>(540-5000)  | 56000<br>(31000-85000) |
| Sweden   | 1990 | Female | 15 to 19 | 81%<br>(73-87%)                | 19%<br>(13-27%)          | 2.5<br>(1.6-3.6)                            | 2.9%<br>(1.9-4.4%)                   | 12%<br>(6.2-18%)                    | 8.6<br>(4.6-13)     | 880<br>(540-1300)      |
| Sweden   | 1990 | Female | 20 to 24 | 87%<br>(80-92%)                | 13%<br>(8-20%)           | 3<br>(1.8-4.5)                              | 3.9%<br>(2.6-5.6%)                   | 13%<br>(6.6-21%)                    | 12<br>(6-19)        | 1400<br>(940-2000)     |
| Sweden   | 1990 | Female | 25 to 29 | 90%<br>(84-93%)                | 10%<br>(6.6-16%)         | 2.8<br>(1.8-4)                              | 3.6%<br>(2.2-5.1%)                   | 12%<br>(5.6-18%)                    | 15<br>(6.9-23)      | 1500<br>(910-2100)     |
| Sweden   | 1990 | Female | 30 to 34 | 91%<br>(85-95%)                | 8.8%<br>(5.2-15%)        | 2.8<br>(1.8-4)                              | 3.2%<br>(1.9-4.6%)                   | 11%<br>(5.6-18%)                    | 17<br>(8.3-26)      | 1400<br>(800-2000)     |
| Sweden   | 1990 | Female | 35 to 39 | 91%<br>(87-95%)                | 8.5%<br>(5.3-13%)        | 2.9<br>(1.8-4.1)                            | 3.6%<br>(2.1-5.3%)                   | 12%<br>(6.5-17%)                    | 28<br>(15-40)       | 1800<br>(1000-2600)    |
| Sweden   | 1990 | Female | 40 to 44 | 92%<br>(87-95%)                | 8.3%<br>(5-13%)          | 3.3<br>(2.2-4.6)                            | 4.5%<br>(2.7-6.4%)                   | 13%<br>(8.3-17%)                    | 53<br>(34-72)       | 2900<br>(1800-4100)    |

| Location | Year | Sex    | Age      | Prevalence of current drinkers | Prevalence of abstainers | Population average of standard drinks daily | Percent of total attributable deaths | Percent of total attributable DALYs | Attributable deaths | Attributable DALYs     |
|----------|------|--------|----------|--------------------------------|--------------------------|---------------------------------------------|--------------------------------------|-------------------------------------|---------------------|------------------------|
| Sweden   | 1990 | Female | 45 to 49 | 92%<br>(87-95%)                | 8%<br>(4.8-13%)          | 4.1<br>(2.7-5.9)                            | 5.9%<br>(3.8-8.6%)                   | 14%<br>(9.6-19%)                    | 85<br>(57-120)      | 4000<br>(2600-5700)    |
| Sweden   | 1990 | Female | 50 to 54 | 92%<br>(88-95%)                | 7.7%<br>(4.6-12%)        | 4.7<br>(3.2-6.5)                            | 6.6%<br>(4.3-9.3%)                   | 14%<br>(9.9-18%)                    | 95<br>(67-130)      | 4000<br>(2700-5500)    |
| Sweden   | 1990 | Female | 55 to 59 | 93%<br>(89-96%)                | 7.3%<br>(4.3-11%)        | 5.1<br>(3.6-7.2)                            | 7.5%<br>(4.8-11%)                    | 13%<br>(8.9-19%)                    | 140<br>(92-190)     | 5000<br>(3200-7100)    |
| Sweden   | 1990 | Female | 60 to 64 | 92%<br>(87-95%)                | 8.1%<br>(4.8-13%)        | 5.1<br>(3.4-7.4)                            | 7%<br>(3.5-11%)                      | 11%<br>(6-17%)                      | 190<br>(100-290)    | 5800<br>(2900-8900)    |
| Sweden   | 1990 | Female | 65 to 69 | 90%<br>(85-94%)                | 9.7%<br>(5.7-15%)        | 4.6<br>(3.3-6)                              | 6%<br>(2.8-9.4%)                     | 8.7%<br>(4-14%)                     | 250<br>(120-400)    | 6500<br>(3000-10000)   |
| Sweden   | 1990 | Female | 70 to 74 | 88%<br>(82-92%)                | 12%<br>(8.3-18%)         | 3.9<br>(2.6-5.4)                            | 4.9%<br>(1.9-1%)                     | 6.6%<br>(1.5-12%)                   | 290<br>(64-550)     | 6000<br>(1300-11000)   |
| Sweden   | 1990 | Female | 75 to 79 | 84%<br>(77-90%)                | 16%<br>(10-23%)          | 3.4<br>(2.1-4.9)                            | 4%<br>(-0.57-9.2%)                   | 5%<br>(-0.81-11%)                   | 350<br>(-56-810)    | 5600<br>(-760-13000)   |
| Sweden   | 1990 | Female | 80 to 84 | 82%<br>(73-88%)                | 18%<br>(12-27%)          | 3.3<br>(2.2-4.5)                            | 3.7%<br>(-0.76-8.8%)                 | 4.3%<br>(-1.3-11%)                  | 410<br>(-130-1000)  | 4900<br>(-950-12000)   |
| Sweden   | 1990 | Female | 85 to 89 | 80%<br>(73-86%)                | 20%<br>(14-27%)          | 3.2<br>(2.1-4.6)                            | 3.5%<br>(-0.84-8.8%)                 | 3.9%<br>(-1.4-10%)                  | 360<br>(-130-980)   | 3000<br>(-750-7600)    |
| Sweden   | 1990 | Female | 90 to 94 | 80%<br>(71-86%)                | 20%<br>(14-29%)          | 3.2<br>(2-4.8)                              | 3.1%<br>(-1.5-9%)                    | 3.4%<br>(-2.2-11%)                  | 190<br>(-120-580)   | 1100<br>(-480-3100)    |
| Sweden   | 1990 | Female | 95 plus  | 78%<br>(67-87%)                | 22%<br>(13-33%)          | 3.1<br>(1.6-5)                              | 3.1%<br>(-2.4-10%)                   | 3.4%<br>(-3.2-12%)                  | 65<br>(-62-230)     | 250<br>(-190-820)      |
| Sweden   | 1990 | Male   | All Ages | 86%<br>(84-88%)                | 14%<br>(12-16%)          | 2.3<br>(2-2.6)                              | 4.4%<br>(2.3-6.7%)                   | 2.5%<br>(-0.87-6%)                  | 1200<br>(-420-2900) | 60000<br>(31000-90000) |
| Sweden   | 1990 | Male   | 15 to 19 | 77%<br>(67-85%)                | 23%<br>(15-33%)          | 1.5<br>(0.94-2.2)                           | 5.3%<br>(3.3-7.6%)                   | 9.2%<br>(4.4-15%)                   | 16<br>(7.8-26)      | 1800<br>(1100-2500)    |
| Sweden   | 1990 | Male   | 20 to 24 | 86%<br>(78-92%)                | 14%<br>(8.3-22%)         | 2.2<br>(1.4-3.2)                            | 10%<br>(7.1-14%)                     | 13%<br>(6.9-21%)                    | 34<br>(18-55)       | 4100<br>(2800-5800)    |
| Sweden   | 1990 | Male   | 25 to 29 | 90%<br>(84-94%)                | 10%<br>(6-16%)           | 2.4<br>(1.5-3.4)                            | 9.9%<br>(6.9-13%)                    | 14%<br>(6.8-20%)                    | 40<br>(20-61)       | 4400<br>(3000-5900)    |
| Sweden   | 1990 | Male   | 30 to 34 | 92%<br>(86-96%)                | 7.8%<br>(4.2-14%)        | 2.4<br>(1.5-3.5)                            | 8.8%<br>(6-12%)                      | 13%<br>(7.1-20%)                    | 44<br>(24-66)       | 4100<br>(2800-5600)    |
| Sweden   | 1990 | Male   | 35 to 39 | 93%<br>(88-96%)                | 7.2%<br>(4-12%)          | 2.3<br>(1.4-3.3)                            | 8.4%<br>(6.1-11%)                    | 13%<br>(8.2-19%)                    | 58<br>(36-83)       | 4500<br>(3200-5900)    |
| Sweden   | 1990 | Male   | 40 to 44 | 93%<br>(89-96%)                | 6.8%<br>(3.7-11%)        | 2.5<br>(1.6-3.5)                            | 8.7%<br>(6.4-11%)                    | 14%<br>(9.3-18%)                    | 98<br>(65-130)      | 6100<br>(4500-7800)    |
| Sweden   | 1990 | Male   | 45 to 49 | 94%<br>(89-96%)                | 6.5%<br>(3.7-11%)        | 3.1<br>(2-4.5)                              | 8.6%<br>(5.8-12%)                    | 13%<br>(8.1-18%)                    | 130<br>(79-180)     | 6600<br>(4500-8900)    |
| Sweden   | 1990 | Male   | 50 to 54 | 94%<br>(90-97%)                | 6.1%<br>(3.4-10%)        | 3.7<br>(2.6-5.1)                            | 8.1%<br>(5.2-12%)                    | 11%<br>(6.6-16%)                    | 130<br>(78-190)     | 5900<br>(3800-8400)    |
| Sweden   | 1990 | Male   | 55 to 59 | 94%<br>(91-97%)                | 5.7%<br>(3.2-9.5%)       | 4.3<br>(2.9-5.9)                            | 7.7%<br>(4.1-12%)                    | 9.6%<br>(4.5-16%)                   | 180<br>(83-290)     | 6600<br>(3500-10000)   |
| Sweden   | 1990 | Male   | 60 to 64 | 94%<br>(90-97%)                | 6.2%<br>(3.3-10%)        | 4.3<br>(2.9-6.2)                            | 6%<br>(1.8-11%)                      | 7%<br>(1.6-14%)                     | 210<br>(47-400)     | 6700<br>(2000-12000)   |

| Location | Year | Sex    | Age      | Prevalence of current drinkers | Prevalence of abstainers | Population average of standard drinks daily | Percent of total attributable deaths | Percent of total attributable DALYs | Attributable deaths | Attributable DALYs     |
|----------|------|--------|----------|--------------------------------|--------------------------|---------------------------------------------|--------------------------------------|-------------------------------------|---------------------|------------------------|
| Sweden   | 1990 | Male   | 65 to 69 | 93%<br>(88-96%)                | 7.3%<br>(4-12%)          | 3.8<br>(2.8-5)                              | 3.5%<br>(0.032-7.3%)                 | 3.7%<br>(-0.83-8.6%)                | 180<br>(-42-420)    | 5100<br>(47-11000)     |
| Sweden   | 1990 | Male   | 70 to 74 | 91%<br>(86-94%)                | 9.4%<br>(5.9-14%)        | 3.2<br>(2.2-4.4)                            | 1.7%<br>(-2.5-7%)                    | 1.5%<br>(-2.9-6.3%)                 | 100<br>(-200-440)   | 2700<br>(-3100-9000)   |
| Sweden   | 1990 | Male   | 75 to 79 | 88%<br>(81-93%)                | 12%<br>(7.3-19%)         | 2.8<br>(1.8-4)                              | 0.81%<br>(-2.8-4.7%)                 | 0.5%<br>(-3.7-5%)                   | 45<br>(-330-450)    | 1200<br>(-4300-7300)   |
| Sweden   | 1990 | Male   | 80 to 84 | 85%<br>(77-91%)                | 15%<br>(8.9-23%)         | 2.7<br>(1.8-3.6)                            | 0.3%<br>(-2.9-3.8%)                  | -0.073%<br>(-3.8-3.9%)              | -6.7<br>(-350-360)  | 330<br>(-3200-4300)    |
| Sweden   | 1990 | Male   | 85 to 89 | 84%<br>(76-90%)                | 16%<br>(10-24%)          | 2.5<br>(1.7-3.5)                            | 0.045%<br>(-3-3.4%)                  | -0.34%<br>(-3.8-3.5%)               | -21<br>(-230-210)   | 24<br>(-1500-1800)     |
| Sweden   | 1990 | Male   | 90 to 94 | 84%<br>(75-90%)                | 16%<br>(10-25%)          | 2.4<br>(1.5-3.6)                            | -0.088%<br>(-3.2-3.6%)               | -0.5%<br>(-4.2-3.8%)                | -13<br>(-110-94)    | -13<br>(-490-540)      |
| Sweden   | 1990 | Male   | 95 plus  | 83%<br>(73-90%)                | 17%<br>(9.7-27%)         | 2.3<br>(1.3-3.8)                            | 0.05%<br>(-3.1-4.8%)                 | -0.36%<br>(-4.1-5.1%)               | -2.3<br>(-26-33)    | 1.3<br>(-81-120)       |
| Sweden   | 1995 | Female | All Ages | 86%<br>(83-88%)                | 14%<br>(12-17%)          | 3.2<br>(2.7-3.7)                            | 5%<br>(3-7.4%)                       | 6.5%<br>(2-12%)                     | 3000<br>(940-5500)  | 62000<br>(36000-90000) |
| Sweden   | 1995 | Female | 15 to 19 | 80%<br>(72-87%)                | 20%<br>(13-28%)          | 2.6<br>(1.7-3.8)                            | 2.8%<br>(1.8-4.1%)                   | 12%<br>(6.2-18%)                    | 6.5<br>(3.4-10)     | 730<br>(450-1000)      |
| Sweden   | 1995 | Female | 20 to 24 | 87%<br>(79-92%)                | 13%<br>(8.3-21%)         | 3.2<br>(1.9-4.8)                            | 4.2%<br>(2.8-5.9%)                   | 14%<br>(6.9-21%)                    | 11<br>(5.4-17)      | 1500<br>(920-2000)     |
| Sweden   | 1995 | Female | 25 to 29 | 89%<br>(84-93%)                | 11%<br>(6.6-16%)         | 3<br>(2-4.3)                                | 3.6%<br>(2.4-4.9%)                   | 12%<br>(6-18%)                      | 12<br>(6-18)        | 1500<br>(980-2100)     |
| Sweden   | 1995 | Female | 30 to 34 | 91%<br>(85-95%)                | 8.9%<br>(5.2-15%)        | 3<br>(2-4.4)                                | 3.2%<br>(2.1-4.6%)                   | 11%<br>(5.9-17%)                    | 16<br>(8.1-24)      | 1500<br>(930-2100)     |
| Sweden   | 1995 | Female | 35 to 39 | 92%<br>(87-95%)                | 8.5%<br>(5.1-13%)        | 3.1<br>(1.9-4.6)                            | 3.5%<br>(2-5%)                       | 12%<br>(7.2-18%)                    | 24<br>(14-34)       | 1700<br>(1000-2400)    |
| Sweden   | 1995 | Female | 40 to 44 | 92%<br>(87-95%)                | 8.2%<br>(5-13%)          | 3.6<br>(2.4-5)                              | 4.4%<br>(2.8-6.2%)                   | 14%<br>(9.2-18%)                    | 44<br>(29-58)       | 2500<br>(1600-3400)    |
| Sweden   | 1995 | Female | 45 to 49 | 92%<br>(87-95%)                | 7.8%<br>(4.8-13%)        | 4.4<br>(2.9-6.2)                            | 5.9%<br>(3.9-8.4%)                   | 15%<br>(11-20%)                     | 89<br>(63-120)      | 4400<br>(3000-6000)    |
| Sweden   | 1995 | Female | 50 to 54 | 92%<br>(87-95%)                | 7.6%<br>(4.6-13%)        | 5.1<br>(3.6-6.8)                            | 7%<br>(4.8-9.7%)                     | 15%<br>(11-19%)                     | 120<br>(92-170)     | 5300<br>(3700-7300)    |
| Sweden   | 1995 | Female | 55 to 59 | 93%<br>(89-96%)                | 7.3%<br>(4.3-11%)        | 5.6<br>(3.9-7.8)                            | 7.7%<br>(5.1-11%)                    | 14%<br>(9.8-19%)                    | 140<br>(97-190)     | 5200<br>(3500-7200)    |
| Sweden   | 1995 | Female | 60 to 64 | 92%<br>(87-95%)                | 8.1%<br>(4.8-13%)        | 5.6<br>(3.7-8)                              | 7.5%<br>(4.2-11%)                    | 12%<br>(7.4-18%)                    | 180<br>(110-260)    | 5700<br>(3300-8300)    |
| Sweden   | 1995 | Female | 65 to 69 | 90%<br>(85-94%)                | 9.8%<br>(5.9-15%)        | 4.9<br>(3.6-6.5)                            | 6.6%<br>(3.4-9.9%)                   | 9.8%<br>(5.2-14%)                   | 230<br>(130-350)    | 6200<br>(3200-9100)    |
| Sweden   | 1995 | Female | 70 to 74 | 88%<br>(82-92%)                | 12%<br>(8.5-18%)         | 4.2<br>(2.8-5.8)                            | 5.6%<br>(2-9.8%)                     | 7.8%<br>(3-14%)                     | 330<br>(120-570)    | 6800<br>(2400-12000)   |
| Sweden   | 1995 | Female | 75 to 79 | 84%<br>(77-90%)                | 16%<br>(10-23%)          | 3.7<br>(2.3-5.3)                            | 4.9%<br>(0.54-10%)                   | 6.2%<br>(0.65-13%)                  | 400<br>(42-830)     | 6400<br>(740-13000)    |
| Sweden   | 1995 | Female | 80 to 84 | 82%<br>(73-88%)                | 18%<br>(12-27%)          | 3.6<br>(2.4-4.9)                            | 4.7%<br>(0.19-9.6%)                  | 5.6%<br>(0.016-12%)                 | 520<br>(1.5-1100)   | 6100<br>(250-13000)    |

| Location | Year | Sex    | Age      | Prevalence of current drinkers | Prevalence of abstainers | Population average of standard drinks daily | Percent of total attributable deaths | Percent of total attributable DALYs | Attributable deaths | Attributable DALYs     |
|----------|------|--------|----------|--------------------------------|--------------------------|---------------------------------------------|--------------------------------------|-------------------------------------|---------------------|------------------------|
| Sweden   | 1995 | Female | 85 to 89 | 80%<br>(72-86%)                | 20%<br>(14-28%)          | 3.5<br>(2.3-5)                              | 4.3%<br>(0.068-9.8%)                 | 5%<br>(-0.27-12%)                   | 510<br>(-28-1200)   | 4200<br>(71-9400)      |
| Sweden   | 1995 | Female | 90 to 94 | 79%<br>(71-86%)                | 21%<br>(14-29%)          | 3.4<br>(2.2-5.2)                            | 3.9%<br>(-0.7-10%)                   | 4.4%<br>(-1.3-12%)                  | 290<br>(-85-780)    | 1700<br>(-300-4100)    |
| Sweden   | 1995 | Female | 95 plus  | 78%<br>(67-87%)                | 22%<br>(13-33%)          | 3.3<br>(1.8-5.4)                            | 3.9%<br>(-1.6-11%)                   | 4.3%<br>(-2.1-13%)                  | 100<br>(-51-310)    | 390<br>(-160-1100)     |
| Sweden   | 1995 | Male   | All Ages | 86%<br>(83-88%)                | 14%<br>(12-17%)          | 2.5<br>(2.1-2.8)                            | 5.2%<br>(3.2-7.3%)                   | 3.4%<br>(0.2-6.7%)                  | 1600<br>(96-3200)   | 67000<br>(40000-95000) |
| Sweden   | 1995 | Male   | 15 to 19 | 77%<br>(67-85%)                | 23%<br>(15-33%)          | 1.6<br>(0.99-2.3)                           | 4.7%<br>(3-6.8%)                     | 9.3%<br>(4.5-15%)                   | 10<br>(4.9-16)      | 1200<br>(790-1800)     |
| Sweden   | 1995 | Male   | 20 to 24 | 86%<br>(78-92%)                | 14%<br>(8.1-22%)         | 2.3<br>(1.5-3.5)                            | 9.9%<br>(7-13%)                      | 13%<br>(6.7-21%)                    | 26<br>(13-41)       | 3500<br>(2300-4900)    |
| Sweden   | 1995 | Male   | 25 to 29 | 90%<br>(83-94%)                | 10%<br>(5.9-17%)         | 2.5<br>(1.6-3.7)                            | 9.5%<br>(6.8-12%)                    | 13%<br>(6.6-20%)                    | 31<br>(15-47)       | 4000<br>(2600-5200)    |
| Sweden   | 1995 | Male   | 30 to 34 | 92%<br>(86-96%)                | 7.9%<br>(4.1-14%)        | 2.6<br>(1.7-3.7)                            | 8.5%<br>(6-11%)                      | 13%<br>(6.8-20%)                    | 39<br>(20-59)       | 4000<br>(2700-5300)    |
| Sweden   | 1995 | Male   | 35 to 39 | 93%<br>(88-96%)                | 7.3%<br>(4-12%)          | 2.4<br>(1.6-3.6)                            | 8.3%<br>(6-11%)                      | 13%<br>(8.1-19%)                    | 51<br>(31-74)       | 4200<br>(3000-5500)    |
| Sweden   | 1995 | Male   | 40 to 44 | 93%<br>(89-96%)                | 6.9%<br>(3.7-11%)        | 2.7<br>(1.8-3.8)                            | 8.8%<br>(6.5-11%)                    | 14%<br>(9.3-19%)                    | 81<br>(53-110)      | 5400<br>(3900-6900)    |
| Sweden   | 1995 | Male   | 45 to 49 | 93%<br>(89-96%)                | 6.5%<br>(3.6-11%)        | 3.3<br>(2.1-4.7)                            | 9.1%<br>(6.4-12%)                    | 14%<br>(9.1-19%)                    | 130<br>(85-180)     | 7300<br>(5100-9600)    |
| Sweden   | 1995 | Male   | 50 to 54 | 94%<br>(90-97%)                | 6.1%<br>(3.4-10%)        | 3.9<br>(2.8-5.4)                            | 9.2%<br>(6.4-12%)                    | 13%<br>(8.7-18%)                    | 180<br>(120-250)    | 8200<br>(5700-11000)   |
| Sweden   | 1995 | Male   | 55 to 59 | 94%<br>(90-97%)                | 5.7%<br>(3.2-9.6%)       | 4.6<br>(3.2-6.4)                            | 8.9%<br>(5.3-13%)                    | 12%<br>(6.6-18%)                    | 200<br>(110-300)    | 7600<br>(4700-11000)   |
| Sweden   | 1995 | Male   | 60 to 64 | 94%<br>(90-96%)                | 6.2%<br>(3.5-10%)        | 4.7<br>(3.1-6.6)                            | 7.3%<br>(3.3-12%)                    | 8.9%<br>(3.4-15%)                   | 220<br>(86-370)     | 7100<br>(3300-12000)   |
| Sweden   | 1995 | Male   | 65 to 69 | 93%<br>(88-96%)                | 7.5%<br>(4.2-12%)        | 4.1<br>(3-5.4)                              | 4.8%<br>(1.4-8.4%)                   | 5.4%<br>(0.99-10%)                  | 210<br>(40-410)     | 5800<br>(1700-11000)   |
| Sweden   | 1995 | Male   | 70 to 74 | 90%<br>(85-94%)                | 9.6%<br>(6-15%)          | 3.5<br>(2.3-4.7)                            | 2.8%<br>(-0.86-6.7%)                 | 2.8%<br>(-1.4-7.6%)                 | 180<br>(-97-490)    | 4200<br>(-1300-10000)  |
| Sweden   | 1995 | Male   | 75 to 79 | 87%<br>(80-93%)                | 13%<br>(7.4-20%)         | 3<br>(1.9-4.3)                              | 1.7%<br>(-1.7-5.7%)                  | 1.6%<br>(-2.5-6.3%)                 | 130<br>(-210-510)   | 2500<br>(-2600-8100)   |
| Sweden   | 1995 | Male   | 80 to 84 | 85%<br>(76-91%)                | 15%<br>(9.2-24%)         | 2.8<br>(1.9-3.9)                            | 1.1%<br>(-2.2-4.6%)                  | 0.83%<br>(-3-4.8%)                  | 75<br>(-280-430)    | 1300<br>(-2500-5200)   |
| Sweden   | 1995 | Male   | 85 to 89 | 84%<br>(75-89%)                | 16%<br>(11-25%)          | 2.7<br>(1.8-3.8)                            | 0.82%<br>(-2.1-4.2%)                 | 0.53%<br>(-3-4.3%)                  | 37<br>(-210-300)    | 510<br>(-1300-2600)    |
| Sweden   | 1995 | Male   | 90 to 94 | 83%<br>(75-89%)                | 17%<br>(11-25%)          | 2.6<br>(1.6-3.9)                            | 0.65%<br>(-2.4-4.6%)                 | 0.34%<br>(-3.3-4.8%)                | 11<br>(-100-150)    | 120<br>(-460-830)      |
| Sweden   | 1995 | Male   | 95 plus  | 83%<br>(72-90%)                | 17%<br>(9.8-28%)         | 2.5<br>(1.3-4.1)                            | 0.76%<br>(-2.7-5.8%)                 | 0.45%<br>(-3.5-6.2%)                | 3.3<br>(-26-47)     | 23<br>(-82-170)        |
| Sweden   | 2000 | Female | All Ages | 86%<br>(83-88%)                | 14%<br>(12-17%)          | 3.3<br>(2.9-3.8)                            | 5.2%<br>(3.3-7.5%)                   | 7%<br>(2.7-12%)                     | 3400<br>(1300-5800) | 64000<br>(40000-90000) |

| Location | Year | Sex    | Age      | Prevalence of current drinkers | Prevalence of abstainers | Population average of standard drinks daily | Percent of total attributable deaths | Percent of total attributable DALYs | Attributable deaths | Attributable DALYs      |
|----------|------|--------|----------|--------------------------------|--------------------------|---------------------------------------------|--------------------------------------|-------------------------------------|---------------------|-------------------------|
| Sweden   | 2000 | Female | 15 to 19 | 80%<br>(72-87%)                | 20%<br>(13-28%)          | 2.7<br>(1.7-3.8)                            | 2.8%<br>(1.7-4.1%)                   | 12%<br>(6.1-18%)                    | 6.5<br>(3.4-10)     | 710<br>(440-1000)       |
| Sweden   | 2000 | Female | 20 to 24 | 86%<br>(79-92%)                | 14%<br>(8.4-21%)         | 3.3<br>(2-4.9)                              | 3.9%<br>(2.6-5.4%)                   | 14%<br>(6.9-21%)                    | 8.7<br>(4.4-13)     | 1200<br>(750-1600)      |
| Sweden   | 2000 | Female | 25 to 29 | 89%<br>(84-93%)                | 11%<br>(6.8-16%)         | 3.1<br>(2-4.6)                              | 3.2%<br>(2.2-4.4%)                   | 12%<br>(6.3-18%)                    | 9.4<br>(4.8-14)     | 1200<br>(790-1700)      |
| Sweden   | 2000 | Female | 30 to 34 | 91%<br>(85-95%)                | 8.9%<br>(5.1-15%)        | 3.1<br>(2-4.5)                              | 2.8%<br>(1.8-3.9%)                   | 12%<br>(6.4-17%)                    | 12<br>(6.7-18)      | 1200<br>(810-1700)      |
| Sweden   | 2000 | Female | 35 to 39 | 91%<br>(87-95%)                | 8.6%<br>(5.1-13%)        | 3.2<br>(2-4.7)                              | 3.3%<br>(2-4.8%)                     | 13%<br>(7.3-18%)                    | 23<br>(13-33)       | 1700<br>(1000-2400)     |
| Sweden   | 2000 | Female | 40 to 44 | 92%<br>(87-95%)                | 8.2%<br>(5-13%)          | 3.7<br>(2.5-5.2)                            | 4.2%<br>(2.7-6%)                     | 14%<br>(9.7-19%)                    | 39<br>(26-52)       | 2300<br>(1500-3200)     |
| Sweden   | 2000 | Female | 45 to 49 | 92%<br>(87-95%)                | 7.8%<br>(4.8-13%)        | 4.5<br>(3-6.5)                              | 5.8%<br>(3.8-8.1%)                   | 15%<br>(11-20%)                     | 75<br>(54-99)       | 3700<br>(2500-5000)     |
| Sweden   | 2000 | Female | 50 to 54 | 93%<br>(88-95%)                | 7.5%<br>(4.6-12%)        | 5.3<br>(3.7-7.1)                            | 6.9%<br>(4.8-9.5%)                   | 15%<br>(11-19%)                     | 130<br>(99-170)     | 5600<br>(4000-7600)     |
| Sweden   | 2000 | Female | 55 to 59 | 93%<br>(89-96%)                | 7.3%<br>(4.3-11%)        | 5.8<br>(4-8)                                | 7.8%<br>(5.4-11%)                    | 14%<br>(11-19%)                     | 180<br>(130-240)    | 6700<br>(4600-9000)     |
| Sweden   | 2000 | Female | 60 to 64 | 92%<br>(87-95%)                | 8.2%<br>(4.8-13%)        | 5.8<br>(3.9-8.1)                            | 7.7%<br>(4.7-11%)                    | 13%<br>(8.3-18%)                    | 190<br>(120-270)    | 6000<br>(3700-8500)     |
| Sweden   | 2000 | Female | 65 to 69 | 90%<br>(84-94%)                | 10%<br>(5.8-16%)         | 5.1<br>(3.7-6.7)                            | 6.9%<br>(4.2-9.9%)                   | 10%<br>(6.5-14%)                    | 220<br>(140-310)    | 5800<br>(3400-8200)     |
| Sweden   | 2000 | Female | 70 to 74 | 87%<br>(81-91%)                | 13%<br>(8.9-19%)         | 4.3<br>(2.9-6)                              | 5.9%<br>(2.5-9.8%)                   | 8.3%<br>(3.7-14%)                   | 290<br>(130-480)    | 6100<br>(2700-10000)    |
| Sweden   | 2000 | Female | 75 to 79 | 83%<br>(75-89%)                | 17%<br>(11-25%)          | 3.7<br>(2.3-5.5)                            | 5.2%<br>(1.1-9.9%)                   | 6.7%<br>(1.5-13%)                   | 420<br>(93-790)     | 6800<br>(1500-13000)    |
| Sweden   | 2000 | Female | 80 to 84 | 80%<br>(71-87%)                | 20%<br>(13-29%)          | 3.6<br>(2.4-5)                              | 5.1%<br>(0.85-9.9%)                  | 6.1%<br>(0.84-12%)                  | 560<br>(75-1100)    | 6600<br>(1100-13000)    |
| Sweden   | 2000 | Female | 85 to 89 | 79%<br>(71-86%)                | 21%<br>(14-29%)          | 3.5<br>(2.3-5)                              | 4.9%<br>(0.71-10%)                   | 5.7%<br>(0.54-12%)                  | 620<br>(59-1300)    | 5100<br>(760-10000)     |
| Sweden   | 2000 | Female | 90 to 94 | 79%<br>(70-85%)                | 21%<br>(15-30%)          | 3.5<br>(2.2-5.3)                            | 4.5%<br>(-0.034-10%)                 | 5.1%<br>(-0.42-12%)                 | 410<br>(-34-960)    | 2300<br>(-17-5200)      |
| Sweden   | 2000 | Female | 95 plus  | 78%<br>(66-87%)                | 22%<br>(13-34%)          | 3.4<br>(1.9-5.5)                            | 4.5%<br>(-1-11%)                     | 5%<br>(-1.4-13%)                    | 160<br>(-47-430)    | 600<br>(-130-1500)      |
| Sweden   | 2000 | Male   | All Ages | 86%<br>(84-89%)                | 14%<br>(11-16%)          | 2.7<br>(2.3-3.1)                            | 6%<br>(4.1-8%)                       | 4.8%<br>(1.6-8.4%)                  | 2200<br>(740-3800)  | 74000<br>(51000-100000) |
| Sweden   | 2000 | Male   | 15 to 19 | 77%<br>(67-85%)                | 23%<br>(15-33%)          | 1.7<br>(1.1-2.6)                            | 4.6%<br>(2.9-6.6%)                   | 9.8%<br>(4.9-15%)                   | 11<br>(5.5-17)      | 1200<br>(780-1800)      |
| Sweden   | 2000 | Male   | 20 to 24 | 86%<br>(79-92%)                | 14%<br>(8-21%)           | 2.5<br>(1.6-3.9)                            | 9.4%<br>(6.3-13%)                    | 14%<br>(7.2-21%)                    | 27<br>(14-41)       | 3100<br>(2000-4200)     |
| Sweden   | 2000 | Male   | 25 to 29 | 90%<br>(84-94%)                | 9.7%<br>(5.8-16%)        | 2.8<br>(1.8-4)                              | 8.7%<br>(6.2-11%)                    | 14%<br>(7.2-21%)                    | 30<br>(15-45)       | 3300<br>(2200-4400)     |
| Sweden   | 2000 | Male   | 30 to 34 | 93%<br>(87-96%)                | 7.4%<br>(4-13%)          | 2.8<br>(1.8-4.1)                            | 7.7%<br>(5.4-10%)                    | 14%<br>(8-21%)                      | 35<br>(19-52)       | 3400<br>(2300-4500)     |

| Location | Year | Sex    | Age      | Prevalence of current drinkers | Prevalence of abstainers | Population average of standard drinks daily | Percent of total attributable deaths | Percent of total attributable DALYs | Attributable deaths | Attributable DALYs     |
|----------|------|--------|----------|--------------------------------|--------------------------|---------------------------------------------|--------------------------------------|-------------------------------------|---------------------|------------------------|
| Sweden   | 2000 | Male   | 35 to 39 | 93%<br>(89-96%)                | 7%<br>(4-11%)            | 2.7<br>(1.7-4)                              | 7.8%<br>(5.6-10%)                    | 15%<br>(9-21%)                      | 48<br>(30-68)       | 3800<br>(2700-5100)    |
| Sweden   | 2000 | Male   | 40 to 44 | 93%<br>(89-96%)                | 6.6%<br>(3.6-11%)        | 2.9<br>(1.9-4.2)                            | 8.7%<br>(6.4-11%)                    | 16%<br>(11-21%)                     | 74<br>(50-98)       | 4700<br>(3500-6000)    |
| Sweden   | 2000 | Male   | 45 to 49 | 94%<br>(90-96%)                | 6.3%<br>(3.5-10%)        | 3.6<br>(2.3-5.2)                            | 9.7%<br>(6.8-13%)                    | 16%<br>(11-22%)                     | 120<br>(84-160)     | 6400<br>(4600-8500)    |
| Sweden   | 2000 | Male   | 50 to 54 | 94%<br>(90-97%)                | 5.9%<br>(3.3-9.8%)       | 4.3<br>(3-5.7)                              | 10%<br>(7.5-13%)                     | 16%<br>(11-21%)                     | 210<br>(150-280)    | 9300<br>(6700-12000)   |
| Sweden   | 2000 | Male   | 55 to 59 | 95%<br>(91-97%)                | 5.5%<br>(3.1-9.1%)       | 5<br>(3.5-6.8)                              | 10%<br>(7.1-14%)                     | 15%<br>(9.9-20%)                    | 280<br>(190-380)    | 10000<br>(7200-14000)  |
| Sweden   | 2000 | Male   | 60 to 64 | 94%<br>(90-97%)                | 5.9%<br>(3.2-9.7%)       | 5.1<br>(3.5-7.1)                            | 8.9%<br>(5.1-13%)                    | 12%<br>(6.4-17%)                    | 270<br>(150-410)    | 8700<br>(5000-13000)   |
| Sweden   | 2000 | Male   | 65 to 69 | 93%<br>(88-96%)                | 7.1%<br>(4-12%)          | 4.5<br>(3.3-5.8)                            | 6.3%<br>(3-9.7%)                     | 7.6%<br>(3.3-12%)                   | 250<br>(110-410)    | 6800<br>(3200-11000)   |
| Sweden   | 2000 | Male   | 70 to 74 | 91%<br>(86-94%)                | 9.4%<br>(5.9-14%)        | 3.8<br>(2.5-5.2)                            | 4.1%<br>(0.53-8.1%)                  | 4.6%<br>(0.11-9.4%)                 | 240<br>(6-490)      | 5200<br>(720-10000)    |
| Sweden   | 2000 | Male   | 75 to 79 | 87%<br>(80-93%)                | 13%<br>(7.4-20%)         | 3.3<br>(2.1-4.7)                            | 2.9%<br>(-0.57-7.1%)                 | 3%<br>(-1.1-8%)                     | 240<br>(-89-640)    | 4100<br>(-800-10000)   |
| Sweden   | 2000 | Male   | 80 to 84 | 85%<br>(76-91%)                | 15%<br>(9.2-24%)         | 3.1<br>(2.1-4.2)                            | 2.1%<br>(-1.4-5.9%)                  | 2%<br>(-2.1-6.4%)                   | 180<br>(-180-570)   | 2400<br>(-1500-6700)   |
| Sweden   | 2000 | Male   | 85 to 89 | 83%<br>(75-89%)                | 17%<br>(11-25%)          | 2.9<br>(1.9-4.1)                            | 1.8%<br>(-1.3-5.3%)                  | 1.6%<br>(-1.9-5.6%)                 | 120<br>(-150-420)   | 1200<br>(-910-3600)    |
| Sweden   | 2000 | Male   | 90 to 94 | 83%<br>(74-89%)                | 17%<br>(11-26%)          | 2.8<br>(1.7-4.2)                            | 1.5%<br>(-1.6-5.7%)                  | 1.4%<br>(-2.2-6.1%)                 | 52<br>(-86-230)     | 350<br>(-380-1300)     |
| Sweden   | 2000 | Male   | 95 plus  | 83%<br>(72-90%)                | 17%<br>(9.8-28%)         | 2.7<br>(1.4-4.4)                            | 1.6%<br>(-2-6.8%)                    | 1.4%<br>(-2.7-7.4%)                 | 13<br>(-26-71)      | 61<br>(-76-260)        |
| Sweden   | 2005 | Female | All Ages | 86%<br>(84-88%)                | 14%<br>(12-16%)          | 3.3<br>(2.9-3.8)                            | 5%<br>(3.3-6.9%)                     | 6.6%<br>(2.9-11%)                   | 3200<br>(1400-5400) | 60000<br>(39000-83000) |
| Sweden   | 2005 | Female | 15 to 19 | 80%<br>(72-87%)                | 20%<br>(13-28%)          | 2.6<br>(1.7-3.8)                            | 2.5%<br>(1.5-3.7%)                   | 11%<br>(5.6-18%)                    | 6.5<br>(3.3-10)     | 740<br>(440-1100)      |
| Sweden   | 2005 | Female | 20 to 24 | 87%<br>(80-92%)                | 13%<br>(8.1-20%)         | 3.1<br>(1.9-4.8)                            | 3.8%<br>(2.4-5.5%)                   | 14%<br>(6.1-22%)                    | 9.2<br>(4.2-15)     | 1200<br>(740-1700)     |
| Sweden   | 2005 | Female | 25 to 29 | 90%<br>(84-94%)                | 10%<br>(6.5-16%)         | 3<br>(2-4.4)                                | 3.1%<br>(2-4.2%)                     | 12%<br>(5.5-18%)                    | 8.2<br>(3.9-13)     | 1100<br>(690-1500)     |
| Sweden   | 2005 | Female | 30 to 34 | 91%<br>(86-95%)                | 8.8%<br>(5.3-14%)        | 3<br>(2-4.4)                                | 2.8%<br>(1.8-3.9%)                   | 11%<br>(6.2-17%)                    | 12<br>(6.6-18)      | 1200<br>(780-1700)     |
| Sweden   | 2005 | Female | 35 to 39 | 92%<br>(87-95%)                | 8.5%<br>(5.2-13%)        | 3.1<br>(1.9-4.6)                            | 3%<br>(1.8-4.3%)                     | 12%<br>(7-17%)                      | 21<br>(12-30)       | 1500<br>(930-2200)     |
| Sweden   | 2005 | Female | 40 to 44 | 92%<br>(87-95%)                | 8.2%<br>(4.9-13%)        | 3.6<br>(2.4-5.1)                            | 3.8%<br>(2.4-5.3%)                   | 14%<br>(9.2-18%)                    | 35<br>(24-46)       | 2100<br>(1300-2900)    |
| Sweden   | 2005 | Female | 45 to 49 | 92%<br>(87-95%)                | 7.8%<br>(4.7-13%)        | 4.5<br>(2.9-6.5)                            | 5.2%<br>(3.4-7.5%)                   | 15%<br>(11-20%)                     | 63<br>(45-84)       | 3200<br>(2100-4400)    |
| Sweden   | 2005 | Female | 50 to 54 | 92%<br>(88-96%)                | 7.5%<br>(4.4-12%)        | 5.2<br>(3.6-7.1)                            | 6.7%<br>(4.6-9.1%)                   | 15%<br>(11-19%)                     | 110<br>(80-140)     | 4700<br>(3300-6300)    |



| Location | Year | Sex    | Age      | Prevalence of current drinkers | Prevalence of abstainers | Population average of standard drinks daily | Percent of total attributable deaths | Percent of total attributable DALYs | Attributable deaths | Attributable DALYs     |
|----------|------|--------|----------|--------------------------------|--------------------------|---------------------------------------------|--------------------------------------|-------------------------------------|---------------------|------------------------|
| Sweden   | 2005 | Female | 55 to 59 | 93%<br>(89-96%)                | 7.2%<br>(4.3-11%)        | 5.7<br>(4.1-7.7)                            | 7.4%<br>(5.1-10%)                    | 14%<br>(11-18%)                     | 180<br>(140-230)    | 6800<br>(4800-9000)    |
| Sweden   | 2005 | Female | 60 to 64 | 92%<br>(87-95%)                | 8%<br>(4.7-13%)          | 5.7<br>(3.9-8)                              | 7.4%<br>(4.7-10%)                    | 12%<br>(8.5-17%)                    | 220<br>(150-300)    | 7000<br>(4600-9700)    |
| Sweden   | 2005 | Female | 65 to 69 | 90%<br>(85-94%)                | 9.8%<br>(5.7-15%)        | 5<br>(3.7-6.6)                              | 6.6%<br>(4.9-2%)                     | 10%<br>(6.5-13%)                    | 210<br>(140-290)    | 5700<br>(3500-8000)    |
| Sweden   | 2005 | Female | 70 to 74 | 87%<br>(81-91%)                | 13%<br>(8.5-19%)         | 4.2<br>(2.8-5.8)                            | 5.7%<br>(2.7-9%)                     | 8%<br>(4.1-12%)                     | 250<br>(120-390)    | 5300<br>(2500-8400)    |
| Sweden   | 2005 | Female | 75 to 79 | 83%<br>(75-89%)                | 17%<br>(11-25%)          | 3.7<br>(2.3-5.4)                            | 5%<br>(1.2-9.2%)                     | 6.5%<br>(1.8-12%)                   | 340<br>(94-610)     | 5500<br>(1400-10000)   |
| Sweden   | 2005 | Female | 80 to 84 | 80%<br>(70-87%)                | 20%<br>(13-30%)          | 3.5<br>(2.3-4.9)                            | 4.7%<br>(0.93-9.2%)                  | 5.8%<br>(0.99-11%)                  | 520<br>(87-1000)    | 6100<br>(1200-12000)   |
| Sweden   | 2005 | Female | 85 to 89 | 78%<br>(69-85%)                | 22%<br>(15-31%)          | 3.4<br>(2.2-4.8)                            | 4.5%<br>(0.92-9.1%)                  | 5.3%<br>(0.83-11%)                  | 570<br>(88-1200)    | 4800<br>(950-9500)     |
| Sweden   | 2005 | Female | 90 to 94 | 77%<br>(68-85%)                | 23%<br>(15-32%)          | 3.3<br>(2.1-5)                              | 4.2%<br>(0.27-9.6%)                  | 4.8%<br>(-0.019-11%)                | 410<br>(-1.6-990)   | 2300<br>(140-5300)     |
| Sweden   | 2005 | Female | 95 plus  | 77%<br>(64-86%)                | 23%<br>(14-36%)          | 3.2<br>(1.7-5.2)                            | 4.2%<br>(-0.89-11%)                  | 4.7%<br>(-1.2-13%)                  | 190<br>(-49-510)    | 710<br>(-140-1800)     |
| Sweden   | 2005 | Male   | All Ages | 87%<br>(85-89%)                | 13%<br>(11-15%)          | 2.7<br>(2.4-3.2)                            | 6.1%<br>(4.4-8.1%)                   | 4.9%<br>(2.1-8.3%)                  | 2200<br>(920-3700)  | 74000<br>(52000-97000) |
| Sweden   | 2005 | Male   | 15 to 19 | 78%<br>(68-85%)                | 22%<br>(15-32%)          | 1.7<br>(1-2.6)                              | 4.4%<br>(2.9-6.3%)                   | 9.4%<br>(4.5-15%)                   | 11<br>(5.1-17)      | 1300<br>(850-1900)     |
| Sweden   | 2005 | Male   | 20 to 24 | 87%<br>(79-92%)                | 13%<br>(7.8-21%)         | 2.5<br>(1.6-3.8)                            | 9.3%<br>(6.3-12%)                    | 13%<br>(6.6-20%)                    | 26<br>(13-39)       | 3100<br>(2000-4200)    |
| Sweden   | 2005 | Male   | 25 to 29 | 91%<br>(85-94%)                | 9.3%<br>(5.5-15%)        | 2.7<br>(1.7-4)                              | 8.6%<br>(6.1-11%)                    | 14%<br>(6.9-20%)                    | 26<br>(13-40)       | 3000<br>(2100-4100)    |
| Sweden   | 2005 | Male   | 30 to 34 | 93%<br>(87-96%)                | 7.1%<br>(3.9-13%)        | 2.8<br>(1.7-4.1)                            | 7.2%<br>(5.1-9.4%)                   | 14%<br>(7.4-20%)                    | 27<br>(15-40)       | 2900<br>(2000-3800)    |
| Sweden   | 2005 | Male   | 35 to 39 | 93%<br>(89-96%)                | 6.7%<br>(3.7-11%)        | 2.6<br>(1.6-3.8)                            | 7.1%<br>(5.1-9.3%)                   | 14%<br>(8.3-20%)                    | 40<br>(23-56)       | 3400<br>(2400-4500)    |
| Sweden   | 2005 | Male   | 40 to 44 | 94%<br>(90-96%)                | 6.3%<br>(3.5-10%)        | 2.9<br>(1.9-4.1)                            | 8.1%<br>(6-10%)                      | 15%<br>(10-20%)                     | 68<br>(46-90)       | 4500<br>(3300-5800)    |
| Sweden   | 2005 | Male   | 45 to 49 | 94%<br>(90-97%)                | 5.9%<br>(3.5-10%)        | 3.5<br>(2.2-5.1)                            | 9.3%<br>(6.7-12%)                    | 16%<br>(11-22%)                     | 110<br>(74-150)     | 5800<br>(4200-7700)    |
| Sweden   | 2005 | Male   | 50 to 54 | 94%<br>(91-97%)                | 5.6%<br>(3.2-9.2%)       | 4.2<br>(3-5.7)                              | 10%<br>(7.6-13%)                     | 16%<br>(12-21%)                     | 180<br>(130-240)    | 8000<br>(5800-10000)   |
| Sweden   | 2005 | Male   | 55 to 59 | 95%<br>(92-97%)                | 5.3%<br>(3-8.5%)         | 4.9<br>(3.5-6.7)                            | 10%<br>(7.4-14%)                     | 15%<br>(11-20%)                     | 290<br>(200-380)    | 11000<br>(7900-15000)  |
| Sweden   | 2005 | Male   | 60 to 64 | 94%<br>(91-97%)                | 5.7%<br>(3.2-9.3%)       | 5<br>(3.5-7)                                | 9.2%<br>(5.8-13%)                    | 12%<br>(7.6-17%)                    | 330<br>(210-470)    | 11000<br>(6900-15000)  |
| Sweden   | 2005 | Male   | 65 to 69 | 93%<br>(89-96%)                | 6.8%<br>(3.8-11%)        | 4.4<br>(3.3-5.7)                            | 6.7%<br>(3.6-9.9%)                   | 8.2%<br>(4.3-12%)                   | 280<br>(140-420)    | 7400<br>(4000-11000)   |
| Sweden   | 2005 | Male   | 70 to 74 | 91%<br>(86-94%)                | 9%<br>(5.9-14%)          | 3.8<br>(2.6-5.2)                            | 4.5%<br>(1.2-8.3%)                   | 5.2%<br>(1.1-9.7%)                  | 230<br>(48-440)     | 5100<br>(1300-9200)    |

| Location | Year | Sex    | Age      | Prevalence of current drinkers | Prevalence of abstainers | Population average of standard drinks daily | Percent of total attributable deaths | Percent of total attributable DALYs | Attributable deaths | Attributable DALYs     |
|----------|------|--------|----------|--------------------------------|--------------------------|---------------------------------------------|--------------------------------------|-------------------------------------|---------------------|------------------------|
| Sweden   | 2005 | Male   | 75 to 79 | 88%<br>(81-93%)                | 12%<br>(7.4-19%)         | 3.3<br>(2.1-4.8)                            | 3%<br>(-0.057-7.1%)                  | 3.2%<br>(-0.48-8.1%)                | 210<br>(-31-520)    | 3700<br>(-64-8500)     |
| Sweden   | 2005 | Male   | 80 to 84 | 85%<br>(76-91%)                | 15%<br>(9.2-24%)         | 3<br>(2.1-4.1)                              | 2.1%<br>(-0.99-5.8%)                 | 2%<br>(-1.6-6.3%)                   | 180<br>(-150-560)   | 2500<br>(-1200-6800)   |
| Sweden   | 2005 | Male   | 85 to 89 | 83%<br>(75-89%)                | 17%<br>(11-25%)          | 2.8<br>(1.9-4)                              | 1.8%<br>(-0.99-5%)                   | 1.7%<br>(-1.5-5.4%)                 | 130<br>(-120-420)   | 1300<br>(-690-3600)    |
| Sweden   | 2005 | Male   | 90 to 94 | 82%<br>(73-89%)                | 18%<br>(11-27%)          | 2.7<br>(1.7-4)                              | 1.6%<br>(-1.3-5.4%)                  | 1.4%<br>(-1.9-5.8%)                 | 60<br>(-79-250)     | 410<br>(-340-1400)     |
| Sweden   | 2005 | Male   | 95 plus  | 82%<br>(71-90%)                | 18%<br>(10-29%)          | 2.6<br>(1.4-4.3)                            | 1.6%<br>(-1.8-6.4%)                  | 1.4%<br>(-2.6-7%)                   | 17<br>(-30-84)      | 78<br>(-87-310)        |
| Sweden   | 2010 | Female | All Ages | 86%<br>(84-88%)                | 14%<br>(12-16%)          | 3.2<br>(2.6-3.7)                            | 4.4%<br>(2.8-6.1%)                   | 5.8%<br>(2.4-9.8%)                  | 2700<br>(1100-4500) | 53000<br>(34000-74000) |
| Sweden   | 2010 | Female | 15 to 19 | 80%<br>(72-87%)                | 20%<br>(13-28%)          | 2.4<br>(1.5-3.5)                            | 2.3%<br>(1.4-3.5%)                   | 10%<br>(4.6-17%)                    | 6.1<br>(2.7-9.8)    | 730<br>(440-1100)      |
| Sweden   | 2010 | Female | 20 to 24 | 87%<br>(79-92%)                | 13%<br>(8.1-21%)         | 2.9<br>(1.8-4.5)                            | 3.6%<br>(2.4-5.3%)                   | 13%<br>(5.6-21%)                    | 9.2<br>(3.9-15)     | 1300<br>(790-1800)     |
| Sweden   | 2010 | Female | 25 to 29 | 90%<br>(84-93%)                | 10%<br>(6.5-16%)         | 2.8<br>(1.8-4.2)                            | 3%<br>(2-4.2%)                       | 11%<br>(5.2-17%)                    | 8.1<br>(3.8-13)     | 1100<br>(720-1600)     |
| Sweden   | 2010 | Female | 30 to 34 | 91%<br>(86-95%)                | 8.6%<br>(5.1-14%)        | 2.8<br>(1.8-4.2)                            | 2.6%<br>(1.7-3.8%)                   | 11%<br>(5.8-17%)                    | 9.9<br>(5.2-15)     | 1100<br>(680-1600)     |
| Sweden   | 2010 | Female | 35 to 39 | 92%<br>(87-95%)                | 8.3%<br>(5-13%)          | 3<br>(1.8-4.2)                              | 2.7%<br>(1.7-3.9%)                   | 12%<br>(6.7-16%)                    | 17<br>(9.7-24)      | 1300<br>(810-1900)     |
| Sweden   | 2010 | Female | 40 to 44 | 92%<br>(88-95%)                | 8%<br>(4.9-12%)          | 3.4<br>(2.2-4.8)                            | 3.3%<br>(2.1-4.8%)                   | 13%<br>(8.6-17%)                    | 30<br>(20-40)       | 1900<br>(1200-2700)    |
| Sweden   | 2010 | Female | 45 to 49 | 92%<br>(88-95%)                | 7.6%<br>(4.7-12%)        | 4.2<br>(2.8-6.2)                            | 4.7%<br>(3-6.8%)                     | 15%<br>(10-20%)                     | 56<br>(40-76)       | 2900<br>(1900-4100)    |
| Sweden   | 2010 | Female | 50 to 54 | 93%<br>(88-95%)                | 7.3%<br>(4.5-12%)        | 4.9<br>(3.4-6.8)                            | 6%<br>(3.9-8.4%)                     | 14%<br>(11-19%)                     | 89<br>(66-120)      | 4000<br>(2700-5500)    |
| Sweden   | 2010 | Female | 55 to 59 | 93%<br>(89-96%)                | 7.1%<br>(4.3-11%)        | 5.4<br>(3.7-7.3)                            | 6.7%<br>(4.4-9.3%)                   | 13%<br>(9.8-18%)                    | 130<br>(95-170)     | 5100<br>(3400-7000)    |
| Sweden   | 2010 | Female | 60 to 64 | 92%<br>(87-95%)                | 7.9%<br>(4.8-13%)        | 5.4<br>(3.6-7.6)                            | 6.6%<br>(4.2-9.6%)                   | 11%<br>(7.9-16%)                    | 200<br>(140-280)    | 6700<br>(4100-9500)    |
| Sweden   | 2010 | Female | 65 to 69 | 90%<br>(85-94%)                | 9.7%<br>(5.7-15%)        | 4.8<br>(3.4-6.3)                            | 5.9%<br>(3.6-8.3%)                   | 9.2%<br>(6.2-12%)                   | 220<br>(150-310)    | 6100<br>(3800-8600)    |
| Sweden   | 2010 | Female | 70 to 74 | 88%<br>(82-91%)                | 12%<br>(8.6-18%)         | 4<br>(2.6-5.7)                              | 5%<br>(2.4-8.2%)                     | 7.3%<br>(4.1-11%)                   | 220<br>(120-350)    | 4800<br>(2300-7700)    |
| Sweden   | 2010 | Female | 75 to 79 | 84%<br>(76-89%)                | 16%<br>(11-24%)          | 3.5<br>(2.2-5.2)                            | 4.3%<br>(0.94-8%)                    | 5.8%<br>(1.6-10%)                   | 260<br>(72-470)     | 4300<br>(980-8100)     |
| Sweden   | 2010 | Female | 80 to 84 | 81%<br>(71-87%)                | 19%<br>(13-29%)          | 3.3<br>(2.2-4.6)                            | 4%<br>(0.59-8%)                      | 5%<br>(0.58-10%)                    | 370<br>(42-750)     | 4500<br>(660-9000)     |
| Sweden   | 2010 | Female | 85 to 89 | 78%<br>(69-85%)                | 22%<br>(15-31%)          | 3.2<br>(2.1-4.5)                            | 3.9%<br>(0.59-7.7%)                  | 4.6%<br>(0.54-9.2%)                 | 500<br>(59-1000)    | 4200<br>(620-8400)     |
| Sweden   | 2010 | Female | 90 to 94 | 77%<br>(68-85%)                | 23%<br>(15-32%)          | 3.1<br>(1.9-4.6)                            | 3.6%<br>(-0.11-8.1%)                 | 4.1%<br>(-0.41-9.6%)                | 370<br>(-38-870)    | 2100<br>(-68-4700)     |

| Location | Year | Sex    | Age      | Prevalence of current drinkers | Prevalence of abstainers | Population average of standard drinks daily | Percent of total attributable deaths | Percent of total attributable DALYs | Attributable deaths | Attributable DALYs     |
|----------|------|--------|----------|--------------------------------|--------------------------|---------------------------------------------|--------------------------------------|-------------------------------------|---------------------|------------------------|
| Sweden   | 2010 | Female | 95 plus  | 77%<br>(65-86%)                | 23%<br>(14-35%)          | 3<br>(1.6-4.9)                              | 3.7%<br>(-0.96-9.4%)                 | 4.1%<br>(-1.3-11%)                  | 190<br>(-59-510)    | 700<br>(-170-1800)     |
| Sweden   | 2010 | Male   | All Ages | 87%<br>(85-89%)                | 13%<br>(11-15%)          | 2.7<br>(2.2-3.1)                            | 5.8%<br>(4.2-7.5%)                   | 4.6%<br>(2-7.6%)                    | 2000<br>(870-3300)  | 71000<br>(50000-92000) |
| Sweden   | 2010 | Male   | 15 to 19 | 77%<br>(67-85%)                | 23%<br>(15-33%)          | 1.6<br>(0.97-2.4)                           | 4.3%<br>(2.9-6.1%)                   | 8.9%<br>(3.9-14%)                   | 9.7<br>(4.3-16)     | 1300<br>(870-1900)     |
| Sweden   | 2010 | Male   | 20 to 24 | 86%<br>(78-92%)                | 14%<br>(8-22%)           | 2.4<br>(1.5-3.6)                            | 9.3%<br>(6.5-12%)                    | 12%<br>(5.6-20%)                    | 25<br>(12-41)       | 3600<br>(2300-4900)    |
| Sweden   | 2010 | Male   | 25 to 29 | 90%<br>(84-94%)                | 9.8%<br>(5.8-16%)        | 2.6<br>(1.6-3.8)                            | 8.7%<br>(6.1-11%)                    | 12%<br>(6-19%)                      | 26<br>(13-41)       | 3300<br>(2200-4500)    |
| Sweden   | 2010 | Male   | 30 to 34 | 93%<br>(87-96%)                | 7.3%<br>(4-13%)          | 2.6<br>(1.7-3.9)                            | 7.2%<br>(5.1-9.5%)                   | 13%<br>(6.5-19%)                    | 25<br>(13-38)       | 2800<br>(2000-3800)    |
| Sweden   | 2010 | Male   | 35 to 39 | 93%<br>(89-96%)                | 6.7%<br>(3.8-11%)        | 2.5<br>(1.6-3.7)                            | 6.7%<br>(4.9-8.7%)                   | 13%<br>(7.5-18%)                    | 32<br>(18-45)       | 3100<br>(2200-4000)    |
| Sweden   | 2010 | Male   | 40 to 44 | 94%<br>(90-96%)                | 6.3%<br>(3.6-10%)        | 2.7<br>(1.8-3.9)                            | 7.4%<br>(5.4-9.5%)                   | 14%<br>(9.3-19%)                    | 55<br>(36-74)       | 4000<br>(2900-5100)    |
| Sweden   | 2010 | Male   | 45 to 49 | 94%<br>(90-96%)                | 6%<br>(3.6-9.8%)         | 3.4<br>(2.2-5)                              | 8.5%<br>(6.1-11%)                    | 15%<br>(10-21%)                     | 95<br>(64-130)      | 5400<br>(3800-7200)    |
| Sweden   | 2010 | Male   | 50 to 54 | 94%<br>(91-97%)                | 5.6%<br>(3.2-9.2%)       | 4<br>(2.8-5.5)                              | 9.5%<br>(6.9-13%)                    | 15%<br>(11-21%)                     | 150<br>(110-200)    | 7000<br>(5100-9100)    |
| Sweden   | 2010 | Male   | 55 to 59 | 95%<br>(91-97%)                | 5.3%<br>(3-8.6%)         | 4.7<br>(3.3-6.5)                            | 9.9%<br>(6.9-13%)                    | 15%<br>(10-20%)                     | 230<br>(160-310)    | 8800<br>(6200-12000)   |
| Sweden   | 2010 | Male   | 60 to 64 | 94%<br>(91-97%)                | 5.7%<br>(3.2-9.2%)       | 4.8<br>(3.2-6.8)                            | 8.8%<br>(5.6-13%)                    | 12%<br>(7.6-17%)                    | 330<br>(200-470)    | 11000<br>(6800-15000)  |
| Sweden   | 2010 | Male   | 65 to 69 | 93%<br>(89-96%)                | 6.8%<br>(3.8-11%)        | 4.2<br>(3.1-5.6)                            | 6.6%<br>(3.8-9.7%)                   | 8.4%<br>(4.8-12%)                   | 320<br>(180-470)    | 8600<br>(5000-13000)   |
| Sweden   | 2010 | Male   | 70 to 74 | 91%<br>(87-94%)                | 8.9%<br>(5.7-13%)        | 3.6<br>(2.4-5)                              | 4.4%<br>(1.6-7.6%)                   | 5.2%<br>(1.7-9.2%)                  | 230<br>(74-400)     | 5000<br>(1900-8700)    |
| Sweden   | 2010 | Male   | 75 to 79 | 88%<br>(82-93%)                | 12%<br>(7.3-18%)         | 3.1<br>(2-4.5)                              | 2.9%<br>(0.22-6.3%)                  | 3.1%<br>(-0.11-7.2%)                | 180<br>(-6.2-410)   | 3200<br>(230-7000)     |
| Sweden   | 2010 | Male   | 80 to 84 | 85%<br>(78-91%)                | 15%<br>(9-22%)           | 2.9<br>(1.9-4)                              | 1.9%<br>(-0.82-5%)                   | 1.8%<br>(-1.4-5.6%)                 | 140<br>(-110-430)   | 2000<br>(-860-5300)    |
| Sweden   | 2010 | Male   | 85 to 89 | 83%<br>(74-89%)                | 17%<br>(11-26%)          | 2.7<br>(1.8-3.8)                            | 1.6%<br>(-0.92-4.6%)                 | 1.5%<br>(-1.5-4.9%)                 | 130<br>(-120-420)   | 1300<br>(-710-3600)    |
| Sweden   | 2010 | Male   | 90 to 94 | 82%<br>(73-89%)                | 18%<br>(11-27%)          | 2.6<br>(1.6-3.9)                            | 1.4%<br>(-1.2-5.1%)                  | 1.3%<br>(-1.8-5.6%)                 | 63<br>(-88-270)     | 430<br>(-360-1500)     |
| Sweden   | 2010 | Male   | 95 plus  | 82%<br>(71-90%)                | 18%<br>(10-29%)          | 2.5<br>(1.3-4.1)                            | 1.5%<br>(-1.6-6%)                    | 1.4%<br>(-2.2-6.6%)                 | 19<br>(-32-94)      | 87<br>(-96-360)        |
| Sweden   | 2016 | Female | All Ages | 86%<br>(84-88%)                | 14%<br>(12-16%)          | 3.2<br>(2.3-4.2)                            | 4.5%<br>(2.6-6.8%)                   | 6.2%<br>(2-11%)                     | 2900<br>(930-5300)  | 56000<br>(31000-88000) |
| Sweden   | 2016 | Female | 15 to 19 | 80%<br>(72-87%)                | 20%<br>(13-28%)          | 2.4<br>(1.4-3.8)                            | 2.2%<br>(1.3-3.4%)                   | 11%<br>(4.5-18%)                    | 4.4<br>(1.8-7.6)    | 560<br>(320-820)       |
| Sweden   | 2016 | Female | 20 to 24 | 87%<br>(80-92%)                | 13%<br>(8.2-20%)         | 3<br>(1.7-4.9)                              | 3.6%<br>(2.3-5.3%)                   | 13%<br>(5.4-22%)                    | 10<br>(4.1-18)      | 1400<br>(880-2100)     |

| Location | Year | Sex    | Age      | Prevalence of current drinkers | Prevalence of abstainers | Population average of standard drinks daily | Percent of total attributable deaths | Percent of total attributable DALYs | Attributable deaths | Attributable DALYs      |
|----------|------|--------|----------|--------------------------------|--------------------------|---------------------------------------------|--------------------------------------|-------------------------------------|---------------------|-------------------------|
| Sweden   | 2016 | Female | 25 to 29 | 89%<br>(84-93%)                | 11%<br>(6.6-16%)         | 2.9<br>(1.7-4.5)                            | 3.1%<br>(2-4.3%)                     | 11%<br>(5-18%)                      | 9.8<br>(4.1-16)     | 1300<br>(830-1900)      |
| Sweden   | 2016 | Female | 30 to 34 | 91%<br>(86-95%)                | 8.8%<br>(5-14%)          | 2.9<br>(1.7-4.5)                            | 2.7%<br>(1.7-4%)                     | 11%<br>(5.5-18%)                    | 11<br>(5.4-18)      | 1200<br>(710-1700)      |
| Sweden   | 2016 | Female | 35 to 39 | 92%<br>(87-95%)                | 8.4%<br>(5.1-13%)        | 3<br>(1.8-4.7)                              | 2.8%<br>(1.6-4.1%)                   | 12%<br>(6.7-18%)                    | 15<br>(8.3-23)      | 1200<br>(740-1800)      |
| Sweden   | 2016 | Female | 40 to 44 | 92%<br>(87-95%)                | 8.1%<br>(4.9-13%)        | 3.5<br>(2.1-5.3)                            | 3.5%<br>(2.1-5.1%)                   | 14%<br>(8.7-19%)                    | 30<br>(19-44)       | 1900<br>(1100-2800)     |
| Sweden   | 2016 | Female | 45 to 49 | 92%<br>(87-95%)                | 7.7%<br>(4.7-13%)        | 4.3<br>(2.5-6.6)                            | 4.7%<br>(2.8-7.1%)                   | 15%<br>(9.9-21%)                    | 60<br>(39-86)       | 3100<br>(1900-4700)     |
| Sweden   | 2016 | Female | 50 to 54 | 93%<br>(88-95%)                | 7.4%<br>(4.5-12%)        | 5<br>(3.1-7.3)                              | 5.9%<br>(3.6-8.6%)                   | 15%<br>(11-20%)                     | 94<br>(64-130)      | 4200<br>(2600-6100)     |
| Sweden   | 2016 | Female | 55 to 59 | 93%<br>(89-96%)                | 7.2%<br>(4.3-11%)        | 5.5<br>(3.5-8.4)                            | 6.7%<br>(4-9.7%)                     | 14%<br>(9.7-19%)                    | 130<br>(87-180)     | 5100<br>(3000-7600)     |
| Sweden   | 2016 | Female | 60 to 64 | 92%<br>(87-95%)                | 8%<br>(4.8-13%)          | 5.5<br>(3.4-8.3)                            | 6.7%<br>(3.6-10%)                    | 12%<br>(7.6-17%)                    | 170<br>(110-250)    | 5800<br>(3200-8800)     |
| Sweden   | 2016 | Female | 65 to 69 | 90%<br>(85-94%)                | 9.7%<br>(5.7-15%)        | 4.9<br>(3.3-7)                              | 6%<br>(3.3-9.3%)                     | 9.5%<br>(5.9-14%)                   | 260<br>(160-390)    | 7300<br>(4000-11000)    |
| Sweden   | 2016 | Female | 70 to 74 | 88%<br>(82-91%)                | 12%<br>(8.6-18%)         | 4.1<br>(2.6-6.2)                            | 5.1%<br>(2.2-8.8%)                   | 7.6%<br>(3.8-12%)                   | 280<br>(140-460)    | 6100<br>(2600-11000)    |
| Sweden   | 2016 | Female | 75 to 79 | 84%<br>(76-89%)                | 16%<br>(11-24%)          | 3.6<br>(2.2-5.4)                            | 4.5%<br>(0.93-8.6%)                  | 6.1%<br>(1.6-11%)                   | 280<br>(71-550)     | 4800<br>(1000-9200)     |
| Sweden   | 2016 | Female | 80 to 84 | 81%<br>(71-87%)                | 19%<br>(13-29%)          | 3.4<br>(2-4.9)                              | 4.3%<br>(0.55-8.9%)                  | 5.5%<br>(0.67-11%)                  | 370<br>(45-810)     | 4500<br>(580-9700)      |
| Sweden   | 2016 | Female | 85 to 89 | 78%<br>(69-85%)                | 22%<br>(15-31%)          | 3.2<br>(2-5)                                | 4.2%<br>(0.32-9%)                    | 5.1%<br>(0.18-11%)                  | 500<br>(17-1100)    | 4200<br>(310-9200)      |
| Sweden   | 2016 | Female | 90 to 94 | 78%<br>(68-85%)                | 22%<br>(15-32%)          | 3.2<br>(1.9-5.1)                            | 3.9%<br>(-0.23-9.2%)                 | 4.6%<br>(-0.5-11%)                  | 470<br>(-53-1200)   | 2700<br>(-150-6300)     |
| Sweden   | 2016 | Female | 95 plus  | 77%<br>(66-86%)                | 23%<br>(14-34%)          | 3.1<br>(1.5-5.2)                            | 4%<br>(-0.95-11%)                    | 4.5%<br>(-1.3-13%)                  | 230<br>(-62-630)    | 820<br>(-180-2200)      |
| Sweden   | 2016 | Male   | All Ages | 87%<br>(85-89%)                | 13%<br>(11-15%)          | 2.7<br>(2-3.6)                              | 5.7%<br>(3.7-8.2%)                   | 5.1%<br>(2-9%)                      | 2400<br>(960-4300)  | 73000<br>(46000-110000) |
| Sweden   | 2016 | Male   | 15 to 19 | 77%<br>(67-85%)                | 23%<br>(15-33%)          | 1.6<br>(0.93-2.7)                           | 3.9%<br>(2.5-5.7%)                   | 8.9%<br>(3.9-15%)                   | 7.1<br>(3-12)       | 990<br>(620-1400)       |
| Sweden   | 2016 | Male   | 20 to 24 | 86%<br>(78-92%)                | 14%<br>(8.3-22%)         | 2.4<br>(1.4-3.9)                            | 8.5%<br>(5.7-12%)                    | 12%<br>(5-20%)                      | 27<br>(11-46)       | 3600<br>(2300-5200)     |
| Sweden   | 2016 | Male   | 25 to 29 | 90%<br>(84-94%)                | 9.8%<br>(5.8-16%)        | 2.7<br>(1.6-4.2)                            | 8%<br>(5.4-11%)                      | 12%<br>(5.6-20%)                    | 29<br>(13-50)       | 3600<br>(2300-5000)     |
| Sweden   | 2016 | Male   | 30 to 34 | 93%<br>(87-96%)                | 7.3%<br>(4-13%)          | 2.7<br>(1.6-4.2)                            | 6.9%<br>(4.6-9.5%)                   | 13%<br>(6.2-20%)                    | 29<br>(14-47)       | 2900<br>(2000-4200)     |
| Sweden   | 2016 | Male   | 35 to 39 | 93%<br>(89-96%)                | 6.8%<br>(3.9-11%)        | 2.6<br>(1.5-4)                              | 6.1%<br>(4.2-8.3%)                   | 13%<br>(6.9-19%)                    | 29<br>(15-45)       | 2600<br>(1700-3600)     |
| Sweden   | 2016 | Male   | 40 to 44 | 94%<br>(90-96%)                | 6.4%<br>(3.6-10%)        | 2.8<br>(1.7-4.3)                            | 6.5%<br>(4.5-9%)                     | 14%<br>(8.4-20%)                    | 50<br>(29-73)       | 3500<br>(2400-4800)     |

| Location    | Year | Sex    | Age      | Prevalence of current drinkers | Prevalence of abstainers | Population average of standard drinks daily | Percent of total attributable deaths | Percent of total attributable DALYs | Attributable deaths | Attributable DALYs     |
|-------------|------|--------|----------|--------------------------------|--------------------------|---------------------------------------------|--------------------------------------|-------------------------------------|---------------------|------------------------|
| Sweden      | 2016 | Male   | 45 to 49 | 94%<br>(90-97%)                | 6%<br>(3.4-10%)          | 3.5<br>(2.1-5.5)                            | 7.8%<br>(5.3-11%)                    | 15%<br>(9.8-21%)                    | 95<br>(59-140)      | 5300<br>(3500-7400)    |
| Sweden      | 2016 | Male   | 50 to 54 | 94%<br>(91-97%)                | 5.6%<br>(3.2-9.1%)       | 4.2<br>(2.7-6.1)                            | 9%<br>(6.1-13%)                      | 15%<br>(10-22%)                     | 150<br>(96-220)     | 6900<br>(4600-9800)    |
| Sweden      | 2016 | Male   | 55 to 59 | 95%<br>(92-97%)                | 5.2%<br>(3-8.4%)         | 4.9<br>(3-7.3)                              | 9.6%<br>(6.3-14%)                    | 15%<br>(9.7-21%)                    | 210<br>(140-310)    | 8400<br>(5400-12000)   |
| Sweden      | 2016 | Male   | 60 to 64 | 94%<br>(91-97%)                | 5.7%<br>(3.2-9.2%)       | 4.9<br>(3-7.3)                              | 8.7%<br>(5-13%)                      | 12%<br>(7-17%)                      | 280<br>(160-410)    | 9100<br>(5000-13000)   |
| Sweden      | 2016 | Male   | 65 to 69 | 93%<br>(89-96%)                | 6.9%<br>(3.9-11%)        | 4.4<br>(2.9-6.2)                            | 6.8%<br>(3.7-10%)                    | 8.9%<br>(4.8-14%)                   | 370<br>(200-590)    | 10000<br>(5500-16000)  |
| Sweden      | 2016 | Male   | 70 to 74 | 91%<br>(86-94%)                | 8.8%<br>(5.8-14%)        | 3.7<br>(2.3-5.4)                            | 4.7%<br>(1.6-8.7%)                   | 5.8%<br>(1.8-11%)                   | 320<br>(100-610)    | 7200<br>(2500-13000)   |
| Sweden      | 2016 | Male   | 75 to 79 | 88%<br>(82-93%)                | 12%<br>(7-18%)           | 3.3<br>(1.9-4.9)                            | 3.3%<br>(0.43-7.2%)                  | 3.7%<br>(0.16-8.3%)                 | 240<br>(11-550)     | 4200<br>(510-9300)     |
| Sweden      | 2016 | Male   | 80 to 84 | 86%<br>(78-91%)                | 14%<br>(8.7-22%)         | 3<br>(1.9-4.4)                              | 2.5%<br>(-0.38-6.5%)                 | 2.6%<br>(-0.85-7.4%)                | 190<br>(-67-560)    | 2600<br>(-380-6700)    |
| Sweden      | 2016 | Male   | 85 to 89 | 83%<br>(75-89%)                | 17%<br>(11-25%)          | 2.8<br>(1.8-4.2)                            | 2.2%<br>(-0.58-5.9%)                 | 2.2%<br>(-1-6.6%)                   | 180<br>(-83-520)    | 1600<br>(-450-4500)    |
| Sweden      | 2016 | Male   | 90 to 94 | 82%<br>(74-89%)                | 18%<br>(11-26%)          | 2.7<br>(1.5-4.3)                            | 1.9%<br>(-1.6-6.1%)                  | 1.9%<br>(-1.6-6.7%)                 | 110<br>(-92-400)    | 700<br>(-380-2200)     |
| Sweden      | 2016 | Male   | 95 plus  | 82%<br>(72-90%)                | 18%<br>(10-28%)          | 2.6<br>(1.3-4.3)                            | 1.9%<br>(-1.4-7.1%)                  | 1.9%<br>(-2-7.9%)                   | 33<br>(-36-140)     | 140<br>(-99-510)       |
| Switzerland | 1990 | Female | All Ages | 88%<br>(85-90%)                | 12%<br>(9.8-15%)         | 3.5<br>(3.2-3.9)                            | 4.9%<br>(3.3-6.6%)                   | 5.4%<br>(1.8-8.9%)                  | 1700<br>(550-2700)  | 45000<br>(31000-60000) |
| Switzerland | 1990 | Female | 15 to 19 | 86%<br>(75-92%)                | 14%<br>(7.6-25%)         | 3.1<br>(2.1-4.4)                            | 3.9%<br>(2.3-5.6%)                   | 14%<br>(7.4-20%)                    | 10<br>(5.6-15)      | 930<br>(570-1300)      |
| Switzerland | 1990 | Female | 20 to 24 | 89%<br>(81-94%)                | 11%<br>(6.1-19%)         | 3.9<br>(2.5-5.5)                            | 5.1%<br>(3.2-7.2%)                   | 16%<br>(9-23%)                      | 20<br>(11-29)       | 1800<br>(1200-2500)    |
| Switzerland | 1990 | Female | 25 to 29 | 90%<br>(82-95%)                | 10%<br>(5-18%)           | 4.1<br>(2.8-5.5)                            | 4.7%<br>(3.1-6.5%)                   | 16%<br>(9.3-22%)                    | 23<br>(13-33)       | 2000<br>(1300-2700)    |
| Switzerland | 1990 | Female | 30 to 34 | 90%<br>(82-95%)                | 10%<br>(5.5-18%)         | 4.3<br>(3.2-5.7)                            | 4.7%<br>(3.2-6.4%)                   | 16%<br>(10-22%)                     | 27<br>(17-36)       | 2000<br>(1400-2600)    |
| Switzerland | 1990 | Female | 35 to 39 | 89%<br>(83-94%)                | 11%<br>(6.4-17%)         | 4.6<br>(3.5-6)                              | 5.3%<br>(3.9-7%)                     | 18%<br>(13-23%)                     | 36<br>(26-46)       | 2300<br>(1700-2900)    |
| Switzerland | 1990 | Female | 40 to 44 | 89%<br>(83-94%)                | 11%<br>(6.5-17%)         | 4.8<br>(3.6-6.2)                            | 6.5%<br>(4.9-8.5%)                   | 19%<br>(15-24%)                     | 58<br>(45-72)       | 3200<br>(2500-4100)    |
| Switzerland | 1990 | Female | 45 to 49 | 91%<br>(87-94%)                | 9%<br>(6.3-13%)          | 5<br>(3.9-6.2)                              | 7.8%<br>(6.1-10%)                    | 19%<br>(16-23%)                     | 86<br>(69-110)      | 4100<br>(3300-5000)    |
| Switzerland | 1990 | Female | 50 to 54 | 92%<br>(89-94%)                | 7.9%<br>(5.8-11%)        | 4.9<br>(3.8-6.2)                            | 8.6%<br>(6.6-11%)                    | 18%<br>(15-22%)                     | 100<br>(81-130)     | 4300<br>(3400-5300)    |
| Switzerland | 1990 | Female | 55 to 59 | 92%<br>(90-94%)                | 7.6%<br>(5.7-10%)        | 4.8<br>(3.8-6.2)                            | 8.4%<br>(6.5-11%)                    | 16%<br>(13-20%)                     | 130<br>(100-150)    | 4500<br>(3500-5600)    |
| Switzerland | 1990 | Female | 60 to 64 | 92%<br>(90-94%)                | 7.6%<br>(5.8-10%)        | 4.6<br>(3.6-5.8)                            | 7.3%<br>(5-9.8%)                     | 12%<br>(8.8-16%)                    | 140<br>(100-190)    | 4400<br>(3000-5900)    |

| Location    | Year | Sex    | Age      | Prevalence of current drinkers | Prevalence of abstainers | Population average of standard drinks daily | Percent of total attributable deaths | Percent of total attributable DALYs | Attributable deaths | Attributable DALYs      |
|-------------|------|--------|----------|--------------------------------|--------------------------|---------------------------------------------|--------------------------------------|-------------------------------------|---------------------|-------------------------|
| Switzerland | 1990 | Female | 65 to 69 | 92%<br>(89-94%)                | 7.9%<br>(5.8-11%)        | 4.1<br>(3.3-5.2)                            | 5.9%<br>(3.5-8.3%)                   | 9.1%<br>(5.3-13%)                   | 160<br>(96-230)     | 4200<br>(2400-5900)     |
| Switzerland | 1990 | Female | 70 to 74 | 90%<br>(87-93%)                | 9.7%<br>(7.4-13%)        | 3.7<br>(2.8-4.7)                            | 4.5%<br>(1.6-7.5%)                   | 6.3%<br>(2.3-11%)                   | 150<br>(56-260)     | 3200<br>(1200-5300)     |
| Switzerland | 1990 | Female | 75 to 79 | 87%<br>(82-91%)                | 13%<br>(8.9-18%)         | 3.3<br>(2.5-4.3)                            | 3.4%<br>(0.38-6.8%)                  | 4.2%<br>(-0.07-8.6%)                | 180<br>(-3.2-380)   | 3000<br>(320-6000)      |
| Switzerland | 1990 | Female | 80 to 84 | 85%<br>(78-89%)                | 15%<br>(11-22%)          | 3.2<br>(2.4-4.2)                            | 3%<br>(-0.24-6.4%)                   | 3.4%<br>(-0.87-7.8%)                | 220<br>(-54-500)    | 2700<br>(-230-5800)     |
| Switzerland | 1990 | Female | 85 to 89 | 83%<br>(77-88%)                | 17%<br>(12-23%)          | 3.1<br>(2.3-4.1)                            | 2.8%<br>(-0.73-6.5%)                 | 3%<br>(-1.4-7.5%)                   | 200<br>(-89-500)    | 1700<br>(-450-4000)     |
| Switzerland | 1990 | Female | 90 to 94 | 83%<br>(76-88%)                | 17%<br>(12-24%)          | 3.1<br>(2.1-4.2)                            | 2.3%<br>(-1.4-6.3%)                  | 2.4%<br>(-2.2-7.3%)                 | 91<br>(-84-280)     | 570<br>(-350-1600)      |
| Switzerland | 1990 | Female | 95 plus  | 82%<br>(73-89%)                | 18%<br>(11-27%)          | 3<br>(1.8-4.4)                              | 2.1%<br>(-2-7.2%)                    | 2.1%<br>(-3.1-8.1%)                 | 26<br>(-39-100)     | 110<br>(-110-370)       |
| Switzerland | 1990 | Male   | All Ages | 90%<br>(87-93%)                | 9.8%<br>(7.1-13%)        | 3.6<br>(3.2-3.9)                            | 9.2%<br>(7.1-11%)                    | 10%<br>(6.7-13%)                    | 3200<br>(2100-4300) | 94000<br>(73000-120000) |
| Switzerland | 1990 | Male   | 15 to 19 | 84%<br>(73-92%)                | 16%<br>(8-27%)           | 2.3<br>(1.5-3.3)                            | 6.9%<br>(3.9-10%)                    | 12%<br>(6-19%)                      | 25<br>(12-39)       | 2100<br>(1200-3200)     |
| Switzerland | 1990 | Male   | 20 to 24 | 89%<br>(81-95%)                | 11%<br>(5.4-19%)         | 3.3<br>(2.2-4.7)                            | 12%<br>(7.1-17%)                     | 17%<br>(8.2-25%)                    | 69<br>(33-100)      | 5700<br>(3400-8000)     |
| Switzerland | 1990 | Male   | 25 to 29 | 91%<br>(85-96%)                | 8.7%<br>(4.4-15%)        | 3.4<br>(2.3-4.9)                            | 11%<br>(6.2-15%)                     | 16%<br>(7.7-25%)                    | 74<br>(34-110)      | 5800<br>(3300-8300)     |
| Switzerland | 1990 | Male   | 30 to 34 | 93%<br>(86-97%)                | 7.4%<br>(3.5-14%)        | 3.6<br>(2.5-5.2)                            | 9.4%<br>(5.8-13%)                    | 15%<br>(7.8-23%)                    | 68<br>(35-100)      | 4800<br>(2900-6800)     |
| Switzerland | 1990 | Male   | 35 to 39 | 93%<br>(87-97%)                | 7%<br>(3.2-13%)          | 3.9<br>(2.8-5.2)                            | 9.2%<br>(6.1-12%)                    | 16%<br>(9.3-22%)                    | 66<br>(38-93)       | 4400<br>(2800-5800)     |
| Switzerland | 1990 | Male   | 40 to 44 | 94%<br>(88-97%)                | 6.3%<br>(2.9-12%)        | 4.5<br>(3.4-5.6)                            | 11%<br>(7.6-14%)                     | 18%<br>(12-24%)                     | 110<br>(72-140)     | 5900<br>(4200-7800)     |
| Switzerland | 1990 | Male   | 45 to 49 | 95%<br>(91-97%)                | 5.2%<br>(2.9-8.8%)       | 5.4<br>(4.3-6.4)                            | 13%<br>(9.9-16%)                     | 20%<br>(16-25%)                     | 160<br>(120-200)    | 7600<br>(6000-9600)     |
| Switzerland | 1990 | Male   | 50 to 54 | 95%<br>(92-97%)                | 5%<br>(3.1-7.7%)         | 5.8<br>(4.6-7)                              | 13%<br>(10-17%)                      | 20%<br>(15-24%)                     | 210<br>(160-260)    | 8500<br>(6500-10000)    |
| Switzerland | 1990 | Male   | 55 to 59 | 94%<br>(92-96%)                | 5.6%<br>(3.9-7.9%)       | 5.8<br>(4.7-6.9)                            | 13%<br>(9.7-15%)                     | 17%<br>(13-21%)                     | 270<br>(200-340)    | 9400<br>(7300-12000)    |
| Switzerland | 1990 | Male   | 60 to 64 | 95%<br>(92-96%)                | 5.4%<br>(3.7-7.5%)       | 5.7<br>(4.7-6.9)                            | 11%<br>(8-14%)                       | 14%<br>(9.6-18%)                    | 310<br>(220-410)    | 9400<br>(6600-12000)    |
| Switzerland | 1990 | Male   | 65 to 69 | 96%<br>(94-97%)                | 4.3%<br>(2.8-6.1%)       | 5.5<br>(4.6-6.6)                            | 9.8%<br>(6.5-13%)                    | 12%<br>(7.4-16%)                    | 380<br>(250-520)    | 9400<br>(6100-13000)    |
| Switzerland | 1990 | Male   | 70 to 74 | 96%<br>(94-97%)                | 4.1%<br>(2.7-6%)         | 5.3<br>(4.3-6.3)                            | 8.5%<br>(5.2-12%)                    | 9.7%<br>(5.6-14%)                   | 370<br>(220-540)    | 7400<br>(4500-11000)    |
| Switzerland | 1990 | Male   | 75 to 79 | 95%<br>(93-97%)                | 4.7%<br>(2.9-7.3%)       | 5<br>(4.1-6)                                | 7.5%<br>(4-11%)                      | 8.3%<br>(4.1-12%)                   | 430<br>(210-650)    | 6700<br>(3500-9900)     |
| Switzerland | 1990 | Male   | 80 to 84 | 94%<br>(91-97%)                | 5.7%<br>(3.5-8.9%)       | 4.7<br>(3.7-5.6)                            | 6.6%<br>(3.1-10%)                    | 7.2%<br>(3-11%)                     | 390<br>(160-610)    | 4500<br>(2100-6800)     |

| Location    | Year | Sex    | Age      | Prevalence of current drinkers | Prevalence of abstainers | Population average of standard drinks daily | Percent of total attributable deaths | Percent of total attributable DALYs | Attributable deaths | Attributable DALYs     |
|-------------|------|--------|----------|--------------------------------|--------------------------|---------------------------------------------|--------------------------------------|-------------------------------------|---------------------|------------------------|
| Switzerland | 1990 | Male   | 85 to 89 | 93%<br>(89-96%)                | 6.8%<br>(4.3-11%)        | 4.4<br>(3.4-5.4)                            | 5.7%<br>(1.9-9.3%)                   | 6.1%<br>(1.6-10%)                   | 230<br>(65-390)     | 1900<br>(630-3100)     |
| Switzerland | 1990 | Male   | 90 to 94 | 93%<br>(89-96%)                | 7.2%<br>(4.4-11%)        | 4.2<br>(3-5.3)                              | 4.6%<br>(0.65-8.5%)                  | 4.8%<br>(0.21-9.4%)                 | 75<br>(3.2-150)     | 430<br>(61-800)        |
| Switzerland | 1990 | Male   | 95 plus  | 92%<br>(86-96%)                | 7.8%<br>(3.9-14%)        | 3.9<br>(2.5-5.3)                            | 3.9%<br>(-0.49-8.5%)                 | 3.9%<br>(-1.2-9.3%)                 | 14<br>(-4.5-34)     | 57<br>(-7.1-130)       |
| Switzerland | 1995 | Female | All Ages | 88%<br>(85-90%)                | 12%<br>(9.8-15%)         | 3.2<br>(2.9-3.6)                            | 4%<br>(2.5-5.5%)                     | 3.8%<br>(0.29-7.1%)                 | 1200<br>(94-2300)   | 37000<br>(24000-51000) |
| Switzerland | 1995 | Female | 15 to 19 | 86%<br>(75-92%)                | 14%<br>(7.6-25%)         | 2.8<br>(1.9-3.9)                            | 3.2%<br>(1.9-4.6%)                   | 12%<br>(6.2-18%)                    | 7.5<br>(3.9-11)     | 720<br>(440-1000)      |
| Switzerland | 1995 | Female | 20 to 24 | 89%<br>(80-94%)                | 11%<br>(6.1-20%)         | 3.5<br>(2.2-5)                              | 4.2%<br>(2.7-5.9%)                   | 14%<br>(7.4-20%)                    | 13<br>(7-19)        | 1300<br>(880-1900)     |
| Switzerland | 1995 | Female | 25 to 29 | 90%<br>(82-95%)                | 10%<br>(5-18%)           | 3.7<br>(2.5-5)                              | 3.7%<br>(2.4-5.1%)                   | 12%<br>(6.8-17%)                    | 17<br>(9.4-24)      | 1600<br>(1100-2200)    |
| Switzerland | 1995 | Female | 30 to 34 | 90%<br>(83-95%)                | 10%<br>(5.2-17%)         | 3.9<br>(2.9-5.2)                            | 3.6%<br>(2.5-4.9%)                   | 11%<br>(7.1-15%)                    | 23<br>(14-32)       | 1800<br>(1300-2400)    |
| Switzerland | 1995 | Female | 35 to 39 | 89%<br>(83-94%)                | 11%<br>(6.3-17%)         | 4.2<br>(3.2-5.3)                            | 4.4%<br>(3.1-5.7%)                   | 15%<br>(11-19%)                     | 31<br>(22-41)       | 2100<br>(1500-2700)    |
| Switzerland | 1995 | Female | 40 to 44 | 89%<br>(83-94%)                | 11%<br>(6.5-17%)         | 4.4<br>(3.3-5.6)                            | 5.8%<br>(4.3-7.6%)                   | 17%<br>(13-21%)                     | 53<br>(40-66)       | 2900<br>(2200-3700)    |
| Switzerland | 1995 | Female | 45 to 49 | 91%<br>(87-94%)                | 9%<br>(6.4-13%)          | 4.5<br>(3.5-5.6)                            | 6.7%<br>(5.1-8.5%)                   | 17%<br>(14-21%)                     | 76<br>(61-93)       | 3700<br>(2900-4500)    |
| Switzerland | 1995 | Female | 50 to 54 | 92%<br>(89-94%)                | 7.9%<br>(5.7-11%)        | 4.5<br>(3.4-5.7)                            | 7.6%<br>(5.8-9.6%)                   | 16%<br>(13-20%)                     | 100<br>(84-130)     | 4400<br>(3400-5400)    |
| Switzerland | 1995 | Female | 55 to 59 | 92%<br>(90-94%)                | 7.6%<br>(5.8-10%)        | 4.4<br>(3.5-5.6)                            | 7.5%<br>(5.8-9.5%)                   | 15%<br>(12-18%)                     | 110<br>(90-140)     | 4100<br>(3200-5000)    |
| Switzerland | 1995 | Female | 60 to 64 | 92%<br>(90-94%)                | 7.7%<br>(5.8-10%)        | 4.2<br>(3.3-5.5)                            | 6.3%<br>(4.3-8.6%)                   | 11%<br>(8.1-14%)                    | 120<br>(87-160)     | 3700<br>(2600-5000)    |
| Switzerland | 1995 | Female | 65 to 69 | 92%<br>(89-94%)                | 8%<br>(5.9-11%)          | 3.8<br>(3-4.7)                              | 5%<br>(2.9-7.1%)                     | 7.9%<br>(4.7-11%)                   | 130<br>(79-190)     | 3400<br>(2000-4800)    |
| Switzerland | 1995 | Female | 70 to 74 | 90%<br>(87-93%)                | 9.8%<br>(7.5-13%)        | 3.3<br>(2.6-4.2)                            | 3.5%<br>(1.1-6.1%)                   | 5.1%<br>(1.5-8.6%)                  | 130<br>(39-230)     | 2800<br>(920-4800)     |
| Switzerland | 1995 | Female | 75 to 79 | 87%<br>(82-91%)                | 13%<br>(9.3-18%)         | 3<br>(2.3-3.9)                              | 2.3%<br>(-0.46-5.2%)                 | 2.9%<br>(-0.87-6.9%)                | 100<br>(-30-250)    | 1800<br>(-340-4000)    |
| Switzerland | 1995 | Female | 80 to 84 | 85%<br>(78-89%)                | 15%<br>(11-22%)          | 2.9<br>(2.2-3.8)                            | 1.8%<br>(-1.2-4.9%)                  | 1.9%<br>(-2-5.9%)                   | 120<br>(-120-360)   | 1600<br>(-980-4300)    |
| Switzerland | 1995 | Female | 85 to 89 | 83%<br>(77-88%)                | 17%<br>(12-23%)          | 2.9<br>(2.1-3.8)                            | 1.5%<br>(-1.6-4.9%)                  | 1.5%<br>(-2.7-5.7%)                 | 110<br>(-200-410)   | 1100<br>(-1200-3400)   |
| Switzerland | 1995 | Female | 90 to 94 | 83%<br>(76-88%)                | 17%<br>(12-24%)          | 2.8<br>(1.9-3.9)                            | 1.2%<br>(-2.3-5.2%)                  | 0.97%<br>(-3.4-5.9%)                | 48<br>(-170-290)    | 370<br>(-740-1600)     |
| Switzerland | 1995 | Female | 95 plus  | 82%<br>(73-89%)                | 18%<br>(11-27%)          | 2.7<br>(1.6-4)                              | 1.1%<br>(-3.1-6.2%)                  | 0.82%<br>(-4.1-7.1%)                | 15<br>(-76-130)     | 81<br>(-230-460)       |
| Switzerland | 1995 | Male   | All Ages | 90%<br>(87-93%)                | 9.7%<br>(7.1-13%)        | 3.2<br>(2.9-3.6)                            | 7.7%<br>(5.9-9.7%)                   | 7.9%<br>(4.8-11%)                   | 2500<br>(1500-3600) | 78000<br>(59000-98000) |

| Location    | Year | Sex    | Age      | Prevalence of current drinkers | Prevalence of abstainers | Population average of standard drinks daily | Percent of total attributable deaths | Percent of total attributable DALYs | Attributable deaths | Attributable DALYs     |
|-------------|------|--------|----------|--------------------------------|--------------------------|---------------------------------------------|--------------------------------------|-------------------------------------|---------------------|------------------------|
| Switzerland | 1995 | Male   | 15 to 19 | 84%<br>(73-92%)                | 16%<br>(7.9-27%)         | 2.1<br>(1.3-3)                              | 5.8%<br>(3.4-8.7%)                   | 11%<br>(5.3-18%)                    | 16<br>(7.7-26)      | 1500<br>(880-2300)     |
| Switzerland | 1995 | Male   | 20 to 24 | 89%<br>(80-94%)                | 11%<br>(5.6-20%)         | 3<br>(1.9-4.3)                              | 10%<br>(6.1-14%)                     | 15%<br>(6.6-22%)                    | 45<br>(20-68)       | 4100<br>(2500-5700)    |
| Switzerland | 1995 | Male   | 25 to 29 | 91%<br>(85-96%)                | 8.6%<br>(4.3-15%)        | 3.1<br>(2.2-4.5)                            | 8.6%<br>(5.2-12%)                    | 13%<br>(5.6-19%)                    | 47<br>(21-72)       | 4200<br>(2500-5900)    |
| Switzerland | 1995 | Male   | 30 to 34 | 93%<br>(86-97%)                | 7.4%<br>(3.4-14%)        | 3.3<br>(2.3-4.7)                            | 7%<br>(4.5-9.7%)                     | 11%<br>(5.3-16%)                    | 49<br>(24-75)       | 4000<br>(2500-5600)    |
| Switzerland | 1995 | Male   | 35 to 39 | 93%<br>(87-97%)                | 7%<br>(3.1-13%)          | 3.5<br>(2.6-4.7)                            | 7.4%<br>(4.9-9.9%)                   | 12%<br>(7.2-17%)                    | 57<br>(33-81)       | 4000<br>(2700-5400)    |
| Switzerland | 1995 | Male   | 40 to 44 | 94%<br>(88-97%)                | 6.4%<br>(3-12%)          | 4<br>(3.1-5.1)                              | 9.1%<br>(6.5-12%)                    | 15%<br>(11-20%)                     | 86<br>(57-110)      | 5000<br>(3600-6500)    |
| Switzerland | 1995 | Male   | 45 to 49 | 95%<br>(91-97%)                | 5.2%<br>(2.9-8.7%)       | 4.8<br>(3.9-5.8)                            | 11%<br>(8.5-14%)                     | 18%<br>(14-23%)                     | 150<br>(110-190)    | 7200<br>(5600-9000)    |
| Switzerland | 1995 | Male   | 50 to 54 | 95%<br>(92-97%)                | 5%<br>(3.1-7.6%)         | 5.2<br>(4.1-6.2)                            | 12%<br>(8.9-15%)                     | 18%<br>(13-22%)                     | 200<br>(150-250)    | 8400<br>(6400-10000)   |
| Switzerland | 1995 | Male   | 55 to 59 | 94%<br>(92-96%)                | 5.6%<br>(4-8%)           | 5.2<br>(4.2-6.1)                            | 11%<br>(8.6-14%)                     | 15%<br>(12-19%)                     | 220<br>(170-280)    | 8000<br>(6000-9900)    |
| Switzerland | 1995 | Male   | 60 to 64 | 95%<br>(92-96%)                | 5.4%<br>(3.7-7.8%)       | 5.1<br>(4.2-6.1)                            | 9.7%<br>(7-13%)                      | 13%<br>(8.8-16%)                    | 260<br>(180-350)    | 7900<br>(5600-10000)   |
| Switzerland | 1995 | Male   | 65 to 69 | 96%<br>(94-97%)                | 4.3%<br>(2.9-6.2%)       | 5<br>(4.1-5.9)                              | 8.2%<br>(5.3-11%)                    | 9.9%<br>(6.1-14%)                   | 290<br>(180-400)    | 7300<br>(4700-9900)    |
| Switzerland | 1995 | Male   | 70 to 74 | 96%<br>(94-97%)                | 4%<br>(2.7-6.1%)         | 4.7<br>(3.9-5.7)                            | 6.7%<br>(3.7-9.8%)                   | 7.7%<br>(3.9-12%)                   | 310<br>(160-470)    | 6400<br>(3500-9300)    |
| Switzerland | 1995 | Male   | 75 to 79 | 95%<br>(93-97%)                | 4.7%<br>(2.9-7.5%)       | 4.5<br>(3.6-5.4)                            | 5.7%<br>(2.5-8.8%)                   | 6.2%<br>(2.4-10%)                   | 280<br>(110-450)    | 4500<br>(2000-7000)    |
| Switzerland | 1995 | Male   | 80 to 84 | 94%<br>(91-97%)                | 5.6%<br>(3.5-9%)         | 4.2<br>(3.4-5.1)                            | 4.7%<br>(1.4-7.9%)                   | 4.9%<br>(1.1-8.8%)                  | 260<br>(62-460)     | 3200<br>(1000-5400)    |
| Switzerland | 1995 | Male   | 85 to 89 | 93%<br>(90-96%)                | 6.7%<br>(4.3-10%)        | 3.9<br>(3-4.9)                              | 3.8%<br>(0.62-7.2%)                  | 3.9%<br>(0.16-7.9%)                 | 170<br>(6.8-340)    | 1400<br>(240-2700)     |
| Switzerland | 1995 | Male   | 90 to 94 | 93%<br>(89-96%)                | 7.3%<br>(4.4-11%)        | 3.7<br>(2.7-4.7)                            | 2.9%<br>(-0.56-6.6%)                 | 2.8%<br>(-1.2-7.2%)                 | 58<br>(-24-150)     | 360<br>(-70-830)       |
| Switzerland | 1995 | Male   | 95 plus  | 92%<br>(87-96%)                | 7.8%<br>(3.9-13%)        | 3.5<br>(2.3-4.8)                            | 2.4%<br>(-1.4-6.5%)                  | 2.2%<br>(-2.2-7%)                   | 11<br>(-11-35)      | 49<br>(-27-130)        |
| Switzerland | 2000 | Female | All Ages | 88%<br>(85-90%)                | 12%<br>(9.8-15%)         | 3<br>(2.7-3.3)                              | 3.3%<br>(2.1-4.7%)                   | 2.8%<br>(-0.23-5.9%)                | 910<br>(-72-1900)   | 31000<br>(20000-43000) |
| Switzerland | 2000 | Female | 15 to 19 | 86%<br>(75-92%)                | 14%<br>(7.5-25%)         | 2.5<br>(1.7-3.6)                            | 2.5%<br>(1.5-3.7%)                   | 11%<br>(5.7-16%)                    | 5.5<br>(2.8-8.3)    | 580<br>(350-840)       |
| Switzerland | 2000 | Female | 20 to 24 | 89%<br>(80-94%)                | 11%<br>(5.9-20%)         | 3.2<br>(2-4.7)                              | 3.5%<br>(2.3-4.9%)                   | 13%<br>(6.6-20%)                    | 8.4<br>(4.3-13)     | 990<br>(640-1400)      |
| Switzerland | 2000 | Female | 25 to 29 | 90%<br>(82-95%)                | 10%<br>(5.1-18%)         | 3.4<br>(2.3-4.6)                            | 3.3%<br>(2.1-4.5%)                   | 12%<br>(6.8-18%)                    | 11<br>(6.1-17)      | 1200<br>(770-1600)     |
| Switzerland | 2000 | Female | 30 to 34 | 90%<br>(82-95%)                | 10%<br>(5.3-18%)         | 3.6<br>(2.6-4.8)                            | 3.2%<br>(2.2-4.3%)                   | 13%<br>(8.7-18%)                    | 17<br>(11-24)       | 1500<br>(1000-2000)    |



| Location    | Year | Sex    | Age      | Prevalence of current drinkers | Prevalence of abstainers | Population average of standard drinks daily | Percent of total attributable deaths | Percent of total attributable DALYs | Attributable deaths | Attributable DALYs     |
|-------------|------|--------|----------|--------------------------------|--------------------------|---------------------------------------------|--------------------------------------|-------------------------------------|---------------------|------------------------|
| Switzerland | 2000 | Female | 35 to 39 | 89%<br>(82-94%)                | 11%<br>(6.4-18%)         | 3.9<br>(2.9-4.9)                            | 3.9%<br>(2.8-5.1%)                   | 15%<br>(11-19%)                     | 30<br>(21-39)       | 2100<br>(1500-2600)    |
| Switzerland | 2000 | Female | 40 to 44 | 89%<br>(84-94%)                | 11%<br>(6.5-16%)         | 4.1<br>(3-5.2)                              | 4.8%<br>(3.5-6.2%)                   | 16%<br>(12-19%)                     | 43<br>(33-55)       | 2500<br>(1900-3100)    |
| Switzerland | 2000 | Female | 45 to 49 | 91%<br>(88-94%)                | 8.7%<br>(6.4-12%)        | 4.2<br>(3.3-5.3)                            | 5.6%<br>(4.2-7.1%)                   | 16%<br>(13-19%)                     | 60<br>(48-74)       | 3000<br>(2300-3700)    |
| Switzerland | 2000 | Female | 50 to 54 | 92%<br>(90-94%)                | 7.6%<br>(5.7-9.9%)       | 4.2<br>(3.2-5.3)                            | 6.5%<br>(4.9-8.3%)                   | 15%<br>(12-18%)                     | 92<br>(72-110)      | 3900<br>(3000-4800)    |
| Switzerland | 2000 | Female | 55 to 59 | 93%<br>(91-94%)                | 7.4%<br>(5.7-9.3%)       | 4.1<br>(3.3-5.1)                            | 6.8%<br>(5.3-8.6%)                   | 14%<br>(11-16%)                     | 120<br>(96-140)     | 4200<br>(3300-5100)    |
| Switzerland | 2000 | Female | 60 to 64 | 93%<br>(91-94%)                | 7.4%<br>(5.8-9.4%)       | 3.9<br>(3-5)                                | 5.8%<br>(4.1-7.8%)                   | 11%<br>(8.1-13%)                    | 110<br>(84-140)     | 3400<br>(2500-4400)    |
| Switzerland | 2000 | Female | 65 to 69 | 92%<br>(90-94%)                | 7.9%<br>(6-10%)          | 3.5<br>(2.8-4.3)                            | 4.3%<br>(2.7-6.1%)                   | 7.4%<br>(4.9-10%)                   | 110<br>(73-150)     | 2800<br>(1700-3900)    |
| Switzerland | 2000 | Female | 70 to 74 | 90%<br>(88-92%)                | 9.6%<br>(7.6-12%)        | 3.1<br>(2.4-3.9)                            | 3%<br>(1.1-5.1%)                     | 4.7%<br>(1.8-7.7%)                  | 110<br>(44-180)     | 2200<br>(810-3800)     |
| Switzerland | 2000 | Female | 75 to 79 | 87%<br>(84-91%)                | 13%<br>(9.1-16%)         | 2.8<br>(2.1-3.6)                            | 1.9%<br>(-0.46-4.2%)                 | 2.5%<br>(-0.79-5.6%)                | 94<br>(-29-220)     | 1600<br>(-390-3700)    |
| Switzerland | 2000 | Female | 80 to 84 | 85%<br>(79-89%)                | 15%<br>(11-21%)          | 2.7<br>(2-3.4)                              | 1.1%<br>(-1.5-3.7%)                  | 1.2%<br>(-2.2-4.6%)                 | 61<br>(-120-240)    | 860<br>(-1100-2800)    |
| Switzerland | 2000 | Female | 85 to 89 | 83%<br>(77-88%)                | 17%<br>(12-23%)          | 2.6<br>(1.9-3.4)                            | 0.73%<br>(-2.3-3.7%)                 | 0.56%<br>(-3.3-4.3%)                | 41<br>(-240-310)    | 520<br>(-1600-2600)    |
| Switzerland | 2000 | Female | 90 to 94 | 83%<br>(77-88%)                | 17%<br>(12-23%)          | 2.6<br>(1.7-3.5)                            | 0.39%<br>(-3.4%)                     | 0.082%<br>(-4.1-4.5%)               | 4.7<br>(-250-260)   | 150<br>(-1100-1400)    |
| Switzerland | 2000 | Female | 95 plus  | 82%<br>(73-89%)                | 18%<br>(11-27%)          | 2.5<br>(1.5-3.6)                            | 0.31%<br>(-3.5-4.7%)                 | -0.058%<br>(-4.9-5.2%)              | -1.4<br>(-110-120)  | 30<br>(-350-450)       |
| Switzerland | 2000 | Male   | All Ages | 91%<br>(88-93%)                | 9.3%<br>(6.8-12%)        | 3<br>(2.7-3.3)                              | 6.7%<br>(5-8.4%)                     | 6.5%<br>(3.7-9.5%)                  | 2000<br>(1100-2900) | 64000<br>(48000-83000) |
| Switzerland | 2000 | Male   | 15 to 19 | 84%<br>(73-92%)                | 16%<br>(8.2-27%)         | 1.9<br>(1.2-2.7)                            | 4.9%<br>(2.9-7.3%)                   | 10%<br>(4.7-17%)                    | 12<br>(5.5-21)      | 1300<br>(730-1900)     |
| Switzerland | 2000 | Male   | 20 to 24 | 89%<br>(81-95%)                | 11%<br>(5.5-19%)         | 2.7<br>(1.7-3.8)                            | 9.2%<br>(5.7-13%)                    | 14%<br>(6.2-21%)                    | 29<br>(13-44)       | 2900<br>(1800-4100)    |
| Switzerland | 2000 | Male   | 25 to 29 | 91%<br>(84-96%)                | 8.7%<br>(4.3-16%)        | 2.9<br>(1.9-4.1)                            | 8.2%<br>(5.1-11%)                    | 13%<br>(5.7-21%)                    | 31<br>(13-49)       | 3000<br>(1800-4200)    |
| Switzerland | 2000 | Male   | 30 to 34 | 93%<br>(86-97%)                | 7.4%<br>(3.5-14%)        | 3<br>(2.1-4.3)                              | 6.8%<br>(4.3-9.3%)                   | 12%<br>(5.6-19%)                    | 35<br>(15-54)       | 3100<br>(1900-4300)    |
| Switzerland | 2000 | Male   | 35 to 39 | 93%<br>(87-97%)                | 7%<br>(3.1-13%)          | 3.2<br>(2.3-4.2)                            | 7%<br>(4.6-9.3%)                     | 14%<br>(7.1-19%)                    | 50<br>(25-71)       | 3700<br>(2300-4800)    |
| Switzerland | 2000 | Male   | 40 to 44 | 94%<br>(88-97%)                | 6.4%<br>(3-12%)          | 3.7<br>(2.8-4.6)                            | 8.2%<br>(5.8-11%)                    | 15%<br>(10-20%)                     | 76<br>(50-100)      | 4500<br>(3200-5800)    |
| Switzerland | 2000 | Male   | 45 to 49 | 95%<br>(92-97%)                | 5%<br>(2.9-8.4%)         | 4.4<br>(3.6-5.2)                            | 9.9%<br>(7.5-13%)                    | 17%<br>(13-22%)                     | 120<br>(86-150)     | 5800<br>(4400-7200)    |
| Switzerland | 2000 | Male   | 50 to 54 | 96%<br>(93-97%)                | 4.5%<br>(2.9-6.6%)       | 4.8<br>(3.8-5.6)                            | 10%<br>(7.9-13%)                     | 17%<br>(13-21%)                     | 180<br>(130-220)    | 7400<br>(5700-9200)    |

| Location    | Year | Sex    | Age      | Prevalence of current drinkers | Prevalence of abstainers | Population average of standard drinks daily | Percent of total attributable deaths | Percent of total attributable DALYs | Attributable deaths | Attributable DALYs     |
|-------------|------|--------|----------|--------------------------------|--------------------------|---------------------------------------------|--------------------------------------|-------------------------------------|---------------------|------------------------|
| Switzerland | 2000 | Male   | 55 to 59 | 95%<br>(94-96%)                | 5%<br>(3.7-6.5%)         | 4.8<br>(3.9-5.6)                            | 9.8%<br>(7.5-12%)                    | 14%<br>(11-18%)                     | 210<br>(160-270)    | 7700<br>(5900-9700)    |
| Switzerland | 2000 | Male   | 60 to 64 | 95%<br>(94-96%)                | 4.9%<br>(3.6-6.4%)       | 4.7<br>(3.9-5.6)                            | 8.7%<br>(6.4-11%)                    | 12%<br>(8.4-15%)                    | 220<br>(150-290)    | 6700<br>(4900-8800)    |
| Switzerland | 2000 | Male   | 65 to 69 | 96%<br>(95-97%)                | 3.9%<br>(2.8-5.4%)       | 4.5<br>(3.8-5.3)                            | 7.2%<br>(4.8-9.8%)                   | 9.1%<br>(5.7-12%)                   | 240<br>(150-330)    | 6100<br>(4000-8300)    |
| Switzerland | 2000 | Male   | 70 to 74 | 96%<br>(95-97%)                | 3.6%<br>(2.5-5.2%)       | 4.3<br>(3.6-5.2)                            | 5.7%<br>(3.3-8.4%)                   | 6.8%<br>(3.6-10%)                   | 240<br>(130-360)    | 5000<br>(2900-7500)    |
| Switzerland | 2000 | Male   | 75 to 79 | 96%<br>(94-97%)                | 4.2%<br>(2.6-6.4%)       | 4.1<br>(3.3-4.9)                            | 4.4%<br>(1.8-7.4%)                   | 4.9%<br>(1.6-8.5%)                  | 230<br>(77-400)     | 3800<br>(1500-6200)    |
| Switzerland | 2000 | Male   | 80 to 84 | 95%<br>(92-97%)                | 5.3%<br>(3.3-8%)         | 3.8<br>(3.1-4.6)                            | 3.3%<br>(0.57-6.4%)                  | 3.4%<br>(0.059-7.1%)                | 160<br>(2.9-340)    | 2100<br>(330-4000)     |
| Switzerland | 2000 | Male   | 85 to 89 | 94%<br>(90-96%)                | 6.4%<br>(4.1-9.6%)       | 3.6<br>(2.8-4.4)                            | 2.4%<br>(-0.31-5.6%)                 | 2.3%<br>(-1-6.2%)                   | 100<br>(-44-270)    | 970<br>(-130-2300)     |
| Switzerland | 2000 | Male   | 90 to 94 | 93%<br>(89-96%)                | 7%<br>(4.2-11%)          | 3.4<br>(2.5-4.2)                            | 1.7%<br>(-1.3-5.1%)                  | 1.4%<br>(-2.2-5.5%)                 | 35<br>(-52-130)     | 250<br>(-190-760)      |
| Switzerland | 2000 | Male   | 95 plus  | 92%<br>(87-96%)                | 7.7%<br>(3.8-13%)        | 3.2<br>(2.1-4.3)                            | 1.3%<br>(-2-4.7%)                    | 0.84%<br>(-3.1-5%)                  | 5<br>(-19-30)       | 31<br>(-48-120)        |
| Switzerland | 2005 | Female | All Ages | 88%<br>(85-90%)                | 12%<br>(9.7-15%)         | 2.9<br>(2.6-3.2)                            | 3.1%<br>(2-4.2%)                     | 2.8%<br>(-0.16-5.5%)                | 870<br>(-52-1800)   | 29000<br>(19000-39000) |
| Switzerland | 2005 | Female | 15 to 19 | 85%<br>(75-92%)                | 15%<br>(7.6-25%)         | 2.4<br>(1.6-3.4)                            | 2.3%<br>(1.3-3.3%)                   | 10%<br>(4.8-16%)                    | 5.1<br>(2.4-7.9)    | 560<br>(330-800)       |
| Switzerland | 2005 | Female | 20 to 24 | 89%<br>(80-94%)                | 11%<br>(6.1-20%)         | 3.1<br>(1.9-4.5)                            | 3.1%<br>(2-4.3%)                     | 12%<br>(5.9-19%)                    | 7.1<br>(3.3-11)     | 910<br>(580-1300)      |
| Switzerland | 2005 | Female | 25 to 29 | 90%<br>(82-95%)                | 10%<br>(5.1-18%)         | 3.3<br>(2.2-4.5)                            | 2.9%<br>(1.9-3.8%)                   | 12%<br>(6.1-18%)                    | 8.5<br>(4.4-12)     | 960<br>(620-1300)      |
| Switzerland | 2005 | Female | 30 to 34 | 90%<br>(82-94%)                | 10%<br>(5.6-18%)         | 3.5<br>(2.5-4.6)                            | 2.9%<br>(2-3.8%)                     | 13%<br>(8.2-18%)                    | 13<br>(8.3-18)      | 1200<br>(800-1600)     |
| Switzerland | 2005 | Female | 35 to 39 | 89%<br>(83-94%)                | 11%<br>(6.4-17%)         | 3.7<br>(2.9-4.7)                            | 3.3%<br>(2.4-4.3%)                   | 14%<br>(10-18%)                     | 23<br>(17-30)       | 1700<br>(1200-2100)    |
| Switzerland | 2005 | Female | 40 to 44 | 89%<br>(84-94%)                | 11%<br>(6.5-16%)         | 3.9<br>(3.1-4.9)                            | 4.1%<br>(3-5.3%)                     | 15%<br>(12-19%)                     | 40<br>(30-50)       | 2400<br>(1800-3000)    |
| Switzerland | 2005 | Female | 45 to 49 | 92%<br>(89-94%)                | 8.4%<br>(6.3-11%)        | 4.1<br>(3.2-5)                              | 5.2%<br>(3.9-6.7%)                   | 15%<br>(12-18%)                     | 61<br>(49-75)       | 3000<br>(2400-3700)    |
| Switzerland | 2005 | Female | 50 to 54 | 93%<br>(91-94%)                | 7.3%<br>(5.7-9.1%)       | 4.1<br>(3.2-5)                              | 5.7%<br>(4.3-7.2%)                   | 15%<br>(12-17%)                     | 76<br>(60-91)       | 3200<br>(2500-3900)    |
| Switzerland | 2005 | Female | 55 to 59 | 93%<br>(91-94%)                | 7.4%<br>(5.9-9.1%)       | 3.9<br>(3.2-4.9)                            | 5.9%<br>(4.6-7.5%)                   | 13%<br>(11-15%)                     | 100<br>(85-130)     | 3700<br>(3000-4600)    |
| Switzerland | 2005 | Female | 60 to 64 | 93%<br>(91-94%)                | 7.2%<br>(5.7-8.8%)       | 3.7<br>(3-4.8)                              | 5.4%<br>(4-7.1%)                     | 10%<br>(8.2-13%)                    | 110<br>(88-140)     | 3400<br>(2500-4500)    |
| Switzerland | 2005 | Female | 65 to 69 | 93%<br>(91-94%)                | 7.3%<br>(5.7-9.3%)       | 3.4<br>(2.7-4.2)                            | 4.3%<br>(2.9-5.9%)                   | 7.8%<br>(5.5-10%)                   | 110<br>(74-140)     | 2600<br>(1800-3600)    |
| Switzerland | 2005 | Female | 70 to 74 | 91%<br>(88-92%)                | 9.4%<br>(7.6-12%)        | 3<br>(2.3-3.7)                              | 3%<br>(1.3-4.7%)                     | 5%<br>(2.5-7.6%)                    | 110<br>(52-160)     | 2100<br>(990-3300)     |

| Location    | Year | Sex    | Age      | Prevalence of current drinkers | Prevalence of abstainers | Population average of standard drinks daily | Percent of total attributable deaths | Percent of total attributable DALYs | Attributable deaths | Attributable DALYs     |
|-------------|------|--------|----------|--------------------------------|--------------------------|---------------------------------------------|--------------------------------------|-------------------------------------|---------------------|------------------------|
| Switzerland | 2005 | Female | 75 to 79 | 87%<br>(83-91%)                | 13%<br>(9.4-17%)         | 2.7<br>(2.1-3.5)                            | 1.9%<br>(-0.011-3.9%)                | 2.7%<br>(0.024-5.4%)                | 93<br>(0.81-190)    | 1500<br>(-10-3100)     |
| Switzerland | 2005 | Female | 80 to 84 | 85%<br>(79-89%)                | 15%<br>(11-21%)          | 2.6<br>(2-3.3)                              | 1.1%<br>(-1.1-3.3%)                  | 1.3%<br>(-1.7-4.3%)                 | 72<br>(-97-250)     | 940<br>(-930-2900)     |
| Switzerland | 2005 | Female | 85 to 89 | 83%<br>(77-87%)                | 17%<br>(13-23%)          | 2.5<br>(1.8-3.2)                            | 0.71%<br>(-1.9-3.3%)                 | 0.62%<br>(-3-3.9%)                  | 40<br>(-200-250)    | 460<br>(-1300-2100)    |
| Switzerland | 2005 | Female | 90 to 94 | 83%<br>(75-88%)                | 17%<br>(12-25%)          | 2.5<br>(1.7-3.3)                            | 0.38%<br>(-2.7-3.6%)                 | 0.14%<br>(-3.9-4.2%)                | 8.5<br>(-230-250)   | 150<br>(-1100-1400)    |
| Switzerland | 2005 | Female | 95 plus  | 82%<br>(73-89%)                | 18%<br>(11-27%)          | 2.4<br>(1.5-3.5)                            | 0.26%<br>(-3.5-4.4%)                 | -0.049%<br>(-4.7-5%)                | -1.4<br>(-140-140)  | 31<br>(-420-510)       |
| Switzerland | 2005 | Male   | All Ages | 91%<br>(88-93%)                | 8.9%<br>(6.6-12%)        | 3<br>(2.7-3.3)                              | 6.3%<br>(4.7-8%)                     | 6.1%<br>(3.4-8.8%)                  | 1800<br>(990-2700)  | 59000<br>(44000-76000) |
| Switzerland | 2005 | Male   | 15 to 19 | 84%<br>(73-92%)                | 16%<br>(8.1-27%)         | 1.8<br>(1.1-2.6)                            | 4.5%<br>(2.7-6.6%)                   | 9.8%<br>(4.2-16%)                   | 10<br>(4.4-17)      | 1100<br>(680-1700)     |
| Switzerland | 2005 | Male   | 20 to 24 | 89%<br>(80-94%)                | 11%<br>(5.6-20%)         | 2.6<br>(1.7-3.8)                            | 8.9%<br>(5.8-12%)                    | 14%<br>(5.8-21%)                    | 23<br>(9.5-36)      | 2700<br>(1700-3800)    |
| Switzerland | 2005 | Male   | 25 to 29 | 91%<br>(85-96%)                | 8.8%<br>(4.3-15%)        | 2.8<br>(1.8-3.9)                            | 7.6%<br>(5-10%)                      | 13%<br>(5.3-20%)                    | 21<br>(8.1-33)      | 2400<br>(1500-3300)    |
| Switzerland | 2005 | Male   | 30 to 34 | 93%<br>(86-97%)                | 7.5%<br>(3.5-14%)        | 2.9<br>(2-4.1)                              | 6.2%<br>(3.9-8.6%)                   | 12%<br>(5.5-20%)                    | 23<br>(10-37)       | 2300<br>(1400-3200)    |
| Switzerland | 2005 | Male   | 35 to 39 | 93%<br>(87-97%)                | 7.1%<br>(3.1-13%)        | 3.1<br>(2.2-4.1)                            | 6.4%<br>(4.1-8.6%)                   | 13%<br>(6.5-19%)                    | 41<br>(21-59)       | 3100<br>(2000-4200)    |
| Switzerland | 2005 | Male   | 40 to 44 | 94%<br>(88-97%)                | 6.4%<br>(3.1-12%)        | 3.5<br>(2.7-4.4)                            | 7.2%<br>(5.1-9.4%)                   | 14%<br>(9.4-20%)                    | 67<br>(42-94)       | 4100<br>(2900-5500)    |
| Switzerland | 2005 | Male   | 45 to 49 | 95%<br>(92-97%)                | 4.9%<br>(2.9-7.8%)       | 4.2<br>(3.5-5)                              | 8.9%<br>(6.8-11%)                    | 16%<br>(12-21%)                     | 110<br>(78-140)     | 5500<br>(4200-7000)    |
| Switzerland | 2005 | Male   | 50 to 54 | 96%<br>(94-97%)                | 4.2%<br>(2.8-6.1%)       | 4.6<br>(3.8-5.5)                            | 9.8%<br>(7.4-12%)                    | 16%<br>(12-20%)                     | 150<br>(110-190)    | 6500<br>(5000-8100)    |
| Switzerland | 2005 | Male   | 55 to 59 | 95%<br>(94-96%)                | 4.8%<br>(3.6-6.2%)       | 4.6<br>(3.9-5.4)                            | 9.4%<br>(7.1-12%)                    | 14%<br>(10-18%)                     | 210<br>(150-260)    | 7500<br>(5700-9300)    |
| Switzerland | 2005 | Male   | 60 to 64 | 95%<br>(94-97%)                | 4.7%<br>(3.4-6.1%)       | 4.6<br>(3.8-5.4)                            | 8.3%<br>(6.2-11%)                    | 12%<br>(8.6-15%)                    | 230<br>(170-290)    | 7100<br>(5200-8900)    |
| Switzerland | 2005 | Male   | 65 to 69 | 96%<br>(95-97%)                | 3.7%<br>(2.6-5.1%)       | 4.4<br>(3.7-5.3)                            | 6.8%<br>(4.8-9.1%)                   | 8.9%<br>(6.1-12%)                   | 210<br>(140-280)    | 5400<br>(3800-7300)    |
| Switzerland | 2005 | Male   | 70 to 74 | 97%<br>(95-98%)                | 3.4%<br>(2.3-4.8%)       | 4.2<br>(3.5-5.1)                            | 5.6%<br>(3.4-7.8%)                   | 6.9%<br>(3.8-9.9%)                  | 220<br>(130-320)    | 4700<br>(2800-6700)    |
| Switzerland | 2005 | Male   | 75 to 79 | 96%<br>(94-97%)                | 4.1%<br>(2.5-6.3%)       | 4<br>(3.3-4.8)                              | 4.3%<br>(2-6.8%)                     | 4.9%<br>(1.9-7.9%)                  | 210<br>(81-340)     | 3500<br>(1600-5500)    |
| Switzerland | 2005 | Male   | 80 to 84 | 95%<br>(92-97%)                | 5.2%<br>(3.2-8.3%)       | 3.7<br>(3-4.4)                              | 3.1%<br>(0.53-5.7%)                  | 3.2%<br>(-0.052-6.4%)               | 160<br>(-2.7-340)   | 2100<br>(340-4000)     |
| Switzerland | 2005 | Male   | 85 to 89 | 94%<br>(90-96%)                | 6.3%<br>(4.1-9.5%)       | 3.5<br>(2.7-4.2)                            | 2.2%<br>(-0.53-5.1%)                 | 2%<br>(-1.3-5.5%)                   | 88<br>(-55-240)     | 870<br>(-210-2000)     |
| Switzerland | 2005 | Male   | 90 to 94 | 93%<br>(89-96%)                | 6.9%<br>(4.2-11%)        | 3.3<br>(2.4-4.1)                            | 1.5%<br>(-1.4-4.7%)                  | 1.2%<br>(-2.3-5.1%)                 | 33<br>(-61-140)     | 250<br>(-240-800)      |

| Location    | Year | Sex    | Age      | Prevalence of current drinkers | Prevalence of abstainers | Population average of standard drinks daily | Percent of total attributable deaths | Percent of total attributable DALYs | Attributable deaths | Attributable DALYs     |
|-------------|------|--------|----------|--------------------------------|--------------------------|---------------------------------------------|--------------------------------------|-------------------------------------|---------------------|------------------------|
| Switzerland | 2005 | Male   | 95 plus  | 92%<br>(87-96%)                | 7.6%<br>(3.9-13%)        | 3.1<br>(2-4.1)                              | 1%<br>(-2.3-4.5%)                    | 0.6%<br>(-3.4-4.8%)                 | 4.8<br>(-27-38)     | 33<br>(-76-150)        |
| Switzerland | 2010 | Female | All Ages | 88%<br>(86-91%)                | 12%<br>(9.4-14%)         | 2.9<br>(2.5-3.3)                            | 2.9%<br>(1.9-4%)                     | 2.7%<br>(0.019-5.4%)                | 900<br>(6.4-1800)   | 28000<br>(18000-38000) |
| Switzerland | 2010 | Female | 15 to 19 | 85%<br>(75-92%)                | 15%<br>(7.6-25%)         | 2.3<br>(1.5-3.3)                            | 1.9%<br>(1.2-2.8%)                   | 9.4%<br>(4.6-14%)                   | 3.6<br>(1.8-5.7)    | 450<br>(280-640)       |
| Switzerland | 2010 | Female | 20 to 24 | 89%<br>(80-94%)                | 11%<br>(6-20%)           | 3<br>(1.9-4.4)                              | 2.8%<br>(1.9-3.8%)                   | 12%<br>(5.7-18%)                    | 5.2<br>(2.5-7.9)    | 800<br>(530-1100)      |
| Switzerland | 2010 | Female | 25 to 29 | 90%<br>(82-95%)                | 10%<br>(5.2-18%)         | 3.1<br>(2.1-4.3)                            | 2.6%<br>(1.7-3.4%)                   | 11%<br>(5.6-17%)                    | 7.2<br>(3.4-11)     | 900<br>(570-1200)      |
| Switzerland | 2010 | Female | 30 to 34 | 90%<br>(82-95%)                | 10%<br>(5.3-18%)         | 3.3<br>(2.3-4.6)                            | 2.5%<br>(1.7-3.4%)                   | 12%<br>(7.7-17%)                    | 10<br>(6.4-14)      | 980<br>(670-1300)      |
| Switzerland | 2010 | Female | 35 to 39 | 89%<br>(83-94%)                | 11%<br>(6.2-17%)         | 3.6<br>(2.7-4.6)                            | 3%<br>(2.2-3.9%)                     | 14%<br>(10-18%)                     | 18<br>(13-22)       | 1300<br>(990-1700)     |
| Switzerland | 2010 | Female | 40 to 44 | 89%<br>(84-94%)                | 11%<br>(6.5-16%)         | 3.8<br>(2.9-4.9)                            | 3.7%<br>(2.7-4.8%)                   | 15%<br>(11-18%)                     | 34<br>(26-42)       | 2100<br>(1500-2600)    |
| Switzerland | 2010 | Female | 45 to 49 | 92%<br>(89-94%)                | 8.3%<br>(6.2-11%)        | 3.9<br>(3.1-4.9)                            | 4.6%<br>(3.5-6%)                     | 15%<br>(12-18%)                     | 59<br>(47-72)       | 3000<br>(2300-3700)    |
| Switzerland | 2010 | Female | 50 to 54 | 93%<br>(91-94%)                | 7.2%<br>(5.5-9%)         | 3.9<br>(3.1-4.9)                            | 5.4%<br>(4.1-6.9%)                   | 14%<br>(12-17%)                     | 80<br>(64-96)       | 3400<br>(2600-4200)    |
| Switzerland | 2010 | Female | 55 to 59 | 93%<br>(91-94%)                | 7.1%<br>(5.6-8.6%)       | 3.9<br>(3.1-4.8)                            | 5.6%<br>(4.3-7.1%)                   | 13%<br>(10-15%)                     | 98<br>(79-120)      | 3500<br>(2700-4300)    |
| Switzerland | 2010 | Female | 60 to 64 | 93%<br>(92-95%)                | 6.9%<br>(5.4-8.5%)       | 3.7<br>(2.9-4.8)                            | 5.1%<br>(3.7-6.7%)                   | 10%<br>(8.1-12%)                    | 120<br>(91-150)     | 3500<br>(2600-4600)    |
| Switzerland | 2010 | Female | 65 to 69 | 93%<br>(91-95%)                | 7%<br>(5.5-8.8%)         | 3.3<br>(2.7-4.1)                            | 4.2%<br>(2.8-5.7%)                   | 7.9%<br>(5.8-9.9%)                  | 120<br>(88-150)     | 3000<br>(2000-3900)    |
| Switzerland | 2010 | Female | 70 to 74 | 91%<br>(89-93%)                | 8.9%<br>(7.3-11%)        | 2.9<br>(2.2-3.7)                            | 2.9%<br>(1.4-4.5%)                   | 5.2%<br>(2.9-7.4%)                  | 100<br>(57-150)     | 2000<br>(960-3200)     |
| Switzerland | 2010 | Female | 75 to 79 | 88%<br>(84-91%)                | 12%<br>(9.1-16%)         | 2.6<br>(2-3.4)                              | 1.9%<br>(0.12-3.7%)                  | 2.9%<br>(0.43-5.4%)                 | 93<br>(14-170)      | 1500<br>(84-2900)      |
| Switzerland | 2010 | Female | 80 to 84 | 85%<br>(80-89%)                | 15%<br>(11-20%)          | 2.5<br>(1.9-3.2)                            | 1.1%<br>(-0.99-3.1%)                 | 1.4%<br>(-1.4-4.1%)                 | 77<br>(-80-230)     | 950<br>(-830-2700)     |
| Switzerland | 2010 | Female | 85 to 89 | 84%<br>(78-88%)                | 16%<br>(12-22%)          | 2.4<br>(1.8-3.2)                            | 0.74%<br>(-1.7-3.1%)                 | 0.73%<br>(-2.5-3.7%)                | 55<br>(-180-290)    | 560<br>(-1300-2400)    |
| Switzerland | 2010 | Female | 90 to 94 | 83%<br>(77-88%)                | 17%<br>(12-23%)          | 2.4<br>(1.6-3.3)                            | 0.43%<br>(-2.5-3.5%)                 | 0.26%<br>(-3.5-4%)                  | 15<br>(-210-240)    | 170<br>(-950-1300)     |
| Switzerland | 2010 | Female | 95 plus  | 82%<br>(73-89%)                | 18%<br>(11-27%)          | 2.3<br>(1.4-3.4)                            | 0.36%<br>(-3.3-4.2%)                 | 0.12%<br>(-4.2-4.9%)                | 4.3<br>(-150-170)   | 52<br>(-460-600)       |
| Switzerland | 2010 | Male   | All Ages | 91%<br>(88-94%)                | 8.7%<br>(6.4-12%)        | 2.9<br>(2.5-3.3)                            | 5.8%<br>(4.4-7.4%)                   | 5.7%<br>(3.1-8.2%)                  | 1700<br>(930-2600)  | 55000<br>(41000-71000) |
| Switzerland | 2010 | Male   | 15 to 19 | 84%<br>(72-92%)                | 16%<br>(8-28%)           | 1.7<br>(1.1-2.5)                            | 4.1%<br>(2.5-5.8%)                   | 9.3%<br>(3.7-16%)                   | 8.1<br>(3.1-14)     | 1000<br>(600-1500)     |
| Switzerland | 2010 | Male   | 20 to 24 | 89%<br>(80-94%)                | 11%<br>(5.6-20%)         | 2.5<br>(1.6-3.6)                            | 8%<br>(5.4-11%)                      | 13%<br>(5.2-21%)                    | 16<br>(6.2-26)      | 2300<br>(1500-3200)    |

| Location    | Year | Sex    | Age      | Prevalence of current drinkers | Prevalence of abstainers | Population average of standard drinks daily | Percent of total attributable deaths | Percent of total attributable DALYs | Attributable deaths | Attributable DALYs     |
|-------------|------|--------|----------|--------------------------------|--------------------------|---------------------------------------------|--------------------------------------|-------------------------------------|---------------------|------------------------|
| Switzerland | 2010 | Male   | 25 to 29 | 91%<br>(84-96%)                | 8.8%<br>(4.3-16%)        | 2.7<br>(1.8-3.8)                            | 7%<br>(4.7-9.5%)                     | 13%<br>(5-20%)                      | 17<br>(6.7-28)      | 2300<br>(1400-3100)    |
| Switzerland | 2010 | Male   | 30 to 34 | 92%<br>(86-96%)                | 7.5%<br>(3.6-14%)        | 2.8<br>(1.9-4.1)                            | 5.6%<br>(3.7-7.8%)                   | 12%<br>(5.3-19%)                    | 19<br>(8.3-29)      | 2000<br>(1300-2700)    |
| Switzerland | 2010 | Male   | 35 to 39 | 93%<br>(87-97%)                | 7.2%<br>(3.2-13%)        | 2.9<br>(2.1-3.9)                            | 5.7%<br>(3.8-7.7%)                   | 13%<br>(6.7-19%)                    | 29<br>(15-42)       | 2300<br>(1500-3100)    |
| Switzerland | 2010 | Male   | 40 to 44 | 94%<br>(88-97%)                | 6.5%<br>(3-12%)          | 3.3<br>(2.5-4.3)                            | 6.5%<br>(4.6-8.7%)                   | 14%<br>(9-20%)                      | 57<br>(36-80)       | 3600<br>(2500-4800)    |
| Switzerland | 2010 | Male   | 45 to 49 | 95%<br>(92-97%)                | 4.9%<br>(2.8-8.1%)       | 4<br>(3.4-4.9)                              | 8%<br>(5.9-10%)                      | 16%<br>(11-20%)                     | 100<br>(73-130)     | 5300<br>(4000-6700)    |
| Switzerland | 2010 | Male   | 50 to 54 | 96%<br>(94-97%)                | 4.2%<br>(2.7-6%)         | 4.4<br>(3.6-5.3)                            | 8.9%<br>(6.7-11%)                    | 15%<br>(12-20%)                     | 140<br>(110-190)    | 6300<br>(4800-7900)    |
| Switzerland | 2010 | Male   | 55 to 59 | 95%<br>(94-96%)                | 4.7%<br>(3.6-6%)         | 4.4<br>(3.7-5.2)                            | 8.8%<br>(6.8-11%)                    | 14%<br>(11-17%)                     | 180<br>(140-230)    | 6700<br>(5200-8400)    |
| Switzerland | 2010 | Male   | 60 to 64 | 95%<br>(94-97%)                | 4.6%<br>(3.4-5.9%)       | 4.3<br>(3.6-5.2)                            | 7.9%<br>(5.9-10%)                    | 11%<br>(8.5-14%)                    | 220<br>(160-280)    | 6900<br>(5200-8700)    |
| Switzerland | 2010 | Male   | 65 to 69 | 96%<br>(95-97%)                | 3.6%<br>(2.6-5%)         | 4.2<br>(3.5-5.1)                            | 6.5%<br>(4.6-8.5%)                   | 8.7%<br>(6.1-11%)                   | 230<br>(150-300)    | 5900<br>(4100-7700)    |
| Switzerland | 2010 | Male   | 70 to 74 | 97%<br>(95-98%)                | 3.4%<br>(2.4-4.8%)       | 4<br>(3.3-4.8)                              | 5.3%<br>(3.3-7.5%)                   | 6.7%<br>(4-9.5%)                    | 200<br>(120-290)    | 4300<br>(2600-6000)    |
| Switzerland | 2010 | Male   | 75 to 79 | 96%<br>(94-97%)                | 4.1%<br>(2.6-6%)         | 3.8<br>(3.1-4.6)                            | 4.1%<br>(2-6.3%)                     | 4.8%<br>(2.1-7.5%)                  | 200<br>(88-320)     | 3400<br>(1600-5200)    |
| Switzerland | 2010 | Male   | 80 to 84 | 95%<br>(92-97%)                | 5.1%<br>(3.2-7.7%)       | 3.5<br>(2.8-4.3)                            | 2.8%<br>(0.51-5.1%)                  | 3%<br>(0.0069-5.8%)                 | 160<br>(0.36-300)   | 2000<br>(360-3700)     |
| Switzerland | 2010 | Male   | 85 to 89 | 94%<br>(91-96%)                | 6.1%<br>(4-9.1%)         | 3.3<br>(2.5-4.1)                            | 2%<br>(-0.28-4.5%)                   | 2.6%<br>(-1-4.9%)                   | 100<br>(-51-260)    | 980<br>(-130-2100)     |
| Switzerland | 2010 | Male   | 90 to 94 | 93%<br>(90-96%)                | 6.7%<br>(4.2-10%)        | 3.1<br>(2.3-4)                              | 1.4%<br>(-1.3-4.2%)                  | 1.2%<br>(-2.1-4.5%)                 | 34<br>(-61-130)     | 250<br>(-220-760)      |
| Switzerland | 2010 | Male   | 95 plus  | 93%<br>(88-96%)                | 7.5%<br>(3.6-12%)        | 2.9<br>(1.9-4)                              | 0.96%<br>(-2.1-4.2%)                 | 0.61%<br>(-3-4.4%)                  | 6.6<br>(-33-48)     | 42<br>(-94-180)        |
| Switzerland | 2016 | Female | All Ages | 88%<br>(86-91%)                | 12%<br>(9.5-14%)         | 2.8<br>(2.2-3.6)                            | 2.8%<br>(1.5-4.3%)                   | 2.6%<br>(-0.42-5.6%)                | 880<br>(-140-2000)  | 28000<br>(14000-43000) |
| Switzerland | 2016 | Female | 15 to 19 | 85%<br>(75-92%)                | 15%<br>(7.5-25%)         | 2.2<br>(1.3-3.3)                            | 1.8%<br>(1.1-2.6%)                   | 9.2%<br>(4.8-15%)                   | 2.7<br>(1.3-4.5)    | 380<br>(230-550)       |
| Switzerland | 2016 | Female | 20 to 24 | 89%<br>(80-94%)                | 11%<br>(6.2-20%)         | 2.9<br>(1.8-4.4)                            | 2.8%<br>(1.9-3.9%)                   | 11%<br>(5.3-17%)                    | 4.7<br>(2-8)        | 790<br>(500-1200)      |
| Switzerland | 2016 | Female | 25 to 29 | 90%<br>(82-95%)                | 10%<br>(5.2-18%)         | 3.1<br>(2-4.6)                              | 2.5%<br>(1.6-3.4%)                   | 11%<br>(5.6-17%)                    | 6.4<br>(2.9-11)     | 890<br>(570-1300)      |
| Switzerland | 2016 | Female | 30 to 34 | 90%<br>(82-95%)                | 10%<br>(5.2-18%)         | 3.3<br>(2.2-4.7)                            | 2.4%<br>(1.6-3.4%)                   | 12%<br>(7.6-17%)                    | 9.8<br>(5.3-16)     | 990<br>(640-1400)      |
| Switzerland | 2016 | Female | 35 to 39 | 89%<br>(83-94%)                | 11%<br>(6.4-17%)         | 3.5<br>(2.4-4.9)                            | 2.8%<br>(1.9-4%)                     | 14%<br>(10-18%)                     | 15<br>(8.8-25)      | 1200<br>(790-1700)     |
| Switzerland | 2016 | Female | 40 to 44 | 89%<br>(83-93%)                | 11%<br>(6.5-17%)         | 3.8<br>(2.6-5.2)                            | 3.4%<br>(2.3-4.9%)                   | 15%<br>(11-18%)                     | 27<br>(17-43)       | 1700<br>(1100-2500)    |

| Location    | Year | Sex    | Age      | Prevalence of current drinkers | Prevalence of abstainers | Population average of standard drinks daily | Percent of total attributable deaths | Percent of total attributable DALYs | Attributable deaths | Attributable DALYs     |
|-------------|------|--------|----------|--------------------------------|--------------------------|---------------------------------------------|--------------------------------------|-------------------------------------|---------------------|------------------------|
| Switzerland | 2016 | Female | 45 to 49 | 91%<br>(88-94%)                | 8.6%<br>(6.3-12%)        | 3.9<br>(2.8-5.2)                            | 4.3%<br>(2.9-6%)                     | 15%<br>(12-18%)                     | 52<br>(34-78)       | 2700<br>(1800-3800)    |
| Switzerland | 2016 | Female | 50 to 54 | 93%<br>(90-94%)                | 7.3%<br>(5.5-9.5%)       | 3.9<br>(2.7-5.3)                            | 5.1%<br>(3.5-7%)                     | 14%<br>(11-17%)                     | 83<br>(55-120)      | 3600<br>(2300-5200)    |
| Switzerland | 2016 | Female | 55 to 59 | 93%<br>(91-94%)                | 7%<br>(5.5-8.8%)         | 3.8<br>(2.8-5.1)                            | 5.3%<br>(3.7-7.2%)                   | 13%<br>(10-15%)                     | 100<br>(65-150)     | 3600<br>(2400-5200)    |
| Switzerland | 2016 | Female | 60 to 64 | 93%<br>(91-94%)                | 7%<br>(5.5-8.8%)         | 3.6<br>(2.6-5)                              | 4.7%<br>(3.2-6.5%)                   | 10%<br>(7.5-13%)                    | 100<br>(66-150)     | 3200<br>(2000-4500)    |
| Switzerland | 2016 | Female | 65 to 69 | 93%<br>(91-94%)                | 7.2%<br>(5.5-9.3%)       | 3.3<br>(2.4-4.4)                            | 4%<br>(2.4-5.8%)                     | 7.8%<br>(5.4-10%)                   | 120<br>(75-190)     | 3100<br>(1800-4700)    |
| Switzerland | 2016 | Female | 70 to 74 | 91%<br>(89-93%)                | 8.9%<br>(7.1-11%)        | 2.9<br>(2-3.9)                              | 2.8%<br>(1.1-4.9%)                   | 5.1%<br>(2.6-7.8%)                  | 110<br>(54-190)     | 2300<br>(830-4000)     |
| Switzerland | 2016 | Female | 75 to 79 | 88%<br>(84-91%)                | 12%<br>(8.9-16%)         | 2.6<br>(1.8-3.6)                            | 1.9%<br>(-0.12-4%)                   | 2.9%<br>(0.25-5.8%)                 | 88<br>(7.3-180)     | 1400<br>(-92-3200)     |
| Switzerland | 2016 | Female | 80 to 84 | 85%<br>(80-89%)                | 15%<br>(11-20%)          | 2.5<br>(1.7-3.5)                            | 1.1%<br>(-1.1-3.5%)                  | 1.5%<br>(-1.6-4.5%)                 | 75<br>(-85-240)     | 950<br>(-920-2900)     |
| Switzerland | 2016 | Female | 85 to 89 | 84%<br>(78-88%)                | 16%<br>(12-22%)          | 2.4<br>(1.6-3.4)                            | 0.73%<br>(-1.8-3.4%)                 | 0.73%<br>(-2.6-4.2%)                | 55<br>(-190-320)    | 570<br>(-1400-2700)    |
| Switzerland | 2016 | Female | 90 to 94 | 83%<br>(77-88%)                | 17%<br>(12-23%)          | 2.4<br>(1.5-3.4)                            | 0.41%<br>(-2.4-3.6%)                 | 0.23%<br>(-3.5-4.2%)                | 17<br>(-260-310)    | 200<br>(-1200-1700)    |
| Switzerland | 2016 | Female | 95 plus  | 83%<br>(74-90%)                | 17%<br>(10-26%)          | 2.3<br>(1.3-3.5)                            | 0.31%<br>(-3.2-4.1%)                 | 0.064%<br>(-4.3-4.8%)               | 2<br>(-150-170)     | 45<br>(-460-590)       |
| Switzerland | 2016 | Male   | All Ages | 91%<br>(89-94%)                | 8.7%<br>(6.5-11%)        | 2.9<br>(2.2-3.7)                            | 5.7%<br>(3.8-7.9%)                   | 5.5%<br>(2.4-8.9%)                  | 1800<br>(730-3300)  | 57000<br>(35000-87000) |
| Switzerland | 2016 | Male   | 15 to 19 | 84%<br>(73-92%)                | 16%<br>(8.1-27%)         | 1.7<br>(1-2.6)                              | 4.1%<br>(2.5-5.9%)                   | 9.2%<br>(3.2-16%)                   | 6.6<br>(2.2-12)     | 880<br>(530-1300)      |
| Switzerland | 2016 | Male   | 20 to 24 | 89%<br>(80-94%)                | 11%<br>(5.8-20%)         | 2.5<br>(1.5-3.7)                            | 8.2%<br>(5.5-11%)                    | 13%<br>(4.9-21%)                    | 14<br>(5.1-26)      | 2200<br>(1400-3300)    |
| Switzerland | 2016 | Male   | 25 to 29 | 91%<br>(84-96%)                | 8.9%<br>(4.5-16%)        | 2.6<br>(1.6-4)                              | 7.2%<br>(4.7-9.9%)                   | 12%<br>(4.9-21%)                    | 17<br>(6.2-32)      | 2400<br>(1500-3400)    |
| Switzerland | 2016 | Male   | 30 to 34 | 92%<br>(85-97%)                | 7.6%<br>(3.4-15%)        | 2.8<br>(1.7-4.2)                            | 5.7%<br>(3.8-8.1%)                   | 12%<br>(5.2-19%)                    | 19<br>(7.7-36)      | 2200<br>(1400-3100)    |
| Switzerland | 2016 | Male   | 35 to 39 | 93%<br>(87-97%)                | 7.3%<br>(3.3-13%)        | 2.9<br>(1.9-4.2)                            | 5.6%<br>(3.7-7.9%)                   | 13%<br>(6.6-19%)                    | 26<br>(12-43)       | 2200<br>(1400-3200)    |
| Switzerland | 2016 | Male   | 40 to 44 | 93%<br>(88-97%)                | 6.6%<br>(3-12%)          | 3.3<br>(2.3-4.7)                            | 6.4%<br>(4.3-9.1%)                   | 14%<br>(9.2-21%)                    | 47<br>(25-76)       | 3000<br>(1900-4400)    |
| Switzerland | 2016 | Male   | 45 to 49 | 95%<br>(91-97%)                | 5.2%<br>(3-8.7%)         | 3.9<br>(2.9-5.2)                            | 7.7%<br>(5.3-11%)                    | 16%<br>(11-22%)                     | 93<br>(54-150)      | 4900<br>(3200-7300)    |
| Switzerland | 2016 | Male   | 50 to 54 | 95%<br>(93-97%)                | 4.5%<br>(2.9-6.7%)       | 4.3<br>(3.1-5.7)                            | 8.5%<br>(5.9-12%)                    | 15%<br>(11-20%)                     | 150<br>(90-240)     | 6700<br>(4400-10000)   |
| Switzerland | 2016 | Male   | 55 to 59 | 95%<br>(93-96%)                | 5%<br>(3.7-6.6%)         | 4.3<br>(3.2-5.7)                            | 8.7%<br>(6.1-12%)                    | 14%<br>(10-18%)                     | 200<br>(120-300)    | 7300<br>(4600-11000)   |
| Switzerland | 2016 | Male   | 60 to 64 | 95%<br>(94-97%)                | 4.8%<br>(3.5-6.3%)       | 4.2<br>(3.1-5.6)                            | 7.8%<br>(5.4-11%)                    | 12%<br>(8.3-15%)                    | 210<br>(130-320)    | 6500<br>(4200-9700)    |

| Location       | Year | Sex    | Age      | Prevalence of current drinkers | Prevalence of abstainers | Population average of standard drinks daily | Percent of total attributable deaths | Percent of total attributable DALYs | Attributable deaths  | Attributable DALYs        |
|----------------|------|--------|----------|--------------------------------|--------------------------|---------------------------------------------|--------------------------------------|-------------------------------------|----------------------|---------------------------|
| Switzerland    | 2016 | Male   | 65 to 69 | 96%<br>(95-97%)                | 3.8%<br>(2.7-5.3%)       | 4.1<br>(3-5.3)                              | 6.5%<br>(4.1-9.3%)                   | 9%<br>(5.9-12%)                     | 240<br>(140-390)     | 6400<br>(3700-10000)      |
| Switzerland    | 2016 | Male   | 70 to 74 | 96%<br>(95-97%)                | 3.6%<br>(2.5-5.1%)       | 3.9<br>(2.9-5.1)                            | 5.3%<br>(2.9-8.1%)                   | 6.9%<br>(3.7-10%)                   | 240<br>(120-410)     | 5100<br>(2600-8500)       |
| Switzerland    | 2016 | Male   | 75 to 79 | 96%<br>(94-97%)                | 4.2%<br>(2.7-6.3%)       | 3.7<br>(2.7-4.8)                            | 4.1%<br>(1.6-6.9%)                   | 4.9%<br>(1.8-8.2%)                  | 200<br>(65-390)      | 3500<br>(1300-6200)       |
| Switzerland    | 2016 | Male   | 80 to 84 | 95%<br>(92-97%)                | 5.3%<br>(3.3-8.3%)       | 3.4<br>(2.5-4.5)                            | 2.9%<br>(0.29-5.9%)                  | 3.1%<br>(-0.14-6.7%)                | 180<br>(-9.7-410)    | 2300<br>(220-4700)        |
| Switzerland    | 2016 | Male   | 85 to 89 | 94%<br>(90-96%)                | 6.4%<br>(4.1-9.5%)       | 3.2<br>(2.3-4.3)                            | 2.1%<br>(-0.56-5.4%)                 | 2.1%<br>(-1.2-5.9%)                 | 120<br>(-70-350)     | 1200<br>(-320-3000)       |
| Switzerland    | 2016 | Male   | 90 to 94 | 93%<br>(89-96%)                | 6.9%<br>(4.2-11%)        | 3.1<br>(2-4.2)                              | 1.5%<br>(-1.3-4.8%)                  | 1.3%<br>(-2.1-5.2%)                 | 51<br>(-87-200)      | 360<br>(-340-1100)        |
| Switzerland    | 2016 | Male   | 95 plus  | 92%<br>(87-96%)                | 7.6%<br>(3.8-13%)        | 2.9<br>(1.7-4.1)                            | 1%<br>(-2.1-4.6%)                    | 0.74%<br>(-3.2-5%)                  | 8.7<br>(-37-61)      | 50<br>(-100-220)          |
| United Kingdom | 1990 | Female | All Ages | 82%<br>(80-85%)                | 18%<br>(15-20%)          | 2.8<br>(1.9-4.1)                            | 3.8%<br>(1.4-6.9%)                   | 4.5%<br>(0.011-10%)                 | 15000<br>(37-33000)  | 340000<br>(120000-610000) |
| United Kingdom | 1990 | Female | 15 to 19 | 79%<br>(70-85%)                | 21%<br>(15-30%)          | 2.2<br>(1.3-3.6)                            | 2.5%<br>(1.5-3.6%)                   | 8.4%<br>(4.5-13%)                   | 45<br>(24-73)        | 5200<br>(3400-7600)       |
| United Kingdom | 1990 | Female | 20 to 24 | 83%<br>(74-89%)                | 17%<br>(11-26%)          | 2.8<br>(1.6-4.6)                            | 3.5%<br>(2.3-4.9%)                   | 9.9%<br>(5.1-16%)                   | 71<br>(36-110)       | 10000<br>(6600-14000)     |
| United Kingdom | 1990 | Female | 25 to 29 | 85%<br>(77-90%)                | 15%<br>(9.9-23%)         | 2.8<br>(1.6-4.6)                            | 3.2%<br>(2.1-4.4%)                   | 10%<br>(5.4-15%)                    | 88<br>(47-140)       | 10000<br>(6700-15000)     |
| United Kingdom | 1990 | Female | 30 to 34 | 87%<br>(78-92%)                | 13%<br>(8.4-22%)         | 3<br>(1.8-4.7)                              | 3.2%<br>(2-4.6%)                     | 11%<br>(6.2-16%)                    | 120<br>(69-170)      | 10000<br>(6600-14000)     |
| United Kingdom | 1990 | Female | 35 to 39 | 88%<br>(82-93%)                | 12%<br>(7.3-18%)         | 3.2<br>(1.9-5.1)                            | 3.8%<br>(2.4-5.6%)                   | 12%<br>(7.6-17%)                    | 190<br>(120-270)     | 13000<br>(8400-18000)     |
| United Kingdom | 1990 | Female | 40 to 44 | 89%<br>(83-93%)                | 11%<br>(6.6-17%)         | 3.5<br>(2-5.6)                              | 4.5%<br>(2.8-6.6%)                   | 12%<br>(8.2-17%)                    | 350<br>(230-480)     | 19000<br>(13000-27000)    |
| United Kingdom | 1990 | Female | 45 to 49 | 89%<br>(82-93%)                | 11%<br>(6.5-18%)         | 4<br>(2.2-6.3)                              | 5.6%<br>(3.3-8.2%)                   | 13%<br>(7.8-18%)                    | 490<br>(300-690)     | 23000<br>(14000-33000)    |
| United Kingdom | 1990 | Female | 50 to 54 | 89%<br>(83-93%)                | 11%<br>(6.6-17%)         | 4.3<br>(2.5-6.8)                            | 6.2%<br>(3.4-9.1%)                   | 12%<br>(6.9-17%)                    | 680<br>(400-980)     | 27000<br>(15000-40000)    |
| United Kingdom | 1990 | Female | 55 to 59 | 89%<br>(83-93%)                | 11%<br>(6.6-17%)         | 4.6<br>(2.7-7.4)                            | 6.4%<br>(3.1-9.8%)                   | 10%<br>(5.5-16%)                    | 980<br>(520-1500)    | 34000<br>(16000-52000)    |
| United Kingdom | 1990 | Female | 60 to 64 | 88%<br>(81-93%)                | 12%<br>(7.4-19%)         | 4.6<br>(2.6-7.4)                            | 5.7%<br>(1.9-9.9%)                   | 8.2%<br>(2.9-14%)                   | 1400<br>(470-2300)   | 39000<br>(13000-68000)    |
| United Kingdom | 1990 | Female | 65 to 69 | 85%<br>(78-91%)                | 15%<br>(8.7-22%)         | 4.1<br>(2.5-6.2)                            | 4.6%<br>(0.84-8.7%)                  | 6.2%<br>(1.2-12%)                   | 1700<br>(310-3200)   | 41000<br>(7100-78000)     |
| United Kingdom | 1990 | Female | 70 to 74 | 83%<br>(76-89%)                | 17%<br>(11-24%)          | 3.7<br>(2.1-5.9)                            | 3.7%<br>(-0.38-8.7%)                 | 4.7%<br>(-0.59-11%)                 | 1600<br>(-210-3800)  | 32000<br>(-3400-74000)    |
| United Kingdom | 1990 | Female | 75 to 79 | 80%<br>(71-87%)                | 20%<br>(13-29%)          | 3.4<br>(1.9-5.4)                            | 2.9%<br>(-1.4-8.3%)                  | 3.5%<br>(-1.9-10%)                  | 1800<br>(-980-5400)  | 29000<br>(-14000-82000)   |
| United Kingdom | 1990 | Female | 80 to 84 | 78%<br>(67-86%)                | 22%<br>(14-33%)          | 3.2<br>(1.9-5.1)                            | 2.8%<br>(-1.4-8.1%)                  | 3.3%<br>(-1.8-9.6%)                 | 2100<br>(-1100-6200) | 25000<br>(-12000-70000)   |

| Location       | Year | Sex    | Age      | Prevalence of current drinkers | Prevalence of abstainers | Population average of standard drinks daily | Percent of total attributable deaths | Percent of total attributable DALYs | Attributable deaths   | Attributable DALYs        |
|----------------|------|--------|----------|--------------------------------|--------------------------|---------------------------------------------|--------------------------------------|-------------------------------------|-----------------------|---------------------------|
| United Kingdom | 1990 | Female | 85 to 89 | 76%<br>(67-83%)                | 24%<br>(17-33%)          | 3.1<br>(1.8-5)                              | 2.9%<br>(-1.2-8.2%)                  | 3.3%<br>(-1.6-9.6%)                 | 1900<br>(-930-5600)   | 15000<br>(-6500-44000)    |
| United Kingdom | 1990 | Female | 90 to 94 | 76%<br>(66-83%)                | 24%<br>(17-34%)          | 3.1<br>(1.7-5.2)                            | 2.6%<br>(-1.4-8.3%)                  | 3%<br>(-1.9-9.6%)                   | 980<br>(-630-3200)    | 5500<br>(-3000-17000)     |
| United Kingdom | 1990 | Female | 95 plus  | 75%<br>(61-85%)                | 25%<br>(15-39%)          | 3<br>(1.5-5.3)                              | 2.7%<br>(-1.8-8.7%)                  | 3.1%<br>(-2.4-10%)                  | 380<br>(-300-1300)    | 1400<br>(-910-4500)       |
| United Kingdom | 1990 | Male   | All Ages | 86%<br>(83-89%)                | 14%<br>(11-17%)          | 2.6<br>(1.7-3.7)                            | 3.2%<br>(0.7-6.1%)                   | 2.2%<br>(-1.4-6.4%)                 | 6800<br>(-4500-20000) | 300000<br>(63000-580000)  |
| United Kingdom | 1990 | Male   | 15 to 19 | 78%<br>(69-85%)                | 22%<br>(15-31%)          | 1.7<br>(0.98-2.8)                           | 4.8%<br>(3-6.9%)                     | 8.5%<br>(4.3-13%)                   | 120<br>(61-190)       | 12000<br>(7600-18000)     |
| United Kingdom | 1990 | Male   | 20 to 24 | 85%<br>(77-91%)                | 15%<br>(9.1-23%)         | 2.6<br>(1.5-4.2)                            | 8.9%<br>(6.1-12%)                    | 13%<br>(6.6-19%)                    | 270<br>(140-400)      | 30000<br>(20000-41000)    |
| United Kingdom | 1990 | Male   | 25 to 29 | 88%<br>(81-93%)                | 12%<br>(7.5-19%)         | 2.8<br>(1.7-4.6)                            | 8.3%<br>(5.7-11%)                    | 13%<br>(6.8-19%)                    | 270<br>(140-410)      | 28000<br>(19000-39000)    |
| United Kingdom | 1990 | Male   | 30 to 34 | 90%<br>(83-94%)                | 10%<br>(5.8-17%)         | 3<br>(1.8-4.6)                              | 7.1%<br>(4.7-10%)                    | 12%<br>(6.7-18%)                    | 250<br>(140-390)      | 23000<br>(15000-31000)    |
| United Kingdom | 1990 | Male   | 35 to 39 | 92%<br>(87-95%)                | 8.5%<br>(5-13%)          | 3<br>(1.8-4.7)                              | 6.1%<br>(4-8.8%)                     | 10%<br>(5.3-15%)                    | 270<br>(140-410)      | 20000<br>(13000-29000)    |
| United Kingdom | 1990 | Male   | 40 to 44 | 93%<br>(88-96%)                | 7.3%<br>(4-12%)          | 3.2<br>(1.9-5.1)                            | 5.3%<br>(3.1-8%)                     | 8.1%<br>(3.9-13%)                   | 350<br>(170-580)      | 22000<br>(13000-34000)    |
| United Kingdom | 1990 | Male   | 45 to 49 | 94%<br>(89-96%)                | 6.4%<br>(3.7-11%)        | 3.7<br>(2.1-5.8)                            | 4.9%<br>(2-8.6%)                     | 6.7%<br>(1.8-13%)                   | 410<br>(110-790)      | 22000<br>(9100-39000)     |
| United Kingdom | 1990 | Male   | 50 to 54 | 94%<br>(90-97%)                | 5.7%<br>(3.1-9.9%)       | 4.1<br>(2.3-6.4)                            | 4.4%<br>(1-8.6%)                     | 5.6%<br>(0.48-12%)                  | 530<br>(45-1100)      | 24000<br>(5200-46000)     |
| United Kingdom | 1990 | Male   | 55 to 59 | 95%<br>(91-97%)                | 5.4%<br>(3-8.6%)         | 4.4<br>(2.6-7)                              | 4.1%<br>(0.27-8.8%)                  | 4.8%<br>(-0.35-11%)                 | 750<br>(-55-1700)     | 28000<br>(1900-60000)     |
| United Kingdom | 1990 | Male   | 60 to 64 | 95%<br>(91-97%)                | 5.5%<br>(3.1-9.1%)       | 4.3<br>(2.5-7)                              | 3.2%<br>(-0.8-8.4%)                  | 3.5%<br>(-1.6-9.7%)                 | 920<br>(-420-2600)    | 30000<br>(-7400-76000)    |
| United Kingdom | 1990 | Male   | 65 to 69 | 94%<br>(90-97%)                | 6%<br>(3.3-9.7%)         | 3.9<br>(2.4-5.9)                            | 2.1%<br>(-1.5-6.4%)                  | 2.2%<br>(-2.1-7.3%)                 | 900<br>(-890-3000)    | 25000<br>(-17000-74000)   |
| United Kingdom | 1990 | Male   | 70 to 74 | 93%<br>(89-96%)                | 6.9%<br>(4.2-11%)        | 3.5<br>(2-5.5)                              | 1.4%<br>(-2.2-5.6%)                  | 1.2%<br>(-2.9-6.1%)                 | 580<br>(-1300-2800)   | 14000<br>(-22000-57000)   |
| United Kingdom | 1990 | Male   | 75 to 79 | 92%<br>(87-95%)                | 8%<br>(4.7-13%)          | 3.2<br>(1.8-5.1)                            | 0.91%<br>(-2.5-5.3%)                 | 0.73%<br>(-3-5.7%)                  | 420<br>(-1800-3300)   | 8700<br>(-23000-52000)    |
| United Kingdom | 1990 | Male   | 80 to 84 | 91%<br>(84-95%)                | 9.3%<br>(5.5-16%)        | 3<br>(1.8-4.7)                              | 0.94%<br>(-2.2-5.1%)                 | 0.78%<br>(-2.7-5.5%)                | 400<br>(-1400-2800)   | 5800<br>(-13000-31000)    |
| United Kingdom | 1990 | Male   | 85 to 89 | 90%<br>(84-94%)                | 10%<br>(6.4-16%)         | 2.9<br>(1.7-4.6)                            | 1%<br>(-1.8-5.1%)                    | 0.9%<br>(-2.4-5.4%)                 | 260<br>(-690-1600)    | 2600<br>(-4700-13000)     |
| United Kingdom | 1990 | Male   | 90 to 94 | 89%<br>(83-93%)                | 11%<br>(6.5-17%)         | 2.9<br>(1.6-4.8)                            | 0.88%<br>(-2-5%)                     | 0.71%<br>(-2.7-5.4%)                | 72<br>(-270-540)      | 530<br>(-1200-3000)       |
| United Kingdom | 1990 | Male   | 95 plus  | 89%<br>(82-94%)                | 11%<br>(6-18%)           | 2.8<br>(1.4-5)                              | 0.98%<br>(-2.2-5.8%)                 | 0.79%<br>(-2.9-6.4%)                | 19<br>(-70-150)       | 95<br>(-220-560)          |
| United Kingdom | 1995 | Female | All Ages | 83%<br>(80-86%)                | 17%<br>(14-20%)          | 2.8<br>(1.9-4.1)                            | 3.8%<br>(1.4-6.8%)                   | 4.6%<br>(0.22-9.9%)                 | 15000<br>(740-33000)  | 330000<br>(130000-580000) |



| Location       | Year | Sex    | Age      | Prevalence of current drinkers | Prevalence of abstainers | Population average of standard drinks daily | Percent of total attributable deaths | Percent of total attributable DALYs | Attributable deaths   | Attributable DALYs        |
|----------------|------|--------|----------|--------------------------------|--------------------------|---------------------------------------------|--------------------------------------|-------------------------------------|-----------------------|---------------------------|
| United Kingdom | 1995 | Female | 15 to 19 | 80%<br>(72-86%)                | 20%<br>(14-28%)          | 2.2<br>(1.3-3.6)                            | 2.3%<br>(1.5-3.4%)                   | 8.1%<br>(4.4-12%)                   | 37<br>(20-57)         | 4400<br>(2900-6400)       |
| United Kingdom | 1995 | Female | 20 to 24 | 84%<br>(76-89%)                | 16%<br>(11-24%)          | 2.8<br>(1.6-4.6)                            | 3.4%<br>(2.3-4.7%)                   | 9.7%<br>(5-15%)                     | 59<br>(30-89)         | 8400<br>(5600-12000)      |
| United Kingdom | 1995 | Female | 25 to 29 | 85%<br>(78-90%)                | 15%<br>(9.7-22%)         | 2.8<br>(1.6-4.6)                            | 3.1%<br>(2.1-4.3%)                   | 9.7%<br>(5.3-15%)                   | 83<br>(46-130)        | 9900<br>(6600-14000)      |
| United Kingdom | 1995 | Female | 30 to 34 | 87%<br>(80-92%)                | 13%<br>(8.2-20%)         | 3<br>(1.8-4.8)                              | 3.1%<br>(2.1-4.5%)                   | 11%<br>(6.5-15%)                    | 130<br>(81-190)       | 11000<br>(7400-16000)     |
| United Kingdom | 1995 | Female | 35 to 39 | 89%<br>(83-93%)                | 11%<br>(7.3-17%)         | 3.2<br>(1.9-5)                              | 3.8%<br>(2.5-5.3%)                   | 12%<br>(8.3-17%)                    | 200<br>(140-280)      | 14000<br>(9200-19000)     |
| United Kingdom | 1995 | Female | 40 to 44 | 90%<br>(84-93%)                | 10%<br>(6.5-16%)         | 3.5<br>(2.1-5.5)                            | 4.7%<br>(3-6.5%)                     | 13%<br>(9-17%)                      | 330<br>(230-440)      | 18000<br>(12000-25000)    |
| United Kingdom | 1995 | Female | 45 to 49 | 90%<br>(84-94%)                | 10%<br>(6.3-16%)         | 4<br>(2.3-6.3)                              | 5.6%<br>(3.4-8%)                     | 13%<br>(8.6-18%)                    | 570<br>(370-790)      | 27000<br>(17000-38000)    |
| United Kingdom | 1995 | Female | 50 to 54 | 90%<br>(84-94%)                | 10%<br>(6.2-16%)         | 4.3<br>(2.5-6.8)                            | 6.2%<br>(3.7-9.1%)                   | 12%<br>(7.7-17%)                    | 720<br>(450-1000)     | 29000<br>(17000-42000)    |
| United Kingdom | 1995 | Female | 55 to 59 | 89%<br>(84-93%)                | 11%<br>(6.6-16%)         | 4.6<br>(2.7-7.4)                            | 6.3%<br>(3.2-9.5%)                   | 11%<br>(5.9-16%)                    | 920<br>(500-1300)     | 32000<br>(16000-48000)    |
| United Kingdom | 1995 | Female | 60 to 64 | 88%<br>(81-92%)                | 12%<br>(7.5-19%)         | 4.5<br>(2.6-7.3)                            | 5.6%<br>(2.1-9.6%)                   | 8.4%<br>(3.3-14%)                   | 1100<br>(450-1900)    | 33000<br>(12000-57000)    |
| United Kingdom | 1995 | Female | 65 to 69 | 86%<br>(78-91%)                | 14%<br>(9.1-22%)         | 4.1<br>(2.5-6.3)                            | 4.5%<br>(1-8.4%)                     | 6.3%<br>(1.5-12%)                   | 1400<br>(350-2700)    | 35000<br>(8000-66000)     |
| United Kingdom | 1995 | Female | 70 to 74 | 83%<br>(76-89%)                | 17%<br>(11-24%)          | 3.7<br>(2.1-5.7)                            | 3.6%<br>(-0.11-8.3%)                 | 4.7%<br>(-0.18-11%)                 | 1800<br>(-67-4000)    | 35000<br>(-960-79000)     |
| United Kingdom | 1995 | Female | 75 to 79 | 81%<br>(72-87%)                | 19%<br>(13-28%)          | 3.4<br>(1.9-5.6)                            | 2.9%<br>(-1.2-8%)                    | 3.6%<br>(-1.6-10%)                  | 1600<br>(-720-4600)   | 25000<br>(-10000-70000)   |
| United Kingdom | 1995 | Female | 80 to 84 | 78%<br>(68-86%)                | 22%<br>(14-32%)          | 3.2<br>(1.9-5.2)                            | 2.9%<br>(-1.1-8%)                    | 3.4%<br>(-1.5-9.4%)                 | 2200<br>(-950-6000)   | 25000<br>(-9500-68000)    |
| United Kingdom | 1995 | Female | 85 to 89 | 77%<br>(68-84%)                | 23%<br>(16-32%)          | 3.2<br>(1.8-5)                              | 3%<br>(-1-8.3%)                      | 3.4%<br>(-1.4-9.7%)                 | 2200<br>(-860-6200)   | 18000<br>(-6000-49000)    |
| United Kingdom | 1995 | Female | 90 to 94 | 76%<br>(67-84%)                | 24%<br>(16-33%)          | 3.1<br>(1.8-5.2)                            | 2.8%<br>(-1.3-8.6%)                  | 3.2%<br>(-1.6-10%)                  | 1300<br>(-670-4100)   | 7300<br>(-3300-22000)     |
| United Kingdom | 1995 | Female | 95 plus  | 75%<br>(63-85%)                | 25%<br>(15-37%)          | 3.1<br>(1.6-5.4)                            | 2.9%<br>(-1.6-9.3%)                  | 3.3%<br>(-2-11%)                    | 530<br>(-320-1700)    | 1900<br>(-1000-6100)      |
| United Kingdom | 1995 | Male   | All Ages | 87%<br>(85-90%)                | 13%<br>(10-15%)          | 2.6<br>(1.8-3.8)                            | 3.8%<br>(1.5-6.6%)                   | 2.7%<br>(-0.75-7.1%)                | 8300<br>(-2300-22000) | 340000<br>(130000-590000) |
| United Kingdom | 1995 | Male   | 15 to 19 | 80%<br>(72-87%)                | 20%<br>(13-28%)          | 1.8<br>(1-2.9)                              | 4.7%<br>(3-6.6%)                     | 8.6%<br>(4.5-13%)                   | 96<br>(50-150)        | 10000<br>(6600-14000)     |
| United Kingdom | 1995 | Male   | 20 to 24 | 86%<br>(79-92%)                | 14%<br>(8.4-21%)         | 2.7<br>(1.5-4.3)                            | 9.1%<br>(6.2-12%)                    | 12%<br>(6.5-19%)                    | 220<br>(120-330)      | 26000<br>(18000-35000)    |
| United Kingdom | 1995 | Male   | 25 to 29 | 89%<br>(82-93%)                | 11%<br>(7.1-18%)         | 2.9<br>(1.7-4.6)                            | 8.5%<br>(6-11%)                      | 12%<br>(6.6-19%)                    | 270<br>(140-410)      | 29000<br>(20000-40000)    |
| United Kingdom | 1995 | Male   | 30 to 34 | 91%<br>(84-94%)                | 9.2%<br>(5.5-16%)        | 3<br>(1.8-4.8)                              | 7.4%<br>(5.2-10%)                    | 12%<br>(6.9-18%)                    | 310<br>(180-460)      | 28000<br>(19000-37000)    |

| Location       | Year | Sex    | Age      | Prevalence of current drinkers | Prevalence of abstainers | Population average of standard drinks daily | Percent of total attributable deaths | Percent of total attributable DALYs | Attributable deaths   | Attributable DALYs        |
|----------------|------|--------|----------|--------------------------------|--------------------------|---------------------------------------------|--------------------------------------|-------------------------------------|-----------------------|---------------------------|
| United Kingdom | 1995 | Male   | 35 to 39 | 92%<br>(88-95%)                | 7.9%<br>(4.8-12%)        | 3<br>(1.8-4.7)                              | 6.8%<br>(4.7-9.2%)                   | 11%<br>(6.8-17%)                    | 320<br>(190-470)      | 24000<br>(17000-33000)    |
| United Kingdom | 1995 | Male   | 40 to 44 | 93%<br>(89-96%)                | 6.8%<br>(3.8-11%)        | 3.3<br>(2-5.2)                              | 6.3%<br>(4.1-9.1%)                   | 10%<br>(6-15%)                      | 400<br>(230-610)      | 25000<br>(16000-35000)    |
| United Kingdom | 1995 | Male   | 45 to 49 | 94%<br>(90-97%)                | 5.8%<br>(3.4-9.9%)       | 3.7<br>(2.2-6)                              | 6.1%<br>(3.4-9.4%)                   | 9%<br>(4.4-15%)                     | 590<br>(290-980)      | 31000<br>(17000-49000)    |
| United Kingdom | 1995 | Male   | 50 to 54 | 95%<br>(91-97%)                | 5.2%<br>(2.9-8.7%)       | 4.2<br>(2.4-6.6)                            | 5.6%<br>(2.4-9.4%)                   | 7.6%<br>(2.7-13%)                   | 690<br>(240-1200)     | 31000<br>(13000-52000)    |
| United Kingdom | 1995 | Male   | 55 to 59 | 95%<br>(92-97%)                | 4.9%<br>(2.8-8%)         | 4.5<br>(2.6-7.1)                            | 5.1%<br>(1.4-9.4%)                   | 6.3%<br>(1.4-12%)                   | 880<br>(190-1700)     | 33000<br>(9100-62000)     |
| United Kingdom | 1995 | Male   | 60 to 64 | 95%<br>(92-97%)                | 5.1%<br>(2.8-8.3%)       | 4.4<br>(2.5-7.2)                            | 4%<br>(0.073-9%)                     | 4.6%<br>(-0.37-11%)                 | 1000<br>(-81-2400)    | 32000<br>(600-70000)      |
| United Kingdom | 1995 | Male   | 65 to 69 | 94%<br>(91-97%)                | 5.6%<br>(3.1-9%)         | 4<br>(2.4-6.1)                              | 2.7%<br>(-0.66-6.9%)                 | 2.9%<br>(-1.2-8%)                   | 1000<br>(-430-2800)   | 27000<br>(-6700-69000)    |
| United Kingdom | 1995 | Male   | 70 to 74 | 94%<br>(90-96%)                | 6.4%<br>(4-10%)          | 3.5<br>(2.1-5.5)                            | 1.7%<br>(-1.7-5.9%)                  | 1.7%<br>(-2.4-6.6%)                 | 840<br>(-1200-3300)   | 19000<br>(-20000-67000)   |
| United Kingdom | 1995 | Male   | 75 to 79 | 93%<br>(88-96%)                | 7.4%<br>(4.3-12%)        | 3.2<br>(1.8-5.3)                            | 1.2%<br>(-2.1-5.6%)                  | 1.1%<br>(-2.7-6.2%)                 | 530<br>(-1400-3100)   | 10000<br>(-18000-48000)   |
| United Kingdom | 1995 | Male   | 80 to 84 | 91%<br>(86-95%)                | 8.5%<br>(4.8-14%)        | 3.1<br>(1.9-4.9)                            | 1.2%<br>(-1.9-5.4%)                  | 1%<br>(-2.5-5.8%)                   | 550<br>(-1300-3000)   | 7600<br>(-12000-34000)    |
| United Kingdom | 1995 | Male   | 85 to 89 | 91%<br>(86-94%)                | 9.4%<br>(6-14%)          | 3<br>(1.8-4.7)                              | 1.3%<br>(-1.6-5.3%)                  | 1.2%<br>(-2.1-5.7%)                 | 420<br>(-730-2000)    | 4000<br>(-4800-16000)     |
| United Kingdom | 1995 | Male   | 90 to 94 | 90%<br>(85-94%)                | 9.8%<br>(6.3-15%)        | 3<br>(1.7-4.9)                              | 1.2%<br>(-1.8-5.6%)                  | 1.1%<br>(-2.5-6.1%)                 | 150<br>(-340-850)     | 1000<br>(-1600-4700)      |
| United Kingdom | 1995 | Male   | 95 plus  | 90%<br>(83-94%)                | 10%<br>(5.5-17%)         | 2.9<br>(1.5-5)                              | 1.3%<br>(-2.6-2%)                    | 1.2%<br>(-2.7-6.8%)                 | 35<br>(-80-200)       | 160<br>(-240-740)         |
| United Kingdom | 2000 | Female | All Ages | 83%<br>(81-86%)                | 17%<br>(14-19%)          | 2.9<br>(1.9-4.2)                            | 3.9%<br>(1.8-6.6%)                   | 4.8%<br>(0.83-10%)                  | 15000<br>(2600-32000) | 330000<br>(150000-560000) |
| United Kingdom | 2000 | Female | 15 to 19 | 80%<br>(72-86%)                | 20%<br>(14-28%)          | 2.2<br>(1.3-3.7)                            | 2.2%<br>(1.4-3.1%)                   | 7.8%<br>(4.3-12%)                   | 35<br>(19-56)         | 4200<br>(2700-6100)       |
| United Kingdom | 2000 | Female | 20 to 24 | 83%<br>(75-89%)                | 17%<br>(11-25%)          | 2.8<br>(1.6-4.8)                            | 3.2%<br>(2.2-4.4%)                   | 9.4%<br>(4.9-14%)                   | 50<br>(26-77)         | 7100<br>(4700-9800)       |
| United Kingdom | 2000 | Female | 25 to 29 | 85%<br>(78-90%)                | 15%<br>(9.8-22%)         | 2.8<br>(1.6-4.6)                            | 3%<br>(2.1-4.1%)                     | 9.7%<br>(5.6-15%)                   | 70<br>(40-110)        | 8400<br>(5600-12000)      |
| United Kingdom | 2000 | Female | 30 to 34 | 87%<br>(79-92%)                | 13%<br>(8.2-21%)         | 3<br>(1.8-4.8)                              | 3.1%<br>(2.1-4.4%)                   | 11%<br>(7.3-15%)                    | 130<br>(85-180)       | 11000<br>(7600-15000)     |
| United Kingdom | 2000 | Female | 35 to 39 | 89%<br>(83-93%)                | 11%<br>(7.3-17%)         | 3.2<br>(1.9-5.2)                            | 3.9%<br>(2.6-5.4%)                   | 13%<br>(8.9-17%)                    | 230<br>(160-310)      | 15000<br>(10000-21000)    |
| United Kingdom | 2000 | Female | 40 to 44 | 89%<br>(83-93%)                | 11%<br>(6.6-17%)         | 3.6<br>(2.2-5.7)                            | 4.8%<br>(3.2-6.7%)                   | 14%<br>(10-18%)                     | 360<br>(260-470)      | 20000<br>(14000-27000)    |
| United Kingdom | 2000 | Female | 45 to 49 | 90%<br>(83-94%)                | 10%<br>(6.3-17%)         | 4<br>(2.3-6.3)                              | 5.8%<br>(3.7-8.1%)                   | 14%<br>(9.7-19%)                    | 530<br>(370-710)      | 25000<br>(17000-34000)    |
| United Kingdom | 2000 | Female | 50 to 54 | 90%<br>(84-94%)                | 10%<br>(6.2-16%)         | 4.4<br>(2.5-7)                              | 6.3%<br>(3.9-8.8%)                   | 13%<br>(8.6-18%)                    | 830<br>(560-1100)     | 34000<br>(21000-47000)    |

| Location       | Year | Sex    | Age      | Prevalence of current drinkers | Prevalence of abstainers | Population average of standard drinks daily | Percent of total attributable deaths | Percent of total attributable DALYs | Attributable deaths   | Attributable DALYs        |
|----------------|------|--------|----------|--------------------------------|--------------------------|---------------------------------------------|--------------------------------------|-------------------------------------|-----------------------|---------------------------|
| United Kingdom | 2000 | Female | 55 to 59 | 89%<br>(84-93%)                | 11%<br>(6.6-16%)         | 4.7<br>(2.7-7.6)                            | 6.3%<br>(3.6-9.1%)                   | 11%<br>(6.9-16%)                    | 940<br>(580-1300)     | 33000<br>(18000-47000)    |
| United Kingdom | 2000 | Female | 60 to 64 | 88%<br>(81-93%)                | 12%<br>(7.5-19%)         | 4.6<br>(2.7-7.6)                            | 5.6%<br>(2.5-8.9%)                   | 8.9%<br>(4.4-14%)                   | 1100<br>(530-1700)    | 32000<br>(14000-51000)    |
| United Kingdom | 2000 | Female | 65 to 69 | 86%<br>(78-91%)                | 14%<br>(9-22%)           | 4.2<br>(2.6-6.5)                            | 4.6%<br>(1.6-8.1%)                   | 6.7%<br>(2.4-12%)                   | 1200<br>(450-2200)    | 31000<br>(11000-54000)    |
| United Kingdom | 2000 | Female | 70 to 74 | 83%<br>(75-89%)                | 17%<br>(11-25%)          | 3.7<br>(2.1-6)                              | 3.8%<br>(0.23-8%)                    | 5.1%<br>(0.43-10%)                  | 1500<br>(130-3200)    | 30000<br>(1800-63000)     |
| United Kingdom | 2000 | Female | 75 to 79 | 81%<br>(72-87%)                | 19%<br>(13-28%)          | 3.4<br>(1.9-5.8)                            | 3.1%<br>(-0.66-7.7%)                 | 3.9%<br>(-0.84-9.7%)                | 1900<br>(-400-4600)   | 29000<br>(-6100-72000)    |
| United Kingdom | 2000 | Female | 80 to 84 | 78%<br>(68-86%)                | 22%<br>(14-32%)          | 3.3<br>(2-5.4)                              | 3.1%<br>(-0.62-7.7%)                 | 3.7%<br>(-0.8-9.5%)                 | 2000<br>(-430-5100)   | 23000<br>(-4500-59000)    |
| United Kingdom | 2000 | Female | 85 to 89 | 77%<br>(68-84%)                | 23%<br>(16-32%)          | 3.2<br>(1.9-5.2)                            | 3.1%<br>(-0.66-8%)                   | 3.6%<br>(-0.87-9.5%)                | 2300<br>(-550-6000)   | 19000<br>(-3900-49000)    |
| United Kingdom | 2000 | Female | 90 to 94 | 76%<br>(67-84%)                | 24%<br>(16-33%)          | 3.2<br>(1.8-5.3)                            | 2.9%<br>(-1-8.1%)                    | 3.3%<br>(-1.3-9.7%)                 | 1500<br>(-610-4400)   | 8300<br>(-3000-24000)     |
| United Kingdom | 2000 | Female | 95 plus  | 75%<br>(63-85%)                | 25%<br>(15-37%)          | 3.1<br>(1.5-5.5)                            | 2.9%<br>(-1.3-9.1%)                  | 3.3%<br>(-1.8-11%)                  | 650<br>(-350-2100)    | 2400<br>(-1100-7400)      |
| United Kingdom | 2000 | Male   | All Ages | 87%<br>(85-90%)                | 13%<br>(10-15%)          | 2.7<br>(1.8-4)                              | 4.5%<br>(2.3-7.2%)                   | 3.6%<br>(0.4-7.6%)                  | 11000<br>(1200-22000) | 390000<br>(210000-630000) |
| United Kingdom | 2000 | Male   | 15 to 19 | 80%<br>(72-86%)                | 20%<br>(14-28%)          | 1.8<br>(1-3)                                | 4.5%<br>(2.9-6.3%)                   | 8.7%<br>(4.6-13%)                   | 92<br>(48-140)        | 9900<br>(6300-14000)      |
| United Kingdom | 2000 | Male   | 20 to 24 | 86%<br>(79-91%)                | 14%<br>(8.6-21%)         | 2.7<br>(1.5-4.5)                            | 8.7%<br>(6.1-11%)                    | 12%<br>(6.7-19%)                    | 190<br>(100-280)      | 22000<br>(15000-29000)    |
| United Kingdom | 2000 | Male   | 25 to 29 | 89%<br>(82-93%)                | 11%<br>(7-18%)           | 2.9<br>(1.7-4.6)                            | 8.3%<br>(5.9-11%)                    | 13%<br>(6.9-19%)                    | 240<br>(130-360)      | 25000<br>(17000-34000)    |
| United Kingdom | 2000 | Male   | 30 to 34 | 91%<br>(85-95%)                | 9.2%<br>(5.2-15%)        | 3<br>(1.8-4.8)                              | 7.7%<br>(5.5-10%)                    | 13%<br>(8-19%)                      | 330<br>(200-470)      | 28000<br>(20000-38000)    |
| United Kingdom | 2000 | Male   | 35 to 39 | 92%<br>(88-95%)                | 7.9%<br>(4.7-12%)        | 3.1<br>(1.8-5)                              | 7.5%<br>(5.3-10%)                    | 13%<br>(8.7-19%)                    | 420<br>(270-580)      | 30000<br>(21000-40000)    |
| United Kingdom | 2000 | Male   | 40 to 44 | 93%<br>(89-96%)                | 6.8%<br>(3.9-11%)        | 3.3<br>(2-5.4)                              | 7.5%<br>(5.3-10%)                    | 13%<br>(8.8-18%)                    | 510<br>(350-730)      | 31000<br>(22000-41000)    |
| United Kingdom | 2000 | Male   | 45 to 49 | 94%<br>(90-97%)                | 5.9%<br>(3.5-10%)        | 3.8<br>(2.2-6.1)                            | 7.6%<br>(4.9-11%)                    | 12%<br>(7.5-18%)                    | 690<br>(440-1000)     | 35000<br>(23000-50000)    |
| United Kingdom | 2000 | Male   | 50 to 54 | 95%<br>(91-97%)                | 5.2%<br>(2.9-8.9%)       | 4.2<br>(2.4-6.7)                            | 7%<br>(4-11%)                        | 10%<br>(5.7-16%)                    | 1000<br>(550-1600)    | 43000<br>(25000-65000)    |
| United Kingdom | 2000 | Male   | 55 to 59 | 95%<br>(92-97%)                | 4.9%<br>(2.8-7.9%)       | 4.5<br>(2.7-7.3)                            | 6.3%<br>(3-10%)                      | 8.4%<br>(3.8-14%)                   | 1100<br>(500-1800)    | 40000<br>(20000-66000)    |
| United Kingdom | 2000 | Male   | 60 to 64 | 95%<br>(92-97%)                | 5.1%<br>(2.9-8.3%)       | 4.5<br>(2.6-7.4)                            | 5.1%<br>(1.6-9.4%)                   | 6.2%<br>(1.7-12%)                   | 1200<br>(330-2300)    | 37000<br>(12000-69000)    |
| United Kingdom | 2000 | Male   | 65 to 69 | 94%<br>(91-97%)                | 5.6%<br>(3.1-9%)         | 4.1<br>(2.5-6.4)                            | 3.6%<br>(0.49-7.5%)                  | 4.1%<br>(0.28-8.8%)                 | 1200<br>(80-2500)     | 31000<br>(4100-64000)     |
| United Kingdom | 2000 | Male   | 70 to 74 | 94%<br>(90-96%)                | 6.4%<br>(4-10%)          | 3.6<br>(2.1-5.9)                            | 2.4%<br>(-0.84-6.5%)                 | 2.5%<br>(-1.3-7.6%)                 | 1000<br>(-540-3100)   | 23000<br>(-7600-63000)    |

| Location       | Year | Sex    | Age      | Prevalence of current drinkers | Prevalence of abstainers | Population average of standard drinks daily | Percent of total attributable deaths | Percent of total attributable DALYs | Attributable deaths   | Attributable DALYs        |
|----------------|------|--------|----------|--------------------------------|--------------------------|---------------------------------------------|--------------------------------------|-------------------------------------|-----------------------|---------------------------|
| United Kingdom | 2000 | Male   | 75 to 79 | 93%<br>(88-96%)                | 7.3%<br>(4.4-12%)        | 3.3<br>(1.9-5.5)                            | 1.7%<br>(-1.4-6.1%)                  | 1.7%<br>(-1.9-6.8%)                 | 900<br>(-1000-3600)   | 16000<br>(-12000-56000)   |
| United Kingdom | 2000 | Male   | 80 to 84 | 92%<br>(86-95%)                | 8.3%<br>(5-14%)          | 3.2<br>(1.9-5.1)                            | 1.6%<br>(-1.4-5.5%)                  | 1.5%<br>(-1.9-6%)                   | 690<br>(-890-2700)    | 9100<br>(-8100-31000)     |
| United Kingdom | 2000 | Male   | 85 to 89 | 91%<br>(86-94%)                | 9.2%<br>(5.9-14%)        | 3.1<br>(1.9-5)                              | 1.7%<br>(-1.2-5.6%)                  | 1.6%<br>(-1.7-6.1%)                 | 610<br>(-630-2300)    | 5600<br>(-3900-18000)     |
| United Kingdom | 2000 | Male   | 90 to 94 | 90%<br>(86-94%)                | 9.6%<br>(6.1-14%)        | 3<br>(1.7-5.1)                              | 1.5%<br>(-1.3-5.9%)                  | 1.5%<br>(-1.9-6.6%)                 | 250<br>(-320-1100)    | 1600<br>(-1400-6200)      |
| United Kingdom | 2000 | Male   | 95 plus  | 90%<br>(83-94%)                | 10%<br>(5.7-17%)         | 3<br>(1.5-5.4)                              | 1.7%<br>(-1.5-6.8%)                  | 1.6%<br>(-2.1-7.5%)                 | 63<br>(-83-310)       | 270<br>(-240-1100)        |
| United Kingdom | 2005 | Female | All Ages | 83%<br>(81-86%)                | 17%<br>(14-19%)          | 3<br>(2-4.3)                                | 4%<br>(2-6.3%)                       | 5%<br>(1.3-9.6%)                    | 15000<br>(4000-29000) | 330000<br>(170000-520000) |
| United Kingdom | 2005 | Female | 15 to 19 | 80%<br>(72-86%)                | 20%<br>(14-28%)          | 2.2<br>(1.3-3.7)                            | 2.1%<br>(1.4-3.1%)                   | 7.6%<br>(4.1-12%)                   | 33<br>(18-52)         | 4400<br>(2800-6400)       |
| United Kingdom | 2005 | Female | 20 to 24 | 83%<br>(75-89%)                | 17%<br>(11-25%)          | 2.8<br>(1.6-4.7)                            | 3.2%<br>(2.3-4.4%)                   | 9.1%<br>(4.9-14%)                   | 48<br>(26-76)         | 7800<br>(5100-11000)      |
| United Kingdom | 2005 | Female | 25 to 29 | 85%<br>(78-90%)                | 15%<br>(9.8-22%)         | 2.9<br>(1.7-4.8)                            | 3.1%<br>(2.2-4.2%)                   | 9.5%<br>(5.6-14%)                   | 61<br>(36-92)         | 8000<br>(5300-11000)      |
| United Kingdom | 2005 | Female | 30 to 34 | 87%<br>(79-92%)                | 13%<br>(8.2-21%)         | 3<br>(1.8-4.9)                              | 3.2%<br>(2.2-4.3%)                   | 11%<br>(7.4-15%)                    | 110<br>(74-150)       | 10000<br>(6900-14000)     |
| United Kingdom | 2005 | Female | 35 to 39 | 89%<br>(83-93%)                | 11%<br>(7.2-17%)         | 3.2<br>(1.9-5.1)                            | 3.9%<br>(2.7-5.3%)                   | 13%<br>(9.5-18%)                    | 230<br>(160-300)      | 15000<br>(11000-21000)    |
| United Kingdom | 2005 | Female | 40 to 44 | 89%<br>(83-93%)                | 11%<br>(6.5-17%)         | 3.6<br>(2.1-5.7)                            | 4.8%<br>(3.3-6.5%)                   | 14%<br>(10-18%)                     | 390<br>(280-500)      | 22000<br>(15000-29000)    |
| United Kingdom | 2005 | Female | 45 to 49 | 90%<br>(83-94%)                | 10%<br>(6.3-17%)         | 4.1<br>(2.4-6.6)                            | 5.8%<br>(3.9-8.1%)                   | 15%<br>(10-19%)                     | 560<br>(400-730)      | 27000<br>(18000-36000)    |
| United Kingdom | 2005 | Female | 50 to 54 | 90%<br>(84-94%)                | 10%<br>(6.4-16%)         | 4.5<br>(2.6-7.2)                            | 6.4%<br>(4.1-8.7%)                   | 13%<br>(9.4-18%)                    | 750<br>(520-990)      | 31000<br>(20000-42000)    |
| United Kingdom | 2005 | Female | 55 to 59 | 89%<br>(84-93%)                | 11%<br>(6.6-16%)         | 4.7<br>(2.8-7.6)                            | 6.3%<br>(3.8-8.9%)                   | 12%<br>(7.7-16%)                    | 1100<br>(700-1400)    | 38000<br>(23000-52000)    |
| United Kingdom | 2005 | Female | 60 to 64 | 88%<br>(82-93%)                | 12%<br>(7.3-18%)         | 4.7<br>(2.7-7.6)                            | 5.7%<br>(3-8.5%)                     | 9.3%<br>(5.4-13%)                   | 1100<br>(630-1600)    | 33000<br>(17000-49000)    |
| United Kingdom | 2005 | Female | 65 to 69 | 86%<br>(78-91%)                | 14%<br>(8.6-22%)         | 4.2<br>(2.6-6.6)                            | 4.7%<br>(2-7.6%)                     | 7.1%<br>(3.4-11%)                   | 1200<br>(570-1900)    | 30000<br>(12000-49000)    |
| United Kingdom | 2005 | Female | 70 to 74 | 83%<br>(76-89%)                | 17%<br>(11-24%)          | 3.8<br>(2.1-6.1)                            | 3.9%<br>(0.91-7.5%)                  | 5.5%<br>(1.5-10%)                   | 1400<br>(370-2500)    | 27000<br>(5900-52000)     |
| United Kingdom | 2005 | Female | 75 to 79 | 80%<br>(72-87%)                | 20%<br>(13-28%)          | 3.5<br>(1.9-5.7)                            | 3.3%<br>(-0.011-7.4%)                | 4.3%<br>(0.062-9.3%)                | 1700<br>(25-3700)     | 26000<br>(-98-59000)      |
| United Kingdom | 2005 | Female | 80 to 84 | 78%<br>(68-86%)                | 22%<br>(14-32%)          | 3.3<br>(2-5.4)                              | 3.2%<br>(-0.11-7.4%)                 | 3.9%<br>(-0.13-9.1%)                | 2300<br>(-75-5200)    | 26000<br>(-940-60000)     |
| United Kingdom | 2005 | Female | 85 to 89 | 77%<br>(67-83%)                | 23%<br>(17-33%)          | 3.2<br>(1.9-5.3)                            | 3.2%<br>(-0.37-7.7%)                 | 3.8%<br>(-0.49-9.1%)                | 2100<br>(-280-5100)   | 17000<br>(-1900-42000)    |
| United Kingdom | 2005 | Female | 90 to 94 | 76%<br>(67-83%)                | 24%<br>(17-33%)          | 3.2<br>(1.8-5.4)                            | 2.9%<br>(-0.71-7.7%)                 | 3.4%<br>(-0.91-9.2%)                | 1600<br>(-430-4300)   | 8900<br>(-2200-24000)     |

| Location       | Year | Sex    | Age      | Prevalence of current drinkers | Prevalence of abstainers | Population average of standard drinks daily | Percent of total attributable deaths | Percent of total attributable DALYs | Attributable deaths   | Attributable DALYs        |
|----------------|------|--------|----------|--------------------------------|--------------------------|---------------------------------------------|--------------------------------------|-------------------------------------|-----------------------|---------------------------|
| United Kingdom | 2005 | Female | 95 plus  | 75%<br>(62-85%)                | 25%<br>(15-38%)          | 3.1<br>(1.5-5.6)                            | 3%<br>(-1.8-3%)                      | 3.4%<br>(-1.4-9.8%)                 | 780<br>(-330-2200)    | 2800<br>(-960-8000)       |
| United Kingdom | 2005 | Male   | All Ages | 88%<br>(85-90%)                | 12%<br>(10-15%)          | 2.8<br>(1.9-4)                              | 5.1%<br>(3.1-7.6%)                   | 4.5%<br>(1.5-8.4%)                  | 13000<br>(4100-23000) | 430000<br>(260000-640000) |
| United Kingdom | 2005 | Male   | 15 to 19 | 80%<br>(72-86%)                | 20%<br>(14-28%)          | 1.8<br>(1-3.1)                              | 4.3%<br>(2.8-5.9%)                   | 8.8%<br>(4.7-14%)                   | 83<br>(44-130)        | 9600<br>(6200-14000)      |
| United Kingdom | 2005 | Male   | 20 to 24 | 86%<br>(79-91%)                | 14%<br>(8.5-21%)         | 2.8<br>(1.5-4.5)                            | 8.4%<br>(6.1-11%)                    | 12%<br>(6.9-19%)                    | 170<br>(96-270)       | 22000<br>(15000-30000)    |
| United Kingdom | 2005 | Male   | 25 to 29 | 89%<br>(82-93%)                | 11%<br>(6.9-18%)         | 2.9<br>(1.7-4.9)                            | 8%<br>(5.8-10%)                      | 13%<br>(7.5-19%)                    | 190<br>(110-280)      | 21000<br>(15000-29000)    |
| United Kingdom | 2005 | Male   | 30 to 34 | 91%<br>(85-95%)                | 9.2%<br>(5.4-15%)        | 3.1<br>(1.8-4.9)                            | 7.6%<br>(5.6-10%)                    | 13%<br>(8.5-19%)                    | 280<br>(180-390)      | 25000<br>(18000-33000)    |
| United Kingdom | 2005 | Male   | 35 to 39 | 92%<br>(88-95%)                | 7.9%<br>(4.8-12%)        | 3.1<br>(1.8-4.9)                            | 7.7%<br>(5.6-10%)                    | 14%<br>(9.6-19%)                    | 440<br>(300-590)      | 31000<br>(23000-40000)    |
| United Kingdom | 2005 | Male   | 40 to 44 | 93%<br>(89-96%)                | 6.8%<br>(3.9-11%)        | 3.4<br>(2-5.3)                              | 8%<br>(5.8-11%)                      | 14%<br>(10-19%)                     | 620<br>(440-830)      | 36000<br>(27000-48000)    |
| United Kingdom | 2005 | Male   | 45 to 49 | 94%<br>(90-97%)                | 5.9%<br>(3.4-10%)        | 3.9<br>(2.3-6.2)                            | 8.4%<br>(5.7-11%)                    | 14%<br>(9.5-19%)                    | 820<br>(560-1100)     | 40000<br>(28000-55000)    |
| United Kingdom | 2005 | Male   | 50 to 54 | 95%<br>(91-97%)                | 5.2%<br>(3-8.9%)         | 4.3<br>(2.5-7)                              | 8.1%<br>(5.2-11%)                    | 12%<br>(7.8-18%)                    | 1000<br>(650-1500)    | 44000<br>(28000-63000)    |
| United Kingdom | 2005 | Male   | 55 to 59 | 95%<br>(92-97%)                | 4.9%<br>(2.9-7.7%)       | 4.7<br>(2.7-7.4)                            | 7.3%<br>(4.2-11%)                    | 10%<br>(5.8-15%)                    | 1400<br>(800-2100)    | 51000<br>(30000-76000)    |
| United Kingdom | 2005 | Male   | 60 to 64 | 95%<br>(92-97%)                | 5%<br>(2.9-8.1%)         | 4.6<br>(2.7-7.5)                            | 6.1%<br>(2.9-9.9%)                   | 7.8%<br>(3.6-13%)                   | 1400<br>(670-2400)    | 44000<br>(21000-72000)    |
| United Kingdom | 2005 | Male   | 65 to 69 | 94%<br>(91-97%)                | 5.6%<br>(3.1-9.2%)       | 4.2<br>(2.6-6.5)                            | 4.5%<br>(1.5-8%)                     | 5.4%<br>(1.7-9.8%)                  | 1300<br>(430-2500)    | 35000<br>(12000-63000)    |
| United Kingdom | 2005 | Male   | 70 to 74 | 94%<br>(90-96%)                | 6.4%<br>(4-10%)          | 3.7<br>(2.1-5.9)                            | 3.2%<br>(0.27-6.9%)                  | 3.6%<br>(0.095-8.1%)                | 1200<br>(33-2800)     | 26000<br>(2300-57000)     |
| United Kingdom | 2005 | Male   | 75 to 79 | 93%<br>(89-96%)                | 7.3%<br>(4.4-11%)        | 3.4<br>(1.9-5.6)                            | 2.4%<br>(-0.55-6.2%)                 | 2.5%<br>(-0.92-7%)                  | 1100<br>(-420-3200)   | 19000<br>(-4400-50000)    |
| United Kingdom | 2005 | Male   | 80 to 84 | 92%<br>(86-95%)                | 8.3%<br>(4.9-14%)        | 3.3<br>(2-5.3)                              | 2.1%<br>(-0.61-5.8%)                 | 2.1%<br>(-0.97-6.3%)                | 1100<br>(-500-3200)   | 14000<br>(-3900-38000)    |
| United Kingdom | 2005 | Male   | 85 to 89 | 91%<br>(86-94%)                | 9.1%<br>(5.8-14%)        | 3.2<br>(1.9-5.1)                            | 2.1%<br>(-0.61-6%)                   | 2.1%<br>(-0.99-6.5%)                | 750<br>(-350-2300)    | 6600<br>(-1900-19000)     |
| United Kingdom | 2005 | Male   | 90 to 94 | 91%<br>(86-94%)                | 9.5%<br>(6.1-14%)        | 3.1<br>(1.8-5.3)                            | 2%<br>(-0.91-6.4%)                   | 2%<br>(-1.3-7.1%)                   | 390<br>(-260-1400)    | 2400<br>(-1100-7800)      |
| United Kingdom | 2005 | Male   | 95 plus  | 90%<br>(83-94%)                | 10%<br>(5.5-17%)         | 3<br>(1.5-5.5)                              | 2%<br>(-1.1-7.2%)                    | 2%<br>(-1.7-8.1%)                   | 110<br>(-92-450)      | 460<br>(-260-1600)        |
| United Kingdom | 2010 | Female | All Ages | 83%<br>(80-85%)                | 17%<br>(15-20%)          | 3<br>(2-4.3)                                | 4%<br>(2.2-6%)                       | 5.2%<br>(1.8-9.2%)                  | 15000<br>(5300-27000) | 330000<br>(190000-490000) |
| United Kingdom | 2010 | Female | 15 to 19 | 79%<br>(71-86%)                | 21%<br>(14-29%)          | 2.2<br>(1.2-3.7)                            | 2%<br>(1.3-2.8%)                     | 7.3%<br>(3.9-12%)                   | 28<br>(15-44)         | 4000<br>(2600-5700)       |
| United Kingdom | 2010 | Female | 20 to 24 | 83%<br>(75-89%)                | 17%<br>(11-25%)          | 2.8<br>(1.6-4.7)                            | 3.1%<br>(2.2-4.2%)                   | 9%<br>(5-14%)                       | 44<br>(24-70)         | 7800<br>(5200-11000)      |

| Location       | Year | Sex    | Age      | Prevalence of current drinkers | Prevalence of abstainers | Population average of standard drinks daily | Percent of total attributable deaths | Percent of total attributable DALYs | Attributable deaths   | Attributable DALYs        |
|----------------|------|--------|----------|--------------------------------|--------------------------|---------------------------------------------|--------------------------------------|-------------------------------------|-----------------------|---------------------------|
| United Kingdom | 2010 | Female | 25 to 29 | 85%<br>(77-90%)                | 15%<br>(10-23%)          | 2.9<br>(1.6-4.7)                            | 3%<br>(2.1-4%)                       | 9.3%<br>(5.5-14%)                   | 62<br>(36-93)         | 8600<br>(5800-12000)      |
| United Kingdom | 2010 | Female | 30 to 34 | 87%<br>(79-92%)                | 13%<br>(8.3-21%)         | 3<br>(1.7-4.8)                              | 3.2%<br>(2.2-4.4%)                   | 11%<br>(7.6-15%)                    | 100<br>(70-140)       | 9600<br>(6800-13000)      |
| United Kingdom | 2010 | Female | 35 to 39 | 88%<br>(82-93%)                | 12%<br>(7.4-18%)         | 3.2<br>(1.9-5.1)                            | 3.9%<br>(2.8-5.3%)                   | 13%<br>(9.6-17%)                    | 200<br>(150-270)      | 14000<br>(10000-19000)    |
| United Kingdom | 2010 | Female | 40 to 44 | 89%<br>(83-93%)                | 11%<br>(6.6-17%)         | 3.6<br>(2.1-5.6)                            | 4.8%<br>(3.3-6.5%)                   | 14%<br>(11-18%)                     | 380<br>(280-480)      | 21000<br>(16000-28000)    |
| United Kingdom | 2010 | Female | 45 to 49 | 90%<br>(83-94%)                | 10%<br>(6.4-17%)         | 4.1<br>(2.3-6.5)                            | 5.6%<br>(3.8-7.6%)                   | 15%<br>(11-19%)                     | 580<br>(420-740)      | 28000<br>(19000-37000)    |
| United Kingdom | 2010 | Female | 50 to 54 | 90%<br>(84-94%)                | 10%<br>(6.2-16%)         | 4.5<br>(2.6-7)                              | 6.2%<br>(4.2-8.5%)                   | 14%<br>(9.7-18%)                    | 760<br>(540-980)      | 31000<br>(21000-42000)    |
| United Kingdom | 2010 | Female | 55 to 59 | 89%<br>(84-93%)                | 11%<br>(6.5-16%)         | 4.8<br>(2.9-7.7)                            | 6.2%<br>(4-8.6%)                     | 12%<br>(8.3-16%)                    | 920<br>(640-1200)     | 33000<br>(21000-45000)    |
| United Kingdom | 2010 | Female | 60 to 64 | 88%<br>(82-93%)                | 12%<br>(7.5-18%)         | 4.7<br>(2.7-7.6)                            | 5.5%<br>(3.2-8%)                     | 9.4%<br>(6-13%)                     | 1200<br>(750-1700)    | 36000<br>(21000-52000)    |
| United Kingdom | 2010 | Female | 65 to 69 | 86%<br>(78-91%)                | 14%<br>(9.1-22%)         | 4.2<br>(2.5-6.5)                            | 4.6%<br>(2.3-7.2%)                   | 7.3%<br>(4-11%)                     | 1100<br>(640-1700)    | 29000<br>(15000-45000)    |
| United Kingdom | 2010 | Female | 70 to 74 | 83%<br>(75-88%)                | 17%<br>(12-25%)          | 3.8<br>(2.2-6.1)                            | 3.9%<br>(1.3-7%)                     | 5.6%<br>(2.1-9.7%)                  | 1300<br>(480-2200)    | 26000<br>(8500-47000)     |
| United Kingdom | 2010 | Female | 75 to 79 | 80%<br>(72-87%)                | 20%<br>(13-28%)          | 3.5<br>(1.9-5.8)                            | 3.4%<br>(0.47-7%)                    | 4.5%<br>(0.78-8.9%)                 | 1500<br>(260-3000)    | 24000<br>(3400-49000)     |
| United Kingdom | 2010 | Female | 80 to 84 | 78%<br>(67-86%)                | 22%<br>(14-33%)          | 3.3<br>(2-5.4)                              | 3.3%<br>(0.2-7%)                     | 4.1%<br>(0.36-8.8%)                 | 2000<br>(180-4300)    | 24000<br>(1400-51000)     |
| United Kingdom | 2010 | Female | 85 to 89 | 76%<br>(66-83%)                | 24%<br>(17-34%)          | 3.2<br>(1.9-5.3)                            | 3.2%<br>(-0.064-7.5%)                | 3.9%<br>(-0.11-8.9%)                | 2400<br>(-69-5500)    | 20000<br>(-390-45000)     |
| United Kingdom | 2010 | Female | 90 to 94 | 75%<br>(66-83%)                | 25%<br>(17-34%)          | 3.1<br>(1.7-5.3)                            | 3%<br>(-0.34-7.4%)                   | 3.5%<br>(-0.44-8.7%)                | 1500<br>(-190-3900)   | 8700<br>(-1000-22000)     |
| United Kingdom | 2010 | Female | 95 plus  | 75%<br>(62-84%)                | 25%<br>(16-38%)          | 3.1<br>(1.5-5.5)                            | 3.1%<br>(-0.72-8.1%)                 | 3.6%<br>(-0.99-9.6%)                | 930<br>(-260-2500)    | 3400<br>(-790-8800)       |
| United Kingdom | 2010 | Male   | All Ages | 87%<br>(85-90%)                | 13%<br>(10-15%)          | 2.9<br>(1.9-4.2)                            | 5.4%<br>(3.5-7.6%)                   | 5.1%<br>(2.3-8.7%)                  | 14000<br>(6200-24000) | 450000<br>(290000-640000) |
| United Kingdom | 2010 | Male   | 15 to 19 | 79%<br>(70-86%)                | 21%<br>(14-30%)          | 1.8<br>(1-3)                                | 3.9%<br>(2.6-5.5%)                   | 8.5%<br>(4.5-13%)                   | 66<br>(35-100)        | 8300<br>(5400-12000)      |
| United Kingdom | 2010 | Male   | 20 to 24 | 86%<br>(78-91%)                | 14%<br>(8.6-22%)         | 2.8<br>(1.5-4.6)                            | 8.1%<br>(5.8-11%)                    | 12%<br>(6.6-19%)                    | 160<br>(84-250)       | 21000<br>(14000-29000)    |
| United Kingdom | 2010 | Male   | 25 to 29 | 89%<br>(82-93%)                | 11%<br>(7.1-18%)         | 3<br>(1.7-4.9)                              | 7.8%<br>(5.8-10%)                    | 13%<br>(7.4-19%)                    | 190<br>(110-290)      | 22000<br>(16000-30000)    |
| United Kingdom | 2010 | Male   | 30 to 34 | 91%<br>(84-95%)                | 9.4%<br>(5.4-16%)        | 3.1<br>(1.8-4.9)                            | 7.5%<br>(5.5-10%)                    | 14%<br>(8.7-19%)                    | 250<br>(160-360)      | 23000<br>(17000-31000)    |
| United Kingdom | 2010 | Male   | 35 to 39 | 92%<br>(88-95%)                | 8%<br>(4.7-12%)          | 3.1<br>(1.8-4.8)                            | 7.8%<br>(5.7-10%)                    | 15%<br>(10-20%)                     | 400<br>(280-540)      | 28000<br>(21000-37000)    |
| United Kingdom | 2010 | Male   | 40 to 44 | 93%<br>(89-96%)                | 6.9%<br>(3.9-11%)        | 3.4<br>(2-5.3)                              | 8.3%<br>(6.1-11%)                    | 15%<br>(11-20%)                     | 650<br>(470-850)      | 38000<br>(28000-49000)    |

| Location       | Year | Sex    | Age      | Prevalence of current drinkers | Prevalence of abstainers | Population average of standard drinks daily | Percent of total attributable deaths | Percent of total attributable DALYs | Attributable deaths   | Attributable DALYs        |
|----------------|------|--------|----------|--------------------------------|--------------------------|---------------------------------------------|--------------------------------------|-------------------------------------|-----------------------|---------------------------|
| United Kingdom | 2010 | Male   | 45 to 49 | 94%<br>(90-97%)                | 5.9%<br>(3.5-10%)        | 4<br>(2.2-6.3)                              | 8.6%<br>(6-11%)                      | 15%<br>(11-20%)                     | 900<br>(630-1200)     | 44000<br>(32000-59000)    |
| United Kingdom | 2010 | Male   | 50 to 54 | 95%<br>(91-97%)                | 5.3%<br>(3-9%)           | 4.4<br>(2.6-7)                              | 8.5%<br>(5.7-12%)                    | 14%<br>(9-19%)                      | 1100<br>(730-1500)    | 47000<br>(31000-64000)    |
| United Kingdom | 2010 | Male   | 55 to 59 | 95%<br>(92-97%)                | 4.9%<br>(2.8-7.7%)       | 4.7<br>(2.9-7.6)                            | 7.9%<br>(4.9-11%)                    | 12%<br>(7.2-16%)                    | 1300<br>(840-1900)    | 49000<br>(30000-69000)    |
| United Kingdom | 2010 | Male   | 60 to 64 | 95%<br>(92-97%)                | 5%<br>(2.8-8.2%)         | 4.7<br>(2.7-7.6)                            | 6.6%<br>(3.7-10%)                    | 9%<br>(4.9-14%)                     | 1700<br>(920-2600)    | 52000<br>(29000-79000)    |
| United Kingdom | 2010 | Male   | 65 to 69 | 94%<br>(91-97%)                | 5.6%<br>(3.1-8.9%)       | 4.2<br>(2.6-6.5)                            | 5.1%<br>(2.5-8.3%)                   | 6.5%<br>(3.2-10%)                   | 1500<br>(730-2500)    | 39000<br>(19000-64000)    |
| United Kingdom | 2010 | Male   | 70 to 74 | 94%<br>(90-96%)                | 6.4%<br>(4-10%)          | 3.8<br>(2.2-6)                              | 3.7%<br>(1.1-7.2%)                   | 4.4%<br>(1.1-8.6%)                  | 1400<br>(360-2700)    | 29000<br>(8500-56000)     |
| United Kingdom | 2010 | Male   | 75 to 79 | 93%<br>(88-96%)                | 7.3%<br>(4.4-12%)        | 3.5<br>(1.9-5.8)                            | 2.9%<br>(0.25-6.3%)                  | 3.2%<br>(0.069-7.2%)                | 1300<br>(28-2900)     | 21000<br>(1800-48000)     |
| United Kingdom | 2010 | Male   | 80 to 84 | 92%<br>(86-95%)                | 8.3%<br>(4.9-14%)        | 3.4<br>(2-5.4)                              | 2.5%<br>(0.068-6%)                   | 2.7%<br>(-0.16-6.6%)                | 1300<br>(-77-3100)    | 16000<br>(420-37000)      |
| United Kingdom | 2010 | Male   | 85 to 89 | 91%<br>(86-94%)                | 9.2%<br>(5.9-14%)        | 3.3<br>(1.9-5.3)                            | 2.4%<br>(-0.096-6%)                  | 2.6%<br>(-0.34-6.7%)                | 1100<br>(-150-2900)   | 9700<br>(-380-24000)      |
| United Kingdom | 2010 | Male   | 90 to 94 | 90%<br>(85-94%)                | 9.6%<br>(6.1-15%)        | 3.2<br>(1.8-5.3)                            | 2.3%<br>(-0.41-6.3%)                 | 2.4%<br>(-0.72-7%)                  | 510<br>(-150-1500)    | 3000<br>(-580-8200)       |
| United Kingdom | 2010 | Male   | 95 plus  | 90%<br>(83-94%)                | 10%<br>(5.7-17%)         | 3.1<br>(1.5-5.4)                            | 2.4%<br>(-0.75-7.1%)                 | 2.5%<br>(-1.2-8%)                   | 180<br>(-85-570)      | 700<br>(-220-2100)        |
| United Kingdom | 2016 | Female | All Ages | 83%<br>(80-86%)                | 17%<br>(14-20%)          | 3<br>(2-4.5)                                | 4%<br>(2.3-6%)                       | 5.3%<br>(2-9.3%)                    | 16000<br>(6300-28000) | 340000<br>(200000-510000) |
| United Kingdom | 2016 | Female | 15 to 19 | 79%<br>(71-86%)                | 21%<br>(14-29%)          | 2.2<br>(1.3-3.6)                            | 1.8%<br>(1.2-2.6%)                   | 7.2%<br>(3.8-11%)                   | 23<br>(12-37)         | 350<br>(2300-5100)        |
| United Kingdom | 2016 | Female | 20 to 24 | 83%<br>(75-89%)                | 17%<br>(11-25%)          | 2.9<br>(1.6-4.8)                            | 3%<br>(2.1-4%)                       | 9%<br>(4.8-14%)                     | 43<br>(23-68)         | 7900<br>(5300-11000)      |
| United Kingdom | 2016 | Female | 25 to 29 | 85%<br>(77-90%)                | 15%<br>(9.9-23%)         | 2.9<br>(1.6-5)                              | 2.9%<br>(2.1-4%)                     | 9.3%<br>(5.6-14%)                   | 60<br>(36-90)         | 8600<br>(5700-12000)      |
| United Kingdom | 2016 | Female | 30 to 34 | 87%<br>(79-92%)                | 13%<br>(8.4-21%)         | 3<br>(1.7-5.1)                              | 3%<br>(2.2-4.2%)                     | 11%<br>(7.8-15%)                    | 100<br>(73-140)       | 9900<br>(7100-13000)      |
| United Kingdom | 2016 | Female | 35 to 39 | 88%<br>(82-93%)                | 12%<br>(7.4-18%)         | 3.2<br>(1.8-5.2)                            | 3.8%<br>(2.7-5.1%)                   | 14%<br>(10-18%)                     | 170<br>(120-220)      | 12000<br>(8600-15000)     |
| United Kingdom | 2016 | Female | 40 to 44 | 89%<br>(83-93%)                | 11%<br>(6.6-17%)         | 3.6<br>(2.1-5.6)                            | 4.6%<br>(3.2-6.3%)                   | 15%<br>(11-18%)                     | 350<br>(260-440)      | 20000<br>(14000-26000)    |
| United Kingdom | 2016 | Female | 45 to 49 | 90%<br>(83-94%)                | 10%<br>(6.3-17%)         | 4.1<br>(2.3-6.4)                            | 5.5%<br>(3.7-7.5%)                   | 15%<br>(11-19%)                     | 600<br>(440-760)      | 29000<br>(20000-39000)    |
| United Kingdom | 2016 | Female | 50 to 54 | 90%<br>(83-94%)                | 10%<br>(6.3-17%)         | 4.5<br>(2.6-7.1)                            | 6.1%<br>(4.1-8.2%)                   | 14%<br>(10-18%)                     | 810<br>(590-1000)     | 34000<br>(24000-45000)    |
| United Kingdom | 2016 | Female | 55 to 59 | 89%<br>(84-93%)                | 11%<br>(6.6-16%)         | 4.8<br>(2.9-7.7)                            | 6.2%<br>(4.1-8.4%)                   | 12%<br>(8.6-16%)                    | 940<br>(660-1200)     | 34000<br>(22000-46000)    |
| United Kingdom | 2016 | Female | 60 to 64 | 88%<br>(81-93%)                | 12%<br>(7.5-19%)         | 4.7<br>(2.7-7.4)                            | 5.5%<br>(3.3-7.9%)                   | 9.6%<br>(6.3-13%)                   | 1100<br>(730-1500)    | 34000<br>(20000-49000)    |

| Location       | Year | Sex    | Age      | Prevalence of current drinkers | Prevalence of abstainers | Population average of standard drinks daily | Percent of total attributable deaths | Percent of total attributable DALYs | Attributable deaths   | Attributable DALYs        |
|----------------|------|--------|----------|--------------------------------|--------------------------|---------------------------------------------|--------------------------------------|-------------------------------------|-----------------------|---------------------------|
| United Kingdom | 2016 | Female | 65 to 69 | 86%<br>(78-91%)                | 14%<br>(9-22%)           | 4.2<br>(2.6-6.5)                            | 4.6%<br>(2.5-7%)                     | 7.4%<br>(4.3-11%)                   | 1400<br>(820-2000)    | 36000<br>(20000-55000)    |
| United Kingdom | 2016 | Female | 70 to 74 | 83%<br>(76-88%)                | 17%<br>(12-24%)          | 3.8<br>(2.2-6.3)                            | 4%<br>(1.5-6.9%)                     | 5.9%<br>(2.6-9.7%)                  | 1300<br>(580-2200)    | 27000<br>(10000-47000)    |
| United Kingdom | 2016 | Female | 75 to 79 | 81%<br>(72-87%)                | 19%<br>(13-28%)          | 3.5<br>(1.9-5.9)                            | 3.5%<br>(0.78-7%)                    | 4.8%<br>(1.2-9.2%)                  | 1600<br>(390-3000)    | 25000<br>(5500-50000)     |
| United Kingdom | 2016 | Female | 80 to 84 | 78%<br>(68-86%)                | 22%<br>(14-32%)          | 3.4<br>(2-5.5)                              | 3.4%<br>(0.48-7.1%)                  | 4.4%<br>(0.72-8.8%)                 | 2200<br>(360-4400)    | 25000<br>(3500-51000)     |
| United Kingdom | 2016 | Female | 85 to 89 | 76%<br>(67-84%)                | 24%<br>(16-33%)          | 3.2<br>(1.9-5.3)                            | 3.4%<br>(0.24-7.3%)                  | 4.2%<br>(0.32-9%)                   | 2500<br>(190-5400)    | 20000<br>(1500-44000)     |
| United Kingdom | 2016 | Female | 90 to 94 | 76%<br>(66-83%)                | 24%<br>(17-34%)          | 3.2<br>(1.8-5.5)                            | 3.1%<br>(-0.061-7.4%)                | 3.7%<br>(-0.14-8.8%)                | 2200<br>(-80-5200)    | 12000<br>(-230-28000)     |
| United Kingdom | 2016 | Female | 95 plus  | 75%<br>(62-84%)                | 25%<br>(16-38%)          | 3<br>(1.5-5.5)                              | 3.3%<br>(-0.5-8.1%)                  | 3.8%<br>(-0.7-9.8%)                 | 1000<br>(-190-2700)   | 3700<br>(-570-9300)       |
| United Kingdom | 2016 | Male   | All Ages | 88%<br>(85-90%)                | 12%<br>(10-15%)          | 3<br>(2-4.4)                                | 5.5%<br>(3.6-7.8%)                   | 5.3%<br>(2.4-8.9%)                  | 16000<br>(7300-27000) | 480000<br>(310000-690000) |
| United Kingdom | 2016 | Male   | 15 to 19 | 80%<br>(72-86%)                | 20%<br>(14-28%)          | 1.9<br>(1.1-3.1)                            | 3.8%<br>(2.6-5.3%)                   | 8.4%<br>(4.2-14%)                   | 59<br>(30-95)         | 7800<br>(5200-11000)      |
| United Kingdom | 2016 | Male   | 20 to 24 | 86%<br>(79-91%)                | 14%<br>(8.5-21%)         | 2.9<br>(1.6-4.7)                            | 8%<br>(5.8-11%)                      | 12%<br>(6.6-19%)                    | 150<br>(82-240)       | 22000<br>(15000-30000)    |
| United Kingdom | 2016 | Male   | 25 to 29 | 89%<br>(82-93%)                | 11%<br>(7.1-18%)         | 3.1<br>(1.7-5.2)                            | 7.8%<br>(5.7-10%)                    | 13%<br>(7.2-19%)                    | 180<br>(110-280)      | 23000<br>(16000-31000)    |
| United Kingdom | 2016 | Male   | 30 to 34 | 90%<br>(84-94%)                | 9.5%<br>(5.5-16%)        | 3.2<br>(1.8-5.2)                            | 7.4%<br>(5.4-9.8%)                   | 14%<br>(8.8-19%)                    | 250<br>(160-360)      | 23000<br>(17000-31000)    |
| United Kingdom | 2016 | Male   | 35 to 39 | 92%<br>(87-95%)                | 8.2%<br>(4.8-13%)        | 3.2<br>(1.8-5)                              | 7.7%<br>(5.7-10%)                    | 15%<br>(10-20%)                     | 340<br>(230-450)      | 25000<br>(18000-32000)    |
| United Kingdom | 2016 | Male   | 40 to 44 | 93%<br>(88-96%)                | 7.1%<br>(4-12%)          | 3.5<br>(2-5.3)                              | 8.3%<br>(6.1-11%)                    | 16%<br>(11-20%)                     | 600<br>(430-780)      | 35000<br>(27000-45000)    |
| United Kingdom | 2016 | Male   | 45 to 49 | 94%<br>(90-96%)                | 6.1%<br>(3.5-10%)        | 4<br>(2.2-6.3)                              | 8.7%<br>(6-12%)                      | 15%<br>(11-21%)                     | 930<br>(650-1200)     | 46000<br>(33000-61000)    |
| United Kingdom | 2016 | Male   | 50 to 54 | 95%<br>(91-97%)                | 5.4%<br>(3.1-9%)         | 4.5<br>(2.6-7.1)                            | 8.6%<br>(5.8-12%)                    | 14%<br>(9.6-19%)                    | 1200<br>(820-1600)    | 51000<br>(35000-69000)    |
| United Kingdom | 2016 | Male   | 55 to 59 | 95%<br>(92-97%)                | 5.1%<br>(2.9-8.2%)       | 4.9<br>(2.9-7.7)                            | 8.1%<br>(5.3-11%)                    | 12%<br>(7.9-17%)                    | 1400<br>(910-2000)    | 51000<br>(33000-72000)    |
| United Kingdom | 2016 | Male   | 60 to 64 | 95%<br>(91-97%)                | 5.1%<br>(2.8-8.5%)       | 4.8<br>(2.8-7.7)                            | 6.9%<br>(4-10%)                      | 9.6%<br>(5.5-14%)                   | 1700<br>(950-2500)    | 52000<br>(30000-77000)    |
| United Kingdom | 2016 | Male   | 65 to 69 | 94%<br>(91-97%)                | 5.6%<br>(3.1-9.1%)       | 4.3<br>(2.7-6.7)                            | 5.4%<br>(2.9-8.4%)                   | 7%<br>(3.7-11%)                     | 2000<br>(1000-3100)   | 52000<br>(27000-80000)    |
| United Kingdom | 2016 | Male   | 70 to 74 | 94%<br>(90-96%)                | 6.4%<br>(4-10%)          | 3.9<br>(2.3-6.4)                            | 4.1%<br>(1.6-7.3%)                   | 4.9%<br>(1.8-8.9%)                  | 1600<br>(590-2900)    | 33000<br>(13000-61000)    |
| United Kingdom | 2016 | Male   | 75 to 79 | 93%<br>(88-96%)                | 7.5%<br>(4.4-12%)        | 3.6<br>(2-5.9)                              | 3.2%<br>(0.6-6.6%)                   | 3.6%<br>(0.52-7.6%)                 | 1500<br>(220-3200)    | 25000<br>(4600-54000)     |
| United Kingdom | 2016 | Male   | 80 to 84 | 91%<br>(86-95%)                | 8.6%<br>(5.1-14%)        | 3.4<br>(2-5.5)                              | 2.8%<br>(0.25-6.2%)                  | 3.1%<br>(0.07-7%)                   | 1600<br>(37-3700)     | 20000<br>(1800-44000)     |



| Location       | Year | Sex    | Age      | Prevalence of current drinkers | Prevalence of abstainers | Population average of standard drinks daily | Percent of total attributable deaths | Percent of total attributable DALYs | Attributable deaths   | Attributable DALYs        |
|----------------|------|--------|----------|--------------------------------|--------------------------|---------------------------------------------|--------------------------------------|-------------------------------------|-----------------------|---------------------------|
| United Kingdom | 2016 | Male   | 85 to 89 | 90%<br>(85-94%)                | 9.6%<br>(6-15%)          | 3.3<br>(1.9-5.3)                            | 2.7%<br>(0.18-6.3%)                  | 2.9%<br>(-0.044-7.1%)               | 1500<br>(-22-3600)    | 12000<br>(810-29000)      |
| United Kingdom | 2016 | Male   | 90 to 94 | 90%<br>(84-94%)                | 10%<br>(6.3-16%)         | 3.2<br>(1.8-5.4)                            | 2.5%<br>(-0.17-6.6%)                 | 2.7%<br>(-0.49-7.4%)                | 910<br>(-160-2500)    | 5300<br>(-340-14000)      |
| United Kingdom | 2016 | Male   | 95 plus  | 90%<br>(83-94%)                | 10%<br>(5.6-17%)         | 3.1<br>(1.6-5.4)                            | 2.6%<br>(-0.54-7.3%)                 | 2.7%<br>(-0.97-8.2%)                | 250<br>(-87-730)      | 950<br>(-200-2700)        |
| Argentina      | 1990 | Female | All Ages | 90%<br>(87-92%)                | 10%<br>(7.8-13%)         | 3.5<br>(3-4.1)                              | 5.1%<br>(3.3-6.9%)                   | 6.6%<br>(2.5-11%)                   | 7500<br>(2800-13000)  | 230000<br>(150000-320000) |
| Argentina      | 1990 | Female | 15 to 19 | 91%<br>(85-96%)                | 8.6%<br>(4.3-15%)        | 4<br>(2.4-5.8)                              | 4.8%<br>(3-6.8%)                     | 13%<br>(7.4-19%)                    | 89<br>(51-130)        | 8300<br>(5200-12000)      |
| Argentina      | 1990 | Female | 20 to 24 | 94%<br>(90-97%)                | 5.7%<br>(2.9-10%)        | 5.7<br>(3.7-8.3)                            | 7%<br>(4.9-9.2%)                     | 16%<br>(10-22%)                     | 130<br>(81-170)       | 12000<br>(8500-16000)     |
| Argentina      | 1990 | Female | 25 to 29 | 95%<br>(91-97%)                | 5.2%<br>(2.6-9.2%)       | 6<br>(4-8.6)                                | 6.9%<br>(5.1-8.9%)                   | 16%<br>(12-21%)                     | 150<br>(110-190)      | 13000<br>(9300-16000)     |
| Argentina      | 1990 | Female | 30 to 34 | 94%<br>(90-97%)                | 5.9%<br>(3.3-10%)        | 5.9<br>(4-8.3)                              | 6.9%<br>(5-9.1%)                     | 16%<br>(11-20%)                     | 190<br>(130-250)      | 13000<br>(9600-17000)     |
| Argentina      | 1990 | Female | 35 to 39 | 92%<br>(87-96%)                | 7.6%<br>(3.8-13%)        | 5.4<br>(3.6-7.8)                            | 7.3%<br>(5-9.8%)                     | 16%<br>(11-21%)                     | 260<br>(180-350)      | 16000<br>(11000-21000)    |
| Argentina      | 1990 | Female | 40 to 44 | 92%<br>(87-96%)                | 8.1%<br>(4.5-13%)        | 5.2<br>(3.3-7.7)                            | 8%<br>(5.2-11%)                      | 16%<br>(10-22%)                     | 340<br>(220-470)      | 18000<br>(11000-25000)    |
| Argentina      | 1990 | Female | 45 to 49 | 93%<br>(87-96%)                | 7.5%<br>(3.9-13%)        | 5.2<br>(3.2-7.7)                            | 8.7%<br>(5.3-12%)                    | 16%<br>(10-22%)                     | 430<br>(270-600)      | 20000<br>(12000-27000)    |
| Argentina      | 1990 | Female | 50 to 54 | 93%<br>(88-96%)                | 7.2%<br>(3.8-12%)        | 4.9<br>(3-7.3)                              | 8.9%<br>(5.1-13%)                    | 15%<br>(8.9-21%)                    | 540<br>(320-760)      | 21000<br>(13000-31000)    |
| Argentina      | 1990 | Female | 55 to 59 | 93%<br>(88-96%)                | 7.4%<br>(4.1-12%)        | 4.8<br>(3-7)                                | 8.9%<br>(4.7-13%)                    | 14%<br>(7.7-20%)                    | 700<br>(390-1000)     | 24000<br>(13000-35000)    |
| Argentina      | 1990 | Female | 60 to 64 | 92%<br>(85-96%)                | 8.4%<br>(4.5-15%)        | 4.4<br>(2.7-6.8)                            | 7.7%<br>(2.7-13%)                    | 11%<br>(4.1-18%)                    | 790<br>(300-1300)     | 23000<br>(8200-38000)     |
| Argentina      | 1990 | Female | 65 to 69 | 90%<br>(82-95%)                | 10%<br>(4.7-18%)         | 3.8<br>(2.5-5.5)                            | 6.3%<br>(2.5-11%)                    | 8.5%<br>(3.4-15%)                   | 800<br>(310-1400)     | 19000<br>(7300-33000)     |
| Argentina      | 1990 | Female | 70 to 74 | 88%<br>(80-94%)                | 12%<br>(6-20%)           | 3.4<br>(2-5.2)                              | 5%<br>(0.33-10%)                     | 6.5%<br>(0.5-13%)                   | 780<br>(60-1600)      | 15000<br>(1000-31000)     |
| Argentina      | 1990 | Female | 75 to 79 | 87%<br>(78-94%)                | 13%<br>(6.3-22%)         | 3.3<br>(1.8-5.1)                            | 4%<br>(-1.5-10%)                     | 4.8%<br>(-1.9-12%)                  | 790<br>(-310-2000)    | 12000<br>(-4200-31000)    |
| Argentina      | 1990 | Female | 80 to 84 | 86%<br>(76-93%)                | 14%<br>(7-24%)           | 3.2<br>(2-4.8)                              | 3.7%<br>(-1.2-9.3%)                  | 4.2%<br>(-1.8-11%)                  | 700<br>(-290-1800)    | 7900<br>(-2700-20000)     |
| Argentina      | 1990 | Female | 85 to 89 | 85%<br>(75-92%)                | 15%<br>(8.1-25%)         | 3.1<br>(1.9-4.8)                            | 3.4%<br>(-1.6-9.4%)                  | 3.8%<br>(-2.1-11%)                  | 520<br>(-300-1500)    | 4100<br>(-1800-11000)     |
| Argentina      | 1990 | Female | 90 to 94 | 85%<br>(75-92%)                | 15%<br>(8-25%)           | 3.1<br>(1.8-5)                              | 3.2%<br>(-2-10%)                     | 3.5%<br>(-2.6-12%)                  | 250<br>(-190-830)     | 1400<br>(-800-4300)       |
| Argentina      | 1990 | Female | 95 plus  | 85%<br>(72-93%)                | 15%<br>(6.9-28%)         | 3.2<br>(1.6-5.5)                            | 3.3%<br>(-2.8-11%)                   | 3.5%<br>(-3.6-13%)                  | 81<br>(-83-300)       | 300<br>(-250-1000)        |
| Argentina      | 1990 | Male   | All Ages | 94%<br>(92-96%)                | 5.7%<br>(3.9-7.9%)       | 3.5<br>(3-4.1)                              | 7.4%<br>(5.3-9.5%)                   | 7.3%<br>(3.9-11%)                   | 10000<br>(5700-16000) | 410000<br>(300000-530000) |

| Location  | Year | Sex    | Age      | Prevalence of current drinkers | Prevalence of abstainers | Population average of standard drinks daily | Percent of total attributable deaths | Percent of total attributable DALYs | Attributable deaths | Attributable DALYs        |
|-----------|------|--------|----------|--------------------------------|--------------------------|---------------------------------------------|--------------------------------------|-------------------------------------|---------------------|---------------------------|
| Argentina | 1990 | Male   | 15 to 19 | 94%<br>(89-97%)                | 5.7%<br>(2.6-11%)        | 3.7<br>(2.3-5.5)                            | 8.9%<br>(6-12%)                      | 15%<br>(9-21%)                      | 210<br>(130-300)    | 18000<br>(12000-25000)    |
| Argentina | 1990 | Male   | 20 to 24 | 96%<br>(92-98%)                | 4.3%<br>(2.1-8.1%)       | 5.6<br>(3.6-8.1)                            | 15%<br>(11-20%)                      | 22%<br>(14-30%)                     | 370<br>(240-500)    | 33000<br>(23000-43000)    |
| Argentina | 1990 | Male   | 25 to 29 | 96%<br>(92-98%)                | 4.3%<br>(2-7.9%)         | 6.3<br>(4.2-8.7)                            | 15%<br>(12-19%)                      | 23%<br>(16-30%)                     | 370<br>(250-500)    | 31000<br>(23000-39000)    |
| Argentina | 1990 | Male   | 30 to 34 | 96%<br>(92-98%)                | 4.3%<br>(2-8.3%)         | 6.2<br>(4.3-8.8)                            | 14%<br>(11-18%)                      | 21%<br>(15-28%)                     | 410<br>(290-540)    | 29000<br>(21000-37000)    |
| Argentina | 1990 | Male   | 35 to 39 | 96%<br>(92-98%)                | 4.1%<br>(1.8-7.5%)       | 5.6<br>(3.7-8)                              | 13%<br>(9.5-18%)                     | 20%<br>(13-26%)                     | 500<br>(340-670)    | 31000<br>(22000-41000)    |
| Argentina | 1990 | Male   | 40 to 44 | 96%<br>(93-98%)                | 3.7%<br>(1.6-7.2%)       | 5.2<br>(3.3-7.6)                            | 13%<br>(8.8-18%)                     | 18%<br>(11-25%)                     | 670<br>(410-930)    | 36000<br>(23000-48000)    |
| Argentina | 1990 | Male   | 45 to 49 | 97%<br>(94-99%)                | 3.1%<br>(1.3-6.3%)       | 5.1<br>(3.2-7.5)                            | 13%<br>(8.2-18%)                     | 17%<br>(10-24%)                     | 880<br>(520-1200)   | 40000<br>(25000-56000)    |
| Argentina | 1990 | Male   | 50 to 54 | 97%<br>(94-99%)                | 2.8%<br>(1.2-5.9%)       | 5<br>(3.1-7.5)                              | 12%<br>(7.1-18%)                     | 15%<br>(8.3-22%)                    | 1100<br>(620-1700)  | 45000<br>(25000-65000)    |
| Argentina | 1990 | Male   | 55 to 59 | 97%<br>(94-99%)                | 3%<br>(1.2-6%)           | 4.8<br>(3-7)                                | 11%<br>(5.6-17%)                     | 13%<br>(6.4-20%)                    | 1400<br>(680-2100)  | 47000<br>(24000-71000)    |
| Argentina | 1990 | Male   | 60 to 64 | 97%<br>(93-99%)                | 3.3%<br>(1.3-7%)         | 4.5<br>(2.6-6.9)                            | 8.7%<br>(3.1-15%)                    | 10%<br>(3.4-17%)                    | 1400<br>(490-2500)  | 41000<br>(15000-70000)    |
| Argentina | 1990 | Male   | 65 to 69 | 96%<br>(92-99%)                | 3.6%<br>(1.4-7.8%)       | 4.1<br>(2.8-5.9)                            | 6.4%<br>(1.9-12%)                    | 7.2%<br>(2-13%)                     | 1200<br>(330-2200)  | 28000<br>(8500-52000)     |
| Argentina | 1990 | Male   | 70 to 74 | 96%<br>(92-98%)                | 3.9%<br>(1.6-8%)         | 3.7<br>(2.2-5.4)                            | 4.5%<br>(-0.027-9.9%)                | 5%<br>(-0.33-11%)                   | 850<br>(-56-1900)   | 17000<br>(-99-37000)      |
| Argentina | 1990 | Male   | 75 to 79 | 96%<br>(92-98%)                | 4.2%<br>(1.8-8.2%)       | 3.4<br>(1.9-5.1)                            | 3.1%<br>(-1.3-8.7%)                  | 3.3%<br>(-1.8-9.8%)                 | 590<br>(-320-1700)  | 9200<br>(-3800-25000)     |
| Argentina | 1990 | Male   | 80 to 84 | 95%<br>(90-98%)                | 4.8%<br>(2.1-10%)        | 3.1<br>(1.9-4.5)                            | 2.2%<br>(-1.5-6.8%)                  | 2.2%<br>(-2-7.4%)                   | 320<br>(-290-1100)  | 3900<br>(-2600-12000)     |
| Argentina | 1990 | Male   | 85 to 89 | 94%<br>(89-97%)                | 5.7%<br>(2.5-11%)        | 2.9<br>(1.8-4.4)                            | 1.6%<br>(-1.8-5.9%)                  | 1.5%<br>(-2.5-6.4%)                 | 140<br>(-230-600)   | 1300<br>(-1400-4700)      |
| Argentina | 1990 | Male   | 90 to 94 | 94%<br>(89-98%)                | 6%<br>(2.4-11%)          | 2.8<br>(1.5-4.4)                            | 1.2%<br>(-2.3-6.1%)                  | 0.98%<br>(-2.9-6.6%)                | 38<br>(-110-260)    | 270<br>(-520-1400)        |
| Argentina | 1990 | Male   | 95 plus  | 94%<br>(87-98%)                | 6%<br>(2-13%)            | 2.8<br>(1.3-4.8)                            | 1.3%<br>(-2.6-7.2%)                  | 1%<br>(-3.5-7.9%)                   | 10<br>(-35-79)      | 50<br>(-100-280)          |
| Argentina | 1995 | Female | All Ages | 90%<br>(87-92%)                | 9.9%<br>(7.6-13%)        | 2.8<br>(2.4-3.2)                            | 3.7%<br>(2.3-5.4%)                   | 4.1%<br>(0.82-8%)                   | 4900<br>(980-9300)  | 170000<br>(100000-250000) |
| Argentina | 1995 | Female | 15 to 19 | 91%<br>(85-96%)                | 8.5%<br>(4.2-15%)        | 3.1<br>(2-4.6)                              | 4.1%<br>(2.6-6%)                     | 11%<br>(5.9-17%)                    | 84<br>(46-130)      | 8400<br>(5200-12000)      |
| Argentina | 1995 | Female | 20 to 24 | 94%<br>(90-97%)                | 5.6%<br>(2.9-10%)        | 4.5<br>(2.8-6.6)                            | 6.1%<br>(4.2-8.2%)                   | 13%<br>(7.8-18%)                    | 110<br>(67-160)     | 12000<br>(8500-16000)     |
| Argentina | 1995 | Female | 25 to 29 | 95%<br>(91-97%)                | 5.2%<br>(2.7-9.3%)       | 4.8<br>(3.2-6.7)                            | 5.9%<br>(4.2-7.7%)                   | 13%<br>(8.4-17%)                    | 120<br>(81-170)     | 11000<br>(7900-15000)     |
| Argentina | 1995 | Female | 30 to 34 | 94%<br>(90-97%)                | 5.8%<br>(3.2-10%)        | 4.7<br>(3.1-6.5)                            | 5.5%<br>(3.8-7.5%)                   | 13%<br>(8.5-17%)                    | 150<br>(98-200)     | 11000<br>(7700-15000)     |

| Location  | Year | Sex    | Age      | Prevalence of current drinkers | Prevalence of abstainers | Population average of standard drinks daily | Percent of total attributable deaths | Percent of total attributable DALYs | Attributable deaths   | Attributable DALYs        |
|-----------|------|--------|----------|--------------------------------|--------------------------|---------------------------------------------|--------------------------------------|-------------------------------------|-----------------------|---------------------------|
| Argentina | 1995 | Female | 35 to 39 | 92%<br>(87-96%)                | 7.6%<br>(3.7-13%)        | 4.3<br>(2.8-6.1)                            | 5.6%<br>(3.6-7.7%)                   | 12%<br>(8.1-17%)                    | 190<br>(120-260)      | 12000<br>(8000-17000)     |
| Argentina | 1995 | Female | 40 to 44 | 92%<br>(87-96%)                | 8.1%<br>(4.3-13%)        | 4.1<br>(2.6-5.9)                            | 6.2%<br>(3.7-8.9%)                   | 13%<br>(7.8-18%)                    | 280<br>(170-390)      | 15000<br>(9100-21000)     |
| Argentina | 1995 | Female | 45 to 49 | 93%<br>(87-96%)                | 7.5%<br>(3.9-13%)        | 4.1<br>(2.6-6)                              | 6.8%<br>(3.9-10%)                    | 13%<br>(7.6-18%)                    | 370<br>(230-530)      | 17000<br>(10000-25000)    |
| Argentina | 1995 | Female | 50 to 54 | 93%<br>(88-96%)                | 7.2%<br>(4-12%)          | 3.9<br>(2.4-5.7)                            | 6.9%<br>(3.6-11%)                    | 12%<br>(6.4-17%)                    | 440<br>(240-650)      | 17000<br>(9100-26000)     |
| Argentina | 1995 | Female | 55 to 59 | 93%<br>(88-96%)                | 7.3%<br>(4-12%)          | 3.8<br>(2.3-5.4)                            | 6.6%<br>(3-10%)                      | 10%<br>(5.2-16%)                    | 500<br>(250-770)      | 17000<br>(8000-27000)     |
| Argentina | 1995 | Female | 60 to 64 | 92%<br>(85-96%)                | 8.3%<br>(4.2-15%)        | 3.5<br>(2-5.2)                              | 5.3%<br>(1.2-9.7%)                   | 7.8%<br>(2.1-14%)                   | 530<br>(140-960)      | 15000<br>(3400-29000)     |
| Argentina | 1995 | Female | 65 to 69 | 90%<br>(82-95%)                | 10%<br>(4.8-18%)         | 3<br>(1.9-4.2)                              | 4%<br>(0.74-7.9%)                    | 5.6%<br>(1.3-11%)                   | 540<br>(130-1000)     | 13000<br>(2500-26000)     |
| Argentina | 1995 | Female | 70 to 74 | 89%<br>(80-94%)                | 11%<br>(6.1-20%)         | 2.7<br>(1.6-4)                              | 2.9%<br>(-0.82-7.2%)                 | 3.8%<br>(-0.97-9.3%)                | 500<br>(-120-1200)    | 9500<br>(-2600-24000)     |
| Argentina | 1995 | Female | 75 to 79 | 87%<br>(78-94%)                | 13%<br>(6.4-22%)         | 2.6<br>(1.4-4)                              | 1.9%<br>(-2.1-6.6%)                  | 2.3%<br>(-2.7-8.3%)                 | 370<br>(-430-1300)    | 5800<br>(-6300-19000)     |
| Argentina | 1995 | Female | 80 to 84 | 86%<br>(76-93%)                | 14%<br>(6.8-24%)         | 2.5<br>(1.6-3.7)                            | 1.6%<br>(-2.1-5.9%)                  | 1.8%<br>(-2.8-7%)                   | 310<br>(-490-1200)    | 3700<br>(-5000-14000)     |
| Argentina | 1995 | Female | 85 to 89 | 85%<br>(76-92%)                | 15%<br>(8-24%)           | 2.5<br>(1.5-3.8)                            | 1.4%<br>(-2.2-5.8%)                  | 1.5%<br>(-2.8-6.8%)                 | 240<br>(-460-1100)    | 2100<br>(-3300-8500)      |
| Argentina | 1995 | Female | 90 to 94 | 85%<br>(76-92%)                | 15%<br>(7.8-24%)         | 2.5<br>(1.4-4)                              | 1.3%<br>(-2.6-6.7%)                  | 1.2%<br>(-3.4-7.6%)                 | 110<br>(-310-700)     | 710<br>(-1500-3700)       |
| Argentina | 1995 | Female | 95 plus  | 85%<br>(73-93%)                | 15%<br>(6.5-27%)         | 2.5<br>(1.3-4.3)                            | 1.3%<br>(-3.1-7.9%)                  | 1.2%<br>(-4.1-9.1%)                 | 38<br>(-130-280)      | 160<br>(-390-980)         |
| Argentina | 1995 | Male   | All Ages | 94%<br>(92-96%)                | 5.7%<br>(3.8-8%)         | 3.3<br>(2.9-3.8)                            | 7.5%<br>(5.6-9.6%)                   | 6.9%<br>(3.9-10%)                   | 10000<br>(5600-16000) | 430000<br>(310000-540000) |
| Argentina | 1995 | Male   | 15 to 19 | 94%<br>(89-97%)                | 5.8%<br>(2.6-11%)        | 3.5<br>(2.1-5.1)                            | 9.6%<br>(6.7-13%)                    | 15%<br>(9.1-21%)                    | 260<br>(160-380)      | 25000<br>(17000-33000)    |
| Argentina | 1995 | Male   | 20 to 24 | 96%<br>(92-98%)                | 4.3%<br>(2.1-7.8%)       | 5.3<br>(3.4-7.6)                            | 16%<br>(12-21%)                      | 21%<br>(14-29%)                     | 460<br>(290-630)      | 43000<br>(31000-56000)    |
| Argentina | 1995 | Male   | 25 to 29 | 96%<br>(92-98%)                | 4.3%<br>(1.9-8.1%)       | 5.8<br>(4-8.2)                              | 15%<br>(12-19%)                      | 20%<br>(14-27%)                     | 440<br>(300-590)      | 37000<br>(28000-47000)    |
| Argentina | 1995 | Male   | 30 to 34 | 96%<br>(91-98%)                | 4.3%<br>(2-8.6%)         | 5.8<br>(4-8.1)                              | 13%<br>(10-17%)                      | 19%<br>(13-25%)                     | 410<br>(290-550)      | 30000<br>(22000-39000)    |
| Argentina | 1995 | Male   | 35 to 39 | 96%<br>(92-98%)                | 4.1%<br>(1.8-7.8%)       | 5.2<br>(3.4-7.3)                            | 13%<br>(9.2-17%)                     | 18%<br>(12-24%)                     | 490<br>(320-660)      | 31000<br>(22000-41000)    |
| Argentina | 1995 | Male   | 40 to 44 | 96%<br>(93-98%)                | 3.7%<br>(1.5-7.5%)       | 4.9<br>(3.1-7)                              | 13%<br>(8.7-17%)                     | 17%<br>(11-24%)                     | 640<br>(400-890)      | 35000<br>(24000-47000)    |
| Argentina | 1995 | Male   | 45 to 49 | 97%<br>(93-99%)                | 3.1%<br>(1.3-6.7%)       | 4.8<br>(3-7)                                | 13%<br>(8.1-18%)                     | 16%<br>(9.9-23%)                    | 880<br>(540-1300)     | 41000<br>(27000-57000)    |
| Argentina | 1995 | Male   | 50 to 54 | 97%<br>(94-99%)                | 2.9%<br>(1.1-6.1%)       | 4.6<br>(2.9-7)                              | 12%<br>(6.9-17%)                     | 14%<br>(8.3-22%)                    | 1100<br>(590-1600)    | 43000<br>(25000-63000)    |

| Location  | Year | Sex    | Age      | Prevalence of current drinkers | Prevalence of abstainers | Population average of standard drinks daily | Percent of total attributable deaths | Percent of total attributable DALYs | Attributable deaths | Attributable DALYs       |
|-----------|------|--------|----------|--------------------------------|--------------------------|---------------------------------------------|--------------------------------------|-------------------------------------|---------------------|--------------------------|
| Argentina | 1995 | Male   | 55 to 59 | 97%<br>(94-99%)                | 3%<br>(1.2-6%)           | 4.5<br>(2.8-6.5)                            | 10%<br>(5.6-15%)                     | 12%<br>(6.5-19%)                    | 1200<br>(640-1900)  | 42000<br>(23000-63000)   |
| Argentina | 1995 | Male   | 60 to 64 | 97%<br>(93-99%)                | 3.3%<br>(1.3-6.7%)       | 4.2<br>(2.5-6.3)                            | 8.1%<br>(3.3-14%)                    | 9.4%<br>(3.7-16%)                   | 1300<br>(510-2300)  | 37000<br>(15000-65000)   |
| Argentina | 1995 | Male   | 65 to 69 | 96%<br>(92-99%)                | 3.5%<br>(1.3-7.5%)       | 3.8<br>(2.5-5.5)                            | 5.9%<br>(1.7-11%)                    | 6.6%<br>(1.7-12%)                   | 1100<br>(300-2100)  | 28000<br>(8200-51000)    |
| Argentina | 1995 | Male   | 70 to 74 | 96%<br>(92-98%)                | 3.8%<br>(1.7-7.6%)       | 3.5<br>(2.1-5)                              | 4.2%<br>(0.23-9%)                    | 4.7%<br>(-0.0042-10%)               | 880<br>(-0.81-2000) | 17000<br>(970-37000)     |
| Argentina | 1995 | Male   | 75 to 79 | 96%<br>(92-98%)                | 4.1%<br>(1.8-7.9%)       | 3.2<br>(1.8-4.7)                            | 3%<br>(-0.88-7.9%)                   | 3.1%<br>(-1.3-8.7%)                 | 560<br>(-230-1500)  | 8800<br>(-2600-23000)    |
| Argentina | 1995 | Male   | 80 to 84 | 95%<br>(91-98%)                | 4.8%<br>(2.1-9.4%)       | 2.9<br>(1.8-4.2)                            | 2.1%<br>(-1.3-6.2%)                  | 2.1%<br>(-1.8-6.7%)                 | 320<br>(-280-1000)  | 3900<br>(-2400-11000)    |
| Argentina | 1995 | Male   | 85 to 89 | 94%<br>(89-97%)                | 5.7%<br>(2.6-11%)        | 2.7<br>(1.6-4)                              | 1.4%<br>(-1.4-5.1%)                  | 1.3%<br>(-2.1-5.5%)                 | 140<br>(-220-580)   | 1300<br>(-1300-4600)     |
| Argentina | 1995 | Male   | 90 to 94 | 94%<br>(89-97%)                | 6%<br>(2.7-11%)          | 2.6<br>(1.5-4)                              | 0.99%<br>(-2-5.2%)                   | 0.79%<br>(-2.7-5.6%)                | 37<br>(-130-270)    | 270<br>(-550-1400)       |
| Argentina | 1995 | Male   | 95 plus  | 94%<br>(87-98%)                | 6%<br>(2.2-13%)          | 2.5<br>(1.2-4.3)                            | 1.1%<br>(-2.4-6%)                    | 0.83%<br>(-3.2-6.5%)                | 10<br>(-40-83)      | 52<br>(-120-300)         |
| Argentina | 2000 | Female | All Ages | 90%<br>(88-92%)                | 9.6%<br>(7.6-12%)        | 2.6<br>(2.2-3)                              | 3.2%<br>(1.9-4.7%)                   | 3.2%<br>(0.38-6.5%)                 | 4200<br>(490-8500)  | 150000<br>(88000-220000) |
| Argentina | 2000 | Female | 15 to 19 | 93%<br>(88-96%)                | 7.2%<br>(3.7-12%)        | 2.9<br>(1.8-4.3)                            | 4%<br>(2.4-5.7%)                     | 10%<br>(5.6-16%)                    | 78<br>(42-120)      | 7800<br>(4800-11000)     |
| Argentina | 2000 | Female | 20 to 24 | 95%<br>(91-97%)                | 5.1%<br>(2.7-9.3%)       | 4.1<br>(2.7-5.9)                            | 5.5%<br>(3.9-7.3%)                   | 12%<br>(7.2-17%)                    | 110<br>(63-150)     | 12000<br>(8600-16000)    |
| Argentina | 2000 | Female | 25 to 29 | 95%<br>(91-97%)                | 5%<br>(2.6-8.9%)         | 4.3<br>(2.9-6)                              | 5.1%<br>(3.6-6.7%)                   | 11%<br>(7.5-16%)                    | 100<br>(68-150)     | 10000<br>(7300-14000)    |
| Argentina | 2000 | Female | 30 to 34 | 94%<br>(90-97%)                | 6%<br>(3.3-10%)          | 4.2<br>(2.9-5.9)                            | 4.6%<br>(3.2-6.3%)                   | 11%<br>(7.2-15%)                    | 120<br>(77-170)     | 9300<br>(6400-13000)     |
| Argentina | 2000 | Female | 35 to 39 | 92%<br>(87-96%)                | 7.9%<br>(3.8-13%)        | 3.8<br>(2.4-5.5)                            | 4.7%<br>(3-6.5%)                     | 11%<br>(6.7-15%)                    | 150<br>(96-220)     | 10000<br>(6600-14000)    |
| Argentina | 2000 | Female | 40 to 44 | 92%<br>(87-96%)                | 8.1%<br>(4.3-13%)        | 3.7<br>(2.4-5.4)                            | 5.3%<br>(3.1-7.6%)                   | 11%<br>(6.5-16%)                    | 230<br>(130-340)    | 13000<br>(7400-18000)    |
| Argentina | 2000 | Female | 45 to 49 | 93%<br>(88-96%)                | 7.2%<br>(4-12%)          | 3.7<br>(2.3-5.5)                            | 5.8%<br>(3.2-8.9%)                   | 11%<br>(6.4-17%)                    | 340<br>(190-500)    | 15000<br>(8500-23000)    |
| Argentina | 2000 | Female | 50 to 54 | 93%<br>(88-96%)                | 7.4%<br>(4.2-12%)        | 3.5<br>(2.1-5.1)                            | 6%<br>(3-9.4%)                       | 10%<br>(5.5-16%)                    | 420<br>(220-650)    | 17000<br>(8300-26000)    |
| Argentina | 2000 | Female | 55 to 59 | 93%<br>(88-96%)                | 7.4%<br>(4.1-12%)        | 3.4<br>(2.1-4.9)                            | 5.7%<br>(2.4-9.2%)                   | 9.2%<br>(4.5-14%)                   | 470<br>(230-740)    | 16000<br>(6900-26000)    |
| Argentina | 2000 | Female | 60 to 64 | 92%<br>(86-95%)                | 8.5%<br>(4.5-14%)        | 3.1<br>(1.8-4.7)                            | 4.5%<br>(1.1-8.5%)                   | 6.9%<br>(2-13%)                     | 460<br>(140-840)    | 13000<br>(3100-25000)    |
| Argentina | 2000 | Female | 65 to 69 | 89%<br>(80-95%)                | 11%<br>(5.1-20%)         | 2.6<br>(1.7-3.7)                            | 3.3%<br>(0.51-6.6%)                  | 4.7%<br>(0.92-9.2%)                 | 440<br>(86-860)     | 10000<br>(1600-21000)    |
| Argentina | 2000 | Female | 70 to 74 | 88%<br>(79-94%)                | 12%<br>(6.2-21%)         | 2.4<br>(1.4-3.6)                            | 2.3%<br>(-0.87-6%)                   | 3.1%<br>(-0.93-7.7%)                | 430<br>(-120-1100)  | 8000<br>(-3200-21000)    |

| Location  | Year | Sex    | Age      | Prevalence of current drinkers | Prevalence of abstainers | Population average of standard drinks daily | Percent of total attributable deaths | Percent of total attributable DALYs | Attributable deaths  | Attributable DALYs        |
|-----------|------|--------|----------|--------------------------------|--------------------------|---------------------------------------------|--------------------------------------|-------------------------------------|----------------------|---------------------------|
| Argentina | 2000 | Female | 75 to 79 | 87%<br>(78-94%)                | 13%<br>(6.3-22%)         | 2.3<br>(1.3-3.7)                            | 1.4%<br>(-2-5.6%)                    | 1.7%<br>(-2.4-6.9%)                 | 290<br>(-430-1200)   | 4500<br>(-6600-19000)     |
| Argentina | 2000 | Female | 80 to 84 | 86%<br>(76-93%)                | 14%<br>(7-24%)           | 2.3<br>(1.4-3.3)                            | 1.1%<br>(-2.1-4.7%)                  | 1.2%<br>(-2.8-5.6%)                 | 240<br>(-540-1100)   | 2800<br>(-5600-12000)     |
| Argentina | 2000 | Female | 85 to 89 | 85%<br>(75-92%)                | 15%<br>(8.3-25%)         | 2.2<br>(1.3-3.4)                            | 0.9%<br>(-2.2-4.8%)                  | 0.89%<br>(-2.8-5.5%)                | 180<br>(-540-1100)   | 1600<br>(-3900-8300)      |
| Argentina | 2000 | Female | 90 to 94 | 85%<br>(75-92%)                | 15%<br>(7.9-25%)         | 2.2<br>(1.2-3.5)                            | 0.71%<br>(-2.4-5.1%)                 | 0.61%<br>(-3.2-5.8%)                | 75<br>(-390-720)     | 530<br>(-1800-3900)       |
| Argentina | 2000 | Female | 95 plus  | 85%<br>(73-93%)                | 15%<br>(6.7-27%)         | 2.2<br>(1.1-3.9)                            | 0.73%<br>(-3.1-6.1%)                 | 0.56%<br>(-3.9-7%)                  | 25<br>(-180-310)     | 130<br>(-550-1100)        |
| Argentina | 2000 | Male   | All Ages | 95%<br>(93-97%)                | 4.9%<br>(3.4-6.7%)       | 2.7<br>(2.4-3.1)                            | 6.1%<br>(4.5-7.9%)                   | 4.8%<br>(2.3-7.7%)                  | 7400<br>(3500-12000) | 350000<br>(250000-460000) |
| Argentina | 2000 | Male   | 15 to 19 | 95%<br>(91-98%)                | 4.7%<br>(2.3-8.7%)       | 2.8<br>(1.7-4.2)                            | 9%<br>(6-12%)                        | 13%<br>(7.6-20%)                    | 240<br>(140-360)     | 23000<br>(15000-31000)    |
| Argentina | 2000 | Male   | 20 to 24 | 96%<br>(94-98%)                | 3.6%<br>(1.8-6.3%)       | 4.2<br>(2.7-6.2)                            | 15%<br>(11-19%)                      | 19%<br>(12-26%)                     | 480<br>(300-670)     | 46000<br>(33000-60000)    |
| Argentina | 2000 | Male   | 25 to 29 | 96%<br>(94-98%)                | 3.6%<br>(1.7-6.4%)       | 4.7<br>(3.2-6.5)                            | 14%<br>(11-18%)                      | 18%<br>(12-25%)                     | 420<br>(270-580)     | 37000<br>(27000-48000)    |
| Argentina | 2000 | Male   | 30 to 34 | 96%<br>(94-98%)                | 3.5%<br>(1.7-6.3%)       | 4.7<br>(3.2-6.6)                            | 11%<br>(8.6-15%)                     | 16%<br>(10-22%)                     | 360<br>(240-500)     | 27000<br>(20000-36000)    |
| Argentina | 2000 | Male   | 35 to 39 | 96%<br>(94-98%)                | 3.5%<br>(1.6-6.5%)       | 4.2<br>(2.7-6)                              | 10%<br>(7.5-14%)                     | 14%<br>(9.3-20%)                    | 370<br>(240-530)     | 25000<br>(18000-34000)    |
| Argentina | 2000 | Male   | 40 to 44 | 97%<br>(94-99%)                | 3.1%<br>(1.2-6.2%)       | 3.9<br>(2.4-5.7)                            | 10%<br>(6.9-14%)                     | 14%<br>(8.5-19%)                    | 490<br>(300-700)     | 28000<br>(19000-39000)    |
| Argentina | 2000 | Male   | 45 to 49 | 97%<br>(95-99%)                | 2.6%<br>(1.1-5.2%)       | 3.8<br>(2.5-5.5)                            | 9.9%<br>(6.4-14%)                    | 13%<br>(7.6-19%)                    | 670<br>(410-1000)    | 33000<br>(21000-47000)    |
| Argentina | 2000 | Male   | 50 to 54 | 98%<br>(95-99%)                | 2.4%<br>(0.98-4.8%)      | 3.8<br>(2.4-5.5)                            | 9%<br>(5.2-14%)                      | 11%<br>(6.2-17%)                    | 850<br>(470-1300)    | 35000<br>(20000-53000)    |
| Argentina | 2000 | Male   | 55 to 59 | 98%<br>(95-99%)                | 2.5%<br>(1.1-4.9%)       | 3.7<br>(2.3-5.4)                            | 7.8%<br>(4.2-12%)                    | 9.2%<br>(4.7-15%)                   | 920<br>(460-1500)    | 32000<br>(17000-52000)    |
| Argentina | 2000 | Male   | 60 to 64 | 97%<br>(94-99%)                | 2.8%<br>(1.2-5.7%)       | 3.4<br>(2-5.2)                              | 5.9%<br>(2.2-11%)                    | 6.8%<br>(2.4-13%)                   | 880<br>(310-1700)    | 26000<br>(9800-49000)     |
| Argentina | 2000 | Male   | 65 to 69 | 97%<br>(93-99%)                | 3.4%<br>(1.3-7.1%)       | 3<br>(2-4.3)                                | 3.9%<br>(0.63-7.6%)                  | 4.3%<br>(0.45-8.9%)                 | 720<br>(75-1500)     | 18000<br>(2800-35000)     |
| Argentina | 2000 | Male   | 70 to 74 | 96%<br>(92-98%)                | 3.9%<br>(1.7-8%)         | 2.7<br>(1.6-4)                              | 2.5%<br>(-0.53-6.3%)                 | 2.7%<br>(-0.84-7.2%)                | 550<br>(-170-1500)   | 11000<br>(-2400-29000)    |
| Argentina | 2000 | Male   | 75 to 79 | 96%<br>(92-98%)                | 4.3%<br>(1.7-8.5%)       | 2.4<br>(1.4-3.8)                            | 1.5%<br>(-1.3-5.2%)                  | 1.5%<br>(-1.8-5.6%)                 | 310<br>(-360-1200)   | 5100<br>(-4500-17000)     |
| Argentina | 2000 | Male   | 80 to 84 | 95%<br>(90-98%)                | 5%<br>(2.2-10%)          | 2.2<br>(1.4-3.3)                            | 0.86%<br>(-1.6-3.9%)                 | 0.75%<br>(-2.2-4.2%)                | 130<br>(-380-730)    | 1800<br>(-3500-8100)      |
| Argentina | 2000 | Male   | 85 to 89 | 94%<br>(89-97%)                | 6%<br>(2.6-11%)          | 2.1<br>(1.2-3.1)                            | 0.5%<br>(-1.7-3.1%)                  | 0.32%<br>(-2.2-3.2%)                | 39<br>(-270-400)     | 520<br>(-1800-3200)       |
| Argentina | 2000 | Male   | 90 to 94 | 94%<br>(88-97%)                | 6.4%<br>(2.6-12%)        | 2<br>(1.1-3.2)                              | 0.21%<br>(-2.1-3%)                   | -0.037%<br>(-2.7-3.2%)              | -2.1<br>(-160-180)   | 69<br>(-720-1000)         |

| Location  | Year | Sex    | Age      | Prevalence of current drinkers | Prevalence of abstainers | Population average of standard drinks daily | Percent of total attributable deaths | Percent of total attributable DALYs | Attributable deaths  | Attributable DALYs        |
|-----------|------|--------|----------|--------------------------------|--------------------------|---------------------------------------------|--------------------------------------|-------------------------------------|----------------------|---------------------------|
| Argentina | 2000 | Male   | 95 plus  | 94%<br>(87-98%)                | 6.3%<br>(2.3-13%)        | 2<br>(0.92-3.5)                             | 0.28%<br>(-2.3-3.8%)                 | -0.021%<br>(-3-4%)                  | -0.32<br>(-47-63)    | 17<br>(-140-240)          |
| Argentina | 2005 | Female | All Ages | 90%<br>(87-92%)                | 9.9%<br>(7.7-13%)        | 2.3<br>(2-2.7)                              | 2.7%<br>(1.4-4%)                     | 2.4%<br>(-0.25-5.2%)                | 3400<br>(-350-7500)  | 130000<br>(68000-190000)  |
| Argentina | 2005 | Female | 15 to 19 | 93%<br>(88-96%)                | 7.4%<br>(3.8-12%)        | 2.6<br>(1.7-3.9)                            | 3.5%<br>(2.2-5.1%)                   | 9.5%<br>(5-14%)                     | 67<br>(35-100)       | 7100<br>(4400-10000)      |
| Argentina | 2005 | Female | 20 to 24 | 95%<br>(90-97%)                | 5.3%<br>(2.8-9.5%)       | 3.7<br>(2.4-5.3)                            | 5.1%<br>(3.6-6.7%)                   | 11%<br>(6.4-16%)                    | 87<br>(50-130)       | 11000<br>(7600-15000)     |
| Argentina | 2005 | Female | 25 to 29 | 95%<br>(91-97%)                | 5.2%<br>(2.6-8.9%)       | 3.9<br>(2.7-5.4)                            | 4.5%<br>(3.2-5.9%)                   | 10%<br>(6.6-15%)                    | 96<br>(60-140)       | 10000<br>(7300-14000)     |
| Argentina | 2005 | Female | 30 to 34 | 94%<br>(90-97%)                | 6.2%<br>(3.4-10%)        | 3.8<br>(2.5-5.3)                            | 4%<br>(2.7-5.4%)                     | 9.5%<br>(6.1-13%)                   | 100<br>(64-140)      | 8600<br>(5800-12000)      |
| Argentina | 2005 | Female | 35 to 39 | 92%<br>(87-96%)                | 8.2%<br>(4-13%)          | 3.4<br>(2.2-4.9)                            | 4%<br>(2.5-5.6%)                     | 9.3%<br>(5.8-13%)                   | 130<br>(78-180)      | 8700<br>(5600-12000)      |
| Argentina | 2005 | Female | 40 to 44 | 92%<br>(87-95%)                | 8.3%<br>(4.6-13%)        | 3.4<br>(2.1-5)                              | 4.5%<br>(2.6-6.6%)                   | 9.9%<br>(5.6-14%)                   | 200<br>(110-290)     | 11000<br>(6200-16000)     |
| Argentina | 2005 | Female | 45 to 49 | 93%<br>(88-96%)                | 7.4%<br>(4.2-12%)        | 3.4<br>(2.2-5.1)                            | 4.9%<br>(2.6-7.7%)                   | 9.7%<br>(5.2-15%)                   | 290<br>(150-440)     | 13000<br>(7200-20000)     |
| Argentina | 2005 | Female | 50 to 54 | 92%<br>(87-96%)                | 7.7%<br>(4.3-13%)        | 3.1<br>(1.9-4.6)                            | 5%<br>(2.3-8%)                       | 8.8%<br>(4.5-13%)                   | 380<br>(190-580)     | 15000<br>(7100-24000)     |
| Argentina | 2005 | Female | 55 to 59 | 92%<br>(87-96%)                | 7.7%<br>(4.4-13%)        | 3<br>(1.9-4.4)                              | 4.7%<br>(1.9-7.7%)                   | 7.7%<br>(3.6-12%)                   | 430<br>(200-680)     | 15000<br>(6200-24000)     |
| Argentina | 2005 | Female | 60 to 64 | 91%<br>(85-95%)                | 8.8%<br>(4.8-15%)        | 2.8<br>(1.6-4.2)                            | 3.7%<br>(0.71-7.2%)                  | 5.8%<br>(1.5-11%)                   | 410<br>(110-770)     | 12000<br>(2200-22000)     |
| Argentina | 2005 | Female | 65 to 69 | 89%<br>(80-95%)                | 11%<br>(5.3-20%)         | 2.3<br>(1.5-3.3)                            | 2.6%<br>(0.14-5.3%)                  | 3.8%<br>(0.69-7.6%)                 | 360<br>(64-710)      | 8200<br>(470-17000)       |
| Argentina | 2005 | Female | 70 to 74 | 87%<br>(78-93%)                | 13%<br>(6.6-22%)         | 2.1<br>(1.2-3.2)                            | 1.7%<br>(-1.1-4.9%)                  | 2.4%<br>(-1.1-6.4%)                 | 320<br>(-150-850)    | 5800<br>(-3600-17000)     |
| Argentina | 2005 | Female | 75 to 79 | 87%<br>(77-94%)                | 13%<br>(6.4-23%)         | 2.1<br>(1.1-3.3)                            | 0.86%<br>(-2.1-4.6%)                 | 1.1%<br>(-2.5-5.6%)                 | 210<br>(-470-1100)   | 3100<br>(-7200-16000)     |
| Argentina | 2005 | Female | 80 to 84 | 86%<br>(74-93%)                | 14%<br>(7.1-26%)         | 2<br>(1.2-3)                                | 0.59%<br>(-2.2-3.8%)                 | 0.67%<br>(-2.8-4.4%)                | 160<br>(-630-1000)   | 1800<br>(-6800-11000)     |
| Argentina | 2005 | Female | 85 to 89 | 85%<br>(74-92%)                | 15%<br>(8.4-26%)         | 1.9<br>(1.2-3)                              | 0.47%<br>(-2.1-3.6%)                 | 0.44%<br>(-2.6-4.2%)                | 100<br>(-610-940)    | 1000<br>(-4500-7600)      |
| Argentina | 2005 | Female | 90 to 94 | 85%<br>(75-92%)                | 15%<br>(8.1-25%)         | 2<br>(1.1-3.2)                              | 0.34%<br>(-2.5-3.9%)                 | 0.22%<br>(-3-4.3%)                  | 34<br>(-460-650)     | 320<br>(-2300-3700)       |
| Argentina | 2005 | Female | 95 plus  | 85%<br>(72-93%)                | 15%<br>(6.7-28%)         | 2<br>(0.99-3.5)                             | 0.37%<br>(-2.9-5.2%)                 | 0.18%<br>(-3.6-5.8%)                | 11<br>(-220-350)     | 89<br>(-690-1200)         |
| Argentina | 2005 | Male   | All Ages | 95%<br>(93-97%)                | 4.8%<br>(3.3-6.6%)       | 2.6<br>(2.2-2.9)                            | 5.7%<br>(4.2-7.4%)                   | 4.2%<br>(1.9-6.7%)                  | 6700<br>(3100-11000) | 320000<br>(240000-430000) |
| Argentina | 2005 | Male   | 15 to 19 | 95%<br>(92-98%)                | 4.7%<br>(2.3-8.4%)       | 2.6<br>(1.6-3.9)                            | 8.4%<br>(5.4-12%)                    | 13%<br>(6.9-19%)                    | 220<br>(120-320)     | 21000<br>(14000-29000)    |
| Argentina | 2005 | Male   | 20 to 24 | 96%<br>(94-98%)                | 3.6%<br>(1.9-6.4%)       | 3.9<br>(2.6-5.8)                            | 15%<br>(11-19%)                      | 18%<br>(11-26%)                     | 410<br>(250-580)     | 42000<br>(30000-54000)    |

| Location  | Year | Sex    | Age      | Prevalence of current drinkers | Prevalence of abstainers | Population average of standard drinks daily | Percent of total attributable deaths | Percent of total attributable DALYs | Attributable deaths  | Attributable DALYs       |
|-----------|------|--------|----------|--------------------------------|--------------------------|---------------------------------------------|--------------------------------------|-------------------------------------|----------------------|--------------------------|
| Argentina | 2005 | Male   | 25 to 29 | 96%<br>(94-98%)                | 3.5%<br>(1.7-6.1%)       | 4.4<br>(3-6.1)                              | 14%<br>(10-17%)                      | 18%<br>(11-25%)                     | 410<br>(260-560)     | 38000<br>(28000-50000)   |
| Argentina | 2005 | Male   | 30 to 34 | 96%<br>(94-98%)                | 3.5%<br>(1.7-6.3%)       | 4.3<br>(2.9-6.1)                            | 11%<br>(8.3-15%)                     | 16%<br>(10-22%)                     | 340<br>(220-470)     | 27000<br>(20000-36000)   |
| Argentina | 2005 | Male   | 35 to 39 | 97%<br>(94-98%)                | 3.5%<br>(1.7-6.4%)       | 3.9<br>(2.5-5.6)                            | 9.6%<br>(6.9-13%)                    | 13%<br>(8.6-19%)                    | 330<br>(210-460)     | 23000<br>(17000-32000)   |
| Argentina | 2005 | Male   | 40 to 44 | 97%<br>(94-99%)                | 3.1%<br>(1.4-6.1%)       | 3.7<br>(2.2-5.5)                            | 9.3%<br>(6.5-13%)                    | 13%<br>(8.1-18%)                    | 410<br>(270-600)     | 25000<br>(17000-34000)   |
| Argentina | 2005 | Male   | 45 to 49 | 97%<br>(95-99%)                | 2.6%<br>(1.2-4.9%)       | 3.6<br>(2.3-5.4)                            | 8.9%<br>(5.9-13%)                    | 11%<br>(7-17%)                      | 570<br>(350-870)     | 29000<br>(19000-41000)   |
| Argentina | 2005 | Male   | 50 to 54 | 98%<br>(95-99%)                | 2.4%<br>(1.1-4.6%)       | 3.5<br>(2.1-5.2)                            | 8.1%<br>(4.9-13%)                    | 10%<br>(5.6-16%)                    | 760<br>(420-1200)    | 32000<br>(19000-50000)   |
| Argentina | 2005 | Male   | 55 to 59 | 97%<br>(95-99%)                | 2.5%<br>(1.1-5%)         | 3.4<br>(2.2-5)                              | 6.9%<br>(3.6-11%)                    | 8.2%<br>(4.1-14%)                   | 860<br>(430-1400)    | 30000<br>(16000-49000)   |
| Argentina | 2005 | Male   | 60 to 64 | 97%<br>(94-99%)                | 2.8%<br>(1.1-5.8%)       | 3.2<br>(1.9-4.7)                            | 5.3%<br>(2-9.7%)                     | 6.1%<br>(2.2-11%)                   | 810<br>(290-1500)    | 24000<br>(9300-44000)    |
| Argentina | 2005 | Male   | 65 to 69 | 97%<br>(93-99%)                | 3.4%<br>(1.4-7%)         | 2.8<br>(1.9-4)                              | 3.4%<br>(0.67-6.9%)                  | 3.9%<br>(0.53-8%)                   | 620<br>(86-1300)     | 15000<br>(3000-31000)    |
| Argentina | 2005 | Male   | 70 to 74 | 96%<br>(92-98%)                | 4%<br>(1.7-7.9%)         | 2.5<br>(1.5-3.7)                            | 2.2%<br>(-0.41-5.5%)                 | 2.4%<br>(-0.72-6.2%)                | 470<br>(-140-1200)   | 9700<br>(-1800-24000)    |
| Argentina | 2005 | Male   | 75 to 79 | 96%<br>(91-98%)                | 4.4%<br>(1.8-8.7%)       | 2.2<br>(1.2-3.5)                            | 1.3%<br>(-1.2-4.5%)                  | 1.3%<br>(-1.6-4.9%)                 | 290<br>(-360-1100)   | 4900<br>(-4600-16000)    |
| Argentina | 2005 | Male   | 80 to 84 | 95%<br>(90-98%)                | 5.2%<br>(2.3-10%)        | 2.1<br>(1.3-3)                              | 0.73%<br>(-1.5-3.1%)                 | 0.63%<br>(-2-3.4%)                  | 120<br>(-390-660)    | 1800<br>(-3700-7800)     |
| Argentina | 2005 | Male   | 85 to 89 | 94%<br>(88-97%)                | 6.2%<br>(2.8-12%)        | 1.9<br>(1.1-2.8)                            | 0.43%<br>(-1.5-2.6%)                 | 0.28%<br>(-2-2.8%)                  | 39<br>(-280-390)     | 510<br>(-1800-3100)      |
| Argentina | 2005 | Male   | 90 to 94 | 93%<br>(88-97%)                | 6.6%<br>(2.9-12%)        | 1.8<br>(1-2.9)                              | 0.13%<br>(-1.9-2.5%)                 | -0.094%<br>(-2.5-2.6%)              | -6.1<br>(-160-170)   | 49<br>(-710-960)         |
| Argentina | 2005 | Male   | 95 plus  | 94%<br>(86-98%)                | 6.4%<br>(2.3-14%)        | 1.8<br>(0.82-3.1)                           | 0.15%<br>(-2.1-3.3%)                 | -0.14%<br>(-2.7-3.4%)               | -2.6<br>(-50-64)     | 11<br>(-150-240)         |
| Argentina | 2010 | Female | All Ages | 90%<br>(87-92%)                | 10%<br>(7.8-13%)         | 2.1<br>(1.8-2.5)                            | 2.2%<br>(1-3.5%)                     | 1.7%<br>(-0.7-4.4%)                 | 2600<br>(-1100-6800) | 110000<br>(52000-180000) |
| Argentina | 2010 | Female | 15 to 19 | 91%<br>(84-96%)                | 8.9%<br>(4.2-16%)        | 2.2<br>(1.3-3.4)                            | 3.1%<br>(1.8-4.6%)                   | 8.2%<br>(3.9-13%)                   | 63<br>(29-99)        | 6400<br>(3800-9400)      |
| Argentina | 2010 | Female | 20 to 24 | 94%<br>(89-97%)                | 5.7%<br>(2.9-11%)        | 3.2<br>(2-4.7)                              | 4.5%<br>(3-6.1%)                     | 10%<br>(5.3-15%)                    | 83<br>(44-120)       | 9900<br>(6500-14000)     |
| Argentina | 2010 | Female | 25 to 29 | 95%<br>(91-97%)                | 5.2%<br>(2.6-9.4%)       | 3.5<br>(2.3-5.1)                            | 4.1%<br>(2.9-5.6%)                   | 9.5%<br>(5.6-14%)                   | 88<br>(52-130)       | 9400<br>(6200-13000)     |
| Argentina | 2010 | Female | 30 to 34 | 94%<br>(90-97%)                | 5.9%<br>(3.2-10%)        | 3.4<br>(2.3-4.9)                            | 3.7%<br>(2.5-5.1%)                   | 8.8%<br>(5.5-13%)                   | 110<br>(69-160)      | 9400<br>(6400-13000)     |
| Argentina | 2010 | Female | 35 to 39 | 92%<br>(88-96%)                | 7.7%<br>(3.8-12%)        | 3.1<br>(2-4.6)                              | 3.5%<br>(2.2-4.9%)                   | 8.3%<br>(5.1-12%)                   | 130<br>(78-180)      | 8700<br>(5500-13000)     |
| Argentina | 2010 | Female | 40 to 44 | 92%<br>(86-96%)                | 8.3%<br>(4.4-14%)        | 3<br>(1.9-4.5)                              | 3.8%<br>(2.1-5.7%)                   | 8.5%<br>(4.8-13%)                   | 170<br>(95-260)      | 9500<br>(5300-14000)     |

| Location  | Year | Sex    | Age      | Prevalence of current drinkers | Prevalence of abstainers | Population average of standard drinks daily | Percent of total attributable deaths | Percent of total attributable DALYs | Attributable deaths  | Attributable DALYs        |
|-----------|------|--------|----------|--------------------------------|--------------------------|---------------------------------------------|--------------------------------------|-------------------------------------|----------------------|---------------------------|
| Argentina | 2010 | Female | 45 to 49 | 92%<br>(87-96%)                | 7.7%<br>(4.3-13%)        | 3<br>(1.9-4.6)                              | 4.1%<br>(2-6.7%)                     | 8.3%<br>(4.4-13%)                   | 240<br>(130-380)     | 11000<br>(5600-18000)     |
| Argentina | 2010 | Female | 50 to 54 | 93%<br>(87-96%)                | 7.4%<br>(4.1-13%)        | 2.8<br>(1.7-4.3)                            | 4.1%<br>(1.8-6.8%)                   | 7.5%<br>(3.7-12%)                   | 320<br>(160-520)     | 13000<br>(5500-21000)     |
| Argentina | 2010 | Female | 55 to 59 | 92%<br>(87-96%)                | 7.6%<br>(4.1-13%)        | 2.7<br>(1.7-4)                              | 3.8%<br>(1.3-6.5%)                   | 6.5%<br>(2.8-10%)                   | 390<br>(160-630)     | 13000<br>(4600-22000)     |
| Argentina | 2010 | Female | 60 to 64 | 91%<br>(85-96%)                | 8.7%<br>(4.4-15%)        | 2.5<br>(1.5-3.9)                            | 3%<br>(0.37-6.2%)                    | 4.7%<br>(1.1-9.3%)                  | 380<br>(88-740)      | 10000<br>(1200-22000)     |
| Argentina | 2010 | Female | 65 to 69 | 90%<br>(80-95%)                | 10%<br>(4.8-20%)         | 2.1<br>(1.4-3.1)                            | 2%<br>(-0.29-4.6%)                   | 3.1%<br>(0.099-6.5%)                | 310<br>(10-650)      | 6800<br>(-980-16000)      |
| Argentina | 2010 | Female | 70 to 74 | 88%<br>(79-94%)                | 12%<br>(6.2-21%)         | 1.9<br>(1.1-3)                              | 1.2%<br>(-1.2-4%)                    | 1.8%<br>(-1.3-5.5%)                 | 240<br>(-170-710)    | 4000<br>(-4200-14000)     |
| Argentina | 2010 | Female | 75 to 79 | 87%<br>(77-93%)                | 13%<br>(6.7-23%)         | 1.9<br>(1-3)                                | 0.41%<br>(-2.2-3.5%)                 | 0.63%<br>(-2.7-4.5%)                | 120<br>(-480-840)    | 1500<br>(-7700-13000)     |
| Argentina | 2010 | Female | 80 to 84 | 85%<br>(74-93%)                | 15%<br>(7.3-26%)         | 1.8<br>(1.1-2.8)                            | 0.14%<br>(-2.3-3%)                   | 0.18%<br>(-2.8-3.7%)                | 46<br>(-730-950)     | 480<br>(-7800-11000)      |
| Argentina | 2010 | Female | 85 to 89 | 84%<br>(74-91%)                | 16%<br>(8.6-26%)         | 1.7<br>(1-2.7)                              | 0.017%<br>(-2.4-2.9%)                | -0.059%<br>(-2.9-3.2%)              | -16<br>(-810-880)    | 45<br>(-5900-7100)        |
| Argentina | 2010 | Female | 90 to 94 | 84%<br>(75-92%)                | 16%<br>(8.2-25%)         | 1.8<br>(0.96-2.9)                           | -0.11%<br>(-2.6-3.1%)                | -0.27%<br>(-3.1-3.5%)               | -50<br>(-580-670)    | -120<br>(-2900-3600)      |
| Argentina | 2010 | Female | 95 plus  | 84%<br>(72-94%)                | 16%<br>(6.5-28%)         | 1.8<br>(0.87-3.1)                           | -0.097%<br>(-3-4%)                   | -0.33%<br>(-3.7-4.6%)               | -25<br>(-280-350)    | -30<br>(-900-1200)        |
| Argentina | 2010 | Male   | All Ages | 94%<br>(92-96%)                | 5.8%<br>(4-7.9%)         | 2.8<br>(2.3-3.3)                            | 6%<br>(4.4-7.7%)                     | 4.8%<br>(2.5-7.5%)                  | 7900<br>(4000-12000) | 350000<br>(250000-450000) |
| Argentina | 2010 | Male   | 15 to 19 | 94%<br>(89-97%)                | 6.1%<br>(2.7-11%)        | 2.7<br>(1.7-4.1)                            | 8.1%<br>(5-11%)                      | 13%<br>(7.2-20%)                    | 230<br>(120-350)     | 21000<br>(13000-29000)    |
| Argentina | 2010 | Male   | 20 to 24 | 95%<br>(92-98%)                | 4.5%<br>(2.2-8.2%)       | 4.2<br>(2.7-6.3)                            | 14%<br>(9.8-19%)                     | 20%<br>(12-28%)                     | 440<br>(280-630)     | 41000<br>(28000-55000)    |
| Argentina | 2010 | Male   | 25 to 29 | 95%<br>(91-98%)                | 4.6%<br>(1.9-8.7%)       | 4.7<br>(3.2-6.6)                            | 13%<br>(9.6-17%)                     | 20%<br>(13-27%)                     | 430<br>(280-610)     | 36000<br>(26000-48000)    |
| Argentina | 2010 | Male   | 30 to 34 | 95%<br>(91-98%)                | 4.5%<br>(2-9.1%)         | 4.6<br>(3.1-6.6)                            | 11%<br>(8-15%)                       | 17%<br>(11-24%)                     | 430<br>(270-600)     | 32000<br>(22000-42000)    |
| Argentina | 2010 | Male   | 35 to 39 | 96%<br>(92-98%)                | 4.3%<br>(1.8-8.3%)       | 4.1<br>(2.7-5.9)                            | 9.5%<br>(6.6-13%)                    | 15%<br>(9.2-21%)                    | 380<br>(240-530)     | 25000<br>(17000-34000)    |
| Argentina | 2010 | Male   | 40 to 44 | 96%<br>(92-98%)                | 3.9%<br>(1.5-7.7%)       | 3.9<br>(2.4-5.7)                            | 9%<br>(6.2-12%)                      | 13%<br>(8.3-19%)                    | 430<br>(270-620)     | 24000<br>(16000-34000)    |
| Argentina | 2010 | Male   | 45 to 49 | 97%<br>(93-99%)                | 3.3%<br>(1.4-6.9%)       | 3.8<br>(2.4-5.6)                            | 8.8%<br>(5.6-13%)                    | 12%<br>(7.4-18%)                    | 590<br>(350-880)     | 28000<br>(18000-41000)    |
| Argentina | 2010 | Male   | 50 to 54 | 97%<br>(94-99%)                | 3.1%<br>(1.3-6.3%)       | 3.7<br>(2.2-5.5)                            | 8.2%<br>(4.8-13%)                    | 11%<br>(6.1-17%)                    | 790<br>(450-1300)    | 33000<br>(19000-50000)    |
| Argentina | 2010 | Male   | 55 to 59 | 97%<br>(93-99%)                | 3.3%<br>(1.3-6.5%)       | 3.6<br>(2.3-5.3)                            | 7.3%<br>(3.9-12%)                    | 9%<br>(4.8-15%)                     | 960<br>(510-1600)    | 34000<br>(18000-54000)    |
| Argentina | 2010 | Male   | 60 to 64 | 97%<br>(92-99%)                | 3.5%<br>(1.3-7.5%)       | 3.4<br>(2-5.2)                              | 5.8%<br>(2.5-11%)                    | 6.9%<br>(2.8-13%)                   | 980<br>(400-1800)    | 29000<br>(12000-53000)    |



| Location  | Year | Sex    | Age      | Prevalence of current drinkers | Prevalence of abstainers | Population average of standard drinks daily | Percent of total attributable deaths | Percent of total attributable DALYs | Attributable deaths  | Attributable DALYs       |
|-----------|------|--------|----------|--------------------------------|--------------------------|---------------------------------------------|--------------------------------------|-------------------------------------|----------------------|--------------------------|
| Argentina | 2010 | Male   | 65 to 69 | 96%<br>(92-99%)                | 3.7%<br>(1.4-7.8%)       | 3.1<br>(2-4.4)                              | 4.2%<br>(1.3-7.8%)                   | 4.8%<br>(1.4-9.1%)                  | 800<br>(240-1500)    | 20000<br>(6300-37000)    |
| Argentina | 2010 | Male   | 70 to 74 | 96%<br>(91-98%)                | 4.1%<br>(1.7-8.7%)       | 2.7<br>(1.7-4.1)                            | 2.9%<br>(0.044-6.5%)                 | 3.2%<br>(-0.16-7.4%)                | 610<br>(-30-1400)    | 12000<br>(180-28000)     |
| Argentina | 2010 | Male   | 75 to 79 | 95%<br>(91-98%)                | 4.5%<br>(1.9-8.9%)       | 2.5<br>(1.4-3.9)                            | 1.9%<br>(-0.8-5.4%)                  | 2%<br>(-1.1-6%)                     | 420<br>(-240-1300)   | 6900<br>(-2800-20000)    |
| Argentina | 2010 | Male   | 80 to 84 | 95%<br>(89-98%)                | 5.3%<br>(2.3-11%)        | 2.3<br>(1.4-3.3)                            | 1.2%<br>(-1.1-3.8%)                  | 1.1%<br>(-1.6-4.1%)                 | 240<br>(-330-890)    | 3100<br>(-3000-10000)    |
| Argentina | 2010 | Male   | 85 to 89 | 94%<br>(88-97%)                | 6.3%<br>(2.8-12%)        | 2<br>(1.2-3.1)                              | 0.83%<br>(-1.2-3.2%)                 | 0.72%<br>(-1.7-3.3%)                | 120<br>(-280-540)    | 1200<br>(-1700-4400)     |
| Argentina | 2010 | Male   | 90 to 94 | 93%<br>(88-97%)                | 6.6%<br>(2.9-12%)        | 2<br>(1.1-3.1)                              | 0.52%<br>(-1.6-3.1%)                 | 0.33%<br>(-2.1-3.3%)                | 25<br>(-160-260)     | 230<br>(-710-1400)       |
| Argentina | 2010 | Male   | 95 plus  | 94%<br>(86-98%)                | 6.4%<br>(2.4-14%)        | 2<br>(0.9-3.4)                              | 0.52%<br>(-1.8-3.9%)                 | 0.27%<br>(-2.4-4.1%)                | 5.9<br>(-53-90)      | 45<br>(-160-340)         |
| Argentina | 2016 | Female | All Ages | 90%<br>(87-92%)                | 10%<br>(7.9-13%)         | 2.5<br>(1.9-3.4)                            | 2.9%<br>(1.2-4.9%)                   | 2.9%<br>(-0.25-6.7%)                | 4700<br>(-400-11000) | 160000<br>(66000-270000) |
| Argentina | 2016 | Female | 15 to 19 | 91%<br>(84-96%)                | 9%<br>(4.4-16%)          | 2.6<br>(1.5-4.2)                            | 3.4%<br>(1.9-5.3%)                   | 9.7%<br>(4.5-16%)                   | 69<br>(32-110)       | 7000<br>(4000-11000)     |
| Argentina | 2016 | Female | 20 to 24 | 94%<br>(90-97%)                | 5.8%<br>(2.9-10%)        | 3.8<br>(2.2-6)                              | 4.9%<br>(3.2-6.9%)                   | 12%<br>(6.3-18%)                    | 95<br>(49-150)       | 11000<br>(7100-16000)    |
| Argentina | 2016 | Female | 25 to 29 | 95%<br>(90-97%)                | 5.3%<br>(2.6-9.6%)       | 4.1<br>(2.4-6.3)                            | 4.6%<br>(3.1-6.4%)                   | 12%<br>(6.6-17%)                    | 100<br>(58-160)      | 11000<br>(6800-15000)    |
| Argentina | 2016 | Female | 30 to 34 | 94%<br>(90-97%)                | 6%<br>(3.2-10%)          | 4.1<br>(2.5-6.2)                            | 4.1%<br>(2.7-5.8%)                   | 11%<br>(6.5-16%)                    | 120<br>(72-180)      | 10000<br>(6500-15000)    |
| Argentina | 2016 | Female | 35 to 39 | 92%<br>(87-96%)                | 7.7%<br>(3.7-13%)        | 3.7<br>(2.2-5.7)                            | 4%<br>(2.4-5.9%)                     | 9.9%<br>(5.8-15%)                   | 160<br>(92-240)      | 11000<br>(6900-17000)    |
| Argentina | 2016 | Female | 40 to 44 | 92%<br>(86-95%)                | 8.4%<br>(4.5-14%)        | 3.6<br>(2-5.6)                              | 4.3%<br>(2.4-6.7%)                   | 10%<br>(5.7-15%)                    | 220<br>(120-350)     | 12000<br>(7000-20000)    |
| Argentina | 2016 | Female | 45 to 49 | 92%<br>(86-96%)                | 7.8%<br>(4.2-14%)        | 3.5<br>(2-5.7)                              | 4.7%<br>(2.4-7.7%)                   | 9.7%<br>(5.3-16%)                   | 280<br>(150-460)     | 13000<br>(6800-22000)    |
| Argentina | 2016 | Female | 50 to 54 | 93%<br>(87-96%)                | 7.5%<br>(4-13%)          | 3.3<br>(1.8-5.3)                            | 4.9%<br>(2.1-8.3%)                   | 9%<br>(4.5-15%)                     | 380<br>(180-630)     | 15000<br>(6500-26000)    |
| Argentina | 2016 | Female | 55 to 59 | 92%<br>(87-96%)                | 7.6%<br>(4.1-13%)        | 3.2<br>(1.9-5.1)                            | 4.8%<br>(1.7-8.4%)                   | 8.1%<br>(3.4-14%)                   | 490<br>(210-820)     | 17000<br>(5900-29000)    |
| Argentina | 2016 | Female | 60 to 64 | 91%<br>(85-96%)                | 8.7%<br>(4.3-15%)        | 3<br>(1.6-4.9)                              | 4%<br>(0.78-8.3%)                    | 6.3%<br>(1.8-12%)                   | 530<br>(150-1000)    | 15000<br>(3000-31000)    |
| Argentina | 2016 | Female | 65 to 69 | 89%<br>(80-95%)                | 11%<br>(4.9-20%)         | 2.5<br>(1.5-4)                              | 3%<br>(0.19-6.6%)                    | 4.5%<br>(0.83-9.5%)                 | 500<br>(89-1000)     | 12000<br>(750-25000)     |
| Argentina | 2016 | Female | 70 to 74 | 88%<br>(79-94%)                | 12%<br>(6.1-21%)         | 2.2<br>(1.2-3.7)                            | 2.1%<br>(-0.76-6%)                   | 3.1%<br>(-0.59-8.1%)                | 420<br>(-83-1100)    | 7900<br>(-3000-22000)    |
| Argentina | 2016 | Female | 75 to 79 | 87%<br>(77-93%)                | 13%<br>(6.7-23%)         | 2.2<br>(1.1-3.6)                            | 1.4%<br>(-1.6-5.7%)                  | 1.9%<br>(-1.9-7.2%)                 | 330<br>(-340-1300)   | 5000<br>(-5800-20000)    |
| Argentina | 2016 | Female | 80 to 84 | 86%<br>(74-93%)                | 14%<br>(7.3-26%)         | 2.1<br>(1.2-3.4)                            | 1.2%<br>(-1.8-4.9%)                  | 1.4%<br>(-2.2-6%)                   | 360<br>(-580-1500)   | 4200<br>(-6500-18000)    |

| Location  | Year | Sex    | Age      | Prevalence of current drinkers | Prevalence of abstainers | Population average of standard drinks daily | Percent of total attributable deaths | Percent of total attributable DALYs | Attributable deaths  | Attributable DALYs        |
|-----------|------|--------|----------|--------------------------------|--------------------------|---------------------------------------------|--------------------------------------|-------------------------------------|----------------------|---------------------------|
| Argentina | 2016 | Female | 85 to 89 | 85%<br>(73-92%)                | 15%<br>(8.4-27%)         | 2<br>(1.2-3.4)                              | 1.1%<br>(-1.8-4.8%)                  | 1.2%<br>(-2.2-5.5%)                 | 340<br>(-680-1600)   | 2900<br>(-4900-13000)     |
| Argentina | 2016 | Female | 90 to 94 | 84%<br>(74-92%)                | 16%<br>(8.3-26%)         | 2.1<br>(1.1-3.5)                            | 0.96%<br>(-2.5-3%)                   | 0.96%<br>(-2.6-6%)                  | 220<br>(-590-1400)   | 1300<br>(-2800-7200)      |
| Argentina | 2016 | Female | 95 plus  | 84%<br>(71-93%)                | 16%<br>(6.9-29%)         | 2.1<br>(0.95-3.8)                           | 1%<br>(-2.3-6.5%)                    | 0.96%<br>(-3.1-7.6%)                | 93<br>(-300-730)     | 400<br>(-920-2500)        |
| Argentina | 2016 | Male   | All Ages | 94%<br>(92-96%)                | 5.7%<br>(3.9-7.7%)       | 2.6<br>(1.9-3.5)                            | 5.8%<br>(3.8-8%)                     | 4.5%<br>(2-7.8%)                    | 7700<br>(3400-13000) | 350000<br>(230000-490000) |
| Argentina | 2016 | Male   | 15 to 19 | 94%<br>(89-97%)                | 6.1%<br>(2.7-11%)        | 2.6<br>(1.4-4.2)                            | 8%<br>(4.8-12%)                      | 13%<br>(6.6-21%)                    | 240<br>(120-370)     | 21000<br>(13000-31000)    |
| Argentina | 2016 | Male   | 20 to 24 | 95%<br>(92-98%)                | 4.5%<br>(2.3-8.3%)       | 3.9<br>(2.3-6)                              | 14%<br>(9.3-19%)                     | 19%<br>(11-28%)                     | 460<br>(260-690)     | 43000<br>(28000-60000)    |
| Argentina | 2016 | Male   | 25 to 29 | 95%<br>(91-98%)                | 4.5%<br>(2-8.6%)         | 4.3<br>(2.5-6.6)                            | 13%<br>(9-18%)                       | 19%<br>(11-28%)                     | 440<br>(250-650)     | 38000<br>(25000-52000)    |
| Argentina | 2016 | Male   | 30 to 34 | 95%<br>(91-98%)                | 4.5%<br>(2-9%)           | 4.3<br>(2.6-6.6)                            | 11%<br>(7.4-15%)                     | 17%<br>(10-24%)                     | 400<br>(240-590)     | 30000<br>(20000-42000)    |
| Argentina | 2016 | Male   | 35 to 39 | 96%<br>(92-98%)                | 4.4%<br>(1.9-8.2%)       | 3.9<br>(2.3-6)                              | 9.1%<br>(5.9-13%)                    | 14%<br>(8-22%)                      | 410<br>(240-620)     | 28000<br>(18000-40000)    |
| Argentina | 2016 | Male   | 40 to 44 | 96%<br>(92-98%)                | 3.9%<br>(1.5-7.8%)       | 3.6<br>(2-5.8)                              | 8.6%<br>(5.6-13%)                    | 13%<br>(7.8-20%)                    | 460<br>(270-700)     | 26000<br>(17000-39000)    |
| Argentina | 2016 | Male   | 45 to 49 | 97%<br>(93-99%)                | 3.2%<br>(1.4-6.9%)       | 3.5<br>(2.1-5.6)                            | 8.2%<br>(5.1-13%)                    | 12%<br>(6.9-18%)                    | 540<br>(320-880)     | 27000<br>(17000-41000)    |
| Argentina | 2016 | Male   | 50 to 54 | 97%<br>(94-99%)                | 3%<br>(1.2-6%)           | 3.4<br>(1.9-5.3)                            | 7.7%<br>(4.4-12%)                    | 10%<br>(5.5-17%)                    | 720<br>(400-1200)    | 30000<br>(17000-49000)    |
| Argentina | 2016 | Male   | 55 to 59 | 97%<br>(94-99%)                | 3.2%<br>(1.3-6.4%)       | 3.4<br>(2-5.3)                              | 6.8%<br>(3.5-12%)                    | 8.5%<br>(4.3-15%)                   | 910<br>(450-1600)    | 32000<br>(17000-54000)    |
| Argentina | 2016 | Male   | 60 to 64 | 97%<br>(93-99%)                | 3.4%<br>(1.4-7.3%)       | 3.1<br>(1.7-5.1)                            | 5.4%<br>(2.1-11%)                    | 6.5%<br>(2.5-13%)                   | 960<br>(360-1900)    | 28000<br>(11000-56000)    |
| Argentina | 2016 | Male   | 65 to 69 | 96%<br>(92-99%)                | 3.7%<br>(1.4-7.9%)       | 2.8<br>(1.7-4.5)                            | 3.9%<br>(1.1-7.8%)                   | 4.5%<br>(1.2-9.3%)                  | 830<br>(220-1700)    | 21000<br>(5900-42000)     |
| Argentina | 2016 | Male   | 70 to 74 | 96%<br>(92-98%)                | 4.1%<br>(1.8-8.2%)       | 2.5<br>(1.4-4)                              | 2.6%<br>(-0.094-6.4%)                | 2.9%<br>(-0.4-7.1%)                 | 610<br>(-80-1500)    | 12000<br>(-440-30000)     |
| Argentina | 2016 | Male   | 75 to 79 | 95%<br>(91-98%)                | 4.5%<br>(1.8-8.8%)       | 2.3<br>(1.2-3.8)                            | 1.7%<br>(-0.83-5.3%)                 | 1.8%<br>(-1.2-5.9%)                 | 380<br>(-260-1300)   | 6300<br>(-3100-20000)     |
| Argentina | 2016 | Male   | 80 to 84 | 95%<br>(89-98%)                | 5.3%<br>(2.2-11%)        | 2.1<br>(1.2-3.3)                            | 1.1%<br>(-1.2-3.9%)                  | 1%<br>(-1.6-4.3%)                   | 220<br>(-350-960)    | 2900<br>(-3400-11000)     |
| Argentina | 2016 | Male   | 85 to 89 | 94%<br>(88-97%)                | 6.4%<br>(2.8-12%)        | 1.9<br>(1.1-3.1)                            | 0.73%<br>(-1.3-3.4%)                 | 0.62%<br>(-1.8-3.6%)                | 110<br>(-320-660)    | 1100<br>(-2000-5400)      |
| Argentina | 2016 | Male   | 90 to 94 | 93%<br>(87-97%)                | 6.8%<br>(2.9-13%)        | 1.8<br>(0.96-3.1)                           | 0.44%<br>(-1.7-3.5%)                 | 0.25%<br>(-2.2-3.8%)                | 25<br>(-210-360)     | 250<br>(-970-2000)        |
| Argentina | 2016 | Male   | 95 plus  | 93%<br>(86-98%)                | 6.7%<br>(2.4-14%)        | 1.8<br>(0.81-3.3)                           | 0.45%<br>(-1.8-4.1%)                 | 0.19%<br>(-2.6-4.3%)                | 5.5<br>(-74-130)     | 51<br>(-210-450)          |
| Chile     | 1990 | Female | All Ages | 76%<br>(70-81%)                | 24%<br>(19-30%)          | 2.6<br>(2.3-2.9)                            | 4.1%<br>(3-5.5%)                     | 5%<br>(2.2-8.4%)                    | 1700<br>(740-2900)   | 66000<br>(46000-86000)    |

| Location | Year | Sex    | Age      | Prevalence of current drinkers | Prevalence of abstainers | Population average of standard drinks daily | Percent of total attributable deaths | Percent of total attributable DALYs | Attributable deaths | Attributable DALYs        |
|----------|------|--------|----------|--------------------------------|--------------------------|---------------------------------------------|--------------------------------------|-------------------------------------|---------------------|---------------------------|
| Chile    | 1990 | Female | 15 to 19 | 77%<br>(63-88%)                | 23%<br>(12-37%)          | 2.7<br>(1.7-4)                              | 4.1%<br>(2.6-5.8%)                   | 11%<br>(5.8-16%)                    | 26<br>(14-40)       | 3000<br>(2000-4300)       |
| Chile    | 1990 | Female | 20 to 24 | 83%<br>(72-91%)                | 17%<br>(9-28%)           | 4<br>(2.6-5.7)                              | 6.3%<br>(4.7-8.2%)                   | 14%<br>(8.8-19%)                    | 40<br>(25-56)       | 5500<br>(3900-7400)       |
| Chile    | 1990 | Female | 25 to 29 | 85%<br>(75-92%)                | 15%<br>(8-25%)           | 4.4<br>(3-6.1)                              | 6.2%<br>(4.7-7.9%)                   | 14%<br>(10-19%)                     | 50<br>(35-69)       | 5500<br>(4000-7200)       |
| Chile    | 1990 | Female | 30 to 34 | 85%<br>(75-92%)                | 15%<br>(7.9-25%)         | 4.4<br>(2.9-6.2)                            | 5.8%<br>(4.3-7.5%)                   | 14%<br>(9.9-18%)                    | 59<br>(42-79)       | 5100<br>(3700-6500)       |
| Chile    | 1990 | Female | 35 to 39 | 84%<br>(73-92%)                | 16%<br>(8-27%)           | 4<br>(2.5-5.7)                              | 5.6%<br>(4-7.5%)                     | 13%<br>(9.4-18%)                    | 71<br>(49-95)       | 4900<br>(3500-6500)       |
| Chile    | 1990 | Female | 40 to 44 | 84%<br>(72-92%)                | 16%<br>(8.4-28%)         | 3.7<br>(2.2-5.5)                            | 6.3%<br>(4.3-8.3%)                   | 13%<br>(9.2-17%)                    | 96<br>(67-130)      | 5400<br>(3700-7100)       |
| Chile    | 1990 | Female | 45 to 49 | 83%<br>(70-91%)                | 17%<br>(8.5-30%)         | 3.7<br>(2.2-5.7)                            | 6.7%<br>(4.5-9.3%)                   | 13%<br>(8.6-17%)                    | 130<br>(85-180)     | 5900<br>(4000-8200)       |
| Chile    | 1990 | Female | 50 to 54 | 82%<br>(69-91%)                | 18%<br>(9.1-31%)         | 3.5<br>(2.1-5.4)                            | 7.1%<br>(4.3-10%)                    | 12%<br>(7.5-17%)                    | 150<br>(94-220)     | 6100<br>(3700-8700)       |
| Chile    | 1990 | Female | 55 to 59 | 81%<br>(68-90%)                | 19%<br>(9.5-32%)         | 3.4<br>(2-5)                                | 6.9%<br>(3.7-10%)                    | 11%<br>(6-15%)                      | 180<br>(100-270)    | 6300<br>(3400-9200)       |
| Chile    | 1990 | Female | 60 to 64 | 80%<br>(65-90%)                | 20%<br>(9.8-35%)         | 3.1<br>(1.7-4.9)                            | 5.8%<br>(2-9.6%)                     | 8.2%<br>(3-13%)                     | 200<br>(72-330)     | 5600<br>(2000-9600)       |
| Chile    | 1990 | Female | 65 to 69 | 77%<br>(62-89%)                | 23%<br>(11-38%)          | 2.7<br>(1.7-4.1)                            | 4.7%<br>(1.4-8.4%)                   | 6.4%<br>(2-11%)                     | 180<br>(59-320)     | 4400<br>(1300-7700)       |
| Chile    | 1990 | Female | 70 to 74 | 74%<br>(60-85%)                | 26%<br>(15-40%)          | 2.4<br>(1.4-3.9)                            | 3.6%<br>(-0.22-7.9%)                 | 4.6%<br>(-0.21-9.9%)                | 170<br>(-7.7-380)   | 3300<br>(-200-7300)       |
| Chile    | 1990 | Female | 75 to 79 | 72%<br>(57-84%)                | 28%<br>(16-43%)          | 2.3<br>(1.2-3.8)                            | 2.6%<br>(-1.3-7.4%)                  | 3.1%<br>(-1.7-9%)                   | 150<br>(-82-430)    | 2200<br>(-1100-6400)      |
| Chile    | 1990 | Female | 80 to 84 | 70%<br>(52-83%)                | 30%<br>(17-48%)          | 2.2<br>(1.2-3.4)                            | 2.2%<br>(-1.3-6.4%)                  | 2.5%<br>(-1.7-7.6%)                 | 120<br>(-85-370)    | 1400<br>(-820-4000)       |
| Chile    | 1990 | Female | 85 to 89 | 68%<br>(51-81%)                | 32%<br>(19-49%)          | 2.1<br>(1.2-3.3)                            | 1.9%<br>(-1.4-6.2%)                  | 2%<br>(-2-7.3%)                     | 80<br>(-77-280)     | 670<br>(-500-2200)        |
| Chile    | 1990 | Female | 90 to 94 | 67%<br>(53-80%)                | 33%<br>(20-47%)          | 2.1<br>(1.1-3.5)                            | 1.7%<br>(-1.5-6.4%)                  | 1.8%<br>(-2.2-7.8%)                 | 35<br>(-41-140)     | 210<br>(-190-780)         |
| Chile    | 1990 | Female | 95 plus  | 68%<br>(48-83%)                | 32%<br>(17-52%)          | 2.1<br>(0.97-3.8)                           | 1.9%<br>(-2.2-8.7%)                  | 1.9%<br>(-2.9-9.9%)                 | 15<br>(-24-79)      | 60<br>(-71-270)           |
| Chile    | 1990 | Male   | All Ages | 84%<br>(79-89%)                | 16%<br>(11-21%)          | 2.7<br>(2.4-3)                              | 8.6%<br>(7-10%)                      | 8.6%<br>(6-12%)                     | 3700<br>(2600-5000) | 170000<br>(130000-200000) |
| Chile    | 1990 | Male   | 15 to 19 | 83%<br>(71-91%)                | 17%<br>(8.9-29%)         | 2.7<br>(1.7-3.9)                            | 8.3%<br>(5.2-12%)                    | 13%<br>(7.2-20%)                    | 79<br>(42-120)      | 7500<br>(4800-11000)      |
| Chile    | 1990 | Male   | 20 to 24 | 88%<br>(78-94%)                | 12%<br>(6.5-22%)         | 4.1<br>(2.8-5.9)                            | 15%<br>(11-20%)                      | 20%<br>(12-29%)                     | 210<br>(120-290)    | 19000<br>(13000-25000)    |
| Chile    | 1990 | Male   | 25 to 29 | 89%<br>(82-95%)                | 11%<br>(5.5-18%)         | 4.7<br>(3.1-6.4)                            | 16%<br>(12-21%)                      | 22%<br>(15-30%)                     | 240<br>(160-330)    | 19000<br>(14000-25000)    |
| Chile    | 1990 | Male   | 30 to 34 | 91%<br>(82-96%)                | 9.3%<br>(4.4-18%)        | 4.7<br>(3.1-6.5)                            | 15%<br>(11-20%)                      | 21%<br>(15-29%)                     | 250<br>(170-330)    | 17000<br>(12000-22000)    |

| Location | Year | Sex    | Age      | Prevalence of current drinkers | Prevalence of abstainers | Population average of standard drinks daily | Percent of total attributable deaths | Percent of total attributable DALYs | Attributable deaths | Attributable DALYs     |
|----------|------|--------|----------|--------------------------------|--------------------------|---------------------------------------------|--------------------------------------|-------------------------------------|---------------------|------------------------|
| Chile    | 1990 | Male   | 35 to 39 | 91%<br>(83-96%)                | 8.8%<br>(4.1-17%)        | 4.2<br>(2.7-6)                              | 14%<br>(10-18%)                      | 20%<br>(14-27%)                     | 250<br>(170-320)    | 15000<br>(11000-19000) |
| Chile    | 1990 | Male   | 40 to 44 | 92%<br>(84-96%)                | 8.4%<br>(4-16%)          | 3.9<br>(2.4-5.7)                            | 14%<br>(10-18%)                      | 20%<br>(14-26%)                     | 290<br>(200-390)    | 15000<br>(11000-20000) |
| Chile    | 1990 | Male   | 45 to 49 | 92%<br>(83-96%)                | 8.2%<br>(3.9-17%)        | 3.9<br>(2.4-5.9)                            | 14%<br>(11-19%)                      | 19%<br>(14-25%)                     | 360<br>(260-480)    | 16000<br>(12000-22000) |
| Chile    | 1990 | Male   | 50 to 54 | 92%<br>(84-96%)                | 8.3%<br>(3.9-16%)        | 3.7<br>(2.3-5.6)                            | 13%<br>(9.4-18%)                     | 17%<br>(12-23%)                     | 380<br>(270-520)    | 15000<br>(11000-20000) |
| Chile    | 1990 | Male   | 55 to 59 | 91%<br>(84-96%)                | 8.7%<br>(4-16%)          | 3.6<br>(2.2-5.3)                            | 12%<br>(7.8-16%)                     | 14%<br>(9.6-20%)                    | 420<br>(280-590)    | 14000<br>(9500-20000)  |
| Chile    | 1990 | Male   | 60 to 64 | 91%<br>(82-96%)                | 9.3%<br>(4.2-18%)        | 3.4<br>(2-5.2)                              | 9.1%<br>(5.1-14%)                    | 11%<br>(6-17%)                      | 420<br>(230-660)    | 12000<br>(6800-19000)  |
| Chile    | 1990 | Male   | 65 to 69 | 90%<br>(81-96%)                | 10%<br>(4.5-19%)         | 3.1<br>(2-4.4)                              | 6.6%<br>(3.3-11%)                    | 7.8%<br>(3.7-13%)                   | 320<br>(150-530)    | 7700<br>(3800-13000)   |
| Chile    | 1990 | Male   | 70 to 74 | 89%<br>(81-95%)                | 11%<br>(5.4-19%)         | 2.7<br>(1.6-4.2)                            | 4.6%<br>(0.94-9.3%)                  | 5.2%<br>(0.91-11%)                  | 250<br>(43-510)     | 4800<br>(960-9700)     |
| Chile    | 1990 | Male   | 75 to 79 | 88%<br>(79-94%)                | 12%<br>(5.8-21%)         | 2.5<br>(1.3-4)                              | 2.9%<br>(-0.48-7.7%)                 | 3.1%<br>(-0.85-8.6%)                | 160<br>(-44-440)    | 2400<br>(-400-6500)    |
| Chile    | 1990 | Male   | 80 to 84 | 86%<br>(75-93%)                | 14%<br>(6.9-25%)         | 2.3<br>(1.3-3.5)                            | 1.8%<br>(-0.98-5.2%)                 | 1.8%<br>(-1.5-5.7%)                 | 74<br>(-61-240)     | 920<br>(-520-2700)     |
| Chile    | 1990 | Male   | 85 to 89 | 84%<br>(72-92%)                | 16%<br>(8.5-28%)         | 2<br>(1.2-3.1)                              | 1.2%<br>(-1.2-4.2%)                  | 1.1%<br>(-1.8-4.6%)                 | 27<br>(-46-110)     | 270<br>(-270-910)      |
| Chile    | 1990 | Male   | 90 to 94 | 83%<br>(71-92%)                | 17%<br>(8.4-29%)         | 1.9<br>(1-3.2)                              | 0.83%<br>(-1.5-3.8%)                 | 0.6%<br>(-2.2-4.2%)                 | 6<br>(-22-42)       | 52<br>(-93-240)        |
| Chile    | 1990 | Male   | 95 plus  | 83%<br>(67-93%)                | 17%<br>(7-33%)           | 1.9<br>(0.89-3.3)                           | 0.55%<br>(-2.2-4.8%)                 | 0.21%<br>(-3.1-5.4%)                | 0.71<br>(-11-19)    | 7.5<br>(-31-68)        |
| Chile    | 1995 | Female | All Ages | 76%<br>(70-82%)                | 24%<br>(18-30%)          | 2<br>(1.8-2.3)                              | 3%<br>(2.1-4.1%)                     | 3.1%<br>(0.72-5.7%)                 | 1100<br>(260-2100)  | 48000<br>(31000-65000) |
| Chile    | 1995 | Female | 15 to 19 | 77%<br>(63-88%)                | 23%<br>(12-37%)          | 2.1<br>(1.3-3.2)                            | 3.2%<br>(2.1-4.5%)                   | 8.3%<br>(4.4-13%)                   | 16<br>(8.7-26)      | 2200<br>(1400-3100)    |
| Chile    | 1995 | Female | 20 to 24 | 83%<br>(72-91%)                | 17%<br>(8.9-28%)         | 3.1<br>(1.9-4.5)                            | 5.3%<br>(3.8-7%)                     | 11%<br>(6.3-16%)                    | 26<br>(14-38)       | 4300<br>(3000-6000)    |
| Chile    | 1995 | Female | 25 to 29 | 85%<br>(74-92%)                | 15%<br>(7.9-26%)         | 3.4<br>(2.3-4.8)                            | 5%<br>(3.7-6.4%)                     | 11%<br>(7.4-16%)                    | 33<br>(21-46)       | 4400<br>(3200-5900)    |
| Chile    | 1995 | Female | 30 to 34 | 85%<br>(74-92%)                | 15%<br>(8.1-26%)         | 3.4<br>(2.3-4.9)                            | 4.4%<br>(3.2-5.7%)                   | 11%<br>(7.7-15%)                    | 40<br>(28-55)       | 4000<br>(2900-5200)    |
| Chile    | 1995 | Female | 35 to 39 | 84%<br>(73-92%)                | 16%<br>(8.3-27%)         | 3.1<br>(2-4.5)                              | 4.4%<br>(3.1-5.8%)                   | 10%<br>(7.1-14%)                    | 56<br>(38-76)       | 4100<br>(3000-5500)    |
| Chile    | 1995 | Female | 40 to 44 | 83%<br>(72-91%)                | 17%<br>(8.5-28%)         | 2.9<br>(1.7-4.2)                            | 4.5%<br>(3-6.1%)                     | 10%<br>(6.7-14%)                    | 73<br>(47-100)      | 4300<br>(2900-5800)    |
| Chile    | 1995 | Female | 45 to 49 | 83%<br>(68-91%)                | 17%<br>(8.6-32%)         | 2.8<br>(1.7-4.3)                            | 4.8%<br>(3.1-7%)                     | 9.7%<br>(6.2-14%)                   | 93<br>(59-130)      | 4500<br>(2800-6400)    |
| Chile    | 1995 | Female | 50 to 54 | 82%<br>(69-91%)                | 18%<br>(9.4-31%)         | 2.7<br>(1.6-4.2)                            | 5%<br>(2.8-7.6%)                     | 8.9%<br>(5.4-13%)                   | 120<br>(70-170)     | 4800<br>(2800-7000)    |

| Location | Year | Sex    | Age      | Prevalence of current drinkers | Prevalence of abstainers | Population average of standard drinks daily | Percent of total attributable deaths | Percent of total attributable DALYs | Attributable deaths | Attributable DALYs        |
|----------|------|--------|----------|--------------------------------|--------------------------|---------------------------------------------|--------------------------------------|-------------------------------------|---------------------|---------------------------|
| Chile    | 1995 | Female | 55 to 59 | 81%<br>(69-91%)                | 19%<br>(9-31%)           | 2.6<br>(1.6-4)                              | 4.8%<br>(2.4-7.4%)                   | 7.9%<br>(4.3-12%)                   | 130<br>(71-190)     | 4400<br>(2300-6800)       |
| Chile    | 1995 | Female | 60 to 64 | 80%<br>(65-90%)                | 20%<br>(10-35%)          | 2.4<br>(1.4-3.8)                            | 3.9%<br>(1.1-7%)                     | 5.8%<br>(1.9-10%)                   | 140<br>(45-240)     | 3900<br>(1100-7000)       |
| Chile    | 1995 | Female | 65 to 69 | 77%<br>(60-89%)                | 23%<br>(11-40%)          | 2.1<br>(1.3-3.2)                            | 2.9%<br>(0.41-5.7%)                  | 4.1%<br>(0.87-7.9%)                 | 130<br>(26-240)     | 3000<br>(450-5900)        |
| Chile    | 1995 | Female | 70 to 74 | 74%<br>(58-85%)                | 26%<br>(15-42%)          | 1.9<br>(1.1-3.1)                            | 2%<br>(-0.72-5.3%)                   | 2.6%<br>(-0.82-6.9%)                | 100<br>(-33-270)    | 2000<br>(-720-5200)       |
| Chile    | 1995 | Female | 75 to 79 | 71%<br>(55-84%)                | 29%<br>(16-45%)          | 1.8<br>(0.91-2.9)                           | 1.2%<br>(-1.6-4.7%)                  | 1.4%<br>(-2.5-7%)                   | 67<br>(-95-270)     | 1000<br>(-1400-4100)      |
| Chile    | 1995 | Female | 80 to 84 | 69%<br>(52-83%)                | 31%<br>(17-48%)          | 1.7<br>(0.95-2.6)                           | 0.84%<br>(-1.7-3.7%)                 | 0.94%<br>(-2.2-4.4%)                | 47<br>(-110-220)    | 570<br>(-1100-2500)       |
| Chile    | 1995 | Female | 85 to 89 | 67%<br>(50-80%)                | 33%<br>(20-50%)          | 1.6<br>(0.89-2.6)                           | 0.63%<br>(-1.8-3.7%)                 | 0.6%<br>(-2.4-4.2%)                 | 27<br>(-110-190)    | 260<br>(-760-1600)        |
| Chile    | 1995 | Female | 90 to 94 | 67%<br>(51-80%)                | 33%<br>(20-49%)          | 1.6<br>(0.83-2.7)                           | 0.54%<br>(-1.9-4%)                   | 0.45%<br>(-2.4-4.5%)                | 12<br>(-66-120)     | 92<br>(-310-670)          |
| Chile    | 1995 | Female | 95 plus  | 67%<br>(48-83%)                | 33%<br>(17-52%)          | 1.6<br>(0.75-3)                             | 0.61%<br>(-2.4-5.4%)                 | 0.46%<br>(-3.1-6.2%)                | 5<br>(-34-68)       | 27<br>(-100-230)          |
| Chile    | 1995 | Male   | All Ages | 84%<br>(79-88%)                | 16%<br>(12-21%)          | 2.5<br>(2.2-2.8)                            | 8%<br>(6.6-9.7%)                     | 7.6%<br>(5.2-10%)                   | 3300<br>(2200-4500) | 150000<br>(120000-180000) |
| Chile    | 1995 | Male   | 15 to 19 | 82%<br>(71-91%)                | 18%<br>(9.2-29%)         | 2.4<br>(1.5-3.6)                            | 7.5%<br>(4.9-11%)                    | 12%<br>(6.8-18%)                    | 64<br>(34-98)       | 6400<br>(4200-8900)       |
| Chile    | 1995 | Male   | 20 to 24 | 87%<br>(78-93%)                | 13%<br>(6.7-22%)         | 3.8<br>(2.5-5.5)                            | 15%<br>(10-19%)                      | 19%<br>(11-27%)                     | 170<br>(100-250)    | 16000<br>(11000-22000)    |
| Chile    | 1995 | Male   | 25 to 29 | 89%<br>(81-94%)                | 11%<br>(5.6-19%)         | 4.3<br>(2.9-5.8)                            | 15%<br>(11-19%)                      | 20%<br>(13-27%)                     | 210<br>(140-290)    | 18000<br>(13000-23000)    |
| Chile    | 1995 | Male   | 30 to 34 | 90%<br>(82-95%)                | 9.6%<br>(4.7-18%)        | 4.2<br>(2.9-5.9)                            | 13%<br>(9.8-17%)                     | 19%<br>(13-26%)                     | 210<br>(150-300)    | 16000<br>(11000-20000)    |
| Chile    | 1995 | Male   | 35 to 39 | 91%<br>(84-96%)                | 9.1%<br>(4.2-16%)        | 3.8<br>(2.5-5.4)                            | 12%<br>(9.1-16%)                     | 18%<br>(13-24%)                     | 220<br>(150-290)    | 14000<br>(10000-18000)    |
| Chile    | 1995 | Male   | 40 to 44 | 91%<br>(84-96%)                | 8.7%<br>(4-16%)          | 3.6<br>(2.2-5.1)                            | 12%<br>(8.9-16%)                     | 17%<br>(12-23%)                     | 250<br>(170-340)    | 14000<br>(10000-18000)    |
| Chile    | 1995 | Male   | 45 to 49 | 92%<br>(82-96%)                | 8.5%<br>(3.8-18%)        | 3.5<br>(2.2-5.3)                            | 12%<br>(8.9-16%)                     | 17%<br>(12-22%)                     | 300<br>(220-410)    | 14000<br>(10000-19000)    |
| Chile    | 1995 | Male   | 50 to 54 | 91%<br>(83-96%)                | 8.6%<br>(3.9-17%)        | 3.4<br>(2.1-5.1)                            | 12%<br>(8.2-16%)                     | 15%<br>(11-21%)                     | 350<br>(240-480)    | 14000<br>(10000-19000)    |
| Chile    | 1995 | Male   | 55 to 59 | 91%<br>(83-96%)                | 9.1%<br>(4.1-17%)        | 3.3<br>(2-4.7)                              | 10%<br>(7.1-14%)                     | 13%<br>(9-18%)                      | 350<br>(240-490)    | 12000<br>(8300-16000)     |
| Chile    | 1995 | Male   | 60 to 64 | 90%<br>(81-96%)                | 9.7%<br>(4.2-19%)        | 3.1<br>(1.8-4.6)                            | 8%<br>(4.7-12%)                      | 9.8%<br>(5.7-15%)                   | 360<br>(210-550)    | 10000<br>(6100-16000)     |
| Chile    | 1995 | Male   | 65 to 69 | 90%<br>(81-96%)                | 10%<br>(4.4-19%)         | 2.8<br>(1.8-4)                              | 6%<br>(3.2-9.5%)                     | 7.1%<br>(3.8-11%)                   | 310<br>(160-500)    | 7500<br>(4000-12000)      |
| Chile    | 1995 | Male   | 70 to 74 | 89%<br>(80-95%)                | 11%<br>(5.2-20%)         | 2.5<br>(1.5-3.8)                            | 4%<br>(1.1-7.8%)                     | 4.6%<br>(1.1-9.1%)                  | 230<br>(56-460)     | 4500<br>(1200-8800)       |

| Location | Year | Sex    | Age      | Prevalence of current drinkers | Prevalence of abstainers | Population average of standard drinks daily | Percent of total attributable deaths | Percent of total attributable DALYs | Attributable deaths | Attributable DALYs     |
|----------|------|--------|----------|--------------------------------|--------------------------|---------------------------------------------|--------------------------------------|-------------------------------------|---------------------|------------------------|
| Chile    | 1995 | Male   | 75 to 79 | 88%<br>(79-94%)                | 12%<br>(6-21%)           | 2.2<br>(1.2-3.5)                            | 2.6%<br>(-0.25-6.2%)                 | 2.8%<br>(-0.43-7.1%)                | 140<br>(-22-360)    | 2200<br>(-210-5500)    |
| Chile    | 1995 | Male   | 80 to 84 | 86%<br>(75-93%)                | 14%<br>(7-25%)           | 2<br>(1.2-3.1)                              | 1.6%<br>(-0.74-4.3%)                 | 1.7%<br>(-1.1-4.9%)                 | 75<br>(-51-220)     | 910<br>(-410-2500)     |
| Chile    | 1995 | Male   | 85 to 89 | 83%<br>(71-91%)                | 17%<br>(8.6-29%)         | 1.8<br>(1.1-2.8)                            | 1.1%<br>(-1-3.4%)                    | 0.99%<br>(-1.5-3.8%)                | 32<br>(-49-120)     | 300<br>(-300-980)      |
| Chile    | 1995 | Male   | 90 to 94 | 82%<br>(69-92%)                | 18%<br>(8.5-31%)         | 1.7<br>(0.93-2.8)                           | 0.68%<br>(-1.4-3.3%)                 | 0.51%<br>(-2-3.6%)                  | 7.8<br>(-30-55)     | 63<br>(-130-300)       |
| Chile    | 1995 | Male   | 95 plus  | 82%<br>(65-93%)                | 18%<br>(6.7-35%)         | 1.7<br>(0.8-3)                              | 0.62%<br>(-1.6-4.3%)                 | 0.37%<br>(-2.4-4.6%)                | 1.7<br>(-11-22)     | 11<br>(-30-80)         |
| Chile    | 2000 | Female | All Ages | 76%<br>(70-82%)                | 24%<br>(18-30%)          | 2<br>(1.7-2.2)                              | 2.9%<br>(2.1-3.9%)                   | 3.1%<br>(1-5.5%)                    | 1200<br>(390-2100)  | 48000<br>(33000-64000) |
| Chile    | 2000 | Female | 15 to 19 | 76%<br>(62-87%)                | 24%<br>(13-38%)          | 2<br>(1.2-3)                                | 3%<br>(2-4.2%)                       | 8.4%<br>(4.4-13%)                   | 15<br>(8.1-24)      | 2200<br>(1400-3200)    |
| Chile    | 2000 | Female | 20 to 24 | 83%<br>(71-91%)                | 17%<br>(9.3-29%)         | 3<br>(1.8-4.3)                              | 5.2%<br>(3.8-6.7%)                   | 11%<br>(6.1-16%)                    | 23<br>(13-33)       | 4100<br>(2900-5700)    |
| Chile    | 2000 | Female | 25 to 29 | 85%<br>(74-92%)                | 15%<br>(8.1-26%)         | 3.3<br>(2.1-4.6)                            | 4.8%<br>(3.6-6.2%)                   | 11%<br>(7.3-16%)                    | 28<br>(18-40)       | 4200<br>(3000-5600)    |
| Chile    | 2000 | Female | 30 to 34 | 85%<br>(73-92%)                | 15%<br>(8.2-27%)         | 3.3<br>(2.2-4.6)                            | 4%<br>(2.9-5.2%)                     | 11%<br>(7.3-14%)                    | 36<br>(25-50)       | 4000<br>(2800-5300)    |
| Chile    | 2000 | Female | 35 to 39 | 84%<br>(72-92%)                | 16%<br>(8.4-28%)         | 3<br>(1.9-4.2)                              | 3.8%<br>(2.7-5%)                     | 10%<br>(6.9-14%)                    | 47<br>(32-64)       | 3900<br>(2700-5200)    |
| Chile    | 2000 | Female | 40 to 44 | 83%<br>(72-91%)                | 17%<br>(8.7-28%)         | 2.8<br>(1.7-4.1)                            | 4%<br>(2.6-5.5%)                     | 9.9%<br>(6.4-13%)                   | 66<br>(42-90)       | 4200<br>(2800-5700)    |
| Chile    | 2000 | Female | 45 to 49 | 83%<br>(68-91%)                | 17%<br>(8.7-32%)         | 2.7<br>(1.7-4)                              | 4.2%<br>(2.6-6%)                     | 9.4%<br>(6-13%)                     | 90<br>(57-130)      | 4500<br>(2900-6300)    |
| Chile    | 2000 | Female | 50 to 54 | 82%<br>(69-91%)                | 18%<br>(9.3-31%)         | 2.6<br>(1.5-4)                              | 4.4%<br>(2.6-6.6%)                   | 8.5%<br>(5.3-12%)                   | 110<br>(67-160)     | 4500<br>(2700-6600)    |
| Chile    | 2000 | Female | 55 to 59 | 81%<br>(69-91%)                | 19%<br>(9.2-31%)         | 2.5<br>(1.5-3.7)                            | 4.4%<br>(2.4-6.6%)                   | 7.8%<br>(4.6-11%)                   | 130<br>(78-190)     | 4600<br>(2500-6800)    |
| Chile    | 2000 | Female | 60 to 64 | 79%<br>(65-90%)                | 21%<br>(10-35%)          | 2.3<br>(1.3-3.7)                            | 3.7%<br>(1.4-6.3%)                   | 6%<br>(2.7-9.9%)                    | 130<br>(57-210)     | 3600<br>(1400-6200)    |
| Chile    | 2000 | Female | 65 to 69 | 76%<br>(60-89%)                | 24%<br>(11-40%)          | 2<br>(1.2-3.1)                              | 3%<br>(0.95-5.4%)                    | 4.5%<br>(1.7-7.7%)                  | 130<br>(51-230)     | 3100<br>(990-5600)     |
| Chile    | 2000 | Female | 70 to 74 | 74%<br>(58-85%)                | 26%<br>(15-42%)          | 1.8<br>(0.99-2.9)                           | 2.1%<br>(-0.23-4.8%)                 | 3.1%<br>(-0.003-6.6%)               | 120<br>(-0.12-260)  | 2200<br>(-250-5000)    |
| Chile    | 2000 | Female | 75 to 79 | 71%<br>(55-84%)                | 29%<br>(16-45%)          | 1.7<br>(0.85-2.8)                           | 1.3%<br>(-1.1-4.3%)                  | 1.7%<br>(-1.2-5.5%)                 | 85<br>(-60-270)     | 1200<br>(-1000-4100)   |
| Chile    | 2000 | Female | 80 to 84 | 69%<br>(51-82%)                | 31%<br>(18-49%)          | 1.6<br>(0.88-2.5)                           | 0.99%<br>(-1.1-3.5%)                 | 1.2%<br>(-1.4-4.3%)                 | 67<br>(-78-240)     | 750<br>(-840-2700)     |
| Chile    | 2000 | Female | 85 to 89 | 67%<br>(50-80%)                | 33%<br>(20-50%)          | 1.5<br>(0.85-2.4)                           | 0.8%<br>(-1.2-3.6%)                  | 0.89%<br>(-1.6-4%)                  | 45<br>(-79-210)     | 390<br>(-550-1700)     |
| Chile    | 2000 | Female | 90 to 94 | 66%<br>(51-80%)                | 34%<br>(20-49%)          | 1.5<br>(0.8-2.5)                            | 0.69%<br>(-1.5-3.7%)                 | 0.67%<br>(-1.9-4.4%)                | 24<br>(-68-150)     | 150<br>(-330-840)      |

| Location | Year | Sex    | Age      | Prevalence of current drinkers | Prevalence of abstainers | Population average of standard drinks daily | Percent of total attributable deaths | Percent of total attributable DALYs | Attributable deaths | Attributable DALYs        |
|----------|------|--------|----------|--------------------------------|--------------------------|---------------------------------------------|--------------------------------------|-------------------------------------|---------------------|---------------------------|
| Chile    | 2000 | Female | 95 plus  | 67%<br>(47-83%)                | 33%<br>(17-53%)          | 1.6<br>(0.7-2.9)                            | 0.73%<br>(-1.8-4.7%)                 | 0.64%<br>(-2.4-5.3%)                | 11<br>(-41-92)      | 49<br>(-120-320)          |
| Chile    | 2000 | Male   | All Ages | 84%<br>(79-89%)                | 16%<br>(11-21%)          | 2.1<br>(1.9-2.4)                            | 7.2%<br>(5.9-8.4%)                   | 6.6%<br>(4.7-8.5%)                  | 2900<br>(2000-3800) | 130000<br>(110000-160000) |
| Chile    | 2000 | Male   | 15 to 19 | 82%<br>(70-91%)                | 18%<br>(9.3-30%)         | 2<br>(1.2-3.1)                              | 6.7%<br>(4.5-9.3%)                   | 11%<br>(5.7-17%)                    | 51<br>(27-79)       | 5700<br>(3700-8000)       |
| Chile    | 2000 | Male   | 20 to 24 | 87%<br>(77-93%)                | 13%<br>(6.9-23%)         | 3.2<br>(2-4.7)                              | 13%<br>(9.5-17%)                     | 17%<br>(9.7-24%)                    | 120<br>(73-180)     | 13000<br>(9400-18000)     |
| Chile    | 2000 | Male   | 25 to 29 | 89%<br>(81-94%)                | 11%<br>(5.6-19%)         | 3.6<br>(2.4-5)                              | 13%<br>(9.8-17%)                     | 17%<br>(11-24%)                     | 160<br>(94-220)     | 15000<br>(10000-19000)    |
| Chile    | 2000 | Male   | 30 to 34 | 90%<br>(81-95%)                | 9.8%<br>(4.7-19%)        | 3.5<br>(2.4-5)                              | 12%<br>(8.9-15%)                     | 16%<br>(11-22%)                     | 180<br>(120-240)    | 14000<br>(10000-18000)    |
| Chile    | 2000 | Male   | 35 to 39 | 91%<br>(83-96%)                | 9.1%<br>(4.2-17%)        | 3.2<br>(2.1-4.5)                            | 11%<br>(8.2-13%)                     | 16%<br>(11-21%)                     | 190<br>(130-250)    | 13000<br>(9600-17000)     |
| Chile    | 2000 | Male   | 40 to 44 | 91%<br>(84-96%)                | 8.7%<br>(4-16%)          | 3<br>(1.9-4.3)                              | 11%<br>(7.9-13%)                     | 16%<br>(11-20%)                     | 230<br>(160-300)    | 13000<br>(9900-17000)     |
| Chile    | 2000 | Male   | 45 to 49 | 92%<br>(83-96%)                | 8.5%<br>(3.8-17%)        | 2.9<br>(1.8-4.5)                            | 11%<br>(7.9-14%)                     | 15%<br>(11-20%)                     | 270<br>(200-360)    | 13000<br>(9900-17000)     |
| Chile    | 2000 | Male   | 50 to 54 | 91%<br>(83-96%)                | 8.7%<br>(4-17%)          | 2.8<br>(1.7-4.2)                            | 9.7%<br>(7.2-13%)                    | 13%<br>(9.8-18%)                    | 300<br>(220-400)    | 12000<br>(9000-16000)     |
| Chile    | 2000 | Male   | 55 to 59 | 91%<br>(83-96%)                | 9.1%<br>(4.1-17%)        | 2.7<br>(1.7-3.9)                            | 8.7%<br>(6.1-12%)                    | 12%<br>(8.3-15%)                    | 330<br>(230-450)    | 12000<br>(8200-15000)     |
| Chile    | 2000 | Male   | 60 to 64 | 90%<br>(82-96%)                | 9.7%<br>(4.2-18%)        | 2.6<br>(1.5-3.9)                            | 7%<br>(4.5-10%)                      | 8.9%<br>(5.8-13%)                   | 290<br>(190-430)    | 8600<br>(5500-13000)      |
| Chile    | 2000 | Male   | 65 to 69 | 90%<br>(80-95%)                | 10%<br>(4.7-20%)         | 2.3<br>(1.5-3.3)                            | 5.2%<br>(3-7.7%)                     | 6.4%<br>(3.8-9.5%)                  | 280<br>(170-420)    | 6700<br>(4000-10000)      |
| Chile    | 2000 | Male   | 70 to 74 | 89%<br>(79-95%)                | 11%<br>(5.4-21%)         | 2.1<br>(1.2-3.2)                            | 3.5%<br>(1.3-6.3%)                   | 4.2%<br>(1.5-7.5%)                  | 210<br>(76-390)     | 4200<br>(1600-7600)       |
| Chile    | 2000 | Male   | 75 to 79 | 87%<br>(78-94%)                | 13%<br>(6.3-22%)         | 1.9<br>(0.99-2.9)                           | 2.2%<br>(0.11-4.9%)                  | 2.5%<br>(0.044-5.6%)                | 130<br>(2.4-300)    | 2000<br>(100-4600)        |
| Chile    | 2000 | Male   | 80 to 84 | 85%<br>(74-93%)                | 15%<br>(7.1-26%)         | 1.7<br>(0.96-2.6)                           | 1.4%<br>(-0.33-3.5%)                 | 1.6%<br>(-0.55-4%)                  | 75<br>(-27-190)     | 890<br>(-200-2200)        |
| Chile    | 2000 | Male   | 85 to 89 | 83%<br>(70-91%)                | 17%<br>(9-30%)           | 1.5<br>(0.87-2.3)                           | 0.99%<br>(-0.58-2.8%)                | 0.99%<br>(-0.84-3.1%)               | 34<br>(-29-110)     | 310<br>(-180-890)         |
| Chile    | 2000 | Male   | 90 to 94 | 82%<br>(68-92%)                | 18%<br>(8.4-32%)         | 1.5<br>(0.75-2.4)                           | 0.55%<br>(-1.1-2.5%)                 | 0.44%<br>(-1.5-2.7%)                | 8.4<br>(-28-54)     | 65<br>(-120-300)          |
| Chile    | 2000 | Male   | 95 plus  | 82%<br>(66-93%)                | 18%<br>(6.8-34%)         | 1.5<br>(0.67-2.6)                           | 0.53%<br>(-1.3-3.2%)                 | 0.34%<br>(-1.8-3.5%)                | 2.1<br>(-12-22)     | 13<br>(-32-80)            |
| Chile    | 2005 | Female | All Ages | 77%<br>(71-82%)                | 23%<br>(18-29%)          | 2.1<br>(1.8-2.4)                            | 3%<br>(2.2-4%)                       | 3.3%<br>(1.3-5.6%)                  | 1400<br>(530-2300)  | 52000<br>(36000-69000)    |
| Chile    | 2005 | Female | 15 to 19 | 76%<br>(63-87%)                | 24%<br>(13-37%)          | 2<br>(1.2-3.1)                              | 3%<br>(2-4.2%)                       | 8.9%<br>(4.6-14%)                   | 17<br>(8.8-28)      | 2400<br>(1600-3400)       |
| Chile    | 2005 | Female | 20 to 24 | 83%<br>(72-91%)                | 17%<br>(8.7-28%)         | 3<br>(1.8-4.4)                              | 5.2%<br>(3.8-6.8%)                   | 12%<br>(6.4-17%)                    | 23<br>(12-33)       | 4300<br>(2900-5900)       |

| Location | Year | Sex    | Age      | Prevalence of current drinkers | Prevalence of abstainers | Population average of standard drinks daily | Percent of total attributable deaths | Percent of total attributable DALYs | Attributable deaths | Attributable DALYs        |
|----------|------|--------|----------|--------------------------------|--------------------------|---------------------------------------------|--------------------------------------|-------------------------------------|---------------------|---------------------------|
| Chile    | 2005 | Female | 25 to 29 | 85%<br>(74-92%)                | 15%<br>(8-26%)           | 3.3<br>(2.2-4.7)                            | 4.9%<br>(3.7-6.3%)                   | 12%<br>(7.5-16%)                    | 27<br>(17-38)       | 4100<br>(2900-5500)       |
| Chile    | 2005 | Female | 30 to 34 | 85%<br>(73-92%)                | 15%<br>(7.9-27%)         | 3.3<br>(2.2-4.8)                            | 4.1%<br>(3-5.4%)                     | 11%<br>(7.4-15%)                    | 34<br>(23-47)       | 3800<br>(2700-5100)       |
| Chile    | 2005 | Female | 35 to 39 | 84%<br>(72-92%)                | 16%<br>(8.2-28%)         | 3.1<br>(1.9-4.4)                            | 3.9%<br>(2.8-5.2%)                   | 11%<br>(7.2-14%)                    | 50<br>(34-68)       | 4200<br>(3000-5500)       |
| Chile    | 2005 | Female | 40 to 44 | 83%<br>(71-91%)                | 17%<br>(8.7-29%)         | 2.9<br>(1.7-4.2)                            | 4%<br>(2.7-5.5%)                     | 10%<br>(6.8-14%)                    | 70<br>(46-97)       | 4500<br>(3100-6000)       |
| Chile    | 2005 | Female | 45 to 49 | 83%<br>(68-91%)                | 17%<br>(8.8-32%)         | 2.8<br>(1.7-4.2)                            | 4.3%<br>(2.8-6.1%)                   | 9.7%<br>(6.5-13%)                   | 98<br>(65-140)      | 5000<br>(3300-7000)       |
| Chile    | 2005 | Female | 50 to 54 | 82%<br>(68-91%)                | 18%<br>(9.3-32%)         | 2.7<br>(1.6-4)                              | 4.2%<br>(2.5-6.3%)                   | 8.6%<br>(5.3-12%)                   | 120<br>(71-170)     | 4900<br>(2900-7300)       |
| Chile    | 2005 | Female | 55 to 59 | 81%<br>(68-90%)                | 19%<br>(9.8-32%)         | 2.6<br>(1.6-3.8)                            | 4.2%<br>(2.3-6.2%)                   | 7.6%<br>(4.6-11%)                   | 130<br>(80-190)     | 4600<br>(2600-6900)       |
| Chile    | 2005 | Female | 60 to 64 | 79%<br>(65-90%)                | 21%<br>(10-35%)          | 2.4<br>(1.4-3.7)                            | 3.6%<br>(1.4-6.2%)                   | 6%<br>(2.8-9.8%)                    | 150<br>(68-240)     | 4200<br>(1700-7300)       |
| Chile    | 2005 | Female | 65 to 69 | 77%<br>(60-89%)                | 23%<br>(11-40%)          | 2.1<br>(1.3-3.1)                            | 3%<br>(1.1-5.3%)                     | 4.7%<br>(2-7.8%)                    | 140<br>(59-230)     | 3200<br>(1100-5700)       |
| Chile    | 2005 | Female | 70 to 74 | 73%<br>(57-85%)                | 27%<br>(15-43%)          | 1.8<br>(1-2.9)                              | 2.2%<br>(0.023-4.9%)                 | 3.3%<br>(0.39-6.6%)                 | 140<br>(16-280)     | 2500<br>(25-5400)         |
| Chile    | 2005 | Female | 75 to 79 | 71%<br>(55-84%)                | 29%<br>(16-45%)          | 1.7<br>(0.89-2.8)                           | 1.5%<br>(-0.75-4.3%)                 | 2.1%<br>(-0.78-5.6%)                | 110<br>(-44-310)    | 1600<br>(-790-4800)       |
| Chile    | 2005 | Female | 80 to 84 | 69%<br>(51-82%)                | 31%<br>(18-49%)          | 1.6<br>(0.9-2.5)                            | 1.3%<br>(-0.8-3.8%)                  | 1.6%<br>(-0.92-4.7%)                | 100<br>(-59-300)    | 1100<br>(-710-3500)       |
| Chile    | 2005 | Female | 85 to 89 | 67%<br>(50-80%)                | 33%<br>(20-50%)          | 1.6<br>(0.89-2.5)                           | 1.3%<br>(-0.99-3.7%)                 | 1.3%<br>(-1.2-4.4%)                 | 76<br>(-71-260)     | 620<br>(-550-2100)        |
| Chile    | 2005 | Female | 90 to 94 | 66%<br>(51-80%)                | 34%<br>(20-49%)          | 1.6<br>(0.84-2.6)                           | 1%<br>(-1.1-4%)                      | 1.1%<br>(-1.4-4.7%)                 | 47<br>(-57-200)     | 280<br>(-300-1100)        |
| Chile    | 2005 | Female | 95 plus  | 67%<br>(46-83%)                | 33%<br>(17-54%)          | 1.6<br>(0.74-2.9)                           | 1.1%<br>(-1.4-5%)                    | 1.1%<br>(-1.8-5.7%)                 | 25<br>(-40-120)     | 96<br>(-120-430)          |
| Chile    | 2005 | Male   | All Ages | 85%<br>(80-89%)                | 15%<br>(11-20%)          | 2.3<br>(2-2.6)                              | 7.4%<br>(6.2-8.7%)                   | 6.8%<br>(4.9-8.8%)                  | 3200<br>(2200-4100) | 140000<br>(120000-170000) |
| Chile    | 2005 | Male   | 15 to 19 | 82%<br>(70-91%)                | 18%<br>(9-30%)           | 2.1<br>(1.3-3.3)                            | 6.8%<br>(4.5-9.4%)                   | 11%<br>(5.9-17%)                    | 57<br>(30-88)       | 6300<br>(4100-8900)       |
| Chile    | 2005 | Male   | 20 to 24 | 87%<br>(77-93%)                | 13%<br>(6.7-23%)         | 3.3<br>(2.1-4.9)                            | 13%<br>(9.7-17%)                     | 18%<br>(11-25%)                     | 130<br>(76-180)     | 14000<br>(9700-19000)     |
| Chile    | 2005 | Male   | 25 to 29 | 89%<br>(81-94%)                | 11%<br>(5.7-19%)         | 3.7<br>(2.4-5.2)                            | 13%<br>(10-17%)                      | 18%<br>(12-25%)                     | 140<br>(89-200)     | 14000<br>(9900-18000)     |
| Chile    | 2005 | Male   | 30 to 34 | 90%<br>(81-95%)                | 9.9%<br>(4.9-19%)        | 3.7<br>(2.5-5.2)                            | 12%<br>(8.9-15%)                     | 17%<br>(12-24%)                     | 160<br>(110-230)    | 13000<br>(9800-17000)     |
| Chile    | 2005 | Male   | 35 to 39 | 91%<br>(83-96%)                | 9.3%<br>(4.2-17%)        | 3.3<br>(2.2-4.7)                            | 11%<br>(8.4-14%)                     | 17%<br>(12-22%)                     | 200<br>(140-260)    | 14000<br>(10000-18000)    |
| Chile    | 2005 | Male   | 40 to 44 | 91%<br>(84-96%)                | 8.8%<br>(4.1-16%)        | 3.1<br>(2-4.5)                              | 11%<br>(8.3-14%)                     | 17%<br>(12-21%)                     | 240<br>(180-310)    | 14000<br>(11000-18000)    |



| Location | Year | Sex    | Age      | Prevalence of current drinkers | Prevalence of abstainers | Population average of standard drinks daily | Percent of total attributable deaths | Percent of total attributable DALYs | Attributable deaths | Attributable DALYs     |
|----------|------|--------|----------|--------------------------------|--------------------------|---------------------------------------------|--------------------------------------|-------------------------------------|---------------------|------------------------|
| Chile    | 2005 | Male   | 45 to 49 | 91%<br>(83-96%)                | 8.6%<br>(4-17%)          | 3.1<br>(1.9-4.7)                            | 11%<br>(8.1-14%)                     | 16%<br>(12-21%)                     | 300<br>(220-390)    | 15000<br>(11000-19000) |
| Chile    | 2005 | Male   | 50 to 54 | 91%<br>(83-96%)                | 8.6%<br>(4-17%)          | 3<br>(1.8-4.5)                              | 9.6%<br>(7-13%)                      | 14%<br>(10-18%)                     | 320<br>(230-420)    | 13000<br>(9800-18000)  |
| Chile    | 2005 | Male   | 55 to 59 | 91%<br>(83-96%)                | 8.9%<br>(4.1-17%)        | 2.9<br>(1.8-4.2)                            | 8.5%<br>(6.1-11%)                    | 12%<br>(8.2-15%)                    | 340<br>(240-460)    | 12000<br>(8600-16000)  |
| Chile    | 2005 | Male   | 60 to 64 | 90%<br>(82-96%)                | 9.5%<br>(4.1-18%)        | 2.7<br>(1.6-4.1)                            | 7%<br>(4.4-10%)                      | 9.1%<br>(5.8-13%)                   | 350<br>(220-510)    | 10000<br>(6600-15000)  |
| Chile    | 2005 | Male   | 65 to 69 | 90%<br>(81-96%)                | 10%<br>(4.3-19%)         | 2.5<br>(1.6-3.5)                            | 5.4%<br>(3.2-8%)                     | 6.8%<br>(4.1-10%)                   | 290<br>(180-430)    | 7100<br>(4200-11000)   |
| Chile    | 2005 | Male   | 70 to 74 | 89%<br>(80-95%)                | 11%<br>(5.2-20%)         | 2.2<br>(1.3-3.3)                            | 3.9%<br>(1.7-6.6%)                   | 4.6%<br>(2-7.9%)                    | 260<br>(110-440)    | 5000<br>(2200-8600)    |
| Chile    | 2005 | Male   | 75 to 79 | 88%<br>(78-94%)                | 12%<br>(5.9-22%)         | 2<br>(1-3.1)                                | 2.6%<br>(0.55-5.3%)                  | 3%<br>(0.61-6%)                     | 180<br>(36-370)     | 2800<br>(600-5600)     |
| Chile    | 2005 | Male   | 80 to 84 | 86%<br>(74-93%)                | 14%<br>(6.9-26%)         | 1.8<br>(1-2.7)                              | 1.8%<br>(0.051-4%)                   | 2%<br>(-0.026-4.5%)                 | 110<br>(-1.5-250)   | 1300<br>(38-2900)      |
| Chile    | 2005 | Male   | 85 to 89 | 83%<br>(71-91%)                | 17%<br>(8.7-29%)         | 1.6<br>(0.92-2.4)                           | 1.3%<br>(-0.19-3.1%)                 | 1.4%<br>(-0.38-3.4%)                | 54<br>(-15-130)     | 460<br>(-69-1100)      |
| Chile    | 2005 | Male   | 90 to 94 | 82%<br>(70-92%)                | 18%<br>(8.4-30%)         | 1.5<br>(0.78-2.5)                           | 0.91%<br>(-0.5-2.7%)                 | 0.89%<br>(-0.82-3.1%)               | 18<br>(-17-63)      | 120<br>(-68-360)       |
| Chile    | 2005 | Male   | 95 plus  | 82%<br>(67-93%)                | 18%<br>(6.9-33%)         | 1.5<br>(0.68-2.6)                           | 0.8%<br>(-0.95-3.3%)                 | 0.65%<br>(-1.5-3.6%)                | 5.4<br>(-13-30)     | 26<br>(-32-110)        |
| Chile    | 2010 | Female | All Ages | 77%<br>(71-82%)                | 23%<br>(18-29%)          | 2.1<br>(1.8-2.4)                            | 3%<br>(2.1-4%)                       | 3.3%<br>(1.4-5.6%)                  | 1500<br>(630-2500)  | 55000<br>(38000-73000) |
| Chile    | 2010 | Female | 15 to 19 | 76%<br>(63-87%)                | 24%<br>(13-37%)          | 2<br>(1.2-3)                                | 3%<br>(1.9-4.3%)                     | 8.4%<br>(4.1-14%)                   | 18<br>(8.7-29)      | 2400<br>(1500-3600)    |
| Chile    | 2010 | Female | 20 to 24 | 83%<br>(71-91%)                | 17%<br>(8.9-29%)         | 3<br>(1.8-4.4)                              | 5.1%<br>(3.5-6.7%)                   | 11%<br>(5.9-16%)                    | 28<br>(15-42)       | 4700<br>(3200-6600)    |
| Chile    | 2010 | Female | 25 to 29 | 85%<br>(75-92%)                | 15%<br>(8.1-25%)         | 3.3<br>(2.2-4.8)                            | 4.7%<br>(3.5-6.2%)                   | 11%<br>(7.2-16%)                    | 29<br>(19-42)       | 4200<br>(2900-5600)    |
| Chile    | 2010 | Female | 30 to 34 | 85%<br>(73-92%)                | 15%<br>(7.8-27%)         | 3.4<br>(2.2-4.9)                            | 4%<br>(2.8-5.4%)                     | 11%<br>(7.2-15%)                    | 35<br>(23-49)       | 3700<br>(2500-4900)    |
| Chile    | 2010 | Female | 35 to 39 | 84%<br>(72-92%)                | 16%<br>(8.1-28%)         | 3.1<br>(1.9-4.4)                            | 3.9%<br>(2.7-5.2%)                   | 11%<br>(7.3-15%)                    | 49<br>(33-67)       | 4000<br>(2800-5300)    |
| Chile    | 2010 | Female | 40 to 44 | 83%<br>(71-92%)                | 17%<br>(8.5-29%)         | 2.9<br>(1.7-4.2)                            | 3.9%<br>(2.6-5.5%)                   | 10%<br>(6.7-14%)                    | 75<br>(48-100)      | 4700<br>(3200-6400)    |
| Chile    | 2010 | Female | 45 to 49 | 83%<br>(69-91%)                | 17%<br>(9.2-31%)         | 2.8<br>(1.7-4.2)                            | 4.2%<br>(2.7-6%)                     | 9.7%<br>(6.4-13%)                   | 110<br>(70-150)     | 5400<br>(3600-7600)    |
| Chile    | 2010 | Female | 50 to 54 | 82%<br>(69-91%)                | 18%<br>(9.4-31%)         | 2.7<br>(1.6-4)                              | 4.2%<br>(2.5-6.2%)                   | 8.6%<br>(5.5-12%)                   | 130<br>(84-190)     | 5500<br>(3400-8000)    |
| Chile    | 2010 | Female | 55 to 59 | 81%<br>(68-91%)                | 19%<br>(9.4-32%)         | 2.6<br>(1.5-3.8)                            | 4%<br>(2.2-5.9%)                     | 7.6%<br>(4.6-11%)                   | 150<br>(86-210)     | 5200<br>(2900-7700)    |
| Chile    | 2010 | Female | 60 to 64 | 79%<br>(65-90%)                | 21%<br>(10-35%)          | 2.4<br>(1.3-3.6)                            | 3.5%<br>(1.5-5.9%)                   | 6%<br>(2.9-9.4%)                    | 150<br>(75-250)     | 4500<br>(1900-7500)    |

| Location | Year | Sex    | Age      | Prevalence of current drinkers | Prevalence of abstainers | Population average of standard drinks daily | Percent of total attributable deaths | Percent of total attributable DALYs | Attributable deaths | Attributable DALYs        |
|----------|------|--------|----------|--------------------------------|--------------------------|---------------------------------------------|--------------------------------------|-------------------------------------|---------------------|---------------------------|
| Chile    | 2010 | Female | 65 to 69 | 76%<br>(60-88%)                | 24%<br>(12-40%)          | 2.1<br>(1.3-3.1)                            | 2.9%<br>(1.1-5%)                     | 4.8%<br>(2.2-7.4%)                  | 160<br>(75-250)     | 3700<br>(1500-6300)       |
| Chile    | 2010 | Female | 70 to 74 | 73%<br>(58-85%)                | 27%<br>(15-42%)          | 1.8<br>(1-2.9)                              | 2.3%<br>(0.22-4.7%)                  | 3.5%<br>(0.73-6.7%)                 | 140<br>(30-270)     | 2600<br>(250-5500)        |
| Chile    | 2010 | Female | 75 to 79 | 71%<br>(55-84%)                | 29%<br>(16-45%)          | 1.7<br>(0.89-2.8)                           | 1.6%<br>(-0.46-4.3%)                 | 2.3%<br>(-0.37-5.6%)                | 130<br>(-20-310)    | 1800<br>(-540-4900)       |
| Chile    | 2010 | Female | 80 to 84 | 68%<br>(50-82%)                | 32%<br>(18-50%)          | 1.6<br>(0.92-2.5)                           | 1.3%<br>(-0.7-3.6%)                  | 1.7%<br>(-0.74-4.5%)                | 120<br>(-52-310)    | 1300<br>(-710-3700)       |
| Chile    | 2010 | Female | 85 to 89 | 66%<br>(49-79%)                | 34%<br>(21-51%)          | 1.5<br>(0.88-2.5)                           | 1.1%<br>(-0.82-3.5%)                 | 1.4%<br>(-1.4-3%)                   | 90<br>(-65-280)     | 730<br>(-510-2400)        |
| Chile    | 2010 | Female | 90 to 94 | 66%<br>(50-80%)                | 34%<br>(20-50%)          | 1.6<br>(0.82-2.6)                           | 1%<br>(-1-3.9%)                      | 1.2%<br>(-1.3-4.6%)                 | 56<br>(-62-220)     | 330<br>(-320-1200)        |
| Chile    | 2010 | Female | 95 plus  | 66%<br>(46-83%)                | 34%<br>(17-54%)          | 1.6<br>(0.72-2.9)                           | 1.1%<br>(-1.5-5%)                    | 1.1%<br>(-1.9-5.7%)                 | 32<br>(-56-160)     | 120<br>(-170-570)         |
| Chile    | 2010 | Male   | All Ages | 85%<br>(80-89%)                | 15%<br>(11-20%)          | 2.8<br>(2.5-3.2)                            | 8%<br>(6.5-9.5%)                     | 7.8%<br>(5.8-10%)                   | 4000<br>(2900-5200) | 170000<br>(130000-200000) |
| Chile    | 2010 | Male   | 15 to 19 | 82%<br>(70-91%)                | 18%<br>(9.4-30%)         | 2.6<br>(1.5-3.9)                            | 7.2%<br>(4.7-10%)                    | 12%<br>(6.6-19%)                    | 65<br>(34-98)       | 6800<br>(4400-9400)       |
| Chile    | 2010 | Male   | 20 to 24 | 87%<br>(78-93%)                | 13%<br>(6.6-22%)         | 4.1<br>(2.6-5.9)                            | 14%<br>(10-18%)                      | 20%<br>(12-28%)                     | 160<br>(93-220)     | 16000<br>(11000-22000)    |
| Chile    | 2010 | Male   | 25 to 29 | 89%<br>(80-94%)                | 11%<br>(5.7-20%)         | 4.6<br>(3-6.3)                              | 14%<br>(10-18%)                      | 20%<br>(14-28%)                     | 170<br>(110-230)    | 15000<br>(11000-20000)    |
| Chile    | 2010 | Male   | 30 to 34 | 90%<br>(81-95%)                | 9.8%<br>(4.7-19%)        | 4.5<br>(3-6.5)                              | 12%<br>(9.2-16%)                     | 20%<br>(13-27%)                     | 170<br>(110-230)    | 13000<br>(9300-17000)     |
| Chile    | 2010 | Male   | 35 to 39 | 91%<br>(83-96%)                | 9.2%<br>(4.3-17%)        | 4<br>(2.6-5.8)                              | 11%<br>(8.5-15%)                     | 19%<br>(13-24%)                     | 200<br>(140-270)    | 14000<br>(10000-18000)    |
| Chile    | 2010 | Male   | 40 to 44 | 91%<br>(84-96%)                | 8.7%<br>(4-16%)          | 3.8<br>(2.4-5.5)                            | 11%<br>(8.4-14%)                     | 18%<br>(13-23%)                     | 270<br>(190-360)    | 16000<br>(12000-20000)    |
| Chile    | 2010 | Male   | 45 to 49 | 91%<br>(82-96%)                | 8.6%<br>(4-18%)          | 3.8<br>(2.4-5.6)                            | 11%<br>(8.4-15%)                     | 17%<br>(13-22%)                     | 360<br>(260-480)    | 18000<br>(13000-23000)    |
| Chile    | 2010 | Male   | 50 to 54 | 91%<br>(83-96%)                | 8.7%<br>(4.1-17%)        | 3.6<br>(2.2-5.3)                            | 10%<br>(7.4-14%)                     | 15%<br>(11-20%)                     | 400<br>(280-540)    | 17000<br>(12000-22000)    |
| Chile    | 2010 | Male   | 55 to 59 | 91%<br>(83-96%)                | 9.2%<br>(4.1-17%)        | 3.5<br>(2.2-5.1)                            | 9.2%<br>(6.3-12%)                    | 13%<br>(8.9-17%)                    | 410<br>(290-560)    | 15000<br>(10000-20000)    |
| Chile    | 2010 | Male   | 60 to 64 | 90%<br>(81-96%)                | 9.8%<br>(4.3-19%)        | 3.3<br>(2-5)                                | 7.8%<br>(4.9-11%)                    | 10%<br>(6.5-15%)                    | 420<br>(260-620)    | 13000<br>(7900-18000)     |
| Chile    | 2010 | Male   | 65 to 69 | 89%<br>(80-96%)                | 11%<br>(4.5-20%)         | 3<br>(2-4.2)                                | 6.3%<br>(3.8-9.3%)                   | 7.9%<br>(4.8-12%)                   | 400<br>(240-600)    | 9900<br>(6000-15000)      |
| Chile    | 2010 | Male   | 70 to 74 | 88%<br>(80-95%)                | 12%<br>(5.4-20%)         | 2.7<br>(1.6-4.1)                            | 4.9%<br>(2.3-8.1%)                   | 5.9%<br>(2.8-9.7%)                  | 330<br>(160-550)    | 6500<br>(3100-11000)      |
| Chile    | 2010 | Male   | 75 to 79 | 87%<br>(78-94%)                | 13%<br>(6.4-22%)         | 2.4<br>(1.3-3.8)                            | 3.6%<br>(1.1-7%)                     | 4.2%<br>(1.2-8.2%)                  | 280<br>(76-540)     | 4300<br>(1300-8300)       |
| Chile    | 2010 | Male   | 80 to 84 | 85%<br>(74-93%)                | 15%<br>(7.2-26%)         | 2.1<br>(1.3-3.2)                            | 2.7%<br>(0.69-5.3%)                  | 3%<br>(0.67-6.1%)                   | 200<br>(44-390)     | 2300<br>(610-4600)        |

| Location | Year | Sex    | Age      | Prevalence of current drinkers | Prevalence of abstainers | Population average of standard drinks daily | Percent of total attributable deaths | Percent of total attributable DALYs | Attributable deaths | Attributable DALYs        |
|----------|------|--------|----------|--------------------------------|--------------------------|---------------------------------------------|--------------------------------------|-------------------------------------|---------------------|---------------------------|
| Chile    | 2010 | Male   | 85 to 89 | 82%<br>(70-91%)                | 18%<br>(8.9-30%)         | 1.9<br>(1.1-3)                              | 2%<br>(0.29-4.3%)                    | 2.2%<br>(0.18-4.9%)                 | 110<br>(8.4-230)    | 890<br>(130-1900)         |
| Chile    | 2010 | Male   | 90 to 94 | 82%<br>(69-92%)                | 18%<br>(8.3-31%)         | 1.8<br>(0.96-3)                             | 1.6%<br>(-0.081-3.9%)                | 1.7%<br>(-0.26-4.4%)                | 40<br>(-6.2-110)    | 240<br>(-12-600)          |
| Chile    | 2010 | Male   | 95 plus  | 82%<br>(65-93%)                | 18%<br>(6.7-35%)         | 1.8<br>(0.83-3.2)                           | 1.5%<br>(-0.63-4.9%)                 | 1.5%<br>(-1-5.4%)                   | 17<br>(-12-62)      | 70<br>(-28-220)           |
| Chile    | 2016 | Female | All Ages | 77%<br>(71-82%)                | 23%<br>(18-29%)          | 2.7<br>(2-3.5)                              | 3.7%<br>(2.4-5.4%)                   | 4.6%<br>(2.2-8%)                    | 2400<br>(1000-4400) | 73000<br>(45000-110000)   |
| Chile    | 2016 | Female | 15 to 19 | 76%<br>(62-87%)                | 24%<br>(13-38%)          | 2.5<br>(1.4-4.1)                            | 3.3%<br>(2.1-4.9%)                   | 11%<br>(5.2-17%)                    | 17<br>(7.4-30)      | 2300<br>(1500-3600)       |
| Chile    | 2016 | Female | 20 to 24 | 83%<br>(71-91%)                | 17%<br>(9.2-29%)         | 3.8<br>(2.2-6)                              | 5.5%<br>(4-7.4%)                     | 14%<br>(7.9-21%)                    | 28<br>(14-48)       | 4800<br>(3100-6900)       |
| Chile    | 2016 | Female | 25 to 29 | 84%<br>(73-92%)                | 16%<br>(8.3-27%)         | 4.2<br>(2.5-6.4)                            | 5.1%<br>(3.7-6.7%)                   | 14%<br>(8.9-20%)                    | 34<br>(18-55)       | 4900<br>(3300-6700)       |
| Chile    | 2016 | Female | 30 to 34 | 84%<br>(73-92%)                | 16%<br>(8.2-27%)         | 4.2<br>(2.5-6.5)                            | 4.4%<br>(3.1-5.9%)                   | 13%<br>(8.3-18%)                    | 38<br>(21-63)       | 4200<br>(2800-6000)       |
| Chile    | 2016 | Female | 35 to 39 | 84%<br>(72-92%)                | 16%<br>(8.5-28%)         | 3.8<br>(2.2-5.9)                            | 4.4%<br>(2.9-6.2%)                   | 13%<br>(8.6-18%)                    | 52<br>(29-88)       | 4400<br>(2800-6400)       |
| Chile    | 2016 | Female | 40 to 44 | 83%<br>(71-91%)                | 17%<br>(8.5-29%)         | 3.6<br>(2-5.6)                              | 4.5%<br>(2.9-6.7%)                   | 12%<br>(8.2-17%)                    | 78<br>(42-130)      | 5100<br>(3100-7700)       |
| Chile    | 2016 | Female | 45 to 49 | 82%<br>(66-91%)                | 18%<br>(9.1-34%)         | 3.5<br>(2-5.4)                              | 4.7%<br>(3-7%)                       | 11%<br>(7.5-16%)                    | 120<br>(66-190)     | 6400<br>(3700-9800)       |
| Chile    | 2016 | Female | 50 to 54 | 82%<br>(67-90%)                | 18%<br>(9.7-33%)         | 3.3<br>(2-5.1)                              | 4.9%<br>(2.9-7.6%)                   | 10%<br>(6.6-15%)                    | 160<br>(90-260)     | 7200<br>(4000-11000)      |
| Chile    | 2016 | Female | 55 to 59 | 81%<br>(68-91%)                | 19%<br>(9.4-32%)         | 3.2<br>(1.9-5)                              | 4.9%<br>(2.6-7.5%)                   | 9.3%<br>(5.7-13%)                   | 200<br>(110-330)    | 7300<br>(3800-12000)      |
| Chile    | 2016 | Female | 60 to 64 | 79%<br>(64-90%)                | 21%<br>(10-36%)          | 2.9<br>(1.6-4.7)                            | 4.4%<br>(1.9-7.4%)                   | 7.6%<br>(3.9-12%)                   | 220<br>(110-380)    | 6800<br>(2800-12000)      |
| Chile    | 2016 | Female | 65 to 69 | 76%<br>(60-88%)                | 24%<br>(12-40%)          | 2.6<br>(1.5-4.1)                            | 4%<br>(1.7-6.5%)                     | 6.3%<br>(3.3-9.8%)                  | 230<br>(110-410)    | 5800<br>(2500-10000)      |
| Chile    | 2016 | Female | 70 to 74 | 73%<br>(56-85%)                | 27%<br>(15-44%)          | 2.3<br>(1.3-3.8)                            | 3.3%<br>(0.9-6.7%)                   | 4.9%<br>(1.7-9.3%)                  | 240<br>(75-480)     | 4700<br>(1200-9800)       |
| Chile    | 2016 | Female | 75 to 79 | 70%<br>(54-84%)                | 30%<br>(16-46%)          | 2.1<br>(1.1-3.6)                            | 2.7%<br>(0.11-6.3%)                  | 3.7%<br>(0.34-8.4%)                 | 220<br>(20-520)     | 3400<br>(130-8400)        |
| Chile    | 2016 | Female | 80 to 84 | 68%<br>(50-82%)                | 32%<br>(18-50%)          | 2<br>(1.1-3.3)                              | 2.4%<br>(0.031-5.6%)                 | 3.1%<br>(0.17-7.4%)                 | 240<br>(12-590)     | 2800<br>(45-7000)         |
| Chile    | 2016 | Female | 85 to 89 | 66%<br>(49-80%)                | 34%<br>(20-51%)          | 1.9<br>(1-3.3)                              | 2.2%<br>(-0.1-5.6%)                  | 2.8%<br>(-0.13-7%)                  | 230<br>(-13-590)    | 1900<br>(-90-4800)        |
| Chile    | 2016 | Female | 90 to 94 | 66%<br>(50-80%)                | 34%<br>(20-50%)          | 1.9<br>(0.97-3.3)                           | 2.2%<br>(-0.4-6.2%)                  | 2.6%<br>(-0.61-7.4%)                | 160<br>(-38-470)    | 940<br>(-170-2600)        |
| Chile    | 2016 | Female | 95 plus  | 67%<br>(46-82%)                | 33%<br>(18-54%)          | 2<br>(0.88-3.7)                             | 2.5%<br>(-1.1-7.8%)                  | 2.8%<br>(-1.4-9.1%)                 | 100<br>(-54-340)    | 360<br>(-160-1100)        |
| Chile    | 2016 | Male   | All Ages | 85%<br>(81-89%)                | 15%<br>(11-19%)          | 2.9<br>(2.2-3.7)                            | 7.8%<br>(5.9-9.9%)                   | 7.4%<br>(5-10%)                     | 4300<br>(2500-6600) | 170000<br>(120000-240000) |

| Location | Year | Sex    | Age      | Prevalence of current drinkers | Prevalence of abstainers | Population average of standard drinks daily | Percent of total attributable deaths | Percent of total attributable DALYs | Attributable deaths | Attributable DALYs     |
|----------|------|--------|----------|--------------------------------|--------------------------|---------------------------------------------|--------------------------------------|-------------------------------------|---------------------|------------------------|
| Chile    | 2016 | Male   | 15 to 19 | 82%<br>(69-90%)                | 18%<br>(9.5-31%)         | 2.5<br>(1.4-4.1)                            | 7.1%<br>(4.5-10%)                    | 13%<br>(6.7-20%)                    | 53<br>(24-89)       | 5900<br>(3600-8900)    |
| Chile    | 2016 | Male   | 20 to 24 | 87%<br>(77-93%)                | 13%<br>(6.9-23%)         | 3.9<br>(2.3-6.2)                            | 14%<br>(9.8-19%)                     | 20%<br>(11-30%)                     | 140<br>(74-230)     | 15000<br>(9900-22000)  |
| Chile    | 2016 | Male   | 25 to 29 | 89%<br>(80-94%)                | 11%<br>(5.7-20%)         | 4.4<br>(2.8-6.5)                            | 14%<br>(10-18%)                      | 21%<br>(13-29%)                     | 160<br>(93-270)     | 16000<br>(11000-22000) |
| Chile    | 2016 | Male   | 30 to 34 | 90%<br>(81-95%)                | 10%<br>(4.8-19%)         | 4.5<br>(2.8-6.7)                            | 12%<br>(8.6-16%)                     | 20%<br>(13-28%)                     | 170<br>(98-280)     | 14000<br>(9200-20000)  |
| Chile    | 2016 | Male   | 35 to 39 | 91%<br>(83-96%)                | 9.4%<br>(4.3-17%)        | 4<br>(2.4-6.2)                              | 11%<br>(8.1-15%)                     | 19%<br>(12-26%)                     | 180<br>(100-290)    | 13000<br>(8400-19000)  |
| Chile    | 2016 | Male   | 40 to 44 | 91%<br>(83-96%)                | 9%<br>(4-17%)            | 3.8<br>(2.2-6)                              | 11%<br>(7.9-15%)                     | 18%<br>(13-24%)                     | 240<br>(140-380)    | 14000<br>(9300-21000)  |
| Chile    | 2016 | Male   | 45 to 49 | 91%<br>(82-96%)                | 8.8%<br>(4-18%)          | 3.7<br>(2.2-5.5)                            | 11%<br>(7.8-15%)                     | 17%<br>(12-23%)                     | 340<br>(200-540)    | 17000<br>(11000-26000) |
| Chile    | 2016 | Male   | 50 to 54 | 91%<br>(83-96%)                | 8.9%<br>(4.1-17%)        | 3.5<br>(2.1-5.4)                            | 10%<br>(7.1-14%)                     | 15%<br>(11-20%)                     | 430<br>(250-680)    | 18000<br>(11000-28000) |
| Chile    | 2016 | Male   | 55 to 59 | 91%<br>(83-96%)                | 9.3%<br>(4.3-17%)        | 3.5<br>(2.1-5.2)                            | 9%<br>(6.1-13%)                      | 13%<br>(8.8-18%)                    | 460<br>(270-730)    | 17000<br>(10000-25000) |
| Chile    | 2016 | Male   | 60 to 64 | 90%<br>(81-96%)                | 10%<br>(4.4-19%)         | 3.2<br>(1.8-5.1)                            | 7.6%<br>(4.6-11%)                    | 10%<br>(6.4-15%)                    | 480<br>(260-770)    | 14000<br>(7900-23000)  |
| Chile    | 2016 | Male   | 65 to 69 | 89%<br>(80-95%)                | 11%<br>(4.8-20%)         | 2.9<br>(1.9-4.4)                            | 6.2%<br>(3.6-9.6%)                   | 7.9%<br>(4.6-12%)                   | 460<br>(250-770)    | 11000<br>(6100-19000)  |
| Chile    | 2016 | Male   | 70 to 74 | 88%<br>(79-94%)                | 12%<br>(5.6-21%)         | 2.6<br>(1.4-4.1)                            | 4.7%<br>(2.3-8.3%)                   | 5.8%<br>(2.8-10%)                   | 390<br>(170-730)    | 7800<br>(3400-14000)   |
| Chile    | 2016 | Male   | 75 to 79 | 87%<br>(77-94%)                | 13%<br>(6.4-23%)         | 2.3<br>(1.2-3.9)                            | 3.5%<br>(1.7-7%)                     | 4.1%<br>(1.2-8.3%)                  | 300<br>(82-620)     | 4600<br>(1400-9600)    |
| Chile    | 2016 | Male   | 80 to 84 | 85%<br>(73-92%)                | 15%<br>(7.6-27%)         | 2.1<br>(1.2-3.3)                            | 2.6%<br>(0.65-5.4%)                  | 3%<br>(0.73-6.3%)                   | 230<br>(56-500)     | 2700<br>(680-5700)     |
| Chile    | 2016 | Male   | 85 to 89 | 82%<br>(68-91%)                | 18%<br>(9.2-32%)         | 1.9<br>(1-3.1)                              | 2.1%<br>(0.35-4.6%)                  | 2.3%<br>(0.25-5.4%)                 | 140<br>(15-330)     | 1200<br>(200-2600)     |
| Chile    | 2016 | Male   | 90 to 94 | 81%<br>(67-91%)                | 19%<br>(8.8-33%)         | 1.8<br>(0.91-3.1)                           | 1.7%<br>(-0.015-4.6%)                | 1.8%<br>(-0.26-5.1%)                | 59<br>(-8.2-170)    | 360<br>(-3.4-970)      |
| Chile    | 2016 | Male   | 95 plus  | 81%<br>(64-93%)                | 19%<br>(7.2-36%)         | 1.8<br>(0.82-3.3)                           | 1.7%<br>(-0.58-5.8%)                 | 1.7%<br>(-0.96-6.5%)                | 23<br>(-13-90)      | 91<br>(-30-300)        |
| Uruguay  | 1990 | Female | All Ages | 55%<br>(49-61%)                | 45%<br>(39-51%)          | 2.2<br>(2-2.5)                              | 3.5%<br>(2.3-4.8%)                   | 3.9%<br>(1.4-6.5%)                  | 530<br>(200-890)    | 16000<br>(10000-22000) |
| Uruguay  | 1990 | Female | 15 to 19 | 61%<br>(44-75%)                | 39%<br>(25-56%)          | 2.2<br>(1.3-3.5)                            | 3.3%<br>(1.9-5%)                     | 8.4%<br>(4.5-14%)                   | 5.6<br>(3-9.2)      | 510<br>(300-770)       |
| Uruguay  | 1990 | Female | 20 to 24 | 72%<br>(58-82%)                | 28%<br>(18-42%)          | 3.6<br>(2.2-5.3)                            | 4.7%<br>(3.2-6.6%)                   | 12%<br>(7.5-18%)                    | 7.2<br>(4.3-10)     | 690<br>(460-980)       |
| Uruguay  | 1990 | Female | 25 to 29 | 72%<br>(57-82%)                | 28%<br>(18-43%)          | 3.9<br>(2.6-5.6)                            | 4.8%<br>(3.4-6.4%)                   | 13%<br>(8.8-18%)                    | 8.8<br>(5.9-12)     | 750<br>(520-1000)      |
| Uruguay  | 1990 | Female | 30 to 34 | 69%<br>(56-80%)                | 31%<br>(20-44%)          | 3.9<br>(2.5-5.5)                            | 5.1%<br>(3.5-6.8%)                   | 13%<br>(8.5-17%)                    | 13<br>(8.3-17)      | 890<br>(620-1200)      |

| Location | Year | Sex    | Age      | Prevalence of current drinkers | Prevalence of abstainers | Population average of standard drinks daily | Percent of total attributable deaths | Percent of total attributable DALYs | Attributable deaths | Attributable DALYs     |
|----------|------|--------|----------|--------------------------------|--------------------------|---------------------------------------------|--------------------------------------|-------------------------------------|---------------------|------------------------|
| Uruguay  | 1990 | Female | 35 to 39 | 66%<br>(52-78%)                | 34%<br>(22-48%)          | 3.4<br>(2.2-5)                              | 5.2%<br>(3.5-7.4%)                   | 12%<br>(7.7-16%)                    | 16<br>(10-22)       | 960<br>(640-1300)      |
| Uruguay  | 1990 | Female | 40 to 44 | 64%<br>(50-76%)                | 36%<br>(24-50%)          | 3.1<br>(1.8-4.6)                            | 5.4%<br>(3.3-7.9%)                   | 11%<br>(6.9-16%)                    | 21<br>(13-30)       | 1100<br>(660-1500)     |
| Uruguay  | 1990 | Female | 45 to 49 | 63%<br>(48-75%)                | 37%<br>(25-52%)          | 3<br>(1.7-4.5)                              | 5.8%<br>(3.5-8.6%)                   | 11%<br>(6.6-16%)                    | 29<br>(17-42)       | 1300<br>(780-1900)     |
| Uruguay  | 1990 | Female | 50 to 54 | 62%<br>(48-74%)                | 38%<br>(26-52%)          | 2.9<br>(1.8-4.4)                            | 6.1%<br>(3.4-9.3%)                   | 10%<br>(5.9-15%)                    | 39<br>(23-58)       | 1500<br>(870-2300)     |
| Uruguay  | 1990 | Female | 55 to 59 | 61%<br>(48-74%)                | 39%<br>(26-52%)          | 2.9<br>(1.8-4.3)                            | 6.2%<br>(3.5-9.5%)                   | 9.5%<br>(5.5-14%)                   | 56<br>(32-83)       | 1900<br>(1000-2800)    |
| Uruguay  | 1990 | Female | 60 to 64 | 58%<br>(43-71%)                | 42%<br>(29-57%)          | 2.6<br>(1.5-4.1)                            | 5.2%<br>(2.1-8.8%)                   | 7.4%<br>(3.2-13%)                   | 61<br>(26-110)      | 1800<br>(730-3100)     |
| Uruguay  | 1990 | Female | 65 to 69 | 52%<br>(38-66%)                | 48%<br>(34-62%)          | 2.1<br>(1.3-3.2)                            | 4.1%<br>(1.6-7.1%)                   | 5.5%<br>(2.3-9.4%)                  | 61<br>(25-100)      | 1500<br>(580-2600)     |
| Uruguay  | 1990 | Female | 70 to 74 | 47%<br>(34-61%)                | 53%<br>(39-66%)          | 1.8<br>(0.99-2.8)                           | 3%<br>(0.16-6.4%)                    | 3.8%<br>(0.2-8.2%)                  | 56<br>(3.1-120)     | 1100<br>(58-2400)      |
| Uruguay  | 1990 | Female | 75 to 79 | 42%<br>(29-57%)                | 58%<br>(43-71%)          | 1.6<br>(0.84-2.7)                           | 2.2%<br>(-0.79-5.8%)                 | 2.6%<br>(-1-7%)                     | 53<br>(-21-140)     | 810<br>(-310-2200)     |
| Uruguay  | 1990 | Female | 80 to 84 | 40%<br>(27-53%)                | 60%<br>(47-73%)          | 1.4<br>(0.78-2.3)                           | 1.8%<br>(-0.73-4.8%)                 | 2.1%<br>(-1-5.7%)                   | 47<br>(-23-130)     | 530<br>(-210-1400)     |
| Uruguay  | 1990 | Female | 85 to 89 | 39%<br>(26-53%)                | 61%<br>(47-74%)          | 1.3<br>(0.72-2.1)                           | 1.6%<br>(-0.84-4.6%)                 | 1.7%<br>(-1.1-5.2%)                 | 36<br>(-23-110)     | 290<br>(-150-830)      |
| Uruguay  | 1990 | Female | 90 to 94 | 39%<br>(27-53%)                | 61%<br>(47-73%)          | 1.3<br>(0.67-2.2)                           | 1.4%<br>(-1-4.8%)                    | 1.5%<br>(-1.3-5.5%)                 | 15<br>(-14-57)      | 86<br>(-62-300)        |
| Uruguay  | 1990 | Female | 95 plus  | 41%<br>(26-59%)                | 59%<br>(41-74%)          | 1.4<br>(0.6-2.6)                            | 1.4%<br>(-1.5-5.7%)                  | 1.4%<br>(-2-6.5%)                   | 5.3<br>(-7.6-24)    | 20<br>(-22-85)         |
| Uruguay  | 1990 | Male   | All Ages | 65%<br>(58-70%)                | 35%<br>(30-42%)          | 2.3<br>(2-2.6)                              | 5%<br>(3.6-6.7%)                     | 4.6%<br>(2.6-7.2%)                  | 760<br>(420-1200)   | 27000<br>(19000-37000) |
| Uruguay  | 1990 | Male   | 15 to 19 | 68%<br>(52-80%)                | 32%<br>(20-48%)          | 2.2<br>(1.3-3.5)                            | 6%<br>(3.8-8.9%)                     | 10%<br>(6.1-16%)                    | 13<br>(7.7-20)      | 1100<br>(710-1600)     |
| Uruguay  | 1990 | Male   | 20 to 24 | 76%<br>(62-85%)                | 24%<br>(15-38%)          | 3.6<br>(2.3-5.4)                            | 11%<br>(7.6-15%)                     | 16%<br>(10-24%)                     | 24<br>(15-35)       | 2000<br>(1300-2700)    |
| Uruguay  | 1990 | Male   | 25 to 29 | 76%<br>(63-85%)                | 24%<br>(15-37%)          | 4<br>(2.7-5.6)                              | 11%<br>(7.6-15%)                     | 17%<br>(11-24%)                     | 27<br>(18-37)       | 2000<br>(1400-2600)    |
| Uruguay  | 1990 | Male   | 30 to 34 | 76%<br>(62-85%)                | 24%<br>(15-38%)          | 3.9<br>(2.6-5.7)                            | 9.7%<br>(6.4-13%)                    | 15%<br>(9.3-21%)                    | 27<br>(17-39)       | 1800<br>(1200-2500)    |
| Uruguay  | 1990 | Male   | 35 to 39 | 75%<br>(62-85%)                | 25%<br>(15-38%)          | 3.5<br>(2.2-5.1)                            | 8.4%<br>(5.4-12%)                    | 13%<br>(7.7-18%)                    | 27<br>(16-39)       | 1600<br>(1000-2300)    |
| Uruguay  | 1990 | Male   | 40 to 44 | 75%<br>(63-85%)                | 25%<br>(15-37%)          | 3.3<br>(1.9-4.8)                            | 8.2%<br>(4.9-12%)                    | 12%<br>(6.6-17%)                    | 36<br>(20-53)       | 1900<br>(1100-2600)    |
| Uruguay  | 1990 | Male   | 45 to 49 | 76%<br>(62-85%)                | 24%<br>(15-38%)          | 3.3<br>(1.9-5)                              | 8.2%<br>(5-12%)                      | 11%<br>(6.3-17%)                    | 52<br>(30-80)       | 2300<br>(1400-3500)    |
| Uruguay  | 1990 | Male   | 50 to 54 | 75%<br>(63-85%)                | 25%<br>(15-37%)          | 3.2<br>(1.9-4.8)                            | 8.1%<br>(4.6-12%)                    | 10%<br>(5.6-16%)                    | 75<br>(41-120)      | 2900<br>(1700-4400)    |

| Location | Year | Sex    | Age      | Prevalence of current drinkers | Prevalence of abstainers | Population average of standard drinks daily | Percent of total attributable deaths | Percent of total attributable DALYs | Attributable deaths | Attributable DALYs     |
|----------|------|--------|----------|--------------------------------|--------------------------|---------------------------------------------|--------------------------------------|-------------------------------------|---------------------|------------------------|
| Uruguay  | 1990 | Male   | 55 to 59 | 74%<br>(62-84%)                | 26%<br>(16-38%)          | 3<br>(1.9-4.4)                              | 7.3%<br>(3.9-11%)                    | 8.7%<br>(4.7-14%)                   | 110<br>(58-170)     | 3600<br>(2000-5600)    |
| Uruguay  | 1990 | Male   | 60 to 64 | 72%<br>(60-82%)                | 28%<br>(18-40%)          | 2.8<br>(1.6-4.2)                            | 6%<br>(2.7-10%)                      | 7%<br>(3.1-12%)                     | 120<br>(53-200)     | 3300<br>(1500-5600)    |
| Uruguay  | 1990 | Male   | 65 to 69 | 69%<br>(56-80%)                | 31%<br>(20-44%)          | 2.5<br>(1.6-3.6)                            | 4.2%<br>(1.6-7.8%)                   | 4.8%<br>(1.7-9.1%)                  | 94<br>(34-180)      | 2200<br>(850-4200)     |
| Uruguay  | 1990 | Male   | 70 to 74 | 66%<br>(54-77%)                | 34%<br>(23-46%)          | 2.2<br>(1.2-3.5)                            | 2.9%<br>(0.23-6.7%)                  | 3.2%<br>(0.073-7.5%)                | 68<br>(1.6-160)     | 1300<br>(100-3100)     |
| Uruguay  | 1990 | Male   | 75 to 79 | 63%<br>(49-76%)                | 37%<br>(24-51%)          | 2<br>(1-3.2)                                | 1.9%<br>(-0.66-5.5%)                 | 2%<br>(-0.95-6.1%)                  | 47<br>(-22-140)     | 730<br>(-260-2100)     |
| Uruguay  | 1990 | Male   | 80 to 84 | 60%<br>(43-74%)                | 40%<br>(26-57%)          | 1.7<br>(0.93-2.6)                           | 1.3%<br>(-0.77-3.9%)                 | 1.3%<br>(-1.1-4.3%)                 | 25<br>(-20-81)      | 300<br>(-180-910)      |
| Uruguay  | 1990 | Male   | 85 to 89 | 55%<br>(39-70%)                | 45%<br>(30-61%)          | 1.4<br>(0.73-2.2)                           | 0.96%<br>(-0.71-3.1%)                | 0.93%<br>(-0.99-3.4%)               | 12<br>(-13-43)      | 110<br>(-79-340)       |
| Uruguay  | 1990 | Male   | 90 to 94 | 54%<br>(38-69%)                | 46%<br>(31-62%)          | 1.3<br>(0.66-2.3)                           | 0.66%<br>(-1-2.9%)                   | 0.58%<br>(-1.3-3.1%)                | 3<br>(-6.9-16)      | 20<br>(-31-89)         |
| Uruguay  | 1990 | Male   | 95 plus  | 55%<br>(35-74%)                | 45%<br>(26-65%)          | 1.3<br>(0.53-2.5)                           | 0.58%<br>(-1.3-3.8%)                 | 0.43%<br>(-1.8-4.1%)                | 0.58<br>(-2.5-5.6)  | 3.1<br>(-7-20)         |
| Uruguay  | 1995 | Female | All Ages | 56%<br>(50-61%)                | 44%<br>(39-50%)          | 2.2<br>(1.9-2.5)                            | 3.4%<br>(2.2-4.7%)                   | 3.8%<br>(1.5-6.4%)                  | 530<br>(210-900)    | 15000<br>(10000-21000) |
| Uruguay  | 1995 | Female | 15 to 19 | 61%<br>(46-75%)                | 39%<br>(25-54%)          | 2.1<br>(1.2-3.3)                            | 3.1%<br>(1.8-4.8%)                   | 8.2%<br>(4.4-13%)                   | 5.4<br>(2.9-8.6)    | 500<br>(290-750)       |
| Uruguay  | 1995 | Female | 20 to 24 | 72%<br>(59-82%)                | 28%<br>(18-41%)          | 3.5<br>(2.2-5)                              | 4.4%<br>(2.9-6.2%)                   | 12%<br>(7.2-17%)                    | 7.3<br>(4.4-11)     | 700<br>(460-980)       |
| Uruguay  | 1995 | Female | 25 to 29 | 72%<br>(58-82%)                | 28%<br>(18-42%)          | 3.8<br>(2.5-5.3)                            | 4.8%<br>(3.3-6.5%)                   | 13%<br>(8.4-17%)                    | 9.2<br>(6.2-13)     | 760<br>(520-1000)      |
| Uruguay  | 1995 | Female | 30 to 34 | 70%<br>(55-80%)                | 30%<br>(20-45%)          | 3.8<br>(2.5-5.4)                            | 4.8%<br>(3.3-6.5%)                   | 12%<br>(8.4-17%)                    | 12<br>(8.3-17)      | 870<br>(590-1200)      |
| Uruguay  | 1995 | Female | 35 to 39 | 66%<br>(52-78%)                | 34%<br>(22-48%)          | 3.3<br>(2.1-4.8)                            | 4.9%<br>(3.2-6.9%)                   | 12%<br>(7.5-16%)                    | 16<br>(10-22)       | 970<br>(630-1300)      |
| Uruguay  | 1995 | Female | 40 to 44 | 64%<br>(51-77%)                | 36%<br>(23-49%)          | 3<br>(1.8-4.5)                              | 5.3%<br>(3.1-7.6%)                   | 11%<br>(6.6-16%)                    | 21<br>(13-30)       | 1100<br>(660-1600)     |
| Uruguay  | 1995 | Female | 45 to 49 | 63%<br>(48-75%)                | 37%<br>(25-52%)          | 2.9<br>(1.7-4.4)                            | 5.6%<br>(3.3-8.3%)                   | 11%<br>(6.3-16%)                    | 28<br>(17-41)       | 1300<br>(760-1800)     |
| Uruguay  | 1995 | Female | 50 to 54 | 63%<br>(49-74%)                | 37%<br>(26-51%)          | 2.9<br>(1.7-4.3)                            | 5.8%<br>(3.2-8.8%)                   | 9.9%<br>(5.7-15%)                   | 37<br>(21-54)       | 1400<br>(820-2200)     |
| Uruguay  | 1995 | Female | 55 to 59 | 62%<br>(49-74%)                | 38%<br>(26-51%)          | 2.8<br>(1.7-4.2)                            | 5.9%<br>(3.2-8.9%)                   | 9.4%<br>(5.4-14%)                   | 47<br>(27-70)       | 1600<br>(900-2400)     |
| Uruguay  | 1995 | Female | 60 to 64 | 59%<br>(44-72%)                | 41%<br>(28-56%)          | 2.6<br>(1.5-4.1)                            | 5%<br>(2-8.7%)                       | 7.3%<br>(3.2-12%)                   | 57<br>(25-95)       | 1700<br>(700-2800)     |
| Uruguay  | 1995 | Female | 65 to 69 | 53%<br>(39-67%)                | 47%<br>(33-61%)          | 2.1<br>(1.3-3.2)                            | 4%<br>(1.5-6.9%)                     | 5.5%<br>(2.3-9.4%)                  | 62<br>(26-110)      | 1500<br>(590-2600)     |
| Uruguay  | 1995 | Female | 70 to 74 | 48%<br>(35-61%)                | 52%<br>(39-65%)          | 1.8<br>(0.97-2.8)                           | 2.9%<br>(0.23-6.1%)                  | 3.8%<br>(0.35-7.9%)                 | 58<br>(5.4-120)     | 1100<br>(92-2400)      |

| Location | Year | Sex    | Age      | Prevalence of current drinkers | Prevalence of abstainers | Population average of standard drinks daily | Percent of total attributable deaths | Percent of total attributable DALYs | Attributable deaths | Attributable DALYs     |
|----------|------|--------|----------|--------------------------------|--------------------------|---------------------------------------------|--------------------------------------|-------------------------------------|---------------------|------------------------|
| Uruguay  | 1995 | Female | 75 to 79 | 43%<br>(30-58%)                | 57%<br>(42-70%)          | 1.6<br>(0.81-2.7)                           | 2.2%<br>(-0.69-5.7%)                 | 2.6%<br>(-0.86-7%)                  | 51<br>(-17-140)     | 780<br>(-240-2000)     |
| Uruguay  | 1995 | Female | 80 to 84 | 40%<br>(27-55%)                | 60%<br>(45-73%)          | 1.4<br>(0.78-2.2)                           | 1.9%<br>(-0.6-4.9%)                  | 2.2%<br>(-0.7-5.8%)                 | 52<br>(-17-140)     | 590<br>(-190-1500)     |
| Uruguay  | 1995 | Female | 85 to 89 | 39%<br>(27-53%)                | 61%<br>(47-73%)          | 1.3<br>(0.72-2.1)                           | 1.6%<br>(-0.6-4.3%)                  | 1.8%<br>(-0.79-5.1%)                | 42<br>(-18-120)     | 340<br>(-120-920)      |
| Uruguay  | 1995 | Female | 90 to 94 | 40%<br>(27-54%)                | 60%<br>(46-73%)          | 1.3<br>(0.68-2.2)                           | 1.5%<br>(-0.75-4.7%)                 | 1.6%<br>(-1.1-5.4%)                 | 19<br>(-14-64)      | 110<br>(-57-340)       |
| Uruguay  | 1995 | Female | 95 plus  | 42%<br>(26-60%)                | 58%<br>(40-74%)          | 1.4<br>(0.61-2.6)                           | 1.5%<br>(-1.2-5.5%)                  | 1.6%<br>(-1.6-6.4%)                 | 7.1<br>(-7.3-28)    | 27<br>(-22-99)         |
| Uruguay  | 1995 | Male   | All Ages | 65%<br>(59-71%)                | 35%<br>(29-41%)          | 2.6<br>(2.3-3)                              | 6.1%<br>(4.6-7.8%)                   | 5.9%<br>(3.7-8.6%)                  | 1000<br>(630-1500)  | 34000<br>(26000-44000) |
| Uruguay  | 1995 | Male   | 15 to 19 | 68%<br>(53-81%)                | 32%<br>(19-47%)          | 2.5<br>(1.4-3.9)                            | 6.9%<br>(4.4-10%)                    | 11%<br>(6.8-17%)                    | 18<br>(10-27)       | 1500<br>(910-2100)     |
| Uruguay  | 1995 | Male   | 20 to 24 | 76%<br>(62-85%)                | 24%<br>(15-38%)          | 4.1<br>(2.5-5.9)                            | 12%<br>(8.2-17%)                     | 18%<br>(12-26%)                     | 33<br>(21-48)       | 2600<br>(1800-3600)    |
| Uruguay  | 1995 | Male   | 25 to 29 | 77%<br>(64-86%)                | 23%<br>(14-36%)          | 4.5<br>(2.9-6.3)                            | 12%<br>(8.6-17%)                     | 19%<br>(13-26%)                     | 34<br>(23-47)       | 2400<br>(1700-3200)    |
| Uruguay  | 1995 | Male   | 30 to 34 | 76%<br>(62-85%)                | 24%<br>(15-38%)          | 4.4<br>(2.9-6.3)                            | 11%<br>(7.4-15%)                     | 17%<br>(11-23%)                     | 33<br>(21-45)       | 2100<br>(1500-2900)    |
| Uruguay  | 1995 | Male   | 35 to 39 | 75%<br>(63-85%)                | 25%<br>(15-37%)          | 3.9<br>(2.5-5.7)                            | 9.4%<br>(6.3-13%)                    | 15%<br>(9.2-20%)                    | 34<br>(21-48)       | 2000<br>(1300-2800)    |
| Uruguay  | 1995 | Male   | 40 to 44 | 75%<br>(63-85%)                | 25%<br>(15-37%)          | 3.7<br>(2.3-5.5)                            | 9.6%<br>(5.9-13%)                    | 14%<br>(8.2-19%)                    | 44<br>(26-62)       | 2300<br>(1400-3100)    |
| Uruguay  | 1995 | Male   | 45 to 49 | 76%<br>(62-85%)                | 24%<br>(15-38%)          | 3.7<br>(2.2-5.5)                            | 9.7%<br>(6-14%)                      | 13%<br>(7.9-19%)                    | 64<br>(39-94)       | 2800<br>(1800-4100)    |
| Uruguay  | 1995 | Male   | 50 to 54 | 76%<br>(64-85%)                | 24%<br>(15-36%)          | 3.6<br>(2.2-5.5)                            | 9.7%<br>(5.8-14%)                    | 12%<br>(7.2-18%)                    | 89<br>(52-130)      | 3400<br>(2100-5100)    |
| Uruguay  | 1995 | Male   | 55 to 59 | 74%<br>(63-84%)                | 26%<br>(16-37%)          | 3.5<br>(2.2-5.1)                            | 9.1%<br>(5.5-13%)                    | 11%<br>(6.5-16%)                    | 120<br>(71-170)     | 3900<br>(2400-5700)    |
| Uruguay  | 1995 | Male   | 60 to 64 | 72%<br>(60-83%)                | 28%<br>(17-40%)          | 3.2<br>(1.9-4.9)                            | 7.5%<br>(4-12%)                      | 8.8%<br>(4.5-14%)                   | 140<br>(75-230)     | 4100<br>(2100-6500)    |
| Uruguay  | 1995 | Male   | 65 to 69 | 69%<br>(57-80%)                | 31%<br>(20-43%)          | 2.8<br>(1.8-4.1)                            | 5.6%<br>(2.7-9.4%)                   | 6.4%<br>(3-11%)                     | 140<br>(64-230)     | 3200<br>(1500-5400)    |
| Uruguay  | 1995 | Male   | 70 to 74 | 67%<br>(54-77%)                | 33%<br>(23-46%)          | 2.5<br>(1.4-3.8)                            | 4%<br>(1.1-8%)                       | 4.5%<br>(1.1-9.1%)                  | 100<br>(25-210)     | 2000<br>(540-4000)     |
| Uruguay  | 1995 | Male   | 75 to 79 | 64%<br>(50-78%)                | 36%<br>(22-50%)          | 2.2<br>(1.2-3.6)                            | 2.9%<br>(0.065-6.8%)                 | 3.1%<br>(-0.011-7.5%)               | 70<br>(-0.26-170)   | 1100<br>(22-2500)      |
| Uruguay  | 1995 | Male   | 80 to 84 | 60%<br>(43-75%)                | 40%<br>(25-57%)          | 1.9<br>(1.1-2.9)                            | 2.1%<br>(-0.1-5%)                    | 2.2%<br>(-0.31-5.5%)                | 46<br>(-6.4-110)    | 530<br>(-26-1300)      |
| Uruguay  | 1995 | Male   | 85 to 89 | 56%<br>(39-70%)                | 44%<br>(30-61%)          | 1.6<br>(0.87-2.5)                           | 1.7%<br>(-0.11-4.3%)                 | 1.8%<br>(-0.29-4.7%)                | 26<br>(-4.3-68)     | 210<br>(-13-530)       |
| Uruguay  | 1995 | Male   | 90 to 94 | 54%<br>(38-69%)                | 46%<br>(31-62%)          | 1.5<br>(0.77-2.5)                           | 1.3%<br>(-0.33-4%)                   | 1.4%<br>(-0.56-4.4%)                | 8.2<br>(-3.4-27)    | 48<br>(-12-150)        |

| Location | Year | Sex    | Age      | Prevalence of current drinkers | Prevalence of abstainers | Population average of standard drinks daily | Percent of total attributable deaths | Percent of total attributable DALYs | Attributable deaths | Attributable DALYs     |
|----------|------|--------|----------|--------------------------------|--------------------------|---------------------------------------------|--------------------------------------|-------------------------------------|---------------------|------------------------|
| Uruguay  | 1995 | Male   | 95 plus  | 55%<br>(35-74%)                | 45%<br>(26-65%)          | 1.5<br>(0.61-2.8)                           | 1.3%<br>(-0.72-4.7%)                 | 1.2%<br>(-1.1-5.2%)                 | 2.1<br>(-1.7-8.7)   | 8.4<br>(-4.7-31)       |
| Uruguay  | 2000 | Female | All Ages | 54%<br>(49-59%)                | 46%<br>(41-51%)          | 2.2<br>(1.9-2.4)                            | 3.5%<br>(2.4-4.8%)                   | 4%<br>(1.9-6.4%)                    | 570<br>(280-920)    | 16000<br>(11000-21000) |
| Uruguay  | 2000 | Female | 15 to 19 | 65%<br>(51-77%)                | 35%<br>(23-49%)          | 2.3<br>(1.4-3.5)                            | 3.1%<br>(1.9-4.7%)                   | 9.1%<br>(4.9-14%)                   | 4.7<br>(2.5-7.4)    | 440<br>(270-650)       |
| Uruguay  | 2000 | Female | 20 to 24 | 73%<br>(60-83%)                | 27%<br>(17-40%)          | 3.6<br>(2.3-5.2)                            | 4.4%<br>(2.9-6.2%)                   | 13%<br>(7.6-18%)                    | 7.6<br>(4.6-11)     | 730<br>(480-990)       |
| Uruguay  | 2000 | Female | 25 to 29 | 72%<br>(60-81%)                | 28%<br>(19-40%)          | 3.9<br>(2.6-5.3)                            | 4.6%<br>(3.2-6%)                     | 13%<br>(8.8-17%)                    | 8.9<br>(6-12)       | 760<br>(540-1000)      |
| Uruguay  | 2000 | Female | 30 to 34 | 69%<br>(57-79%)                | 31%<br>(21-43%)          | 3.8<br>(2.6-5.3)                            | 4.5%<br>(3.2-6%)                     | 12%<br>(8.6-16%)                    | 10<br>(7.3-14)      | 760<br>(540-990)       |
| Uruguay  | 2000 | Female | 35 to 39 | 64%<br>(52-76%)                | 36%<br>(24-48%)          | 3.2<br>(2.1-4.7)                            | 4.5%<br>(3-6.3%)                     | 12%<br>(7.7-16%)                    | 14<br>(9.4-19)      | 880<br>(590-1200)      |
| Uruguay  | 2000 | Female | 40 to 44 | 61%<br>(49-73%)                | 39%<br>(27-51%)          | 2.9<br>(1.7-4.3)                            | 5%<br>(3.1-7.2%)                     | 11%<br>(6.7-15%)                    | 22<br>(13-30)       | 1100<br>(700-1600)     |
| Uruguay  | 2000 | Female | 45 to 49 | 60%<br>(48-72%)                | 40%<br>(28-52%)          | 2.8<br>(1.7-4.2)                            | 5.5%<br>(3.3-8.1%)                   | 11%<br>(6.7-16%)                    | 29<br>(18-42)       | 1300<br>(790-1900)     |
| Uruguay  | 2000 | Female | 50 to 54 | 60%<br>(47-71%)                | 40%<br>(29-53%)          | 2.8<br>(1.7-4.2)                            | 5.9%<br>(3.4-8.9%)                   | 10%<br>(6.1-15%)                    | 38<br>(23-57)       | 1500<br>(890-2300)     |
| Uruguay  | 2000 | Female | 55 to 59 | 60%<br>(47-71%)                | 40%<br>(29-53%)          | 2.8<br>(1.7-4.2)                            | 6%<br>(3.4-9.1%)                     | 9.6%<br>(5.7-14%)                   | 48<br>(29-71)       | 1600<br>(950-2500)     |
| Uruguay  | 2000 | Female | 60 to 64 | 55%<br>(43-68%)                | 45%<br>(32-57%)          | 2.4<br>(1.4-3.9)                            | 5%<br>(2.4-8.3%)                     | 7.5%<br>(3.8-12%)                   | 52<br>(26-84)       | 1500<br>(710-2500)     |
| Uruguay  | 2000 | Female | 65 to 69 | 49%<br>(36-63%)                | 51%<br>(37-64%)          | 1.9<br>(1.2-2.9)                            | 4%<br>(1.8-6.7%)                     | 5.7%<br>(2.7-9.2%)                  | 60<br>(28-98)       | 1500<br>(650-2400)     |
| Uruguay  | 2000 | Female | 70 to 74 | 43%<br>(31-56%)                | 57%<br>(44-69%)          | 1.6<br>(0.88-2.6)                           | 3%<br>(0.78-5.9%)                    | 4%<br>(1.2-7.7%)                    | 61<br>(18-120)      | 1200<br>(300-2300)     |
| Uruguay  | 2000 | Female | 75 to 79 | 39%<br>(28-54%)                | 61%<br>(46-72%)          | 1.5<br>(0.76-2.5)                           | 2.3%<br>(-0.069-5.3%)                | 2.9%<br>(-0.054-6.7%)               | 60<br>(-1.1-130)    | 910<br>(-25-2000)      |
| Uruguay  | 2000 | Female | 80 to 84 | 38%<br>(26-52%)                | 62%<br>(48-74%)          | 1.4<br>(0.74-2.2)                           | 2.1%<br>(0.03-4.7%)                  | 2.5%<br>(0.011-5.6%)                | 59<br>(0.25-130)    | 660<br>(9.3-1500)      |
| Uruguay  | 2000 | Female | 85 to 89 | 38%<br>(26-52%)                | 62%<br>(48-74%)          | 1.3<br>(0.72-2.1)                           | 1.9%<br>(-0.18-4.5%)                 | 2.2%<br>(-0.24-5.2%)                | 53<br>(-5.7-130)    | 420<br>(-39-1000)      |
| Uruguay  | 2000 | Female | 90 to 94 | 39%<br>(27-53%)                | 61%<br>(47-73%)          | 1.3<br>(0.69-2.3)                           | 1.8%<br>(-0.51-4.9%)                 | 2%<br>(-0.74-5.8%)                  | 33<br>(-12-94)      | 180<br>(-53-500)       |
| Uruguay  | 2000 | Female | 95 plus  | 42%<br>(26-59%)                | 58%<br>(41-74%)          | 1.4<br>(0.6-2.6)                            | 1.8%<br>(-0.83-5.8%)                 | 2%<br>(-1.1-6.7%)                   | 12<br>(-6.4-40)     | 43<br>(-19-140)        |
| Uruguay  | 2000 | Male   | All Ages | 71%<br>(65-75%)                | 29%<br>(25-35%)          | 2.6<br>(2.3-2.9)                            | 6.2%<br>(4.7-7.9%)                   | 5.8%<br>(3.7-8.3%)                  | 960<br>(620-1400)   | 33000<br>(25000-43000) |
| Uruguay  | 2000 | Male   | 15 to 19 | 76%<br>(64-85%)                | 24%<br>(15-36%)          | 2.6<br>(1.5-3.9)                            | 7.1%<br>(4.4-10%)                    | 12%<br>(7.1-18%)                    | 16<br>(9.4-24)      | 1300<br>(840-1900)     |
| Uruguay  | 2000 | Male   | 20 to 24 | 81%<br>(71-88%)                | 19%<br>(12-29%)          | 4.1<br>(2.6-5.8)                            | 13%<br>(8.4-17%)                     | 19%<br>(12-27%)                     | 37<br>(23-52)       | 2900<br>(1900-3900)    |



| Location | Year | Sex    | Age      | Prevalence of current drinkers | Prevalence of abstainers | Population average of standard drinks daily | Percent of total attributable deaths | Percent of total attributable DALYs | Attributable deaths | Attributable DALYs    |
|----------|------|--------|----------|--------------------------------|--------------------------|---------------------------------------------|--------------------------------------|-------------------------------------|---------------------|-----------------------|
| Uruguay  | 2000 | Male   | 25 to 29 | 82%<br>(74-88%)                | 18%<br>(12-26%)          | 4.5<br>(3-6.1)                              | 12%<br>(8.6-16%)                     | 19%<br>(12-26%)                     | 36<br>(24-49)       | 2600<br>(1800-3400)   |
| Uruguay  | 2000 | Male   | 30 to 34 | 81%<br>(73-88%)                | 19%<br>(12-27%)          | 4.4<br>(3-6.1)                              | 10%<br>(7.3-14%)                     | 17%<br>(11-23%)                     | 30<br>(20-41)       | 2000<br>(1400-2600)   |
| Uruguay  | 2000 | Male   | 35 to 39 | 79%<br>(71-86%)                | 21%<br>(14-29%)          | 3.7<br>(2.4-5.3)                            | 9.3%<br>(6.4-13%)                    | 14%<br>(9.4-20%)                    | 34<br>(22-47)       | 2000<br>(1300-2700)   |
| Uruguay  | 2000 | Male   | 40 to 44 | 78%<br>(70-87%)                | 22%<br>(13-30%)          | 3.6<br>(2.2-5.2)                            | 9.2%<br>(5.9-13%)                    | 14%<br>(8.5-19%)                    | 41<br>(25-59)       | 2200<br>(1400-3000)   |
| Uruguay  | 2000 | Male   | 45 to 49 | 80%<br>(72-87%)                | 20%<br>(13-28%)          | 3.6<br>(2.2-5.2)                            | 9.5%<br>(6-14%)                      | 13%<br>(8.2-18%)                    | 61<br>(39-88)       | 2800<br>(1800-3900)   |
| Uruguay  | 2000 | Male   | 50 to 54 | 80%<br>(72-87%)                | 20%<br>(13-28%)          | 3.5<br>(2.2-5.2)                            | 9.5%<br>(5.8-14%)                    | 12%<br>(7.4-18%)                    | 87<br>(53-130)      | 3300<br>(2100-4900)   |
| Uruguay  | 2000 | Male   | 55 to 59 | 78%<br>(69-85%)                | 22%<br>(15-31%)          | 3.3<br>(2.1-4.9)                            | 8.7%<br>(5.3-13%)                    | 11%<br>(6.6-16%)                    | 110<br>(67-160)     | 3600<br>(2300-5300)   |
| Uruguay  | 2000 | Male   | 60 to 64 | 76%<br>(67-83%)                | 24%<br>(17-33%)          | 3.1<br>(1.8-4.6)                            | 7.5%<br>(4.2-12%)                    | 8.9%<br>(5-14%)                     | 120<br>(70-200)     | 3500<br>(1900-5500)   |
| Uruguay  | 2000 | Male   | 65 to 69 | 74%<br>(64-82%)                | 26%<br>(18-36%)          | 2.8<br>(1.8-4)                              | 5.5%<br>(2.8-9.1%)                   | 6.4%<br>(3.1-11%)                   | 130<br>(63-210)     | 3000<br>(1500-5000)   |
| Uruguay  | 2000 | Male   | 70 to 74 | 71%<br>(61-80%)                | 29%<br>(20-39%)          | 2.4<br>(1.4-3.7)                            | 3.9%<br>(1.2-7.4%)                   | 4.4%<br>(1.3-8.5%)                  | 100<br>(31-200)     | 2000<br>(630-3800)    |
| Uruguay  | 2000 | Male   | 75 to 79 | 69%<br>(57-80%)                | 31%<br>(20-43%)          | 2.2<br>(1.2-3.5)                            | 2.9%<br>(0.32-6.4%)                  | 3.2%<br>(0.26-7.2%)                 | 76<br>(6.1-170)     | 1200<br>(130-2600)    |
| Uruguay  | 2000 | Male   | 80 to 84 | 63%<br>(47-77%)                | 37%<br>(23-53%)          | 1.8<br>(1-2.7)                              | 2%<br>(0.04-4.4%)                    | 2.1%<br>(-0.08-4.9%)                | 43<br>(-1.6-100)    | 490<br>(10-1100)      |
| Uruguay  | 2000 | Male   | 85 to 89 | 56%<br>(40-71%)                | 44%<br>(29-60%)          | 1.4<br>(0.78-2.3)                           | 1.6%<br>(0.09-3.5%)                  | 1.7%<br>(-0.046-3.9%)               | 25<br>(-0.69-58)    | 200<br>(12-460)       |
| Uruguay  | 2000 | Male   | 90 to 94 | 54%<br>(39-70%)                | 46%<br>(30-61%)          | 1.3<br>(0.68-2.3)                           | 1.3%<br>(-0.17-3.4%)                 | 1.3%<br>(-0.31-3.7%)                | 9.7<br>(-2.3-27)    | 56<br>(-7.2-150)      |
| Uruguay  | 2000 | Male   | 95 plus  | 56%<br>(37-74%)                | 44%<br>(26-63%)          | 1.3<br>(0.55-2.5)                           | 1.3%<br>(-0.39-4.2%)                 | 1.3%<br>(-0.66-4.6%)                | 2.7<br>(-1.3-9.3)   | 11<br>(-3.2-33)       |
| Uruguay  | 2005 | Female | All Ages | 53%<br>(48-58%)                | 47%<br>(42-52%)          | 2<br>(1.7-2.2)                              | 3%<br>(2-4.2%)                       | 3.3%<br>(1.5-5.3%)                  | 490<br>(220-810)    | 13000<br>(9000-18000) |
| Uruguay  | 2005 | Female | 15 to 19 | 65%<br>(51-76%)                | 35%<br>(24-49%)          | 2.1<br>(1.3-3.2)                            | 2.8%<br>(1.7-4.4%)                   | 8.5%<br>(4.6-14%)                   | 4.2<br>(2.3-6.7)    | 400<br>(250-600)      |
| Uruguay  | 2005 | Female | 20 to 24 | 73%<br>(60-82%)                | 27%<br>(18-40%)          | 3.3<br>(2.1-4.8)                            | 4.1%<br>(2.7-5.9%)                   | 12%<br>(7.2-17%)                    | 6.2<br>(3.6-9.1)    | 610<br>(400-860)      |
| Uruguay  | 2005 | Female | 25 to 29 | 71%<br>(60-81%)                | 29%<br>(19-40%)          | 3.5<br>(2.3-4.9)                            | 4.1%<br>(2.8-5.5%)                   | 12%<br>(7.6-16%)                    | 7.5<br>(4.9-10)     | 670<br>(460-890)      |
| Uruguay  | 2005 | Female | 30 to 34 | 68%<br>(56-78%)                | 32%<br>(22-44%)          | 3.5<br>(2.3-4.9)                            | 4.2%<br>(3-5.7%)                     | 11%<br>(7.6-15%)                    | 11<br>(7.2-14)      | 760<br>(530-1000)     |
| Uruguay  | 2005 | Female | 35 to 39 | 63%<br>(51-74%)                | 37%<br>(26-49%)          | 2.9<br>(1.9-4.3)                            | 3.8%<br>(2.6-5.4%)                   | 10%<br>(6.7-14%)                    | 11<br>(7.1-15)      | 690<br>(460-940)      |
| Uruguay  | 2005 | Female | 40 to 44 | 60%<br>(48-72%)                | 40%<br>(28-52%)          | 2.6<br>(1.6-3.8)                            | 4.4%<br>(2.7-6.3%)                   | 9.7%<br>(5.9-14%)                   | 19<br>(11-26)       | 980<br>(600-1400)     |

| Location | Year | Sex    | Age      | Prevalence of current drinkers | Prevalence of abstainers | Population average of standard drinks daily | Percent of total attributable deaths | Percent of total attributable DALYs | Attributable deaths | Attributable DALYs     |
|----------|------|--------|----------|--------------------------------|--------------------------|---------------------------------------------|--------------------------------------|-------------------------------------|---------------------|------------------------|
| Uruguay  | 2005 | Female | 45 to 49 | 59%<br>(47-71%)                | 41%<br>(29-53%)          | 2.5<br>(1.5-3.8)                            | 4.7%<br>(2.8-6.9%)                   | 9.4%<br>(5.7-14%)                   | 25<br>(16-37)       | 1200<br>(720-1700)     |
| Uruguay  | 2005 | Female | 50 to 54 | 59%<br>(46-71%)                | 41%<br>(29-54%)          | 2.5<br>(1.5-3.8)                            | 5.1%<br>(2.9-7.9%)                   | 8.9%<br>(5.2-13%)                   | 35<br>(21-52)       | 1400<br>(790-2100)     |
| Uruguay  | 2005 | Female | 55 to 59 | 59%<br>(47-70%)                | 41%<br>(30-53%)          | 2.5<br>(1.6-3.7)                            | 5.1%<br>(2.8-7.7%)                   | 8.3%<br>(4.7-12%)                   | 43<br>(24-64)       | 1500<br>(800-2200)     |
| Uruguay  | 2005 | Female | 60 to 64 | 54%<br>(42-67%)                | 46%<br>(33-58%)          | 2.2<br>(1.3-3.4)                            | 4.3%<br>(1.9-7.3%)                   | 6.5%<br>(3.1-11%)                   | 44<br>(21-73)       | 1300<br>(570-2200)     |
| Uruguay  | 2005 | Female | 65 to 69 | 48%<br>(36-62%)                | 52%<br>(38-64%)          | 1.7<br>(1.1-2.6)                            | 3.3%<br>(1.5-5.6%)                   | 4.8%<br>(2.3-7.9%)                  | 46<br>(22-76)       | 1100<br>(500-1800)     |
| Uruguay  | 2005 | Female | 70 to 74 | 42%<br>(30-56%)                | 58%<br>(44-70%)          | 1.4<br>(0.79-2.3)                           | 2.5%<br>(0.59-4.8%)                  | 3.4%<br>(0.92-6.5%)                 | 49<br>(13-94)       | 950<br>(220-1900)      |
| Uruguay  | 2005 | Female | 75 to 79 | 38%<br>(27-53%)                | 62%<br>(47-73%)          | 1.3<br>(0.7-2.2)                            | 1.9%<br>(-0.1-4.5%)                  | 2.4%<br>(-0.077-5.6%)               | 53<br>(-1.7-120)    | 790<br>(-41-1900)      |
| Uruguay  | 2005 | Female | 80 to 84 | 37%<br>(25-51%)                | 63%<br>(49-75%)          | 1.2<br>(0.68-1.9)                           | 1.6%<br>(-0.15-3.8%)                 | 2%<br>(-0.17-4.6%)                  | 51<br>(-4.6-120)    | 580<br>(-53-1400)      |
| Uruguay  | 2005 | Female | 85 to 89 | 37%<br>(26-51%)                | 63%<br>(49-74%)          | 1.2<br>(0.65-1.9)                           | 1.5%<br>(-0.23-3.7%)                 | 1.8%<br>(-0.29-4.4%)                | 46<br>(-7.8-120)    | 370<br>(-56-900)       |
| Uruguay  | 2005 | Female | 90 to 94 | 38%<br>(26-52%)                | 62%<br>(48-74%)          | 1.2<br>(0.61-2.1)                           | 1.5%<br>(-0.46-4.2%)                 | 1.7%<br>(-0.64-4.9%)                | 31<br>(-12-91)      | 170<br>(-54-480)       |
| Uruguay  | 2005 | Female | 95 plus  | 41%<br>(26-58%)                | 59%<br>(42-74%)          | 1.3<br>(0.56-2.4)                           | 1.5%<br>(-0.8-5%)                    | 1.7%<br>(-1-5.7%)                   | 13<br>(-8-44)       | 47<br>(-25-150)        |
| Uruguay  | 2005 | Male   | All Ages | 70%<br>(65-75%)                | 30%<br>(25-35%)          | 2.4<br>(2.1-2.8)                            | 5.6%<br>(4.3-7.1%)                   | 5%<br>(3.2-7.3%)                    | 840<br>(530-1200)   | 29000<br>(22000-37000) |
| Uruguay  | 2005 | Male   | 15 to 19 | 76%<br>(64-85%)                | 24%<br>(15-36%)          | 2.4<br>(1.4-3.7)                            | 6.6%<br>(4-9.6%)                     | 12%<br>(6.6-18%)                    | 14<br>(7.7-21)      | 1200<br>(730-1700)     |
| Uruguay  | 2005 | Male   | 20 to 24 | 81%<br>(71-88%)                | 19%<br>(12-29%)          | 3.8<br>(2.4-5.6)                            | 12%<br>(8-17%)                       | 18%<br>(11-26%)                     | 28<br>(17-40)       | 2300<br>(1500-3100)    |
| Uruguay  | 2005 | Male   | 25 to 29 | 82%<br>(73-88%)                | 18%<br>(12-27%)          | 4.2<br>(2.8-5.8)                            | 11%<br>(8-15%)                       | 18%<br>(12-25%)                     | 31<br>(20-43)       | 2300<br>(1600-3000)    |
| Uruguay  | 2005 | Male   | 30 to 34 | 80%<br>(72-87%)                | 20%<br>(13-28%)          | 4.1<br>(2.7-5.7)                            | 9.6%<br>(6.6-13%)                    | 15%<br>(10-21%)                     | 28<br>(19-39)       | 1900<br>(1300-2600)    |
| Uruguay  | 2005 | Male   | 35 to 39 | 78%<br>(71-86%)                | 22%<br>(14-29%)          | 3.5<br>(2.2-5)                              | 8%<br>(5.5-11%)                      | 13%<br>(8.2-18%)                    | 24<br>(16-35)       | 1500<br>(1000-2100)    |
| Uruguay  | 2005 | Male   | 40 to 44 | 78%<br>(70-86%)                | 22%<br>(14-30%)          | 3.3<br>(2.1-4.8)                            | 8.2%<br>(5.3-11%)                    | 12%<br>(7.7-17%)                    | 36<br>(22-51)       | 1900<br>(1200-2700)    |
| Uruguay  | 2005 | Male   | 45 to 49 | 79%<br>(71-87%)                | 21%<br>(13-29%)          | 3.4<br>(2.1-4.9)                            | 8.6%<br>(5.6-12%)                    | 12%<br>(7.6-17%)                    | 54<br>(34-79)       | 2500<br>(1600-3500)    |
| Uruguay  | 2005 | Male   | 50 to 54 | 79%<br>(70-86%)                | 21%<br>(14-30%)          | 3.3<br>(2-4.9)                              | 8.3%<br>(5.1-12%)                    | 11%<br>(6.5-16%)                    | 74<br>(44-110)      | 2900<br>(1800-4300)    |
| Uruguay  | 2005 | Male   | 55 to 59 | 77%<br>(68-84%)                | 23%<br>(16-32%)          | 3.1<br>(1.9-4.4)                            | 7.5%<br>(4.5-11%)                    | 9.3%<br>(5.6-14%)                   | 91<br>(55-140)      | 3000<br>(1800-4500)    |
| Uruguay  | 2005 | Male   | 60 to 64 | 75%<br>(66-83%)                | 25%<br>(17-34%)          | 2.9<br>(1.7-4.3)                            | 6.5%<br>(3.6-10%)                    | 7.7%<br>(4.2-12%)                   | 100<br>(57-170)     | 2900<br>(1700-4700)    |

| Location | Year | Sex    | Age      | Prevalence of current drinkers | Prevalence of abstainers | Population average of standard drinks daily | Percent of total attributable deaths | Percent of total attributable DALYs | Attributable deaths | Attributable DALYs    |
|----------|------|--------|----------|--------------------------------|--------------------------|---------------------------------------------|--------------------------------------|-------------------------------------|---------------------|-----------------------|
| Uruguay  | 2005 | Male   | 65 to 69 | 73%<br>(64-82%)                | 27%<br>(18-36%)          | 2.6<br>(1.7-3.7)                            | 5%<br>(2.5-8.1%)                     | 5.8%<br>(3-9.6%)                    | 100<br>(51-170)     | 2400<br>(1200-3900)   |
| Uruguay  | 2005 | Male   | 70 to 74 | 71%<br>(61-79%)                | 29%<br>(21-39%)          | 2.3<br>(1.4-3.5)                            | 3.6%<br>(1.2-6.7%)                   | 4.1%<br>(1.3-7.7%)                  | 91<br>(30-170)      | 1800<br>(580-3300)    |
| Uruguay  | 2005 | Male   | 75 to 79 | 69%<br>(56-79%)                | 31%<br>(21-44%)          | 2.1<br>(1.1-3.3)                            | 2.7%<br>(0.4-5.8%)                   | 3%<br>(0.35-6.5%)                   | 76<br>(8.9-170)     | 1200<br>(170-2600)    |
| Uruguay  | 2005 | Male   | 80 to 84 | 63%<br>(47-77%)                | 37%<br>(23-53%)          | 1.7<br>(0.95-2.6)                           | 1.9%<br>(0.15-4.1%)                  | 2.1%<br>(0.099-4.6%)                | 47<br>(2.2-100)     | 530<br>(44-1200)      |
| Uruguay  | 2005 | Male   | 85 to 89 | 55%<br>(39-70%)                | 45%<br>(30-61%)          | 1.3<br>(0.72-2.1)                           | 1.5%<br>(0.14-3.2%)                  | 1.6%<br>(0.033-3.5%)                | 25<br>(0.54-57)     | 200<br>(19-450)       |
| Uruguay  | 2005 | Male   | 90 to 94 | 54%<br>(38-69%)                | 46%<br>(31-62%)          | 1.2<br>(0.63-2.1)                           | 1.2%<br>(-0.089-3.2%)                | 1.2%<br>(-0.21-3.4%)                | 10<br>(-1.7-28)     | 58<br>(-4.4-150)      |
| Uruguay  | 2005 | Male   | 95 plus  | 55%<br>(36-74%)                | 45%<br>(26-64%)          | 1.2<br>(0.52-2.3)                           | 1.2%<br>(-0.38-3.9%)                 | 1.2%<br>(-0.56-4.2%)                | 3<br>(-1.4-11)      | 12<br>(-3.7-38)       |
| Uruguay  | 2010 | Female | All Ages | 57%<br>(51-62%)                | 43%<br>(38-49%)          | 1.8<br>(1.5-2.1)                            | 2.5%<br>(1.6-3.6%)                   | 2.5%<br>(0.84-4.6%)                 | 390<br>(130-710)    | 11000<br>(7000-16000) |
| Uruguay  | 2010 | Female | 15 to 19 | 62%<br>(47-76%)                | 38%<br>(24-53%)          | 1.7<br>(0.96-2.7)                           | 2.5%<br>(1.5-3.8%)                   | 7.2%<br>(3.7-12%)                   | 3.6<br>(1.9-5.9)    | 360<br>(220-550)      |
| Uruguay  | 2010 | Female | 20 to 24 | 73%<br>(60-83%)                | 27%<br>(17-40%)          | 2.8<br>(1.7-4.2)                            | 4.1%<br>(2.6-5.9%)                   | 10%<br>(5.7-16%)                    | 6.5<br>(3.6-9.9)    | 640<br>(400-930)      |
| Uruguay  | 2010 | Female | 25 to 29 | 73%<br>(60-83%)                | 27%<br>(17-40%)          | 3.1<br>(2-4.4)                              | 3.9%<br>(2.7-5.4%)                   | 10%<br>(6.6-15%)                    | 6.7<br>(4.2-9.7)    | 610<br>(400-850)      |
| Uruguay  | 2010 | Female | 30 to 34 | 71%<br>(57-80%)                | 29%<br>(20-43%)          | 3.1<br>(2-4.4)                              | 3.7%<br>(2.5-5.1%)                   | 10%<br>(6.6-14%)                    | 8.8<br>(5.8-12)     | 680<br>(460-930)      |
| Uruguay  | 2010 | Female | 35 to 39 | 67%<br>(53-78%)                | 33%<br>(22-47%)          | 2.7<br>(1.7-4.1)                            | 3.6%<br>(2.4-5.1%)                   | 9.2%<br>(6-13%)                     | 11<br>(7.1-15)      | 710<br>(470-980)      |
| Uruguay  | 2010 | Female | 40 to 44 | 65%<br>(52-76%)                | 35%<br>(24-48%)          | 2.5<br>(1.4-3.6)                            | 3.7%<br>(2.2-5.3%)                   | 9%<br>(5.3-13%)                     | 14<br>(8.1-20)      | 750<br>(450-1100)     |
| Uruguay  | 2010 | Female | 45 to 49 | 64%<br>(50-76%)                | 36%<br>(24-50%)          | 2.4<br>(1.4-3.6)                            | 4.1%<br>(2.4-6.2%)                   | 8.4%<br>(5-12%)                     | 23<br>(13-33)       | 1000<br>(600-1500)    |
| Uruguay  | 2010 | Female | 50 to 54 | 63%<br>(50-74%)                | 37%<br>(26-50%)          | 2.3<br>(1.4-3.6)                            | 4.2%<br>(2.3-6.7%)                   | 7.6%<br>(4.4-12%)                   | 31<br>(17-47)       | 1200<br>(670-1900)    |
| Uruguay  | 2010 | Female | 55 to 59 | 63%<br>(50-74%)                | 37%<br>(26-50%)          | 2.3<br>(1.4-3.5)                            | 4.2%<br>(2.1-6.5%)                   | 6.9%<br>(3.9-11%)                   | 35<br>(19-53)       | 1200<br>(630-1900)    |
| Uruguay  | 2010 | Female | 60 to 64 | 59%<br>(46-72%)                | 41%<br>(28-54%)          | 2.1<br>(1.2-3.4)                            | 3.6%<br>(1.3-6.3%)                   | 5.5%<br>(2.4-9.5%)                  | 38<br>(17-65)       | 1100<br>(430-1900)    |
| Uruguay  | 2010 | Female | 65 to 69 | 54%<br>(39-68%)                | 46%<br>(32-61%)          | 1.7<br>(1-2.7)                              | 2.7%<br>(0.94-4.9%)                  | 4.1%<br>(1.7-7.2%)                  | 38<br>(15-67)       | 900<br>(310-1700)     |
| Uruguay  | 2010 | Female | 70 to 74 | 49%<br>(35-62%)                | 51%<br>(38-65%)          | 1.5<br>(0.79-2.3)                           | 2%<br>(0.12-4.3%)                    | 2.8%<br>(0.37-5.9%)                 | 37<br>(4.8-77)      | 710<br>(44-1500)      |
| Uruguay  | 2010 | Female | 75 to 79 | 44%<br>(31-59%)                | 56%<br>(41-69%)          | 1.3<br>(0.69-2.2)                           | 1.4%<br>(-0.52-3.8%)                 | 1.8%<br>(-0.56-4.8%)                | 38<br>(-12-99)      | 560<br>(-210-1500)    |
| Uruguay  | 2010 | Female | 80 to 84 | 42%<br>(28-57%)                | 58%<br>(43-72%)          | 1.2<br>(0.65-1.9)                           | 1.1%<br>(-0.5-3.2%)                  | 1.4%<br>(-0.6-4%)                   | 39<br>(-17-110)     | 430<br>(-200-1300)    |

| Location | Year | Sex    | Age      | Prevalence of current drinkers | Prevalence of abstainers | Population average of standard drinks daily | Percent of total attributable deaths | Percent of total attributable DALYs | Attributable deaths | Attributable DALYs     |
|----------|------|--------|----------|--------------------------------|--------------------------|---------------------------------------------|--------------------------------------|-------------------------------------|---------------------|------------------------|
| Uruguay  | 2010 | Female | 85 to 89 | 41%<br>(28-55%)                | 59%<br>(45-72%)          | 1.1<br>(0.61-1.8)                           | 0.97%<br>(-0.5-2.9%)                 | 1.2%<br>(-0.6-3.6%)                 | 34<br>(-17-100)     | 270<br>(-130-850)      |
| Uruguay  | 2010 | Female | 90 to 94 | 41%<br>(28-55%)                | 59%<br>(45-72%)          | 1.1<br>(0.57-1.9)                           | 0.92%<br>(-0.65-3.2%)                | 1%<br>(-0.81-3.7%)                  | 21<br>(-16-76)      | 120<br>(-84-410)       |
| Uruguay  | 2010 | Female | 95 plus  | 44%<br>(27-62%)                | 56%<br>(38-73%)          | 1.2<br>(0.52-2.2)                           | 0.97%<br>(-0.99-4%)                  | 1%<br>(-1.3-4.6%)                   | 9<br>(-11-40)       | 34<br>(-35-140)        |
| Uruguay  | 2010 | Male   | All Ages | 67%<br>(61-72%)                | 33%<br>(28-39%)          | 2.4<br>(2.1-2.8)                            | 5.9%<br>(4.5-7.4%)                   | 5.4%<br>(3.6-7.6%)                  | 890<br>(590-1300)   | 30000<br>(23000-39000) |
| Uruguay  | 2010 | Male   | 15 to 19 | 69%<br>(54-81%)                | 31%<br>(19-46%)          | 2.2<br>(1.3-3.4)                            | 6.8%<br>(4.1-10%)                    | 11%<br>(6.2-17%)                    | 17<br>(9.6-27)      | 1400<br>(840-2100)     |
| Uruguay  | 2010 | Male   | 20 to 24 | 76%<br>(64-85%)                | 24%<br>(15-36%)          | 3.7<br>(2.3-5.4)                            | 12%<br>(7.9-17%)                     | 18%<br>(11-26%)                     | 36<br>(21-51)       | 2800<br>(1800-3800)    |
| Uruguay  | 2010 | Male   | 25 to 29 | 77%<br>(64-86%)                | 23%<br>(14-36%)          | 4.1<br>(2.7-5.6)                            | 12%<br>(8.3-17%)                     | 19%<br>(12-26%)                     | 35<br>(22-49)       | 2500<br>(1700-3300)    |
| Uruguay  | 2010 | Male   | 30 to 34 | 77%<br>(64-86%)                | 23%<br>(14-36%)          | 4<br>(2.6-5.7)                              | 10%<br>(6.8-14%)                     | 16%<br>(10-23%)                     | 32<br>(21-46)       | 2200<br>(1500-3000)    |
| Uruguay  | 2010 | Male   | 35 to 39 | 76%<br>(64-85%)                | 24%<br>(15-36%)          | 3.5<br>(2.2-5)                              | 8.4%<br>(5.7-12%)                    | 13%<br>(8.6-19%)                    | 31<br>(20-44)       | 1900<br>(1300-2600)    |
| Uruguay  | 2010 | Male   | 40 to 44 | 76%<br>(64-85%)                | 24%<br>(15-36%)          | 3.3<br>(2-4.8)                              | 8.2%<br>(5.4-11%)                    | 13%<br>(8-18%)                      | 34<br>(21-48)       | 1800<br>(1200-2500)    |
| Uruguay  | 2010 | Male   | 45 to 49 | 76%<br>(64-85%)                | 24%<br>(15-36%)          | 3.3<br>(2-4.9)                              | 8.4%<br>(5.5-12%)                    | 12%<br>(7.5-18%)                    | 52<br>(33-76)       | 2400<br>(1600-3500)    |
| Uruguay  | 2010 | Male   | 50 to 54 | 76%<br>(65-85%)                | 24%<br>(15-35%)          | 3.2<br>(2-4.8)                              | 8.2%<br>(5.2-12%)                    | 11%<br>(6.8-16%)                    | 73<br>(46-110)      | 2900<br>(1900-4300)    |
| Uruguay  | 2010 | Male   | 55 to 59 | 75%<br>(63-84%)                | 25%<br>(16-37%)          | 3.1<br>(2-4.5)                              | 7.7%<br>(4.9-11%)                    | 9.7%<br>(6.1-14%)                   | 92<br>(57-130)      | 3100<br>(1900-4400)    |
| Uruguay  | 2010 | Male   | 60 to 64 | 73%<br>(61-83%)                | 27%<br>(17-39%)          | 2.8<br>(1.7-4.4)                            | 6.5%<br>(3.7-10%)                    | 7.9%<br>(4.5-12%)                   | 100<br>(58-160)     | 2900<br>(1700-4500)    |
| Uruguay  | 2010 | Male   | 65 to 69 | 70%<br>(58-80%)                | 30%<br>(20-42%)          | 2.5<br>(1.6-3.7)                            | 5.2%<br>(2.9-8.3%)                   | 6.1%<br>(3.4-9.7%)                  | 100<br>(59-170)     | 2500<br>(1400-4000)    |
| Uruguay  | 2010 | Male   | 70 to 74 | 68%<br>(55-78%)                | 32%<br>(22-45%)          | 2.3<br>(1.3-3.5)                            | 3.9%<br>(1.7-7%)                     | 4.4%<br>(1.9-7.9%)                  | 90<br>(37-160)      | 1700<br>(730-3100)     |
| Uruguay  | 2010 | Male   | 75 to 79 | 65%<br>(49-78%)                | 35%<br>(22-51%)          | 2<br>(1.1-3.3)                              | 2.9%<br>(0.8-5.9%)                   | 3.3%<br>(0.85-6.7%)                 | 82<br>(21-170)      | 1200<br>(350-2500)     |
| Uruguay  | 2010 | Male   | 80 to 84 | 61%<br>(45-76%)                | 39%<br>(24-55%)          | 1.7<br>(0.97-2.6)                           | 2.2%<br>(0.57-4.4%)                  | 2.4%<br>(0.59-4.8%)                 | 59<br>(14-120)      | 670<br>(180-1300)      |
| Uruguay  | 2010 | Male   | 85 to 89 | 57%<br>(40-71%)                | 43%<br>(29-60%)          | 1.4<br>(0.79-2.3)                           | 1.7%<br>(0.37-3.7%)                  | 1.8%<br>(0.31-4.1%)                 | 34<br>(5.9-76)      | 280<br>(61-600)        |
| Uruguay  | 2010 | Male   | 90 to 94 | 55%<br>(39-70%)                | 45%<br>(30-61%)          | 1.3<br>(0.69-2.3)                           | 1.4%<br>(0.11-3.4%)                  | 1.5%<br>(0.04-3.9%)                 | 13<br>(0.34-33)     | 71<br>(5.7-180)        |
| Uruguay  | 2010 | Male   | 95 plus  | 57%<br>(36-75%)                | 43%<br>(25-64%)          | 1.3<br>(0.58-2.5)                           | 1.4%<br>(-0.16-4%)                   | 1.4%<br>(-0.36-4.3%)                | 3.5<br>(-0.89-11)   | 14<br>(-1.5-38)        |
| Uruguay  | 2016 | Female | All Ages | 57%<br>(51-62%)                | 43%<br>(38-49%)          | 2.1<br>(1.6-2.8)                            | 3%<br>(1.7-4.7%)                     | 3.2%<br>(1.1-6.1%)                  | 530<br>(180-1000)   | 14000<br>(7800-21000)  |

| Location | Year | Sex    | Age      | Prevalence of current drinkers | Prevalence of abstainers | Population average of standard drinks daily | Percent of total attributable deaths | Percent of total attributable DALYs | Attributable deaths | Attributable DALYs     |
|----------|------|--------|----------|--------------------------------|--------------------------|---------------------------------------------|--------------------------------------|-------------------------------------|---------------------|------------------------|
| Uruguay  | 2016 | Female | 15 to 19 | 62%<br>(47-76%)                | 38%<br>(24-53%)          | 2<br>(1.1-3.3)                              | 2.7%<br>(1.5-4.1%)                   | 8.3%<br>(4.1-14%)                   | 3.6<br>(1.8-6.2)    | 370<br>(210-560)       |
| Uruguay  | 2016 | Female | 20 to 24 | 73%<br>(60-83%)                | 27%<br>(17-40%)          | 3.3<br>(1.9-5.2)                            | 4.1%<br>(2.6-5.9%)                   | 12%<br>(6.6-19%)                    | 6.2<br>(3.3-9.6)    | 650<br>(400-920)       |
| Uruguay  | 2016 | Female | 25 to 29 | 73%<br>(60-83%)                | 27%<br>(17-40%)          | 3.6<br>(2.1-5.3)                            | 4%<br>(2.6-5.6%)                     | 12%<br>(7.3-18%)                    | 6.9<br>(4-10)       | 640<br>(430-900)       |
| Uruguay  | 2016 | Female | 30 to 34 | 71%<br>(58-81%)                | 29%<br>(19-42%)          | 3.6<br>(2.1-5.4)                            | 4.2%<br>(2.7-6%)                     | 12%<br>(7.1-16%)                    | 9.7<br>(5.9-14)     | 730<br>(470-1000)      |
| Uruguay  | 2016 | Female | 35 to 39 | 67%<br>(54-79%)                | 33%<br>(21-46%)          | 3.2<br>(1.8-4.9)                            | 4%<br>(2.5-5.9%)                     | 11%<br>(6.5-15%)                    | 12<br>(7.3-18)      | 800<br>(500-1200)      |
| Uruguay  | 2016 | Female | 40 to 44 | 65%<br>(52-77%)                | 35%<br>(23-48%)          | 2.8<br>(1.6-4.6)                            | 4.3%<br>(2.4-6.5%)                   | 10%<br>(5.8-15%)                    | 18<br>(10-27)       | 980<br>(560-1500)      |
| Uruguay  | 2016 | Female | 45 to 49 | 64%<br>(50-77%)                | 36%<br>(23-50%)          | 2.8<br>(1.5-4.4)                            | 4.4%<br>(2.6-6.8%)                   | 9.5%<br>(5.6-14%)                   | 22<br>(13-33)       | 1000<br>(590-1600)     |
| Uruguay  | 2016 | Female | 50 to 54 | 64%<br>(51-75%)                | 36%<br>(25-49%)          | 2.7<br>(1.5-4.3)                            | 4.7%<br>(2.5-7.3%)                   | 8.6%<br>(4.9-13%)                   | 32<br>(18-50)       | 1300<br>(720-2100)     |
| Uruguay  | 2016 | Female | 55 to 59 | 63%<br>(50-75%)                | 37%<br>(25-50%)          | 2.7<br>(1.5-4.2)                            | 4.8%<br>(2.5-7.7%)                   | 8%<br>(4.5-12%)                     | 43<br>(24-68)       | 1500<br>(790-2400)     |
| Uruguay  | 2016 | Female | 60 to 64 | 60%<br>(46-72%)                | 40%<br>(28-54%)          | 2.4<br>(1.3-4.1)                            | 4.1%<br>(1.6-7.3%)                   | 6.4%<br>(2.8-11%)                   | 45<br>(20-80)       | 1300<br>(530-2400)     |
| Uruguay  | 2016 | Female | 65 to 69 | 54%<br>(40-68%)                | 46%<br>(32-60%)          | 2<br>(1.1-3.2)                              | 3.3%<br>(1.2-6.1%)                   | 4.9%<br>(1.9-8.8%)                  | 46<br>(18-84)       | 1100<br>(410-2100)     |
| Uruguay  | 2016 | Female | 70 to 74 | 49%<br>(35-62%)                | 51%<br>(38-65%)          | 1.7<br>(0.88-2.8)                           | 2.6%<br>(0.47-5.5%)                  | 3.7%<br>(0.8-7.6%)                  | 47<br>(11-97)       | 920<br>(170-1900)      |
| Uruguay  | 2016 | Female | 75 to 79 | 44%<br>(31-60%)                | 56%<br>(40-69%)          | 1.5<br>(0.76-2.6)                           | 2%<br>(-0.2-5.1%)                    | 2.7%<br>(-0.16-6.6%)                | 48<br>(-2.8-120)    | 730<br>(-77-1900)      |
| Uruguay  | 2016 | Female | 80 to 84 | 42%<br>(29-56%)                | 58%<br>(44-71%)          | 1.4<br>(0.74-2.2)                           | 1.7%<br>(-0.23-4.3%)                 | 2.1%<br>(-0.24-5.4%)                | 59<br>(-6.5-150)    | 670<br>(-94-1700)      |
| Uruguay  | 2016 | Female | 85 to 89 | 41%<br>(27-55%)                | 59%<br>(45-73%)          | 1.3<br>(0.66-2.2)                           | 1.6%<br>(-0.18-4.1%)                 | 1.9%<br>(-0.22-5.1%)                | 61<br>(-7.1-160)    | 490<br>(-51-1300)      |
| Uruguay  | 2016 | Female | 90 to 94 | 41%<br>(28-55%)                | 59%<br>(45-72%)          | 1.3<br>(0.62-2.2)                           | 1.5%<br>(-0.43-4.3%)                 | 1.8%<br>(-0.54-5.3%)                | 46<br>(-14-140)     | 250<br>(-71-730)       |
| Uruguay  | 2016 | Female | 95 plus  | 44%<br>(28-61%)                | 56%<br>(39-72%)          | 1.4<br>(0.57-2.7)                           | 1.6%<br>(-0.7-5.2%)                  | 1.8%<br>(-0.93-6.2%)                | 20<br>(-10-68)      | 73<br>(-31-240)        |
| Uruguay  | 2016 | Male   | All Ages | 67%<br>(61-73%)                | 33%<br>(27-39%)          | 2.2<br>(1.6-2.9)                            | 5.5%<br>(3.9-7.4%)                   | 4.8%<br>(3-7.2%)                    | 810<br>(490-1200)   | 28000<br>(20000-39000) |
| Uruguay  | 2016 | Male   | 15 to 19 | 69%<br>(54-81%)                | 31%<br>(19-46%)          | 2<br>(1.1-3.3)                              | 6.4%<br>(3.6-9.9%)                   | 11%<br>(5.5-17%)                    | 15<br>(7.6-24)      | 1200<br>(700-1900)     |
| Uruguay  | 2016 | Male   | 20 to 24 | 76%<br>(63-85%)                | 24%<br>(15-37%)          | 3.3<br>(1.9-5.3)                            | 11%<br>(6.9-16%)                     | 17%<br>(9.3-26%)                    | 33<br>(18-49)       | 2600<br>(1600-3700)    |
| Uruguay  | 2016 | Male   | 25 to 29 | 77%<br>(65-87%)                | 23%<br>(13-35%)          | 3.7<br>(2.2-5.5)                            | 11%<br>(7.3-16%)                     | 18%<br>(10-26%)                     | 33<br>(19-49)       | 2500<br>(1500-3400)    |
| Uruguay  | 2016 | Male   | 30 to 34 | 77%<br>(64-86%)                | 23%<br>(14-36%)          | 3.6<br>(2.2-5.4)                            | 9.5%<br>(6.1-14%)                    | 15%<br>(8.9-22%)                    | 28<br>(17-42)       | 1900<br>(1200-2700)    |

| Location | Year | Sex    | Age      | Prevalence of current drinkers | Prevalence of abstainers | Population average of standard drinks daily | Percent of total attributable deaths | Percent of total attributable DALYs | Attributable deaths  | Attributable DALYs      |
|----------|------|--------|----------|--------------------------------|--------------------------|---------------------------------------------|--------------------------------------|-------------------------------------|----------------------|-------------------------|
| Uruguay  | 2016 | Male   | 35 to 39 | 76%<br>(64-85%)                | 24%<br>(15-36%)          | 3.2<br>(1.8-4.9)                            | 8.1%<br>(5.3-12%)                    | 13%<br>(7.7-19%)                    | 30<br>(18-45)        | 1800<br>(1200-2700)     |
| Uruguay  | 2016 | Male   | 40 to 44 | 76%<br>(64-86%)                | 24%<br>(14-36%)          | 3<br>(1.7-4.8)                              | 7.7%<br>(4.8-11%)                    | 12%<br>(7.2-18%)                    | 36<br>(21-54)        | 1900<br>(1200-2800)     |
| Uruguay  | 2016 | Male   | 45 to 49 | 76%<br>(64-86%)                | 24%<br>(14-36%)          | 3<br>(1.7-4.7)                              | 7.8%<br>(5-12%)                      | 11%<br>(7.1-17%)                    | 45<br>(28-69)        | 2100<br>(1400-3100)     |
| Uruguay  | 2016 | Male   | 50 to 54 | 76%<br>(65-85%)                | 24%<br>(15-35%)          | 2.9<br>(1.6-4.6)                            | 7.5%<br>(4.6-11%)                    | 10%<br>(6.1-16%)                    | 65<br>(39-99)        | 2600<br>(1600-3900)     |
| Uruguay  | 2016 | Male   | 55 to 59 | 75%<br>(64-84%)                | 25%<br>(16-36%)          | 2.8<br>(1.7-4.4)                            | 7%<br>(4.2-10%)                      | 8.9%<br>(5.3-13%)                   | 88<br>(52-130)       | 3000<br>(1800-4500)     |
| Uruguay  | 2016 | Male   | 60 to 64 | 73%<br>(61-83%)                | 27%<br>(17-39%)          | 2.6<br>(1.4-4.2)                            | 6%<br>(3.2-9.8%)                     | 7.3%<br>(3.9-12%)                   | 97<br>(53-160)       | 2800<br>(1500-4600)     |
| Uruguay  | 2016 | Male   | 65 to 69 | 70%<br>(57-80%)                | 30%<br>(20-43%)          | 2.3<br>(1.4-3.6)                            | 4.7%<br>(2.4-7.7%)                   | 5.5%<br>(2.8-9.1%)                  | 95<br>(48-160)       | 2300<br>(1200-3800)     |
| Uruguay  | 2016 | Male   | 70 to 74 | 67%<br>(55-77%)                | 33%<br>(23-45%)          | 2<br>(1.1-3.3)                              | 3.4%<br>(1.3-6.3%)                   | 4%<br>(1.5-7.3%)                    | 82<br>(31-150)       | 1600<br>(620-2900)      |
| Uruguay  | 2016 | Male   | 75 to 79 | 65%<br>(51-79%)                | 35%<br>(21-49%)          | 1.8<br>(0.93-3.1)                           | 2.6%<br>(0.68-5.6%)                  | 3%<br>(0.74-6.3%)                   | 67<br>(16-140)       | 1000<br>(250-2200)      |
| Uruguay  | 2016 | Male   | 80 to 84 | 61%<br>(45-76%)                | 39%<br>(24-55%)          | 1.5<br>(0.82-2.5)                           | 1.9%<br>(0.36-4.1%)                  | 2.1%<br>(0.37-4.5%)                 | 49<br>(8.7-110)      | 560<br>(110-1200)       |
| Uruguay  | 2016 | Male   | 85 to 89 | 56%<br>(40-71%)                | 44%<br>(29-60%)          | 1.3<br>(0.65-2.2)                           | 1.4%<br>(0.24-3.5%)                  | 1.6%<br>(0.17-3.8%)                 | 32<br>(3.4-79)       | 260<br>(43-630)         |
| Uruguay  | 2016 | Male   | 90 to 94 | 55%<br>(39-70%)                | 45%<br>(30-61%)          | 1.2<br>(0.59-2.2)                           | 1.2%<br>(-0.029-3.4%)                | 1.2%<br>(-0.14-3.7%)                | 14<br>(-1.6-42)      | 81<br>(-2-230)          |
| Uruguay  | 2016 | Male   | 95 plus  | 56%<br>(37-75%)                | 44%<br>(25-63%)          | 1.2<br>(0.49-2.3)                           | 1.3%<br>(-0.28-4.2%)                 | 1.3%<br>(-0.49-4.6%)                | 4.1<br>(-1.6-15)     | 16<br>(-3.4-53)         |
| Canada   | 1990 | Female | All Ages | 80%<br>(76-83%)                | 20%<br>(17-24%)          | 2.5<br>(2.2-2.8)                            | 2.6%<br>(1.4-3.7%)                   | 1.2%<br>(-1.2-3.9%)                 | 1100<br>(-1000-3400) | 82000<br>(46000-120000) |
| Canada   | 1990 | Female | 15 to 19 | 68%<br>(56-78%)                | 32%<br>(22-44%)          | 2.1<br>(1.2-3.1)                            | 3.4%<br>(2.1-5%)                     | 11%<br>(5.8-18%)                    | 36<br>(19-58)        | 3700<br>(2300-5400)     |
| Canada   | 1990 | Female | 20 to 24 | 86%<br>(77-92%)                | 14%<br>(8-23%)           | 4.1<br>(2.7-5.6)                            | 5.4%<br>(3.9-7.2%)                   | 17%<br>(10-24%)                     | 65<br>(41-92)        | 7300<br>(5200-9600)     |
| Canada   | 1990 | Female | 25 to 29 | 89%<br>(82-93%)                | 11%<br>(6.6-18%)         | 4.1<br>(2.8-5.3)                            | 5%<br>(3.7-6.6%)                     | 16%<br>(11-22%)                     | 84<br>(56-110)       | 8800<br>(6400-12000)    |
| Canada   | 1990 | Female | 30 to 34 | 90%<br>(84-95%)                | 9.7%<br>(5.4-16%)        | 3.9<br>(2.7-5.2)                            | 4.7%<br>(3.4-6.3%)                   | 15%<br>(10-19%)                     | 100<br>(71-140)      | 9100<br>(6600-12000)    |
| Canada   | 1990 | Female | 35 to 39 | 91%<br>(85-95%)                | 9.3%<br>(5.3-15%)        | 3.6<br>(2.5-4.9)                            | 4.8%<br>(3.3-6.3%)                   | 14%<br>(9.8-18%)                    | 130<br>(90-170)      | 9200<br>(6400-12000)    |
| Canada   | 1990 | Female | 40 to 44 | 91%<br>(85-95%)                | 9.4%<br>(5.5-15%)        | 3.4<br>(2.3-4.8)                            | 4.9%<br>(3.3-6.7%)                   | 13%<br>(8.7-17%)                    | 160<br>(110-210)     | 9600<br>(6400-13000)    |
| Canada   | 1990 | Female | 45 to 49 | 90%<br>(84-94%)                | 9.7%<br>(5.5-16%)        | 3.3<br>(2.2-4.7)                            | 5.2%<br>(3.3-7.3%)                   | 11%<br>(7.8-15%)                    | 190<br>(130-250)     | 9200<br>(6200-13000)    |
| Canada   | 1990 | Female | 50 to 54 | 89%<br>(83-93%)                | 11%<br>(6.5-17%)         | 3.1<br>(2-4.4)                              | 4.9%<br>(2.9-7.3%)                   | 9.2%<br>(5.8-13%)                   | 200<br>(120-280)     | 8400<br>(5100-12000)    |

| Location | Year | Sex    | Age      | Prevalence of current drinkers | Prevalence of abstainers | Population average of standard drinks daily | Percent of total attributable deaths | Percent of total attributable DALYs | Attributable deaths | Attributable DALYs        |
|----------|------|--------|----------|--------------------------------|--------------------------|---------------------------------------------|--------------------------------------|-------------------------------------|---------------------|---------------------------|
| Canada   | 1990 | Female | 55 to 59 | 87%<br>(79-93%)                | 13%<br>(7.4-21%)         | 2.7<br>(1.8-4)                              | 4.1%<br>(2-6.3%)                     | 6.9%<br>(3.6-10%)                   | 230<br>(120-330)    | 8000<br>(4000-12000)      |
| Canada   | 1990 | Female | 60 to 64 | 84%<br>(74-91%)                | 16%<br>(9.5-26%)         | 2.4<br>(1.4-3.7)                            | 2.9%<br>(0.63-5.5%)                  | 4.4%<br>(1.2-8%)                    | 220<br>(61-410)     | 6600<br>(1500-13000)      |
| Canada   | 1990 | Female | 65 to 69 | 79%<br>(68-88%)                | 21%<br>(12-32%)          | 2.1<br>(1.4-3)                              | 1.6%<br>(-0.62-3.9%)                 | 2.4%<br>(-0.58-5.6%)                | 190<br>(-43-420)    | 4400<br>(-1600-11000)     |
| Canada   | 1990 | Female | 70 to 74 | 75%<br>(64-84%)                | 25%<br>(16-36%)          | 1.8<br>(1.1-2.7)                            | 0.42%<br>(-1.8-2.9%)                 | 0.62%<br>(-2.3-3.8%)                | 60<br>(-220-360)    | 1100<br>(-4700-7600)      |
| Canada   | 1990 | Female | 75 to 79 | 71%<br>(57-83%)                | 29%<br>(17-43%)          | 1.6<br>(0.93-2.5)                           | -0.43%<br>(-2.8-2.4%)                | -0.65%<br>(-3.7-2.7%)               | -82<br>(-470-350)   | -1100<br>(-7000-5900)     |
| Canada   | 1990 | Female | 80 to 84 | 68%<br>(52-81%)                | 32%<br>(19-48%)          | 1.5<br>(0.94-2.3)                           | -0.76%<br>(-3.2-1.8%)                | -1.1%<br>(-4.1-2.1%)                | -160<br>(-580-290)  | -1500<br>(-6100-3500)     |
| Canada   | 1990 | Female | 85 to 89 | 66%<br>(50-80%)                | 34%<br>(20-50%)          | 1.5<br>(0.91-2.3)                           | -0.79%<br>(-3.1-1.9%)                | -1.2%<br>(-4.1-1.9%)                | -160<br>(-530-240)  | -960<br>(-3800-2400)      |
| Canada   | 1990 | Female | 90 to 94 | 68%<br>(52-81%)                | 32%<br>(19-48%)          | 1.6<br>(0.94-2.5)                           | -0.8%<br>(-3.5-2.3%)                 | -1.3%<br>(-4.4-2.5%)                | -110<br>(-390-220)  | -450<br>(-2000-1300)      |
| Canada   | 1990 | Female | 95 plus  | 71%<br>(52-86%)                | 29%<br>(14-48%)          | 1.8<br>(0.94-2.9)                           | -0.72%<br>(-4.1-3.7%)                | -1.3%<br>(-5.3-4%)                  | -58<br>(-240-190)   | -130<br>(-750-690)        |
| Canada   | 1990 | Male   | All Ages | 85%<br>(82-88%)                | 15%<br>(12-18%)          | 2.8<br>(2.5-3.1)                            | 4.7%<br>(3.2-6.2%)                   | 2.5%<br>(0.37-4.8%)                 | 2600<br>(400-5100)  | 170000<br>(120000-240000) |
| Canada   | 1990 | Male   | 15 to 19 | 69%<br>(57-79%)                | 31%<br>(21-43%)          | 2.2<br>(1.3-3.3)                            | 7.2%<br>(4.2-11%)                    | 13%<br>(6.8-19%)                    | 120<br>(63-180)     | 10000<br>(6000-15000)     |
| Canada   | 1990 | Male   | 20 to 24 | 88%<br>(81-94%)                | 12%<br>(6.5-19%)         | 4.6<br>(3.1-6.3)                            | 15%<br>(10-20%)                      | 23%<br>(15-32%)                     | 290<br>(180-400)    | 25000<br>(17000-33000)    |
| Canada   | 1990 | Male   | 25 to 29 | 92%<br>(87-95%)                | 7.8%<br>(4.5-13%)        | 4.8<br>(3.4-6.3)                            | 13%<br>(9.4-17%)                     | 21%<br>(14-29%)                     | 320<br>(210-430)    | 26000<br>(19000-34000)    |
| Canada   | 1990 | Male   | 30 to 34 | 94%<br>(89-97%)                | 6.1%<br>(3.2-11%)        | 4.6<br>(3.2-6.1)                            | 11%<br>(7.8-14%)                     | 18%<br>(12-25%)                     | 300<br>(200-420)    | 23000<br>(16000-30000)    |
| Canada   | 1990 | Male   | 35 to 39 | 94%<br>(90-97%)                | 5.6%<br>(2.9-9.5%)       | 4<br>(2.8-5.5)                              | 8.9%<br>(6.2-12%)                    | 15%<br>(9-20%)                      | 270<br>(170-380)    | 19000<br>(13000-25000)    |
| Canada   | 1990 | Male   | 40 to 44 | 94%<br>(90-97%)                | 5.6%<br>(3-9.7%)         | 3.7<br>(2.4-5.2)                            | 7.6%<br>(4.8-11%)                    | 12%<br>(6.5-17%)                    | 260<br>(140-390)    | 16000<br>(10000-22000)    |
| Canada   | 1990 | Male   | 45 to 49 | 94%<br>(89-97%)                | 6%<br>(3-11%)            | 3.5<br>(2.3-5)                              | 7.1%<br>(4.3-10%)                    | 9.8%<br>(5.3-15%)                   | 270<br>(150-420)    | 14000<br>(8800-21000)     |
| Canada   | 1990 | Male   | 50 to 54 | 94%<br>(89-97%)                | 6.4%<br>(3.3-11%)        | 3.2<br>(2-4.7)                              | 6%<br>(3.1-9.5%)                     | 7.6%<br>(3.5-13%)                   | 280<br>(130-480)    | 13000<br>(6700-21000)     |
| Canada   | 1990 | Male   | 55 to 59 | 93%<br>(88-96%)                | 7%<br>(3.7-12%)          | 2.9<br>(1.9-4.3)                            | 4.7%<br>(1.9-7.9%)                   | 5.5%<br>(1.8-9.8%)                  | 330<br>(110-590)    | 13000<br>(5300-21000)     |
| Canada   | 1990 | Male   | 60 to 64 | 92%<br>(86-96%)                | 8.1%<br>(4.1-14%)        | 2.7<br>(1.6-4.1)                            | 3.2%<br>(0.39-6.7%)                  | 3.4%<br>(-0.094-7.9%)               | 320<br>(-8.6-740)   | 11000<br>(1400-22000)     |
| Canada   | 1990 | Male   | 65 to 69 | 90%<br>(84-95%)                | 9.7%<br>(4.8-16%)        | 2.4<br>(1.6-3.3)                            | 1.7%<br>(-0.76-4.6%)                 | 1.7%<br>(-1.3-5.1%)                 | 210<br>(-160-630)   | 6200<br>(-2700-17000)     |
| Canada   | 1990 | Male   | 70 to 74 | 89%<br>(81-94%)                | 11%<br>(6.3-19%)         | 2<br>(1.2-2.9)                              | 0.55%<br>(-1.7-3%)                   | 0.32%<br>(-2.4-3.2%)                | 45<br>(-330-450)    | 1700<br>(-5400-9700)      |

| Location | Year | Sex    | Age      | Prevalence of current drinkers | Prevalence of abstainers | Population average of standard drinks daily | Percent of total attributable deaths | Percent of total attributable DALYs | Attributable deaths | Attributable DALYs      |
|----------|------|--------|----------|--------------------------------|--------------------------|---------------------------------------------|--------------------------------------|-------------------------------------|---------------------|-------------------------|
| Canada   | 1990 | Male   | 75 to 79 | 87%<br>(78-93%)                | 13%<br>(6.7-22%)         | 1.7<br>(1-2.6)                              | -0.18%<br>(-2.2-2.2%)                | -0.53%<br>(-3-2.2%)                 | -84<br>(-480-350)   | -480<br>(-6200-5900)    |
| Canada   | 1990 | Male   | 80 to 84 | 86%<br>(75-93%)                | 14%<br>(7.3-25%)         | 1.6<br>(1-2.3)                              | -0.51%<br>(-2.5-1.6%)                | -0.88%<br>(-3.2-1.5%)               | -120<br>(-430-210)  | -860<br>(-4100-2700)    |
| Canada   | 1990 | Male   | 85 to 89 | 85%<br>(74-92%)                | 15%<br>(7.9-26%)         | 1.6<br>(0.98-2.4)                           | -0.68%<br>(-2.5-1.4%)                | -1.1%<br>(-3.3-1.2%)                | -100<br>(-310-110)  | -550<br>(-2000-1100)    |
| Canada   | 1990 | Male   | 90 to 94 | 86%<br>(76-93%)                | 14%<br>(7.1-24%)         | 1.6<br>(0.98-2.5)                           | -0.83%<br>(-2.8-1.3%)                | -1.3%<br>(-3.8-1.2%)                | -56<br>(-150-48)    | -210<br>(-710-340)      |
| Canada   | 1990 | Male   | 95 plus  | 87%<br>(75-94%)                | 13%<br>(5.5-25%)         | 1.7<br>(0.92-2.8)                           | -0.86%<br>(-3.2-2%)                  | -1.5%<br>(-4.3-1.7%)                | -23<br>(-67-26)     | -54<br>(-200-120)       |
| Canada   | 1995 | Female | All Ages | 80%<br>(77-84%)                | 20%<br>(16-23%)          | 2.4<br>(2.1-2.6)                            | 2.2%<br>(1.3-3.3%)                   | 0.91%<br>(-1.3-3.3%)                | 910<br>(-1300-3300) | 77000<br>(42000-110000) |
| Canada   | 1995 | Female | 15 to 19 | 69%<br>(58-79%)                | 31%<br>(21-42%)          | 2<br>(1.2-3)                                | 3.3%<br>(2-4.8%)                     | 11%<br>(5.3-17%)                    | 34<br>(17-54)       | 3700<br>(2200-5400)     |
| Canada   | 1995 | Female | 20 to 24 | 87%<br>(78-92%)                | 13%<br>(7.9-22%)         | 3.8<br>(2.5-5.3)                            | 5%<br>(3.5-6.6%)                     | 15%<br>(9-22%)                      | 51<br>(30-73)       | 6300<br>(4400-8500)     |
| Canada   | 1995 | Female | 25 to 29 | 89%<br>(83-93%)                | 11%<br>(6.5-17%)         | 3.8<br>(2.7-5.2)                            | 4.6%<br>(3.3-6%)                     | 14%<br>(9.2-20%)                    | 61<br>(39-83)       | 6800<br>(4900-9000)     |
| Canada   | 1995 | Female | 30 to 34 | 90%<br>(84-95%)                | 9.5%<br>(5.4-16%)        | 3.7<br>(2.5-5)                              | 4.2%<br>(2.9-5.6%)                   | 13%<br>(8.8-18%)                    | 89<br>(60-120)      | 8200<br>(5800-11000)    |
| Canada   | 1995 | Female | 35 to 39 | 91%<br>(85-95%)                | 9.2%<br>(5.2-15%)        | 3.4<br>(2.3-4.6)                            | 4.3%<br>(3-5.6%)                     | 13%<br>(8.8-17%)                    | 130<br>(87-170)     | 9100<br>(6400-12000)    |
| Canada   | 1995 | Female | 40 to 44 | 91%<br>(85-95%)                | 9.3%<br>(5.4-15%)        | 3.2<br>(2.1-4.4)                            | 4.4%<br>(2.9-6.1%)                   | 12%<br>(7.8-16%)                    | 160<br>(110-220)    | 9700<br>(6500-13000)    |
| Canada   | 1995 | Female | 45 to 49 | 90%<br>(84-94%)                | 9.6%<br>(5.6-16%)        | 3.1<br>(2.1-4.3)                            | 4.6%<br>(3-6.5%)                     | 10%<br>(7.4-14%)                    | 210<br>(150-280)    | 10000<br>(7100-14000)   |
| Canada   | 1995 | Female | 50 to 54 | 89%<br>(83-94%)                | 11%<br>(6.4-17%)         | 2.9<br>(1.9-4.1)                            | 4.5%<br>(2.6-6.6%)                   | 8.8%<br>(5.6-12%)                   | 220<br>(140-300)    | 9100<br>(5400-13000)    |
| Canada   | 1995 | Female | 55 to 59 | 87%<br>(79-93%)                | 13%<br>(7.2-21%)         | 2.6<br>(1.7-3.8)                            | 3.7%<br>(1.8-5.8%)                   | 6.5%<br>(3.6-9.6%)                  | 210<br>(120-310)    | 7500<br>(3800-12000)    |
| Canada   | 1995 | Female | 60 to 64 | 84%<br>(75-91%)                | 16%<br>(9.4-25%)         | 2.3<br>(1.4-3.5)                            | 2.6%<br>(0.56-5%)                    | 4.2%<br>(1.4-7.5%)                  | 200<br>(66-370)     | 5800<br>(1300-11000)    |
| Canada   | 1995 | Female | 65 to 69 | 80%<br>(69-88%)                | 20%<br>(12-31%)          | 2<br>(1.3-2.8)                              | 1.5%<br>(-0.4-3.6%)                  | 2.4%<br>(-0.27-5.1%)                | 180<br>(-20-380)    | 4000<br>(-980-9600)     |
| Canada   | 1995 | Female | 70 to 74 | 76%<br>(65-84%)                | 24%<br>(16-35%)          | 1.7<br>(1.1-2.5)                            | 0.39%<br>(-1.6-2.6%)                 | 0.71%<br>(-1.9-3.6%)                | 77<br>(-210-390)    | 1100<br>(-4700-7700)    |
| Canada   | 1995 | Female | 75 to 79 | 72%<br>(58-83%)                | 28%<br>(17-42%)          | 1.5<br>(0.89-2.3)                           | -0.44%<br>(-2.6-2%)                  | -0.55%<br>(-3.3-2.5%)               | -74<br>(-440-330)   | -1200<br>(-6800-5400)   |
| Canada   | 1995 | Female | 80 to 84 | 69%<br>(54-81%)                | 31%<br>(19-46%)          | 1.5<br>(0.89-2.1)                           | -0.85%<br>(-3-1.5%)                  | -1.1%<br>(-3.8-1.6%)                | -190<br>(-640-280)  | -2000<br>(-6800-3400)   |
| Canada   | 1995 | Female | 85 to 89 | 67%<br>(52-80%)                | 33%<br>(20-48%)          | 1.4<br>(0.84-2.2)                           | -0.95%<br>(-3.1-1.5%)                | -1.3%<br>(-4-1.6%)                  | -210<br>(-640-260)  | -1400<br>(-4700-2300)   |
| Canada   | 1995 | Female | 90 to 94 | 68%<br>(52-81%)                | 32%<br>(19-48%)          | 1.5<br>(0.89-2.4)                           | -0.99%<br>(-3.5-1.9%)                | -1.4%<br>(-4.3-2%)                  | -160<br>(-480-220)  | -690<br>(-2400-1400)    |



| Location | Year | Sex    | Age      | Prevalence of current drinkers | Prevalence of abstainers | Population average of standard drinks daily | Percent of total attributable deaths | Percent of total attributable DALYs | Attributable deaths  | Attributable DALYs        |
|----------|------|--------|----------|--------------------------------|--------------------------|---------------------------------------------|--------------------------------------|-------------------------------------|----------------------|---------------------------|
| Canada   | 1995 | Female | 95 plus  | 71%<br>(52-86%)                | 29%<br>(14-48%)          | 1.7<br>(0.89-2.8)                           | -0.96%<br>(-4.2-3.2%)                | -1.5%<br>(-5.3-3.3%)                | -85<br>(-300-180)    | -220<br>(-940-720)        |
| Canada   | 1995 | Male   | All Ages | 85%<br>(82-88%)                | 15%<br>(12-18%)          | 2.6<br>(2.3-2.9)                            | 4.3%<br>(3-5.7%)                     | 2.3%<br>(0.37-4.4%)                 | 2600<br>(410-4900)   | 170000<br>(110000-220000) |
| Canada   | 1995 | Male   | 15 to 19 | 69%<br>(57-79%)                | 31%<br>(21-43%)          | 2<br>(1.2-3.1)                              | 6.6%<br>(4-9.7%)                     | 12%<br>(6.1-19%)                    | 97<br>(50-150)       | 9000<br>(5300-13000)      |
| Canada   | 1995 | Male   | 20 to 24 | 88%<br>(81-94%)                | 12%<br>(6.3-19%)         | 4.3<br>(2.9-6)                              | 13%<br>(9.1-18%)                     | 22%<br>(13-30%)                     | 230<br>(140-330)     | 21000<br>(14000-28000)    |
| Canada   | 1995 | Male   | 25 to 29 | 92%<br>(87-96%)                | 7.8%<br>(4.5-13%)        | 4.5<br>(3.2-6.1)                            | 12%<br>(8.4-15%)                     | 20%<br>(13-27%)                     | 230<br>(150-320)     | 20000<br>(14000-26000)    |
| Canada   | 1995 | Male   | 30 to 34 | 94%<br>(89-97%)                | 6.1%<br>(3.1-11%)        | 4.3<br>(3-5.8)                              | 9.3%<br>(6.6-12%)                    | 15%<br>(9.6-21%)                    | 260<br>(170-370)     | 20000<br>(15000-27000)    |
| Canada   | 1995 | Male   | 35 to 39 | 94%<br>(90-97%)                | 5.7%<br>(3-9.5%)         | 3.8<br>(2.6-5.1)                            | 8%<br>(5.4-11%)                      | 13%<br>(7.6-18%)                    | 270<br>(160-390)     | 19000<br>(13000-26000)    |
| Canada   | 1995 | Male   | 40 to 44 | 94%<br>(90-97%)                | 5.6%<br>(3-9.8%)         | 3.4<br>(2.3-4.8)                            | 7.1%<br>(4.5-9.8%)                   | 11%<br>(6.3-16%)                    | 280<br>(160-400)     | 17000<br>(11000-23000)    |
| Canada   | 1995 | Male   | 45 to 49 | 94%<br>(88-97%)                | 6%<br>(3-12%)            | 3.3<br>(2.2-4.5)                            | 6.6%<br>(4.1-9.4%)                   | 9.5%<br>(5.4-14%)                   | 310<br>(180-460)     | 16000<br>(10000-23000)    |
| Canada   | 1995 | Male   | 50 to 54 | 94%<br>(89-97%)                | 6.4%<br>(3.3-11%)        | 3<br>(1.9-4.4)                              | 5.6%<br>(3.1-8.6%)                   | 7.4%<br>(3.7-12%)                   | 300<br>(150-480)     | 14000<br>(7400-21000)     |
| Canada   | 1995 | Male   | 55 to 59 | 93%<br>(88-96%)                | 7%<br>(3.6-12%)          | 2.7<br>(1.8-4)                              | 4.4%<br>(2-7.2%)                     | 5.4%<br>(2.1-9.1%)                  | 300<br>(120-510)     | 11000<br>(5200-19000)     |
| Canada   | 1995 | Male   | 60 to 64 | 92%<br>(86-96%)                | 8.1%<br>(4-14%)          | 2.5<br>(1.5-3.8)                            | 3.2%<br>(0.63-6.2%)                  | 3.6%<br>(0.29-7.4%)                 | 300<br>(25-620)      | 10000<br>(2100-20000)     |
| Canada   | 1995 | Male   | 65 to 69 | 90%<br>(83-95%)                | 9.7%<br>(4.9-17%)        | 2.2<br>(1.5-3.1)                            | 1.9%<br>(-0.32-4.5%)                 | 2%<br>(-0.73-5%)                    | 250<br>(-90-630)     | 6900<br>(-1200-16000)     |
| Canada   | 1995 | Male   | 70 to 74 | 89%<br>(82-94%)                | 11%<br>(6.4-18%)         | 1.9<br>(1.2-2.7)                            | 0.78%<br>(-1.2-3%)                   | 0.66%<br>(-1.7-3.3%)                | 100<br>(-270-510)    | 2800<br>(-4500-11000)     |
| Canada   | 1995 | Male   | 75 to 79 | 87%<br>(78-93%)                | 13%<br>(6.8-22%)         | 1.6<br>(0.98-2.5)                           | -0.034%<br>(-2-2.1%)                 | -0.32%<br>(-2.6-2.1%)               | -52<br>(-430-330)    | -94<br>(-5600-5700)       |
| Canada   | 1995 | Male   | 80 to 84 | 86%<br>(74-93%)                | 14%<br>(7.2-26%)         | 1.5<br>(0.97-2.2)                           | -0.45%<br>(-2.2-1.5%)                | -0.77%<br>(-2.9-1.4%)               | -130<br>(-470-230)   | -900<br>(-4500-3100)      |
| Canada   | 1995 | Male   | 85 to 89 | 85%<br>(73-92%)                | 15%<br>(7.8-27%)         | 1.5<br>(0.9-2.2)                            | -0.65%<br>(-2.4-1.2%)                | -1%<br>(-3.1-1.1%)                  | -110<br>(-340-120)   | -630<br>(-2300-1100)      |
| Canada   | 1995 | Male   | 90 to 94 | 86%<br>(76-93%)                | 14%<br>(7.1-24%)         | 1.5<br>(0.91-2.3)                           | -0.83%<br>(-2.7-1.1%)                | -1.3%<br>(-3.5-0.99%)               | -69<br>(-180-54)     | -270<br>(-840-380)        |
| Canada   | 1995 | Male   | 95 plus  | 87%<br>(76-94%)                | 13%<br>(5.6-24%)         | 1.6<br>(0.86-2.6)                           | -0.86%<br>(-3-1.6%)                  | -1.4%<br>(-3.9-1.4%)                | -24<br>(-66-23)      | -58<br>(-200-110)         |
| Canada   | 2000 | Female | All Ages | 81%<br>(78-84%)                | 19%<br>(16-22%)          | 2.4<br>(2.2-2.7)                            | 2.3%<br>(1.4-3.3%)                   | 1.1%<br>(-0.97-3.4%)                | 1200<br>(-1000-3600) | 82000<br>(49000-120000)   |
| Canada   | 2000 | Female | 15 to 19 | 76%<br>(69-83%)                | 24%<br>(17-31%)          | 2.2<br>(1.4-3.2)                            | 3.4%<br>(2.1-5%)                     | 12%<br>(5.9-18%)                    | 37<br>(19-57)        | 4000<br>(2500-5700)       |
| Canada   | 2000 | Female | 20 to 24 | 88%<br>(81-93%)                | 12%<br>(7.2-19%)         | 4<br>(2.6-5.6)                              | 5.1%<br>(3.6-6.7%)                   | 16%<br>(9.4-22%)                    | 52<br>(32-74)        | 6500<br>(4600-8700)       |

| Location | Year | Sex    | Age      | Prevalence of current drinkers | Prevalence of abstainers | Population average of standard drinks daily | Percent of total attributable deaths | Percent of total attributable DALYs | Attributable deaths | Attributable DALYs       |
|----------|------|--------|----------|--------------------------------|--------------------------|---------------------------------------------|--------------------------------------|-------------------------------------|---------------------|--------------------------|
| Canada   | 2000 | Female | 25 to 29 | 90%<br>(85-93%)                | 10%<br>(6.6-15%)         | 3.9<br>(2.7-5.3)                            | 4.5%<br>(3.2-5.8%)                   | 14%<br>(9.3-20%)                    | 51<br>(33-70)       | 6100<br>(4300-8100)      |
| Canada   | 2000 | Female | 30 to 34 | 90%<br>(85-94%)                | 9.5%<br>(5.7-15%)        | 3.7<br>(2.6-5.1)                            | 4.1%<br>(2.9-5.4%)                   | 13%<br>(8.9-18%)                    | 69<br>(46-93)       | 6700<br>(4600-8900)      |
| Canada   | 2000 | Female | 35 to 39 | 91%<br>(87-95%)                | 9%<br>(5.1-13%)          | 3.4<br>(2.4-4.6)                            | 4.1%<br>(2.8-5.5%)                   | 13%<br>(8.7-16%)                    | 120<br>(82-160)     | 9000<br>(6200-12000)     |
| Canada   | 2000 | Female | 40 to 44 | 91%<br>(87-95%)                | 8.8%<br>(5.3-13%)        | 3.3<br>(2.2-4.5)                            | 4.3%<br>(2.8-5.9%)                   | 12%<br>(8-15%)                      | 170<br>(120-230)    | 10000<br>(6900-14000)    |
| Canada   | 2000 | Female | 45 to 49 | 91%<br>(85-94%)                | 9.2%<br>(5.5-15%)        | 3.2<br>(2.2-4.4)                            | 4.5%<br>(2.9-6.2%)                   | 11%<br>(7.6-14%)                    | 220<br>(160-290)    | 11000<br>(7300-15000)    |
| Canada   | 2000 | Female | 50 to 54 | 90%<br>(84-93%)                | 10%<br>(6.6-16%)         | 2.9<br>(2-4.2)                              | 4.5%<br>(2.6-6.5%)                   | 9.1%<br>(6-12%)                     | 270<br>(170-360)    | 11000<br>(6900-16000)    |
| Canada   | 2000 | Female | 55 to 59 | 87%<br>(80-92%)                | 13%<br>(7.6-20%)         | 2.6<br>(1.8-3.7)                            | 3.7%<br>(1.9-5.5%)                   | 6.8%<br>(4-9.5%)                    | 240<br>(140-340)    | 8500<br>(4500-13000)     |
| Canada   | 2000 | Female | 60 to 64 | 84%<br>(76-90%)                | 16%<br>(9.9-24%)         | 2.3<br>(1.4-3.4)                            | 2.7%<br>(0.82-4.9%)                  | 4.5%<br>(1.9-7.6%)                  | 210<br>(88-350)     | 6000<br>(1900-11000)     |
| Canada   | 2000 | Female | 65 to 69 | 79%<br>(71-87%)                | 21%<br>(13-29%)          | 2<br>(1.4-2.8)                              | 1.6%<br>(-0.049-3.5%)                | 2.8%<br>(0.49-5.1%)                 | 190<br>(33-350)     | 4200<br>(-130-9100)      |
| Canada   | 2000 | Female | 70 to 74 | 74%<br>(65-82%)                | 26%<br>(18-35%)          | 1.7<br>(1.1-2.5)                            | 0.69%<br>(-1-2.7%)                   | 1.2%<br>(-1.1-3.7%)                 | 120<br>(-110-370)   | 2000<br>(-3000-7800)     |
| Canada   | 2000 | Female | 75 to 79 | 70%<br>(59-81%)                | 30%<br>(19-41%)          | 1.5<br>(0.91-2.3)                           | -0.069%<br>(-1.9-2.2%)               | -0.016%<br>(-2.3-2.7%)              | -2.5<br>(-350-390)  | -210<br>(-5600-6600)     |
| Canada   | 2000 | Female | 80 to 84 | 69%<br>(53-81%)                | 31%<br>(19-47%)          | 1.5<br>(0.92-2.2)                           | -0.53%<br>(-2.5-1.7%)                | -0.7%<br>(-3.1-2%)                  | -120<br>(-540-340)  | -1300<br>(-6000-4200)    |
| Canada   | 2000 | Female | 85 to 89 | 67%<br>(51-81%)                | 33%<br>(19-49%)          | 1.5<br>(0.85-2.2)                           | -0.71%<br>(-2.7-1.6%)                | -1%<br>(-3.5-1.7%)                  | -200<br>(-660-330)  | -1300<br>(-4800-2900)    |
| Canada   | 2000 | Female | 90 to 94 | 68%<br>(53-82%)                | 32%<br>(18-47%)          | 1.6<br>(0.91-2.4)                           | -0.74%<br>(-3.2-2%)                  | -1.1%<br>(-4-2%)                    | -150<br>(-530-270)  | -620<br>(-2700-1700)     |
| Canada   | 2000 | Female | 95 plus  | 71%<br>(52-86%)                | 29%<br>(14-48%)          | 1.7<br>(0.91-2.9)                           | -0.68%<br>(-3.8-3.4%)                | -1.1%<br>(-4.8-3.6%)                | -77<br>(-330-250)   | -190<br>(-1000-940)      |
| Canada   | 2000 | Male   | All Ages | 88%<br>(85-90%)                | 12%<br>(10-15%)          | 2.8<br>(2.5-3.1)                            | 4.6%<br>(3.3-5.9%)                   | 2.7%<br>(0.82-4.6%)                 | 3000<br>(920-5300)  | 18000<br>(130000-230000) |
| Canada   | 2000 | Male   | 15 to 19 | 79%<br>(72-86%)                | 21%<br>(14-28%)          | 2.5<br>(1.5-3.7)                            | 7%<br>(4.4-10%)                      | 14%<br>(7.4-21%)                    | 99<br>(52-150)      | 9400<br>(5900-13000)     |
| Canada   | 2000 | Male   | 20 to 24 | 91%<br>(86-95%)                | 8.7%<br>(5.2-14%)        | 4.7<br>(3.2-6.4)                            | 14%<br>(9.5-18%)                     | 23%<br>(14-32%)                     | 220<br>(130-300)    | 20000<br>(14000-26000)   |
| Canada   | 2000 | Male   | 25 to 29 | 93%<br>(90-96%)                | 6.5%<br>(4-9.7%)         | 4.7<br>(3.2-6.3)                            | 12%<br>(8.7-15%)                     | 22%<br>(14-30%)                     | 190<br>(120-260)    | 17000<br>(12000-22000)   |
| Canada   | 2000 | Male   | 30 to 34 | 95%<br>(92-97%)                | 5.1%<br>(2.8-8%)         | 4.5<br>(3.1-6.1)                            | 9.9%<br>(7.2-13%)                    | 18%<br>(12-26%)                     | 210<br>(130-290)    | 17000<br>(12000-23000)   |
| Canada   | 2000 | Male   | 35 to 39 | 95%<br>(92-97%)                | 4.9%<br>(2.7-7.9%)       | 3.9<br>(2.8-5.3)                            | 8.5%<br>(5.8-11%)                    | 15%<br>(9.1-21%)                    | 270<br>(160-360)    | 19000<br>(13000-25000)   |
| Canada   | 2000 | Male   | 40 to 44 | 95%<br>(92-97%)                | 4.8%<br>(2.7-7.8%)       | 3.6<br>(2.4-5)                              | 7.7%<br>(5-10%)                      | 13%<br>(7.5-18%)                    | 310<br>(180-440)    | 19000<br>(12000-26000)   |

| Location | Year | Sex    | Age      | Prevalence of current drinkers | Prevalence of abstainers | Population average of standard drinks daily | Percent of total attributable deaths | Percent of total attributable DALYs | Attributable deaths | Attributable DALYs      |
|----------|------|--------|----------|--------------------------------|--------------------------|---------------------------------------------|--------------------------------------|-------------------------------------|---------------------|-------------------------|
| Canada   | 2000 | Male   | 45 to 49 | 95%<br>(91-97%)                | 5.1%<br>(2.8-8.7%)       | 3.4<br>(2.4-4.7)                            | 7.2%<br>(4.6-10%)                    | 11%<br>(6.7-16%)                    | 360<br>(220-510)    | 19000<br>(12000-26000)  |
| Canada   | 2000 | Male   | 50 to 54 | 94%<br>(91-97%)                | 5.6%<br>(3.1-9.4%)       | 3.2<br>(2-4.5)                              | 6.2%<br>(3.6-9.1%)                   | 8.6%<br>(4.8-13%)                   | 390<br>(210-590)    | 18000<br>(10000-26000)  |
| Canada   | 2000 | Male   | 55 to 59 | 94%<br>(90-96%)                | 6.2%<br>(3.5-9.9%)       | 2.9<br>(1.9-4.1)                            | 4.8%<br>(2.5-7.5%)                   | 6.2%<br>(2.9-9.9%)                  | 360<br>(160-570)    | 14000<br>(7300-21000)   |
| Canada   | 2000 | Male   | 60 to 64 | 93%<br>(89-96%)                | 7%<br>(3.9-11%)          | 2.7<br>(1.7-4)                              | 3.6%<br>(1.2-6.6%)                   | 4.4%<br>(1.3-8.2%)                  | 330<br>(94-620)     | 11000<br>(3500-20000)   |
| Canada   | 2000 | Male   | 65 to 69 | 91%<br>(86-96%)                | 8.6%<br>(4.4-14%)        | 2.3<br>(1.6-3.3)                            | 2.4%<br>(0.26-4.7%)                  | 2.7%<br>(0.03-5.7%)                 | 300<br>(3.3-630)    | 8000<br>(840-16000)     |
| Canada   | 2000 | Male   | 70 to 74 | 89%<br>(83-94%)                | 11%<br>(6.3-17%)         | 1.9<br>(1.2-2.7)                            | 1.2%<br>(-0.57-3.3%)                 | 1.3%<br>(-0.89-3.8%)                | 190<br>(-130-560)   | 4400<br>(-2000-12000)   |
| Canada   | 2000 | Male   | 75 to 79 | 87%<br>(80-93%)                | 13%<br>(6.7-20%)         | 1.7<br>(1-2.5)                              | 0.37%<br>(-1.3-2.4%)                 | 0.18%<br>(-1.8-2.5%)                | 33<br>(-320-440)    | 1200<br>(-4200-7500)    |
| Canada   | 2000 | Male   | 80 to 84 | 86%<br>(75-93%)                | 14%<br>(7.4-25%)         | 1.5<br>(0.98-2.2)                           | -0.17%<br>(-1.7-1.7%)                | -0.45%<br>(-2.4-1.7%)               | -73<br>(-380-270)   | -350<br>(-3600-3500)    |
| Canada   | 2000 | Male   | 85 to 89 | 84%<br>(74-92%)                | 16%<br>(7.9-26%)         | 1.5<br>(0.9-2.2)                            | -0.44%<br>(-2-1.3%)                  | -0.79%<br>(-2.7-1.2%)               | -100<br>(-340-160)  | -510<br>(-2300-1500)    |
| Canada   | 2000 | Male   | 90 to 94 | 85%<br>(75-92%)                | 15%<br>(7.6-25%)         | 1.5<br>(0.92-2.4)                           | -0.63%<br>(-2.4-1.3%)                | -1%<br>(-3.1-1.2%)                  | -65<br>(-200-72)    | -240<br>(-900-500)      |
| Canada   | 2000 | Male   | 95 plus  | 87%<br>(75-94%)                | 13%<br>(5.9-25%)         | 1.6<br>(0.87-2.7)                           | -0.65%<br>(-2.7-1.9%)                | -1.1%<br>(-3.6-1.8%)                | -23<br>(-72-35)     | -51<br>(-220-150)       |
| Canada   | 2005 | Female | All Ages | 82%<br>(79-84%)                | 18%<br>(16-21%)          | 2.6<br>(2.3-2.8)                            | 2.6%<br>(1.7-3.5%)                   | 1.6%<br>(-0.2-3.8%)                 | 1900<br>(-220-4300) | 95000<br>(61000-130000) |
| Canada   | 2005 | Female | 15 to 19 | 76%<br>(69-83%)                | 24%<br>(17-31%)          | 2.3<br>(1.4-3.4)                            | 3.4%<br>(2.2-4.9%)                   | 12%<br>(6.2-18%)                    | 36<br>(18-55)       | 4000<br>(2600-5700)     |
| Canada   | 2005 | Female | 20 to 24 | 88%<br>(81-93%)                | 12%<br>(7.2-19%)         | 4.2<br>(2.8-5.9)                            | 5.2%<br>(3.7-6.8%)                   | 16%<br>(9.9-23%)                    | 57<br>(35-80)       | 7200<br>(5100-9500)     |
| Canada   | 2005 | Female | 25 to 29 | 90%<br>(85-93%)                | 10%<br>(6.5-15%)         | 4.2<br>(2.9-5.6)                            | 4.5%<br>(3.4-5.9%)                   | 15%<br>(9.7-20%)                    | 52<br>(34-71)       | 6400<br>(4600-8500)     |
| Canada   | 2005 | Female | 30 to 34 | 90%<br>(86-94%)                | 9.5%<br>(5.8-14%)        | 3.9<br>(2.7-5.5)                            | 4.2%<br>(3-5.4%)                     | 14%<br>(9.4-19%)                    | 66<br>(44-90)       | 6500<br>(4600-8700)     |
| Canada   | 2005 | Female | 35 to 39 | 91%<br>(87-95%)                | 9%<br>(5.1-13%)          | 3.6<br>(2.5-4.9)                            | 4.2%<br>(2.9-5.5%)                   | 13%<br>(9.2-17%)                    | 100<br>(71-130)     | 7800<br>(5500-10000)    |
| Canada   | 2005 | Female | 40 to 44 | 91%<br>(87-95%)                | 8.8%<br>(5.3-13%)        | 3.5<br>(2.3-4.7)                            | 4.4%<br>(3-6%)                       | 12%<br>(8.3-16%)                    | 170<br>(120-220)    | 11000<br>(7400-14000)   |
| Canada   | 2005 | Female | 45 to 49 | 91%<br>(85-95%)                | 9.3%<br>(5.5-15%)        | 3.4<br>(2.3-4.6)                            | 4.7%<br>(3.2-6.4%)                   | 11%<br>(8-14%)                      | 250<br>(180-330)    | 13000<br>(8900-17000)   |
| Canada   | 2005 | Female | 50 to 54 | 89%<br>(84-93%)                | 11%<br>(6.6-16%)         | 3.1<br>(2.1-4.4)                            | 4.6%<br>(2.9-6.6%)                   | 9.5%<br>(6.5-13%)                   | 300<br>(210-400)    | 13000<br>(8300-18000)   |
| Canada   | 2005 | Female | 55 to 59 | 87%<br>(80-92%)                | 13%<br>(7.8-20%)         | 2.8<br>(1.9-3.9)                            | 3.9%<br>(2.3-5.7%)                   | 7.3%<br>(4.7-9.9%)                  | 310<br>(200-420)    | 11000<br>(6600-16000)   |
| Canada   | 2005 | Female | 60 to 64 | 84%<br>(76-90%)                | 16%<br>(10-24%)          | 2.4<br>(1.5-3.5)                            | 2.9%<br>(1.2-5%)                     | 5%<br>(2.5-7.7%)                    | 260<br>(130-400)    | 7800<br>(3100-13000)    |

| Location | Year | Sex    | Age      | Prevalence of current drinkers | Prevalence of abstainers | Population average of standard drinks daily | Percent of total attributable deaths | Percent of total attributable DALYs | Attributable deaths | Attributable DALYs        |
|----------|------|--------|----------|--------------------------------|--------------------------|---------------------------------------------|--------------------------------------|-------------------------------------|---------------------|---------------------------|
| Canada   | 2005 | Female | 65 to 69 | 79%<br>(70-87%)                | 21%<br>(13-30%)          | 2.1<br>(1.5-2.9)                            | 2%<br>(0.46-3.7%)                    | 3.3%<br>(1.2-5.5%)                  | 220<br>(77-360)     | 5000<br>(1200-9300)       |
| Canada   | 2005 | Female | 70 to 74 | 74%<br>(65-82%)                | 26%<br>(18-35%)          | 1.8<br>(1.1-2.5)                            | 1.1%<br>(-0.57-3%)                   | 1.8%<br>(-0.38-4.2%)                | 170<br>(-36-400)    | 2900<br>(-1600-8100)      |
| Canada   | 2005 | Female | 75 to 79 | 70%<br>(58-80%)                | 30%<br>(20-42%)          | 1.6<br>(0.95-2.4)                           | 0.37%<br>(-1.2-2.4%)                 | 0.6%<br>(-1.4-3.1%)                 | 85<br>(-200-440)    | 1100<br>(-3600-7000)      |
| Canada   | 2005 | Female | 80 to 84 | 68%<br>(53-81%)                | 32%<br>(19-47%)          | 1.5<br>(0.97-2.2)                           | -0.004%<br>(-1.8-2%)                 | -0.017%<br>(-2.2-2.5%)              | -3.3<br>(-440-480)  | -8.7<br>(-5000-5700)      |
| Canada   | 2005 | Female | 85 to 89 | 67%<br>(51-80%)                | 33%<br>(20-49%)          | 1.5<br>(0.91-2.3)                           | -0.26%<br>(-2.1-2%)                  | -0.48%<br>(-2.8-2.1%)               | -96<br>(-560-430)   | -500<br>(-4200-3900)      |
| Canada   | 2005 | Female | 90 to 94 | 68%<br>(52-82%)                | 32%<br>(18-48%)          | 1.7<br>(0.96-2.6)                           | -0.24%<br>(-2.6-2.5%)                | -0.53%<br>(-3.2-2.7%)               | -85<br>(-520-430)   | -250<br>(-2600-2500)      |
| Canada   | 2005 | Female | 95 plus  | 71%<br>(52-86%)                | 29%<br>(14-48%)          | 1.8<br>(0.95-3)                             | -0.082%<br>(-3.3-4%)                 | -0.42%<br>(-4-4.3%)                 | -35<br>(-340-350)   | -27<br>(-1100-1300)       |
| Canada   | 2005 | Male   | All Ages | 88%<br>(86-90%)                | 12%<br>(9.8-14%)         | 2.9<br>(2.6-3.2)                            | 5%<br>(3.8-6.3%)                     | 3.3%<br>(1.6-5.2%)                  | 3900<br>(1800-6100) | 200000<br>(150000-260000) |
| Canada   | 2005 | Male   | 15 to 19 | 80%<br>(72-86%)                | 20%<br>(14-28%)          | 2.6<br>(1.6-3.8)                            | 7%<br>(4.4-10%)                      | 14%<br>(7.8-22%)                    | 96<br>(53-140)      | 9400<br>(6000-13000)      |
| Canada   | 2005 | Male   | 20 to 24 | 91%<br>(86-95%)                | 8.7%<br>(5.3-14%)        | 4.9<br>(3.2-6.8)                            | 14%<br>(9.7-18%)                     | 23%<br>(14-32%)                     | 220<br>(140-310)    | 21000<br>(15000-27000)    |
| Canada   | 2005 | Male   | 25 to 29 | 93%<br>(90-96%)                | 6.5%<br>(4-9.9%)         | 5<br>(3.4-6.7)                              | 12%<br>(8.9-16%)                     | 22%<br>(15-30%)                     | 200<br>(130-270)    | 18000<br>(13000-23000)    |
| Canada   | 2005 | Male   | 30 to 34 | 95%<br>(92-97%)                | 5.1%<br>(2.9-8.4%)       | 4.7<br>(3.2-6.5)                            | 10%<br>(7.3-14%)                     | 19%<br>(13-27%)                     | 190<br>(130-270)    | 16000<br>(11000-21000)    |
| Canada   | 2005 | Male   | 35 to 39 | 95%<br>(92-97%)                | 4.8%<br>(2.7-7.8%)       | 4.2<br>(3-5.7)                              | 8.8%<br>(6.1-12%)                    | 16%<br>(10-22%)                     | 230<br>(140-310)    | 16000<br>(11000-22000)    |
| Canada   | 2005 | Male   | 40 to 44 | 95%<br>(92-97%)                | 4.8%<br>(2.7-7.9%)       | 3.8<br>(2.6-5.4)                            | 8.1%<br>(5.4-11%)                    | 14%<br>(8.7-20%)                    | 330<br>(210-470)    | 20000<br>(14000-28000)    |
| Canada   | 2005 | Male   | 45 to 49 | 95%<br>(91-97%)                | 5.1%<br>(2.7-8.7%)       | 3.6<br>(2.5-5.1)                            | 7.9%<br>(5.2-11%)                    | 12%<br>(8-17%)                      | 440<br>(280-610)    | 23000<br>(15000-31000)    |
| Canada   | 2005 | Male   | 50 to 54 | 94%<br>(91-97%)                | 5.5%<br>(3-9%)           | 3.4<br>(2.2-4.8)                            | 7.1%<br>(4.6-10%)                    | 10%<br>(6.5-15%)                    | 500<br>(310-720)    | 22000<br>(14000-31000)    |
| Canada   | 2005 | Male   | 55 to 59 | 94%<br>(90-97%)                | 6.2%<br>(3.5-10%)        | 3<br>(2-4.3)                                | 5.6%<br>(3.3-8.3%)                   | 7.5%<br>(4.4-11%)                   | 500<br>(290-760)    | 19000<br>(11000-28000)    |
| Canada   | 2005 | Male   | 60 to 64 | 93%<br>(89-96%)                | 7%<br>(3.9-11%)          | 2.8<br>(1.8-4.2)                            | 4.3%<br>(1.9-7.3%)                   | 5.5%<br>(2.3-9.4%)                  | 450<br>(190-760)    | 14000<br>(6400-24000)     |
| Canada   | 2005 | Male   | 65 to 69 | 91%<br>(86-95%)                | 8.6%<br>(4.6-14%)        | 2.5<br>(1.7-3.4)                            | 3%<br>(1.1-5.4%)                     | 3.6%<br>(1.2-6.5%)                  | 360<br>(120-650)    | 9600<br>(3600-17000)      |
| Canada   | 2005 | Male   | 70 to 74 | 89%<br>(84-94%)                | 11%<br>(6.4-16%)         | 2<br>(1.3-2.9)                              | 1.8%<br>(0.11-3.8%)                  | 2.1%<br>(-0.026-4.5%)               | 290<br>(-3.5-620)   | 6200<br>(370-13000)       |
| Canada   | 2005 | Male   | 75 to 79 | 88%<br>(80-93%)                | 12%<br>(6.6-20%)         | 1.8<br>(1.1-2.7)                            | 0.94%<br>(-0.68-2.9%)                | 0.91%<br>(-1-3.2%)                  | 160<br>(-180-550)   | 3000<br>(-2100-9300)      |
| Canada   | 2005 | Male   | 80 to 84 | 86%<br>(75-93%)                | 14%<br>(7.3-25%)         | 1.6<br>(1-2.4)                              | 0.3%<br>(-1.2-2.1%)                  | 0.1%<br>(-1.7-2.1%)                 | 20<br>(-330-410)    | 760<br>(-3000-5200)       |

| Location | Year | Sex    | Age      | Prevalence of current drinkers | Prevalence of abstainers | Population average of standard drinks daily | Percent of total attributable deaths | Percent of total attributable DALYs | Attributable deaths | Attributable DALYs        |
|----------|------|--------|----------|--------------------------------|--------------------------|---------------------------------------------|--------------------------------------|-------------------------------------|---------------------|---------------------------|
| Canada   | 2005 | Male   | 85 to 89 | 85%<br>(73-92%)                | 15%<br>(8-27%)           | 1.6<br>(0.99-2.3)                           | -0.076%<br>(-1.5-1.7%)               | -0.37%<br>(-2.1-1.6%)               | -53<br>(-310-220)   | -95<br>(-2000-2100)       |
| Canada   | 2005 | Male   | 90 to 94 | 86%<br>(76-93%)                | 14%<br>(7.2-24%)         | 1.6<br>(0.99-2.5)                           | -0.26%<br>(-1.9-1.6%)                | -0.62%<br>(-2.6-1.5%)               | -49<br>(-200-120)   | -130<br>(-910-780)        |
| Canada   | 2005 | Male   | 95 plus  | 87%<br>(76-94%)                | 13%<br>(5.6-24%)         | 1.7<br>(0.92-2.9)                           | -0.26%<br>(-2.4-2.3%)                | -0.69%<br>(-3.2-2.3%)               | -17<br>(-79-57)     | -26<br>(-240-230)         |
| Canada   | 2010 | Female | All Ages | 80%<br>(77-84%)                | 20%<br>(16-23%)          | 2.7<br>(2.4-3)                              | 2.8%<br>(2-3.7%)                     | 2.2%<br>(0.51-4.2%)                 | 2700<br>(610-5100)  | 110000<br>(76000-150000)  |
| Canada   | 2010 | Female | 15 to 19 | 68%<br>(55-78%)                | 32%<br>(22-45%)          | 2.2<br>(1.3-3.2)                            | 3%<br>(2-4.3%)                       | 11%<br>(5.9-17%)                    | 31<br>(16-49)       | 3700<br>(2300-5200)       |
| Canada   | 2010 | Female | 20 to 24 | 86%<br>(76-92%)                | 14%<br>(8-24%)           | 4.3<br>(2.9-6)                              | 5.1%<br>(3.7-6.7%)                   | 17%<br>(10-23%)                     | 57<br>(35-81)       | 7300<br>(5100-9700)       |
| Canada   | 2010 | Female | 25 to 29 | 89%<br>(82-93%)                | 11%<br>(6.8-18%)         | 4.4<br>(3-6)                                | 4.7%<br>(3.5-6%)                     | 16%<br>(10-21%)                     | 60<br>(41-83)       | 7300<br>(5200-9500)       |
| Canada   | 2010 | Female | 30 to 34 | 90%<br>(83-95%)                | 10%<br>(5.5-17%)         | 4.1<br>(2.8-5.8)                            | 4.3%<br>(3.1-5.6%)                   | 15%<br>(10-19%)                     | 73<br>(50-98)       | 7200<br>(5200-9500)       |
| Canada   | 2010 | Female | 35 to 39 | 90%<br>(85-95%)                | 9.5%<br>(5.3-15%)        | 3.9<br>(2.6-5.3)                            | 4.3%<br>(3-5.6%)                     | 14%<br>(9.8-18%)                    | 98<br>(69-130)      | 7800<br>(5500-10000)      |
| Canada   | 2010 | Female | 40 to 44 | 90%<br>(85-95%)                | 9.5%<br>(5.5-15%)        | 3.6<br>(2.4-5.1)                            | 4.6%<br>(3.1-6.1%)                   | 13%<br>(9.3-17%)                    | 160<br>(110-200)    | 9800<br>(6600-13000)      |
| Canada   | 2010 | Female | 45 to 49 | 90%<br>(83-94%)                | 10%<br>(5.7-17%)         | 3.5<br>(2.4-4.8)                            | 4.8%<br>(3.3-6.5%)                   | 12%<br>(8.8-15%)                    | 260<br>(190-330)    | 13000<br>(9600-18000)     |
| Canada   | 2010 | Female | 50 to 54 | 89%<br>(82-93%)                | 11%<br>(6.7-18%)         | 3.3<br>(2.2-4.6)                            | 4.8%<br>(3.1-6.7%)                   | 9.9%<br>(7.3-13%)                   | 340<br>(240-440)    | 15000<br>(10000-20000)    |
| Canada   | 2010 | Female | 55 to 59 | 87%<br>(79-93%)                | 13%<br>(7.4-21%)         | 2.9<br>(2-4.1)                              | 4.2%<br>(2.4-6%)                     | 7.9%<br>(5.3-11%)                   | 350<br>(230-470)    | 13000<br>(7700-19000)     |
| Canada   | 2010 | Female | 60 to 64 | 83%<br>(74-90%)                | 17%<br>(9.8-26%)         | 2.6<br>(1.6-3.8)                            | 3.2%<br>(1.4-5.2%)                   | 5.6%<br>(3.2-8.4%)                  | 340<br>(190-500)    | 10000<br>(4700-17000)     |
| Canada   | 2010 | Female | 65 to 69 | 79%<br>(68-87%)                | 21%<br>(13-32%)          | 2.2<br>(1.5-3.1)                            | 2.3%<br>(0.83-4%)                    | 3.9%<br>(1.8-6%)                    | 280<br>(130-430)    | 6800<br>(2400-12000)      |
| Canada   | 2010 | Female | 70 to 74 | 75%<br>(63-84%)                | 25%<br>(16-37%)          | 1.9<br>(1.2-2.8)                            | 1.5%<br>(-0.088-3.3%)                | 2.5%<br>(0.36-4.8%)                 | 230<br>(32-440)     | 4100<br>(-230-9000)       |
| Canada   | 2010 | Female | 75 to 79 | 70%<br>(55-82%)                | 30%<br>(18-45%)          | 1.7<br>(1-2.6)                              | 0.89%<br>(-0.64-2.9%)                | 1.4%<br>(-0.64-3.7%)                | 180<br>(-85-490)    | 2500<br>(-1900-8300)      |
| Canada   | 2010 | Female | 80 to 84 | 67%<br>(51-81%)                | 33%<br>(19-49%)          | 1.6<br>(0.97-2.3)                           | 0.61%<br>(-1.2-2.4%)                 | 0.8%<br>(-1.2-3%)                   | 150<br>(-230-570)   | 1700<br>(-2900-6800)      |
| Canada   | 2010 | Female | 85 to 89 | 65%<br>(49-79%)                | 35%<br>(21-51%)          | 1.6<br>(0.93-2.4)                           | 0.32%<br>(-1.4-2.4%)                 | 0.25%<br>(-1.9-2.7%)                | 57<br>(-440-620)    | 760<br>(-3400-5500)       |
| Canada   | 2010 | Female | 90 to 94 | 67%<br>(51-81%)                | 33%<br>(19-49%)          | 1.7<br>(1-2.6)                              | 0.33%<br>(-1.9-3%)                   | 0.16%<br>(-2.4-3.3%)                | 28<br>(-440-590)    | 390<br>(-2200-3600)       |
| Canada   | 2010 | Female | 95 plus  | 71%<br>(52-86%)                | 29%<br>(14-48%)          | 2<br>(1-3.2)                                | 0.54%<br>(-2.6-4.5%)                 | 0.33%<br>(-3.3-4.9%)                | 36<br>(-360-540)    | 240<br>(-1100-2000)       |
| Canada   | 2010 | Male   | All Ages | 86%<br>(84-89%)                | 14%<br>(11-16%)          | 3<br>(2.7-3.4)                              | 5.2%<br>(4-6.5%)                     | 3.9%<br>(2.2-5.6%)                  | 4700<br>(2700-6900) | 220000<br>(170000-270000) |

| Location | Year | Sex    | Age      | Prevalence of current drinkers | Prevalence of abstainers | Population average of standard drinks daily | Percent of total attributable deaths | Percent of total attributable DALYs | Attributable deaths | Attributable DALYs       |
|----------|------|--------|----------|--------------------------------|--------------------------|---------------------------------------------|--------------------------------------|-------------------------------------|---------------------|--------------------------|
| Canada   | 2010 | Male   | 15 to 19 | 69%<br>(58-80%)                | 31%<br>(20-42%)          | 2.4<br>(1.4-3.6)                            | 6%<br>(3.7-8.5%)                     | 13%<br>(7-20%)                      | 78<br>(41-120)      | 7800<br>(4900-11000)     |
| Canada   | 2010 | Male   | 20 to 24 | 89%<br>(81-94%)                | 11%<br>(6.1-19%)         | 5<br>(3.4-7.1)                              | 13%<br>(9.1-17%)                     | 23%<br>(15-32%)                     | 210<br>(130-280)    | 19000<br>(14000-25000)   |
| Canada   | 2010 | Male   | 25 to 29 | 92%<br>(87-95%)                | 7.7%<br>(4.5-13%)        | 5.2<br>(3.6-7)                              | 12%<br>(8.6-15%)                     | 23%<br>(15-30%)                     | 200<br>(140-270)    | 18000<br>(13000-23000)   |
| Canada   | 2010 | Male   | 30 to 34 | 94%<br>(89-97%)                | 6.1%<br>(3-11%)          | 4.9<br>(3.3-6.8)                            | 9.9%<br>(7.3-13%)                    | 20%<br>(13-28%)                     | 190<br>(130-260)    | 16000<br>(11000-20000)   |
| Canada   | 2010 | Male   | 35 to 39 | 94%<br>(90-97%)                | 5.7%<br>(2.9-9.8%)       | 4.3<br>(3-6)                                | 8.9%<br>(6.3-12%)                    | 18%<br>(11-24%)                     | 210<br>(140-280)    | 15000<br>(11000-20000)   |
| Canada   | 2010 | Male   | 40 to 44 | 94%<br>(90-97%)                | 5.6%<br>(2.9-9.8%)       | 4<br>(2.6-5.6)                              | 8.4%<br>(5.8-11%)                    | 15%<br>(10-21%)                     | 290<br>(190-390)    | 18000<br>(12000-24000)   |
| Canada   | 2010 | Male   | 45 to 49 | 94%<br>(89-97%)                | 6%<br>(3-11%)            | 3.8<br>(2.6-5.2)                            | 8.2%<br>(5.7-11%)                    | 14%<br>(9.2-19%)                    | 450<br>(300-630)    | 24000<br>(17000-32000)   |
| Canada   | 2010 | Male   | 50 to 54 | 94%<br>(89-97%)                | 6.5%<br>(3.5-11%)        | 3.5<br>(2.3-4.9)                            | 7.6%<br>(5.1-11%)                    | 12%<br>(7.5-16%)                    | 590<br>(380-840)    | 26000<br>(18000-36000)   |
| Canada   | 2010 | Male   | 55 to 59 | 93%<br>(88-96%)                | 6.9%<br>(3.7-12%)        | 3.2<br>(2.1-4.4)                            | 6.4%<br>(4.1-9%)                     | 9%<br>(5.8-13%)                     | 630<br>(400-890)    | 24000<br>(15000-34000)   |
| Canada   | 2010 | Male   | 60 to 64 | 92%<br>(86-96%)                | 8%<br>(4.1-14%)          | 2.9<br>(1.8-4.3)                            | 5%<br>(2.6-7.8%)                     | 6.6%<br>(3.5-10%)                   | 610<br>(320-960)    | 20000<br>(11000-31000)   |
| Canada   | 2010 | Male   | 65 to 69 | 90%<br>(83-95%)                | 9.7%<br>(4.8-17%)        | 2.6<br>(1.7-3.5)                            | 3.6%<br>(1.7-5.8%)                   | 4.5%<br>(2.1-7.3%)                  | 480<br>(230-790)    | 13000<br>(6300-21000)    |
| Canada   | 2010 | Male   | 70 to 74 | 89%<br>(82-94%)                | 11%<br>(6.3-18%)         | 2.1<br>(1.4-3.1)                            | 2.4%<br>(0.69-4.3%)                  | 2.9%<br>(0.78-5.2%)                 | 360<br>(98-660)     | 7800<br>(2200-14000)     |
| Canada   | 2010 | Male   | 75 to 79 | 87%<br>(78-93%)                | 13%<br>(6.7-22%)         | 1.9<br>(1.2-2.8)                            | 1.5%<br>(-0.14-3.4%)                 | 1.6%<br>(-0.35-3.7%)                | 260<br>(-58-620)    | 4600<br>(-440-11000)     |
| Canada   | 2010 | Male   | 80 to 84 | 86%<br>(75-93%)                | 14%<br>(7.4-25%)         | 1.8<br>(1.1-2.5)                            | 0.8%<br>(-0.68-2.4%)                 | 0.71%<br>(-1.2-2.6%)                | 140<br>(-230-500)   | 2100<br>(-1900-6500)     |
| Canada   | 2010 | Male   | 85 to 89 | 85%<br>(74-92%)                | 15%<br>(7.8-26%)         | 1.7<br>(1.1-2.5)                            | 0.36%<br>(-1.1-2%)                   | 0.13%<br>(-1.6-2.1%)                | 22<br>(-280-360)    | 580<br>(-1700-3400)      |
| Canada   | 2010 | Male   | 90 to 94 | 86%<br>(76-93%)                | 14%<br>(7.4-24%)         | 1.8<br>(1.1-2.7)                            | 0.17%<br>(-1.5-2.1%)                 | -0.13%<br>(-2.1-2.1%)               | -12<br>(-190-200)   | 98<br>(-870-1200)        |
| Canada   | 2010 | Male   | 95 plus  | 87%<br>(75-94%)                | 13%<br>(5.8-25%)         | 1.9<br>(1-3.1)                              | 0.2%<br>(-1.9-2.9%)                  | -0.16%<br>(-2.7-2.8%)               | -5.4<br>(-91-97)    | 28<br>(-260-390)         |
| Canada   | 2016 | Female | All Ages | 81%<br>(77-84%)                | 19%<br>(16-23%)          | 2.7<br>(2.2-3.2)                            | 2.8%<br>(1.8-3.8%)                   | 2.2%<br>(0.21-4.4%)                 | 2900<br>(290-5800)  | 120000<br>(74000-160000) |
| Canada   | 2016 | Female | 15 to 19 | 68%<br>(56-79%)                | 32%<br>(21-44%)          | 2.2<br>(1.3-3.4)                            | 3%<br>(1.9-4.3%)                     | 11%<br>(6-18%)                      | 30<br>(16-47)       | 3600<br>(2300-5100)      |
| Canada   | 2016 | Female | 20 to 24 | 86%<br>(77-92%)                | 14%<br>(8.2-23%)         | 4.3<br>(2.7-6.3)                            | 5%<br>(3.6-6.6%)                     | 17%<br>(10-24%)                     | 59<br>(36-84)       | 7700<br>(5400-10000)     |
| Canada   | 2016 | Female | 25 to 29 | 89%<br>(82-93%)                | 11%<br>(6.6-18%)         | 4.3<br>(2.9-6.1)                            | 4.6%<br>(3.4-6%)                     | 16%<br>(10-22%)                     | 63<br>(41-89)       | 7700<br>(5500-10000)     |
| Canada   | 2016 | Female | 30 to 34 | 90%<br>(84-95%)                | 9.7%<br>(5.4-16%)        | 4.1<br>(2.8-5.8)                            | 4.4%<br>(3.1-5.7%)                   | 15%<br>(10-20%)                     | 81<br>(55-110)      | 8000<br>(5700-11000)     |

| Location | Year | Sex    | Age      | Prevalence of current drinkers | Prevalence of abstainers | Population average of standard drinks daily | Percent of total attributable deaths | Percent of total attributable DALYs | Attributable deaths | Attributable DALYs        |
|----------|------|--------|----------|--------------------------------|--------------------------|---------------------------------------------|--------------------------------------|-------------------------------------|---------------------|---------------------------|
| Canada   | 2016 | Female | 35 to 39 | 91%<br>(86-95%)                | 9.2%<br>(5.1-14%)        | 3.8<br>(2.5-5.5)                            | 4.3%<br>(3-5.8%)                     | 14%<br>(9.7-18%)                    | 100<br>(69-130)     | 7900<br>(5500-11000)      |
| Canada   | 2016 | Female | 40 to 44 | 91%<br>(85-95%)                | 9.2%<br>(5.3-15%)        | 3.6<br>(2.3-5.2)                            | 4.6%<br>(3.1-6.3%)                   | 13%<br>(9.2-18%)                    | 150<br>(100-200)    | 9400<br>(6400-13000)      |
| Canada   | 2016 | Female | 45 to 49 | 90%<br>(83-95%)                | 9.7%<br>(5.2-17%)        | 3.5<br>(2.3-5)                              | 4.8%<br>(3.2-6.6%)                   | 12%<br>(8.8-16%)                    | 240<br>(170-320)    | 13000<br>(8700-17000)     |
| Canada   | 2016 | Female | 50 to 54 | 89%<br>(82-94%)                | 11%<br>(6.4-18%)         | 3.3<br>(2.1-4.7)                            | 4.7%<br>(3-6.8%)                     | 10%<br>(7.1-14%)                    | 350<br>(250-480)    | 16000<br>(10000-23000)    |
| Canada   | 2016 | Female | 55 to 59 | 87%<br>(79-93%)                | 13%<br>(7.3-21%)         | 2.9<br>(1.9-4.2)                            | 4.1%<br>(2.4-6.1%)                   | 8%<br>(5.4-11%)                     | 400<br>(260-540)    | 15000<br>(8600-22000)     |
| Canada   | 2016 | Female | 60 to 64 | 84%<br>(75-90%)                | 16%<br>(9.7-25%)         | 2.6<br>(1.6-3.9)                            | 3.1%<br>(1.3-5.2%)                   | 5.7%<br>(3.2-8.7%)                  | 380<br>(210-570)    | 12000<br>(5200-19000)     |
| Canada   | 2016 | Female | 65 to 69 | 79%<br>(68-88%)                | 21%<br>(12-32%)          | 2.2<br>(1.5-3.1)                            | 2.3%<br>(0.68-4.1%)                  | 3.9%<br>(1.8-6.1%)                  | 350<br>(160-560)    | 8500<br>(2600-15000)      |
| Canada   | 2016 | Female | 70 to 74 | 75%<br>(64-84%)                | 25%<br>(16-36%)          | 1.9<br>(1.2-2.9)                            | 1.5%<br>(-0.14-3.4%)                 | 2.5%<br>(0.35-4.8%)                 | 260<br>(36-520)     | 4700<br>(-480-11000)      |
| Canada   | 2016 | Female | 75 to 79 | 71%<br>(57-83%)                | 29%<br>(17-43%)          | 1.7<br>(0.97-2.7)                           | 0.85%<br>(-0.78-2.9%)                | 1.3%<br>(-0.75-4%)                  | 180<br>(-100-540)   | 2500<br>(-2200-8700)      |
| Canada   | 2016 | Female | 80 to 84 | 68%<br>(52-82%)                | 32%<br>(18-48%)          | 1.6<br>(0.98-2.4)                           | 0.56%<br>(-1.1-2.5%)                 | 0.75%<br>(-1.4-3.2%)                | 140<br>(-270-600)   | 1600<br>(-3400-7500)      |
| Canada   | 2016 | Female | 85 to 89 | 66%<br>(50-80%)                | 34%<br>(20-50%)          | 1.6<br>(0.93-2.5)                           | 0.35%<br>(-1.5-2.4%)                 | 0.28%<br>(-1.9-2.8%)                | 70<br>(-470-700)    | 890<br>(-3700-6100)       |
| Canada   | 2016 | Female | 90 to 94 | 68%<br>(53-81%)                | 32%<br>(19-47%)          | 1.8<br>(1-2.8)                              | 0.35%<br>(-1.9-3.1%)                 | 0.18%<br>(-2.4-3.4%)                | 40<br>(-530-760)    | 520<br>(-2800-4500)       |
| Canada   | 2016 | Female | 95 plus  | 72%<br>(53-86%)                | 28%<br>(14-47%)          | 2<br>(1-3.2)                                | 0.53%<br>(-2.7-4.6%)                 | 0.31%<br>(-3.5-5.1%)                | 45<br>(-500-730)    | 310<br>(-1500-2700)       |
| Canada   | 2016 | Male   | All Ages | 87%<br>(84-89%)                | 13%<br>(11-16%)          | 3<br>(2.5-3.6)                              | 5.1%<br>(3.8-6.4%)                   | 3.7%<br>(1.9-5.6%)                  | 5100<br>(2600-7700) | 230000<br>(170000-300000) |
| Canada   | 2016 | Male   | 15 to 19 | 69%<br>(57-80%)                | 31%<br>(20-43%)          | 2.3<br>(1.3-3.6)                            | 5.9%<br>(3.7-8.5%)                   | 13%<br>(6.9-20%)                    | 73<br>(38-110)      | 7500<br>(4600-11000)      |
| Canada   | 2016 | Male   | 20 to 24 | 88%<br>(81-94%)                | 12%<br>(6.3-19%)         | 5<br>(3.2-7.1)                              | 12%<br>(8.8-17%)                     | 23%<br>(14-32%)                     | 210<br>(130-290)    | 20000<br>(14000-27000)    |
| Canada   | 2016 | Male   | 25 to 29 | 92%<br>(87-96%)                | 7.8%<br>(4.4-13%)        | 5.2<br>(3.5-7.2)                            | 11%<br>(8.4-15%)                     | 22%<br>(15-31%)                     | 210<br>(130-280)    | 19000<br>(14000-25000)    |
| Canada   | 2016 | Male   | 30 to 34 | 94%<br>(89-97%)                | 6.2%<br>(3-11%)          | 4.9<br>(3.3-6.8)                            | 9.8%<br>(7-13%)                      | 20%<br>(13-28%)                     | 200<br>(130-280)    | 17000<br>(12000-22000)    |
| Canada   | 2016 | Male   | 35 to 39 | 94%<br>(90-97%)                | 5.7%<br>(2.9-9.6%)       | 4.3<br>(2.9-6.2)                            | 8.8%<br>(6.3-12%)                    | 18%<br>(11-24%)                     | 210<br>(130-290)    | 15000<br>(10000-20000)    |
| Canada   | 2016 | Male   | 40 to 44 | 94%<br>(90-97%)                | 5.6%<br>(2.9-9.9%)       | 3.9<br>(2.5-5.7)                            | 8.5%<br>(5.7-12%)                    | 16%<br>(9.7-22%)                    | 270<br>(170-390)    | 17000<br>(11000-23000)    |
| Canada   | 2016 | Male   | 45 to 49 | 94%<br>(89-97%)                | 6%<br>(2.9-11%)          | 3.7<br>(2.5-5.3)                            | 8.1%<br>(5.6-11%)                    | 14%<br>(9.1-20%)                    | 410<br>(270-570)    | 22000<br>(15000-30000)    |
| Canada   | 2016 | Male   | 50 to 54 | 94%<br>(89-97%)                | 6.5%<br>(3.4-11%)        | 3.5<br>(2.2-5)                              | 7.6%<br>(4.9-11%)                    | 12%<br>(7.5-17%)                    | 630<br>(400-900)    | 28000<br>(18000-40000)    |

| Location      | Year | Sex    | Age      | Prevalence of current drinkers | Prevalence of abstainers | Population average of standard drinks daily | Percent of total attributable deaths | Percent of total attributable DALYs | Attributable deaths   | Attributable DALYs        |
|---------------|------|--------|----------|--------------------------------|--------------------------|---------------------------------------------|--------------------------------------|-------------------------------------|-----------------------|---------------------------|
| Canada        | 2016 | Male   | 55 to 59 | 93%<br>(88-96%)                | 7.1%<br>(3.7-12%)        | 3.1<br>(2.1-4.5)                            | 6.4%<br>(4.1-9.3%)                   | 9.1%<br>(5.8-13%)                   | 720<br>(460-1100)     | 28000<br>(18000-40000)    |
| Canada        | 2016 | Male   | 60 to 64 | 92%<br>(86-96%)                | 8.2%<br>(4.2-14%)        | 2.8<br>(1.8-4.2)                            | 4.9%<br>(2.7-7.8%)                   | 6.7%<br>(3.7-11%)                   | 690<br>(380-1100)     | 23000<br>(12000-36000)    |
| Canada        | 2016 | Male   | 65 to 69 | 90%<br>(83-95%)                | 9.8%<br>(5-17%)          | 2.5<br>(1.7-3.5)                            | 3.6%<br>(1.7-5.8%)                   | 4.6%<br>(2.1-7.4%)                  | 610<br>(280-990)      | 16000<br>(7600-27000)     |
| Canada        | 2016 | Male   | 70 to 74 | 89%<br>(82-94%)                | 11%<br>(6.4-18%)         | 2.1<br>(1.3-3.1)                            | 2.4%<br>(0.59-4.5%)                  | 2.8%<br>(0.7-5.3%)                  | 420<br>(100-800)      | 9000<br>(2300-17000)      |
| Canada        | 2016 | Male   | 75 to 79 | 87%<br>(78-93%)                | 13%<br>(6.9-22%)         | 1.9<br>(1.1-2.9)                            | 1.4%<br>(-0.11-3.4%)                 | 1.6%<br>(-0.34-3.9%)                | 270<br>(-59-680)      | 4800<br>(-370-12000)      |
| Canada        | 2016 | Male   | 80 to 84 | 85%<br>(75-92%)                | 15%<br>(7.6-25%)         | 1.7<br>(1.1-2.5)                            | 0.84%<br>(-0.64-2.4%)                | 0.77%<br>(-1-2.7%)                  | 160<br>(-210-560)     | 2500<br>(-1900-7300)      |
| Canada        | 2016 | Male   | 85 to 89 | 85%<br>(74-92%)                | 15%<br>(8-26%)           | 1.7<br>(1-2.5)                              | 0.46%<br>(-0.94-2%)                  | 0.24%<br>(-1.5-2.1%)                | 48<br>(-290-410)      | 870<br>(-1800-3800)       |
| Canada        | 2016 | Male   | 90 to 94 | 86%<br>(76-93%)                | 14%<br>(7.3-24%)         | 1.8<br>(1-2.8)                              | 0.23%<br>(-1.4-2.1%)                 | -0.064%<br>(-2-2.1%)                | -7.8<br>(-250-260)    | 180<br>(-1100-1600)       |
| Canada        | 2016 | Male   | 95 plus  | 87%<br>(76-94%)                | 13%<br>(5.8-24%)         | 1.9<br>(1-3.1)                              | 0.21%<br>(-1.9-3%)                   | -0.15%<br>(-2.6-3%)                 | -6.7<br>(-120-140)    | 40<br>(-360-560)          |
| United States | 1990 | Female | All Ages | 60%<br>(57-63%)                | 40%<br>(37-43%)          | 1.8<br>(1.6-2)                              | 2%<br>(1.3-2.6%)                     | 0.46%<br>(-0.71-1.6%)               | 4800<br>(-7400-17000) | 690000<br>(450000-930000) |
| United States | 1990 | Female | 15 to 19 | 53%<br>(45-61%)                | 47%<br>(39-55%)          | 1.8<br>(1.4-2.2)                            | 3.7%<br>(2.5-4.9%)                   | 9.3%<br>(5.7-14%)                   | 370<br>(230-550)      | 41000<br>(29000-56000)    |
| United States | 1990 | Female | 20 to 24 | 75%<br>(67-81%)                | 25%<br>(19-33%)          | 3.6<br>(3.1-4.1)                            | 6.1%<br>(4.8-7.4%)                   | 14%<br>(11-18%)                     | 690<br>(510-870)      | 86000<br>(66000-110000)   |
| United States | 1990 | Female | 25 to 29 | 79%<br>(72-84%)                | 21%<br>(16-28%)          | 3.2<br>(2.8-3.6)                            | 5.3%<br>(4.2-6.3%)                   | 12%<br>(9.1-15%)                    | 790<br>(610-990)      | 91000<br>(71000-110000)   |
| United States | 1990 | Female | 30 to 34 | 80%<br>(74-85%)                | 20%<br>(15-26%)          | 2.8<br>(2.4-3.3)                            | 4.6%<br>(3.7-5.5%)                   | 10%<br>(8.2-13%)                    | 960<br>(760-1200)     | 90000<br>(72000-110000)   |
| United States | 1990 | Female | 35 to 39 | 80%<br>(74-85%)                | 20%<br>(15-26%)          | 2.6<br>(2.3-3)                              | 4.5%<br>(3.7-5.5%)                   | 10%<br>(8.6-12%)                    | 1200<br>(990-1400)    | 90000<br>(75000-110000)   |
| United States | 1990 | Female | 40 to 44 | 78%<br>(72-84%)                | 22%<br>(16-28%)          | 2.4<br>(2.1-2.8)                            | 4.5%<br>(3.6-5.4%)                   | 9.8%<br>(8-12%)                     | 1500<br>(1200-1700)   | 90000<br>(74000-110000)   |
| United States | 1990 | Female | 45 to 49 | 76%<br>(68-82%)                | 24%<br>(18-32%)          | 2.2<br>(1.9-2.6)                            | 4.1%<br>(3.2-5%)                     | 8%<br>(6.4-9.6%)                    | 1500<br>(1200-1800)   | 76000<br>(60000-91000)    |
| United States | 1990 | Female | 50 to 54 | 73%<br>(65-79%)                | 27%<br>(21-35%)          | 1.9<br>(1.6-2.3)                            | 3.4%<br>(2.5-4.4%)                   | 5.8%<br>(4.5-7.3%)                  | 1500<br>(1100-1800)   | 62000<br>(47000-79000)    |
| United States | 1990 | Female | 55 to 59 | 69%<br>(60-77%)                | 31%<br>(23-40%)          | 1.7<br>(1.4-2)                              | 2.4%<br>(1.5-3.3%)                   | 3.8%<br>(2.5-5.2%)                  | 1400<br>(930-1900)    | 50000<br>(32000-68000)    |
| United States | 1990 | Female | 60 to 64 | 63%<br>(54-72%)                | 37%<br>(28-46%)          | 1.4<br>(1.2-1.7)                            | 1.4%<br>(0.53-2.3%)                  | 2.1%<br>(0.8-3.4%)                  | 1300<br>(490-2000)    | 37000<br>(14000-61000)    |
| United States | 1990 | Female | 65 to 69 | 57%<br>(48-67%)                | 43%<br>(33-52%)          | 1.3<br>(1-1.6)                              | 0.71%<br>(-0.21-1.6%)                | 1%<br>(-0.29-2.4%)                  | 910<br>(-260-2100)    | 22000<br>(-6100-50000)    |
| United States | 1990 | Female | 70 to 74 | 53%<br>(41-63%)                | 47%<br>(37-59%)          | 1.1<br>(0.82-1.4)                           | 0.089%<br>(-0.96-1.1%)               | 0.11%<br>(-1.3-1.5%)                | 120<br>(-1500-1700)   | 2700<br>(-28000-32000)    |



| Location      | Year | Sex    | Age      | Prevalence of current drinkers | Prevalence of abstainers | Population average of standard drinks daily | Percent of total attributable deaths | Percent of total attributable DALYs | Attributable deaths    | Attributable DALYs           |
|---------------|------|--------|----------|--------------------------------|--------------------------|---------------------------------------------|--------------------------------------|-------------------------------------|------------------------|------------------------------|
| United States | 1990 | Female | 75 to 79 | 47%<br>(35-59%)                | 53%<br>(41-65%)          | 0.93<br>(0.67-1.3)                          | -0.41%<br>(-1.4-0.56%)               | -0.61%<br>(-2-0.7%)                 | -880<br>(-2900-1000)   | -11000<br>(-40000-16000)     |
| United States | 1990 | Female | 80 to 84 | 42%<br>(30-53%)                | 58%<br>(47-70%)          | 0.81<br>(0.56-1.1)                          | -0.7%<br>(-1.7-0.22%)                | -0.99%<br>(-2.3-0.28%)              | -1600<br>(-3700-460)   | -16000<br>(-38000-5000)      |
| United States | 1990 | Female | 85 to 89 | 40%<br>(29-51%)                | 60%<br>(49-71%)          | 0.76<br>(0.5-1.1)                           | -0.93%<br>(-2-0.043%)                | -1.3%<br>(-2.7--0.041%)             | -2000<br>(-4200--64)   | -14000<br>(-30000-690)       |
| United States | 1990 | Female | 90 to 94 | 41%<br>(30-52%)                | 59%<br>(48-70%)          | 0.78<br>(0.52-1.1)                          | -1.2%<br>(-2.3--0.072%)              | -1.6%<br>(-3.1--0.23%)              | -1700<br>(-3300--250)  | -8000<br>(-16000--520)       |
| United States | 1990 | Female | 95 plus  | 44%<br>(30-58%)                | 56%<br>(42-70%)          | 0.85<br>(0.53-1.2)                          | -1.5%<br>(-3--0.21%)                 | -2.1%<br>(-4--0.44%)                | -1200<br>(-2200--250)  | -3400<br>(-6800--490)        |
| United States | 1990 | Male   | All Ages | 72%<br>(69-74%)                | 28%<br>(26-31%)          | 3.2<br>(2.9-3.6)                            | 6.2%<br>(4.9-7.5%)                   | 3.8%<br>(2.1-5.6%)                  | 42000<br>(23000-63000) | 2500000<br>(1900000-3000000) |
| United States | 1990 | Male   | 15 to 19 | 57%<br>(50-64%)                | 43%<br>(36-50%)          | 2.8<br>(2.3-3.3)                            | 9.5%<br>(7.1-12%)                    | 15%<br>(11-20%)                     | 1700<br>(1200-2200)    | 140000<br>(110000-180000)    |
| United States | 1990 | Male   | 20 to 24 | 82%<br>(76-87%)                | 18%<br>(13-24%)          | 6.4<br>(5.6-7.3)                            | 19%<br>(15-23%)                      | 28%<br>(22-33%)                     | 4400<br>(3500-5300)    | 360000<br>(300000-430000)    |
| United States | 1990 | Male   | 25 to 29 | 87%<br>(83-90%)                | 13%<br>(10-17%)          | 5.7<br>(5.1-6.5)                            | 15%<br>(13-18%)                      | 22%<br>(18-26%)                     | 4200<br>(3400-5100)    | 340000<br>(280000-400000)    |
| United States | 1990 | Male   | 30 to 34 | 90%<br>(86-92%)                | 10%<br>(7.7-14%)         | 5.1<br>(4.5-5.8)                            | 12%<br>(10-14%)                      | 17%<br>(14-20%)                     | 4100<br>(3400-4900)    | 310000<br>(260000-360000)    |
| United States | 1990 | Male   | 35 to 39 | 90%<br>(87-93%)                | 10%<br>(7.4-13%)         | 4.7<br>(4.1-5.3)                            | 11%<br>(9.5-13%)                     | 15%<br>(13-18%)                     | 4200<br>(3500-4900)    | 280000<br>(230000-320000)    |
| United States | 1990 | Male   | 40 to 44 | 90%<br>(86-92%)                | 10%<br>(7.6-14%)         | 4.3<br>(3.8-4.9)                            | 10%<br>(8.8-12%)                     | 14%<br>(12-16%)                     | 4200<br>(3500-4900)    | 240000<br>(210000-280000)    |
| United States | 1990 | Male   | 45 to 49 | 89%<br>(85-92%)                | 11%<br>(8-15%)           | 3.9<br>(3.4-4.5)                            | 9.1%<br>(7.6-11%)                    | 12%<br>(9.6-14%)                    | 3900<br>(3200-4800)    | 200000<br>(160000-240000)    |
| United States | 1990 | Male   | 50 to 54 | 88%<br>(84-91%)                | 12%<br>(8.7-16%)         | 3.6<br>(3.1-4.1)                            | 7.3%<br>(5.7-9%)                     | 9%<br>(6.7-11%)                     | 3800<br>(2800-4800)    | 160000<br>(130000-200000)    |
| United States | 1990 | Male   | 55 to 59 | 86%<br>(82-90%)                | 14%<br>(9.7-18%)         | 3.2<br>(2.8-3.7)                            | 5.5%<br>(4-7.3%)                     | 6.5%<br>(4.4-8.9%)                  | 3900<br>(2600-5300)    | 150000<br>(110000-190000)    |
| United States | 1990 | Male   | 60 to 64 | 84%<br>(79-89%)                | 16%<br>(11-21%)          | 2.9<br>(2.5-3.4)                            | 3.8%<br>(2.2-5.6%)                   | 4.2%<br>(2.1-6.4%)                  | 4000<br>(2000-6000)    | 130000<br>(73000-180000)     |
| United States | 1990 | Male   | 65 to 69 | 82%<br>(76-87%)                | 18%<br>(13-24%)          | 2.7<br>(2.2-3.1)                            | 2.5%<br>(0.87-4.2%)                  | 2.5%<br>(0.55-4.6%)                 | 3200<br>(700-5900)     | 91000<br>(32000-160000)      |
| United States | 1990 | Male   | 70 to 74 | 79%<br>(72-85%)                | 21%<br>(15-28%)          | 2.4<br>(1.9-2.9)                            | 1.4%<br>(-0.22-3.1%)                 | 1.2%<br>(-0.74-3.3%)                | 1800<br>(-1100-5000)   | 47000<br>(-7600-100000)      |
| United States | 1990 | Male   | 75 to 79 | 76%<br>(67-83%)                | 24%<br>(17-33%)          | 2.1<br>(1.6-2.5)                            | 0.61%<br>(-0.91-2.2%)                | 0.31%<br>(-1.5-2.2%)                | 490<br>(-2400-3600)    | 17000<br>(-25000-59000)      |
| United States | 1990 | Male   | 80 to 84 | 73%<br>(62-80%)                | 27%<br>(20-38%)          | 1.8<br>(1.4-2.2)                            | 0.11%<br>(-1.3-1.6%)                 | -0.25%<br>(-2-1.5%)                 | -340<br>(-2800-2100)   | 2000<br>(-23000-27000)       |
| United States | 1990 | Male   | 85 to 89 | 71%<br>(61-79%)                | 29%<br>(21-39%)          | 1.7<br>(1.3-2.2)                            | -0.21%<br>(-1.7-1.2%)                | -0.66%<br>(-2.4-1.1%)               | -610<br>(-2200-1000)   | -1800<br>(-14000-9900)       |

| Location      | Year | Sex    | Age      | Prevalence of current drinkers | Prevalence of abstainers | Population average of standard drinks daily | Percent of total attributable deaths | Percent of total attributable DALYs | Attributable deaths    | Attributable DALYs        |
|---------------|------|--------|----------|--------------------------------|--------------------------|---------------------------------------------|--------------------------------------|-------------------------------------|------------------------|---------------------------|
| United States | 1990 | Male   | 90 to 94 | 72%<br>(63-80%)                | 28%<br>(20-37%)          | 1.7<br>(1.3-2.2)                            | -0.59%<br>(-2.3-1%)                  | -1.2%<br>(-3.3-0.81%)               | -510<br>(-1400-360)    | -1600<br>(-6200-2800)     |
| United States | 1990 | Male   | 95 plus  | 74%<br>(62-83%)                | 26%<br>(17-38%)          | 1.7<br>(1.2-2.3)                            | -0.79%<br>(-2.7-1.1%)                | -1.5%<br>(-3.9-0.75%)               | -250<br>(-640-120)     | -520<br>(-1800-720)       |
| United States | 1995 | Female | All Ages | 60%<br>(57-63%)                | 40%<br>(37-43%)          | 1.7<br>(1.5-1.9)                            | 1.9%<br>(1.3-2.5%)                   | 0.37%<br>(-0.72-1.5%)               | 4200<br>(-8200-17000)  | 690000<br>(460000-940000) |
| United States | 1995 | Female | 15 to 19 | 52%<br>(44-61%)                | 48%<br>(39-56%)          | 1.7<br>(1.4-2.1)                            | 3.5%<br>(2.5-4.7%)                   | 8.9%<br>(5.5-13%)                   | 350<br>(220-510)       | 41000<br>(29000-56000)    |
| United States | 1995 | Female | 20 to 24 | 74%<br>(65-80%)                | 26%<br>(20-35%)          | 3.5<br>(3-4)                                | 5.8%<br>(4.6-7%)                     | 13%<br>(9.7-17%)                    | 570<br>(420-730)       | 77000<br>(59000-98000)    |
| United States | 1995 | Female | 25 to 29 | 78%<br>(71-83%)                | 22%<br>(17-29%)          | 3.1<br>(2.7-3.5)                            | 4.9%<br>(4-5.8%)                     | 10%<br>(7.7-13%)                    | 610<br>(460-780)       | 78000<br>(60000-97000)    |
| United States | 1995 | Female | 30 to 34 | 80%<br>(73-85%)                | 20%<br>(15-27%)          | 2.7<br>(2.4-3.2)                            | 4.3%<br>(3.5-5.1%)                   | 8.8%<br>(6.9-11%)                   | 830<br>(650-1000)      | 84000<br>(67000-100000)   |
| United States | 1995 | Female | 35 to 39 | 80%<br>(74-85%)                | 20%<br>(15-26%)          | 2.6<br>(2.2-3)                              | 4.3%<br>(3.6-5.2%)                   | 9.1%<br>(7.4-11%)                   | 1300<br>(1000-1500)    | 97000<br>(80000-110000)   |
| United States | 1995 | Female | 40 to 44 | 78%<br>(73-84%)                | 22%<br>(16-27%)          | 2.4<br>(2.1-2.8)                            | 4.3%<br>(3.5-5.2%)                   | 8.9%<br>(7.3-10%)                   | 1600<br>(1300-1900)    | 99000<br>(82000-120000)   |
| United States | 1995 | Female | 45 to 49 | 76%<br>(69-82%)                | 24%<br>(18-31%)          | 2.2<br>(1.9-2.6)                            | 3.9%<br>(3.1-4.7%)                   | 7.5%<br>(6.1-9%)                    | 1800<br>(1400-2100)    | 91000<br>(74000-110000)   |
| United States | 1995 | Female | 50 to 54 | 73%<br>(66-79%)                | 27%<br>(21-34%)          | 1.9<br>(1.6-2.3)                            | 3.1%<br>(2.3-4%)                     | 5.5%<br>(4.2-6.9%)                  | 1600<br>(1200-2000)    | 69000<br>(52000-87000)    |
| United States | 1995 | Female | 55 to 59 | 69%<br>(60-76%)                | 31%<br>(24-40%)          | 1.6<br>(1.3-1.9)                            | 2.2%<br>(1.4-3.1%)                   | 3.5%<br>(2.3-4.8%)                  | 1300<br>(860-1800)     | 48000<br>(32000-67000)    |
| United States | 1995 | Female | 60 to 64 | 63%<br>(54-72%)                | 37%<br>(28-46%)          | 1.4<br>(1.1-1.7)                            | 1.3%<br>(0.55-2.2%)                  | 1.9%<br>(0.74-3.1%)                 | 1100<br>(410-1700)     | 32000<br>(13000-53000)    |
| United States | 1995 | Female | 65 to 69 | 58%<br>(49-67%)                | 42%<br>(33-51%)          | 1.3<br>(0.99-1.6)                           | 0.72%<br>(-0.14-1.6%)                | 0.98%<br>(-0.22-2.2%)               | 830<br>(-190-1900)     | 21000<br>(-4200-46000)    |
| United States | 1995 | Female | 70 to 74 | 54%<br>(42-64%)                | 46%<br>(36-58%)          | 1.1<br>(0.84-1.4)                           | 0.18%<br>(-0.72-1.1%)                | 0.21%<br>(-1.1-1.4%)                | 250<br>(-1300-1700)    | 5900<br>(-23000-34000)    |
| United States | 1995 | Female | 75 to 79 | 48%<br>(37-60%)                | 52%<br>(40-63%)          | 0.95<br>(0.69-1.3)                          | -0.29%<br>(-1.2-0.6%)                | -0.48%<br>(-1.7-0.71%)              | -730<br>(-2500-1100)   | -8700<br>(-35000-18000)   |
| United States | 1995 | Female | 80 to 84 | 43%<br>(31-53%)                | 57%<br>(47-69%)          | 0.81<br>(0.56-1.1)                          | -0.59%<br>(-1.5-0.25%)               | -0.86%<br>(-2-0.27%)                | -1600<br>(-3600-480)   | -15000<br>(-36000-6200)   |
| United States | 1995 | Female | 85 to 89 | 40%<br>(29-51%)                | 60%<br>(49-71%)          | 0.75<br>(0.5-1)                             | -0.82%<br>(-1.8-0.064%)              | -1.2%<br>(-2.5--0.0043%)            | -2100<br>(-4500--7.8)  | -14000<br>(-32000-1100)   |
| United States | 1995 | Female | 90 to 94 | 41%<br>(30-52%)                | 59%<br>(48-70%)          | 0.78<br>(0.52-1.1)                          | -1.1%<br>(-2.2--0.078%)              | -1.5%<br>(-2.9--0.22%)              | -2000<br>(-3800--290)  | -9200<br>(-18000--660)    |
| United States | 1995 | Female | 95 plus  | 45%<br>(31-58%)                | 55%<br>(42-69%)          | 0.85<br>(0.53-1.2)                          | -1.5%<br>(-2.9--0.21%)               | -2%<br>(-3.9--0.44%)                | -1400<br>(-2700--300)  | -4100<br>(-8000--580)     |
| United States | 1995 | Male   | All Ages | 72%<br>(69-74%)                | 28%<br>(26-31%)          | 3.1<br>(2.8-3.4)                            | 5.9%<br>(4.7-7%)                     | 3.5%<br>(1.9-5.2%)                  | 42000<br>(22000-61000) | 240000<br>(190000-300000) |

| Location      | Year | Sex    | Age      | Prevalence of current drinkers | Prevalence of abstainers | Population average of standard drinks daily | Percent of total attributable deaths | Percent of total attributable DALYs | Attributable deaths   | Attributable DALYs        |
|---------------|------|--------|----------|--------------------------------|--------------------------|---------------------------------------------|--------------------------------------|-------------------------------------|-----------------------|---------------------------|
| United States | 1995 | Male   | 15 to 19 | 56%<br>(49-63%)                | 44%<br>(37-51%)          | 2.6<br>(2.2-3.1)                            | 8.9%<br>(6.7-11%)                    | 14%<br>(10-19%)                     | 1600<br>(1100-2100)   | 140000<br>(110000-180000) |
| United States | 1995 | Male   | 20 to 24 | 81%<br>(76-86%)                | 19%<br>(14-24%)          | 6.1<br>(5.3-6.9)                            | 18%<br>(15-21%)                      | 27%<br>(21-32%)                     | 3900<br>(3100-4700)   | 330000<br>(270000-390000) |
| United States | 1995 | Male   | 25 to 29 | 87%<br>(83-90%)                | 13%<br>(10-17%)          | 5.5<br>(4.9-6.2)                            | 14%<br>(12-17%)                      | 21%<br>(17-25%)                     | 3300<br>(2700-4000)   | 280000<br>(230000-330000) |
| United States | 1995 | Male   | 30 to 34 | 89%<br>(86-92%)                | 11%<br>(7.8-14%)         | 4.9<br>(4.3-5.6)                            | 11%<br>(9.1-12%)                     | 14%<br>(12-17%)                     | 3500<br>(2800-4100)   | 270000<br>(220000-320000) |
| United States | 1995 | Male   | 35 to 39 | 90%<br>(86-92%)                | 10%<br>(7.6-14%)         | 4.5<br>(4-5.1)                              | 9.9%<br>(8.3-11%)                    | 13%<br>(11-15%)                     | 4000<br>(3300-4700)   | 280000<br>(230000-320000) |
| United States | 1995 | Male   | 40 to 44 | 89%<br>(86-92%)                | 11%<br>(7.7-14%)         | 4.1<br>(3.6-4.7)                            | 9.5%<br>(8-11%)                      | 12%<br>(10-14%)                     | 4600<br>(3800-5300)   | 270000<br>(230000-310000) |
| United States | 1995 | Male   | 45 to 49 | 89%<br>(85-92%)                | 11%<br>(7.9-15%)         | 3.8<br>(3.3-4.3)                            | 8.7%<br>(7.3-10%)                    | 11%<br>(9.4-13%)                    | 4800<br>(4000-5700)   | 240000<br>(210000-290000) |
| United States | 1995 | Male   | 50 to 54 | 88%<br>(84-91%)                | 12%<br>(8.7-16%)         | 3.5<br>(3-4)                                | 7.1%<br>(5.7-8.6%)                   | 8.9%<br>(6.9-11%)                   | 4300<br>(3300-5400)   | 190000<br>(150000-230000) |
| United States | 1995 | Male   | 55 to 59 | 86%<br>(82-90%)                | 14%<br>(9.9-18%)         | 3.1<br>(2.6-3.6)                            | 5.4%<br>(4-7%)                       | 6.5%<br>(4.5-8.6%)                  | 3800<br>(2600-5100)   | 150000<br>(110000-190000) |
| United States | 1995 | Male   | 60 to 64 | 84%<br>(79-88%)                | 16%<br>(12-21%)          | 2.8<br>(2.4-3.3)                            | 3.9%<br>(2.4-5.5%)                   | 4.3%<br>(2.4-6.4%)                  | 3600<br>(2000-5300)   | 120000<br>(72000-170000)  |
| United States | 1995 | Male   | 65 to 69 | 82%<br>(76-87%)                | 18%<br>(13-24%)          | 2.6<br>(2.2-3)                              | 2.5%<br>(1.1-4.1%)                   | 2.6%<br>(0.73-4.6%)                 | 3200<br>(880-5500)    | 89000<br>(37000-150000)   |
| United States | 1995 | Male   | 70 to 74 | 79%<br>(73-85%)                | 21%<br>(15-27%)          | 2.3<br>(1.9-2.8)                            | 1.5%<br>(0.0083-3.1%)                | 1.4%<br>(-0.47-3.3%)                | 2200<br>(-730-5200)   | 54000<br>(300-110000)     |
| United States | 1995 | Male   | 75 to 79 | 77%<br>(69-83%)                | 23%<br>(17-31%)          | 2<br>(1.6-2.5)                              | 0.7%<br>(-0.68-2.2%)                 | 0.42%<br>(-1.3-2.3%)                | 700<br>(-2200-3800)   | 21000<br>(-20000-65000)   |
| United States | 1995 | Male   | 80 to 84 | 73%<br>(64-81%)                | 27%<br>(19-36%)          | 1.8<br>(1.4-2.2)                            | 0.17%<br>(-1.2-1.5%)                 | -0.17%<br>(-1.9-1.4%)               | -270<br>(-2900-2300)  | 3400<br>(-23000-30000)    |
| United States | 1995 | Male   | 85 to 89 | 71%<br>(62-79%)                | 29%<br>(21-38%)          | 1.6<br>(1.2-2.1)                            | -0.18%<br>(-1.6-1.2%)                | -0.6%<br>(-2.3-1%)                  | -670<br>(-2600-1200)  | -1800<br>(-16000-13000)   |
| United States | 1995 | Male   | 90 to 94 | 72%<br>(63-80%)                | 28%<br>(20-37%)          | 1.7<br>(1.2-2.1)                            | -0.56%<br>(-2.2-0.99%)               | -1.1%<br>(-3.1-0.78%)               | -600<br>(-1700-420)   | -1900<br>(-7300-3400)     |
| United States | 1995 | Male   | 95 plus  | 74%<br>(63-83%)                | 26%<br>(17-37%)          | 1.7<br>(1.2-2.2)                            | -0.81%<br>(-2.6-0.9%)                | -1.5%<br>(-3.8-0.61%)               | -270<br>(-690-110)    | -600<br>(-1900-680)       |
| United States | 2000 | Female | All Ages | 60%<br>(58-63%)                | 40%<br>(37-42%)          | 1.7<br>(1.5-1.9)                            | 1.8%<br>(1.2-2.5%)                   | 0.37%<br>(-0.76-1.5%)               | 4500<br>(-9200-19000) | 710000<br>(460000-980000) |
| United States | 2000 | Female | 15 to 19 | 52%<br>(44-60%)                | 48%<br>(40-56%)          | 1.7<br>(1.3-2.1)                            | 3.2%<br>(2.2-4.2%)                   | 8.8%<br>(5.3-13%)                   | 340<br>(210-500)      | 41000<br>(29000-54000)    |
| United States | 2000 | Female | 20 to 24 | 73%<br>(65-80%)                | 27%<br>(20-35%)          | 3.5<br>(3-4)                                | 5.1%<br>(4.2-6.2%)                   | 13%<br>(9.6-17%)                    | 560<br>(420-720)      | 71000<br>(56000-88000)    |
| United States | 2000 | Female | 25 to 29 | 77%<br>(71-82%)                | 23%<br>(18-29%)          | 3.1<br>(2.7-3.5)                            | 4.5%<br>(3.6-5.3%)                   | 11%<br>(7.9-13%)                    | 540<br>(400-680)      | 67000<br>(53000-82000)    |
| United States | 2000 | Female | 30 to 34 | 79%<br>(73-84%)                | 21%<br>(16-27%)          | 2.8<br>(2.4-3.2)                            | 4.1%<br>(3.3-4.9%)                   | 9.2%<br>(7.2-11%)                   | 700<br>(540-850)      | 71000<br>(57000-88000)    |

| Location      | Year | Sex    | Age      | Prevalence of current drinkers | Prevalence of abstainers | Population average of standard drinks daily | Percent of total attributable deaths | Percent of total attributable DALYs | Attributable deaths    | Attributable DALYs           |
|---------------|------|--------|----------|--------------------------------|--------------------------|---------------------------------------------|--------------------------------------|-------------------------------------|------------------------|------------------------------|
| United States | 2000 | Female | 35 to 39 | 80%<br>(75-85%)                | 20%<br>(15-25%)          | 2.6<br>(2.2-3)                              | 4.2%<br>(3.4-5%)                     | 9.3%<br>(7.5-11%)                   | 1200<br>(960-1400)     | 92000<br>(76000-110000)      |
| United States | 2000 | Female | 40 to 44 | 79%<br>(74-84%)                | 21%<br>(16-26%)          | 2.5<br>(2.1-2.8)                            | 4.3%<br>(3.5-5.2%)                   | 9%<br>(7.3-11%)                     | 1800<br>(1400-2100)    | 110000<br>(89000-130000)     |
| United States | 2000 | Female | 45 to 49 | 77%<br>(70-83%)                | 23%<br>(17-30%)          | 2.3<br>(2-2.7)                              | 4%<br>(3.2-4.9%)                     | 7.8%<br>(6.3-9.3%)                  | 2000<br>(1600-2400)    | 100000<br>(85000-130000)     |
| United States | 2000 | Female | 50 to 54 | 75%<br>(68-80%)                | 25%<br>(20-32%)          | 2<br>(1.7-2.4)                              | 3.2%<br>(2.4-4.2%)                   | 5.7%<br>(4.4-7.3%)                  | 2000<br>(1500-2500)    | 87000<br>(66000-110000)      |
| United States | 2000 | Female | 55 to 59 | 71%<br>(63-78%)                | 29%<br>(22-37%)          | 1.7<br>(1.4-2)                              | 2.3%<br>(1.5-3.2%)                   | 3.7%<br>(2.4-5.1%)                  | 1600<br>(1000-2200)    | 58000<br>(38000-80000)       |
| United States | 2000 | Female | 60 to 64 | 65%<br>(57-72%)                | 35%<br>(28-43%)          | 1.5<br>(1.2-1.8)                            | 1.3%<br>(0.54-2.2%)                  | 2%<br>(0.77-3.3%)                   | 1100<br>(430-1800)     | 34000<br>(13000-55000)       |
| United States | 2000 | Female | 65 to 69 | 59%<br>(48-69%)                | 41%<br>(31-52%)          | 1.3<br>(1-1.6)                              | 0.76%<br>(-0.089-1.7%)               | 1.1%<br>(-0.095-2.3%)               | 820<br>(-72-1700)      | 20000<br>(-2300-44000)       |
| United States | 2000 | Female | 70 to 74 | 55%<br>(44-65%)                | 45%<br>(35-56%)          | 1.2<br>(0.88-1.5)                           | 0.37%<br>(-0.65-1.2%)                | 0.37%<br>(-0.87-1.6%)               | 420<br>(-1000-1800)    | 8400<br>(-19000-36000)       |
| United States | 2000 | Female | 75 to 79 | 51%<br>(40-62%)                | 49%<br>(38-60%)          | 1<br>(0.76-1.4)                             | -0.21%<br>(-1.1-0.68%)               | -0.34%<br>(-1.5-0.85%)              | -560<br>(-2400-1400)   | -6700<br>(-33000-22000)      |
| United States | 2000 | Female | 80 to 84 | 46%<br>(34-57%)                | 54%<br>(43-66%)          | 0.91<br>(0.64-1.2)                          | -0.55%<br>(-1.4-0.31%)               | -0.79%<br>(-1.9-0.37%)              | -1500<br>(-3700-700)   | -15000<br>(-38000-8300)      |
| United States | 2000 | Female | 85 to 89 | 43%<br>(32-55%)                | 57%<br>(45-68%)          | 0.83<br>(0.56-1.2)                          | -0.8%<br>(-1.8-0.085%)               | -1.1%<br>(-2.5-0.033%)              | -2300<br>(-5100-68)    | -16000<br>(-35000-1700)      |
| United States | 2000 | Female | 90 to 94 | 45%<br>(33-56%)                | 55%<br>(44-67%)          | 0.87<br>(0.6-1.2)                           | -1.1%<br>(-2.2--0.056%)              | -1.5%<br>(-3--0.2%)                 | -2400<br>(-4600--310)  | -11000<br>(-22000--540)      |
| United States | 2000 | Female | 95 plus  | 50%<br>(36-63%)                | 50%<br>(37-64%)          | 0.98<br>(0.62-1.4)                          | -1.6%<br>(-3.1--0.19%)               | -2.1%<br>(-4.2--0.39%)              | -1700<br>(-3400--310)  | -5200<br>(-10000--630)       |
| United States | 2000 | Male   | All Ages | 72%<br>(70-75%)                | 28%<br>(25-30%)          | 3<br>(2.7-3.4)                              | 6%<br>(4.9-7.1%)                     | 3.8%<br>(2.2-5.4%)                  | 44000<br>(25000-63000) | 2500000<br>(2000000-3000000) |
| United States | 2000 | Male   | 15 to 19 | 54%<br>(48-61%)                | 46%<br>(39-52%)          | 2.5<br>(2.1-3)                              | 7.9%<br>(5.9-10%)                    | 14%<br>(9.8-19%)                    | 1300<br>(950-1800)     | 120000<br>(94000-160000)     |
| United States | 2000 | Male   | 20 to 24 | 81%<br>(75-86%)                | 19%<br>(14-25%)          | 6<br>(5.3-6.9)                              | 16%<br>(13-19%)                      | 26%<br>(21-32%)                     | 3500<br>(2800-4200)    | 290000<br>(240000-350000)    |
| United States | 2000 | Male   | 25 to 29 | 87%<br>(83-90%)                | 13%<br>(10-17%)          | 5.5<br>(4.8-6.2)                            | 23%<br>(11-16%)                      | 23%<br>(18-28%)                     | 2900<br>(2300-3500)    | 240000<br>(200000-290000)    |
| United States | 2000 | Male   | 30 to 34 | 89%<br>(86-92%)                | 11%<br>(7.9-14%)         | 4.9<br>(4.3-5.5)                            | 11%<br>(9.6-13%)                     | 18%<br>(15-22%)                     | 2800<br>(2300-3400)    | 220000<br>(190000-270000)    |
| United States | 2000 | Male   | 35 to 39 | 90%<br>(87-92%)                | 10%<br>(7.6-13%)         | 4.5<br>(3.9-5.1)                            | 11%<br>(8.8-12%)                     | 16%<br>(13-19%)                     | 3700<br>(3100-4400)    | 260000<br>(210000-300000)    |
| United States | 2000 | Male   | 40 to 44 | 90%<br>(87-92%)                | 10%<br>(7.6-13%)         | 4.1<br>(3.6-4.7)                            | 10%<br>(8.5-12%)                     | 14%<br>(12-17%)                     | 4900<br>(4000-5700)    | 280000<br>(240000-330000)    |
| United States | 2000 | Male   | 45 to 49 | 89%<br>(86-92%)                | 11%<br>(7.6-14%)         | 3.8<br>(3.3-4.4)                            | 9.4%<br>(7.9-11%)                    | 13%<br>(11-15%)                     | 5700<br>(4700-6600)    | 290000<br>(240000-330000)    |

| Location      | Year | Sex    | Age      | Prevalence of current drinkers | Prevalence of abstainers | Population average of standard drinks daily | Percent of total attributable deaths | Percent of total attributable DALYs | Attributable deaths    | Attributable DALYs         |
|---------------|------|--------|----------|--------------------------------|--------------------------|---------------------------------------------|--------------------------------------|-------------------------------------|------------------------|----------------------------|
| United States | 2000 | Male   | 50 to 54 | 89%<br>(85-92%)                | 11%<br>(8.4-15%)         | 3.5<br>(3-4)                                | 7.8%<br>(6.4-9.3%)                   | 10%<br>(8-12%)                      | 5600<br>(4400-6700)    | 250000<br>(200000-300000)  |
| United States | 2000 | Male   | 55 to 59 | 87%<br>(83-91%)                | 13%<br>(9.2-17%)         | 3.2<br>(2.7-3.6)                            | 6%<br>(4.5-7.4%)                     | 7.2%<br>(5.1-9.3%)                  | 4600<br>(3300-6000)    | 180000<br>(140000-230000)  |
| United States | 2000 | Male   | 60 to 64 | 85%<br>(80-89%)                | 15%<br>(11-20%)          | 2.8<br>(2.4-3.3)                            | 4.3%<br>(2.9-5.8%)                   | 4.9%<br>(2.9-6.8%)                  | 3800<br>(2300-5400)    | 130000<br>(86000-170000)   |
| United States | 2000 | Male   | 65 to 69 | 82%<br>(75-87%)                | 18%<br>(13-25%)          | 2.6<br>(2.1-3)                              | 2.9%<br>(1.6-4.4%)                   | 3.1%<br>(1.3-5%)                    | 3200<br>(1400-5200)    | 91000<br>(49000-140000)    |
| United States | 2000 | Male   | 70 to 74 | 80%<br>(73-85%)                | 20%<br>(15-27%)          | 2.3<br>(1.9-2.8)                            | 1.8%<br>(0.45-3.3%)                  | 1.8%<br>(0.041-3.6%)                | 2600<br>(58-5200)      | 62000<br>(15000-110000)    |
| United States | 2000 | Male   | 75 to 79 | 78%<br>(71-84%)                | 22%<br>(16-29%)          | 2.1<br>(1.7-2.5)                            | 0.97%<br>(-0.39-2.4%)                | 0.75%<br>(-0.95-2.5%)               | 1300<br>(-1600-4300)   | 30000<br>(-12000-75000)    |
| United States | 2000 | Male   | 80 to 84 | 75%<br>(66-82%)                | 25%<br>(18-34%)          | 1.8<br>(1.4-2.3)                            | 0.35%<br>(-0.95-1.7%)                | 0.03%<br>(-1.6-1.7%)                | 50<br>(-2600-2800)     | 7400<br>(-20000-37000)     |
| United States | 2000 | Male   | 85 to 89 | 73%<br>(65-81%)                | 27%<br>(19-35%)          | 1.7<br>(1.3-2.1)                            | -0.079%<br>(-1.4-1.2%)               | -0.48%<br>(-2.2-1.1%)               | -620<br>(-2800-1500)   | -900<br>(-17000-15000)     |
| United States | 2000 | Male   | 90 to 94 | 75%<br>(66-81%)                | 25%<br>(19-34%)          | 1.7<br>(1.3-2.2)                            | -0.52%<br>(-2.1-0.93%)               | -1%<br>(-3-0.76%)                   | -670<br>(-1900-490)    | -2100<br>(-8300-3800)      |
| United States | 2000 | Male   | 95 plus  | 76%<br>(66-83%)                | 24%<br>(17-34%)          | 1.7<br>(1.2-2.3)                            | -0.78%<br>(-2.6-0.85%)               | -1.4%<br>(-3.7-0.63%)               | -300<br>(-780-130)     | -670<br>(-2200-760)        |
| United States | 2005 | Female | All Ages | 61%<br>(58-63%)                | 39%<br>(37-42%)          | 1.8<br>(1.6-2)                              | 2.1%<br>(1.5-2.8%)                   | 0.87%<br>(-0.13-1.9%)               | 11000<br>(-1600-23000) | 840000<br>(600000-1100000) |
| United States | 2005 | Female | 15 to 19 | 50%<br>(43-58%)                | 50%<br>(42-57%)          | 1.7<br>(1.4-2.1)                            | 3.1%<br>(2.2-4%)                     | 8.8%<br>(5.3-13%)                   | 340<br>(210-490)       | 41000<br>(30000-54000)     |
| United States | 2005 | Female | 20 to 24 | 72%<br>(65-79%)                | 28%<br>(21-35%)          | 3.7<br>(3.1-4.2)                            | 5.2%<br>(4.3-6.2%)                   | 13%<br>(9.6-16%)                    | 630<br>(470-780)       | 78000<br>(62000-97000)     |
| United States | 2005 | Female | 25 to 29 | 77%<br>(71-82%)                | 23%<br>(18-29%)          | 3.2<br>(2.8-3.7)                            | 4.6%<br>(3.8-5.4%)                   | 11%<br>(8.3-13%)                    | 580<br>(450-710)       | 70000<br>(56000-86000)     |
| United States | 2005 | Female | 30 to 34 | 79%<br>(73-84%)                | 21%<br>(16-27%)          | 2.9<br>(2.5-3.3)                            | 4.1%<br>(3.3-4.9%)                   | 9.3%<br>(7.3-11%)                   | 680<br>(530-820)       | 69000<br>(56000-84000)     |
| United States | 2005 | Female | 35 to 39 | 79%<br>(74-84%)                | 21%<br>(16-26%)          | 2.7<br>(2.4-3.2)                            | 4.2%<br>(3.4-5%)                     | 9.4%<br>(7.7-11%)                   | 1100<br>(880-1300)     | 84000<br>(68000-100000)    |
| United States | 2005 | Female | 40 to 44 | 79%<br>(74-84%)                | 21%<br>(16-26%)          | 2.6<br>(2.3-3)                              | 4.4%<br>(3.6-5.3%)                   | 9.3%<br>(7.7-11%)                   | 1800<br>(1500-2200)    | 110000<br>(92000-130000)   |
| United States | 2005 | Female | 45 to 49 | 78%<br>(71-83%)                | 22%<br>(17-29%)          | 2.4<br>(2.1-2.8)                            | 4.3%<br>(3.5-5.2%)                   | 8.3%<br>(6.8-9.8%)                  | 2500<br>(2000-2900)    | 130000<br>(100000-150000)  |
| United States | 2005 | Female | 50 to 54 | 75%<br>(69-81%)                | 25%<br>(19-31%)          | 2.2<br>(1.8-2.5)                            | 3.7%<br>(2.9-4.6%)                   | 6.6%<br>(5.3-8%)                    | 2600<br>(2100-3100)    | 110000<br>(87000-140000)   |
| United States | 2005 | Female | 55 to 59 | 71%<br>(64-78%)                | 29%<br>(22-36%)          | 1.9<br>(1.6-2.2)                            | 2.7%<br>(1.9-3.5%)                   | 4.6%<br>(3.4-5.8%)                  | 2300<br>(1700-2900)    | 82000<br>(58000-110000)    |
| United States | 2005 | Female | 60 to 64 | 66%<br>(58-73%)                | 34%<br>(27-42%)          | 1.6<br>(1.3-1.9)                            | 1.7%<br>(0.87-2.5%)                  | 2.7%<br>(1.6-3.8%)                  | 1600<br>(960-2300)     | 47000<br>(25000-70000)     |

| Location      | Year | Sex    | Age      | Prevalence of current drinkers | Prevalence of abstainers | Population average of standard drinks daily | Percent of total attributable deaths | Percent of total attributable DALYs | Attributable deaths    | Attributable DALYs        |
|---------------|------|--------|----------|--------------------------------|--------------------------|---------------------------------------------|--------------------------------------|-------------------------------------|------------------------|---------------------------|
| United States | 2005 | Female | 65 to 69 | 58%<br>(49-66%)                | 42%<br>(34-51%)          | 1.3<br>(1.1-1.6)                            | 1%<br>(0.26-1.8%)                    | 1.6%<br>(0.64-2.6%)                 | 1200<br>(470-1900)     | 27000<br>(6700-49000)     |
| United States | 2005 | Female | 70 to 74 | 53%<br>(45-61%)                | 47%<br>(39-55%)          | 1.2<br>(0.94-1.5)                           | 0.55%<br>(-0.19-1.4%)                | 0.88%<br>(-0.13-1.9%)               | 880<br>(-130-1900)     | 16000<br>(-5400-38000)    |
| United States | 2005 | Female | 75 to 79 | 50%<br>(42-59%)                | 50%<br>(41-58%)          | 1.1<br>(0.86-1.3)                           | 0.11%<br>(-0.63-0.9%)                | 0.17%<br>(-0.8-1.2%)                | 240<br>(-1200-1700)    | 3400<br>(-19000-27000)    |
| United States | 2005 | Female | 80 to 84 | 47%<br>(36-57%)                | 53%<br>(43-64%)          | 0.98<br>(0.71-1.3)                          | -0.23%<br>(-1-0.56%)                 | -0.33%<br>(-1.4-0.69%)              | -650<br>(-2600-1300)   | -6400<br>(-29000-16000)   |
| United States | 2005 | Female | 85 to 89 | 45%<br>(35-55%)                | 55%<br>(45-65%)          | 0.93<br>(0.66-1.2)                          | -0.53%<br>(-1.4-0.29%)               | -0.78%<br>(-1.9-0.3%)               | -1600<br>(-4000-620)   | -11000<br>(-30000-5900)   |
| United States | 2005 | Female | 90 to 94 | 47%<br>(37-56%)                | 53%<br>(44-63%)          | 0.97<br>(0.7-1.3)                           | -0.85%<br>(-1.9-0.14%)               | -1.2%<br>(-2.5-0.086%)              | -2000<br>(-4100-140)   | -9000<br>(-21000-1500)    |
| United States | 2005 | Female | 95 plus  | 52%<br>(39-63%)                | 48%<br>(37-61%)          | 1.1<br>(0.71-1.5)                           | -1.3%<br>(-2.7-0.014%)               | -1.8%<br>(-3.5--0.16%)              | -1500<br>(-3100--140)  | -4600<br>(-9600-52)       |
| United States | 2005 | Male   | All Ages | 72%<br>(70-75%)                | 28%<br>(25-30%)          | 3.2<br>(2.8-3.5)                            | 6.6%<br>(5.5-7.7%)                   | 4.7%<br>(3.1-6.2%)                  | 56000<br>(37000-74000) | 280000<br>(230000-340000) |
| United States | 2005 | Male   | 15 to 19 | 53%<br>(46-60%)                | 47%<br>(40-54%)          | 2.6<br>(2.1-3)                              | 7.7%<br>(5.9-9.8%)                   | 14%<br>(9.8-18%)                    | 1300<br>(970-1800)     | 13000<br>(96000-160000)   |
| United States | 2005 | Male   | 20 to 24 | 80%<br>(75-85%)                | 20%<br>(15-25%)          | 6.3<br>(5.4-7.2)                            | 16%<br>(13-19%)                      | 25%<br>(20-30%)                     | 4000<br>(3200-4800)    | 33000<br>(270000-390000)  |
| United States | 2005 | Male   | 25 to 29 | 87%<br>(83-90%)                | 13%<br>(10-17%)          | 5.7<br>(5-6.5)                              | 14%<br>(12-17%)                      | 22%<br>(18-27%)                     | 3200<br>(2600-3900)    | 26000<br>(22000-310000)   |
| United States | 2005 | Male   | 30 to 34 | 89%<br>(86-92%)                | 11%<br>(8-14%)           | 5.1<br>(4.4-5.8)                            | 12%<br>(10-14%)                      | 19%<br>(15-23%)                     | 2900<br>(2300-3400)    | 22000<br>(19000-260000)   |
| United States | 2005 | Male   | 35 to 39 | 90%<br>(86-92%)                | 10%<br>(7.6-14%)         | 4.7<br>(4.1-5.3)                            | 11%<br>(9.2-13%)                     | 17%<br>(14-20%)                     | 3400<br>(2800-4000)    | 24000<br>(20000-270000)   |
| United States | 2005 | Male   | 40 to 44 | 90%<br>(86-92%)                | 10%<br>(7.7-14%)         | 4.3<br>(3.8-4.9)                            | 10%<br>(8.9-12%)                     | 15%<br>(13-17%)                     | 5000<br>(4100-5800)    | 29000<br>(25000-340000)   |
| United States | 2005 | Male   | 45 to 49 | 89%<br>(86-92%)                | 11%<br>(7.6-14%)         | 4<br>(3.5-4.6)                              | 10%<br>(8.6-12%)                     | 14%<br>(12-16%)                     | 6800<br>(5700-7800)    | 34000<br>(29000-390000)   |
| United States | 2005 | Male   | 50 to 54 | 89%<br>(85-92%)                | 11%<br>(8.3-15%)         | 3.7<br>(3.2-4.2)                            | 8.9%<br>(7.4-10%)                    | 12%<br>(9.6-14%)                    | 7500<br>(6200-8800)    | 33000<br>(27000-380000)   |
| United States | 2005 | Male   | 55 to 59 | 87%<br>(83-91%)                | 13%<br>(9.4-17%)         | 3.3<br>(2.8-3.8)                            | 7%<br>(5.6-8.5%)                     | 8.9%<br>(6.9-11%)                   | 7000<br>(5400-8500)    | 26000<br>(21000-320000)   |
| United States | 2005 | Male   | 60 to 64 | 85%<br>(80-89%)                | 15%<br>(11-20%)          | 3<br>(2.6-3.4)                              | 5.1%<br>(3.7-6.5%)                   | 6%<br>(4.2-8%)                      | 5300<br>(3600-7000)    | 17000<br>(13000-220000)   |
| United States | 2005 | Male   | 65 to 69 | 82%<br>(76-86%)                | 18%<br>(14-24%)          | 2.7<br>(2.3-3.1)                            | 3.6%<br>(2.3-4.9%)                   | 4.1%<br>(2.4-5.8%)                  | 4000<br>(2400-5700)    | 11000<br>(7300-160000)    |
| United States | 2005 | Male   | 70 to 74 | 80%<br>(74-84%)                | 20%<br>(16-26%)          | 2.4<br>(2-2.9)                              | 2.4%<br>(1.1-3.7%)                   | 2.6%<br>(0.94-4.2%)                 | 3200<br>(1200-5100)    | 7300<br>(3400-110000)     |
| United States | 2005 | Male   | 75 to 79 | 78%<br>(72-83%)                | 22%<br>(17-28%)          | 2.1<br>(1.8-2.6)                            | 1.5%<br>(0.29-2.7%)                  | 1.4%<br>(-0.13-2.9%)                | 2200<br>(-210-4600)    | 43000<br>(8600-81000)     |

| Location      | Year | Sex    | Age      | Prevalence of current drinkers | Prevalence of abstainers | Population average of standard drinks daily | Percent of total attributable deaths | Percent of total attributable DALYs | Attributable deaths   | Attributable DALYs         |
|---------------|------|--------|----------|--------------------------------|--------------------------|---------------------------------------------|--------------------------------------|-------------------------------------|-----------------------|----------------------------|
| United States | 2005 | Male   | 80 to 84 | 76%<br>(67-82%)                | 24%<br>(18-33%)          | 1.9<br>(1.5-2.4)                            | 0.83%<br>(-0.31-2.1%)                | 0.59%<br>(-0.89-2.1%)               | 1000<br>(-1500-3600)  | 19000<br>(-7200-48000)     |
| United States | 2005 | Male   | 85 to 89 | 75%<br>(67-80%)                | 25%<br>(20-33%)          | 1.8<br>(1.5-2.3)                            | 0.34%<br>(-0.9-1.7%)                 | -0.027%<br>(-1.6-1.5%)              | -37<br>(-2200-2100)   | 4400<br>(-12000-21000)     |
| United States | 2005 | Male   | 90 to 94 | 75%<br>(68-81%)                | 25%<br>(19-32%)          | 1.9<br>(1.4-2.3)                            | -0.13%<br>(-1.6-1.3%)                | -0.61%<br>(-2.4-1.1%)               | -460<br>(-1800-800)   | -600<br>(-7300-6000)       |
| United States | 2005 | Male   | 95 plus  | 76%<br>(67-83%)                | 24%<br>(17-33%)          | 1.8<br>(1.3-2.4)                            | -0.4%<br>(-2.1-1.3%)                 | -0.99%<br>(-3.1-1%)                 | -240<br>(-730-250)    | -390<br>(-2000-1300)       |
| United States | 2010 | Female | All Ages | 59%<br>(57-62%)                | 41%<br>(38-43%)          | 1.9<br>(1.6-2.1)                            | 2.3%<br>(1.7-3%)                     | 1.3%<br>(0.33-2.4%)                 | 17000<br>(4000-30000) | 950000<br>(680000-1200000) |
| United States | 2010 | Female | 15 to 19 | 37%<br>(31-44%)                | 63%<br>(56-69%)          | 1.3<br>(1-1.6)                              | 2.4%<br>(1.8-3.1%)                   | 7.1%<br>(4.4-10%)                   | 220<br>(140-320)      | 32000<br>(24000-42000)     |
| United States | 2010 | Female | 20 to 24 | 72%<br>(64-78%)                | 28%<br>(22-36%)          | 3.7<br>(3.1-4.4)                            | 5.1%<br>(4.2-6.1%)                   | 13%<br>(9.9-16%)                    | 620<br>(470-780)      | 79000<br>(62000-97000)     |
| United States | 2010 | Female | 25 to 29 | 78%<br>(72-83%)                | 22%<br>(17-28%)          | 3.4<br>(2.9-4)                              | 4.7%<br>(3.9-5.6%)                   | 11%<br>(8.5-14%)                    | 660<br>(500-810)      | 78000<br>(63000-95000)     |
| United States | 2010 | Female | 30 to 34 | 79%<br>(73-84%)                | 21%<br>(16-27%)          | 3<br>(2.5-3.5)                              | 4.2%<br>(3.5-5.1%)                   | 9.8%<br>(7.6-12%)                   | 720<br>(560-870)      | 72000<br>(58000-89000)     |
| United States | 2010 | Female | 35 to 39 | 79%<br>(74-84%)                | 21%<br>(16-26%)          | 2.8<br>(2.4-3.4)                            | 4.2%<br>(3.5-5.1%)                   | 10%<br>(8.1-12%)                    | 1000<br>(840-1200)    | 81000<br>(66000-97000)     |
| United States | 2010 | Female | 40 to 44 | 79%<br>(74-84%)                | 21%<br>(16-26%)          | 2.7<br>(2.3-3.2)                            | 4.4%<br>(3.6-5.4%)                   | 10%<br>(8.2-12%)                    | 1700<br>(1400-1900)   | 100000<br>(83000-120000)   |
| United States | 2010 | Female | 45 to 49 | 78%<br>(71-83%)                | 22%<br>(17-29%)          | 2.5<br>(2.1-3)                              | 4.5%<br>(3.6-5.6%)                   | 9%<br>(7.5-11%)                     | 2600<br>(2200-3100)   | 130000<br>(110000-160000)  |
| United States | 2010 | Female | 50 to 54 | 75%<br>(69-81%)                | 25%<br>(19-31%)          | 2.3<br>(1.9-2.7)                            | 4.1%<br>(3.2-5.1%)                   | 7.4%<br>(5.9-8.9%)                  | 3200<br>(2500-3800)   | 140000<br>(110000-170000)  |
| United States | 2010 | Female | 55 to 59 | 72%<br>(65-79%)                | 28%<br>(21-35%)          | 1.9<br>(1.6-2.3)                            | 3.1%<br>(2.2-4%)                     | 5.4%<br>(4.1-6.7%)                  | 2900<br>(2200-3600)   | 100000<br>(75000-140000)   |
| United States | 2010 | Female | 60 to 64 | 66%<br>(59-73%)                | 34%<br>(27-41%)          | 1.7<br>(1.4-2)                              | 2%<br>(1.1-2.9%)                     | 3.4%<br>(2.3-4.6%)                  | 2400<br>(1600-3200)   | 68000<br>(40000-99000)     |
| United States | 2010 | Female | 65 to 69 | 59%<br>(51-67%)                | 41%<br>(33-49%)          | 1.4<br>(1.1-1.8)                            | 1.3%<br>(0.53-2.1%)                  | 2.2%<br>(1.2-3.2%)                  | 1800<br>(940-2600)    | 41000<br>(17000-65000)     |
| United States | 2010 | Female | 70 to 74 | 54%<br>(45-61%)                | 46%<br>(39-55%)          | 1.2<br>(0.97-1.5)                           | 0.82%<br>(0.075-1.6%)                | 1.4%<br>(0.42-2.3%)                 | 1300<br>(410-2300)    | 23000<br>(2200-45000)      |
| United States | 2010 | Female | 75 to 79 | 50%<br>(42-59%)                | 50%<br>(41-58%)          | 1.1<br>(0.88-1.4)                           | 0.39%<br>(-0.33-1.2%)                | 0.58%<br>(-0.31-1.6%)               | 760<br>(-410-2000)    | 11000<br>(-9000-33000)     |
| United States | 2010 | Female | 80 to 84 | 47%<br>(36-57%)                | 53%<br>(43-64%)          | 1<br>(0.74-1.3)                             | 0.072%<br>(-0.67-0.87%)              | 0.084%<br>(-0.87-1%)                | 150<br>(-1600-1900)   | 2000<br>(-18000-24000)     |
| United States | 2010 | Female | 85 to 89 | 46%<br>(35-56%)                | 54%<br>(44-65%)          | 0.98<br>(0.69-1.3)                          | -0.22%<br>(-1-0.65%)                 | -0.37%<br>(-1.4-0.66%)              | -800<br>(-3000-1400)  | -4700<br>(-22000-14000)    |
| United States | 2010 | Female | 90 to 94 | 47%<br>(37-56%)                | 53%<br>(44-63%)          | 1<br>(0.72-1.3)                             | -0.53%<br>(-1.5-0.47%)               | -0.81%<br>(-2-0.4%)                 | -1400<br>(-3400-680)  | -5900<br>(-17000-5200)     |

| Location      | Year | Sex    | Age      | Prevalence of current drinkers | Prevalence of abstainers | Population average of standard drinks daily | Percent of total attributable deaths | Percent of total attributable DALYs | Attributable deaths    | Attributable DALYs        |
|---------------|------|--------|----------|--------------------------------|--------------------------|---------------------------------------------|--------------------------------------|-------------------------------------|------------------------|---------------------------|
| United States | 2010 | Female | 95 plus  | 51%<br>(38-63%)                | 49%<br>(37-62%)          | 1.1<br>(0.72-1.5)                           | -0.89%<br>(-2.2-0.42%)               | -1.3%<br>(-2.9-0.28%)               | -1300<br>(-2800-270)   | -3600<br>(-8700-1800)     |
| United States | 2010 | Male   | All Ages | 72%<br>(70-75%)                | 28%<br>(25-30%)          | 3.2<br>(2.8-3.7)                            | 6.8%<br>(5.6-8%)                     | 5.2%<br>(3.7-6.8%)                  | 64000<br>(46000-84000) | 300000<br>(250000-360000) |
| United States | 2010 | Male   | 15 to 19 | 48%<br>(42-55%)                | 52%<br>(45-58%)          | 2.4<br>(1.9-2.9)                            | 6.7%<br>(5.2-8.4%)                   | 13%<br>(9.2-17%)                    | 1000<br>(720-1300)     | 100000<br>(78000-130000)  |
| United States | 2010 | Male   | 20 to 24 | 81%<br>(75-86%)                | 19%<br>(14-25%)          | 6.4<br>(5.5-7.6)                            | 15%<br>(12-18%)                      | 25%<br>(20-30%)                     | 3600<br>(2900-4400)    | 300000<br>(250000-360000) |
| United States | 2010 | Male   | 25 to 29 | 87%<br>(83-90%)                | 13%<br>(10-17%)          | 5.8<br>(5-6.8)                              | 14%<br>(11-16%)                      | 22%<br>(18-27%)                     | 3300<br>(2600-3900)    | 270000<br>(220000-320000) |
| United States | 2010 | Male   | 30 to 34 | 89%<br>(86-92%)                | 11%<br>(8-14%)           | 5.2<br>(4.4-6)                              | 12%<br>(10-14%)                      | 19%<br>(16-23%)                     | 2900<br>(2300-3500)    | 230000<br>(190000-270000) |
| United States | 2010 | Male   | 35 to 39 | 89%<br>(86-92%)                | 11%<br>(7.8-14%)         | 4.8<br>(4.1-5.6)                            | 11%<br>(9.3-13%)                     | 18%<br>(14-21%)                     | 3200<br>(2600-3800)    | 220000<br>(180000-260000) |
| United States | 2010 | Male   | 40 to 44 | 89%<br>(86-92%)                | 11%<br>(7.8-14%)         | 4.4<br>(3.7-5.1)                            | 11%<br>(8.9-12%)                     | 16%<br>(13-19%)                     | 4300<br>(3500-5000)    | 250000<br>(210000-300000) |
| United States | 2010 | Male   | 45 to 49 | 89%<br>(86-92%)                | 11%<br>(7.8-14%)         | 4.1<br>(3.5-4.8)                            | 10%<br>(8.8-12%)                     | 15%<br>(13-17%)                     | 6700<br>(5600-7800)    | 330000<br>(280000-390000) |
| United States | 2010 | Male   | 50 to 54 | 89%<br>(85-92%)                | 11%<br>(8.4-15%)         | 3.7<br>(3.1-4.3)                            | 9.6%<br>(8-11%)                      | 13%<br>(11-15%)                     | 8700<br>(7200-10000)   | 380000<br>(310000-440000) |
| United States | 2010 | Male   | 55 to 59 | 87%<br>(83-91%)                | 13%<br>(9.4-17%)         | 3.4<br>(2.8-4)                              | 7.9%<br>(6.4-9.5%)                   | 10%<br>(8.2-12%)                    | 8900<br>(7100-11000)   | 330000<br>(270000-400000) |
| United States | 2010 | Male   | 60 to 64 | 85%<br>(81-89%)                | 15%<br>(11-19%)          | 3.1<br>(2.6-3.6)                            | 5.8%<br>(4.4-7.3%)                   | 7.3%<br>(5.4-9.2%)                  | 7600<br>(5600-9600)    | 240000<br>(190000-310000) |
| United States | 2010 | Male   | 65 to 69 | 82%<br>(77-86%)                | 18%<br>(14-23%)          | 2.8<br>(2.3-3.3)                            | 4.2%<br>(2.9-5.6%)                   | 4.9%<br>(3.3-6.7%)                  | 5400<br>(3600-7300)    | 150000<br>(100000-200000) |
| United States | 2010 | Male   | 70 to 74 | 80%<br>(74-84%)                | 20%<br>(16-26%)          | 2.5<br>(2-3)                                | 2.8%<br>(1.6-4.2%)                   | 3.2%<br>(1.7-4.8%)                  | 3900<br>(2000-5900)    | 88000<br>(50000-130000)   |
| United States | 2010 | Male   | 75 to 79 | 78%<br>(72-83%)                | 22%<br>(17-28%)          | 2.2<br>(1.8-2.7)                            | 1.9%<br>(0.73-3.1%)                  | 1.9%<br>(0.47-3.5%)                 | 2700<br>(670-5000)     | 52000<br>(20000-88000)    |
| United States | 2010 | Male   | 80 to 84 | 76%<br>(67-82%)                | 24%<br>(18-33%)          | 2<br>(1.6-2.5)                              | 1.3%<br>(0.18-2.4%)                  | 1.1%<br>(-0.26-2.5%)                | 1800<br>(-440-4300)    | 29000<br>(4300-58000)     |
| United States | 2010 | Male   | 85 to 89 | 75%<br>(67-81%)                | 25%<br>(19-33%)          | 1.9<br>(1.5-2.4)                            | 0.76%<br>(-0.38-1.9%)                | 0.44%<br>(-0.95-1.8%)               | 670<br>(-1400-2800)    | 11000<br>(-5500-29000)    |
| United States | 2010 | Male   | 90 to 94 | 75%<br>(68-81%)                | 25%<br>(19-32%)          | 1.9<br>(1.4-2.4)                            | 0.28%<br>(-1-1.7%)                   | -0.16%<br>(-1.8-1.5%)               | -140<br>(-1600-1300)   | 1600<br>(-5900-9500)      |
| United States | 2010 | Male   | 95 plus  | 76%<br>(67-83%)                | 24%<br>(17-33%)          | 1.9<br>(1.3-2.5)                            | 0.036%<br>(-1.5-1.7%)                | -0.51%<br>(-2.4-1.5%)               | -150<br>(-710-430)     | 46<br>(-1800-2100)        |
| United States | 2016 | Female | All Ages | 60%<br>(57-63%)                | 40%<br>(37-43%)          | 1.9<br>(1.4-2.4)                            | 2.3%<br>(1.5-3.3%)                   | 1.4%<br>(0.2-2.7%)                  | 19000<br>(2700-37000)  | 100000<br>(66000-140000)  |
| United States | 2016 | Female | 15 to 19 | 35%<br>(29-43%)                | 65%<br>(57-71%)          | 1.2<br>(0.85-1.7)                           | 2.4%<br>(1.8-3.1%)                   | 7%<br>(4.2-11%)                     | 200<br>(120-310)       | 30000<br>(22000-40000)    |



| Location      | Year | Sex    | Age      | Prevalence of current drinkers | Prevalence of abstainers | Population average of standard drinks daily | Percent of total attributable deaths | Percent of total attributable DALYs | Attributable deaths     | Attributable DALYs        |
|---------------|------|--------|----------|--------------------------------|--------------------------|---------------------------------------------|--------------------------------------|-------------------------------------|-------------------------|---------------------------|
| United States | 2016 | Female | 20 to 24 | 72%<br>(64-79%)                | 28%<br>(21-36%)          | 3.7<br>(2.8-4.9)                            | 5.1%<br>(4-6.3%)                     | 13%<br>(9.3-17%)                    | 670<br>(480-890)        | 84000<br>(64000-100000)   |
| United States | 2016 | Female | 25 to 29 | 79%<br>(73-84%)                | 21%<br>(16-27%)          | 3.4<br>(2.6-4.4)                            | 4.8%<br>(3.7-5.9%)                   | 11%<br>(8.3-15%)                    | 740<br>(540-970)        | 84000<br>(65000-110000)   |
| United States | 2016 | Female | 30 to 34 | 79%<br>(73-85%)                | 21%<br>(15-27%)          | 3<br>(2.2-3.9)                              | 4.4%<br>(3.4-5.4%)                   | 10%<br>(7.5-13%)                    | 870<br>(650-1100)       | 83000<br>(64000-110000)   |
| United States | 2016 | Female | 35 to 39 | 80%<br>(74-85%)                | 20%<br>(15-26%)          | 2.8<br>(2.1-3.7)                            | 4.4%<br>(3.4-5.5%)                   | 10%<br>(7.8-13%)                    | 1100<br>(860-1400)      | 85000<br>(66000-110000)   |
| United States | 2016 | Female | 40 to 44 | 79%<br>(73-84%)                | 21%<br>(16-27%)          | 2.7<br>(2-3.4)                              | 4.5%<br>(3.4-5.8%)                   | 10%<br>(7.9-13%)                    | 1600<br>(1300-2100)     | 100000<br>(77000-130000)  |
| United States | 2016 | Female | 45 to 49 | 78%<br>(71-83%)                | 22%<br>(17-29%)          | 2.5<br>(1.9-3.3)                            | 4.6%<br>(3.4-5.9%)                   | 9.3%<br>(7.3-11%)                   | 2400<br>(1900-2900)     | 120000<br>(90000-150000)  |
| United States | 2016 | Female | 50 to 54 | 76%<br>(70-81%)                | 24%<br>(19-30%)          | 2.3<br>(1.7-2.9)                            | 4.2%<br>(3-5.6%)                     | 7.6%<br>(5.7-9.5%)                  | 3300<br>(2500-4200)     | 140000<br>(100000-180000) |
| United States | 2016 | Female | 55 to 59 | 73%<br>(66-79%)                | 27%<br>(21-34%)          | 2<br>(1.4-2.5)                              | 3.2%<br>(2.1-4.5%)                   | 5.6%<br>(3.9-7.4%)                  | 3500<br>(2500-4600)     | 120000<br>(81000-170000)  |
| United States | 2016 | Female | 60 to 64 | 67%<br>(60-74%)                | 33%<br>(26-40%)          | 1.7<br>(1.2-2.2)                            | 2.1%<br>(1.1-3.2%)                   | 3.6%<br>(2.1-5.1%)                  | 2900<br>(1600-4100)     | 82000<br>(42000-130000)   |
| United States | 2016 | Female | 65 to 69 | 60%<br>(52-68%)                | 40%<br>(32-48%)          | 1.5<br>(1.1-1.9)                            | 1.4%<br>(0.48-2.4%)                  | 2.4%<br>(1.1-3.7%)                  | 2500<br>(1200-3900)     | 57000<br>(20000-98000)    |
| United States | 2016 | Female | 70 to 74 | 55%<br>(44-64%)                | 45%<br>(36-56%)          | 1.3<br>(0.9-1.8)                            | 0.91%<br>(0.03-2%)                   | 1.5%<br>(0.36-2.8%)                 | 1800<br>(430-3400)      | 32000<br>(1100-69000)     |
| United States | 2016 | Female | 75 to 79 | 51%<br>(40-63%)                | 49%<br>(37-60%)          | 1.1<br>(0.77-1.6)                           | 0.46%<br>(-0.37-1.5%)                | 0.69%<br>(-0.41-1.9%)               | 960<br>(-560-2700)      | 14000<br>(-11000-43000)   |
| United States | 2016 | Female | 80 to 84 | 48%<br>(35-58%)                | 52%<br>(42-65%)          | 1<br>(0.67-1.4)                             | 0.11%<br>(-0.72-1%)                  | 0.14%<br>(-0.94-1.3%)               | 250<br>(-1600-2200)     | 2900<br>(-19000-27000)    |
| United States | 2016 | Female | 85 to 89 | 46%<br>(34-57%)                | 54%<br>(43-66%)          | 0.96<br>(0.6-1.4)                           | -0.19%<br>(-1.1-0.81%)               | -0.32%<br>(-1.5-0.85%)              | -720<br>(-3300-1900)    | -4200<br>(-24000-18000)   |
| United States | 2016 | Female | 90 to 94 | 47%<br>(36-58%)                | 53%<br>(42-64%)          | 0.99<br>(0.62-1.4)                          | -0.51%<br>(-1.6-0.63%)               | -0.78%<br>(-2.1-0.56%)              | -1600<br>(-4300-1200)   | -7100<br>(-21000-8600)    |
| United States | 2016 | Female | 95 plus  | 51%<br>(37-64%)                | 49%<br>(36-63%)          | 1.1<br>(0.64-1.6)                           | -0.92%<br>(-2.4-0.57%)               | -1.3%<br>(-3.1-0.36%)               | -1600<br>(-3700-430)    | -4600<br>(-12000-2800)    |
| United States | 2016 | Male   | All Ages | 73%<br>(71-75%)                | 27%<br>(25-29%)          | 3.2<br>(2.5-4.1)                            | 6.7%<br>(5.1-8.5%)                   | 5.1%<br>(3.3-7.2%)                  | 71000<br>(46000-100000) | 320000<br>(240000-410000) |
| United States | 2016 | Male   | 15 to 19 | 49%<br>(42-55%)                | 51%<br>(45-58%)          | 2.4<br>(1.7-3.2)                            | 6.8%<br>(5-8.9%)                     | 13%<br>(8.8-18%)                    | 940<br>(620-1300)       | 93000<br>(68000-120000)   |
| United States | 2016 | Male   | 20 to 24 | 81%<br>(75-86%)                | 19%<br>(14-25%)          | 6.4<br>(4.9-8.4)                            | 15%<br>(12-19%)                      | 25%<br>(19-32%)                     | 3800<br>(2900-4800)     | 320000<br>(250000-390000) |
| United States | 2016 | Male   | 25 to 29 | 87%<br>(83-90%)                | 13%<br>(10-17%)          | 5.8<br>(4.5-7.5)                            | 14%<br>(11-17%)                      | 22%<br>(17-28%)                     | 3700<br>(2800-4700)     | 300000<br>(240000-360000) |
| United States | 2016 | Male   | 30 to 34 | 89%<br>(86-92%)                | 11%<br>(7.9-14%)         | 5.2<br>(3.9-6.7)                            | 12%<br>(9.6-15%)                     | 19%<br>(15-24%)                     | 3500<br>(2600-4400)     | 260000<br>(210000-320000) |

| Location            | Year | Sex    | Age      | Prevalence of current drinkers | Prevalence of abstainers | Population average of standard drinks daily | Percent of total attributable deaths | Percent of total attributable DALYs | Attributable deaths    | Attributable DALYs        |
|---------------------|------|--------|----------|--------------------------------|--------------------------|---------------------------------------------|--------------------------------------|-------------------------------------|------------------------|---------------------------|
| United States       | 2016 | Male   | 35 to 39 | 90%<br>(86-92%)                | 10%<br>(7.7-14%)         | 4.7<br>(3.6-6.1)                            | 11%<br>(8.9-14%)                     | 18%<br>(14-22%)                     | 3500<br>(2700-4300)    | 240000<br>(190000-290000) |
| United States       | 2016 | Male   | 40 to 44 | 89%<br>(86-92%)                | 11%<br>(7.8-14%)         | 4.3<br>(3.3-5.6)                            | 11%<br>(8.4-13%)                     | 16%<br>(13-20%)                     | 4100<br>(3200-5100)    | 240000<br>(190000-300000) |
| United States       | 2016 | Male   | 45 to 49 | 89%<br>(86-92%)                | 11%<br>(7.8-14%)         | 4<br>(3.1-5.2)                              | 11%<br>(8.3-13%)                     | 15%<br>(12-19%)                     | 5900<br>(4600-7200)    | 300000<br>(240000-360000) |
| United States       | 2016 | Male   | 50 to 54 | 88%<br>(85-91%)                | 12%<br>(8.5-15%)         | 3.7<br>(2.8-4.7)                            | 9.7%<br>(7.6-12%)                    | 13%<br>(10-16%)                     | 8800<br>(6900-11000)   | 380000<br>(300000-470000) |
| United States       | 2016 | Male   | 55 to 59 | 87%<br>(83-91%)                | 13%<br>(9.3-17%)         | 3.3<br>(2.5-4.2)                            | 7.9%<br>(6-10%)                      | 10%<br>(7.8-13%)                    | 10000<br>(7700-13000)  | 380000<br>(280000-480000) |
| United States       | 2016 | Male   | 60 to 64 | 85%<br>(81-89%)                | 15%<br>(11-19%)          | 3<br>(2.2-3.9)                              | 5.9%<br>(4.1-7.8%)                   | 7.4%<br>(5.1-9.9%)                  | 9000<br>(6200-12000)   | 290000<br>(200000-390000) |
| United States       | 2016 | Male   | 65 to 69 | 82%<br>(77-87%)                | 18%<br>(13-23%)          | 2.7<br>(2-3.5)                              | 4.2%<br>(2.7-6%)                     | 5.1%<br>(3.1-7.4%)                  | 7300<br>(4500-11000)   | 200000<br>(130000-290000) |
| United States       | 2016 | Male   | 70 to 74 | 80%<br>(73-85%)                | 20%<br>(15-27%)          | 2.4<br>(1.8-3.2)                            | 2.8%<br>(1.4-4.7%)                   | 3.2%<br>(1.5-5.4%)                  | 4900<br>(2300-8200)    | 110000<br>(57000-180000)  |
| United States       | 2016 | Male   | 75 to 79 | 78%<br>(71-84%)                | 22%<br>(16-29%)          | 2.2<br>(1.6-3)                              | 1.9%<br>(0.61-3.5%)                  | 1.9%<br>(0.42-3.9%)                 | 3100<br>(670-6100)     | 58000<br>(19000-110000)   |
| United States       | 2016 | Male   | 80 to 84 | 76%<br>(67-83%)                | 24%<br>(17-33%)          | 2<br>(1.4-2.7)                              | 1.3%<br>(0.076-2.7%)                 | 1.1%<br>(-0.33-2.8%)                | 1900<br>(-560-4800)    | 30000<br>(1800-65000)     |
| United States       | 2016 | Male   | 85 to 89 | 75%<br>(66-82%)                | 25%<br>(18-34%)          | 1.9<br>(1.3-2.5)                            | 0.75%<br>(-0.46-2.2%)                | 0.46%<br>(-1.1-2.2%)                | 790<br>(-1800-3800)    | 12000<br>(-7600-37000)    |
| United States       | 2016 | Male   | 90 to 94 | 75%<br>(67-82%)                | 25%<br>(18-33%)          | 1.8<br>(1.3-2.6)                            | 0.29%<br>(-1.1-2%)                   | -0.12%<br>(-1.8-1.9%)               | -140<br>(-2200-2300)   | 2300<br>(-8500-15000)     |
| United States       | 2016 | Male   | 95 plus  | 76%<br>(66-84%)                | 24%<br>(16-34%)          | 1.8<br>(1.2-2.6)                            | -0.017%<br>(-1.7-1.9%)               | -0.54%<br>(-2.6-1.7%)               | -230<br>(-1100-740)    | -26<br>(-3100-3400)       |
| Antigua and Barbuda | 1990 | Female | All Ages | 38%<br>(32-45%)                | 62%<br>(55-68%)          | 0.24<br>(0.15-0.33)                         | 0.86%<br>(0.52-1.2%)                 | 0.13%<br>(-0.43-0.64%)              | 0.26<br>(-0.82-1.2)    | 63<br>(37-89)             |
| Antigua and Barbuda | 1990 | Female | 15 to 19 | 44%<br>(30-61%)                | 56%<br>(39-70%)          | 0.28<br>(0.14-0.49)                         | 1.5%<br>(1.1-2%)                     | 2.5%<br>(1.7-3.5%)                  | 0.038<br>(0.026-0.055) | 5.1<br>(3.6-6.9)          |
| Antigua and Barbuda | 1990 | Female | 20 to 24 | 50%<br>(34-66%)                | 50%<br>(34-66%)          | 0.41<br>(0.2-0.67)                          | 2.6%<br>(1.9-3.5%)                   | 2.7%<br>(1.9-3.6%)                  | 0.053<br>(0.036-0.074) | 12<br>(7.8-16)            |
| Antigua and Barbuda | 1990 | Female | 25 to 29 | 50%<br>(33-66%)                | 50%<br>(34-67%)          | 0.42<br>(0.21-0.68)                         | 2.4%<br>(1.8-3.1%)                   | 2.5%<br>(1.8-3.4%)                  | 0.058<br>(0.039-0.081) | 11<br>(7.5-14)            |
| Antigua and Barbuda | 1990 | Female | 30 to 34 | 48%<br>(31-65%)                | 52%<br>(35-69%)          | 0.41<br>(0.21-0.66)                         | 2.3%<br>(1.7-3%)                     | 3.4%<br>(2.6-4.5%)                  | 0.065<br>(0.047-0.088) | 8.2<br>(5.8-11)           |
| Antigua and Barbuda | 1990 | Female | 35 to 39 | 47%<br>(32-64%)                | 53%<br>(36-68%)          | 0.38<br>(0.18-0.65)                         | 2.3%<br>(1.7-2.9%)                   | 3.4%<br>(2.5-4.4%)                  | 0.084<br>(0.061-0.11)  | 8.2<br>(6-11)             |
| Antigua and Barbuda | 1990 | Female | 40 to 44 | 46%<br>(31-64%)                | 54%<br>(36-69%)          | 0.36<br>(0.17-0.63)                         | 2.4%<br>(1.7-3.1%)                   | 3.3%<br>(2.3-4.5%)                  | 0.14<br>(0.093-0.2)    | 9.1<br>(6.5-12)           |
| Antigua and Barbuda | 1990 | Female | 45 to 49 | 44%<br>(28-61%)                | 56%<br>(39-72%)          | 0.35<br>(0.16-0.64)                         | 1.8%<br>(1.1-2.4%)                   | 2.6%<br>(1.6-3.7%)                  | 0.11<br>(0.064-0.16)   | 6.2<br>(3.8-8.4)          |
| Antigua and Barbuda | 1990 | Female | 50 to 54 | 40%<br>(25-57%)                | 60%<br>(43-75%)          | 0.31<br>(0.14-0.57)                         | 1.4%<br>(0.66-2%)                    | 2%<br>(0.87-3%)                     | 0.083<br>(0.037-0.13)  | 3.8<br>(1.8-5.8)          |

| Location            | Year | Sex    | Age      | Prevalence of current drinkers | Prevalence of abstainers | Population average of standard drinks daily | Percent of total attributable deaths | Percent of total attributable DALYs | Attributable deaths         | Attributable DALYs     |
|---------------------|------|--------|----------|--------------------------------|--------------------------|---------------------------------------------|--------------------------------------|-------------------------------------|-----------------------------|------------------------|
| Antigua and Barbuda | 1990 | Female | 55 to 59 | 36%<br>(22-53%)                | 64%<br>(47-78%)          | 0.27<br>(0.12-0.49)                         | 0.85%<br>(0.12-1.5%)                 | 1.2%<br>(0.11-2%)                   | 0.065<br>(0.0067-0.12)      | 2.5<br>(0.36-4.4)      |
| Antigua and Barbuda | 1990 | Female | 60 to 64 | 32%<br>(20-48%)                | 68%<br>(52-80%)          | 0.23<br>(0.1-0.43)                          | 0.36%<br>(-0.41-0.94%)               | 0.44%<br>(-0.58-1.3%)               | 0.054<br>(-0.073-0.15)      | 1.9<br>(-2.1-4.9)      |
| Antigua and Barbuda | 1990 | Female | 65 to 69 | 30%<br>(19-44%)                | 70%<br>(56-81%)          | 0.2<br>(0.09-0.36)                          | -0.018%<br>(-0.81-0.59%)             | -0.046%<br>(-1-0.75%)               | -0.0077<br>(-0.18-0.12)     | -0.09<br>(-4.2-3.1)    |
| Antigua and Barbuda | 1990 | Female | 70 to 74 | 27%<br>(17-42%)                | 73%<br>(58-83%)          | 0.17<br>(0.07-0.31)                         | -0.13%<br>(-0.89-0.44%)              | -0.17%<br>(-1.1-0.55%)              | -0.042<br>(-0.27-0.13)      | -0.77<br>(-5.2-2.6)    |
| Antigua and Barbuda | 1990 | Female | 75 to 79 | 24%<br>(14-38%)                | 76%<br>(62-86%)          | 0.15<br>(0.062-0.28)                        | -0.24%<br>(-1.1-0.33%)               | -0.31%<br>(-1.3-0.38%)              | -0.11<br>(-0.47-0.14)       | -1.5<br>(-6.7-2.2)     |
| Antigua and Barbuda | 1990 | Female | 80 to 84 | 22%<br>(13-35%)                | 78%<br>(65-87%)          | 0.14<br>(0.062-0.25)                        | -0.27%<br>(-0.91-0.23%)              | -0.37%<br>(-1.2-0.23%)              | -0.11<br>(-0.35-0.07)       | -1.1<br>(-3.6-0.91)    |
| Antigua and Barbuda | 1990 | Female | 85 to 89 | 22%<br>(13-33%)                | 78%<br>(67-87%)          | 0.14<br>(0.062-0.27)                        | -0.32%<br>(-1-0.13%)                 | -0.46%<br>(-1.3-0.09%)              | -0.11<br>(-0.29-0.02)       | -0.67<br>(-2.1-0.29)   |
| Antigua and Barbuda | 1990 | Female | 90 to 94 | 25%<br>(15-37%)                | 75%<br>(63-85%)          | 0.16<br>(0.064-0.33)                        | -0.38%<br>(-1.1-0.12%)               | -0.56%<br>(-1.4-0.05%)              | -0.071<br>(-0.18-0.0067)    | -0.3<br>(-0.84-0.091)  |
| Antigua and Barbuda | 1990 | Female | 95 plus  | 29%<br>(15-46%)                | 71%<br>(54-85%)          | 0.19<br>(0.065-0.4)                         | -0.49%<br>(-1.3-0.13%)               | -0.76%<br>(-1.8--0.012%)            | -0.031<br>(-0.074--0.00047) | -0.08<br>(-0.22-0.022) |
| Antigua and Barbuda | 1990 | Male   | All Ages | 60%<br>(52-68%)                | 40%<br>(32-48%)          | 0.5<br>(0.31-0.67)                          | 3.4%<br>(2.8-4.1%)                   | 2.5%<br>(1.8-3.4%)                  | 5.3<br>(3.7-7.2)            | 280<br>(220-340)       |
| Antigua and Barbuda | 1990 | Male   | 15 to 19 | 61%<br>(44-76%)                | 39%<br>(24-56%)          | 0.39<br>(0.2-0.67)                          | 3.2%<br>(2.3-4.2%)                   | 3.7%<br>(2.3-5.6%)                  | 0.087<br>(0.052-0.13)       | 11<br>(7.8-15)         |
| Antigua and Barbuda | 1990 | Male   | 20 to 24 | 70%<br>(53-83%)                | 30%<br>(17-47%)          | 0.71<br>(0.37-1.1)                          | 6.5%<br>(5-8.3%)                     | 5.9%<br>(3.7-8.2%)                  | 0.18<br>(0.11-0.27)         | 30<br>(21-40)          |
| Antigua and Barbuda | 1990 | Male   | 25 to 29 | 73%<br>(56-85%)                | 27%<br>(15-44%)          | 0.85<br>(0.45-1.3)                          | 6.6%<br>(5.1-8.3%)                   | 6.3%<br>(4.3-8.6%)                  | 0.26<br>(0.18-0.37)         | 34<br>(24-44)          |
| Antigua and Barbuda | 1990 | Male   | 30 to 34 | 74%<br>(57-85%)                | 26%<br>(15-43%)          | 0.89<br>(0.46-1.4)                          | 6.4%<br>(5.2-7.9%)                   | 7%<br>(5.1-9%)                      | 0.25<br>(0.18-0.33)         | 27<br>(20-34)          |
| Antigua and Barbuda | 1990 | Male   | 35 to 39 | 74%<br>(58-86%)                | 26%<br>(14-42%)          | 0.84<br>(0.43-1.4)                          | 6.8%<br>(5.5-8.3%)                   | 7.8%<br>(5.8-10%)                   | 0.34<br>(0.25-0.45)         | 28<br>(22-35)          |
| Antigua and Barbuda | 1990 | Male   | 40 to 44 | 73%<br>(58-85%)                | 27%<br>(15-42%)          | 0.81<br>(0.39-1.4)                          | 7.1%<br>(5.6-8.7%)                   | 8.2%<br>(6.2-10%)                   | 0.49<br>(0.36-0.64)         | 31<br>(23-39)          |
| Antigua and Barbuda | 1990 | Male   | 45 to 49 | 71%<br>(53-84%)                | 29%<br>(16-47%)          | 0.76<br>(0.38-1.3)                          | 6.3%<br>(5.1-7.8%)                   | 7.6%<br>(5.8-9.6%)                  | 0.41<br>(0.3-0.53)          | 24<br>(18-30)          |
| Antigua and Barbuda | 1990 | Male   | 50 to 54 | 70%<br>(53-83%)                | 30%<br>(17-47%)          | 0.7<br>(0.34-1.2)                           | 5.6%<br>(4.3-7%)                     | 6.5%<br>(4.8-8.3%)                  | 0.52<br>(0.37-0.69)         | 23<br>(17-29)          |
| Antigua and Barbuda | 1990 | Male   | 55 to 59 | 68%<br>(50-82%)                | 32%<br>(18-50%)          | 0.65<br>(0.31-1.2)                          | 4.5%<br>(3.2-6%)                     | 5%<br>(3.4-6.9%)                    | 0.52<br>(0.35-0.72)         | 19<br>(13-25)          |
| Antigua and Barbuda | 1990 | Male   | 60 to 64 | 66%<br>(47-83%)                | 34%<br>(17-53%)          | 0.59<br>(0.28-1.1)                          | 3%<br>(2-4.4%)                       | 3.3%<br>(2-4.8%)                    | 0.76<br>(0.46-1.1)          | 23<br>(15-33)          |
| Antigua and Barbuda | 1990 | Male   | 65 to 69 | 65%<br>(47-80%)                | 35%<br>(20-53%)          | 0.53<br>(0.26-0.91)                         | 2.5%<br>(1.6-3.5%)                   | 2.8%<br>(1.7-4%)                    | 0.56<br>(0.34-0.8)          | 14<br>(8.7-20)         |
| Antigua and Barbuda | 1990 | Male   | 70 to 74 | 62%<br>(43-77%)                | 38%<br>(23-57%)          | 0.44<br>(0.21-0.81)                         | 1.4%<br>(0.6-2.3%)                   | 1.5%<br>(0.52-2.5%)                 | 0.52<br>(0.18-0.87)         | 11<br>(4.5-17)         |

| Location            | Year | Sex    | Age      | Prevalence of current drinkers | Prevalence of abstainers | Population average of standard drinks daily | Percent of total attributable deaths | Percent of total attributable DALYs | Attributable deaths          | Attributable DALYs      |
|---------------------|------|--------|----------|--------------------------------|--------------------------|---------------------------------------------|--------------------------------------|-------------------------------------|------------------------------|-------------------------|
| Antigua and Barbuda | 1990 | Male   | 75 to 79 | 57%<br>(37-75%)                | 43%<br>(25-63%)          | 0.37<br>(0.17-0.66)                         | 0.81%<br>(0.046-1.5%)                | 0.8%<br>(-0.073-1.6%)               | 0.28<br>(-0.025-0.56)        | 4.7<br>(0.27-8.6)       |
| Antigua and Barbuda | 1990 | Male   | 80 to 84 | 52%<br>(33-70%)                | 48%<br>(30-67%)          | 0.32<br>(0.15-0.55)                         | 0.5%<br>(-0.14-1.1%)                 | 0.47%<br>(-0.29-1.1%)               | 0.1<br>(-0.068-0.25)         | 1.4<br>(-0.42-2.9)      |
| Antigua and Barbuda | 1990 | Male   | 85 to 89 | 47%<br>(30-64%)                | 53%<br>(36-70%)          | 0.28<br>(0.13-0.51)                         | 0.4%<br>(-0.21-0.88%)                | 0.33%<br>(-0.4-0.91%)               | 0.039<br>(-0.047-0.11)       | 0.41<br>(-0.21-0.91)    |
| Antigua and Barbuda | 1990 | Male   | 90 to 94 | 47%<br>(31-64%)                | 53%<br>(36-69%)          | 0.28<br>(0.13-0.54)                         | 0.21%<br>(-0.44-0.7%)                | 0.044%<br>(-0.75-0.63%)             | 0.0018<br>(-0.031-0.026)     | 0.052<br>(-0.11-0.17)   |
| Antigua and Barbuda | 1990 | Male   | 95 plus  | 50%<br>(31-70%)                | 50%<br>(30-69%)          | 0.31<br>(0.13-0.62)                         | 0.13%<br>(-0.63-0.73%)               | -0.16%<br>(-1.1-0.55%)              | -0.00096<br>(-0.0063-0.0031) | 0.003<br>(-0.015-0.017) |
| Antigua and Barbuda | 1995 | Female | All Ages | 38%<br>(31-45%)                | 62%<br>(55-69%)          | 0.32<br>(0.22-0.43)                         | 0.83%<br>(0.5-1.2%)                  | 0.15%<br>(-0.41-0.7%)               | 0.32<br>(-0.85-1.4)          | 67<br>(39-96)           |
| Antigua and Barbuda | 1995 | Female | 15 to 19 | 44%<br>(30-60%)                | 56%<br>(40-70%)          | 0.37<br>(0.18-0.64)                         | 1.5%<br>(1.1-2.1%)                   | 2.5%<br>(1.7-3.5%)                  | 0.038<br>(0.025-0.053)       | 4.9<br>(3.4-6.7)        |
| Antigua and Barbuda | 1995 | Female | 20 to 24 | 50%<br>(34-66%)                | 50%<br>(34-66%)          | 0.54<br>(0.27-0.91)                         | 2.5%<br>(1.8-3.3%)                   | 2.7%<br>(1.8-3.9%)                  | 0.051<br>(0.034-0.073)       | 9.5<br>(6.5-13)         |
| Antigua and Barbuda | 1995 | Female | 25 to 29 | 49%<br>(33-66%)                | 51%<br>(34-67%)          | 0.56<br>(0.31-0.9)                          | 2.3%<br>(1.7-3%)                     | 2.5%<br>(1.7-3.5%)                  | 0.067<br>(0.043-0.094)       | 11<br>(7.8-15)          |
| Antigua and Barbuda | 1995 | Female | 30 to 34 | 48%<br>(31-64%)                | 52%<br>(36-69%)          | 0.54<br>(0.29-0.84)                         | 2%<br>(1.5-2.7%)                     | 3.1%<br>(2.2-4%)                    | 0.059<br>(0.041-0.083)       | 8.9<br>(6.2-12)         |
| Antigua and Barbuda | 1995 | Female | 35 to 39 | 47%<br>(31-64%)                | 53%<br>(36-69%)          | 0.5<br>(0.26-0.81)                          | 2%<br>(1.5-2.6%)                     | 3.2%<br>(2.4-4.3%)                  | 0.085<br>(0.06-0.12)         | 8.6<br>(6-11)           |
| Antigua and Barbuda | 1995 | Female | 40 to 44 | 46%<br>(31-64%)                | 54%<br>(36-69%)          | 0.47<br>(0.23-0.78)                         | 2.3%<br>(1.6-3%)                     | 3.3%<br>(2.3-4.6%)                  | 0.19<br>(0.13-0.26)          | 12<br>(8.4-16)          |
| Antigua and Barbuda | 1995 | Female | 45 to 49 | 43%<br>(27-61%)                | 57%<br>(39-73%)          | 0.46<br>(0.24-0.82)                         | 1.8%<br>(1.1-2.5%)                   | 2.6%<br>(1.5-4%)                    | 0.13<br>(0.074-0.2)          | 7.2<br>(4.3-10)         |
| Antigua and Barbuda | 1995 | Female | 50 to 54 | 40%<br>(25-57%)                | 60%<br>(43-75%)          | 0.41<br>(0.21-0.73)                         | 1.4%<br>(0.63-2.2%)                  | 2%<br>(0.87-3.3%)                   | 0.14<br>(0.059-0.23)         | 6.1<br>(2.7-9.8)        |
| Antigua and Barbuda | 1995 | Female | 55 to 59 | 35%<br>(22-53%)                | 65%<br>(47-78%)          | 0.35<br>(0.16-0.63)                         | 0.87%<br>(0.13-1.6%)                 | 1.2%<br>(0.14-2.3%)                 | 0.081<br>(0.009-0.15)        | 3<br>(0.48-5.3)         |
| Antigua and Barbuda | 1995 | Female | 60 to 64 | 32%<br>(19-49%)                | 68%<br>(51-81%)          | 0.3<br>(0.14-0.57)                          | 0.3%<br>(-0.57-1%)                   | 0.37%<br>(-0.71-1.3%)               | 0.042<br>(-0.081-0.16)       | 1.4<br>(-2.5-4.7)       |
| Antigua and Barbuda | 1995 | Female | 65 to 69 | 29%<br>(18-44%)                | 71%<br>(56-82%)          | 0.27<br>(0.12-0.48)                         | -0.048%<br>(-0.91-0.6%)              | -0.057%<br>(-1.2-0.78%)             | -0.01<br>(-0.21-0.15)        | -0.29<br>(-5.3-3.6)     |
| Antigua and Barbuda | 1995 | Female | 70 to 74 | 27%<br>(17-41%)                | 73%<br>(59-83%)          | 0.22<br>(0.1-0.4)                           | -0.19%<br>(-1-0.41%)                 | -0.22%<br>(-1.2-0.53%)              | -0.051<br>(-0.29-0.12)       | -1.1<br>(-5.7-2.3)      |
| Antigua and Barbuda | 1995 | Female | 75 to 79 | 24%<br>(14-38%)                | 76%<br>(62-86%)          | 0.19<br>(0.086-0.37)                        | -0.28%<br>(-1-0.28%)                 | -0.36%<br>(-1.3-0.35%)              | -0.11<br>(-0.41-0.11)        | -1.6<br>(-5.9-1.6)      |
| Antigua and Barbuda | 1995 | Female | 80 to 84 | 22%<br>(13-34%)                | 78%<br>(66-87%)          | 0.18<br>(0.085-0.34)                        | -0.32%<br>(-1-0.18%)                 | -0.43%<br>(-1.3-0.2%)               | -0.14<br>(-0.44-0.07)        | -1.4<br>(-4.6-0.84)     |
| Antigua and Barbuda | 1995 | Female | 85 to 89 | 22%<br>(13-34%)                | 78%<br>(66-87%)          | 0.19<br>(0.086-0.35)                        | -0.36%<br>(-1-0.11%)                 | -0.51%<br>(-1.3-0.061%)             | -0.14<br>(-0.38-0.018)       | -0.94<br>(-2.7-0.29)    |
| Antigua and Barbuda | 1995 | Female | 90 to 94 | 24%<br>(14-37%)                | 76%<br>(63-86%)          | 0.21<br>(0.089-0.42)                        | -0.37%<br>(-1-0.15%)                 | -0.57%<br>(-1.4-0.09%)              | -0.074<br>(-0.18-0.011)      | -0.31<br>(-0.83-0.12)   |

| Location            | Year | Sex    | Age      | Prevalence of current drinkers | Prevalence of abstainers | Population average of standard drinks daily | Percent of total attributable deaths | Percent of total attributable DALYs | Attributable deaths        | Attributable DALYs     |
|---------------------|------|--------|----------|--------------------------------|--------------------------|---------------------------------------------|--------------------------------------|-------------------------------------|----------------------------|------------------------|
| Antigua and Barbuda | 1995 | Female | 95 plus  | 29%<br>(16-46%)                | 71%<br>(54-84%)          | 0.26<br>(0.087-0.54)                        | -0.44%<br>(-1.2-0.21%)               | -0.75%<br>(-1.8-0.095%)             | -0.034<br>(-0.081-0.0041)  | -0.085<br>(-0.24-0.04) |
| Antigua and Barbuda | 1995 | Male   | All Ages | 60%<br>(53-68%)                | 40%<br>(32-47%)          | 0.67<br>(0.46-0.89)                         | 3.5%<br>(2.8-4.3%)                   | 2.7%<br>(1.8-3.6%)                  | 6<br>(4-8.2)               | 320<br>(250-390)       |
| Antigua and Barbuda | 1995 | Male   | 15 to 19 | 60%<br>(44-76%)                | 40%<br>(24-56%)          | 0.52<br>(0.27-0.88)                         | 3.5%<br>(2.5-4.7%)                   | 4.1%<br>(2.4-6.2%)                  | 0.098<br>(0.058-0.15)      | 12<br>(8.2-17)         |
| Antigua and Barbuda | 1995 | Male   | 20 to 24 | 70%<br>(53-83%)                | 30%<br>(17-47%)          | 0.95<br>(0.54-1.5)                          | 6.9%<br>(5.1-8.7%)                   | 6.4%<br>(4.2-9%)                    | 0.19<br>(0.12-0.27)        | 28<br>(19-37)          |
| Antigua and Barbuda | 1995 | Male   | 25 to 29 | 73%<br>(56-84%)                | 27%<br>(16-44%)          | 1.1<br>(0.65-1.7)                           | 6.7%<br>(5.3-8.4%)                   | 6.4%<br>(4.3-8.6%)                  | 0.29<br>(0.19-0.4)         | 37<br>(27-49)          |
| Antigua and Barbuda | 1995 | Male   | 30 to 34 | 74%<br>(56-85%)                | 26%<br>(15-44%)          | 1.2<br>(0.67-1.8)                           | 6.2%<br>(5-7.7%)                     | 6.6%<br>(4.9-8.6%)                  | 0.35<br>(0.25-0.47)        | 36<br>(27-46)          |
| Antigua and Barbuda | 1995 | Male   | 35 to 39 | 73%<br>(58-86%)                | 27%<br>(14-42%)          | 1.1<br>(0.62-1.8)                           | 6.3%<br>(5.1-7.6%)                   | 7.2%<br>(5.5-9.3%)                  | 0.35<br>(0.26-0.46)        | 31<br>(24-40)          |
| Antigua and Barbuda | 1995 | Male   | 40 to 44 | 72%<br>(57-84%)                | 28%<br>(16-43%)          | 1.1<br>(0.58-1.7)                           | 6.6%<br>(5.2-8.2%)                   | 7.9%<br>(6-10%)                     | 0.54<br>(0.39-0.71)        | 35<br>(27-45)          |
| Antigua and Barbuda | 1995 | Male   | 45 to 49 | 71%<br>(53-84%)                | 29%<br>(16-47%)          | 1<br>(0.55-1.7)                             | 6%<br>(4.7-7.6%)                     | 7.3%<br>(5.5-9.4%)                  | 0.47<br>(0.34-0.62)        | 27<br>(21-35)          |
| Antigua and Barbuda | 1995 | Male   | 50 to 54 | 69%<br>(52-83%)                | 31%<br>(17-48%)          | 0.93<br>(0.48-1.6)                          | 5.6%<br>(4.1-7.3%)                   | 6.5%<br>(4.6-8.6%)                  | 0.75<br>(0.52-1)           | 33<br>(24-44)          |
| Antigua and Barbuda | 1995 | Male   | 55 to 59 | 68%<br>(50-82%)                | 32%<br>(18-50%)          | 0.85<br>(0.44-1.4)                          | 4.6%<br>(3.1-6.4%)                   | 5.3%<br>(3.4-7.4%)                  | 0.77<br>(0.49-1.1)         | 28<br>(18-38)          |
| Antigua and Barbuda | 1995 | Male   | 60 to 64 | 66%<br>(47-82%)                | 34%<br>(18-53%)          | 0.78<br>(0.37-1.4)                          | 3.2%<br>(1.9-4.7%)                   | 3.5%<br>(2-5.3%)                    | 0.6<br>(0.33-0.91)         | 18<br>(11-26)          |
| Antigua and Barbuda | 1995 | Male   | 65 to 69 | 65%<br>(46-80%)                | 35%<br>(20-54%)          | 0.69<br>(0.35-1.2)                          | 2.6%<br>(1.5-3.8%)                   | 2.9%<br>(1.6-4.3%)                  | 0.65<br>(0.36-0.98)        | 16<br>(9.4-24)         |
| Antigua and Barbuda | 1995 | Male   | 70 to 74 | 62%<br>(43-76%)                | 38%<br>(24-57%)          | 0.59<br>(0.29-1)                            | 1.5%<br>(0.57-2.5%)                  | 1.6%<br>(0.52-2.8%)                 | 0.39<br>(0.13-0.69)        | 8.1<br>(3-14)          |
| Antigua and Barbuda | 1995 | Male   | 75 to 79 | 57%<br>(37-74%)                | 43%<br>(26-63%)          | 0.49<br>(0.23-0.86)                         | 0.91%<br>(0.15-1.7%)                 | 0.94%<br>(0.016-1.9%)               | 0.3<br>(0.0048-0.61)       | 5.1<br>(0.87-9.4)      |
| Antigua and Barbuda | 1995 | Male   | 80 to 84 | 51%<br>(32-69%)                | 49%<br>(31-68%)          | 0.42<br>(0.2-0.7)                           | 0.56%<br>(-0.12-1.2%)                | 0.54%<br>(-0.26-1.3%)               | 0.17<br>(-0.078-0.42)      | 2.2<br>(-0.46-4.8)     |
| Antigua and Barbuda | 1995 | Male   | 85 to 89 | 46%<br>(29-63%)                | 54%<br>(37-71%)          | 0.37<br>(0.18-0.68)                         | 0.44%<br>(-0.14-1%)                  | 0.39%<br>(-0.32-1%)                 | 0.071<br>(-0.059-0.19)     | 0.71<br>(-0.24-1.6)    |
| Antigua and Barbuda | 1995 | Male   | 90 to 94 | 47%<br>(31-64%)                | 53%<br>(36-69%)          | 0.37<br>(0.17-0.68)                         | 0.27%<br>(-0.35-0.84%)               | 0.1%<br>(-0.65-0.78%)               | 0.0058<br>(-0.036-0.043)   | 0.092<br>(-0.12-0.29)  |
| Antigua and Barbuda | 1995 | Male   | 95 plus  | 50%<br>(30-69%)                | 50%<br>(31-70%)          | 0.4<br>(0.16-0.77)                          | 0.21%<br>(-0.55-0.88%)               | -0.1%<br>(-0.99-0.74%)              | -0.0013<br>(-0.013-0.0098) | 0.011<br>(-0.03-0.048) |
| Antigua and Barbuda | 2000 | Female | All Ages | 37%<br>(31-45%)                | 63%<br>(55-69%)          | 0.46<br>(0.33-0.6)                          | 0.95%<br>(0.6-1.3%)                  | 0.37%<br>(-0.25-1%)                 | 0.78<br>(-0.52-2.3)        | 85<br>(52-120)         |
| Antigua and Barbuda | 2000 | Female | 15 to 19 | 43%<br>(29-59%)                | 57%<br>(41-71%)          | 0.51<br>(0.26-0.87)                         | 1.5%<br>(1-2.1%)                     | 2.4%<br>(1.5-3.6%)                  | 0.042<br>(0.027-0.063)     | 5.7<br>(3.9-8)         |
| Antigua and Barbuda | 2000 | Female | 20 to 24 | 49%<br>(33-65%)                | 51%<br>(35-67%)          | 0.76<br>(0.4-1.3)                           | 2.5%<br>(1.8-3.4%)                   | 2.9%<br>(1.8-4.3%)                  | 0.062<br>(0.038-0.093)     | 9.5<br>(6.4-13)        |

| Location            | Year | Sex    | Age      | Prevalence of current drinkers | Prevalence of abstainers | Population average of standard drinks daily | Percent of total attributable deaths | Percent of total attributable DALYs | Attributable deaths     | Attributable DALYs    |
|---------------------|------|--------|----------|--------------------------------|--------------------------|---------------------------------------------|--------------------------------------|-------------------------------------|-------------------------|-----------------------|
| Antigua and Barbuda | 2000 | Female | 25 to 29 | 48%<br>(32-65%)                | 52%<br>(35-68%)          | 0.78<br>(0.42-1.2)                          | 2.3%<br>(1.7-3%)                     | 2.4%<br>(1.6-3.5%)                  | 0.054<br>(0.034-0.079)  | 10<br>(7.2-15)        |
| Antigua and Barbuda | 2000 | Female | 30 to 34 | 47%<br>(30-64%)                | 53%<br>(36-70%)          | 0.75<br>(0.41-1.2)                          | 2%<br>(1.4-2.7%)                     | 2.8%<br>(2-3.8%)                    | 0.093<br>(0.063-0.13)   | 13<br>(8.6-18)        |
| Antigua and Barbuda | 2000 | Female | 35 to 39 | 46%<br>(31-64%)                | 54%<br>(36-69%)          | 0.69<br>(0.38-1.1)                          | 1.9%<br>(1.4-2.6%)                   | 3.2%<br>(2.3-4.2%)                  | 0.13<br>(0.09-0.18)     | 12<br>(8.8-17)        |
| Antigua and Barbuda | 2000 | Female | 40 to 44 | 45%<br>(30-63%)                | 55%<br>(37-70%)          | 0.66<br>(0.34-1.1)                          | 2.2%<br>(1.4-3%)                     | 3.5%<br>(2.2-4.9%)                  | 0.23<br>(0.14-0.33)     | 14<br>(9.5-20)        |
| Antigua and Barbuda | 2000 | Female | 45 to 49 | 43%<br>(27-60%)                | 57%<br>(40-73%)          | 0.64<br>(0.33-1.1)                          | 1.7%<br>(0.99-2.6%)                  | 2.9%<br>(1.7-4.4%)                  | 0.18<br>(0.11-0.28)     | 9.8<br>(5.6-15)       |
| Antigua and Barbuda | 2000 | Female | 50 to 54 | 39%<br>(25-56%)                | 61%<br>(44-75%)          | 0.58<br>(0.29-0.99)                         | 1.6%<br>(0.62-2.6%)                  | 2.3%<br>(0.97-3.9%)                 | 0.18<br>(0.072-0.3)     | 7.4<br>(2.9-13)       |
| Antigua and Barbuda | 2000 | Female | 55 to 59 | 35%<br>(22-52%)                | 65%<br>(48-78%)          | 0.49<br>(0.23-0.88)                         | 0.97%<br>(0.094-2%)                  | 1.4%<br>(0.21-2.8%)                 | 0.13<br>(0.018-0.25)    | 4.5<br>(0.47-9.1)     |
| Antigua and Barbuda | 2000 | Female | 60 to 64 | 31%<br>(19-47%)                | 69%<br>(53-81%)          | 0.42<br>(0.19-0.77)                         | 0.43%<br>(-0.51-1.4%)                | 0.58%<br>(-0.63-1.9%)               | 0.063<br>(-0.068-0.21)  | 1.8<br>(-2.1-6.2)     |
| Antigua and Barbuda | 2000 | Female | 65 to 69 | 29%<br>(18-43%)                | 71%<br>(57-82%)          | 0.37<br>(0.18-0.65)                         | 0.062%<br>(-0.76-0.87%)              | 0.13%<br>(-0.97-1.2%)               | 0.019<br>(-0.14-0.18)   | 0.31<br>(-3.8-4.2)    |
| Antigua and Barbuda | 2000 | Female | 70 to 74 | 26%<br>(17-40%)                | 74%<br>(60-83%)          | 0.31<br>(0.14-0.55)                         | -0.11%<br>(-0.96-0.63%)              | -0.094%<br>(-1.2-0.85%)             | -0.023<br>(-0.27-0.21)  | -0.67<br>(-5.8-3.8)   |
| Antigua and Barbuda | 2000 | Female | 75 to 79 | 23%<br>(14-37%)                | 77%<br>(63-86%)          | 0.27<br>(0.12-0.51)                         | -0.19%<br>(-0.96-0.46%)              | -0.23%<br>(-1.1-0.59%)              | -0.056<br>(-0.28-0.15)  | -0.88<br>(-4.2-2.1)   |
| Antigua and Barbuda | 2000 | Female | 80 to 84 | 22%<br>(12-34%)                | 78%<br>(66-88%)          | 0.26<br>(0.12-0.47)                         | -0.22%<br>(-0.93-0.42%)              | -0.29%<br>(-1.2-0.51%)              | -0.095<br>(-0.39-0.16)  | -0.97<br>(-4.2-1.8)   |
| Antigua and Barbuda | 2000 | Female | 85 to 89 | 22%<br>(13-33%)                | 78%<br>(67-87%)          | 0.26<br>(0.12-0.47)                         | -0.26%<br>(-0.92-0.34%)              | -0.39%<br>(-1.2-0.33%)              | -0.12<br>(-0.37-0.1)    | -0.76<br>(-2.7-0.96)  |
| Antigua and Barbuda | 2000 | Female | 90 to 94 | 24%<br>(14-36%)                | 76%<br>(64-86%)          | 0.29<br>(0.13-0.57)                         | -0.26%<br>(-0.93-0.45%)              | -0.43%<br>(-1.3-0.42%)              | -0.077<br>(-0.23-0.075) | -0.29<br>(-1.1-0.5)   |
| Antigua and Barbuda | 2000 | Female | 95 plus  | 28%<br>(15-45%)                | 72%<br>(55-85%)          | 0.35<br>(0.13-0.74)                         | -0.25%<br>(-1.1-0.65%)               | -0.52%<br>(-1.6-0.59%)              | -0.03<br>(-0.09-0.033)  | -0.06<br>(-0.26-0.16) |
| Antigua and Barbuda | 2000 | Male   | All Ages | 60%<br>(52-68%)                | 40%<br>(32-48%)          | 0.95<br>(0.69-1.2)                          | 3.9%<br>(3-4.7%)                     | 3.1%<br>(2.1-4.2%)                  | 7.5<br>(4.9-10)         | 380<br>(300-480)      |
| Antigua and Barbuda | 2000 | Male   | 15 to 19 | 60%<br>(42-75%)                | 40%<br>(25-58%)          | 0.73<br>(0.36-1.2)                          | 4%<br>(2.8-5.6%)                     | 4.8%<br>(2.8-7.3%)                  | 0.16<br>(0.091-0.25)    | 17<br>(11-24)         |
| Antigua and Barbuda | 2000 | Male   | 20 to 24 | 69%<br>(52-83%)                | 31%<br>(17-48%)          | 1.3<br>(0.76-2.1)                           | 7.6%<br>(5.6-9.8%)                   | 7.5%<br>(4.9-11%)                   | 0.31<br>(0.2-0.46)      | 34<br>(24-45)         |
| Antigua and Barbuda | 2000 | Male   | 25 to 29 | 72%<br>(56-84%)                | 28%<br>(16-44%)          | 1.6<br>(0.91-2.4)                           | 7.1%<br>(5.5-8.7%)                   | 6.5%<br>(4.3-8.8%)                  | 0.24<br>(0.16-0.33)     | 33<br>(24-44)         |
| Antigua and Barbuda | 2000 | Male   | 30 to 34 | 73%<br>(55-85%)                | 27%<br>(15-45%)          | 1.7<br>(0.97-2.5)                           | 6.3%<br>(5-7.9%)                     | 6.4%<br>(4.6-8.5%)                  | 0.43<br>(0.3-0.59)      | 44<br>(33-57)         |
| Antigua and Barbuda | 2000 | Male   | 35 to 39 | 73%<br>(57-85%)                | 27%<br>(15-43%)          | 1.6<br>(0.9-2.3)                            | 5.9%<br>(4.7-7.3%)                   | 6.3%<br>(4.6-8.3%)                  | 0.42<br>(0.29-0.58)     | 39<br>(29-50)         |
| Antigua and Barbuda | 2000 | Male   | 40 to 44 | 72%<br>(57-85%)                | 28%<br>(15-43%)          | 1.5<br>(0.82-2.3)                           | 6.4%<br>(5-7.9%)                     | 7.4%<br>(5.6-9.4%)                  | 0.62<br>(0.45-0.82)     | 42<br>(32-55)         |

| Location            | Year | Sex    | Age      | Prevalence of current drinkers | Prevalence of abstainers | Population average of standard drinks daily | Percent of total attributable deaths | Percent of total attributable DALYs | Attributable deaths      | Attributable DALYs     |
|---------------------|------|--------|----------|--------------------------------|--------------------------|---------------------------------------------|--------------------------------------|-------------------------------------|--------------------------|------------------------|
| Antigua and Barbuda | 2000 | Male   | 45 to 49 | 70%<br>(51-84%)                | 30%<br>(16-49%)          | 1.4<br>(0.8-2.3)                            | 6.2%<br>(4.6-8%)                     | 7.4%<br>(5.3-9.8%)                  | 0.67<br>(0.47-0.91)      | 38<br>(28-51)          |
| Antigua and Barbuda | 2000 | Male   | 50 to 54 | 69%<br>(51-83%)                | 31%<br>(17-49%)          | 1.3<br>(0.69-2.2)                           | 6%<br>(4.3-8.1%)                     | 7.1%<br>(4.8-9.7%)                  | 0.89<br>(0.6-1.2)        | 40<br>(27-54)          |
| Antigua and Barbuda | 2000 | Male   | 55 to 59 | 67%<br>(49-82%)                | 33%<br>(18-51%)          | 1.2<br>(0.61-2)                             | 5.2%<br>(3.5-7.4%)                   | 6%<br>(3.9-8.7%)                    | 0.99<br>(0.63-1.4)       | 36<br>(24-51)          |
| Antigua and Barbuda | 2000 | Male   | 60 to 64 | 65%<br>(46-82%)                | 35%<br>(18-54%)          | 1.1<br>(0.52-1.9)                           | 3.8%<br>(2.2-5.9%)                   | 4.3%<br>(2.5-6.9%)                  | 0.68<br>(0.39-1.1)       | 21<br>(12-32)          |
| Antigua and Barbuda | 2000 | Male   | 65 to 69 | 64%<br>(45-80%)                | 36%<br>(20-55%)          | 0.97<br>(0.5-1.6)                           | 2.9%<br>(1.6-4.8%)                   | 3.3%<br>(1.7-5.6%)                  | 0.57<br>(0.29-0.95)      | 14<br>(7.7-23)         |
| Antigua and Barbuda | 2000 | Male   | 70 to 74 | 61%<br>(43-76%)                | 39%<br>(24-57%)          | 0.82<br>(0.4-1.4)                           | 1.9%<br>(0.73-3.3%)                  | 2.1%<br>(0.72-3.7%)                 | 0.59<br>(0.2-1)          | 12<br>(4.7-21)         |
| Antigua and Barbuda | 2000 | Male   | 75 to 79 | 56%<br>(37-74%)                | 44%<br>(26-63%)          | 0.69<br>(0.33-1.2)                          | 1.3%<br>(0.4-2.5%)                   | 1.4%<br>(0.34-2.7%)                 | 0.38<br>(0.092-0.74)     | 5.9<br>(1.8-11)        |
| Antigua and Barbuda | 2000 | Male   | 80 to 84 | 50%<br>(32-68%)                | 50%<br>(32-68%)          | 0.58<br>(0.28-1)                            | 0.9%<br>(0.17-1.8%)                  | 0.94%<br>(0.094-2%)                 | 0.27<br>(0.027-0.58)     | 3.3<br>(0.59-6.7)      |
| Antigua and Barbuda | 2000 | Male   | 85 to 89 | 45%<br>(28-63%)                | 55%<br>(37-72%)          | 0.51<br>(0.25-0.9)                          | 0.72%<br>(0.1-1.4%)                  | 0.7%<br>(-0.039-1.6%)               | 0.18<br>(-0.0098-0.39)   | 1.6<br>(0.23-3.3)      |
| Antigua and Barbuda | 2000 | Male   | 90 to 94 | 46%<br>(30-64%)                | 54%<br>(36-70%)          | 0.52<br>(0.24-0.95)                         | 0.46%<br>(-0.18-1.3%)                | 0.32%<br>(-0.45-1.3%)               | 0.033<br>(-0.048-0.13)   | 0.29<br>(-0.11-0.82)   |
| Antigua and Barbuda | 2000 | Male   | 95 plus  | 49%<br>(29-69%)                | 51%<br>(31-71%)          | 0.57<br>(0.23-1)                            | 0.41%<br>(-0.39-1.4%)                | 0.12%<br>(-0.87-1.2%)               | 0.0026<br>(-0.019-0.027) | 0.037<br>(-0.036-0.12) |
| Antigua and Barbuda | 2005 | Female | All Ages | 37%<br>(31-45%)                | 63%<br>(55-69%)          | 0.54<br>(0.38-0.72)                         | 1.1%<br>(0.68-1.6%)                  | 0.61%<br>(-0.095-1.5%)              | 1.3<br>(-0.22-3.2)       | 100<br>(63-150)        |
| Antigua and Barbuda | 2005 | Female | 15 to 19 | 43%<br>(29-59%)                | 57%<br>(41-71%)          | 0.6<br>(0.3-1)                              | 1.4%<br>(0.95-2%)                    | 2.8%<br>(1.8-4.2%)                  | 0.035<br>(0.022-0.053)   | 5.4<br>(3.6-7.8)       |
| Antigua and Barbuda | 2005 | Female | 20 to 24 | 49%<br>(33-64%)                | 51%<br>(36-67%)          | 0.89<br>(0.47-1.5)                          | 2.6%<br>(1.8-3.5%)                   | 3.1%<br>(2-4.8%)                    | 0.072<br>(0.045-0.11)    | 11<br>(7.4-16)         |
| Antigua and Barbuda | 2005 | Female | 25 to 29 | 48%<br>(32-65%)                | 52%<br>(35-68%)          | 0.92<br>(0.47-1.5)                          | 2.4%<br>(1.8-3.2%)                   | 3%<br>(2-4.3%)                      | 0.052<br>(0.034-0.077)   | 8.8<br>(6.1-13)        |
| Antigua and Barbuda | 2005 | Female | 30 to 34 | 47%<br>(30-64%)                | 53%<br>(36-70%)          | 0.9<br>(0.48-1.4)                           | 2.4%<br>(1.7-3.1%)                   | 3.8%<br>(2.6-5.1%)                  | 0.12<br>(0.084-0.17)     | 13<br>(9.5-18)         |
| Antigua and Barbuda | 2005 | Female | 35 to 39 | 46%<br>(30-63%)                | 54%<br>(37-70%)          | 0.82<br>(0.45-1.3)                          | 2.1%<br>(1.5-2.8%)                   | 3.9%<br>(2.8-5.3%)                  | 0.19<br>(0.13-0.27)      | 16<br>(11-21)          |
| Antigua and Barbuda | 2005 | Female | 40 to 44 | 44%<br>(29-62%)                | 56%<br>(38-71%)          | 0.78<br>(0.41-1.2)                          | 2.2%<br>(1.4-3.1%)                   | 4%<br>(2.6-5.7%)                    | 0.24<br>(0.16-0.35)      | 15<br>(9.5-21)         |
| Antigua and Barbuda | 2005 | Female | 45 to 49 | 43%<br>(27-60%)                | 57%<br>(40-73%)          | 0.75<br>(0.39-1.3)                          | 2%<br>(1.2-3%)                       | 3.5%<br>(2.2-5.4%)                  | 0.23<br>(0.14-0.35)      | 12<br>(7-18)           |
| Antigua and Barbuda | 2005 | Female | 50 to 54 | 39%<br>(25-56%)                | 61%<br>(44-75%)          | 0.68<br>(0.34-1.2)                          | 1.9%<br>(0.82-3.2%)                  | 2.8%<br>(1.3-4.7%)                  | 0.28<br>(0.13-0.46)      | 11<br>(4.9-19)         |
| Antigua and Barbuda | 2005 | Female | 55 to 59 | 34%<br>(22-51%)                | 66%<br>(49-78%)          | 0.58<br>(0.27-1)                            | 1.2%<br>(0.21-2.3%)                  | 1.9%<br>(0.5-3.6%)                  | 0.13<br>(0.034-0.25)     | 4.5<br>(0.77-9)        |
| Antigua and Barbuda | 2005 | Female | 60 to 64 | 31%<br>(19-48%)                | 69%<br>(52-81%)          | 0.5<br>(0.23-0.92)                          | 0.66%<br>(-0.33-1.8%)                | 1%<br>(-0.31-2.6%)                  | 0.13<br>(-0.04-0.32)     | 3.6<br>(-1.8-9.6)      |

| Location            | Year | Sex    | Age      | Prevalence of current drinkers | Prevalence of abstainers | Population average of standard drinks daily | Percent of total attributable deaths | Percent of total attributable DALYs | Attributable deaths    | Attributable DALYs    |
|---------------------|------|--------|----------|--------------------------------|--------------------------|---------------------------------------------|--------------------------------------|-------------------------------------|------------------------|-----------------------|
| Antigua and Barbuda | 2005 | Female | 65 to 69 | 28%<br>(18-43%)                | 72%<br>(57-82%)          | 0.43<br>(0.21-0.79)                         | 0.26%<br>(-0.65-1.2%)                | 0.45%<br>(-0.68-1.7%)               | 0.07<br>(-0.11-0.26)   | 1.3<br>(-3.4-6.3)     |
| Antigua and Barbuda | 2005 | Female | 70 to 74 | 26%<br>(16-40%)                | 74%<br>(60-84%)          | 0.36<br>(0.17-0.67)                         | 0.036%<br>(-0.8-0.85%)               | 0.13%<br>(-0.95-1.2%)               | 0.024<br>(-0.18-0.23)  | 0.17<br>(-3.9-4.3)    |
| Antigua and Barbuda | 2005 | Female | 75 to 79 | 23%<br>(14-37%)                | 77%<br>(63-86%)          | 0.32<br>(0.14-0.6)                          | -0.089%<br>(-0.92-0.68%)             | -0.085%<br>(-1.1-0.88%)             | -0.021<br>(-0.28-0.21) | -0.43<br>(-4.4-3.1)   |
| Antigua and Barbuda | 2005 | Female | 80 to 84 | 21%<br>(12-33%)                | 79%<br>(67-88%)          | 0.3<br>(0.14-0.53)                          | -0.11%<br>(-0.83-0.56%)              | -0.15%<br>(-1-0.74%)                | -0.048<br>(-0.33-0.23) | -0.51<br>(-3.7-2.5)   |
| Antigua and Barbuda | 2005 | Female | 85 to 89 | 21%<br>(13-32%)                | 79%<br>(68-87%)          | 0.3<br>(0.14-0.57)                          | -0.13%<br>(-0.83-0.58%)              | -0.22%<br>(-1.1-0.66%)              | -0.068<br>(-0.34-0.2)  | -0.39<br>(-2.5-1.7)   |
| Antigua and Barbuda | 2005 | Female | 90 to 94 | 24%<br>(14-37%)                | 76%<br>(63-86%)          | 0.35<br>(0.15-0.68)                         | -0.16%<br>(-0.95-0.71%)              | -0.3%<br>(-1.2-0.75%)               | -0.074<br>(-0.32-0.19) | -0.25<br>(-1.5-1.1)   |
| Antigua and Barbuda | 2005 | Female | 95 plus  | 28%<br>(15-45%)                | 72%<br>(55-85%)          | 0.41<br>(0.15-0.86)                         | -0.12%<br>(-1.1-1.1%)                | -0.32%<br>(-1.5-1%)                 | -0.03<br>(-0.14-0.095) | -0.044<br>(-0.4-0.39) |
| Antigua and Barbuda | 2005 | Male   | All Ages | 60%<br>(52-68%)                | 40%<br>(32-48%)          | 1.1<br>(0.79-1.5)                           | 4.6%<br>(3.6-5.6%)                   | 3.8%<br>(2.6-5.3%)                  | 9.3<br>(6.3-13)        | 470<br>(360-580)      |
| Antigua and Barbuda | 2005 | Male   | 15 to 19 | 59%<br>(42-75%)                | 41%<br>(25-58%)          | 0.85<br>(0.44-1.4)                          | 4.3%<br>(3-5.9%)                     | 5.4%<br>(3.2-8.3%)                  | 0.19<br>(0.11-0.29)    | 20<br>(13-29)         |
| Antigua and Barbuda | 2005 | Male   | 20 to 24 | 69%<br>(52-83%)                | 31%<br>(17-48%)          | 1.6<br>(0.87-2.5)                           | 8.4%<br>(6.2-11%)                    | 8.7%<br>(5.6-12%)                   | 0.5<br>(0.32-0.74)     | 51<br>(36-69)         |
| Antigua and Barbuda | 2005 | Male   | 25 to 29 | 72%<br>(56-84%)                | 28%<br>(16-44%)          | 1.9<br>(1-2.9)                              | 8.6%<br>(6.7-11%)                    | 9.3%<br>(6.2-13%)                   | 0.32<br>(0.21-0.45)    | 36<br>(27-48)         |
| Antigua and Barbuda | 2005 | Male   | 30 to 34 | 73%<br>(55-85%)                | 27%<br>(15-45%)          | 2<br>(1.2-3)                                | 8.1%<br>(6.3-10%)                    | 9.3%<br>(6.8-13%)                   | 0.61<br>(0.43-0.84)    | 53<br>(40-70)         |
| Antigua and Barbuda | 2005 | Male   | 35 to 39 | 73%<br>(56-85%)                | 27%<br>(15-44%)          | 1.9<br>(1.1-2.8)                            | 7.2%<br>(5.7-8.9%)                   | 9%<br>(6.8-12%)                     | 0.6<br>(0.43-0.79)     | 52<br>(40-67)         |
| Antigua and Barbuda | 2005 | Male   | 40 to 44 | 72%<br>(57-85%)                | 28%<br>(15-43%)          | 1.8<br>(0.98-2.7)                           | 7.4%<br>(5.8-9.4%)                   | 9.7%<br>(7.3-12%)                   | 0.8<br>(0.58-1.1)      | 51<br>(38-66)         |
| Antigua and Barbuda | 2005 | Male   | 45 to 49 | 70%<br>(52-84%)                | 30%<br>(16-48%)          | 1.7<br>(0.93-2.8)                           | 7.3%<br>(5.4-9.7%)                   | 9.3%<br>(6.7-13%)                   | 0.95<br>(0.66-1.3)     | 51<br>(37-68)         |
| Antigua and Barbuda | 2005 | Male   | 50 to 54 | 69%<br>(51-83%)                | 31%<br>(17-49%)          | 1.5<br>(0.8-2.5)                            | 6.7%<br>(4.7-9.3%)                   | 8.3%<br>(5.6-12%)                   | 1<br>(0.67-1.5)        | 46<br>(31-63)         |
| Antigua and Barbuda | 2005 | Male   | 55 to 59 | 67%<br>(50-82%)                | 33%<br>(18-50%)          | 1.4<br>(0.7-2.3)                            | 5.8%<br>(3.7-8.4%)                   | 7%<br>(4.5-10%)                     | 0.94<br>(0.6-1.4)      | 34<br>(22-50)         |
| Antigua and Barbuda | 2005 | Male   | 60 to 64 | 65%<br>(46-81%)                | 35%<br>(19-54%)          | 1.3<br>(0.62-2.3)                           | 4.4%<br>(2.7-6.8%)                   | 5.3%<br>(3.2-8.3%)                  | 0.82<br>(0.5-1.3)      | 26<br>(16-40)         |
| Antigua and Barbuda | 2005 | Male   | 65 to 69 | 64%<br>(45-80%)                | 36%<br>(20-55%)          | 1.2<br>(0.58-2)                             | 3.4%<br>(1.9-5.7%)                   | 4%<br>(2.2-6.8%)                    | 0.86<br>(0.46-1.4)     | 22<br>(12-36)         |
| Antigua and Barbuda | 2005 | Male   | 70 to 74 | 61%<br>(42-76%)                | 39%<br>(24-58%)          | 0.97<br>(0.48-1.7)                          | 2.2%<br>(0.85-4%)                    | 2.5%<br>(0.86-4.5%)                 | 0.59<br>(0.21-1.1)     | 12<br>(4.6-22)        |
| Antigua and Barbuda | 2005 | Male   | 75 to 79 | 56%<br>(36-73%)                | 44%<br>(27-64%)          | 0.81<br>(0.38-1.5)                          | 1.5%<br>(0.42-3%)                    | 1.6%<br>(0.37-3.3%)                 | 0.49<br>(0.12-1)       | 7.9<br>(2.2-16)       |
| Antigua and Barbuda | 2005 | Male   | 80 to 84 | 50%<br>(31-68%)                | 50%<br>(32-69%)          | 0.69<br>(0.34-1.2)                          | 1%<br>(0.23-2.2%)                    | 1.1%<br>(0.16-2.4%)                 | 0.33<br>(0.045-0.72)   | 4<br>(0.83-8.3)       |



| Location            | Year | Sex    | Age      | Prevalence of current drinkers | Prevalence of abstainers | Population average of standard drinks daily | Percent of total attributable deaths | Percent of total attributable DALYs | Attributable deaths     | Attributable DALYs    |
|---------------------|------|--------|----------|--------------------------------|--------------------------|---------------------------------------------|--------------------------------------|-------------------------------------|-------------------------|-----------------------|
| Antigua and Barbuda | 2005 | Male   | 85 to 89 | 45%<br>(29-62%)                | 55%<br>(38-71%)          | 0.61<br>(0.29-1.1)                          | 0.85%<br>(0.19-1.7%)                 | 0.85%<br>(0.035-1.8%)               | 0.18<br>(0.0072-0.39)   | 1.7<br>(0.37-3.3)     |
| Antigua and Barbuda | 2005 | Male   | 90 to 94 | 45%<br>(30-62%)                | 55%<br>(38-70%)          | 0.61<br>(0.28-1.1)                          | 0.63%<br>(-0.052-1.6%)               | 0.51%<br>(-0.33-1.7%)               | 0.074<br>(-0.048-0.24)  | 0.58<br>(-0.047-1.5)  |
| Antigua and Barbuda | 2005 | Male   | 95 plus  | 48%<br>(29-68%)                | 52%<br>(32-71%)          | 0.65<br>(0.27-1.3)                          | 0.59%<br>(-0.29-1.9%)                | 0.33%<br>(-0.75-1.9%)               | 0.012<br>(-0.028-0.068) | 0.091<br>(-0.046-0.3) |
| Antigua and Barbuda | 2010 | Female | All Ages | 37%<br>(31-44%)                | 63%<br>(56-69%)          | 0.61<br>(0.4-0.86)                          | 1.3%<br>(0.77-1.9%)                  | 0.94%<br>(0.16-2%)                  | 2.1<br>(0.34-4.3)       | 120<br>(72-180)       |
| Antigua and Barbuda | 2010 | Female | 15 to 19 | 42%<br>(29-59%)                | 58%<br>(41-71%)          | 0.67<br>(0.33-1.2)                          | 1.4%<br>(0.93-2%)                    | 2.8%<br>(1.7-4.3%)                  | 0.039<br>(0.023-0.061)  | 5.9<br>(3.9-8.7)      |
| Antigua and Barbuda | 2010 | Female | 20 to 24 | 48%<br>(32-64%)                | 52%<br>(36-68%)          | 1<br>(0.49-1.7)                             | 2.5%<br>(1.7-3.4%)                   | 3.4%<br>(2-5.2%)                    | 0.061<br>(0.036-0.097)  | 11<br>(7.1-15)        |
| Antigua and Barbuda | 2010 | Female | 25 to 29 | 48%<br>(31-64%)                | 52%<br>(36-69%)          | 1<br>(0.51-1.7)                             | 2.5%<br>(1.8-3.4%)                   | 3.4%<br>(2-5.2%)                    | 0.07<br>(0.04-0.11)     | 11<br>(7.2-15)        |
| Antigua and Barbuda | 2010 | Female | 30 to 34 | 46%<br>(30-64%)                | 54%<br>(36-70%)          | 0.99<br>(0.5-1.6)                           | 2.6%<br>(1.8-3.5%)                   | 4.2%<br>(2.8-6%)                    | 0.11<br>(0.069-0.16)    | 11<br>(7.5-15)        |
| Antigua and Barbuda | 2010 | Female | 35 to 39 | 45%<br>(30-63%)                | 55%<br>(37-70%)          | 0.91<br>(0.47-1.5)                          | 2.2%<br>(1.6-3%)                     | 4.3%<br>(2.9-5.9%)                  | 0.17<br>(0.11-0.25)     | 14<br>(9.9-20)        |
| Antigua and Barbuda | 2010 | Female | 40 to 44 | 44%<br>(29-62%)                | 56%<br>(38-71%)          | 0.86<br>(0.42-1.5)                          | 2.2%<br>(1.4-3.2%)                   | 4.3%<br>(2.8-6.4%)                  | 0.31<br>(0.2-0.47)      | 19<br>(12-28)         |
| Antigua and Barbuda | 2010 | Female | 45 to 49 | 42%<br>(26-60%)                | 58%<br>(40-74%)          | 0.84<br>(0.43-1.5)                          | 2.1%<br>(1.1-3.3%)                   | 3.9%<br>(2.3-6.1%)                  | 0.31<br>(0.19-0.5)      | 16<br>(8.9-25)        |
| Antigua and Barbuda | 2010 | Female | 50 to 54 | 38%<br>(24-55%)                | 62%<br>(45-76%)          | 0.76<br>(0.38-1.3)                          | 2%<br>(0.89-3.5%)                    | 3.3%<br>(1.6-5.5%)                  | 0.38<br>(0.18-0.65)     | 15<br>(6.7-27)        |
| Antigua and Barbuda | 2010 | Female | 55 to 59 | 34%<br>(21-51%)                | 66%<br>(49-79%)          | 0.65<br>(0.3-1.1)                           | 1.3%<br>(0.34-2.6%)                  | 2.3%<br>(0.84-4.2%)                 | 0.22<br>(0.075-0.42)    | 7.7<br>(2-15)         |
| Antigua and Barbuda | 2010 | Female | 60 to 64 | 30%<br>(18-46%)                | 70%<br>(54-82%)          | 0.55<br>(0.25-1)                            | 0.87%<br>(-0.17-2.2%)                | 1.4%<br>(-0.055-3.3%)               | 0.14<br>(-0.0054-0.33)  | 3.9<br>(-0.78-9.8)    |
| Antigua and Barbuda | 2010 | Female | 65 to 69 | 28%<br>(18-42%)                | 72%<br>(58-82%)          | 0.48<br>(0.22-0.88)                         | 0.46%<br>(-0.44-1.6%)                | 0.79%<br>(-0.43-2.3%)               | 0.12<br>(-0.06-0.34)    | 2.5<br>(-2.3-8.1)     |
| Antigua and Barbuda | 2010 | Female | 70 to 74 | 26%<br>(16-40%)                | 74%<br>(60-84%)          | 0.41<br>(0.19-0.77)                         | 0.25%<br>(-0.63-1.2%)                | 0.44%<br>(-0.71-1.8%)               | 0.085<br>(-0.14-0.34)   | 1.3<br>(-3.3-6.4)     |
| Antigua and Barbuda | 2010 | Female | 75 to 79 | 23%<br>(14-37%)                | 77%<br>(63-86%)          | 0.36<br>(0.15-0.7)                          | 0.12%<br>(-0.74-1%)                  | 0.19%<br>(-0.89-1.3%)               | 0.049<br>(-0.22-0.34)   | 0.58<br>(-3.5-5)      |
| Antigua and Barbuda | 2010 | Female | 80 to 84 | 21%<br>(12-33%)                | 79%<br>(67-88%)          | 0.34<br>(0.14-0.62)                         | 0.048%<br>(-0.69-0.8%)               | 0.059%<br>(-0.85-1%)                | 0.017<br>(-0.24-0.29)   | 0.19<br>(-2.8-3.3)    |
| Antigua and Barbuda | 2010 | Female | 85 to 89 | 21%<br>(12-32%)                | 79%<br>(68-88%)          | 0.34<br>(0.15-0.64)                         | 0.044%<br>(-0.69-0.92%)              | -0.0058%<br>(-0.92-1.1%)            | -0.002<br>(-0.31-0.34)  | 0.14<br>(-2.2-2.8)    |
| Antigua and Barbuda | 2010 | Female | 90 to 94 | 23%<br>(14-35%)                | 77%<br>(65-86%)          | 0.39<br>(0.15-0.75)                         | 0.061%<br>(-0.75-1.1%)               | -0.039%<br>(-1-1.2%)                | -0.0093<br>(-0.25-0.28) | 0.09<br>(-1.1-1.6)    |
| Antigua and Barbuda | 2010 | Female | 95 plus  | 27%<br>(15-45%)                | 73%<br>(55-85%)          | 0.47<br>(0.15-1)                            | 0.14%<br>(-0.86-1.6%)                | -0.032%<br>(-1.3-1.6%)              | -0.0033<br>(-0.13-0.18) | 0.062<br>(-0.37-0.68) |
| Antigua and Barbuda | 2010 | Male   | All Ages | 60%<br>(52-68%)                | 40%<br>(32-48%)          | 1.3<br>(0.84-1.7)                           | 5%<br>(3.9-6.5%)                     | 4.5%<br>(3-6.3%)                    | 11<br>(7.1-16)          | 530<br>(390-680)      |

| Location            | Year | Sex    | Age      | Prevalence of current drinkers | Prevalence of abstainers | Population average of standard drinks daily | Percent of total attributable deaths | Percent of total attributable DALYs | Attributable deaths     | Attributable DALYs    |
|---------------------|------|--------|----------|--------------------------------|--------------------------|---------------------------------------------|--------------------------------------|-------------------------------------|-------------------------|-----------------------|
| Antigua and Barbuda | 2010 | Male   | 15 to 19 | 59%<br>(42-75%)                | 41%<br>(25-58%)          | 0.97<br>(0.47-1.7)                          | 4.4%<br>(3-6.3%)                     | 5.8%<br>(3.4-8.9%)                  | 0.22<br>(0.13-0.35)     | 24<br>(15-34)         |
| Antigua and Barbuda | 2010 | Male   | 20 to 24 | 69%<br>(52-82%)                | 31%<br>(18-48%)          | 1.8<br>(0.96-3)                             | 8.7%<br>(6.4-12%)                    | 9.4%<br>(6-14%)                     | 0.49<br>(0.3-0.74)      | 51<br>(36-70)         |
| Antigua and Barbuda | 2010 | Male   | 25 to 29 | 72%<br>(55-84%)                | 28%<br>(16-45%)          | 2.1<br>(1.1-3.5)                            | 9%<br>(6.8-12%)                      | 10%<br>(6.4-14%)                    | 0.4<br>(0.26-0.59)      | 44<br>(32-60)         |
| Antigua and Barbuda | 2010 | Male   | 30 to 34 | 73%<br>(55-85%)                | 27%<br>(15-45%)          | 2.2<br>(1.2-3.5)                            | 8.8%<br>(6.7-12%)                    | 10%<br>(7.1-15%)                    | 0.54<br>(0.37-0.79)     | 46<br>(33-61)         |
| Antigua and Barbuda | 2010 | Male   | 35 to 39 | 73%<br>(57-85%)                | 27%<br>(15-43%)          | 2.1<br>(1.1-3.4)                            | 7.8%<br>(6-9.9%)                     | 10%<br>(7.5-14%)                    | 0.57<br>(0.39-0.79)     | 47<br>(34-61)         |
| Antigua and Barbuda | 2010 | Male   | 40 to 44 | 71%<br>(56-85%)                | 29%<br>(15-44%)          | 2<br>(1-3.3)                                | 7.6%<br>(5.7-9.9%)                   | 10%<br>(7.6-14%)                    | 0.98<br>(0.68-1.3)      | 64<br>(46-86)         |
| Antigua and Barbuda | 2010 | Male   | 45 to 49 | 70%<br>(51-84%)                | 30%<br>(16-49%)          | 1.9<br>(1-3.2)                              | 7.5%<br>(5.5-10%)                    | 9.9%<br>(7-14%)                     | 1.1<br>(0.79-1.6)       | 61<br>(44-84)         |
| Antigua and Barbuda | 2010 | Male   | 50 to 54 | 68%<br>(50-83%)                | 32%<br>(17-50%)          | 1.7<br>(0.88-2.9)                           | 7%<br>(4.8-10%)                      | 9%<br>(6-13%)                       | 1.2<br>(0.79-1.8)       | 56<br>(38-80)         |
| Antigua and Barbuda | 2010 | Male   | 55 to 59 | 67%<br>(49-82%)                | 33%<br>(18-51%)          | 1.6<br>(0.78-2.6)                           | 6.3%<br>(4-9.4%)                     | 7.7%<br>(4.7-12%)                   | 1.4<br>(0.88-2.2)       | 52<br>(33-79)         |
| Antigua and Barbuda | 2010 | Male   | 60 to 64 | 65%<br>(46-82%)                | 35%<br>(18-54%)          | 1.5<br>(0.66-2.6)                           | 4.9%<br>(2.9-7.9%)                   | 6%<br>(3.5-9.6%)                    | 0.96<br>(0.55-1.6)      | 29<br>(17-47)         |
| Antigua and Barbuda | 2010 | Male   | 65 to 69 | 64%<br>(44-79%)                | 36%<br>(21-56%)          | 1.3<br>(0.63-2.2)                           | 3.8%<br>(2-6.5%)                     | 4.5%<br>(2.4-7.7%)                  | 0.95<br>(0.5-1.6)       | 24<br>(13-41)         |
| Antigua and Barbuda | 2010 | Male   | 70 to 74 | 60%<br>(42-76%)                | 40%<br>(24-58%)          | 1.1<br>(0.5-1.9)                            | 2.5%<br>(1.1-4.6%)                   | 2.9%<br>(1.1-5.3%)                  | 0.76<br>(0.29-1.4)      | 16<br>(6.7-28)        |
| Antigua and Barbuda | 2010 | Male   | 75 to 79 | 55%<br>(35-73%)                | 45%<br>(27-65%)          | 0.9<br>(0.41-1.6)                           | 1.8%<br>(0.63-3.7%)                  | 2%<br>(0.61-4.2%)                   | 0.5<br>(0.15-1.1)       | 8<br>(2.7-16)         |
| Antigua and Barbuda | 2010 | Male   | 80 to 84 | 49%<br>(31-67%)                | 51%<br>(33-69%)          | 0.76<br>(0.36-1.4)                          | 1.3%<br>(0.37-2.6%)                  | 1.4%<br>(0.34-2.9%)                 | 0.39<br>(0.093-0.83)    | 4.7<br>(1.4-9.6)      |
| Antigua and Barbuda | 2010 | Male   | 85 to 89 | 45%<br>(27-61%)                | 55%<br>(39-73%)          | 0.67<br>(0.3-1.2)                           | 1.1%<br>(0.34-2.2%)                  | 1.1%<br>(0.21-2.4%)                 | 0.24<br>(0.046-0.53)    | 2.2<br>(0.7-4.5)      |
| Antigua and Barbuda | 2010 | Male   | 90 to 94 | 45%<br>(29-61%)                | 55%<br>(39-71%)          | 0.67<br>(0.29-1.3)                          | 0.89%<br>(0.18-2.1%)                 | 0.82%<br>(-0.041-2.2%)              | 0.099<br>(-0.0051-0.27) | 0.68<br>(0.13-1.6)    |
| Antigua and Barbuda | 2010 | Male   | 95 plus  | 47%<br>(28-67%)                | 53%<br>(33-72%)          | 0.73<br>(0.27-1.5)                          | 0.88%<br>(-0.042-2.6%)               | 0.68%<br>(-0.42-2.7%)               | 0.032<br>(-0.02-0.12)   | 0.18<br>(-0.0085-0.5) |
| Antigua and Barbuda | 2016 | Female | All Ages | 37%<br>(30-44%)                | 63%<br>(56-70%)          | 0.66<br>(0.37-1)                            | 1.4%<br>(0.79-2.3%)                  | 1.2%<br>(0.34-2.6%)                 | 2.9<br>(0.79-6.4)       | 150<br>(79-240)       |
| Antigua and Barbuda | 2016 | Female | 15 to 19 | 42%<br>(29-58%)                | 58%<br>(42-71%)          | 0.71<br>(0.32-1.3)                          | 1.4%<br>(0.91-2.1%)                  | 2.7%<br>(1.5-4.5%)                  | 0.036<br>(0.019-0.06)   | 5.6<br>(3.5-8.5)      |
| Antigua and Barbuda | 2016 | Female | 20 to 24 | 48%<br>(32-64%)                | 52%<br>(36-68%)          | 1.1<br>(0.46-2)                             | 2.5%<br>(1.6-3.5%)                   | 3.4%<br>(1.9-5.6%)                  | 0.06<br>(0.032-0.1)     | 12<br>(7.3-17)        |
| Antigua and Barbuda | 2016 | Female | 25 to 29 | 47%<br>(31-64%)                | 53%<br>(36-69%)          | 1.1<br>(0.48-2)                             | 2.6%<br>(1.8-3.6%)                   | 3.6%<br>(2-5.7%)                    | 0.082<br>(0.044-0.14)   | 12<br>(8-18)          |
| Antigua and Barbuda | 2016 | Female | 30 to 34 | 46%<br>(29-63%)                | 54%<br>(37-71%)          | 1.1<br>(0.47-1.9)                           | 2.7%<br>(1.8-3.7%)                   | 4.3%<br>(2.7-6.4%)                  | 0.14<br>(0.083-0.22)    | 14<br>(9.2-20)        |

| Location            | Year | Sex    | Age      | Prevalence of current drinkers | Prevalence of abstainers | Population average of standard drinks daily | Percent of total attributable deaths | Percent of total attributable DALYs | Attributable deaths   | Attributable DALYs   |
|---------------------|------|--------|----------|--------------------------------|--------------------------|---------------------------------------------|--------------------------------------|-------------------------------------|-----------------------|----------------------|
| Antigua and Barbuda | 2016 | Female | 35 to 39 | 45%<br>(29-62%)                | 55%<br>(38-71%)          | 0.98<br>(0.42-1.8)                          | 2.4%<br>(1.6-3.5%)                   | 4.5%<br>(2.9-6.8%)                  | 0.14<br>(0.085-0.23)  | 11<br>(7.2-17)       |
| Antigua and Barbuda | 2016 | Female | 40 to 44 | 44%<br>(29-62%)                | 56%<br>(38-71%)          | 0.92<br>(0.39-1.8)                          | 2.3%<br>(1.4-3.5%)                   | 4.6%<br>(2.9-7.1%)                  | 0.25<br>(0.15-0.41)   | 16<br>(9.5-25)       |
| Antigua and Barbuda | 2016 | Female | 45 to 49 | 42%<br>(26-59%)                | 58%<br>(41-74%)          | 0.89<br>(0.41-1.7)                          | 2.2%<br>(1.2-3.6%)                   | 4.1%<br>(2.3-6.7%)                  | 0.45<br>(0.24-0.77)   | 23<br>(12-38)        |
| Antigua and Barbuda | 2016 | Female | 50 to 54 | 38%<br>(24-55%)                | 62%<br>(45-76%)          | 0.79<br>(0.35-1.5)                          | 2.2%<br>(0.98-3.9%)                  | 3.6%<br>(1.8-6.3%)                  | 0.54<br>(0.27-0.97)   | 22<br>(10-40)        |
| Antigua and Barbuda | 2016 | Female | 55 to 59 | 33%<br>(20-50%)                | 67%<br>(50-80%)          | 0.67<br>(0.28-1.2)                          | 1.6%<br>(0.55-3%)                    | 2.7%<br>(1.1-5.1%)                  | 0.36<br>(0.15-0.68)   | 12<br>(4.4-24)       |
| Antigua and Barbuda | 2016 | Female | 60 to 64 | 30%<br>(18-46%)                | 70%<br>(54-82%)          | 0.58<br>(0.23-1.1)                          | 1.1%<br>(-0.0021-2.7%)               | 1.7%<br>(0.17-4%)                   | 0.29<br>(0.026-0.69)  | 8.2<br>(-0.016-21)   |
| Antigua and Barbuda | 2016 | Female | 65 to 69 | 28%<br>(17-42%)                | 72%<br>(58-83%)          | 0.51<br>(0.2-0.9)                           | 0.64%<br>(-0.29-1.9%)                | 1.1%<br>(-0.25-2.8%)                | 0.14<br>(-0.035-0.38) | 3.1<br>(-1.4-9.4)    |
| Antigua and Barbuda | 2016 | Female | 70 to 74 | 25%<br>(16-38%)                | 75%<br>(62-84%)          | 0.43<br>(0.17-0.84)                         | 0.43%<br>(-0.4-1.7%)                 | 0.69%<br>(-0.43-2.4%)               | 0.15<br>(-0.091-0.52) | 2.5<br>(-2.3-10)     |
| Antigua and Barbuda | 2016 | Female | 75 to 79 | 22%<br>(14-35%)                | 78%<br>(65-86%)          | 0.38<br>(0.14-0.76)                         | 0.29%<br>(-0.53-1.4%)                | 0.41%<br>(-0.62-1.9%)               | 0.12<br>(-0.2-0.57)   | 1.7<br>(-3.2-8.5)    |
| Antigua and Barbuda | 2016 | Female | 80 to 84 | 21%<br>(12-33%)                | 79%<br>(67-88%)          | 0.35<br>(0.14-0.7)                          | 0.2%<br>(-0.52-1.2%)                 | 0.24%<br>(-0.67-1.5%)               | 0.076<br>(-0.2-0.5)   | 0.88<br>(-2.3-5.6)   |
| Antigua and Barbuda | 2016 | Female | 85 to 89 | 20%<br>(12-31%)                | 80%<br>(69-88%)          | 0.35<br>(0.14-0.7)                          | 0.2%<br>(-0.54-1.2%)                 | 0.18%<br>(-0.76-1.4%)               | 0.053<br>(-0.22-0.42) | 0.55<br>(-1.6-3.4)   |
| Antigua and Barbuda | 2016 | Female | 90 to 94 | 23%<br>(13-35%)                | 77%<br>(65-87%)          | 0.4<br>(0.15-0.81)                          | 0.19%<br>(-0.61-1.4%)                | 0.12%<br>(-0.87-1.6%)               | 0.029<br>(-0.21-0.39) | 0.29<br>(-0.93-2.2)  |
| Antigua and Barbuda | 2016 | Female | 95 plus  | 27%<br>(14-43%)                | 73%<br>(57-86%)          | 0.48<br>(0.15-1.1)                          | 0.29%<br>(-0.76-2%)                  | 0.14%<br>(-1.1-2.2%)                | 0.013<br>(-0.11-0.21) | 0.11<br>(-0.29-0.77) |
| Antigua and Barbuda | 2016 | Male   | All Ages | 60%<br>(52-68%)                | 40%<br>(32-48%)          | 1.4<br>(0.75-2.1)                           | 5.3%<br>(3.8-7.2%)                   | 4.9%<br>(3.1-7.5%)                  | 13<br>(7.6-20)        | 600<br>(410-840)     |
| Antigua and Barbuda | 2016 | Male   | 15 to 19 | 59%<br>(42-75%)                | 41%<br>(25-58%)          | 1<br>(0.43-1.9)                             | 4.3%<br>(2.9-6.2%)                   | 5.8%<br>(3.3-9.1%)                  | 0.22<br>(0.12-0.35)   | 23<br>(15-34)        |
| Antigua and Barbuda | 2016 | Male   | 20 to 24 | 68%<br>(51-82%)                | 32%<br>(18-49%)          | 1.9<br>(0.84-3.3)                           | 8.6%<br>(6-12%)                      | 9.5%<br>(5.7-15%)                   | 0.5<br>(0.29-0.81)    | 54<br>(37-77)        |
| Antigua and Barbuda | 2016 | Male   | 25 to 29 | 71%<br>(54-84%)                | 29%<br>(16-46%)          | 2.3<br>(1-4)                                | 9.1%<br>(6.7-12%)                    | 10%<br>(6.4-16%)                    | 0.41<br>(0.25-0.65)   | 46<br>(32-63)        |
| Antigua and Barbuda | 2016 | Male   | 30 to 34 | 72%<br>(55-85%)                | 28%<br>(15-45%)          | 2.3<br>(1.1-4)                              | 8.9%<br>(6.5-12%)                    | 11%<br>(6.8-16%)                    | 0.62<br>(0.39-0.93)   | 54<br>(37-74)        |
| Antigua and Barbuda | 2016 | Male   | 35 to 39 | 72%<br>(56-85%)                | 28%<br>(15-44%)          | 2.2<br>(1-3.9)                              | 8.2%<br>(6-11%)                      | 11%<br>(7.3-15%)                    | 0.48<br>(0.29-0.73)   | 39<br>(26-54)        |
| Antigua and Barbuda | 2016 | Male   | 40 to 44 | 71%<br>(56-84%)                | 29%<br>(16-44%)          | 2.1<br>(0.94-3.9)                           | 7.8%<br>(5.7-11%)                    | 11%<br>(7.7-16%)                    | 0.74<br>(0.47-1.1)    | 49<br>(34-70)        |
| Antigua and Barbuda | 2016 | Male   | 45 to 49 | 70%<br>(50-84%)                | 30%<br>(16-50%)          | 2<br>(0.99-3.6)                             | 7.7%<br>(5.5-11%)                    | 10%<br>(7-15%)                      | 1.5<br>(0.91-2.2)     | 79<br>(52-110)       |
| Antigua and Barbuda | 2016 | Male   | 50 to 54 | 68%<br>(50-83%)                | 32%<br>(17-50%)          | 1.8<br>(0.85-3.3)                           | 7.1%<br>(4.7-11%)                    | 9.3%<br>(5.9-14%)                   | 1.5<br>(0.92-2.4)     | 70<br>(44-110)       |

| Location            | Year | Sex    | Age      | Prevalence of current drinkers | Prevalence of abstainers | Population average of standard drinks daily | Percent of total attributable deaths | Percent of total attributable DALYs | Attributable deaths    | Attributable DALYs   |
|---------------------|------|--------|----------|--------------------------------|--------------------------|---------------------------------------------|--------------------------------------|-------------------------------------|------------------------|----------------------|
| Antigua and Barbuda | 2016 | Male   | 55 to 59 | 66%<br>(48-82%)                | 34%<br>(18-52%)          | 1.7<br>(0.73-3)                             | 6.4%<br>(3.9-10%)                    | 8%<br>(4.7-13%)                     | 1.8<br>(1-2.9)         | 68<br>(39-100)       |
| Antigua and Barbuda | 2016 | Male   | 60 to 64 | 64%<br>(45-81%)                | 36%<br>(19-55%)          | 1.5<br>(0.61-2.8)                           | 5.2%<br>(2.8-8.6%)                   | 6.3%<br>(3.3-11%)                   | 1.7<br>(0.87-2.8)      | 51<br>(27-83)        |
| Antigua and Barbuda | 2016 | Male   | 65 to 69 | 63%<br>(44-79%)                | 37%<br>(21-56%)          | 1.4<br>(0.57-2.4)                           | 4%<br>(1.9-7%)                       | 4.8%<br>(2.3-8.7%)                  | 1.1<br>(0.53-2)        | 28<br>(14-49)        |
| Antigua and Barbuda | 2016 | Male   | 70 to 74 | 60%<br>(41-76%)                | 40%<br>(24-59%)          | 1.1<br>(0.47-2.1)                           | 2.7%<br>(1.1-5.4%)                   | 3.2%<br>(1.2-6.4%)                  | 0.78<br>(0.3-1.6)      | 16<br>(6.5-32)       |
| Antigua and Barbuda | 2016 | Male   | 75 to 79 | 55%<br>(35-73%)                | 45%<br>(27-65%)          | 0.95<br>(0.37-1.8)                          | 2%<br>(0.65-4.2%)                    | 2.2%<br>(0.65-4.9%)                 | 0.7<br>(0.2-1.6)       | 11<br>(3.6-24)       |
| Antigua and Barbuda | 2016 | Male   | 80 to 84 | 49%<br>(30-67%)                | 51%<br>(33-70%)          | 0.8<br>(0.33-1.5)                           | 1.4%<br>(0.36-3.3%)                  | 1.6%<br>(0.32-3.6%)                 | 0.43<br>(0.087-1)      | 5.1<br>(1.3-12)      |
| Antigua and Barbuda | 2016 | Male   | 85 to 89 | 44%<br>(27-61%)                | 56%<br>(39-73%)          | 0.7<br>(0.29-1.4)                           | 1.2%<br>(0.31-2.7%)                  | 1.2%<br>(0.2-3%)                    | 0.24<br>(0.038-0.57)   | 2.1<br>(0.54-4.7)    |
| Antigua and Barbuda | 2016 | Male   | 90 to 94 | 44%<br>(29-61%)                | 56%<br>(39-71%)          | 0.71<br>(0.28-1.4)                          | 1%<br>(0.21-2.6%)                    | 0.96%<br>(0.0016-2.9%)              | 0.12<br>(0.0002-0.35)  | 0.77<br>(0.16-2)     |
| Antigua and Barbuda | 2016 | Male   | 95 plus  | 47%<br>(28-67%)                | 53%<br>(33-72%)          | 0.76<br>(0.26-1.6)                          | 1.1%<br>(0.078-3%)                   | 0.87%<br>(-0.34-3.2%)               | 0.031<br>(-0.013-0.11) | 0.16<br>(0.012-0.45) |
| The Bahamas         | 1990 | Female | All Ages | 36%<br>(30-44%)                | 64%<br>(56-70%)          | 1.8<br>(1.5-2.1)                            | 4.6%<br>(3.6-5.8%)                   | 6.3%<br>(4.5-8.5%)                  | 39<br>(27-51)          | 1500<br>(1200-1900)  |
| The Bahamas         | 1990 | Female | 15 to 19 | 42%<br>(29-58%)                | 58%<br>(42-71%)          | 2<br>(1.1-3.3)                              | 3.2%<br>(2-4.9%)                     | 7.2%<br>(4.3-11%)                   | 0.51<br>(0.29-0.79)    | 51<br>(32-76)        |
| The Bahamas         | 1990 | Female | 20 to 24 | 48%<br>(32-65%)                | 52%<br>(35-68%)          | 3.1<br>(1.8-4.5)                            | 5.7%<br>(4-7.6%)                     | 9.6%<br>(6.3-13%)                   | 1.2<br>(0.77-1.6)      | 110<br>(76-140)      |
| The Bahamas         | 1990 | Female | 25 to 29 | 48%<br>(31-65%)                | 52%<br>(35-69%)          | 3.2<br>(1.9-4.6)                            | 6.7%<br>(4.8-8.6%)                   | 9.8%<br>(6.8-13%)                   | 2.2<br>(1.5-2.9)       | 170<br>(120-230)     |
| The Bahamas         | 1990 | Female | 30 to 34 | 46%<br>(29-63%)                | 54%<br>(37-71%)          | 3<br>(1.8-4.6)                              | 7.2%<br>(5.2-9.5%)                   | 10%<br>(7-13%)                      | 2.8<br>(2-3.8)         | 190<br>(140-250)     |
| The Bahamas         | 1990 | Female | 35 to 39 | 45%<br>(30-63%)                | 55%<br>(37-70%)          | 2.8<br>(1.6-4.3)                            | 7.3%<br>(5.2-9.7%)                   | 10%<br>(7.3-14%)                    | 3<br>(2.1-4.1)         | 180<br>(120-240)     |
| The Bahamas         | 1990 | Female | 40 to 44 | 44%<br>(29-62%)                | 56%<br>(38-71%)          | 2.7<br>(1.4-4.2)                            | 7.3%<br>(4.9-10%)                    | 11%<br>(7.7-16%)                    | 2.7<br>(1.8-3.8)       | 140<br>(96-200)      |
| The Bahamas         | 1990 | Female | 45 to 49 | 42%<br>(26-59%)                | 58%<br>(41-74%)          | 2.6<br>(1.4-4.3)                            | 7.1%<br>(4.6-10%)                    | 11%<br>(7.3-16%)                    | 2.4<br>(1.6-3.6)       | 110<br>(75-170)      |
| The Bahamas         | 1990 | Female | 50 to 54 | 38%<br>(24-56%)                | 62%<br>(44-76%)          | 2.3<br>(1.2-3.9)                            | 7.4%<br>(4.4-11%)                    | 11%<br>(6.7-16%)                    | 3.2<br>(2-4.9)         | 130<br>(80-200)      |
| The Bahamas         | 1990 | Female | 55 to 59 | 34%<br>(21-51%)                | 66%<br>(49-79%)          | 2<br>(0.99-3.4)                             | 6.8%<br>(3.8-10%)                    | 9.5%<br>(5.4-14%)                   | 3.4<br>(1.9-5.1)       | 120<br>(66-180)      |
| The Bahamas         | 1990 | Female | 60 to 64 | 30%<br>(18-46%)                | 70%<br>(54-82%)          | 1.7<br>(0.83-3.1)                           | 5.5%<br>(2.8-9.1%)                   | 7.7%<br>(4-13%)                     | 2.5<br>(1.3-4.1)       | 75<br>(38-120)       |
| The Bahamas         | 1990 | Female | 65 to 69 | 28%<br>(17-42%)                | 72%<br>(58-83%)          | 1.5<br>(0.77-2.5)                           | 5%<br>(2.4-8.4%)                     | 6.6%<br>(3.2-11%)                   | 2.7<br>(1.4-4.5)       | 65<br>(33-110)       |
| The Bahamas         | 1990 | Female | 70 to 74 | 25%<br>(16-38%)                | 75%<br>(62-84%)          | 1.2<br>(0.62-2.3)                           | 4.3%<br>(1.8-7.9%)                   | 5.4%<br>(2.3-9.8%)                  | 3.1<br>(1.3-5.8)       | 59<br>(25-110)       |

| Location    | Year | Sex    | Age      | Prevalence of current drinkers | Prevalence of abstainers | Population average of standard drinks daily | Percent of total attributable deaths | Percent of total attributable DALYs | Attributable deaths  | Attributable DALYs  |
|-------------|------|--------|----------|--------------------------------|--------------------------|---------------------------------------------|--------------------------------------|-------------------------------------|----------------------|---------------------|
| The Bahamas | 1990 | Female | 75 to 79 | 23%<br>(13-36%)                | 77%<br>(64-87%)          | 1.1<br>(0.47-2)                             | 3.6%<br>(1.3-7%)                     | 4.4%<br>(1.6-8.4%)                  | 3.2<br>(1.2-6)       | 47<br>(17-89)       |
| The Bahamas | 1990 | Female | 80 to 84 | 21%<br>(12-33%)                | 79%<br>(67-88%)          | 1<br>(0.48-1.7)                             | 3.4%<br>(1.4-6.4%)                   | 4.1%<br>(1.7-7.6%)                  | 2.6<br>(1.1-4.9)     | 29<br>(12-52)       |
| The Bahamas | 1990 | Female | 85 to 89 | 21%<br>(12-32%)                | 79%<br>(68-88%)          | 1<br>(0.5-1.8)                              | 3.5%<br>(1.4-6.6%)                   | 4.1%<br>(1.6-7.8%)                  | 1.8<br>(0.69-3.4)    | 14<br>(5.3-26)      |
| The Bahamas | 1990 | Female | 90 to 94 | 23%<br>(14-35%)                | 77%<br>(65-86%)          | 1.2<br>(0.53-2.2)                           | 3.9%<br>(1.4-7.8%)                   | 4.6%<br>(1.6-9.2%)                  | 0.88<br>(0.31-1.8)   | 4.6<br>(1.7-9.1)    |
| The Bahamas | 1990 | Female | 95 plus  | 27%<br>(15-44%)                | 73%<br>(56-85%)          | 1.4<br>(0.52-2.9)                           | 4.6%<br>(1-9.6%)                     | 5.3%<br>(1.1-11%)                   | 0.27<br>(0.056-0.59) | 0.95<br>(0.22-2)    |
| The Bahamas | 1990 | Male   | All Ages | 57%<br>(49-66%)                | 43%<br>(34-51%)          | 3.7<br>(3.2-4.2)                            | 12%<br>(9.9-14%)                     | 15%<br>(12-17%)                     | 120<br>(97-140)      | 4800<br>(4100-5600) |
| The Bahamas | 1990 | Male   | 15 to 19 | 59%<br>(42-75%)                | 41%<br>(25-58%)          | 3<br>(1.6-4.6)                              | 8.9%<br>(5.7-13%)                    | 13%<br>(7.8-19%)                    | 2.3<br>(1.4-3.5)     | 200<br>(130-280)    |
| The Bahamas | 1990 | Male   | 20 to 24 | 69%<br>(52-83%)                | 31%<br>(17-48%)          | 5.5<br>(3.5-7.8)                            | 17%<br>(12-22%)                      | 21%<br>(15-29%)                     | 5.3<br>(3.6-7.4)     | 430<br>(300-560)    |
| The Bahamas | 1990 | Male   | 25 to 29 | 72%<br>(55-84%)                | 28%<br>(16-45%)          | 6.6<br>(4.4-9.3)                            | 18%<br>(13-22%)                      | 21%<br>(15-28%)                     | 8.8<br>(6.3-11)      | 630<br>(470-800)    |
| The Bahamas | 1990 | Male   | 30 to 34 | 73%<br>(56-85%)                | 27%<br>(15-44%)          | 6.9<br>(4.6-9.6)                            | 16%<br>(13-20%)                      | 20%<br>(15-24%)                     | 8.3<br>(6.3-10)      | 540<br>(420-670)    |
| The Bahamas | 1990 | Male   | 35 to 39 | 73%<br>(57-85%)                | 27%<br>(15-43%)          | 6.6<br>(4.1-9.7)                            | 16%<br>(13-20%)                      | 20%<br>(16-24%)                     | 8<br>(6.1-9.7)       | 460<br>(370-560)    |
| The Bahamas | 1990 | Male   | 40 to 44 | 72%<br>(56-84%)                | 28%<br>(16-44%)          | 6.3<br>(3.7-9.7)                            | 17%<br>(14-21%)                      | 21%<br>(17-26%)                     | 8.5<br>(6.8-10)      | 440<br>(350-530)    |
| The Bahamas | 1990 | Male   | 45 to 49 | 70%<br>(51-84%)                | 30%<br>(16-49%)          | 6<br>(3.4-9.7)                              | 18%<br>(14-22%)                      | 21%<br>(17-26%)                     | 11<br>(8.1-13)       | 470<br>(370-580)    |
| The Bahamas | 1990 | Male   | 50 to 54 | 69%<br>(50-83%)                | 31%<br>(17-50%)          | 5.6<br>(3.2-8.9)                            | 17%<br>(13-21%)                      | 21%<br>(16-25%)                     | 11<br>(8.6-13)       | 430<br>(340-520)    |
| The Bahamas | 1990 | Male   | 55 to 59 | 67%<br>(49-82%)                | 33%<br>(18-51%)          | 5.1<br>(2.8-8)                              | 17%<br>(12-21%)                      | 20%<br>(15-25%)                     | 11<br>(8.1-14)       | 360<br>(270-450)    |
| The Bahamas | 1990 | Male   | 60 to 64 | 65%<br>(46-82%)                | 35%<br>(18-54%)          | 4.6<br>(2.5-7.7)                            | 15%<br>(10-19%)                      | 17%<br>(12-23%)                     | 10<br>(7.1-13)       | 290<br>(200-380)    |
| The Bahamas | 1990 | Male   | 65 to 69 | 64%<br>(45-79%)                | 36%<br>(21-55%)          | 4.1<br>(2.3-6.5)                            | 14%<br>(9.6-18%)                     | 16%<br>(11-21%)                     | 11<br>(7.4-14)       | 250<br>(170-330)    |
| The Bahamas | 1990 | Male   | 70 to 74 | 60%<br>(42-76%)                | 40%<br>(24-58%)          | 3.4<br>(1.8-6)                              | 11%<br>(7-15%)                       | 13%<br>(8-18%)                      | 7.3<br>(4.5-10)      | 140<br>(87-190)     |
| The Bahamas | 1990 | Male   | 75 to 79 | 55%<br>(36-74%)                | 45%<br>(26-64%)          | 2.9<br>(1.5-5)                              | 9.2%<br>(5.1-14%)                    | 10%<br>(5.9-15%)                    | 7.6<br>(4.2-11)      | 110<br>(61-160)     |
| The Bahamas | 1990 | Male   | 80 to 84 | 49%<br>(31-67%)                | 51%<br>(33-69%)          | 2.4<br>(1.2-4)                              | 7.9%<br>(4.4-12%)                    | 9%<br>(4.8-14%)                     | 4.5<br>(2.5-7)       | 49<br>(27-74)       |
| The Bahamas | 1990 | Male   | 85 to 89 | 45%<br>(28-62%)                | 55%<br>(38-72%)          | 2.1<br>(1.1-3.7)                            | 7%<br>(3.6-11%)                      | 7.8%<br>(3.9-13%)                   | 2.2<br>(1.1-3.6)     | 17<br>(8.7-28)      |
| The Bahamas | 1990 | Male   | 90 to 94 | 45%<br>(30-62%)                | 55%<br>(38-70%)          | 2.2<br>(1-3.9)                              | 6.5%<br>(3-11%)                      | 7.3%<br>(3.2-12%)                   | 0.76<br>(0.33-1.3)   | 4<br>(1.8-6.7)      |

| Location    | Year | Sex    | Age      | Prevalence of current drinkers | Prevalence of abstainers | Population average of standard drinks daily | Percent of total attributable deaths | Percent of total attributable DALYs | Attributable deaths  | Attributable DALYs  |
|-------------|------|--------|----------|--------------------------------|--------------------------|---------------------------------------------|--------------------------------------|-------------------------------------|----------------------|---------------------|
| The Bahamas | 1990 | Male   | 95 plus  | 48%<br>(28-68%)                | 52%<br>(32-72%)          | 2.3<br>(0.96-4.3)                           | 6.7%<br>(2.6-11%)                    | 7.5%<br>(2.6-13%)                   | 0.17<br>(0.058-0.3)  | 0.61<br>(0.24-1.1)  |
| The Bahamas | 1995 | Female | All Ages | 36%<br>(30-43%)                | 64%<br>(57-70%)          | 1.5<br>(1.3-1.8)                            | 3.9%<br>(3.1-4.9%)                   | 5.2%<br>(3.6-7.1%)                  | 37<br>(26-51)        | 1400<br>(1100-1800) |
| The Bahamas | 1995 | Female | 15 to 19 | 42%<br>(28-58%)                | 58%<br>(42-72%)          | 1.8<br>(0.92-2.9)                           | 2.6%<br>(1.7-3.9%)                   | 5.8%<br>(3.5-9%)                    | 0.36<br>(0.21-0.55)  | 39<br>(24-58)       |
| The Bahamas | 1995 | Female | 20 to 24 | 48%<br>(32-64%)                | 52%<br>(36-68%)          | 2.6<br>(1.5-4)                              | 4.3%<br>(3-5.8%)                     | 6.8%<br>(4.2-9.6%)                  | 0.82<br>(0.51-1.2)   | 85<br>(58-120)      |
| The Bahamas | 1995 | Female | 25 to 29 | 47%<br>(31-64%)                | 53%<br>(36-69%)          | 2.7<br>(1.6-4)                              | 5.2%<br>(3.7-6.9%)                   | 6.8%<br>(4.6-9.4%)                  | 1.7<br>(1.1-2.5)     | 140<br>(99-190)     |
| The Bahamas | 1995 | Female | 30 to 34 | 45%<br>(29-63%)                | 55%<br>(37-71%)          | 2.6<br>(1.5-4.1)                            | 5.3%<br>(3.9-7.2%)                   | 6.8%<br>(4.7-9.5%)                  | 2.7<br>(1.8-3.8)     | 190<br>(130-250)    |
| The Bahamas | 1995 | Female | 35 to 39 | 45%<br>(29-63%)                | 55%<br>(37-71%)          | 2.4<br>(1.4-3.8)                            | 5.6%<br>(4-7.6%)                     | 7.5%<br>(5.2-10%)                   | 3.1<br>(2.1-4.3)     | 190<br>(130-250)    |
| The Bahamas | 1995 | Female | 40 to 44 | 43%<br>(28-62%)                | 57%<br>(38-72%)          | 2.3<br>(1.2-3.7)                            | 6%<br>(4.1-8.5%)                     | 9%<br>(6-13%)                       | 2.9<br>(1.9-4.1)     | 150<br>(100-210)    |
| The Bahamas | 1995 | Female | 45 to 49 | 42%<br>(25-59%)                | 58%<br>(41-75%)          | 2.2<br>(1.2-3.7)                            | 5.7%<br>(3.7-8.9%)                   | 9%<br>(5.8-14%)                     | 2.4<br>(1.6-3.7)     | 120<br>(74-180)     |
| The Bahamas | 1995 | Female | 50 to 54 | 38%<br>(24-55%)                | 62%<br>(45-76%)          | 2<br>(1.1-3.4)                              | 6.3%<br>(3.6-10%)                    | 9.2%<br>(5.4-14%)                   | 3.2<br>(1.9-5.1)     | 130<br>(73-200)     |
| The Bahamas | 1995 | Female | 55 to 59 | 34%<br>(20-50%)                | 66%<br>(50-80%)          | 1.7<br>(0.84-2.9)                           | 5.6%<br>(3-9%)                       | 7.9%<br>(4.4-12%)                   | 3.4<br>(1.8-5.4)     | 120<br>(63-190)     |
| The Bahamas | 1995 | Female | 60 to 64 | 30%<br>(18-47%)                | 70%<br>(53-82%)          | 1.5<br>(0.71-2.6)                           | 4.5%<br>(2.1-7.4%)                   | 6.4%<br>(3.2-11%)                   | 2.4<br>(1.2-3.9)     | 71<br>(34-120)      |
| The Bahamas | 1995 | Female | 65 to 69 | 27%<br>(17-41%)                | 73%<br>(59-83%)          | 1.3<br>(0.66-2.1)                           | 4.1%<br>(1.8-7.1%)                   | 5.4%<br>(2.5-9%)                    | 2.9<br>(1.3-4.9)     | 70<br>(32-120)      |
| The Bahamas | 1995 | Female | 70 to 74 | 25%<br>(16-39%)                | 75%<br>(61-84%)          | 1.1<br>(0.54-1.9)                           | 3.5%<br>(1.3-6.6%)                   | 4.3%<br>(1.6-8.1%)                  | 2.8<br>(1.1-5.3)     | 53<br>(19-99)       |
| The Bahamas | 1995 | Female | 75 to 79 | 22%<br>(13-36%)                | 78%<br>(64-87%)          | 0.94<br>(0.43-1.7)                          | 2.9%<br>(0.91-5.7%)                  | 3.6%<br>(1.1-7.1%)                  | 2.5<br>(0.79-4.9)    | 36<br>(11-74)       |
| The Bahamas | 1995 | Female | 80 to 84 | 21%<br>(12-33%)                | 79%<br>(67-88%)          | 0.88<br>(0.42-1.5)                          | 2.8%<br>(1-5.3%)                     | 3.3%<br>(1.2-6.3%)                  | 2.5<br>(0.94-4.7)    | 27<br>(10-51)       |
| The Bahamas | 1995 | Female | 85 to 89 | 21%<br>(12-32%)                | 79%<br>(68-88%)          | 0.9<br>(0.41-1.5)                           | 2.8%<br>(0.97-5.6%)                  | 3.3%<br>(1.1-6.6%)                  | 2.1<br>(0.68-4.1)    | 16<br>(5.4-31)      |
| The Bahamas | 1995 | Female | 90 to 94 | 23%<br>(13-35%)                | 77%<br>(65-87%)          | 1<br>(0.46-1.9)                             | 3.2%<br>(0.99-6.6%)                  | 3.7%<br>(1.1-7.8%)                  | 1<br>(0.3-2.2)       | 5.4<br>(1.6-11)     |
| The Bahamas | 1995 | Female | 95 plus  | 27%<br>(14-44%)                | 73%<br>(56-86%)          | 1.2<br>(0.43-2.5)                           | 3.7%<br>(0.77-8.5%)                  | 4.3%<br>(0.72-10%)                  | 0.34<br>(0.057-0.79) | 1.2<br>(0.25-2.7)   |
| The Bahamas | 1995 | Male   | All Ages | 58%<br>(49-66%)                | 42%<br>(34-51%)          | 3.2<br>(2.7-3.7)                            | 10%<br>(8.5-12%)                     | 12%<br>(9.7-14%)                    | 110<br>(91-140)      | 4600<br>(3900-5500) |
| The Bahamas | 1995 | Male   | 15 to 19 | 59%<br>(41-74%)                | 41%<br>(26-59%)          | 2.5<br>(1.3-4.1)                            | 6.5%<br>(4.4-9.1%)                   | 11%<br>(6.7-16%)                    | 0.94<br>(0.56-1.4)   | 95<br>(65-130)      |
| The Bahamas | 1995 | Male   | 20 to 24 | 69%<br>(51-82%)                | 31%<br>(18-49%)          | 4.7<br>(3-6.9)                              | 14%<br>(10-19%)                      | 18%<br>(12-24%)                     | 4.9<br>(3.3-6.8)     | 390<br>(280-530)    |

| Location    | Year | Sex    | Age      | Prevalence of current drinkers | Prevalence of abstainers | Population average of standard drinks daily | Percent of total attributable deaths | Percent of total attributable DALYs | Attributable deaths | Attributable DALYs |
|-------------|------|--------|----------|--------------------------------|--------------------------|---------------------------------------------|--------------------------------------|-------------------------------------|---------------------|--------------------|
| The Bahamas | 1995 | Male   | 25 to 29 | 72%<br>(54-84%)                | 28%<br>(16-46%)          | 5.7<br>(3.8-8)                              | 14%<br>(10-17%)                      | 16%<br>(11-21%)                     | 6.5<br>(4.5-8.5)    | 480<br>(350-610)   |
| The Bahamas | 1995 | Male   | 30 to 34 | 72%<br>(54-85%)                | 28%<br>(15-46%)          | 5.9<br>(3.9-8.3)                            | 12%<br>(9-15%)                       | 13%<br>(9.5-17%)                    | 9.7<br>(7.1-13)     | 630<br>(470-800)   |
| The Bahamas | 1995 | Male   | 35 to 39 | 72%<br>(56-85%)                | 28%<br>(15-44%)          | 5.6<br>(3.5-8.3)                            | 12%<br>(9-15%)                       | 13%<br>(9.8-17%)                    | 8.4<br>(6.2-11)     | 500<br>(380-620)   |
| The Bahamas | 1995 | Male   | 40 to 44 | 71%<br>(55-84%)                | 29%<br>(16-45%)          | 5.4<br>(3.1-8.1)                            | 13%<br>(9.9-16%)                     | 15%<br>(11-19%)                     | 9.8<br>(7.2-12)     | 500<br>(380-630)   |
| The Bahamas | 1995 | Male   | 45 to 49 | 70%<br>(51-84%)                | 30%<br>(16-49%)          | 5.1<br>(2.9-8.1)                            | 14%<br>(11-17%)                      | 17%<br>(13-20%)                     | 8.5<br>(6.4-11)     | 390<br>(300-490)   |
| The Bahamas | 1995 | Male   | 50 to 54 | 68%<br>(50-83%)                | 32%<br>(17-50%)          | 4.7<br>(2.6-7.6)                            | 14%<br>(11-18%)                      | 17%<br>(13-21%)                     | 9.9<br>(7.2-12)     | 390<br>(290-490)   |
| The Bahamas | 1995 | Male   | 55 to 59 | 66%<br>(49-82%)                | 34%<br>(18-51%)          | 4.3<br>(2.3-6.8)                            | 14%<br>(9.9-18%)                     | 17%<br>(12-22%)                     | 12<br>(8.1-15)      | 390<br>(280-510)   |
| The Bahamas | 1995 | Male   | 60 to 64 | 64%<br>(45-81%)                | 36%<br>(19-55%)          | 3.9<br>(2.1-6.5)                            | 13%<br>(8.3-17%)                     | 15%<br>(9.9-20%)                    | 9.7<br>(6.4-13)     | 280<br>(180-370)   |
| The Bahamas | 1995 | Male   | 65 to 69 | 63%<br>(44-79%)                | 37%<br>(21-56%)          | 3.5<br>(1.9-5.5)                            | 12%<br>(7.7-16%)                     | 14%<br>(8.7-19%)                    | 12<br>(7.5-16)      | 270<br>(180-370)   |
| The Bahamas | 1995 | Male   | 70 to 74 | 60%<br>(41-75%)                | 40%<br>(25-59%)          | 2.9<br>(1.6-5)                              | 9.4%<br>(5.3-14%)                    | 11%<br>(6-16%)                      | 7.5<br>(4.3-11)     | 140<br>(82-220)    |
| The Bahamas | 1995 | Male   | 75 to 79 | 54%<br>(35-73%)                | 46%<br>(27-65%)          | 2.4<br>(1.2-4.3)                            | 7.9%<br>(4.1-12%)                    | 8.8%<br>(4.5-14%)                   | 7.1<br>(3.7-11)     | 100<br>(53-160)    |
| The Bahamas | 1995 | Male   | 80 to 84 | 49%<br>(30-67%)                | 51%<br>(33-70%)          | 2<br>(1-3.4)                                | 6.6%<br>(3.4-10%)                    | 7.5%<br>(3.8-12%)                   | 4<br>(2-6.3)        | 43<br>(23-69)      |
| The Bahamas | 1995 | Male   | 85 to 89 | 44%<br>(27-61%)                | 56%<br>(39-73%)          | 1.8<br>(0.87-3.1)                           | 5.6%<br>(2.6-9.4%)                   | 6.3%<br>(2.8-11%)                   | 2.5<br>(1.1-4.1)    | 19<br>(8.9-32)     |
| The Bahamas | 1995 | Male   | 90 to 94 | 45%<br>(29-62%)                | 55%<br>(38-71%)          | 1.8<br>(0.88-3.2)                           | 5.2%<br>(2.3-9.2%)                   | 5.8%<br>(2.4-10%)                   | 0.87<br>(0.35-1.6)  | 4.7<br>(2-8.2)     |
| The Bahamas | 1995 | Male   | 95 plus  | 48%<br>(29-68%)                | 52%<br>(32-71%)          | 2<br>(0.79-3.7)                             | 5.4%<br>(1.9-10%)                    | 6%<br>(1.7-12%)                     | 0.21<br>(0.061-0.4) | 0.76<br>(0.26-1.4) |
| The Bahamas | 2000 | Female | All Ages | 35%<br>(29-43%)                | 65%<br>(57-71%)          | 1.3<br>(1.1-1.6)                            | 3.1%<br>(2.4-4%)                     | 3.9%<br>(2.5-5.5%)                  | 33<br>(21-47)       | 1200<br>(920-1600) |
| The Bahamas | 2000 | Female | 15 to 19 | 41%<br>(28-58%)                | 59%<br>(42-72%)          | 1.5<br>(0.8-2.5)                            | 2%<br>(1.3-3%)                       | 4.4%<br>(2.5-7.2%)                  | 0.26<br>(0.14-0.44) | 32<br>(20-49)      |
| The Bahamas | 2000 | Female | 20 to 24 | 47%<br>(31-63%)                | 53%<br>(37-69%)          | 2.2<br>(1.2-3.5)                            | 3.2%<br>(2.2-4.3%)                   | 4.3%<br>(2.5-6.4%)                  | 0.45<br>(0.26-0.69) | 55<br>(37-79)      |
| The Bahamas | 2000 | Female | 25 to 29 | 47%<br>(30-63%)                | 53%<br>(37-70%)          | 2.3<br>(1.4-3.5)                            | 3.4%<br>(2.4-4.6%)                   | 4%<br>(2.5-5.7%)                    | 0.9<br>(0.56-1.3)   | 88<br>(60-120)     |
| The Bahamas | 2000 | Female | 30 to 34 | 45%<br>(28-62%)                | 55%<br>(38-72%)          | 2.2<br>(1.3-3.5)                            | 4.6%<br>(3.3-6.3%)                   | 5.9%<br>(4.2-8.3%)                  | 2.1<br>(1.5-3)      | 150<br>(110-210)   |
| The Bahamas | 2000 | Female | 35 to 39 | 44%<br>(29-62%)                | 56%<br>(38-71%)          | 2<br>(1.2-3.1)                              | 4.1%<br>(2.9-5.6%)                   | 5.5%<br>(3.8-7.7%)                  | 2.5<br>(1.7-3.6)    | 160<br>(110-220)   |
| The Bahamas | 2000 | Female | 40 to 44 | 43%<br>(28-61%)                | 57%<br>(39-72%)          | 1.9<br>(1.1-3)                              | 4.3%<br>(2.9-6.1%)                   | 6.1%<br>(4.1-8.7%)                  | 2.6<br>(1.7-3.8)    | 140<br>(94-200)    |

| Location    | Year | Sex    | Age      | Prevalence of current drinkers | Prevalence of abstainers | Population average of standard drinks daily | Percent of total attributable deaths | Percent of total attributable DALYs | Attributable deaths  | Attributable DALYs  |
|-------------|------|--------|----------|--------------------------------|--------------------------|---------------------------------------------|--------------------------------------|-------------------------------------|----------------------|---------------------|
| The Bahamas | 2000 | Female | 45 to 49 | 41%<br>(25-58%)                | 59%<br>(42-75%)          | 1.9<br>(1-3.1)                              | 3.9%<br>(2.5-6%)                     | 5.8%<br>(3.8-8.9%)                  | 2.1<br>(1.3-3.2)     | 100<br>(66-160)     |
| The Bahamas | 2000 | Female | 50 to 54 | 37%<br>(23-54%)                | 63%<br>(46-77%)          | 1.7<br>(0.89-2.9)                           | 4.8%<br>(2.8-7.7%)                   | 6.9%<br>(4-11%)                     | 2.9<br>(1.7-4.6)     | 120<br>(68-190)     |
| The Bahamas | 2000 | Female | 55 to 59 | 33%<br>(20-50%)                | 67%<br>(50-80%)          | 1.4<br>(0.69-2.5)                           | 4.4%<br>(2.3-7.3%)                   | 6.2%<br>(3.3-10%)                   | 2.8<br>(1.5-4.6)     | 97<br>(51-160)      |
| The Bahamas | 2000 | Female | 60 to 64 | 29%<br>(17-45%)                | 71%<br>(55-83%)          | 1.2<br>(0.57-2.2)                           | 3.5%<br>(1.6-6.1%)                   | 4.9%<br>(2.4-8.4%)                  | 2.4<br>(1.1-4.1)     | 70<br>(32-120)      |
| The Bahamas | 2000 | Female | 65 to 69 | 27%<br>(17-41%)                | 73%<br>(59-83%)          | 1.1<br>(0.54-1.8)                           | 3.1%<br>(1.3-5.5%)                   | 4.1%<br>(1.8-7.2%)                  | 2.7<br>(1.2-4.7)     | 64<br>(26-110)      |
| The Bahamas | 2000 | Female | 70 to 74 | 24%<br>(15-38%)                | 76%<br>(62-85%)          | 0.89<br>(0.43-1.6)                          | 2.7%<br>(0.86-5.2%)                  | 3.4%<br>(1.1-6.5%)                  | 2.8<br>(0.91-5.2)    | 53<br>(17-100)      |
| The Bahamas | 2000 | Female | 75 to 79 | 22%<br>(13-35%)                | 78%<br>(65-87%)          | 0.79<br>(0.35-1.4)                          | 2.3%<br>(0.52-4.7%)                  | 2.8%<br>(0.69-5.8%)                 | 2.4<br>(0.57-4.9)    | 35<br>(7.9-71)      |
| The Bahamas | 2000 | Female | 80 to 84 | 20%<br>(11-32%)                | 80%<br>(68-89%)          | 0.74<br>(0.34-1.3)                          | 2.1%<br>(0.7-4.2%)                   | 2.6%<br>(0.83-5%)                   | 2.3<br>(0.74-4.5)    | 25<br>(8-49)        |
| The Bahamas | 2000 | Female | 85 to 89 | 20%<br>(12-31%)                | 80%<br>(69-88%)          | 0.75<br>(0.36-1.3)                          | 2.1%<br>(0.69-4.4%)                  | 2.5%<br>(0.75-5.2%)                 | 1.9<br>(0.59-4.1)    | 15<br>(4.7-31)      |
| The Bahamas | 2000 | Female | 90 to 94 | 22%<br>(13-34%)                | 78%<br>(66-87%)          | 0.85<br>(0.37-1.7)                          | 2.3%<br>(0.63-5.3%)                  | 2.7%<br>(0.62-6.2%)                 | 1.2<br>(0.27-2.7)    | 6.2<br>(1.6-14)     |
| The Bahamas | 2000 | Female | 95 plus  | 26%<br>(14-43%)                | 74%<br>(57-86%)          | 1<br>(0.35-2.1)                             | 2.8%<br>(0.46-6.8%)                  | 3.1%<br>(0.37-7.8%)                 | 0.39<br>(0.047-0.99) | 1.4<br>(0.23-3.4)   |
| The Bahamas | 2000 | Male   | All Ages | 58%<br>(49-66%)                | 42%<br>(34-51%)          | 2.8<br>(2.3-3.2)                            | 8.9%<br>(7.4-10%)                    | 10%<br>(7.7-12%)                    | 100<br>(78-130)      | 4200<br>(3500-5000) |
| The Bahamas | 2000 | Male   | 15 to 19 | 58%<br>(41-74%)                | 42%<br>(26-59%)          | 2.2<br>(1.1-3.5)                            | 6.6%<br>(4.2-9.5%)                   | 9.8%<br>(5.7-15%)                   | 1.5<br>(0.87-2.3)    | 130<br>(85-190)     |
| The Bahamas | 2000 | Male   | 20 to 24 | 68%<br>(51-82%)                | 32%<br>(18-49%)          | 4<br>(2.4-5.8)                              | 14%<br>(10-19%)                      | 18%<br>(11-24%)                     | 4.3<br>(2.8-6.1)     | 340<br>(240-460)    |
| The Bahamas | 2000 | Male   | 25 to 29 | 71%<br>(53-84%)                | 29%<br>(16-47%)          | 4.8<br>(3.1-6.9)                            | 14%<br>(10-19%)                      | 17%<br>(12-23%)                     | 6.7<br>(4.6-9.1)     | 490<br>(350-640)    |
| The Bahamas | 2000 | Male   | 30 to 34 | 72%<br>(54-85%)                | 28%<br>(15-46%)          | 5<br>(3.3-7.2)                              | 10%<br>(7.7-13%)                     | 11%<br>(7.9-15%)                    | 6.1<br>(4.3-8.1)     | 420<br>(310-540)    |
| The Bahamas | 2000 | Male   | 35 to 39 | 72%<br>(56-84%)                | 28%<br>(16-44%)          | 4.8<br>(3-6.9)                              | 8.7%<br>(6.3-11%)                    | 9.3%<br>(6.4-12%)                   | 6.4<br>(4.3-8.8)     | 410<br>(290-530)    |
| The Bahamas | 2000 | Male   | 40 to 44 | 71%<br>(55-84%)                | 29%<br>(16-45%)          | 4.5<br>(2.7-6.8)                            | 9.2%<br>(6.8-12%)                    | 10%<br>(7.2-13%)                    | 7.1<br>(5-9.4)       | 390<br>(280-500)    |
| The Bahamas | 2000 | Male   | 45 to 49 | 69%<br>(50-83%)                | 31%<br>(17-50%)          | 4.3<br>(2.4-6.9)                            | 11%<br>(8.1-14%)                     | 13%<br>(9.1-17%)                    | 8.9<br>(6.3-12)      | 420<br>(300-540)    |
| The Bahamas | 2000 | Male   | 50 to 54 | 68%<br>(50-83%)                | 32%<br>(17-50%)          | 3.9<br>(2.2-6.3)                            | 12%<br>(8.5-15%)                     | 14%<br>(9.8-18%)                    | 9.8<br>(6.6-13)      | 390<br>(280-510)    |
| The Bahamas | 2000 | Male   | 55 to 59 | 66%<br>(48-81%)                | 34%<br>(19-52%)          | 3.6<br>(1.9-5.8)                            | 12%<br>(7.9-16%)                     | 14%<br>(9.3-19%)                    | 11<br>(6.8-14)       | 360<br>(240-480)    |
| The Bahamas | 2000 | Male   | 60 to 64 | 64%<br>(44-81%)                | 36%<br>(19-56%)          | 3.3<br>(1.7-5.5)                            | 11%<br>(6.5-15%)                     | 13%<br>(7.6-18%)                    | 10<br>(6-14)         | 290<br>(180-400)    |



| Location    | Year | Sex    | Age      | Prevalence of current drinkers | Prevalence of abstainers | Population average of standard drinks daily | Percent of total attributable deaths | Percent of total attributable DALYs | Attributable deaths  | Attributable DALYs |
|-------------|------|--------|----------|--------------------------------|--------------------------|---------------------------------------------|--------------------------------------|-------------------------------------|----------------------|--------------------|
| The Bahamas | 2000 | Male   | 65 to 69 | 62%<br>(43-78%)                | 38%<br>(22-57%)          | 2.9<br>(1.5-4.6)                            | 10%<br>(6.2-14%)                     | 12%<br>(6.9-16%)                    | 11<br>(6.3-15)       | 250<br>(150-350)   |
| The Bahamas | 2000 | Male   | 70 to 74 | 59%<br>(41-75%)                | 41%<br>(25-59%)          | 2.4<br>(1.3-4.1)                            | 7.6%<br>(4-12%)                      | 8.7%<br>(4.4-14%)                   | 7<br>(3.5-11)        | 130<br>(69-210)    |
| The Bahamas | 2000 | Male   | 75 to 79 | 54%<br>(34-72%)                | 46%<br>(28-66%)          | 2<br>(0.98-3.7)                             | 6.3%<br>(2.9-10%)                    | 7.1%<br>(3.2-12%)                   | 6.4<br>(3-11)        | 93<br>(43-150)     |
| The Bahamas | 2000 | Male   | 80 to 84 | 48%<br>(30-66%)                | 52%<br>(34-70%)          | 1.7<br>(0.85-2.8)                           | 5.2%<br>(2.5-8.6%)                   | 5.8%<br>(2.8-9.6%)                  | 4<br>(1.9-6.7)       | 44<br>(22-72)      |
| The Bahamas | 2000 | Male   | 85 to 89 | 43%<br>(27-60%)                | 57%<br>(40-73%)          | 1.5<br>(0.75-2.5)                           | 4.4%<br>(2.1-7.7%)                   | 4.8%<br>(2.3-8.6%)                  | 2.3<br>(1.1-4.2)     | 18<br>(8.8-32)     |
| The Bahamas | 2000 | Male   | 90 to 94 | 44%<br>(28-61%)                | 56%<br>(39-72%)          | 1.5<br>(0.75-2.7)                           | 4.1%<br>(1.8-7.7%)                   | 4.5%<br>(1.8-8.7%)                  | 1.1<br>(0.44-2.1)    | 5.8<br>(2.5-11)    |
| The Bahamas | 2000 | Male   | 95 plus  | 47%<br>(27-67%)                | 53%<br>(33-73%)          | 1.6<br>(0.65-3.1)                           | 4.3%<br>(1.4-8.4%)                   | 4.7%<br>(1.3-9.6%)                  | 0.26<br>(0.072-0.52) | 0.96<br>(0.31-1.9) |
| The Bahamas | 2005 | Female | All Ages | 35%<br>(29-43%)                | 65%<br>(57-71%)          | 1.2<br>(1-1.5)                              | 2.9%<br>(2.2-3.8%)                   | 3.7%<br>(2.4-5.3%)                  | 35<br>(22-50)        | 1200<br>(940-1600) |
| The Bahamas | 2005 | Female | 15 to 19 | 41%<br>(28-57%)                | 59%<br>(43-72%)          | 1.3<br>(0.71-2.3)                           | 2%<br>(1.3-2.9%)                     | 4.4%<br>(2.5-7%)                    | 0.27<br>(0.15-0.44)  | 33<br>(20-49)      |
| The Bahamas | 2005 | Female | 20 to 24 | 47%<br>(31-63%)                | 53%<br>(37-69%)          | 2<br>(1.1-3.1)                              | 3.2%<br>(2.2-4.3%)                   | 4.7%<br>(2.8-7.1%)                  | 0.49<br>(0.29-0.76)  | 61<br>(40-86)      |
| The Bahamas | 2005 | Female | 25 to 29 | 46%<br>(30-63%)                | 54%<br>(37-70%)          | 2.1<br>(1.2-3.2)                            | 3.7%<br>(2.6-5%)                     | 4.9%<br>(3.1-7.2%)                  | 0.99<br>(0.62-1.5)   | 93<br>(64-130)     |
| The Bahamas | 2005 | Female | 30 to 34 | 44%<br>(28-62%)                | 56%<br>(38-72%)          | 2<br>(1.1-3.1)                              | 3.8%<br>(2.7-5.3%)                   | 5%<br>(3.4-7.2%)                    | 1.5<br>(0.99-2.1)    | 110<br>(77-150)    |
| The Bahamas | 2005 | Female | 35 to 39 | 43%<br>(28-62%)                | 57%<br>(38-72%)          | 1.8<br>(1-2.9)                              | 4.1%<br>(2.9-5.8%)                   | 5.9%<br>(4.1-8.4%)                  | 2.3<br>(1.6-3.3)     | 140<br>(100-200)   |
| The Bahamas | 2005 | Female | 40 to 44 | 42%<br>(28-61%)                | 58%<br>(39-72%)          | 1.7<br>(0.93-2.8)                           | 4.2%<br>(2.9-6%)                     | 6.5%<br>(4.5-9.3%)                  | 2.5<br>(1.7-3.6)     | 140<br>(94-200)    |
| The Bahamas | 2005 | Female | 45 to 49 | 40%<br>(24-58%)                | 60%<br>(42-76%)          | 1.7<br>(0.91-2.8)                           | 4.2%<br>(2.7-6.2%)                   | 6.8%<br>(4.4-10%)                   | 2.7<br>(1.8-4.1)     | 130<br>(83-190)    |
| The Bahamas | 2005 | Female | 50 to 54 | 37%<br>(22-54%)                | 63%<br>(46-78%)          | 1.5<br>(0.82-2.5)                           | 4.4%<br>(2.6-6.8%)                   | 6.6%<br>(4.1-10%)                   | 3.3<br>(2-5.1)       | 140<br>(81-210)    |
| The Bahamas | 2005 | Female | 55 to 59 | 33%<br>(20-49%)                | 67%<br>(51-80%)          | 1.3<br>(0.65-2.2)                           | 4%<br>(2.2-6.6%)                     | 5.8%<br>(3.3-9.3%)                  | 3.3<br>(1.9-5.3)     | 110<br>(62-190)    |
| The Bahamas | 2005 | Female | 60 to 64 | 29%<br>(17-45%)                | 71%<br>(55-83%)          | 1.1<br>(0.54-1.9)                           | 3.2%<br>(1.5-5.4%)                   | 4.6%<br>(2.3-7.8%)                  | 2.6<br>(1.3-4.4)     | 77<br>(36-130)     |
| The Bahamas | 2005 | Female | 65 to 69 | 27%<br>(17-40%)                | 73%<br>(60-83%)          | 0.95<br>(0.5-1.6)                           | 2.8%<br>(1.2-4.8%)                   | 3.8%<br>(1.7-6.3%)                  | 2.7<br>(1.2-4.6)     | 64<br>(28-110)     |
| The Bahamas | 2005 | Female | 70 to 74 | 24%<br>(15-38%)                | 76%<br>(62-85%)          | 0.8<br>(0.39-1.4)                           | 2.3%<br>(0.77-4.6%)                  | 3.1%<br>(1.1-5.8%)                  | 3<br>(1.1-5.7)       | 56<br>(18-110)     |
| The Bahamas | 2005 | Female | 75 to 79 | 22%<br>(12-35%)                | 78%<br>(65-88%)          | 0.7<br>(0.32-1.3)                           | 2%<br>(0.57-4.1%)                    | 2.5%<br>(0.77-5.2%)                 | 2.6<br>(0.78-5.3)    | 38<br>(11-78)      |
| The Bahamas | 2005 | Female | 80 to 84 | 20%<br>(11-32%)                | 80%<br>(68-89%)          | 0.65<br>(0.31-1.1)                          | 1.9%<br>(0.66-3.6%)                  | 2.3%<br>(0.83-4.5%)                 | 2.6<br>(0.91-5)      | 28<br>(10-54)      |

| Location    | Year | Sex    | Age      | Prevalence of current drinkers | Prevalence of abstainers | Population average of standard drinks daily | Percent of total attributable deaths | Percent of total attributable DALYs | Attributable deaths  | Attributable DALYs  |
|-------------|------|--------|----------|--------------------------------|--------------------------|---------------------------------------------|--------------------------------------|-------------------------------------|----------------------|---------------------|
| The Bahamas | 2005 | Female | 85 to 89 | 20%<br>(12-30%)                | 80%<br>(70-88%)          | 0.66<br>(0.32-1.2)                          | 1.8%<br>(0.56-3.7%)                  | 2.1%<br>(0.65-4.4%)                 | 1.9<br>(0.58-4)      | 15<br>(4.7-31)      |
| The Bahamas | 2005 | Female | 90 to 94 | 22%<br>(13-34%)                | 78%<br>(66-87%)          | 0.76<br>(0.34-1.6)                          | 2%<br>(0.5-4.6%)                     | 2.3%<br>(0.53-5.4%)                 | 1.2<br>(0.27-2.9)    | 6.5<br>(1.6-15)     |
| The Bahamas | 2005 | Female | 95 plus  | 26%<br>(13-43%)                | 74%<br>(57-87%)          | 0.91<br>(0.37-1.9)                          | 2.4%<br>(0.37-5.6%)                  | 2.6%<br>(0.28-6.7%)                 | 0.5<br>(0.052-1.3)   | 1.8<br>(0.27-4.3)   |
| The Bahamas | 2005 | Male   | All Ages | 59%<br>(51-67%)                | 41%<br>(33-49%)          | 2.6<br>(2.2-3)                              | 9.3%<br>(7.6-11%)                    | 10%<br>(8.1-13%)                    | 110<br>(87-140)      | 4700<br>(3900-5500) |
| The Bahamas | 2005 | Male   | 15 to 19 | 58%<br>(40-74%)                | 42%<br>(26-60%)          | 1.9<br>(1-3.1)                              | 6.5%<br>(4.2-9.5%)                   | 9.4%<br>(5.6-14%)                   | 1.7<br>(0.97-2.6)    | 150<br>(95-210)     |
| The Bahamas | 2005 | Male   | 20 to 24 | 68%<br>(50-82%)                | 32%<br>(18-50%)          | 3.6<br>(2.1-5.3)                            | 13%<br>(9.3-18%)                     | 16%<br>(10-23%)                     | 4.9<br>(3.1-7.1)     | 390<br>(270-540)    |
| The Bahamas | 2005 | Male   | 25 to 29 | 71%<br>(53-84%)                | 29%<br>(16-47%)          | 4.3<br>(2.7-6.2)                            | 14%<br>(10-19%)                      | 17%<br>(11-23%)                     | 6.2<br>(4.2-8.7)     | 460<br>(330-620)    |
| The Bahamas | 2005 | Male   | 30 to 34 | 72%<br>(54-84%)                | 28%<br>(16-46%)          | 4.5<br>(2.9-6.5)                            | 13%<br>(9.6-16%)                     | 15%<br>(11-20%)                     | 6.6<br>(4.8-8.8)     | 440<br>(330-570)    |
| The Bahamas | 2005 | Male   | 35 to 39 | 71%<br>(56-84%)                | 29%<br>(16-44%)          | 4.3<br>(2.6-6.3)                            | 11%<br>(8.3-14%)                     | 13%<br>(9.2-17%)                    | 8.6<br>(6-11)        | 520<br>(370-660)    |
| The Bahamas | 2005 | Male   | 40 to 44 | 70%<br>(54-84%)                | 30%<br>(16-46%)          | 4.1<br>(2.4-6.2)                            | 11%<br>(8.2-14%)                     | 13%<br>(9.4-17%)                    | 9<br>(6.3-12)        | 480<br>(350-620)    |
| The Bahamas | 2005 | Male   | 45 to 49 | 69%<br>(49-83%)                | 31%<br>(17-51%)          | 3.9<br>(2.2-6.1)                            | 12%<br>(8.6-16%)                     | 15%<br>(10-19%)                     | 11<br>(7.8-15)       | 530<br>(380-680)    |
| The Bahamas | 2005 | Male   | 50 to 54 | 67%<br>(49-82%)                | 33%<br>(18-51%)          | 3.5<br>(2-5.7)                              | 12%<br>(8.1-16%)                     | 15%<br>(9.7-19%)                    | 11<br>(7.3-15)       | 450<br>(310-600)    |
| The Bahamas | 2005 | Male   | 55 to 59 | 65%<br>(47-80%)                | 35%<br>(20-53%)          | 3.2<br>(1.8-5.2)                            | 11%<br>(7.3-15%)                     | 14%<br>(8.9-19%)                    | 11<br>(7-15)         | 390<br>(250-530)    |
| The Bahamas | 2005 | Male   | 60 to 64 | 64%<br>(43-80%)                | 36%<br>(20-57%)          | 2.9<br>(1.6-4.9)                            | 9.8%<br>(5.7-14%)                    | 12%<br>(7.1-17%)                    | 10<br>(6-14)         | 290<br>(180-420)    |
| The Bahamas | 2005 | Male   | 65 to 69 | 62%<br>(43-78%)                | 38%<br>(22-57%)          | 2.6<br>(1.4-4.2)                            | 9%<br>(5.5-13%)                      | 11%<br>(6.3-16%)                    | 10<br>(6.1-15)       | 240<br>(150-350)    |
| The Bahamas | 2005 | Male   | 70 to 74 | 59%<br>(40-75%)                | 41%<br>(25-60%)          | 2.2<br>(1.1-3.7)                            | 6.8%<br>(3.6-11%)                    | 8%<br>(4-13%)                       | 7.3<br>(3.7-12)      | 140<br>(72-230)     |
| The Bahamas | 2005 | Male   | 75 to 79 | 54%<br>(34-72%)                | 46%<br>(28-66%)          | 1.8<br>(0.89-3.2)                           | 5.5%<br>(2.6-9.4%)                   | 6.4%<br>(2.9-11%)                   | 5.8<br>(2.6-9.7)     | 86<br>(40-140)      |
| The Bahamas | 2005 | Male   | 80 to 84 | 48%<br>(30-66%)                | 52%<br>(34-70%)          | 1.5<br>(0.78-2.5)                           | 4.6%<br>(2.3-7.7%)                   | 5.3%<br>(2.5-8.9%)                  | 4.2<br>(2-7.1)       | 46<br>(23-78)       |
| The Bahamas | 2005 | Male   | 85 to 89 | 43%<br>(27-60%)                | 57%<br>(40-73%)          | 1.3<br>(0.66-2.3)                           | 3.9%<br>(1.9-6.9%)                   | 4.4%<br>(2.1-7.9%)                  | 2.3<br>(1.1-4.2)     | 18<br>(8.9-33)      |
| The Bahamas | 2005 | Male   | 90 to 94 | 43%<br>(28-61%)                | 57%<br>(39-72%)          | 1.3<br>(0.66-2.5)                           | 3.6%<br>(1.6-6.8%)                   | 3.9%<br>(1.6-7.8%)                  | 0.97<br>(0.4-1.9)    | 5.3<br>(2.3-10)     |
| The Bahamas | 2005 | Male   | 95 plus  | 46%<br>(27-67%)                | 54%<br>(33-73%)          | 1.5<br>(0.58-2.8)                           | 3.7%<br>(1.2-7.5%)                   | 4%<br>(1.1-8.5%)                    | 0.31<br>(0.082-0.65) | 1.1<br>(0.36-2.3)   |
| The Bahamas | 2010 | Female | All Ages | 35%<br>(29-42%)                | 65%<br>(58-71%)          | 1.2<br>(0.95-1.5)                           | 2.9%<br>(2.1-3.9%)                   | 3.6%<br>(2.3-5.3%)                  | 39<br>(25-59)        | 1400<br>(1000-1800) |

| Location    | Year | Sex    | Age      | Prevalence of current drinkers | Prevalence of abstainers | Population average of standard drinks daily | Percent of total attributable deaths | Percent of total attributable DALYs | Attributable deaths | Attributable DALYs  |
|-------------|------|--------|----------|--------------------------------|--------------------------|---------------------------------------------|--------------------------------------|-------------------------------------|---------------------|---------------------|
| The Bahamas | 2010 | Female | 15 to 19 | 41%<br>(27-57%)                | 59%<br>(43-73%)          | 1.3<br>(0.66-2.1)                           | 1.9%<br>(1.3-3%)                     | 4.3%<br>(2.4-6.8%)                  | 0.29<br>(0.16-0.49) | 35<br>(21-54)       |
| The Bahamas | 2010 | Female | 20 to 24 | 47%<br>(30-63%)                | 53%<br>(37-70%)          | 1.9<br>(1-3)                                | 3.5%<br>(2.4-4.9%)                   | 5.7%<br>(3.3-8.8%)                  | 0.64<br>(0.36-1)    | 74<br>(48-110)      |
| The Bahamas | 2010 | Female | 25 to 29 | 46%<br>(30-63%)                | 54%<br>(37-70%)          | 2<br>(1.1-3)                                | 3.5%<br>(2.5-4.7%)                   | 4.7%<br>(2.9-7%)                    | 0.91<br>(0.55-1.4)  | 90<br>(61-130)      |
| The Bahamas | 2010 | Female | 30 to 34 | 44%<br>(28-62%)                | 56%<br>(38-72%)          | 1.9<br>(1.1-3)                              | 4%<br>(2.9-5.6%)                     | 5.8%<br>(3.9-8.3%)                  | 1.5<br>(1-2.2)      | 110<br>(79-160)     |
| The Bahamas | 2010 | Female | 35 to 39 | 43%<br>(28-61%)                | 57%<br>(39-72%)          | 1.8<br>(0.99-2.9)                           | 4.1%<br>(2.9-5.7%)                   | 6.1%<br>(4.3-8.6%)                  | 2.3<br>(1.5-3.2)    | 140<br>(99-200)     |
| The Bahamas | 2010 | Female | 40 to 44 | 42%<br>(27-61%)                | 58%<br>(39-73%)          | 1.7<br>(0.89-2.7)                           | 4.1%<br>(2.8-6%)                     | 6.7%<br>(4.5-9.6%)                  | 2.6<br>(1.7-3.7)    | 140<br>(94-210)     |
| The Bahamas | 2010 | Female | 45 to 49 | 40%<br>(25-58%)                | 60%<br>(42-75%)          | 1.6<br>(0.85-2.7)                           | 3.9%<br>(2.5-6%)                     | 6.4%<br>(4.1-9.7%)                  | 3.1<br>(1.9-4.7)    | 150<br>(94-230)     |
| The Bahamas | 2010 | Female | 50 to 54 | 37%<br>(23-54%)                | 63%<br>(46-77%)          | 1.4<br>(0.77-2.4)                           | 4.1%<br>(2.4-6.5%)                   | 6.4%<br>(3.9-9.9%)                  | 3.9<br>(2.4-6.2)    | 160<br>(93-250)     |
| The Bahamas | 2010 | Female | 55 to 59 | 33%<br>(20-49%)                | 67%<br>(51-80%)          | 1.2<br>(0.62-2.1)                           | 3.8%<br>(2.1-6.2%)                   | 5.6%<br>(3.3-9.1%)                  | 3.9<br>(2.3-6.3)    | 140<br>(77-220)     |
| The Bahamas | 2010 | Female | 60 to 64 | 29%<br>(17-45%)                | 71%<br>(55-83%)          | 1<br>(0.51-1.8)                             | 3%<br>(1.4-5.4%)                     | 4.4%<br>(2.2-7.6%)                  | 3<br>(1.5-5.2)      | 88<br>(43-160)      |
| The Bahamas | 2010 | Female | 65 to 69 | 27%<br>(17-40%)                | 73%<br>(60-83%)          | 0.91<br>(0.49-1.5)                          | 2.6%<br>(1.2-4.5%)                   | 3.6%<br>(1.8-6.2%)                  | 2.9<br>(1.4-5.1)    | 70<br>(33-130)      |
| The Bahamas | 2010 | Female | 70 to 74 | 24%<br>(15-37%)                | 76%<br>(63-85%)          | 0.77<br>(0.38-1.5)                          | 2.2%<br>(0.81-4.5%)                  | 3%<br>(1.2-5.8%)                    | 3.4<br>(1.3-6.7)    | 63<br>(22-130)      |
| The Bahamas | 2010 | Female | 75 to 79 | 21%<br>(13-35%)                | 79%<br>(65-87%)          | 0.67<br>(0.31-1.2)                          | 1.9%<br>(0.55-3.9%)                  | 2.4%<br>(0.76-5%)                   | 3<br>(0.93-6.2)     | 43<br>(13-91)       |
| The Bahamas | 2010 | Female | 80 to 84 | 20%<br>(11-31%)                | 80%<br>(69-89%)          | 0.63<br>(0.29-1.1)                          | 1.8%<br>(0.58-3.5%)                  | 2.2%<br>(0.72-4.3%)                 | 3.1<br>(1-6.3)      | 34<br>(11-68)       |
| The Bahamas | 2010 | Female | 85 to 89 | 20%<br>(11-30%)                | 80%<br>(70-89%)          | 0.64<br>(0.3-1.2)                           | 1.7%<br>(0.54-3.8%)                  | 2%<br>(0.61-4.5%)                   | 2.3<br>(0.7-4.9)    | 18<br>(5.6-38)      |
| The Bahamas | 2010 | Female | 90 to 94 | 22%<br>(13-34%)                | 78%<br>(66-87%)          | 0.73<br>(0.31-1.5)                          | 1.9%<br>(0.46-4.5%)                  | 2.2%<br>(0.47-5.3%)                 | 1.3<br>(0.28-3.2)   | 7.1<br>(1.7-16)     |
| The Bahamas | 2010 | Female | 95 plus  | 26%<br>(13-43%)                | 74%<br>(57-87%)          | 0.89<br>(0.31-1.9)                          | 2.3%<br>(0.3-5.8%)                   | 2.5%<br>(0.18-6.7%)                 | 0.57<br>(0.039-1.5) | 2.1<br>(0.26-5.2)   |
| The Bahamas | 2010 | Male   | All Ages | 59%<br>(51-67%)                | 41%<br>(33-49%)          | 2.6<br>(2.1-3.2)                            | 9.4%<br>(7.7-11%)                    | 10%<br>(7.9-13%)                    | 120<br>(94-160)     | 5200<br>(4200-6200) |
| The Bahamas | 2010 | Male   | 15 to 19 | 58%<br>(40-74%)                | 42%<br>(26-60%)          | 1.9<br>(0.98-3)                             | 6.4%<br>(4-9.3%)                     | 9.2%<br>(5.2-14%)                   | 1.8<br>(1-2.8)      | 160<br>(100-230)    |
| The Bahamas | 2010 | Male   | 20 to 24 | 68%<br>(50-82%)                | 32%<br>(18-50%)          | 3.5<br>(2-5.1)                              | 13%<br>(9.1-19%)                     | 16%<br>(10-24%)                     | 6.3<br>(4-9.3)      | 500<br>(330-690)    |
| The Bahamas | 2010 | Male   | 25 to 29 | 71%<br>(54-83%)                | 29%<br>(17-46%)          | 4.2<br>(2.5-6.1)                            | 14%<br>(9.6-18%)                     | 17%<br>(11-24%)                     | 6.2<br>(4-8.7)      | 470<br>(330-630)    |
| The Bahamas | 2010 | Male   | 30 to 34 | 72%<br>(54-85%)                | 28%<br>(15-46%)          | 4.3<br>(2.7-6.4)                            | 13%<br>(9.5-17%)                     | 16%<br>(11-21%)                     | 6.5<br>(4.5-8.9)    | 440<br>(320-580)    |

| Location    | Year | Sex    | Age      | Prevalence of current drinkers | Prevalence of abstainers | Population average of standard drinks daily | Percent of total attributable deaths | Percent of total attributable DALYs | Attributable deaths  | Attributable DALYs |
|-------------|------|--------|----------|--------------------------------|--------------------------|---------------------------------------------|--------------------------------------|-------------------------------------|----------------------|--------------------|
| The Bahamas | 2010 | Male   | 35 to 39 | 71%<br>(55-84%)                | 29%<br>(16-45%)          | 4.1<br>(2.5-6.3)                            | 13%<br>(9.2-17%)                     | 15%<br>(11-20%)                     | 11<br>(7.6-15)       | 640<br>(460-830)   |
| The Bahamas | 2010 | Male   | 40 to 44 | 70%<br>(55-83%)                | 30%<br>(17-45%)          | 3.9<br>(2.3-6.1)                            | 12%<br>(8.7-16%)                     | 15%<br>(10-20%)                     | 11<br>(7.4-14)       | 580<br>(400-740)   |
| The Bahamas | 2010 | Male   | 45 to 49 | 69%<br>(49-83%)                | 31%<br>(17-51%)          | 3.7<br>(2.1-5.9)                            | 11%<br>(7.9-15%)                     | 14%<br>(9.7-18%)                    | 12<br>(8.1-16)       | 570<br>(400-740)   |
| The Bahamas | 2010 | Male   | 50 to 54 | 67%<br>(49-83%)                | 33%<br>(17-51%)          | 3.4<br>(1.9-5.4)                            | 11%<br>(7.6-15%)                     | 14%<br>(9.6-19%)                    | 12<br>(7.9-16)       | 490<br>(330-650)   |
| The Bahamas | 2010 | Male   | 55 to 59 | 65%<br>(47-81%)                | 35%<br>(19-53%)          | 3.1<br>(1.7-5)                              | 11%<br>(7.1-15%)                     | 14%<br>(8.8-19%)                    | 12<br>(8-17)         | 430<br>(280-600)   |
| The Bahamas | 2010 | Male   | 60 to 64 | 63%<br>(44-80%)                | 37%<br>(20-56%)          | 2.8<br>(1.5-4.7)                            | 9.4%<br>(5.6-14%)                    | 12%<br>(7-17%)                      | 11<br>(6.6-16)       | 320<br>(200-460)   |
| The Bahamas | 2010 | Male   | 65 to 69 | 62%<br>(43-78%)                | 38%<br>(22-57%)          | 2.5<br>(1.4-4)                              | 8.4%<br>(5-12%)                      | 10%<br>(6-15%)                      | 10<br>(6.1-15)       | 250<br>(150-360)   |
| The Bahamas | 2010 | Male   | 70 to 74 | 58%<br>(41-74%)                | 42%<br>(26-59%)          | 2.1<br>(1.1-3.8)                            | 6.5%<br>(3.4-11%)                    | 7.7%<br>(3.9-13%)                   | 8.4<br>(4.2-14)      | 160<br>(84-270)    |
| The Bahamas | 2010 | Male   | 75 to 79 | 53%<br>(34-72%)                | 47%<br>(28-66%)          | 1.7<br>(0.85-3.1)                           | 5.2%<br>(2.5-9%)                     | 6%<br>(2.8-10%)                     | 6.1<br>(2.8-10)      | 91<br>(43-150)     |
| The Bahamas | 2010 | Male   | 80 to 84 | 48%<br>(29-66%)                | 52%<br>(34-71%)          | 1.5<br>(0.72-2.4)                           | 4.3%<br>(2.1-7.4%)                   | 4.9%<br>(2.4-8.4%)                  | 4.7<br>(2.3-8.1)     | 51<br>(26-88)      |
| The Bahamas | 2010 | Male   | 85 to 89 | 43%<br>(27-60%)                | 57%<br>(40-73%)          | 1.3<br>(0.63-2.3)                           | 3.7%<br>(1.7-6.6%)                   | 4.1%<br>(1.9-7.4%)                  | 2.7<br>(1.2-4.9)     | 21<br>(10-38)      |
| The Bahamas | 2010 | Male   | 90 to 94 | 43%<br>(27-60%)                | 57%<br>(40-73%)          | 1.3<br>(0.61-2.4)                           | 3.4%<br>(1.5-6.6%)                   | 3.7%<br>(1.5-7.5%)                  | 1.1<br>(0.43-2.2)    | 6<br>(2.6-12)      |
| The Bahamas | 2010 | Male   | 95 plus  | 46%<br>(26-66%)                | 54%<br>(34-74%)          | 1.4<br>(0.53-2.7)                           | 3.5%<br>(1.2-7%)                     | 3.8%<br>(1-8.2%)                    | 0.31<br>(0.086-0.67) | 1.2<br>(0.38-2.4)  |
| The Bahamas | 2016 | Female | All Ages | 35%<br>(29-42%)                | 65%<br>(58-71%)          | 1.1<br>(0.65-1.6)                           | 2.7%<br>(1.6-4%)                     | 3.1%<br>(1.5-5.4%)                  | 44<br>(21-75)        | 1500<br>(870-2300) |
| The Bahamas | 2016 | Female | 15 to 19 | 41%<br>(27-57%)                | 59%<br>(43-73%)          | 1.2<br>(0.52-2.1)                           | 1.9%<br>(1.1-2.9%)                   | 4%<br>(2.1-7%)                      | 0.24<br>(0.12-0.44)  | 30<br>(18-48)      |
| The Bahamas | 2016 | Female | 20 to 24 | 46%<br>(30-62%)                | 54%<br>(38-70%)          | 1.7<br>(0.81-3)                             | 3.2%<br>(2.1-4.7%)                   | 5%<br>(2.6-7.9%)                    | 0.58<br>(0.29-1)     | 73<br>(45-110)     |
| The Bahamas | 2016 | Female | 25 to 29 | 46%<br>(29-63%)                | 54%<br>(37-71%)          | 1.8<br>(0.84-3)                             | 3.5%<br>(2.3-5%)                     | 4.9%<br>(2.8-7.6%)                  | 0.99<br>(0.52-1.6)   | 97<br>(61-140)     |
| The Bahamas | 2016 | Female | 30 to 34 | 44%<br>(28-62%)                | 56%<br>(38-72%)          | 1.7<br>(0.83-2.9)                           | 3.8%<br>(2.5-5.5%)                   | 5.5%<br>(3.4-8.3%)                  | 1.7<br>(0.97-2.6)    | 130<br>(80-190)    |
| The Bahamas | 2016 | Female | 35 to 39 | 43%<br>(28-61%)                | 57%<br>(39-72%)          | 1.6<br>(0.78-2.8)                           | 3.9%<br>(2.5-5.7%)                   | 5.9%<br>(3.8-8.7%)                  | 2<br>(1.2-3.1)       | 130<br>(80-190)    |
| The Bahamas | 2016 | Female | 40 to 44 | 42%<br>(27-61%)                | 58%<br>(39-73%)          | 1.5<br>(0.71-2.6)                           | 3.8%<br>(2.3-5.6%)                   | 6.1%<br>(3.8-9.4%)                  | 2.5<br>(1.5-3.9)     | 140<br>(85-220)    |
| The Bahamas | 2016 | Female | 45 to 49 | 40%<br>(24-57%)                | 60%<br>(43-76%)          | 1.4<br>(0.68-2.6)                           | 3.7%<br>(2.2-5.9%)                   | 6.2%<br>(3.8-9.9%)                  | 3<br>(1.8-4.7)       | 140<br>(83-230)    |
| The Bahamas | 2016 | Female | 50 to 54 | 37%<br>(22-54%)                | 63%<br>(46-78%)          | 1.3<br>(0.59-2.3)                           | 3.9%<br>(2.1-6.4%)                   | 6%<br>(3.4-9.7%)                    | 4.5<br>(2.5-7.4)     | 180<br>(96-300)    |

| Location    | Year | Sex    | Age      | Prevalence of current drinkers | Prevalence of abstainers | Population average of standard drinks daily | Percent of total attributable deaths | Percent of total attributable DALYs | Attributable deaths | Attributable DALYs  |
|-------------|------|--------|----------|--------------------------------|--------------------------|---------------------------------------------|--------------------------------------|-------------------------------------|---------------------|---------------------|
| The Bahamas | 2016 | Female | 55 to 59 | 32%<br>(20-49%)                | 68%<br>(51-80%)          | 1.1<br>(0.47-2)                             | 3.5%<br>(1.7-5.9%)                   | 5.2%<br>(2.7-8.5%)                  | 4.9<br>(2.5-8.4)    | 170<br>(81-290)     |
| The Bahamas | 2016 | Female | 60 to 64 | 29%<br>(17-44%)                | 71%<br>(56-83%)          | 0.94<br>(0.42-1.8)                          | 2.7%<br>(1.1-5.1%)                   | 3.9%<br>(1.7-7.1%)                  | 3.9<br>(1.7-7.2)    | 110<br>(46-220)     |
| The Bahamas | 2016 | Female | 65 to 69 | 26%<br>(16-40%)                | 74%<br>(60-84%)          | 0.82<br>(0.36-1.5)                          | 2.3%<br>(0.89-4.5%)                  | 3.2%<br>(1.3-6%)                    | 3.8<br>(1.5-7.5)    | 90<br>(33-180)      |
| The Bahamas | 2016 | Female | 70 to 74 | 24%<br>(15-38%)                | 76%<br>(62-85%)          | 0.7<br>(0.3-1.4)                            | 2%<br>(0.5-4.5%)                     | 2.6%<br>(0.74-5.7%)                 | 3.6<br>(1-8.1)      | 67<br>(17-150)      |
| The Bahamas | 2016 | Female | 75 to 79 | 21%<br>(13-34%)                | 79%<br>(66-87%)          | 0.61<br>(0.24-1.2)                          | 1.7%<br>(0.29-4%)                    | 2.1%<br>(0.43-4.9%)                 | 3.6<br>(0.69-8.7)   | 52<br>(8.9-130)     |
| The Bahamas | 2016 | Female | 80 to 84 | 20%<br>(11-31%)                | 80%<br>(69-89%)          | 0.57<br>(0.24-1.1)                          | 1.6%<br>(0.28-3.6%)                  | 1.9%<br>(0.38-4.3%)                 | 3.9<br>(0.75-9.1)   | 42<br>(7.5-98)      |
| The Bahamas | 2016 | Female | 85 to 89 | 20%<br>(11-31%)                | 80%<br>(69-89%)          | 0.58<br>(0.23-1.1)                          | 1.5%<br>(0.26-3.6%)                  | 1.8%<br>(0.27-4.2%)                 | 2.9<br>(0.45-7.1)   | 22<br>(3.8-54)      |
| The Bahamas | 2016 | Female | 90 to 94 | 22%<br>(13-34%)                | 78%<br>(66-87%)          | 0.65<br>(0.25-1.3)                          | 1.6%<br>(0.18-4.1%)                  | 1.8%<br>(0.16-4.7%)                 | 1.6<br>(0.14-4.2)   | 8.4<br>(0.94-22)    |
| The Bahamas | 2016 | Female | 95 plus  | 26%<br>(14-43%)                | 74%<br>(57-86%)          | 0.78<br>(0.25-1.7)                          | 1.9%<br>(0.16-5.1%)                  | 2.1%<br>(0.061-6%)                  | 0.59<br>(0.016-1.7) | 2.2<br>(0.17-5.9)   |
| The Bahamas | 2016 | Male   | All Ages | 59%<br>(52-67%)                | 41%<br>(33-48%)          | 2.4<br>(1.5-3.4)                            | 8.7%<br>(6.1-11%)                    | 9%<br>(5.6-13%)                     | 130<br>(82-190)     | 5400<br>(3700-7200) |
| The Bahamas | 2016 | Male   | 15 to 19 | 57%<br>(40-74%)                | 43%<br>(26-60%)          | 1.7<br>(0.79-3)                             | 5.9%<br>(3.6-8.9%)                   | 8.5%<br>(4.6-14%)                   | 1.4<br>(0.73-2.3)   | 130<br>(78-200)     |
| The Bahamas | 2016 | Male   | 20 to 24 | 68%<br>(51-82%)                | 32%<br>(18-49%)          | 3.1<br>(1.6-5.2)                            | 12%<br>(7.9-17%)                     | 15%<br>(8.3-22%)                    | 5.5<br>(3.1-8.4)    | 450<br>(280-660)    |
| The Bahamas | 2016 | Male   | 25 to 29 | 71%<br>(53-83%)                | 29%<br>(17-47%)          | 3.7<br>(1.9-5.9)                            | 13%<br>(8.6-18%)                     | 16%<br>(9.6-24%)                    | 6.3<br>(3.7-9.6)    | 480<br>(310-680)    |
| The Bahamas | 2016 | Male   | 30 to 34 | 71%<br>(54-85%)                | 29%<br>(15-46%)          | 3.9<br>(2-6.4)                              | 12%<br>(8.3-17%)                     | 15%<br>(9.6-21%)                    | 7.6<br>(4.8-11)     | 520<br>(340-730)    |
| The Bahamas | 2016 | Male   | 35 to 39 | 71%<br>(55-85%)                | 29%<br>(15-45%)          | 3.7<br>(1.9-6.1)                            | 12%<br>(8.1-16%)                     | 14%<br>(9.1-20%)                    | 9.1<br>(5.7-13)     | 540<br>(360-740)    |
| The Bahamas | 2016 | Male   | 40 to 44 | 70%<br>(54-83%)                | 30%<br>(17-46%)          | 3.5<br>(1.8-6)                              | 11%<br>(7.4-15%)                     | 14%<br>(8.6-18%)                    | 10<br>(6.3-14)      | 540<br>(360-750)    |
| The Bahamas | 2016 | Male   | 45 to 49 | 69%<br>(49-83%)                | 31%<br>(17-51%)          | 3.3<br>(1.6-5.7)                            | 11%<br>(6.9-15%)                     | 13%<br>(8.1-19%)                    | 11<br>(6.8-16)      | 540<br>(340-760)    |
| The Bahamas | 2016 | Male   | 50 to 54 | 67%<br>(48-82%)                | 33%<br>(18-52%)          | 3<br>(1.5-5.2)                              | 11%<br>(6.4-15%)                     | 13%<br>(7.8-19%)                    | 14<br>(7.9-20)      | 570<br>(340-800)    |
| The Bahamas | 2016 | Male   | 55 to 59 | 65%<br>(47-81%)                | 35%<br>(19-53%)          | 2.8<br>(1.3-4.9)                            | 9.8%<br>(5.7-14%)                    | 12%<br>(7-18%)                      | 15<br>(8.2-22)      | 510<br>(290-750)    |
| The Bahamas | 2016 | Male   | 60 to 64 | 63%<br>(43-80%)                | 37%<br>(20-57%)          | 2.5<br>(1.2-4.5)                            | 8.3%<br>(4.4-13%)                    | 10%<br>(5.3-16%)                    | 13<br>(6.6-21)      | 380<br>(200-600)    |
| The Bahamas | 2016 | Male   | 65 to 69 | 62%<br>(43-78%)                | 38%<br>(22-57%)          | 2.2<br>(1.1-4)                              | 7.4%<br>(3.7-12%)                    | 8.9%<br>(4.3-15%)                   | 13<br>(6.5-21)      | 310<br>(160-510)    |
| The Bahamas | 2016 | Male   | 70 to 74 | 58%<br>(39-74%)                | 42%<br>(26-61%)          | 1.9<br>(0.86-3.4)                           | 5.6%<br>(2.5-9.9%)                   | 6.7%<br>(2.9-12%)                   | 9.5<br>(4.2-17)     | 180<br>(83-330)     |

| Location    | Year | Sex    | Age      | Prevalence of current drinkers | Prevalence of abstainers | Population average of standard drinks daily | Percent of total attributable deaths | Percent of total attributable DALYs | Attributable deaths  | Attributable DALYs |
|-------------|------|--------|----------|--------------------------------|--------------------------|---------------------------------------------|--------------------------------------|-------------------------------------|----------------------|--------------------|
| The Bahamas | 2016 | Male   | 75 to 79 | 53%<br>(34-72%)                | 47%<br>(28-66%)          | 1.6<br>(0.7-3)                              | 4.5%<br>(1.9-8.5%)                   | 5.2%<br>(2.1-9.9%)                  | 8.4<br>(3.3-16)      | 130<br>(50-240)    |
| The Bahamas | 2016 | Male   | 80 to 84 | 47%<br>(29-66%)                | 53%<br>(34-71%)          | 1.3<br>(0.58-2.4)                           | 3.7%<br>(1.5-7%)                     | 4.2%<br>(1.7-8.1%)                  | 5.6<br>(2.2-11)      | 62<br>(25-120)     |
| The Bahamas | 2016 | Male   | 85 to 89 | 43%<br>(26-59%)                | 57%<br>(41-74%)          | 1.1<br>(0.48-2.2)                           | 3.2%<br>(1.2-6.3%)                   | 3.5%<br>(1.2-7.1%)                  | 3<br>(1.1-6.1)       | 24<br>(8.9-47)     |
| The Bahamas | 2016 | Male   | 90 to 94 | 43%<br>(27-60%)                | 57%<br>(40-73%)          | 1.1<br>(0.46-2.2)                           | 2.8%<br>(0.92-6.2%)                  | 3.1%<br>(0.89-7%)                   | 1.2<br>(0.37-2.8)    | 6.9<br>(2.3-15)    |
| The Bahamas | 2016 | Male   | 95 plus  | 46%<br>(27-66%)                | 54%<br>(34-73%)          | 1.2<br>(0.43-2.5)                           | 3%<br>(0.78-6.6%)                    | 3.1%<br>(0.57-7.5%)                 | 0.35<br>(0.065-0.83) | 1.3<br>(0.34-3)    |
| Barbados    | 1990 | Female | All Ages | 32%<br>(26-39%)                | 68%<br>(61-74%)          | 1.2<br>(1-1.4)                              | 2.2%<br>(1.4-3.1%)                   | 2.3%<br>(0.97-4.1%)                 | 27<br>(11-48)        | 790<br>(510-1100)  |
| Barbados    | 1990 | Female | 15 to 19 | 37%<br>(24-53%)                | 63%<br>(47-76%)          | 1.3<br>(0.7-2.2)                            | 1.9%<br>(1.2-2.9%)                   | 3.8%<br>(2-6.3%)                    | 0.24<br>(0.12-0.4)   | 28<br>(17-43)      |
| Barbados    | 1990 | Female | 20 to 24 | 43%<br>(28-59%)                | 57%<br>(41-72%)          | 2<br>(1.1-3.1)                              | 3.4%<br>(2.3-4.7%)                   | 5.6%<br>(3.2-8.4%)                  | 0.44<br>(0.25-0.67)  | 54<br>(36-76)      |
| Barbados    | 1990 | Female | 25 to 29 | 43%<br>(26-60%)                | 57%<br>(40-74%)          | 2<br>(1.2-3)                                | 3.4%<br>(2.4-4.5%)                   | 5.5%<br>(3.5-7.7%)                  | 0.5<br>(0.32-0.72)   | 59<br>(40-80)      |
| Barbados    | 1990 | Female | 30 to 34 | 41%<br>(25-59%)                | 59%<br>(41-75%)          | 2<br>(1.1-2.9)                              | 3.2%<br>(2.3-4.3%)                   | 5.6%<br>(3.7-7.9%)                  | 0.62<br>(0.4-0.89)   | 60<br>(41-81)      |
| Barbados    | 1990 | Female | 35 to 39 | 40%<br>(25-58%)                | 60%<br>(42-75%)          | 1.8<br>(1-2.9)                              | 3.5%<br>(2.4-4.9%)                   | 6.1%<br>(4-8.7%)                    | 0.91<br>(0.6-1.4)    | 65<br>(44-94)      |
| Barbados    | 1990 | Female | 40 to 44 | 39%<br>(25-57%)                | 61%<br>(43-75%)          | 1.7<br>(0.91-2.8)                           | 3.7%<br>(2.3-5.5%)                   | 6.5%<br>(4-9.8%)                    | 1.1<br>(0.7-1.7)     | 66<br>(41-99)      |
| Barbados    | 1990 | Female | 45 to 49 | 37%<br>(22-53%)                | 63%<br>(47-78%)          | 1.7<br>(0.87-2.9)                           | 3.8%<br>(2.2-6.4%)                   | 6.3%<br>(3.6-11%)                   | 1.1<br>(0.64-1.9)    | 55<br>(31-93)      |
| Barbados    | 1990 | Female | 50 to 54 | 33%<br>(20-50%)                | 67%<br>(50-80%)          | 1.5<br>(0.77-2.6)                           | 3.8%<br>(1.9-6.7%)                   | 5.8%<br>(3-10%)                     | 1.5<br>(0.77-2.7)    | 63<br>(31-110)     |
| Barbados    | 1990 | Female | 55 to 59 | 29%<br>(17-45%)                | 71%<br>(55-83%)          | 1.2<br>(0.61-2.1)                           | 3.1%<br>(1.4-5.5%)                   | 4.7%<br>(2.3-8.1%)                  | 1.5<br>(0.72-2.5)    | 54<br>(25-94)      |
| Barbados    | 1990 | Female | 60 to 64 | 26%<br>(15-41%)                | 74%<br>(59-85%)          | 1.1<br>(0.52-1.8)                           | 2.6%<br>(0.86-5.1%)                  | 3.6%<br>(1.3-6.9%)                  | 2.2<br>(0.79-4.2)    | 65<br>(22-130)     |
| Barbados    | 1990 | Female | 65 to 69 | 24%<br>(14-37%)                | 76%<br>(63-86%)          | 0.92<br>(0.47-1.5)                          | 2.1%<br>(0.64-4.1%)                  | 2.8%<br>(0.87-5.4%)                 | 2.2<br>(0.68-4.2)    | 53<br>(16-100)     |
| Barbados    | 1990 | Female | 70 to 74 | 21%<br>(13-34%)                | 79%<br>(66-87%)          | 0.77<br>(0.37-1.4)                          | 1.7%<br>(0.23-3.9%)                  | 2.2%<br>(0.33-4.8%)                 | 2.8<br>(0.42-6.3)    | 54<br>(7.2-120)    |
| Barbados    | 1990 | Female | 75 to 79 | 19%<br>(11-31%)                | 81%<br>(69-89%)          | 0.67<br>(0.31-1.2)                          | 1.3%<br>(-0.058-3.3%)                | 1.6%<br>(-0.086-4.1%)               | 2.8<br>(-0.15-6.9)   | 42<br>(-1.8-100)   |
| Barbados    | 1990 | Female | 80 to 84 | 17%<br>(9.7-28%)               | 83%<br>(72-90%)          | 0.62<br>(0.3-1.1)                           | 1.3%<br>(0.11-3.1%)                  | 1.5%<br>(0.11-3.6%)                 | 3<br>(0.2-7.2)       | 33<br>(2.9-76)     |
| Barbados    | 1990 | Female | 85 to 89 | 17%<br>(10-28%)                | 83%<br>(72-90%)          | 0.64<br>(0.3-1.2)                           | 1.3%<br>(0.12-3.2%)                  | 1.5%<br>(0.086-3.6%)                | 2.8<br>(0.17-6.8)    | 22<br>(1.9-53)     |
| Barbados    | 1990 | Female | 90 to 94 | 19%<br>(11-31%)                | 81%<br>(69-89%)          | 0.73<br>(0.32-1.4)                          | 1.5%<br>(0.036-3.9%)                 | 1.7%<br>(-0.045-4.5%)               | 1.9<br>(-0.05-5.1)   | 10<br>(0.24-26)    |

| Location | Year | Sex    | Age      | Prevalence of current drinkers | Prevalence of abstainers | Population average of standard drinks daily | Percent of total attributable deaths | Percent of total attributable DALYs | Attributable deaths  | Attributable DALYs  |
|----------|------|--------|----------|--------------------------------|--------------------------|---------------------------------------------|--------------------------------------|-------------------------------------|----------------------|---------------------|
| Barbados | 1990 | Female | 95 plus  | 23%<br>(12-39%)                | 77%<br>(61-88%)          | 0.87<br>(0.32-1.8)                          | 1.8%<br>(-0.12-4.9%)                 | 1.9%<br>(-0.29-5.7%)                | 0.71<br>(-0.1-2.1)   | 2.6<br>(-0.17-7.1)  |
| Barbados | 1990 | Male   | All Ages | 56%<br>(47-65%)                | 44%<br>(35-53%)          | 2.7<br>(2.4-3.1)                            | 7.5%<br>(6-9.1%)                     | 7.6%<br>(5.4-10%)                   | 82<br>(57-110)       | 2800<br>(2200-3400) |
| Barbados | 1990 | Male   | 15 to 19 | 54%<br>(37-71%)                | 46%<br>(29-63%)          | 2<br>(1.1-3.2)                              | 5.3%<br>(3.5-7.7%)                   | 8.2%<br>(4.8-13%)                   | 0.83<br>(0.48-1.3)   | 84<br>(55-120)      |
| Barbados | 1990 | Male   | 20 to 24 | 65%<br>(47-80%)                | 35%<br>(20-53%)          | 3.8<br>(2.4-5.6)                            | 11%<br>(8.3-15%)                     | 15%<br>(9.9-22%)                    | 2.4<br>(1.6-3.5)     | 220<br>(160-300)    |
| Barbados | 1990 | Male   | 25 to 29 | 68%<br>(49-82%)                | 32%<br>(18-51%)          | 4.5<br>(2.9-6.4)                            | 12%<br>(9.1-16%)                     | 17%<br>(11-22%)                     | 3.4<br>(2.3-4.7)     | 280<br>(200-360)    |
| Barbados | 1990 | Male   | 30 to 34 | 69%<br>(50-84%)                | 31%<br>(16-50%)          | 4.7<br>(3.1-6.7)                            | 12%<br>(8.9-15%)                     | 16%<br>(12-21%)                     | 3.9<br>(2.8-5.1)     | 280<br>(200-350)    |
| Barbados | 1990 | Male   | 35 to 39 | 69%<br>(52-83%)                | 31%<br>(17-48%)          | 4.5<br>(2.8-6.7)                            | 11%<br>(8.6-15%)                     | 16%<br>(11-20%)                     | 3.9<br>(2.8-5.1)     | 250<br>(180-320)    |
| Barbados | 1990 | Male   | 40 to 44 | 68%<br>(52-82%)                | 32%<br>(18-48%)          | 4.3<br>(2.4-6.6)                            | 11%<br>(7.7-14%)                     | 16%<br>(11-20%)                     | 3.4<br>(2.3-4.5)     | 190<br>(140-250)    |
| Barbados | 1990 | Male   | 45 to 49 | 66%<br>(45-81%)                | 34%<br>(19-55%)          | 4<br>(2.1-6.6)                              | 12%<br>(8.1-15%)                     | 15%<br>(10-20%)                     | 4.2<br>(2.7-5.5)     | 190<br>(130-250)    |
| Barbados | 1990 | Male   | 50 to 54 | 64%<br>(45-80%)                | 36%<br>(20-55%)          | 3.6<br>(2-6.1)                              | 11%<br>(7.2-15%)                     | 14%<br>(9.2-19%)                    | 4.5<br>(2.9-6.2)     | 180<br>(120-250)    |
| Barbados | 1990 | Male   | 55 to 59 | 62%<br>(44-79%)                | 38%<br>(21-56%)          | 3.3<br>(1.8-5.5)                            | 11%<br>(6.6-15%)                     | 13%<br>(8.2-18%)                    | 5.9<br>(3.6-8.2)     | 200<br>(120-280)    |
| Barbados | 1990 | Male   | 60 to 64 | 60%<br>(39-78%)                | 40%<br>(22-61%)          | 3<br>(1.6-5.2)                              | 9.1%<br>(5.2-13%)                    | 11%<br>(6.2-15%)                    | 7.3<br>(4.1-10)      | 210<br>(120-300)    |
| Barbados | 1990 | Male   | 65 to 69 | 59%<br>(39-76%)                | 41%<br>(24-61%)          | 2.6<br>(1.5-4.2)                            | 8.4%<br>(4.8-12%)                    | 9.8%<br>(5.6-14%)                   | 9.1<br>(5.3-13)      | 220<br>(130-320)    |
| Barbados | 1990 | Male   | 70 to 74 | 55%<br>(37-72%)                | 45%<br>(28-63%)          | 2.2<br>(1.1-3.8)                            | 6.3%<br>(3.1-10%)                    | 7.2%<br>(3.5-12%)                   | 9.8<br>(4.7-16)      | 190<br>(92-300)     |
| Barbados | 1990 | Male   | 75 to 79 | 50%<br>(31-69%)                | 50%<br>(31-69%)          | 1.8<br>(0.89-3.1)                           | 4.9%<br>(2.1-8.1%)                   | 5.5%<br>(2.2-9.2%)                  | 9.2<br>(3.8-16)      | 140<br>(58-230)     |
| Barbados | 1990 | Male   | 80 to 84 | 44%<br>(27-63%)                | 56%<br>(37-73%)          | 1.5<br>(0.78-2.5)                           | 4.1%<br>(1.8-7.1%)                   | 4.5%<br>(1.9-7.9%)                  | 7.3<br>(3-13)        | 79<br>(34-140)      |
| Barbados | 1990 | Male   | 85 to 89 | 40%<br>(24-57%)                | 60%<br>(43-76%)          | 1.3<br>(0.66-2.4)                           | 3.4%<br>(1.3-6.4%)                   | 3.7%<br>(1.4-7.2%)                  | 4.4<br>(1.7-8.5)     | 34<br>(14-65)       |
| Barbados | 1990 | Male   | 90 to 94 | 40%<br>(25-57%)                | 60%<br>(43-75%)          | 1.3<br>(0.64-2.5)                           | 3%<br>(0.94-6.2%)                    | 3.2%<br>(0.9-7%)                    | 1.5<br>(0.42-3.2)    | 8.2<br>(2.6-17)     |
| Barbados | 1990 | Male   | 95 plus  | 43%<br>(24-64%)                | 57%<br>(36-76%)          | 1.5<br>(0.59-2.9)                           | 3.1%<br>(0.64-6.8%)                  | 3.3%<br>(0.4-7.6%)                  | 0.31<br>(0.038-0.71) | 1.2<br>(0.23-2.5)   |
| Barbados | 1995 | Female | All Ages | 31%<br>(26-38%)                | 69%<br>(62-74%)          | 1.1<br>(0.94-1.3)                           | 1.9%<br>(1.3-2.8%)                   | 1.9%<br>(0.78-3.5%)                 | 23<br>(9.2-44)       | 720<br>(470-1000)   |
| Barbados | 1995 | Female | 15 to 19 | 36%<br>(24-53%)                | 64%<br>(47-76%)          | 1.2<br>(0.62-1.9)                           | 1.8%<br>(1.1-2.8%)                   | 3.5%<br>(1.7-6%)                    | 0.18<br>(0.087-0.31) | 21<br>(12-34)       |
| Barbados | 1995 | Female | 20 to 24 | 42%<br>(27-59%)                | 58%<br>(41-73%)          | 1.8<br>(0.96-2.9)                           | 3.2%<br>(2-4.4%)                     | 5.1%<br>(2.8-7.8%)                  | 0.42<br>(0.23-0.66)  | 51<br>(32-74)       |

| Location | Year | Sex    | Age      | Prevalence of current drinkers | Prevalence of abstainers | Population average of standard drinks daily | Percent of total attributable deaths | Percent of total attributable DALYs | Attributable deaths | Attributable DALYs  |
|----------|------|--------|----------|--------------------------------|--------------------------|---------------------------------------------|--------------------------------------|-------------------------------------|---------------------|---------------------|
| Barbados | 1995 | Female | 25 to 29 | 42%<br>(26-59%)                | 58%<br>(41-74%)          | 1.8<br>(1.1-2.7)                            | 3.2%<br>(2.2-4.3%)                   | 4.9%<br>(3-7.1%)                    | 0.43<br>(0.26-0.64) | 51<br>(34-70)       |
| Barbados | 1995 | Female | 30 to 34 | 41%<br>(25-57%)                | 59%<br>(43-75%)          | 1.8<br>(1-2.6)                              | 3%<br>(2.1-4.1%)                     | 5%<br>(3.3-7%)                      | 0.6<br>(0.38-0.86)  | 58<br>(39-79)       |
| Barbados | 1995 | Female | 35 to 39 | 40%<br>(25-57%)                | 60%<br>(43-75%)          | 1.6<br>(0.93-2.5)                           | 3.2%<br>(2.2-4.5%)                   | 5.4%<br>(3.6-7.8%)                  | 1.1<br>(0.68-1.6)   | 74<br>(50-110)      |
| Barbados | 1995 | Female | 40 to 44 | 38%<br>(24-56%)                | 62%<br>(44-76%)          | 1.5<br>(0.8-2.4)                            | 3.2%<br>(2-4.9%)                     | 5.7%<br>(3.5-8.4%)                  | 1.2<br>(0.72-1.8)   | 71<br>(43-110)      |
| Barbados | 1995 | Female | 45 to 49 | 36%<br>(22-53%)                | 64%<br>(47-78%)          | 1.5<br>(0.78-2.5)                           | 3.2%<br>(1.8-5.3%)                   | 5.4%<br>(3.1-8.8%)                  | 1.2<br>(0.71-2)     | 62<br>(35-100)      |
| Barbados | 1995 | Female | 50 to 54 | 33%<br>(20-50%)                | 67%<br>(50-80%)          | 1.3<br>(0.68-2.2)                           | 3.2%<br>(1.5-5.7%)                   | 5%<br>(2.5-8.5%)                    | 1.4<br>(0.67-2.5)   | 57<br>(27-100)      |
| Barbados | 1995 | Female | 55 to 59 | 29%<br>(17-45%)                | 71%<br>(55-83%)          | 1.1<br>(0.55-1.9)                           | 2.6%<br>(1.1-4.7%)                   | 4%<br>(1.8-7%)                      | 1.4<br>(0.62-2.4)   | 49<br>(21-86)       |
| Barbados | 1995 | Female | 60 to 64 | 26%<br>(15-41%)                | 74%<br>(59-85%)          | 0.95<br>(0.47-1.6)                          | 2.2%<br>(0.63-4.4%)                  | 3%<br>(0.97-5.9%)                   | 1.7<br>(0.53-3.3)   | 50<br>(14-100)      |
| Barbados | 1995 | Female | 65 to 69 | 24%<br>(14-37%)                | 76%<br>(63-86%)          | 0.82<br>(0.42-1.4)                          | 1.7%<br>(0.41-3.6%)                  | 2.3%<br>(0.63-4.6%)                 | 1.9<br>(0.52-3.8)   | 47<br>(11-95)       |
| Barbados | 1995 | Female | 70 to 74 | 21%<br>(13-34%)                | 79%<br>(66-87%)          | 0.69<br>(0.33-1.2)                          | 1.4%<br>(0.041-3.3%)                 | 1.8%<br>(0.11-4.3%)                 | 2.1<br>(0.12-4.8)   | 39<br>(1.1-93)      |
| Barbados | 1995 | Female | 75 to 79 | 19%<br>(11-31%)                | 81%<br>(69-89%)          | 0.6<br>(0.28-1.1)                           | 1%<br>(-0.24-2.7%)                   | 1.3%<br>(-0.28-3.4%)                | 2.1<br>(-0.46-5.5)  | 31<br>(-7.3-83)     |
| Barbados | 1995 | Female | 80 to 84 | 17%<br>(9.6-28%)               | 83%<br>(72-90%)          | 0.56<br>(0.27-0.98)                         | 1%<br>(-0.053-2.6%)                  | 1.2%<br>(-0.072-3.1%)               | 2.6<br>(-0.15-6.5)  | 29<br>(-1.4-72)     |
| Barbados | 1995 | Female | 85 to 89 | 17%<br>(9.9-27%)               | 83%<br>(73-90%)          | 0.57<br>(0.27-1)                            | 1.1%<br>(-0.017-2.6%)                | 1.2%<br>(-0.073-3%)                 | 2.5<br>(-0.15-6.3)  | 19<br>(-0.31-48)    |
| Barbados | 1995 | Female | 90 to 94 | 19%<br>(11-30%)                | 81%<br>(70-89%)          | 0.66<br>(0.29-1.3)                          | 1.2%<br>(-0.055-3.4%)                | 1.3%<br>(-0.14-4%)                  | 1.8<br>(-0.19-5.2)  | 9.6<br>(-0.43-27)   |
| Barbados | 1995 | Female | 95 plus  | 23%<br>(12-38%)                | 77%<br>(62-88%)          | 0.79<br>(0.27-1.6)                          | 1.5%<br>(-0.24-4.4%)                 | 1.6%<br>(-0.42-5%)                  | 0.82<br>(-0.22-2.7) | 3<br>(-0.49-9)      |
| Barbados | 1995 | Male   | All Ages | 56%<br>(48-64%)                | 44%<br>(36-52%)          | 2.5<br>(2.2-2.9)                            | 6.8%<br>(5.4-8.3%)                   | 6.5%<br>(4.5-8.9%)                  | 78<br>(52-110)      | 2600<br>(2100-3300) |
| Barbados | 1995 | Male   | 15 to 19 | 54%<br>(37-71%)                | 46%<br>(29-63%)          | 1.8<br>(0.93-2.9)                           | 5.1%<br>(3.4-7.5%)                   | 7.5%<br>(4.4-12%)                   | 0.73<br>(0.41-1.1)  | 71<br>(46-100)      |
| Barbados | 1995 | Male   | 20 to 24 | 65%<br>(46-80%)                | 35%<br>(20-54%)          | 3.3<br>(2-5)                                | 10%<br>(7.2-14%)                     | 13%<br>(8.5-19%)                    | 2.1<br>(1.3-3)      | 190<br>(130-260)    |
| Barbados | 1995 | Male   | 25 to 29 | 68%<br>(49-82%)                | 32%<br>(18-51%)          | 4<br>(2.5-5.7)                              | 11%<br>(7.7-14%)                     | 14%<br>(8.9-19%)                    | 2.8<br>(1.8-3.9)    | 230<br>(160-300)    |
| Barbados | 1995 | Male   | 30 to 34 | 69%<br>(49-83%)                | 31%<br>(17-51%)          | 4.2<br>(2.7-5.8)                            | 9.6%<br>(7.2-12%)                    | 12%<br>(8.3-16%)                    | 3.5<br>(2.4-4.7)    | 250<br>(180-330)    |
| Barbados | 1995 | Male   | 35 to 39 | 69%<br>(52-83%)                | 31%<br>(17-48%)          | 4<br>(2.5-5.9)                              | 9.2%<br>(6.7-12%)                    | 12%<br>(8.4-16%)                    | 3.6<br>(2.4-4.8)    | 230<br>(170-300)    |
| Barbados | 1995 | Male   | 40 to 44 | 68%<br>(52-82%)                | 32%<br>(18-48%)          | 3.8<br>(2.2-5.7)                            | 9.3%<br>(6.5-12%)                    | 13%<br>(8.4-17%)                    | 3.8<br>(2.4-5.1)    | 220<br>(150-280)    |



| Location | Year | Sex    | Age      | Prevalence of current drinkers | Prevalence of abstainers | Population average of standard drinks daily | Percent of total attributable deaths | Percent of total attributable DALYs | Attributable deaths  | Attributable DALYs |
|----------|------|--------|----------|--------------------------------|--------------------------|---------------------------------------------|--------------------------------------|-------------------------------------|----------------------|--------------------|
| Barbados | 1995 | Male   | 45 to 49 | 66%<br>(45-81%)                | 34%<br>(19-55%)          | 3.5<br>(2-5.7)                              | 10%<br>(6.7-13%)                     | 13%<br>(8.4-17%)                    | 5.3<br>(3.4-7.3)     | 250<br>(170-340)   |
| Barbados | 1995 | Male   | 50 to 54 | 64%<br>(45-80%)                | 36%<br>(20-55%)          | 3.2<br>(1.7-5.1)                            | 9.8%<br>(6.3-13%)                    | 12%<br>(7.6-17%)                    | 4.5<br>(2.8-6.3)     | 190<br>(120-250)   |
| Barbados | 1995 | Male   | 55 to 59 | 62%<br>(43-78%)                | 38%<br>(22-57%)          | 2.9<br>(1.6-4.7)                            | 9.5%<br>(5.7-13%)                    | 12%<br>(7-16%)                      | 6.2<br>(3.6-8.8)     | 210<br>(130-300)   |
| Barbados | 1995 | Male   | 60 to 64 | 60%<br>(39-78%)                | 40%<br>(22-61%)          | 2.7<br>(1.4-4.5)                            | 8%<br>(4.4-12%)                      | 9.7%<br>(5.4-14%)                   | 6.6<br>(3.6-9.8)     | 190<br>(110-290)   |
| Barbados | 1995 | Male   | 65 to 69 | 58%<br>(39-76%)                | 42%<br>(24-61%)          | 2.3<br>(1.3-3.8)                            | 7.2%<br>(4-11%)                      | 8.5%<br>(4.7-13%)                   | 8.7<br>(4.8-13)      | 210<br>(120-310)   |
| Barbados | 1995 | Male   | 70 to 74 | 55%<br>(36-71%)                | 45%<br>(29-64%)          | 1.9<br>(1-3.4)                              | 5.4%<br>(2.5-9%)                     | 6.2%<br>(2.8-10%)                   | 8.2<br>(3.7-14)      | 160<br>(70-260)    |
| Barbados | 1995 | Male   | 75 to 79 | 49%<br>(30-69%)                | 51%<br>(31-70%)          | 1.6<br>(0.8-2.7)                            | 4.3%<br>(1.7-7.4%)                   | 4.8%<br>(1.9-8.4%)                  | 8.1<br>(3-14)        | 120<br>(47-210)    |
| Barbados | 1995 | Male   | 80 to 84 | 43%<br>(26-62%)                | 57%<br>(38-74%)          | 1.3<br>(0.69-2.3)                           | 3.4%<br>(1.4-6.1%)                   | 3.8%<br>(1.5-6.9%)                  | 7<br>(2.8-13)        | 77<br>(32-140)     |
| Barbados | 1995 | Male   | 85 to 89 | 39%<br>(23-56%)                | 61%<br>(44-77%)          | 1.2<br>(0.58-2.1)                           | 2.8%<br>(1-5.5%)                     | 3%<br>(1.1-6.1%)                    | 4.3<br>(1.5-8.6)     | 34<br>(13-66)      |
| Barbados | 1995 | Male   | 90 to 94 | 39%<br>(24-57%)                | 61%<br>(43-76%)          | 1.2<br>(0.56-2.2)                           | 2.4%<br>(0.68-5.4%)                  | 2.6%<br>(0.61-6%)                   | 1.8<br>(0.44-4.2)    | 10<br>(2.8-22)     |
| Barbados | 1995 | Male   | 95 plus  | 43%<br>(24-63%)                | 57%<br>(37-76%)          | 1.3<br>(0.52-2.5)                           | 2.5%<br>(0.4-5.9%)                   | 2.7%<br>(0.21-6.4%)                 | 0.48<br>(0.038-1.2)  | 1.8<br>(0.28-4.2)  |
| Barbados | 2000 | Female | All Ages | 30%<br>(25-37%)                | 70%<br>(63-75%)          | 1<br>(0.88-1.2)                             | 1.8%<br>(1.2-2.5%)                   | 1.8%<br>(0.82-3.2%)                 | 22<br>(9.3-38)       | 690<br>(460-960)   |
| Barbados | 2000 | Female | 15 to 19 | 36%<br>(23-52%)                | 64%<br>(48-77%)          | 1.1<br>(0.58-1.9)                           | 1.6%<br>(0.96-2.4%)                  | 1.6%<br>(1.6-5.4%)                  | 0.12<br>(0.061-0.22) | 17<br>(10-27)      |
| Barbados | 2000 | Female | 20 to 24 | 42%<br>(26-58%)                | 58%<br>(42-74%)          | 1.7<br>(0.9-2.7)                            | 3.1%<br>(2-4.4%)                     | 4.6%<br>(2.5-7.4%)                  | 0.35<br>(0.19-0.56)  | 42<br>(27-61)      |
| Barbados | 2000 | Female | 25 to 29 | 41%<br>(25-58%)                | 59%<br>(42-75%)          | 1.7<br>(0.95-2.7)                           | 3.2%<br>(2.2-4.4%)                   | 4.6%<br>(2.7-6.7%)                  | 0.49<br>(0.28-0.77)  | 53<br>(35-75)      |
| Barbados | 2000 | Female | 30 to 34 | 39%<br>(24-56%)                | 61%<br>(44-76%)          | 1.7<br>(0.95-2.6)                           | 2.9%<br>(2-3.9%)                     | 4.3%<br>(2.8-6.2%)                  | 0.55<br>(0.34-0.82)  | 52<br>(35-73)      |
| Barbados | 2000 | Female | 35 to 39 | 39%<br>(24-56%)                | 61%<br>(44-76%)          | 1.5<br>(0.89-2.4)                           | 2.9%<br>(2-4%)                       | 4.7%<br>(3.1-6.8%)                  | 0.92<br>(0.58-1.4)   | 67<br>(45-97)      |
| Barbados | 2000 | Female | 40 to 44 | 38%<br>(24-56%)                | 62%<br>(44-76%)          | 1.5<br>(0.78-2.3)                           | 2.9%<br>(1.8-4.4%)                   | 5%<br>(3.1-7.4%)                    | 1.2<br>(0.77-1.9)    | 74<br>(46-110)     |
| Barbados | 2000 | Female | 45 to 49 | 36%<br>(21-53%)                | 64%<br>(47-79%)          | 1.4<br>(0.75-2.3)                           | 2.9%<br>(1.7-4.8%)                   | 4.9%<br>(3-7.8%)                    | 1.4<br>(0.82-2.3)    | 71<br>(41-110)     |
| Barbados | 2000 | Female | 50 to 54 | 32%<br>(19-48%)                | 68%<br>(52-81%)          | 1.2<br>(0.68-2)                             | 2.8%<br>(1.4-4.8%)                   | 4.5%<br>(2.4-7.5%)                  | 1.5<br>(0.77-2.5)    | 63<br>(32-110)     |
| Barbados | 2000 | Female | 55 to 59 | 28%<br>(16-44%)                | 72%<br>(56-84%)          | 1<br>(0.54-1.8)                             | 2.5%<br>(1.1-4.5%)                   | 3.8%<br>(1.9-6.5%)                  | 1.4<br>(0.69-2.4)    | 49<br>(23-87)      |
| Barbados | 2000 | Female | 60 to 64 | 25%<br>(14-40%)                | 75%<br>(60-86%)          | 0.89<br>(0.44-1.6)                          | 2%<br>(0.64-4%)                      | 2.9%<br>(1.1-5.4%)                  | 1.5<br>(0.56-3)      | 46<br>(14-94)      |

| Location | Year | Sex    | Age      | Prevalence of current drinkers | Prevalence of abstainers | Population average of standard drinks daily | Percent of total attributable deaths | Percent of total attributable DALYs | Attributable deaths | Attributable DALYs  |
|----------|------|--------|----------|--------------------------------|--------------------------|---------------------------------------------|--------------------------------------|-------------------------------------|---------------------|---------------------|
| Barbados | 2000 | Female | 65 to 69 | 23%<br>(14-36%)                | 77%<br>(64-86%)          | 0.77<br>(0.4-1.3)                           | 1.5%<br>(0.37-3.1%)                  | 2.2%<br>(0.66-4.2%)                 | 1.6<br>(0.46-3)     | 38<br>(9.7-76)      |
| Barbados | 2000 | Female | 70 to 74 | 20%<br>(12-33%)                | 80%<br>(67-88%)          | 0.65<br>(0.32-1.2)                          | 1.2%<br>(0.041-3%)                   | 1.7%<br>(0.17-3.9%)                 | 2<br>(0.2-4.8)      | 38<br>(1.3-96)      |
| Barbados | 2000 | Female | 75 to 79 | 18%<br>(10-30%)                | 82%<br>(70-90%)          | 0.56<br>(0.26-1)                            | 0.94%<br>(-0.16-2.5%)                | 1.2%<br>(-0.15-3.1%)                | 1.8<br>(-0.22-4.6)  | 26<br>(-4.7-70)     |
| Barbados | 2000 | Female | 80 to 84 | 17%<br>(9.3-28%)               | 83%<br>(72-91%)          | 0.53<br>(0.25-0.92)                         | 0.94%<br>(0.025-2.3%)                | 1.2%<br>(0.047-2.9%)                | 2<br>(0.078-5)      | 22<br>(0.6-55)      |
| Barbados | 2000 | Female | 85 to 89 | 17%<br>(9.5-26%)               | 83%<br>(74-90%)          | 0.54<br>(0.26-0.99)                         | 0.95%<br>(0.084-2.4%)                | 1.1%<br>(0.067-2.7%)                | 2.3<br>(0.13-5.7)   | 18<br>(1.5-45)      |
| Barbados | 2000 | Female | 90 to 94 | 19%<br>(11-29%)                | 81%<br>(71-89%)          | 0.62<br>(0.27-1.2)                          | 1.1%<br>(-0.0093-3.1%)               | 1.2%<br>(-0.086-3.6%)               | 1.7<br>(-0.12-5)    | 9.3<br>(-0.078-27)  |
| Barbados | 2000 | Female | 95 plus  | 22%<br>(11-37%)                | 78%<br>(63-89%)          | 0.75<br>(0.26-1.5)                          | 1.3%<br>(-0.16-4%)                   | 1.4%<br>(-0.33-4.7%)                | 0.83<br>(-0.19-2.7) | 3.1<br>(-0.37-9.4)  |
| Barbados | 2000 | Male   | All Ages | 55%<br>(47-63%)                | 45%<br>(37-53%)          | 2.4<br>(2.1-2.7)                            | 6.3%<br>(5.1-7.7%)                   | 6.1%<br>(4.2-8.1%)                  | 71<br>(50-97)       | 2500<br>(2000-3100) |
| Barbados | 2000 | Male   | 15 to 19 | 53%<br>(35-70%)                | 47%<br>(30-65%)          | 1.7<br>(0.86-2.7)                           | 5%<br>(3.2-7.3%)                     | 7.1%<br>(4-11%)                     | 0.74<br>(0.42-1.2)  | 72<br>(46-110)      |
| Barbados | 2000 | Male   | 20 to 24 | 64%<br>(46-79%)                | 36%<br>(21-54%)          | 3.2<br>(1.8-4.8)                            | 10%<br>(7.3-14%)                     | 13%<br>(8.4-19%)                    | 1.9<br>(1.1-2.8)    | 170<br>(120-230)    |
| Barbados | 2000 | Male   | 25 to 29 | 67%<br>(49-82%)                | 33%<br>(18-51%)          | 3.9<br>(2.3-5.7)                            | 11%<br>(7.6-15%)                     | 14%<br>(8.7-19%)                    | 2.9<br>(1.8-4.2)    | 230<br>(160-310)    |
| Barbados | 2000 | Male   | 30 to 34 | 68%<br>(49-83%)                | 32%<br>(17-51%)          | 4<br>(2.5-5.8)                              | 8.4%<br>(6.3-11%)                    | 10%<br>(7-14%)                      | 2.3<br>(1.6-3.3)    | 180<br>(130-240)    |
| Barbados | 2000 | Male   | 35 to 39 | 68%<br>(51-82%)                | 32%<br>(18-49%)          | 3.8<br>(2.3-5.6)                            | 7.9%<br>(5.9-10%)                    | 9.8%<br>(6.7-13%)                   | 2.9<br>(1.9-3.9)    | 200<br>(140-260)    |
| Barbados | 2000 | Male   | 40 to 44 | 67%<br>(50-82%)                | 33%<br>(18-50%)          | 3.6<br>(2.1-5.3)                            | 8.3%<br>(5.9-11%)                    | 11%<br>(7.4-15%)                    | 3.7<br>(2.4-5)      | 220<br>(150-290)    |
| Barbados | 2000 | Male   | 45 to 49 | 65%<br>(44-80%)                | 35%<br>(20-56%)          | 3.4<br>(1.9-5.2)                            | 9.1%<br>(6.3-12%)                    | 12%<br>(7.9-15%)                    | 5.4<br>(3.6-7.5)    | 260<br>(180-350)    |
| Barbados | 2000 | Male   | 50 to 54 | 63%<br>(43-79%)                | 37%<br>(21-57%)          | 3<br>(1.7-4.8)                              | 9.1%<br>(5.9-12%)                    | 12%<br>(7.2-16%)                    | 6.2<br>(3.8-8.7)    | 260<br>(160-350)    |
| Barbados | 2000 | Male   | 55 to 59 | 61%<br>(43-77%)                | 39%<br>(23-57%)          | 2.8<br>(1.5-4.4)                            | 8.6%<br>(5.2-12%)                    | 11%<br>(6.5-15%)                    | 5.5<br>(3.4-7.8)    | 200<br>(120-270)    |
| Barbados | 2000 | Male   | 60 to 64 | 59%<br>(39-77%)                | 41%<br>(23-61%)          | 2.5<br>(1.3-4.2)                            | 7.2%<br>(4.1-11%)                    | 8.8%<br>(4.9-13%)                   | 6.2<br>(3.4-9.3)    | 180<br>(100-270)    |
| Barbados | 2000 | Male   | 65 to 69 | 57%<br>(38-75%)                | 43%<br>(25-62%)          | 2.2<br>(1.2-3.6)                            | 6.4%<br>(3.5-9.8%)                   | 7.7%<br>(4.2-12%)                   | 7.3<br>(4-11)       | 180<br>(100-270)    |
| Barbados | 2000 | Male   | 70 to 74 | 53%<br>(35-71%)                | 47%<br>(29-65%)          | 1.8<br>(0.97-3.1)                           | 4.8%<br>(2.3-8.2%)                   | 5.6%<br>(2.7-9.6%)                  | 7.5<br>(3.6-13)     | 150<br>(72-250)     |
| Barbados | 2000 | Male   | 75 to 79 | 48%<br>(29-67%)                | 52%<br>(33-71%)          | 1.5<br>(0.74-2.6)                           | 3.8%<br>(1.6-6.9%)                   | 4.4%<br>(1.8-7.7%)                  | 6.5<br>(2.7-12)     | 99<br>(42-170)      |
| Barbados | 2000 | Male   | 80 to 84 | 42%<br>(25-61%)                | 58%<br>(39-75%)          | 1.2<br>(0.64-2.1)                           | 3.1%<br>(1.4-5.3%)                   | 3.4%<br>(1.5-6%)                    | 5.8<br>(2.5-9.8)    | 64<br>(28-110)      |

| Location | Year | Sex    | Age      | Prevalence of current drinkers | Prevalence of abstainers | Population average of standard drinks daily | Percent of total attributable deaths | Percent of total attributable DALYs | Attributable deaths  | Attributable DALYs  |
|----------|------|--------|----------|--------------------------------|--------------------------|---------------------------------------------|--------------------------------------|-------------------------------------|----------------------|---------------------|
| Barbados | 2000 | Male   | 85 to 89 | 38%<br>(22-55%)                | 62%<br>(45-78%)          | 1.1<br>(0.54-1.9)                           | 2.6%<br>(1.1-5%)                     | 2.8%<br>(1.1-5.6%)                  | 4<br>(1.6-7.9)       | 32<br>(13-61)       |
| Barbados | 2000 | Male   | 90 to 94 | 38%<br>(24-55%)                | 62%<br>(45-76%)          | 1.1<br>(0.52-2.1)                           | 2.3%<br>(0.77-4.9%)                  | 2.4%<br>(0.74-5.5%)                 | 1.9<br>(0.58-4.2)    | 10<br>(3.6-23)      |
| Barbados | 2000 | Male   | 95 plus  | 42%<br>(23-62%)                | 58%<br>(38-77%)          | 1.2<br>(0.48-2.4)                           | 2.4%<br>(0.57-5.3%)                  | 2.5%<br>(0.42-6%)                   | 0.62<br>(0.1-1.5)    | 2.4<br>(0.57-5.3)   |
| Barbados | 2005 | Female | All Ages | 30%<br>(25-37%)                | 70%<br>(63-75%)          | 1.1<br>(0.92-1.2)                           | 2%<br>(1.4-2.7%)                     | 2.1%<br>(1-3.3%)                    | 24<br>(12-40)        | 760<br>(540-1000)   |
| Barbados | 2005 | Female | 15 to 19 | 36%<br>(23-52%)                | 64%<br>(48-77%)          | 1.2<br>(0.59-2)                             | 1.7%<br>(1-2.6%)                     | 3.7%<br>(1.8-6.3%)                  | 0.14<br>(0.066-0.24) | 18<br>(11-28)       |
| Barbados | 2005 | Female | 20 to 24 | 42%<br>(26-58%)                | 58%<br>(42-74%)          | 1.7<br>(0.92-2.9)                           | 3.3%<br>(2.1-4.7%)                   | 5.2%<br>(2.8-8.1%)                  | 0.4<br>(0.21-0.65)   | 46<br>(29-66)       |
| Barbados | 2005 | Female | 25 to 29 | 41%<br>(25-58%)                | 59%<br>(42-75%)          | 1.8<br>(1-2.8)                              | 3.3%<br>(2.2-4.6%)                   | 4.9%<br>(2.9-7.2%)                  | 0.45<br>(0.27-0.68)  | 48<br>(32-68)       |
| Barbados | 2005 | Female | 30 to 34 | 39%<br>(24-56%)                | 61%<br>(44-76%)          | 1.7<br>(0.95-2.6)                           | 3.2%<br>(2.2-4.4%)                   | 5.2%<br>(3.3-7.5%)                  | 0.66<br>(0.41-0.98)  | 58<br>(40-81)       |
| Barbados | 2005 | Female | 35 to 39 | 39%<br>(24-56%)                | 61%<br>(44-76%)          | 1.6<br>(0.92-2.5)                           | 3.1%<br>(2.1-4.3%)                   | 5.3%<br>(3.6-7.5%)                  | 0.87<br>(0.56-1.3)   | 63<br>(42-89)       |
| Barbados | 2005 | Female | 40 to 44 | 37%<br>(23-56%)                | 63%<br>(44-77%)          | 1.5<br>(0.82-2.4)                           | 3.2%<br>(2-4.7%)                     | 5.6%<br>(3.7-8.1%)                  | 1.4<br>(0.87-2)      | 80<br>(52-120)      |
| Barbados | 2005 | Female | 45 to 49 | 35%<br>(21-52%)                | 65%<br>(48-79%)          | 1.4<br>(0.78-2.3)                           | 3.1%<br>(1.9-4.9%)                   | 5.4%<br>(3.3-8.5%)                  | 1.8<br>(1.1-2.8)     | 89<br>(55-140)      |
| Barbados | 2005 | Female | 50 to 54 | 32%<br>(19-48%)                | 68%<br>(52-81%)          | 1.3<br>(0.7-2.1)                            | 2.9%<br>(1.5-4.8%)                   | 4.8%<br>(2.7-7.8%)                  | 1.7<br>(0.98-2.8)    | 75<br>(41-130)      |
| Barbados | 2005 | Female | 55 to 59 | 28%<br>(17-44%)                | 72%<br>(56-83%)          | 1.1<br>(0.56-1.8)                           | 2.6%<br>(1.4-4.5%)                   | 4.1%<br>(2.3-6.9%)                  | 1.9<br>(1-3.1)       | 67<br>(35-110)      |
| Barbados | 2005 | Female | 60 to 64 | 25%<br>(15-39%)                | 75%<br>(61-85%)          | 0.92<br>(0.45-1.6)                          | 2.1%<br>(0.8-3.9%)                   | 3.2%<br>(1.4-5.7%)                  | 1.7<br>(0.72-2.9)    | 50<br>(20-92)       |
| Barbados | 2005 | Female | 65 to 69 | 23%<br>(14-36%)                | 77%<br>(64-86%)          | 0.8<br>(0.41-1.3)                           | 1.7%<br>(0.56-3.1%)                  | 2.5%<br>(0.94-4.3%)                 | 1.6<br>(0.63-2.9)    | 40<br>(13-75)       |
| Barbados | 2005 | Female | 70 to 74 | 20%<br>(13-32%)                | 80%<br>(68-87%)          | 0.67<br>(0.34-1.2)                          | 1.3%<br>(0.22-3%)                    | 1.9%<br>(0.45-4.1%)                 | 1.9<br>(0.43-4)      | 36<br>(5.9-81)      |
| Barbados | 2005 | Female | 75 to 79 | 18%<br>(11-29%)                | 82%<br>(71-89%)          | 0.58<br>(0.28-1)                            | 1.1%<br>(0.006-2.6%)                 | 1.4%<br>(0.079-3.4%)                | 2.1<br>(0.11-5)      | 31<br>(0.17-77)     |
| Barbados | 2005 | Female | 80 to 84 | 17%<br>(9.4-27%)               | 83%<br>(73-91%)          | 0.55<br>(0.26-0.94)                         | 1%<br>(0.13-2.4%)                    | 1.3%<br>(0.18-3%)                   | 2.3<br>(0.32-5.2)    | 25<br>(3.4-60)      |
| Barbados | 2005 | Female | 85 to 89 | 17%<br>(9.5-26%)               | 83%<br>(74-91%)          | 0.56<br>(0.26-0.99)                         | 1%<br>(0.11-2.4%)                    | 1.2%<br>(0.11-2.8%)                 | 2.3<br>(0.22-5.4)    | 18<br>(1.9-43)      |
| Barbados | 2005 | Female | 90 to 94 | 19%<br>(11-30%)                | 81%<br>(70-89%)          | 0.63<br>(0.27-1.2)                          | 1.2%<br>(0.017-3.2%)                 | 1.3%<br>(-0.027-3.6%)               | 2.1<br>(-0.041-5.6)  | 11<br>(0.16-30)     |
| Barbados | 2005 | Female | 95 plus  | 22%<br>(11-38%)                | 78%<br>(62-89%)          | 0.76<br>(0.27-1.6)                          | 1.5%<br>(-0.073-4.2%)                | 1.6%<br>(-0.2-4.7%)                 | 1<br>(-0.13-3)       | 3.7<br>(-0.18-11)   |
| Barbados | 2005 | Male   | All Ages | 56%<br>(47-64%)                | 44%<br>(36-53%)          | 2.5<br>(2.2-2.8)                            | 6.9%<br>(5.7-8.2%)                   | 6.7%<br>(4.9-8.8%)                  | 77<br>(56-100)       | 2700<br>(2200-3300) |

| Location | Year | Sex    | Age      | Prevalence of current drinkers | Prevalence of abstainers | Population average of standard drinks daily | Percent of total attributable deaths | Percent of total attributable DALYs | Attributable deaths | Attributable DALYs |
|----------|------|--------|----------|--------------------------------|--------------------------|---------------------------------------------|--------------------------------------|-------------------------------------|---------------------|--------------------|
| Barbados | 2005 | Male   | 15 to 19 | 53%<br>(35-70%)                | 47%<br>(30-65%)          | 1.7<br>(0.89-2.9)                           | 5.3%<br>(3.4-7.7%)                   | 7.8%<br>(4.5-12%)                   | 0.7<br>(0.39-1.1)   | 68<br>(44-100)     |
| Barbados | 2005 | Male   | 20 to 24 | 64%<br>(45-80%)                | 36%<br>(20-55%)          | 3.3<br>(1.9-5.1)                            | 11%<br>(7.6-15%)                     | 14%<br>(8.9-21%)                    | 1.8<br>(1.1-2.7)    | 170<br>(110-230)   |
| Barbados | 2005 | Male   | 25 to 29 | 67%<br>(48-82%)                | 33%<br>(18-52%)          | 4<br>(2.4-5.9)                              | 12%<br>(8.3-16%)                     | 15%<br>(9.8-22%)                    | 2.7<br>(1.7-3.8)    | 210<br>(150-290)   |
| Barbados | 2005 | Male   | 30 to 34 | 68%<br>(49-83%)                | 32%<br>(17-51%)          | 4.2<br>(2.6-6.1)                            | 11%<br>(7.8-14%)                     | 14%<br>(9.9-19%)                    | 2.8<br>(1.9-3.7)    | 210<br>(150-270)   |
| Barbados | 2005 | Male   | 35 to 39 | 68%<br>(51-82%)                | 32%<br>(18-49%)          | 3.9<br>(2.4-5.9)                            | 9.7%<br>(7.2-13%)                    | 13%<br>(9.5-18%)                    | 3.2<br>(2.2-4.3)    | 210<br>(150-270)   |
| Barbados | 2005 | Male   | 40 to 44 | 67%<br>(50-81%)                | 33%<br>(19-50%)          | 3.7<br>(2.2-5.5)                            | 9.4%<br>(6.8-12%)                    | 13%<br>(9.4-17%)                    | 4<br>(2.7-5.3)      | 230<br>(170-300)   |
| Barbados | 2005 | Male   | 45 to 49 | 65%<br>(44-80%)                | 35%<br>(20-56%)          | 3.4<br>(2-5.3)                              | 10%<br>(7.2-13%)                     | 14%<br>(9.6-18%)                    | 6.5<br>(4.4-8.7)    | 310<br>(220-410)   |
| Barbados | 2005 | Male   | 50 to 54 | 63%<br>(43-79%)                | 37%<br>(21-57%)          | 3.1<br>(1.8-4.8)                            | 9.8%<br>(6.5-13%)                    | 13%<br>(8.6-17%)                    | 7.2<br>(4.7-9.7)    | 300<br>(200-400)   |
| Barbados | 2005 | Male   | 55 to 59 | 61%<br>(42-78%)                | 39%<br>(22-58%)          | 2.9<br>(1.6-4.5)                            | 8.9%<br>(5.6-12%)                    | 12%<br>(7.2-16%)                    | 7.5<br>(4.6-10)     | 270<br>(170-370)   |
| Barbados | 2005 | Male   | 60 to 64 | 59%<br>(39-77%)                | 41%<br>(23-61%)          | 2.6<br>(1.4-4.3)                            | 7.7%<br>(4.3-11%)                    | 9.6%<br>(5.4-14%)                   | 6.8<br>(3.8-9.8)    | 200<br>(110-290)   |
| Barbados | 2005 | Male   | 65 to 69 | 57%<br>(37-75%)                | 43%<br>(25-63%)          | 2.3<br>(1.2-3.6)                            | 6.7%<br>(3.9-10%)                    | 8.2%<br>(4.8-12%)                   | 7.2<br>(4.2-11)     | 180<br>(100-270)   |
| Barbados | 2005 | Male   | 70 to 74 | 53%<br>(35-70%)                | 47%<br>(30-65%)          | 1.9<br>(0.98-3.1)                           | 4.9%<br>(2.5-8.2%)                   | 5.9%<br>(3-9.8%)                    | 6.9<br>(3.4-12)     | 140<br>(70-230)    |
| Barbados | 2005 | Male   | 75 to 79 | 48%<br>(30-67%)                | 52%<br>(33-70%)          | 1.5<br>(0.77-2.7)                           | 3.9%<br>(1.7-6.9%)                   | 4.5%<br>(2-7.9%)                    | 7<br>(3-12)         | 110<br>(47-190)    |
| Barbados | 2005 | Male   | 80 to 84 | 42%<br>(25-61%)                | 58%<br>(39-75%)          | 1.3<br>(0.67-2.1)                           | 3.2%<br>(1.5-5.5%)                   | 3.6%<br>(1.6-6.3%)                  | 5.9<br>(2.7-10)     | 66<br>(30-120)     |
| Barbados | 2005 | Male   | 85 to 89 | 38%<br>(22-55%)                | 62%<br>(45-78%)          | 1.1<br>(0.56-2)                             | 2.7%<br>(1.2-4.9%)                   | 3%<br>(1.3-5.6%)                    | 4<br>(1.7-7.5)      | 32<br>(14-58)      |
| Barbados | 2005 | Male   | 90 to 94 | 38%<br>(23-55%)                | 62%<br>(45-77%)          | 1.1<br>(0.54-2.1)                           | 2.4%<br>(0.86-5%)                    | 2.6%<br>(0.81-5.6%)                 | 2.1<br>(0.63-4.4)   | 11<br>(4-24)       |
| Barbados | 2005 | Male   | 95 plus  | 41%<br>(23-62%)                | 59%<br>(38-77%)          | 1.2<br>(0.49-2.5)                           | 2.6%<br>(0.71-5.6%)                  | 2.7%<br>(0.59-6.3%)                 | 0.71<br>(0.15-1.6)  | 2.7<br>(0.73-5.9)  |
| Barbados | 2010 | Female | All Ages | 30%<br>(25-36%)                | 70%<br>(64-75%)          | 1.1<br>(0.97-1.3)                           | 2.2%<br>(1.6-3%)                     | 2.4%<br>(1.4-3.9%)                  | 28<br>(16-45)       | 860<br>(620-1200)  |
| Barbados | 2010 | Female | 15 to 19 | 36%<br>(23-52%)                | 64%<br>(48-77%)          | 1.3<br>(0.64-2.2)                           | 1.9%<br>(1.1-2.9%)                   | 3.9%<br>(1.9-7%)                    | 0.17<br>(0.082-0.3) | 20<br>(12-32)      |
| Barbados | 2010 | Female | 20 to 24 | 41%<br>(26-58%)                | 59%<br>(42-74%)          | 1.9<br>(1-3.1)                              | 3.5%<br>(2.3-4.9%)                   | 5.6%<br>(3-8.9%)                    | 0.38<br>(0.2-0.62)  | 43<br>(28-63)      |
| Barbados | 2010 | Female | 25 to 29 | 41%<br>(25-58%)                | 59%<br>(42-75%)          | 1.9<br>(1-3)                                | 3.4%<br>(2.3-4.8%)                   | 5.3%<br>(3.1-8%)                    | 0.46<br>(0.26-0.71) | 49<br>(32-70)      |
| Barbados | 2010 | Female | 30 to 34 | 39%<br>(24-57%)                | 61%<br>(43-76%)          | 1.8<br>(1-2.9)                              | 3.4%<br>(2.2-4.7%)                   | 5.5%<br>(3.4-8%)                    | 0.61<br>(0.38-0.91) | 54<br>(36-77)      |

| Location | Year | Sex    | Age      | Prevalence of current drinkers | Prevalence of abstainers | Population average of standard drinks daily | Percent of total attributable deaths | Percent of total attributable DALYs | Attributable deaths | Attributable DALYs  |
|----------|------|--------|----------|--------------------------------|--------------------------|---------------------------------------------|--------------------------------------|-------------------------------------|---------------------|---------------------|
| Barbados | 2010 | Female | 35 to 39 | 39%<br>(24-56%)                | 61%<br>(44-76%)          | 1.7<br>(0.95-2.8)                           | 3.4%<br>(2.3-4.8%)                   | 5.8%<br>(3.8-8.4%)                  | 1<br>(0.67-1.6)     | 73<br>(50-100)      |
| Barbados | 2010 | Female | 40 to 44 | 37%<br>(24-55%)                | 63%<br>(45-76%)          | 1.6<br>(0.87-2.6)                           | 3.3%<br>(2.1-4.9%)                   | 5.9%<br>(3.7-8.7%)                  | 1.3<br>(0.84-2)     | 78<br>(50-120)      |
| Barbados | 2010 | Female | 45 to 49 | 35%<br>(21-53%)                | 65%<br>(47-79%)          | 1.5<br>(0.84-2.5)                           | 3.3%<br>(2-5.1%)                     | 5.6%<br>(3.4-8.9%)                  | 1.9<br>(1.2-3)      | 97<br>(60-150)      |
| Barbados | 2010 | Female | 50 to 54 | 32%<br>(19-49%)                | 68%<br>(51-81%)          | 1.4<br>(0.77-2.2)                           | 3.3%<br>(1.8-5.3%)                   | 5.4%<br>(3.2-8.4%)                  | 2.5<br>(1.5-4)      | 100<br>(59-170)     |
| Barbados | 2010 | Female | 55 to 59 | 28%<br>(16-44%)                | 72%<br>(56-84%)          | 1.2<br>(0.6-1.9)                            | 2.8%<br>(1.5-4.8%)                   | 4.5%<br>(2.6-7.3%)                  | 2.3<br>(1.3-3.8)    | 84<br>(46-140)      |
| Barbados | 2010 | Female | 60 to 64 | 25%<br>(14-39%)                | 75%<br>(61-86%)          | 0.99<br>(0.5-1.7)                           | 2.2%<br>(0.92-4%)                    | 3.4%<br>(1.6-5.9%)                  | 1.9<br>(0.89-3.4)   | 60<br>(25-110)      |
| Barbados | 2010 | Female | 65 to 69 | 23%<br>(14-36%)                | 77%<br>(64-86%)          | 0.86<br>(0.44-1.4)                          | 1.9%<br>(0.77-3.5%)                  | 2.8%<br>(1.3-4.8%)                  | 2<br>(0.91-3.5)     | 49<br>(20-91)       |
| Barbados | 2010 | Female | 70 to 74 | 20%<br>(13-33%)                | 80%<br>(67-87%)          | 0.72<br>(0.36-1.3)                          | 1.5%<br>(0.37-3.2%)                  | 2.2%<br>(0.69-4.4%)                 | 1.9<br>(0.59-3.8)   | 37<br>(9.6-80)      |
| Barbados | 2010 | Female | 75 to 79 | 18%<br>(11-30%)                | 82%<br>(70-89%)          | 0.63<br>(0.3-1.1)                           | 1.3%<br>(0.19-3%)                    | 1.7%<br>(0.32-3.9%)                 | 2.4<br>(0.45-5.4)   | 36<br>(5.6-84)      |
| Barbados | 2010 | Female | 80 to 84 | 17%<br>(9.3-27%)               | 83%<br>(73-91%)          | 0.59<br>(0.29-1)                            | 1.2%<br>(0.21-2.6%)                  | 1.5%<br>(0.3-3.3%)                  | 2.7<br>(0.52-5.8)   | 30<br>(5.8-67)      |
| Barbados | 2010 | Female | 85 to 89 | 17%<br>(9.5-26%)               | 83%<br>(74-91%)          | 0.59<br>(0.27-1.1)                          | 1.2%<br>(0.23-2.8%)                  | 1.5%<br>(0.25-3.4%)                 | 2.9<br>(0.51-6.7)   | 23<br>(4.3-52)      |
| Barbados | 2010 | Female | 90 to 94 | 18%<br>(11-29%)                | 82%<br>(71-89%)          | 0.67<br>(0.3-1.2)                           | 1.5%<br>(0.18-3.6%)                  | 1.7%<br>(0.14-4.2%)                 | 2.6<br>(0.23-6.6)   | 14<br>(1.7-34)      |
| Barbados | 2010 | Female | 95 plus  | 22%<br>(11-38%)                | 78%<br>(62-89%)          | 0.81<br>(0.29-1.7)                          | 1.8%<br>(0.074-4.6%)                 | 1.9%<br>(-0.058-5.4%)               | 1.4<br>(-0.042-3.9) | 5<br>(0.21-13)      |
| Barbados | 2010 | Male   | All Ages | 55%<br>(47-63%)                | 45%<br>(37-53%)          | 2.7<br>(2.3-3)                              | 7.3%<br>(6-8.6%)                     | 7.3%<br>(5.4-9.5%)                  | 86<br>(63-110)      | 2900<br>(2400-3600) |
| Barbados | 2010 | Male   | 15 to 19 | 53%<br>(35-70%)                | 47%<br>(30-65%)          | 1.9<br>(0.93-3)                             | 5.1%<br>(3.2-7.5%)                   | 8%<br>(4.4-13%)                     | 0.6<br>(0.33-0.95)  | 61<br>(39-89)       |
| Barbados | 2010 | Male   | 20 to 24 | 64%<br>(46-79%)                | 36%<br>(21-54%)          | 3.5<br>(2-5.5)                              | 11%<br>(7.7-15%)                     | 15%<br>(9.1-21%)                    | 1.6<br>(0.94-2.3)   | 150<br>(100-200)    |
| Barbados | 2010 | Male   | 25 to 29 | 67%<br>(48-81%)                | 33%<br>(19-52%)          | 4.3<br>(2.5-6.3)                            | 12%<br>(8.5-16%)                     | 16%<br>(10-22%)                     | 2.5<br>(1.6-3.5)    | 200<br>(140-270)    |
| Barbados | 2010 | Male   | 30 to 34 | 68%<br>(48-83%)                | 32%<br>(17-52%)          | 4.5<br>(2.7-6.6)                            | 11%<br>(8.3-15%)                     | 16%<br>(11-21%)                     | 2.8<br>(1.9-3.8)    | 200<br>(150-260)    |
| Barbados | 2010 | Male   | 35 to 39 | 68%<br>(51-82%)                | 32%<br>(18-49%)          | 4.3<br>(2.5-6.2)                            | 10%<br>(7.5-13%)                     | 15%<br>(10-19%)                     | 3.3<br>(2.3-4.4)    | 220<br>(160-280)    |
| Barbados | 2010 | Male   | 40 to 44 | 67%<br>(50-81%)                | 33%<br>(19-50%)          | 4<br>(2.4-5.9)                              | 10%<br>(7.2-13%)                     | 15%<br>(10-19%)                     | 3.9<br>(2.7-5)      | 220<br>(160-290)    |
| Barbados | 2010 | Male   | 45 to 49 | 65%<br>(44-80%)                | 35%<br>(20-56%)          | 3.7<br>(2.1-5.6)                            | 11%<br>(7.6-14%)                     | 14%<br>(10-18%)                     | 6.8<br>(4.7-8.9)    | 330<br>(230-420)    |
| Barbados | 2010 | Male   | 50 to 54 | 63%<br>(43-80%)                | 37%<br>(20-57%)          | 3.4<br>(2-5.2)                              | 10%<br>(6.9-13%)                     | 13%<br>(9.1-17%)                    | 8.2<br>(5.4-11)     | 340<br>(240-450)    |

| Location | Year | Sex    | Age      | Prevalence of current drinkers | Prevalence of abstainers | Population average of standard drinks daily | Percent of total attributable deaths | Percent of total attributable DALYs | Attributable deaths  | Attributable DALYs |
|----------|------|--------|----------|--------------------------------|--------------------------|---------------------------------------------|--------------------------------------|-------------------------------------|----------------------|--------------------|
| Barbados | 2010 | Male   | 55 to 59 | 61%<br>(42-78%)                | 39%<br>(22-58%)          | 3.1<br>(1.7-4.8)                            | 9.5%<br>(6.2-13%)                    | 12%<br>(8.2-17%)                    | 9<br>(5.9-12)        | 320<br>(220-440)   |
| Barbados | 2010 | Male   | 60 to 64 | 59%<br>(38-77%)                | 41%<br>(23-62%)          | 2.8<br>(1.5-4.5)                            | 8.2%<br>(4.8-11%)                    | 10%<br>(6-14%)                      | 9.5<br>(5.6-14)      | 290<br>(170-400)   |
| Barbados | 2010 | Male   | 65 to 69 | 57%<br>(37-75%)                | 43%<br>(25-63%)          | 2.5<br>(1.4-3.9)                            | 7.3%<br>(4.3-10%)                    | 9%<br>(5.4-13%)                     | 8.5<br>(5-12)        | 210<br>(130-310)   |
| Barbados | 2010 | Male   | 70 to 74 | 53%<br>(35-70%)                | 47%<br>(30-65%)          | 2<br>(1.1-3.5)                              | 5.5%<br>(2.8-8.7%)                   | 6.6%<br>(3.3-11%)                   | 8.1<br>(4.1-13)      | 160<br>(83-260)    |
| Barbados | 2010 | Male   | 75 to 79 | 48%<br>(29-67%)                | 52%<br>(33-71%)          | 1.7<br>(0.81-2.9)                           | 4.2%<br>(1.9-7.2%)                   | 5%<br>(2.2-8.5%)                    | 7.4<br>(3.2-13)      | 110<br>(49-190)    |
| Barbados | 2010 | Male   | 80 to 84 | 42%<br>(25-61%)                | 58%<br>(39-75%)          | 1.4<br>(0.7-2.3)                            | 3.5%<br>(1.6-5.9%)                   | 4%<br>(1.8-6.7%)                    | 6.5<br>(2.9-11)      | 73<br>(34-120)     |
| Barbados | 2010 | Male   | 85 to 89 | 38%<br>(22-55%)                | 62%<br>(45-78%)          | 1.2<br>(0.62-2.1)                           | 2.9%<br>(1.3-5.2%)                   | 3.3%<br>(1.4-5.9%)                  | 4.5<br>(1.9-8.1)     | 36<br>(16-64)      |
| Barbados | 2010 | Male   | 90 to 94 | 38%<br>(23-56%)                | 62%<br>(44-77%)          | 1.2<br>(0.59-2.2)                           | 2.7%<br>(1-5.3%)                     | 3%<br>(1-6%)                        | 2.4<br>(0.83-4.9)    | 13<br>(5-26)       |
| Barbados | 2010 | Male   | 95 plus  | 41%<br>(23-61%)                | 59%<br>(39-77%)          | 1.3<br>(0.53-2.6)                           | 2.9%<br>(0.86-6.2%)                  | 3.1%<br>(0.7-7.1%)                  | 0.84<br>(0.19-1.9)   | 3.2<br>(0.92-6.6)  |
| Barbados | 2016 | Female | All Ages | 30%<br>(24-36%)                | 70%<br>(64-76%)          | 1.2<br>(0.88-1.6)                           | 2.3%<br>(1.5-3.5%)                   | 2.6%<br>(1.2-4.3%)                  | 35<br>(17-61)        | 980<br>(600-1500)  |
| Barbados | 2016 | Female | 15 to 19 | 36%<br>(23-52%)                | 64%<br>(48-77%)          | 1.3<br>(0.64-2.3)                           | 1.9%<br>(1.1-3.1%)                   | 4.1%<br>(1.9-7.2%)                  | 0.16<br>(0.072-0.29) | 20<br>(11-32)      |
| Barbados | 2016 | Female | 20 to 24 | 41%<br>(26-58%)                | 59%<br>(42-74%)          | 2<br>(0.96-3.5)                             | 3.5%<br>(2.2-5.1%)                   | 5.7%<br>(3-9.4%)                    | 0.36<br>(0.18-0.62)  | 43<br>(26-63)      |
| Barbados | 2016 | Female | 25 to 29 | 41%<br>(25-58%)                | 59%<br>(42-75%)          | 2<br>(1-3.5)                                | 3.4%<br>(2.3-4.9%)                   | 5.5%<br>(3-8.5%)                    | 0.41<br>(0.22-0.67)  | 45<br>(29-65)      |
| Barbados | 2016 | Female | 30 to 34 | 39%<br>(24-57%)                | 61%<br>(43-76%)          | 2<br>(1-3.3)                                | 3.4%<br>(2.2-4.9%)                   | 5.7%<br>(3.4-8.8%)                  | 0.61<br>(0.36-0.98)  | 55<br>(35-80)      |
| Barbados | 2016 | Female | 35 to 39 | 39%<br>(24-56%)                | 61%<br>(44-76%)          | 1.8<br>(0.94-3.1)                           | 3.5%<br>(2.3-5.1%)                   | 6.1%<br>(3.7-9.2%)                  | 0.93<br>(0.56-1.4)   | 66<br>(42-97)      |
| Barbados | 2016 | Female | 40 to 44 | 37%<br>(24-56%)                | 63%<br>(44-76%)          | 1.7<br>(0.89-2.8)                           | 3.5%<br>(2.1-5.3%)                   | 6.2%<br>(3.8-9.4%)                  | 1.3<br>(0.77-2)      | 79<br>(49-120)     |
| Barbados | 2016 | Female | 45 to 49 | 35%<br>(21-52%)                | 65%<br>(48-79%)          | 1.6<br>(0.86-2.8)                           | 3.5%<br>(2-5.7%)                     | 5.9%<br>(3.6-9.6%)                  | 1.8<br>(1.1-3)       | 90<br>(53-150)     |
| Barbados | 2016 | Female | 50 to 54 | 32%<br>(19-47%)                | 68%<br>(53-81%)          | 1.4<br>(0.79-2.4)                           | 3.4%<br>(1.9-5.9%)                   | 5.6%<br>(3.2-9.2%)                  | 2.6<br>(1.5-4.4)     | 110<br>(61-190)    |
| Barbados | 2016 | Female | 55 to 59 | 28%<br>(17-44%)                | 72%<br>(56-83%)          | 1.2<br>(0.64-2.1)                           | 3%<br>(1.6-5.3%)                     | 4.8%<br>(2.7-8%)                    | 3.1<br>(1.7-5.1)     | 110<br>(59-190)    |
| Barbados | 2016 | Female | 60 to 64 | 25%<br>(15-39%)                | 75%<br>(61-85%)          | 1<br>(0.51-1.8)                             | 2.5%<br>(1-4.8%)                     | 3.7%<br>(1.7-6.7%)                  | 2.9<br>(1.4-5.4)     | 88<br>(37-170)     |
| Barbados | 2016 | Female | 65 to 69 | 23%<br>(14-35%)                | 77%<br>(65-86%)          | 0.91<br>(0.46-1.6)                          | 2.1%<br>(0.85-4.2%)                  | 3.1%<br>(1.4-5.7%)                  | 3.1<br>(1.4-5.8)     | 78<br>(31-150)     |
| Barbados | 2016 | Female | 70 to 74 | 21%<br>(13-33%)                | 79%<br>(67-87%)          | 0.77<br>(0.38-1.4)                          | 1.7%<br>(0.42-3.7%)                  | 2.5%<br>(0.72-5.1%)                 | 2.8<br>(0.82-5.8)    | 55<br>(13-120)     |

| Location | Year | Sex    | Age      | Prevalence of current drinkers | Prevalence of abstainers | Population average of standard drinks daily | Percent of total attributable deaths | Percent of total attributable DALYs | Attributable deaths  | Attributable DALYs  |
|----------|------|--------|----------|--------------------------------|--------------------------|---------------------------------------------|--------------------------------------|-------------------------------------|----------------------|---------------------|
| Barbados | 2016 | Female | 75 to 79 | 18%<br>(11-30%)                | 82%<br>(70-89%)          | 0.67<br>(0.31-1.2)                          | 1.4%<br>(0.21-3.4%)                  | 1.9%<br>(0.32-4.3%)                 | 3.1<br>(0.56-7.1)    | 47<br>(7-110)       |
| Barbados | 2016 | Female | 80 to 84 | 17%<br>(9.3-27%)               | 83%<br>(73-91%)          | 0.62<br>(0.3-1.1)                           | 1.4%<br>(0.26-3.1%)                  | 1.7%<br>(0.34-3.9%)                 | 3.6<br>(0.71-8.1)    | 40<br>(7.5-93)      |
| Barbados | 2016 | Female | 85 to 89 | 17%<br>(9.4-26%)               | 83%<br>(74-91%)          | 0.63<br>(0.29-1.2)                          | 1.4%<br>(0.27-3.2%)                  | 1.7%<br>(0.29-3.9%)                 | 3.7<br>(0.66-8.7)    | 29<br>(5.5-67)      |
| Barbados | 2016 | Female | 90 to 94 | 18%<br>(11-29%)                | 82%<br>(71-89%)          | 0.71<br>(0.3-1.4)                           | 1.6%<br>(0.22-3.9%)                  | 1.9%<br>(0.2-4.5%)                  | 3.3<br>(0.37-8.1)    | 18<br>(2.4-43)      |
| Barbados | 2016 | Female | 95 plus  | 22%<br>(11-37%)                | 78%<br>(63-89%)          | 0.86<br>(0.29-1.8)                          | 2%<br>(0.11-5.4%)                    | 2.2%<br>(-0.00055-6.2%)             | 1.6<br>(-0.0004-4.4) | 5.6<br>(0.29-15)    |
| Barbados | 2016 | Male   | All Ages | 55%<br>(47-63%)                | 45%<br>(37-53%)          | 2.8<br>(2.1-3.6)                            | 7.5%<br>(5.7-9.4%)                   | 7.5%<br>(5.2-9.9%)                  | 100<br>(68-130)      | 3200<br>(2400-4100) |
| Barbados | 2016 | Male   | 15 to 19 | 53%<br>(35-71%)                | 47%<br>(29-65%)          | 2<br>(0.93-3.4)                             | 5.3%<br>(3.3-8%)                     | 8.4%<br>(4.5-14%)                   | 0.61<br>(0.31-1)     | 61<br>(38-94)       |
| Barbados | 2016 | Male   | 20 to 24 | 64%<br>(45-79%)                | 36%<br>(21-55%)          | 3.8<br>(2-6.2)                              | 11%<br>(7.6-15%)                     | 16%<br>(9.2-23%)                    | 1.6<br>(0.92-2.4)    | 150<br>(97-210)     |
| Barbados | 2016 | Male   | 25 to 29 | 67%<br>(47-82%)                | 33%<br>(18-53%)          | 4.6<br>(2.5-7.1)                            | 12%<br>(8.7-16%)                     | 17%<br>(11-23%)                     | 2.3<br>(1.4-3.3)     | 190<br>(130-250)    |
| Barbados | 2016 | Male   | 30 to 34 | 68%<br>(48-83%)                | 32%<br>(17-52%)          | 4.8<br>(2.7-7.4)                            | 12%<br>(8.4-15%)                     | 17%<br>(11-22%)                     | 2.8<br>(1.8-3.8)     | 200<br>(140-260)    |
| Barbados | 2016 | Male   | 35 to 39 | 68%<br>(51-82%)                | 32%<br>(18-49%)          | 4.5<br>(2.5-7.2)                            | 11%<br>(7.7-14%)                     | 16%<br>(11-21%)                     | 3.1<br>(2-4.3)       | 200<br>(140-270)    |
| Barbados | 2016 | Male   | 40 to 44 | 67%<br>(49-81%)                | 33%<br>(19-51%)          | 4.3<br>(2.4-6.7)                            | 10%<br>(7.3-13%)                     | 15%<br>(10-20%)                     | 3.8<br>(2.6-5.2)     | 220<br>(160-290)    |
| Barbados | 2016 | Male   | 45 to 49 | 65%<br>(44-80%)                | 35%<br>(20-56%)          | 3.9<br>(2.3-6.3)                            | 11%<br>(7.8-14%)                     | 15%<br>(11-19%)                     | 6.4<br>(4.3-8.5)     | 310<br>(210-400)    |
| Barbados | 2016 | Male   | 50 to 54 | 63%<br>(44-80%)                | 37%<br>(20-56%)          | 3.6<br>(2-5.8)                              | 10%<br>(7-13%)                       | 14%<br>(9.4-18%)                    | 8.3<br>(5.5-11)      | 350<br>(230-460)    |
| Barbados | 2016 | Male   | 55 to 59 | 61%<br>(43-78%)                | 39%<br>(22-57%)          | 3.2<br>(1.8-5.3)                            | 9.7%<br>(6.3-13%)                    | 13%<br>(8.2-17%)                    | 11<br>(6.7-15)       | 380<br>(240-530)    |
| Barbados | 2016 | Male   | 60 to 64 | 59%<br>(38-77%)                | 41%<br>(23-62%)          | 2.9<br>(1.5-5)                              | 8.4%<br>(5.1-12%)                    | 11%<br>(6.4-15%)                    | 12<br>(6.9-17)       | 350<br>(210-500)    |
| Barbados | 2016 | Male   | 65 to 69 | 57%<br>(37-75%)                | 43%<br>(25-63%)          | 2.6<br>(1.4-4.3)                            | 7.4%<br>(4.3-11%)                    | 9.2%<br>(5.3-13%)                   | 12<br>(7-19)         | 310<br>(180-460)    |
| Barbados | 2016 | Male   | 70 to 74 | 53%<br>(35-71%)                | 47%<br>(29-65%)          | 2.1<br>(1.1-3.7)                            | 5.7%<br>(2.8-9%)                     | 6.9%<br>(3.4-11%)                   | 10<br>(5-16)         | 200<br>(100-320)    |
| Barbados | 2016 | Male   | 75 to 79 | 48%<br>(29-68%)                | 52%<br>(32-71%)          | 1.8<br>(0.85-3.2)                           | 4.5%<br>(2-7.7%)                     | 5.3%<br>(2.4-9%)                    | 8.8<br>(3.9-15)      | 140<br>(61-230)     |
| Barbados | 2016 | Male   | 80 to 84 | 42%<br>(25-61%)                | 58%<br>(39-75%)          | 1.5<br>(0.74-2.5)                           | 3.7%<br>(1.7-6.4%)                   | 4.2%<br>(1.9-7.3%)                  | 7.7<br>(3.5-13)      | 86<br>(40-150)      |
| Barbados | 2016 | Male   | 85 to 89 | 38%<br>(22-54%)                | 62%<br>(46-78%)          | 1.3<br>(0.61-2.2)                           | 3.1%<br>(1.4-5.6%)                   | 3.5%<br>(1.5-6.4%)                  | 5.2<br>(2.2-9.5)     | 42<br>(18-75)       |
| Barbados | 2016 | Male   | 90 to 94 | 38%<br>(24-54%)                | 62%<br>(46-76%)          | 1.3<br>(0.59-2.3)                           | 2.9%<br>(1-5.5%)                     | 3.1%<br>(1-6.2%)                    | 3<br>(0.99-6)        | 17<br>(6-32)        |

| Location | Year | Sex    | Age      | Prevalence of current drinkers | Prevalence of abstainers | Population average of standard drinks daily | Percent of total attributable deaths | Percent of total attributable DALYs | Attributable deaths   | Attributable DALYs  |
|----------|------|--------|----------|--------------------------------|--------------------------|---------------------------------------------|--------------------------------------|-------------------------------------|-----------------------|---------------------|
| Barbados | 2016 | Male   | 95 plus  | 41%<br>(22-61%)                | 59%<br>(39-78%)          | 1.4<br>(0.51-2.7)                           | 3.1%<br>(0.89-6.2%)                  | 3.3%<br>(0.75-7%)                   | 0.99<br>(0.22-2.2)    | 3.8<br>(1-7.7)      |
| Belize   | 1990 | Female | All Ages | 22%<br>(18-26%)                | 78%<br>(74-82%)          | 0.84<br>(0.69-1.1)                          | 1.5%<br>(1.2-2%)                     | 2.4%<br>(1.6-3.4%)                  | 11<br>(7.1-16)        | 430<br>(330-560)    |
| Belize   | 1990 | Female | 15 to 19 | 28%<br>(20-38%)                | 72%<br>(62-80%)          | 1.1<br>(0.63-1.8)                           | 2.1%<br>(1.3-3.3%)                   | 4.2%<br>(2.4-6.8%)                  | 0.27<br>(0.15-0.45)   | 29<br>(18-43)       |
| Belize   | 1990 | Female | 20 to 24 | 38%<br>(27-49%)                | 62%<br>(51-73%)          | 1.9<br>(1.1-2.8)                            | 3.9%<br>(2.7-5.5%)                   | 6.9%<br>(4.3-10%)                   | 0.5<br>(0.31-0.74)    | 51<br>(35-72)       |
| Belize   | 1990 | Female | 25 to 29 | 38%<br>(27-49%)                | 62%<br>(51-73%)          | 2<br>(1.2-2.9)                              | 4.1%<br>(3-5.5%)                     | 7%<br>(4.6-9.9%)                    | 0.54<br>(0.35-0.79)   | 51<br>(35-69)       |
| Belize   | 1990 | Female | 30 to 34 | 37%<br>(25-49%)                | 63%<br>(51-75%)          | 2<br>(1.2-3.1)                              | 4.1%<br>(2.9-5.6%)                   | 7.4%<br>(4.9-10%)                   | 0.5<br>(0.32-0.71)    | 39<br>(27-54)       |
| Belize   | 1990 | Female | 35 to 39 | 36%<br>(24-47%)                | 64%<br>(53-76%)          | 1.8<br>(1-3)                                | 4.2%<br>(2.9-6%)                     | 7.6%<br>(5-11%)                     | 0.56<br>(0.36-0.81)   | 36<br>(24-51)       |
| Belize   | 1990 | Female | 40 to 44 | 34%<br>(23-44%)                | 66%<br>(56-77%)          | 1.6<br>(0.89-2.6)                           | 4.3%<br>(2.8-6.2%)                   | 7.6%<br>(4.9-11%)                   | 0.6<br>(0.37-0.87)    | 33<br>(21-47)       |
| Belize   | 1990 | Female | 45 to 49 | 31%<br>(20-41%)                | 69%<br>(59-80%)          | 1.6<br>(0.82-2.6)                           | 4.3%<br>(2.6-6.6%)                   | 7.1%<br>(4.3-11%)                   | 0.63<br>(0.37-0.96)   | 29<br>(17-45)       |
| Belize   | 1990 | Female | 50 to 54 | 27%<br>(19-37%)                | 73%<br>(63-81%)          | 1.4<br>(0.75-2.4)                           | 4.4%<br>(2.5-7%)                     | 6.8%<br>(3.8-11%)                   | 0.86<br>(0.48-1.3)    | 34<br>(19-54)       |
| Belize   | 1990 | Female | 55 to 59 | 23%<br>(15-32%)                | 77%<br>(68-85%)          | 1.1<br>(0.58-1.9)                           | 3.9%<br>(2.2-6.4%)                   | 5.8%<br>(3.3-9.3%)                  | 0.95<br>(0.52-1.6)    | 32<br>(18-54)       |
| Belize   | 1990 | Female | 60 to 64 | 19%<br>(12-28%)                | 81%<br>(72-88%)          | 0.9<br>(0.45-1.6)                           | 3.1%<br>(1.5-5.4%)                   | 4.3%<br>(2.2-7.4%)                  | 0.95<br>(0.47-1.7)    | 27<br>(13-49)       |
| Belize   | 1990 | Female | 65 to 69 | 18%<br>(12-25%)                | 82%<br>(75-88%)          | 0.77<br>(0.4-1.3)                           | 2.6%<br>(1.3-4.5%)                   | 3.5%<br>(1.8-5.9%)                  | 0.9<br>(0.44-1.5)     | 21<br>(10-36)       |
| Belize   | 1990 | Female | 70 to 74 | 16%<br>(10-22%)                | 84%<br>(78-90%)          | 0.62<br>(0.32-1.1)                          | 2.1%<br>(0.91-4%)                    | 2.8%<br>(1.2-5.2%)                  | 0.88<br>(0.38-1.7)    | 16<br>(6.9-32)      |
| Belize   | 1990 | Female | 75 to 79 | 13%<br>(8.4-20%)               | 87%<br>(80-92%)          | 0.53<br>(0.25-0.95)                         | 1.6%<br>(0.59-3.3%)                  | 2.1%<br>(0.74-4.1%)                 | 0.79<br>(0.28-1.6)    | 11<br>(4-24)        |
| Belize   | 1990 | Female | 80 to 84 | 12%<br>(7.6-17%)               | 88%<br>(83-92%)          | 0.5<br>(0.26-0.85)                          | 1.5%<br>(0.57-2.8%)                  | 1.8%<br>(0.69-3.4%)                 | 0.82<br>(0.3-1.6)     | 8.8<br>(3.3-17)     |
| Belize   | 1990 | Female | 85 to 89 | 13%<br>(7.5-19%)               | 87%<br>(81-92%)          | 0.52<br>(0.26-0.92)                         | 1.4%<br>(0.5-2.9%)                   | 1.7%<br>(0.58-3.5%)                 | 0.61<br>(0.21-1.2)    | 4.7<br>(1.6-9.4)    |
| Belize   | 1990 | Female | 90 to 94 | 15%<br>(9.1-22%)               | 85%<br>(78-91%)          | 0.61<br>(0.28-1.2)                          | 1.6%<br>(0.4-3.7%)                   | 1.8%<br>(0.4-4.4%)                  | 0.42<br>(0.096-1)     | 2.2<br>(0.57-5.3)   |
| Belize   | 1990 | Female | 95 plus  | 18%<br>(9.5-30%)               | 82%<br>(70-90%)          | 0.75<br>(0.28-1.5)                          | 1.8%<br>(0.15-4.7%)                  | 2%<br>(0.044-5.4%)                  | 0.17<br>(0.0039-0.47) | 0.62<br>(0.052-1.6) |
| Belize   | 1990 | Male   | All Ages | 46%<br>(39-54%)                | 54%<br>(46-61%)          | 2.1<br>(1.8-2.5)                            | 5.2%<br>(4.2-6.3%)                   | 7.3%<br>(5.5-9.4%)                  | 42<br>(32-54)         | 1700<br>(1400-2100) |
| Belize   | 1990 | Male   | 15 to 19 | 50%<br>(38-61%)                | 50%<br>(39-62%)          | 1.9<br>(1.1-2.9)                            | 5.9%<br>(3.9-8.3%)                   | 8.4%<br>(5.1-13%)                   | 1<br>(0.63-1.6)       | 93<br>(61-130)      |
| Belize   | 1990 | Male   | 20 to 24 | 63%<br>(51-73%)                | 37%<br>(27-49%)          | 4<br>(2.7-5.8)                              | 13%<br>(9.2-17%)                     | 16%<br>(11-23%)                     | 2.6<br>(1.7-3.7)      | 220<br>(150-290)    |



| Location | Year | Sex    | Age      | Prevalence of current drinkers | Prevalence of abstainers | Population average of standard drinks daily | Percent of total attributable deaths | Percent of total attributable DALYs | Attributable deaths  | Attributable DALYs |
|----------|------|--------|----------|--------------------------------|--------------------------|---------------------------------------------|--------------------------------------|-------------------------------------|----------------------|--------------------|
| Belize   | 1990 | Male   | 25 to 29 | 70%<br>(58-79%)                | 30%<br>(21-42%)          | 5.1<br>(3.4-7.1)                            | 15%<br>(11-19%)                      | 19%<br>(14-25%)                     | 3.3<br>(2.2-4.5)     | 240<br>(170-320)   |
| Belize   | 1990 | Male   | 30 to 34 | 74%<br>(62-83%)                | 26%<br>(17-38%)          | 5.2<br>(3.4-7.3)                            | 15%<br>(11-18%)                      | 20%<br>(14-25%)                     | 2.9<br>(1.9-3.8)     | 190<br>(140-240)   |
| Belize   | 1990 | Male   | 35 to 39 | 75%<br>(64-84%)                | 25%<br>(16-36%)          | 4.9<br>(3-7.4)                              | 14%<br>(11-18%)                      | 20%<br>(14-25%)                     | 2.7<br>(1.8-3.6)     | 160<br>(110-210)   |
| Belize   | 1990 | Male   | 40 to 44 | 73%<br>(62-82%)                | 27%<br>(18-38%)          | 4.9<br>(2.8-7.5)                            | 14%<br>(10-18%)                      | 19%<br>(14-25%)                     | 2.6<br>(1.7-3.4)     | 140<br>(94-170)    |
| Belize   | 1990 | Male   | 45 to 49 | 70%<br>(55-80%)                | 30%<br>(20-45%)          | 4.5<br>(2.5-7.3)                            | 14%<br>(9.7-17%)                     | 18%<br>(13-23%)                     | 2.5<br>(1.7-3.3)     | 110<br>(79-150)    |
| Belize   | 1990 | Male   | 50 to 54 | 68%<br>(56-78%)                | 32%<br>(22-44%)          | 4<br>(2.3-6.4)                              | 13%<br>(8.5-16%)                     | 16%<br>(11-21%)                     | 3<br>(1.9-4.1)       | 120<br>(80-160)    |
| Belize   | 1990 | Male   | 55 to 59 | 67%<br>(54-78%)                | 33%<br>(22-46%)          | 3.7<br>(2.1-6)                              | 12%<br>(7.8-16%)                     | 15%<br>(9.6-20%)                    | 3.5<br>(2.2-4.9)     | 120<br>(78-170)    |
| Belize   | 1990 | Male   | 60 to 64 | 65%<br>(50-77%)                | 35%<br>(23-50%)          | 3.4<br>(1.8-5.7)                            | 10%<br>(6.2-15%)                     | 13%<br>(7.6-18%)                    | 4.1<br>(2.5-6)       | 120<br>(72-170)    |
| Belize   | 1990 | Male   | 65 to 69 | 62%<br>(49-74%)                | 38%<br>(26-51%)          | 2.9<br>(1.6-4.6)                            | 9%<br>(5.3-13%)                      | 11%<br>(6.4-16%)                    | 3.6<br>(2.1-5.4)     | 86<br>(51-130)     |
| Belize   | 1990 | Male   | 70 to 74 | 58%<br>(45-70%)                | 42%<br>(30-55%)          | 2.3<br>(1.2-3.9)                            | 6.9%<br>(3.5-11%)                    | 8.2%<br>(4.1-13%)                   | 3.2<br>(1.6-5.2)     | 62<br>(31-100)     |
| Belize   | 1990 | Male   | 75 to 79 | 54%<br>(39-69%)                | 46%<br>(31-61%)          | 1.9<br>(0.95-3.2)                           | 5.4%<br>(2.4-9.3%)                   | 6.3%<br>(2.7-11%)                   | 2.6<br>(1.1-4.4)     | 39<br>(17-66)      |
| Belize   | 1990 | Male   | 80 to 84 | 47%<br>(32-61%)                | 53%<br>(39-68%)          | 1.6<br>(0.83-2.6)                           | 4.5%<br>(1.9-8%)                     | 5.2%<br>(2.1-9.3%)                  | 2.3<br>(0.93-4)      | 25<br>(11-43)      |
| Belize   | 1990 | Male   | 85 to 89 | 39%<br>(26-54%)                | 61%<br>(46-74%)          | 1.4<br>(0.7-2.4)                            | 3.8%<br>(1.7-7.1%)                   | 4.3%<br>(1.8-8.1%)                  | 1.4<br>(0.56-2.6)    | 11<br>(4.6-20)     |
| Belize   | 1990 | Male   | 90 to 94 | 38%<br>(24-51%)                | 62%<br>(49-76%)          | 1.3<br>(0.65-2.3)                           | 3.3%<br>(1.3-6.6%)                   | 3.7%<br>(1.3-7.5%)                  | 0.71<br>(0.25-1.4)   | 3.8<br>(1.4-7.4)   |
| Belize   | 1990 | Male   | 95 plus  | 39%<br>(23-56%)                | 61%<br>(44-77%)          | 1.4<br>(0.57-2.7)                           | 3.4%<br>(0.91-7.3%)                  | 3.6%<br>(0.75-8.2%)                 | 0.21<br>(0.041-0.46) | 0.76<br>(0.2-1.6)  |
| Belize   | 1995 | Female | All Ages | 23%<br>(19-27%)                | 77%<br>(73-81%)          | 0.84<br>(0.67-1)                            | 1.8%<br>(1.4-2.3%)                   | 2.5%<br>(1.7-3.6%)                  | 12<br>(7.7-17)       | 480<br>(360-620)   |
| Belize   | 1995 | Female | 15 to 19 | 29%<br>(20-39%)                | 71%<br>(61-80%)          | 1.1<br>(0.58-1.7)                           | 2%<br>(1.2-3%)                       | 3.9%<br>(2.1-6.2%)                  | 0.26<br>(0.14-0.42)  | 28<br>(17-43)      |
| Belize   | 1995 | Female | 20 to 24 | 38%<br>(27-50%)                | 62%<br>(50-73%)          | 1.8<br>(1.1-2.7)                            | 3.8%<br>(2.5-5.4%)                   | 6.1%<br>(3.8-9.2%)                  | 0.5<br>(0.3-0.76)    | 51<br>(34-73)      |
| Belize   | 1995 | Female | 25 to 29 | 38%<br>(27-50%)                | 62%<br>(50-73%)          | 1.9<br>(1.2-2.8)                            | 4%<br>(2.8-5.4%)                     | 6.1%<br>(4-8.6%)                    | 0.55<br>(0.36-0.8)   | 50<br>(35-68)      |
| Belize   | 1995 | Female | 30 to 34 | 37%<br>(26-50%)                | 63%<br>(50-74%)          | 1.9<br>(1.1-2.9)                            | 3.8%<br>(2.7-5.1%)                   | 6.3%<br>(4.3-8.7%)                  | 0.66<br>(0.44-0.94)  | 53<br>(37-72)      |
| Belize   | 1995 | Female | 35 to 39 | 36%<br>(24-47%)                | 64%<br>(53-76%)          | 1.7<br>(1-2.7)                              | 3.6%<br>(2.5-5.1%)                   | 6.5%<br>(4.5-9.2%)                  | 0.57<br>(0.38-0.82)  | 39<br>(26-54)      |
| Belize   | 1995 | Female | 40 to 44 | 34%<br>(23-46%)                | 66%<br>(54-77%)          | 1.5<br>(0.85-2.5)                           | 4.2%<br>(2.7-6.1%)                   | 6.8%<br>(4.3-9.8%)                  | 0.9<br>(0.55-1.3)    | 48<br>(31-69)      |

| Location | Year | Sex    | Age      | Prevalence of current drinkers | Prevalence of abstainers | Population average of standard drinks daily | Percent of total attributable deaths | Percent of total attributable DALYs | Attributable deaths    | Attributable DALYs  |
|----------|------|--------|----------|--------------------------------|--------------------------|---------------------------------------------|--------------------------------------|-------------------------------------|------------------------|---------------------|
| Belize   | 1995 | Female | 45 to 49 | 31%<br>(20-42%)                | 69%<br>(58-80%)          | 1.5<br>(0.79-2.5)                           | 4.1%<br>(2.4-6.4%)                   | 6.4%<br>(3.8-10%)                   | 0.86<br>(0.5-1.4)      | 40<br>(23-64)       |
| Belize   | 1995 | Female | 50 to 54 | 27%<br>(19-37%)                | 73%<br>(63-81%)          | 1.3<br>(0.71-2.2)                           | 4.2%<br>(2.2-6.8%)                   | 6.2%<br>(3.3-9.8%)                  | 0.92<br>(0.49-1.5)     | 36<br>(19-58)       |
| Belize   | 1995 | Female | 55 to 59 | 23%<br>(15-32%)                | 77%<br>(68-85%)          | 1.1<br>(0.55-1.8)                           | 3.7%<br>(1.9-6%)                     | 5.2%<br>(2.8-8.4%)                  | 1.1<br>(0.56-1.7)      | 35<br>(19-59)       |
| Belize   | 1995 | Female | 60 to 64 | 20%<br>(13-29%)                | 80%<br>(71-87%)          | 0.86<br>(0.43-1.5)                          | 3%<br>(1.4-5.3%)                     | 4%<br>(1.9-7%)                      | 1.1<br>(0.5-1.9)       | 30<br>(14-54)       |
| Belize   | 1995 | Female | 65 to 69 | 18%<br>(11-25%)                | 82%<br>(75-89%)          | 0.72<br>(0.38-1.2)                          | 2.3%<br>(1-4.1%)                     | 3%<br>(1.4-5.3%)                    | 1.1<br>(0.48-1.8)      | 25<br>(11-44)       |
| Belize   | 1995 | Female | 70 to 74 | 16%<br>(10-22%)                | 84%<br>(78-90%)          | 0.58<br>(0.3-1)                             | 1.9%<br>(0.7-3.7%)                   | 2.4%<br>(0.97-4.6%)                 | 0.92<br>(0.37-1.7)     | 17<br>(6.7-33)      |
| Belize   | 1995 | Female | 75 to 79 | 13%<br>(8.5-20%)               | 87%<br>(80-91%)          | 0.5<br>(0.24-0.88)                          | 1.4%<br>(0.44-2.9%)                  | 1.8%<br>(0.55-3.6%)                 | 0.67<br>(0.21-1.4)     | 9.8<br>(3-20)       |
| Belize   | 1995 | Female | 80 to 84 | 12%<br>(7.7-18%)               | 88%<br>(82-92%)          | 0.47<br>(0.24-0.79)                         | 1.3%<br>(0.46-2.5%)                  | 1.6%<br>(0.57-3.1%)                 | 0.78<br>(0.29-1.5)     | 8.4<br>(3.1-16)     |
| Belize   | 1995 | Female | 85 to 89 | 13%<br>(7.6-19%)               | 87%<br>(81-92%)          | 0.49<br>(0.24-0.88)                         | 1.3%<br>(0.41-2.6%)                  | 1.5%<br>(0.49-3.1%)                 | 0.67<br>(0.22-1.4)     | 5.2<br>(1.7-11)     |
| Belize   | 1995 | Female | 90 to 94 | 15%<br>(9.2-23%)               | 85%<br>(77-91%)          | 0.59<br>(0.26-1.1)                          | 1.4%<br>(0.31-3.3%)                  | 1.6%<br>(0.3-4%)                    | 0.37<br>(0.068-0.92)   | 2<br>(0.43-4.7)     |
| Belize   | 1995 | Female | 95 plus  | 19%<br>(9.7-30%)               | 81%<br>(70-90%)          | 0.73<br>(0.26-1.4)                          | 1.6%<br>(0.072-4.3%)                 | 1.8%<br>(-0.055-5%)                 | 0.17<br>(-0.0053-0.49) | 0.62<br>(0.028-1.7) |
| Belize   | 1995 | Male   | All Ages | 48%<br>(41-55%)                | 52%<br>(45-59%)          | 2.1<br>(1.8-2.5)                            | 6.6%<br>(5.2-8.1%)                   | 8.2%<br>(6-11%)                     | 55<br>(41-72)          | 2200<br>(1800-2800) |
| Belize   | 1995 | Male   | 15 to 19 | 50%<br>(38-61%)                | 50%<br>(39-62%)          | 1.8<br>(0.99-2.8)                           | 6.1%<br>(4-8.8%)                     | 8.2%<br>(5-13%)                     | 1.4<br>(0.77-2.1)      | 120<br>(75-170)     |
| Belize   | 1995 | Male   | 20 to 24 | 63%<br>(51-74%)                | 37%<br>(26-49%)          | 3.8<br>(2.4-5.4)                            | 13%<br>(9.2-18%)                     | 16%<br>(10-23%)                     | 3.3<br>(2.1-4.9)       | 270<br>(180-370)    |
| Belize   | 1995 | Male   | 25 to 29 | 70%<br>(58-79%)                | 30%<br>(21-42%)          | 4.8<br>(3.2-6.8)                            | 15%<br>(11-19%)                      | 19%<br>(13-25%)                     | 3.5<br>(2.3-4.9)       | 260<br>(180-340)    |
| Belize   | 1995 | Male   | 30 to 34 | 74%<br>(62-83%)                | 26%<br>(17-38%)          | 4.9<br>(3.2-6.8)                            | 14%<br>(10-17%)                      | 18%<br>(13-23%)                     | 4<br>(2.7-5.5)         | 270<br>(190-350)    |
| Belize   | 1995 | Male   | 35 to 39 | 75%<br>(64-84%)                | 25%<br>(16-36%)          | 4.6<br>(2.9-6.7)                            | 14%<br>(9.9-17%)                     | 18%<br>(12-23%)                     | 3.7<br>(2.4-5)         | 220<br>(150-290)    |
| Belize   | 1995 | Male   | 40 to 44 | 74%<br>(63-82%)                | 26%<br>(18-37%)          | 4.5<br>(2.6-6.8)                            | 14%<br>(9.6-17%)                     | 18%<br>(12-23%)                     | 3.5<br>(2.4-4.8)       | 190<br>(130-250)    |
| Belize   | 1995 | Male   | 45 to 49 | 70%<br>(57-79%)                | 30%<br>(21-43%)          | 4.2<br>(2.4-6.6)                            | 13%<br>(9.3-17%)                     | 17%<br>(11-22%)                     | 3.7<br>(2.4-4.8)       | 170<br>(120-220)    |
| Belize   | 1995 | Male   | 50 to 54 | 68%<br>(56-78%)                | 32%<br>(22-44%)          | 3.8<br>(2.1-6.1)                            | 12%<br>(8-16%)                       | 15%<br>(9.8-20%)                    | 3.6<br>(2.3-4.8)       | 140<br>(92-190)     |
| Belize   | 1995 | Male   | 55 to 59 | 67%<br>(55-78%)                | 33%<br>(22-45%)          | 3.5<br>(1.9-5.6)                            | 11%<br>(7.3-16%)                     | 14%<br>(8.6-19%)                    | 4.5<br>(2.8-6.4)       | 150<br>(95-210)     |
| Belize   | 1995 | Male   | 60 to 64 | 65%<br>(51-76%)                | 35%<br>(24-49%)          | 3.1<br>(1.7-5.4)                            | 9.9%<br>(5.7-15%)                    | 12%<br>(6.6-17%)                    | 4.7<br>(2.7-7)         | 130<br>(78-200)     |

| Location | Year | Sex    | Age      | Prevalence of current drinkers | Prevalence of abstainers | Population average of standard drinks daily | Percent of total attributable deaths | Percent of total attributable DALYs | Attributable deaths  | Attributable DALYs |
|----------|------|--------|----------|--------------------------------|--------------------------|---------------------------------------------|--------------------------------------|-------------------------------------|----------------------|--------------------|
| Belize   | 1995 | Male   | 65 to 69 | 62%<br>(49-74%)                | 38%<br>(26-51%)          | 2.7<br>(1.6-4.3)                            | 8.6%<br>(4.8-13%)                    | 9.9%<br>(5.5-15%)                   | 6<br>(3.4-9.2)       | 140<br>(81-210)    |
| Belize   | 1995 | Male   | 70 to 74 | 58%<br>(46-71%)                | 42%<br>(29-54%)          | 2.2<br>(1.2-3.6)                            | 6.7%<br>(3.2-11%)                    | 7.6%<br>(3.5-12%)                   | 4.6<br>(2.1-7.5)     | 86<br>(40-140)     |
| Belize   | 1995 | Male   | 75 to 79 | 54%<br>(39-69%)                | 46%<br>(31-61%)          | 1.8<br>(0.88-3)                             | 5.3%<br>(2.1-9.3%)                   | 5.9%<br>(2.3-10%)                   | 3.4<br>(1.4-6.1)     | 50<br>(20-87)      |
| Belize   | 1995 | Male   | 80 to 84 | 47%<br>(32-61%)                | 53%<br>(39-68%)          | 1.5<br>(0.75-2.5)                           | 4.2%<br>(1.6-7.6%)                   | 4.6%<br>(1.7-8.7%)                  | 2.9<br>(1.1-5.2)     | 31<br>(12-57)      |
| Belize   | 1995 | Male   | 85 to 89 | 39%<br>(27-54%)                | 61%<br>(46-73%)          | 1.3<br>(0.64-2.2)                           | 3.4%<br>(1.4-6.6%)                   | 3.8%<br>(1.4-7.5%)                  | 1.7<br>(0.65-3.3)    | 13<br>(5.3-25)     |
| Belize   | 1995 | Male   | 90 to 94 | 38%<br>(25-51%)                | 62%<br>(49-75%)          | 1.2<br>(0.59-2.2)                           | 2.9%<br>(1-6.1%)                     | 3.2%<br>(0.97-6.8%)                 | 0.62<br>(0.19-1.3)   | 3.4<br>(1.2-7)     |
| Belize   | 1995 | Male   | 95 plus  | 39%<br>(23-57%)                | 61%<br>(43-77%)          | 1.3<br>(0.53-2.5)                           | 3%<br>(0.79-6.7%)                    | 3.2%<br>(0.59-7.5%)                 | 0.22<br>(0.042-0.53) | 0.83<br>(0.22-1.9) |
| Belize   | 2000 | Female | All Ages | 21%<br>(18-25%)                | 79%<br>(75-82%)          | 0.74<br>(0.6-0.9)                           | 1.7%<br>(1.3-2.2%)                   | 2.2%<br>(1.5-3.2%)                  | 13<br>(8.6-19)       | 540<br>(420-700)   |
| Belize   | 2000 | Female | 15 to 19 | 24%<br>(17-33%)                | 76%<br>(67-83%)          | 0.82<br>(0.46-1.3)                          | 1.7%<br>(1.1-2.6%)                   | 3%<br>(1.7-4.8%)                    | 0.28<br>(0.15-0.46)  | 31<br>(20-47)      |
| Belize   | 2000 | Female | 20 to 24 | 33%<br>(25-42%)                | 67%<br>(58-75%)          | 1.4<br>(0.91-2.2)                           | 3.1%<br>(2.2-4.3%)                   | 4.4%<br>(2.7-6.6%)                  | 0.51<br>(0.31-0.75)  | 56<br>(39-79)      |
| Belize   | 2000 | Female | 25 to 29 | 36%<br>(28-44%)                | 64%<br>(56-72%)          | 1.7<br>(1.1-2.3)                            | 3.3%<br>(2.4-4.5%)                   | 4.5%<br>(3.1-6.4%)                  | 0.65<br>(0.43-0.95)  | 62<br>(44-85)      |
| Belize   | 2000 | Female | 30 to 34 | 34%<br>(26-43%)                | 66%<br>(57-74%)          | 1.7<br>(1.1-2.4)                            | 3.3%<br>(2.4-4.5%)                   | 4.7%<br>(3.3-6.6%)                  | 0.71<br>(0.47-1.1)   | 57<br>(40-80)      |
| Belize   | 2000 | Female | 35 to 39 | 32%<br>(24-41%)                | 68%<br>(59-76%)          | 1.4<br>(0.86-2.2)                           | 3.4%<br>(2.4-4.7%)                   | 5.2%<br>(3.7-7.1%)                  | 0.87<br>(0.59-1.3)   | 57<br>(39-80)      |
| Belize   | 2000 | Female | 40 to 44 | 30%<br>(23-39%)                | 70%<br>(61-77%)          | 1.3<br>(0.75-2)                             | 3.5%<br>(2.3-5.1%)                   | 5.4%<br>(3.6-7.6%)                  | 0.95<br>(0.62-1.4)   | 51<br>(34-73)      |
| Belize   | 2000 | Female | 45 to 49 | 28%<br>(20-36%)                | 72%<br>(64-80%)          | 1.2<br>(0.69-2)                             | 3.5%<br>(2.1-5.3%)                   | 5.1%<br>(3.2-7.9%)                  | 1<br>(0.63-1.6)      | 48<br>(29-72)      |
| Belize   | 2000 | Female | 50 to 54 | 23%<br>(16-31%)                | 77%<br>(69-84%)          | 1<br>(0.55-1.7)                             | 3.5%<br>(2-5.6%)                     | 5%<br>(2.8-7.8%)                    | 1.1<br>(0.61-1.8)    | 44<br>(23-69)      |
| Belize   | 2000 | Female | 55 to 59 | 19%<br>(13-26%)                | 81%<br>(74-87%)          | 0.8<br>(0.43-1.4)                           | 3.1%<br>(1.7-5.1%)                   | 4.2%<br>(2.4-6.7%)                  | 1<br>(0.59-1.7)      | 35<br>(19-57)      |
| Belize   | 2000 | Female | 60 to 64 | 16%<br>(11-23%)                | 84%<br>(77-89%)          | 0.66<br>(0.34-1.2)                          | 2.5%<br>(1.1-4.3%)                   | 3.1%<br>(1.5-5.5%)                  | 1.1<br>(0.52-1.9)    | 31<br>(14-55)      |
| Belize   | 2000 | Female | 65 to 69 | 15%<br>(9.6-21%)               | 85%<br>(79-90%)          | 0.56<br>(0.3-0.93)                          | 2%<br>(0.9-3.5%)                     | 2.5%<br>(1.2-4.4%)                  | 1.1<br>(0.51-1.9)    | 25<br>(12-45)      |
| Belize   | 2000 | Female | 70 to 74 | 13%<br>(8.7-19%)               | 87%<br>(81-91%)          | 0.47<br>(0.24-0.82)                         | 1.5%<br>(0.58-3%)                    | 1.9%<br>(0.75-3.8%)                 | 1<br>(0.39-2)        | 19<br>(6.9-37)     |
| Belize   | 2000 | Female | 75 to 79 | 12%<br>(7.7-18%)               | 88%<br>(82-92%)          | 0.42<br>(0.2-0.75)                          | 1.2%<br>(0.33-2.6%)                  | 1.5%<br>(0.41-3.1%)                 | 0.76<br>(0.21-1.6)   | 11<br>(3-23)       |
| Belize   | 2000 | Female | 80 to 84 | 12%<br>(7.5-17%)               | 88%<br>(83-93%)          | 0.42<br>(0.22-0.71)                         | 1.2%<br>(0.37-2.3%)                  | 1.4%<br>(0.43-2.7%)                 | 0.74<br>(0.23-1.5)   | 7.9<br>(2.5-15)    |

| Location | Year | Sex    | Age      | Prevalence of current drinkers | Prevalence of abstainers | Population average of standard drinks daily | Percent of total attributable deaths | Percent of total attributable DALYs | Attributable deaths   | Attributable DALYs  |
|----------|------|--------|----------|--------------------------------|--------------------------|---------------------------------------------|--------------------------------------|-------------------------------------|-----------------------|---------------------|
| Belize   | 2000 | Female | 85 to 89 | 13%<br>(7.5-18%)               | 87%<br>(82-93%)          | 0.45<br>(0.22-0.8)                          | 1.1%<br>(0.32-2.4%)                  | 1.3%<br>(0.35-2.7%)                 | 0.64<br>(0.17-1.4)    | 4.9<br>(1.3-10)     |
| Belize   | 2000 | Female | 90 to 94 | 15%<br>(8.9-22%)               | 85%<br>(78-91%)          | 0.53<br>(0.25-1)                            | 1.2%<br>(0.24-3.1%)                  | 1.4%<br>(0.22-3.6%)                 | 0.39<br>(0.063-1)     | 2.1<br>(0.41-5.1)   |
| Belize   | 2000 | Female | 95 plus  | 18%<br>(9.6-30%)               | 82%<br>(70-90%)          | 0.65<br>(0.25-1.4)                          | 1.4%<br>(0.027-4%)                   | 1.5%<br>(-0.11-4.6%)                | 0.14<br>(-0.011-0.42) | 0.5<br>(0.0099-1.5) |
| Belize   | 2000 | Male   | All Ages | 52%<br>(46-58%)                | 48%<br>(42-54%)          | 2.3<br>(1.9-2.7)                            | 7.5%<br>(6-9.1%)                     | 8.6%<br>(6.5-11%)                   | 74<br>(55-94)         | 3200<br>(2500-3900) |
| Belize   | 2000 | Male   | 15 to 19 | 52%<br>(44-59%)                | 48%<br>(41-56%)          | 1.8<br>(1.1-2.6)                            | 6.5%<br>(4.4-9.2%)                   | 8.4%<br>(5.4-12%)                   | 2.2<br>(1.3-3.4)      | 180<br>(120-270)    |
| Belize   | 2000 | Male   | 20 to 24 | 68%<br>(61-74%)                | 32%<br>(26-39%)          | 3.9<br>(2.7-5.4)                            | 14%<br>(10-19%)                      | 17%<br>(12-23%)                     | 5.8<br>(3.8-8.4)      | 440<br>(300-600)    |
| Belize   | 2000 | Male   | 25 to 29 | 76%<br>(70-80%)                | 24%<br>(20-30%)          | 5<br>(3.5-6.8)                              | 16%<br>(12-20%)                      | 19%<br>(14-25%)                     | 6.6<br>(4.6-9)        | 460<br>(330-620)    |
| Belize   | 2000 | Male   | 30 to 34 | 77%<br>(71-82%)                | 23%<br>(18-29%)          | 4.9<br>(3.5-6.6)                            | 13%<br>(10-17%)                      | 16%<br>(12-21%)                     | 5.4<br>(3.8-7.2)      | 350<br>(250-460)    |
| Belize   | 2000 | Male   | 35 to 39 | 78%<br>(72-83%)                | 22%<br>(17-28%)          | 4.6<br>(3.1-6.6)                            | 15%<br>(11-19%)                      | 18%<br>(13-24%)                     | 6.1<br>(4.2-8.2)      | 350<br>(250-450)    |
| Belize   | 2000 | Male   | 40 to 44 | 77%<br>(72-83%)                | 23%<br>(17-28%)          | 4.7<br>(2.9-6.9)                            | 14%<br>(10-18%)                      | 17%<br>(12-22%)                     | 5.8<br>(3.9-7.7)      | 300<br>(200-390)    |
| Belize   | 2000 | Male   | 45 to 49 | 73%<br>(67-79%)                | 27%<br>(21-33%)          | 4.2<br>(2.6-6.3)                            | 13%<br>(9.1-17%)                     | 16%<br>(11-21%)                     | 5.3<br>(3.4-7)        | 240<br>(160-310)    |
| Belize   | 2000 | Male   | 50 to 54 | 71%<br>(64-77%)                | 29%<br>(23-36%)          | 3.8<br>(2.1-5.8)                            | 12%<br>(8.2-16%)                     | 15%<br>(9.4-19%)                    | 5.3<br>(3.4-7.2)      | 210<br>(130-280)    |
| Belize   | 2000 | Male   | 55 to 59 | 70%<br>(62-77%)                | 30%<br>(23-38%)          | 3.5<br>(2.1-5.6)                            | 11%<br>(7.1-16%)                     | 13%<br>(8.2-19%)                    | 5.1<br>(3.1-7.2)      | 170<br>(110-240)    |
| Belize   | 2000 | Male   | 60 to 64 | 68%<br>(59-77%)                | 32%<br>(23-41%)          | 3.2<br>(1.9-5.3)                            | 9.9%<br>(5.7-14%)                    | 11%<br>(6.4-17%)                    | 5.9<br>(3.4-9)        | 170<br>(97-250)     |
| Belize   | 2000 | Male   | 65 to 69 | 64%<br>(54-72%)                | 36%<br>(28-46%)          | 2.6<br>(1.7-4)                              | 8.2%<br>(4.6-12%)                    | 9.3%<br>(5.1-14%)                   | 5.9<br>(3.3-9.1)      | 140<br>(78-210)     |
| Belize   | 2000 | Male   | 70 to 74 | 57%<br>(47-67%)                | 43%<br>(33-53%)          | 1.9<br>(1.1-3.1)                            | 5.9%<br>(2.8-9.9%)                   | 6.6%<br>(3.1-11%)                   | 5.4<br>(2.4-9.2)      | 100<br>(47-170)     |
| Belize   | 2000 | Male   | 75 to 79 | 54%<br>(41-66%)                | 46%<br>(34-59%)          | 1.6<br>(0.83-2.6)                           | 4.7%<br>(2-8.1%)                     | 5.2%<br>(2.1-9%)                    | 3.8<br>(1.6-6.6)      | 56<br>(23-95)       |
| Belize   | 2000 | Male   | 80 to 84 | 46%<br>(32-59%)                | 54%<br>(41-68%)          | 1.3<br>(0.73-2.2)                           | 3.7%<br>(1.5-6.8%)                   | 4.1%<br>(1.6-7.5%)                  | 2.7<br>(1.1-4.9)      | 29<br>(12-53)       |
| Belize   | 2000 | Male   | 85 to 89 | 38%<br>(25-52%)                | 62%<br>(48-75%)          | 1.1<br>(0.56-1.9)                           | 3%<br>(1.2-5.5%)                     | 3.2%<br>(1.3-6.1%)                  | 1.5<br>(0.59-2.9)     | 11<br>(4.8-22)      |
| Belize   | 2000 | Male   | 90 to 94 | 36%<br>(23-50%)                | 64%<br>(50-77%)          | 1.1<br>(0.52-2)                             | 2.6%<br>(0.98-5.2%)                  | 2.7%<br>(0.95-5.8%)                 | 0.57<br>(0.2-1.2)     | 3.2<br>(1.2-6.5)    |
| Belize   | 2000 | Male   | 95 plus  | 37%<br>(21-54%)                | 63%<br>(46-79%)          | 1.1<br>(0.47-2.2)                           | 2.7%<br>(0.79-5.8%)                  | 2.8%<br>(0.59-6.3%)                 | 0.16<br>(0.034-0.36)  | 0.6<br>(0.18-1.3)   |
| Belize   | 2005 | Female | All Ages | 21%<br>(18-25%)                | 79%<br>(75-82%)          | 0.81<br>(0.66-1)                            | 2%<br>(1.6-2.5%)                     | 2.7%<br>(1.9-3.7%)                  | 16<br>(11-22)         | 670<br>(520-860)    |

| Location | Year | Sex    | Age      | Prevalence of current drinkers | Prevalence of abstainers | Population average of standard drinks daily | Percent of total attributable deaths | Percent of total attributable DALYs | Attributable deaths   | Attributable DALYs  |
|----------|------|--------|----------|--------------------------------|--------------------------|---------------------------------------------|--------------------------------------|-------------------------------------|-----------------------|---------------------|
| Belize   | 2005 | Female | 15 to 19 | 23%<br>(17-32%)                | 77%<br>(68-83%)          | 0.88<br>(0.49-1.4)                          | 1.9%<br>(1.2-2.9%)                   | 3.5%<br>(1.9-5.6%)                  | 0.32<br>(0.18-0.54)   | 35<br>(22-53)       |
| Belize   | 2005 | Female | 20 to 24 | 33%<br>(25-42%)                | 67%<br>(58-75%)          | 1.6<br>(0.93-2.4)                           | 3.4%<br>(2.4-4.7%)                   | 5.1%<br>(3.2-7.6%)                  | 0.65<br>(0.39-0.99)   | 70<br>(47-96)       |
| Belize   | 2005 | Female | 25 to 29 | 35%<br>(28-44%)                | 65%<br>(56-72%)          | 1.8<br>(1.2-2.5)                            | 3.6%<br>(2.6-4.8%)                   | 5.3%<br>(3.6-7.5%)                  | 0.78<br>(0.51-1.1)    | 72<br>(51-99)       |
| Belize   | 2005 | Female | 30 to 34 | 34%<br>(26-44%)                | 66%<br>(56-74%)          | 1.7<br>(1.1-2.6)                            | 3.4%<br>(2.5-4.6%)                   | 5%<br>(3.5-7%)                      | 0.97<br>(0.64-1.4)    | 77<br>(55-110)      |
| Belize   | 2005 | Female | 35 to 39 | 31%<br>(23-41%)                | 69%<br>(59-77%)          | 1.5<br>(0.91-2.3)                           | 3.4%<br>(2.4-4.7%)                   | 5.2%<br>(3.7-7.2%)                  | 1.2<br>(0.79-1.7)     | 77<br>(53-110)      |
| Belize   | 2005 | Female | 40 to 44 | 30%<br>(23-38%)                | 70%<br>(62-77%)          | 1.4<br>(0.8-2.1)                            | 3.5%<br>(2.4-5%)                     | 5.6%<br>(3.8-7.7%)                  | 1.3<br>(0.88-1.9)     | 71<br>(48-100)      |
| Belize   | 2005 | Female | 45 to 49 | 28%<br>(19-36%)                | 72%<br>(64-81%)          | 1.3<br>(0.74-2.2)                           | 3.9%<br>(2.5-5.9%)                   | 5.8%<br>(3.8-8.8%)                  | 1.3<br>(0.86-2)       | 61<br>(39-93)       |
| Belize   | 2005 | Female | 50 to 54 | 23%<br>(16-30%)                | 77%<br>(70-84%)          | 1.1<br>(0.59-1.9)                           | 3.9%<br>(2.3-6.1%)                   | 5.6%<br>(3.3-8.6%)                  | 1.4<br>(0.82-2.1)     | 54<br>(32-86)       |
| Belize   | 2005 | Female | 55 to 59 | 18%<br>(13-26%)                | 82%<br>(74-87%)          | 0.86<br>(0.45-1.5)                          | 3.4%<br>(1.9-5.5%)                   | 4.7%<br>(2.8-7.4%)                  | 1.2<br>(0.73-1.9)     | 41<br>(24-67)       |
| Belize   | 2005 | Female | 60 to 64 | 16%<br>(11-23%)                | 84%<br>(77-89%)          | 0.71<br>(0.36-1.3)                          | 2.7%<br>(1.3-4.8%)                   | 3.6%<br>(1.8-6.1%)                  | 1.1<br>(0.57-2)       | 32<br>(15-57)       |
| Belize   | 2005 | Female | 65 to 69 | 15%<br>(9.9-20%)               | 85%<br>(80-90%)          | 0.6<br>(0.32-1)                             | 2.3%<br>(1.2-3.9%)                   | 2.9%<br>(1.5-4.9%)                  | 1.2<br>(0.62-2.1)     | 29<br>(14-50)       |
| Belize   | 2005 | Female | 70 to 74 | 13%<br>(8.7-19%)               | 87%<br>(81-91%)          | 0.5<br>(0.26-0.88)                          | 1.8%<br>(0.77-3.3%)                  | 2.3%<br>(1-4.1%)                    | 1.1<br>(0.51-2.1)     | 21<br>(9-39)        |
| Belize   | 2005 | Female | 75 to 79 | 12%<br>(7.5-18%)               | 88%<br>(82-92%)          | 0.45<br>(0.22-0.8)                          | 1.5%<br>(0.52-2.8%)                  | 1.8%<br>(0.66-3.4%)                 | 1<br>(0.37-2)         | 15<br>(5.3-29)      |
| Belize   | 2005 | Female | 80 to 84 | 11%<br>(7.3-16%)               | 89%<br>(84-93%)          | 0.44<br>(0.23-0.75)                         | 1.4%<br>(0.53-2.6%)                  | 1.6%<br>(0.64-3%)                   | 0.86<br>(0.33-1.6)    | 9.1<br>(3.4-17)     |
| Belize   | 2005 | Female | 85 to 89 | 12%<br>(7.4-18%)               | 88%<br>(82-93%)          | 0.48<br>(0.23-0.83)                         | 1.3%<br>(0.45-2.6%)                  | 1.5%<br>(0.5-3.1%)                  | 0.64<br>(0.21-1.3)    | 4.9<br>(1.7-9.8)    |
| Belize   | 2005 | Female | 90 to 94 | 14%<br>(8.8-22%)               | 86%<br>(78-91%)          | 0.56<br>(0.26-1.1)                          | 1.4%<br>(0.4-3.2%)                   | 1.6%<br>(0.4-3.8%)                  | 0.42<br>(0.1-0.98)    | 2.2<br>(0.6-5)      |
| Belize   | 2005 | Female | 95 plus  | 18%<br>(9.5-29%)               | 82%<br>(71-90%)          | 0.69<br>(0.26-1.4)                          | 1.6%<br>(0.19-4.3%)                  | 1.8%<br>(0.088-4.8%)                | 0.17<br>(0.0087-0.47) | 0.62<br>(0.07-1.6)  |
| Belize   | 2005 | Male   | All Ages | 53%<br>(47-58%)                | 47%<br>(42-53%)          | 2.5<br>(2.1-2.9)                            | 8.4%<br>(6.8-10%)                    | 9.8%<br>(7.7-12%)                   | 82<br>(64-100)        | 3700<br>(3000-4500) |
| Belize   | 2005 | Male   | 15 to 19 | 51%<br>(44-59%)                | 49%<br>(41-56%)          | 1.9<br>(1.1-2.8)                            | 7%<br>(4.6-10%)                      | 9.5%<br>(5.9-14%)                   | 2.4<br>(1.4-3.7)      | 200<br>(130-290)    |
| Belize   | 2005 | Male   | 20 to 24 | 68%<br>(61-73%)                | 32%<br>(27-39%)          | 4.2<br>(2.8-5.8)                            | 15%<br>(11-20%)                      | 18%<br>(12-25%)                     | 6.8<br>(4.3-9.8)      | 510<br>(350-710)    |
| Belize   | 2005 | Male   | 25 to 29 | 76%<br>(70-80%)                | 24%<br>(20-30%)          | 5.4<br>(3.8-7.4)                            | 16%<br>(12-20%)                      | 20%<br>(14-26%)                     | 6.6<br>(4.5-9.5)      | 470<br>(330-640)    |
| Belize   | 2005 | Male   | 30 to 34 | 77%<br>(72-82%)                | 23%<br>(18-28%)          | 5.3<br>(3.8-7.2)                            | 14%<br>(11-18%)                      | 18%<br>(13-23%)                     | 6.9<br>(4.9-9.6)      | 450<br>(330-590)    |

| Location | Year | Sex    | Age      | Prevalence of current drinkers | Prevalence of abstainers | Population average of standard drinks daily | Percent of total attributable deaths | Percent of total attributable DALYs | Attributable deaths | Attributable DALYs |
|----------|------|--------|----------|--------------------------------|--------------------------|---------------------------------------------|--------------------------------------|-------------------------------------|---------------------|--------------------|
| Belize   | 2005 | Male   | 35 to 39 | 77%<br>(72-83%)                | 23%<br>(17-28%)          | 4.9<br>(3.3-7)                              | 14%<br>(11-18%)                      | 18%<br>(13-23%)                     | 7.3<br>(5.2-9.8)    | 430<br>(310-560)   |
| Belize   | 2005 | Male   | 40 to 44 | 77%<br>(72-83%)                | 23%<br>(17-28%)          | 5<br>(3.2-7.4)                              | 14%<br>(10-17%)                      | 17%<br>(12-22%)                     | 7<br>(4.9-9.3)      | 360<br>(270-480)   |
| Belize   | 2005 | Male   | 45 to 49 | 73%<br>(67-79%)                | 27%<br>(21-33%)          | 4.6<br>(2.8-6.9)                            | 14%<br>(10-18%)                      | 17%<br>(12-22%)                     | 6.7<br>(4.6-8.7)    | 300<br>(210-390)   |
| Belize   | 2005 | Male   | 50 to 54 | 71%<br>(64-77%)                | 29%<br>(23-36%)          | 4<br>(2.3-6.2)                              | 13%<br>(9.1-17%)                     | 16%<br>(11-20%)                     | 6.2<br>(4.2-8.2)    | 240<br>(170-320)   |
| Belize   | 2005 | Male   | 55 to 59 | 69%<br>(62-77%)                | 31%<br>(23-38%)          | 3.8<br>(2.3-5.7)                            | 12%<br>(8-16%)                       | 15%<br>(9.4-19%)                    | 6.1<br>(3.8-8.2)    | 210<br>(130-280)   |
| Belize   | 2005 | Male   | 60 to 64 | 68%<br>(59-76%)                | 32%<br>(24-41%)          | 3.4<br>(2-5.5)                              | 11%<br>(6.3-15%)                     | 12%<br>(7.3-17%)                    | 5.7<br>(3.4-8)      | 160<br>(98-230)    |
| Belize   | 2005 | Male   | 65 to 69 | 63%<br>(54-72%)                | 37%<br>(28-46%)          | 2.8<br>(1.7-4.3)                            | 8.7%<br>(5.3-13%)                    | 10%<br>(6.1-15%)                    | 6.2<br>(3.6-9.1)    | 150<br>(85-210)    |
| Belize   | 2005 | Male   | 70 to 74 | 57%<br>(47-67%)                | 43%<br>(33-53%)          | 2.1<br>(1.2-3.5)                            | 6.5%<br>(3.4-10%)                    | 7.3%<br>(3.7-12%)                   | 5<br>(2.5-8.2)      | 95<br>(49-150)     |
| Belize   | 2005 | Male   | 75 to 79 | 53%<br>(40-66%)                | 47%<br>(34-60%)          | 1.7<br>(0.89-2.8)                           | 5.1%<br>(2.3-8.6%)                   | 5.7%<br>(2.5-9.4%)                  | 4.5<br>(1.8-7.7)    | 66<br>(28-110)     |
| Belize   | 2005 | Male   | 80 to 84 | 46%<br>(31-59%)                | 54%<br>(41-69%)          | 1.4<br>(0.76-2.3)                           | 4.2%<br>(1.9-7.1%)                   | 4.6%<br>(2-8%)                      | 3<br>(1.3-5.1)      | 32<br>(15-55)      |
| Belize   | 2005 | Male   | 85 to 89 | 37%<br>(25-52%)                | 63%<br>(48-75%)          | 1.2<br>(0.6-2)                              | 3.3%<br>(1.5-5.8%)                   | 3.6%<br>(1.5-6.5%)                  | 1.4<br>(0.58-2.5)   | 11<br>(4.8-19)     |
| Belize   | 2005 | Male   | 90 to 94 | 36%<br>(23-49%)                | 64%<br>(51-77%)          | 1.2<br>(0.55-2.1)                           | 2.9%<br>(1.1-5.7%)                   | 3.1%<br>(1.1-6.3%)                  | 0.56<br>(0.2-1.1)   | 3.1<br>(1.2-5.9)   |
| Belize   | 2005 | Male   | 95 plus  | 37%<br>(21-54%)                | 63%<br>(46-79%)          | 1.2<br>(0.5-2.3)                            | 3%<br>(0.89-6.4%)                    | 3.1%<br>(0.74-7.1%)                 | 0.17<br>(0.04-0.39) | 0.65<br>(0.19-1.4) |
| Belize   | 2010 | Female | All Ages | 21%<br>(18-25%)                | 79%<br>(75-82%)          | 0.95<br>(0.75-1.2)                          | 2.4%<br>(1.8-3.1%)                   | 3.3%<br>(2.4-4.5%)                  | 22<br>(15-30)       | 900<br>(690-1200)  |
| Belize   | 2010 | Female | 15 to 19 | 23%<br>(16-32%)                | 77%<br>(68-84%)          | 1<br>(0.55-1.7)                             | 2.1%<br>(1.3-3.1%)                   | 4%<br>(2.1-6.5%)                    | 0.45<br>(0.24-0.74) | 47<br>(28-70)      |
| Belize   | 2010 | Female | 20 to 24 | 33%<br>(24-42%)                | 67%<br>(58-76%)          | 1.8<br>(1-2.8)                              | 3.8%<br>(2.6-5.2%)                   | 5.9%<br>(3.5-8.9%)                  | 0.9<br>(0.53-1.4)   | 90<br>(60-130)     |
| Belize   | 2010 | Female | 25 to 29 | 35%<br>(27-44%)                | 65%<br>(56-73%)          | 2<br>(1.3-2.9)                              | 3.8%<br>(2.7-5.2%)                   | 5.6%<br>(3.7-8%)                    | 1<br>(0.67-1.5)     | 93<br>(64-130)     |
| Belize   | 2010 | Female | 30 to 34 | 34%<br>(25-43%)                | 66%<br>(57-75%)          | 2<br>(1.2-3.1)                              | 3.7%<br>(2.6-5%)                     | 5.7%<br>(3.9-7.8%)                  | 1.1<br>(0.72-1.6)   | 86<br>(58-120)     |
| Belize   | 2010 | Female | 35 to 39 | 31%<br>(23-41%)                | 69%<br>(59-77%)          | 1.7<br>(1-2.7)                              | 3.8%<br>(2.7-5.3%)                   | 5.9%<br>(4.1-8%)                    | 1.6<br>(1-2.2)      | 99<br>(68-140)     |
| Belize   | 2010 | Female | 40 to 44 | 30%<br>(22-38%)                | 70%<br>(62-78%)          | 1.5<br>(0.91-2.4)                           | 3.7%<br>(2.5-5.2%)                   | 6%<br>(4.2-8.3%)                    | 1.5<br>(0.97-2.1)   | 82<br>(55-120)     |
| Belize   | 2010 | Female | 45 to 49 | 27%<br>(19-35%)                | 73%<br>(65-81%)          | 1.5<br>(0.83-2.5)                           | 4.3%<br>(2.8-6.4%)                   | 6.4%<br>(4.1-9.5%)                  | 2.3<br>(1.5-3.5)    | 110<br>(67-160)    |
| Belize   | 2010 | Female | 50 to 54 | 23%<br>(16-31%)                | 77%<br>(69-84%)          | 1.2<br>(0.66-2.1)                           | 4%<br>(2.2-6.4%)                     | 6%<br>(3.6-9.3%)                    | 1.9<br>(1.2-3.1)    | 79<br>(46-130)     |

| Location | Year | Sex    | Age      | Prevalence of current drinkers | Prevalence of abstainers | Population average of standard drinks daily | Percent of total attributable deaths | Percent of total attributable DALYs | Attributable deaths  | Attributable DALYs  |
|----------|------|--------|----------|--------------------------------|--------------------------|---------------------------------------------|--------------------------------------|-------------------------------------|----------------------|---------------------|
| Belize   | 2010 | Female | 55 to 59 | 18%<br>(13-26%)                | 82%<br>(74-87%)          | 0.97<br>(0.52-1.7)                          | 3.6%<br>(2-5.8%)                     | 5.2%<br>(3.1-8.1%)                  | 1.8<br>(1-2.8)       | 61<br>(35-99)       |
| Belize   | 2010 | Female | 60 to 64 | 16%<br>(11-23%)                | 84%<br>(77-89%)          | 0.8<br>(0.4-1.4)                            | 3.1%<br>(1.5-5.1%)                   | 4.1%<br>(2.1-6.6%)                  | 1.8<br>(0.93-3)      | 50<br>(25-87)       |
| Belize   | 2010 | Female | 65 to 69 | 14%<br>(9.5-20%)               | 86%<br>(80-90%)          | 0.67<br>(0.35-1.1)                          | 2.6%<br>(1.4-4.3%)                   | 3.4%<br>(1.9-5.5%)                  | 1.6<br>(0.87-2.7)    | 38<br>(20-63)       |
| Belize   | 2010 | Female | 70 to 74 | 13%<br>(8.4-19%)               | 87%<br>(81-92%)          | 0.56<br>(0.29-1)                            | 2.1%<br>(0.99-3.7%)                  | 2.7%<br>(1.4-4.8%)                  | 1.2<br>(0.62-2.2)    | 24<br>(11-43)       |
| Belize   | 2010 | Female | 75 to 79 | 12%<br>(7.5-17%)               | 88%<br>(83-93%)          | 0.51<br>(0.24-0.92)                         | 1.8%<br>(0.69-3.5%)                  | 2.2%<br>(0.89-4.2%)                 | 1.4<br>(0.59-2.7)    | 21<br>(8.3-41)      |
| Belize   | 2010 | Female | 80 to 84 | 11%<br>(7.3-17%)               | 89%<br>(83-93%)          | 0.51<br>(0.26-0.86)                         | 1.7%<br>(0.69-3.2%)                  | 2%<br>(0.84-3.8%)                   | 1.3<br>(0.52-2.3)    | 13<br>(5.4-25)      |
| Belize   | 2010 | Female | 85 to 89 | 12%<br>(7.3-18%)               | 88%<br>(82-93%)          | 0.55<br>(0.25-0.99)                         | 1.7%<br>(0.65-3.5%)                  | 2%<br>(0.75-4.1%)                   | 0.93<br>(0.35-1.9)   | 7<br>(2.7-14)       |
| Belize   | 2010 | Female | 90 to 94 | 14%<br>(8.8-21%)               | 86%<br>(79-91%)          | 0.64<br>(0.29-1.2)                          | 1.9%<br>(0.56-4.2%)                  | 2.1%<br>(0.59-4.9%)                 | 0.54<br>(0.15-1.2)   | 2.8<br>(0.86-6.4)   |
| Belize   | 2010 | Female | 95 plus  | 18%<br>(9.3-29%)               | 82%<br>(71-91%)          | 0.79<br>(0.29-1.6)                          | 2.1%<br>(0.36-5.1%)                  | 2.4%<br>(0.28-6%)                   | 0.23<br>(0.027-0.59) | 0.83<br>(0.14-2)    |
| Belize   | 2010 | Male   | All Ages | 54%<br>(48-59%)                | 46%<br>(41-52%)          | 2.9<br>(2.4-3.6)                            | 9.5%<br>(7.7-11%)                    | 11%<br>(8.8-14%)                    | 110<br>(85-140)      | 4600<br>(3700-5600) |
| Belize   | 2010 | Male   | 15 to 19 | 51%<br>(43-59%)                | 49%<br>(41-57%)          | 2.2<br>(1.2-3.4)                            | 7.6%<br>(4.9-11%)                    | 10%<br>(6.3-16%)                    | 2.9<br>(1.7-4.6)     | 240<br>(150-370)    |
| Belize   | 2010 | Male   | 20 to 24 | 67%<br>(61-73%)                | 33%<br>(27-39%)          | 4.8<br>(3.1-6.9)                            | 16%<br>(12-21%)                      | 20%<br>(14-28%)                     | 7.4<br>(4.8-11)      | 560<br>(390-780)    |
| Belize   | 2010 | Male   | 25 to 29 | 75%<br>(70-80%)                | 25%<br>(20-30%)          | 6.2<br>(4.1-8.6)                            | 16%<br>(12-21%)                      | 21%<br>(15-28%)                     | 7.1<br>(4.7-9.6)     | 500<br>(350-670)    |
| Belize   | 2010 | Male   | 30 to 34 | 77%<br>(71-82%)                | 23%<br>(18-29%)          | 6<br>(4.2-8.4)                              | 15%<br>(12-19%)                      | 20%<br>(15-25%)                     | 6.5<br>(4.5-8.8)     | 420<br>(300-560)    |
| Belize   | 2010 | Male   | 35 to 39 | 77%<br>(72-83%)                | 23%<br>(17-28%)          | 5.6<br>(3.8-8.1)                            | 14%<br>(11-18%)                      | 18%<br>(13-23%)                     | 6.9<br>(4.8-9.4)     | 410<br>(300-540)    |
| Belize   | 2010 | Male   | 40 to 44 | 77%<br>(72-83%)                | 23%<br>(17-28%)          | 5.7<br>(3.6-8.4)                            | 15%<br>(11-18%)                      | 19%<br>(14-24%)                     | 8.3<br>(5.9-11)      | 430<br>(310-560)    |
| Belize   | 2010 | Male   | 45 to 49 | 73%<br>(67-79%)                | 27%<br>(21-33%)          | 5.2<br>(3.1-8)                              | 14%<br>(11-18%)                      | 18%<br>(13-22%)                     | 9.7<br>(7-13)        | 450<br>(330-570)    |
| Belize   | 2010 | Male   | 50 to 54 | 70%<br>(64-77%)                | 30%<br>(23-36%)          | 4.6<br>(2.7-7.2)                            | 14%<br>(9.9-17%)                     | 17%<br>(12-21%)                     | 10<br>(6.9-13)       | 400<br>(280-520)    |
| Belize   | 2010 | Male   | 55 to 59 | 69%<br>(61-77%)                | 31%<br>(23-39%)          | 4.3<br>(2.6-6.7)                            | 13%<br>(9.1-17%)                     | 16%<br>(11-20%)                     | 11<br>(7.2-14)       | 360<br>(250-470)    |
| Belize   | 2010 | Male   | 60 to 64 | 68%<br>(59-76%)                | 32%<br>(24-41%)          | 3.9<br>(2.3-6.4)                            | 12%<br>(7.7-16%)                     | 14%<br>(8.9-18%)                    | 9.9<br>(6.4-14)      | 280<br>(180-390)    |
| Belize   | 2010 | Male   | 65 to 69 | 63%<br>(54-72%)                | 37%<br>(28-46%)          | 3.2<br>(1.9-4.9)                            | 10%<br>(6.2-14%)                     | 12%<br>(7.1-16%)                    | 8.7<br>(5.4-12)      | 210<br>(130-290)    |
| Belize   | 2010 | Male   | 70 to 74 | 57%<br>(46-66%)                | 43%<br>(34-54%)          | 2.4<br>(1.3-3.8)                            | 7.5%<br>(4-11%)                      | 8.5%<br>(4.5-13%)                   | 7.7<br>(4.2-12)      | 150<br>(81-220)     |

| Location | Year | Sex    | Age      | Prevalence of current drinkers | Prevalence of abstainers | Population average of standard drinks daily | Percent of total attributable deaths | Percent of total attributable DALYs | Attributable deaths  | Attributable DALYs |
|----------|------|--------|----------|--------------------------------|--------------------------|---------------------------------------------|--------------------------------------|-------------------------------------|----------------------|--------------------|
| Belize   | 2010 | Male   | 75 to 79 | 53%<br>(40-66%)                | 47%<br>(34-60%)          | 2<br>(1-3.2)                                | 5.9%<br>(2.8-9.2%)                   | 6.6%<br>(3-10%)                     | 6.2<br>(2.8-10)      | 91<br>(43-150)     |
| Belize   | 2010 | Male   | 80 to 84 | 46%<br>(31-58%)                | 54%<br>(42-69%)          | 1.6<br>(0.87-2.6)                           | 5%<br>(2.3-8%)                       | 5.6%<br>(2.5-9%)                    | 4.1<br>(1.9-7)       | 45<br>(21-75)      |
| Belize   | 2010 | Male   | 85 to 89 | 37%<br>(25-51%)                | 63%<br>(49-75%)          | 1.4<br>(0.67-2.4)                           | 4%<br>(1.7-7%)                       | 4.4%<br>(1.8-7.8%)                  | 2<br>(0.84-3.6)      | 16<br>(6.9-27)     |
| Belize   | 2010 | Male   | 90 to 94 | 35%<br>(23-49%)                | 65%<br>(51-77%)          | 1.3<br>(0.61-2.5)                           | 3.5%<br>(1.4-6.7%)                   | 3.8%<br>(1.4-7.5%)                  | 0.7<br>(0.25-1.4)    | 3.8<br>(1.5-7.2)   |
| Belize   | 2010 | Male   | 95 plus  | 36%<br>(20-53%)                | 64%<br>(47-80%)          | 1.4<br>(0.55-2.7)                           | 3.5%<br>(1.2-7.1%)                   | 3.8%<br>(0.98-8%)                   | 0.21<br>(0.054-0.45) | 0.77<br>(0.25-1.6) |
| Belize   | 2016 | Female | All Ages | 25%<br>(21-29%)                | 75%<br>(71-79%)          | 1.2<br>(0.88-1.7)                           | 2.9%<br>(2-4.1%)                     | 4.1%<br>(2.7-5.9%)                  | 30<br>(19-44)        | 1200<br>(850-1700) |
| Belize   | 2016 | Female | 15 to 19 | 28%<br>(20-38%)                | 72%<br>(62-80%)          | 1.3<br>(0.7-2.3)                            | 2.4%<br>(1.5-3.8%)                   | 5.1%<br>(2.6-8.6%)                  | 0.58<br>(0.29-0.99)  | 59<br>(35-94)      |
| Belize   | 2016 | Female | 20 to 24 | 37%<br>(26-49%)                | 63%<br>(51-74%)          | 2.2<br>(1.2-3.6)                            | 4.2%<br>(2.8-6%)                     | 7.3%<br>(4.1-11%)                   | 1.1<br>(0.59-1.7)    | 110<br>(70-160)    |
| Belize   | 2016 | Female | 25 to 29 | 37%<br>(26-49%)                | 63%<br>(51-74%)          | 2.3<br>(1.3-3.7)                            | 4.2%<br>(2.9-5.7%)                   | 6.6%<br>(4.2-9.6%)                  | 1.3<br>(0.78-2.1)    | 120<br>(76-170)    |
| Belize   | 2016 | Female | 30 to 34 | 36%<br>(25-49%)                | 64%<br>(51-75%)          | 2.3<br>(1.3-3.8)                            | 4.3%<br>(2.9-6%)                     | 6.8%<br>(4.5-9.6%)                  | 1.7<br>(1-2.6)       | 130<br>(80-180)    |
| Belize   | 2016 | Female | 35 to 39 | 35%<br>(24-46%)                | 65%<br>(54-76%)          | 2.1<br>(1.2-3.5)                            | 4.1%<br>(2.6-5.9%)                   | 6.7%<br>(4.3-9.5%)                  | 1.7<br>(1-2.7)       | 110<br>(71-170)    |
| Belize   | 2016 | Female | 40 to 44 | 33%<br>(23-45%)                | 67%<br>(55-77%)          | 1.9<br>(1-3.1)                              | 4%<br>(2.5-6%)                       | 6.9%<br>(4.5-10%)                   | 1.8<br>(1.1-3)       | 100<br>(63-160)    |
| Belize   | 2016 | Female | 45 to 49 | 31%<br>(19-41%)                | 69%<br>(59-81%)          | 1.8<br>(0.89-3.1)                           | 4.6%<br>(2.8-7%)                     | 7.2%<br>(4.5-11%)                   | 2.8<br>(1.6-4.3)     | 130<br>(75-200)    |
| Belize   | 2016 | Female | 50 to 54 | 27%<br>(18-36%)                | 73%<br>(64-82%)          | 1.6<br>(0.81-2.8)                           | 4.7%<br>(2.6-7.7%)                   | 7.1%<br>(4-11%)                     | 3.2<br>(1.8-5.2)     | 130<br>(70-210)    |
| Belize   | 2016 | Female | 55 to 59 | 22%<br>(15-31%)                | 78%<br>(69-85%)          | 1.3<br>(0.63-2.3)                           | 4.2%<br>(2.3-7.1%)                   | 6.1%<br>(3.5-9.9%)                  | 3<br>(1.6-4.9)       | 100<br>(54-170)    |
| Belize   | 2016 | Female | 60 to 64 | 19%<br>(12-28%)                | 81%<br>(72-88%)          | 1<br>(0.5-1.9)                              | 3.6%<br>(1.7-6.2%)                   | 4.8%<br>(2.4-8%)                    | 2.6<br>(1.3-4.5)     | 76<br>(35-130)     |
| Belize   | 2016 | Female | 65 to 69 | 18%<br>(11-25%)                | 82%<br>(75-89%)          | 0.89<br>(0.43-1.5)                          | 3.1%<br>(1.5-5.4%)                   | 4.1%<br>(2-6.9%)                    | 2.3<br>(1.1-3.9)     | 53<br>(24-94)      |
| Belize   | 2016 | Female | 70 to 74 | 15%<br>(10-22%)                | 85%<br>(78-90%)          | 0.73<br>(0.36-1.3)                          | 2.6%<br>(1-4.8%)                     | 3.3%<br>(1.4-6.2%)                  | 1.9<br>(0.81-3.5)    | 36<br>(15-69)      |
| Belize   | 2016 | Female | 75 to 79 | 13%<br>(8.5-20%)               | 87%<br>(80-92%)          | 0.62<br>(0.28-1.1)                          | 2.2%<br>(0.77-4.3%)                  | 2.7%<br>(0.99-5.2%)                 | 1.8<br>(0.66-3.5)    | 26<br>(9.3-52)     |
| Belize   | 2016 | Female | 80 to 84 | 12%<br>(7.4-17%)               | 88%<br>(83-93%)          | 0.58<br>(0.28-1)                            | 2%<br>(0.82-4%)                      | 2.4%<br>(1-4.8%)                    | 1.6<br>(0.62-3.1)    | 17<br>(6.6-34)     |
| Belize   | 2016 | Female | 85 to 89 | 13%<br>(7.4-19%)               | 87%<br>(81-93%)          | 0.6<br>(0.28-1.2)                           | 2%<br>(0.76-4.3%)                    | 2.3%<br>(0.85-5.1%)                 | 1.4<br>(0.5-3)       | 10<br>(3.9-23)     |
| Belize   | 2016 | Female | 90 to 94 | 14%<br>(8.8-22%)               | 86%<br>(78-91%)          | 0.7<br>(0.3-1.4)                            | 2.2%<br>(0.66-4.8%)                  | 2.5%<br>(0.69-5.6%)                 | 0.81<br>(0.22-1.8)   | 4.2<br>(1.2-9.4)   |



| Location | Year | Sex    | Age      | Prevalence of current drinkers | Prevalence of abstainers | Population average of standard drinks daily | Percent of total attributable deaths | Percent of total attributable DALYs | Attributable deaths  | Attributable DALYs     |
|----------|------|--------|----------|--------------------------------|--------------------------|---------------------------------------------|--------------------------------------|-------------------------------------|----------------------|------------------------|
| Belize   | 2016 | Female | 95 plus  | 18%<br>(9.5-30%)               | 82%<br>(70-90%)          | 0.87<br>(0.31-1.8)                          | 2.5%<br>(0.49-5.8%)                  | 2.8%<br>(0.45-6.7%)                 | 0.31<br>(0.05-0.75)  | 1.1<br>(0.21-2.6)      |
| Belize   | 2016 | Male   | All Ages | 52%<br>(45-58%)                | 48%<br>(42-55%)          | 3.1<br>(2.3-4.1)                            | 9.8%<br>(7.6-12%)                    | 12%<br>(8.8-14%)                    | 130<br>(90-170)      | 5300<br>(3900-6900)    |
| Belize   | 2016 | Male   | 15 to 19 | 49%<br>(38-61%)                | 51%<br>(39-62%)          | 2.2<br>(1.2-3.6)                            | 7.5%<br>(4.6-11%)                    | 11%<br>(6.1-16%)                    | 3<br>(1.5-5)         | 250<br>(140-400)       |
| Belize   | 2016 | Male   | 20 to 24 | 63%<br>(50-74%)                | 37%<br>(26-50%)          | 4.7<br>(2.6-7.3)                            | 15%<br>(11-21%)                      | 20%<br>(13-27%)                     | 7.8<br>(4.2-13)      | 600<br>(350-920)       |
| Belize   | 2016 | Male   | 25 to 29 | 70%<br>(57-79%)                | 30%<br>(21-43%)          | 5.9<br>(3.6-9.1)                            | 16%<br>(11-21%)                      | 21%<br>(14-28%)                     | 7.8<br>(4.2-12)      | 570<br>(340-800)       |
| Belize   | 2016 | Male   | 30 to 34 | 73%<br>(61-82%)                | 27%<br>(18-39%)          | 6<br>(3.6-9.2)                              | 15%<br>(11-20%)                      | 20%<br>(14-26%)                     | 7.6<br>(4.4-12)      | 500<br>(310-720)       |
| Belize   | 2016 | Male   | 35 to 39 | 74%<br>(63-83%)                | 26%<br>(17-37%)          | 5.7<br>(3.3-9)                              | 14%<br>(10-18%)                      | 19%<br>(13-24%)                     | 7.5<br>(4.4-11)      | 450<br>(290-630)       |
| Belize   | 2016 | Male   | 40 to 44 | 73%<br>(62-82%)                | 27%<br>(18-38%)          | 5.6<br>(3.1-8.8)                            | 14%<br>(11-18%)                      | 19%<br>(13-24%)                     | 9.4<br>(5.8-13)      | 490<br>(330-680)       |
| Belize   | 2016 | Male   | 45 to 49 | 69%<br>(55-79%)                | 31%<br>(21-45%)          | 5.1<br>(2.7-8.4)                            | 14%<br>(10-18%)                      | 18%<br>(13-23%)                     | 11<br>(7.5-16)       | 520<br>(350-720)       |
| Belize   | 2016 | Male   | 50 to 54 | 67%<br>(55-77%)                | 33%<br>(23-45%)          | 4.6<br>(2.3-7.8)                            | 14%<br>(9.7-17%)                     | 17%<br>(12-21%)                     | 13<br>(8.7-18)       | 530<br>(350-710)       |
| Belize   | 2016 | Male   | 55 to 59 | 66%<br>(54-77%)                | 34%<br>(23-46%)          | 4.3<br>(2.2-7.3)                            | 13%<br>(8.8-17%)                     | 16%<br>(11-20%)                     | 14<br>(8.9-19)       | 470<br>(300-640)       |
| Belize   | 2016 | Male   | 60 to 64 | 64%<br>(50-76%)                | 36%<br>(24-50%)          | 3.8<br>(2-6.7)                              | 11%<br>(7.1-15%)                     | 13%<br>(8.2-18%)                    | 12<br>(7.6-18)       | 350<br>(220-510)       |
| Belize   | 2016 | Male   | 65 to 69 | 61%<br>(48-73%)                | 39%<br>(27-52%)          | 3.3<br>(1.8-5.5)                            | 9.9%<br>(6-14%)                      | 11%<br>(6.8-16%)                    | 11<br>(6.4-16)       | 260<br>(150-370)       |
| Belize   | 2016 | Male   | 70 to 74 | 58%<br>(44-69%)                | 42%<br>(31-56%)          | 2.6<br>(1.3-4.5)                            | 7.8%<br>(4-12%)                      | 8.9%<br>(4.6-13%)                   | 8.1<br>(4.2-12)      | 150<br>(82-230)        |
| Belize   | 2016 | Male   | 75 to 79 | 54%<br>(38-68%)                | 46%<br>(32-62%)          | 2.2<br>(1-3.8)                              | 6.2%<br>(2.8-9.8%)                   | 7%<br>(3-11%)                       | 6.4<br>(2.8-10)      | 94<br>(42-150)         |
| Belize   | 2016 | Male   | 80 to 84 | 46%<br>(32-60%)                | 54%<br>(40-68%)          | 1.8<br>(0.88-3.2)                           | 5.3%<br>(2.4-8.6%)                   | 6%<br>(2.6-9.7%)                    | 4.7<br>(2.1-7.7)     | 51<br>(24-83)          |
| Belize   | 2016 | Male   | 85 to 89 | 39%<br>(25-53%)                | 61%<br>(47-75%)          | 1.6<br>(0.71-2.9)                           | 4.4%<br>(1.9-7.9%)                   | 4.9%<br>(2-8.9%)                    | 2.7<br>(1.1-4.9)     | 21<br>(9.1-38)         |
| Belize   | 2016 | Male   | 90 to 94 | 36%<br>(24-51%)                | 64%<br>(49-76%)          | 1.5<br>(0.67-2.8)                           | 3.9%<br>(1.5-7.1%)                   | 4.3%<br>(1.5-8.1%)                  | 0.95<br>(0.33-1.8)   | 5.2<br>(2-9.3)         |
| Belize   | 2016 | Male   | 95 plus  | 37%<br>(21-55%)                | 63%<br>(45-79%)          | 1.5<br>(0.61-3.1)                           | 3.9%<br>(1.3-8%)                     | 4.2%<br>(1.1-9%)                    | 0.24<br>(0.062-0.51) | 0.88<br>(0.28-1.8)     |
| Cuba     | 1990 | Female | All Ages | 31%<br>(25-38%)                | 69%<br>(62-75%)          | 0.88<br>(0.73-1)                            | 1.8%<br>(1.3-2.5%)                   | 1.6%<br>(0.55-2.6%)                 | 510<br>(180-860)     | 24000<br>(16000-32000) |
| Cuba     | 1990 | Female | 15 to 19 | 36%<br>(23-52%)                | 64%<br>(48-77%)          | 0.94<br>(0.48-1.5)                          | 2.5%<br>(1.2-4.2%)                   | 5%<br>(2-9.3%)                      | 20<br>(8-38)         | 1800<br>(940-3100)     |
| Cuba     | 1990 | Female | 20 to 24 | 42%<br>(27-59%)                | 58%<br>(41-73%)          | 1.4<br>(0.79-2.2)                           | 3.8%<br>(2.3-5.9%)                   | 7.1%<br>(3.3-12%)                   | 35<br>(16-58)        | 3300<br>(2000-5000)    |

| Location | Year | Sex    | Age      | Prevalence of current drinkers | Prevalence of abstainers | Population average of standard drinks daily | Percent of total attributable deaths | Percent of total attributable DALYs | Attributable deaths | Attributable DALYs      |
|----------|------|--------|----------|--------------------------------|--------------------------|---------------------------------------------|--------------------------------------|-------------------------------------|---------------------|-------------------------|
| Cuba     | 1990 | Female | 25 to 29 | 41%<br>(26-59%)                | 59%<br>(41-74%)          | 1.5<br>(0.84-2.2)                           | 3.6%<br>(2.3-5.2%)                   | 6.6%<br>(3.5-10%)                   | 33<br>(18-53)       | 3100<br>(1900-4400)     |
| Cuba     | 1990 | Female | 30 to 34 | 40%<br>(24-57%)                | 60%<br>(43-76%)          | 1.4<br>(0.79-2.2)                           | 3.2%<br>(2.1-4.7%)                   | 5.8%<br>(3.2-9.5%)                  | 24<br>(13-39)       | 2000<br>(1300-2900)     |
| Cuba     | 1990 | Female | 35 to 39 | 39%<br>(25-57%)                | 61%<br>(43-75%)          | 1.3<br>(0.74-2.1)                           | 2.9%<br>(1.8-4.4%)                   | 5.3%<br>(2.8-8.4%)                  | 29<br>(15-46)       | 2000<br>(1200-3000)     |
| Cuba     | 1990 | Female | 40 to 44 | 38%<br>(24-56%)                | 62%<br>(44-76%)          | 1.2<br>(0.64-2)                             | 2.8%<br>(1.5-4.5%)                   | 4.8%<br>(2.4-7.9%)                  | 34<br>(17-56)       | 2000<br>(1100-3000)     |
| Cuba     | 1990 | Female | 45 to 49 | 36%<br>(21-52%)                | 64%<br>(48-79%)          | 1.2<br>(0.6-2.1)                            | 2.8%<br>(1.4-4.8%)                   | 4.6%<br>(2-8%)                      | 43<br>(19-76)       | 2100<br>(1000-3600)     |
| Cuba     | 1990 | Female | 50 to 54 | 32%<br>(19-49%)                | 68%<br>(51-81%)          | 1.1<br>(0.55-1.8)                           | 2.5%<br>(1.1-4.4%)                   | 3.9%<br>(1.6-7%)                    | 47<br>(20-87)       | 1900<br>(870-3500)      |
| Cuba     | 1990 | Female | 55 to 59 | 28%<br>(17-44%)                | 72%<br>(56-83%)          | 0.89<br>(0.46-1.6)                          | 2.1%<br>(0.86-3.8%)                  | 3%<br>(1.2-5.6%)                    | 45<br>(18-84)       | 1600<br>(660-2900)      |
| Cuba     | 1990 | Female | 60 to 64 | 25%<br>(15-40%)                | 75%<br>(60-85%)          | 0.76<br>(0.36-1.4)                          | 1.6%<br>(0.41-3.3%)                  | 2.3%<br>(0.52-4.6%)                 | 45<br>(11-93)       | 1300<br>(340-2700)      |
| Cuba     | 1990 | Female | 65 to 69 | 23%<br>(14-36%)                | 77%<br>(64-86%)          | 0.66<br>(0.33-1.1)                          | 1.2%<br>(0.2-2.6%)                   | 1.7%<br>(0.25-3.5%)                 | 43<br>(6.1-87)      | 1000<br>(160-2100)      |
| Cuba     | 1990 | Female | 70 to 74 | 21%<br>(13-33%)                | 79%<br>(67-87%)          | 0.55<br>(0.27-1)                            | 0.87%<br>(-0.17-2.2%)                | 1.1%<br>(-0.24-2.9%)                | 38<br>(-8.1-97)     | 740<br>(-140-1900)      |
| Cuba     | 1990 | Female | 75 to 79 | 18%<br>(11-30%)                | 82%<br>(70-89%)          | 0.48<br>(0.22-0.91)                         | 0.57%<br>(-0.36-1.7%)                | 0.69%<br>(-0.51-2.2%)               | 30<br>(-23-96)      | 470<br>(-300-1400)      |
| Cuba     | 1990 | Female | 80 to 84 | 17%<br>(9.4-27%)               | 83%<br>(73-91%)          | 0.44<br>(0.21-0.77)                         | 0.43%<br>(-0.38-1.4%)                | 0.49%<br>(-0.54-1.7%)               | 23<br>(-25-80)      | 270<br>(-230-890)       |
| Cuba     | 1990 | Female | 85 to 89 | 17%<br>(9.6-26%)               | 83%<br>(74-90%)          | 0.45<br>(0.21-0.8)                          | 0.3%<br>(-0.5-1.3%)                  | 0.27%<br>(-0.7-1.5%)                | 12<br>(-32-66)      | 120<br>(-200-520)       |
| Cuba     | 1990 | Female | 90 to 94 | 19%<br>(11-30%)                | 81%<br>(70-89%)          | 0.52<br>(0.22-1)                            | 0.29%<br>(-0.74-1.7%)                | 0.22%<br>(-1-2%)                    | 5.4<br>(-26-49)     | 44<br>(-110-270)        |
| Cuba     | 1990 | Female | 95 plus  | 22%<br>(11-38%)                | 78%<br>(62-89%)          | 0.62<br>(0.21-1.3)                          | 0.39%<br>(-0.95-2.5%)                | 0.26%<br>(-1.4-2.8%)                | 2.1<br>(-11-22)     | 13<br>(-31-80)          |
| Cuba     | 1990 | Male   | All Ages | 55%<br>(47-63%)                | 45%<br>(37-53%)          | 2<br>(1.7-2.3)                              | 6.2%<br>(4.9-7.7%)                   | 5.4%<br>(3.4-7.9%)                  | 2200<br>(1400-3200) | 94000<br>(72000-120000) |
| Cuba     | 1990 | Male   | 15 to 19 | 53%<br>(36-71%)                | 47%<br>(29-64%)          | 1.4<br>(0.79-2.3)                           | 5%<br>(3.1-7.5%)                     | 7.3%<br>(4-12%)                     | 44<br>(24-73)       | 4100<br>(2500-6200)     |
| Cuba     | 1990 | Male   | 20 to 24 | 64%<br>(45-80%)                | 36%<br>(20-55%)          | 2.7<br>(1.7-4)                              | 11%<br>(7.3-15%)                     | 14%<br>(8.6-20%)                    | 120<br>(74-180)     | 11000<br>(7100-15000)   |
| Cuba     | 1990 | Male   | 25 to 29 | 67%<br>(48-82%)                | 33%<br>(18-52%)          | 3.3<br>(2.1-4.7)                            | 12%<br>(8.3-16%)                     | 16%<br>(11-23%)                     | 150<br>(96-210)     | 12000<br>(8200-16000)   |
| Cuba     | 1990 | Male   | 30 to 34 | 69%<br>(49-83%)                | 31%<br>(17-51%)          | 3.4<br>(2.1-5)                              | 12%<br>(8.3-16%)                     | 17%<br>(11-24%)                     | 120<br>(81-170)     | 8600<br>(5900-11000)    |
| Cuba     | 1990 | Male   | 35 to 39 | 68%<br>(51-82%)                | 32%<br>(18-49%)          | 3.3<br>(2-5)                                | 11%<br>(7.5-15%)                     | 16%<br>(10-22%)                     | 140<br>(84-190)     | 8600<br>(5800-12000)    |
| Cuba     | 1990 | Male   | 40 to 44 | 67%<br>(51-81%)                | 33%<br>(19-49%)          | 3.1<br>(1.8-4.7)                            | 11%<br>(6.8-15%)                     | 15%<br>(9-21%)                      | 150<br>(90-210)     | 8000<br>(5300-11000)    |

| Location | Year | Sex    | Age      | Prevalence of current drinkers | Prevalence of abstainers | Population average of standard drinks daily | Percent of total attributable deaths | Percent of total attributable DALYs | Attributable deaths | Attributable DALYs     |
|----------|------|--------|----------|--------------------------------|--------------------------|---------------------------------------------|--------------------------------------|-------------------------------------|---------------------|------------------------|
| Cuba     | 1990 | Male   | 45 to 49 | 65%<br>(44-80%)                | 35%<br>(20-56%)          | 2.9<br>(1.6-4.7)                            | 9.8%<br>(6.1-14%)                    | 13%<br>(7.6-19%)                    | 170<br>(100-250)    | 8300<br>(5200-12000)   |
| Cuba     | 1990 | Male   | 50 to 54 | 63%<br>(44-80%)                | 37%<br>(20-56%)          | 2.6<br>(1.5-4.2)                            | 8.7%<br>(5.2-13%)                    | 11%<br>(6.4-17%)                    | 190<br>(100-280)    | 7900<br>(4700-12000)   |
| Cuba     | 1990 | Male   | 55 to 59 | 61%<br>(44-78%)                | 39%<br>(22-56%)          | 2.4<br>(1.3-3.9)                            | 7.7%<br>(4.2-12%)                    | 9.7%<br>(5.2-15%)                   | 200<br>(100-310)    | 6900<br>(3800-11000)   |
| Cuba     | 1990 | Male   | 60 to 64 | 59%<br>(40-78%)                | 41%<br>(22-60%)          | 2.2<br>(1.1-3.7)                            | 6.1%<br>(2.8-10%)                    | 7.4%<br>(3.2-13%)                   | 200<br>(90-340)     | 6000<br>(2700-10000)   |
| Cuba     | 1990 | Male   | 65 to 69 | 58%<br>(39-75%)                | 42%<br>(25-61%)          | 1.9<br>(1-3.1)                              | 4.9%<br>(2.1-8.6%)                   | 5.8%<br>(2.4-10%)                   | 200<br>(83-360)     | 5000<br>(2200-8700)    |
| Cuba     | 1990 | Male   | 70 to 74 | 54%<br>(35-71%)                | 46%<br>(29-65%)          | 1.6<br>(0.79-2.8)                           | 3.6%<br>(1.2-7.3%)                   | 4.1%<br>(1.2-8.6%)                  | 190<br>(54-390)     | 3700<br>(1200-7400)    |
| Cuba     | 1990 | Male   | 75 to 79 | 49%<br>(30-68%)                | 51%<br>(32-70%)          | 1.3<br>(0.65-2.3)                           | 2.6%<br>(0.57-5.5%)                  | 2.9%<br>(0.49-6.3%)                 | 160<br>(27-350)     | 2400<br>(530-5200)     |
| Cuba     | 1990 | Male   | 80 to 84 | 43%<br>(26-62%)                | 57%<br>(38-74%)          | 1.1<br>(0.56-1.8)                           | 1.8%<br>(0.24-4.1%)                  | 2%<br>(0.15-4.7%)                   | 110<br>(8.4-250)    | 1200<br>(160-2800)     |
| Cuba     | 1990 | Male   | 85 to 89 | 38%<br>(23-55%)                | 62%<br>(45-77%)          | 0.94<br>(0.47-1.6)                          | 1.3%<br>(0.0043-3.5%)                | 1.3%<br>(-0.2-3.9%)                 | 61<br>(-9.4-180)    | 520<br>(1.7-1400)      |
| Cuba     | 1990 | Male   | 90 to 94 | 39%<br>(24-57%)                | 61%<br>(43-76%)          | 0.96<br>(0.44-1.7)                          | 0.97%<br>(-0.37-3.3%)                | 0.91%<br>(-0.7-3.6%)                | 21<br>(-16-86)      | 140<br>(-52-460)       |
| Cuba     | 1990 | Male   | 95 plus  | 42%<br>(23-62%)                | 58%<br>(38-77%)          | 1<br>(0.42-2)                               | 0.96%<br>(-0.76-3.8%)                | 0.78%<br>(-1.3-4.2%)                | 4.8<br>(-8-26)      | 24<br>(-18-95)         |
| Cuba     | 1995 | Female | All Ages | 32%<br>(26-39%)                | 68%<br>(61-74%)          | 0.85<br>(0.72-1)                            | 1.7%<br>(1.1-2.3%)                   | 1.4%<br>(0.4-2.4%)                  | 480<br>(140-870)    | 22000<br>(15000-31000) |
| Cuba     | 1995 | Female | 15 to 19 | 37%<br>(24-53%)                | 63%<br>(47-76%)          | 0.9<br>(0.45-1.5)                           | 2.2%<br>(1.1-3.7%)                   | 4.7%<br>(1.9-8.7%)                  | 11<br>(4.4-20)      | 1000<br>(540-1700)     |
| Cuba     | 1995 | Female | 20 to 24 | 43%<br>(27-60%)                | 57%<br>(40-73%)          | 1.4<br>(0.75-2.1)                           | 3.5%<br>(2.1-5.3%)                   | 6.4%<br>(2.9-11%)                   | 25<br>(11-44)       | 2600<br>(1500-4000)    |
| Cuba     | 1995 | Female | 25 to 29 | 42%<br>(26-59%)                | 58%<br>(41-74%)          | 1.4<br>(0.8-2.1)                            | 3.3%<br>(2.2-4.6%)                   | 5.9%<br>(3.1-9.3%)                  | 27<br>(14-42)       | 2700<br>(1700-3800)    |
| Cuba     | 1995 | Female | 30 to 34 | 41%<br>(25-58%)                | 59%<br>(42-75%)          | 1.3<br>(0.8-2.1)                            | 2.9%<br>(2-4.2%)                     | 5.3%<br>(2.9-8.4%)                  | 28<br>(16-44)       | 2500<br>(1600-3600)    |
| Cuba     | 1995 | Female | 35 to 39 | 40%<br>(26-58%)                | 60%<br>(42-74%)          | 1.2<br>(0.71-2)                             | 2.7%<br>(1.7-4.1%)                   | 5%<br>(2.8-7.8%)                    | 26<br>(15-41)       | 1900<br>(1100-2700)    |
| Cuba     | 1995 | Female | 40 to 44 | 39%<br>(24-57%)                | 61%<br>(43-76%)          | 1.2<br>(0.6-1.9)                            | 2.6%<br>(1.4-4%)                     | 4.6%<br>(2.3-7.4%)                  | 36<br>(17-59)       | 2100<br>(1100-3200)    |
| Cuba     | 1995 | Female | 45 to 49 | 37%<br>(22-54%)                | 63%<br>(46-78%)          | 1.1<br>(0.58-1.9)                           | 2.6%<br>(1.3-4.5%)                   | 4.3%<br>(1.9-7.5%)                  | 43<br>(20-77)       | 2100<br>(1000-3500)    |
| Cuba     | 1995 | Female | 50 to 54 | 33%<br>(20-49%)                | 67%<br>(51-80%)          | 1<br>(0.53-1.7)                             | 2.4%<br>(1-4.2%)                     | 3.7%<br>(1.6-6.6%)                  | 49<br>(21-89)       | 2000<br>(890-3600)     |
| Cuba     | 1995 | Female | 55 to 59 | 29%<br>(17-45%)                | 71%<br>(55-83%)          | 0.85<br>(0.43-1.5)                          | 1.9%<br>(0.79-3.5%)                  | 2.9%<br>(1.1-5.3%)                  | 49<br>(19-90)       | 1700<br>(690-3100)     |
| Cuba     | 1995 | Female | 60 to 64 | 26%<br>(15-41%)                | 74%<br>(59-85%)          | 0.73<br>(0.35-1.3)                          | 1.5%<br>(0.34-3.1%)                  | 2.1%<br>(0.43-4.3%)                 | 45<br>(9.5-94)      | 1300<br>(300-2700)     |

| Location | Year | Sex    | Age      | Prevalence of current drinkers | Prevalence of abstainers | Population average of standard drinks daily | Percent of total attributable deaths | Percent of total attributable DALYs | Attributable deaths | Attributable DALYs      |
|----------|------|--------|----------|--------------------------------|--------------------------|---------------------------------------------|--------------------------------------|-------------------------------------|---------------------|-------------------------|
| Cuba     | 1995 | Female | 65 to 69 | 24%<br>(15-37%)                | 76%<br>(63-85%)          | 0.63<br>(0.33-1.1)                          | 1.1%<br>(0.11-2.3%)                  | 1.5%<br>(0.12-3.2%)                 | 42<br>(3.4-89)      | 1000<br>(110-2200)      |
| Cuba     | 1995 | Female | 70 to 74 | 21%<br>(13-34%)                | 79%<br>(66-87%)          | 0.53<br>(0.26-0.95)                         | 0.76%<br>(-0.23-2%)                  | 0.98%<br>(-0.33-2.6%)               | 36<br>(-12-94)      | 690<br>(-210-1800)      |
| Cuba     | 1995 | Female | 75 to 79 | 19%<br>(11-31%)                | 81%<br>(69-89%)          | 0.46<br>(0.21-0.85)                         | 0.49%<br>(-0.43-1.6%)                | 0.59%<br>(-0.6-2%)                  | 27<br>(-28-92)      | 420<br>(-370-1400)      |
| Cuba     | 1995 | Female | 80 to 84 | 17%<br>(9.9-28%)               | 83%<br>(72-90%)          | 0.43<br>(0.2-0.74)                          | 0.37%<br>(-0.4-1.3%)                 | 0.41%<br>(-0.55-1.6%)               | 22<br>(-29-83)      | 270<br>(-280-930)       |
| Cuba     | 1995 | Female | 85 to 89 | 17%<br>(10-27%)                | 83%<br>(73-90%)          | 0.44<br>(0.21-0.79)                         | 0.25%<br>(-0.5-1.2%)                 | 0.21%<br>(-0.73-1.4%)               | 11<br>(-37-71)      | 120<br>(-240-570)       |
| Cuba     | 1995 | Female | 90 to 94 | 20%<br>(11-31%)                | 80%<br>(69-89%)          | 0.51<br>(0.22-1)                            | 0.24%<br>(-0.65-1.6%)                | 0.15%<br>(-0.97-1.9%)               | 4.3<br>(-28-54)     | 44<br>(-120-290)        |
| Cuba     | 1995 | Female | 95 plus  | 23%<br>(12-39%)                | 77%<br>(61-88%)          | 0.61<br>(0.21-1.3)                          | 0.33%<br>(-0.88-2.3%)                | 0.17%<br>(-1.4-2.6%)                | 1.7<br>(-14-27)     | 14<br>(-37-97)          |
| Cuba     | 1995 | Male   | All Ages | 56%<br>(48-65%)                | 44%<br>(35-52%)          | 1.9<br>(1.7-2.2)                            | 6.3%<br>(4.9-7.9%)                   | 5.2%<br>(3.3-7.6%)                  | 2300<br>(1400-3300) | 96000<br>(75000-120000) |
| Cuba     | 1995 | Male   | 15 to 19 | 54%<br>(36-71%)                | 46%<br>(29-64%)          | 1.3<br>(0.73-2.2)                           | 4.9%<br>(3-7.5%)                     | 7.1%<br>(3.9-12%)                   | 29<br>(15-49)       | 2700<br>(1700-4100)     |
| Cuba     | 1995 | Male   | 20 to 24 | 65%<br>(46-80%)                | 35%<br>(20-54%)          | 2.6<br>(1.6-3.8)                            | 10%<br>(6.9-14%)                     | 13%<br>(8-20%)                      | 100<br>(60-150)     | 9000<br>(6100-12000)    |
| Cuba     | 1995 | Male   | 25 to 29 | 68%<br>(49-82%)                | 32%<br>(18-51%)          | 3.1<br>(2-4.4)                              | 11%<br>(7.9-15%)                     | 15%<br>(10-22%)                     | 140<br>(90-200)     | 11000<br>(7900-15000)   |
| Cuba     | 1995 | Male   | 30 to 34 | 69%<br>(49-83%)                | 31%<br>(17-51%)          | 3.2<br>(2-4.5)                              | 11%<br>(7.9-15%)                     | 16%<br>(10-21%)                     | 160<br>(100-220)    | 11000<br>(7900-15000)   |
| Cuba     | 1995 | Male   | 35 to 39 | 69%<br>(52-83%)                | 31%<br>(17-48%)          | 3<br>(1.8-4.5)                              | 11%<br>(7.5-14%)                     | 15%<br>(9.8-21%)                    | 130<br>(82-180)     | 8300<br>(5800-11000)    |
| Cuba     | 1995 | Male   | 40 to 44 | 68%<br>(51-82%)                | 32%<br>(18-49%)          | 2.9<br>(1.7-4.4)                            | 10%<br>(6.8-14%)                     | 14%<br>(8.9-20%)                    | 160<br>(99-230)     | 9000<br>(6000-12000)    |
| Cuba     | 1995 | Male   | 45 to 49 | 66%<br>(45-81%)                | 34%<br>(19-55%)          | 2.7<br>(1.5-4.5)                            | 9.8%<br>(6.3-14%)                    | 13%<br>(7.7-19%)                    | 180<br>(110-270)    | 8900<br>(5700-13000)    |
| Cuba     | 1995 | Male   | 50 to 54 | 64%<br>(45-80%)                | 36%<br>(20-55%)          | 2.5<br>(1.4-4.1)                            | 8.6%<br>(5.2-13%)                    | 11%<br>(6.3-16%)                    | 210<br>(120-310)    | 8700<br>(5300-13000)    |
| Cuba     | 1995 | Male   | 55 to 59 | 62%<br>(44-78%)                | 38%<br>(22-56%)          | 2.3<br>(1.2-3.6)                            | 7.5%<br>(4.4-11%)                    | 9.4%<br>(5.3-14%)                   | 230<br>(130-350)    | 8000<br>(4700-12000)    |
| Cuba     | 1995 | Male   | 60 to 64 | 60%<br>(40-78%)                | 40%<br>(22-60%)          | 2<br>(1.1-3.5)                              | 6%<br>(3-10%)                        | 7.2%<br>(3.4-12%)                   | 210<br>(99-350)     | 6200<br>(3100-10000)    |
| Cuba     | 1995 | Male   | 65 to 69 | 58%<br>(39-76%)                | 42%<br>(24-61%)          | 1.8<br>(0.98-3)                             | 4.6%<br>(2.1-8.2%)                   | 5.4%<br>(2.3-10%)                   | 210<br>(89-380)     | 5100<br>(2300-9000)     |
| Cuba     | 1995 | Male   | 70 to 74 | 55%<br>(36-71%)                | 45%<br>(29-64%)          | 1.5<br>(0.75-2.6)                           | 3.3%<br>(1.1-7%)                     | 3.8%<br>(1.2-8.2%)                  | 180<br>(56-390)     | 3600<br>(1200-7600)     |
| Cuba     | 1995 | Male   | 75 to 79 | 49%<br>(30-69%)                | 51%<br>(31-70%)          | 1.2<br>(0.59-2.2)                           | 2.3%<br>(0.48-5.4%)                  | 2.6%<br>(0.42-6.2%)                 | 150<br>(24-360)     | 2300<br>(480-5300)      |
| Cuba     | 1995 | Male   | 80 to 84 | 44%<br>(26-62%)                | 56%<br>(38-74%)          | 1<br>(0.52-1.7)                             | 1.6%<br>(0.21-3.8%)                  | 1.7%<br>(0.1-4.3%)                  | 100<br>(5.8-260)    | 1200<br>(160-2800)      |

| Location | Year | Sex    | Age      | Prevalence of current drinkers | Prevalence of abstainers | Population average of standard drinks daily | Percent of total attributable deaths | Percent of total attributable DALYs | Attributable deaths | Attributable DALYs      |
|----------|------|--------|----------|--------------------------------|--------------------------|---------------------------------------------|--------------------------------------|-------------------------------------|---------------------|-------------------------|
| Cuba     | 1995 | Male   | 85 to 89 | 39%<br>(23-56%)                | 61%<br>(44-77%)          | 0.89<br>(0.44-1.6)                          | 1.1%<br>(-0.071-3.2%)                | 1.1%<br>(-0.29-3.6%)                | 52<br>(-14-170)     | 460<br>(-32-1400)       |
| Cuba     | 1995 | Male   | 90 to 94 | 39%<br>(25-56%)                | 61%<br>(44-75%)          | 0.9<br>(0.43-1.6)                           | 0.77%<br>(-0.39-2.7%)                | 0.67%<br>(-0.72-3%)                 | 17<br>(-18-77)      | 120<br>(-60-430)        |
| Cuba     | 1995 | Male   | 95 plus  | 43%<br>(24-63%)                | 57%<br>(37-76%)          | 0.98<br>(0.41-1.9)                          | 0.77%<br>(-0.68-3.3%)                | 0.53%<br>(-1.3-3.5%)                | 4.1<br>(-10-27)     | 25<br>(-22-100)         |
| Cuba     | 2000 | Female | All Ages | 33%<br>(27-40%)                | 67%<br>(60-73%)          | 0.86<br>(0.73-1)                            | 1.6%<br>(1.1-2.2%)                   | 1.3%<br>(0.43-2.4%)                 | 470<br>(150-850)    | 21000<br>(14000-28000)  |
| Cuba     | 2000 | Female | 15 to 19 | 38%<br>(25-55%)                | 62%<br>(45-75%)          | 0.92<br>(0.47-1.6)                          | 1.8%<br>(1.1-2.9%)                   | 4.3%<br>(2-7.8%)                    | 6.7<br>(3.1-12)     | 750<br>(450-1200)       |
| Cuba     | 2000 | Female | 20 to 24 | 44%<br>(29-60%)                | 56%<br>(40-71%)          | 1.4<br>(0.75-2.2)                           | 3.1%<br>(2-4.5%)                     | 5.8%<br>(2.8-9.7%)                  | 11<br>(5.6-19)      | 1400<br>(850-2000)      |
| Cuba     | 2000 | Female | 25 to 29 | 43%<br>(27-60%)                | 57%<br>(40-73%)          | 1.4<br>(0.8-2.1)                            | 3.1%<br>(2.1-4.3%)                   | 5.4%<br>(2.9-8.4%)                  | 18<br>(10-29)       | 2100<br>(1400-2900)     |
| Cuba     | 2000 | Female | 30 to 34 | 42%<br>(26-59%)                | 58%<br>(41-74%)          | 1.4<br>(0.81-2.1)                           | 2.8%<br>(1.9-3.8%)                   | 4.9%<br>(3-7.5%)                    | 22<br>(13-34)       | 2200<br>(1500-3100)     |
| Cuba     | 2000 | Female | 35 to 39 | 41%<br>(26-58%)                | 59%<br>(42-74%)          | 1.3<br>(0.74-1.9)                           | 2.5%<br>(1.7-3.7%)                   | 4.7%<br>(2.7-7.1%)                  | 29<br>(17-45)       | 2300<br>(1500-3200)     |
| Cuba     | 2000 | Female | 40 to 44 | 40%<br>(25-58%)                | 60%<br>(42-75%)          | 1.2<br>(0.63-1.9)                           | 2.5%<br>(1.5-3.7%)                   | 4.5%<br>(2.5-6.9%)                  | 30<br>(17-46)       | 1800<br>(1100-2700)     |
| Cuba     | 2000 | Female | 45 to 49 | 38%<br>(23-55%)                | 62%<br>(45-77%)          | 1.1<br>(0.6-2)                              | 2.5%<br>(1.4-4%)                     | 4.2%<br>(2.2-7.1%)                  | 44<br>(23-74)       | 2200<br>(1200-3500)     |
| Cuba     | 2000 | Female | 50 to 54 | 34%<br>(21-50%)                | 66%<br>(50-79%)          | 1<br>(0.53-1.7)                             | 2.4%<br>(1.1-4%)                     | 3.7%<br>(1.7-6.2%)                  | 50<br>(23-84)       | 2000<br>(1000-3400)     |
| Cuba     | 2000 | Female | 55 to 59 | 30%<br>(18-46%)                | 70%<br>(54-82%)          | 0.86<br>(0.44-1.5)                          | 1.9%<br>(0.83-3.4%)                  | 2.8%<br>(1.2-5.1%)                  | 51<br>(21-93)       | 1800<br>(750-3100)      |
| Cuba     | 2000 | Female | 60 to 64 | 27%<br>(16-42%)                | 73%<br>(58-84%)          | 0.73<br>(0.36-1.3)                          | 1.5%<br>(0.43-3%)                    | 2.1%<br>(0.62-4.2%)                 | 49<br>(14-98)       | 1500<br>(430-2900)      |
| Cuba     | 2000 | Female | 65 to 69 | 24%<br>(15-38%)                | 76%<br>(62-85%)          | 0.64<br>(0.33-1.1)                          | 1.1%<br>(0.16-2.3%)                  | 1.5%<br>(0.18-3.1%)                 | 43<br>(5.3-90)      | 1000<br>(150-2200)      |
| Cuba     | 2000 | Female | 70 to 74 | 22%<br>(14-35%)                | 78%<br>(65-86%)          | 0.54<br>(0.27-0.98)                         | 0.74%<br>(-0.23-1.9%)                | 0.96%<br>(-0.33-2.5%)               | 36<br>(-12-94)      | 700<br>(-210-1800)      |
| Cuba     | 2000 | Female | 75 to 79 | 20%<br>(12-32%)                | 80%<br>(68-88%)          | 0.47<br>(0.21-0.87)                         | 0.54%<br>(-0.33-1.6%)                | 0.66%<br>(-0.49-2.1%)               | 30<br>(-22-93)      | 470<br>(-290-1400)      |
| Cuba     | 2000 | Female | 80 to 84 | 18%<br>(10-29%)                | 82%<br>(71-90%)          | 0.44<br>(0.21-0.76)                         | 0.39%<br>(-0.31-1.3%)                | 0.44%<br>(-0.49-1.6%)               | 23<br>(-25-83)      | 280<br>(-220-960)       |
| Cuba     | 2000 | Female | 85 to 89 | 18%<br>(10-29%)                | 82%<br>(71-90%)          | 0.45<br>(0.21-0.81)                         | 0.29%<br>(-0.4-1.2%)                 | 0.27%<br>(-0.65-1.5%)               | 13<br>(-32-72)      | 140<br>(-190-590)       |
| Cuba     | 2000 | Female | 90 to 94 | 20%<br>(12-32%)                | 80%<br>(68-88%)          | 0.51<br>(0.22-0.99)                         | 0.28%<br>(-0.51-1.5%)                | 0.19%<br>(-0.84-1.8%)               | 6.1<br>(-26-57)     | 60<br>(-100-320)        |
| Cuba     | 2000 | Female | 95 plus  | 24%<br>(12-40%)                | 76%<br>(60-88%)          | 0.61<br>(0.22-1.2)                          | 0.36%<br>(-0.72-2%)                  | 0.16%<br>(-1.3-2.4%)                | 2<br>(-16-29)       | 20<br>(-39-110)         |
| Cuba     | 2000 | Male   | All Ages | 58%<br>(50-66%)                | 42%<br>(34-50%)          | 1.9<br>(1.7-2.2)                            | 6.4%<br>(5-8%)                       | 5.4%<br>(3.6-7.7%)                  | 2300<br>(1500-3300) | 96000<br>(75000-120000) |

| Location | Year | Sex    | Age      | Prevalence of current drinkers | Prevalence of abstainers | Population average of standard drinks daily | Percent of total attributable deaths | Percent of total attributable DALYs | Attributable deaths | Attributable DALYs     |
|----------|------|--------|----------|--------------------------------|--------------------------|---------------------------------------------|--------------------------------------|-------------------------------------|---------------------|------------------------|
| Cuba     | 2000 | Male   | 15 to 19 | 55%<br>(38-72%)                | 45%<br>(28-62%)          | 1.4<br>(0.74-2.2)                           | 4.4%<br>(2.9-6.6%)                   | 6.9%<br>(3.8-11%)                   | 20<br>(11-33)       | 2000<br>(1300-3000)    |
| Cuba     | 2000 | Male   | 20 to 24 | 66%<br>(48-80%)                | 34%<br>(20-52%)          | 2.6<br>(1.6-3.9)                            | 9.8%<br>(6.8-13%)                    | 13%<br>(8.2-20%)                    | 55<br>(33-81)       | 5200<br>(3600-7200)    |
| Cuba     | 2000 | Male   | 25 to 29 | 69%<br>(51-83%)                | 31%<br>(17-49%)          | 3.1<br>(1.9-4.4)                            | 11%<br>(7.7-14%)                     | 15%<br>(9.7-22%)                    | 110<br>(68-150)     | 9000<br>(6300-12000)   |
| Cuba     | 2000 | Male   | 30 to 34 | 70%<br>(51-84%)                | 30%<br>(16-49%)          | 3.2<br>(2.1-4.4)                            | 11%<br>(7.8-14%)                     | 16%<br>(11-21%)                     | 130<br>(89-180)     | 10000<br>(7300-13000)  |
| Cuba     | 2000 | Male   | 35 to 39 | 70%<br>(53-84%)                | 30%<br>(16-47%)          | 3<br>(1.9-4.3)                              | 11%<br>(7.7-14%)                     | 16%<br>(11-21%)                     | 160<br>(110-220)    | 11000<br>(7800-14000)  |
| Cuba     | 2000 | Male   | 40 to 44 | 69%<br>(52-83%)                | 31%<br>(17-48%)          | 2.9<br>(1.7-4.3)                            | 11%<br>(7.6-15%)                     | 15%<br>(10-21%)                     | 150<br>(100-210)    | 8800<br>(6200-12000)   |
| Cuba     | 2000 | Male   | 45 to 49 | 67%<br>(47-82%)                | 33%<br>(18-53%)          | 2.7<br>(1.5-4.3)                            | 11%<br>(7.2-14%)                     | 14%<br>(9.2-20%)                    | 210<br>(140-300)    | 10000<br>(7200-14000)  |
| Cuba     | 2000 | Male   | 50 to 54 | 65%<br>(46-81%)                | 35%<br>(19-54%)          | 2.5<br>(1.4-4)                              | 9.3%<br>(6-13%)                      | 12%<br>(7.7-17%)                    | 230<br>(150-330)    | 9700<br>(6400-14000)   |
| Cuba     | 2000 | Male   | 55 to 59 | 63%<br>(45-79%)                | 37%<br>(21-55%)          | 2.2<br>(1.2-3.5)                            | 7.9%<br>(4.9-12%)                    | 9.9%<br>(5.9-15%)                   | 260<br>(160-390)    | 9100<br>(5700-13000)   |
| Cuba     | 2000 | Male   | 60 to 64 | 61%<br>(41-78%)                | 39%<br>(22-59%)          | 2<br>(1.1-3.3)                              | 6.2%<br>(3.4-10%)                    | 7.5%<br>(3.9-13%)                   | 240<br>(130-410)    | 7300<br>(3900-12000)   |
| Cuba     | 2000 | Male   | 65 to 69 | 60%<br>(40-77%)                | 40%<br>(23-60%)          | 1.8<br>(0.98-2.9)                           | 4.7%<br>(2.4-8.1%)                   | 5.7%<br>(2.7-9.9%)                  | 220<br>(100-380)    | 5400<br>(2700-9100)    |
| Cuba     | 2000 | Male   | 70 to 74 | 56%<br>(37-73%)                | 44%<br>(27-63%)          | 1.5<br>(0.77-2.6)                           | 3.4%<br>(1.3-6.8%)                   | 3.9%<br>(1.4-8%)                    | 190<br>(68-390)     | 3800<br>(1500-7500)    |
| Cuba     | 2000 | Male   | 75 to 79 | 51%<br>(32-70%)                | 49%<br>(30-68%)          | 1.2<br>(0.6-2.2)                            | 2.4%<br>(0.66-5.1%)                  | 2.7%<br>(0.63-5.9%)                 | 150<br>(36-330)     | 2300<br>(640-5000)     |
| Cuba     | 2000 | Male   | 80 to 84 | 45%<br>(27-63%)                | 55%<br>(37-73%)          | 1<br>(0.52-1.7)                             | 1.6%<br>(0.34-3.7%)                  | 1.8%<br>(0.23-4.3%)                 | 99<br>(13-240)      | 1200<br>(240-2700)     |
| Cuba     | 2000 | Male   | 85 to 89 | 40%<br>(24-57%)                | 60%<br>(43-76%)          | 0.9<br>(0.44-1.6)                           | 1.1%<br>(0.066-3%)                   | 1.2%<br>(-0.1-3.5%)                 | 54<br>(-4.7-160)    | 480<br>(28-1300)       |
| Cuba     | 2000 | Male   | 90 to 94 | 41%<br>(26-58%)                | 59%<br>(42-74%)          | 0.92<br>(0.43-1.7)                          | 0.83%<br>(-0.26-2.8%)                | 0.75%<br>(-0.58-3.1%)               | 19<br>(-15-81)      | 140<br>(-42-450)       |
| Cuba     | 2000 | Male   | 95 plus  | 44%<br>(25-64%)                | 56%<br>(36-75%)          | 1<br>(0.41-1.9)                             | 0.84%<br>(-0.57-3.3%)                | 0.6%<br>(-1.2-3.6%)                 | 5.3<br>(-11-32)     | 31<br>(-21-120)        |
| Cuba     | 2005 | Female | All Ages | 34%<br>(28-42%)                | 66%<br>(58-72%)          | 0.96<br>(0.82-1.1)                          | 1.7%<br>(1.2-2.3%)                   | 1.5%<br>(0.63-2.6%)                 | 580<br>(240-970)    | 22000<br>(15000-30000) |
| Cuba     | 2005 | Female | 15 to 19 | 40%<br>(26-56%)                | 60%<br>(44-74%)          | 1<br>(0.53-1.8)                             | 1.7%<br>(1.1-2.6%)                   | 4.5%<br>(2.3-7.8%)                  | 5.9<br>(3.1-10)     | 750<br>(450-1100)      |
| Cuba     | 2005 | Female | 20 to 24 | 46%<br>(30-62%)                | 54%<br>(38-70%)          | 1.5<br>(0.81-2.5)                           | 3%<br>(2-4.3%)                       | 5.8%<br>(3-9.2%)                    | 8.6<br>(4.5-14)     | 1200<br>(780-1800)     |
| Cuba     | 2005 | Female | 25 to 29 | 45%<br>(28-62%)                | 55%<br>(38-72%)          | 1.6<br>(0.87-2.5)                           | 3%<br>(2.1-4.1%)                     | 5.4%<br>(3.2-8.4%)                  | 10<br>(5.8-15)      | 1300<br>(850-1800)     |
| Cuba     | 2005 | Female | 30 to 34 | 43%<br>(27-61%)                | 57%<br>(39-73%)          | 1.5<br>(0.88-2.3)                           | 2.7%<br>(1.9-3.8%)                   | 5.1%<br>(3.2-7.5%)                  | 17<br>(11-26)       | 1900<br>(1300-2600)    |

| Location | Year | Sex    | Age      | Prevalence of current drinkers | Prevalence of abstainers | Population average of standard drinks daily | Percent of total attributable deaths | Percent of total attributable DALYs | Attributable deaths | Attributable DALYs       |
|----------|------|--------|----------|--------------------------------|--------------------------|---------------------------------------------|--------------------------------------|-------------------------------------|---------------------|--------------------------|
| Cuba     | 2005 | Female | 35 to 39 | 42%<br>(27-60%)                | 58%<br>(40-73%)          | 1.4<br>(0.83-2.1)                           | 2.5%<br>(1.8-3.4%)                   | 4.9%<br>(3.2-7.1%)                  | 26<br>(16-37)       | 2100<br>(1500-2900)      |
| Cuba     | 2005 | Female | 40 to 44 | 41%<br>(27-59%)                | 59%<br>(41-73%)          | 1.3<br>(0.73-2)                             | 2.5%<br>(1.6-3.6%)                   | 4.9%<br>(3-7.2%)                    | 39<br>(24-57)       | 2500<br>(1600-3400)      |
| Cuba     | 2005 | Female | 45 to 49 | 39%<br>(24-57%)                | 61%<br>(43-76%)          | 1.3<br>(0.67-2.1)                           | 2.6%<br>(1.6-4%)                     | 4.7%<br>(2.6-7.4%)                  | 42<br>(24-67)       | 2100<br>(1300-3200)      |
| Cuba     | 2005 | Female | 50 to 54 | 36%<br>(22-53%)                | 64%<br>(47-78%)          | 1.1<br>(0.61-1.8)                           | 2.5%<br>(1.3-3.9%)                   | 4.1%<br>(2.1-6.4%)                  | 57<br>(29-91)       | 2400<br>(1300-3700)      |
| Cuba     | 2005 | Female | 55 to 59 | 31%<br>(19-48%)                | 69%<br>(52-81%)          | 0.96<br>(0.5-1.6)                           | 2.2%<br>(1.1-3.7%)                   | 3.3%<br>(1.6-5.6%)                  | 60<br>(30-100)      | 2100<br>(1100-3500)      |
| Cuba     | 2005 | Female | 60 to 64 | 28%<br>(17-43%)                | 72%<br>(57-83%)          | 0.82<br>(0.4-1.4)                           | 1.8%<br>(0.67-3.2%)                  | 2.5%<br>(0.97-4.6%)                 | 62<br>(24-120)      | 1800<br>(710-3400)       |
| Cuba     | 2005 | Female | 65 to 69 | 26%<br>(16-39%)                | 74%<br>(61-84%)          | 0.71<br>(0.37-1.2)                          | 1.3%<br>(0.41-2.5%)                  | 1.8%<br>(0.57-3.4%)                 | 57<br>(18-110)      | 1400<br>(440-2600)       |
| Cuba     | 2005 | Female | 70 to 74 | 23%<br>(14-37%)                | 77%<br>(63-86%)          | 0.6<br>(0.3-1.1)                            | 0.93%<br>(-0.024-2.1%)               | 1.2%<br>(-0.062-2.8%)               | 48<br>(-2.4-110)    | 930<br>(-22-2100)        |
| Cuba     | 2005 | Female | 75 to 79 | 21%<br>(13-33%)                | 79%<br>(67-87%)          | 0.52<br>(0.24-0.96)                         | 0.71%<br>(-0.15-1.9%)                | 0.9%<br>(-0.24-2.3%)                | 43<br>(-11-110)     | 660<br>(-140-1700)       |
| Cuba     | 2005 | Female | 80 to 84 | 19%<br>(11-30%)                | 81%<br>(70-89%)          | 0.49<br>(0.24-0.84)                         | 0.6%<br>(-0.096-1.5%)                | 0.72%<br>(-0.18-1.9%)               | 39<br>(-9.8-110)    | 460<br>(-69-1200)        |
| Cuba     | 2005 | Female | 85 to 89 | 19%<br>(11-29%)                | 81%<br>(71-89%)          | 0.5<br>(0.24-0.88)                          | 0.54%<br>(-0.19-1.5%)                | 0.58%<br>(-0.33-1.8%)               | 31<br>(-18-94)      | 280<br>(-91-750)         |
| Cuba     | 2005 | Female | 90 to 94 | 21%<br>(13-33%)                | 79%<br>(67-87%)          | 0.57<br>(0.25-1.1)                          | 0.56%<br>(-0.33-2%)                  | 0.54%<br>(-0.58-2.4%)               | 21<br>(-22-89)      | 140<br>(-81-480)         |
| Cuba     | 2005 | Female | 95 plus  | 25%<br>(13-42%)                | 75%<br>(58-87%)          | 0.68<br>(0.25-1.4)                          | 0.67%<br>(-0.52-2.7%)                | 0.57%<br>(-0.97-3.1%)               | 9.6<br>(-16-52)     | 49<br>(-38-190)          |
| Cuba     | 2005 | Male   | All Ages | 60%<br>(51-67%)                | 40%<br>(33-49%)          | 2.1<br>(1.9-2.4)                            | 6.9%<br>(5.5-8.4%)                   | 6.1%<br>(4.2-8.4%)                  | 2700<br>(1900-3700) | 100000<br>(82000-120000) |
| Cuba     | 2005 | Male   | 15 to 19 | 57%<br>(39-73%)                | 43%<br>(27-61%)          | 1.5<br>(0.8-2.4)                            | 4.4%<br>(2.9-6.3%)                   | 7.2%<br>(4.1-12%)                   | 19<br>(11-31)       | 2100<br>(1400-3100)      |
| Cuba     | 2005 | Male   | 20 to 24 | 67%<br>(50-82%)                | 33%<br>(18-50%)          | 2.8<br>(1.7-4.2)                            | 9.6%<br>(6.7-13%)                    | 14%<br>(8.4-20%)                    | 43<br>(26-63)       | 4500<br>(3100-6100)      |
| Cuba     | 2005 | Male   | 25 to 29 | 70%<br>(52-83%)                | 30%<br>(17-48%)          | 3.3<br>(2.1-4.9)                            | 11%<br>(7.9-15%)                     | 16%<br>(10-23%)                     | 63<br>(40-89)       | 5600<br>(4000-7400)      |
| Cuba     | 2005 | Male   | 30 to 34 | 71%<br>(52-84%)                | 29%<br>(16-48%)          | 3.5<br>(2.2-4.9)                            | 11%<br>(8-14%)                       | 17%<br>(12-23%)                     | 110<br>(76-150)     | 8600<br>(6300-11000)     |
| Cuba     | 2005 | Male   | 35 to 39 | 71%<br>(54-84%)                | 29%<br>(16-46%)          | 3.3<br>(2.1-4.7)                            | 11%<br>(8.2-14%)                     | 17%<br>(12-22%)                     | 150<br>(110-200)    | 10000<br>(7800-13000)    |
| Cuba     | 2005 | Male   | 40 to 44 | 70%<br>(53-83%)                | 30%<br>(17-47%)          | 3.1<br>(1.9-4.5)                            | 11%<br>(8.2-14%)                     | 17%<br>(12-22%)                     | 210<br>(150-280)    | 12000<br>(9100-16000)    |
| Cuba     | 2005 | Male   | 45 to 49 | 68%<br>(47-82%)                | 32%<br>(18-53%)          | 2.9<br>(1.6-4.6)                            | 11%<br>(8.2-15%)                     | 16%<br>(11-22%)                     | 220<br>(150-290)    | 11000<br>(7600-14000)    |
| Cuba     | 2005 | Male   | 50 to 54 | 66%<br>(48-82%)                | 34%<br>(18-52%)          | 2.7<br>(1.5-4.2)                            | 10%<br>(7.1-14%)                     | 14%<br>(9.5-19%)                    | 280<br>(190-390)    | 12000<br>(8100-16000)    |

| Location | Year | Sex    | Age      | Prevalence of current drinkers | Prevalence of abstainers | Population average of standard drinks daily | Percent of total attributable deaths | Percent of total attributable DALYs | Attributable deaths | Attributable DALYs     |
|----------|------|--------|----------|--------------------------------|--------------------------|---------------------------------------------|--------------------------------------|-------------------------------------|---------------------|------------------------|
| Cuba     | 2005 | Male   | 55 to 59 | 64%<br>(47-80%)                | 36%<br>(20-53%)          | 2.5<br>(1.4-3.9)                            | 8.9%<br>(5.8-13%)                    | 11%<br>(7.3-16%)                    | 300<br>(190-440)    | 11000<br>(7000-15000)  |
| Cuba     | 2005 | Male   | 60 to 64 | 62%<br>(42-79%)                | 38%<br>(21-58%)          | 2.2<br>(1.2-3.7)                            | 7%<br>(4-11%)                        | 8.6%<br>(4.8-14%)                   | 310<br>(170-490)    | 9100<br>(5200-14000)   |
| Cuba     | 2005 | Male   | 65 to 69 | 61%<br>(41-77%)                | 39%<br>(23-59%)          | 2<br>(1.1-3.1)                              | 5.5%<br>(3.1-8.9%)                   | 6.7%<br>(3.7-11%)                   | 290<br>(160-470)    | 7000<br>(3900-11000)   |
| Cuba     | 2005 | Male   | 70 to 74 | 57%<br>(39-73%)                | 43%<br>(27-61%)          | 1.6<br>(0.84-2.8)                           | 4.1%<br>(1.8-7.4%)                   | 4.8%<br>(2-8.9%)                    | 240<br>(100-450)    | 4700<br>(2100-8700)    |
| Cuba     | 2005 | Male   | 75 to 79 | 52%<br>(33-71%)                | 48%<br>(29-67%)          | 1.4<br>(0.68-2.4)                           | 2.9%<br>(1-5.6%)                     | 3.3%<br>(1.1-6.7%)                  | 190<br>(61-390)     | 3000<br>(1000-5800)    |
| Cuba     | 2005 | Male   | 80 to 84 | 46%<br>(28-64%)                | 54%<br>(36-72%)          | 1.1<br>(0.58-1.9)                           | 2%<br>(0.57-4.1%)                    | 2.3%<br>(0.55-4.8%)                 | 130<br>(32-280)     | 1500<br>(440-3100)     |
| Cuba     | 2005 | Male   | 85 to 89 | 42%<br>(25-59%)                | 58%<br>(41-75%)          | 1<br>(0.49-1.7)                             | 1.5%<br>(0.3-3.5%)                   | 1.6%<br>(0.18-4%)                   | 77<br>(8.5-190)     | 650<br>(140-1500)      |
| Cuba     | 2005 | Male   | 90 to 94 | 42%<br>(27-59%)                | 58%<br>(41-73%)          | 1<br>(0.48-1.8)                             | 1.2%<br>(-0.049-3.3%)                | 1.2%<br>(-0.32-3.8%)                | 35<br>(-9.3-110)    | 220<br>(-9.3-620)      |
| Cuba     | 2005 | Male   | 95 plus  | 45%<br>(26-65%)                | 55%<br>(35-74%)          | 1.1<br>(0.46-2.1)                           | 1.2%<br>(-0.37-3.9%)                 | 1.1%<br>(-0.86-4.4%)                | 11<br>(-8.9-46)     | 52<br>(-17-170)        |
| Cuba     | 2010 | Female | All Ages | 35%<br>(29-42%)                | 65%<br>(58-71%)          | 1<br>(0.87-1.2)                             | 1.8%<br>(1.3-2.4%)                   | 1.8%<br>(0.86-3%)                   | 720<br>(340-1200)   | 24000<br>(17000-33000) |
| Cuba     | 2010 | Female | 15 to 19 | 40%<br>(27-57%)                | 60%<br>(43-73%)          | 1.1<br>(0.54-1.9)                           | 1.8%<br>(1.1-2.7%)                   | 4.8%<br>(2.5-8.2%)                  | 4.7<br>(2.5-8.1)    | 630<br>(380-960)       |
| Cuba     | 2010 | Female | 20 to 24 | 46%<br>(30-63%)                | 54%<br>(37-70%)          | 1.6<br>(0.86-2.7)                           | 3%<br>(2-4.2%)                       | 5.9%<br>(3.2-9.4%)                  | 8.8<br>(4.8-14)     | 1300<br>(850-1900)     |
| Cuba     | 2010 | Female | 25 to 29 | 46%<br>(30-63%)                | 54%<br>(37-70%)          | 1.7<br>(0.93-2.7)                           | 3%<br>(2.1-4.1%)                     | 5.7%<br>(3.3-8.7%)                  | 8.5<br>(5-13)       | 1200<br>(800-1700)     |
| Cuba     | 2010 | Female | 30 to 34 | 44%<br>(28-61%)                | 56%<br>(39-72%)          | 1.6<br>(0.92-2.6)                           | 2.7%<br>(1.9-3.7%)                   | 5.5%<br>(3.5-8%)                    | 11<br>(6.7-16)      | 1200<br>(840-1700)     |
| Cuba     | 2010 | Female | 35 to 39 | 43%<br>(28-61%)                | 57%<br>(39-72%)          | 1.5<br>(0.88-2.4)                           | 2.6%<br>(1.8-3.5%)                   | 5.2%<br>(3.4-7.4%)                  | 21<br>(14-31)       | 1900<br>(1300-2600)    |
| Cuba     | 2010 | Female | 40 to 44 | 42%<br>(27-60%)                | 58%<br>(40-73%)          | 1.4<br>(0.78-2.2)                           | 2.5%<br>(1.7-3.7%)                   | 5.2%<br>(3.3-7.7%)                  | 37<br>(23-53)       | 2400<br>(1600-3400)    |
| Cuba     | 2010 | Female | 45 to 49 | 40%<br>(24-57%)                | 60%<br>(43-76%)          | 1.4<br>(0.75-2.2)                           | 2.7%<br>(1.7-4.1%)                   | 5.1%<br>(3.1-7.8%)                  | 59<br>(36-91)       | 3000<br>(1900-4500)    |
| Cuba     | 2010 | Female | 50 to 54 | 36%<br>(23-54%)                | 64%<br>(46-77%)          | 1.2<br>(0.68-1.9)                           | 2.7%<br>(1.5-4.1%)                   | 4.6%<br>(2.6-6.9%)                  | 57<br>(33-89)       | 2400<br>(1400-3700)    |
| Cuba     | 2010 | Female | 55 to 59 | 32%<br>(20-48%)                | 68%<br>(52-80%)          | 1<br>(0.56-1.7)                             | 2.3%<br>(1.3-3.8%)                   | 3.7%<br>(2.1-6%)                    | 72<br>(42-120)      | 2600<br>(1500-4200)    |
| Cuba     | 2010 | Female | 60 to 64 | 28%<br>(17-44%)                | 72%<br>(56-83%)          | 0.88<br>(0.44-1.5)                          | 1.9%<br>(0.85-3.4%)                  | 2.8%<br>(1.3-4.9%)                  | 71<br>(32-130)      | 2100<br>(940-3800)     |
| Cuba     | 2010 | Female | 65 to 69 | 26%<br>(16-40%)                | 74%<br>(60-84%)          | 0.77<br>(0.41-1.3)                          | 1.5%<br>(0.63-2.8%)                  | 2.2%<br>(0.84-3.8%)                 | 73<br>(29-130)      | 1800<br>(710-3200)     |
| Cuba     | 2010 | Female | 70 to 74 | 24%<br>(15-37%)                | 76%<br>(63-85%)          | 0.65<br>(0.33-1.1)                          | 1.1%<br>(0.12-2.5%)                  | 1.5%<br>(0.17-3.3%)                 | 65<br>(7.4-140)     | 1300<br>(130-2800)     |



| Location | Year | Sex    | Age      | Prevalence of current drinkers | Prevalence of abstainers | Population average of standard drinks daily | Percent of total attributable deaths | Percent of total attributable DALYs | Attributable deaths | Attributable DALYs       |
|----------|------|--------|----------|--------------------------------|--------------------------|---------------------------------------------|--------------------------------------|-------------------------------------|---------------------|--------------------------|
| Cuba     | 2010 | Female | 75 to 79 | 21%<br>(12-34%)                | 79%<br>(66-88%)          | 0.57<br>(0.26-1.1)                          | 0.89%<br>(-0.011-2.2%)               | 1.2%<br>(-0.051-2.8%)               | 58<br>(-2.6-140)    | 890<br>(-11-2100)        |
| Cuba     | 2010 | Female | 80 to 84 | 20%<br>(11-31%)                | 80%<br>(69-89%)          | 0.54<br>(0.26-0.93)                         | 0.8%<br>(0.059-1.8%)                 | 1%<br>(0.0099-2.3%)                 | 59<br>(0.59-140)    | 680<br>(49-1500)         |
| Cuba     | 2010 | Female | 85 to 89 | 20%<br>(11-30%)                | 80%<br>(70-89%)          | 0.55<br>(0.26-0.99)                         | 0.78%<br>(0.031-1.9%)                | 0.89%<br>(-0.083-2.3%)              | 52<br>(-4.8-140)    | 450<br>(17-1100)         |
| Cuba     | 2010 | Female | 90 to 94 | 22%<br>(13-34%)                | 78%<br>(66-87%)          | 0.62<br>(0.28-1.2)                          | 0.87%<br>(-0.082-2.5%)               | 0.93%<br>(-0.31-3%)                 | 40<br>(-13-130)     | 250<br>(-22-730)         |
| Cuba     | 2010 | Female | 95 plus  | 26%<br>(13-42%)                | 74%<br>(58-87%)          | 0.75<br>(0.28-1.6)                          | 1.1%<br>(-0.29-3.7%)                 | 1%<br>(-0.66-4.3%)                  | 20<br>(-13-82)      | 88<br>(-24-300)          |
| Cuba     | 2010 | Male   | All Ages | 60%<br>(53-68%)                | 40%<br>(32-47%)          | 2.3<br>(2-2.7)                              | 7.4%<br>(6-9%)                       | 6.8%<br>(4.9-9.2%)                  | 3200<br>(2300-4400) | 110000<br>(91000-140000) |
| Cuba     | 2010 | Male   | 15 to 19 | 57%<br>(40-73%)                | 43%<br>(27-60%)          | 1.6<br>(0.83-2.6)                           | 4.4%<br>(2.9-6.2%)                   | 7.8%<br>(4.4-12%)                   | 15<br>(8.9-25)      | 1800<br>(1200-2600)      |
| Cuba     | 2010 | Male   | 20 to 24 | 67%<br>(51-82%)                | 33%<br>(18-49%)          | 3<br>(1.7-4.5)                              | 9.6%<br>(6.8-13%)                    | 14%<br>(8.6-21%)                    | 44<br>(27-66)       | 4800<br>(3300-6500)      |
| Cuba     | 2010 | Male   | 25 to 29 | 70%<br>(53-83%)                | 30%<br>(17-47%)          | 3.6<br>(2.2-5.4)                            | 11%<br>(7.7-14%)                     | 17%<br>(11-24%)                     | 55<br>(35-78)       | 5000<br>(3500-6700)      |
| Cuba     | 2010 | Male   | 30 to 34 | 71%<br>(53-85%)                | 29%<br>(15-47%)          | 3.7<br>(2.3-5.4)                            | 11%<br>(8-14%)                       | 18%<br>(12-24%)                     | 73<br>(50-98)       | 5700<br>(4100-7400)      |
| Cuba     | 2010 | Male   | 35 to 39 | 71%<br>(54-84%)                | 29%<br>(16-46%)          | 3.5<br>(2.2-5.2)                            | 11%<br>(8.3-14%)                     | 18%<br>(13-23%)                     | 140<br>(97-180)     | 9300<br>(6900-12000)     |
| Cuba     | 2010 | Male   | 40 to 44 | 70%<br>(54-84%)                | 30%<br>(16-46%)          | 3.3<br>(2-4.9)                              | 12%<br>(8.6-15%)                     | 19%<br>(14-24%)                     | 210<br>(160-280)    | 12000<br>(9400-16000)    |
| Cuba     | 2010 | Male   | 45 to 49 | 68%<br>(49-83%)                | 32%<br>(17-51%)          | 3.2<br>(1.9-4.8)                            | 12%<br>(8.8-15%)                     | 18%<br>(13-23%)                     | 320<br>(230-410)    | 16000<br>(12000-20000)   |
| Cuba     | 2010 | Male   | 50 to 54 | 67%<br>(49-82%)                | 33%<br>(18-51%)          | 2.9<br>(1.7-4.5)                            | 11%<br>(8.1-15%)                     | 16%<br>(11-21%)                     | 300<br>(210-410)    | 13000<br>(9000-17000)    |
| Cuba     | 2010 | Male   | 55 to 59 | 65%<br>(47-80%)                | 35%<br>(20-53%)          | 2.6<br>(1.5-4.2)                            | 9.9%<br>(6.7-13%)                    | 13%<br>(8.7-18%)                    | 380<br>(250-530)    | 13000<br>(9000-18000)    |
| Cuba     | 2010 | Male   | 60 to 64 | 63%<br>(43-80%)                | 37%<br>(20-57%)          | 2.4<br>(1.3-4)                              | 7.9%<br>(4.8-12%)                    | 9.9%<br>(5.9-15%)                   | 370<br>(220-560)    | 11000<br>(6600-16000)    |
| Cuba     | 2010 | Male   | 65 to 69 | 61%<br>(42-78%)                | 39%<br>(22-58%)          | 2.1<br>(1.2-3.3)                            | 6.3%<br>(3.8-9.7%)                   | 7.7%<br>(4.5-12%)                   | 370<br>(220-580)    | 9000<br>(5400-14000)     |
| Cuba     | 2010 | Male   | 70 to 74 | 58%<br>(39-74%)                | 42%<br>(26-61%)          | 1.8<br>(0.93-3)                             | 4.7%<br>(2.3-8.1%)                   | 5.7%<br>(2.7-10%)                   | 320<br>(150-560)    | 6300<br>(3100-11000)     |
| Cuba     | 2010 | Male   | 75 to 79 | 53%<br>(34-71%)                | 47%<br>(29-66%)          | 1.5<br>(0.74-2.6)                           | 3.4%<br>(1.4-6.3%)                   | 4%<br>(1.5-7.6%)                    | 240<br>(94-460)     | 3700<br>(1500-6900)      |
| Cuba     | 2010 | Male   | 80 to 84 | 47%<br>(29-65%)                | 53%<br>(35-71%)          | 1.2<br>(0.64-2.1)                           | 2.4%<br>(0.83-4.6%)                  | 2.8%<br>(0.87-5.5%)                 | 170<br>(54-350)     | 2000<br>(700-3900)       |
| Cuba     | 2010 | Male   | 85 to 89 | 42%<br>(26-60%)                | 58%<br>(40-74%)          | 1.1<br>(0.54-1.9)                           | 1.9%<br>(0.57-4%)                    | 2%<br>(0.49-4.8%)                   | 110<br>(27-250)     | 910<br>(280-2000)        |
| Cuba     | 2010 | Male   | 90 to 94 | 43%<br>(27-60%)                | 57%<br>(40-73%)          | 1.1<br>(0.53-2)                             | 1.6%<br>(0.21-3.9%)                  | 1.6%<br>(0.00089-4.4%)              | 54<br>(0.03-150)    | 320<br>(42-800)          |

| Location | Year | Sex    | Age      | Prevalence of current drinkers | Prevalence of abstainers | Population average of standard drinks daily | Percent of total attributable deaths | Percent of total attributable DALYs | Attributable deaths | Attributable DALYs       |
|----------|------|--------|----------|--------------------------------|--------------------------|---------------------------------------------|--------------------------------------|-------------------------------------|---------------------|--------------------------|
| Cuba     | 2010 | Male   | 95 plus  | 45%<br>(26-66%)                | 55%<br>(34-74%)          | 1.2<br>(0.49-2.3)                           | 1.6%<br>(-0.16-4.6%)                 | 1.5%<br>(-0.62-5.2%)                | 17<br>(-7-59)       | 75<br>(-7.7-220)         |
| Cuba     | 2016 | Female | All Ages | 34%<br>(29-41%)                | 66%<br>(59-71%)          | 1.1<br>(0.83-1.5)                           | 2%<br>(1.3-2.9%)                     | 2.1%<br>(0.96-3.7%)                 | 910<br>(420-1600)   | 28000<br>(18000-41000)   |
| Cuba     | 2016 | Female | 15 to 19 | 40%<br>(27-57%)                | 60%<br>(43-73%)          | 1.2<br>(0.56-2.1)                           | 1.8%<br>(1.1-2.9%)                   | 5.3%<br>(2.7-9%)                    | 4.3<br>(2.2-7.5)    | 580<br>(350-910)         |
| Cuba     | 2016 | Female | 20 to 24 | 46%<br>(30-63%)                | 54%<br>(37-70%)          | 1.8<br>(0.9-3.1)                            | 3.2%<br>(2.1-4.5%)                   | 6.7%<br>(3.5-11%)                   | 7.8<br>(4.2-13)     | 1200<br>(740-1700)       |
| Cuba     | 2016 | Female | 25 to 29 | 46%<br>(30-63%)                | 54%<br>(37-70%)          | 1.8<br>(0.96-3)                             | 3.1%<br>(2.2-4.3%)                   | 6.1%<br>(3.4-9.5%)                  | 9.7<br>(5.3-15)     | 1400<br>(900-2000)       |
| Cuba     | 2016 | Female | 30 to 34 | 44%<br>(28-61%)                | 56%<br>(39-72%)          | 1.8<br>(0.93-2.9)                           | 2.9%<br>(2-4%)                       | 6%<br>(3.7-9%)                      | 11<br>(6.5-16)      | 1300<br>(840-1800)       |
| Cuba     | 2016 | Female | 35 to 39 | 43%<br>(28-61%)                | 57%<br>(39-72%)          | 1.6<br>(0.92-2.7)                           | 2.7%<br>(1.8-3.9%)                   | 5.9%<br>(3.6-8.8%)                  | 14<br>(8.7-22)      | 1300<br>(850-1800)       |
| Cuba     | 2016 | Female | 40 to 44 | 42%<br>(27-60%)                | 58%<br>(40-73%)          | 1.5<br>(0.79-2.6)                           | 2.7%<br>(1.8-4.1%)                   | 5.9%<br>(3.5-9.2%)                  | 33<br>(20-52)       | 2200<br>(1400-3200)      |
| Cuba     | 2016 | Female | 45 to 49 | 40%<br>(25-57%)                | 60%<br>(43-75%)          | 1.5<br>(0.77-2.5)                           | 2.9%<br>(1.8-4.6%)                   | 5.8%<br>(3.5-8.9%)                  | 62<br>(37-96)       | 3200<br>(2000-5000)      |
| Cuba     | 2016 | Female | 50 to 54 | 36%<br>(23-53%)                | 64%<br>(47-77%)          | 1.3<br>(0.71-2.2)                           | 2.9%<br>(1.6-4.5%)                   | 5.1%<br>(2.9-7.9%)                  | 90<br>(50-140)      | 3900<br>(2200-6200)      |
| Cuba     | 2016 | Female | 55 to 59 | 32%<br>(19-49%)                | 68%<br>(51-81%)          | 1.1<br>(0.58-1.9)                           | 2.5%<br>(1.4-4.3%)                   | 4.1%<br>(2.3-6.9%)                  | 82<br>(45-140)      | 2900<br>(1600-4800)      |
| Cuba     | 2016 | Female | 60 to 64 | 29%<br>(17-44%)                | 71%<br>(56-83%)          | 0.96<br>(0.49-1.7)                          | 2.2%<br>(1-4.1%)                     | 3.2%<br>(1.5-6%)                    | 94<br>(44-180)      | 2800<br>(1300-5300)      |
| Cuba     | 2016 | Female | 65 to 69 | 26%<br>(16-40%)                | 74%<br>(60-84%)          | 0.84<br>(0.44-1.4)                          | 1.8%<br>(0.7-3.4%)                   | 2.5%<br>(0.99-4.8%)                 | 90<br>(36-170)      | 2200<br>(860-4200)       |
| Cuba     | 2016 | Female | 70 to 74 | 24%<br>(15-38%)                | 76%<br>(62-85%)          | 0.71<br>(0.34-1.3)                          | 1.4%<br>(0.27-3%)                    | 1.9%<br>(0.41-4.2%)                 | 83<br>(17-180)      | 1600<br>(320-3600)       |
| Cuba     | 2016 | Female | 75 to 79 | 21%<br>(12-35%)                | 79%<br>(65-88%)          | 0.62<br>(0.28-1.2)                          | 1.1%<br>(0.099-2.6%)                 | 1.4%<br>(0.1-3.4%)                  | 81<br>(5.7-200)     | 1200<br>(120-3000)       |
| Cuba     | 2016 | Female | 80 to 84 | 20%<br>(11-32%)                | 80%<br>(68-89%)          | 0.58<br>(0.28-1)                            | 0.97%<br>(0.14-2.2%)                 | 1.2%<br>(0.09-2.9%)                 | 84<br>(6.6-200)     | 980<br>(130-2300)        |
| Cuba     | 2016 | Female | 85 to 89 | 20%<br>(11-30%)                | 80%<br>(70-89%)          | 0.59<br>(0.27-1.1)                          | 0.95%<br>(0.1-2.4%)                  | 1.1%<br>(0.016-3%)                  | 73<br>(1.1-190)     | 630<br>(72-1600)         |
| Cuba     | 2016 | Female | 90 to 94 | 22%<br>(13-33%)                | 78%<br>(67-87%)          | 0.66<br>(0.3-1.3)                           | 1.1%<br>(-0.03-3%)                   | 1.2%<br>(-0.23-3.7%)                | 58<br>(-12-180)     | 360<br>(-11-1000)        |
| Cuba     | 2016 | Female | 95 plus  | 26%<br>(13-43%)                | 74%<br>(57-87%)          | 0.79<br>(0.29-1.7)                          | 1.3%<br>(-0.17-4.1%)                 | 1.3%<br>(-0.51-5%)                  | 29<br>(-11-110)     | 120<br>(-16-390)         |
| Cuba     | 2016 | Male   | All Ages | 61%<br>(53-68%)                | 39%<br>(32-47%)          | 2.5<br>(1.9-3.3)                            | 8%<br>(6.1-10%)                      | 7.4%<br>(5.1-11%)                   | 3900<br>(2600-5600) | 130000<br>(99000-170000) |
| Cuba     | 2016 | Male   | 15 to 19 | 57%<br>(40-74%)                | 43%<br>(26-60%)          | 1.7<br>(0.84-3)                             | 4.6%<br>(2.9-6.8%)                   | 8.4%<br>(4.6-14%)                   | 14<br>(7.8-23)      | 1700<br>(1000-2400)      |
| Cuba     | 2016 | Male   | 20 to 24 | 68%<br>(50-82%)                | 32%<br>(18-50%)          | 3.2<br>(1.8-5.3)                            | 10%<br>(6.9-14%)                     | 16%<br>(9.1-23%)                    | 41<br>(24-63)       | 4400<br>(3000-6100)      |

| Location | Year | Sex    | Age      | Prevalence of current drinkers | Prevalence of abstainers | Population average of standard drinks daily | Percent of total attributable deaths | Percent of total attributable DALYs | Attributable deaths   | Attributable DALYs     |
|----------|------|--------|----------|--------------------------------|--------------------------|---------------------------------------------|--------------------------------------|-------------------------------------|-----------------------|------------------------|
| Cuba     | 2016 | Male   | 25 to 29 | 71%<br>(53-83%)                | 29%<br>(17-47%)          | 3.9<br>(2.3-6.1)                            | 11%<br>(7.7-14%)                     | 17%<br>(11-24%)                     | 64<br>(39-91)         | 6000<br>(4100-7900)    |
| Cuba     | 2016 | Male   | 30 to 34 | 71%<br>(53-85%)                | 29%<br>(15-47%)          | 4.1<br>(2.3-6.2)                            | 11%<br>(8-15%)                       | 18%<br>(12-25%)                     | 75<br>(48-100)        | 6000<br>(4200-7800)    |
| Cuba     | 2016 | Male   | 35 to 39 | 71%<br>(54-84%)                | 29%<br>(16-46%)          | 3.8<br>(2.2-5.9)                            | 11%<br>(8.4-15%)                     | 19%<br>(13-26%)                     | 91<br>(61-130)        | 6300<br>(4600-8300)    |
| Cuba     | 2016 | Male   | 40 to 44 | 70%<br>(54-84%)                | 30%<br>(16-46%)          | 3.6<br>(2-5.8)                              | 12%<br>(9-16%)                       | 20%<br>(14-26%)                     | 200<br>(130-260)      | 11000<br>(8100-15000)  |
| Cuba     | 2016 | Male   | 45 to 49 | 68%<br>(49-83%)                | 32%<br>(17-51%)          | 3.4<br>(2-5.3)                              | 13%<br>(9.2-16%)                     | 19%<br>(14-25%)                     | 330<br>(230-440)      | 16000<br>(12000-21000) |
| Cuba     | 2016 | Male   | 50 to 54 | 67%<br>(49-82%)                | 33%<br>(18-51%)          | 3.1<br>(1.8-5)                              | 12%<br>(8.8-16%)                     | 17%<br>(12-22%)                     | 490<br>(340-650)      | 20000<br>(15000-27000) |
| Cuba     | 2016 | Male   | 55 to 59 | 65%<br>(47-80%)                | 35%<br>(20-53%)          | 2.9<br>(1.6-4.7)                            | 11%<br>(7.4-15%)                     | 14%<br>(9.9-20%)                    | 450<br>(300-630)      | 16000<br>(11000-22000) |
| Cuba     | 2016 | Male   | 60 to 64 | 63%<br>(43-80%)                | 37%<br>(20-57%)          | 2.6<br>(1.4-4.4)                            | 8.7%<br>(5.3-13%)                    | 11%<br>(6.7-16%)                    | 480<br>(280-720)      | 14000<br>(8400-21000)  |
| Cuba     | 2016 | Male   | 65 to 69 | 62%<br>(42-78%)                | 38%<br>(22-58%)          | 2.3<br>(1.3-3.7)                            | 7%<br>(4.1-11%)                      | 8.6%<br>(5-13%)                     | 460<br>(260-700)      | 11000<br>(6500-17000)  |
| Cuba     | 2016 | Male   | 70 to 74 | 58%<br>(40-74%)                | 42%<br>(26-60%)          | 1.9<br>(0.97-3.4)                           | 5.3%<br>(2.5-9.1%)                   | 6.4%<br>(3.1-11%)                   | 400<br>(190-690)      | 7800<br>(3800-13000)   |
| Cuba     | 2016 | Male   | 75 to 79 | 53%<br>(34-72%)                | 47%<br>(28-66%)          | 1.6<br>(0.77-2.9)                           | 3.9%<br>(1.6-7.1%)                   | 4.6%<br>(1.8-8.5%)                  | 330<br>(120-630)      | 5100<br>(2000-9400)    |
| Cuba     | 2016 | Male   | 80 to 84 | 47%<br>(29-66%)                | 53%<br>(34-71%)          | 1.3<br>(0.68-2.4)                           | 2.7%<br>(0.96-5.5%)                  | 3.2%<br>(1-6.6%)                    | 240<br>(79-510)       | 2800<br>(970-5700)     |
| Cuba     | 2016 | Male   | 85 to 89 | 43%<br>(26-60%)                | 57%<br>(40-74%)          | 1.2<br>(0.59-2.1)                           | 2.2%<br>(0.69-4.8%)                  | 2.5%<br>(0.67-5.7%)                 | 150<br>(42-360)       | 1300<br>(420-2900)     |
| Cuba     | 2016 | Male   | 90 to 94 | 43%<br>(27-60%)                | 57%<br>(40-73%)          | 1.2<br>(0.57-2.2)                           | 1.9%<br>(0.35-4.8%)                  | 2%<br>(0.14-5.5%)                   | 79<br>(5.5-210)       | 460<br>(83-1100)       |
| Cuba     | 2016 | Male   | 95 plus  | 45%<br>(27-66%)                | 55%<br>(34-73%)          | 1.3<br>(0.52-2.5)                           | 2%<br>(0.022-5.4%)                   | 2%<br>(-0.37-6.2%)                  | 25<br>(-4.7-82)       | 110<br>(1.1-300)       |
| Dominica | 1990 | Female | All Ages | 35%<br>(29-42%)                | 65%<br>(58-71%)          | 1.4<br>(1.2-1.7)                            | 3.4%<br>(2.5-4.5%)                   | 4.2%<br>(2.5-6.2%)                  | 9.5<br>(5.7-14)       | 290<br>(210-380)       |
| Dominica | 1990 | Female | 15 to 19 | 42%<br>(28-58%)                | 58%<br>(42-72%)          | 1.7<br>(0.97-2.7)                           | 2.5%<br>(1.6-3.5%)                   | 6.4%<br>(4-9.7%)                    | 0.074<br>(0.044-0.11) | 8.9<br>(5.7-13)        |
| Dominica | 1990 | Female | 20 to 24 | 48%<br>(32-64%)                | 52%<br>(36-68%)          | 2.6<br>(1.5-3.8)                            | 4.7%<br>(3.4-6.3%)                   | 9.1%<br>(6.1-13%)                   | 0.18<br>(0.11-0.25)   | 19<br>(13-27)          |
| Dominica | 1990 | Female | 25 to 29 | 48%<br>(31-64%)                | 52%<br>(36-69%)          | 2.7<br>(1.6-3.8)                            | 5.2%<br>(3.8-6.8%)                   | 9.3%<br>(6.4-12%)                   | 0.23<br>(0.16-0.32)   | 22<br>(16-30)          |
| Dominica | 1990 | Female | 30 to 34 | 46%<br>(29-63%)                | 54%<br>(37-71%)          | 2.6<br>(1.6-3.9)                            | 5.2%<br>(3.8-6.8%)                   | 9.4%<br>(6.7-13%)                   | 0.25<br>(0.17-0.34)   | 20<br>(14-26)          |
| Dominica | 1990 | Female | 35 to 39 | 45%<br>(30-62%)                | 55%<br>(38-70%)          | 2.4<br>(1.4-3.8)                            | 5.3%<br>(3.7-7.3%)                   | 9.4%<br>(6.6-13%)                   | 0.31<br>(0.21-0.44)   | 21<br>(15-28)          |
| Dominica | 1990 | Female | 40 to 44 | 44%<br>(29-62%)                | 56%<br>(38-71%)          | 2.3<br>(1.2-3.7)                            | 5.9%<br>(3.8-8.4%)                   | 9.8%<br>(6.5-14%)                   | 0.44<br>(0.28-0.63)   | 24<br>(16-34)          |

| Location | Year | Sex    | Age      | Prevalence of current drinkers | Prevalence of abstainers | Population average of standard drinks daily | Percent of total attributable deaths | Percent of total attributable DALYs | Attributable deaths  | Attributable DALYs  |
|----------|------|--------|----------|--------------------------------|--------------------------|---------------------------------------------|--------------------------------------|-------------------------------------|----------------------|---------------------|
| Dominica | 1990 | Female | 45 to 49 | 42%<br>(26-59%)                | 58%<br>(41-74%)          | 2.2<br>(1.2-3.7)                            | 5.4%<br>(3.4-8.1%)                   | 9.2%<br>(5.9-14%)                   | 0.39<br>(0.25-0.59)  | 19<br>(12-29)       |
| Dominica | 1990 | Female | 50 to 54 | 38%<br>(24-55%)                | 62%<br>(45-76%)          | 2<br>(1.1-3.4)                              | 6%<br>(3.5-9.3%)                     | 8.7%<br>(5.2-13%)                   | 0.7<br>(0.41-1.1)    | 28<br>(17-44)       |
| Dominica | 1990 | Female | 55 to 59 | 34%<br>(20-51%)                | 66%<br>(49-80%)          | 1.7<br>(0.87-2.8)                           | 5.4%<br>(3-8.7%)                     | 7.4%<br>(4.1-12%)                   | 0.74<br>(0.42-1.2)   | 26<br>(14-42)       |
| Dominica | 1990 | Female | 60 to 64 | 30%<br>(18-46%)                | 70%<br>(54-82%)          | 1.4<br>(0.73-2.5)                           | 4.6%<br>(2.1-7.9%)                   | 5.8%<br>(2.7-10%)                   | 0.86<br>(0.4-1.5)    | 25<br>(11-43)       |
| Dominica | 1990 | Female | 65 to 69 | 28%<br>(18-42%)                | 72%<br>(58-82%)          | 1.3<br>(0.68-2)                             | 3.9%<br>(1.8-6.7%)                   | 4.9%<br>(2.3-8.2%)                  | 0.88<br>(0.42-1.5)   | 21<br>(9.8-36)      |
| Dominica | 1990 | Female | 70 to 74 | 25%<br>(16-39%)                | 75%<br>(61-84%)          | 1.1<br>(0.54-1.9)                           | 3.2%<br>(1.1-6.2%)                   | 3.9%<br>(1.4-7.3%)                  | 1<br>(0.36-1.9)      | 19<br>(6.6-36)      |
| Dominica | 1990 | Female | 75 to 79 | 22%<br>(13-36%)                | 78%<br>(64-87%)          | 0.92<br>(0.43-1.7)                          | 2.7%<br>(0.83-5.3%)                  | 3.2%<br>(0.99-6.4%)                 | 0.94<br>(0.29-1.8)   | 14<br>(4.1-27)      |
| Dominica | 1990 | Female | 80 to 84 | 21%<br>(12-32%)                | 79%<br>(68-88%)          | 0.86<br>(0.42-1.4)                          | 2.6%<br>(0.89-5%)                    | 2.9%<br>(0.98-5.6%)                 | 1.1<br>(0.37-2.1)    | 12<br>(3.9-23)      |
| Dominica | 1990 | Female | 85 to 89 | 21%<br>(12-31%)                | 79%<br>(69-88%)          | 0.87<br>(0.43-1.5)                          | 2.5%<br>(0.82-5.1%)                  | 2.8%<br>(0.88-5.7%)                 | 0.82<br>(0.26-1.7)   | 6.2<br>(2-13)       |
| Dominica | 1990 | Female | 90 to 94 | 23%<br>(14-35%)                | 77%<br>(65-86%)          | 1<br>(0.45-1.9)                             | 2.8%<br>(0.71-6.4%)                  | 3.1%<br>(0.73-7.2%)                 | 0.43<br>(0.1-1)      | 2.2<br>(0.58-5.1)   |
| Dominica | 1990 | Female | 95 plus  | 27%<br>(15-44%)                | 73%<br>(56-85%)          | 1.2<br>(0.44-2.4)                           | 3.3%<br>(0.41-8%)                    | 3.6%<br>(0.32-9%)                   | 0.15<br>(0.013-0.37) | 0.52<br>(0.068-1.3) |
| Dominica | 1990 | Male   | All Ages | 56%<br>(48-65%)                | 44%<br>(35-52%)          | 3<br>(2.7-3.3)                              | 8.6%<br>(7.2-10%)                    | 9.8%<br>(7.4-12%)                   | 24<br>(18-31)        | 840<br>(700-990)    |
| Dominica | 1990 | Male   | 15 to 19 | 59%<br>(42-75%)                | 41%<br>(25-58%)          | 2.5<br>(1.4-3.9)                            | 6.8%<br>(4.5-9.7%)                   | 10%<br>(6.5-15%)                    | 0.35<br>(0.22-0.53)  | 33<br>(22-47)       |
| Dominica | 1990 | Male   | 20 to 24 | 69%<br>(52-83%)                | 31%<br>(17-48%)          | 4.7<br>(3-6.5)                              | 13%<br>(10-17%)                      | 19%<br>(13-25%)                     | 0.77<br>(0.53-1)     | 69<br>(51-90)       |
| Dominica | 1990 | Male   | 25 to 29 | 72%<br>(55-84%)                | 28%<br>(16-45%)          | 5.6<br>(3.7-7.6)                            | 15%<br>(12-19%)                      | 20%<br>(15-25%)                     | 1.3<br>(0.97-1.7)    | 99<br>(75-120)      |
| Dominica | 1990 | Male   | 30 to 34 | 73%<br>(55-85%)                | 27%<br>(15-45%)          | 5.9<br>(3.8-8.1)                            | 15%<br>(12-18%)                      | 20%<br>(15-25%)                     | 1.1<br>(0.88-1.4)    | 79<br>(61-96)       |
| Dominica | 1990 | Male   | 35 to 39 | 72%<br>(56-85%)                | 28%<br>(15-44%)          | 5.6<br>(3.6-8.2)                            | 13%<br>(11-16%)                      | 20%<br>(15-24%)                     | 0.81<br>(0.61-1)     | 54<br>(42-67)       |
| Dominica | 1990 | Male   | 40 to 44 | 71%<br>(55-85%)                | 29%<br>(15-45%)          | 5.4<br>(3.1-8.1)                            | 15%<br>(11-18%)                      | 19%<br>(15-24%)                     | 1.3<br>(0.97-1.7)    | 71<br>(53-88)       |
| Dominica | 1990 | Male   | 45 to 49 | 70%<br>(51-83%)                | 30%<br>(17-49%)          | 5<br>(2.9-7.9)                              | 13%<br>(10-17%)                      | 19%<br>(14-23%)                     | 1.2<br>(0.86-1.5)    | 57<br>(44-71)       |
| Dominica | 1990 | Male   | 50 to 54 | 68%<br>(51-83%)                | 32%<br>(17-49%)          | 4.7<br>(2.6-7.3)                            | 13%<br>(9.5-17%)                     | 17%<br>(12-22%)                     | 1.6<br>(1.1-2.1)     | 66<br>(47-84)       |
| Dominica | 1990 | Male   | 55 to 59 | 66%<br>(48-82%)                | 34%<br>(18-52%)          | 4.3<br>(2.4-6.9)                            | 12%<br>(8.6-16%)                     | 16%<br>(11-20%)                     | 1.8<br>(1.2-2.4)     | 63<br>(44-83)       |
| Dominica | 1990 | Male   | 60 to 64 | 65%<br>(45-81%)                | 35%<br>(19-55%)          | 3.9<br>(2.2-6.6)                            | 11%<br>(7.1-15%)                     | 13%<br>(8.5-18%)                    | 2.2<br>(1.4-3)       | 64<br>(41-86)       |

| Location | Year | Sex    | Age      | Prevalence of current drinkers | Prevalence of abstainers | Population average of standard drinks daily | Percent of total attributable deaths | Percent of total attributable DALYs | Attributable deaths    | Attributable DALYs |
|----------|------|--------|----------|--------------------------------|--------------------------|---------------------------------------------|--------------------------------------|-------------------------------------|------------------------|--------------------|
| Dominica | 1990 | Male   | 65 to 69 | 63%<br>(44-79%)                | 37%<br>(21-56%)          | 3.5<br>(2-5.5)                              | 10%<br>(6.6-14%)                     | 12%<br>(7.7-16%)                    | 2.5<br>(1.6-3.5)       | 59<br>(38-81)      |
| Dominica | 1990 | Male   | 70 to 74 | 60%<br>(42-76%)                | 40%<br>(24-58%)          | 2.9<br>(1.5-4.9)                            | 8.3%<br>(4.4-12%)                    | 9.3%<br>(4.9-14%)                   | 3<br>(1.6-4.5)         | 56<br>(30-84)      |
| Dominica | 1990 | Male   | 75 to 79 | 55%<br>(35-74%)                | 45%<br>(26-65%)          | 2.4<br>(1.2-4.2)                            | 6.5%<br>(3.2-10%)                    | 7.3%<br>(3.5-11%)                   | 2.3<br>(1.1-3.5)       | 33<br>(16-52)      |
| Dominica | 1990 | Male   | 80 to 84 | 49%<br>(30-68%)                | 51%<br>(32-70%)          | 2.1<br>(1.1-3.3)                            | 5.6%<br>(2.7-9%)                     | 6.2%<br>(2.9-9.9%)                  | 1.9<br>(0.89-3)        | 20<br>(9.7-33)     |
| Dominica | 1990 | Male   | 85 to 89 | 45%<br>(28-62%)                | 55%<br>(38-72%)          | 1.8<br>(0.94-3)                             | 4.9%<br>(2.2-8.1%)                   | 5.4%<br>(2.3-9.2%)                  | 1.3<br>(0.58-2.3)      | 10<br>(4.5-17)     |
| Dominica | 1990 | Male   | 90 to 94 | 45%<br>(29-62%)                | 55%<br>(38-71%)          | 1.8<br>(0.89-3.3)                           | 4.5%<br>(1.8-8.2%)                   | 4.9%<br>(1.9-9.3%)                  | 0.58<br>(0.21-1.1)     | 3.1<br>(1.2-5.7)   |
| Dominica | 1990 | Male   | 95 plus  | 48%<br>(28-68%)                | 52%<br>(32-72%)          | 2<br>(0.81-3.7)                             | 4.6%<br>(1.4-9%)                     | 5%<br>(1.3-10%)                     | 0.15<br>(0.039-0.31)   | 0.56<br>(0.16-1.1) |
| Dominica | 1995 | Female | All Ages | 35%<br>(29-42%)                | 65%<br>(58-71%)          | 1.4<br>(1.2-1.6)                            | 3.2%<br>(2.3-4.3%)                   | 3.8%<br>(2.2-5.8%)                  | 9.4<br>(5.2-15)        | 280<br>(200-380)   |
| Dominica | 1995 | Female | 15 to 19 | 42%<br>(28-58%)                | 58%<br>(42-72%)          | 1.7<br>(0.91-2.7)                           | 2.4%<br>(1.5-3.5%)                   | 5.8%<br>(3.5-9%)                    | 0.065<br>(0.039-0.099) | 7.9<br>(4.9-12)    |
| Dominica | 1995 | Female | 20 to 24 | 48%<br>(32-64%)                | 52%<br>(36-68%)          | 2.5<br>(1.4-3.7)                            | 4.4%<br>(3.1-5.9%)                   | 8.2%<br>(5.3-12%)                   | 0.15<br>(0.098-0.22)   | 17<br>(12-24)      |
| Dominica | 1995 | Female | 25 to 29 | 47%<br>(30-64%)                | 53%<br>(36-70%)          | 2.6<br>(1.5-3.7)                            | 5.1%<br>(3.7-6.8%)                   | 8.4%<br>(5.8-11%)                   | 0.26<br>(0.17-0.35)    | 24<br>(17-31)      |
| Dominica | 1995 | Female | 30 to 34 | 45%<br>(29-63%)                | 55%<br>(37-71%)          | 2.5<br>(1.5-3.7)                            | 5.2%<br>(3.8-6.9%)                   | 8.6%<br>(6.2-11%)                   | 0.34<br>(0.24-0.47)    | 26<br>(19-35)      |
| Dominica | 1995 | Female | 35 to 39 | 45%<br>(30-62%)                | 55%<br>(38-70%)          | 2.3<br>(1.4-3.5)                            | 5%<br>(3.5-6.9%)                     | 8.6%<br>(6-12%)                     | 0.33<br>(0.22-0.46)    | 22<br>(15-30)      |
| Dominica | 1995 | Female | 40 to 44 | 44%<br>(29-61%)                | 56%<br>(39-71%)          | 2.2<br>(1.2-3.5)                            | 5.3%<br>(3.4-7.6%)                   | 9%<br>(6-13%)                       | 0.42<br>(0.27-0.61)    | 24<br>(15-34)      |
| Dominica | 1995 | Female | 45 to 49 | 41%<br>(25-59%)                | 59%<br>(41-75%)          | 2.1<br>(1.1-3.5)                            | 5%<br>(3.1-7.8%)                     | 8.5%<br>(5.4-13%)                   | 0.39<br>(0.25-0.61)    | 19<br>(12-30)      |
| Dominica | 1995 | Female | 50 to 54 | 38%<br>(24-56%)                | 62%<br>(44-76%)          | 1.9<br>(1-3.3)                              | 5.3%<br>(3-8.4%)                     | 8.1%<br>(4.7-12%)                   | 0.56<br>(0.32-0.87)    | 23<br>(13-36)      |
| Dominica | 1995 | Female | 55 to 59 | 34%<br>(21-50%)                | 66%<br>(50-79%)          | 1.6<br>(0.86-2.8)                           | 4.9%<br>(2.6-8.1%)                   | 7%<br>(3.8-11%)                     | 0.69<br>(0.38-1.1)     | 24<br>(13-40)      |
| Dominica | 1995 | Female | 60 to 64 | 30%<br>(18-47%)                | 70%<br>(53-82%)          | 1.4<br>(0.69-2.4)                           | 4.2%<br>(1.8-7.5%)                   | 5.4%<br>(2.4-9.4%)                  | 0.81<br>(0.36-1.4)     | 23<br>(10-42)      |
| Dominica | 1995 | Female | 65 to 69 | 28%<br>(17-41%)                | 72%<br>(59-83%)          | 1.2<br>(0.63-2)                             | 3.5%<br>(1.5-6.3%)                   | 4.4%<br>(1.9-7.8%)                  | 0.81<br>(0.36-1.4)     | 19<br>(8.2-35)     |
| Dominica | 1995 | Female | 70 to 74 | 25%<br>(16-38%)                | 75%<br>(62-84%)          | 1<br>(0.52-1.8)                             | 2.9%<br>(0.79-5.8%)                  | 3.5%<br>(0.97-6.8%)                 | 0.97<br>(0.28-2)       | 18<br>(4.8-37)     |
| Dominica | 1995 | Female | 75 to 79 | 22%<br>(13-36%)                | 78%<br>(64-87%)          | 0.88<br>(0.41-1.6)                          | 2.4%<br>(0.58-5.1%)                  | 2.9%<br>(0.71-5.9%)                 | 0.94<br>(0.23-1.9)     | 14<br>(3.3-28)     |
| Dominica | 1995 | Female | 80 to 84 | 21%<br>(12-32%)                | 79%<br>(68-88%)          | 0.83<br>(0.39-1.4)                          | 2.3%<br>(0.67-4.7%)                  | 2.7%<br>(0.74-5.2%)                 | 1.1<br>(0.3-2.1)       | 11<br>(3.2-22)     |

| Location | Year | Sex    | Age      | Prevalence of current drinkers | Prevalence of abstainers | Population average of standard drinks daily | Percent of total attributable deaths | Percent of total attributable DALYs | Attributable deaths | Attributable DALYs  |
|----------|------|--------|----------|--------------------------------|--------------------------|---------------------------------------------|--------------------------------------|-------------------------------------|---------------------|---------------------|
| Dominica | 1995 | Female | 85 to 89 | 21%<br>(12-32%)                | 79%<br>(68-88%)          | 0.84<br>(0.41-1.5)                          | 2.3%<br>(0.66-4.9%)                  | 2.6%<br>(0.69-5.6%)                 | 0.87<br>(0.23-1.9)  | 6.6<br>(1.8-14)     |
| Dominica | 1995 | Female | 90 to 94 | 23%<br>(13-35%)                | 77%<br>(65-87%)          | 0.97<br>(0.42-1.8)                          | 2.5%<br>(0.61-6%)                    | 2.8%<br>(0.58-6.9%)                 | 0.5<br>(0.11-1.2)   | 2.6<br>(0.63-6.2)   |
| Dominica | 1995 | Female | 95 plus  | 27%<br>(14-44%)                | 73%<br>(56-86%)          | 1.2<br>(0.42-2.3)                           | 3%<br>(0.3-7.3%)                     | 3.3%<br>(0.2-8.3%)                  | 0.2<br>(0.012-0.49) | 0.69<br>(0.068-1.7) |
| Dominica | 1995 | Male   | All Ages | 57%<br>(49-65%)                | 43%<br>(35-51%)          | 2.9<br>(2.6-3.3)                            | 8.6%<br>(7.2-10%)                    | 9.1%<br>(6.8-12%)                   | 26<br>(19-33)       | 900<br>(750-1100)   |
| Dominica | 1995 | Male   | 15 to 19 | 59%<br>(41-74%)                | 41%<br>(26-59%)          | 2.4<br>(1.3-3.7)                            | 7%<br>(4.7-10%)                      | 9.9%<br>(6.1-15%)                   | 0.4<br>(0.24-0.61)  | 35<br>(23-52)       |
| Dominica | 1995 | Male   | 20 to 24 | 69%<br>(51-82%)                | 31%<br>(18-49%)          | 4.5<br>(2.8-6.4)                            | 13%<br>(10-17%)                      | 18%<br>(12-24%)                     | 0.78<br>(0.53-1)    | 69<br>(51-90)       |
| Dominica | 1995 | Male   | 25 to 29 | 72%<br>(55-84%)                | 28%<br>(16-45%)          | 5.4<br>(3.6-7.3)                            | 15%<br>(12-19%)                      | 19%<br>(14-24%)                     | 1.6<br>(1.1-2)      | 110<br>(85-140)     |
| Dominica | 1995 | Male   | 30 to 34 | 73%<br>(54-85%)                | 27%<br>(15-46%)          | 5.6<br>(3.6-7.8)                            | 14%<br>(11-17%)                      | 18%<br>(14-23%)                     | 1.2<br>(0.88-1.5)   | 83<br>(64-100)      |
| Dominica | 1995 | Male   | 35 to 39 | 72%<br>(56-85%)                | 28%<br>(15-44%)          | 5.3<br>(3.4-7.9)                            | 13%<br>(10-16%)                      | 18%<br>(13-22%)                     | 1.1<br>(0.82-1.4)   | 70<br>(54-87)       |
| Dominica | 1995 | Male   | 40 to 44 | 71%<br>(56-84%)                | 29%<br>(16-44%)          | 5.1<br>(3-7.6)                              | 14%<br>(10-17%)                      | 18%<br>(13-22%)                     | 1.5<br>(1-1.9)      | 78<br>(57-99)       |
| Dominica | 1995 | Male   | 45 to 49 | 70%<br>(50-83%)                | 30%<br>(17-50%)          | 4.8<br>(2.8-7.6)                            | 13%<br>(9.9-16%)                     | 17%<br>(13-21%)                     | 1.4<br>(1-1.8)      | 67<br>(50-86)       |
| Dominica | 1995 | Male   | 50 to 54 | 68%<br>(50-83%)                | 32%<br>(17-50%)          | 4.4<br>(2.5-6.9)                            | 13%<br>(9-16%)                       | 16%<br>(11-20%)                     | 1.8<br>(1.2-2.3)    | 72<br>(50-92)       |
| Dominica | 1995 | Male   | 55 to 59 | 66%<br>(49-82%)                | 34%<br>(18-51%)          | 4.1<br>(2.2-6.6)                            | 12%<br>(7.8-15%)                     | 15%<br>(10-19%)                     | 1.7<br>(1.1-2.2)    | 60<br>(41-80)       |
| Dominica | 1995 | Male   | 60 to 64 | 65%<br>(45-81%)                | 35%<br>(19-55%)          | 3.7<br>(2-6.2)                              | 10%<br>(6.4-14%)                     | 12%<br>(7.5-17%)                    | 2.4<br>(1.5-3.3)    | 68<br>(42-94)       |
| Dominica | 1995 | Male   | 65 to 69 | 63%<br>(44-79%)                | 37%<br>(21-56%)          | 3.3<br>(1.9-5.3)                            | 9.4%<br>(6-13%)                      | 11%<br>(6.9-15%)                    | 2.5<br>(1.5-3.5)    | 59<br>(37-82)       |
| Dominica | 1995 | Male   | 70 to 74 | 60%<br>(41-75%)                | 40%<br>(25-59%)          | 2.8<br>(1.5-4.7)                            | 7.7%<br>(4-12%)                      | 8.5%<br>(4.5-13%)                   | 3.2<br>(1.7-5)      | 59<br>(32-92)       |
| Dominica | 1995 | Male   | 75 to 79 | 54%<br>(35-73%)                | 46%<br>(27-65%)          | 2.3<br>(1.2-3.9)                            | 6%<br>(2.9-9.4%)                     | 6.7%<br>(3.1-11%)                   | 2.2<br>(1-3.5)      | 32<br>(16-51)       |
| Dominica | 1995 | Male   | 80 to 84 | 49%<br>(31-67%)                | 51%<br>(33-69%)          | 1.9<br>(1-3.1)                              | 5.2%<br>(2.3-8.3%)                   | 5.6%<br>(2.5-9.1%)                  | 2<br>(0.85-3.2)     | 21<br>(9.4-34)      |
| Dominica | 1995 | Male   | 85 to 89 | 44%<br>(28-60%)                | 56%<br>(40-72%)          | 1.7<br>(0.87-2.8)                           | 4.3%<br>(1.9-7.4%)                   | 4.7%<br>(2-8.2%)                    | 1.3<br>(0.57-2.3)   | 10<br>(4.5-17)      |
| Dominica | 1995 | Male   | 90 to 94 | 45%<br>(29-62%)                | 55%<br>(38-71%)          | 1.7<br>(0.82-3)                             | 3.9%<br>(1.5-7.3%)                   | 4.2%<br>(1.6-8.3%)                  | 0.62<br>(0.23-1.2)  | 3.3<br>(1.3-6.3)    |
| Dominica | 1995 | Male   | 95 plus  | 48%<br>(28-68%)                | 52%<br>(32-72%)          | 1.8<br>(0.76-3.4)                           | 4.1%<br>(1.2-8%)                     | 4.4%<br>(1-9%)                      | 0.2<br>(0.047-0.42) | 0.74<br>(0.21-1.5)  |
| Dominica | 2000 | Female | All Ages | 35%<br>(29-41%)                | 65%<br>(59-71%)          | 1.3<br>(1.1-1.5)                            | 2.8%<br>(2-3.9%)                     | 3.3%<br>(1.9-5.2%)                  | 7.4<br>(4.1-12)     | 230<br>(160-320)    |

| Location | Year | Sex    | Age      | Prevalence of current drinkers | Prevalence of abstainers | Population average of standard drinks daily | Percent of total attributable deaths | Percent of total attributable DALYs | Attributable deaths   | Attributable DALYs  |
|----------|------|--------|----------|--------------------------------|--------------------------|---------------------------------------------|--------------------------------------|-------------------------------------|-----------------------|---------------------|
| Dominica | 2000 | Female | 15 to 19 | 41%<br>(27-57%)                | 59%<br>(43-73%)          | 1.5<br>(0.81-2.5)                           | 2.3%<br>(1.4-3.5%)                   | 5.3%<br>(3.1-8.4%)                  | 0.068<br>(0.039-0.11) | 8<br>(5-12)         |
| Dominica | 2000 | Female | 20 to 24 | 47%<br>(30-64%)                | 53%<br>(36-70%)          | 2.3<br>(1.3-3.5)                            | 4.1%<br>(2.8-5.7%)                   | 7.2%<br>(4.5-10%)                   | 0.12<br>(0.075-0.18)  | 14<br>(9.7-20)      |
| Dominica | 2000 | Female | 25 to 29 | 47%<br>(30-63%)                | 53%<br>(37-70%)          | 2.4<br>(1.4-3.6)                            | 4.2%<br>(3.1-5.5%)                   | 7%<br>(4.7-9.6%)                    | 0.15<br>(0.099-0.21)  | 16<br>(11-22)       |
| Dominica | 2000 | Female | 30 to 34 | 45%<br>(29-62%)                | 55%<br>(38-71%)          | 2.3<br>(1.4-3.5)                            | 4.4%<br>(3.2-5.8%)                   | 7.4%<br>(5.2-10%)                   | 0.24<br>(0.16-0.33)   | 20<br>(14-27)       |
| Dominica | 2000 | Female | 35 to 39 | 44%<br>(29-62%)                | 56%<br>(38-71%)          | 2.1<br>(1.3-3.3)                            | 4.4%<br>(3-6.1%)                     | 7.6%<br>(5.5-10%)                   | 0.3<br>(0.2-0.42)     | 21<br>(15-29)       |
| Dominica | 2000 | Female | 40 to 44 | 43%<br>(28-61%)                | 57%<br>(39-72%)          | 2<br>(1.1-3.2)                              | 4.6%<br>(3-6.5%)                     | 8%<br>(5.4-11%)                     | 0.34<br>(0.22-0.5)    | 20<br>(13-29)       |
| Dominica | 2000 | Female | 45 to 49 | 41%<br>(25-58%)                | 59%<br>(42-75%)          | 1.9<br>(1-3.3)                              | 4.5%<br>(2.8-7.2%)                   | 7.7%<br>(4.9-12%)                   | 0.39<br>(0.25-0.63)   | 20<br>(12-32)       |
| Dominica | 2000 | Female | 50 to 54 | 37%<br>(23-54%)                | 63%<br>(46-77%)          | 1.7<br>(0.92-2.9)                           | 4.5%<br>(2.4-7.2%)                   | 7.2%<br>(4.1-11%)                   | 0.44<br>(0.25-0.7)    | 18<br>(10-30)       |
| Dominica | 2000 | Female | 55 to 59 | 33%<br>(20-50%)                | 67%<br>(50-80%)          | 1.5<br>(0.73-2.5)                           | 4.1%<br>(2.1-6.9%)                   | 6.1%<br>(3.3-10%)                   | 0.52<br>(0.27-0.85)   | 18<br>(9.5-31)      |
| Dominica | 2000 | Female | 60 to 64 | 29%<br>(17-45%)                | 71%<br>(55-83%)          | 1.3<br>(0.61-2.2)                           | 3.5%<br>(1.5-6.5%)                   | 4.8%<br>(2.1-8.6%)                  | 0.62<br>(0.28-1.1)    | 18<br>(7.7-34)      |
| Dominica | 2000 | Female | 65 to 69 | 27%<br>(17-40%)                | 73%<br>(60-83%)          | 1.1<br>(0.58-1.8)                           | 3%<br>(1.1-5.5%)                     | 3.9%<br>(1.6-6.9%)                  | 0.64<br>(0.26-1.2)    | 15<br>(6-29)        |
| Dominica | 2000 | Female | 70 to 74 | 24%<br>(15-38%)                | 76%<br>(62-85%)          | 0.93<br>(0.46-1.7)                          | 2.4%<br>(0.58-5.2%)                  | 3%<br>(0.8-6.2%)                    | 0.7<br>(0.19-1.4)     | 13<br>(3.2-28)      |
| Dominica | 2000 | Female | 75 to 79 | 22%<br>(13-35%)                | 78%<br>(65-87%)          | 0.81<br>(0.37-1.5)                          | 2%<br>(0.41-4.4%)                    | 2.4%<br>(0.55-5.2%)                 | 0.69<br>(0.16-1.5)    | 10<br>(2.2-22)      |
| Dominica | 2000 | Female | 80 to 84 | 20%<br>(12-32%)                | 80%<br>(68-88%)          | 0.77<br>(0.36-1.3)                          | 1.9%<br>(0.49-4%)                    | 2.2%<br>(0.57-4.6%)                 | 0.81<br>(0.19-1.7)    | 8.7<br>(2.1-18)     |
| Dominica | 2000 | Female | 85 to 89 | 20%<br>(12-31%)                | 80%<br>(69-88%)          | 0.78<br>(0.38-1.4)                          | 1.9%<br>(0.53-4.2%)                  | 2.2%<br>(0.57-4.8%)                 | 0.7<br>(0.17-1.5)     | 5.3<br>(1.4-11)     |
| Dominica | 2000 | Female | 90 to 94 | 22%<br>(13-35%)                | 78%<br>(65-87%)          | 0.88<br>(0.38-1.7)                          | 2.2%<br>(0.51-5%)                    | 2.4%<br>(0.48-5.8%)                 | 0.45<br>(0.087-1.1)   | 2.4<br>(0.51-5.5)   |
| Dominica | 2000 | Female | 95 plus  | 26%<br>(14-43%)                | 74%<br>(57-86%)          | 1<br>(0.38-2.1)                             | 2.5%<br>(0.26-6.2%)                  | 2.8%<br>(0.16-7%)                   | 0.19<br>(0.011-0.47)  | 0.68<br>(0.071-1.6) |
| Dominica | 2000 | Male   | All Ages | 57%<br>(49-65%)                | 43%<br>(35-51%)          | 2.8<br>(2.4-3.2)                            | 7.7%<br>(6.4-9.1%)                   | 8%<br>(6-10%)                       | 21<br>(15-28)         | 770<br>(630-920)    |
| Dominica | 2000 | Male   | 15 to 19 | 58%<br>(41-74%)                | 42%<br>(26-59%)          | 2.2<br>(1.2-3.5)                            | 6.5%<br>(4.2-9.4%)                   | 9.3%<br>(5.5-14%)                   | 0.34<br>(0.2-0.52)    | 31<br>(20-45)       |
| Dominica | 2000 | Male   | 20 to 24 | 68%<br>(50-82%)                | 32%<br>(18-50%)          | 4.1<br>(2.6-5.9)                            | 12%<br>(9.3-16%)                     | 16%<br>(11-22%)                     | 0.59<br>(0.4-0.82)    | 54<br>(40-71)       |
| Dominica | 2000 | Male   | 25 to 29 | 71%<br>(54-84%)                | 29%<br>(16-46%)          | 5<br>(3.2-7)                                | 14%<br>(10-17%)                      | 17%<br>(12-22%)                     | 1.1<br>(0.75-1.4)     | 81<br>(61-100)      |
| Dominica | 2000 | Male   | 30 to 34 | 72%<br>(54-85%)                | 28%<br>(15-46%)          | 5.2<br>(3.4-7.4)                            | 12%<br>(9.4-15%)                     | 15%<br>(12-19%)                     | 0.94<br>(0.69-1.2)    | 70<br>(53-87)       |

| Location | Year | Sex    | Age      | Prevalence of current drinkers | Prevalence of abstainers | Population average of standard drinks daily | Percent of total attributable deaths | Percent of total attributable DALYs | Attributable deaths    | Attributable DALYs |
|----------|------|--------|----------|--------------------------------|--------------------------|---------------------------------------------|--------------------------------------|-------------------------------------|------------------------|--------------------|
| Dominica | 2000 | Male   | 35 to 39 | 72%<br>(56-85%)                | 28%<br>(15-44%)          | 4.9<br>(3.1-7.2)                            | 12%<br>(9.2-15%)                     | 15%<br>(11-19%)                     | 1.1<br>(0.82-1.5)      | 73<br>(55-93)      |
| Dominica | 2000 | Male   | 40 to 44 | 71%<br>(55-84%)                | 29%<br>(16-45%)          | 4.7<br>(2.7-7)                              | 12%<br>(8.8-15%)                     | 15%<br>(11-19%)                     | 1.1<br>(0.82-1.5)      | 66<br>(48-82)      |
| Dominica | 2000 | Male   | 45 to 49 | 69%<br>(49-83%)                | 31%<br>(17-51%)          | 4.4<br>(2.5-6.9)                            | 12%<br>(8.7-15%)                     | 15%<br>(11-19%)                     | 1.2<br>(0.88-1.6)      | 62<br>(45-80)      |
| Dominica | 2000 | Male   | 50 to 54 | 67%<br>(49-82%)                | 33%<br>(18-51%)          | 4.1<br>(2.3-6.2)                            | 12%<br>(8.2-15%)                     | 15%<br>(10-18%)                     | 1.6<br>(1.1-2)         | 65<br>(45-84)      |
| Dominica | 2000 | Male   | 55 to 59 | 66%<br>(47-81%)                | 34%<br>(19-53%)          | 3.8<br>(2-5.9)                              | 11%<br>(7.1-14%)                     | 13%<br>(9.1-17%)                    | 1.6<br>(1.1-2.1)       | 57<br>(39-75)      |
| Dominica | 2000 | Male   | 60 to 64 | 64%<br>(44-81%)                | 36%<br>(19-56%)          | 3.4<br>(1.8-5.8)                            | 9.2%<br>(5.5-13%)                    | 11%<br>(6.8-15%)                    | 1.9<br>(1.2-2.7)       | 57<br>(34-79)      |
| Dominica | 2000 | Male   | 65 to 69 | 62%<br>(43-78%)                | 38%<br>(22-57%)          | 3<br>(1.7-4.9)                              | 8.3%<br>(5.2-12%)                    | 9.8%<br>(6.1-14%)                   | 2.1<br>(1.3-3)         | 51<br>(31-73)      |
| Dominica | 2000 | Male   | 70 to 74 | 59%<br>(40-75%)                | 41%<br>(25-60%)          | 2.5<br>(1.3-4.4)                            | 6.6%<br>(3.5-10%)                    | 7.4%<br>(3.8-12%)                   | 2.4<br>(1.3-3.9)       | 47<br>(25-74)      |
| Dominica | 2000 | Male   | 75 to 79 | 54%<br>(35-73%)                | 46%<br>(27-65%)          | 2.1<br>(1.1-3.7)                            | 5.2%<br>(2.4-8.5%)                   | 5.8%<br>(2.6-9.5%)                  | 1.9<br>(0.84-3.1)      | 28<br>(13-46)      |
| Dominica | 2000 | Male   | 80 to 84 | 48%<br>(30-66%)                | 52%<br>(34-70%)          | 1.8<br>(0.92-2.9)                           | 4.4%<br>(2-7.1%)                     | 4.8%<br>(2.1-7.8%)                  | 1.7<br>(0.72-2.8)      | 18<br>(8-29)       |
| Dominica | 2000 | Male   | 85 to 89 | 43%<br>(27-60%)                | 57%<br>(40-73%)          | 1.5<br>(0.78-2.6)                           | 3.6%<br>(1.6-6.3%)                   | 3.9%<br>(1.7-7%)                    | 1<br>(0.44-1.8)        | 8<br>(3.7-14)      |
| Dominica | 2000 | Male   | 90 to 94 | 44%<br>(29-61%)                | 56%<br>(39-71%)          | 1.6<br>(0.75-2.8)                           | 3.3%<br>(1.4-6.2%)                   | 3.6%<br>(1.4-7%)                    | 0.5<br>(0.19-1)        | 2.7<br>(1.1-5.3)   |
| Dominica | 2000 | Male   | 95 plus  | 47%<br>(27-67%)                | 53%<br>(33-73%)          | 1.7<br>(0.71-3.2)                           | 3.6%<br>(1.1-7.1%)                   | 3.8%<br>(0.96-7.9%)                 | 0.19<br>(0.048-0.4)    | 0.72<br>(0.21-1.4) |
| Dominica | 2005 | Female | All Ages | 35%<br>(29-42%)                | 65%<br>(58-71%)          | 1.3<br>(1.1-1.5)                            | 2.6%<br>(1.9-3.5%)                   | 3.1%<br>(1.8-4.9%)                  | 7.1<br>(4-11)          | 220<br>(160-300)   |
| Dominica | 2005 | Female | 15 to 19 | 41%<br>(27-58%)                | 59%<br>(42-73%)          | 1.5<br>(0.77-2.3)                           | 2.1%<br>(1.4-3.1%)                   | 5.3%<br>(3.1-8.5%)                  | 0.055<br>(0.032-0.088) | 7<br>(4.4-10)      |
| Dominica | 2005 | Female | 20 to 24 | 47%<br>(31-63%)                | 53%<br>(37-69%)          | 2.2<br>(1.2-3.3)                            | 4.1%<br>(2.8-5.6%)                   | 7.3%<br>(4.5-11%)                   | 0.14<br>(0.083-0.2)    | 15<br>(10-21)      |
| Dominica | 2005 | Female | 25 to 29 | 46%<br>(30-64%)                | 54%<br>(36-70%)          | 2.2<br>(1.3-3.4)                            | 3.8%<br>(2.7-5.1%)                   | 6.9%<br>(4.5-9.7%)                  | 0.1<br>(0.065-0.15)    | 12<br>(8.5-17)     |
| Dominica | 2005 | Female | 30 to 34 | 44%<br>(28-62%)                | 56%<br>(38-72%)          | 2.1<br>(1.3-3.3)                            | 4.1%<br>(3-5.6%)                     | 7.4%<br>(5.1-10%)                   | 0.21<br>(0.14-0.29)    | 17<br>(12-24)      |
| Dominica | 2005 | Female | 35 to 39 | 43%<br>(28-61%)                | 57%<br>(39-72%)          | 2<br>(1.2-3.1)                              | 4%<br>(2.9-5.6%)                     | 7.4%<br>(5.3-10%)                   | 0.26<br>(0.18-0.37)    | 19<br>(13-26)      |
| Dominica | 2005 | Female | 40 to 44 | 42%<br>(27-60%)                | 58%<br>(40-73%)          | 1.9<br>(1-3)                                | 4.2%<br>(2.8-6.1%)                   | 7.7%<br>(5.3-11%)                   | 0.36<br>(0.24-0.52)    | 21<br>(14-30)      |
| Dominica | 2005 | Female | 45 to 49 | 40%<br>(25-57%)                | 60%<br>(43-75%)          | 1.8<br>(0.98-3)                             | 4.4%<br>(2.8-6.9%)                   | 7.4%<br>(4.7-11%)                   | 0.44<br>(0.27-0.7)     | 21<br>(13-34)      |
| Dominica | 2005 | Female | 50 to 54 | 37%<br>(23-53%)                | 63%<br>(47-77%)          | 1.6<br>(0.89-2.7)                           | 4.1%<br>(2.3-6.7%)                   | 6.8%<br>(4.1-10%)                   | 0.46<br>(0.26-0.72)    | 19<br>(11-30)      |



| Location | Year | Sex    | Age      | Prevalence of current drinkers | Prevalence of abstainers | Population average of standard drinks daily | Percent of total attributable deaths | Percent of total attributable DALYs | Attributable deaths | Attributable DALYs  |
|----------|------|--------|----------|--------------------------------|--------------------------|---------------------------------------------|--------------------------------------|-------------------------------------|---------------------|---------------------|
| Dominica | 2005 | Female | 55 to 59 | 32%<br>(20-49%)                | 68%<br>(51-80%)          | 1.4<br>(0.72-2.3)                           | 3.7%<br>(1.8-6.3%)                   | 5.7%<br>(3.1-9.3%)                  | 0.44<br>(0.24-0.74) | 16<br>(8.2-27)      |
| Dominica | 2005 | Female | 60 to 64 | 29%<br>(17-45%)                | 71%<br>(55-83%)          | 1.2<br>(0.6-2.1)                            | 3.1%<br>(1.2-5.7%)                   | 4.4%<br>(2-7.8%)                    | 0.48<br>(0.22-0.88) | 14<br>(5.7-27)      |
| Dominica | 2005 | Female | 65 to 69 | 27%<br>(17-41%)                | 73%<br>(59-83%)          | 1<br>(0.55-1.7)                             | 2.7%<br>(1.1-4.9%)                   | 3.7%<br>(1.7-6.4%)                  | 0.6<br>(0.26-1.1)   | 14<br>(5.7-26)      |
| Dominica | 2005 | Female | 70 to 74 | 24%<br>(15-38%)                | 76%<br>(62-85%)          | 0.87<br>(0.43-1.6)                          | 2.2%<br>(0.59-4.8%)                  | 2.9%<br>(0.82-5.8%)                 | 0.68<br>(0.19-1.4)  | 13<br>(3.3-26)      |
| Dominica | 2005 | Female | 75 to 79 | 22%<br>(13-35%)                | 78%<br>(65-87%)          | 0.76<br>(0.36-1.4)                          | 1.9%<br>(0.29-4.1%)                  | 2.3%<br>(0.41-4.9%)                 | 0.68<br>(0.13-1.5)  | 9.8<br>(1.6-21)     |
| Dominica | 2005 | Female | 80 to 84 | 20%<br>(11-31%)                | 80%<br>(69-89%)          | 0.71<br>(0.34-1.2)                          | 1.8%<br>(0.47-3.8%)                  | 2.1%<br>(0.58-4.3%)                 | 0.77<br>(0.21-1.5)  | 8.2<br>(2.2-17)     |
| Dominica | 2005 | Female | 85 to 89 | 20%<br>(12-30%)                | 80%<br>(70-88%)          | 0.72<br>(0.36-1.3)                          | 1.8%<br>(0.52-3.7%)                  | 2.1%<br>(0.58-4.3%)                 | 0.72<br>(0.2-1.5)   | 5.5<br>(1.5-11)     |
| Dominica | 2005 | Female | 90 to 94 | 22%<br>(13-34%)                | 78%<br>(66-87%)          | 0.83<br>(0.37-1.5)                          | 2.1%<br>(0.49-4.9%)                  | 2.3%<br>(0.49-5.6%)                 | 0.5<br>(0.1-1.2)    | 2.6<br>(0.61-6.1)   |
| Dominica | 2005 | Female | 95 plus  | 26%<br>(14-43%)                | 74%<br>(57-86%)          | 0.98<br>(0.35-1.9)                          | 2.4%<br>(0.19-5.9%)                  | 2.6%<br>(0.12-6.7%)                 | 0.22<br>(0.01-0.56) | 0.79<br>(0.062-1.9) |
| Dominica | 2005 | Male   | All Ages | 57%<br>(50-65%)                | 43%<br>(35-50%)          | 2.7<br>(2.4-3)                              | 7.8%<br>(6.5-9.2%)                   | 7.9%<br>(6-10%)                     | 22<br>(16-29)       | 800<br>(660-960)    |
| Dominica | 2005 | Male   | 15 to 19 | 58%<br>(40-74%)                | 42%<br>(26-60%)          | 2.1<br>(1.1-3.2)                            | 6.2%<br>(4.1-8.9%)                   | 9.3%<br>(5.6-14%)                   | 0.31<br>(0.19-0.47) | 29<br>(19-42)       |
| Dominica | 2005 | Male   | 20 to 24 | 68%<br>(50-82%)                | 32%<br>(18-50%)          | 3.9<br>(2.4-5.5)                            | 12%<br>(9-16%)                       | 17%<br>(11-23%)                     | 0.64<br>(0.43-0.91) | 58<br>(41-78)       |
| Dominica | 2005 | Male   | 25 to 29 | 71%<br>(53-84%)                | 29%<br>(16-47%)          | 4.7<br>(3-6.7)                              | 14%<br>(10-18%)                      | 18%<br>(13-24%)                     | 0.88<br>(0.6-1.2)   | 68<br>(49-89)       |
| Dominica | 2005 | Male   | 30 to 34 | 72%<br>(54-85%)                | 28%<br>(15-46%)          | 4.9<br>(3.1-7)                              | 13%<br>(9.9-16%)                     | 17%<br>(13-22%)                     | 1<br>(0.74-1.4)     | 73<br>(56-94)       |
| Dominica | 2005 | Male   | 35 to 39 | 71%<br>(55-85%)                | 29%<br>(15-45%)          | 4.6<br>(2.9-6.8)                            | 12%<br>(9.1-15%)                     | 16%<br>(12-21%)                     | 0.97<br>(0.69-1.3)  | 65<br>(49-81)       |
| Dominica | 2005 | Male   | 40 to 44 | 70%<br>(54-84%)                | 30%<br>(16-46%)          | 4.4<br>(2.7-6.4)                            | 13%<br>(9.5-16%)                     | 16%<br>(12-21%)                     | 1.6<br>(1.1-2)      | 86<br>(64-110)      |
| Dominica | 2005 | Male   | 45 to 49 | 69%<br>(49-83%)                | 31%<br>(17-51%)          | 4.2<br>(2.4-6.5)                            | 12%<br>(9-15%)                       | 16%<br>(12-20%)                     | 1.5<br>(1.1-2)      | 74<br>(54-95)       |
| Dominica | 2005 | Male   | 50 to 54 | 67%<br>(49-82%)                | 33%<br>(18-51%)          | 3.8<br>(2.1-6)                              | 11%<br>(8-15%)                       | 15%<br>(10-19%)                     | 1.7<br>(1.2-2.3)    | 73<br>(50-94)       |
| Dominica | 2005 | Male   | 55 to 59 | 65%<br>(48-81%)                | 35%<br>(19-52%)          | 3.5<br>(1.9-5.6)                            | 11%<br>(7.1-14%)                     | 13%<br>(8.7-18%)                    | 1.8<br>(1.2-2.5)    | 65<br>(43-87)       |
| Dominica | 2005 | Male   | 60 to 64 | 63%<br>(44-80%)                | 37%<br>(20-56%)          | 3.2<br>(1.7-5.4)                            | 9%<br>(5.4-13%)                      | 11%<br>(6.5-15%)                    | 2<br>(1.2-2.8)      | 58<br>(35-82)       |
| Dominica | 2005 | Male   | 65 to 69 | 62%<br>(43-78%)                | 38%<br>(22-57%)          | 2.8<br>(1.6-4.5)                            | 7.9%<br>(4.9-11%)                    | 9.5%<br>(5.9-13%)                   | 2<br>(1.3-2.9)      | 50<br>(31-72)       |
| Dominica | 2005 | Male   | 70 to 74 | 59%<br>(40-75%)                | 41%<br>(25-60%)          | 2.4<br>(1.3-4.1)                            | 6.3%<br>(3.2-9.9%)                   | 7.1%<br>(3.6-11%)                   | 2.3<br>(1.2-3.6)    | 44<br>(23-69)       |

| Location | Year | Sex    | Age      | Prevalence of current drinkers | Prevalence of abstainers | Population average of standard drinks daily | Percent of total attributable deaths | Percent of total attributable DALYs | Attributable deaths   | Attributable DALYs |
|----------|------|--------|----------|--------------------------------|--------------------------|---------------------------------------------|--------------------------------------|-------------------------------------|-----------------------|--------------------|
| Dominica | 2005 | Male   | 75 to 79 | 53%<br>(35-72%)                | 47%<br>(28-65%)          | 2<br>(0.98-3.5)                             | 4.9%<br>(2.3-8.3%)                   | 5.5%<br>(2.5-9.2%)                  | 1.9<br>(0.87-3.3)     | 29<br>(13-48)      |
| Dominica | 2005 | Male   | 80 to 84 | 48%<br>(30-65%)                | 52%<br>(35-70%)          | 1.6<br>(0.86-2.6)                           | 4%<br>(1.9-6.6%)                     | 4.4%<br>(2-7.3%)                    | 1.6<br>(0.74-2.6)     | 17<br>(8.2-29)     |
| Dominica | 2005 | Male   | 85 to 89 | 43%<br>(26-60%)                | 57%<br>(40-74%)          | 1.4<br>(0.72-2.4)                           | 3.3%<br>(1.5-6%)                     | 3.6%<br>(1.6-6.7%)                  | 1.1<br>(0.48-2)       | 8.4<br>(3.8-15)    |
| Dominica | 2005 | Male   | 90 to 94 | 43%<br>(28-61%)                | 57%<br>(39-72%)          | 1.4<br>(0.7-2.6)                            | 3.1%<br>(1.3-5.9%)                   | 3.3%<br>(1.2-6.5%)                  | 0.51<br>(0.19-1)      | 2.8<br>(1.1-5.4)   |
| Dominica | 2005 | Male   | 95 plus  | 46%<br>(27-67%)                | 54%<br>(33-73%)          | 1.6<br>(0.66-3)                             | 3.3%<br>(0.97-6.7%)                  | 3.5%<br>(0.84-7.4%)                 | 0.2<br>(0.047-0.42)   | 0.72<br>(0.21-1.5) |
| Dominica | 2010 | Female | All Ages | 35%<br>(29-42%)                | 65%<br>(58-71%)          | 1.3<br>(1.1-1.6)                            | 2.5%<br>(1.8-3.5%)                   | 3.1%<br>(1.7-4.9%)                  | 7.8<br>(4.3-13)       | 230<br>(160-310)   |
| Dominica | 2010 | Female | 15 to 19 | 41%<br>(27-57%)                | 59%<br>(43-73%)          | 1.5<br>(0.79-2.4)                           | 1.9%<br>(1.2-2.7%)                   | 4.6%<br>(2.6-7.3%)                  | 0.04<br>(0.022-0.064) | 5.8<br>(3.6-8.9)   |
| Dominica | 2010 | Female | 20 to 24 | 46%<br>(31-64%)                | 54%<br>(36-69%)          | 2.2<br>(1.2-3.4)                            | 4%<br>(2.7-5.6%)                     | 6.7%<br>(4.1-10%)                   | 0.14<br>(0.084-0.22)  | 16<br>(10-22)      |
| Dominica | 2010 | Female | 25 to 29 | 46%<br>(29-63%)                | 54%<br>(37-71%)          | 2.2<br>(1.3-3.5)                            | 3.9%<br>(2.8-5.4%)                   | 6.5%<br>(4-9.3%)                    | 0.14<br>(0.088-0.2)   | 15<br>(10-21)      |
| Dominica | 2010 | Female | 30 to 34 | 44%<br>(28-62%)                | 56%<br>(38-72%)          | 2.2<br>(1.3-3.4)                            | 3.5%<br>(2.5-4.8%)                   | 6.5%<br>(4.4-9.2%)                  | 0.12<br>(0.081-0.18)  | 12<br>(8.5-17)     |
| Dominica | 2010 | Female | 35 to 39 | 44%<br>(29-61%)                | 56%<br>(39-71%)          | 2<br>(1.1-3.1)                              | 3.9%<br>(2.7-5.4%)                   | 7.1%<br>(5-9.9%)                    | 0.25<br>(0.17-0.36)   | 18<br>(12-25)      |
| Dominica | 2010 | Female | 40 to 44 | 42%<br>(27-60%)                | 58%<br>(40-73%)          | 1.9<br>(1.1-3)                              | 4.2%<br>(2.8-6.2%)                   | 7.5%<br>(5.1-11%)                   | 0.38<br>(0.26-0.56)   | 22<br>(15-32)      |
| Dominica | 2010 | Female | 45 to 49 | 40%<br>(25-57%)                | 60%<br>(43-75%)          | 1.8<br>(0.98-3)                             | 4.2%<br>(2.6-6.7%)                   | 7.2%<br>(4.6-11%)                   | 0.48<br>(0.31-0.76)   | 24<br>(15-38)      |
| Dominica | 2010 | Female | 50 to 54 | 37%<br>(23-54%)                | 63%<br>(46-77%)          | 1.6<br>(0.87-2.7)                           | 4.3%<br>(2.4-6.8%)                   | 6.7%<br>(4-10%)                     | 0.55<br>(0.32-0.86)   | 23<br>(13-36)      |
| Dominica | 2010 | Female | 55 to 59 | 32%<br>(20-49%)                | 68%<br>(51-80%)          | 1.4<br>(0.71-2.4)                           | 3.6%<br>(1.8-6.1%)                   | 5.6%<br>(3.1-9.2%)                  | 0.5<br>(0.27-0.81)    | 18<br>(9.2-31)     |
| Dominica | 2010 | Female | 60 to 64 | 29%<br>(17-45%)                | 71%<br>(55-83%)          | 1.2<br>(0.59-2.1)                           | 3.1%<br>(1.3-5.7%)                   | 4.4%<br>(2.1-7.8%)                  | 0.55<br>(0.25-0.99)   | 16<br>(6.8-31)     |
| Dominica | 2010 | Female | 65 to 69 | 26%<br>(16-41%)                | 74%<br>(59-84%)          | 1<br>(0.55-1.7)                             | 2.6%<br>(1.1-4.8%)                   | 3.7%<br>(1.6-6.4%)                  | 0.56<br>(0.25-0.97)   | 13<br>(5.4-24)     |
| Dominica | 2010 | Female | 70 to 74 | 24%<br>(15-38%)                | 76%<br>(62-85%)          | 0.87<br>(0.43-1.6)                          | 2.3%<br>(0.62-4.7%)                  | 2.9%<br>(0.9-5.8%)                  | 0.74<br>(0.23-1.5)    | 14<br>(4-28)       |
| Dominica | 2010 | Female | 75 to 79 | 22%<br>(13-34%)                | 78%<br>(66-87%)          | 0.77<br>(0.35-1.4)                          | 1.9%<br>(0.36-4.2%)                  | 2.4%<br>(0.5-5.1%)                  | 0.77<br>(0.16-1.6)    | 11<br>(2.1-25)     |
| Dominica | 2010 | Female | 80 to 84 | 20%<br>(11-31%)                | 80%<br>(69-89%)          | 0.72<br>(0.34-1.2)                          | 1.9%<br>(0.54-3.9%)                  | 2.2%<br>(0.62-4.6%)                 | 0.87<br>(0.25-1.8)    | 9.3<br>(2.7-19)    |
| Dominica | 2010 | Female | 85 to 89 | 20%<br>(12-30%)                | 80%<br>(70-88%)          | 0.73<br>(0.34-1.3)                          | 1.9%<br>(0.52-4%)                    | 2.1%<br>(0.56-4.6%)                 | 0.82<br>(0.21-1.8)    | 6.3<br>(1.7-13)    |
| Dominica | 2010 | Female | 90 to 94 | 22%<br>(13-34%)                | 78%<br>(66-87%)          | 0.83<br>(0.37-1.6)                          | 2.1%<br>(0.47-5%)                    | 2.3%<br>(0.45-5.6%)                 | 0.62<br>(0.12-1.5)    | 3.3<br>(0.73-7.7)  |

| Location | Year | Sex    | Age      | Prevalence of current drinkers | Prevalence of abstainers | Population average of standard drinks daily | Percent of total attributable deaths | Percent of total attributable DALYs | Attributable deaths  | Attributable DALYs |
|----------|------|--------|----------|--------------------------------|--------------------------|---------------------------------------------|--------------------------------------|-------------------------------------|----------------------|--------------------|
| Dominica | 2010 | Female | 95 plus  | 26%<br>(13-43%)                | 74%<br>(57-87%)          | 1<br>(0.36-2.1)                             | 2.4%<br>(0.25-6.3%)                  | 2.6%<br>(0.15-7%)                   | 0.29<br>(0.016-0.77) | 1<br>(0.1-2.6)     |
| Dominica | 2010 | Male   | All Ages | 58%<br>(50-66%)                | 42%<br>(34-50%)          | 2.8<br>(2.3-3.3)                            | 8%<br>(6.6-9.5%)                     | 8.2%<br>(6.1-10%)                   | 25<br>(18-31)        | 890<br>(710-1100)  |
| Dominica | 2010 | Male   | 15 to 19 | 58%<br>(41-74%)                | 42%<br>(26-59%)          | 2.1<br>(1.2-3.3)                            | 5.9%<br>(3.8-8.4%)                   | 8.9%<br>(5.3-13%)                   | 0.26<br>(0.15-0.39)  | 25<br>(16-36)      |
| Dominica | 2010 | Male   | 20 to 24 | 68%<br>(50-82%)                | 32%<br>(18-50%)          | 4<br>(2.5-5.8)                              | 13%<br>(9.1-17%)                     | 16%<br>(11-23%)                     | 0.84<br>(0.55-1.2)   | 71<br>(50-97)      |
| Dominica | 2010 | Male   | 25 to 29 | 71%<br>(53-83%)                | 29%<br>(17-47%)          | 4.8<br>(3-7)                                | 13%<br>(9.8-17%)                     | 18%<br>(12-24%)                     | 0.89<br>(0.6-1.2)    | 70<br>(52-92)      |
| Dominica | 2010 | Male   | 30 to 34 | 72%<br>(54-85%)                | 28%<br>(15-46%)          | 5<br>(3-7.3)                                | 13%<br>(10-17%)                      | 17%<br>(13-23%)                     | 1.1<br>(0.76-1.4)    | 73<br>(54-91)      |
| Dominica | 2010 | Male   | 35 to 39 | 71%<br>(55-84%)                | 29%<br>(16-45%)          | 4.7<br>(3-7.1)                              | 11%<br>(8.7-14%)                     | 16%<br>(11-20%)                     | 0.82<br>(0.58-1.1)   | 57<br>(43-73)      |
| Dominica | 2010 | Male   | 40 to 44 | 70%<br>(55-84%)                | 30%<br>(16-45%)          | 4.5<br>(2.7-6.8)                            | 13%<br>(9.5-16%)                     | 16%<br>(12-21%)                     | 1.7<br>(1.2-2.2)     | 93<br>(68-120)     |
| Dominica | 2010 | Male   | 45 to 49 | 69%<br>(49-82%)                | 31%<br>(18-51%)          | 4.2<br>(2.5-6.5)                            | 12%<br>(9.1-16%)                     | 16%<br>(11-20%)                     | 2.1<br>(1.5-2.8)     | 100<br>(74-130)    |
| Dominica | 2010 | Male   | 50 to 54 | 67%<br>(49-82%)                | 33%<br>(18-51%)          | 3.9<br>(2.1-6)                              | 12%<br>(8.3-15%)                     | 15%<br>(10-19%)                     | 2.1<br>(1.5-2.7)     | 86<br>(61-110)     |
| Dominica | 2010 | Male   | 55 to 59 | 65%<br>(47-81%)                | 35%<br>(19-53%)          | 3.5<br>(1.9-5.5)                            | 11%<br>(7-14%)                       | 13%<br>(8.5-17%)                    | 2.3<br>(1.4-3.1)     | 80<br>(52-110)     |
| Dominica | 2010 | Male   | 60 to 64 | 63%<br>(44-80%)                | 37%<br>(20-56%)          | 3.2<br>(1.7-5.4)                            | 9.1%<br>(5.5-13%)                    | 11%<br>(6.5-15%)                    | 2.3<br>(1.3-3.3)     | 67<br>(40-96)      |
| Dominica | 2010 | Male   | 65 to 69 | 62%<br>(42-78%)                | 38%<br>(22-58%)          | 2.9<br>(1.6-4.5)                            | 8.1%<br>(5.1-12%)                    | 9.6%<br>(6-14%)                     | 2.3<br>(1.4-3.3)     | 57<br>(35-81)      |
| Dominica | 2010 | Male   | 70 to 74 | 58%<br>(40-74%)                | 42%<br>(26-60%)          | 2.4<br>(1.3-4.1)                            | 6.3%<br>(3.4-9.8%)                   | 7.2%<br>(3.8-11%)                   | 2.3<br>(1.2-3.6)     | 45<br>(24-71)      |
| Dominica | 2010 | Male   | 75 to 79 | 53%<br>(34-72%)                | 47%<br>(28-66%)          | 2<br>(1-3.5)                                | 5%<br>(2.4-8.2%)                     | 5.6%<br>(2.6-9.1%)                  | 2.1<br>(0.99-3.5)    | 32<br>(15-53)      |
| Dominica | 2010 | Male   | 80 to 84 | 48%<br>(29-66%)                | 52%<br>(34-71%)          | 1.7<br>(0.86-2.7)                           | 4%<br>(2-6.6%)                       | 4.4%<br>(2.1-7.4%)                  | 1.7<br>(0.79-2.7)    | 18<br>(8.9-30)     |
| Dominica | 2010 | Male   | 85 to 89 | 43%<br>(27-60%)                | 57%<br>(40-73%)          | 1.5<br>(0.74-2.6)                           | 3.4%<br>(1.6-6.1%)                   | 3.7%<br>(1.7-6.8%)                  | 1.1<br>(0.51-2)      | 8.9<br>(4.1-16)    |
| Dominica | 2010 | Male   | 90 to 94 | 43%<br>(28-60%)                | 57%<br>(40-72%)          | 1.5<br>(0.71-2.7)                           | 3.1%<br>(1.3-5.9%)                   | 3.4%<br>(1.3-6.6%)                  | 0.51<br>(0.2-1)      | 2.8<br>(1.2-5.3)   |
| Dominica | 2010 | Male   | 95 plus  | 46%<br>(26-66%)                | 54%<br>(34-74%)          | 1.6<br>(0.64-3.1)                           | 3.3%<br>(1.1-6.9%)                   | 3.6%<br>(0.97-7.8%)                 | 0.18<br>(0.05-0.4)   | 0.69<br>(0.22-1.4) |
| Dominica | 2016 | Female | All Ages | 35%<br>(29-42%)                | 65%<br>(58-71%)          | 1.4<br>(1-1.9)                              | 2.7%<br>(1.7-4.1%)                   | 3.4%<br>(1.6-5.8%)                  | 9.5<br>(4.6-17)      | 280<br>(160-420)   |
| Dominica | 2016 | Female | 15 to 19 | 41%<br>(27-57%)                | 59%<br>(43-73%)          | 1.5<br>(0.76-2.6)                           | 2.2%<br>(1.3-3.4%)                   | 5.3%<br>(2.9-8.9%)                  | 0.058<br>(0.031-0.1) | 7.2<br>(4.4-11)    |
| Dominica | 2016 | Female | 20 to 24 | 47%<br>(31-63%)                | 53%<br>(37-69%)          | 2.3<br>(1.2-3.8)                            | 4.1%<br>(2.7-5.8%)                   | 7.3%<br>(4.2-11%)                   | 0.14<br>(0.079-0.23) | 16<br>(10-24)      |

| Location | Year | Sex    | Age      | Prevalence of current drinkers | Prevalence of abstainers | Population average of standard drinks daily | Percent of total attributable deaths | Percent of total attributable DALYs | Attributable deaths  | Attributable DALYs |
|----------|------|--------|----------|--------------------------------|--------------------------|---------------------------------------------|--------------------------------------|-------------------------------------|----------------------|--------------------|
| Dominica | 2016 | Female | 25 to 29 | 46%<br>(30-63%)                | 54%<br>(37-70%)          | 2.3<br>(1.3-3.9)                            | 4.2%<br>(2.9-5.9%)                   | 7.2%<br>(4.4-11%)                   | 0.17<br>(0.098-0.26) | 17<br>(11-25)      |
| Dominica | 2016 | Female | 30 to 34 | 44%<br>(28-61%)                | 56%<br>(39-72%)          | 2.2<br>(1.2-3.6)                            | 3.9%<br>(2.8-5.5%)                   | 7.4%<br>(4.8-11%)                   | 0.18<br>(0.11-0.28)  | 16<br>(11-24)      |
| Dominica | 2016 | Female | 35 to 39 | 43%<br>(29-61%)                | 57%<br>(39-71%)          | 2.1<br>(1.1-3.3)                            | 4%<br>(2.8-5.8%)                     | 7.6%<br>(5.2-11%)                   | 0.25<br>(0.16-0.38)  | 18<br>(12-26)      |
| Dominica | 2016 | Female | 40 to 44 | 42%<br>(27-60%)                | 58%<br>(40-73%)          | 1.9<br>(1-3.3)                              | 4.3%<br>(2.7-6.5%)                   | 7.9%<br>(5.2-12%)                   | 0.39<br>(0.24-0.63)  | 23<br>(14-35)      |
| Dominica | 2016 | Female | 45 to 49 | 40%<br>(25-58%)                | 60%<br>(42-75%)          | 1.9<br>(0.96-3.3)                           | 4.4%<br>(2.6-7%)                     | 7.5%<br>(4.7-12%)                   | 0.56<br>(0.32-0.9)   | 27<br>(15-45)      |
| Dominica | 2016 | Female | 50 to 54 | 37%<br>(23-54%)                | 63%<br>(46-77%)          | 1.7<br>(0.86-2.9)                           | 4.5%<br>(2.4-7.3%)                   | 7%<br>(4-11%)                       | 0.77<br>(0.42-1.3)   | 32<br>(17-54)      |
| Dominica | 2016 | Female | 55 to 59 | 32%<br>(20-49%)                | 68%<br>(51-80%)          | 1.4<br>(0.7-2.5)                            | 3.9%<br>(1.9-6.6%)                   | 5.9%<br>(3-9.9%)                    | 0.69<br>(0.35-1.2)   | 24<br>(12-43)      |
| Dominica | 2016 | Female | 60 to 64 | 29%<br>(17-45%)                | 71%<br>(55-83%)          | 1.2<br>(0.58-2.2)                           | 3.3%<br>(1.3-6.2%)                   | 4.7%<br>(2.1-8.4%)                  | 0.77<br>(0.33-1.4)   | 23<br>(9-44)       |
| Dominica | 2016 | Female | 65 to 69 | 27%<br>(16-41%)                | 73%<br>(59-84%)          | 1.1<br>(0.55-1.9)                           | 2.9%<br>(1.1-5.5%)                   | 3.9%<br>(1.7-7.1%)                  | 0.77<br>(0.3-1.4)    | 19<br>(6.7-36)     |
| Dominica | 2016 | Female | 70 to 74 | 24%<br>(15-37%)                | 76%<br>(63-85%)          | 0.91<br>(0.44-1.7)                          | 2.5%<br>(0.66-5.1%)                  | 3.2%<br>(0.99-6.4%)                 | 0.88<br>(0.25-1.8)   | 17<br>(4.4-36)     |
| Dominica | 2016 | Female | 75 to 79 | 22%<br>(13-35%)                | 78%<br>(65-87%)          | 0.79<br>(0.34-1.5)                          | 2.1%<br>(0.46-4.7%)                  | 2.6%<br>(0.62-5.7%)                 | 0.93<br>(0.21-2.2)   | 14<br>(2.8-33)     |
| Dominica | 2016 | Female | 80 to 84 | 20%<br>(11-31%)                | 80%<br>(69-89%)          | 0.74<br>(0.34-1.3)                          | 2%<br>(0.53-4.5%)                    | 2.4%<br>(0.62-5.3%)                 | 1<br>(0.26-2.2)      | 11<br>(2.7-25)     |
| Dominica | 2016 | Female | 85 to 89 | 20%<br>(12-30%)                | 80%<br>(70-88%)          | 0.75<br>(0.34-1.4)                          | 2%<br>(0.53-4.5%)                    | 2.3%<br>(0.58-5.3%)                 | 0.9<br>(0.23-2.1)    | 6.9<br>(1.8-16)    |
| Dominica | 2016 | Female | 90 to 94 | 22%<br>(13-34%)                | 78%<br>(66-87%)          | 0.86<br>(0.37-1.7)                          | 2.2%<br>(0.48-5.3%)                  | 2.5%<br>(0.46-6.1%)                 | 0.69<br>(0.13-1.7)   | 3.7<br>(0.78-8.9)  |
| Dominica | 2016 | Female | 95 plus  | 26%<br>(13-43%)                | 74%<br>(57-87%)          | 1<br>(0.36-2.2)                             | 2.5%<br>(0.35-6.5%)                  | 2.8%<br>(0.23-7.3%)                 | 0.33<br>(0.029-0.86) | 1.2<br>(0.16-3)    |
| Dominica | 2016 | Male   | All Ages | 59%<br>(50-66%)                | 41%<br>(34-50%)          | 2.9<br>(2.2-3.9)                            | 8.4%<br>(6.5-10%)                    | 8.5%<br>(6-11%)                     | 29<br>(19-40)        | 1000<br>(770-1300) |
| Dominica | 2016 | Male   | 15 to 19 | 58%<br>(40-74%)                | 42%<br>(26-60%)          | 2.2<br>(1.1-3.7)                            | 6.5%<br>(4.1-9.6%)                   | 9.8%<br>(5.6-15%)                   | 0.33<br>(0.18-0.55)  | 30<br>(18-47)      |
| Dominica | 2016 | Male   | 20 to 24 | 68%<br>(50-81%)                | 32%<br>(19-50%)          | 4.1<br>(2.4-6.5)                            | 13%<br>(9.4-18%)                     | 17%<br>(11-24%)                     | 0.95<br>(0.57-1.4)   | 79<br>(52-110)     |
| Dominica | 2016 | Male   | 25 to 29 | 71%<br>(53-84%)                | 29%<br>(16-47%)          | 4.9<br>(2.8-7.6)                            | 14%<br>(10-18%)                      | 19%<br>(12-25%)                     | 1.1<br>(0.71-1.6)    | 86<br>(59-120)     |
| Dominica | 2016 | Male   | 30 to 34 | 72%<br>(53-85%)                | 28%<br>(15-47%)          | 5.1<br>(3-7.8)                              | 14%<br>(10-17%)                      | 18%<br>(12-24%)                     | 1.2<br>(0.82-1.7)    | 86<br>(61-120)     |
| Dominica | 2016 | Male   | 35 to 39 | 71%<br>(55-84%)                | 29%<br>(16-45%)          | 4.8<br>(2.8-7.6)                            | 12%<br>(9.1-16%)                     | 17%<br>(12-22%)                     | 1<br>(0.69-1.4)      | 67<br>(47-90)      |
| Dominica | 2016 | Male   | 40 to 44 | 70%<br>(54-84%)                | 30%<br>(16-46%)          | 4.6<br>(2.6-7.4)                            | 13%<br>(9.3-16%)                     | 17%<br>(12-21%)                     | 1.7<br>(1.1-2.4)     | 94<br>(66-120)     |

| Location           | Year | Sex    | Age      | Prevalence of current drinkers | Prevalence of abstainers | Population average of standard drinks daily | Percent of total attributable deaths | Percent of total attributable DALYs | Attributable deaths | Attributable DALYs     |
|--------------------|------|--------|----------|--------------------------------|--------------------------|---------------------------------------------|--------------------------------------|-------------------------------------|---------------------|------------------------|
| Dominica           | 2016 | Male   | 45 to 49 | 69%<br>(49-83%)                | 31%<br>(17-51%)          | 4.3<br>(2.4-7.1)                            | 12%<br>(9-16%)                       | 16%<br>(11-20%)                     | 2.2<br>(1.5-2.9)    | 100<br>(74-140)        |
| Dominica           | 2016 | Male   | 50 to 54 | 67%<br>(49-82%)                | 33%<br>(18-51%)          | 4<br>(2.1-6.5)                              | 12%<br>(8.3-15%)                     | 15%<br>(10-19%)                     | 2.7<br>(1.8-3.8)    | 110<br>(78-150)        |
| Dominica           | 2016 | Male   | 55 to 59 | 65%<br>(48-81%)                | 35%<br>(19-52%)          | 3.6<br>(1.9-6.1)                            | 11%<br>(7-14%)                       | 13%<br>(8.4-18%)                    | 2.7<br>(1.7-3.8)    | 97<br>(61-140)         |
| Dominica           | 2016 | Male   | 60 to 64 | 63%<br>(43-80%)                | 37%<br>(20-57%)          | 3.3<br>(1.7-5.7)                            | 9.2%<br>(5.3-13%)                    | 11%<br>(6.4-15%)                    | 2.8<br>(1.6-4.1)    | 84<br>(48-120)         |
| Dominica           | 2016 | Male   | 65 to 69 | 62%<br>(43-78%)                | 38%<br>(22-57%)          | 2.9<br>(1.5-4.8)                            | 8.2%<br>(4.8-12%)                    | 9.6%<br>(5.6-14%)                   | 2.9<br>(1.6-4.2)    | 70<br>(40-100)         |
| Dominica           | 2016 | Male   | 70 to 74 | 58%<br>(40-74%)                | 42%<br>(26-60%)          | 2.5<br>(1.2-4.3)                            | 6.4%<br>(3.3-10%)                    | 7.3%<br>(3.7-12%)                   | 2.7<br>(1.3-4.5)    | 53<br>(26-85)          |
| Dominica           | 2016 | Male   | 75 to 79 | 53%<br>(34-72%)                | 47%<br>(28-66%)          | 2.1<br>(0.98-3.8)                           | 5.1%<br>(2.3-8.3%)                   | 5.7%<br>(2.5-9.5%)                  | 2.5<br>(1.1-4.3)    | 37<br>(16-64)          |
| Dominica           | 2016 | Male   | 80 to 84 | 48%<br>(30-66%)                | 52%<br>(34-70%)          | 1.7<br>(0.84-3)                             | 4.1%<br>(1.9-7%)                     | 4.6%<br>(2-7.9%)                    | 1.9<br>(0.83-3.4)   | 21<br>(9.4-37)         |
| Dominica           | 2016 | Male   | 85 to 89 | 43%<br>(26-60%)                | 57%<br>(40-74%)          | 1.5<br>(0.73-2.8)                           | 3.5%<br>(1.5-6.3%)                   | 3.8%<br>(1.6-7.2%)                  | 1.2<br>(0.5-2.3)    | 9.7<br>(4.1-18)        |
| Dominica           | 2016 | Male   | 90 to 94 | 43%<br>(28-61%)                | 57%<br>(39-72%)          | 1.5<br>(0.71-2.9)                           | 3.2%<br>(1.3-6.2%)                   | 3.5%<br>(1.3-6.8%)                  | 0.58<br>(0.21-1.1)  | 3.2<br>(1.2-6.2)       |
| Dominica           | 2016 | Male   | 95 plus  | 46%<br>(26-66%)                | 54%<br>(34-74%)          | 1.6<br>(0.63-3.2)                           | 3.4%<br>(1.1-7.2%)                   | 3.7%<br>(0.98-8.2%)                 | 0.2<br>(0.05-0.44)  | 0.75<br>(0.24-1.6)     |
| Dominican Republic | 1990 | Female | All Ages | 47%<br>(41-53%)                | 53%<br>(47-59%)          | 0.84<br>(0.72-0.96)                         | 1.4%<br>(1.1-1.8%)                   | 2.1%<br>(1.3-2.9%)                  | 340<br>(220-480)    | 15000<br>(12000-19000) |
| Dominican Republic | 1990 | Female | 15 to 19 | 57%<br>(45-68%)                | 43%<br>(32-55%)          | 1.1<br>(0.71-1.6)                           | 2.1%<br>(1.3-3.1%)                   | 4.3%<br>(2.2-6.6%)                  | 9.7<br>(4.7-17)     | 1000<br>(600-1600)     |
| Dominican Republic | 1990 | Female | 20 to 24 | 64%<br>(52-74%)                | 36%<br>(26-48%)          | 1.7<br>(1.2-2.4)                            | 4.1%<br>(2.8-5.6%)                   | 7.1%<br>(4.3-10%)                   | 21<br>(12-32)       | 2100<br>(1400-2900)    |
| Dominican Republic | 1990 | Female | 25 to 29 | 63%<br>(50-73%)                | 37%<br>(27-50%)          | 1.6<br>(1.1-2.3)                            | 4.1%<br>(2.8-5.7%)                   | 7%<br>(4.1-10%)                     | 22<br>(13-34)       | 1900<br>(1300-2700)    |
| Dominican Republic | 1990 | Female | 30 to 34 | 60%<br>(47-70%)                | 40%<br>(30-53%)          | 1.6<br>(1-2.2)                              | 4%<br>(2.6-5.5%)                     | 7%<br>(4.2-10%)                     | 24<br>(14-35)       | 1800<br>(1100-2500)    |
| Dominican Republic | 1990 | Female | 35 to 39 | 57%<br>(44-68%)                | 43%<br>(32-56%)          | 1.5<br>(0.91-2.1)                           | 3.8%<br>(2.5-5.5%)                   | 6.7%<br>(4.1-9.9%)                  | 25<br>(15-38)       | 1500<br>(970-2200)     |
| Dominican Republic | 1990 | Female | 40 to 44 | 54%<br>(43-65%)                | 46%<br>(35-57%)          | 1.3<br>(0.81-1.9)                           | 3.6%<br>(2.1-5.2%)                   | 6.3%<br>(3.8-9.5%)                  | 24<br>(14-37)       | 1300<br>(780-1900)     |
| Dominican Republic | 1990 | Female | 45 to 49 | 51%<br>(36-63%)                | 49%<br>(37-64%)          | 1.3<br>(0.77-1.9)                           | 3.5%<br>(1.9-5.4%)                   | 5.9%<br>(3.3-9.1%)                  | 26<br>(14-40)       | 1200<br>(670-1800)     |
| Dominican Republic | 1990 | Female | 50 to 54 | 47%<br>(34-60%)                | 53%<br>(40-66%)          | 1.1<br>(0.62-1.7)                           | 3.2%<br>(1.6-5.1%)                   | 5.2%<br>(2.7-8.2%)                  | 30<br>(15-48)       | 1200<br>(600-1800)     |
| Dominican Republic | 1990 | Female | 55 to 59 | 43%<br>(29-59%)                | 57%<br>(41-71%)          | 0.87<br>(0.49-1.4)                          | 2.7%<br>(1.4-4.5%)                   | 4.2%<br>(2.2-6.9%)                  | 29<br>(15-48)       | 950<br>(500-1600)      |
| Dominican Republic | 1990 | Female | 60 to 64 | 38%<br>(24-52%)                | 62%<br>(48-76%)          | 0.77<br>(0.41-1.3)                          | 2.1%<br>(0.86-3.8%)                  | 3.1%<br>(1.3-5.5%)                  | 26<br>(11-48)       | 720<br>(280-1300)      |

| Location           | Year | Sex    | Age      | Prevalence of current drinkers | Prevalence of abstainers | Population average of standard drinks daily | Percent of total attributable deaths | Percent of total attributable DALYs | Attributable deaths | Attributable DALYs     |
|--------------------|------|--------|----------|--------------------------------|--------------------------|---------------------------------------------|--------------------------------------|-------------------------------------|---------------------|------------------------|
| Dominican Republic | 1990 | Female | 65 to 69 | 32%<br>(21-45%)                | 68%<br>(55-79%)          | 0.71<br>(0.41-1.1)                          | 1.9%<br>(0.73-3.3%)                  | 2.7%<br>(1.1-4.6%)                  | 26<br>(10-45)       | 580<br>(210-1000)      |
| Dominican Republic | 1990 | Female | 70 to 74 | 28%<br>(18-41%)                | 72%<br>(59-82%)          | 0.64<br>(0.35-1.1)                          | 1.8%<br>(0.6-3.3%)                   | 2.4%<br>(0.81-4.2%)                 | 27<br>(8.8-48)      | 490<br>(150-870)       |
| Dominican Republic | 1990 | Female | 75 to 79 | 26%<br>(16-38%)                | 74%<br>(62-84%)          | 0.59<br>(0.28-1)                            | 1.4%<br>(0.21-2.7%)                  | 1.7%<br>(0.29-3.4%)                 | 21<br>(3.4-42)      | 290<br>(44-600)        |
| Dominican Republic | 1990 | Female | 80 to 84 | 24%<br>(14-37%)                | 76%<br>(63-86%)          | 0.54<br>(0.28-0.91)                         | 1.1%<br>(0.098-2.3%)                 | 1.4%<br>(0.084-2.8%)                | 15<br>(0.94-30)     | 160<br>(14-310)        |
| Dominican Republic | 1990 | Female | 85 to 89 | 24%<br>(15-37%)                | 76%<br>(63-85%)          | 0.53<br>(0.29-0.91)                         | 0.83%<br>(-0.12-1.9%)                | 0.93%<br>(-0.22-2.2%)               | 8.7<br>(-2.1-21)    | 69<br>(-9.4-160)       |
| Dominican Republic | 1990 | Female | 90 to 94 | 27%<br>(17-40%)                | 73%<br>(60-83%)          | 0.59<br>(0.29-1)                            | 0.68%<br>(-0.33-2.1%)                | 0.68%<br>(-0.56-2.3%)               | 3.6<br>(-2.9-12)    | 22<br>(-11-66)         |
| Dominican Republic | 1990 | Female | 95 plus  | 32%<br>(17-50%)                | 68%<br>(50-83%)          | 0.69<br>(0.3-1.3)                           | 0.62%<br>(-0.7-2.5%)                 | 0.54%<br>(-1-2.7%)                  | 1<br>(-2-5.3)       | 4.8<br>(-5.2-19)       |
| Dominican Republic | 1990 | Male   | All Ages | 70%<br>(64-76%)                | 30%<br>(24-36%)          | 1.4<br>(1.2-1.5)                            | 3.6%<br>(2.9-4.3%)                   | 4.6%<br>(3.4-5.8%)                  | 980<br>(730-1300)   | 47000<br>(38000-57000) |
| Dominican Republic | 1990 | Male   | 15 to 19 | 75%<br>(65-83%)                | 25%<br>(17-35%)          | 1.2<br>(0.82-1.8)                           | 5.2%<br>(3.4-7.2%)                   | 7.5%<br>(4.3-11%)                   | 31<br>(18-45)       | 2900<br>(1900-4000)    |
| Dominican Republic | 1990 | Male   | 20 to 24 | 85%<br>(77-90%)                | 15%<br>(10-23%)          | 2.2<br>(1.6-2.9)                            | 10%<br>(7.9-13%)                     | 13%<br>(8.9-18%)                    | 73<br>(50-98)       | 6400<br>(4700-8300)    |
| Dominican Republic | 1990 | Male   | 25 to 29 | 86%<br>(78-90%)                | 14%<br>(9.7-22%)         | 2.5<br>(1.9-3.4)                            | 11%<br>(8.3-14%)                     | 14%<br>(10-18%)                     | 80<br>(57-110)      | 6400<br>(4800-8100)    |
| Dominican Republic | 1990 | Male   | 30 to 34 | 86%<br>(79-90%)                | 14%<br>(9.8-21%)         | 2.9<br>(2-3.8)                              | 11%<br>(8.6-14%)                     | 15%<br>(11-20%)                     | 85<br>(60-110)      | 5900<br>(4400-7600)    |
| Dominican Republic | 1990 | Male   | 35 to 39 | 85%<br>(77-90%)                | 15%<br>(10-23%)          | 3<br>(2-4.1)                                | 11%<br>(8.5-15%)                     | 15%<br>(11-20%)                     | 87<br>(61-110)      | 5300<br>(3900-6900)    |
| Dominican Republic | 1990 | Male   | 40 to 44 | 83%<br>(76-89%)                | 17%<br>(11-24%)          | 2.8<br>(1.8-3.9)                            | 11%<br>(7.5-14%)                     | 14%<br>(9.9-19%)                    | 82<br>(56-110)      | 4400<br>(3100-5900)    |
| Dominican Republic | 1990 | Male   | 45 to 49 | 81%<br>(71-88%)                | 19%<br>(12-29%)          | 2.3<br>(1.5-3.3)                            | 8.8%<br>(6.2-12%)                    | 12%<br>(8-16%)                      | 73<br>(48-100)      | 3400<br>(2400-4700)    |
| Dominican Republic | 1990 | Male   | 50 to 54 | 79%<br>(70-86%)                | 21%<br>(14-30%)          | 2<br>(1.2-2.9)                              | 7.2%<br>(4.7-10%)                    | 9.5%<br>(6-13%)                     | 74<br>(46-100)      | 3000<br>(2000-4300)    |
| Dominican Republic | 1990 | Male   | 55 to 59 | 77%<br>(67-85%)                | 23%<br>(15-33%)          | 1.9<br>(1.2-2.9)                            | 6.3%<br>(4-9.2%)                     | 8.3%<br>(5.2-12%)                   | 77<br>(48-110)      | 2700<br>(1700-4000)    |
| Dominican Republic | 1990 | Male   | 60 to 64 | 76%<br>(64-85%)                | 24%<br>(15-36%)          | 1.8<br>(1.1-2.9)                            | 5.5%<br>(3.1-8.7%)                   | 7%<br>(3.7-11%)                     | 81<br>(43-130)      | 2400<br>(1300-3800)    |
| Dominican Republic | 1990 | Male   | 65 to 69 | 76%<br>(64-86%)                | 24%<br>(14-36%)          | 1.7<br>(1.1-2.4)                            | 4.6%<br>(2.6-6.9%)                   | 5.7%<br>(3.1-8.7%)                  | 74<br>(40-120)      | 1800<br>(1000-2800)    |
| Dominican Republic | 1990 | Male   | 70 to 74 | 73%<br>(59-84%)                | 27%<br>(16-41%)          | 1.4<br>(0.83-2.1)                           | 3.7%<br>(1.7-6%)                     | 4.5%<br>(2-7.3%)                    | 64<br>(27-100)      | 1200<br>(560-2000)     |
| Dominican Republic | 1990 | Male   | 75 to 79 | 68%<br>(51-81%)                | 32%<br>(19-49%)          | 1.2<br>(0.71-2)                             | 2.9%<br>(1-5.1%)                     | 3.3%<br>(1.1-6%)                    | 48<br>(15-88)       | 710<br>(240-1300)      |
| Dominican Republic | 1990 | Male   | 80 to 84 | 62%<br>(44-76%)                | 38%<br>(24-56%)          | 1<br>(0.61-1.6)                             | 2.1%<br>(0.63-3.7%)                  | 2.4%<br>(0.54-4.3%)                 | 29<br>(6.5-53)      | 320<br>(95-570)        |

| Location           | Year | Sex    | Age      | Prevalence of current drinkers | Prevalence of abstainers | Population average of standard drinks daily | Percent of total attributable deaths | Percent of total attributable DALYs | Attributable deaths | Attributable DALYs     |
|--------------------|------|--------|----------|--------------------------------|--------------------------|---------------------------------------------|--------------------------------------|-------------------------------------|---------------------|------------------------|
| Dominican Republic | 1990 | Male   | 85 to 89 | 58%<br>(40-73%)                | 42%<br>(27-60%)          | 0.87<br>(0.48-1.4)                          | 1.5%<br>(0.33-2.8%)                  | 1.6%<br>(0.16-3.2%)                 | 15<br>(1.6-29)      | 130<br>(26-230)        |
| Dominican Republic | 1990 | Male   | 90 to 94 | 58%<br>(42-73%)                | 42%<br>(27-58%)          | 0.85<br>(0.45-1.4)                          | 0.96%<br>(-0.26-2.4%)                | 0.88%<br>(-0.63-2.5%)               | 4.2<br>(-3-12)      | 27<br>(-7.4-67)        |
| Dominican Republic | 1990 | Male   | 95 plus  | 61%<br>(40-79%)                | 39%<br>(21-60%)          | 0.88<br>(0.41-1.6)                          | 0.73%<br>(-0.7-2.4%)                 | 0.46%<br>(-1.3-2.5%)                | 0.68<br>(-1.9-3.7)  | 4.3<br>(-4.1-14)       |
| Dominican Republic | 1995 | Female | All Ages | 47%<br>(41-53%)                | 53%<br>(47-59%)          | 0.99<br>(0.85-1.1)                          | 1.7%<br>(1.3-2.2%)                   | 2.7%<br>(1.8-3.7%)                  | 460<br>(300-630)    | 19000<br>(14000-23000) |
| Dominican Republic | 1995 | Female | 15 to 19 | 57%<br>(46-68%)                | 43%<br>(32-54%)          | 1.3<br>(0.84-1.9)                           | 2.4%<br>(1.5-3.4%)                   | 5.3%<br>(3-8.1%)                    | 11<br>(6.2-18)      | 1200<br>(740-1700)     |
| Dominican Republic | 1995 | Female | 20 to 24 | 64%<br>(53-74%)                | 36%<br>(26-47%)          | 2<br>(1.3-2.8)                              | 4.1%<br>(2.9-5.5%)                   | 7.1%<br>(4.4-10%)                   | 22<br>(13-32)       | 2200<br>(1500-3100)    |
| Dominican Republic | 1995 | Female | 25 to 29 | 63%<br>(50-73%)                | 37%<br>(27-50%)          | 1.9<br>(1.3-2.7)                            | 3.9%<br>(2.7-5.3%)                   | 6%<br>(3.8-8.9%)                    | 24<br>(15-34)       | 2100<br>(1500-2900)    |
| Dominican Republic | 1995 | Female | 30 to 34 | 60%<br>(46-71%)                | 40%<br>(29-54%)          | 1.8<br>(1.2-2.6)                            | 3.8%<br>(2.6-5.2%)                   | 6.2%<br>(3.9-9%)                    | 27<br>(17-38)       | 2000<br>(1400-2800)    |
| Dominican Republic | 1995 | Female | 35 to 39 | 57%<br>(43-69%)                | 43%<br>(31-57%)          | 1.7<br>(1-2.5)                              | 3.7%<br>(2.5-5.3%)                   | 6.4%<br>(4-9.4%)                    | 30<br>(19-43)       | 1900<br>(1300-2600)    |
| Dominican Republic | 1995 | Female | 40 to 44 | 54%<br>(42-65%)                | 46%<br>(35-58%)          | 1.6<br>(0.95-2.2)                           | 3.8%<br>(2.5-5.4%)                   | 6.6%<br>(4.2-9.6%)                  | 32<br>(20-46)       | 1700<br>(1100-2400)    |
| Dominican Republic | 1995 | Female | 45 to 49 | 50%<br>(36-63%)                | 50%<br>(37-64%)          | 1.5<br>(0.87-2.2)                           | 3.8%<br>(2.3-5.6%)                   | 6.4%<br>(3.8-9.6%)                  | 33<br>(20-49)       | 1500<br>(920-2300)     |
| Dominican Republic | 1995 | Female | 50 to 54 | 46%<br>(34-60%)                | 54%<br>(40-66%)          | 1.3<br>(0.72-2)                             | 3.7%<br>(2-5.7%)                     | 5.9%<br>(3.2-9.1%)                  | 34<br>(19-55)       | 1300<br>(730-2100)     |
| Dominican Republic | 1995 | Female | 55 to 59 | 43%<br>(29-59%)                | 57%<br>(41-71%)          | 1<br>(0.58-1.7)                             | 3.2%<br>(1.8-5%)                     | 5%<br>(2.9-7.8%)                    | 37<br>(21-58)       | 1200<br>(700-1900)     |
| Dominican Republic | 1995 | Female | 60 to 64 | 38%<br>(24-53%)                | 62%<br>(47-76%)          | 0.9<br>(0.49-1.5)                           | 2.6%<br>(1.2-4.5%)                   | 3.9%<br>(2-6.6%)                    | 36<br>(17-62)       | 1000<br>(470-1700)     |
| Dominican Republic | 1995 | Female | 65 to 69 | 32%<br>(20-44%)                | 68%<br>(56-80%)          | 0.82<br>(0.47-1.3)                          | 2.4%<br>(1.1-3.9%)                   | 3.4%<br>(1.7-5.5%)                  | 37<br>(18-60)       | 850<br>(410-1400)      |
| Dominican Republic | 1995 | Female | 70 to 74 | 28%<br>(18-40%)                | 72%<br>(60-82%)          | 0.75<br>(0.4-1.2)                           | 2.4%<br>(0.93-4%)                    | 3.2%<br>(1.3-5.4%)                  | 40<br>(16-68)       | 740<br>(290-1300)      |
| Dominican Republic | 1995 | Female | 75 to 79 | 26%<br>(16-39%)                | 74%<br>(61-84%)          | 0.7<br>(0.34-1.2)                           | 1.9%<br>(0.62-3.4%)                  | 2.5%<br>(0.83-4.5%)                 | 34<br>(11-61)       | 480<br>(160-890)       |
| Dominican Republic | 1995 | Female | 80 to 84 | 24%<br>(15-37%)                | 76%<br>(63-85%)          | 0.63<br>(0.33-1)                            | 1.7%<br>(0.56-2.9%)                  | 2.1%<br>(0.66-3.7%)                 | 29<br>(9.4-53)      | 310<br>(100-550)       |
| Dominican Republic | 1995 | Female | 85 to 89 | 25%<br>(15-37%)                | 75%<br>(63-85%)          | 0.62<br>(0.33-1)                            | 1.4%<br>(0.28-2.7%)                  | 1.6%<br>(0.24-3.2%)                 | 19<br>(3-40)        | 150<br>(30-300)        |
| Dominican Republic | 1995 | Female | 90 to 94 | 27%<br>(17-40%)                | 73%<br>(60-83%)          | 0.7<br>(0.35-1.2)                           | 1.2%<br>(0.056-3%)                   | 1.4%<br>(-0.08-3.4%)                | 9.9<br>(-0.58-24)   | 55<br>(2.5-130)        |
| Dominican Republic | 1995 | Female | 95 plus  | 32%<br>(18-51%)                | 68%<br>(49-82%)          | 0.81<br>(0.36-1.5)                          | 1.2%<br>(-0.34-3.5%)                 | 1.2%<br>(-0.59-3.9%)                | 3.4<br>(-1.6-11)    | 13<br>(-3.7-38)        |
| Dominican Republic | 1995 | Male   | All Ages | 70%<br>(64-75%)                | 30%<br>(25-36%)          | 1.6<br>(1.4-1.8)                            | 4.2%<br>(3.4-5.1%)                   | 5.3%<br>(4-6.7%)                    | 1200<br>(910-1500)  | 56000<br>(45000-68000) |

| Location           | Year | Sex    | Age      | Prevalence of current drinkers | Prevalence of abstainers | Population average of standard drinks daily | Percent of total attributable deaths | Percent of total attributable DALYs | Attributable deaths | Attributable DALYs     |
|--------------------|------|--------|----------|--------------------------------|--------------------------|---------------------------------------------|--------------------------------------|-------------------------------------|---------------------|------------------------|
| Dominican Republic | 1995 | Male   | 15 to 19 | 75%<br>(65-83%)                | 25%<br>(17-35%)          | 1.4<br>(0.93-2)                             | 5.6%<br>(3.7-7.6%)                   | 8.6%<br>(5-13%)                     | 33<br>(19-48)       | 3000<br>(2000-4200)    |
| Dominican Republic | 1995 | Male   | 20 to 24 | 85%<br>(77-90%)                | 15%<br>(10-23%)          | 2.6<br>(1.8-3.3)                            | 10%<br>(7.6-14%)                     | 13%<br>(9-18%)                      | 76<br>(52-100)      | 6700<br>(4900-8600)    |
| Dominican Republic | 1995 | Male   | 25 to 29 | 86%<br>(78-90%)                | 14%<br>(9.6-22%)         | 2.9<br>(2.1-3.9)                            | 10%<br>(7.4-13%)                     | 12%<br>(8-17%)                      | 85<br>(60-110)      | 6800<br>(5100-8800)    |
| Dominican Republic | 1995 | Male   | 30 to 34 | 86%<br>(78-90%)                | 14%<br>(9.6-22%)         | 3.3<br>(2.3-4.4)                            | 10%<br>(7.6-13%)                     | 13%<br>(8.9-17%)                    | 98<br>(70-130)      | 6900<br>(5000-8900)    |
| Dominican Republic | 1995 | Male   | 35 to 39 | 85%<br>(77-90%)                | 15%<br>(10-23%)          | 3.4<br>(2.3-4.7)                            | 10%<br>(7.6-13%)                     | 13%<br>(9.2-18%)                    | 100<br>(74-140)     | 6400<br>(4800-8300)    |
| Dominican Republic | 1995 | Male   | 40 to 44 | 83%<br>(76-89%)                | 17%<br>(11-24%)          | 3.2<br>(2.1-4.4)                            | 10%<br>(7.1-13%)                     | 13%<br>(8.9-18%)                    | 100<br>(71-140)     | 5600<br>(3900-7400)    |
| Dominican Republic | 1995 | Male   | 45 to 49 | 81%<br>(71-87%)                | 19%<br>(13-29%)          | 2.7<br>(1.7-3.7)                            | 9%<br>(6.3-12%)                      | 12%<br>(7.9-16%)                    | 94<br>(62-130)      | 4400<br>(3100-6100)    |
| Dominican Republic | 1995 | Male   | 50 to 54 | 79%<br>(71-85%)                | 21%<br>(15-29%)          | 2.3<br>(1.4-3.4)                            | 7.7%<br>(5.2-11%)                    | 10%<br>(6.6-14%)                    | 86<br>(55-120)      | 3500<br>(2300-4900)    |
| Dominican Republic | 1995 | Male   | 55 to 59 | 77%<br>(67-85%)                | 23%<br>(15-33%)          | 2.2<br>(1.4-3.3)                            | 7.1%<br>(4.5-10%)                    | 9.1%<br>(5.8-14%)                   | 97<br>(61-150)      | 3400<br>(2200-5000)    |
| Dominican Republic | 1995 | Male   | 60 to 64 | 76%<br>(64-85%)                | 24%<br>(15-36%)          | 2.1<br>(1.3-3.2)                            | 6.3%<br>(3.7-9.9%)                   | 8%<br>(4.4-13%)                     | 110<br>(61-170)     | 3200<br>(1800-5000)    |
| Dominican Republic | 1995 | Male   | 65 to 69 | 76%<br>(63-86%)                | 24%<br>(14-37%)          | 1.9<br>(1.2-2.7)                            | 5.4%<br>(3.2-8.1%)                   | 6.7%<br>(3.8-10%)                   | 100<br>(60-160)     | 2500<br>(1500-3800)    |
| Dominican Republic | 1995 | Male   | 70 to 74 | 73%<br>(59-84%)                | 27%<br>(16-41%)          | 1.6<br>(0.98-2.4)                           | 4.3%<br>(2.1-6.9%)                   | 5.3%<br>(2.6-8.3%)                  | 91<br>(43-150)      | 1700<br>(850-2700)     |
| Dominican Republic | 1995 | Male   | 75 to 79 | 68%<br>(51-81%)                | 32%<br>(19-49%)          | 1.4<br>(0.8-2.2)                            | 3.4%<br>(1.4-5.9%)                   | 4%<br>(1.6-6.9%)                    | 72<br>(29-130)      | 1100<br>(430-1800)     |
| Dominican Republic | 1995 | Male   | 80 to 84 | 62%<br>(44-76%)                | 38%<br>(24-56%)          | 1.2<br>(0.68-1.8)                           | 2.6%<br>(1.1-4.4%)                   | 3%<br>(1.2-5.1%)                    | 52<br>(20-89)       | 570<br>(230-960)       |
| Dominican Republic | 1995 | Male   | 85 to 89 | 57%<br>(40-73%)                | 43%<br>(27-60%)          | 0.98<br>(0.53-1.6)                          | 1.9%<br>(0.72-3.4%)                  | 2.1%<br>(0.64-3.8%)                 | 28<br>(8.4-50)      | 220<br>(81-390)        |
| Dominican Republic | 1995 | Male   | 90 to 94 | 58%<br>(41-73%)                | 42%<br>(27-59%)          | 0.96<br>(0.5-1.6)                           | 1.3%<br>(0.11-2.8%)                  | 1.3%<br>(-0.12-3.1%)                | 8.9<br>(-0.82-21)   | 54<br>(4.6-120)        |
| Dominican Republic | 1995 | Male   | 95 plus  | 61%<br>(41-79%)                | 39%<br>(21-59%)          | 1<br>(0.45-1.8)                             | 1.1%<br>(-0.32-3.1%)                 | 0.95%<br>(-0.83-3.2%)               | 2<br>(-1.7-6.7)     | 9.5<br>(-2.7-25)       |
| Dominican Republic | 2000 | Female | All Ages | 44%<br>(39-49%)                | 56%<br>(51-61%)          | 1<br>(0.88-1.2)                             | 1.7%<br>(1.4-2.1%)                   | 2.6%<br>(1.8-3.6%)                  | 480<br>(320-660)    | 19000<br>(14000-23000) |
| Dominican Republic | 2000 | Female | 15 to 19 | 58%<br>(48-67%)                | 42%<br>(33-52%)          | 1.4<br>(0.94-2)                             | 2.5%<br>(1.6-3.6%)                   | 6%<br>(3.5-8.8%)                    | 13<br>(7.4-19)      | 1300<br>(840-1900)     |
| Dominican Republic | 2000 | Female | 20 to 24 | 63%<br>(53-72%)                | 37%<br>(28-47%)          | 2.1<br>(1.5-2.9)                            | 3.9%<br>(2.8-5.1%)                   | 6.5%<br>(4-9.4%)                    | 20<br>(13-28)       | 2100<br>(1500-2800)    |
| Dominican Republic | 2000 | Female | 25 to 29 | 60%<br>(50-69%)                | 40%<br>(31-50%)          | 2<br>(1.4-2.7)                              | 3.3%<br>(2.4-4.3%)                   | 4.5%<br>(2.7-6.8%)                  | 21<br>(14-28)       | 2000<br>(1400-2700)    |
| Dominican Republic | 2000 | Female | 30 to 34 | 56%<br>(46-65%)                | 44%<br>(35-54%)          | 1.8<br>(1.3-2.6)                            | 2.9%<br>(2.1-3.9%)                   | 4%<br>(2.6-5.9%)                    | 23<br>(15-32)       | 1900<br>(1300-2500)    |



| Location           | Year | Sex    | Age      | Prevalence of current drinkers | Prevalence of abstainers | Population average of standard drinks daily | Percent of total attributable deaths | Percent of total attributable DALYs | Attributable deaths | Attributable DALYs     |
|--------------------|------|--------|----------|--------------------------------|--------------------------|---------------------------------------------|--------------------------------------|-------------------------------------|---------------------|------------------------|
| Dominican Republic | 2000 | Female | 35 to 39 | 53%<br>(43-63%)                | 47%<br>(37-57%)          | 1.6<br>(1.1-2.4)                            | 2.9%<br>(2.1-4.1%)                   | 4.5%<br>(2.7-6.9%)                  | 26<br>(17-37)       | 1800<br>(1200-2400)    |
| Dominican Republic | 2000 | Female | 40 to 44 | 49%<br>(40-59%)                | 51%<br>(41-60%)          | 1.5<br>(0.95-2.1)                           | 3%<br>(2-4.3%)                       | 4.8%<br>(3.1-7%)                    | 29<br>(19-42)       | 1600<br>(1100-2300)    |
| Dominican Republic | 2000 | Female | 45 to 49 | 45%<br>(34-56%)                | 55%<br>(44-66%)          | 1.4<br>(0.9-2.1)                            | 3.1%<br>(2-4.6%)                     | 5.2%<br>(3.3-7.6%)                  | 32<br>(20-48)       | 1500<br>(980-2300)     |
| Dominican Republic | 2000 | Female | 50 to 54 | 41%<br>(30-53%)                | 59%<br>(47-70%)          | 1.2<br>(0.68-1.9)                           | 3.1%<br>(1.9-4.8%)                   | 5.2%<br>(3.1-7.8%)                  | 32<br>(19-51)       | 1300<br>(780-2000)     |
| Dominican Republic | 2000 | Female | 55 to 59 | 36%<br>(23-51%)                | 64%<br>(49-77%)          | 0.89<br>(0.51-1.5)                          | 2.8%<br>(1.7-4.3%)                   | 4.5%<br>(2.8-6.8%)                  | 31<br>(19-49)       | 1100<br>(650-1700)     |
| Dominican Republic | 2000 | Female | 60 to 64 | 31%<br>(19-45%)                | 69%<br>(55-81%)          | 0.77<br>(0.41-1.3)                          | 2.5%<br>(1.3-4%)                     | 3.8%<br>(2.1-6.1%)                  | 35<br>(19-56)       | 990<br>(530-1600)      |
| Dominican Republic | 2000 | Female | 65 to 69 | 27%<br>(17-38%)                | 73%<br>(62-83%)          | 0.74<br>(0.42-1.2)                          | 2.4%<br>(1.3-3.7%)                   | 3.5%<br>(1.9-5.5%)                  | 40<br>(22-63)       | 920<br>(490-1500)      |
| Dominican Republic | 2000 | Female | 70 to 74 | 25%<br>(16-36%)                | 75%<br>(64-84%)          | 0.72<br>(0.39-1.2)                          | 2.4%<br>(1.1-3.9%)                   | 3.4%<br>(1.7-5.4%)                  | 45<br>(22-74)       | 830<br>(400-1400)      |
| Dominican Republic | 2000 | Female | 75 to 79 | 24%<br>(15-36%)                | 76%<br>(64-85%)          | 0.72<br>(0.37-1.2)                          | 2%<br>(0.73-3.7%)                    | 2.7%<br>(0.99-4.9%)                 | 40<br>(14-72)       | 580<br>(210-1000)      |
| Dominican Republic | 2000 | Female | 80 to 84 | 24%<br>(15-36%)                | 76%<br>(64-85%)          | 0.69<br>(0.37-1.1)                          | 1.9%<br>(0.68-3.3%)                  | 2.3%<br>(0.82-4.2%)                 | 40<br>(14-72)       | 430<br>(150-770)       |
| Dominican Republic | 2000 | Female | 85 to 89 | 24%<br>(15-37%)                | 76%<br>(63-85%)          | 0.68<br>(0.35-1.1)                          | 1.6%<br>(0.5-3.1%)                   | 1.9%<br>(0.49-3.7%)                 | 28<br>(7.3-57)      | 220<br>(66-430)        |
| Dominican Republic | 2000 | Female | 90 to 94 | 27%<br>(17-40%)                | 73%<br>(60-83%)          | 0.75<br>(0.38-1.3)                          | 1.5%<br>(0.27-3.4%)                  | 1.7%<br>(0.19-4%)                   | 16<br>(1.7-36)      | 86<br>(15-190)         |
| Dominican Republic | 2000 | Female | 95 plus  | 32%<br>(17-50%)                | 68%<br>(50-83%)          | 0.88<br>(0.39-1.6)                          | 1.5%<br>(-0.12-4%)                   | 1.6%<br>(-0.42-4.7%)                | 5.6<br>(-1.5-16)    | 21<br>(-1.7-56)        |
| Dominican Republic | 2000 | Male   | All Ages | 73%<br>(69-77%)                | 27%<br>(23-31%)          | 1.9<br>(1.7-2.1)                            | 4.5%<br>(3.7-5.5%)                   | 5.4%<br>(4.1-6.9%)                  | 1400<br>(1000-1800) | 62000<br>(50000-75000) |
| Dominican Republic | 2000 | Male   | 15 to 19 | 79%<br>(73-85%)                | 21%<br>(15-27%)          | 1.7<br>(1.2-2.4)                            | 6%<br>(4.1-8.3%)                     | 10%<br>(6.2-14%)                    | 36<br>(22-53)       | 3400<br>(2300-4700)    |
| Dominican Republic | 2000 | Male   | 20 to 24 | 87%<br>(83-91%)                | 13%<br>(9.4-17%)         | 3<br>(2.2-3.9)                              | 11%<br>(7.9-14%)                     | 14%<br>(9.7-19%)                    | 79<br>(55-110)      | 7000<br>(5000-9000)    |
| Dominican Republic | 2000 | Male   | 25 to 29 | 88%<br>(85-91%)                | 12%<br>(8.8-15%)         | 3.4<br>(2.6-4.4)                            | 9.4%<br>(6.7-12%)                    | 11%<br>(6.9-16%)                    | 87<br>(61-110)      | 7100<br>(5200-9000)    |
| Dominican Republic | 2000 | Male   | 30 to 34 | 88%<br>(84-91%)                | 12%<br>(9.2-16%)         | 3.8<br>(2.9-4.9)                            | 8.6%<br>(6.3-11%)                    | 10%<br>(6.8-14%)                    | 100<br>(73-130)     | 7200<br>(5300-9200)    |
| Dominican Republic | 2000 | Male   | 35 to 39 | 87%<br>(82-90%)                | 13%<br>(9.7-18%)         | 3.9<br>(2.7-5.2)                            | 8.9%<br>(6.5-12%)                    | 11%<br>(7.2-15%)                    | 110<br>(79-150)     | 7100<br>(5200-9300)    |
| Dominican Republic | 2000 | Male   | 40 to 44 | 85%<br>(80-89%)                | 15%<br>(11-20%)          | 3.6<br>(2.4-4.9)                            | 8.6%<br>(6.1-11%)                    | 11%<br>(7.1-14%)                    | 120<br>(80-160)     | 6500<br>(4600-8400)    |
| Dominican Republic | 2000 | Male   | 45 to 49 | 82%<br>(76-87%)                | 18%<br>(13-24%)          | 3<br>(2-4.1)                                | 8%<br>(5.6-11%)                      | 10%<br>(6.9-14%)                    | 110<br>(74-150)     | 5300<br>(3700-7200)    |
| Dominican Republic | 2000 | Male   | 50 to 54 | 79%<br>(73-84%)                | 21%<br>(16-27%)          | 2.5<br>(1.6-3.5)                            | 7.2%<br>(4.7-10%)                    | 9.2%<br>(5.9-13%)                   | 97<br>(62-140)      | 4100<br>(2700-5800)    |

| Location           | Year | Sex    | Age      | Prevalence of current drinkers | Prevalence of abstainers | Population average of standard drinks daily | Percent of total attributable deaths | Percent of total attributable DALYs | Attributable deaths | Attributable DALYs     |
|--------------------|------|--------|----------|--------------------------------|--------------------------|---------------------------------------------|--------------------------------------|-------------------------------------|---------------------|------------------------|
| Dominican Republic | 2000 | Male   | 55 to 59 | 75%<br>(68-82%)                | 25%<br>(18-32%)          | 2.3<br>(1.5-3.3)                            | 6.8%<br>(4.5-10%)                    | 8.8%<br>(5.6-13%)                   | 97<br>(61-150)      | 3400<br>(2200-5100)    |
| Dominican Republic | 2000 | Male   | 60 to 64 | 74%<br>(63-83%)                | 26%<br>(17-37%)          | 2.2<br>(1.4-3.3)                            | 6.2%<br>(3.7-9.7%)                   | 7.9%<br>(4.5-12%)                   | 110<br>(66-180)     | 3400<br>(2000-5300)    |
| Dominican Republic | 2000 | Male   | 65 to 69 | 72%<br>(59-83%)                | 28%<br>(17-41%)          | 1.9<br>(1.2-2.6)                            | 5.2%<br>(3.2-7.8%)                   | 6.5%<br>(3.9-9.7%)                  | 120<br>(69-180)     | 2800<br>(1700-4200)    |
| Dominican Republic | 2000 | Male   | 70 to 74 | 68%<br>(53-80%)                | 32%<br>(20-47%)          | 1.5<br>(0.91-2.3)                           | 4.2%<br>(2.3-6.7%)                   | 5.2%<br>(2.8-8.2%)                  | 100<br>(56-160)     | 2000<br>(1100-3100)    |
| Dominican Republic | 2000 | Male   | 75 to 79 | 63%<br>(48-78%)                | 37%<br>(22-52%)          | 1.4<br>(0.79-2.2)                           | 3.5%<br>(1.6-5.9%)                   | 4.1%<br>(1.9-7.1%)                  | 86<br>(40-150)      | 1300<br>(600-2200)     |
| Dominican Republic | 2000 | Male   | 80 to 84 | 60%<br>(42-75%)                | 40%<br>(25-58%)          | 1.2<br>(0.71-1.8)                           | 2.8%<br>(1.3-4.7%)                   | 3.2%<br>(1.4-5.5%)                  | 70<br>(30-120)      | 770<br>(350-1300)      |
| Dominican Republic | 2000 | Male   | 85 to 89 | 56%<br>(39-72%)                | 44%<br>(28-61%)          | 1<br>(0.56-1.7)                             | 2.1%<br>(0.91-3.6%)                  | 2.3%<br>(0.87-4.1%)                 | 39<br>(15-67)       | 310<br>(130-540)       |
| Dominican Republic | 2000 | Male   | 90 to 94 | 56%<br>(40-72%)                | 44%<br>(28-60%)          | 1<br>(0.54-1.7)                             | 1.5%<br>(0.39-3.2%)                  | 1.6%<br>(0.12-3.5%)                 | 14<br>(1-30)        | 81<br>(20-170)         |
| Dominican Republic | 2000 | Male   | 95 plus  | 59%<br>(38-77%)                | 41%<br>(23-62%)          | 1.1<br>(0.48-1.8)                           | 1.4%<br>(0.029-3.5%)                 | 1.3%<br>(-0.42-3.7%)                | 3.3<br>(-1.1-9.7)   | 15<br>(0.31-36)        |
| Dominican Republic | 2005 | Female | All Ages | 44%<br>(40-48%)                | 56%<br>(52-60%)          | 1.1<br>(0.91-1.2)                           | 1.6%<br>(1.3-2.1%)                   | 2.4%<br>(1.6-3.4%)                  | 490<br>(310-710)    | 19000<br>(14000-24000) |
| Dominican Republic | 2005 | Female | 15 to 19 | 59%<br>(52-67%)                | 41%<br>(33-48%)          | 1.5<br>(1-2.1)                              | 2.5%<br>(1.7-3.4%)                   | 5.8%<br>(3.6-8.4%)                  | 13<br>(8.2-20)      | 1400<br>(880-1900)     |
| Dominican Republic | 2005 | Female | 20 to 24 | 63%<br>(57-70%)                | 37%<br>(30-43%)          | 2.2<br>(1.6-3)                              | 3.8%<br>(2.7-5%)                     | 6.5%<br>(4-9.4%)                    | 21<br>(14-30)       | 2200<br>(1600-3000)    |
| Dominican Republic | 2005 | Female | 25 to 29 | 61%<br>(54-67%)                | 39%<br>(33-46%)          | 2<br>(1.5-2.7)                              | 3.1%<br>(2.2-4.1%)                   | 4%<br>(2.4-6.3%)                    | 21<br>(14-29)       | 2000<br>(1500-2700)    |
| Dominican Republic | 2005 | Female | 30 to 34 | 57%<br>(49-63%)                | 43%<br>(37-51%)          | 1.9<br>(1.3-2.5)                            | 2.6%<br>(1.8-3.6%)                   | 3.4%<br>(2.1-5.1%)                  | 22<br>(14-32)       | 1900<br>(1300-2600)    |
| Dominican Republic | 2005 | Female | 35 to 39 | 52%<br>(45-59%)                | 48%<br>(41-55%)          | 1.7<br>(1.2-2.4)                            | 2.5%<br>(1.7-3.5%)                   | 3.4%<br>(2.1-5.3%)                  | 24<br>(16-35)       | 1700<br>(1200-2400)    |
| Dominican Republic | 2005 | Female | 40 to 44 | 48%<br>(40-55%)                | 52%<br>(45-60%)          | 1.5<br>(1-2)                                | 2.5%<br>(1.7-3.5%)                   | 3.8%<br>(2.5-5.5%)                  | 28<br>(19-41)       | 1700<br>(1100-2400)    |
| Dominican Republic | 2005 | Female | 45 to 49 | 43%<br>(34-51%)                | 57%<br>(49-66%)          | 1.3<br>(0.88-1.9)                           | 2.6%<br>(1.7-3.9%)                   | 4.2%<br>(2.7-6.3%)                  | 32<br>(19-48)       | 1600<br>(990-2300)     |
| Dominican Republic | 2005 | Female | 50 to 54 | 38%<br>(28-49%)                | 62%<br>(51-72%)          | 1.1<br>(0.66-1.7)                           | 2.6%<br>(1.5-4.1%)                   | 4.3%<br>(2.5-6.5%)                  | 32<br>(18-51)       | 1300<br>(750-2000)     |
| Dominican Republic | 2005 | Female | 55 to 59 | 32%<br>(21-47%)                | 68%<br>(53-79%)          | 0.81<br>(0.46-1.4)                          | 2.3%<br>(1.4-3.7%)                   | 3.8%<br>(2.4-5.8%)                  | 29<br>(17-47)       | 1000<br>(610-1600)     |
| Dominican Republic | 2005 | Female | 60 to 64 | 27%<br>(17-40%)                | 73%<br>(60-83%)          | 0.7<br>(0.38-1.2)                           | 2.1%<br>(1.1-3.5%)                   | 3.3%<br>(1.8-5.4%)                  | 30<br>(15-49)       | 860<br>(460-1400)      |
| Dominican Republic | 2005 | Female | 65 to 69 | 25%<br>(16-36%)                | 75%<br>(64-84%)          | 0.7<br>(0.4-1.1)                            | 2.1%<br>(1.1-3.4%)                   | 3.2%<br>(1.8-5%)                    | 38<br>(20-61)       | 900<br>(470-1400)      |
| Dominican Republic | 2005 | Female | 70 to 74 | 24%<br>(15-35%)                | 76%<br>(65-85%)          | 0.7<br>(0.38-1.2)                           | 2.1%<br>(0.95-3.6%)                  | 3.1%<br>(1.5-5.1%)                  | 46<br>(21-80)       | 870<br>(400-1500)      |

| Location           | Year | Sex    | Age      | Prevalence of current drinkers | Prevalence of abstainers | Population average of standard drinks daily | Percent of total attributable deaths | Percent of total attributable DALYs | Attributable deaths | Attributable DALYs     |
|--------------------|------|--------|----------|--------------------------------|--------------------------|---------------------------------------------|--------------------------------------|-------------------------------------|---------------------|------------------------|
| Dominican Republic | 2005 | Female | 75 to 79 | 24%<br>(15-35%)                | 76%<br>(65-85%)          | 0.72<br>(0.37-1.2)                          | 1.8%<br>(0.56-3.5%)                  | 2.5%<br>(0.75-4.7%)                 | 43<br>(13-83)       | 630<br>(180-1200)      |
| Dominican Republic | 2005 | Female | 80 to 84 | 24%<br>(14-36%)                | 76%<br>(64-86%)          | 0.69<br>(0.38-1.1)                          | 1.7%<br>(0.58-3.2%)                  | 2.2%<br>(0.75-4.1%)                 | 46<br>(15-84)       | 490<br>(160-910)       |
| Dominican Republic | 2005 | Female | 85 to 89 | 24%<br>(14-37%)                | 76%<br>(63-86%)          | 0.68<br>(0.36-1.1)                          | 1.5%<br>(0.46-3%)                    | 1.8%<br>(0.53-3.6%)                 | 35<br>(9.3-68)      | 270<br>(81-530)        |
| Dominican Republic | 2005 | Female | 90 to 94 | 27%<br>(16-39%)                | 73%<br>(61-84%)          | 0.76<br>(0.38-1.3)                          | 1.5%<br>(0.25-3.4%)                  | 1.7%<br>(0.16-4.1%)                 | 20<br>(1.7-47)      | 110<br>(17-240)        |
| Dominican Republic | 2005 | Female | 95 plus  | 31%<br>(17-50%)                | 69%<br>(50-83%)          | 0.88<br>(0.38-1.6)                          | 1.5%<br>(-0.14-4.1%)                 | 1.6%<br>(-0.45-4.7%)                | 6.9<br>(-2-20)      | 27<br>(-2.6-71)        |
| Dominican Republic | 2005 | Male   | All Ages | 74%<br>(70-78%)                | 26%<br>(22-30%)          | 2<br>(1.8-2.2)                              | 4.4%<br>(3.6-5.4%)                   | 5%<br>(3.8-6.5%)                    | 1500<br>(1100-1900) | 65000<br>(52000-80000) |
| Dominican Republic | 2005 | Male   | 15 to 19 | 79%<br>(73-85%)                | 21%<br>(15-27%)          | 1.8<br>(1.2-2.4)                            | 5.9%<br>(4.1-7.9%)                   | 9.6%<br>(6.1-14%)                   | 37<br>(22-54)       | 3500<br>(2400-4800)    |
| Dominican Republic | 2005 | Male   | 20 to 24 | 87%<br>(83-91%)                | 13%<br>(9.2-17%)         | 3.1<br>(2.3-3.9)                            | 11%<br>(7.8-14%)                     | 14%<br>(9.4-19%)                    | 83<br>(56-110)      | 7400<br>(5300-9600)    |
| Dominican Republic | 2005 | Male   | 25 to 29 | 88%<br>(84-91%)                | 12%<br>(8.7-16%)         | 3.5<br>(2.6-4.5)                            | 9.2%<br>(6.5-12%)                    | 11%<br>(6.7-16%)                    | 89<br>(62-120)      | 7300<br>(5400-9300)    |
| Dominican Republic | 2005 | Male   | 30 to 34 | 88%<br>(84-91%)                | 12%<br>(9-16%)           | 3.9<br>(2.9-5)                              | 8.1%<br>(5.9-11%)                    | 9.3%<br>(6.1-13%)                   | 100<br>(72-140)     | 7300<br>(5400-9500)    |
| Dominican Republic | 2005 | Male   | 35 to 39 | 87%<br>(83-90%)                | 13%<br>(9.5-17%)         | 4<br>(2.8-5.3)                              | 7.7%<br>(5.5-10%)                    | 9%<br>(5.8-13%)                     | 110<br>(76-160)     | 7200<br>(5100-9700)    |
| Dominican Republic | 2005 | Male   | 40 to 44 | 86%<br>(81-89%)                | 14%<br>(11-19%)          | 3.7<br>(2.5-5)                              | 7.7%<br>(5.4-10%)                    | 9.1%<br>(6.1-13%)                   | 120<br>(83-170)     | 6900<br>(4800-9200)    |
| Dominican Republic | 2005 | Male   | 45 to 49 | 83%<br>(78-88%)                | 17%<br>(12-22%)          | 3.1<br>(2.2-4.3)                            | 7.2%<br>(4.9-9.9%)                   | 8.7%<br>(5.7-12%)                   | 120<br>(80-170)     | 5900<br>(4000-8100)    |
| Dominican Republic | 2005 | Male   | 50 to 54 | 82%<br>(76-86%)                | 18%<br>(14-24%)          | 2.7<br>(1.8-3.9)                            | 6.8%<br>(4.3-9.8%)                   | 8.5%<br>(5.2-13%)                   | 110<br>(66-170)     | 4800<br>(2900-6900)    |
| Dominican Republic | 2005 | Male   | 55 to 59 | 79%<br>(72-85%)                | 21%<br>(15-28%)          | 2.5<br>(1.7-3.6)                            | 6.7%<br>(4.2-10%)                    | 8.6%<br>(5.2-13%)                   | 110<br>(66-170)     | 3900<br>(2400-5900)    |
| Dominican Republic | 2005 | Male   | 60 to 64 | 75%<br>(64-84%)                | 25%<br>(16-36%)          | 2.3<br>(1.4-3.5)                            | 5.9%<br>(3.3-9.2%)                   | 7.4%<br>(4.1-12%)                   | 110<br>(61-180)     | 3200<br>(1800-5200)    |
| Dominican Republic | 2005 | Male   | 65 to 69 | 72%<br>(59-83%)                | 28%<br>(17-41%)          | 1.9<br>(1.2-2.7)                            | 4.8%<br>(2.8-7.3%)                   | 6%<br>(3.4-9.2%)                    | 110<br>(63-180)     | 2800<br>(1600-4300)    |
| Dominican Republic | 2005 | Male   | 70 to 74 | 68%<br>(53-81%)                | 32%<br>(19-47%)          | 1.5<br>(0.92-2.3)                           | 4%<br>(2.2-6.4%)                     | 4.9%<br>(2.7-8%)                    | 110<br>(57-180)     | 2100<br>(1100-3400)    |
| Dominican Republic | 2005 | Male   | 75 to 79 | 63%<br>(48-77%)                | 37%<br>(23-52%)          | 1.4<br>(0.81-2.2)                           | 3.3%<br>(1.4-5.7%)                   | 3.9%<br>(1.6-6.8%)                  | 94<br>(40-170)      | 1400<br>(620-2500)     |
| Dominican Republic | 2005 | Male   | 80 to 84 | 59%<br>(41-74%)                | 41%<br>(26-59%)          | 1.2<br>(0.7-1.8)                            | 2.5%<br>(1.1-4.4%)                   | 2.9%<br>(1.2-5.2%)                  | 80<br>(33-140)      | 890<br>(380-1600)      |
| Dominican Republic | 2005 | Male   | 85 to 89 | 55%<br>(39-71%)                | 45%<br>(29-61%)          | 1<br>(0.56-1.7)                             | 1.9%<br>(0.73-3.3%)                  | 2.1%<br>(0.68-3.7%)                 | 43<br>(14-79)       | 350<br>(130-630)       |
| Dominican Republic | 2005 | Male   | 90 to 94 | 56%<br>(40-71%)                | 44%<br>(29-60%)          | 1<br>(0.53-1.7)                             | 1.4%<br>(0.25-3%)                    | 1.4%<br>(-0.03-3.3%)                | 15<br>(-0.32-35)    | 90<br>(17-200)         |

| Location           | Year | Sex    | Age      | Prevalence of current drinkers | Prevalence of abstainers | Population average of standard drinks daily | Percent of total attributable deaths | Percent of total attributable DALYs | Attributable deaths | Attributable DALYs     |
|--------------------|------|--------|----------|--------------------------------|--------------------------|---------------------------------------------|--------------------------------------|-------------------------------------|---------------------|------------------------|
| Dominican Republic | 2005 | Male   | 95 plus  | 58%<br>(37-77%)                | 42%<br>(23-63%)          | 1<br>(0.46-1.9)                             | 1.3%<br>(-0.087-3.3%)                | 1.1%<br>(-0.53-3.5%)                | 3.6<br>(-1.7-11)    | 17<br>(-1.2-42)        |
| Dominican Republic | 2010 | Female | All Ages | 44%<br>(41-48%)                | 56%<br>(52-59%)          | 1.1<br>(0.93-1.3)                           | 1.7%<br>(1.2-2.2%)                   | 2.4%<br>(1.3-3.5%)                  | 520<br>(280-800)    | 20000<br>(14000-26000) |
| Dominican Republic | 2010 | Female | 15 to 19 | 58%<br>(51-65%)                | 42%<br>(35-49%)          | 1.5<br>(1-2.1)                              | 2.4%<br>(1.6-3.3%)                   | 5.5%<br>(3.3-8%)                    | 12<br>(7.3-19)      | 1300<br>(860-1900)     |
| Dominican Republic | 2010 | Female | 20 to 24 | 63%<br>(57-69%)                | 37%<br>(31-43%)          | 2.2<br>(1.6-3)                              | 3.8%<br>(2.7-5.1%)                   | 6.9%<br>(4.3-10%)                   | 19<br>(12-28)       | 2200<br>(1500-3000)    |
| Dominican Republic | 2010 | Female | 25 to 29 | 61%<br>(56-67%)                | 39%<br>(33-44%)          | 2.1<br>(1.5-2.8)                            | 3.3%<br>(2.3-4.3%)                   | 4.8%<br>(2.8-7.4%)                  | 20<br>(13-29)       | 2100<br>(1500-2800)    |
| Dominican Republic | 2010 | Female | 30 to 34 | 57%<br>(51-62%)                | 43%<br>(38-49%)          | 1.9<br>(1.3-2.6)                            | 2.7%<br>(1.9-3.8%)                   | 3.8%<br>(2.3-5.7%)                  | 21<br>(13-30)       | 1900<br>(1300-2600)    |
| Dominican Republic | 2010 | Female | 35 to 39 | 51%<br>(45-57%)                | 49%<br>(43-55%)          | 1.7<br>(1.1-2.3)                            | 2.5%<br>(1.7-3.5%)                   | 3.6%<br>(2.2-5.5%)                  | 22<br>(14-33)       | 1700<br>(1100-2400)    |
| Dominican Republic | 2010 | Female | 40 to 44 | 46%<br>(41-52%)                | 54%<br>(48-59%)          | 1.4<br>(0.99-2)                             | 2.4%<br>(1.6-3.4%)                   | 3.8%<br>(2.4-5.5%)                  | 26<br>(17-39)       | 1600<br>(1100-2300)    |
| Dominican Republic | 2010 | Female | 45 to 49 | 41%<br>(34-48%)                | 59%<br>(52-66%)          | 1.3<br>(0.86-1.8)                           | 2.4%<br>(1.5-3.7%)                   | 4.1%<br>(2.6-6.2%)                  | 30<br>(18-47)       | 1600<br>(950-2300)     |
| Dominican Republic | 2010 | Female | 50 to 54 | 41%<br>(31-54%)                | 59%<br>(46-69%)          | 1.2<br>(0.75-1.9)                           | 2.6%<br>(1.4-4.1%)                   | 4.4%<br>(2.4-6.9%)                  | 35<br>(18-58)       | 1500<br>(820-2400)     |
| Dominican Republic | 2010 | Female | 55 to 59 | 42%<br>(28-58%)                | 58%<br>(42-72%)          | 1.1<br>(0.64-1.8)                           | 2.4%<br>(1.2-4.1%)                   | 4.1%<br>(2.2-6.8%)                  | 36<br>(18-61)       | 1300<br>(640-2100)     |
| Dominican Republic | 2010 | Female | 60 to 64 | 37%<br>(23-51%)                | 63%<br>(49-77%)          | 1<br>(0.55-1.7)                             | 2.1%<br>(0.82-3.8%)                  | 3.3%<br>(1.4-6%)                    | 34<br>(14-65)       | 1000<br>(390-1900)     |
| Dominican Republic | 2010 | Female | 65 to 69 | 31%<br>(20-43%)                | 69%<br>(57-80%)          | 0.92<br>(0.53-1.5)                          | 2.1%<br>(0.89-3.6%)                  | 3.1%<br>(1.4-5.4%)                  | 39<br>(17-70)       | 920<br>(390-1600)      |
| Dominican Republic | 2010 | Female | 70 to 74 | 27%<br>(18-40%)                | 73%<br>(60-82%)          | 0.83<br>(0.45-1.4)                          | 2%<br>(0.67-3.8%)                    | 2.9%<br>(1-5.2%)                    | 49<br>(17-93)       | 940<br>(320-1800)      |
| Dominican Republic | 2010 | Female | 75 to 79 | 25%<br>(15-37%)                | 75%<br>(63-85%)          | 0.77<br>(0.38-1.3)                          | 1.8%<br>(0.4-3.5%)                   | 2.4%<br>(0.52-4.7%)                 | 49<br>(11-100)      | 730<br>(160-1500)      |
| Dominican Republic | 2010 | Female | 80 to 84 | 23%<br>(14-35%)                | 77%<br>(65-86%)          | 0.7<br>(0.37-1.2)                           | 1.6%<br>(0.43-2.9%)                  | 2%<br>(0.51-3.7%)                   | 52<br>(13-100)      | 570<br>(150-1100)      |
| Dominican Republic | 2010 | Female | 85 to 89 | 24%<br>(14-36%)                | 76%<br>(64-86%)          | 0.68<br>(0.36-1.2)                          | 1.4%<br>(0.42-2.9%)                  | 1.7%<br>(0.41-3.4%)                 | 41<br>(9.2-85)      | 320<br>(89-650)        |
| Dominican Republic | 2010 | Female | 90 to 94 | 26%<br>(16-40%)                | 74%<br>(60-84%)          | 0.76<br>(0.37-1.4)                          | 1.4%<br>(0.16-3.2%)                  | 1.5%<br>(-0.0021-3.8%)              | 23<br>(-0.031-58)   | 130<br>(14-320)        |
| Dominican Republic | 2010 | Female | 95 plus  | 31%<br>(17-49%)                | 69%<br>(51-83%)          | 0.88<br>(0.37-1.7)                          | 1.4%<br>(-0.21-3.9%)                 | 1.5%<br>(-0.55-4.6%)                | 8.4<br>(-3.2-26)    | 34<br>(-5-93)          |
| Dominican Republic | 2010 | Male   | All Ages | 73%<br>(69-78%)                | 27%<br>(22-31%)          | 2<br>(1.8-2.3)                              | 4.7%<br>(3.7-5.8%)                   | 5.1%<br>(3.6-6.9%)                  | 1600<br>(1100-2100) | 69000<br>(52000-87000) |
| Dominican Republic | 2010 | Male   | 15 to 19 | 76%<br>(69-83%)                | 24%<br>(17-31%)          | 1.7<br>(1.1-2.4)                            | 5.7%<br>(3.8-7.8%)                   | 9.5%<br>(5.5-14%)                   | 36<br>(21-54)       | 3500<br>(2300-4900)    |
| Dominican Republic | 2010 | Male   | 20 to 24 | 86%<br>(81-90%)                | 14%<br>(9.7-19%)         | 3<br>(2.2-4)                                | 11%<br>(7.9-14%)                     | 15%<br>(9.8-21%)                    | 82<br>(54-110)      | 7500<br>(5200-9800)    |

| Location           | Year | Sex    | Age      | Prevalence of current drinkers | Prevalence of abstainers | Population average of standard drinks daily | Percent of total attributable deaths | Percent of total attributable DALYs | Attributable deaths | Attributable DALYs     |
|--------------------|------|--------|----------|--------------------------------|--------------------------|---------------------------------------------|--------------------------------------|-------------------------------------|---------------------|------------------------|
| Dominican Republic | 2010 | Male   | 25 to 29 | 87%<br>(82-91%)                | 13%<br>(9.2-18%)         | 3.5<br>(2.5-4.5)                            | 9.8%<br>(6.8-13%)                    | 12%<br>(7.4-18%)                    | 92<br>(60-130)      | 7600<br>(5300-9900)    |
| Dominican Republic | 2010 | Male   | 30 to 34 | 87%<br>(82-90%)                | 13%<br>(9.8-18%)         | 3.9<br>(2.8-5.1)                            | 8.6%<br>(6.1-11%)                    | 10%<br>(6.7-15%)                    | 100<br>(67-140)     | 7400<br>(5200-9700)    |
| Dominican Republic | 2010 | Male   | 35 to 39 | 86%<br>(81-90%)                | 14%<br>(10-19%)          | 4<br>(2.8-5.4)                              | 8.1%<br>(5.6-11%)                    | 9.7%<br>(6-14%)                     | 110<br>(74-160)     | 7300<br>(5000-10000)   |
| Dominican Republic | 2010 | Male   | 40 to 44 | 85%<br>(79-89%)                | 15%<br>(11-21%)          | 3.8<br>(2.5-5)                              | 7.7%<br>(5.4-10%)                    | 9.3%<br>(6.1-13%)                   | 130<br>(80-180)     | 7000<br>(4700-9600)    |
| Dominican Republic | 2010 | Male   | 45 to 49 | 83%<br>(76-88%)                | 17%<br>(12-24%)          | 3.2<br>(2.2-4.4)                            | 7.2%<br>(4.8-10%)                    | 8.9%<br>(5.6-13%)                   | 130<br>(79-190)     | 6300<br>(4100-9100)    |
| Dominican Republic | 2010 | Male   | 50 to 54 | 80%<br>(74-86%)                | 20%<br>(14-26%)          | 2.7<br>(1.8-3.9)                            | 6.6%<br>(3.9-9.8%)                   | 8.2%<br>(4.6-13%)                   | 130<br>(70-190)     | 5400<br>(3100-8000)    |
| Dominican Republic | 2010 | Male   | 55 to 59 | 78%<br>(71-84%)                | 22%<br>(16-29%)          | 2.6<br>(1.7-3.8)                            | 6.7%<br>(3.9-10%)                    | 8.6%<br>(5-13%)                     | 130<br>(74-210)     | 4700<br>(2800-7300)    |
| Dominican Republic | 2010 | Male   | 60 to 64 | 76%<br>(65-85%)                | 24%<br>(15-35%)          | 2.4<br>(1.5-3.7)                            | 6%<br>(3.1-9.7%)                     | 7.5%<br>(3.7-13%)                   | 130<br>(62-210)     | 3800<br>(2000-6300)    |
| Dominican Republic | 2010 | Male   | 65 to 69 | 75%<br>(63-86%)                | 25%<br>(14-37%)          | 2.1<br>(1.4-3.1)                            | 5%<br>(2.8-7.7%)                     | 6.2%<br>(3.4-10%)                   | 120<br>(63-190)     | 2900<br>(1600-4600)    |
| Dominican Republic | 2010 | Male   | 70 to 74 | 72%<br>(58-84%)                | 28%<br>(16-42%)          | 1.8<br>(1.1-2.7)                            | 4.1%<br>(2-6.8%)                     | 5%<br>(2.3-8.3%)                    | 120<br>(55-200)     | 2300<br>(1100-3900)    |
| Dominican Republic | 2010 | Male   | 75 to 79 | 66%<br>(50-80%)                | 34%<br>(20-50%)          | 1.6<br>(0.89-2.4)                           | 3.2%<br>(1.2-5.9%)                   | 3.8%<br>(1.3-7%)                    | 110<br>(36-200)     | 1600<br>(620-3000)     |
| Dominican Republic | 2010 | Male   | 80 to 84 | 61%<br>(43-75%)                | 39%<br>(25-57%)          | 1.3<br>(0.76-2)                             | 2.5%<br>(0.97-4.4%)                  | 2.8%<br>(1-5.2%)                    | 93<br>(34-170)      | 1100<br>(420-1900)     |
| Dominican Republic | 2010 | Male   | 85 to 89 | 56%<br>(39-72%)                | 44%<br>(28-61%)          | 1.1<br>(0.6-1.8)                            | 1.8%<br>(0.57-3.5%)                  | 2%<br>(0.47-3.9%)                   | 51<br>(12-100)      | 420<br>(130-790)       |
| Dominican Republic | 2010 | Male   | 90 to 94 | 56%<br>(40-72%)                | 44%<br>(28-60%)          | 1<br>(0.55-1.7)                             | 1.3%<br>(0.016-3%)                   | 1.3%<br>(-0.34-3.2%)                | 17<br>(-4.6-43)     | 110<br>(1.3-240)       |
| Dominican Republic | 2010 | Male   | 95 plus  | 59%<br>(38-77%)                | 41%<br>(23-62%)          | 1.1<br>(0.49-2)                             | 1.1%<br>(-0.4-3.3%)                  | 0.93%<br>(-0.97-3.6%)               | 3.8<br>(-4-14)      | 19<br>(-6.7-55)        |
| Dominican Republic | 2016 | Female | All Ages | 43%<br>(39-47%)                | 57%<br>(53-61%)          | 1.2<br>(0.9-1.5)                            | 2%<br>(1.3-2.8%)                     | 2.8%<br>(1.5-4.4%)                  | 680<br>(330-1100)   | 23000<br>(15000-33000) |
| Dominican Republic | 2016 | Female | 15 to 19 | 55%<br>(47-62%)                | 45%<br>(38-53%)          | 1.5<br>(0.95-2.3)                           | 2.3%<br>(1.5-3.5%)                   | 5.6%<br>(3.1-8.8%)                  | 12<br>(6.4-19)      | 1300<br>(780-1900)     |
| Dominican Republic | 2016 | Female | 20 to 24 | 62%<br>(55-68%)                | 38%<br>(32-45%)          | 2.3<br>(1.5-3.4)                            | 3.9%<br>(2.7-5.4%)                   | 7.4%<br>(4.4-11%)                   | 19<br>(11-31)       | 2300<br>(1500-3200)    |
| Dominican Republic | 2016 | Female | 25 to 29 | 61%<br>(55-67%)                | 39%<br>(33-45%)          | 2.3<br>(1.5-3.3)                            | 3.6%<br>(2.5-5%)                     | 6%<br>(3.5-9.1%)                    | 21<br>(12-32)       | 2200<br>(1500-3100)    |
| Dominican Republic | 2016 | Female | 30 to 34 | 56%<br>(49-62%)                | 44%<br>(38-51%)          | 2<br>(1.3-3)                                | 3%<br>(2.1-4.3%)                     | 4.7%<br>(2.8-7.1%)                  | 22<br>(13-33)       | 2000<br>(1300-2900)    |
| Dominican Republic | 2016 | Female | 35 to 39 | 50%<br>(43-58%)                | 50%<br>(42-57%)          | 1.7<br>(1.1-2.6)                            | 2.7%<br>(1.8-3.9%)                   | 4.4%<br>(2.5-6.7%)                  | 23<br>(14-36)       | 1800<br>(1200-2600)    |
| Dominican Republic | 2016 | Female | 40 to 44 | 46%<br>(39-53%)                | 54%<br>(47-61%)          | 1.5<br>(0.97-2.2)                           | 2.6%<br>(1.7-3.9%)                   | 4.5%<br>(2.7-6.8%)                  | 28<br>(16-44)       | 1800<br>(1100-2700)    |

| Location           | Year | Sex    | Age      | Prevalence of current drinkers | Prevalence of abstainers | Population average of standard drinks daily | Percent of total attributable deaths | Percent of total attributable DALYs | Attributable deaths | Attributable DALYs      |
|--------------------|------|--------|----------|--------------------------------|--------------------------|---------------------------------------------|--------------------------------------|-------------------------------------|---------------------|-------------------------|
| Dominican Republic | 2016 | Female | 45 to 49 | 41%<br>(33-50%)                | 59%<br>(50-67%)          | 1.4<br>(0.85-2.1)                           | 2.7%<br>(1.6-4.1%)                   | 4.7%<br>(2.8-7.3%)                  | 34<br>(19-55)       | 1800<br>(1100-2800)     |
| Dominican Republic | 2016 | Female | 50 to 54 | 42%<br>(31-54%)                | 58%<br>(46-69%)          | 1.4<br>(0.75-2.2)                           | 2.9%<br>(1.5-4.7%)                   | 5.1%<br>(2.7-8.2%)                  | 44<br>(22-76)       | 1900<br>(990-3200)      |
| Dominican Republic | 2016 | Female | 55 to 59 | 42%<br>(28-57%)                | 58%<br>(43-72%)          | 1.2<br>(0.64-2)                             | 2.7%<br>(1.3-4.7%)                   | 4.7%<br>(2.4-7.7%)                  | 49<br>(24-83)       | 1700<br>(870-3100)      |
| Dominican Republic | 2016 | Female | 60 to 64 | 36%<br>(23-52%)                | 64%<br>(48-77%)          | 1.1<br>(0.56-1.8)                           | 2.3%<br>(0.88-4.3%)                  | 3.7%<br>(1.5-6.6%)                  | 48<br>(18-94)       | 1400<br>(540-2800)      |
| Dominican Republic | 2016 | Female | 65 to 69 | 31%<br>(20-43%)                | 69%<br>(57-80%)          | 0.98<br>(0.52-1.6)                          | 2.4%<br>(0.92-4.2%)                  | 3.6%<br>(1.4-6.1%)                  | 55<br>(21-100)      | 1300<br>(520-2500)      |
| Dominican Republic | 2016 | Female | 70 to 74 | 27%<br>(18-40%)                | 73%<br>(60-82%)          | 0.9<br>(0.46-1.6)                           | 2.3%<br>(0.68-4.4%)                  | 3.3%<br>(1-6.2%)                    | 61<br>(18-120)      | 1200<br>(340-2300)      |
| Dominican Republic | 2016 | Female | 75 to 79 | 25%<br>(15-37%)                | 75%<br>(63-85%)          | 0.84<br>(0.4-1.5)                           | 2%<br>(0.48-4.2%)                    | 2.7%<br>(0.68-5.7%)                 | 68<br>(15-140)      | 1000<br>(230-2100)      |
| Dominican Republic | 2016 | Female | 80 to 84 | 23%<br>(14-36%)                | 77%<br>(64-86%)          | 0.76<br>(0.38-1.3)                          | 1.9%<br>(0.56-3.6%)                  | 2.3%<br>(0.73-4.6%)                 | 78<br>(23-160)      | 850<br>(260-1700)       |
| Dominican Republic | 2016 | Female | 85 to 89 | 24%<br>(14-36%)                | 76%<br>(64-86%)          | 0.74<br>(0.38-1.3)                          | 1.7%<br>(0.42-3.4%)                  | 2%<br>(0.4-4.1%)                    | 65<br>(13-130)      | 510<br>(130-1000)       |
| Dominican Republic | 2016 | Female | 90 to 94 | 26%<br>(16-39%)                | 74%<br>(61-84%)          | 0.83<br>(0.41-1.5)                          | 1.7%<br>(0.14-4%)                    | 1.9%<br>(-0.022-4.7%)               | 38<br>(-0.5-97)     | 210<br>(18-520)         |
| Dominican Republic | 2016 | Female | 95 plus  | 31%<br>(17-49%)                | 69%<br>(51-83%)          | 0.96<br>(0.38-1.8)                          | 1.7%<br>(-0.12-4.9%)                 | 1.8%<br>(-0.45-5.6%)                | 15<br>(-3.7-46)     | 58<br>(-3.7-160)        |
| Dominican Republic | 2016 | Male   | All Ages | 72%<br>(67-75%)                | 28%<br>(25-33%)          | 2.1<br>(1.6-2.7)                            | 5.4%<br>(3.8-7.1%)                   | 5.7%<br>(3.5-8.2%)                  | 1900<br>(1100-2700) | 79000<br>(54000-110000) |
| Dominican Republic | 2016 | Male   | 15 to 19 | 73%<br>(66-80%)                | 27%<br>(20-34%)          | 1.6<br>(0.97-2.5)                           | 5.6%<br>(3.6-7.9%)                   | 9.3%<br>(5.2-14%)                   | 35<br>(19-58)       | 3400<br>(2100-5000)     |
| Dominican Republic | 2016 | Male   | 20 to 24 | 85%<br>(80-89%)                | 15%<br>(11-20%)          | 3.1<br>(2.1-4.4)                            | 11%<br>(8-15%)                       | 16%<br>(9.8-22%)                    | 87<br>(52-130)      | 8000<br>(5400-11000)    |
| Dominican Republic | 2016 | Male   | 25 to 29 | 86%<br>(82-90%)                | 14%<br>(10-18%)          | 3.6<br>(2.4-5)                              | 11%<br>(7.7-14%)                     | 14%<br>(8.7-20%)                    | 100<br>(61-150)     | 8400<br>(5700-12000)    |
| Dominican Republic | 2016 | Male   | 30 to 34 | 85%<br>(81-89%)                | 15%<br>(11-19%)          | 4<br>(2.7-5.6)                              | 9.8%<br>(6.7-13%)                    | 12%<br>(7.7-18%)                    | 110<br>(68-160)     | 8200<br>(5600-11000)    |
| Dominican Republic | 2016 | Male   | 35 to 39 | 84%<br>(79-88%)                | 16%<br>(12-21%)          | 4<br>(2.5-5.7)                              | 9.1%<br>(6-12%)                      | 12%<br>(6.9-17%)                    | 120<br>(71-180)     | 7900<br>(5000-11000)    |
| Dominican Republic | 2016 | Male   | 40 to 44 | 83%<br>(78-87%)                | 17%<br>(13-22%)          | 3.8<br>(2.4-5.5)                            | 8.6%<br>(5.7-12%)                    | 11%<br>(6.8-15%)                    | 140<br>(80-200)     | 7700<br>(4800-11000)    |
| Dominican Republic | 2016 | Male   | 45 to 49 | 81%<br>(75-86%)                | 19%<br>(14-25%)          | 3.2<br>(2.1-4.7)                            | 7.8%<br>(5.1-11%)                    | 9.8%<br>(6.1-14%)                   | 140<br>(82-220)     | 7000<br>(4400-10000)    |
| Dominican Republic | 2016 | Male   | 50 to 54 | 77%<br>(70-82%)                | 23%<br>(18-30%)          | 2.6<br>(1.6-3.9)                            | 7%<br>(4.2-10%)                      | 8.9%<br>(5.1-14%)                   | 140<br>(77-230)     | 6200<br>(3600-9400)     |
| Dominican Republic | 2016 | Male   | 55 to 59 | 75%<br>(68-82%)                | 25%<br>(18-32%)          | 2.5<br>(1.6-3.7)                            | 6.9%<br>(3.9-11%)                    | 8.9%<br>(4.9-14%)                   | 160<br>(87-270)     | 5900<br>(3300-9500)     |
| Dominican Republic | 2016 | Male   | 60 to 64 | 75%<br>(64-84%)                | 25%<br>(16-36%)          | 2.5<br>(1.4-4)                              | 6.4%<br>(3.2-11%)                    | 8.2%<br>(4-14%)                     | 170<br>(79-290)     | 5200<br>(2600-8700)     |

| Location           | Year | Sex    | Age      | Prevalence of current drinkers | Prevalence of abstainers | Population average of standard drinks daily | Percent of total attributable deaths | Percent of total attributable DALYs | Attributable deaths  | Attributable DALYs  |
|--------------------|------|--------|----------|--------------------------------|--------------------------|---------------------------------------------|--------------------------------------|-------------------------------------|----------------------|---------------------|
| Dominican Republic | 2016 | Male   | 65 to 69 | 75%<br>(62-86%)                | 25%<br>(14-38%)          | 2.3<br>(1.4-3.4)                            | 5.6%<br>(2.9-9.1%)                   | 7%<br>(3.6-12%)                     | 160<br>(80-270)      | 4000<br>(2100-6600) |
| Dominican Republic | 2016 | Male   | 70 to 74 | 72%<br>(58-84%)                | 28%<br>(16-42%)          | 1.9<br>(1.1-3)                              | 4.5%<br>(2-7.8%)                     | 5.5%<br>(2.4-9.9%)                  | 140<br>(57-250)      | 2700<br>(1200-4800) |
| Dominican Republic | 2016 | Male   | 75 to 79 | 67%<br>(50-81%)                | 33%<br>(19-50%)          | 1.7<br>(0.92-2.7)                           | 3.6%<br>(1.2-6.8%)                   | 4.3%<br>(1.3-8.2%)                  | 130<br>(39-250)      | 2000<br>(640-3800)  |
| Dominican Republic | 2016 | Male   | 80 to 84 | 61%<br>(43-75%)                | 39%<br>(25-57%)          | 1.4<br>(0.78-2.2)                           | 2.8%<br>(1-5.2%)                     | 3.2%<br>(1-6%)                      | 120<br>(40-240)      | 1400<br>(500-2600)  |
| Dominican Republic | 2016 | Male   | 85 to 89 | 56%<br>(39-72%)                | 44%<br>(28-61%)          | 1.1<br>(0.63-1.9)                           | 2.1%<br>(0.59-4.1%)                  | 2.2%<br>(0.48-4.6%)                 | 73<br>(16-150)       | 600<br>(180-1200)   |
| Dominican Republic | 2016 | Male   | 90 to 94 | 56%<br>(39-72%)                | 44%<br>(28-61%)          | 1.1<br>(0.58-1.9)                           | 1.5%<br>(0.064-3.6%)                 | 1.5%<br>(-0.31-4%)                  | 26<br>(-5.6-70)      | 160<br>(7-390)      |
| Dominican Republic | 2016 | Male   | 95 plus  | 59%<br>(38-77%)                | 41%<br>(23-62%)          | 1.1<br>(0.51-2.1)                           | 1.3%<br>(-0.35-3.9%)                 | 1.1%<br>(-0.88-4.2%)                | 5.9<br>(-4.6-22)     | 29<br>(-7.3-87)     |
| Grenada            | 1990 | Female | All Ages | 31%<br>(25-37%)                | 69%<br>(63-75%)          | 1.2<br>(1.1-1.4)                            | 2.9%<br>(1.9-3.9%)                   | 3.8%<br>(2-6%)                      | 14<br>(7.4-22)       | 400<br>(270-550)    |
| Grenada            | 1990 | Female | 15 to 19 | 40%<br>(26-56%)                | 60%<br>(44-74%)          | 1.6<br>(0.91-2.6)                           | 2.3%<br>(1.3-3.4%)                   | 4.8%<br>(2.6-7.7%)                  | 0.14<br>(0.075-0.23) | 15<br>(9.1-23)      |
| Grenada            | 1990 | Female | 20 to 24 | 46%<br>(30-62%)                | 54%<br>(38-70%)          | 2.5<br>(1.4-3.8)                            | 4%<br>(2.7-5.5%)                     | 7.1%<br>(4.3-10%)                   | 0.21<br>(0.13-0.32)  | 22<br>(14-31)       |
| Grenada            | 1990 | Female | 25 to 29 | 45%<br>(29-63%)                | 55%<br>(37-71%)          | 2.6<br>(1.5-3.8)                            | 4.4%<br>(3.1-6%)                     | 7.6%<br>(5-11%)                     | 0.3<br>(0.19-0.44)   | 27<br>(18-38)       |
| Grenada            | 1990 | Female | 30 to 34 | 43%<br>(27-61%)                | 57%<br>(39-73%)          | 2.5<br>(1.5-3.7)                            | 4.5%<br>(3-6.2%)                     | 7.6%<br>(5-11%)                     | 0.36<br>(0.22-0.55)  | 27<br>(18-40)       |
| Grenada            | 1990 | Female | 35 to 39 | 43%<br>(28-60%)                | 57%<br>(40-72%)          | 2.3<br>(1.3-3.7)                            | 4.8%<br>(3.1-7%)                     | 8.1%<br>(5.2-12%)                   | 0.44<br>(0.26-0.67)  | 27<br>(17-40)       |
| Grenada            | 1990 | Female | 40 to 44 | 42%<br>(26-60%)                | 58%<br>(40-74%)          | 2.2<br>(1.1-3.5)                            | 5.1%<br>(3-7.6%)                     | 8.5%<br>(4.9-12%)                   | 0.51<br>(0.28-0.77)  | 27<br>(15-40)       |
| Grenada            | 1990 | Female | 45 to 49 | 39%<br>(24-57%)                | 61%<br>(43-76%)          | 2.1<br>(1.1-3.6)                            | 5.4%<br>(3.1-8.8%)                   | 8.5%<br>(4.8-14%)                   | 0.56<br>(0.31-0.93)  | 26<br>(14-43)       |
| Grenada            | 1990 | Female | 50 to 54 | 36%<br>(22-53%)                | 64%<br>(47-78%)          | 1.9<br>(1-3.2)                              | 5.4%<br>(2.8-9.1%)                   | 7.9%<br>(4.2-13%)                   | 0.97<br>(0.5-1.6)    | 38<br>(20-65)       |
| Grenada            | 1990 | Female | 55 to 59 | 32%<br>(19-48%)                | 68%<br>(52-81%)          | 1.6<br>(0.83-2.6)                           | 5%<br>(2.4-8.5%)                     | 7%<br>(3.4-11%)                     | 1<br>(0.45-1.7)      | 33<br>(15-56)       |
| Grenada            | 1990 | Female | 60 to 64 | 28%<br>(17-44%)                | 72%<br>(56-83%)          | 1.3<br>(0.67-2.3)                           | 4.1%<br>(1.5-7.2%)                   | 5.4%<br>(2.1-9.4%)                  | 1.4<br>(0.53-2.5)    | 40<br>(15-71)       |
| Grenada            | 1990 | Female | 65 to 69 | 26%<br>(16-39%)                | 74%<br>(61-84%)          | 1.2<br>(0.63-1.9)                           | 3.6%<br>(1.4-6.3%)                   | 4.6%<br>(1.9-7.8%)                  | 1.8<br>(0.7-3)       | 41<br>(16-71)       |
| Grenada            | 1990 | Female | 70 to 74 | 23%<br>(14-37%)                | 77%<br>(63-86%)          | 0.99<br>(0.51-1.7)                          | 2.9%<br>(0.74-5.7%)                  | 3.6%<br>(0.95-7.1%)                 | 2.1<br>(0.53-4.2)    | 39<br>(9.6-78)      |
| Grenada            | 1990 | Female | 75 to 79 | 21%<br>(12-34%)                | 79%<br>(66-88%)          | 0.86<br>(0.39-1.5)                          | 2.3%<br>(0.34-4.7%)                  | 2.7%<br>(0.39-5.7%)                 | 1.3<br>(0.18-2.7)    | 18<br>(2.8-38)      |
| Grenada            | 1990 | Female | 80 to 84 | 19%<br>(11-30%)                | 81%<br>(70-89%)          | 0.8<br>(0.38-1.3)                           | 2.1%<br>(0.47-4.3%)                  | 2.5%<br>(0.53-5.1%)                 | 1.1<br>(0.23-2.3)    | 12<br>(2.6-25)      |

| Location | Year | Sex    | Age      | Prevalence of current drinkers | Prevalence of abstainers | Population average of standard drinks daily | Percent of total attributable deaths | Percent of total attributable DALYs | Attributable deaths   | Attributable DALYs  |
|----------|------|--------|----------|--------------------------------|--------------------------|---------------------------------------------|--------------------------------------|-------------------------------------|-----------------------|---------------------|
| Grenada  | 1990 | Female | 85 to 89 | 19%<br>(11-29%)                | 81%<br>(71-89%)          | 0.82<br>(0.41-1.5)                          | 2.2%<br>(0.53-4.7%)                  | 2.5%<br>(0.58-5.6%)                 | 0.98<br>(0.23-2.2)    | 7.4<br>(1.8-16)     |
| Grenada  | 1990 | Female | 90 to 94 | 21%<br>(13-34%)                | 79%<br>(66-87%)          | 0.94<br>(0.42-1.8)                          | 2.4%<br>(0.41-5.8%)                  | 2.8%<br>(0.41-6.8%)                 | 0.54<br>(0.083-1.3)   | 2.8<br>(0.5-6.7)    |
| Grenada  | 1990 | Female | 95 plus  | 25%<br>(13-42%)                | 75%<br>(58-87%)          | 1.1<br>(0.42-2.3)                           | 2.9%<br>(0.17-7.6%)                  | 3.2%<br>(0.053-8.7%)                | 0.17<br>(0.0028-0.47) | 0.61<br>(0.035-1.6) |
| Grenada  | 1990 | Male   | All Ages | 52%<br>(43-61%)                | 48%<br>(39-57%)          | 2.6<br>(2.4-2.9)                            | 8.1%<br>(6.5-9.9%)                   | 10%<br>(7.5-13%)                    | 36<br>(26-47)         | 1200<br>(980-1500)  |
| Grenada  | 1990 | Male   | 15 to 19 | 57%<br>(40-73%)                | 43%<br>(27-60%)          | 2.4<br>(1.4-3.7)                            | 6.1%<br>(3.9-8.9%)                   | 8.5%<br>(5-13%)                     | 0.59<br>(0.34-0.93)   | 53<br>(34-79)       |
| Grenada  | 1990 | Male   | 20 to 24 | 67%<br>(50-82%)                | 33%<br>(18-50%)          | 4.6<br>(3-6.4)                              | 13%<br>(9.1-17%)                     | 16%<br>(11-22%)                     | 1.3<br>(0.8-1.9)      | 100<br>(72-140)     |
| Grenada  | 1990 | Male   | 25 to 29 | 70%<br>(52-83%)                | 30%<br>(17-48%)          | 5.5<br>(3.6-7.5)                            | 14%<br>(10-17%)                      | 18%<br>(13-23%)                     | 1.5<br>(0.97-2)       | 110<br>(78-150)     |
| Grenada  | 1990 | Male   | 30 to 34 | 71%<br>(53-84%)                | 29%<br>(16-47%)          | 5.8<br>(3.8-8.1)                            | 14%<br>(11-17%)                      | 18%<br>(14-23%)                     | 1.5<br>(1-2.1)        | 100<br>(75-130)     |
| Grenada  | 1990 | Male   | 35 to 39 | 71%<br>(55-84%)                | 29%<br>(16-45%)          | 5.5<br>(3.4-8.3)                            | 13%<br>(10-17%)                      | 18%<br>(13-23%)                     | 1.6<br>(1.1-2.2)      | 96<br>(69-130)      |
| Grenada  | 1990 | Male   | 40 to 44 | 70%<br>(54-84%)                | 30%<br>(16-46%)          | 5.3<br>(3-8.1)                              | 14%<br>(9.9-17%)                     | 18%<br>(13-23%)                     | 1.5<br>(1-2.1)        | 81<br>(57-110)      |
| Grenada  | 1990 | Male   | 45 to 49 | 68%<br>(49-82%)                | 32%<br>(18-51%)          | 5<br>(2.8-7.7)                              | 14%<br>(10-17%)                      | 18%<br>(13-22%)                     | 1.5<br>(1.1-2)        | 68<br>(49-90)       |
| Grenada  | 1990 | Male   | 50 to 54 | 67%<br>(49-82%)                | 33%<br>(18-51%)          | 4.6<br>(2.6-7.2)                            | 13%<br>(9.1-17%)                     | 16%<br>(11-21%)                     | 2.7<br>(1.8-3.6)      | 110<br>(72-140)     |
| Grenada  | 1990 | Male   | 55 to 59 | 65%<br>(46-81%)                | 35%<br>(19-54%)          | 4.2<br>(2.3-6.6)                            | 13%<br>(8.4-17%)                     | 16%<br>(10-20%)                     | 2.7<br>(1.7-3.7)      | 92<br>(60-120)      |
| Grenada  | 1990 | Male   | 60 to 64 | 63%<br>(43-80%)                | 37%<br>(20-57%)          | 3.8<br>(2.1-6.2)                            | 11%<br>(6.3-15%)                     | 13%<br>(7.5-18%)                    | 4.5<br>(2.5-6.3)      | 130<br>(73-180)     |
| Grenada  | 1990 | Male   | 65 to 69 | 61%<br>(42-78%)                | 39%<br>(22-58%)          | 3.3<br>(1.9-5.2)                            | 10%<br>(6.3-14%)                     | 12%<br>(7.3-17%)                    | 4.6<br>(2.7-6.5)      | 110<br>(64-150)     |
| Grenada  | 1990 | Male   | 70 to 74 | 58%<br>(39-74%)                | 42%<br>(26-61%)          | 2.8<br>(1.4-4.6)                            | 8.4%<br>(4.3-13%)                    | 9.7%<br>(4.9-15%)                   | 4.8<br>(2.4-7.4)      | 90<br>(46-140)      |
| Grenada  | 1990 | Male   | 75 to 79 | 53%<br>(34-71%)                | 47%<br>(29-66%)          | 2.3<br>(1.2-4)                              | 6.6%<br>(2.9-11%)                    | 7.5%<br>(3.2-12%)                   | 3.1<br>(1.3-5.1)      | 45<br>(20-73)       |
| Grenada  | 1990 | Male   | 80 to 84 | 47%<br>(29-65%)                | 53%<br>(35-71%)          | 2<br>(1-3.2)                                | 5.5%<br>(2.5-9.1%)                   | 6.3%<br>(2.8-10%)                   | 2.1<br>(0.91-3.5)     | 23<br>(9.9-37)      |
| Grenada  | 1990 | Male   | 85 to 89 | 42%<br>(26-59%)                | 58%<br>(41-74%)          | 1.7<br>(0.88-2.9)                           | 4.7%<br>(2-8.3%)                     | 5.3%<br>(2.2-9.5%)                  | 1.2<br>(0.48-2.2)     | 9.2<br>(3.8-16)     |
| Grenada  | 1990 | Male   | 90 to 94 | 43%<br>(28-60%)                | 57%<br>(40-72%)          | 1.7<br>(0.84-3.1)                           | 4.3%<br>(1.5-8.3%)                   | 4.8%<br>(1.5-9.5%)                  | 0.38<br>(0.12-0.75)   | 2<br>(0.69-3.9)     |
| Grenada  | 1990 | Male   | 95 plus  | 46%<br>(26-66%)                | 54%<br>(34-74%)          | 1.9<br>(0.78-3.5)                           | 4.4%<br>(1.1-8.8%)                   | 4.8%<br>(0.99-10%)                  | 0.077<br>(0.015-0.16) | 0.28<br>(0.07-0.57) |
| Grenada  | 1995 | Female | All Ages | 31%<br>(25-38%)                | 69%<br>(62-75%)          | 1.2<br>(1.1-1.4)                            | 2.9%<br>(2-4%)                       | 3.7%<br>(2-5.9%)                    | 14<br>(7.5-22)        | 390<br>(270-550)    |



| Location | Year | Sex    | Age      | Prevalence of current drinkers | Prevalence of abstainers | Population average of standard drinks daily | Percent of total attributable deaths | Percent of total attributable DALYs | Attributable deaths   | Attributable DALYs  |
|----------|------|--------|----------|--------------------------------|--------------------------|---------------------------------------------|--------------------------------------|-------------------------------------|-----------------------|---------------------|
| Grenada  | 1995 | Female | 15 to 19 | 39%<br>(26-56%)                | 61%<br>(44-74%)          | 1.6<br>(0.91-2.6)                           | 2.3%<br>(1.4-3.4%)                   | 4.7%<br>(2.5-7.6%)                  | 0.13<br>(0.07-0.22)   | 15<br>(8.6-22)      |
| Grenada  | 1995 | Female | 20 to 24 | 46%<br>(30-62%)                | 54%<br>(38-70%)          | 2.5<br>(1.4-3.7)                            | 4%<br>(2.7-5.5%)                     | 6.9%<br>(4.1-10%)                   | 0.23<br>(0.13-0.35)   | 24<br>(16-35)       |
| Grenada  | 1995 | Female | 25 to 29 | 45%<br>(29-62%)                | 55%<br>(38-71%)          | 2.6<br>(1.5-3.9)                            | 4.4%<br>(3-6%)                       | 7.3%<br>(4.6-10%)                   | 0.23<br>(0.14-0.35)   | 21<br>(14-30)       |
| Grenada  | 1995 | Female | 30 to 34 | 43%<br>(27-61%)                | 57%<br>(39-73%)          | 2.5<br>(1.4-3.7)                            | 4.5%<br>(3-6.2%)                     | 7.4%<br>(4.8-11%)                   | 0.42<br>(0.25-0.64)   | 32<br>(21-46)       |
| Grenada  | 1995 | Female | 35 to 39 | 42%<br>(27-60%)                | 58%<br>(40-73%)          | 2.3<br>(1.3-3.6)                            | 4.7%<br>(3.1-6.8%)                   | 7.8%<br>(4.9-11%)                   | 0.53<br>(0.31-0.8)    | 33<br>(21-50)       |
| Grenada  | 1995 | Female | 40 to 44 | 41%<br>(27-59%)                | 59%<br>(41-73%)          | 2.2<br>(1.2-3.4)                            | 5%<br>(2.9-7.5%)                     | 8.2%<br>(4.8-12%)                   | 0.57<br>(0.33-0.87)   | 30<br>(18-45)       |
| Grenada  | 1995 | Female | 45 to 49 | 39%<br>(24-55%)                | 61%<br>(45-76%)          | 2.1<br>(1.1-3.6)                            | 5.3%<br>(3-8.6%)                     | 8.1%<br>(4.7-13%)                   | 0.6<br>(0.34-0.98)    | 28<br>(16-45)       |
| Grenada  | 1995 | Female | 50 to 54 | 36%<br>(22-53%)                | 64%<br>(47-78%)          | 1.9<br>(1-3.3)                              | 5.3%<br>(2.7-9%)                     | 7.7%<br>(4-13%)                     | 0.66<br>(0.34-1.1)    | 26<br>(13-45)       |
| Grenada  | 1995 | Female | 55 to 59 | 31%<br>(19-49%)                | 69%<br>(51-81%)          | 1.6<br>(0.82-2.7)                           | 4.9%<br>(2.2-8.3%)                   | 6.8%<br>(3.3-11%)                   | 1<br>(0.47-1.7)       | 34<br>(16-57)       |
| Grenada  | 1995 | Female | 60 to 64 | 28%<br>(16-44%)                | 72%<br>(56-84%)          | 1.4<br>(0.68-2.3)                           | 4%<br>(1.6-7.1%)                     | 5.4%<br>(2.3-9.4%)                  | 1<br>(0.41-1.8)       | 29<br>(11-52)       |
| Grenada  | 1995 | Female | 65 to 69 | 26%<br>(16-39%)                | 74%<br>(61-84%)          | 1.2<br>(0.63-2)                             | 3.5%<br>(1.4-6.2%)                   | 4.5%<br>(1.8-7.8%)                  | 1.6<br>(0.66-2.8)     | 37<br>(15-65)       |
| Grenada  | 1995 | Female | 70 to 74 | 23%<br>(15-35%)                | 77%<br>(65-85%)          | 0.98<br>(0.51-1.7)                          | 2.8%<br>(0.79-5.6%)                  | 3.6%<br>(1.1-6.9%)                  | 1.7<br>(0.5-3.3)      | 32<br>(9-62)        |
| Grenada  | 1995 | Female | 75 to 79 | 21%<br>(12-33%)                | 79%<br>(67-88%)          | 0.85<br>(0.39-1.5)                          | 2.3%<br>(0.41-4.8%)                  | 2.8%<br>(0.5-5.8%)                  | 1.9<br>(0.34-3.9)     | 27<br>(4.7-57)      |
| Grenada  | 1995 | Female | 80 to 84 | 19%<br>(11-30%)                | 81%<br>(70-89%)          | 0.8<br>(0.38-1.4)                           | 2.2%<br>(0.55-4.4%)                  | 2.5%<br>(0.64-5.3%)                 | 1.4<br>(0.35-2.9)     | 15<br>(3.8-30)      |
| Grenada  | 1995 | Female | 85 to 89 | 19%<br>(11-30%)                | 81%<br>(70-89%)          | 0.82<br>(0.41-1.5)                          | 2.2%<br>(0.6-4.7%)                   | 2.5%<br>(0.66-5.6%)                 | 0.95<br>(0.24-2.1)    | 7.1<br>(2-16)       |
| Grenada  | 1995 | Female | 90 to 94 | 21%<br>(13-33%)                | 79%<br>(67-87%)          | 0.95<br>(0.41-1.8)                          | 2.5%<br>(0.46-6%)                    | 2.8%<br>(0.47-7%)                   | 0.62<br>(0.1-1.5)     | 3.2<br>(0.62-7.7)   |
| Grenada  | 1995 | Female | 95 plus  | 25%<br>(13-42%)                | 75%<br>(58-87%)          | 1.1<br>(0.41-2.4)                           | 2.9%<br>(0.15-7.7%)                  | 3.3%<br>(0.061-8.8%)                | 0.24<br>(0.0042-0.63) | 0.82<br>(0.042-2.1) |
| Grenada  | 1995 | Male   | All Ages | 52%<br>(44-61%)                | 48%<br>(39-56%)          | 2.6<br>(2.4-2.9)                            | 8.5%<br>(7-10%)                      | 10%<br>(7.4-13%)                    | 35<br>(26-46)         | 1200<br>(1000-1500) |
| Grenada  | 1995 | Male   | 15 to 19 | 56%<br>(39-73%)                | 44%<br>(27-61%)          | 2.4<br>(1.3-3.7)                            | 6.2%<br>(4-9.2%)                     | 8.5%<br>(5-13%)                     | 0.62<br>(0.34-0.99)   | 55<br>(34-82)       |
| Grenada  | 1995 | Male   | 20 to 24 | 67%<br>(49-81%)                | 33%<br>(19-51%)          | 4.6<br>(2.9-6.5)                            | 13%<br>(9.2-17%)                     | 16%<br>(11-22%)                     | 1.6<br>(0.98-2.2)     | 130<br>(86-170)     |
| Grenada  | 1995 | Male   | 25 to 29 | 70%<br>(52-83%)                | 30%<br>(17-48%)          | 5.5<br>(3.6-7.7)                            | 14%<br>(10-17%)                      | 17%<br>(12-23%)                     | 1.3<br>(0.87-1.8)     | 96<br>(69-130)      |
| Grenada  | 1995 | Male   | 30 to 34 | 71%<br>(53-84%)                | 29%<br>(16-47%)          | 5.8<br>(3.7-8.1)                            | 13%<br>(10-16%)                      | 17%<br>(13-22%)                     | 1.8<br>(1.2-2.4)      | 120<br>(87-160)     |

| Location | Year | Sex    | Age      | Prevalence of current drinkers | Prevalence of abstainers | Population average of standard drinks daily | Percent of total attributable deaths | Percent of total attributable DALYs | Attributable deaths  | Attributable DALYs   |
|----------|------|--------|----------|--------------------------------|--------------------------|---------------------------------------------|--------------------------------------|-------------------------------------|----------------------|----------------------|
| Grenada  | 1995 | Male   | 35 to 39 | 71%<br>(54-84%)                | 29%<br>(16-46%)          | 5.4<br>(3.4-8.1)                            | 13%<br>(9.9-16%)                     | 17%<br>(12-21%)                     | 1.9<br>(1.3-2.5)     | 110<br>(81-150)      |
| Grenada  | 1995 | Male   | 40 to 44 | 70%<br>(54-83%)                | 30%<br>(17-46%)          | 5.2<br>(3-7.9)                              | 13%<br>(9.7-17%)                     | 17%<br>(12-21%)                     | 1.9<br>(1.3-2.6)     | 100<br>(73-130)      |
| Grenada  | 1995 | Male   | 45 to 49 | 68%<br>(48-83%)                | 32%<br>(17-52%)          | 4.9<br>(2.8-7.8)                            | 14%<br>(10-17%)                      | 17%<br>(13-22%)                     | 1.8<br>(1.3-2.4)     | 83<br>(60-110)       |
| Grenada  | 1995 | Male   | 50 to 54 | 66%<br>(48-82%)                | 34%<br>(18-52%)          | 4.6<br>(2.6-7.2)                            | 13%<br>(9.1-17%)                     | 16%<br>(11-21%)                     | 1.9<br>(1.3-2.6)     | 75<br>(51-100)       |
| Grenada  | 1995 | Male   | 55 to 59 | 65%<br>(47-80%)                | 35%<br>(20-53%)          | 4.2<br>(2.3-6.7)                            | 13%<br>(8.3-17%)                     | 15%<br>(10-20%)                     | 3.3<br>(2.1-4.5)     | 110<br>(74-150)      |
| Grenada  | 1995 | Male   | 60 to 64 | 62%<br>(42-80%)                | 38%<br>(20-58%)          | 3.8<br>(2-6.3)                              | 11%<br>(6.6-15%)                     | 13%<br>(7.6-18%)                    | 2.8<br>(1.7-4)       | 81<br>(48-110)       |
| Grenada  | 1995 | Male   | 65 to 69 | 61%<br>(42-77%)                | 39%<br>(23-58%)          | 3.3<br>(1.9-5.3)                            | 10%<br>(6.2-14%)                     | 12%<br>(7.2-17%)                    | 5<br>(2.9-7.2)       | 120<br>(70-170)      |
| Grenada  | 1995 | Male   | 70 to 74 | 57%<br>(38-74%)                | 43%<br>(26-62%)          | 2.8<br>(1.4-4.7)                            | 8.2%<br>(4.3-13%)                    | 9.5%<br>(4.9-15%)                   | 3.8<br>(1.9-6)       | 72<br>(37-110)       |
| Grenada  | 1995 | Male   | 75 to 79 | 52%<br>(34-70%)                | 48%<br>(30-66%)          | 2.3<br>(1.2-3.9)                            | 6.4%<br>(2.9-10%)                    | 7.2%<br>(3.3-12%)                   | 3.7<br>(1.6-6.1)     | 54<br>(24-88)        |
| Grenada  | 1995 | Male   | 80 to 84 | 46%<br>(28-64%)                | 54%<br>(36-72%)          | 1.9<br>(0.99-3.1)                           | 5.3%<br>(2.4-8.7%)                   | 6%<br>(2.6-9.8%)                    | 2.2<br>(0.95-3.7)    | 24<br>(11-40)        |
| Grenada  | 1995 | Male   | 85 to 89 | 42%<br>(25-59%)                | 58%<br>(41-75%)          | 1.7<br>(0.86-2.8)                           | 4.6%<br>(1.9-8%)                     | 5.1%<br>(2-9.2%)                    | 1.2<br>(0.49-2.2)    | 9.5<br>(3.9-17)      |
| Grenada  | 1995 | Male   | 90 to 94 | 42%<br>(27-59%)                | 58%<br>(41-73%)          | 1.7<br>(0.81-3.1)                           | 4.1%<br>(1.5-7.8%)                   | 4.6%<br>(1.5-9%)                    | 0.48<br>(0.16-0.94)  | 2.6<br>(0.92-4.9)    |
| Grenada  | 1995 | Male   | 95 plus  | 46%<br>(26-66%)                | 54%<br>(34-74%)          | 1.9<br>(0.77-3.5)                           | 4.2%<br>(1-8.5%)                     | 4.7%<br>(0.85-9.8%)                 | 0.12<br>(0.021-0.25) | 0.42<br>(0.098-0.87) |
| Grenada  | 2000 | Female | All Ages | 32%<br>(26-38%)                | 68%<br>(62-74%)          | 1.2<br>(1.1-1.4)                            | 2.7%<br>(1.9-3.7%)                   | 3.3%<br>(1.7-5.4%)                  | 13<br>(6.6-21)       | 370<br>(250-520)     |
| Grenada  | 2000 | Female | 15 to 19 | 39%<br>(26-56%)                | 61%<br>(44-74%)          | 1.6<br>(0.89-2.5)                           | 2.2%<br>(1.3-3.3%)                   | 4.5%<br>(2.4-7.3%)                  | 0.14<br>(0.073-0.23) | 16<br>(9.5-24)       |
| Grenada  | 2000 | Female | 20 to 24 | 45%<br>(29-62%)                | 55%<br>(38-71%)          | 2.4<br>(1.4-3.6)                            | 3.8%<br>(2.6-5.2%)                   | 6.3%<br>(3.8-9.4%)                  | 0.22<br>(0.12-0.33)  | 24<br>(16-34)        |
| Grenada  | 2000 | Female | 25 to 29 | 44%<br>(28-62%)                | 56%<br>(38-72%)          | 2.4<br>(1.4-3.7)                            | 4%<br>(2.7-5.6%)                     | 6.4%<br>(3.9-9.2%)                  | 0.24<br>(0.13-0.36)  | 22<br>(14-32)        |
| Grenada  | 2000 | Female | 30 to 34 | 43%<br>(27-60%)                | 57%<br>(40-73%)          | 2.4<br>(1.3-3.6)                            | 4.1%<br>(2.7-5.7%)                   | 6.6%<br>(4.2-9.4%)                  | 0.28<br>(0.16-0.44)  | 22<br>(14-32)        |
| Grenada  | 2000 | Female | 35 to 39 | 42%<br>(27-59%)                | 58%<br>(41-73%)          | 2.2<br>(1.3-3.4)                            | 4.3%<br>(2.7-6.2%)                   | 6.9%<br>(4.4-9.9%)                  | 0.52<br>(0.3-0.79)   | 33<br>(20-49)        |
| Grenada  | 2000 | Female | 40 to 44 | 41%<br>(26-59%)                | 59%<br>(41-74%)          | 2.1<br>(1.1-3.3)                            | 4.6%<br>(2.7-6.9%)                   | 7.4%<br>(4.5-11%)                   | 0.59<br>(0.34-0.89)  | 32<br>(19-48)        |
| Grenada  | 2000 | Female | 45 to 49 | 39%<br>(23-56%)                | 61%<br>(44-77%)          | 2<br>(1-3.4)                                | 4.8%<br>(2.7-8%)                     | 7.4%<br>(4.3-12%)                   | 0.63<br>(0.35-1)     | 29<br>(16-48)        |
| Grenada  | 2000 | Female | 50 to 54 | 35%<br>(21-52%)                | 65%<br>(48-79%)          | 1.8<br>(0.93-3.1)                           | 4.8%<br>(2.3-8.3%)                   | 6.9%<br>(3.5-11%)                   | 0.68<br>(0.34-1.1)   | 27<br>(13-46)        |

| Location | Year | Sex    | Age      | Prevalence of current drinkers | Prevalence of abstainers | Population average of standard drinks daily | Percent of total attributable deaths | Percent of total attributable DALYs | Attributable deaths   | Attributable DALYs  |
|----------|------|--------|----------|--------------------------------|--------------------------|---------------------------------------------|--------------------------------------|-------------------------------------|-----------------------|---------------------|
| Grenada  | 2000 | Female | 55 to 59 | 31%<br>(19-48%)                | 69%<br>(52-81%)          | 1.5<br>(0.77-2.5)                           | 4.3%<br>(2-7.5%)                     | 6%<br>(2.8-10%)                     | 0.82<br>(0.39-1.4)    | 28<br>(13-48)       |
| Grenada  | 2000 | Female | 60 to 64 | 28%<br>(16-43%)                | 72%<br>(57-84%)          | 1.3<br>(0.64-2.2)                           | 3.5%<br>(1.3-6.6%)                   | 4.8%<br>(1.8-8.7%)                  | 0.98<br>(0.37-1.8)    | 28<br>(9.7-53)      |
| Grenada  | 2000 | Female | 65 to 69 | 25%<br>(15-39%)                | 75%<br>(61-85%)          | 1.1<br>(0.59-1.9)                           | 3.1%<br>(1.1-5.6%)                   | 4%<br>(1.5-7%)                      | 1<br>(0.38-1.8)       | 24<br>(8.5-45)      |
| Grenada  | 2000 | Female | 70 to 74 | 23%<br>(14-36%)                | 77%<br>(64-86%)          | 0.94<br>(0.48-1.7)                          | 2.5%<br>(0.56-5.3%)                  | 3.2%<br>(0.84-6.4%)                 | 1.6<br>(0.42-3.4)     | 30<br>(7.1-65)      |
| Grenada  | 2000 | Female | 75 to 79 | 20%<br>(12-34%)                | 80%<br>(66-88%)          | 0.82<br>(0.38-1.5)                          | 2%<br>(0.23-4.4%)                    | 2.5%<br>(0.29-5.3%)                 | 1.4<br>(0.16-3.1)     | 20<br>(2.2-45)      |
| Grenada  | 2000 | Female | 80 to 84 | 19%<br>(11-30%)                | 81%<br>(70-89%)          | 0.77<br>(0.36-1.3)                          | 2%<br>(0.42-4.1%)                    | 2.3%<br>(0.51-4.8%)                 | 1.5<br>(0.34-3.2)     | 16<br>(3.7-35)      |
| Grenada  | 2000 | Female | 85 to 89 | 19%<br>(11-29%)                | 81%<br>(71-89%)          | 0.78<br>(0.38-1.4)                          | 2%<br>(0.46-4.5%)                    | 2.3%<br>(0.49-5.2%)                 | 1.2<br>(0.26-2.7)     | 9.1<br>(2.1-20)     |
| Grenada  | 2000 | Female | 90 to 94 | 21%<br>(12-32%)                | 79%<br>(68-88%)          | 0.89<br>(0.39-1.7)                          | 2.2%<br>(0.35-5.4%)                  | 2.6%<br>(0.36-6.4%)                 | 0.59<br>(0.082-1.5)   | 3.1<br>(0.49-7.5)   |
| Grenada  | 2000 | Female | 95 plus  | 24%<br>(13-41%)                | 76%<br>(59-87%)          | 1.1<br>(0.39-2.2)                           | 2.7%<br>(0.19-6.9%)                  | 3%<br>(0.086-8%)                    | 0.26<br>(0.0075-0.71) | 0.92<br>(0.069-2.4) |
| Grenada  | 2000 | Male   | All Ages | 53%<br>(44-62%)                | 47%<br>(38-56%)          | 2.6<br>(2.4-2.9)                            | 8.6%<br>(7.1-10%)                    | 9.5%<br>(7.2-12%)                   | 36<br>(27-47)         | 1300<br>(1100-1600) |
| Grenada  | 2000 | Male   | 15 to 19 | 56%<br>(38-73%)                | 44%<br>(27-62%)          | 2.3<br>(1.3-3.5)                            | 6.2%<br>(4.1-9%)                     | 8.4%<br>(5-13%)                     | 0.75<br>(0.42-1.2)    | 66<br>(41-99)       |
| Grenada  | 2000 | Male   | 20 to 24 | 66%<br>(49-81%)                | 34%<br>(19-51%)          | 4.4<br>(2.8-6.1)                            | 13%<br>(9.3-17%)                     | 16%<br>(11-22%)                     | 1.7<br>(1.1-2.4)      | 140<br>(92-180)     |
| Grenada  | 2000 | Male   | 25 to 29 | 70%<br>(51-83%)                | 30%<br>(17-49%)          | 5.3<br>(3.4-7.4)                            | 14%<br>(10-17%)                      | 17%<br>(12-22%)                     | 1.7<br>(1.1-2.4)      | 130<br>(88-170)     |
| Grenada  | 2000 | Male   | 30 to 34 | 71%<br>(51-84%)                | 29%<br>(16-49%)          | 5.5<br>(3.4-7.8)                            | 13%<br>(10-17%)                      | 17%<br>(13-21%)                     | 1.6<br>(1-2.2)        | 110<br>(75-140)     |
| Grenada  | 2000 | Male   | 35 to 39 | 70%<br>(54-84%)                | 30%<br>(16-46%)          | 5.2<br>(3.3-7.8)                            | 13%<br>(9.6-16%)                     | 16%<br>(12-20%)                     | 2.1<br>(1.4-2.8)      | 130<br>(89-160)     |
| Grenada  | 2000 | Male   | 40 to 44 | 69%<br>(53-83%)                | 31%<br>(17-47%)          | 5<br>(2.9-7.4)                              | 13%<br>(9.4-16%)                     | 16%<br>(12-20%)                     | 2.1<br>(1.4-2.9)      | 110<br>(80-150)     |
| Grenada  | 2000 | Male   | 45 to 49 | 67%<br>(47-82%)                | 33%<br>(18-53%)          | 4.7<br>(2.7-7.4)                            | 13%<br>(9.5-17%)                     | 16%<br>(12-20%)                     | 2.5<br>(1.7-3.3)      | 110<br>(80-150)     |
| Grenada  | 2000 | Male   | 50 to 54 | 66%<br>(47-81%)                | 34%<br>(19-53%)          | 4.3<br>(2.4-6.8)                            | 13%<br>(8.6-16%)                     | 15%<br>(10-20%)                     | 2.4<br>(1.5-3.3)      | 96<br>(64-130)      |
| Grenada  | 2000 | Male   | 55 to 59 | 64%<br>(46-80%)                | 36%<br>(20-54%)          | 4<br>(2.2-6.3)                              | 12%<br>(8-16%)                       | 15%<br>(9.3-19%)                    | 2.6<br>(1.7-3.6)      | 88<br>(57-120)      |
| Grenada  | 2000 | Male   | 60 to 64 | 62%<br>(41-79%)                | 38%<br>(21-59%)          | 3.6<br>(1.9-6)                              | 10%<br>(6-14%)                       | 12%<br>(7-17%)                      | 3.4<br>(1.9-4.9)      | 97<br>(57-140)      |
| Grenada  | 2000 | Male   | 65 to 69 | 60%<br>(41-77%)                | 40%<br>(23-59%)          | 3.2<br>(1.8-5)                              | 9.5%<br>(5.6-13%)                    | 11%<br>(6.5-16%)                    | 3.6<br>(2.1-5.2)      | 85<br>(51-120)      |
| Grenada  | 2000 | Male   | 70 to 74 | 57%<br>(38-73%)                | 43%<br>(27-62%)          | 2.6<br>(1.4-4.5)                            | 7.5%<br>(3.7-12%)                    | 8.6%<br>(4.2-13%)                   | 4.6<br>(2.2-7.4)      | 87<br>(43-140)      |

| Location | Year | Sex    | Age      | Prevalence of current drinkers | Prevalence of abstainers | Population average of standard drinks daily | Percent of total attributable deaths | Percent of total attributable DALYs | Attributable deaths  | Attributable DALYs  |
|----------|------|--------|----------|--------------------------------|--------------------------|---------------------------------------------|--------------------------------------|-------------------------------------|----------------------|---------------------|
| Grenada  | 2000 | Male   | 75 to 79 | 52%<br>(32-71%)                | 48%<br>(29-68%)          | 2.2<br>(1.1-3.7)                            | 5.8%<br>(2.6-9.5%)                   | 6.6%<br>(2.9-11%)                   | 3<br>(1.3-5.1)       | 44<br>(20-73)       |
| Grenada  | 2000 | Male   | 80 to 84 | 46%<br>(28-64%)                | 54%<br>(36-72%)          | 1.8<br>(0.93-2.9)                           | 4.8%<br>(2.1-8%)                     | 5.4%<br>(2.4-9.1%)                  | 2.4<br>(1-4.1)       | 26<br>(12-43)       |
| Grenada  | 2000 | Male   | 85 to 89 | 41%<br>(25-58%)                | 59%<br>(42-75%)          | 1.6<br>(0.82-2.7)                           | 4.1%<br>(1.8-7.4%)                   | 4.6%<br>(1.9-8.3%)                  | 1.1<br>(0.47-2)      | 8.8<br>(3.8-15)     |
| Grenada  | 2000 | Male   | 90 to 94 | 42%<br>(26-59%)                | 58%<br>(41-74%)          | 1.6<br>(0.77-2.9)                           | 3.8%<br>(1.4-7.4%)                   | 4.2%<br>(1.4-8.3%)                  | 0.43<br>(0.15-0.87)  | 2.3<br>(0.86-4.6)   |
| Grenada  | 2000 | Male   | 95 plus  | 45%<br>(26-65%)                | 55%<br>(35-74%)          | 1.7<br>(0.72-3.4)                           | 4%<br>(1.1-8.1%)                     | 4.3%<br>(0.93-9.3%)                 | 0.13<br>(0.027-0.27) | 0.46<br>(0.12-0.95) |
| Grenada  | 2005 | Female | All Ages | 33%<br>(27-40%)                | 67%<br>(60-73%)          | 1.3<br>(1.1-1.4)                            | 2.7%<br>(1.8-3.7%)                   | 3%<br>(1.5-5.1%)                    | 13<br>(6.4-22)       | 380<br>(260-540)    |
| Grenada  | 2005 | Female | 15 to 19 | 39%<br>(26-56%)                | 61%<br>(44-74%)          | 1.5<br>(0.86-2.4)                           | 2.1%<br>(1.3-3.2%)                   | 4.3%<br>(2.4-7%)                    | 0.15<br>(0.08-0.25)  | 17<br>(10-26)       |
| Grenada  | 2005 | Female | 20 to 24 | 45%<br>(29-62%)                | 55%<br>(38-71%)          | 2.3<br>(1.4-3.3)                            | 3.7%<br>(2.5-5.1%)                   | 6.1%<br>(3.7-9%)                    | 0.26<br>(0.15-0.39)  | 28<br>(19-40)       |
| Grenada  | 2005 | Female | 25 to 29 | 45%<br>(28-62%)                | 55%<br>(38-72%)          | 2.3<br>(1.4-3.6)                            | 4%<br>(2.7-5.5%)                     | 6.2%<br>(3.7-8.9%)                  | 0.29<br>(0.16-0.43)  | 27<br>(17-37)       |
| Grenada  | 2005 | Female | 30 to 34 | 43%<br>(27-60%)                | 57%<br>(40-73%)          | 2.3<br>(1.3-3.5)                            | 4.1%<br>(2.8-5.7%)                   | 6.4%<br>(4.1-9.2%)                  | 0.32<br>(0.18-0.48)  | 24<br>(15-35)       |
| Grenada  | 2005 | Female | 35 to 39 | 42%<br>(27-59%)                | 58%<br>(41-73%)          | 2.1<br>(1.2-3.3)                            | 4.3%<br>(2.8-6.1%)                   | 6.7%<br>(4.3-9.8%)                  | 0.41<br>(0.24-0.63)  | 26<br>(16-38)       |
| Grenada  | 2005 | Female | 40 to 44 | 41%<br>(26-59%)                | 59%<br>(41-74%)          | 2<br>(1.1-3.2)                              | 4.4%<br>(2.6-6.7%)                   | 7%<br>(4.2-11%)                     | 0.73<br>(0.43-1.1)   | 39<br>(23-60)       |
| Grenada  | 2005 | Female | 45 to 49 | 39%<br>(24-56%)                | 61%<br>(44-76%)          | 1.9<br>(1-3.2)                              | 4.6%<br>(2.5-7.8%)                   | 7%<br>(3.9-11%)                     | 0.8<br>(0.43-1.3)    | 37<br>(20-61)       |
| Grenada  | 2005 | Female | 50 to 54 | 35%<br>(22-51%)                | 65%<br>(49-78%)          | 1.7<br>(0.91-2.9)                           | 4.5%<br>(2.1-7.9%)                   | 6.4%<br>(3.3-11%)                   | 0.79<br>(0.39-1.3)   | 31<br>(15-53)       |
| Grenada  | 2005 | Female | 55 to 59 | 31%<br>(19-47%)                | 69%<br>(53-81%)          | 1.5<br>(0.75-2.4)                           | 4.1%<br>(1.8-7.1%)                   | 5.6%<br>(2.7-9.7%)                  | 0.78<br>(0.37-1.3)   | 27<br>(12-46)       |
| Grenada  | 2005 | Female | 60 to 64 | 28%<br>(16-44%)                | 72%<br>(56-84%)          | 1.2<br>(0.62-2.2)                           | 3.3%<br>(1-6.3%)                     | 4.4%<br>(1.6-8.2%)                  | 0.84<br>(0.31-1.6)   | 24<br>(7.6-47)      |
| Grenada  | 2005 | Female | 65 to 69 | 26%<br>(16-39%)                | 74%<br>(61-84%)          | 1.1<br>(0.58-1.8)                           | 2.8%<br>(0.9-5.4%)                   | 3.7%<br>(1.3-6.8%)                  | 1.1<br>(0.39-2)      | 25<br>(8.3-49)      |
| Grenada  | 2005 | Female | 70 to 74 | 23%<br>(14-36%)                | 77%<br>(64-86%)          | 0.9<br>(0.45-1.6)                           | 2.2%<br>(0.36-4.7%)                  | 2.7%<br>(0.57-5.9%)                 | 1<br>(0.21-2.2)      | 19<br>(3.1-42)      |
| Grenada  | 2005 | Female | 75 to 79 | 20%<br>(12-33%)                | 80%<br>(67-88%)          | 0.78<br>(0.35-1.4)                          | 1.8%<br>(0.12-4.1%)                  | 2.1%<br>(0.2-5%)                    | 1.5<br>(0.14-3.4)    | 21<br>(1.5-50)      |
| Grenada  | 2005 | Female | 80 to 84 | 19%<br>(11-30%)                | 81%<br>(70-89%)          | 0.73<br>(0.35-1.2)                          | 1.8%<br>(0.31-3.8%)                  | 2.1%<br>(0.37-4.5%)                 | 1.5<br>(0.26-3.2)    | 16<br>(2.6-35)      |
| Grenada  | 2005 | Female | 85 to 89 | 19%<br>(11-30%)                | 81%<br>(70-89%)          | 0.74<br>(0.36-1.3)                          | 1.8%<br>(0.35-4.1%)                  | 2.1%<br>(0.39-4.7%)                 | 1.4<br>(0.25-3.2)    | 10<br>(1.9-24)      |
| Grenada  | 2005 | Female | 90 to 94 | 21%<br>(12-33%)                | 79%<br>(67-88%)          | 0.85<br>(0.39-1.6)                          | 2%<br>(0.32-5%)                      | 2.3%<br>(0.29-5.7%)                 | 0.78<br>(0.096-1.9)  | 4.1<br>(0.62-10)    |

| Location | Year | Sex    | Age      | Prevalence of current drinkers | Prevalence of abstainers | Population average of standard drinks daily | Percent of total attributable deaths | Percent of total attributable DALYs | Attributable deaths   | Attributable DALYs  |
|----------|------|--------|----------|--------------------------------|--------------------------|---------------------------------------------|--------------------------------------|-------------------------------------|-----------------------|---------------------|
| Grenada  | 2005 | Female | 95 plus  | 25%<br>(13-41%)                | 75%<br>(59-87%)          | 1<br>(0.38-2.1)                             | 2.4%<br>(0.093-6.4%)                 | 2.7%<br>(-0.021-7.3%)               | 0.26<br>(-0.002-0.69) | 0.89<br>(0.033-2.3) |
| Grenada  | 2005 | Male   | All Ages | 55%<br>(47-64%)                | 45%<br>(36-53%)          | 2.7<br>(2.5-3)                              | 8.9%<br>(7.3-10%)                    | 9.3%<br>(7-12%)                     | 38<br>(28-49)         | 1400<br>(1200-1700) |
| Grenada  | 2005 | Male   | 15 to 19 | 56%<br>(39-73%)                | 44%<br>(27-61%)          | 2.2<br>(1.3-3.3)                            | 6.1%<br>(3.9-8.8%)                   | 8.2%<br>(4.9-12%)                   | 0.81<br>(0.42-1.3)    | 71<br>(43-110)      |
| Grenada  | 2005 | Male   | 20 to 24 | 67%<br>(49-82%)                | 33%<br>(18-51%)          | 4.2<br>(2.7-5.9)                            | 13%<br>(9-17%)                       | 15%<br>(10-21%)                     | 2<br>(1.2-3)          | 160<br>(110-230)    |
| Grenada  | 2005 | Male   | 25 to 29 | 70%<br>(52-83%)                | 30%<br>(17-48%)          | 5<br>(3.2-7)                                | 14%<br>(10-18%)                      | 17%<br>(12-22%)                     | 1.9<br>(1.2-2.7)      | 140<br>(94-190)     |
| Grenada  | 2005 | Male   | 30 to 34 | 71%<br>(52-84%)                | 29%<br>(16-48%)          | 5.3<br>(3.3-7.5)                            | 13%<br>(10-17%)                      | 17%<br>(12-22%)                     | 1.9<br>(1.2-2.6)      | 120<br>(87-160)     |
| Grenada  | 2005 | Male   | 35 to 39 | 71%<br>(54-84%)                | 29%<br>(16-46%)          | 5<br>(3.1-7.5)                              | 13%<br>(9.8-16%)                     | 17%<br>(12-21%)                     | 1.8<br>(1.2-2.4)      | 110<br>(76-140)     |
| Grenada  | 2005 | Male   | 40 to 44 | 69%<br>(54-83%)                | 31%<br>(17-46%)          | 4.8<br>(2.7-7.2)                            | 13%<br>(9.2-16%)                     | 16%<br>(11-21%)                     | 2.7<br>(1.8-3.7)      | 140<br>(100-190)    |
| Grenada  | 2005 | Male   | 45 to 49 | 68%<br>(47-82%)                | 32%<br>(18-53%)          | 4.5<br>(2.6-7)                              | 13%<br>(9.3-17%)                     | 16%<br>(11-20%)                     | 2.9<br>(1.9-4)        | 130<br>(91-180)     |
| Grenada  | 2005 | Male   | 50 to 54 | 66%<br>(47-81%)                | 34%<br>(19-53%)          | 4.1<br>(2.3-6.5)                            | 12%<br>(8.5-16%)                     | 15%<br>(10-20%)                     | 3.2<br>(2.1-4.3)      | 130<br>(86-170)     |
| Grenada  | 2005 | Male   | 55 to 59 | 64%<br>(46-80%)                | 36%<br>(20-54%)          | 3.8<br>(2.1-6.1)                            | 12%<br>(7.5-16%)                     | 14%<br>(8.8-19%)                    | 3<br>(1.9-4.2)        | 100<br>(67-140)     |
| Grenada  | 2005 | Male   | 60 to 64 | 62%<br>(42-79%)                | 38%<br>(21-58%)          | 3.4<br>(1.8-5.8)                            | 10%<br>(5.6-14%)                     | 12%<br>(6.5-16%)                    | 2.9<br>(1.6-4.1)      | 82<br>(47-120)      |
| Grenada  | 2005 | Male   | 65 to 69 | 61%<br>(41-77%)                | 39%<br>(23-59%)          | 3<br>(1.7-4.8)                              | 8.9%<br>(5.1-13%)                    | 10%<br>(5.9-15%)                    | 3.8<br>(2.2-5.5)      | 89<br>(51-130)      |
| Grenada  | 2005 | Male   | 70 to 74 | 57%<br>(39-74%)                | 43%<br>(26-61%)          | 2.5<br>(1.3-4.3)                            | 6.8%<br>(3.3-11%)                    | 7.7%<br>(3.7-12%)                   | 3.1<br>(1.5-5)        | 60<br>(29-95)       |
| Grenada  | 2005 | Male   | 75 to 79 | 52%<br>(33-71%)                | 48%<br>(29-67%)          | 2.1<br>(1-3.6)                              | 5.4%<br>(2.3-9%)                     | 6.1%<br>(2.6-10%)                   | 3.6<br>(1.5-6.1)      | 53<br>(23-89)       |
| Grenada  | 2005 | Male   | 80 to 84 | 46%<br>(28-64%)                | 54%<br>(36-72%)          | 1.7<br>(0.89-2.8)                           | 4.5%<br>(2-7.4%)                     | 5%<br>(2.1-8.5%)                    | 2.4<br>(1-4.1)        | 26<br>(12-44)       |
| Grenada  | 2005 | Male   | 85 to 89 | 41%<br>(25-59%)                | 59%<br>(41-75%)          | 1.5<br>(0.77-2.6)                           | 3.8%<br>(1.6-6.9%)                   | 4.3%<br>(1.8-7.8%)                  | 1.3<br>(0.52-2.3)     | 9.8<br>(4.2-18)     |
| Grenada  | 2005 | Male   | 90 to 94 | 42%<br>(26-59%)                | 58%<br>(41-74%)          | 1.6<br>(0.75-2.9)                           | 3.5%<br>(1.3-7%)                     | 3.8%<br>(1.3-7.8%)                  | 0.43<br>(0.15-0.87)   | 2.3<br>(0.87-4.6)   |
| Grenada  | 2005 | Male   | 95 plus  | 45%<br>(26-65%)                | 55%<br>(35-74%)          | 1.7<br>(0.69-3.2)                           | 3.6%<br>(0.97-7.6%)                  | 3.9%<br>(0.87-8.5%)                 | 0.12<br>(0.026-0.25)  | 0.42<br>(0.11-0.89) |
| Grenada  | 2010 | Female | All Ages | 33%<br>(27-40%)                | 67%<br>(60-73%)          | 1.2<br>(1.1-1.4)                            | 2.5%<br>(1.7-3.5%)                   | 2.7%<br>(1.4-4.5%)                  | 11<br>(5.7-19)        | 360<br>(250-500)    |
| Grenada  | 2010 | Female | 15 to 19 | 39%<br>(26-55%)                | 61%<br>(45-74%)          | 1.4<br>(0.78-2.3)                           | 2%<br>(1.3-3.1%)                     | 4.1%<br>(2.2-6.8%)                  | 0.12<br>(0.065-0.21)  | 14<br>(8.4-21)      |
| Grenada  | 2010 | Female | 20 to 24 | 45%<br>(29-61%)                | 55%<br>(39-71%)          | 2.1<br>(1.2-3.2)                            | 3.5%<br>(2.4-4.9%)                   | 5.7%<br>(3.4-8.5%)                  | 0.26<br>(0.16-0.41)   | 30<br>(20-43)       |

| Location | Year | Sex    | Age      | Prevalence of current drinkers | Prevalence of abstainers | Population average of standard drinks daily | Percent of total attributable deaths | Percent of total attributable DALYs | Attributable deaths   | Attributable DALYs  |
|----------|------|--------|----------|--------------------------------|--------------------------|---------------------------------------------|--------------------------------------|-------------------------------------|-----------------------|---------------------|
| Grenada  | 2010 | Female | 25 to 29 | 44%<br>(28-61%)                | 56%<br>(39-72%)          | 2.1<br>(1.3-3.2)                            | 3.7%<br>(2.5-5.1%)                   | 5.7%<br>(3.5-8.3%)                  | 0.31<br>(0.18-0.48)   | 30<br>(20-43)       |
| Grenada  | 2010 | Female | 30 to 34 | 42%<br>(26-60%)                | 58%<br>(40-74%)          | 2.1<br>(1.2-3.2)                            | 3.7%<br>(2.5-5.3%)                   | 5.8%<br>(3.7-8.6%)                  | 0.34<br>(0.2-0.52)    | 27<br>(17-38)       |
| Grenada  | 2010 | Female | 35 to 39 | 42%<br>(26-60%)                | 58%<br>(40-74%)          | 1.9<br>(1.1-3.1)                            | 3.9%<br>(2.5-5.8%)                   | 6.2%<br>(3.9-9.5%)                  | 0.39<br>(0.22-0.61)   | 25<br>(15-37)       |
| Grenada  | 2010 | Female | 40 to 44 | 40%<br>(26-59%)                | 60%<br>(41-74%)          | 1.8<br>(0.96-3)                             | 4.1%<br>(2.4-6.2%)                   | 6.5%<br>(3.9-9.8%)                  | 0.49<br>(0.28-0.75)   | 26<br>(15-41)       |
| Grenada  | 2010 | Female | 45 to 49 | 39%<br>(23-56%)                | 61%<br>(44-77%)          | 1.8<br>(0.91-3)                             | 4.2%<br>(2.2-7.1%)                   | 6.4%<br>(3.5-11%)                   | 0.91<br>(0.5-1.5)     | 42<br>(23-70)       |
| Grenada  | 2010 | Female | 50 to 54 | 35%<br>(21-51%)                | 65%<br>(49-79%)          | 1.6<br>(0.84-2.7)                           | 4.1%<br>(1.9-7.1%)                   | 5.9%<br>(2.9-9.8%)                  | 0.93<br>(0.46-1.6)    | 37<br>(18-64)       |
| Grenada  | 2010 | Female | 55 to 59 | 31%<br>(18-47%)                | 69%<br>(53-82%)          | 1.3<br>(0.67-2.2)                           | 3.6%<br>(1.4-6.5%)                   | 5%<br>(2.3-8.7%)                    | 0.83<br>(0.37-1.5)    | 28<br>(12-51)       |
| Grenada  | 2010 | Female | 60 to 64 | 27%<br>(16-43%)                | 73%<br>(57-84%)          | 1.1<br>(0.55-2)                             | 2.9%<br>(0.86-5.7%)                  | 3.9%<br>(1.3-7.3%)                  | 0.72<br>(0.24-1.4)    | 21<br>(6.2-41)      |
| Grenada  | 2010 | Female | 65 to 69 | 25%<br>(16-39%)                | 75%<br>(61-84%)          | 0.99<br>(0.53-1.6)                          | 2.4%<br>(0.69-4.7%)                  | 3.1%<br>(1-5.9%)                    | 0.82<br>(0.27-1.6)    | 19<br>(5.6-39)      |
| Grenada  | 2010 | Female | 70 to 74 | 23%<br>(14-35%)                | 77%<br>(65-86%)          | 0.82<br>(0.41-1.5)                          | 1.8%<br>(0.16-4.1%)                  | 2.3%<br>(0.32-4.9%)                 | 0.96<br>(0.14-2.1)    | 18<br>(1.7-41)      |
| Grenada  | 2010 | Female | 75 to 79 | 20%<br>(12-33%)                | 80%<br>(67-88%)          | 0.72<br>(0.32-1.3)                          | 1.5%<br>(-0.025-3.7%)                | 1.8%<br>(0.019-4.5%)                | 0.86<br>(0.0093-2.1)  | 12<br>(-0.23-31)    |
| Grenada  | 2010 | Female | 80 to 84 | 19%<br>(10-30%)                | 81%<br>(70-90%)          | 0.67<br>(0.32-1.2)                          | 1.5%<br>(0.18-3.4%)                  | 1.7%<br>(0.23-4%)                   | 1.2<br>(0.16-2.8)     | 13<br>(1.6-30)      |
| Grenada  | 2010 | Female | 85 to 89 | 19%<br>(11-29%)                | 81%<br>(71-89%)          | 0.69<br>(0.33-1.2)                          | 1.5%<br>(0.24-3.7%)                  | 1.8%<br>(0.25-4.2%)                 | 1.2<br>(0.17-2.9)     | 9.3<br>(1.4-22)     |
| Grenada  | 2010 | Female | 90 to 94 | 21%<br>(12-33%)                | 79%<br>(67-88%)          | 0.78<br>(0.33-1.5)                          | 1.7%<br>(0.19-4.4%)                  | 2%<br>(0.15-5%)                     | 0.79<br>(0.062-2)     | 4.2<br>(0.46-10)    |
| Grenada  | 2010 | Female | 95 plus  | 24%<br>(13-41%)                | 76%<br>(59-87%)          | 0.95<br>(0.34-2)                            | 2.1%<br>(0.024-6%)                   | 2.3%<br>(-0.088-6.8%)               | 0.32<br>(-0.012-0.95) | 1.1<br>(0.013-3.2)  |
| Grenada  | 2010 | Male   | All Ages | 56%<br>(48-65%)                | 44%<br>(35-52%)          | 2.7<br>(2.4-3)                              | 8.6%<br>(7.1-10%)                    | 8.9%<br>(6.7-11%)                   | 36<br>(27-47)         | 1400<br>(1100-1800) |
| Grenada  | 2010 | Male   | 15 to 19 | 56%<br>(38-73%)                | 44%<br>(27-62%)          | 2<br>(1.1-3.1)                              | 5.8%<br>(3.8-8.5%)                   | 7.8%<br>(4.7-12%)                   | 0.65<br>(0.37-1)      | 58<br>(35-86)       |
| Grenada  | 2010 | Male   | 20 to 24 | 66%<br>(48-81%)                | 34%<br>(19-52%)          | 3.8<br>(2.5-5.4)                            | 12%<br>(8.5-16%)                     | 15%<br>(9.6-20%)                    | 2.1<br>(1.2-3.1)      | 170<br>(110-240)    |
| Grenada  | 2010 | Male   | 25 to 29 | 69%<br>(52-83%)                | 31%<br>(17-48%)          | 4.6<br>(3.1-6.4)                            | 13%<br>(9.6-17%)                     | 16%<br>(11-22%)                     | 2.1<br>(1.3-3)        | 160<br>(110-220)    |
| Grenada  | 2010 | Male   | 30 to 34 | 70%<br>(51-84%)                | 30%<br>(16-49%)          | 4.9<br>(3.1-7.1)                            | 13%<br>(9.6-16%)                     | 16%<br>(12-21%)                     | 1.9<br>(1.2-2.6)      | 130<br>(87-170)     |
| Grenada  | 2010 | Male   | 35 to 39 | 70%<br>(54-84%)                | 30%<br>(16-46%)          | 4.6<br>(2.8-6.9)                            | 12%<br>(9-16%)                       | 16%<br>(11-21%)                     | 1.9<br>(1.3-2.7)      | 110<br>(81-160)     |
| Grenada  | 2010 | Male   | 40 to 44 | 69%<br>(53-83%)                | 31%<br>(17-47%)          | 4.4<br>(2.5-6.7)                            | 12%<br>(8.6-16%)                     | 16%<br>(11-20%)                     | 2<br>(1.3-2.8)        | 110<br>(72-150)     |

| Location | Year | Sex    | Age      | Prevalence of current drinkers | Prevalence of abstainers | Population average of standard drinks daily | Percent of total attributable deaths | Percent of total attributable DALYs | Attributable deaths   | Attributable DALYs |
|----------|------|--------|----------|--------------------------------|--------------------------|---------------------------------------------|--------------------------------------|-------------------------------------|-----------------------|--------------------|
| Grenada  | 2010 | Male   | 45 to 49 | 67%<br>(47-82%)                | 33%<br>(18-53%)          | 4.1<br>(2.3-6.5)                            | 12%<br>(8.5-16%)                     | 15%<br>(10-19%)                     | 3.2<br>(2.1-4.5)      | 150<br>(99-200)    |
| Grenada  | 2010 | Male   | 50 to 54 | 66%<br>(47-81%)                | 34%<br>(19-53%)          | 3.8<br>(2.1-6.1)                            | 12%<br>(7.7-15%)                     | 14%<br>(9.2-19%)                    | 3.3<br>(2.1-4.6)      | 130<br>(87-180)    |
| Grenada  | 2010 | Male   | 55 to 59 | 64%<br>(46-80%)                | 36%<br>(20-54%)          | 3.5<br>(1.9-5.3)                            | 11%<br>(6.6-15%)                     | 13%<br>(7.7-17%)                    | 3.6<br>(2.1-5)        | 120<br>(74-170)    |
| Grenada  | 2010 | Male   | 60 to 64 | 62%<br>(41-79%)                | 38%<br>(21-59%)          | 3.1<br>(1.7-5.3)                            | 9.2%<br>(5-13%)                      | 11%<br>(5.8-15%)                    | 3<br>(1.6-4.5)        | 87<br>(47-130)     |
| Grenada  | 2010 | Male   | 65 to 69 | 60%<br>(41-77%)                | 40%<br>(23-59%)          | 2.8<br>(1.6-4.4)                            | 8.3%<br>(4.7-12%)                    | 9.6%<br>(5.5-14%)                   | 2.9<br>(1.7-4.3)      | 70<br>(40-100)     |
| Grenada  | 2010 | Male   | 70 to 74 | 57%<br>(38-73%)                | 43%<br>(27-62%)          | 2.3<br>(1.2-3.9)                            | 6.2%<br>(3.1-10%)                    | 7.1%<br>(3.5-12%)                   | 3.1<br>(1.5-5.1)      | 59<br>(29-98)      |
| Grenada  | 2010 | Male   | 75 to 79 | 52%<br>(32-71%)                | 48%<br>(29-68%)          | 1.9<br>(0.94-3.4)                           | 5%<br>(2.1-8.7%)                     | 5.6%<br>(2.3-9.9%)                  | 2.4<br>(1-4.3)        | 36<br>(16-64)      |
| Grenada  | 2010 | Male   | 80 to 84 | 46%<br>(28-64%)                | 54%<br>(36-72%)          | 1.6<br>(0.83-2.6)                           | 4.1%<br>(1.8-7%)                     | 4.6%<br>(1.9-8%)                    | 2.2<br>(0.94-3.9)     | 24<br>(11-42)      |
| Grenada  | 2010 | Male   | 85 to 89 | 41%<br>(25-58%)                | 59%<br>(42-75%)          | 1.4<br>(0.71-2.5)                           | 3.4%<br>(1.5-6.4%)                   | 3.8%<br>(1.5-7.2%)                  | 1.4<br>(0.56-2.6)     | 11<br>(4.5-20)     |
| Grenada  | 2010 | Male   | 90 to 94 | 41%<br>(26-59%)                | 59%<br>(41-74%)          | 1.4<br>(0.66-2.6)                           | 3.1%<br>(1.1-6.3%)                   | 3.4%<br>(1.1-7.1%)                  | 0.49<br>(0.16-1)      | 2.7<br>(0.95-5.4)  |
| Grenada  | 2010 | Male   | 95 plus  | 44%<br>(25-65%)                | 56%<br>(35-75%)          | 1.5<br>(0.61-3)                             | 3.2%<br>(0.88-7%)                    | 3.5%<br>(0.72-7.9%)                 | 0.12<br>(0.026-0.28)  | 0.46<br>(0.12-1)   |
| Grenada  | 2016 | Female | All Ages | 33%<br>(27-40%)                | 67%<br>(60-73%)          | 1.2<br>(0.95-1.6)                           | 2.5%<br>(1.6-3.7%)                   | 2.8%<br>(1.3-4.6%)                  | 12<br>(5.2-21)        | 360<br>(220-550)   |
| Grenada  | 2016 | Female | 15 to 19 | 38%<br>(25-54%)                | 62%<br>(46-75%)          | 1.4<br>(0.7-2.3)                            | 2%<br>(1.2-3.2%)                     | 4%<br>(2-7.1%)                      | 0.099<br>(0.048-0.18) | 11<br>(6.6-19)     |
| Grenada  | 2016 | Female | 20 to 24 | 44%<br>(29-61%)                | 56%<br>(39-71%)          | 2<br>(1.1-3.3)                              | 3.5%<br>(2.3-5%)                     | 5.5%<br>(2.9-8.8%)                  | 0.2<br>(0.1-0.34)     | 23<br>(15-35)      |
| Grenada  | 2016 | Female | 25 to 29 | 44%<br>(27-61%)                | 56%<br>(39-73%)          | 2.1<br>(1.2-3.4)                            | 3.6%<br>(2.4-5.3%)                   | 5.6%<br>(3.3-8.6%)                  | 0.31<br>(0.17-0.54)   | 31<br>(20-47)      |
| Grenada  | 2016 | Female | 30 to 34 | 42%<br>(26-60%)                | 58%<br>(40-74%)          | 2<br>(1.1-3.3)                              | 3.6%<br>(2.3-5.2%)                   | 5.7%<br>(3.5-8.6%)                  | 0.39<br>(0.21-0.65)   | 32<br>(19-49)      |
| Grenada  | 2016 | Female | 35 to 39 | 41%<br>(26-59%)                | 59%<br>(41-74%)          | 1.9<br>(1-3.1)                              | 3.8%<br>(2.3-5.6%)                   | 6.1%<br>(3.8-9.2%)                  | 0.45<br>(0.24-0.76)   | 29<br>(17-47)      |
| Grenada  | 2016 | Female | 40 to 44 | 40%<br>(25-58%)                | 60%<br>(42-75%)          | 1.8<br>(0.92-3)                             | 3.9%<br>(2.2-6.3%)                   | 6.4%<br>(3.8-9.9%)                  | 0.5<br>(0.27-0.83)    | 27<br>(15-45)      |
| Grenada  | 2016 | Female | 45 to 49 | 38%<br>(22-55%)                | 62%<br>(45-78%)          | 1.7<br>(0.89-3.1)                           | 4.1%<br>(2.2-7.1%)                   | 6.3%<br>(3.5-11%)                   | 0.6<br>(0.31-1)       | 28<br>(15-49)      |
| Grenada  | 2016 | Female | 50 to 54 | 34%<br>(21-51%)                | 66%<br>(49-79%)          | 1.5<br>(0.79-2.7)                           | 3.9%<br>(1.8-7%)                     | 5.7%<br>(2.9-9.9%)                  | 1<br>(0.52-1.9)       | 42<br>(20-77)      |
| Grenada  | 2016 | Female | 55 to 59 | 30%<br>(18-46%)                | 70%<br>(54-82%)          | 1.3<br>(0.66-2.3)                           | 3.4%<br>(1.5-6.3%)                   | 4.8%<br>(2.2-8.6%)                  | 1.1<br>(0.5-2)        | 37<br>(16-70)      |
| Grenada  | 2016 | Female | 60 to 64 | 27%<br>(16-42%)                | 73%<br>(58-84%)          | 1.1<br>(0.52-2)                             | 2.8%<br>(0.84-5.6%)                  | 3.8%<br>(1.3-7.4%)                  | 0.9<br>(0.3-1.8)      | 26<br>(7.7-53)     |

| Location | Year | Sex    | Age      | Prevalence of current drinkers | Prevalence of abstainers | Population average of standard drinks daily | Percent of total attributable deaths | Percent of total attributable DALYs | Attributable deaths    | Attributable DALYs  |
|----------|------|--------|----------|--------------------------------|--------------------------|---------------------------------------------|--------------------------------------|-------------------------------------|------------------------|---------------------|
| Grenada  | 2016 | Female | 65 to 69 | 25%<br>(15-38%)                | 75%<br>(62-85%)          | 0.95<br>(0.49-1.6)                          | 2.3%<br>(0.67-4.6%)                  | 3.1%<br>(1-5.8%)                    | 0.82<br>(0.27-1.6)     | 19<br>(5.6-38)      |
| Grenada  | 2016 | Female | 70 to 74 | 22%<br>(14-35%)                | 78%<br>(65-86%)          | 0.81<br>(0.39-1.4)                          | 1.9%<br>(0.28-4.3%)                  | 2.4%<br>(0.45-5.3%)                 | 0.89<br>(0.16-2)       | 17<br>(2.2-39)      |
| Grenada  | 2016 | Female | 75 to 79 | 20%<br>(12-32%)                | 80%<br>(68-88%)          | 0.71<br>(0.31-1.3)                          | 1.5%<br>(0.059-3.7%)                 | 1.9%<br>(0.15-4.5%)                 | 1<br>(0.076-2.5)       | 15<br>(0.55-36)     |
| Grenada  | 2016 | Female | 80 to 84 | 18%<br>(10-29%)                | 82%<br>(71-90%)          | 0.65<br>(0.31-1.2)                          | 1.5%<br>(0.21-3.4%)                  | 1.8%<br>(0.26-4%)                   | 1.2<br>(0.17-2.7)      | 12<br>(1.7-29)      |
| Grenada  | 2016 | Female | 85 to 89 | 18%<br>(11-28%)                | 82%<br>(72-89%)          | 0.66<br>(0.31-1.2)                          | 1.5%<br>(0.21-3.7%)                  | 1.8%<br>(0.22-4.2%)                 | 1.1<br>(0.13-2.6)      | 8.1<br>(1.2-20)     |
| Grenada  | 2016 | Female | 90 to 94 | 20%<br>(12-32%)                | 80%<br>(68-88%)          | 0.76<br>(0.32-1.5)                          | 1.7%<br>(0.2-4.4%)                   | 1.9%<br>(0.18-5.2%)                 | 0.83<br>(0.076-2.2)    | 4.4<br>(0.53-12)    |
| Grenada  | 2016 | Female | 95 plus  | 24%<br>(12-40%)                | 76%<br>(60-88%)          | 0.91<br>(0.32-2)                            | 2%<br>(0.049-5.5%)                   | 2.3%<br>(-0.062-6.4%)               | 0.34<br>(-0.0094-0.96) | 1.2<br>(0.028-3.3)  |
| Grenada  | 2016 | Male   | All Ages | 56%<br>(48-65%)                | 44%<br>(35-52%)          | 2.7<br>(2.1-3.5)                            | 8.5%<br>(6.6-11%)                    | 8.7%<br>(6.1-11%)                   | 39<br>(26-52)          | 1500<br>(1100-1900) |
| Grenada  | 2016 | Male   | 15 to 19 | 55%<br>(38-72%)                | 45%<br>(28-62%)          | 2<br>(1-3.2)                                | 5.8%<br>(3.7-8.7%)                   | 7.8%<br>(4.4-12%)                   | 0.54<br>(0.28-0.93)    | 48<br>(28-76)       |
| Grenada  | 2016 | Male   | 20 to 24 | 66%<br>(48-81%)                | 34%<br>(19-52%)          | 3.8<br>(2.2-5.6)                            | 12%<br>(8.1-16%)                     | 15%<br>(8.9-21%)                    | 1.6<br>(0.86-2.6)      | 130<br>(80-190)     |
| Grenada  | 2016 | Male   | 25 to 29 | 69%<br>(51-83%)                | 31%<br>(17-49%)          | 4.5<br>(2.8-6.8)                            | 13%<br>(9-17%)                       | 16%<br>(11-22%)                     | 2.2<br>(1.2-3.4)       | 170<br>(110-240)    |
| Grenada  | 2016 | Male   | 30 to 34 | 70%<br>(51-84%)                | 30%<br>(16-49%)          | 4.7<br>(2.8-7.2)                            | 12%<br>(8.8-16%)                     | 16%<br>(11-21%)                     | 2.3<br>(1.3-3.4)       | 160<br>(98-220)     |
| Grenada  | 2016 | Male   | 35 to 39 | 70%<br>(53-84%)                | 30%<br>(16-47%)          | 4.5<br>(2.7-6.9)                            | 12%<br>(8.4-16%)                     | 16%<br>(11-20%)                     | 2.1<br>(1.3-3.1)       | 130<br>(83-180)     |
| Grenada  | 2016 | Male   | 40 to 44 | 69%<br>(52-83%)                | 31%<br>(17-48%)          | 4.3<br>(2.3-6.8)                            | 12%<br>(8.2-16%)                     | 15%<br>(9.9-20%)                    | 2.3<br>(1.4-3.3)       | 120<br>(79-170)     |
| Grenada  | 2016 | Male   | 45 to 49 | 67%<br>(46-82%)                | 33%<br>(18-54%)          | 4<br>(2.2-6.6)                              | 12%<br>(8.2-16%)                     | 15%<br>(10-19%)                     | 2.5<br>(1.6-3.6)       | 120<br>(75-160)     |
| Grenada  | 2016 | Male   | 50 to 54 | 65%<br>(46-80%)                | 35%<br>(20-54%)          | 3.7<br>(2-6)                                | 11%<br>(7.4-15%)                     | 14%<br>(9-18%)                      | 4<br>(2.4-5.6)         | 160<br>(99-220)     |
| Grenada  | 2016 | Male   | 55 to 59 | 63%<br>(45-79%)                | 37%<br>(21-55%)          | 3.4<br>(1.8-5.6)                            | 10%<br>(6.2-14%)                     | 12%<br>(7.3-17%)                    | 4.2<br>(2.4-6.2)       | 140<br>(84-210)     |
| Grenada  | 2016 | Male   | 60 to 64 | 61%<br>(41-79%)                | 39%<br>(21-59%)          | 3<br>(1.6-5.4)                              | 8.9%<br>(4.8-13%)                    | 10%<br>(5.6-15%)                    | 4<br>(2-6.2)           | 110<br>(60-180)     |
| Grenada  | 2016 | Male   | 65 to 69 | 60%<br>(40-76%)                | 40%<br>(24-60%)          | 2.7<br>(1.4-4.4)                            | 8.1%<br>(4.4-12%)                    | 9.4%<br>(5-14%)                     | 3.6<br>(1.9-5.5)       | 85<br>(46-130)      |
| Grenada  | 2016 | Male   | 70 to 74 | 56%<br>(38-73%)                | 44%<br>(27-62%)          | 2.2<br>(1.1-3.9)                            | 6.1%<br>(2.9-10%)                    | 6.9%<br>(3.3-12%)                   | 2.7<br>(1.2-4.5)       | 51<br>(24-86)       |
| Grenada  | 2016 | Male   | 75 to 79 | 51%<br>(32-70%)                | 49%<br>(30-68%)          | 1.9<br>(0.85-3.3)                           | 4.8%<br>(2-8.5%)                     | 5.4%<br>(2.1-9.6%)                  | 2.6<br>(1-4.7)         | 39<br>(16-69)       |
| Grenada  | 2016 | Male   | 80 to 84 | 45%<br>(27-63%)                | 55%<br>(37-73%)          | 1.5<br>(0.77-2.6)                           | 3.9%<br>(1.6-7.1%)                   | 4.4%<br>(1.7-7.9%)                  | 2.1<br>(0.77-3.8)      | 23<br>(8.8-41)      |



| Location | Year | Sex    | Age      | Prevalence of current drinkers | Prevalence of abstainers | Population average of standard drinks daily | Percent of total attributable deaths | Percent of total attributable DALYs | Attributable deaths   | Attributable DALYs     |
|----------|------|--------|----------|--------------------------------|--------------------------|---------------------------------------------|--------------------------------------|-------------------------------------|-----------------------|------------------------|
| Grenada  | 2016 | Male   | 85 to 89 | 40%<br>(24-57%)                | 60%<br>(43-76%)          | 1.4<br>(0.66-2.4)                           | 3.3%<br>(1.3-6.4%)                   | 3.7%<br>(1.4-7.2%)                  | 1.3<br>(0.48-2.5)     | 10<br>(3.9-20)         |
| Grenada  | 2016 | Male   | 90 to 94 | 40%<br>(26-58%)                | 60%<br>(42-74%)          | 1.4<br>(0.61-2.6)                           | 2.9%<br>(0.98-6.3%)                  | 3.2%<br>(0.92-7%)                   | 0.62<br>(0.18-1.4)    | 3.4<br>(1.1-7.3)       |
| Grenada  | 2016 | Male   | 95 plus  | 44%<br>(25-65%)                | 56%<br>(35-75%)          | 1.5<br>(0.58-3)                             | 3.1%<br>(0.81-7%)                    | 3.3%<br>(0.66-7.9%)                 | 0.15<br>(0.03-0.36)   | 0.56<br>(0.15-1.3)     |
| Guyana   | 1990 | Female | All Ages | 29%<br>(23-36%)                | 71%<br>(64-77%)          | 0.46<br>(0.37-0.59)                         | 1.2%<br>(0.83-1.7%)                  | 1.3%<br>(0.66-2.1%)                 | 31<br>(15-50)         | 1600<br>(1100-2200)    |
| Guyana   | 1990 | Female | 15 to 19 | 35%<br>(22-51%)                | 65%<br>(49-78%)          | 0.53<br>(0.32-0.83)                         | 1.7%<br>(1-2.5%)                     | 2.7%<br>(1.4-4.5%)                  | 1.1<br>(0.58-1.9)     | 110<br>(67-170)        |
| Guyana   | 1990 | Female | 20 to 24 | 41%<br>(26-58%)                | 59%<br>(42-74%)          | 0.82<br>(0.5-1.2)                           | 2.9%<br>(2-4%)                       | 3.7%<br>(2.2-5.8%)                  | 2.2<br>(1.3-3.4)      | 220<br>(150-310)       |
| Guyana   | 1990 | Female | 25 to 29 | 41%<br>(25-58%)                | 59%<br>(42-75%)          | 0.87<br>(0.55-1.3)                          | 3%<br>(2.1-4.1%)                     | 3.8%<br>(2.5-5.5%)                  | 2.5<br>(1.6-3.6)      | 220<br>(160-300)       |
| Guyana   | 1990 | Female | 30 to 34 | 39%<br>(23-56%)                | 61%<br>(44-77%)          | 0.87<br>(0.51-1.3)                          | 3%<br>(2.2-4%)                       | 4.2%<br>(2.9-5.7%)                  | 2.6<br>(1.9-3.7)      | 200<br>(150-270)       |
| Guyana   | 1990 | Female | 35 to 39 | 38%<br>(24-55%)                | 62%<br>(45-76%)          | 0.84<br>(0.5-1.3)                           | 3.1%<br>(2.3-4.1%)                   | 4.4%<br>(3.2-6%)                    | 3<br>(2.1-4.2)        | 190<br>(140-260)       |
| Guyana   | 1990 | Female | 40 to 44 | 37%<br>(23-55%)                | 63%<br>(45-77%)          | 0.8<br>(0.47-1.2)                           | 2.9%<br>(1.9-4%)                     | 4.1%<br>(2.7-5.9%)                  | 3.3<br>(2.1-4.7)      | 170<br>(120-240)       |
| Guyana   | 1990 | Female | 45 to 49 | 35%<br>(20-52%)                | 65%<br>(48-80%)          | 0.74<br>(0.39-1.2)                          | 2.5%<br>(1.5-3.9%)                   | 3.5%<br>(2-5.5%)                    | 3.1<br>(1.8-4.8)      | 140<br>(82-220)        |
| Guyana   | 1990 | Female | 50 to 54 | 32%<br>(19-48%)                | 68%<br>(52-81%)          | 0.67<br>(0.36-1.1)                          | 2.3%<br>(0.95-3.9%)                  | 3%<br>(1.2-5.2%)                    | 3.1<br>(1.3-5.4)      | 120<br>(51-210)        |
| Guyana   | 1990 | Female | 55 to 59 | 28%<br>(16-43%)                | 72%<br>(57-84%)          | 0.59<br>(0.31-1)                            | 1.9%<br>(0.58-3.7%)                  | 2.4%<br>(0.7-4.7%)                  | 3.3<br>(0.95-6.4)     | 110<br>(33-210)        |
| Guyana   | 1990 | Female | 60 to 64 | 24%<br>(14-39%)                | 76%<br>(61-86%)          | 0.52<br>(0.27-0.92)                         | 1.2%<br>(-0.037-2.9%)                | 1.5%<br>(-0.046-3.5%)               | 2.4<br>(-0.077-5.8)   | 67<br>(-2-160)         |
| Guyana   | 1990 | Female | 65 to 69 | 22%<br>(13-35%)                | 78%<br>(65-87%)          | 0.44<br>(0.24-0.73)                         | 0.76%<br>(-0.31-2%)                  | 0.94%<br>(-0.38-2.5%)               | 2<br>(-0.81-5.3)      | 46<br>(-18-120)        |
| Guyana   | 1990 | Female | 70 to 74 | 20%<br>(12-32%)                | 80%<br>(68-88%)          | 0.37<br>(0.2-0.65)                          | 0.5%<br>(-0.44-1.6%)                 | 0.61%<br>(-0.52-1.9%)               | 1.1<br>(-0.94-3.6)    | 21<br>(-18-64)         |
| Guyana   | 1990 | Female | 75 to 79 | 18%<br>(10-29%)                | 82%<br>(71-90%)          | 0.32<br>(0.16-0.57)                         | 0.32%<br>(-0.55-1.2%)                | 0.37%<br>(-0.67-1.4%)               | 0.49<br>(-0.88-1.9)   | 6.9<br>(-12-26)        |
| Guyana   | 1990 | Female | 80 to 84 | 16%<br>(9.1-26%)               | 84%<br>(74-91%)          | 0.29<br>(0.15-0.49)                         | 0.32%<br>(-0.33-1%)                  | 0.38%<br>(-0.41-1.3%)               | 0.63<br>(-0.71-2.1)   | 6.9<br>(-7.2-22)       |
| Guyana   | 1990 | Female | 85 to 89 | 16%<br>(9.2-25%)               | 84%<br>(75-91%)          | 0.29<br>(0.15-0.5)                          | 0.25%<br>(-0.33-0.88%)               | 0.26%<br>(-0.44-1%)                 | 0.38<br>(-0.67-1.5)   | 3.3<br>(-4.5-12)       |
| Guyana   | 1990 | Female | 90 to 94 | 17%<br>(10-28%)                | 83%<br>(72-90%)          | 0.33<br>(0.16-0.58)                         | 0.23%<br>(-0.45-1%)                  | 0.2%<br>(-0.6-1.2%)                 | 0.12<br>(-0.36-0.69)  | 0.83<br>(-1.6-3.7)     |
| Guyana   | 1990 | Female | 95 plus  | 21%<br>(11-35%)                | 79%<br>(65-89%)          | 0.39<br>(0.16-0.74)                         | 0.22%<br>(-0.71-1.3%)                | 0.14%<br>(-0.98-1.5%)               | 0.022<br>(-0.16-0.24) | 0.14<br>(-0.46-0.86)   |
| Guyana   | 1990 | Male   | All Ages | 56%<br>(47-64%)                | 44%<br>(36-53%)          | 3.9<br>(3.4-4.4)                            | 10%<br>(8.7-12%)                     | 14%<br>(12-17%)                     | 460<br>(380-540)      | 18000<br>(15000-21000) |

| Location | Year | Sex    | Age      | Prevalence of current drinkers | Prevalence of abstainers | Population average of standard drinks daily | Percent of total attributable deaths | Percent of total attributable DALYs | Attributable deaths | Attributable DALYs  |
|----------|------|--------|----------|--------------------------------|--------------------------|---------------------------------------------|--------------------------------------|-------------------------------------|---------------------|---------------------|
| Guyana   | 1990 | Male   | 15 to 19 | 59%<br>(42-74%)                | 41%<br>(26-58%)          | 3.6<br>(2.5-4.8)                            | 11%<br>(7.6-14%)                     | 16%<br>(11-21%)                     | 10<br>(7.1-14)      | 800<br>(580-1100)   |
| Guyana   | 1990 | Male   | 20 to 24 | 69%<br>(52-83%)                | 31%<br>(17-48%)          | 6.9<br>(5.2-8.8)                            | 21%<br>(16-26%)                      | 27%<br>(20-33%)                     | 30<br>(22-38)       | 2100<br>(1600-2700) |
| Guyana   | 1990 | Male   | 25 to 29 | 72%<br>(55-84%)                | 28%<br>(16-45%)          | 7.7<br>(5.9-9.6)                            | 21%<br>(17-26%)                      | 27%<br>(20-32%)                     | 33<br>(25-41)       | 2200<br>(1700-2700) |
| Guyana   | 1990 | Male   | 30 to 34 | 73%<br>(55-85%)                | 27%<br>(15-45%)          | 7.7<br>(5.6-9.9)                            | 20%<br>(16-24%)                      | 26%<br>(20-31%)                     | 33<br>(27-41)       | 2000<br>(1600-2400) |
| Guyana   | 1990 | Male   | 35 to 39 | 72%<br>(56-85%)                | 28%<br>(15-44%)          | 7.2<br>(5.2-9.3)                            | 20%<br>(16-24%)                      | 26%<br>(21-30%)                     | 29<br>(23-35)       | 1600<br>(1300-1900) |
| Guyana   | 1990 | Male   | 40 to 44 | 71%<br>(56-84%)                | 29%<br>(16-44%)          | 6.8<br>(4.9-9.1)                            | 20%<br>(16-24%)                      | 25%<br>(21-30%)                     | 30<br>(25-37)       | 1500<br>(1200-1800) |
| Guyana   | 1990 | Male   | 45 to 49 | 70%<br>(51-84%)                | 30%<br>(16-49%)          | 6.4<br>(4.3-8.8)                            | 21%<br>(17-25%)                      | 25%<br>(20-30%)                     | 39<br>(30-47)       | 1600<br>(1300-2000) |
| Guyana   | 1990 | Male   | 50 to 54 | 68%<br>(50-83%)                | 32%<br>(17-50%)          | 5.7<br>(3.8-8.1)                            | 19%<br>(15-24%)                      | 23%<br>(18-28%)                     | 37<br>(29-47)       | 1400<br>(1100-1700) |
| Guyana   | 1990 | Male   | 55 to 59 | 66%<br>(49-81%)                | 34%<br>(19-51%)          | 5<br>(3-7.7)                                | 18%<br>(13-23%)                      | 21%<br>(15-27%)                     | 41<br>(30-52)       | 1300<br>(960-1700)  |
| Guyana   | 1990 | Male   | 60 to 64 | 65%<br>(45-82%)                | 35%<br>(18-55%)          | 4.5<br>(2.6-7.3)                            | 16%<br>(11-21%)                      | 18%<br>(12-24%)                     | 46<br>(31-62)       | 1300<br>(840-1700)  |
| Guyana   | 1990 | Male   | 65 to 69 | 63%<br>(44-79%)                | 37%<br>(21-56%)          | 4.1<br>(2.4-6.3)                            | 15%<br>(11-20%)                      | 17%<br>(12-23%)                     | 44<br>(30-60)       | 1000<br>(700-1400)  |
| Guyana   | 1990 | Male   | 70 to 74 | 60%<br>(42-76%)                | 40%<br>(24-58%)          | 3.4<br>(2-5.5)                              | 12%<br>(7.7-17%)                     | 14%<br>(8.7-20%)                    | 36<br>(23-51)       | 660<br>(420-930)    |
| Guyana   | 1990 | Male   | 75 to 79 | 55%<br>(35-74%)                | 45%<br>(26-65%)          | 2.9<br>(1.5-4.8)                            | 10%<br>(5.7-15%)                     | 11%<br>(6.2-17%)                    | 22<br>(12-33)       | 310<br>(170-460)    |
| Guyana   | 1990 | Male   | 80 to 84 | 49%<br>(31-67%)                | 51%<br>(33-69%)          | 2.4<br>(1.4-4)                              | 8%<br>(4.6-12%)                      | 9.3%<br>(5.3-14%)                   | 15<br>(8.2-23)      | 160<br>(90-240)     |
| Guyana   | 1990 | Male   | 85 to 89 | 45%<br>(28-62%)                | 55%<br>(38-72%)          | 2.1<br>(1.2-3.6)                            | 6.7%<br>(3.7-10%)                    | 7.7%<br>(4.2-12%)                   | 9.9<br>(5.4-16)     | 76<br>(42-120)      |
| Guyana   | 1990 | Male   | 90 to 94 | 45%<br>(29-63%)                | 55%<br>(37-71%)          | 2.1<br>(1.1-3.6)                            | 6%<br>(2.9-9.9%)                     | 6.9%<br>(3.2-11%)                   | 3<br>(1.4-5)        | 16<br>(7.4-26)      |
| Guyana   | 1990 | Male   | 95 plus  | 48%<br>(28-68%)                | 52%<br>(32-72%)          | 2.2<br>(0.98-3.9)                           | 6.2%<br>(2.4-11%)                    | 7%<br>(2.4-13%)                     | 0.71<br>(0.24-1.3)  | 2.5<br>(0.95-4.4)   |
| Guyana   | 1995 | Female | All Ages | 29%<br>(23-36%)                | 71%<br>(64-77%)          | 0.53<br>(0.41-0.66)                         | 1.3%<br>(0.93-1.8%)                  | 1.4%<br>(0.67-2.3%)                 | 37<br>(17-60)       | 1800<br>(1200-2500) |
| Guyana   | 1995 | Female | 15 to 19 | 35%<br>(23-51%)                | 65%<br>(49-77%)          | 0.62<br>(0.37-0.96)                         | 1.7%<br>(1.1-2.6%)                   | 2.8%<br>(1.5-4.8%)                  | 1.1<br>(0.59-1.9)   | 110<br>(70-170)     |
| Guyana   | 1995 | Female | 20 to 24 | 41%<br>(26-58%)                | 59%<br>(42-74%)          | 0.94<br>(0.57-1.4)                          | 2.9%<br>(2-3.9%)                     | 3.6%<br>(2.2-5.6%)                  | 2.3<br>(1.4-3.6)    | 230<br>(160-320)    |
| Guyana   | 1995 | Female | 25 to 29 | 41%<br>(25-58%)                | 59%<br>(42-75%)          | 1<br>(0.63-1.5)                             | 3.1%<br>(2.2-4.2%)                   | 3.8%<br>(2.4-5.4%)                  | 2.8<br>(1.8-4.2)    | 240<br>(170-330)    |
| Guyana   | 1995 | Female | 30 to 34 | 39%<br>(24-56%)                | 61%<br>(44-76%)          | 1<br>(0.58-1.5)                             | 3%<br>(2.2-4%)                       | 4%<br>(2.7-5.4%)                    | 2.8<br>(1.9-4)      | 210<br>(150-280)    |

| Location | Year | Sex    | Age      | Prevalence of current drinkers | Prevalence of abstainers | Population average of standard drinks daily | Percent of total attributable deaths | Percent of total attributable DALYs | Attributable deaths   | Attributable DALYs     |
|----------|------|--------|----------|--------------------------------|--------------------------|---------------------------------------------|--------------------------------------|-------------------------------------|-----------------------|------------------------|
| Guyana   | 1995 | Female | 35 to 39 | 38%<br>(24-55%)                | 62%<br>(45-76%)          | 0.97<br>(0.57-1.5)                          | 3.2%<br>(2.3-4.3%)                   | 4.5%<br>(3.2-6.2%)                  | 3.3<br>(2.3-4.5)      | 200<br>(150-270)       |
| Guyana   | 1995 | Female | 40 to 44 | 37%<br>(23-55%)                | 63%<br>(45-77%)          | 0.92<br>(0.53-1.4)                          | 3%<br>(2.1-4.3%)                     | 4.4%<br>(3-6.3%)                    | 3.4<br>(2.2-4.8)      | 180<br>(120-250)       |
| Guyana   | 1995 | Female | 45 to 49 | 35%<br>(21-52%)                | 65%<br>(48-79%)          | 0.85<br>(0.46-1.3)                          | 2.7%<br>(1.5-4.1%)                   | 3.7%<br>(2.1-5.8%)                  | 3.3<br>(1.9-5.2)      | 150<br>(86-230)        |
| Guyana   | 1995 | Female | 50 to 54 | 32%<br>(19-48%)                | 68%<br>(52-81%)          | 0.76<br>(0.42-1.2)                          | 2.5%<br>(1.1-4.3%)                   | 3.3%<br>(1.5-5.7%)                  | 3.5<br>(1.6-6.1)      | 130<br>(62-230)        |
| Guyana   | 1995 | Female | 55 to 59 | 28%<br>(16-43%)                | 72%<br>(57-84%)          | 0.68<br>(0.36-1.2)                          | 2.2%<br>(0.76-4.2%)                  | 2.9%<br>(1-5.4%)                    | 4<br>(1.4-7.5)        | 130<br>(45-240)        |
| Guyana   | 1995 | Female | 60 to 64 | 25%<br>(14-40%)                | 75%<br>(60-86%)          | 0.59<br>(0.31-1.1)                          | 1.5%<br>(0.098-3.3%)                 | 1.9%<br>(0.13-4.1%)                 | 2.7<br>(0.19-6.2)     | 76<br>(5.2-170)        |
| Guyana   | 1995 | Female | 65 to 69 | 22%<br>(14-35%)                | 78%<br>(65-86%)          | 0.51<br>(0.28-0.84)                         | 0.96%<br>(-0.15-2.4%)                | 1.2%<br>(-0.17-2.9%)                | 2.4<br>(-0.36-5.8)    | 55<br>(-8.3-130)       |
| Guyana   | 1995 | Female | 70 to 74 | 20%<br>(12-32%)                | 80%<br>(68-88%)          | 0.42<br>(0.23-0.75)                         | 0.62%<br>(-0.42-1.9%)                | 0.77%<br>(-0.46-2.3%)               | 2<br>(-1.2-6)         | 35<br>(-25-110)        |
| Guyana   | 1995 | Female | 75 to 79 | 18%<br>(10-29%)                | 82%<br>(71-90%)          | 0.36<br>(0.18-0.64)                         | 0.39%<br>(-0.57-1.3%)                | 0.47%<br>(-0.66-1.6%)               | 1.8<br>(-2.6-6.3)     | 25<br>(-38-89)         |
| Guyana   | 1995 | Female | 80 to 84 | 16%<br>(9.1-26%)               | 84%<br>(74-91%)          | 0.34<br>(0.18-0.56)                         | 0.42%<br>(-0.3-1.2%)                 | 0.5%<br>(-0.37-1.4%)                | 0.83<br>(-0.6-2.4)    | 8.9<br>(-6.3-25)       |
| Guyana   | 1995 | Female | 85 to 89 | 16%<br>(9.3-25%)               | 84%<br>(75-91%)          | 0.34<br>(0.17-0.59)                         | 0.39%<br>(-0.24-1.2%)                | 0.43%<br>(-0.33-1.4%)               | 0.43<br>(-0.33-1.4)   | 3.5<br>(-2.1-11)       |
| Guyana   | 1995 | Female | 90 to 94 | 18%<br>(11-28%)                | 82%<br>(72-89%)          | 0.38<br>(0.19-0.68)                         | 0.39%<br>(-0.34-1.4%)                | 0.38%<br>(-0.49-1.5%)               | 0.33<br>(-0.42-1.3)   | 2<br>(-1.8-7)          |
| Guyana   | 1995 | Female | 95 plus  | 21%<br>(11-35%)                | 79%<br>(65-89%)          | 0.45<br>(0.19-0.86)                         | 0.41%<br>(-0.58-1.8%)                | 0.35%<br>(-0.82-2%)                 | 0.056<br>(-0.13-0.31) | 0.25<br>(-0.36-1.1)    |
| Guyana   | 1995 | Male   | All Ages | 55%<br>(47-64%)                | 45%<br>(36-53%)          | 4.3<br>(3.7-5)                              | 11%<br>(9.6-13%)                     | 15%<br>(13-18%)                     | 510<br>(420-610)      | 20000<br>(17000-23000) |
| Guyana   | 1995 | Male   | 15 to 19 | 59%<br>(41-74%)                | 41%<br>(26-59%)          | 4.1<br>(2.8-5.5)                            | 12%<br>(8.3-15%)                     | 17%<br>(12-23%)                     | 10<br>(7.1-14)        | 810<br>(590-1100)      |
| Guyana   | 1995 | Male   | 20 to 24 | 69%<br>(51-82%)                | 31%<br>(18-49%)          | 7.8<br>(5.8-10)                             | 21%<br>(16-26%)                      | 26%<br>(19-33%)                     | 27<br>(19-34)         | 1900<br>(1400-2400)    |
| Guyana   | 1995 | Male   | 25 to 29 | 72%<br>(55-84%)                | 28%<br>(16-45%)          | 8.6<br>(6.6-11)                             | 21%<br>(16-25%)                      | 25%<br>(19-31%)                     | 35<br>(26-43)         | 2300<br>(1700-2800)    |
| Guyana   | 1995 | Male   | 30 to 34 | 72%<br>(55-85%)                | 28%<br>(15-45%)          | 8.7<br>(6.3-11)                             | 19%<br>(16-23%)                      | 24%<br>(19-29%)                     | 33<br>(26-40)         | 2000<br>(1600-2400)    |
| Guyana   | 1995 | Male   | 35 to 39 | 72%<br>(56-85%)                | 28%<br>(15-44%)          | 8<br>(5.8-11)                               | 19%<br>(15-23%)                      | 24%<br>(19-28%)                     | 32<br>(25-39)         | 1800<br>(1400-2100)    |
| Guyana   | 1995 | Male   | 40 to 44 | 71%<br>(56-84%)                | 29%<br>(16-44%)          | 7.6<br>(5.4-10)                             | 20%<br>(16-24%)                      | 24%<br>(20-29%)                     | 40<br>(33-49)         | 2000<br>(1600-2400)    |
| Guyana   | 1995 | Male   | 45 to 49 | 70%<br>(50-83%)                | 30%<br>(17-50%)          | 7.1<br>(4.8-9.7)                            | 20%<br>(16-24%)                      | 24%<br>(20-29%)                     | 43<br>(34-53)         | 1900<br>(1500-2300)    |
| Guyana   | 1995 | Male   | 50 to 54 | 68%<br>(50-83%)                | 32%<br>(17-50%)          | 6.5<br>(4.4-9.1)                            | 19%<br>(15-24%)                      | 23%<br>(18-28%)                     | 43<br>(33-53)         | 1600<br>(1300-2000)    |

| Location | Year | Sex    | Age      | Prevalence of current drinkers | Prevalence of abstainers | Population average of standard drinks daily | Percent of total attributable deaths | Percent of total attributable DALYs | Attributable deaths | Attributable DALYs  |
|----------|------|--------|----------|--------------------------------|--------------------------|---------------------------------------------|--------------------------------------|-------------------------------------|---------------------|---------------------|
| Guyana   | 1995 | Male   | 55 to 59 | 66%<br>(49-82%)                | 34%<br>(18-51%)          | 5.8<br>(3.5-9)                              | 19%<br>(14-23%)                      | 22%<br>(16-27%)                     | 44<br>(33-56)       | 1400<br>(1100-1800) |
| Guyana   | 1995 | Male   | 60 to 64 | 65%<br>(46-81%)                | 35%<br>(19-54%)          | 5.2<br>(3-8.6)                              | 16%<br>(12-21%)                      | 19%<br>(14-24%)                     | 46<br>(33-60)       | 1300<br>(890-1700)  |
| Guyana   | 1995 | Male   | 65 to 69 | 63%<br>(45-79%)                | 37%<br>(21-55%)          | 4.6<br>(2.7-7)                              | 16%<br>(11-20%)                      | 18%<br>(13-23%)                     | 45<br>(32-60)       | 1000<br>(740-1400)  |
| Guyana   | 1995 | Male   | 70 to 74 | 60%<br>(41-75%)                | 40%<br>(25-59%)          | 3.9<br>(2.2-6.2)                            | 13%<br>(8.9-18%)                     | 15%<br>(10-21%)                     | 39<br>(27-54)       | 720<br>(490-1000)   |
| Guyana   | 1995 | Male   | 75 to 79 | 55%<br>(35-73%)                | 45%<br>(27-65%)          | 3.2<br>(1.8-5.3)                            | 9.9%<br>(6.1-14%)                    | 12%<br>(7.3-17%)                    | 28<br>(17-41)       | 410<br>(250-590)    |
| Guyana   | 1995 | Male   | 80 to 84 | 49%<br>(30-67%)                | 51%<br>(33-70%)          | 2.7<br>(1.5-4.4)                            | 9.3%<br>(5.7-14%)                    | 10%<br>(6.3-15%)                    | 22<br>(13-32)       | 230<br>(140-340)    |
| Guyana   | 1995 | Male   | 85 to 89 | 44%<br>(27-62%)                | 56%<br>(38-73%)          | 2.4<br>(1.3-3.9)                            | 7.8%<br>(4.4-12%)                    | 8.8%<br>(5-13%)                     | 9.7<br>(5.4-15)     | 73<br>(41-110)      |
| Guyana   | 1995 | Male   | 90 to 94 | 45%<br>(29-62%)                | 55%<br>(38-71%)          | 2.4<br>(1.3-4)                              | 7%<br>(3.5-11%)                      | 7.9%<br>(3.8-13%)                   | 5.6<br>(2.7-9)      | 29<br>(14-47)       |
| Guyana   | 1995 | Male   | 95 plus  | 48%<br>(28-68%)                | 52%<br>(32-72%)          | 2.5<br>(1.1-4.5)                            | 7.2%<br>(2.9-12%)                    | 8%<br>(3-14%)                       | 0.92<br>(0.35-1.6)  | 3.2<br>(1.3-5.5)    |
| Guyana   | 2000 | Female | All Ages | 28%<br>(23-35%)                | 72%<br>(65-77%)          | 0.45<br>(0.36-0.57)                         | 1.2%<br>(0.77-1.6%)                  | 1.1%<br>(0.5-1.9%)                  | 26<br>(11-42)       | 1500<br>(980-2000)  |
| Guyana   | 2000 | Female | 15 to 19 | 35%<br>(22-51%)                | 65%<br>(49-78%)          | 0.52<br>(0.31-0.82)                         | 1.5%<br>(0.92-2.3%)                  | 2.5%<br>(1.3-4.4%)                  | 0.71<br>(0.35-1.2)  | 76<br>(46-120)      |
| Guyana   | 2000 | Female | 20 to 24 | 41%<br>(26-57%)                | 59%<br>(43-74%)          | 0.79<br>(0.48-1.2)                          | 2.7%<br>(1.8-3.9%)                   | 3.3%<br>(1.9-5.3%)                  | 2.1<br>(1.2-3.4)    | 200<br>(140-300)    |
| Guyana   | 2000 | Female | 25 to 29 | 40%<br>(24-57%)                | 60%<br>(43-76%)          | 0.84<br>(0.52-1.3)                          | 2.8%<br>(2-3.8%)                     | 3.3%<br>(2-4.8%)                    | 2.8<br>(1.8-4.2)    | 240<br>(170-330)    |
| Guyana   | 2000 | Female | 30 to 34 | 39%<br>(23-56%)                | 61%<br>(44-77%)          | 0.84<br>(0.49-1.3)                          | 2.7%<br>(2-3.6%)                     | 3.5%<br>(2.5-4.9%)                  | 3.1<br>(2.1-4.3)    | 220<br>(160-300)    |
| Guyana   | 2000 | Female | 35 to 39 | 38%<br>(24-55%)                | 62%<br>(45-76%)          | 0.8<br>(0.47-1.2)                           | 2.8%<br>(2.1-3.7%)                   | 3.9%<br>(2.8-5.3%)                  | 3.6<br>(2.6-5)      | 220<br>(160-300)    |
| Guyana   | 2000 | Female | 40 to 44 | 36%<br>(23-55%)                | 64%<br>(45-77%)          | 0.76<br>(0.45-1.2)                          | 2.3%<br>(1.5-3.3%)                   | 3.4%<br>(2.2-4.8%)                  | 3.2<br>(2.1-4.6)    | 170<br>(120-240)    |
| Guyana   | 2000 | Female | 45 to 49 | 35%<br>(20-52%)                | 65%<br>(48-80%)          | 0.71<br>(0.38-1.1)                          | 1.8%<br>(0.88-3.1%)                  | 2.5%<br>(1.2-4.2%)                  | 2.8<br>(1.3-4.6)    | 130<br>(60-210)     |
| Guyana   | 2000 | Female | 50 to 54 | 31%<br>(19-48%)                | 69%<br>(52-81%)          | 0.65<br>(0.35-1.1)                          | 1.4%<br>(0.26-2.8%)                  | 1.8%<br>(0.33-3.7%)                 | 2.3<br>(0.42-4.7)   | 89<br>(17-180)      |
| Guyana   | 2000 | Female | 55 to 59 | 27%<br>(16-43%)                | 73%<br>(57-84%)          | 0.58<br>(0.32-0.98)                         | 1.2%<br>(-0.12-2.7%)                 | 1.5%<br>(-0.11-3.4%)                | 1.8<br>(-0.13-4.1)  | 59<br>(-6.5-140)    |
| Guyana   | 2000 | Female | 60 to 64 | 24%<br>(14-39%)                | 76%<br>(61-86%)          | 0.51<br>(0.26-0.89)                         | 0.69%<br>(-0.52-2.1%)                | 0.89%<br>(-0.62-2.6%)               | 1.4<br>(-0.91-4.1)  | 37<br>(-28-110)     |
| Guyana   | 2000 | Female | 65 to 69 | 22%<br>(13-34%)                | 78%<br>(66-87%)          | 0.44<br>(0.24-0.72)                         | 0.31%<br>(-0.74-1.4%)                | 0.41%<br>(-0.84-1.7%)               | 0.64<br>(-1.3-2.6)  | 14<br>(-31-59)      |
| Guyana   | 2000 | Female | 70 to 74 | 20%<br>(12-31%)                | 80%<br>(69-88%)          | 0.36<br>(0.19-0.63)                         | 0.17%<br>(-0.75-1.2%)                | 0.24%<br>(-0.84-1.4%)               | 0.5<br>(-1.8-3)     | 8<br>(-36-55)       |

| Location | Year | Sex    | Age      | Prevalence of current drinkers | Prevalence of abstainers | Population average of standard drinks daily | Percent of total attributable deaths | Percent of total attributable DALYs | Attributable deaths   | Attributable DALYs     |
|----------|------|--------|----------|--------------------------------|--------------------------|---------------------------------------------|--------------------------------------|-------------------------------------|-----------------------|------------------------|
| Guyana   | 2000 | Female | 75 to 79 | 17%<br>(10-28%)                | 83%<br>(72-90%)          | 0.31<br>(0.15-0.54)                         | 0.083%<br>(-0.73-0.86%)              | 0.12%<br>(-0.85-1.1%)               | 0.23<br>(-1.6-2.1)    | 2.8<br>(-24-29)        |
| Guyana   | 2000 | Female | 80 to 84 | 16%<br>(9.2-26%)               | 84%<br>(74-91%)          | 0.29<br>(0.15-0.49)                         | 0.19%<br>(-0.46-0.83%)               | 0.24%<br>(-0.55-1.1%)               | 0.46<br>(-1.1-2)      | 4.8<br>(-12-21)        |
| Guyana   | 2000 | Female | 85 to 89 | 16%<br>(9.3-25%)               | 84%<br>(75-91%)          | 0.29<br>(0.15-0.51)                         | 0.21%<br>(-0.35-0.79%)               | 0.23%<br>(-0.46-0.98%)              | 0.17<br>(-0.33-0.73)  | 1.4<br>(-2.3-5.5)      |
| Guyana   | 2000 | Female | 90 to 94 | 17%<br>(10-27%)                | 83%<br>(73-90%)          | 0.32<br>(0.16-0.57)                         | 0.18%<br>(-0.44-0.98%)               | 0.15%<br>(-0.6-1.1%)                | 0.061<br>(-0.25-0.46) | 0.44<br>(-1.1-2.4)     |
| Guyana   | 2000 | Female | 95 plus  | 20%<br>(11-34%)                | 80%<br>(66-89%)          | 0.37<br>(0.15-0.7)                          | 0.16%<br>(-0.66-1.3%)                | 0.072%<br>(-0.87-1.4%)              | 0.017<br>(-0.21-0.33) | 0.15<br>(-0.62-1.2)    |
| Guyana   | 2000 | Male   | All Ages | 56%<br>(47-64%)                | 44%<br>(36-53%)          | 3.9<br>(3.3-4.5)                            | 12%<br>(9.8-14%)                     | 15%<br>(12-17%)                     | 460<br>(380-550)      | 19000<br>(16000-22000) |
| Guyana   | 2000 | Male   | 15 to 19 | 58%<br>(41-74%)                | 42%<br>(26-59%)          | 3.5<br>(2.4-4.8)                            | 11%<br>(7.5-14%)                     | 15%<br>(11-21%)                     | 8.3<br>(5.6-11)       | 660<br>(470-870)       |
| Guyana   | 2000 | Male   | 20 to 24 | 68%<br>(51-82%)                | 32%<br>(18-49%)          | 6.8<br>(5-8.7)                              | 20%<br>(15-25%)                      | 26%<br>(19-32%)                     | 26<br>(19-33)         | 1900<br>(1400-2400)    |
| Guyana   | 2000 | Male   | 25 to 29 | 71%<br>(54-84%)                | 29%<br>(16-46%)          | 7.5<br>(5.8-9.5)                            | 21%<br>(16-25%)                      | 25%<br>(19-31%)                     | 39<br>(29-49)         | 2600<br>(2000-3200)    |
| Guyana   | 2000 | Male   | 30 to 34 | 72%<br>(54-85%)                | 28%<br>(15-46%)          | 7.5<br>(5.5-9.6)                            | 20%<br>(16-24%)                      | 24%<br>(19-28%)                     | 45<br>(35-55)         | 2700<br>(2100-3300)    |
| Guyana   | 2000 | Male   | 35 to 39 | 72%<br>(56-84%)                | 28%<br>(16-44%)          | 7<br>(5-9.2)                                | 19%<br>(15-22%)                      | 23%<br>(18-28%)                     | 37<br>(29-46)         | 2000<br>(1600-2500)    |
| Guyana   | 2000 | Male   | 40 to 44 | 71%<br>(55-84%)                | 29%<br>(16-45%)          | 6.6<br>(4.8-8.9)                            | 19%<br>(15-22%)                      | 23%<br>(19-28%)                     | 39<br>(31-48)         | 1900<br>(1600-2400)    |
| Guyana   | 2000 | Male   | 45 to 49 | 69%<br>(50-83%)                | 31%<br>(17-50%)          | 6.2<br>(4.2-8.3)                            | 18%<br>(15-22%)                      | 22%<br>(18-26%)                     | 35<br>(27-43)         | 1500<br>(1200-1900)    |
| Guyana   | 2000 | Male   | 50 to 54 | 68%<br>(50-83%)                | 32%<br>(17-50%)          | 5.6<br>(3.7-7.8)                            | 18%<br>(14-22%)                      | 21%<br>(16-26%)                     | 41<br>(31-52)         | 1600<br>(1200-2000)    |
| Guyana   | 2000 | Male   | 55 to 59 | 66%<br>(48-81%)                | 34%<br>(19-52%)          | 4.9<br>(2.8-7.7)                            | 16%<br>(12-21%)                      | 19%<br>(13-25%)                     | 36<br>(25-47)         | 1200<br>(810-1500)     |
| Guyana   | 2000 | Male   | 60 to 64 | 64%<br>(44-81%)                | 36%<br>(19-56%)          | 4.3<br>(2.5-7)                              | 14%<br>(9.7-19%)                     | 17%<br>(11-22%)                     | 38<br>(25-51)         | 1000<br>(700-1400)     |
| Guyana   | 2000 | Male   | 65 to 69 | 63%<br>(44-79%)                | 37%<br>(21-56%)          | 3.9<br>(2.3-6)                              | 14%<br>(9.3-18%)                     | 16%<br>(11-21%)                     | 35<br>(24-48)         | 810<br>(550-1100)      |
| Guyana   | 2000 | Male   | 70 to 74 | 59%<br>(41-75%)                | 41%<br>(25-59%)          | 3.3<br>(1.8-5.2)                            | 11%<br>(6.6-16%)                     | 13%<br>(7.6-19%)                    | 35<br>(20-51)         | 640<br>(380-940)       |
| Guyana   | 2000 | Male   | 75 to 79 | 54%<br>(35-73%)                | 46%<br>(27-65%)          | 2.7<br>(1.5-4.5)                            | 8.8%<br>(4.9-13%)                    | 10%<br>(5.6-15%)                    | 21<br>(12-32)         | 310<br>(170-460)       |
| Guyana   | 2000 | Male   | 80 to 84 | 48%<br>(30-66%)                | 52%<br>(34-70%)          | 2.3<br>(1.3-3.7)                            | 7.5%<br>(4.2-11%)                    | 8.7%<br>(4.8-13%)                   | 16<br>(9.1-25)        | 170<br>(97-260)        |
| Guyana   | 2000 | Male   | 85 to 89 | 44%<br>(27-61%)                | 56%<br>(39-73%)          | 2<br>(1.1-3.3)                              | 6.2%<br>(3.4-9.5%)                   | 7.1%<br>(3.8-11%)                   | 3.8<br>(2.1-5.9)      | 30<br>(16-46)          |
| Guyana   | 2000 | Male   | 90 to 94 | 44%<br>(28-61%)                | 56%<br>(39-72%)          | 2<br>(1-3.4)                                | 5.8%<br>(2.8-9.7%)                   | 6.5%<br>(3-11%)                     | 2.4<br>(1.1-4)        | 13<br>(5.9-21)         |

| Location | Year | Sex    | Age      | Prevalence of current drinkers | Prevalence of abstainers | Population average of standard drinks daily | Percent of total attributable deaths | Percent of total attributable DALYs | Attributable deaths    | Attributable DALYs     |
|----------|------|--------|----------|--------------------------------|--------------------------|---------------------------------------------|--------------------------------------|-------------------------------------|------------------------|------------------------|
| Guyana   | 2000 | Male   | 95 plus  | 47%<br>(28-68%)                | 53%<br>(32-72%)          | 2.1<br>(0.94-3.9)                           | 6.1%<br>(2.2-11%)                    | 6.7%<br>(2.2-12%)                   | 1<br>(0.33-1.8)        | 3.5<br>(1.3-6.2)       |
| Guyana   | 2005 | Female | All Ages | 23%<br>(19-29%)                | 77%<br>(71-81%)          | 0.3<br>(0.25-0.37)                          | 0.93%<br>(0.61-1.3%)                 | 0.81%<br>(0.25-1.4%)                | 20<br>(6.3-35)         | 1200<br>(770-1600)     |
| Guyana   | 2005 | Female | 15 to 19 | 27%<br>(18-41%)                | 73%<br>(59-82%)          | 0.33<br>(0.2-0.52)                          | 1.2%<br>(0.71-2%)                    | 1.7%<br>(0.67-3.3%)                 | 0.57<br>(0.22-1.1)     | 62<br>(36-99)          |
| Guyana   | 2005 | Female | 20 to 24 | 32%<br>(21-46%)                | 68%<br>(54-79%)          | 0.48<br>(0.31-0.72)                         | 2%<br>(1.3-2.9%)                     | 2.2%<br>(1.2-3.5%)                  | 1.3<br>(0.66-2.1)      | 130<br>(85-190)        |
| Guyana   | 2005 | Female | 25 to 29 | 33%<br>(23-49%)                | 67%<br>(51-77%)          | 0.55<br>(0.36-0.8)                          | 2%<br>(1.4-2.6%)                     | 2%<br>(1.3-3%)                      | 1.6<br>(1-2.4)         | 150<br>(110-210)       |
| Guyana   | 2005 | Female | 30 to 34 | 32%<br>(21-47%)                | 68%<br>(53-79%)          | 0.55<br>(0.35-0.81)                         | 2%<br>(1.5-2.6%)                     | 2.3%<br>(1.6-3.1%)                  | 2<br>(1.4-2.9)         | 160<br>(120-220)       |
| Guyana   | 2005 | Female | 35 to 39 | 31%<br>(22-46%)                | 69%<br>(54-78%)          | 0.53<br>(0.35-0.78)                         | 2.1%<br>(1.6-2.7%)                   | 2.7%<br>(2-3.6%)                    | 2.7<br>(1.9-3.7)       | 170<br>(130-230)       |
| Guyana   | 2005 | Female | 40 to 44 | 32%<br>(22-47%)                | 68%<br>(53-78%)          | 0.54<br>(0.36-0.8)                          | 2%<br>(1.4-2.7%)                     | 2.8%<br>(2-3.8%)                    | 3.2<br>(2.2-4.4)       | 170<br>(120-230)       |
| Guyana   | 2005 | Female | 45 to 49 | 31%<br>(20-45%)                | 69%<br>(55-80%)          | 0.51<br>(0.32-0.77)                         | 1.6%<br>(0.93-2.5%)                  | 2.2%<br>(1.3-3.4%)                  | 3.2<br>(1.8-4.8)       | 140<br>(85-220)        |
| Guyana   | 2005 | Female | 50 to 54 | 29%<br>(17-44%)                | 71%<br>(56-83%)          | 0.48<br>(0.27-0.76)                         | 1.3%<br>(0.39-2.3%)                  | 1.8%<br>(0.66-3.1%)                 | 2.7<br>(0.99-4.7)      | 100<br>(29-180)        |
| Guyana   | 2005 | Female | 55 to 59 | 27%<br>(15-42%)                | 73%<br>(58-85%)          | 0.46<br>(0.25-0.78)                         | 0.98%<br>(-0.1-2%)                   | 1.3%<br>(-0.0035-2.6%)              | 2.3<br>(-0.0061-4.6)   | 72<br>(-7.5-150)       |
| Guyana   | 2005 | Female | 60 to 64 | 24%<br>(14-38%)                | 76%<br>(62-86%)          | 0.4<br>(0.21-0.71)                          | 0.42%<br>(-0.61-1.5%)                | 0.58%<br>(-0.68-1.8%)               | 1<br>(-1.2-3.2)        | 26<br>(-36-87)         |
| Guyana   | 2005 | Female | 65 to 69 | 21%<br>(13-34%)                | 79%<br>(66-87%)          | 0.35<br>(0.19-0.57)                         | 0.043%<br>(-0.84-0.81%)              | 0.11%<br>(-0.92-1.1%)               | 0.23<br>(-1.9-2.2)     | 2.6<br>(-48-50)        |
| Guyana   | 2005 | Female | 70 to 74 | 19%<br>(12-31%)                | 81%<br>(69-88%)          | 0.29<br>(0.15-0.51)                         | -0.047%<br>(-0.91-0.75%)             | -0.017%<br>(-1-0.89%)               | -0.032<br>(-1.9-1.8)   | -1.9<br>(-38-31)       |
| Guyana   | 2005 | Female | 75 to 79 | 17%<br>(9.8-28%)               | 83%<br>(72-90%)          | 0.25<br>(0.12-0.43)                         | -0.11%<br>(-0.91-0.53%)              | -0.11%<br>(-1.1-0.64%)              | -0.27<br>(-2.5-1.6)    | -4.5<br>(-37-22)       |
| Guyana   | 2005 | Female | 80 to 84 | 15%<br>(8.7-25%)               | 85%<br>(75-91%)          | 0.23<br>(0.12-0.38)                         | -0.048%<br>(-0.73-0.46%)             | -0.055%<br>(-0.84-0.56%)            | -0.11<br>(-1.7-1.1)    | -1.2<br>(-18-12)       |
| Guyana   | 2005 | Female | 85 to 89 | 15%<br>(9-24%)                 | 85%<br>(76-91%)          | 0.23<br>(0.12-0.38)                         | 0.032%<br>(-0.46-0.53%)              | 0.014%<br>(-0.62-0.65%)             | 0.021<br>(-0.92-0.99)  | 0.46<br>(-6.6-7.6)     |
| Guyana   | 2005 | Female | 90 to 94 | 17%<br>(9.9-27%)               | 83%<br>(73-90%)          | 0.25<br>(0.13-0.45)                         | -0.042%<br>(-0.63-0.58%)             | -0.1%<br>(-0.78-0.61%)              | -0.071<br>(-0.54-0.42) | -0.17<br>(-2.6-2.3)    |
| Guyana   | 2005 | Female | 95 plus  | 20%<br>(10-33%)                | 80%<br>(67-90%)          | 0.3<br>(0.13-0.56)                          | -0.065%<br>(-0.79-0.72%)             | -0.18%<br>(-1-0.77%)                | -0.028<br>(-0.17-0.12) | -0.04<br>(-0.49-0.45)  |
| Guyana   | 2005 | Male   | All Ages | 57%<br>(49-65%)                | 43%<br>(35-51%)          | 3.2<br>(2.9-3.6)                            | 12%<br>(10-14%)                      | 14%<br>(12-16%)                     | 480<br>(390-570)       | 20000<br>(16000-23000) |
| Guyana   | 2005 | Male   | 15 to 19 | 57%<br>(42-72%)                | 43%<br>(28-58%)          | 2.8<br>(2-3.7)                              | 9.9%<br>(7-13%)                      | 13%<br>(9.2-18%)                    | 8.2<br>(5.6-11)        | 640<br>(450-850)       |
| Guyana   | 2005 | Male   | 20 to 24 | 71%<br>(56-83%)                | 29%<br>(17-44%)          | 5.9<br>(4.6-7.2)                            | 21%<br>(16-26%)                      | 25%<br>(19-32%)                     | 23<br>(17-30)          | 1600<br>(1200-2100)    |

| Location | Year | Sex    | Age      | Prevalence of current drinkers | Prevalence of abstainers | Population average of standard drinks daily | Percent of total attributable deaths | Percent of total attributable DALYs | Attributable deaths | Attributable DALYs  |
|----------|------|--------|----------|--------------------------------|--------------------------|---------------------------------------------|--------------------------------------|-------------------------------------|---------------------|---------------------|
| Guyana   | 2005 | Male   | 25 to 29 | 74%<br>(61-85%)                | 26%<br>(15-39%)          | 6.6<br>(5.4-7.9)                            | 21%<br>(16-26%)                      | 25%<br>(19-31%)                     | 32<br>(24-40)       | 2100<br>(1600-2600) |
| Guyana   | 2005 | Male   | 30 to 34 | 74%<br>(61-85%)                | 26%<br>(15-39%)          | 6.5<br>(5.1-7.9)                            | 19%<br>(15-22%)                      | 22%<br>(18-27%)                     | 36<br>(28-44)       | 2200<br>(1700-2600) |
| Guyana   | 2005 | Male   | 35 to 39 | 74%<br>(61-85%)                | 26%<br>(15-39%)          | 6<br>(4.8-7.3)                              | 17%<br>(14-20%)                      | 21%<br>(17-25%)                     | 40<br>(32-49)       | 2200<br>(1800-2700) |
| Guyana   | 2005 | Male   | 40 to 44 | 73%<br>(61-84%)                | 27%<br>(16-39%)          | 5.8<br>(4.6-7.2)                            | 18%<br>(15-21%)                      | 22%<br>(19-25%)                     | 47<br>(38-57)       | 2300<br>(1900-2800) |
| Guyana   | 2005 | Male   | 45 to 49 | 73%<br>(57-84%)                | 27%<br>(16-43%)          | 5.5<br>(4.2-6.9)                            | 18%<br>(15-21%)                      | 22%<br>(19-26%)                     | 53<br>(43-64)       | 2300<br>(1900-2800) |
| Guyana   | 2005 | Male   | 50 to 54 | 69%<br>(52-82%)                | 31%<br>(18-48%)          | 4.6<br>(3.2-6.1)                            | 17%<br>(13-21%)                      | 20%<br>(16-24%)                     | 53<br>(42-66)       | 2000<br>(1600-2500) |
| Guyana   | 2005 | Male   | 55 to 59 | 65%<br>(47-81%)                | 35%<br>(19-53%)          | 3.9<br>(2.3-6)                              | 15%<br>(10-20%)                      | 17%<br>(12-23%)                     | 46<br>(31-61)       | 1500<br>(1000-2000) |
| Guyana   | 2005 | Male   | 60 to 64 | 64%<br>(44-80%)                | 36%<br>(20-56%)          | 3.5<br>(2-5.5)                              | 13%<br>(8.1-18%)                     | 15%<br>(9.2-21%)                    | 35<br>(22-49)       | 970<br>(600-1300)   |
| Guyana   | 2005 | Male   | 65 to 69 | 62%<br>(43-78%)                | 38%<br>(22-57%)          | 3.1<br>(1.9-4.7)                            | 12%<br>(7.4-16%)                     | 14%<br>(8.5-19%)                    | 37<br>(23-52)       | 860<br>(540-1200)   |
| Guyana   | 2005 | Male   | 70 to 74 | 59%<br>(40-74%)                | 41%<br>(26-60%)          | 2.6<br>(1.5-4.2)                            | 9.4%<br>(5.1-14%)                    | 10%<br>(5.6-16%)                    | 24<br>(13-37)       | 450<br>(240-680)    |
| Guyana   | 2005 | Male   | 75 to 79 | 54%<br>(34-72%)                | 46%<br>(28-66%)          | 2.2<br>(1.2-3.6)                            | 7.3%<br>(3.4-12%)                    | 8.2%<br>(3.8-13%)                   | 21<br>(9.7-34)      | 300<br>(140-480)    |
| Guyana   | 2005 | Male   | 80 to 84 | 48%<br>(30-66%)                | 52%<br>(34-70%)          | 1.8<br>(1-2.9)                              | 5.9%<br>(3-9.6%)                     | 6.7%<br>(3.4-11%)                   | 13<br>(6.4-21)      | 140<br>(69-220)     |
| Guyana   | 2005 | Male   | 85 to 89 | 43%<br>(27-60%)                | 57%<br>(40-73%)          | 1.6<br>(0.89-2.6)                           | 4.6%<br>(2.5-7.6%)                   | 5.3%<br>(2.8-8.7%)                  | 5.6<br>(2.9-9.2)    | 44<br>(23-72)       |
| Guyana   | 2005 | Male   | 90 to 94 | 43%<br>(28-61%)                | 57%<br>(39-72%)          | 1.6<br>(0.87-2.7)                           | 4.4%<br>(1.9-7.8%)                   | 4.7%<br>(2-8.7%)                    | 1.9<br>(0.8-3.4)    | 9.9<br>(4.4-18)     |
| Guyana   | 2005 | Male   | 95 plus  | 46%<br>(27-66%)                | 54%<br>(34-73%)          | 1.7<br>(0.75-3.1)                           | 4.6%<br>(1.5-8.9%)                   | 5%<br>(1.4-9.9%)                    | 0.55<br>(0.16-1.1)  | 1.9<br>(0.61-3.7)   |
| Guyana   | 2010 | Female | All Ages | 23%<br>(19-29%)                | 77%<br>(71-81%)          | 0.27<br>(0.22-0.32)                         | 0.88%<br>(0.55-1.2%)                 | 0.71%<br>(0.2-1.3%)                 | 18<br>(5-33)        | 1100<br>(690-1600)  |
| Guyana   | 2010 | Female | 15 to 19 | 27%<br>(17-41%)                | 73%<br>(59-83%)          | 0.28<br>(0.17-0.45)                         | 1.1%<br>(0.59-1.9%)                  | 1.6%<br>(0.49-3.1%)                 | 0.69<br>(0.21-1.4)  | 77<br>(41-130)      |
| Guyana   | 2010 | Female | 20 to 24 | 31%<br>(20-45%)                | 69%<br>(55-80%)          | 0.42<br>(0.26-0.63)                         | 1.9%<br>(1.2-2.8%)                   | 2.1%<br>(1.1-3.4%)                  | 0.93<br>(0.47-1.6)  | 100<br>(64-150)     |
| Guyana   | 2010 | Female | 25 to 29 | 32%<br>(21-47%)                | 68%<br>(53-79%)          | 0.47<br>(0.31-0.7)                          | 1.9%<br>(1.4-2.6%)                   | 2%<br>(1.3-3%)                      | 1.1<br>(0.69-1.7)   | 110<br>(75-150)     |
| Guyana   | 2010 | Female | 30 to 34 | 31%<br>(20-46%)                | 69%<br>(54-80%)          | 0.47<br>(0.3-0.72)                          | 2%<br>(1.5-2.7%)                     | 2.4%<br>(1.6-3.3%)                  | 1.9<br>(1.3-2.7)    | 150<br>(110-200)    |
| Guyana   | 2010 | Female | 35 to 39 | 31%<br>(21-46%)                | 69%<br>(54-79%)          | 0.46<br>(0.3-0.7)                           | 2.2%<br>(1.6-2.8%)                   | 2.9%<br>(2.1-3.8%)                  | 2.8<br>(2-3.8)      | 180<br>(130-230)    |
| Guyana   | 2010 | Female | 40 to 44 | 32%<br>(22-47%)                | 68%<br>(53-78%)          | 0.47<br>(0.31-0.69)                         | 1.9%<br>(1.3-2.5%)                   | 2.7%<br>(1.9-3.7%)                  | 3.2<br>(2.2-4.5)    | 170<br>(120-240)    |

| Location | Year | Sex    | Age      | Prevalence of current drinkers | Prevalence of abstainers | Population average of standard drinks daily | Percent of total attributable deaths | Percent of total attributable DALYs | Attributable deaths   | Attributable DALYs     |
|----------|------|--------|----------|--------------------------------|--------------------------|---------------------------------------------|--------------------------------------|-------------------------------------|-----------------------|------------------------|
| Guyana   | 2010 | Female | 45 to 49 | 30%<br>(20-44%)                | 70%<br>(56-80%)          | 0.44<br>(0.27-0.67)                         | 1.5%<br>(0.79-2.2%)                  | 2.1%<br>(1.2-3.2%)                  | 3.2<br>(1.7-4.8)      | 140<br>(78-220)        |
| Guyana   | 2010 | Female | 50 to 54 | 29%<br>(17-44%)                | 71%<br>(56-83%)          | 0.42<br>(0.24-0.66)                         | 1.2%<br>(0.32-2%)                    | 1.7%<br>(0.6-2.9%)                  | 3.1<br>(1.1-5.4)      | 120<br>(32-200)        |
| Guyana   | 2010 | Female | 55 to 59 | 26%<br>(16-42%)                | 74%<br>(58-84%)          | 0.4<br>(0.22-0.66)                          | 0.82%<br>(-0.14-1.7%)                | 1.1%<br>(-0.032-2.2%)               | 2.3<br>(-0.064-4.6)   | 72<br>(-14-150)        |
| Guyana   | 2010 | Female | 60 to 64 | 23%<br>(13-37%)                | 77%<br>(63-87%)          | 0.35<br>(0.18-0.61)                         | 0.32%<br>(-0.62-1.2%)                | 0.46%<br>(-0.65-1.5%)               | 0.97<br>(-1.4-3.3)    | 24<br>(-47-87)         |
| Guyana   | 2010 | Female | 65 to 69 | 21%<br>(12-33%)                | 79%<br>(67-88%)          | 0.3<br>(0.16-0.5)                           | -0.054%<br>(-0.9-0.65%)              | -0.02%<br>(-1-0.83%)                | -0.042<br>(-2.3-1.9)  | -3.3<br>(-55-41)       |
| Guyana   | 2010 | Female | 70 to 74 | 19%<br>(12-31%)                | 81%<br>(69-88%)          | 0.25<br>(0.13-0.44)                         | -0.14%<br>(-0.91-0.55%)              | -0.14%<br>(-1-0.65%)                | -0.34<br>(-2.6-1.6)   | -7.7<br>(-50-29)       |
| Guyana   | 2010 | Female | 75 to 79 | 17%<br>(9.8-27%)               | 83%<br>(73-90%)          | 0.22<br>(0.11-0.39)                         | -0.25%<br>(-1.1-0.37%)               | -0.28%<br>(-1.2-0.42%)              | -0.63<br>(-2.7-0.92)  | -8.9<br>(-38-14)       |
| Guyana   | 2010 | Female | 80 to 84 | 15%<br>(8.5-25%)               | 85%<br>(75-91%)          | 0.2<br>(0.1-0.34)                           | -0.17%<br>(-0.87-0.32%)              | -0.21%<br>(-1-0.36%)                | -0.43<br>(-2.1-0.75)  | -4.2<br>(-22-8)        |
| Guyana   | 2010 | Female | 85 to 89 | 15%<br>(8.5-24%)               | 85%<br>(76-92%)          | 0.2<br>(0.1-0.33)                           | -0.12%<br>(-0.68-0.34%)              | -0.17%<br>(-0.83-0.38%)             | -0.26<br>(-1.3-0.58)  | -1.6<br>(-8.9-4.5)     |
| Guyana   | 2010 | Female | 90 to 94 | 17%<br>(9.9-26%)               | 83%<br>(74-90%)          | 0.22<br>(0.11-0.38)                         | -0.066%<br>(-0.61-0.46%)             | -0.16%<br>(-0.8-0.48%)              | -0.15<br>(-0.77-0.46) | -0.38<br>(-3.5-2.5)    |
| Guyana   | 2010 | Female | 95 plus  | 19%<br>(10-33%)                | 81%<br>(67-90%)          | 0.26<br>(0.11-0.49)                         | -0.096%<br>(-0.77-0.55%)             | -0.26%<br>(-1.1-0.56%)              | -0.047<br>(-0.19-0.1) | -0.071<br>(-0.56-0.41) |
| Guyana   | 2010 | Male   | All Ages | 57%<br>(49-65%)                | 43%<br>(35-51%)          | 2.9<br>(2.6-3.3)                            | 12%<br>(9.8-13%)                     | 13%<br>(11-16%)                     | 460<br>(370-560)      | 19000<br>(16000-22000) |
| Guyana   | 2010 | Male   | 15 to 19 | 57%<br>(41-71%)                | 43%<br>(29-59%)          | 2.5<br>(1.8-3.3)                            | 9%<br>(6.3-12%)                      | 12%<br>(8.3-17%)                    | 9.5<br>(6.3-13)       | 750<br>(520-1000)      |
| Guyana   | 2010 | Male   | 20 to 24 | 71%<br>(56-82%)                | 29%<br>(18-44%)          | 5.3<br>(4.1-6.6)                            | 19%<br>(15-24%)                      | 24%<br>(18-31%)                     | 21<br>(16-28)         | 1500<br>(1200-1900)    |
| Guyana   | 2010 | Male   | 25 to 29 | 74%<br>(61-84%)                | 26%<br>(16-39%)          | 5.9<br>(4.6-7.2)                            | 20%<br>(16-24%)                      | 24%<br>(19-30%)                     | 25<br>(19-32)         | 1700<br>(1300-2100)    |
| Guyana   | 2010 | Male   | 30 to 34 | 74%<br>(60-85%)                | 26%<br>(15-40%)          | 5.8<br>(4.5-7.2)                            | 20%<br>(16-24%)                      | 24%<br>(19-28%)                     | 32<br>(25-39)         | 1900<br>(1500-2300)    |
| Guyana   | 2010 | Male   | 35 to 39 | 74%<br>(61-85%)                | 26%<br>(15-39%)          | 5.3<br>(4.1-6.6)                            | 19%<br>(15-22%)                      | 23%<br>(19-27%)                     | 39<br>(31-47)         | 2100<br>(1700-2500)    |
| Guyana   | 2010 | Male   | 40 to 44 | 73%<br>(60-84%)                | 27%<br>(16-40%)          | 5.2<br>(4.1-6.3)                            | 17%<br>(15-20%)                      | 22%<br>(18-25%)                     | 47<br>(38-57)         | 2300<br>(1900-2800)    |
| Guyana   | 2010 | Male   | 45 to 49 | 72%<br>(57-84%)                | 28%<br>(16-43%)          | 4.9<br>(3.7-6.1)                            | 17%<br>(14-20%)                      | 21%<br>(17-25%)                     | 56<br>(45-69)         | 2400<br>(2000-3000)    |
| Guyana   | 2010 | Male   | 50 to 54 | 68%<br>(51-82%)                | 32%<br>(18-49%)          | 4.1<br>(2.8-5.4)                            | 15%<br>(12-18%)                      | 18%<br>(14-22%)                     | 53<br>(41-66)         | 2000<br>(1600-2500)    |
| Guyana   | 2010 | Male   | 55 to 59 | 65%<br>(47-81%)                | 35%<br>(19-53%)          | 3.5<br>(2.1-5.2)                            | 13%<br>(8.9-18%)                     | 16%<br>(10-21%)                     | 48<br>(31-66)         | 1600<br>(1000-2200)    |
| Guyana   | 2010 | Male   | 60 to 64 | 63%<br>(43-80%)                | 37%<br>(20-57%)          | 3.1<br>(1.7-4.9)                            | 11%<br>(6.5-16%)                     | 13%<br>(7.6-19%)                    | 41<br>(24-59)         | 1100<br>(670-1600)     |



| Location | Year | Sex    | Age      | Prevalence of current drinkers | Prevalence of abstainers | Population average of standard drinks daily | Percent of total attributable deaths | Percent of total attributable DALYs | Attributable deaths  | Attributable DALYs |
|----------|------|--------|----------|--------------------------------|--------------------------|---------------------------------------------|--------------------------------------|-------------------------------------|----------------------|--------------------|
| Guyana   | 2010 | Male   | 65 to 69 | 61%<br>(42-78%)                | 39%<br>(22-58%)          | 2.7<br>(1.6-4.1)                            | 10%<br>(6.2-15%)                     | 12%<br>(6.8-17%)                    | 30<br>(18-44)        | 680<br>(410-1000)  |
| Guyana   | 2010 | Male   | 70 to 74 | 58%<br>(40-74%)                | 42%<br>(26-60%)          | 2.3<br>(1.3-3.6)                            | 8%<br>(4.1-13%)                      | 9%<br>(4.6-14%)                     | 28<br>(14-45)        | 520<br>(270-830)   |
| Guyana   | 2010 | Male   | 75 to 79 | 53%<br>(33-72%)                | 47%<br>(28-67%)          | 1.9<br>(1-3.2)                              | 6.4%<br>(2.8-11%)                    | 7.1%<br>(3-12%)                     | 16<br>(6.8-28)       | 230<br>(100-390)   |
| Guyana   | 2010 | Male   | 80 to 84 | 47%<br>(29-65%)                | 53%<br>(35-71%)          | 1.6<br>(0.88-2.6)                           | 5%<br>(2.5-8.3%)                     | 5.6%<br>(2.7-9.4%)                  | 10<br>(4.9-17)       | 110<br>(54-180)    |
| Guyana   | 2010 | Male   | 85 to 89 | 43%<br>(26-60%)                | 57%<br>(40-74%)          | 1.4<br>(0.77-2.3)                           | 3.9%<br>(1.9-6.6%)                   | 4.3%<br>(2.1-7.5%)                  | 4.8<br>(2.3-8.2)     | 37<br>(19-63)      |
| Guyana   | 2010 | Male   | 90 to 94 | 43%<br>(27-60%)                | 57%<br>(40-73%)          | 1.4<br>(0.74-2.3)                           | 3.2%<br>(1.5-6%)                     | 3.6%<br>(1.5-6.8%)                  | 1.8<br>(0.73-3.4)    | 9.8<br>(4.5-18)    |
| Guyana   | 2010 | Male   | 95 plus  | 45%<br>(26-66%)                | 55%<br>(34-74%)          | 1.5<br>(0.64-2.8)                           | 3.5%<br>(1.2-7%)                     | 3.8%<br>(0.99-8.1%)                 | 0.3<br>(0.079-0.64)  | 1.1<br>(0.37-2.4)  |
| Guyana   | 2016 | Female | All Ages | 28%<br>(23-35%)                | 72%<br>(65-77%)          | 0.35<br>(0.26-0.46)                         | 0.95%<br>(0.51-1.4%)                 | 0.81%<br>(0.18-1.5%)                | 20<br>(4.3-37)       | 1100<br>(590-1700) |
| Guyana   | 2016 | Female | 15 to 19 | 34%<br>(22-51%)                | 66%<br>(49-78%)          | 0.38<br>(0.22-0.61)                         | 1.3%<br>(0.68-2%)                    | 2%<br>(0.6-3.8%)                    | 0.78<br>(0.24-1.5)   | 89<br>(45-140)     |
| Guyana   | 2016 | Female | 20 to 24 | 40%<br>(25-56%)                | 60%<br>(44-75%)          | 0.57<br>(0.32-0.88)                         | 2.2%<br>(1.4-3.2%)                   | 2.6%<br>(1.2-4.4%)                  | 1.5<br>(0.7-2.5)     | 160<br>(100-240)   |
| Guyana   | 2016 | Female | 25 to 29 | 39%<br>(23-56%)                | 61%<br>(44-77%)          | 0.61<br>(0.35-0.99)                         | 2.1%<br>(1.5-3%)                     | 2.5%<br>(1.4-3.9%)                  | 1<br>(0.56-1.7)      | 100<br>(67-140)    |
| Guyana   | 2016 | Female | 30 to 34 | 37%<br>(22-54%)                | 63%<br>(46-78%)          | 0.6<br>(0.33-0.99)                          | 2.1%<br>(1.5-3%)                     | 2.7%<br>(1.8-4%)                    | 1.2<br>(0.74-1.8)    | 96<br>(66-130)     |
| Guyana   | 2016 | Female | 35 to 39 | 36%<br>(23-54%)                | 64%<br>(46-77%)          | 0.58<br>(0.31-0.94)                         | 2.2%<br>(1.6-3%)                     | 3.1%<br>(2.1-4.3%)                  | 1.9<br>(1.2-2.8)     | 130<br>(88-170)    |
| Guyana   | 2016 | Female | 40 to 44 | 35%<br>(22-53%)                | 65%<br>(47-78%)          | 0.55<br>(0.31-0.87)                         | 1.9%<br>(1.2-2.7%)                   | 2.9%<br>(1.9-4.1%)                  | 2.5<br>(1.6-3.7)     | 140<br>(90-190)    |
| Guyana   | 2016 | Female | 45 to 49 | 33%<br>(19-51%)                | 67%<br>(49-81%)          | 0.51<br>(0.28-0.84)                         | 1.5%<br>(0.69-2.4%)                  | 2.2%<br>(1-3.5%)                    | 3.1<br>(1.4-5.1)     | 140<br>(63-220)    |
| Guyana   | 2016 | Female | 50 to 54 | 30%<br>(18-46%)                | 70%<br>(54-82%)          | 0.46<br>(0.25-0.78)                         | 1.2%<br>(0.31-2.2%)                  | 1.8%<br>(0.61-3.2%)                 | 3.4<br>(1.1-6)       | 130<br>(34-230)    |
| Guyana   | 2016 | Female | 55 to 59 | 26%<br>(15-42%)                | 74%<br>(58-85%)          | 0.42<br>(0.21-0.71)                         | 0.93%<br>(0.033-2%)                  | 1.3%<br>(0.16-2.7%)                 | 3.3<br>(0.4-6.9)     | 110<br>(3.9-230)   |
| Guyana   | 2016 | Female | 60 to 64 | 23%<br>(13-38%)                | 77%<br>(62-87%)          | 0.37<br>(0.18-0.63)                         | 0.45%<br>(-0.47-1.4%)                | 0.64%<br>(-0.54-1.8%)               | 1.6<br>(-1.4-4.7)    | 41<br>(-44-130)    |
| Guyana   | 2016 | Female | 65 to 69 | 21%<br>(13-33%)                | 79%<br>(67-87%)          | 0.32<br>(0.16-0.53)                         | 0.076%<br>(-0.76-0.86%)              | 0.15%<br>(-0.87-1.1%)               | 0.36<br>(-2.2-2.7)   | 5.5<br>(-55-60)    |
| Guyana   | 2016 | Female | 70 to 74 | 19%<br>(11-30%)                | 81%<br>(70-89%)          | 0.26<br>(0.13-0.46)                         | -0.049%<br>(-0.8-0.71%)              | -0.025%<br>(-0.96-0.9%)             | -0.06<br>(-2.4-2.3)  | -2.7<br>(-46-40)   |
| Guyana   | 2016 | Female | 75 to 79 | 17%<br>(9.7-28%)               | 83%<br>(72-90%)          | 0.23<br>(0.11-0.41)                         | -0.12%<br>(-0.87-0.5%)               | -0.14%<br>(-1-0.58%)                | -0.38<br>(-2.6-1.6)  | -5.5<br>(-38-22)   |
| Guyana   | 2016 | Female | 80 to 84 | 15%<br>(8.8-25%)               | 85%<br>(75-91%)          | 0.21<br>(0.1-0.36)                          | -0.072%<br>(-0.72-0.46%)             | -0.1%<br>(-0.85-0.53%)              | -0.17<br>(-1.5-0.88) | -1.5<br>(-15-9.5)  |

| Location | Year | Sex    | Age      | Prevalence of current drinkers | Prevalence of abstainers | Population average of standard drinks daily | Percent of total attributable deaths | Percent of total attributable DALYs | Attributable deaths    | Attributable DALYs     |
|----------|------|--------|----------|--------------------------------|--------------------------|---------------------------------------------|--------------------------------------|-------------------------------------|------------------------|------------------------|
| Guyana   | 2016 | Female | 85 to 89 | 15%<br>(8.8-24%)               | 85%<br>(76-91%)          | 0.21<br>(0.1-0.36)                          | -0.044%<br>(-0.56-0.45%)             | -0.095%<br>(-0.72-0.5%)             | -0.088<br>(-0.68-0.46) | -0.36<br>(-4.6-3.7)    |
| Guyana   | 2016 | Female | 90 to 94 | 17%<br>(9.8-26%)               | 83%<br>(74-90%)          | 0.23<br>(0.11-0.41)                         | -0.046%<br>(-0.63-0.53%)             | -0.13%<br>(-0.84-0.57%)             | -0.08<br>(-0.51-0.34)  | -0.17<br>(-2.3-2)      |
| Guyana   | 2016 | Female | 95 plus  | 20%<br>(10-33%)                | 80%<br>(67-90%)          | 0.27<br>(0.11-0.56)                         | -0.084%<br>(-0.8-0.66%)              | -0.24%<br>(-1.1-0.62%)              | -0.061<br>(-0.29-0.16) | -0.087<br>(-0.82-0.69) |
| Guyana   | 2016 | Male   | All Ages | 57%<br>(48-66%)                | 43%<br>(34-52%)          | 3.1<br>(2.4-3.9)                            | 12%<br>(9.1-14%)                     | 13%<br>(9.9-17%)                    | 460<br>(340-590)       | 19000<br>(14000-23000) |
| Guyana   | 2016 | Male   | 15 to 19 | 57%<br>(40-74%)                | 43%<br>(26-60%)          | 2.6<br>(1.7-3.7)                            | 9%<br>(5.9-13%)                      | 13%<br>(8-19%)                      | 10<br>(6.3-15)         | 810<br>(540-1100)      |
| Guyana   | 2016 | Male   | 20 to 24 | 67%<br>(50-82%)                | 33%<br>(18-50%)          | 5.1<br>(3.4-7.1)                            | 18%<br>(14-24%)                      | 23%<br>(17-31%)                     | 27<br>(19-36)          | 1900<br>(1400-2500)    |
| Guyana   | 2016 | Male   | 25 to 29 | 71%<br>(53-83%)                | 29%<br>(17-47%)          | 5.7<br>(3.8-7.8)                            | 19%<br>(14-24%)                      | 24%<br>(17-30%)                     | 24<br>(17-31)          | 1600<br>(1200-2000)    |
| Guyana   | 2016 | Male   | 30 to 34 | 71%<br>(53-85%)                | 29%<br>(15-47%)          | 5.7<br>(3.7-8.1)                            | 18%<br>(14-23%)                      | 22%<br>(17-28%)                     | 25<br>(18-32)          | 1500<br>(1100-1900)    |
| Guyana   | 2016 | Male   | 35 to 39 | 71%<br>(55-84%)                | 29%<br>(16-45%)          | 5.3<br>(3.4-7.5)                            | 17%<br>(13-22%)                      | 22%<br>(16-27%)                     | 25<br>(18-32)          | 1400<br>(1000-1800)    |
| Guyana   | 2016 | Male   | 40 to 44 | 70%<br>(54-84%)                | 30%<br>(16-46%)          | 5<br>(3.4-7)                                | 17%<br>(13-21%)                      | 21%<br>(16-26%)                     | 32<br>(23-41)          | 1600<br>(1200-2000)    |
| Guyana   | 2016 | Male   | 45 to 49 | 68%<br>(49-83%)                | 32%<br>(17-51%)          | 4.7<br>(3.1-6.6)                            | 16%<br>(13-20%)                      | 20%<br>(16-25%)                     | 50<br>(36-64)          | 2200<br>(1600-2800)    |
| Guyana   | 2016 | Male   | 50 to 54 | 67%<br>(48-82%)                | 33%<br>(18-52%)          | 4.2<br>(2.7-6.1)                            | 15%<br>(11-19%)                      | 18%<br>(13-23%)                     | 60<br>(43-80)          | 2300<br>(1700-3000)    |
| Guyana   | 2016 | Male   | 55 to 59 | 65%<br>(47-80%)                | 35%<br>(20-53%)          | 3.6<br>(2.1-5.6)                            | 13%<br>(8.8-18%)                     | 16%<br>(10-21%)                     | 63<br>(40-89)          | 2100<br>(1300-2900)    |
| Guyana   | 2016 | Male   | 60 to 64 | 63%<br>(43-80%)                | 37%<br>(20-57%)          | 3.2<br>(1.7-5.1)                            | 11%<br>(6.3-17%)                     | 13%<br>(7.3-19%)                    | 48<br>(27-72)          | 1300<br>(760-2000)     |
| Guyana   | 2016 | Male   | 65 to 69 | 62%<br>(42-78%)                | 38%<br>(22-58%)          | 2.8<br>(1.6-4.5)                            | 10%<br>(5.8-15%)                     | 12%<br>(6.7-18%)                    | 40<br>(22-61)          | 930<br>(520-1400)      |
| Guyana   | 2016 | Male   | 70 to 74 | 58%<br>(40-74%)                | 42%<br>(26-60%)          | 2.4<br>(1.3-4)                              | 8.1%<br>(4-13%)                      | 9.2%<br>(4.4-15%)                   | 25<br>(12-39)          | 460<br>(230-730)       |
| Guyana   | 2016 | Male   | 75 to 79 | 53%<br>(34-72%)                | 47%<br>(28-66%)          | 2<br>(1-3.5)                                | 6.4%<br>(2.8-11%)                    | 7.2%<br>(3-12%)                     | 21<br>(8.8-36)         | 300<br>(130-520)       |
| Guyana   | 2016 | Male   | 80 to 84 | 47%<br>(29-66%)                | 53%<br>(34-71%)          | 1.7<br>(0.88-2.8)                           | 5.1%<br>(2.2-9%)                     | 5.7%<br>(2.5-10%)                   | 10<br>(4.5-18)         | 110<br>(49-190)        |
| Guyana   | 2016 | Male   | 85 to 89 | 42%<br>(26-59%)                | 58%<br>(41-74%)          | 1.4<br>(0.74-2.4)                           | 4%<br>(1.8-7.2%)                     | 4.5%<br>(1.9-8.3%)                  | 3.2<br>(1.4-5.8)       | 25<br>(11-45)          |
| Guyana   | 2016 | Male   | 90 to 94 | 42%<br>(28-60%)                | 58%<br>(40-72%)          | 1.4<br>(0.72-2.4)                           | 3.4%<br>(1.4-6.6%)                   | 3.7%<br>(1.3-7.5%)                  | 1.6<br>(0.58-3.1)      | 8.7<br>(3.5-17)        |
| Guyana   | 2016 | Male   | 95 plus  | 45%<br>(26-65%)                | 55%<br>(35-74%)          | 1.5<br>(0.64-2.9)                           | 3.6%<br>(1-7.8%)                     | 3.9%<br>(0.9-8.9%)                  | 0.47<br>(0.11-1.1)     | 1.8<br>(0.52-3.9)      |
| Haiti    | 1990 | Female | All Ages | 25%<br>(21-30%)                | 75%<br>(70-79%)          | 0.74<br>(0.63-0.85)                         | 1.4%<br>(0.96-2%)                    | 2.1%<br>(1.2-3.2%)                  | 1000<br>(590-1600)     | 42000<br>(29000-58000) |

| Location | Year | Sex    | Age      | Prevalence of current drinkers | Prevalence of abstainers | Population average of standard drinks daily | Percent of total attributable deaths | Percent of total attributable DALYs | Attributable deaths | Attributable DALYs       |
|----------|------|--------|----------|--------------------------------|--------------------------|---------------------------------------------|--------------------------------------|-------------------------------------|---------------------|--------------------------|
| Haiti    | 1990 | Female | 15 to 19 | 33%<br>(22-46%)                | 67%<br>(54-78%)          | 1<br>(0.56-1.6)                             | 2.8%<br>(1.4-4.5%)                   | 4%<br>(1.9-6.8%)                    | 28<br>(13-47)       | 2300<br>(1200-3700)      |
| Haiti    | 1990 | Female | 20 to 24 | 38%<br>(26-52%)                | 62%<br>(48-74%)          | 1.5<br>(0.89-2.3)                           | 4.5%<br>(2.6-6.8%)                   | 5.7%<br>(3-9.2%)                    | 57<br>(30-93)       | 4400<br>(2600-6800)      |
| Haiti    | 1990 | Female | 25 to 29 | 37%<br>(24-50%)                | 63%<br>(50-76%)          | 1.5<br>(0.92-2.3)                           | 4.7%<br>(2.9-7.1%)                   | 5.8%<br>(3.3-9.1%)                  | 67<br>(38-110)      | 4700<br>(2900-7100)      |
| Haiti    | 1990 | Female | 30 to 34 | 36%<br>(22-49%)                | 64%<br>(51-78%)          | 1.5<br>(0.87-2.3)                           | 4.5%<br>(2.7-6.9%)                   | 5.6%<br>(3.1-8.9%)                  | 66<br>(37-110)      | 4200<br>(2500-6500)      |
| Haiti    | 1990 | Female | 35 to 39 | 37%<br>(24-51%)                | 63%<br>(49-76%)          | 1.4<br>(0.82-2.3)                           | 4.8%<br>(2.8-7.4%)                   | 6.1%<br>(3.5-9.5%)                  | 82<br>(45-130)      | 4400<br>(2600-6900)      |
| Haiti    | 1990 | Female | 40 to 44 | 36%<br>(24-50%)                | 64%<br>(50-76%)          | 1.4<br>(0.74-2.2)                           | 4.9%<br>(2.6-8.1%)                   | 6.3%<br>(3.3-10%)                   | 82<br>(41-140)      | 4000<br>(2100-6500)      |
| Haiti    | 1990 | Female | 45 to 49 | 35%<br>(21-49%)                | 65%<br>(51-79%)          | 1.3<br>(0.69-2.2)                           | 4.7%<br>(2.3-7.8%)                   | 5.9%<br>(2.9-9.9%)                  | 95<br>(44-170)      | 4000<br>(1900-6900)      |
| Haiti    | 1990 | Female | 50 to 54 | 31%<br>(19-45%)                | 69%<br>(55-81%)          | 1.2<br>(0.62-2)                             | 4.6%<br>(2-8.2%)                     | 5.6%<br>(2.4-10%)                   | 120<br>(50-210)     | 4300<br>(1900-7900)      |
| Haiti    | 1990 | Female | 55 to 59 | 26%<br>(16-40%)                | 74%<br>(60-84%)          | 0.97<br>(0.5-1.7)                           | 3.8%<br>(1.4-7.1%)                   | 4.5%<br>(1.7-8.5%)                  | 110<br>(40-200)     | 3500<br>(1300-6400)      |
| Haiti    | 1990 | Female | 60 to 64 | 23%<br>(14-36%)                | 77%<br>(64-86%)          | 0.82<br>(0.4-1.5)                           | 2.8%<br>(0.72-5.8%)                  | 3.3%<br>(0.8-6.8%)                  | 91<br>(22-180)      | 2500<br>(610-5000)       |
| Haiti    | 1990 | Female | 65 to 69 | 21%<br>(13-32%)                | 79%<br>(68-87%)          | 0.71<br>(0.37-1.2)                          | 2.1%<br>(0.38-4.4%)                  | 2.4%<br>(0.44-5%)                   | 80<br>(14-170)      | 1800<br>(320-3800)       |
| Haiti    | 1990 | Female | 70 to 74 | 19%<br>(12-29%)                | 81%<br>(71-88%)          | 0.59<br>(0.29-1.1)                          | 1.6%<br>(-0.019-4%)                  | 1.8%<br>(-0.043-4.4%)               | 66<br>(-1.4-160)    | 1200<br>(-14-3000)       |
| Haiti    | 1990 | Female | 75 to 79 | 17%<br>(9.9-26%)               | 83%<br>(74-90%)          | 0.5<br>(0.23-0.92)                          | 1.2%<br>(-0.19-3.2%)                 | 1.3%<br>(-0.23-3.6%)                | 45<br>(-7.6-120)    | 630<br>(-100-1700)       |
| Haiti    | 1990 | Female | 80 to 84 | 15%<br>(9-23%)                 | 85%<br>(77-91%)          | 0.47<br>(0.24-0.79)                         | 1.1%<br>(-0.0089-2.7%)               | 1.3%<br>(-0.032-3.1%)               | 32<br>(-0.88-78)    | 340<br>(-2.6-800)        |
| Haiti    | 1990 | Female | 85 to 89 | 15%<br>(8.9-23%)               | 85%<br>(77-91%)          | 0.48<br>(0.23-0.87)                         | 1.1%<br>(0.0096-2.8%)                | 1.2%<br>(-0.012-3.1%)               | 14<br>(-0.14-37)    | 100<br>(0.9-270)         |
| Haiti    | 1990 | Female | 90 to 94 | 17%<br>(10-26%)                | 83%<br>(74-90%)          | 0.54<br>(0.24-1.1)                          | 1.2%<br>(-0.0014-3.2%)               | 1.3%<br>(-0.069-3.6%)               | 4.3<br>(-0.23-12)   | 23<br>(-0.027-61)        |
| Haiti    | 1990 | Female | 95 plus  | 20%<br>(10-33%)                | 80%<br>(67-90%)          | 0.64<br>(0.23-1.3)                          | 1.3%<br>(-0.2-4%)                    | 1.4%<br>(-0.3-4.6%)                 | 1.1<br>(-0.23-3.4)  | 3.8<br>(-0.58-12)        |
| Haiti    | 1990 | Male   | All Ages | 44%<br>(37-51%)                | 56%<br>(49-63%)          | 1.7<br>(1.5-1.9)                            | 3.3%<br>(2.6-4.2%)                   | 5.1%<br>(3.7-6.5%)                  | 2400<br>(1700-3100) | 100000<br>(80000-130000) |
| Haiti    | 1990 | Male   | 15 to 19 | 55%<br>(41-68%)                | 45%<br>(32-59%)          | 1.7<br>(1-2.7)                              | 6.1%<br>(3.8-9%)                     | 7.8%<br>(4.7-12%)                   | 60<br>(34-97)       | 4900<br>(3000-7400)      |
| Haiti    | 1990 | Male   | 20 to 24 | 66%<br>(52-77%)                | 34%<br>(23-48%)          | 3.3<br>(2.2-4.5)                            | 12%<br>(8.1-16%)                     | 14%<br>(9-19%)                      | 160<br>(100-240)    | 12000<br>(8100-17000)    |
| Haiti    | 1990 | Male   | 25 to 29 | 66%<br>(52-77%)                | 34%<br>(23-48%)          | 3.9<br>(2.6-5.3)                            | 13%<br>(9-17%)                       | 15%<br>(10-21%)                     | 190<br>(130-270)    | 13000<br>(9100-18000)    |
| Haiti    | 1990 | Male   | 30 to 34 | 65%<br>(51-76%)                | 35%<br>(24-49%)          | 4<br>(2.6-5.6)                              | 13%<br>(9.6-18%)                     | 16%<br>(11-21%)                     | 210<br>(140-290)    | 13000<br>(8700-17000)    |

| Location | Year | Sex    | Age      | Prevalence of current drinkers | Prevalence of abstainers | Population average of standard drinks daily | Percent of total attributable deaths | Percent of total attributable DALYs | Attributable deaths | Attributable DALYs     |
|----------|------|--------|----------|--------------------------------|--------------------------|---------------------------------------------|--------------------------------------|-------------------------------------|---------------------|------------------------|
| Haiti    | 1990 | Male   | 35 to 39 | 63%<br>(49-75%)                | 37%<br>(25-51%)          | 3.7<br>(2.3-5.5)                            | 13%<br>(8.7-17%)                     | 15%<br>(10-21%)                     | 210<br>(140-290)    | 11000<br>(7800-16000)  |
| Haiti    | 1990 | Male   | 40 to 44 | 61%<br>(49-73%)                | 39%<br>(27-51%)          | 3.5<br>(2.1-5.3)                            | 12%<br>(8.1-16%)                     | 15%<br>(9.4-20%)                    | 180<br>(120-260)    | 9100<br>(5900-13000)   |
| Haiti    | 1990 | Male   | 45 to 49 | 60%<br>(44-72%)                | 40%<br>(28-56%)          | 3.3<br>(1.9-5.1)                            | 12%<br>(7.4-16%)                     | 14%<br>(8.5-20%)                    | 210<br>(130-300)    | 9200<br>(5700-13000)   |
| Haiti    | 1990 | Male   | 50 to 54 | 57%<br>(43-70%)                | 43%<br>(30-57%)          | 3<br>(1.7-4.7)                              | 11%<br>(6.3-15%)                     | 13%<br>(7.3-18%)                    | 210<br>(120-310)    | 8100<br>(4600-12000)   |
| Haiti    | 1990 | Male   | 55 to 59 | 54%<br>(39-69%)                | 46%<br>(31-61%)          | 2.7<br>(1.5-4.3)                            | 9.7%<br>(5.5-14%)                    | 12%<br>(6.4-17%)                    | 210<br>(110-310)    | 6800<br>(3900-10000)   |
| Haiti    | 1990 | Male   | 60 to 64 | 52%<br>(36-69%)                | 48%<br>(31-64%)          | 2.4<br>(1.3-4.2)                            | 8.3%<br>(4.1-13%)                    | 9.6%<br>(4.7-15%)                   | 190<br>(93-310)     | 5400<br>(2700-8600)    |
| Haiti    | 1990 | Male   | 65 to 69 | 51%<br>(34-69%)                | 49%<br>(31-66%)          | 2.2<br>(1.2-3.4)                            | 7.1%<br>(3.5-11%)                    | 8.2%<br>(3.9-13%)                   | 180<br>(88-300)     | 4300<br>(2100-6900)    |
| Haiti    | 1990 | Male   | 70 to 74 | 47%<br>(31-65%)                | 53%<br>(35-69%)          | 1.8<br>(0.9-3)                              | 5.4%<br>(2.1-9.4%)                   | 6.1%<br>(2.4-11%)                   | 150<br>(58-280)     | 2900<br>(1100-5000)    |
| Haiti    | 1990 | Male   | 75 to 79 | 42%<br>(27-60%)                | 58%<br>(40-73%)          | 1.5<br>(0.7-2.5)                            | 4.2%<br>(1.4-7.6%)                   | 4.7%<br>(1.5-8.5%)                  | 110<br>(38-210)     | 1600<br>(550-2900)     |
| Haiti    | 1990 | Male   | 80 to 84 | 37%<br>(23-54%)                | 63%<br>(46-77%)          | 1.2<br>(0.63-2.1)                           | 3.4%<br>(1.2-6.3%)                   | 3.7%<br>(1.2-7.1%)                  | 60<br>(20-110)      | 640<br>(230-1200)      |
| Haiti    | 1990 | Male   | 85 to 89 | 34%<br>(21-48%)                | 66%<br>(52-79%)          | 1.1<br>(0.56-1.8)                           | 2.7%<br>(0.99-5.3%)                  | 3%<br>(1-6%)                        | 27<br>(9.1-55)      | 210<br>(74-410)        |
| Haiti    | 1990 | Male   | 90 to 94 | 35%<br>(22-49%)                | 65%<br>(51-78%)          | 1.1<br>(0.53-2)                             | 2.3%<br>(0.64-5%)                    | 2.5%<br>(0.57-5.7%)                 | 8.3<br>(1.9-19)     | 45<br>(13-97)          |
| Haiti    | 1990 | Male   | 95 plus  | 38%<br>(23-57%)                | 62%<br>(43-77%)          | 1.2<br>(0.5-2.2)                            | 2.4%<br>(0.36-5.7%)                  | 2.5%<br>(0.17-6.5%)                 | 1.9<br>(0.13-4.7)   | 7<br>(1-17)            |
| Haiti    | 1995 | Female | All Ages | 29%<br>(24-34%)                | 71%<br>(66-76%)          | 0.74<br>(0.64-0.84)                         | 1.3%<br>(0.89-1.8%)                  | 1.7%<br>(0.96-2.7%)                 | 870<br>(480-1300)   | 37000<br>(25000-51000) |
| Haiti    | 1995 | Female | 15 to 19 | 37%<br>(26-50%)                | 63%<br>(50-74%)          | 0.99<br>(0.56-1.5)                          | 2.5%<br>(1.3-4%)                     | 3.7%<br>(1.7-6.1%)                  | 28<br>(13-47)       | 2300<br>(1200-3600)    |
| Haiti    | 1995 | Female | 20 to 24 | 44%<br>(32-57%)                | 56%<br>(43-68%)          | 1.6<br>(0.95-2.3)                           | 3.6%<br>(2.2-5.6%)                   | 4.5%<br>(2.4-7.3%)                  | 51<br>(27-81)       | 4000<br>(2400-6000)    |
| Haiti    | 1995 | Female | 25 to 29 | 41%<br>(29-54%)                | 59%<br>(46-71%)          | 1.5<br>(0.97-2.2)                           | 3.4%<br>(2.1-5.3%)                   | 3.9%<br>(2.2-6.5%)                  | 59<br>(34-95)       | 4200<br>(2600-6400)    |
| Haiti    | 1995 | Female | 30 to 34 | 39%<br>(26-53%)                | 61%<br>(47-74%)          | 1.5<br>(0.84-2.2)                           | 3.2%<br>(1.9-4.9%)                   | 3.7%<br>(2.1-6.1%)                  | 62<br>(35-98)       | 3900<br>(2400-6000)    |
| Haiti    | 1995 | Female | 35 to 39 | 42%<br>(29-55%)                | 58%<br>(45-71%)          | 1.5<br>(0.88-2.3)                           | 3.7%<br>(2.1-5.7%)                   | 4.5%<br>(2.5-7.2%)                  | 74<br>(42-120)      | 4100<br>(2400-6400)    |
| Haiti    | 1995 | Female | 40 to 44 | 44%<br>(32-57%)                | 56%<br>(43-68%)          | 1.5<br>(0.85-2.4)                           | 4%<br>(2.1-6.5%)                     | 5%<br>(2.6-8.3%)                    | 85<br>(43-140)      | 4100<br>(2100-6800)    |
| Haiti    | 1995 | Female | 45 to 49 | 41%<br>(27-54%)                | 59%<br>(46-73%)          | 1.4<br>(0.76-2.3)                           | 3.9%<br>(1.8-6.7%)                   | 4.8%<br>(2.2-8.4%)                  | 81<br>(36-140)      | 3400<br>(1500-5900)    |
| Haiti    | 1995 | Female | 50 to 54 | 33%<br>(20-47%)                | 67%<br>(53-80%)          | 1.1<br>(0.59-1.8)                           | 3.7%<br>(1.4-6.7%)                   | 4.5%<br>(1.7-8.2%)                  | 96<br>(37-180)      | 3500<br>(1400-6700)    |

| Location | Year | Sex    | Age      | Prevalence of current drinkers | Prevalence of abstainers | Population average of standard drinks daily | Percent of total attributable deaths | Percent of total attributable DALYs | Attributable deaths | Attributable DALYs      |
|----------|------|--------|----------|--------------------------------|--------------------------|---------------------------------------------|--------------------------------------|-------------------------------------|---------------------|-------------------------|
| Haiti    | 1995 | Female | 55 to 59 | 26%<br>(17-40%)                | 74%<br>(60-83%)          | 0.85<br>(0.43-1.5)                          | 2.9%<br>(1-5.4%)                     | 3.5%<br>(1.2-6.5%)                  | 90<br>(30-170)      | 2900<br>(960-5300)      |
| Haiti    | 1995 | Female | 60 to 64 | 23%<br>(14-36%)                | 77%<br>(64-86%)          | 0.71<br>(0.35-1.3)                          | 2.1%<br>(0.31-4.4%)                  | 2.5%<br>(0.38-5.2%)                 | 73<br>(11-160)      | 2000<br>(290-4200)      |
| Haiti    | 1995 | Female | 65 to 69 | 21%<br>(13-33%)                | 79%<br>(67-87%)          | 0.62<br>(0.33-1)                            | 1.5%<br>(0.056-3.4%)                 | 1.7%<br>(0.067-3.8%)                | 59<br>(2.3-130)     | 1300<br>(48-2900)       |
| Haiti    | 1995 | Female | 70 to 74 | 19%<br>(12-29%)                | 81%<br>(71-88%)          | 0.51<br>(0.25-0.9)                          | 1.1%<br>(-0.25-2.9%)                 | 1.2%<br>(-0.25-3.3%)                | 45<br>(-8.7-120)    | 810<br>(-180-2100)      |
| Haiti    | 1995 | Female | 75 to 79 | 17%<br>(9.9-26%)               | 83%<br>(74-90%)          | 0.44<br>(0.2-0.81)                          | 0.79%<br>(-0.41-2.4%)                | 0.88%<br>(-0.47-2.7%)               | 31<br>(-17-97)      | 440<br>(-220-1400)      |
| Haiti    | 1995 | Female | 80 to 84 | 15%<br>(9-24%)                 | 85%<br>(76-91%)          | 0.41<br>(0.2-0.7)                           | 0.76%<br>(-0.2-2.1%)                 | 0.85%<br>(-0.26-2.3%)               | 24<br>(-7.2-66)     | 250<br>(-64-690)        |
| Haiti    | 1995 | Female | 85 to 89 | 15%<br>(9-23%)                 | 85%<br>(77-91%)          | 0.42<br>(0.2-0.76)                          | 0.74%<br>(-0.21-2.2%)                | 0.81%<br>(-0.28-2.5%)               | 11<br>(-3.7-33)     | 82<br>(-24-240)         |
| Haiti    | 1995 | Female | 90 to 94 | 17%<br>(10-26%)                | 83%<br>(74-90%)          | 0.48<br>(0.22-0.93)                         | 0.81%<br>(-0.22-2.6%)                | 0.88%<br>(-0.33-2.9%)               | 3.6<br>(-1.3-12)    | 19<br>(-5.4-60)         |
| Haiti    | 1995 | Female | 95 plus  | 20%<br>(11-33%)                | 80%<br>(67-89%)          | 0.57<br>(0.21-1.2)                          | 0.93%<br>(-0.45-3.2%)                | 0.97%<br>(-0.61-3.5%)               | 0.91<br>(-0.57-3.3) | 3.4<br>(-1.6-11)        |
| Haiti    | 1995 | Male   | All Ages | 48%<br>(40-55%)                | 52%<br>(45-60%)          | 1.6<br>(1.4-1.8)                            | 3.2%<br>(2.5-4%)                     | 4.6%<br>(3.4-5.9%)                  | 2200<br>(1600-2800) | 97000<br>(77000-120000) |
| Haiti    | 1995 | Male   | 15 to 19 | 60%<br>(47-72%)                | 40%<br>(28-53%)          | 1.7<br>(1-2.5)                              | 5.9%<br>(3.8-8.5%)                   | 7.8%<br>(4.8-12%)                   | 65<br>(37-100)      | 5300<br>(3400-7900)     |
| Haiti    | 1995 | Male   | 20 to 24 | 70%<br>(59-79%)                | 30%<br>(21-41%)          | 3.2<br>(2.2-4.2)                            | 11%<br>(7.4-15%)                     | 12%<br>(7.9-17%)                    | 150<br>(94-220)     | 11000<br>(7700-16000)   |
| Haiti    | 1995 | Male   | 25 to 29 | 69%<br>(57-78%)                | 31%<br>(22-43%)          | 3.6<br>(2.4-4.9)                            | 10%<br>(6.7-14%)                     | 11%<br>(7.1-16%)                    | 180<br>(120-250)    | 12000<br>(8500-17000)   |
| Haiti    | 1995 | Male   | 30 to 34 | 69%<br>(57-78%)                | 31%<br>(22-43%)          | 3.7<br>(2.5-5.1)                            | 9.8%<br>(6.8-13%)                    | 11%<br>(7.2-15%)                    | 200<br>(130-280)    | 12000<br>(8500-17000)   |
| Haiti    | 1995 | Male   | 35 to 39 | 67%<br>(56-77%)                | 33%<br>(23-44%)          | 3.5<br>(2.3-5.1)                            | 9.7%<br>(6.5-14%)                    | 11%<br>(7-16%)                      | 200<br>(130-290)    | 11000<br>(7400-16000)   |
| Haiti    | 1995 | Male   | 40 to 44 | 63%<br>(51-74%)                | 37%<br>(26-49%)          | 3.2<br>(1.9-4.8)                            | 9.2%<br>(5.9-13%)                    | 11%<br>(6.7-15%)                    | 190<br>(120-280)    | 9600<br>(6200-14000)    |
| Haiti    | 1995 | Male   | 45 to 49 | 62%<br>(46-74%)                | 38%<br>(26-54%)          | 3<br>(1.7-4.8)                              | 9.2%<br>(5.6-13%)                    | 11%<br>(6.2-16%)                    | 170<br>(100-260)    | 7600<br>(4600-11000)    |
| Haiti    | 1995 | Male   | 50 to 54 | 61%<br>(48-73%)                | 39%<br>(27-52%)          | 2.8<br>(1.6-4.4)                            | 9%<br>(5.2-13%)                      | 11%<br>(5.9-16%)                    | 200<br>(110-290)    | 7600<br>(4300-11000)    |
| Haiti    | 1995 | Male   | 55 to 59 | 56%<br>(41-70%)                | 44%<br>(30-59%)          | 2.5<br>(1.4-3.8)                            | 8%<br>(4.4-12%)                      | 9.4%<br>(5.1-14%)                   | 190<br>(100-300)    | 6300<br>(3500-9700)     |
| Haiti    | 1995 | Male   | 60 to 64 | 52%<br>(35-69%)                | 48%<br>(31-65%)          | 2.1<br>(1.1-3.6)                            | 6.6%<br>(3.2-11%)                    | 7.7%<br>(3.6-13%)                   | 170<br>(81-290)     | 4800<br>(2400-8100)     |
| Haiti    | 1995 | Male   | 65 to 69 | 51%<br>(34-68%)                | 49%<br>(32-66%)          | 1.9<br>(1-2.9)                              | 5.6%<br>(2.7-9.3%)                   | 6.5%<br>(3-11%)                     | 150<br>(72-260)     | 3600<br>(1700-5900)     |
| Haiti    | 1995 | Male   | 70 to 74 | 47%<br>(30-65%)                | 53%<br>(35-70%)          | 1.6<br>(0.81-2.6)                           | 4.3%<br>(1.6-7.9%)                   | 4.8%<br>(1.7-9%)                    | 130<br>(44-240)     | 2400<br>(860-4300)      |

| Location | Year | Sex    | Age      | Prevalence of current drinkers | Prevalence of abstainers | Population average of standard drinks daily | Percent of total attributable deaths | Percent of total attributable DALYs | Attributable deaths | Attributable DALYs     |
|----------|------|--------|----------|--------------------------------|--------------------------|---------------------------------------------|--------------------------------------|-------------------------------------|---------------------|------------------------|
| Haiti    | 1995 | Male   | 75 to 79 | 42%<br>(27-60%)                | 58%<br>(40-73%)          | 1.3<br>(0.63-2.2)                           | 3.3%<br>(1.1-6.3%)                   | 3.7%<br>(1.1-7%)                    | 91<br>(28-180)      | 1300<br>(440-2500)     |
| Haiti    | 1995 | Male   | 80 to 84 | 37%<br>(23-54%)                | 63%<br>(46-77%)          | 1.1<br>(0.56-1.8)                           | 2.6%<br>(0.89-5%)                    | 2.8%<br>(0.92-5.5%)                 | 50<br>(16-97)       | 540<br>(180-1000)      |
| Haiti    | 1995 | Male   | 85 to 89 | 34%<br>(21-48%)                | 66%<br>(52-79%)          | 0.95<br>(0.49-1.6)                          | 2%<br>(0.66-4.2%)                    | 2.2%<br>(0.63-4.7%)                 | 23<br>(6.6-49)      | 180<br>(60-370)        |
| Haiti    | 1995 | Male   | 90 to 94 | 35%<br>(22-50%)                | 65%<br>(50-78%)          | 0.96<br>(0.46-1.7)                          | 1.7%<br>(0.41-3.8%)                  | 1.8%<br>(0.28-4.2%)                 | 7.1<br>(1.1-17)     | 40<br>(9.5-88)         |
| Haiti    | 1995 | Male   | 95 plus  | 38%<br>(22-57%)                | 62%<br>(43-78%)          | 1.1<br>(0.42-1.9)                           | 1.7%<br>(0.15-4.4%)                  | 1.8%<br>(-0.086-4.9%)               | 1.7<br>(-0.082-4.8) | 6.6<br>(0.54-17)       |
| Haiti    | 2000 | Female | All Ages | 24%<br>(20-29%)                | 76%<br>(71-80%)          | 0.67<br>(0.58-0.77)                         | 1.2%<br>(0.83-1.7%)                  | 1.7%<br>(0.91-2.6%)                 | 850<br>(460-1300)   | 35000<br>(24000-49000) |
| Haiti    | 2000 | Female | 15 to 19 | 31%<br>(22-43%)                | 69%<br>(57-78%)          | 0.89<br>(0.51-1.4)                          | 2.2%<br>(1.2-3.4%)                   | 3.3%<br>(1.7-5.4%)                  | 26<br>(13-44)       | 2200<br>(1200-3600)    |
| Haiti    | 2000 | Female | 20 to 24 | 36%<br>(26-48%)                | 64%<br>(52-74%)          | 1.4<br>(0.83-2)                             | 2.9%<br>(1.8-4.5%)                   | 3.5%<br>(1.8-5.8%)                  | 43<br>(23-70)       | 3600<br>(2200-5300)    |
| Haiti    | 2000 | Female | 25 to 29 | 34%<br>(24-46%)                | 66%<br>(54-76%)          | 1.3<br>(0.81-2)                             | 2.3%<br>(1.3-3.5%)                   | 2.4%<br>(1.3-4.1%)                  | 44<br>(24-71)       | 3300<br>(2100-4900)    |
| Haiti    | 2000 | Female | 30 to 34 | 31%<br>(20-44%)                | 69%<br>(56-80%)          | 1.2<br>(0.7-1.9)                            | 2%<br>(1.2-3.2%)                     | 2.1%<br>(1.1-3.6%)                  | 46<br>(26-75)       | 3100<br>(1900-4800)    |
| Haiti    | 2000 | Female | 35 to 39 | 33%<br>(22-45%)                | 67%<br>(55-78%)          | 1.2<br>(0.69-1.9)                           | 2.3%<br>(1.4-3.7%)                   | 2.7%<br>(1.5-4.4%)                  | 60<br>(34-98)       | 3400<br>(2000-5300)    |
| Haiti    | 2000 | Female | 40 to 44 | 35%<br>(25-47%)                | 65%<br>(53-75%)          | 1.2<br>(0.71-2)                             | 2.8%<br>(1.6-4.5%)                   | 3.3%<br>(1.8-5.4%)                  | 70<br>(37-110)      | 3500<br>(1900-5500)    |
| Haiti    | 2000 | Female | 45 to 49 | 35%<br>(22-47%)                | 65%<br>(53-78%)          | 1.3<br>(0.7-2)                              | 3.1%<br>(1.6-5.3%)                   | 3.8%<br>(1.9-6.6%)                  | 81<br>(41-140)      | 3500<br>(1800-6000)    |
| Haiti    | 2000 | Female | 50 to 54 | 31%<br>(20-45%)                | 69%<br>(55-80%)          | 1.1<br>(0.59-1.9)                           | 3.4%<br>(1.5-6.2%)                   | 4.2%<br>(1.8-7.5%)                  | 90<br>(39-170)      | 3300<br>(1500-6200)    |
| Haiti    | 2000 | Female | 55 to 59 | 26%<br>(16-39%)                | 74%<br>(61-84%)          | 0.91<br>(0.46-1.5)                          | 3%<br>(1.2-5.4%)                     | 3.6%<br>(1.4-6.5%)                  | 94<br>(35-170)      | 3000<br>(1100-5600)    |
| Haiti    | 2000 | Female | 60 to 64 | 23%<br>(14-36%)                | 77%<br>(64-86%)          | 0.76<br>(0.37-1.4)                          | 2.3%<br>(0.54-4.7%)                  | 2.7%<br>(0.66-5.6%)                 | 83<br>(20-170)      | 2300<br>(540-4600)     |
| Haiti    | 2000 | Female | 65 to 69 | 21%<br>(13-32%)                | 79%<br>(68-87%)          | 0.66<br>(0.35-1.1)                          | 1.7%<br>(0.2-3.6%)                   | 2%<br>(0.26-4.2%)                   | 71<br>(9.1-150)     | 1600<br>(180-3400)     |
| Haiti    | 2000 | Female | 70 to 74 | 19%<br>(12-29%)                | 81%<br>(71-88%)          | 0.55<br>(0.28-0.94)                         | 1.3%<br>(-0.067-3.2%)                | 1.5%<br>(-0.078-3.7%)               | 54<br>(-3-140)      | 980<br>(-51-2400)      |
| Haiti    | 2000 | Female | 75 to 79 | 16%<br>(9.9-26%)               | 84%<br>(74-90%)          | 0.47<br>(0.22-0.85)                         | 0.97%<br>(-0.25-2.6%)                | 1.1%<br>(-0.29-3%)                  | 38<br>(-10-100)     | 540<br>(-130-1500)     |
| Haiti    | 2000 | Female | 80 to 84 | 15%<br>(9-23%)                 | 85%<br>(77-91%)          | 0.44<br>(0.22-0.75)                         | 0.92%<br>(-0.048-2.3%)               | 1%<br>(-0.084-2.5%)                 | 31<br>(-2.6-76)     | 320<br>(-17-790)       |
| Haiti    | 2000 | Female | 85 to 89 | 15%<br>(8.9-23%)               | 85%<br>(77-91%)          | 0.45<br>(0.22-0.82)                         | 0.88%<br>(-0.12-2.4%)                | 0.98%<br>(-0.18-2.6%)               | 15<br>(-2.8-42)     | 120<br>(-15-310)       |
| Haiti    | 2000 | Female | 90 to 94 | 17%<br>(10-26%)                | 83%<br>(74-90%)          | 0.51<br>(0.23-0.98)                         | 0.95%<br>(-0.098-2.8%)               | 1%<br>(-0.18-3.2%)                  | 5.2<br>(-0.91-16)   | 28<br>(-2.8-79)        |

| Location | Year | Sex    | Age      | Prevalence of current drinkers | Prevalence of abstainers | Population average of standard drinks daily | Percent of total attributable deaths | Percent of total attributable DALYs | Attributable deaths | Attributable DALYs       |
|----------|------|--------|----------|--------------------------------|--------------------------|---------------------------------------------|--------------------------------------|-------------------------------------|---------------------|--------------------------|
| Haiti    | 2000 | Female | 95 plus  | 20%<br>(10-33%)                | 80%<br>(67-90%)          | 0.61<br>(0.22-1.2)                          | 1.1%<br>(-0.29-3.5%)                 | 1.2%<br>(-0.45-3.9%)                | 1.3<br>(-0.51-4.5)  | 4.8<br>(-1.3-15)         |
| Haiti    | 2000 | Male   | All Ages | 46%<br>(40-53%)                | 54%<br>(47-60%)          | 1.7<br>(1.5-1.9)                            | 3.5%<br>(2.7-4.4%)                   | 4.8%<br>(3.5-6.2%)                  | 2300<br>(1600-2900) | 100000<br>(78000-130000) |
| Haiti    | 2000 | Male   | 15 to 19 | 58%<br>(46-70%)                | 42%<br>(30-54%)          | 1.8<br>(1.1-2.6)                            | 5.8%<br>(3.8-8.3%)                   | 7.9%<br>(4.8-11%)                   | 71<br>(42-110)      | 5900<br>(3900-8700)      |
| Haiti    | 2000 | Male   | 20 to 24 | 69%<br>(57-78%)                | 31%<br>(22-43%)          | 3.3<br>(2.3-4.5)                            | 11%<br>(7.5-15%)                     | 13%<br>(8.3-18%)                    | 160<br>(100-240)    | 12000<br>(8400-17000)    |
| Haiti    | 2000 | Male   | 25 to 29 | 68%<br>(56-77%)                | 32%<br>(23-44%)          | 3.8<br>(2.6-5.2)                            | 9.2%<br>(6.1-13%)                    | 10%<br>(6.2-15%)                    | 170<br>(110-240)    | 12000<br>(8000-16000)    |
| Haiti    | 2000 | Male   | 30 to 34 | 67%<br>(56-76%)                | 33%<br>(24-44%)          | 3.9<br>(2.6-5.4)                            | 8.2%<br>(5.7-11%)                    | 9%<br>(5.8-13%)                     | 190<br>(120-270)    | 12000<br>(8100-16000)    |
| Haiti    | 2000 | Male   | 35 to 39 | 65%<br>(54-75%)                | 35%<br>(25-46%)          | 3.6<br>(2.3-5.3)                            | 7.9%<br>(5.1-11%)                    | 8.7%<br>(5.3-13%)                   | 200<br>(130-280)    | 11000<br>(7400-16000)    |
| Haiti    | 2000 | Male   | 40 to 44 | 61%<br>(50-72%)                | 39%<br>(28-50%)          | 3.3<br>(2-4.9)                              | 7.7%<br>(5-11%)                      | 8.6%<br>(5.4-12%)                   | 190<br>(120-280)    | 9700<br>(6300-14000)     |
| Haiti    | 2000 | Male   | 45 to 49 | 60%<br>(47-72%)                | 40%<br>(28-53%)          | 3.1<br>(1.8-4.8)                            | 8%<br>(5-11%)                        | 9.1%<br>(5.6-13%)                   | 200<br>(120-290)    | 8800<br>(5500-12000)     |
| Haiti    | 2000 | Male   | 50 to 54 | 59%<br>(46-70%)                | 41%<br>(30-54%)          | 2.9<br>(1.7-4.5)                            | 8.3%<br>(4.9-12%)                    | 9.7%<br>(5.5-14%)                   | 180<br>(99-260)     | 6900<br>(4000-10000)     |
| Haiti    | 2000 | Male   | 55 to 59 | 54%<br>(40-68%)                | 46%<br>(32-60%)          | 2.5<br>(1.4-3.9)                            | 7.9%<br>(4.4-12%)                    | 9.3%<br>(5.1-14%)                   | 200<br>(100-310)    | 6600<br>(3600-10000)     |
| Haiti    | 2000 | Male   | 60 to 64 | 51%<br>(35-68%)                | 49%<br>(32-65%)          | 2.2<br>(1.2-3.9)                            | 6.8%<br>(3.4-11%)                    | 7.9%<br>(3.9-13%)                   | 190<br>(91-320)     | 5300<br>(2700-8800)      |
| Haiti    | 2000 | Male   | 65 to 69 | 51%<br>(33-68%)                | 49%<br>(32-67%)          | 2<br>(1.1-3.1)                              | 6%<br>(3-9.5%)                       | 6.9%<br>(3.3-11%)                   | 180<br>(84-290)     | 4100<br>(2000-6600)      |
| Haiti    | 2000 | Male   | 70 to 74 | 47%<br>(30-64%)                | 53%<br>(36-70%)          | 1.7<br>(0.86-2.8)                           | 4.6%<br>(1.7-8.2%)                   | 5.2%<br>(1.9-9.4%)                  | 140<br>(50-250)     | 2600<br>(970-4600)       |
| Haiti    | 2000 | Male   | 75 to 79 | 42%<br>(27-60%)                | 58%<br>(40-73%)          | 1.4<br>(0.68-2.4)                           | 3.5%<br>(1.3-6.6%)                   | 4%<br>(1.4-7.4%)                    | 99<br>(35-190)      | 1400<br>(520-2600)       |
| Haiti    | 2000 | Male   | 80 to 84 | 37%<br>(22-53%)                | 63%<br>(47-78%)          | 1.1<br>(0.6-1.9)                            | 2.8%<br>(1-5.3%)                     | 3.1%<br>(1.1-6.1%)                  | 58<br>(20-110)      | 630<br>(230-1200)        |
| Haiti    | 2000 | Male   | 85 to 89 | 33%<br>(21-47%)                | 67%<br>(53-79%)          | 1<br>(0.52-1.7)                             | 2.2%<br>(0.8-4.5%)                   | 2.5%<br>(0.78-5.1%)                 | 28<br>(8.9-56)      | 210<br>(76-430)          |
| Haiti    | 2000 | Male   | 90 to 94 | 34%<br>(22-49%)                | 66%<br>(51-78%)          | 1<br>(0.5-1.8)                              | 1.9%<br>(0.57-4.1%)                  | 2.1%<br>(0.46-4.6%)                 | 9.2<br>(2-21)       | 51<br>(15-110)           |
| Haiti    | 2000 | Male   | 95 plus  | 38%<br>(23-57%)                | 62%<br>(43-77%)          | 1.1<br>(0.46-2.1)                           | 2%<br>(0.33-4.7%)                    | 2.1%<br>(0.11-5.2%)                 | 2.3<br>(0.12-5.8)   | 9<br>(1.5-21)            |
| Haiti    | 2005 | Female | All Ages | 24%<br>(20-29%)                | 76%<br>(71-80%)          | 0.7<br>(0.6-0.79)                           | 1.2%<br>(0.83-1.7%)                  | 1.6%<br>(0.88-2.5%)                 | 880<br>(460-1400)   | 36000<br>(24000-51000)   |
| Haiti    | 2005 | Female | 15 to 19 | 31%<br>(22-43%)                | 69%<br>(57-78%)          | 0.9<br>(0.5-1.4)                            | 2%<br>(1.1-3.2%)                     | 3%<br>(1.5-5%)                      | 24<br>(12-40)       | 2100<br>(1200-3300)      |
| Haiti    | 2005 | Female | 20 to 24 | 36%<br>(25-48%)                | 64%<br>(52-75%)          | 1.4<br>(0.84-2)                             | 2.9%<br>(1.7-4.4%)                   | 3.6%<br>(1.8-5.8%)                  | 45<br>(24-73)       | 3800<br>(2300-5700)      |

| Location | Year | Sex    | Age      | Prevalence of current drinkers | Prevalence of abstainers | Population average of standard drinks daily | Percent of total attributable deaths | Percent of total attributable DALYs | Attributable deaths | Attributable DALYs       |
|----------|------|--------|----------|--------------------------------|--------------------------|---------------------------------------------|--------------------------------------|-------------------------------------|---------------------|--------------------------|
| Haiti    | 2005 | Female | 25 to 29 | 34%<br>(24-46%)                | 66%<br>(54-76%)          | 1.3<br>(0.83-2)                             | 2.2%<br>(1.3-3.4%)                   | 2.3%<br>(1.2-3.9%)                  | 45<br>(25-73)       | 3500<br>(2200-5200)      |
| Haiti    | 2005 | Female | 30 to 34 | 31%<br>(20-44%)                | 69%<br>(56-80%)          | 1.2<br>(0.69-1.9)                           | 1.7%<br>(1-2.7%)                     | 1.7%<br>(0.92-2.9%)                 | 41<br>(23-71)       | 2900<br>(1700-4600)      |
| Haiti    | 2005 | Female | 35 to 39 | 33%<br>(22-45%)                | 67%<br>(55-78%)          | 1.2<br>(0.71-1.9)                           | 2%<br>(1.2-3.2%)                     | 2.2%<br>(1.2-3.6%)                  | 56<br>(30-95)       | 3300<br>(1900-5300)      |
| Haiti    | 2005 | Female | 40 to 44 | 35%<br>(24-47%)                | 65%<br>(53-76%)          | 1.3<br>(0.7-2)                              | 2.3%<br>(1.3-3.7%)                   | 2.7%<br>(1.4-4.4%)                  | 73<br>(35-120)      | 3600<br>(1900-6000)      |
| Haiti    | 2005 | Female | 45 to 49 | 34%<br>(22-47%)                | 66%<br>(53-78%)          | 1.3<br>(0.7-2.1)                            | 2.8%<br>(1.4-4.7%)                   | 3.3%<br>(1.7-5.8%)                  | 81<br>(40-150)      | 3500<br>(1700-6200)      |
| Haiti    | 2005 | Female | 50 to 54 | 31%<br>(19-44%)                | 69%<br>(56-81%)          | 1.1<br>(0.6-1.9)                            | 3.2%<br>(1.3-5.7%)                   | 3.9%<br>(1.6-6.9%)                  | 100<br>(41-190)     | 3700<br>(1500-7000)      |
| Haiti    | 2005 | Female | 55 to 59 | 26%<br>(16-39%)                | 74%<br>(61-84%)          | 0.92<br>(0.46-1.6)                          | 2.9%<br>(1.2-5.1%)                   | 3.5%<br>(1.4-6.4%)                  | 89<br>(35-170)      | 2900<br>(1100-5300)      |
| Haiti    | 2005 | Female | 60 to 64 | 23%<br>(14-36%)                | 77%<br>(64-86%)          | 0.78<br>(0.38-1.4)                          | 2.2%<br>(0.55-4.6%)                  | 2.7%<br>(0.66-5.5%)                 | 84<br>(20-180)      | 2300<br>(510-4800)       |
| Haiti    | 2005 | Female | 65 to 69 | 21%<br>(13-32%)                | 79%<br>(68-87%)          | 0.68<br>(0.35-1.1)                          | 1.7%<br>(0.22-3.7%)                  | 2%<br>(0.25-4.3%)                   | 77<br>(9.9-160)     | 1700<br>(220-3700)       |
| Haiti    | 2005 | Female | 70 to 74 | 19%<br>(12-30%)                | 81%<br>(70-88%)          | 0.56<br>(0.28-0.98)                         | 1.3%<br>(-0.056-3.2%)                | 1.5%<br>(-0.063-3.7%)               | 61<br>(-2.7-150)    | 1100<br>(-48-2800)       |
| Haiti    | 2005 | Female | 75 to 79 | 16%<br>(9.8-26%)               | 84%<br>(74-90%)          | 0.48<br>(0.22-0.89)                         | 0.98%<br>(-0.25-2.7%)                | 1.1%<br>(-0.29-3.1%)                | 41<br>(-11-110)     | 580<br>(-150-1500)       |
| Haiti    | 2005 | Female | 80 to 84 | 15%<br>(9.1-24%)               | 85%<br>(76-91%)          | 0.45<br>(0.22-0.75)                         | 0.93%<br>(-0.064-2.2%)               | 1%<br>(-0.098-2.6%)                 | 33<br>(-3.4-80)     | 340<br>(-26-830)         |
| Haiti    | 2005 | Female | 85 to 89 | 15%<br>(9.1-23%)               | 85%<br>(77-91%)          | 0.45<br>(0.22-0.81)                         | 0.89%<br>(-0.1-2.3%)                 | 0.99%<br>(-0.17-2.6%)               | 18<br>(-3.1-47)     | 140<br>(-16-350)         |
| Haiti    | 2005 | Female | 90 to 94 | 17%<br>(10-26%)                | 83%<br>(74-90%)          | 0.51<br>(0.24-0.98)                         | 0.96%<br>(-0.08-2.7%)                | 1.1%<br>(-0.17-3.1%)                | 6.7<br>(-1.1-20)    | 36<br>(-3.1-100)         |
| Haiti    | 2005 | Female | 95 plus  | 19%<br>(10-32%)                | 81%<br>(68-90%)          | 0.6<br>(0.22-1.2)                           | 1.1%<br>(-0.24-3.5%)                 | 1.2%<br>(-0.4-3.9%)                 | 1.7<br>(-0.58-5.7)  | 6.2<br>(-1.4-20)         |
| Haiti    | 2005 | Male   | All Ages | 47%<br>(41-54%)                | 53%<br>(46-59%)          | 1.8<br>(1.6-2)                              | 3.5%<br>(2.6-4.5%)                   | 4.7%<br>(3.4-6.2%)                  | 2300<br>(1600-3100) | 100000<br>(75000-130000) |
| Haiti    | 2005 | Male   | 15 to 19 | 58%<br>(45-71%)                | 42%<br>(29-55%)          | 1.8<br>(1.1-2.6)                            | 5.4%<br>(3.6-7.8%)                   | 7.2%<br>(4.5-11%)                   | 65<br>(38-110)      | 5600<br>(3600-8400)      |
| Haiti    | 2005 | Male   | 20 to 24 | 69%<br>(57-78%)                | 31%<br>(22-43%)          | 3.3<br>(2.3-4.4)                            | 11%<br>(7.6-15%)                     | 13%<br>(8.8-18%)                    | 170<br>(110-260)    | 14000<br>(9100-20000)    |
| Haiti    | 2005 | Male   | 25 to 29 | 68%<br>(57-77%)                | 32%<br>(23-43%)          | 3.8<br>(2.6-5.1)                            | 9.6%<br>(6.4-14%)                    | 11%<br>(6.5-16%)                    | 180<br>(110-260)    | 13000<br>(8300-18000)    |
| Haiti    | 2005 | Male   | 30 to 34 | 67%<br>(55-76%)                | 33%<br>(24-45%)          | 3.9<br>(2.6-5.4)                            | 7.9%<br>(5.3-11%)                    | 8.6%<br>(5.4-13%)                   | 170<br>(110-250)    | 11000<br>(7400-16000)    |
| Haiti    | 2005 | Male   | 35 to 39 | 65%<br>(55-75%)                | 35%<br>(25-45%)          | 3.6<br>(2.3-5.3)                            | 7.3%<br>(4.7-10%)                    | 8%<br>(4.8-12%)                     | 190<br>(110-290)    | 11000<br>(6900-16000)    |
| Haiti    | 2005 | Male   | 40 to 44 | 61%<br>(50-72%)                | 39%<br>(28-50%)          | 3.3<br>(2-4.9)                              | 6.9%<br>(4.4-9.9%)                   | 7.7%<br>(4.7-11%)                   | 190<br>(110-300)    | 9900<br>(6100-15000)     |



| Location | Year | Sex    | Age      | Prevalence of current drinkers | Prevalence of abstainers | Population average of standard drinks daily | Percent of total attributable deaths | Percent of total attributable DALYs | Attributable deaths | Attributable DALYs     |
|----------|------|--------|----------|--------------------------------|--------------------------|---------------------------------------------|--------------------------------------|-------------------------------------|---------------------|------------------------|
| Haiti    | 2005 | Male   | 45 to 49 | 60%<br>(47-71%)                | 40%<br>(29-53%)          | 3.1<br>(1.9-4.9)                            | 7.4%<br>(4.7-11%)                    | 8.4%<br>(5-12%)                     | 200<br>(120-300)    | 9000<br>(5500-13000)   |
| Haiti    | 2005 | Male   | 50 to 54 | 59%<br>(47-70%)                | 41%<br>(30-53%)          | 2.9<br>(1.7-4.6)                            | 7.9%<br>(4.7-11%)                    | 9.2%<br>(5.4-13%)                   | 210<br>(110-310)    | 8100<br>(4600-12000)   |
| Haiti    | 2005 | Male   | 55 to 59 | 54%<br>(40-68%)                | 46%<br>(32-60%)          | 2.5<br>(1.4-4)                              | 7.8%<br>(4.4-12%)                    | 9.2%<br>(5.2-14%)                   | 180<br>(97-280)     | 6100<br>(3400-9400)    |
| Haiti    | 2005 | Male   | 60 to 64 | 51%<br>(35-68%)                | 49%<br>(32-65%)          | 2.2<br>(1.2-3.9)                            | 6.7%<br>(3.3-11%)                    | 7.8%<br>(3.7-13%)                   | 190<br>(90-320)     | 5500<br>(2700-9000)    |
| Haiti    | 2005 | Male   | 65 to 69 | 51%<br>(33-68%)                | 49%<br>(32-67%)          | 2<br>(1.1-3.2)                              | 5.9%<br>(2.9-9.5%)                   | 6.8%<br>(3.3-11%)                   | 190<br>(86-310)     | 4400<br>(2100-7300)    |
| Haiti    | 2005 | Male   | 70 to 74 | 47%<br>(30-65%)                | 53%<br>(35-70%)          | 1.7<br>(0.87-2.8)                           | 4.5%<br>(1.8-8%)                     | 5.2%<br>(2-9.2%)                    | 150<br>(55-260)     | 2800<br>(1100-4800)    |
| Haiti    | 2005 | Male   | 75 to 79 | 41%<br>(27-60%)                | 59%<br>(40-73%)          | 1.4<br>(0.68-2.4)                           | 3.5%<br>(1.3-6.4%)                   | 3.9%<br>(1.3-7.3%)                  | 100<br>(34-190)     | 1500<br>(520-2700)     |
| Haiti    | 2005 | Male   | 80 to 84 | 36%<br>(22-54%)                | 64%<br>(46-78%)          | 1.1<br>(0.59-1.9)                           | 2.8%<br>(1-5.2%)                     | 3.1%<br>(1-5.9%)                    | 62<br>(21-120)      | 670<br>(240-1300)      |
| Haiti    | 2005 | Male   | 85 to 89 | 33%<br>(21-47%)                | 67%<br>(53-79%)          | 1<br>(0.52-1.7)                             | 2.2%<br>(0.77-4.4%)                  | 2.4%<br>(0.75-4.9%)                 | 29<br>(9.2-60)      | 230<br>(80-460)        |
| Haiti    | 2005 | Male   | 90 to 94 | 34%<br>(22-49%)                | 66%<br>(51-78%)          | 1<br>(0.49-1.8)                             | 1.9%<br>(0.58-4.2%)                  | 2.1%<br>(0.5-4.6%)                  | 9.9<br>(2.4-22)     | 55<br>(16-120)         |
| Haiti    | 2005 | Male   | 95 plus  | 37%<br>(22-56%)                | 63%<br>(44-78%)          | 1.1<br>(0.45-2.1)                           | 2%<br>(0.34-4.7%)                    | 2.1%<br>(0.17-5.3%)                 | 2.6<br>(0.21-6.7)   | 9.9<br>(1.8-24)        |
| Haiti    | 2010 | Female | All Ages | 22%<br>(18-26%)                | 78%<br>(74-82%)          | 0.68<br>(0.57-0.81)                         | 0.54%<br>(0.26-1.1%)                 | 0.77%<br>(0.33-1.6%)                | 1000<br>(550-1600)  | 40000<br>(27000-57000) |
| Haiti    | 2010 | Female | 15 to 19 | 28%<br>(19-39%)                | 72%<br>(61-81%)          | 0.89<br>(0.49-1.4)                          | 0.4%<br>(0.14-1.1%)                  | 0.37%<br>(0.11-1.2%)                | 24<br>(12-41)       | 2100<br>(1200-3300)    |
| Haiti    | 2010 | Female | 20 to 24 | 31%<br>(22-42%)                | 69%<br>(58-78%)          | 1.3<br>(0.78-1.9)                           | 0.8%<br>(0.31-2.1%)                  | 0.69%<br>(0.22-2%)                  | 44<br>(24-72)       | 3800<br>(2400-5700)    |
| Haiti    | 2010 | Female | 25 to 29 | 29%<br>(20-40%)                | 71%<br>(60-80%)          | 1.2<br>(0.75-1.8)                           | 0.83%<br>(0.35-1.9%)                 | 0.72%<br>(0.26-2%)                  | 50<br>(27-82)       | 3900<br>(2500-6000)    |
| Haiti    | 2010 | Female | 30 to 34 | 27%<br>(17-39%)                | 73%<br>(61-83%)          | 1.2<br>(0.67-1.8)                           | 0.81%<br>(0.37-1.7%)                 | 0.72%<br>(0.29-1.7%)                | 46<br>(26-79)       | 3200<br>(2000-5000)    |
| Haiti    | 2010 | Female | 35 to 39 | 27%<br>(18-39%)                | 73%<br>(61-82%)          | 1.1<br>(0.61-1.7)                           | 0.95%<br>(0.43-1.9%)                 | 0.92%<br>(0.37-2.1%)                | 54<br>(28-94)       | 3200<br>(1800-5200)    |
| Haiti    | 2010 | Female | 40 to 44 | 27%<br>(18-38%)                | 73%<br>(62-82%)          | 1<br>(0.55-1.7)                             | 1.1%<br>(0.5-2.1%)                   | 1.2%<br>(0.47-2.4%)                 | 69<br>(35-120)      | 3500<br>(1900-5700)    |
| Haiti    | 2010 | Female | 45 to 49 | 28%<br>(17-39%)                | 72%<br>(61-83%)          | 1.1<br>(0.59-1.9)                           | 1.4%<br>(0.6-2.8%)                   | 1.5%<br>(0.58-3.2%)                 | 86<br>(41-160)      | 3800<br>(1900-6700)    |
| Haiti    | 2010 | Female | 50 to 54 | 28%<br>(18-42%)                | 72%<br>(58-82%)          | 1.1<br>(0.58-2)                             | 1.8%<br>(0.7-3.8%)                   | 2%<br>(0.74-4.4%)                   | 110<br>(49-210)     | 4200<br>(1800-7700)    |
| Haiti    | 2010 | Female | 55 to 59 | 26%<br>(16-40%)                | 74%<br>(60-84%)          | 1<br>(0.51-1.8)                             | 1.8%<br>(0.65-3.7%)                  | 2%<br>(0.67-4.3%)                   | 120<br>(49-220)     | 3800<br>(1600-7000)    |
| Haiti    | 2010 | Female | 60 to 64 | 23%<br>(13-36%)                | 77%<br>(64-87%)          | 0.85<br>(0.41-1.6)                          | 1.5%<br>(0.38-3.2%)                  | 1.6%<br>(0.42-3.5%)                 | 95<br>(28-200)      | 2600<br>(780-5400)     |

| Location | Year | Sex    | Age      | Prevalence of current drinkers | Prevalence of abstainers | Population average of standard drinks daily | Percent of total attributable deaths | Percent of total attributable DALYs | Attributable deaths | Attributable DALYs       |
|----------|------|--------|----------|--------------------------------|--------------------------|---------------------------------------------|--------------------------------------|-------------------------------------|---------------------|--------------------------|
| Haiti    | 2010 | Female | 65 to 69 | 21%<br>(13-32%)                | 79%<br>(68-87%)          | 0.74<br>(0.39-1.2)                          | 1.3%<br>(0.27-2.8%)                  | 1.4%<br>(0.29-3.2%)                 | 95<br>(21-200)      | 2200<br>(490-4400)       |
| Haiti    | 2010 | Female | 70 to 74 | 19%<br>(12-29%)                | 81%<br>(71-88%)          | 0.62<br>(0.31-1.1)                          | 1.1%<br>(0.1-2.7%)                   | 1.2%<br>(0.11-3%)                   | 84<br>(8.3-200)     | 1500<br>(150-3700)       |
| Haiti    | 2010 | Female | 75 to 79 | 16%<br>(9.8-26%)               | 84%<br>(74-90%)          | 0.53<br>(0.24-0.98)                         | 0.89%<br>(-0.048-2.4%)               | 0.97%<br>(-0.068-2.6%)              | 61<br>(-4.4-160)    | 870<br>(-55-2200)        |
| Haiti    | 2010 | Female | 80 to 84 | 15%<br>(9.1-24%)               | 85%<br>(76-91%)          | 0.5<br>(0.24-0.85)                          | 0.88%<br>(0.053-2.2%)                | 0.96%<br>(0.049-2.4%)               | 48<br>(2.8-110)     | 510<br>(36-1200)         |
| Haiti    | 2010 | Female | 85 to 89 | 15%<br>(9-24%)                 | 85%<br>(76-91%)          | 0.51<br>(0.24-0.91)                         | 0.9%<br>(0.048-2.3%)                 | 0.97%<br>(0.023-2.5%)               | 27<br>(0.46-70)     | 210<br>(8.6-510)         |
| Haiti    | 2010 | Female | 90 to 94 | 17%<br>(10-26%)                | 83%<br>(74-90%)          | 0.57<br>(0.27-1.1)                          | 1%<br>(0.035-2.6%)                   | 1.1%<br>(-0.016-2.9%)               | 11<br>(-0.16-29)    | 57<br>(1.9-150)          |
| Haiti    | 2010 | Female | 95 plus  | 20%<br>(11-32%)                | 80%<br>(68-89%)          | 0.68<br>(0.26-1.4)                          | 1.3%<br>(-0.12-3.5%)                 | 1.3%<br>(-0.23-3.9%)                | 3.2<br>(-0.56-10)   | 12<br>(-1.1-35)          |
| Haiti    | 2010 | Male   | All Ages | 47%<br>(41-53%)                | 53%<br>(47-59%)          | 2<br>(1.8-2.3)                              | 1.2%<br>(0.6-2.9%)                   | 1.7%<br>(0.77-4.1%)                 | 2800<br>(1900-3900) | 120000<br>(88000-160000) |
| Haiti    | 2010 | Male   | 15 to 19 | 55%<br>(44-68%)                | 45%<br>(32-56%)          | 1.8<br>(1.1-2.7)                            | 0.61%<br>(0.21-1.9%)                 | 0.53%<br>(0.16-1.7%)                | 67<br>(39-110)      | 5800<br>(3600-8900)      |
| Haiti    | 2010 | Male   | 20 to 24 | 68%<br>(58-77%)                | 32%<br>(23-42%)          | 3.6<br>(2.5-4.8)                            | 1.6%<br>(0.61-5.2%)                  | 1.5%<br>(0.49-5.2%)                 | 190<br>(120-300)    | 15000<br>(10000-22000)   |
| Haiti    | 2010 | Male   | 25 to 29 | 68%<br>(59-77%)                | 32%<br>(23-41%)          | 4.3<br>(2.9-5.8)                            | 2%<br>(0.79-6%)                      | 1.8%<br>(0.65-5.8%)                 | 230<br>(140-350)    | 16000<br>(11000-24000)   |
| Haiti    | 2010 | Male   | 30 to 34 | 66%<br>(57-74%)                | 34%<br>(26-43%)          | 4.3<br>(2.9-5.9)                            | 2.3%<br>(0.96-6%)                    | 2.1%<br>(0.81-6%)                   | 210<br>(130-320)    | 14000<br>(9100-20000)    |
| Haiti    | 2010 | Male   | 35 to 39 | 63%<br>(54-73%)                | 37%<br>(27-46%)          | 3.9<br>(2.4-5.7)                            | 2.5%<br>(1.1-6.2%)                   | 2.4%<br>(0.97-6.3%)                 | 200<br>(120-300)    | 11000<br>(7200-16000)    |
| Haiti    | 2010 | Male   | 40 to 44 | 61%<br>(52-71%)                | 39%<br>(29-48%)          | 3.6<br>(2.2-5.5)                            | 2.7%<br>(1.3-6.1%)                   | 2.6%<br>(1.1-6.5%)                  | 220<br>(130-330)    | 11000<br>(7000-16000)    |
| Haiti    | 2010 | Male   | 45 to 49 | 61%<br>(50-71%)                | 39%<br>(29-50%)          | 3.5<br>(2.2-5.4)                            | 3.1%<br>(1.5-6.9%)                   | 3.1%<br>(1.4-7.4%)                  | 250<br>(140-370)    | 11000<br>(6800-16000)    |
| Haiti    | 2010 | Male   | 50 to 54 | 58%<br>(47-69%)                | 42%<br>(31-53%)          | 3.2<br>(1.9-4.9)                            | 3.4%<br>(1.5-7.6%)                   | 3.5%<br>(1.4-8.3%)                  | 250<br>(140-380)    | 9800<br>(5600-14000)     |
| Haiti    | 2010 | Male   | 55 to 59 | 54%<br>(42-66%)                | 46%<br>(34-58%)          | 2.8<br>(1.6-4.4)                            | 3.8%<br>(1.7-7.8%)                   | 3.9%<br>(1.6-8.7%)                  | 250<br>(140-390)    | 8500<br>(5000-13000)     |
| Haiti    | 2010 | Male   | 60 to 64 | 51%<br>(35-68%)                | 49%<br>(32-65%)          | 2.5<br>(1.3-4.3)                            | 3.6%<br>(1.6-7.1%)                   | 3.7%<br>(1.5-8.1%)                  | 210<br>(110-340)    | 6000<br>(3100-9600)      |
| Haiti    | 2010 | Male   | 65 to 69 | 50%<br>(33-67%)                | 50%<br>(33-67%)          | 2.2<br>(1.2-3.6)                            | 3.7%<br>(1.7-6.9%)                   | 3.9%<br>(1.7-7.5%)                  | 230<br>(120-380)    | 5500<br>(2900-8800)      |
| Haiti    | 2010 | Male   | 70 to 74 | 47%<br>(30-64%)                | 53%<br>(36-70%)          | 1.9<br>(0.96-3.1)                           | 3.1%<br>(1.2-6%)                     | 3.3%<br>(1.2-6.5%)                  | 190<br>(76-330)     | 3600<br>(1500-6100)      |
| Haiti    | 2010 | Male   | 75 to 79 | 41%<br>(27-59%)                | 59%<br>(41-73%)          | 1.5<br>(0.74-2.6)                           | 2.6%<br>(0.89-5.1%)                  | 2.7%<br>(0.87-5.5%)                 | 130<br>(46-250)     | 1900<br>(710-3500)       |
| Haiti    | 2010 | Male   | 80 to 84 | 37%<br>(23-54%)                | 63%<br>(46-77%)          | 1.3<br>(0.66-2.1)                           | 2.2%<br>(0.76-4.4%)                  | 2.3%<br>(0.74-4.8%)                 | 81<br>(30-150)      | 880<br>(330-1600)        |

| Location | Year | Sex    | Age      | Prevalence of current drinkers | Prevalence of abstainers | Population average of standard drinks daily | Percent of total attributable deaths | Percent of total attributable DALYs | Attributable deaths | Attributable DALYs       |
|----------|------|--------|----------|--------------------------------|--------------------------|---------------------------------------------|--------------------------------------|-------------------------------------|---------------------|--------------------------|
| Haiti    | 2010 | Male   | 85 to 89 | 33%<br>(21-48%)                | 67%<br>(52-79%)          | 1.1<br>(0.57-1.9)                           | 1.9%<br>(0.72-3.8%)                  | 2%<br>(0.68-4.2%)                   | 40<br>(14-78)       | 310<br>(120-600)         |
| Haiti    | 2010 | Male   | 90 to 94 | 34%<br>(22-48%)                | 66%<br>(52-78%)          | 1.1<br>(0.55-2)                             | 1.8%<br>(0.54-3.7%)                  | 1.9%<br>(0.45-4%)                   | 13<br>(3.4-28)      | 73<br>(22-150)           |
| Haiti    | 2010 | Male   | 95 plus  | 37%<br>(22-55%)                | 63%<br>(45-78%)          | 1.2<br>(0.51-2.3)                           | 1.9%<br>(0.34-4.3%)                  | 1.9%<br>(0.22-4.7%)                 | 3.6<br>(0.46-8.8)   | 14<br>(2.8-32)           |
| Haiti    | 2016 | Female | All Ages | 23%<br>(19-27%)                | 77%<br>(73-81%)          | 0.74<br>(0.56-0.97)                         | 1.7%<br>(1-2.6%)                     | 2.3%<br>(1.1-3.9%)                  | 1100<br>(530-2000)  | 44000<br>(26000-67000)   |
| Haiti    | 2016 | Female | 15 to 19 | 30%<br>(22-41%)                | 70%<br>(59-78%)          | 0.98<br>(0.52-1.6)                          | 1.8%<br>(1-2.9%)                     | 2.7%<br>(1.3-4.5%)                  | 23<br>(11-39)       | 2100<br>(1100-3300)      |
| Haiti    | 2016 | Female | 20 to 24 | 33%<br>(25-44%)                | 67%<br>(56-75%)          | 1.4<br>(0.8-2.2)                            | 3.4%<br>(2-5.1%)                     | 4.6%<br>(2.4-7.4%)                  | 42<br>(21-74)       | 3800<br>(2200-6000)      |
| Haiti    | 2016 | Female | 25 to 29 | 30%<br>(22-41%)                | 70%<br>(59-78%)          | 1.3<br>(0.79-2.1)                           | 3.2%<br>(2.1-4.8%)                   | 4.1%<br>(2.2-6.6%)                  | 49<br>(25-83)       | 4000<br>(2400-6100)      |
| Haiti    | 2016 | Female | 30 to 34 | 28%<br>(19-39%)                | 72%<br>(61-81%)          | 1.2<br>(0.7-1.9)                            | 2.8%<br>(1.7-4.1%)                   | 3.5%<br>(2-5.5%)                    | 56<br>(30-93)       | 4000<br>(2400-6100)      |
| Haiti    | 2016 | Female | 35 to 39 | 28%<br>(20-41%)                | 72%<br>(59-80%)          | 1.2<br>(0.63-1.9)                           | 2.9%<br>(1.8-4.5%)                   | 3.7%<br>(2.1-5.8%)                  | 68<br>(33-120)      | 4000<br>(2200-6500)      |
| Haiti    | 2016 | Female | 40 to 44 | 28%<br>(20-39%)                | 72%<br>(61-80%)          | 1.1<br>(0.58-1.9)                           | 3.1%<br>(1.7-5.1%)                   | 4.1%<br>(2.2-6.7%)                  | 76<br>(37-130)      | 3900<br>(2000-6500)      |
| Haiti    | 2016 | Female | 45 to 49 | 26%<br>(17-39%)                | 74%<br>(61-83%)          | 1.1<br>(0.53-1.9)                           | 3.3%<br>(1.7-5.7%)                   | 4.4%<br>(2.3-7.5%)                  | 91<br>(43-170)      | 4000<br>(2000-7200)      |
| Haiti    | 2016 | Female | 50 to 54 | 27%<br>(17-40%)                | 73%<br>(60-83%)          | 1.1<br>(0.54-1.9)                           | 3.8%<br>(1.7-6.7%)                   | 4.8%<br>(2.2-8.6%)                  | 120<br>(53-230)     | 4700<br>(2100-8700)      |
| Haiti    | 2016 | Female | 55 to 59 | 26%<br>(16-39%)                | 74%<br>(61-84%)          | 1<br>(0.49-1.8)                             | 3.5%<br>(1.4-6.6%)                   | 4.4%<br>(1.7-8.3%)                  | 130<br>(50-250)     | 4100<br>(1600-8100)      |
| Haiti    | 2016 | Female | 60 to 64 | 23%<br>(13-36%)                | 77%<br>(64-87%)          | 0.86<br>(0.41-1.5)                          | 2.7%<br>(0.74-5.6%)                  | 3.3%<br>(0.89-6.8%)                 | 110<br>(30-240)     | 3100<br>(830-6700)       |
| Haiti    | 2016 | Female | 65 to 69 | 21%<br>(13-32%)                | 79%<br>(68-87%)          | 0.75<br>(0.39-1.3)                          | 2.2%<br>(0.43-4.8%)                  | 2.6%<br>(0.48-5.4%)                 | 98<br>(18-210)      | 2200<br>(420-4800)       |
| Haiti    | 2016 | Female | 70 to 74 | 19%<br>(12-29%)                | 81%<br>(71-88%)          | 0.63<br>(0.29-1.2)                          | 1.7%<br>(0.12-4.3%)                  | 2%<br>(0.14-5%)                     | 92<br>(6.4-230)     | 1700<br>(120-4100)       |
| Haiti    | 2016 | Female | 75 to 79 | 16%<br>(9.7-26%)               | 84%<br>(74-90%)          | 0.54<br>(0.24-1)                            | 1.3%<br>(-0.033-3.6%)                | 1.5%<br>(-0.03-4.1%)                | 75<br>(-1.7-200)    | 1100<br>(-26-2900)       |
| Haiti    | 2016 | Female | 80 to 84 | 15%<br>(8.8-24%)               | 85%<br>(76-91%)          | 0.5<br>(0.24-0.89)                          | 1.2%<br>(0.012-3.1%)                 | 1.4%<br>(-0.011-3.6%)               | 64<br>(-0.5-170)    | 670<br>(6.9-1700)        |
| Haiti    | 2016 | Female | 85 to 89 | 15%<br>(8.9-23%)               | 85%<br>(77-91%)          | 0.51<br>(0.23-0.98)                         | 1.2%<br>(0.072-3.3%)                 | 1.3%<br>(0.017-3.7%)                | 31<br>(0.38-89)     | 240<br>(14-660)          |
| Haiti    | 2016 | Female | 90 to 94 | 17%<br>(9.9-26%)               | 83%<br>(74-90%)          | 0.57<br>(0.25-1.1)                          | 1.3%<br>(0.027-3.5%)                 | 1.4%<br>(-0.056-4%)                 | 14<br>(-0.54-39)    | 71<br>(1.5-200)          |
| Haiti    | 2016 | Female | 95 plus  | 20%<br>(10-32%)                | 80%<br>(68-90%)          | 0.68<br>(0.25-1.4)                          | 1.4%<br>(-0.19-4.2%)                 | 1.5%<br>(-0.33-4.8%)                | 3.9<br>(-0.86-12)   | 14<br>(-1.9-43)          |
| Haiti    | 2016 | Male   | All Ages | 50%<br>(44-55%)                | 50%<br>(45-56%)          | 2.2<br>(1.7-2.9)                            | 5.5%<br>(3.8-7.4%)                   | 7%<br>(4.7-9.5%)                    | 3200<br>(2000-4600) | 140000<br>(96000-190000) |

| Location | Year | Sex    | Age      | Prevalence of current drinkers | Prevalence of abstainers | Population average of standard drinks daily | Percent of total attributable deaths | Percent of total attributable DALYs | Attributable deaths | Attributable DALYs     |
|----------|------|--------|----------|--------------------------------|--------------------------|---------------------------------------------|--------------------------------------|-------------------------------------|---------------------|------------------------|
| Haiti    | 2016 | Male   | 15 to 19 | 57%<br>(47-68%)                | 43%<br>(32-53%)          | 1.9<br>(1.1-2.9)                            | 4.8%<br>(3.1-7.2%)                   | 6.1%<br>(3.6-9.6%)                  | 72<br>(39-120)      | 6100<br>(3700-9600)    |
| Haiti    | 2016 | Male   | 20 to 24 | 70%<br>(61-78%)                | 30%<br>(22-39%)          | 3.8<br>(2.4-5.6)                            | 12%<br>(8.3-17%)                     | 15%<br>(9.6-21%)                    | 210<br>(120-330)    | 16000<br>(10000-24000) |
| Haiti    | 2016 | Male   | 25 to 29 | 70%<br>(61-77%)                | 30%<br>(23-39%)          | 4.5<br>(2.9-6.5)                            | 13%<br>(9.1-18%)                     | 16%<br>(11-22%)                     | 250<br>(150-380)    | 18000<br>(12000-26000) |
| Haiti    | 2016 | Male   | 30 to 34 | 68%<br>(60-76%)                | 32%<br>(24-40%)          | 4.5<br>(2.9-6.6)                            | 12%<br>(8.8-16%)                     | 15%<br>(10-21%)                     | 280<br>(160-430)    | 18000<br>(11000-26000) |
| Haiti    | 2016 | Male   | 35 to 39 | 65%<br>(56-74%)                | 35%<br>(26-44%)          | 4.1<br>(2.5-6.2)                            | 11%<br>(7.6-15%)                     | 13%<br>(8.6-19%)                    | 260<br>(150-390)    | 15000<br>(9000-22000)  |
| Haiti    | 2016 | Male   | 40 to 44 | 63%<br>(55-72%)                | 37%<br>(28-45%)          | 3.9<br>(2.2-5.9)                            | 11%<br>(7.2-14%)                     | 13%<br>(8.3-17%)                    | 240<br>(140-370)    | 12000<br>(7400-18000)  |
| Haiti    | 2016 | Male   | 45 to 49 | 63%<br>(53-72%)                | 37%<br>(28-47%)          | 3.7<br>(2.2-5.8)                            | 11%<br>(6.9-15%)                     | 13%<br>(8.1-18%)                    | 270<br>(150-410)    | 12000<br>(7300-18000)  |
| Haiti    | 2016 | Male   | 50 to 54 | 60%<br>(50-70%)                | 40%<br>(30-50%)          | 3.4<br>(1.9-5.4)                            | 10%<br>(6.2-14%)                     | 12%<br>(7.2-17%)                    | 300<br>(160-450)    | 12000<br>(6600-17000)  |
| Haiti    | 2016 | Male   | 55 to 59 | 55%<br>(44-67%)                | 45%<br>(33-56%)          | 2.9<br>(1.6-4.7)                            | 9.5%<br>(5.6-14%)                    | 12%<br>(6.6-17%)                    | 290<br>(160-450)    | 9900<br>(5500-15000)   |
| Haiti    | 2016 | Male   | 60 to 64 | 51%<br>(36-68%)                | 49%<br>(32-64%)          | 2.5<br>(1.3-4.4)                            | 7.9%<br>(4.1-12%)                    | 9.4%<br>(4.8-15%)                   | 280<br>(130-450)    | 7800<br>(3900-13000)   |
| Haiti    | 2016 | Male   | 65 to 69 | 50%<br>(33-68%)                | 50%<br>(32-67%)          | 2.3<br>(1.2-3.7)                            | 6.9%<br>(3.6-11%)                    | 8.1%<br>(4.1-13%)                   | 240<br>(110-400)    | 5500<br>(2600-9100)    |
| Haiti    | 2016 | Male   | 70 to 74 | 47%<br>(30-64%)                | 53%<br>(36-70%)          | 1.9<br>(0.9-3.3)                            | 5.3%<br>(2.1-9.2%)                   | 6.1%<br>(2.3-11%)                   | 210<br>(77-370)     | 3900<br>(1500-6900)    |
| Haiti    | 2016 | Male   | 75 to 79 | 41%<br>(27-60%)                | 59%<br>(40-73%)          | 1.5<br>(0.75-2.8)                           | 4.1%<br>(1.4-7.7%)                   | 4.6%<br>(1.5-8.7%)                  | 160<br>(52-300)     | 2300<br>(790-4300)     |
| Haiti    | 2016 | Male   | 80 to 84 | 37%<br>(22-53%)                | 63%<br>(47-78%)          | 1.3<br>(0.67-2.2)                           | 3.3%<br>(1.1-6.2%)                   | 3.7%<br>(1.2-7%)                    | 100<br>(33-200)     | 1100<br>(390-2100)     |
| Haiti    | 2016 | Male   | 85 to 89 | 33%<br>(21-47%)                | 67%<br>(53-79%)          | 1.1<br>(0.56-2)                             | 2.7%<br>(0.94-5.5%)                  | 3%<br>(0.94-6.3%)                   | 44<br>(14-92)       | 340<br>(120-700)       |
| Haiti    | 2016 | Male   | 90 to 94 | 34%<br>(21-49%)                | 66%<br>(51-79%)          | 1.1<br>(0.52-2.1)                           | 2.3%<br>(0.66-5%)                    | 2.5%<br>(0.58-5.7%)                 | 16<br>(3.7-36)      | 88<br>(25-190)         |
| Haiti    | 2016 | Male   | 95 plus  | 37%<br>(22-55%)                | 63%<br>(45-78%)          | 1.2<br>(0.5-2.3)                            | 2.4%<br>(0.44-5.6%)                  | 2.5%<br>(0.23-6.3%)                 | 3.9<br>(0.37-9.8)   | 15<br>(2.8-35)         |
| Jamaica  | 1990 | Female | All Ages | 25%<br>(20-31%)                | 75%<br>(69-80%)          | 0.82<br>(0.67-0.99)                         | 1.5%<br>(0.92-2.1%)                  | 2%<br>(0.78-3.6%)                   | 150<br>(57-270)     | 4900<br>(3100-7300)    |
| Jamaica  | 1990 | Female | 15 to 19 | 31%<br>(20-47%)                | 69%<br>(53-80%)          | 1<br>(0.55-1.8)                             | 1.6%<br>(1-2.4%)                     | 3.3%<br>(1.6-5.6%)                  | 1.8<br>(0.89-3.2)   | 250<br>(140-380)       |
| Jamaica  | 1990 | Female | 20 to 24 | 37%<br>(23-53%)                | 63%<br>(47-77%)          | 1.6<br>(0.88-2.5)                           | 3%<br>(2-4.1%)                       | 5.1%<br>(2.8-7.8%)                  | 3.3<br>(1.8-5.3)    | 460<br>(300-670)       |
| Jamaica  | 1990 | Female | 25 to 29 | 37%<br>(22-54%)                | 63%<br>(46-78%)          | 1.6<br>(0.95-2.5)                           | 3.1%<br>(2.2-4.3%)                   | 5.2%<br>(3-7.8%)                    | 3.7<br>(2.2-5.6)    | 450<br>(310-640)       |
| Jamaica  | 1990 | Female | 30 to 34 | 35%<br>(21-52%)                | 65%<br>(48-79%)          | 1.6<br>(0.89-2.5)                           | 3.1%<br>(2-4.4%)                     | 5.2%<br>(3.1-7.9%)                  | 4.6<br>(2.7-7.1)    | 430<br>(280-620)       |

| Location | Year | Sex    | Age      | Prevalence of current drinkers | Prevalence of abstainers | Population average of standard drinks daily | Percent of total attributable deaths | Percent of total attributable DALYs | Attributable deaths | Attributable DALYs     |
|----------|------|--------|----------|--------------------------------|--------------------------|---------------------------------------------|--------------------------------------|-------------------------------------|---------------------|------------------------|
| Jamaica  | 1990 | Female | 35 to 39 | 34%<br>(21-51%)                | 66%<br>(49-79%)          | 1.4<br>(0.76-2.4)                           | 2.9%<br>(1.8-4.3%)                   | 5%<br>(2.8-7.8%)                    | 4.7<br>(2.6-7.4)    | 350<br>(220-530)       |
| Jamaica  | 1990 | Female | 40 to 44 | 33%<br>(20-50%)                | 67%<br>(50-80%)          | 1.4<br>(0.68-2.3)                           | 3.1%<br>(1.7-4.9%)                   | 5.4%<br>(2.7-8.9%)                  | 6<br>(3-9.9)        | 350<br>(190-570)       |
| Jamaica  | 1990 | Female | 45 to 49 | 31%<br>(18-47%)                | 69%<br>(53-82%)          | 1.3<br>(0.64-2.3)                           | 3.2%<br>(1.6-5.5%)                   | 5.3%<br>(2.6-9.2%)                  | 7.5<br>(3.6-13)     | 370<br>(180-630)       |
| Jamaica  | 1990 | Female | 50 to 54 | 28%<br>(16-44%)                | 72%<br>(56-84%)          | 1.2<br>(0.58-2.1)                           | 3.3%<br>(1.4-5.9%)                   | 5%<br>(2-8.8%)                      | 10<br>(4.1-18)      | 410<br>(170-740)       |
| Jamaica  | 1990 | Female | 55 to 59 | 24%<br>(14-39%)                | 76%<br>(61-86%)          | 0.97<br>(0.46-1.7)                          | 2.7%<br>(0.93-5.2%)                  | 4.1%<br>(1.4-7.5%)                  | 11<br>(3.5-20)      | 370<br>(130-700)       |
| Jamaica  | 1990 | Female | 60 to 64 | 21%<br>(12-36%)                | 79%<br>(64-88%)          | 0.82<br>(0.38-1.5)                          | 2.3%<br>(0.47-4.6%)                  | 3.1%<br>(0.69-6.3%)                 | 13<br>(2.7-26)      | 370<br>(76-760)        |
| Jamaica  | 1990 | Female | 65 to 69 | 20%<br>(12-31%)                | 80%<br>(69-88%)          | 0.71<br>(0.36-1.2)                          | 1.9%<br>(0.38-4%)                    | 2.5%<br>(0.51-5.4%)                 | 14<br>(2.8-29)      | 330<br>(65-710)        |
| Jamaica  | 1990 | Female | 70 to 74 | 17%<br>(10-28%)                | 83%<br>(72-90%)          | 0.6<br>(0.28-1.1)                           | 1.5%<br>(0.074-3.7%)                 | 2%<br>(0.096-4.9%)                  | 14<br>(0.69-35)     | 260<br>(14-660)        |
| Jamaica  | 1990 | Female | 75 to 79 | 15%<br>(8.7-26%)               | 85%<br>(74-91%)          | 0.51<br>(0.22-0.98)                         | 1.2%<br>(-0.018-3.1%)                | 1.6%<br>(-0.038-3.9%)               | 14<br>(-0.32-35)    | 200<br>(-2.6-520)      |
| Jamaica  | 1990 | Female | 80 to 84 | 14%<br>(7.6-23%)               | 86%<br>(77-92%)          | 0.48<br>(0.21-0.85)                         | 1.2%<br>(0.11-2.7%)                  | 1.5%<br>(0.13-3.5%)                 | 16<br>(1.4-38)      | 180<br>(18-420)        |
| Jamaica  | 1990 | Female | 85 to 89 | 14%<br>(7.7-23%)               | 86%<br>(77-92%)          | 0.49<br>(0.23-0.91)                         | 1.2%<br>(0.15-2.9%)                  | 1.4%<br>(0.15-3.5%)                 | 12<br>(1.3-30)      | 96<br>(12-230)         |
| Jamaica  | 1990 | Female | 90 to 94 | 16%<br>(9-26%)                 | 84%<br>(74-91%)          | 0.56<br>(0.24-1.1)                          | 1.4%<br>(0.12-3.5%)                  | 1.6%<br>(0.066-4.2%)                | 8.9<br>(0.35-23)    | 47<br>(3.8-120)        |
| Jamaica  | 1990 | Female | 95 plus  | 19%<br>(9.5-33%)               | 81%<br>(67-91%)          | 0.68<br>(0.24-1.5)                          | 1.7%<br>(-0.018-4.7%)                | 1.9%<br>(-0.14-5.4%)                | 3.8<br>(-0.28-11)   | 13<br>(-0.15-36)       |
| Jamaica  | 1990 | Male   | All Ages | 45%<br>(36-54%)                | 55%<br>(46-64%)          | 1.9<br>(1.5-2.2)                            | 4.2%<br>(3.2-5.3%)                   | 5.4%<br>(3.4-7.5%)                  | 390<br>(250-530)    | 14000<br>(11000-18000) |
| Jamaica  | 1990 | Male   | 15 to 19 | 48%<br>(31-66%)                | 52%<br>(34-69%)          | 1.6<br>(0.86-2.6)                           | 4.6%<br>(2.9-6.6%)                   | 7.3%<br>(3.8-11%)                   | 6.4<br>(3.3-10)     | 700<br>(450-1000)      |
| Jamaica  | 1990 | Male   | 20 to 24 | 60%<br>(41-77%)                | 40%<br>(23-59%)          | 3.1<br>(1.9-4.5)                            | 10%<br>(7.1-13%)                     | 14%<br>(8.6-20%)                    | 17<br>(10-26)       | 1700<br>(1200-2300)    |
| Jamaica  | 1990 | Male   | 25 to 29 | 63%<br>(44-79%)                | 37%<br>(21-56%)          | 3.8<br>(2.4-5.6)                            | 11%<br>(7.7-14%)                     | 15%<br>(9.6-21%)                    | 19<br>(12-27)       | 1600<br>(1200-2200)    |
| Jamaica  | 1990 | Male   | 30 to 34 | 64%<br>(43-80%)                | 36%<br>(20-57%)          | 4<br>(2.4-6.1)                              | 10%<br>(7.3-13%)                     | 15%<br>(10-21%)                     | 18<br>(11-25)       | 1400<br>(960-1800)     |
| Jamaica  | 1990 | Male   | 35 to 39 | 64%<br>(46-80%)                | 36%<br>(20-54%)          | 3.8<br>(2.2-6)                              | 9.4%<br>(6.5-13%)                    | 14%<br>(9.1-20%)                    | 16<br>(10-24)       | 1100<br>(750-1500)     |
| Jamaica  | 1990 | Male   | 40 to 44 | 63%<br>(45-79%)                | 37%<br>(21-55%)          | 3.6<br>(1.9-5.9)                            | 8.8%<br>(5.9-12%)                    | 13%<br>(8.1-18%)                    | 17<br>(10-24)       | 970<br>(630-1300)      |
| Jamaica  | 1990 | Male   | 45 to 49 | 61%<br>(40-77%)                | 39%<br>(23-60%)          | 3.3<br>(1.7-5.6)                            | 8.4%<br>(5.3-12%)                    | 12%<br>(7.2-17%)                    | 18<br>(11-26)       | 920<br>(570-1300)      |
| Jamaica  | 1990 | Male   | 50 to 54 | 59%<br>(39-77%)                | 41%<br>(23-61%)          | 3<br>(1.5-5)                                | 7.9%<br>(4.7-11%)                    | 11%<br>(6.3-16%)                    | 22<br>(12-31)       | 920<br>(550-1300)      |

| Location | Year | Sex    | Age      | Prevalence of current drinkers | Prevalence of abstainers | Population average of standard drinks daily | Percent of total attributable deaths | Percent of total attributable DALYs | Attributable deaths | Attributable DALYs  |
|----------|------|--------|----------|--------------------------------|--------------------------|---------------------------------------------|--------------------------------------|-------------------------------------|---------------------|---------------------|
| Jamaica  | 1990 | Male   | 55 to 59 | 57%<br>(38-75%)                | 43%<br>(25-62%)          | 2.7<br>(1.4-4.5)                            | 7.6%<br>(4.3-11%)                    | 10%<br>(5.7-15%)                    | 28<br>(15-40)       | 990<br>(570-1400)   |
| Jamaica  | 1990 | Male   | 60 to 64 | 54%<br>(34-74%)                | 46%<br>(26-66%)          | 2.4<br>(1.2-4.2)                            | 6.7%<br>(3.3-10%)                    | 8.6%<br>(4.3-13%)                   | 34<br>(17-52)       | 1000<br>(510-1500)  |
| Jamaica  | 1990 | Male   | 65 to 69 | 53%<br>(33-71%)                | 47%<br>(29-67%)          | 2.1<br>(1.1-3.6)                            | 6.2%<br>(3.1-9.7%)                   | 7.8%<br>(4-12%)                     | 42<br>(21-65)       | 1000<br>(510-1600)  |
| Jamaica  | 1990 | Male   | 70 to 74 | 49%<br>(30-67%)                | 51%<br>(33-70%)          | 1.7<br>(0.82-3.1)                           | 4.9%<br>(2.1-8.5%)                   | 6.1%<br>(2.6-11%)                   | 42<br>(17-73)       | 810<br>(340-1400)   |
| Jamaica  | 1990 | Male   | 75 to 79 | 44%<br>(26-63%)                | 56%<br>(37-74%)          | 1.4<br>(0.68-2.6)                           | 3.9%<br>(1.5-6.9%)                   | 4.7%<br>(1.8-8.5%)                  | 38<br>(15-69)       | 580<br>(230-1000)   |
| Jamaica  | 1990 | Male   | 80 to 84 | 38%<br>(22-56%)                | 62%<br>(44-78%)          | 1.2<br>(0.59-2.1)                           | 3.3%<br>(1.3-5.9%)                   | 3.8%<br>(1.5-7%)                    | 35<br>(13-64)       | 380<br>(150-690)    |
| Jamaica  | 1990 | Male   | 85 to 89 | 34%<br>(19-50%)                | 66%<br>(50-81%)          | 1<br>(0.49-1.9)                             | 2.7%<br>(0.98-5.3%)                  | 3.1%<br>(1.1-6.3%)                  | 23<br>(7.9-45)      | 180<br>(64-340)     |
| Jamaica  | 1990 | Male   | 90 to 94 | 34%<br>(21-51%)                | 66%<br>(49-79%)          | 1<br>(0.46-1.9)                             | 2.5%<br>(0.73-5%)                    | 2.8%<br>(0.73-5.8%)                 | 9.5<br>(2.4-19)     | 51<br>(15-100)      |
| Jamaica  | 1990 | Male   | 95 plus  | 37%<br>(20-57%)                | 63%<br>(43-80%)          | 1.1<br>(0.44-2.3)                           | 2.5%<br>(0.49-5.6%)                  | 2.7%<br>(0.35-6.4%)                 | 2.4<br>(0.31-5.6)   | 8.9<br>(1.8-20)     |
| Jamaica  | 1995 | Female | All Ages | 25%<br>(20-31%)                | 75%<br>(69-80%)          | 0.79<br>(0.65-0.95)                         | 1.4%<br>(0.85-2.1%)                  | 1.7%<br>(0.55-3.1%)                 | 140<br>(46-250)     | 4700<br>(2900-7100) |
| Jamaica  | 1995 | Female | 15 to 19 | 32%<br>(20-47%)                | 68%<br>(53-80%)          | 0.98<br>(0.51-1.7)                          | 1.6%<br>(0.94-2.4%)                  | 3%<br>(1.4-5.2%)                    | 1.7<br>(0.82-3)     | 230<br>(130-360)    |
| Jamaica  | 1995 | Female | 20 to 24 | 37%<br>(23-54%)                | 63%<br>(46-77%)          | 1.5<br>(0.83-2.4)                           | 2.7%<br>(1.8-3.9%)                   | 4.2%<br>(2.2-6.5%)                  | 3.2<br>(1.6-5.1)    | 440<br>(280-650)    |
| Jamaica  | 1995 | Female | 25 to 29 | 37%<br>(22-54%)                | 63%<br>(46-78%)          | 1.5<br>(0.89-2.4)                           | 2.8%<br>(2-3.8%)                     | 4.1%<br>(2.4-6.1%)                  | 3.9<br>(2.1-6)      | 460<br>(310-670)    |
| Jamaica  | 1995 | Female | 30 to 34 | 36%<br>(21-53%)                | 64%<br>(47-79%)          | 1.5<br>(0.84-2.4)                           | 2.6%<br>(1.8-3.7%)                   | 4.1%<br>(2.4-6.2%)                  | 4.5<br>(2.5-7)      | 440<br>(290-630)    |
| Jamaica  | 1995 | Female | 35 to 39 | 35%<br>(21-52%)                | 65%<br>(48-79%)          | 1.4<br>(0.75-2.2)                           | 2.6%<br>(1.6-3.9%)                   | 4.2%<br>(2.5-6.6%)                  | 5.2<br>(2.9-8.6)    | 400<br>(240-620)    |
| Jamaica  | 1995 | Female | 40 to 44 | 33%<br>(21-51%)                | 67%<br>(49-79%)          | 1.3<br>(0.65-2.1)                           | 2.7%<br>(1.4-4.4%)                   | 4.6%<br>(2.4-7.6%)                  | 6.2<br>(3.2-11)     | 370<br>(200-610)    |
| Jamaica  | 1995 | Female | 45 to 49 | 31%<br>(18-48%)                | 69%<br>(52-82%)          | 1.2<br>(0.59-2.2)                           | 2.8%<br>(1.4-4.9%)                   | 4.5%<br>(2.2-8.2%)                  | 7.3<br>(3.4-13)     | 360<br>(170-650)    |
| Jamaica  | 1995 | Female | 50 to 54 | 28%<br>(16-45%)                | 72%<br>(55-84%)          | 1.1<br>(0.54-2)                             | 2.8%<br>(1.1-5.1%)                   | 4.3%<br>(1.8-7.7%)                  | 9<br>(3.7-17)       | 370<br>(150-700)    |
| Jamaica  | 1995 | Female | 55 to 59 | 25%<br>(14-40%)                | 75%<br>(60-86%)          | 0.92<br>(0.44-1.6)                          | 2.4%<br>(0.77-4.7%)                  | 3.5%<br>(1.2-6.6%)                  | 9.4<br>(3.1-19)     | 330<br>(110-650)    |
| Jamaica  | 1995 | Female | 60 to 64 | 22%<br>(12-36%)                | 78%<br>(64-88%)          | 0.78<br>(0.36-1.4)                          | 1.9%<br>(0.25-4.1%)                  | 2.6%<br>(0.38-5.6%)                 | 10<br>(1.5-22)      | 290<br>(40-670)     |
| Jamaica  | 1995 | Female | 65 to 69 | 20%<br>(12-31%)                | 80%<br>(69-88%)          | 0.68<br>(0.35-1.2)                          | 1.6%<br>(0.16-3.7%)                  | 2.1%<br>(0.29-4.8%)                 | 11<br>(1.5-25)      | 260<br>(29-610)     |
| Jamaica  | 1995 | Female | 70 to 74 | 18%<br>(11-29%)                | 82%<br>(71-89%)          | 0.56<br>(0.27-1)                            | 1.2%<br>(-0.12-3.3%)                 | 1.6%<br>(-0.1-4.2%)                 | 11<br>(-0.68-31)    | 220<br>(-23-590)    |

| Location | Year | Sex    | Age      | Prevalence of current drinkers | Prevalence of abstainers | Population average of standard drinks daily | Percent of total attributable deaths | Percent of total attributable DALYs | Attributable deaths | Attributable DALYs     |
|----------|------|--------|----------|--------------------------------|--------------------------|---------------------------------------------|--------------------------------------|-------------------------------------|---------------------|------------------------|
| Jamaica  | 1995 | Female | 75 to 79 | 16%<br>(8.9-26%)               | 84%<br>(74-91%)          | 0.49<br>(0.21-0.93)                         | 0.98%<br>(-0.2-2.9%)                 | 1.2%<br>(-0.23-3.5%)                | 11<br>(-2.1-34)     | 170<br>(-30-500)       |
| Jamaica  | 1995 | Female | 80 to 84 | 14%<br>(7.6-24%)               | 86%<br>(76-92%)          | 0.46<br>(0.21-0.82)                         | 0.97%<br>(-0.068-2.5%)               | 1.2%<br>(-0.078-3%)                 | 15<br>(-1-39)       | 160<br>(-10-410)       |
| Jamaica  | 1995 | Female | 85 to 89 | 14%<br>(8-23%)                 | 86%<br>(77-92%)          | 0.46<br>(0.22-0.85)                         | 1%<br>(-0.015-2.6%)                  | 1.2%<br>(-0.069-3.2%)               | 15<br>(-0.93-39)    | 120<br>(-1.7-300)      |
| Jamaica  | 1995 | Female | 90 to 94 | 16%<br>(9.1-26%)               | 84%<br>(74-91%)          | 0.53<br>(0.22-1)                            | 1.2%<br>(-0.071-3.2%)                | 1.3%<br>(-0.13-3.8%)                | 8.6<br>(-0.86-24)   | 46<br>(-2.8-130)       |
| Jamaica  | 1995 | Female | 95 plus  | 19%<br>(9.5-34%)               | 81%<br>(66-90%)          | 0.65<br>(0.22-1.3)                          | 1.4%<br>(-0.17-4.2%)                 | 1.6%<br>(-0.33-4.9%)                | 4<br>(-0.85-13)     | 14<br>(-1.7-43)        |
| Jamaica  | 1995 | Male   | All Ages | 46%<br>(37-55%)                | 54%<br>(45-63%)          | 1.8<br>(1.5-2.1)                            | 4.3%<br>(3.3-5.4%)                   | 5%<br>(3.2-7%)                      | 400<br>(250-570)    | 15000<br>(11000-19000) |
| Jamaica  | 1995 | Male   | 15 to 19 | 49%<br>(31-67%)                | 51%<br>(33-69%)          | 1.5<br>(0.8-2.4)                            | 4.5%<br>(2.8-6.6%)                   | 7%<br>(3.5-12%)                     | 6.6<br>(3.4-11)     | 700<br>(430-1000)      |
| Jamaica  | 1995 | Male   | 20 to 24 | 60%<br>(41-77%)                | 40%<br>(23-59%)          | 2.9<br>(1.8-4.3)                            | 9.5%<br>(6.5-13%)                    | 12%<br>(7.5-19%)                    | 18<br>(10-27)       | 1700<br>(1100-2400)    |
| Jamaica  | 1995 | Male   | 25 to 29 | 64%<br>(44-79%)                | 36%<br>(21-56%)          | 3.6<br>(2.2-5.1)                            | 9.6%<br>(6.8-13%)                    | 13%<br>(7.9-19%)                    | 20<br>(12-29)       | 1700<br>(1200-2400)    |
| Jamaica  | 1995 | Male   | 30 to 34 | 65%<br>(44-80%)                | 35%<br>(20-56%)          | 3.7<br>(2.2-5.5)                            | 8.9%<br>(6.2-12%)                    | 12%<br>(7.7-17%)                    | 19<br>(12-29)       | 1500<br>(1000-2100)    |
| Jamaica  | 1995 | Male   | 35 to 39 | 64%<br>(46-80%)                | 36%<br>(20-54%)          | 3.5<br>(2-5.5)                              | 8.4%<br>(5.9-12%)                    | 12%<br>(7.5-17%)                    | 20<br>(12-29)       | 1300<br>(890-1900)     |
| Jamaica  | 1995 | Male   | 40 to 44 | 63%<br>(45-79%)                | 37%<br>(21-55%)          | 3.3<br>(1.8-5.3)                            | 8%<br>(5.1-11%)                      | 11%<br>(6.8-16%)                    | 19<br>(11-28)       | 1100<br>(710-1600)     |
| Jamaica  | 1995 | Male   | 45 to 49 | 61%<br>(39-77%)                | 39%<br>(23-61%)          | 3.1<br>(1.6-5.3)                            | 7.5%<br>(4.7-11%)                    | 10%<br>(6.1-15%)                    | 20<br>(12-31)       | 1000<br>(620-1500)     |
| Jamaica  | 1995 | Male   | 50 to 54 | 59%<br>(39-77%)                | 41%<br>(23-61%)          | 2.8<br>(1.4-4.7)                            | 7.2%<br>(4.1-10%)                    | 9.7%<br>(5.4-14%)                   | 24<br>(13-35)       | 1000<br>(580-1500)     |
| Jamaica  | 1995 | Male   | 55 to 59 | 57%<br>(39-75%)                | 43%<br>(25-61%)          | 2.5<br>(1.3-4.2)                            | 6.9%<br>(3.8-10%)                    | 9.1%<br>(5-13%)                     | 29<br>(15-43)       | 1000<br>(570-1500)     |
| Jamaica  | 1995 | Male   | 60 to 64 | 55%<br>(35-74%)                | 45%<br>(26-65%)          | 2.3<br>(1.1-4)                              | 6.1%<br>(3.1-9.4%)                   | 7.8%<br>(3.8-12%)                   | 34<br>(17-53)       | 1000<br>(510-1600)     |
| Jamaica  | 1995 | Male   | 65 to 69 | 53%<br>(34-71%)                | 47%<br>(29-66%)          | 2<br>(1.1-3.3)                              | 5.6%<br>(2.8-9.2%)                   | 7%<br>(3.5-11%)                     | 43<br>(21-71)       | 1000<br>(530-1700)     |
| Jamaica  | 1995 | Male   | 70 to 74 | 49%<br>(31-67%)                | 51%<br>(33-69%)          | 1.6<br>(0.78-2.9)                           | 4.4%<br>(1.8-7.7%)                   | 5.3%<br>(2.2-9.4%)                  | 41<br>(16-72)       | 800<br>(330-1400)      |
| Jamaica  | 1995 | Male   | 75 to 79 | 44%<br>(26-64%)                | 56%<br>(36-74%)          | 1.3<br>(0.62-2.5)                           | 3.4%<br>(1.2-6.3%)                   | 4.1%<br>(1.5-7.5%)                  | 34<br>(12-63)       | 510<br>(190-940)       |
| Jamaica  | 1995 | Male   | 80 to 84 | 38%<br>(22-56%)                | 62%<br>(44-78%)          | 1.1<br>(0.55-1.9)                           | 2.8%<br>(1.1-5.2%)                   | 3.2%<br>(1.2-6.1%)                  | 31<br>(11-58)       | 340<br>(130-640)       |
| Jamaica  | 1995 | Male   | 85 to 89 | 34%<br>(19-50%)                | 66%<br>(50-81%)          | 0.96<br>(0.47-1.8)                          | 2.3%<br>(0.82-4.6%)                  | 2.7%<br>(0.87-5.4%)                 | 24<br>(8.1-49)      | 190<br>(68-390)        |
| Jamaica  | 1995 | Male   | 90 to 94 | 34%<br>(21-51%)                | 66%<br>(49-79%)          | 0.98<br>(0.44-1.8)                          | 2.1%<br>(0.58-4.5%)                  | 2.3%<br>(0.57-5.1%)                 | 12<br>(2.9-26)      | 64<br>(18-140)         |

| Location | Year | Sex    | Age      | Prevalence of current drinkers | Prevalence of abstainers | Population average of standard drinks daily | Percent of total attributable deaths | Percent of total attributable DALYs | Attributable deaths | Attributable DALYs     |
|----------|------|--------|----------|--------------------------------|--------------------------|---------------------------------------------|--------------------------------------|-------------------------------------|---------------------|------------------------|
| Jamaica  | 1995 | Male   | 95 plus  | 38%<br>(20-58%)                | 62%<br>(42-80%)          | 1.1<br>(0.41-2.1)                           | 2.2%<br>(0.4-5.1%)                   | 2.3%<br>(0.24-5.7%)                 | 3.3<br>(0.35-8.2)   | 12<br>(2.3-29)         |
| Jamaica  | 2000 | Female | All Ages | 26%<br>(21-33%)                | 74%<br>(67-79%)          | 0.75<br>(0.62-0.89)                         | 1.3%<br>(0.74-1.9%)                  | 1.3%<br>(0.38-2.6%)                 | 120<br>(34-230)     | 4400<br>(2600-6600)    |
| Jamaica  | 2000 | Female | 15 to 19 | 33%<br>(21-48%)                | 67%<br>(52-79%)          | 0.93<br>(0.49-1.6)                          | 1.4%<br>(0.87-2.1%)                  | 2.6%<br>(1.2-4.4%)                  | 1.4<br>(0.63-2.4)   | 200<br>(120-310)       |
| Jamaica  | 2000 | Female | 20 to 24 | 38%<br>(24-55%)                | 62%<br>(45-76%)          | 1.4<br>(0.75-2.2)                           | 2.5%<br>(1.6-3.4%)                   | 3.3%<br>(1.7-5.2%)                  | 2.4<br>(1.2-3.9)    | 370<br>(240-530)       |
| Jamaica  | 2000 | Female | 25 to 29 | 38%<br>(23-55%)                | 62%<br>(45-77%)          | 1.4<br>(0.81-2.2)                           | 2.5%<br>(1.7-3.5%)                   | 3%<br>(1.7-4.6%)                    | 3.8<br>(2.1-5.8)    | 450<br>(300-640)       |
| Jamaica  | 2000 | Female | 30 to 34 | 36%<br>(22-53%)                | 64%<br>(47-78%)          | 1.4<br>(0.78-2.1)                           | 2.3%<br>(1.6-3.3%)                   | 3.1%<br>(1.9-4.8%)                  | 4.7<br>(2.8-7.4)    | 460<br>(300-660)       |
| Jamaica  | 2000 | Female | 35 to 39 | 35%<br>(22-52%)                | 65%<br>(48-78%)          | 1.3<br>(0.7-2)                              | 2.3%<br>(1.5-3.4%)                   | 3.3%<br>(2-5.2%)                    | 5.9<br>(3.3-9.6)    | 450<br>(290-690)       |
| Jamaica  | 2000 | Female | 40 to 44 | 34%<br>(21-52%)                | 66%<br>(48-79%)          | 1.2<br>(0.62-2)                             | 2.3%<br>(1.3-3.8%)                   | 3.7%<br>(2-6%)                      | 7<br>(3.8-11)       | 420<br>(240-660)       |
| Jamaica  | 2000 | Female | 45 to 49 | 32%<br>(18-49%)                | 68%<br>(51-82%)          | 1.2<br>(0.57-2)                             | 2.4%<br>(1.3-4.3%)                   | 3.8%<br>(1.9-6.8%)                  | 7.6<br>(3.7-13)     | 370<br>(190-670)       |
| Jamaica  | 2000 | Female | 50 to 54 | 29%<br>(17-45%)                | 71%<br>(55-83%)          | 1<br>(0.52-1.8)                             | 2.3%<br>(0.88-4.4%)                  | 3.5%<br>(1.4-6.5%)                  | 8.4<br>(3.4-16)     | 350<br>(130-650)       |
| Jamaica  | 2000 | Female | 55 to 59 | 25%<br>(15-40%)                | 75%<br>(60-85%)          | 0.85<br>(0.4-1.5)                           | 1.9%<br>(0.53-3.8%)                  | 2.8%<br>(0.87-5.4%)                 | 8.2<br>(2.6-16)     | 290<br>(80-590)        |
| Jamaica  | 2000 | Female | 60 to 64 | 22%<br>(13-36%)                | 78%<br>(64-87%)          | 0.72<br>(0.33-1.3)                          | 1.5%<br>(0.011-3.3%)                 | 2%<br>(0.12-4.5%)                   | 8.5<br>(0.49-19)    | 250<br>(1.9-570)       |
| Jamaica  | 2000 | Female | 65 to 69 | 20%<br>(12-32%)                | 80%<br>(68-88%)          | 0.63<br>(0.32-1.1)                          | 1.1%<br>(-0.071-2.9%)                | 1.5%<br>(0.008-3.9%)                | 9<br>(0.047-23)     | 210<br>(-13-560)       |
| Jamaica  | 2000 | Female | 70 to 74 | 18%<br>(11-29%)                | 82%<br>(71-89%)          | 0.53<br>(0.26-1)                            | 0.88%<br>(-0.3-2.8%)                 | 1.2%<br>(-0.31-3.6%)                | 9.2<br>(-2.2-27)    | 170<br>(-57-530)       |
| Jamaica  | 2000 | Female | 75 to 79 | 16%<br>(9.2-27%)               | 84%<br>(73-91%)          | 0.46<br>(0.2-0.88)                          | 0.72%<br>(-0.4-2.3%)                 | 0.93%<br>(-0.45-3%)                 | 8.5<br>(-4.1-27)    | 120<br>(-66-410)       |
| Jamaica  | 2000 | Female | 80 to 84 | 15%<br>(8.1-25%)               | 85%<br>(75-92%)          | 0.43<br>(0.19-0.76)                         | 0.69%<br>(-0.26-2.1%)                | 0.84%<br>(-0.31-2.5%)               | 10<br>(-3.8-31)     | 110<br>(-40-340)       |
| Jamaica  | 2000 | Female | 85 to 89 | 15%<br>(8.2-24%)               | 85%<br>(76-92%)          | 0.44<br>(0.21-0.8)                          | 0.74%<br>(-0.19-2.2%)                | 0.85%<br>(-0.23-2.6%)               | 11<br>(-2.9-34)     | 86<br>(-21-260)        |
| Jamaica  | 2000 | Female | 90 to 94 | 17%<br>(9.5-26%)               | 83%<br>(74-91%)          | 0.49<br>(0.21-0.96)                         | 0.84%<br>(-0.21-2.7%)                | 0.93%<br>(-0.33-3.2%)               | 8.2<br>(-2.9-28)    | 45<br>(-11-140)        |
| Jamaica  | 2000 | Female | 95 plus  | 20%<br>(9.7-34%)               | 80%<br>(66-90%)          | 0.6<br>(0.21-1.2)                           | 1%<br>(-0.36-3.5%)                   | 1.1%<br>(-0.57-4.1%)                | 3.4<br>(-1.8-13)    | 13<br>(-4.4-44)        |
| Jamaica  | 2000 | Male   | All Ages | 47%<br>(39-56%)                | 53%<br>(44-61%)          | 1.7<br>(1.4-2)                              | 4.2%<br>(3.2-5.2%)                   | 4.4%<br>(2.9-6.2%)                  | 400<br>(260-570)    | 16000<br>(12000-20000) |
| Jamaica  | 2000 | Male   | 15 to 19 | 49%<br>(32-67%)                | 51%<br>(33-68%)          | 1.4<br>(0.75-2.3)                           | 4.2%<br>(2.6-6.1%)                   | 6.3%<br>(3.3-10%)                   | 6<br>(3.1-10)       | 650<br>(410-960)       |
| Jamaica  | 2000 | Male   | 20 to 24 | 61%<br>(42-77%)                | 39%<br>(23-58%)          | 2.7<br>(1.6-4)                              | 9%<br>(6.3-12%)                      | 11%<br>(6.8-17%)                    | 17<br>(10-26)       | 1600<br>(1100-2300)    |



| Location | Year | Sex    | Age      | Prevalence of current drinkers | Prevalence of abstainers | Population average of standard drinks daily | Percent of total attributable deaths | Percent of total attributable DALYs | Attributable deaths | Attributable DALYs  |
|----------|------|--------|----------|--------------------------------|--------------------------|---------------------------------------------|--------------------------------------|-------------------------------------|---------------------|---------------------|
| Jamaica  | 2000 | Male   | 25 to 29 | 64%<br>(45-80%)                | 36%<br>(20-55%)          | 3.3<br>(2-4.8)                              | 9%<br>(6.2-12%)                      | 11%<br>(6.8-16%)                    | 21<br>(13-31)       | 1800<br>(1200-2500) |
| Jamaica  | 2000 | Male   | 30 to 34 | 65%<br>(45-81%)                | 35%<br>(19-55%)          | 3.5<br>(2.1-5)                              | 8.1%<br>(5.7-11%)                    | 10%<br>(6.5-14%)                    | 23<br>(14-33)       | 1700<br>(1200-2400) |
| Jamaica  | 2000 | Male   | 35 to 39 | 65%<br>(47-80%)                | 35%<br>(20-53%)          | 3.2<br>(1.9-5)                              | 7.3%<br>(5-9.9%)                     | 9.1%<br>(5.7-13%)                   | 22<br>(14-33)       | 1500<br>(1000-2100) |
| Jamaica  | 2000 | Male   | 40 to 44 | 64%<br>(47-79%)                | 36%<br>(21-53%)          | 3.1<br>(1.7-4.8)                            | 6.9%<br>(4.6-9.6%)                   | 8.9%<br>(5.4-13%)                   | 23<br>(14-33)       | 1400<br>(880-1900)  |
| Jamaica  | 2000 | Male   | 45 to 49 | 62%<br>(41-78%)                | 38%<br>(22-59%)          | 2.9<br>(1.5-4.9)                            | 6.7%<br>(4.2-9.4%)                   | 8.6%<br>(5-13%)                     | 22<br>(13-34)       | 1100<br>(700-1700)  |
| Jamaica  | 2000 | Male   | 50 to 54 | 60%<br>(40-78%)                | 40%<br>(22-60%)          | 2.6<br>(1.3-4.5)                            | 6.3%<br>(3.7-9.3%)                   | 8.1%<br>(4.4-12%)                   | 25<br>(13-37)       | 1100<br>(610-1600)  |
| Jamaica  | 2000 | Male   | 55 to 59 | 58%<br>(40-76%)                | 42%<br>(24-60%)          | 2.3<br>(1.2-4)                              | 6.1%<br>(3.2-9.3%)                   | 7.8%<br>(4.1-12%)                   | 30<br>(16-47)       | 1100<br>(580-1700)  |
| Jamaica  | 2000 | Male   | 60 to 64 | 55%<br>(35-74%)                | 45%<br>(26-65%)          | 2.1<br>(1-3.6)                              | 5.4%<br>(2.6-8.6%)                   | 6.7%<br>(3.1-11%)                   | 34<br>(16-53)       | 1000<br>(480-1600)  |
| Jamaica  | 2000 | Male   | 65 to 69 | 54%<br>(35-72%)                | 46%<br>(28-65%)          | 1.8<br>(0.97-3)                             | 4.9%<br>(2.4-8.2%)                   | 5.9%<br>(2.9-9.9%)                  | 42<br>(20-71)       | 1000<br>(500-1700)  |
| Jamaica  | 2000 | Male   | 70 to 74 | 50%<br>(32-67%)                | 50%<br>(33-68%)          | 1.5<br>(0.75-2.7)                           | 3.8%<br>(1.5-6.7%)                   | 4.5%<br>(1.8-8%)                    | 41<br>(17-75)       | 820<br>(330-1400)   |
| Jamaica  | 2000 | Male   | 75 to 79 | 45%<br>(27-65%)                | 55%<br>(35-73%)          | 1.2<br>(0.58-2.2)                           | 2.9%<br>(1.1-5.5%)                   | 3.4%<br>(1.2-6.4%)                  | 33<br>(12-65)       | 510<br>(190-990)    |
| Jamaica  | 2000 | Male   | 80 to 84 | 39%<br>(22-57%)                | 61%<br>(43-78%)          | 1<br>(0.51-1.8)                             | 2.3%<br>(0.86-4.4%)                  | 2.6%<br>(0.96-5%)                   | 27<br>(9.9-52)      | 310<br>(110-570)    |
| Jamaica  | 2000 | Male   | 85 to 89 | 35%<br>(20-50%)                | 65%<br>(50-80%)          | 0.9<br>(0.44-1.6)                           | 1.9%<br>(0.69-3.9%)                  | 2.1%<br>(0.7-4.4%)                  | 21<br>(6.8-43)      | 170<br>(61-340)     |
| Jamaica  | 2000 | Male   | 90 to 94 | 35%<br>(21-51%)                | 65%<br>(49-79%)          | 0.9<br>(0.43-1.7)                           | 1.7%<br>(0.46-3.7%)                  | 1.8%<br>(0.42-4.2%)                 | 12<br>(2.7-27)      | 67<br>(18-140)      |
| Jamaica  | 2000 | Male   | 95 plus  | 38%<br>(20-59%)                | 62%<br>(41-80%)          | 1<br>(0.4-1.9)                              | 1.8%<br>(0.3-4.3%)                   | 1.8%<br>(0.12-4.8%)                 | 4.3<br>(0.28-11)    | 17<br>(2.8-40)      |
| Jamaica  | 2005 | Female | All Ages | 26%<br>(21-32%)                | 74%<br>(68-79%)          | 0.81<br>(0.67-0.98)                         | 1.5%<br>(0.91-2.2%)                  | 1.6%<br>(0.62-3.1%)                 | 150<br>(56-280)     | 5200<br>(3200-7700) |
| Jamaica  | 2005 | Female | 15 to 19 | 32%<br>(20-48%)                | 68%<br>(52-80%)          | 0.97<br>(0.51-1.7)                          | 1.5%<br>(0.91-2.3%)                  | 3%<br>(1.5-5.2%)                    | 1.5<br>(0.74-2.6)   | 210<br>(130-330)    |
| Jamaica  | 2005 | Female | 20 to 24 | 38%<br>(23-54%)                | 62%<br>(46-77%)          | 1.5<br>(0.78-2.4)                           | 2.7%<br>(1.8-3.8%)                   | 3.8%<br>(2-6.1%)                    | 3.3<br>(1.7-5.4)    | 430<br>(280-630)    |
| Jamaica  | 2005 | Female | 25 to 29 | 37%<br>(22-54%)                | 63%<br>(46-78%)          | 1.5<br>(0.84-2.4)                           | 2.6%<br>(1.8-3.7%)                   | 3.4%<br>(1.9-5.1%)                  | 3.9<br>(2.1-6.2)    | 450<br>(300-640)    |
| Jamaica  | 2005 | Female | 30 to 34 | 36%<br>(21-53%)                | 64%<br>(47-79%)          | 1.5<br>(0.81-2.3)                           | 2.4%<br>(1.6-3.5%)                   | 3.2%<br>(1.9-5.1%)                  | 4.5<br>(2.6-7.1)    | 440<br>(280-640)    |
| Jamaica  | 2005 | Female | 35 to 39 | 35%<br>(22-52%)                | 65%<br>(48-78%)          | 1.3<br>(0.74-2.2)                           | 2.4%<br>(1.6-3.6%)                   | 3.7%<br>(2.2-5.6%)                  | 6.9<br>(4.1-11)     | 520<br>(340-780)    |
| Jamaica  | 2005 | Female | 40 to 44 | 34%<br>(21-52%)                | 66%<br>(48-79%)          | 1.3<br>(0.66-2.1)                           | 2.5%<br>(1.4-3.8%)                   | 3.9%<br>(2.2-6.2%)                  | 8.8<br>(4.8-14)     | 540<br>(300-840)    |

| Location | Year | Sex    | Age      | Prevalence of current drinkers | Prevalence of abstainers | Population average of standard drinks daily | Percent of total attributable deaths | Percent of total attributable DALYs | Attributable deaths | Attributable DALYs     |
|----------|------|--------|----------|--------------------------------|--------------------------|---------------------------------------------|--------------------------------------|-------------------------------------|---------------------|------------------------|
| Jamaica  | 2005 | Female | 45 to 49 | 32%<br>(18-49%)                | 68%<br>(51-82%)          | 1.2<br>(0.6-2.1)                            | 2.6%<br>(1.4-4.5%)                   | 4.1%<br>(2.1-7%)                    | 11<br>(5.5-18)      | 530<br>(280-920)       |
| Jamaica  | 2005 | Female | 50 to 54 | 29%<br>(17-45%)                | 71%<br>(55-83%)          | 1.1<br>(0.55-1.9)                           | 2.5%<br>(1.1-4.6%)                   | 3.9%<br>(1.7-6.8%)                  | 11<br>(5.1-20)      | 470<br>(210-850)       |
| Jamaica  | 2005 | Female | 55 to 59 | 25%<br>(15-40%)                | 75%<br>(60-85%)          | 0.91<br>(0.43-1.6)                          | 2.1%<br>(0.66-4.2%)                  | 3.2%<br>(1.1-6%)                    | 9.6<br>(3.3-18)     | 340<br>(100-660)       |
| Jamaica  | 2005 | Female | 60 to 64 | 22%<br>(13-36%)                | 78%<br>(64-87%)          | 0.77<br>(0.36-1.4)                          | 1.7%<br>(0.2-3.7%)                   | 2.4%<br>(0.4-4.9%)                  | 10<br>(1.8-21)      | 300<br>(37-650)        |
| Jamaica  | 2005 | Female | 65 to 69 | 20%<br>(12-32%)                | 80%<br>(68-88%)          | 0.67<br>(0.34-1.1)                          | 1.4%<br>(0.076-3.2%)                 | 1.9%<br>(0.25-4.3%)                 | 10<br>(1.3-24)      | 250<br>(14-590)        |
| Jamaica  | 2005 | Female | 70 to 74 | 18%<br>(11-29%)                | 82%<br>(71-89%)          | 0.56<br>(0.26-1.1)                          | 1.1%<br>(-0.15-3.1%)                 | 1.5%<br>(-0.093-4%)                 | 11<br>(-0.75-31)    | 220<br>(-28-630)       |
| Jamaica  | 2005 | Female | 75 to 79 | 16%<br>(9.2-26%)               | 84%<br>(74-91%)          | 0.49<br>(0.22-0.92)                         | 0.87%<br>(-0.3-2.6%)                 | 1.1%<br>(-0.3-3.4%)                 | 11<br>(-3.1-33)     | 170<br>(-60-510)       |
| Jamaica  | 2005 | Female | 80 to 84 | 15%<br>(8.1-24%)               | 85%<br>(76-92%)          | 0.45<br>(0.21-0.8)                          | 0.84%<br>(-0.098-2.4%)               | 1%<br>(-0.12-2.9%)                  | 13<br>(-1.6-38)     | 150<br>(-18-420)       |
| Jamaica  | 2005 | Female | 85 to 89 | 15%<br>(8.1-23%)               | 85%<br>(77-92%)          | 0.46<br>(0.22-0.84)                         | 0.9%<br>(-0.085-2.5%)                | 1.1%<br>(-0.11-3%)                  | 14<br>(-1.4-39)     | 110<br>(-9.8-300)      |
| Jamaica  | 2005 | Female | 90 to 94 | 16%<br>(9.3-27%)               | 84%<br>(73-91%)          | 0.52<br>(0.22-1)                            | 1%<br>(-0.12-3%)                     | 1.2%<br>(-0.2-3.6%)                 | 11<br>(-1.9-33)     | 59<br>(-6.5-170)       |
| Jamaica  | 2005 | Female | 95 plus  | 20%<br>(9.6-35%)               | 80%<br>(65-90%)          | 0.63<br>(0.22-1.3)                          | 1.2%<br>(-0.29-3.8%)                 | 1.4%<br>(-0.45-4.5%)                | 5.9<br>(-1.9-19)    | 22<br>(-4.9-66)        |
| Jamaica  | 2005 | Male   | All Ages | 47%<br>(39-56%)                | 53%<br>(44-61%)          | 1.8<br>(1.5-2.2)                            | 4.9%<br>(3.8-6.1%)                   | 5%<br>(3.5-6.9%)                    | 460<br>(310-650)    | 18000<br>(14000-24000) |
| Jamaica  | 2005 | Male   | 15 to 19 | 49%<br>(31-67%)                | 51%<br>(33-69%)          | 1.5<br>(0.79-2.4)                           | 4.8%<br>(2.9-7.1%)                   | 7.3%<br>(3.7-12%)                   | 8.6<br>(4.3-14)     | 850<br>(510-1300)      |
| Jamaica  | 2005 | Male   | 20 to 24 | 61%<br>(42-77%)                | 39%<br>(23-58%)          | 2.9<br>(1.7-4.4)                            | 11%<br>(7.1-15%)                     | 13%<br>(7.7-20%)                    | 28<br>(16-41)       | 2300<br>(1500-3300)    |
| Jamaica  | 2005 | Male   | 25 to 29 | 64%<br>(44-79%)                | 36%<br>(21-56%)          | 3.5<br>(2.1-5.2)                            | 11%<br>(7.3-15%)                     | 14%<br>(8.3-20%)                    | 29<br>(17-43)       | 2200<br>(1500-3100)    |
| Jamaica  | 2005 | Male   | 30 to 34 | 65%<br>(44-80%)                | 35%<br>(20-56%)          | 3.7<br>(2.2-5.5)                            | 9.5%<br>(6.5-13%)                    | 12%<br>(7.7-17%)                    | 28<br>(18-41)       | 2000<br>(1400-2800)    |
| Jamaica  | 2005 | Male   | 35 to 39 | 65%<br>(47-80%)                | 35%<br>(20-53%)          | 3.5<br>(2-5.3)                              | 8.1%<br>(5.7-11%)                    | 10%<br>(6.6-15%)                    | 26<br>(17-39)       | 1700<br>(1200-2400)    |
| Jamaica  | 2005 | Male   | 40 to 44 | 63%<br>(46-79%)                | 37%<br>(21-54%)          | 3.3<br>(1.8-5.1)                            | 7.2%<br>(4.9-10%)                    | 9.4%<br>(6-14%)                     | 26<br>(16-38)       | 1500<br>(1000-2200)    |
| Jamaica  | 2005 | Male   | 45 to 49 | 61%<br>(41-78%)                | 39%<br>(22-59%)          | 3<br>(1.6-4.9)                              | 7%<br>(4.5-9.7%)                     | 9.2%<br>(5.6-13%)                   | 25<br>(15-36)       | 1300<br>(800-1800)     |
| Jamaica  | 2005 | Male   | 50 to 54 | 59%<br>(40-77%)                | 41%<br>(23-60%)          | 2.7<br>(1.4-4.6)                            | 6.5%<br>(3.9-9.4%)                   | 8.6%<br>(5.1-13%)                   | 29<br>(17-43)       | 1300<br>(770-1900)     |
| Jamaica  | 2005 | Male   | 55 to 59 | 57%<br>(39-76%)                | 43%<br>(24-61%)          | 2.5<br>(1.3-4.1)                            | 6.3%<br>(3.5-9.4%)                   | 8.3%<br>(4.5-12%)                   | 31<br>(17-47)       | 1100<br>(630-1700)     |
| Jamaica  | 2005 | Male   | 60 to 64 | 55%<br>(35-74%)                | 45%<br>(26-65%)          | 2.2<br>(1.1-3.9)                            | 5.7%<br>(2.9-8.8%)                   | 7.1%<br>(3.6-11%)                   | 36<br>(18-58)       | 1100<br>(550-1700)     |

| Location | Year | Sex    | Age      | Prevalence of current drinkers | Prevalence of abstainers | Population average of standard drinks daily | Percent of total attributable deaths | Percent of total attributable DALYs | Attributable deaths | Attributable DALYs  |
|----------|------|--------|----------|--------------------------------|--------------------------|---------------------------------------------|--------------------------------------|-------------------------------------|---------------------|---------------------|
| Jamaica  | 2005 | Male   | 65 to 69 | 54%<br>(34-72%)                | 46%<br>(28-66%)          | 1.9<br>(1-3.3)                              | 5.1%<br>(2.6-8.4%)                   | 6.4%<br>(3.2-10%)                   | 39<br>(20-64)       | 970<br>(490-1600)   |
| Jamaica  | 2005 | Male   | 70 to 74 | 50%<br>(31-67%)                | 50%<br>(33-69%)          | 1.6<br>(0.77-2.9)                           | 4%<br>(1.7-7.1%)                     | 4.8%<br>(2-8.7%)                    | 40<br>(17-73)       | 790<br>(330-1400)   |
| Jamaica  | 2005 | Male   | 75 to 79 | 44%<br>(27-64%)                | 56%<br>(36-73%)          | 1.3<br>(0.62-2.3)                           | 3.1%<br>(1.2-5.7%)                   | 3.7%<br>(1.4-6.8%)                  | 36<br>(14-67)       | 560<br>(220-1100)   |
| Jamaica  | 2005 | Male   | 80 to 84 | 39%<br>(22-57%)                | 61%<br>(43-78%)          | 1.1<br>(0.52-1.9)                           | 2.5%<br>(1-4.7%)                     | 2.9%<br>(1.2-5.4%)                  | 33<br>(13-61)       | 370<br>(150-700)    |
| Jamaica  | 2005 | Male   | 85 to 89 | 34%<br>(19-51%)                | 66%<br>(49-81%)          | 0.94<br>(0.46-1.7)                          | 2.1%<br>(0.81-4.2%)                  | 2.4%<br>(0.86-4.8%)                 | 24<br>(8.7-48)      | 190<br>(74-370)     |
| Jamaica  | 2005 | Male   | 90 to 94 | 35%<br>(21-52%)                | 65%<br>(48-79%)          | 0.95<br>(0.44-1.8)                          | 1.9%<br>(0.61-4.1%)                  | 2.1%<br>(0.59-4.7%)                 | 14<br>(3.8-31)      | 77<br>(24-160)      |
| Jamaica  | 2005 | Male   | 95 plus  | 38%<br>(20-58%)                | 62%<br>(42-80%)          | 1<br>(0.43-2)                               | 2%<br>(0.45-4.6%)                    | 2.1%<br>(0.3-5.2%)                  | 5.7<br>(0.8-14)     | 22<br>(4.7-50)      |
| Jamaica  | 2010 | Female | All Ages | 27%<br>(22-33%)                | 73%<br>(67-78%)          | 0.93<br>(0.75-1.2)                          | 1.7%<br>(1-2.6%)                     | 2%<br>(0.8-3.8%)                    | 200<br>(77-360)     | 6300<br>(3800-9600) |
| Jamaica  | 2010 | Female | 15 to 19 | 32%<br>(20-48%)                | 68%<br>(52-80%)          | 1.1<br>(0.55-1.9)                           | 1.7%<br>(1-2.7%)                     | 3.5%<br>(1.7-6.1%)                  | 2.1<br>(1-3.7)      | 270<br>(160-420)    |
| Jamaica  | 2010 | Female | 20 to 24 | 38%<br>(23-55%)                | 62%<br>(45-77%)          | 1.6<br>(0.86-2.6)                           | 2.9%<br>(1.9-4.1%)                   | 4.6%<br>(2.4-7.4%)                  | 3.5<br>(1.8-5.7)    | 480<br>(300-690)    |
| Jamaica  | 2010 | Female | 25 to 29 | 38%<br>(22-54%)                | 62%<br>(46-78%)          | 1.7<br>(0.95-2.6)                           | 3%<br>(2-4.2%)                       | 4.5%<br>(2.5-6.9%)                  | 4.1<br>(2.3-6.5)    | 490<br>(310-720)    |
| Jamaica  | 2010 | Female | 30 to 34 | 36%<br>(21-53%)                | 64%<br>(47-79%)          | 1.6<br>(0.89-2.6)                           | 2.8%<br>(1.9-4%)                     | 4.5%<br>(2.5-7.1%)                  | 4.6<br>(2.5-7.4)    | 450<br>(290-660)    |
| Jamaica  | 2010 | Female | 35 to 39 | 35%<br>(22-52%)                | 65%<br>(48-78%)          | 1.5<br>(0.81-2.4)                           | 2.8%<br>(1.8-4.1%)                   | 4.6%<br>(2.8-7.3%)                  | 6.5<br>(3.7-10)     | 500<br>(320-740)    |
| Jamaica  | 2010 | Female | 40 to 44 | 34%<br>(21-52%)                | 66%<br>(48-79%)          | 1.4<br>(0.75-2.3)                           | 2.8%<br>(1.6-4.3%)                   | 4.9%<br>(2.8-7.6%)                  | 9.5<br>(5.3-15)     | 580<br>(330-910)    |
| Jamaica  | 2010 | Female | 45 to 49 | 32%<br>(18-49%)                | 68%<br>(51-82%)          | 1.4<br>(0.67-2.3)                           | 2.9%<br>(1.5-4.9%)                   | 4.9%<br>(2.6-8.1%)                  | 12<br>(6.4-21)      | 610<br>(320-1100)   |
| Jamaica  | 2010 | Female | 50 to 54 | 29%<br>(17-45%)                | 71%<br>(55-83%)          | 1.2<br>(0.6-2.1)                            | 2.9%<br>(1.4-5.1%)                   | 4.6%<br>(2.1-7.8%)                  | 16<br>(7.1-27)      | 650<br>(290-1200)   |
| Jamaica  | 2010 | Female | 55 to 59 | 25%<br>(14-41%)                | 75%<br>(59-86%)          | 1<br>(0.47-1.8)                             | 2.6%<br>(0.95-4.8%)                  | 3.8%<br>(1.5-7%)                    | 14<br>(5.7-26)      | 500<br>(190-940)    |
| Jamaica  | 2010 | Female | 60 to 64 | 22%<br>(12-37%)                | 78%<br>(63-88%)          | 0.86<br>(0.4-1.6)                           | 2.1%<br>(0.47-4.5%)                  | 3%<br>(0.79-6.1%)                   | 14<br>(3.7-29)      | 420<br>(93-860)     |
| Jamaica  | 2010 | Female | 65 to 69 | 20%<br>(12-32%)                | 80%<br>(68-88%)          | 0.74<br>(0.38-1.3)                          | 1.7%<br>(0.3-4%)                     | 2.4%<br>(0.5-5.1%)                  | 14<br>(3.2-30)      | 340<br>(62-750)     |
| Jamaica  | 2010 | Female | 70 to 74 | 18%<br>(11-29%)                | 82%<br>(71-89%)          | 0.63<br>(0.29-1.2)                          | 1.4%<br>(0.015-3.7%)                 | 1.9%<br>(0.12-4.8%)                 | 15<br>(0.95-39)     | 290<br>(2.8-760)    |
| Jamaica  | 2010 | Female | 75 to 79 | 16%<br>(9.3-27%)               | 84%<br>(73-91%)          | 0.54<br>(0.23-1)                            | 1.2%<br>(-0.14-3.3%)                 | 1.5%<br>(-0.12-4.2%)                | 16<br>(-1.4-44)     | 240<br>(-30-670)    |
| Jamaica  | 2010 | Female | 80 to 84 | 15%<br>(7.9-24%)               | 85%<br>(76-92%)          | 0.51<br>(0.23-0.92)                         | 1.1%<br>(-0.033-2.9%)                | 1.4%<br>(-0.026-3.6%)               | 21<br>(-0.42-54)    | 230<br>(-6.9-580)   |

| Location | Year | Sex    | Age      | Prevalence of current drinkers | Prevalence of abstainers | Population average of standard drinks daily | Percent of total attributable deaths | Percent of total attributable DALYs | Attributable deaths | Attributable DALYs     |
|----------|------|--------|----------|--------------------------------|--------------------------|---------------------------------------------|--------------------------------------|-------------------------------------|---------------------|------------------------|
| Jamaica  | 2010 | Female | 85 to 89 | 15%<br>(8.3-23%)               | 85%<br>(77-92%)          | 0.51<br>(0.24-0.96)                         | 1.2%<br>(0.005-3%)                   | 1.4%<br>(-0.0075-3.6%)              | 20<br>(-0.11-52)    | 160<br>(0.63-410)      |
| Jamaica  | 2010 | Female | 90 to 94 | 16%<br>(9.3-26%)               | 84%<br>(74-91%)          | 0.58<br>(0.25-1.1)                          | 1.4%<br>(0.018-3.6%)                 | 1.6%<br>(-0.043-4.4%)               | 15<br>(-0.42-41)    | 80<br>(1.1-210)        |
| Jamaica  | 2010 | Female | 95 plus  | 20%<br>(9.8-34%)               | 80%<br>(66-90%)          | 0.7<br>(0.24-1.5)                           | 1.6%<br>(-0.13-4.6%)                 | 1.8%<br>(-0.28-5.4%)                | 7.9<br>(-1.2-24)    | 29<br>(-2.3-82)        |
| Jamaica  | 2010 | Male   | All Ages | 49%<br>(40-58%)                | 51%<br>(42-60%)          | 2.1<br>(1.7-2.6)                            | 5.6%<br>(4.2-7.3%)                   | 5.9%<br>(3.9-8%)                    | 600<br>(390-850)    | 22000<br>(17000-29000) |
| Jamaica  | 2010 | Male   | 15 to 19 | 49%<br>(32-67%)                | 51%<br>(33-68%)          | 1.6<br>(0.86-2.7)                           | 5.1%<br>(3.1-7.7%)                   | 7.8%<br>(4-13%)                     | 9.8<br>(4.9-16)     | 960<br>(590-1400)      |
| Jamaica  | 2010 | Male   | 20 to 24 | 60%<br>(42-77%)                | 40%<br>(23-58%)          | 3.2<br>(1.8-4.9)                            | 11%<br>(7.2-15%)                     | 14%<br>(8.2-21%)                    | 26<br>(15-41)       | 2300<br>(1500-3300)    |
| Jamaica  | 2010 | Male   | 25 to 29 | 64%<br>(44-79%)                | 36%<br>(21-56%)          | 3.9<br>(2.3-5.8)                            | 11%<br>(7.6-16%)                     | 16%<br>(9.4-23%)                    | 28<br>(17-43)       | 2300<br>(1500-3200)    |
| Jamaica  | 2010 | Male   | 30 to 34 | 65%<br>(45-80%)                | 35%<br>(20-55%)          | 4.1<br>(2.4-6.2)                            | 11%<br>(7.2-15%)                     | 15%<br>(9.3-22%)                    | 26<br>(16-39)       | 1900<br>(1200-2600)    |
| Jamaica  | 2010 | Male   | 35 to 39 | 65%<br>(48-80%)                | 35%<br>(20-52%)          | 3.8<br>(2.2-6)                              | 9.7%<br>(6.6-14%)                    | 14%<br>(8.6-20%)                    | 30<br>(18-45)       | 1900<br>(1200-2700)    |
| Jamaica  | 2010 | Male   | 40 to 44 | 64%<br>(47-79%)                | 36%<br>(21-53%)          | 3.6<br>(2-5.6)                              | 9.2%<br>(6-13%)                      | 13%<br>(8-19%)                      | 36<br>(21-54)       | 2000<br>(1300-2900)    |
| Jamaica  | 2010 | Male   | 45 to 49 | 62%<br>(41-78%)                | 38%<br>(22-59%)          | 3.3<br>(1.8-5.4)                            | 8.6%<br>(5.5-12%)                    | 12%<br>(7.3-17%)                    | 42<br>(24-61)       | 2000<br>(1300-2800)    |
| Jamaica  | 2010 | Male   | 50 to 54 | 59%<br>(40-77%)                | 41%<br>(23-60%)          | 3<br>(1.6-5)                                | 7.8%<br>(4.7-11%)                    | 10%<br>(5.9-15%)                    | 43<br>(25-63)       | 1800<br>(1100-2600)    |
| Jamaica  | 2010 | Male   | 55 to 59 | 57%<br>(39-75%)                | 43%<br>(25-61%)          | 2.8<br>(1.4-4.7)                            | 7.5%<br>(4.2-11%)                    | 9.7%<br>(5.4-14%)                   | 50<br>(27-72)       | 1800<br>(1000-2600)    |
| Jamaica  | 2010 | Male   | 60 to 64 | 55%<br>(35-74%)                | 45%<br>(26-65%)          | 2.5<br>(1.3-4.4)                            | 6.6%<br>(3.4-9.8%)                   | 8.2%<br>(4.2-12%)                   | 52<br>(26-80)       | 1600<br>(810-2400)     |
| Jamaica  | 2010 | Male   | 65 to 69 | 54%<br>(35-72%)                | 46%<br>(28-65%)          | 2.2<br>(1.1-3.7)                            | 6%<br>(3-9.4%)                       | 7.3%<br>(3.7-12%)                   | 54<br>(28-87)       | 1300<br>(680-2100)     |
| Jamaica  | 2010 | Male   | 70 to 74 | 50%<br>(31-67%)                | 50%<br>(33-69%)          | 1.8<br>(0.83-3.2)                           | 4.6%<br>(1.9-8%)                     | 5.5%<br>(2.3-9.4%)                  | 51<br>(22-91)       | 1000<br>(440-1800)     |
| Jamaica  | 2010 | Male   | 75 to 79 | 45%<br>(27-64%)                | 55%<br>(36-73%)          | 1.5<br>(0.67-2.6)                           | 3.7%<br>(1.4-6.7%)                   | 4.3%<br>(1.6-7.9%)                  | 46<br>(18-85)       | 710<br>(280-1300)      |
| Jamaica  | 2010 | Male   | 80 to 84 | 39%<br>(23-57%)                | 61%<br>(43-77%)          | 1.2<br>(0.59-2.2)                           | 3.1%<br>(1.3-5.6%)                   | 3.5%<br>(1.4-6.4%)                  | 46<br>(19-85)       | 520<br>(210-950)       |
| Jamaica  | 2010 | Male   | 85 to 89 | 35%<br>(20-51%)                | 65%<br>(49-80%)          | 1.1<br>(0.51-1.9)                           | 2.6%<br>(0.98-4.9%)                  | 2.9%<br>(1.1-5.6%)                  | 37<br>(14-72)       | 300<br>(110-560)       |
| Jamaica  | 2010 | Male   | 90 to 94 | 35%<br>(21-51%)                | 65%<br>(49-79%)          | 1.1<br>(0.48-2)                             | 2.4%<br>(0.8-4.8%)                   | 2.6%<br>(0.82-5.5%)                 | 20<br>(6.2-42)      | 110<br>(36-220)        |
| Jamaica  | 2010 | Male   | 95 plus  | 37%<br>(20-58%)                | 63%<br>(42-80%)          | 1.2<br>(0.46-2.3)                           | 2.4%<br>(0.53-5.4%)                  | 2.6%<br>(0.42-6%)                   | 7.5<br>(1.2-18)     | 28<br>(6.2-62)         |
| Jamaica  | 2016 | Female | All Ages | 27%<br>(22-33%)                | 73%<br>(67-78%)          | 1<br>(0.75-1.4)                             | 1.9%<br>(1.1-3.1%)                   | 2.3%<br>(0.79-4.4%)                 | 240<br>(80-470)     | 7300<br>(4000-12000)   |

| Location | Year | Sex    | Age      | Prevalence of current drinkers | Prevalence of abstainers | Population average of standard drinks daily | Percent of total attributable deaths | Percent of total attributable DALYs | Attributable deaths | Attributable DALYs     |
|----------|------|--------|----------|--------------------------------|--------------------------|---------------------------------------------|--------------------------------------|-------------------------------------|---------------------|------------------------|
| Jamaica  | 2016 | Female | 15 to 19 | 33%<br>(20-49%)                | 67%<br>(51-80%)          | 1.2<br>(0.58-2.1)                           | 1.8%<br>(1-2.9%)                     | 3.8%<br>(1.8-7%)                    | 2.2<br>(0.95-4)     | 270<br>(150-440)       |
| Jamaica  | 2016 | Female | 20 to 24 | 38%<br>(24-55%)                | 62%<br>(45-76%)          | 1.8<br>(0.87-3)                             | 3.1%<br>(1.9-4.4%)                   | 5.1%<br>(2.5-8.3%)                  | 3.8<br>(1.7-6.5)    | 520<br>(320-770)       |
| Jamaica  | 2016 | Female | 25 to 29 | 38%<br>(23-55%)                | 62%<br>(45-77%)          | 1.8<br>(0.96-3)                             | 3.1%<br>(2.1-4.5%)                   | 4.9%<br>(2.6-7.7%)                  | 4.3<br>(2.1-7.4)    | 530<br>(330-790)       |
| Jamaica  | 2016 | Female | 30 to 34 | 36%<br>(22-53%)                | 64%<br>(47-78%)          | 1.7<br>(0.95-2.9)                           | 3%<br>(1.9-4.3%)                     | 4.9%<br>(2.8-7.8%)                  | 5.1<br>(2.5-9)      | 520<br>(320-800)       |
| Jamaica  | 2016 | Female | 35 to 39 | 35%<br>(21-52%)                | 65%<br>(48-79%)          | 1.6<br>(0.81-2.7)                           | 2.9%<br>(1.8-4.4%)                   | 5%<br>(2.9-8%)                      | 6.4<br>(3.3-12)     | 510<br>(300-800)       |
| Jamaica  | 2016 | Female | 40 to 44 | 34%<br>(21-51%)                | 66%<br>(49-79%)          | 1.5<br>(0.74-2.5)                           | 3%<br>(1.6-4.9%)                     | 5.2%<br>(2.8-8.6%)                  | 9.1<br>(4.4-17)     | 570<br>(300-980)       |
| Jamaica  | 2016 | Female | 45 to 49 | 32%<br>(18-48%)                | 68%<br>(52-82%)          | 1.4<br>(0.68-2.5)                           | 3.1%<br>(1.6-5.5%)                   | 5.2%<br>(2.7-8.8%)                  | 13<br>(6.1-24)      | 660<br>(320-1200)      |
| Jamaica  | 2016 | Female | 50 to 54 | 29%<br>(17-45%)                | 71%<br>(55-83%)          | 1.3<br>(0.59-2.3)                           | 3.1%<br>(1.4-5.6%)                   | 4.9%<br>(2.2-8.5%)                  | 17<br>(7.4-32)      | 740<br>(320-1400)      |
| Jamaica  | 2016 | Female | 55 to 59 | 25%<br>(15-40%)                | 75%<br>(60-85%)          | 1.1<br>(0.5-1.9)                            | 2.8%<br>(0.99-5.5%)                  | 4.1%<br>(1.7-7.7%)                  | 20<br>(7.8-39)      | 720<br>(250-1500)      |
| Jamaica  | 2016 | Female | 60 to 64 | 22%<br>(13-36%)                | 78%<br>(64-87%)          | 0.92<br>(0.42-1.7)                          | 2.3%<br>(0.46-4.9%)                  | 3.2%<br>(0.87-6.6%)                 | 19<br>(4.9-40)      | 580<br>(130-1300)      |
| Jamaica  | 2016 | Female | 65 to 69 | 20%<br>(12-32%)                | 80%<br>(68-88%)          | 0.8<br>(0.38-1.4)                           | 1.9%<br>(0.28-4.4%)                  | 2.7%<br>(0.61-5.6%)                 | 19<br>(3.9-39)      | 450<br>(77-1000)       |
| Jamaica  | 2016 | Female | 70 to 74 | 18%<br>(11-30%)                | 82%<br>(70-89%)          | 0.67<br>(0.3-1.3)                           | 1.6%<br>(0.03-4.2%)                  | 2.1%<br>(0.13-5.3%)                 | 18<br>(1.1-46)      | 350<br>(6.1-910)       |
| Jamaica  | 2016 | Female | 75 to 79 | 16%<br>(9.2-27%)               | 84%<br>(73-91%)          | 0.58<br>(0.24-1.1)                          | 1.3%<br>(-0.16-3.6%)                 | 1.7%<br>(-0.18-4.7%)                | 19<br>(-2.2-49)     | 280<br>(-39-760)       |
| Jamaica  | 2016 | Female | 80 to 84 | 15%<br>(8.3-24%)               | 85%<br>(76-92%)          | 0.54<br>(0.24-1)                            | 1.3%<br>(-0.021-3.5%)                | 1.6%<br>(-0.041-4.3%)               | 26<br>(-0.71-69)    | 280<br>(-4.9-760)      |
| Jamaica  | 2016 | Female | 85 to 89 | 15%<br>(8.1-23%)               | 85%<br>(77-92%)          | 0.55<br>(0.23-1.1)                          | 1.3%<br>(0.067-3.4%)                 | 1.6%<br>(0.055-4.1%)                | 27<br>(0.97-70)     | 210<br>(11-540)        |
| Jamaica  | 2016 | Female | 90 to 94 | 16%<br>(9.3-26%)               | 84%<br>(74-91%)          | 0.62<br>(0.26-1.3)                          | 1.5%<br>(0.072-4%)                   | 1.7%<br>(-0.0062-4.7%)              | 20<br>(-0.074-54)   | 110<br>(4.8-280)       |
| Jamaica  | 2016 | Female | 95 plus  | 20%<br>(9.6-34%)               | 80%<br>(66-90%)          | 0.76<br>(0.27-1.6)                          | 1.8%<br>(-0.044-5%)                  | 2%<br>(-0.2-5.8%)                   | 9.5<br>(-0.95-27)   | 34<br>(-0.89-94)       |
| Jamaica  | 2016 | Male   | All Ages | 50%<br>(42-58%)                | 50%<br>(42-58%)          | 2.4<br>(1.7-3.3)                            | 6.1%<br>(4.4-8.1%)                   | 6.3%<br>(3.9-8.7%)                  | 720<br>(420-1100)   | 26000<br>(18000-36000) |
| Jamaica  | 2016 | Male   | 15 to 19 | 50%<br>(32-68%)                | 50%<br>(32-68%)          | 1.8<br>(0.87-3)                             | 5.4%<br>(3.2-8.4%)                   | 8.5%<br>(4.1-14%)                   | 10<br>(4.7-18)      | 990<br>(560-1600)      |
| Jamaica  | 2016 | Male   | 20 to 24 | 61%<br>(42-77%)                | 39%<br>(23-58%)          | 3.4<br>(1.8-5.6)                            | 11%<br>(7.7-17%)                     | 15%<br>(8.8-24%)                    | 28<br>(15-48)       | 2500<br>(1600-3800)    |
| Jamaica  | 2016 | Male   | 25 to 29 | 64%<br>(45-79%)                | 36%<br>(21-55%)          | 4.2<br>(2.4-6.9)                            | 12%<br>(8.2-17%)                     | 17%<br>(10-25%)                     | 33<br>(19-53)       | 2700<br>(1700-3900)    |
| Jamaica  | 2016 | Male   | 30 to 34 | 65%<br>(45-81%)                | 35%<br>(19-55%)          | 4.4<br>(2.5-7.1)                            | 11%<br>(7.7-15%)                     | 16%<br>(9.9-23%)                    | 31<br>(18-48)       | 2200<br>(1500-3200)    |

| Location    | Year | Sex    | Age      | Prevalence of current drinkers | Prevalence of abstainers | Population average of standard drinks daily | Percent of total attributable deaths | Percent of total attributable DALYs | Attributable deaths | Attributable DALYs  |
|-------------|------|--------|----------|--------------------------------|--------------------------|---------------------------------------------|--------------------------------------|-------------------------------------|---------------------|---------------------|
| Jamaica     | 2016 | Male   | 35 to 39 | 65%<br>(48-80%)                | 35%<br>(20-52%)          | 4.1<br>(2.3-6.7)                            | 10%<br>(7.1-14%)                     | 15%<br>(9.3-21%)                    | 29<br>(17-45)       | 1900<br>(1200-2800) |
| Jamaica     | 2016 | Male   | 40 to 44 | 64%<br>(47-79%)                | 36%<br>(21-53%)          | 3.9<br>(2-6.3)                              | 9.7%<br>(6.4-13%)                    | 14%<br>(8.5-19%)                    | 35<br>(20-53)       | 2000<br>(1200-2900) |
| Jamaica     | 2016 | Male   | 45 to 49 | 62%<br>(40-78%)                | 38%<br>(22-60%)          | 3.6<br>(1.8-6.2)                            | 9.1%<br>(5.8-13%)                    | 12%<br>(7.8-17%)                    | 46<br>(26-71)       | 2300<br>(1400-3300) |
| Jamaica     | 2016 | Male   | 50 to 54 | 60%<br>(41-77%)                | 40%<br>(23-59%)          | 3.2<br>(1.6-5.5)                            | 8.2%<br>(5-12%)                      | 11%<br>(6.4-15%)                    | 55<br>(29-85)       | 2300<br>(1300-3500) |
| Jamaica     | 2016 | Male   | 55 to 59 | 57%<br>(39-75%)                | 43%<br>(25-61%)          | 2.9<br>(1.4-5.1)                            | 7.7%<br>(4.2-11%)                    | 10%<br>(5.4-14%)                    | 61<br>(30-95)       | 2200<br>(1100-3300) |
| Jamaica     | 2016 | Male   | 60 to 64 | 55%<br>(35-74%)                | 45%<br>(26-65%)          | 2.6<br>(1.3-4.8)                            | 6.8%<br>(3.5-10%)                    | 8.4%<br>(4.4-13%)                   | 68<br>(32-110)      | 2100<br>(1000-3300) |
| Jamaica     | 2016 | Male   | 65 to 69 | 54%<br>(34-72%)                | 46%<br>(28-66%)          | 2.3<br>(1.1-4)                              | 6.2%<br>(3.2-9.8%)                   | 7.6%<br>(3.8-12%)                   | 72<br>(34-120)      | 1800<br>(870-2900)  |
| Jamaica     | 2016 | Male   | 70 to 74 | 50%<br>(32-67%)                | 50%<br>(33-68%)          | 1.9<br>(0.88-3.5)                           | 4.9%<br>(2-8.3%)                     | 5.8%<br>(2.4-10%)                   | 63<br>(25-110)      | 1200<br>(510-2200)  |
| Jamaica     | 2016 | Male   | 75 to 79 | 45%<br>(27-64%)                | 55%<br>(36-73%)          | 1.6<br>(0.68-2.9)                           | 3.9%<br>(1.5-7%)                     | 4.6%<br>(1.7-8.3%)                  | 56<br>(19-100)      | 850<br>(310-1500)   |
| Jamaica     | 2016 | Male   | 80 to 84 | 39%<br>(23-57%)                | 61%<br>(43-77%)          | 1.3<br>(0.6-2.3)                            | 3.3%<br>(1.2-5.9%)                   | 3.8%<br>(1.4-6.7%)                  | 55<br>(20-100)      | 620<br>(230-1100)   |
| Jamaica     | 2016 | Male   | 85 to 89 | 35%<br>(20-51%)                | 65%<br>(49-80%)          | 1.1<br>(0.51-2.1)                           | 2.8%<br>(1-5.4%)                     | 3.2%<br>(1.1-6.1%)                  | 43<br>(14-84)       | 340<br>(120-650)    |
| Jamaica     | 2016 | Male   | 90 to 94 | 35%<br>(21-51%)                | 65%<br>(49-79%)          | 1.1<br>(0.49-2.2)                           | 2.6%<br>(0.81-5.1%)                  | 2.8%<br>(0.83-5.8%)                 | 26<br>(7.5-54)      | 140<br>(44-280)     |
| Jamaica     | 2016 | Male   | 95 plus  | 37%<br>(20-58%)                | 63%<br>(42-80%)          | 1.2<br>(0.46-2.5)                           | 2.6%<br>(0.63-5.8%)                  | 2.8%<br>(0.5-6.6%)                  | 9.2<br>(1.6-21)     | 35<br>(8.7-77)      |
| Saint Lucia | 1990 | Female | All Ages | 34%<br>(28-41%)                | 66%<br>(59-72%)          | 1.3<br>(1.1-1.5)                            | 3.4%<br>(2.5-4.5%)                   | 4.6%<br>(2.8-6.8%)                  | 19<br>(12-28)       | 650<br>(490-850)    |
| Saint Lucia | 1990 | Female | 15 to 19 | 43%<br>(29-59%)                | 57%<br>(41-71%)          | 1.7<br>(0.95-2.7)                           | 3%<br>(1.9-4.4%)                     | 7%<br>(4.2-10%)                     | 0.3<br>(0.18-0.46)  | 30<br>(20-44)       |
| Saint Lucia | 1990 | Female | 20 to 24 | 49%<br>(33-65%)                | 51%<br>(35-67%)          | 2.5<br>(1.5-3.8)                            | 4.9%<br>(3.5-6.6%)                   | 9.6%<br>(6.5-13%)                   | 0.45<br>(0.3-0.62)  | 46<br>(33-62)       |
| Saint Lucia | 1990 | Female | 25 to 29 | 48%<br>(32-65%)                | 52%<br>(35-68%)          | 2.6<br>(1.6-3.9)                            | 5.8%<br>(4.2-7.7%)                   | 9.9%<br>(7-13%)                     | 0.69<br>(0.48-0.93) | 59<br>(43-78)       |
| Saint Lucia | 1990 | Female | 30 to 34 | 46%<br>(30-64%)                | 54%<br>(36-70%)          | 2.5<br>(1.5-3.9)                            | 5.6%<br>(4-7.3%)                     | 9.7%<br>(7-13%)                     | 0.62<br>(0.44-0.83) | 48<br>(35-63)       |
| Saint Lucia | 1990 | Female | 35 to 39 | 45%<br>(30-63%)                | 55%<br>(37-70%)          | 2.4<br>(1.4-3.8)                            | 6.1%<br>(4.4-8.3%)                   | 10%<br>(7.4-14%)                    | 0.75<br>(0.54-1)    | 47<br>(34-64)       |
| Saint Lucia | 1990 | Female | 40 to 44 | 44%<br>(30-63%)                | 56%<br>(37-70%)          | 2.3<br>(1.2-3.7)                            | 6.6%<br>(4.4-9.2%)                   | 11%<br>(7.1-15%)                    | 1<br>(0.7-1.4)      | 55<br>(37-77)       |
| Saint Lucia | 1990 | Female | 45 to 49 | 42%<br>(27-59%)                | 58%<br>(41-73%)          | 2.2<br>(1.2-3.7)                            | 6.5%<br>(4.1-9.9%)                   | 10%<br>(6.4-15%)                    | 1.1<br>(0.72-1.7)   | 52<br>(33-78)       |
| Saint Lucia | 1990 | Female | 50 to 54 | 39%<br>(24-56%)                | 61%<br>(44-76%)          | 2<br>(1-3.3)                                | 7%<br>(4.2-11%)                      | 9.8%<br>(5.9-15%)                   | 1.7<br>(1-2.6)      | 67<br>(40-100)      |

| Location    | Year | Sex    | Age      | Prevalence of current drinkers | Prevalence of abstainers | Population average of standard drinks daily | Percent of total attributable deaths | Percent of total attributable DALYs | Attributable deaths  | Attributable DALYs  |
|-------------|------|--------|----------|--------------------------------|--------------------------|---------------------------------------------|--------------------------------------|-------------------------------------|----------------------|---------------------|
| Saint Lucia | 1990 | Female | 55 to 59 | 34%<br>(21-51%)                | 66%<br>(49-79%)          | 1.7<br>(0.86-2.8)                           | 5.6%<br>(3-9%)                       | 8.2%<br>(4.6-13%)                   | 1.5<br>(0.81-2.3)    | 51<br>(28-81)       |
| Saint Lucia | 1990 | Female | 60 to 64 | 31%<br>(18-47%)                | 69%<br>(53-82%)          | 1.4<br>(0.71-2.5)                           | 4.9%<br>(2.2-8.5%)                   | 6.3%<br>(2.8-11%)                   | 1.9<br>(0.86-3.3)    | 55<br>(24-95)       |
| Saint Lucia | 1990 | Female | 65 to 69 | 28%<br>(18-42%)                | 72%<br>(58-82%)          | 1.2<br>(0.67-2)                             | 3.9%<br>(1.7-6.9%)                   | 5.2%<br>(2.3-8.8%)                  | 1.9<br>(0.86-3.2)    | 45<br>(19-77)       |
| Saint Lucia | 1990 | Female | 70 to 74 | 26%<br>(16-39%)                | 74%<br>(61-84%)          | 1<br>(0.53-1.9)                             | 3.1%<br>(0.89-6.3%)                  | 4%<br>(1.3-7.9%)                    | 2.1<br>(0.65-4.1)    | 40<br>(12-80)       |
| Saint Lucia | 1990 | Female | 75 to 79 | 23%<br>(13-37%)                | 77%<br>(63-87%)          | 0.9<br>(0.41-1.6)                           | 2.4%<br>(0.52-5.1%)                  | 3.2%<br>(0.69-6.6%)                 | 1.6<br>(0.34-3.2)    | 23<br>(5-49)        |
| Saint Lucia | 1990 | Female | 80 to 84 | 21%<br>(12-33%)                | 79%<br>(67-88%)          | 0.84<br>(0.4-1.4)                           | 2.4%<br>(0.68-4.9%)                  | 2.9%<br>(0.81-5.9%)                 | 1.7<br>(0.47-3.4)    | 18<br>(5-36)        |
| Saint Lucia | 1990 | Female | 85 to 89 | 21%<br>(12-32%)                | 79%<br>(68-88%)          | 0.86<br>(0.42-1.6)                          | 2.4%<br>(0.67-5%)                    | 2.8%<br>(0.74-5.9%)                 | 1<br>(0.27-2.1)      | 7.6<br>(2.1-16)     |
| Saint Lucia | 1990 | Female | 90 to 94 | 23%<br>(14-36%)                | 77%<br>(64-86%)          | 0.99<br>(0.44-1.9)                          | 2.6%<br>(0.62-5.9%)                  | 3.1%<br>(0.62-6.9%)                 | 0.56<br>(0.11-1.3)   | 2.9<br>(0.67-6.5)   |
| Saint Lucia | 1990 | Female | 95 plus  | 28%<br>(15-45%)                | 72%<br>(55-85%)          | 1.2<br>(0.45-2.3)                           | 3.1%<br>(0.36-7.3%)                  | 3.5%<br>(0.25-8.5%)                 | 0.21<br>(0.016-0.51) | 0.74<br>(0.086-1.7) |
| Saint Lucia | 1990 | Male   | All Ages | 55%<br>(47-63%)                | 45%<br>(37-53%)          | 2.7<br>(2.4-3)                              | 8.8%<br>(7.1-10%)                    | 11%<br>(8.3-14%)                    | 53<br>(40-66)        | 1900<br>(1600-2300) |
| Saint Lucia | 1990 | Male   | 15 to 19 | 60%<br>(42-75%)                | 40%<br>(25-58%)          | 2.5<br>(1.4-3.8)                            | 6.6%<br>(4.3-9.4%)                   | 11%<br>(6.6-16%)                    | 0.8<br>(0.49-1.2)    | 73<br>(48-100)      |
| Saint Lucia | 1990 | Male   | 20 to 24 | 69%<br>(52-83%)                | 31%<br>(17-48%)          | 4.6<br>(3.1-6.4)                            | 14%<br>(11-19%)                      | 19%<br>(14-26%)                     | 2.4<br>(1.7-3.3)     | 190<br>(140-250)    |
| Saint Lucia | 1990 | Male   | 25 to 29 | 72%<br>(56-84%)                | 28%<br>(16-44%)          | 5.5<br>(3.7-7.5)                            | 15%<br>(12-19%)                      | 22%<br>(16-28%)                     | 2.4<br>(1.7-3.1)     | 180<br>(140-230)    |
| Saint Lucia | 1990 | Male   | 30 to 34 | 73%<br>(56-85%)                | 27%<br>(15-44%)          | 5.8<br>(3.8-8)                              | 16%<br>(12-20%)                      | 22%<br>(17-27%)                     | 2.7<br>(2.1-3.4)     | 180<br>(140-220)    |
| Saint Lucia | 1990 | Male   | 35 to 39 | 73%<br>(57-85%)                | 27%<br>(15-43%)          | 5.5<br>(3.5-8.2)                            | 16%<br>(12-20%)                      | 21%<br>(16-27%)                     | 3<br>(2.2-3.7)       | 170<br>(130-210)    |
| Saint Lucia | 1990 | Male   | 40 to 44 | 72%<br>(57-85%)                | 28%<br>(15-43%)          | 5.3<br>(3.1-7.8)                            | 16%<br>(12-20%)                      | 21%<br>(16-26%)                     | 3.1<br>(2.3-3.8)     | 160<br>(120-200)    |
| Saint Lucia | 1990 | Male   | 45 to 49 | 70%<br>(52-84%)                | 30%<br>(16-48%)          | 5<br>(2.9-8)                                | 16%<br>(12-20%)                      | 20%<br>(15-25%)                     | 3.4<br>(2.5-4.3)     | 150<br>(110-190)    |
| Saint Lucia | 1990 | Male   | 50 to 54 | 69%<br>(51-83%)                | 31%<br>(17-49%)          | 4.6<br>(2.6-7.1)                            | 14%<br>(10-18%)                      | 19%<br>(13-23%)                     | 3.5<br>(2.4-4.4)     | 140<br>(99-180)     |
| Saint Lucia | 1990 | Male   | 55 to 59 | 67%<br>(49-82%)                | 33%<br>(18-51%)          | 4.2<br>(2.3-6.6)                            | 13%<br>(9.3-17%)                     | 17%<br>(12-22%)                     | 4.3<br>(3-5.6)       | 150<br>(100-190)    |
| Saint Lucia | 1990 | Male   | 60 to 64 | 65%<br>(46-82%)                | 35%<br>(18-54%)          | 3.8<br>(2.1-6.4)                            | 12%<br>(7.4-16%)                     | 14%<br>(8.7-19%)                    | 5.6<br>(3.5-7.7)     | 160<br>(100-220)    |
| Saint Lucia | 1990 | Male   | 65 to 69 | 64%<br>(45-79%)                | 36%<br>(21-55%)          | 3.4<br>(2-5.4)                              | 11%<br>(6.5-15%)                     | 13%<br>(7.9-18%)                    | 5.5<br>(3.4-7.6)     | 130<br>(82-180)     |
| Saint Lucia | 1990 | Male   | 70 to 74 | 60%<br>(42-76%)                | 40%<br>(24-58%)          | 2.9<br>(1.6-4.8)                            | 8.4%<br>(4.5-13%)                    | 10%<br>(5.3-15%)                    | 6.4<br>(3.5-9.9)     | 120<br>(66-190)     |

| Location    | Year | Sex    | Age      | Prevalence of current drinkers | Prevalence of abstainers | Population average of standard drinks daily | Percent of total attributable deaths | Percent of total attributable DALYs | Attributable deaths  | Attributable DALYs  |
|-------------|------|--------|----------|--------------------------------|--------------------------|---------------------------------------------|--------------------------------------|-------------------------------------|----------------------|---------------------|
| Saint Lucia | 1990 | Male   | 75 to 79 | 56%<br>(36-74%)                | 44%<br>(26-64%)          | 2.4<br>(1.2-4.1)                            | 6.5%<br>(3.1-10%)                    | 7.7%<br>(3.6-12%)                   | 4.3<br>(2-6.9)       | 64<br>(31-100)      |
| Saint Lucia | 1990 | Male   | 80 to 84 | 50%<br>(32-68%)                | 50%<br>(32-68%)          | 2.1<br>(1.1-3.4)                            | 5.6%<br>(2.7-9.2%)                   | 6.4%<br>(2.9-10%)                   | 3.3<br>(1.5-5.4)     | 36<br>(17-58)       |
| Saint Lucia | 1990 | Male   | 85 to 89 | 45%<br>(29-62%)                | 55%<br>(38-71%)          | 1.8<br>(0.93-3.1)                           | 4.8%<br>(2.1-8.2%)                   | 5.4%<br>(2.2-9.5%)                  | 1.4<br>(0.59-2.6)    | 11<br>(4.9-19)      |
| Saint Lucia | 1990 | Male   | 90 to 94 | 46%<br>(30-63%)                | 54%<br>(37-70%)          | 1.8<br>(0.89-3.2)                           | 4.3%<br>(1.6-7.9%)                   | 4.8%<br>(1.7-9%)                    | 0.51<br>(0.18-0.97)  | 2.7<br>(1-5.1)      |
| Saint Lucia | 1990 | Male   | 95 plus  | 49%<br>(29-69%)                | 51%<br>(31-71%)          | 1.9<br>(0.79-3.8)                           | 4.4%<br>(1.1-8.9%)                   | 4.8%<br>(0.98-10%)                  | 0.13<br>(0.027-0.27) | 0.47<br>(0.12-0.95) |
| Saint Lucia | 1995 | Female | All Ages | 35%<br>(29-42%)                | 65%<br>(58-71%)          | 1.5<br>(1.3-1.8)                            | 3.8%<br>(2.8-4.9%)                   | 5.1%<br>(3.3-7.3%)                  | 21<br>(14-31)        | 700<br>(520-930)    |
| Saint Lucia | 1995 | Female | 15 to 19 | 42%<br>(29-59%)                | 58%<br>(41-71%)          | 1.9<br>(1-3)                                | 3.1%<br>(2-4.6%)                     | 7.4%<br>(4.5-11%)                   | 0.26<br>(0.16-0.4)   | 27<br>(17-38)       |
| Saint Lucia | 1995 | Female | 20 to 24 | 48%<br>(32-64%)                | 52%<br>(36-68%)          | 2.8<br>(1.7-4.4)                            | 4.9%<br>(3.5-6.6%)                   | 10%<br>(6.5-14%)                    | 0.41<br>(0.27-0.56)  | 44<br>(31-60)       |
| Saint Lucia | 1995 | Female | 25 to 29 | 48%<br>(31-65%)                | 52%<br>(35-69%)          | 2.9<br>(1.8-4.2)                            | 5.9%<br>(4.3-7.7%)                   | 10%<br>(7.2-13%)                    | 0.68<br>(0.47-0.91)  | 59<br>(43-77)       |
| Saint Lucia | 1995 | Female | 30 to 34 | 46%<br>(29-64%)                | 54%<br>(36-71%)          | 2.8<br>(1.7-4.2)                            | 5.4%<br>(3.9-7.1%)                   | 9.8%<br>(7-13%)                     | 0.67<br>(0.48-0.87)  | 54<br>(39-70)       |
| Saint Lucia | 1995 | Female | 35 to 39 | 45%<br>(30-63%)                | 55%<br>(37-70%)          | 2.7<br>(1.6-4.1)                            | 6.1%<br>(4.4-8.3%)                   | 11%<br>(7.7-14%)                    | 0.9<br>(0.64-1.2)    | 58<br>(42-79)       |
| Saint Lucia | 1995 | Female | 40 to 44 | 44%<br>(29-62%)                | 56%<br>(38-71%)          | 2.5<br>(1.4-4)                              | 6.8%<br>(4.6-9.4%)                   | 11%<br>(7.5-15%)                    | 1.1<br>(0.76-1.5)    | 60<br>(41-84)       |
| Saint Lucia | 1995 | Female | 45 to 49 | 42%<br>(27-59%)                | 58%<br>(41-73%)          | 2.4<br>(1.3-4)                              | 6.8%<br>(4.3-10%)                    | 10%<br>(6.6-15%)                    | 1.3<br>(0.82-1.8)    | 60<br>(38-88)       |
| Saint Lucia | 1995 | Female | 50 to 54 | 38%<br>(24-55%)                | 62%<br>(45-76%)          | 2.2<br>(1.2-3.7)                            | 7.1%<br>(4.3-11%)                    | 10%<br>(6.4-15%)                    | 1.5<br>(0.96-2.3)    | 62<br>(38-96)       |
| Saint Lucia | 1995 | Female | 55 to 59 | 34%<br>(21-51%)                | 66%<br>(49-79%)          | 1.9<br>(0.95-3.1)                           | 6.1%<br>(3.3-9.9%)                   | 8.7%<br>(4.9-14%)                   | 1.6<br>(0.89-2.5)    | 56<br>(31-91)       |
| Saint Lucia | 1995 | Female | 60 to 64 | 30%<br>(18-47%)                | 70%<br>(53-82%)          | 1.6<br>(0.79-2.8)                           | 5.4%<br>(2.4-9.4%)                   | 7%<br>(3.2-12%)                     | 2.3<br>(1-3.9)       | 65<br>(29-110)      |
| Saint Lucia | 1995 | Female | 65 to 69 | 28%<br>(18-42%)                | 72%<br>(58-82%)          | 1.4<br>(0.75-2.3)                           | 4.4%<br>(1.9-7.7%)                   | 5.7%<br>(2.6-9.8%)                  | 1.9<br>(0.86-3.2)    | 45<br>(20-78)       |
| Saint Lucia | 1995 | Female | 70 to 74 | 25%<br>(16-39%)                | 75%<br>(61-84%)          | 1.2<br>(0.59-2.1)                           | 3.6%<br>(1.2-7.1%)                   | 4.5%<br>(1.6-8.7%)                  | 2.4<br>(0.84-4.6)    | 45<br>(15-89)       |
| Saint Lucia | 1995 | Female | 75 to 79 | 22%<br>(13-36%)                | 78%<br>(64-87%)          | 1<br>(0.45-1.8)                             | 2.7%<br>(0.77-5.5%)                  | 3.6%<br>(1.1-7.2%)                  | 1.9<br>(0.56-3.8)    | 30<br>(8.4-58)      |
| Saint Lucia | 1995 | Female | 80 to 84 | 21%<br>(12-33%)                | 79%<br>(67-88%)          | 0.95<br>(0.45-1.6)                          | 2.6%<br>(0.91-5.1%)                  | 3.3%<br>(1.2-6.5%)                  | 2<br>(0.69-3.9)      | 22<br>(7.7-43)      |
| Saint Lucia | 1995 | Female | 85 to 89 | 21%<br>(12-32%)                | 79%<br>(68-88%)          | 0.97<br>(0.49-1.7)                          | 2.6%<br>(0.92-5.1%)                  | 3.2%<br>(1-6.3%)                    | 1.3<br>(0.43-2.6)    | 10<br>(3.6-20)      |
| Saint Lucia | 1995 | Female | 90 to 94 | 23%<br>(14-35%)                | 77%<br>(65-86%)          | 1.1<br>(0.5-2.1)                            | 3.1%<br>(0.96-6.7%)                  | 3.6%<br>(1-7.9%)                    | 0.78<br>(0.22-1.7)   | 4.1<br>(1.2-8.8)    |



| Location    | Year | Sex    | Age      | Prevalence of current drinkers | Prevalence of abstainers | Population average of standard drinks daily | Percent of total attributable deaths | Percent of total attributable DALYs | Attributable deaths  | Attributable DALYs  |
|-------------|------|--------|----------|--------------------------------|--------------------------|---------------------------------------------|--------------------------------------|-------------------------------------|----------------------|---------------------|
| Saint Lucia | 1995 | Female | 95 plus  | 27%<br>(15-44%)                | 73%<br>(56-85%)          | 1.3<br>(0.49-2.6)                           | 3.6%<br>(0.63-8.1%)                  | 4.2%<br>(0.54-9.5%)                 | 0.3<br>(0.038-0.67)  | 1<br>(0.18-2.3)     |
| Saint Lucia | 1995 | Male   | All Ages | 56%<br>(48-64%)                | 44%<br>(36-52%)          | 3.2<br>(2.8-3.6)                            | 10%<br>(8.3-12%)                     | 12%<br>(9.4-14%)                    | 59<br>(47-72)        | 2200<br>(1900-2500) |
| Saint Lucia | 1995 | Male   | 15 to 19 | 59%<br>(42-75%)                | 41%<br>(25-58%)          | 2.8<br>(1.5-4.3)                            | 7.5%<br>(4.8-11%)                    | 12%<br>(7.2-18%)                    | 0.85<br>(0.51-1.3)   | 75<br>(49-110)      |
| Saint Lucia | 1995 | Male   | 20 to 24 | 69%<br>(52-83%)                | 31%<br>(17-48%)          | 5.1<br>(3.3-7.1)                            | 16%<br>(12-20%)                      | 21%<br>(15-28%)                     | 2.6<br>(1.8-3.5)     | 210<br>(150-270)    |
| Saint Lucia | 1995 | Male   | 25 to 29 | 72%<br>(55-84%)                | 28%<br>(16-45%)          | 6.1<br>(4.1-8.4)                            | 17%<br>(13-22%)                      | 23%<br>(17-29%)                     | 3.3<br>(2.4-4.2)     | 230<br>(180-300)    |
| Saint Lucia | 1995 | Male   | 30 to 34 | 73%<br>(55-85%)                | 27%<br>(15-45%)          | 6.4<br>(4.2-8.7)                            | 17%<br>(13-21%)                      | 22%<br>(17-28%)                     | 3.7<br>(2.8-4.5)     | 240<br>(190-290)    |
| Saint Lucia | 1995 | Male   | 35 to 39 | 72%<br>(57-85%)                | 28%<br>(15-43%)          | 6.1<br>(3.9-8.8)                            | 16%<br>(13-20%)                      | 22%<br>(17-27%)                     | 3.5<br>(2.7-4.3)     | 210<br>(160-250)    |
| Saint Lucia | 1995 | Male   | 40 to 44 | 72%<br>(56-85%)                | 28%<br>(15-44%)          | 5.8<br>(3.4-8.7)                            | 16%<br>(13-20%)                      | 21%<br>(17-26%)                     | 3.5<br>(2.7-4.3)     | 180<br>(140-220)    |
| Saint Lucia | 1995 | Male   | 45 to 49 | 70%<br>(51-84%)                | 30%<br>(16-49%)          | 5.5<br>(3.2-9)                              | 16%<br>(12-20%)                      | 21%<br>(16-25%)                     | 3.8<br>(2.8-4.6)     | 170<br>(130-210)    |
| Saint Lucia | 1995 | Male   | 50 to 54 | 69%<br>(51-83%)                | 31%<br>(17-49%)          | 5.1<br>(2.9-8.2)                            | 15%<br>(11-19%)                      | 19%<br>(14-24%)                     | 4.2<br>(3-5.3)       | 170<br>(120-210)    |
| Saint Lucia | 1995 | Male   | 55 to 59 | 67%<br>(50-81%)                | 33%<br>(19-50%)          | 4.7<br>(2.6-7.5)                            | 14%<br>(10-17%)                      | 18%<br>(13-22%)                     | 4.3<br>(3.1-5.4)     | 150<br>(110-190)    |
| Saint Lucia | 1995 | Male   | 60 to 64 | 65%<br>(46-81%)                | 35%<br>(19-54%)          | 4.3<br>(2.3-7.1)                            | 12%<br>(7.8-16%)                     | 15%<br>(9.8-20%)                    | 4.9<br>(3.2-6.5)     | 140<br>(95-190)     |
| Saint Lucia | 1995 | Male   | 65 to 69 | 63%<br>(45-79%)                | 37%<br>(21-55%)          | 3.8<br>(2.2-5.9)                            | 11%<br>(7.3-15%)                     | 14%<br>(8.8-18%)                    | 5.7<br>(3.6-7.6)     | 140<br>(88-180)     |
| Saint Lucia | 1995 | Male   | 70 to 74 | 60%<br>(42-76%)                | 40%<br>(24-58%)          | 3.2<br>(1.7-5.3)                            | 9.1%<br>(5.1-13%)                    | 11%<br>(6.1-16%)                    | 6.6<br>(3.8-9.6)     | 130<br>(73-180)     |
| Saint Lucia | 1995 | Male   | 75 to 79 | 55%<br>(36-74%)                | 45%<br>(26-64%)          | 2.7<br>(1.4-4.6)                            | 7%<br>(3.7-11%)                      | 8.3%<br>(4.4-12%)                   | 5.3<br>(2.8-7.9)     | 80<br>(42-120)      |
| Saint Lucia | 1995 | Male   | 80 to 84 | 49%<br>(31-67%)                | 51%<br>(33-69%)          | 2.3<br>(1.2-3.7)                            | 6.1%<br>(3.1-9.2%)                   | 7%<br>(3.5-11%)                     | 4.4<br>(2.1-6.7)     | 48<br>(24-73)       |
| Saint Lucia | 1995 | Male   | 85 to 89 | 45%<br>(28-62%)                | 55%<br>(38-72%)          | 2<br>(1-3.4)                                | 5.1%<br>(2.6-8.2%)                   | 5.8%<br>(2.8-9.6%)                  | 1.9<br>(0.94-3.1)    | 15<br>(7.5-24)      |
| Saint Lucia | 1995 | Male   | 90 to 94 | 45%<br>(29-62%)                | 55%<br>(38-71%)          | 2<br>(0.98-3.5)                             | 4.7%<br>(2.1-8.1%)                   | 5.3%<br>(2.3-9.3%)                  | 0.66<br>(0.28-1.2)   | 3.6<br>(1.6-6.2)    |
| Saint Lucia | 1995 | Male   | 95 plus  | 48%<br>(29-68%)                | 52%<br>(32-71%)          | 2.1<br>(0.88-4.1)                           | 4.9%<br>(1.6-9.2%)                   | 5.4%<br>(1.5-10%)                   | 0.17<br>(0.046-0.33) | 0.6<br>(0.19-1.1)   |
| Saint Lucia | 2000 | Female | All Ages | 35%<br>(29-42%)                | 65%<br>(58-71%)          | 1.6<br>(1.4-1.8)                            | 3.6%<br>(2.7-4.7%)                   | 4.7%<br>(3-6.9%)                    | 20<br>(13-30)        | 660<br>(490-880)    |
| Saint Lucia | 2000 | Female | 15 to 19 | 41%<br>(28-58%)                | 59%<br>(42-72%)          | 1.9<br>(1-3)                                | 2.6%<br>(1.6-3.8%)                   | 6.8%<br>(4.1-10%)                   | 0.2<br>(0.11-0.3)    | 23<br>(15-34)       |
| Saint Lucia | 2000 | Female | 20 to 24 | 47%<br>(31-64%)                | 53%<br>(36-69%)          | 2.8<br>(1.6-4.3)                            | 4.6%<br>(3.3-6.3%)                   | 8.8%<br>(5.7-12%)                   | 0.4<br>(0.25-0.56)   | 43<br>(30-58)       |

| Location    | Year | Sex    | Age      | Prevalence of current drinkers | Prevalence of abstainers | Population average of standard drinks daily | Percent of total attributable deaths | Percent of total attributable DALYs | Attributable deaths  | Attributable DALYs  |
|-------------|------|--------|----------|--------------------------------|--------------------------|---------------------------------------------|--------------------------------------|-------------------------------------|----------------------|---------------------|
| Saint Lucia | 2000 | Female | 25 to 29 | 47%<br>(30-64%)                | 53%<br>(36-70%)          | 2.9<br>(1.7-4.2)                            | 4.7%<br>(3.4-6.1%)                   | 8.6%<br>(5.9-12%)                   | 0.43<br>(0.29-0.59)  | 43<br>(31-58)       |
| Saint Lucia | 2000 | Female | 30 to 34 | 45%<br>(29-63%)                | 55%<br>(37-71%)          | 2.8<br>(1.7-4.2)                            | 4.5%<br>(3.3-5.8%)                   | 7.8%<br>(5.6-10%)                   | 0.51<br>(0.36-0.67)  | 45<br>(32-59)       |
| Saint Lucia | 2000 | Female | 35 to 39 | 44%<br>(29-62%)                | 56%<br>(38-71%)          | 2.6<br>(1.5-4.1)                            | 5%<br>(3.6-6.8%)                     | 9.2%<br>(6.6-12%)                   | 0.79<br>(0.56-1.1)   | 55<br>(39-74)       |
| Saint Lucia | 2000 | Female | 40 to 44 | 43%<br>(28-61%)                | 57%<br>(39-72%)          | 2.5<br>(1.3-3.9)                            | 6.1%<br>(4-8.4%)                     | 9.9%<br>(6.8-14%)                   | 1.3<br>(0.91-1.8)    | 71<br>(48-99)       |
| Saint Lucia | 2000 | Female | 45 to 49 | 41%<br>(26-58%)                | 59%<br>(42-74%)          | 2.4<br>(1.3-3.9)                            | 6.2%<br>(4-9.3%)                     | 9.5%<br>(6.2-14%)                   | 1.3<br>(0.84-1.9)    | 61<br>(40-91)       |
| Saint Lucia | 2000 | Female | 50 to 54 | 37%<br>(23-55%)                | 63%<br>(45-77%)          | 2.1<br>(1.2-3.6)                            | 6.4%<br>(3.9-10%)                    | 9.5%<br>(6-14%)                     | 1.5<br>(0.97-2.3)    | 62<br>(38-95)       |
| Saint Lucia | 2000 | Female | 55 to 59 | 33%<br>(20-51%)                | 67%<br>(49-80%)          | 1.8<br>(0.94-3)                             | 5.5%<br>(2.9-9.2%)                   | 8%<br>(4.5-13%)                     | 1.4<br>(0.78-2.2)    | 49<br>(26-82)       |
| Saint Lucia | 2000 | Female | 60 to 64 | 30%<br>(18-46%)                | 70%<br>(54-82%)          | 1.6<br>(0.77-2.8)                           | 5%<br>(2.2-9%)                       | 6.5%<br>(3-11%)                     | 1.9<br>(0.88-3.3)    | 56<br>(25-100)      |
| Saint Lucia | 2000 | Female | 65 to 69 | 27%<br>(17-41%)                | 73%<br>(59-83%)          | 1.4<br>(0.72-2.3)                           | 4%<br>(1.7-7%)                       | 5.4%<br>(2.4-9.2%)                  | 1.8<br>(0.79-3)      | 43<br>(19-77)       |
| Saint Lucia | 2000 | Female | 70 to 74 | 25%<br>(16-38%)                | 75%<br>(62-84%)          | 1.1<br>(0.57-2)                             | 3.4%<br>(1.1-6.9%)                   | 4.3%<br>(1.4-8.7%)                  | 1.9<br>(0.61-3.7)    | 35<br>(11-74)       |
| Saint Lucia | 2000 | Female | 75 to 79 | 22%<br>(13-36%)                | 78%<br>(64-87%)          | 0.99<br>(0.46-1.8)                          | 2.8%<br>(0.69-5.7%)                  | 3.6%<br>(0.96-7.3%)                 | 1.9<br>(0.5-3.8)     | 28<br>(7-59)        |
| Saint Lucia | 2000 | Female | 80 to 84 | 20%<br>(12-33%)                | 80%<br>(67-88%)          | 0.93<br>(0.46-1.6)                          | 2.5%<br>(0.83-4.9%)                  | 3.2%<br>(1.1-6.4%)                  | 2<br>(0.67-3.8)      | 22<br>(7.6-43)      |
| Saint Lucia | 2000 | Female | 85 to 89 | 20%<br>(12-32%)                | 80%<br>(68-88%)          | 0.95<br>(0.48-1.7)                          | 2.5%<br>(0.92-4.8%)                  | 3.1%<br>(1.1-6.1%)                  | 1.7<br>(0.59-3.3)    | 13<br>(4.9-26)      |
| Saint Lucia | 2000 | Female | 90 to 94 | 23%<br>(13-35%)                | 77%<br>(65-87%)          | 1.1<br>(0.48-2.1)                           | 2.9%<br>(0.95-6.2%)                  | 3.5%<br>(1-7.5%)                    | 1<br>(0.3-2.2)       | 5.5<br>(1.7-12)     |
| Saint Lucia | 2000 | Female | 95 plus  | 27%<br>(14-44%)                | 73%<br>(56-86%)          | 1.3<br>(0.47-2.6)                           | 3.4%<br>(0.68-7.4%)                  | 4%<br>(0.68-8.9%)                   | 0.32<br>(0.054-0.71) | 1.1<br>(0.22-2.4)   |
| Saint Lucia | 2000 | Male   | All Ages | 56%<br>(48-65%)                | 44%<br>(35-52%)          | 3.3<br>(3-3.7)                              | 10%<br>(8.4-12%)                     | 12%<br>(9.4-14%)                    | 58<br>(47-70)        | 2200<br>(1900-2600) |
| Saint Lucia | 2000 | Male   | 15 to 19 | 58%<br>(41-74%)                | 42%<br>(26-59%)          | 2.7<br>(1.5-4.3)                            | 7.8%<br>(5.1-11%)                    | 12%<br>(7.1-18%)                    | 1.1<br>(0.66-1.7)    | 95<br>(62-140)      |
| Saint Lucia | 2000 | Male   | 20 to 24 | 68%<br>(51-82%)                | 32%<br>(18-49%)          | 5.1<br>(3.3-7.2)                            | 16%<br>(11-21%)                      | 21%<br>(14-28%)                     | 2.7<br>(1.9-3.7)     | 210<br>(150-280)    |
| Saint Lucia | 2000 | Male   | 25 to 29 | 71%<br>(54-84%)                | 29%<br>(16-46%)          | 6.1<br>(4-8.5)                              | 17%<br>(13-21%)                      | 22%<br>(16-29%)                     | 3.1<br>(2.3-4.1)     | 230<br>(170-290)    |
| Saint Lucia | 2000 | Male   | 30 to 34 | 72%<br>(54-85%)                | 28%<br>(15-46%)          | 6.4<br>(4.3-8.8)                            | 16%<br>(12-20%)                      | 22%<br>(16-27%)                     | 3.2<br>(2.4-4)       | 220<br>(170-270)    |
| Saint Lucia | 2000 | Male   | 35 to 39 | 72%<br>(56-85%)                | 28%<br>(15-44%)          | 6.1<br>(3.9-8.7)                            | 15%<br>(12-19%)                      | 21%<br>(16-26%)                     | 3.5<br>(2.7-4.3)     | 210<br>(170-260)    |
| Saint Lucia | 2000 | Male   | 40 to 44 | 71%<br>(55-84%)                | 29%<br>(16-45%)          | 5.8<br>(3.5-8.5)                            | 15%<br>(12-19%)                      | 21%<br>(16-25%)                     | 3.8<br>(2.9-4.7)     | 200<br>(160-250)    |

| Location    | Year | Sex    | Age      | Prevalence of current drinkers | Prevalence of abstainers | Population average of standard drinks daily | Percent of total attributable deaths | Percent of total attributable DALYs | Attributable deaths  | Attributable DALYs |
|-------------|------|--------|----------|--------------------------------|--------------------------|---------------------------------------------|--------------------------------------|-------------------------------------|----------------------|--------------------|
| Saint Lucia | 2000 | Male   | 45 to 49 | 69%<br>(50-83%)                | 31%<br>(17-50%)          | 5.5<br>(3.1-8.7)                            | 15%<br>(12-19%)                      | 20%<br>(15-24%)                     | 4.2<br>(3.1-5.1)     | 190<br>(150-240)   |
| Saint Lucia | 2000 | Male   | 50 to 54 | 68%<br>(49-83%)                | 32%<br>(17-51%)          | 5.1<br>(2.9-8.1)                            | 15%<br>(11-18%)                      | 18%<br>(14-23%)                     | 4.4<br>(3.3-5.5)     | 180<br>(130-220)   |
| Saint Lucia | 2000 | Male   | 55 to 59 | 66%<br>(48-81%)                | 34%<br>(19-52%)          | 4.7<br>(2.6-7.4)                            | 14%<br>(10-18%)                      | 17%<br>(12-22%)                     | 4.7<br>(3.4-6)       | 160<br>(120-200)   |
| Saint Lucia | 2000 | Male   | 60 to 64 | 64%<br>(45-81%)                | 36%<br>(19-55%)          | 4.2<br>(2.2-7)                              | 12%<br>(7.6-15%)                     | 14%<br>(9.5-19%)                    | 4.5<br>(3-5.9)       | 130<br>(89-170)    |
| Saint Lucia | 2000 | Male   | 65 to 69 | 63%<br>(44-79%)                | 37%<br>(21-56%)          | 3.8<br>(2.1-6)                              | 11%<br>(7-14%)                       | 13%<br>(8.8-18%)                    | 5.1<br>(3.4-6.7)     | 120<br>(82-170)    |
| Saint Lucia | 2000 | Male   | 70 to 74 | 59%<br>(41-75%)                | 41%<br>(25-59%)          | 3.2<br>(1.7-5.3)                            | 8.8%<br>(5.1-13%)                    | 10%<br>(6-15%)                      | 5.8<br>(3.4-8.3)     | 110<br>(65-160)    |
| Saint Lucia | 2000 | Male   | 75 to 79 | 54%<br>(35-72%)                | 46%<br>(28-65%)          | 2.6<br>(1.4-4.5)                            | 6.7%<br>(3.6-10%)                    | 8%<br>(4.3-12%)                     | 4.6<br>(2.5-7)       | 70<br>(38-110)     |
| Saint Lucia | 2000 | Male   | 80 to 84 | 48%<br>(30-66%)                | 52%<br>(34-70%)          | 2.2<br>(1.1-3.6)                            | 5.6%<br>(3-8.4%)                     | 6.6%<br>(3.5-10%)                   | 4<br>(2.1-6.1)       | 45<br>(24-68)      |
| Saint Lucia | 2000 | Male   | 85 to 89 | 44%<br>(27-61%)                | 56%<br>(39-73%)          | 1.9<br>(0.97-3.2)                           | 4.7%<br>(2.4-7.4%)                   | 5.5%<br>(2.7-8.8%)                  | 2.3<br>(1.1-3.7)     | 19<br>(9.7-30)     |
| Saint Lucia | 2000 | Male   | 90 to 94 | 44%<br>(28-61%)                | 56%<br>(39-72%)          | 1.9<br>(0.95-3.4)                           | 4.3%<br>(2-7.2%)                     | 4.9%<br>(2.1-8.4%)                  | 0.8<br>(0.35-1.4)    | 4.4<br>(2.1-7.5)   |
| Saint Lucia | 2000 | Male   | 95 plus  | 47%<br>(28-68%)                | 53%<br>(32-72%)          | 2.1<br>(0.87-4.1)                           | 4.4%<br>(1.5-8.1%)                   | 4.9%<br>(1.4-9.4%)                  | 0.17<br>(0.049-0.32) | 0.63<br>(0.22-1.2) |
| Saint Lucia | 2005 | Female | All Ages | 35%<br>(29-43%)                | 65%<br>(57-71%)          | 1.6<br>(1.4-1.8)                            | 3.5%<br>(2.6-4.5%)                   | 4.4%<br>(2.9-6.4%)                  | 20<br>(13-29)        | 660<br>(500-870)   |
| Saint Lucia | 2005 | Female | 15 to 19 | 41%<br>(28-57%)                | 59%<br>(43-72%)          | 1.8<br>(0.98-2.8)                           | 2.3%<br>(1.5-3.4%)                   | 6.8%<br>(4-11%)                     | 0.17<br>(0.1-0.26)   | 21<br>(13-31)      |
| Saint Lucia | 2005 | Female | 20 to 24 | 47%<br>(31-64%)                | 53%<br>(36-69%)          | 2.6<br>(1.5-4.1)                            | 4.8%<br>(3.3-6.6%)                   | 9.1%<br>(5.8-13%)                   | 0.53<br>(0.33-0.75)  | 53<br>(36-72)      |
| Saint Lucia | 2005 | Female | 25 to 29 | 46%<br>(30-64%)                | 54%<br>(36-70%)          | 2.7<br>(1.6-4.1)                            | 4.8%<br>(3.4-6.4%)                   | 9%<br>(6.1-12%)                     | 0.46<br>(0.31-0.63)  | 45<br>(32-60)      |
| Saint Lucia | 2005 | Female | 30 to 34 | 45%<br>(28-62%)                | 55%<br>(38-72%)          | 2.6<br>(1.6-3.9)                            | 5%<br>(3.6-6.6%)                     | 8.8%<br>(6.1-12%)                   | 0.73<br>(0.51-0.99)  | 57<br>(41-75)      |
| Saint Lucia | 2005 | Female | 35 to 39 | 44%<br>(29-61%)                | 56%<br>(39-71%)          | 2.4<br>(1.4-3.8)                            | 4.8%<br>(3.4-6.5%)                   | 9.3%<br>(6.7-12%)                   | 0.78<br>(0.56-1.1)   | 54<br>(38-73)      |
| Saint Lucia | 2005 | Female | 40 to 44 | 42%<br>(27-61%)                | 58%<br>(39-73%)          | 2.3<br>(1.3-3.6)                            | 5.2%<br>(3.6-7.4%)                   | 9.5%<br>(6.6-13%)                   | 1.2<br>(0.82-1.6)    | 67<br>(46-94)      |
| Saint Lucia | 2005 | Female | 45 to 49 | 40%<br>(25-58%)                | 60%<br>(42-75%)          | 2.2<br>(1.2-3.7)                            | 5.2%<br>(3.3-8.1%)                   | 9.1%<br>(6-13%)                     | 1.2<br>(0.78-1.8)    | 59<br>(38-88)      |
| Saint Lucia | 2005 | Female | 50 to 54 | 37%<br>(23-54%)                | 63%<br>(46-77%)          | 2<br>(1.1-3.3)                              | 5.9%<br>(3.6-9.4%)                   | 9.1%<br>(5.7-14%)                   | 1.6<br>(0.98-2.4)    | 63<br>(39-97)      |
| Saint Lucia | 2005 | Female | 55 to 59 | 33%<br>(20-49%)                | 67%<br>(51-80%)          | 1.7<br>(0.88-2.8)                           | 5.1%<br>(2.8-8.3%)                   | 7.6%<br>(4.3-12%)                   | 1.4<br>(0.82-2.3)    | 51<br>(28-83)      |
| Saint Lucia | 2005 | Female | 60 to 64 | 29%<br>(17-45%)                | 71%<br>(55-83%)          | 1.5<br>(0.73-2.5)                           | 4.6%<br>(2.1-8%)                     | 6.2%<br>(2.9-11%)                   | 1.7<br>(0.82-2.9)    | 50<br>(23-87)      |

| Location    | Year | Sex    | Age      | Prevalence of current drinkers | Prevalence of abstainers | Population average of standard drinks daily | Percent of total attributable deaths | Percent of total attributable DALYs | Attributable deaths  | Attributable DALYs  |
|-------------|------|--------|----------|--------------------------------|--------------------------|---------------------------------------------|--------------------------------------|-------------------------------------|----------------------|---------------------|
| Saint Lucia | 2005 | Female | 65 to 69 | 27%<br>(17-41%)                | 73%<br>(59-83%)          | 1.3<br>(0.69-2.1)                           | 3.8%<br>(1.7-6.8%)                   | 5%<br>(2.3-8.7%)                    | 1.8<br>(0.79-3.1)    | 42<br>(19-75)       |
| Saint Lucia | 2005 | Female | 70 to 74 | 24%<br>(15-38%)                | 76%<br>(62-85%)          | 1.1<br>(0.54-1.9)                           | 3.1%<br>(1.1-6.1%)                   | 4%<br>(1.5-7.9%)                    | 1.8<br>(0.64-3.5)    | 34<br>(12-68)       |
| Saint Lucia | 2005 | Female | 75 to 79 | 22%<br>(13-34%)                | 78%<br>(66-87%)          | 0.92<br>(0.42-1.7)                          | 2.6%<br>(0.65-5.5%)                  | 3.3%<br>(0.88-7%)                   | 1.4<br>(0.35-2.9)    | 21<br>(5.1-44)      |
| Saint Lucia | 2005 | Female | 80 to 84 | 20%<br>(11-32%)                | 80%<br>(68-89%)          | 0.86<br>(0.42-1.5)                          | 2.3%<br>(0.79-4.7%)                  | 2.9%<br>(0.98-5.8%)                 | 1.9<br>(0.64-3.8)    | 21<br>(7.4-43)      |
| Saint Lucia | 2005 | Female | 85 to 89 | 20%<br>(11-31%)                | 80%<br>(69-89%)          | 0.88<br>(0.43-1.6)                          | 2.2%<br>(0.78-4.3%)                  | 2.7%<br>(0.93-5.4%)                 | 1.7<br>(0.6-3.5)     | 14<br>(5.1-28)      |
| Saint Lucia | 2005 | Female | 90 to 94 | 22%<br>(13-34%)                | 78%<br>(66-87%)          | 1<br>(0.46-1.9)                             | 2.5%<br>(0.78-5.5%)                  | 3%<br>(0.83-6.7%)                   | 1.3<br>(0.38-2.9)    | 7.2<br>(2.2-15)     |
| Saint Lucia | 2005 | Female | 95 plus  | 26%<br>(14-43%)                | 74%<br>(57-86%)          | 1.2<br>(0.44-2.5)                           | 3%<br>(0.6-6.6%)                     | 3.5%<br>(0.57-8%)                   | 0.43<br>(0.071-0.99) | 1.5<br>(0.31-3.5)   |
| Saint Lucia | 2005 | Male   | All Ages | 58%<br>(49-66%)                | 42%<br>(34-51%)          | 3.3<br>(3-3.6)                              | 10%<br>(8.7-12%)                     | 11%<br>(9.1-14%)                    | 63<br>(51-76)        | 2400<br>(2100-2800) |
| Saint Lucia | 2005 | Male   | 15 to 19 | 58%<br>(41-74%)                | 42%<br>(26-59%)          | 2.5<br>(1.4-3.9)                            | 7.5%<br>(4.9-11%)                    | 12%<br>(7-17%)                      | 1.1<br>(0.68-1.7)    | 97<br>(63-140)      |
| Saint Lucia | 2005 | Male   | 20 to 24 | 68%<br>(50-82%)                | 32%<br>(18-50%)          | 4.8<br>(3.1-6.7)                            | 15%<br>(11-20%)                      | 20%<br>(14-28%)                     | 2.9<br>(2-4)         | 230<br>(170-300)    |
| Saint Lucia | 2005 | Male   | 25 to 29 | 71%<br>(54-83%)                | 29%<br>(17-46%)          | 5.7<br>(3.8-7.9)                            | 17%<br>(13-22%)                      | 22%<br>(16-30%)                     | 3.8<br>(2.7-5)       | 270<br>(200-340)    |
| Saint Lucia | 2005 | Male   | 30 to 34 | 72%<br>(54-85%)                | 28%<br>(15-46%)          | 6<br>(3.9-8.4)                              | 16%<br>(13-21%)                      | 22%<br>(17-28%)                     | 3.6<br>(2.7-4.6)     | 240<br>(180-300)    |
| Saint Lucia | 2005 | Male   | 35 to 39 | 72%<br>(55-85%)                | 28%<br>(15-45%)          | 5.7<br>(3.7-8.3)                            | 16%<br>(12-20%)                      | 21%<br>(16-27%)                     | 4.2<br>(3.2-5.3)     | 250<br>(190-310)    |
| Saint Lucia | 2005 | Male   | 40 to 44 | 70%<br>(55-84%)                | 30%<br>(16-45%)          | 5.5<br>(3.3-8)                              | 15%<br>(12-19%)                      | 20%<br>(16-25%)                     | 4.6<br>(3.5-5.7)     | 240<br>(190-300)    |
| Saint Lucia | 2005 | Male   | 45 to 49 | 69%<br>(49-83%)                | 31%<br>(17-51%)          | 5.1<br>(3-8.3)                              | 15%<br>(11-18%)                      | 20%<br>(14-24%)                     | 4.8<br>(3.6-5.9)     | 220<br>(170-280)    |
| Saint Lucia | 2005 | Male   | 50 to 54 | 67%<br>(49-82%)                | 33%<br>(18-51%)          | 4.7<br>(2.7-7.4)                            | 14%<br>(10-17%)                      | 18%<br>(13-22%)                     | 4.3<br>(3.1-5.4)     | 180<br>(130-220)    |
| Saint Lucia | 2005 | Male   | 55 to 59 | 65%<br>(47-81%)                | 35%<br>(19-53%)          | 4.3<br>(2.4-6.9)                            | 13%<br>(9.4-17%)                     | 17%<br>(12-21%)                     | 5.1<br>(3.6-6.6)     | 170<br>(130-230)    |
| Saint Lucia | 2005 | Male   | 60 to 64 | 64%<br>(44-80%)                | 36%<br>(20-56%)          | 3.9<br>(2.1-6.5)                            | 12%<br>(7.5-16%)                     | 14%<br>(8.8-18%)                    | 5.4<br>(3.5-7.3)     | 150<br>(100-210)    |
| Saint Lucia | 2005 | Male   | 65 to 69 | 62%<br>(43-78%)                | 38%<br>(22-57%)          | 3.5<br>(2-5.6)                              | 10%<br>(6.5-14%)                     | 13%<br>(7.9-17%)                    | 5.7<br>(3.6-7.7)     | 140<br>(86-190)     |
| Saint Lucia | 2005 | Male   | 70 to 74 | 59%<br>(41-75%)                | 41%<br>(25-59%)          | 2.9<br>(1.5-4.9)                            | 8.2%<br>(4.5-12%)                    | 9.6%<br>(5.3-14%)                   | 5.4<br>(3-8)         | 100<br>(59-150)     |
| Saint Lucia | 2005 | Male   | 75 to 79 | 54%<br>(35-72%)                | 46%<br>(28-65%)          | 2.4<br>(1.2-4.2)                            | 6.5%<br>(3.2-10%)                    | 7.5%<br>(3.6-11%)                   | 4.3<br>(2.1-6.5)     | 63<br>(31-97)       |
| Saint Lucia | 2005 | Male   | 80 to 84 | 48%<br>(29-66%)                | 52%<br>(34-71%)          | 2<br>(1.1-3.3)                              | 5.2%<br>(2.6-8%)                     | 6%<br>(3-9.3%)                      | 3.9<br>(2-6.1)       | 44<br>(23-67)       |

| Location    | Year | Sex    | Age      | Prevalence of current drinkers | Prevalence of abstainers | Population average of standard drinks daily | Percent of total attributable deaths | Percent of total attributable DALYs | Attributable deaths  | Attributable DALYs  |
|-------------|------|--------|----------|--------------------------------|--------------------------|---------------------------------------------|--------------------------------------|-------------------------------------|----------------------|---------------------|
| Saint Lucia | 2005 | Male   | 85 to 89 | 43%<br>(26-60%)                | 57%<br>(40-74%)          | 1.8<br>(0.9-3)                              | 4.3%<br>(2.1-6.9%)                   | 5%<br>(2.4-8.2%)                    | 2.6<br>(1.2-4.3)     | 21<br>(11-34)       |
| Saint Lucia | 2005 | Male   | 90 to 94 | 43%<br>(28-61%)                | 57%<br>(39-72%)          | 1.8<br>(0.89-3.2)                           | 3.9%<br>(1.8-6.7%)                   | 4.4%<br>(1.8-7.8%)                  | 1.2<br>(0.51-2.1)    | 6.8<br>(3-12)       |
| Saint Lucia | 2005 | Male   | 95 plus  | 46%<br>(27-66%)                | 54%<br>(34-73%)          | 2<br>(0.79-3.9)                             | 4.1%<br>(1.4-7.6%)                   | 4.5%<br>(1.3-8.8%)                  | 0.26<br>(0.076-0.52) | 1<br>(0.36-1.9)     |
| Saint Lucia | 2010 | Female | All Ages | 35%<br>(29-42%)                | 65%<br>(58-71%)          | 1.4<br>(1.2-1.6)                            | 3%<br>(2.3-3.9%)                     | 3.8%<br>(2.4-5.6%)                  | 18<br>(12-27)        | 630<br>(470-800)    |
| Saint Lucia | 2010 | Female | 15 to 19 | 40%<br>(27-57%)                | 60%<br>(43-73%)          | 1.5<br>(0.83-2.5)                           | 2.2%<br>(1.4-3.2%)                   | 5.3%<br>(3-8.4%)                    | 0.17<br>(0.095-0.26) | 20<br>(13-30)       |
| Saint Lucia | 2010 | Female | 20 to 24 | 46%<br>(31-63%)                | 54%<br>(37-69%)          | 2.3<br>(1.3-3.6)                            | 4.1%<br>(2.8-5.7%)                   | 7.5%<br>(4.6-11%)                   | 0.39<br>(0.24-0.56)  | 42<br>(28-58)       |
| Saint Lucia | 2010 | Female | 25 to 29 | 46%<br>(29-63%)                | 54%<br>(37-71%)          | 2.4<br>(1.4-3.6)                            | 4.1%<br>(2.9-5.5%)                   | 7.4%<br>(4.7-10%)                   | 0.4<br>(0.26-0.57)   | 42<br>(29-57)       |
| Saint Lucia | 2010 | Female | 30 to 34 | 44%<br>(28-61%)                | 56%<br>(39-72%)          | 2.3<br>(1.3-3.5)                            | 4.1%<br>(2.9-5.5%)                   | 7.3%<br>(4.9-9.9%)                  | 0.53<br>(0.36-0.73)  | 45<br>(31-60)       |
| Saint Lucia | 2010 | Female | 35 to 39 | 43%<br>(28-61%)                | 57%<br>(39-72%)          | 2.1<br>(1.2-3.3)                            | 4.2%<br>(2.9-5.7%)                   | 8.1%<br>(5.7-11%)                   | 0.72<br>(0.5-0.97)   | 51<br>(35-69)       |
| Saint Lucia | 2010 | Female | 40 to 44 | 42%<br>(27-60%)                | 58%<br>(40-73%)          | 2<br>(1.1-3.2)                              | 4.8%<br>(3.2-6.8%)                   | 8.5%<br>(5.8-12%)                   | 1.3<br>(0.9-1.8)     | 73<br>(49-100)      |
| Saint Lucia | 2010 | Female | 45 to 49 | 40%<br>(25-58%)                | 60%<br>(42-75%)          | 1.9<br>(1.1-3.1)                            | 4.7%<br>(3.1-7.1%)                   | 8%<br>(5.4-12%)                     | 1.5<br>(1-2.2)       | 73<br>(48-110)      |
| Saint Lucia | 2010 | Female | 50 to 54 | 37%<br>(23-53%)                | 63%<br>(47-77%)          | 1.7<br>(0.98-2.8)                           | 4.7%<br>(2.8-7.3%)                   | 7.7%<br>(4.9-11%)                   | 1.6<br>(1-2.4)       | 66<br>(40-100)      |
| Saint Lucia | 2010 | Female | 55 to 59 | 32%<br>(20-48%)                | 68%<br>(52-80%)          | 1.5<br>(0.77-2.4)                           | 4.2%<br>(2.3-6.8%)                   | 6.5%<br>(3.7-10%)                   | 1.5<br>(0.83-2.3)    | 51<br>(29-85)       |
| Saint Lucia | 2010 | Female | 60 to 64 | 29%<br>(17-44%)                | 71%<br>(56-83%)          | 1.3<br>(0.62-2.2)                           | 3.4%<br>(1.6-5.9%)                   | 5.1%<br>(2.5-8.5%)                  | 1.4<br>(0.68-2.3)    | 41<br>(19-71)       |
| Saint Lucia | 2010 | Female | 65 to 69 | 26%<br>(16-40%)                | 74%<br>(60-84%)          | 1.1<br>(0.6-1.8)                            | 3%<br>(1.4-5.3%)                     | 4.2%<br>(2-7.2%)                    | 1.6<br>(0.75-2.8)    | 38<br>(17-67)       |
| Saint Lucia | 2010 | Female | 70 to 74 | 24%<br>(15-38%)                | 76%<br>(62-85%)          | 0.92<br>(0.46-1.6)                          | 2.4%<br>(0.83-4.9%)                  | 3.4%<br>(1.3-6.6%)                  | 1.5<br>(0.54-2.9)    | 28<br>(9.3-57)      |
| Saint Lucia | 2010 | Female | 75 to 79 | 21%<br>(13-35%)                | 79%<br>(65-87%)          | 0.8<br>(0.37-1.4)                           | 2%<br>(0.42-4.3%)                    | 2.7%<br>(0.58-5.6%)                 | 1.4<br>(0.29-2.9)    | 20<br>(4.4-44)      |
| Saint Lucia | 2010 | Female | 80 to 84 | 20%<br>(11-32%)                | 80%<br>(68-89%)          | 0.76<br>(0.36-1.3)                          | 1.8%<br>(0.53-3.8%)                  | 2.3%<br>(0.72-4.9%)                 | 1.5<br>(0.44-3.1)    | 17<br>(5.2-36)      |
| Saint Lucia | 2010 | Female | 85 to 89 | 20%<br>(12-30%)                | 80%<br>(70-88%)          | 0.77<br>(0.38-1.3)                          | 1.8%<br>(0.59-3.7%)                  | 2.2%<br>(0.69-4.7%)                 | 1.5<br>(0.44-3.1)    | 12<br>(3.7-24)      |
| Saint Lucia | 2010 | Female | 90 to 94 | 22%<br>(13-34%)                | 78%<br>(66-87%)          | 0.88<br>(0.38-1.6)                          | 2%<br>(0.57-4.3%)                    | 2.4%<br>(0.61-5.4%)                 | 1.1<br>(0.29-2.5)    | 6.3<br>(1.7-14)     |
| Saint Lucia | 2010 | Female | 95 plus  | 26%<br>(13-43%)                | 74%<br>(57-87%)          | 1.1<br>(0.38-2.1)                           | 2.4%<br>(0.43-5.5%)                  | 2.8%<br>(0.31-6.7%)                 | 0.48<br>(0.055-1.2)  | 1.8<br>(0.32-4.2)   |
| Saint Lucia | 2010 | Male   | All Ages | 59%<br>(50-67%)                | 41%<br>(33-50%)          | 3.1<br>(2.7-3.5)                            | 9.5%<br>(8-11%)                      | 10%<br>(8.1-12%)                    | 64<br>(51-79)        | 2500<br>(2100-2900) |

| Location    | Year | Sex    | Age      | Prevalence of current drinkers | Prevalence of abstainers | Population average of standard drinks daily | Percent of total attributable deaths | Percent of total attributable DALYs | Attributable deaths  | Attributable DALYs |
|-------------|------|--------|----------|--------------------------------|--------------------------|---------------------------------------------|--------------------------------------|-------------------------------------|----------------------|--------------------|
| Saint Lucia | 2010 | Male   | 15 to 19 | 57%<br>(40-74%)                | 43%<br>(26-60%)          | 2.2<br>(1.2-3.5)                            | 6.3%<br>(4.1-9.1%)                   | 9.6%<br>(5.6-15%)                   | 0.88<br>(0.51-1.3)   | 80<br>(51-110)     |
| Saint Lucia | 2010 | Male   | 20 to 24 | 68%<br>(50-82%)                | 32%<br>(18-50%)          | 4.2<br>(2.7-6.2)                            | 14%<br>(9.6-18%)                     | 18%<br>(12-25%)                     | 2.5<br>(1.6-3.5)     | 200<br>(140-270)   |
| Saint Lucia | 2010 | Male   | 25 to 29 | 71%<br>(54-84%)                | 29%<br>(16-46%)          | 5.1<br>(3.2-7.2)                            | 16%<br>(11-21%)                      | 20%<br>(14-27%)                     | 3.7<br>(2.6-5.1)     | 260<br>(190-350)   |
| Saint Lucia | 2010 | Male   | 30 to 34 | 71%<br>(53-85%)                | 29%<br>(15-47%)          | 5.3<br>(3.3-7.5)                            | 15%<br>(11-19%)                      | 20%<br>(14-26%)                     | 3.6<br>(2.6-4.6)     | 240<br>(180-300)   |
| Saint Lucia | 2010 | Male   | 35 to 39 | 71%<br>(55-85%)                | 29%<br>(15-45%)          | 5<br>(3.2-7.4)                              | 14%<br>(10-17%)                      | 19%<br>(14-24%)                     | 3.4<br>(2.5-4.4)     | 210<br>(160-260)   |
| Saint Lucia | 2010 | Male   | 40 to 44 | 70%<br>(54-83%)                | 30%<br>(17-46%)          | 4.8<br>(2.9-7.1)                            | 13%<br>(9.9-17%)                     | 18%<br>(13-23%)                     | 4.5<br>(3.3-5.7)     | 240<br>(180-300)   |
| Saint Lucia | 2010 | Male   | 45 to 49 | 68%<br>(48-83%)                | 32%<br>(17-52%)          | 4.5<br>(2.7-6.9)                            | 13%<br>(10-17%)                      | 18%<br>(13-22%)                     | 5.7<br>(4.1-7.2)     | 270<br>(200-340)   |
| Saint Lucia | 2010 | Male   | 50 to 54 | 67%<br>(48-82%)                | 33%<br>(18-52%)          | 4.2<br>(2.4-6.4)                            | 12%<br>(8.9-16%)                     | 16%<br>(12-21%)                     | 5.2<br>(3.6-6.6)     | 210<br>(150-270)   |
| Saint Lucia | 2010 | Male   | 55 to 59 | 65%<br>(47-81%)                | 35%<br>(19-53%)          | 3.8<br>(2.2-5.9)                            | 12%<br>(8.3-15%)                     | 15%<br>(10-20%)                     | 6<br>(4.1-7.9)       | 210<br>(140-270)   |
| Saint Lucia | 2010 | Male   | 60 to 64 | 63%<br>(43-80%)                | 37%<br>(20-57%)          | 3.4<br>(1.9-5.6)                            | 10%<br>(6.2-14%)                     | 12%<br>(7.7-17%)                    | 5.9<br>(3.6-8.1)     | 170<br>(110-240)   |
| Saint Lucia | 2010 | Male   | 65 to 69 | 62%<br>(43-78%)                | 38%<br>(22-57%)          | 3.1<br>(1.7-4.8)                            | 9%<br>(5.6-13%)                      | 11%<br>(6.9-15%)                    | 5.4<br>(3.3-7.5)     | 130<br>(82-180)    |
| Saint Lucia | 2010 | Male   | 70 to 74 | 58%<br>(40-74%)                | 42%<br>(26-60%)          | 2.6<br>(1.3-4.4)                            | 7%<br>(3.8-11%)                      | 8.3%<br>(4.4-13%)                   | 5.4<br>(2.8-8.6)     | 110<br>(57-170)    |
| Saint Lucia | 2010 | Male   | 75 to 79 | 53%<br>(34-72%)                | 47%<br>(28-66%)          | 2.1<br>(1.1-3.7)                            | 5.6%<br>(2.7-8.9%)                   | 6.5%<br>(3.1-10%)                   | 4.4<br>(2.1-7)       | 67<br>(32-110)     |
| Saint Lucia | 2010 | Male   | 80 to 84 | 47%<br>(29-65%)                | 53%<br>(35-71%)          | 1.8<br>(0.9-2.9)                            | 4.3%<br>(2.1-7.1%)                   | 5.1%<br>(2.4-8.4%)                  | 3.4<br>(1.6-5.6)     | 38<br>(19-62)      |
| Saint Lucia | 2010 | Male   | 85 to 89 | 42%<br>(26-60%)                | 58%<br>(40-74%)          | 1.6<br>(0.78-2.7)                           | 3.7%<br>(1.7-6.3%)                   | 4.2%<br>(2-7.4%)                    | 2.2<br>(1-4)         | 18<br>(8.8-32)     |
| Saint Lucia | 2010 | Male   | 90 to 94 | 43%<br>(27-60%)                | 57%<br>(40-73%)          | 1.6<br>(0.76-2.8)                           | 3.2%<br>(1.4-5.9%)                   | 3.7%<br>(1.5-6.9%)                  | 1.2<br>(0.48-2.3)    | 7<br>(3-13)        |
| Saint Lucia | 2010 | Male   | 95 plus  | 46%<br>(27-66%)                | 54%<br>(34-73%)          | 1.7<br>(0.68-3.3)                           | 3.4%<br>(1.2-6.8%)                   | 3.7%<br>(1-7.8%)                    | 0.37<br>(0.099-0.78) | 1.5<br>(0.49-2.9)  |
| Saint Lucia | 2016 | Female | All Ages | 35%<br>(29-42%)                | 65%<br>(58-71%)          | 1.4<br>(1-1.8)                              | 3%<br>(2.1-4.2%)                     | 3.7%<br>(2.1-5.7%)                  | 19<br>(11-30)        | 650<br>(450-900)   |
| Saint Lucia | 2016 | Female | 15 to 19 | 40%<br>(27-56%)                | 60%<br>(44-73%)          | 1.5<br>(0.73-2.5)                           | 2.2%<br>(1.4-3.3%)                   | 5.8%<br>(3.1-9.2%)                  | 0.17<br>(0.088-0.27) | 19<br>(12-30)      |
| Saint Lucia | 2016 | Female | 20 to 24 | 46%<br>(30-63%)                | 54%<br>(37-70%)          | 2.2<br>(1.2-3.6)                            | 3.9%<br>(2.6-5.5%)                   | 7.7%<br>(4.5-11%)                   | 0.35<br>(0.2-0.52)   | 40<br>(26-57)      |
| Saint Lucia | 2016 | Female | 25 to 29 | 45%<br>(29-63%)                | 55%<br>(37-71%)          | 2.2<br>(1.2-3.6)                            | 4%<br>(2.8-5.5%)                     | 7.6%<br>(4.7-11%)                   | 0.37<br>(0.23-0.56)  | 39<br>(26-55)      |
| Saint Lucia | 2016 | Female | 30 to 34 | 44%<br>(28-61%)                | 56%<br>(39-72%)          | 2.2<br>(1.1-3.6)                            | 3.9%<br>(2.7-5.5%)                   | 7.5%<br>(5-11%)                     | 0.52<br>(0.34-0.74)  | 45<br>(31-62)      |

| Location    | Year | Sex    | Age      | Prevalence of current drinkers | Prevalence of abstainers | Population average of standard drinks daily | Percent of total attributable deaths | Percent of total attributable DALYs | Attributable deaths | Attributable DALYs  |
|-------------|------|--------|----------|--------------------------------|--------------------------|---------------------------------------------|--------------------------------------|-------------------------------------|---------------------|---------------------|
| Saint Lucia | 2016 | Female | 35 to 39 | 43%<br>(28-61%)                | 57%<br>(39-72%)          | 2<br>(1.1-3.3)                              | 3.9%<br>(2.7-5.5%)                   | 8.1%<br>(5.6-11%)                   | 0.64<br>(0.43-0.91) | 46<br>(31-64)       |
| Saint Lucia | 2016 | Female | 40 to 44 | 42%<br>(27-61%)                | 58%<br>(39-73%)          | 1.9<br>(0.99-3.2)                           | 4.5%<br>(2.9-6.6%)                   | 8.4%<br>(5.6-12%)                   | 1.2<br>(0.77-1.7)   | 67<br>(44-98)       |
| Saint Lucia | 2016 | Female | 45 to 49 | 40%<br>(24-57%)                | 60%<br>(43-76%)          | 1.8<br>(0.99-3.1)                           | 4.4%<br>(2.8-6.7%)                   | 7.8%<br>(5.2-12%)                   | 1.5<br>(0.96-2.1)   | 72<br>(47-110)      |
| Saint Lucia | 2016 | Female | 50 to 54 | 36%<br>(22-54%)                | 64%<br>(46-78%)          | 1.6<br>(0.87-2.8)                           | 4.4%<br>(2.6-6.9%)                   | 7.5%<br>(4.7-11%)                   | 1.9<br>(1.1-2.8)    | 77<br>(46-120)      |
| Saint Lucia | 2016 | Female | 55 to 59 | 32%<br>(19-48%)                | 68%<br>(52-81%)          | 1.4<br>(0.71-2.4)                           | 3.9%<br>(2-6.6%)                     | 6.2%<br>(3.4-10%)                   | 1.8<br>(1-3)        | 65<br>(35-110)      |
| Saint Lucia | 2016 | Female | 60 to 64 | 28%<br>(17-44%)                | 72%<br>(56-83%)          | 1.2<br>(0.56-2.1)                           | 3.2%<br>(1.4-5.9%)                   | 4.9%<br>(2.1-8.5%)                  | 1.5<br>(0.69-2.7)   | 46<br>(19-82)       |
| Saint Lucia | 2016 | Female | 65 to 69 | 26%<br>(16-40%)                | 74%<br>(60-84%)          | 1<br>(0.52-1.8)                             | 2.8%<br>(1.1-5.1%)                   | 3.9%<br>(1.6-7%)                    | 1.7<br>(0.69-3)     | 41<br>(15-75)       |
| Saint Lucia | 2016 | Female | 70 to 74 | 24%<br>(14-37%)                | 76%<br>(63-86%)          | 0.87<br>(0.41-1.6)                          | 2.2%<br>(0.68-4.6%)                  | 3.2%<br>(1.1-6.4%)                  | 1.5<br>(0.49-3)     | 29<br>(8.5-59)      |
| Saint Lucia | 2016 | Female | 75 to 79 | 21%<br>(13-34%)                | 79%<br>(66-87%)          | 0.76<br>(0.33-1.4)                          | 1.8%<br>(0.38-4%)                    | 2.5%<br>(0.55-5.4%)                 | 1.4<br>(0.3-3.1)    | 21<br>(4.3-47)      |
| Saint Lucia | 2016 | Female | 80 to 84 | 20%<br>(11-31%)                | 80%<br>(69-89%)          | 0.71<br>(0.34-1.3)                          | 1.6%<br>(0.41-3.7%)                  | 2.2%<br>(0.51-4.8%)                 | 1.7<br>(0.39-3.8)   | 19<br>(4.6-42)      |
| Saint Lucia | 2016 | Female | 85 to 89 | 19%<br>(11-30%)                | 81%<br>(70-89%)          | 0.72<br>(0.34-1.3)                          | 1.7%<br>(0.48-3.7%)                  | 2.1%<br>(0.53-4.6%)                 | 1.6<br>(0.41-3.6)   | 13<br>(3.5-28)      |
| Saint Lucia | 2016 | Female | 90 to 94 | 21%<br>(13-33%)                | 79%<br>(67-87%)          | 0.81<br>(0.34-1.6)                          | 1.9%<br>(0.44-4.2%)                  | 2.2%<br>(0.46-5.3%)                 | 0.93<br>(0.19-2.2)  | 5.1<br>(1.2-11)     |
| Saint Lucia | 2016 | Female | 95 plus  | 25%<br>(13-43%)                | 75%<br>(57-87%)          | 0.98<br>(0.34-2)                            | 2.2%<br>(0.35-5.6%)                  | 2.5%<br>(0.21-6.8%)                 | 0.55<br>(0.045-1.5) | 2<br>(0.33-5.1)     |
| Saint Lucia | 2016 | Male   | All Ages | 59%<br>(51-67%)                | 41%<br>(33-49%)          | 3<br>(2.3-3.9)                              | 9.4%<br>(7.4-11%)                    | 9.8%<br>(7.2-13%)                   | 65<br>(47-85)       | 2500<br>(2000-3100) |
| Saint Lucia | 2016 | Male   | 15 to 19 | 57%<br>(39-73%)                | 43%<br>(27-61%)          | 2.1<br>(1.1-3.6)                            | 6.4%<br>(4-9.3%)                     | 10%<br>(5.9-15%)                    | 0.78<br>(0.44-1.2)  | 71<br>(45-100)      |
| Saint Lucia | 2016 | Male   | 20 to 24 | 67%<br>(51-82%)                | 33%<br>(18-49%)          | 3.9<br>(2.4-6.2)                            | 13%<br>(9.3-18%)                     | 18%<br>(11-25%)                     | 2.4<br>(1.5-3.4)    | 200<br>(140-270)    |
| Saint Lucia | 2016 | Male   | 25 to 29 | 70%<br>(53-83%)                | 30%<br>(17-47%)          | 4.8<br>(2.8-7.3)                            | 15%<br>(11-20%)                      | 20%<br>(13-28%)                     | 3.3<br>(2.1-4.6)    | 240<br>(170-320)    |
| Saint Lucia | 2016 | Male   | 30 to 34 | 71%<br>(53-85%)                | 29%<br>(15-47%)          | 5<br>(2.9-7.5)                              | 14%<br>(11-19%)                      | 20%<br>(14-26%)                     | 3.3<br>(2.3-4.5)    | 220<br>(160-290)    |
| Saint Lucia | 2016 | Male   | 35 to 39 | 71%<br>(55-84%)                | 29%<br>(16-45%)          | 4.7<br>(2.7-7.2)                            | 13%<br>(9.6-17%)                     | 19%<br>(13-24%)                     | 3.4<br>(2.3-4.5)    | 210<br>(150-270)    |
| Saint Lucia | 2016 | Male   | 40 to 44 | 70%<br>(54-83%)                | 30%<br>(17-46%)          | 4.5<br>(2.4-6.9)                            | 13%<br>(9.2-16%)                     | 18%<br>(12-23%)                     | 4<br>(2.7-5.2)      | 220<br>(160-280)    |
| Saint Lucia | 2016 | Male   | 45 to 49 | 68%<br>(48-83%)                | 32%<br>(17-52%)          | 4.2<br>(2.4-6.8)                            | 13%<br>(9.3-17%)                     | 17%<br>(12-22%)                     | 5.7<br>(4-7.4)      | 270<br>(190-350)    |
| Saint Lucia | 2016 | Male   | 50 to 54 | 67%<br>(49-82%)                | 33%<br>(18-51%)          | 3.9<br>(2.1-6.3)                            | 12%<br>(8.3-15%)                     | 16%<br>(11-20%)                     | 6.4<br>(4.3-8.4)    | 270<br>(180-340)    |

| Location                         | Year | Sex    | Age      | Prevalence of current drinkers | Prevalence of abstainers | Population average of standard drinks daily | Percent of total attributable deaths | Percent of total attributable DALYs | Attributable deaths  | Attributable DALYs |
|----------------------------------|------|--------|----------|--------------------------------|--------------------------|---------------------------------------------|--------------------------------------|-------------------------------------|----------------------|--------------------|
| Saint Lucia                      | 2016 | Male   | 55 to 59 | 65%<br>(46-80%)                | 35%<br>(20-54%)          | 3.6<br>(2-5.9)                              | 11%<br>(7.4-15%)                     | 14%<br>(9.3-19%)                    | 7<br>(4.4-9.4)       | 240<br>(160-330)   |
| Saint Lucia                      | 2016 | Male   | 60 to 64 | 63%<br>(43-80%)                | 37%<br>(20-57%)          | 3.2<br>(1.6-5.5)                            | 9.6%<br>(5.3-14%)                    | 12%<br>(6.6-17%)                    | 6.5<br>(3.7-9.2)     | 190<br>(110-270)   |
| Saint Lucia                      | 2016 | Male   | 65 to 69 | 62%<br>(42-78%)                | 38%<br>(22-58%)          | 2.9<br>(1.5-4.8)                            | 8.5%<br>(4.9-12%)                    | 10%<br>(6-15%)                      | 6.1<br>(3.4-8.9)     | 150<br>(84-210)    |
| Saint Lucia                      | 2016 | Male   | 70 to 74 | 58%<br>(39-74%)                | 42%<br>(26-61%)          | 2.4<br>(1.2-4.2)                            | 6.5%<br>(3.2-10%)                    | 7.7%<br>(3.8-12%)                   | 5<br>(2.5-8)         | 98<br>(49-160)     |
| Saint Lucia                      | 2016 | Male   | 75 to 79 | 53%<br>(34-71%)                | 47%<br>(29-66%)          | 2<br>(0.98-3.6)                             | 5.1%<br>(2.3-8.6%)                   | 6%<br>(2.7-10%)                     | 4.6<br>(2-7.6)       | 69<br>(32-120)     |
| Saint Lucia                      | 2016 | Male   | 80 to 84 | 47%<br>(29-65%)                | 53%<br>(35-71%)          | 1.7<br>(0.83-2.9)                           | 4%<br>(1.8-6.9%)                     | 4.7%<br>(2.1-8.1%)                  | 3.5<br>(1.6-6.2)     | 40<br>(18-69)      |
| Saint Lucia                      | 2016 | Male   | 85 to 89 | 42%<br>(26-59%)                | 58%<br>(41-74%)          | 1.5<br>(0.69-2.6)                           | 3.4%<br>(1.6-6%)                     | 3.9%<br>(1.8-7.1%)                  | 2.1<br>(0.95-3.9)    | 17<br>(8.1-31)     |
| Saint Lucia                      | 2016 | Male   | 90 to 94 | 42%<br>(27-59%)                | 58%<br>(41-73%)          | 1.5<br>(0.67-2.6)                           | 3%<br>(1.2-5.8%)                     | 3.4%<br>(1.2-6.7%)                  | 1<br>(0.36-2)        | 5.7<br>(2.3-11)    |
| Saint Lucia                      | 2016 | Male   | 95 plus  | 45%<br>(26-66%)                | 55%<br>(34-74%)          | 1.6<br>(0.61-3.2)                           | 3.2%<br>(0.94-6.6%)                  | 3.4%<br>(0.76-7.5%)                 | 0.4<br>(0.089-0.87)  | 1.6<br>(0.44-3.2)  |
| Saint Vincent and the Grenadines | 1990 | Female | All Ages | 35%<br>(28-42%)                | 65%<br>(58-72%)          | 0.77<br>(0.64-0.9)                          | 1.4%<br>(0.83-2.1%)                  | 1.2%<br>(0.071-2.6%)                | 4.4<br>(0.26-9.3)    | 210<br>(120-310)   |
| Saint Vincent and the Grenadines | 1990 | Female | 15 to 19 | 43%<br>(29-59%)                | 57%<br>(41-71%)          | 1<br>(0.57-1.6)                             | 2%<br>(1.3-2.9%)                     | 3.9%<br>(2.3-6.1%)                  | 0.14<br>(0.081-0.23) | 16<br>(10-23)      |
| Saint Vincent and the Grenadines | 1990 | Female | 20 to 24 | 49%<br>(33-65%)                | 51%<br>(35-67%)          | 1.5<br>(0.92-2.2)                           | 3.4%<br>(2.3-4.8%)                   | 5.3%<br>(3.3-7.7%)                  | 0.23<br>(0.14-0.34)  | 26<br>(17-36)      |
| Saint Vincent and the Grenadines | 1990 | Female | 25 to 29 | 49%<br>(32-66%)                | 51%<br>(34-68%)          | 1.6<br>(0.97-2.3)                           | 3.7%<br>(2.6-4.8%)                   | 5.5%<br>(3.5-7.9%)                  | 0.29<br>(0.18-0.43)  | 28<br>(20-39)      |
| Saint Vincent and the Grenadines | 1990 | Female | 30 to 34 | 47%<br>(30-64%)                | 53%<br>(36-70%)          | 1.5<br>(0.88-2.4)                           | 3.6%<br>(2.5-4.8%)                   | 5.5%<br>(3.6-7.8%)                  | 0.3<br>(0.19-0.43)   | 24<br>(17-34)      |
| Saint Vincent and the Grenadines | 1990 | Female | 35 to 39 | 46%<br>(31-63%)                | 54%<br>(37-69%)          | 1.4<br>(0.8-2.3)                            | 3.4%<br>(2.1-4.9%)                   | 5.2%<br>(3.1-7.8%)                  | 0.3<br>(0.18-0.46)   | 20<br>(13-29)      |
| Saint Vincent and the Grenadines | 1990 | Female | 40 to 44 | 45%<br>(30-63%)                | 55%<br>(37-70%)          | 1.4<br>(0.7-2.3)                            | 3.3%<br>(1.9-5.3%)                   | 5.2%<br>(2.9-8.3%)                  | 0.31<br>(0.17-0.5)   | 17<br>(9.8-27)     |
| Saint Vincent and the Grenadines | 1990 | Female | 45 to 49 | 43%<br>(27-60%)                | 57%<br>(40-73%)          | 1.3<br>(0.69-2.2)                           | 3.1%<br>(1.4-5.2%)                   | 4.6%<br>(2.1-7.7%)                  | 0.3<br>(0.14-0.51)   | 14<br>(6.7-23)     |
| Saint Vincent and the Grenadines | 1990 | Female | 50 to 54 | 39%<br>(25-57%)                | 61%<br>(43-75%)          | 1.2<br>(0.63-2)                             | 2.8%<br>(0.89-5.2%)                  | 3.9%<br>(1.3-7.2%)                  | 0.48<br>(0.16-0.88)  | 19<br>(6.4-36)     |
| Saint Vincent and the Grenadines | 1990 | Female | 55 to 59 | 35%<br>(22-52%)                | 65%<br>(48-78%)          | 1<br>(0.51-1.7)                             | 2.2%<br>(0.47-4.4%)                  | 3%<br>(0.69-5.9%)                   | 0.45<br>(0.1-0.9)    | 15<br>(3.2-31)     |
| Saint Vincent and the Grenadines | 1990 | Female | 60 to 64 | 31%<br>(19-47%)                | 69%<br>(53-81%)          | 0.86<br>(0.44-1.5)                          | 1.5%<br>(-0.19-3.6%)                 | 2%<br>(-0.18-4.7%)                  | 0.44<br>(-0.038-1)   | 12<br>(-1.5-30)    |
| Saint Vincent and the Grenadines | 1990 | Female | 65 to 69 | 29%<br>(18-43%)                | 71%<br>(57-82%)          | 0.74<br>(0.39-1.2)                          | 0.97%<br>(-0.52-2.8%)                | 1.3%<br>(-0.54-3.6%)                | 0.39<br>(-0.17-1.1)  | 8.9<br>(-4.8-26)   |
| Saint Vincent and the Grenadines | 1990 | Female | 70 to 74 | 26%<br>(17-40%)                | 74%<br>(60-83%)          | 0.63<br>(0.31-1.1)                          | 0.47%<br>(-1.2-3%)                   | 0.61%<br>(-1.2-2.9%)                | 0.24<br>(-0.48-1.1)  | 4.3<br>(-9.3-21)   |



| Location                         | Year | Sex    | Age      | Prevalence of current drinkers | Prevalence of abstainers | Population average of standard drinks daily | Percent of total attributable deaths | Percent of total attributable DALYs | Attributable deaths   | Attributable DALYs   |
|----------------------------------|------|--------|----------|--------------------------------|--------------------------|---------------------------------------------|--------------------------------------|-------------------------------------|-----------------------|----------------------|
| Saint Vincent and the Grenadines | 1990 | Female | 75 to 79 | 23%<br>(14-36%)                | 77%<br>(64-86%)          | 0.54<br>(0.24-1)                            | 0.26%<br>(-1.1-1.9%)                 | 0.31%<br>(-1.3-2.4%)                | 0.14<br>(-0.57-1)     | 2<br>(-8.3-15)       |
| Saint Vincent and the Grenadines | 1990 | Female | 80 to 84 | 21%<br>(12-34%)                | 79%<br>(66-88%)          | 0.51<br>(0.24-0.89)                         | 0.28%<br>(-0.89-1.7%)                | 0.31%<br>(-1.1-2%)                  | 0.14<br>(-0.49-0.92)  | 1.6<br>(-5.1-9.9)    |
| Saint Vincent and the Grenadines | 1990 | Female | 85 to 89 | 21%<br>(13-33%)                | 79%<br>(67-87%)          | 0.52<br>(0.25-0.92)                         | 0.28%<br>(-0.76-1.8%)                | 0.28%<br>(-0.94-2%)                 | 0.11<br>(-0.39-0.83)  | 1<br>(-2.7-6.4)      |
| Saint Vincent and the Grenadines | 1990 | Female | 90 to 94 | 24%<br>(14-37%)                | 76%<br>(63-86%)          | 0.59<br>(0.27-1.1)                          | 0.45%<br>(-0.73-2.3%)                | 0.45%<br>(-0.96-2.6%)               | 0.093<br>(-0.2-0.55)  | 0.56<br>(-0.9-2.8)   |
| Saint Vincent and the Grenadines | 1990 | Female | 95 plus  | 28%<br>(15-46%)                | 72%<br>(54-85%)          | 0.71<br>(0.26-1.4)                          | 0.62%<br>(-1.1-3.3%)                 | 0.58%<br>(-1.4-3.7%)                | 0.037<br>(-0.09-0.23) | 0.15<br>(-0.26-0.81) |
| Saint Vincent and the Grenadines | 1990 | Male   | All Ages | 55%<br>(47-64%)                | 45%<br>(36-53%)          | 1.6<br>(1.3-1.8)                            | 5.8%<br>(4.5-7.2%)                   | 6.4%<br>(4.6-8.7%)                  | 24<br>(16-32)         | 980<br>(780-1200)    |
| Saint Vincent and the Grenadines | 1990 | Male   | 15 to 19 | 60%<br>(43-75%)                | 40%<br>(25-57%)          | 1.5<br>(0.86-2.2)                           | 5.7%<br>(3.9-7.7%)                   | 7.5%<br>(4.8-11%)                   | 0.61<br>(0.39-0.93)   | 57<br>(39-81)        |
| Saint Vincent and the Grenadines | 1990 | Male   | 20 to 24 | 69%<br>(52-83%)                | 31%<br>(17-48%)          | 2.7<br>(1.8-3.8)                            | 11%<br>(8.2-14%)                     | 12%<br>(8.7-17%)                    | 1.3<br>(0.87-1.8)     | 120<br>(87-160)      |
| Saint Vincent and the Grenadines | 1990 | Male   | 25 to 29 | 72%<br>(56-84%)                | 28%<br>(16-44%)          | 3.3<br>(2.2-4.5)                            | 12%<br>(9.1-15%)                     | 14%<br>(9.8-18%)                    | 1.4<br>(0.97-2)       | 120<br>(90-160)      |
| Saint Vincent and the Grenadines | 1990 | Male   | 30 to 34 | 73%<br>(56-85%)                | 27%<br>(15-44%)          | 3.4<br>(2.2-4.9)                            | 12%<br>(9.2-15%)                     | 15%<br>(11-19%)                     | 1.3<br>(0.89-1.8)     | 96<br>(71-130)       |
| Saint Vincent and the Grenadines | 1990 | Male   | 35 to 39 | 73%<br>(57-85%)                | 27%<br>(15-43%)          | 3.2<br>(2-5)                                | 12%<br>(9.1-15%)                     | 15%<br>(11-20%)                     | 1.2<br>(0.83-1.6)     | 77<br>(57-100)       |
| Saint Vincent and the Grenadines | 1990 | Male   | 40 to 44 | 72%<br>(56-85%)                | 28%<br>(15-44%)          | 3.1<br>(1.7-4.9)                            | 12%<br>(8.8-16%)                     | 15%<br>(11-21%)                     | 1.2<br>(0.84-1.7)     | 69<br>(49-91)        |
| Saint Vincent and the Grenadines | 1990 | Male   | 45 to 49 | 71%<br>(52-84%)                | 29%<br>(16-48%)          | 3<br>(1.6-4.8)                              | 12%<br>(8.3-16%)                     | 15%<br>(10-20%)                     | 1.4<br>(0.94-1.9)     | 67<br>(47-91)        |
| Saint Vincent and the Grenadines | 1990 | Male   | 50 to 54 | 69%<br>(51-83%)                | 31%<br>(17-49%)          | 2.7<br>(1.5-4.3)                            | 11%<br>(7.5-15%)                     | 14%<br>(9-19%)                      | 2<br>(1.3-2.8)        | 82<br>(55-110)       |
| Saint Vincent and the Grenadines | 1990 | Male   | 55 to 59 | 67%<br>(50-82%)                | 33%<br>(18-50%)          | 2.5<br>(1.3-4)                              | 10%<br>(6.6-14%)                     | 12%<br>(7.9-17%)                    | 2.2<br>(1.4-3.2)      | 77<br>(50-110)       |
| Saint Vincent and the Grenadines | 1990 | Male   | 60 to 64 | 66%<br>(46-82%)                | 34%<br>(18-54%)          | 2.3<br>(1.2-3.8)                            | 8.1%<br>(4.6-12%)                    | 9.4%<br>(5.3-15%)                   | 2.4<br>(1.4-3.7)      | 69<br>(40-110)       |
| Saint Vincent and the Grenadines | 1990 | Male   | 65 to 69 | 64%<br>(46-80%)                | 36%<br>(20-54%)          | 2<br>(1.1-3.2)                              | 6.7%<br>(3.8-10%)                    | 7.7%<br>(4.3-12%)                   | 2.5<br>(1.4-4)        | 60<br>(33-95)        |
| Saint Vincent and the Grenadines | 1990 | Male   | 70 to 74 | 61%<br>(43-76%)                | 39%<br>(24-57%)          | 1.7<br>(0.86-2.9)                           | 4.7%<br>(1.9-8.4%)                   | 5.3%<br>(2.1-9.5%)                  | 2.3<br>(0.85-4.2)     | 44<br>(18-79)        |
| Saint Vincent and the Grenadines | 1990 | Male   | 75 to 79 | 56%<br>(37-74%)                | 44%<br>(26-63%)          | 1.4<br>(0.7-2.4)                            | 3.6%<br>(1.3-6.9%)                   | 4.1%<br>(1.4-7.8%)                  | 1.8<br>(0.6-3.7)      | 27<br>(9.4-53)       |
| Saint Vincent and the Grenadines | 1990 | Male   | 80 to 84 | 51%<br>(32-69%)                | 49%<br>(31-68%)          | 1.2<br>(0.62-2)                             | 2.8%<br>(0.96-5.5%)                  | 3.1%<br>(1-6.2%)                    | 1.1<br>(0.36-2.2)     | 12<br>(4.1-23)       |
| Saint Vincent and the Grenadines | 1990 | Male   | 85 to 89 | 46%<br>(29-63%)                | 54%<br>(37-71%)          | 1.1<br>(0.53-1.9)                           | 2.2%<br>(0.7-4.6%)                   | 2.4%<br>(0.65-5.1%)                 | 0.6<br>(0.16-1.3)     | 4.7<br>(1.5-9.9)     |
| Saint Vincent and the Grenadines | 1990 | Male   | 90 to 94 | 46%<br>(30-63%)                | 54%<br>(37-70%)          | 1.1<br>(0.53-1.9)                           | 1.9%<br>(0.36-4.3%)                  | 2%<br>(0.21-4.8%)                   | 0.2<br>(0.021-0.48)   | 1.1<br>(0.22-2.6)    |

| Location                         | Year | Sex    | Age      | Prevalence of current drinkers | Prevalence of abstainers | Population average of standard drinks daily | Percent of total attributable deaths | Percent of total attributable DALYs | Attributable deaths     | Attributable DALYs    |
|----------------------------------|------|--------|----------|--------------------------------|--------------------------|---------------------------------------------|--------------------------------------|-------------------------------------|-------------------------|-----------------------|
| Saint Vincent and the Grenadines | 1990 | Male   | 95 plus  | 49%<br>(30-69%)                | 51%<br>(31-70%)          | 1.2<br>(0.47-2.2)                           | 1.9%<br>(0.074-5.1%)                 | 1.9%<br>(-0.27-5.6%)                | 0.039<br>(-0.0051-0.11) | 0.15<br>(0.0061-0.41) |
| Saint Vincent and the Grenadines | 1995 | Female | All Ages | 35%<br>(29-42%)                | 65%<br>(58-71%)          | 0.78<br>(0.66-0.9)                          | 1.3%<br>(0.74-2%)                    | 1%<br>(-0.11-2.4%)                  | 4<br>(-0.4-9.1)         | 200<br>(110-310)      |
| Saint Vincent and the Grenadines | 1995 | Female | 15 to 19 | 43%<br>(29-59%)                | 57%<br>(41-71%)          | 0.98<br>(0.53-1.6)                          | 1.8%<br>(1.1-2.7%)                   | 3.4%<br>(1.9-5.5%)                  | 0.12<br>(0.067-0.19)    | 14<br>(8.4-20)        |
| Saint Vincent and the Grenadines | 1995 | Female | 20 to 24 | 49%<br>(33-64%)                | 51%<br>(36-67%)          | 1.5<br>(0.85-2.2)                           | 3%<br>(2-4.2%)                       | 4.3%<br>(2.5-6.4%)                  | 0.2<br>(0.12-0.3)       | 24<br>(15-33)         |
| Saint Vincent and the Grenadines | 1995 | Female | 25 to 29 | 48%<br>(32-65%)                | 52%<br>(35-68%)          | 1.5<br>(0.92-2.2)                           | 3.3%<br>(2.3-4.4%)                   | 4.5%<br>(2.8-6.6%)                  | 0.25<br>(0.15-0.38)     | 25<br>(17-34)         |
| Saint Vincent and the Grenadines | 1995 | Female | 30 to 34 | 46%<br>(30-64%)                | 54%<br>(36-70%)          | 1.5<br>(0.88-2.2)                           | 3.2%<br>(2.2-4.4%)                   | 4.5%<br>(2.9-6.5%)                  | 0.35<br>(0.21-0.52)     | 28<br>(19-39)         |
| Saint Vincent and the Grenadines | 1995 | Female | 35 to 39 | 46%<br>(31-63%)                | 54%<br>(37-69%)          | 1.4<br>(0.77-2.2)                           | 3%<br>(1.9-4.5%)                     | 4.4%<br>(2.6-6.7%)                  | 0.36<br>(0.21-0.57)     | 24<br>(15-36)         |
| Saint Vincent and the Grenadines | 1995 | Female | 40 to 44 | 44%<br>(29-63%)                | 56%<br>(37-71%)          | 1.3<br>(0.69-2.1)                           | 3%<br>(1.7-4.8%)                     | 4.6%<br>(2.5-7.3%)                  | 0.39<br>(0.2-0.63)      | 21<br>(12-34)         |
| Saint Vincent and the Grenadines | 1995 | Female | 45 to 49 | 42%<br>(27-60%)                | 58%<br>(40-73%)          | 1.2<br>(0.66-2.1)                           | 2.8%<br>(1.2-4.9%)                   | 4%<br>(1.7-7%)                      | 0.35<br>(0.15-0.61)     | 17<br>(7-28)          |
| Saint Vincent and the Grenadines | 1995 | Female | 50 to 54 | 39%<br>(24-56%)                | 61%<br>(44-76%)          | 1.1<br>(0.6-1.9)                            | 2.5%<br>(0.67-4.9%)                  | 3.5%<br>(1-6.6%)                    | 0.35<br>(0.1-0.66)      | 14<br>(3.7-26)        |
| Saint Vincent and the Grenadines | 1995 | Female | 55 to 59 | 34%<br>(21-52%)                | 66%<br>(48-79%)          | 0.95<br>(0.48-1.6)                          | 1.8%<br>(0.19-4%)                    | 2.5%<br>(0.34-5.4%)                 | 0.46<br>(0.062-1)       | 15<br>(1.6-34)        |
| Saint Vincent and the Grenadines | 1995 | Female | 60 to 64 | 31%<br>(19-48%)                | 69%<br>(52-81%)          | 0.81<br>(0.41-1.5)                          | 1.2%<br>(-0.41-3.4%)                 | 1.6%<br>(-0.46-4.4%)                | 0.36<br>(-0.1-0.96)     | 10<br>(-3.7-28)       |
| Saint Vincent and the Grenadines | 1995 | Female | 65 to 69 | 28%<br>(18-43%)                | 72%<br>(57-82%)          | 0.71<br>(0.37-1.2)                          | 0.64%<br>(-0.78-2.4%)                | 0.86%<br>(-0.85-2.9%)               | 0.28<br>(-0.27-0.94)    | 6.1<br>(-7.3-22)      |
| Saint Vincent and the Grenadines | 1995 | Female | 70 to 74 | 26%<br>(16-39%)                | 74%<br>(61-84%)          | 0.6<br>(0.29-1)                             | 0.23%<br>(-1.2-1.9%)                 | 0.33%<br>(-1.4-2.3%)                | 0.14<br>(-0.59-1)       | 2.3<br>(-12-19)       |
| Saint Vincent and the Grenadines | 1995 | Female | 75 to 79 | 23%<br>(13-37%)                | 77%<br>(63-87%)          | 0.52<br>(0.23-0.98)                         | 0.1%<br>(-1.2-1.8%)                  | 0.14%<br>(-1.4-2.1%)                | 0.071<br>(-0.72-1.1)    | 0.93<br>(-11-15)      |
| Saint Vincent and the Grenadines | 1995 | Female | 80 to 84 | 21%<br>(12-33%)                | 79%<br>(67-88%)          | 0.49<br>(0.23-0.85)                         | 0.21%<br>(-0.93-1.7%)                | 0.24%<br>(-1.1-2%)                  | 0.12<br>(-0.55-1)       | 1.3<br>(-6-11)        |
| Saint Vincent and the Grenadines | 1995 | Female | 85 to 89 | 21%<br>(12-32%)                | 79%<br>(68-88%)          | 0.5<br>(0.24-0.89)                          | 0.18%<br>(-0.85-1.6%)                | 0.17%<br>(-1-1.9%)                  | 0.069<br>(-0.42-0.78)   | 0.67<br>(-3-5.9)      |
| Saint Vincent and the Grenadines | 1995 | Female | 90 to 94 | 24%<br>(14-37%)                | 76%<br>(63-86%)          | 0.58<br>(0.25-1.1)                          | 0.3%<br>(-0.89-2.1%)                 | 0.26%<br>(-1.1-2.4%)                | 0.063<br>(-0.27-0.58)   | 0.43<br>(-1.3-3)      |
| Saint Vincent and the Grenadines | 1995 | Female | 95 plus  | 28%<br>(14-46%)                | 72%<br>(54-86%)          | 0.69<br>(0.25-1.4)                          | 0.47%<br>(-1.1-3.2%)                 | 0.4%<br>(-1.5-3.5%)                 | 0.032<br>(-0.12-0.28)   | 0.15<br>(-0.36-0.98)  |
| Saint Vincent and the Grenadines | 1995 | Male   | All Ages | 57%<br>(48-65%)                | 43%<br>(35-52%)          | 1.6<br>(1.4-1.9)                            | 5.8%<br>(4.6-7.2%)                   | 5.9%<br>(4.1-8.1%)                  | 24<br>(17-33)           | 1000<br>(810-1200)    |
| Saint Vincent and the Grenadines | 1995 | Male   | 15 to 19 | 60%<br>(42-75%)                | 40%<br>(25-58%)          | 1.4<br>(0.8-2.2)                            | 5.5%<br>(3.8-7.7%)                   | 7.2%<br>(4.5-11%)                   | 0.63<br>(0.37-0.95)     | 58<br>(38-84)         |
| Saint Vincent and the Grenadines | 1995 | Male   | 20 to 24 | 69%<br>(52-83%)                | 31%<br>(17-48%)          | 2.6<br>(1.7-3.7)                            | 11%<br>(7.9-14%)                     | 12%<br>(8.1-16%)                    | 1.4<br>(0.87-2)         | 120<br>(87-160)       |

| Location                         | Year | Sex    | Age      | Prevalence of current drinkers | Prevalence of abstainers | Population average of standard drinks daily | Percent of total attributable deaths | Percent of total attributable DALYs | Attributable deaths    | Attributable DALYs   |
|----------------------------------|------|--------|----------|--------------------------------|--------------------------|---------------------------------------------|--------------------------------------|-------------------------------------|------------------------|----------------------|
| Saint Vincent and the Grenadines | 1995 | Male   | 25 to 29 | 72%<br>(56-84%)                | 28%<br>(16-44%)          | 3.1<br>(2.1-4.3)                            | 11%<br>(8.4-14%)                     | 13%<br>(8.9-17%)                    | 1.3<br>(0.91-1.8)      | 110<br>(82-140)      |
| Saint Vincent and the Grenadines | 1995 | Male   | 30 to 34 | 73%<br>(55-85%)                | 27%<br>(15-45%)          | 3.3<br>(2.1-4.5)                            | 11%<br>(8.1-13%)                     | 13%<br>(9.2-17%)                    | 1.5<br>(1-2)           | 110<br>(80-140)      |
| Saint Vincent and the Grenadines | 1995 | Male   | 35 to 39 | 73%<br>(57-85%)                | 27%<br>(15-43%)          | 3.1<br>(1.9-4.6)                            | 11%<br>(8.1-14%)                     | 13%<br>(9.6-18%)                    | 1.4<br>(0.98-2)        | 94<br>(69-120)       |
| Saint Vincent and the Grenadines | 1995 | Male   | 40 to 44 | 72%<br>(57-85%)                | 28%<br>(15-43%)          | 3<br>(1.7-4.6)                              | 11%<br>(7.9-14%)                     | 13%<br>(9.5-18%)                    | 1.4<br>(0.96-2)        | 80<br>(57-110)       |
| Saint Vincent and the Grenadines | 1995 | Male   | 45 to 49 | 70%<br>(51-84%)                | 30%<br>(16-49%)          | 2.8<br>(1.5-4.6)                            | 11%<br>(7.4-14%)                     | 13%<br>(9-18%)                      | 1.5<br>(1-2.2)         | 75<br>(51-100)       |
| Saint Vincent and the Grenadines | 1995 | Male   | 50 to 54 | 69%<br>(51-83%)                | 31%<br>(17-49%)          | 2.6<br>(1.5-4.1)                            | 9.8%<br>(6.6-14%)                    | 12%<br>(7.7-17%)                    | 1.7<br>(1.1-2.4)       | 69<br>(44-97)        |
| Saint Vincent and the Grenadines | 1995 | Male   | 55 to 59 | 67%<br>(49-82%)                | 33%<br>(18-51%)          | 2.4<br>(1.3-3.8)                            | 9.2%<br>(5.8-13%)                    | 11%<br>(7-16%)                      | 2.4<br>(1.5-3.5)       | 83<br>(53-120)       |
| Saint Vincent and the Grenadines | 1995 | Male   | 60 to 64 | 65%<br>(46-82%)                | 35%<br>(18-54%)          | 2.2<br>(1.2-3.6)                            | 7.4%<br>(4.1-12%)                    | 8.7%<br>(4.7-14%)                   | 2.3<br>(1.3-3.7)       | 68<br>(37-110)       |
| Saint Vincent and the Grenadines | 1995 | Male   | 65 to 69 | 64%<br>(45-80%)                | 36%<br>(20-55%)          | 1.9<br>(1-3.1)                              | 6.2%<br>(3.3-9.8%)                   | 7.1%<br>(3.8-11%)                   | 2.6<br>(1.4-4.1)       | 61<br>(33-95)        |
| Saint Vincent and the Grenadines | 1995 | Male   | 70 to 74 | 60%<br>(42-76%)                | 40%<br>(24-58%)          | 1.6<br>(0.82-2.7)                           | 4.3%<br>(1.7-7.7%)                   | 4.8%<br>(1.9-8.9%)                  | 2.1<br>(0.85-4)        | 41<br>(17-75)        |
| Saint Vincent and the Grenadines | 1995 | Male   | 75 to 79 | 55%<br>(36-73%)                | 45%<br>(27-64%)          | 1.3<br>(0.66-2.3)                           | 3.2%<br>(1-6.4%)                     | 3.6%<br>(1.1-7.2%)                  | 1.9<br>(0.56-3.8)      | 28<br>(9.1-56)       |
| Saint Vincent and the Grenadines | 1995 | Male   | 80 to 84 | 50%<br>(31-67%)                | 50%<br>(33-69%)          | 1.1<br>(0.58-1.9)                           | 2.3%<br>(0.66-4.7%)                  | 2.5%<br>(0.6-5.2%)                  | 1.1<br>(0.26-2.2)      | 12<br>(3.4-24)       |
| Saint Vincent and the Grenadines | 1995 | Male   | 85 to 89 | 45%<br>(28-62%)                | 55%<br>(38-72%)          | 1<br>(0.51-1.7)                             | 1.8%<br>(0.4-3.9%)                   | 1.8%<br>(0.28-4.2%)                 | 0.56<br>(0.089-1.3)    | 4.6<br>(1-10)        |
| Saint Vincent and the Grenadines | 1995 | Male   | 90 to 94 | 46%<br>(30-63%)                | 54%<br>(37-70%)          | 1<br>(0.49-1.9)                             | 1.5%<br>(0.15-3.7%)                  | 1.5%<br>(-0.06-4.1%)                | 0.21<br>(-0.0085-0.57) | 1.2<br>(0.12-3)      |
| Saint Vincent and the Grenadines | 1995 | Male   | 95 plus  | 49%<br>(30-69%)                | 51%<br>(31-70%)          | 1.1<br>(0.45-2.1)                           | 1.6%<br>(-0.073-4.4%)                | 1.5%<br>(-0.41-4.8%)                | 0.053<br>(-0.014-0.17) | 0.22<br>(-0.01-0.61) |
| Saint Vincent and the Grenadines | 2000 | Female | All Ages | 35%<br>(29-42%)                | 65%<br>(58-71%)          | 0.8<br>(0.66-0.93)                          | 1.2%<br>(0.64-1.9%)                  | 0.92%<br>(-0.13-2.2%)               | 3.5<br>(-0.52-8.6)     | 190<br>(94-290)      |
| Saint Vincent and the Grenadines | 2000 | Female | 15 to 19 | 42%<br>(29-59%)                | 58%<br>(41-71%)          | 0.97<br>(0.52-1.6)                          | 1.7%<br>(1.1-2.6%)                   | 3.2%<br>(1.7-5.4%)                  | 0.11<br>(0.059-0.18)   | 12<br>(7.7-19)       |
| Saint Vincent and the Grenadines | 2000 | Female | 20 to 24 | 48%<br>(32-64%)                | 52%<br>(36-68%)          | 1.4<br>(0.79-2.2)                           | 2.7%<br>(1.8-3.8%)                   | 3.7%<br>(2.1-5.7%)                  | 0.17<br>(0.093-0.26)   | 21<br>(13-29)        |
| Saint Vincent and the Grenadines | 2000 | Female | 25 to 29 | 48%<br>(31-65%)                | 52%<br>(35-69%)          | 1.5<br>(0.88-2.2)                           | 2.8%<br>(1.9-3.7%)                   | 3.5%<br>(2.1-5.1%)                  | 0.19<br>(0.11-0.29)    | 20<br>(13-28)        |
| Saint Vincent and the Grenadines | 2000 | Female | 30 to 34 | 46%<br>(29-63%)                | 54%<br>(37-71%)          | 1.4<br>(0.82-2.2)                           | 2.8%<br>(1.9-3.9%)                   | 3.9%<br>(2.4-5.5%)                  | 0.26<br>(0.15-0.39)    | 22<br>(14-31)        |
| Saint Vincent and the Grenadines | 2000 | Female | 35 to 39 | 45%<br>(30-62%)                | 55%<br>(38-70%)          | 1.3<br>(0.77-2.1)                           | 2.6%<br>(1.7-3.9%)                   | 3.8%<br>(2.4-5.7%)                  | 0.36<br>(0.21-0.58)    | 25<br>(16-37)        |
| Saint Vincent and the Grenadines | 2000 | Female | 40 to 44 | 44%<br>(29-62%)                | 56%<br>(38-71%)          | 1.3<br>(0.68-2)                             | 2.7%<br>(1.5-4.2%)                   | 4%<br>(2.2-6.2%)                    | 0.41<br>(0.22-0.67)    | 23<br>(12-37)        |

| Location                         | Year | Sex    | Age      | Prevalence of current drinkers | Prevalence of abstainers | Population average of standard drinks daily | Percent of total attributable deaths | Percent of total attributable DALYs | Attributable deaths   | Attributable DALYs   |
|----------------------------------|------|--------|----------|--------------------------------|--------------------------|---------------------------------------------|--------------------------------------|-------------------------------------|-----------------------|----------------------|
| Saint Vincent and the Grenadines | 2000 | Female | 45 to 49 | 42%<br>(26-58%)                | 58%<br>(42-74%)          | 1.2<br>(0.64-2)                             | 2.4%<br>(1-4.2%)                     | 3.5%<br>(1.6-5.9%)                  | 0.39<br>(0.18-0.68)   | 18<br>(8.1-32)       |
| Saint Vincent and the Grenadines | 2000 | Female | 50 to 54 | 38%<br>(24-55%)                | 62%<br>(45-76%)          | 1.1<br>(0.58-1.8)                           | 2.2%<br>(0.54-4.4%)                  | 3.1%<br>(0.86-5.9%)                 | 0.39<br>(0.11-0.76)   | 15<br>(3.8-30)       |
| Saint Vincent and the Grenadines | 2000 | Female | 55 to 59 | 34%<br>(21-51%)                | 66%<br>(49-79%)          | 0.93<br>(0.47-1.6)                          | 1.6%<br>(0.078-3.8%)                 | 2.2%<br>(0.25-4.9%)                 | 0.31<br>(0.033-0.7)   | 10<br>(0.46-24)      |
| Saint Vincent and the Grenadines | 2000 | Female | 60 to 64 | 30%<br>(18-47%)                | 70%<br>(53-82%)          | 0.79<br>(0.39-1.4)                          | 1%<br>(-0.55-3.2%)                   | 1.4%<br>(-0.6-4.2%)                 | 0.36<br>(-0.15-1)     | 9.8<br>(-5.1-30)     |
| Saint Vincent and the Grenadines | 2000 | Female | 65 to 69 | 28%<br>(18-42%)                | 72%<br>(58-82%)          | 0.69<br>(0.36-1.1)                          | 0.53%<br>(-0.86-2.2%)                | 0.75%<br>(-0.93-2.7%)               | 0.23<br>(-0.28-0.81)  | 4.8<br>(-7.8-19)     |
| Saint Vincent and the Grenadines | 2000 | Female | 70 to 74 | 25%<br>(16-40%)                | 75%<br>(60-84%)          | 0.59<br>(0.29-1)                            | 0.2%<br>(-1.2-1.9%)                  | 0.31%<br>(-1.4-2.4%)                | 0.13<br>(-0.57-1)     | 1.9<br>(-12-19)      |
| Saint Vincent and the Grenadines | 2000 | Female | 75 to 79 | 23%<br>(13-36%)                | 77%<br>(64-87%)          | 0.51<br>(0.23-0.92)                         | 0.087%<br>(-1.2-1.7%)                | 0.13%<br>(-1.4-2%)                  | 0.068<br>(-0.7-1)     | 0.79<br>(-11-15)     |
| Saint Vincent and the Grenadines | 2000 | Female | 80 to 84 | 21%<br>(12-33%)                | 79%<br>(67-88%)          | 0.48<br>(0.23-0.81)                         | 0.1%<br>(-0.97-1.4%)                 | 0.12%<br>(-1.1-1.7%)                | 0.068<br>(-0.67-0.99) | 0.77<br>(-7.3-11)    |
| Saint Vincent and the Grenadines | 2000 | Female | 85 to 89 | 21%<br>(12-32%)                | 79%<br>(68-88%)          | 0.49<br>(0.23-0.86)                         | 0.12%<br>(-0.9-1.5%)                 | 0.097%<br>(-1.1-1.6%)               | 0.043<br>(-0.48-0.72) | 0.48<br>(-3.5-5.7)   |
| Saint Vincent and the Grenadines | 2000 | Female | 90 to 94 | 23%<br>(14-36%)                | 77%<br>(64-86%)          | 0.55<br>(0.24-1.1)                          | 0.22%<br>(-0.88-1.9%)                | 0.18%<br>(-1.1-2.1%)                | 0.041<br>(-0.27-0.48) | 0.31<br>(-1.2-2.5)   |
| Saint Vincent and the Grenadines | 2000 | Female | 95 plus  | 27%<br>(14-45%)                | 73%<br>(55-86%)          | 0.66<br>(0.24-1.3)                          | 0.38%<br>(-1.1-2.8%)                 | 0.29%<br>(-1.5-3.1%)                | 0.025<br>(-0.13-0.27) | 0.13<br>(-0.39-0.93) |
| Saint Vincent and the Grenadines | 2000 | Male   | All Ages | 57%<br>(49-66%)                | 43%<br>(34-51%)          | 1.7<br>(1.5-1.9)                            | 5.8%<br>(4.6-7.1%)                   | 5.7%<br>(4-7.6%)                    | 25<br>(18-34)         | 1100<br>(850-1300)   |
| Saint Vincent and the Grenadines | 2000 | Male   | 15 to 19 | 59%<br>(42-75%)                | 41%<br>(25-58%)          | 1.4<br>(0.74-2.2)                           | 5.4%<br>(3.6-7.7%)                   | 7%<br>(4.2-10%)                     | 0.63<br>(0.37-1)      | 57<br>(38-85)        |
| Saint Vincent and the Grenadines | 2000 | Male   | 20 to 24 | 69%<br>(51-83%)                | 31%<br>(17-49%)          | 2.6<br>(1.6-3.7)                            | 10%<br>(7.4-13%)                     | 11%<br>(7.2-15%)                    | 1.4<br>(0.88-2)       | 120<br>(85-170)      |
| Saint Vincent and the Grenadines | 2000 | Male   | 25 to 29 | 72%<br>(55-84%)                | 28%<br>(16-45%)          | 3.1<br>(2-4.4)                              | 9.3%<br>(6.9-12%)                    | 9.9%<br>(6.8-14%)                   | 1.2<br>(0.78-1.7)     | 100<br>(75-140)      |
| Saint Vincent and the Grenadines | 2000 | Male   | 30 to 34 | 73%<br>(55-85%)                | 27%<br>(15-45%)          | 3.2<br>(2.1-4.6)                            | 7.9%<br>(6-10%)                      | 8.3%<br>(5.7-11%)                   | 1<br>(0.7-1.5)        | 84<br>(61-110)       |
| Saint Vincent and the Grenadines | 2000 | Male   | 35 to 39 | 72%<br>(56-85%)                | 28%<br>(15-44%)          | 3<br>(1.9-4.5)                              | 9.7%<br>(7.3-12%)                    | 11%<br>(8.1-15%)                    | 1.8<br>(1.2-2.4)      | 120<br>(85-150)      |
| Saint Vincent and the Grenadines | 2000 | Male   | 40 to 44 | 71%<br>(56-84%)                | 29%<br>(16-44%)          | 2.9<br>(1.7-4.4)                            | 10%<br>(7.5-13%)                     | 12%<br>(8.6-17%)                    | 2<br>(1.4-2.7)        | 110<br>(80-150)      |
| Saint Vincent and the Grenadines | 2000 | Male   | 45 to 49 | 70%<br>(51-83%)                | 30%<br>(17-49%)          | 2.8<br>(1.5-4.4)                            | 9.4%<br>(6.6-13%)                    | 11%<br>(7.6-15%)                    | 1.8<br>(1.2-2.5)      | 90<br>(63-120)       |
| Saint Vincent and the Grenadines | 2000 | Male   | 50 to 54 | 68%<br>(50-83%)                | 32%<br>(17-50%)          | 2.5<br>(1.4-4.1)                            | 9.2%<br>(6.1-13%)                    | 11%<br>(7-15%)                      | 2<br>(1.3-2.8)        | 83<br>(53-120)       |
| Saint Vincent and the Grenadines | 2000 | Male   | 55 to 59 | 66%<br>(49-82%)                | 34%<br>(18-51%)          | 2.3<br>(1.3-3.8)                            | 8.6%<br>(5.3-12%)                    | 10%<br>(6.2-15%)                    | 2.1<br>(1.3-3.1)      | 73<br>(47-110)       |
| Saint Vincent and the Grenadines | 2000 | Male   | 60 to 64 | 65%<br>(45-81%)                | 35%<br>(19-55%)          | 2.1<br>(1.1-3.6)                            | 7%<br>(3.9-11%)                      | 8.1%<br>(4.5-13%)                   | 2.6<br>(1.4-4.1)      | 76<br>(42-120)       |

| Location                         | Year | Sex    | Age      | Prevalence of current drinkers | Prevalence of abstainers | Population average of standard drinks daily | Percent of total attributable deaths | Percent of total attributable DALYs | Attributable deaths   | Attributable DALYs    |
|----------------------------------|------|--------|----------|--------------------------------|--------------------------|---------------------------------------------|--------------------------------------|-------------------------------------|-----------------------|-----------------------|
| Saint Vincent and the Grenadines | 2000 | Male   | 65 to 69 | 63%<br>(44-79%)                | 37%<br>(21-56%)          | 1.9<br>(1-3)                                | 5.9%<br>(3.1-9.4%)                   | 6.7%<br>(3.5-11%)                   | 2.6<br>(1.4-4.2)      | 62<br>(33-100)        |
| Saint Vincent and the Grenadines | 2000 | Male   | 70 to 74 | 60%<br>(41-75%)                | 40%<br>(25-59%)          | 1.6<br>(0.81-2.7)                           | 4.2%<br>(1.8-7.6%)                   | 4.7%<br>(2-8.4%)                    | 2.3<br>(0.98-4.1)     | 44<br>(19-79)         |
| Saint Vincent and the Grenadines | 2000 | Male   | 75 to 79 | 55%<br>(35-73%)                | 45%<br>(27-65%)          | 1.3<br>(0.65-2.3)                           | 3%<br>(1-5.9%)                       | 3.3%<br>(1.1-6.6%)                  | 1.7<br>(0.55-3.4)     | 26<br>(8.6-51)        |
| Saint Vincent and the Grenadines | 2000 | Male   | 80 to 84 | 49%<br>(31-67%)                | 51%<br>(33-69%)          | 1.1<br>(0.57-1.8)                           | 2.2%<br>(0.72-4.3%)                  | 2.3%<br>(0.71-4.7%)                 | 1.1<br>(0.33-2.3)     | 12<br>(4.1-25)        |
| Saint Vincent and the Grenadines | 2000 | Male   | 85 to 89 | 44%<br>(28-62%)                | 56%<br>(38-72%)          | 0.96<br>(0.49-1.6)                          | 1.7%<br>(0.48-3.5%)                  | 1.8%<br>(0.43-3.8%)                 | 0.6<br>(0.15-1.3)     | 4.9<br>(1.4-10)       |
| Saint Vincent and the Grenadines | 2000 | Male   | 90 to 94 | 45%<br>(29-62%)                | 55%<br>(38-71%)          | 0.98<br>(0.49-1.8)                          | 1.4%<br>(0.26-3.5%)                  | 1.5%<br>(0.098-3.9%)                | 0.23<br>(0.016-0.6)   | 1.3<br>(0.24-3.3)     |
| Saint Vincent and the Grenadines | 2000 | Male   | 95 plus  | 48%<br>(28-68%)                | 52%<br>(32-72%)          | 1.1<br>(0.44-2)                             | 1.5%<br>(0.035-4.2%)                 | 1.4%<br>(-0.29-4.5%)                | 0.063<br>(-0.014-0.2) | 0.27<br>(0.0058-0.73) |
| Saint Vincent and the Grenadines | 2005 | Female | All Ages | 36%<br>(29-43%)                | 64%<br>(57-71%)          | 0.9<br>(0.75-1.1)                           | 1.5%<br>(0.82-2.2%)                  | 1.3%<br>(0.09-2.7%)                 | 4.8<br>(0.35-10)      | 210<br>(120-320)      |
| Saint Vincent and the Grenadines | 2005 | Female | 15 to 19 | 42%<br>(28-58%)                | 58%<br>(42-72%)          | 1<br>(0.55-1.7)                             | 1.9%<br>(1.2-2.9%)                   | 3.7%<br>(2-6%)                      | 0.11<br>(0.059-0.19)  | 12<br>(7.5-19)        |
| Saint Vincent and the Grenadines | 2005 | Female | 20 to 24 | 48%<br>(32-64%)                | 52%<br>(36-68%)          | 1.6<br>(0.85-2.4)                           | 3%<br>(2-4.2%)                       | 4.5%<br>(2.5-6.8%)                  | 0.18<br>(0.095-0.27)  | 21<br>(13-30)         |
| Saint Vincent and the Grenadines | 2005 | Female | 25 to 29 | 47%<br>(30-64%)                | 53%<br>(36-70%)          | 1.6<br>(0.91-2.4)                           | 3%<br>(2-4.1%)                       | 4.1%<br>(2.4-6.2%)                  | 0.19<br>(0.1-0.29)    | 21<br>(13-29)         |
| Saint Vincent and the Grenadines | 2005 | Female | 30 to 34 | 45%<br>(29-62%)                | 55%<br>(38-71%)          | 1.5<br>(0.89-2.4)                           | 2.8%<br>(1.9-3.9%)                   | 4.2%<br>(2.7-6%)                    | 0.22<br>(0.13-0.34)   | 20<br>(13-28)         |
| Saint Vincent and the Grenadines | 2005 | Female | 35 to 39 | 45%<br>(30-62%)                | 55%<br>(38-70%)          | 1.4<br>(0.85-2.2)                           | 2.8%<br>(1.8-4%)                     | 4.4%<br>(2.8-6.5%)                  | 0.3<br>(0.19-0.47)    | 21<br>(14-31)         |
| Saint Vincent and the Grenadines | 2005 | Female | 40 to 44 | 43%<br>(29-61%)                | 57%<br>(39-71%)          | 1.3<br>(0.74-2.2)                           | 2.8%<br>(1.5-4.4%)                   | 4.5%<br>(2.5-7%)                    | 0.48<br>(0.27-0.76)   | 27<br>(15-43)         |
| Saint Vincent and the Grenadines | 2005 | Female | 45 to 49 | 42%<br>(26-59%)                | 58%<br>(41-74%)          | 1.3<br>(0.7-2.1)                            | 2.7%<br>(1.2-4.5%)                   | 4%<br>(2-6.6%)                      | 0.52<br>(0.25-0.86)   | 25<br>(11-41)         |
| Saint Vincent and the Grenadines | 2005 | Female | 50 to 54 | 38%<br>(24-55%)                | 62%<br>(45-76%)          | 1.2<br>(0.63-2)                             | 2.5%<br>(0.79-4.8%)                  | 3.7%<br>(1.3-6.7%)                  | 0.53<br>(0.18-0.96)   | 21<br>(6.5-39)        |
| Saint Vincent and the Grenadines | 2005 | Female | 55 to 59 | 34%<br>(20-51%)                | 66%<br>(49-80%)          | 1<br>(0.51-1.7)                             | 2%<br>(0.37-4.3%)                    | 2.8%<br>(0.7-5.8%)                  | 0.45<br>(0.11-0.93)   | 15<br>(2.8-33)        |
| Saint Vincent and the Grenadines | 2005 | Female | 60 to 64 | 30%<br>(18-46%)                | 70%<br>(54-82%)          | 0.86<br>(0.42-1.5)                          | 1.4%<br>(-0.26-3.7%)                 | 1.9%<br>(-0.2-5%)                   | 0.34<br>(-0.037-0.87) | 9.4<br>(-1.8-25)      |
| Saint Vincent and the Grenadines | 2005 | Female | 65 to 69 | 28%<br>(17-42%)                | 72%<br>(58-83%)          | 0.75<br>(0.4-1.2)                           | 0.85%<br>(-0.67-2.7%)                | 1.2%<br>(-0.69-3.4%)                | 0.39<br>(-0.23-1.1)   | 8.5<br>(-6.9-26)      |
| Saint Vincent and the Grenadines | 2005 | Female | 70 to 74 | 25%<br>(16-39%)                | 75%<br>(61-84%)          | 0.63<br>(0.31-1.1)                          | 0.54%<br>(-0.9-2.5%)                 | 0.75%<br>(-1-3.1%)                  | 0.29<br>(-0.37-1.2)   | 4.9<br>(-8.1-23)      |
| Saint Vincent and the Grenadines | 2005 | Female | 75 to 79 | 22%<br>(13-35%)                | 78%<br>(65-87%)          | 0.54<br>(0.24-0.97)                         | 0.3%<br>(-1-2%)                      | 0.39%<br>(-1.2-2.4%)                | 0.2<br>(-0.61-1.3)    | 2.7<br>(-9.2-18)      |
| Saint Vincent and the Grenadines | 2005 | Female | 80 to 84 | 21%<br>(12-32%)                | 79%<br>(68-88%)          | 0.51<br>(0.25-0.88)                         | 0.34%<br>(-0.81-1.8%)                | 0.4%<br>(-0.95-2.1%)                | 0.23<br>(-0.55-1.2)   | 2.5<br>(-5.8-13)      |

| Location                         | Year | Sex    | Age      | Prevalence of current drinkers | Prevalence of abstainers | Population average of standard drinks daily | Percent of total attributable deaths | Percent of total attributable DALYs | Attributable deaths     | Attributable DALYs  |
|----------------------------------|------|--------|----------|--------------------------------|--------------------------|---------------------------------------------|--------------------------------------|-------------------------------------|-------------------------|---------------------|
| Saint Vincent and the Grenadines | 2005 | Female | 85 to 89 | 21%<br>(12-32%)                | 79%<br>(68-88%)          | 0.52<br>(0.25-0.9)                          | 0.36%<br>(-0.7-1.8%)                 | 0.38%<br>(-0.83-2%)                 | 0.2<br>(-0.43-1)        | 1.6<br>(-3.1-8)     |
| Saint Vincent and the Grenadines | 2005 | Female | 90 to 94 | 23%<br>(14-36%)                | 77%<br>(64-86%)          | 0.59<br>(0.27-1.1)                          | 0.46%<br>(-0.76-2.2%)                | 0.45%<br>(-0.98-2.6%)               | 0.11<br>(-0.25-0.64)    | 0.69<br>(-1.2-3.4)  |
| Saint Vincent and the Grenadines | 2005 | Female | 95 plus  | 27%<br>(14-44%)                | 73%<br>(56-86%)          | 0.71<br>(0.25-1.4)                          | 0.64%<br>(-0.93-3.1%)                | 0.59%<br>(-1.3-3.5%)                | 0.051<br>(-0.11-0.3)    | 0.22<br>(-0.32-1)   |
| Saint Vincent and the Grenadines | 2005 | Male   | All Ages | 59%<br>(50-66%)                | 41%<br>(34-50%)          | 1.9<br>(1.7-2.2)                            | 6.9%<br>(5.7-8.3%)                   | 6.8%<br>(5-8.9%)                    | 30<br>(22-39)           | 1300<br>(1000-1500) |
| Saint Vincent and the Grenadines | 2005 | Male   | 15 to 19 | 59%<br>(41-75%)                | 41%<br>(25-59%)          | 1.5<br>(0.81-2.4)                           | 5.9%<br>(3.9-8.2%)                   | 7.6%<br>(4.6-12%)                   | 0.64<br>(0.38-0.99)     | 57<br>(37-83)       |
| Saint Vincent and the Grenadines | 2005 | Male   | 20 to 24 | 69%<br>(51-82%)                | 31%<br>(18-49%)          | 2.7<br>(1.7-4)                              | 11%<br>(8.1-15%)                     | 13%<br>(8.4-18%)                    | 1.5<br>(0.99-2.2)       | 130<br>(92-180)     |
| Saint Vincent and the Grenadines | 2005 | Male   | 25 to 29 | 71%<br>(54-84%)                | 29%<br>(16-46%)          | 3.3<br>(2.1-4.8)                            | 11%<br>(8.5-15%)                     | 13%<br>(9-18%)                      | 1.5<br>(0.98-2.2)       | 120<br>(85-160)     |
| Saint Vincent and the Grenadines | 2005 | Male   | 30 to 34 | 72%<br>(55-85%)                | 28%<br>(15-45%)          | 3.4<br>(2.2-4.8)                            | 11%<br>(8.3-14%)                     | 13%<br>(9.5-18%)                    | 1.6<br>(1.1-2.2)        | 110<br>(81-150)     |
| Saint Vincent and the Grenadines | 2005 | Male   | 35 to 39 | 72%<br>(57-85%)                | 28%<br>(15-43%)          | 3.3<br>(2.1-4.8)                            | 11%<br>(8-13%)                       | 13%<br>(9.4-17%)                    | 1.7<br>(1.2-2.4)        | 110<br>(82-150)     |
| Saint Vincent and the Grenadines | 2005 | Male   | 40 to 44 | 71%<br>(56-84%)                | 29%<br>(16-44%)          | 3.1<br>(1.8-4.7)                            | 11%<br>(8.1-14%)                     | 14%<br>(9.8-18%)                    | 2.5<br>(1.8-3.4)        | 140<br>(100-190)    |
| Saint Vincent and the Grenadines | 2005 | Male   | 45 to 49 | 70%<br>(51-84%)                | 30%<br>(16-49%)          | 2.9<br>(1.6-4.6)                            | 11%<br>(7.7-14%)                     | 13%<br>(9.2-18%)                    | 2.7<br>(1.9-3.7)        | 130<br>(94-180)     |
| Saint Vincent and the Grenadines | 2005 | Male   | 50 to 54 | 68%<br>(50-83%)                | 32%<br>(17-50%)          | 2.7<br>(1.5-4.2)                            | 10%<br>(6.8-14%)                     | 12%<br>(8.1-17%)                    | 2.7<br>(1.7-3.7)        | 110<br>(73-150)     |
| Saint Vincent and the Grenadines | 2005 | Male   | 55 to 59 | 66%<br>(49-81%)                | 34%<br>(19-51%)          | 2.5<br>(1.3-4)                              | 9.3%<br>(5.9-13%)                    | 11%<br>(7.1-16%)                    | 2.7<br>(1.7-3.8)        | 93<br>(58-130)      |
| Saint Vincent and the Grenadines | 2005 | Male   | 60 to 64 | 64%<br>(45-81%)                | 36%<br>(19-55%)          | 2.2<br>(1.2-3.8)                            | 7.6%<br>(4.3-12%)                    | 8.9%<br>(5.1-14%)                   | 2.4<br>(1.4-3.7)        | 71<br>(41-110)      |
| Saint Vincent and the Grenadines | 2005 | Male   | 65 to 69 | 63%<br>(44-79%)                | 37%<br>(21-56%)          | 2<br>(1.1-3.2)                              | 6.4%<br>(3.5-10%)                    | 7.4%<br>(4.1-12%)                   | 3<br>(1.7-4.8)          | 73<br>(40-110)      |
| Saint Vincent and the Grenadines | 2005 | Male   | 70 to 74 | 60%<br>(42-76%)                | 40%<br>(24-58%)          | 1.7<br>(0.89-2.8)                           | 4.6%<br>(2-8.2%)                     | 5.3%<br>(2.3-9.2%)                  | 2.5<br>(1.1-4.4)        | 48<br>(21-84)       |
| Saint Vincent and the Grenadines | 2005 | Male   | 75 to 79 | 55%<br>(35-73%)                | 45%<br>(27-65%)          | 1.4<br>(0.68-2.3)                           | 3.4%<br>(1.2-6.3%)                   | 3.8%<br>(1.3-7.1%)                  | 1.9<br>(0.65-3.6)       | 29<br>(10-53)       |
| Saint Vincent and the Grenadines | 2005 | Male   | 80 to 84 | 49%<br>(30-67%)                | 51%<br>(33-70%)          | 1.2<br>(0.6-1.9)                            | 2.5%<br>(0.93-4.7%)                  | 2.8%<br>(0.93-5.2%)                 | 1.2<br>(0.43-2.4)       | 14<br>(5.1-26)      |
| Saint Vincent and the Grenadines | 2005 | Male   | 85 to 89 | 44%<br>(28-61%)                | 56%<br>(39-72%)          | 1<br>(0.54-1.7)                             | 2%<br>(0.72-4%)                      | 2.2%<br>(0.68-4.4%)                 | 0.74<br>(0.23-1.5)      | 5.9<br>(2.1-12)     |
| Saint Vincent and the Grenadines | 2005 | Male   | 90 to 94 | 44%<br>(29-62%)                | 56%<br>(38-71%)          | 1<br>(0.51-1.9)                             | 1.7%<br>(0.46-4%)                    | 1.8%<br>(0.29-4.4%)                 | 0.29<br>(0.047-0.69)    | 1.7<br>(0.42-3.8)   |
| Saint Vincent and the Grenadines | 2005 | Male   | 95 plus  | 47%<br>(28-67%)                | 53%<br>(33-72%)          | 1.1<br>(0.45-2.2)                           | 1.8%<br>(0.21-4.7%)                  | 1.8%<br>(-0.091-5.3%)               | 0.082<br>(-0.0042-0.24) | 0.33<br>(0.04-0.87) |
| Saint Vincent and the Grenadines | 2010 | Female | All Ages | 36%<br>(29-43%)                | 64%<br>(57-71%)          | 0.99<br>(0.79-1.2)                          | 1.7%<br>(0.94-2.6%)                  | 1.6%<br>(0.3-3.3%)                  | 6.1<br>(1.1-12)         | 250<br>(130-380)    |

| Location                         | Year | Sex    | Age      | Prevalence of current drinkers | Prevalence of abstainers | Population average of standard drinks daily | Percent of total attributable deaths | Percent of total attributable DALYs | Attributable deaths  | Attributable DALYs  |
|----------------------------------|------|--------|----------|--------------------------------|--------------------------|---------------------------------------------|--------------------------------------|-------------------------------------|----------------------|---------------------|
| Saint Vincent and the Grenadines | 2010 | Female | 15 to 19 | 41%<br>(28-58%)                | 59%<br>(42-72%)          | 1.1<br>(0.58-1.9)                           | 2%<br>(1.2-3%)                       | 4%<br>(2-6.8%)                      | 0.11<br>(0.057-0.19) | 12<br>(7.4-20)      |
| Saint Vincent and the Grenadines | 2010 | Female | 20 to 24 | 47%<br>(31-64%)                | 53%<br>(36-69%)          | 1.7<br>(0.89-2.6)                           | 3.1%<br>(2-4.4%)                     | 4.9%<br>(2.7-7.6%)                  | 0.17<br>(0.09-0.27)  | 21<br>(13-30)       |
| Saint Vincent and the Grenadines | 2010 | Female | 25 to 29 | 47%<br>(30-64%)                | 53%<br>(36-70%)          | 1.7<br>(0.98-2.7)                           | 3.2%<br>(2.1-4.3%)                   | 4.8%<br>(2.8-7.4%)                  | 0.2<br>(0.11-0.32)   | 22<br>(14-31)       |
| Saint Vincent and the Grenadines | 2010 | Female | 30 to 34 | 45%<br>(29-63%)                | 55%<br>(37-71%)          | 1.7<br>(0.95-2.6)                           | 2.9%<br>(2-4.1%)                     | 4.6%<br>(2.8-6.7%)                  | 0.23<br>(0.14-0.36)  | 21<br>(13-29)       |
| Saint Vincent and the Grenadines | 2010 | Female | 35 to 39 | 44%<br>(29-62%)                | 56%<br>(38-71%)          | 1.5<br>(0.88-2.4)                           | 2.8%<br>(1.9-4.2%)                   | 4.6%<br>(3-6.9%)                    | 0.3<br>(0.19-0.47)   | 21<br>(14-31)       |
| Saint Vincent and the Grenadines | 2010 | Female | 40 to 44 | 43%<br>(28-61%)                | 57%<br>(39-72%)          | 1.4<br>(0.76-2.3)                           | 2.9%<br>(1.6-4.5%)                   | 4.8%<br>(2.7-7.4%)                  | 0.43<br>(0.24-0.68)  | 24<br>(13-38)       |
| Saint Vincent and the Grenadines | 2010 | Female | 45 to 49 | 41%<br>(25-58%)                | 59%<br>(42-75%)          | 1.4<br>(0.73-2.3)                           | 2.9%<br>(1.4-4.9%)                   | 4.4%<br>(2.2-7.5%)                  | 0.66<br>(0.32-1.1)   | 31<br>(15-54)       |
| Saint Vincent and the Grenadines | 2010 | Female | 50 to 54 | 38%<br>(23-55%)                | 62%<br>(45-77%)          | 1.3<br>(0.68-2.1)                           | 2.8%<br>(0.95-5.3%)                  | 4.1%<br>(1.5-7.6%)                  | 0.72<br>(0.27-1.3)   | 29<br>(9.7-53)      |
| Saint Vincent and the Grenadines | 2010 | Female | 55 to 59 | 33%<br>(20-50%)                | 67%<br>(50-80%)          | 1.1<br>(0.54-1.9)                           | 2.2%<br>(0.52-4.7%)                  | 3.2%<br>(0.95-6.3%)                 | 0.63<br>(0.18-1.2)   | 21<br>(4.9-43)      |
| Saint Vincent and the Grenadines | 2010 | Female | 60 to 64 | 30%<br>(18-45%)                | 70%<br>(55-82%)          | 0.91<br>(0.45-1.6)                          | 1.6%<br>(-0.057-4.1%)                | 2.3%<br>(0.11-5.4%)                 | 0.49<br>(0.024-1.2)  | 14<br>(-0.46-34)    |
| Saint Vincent and the Grenadines | 2010 | Female | 65 to 69 | 27%<br>(17-41%)                | 73%<br>(59-83%)          | 0.8<br>(0.43-1.3)                           | 1.1%<br>(-0.47-3.2%)                 | 1.5%<br>(-0.46-4%)                  | 0.36<br>(-0.11-0.99) | 8.2<br>(-3.4-24)    |
| Saint Vincent and the Grenadines | 2010 | Female | 70 to 74 | 25%<br>(15-38%)                | 75%<br>(62-85%)          | 0.68<br>(0.33-1.2)                          | 0.81%<br>(-0.75-3%)                  | 1.1%<br>(-0.86-3.8%)                | 0.46<br>(-0.35-1.7)  | 8.3<br>(-7.7-31)    |
| Saint Vincent and the Grenadines | 2010 | Female | 75 to 79 | 22%<br>(13-35%)                | 78%<br>(65-87%)          | 0.6<br>(0.26-1.1)                           | 0.57%<br>(-0.82-2.7%)                | 0.71%<br>(-0.95-3.2%)               | 0.33<br>(-0.46-1.5)  | 4.8<br>(-7.1-22)    |
| Saint Vincent and the Grenadines | 2010 | Female | 80 to 84 | 20%<br>(12-32%)                | 80%<br>(68-88%)          | 0.56<br>(0.27-0.98)                         | 0.62%<br>(-0.63-2.3%)                | 0.73%<br>(-0.77-2.6%)               | 0.39<br>(-0.41-1.4)  | 4.2<br>(-4.3-15)    |
| Saint Vincent and the Grenadines | 2010 | Female | 85 to 89 | 20%<br>(12-31%)                | 80%<br>(69-88%)          | 0.56<br>(0.27-1)                            | 0.59%<br>(-0.61-2.3%)                | 0.64%<br>(-0.76-2.6%)               | 0.32<br>(-0.37-1.3)  | 2.6<br>(-2.6-9.9)   |
| Saint Vincent and the Grenadines | 2010 | Female | 90 to 94 | 22%<br>(13-34%)                | 78%<br>(66-87%)          | 0.64<br>(0.27-1.2)                          | 0.74%<br>(-0.63-2.9%)                | 0.78%<br>(-0.82-3.4%)               | 0.22<br>(-0.23-0.98) | 1.3<br>(-1.1-5.2)   |
| Saint Vincent and the Grenadines | 2010 | Female | 95 plus  | 26%<br>(14-44%)                | 74%<br>(56-86%)          | 0.76<br>(0.27-1.6)                          | 1%<br>(-0.75-3.9%)                   | 1%<br>(-1.1-4.5%)                   | 0.095<br>(-0.1-0.43) | 0.37<br>(-0.28-1.5) |
| Saint Vincent and the Grenadines | 2010 | Male   | All Ages | 59%<br>(51-67%)                | 41%<br>(33-49%)          | 2.1<br>(1.8-2.6)                            | 7.7%<br>(6.2-9.3%)                   | 7.7%<br>(5.6-10%)                   | 34<br>(25-45)        | 1400<br>(1100-1700) |
| Saint Vincent and the Grenadines | 2010 | Male   | 15 to 19 | 58%<br>(41-74%)                | 42%<br>(26-59%)          | 1.6<br>(0.87-2.6)                           | 6.2%<br>(4-8.9%)                     | 8.2%<br>(4.9-12%)                   | 0.69<br>(0.4-1.1)    | 60<br>(38-90)       |
| Saint Vincent and the Grenadines | 2010 | Male   | 20 to 24 | 68%<br>(51-82%)                | 32%<br>(18-49%)          | 3<br>(1.8-4.5)                              | 12%<br>(8.4-16%)                     | 14%<br>(9-20%)                      | 1.6<br>(1-2.4)       | 140<br>(93-190)     |
| Saint Vincent and the Grenadines | 2010 | Male   | 25 to 29 | 71%<br>(54-84%)                | 29%<br>(16-46%)          | 3.6<br>(2.2-5.3)                            | 12%<br>(9.1-16%)                     | 15%<br>(9.9-21%)                    | 1.7<br>(1.1-2.4)     | 130<br>(94-180)     |
| Saint Vincent and the Grenadines | 2010 | Male   | 30 to 34 | 72%<br>(54-85%)                | 28%<br>(15-46%)          | 3.8<br>(2.4-5.5)                            | 12%<br>(8.9-15%)                     | 15%<br>(10-20%)                     | 1.7<br>(1.2-2.4)     | 120<br>(90-160)     |

| Location                         | Year | Sex    | Age      | Prevalence of current drinkers | Prevalence of abstainers | Population average of standard drinks daily | Percent of total attributable deaths | Percent of total attributable DALYs | Attributable deaths     | Attributable DALYs   |
|----------------------------------|------|--------|----------|--------------------------------|--------------------------|---------------------------------------------|--------------------------------------|-------------------------------------|-------------------------|----------------------|
| Saint Vincent and the Grenadines | 2010 | Male   | 35 to 39 | 72%<br>(56-85%)                | 28%<br>(15-44%)          | 3.5<br>(2.2-5.2)                            | 11%<br>(8.6-15%)                     | 14%<br>(10-19%)                     | 1.9<br>(1.3-2.6)        | 120<br>(88-160)      |
| Saint Vincent and the Grenadines | 2010 | Male   | 40 to 44 | 71%<br>(54-84%)                | 29%<br>(16-46%)          | 3.4<br>(1.9-5.1)                            | 11%<br>(8.3-15%)                     | 14%<br>(10-19%)                     | 2.4<br>(1.6-3.2)        | 130<br>(95-170)      |
| Saint Vincent and the Grenadines | 2010 | Male   | 45 to 49 | 69%<br>(50-83%)                | 31%<br>(17-50%)          | 3.2<br>(1.8-4.9)                            | 11%<br>(7.8-15%)                     | 14%<br>(9.3-18%)                    | 3.4<br>(2.3-4.6)        | 160<br>(120-220)     |
| Saint Vincent and the Grenadines | 2010 | Male   | 50 to 54 | 68%<br>(49-82%)                | 32%<br>(18-51%)          | 2.9<br>(1.6-4.6)                            | 11%<br>(7.1-15%)                     | 13%<br>(8.3-18%)                    | 3.7<br>(2.4-5.1)        | 150<br>(100-210)     |
| Saint Vincent and the Grenadines | 2010 | Male   | 55 to 59 | 66%<br>(48-81%)                | 34%<br>(19-52%)          | 2.7<br>(1.5-4.3)                            | 10%<br>(6.3-14%)                     | 12%<br>(7.6-17%)                    | 3.6<br>(2.2-5.1)        | 120<br>(78-180)      |
| Saint Vincent and the Grenadines | 2010 | Male   | 60 to 64 | 64%<br>(44-81%)                | 36%<br>(19-56%)          | 2.4<br>(1.3-4.2)                            | 8.2%<br>(4.6-13%)                    | 9.7%<br>(5.4-15%)                   | 3.1<br>(1.7-4.9)        | 92<br>(51-140)       |
| Saint Vincent and the Grenadines | 2010 | Male   | 65 to 69 | 63%<br>(44-79%)                | 37%<br>(21-56%)          | 2.2<br>(1.2-3.6)                            | 7%<br>(3.8-11%)                      | 8.1%<br>(4.3-13%)                   | 2.8<br>(1.5-4.5)        | 67<br>(36-110)       |
| Saint Vincent and the Grenadines | 2010 | Male   | 70 to 74 | 59%<br>(40-75%)                | 41%<br>(25-60%)          | 1.8<br>(0.96-3)                             | 5.2%<br>(2.4-9.2%)                   | 5.9%<br>(2.7-10%)                   | 2.9<br>(1.3-5.4)        | 57<br>(26-100)       |
| Saint Vincent and the Grenadines | 2010 | Male   | 75 to 79 | 54%<br>(35-72%)                | 46%<br>(28-65%)          | 1.5<br>(0.75-2.6)                           | 3.8%<br>(1.5-7.1%)                   | 4.3%<br>(1.6-7.9%)                  | 2.1<br>(0.79-4)         | 32<br>(12-60)        |
| Saint Vincent and the Grenadines | 2010 | Male   | 80 to 84 | 48%<br>(30-66%)                | 52%<br>(34-70%)          | 1.3<br>(0.65-2.1)                           | 2.9%<br>(1.1-5.6%)                   | 3.2%<br>(1.2-6.2%)                  | 1.4<br>(0.49-2.7)       | 16<br>(5.8-30)       |
| Saint Vincent and the Grenadines | 2010 | Male   | 85 to 89 | 44%<br>(27-61%)                | 56%<br>(39-73%)          | 1.1<br>(0.56-1.9)                           | 2.4%<br>(0.91-4.9%)                  | 2.6%<br>(0.88-5.4%)                 | 0.84<br>(0.29-1.8)      | 6.7<br>(2.5-14)      |
| Saint Vincent and the Grenadines | 2010 | Male   | 90 to 94 | 44%<br>(28-61%)                | 56%<br>(39-72%)          | 1.1<br>(0.53-2)                             | 2%<br>(0.57-4.6%)                    | 2.1%<br>(0.43-5%)                   | 0.33<br>(0.067-0.79)    | 1.9<br>(0.53-4.2)    |
| Saint Vincent and the Grenadines | 2010 | Male   | 95 plus  | 47%<br>(27-67%)                | 53%<br>(33-73%)          | 1.2<br>(0.49-2.3)                           | 2.1%<br>(0.31-5.3%)                  | 2.1%<br>(0.015-5.8%)                | 0.098<br>(0.00067-0.27) | 0.39<br>(0.057-0.97) |
| Saint Vincent and the Grenadines | 2016 | Female | All Ages | 35%<br>(29-42%)                | 65%<br>(58-71%)          | 1<br>(0.74-1.4)                             | 1.9%<br>(0.97-3.1%)                  | 1.9%<br>(0.44-3.8%)                 | 7.6<br>(1.7-16)         | 280<br>(140-470)     |
| Saint Vincent and the Grenadines | 2016 | Female | 15 to 19 | 41%<br>(28-58%)                | 59%<br>(42-72%)          | 1.2<br>(0.55-2)                             | 2%<br>(1.1-3.2%)                     | 4.1%<br>(1.9-7.1%)                  | 0.1<br>(0.047-0.18)     | 11<br>(6.4-18)       |
| Saint Vincent and the Grenadines | 2016 | Female | 20 to 24 | 47%<br>(31-63%)                | 53%<br>(37-69%)          | 1.7<br>(0.89-2.9)                           | 3.2%<br>(1.9-4.8%)                   | 5.2%<br>(2.6-8.7%)                  | 0.17<br>(0.083-0.29)    | 20<br>(12-31)        |
| Saint Vincent and the Grenadines | 2016 | Female | 25 to 29 | 46%<br>(30-64%)                | 54%<br>(36-70%)          | 1.8<br>(0.96-2.8)                           | 3.3%<br>(2.1-4.7%)                   | 5%<br>(2.8-7.9%)                    | 0.2<br>(0.1-0.35)       | 22<br>(13-33)        |
| Saint Vincent and the Grenadines | 2016 | Female | 30 to 34 | 44%<br>(28-62%)                | 56%<br>(38-72%)          | 1.7<br>(0.91-2.8)                           | 3.1%<br>(2-4.6%)                     | 4.9%<br>(2.9-7.5%)                  | 0.27<br>(0.15-0.45)     | 23<br>(14-35)        |
| Saint Vincent and the Grenadines | 2016 | Female | 35 to 39 | 44%<br>(28-61%)                | 56%<br>(39-72%)          | 1.6<br>(0.86-2.7)                           | 3%<br>(1.9-4.5%)                     | 4.9%<br>(2.9-7.4%)                  | 0.35<br>(0.2-0.58)      | 24<br>(15-38)        |
| Saint Vincent and the Grenadines | 2016 | Female | 40 to 44 | 42%<br>(27-61%)                | 58%<br>(39-73%)          | 1.5<br>(0.79-2.5)                           | 3.1%<br>(1.6-5.1%)                   | 5.1%<br>(2.7-8.3%)                  | 0.48<br>(0.25-0.8)      | 27<br>(14-43)        |
| Saint Vincent and the Grenadines | 2016 | Female | 45 to 49 | 40%<br>(25-58%)                | 60%<br>(42-75%)          | 1.4<br>(0.74-2.5)                           | 3.1%<br>(1.4-5.5%)                   | 4.7%<br>(2.4-8.2%)                  | 0.62<br>(0.31-1.1)      | 29<br>(14-51)        |
| Saint Vincent and the Grenadines | 2016 | Female | 50 to 54 | 37%<br>(23-55%)                | 63%<br>(45-77%)          | 1.3<br>(0.68-2.3)                           | 3%<br>(1.1-5.8%)                     | 4.4%<br>(1.8-8.1%)                  | 0.92<br>(0.36-1.7)      | 37<br>(13-70)        |



| Location                         | Year | Sex    | Age      | Prevalence of current drinkers | Prevalence of abstainers | Population average of standard drinks daily | Percent of total attributable deaths | Percent of total attributable DALYs | Attributable deaths  | Attributable DALYs  |
|----------------------------------|------|--------|----------|--------------------------------|--------------------------|---------------------------------------------|--------------------------------------|-------------------------------------|----------------------|---------------------|
| Saint Vincent and the Grenadines | 2016 | Female | 55 to 59 | 32%<br>(20-49%)                | 68%<br>(51-80%)          | 1.1<br>(0.54-1.9)                           | 2.4%<br>(0.73-4.9%)                  | 3.5%<br>(1.2-6.6%)                  | 0.89<br>(0.3-1.7)    | 30<br>(9.1-60)      |
| Saint Vincent and the Grenadines | 2016 | Female | 60 to 64 | 29%<br>(18-45%)                | 71%<br>(55-82%)          | 0.94<br>(0.46-1.7)                          | 1.8%<br>(0.11-4.3%)                  | 2.5%<br>(0.33-5.6%)                 | 0.71<br>(0.092-1.6)  | 20<br>(1.3-50)      |
| Saint Vincent and the Grenadines | 2016 | Female | 65 to 69 | 27%<br>(17-41%)                | 73%<br>(59-83%)          | 0.82<br>(0.44-1.4)                          | 1.3%<br>(-0.28-3.7%)                 | 1.8%<br>(-0.22-4.6%)                | 0.55<br>(-0.072-1.5) | 13<br>(-2.6-35)     |
| Saint Vincent and the Grenadines | 2016 | Female | 70 to 74 | 24%<br>(15-38%)                | 76%<br>(62-85%)          | 0.69<br>(0.33-1.3)                          | 1%<br>(-0.65-3.3%)                   | 1.3%<br>(-0.67-4.1%)                | 0.43<br>(-0.21-1.4)  | 7.8<br>(-4.7-26)    |
| Saint Vincent and the Grenadines | 2016 | Female | 75 to 79 | 22%<br>(13-35%)                | 78%<br>(65-87%)          | 0.61<br>(0.26-1.2)                          | 0.74%<br>(-0.73-2.9%)                | 0.91%<br>(-0.87-3.5%)               | 0.48<br>(-0.45-1.9)  | 6.9<br>(-6.9-28)    |
| Saint Vincent and the Grenadines | 2016 | Female | 80 to 84 | 20%<br>(11-31%)                | 80%<br>(69-89%)          | 0.57<br>(0.26-1.1)                          | 0.78%<br>(-0.56-2.8%)                | 0.92%<br>(-0.66-3.3%)               | 0.57<br>(-0.4-2.1)   | 6.1<br>(-4.2-22)    |
| Saint Vincent and the Grenadines | 2016 | Female | 85 to 89 | 20%<br>(11-31%)                | 80%<br>(69-89%)          | 0.57<br>(0.26-1.1)                          | 0.79%<br>(-0.47-2.7%)                | 0.88%<br>(-0.59-3.1%)               | 0.42<br>(-0.27-1.5)  | 3.3<br>(-1.9-11)    |
| Saint Vincent and the Grenadines | 2016 | Female | 90 to 94 | 22%<br>(13-34%)                | 78%<br>(66-87%)          | 0.65<br>(0.28-1.3)                          | 0.91%<br>(-0.5-3.3%)                 | 0.99%<br>(-0.7-3.7%)                | 0.29<br>(-0.2-1.1)   | 1.6<br>(-0.89-5.7)  |
| Saint Vincent and the Grenadines | 2016 | Female | 95 plus  | 26%<br>(14-43%)                | 74%<br>(57-86%)          | 0.79<br>(0.28-1.6)                          | 1.2%<br>(-0.68-4.5%)                 | 1.2%<br>(-0.96-5.1%)                | 0.13<br>(-0.1-0.58)  | 0.51<br>(-0.29-2)   |
| Saint Vincent and the Grenadines | 2016 | Male   | All Ages | 59%<br>(51-67%)                | 41%<br>(33-49%)          | 2.3<br>(1.7-3)                              | 8.2%<br>(6.3-10%)                    | 8.2%<br>(5.6-11%)                   | 42<br>(28-57)        | 1600<br>(1200-2100) |
| Saint Vincent and the Grenadines | 2016 | Male   | 15 to 19 | 58%<br>(40-74%)                | 42%<br>(26-60%)          | 1.7<br>(0.82-2.8)                           | 6.3%<br>(3.9-9.3%)                   | 8.3%<br>(4.8-13%)                   | 0.63<br>(0.33-1)     | 55<br>(33-86)       |
| Saint Vincent and the Grenadines | 2016 | Male   | 20 to 24 | 68%<br>(50-82%)                | 32%<br>(18-50%)          | 3.1<br>(1.7-5)                              | 12%<br>(8.3-17%)                     | 14%<br>(8.9-21%)                    | 1.6<br>(0.92-2.5)    | 130<br>(86-200)     |
| Saint Vincent and the Grenadines | 2016 | Male   | 25 to 29 | 71%<br>(53-84%)                | 29%<br>(16-47%)          | 3.7<br>(2.2-5.8)                            | 13%<br>(8.9-17%)                     | 16%<br>(9.8-22%)                    | 1.7<br>(1-2.6)       | 130<br>(87-190)     |
| Saint Vincent and the Grenadines | 2016 | Male   | 30 to 34 | 72%<br>(54-85%)                | 28%<br>(15-46%)          | 3.9<br>(2.3-6.1)                            | 12%<br>(8.9-16%)                     | 15%<br>(10-21%)                     | 1.9<br>(1.2-2.7)     | 130<br>(89-180)     |
| Saint Vincent and the Grenadines | 2016 | Male   | 35 to 39 | 71%<br>(55-85%)                | 29%<br>(15-45%)          | 3.7<br>(2.1-5.7)                            | 12%<br>(8.4-15%)                     | 15%<br>(10-20%)                     | 2.1<br>(1.3-2.9)     | 130<br>(91-180)     |
| Saint Vincent and the Grenadines | 2016 | Male   | 40 to 44 | 70%<br>(54-84%)                | 30%<br>(16-46%)          | 3.5<br>(1.9-5.5)                            | 12%<br>(8.4-16%)                     | 15%<br>(10-21%)                     | 2.6<br>(1.7-3.6)     | 140<br>(96-190)     |
| Saint Vincent and the Grenadines | 2016 | Male   | 45 to 49 | 69%<br>(48-83%)                | 31%<br>(17-52%)          | 3.3<br>(1.8-5.3)                            | 12%<br>(8-16%)                       | 15%<br>(9.4-20%)                    | 3.4<br>(2.2-4.7)     | 160<br>(110-220)    |
| Saint Vincent and the Grenadines | 2016 | Male   | 50 to 54 | 67%<br>(49-83%)                | 33%<br>(17-51%)          | 3<br>(1.7-4.9)                              | 11%<br>(7.4-15%)                     | 14%<br>(8.9-19%)                    | 5<br>(3.2-7.1)       | 200<br>(130-290)    |
| Saint Vincent and the Grenadines | 2016 | Male   | 55 to 59 | 65%<br>(48-81%)                | 35%<br>(19-52%)          | 2.8<br>(1.5-4.6)                            | 10%<br>(6.3-14%)                     | 12%<br>(7.6-17%)                    | 5.5<br>(3.3-7.9)     | 190<br>(120-270)    |
| Saint Vincent and the Grenadines | 2016 | Male   | 60 to 64 | 63%<br>(44-81%)                | 37%<br>(19-56%)          | 2.5<br>(1.3-4.2)                            | 8.4%<br>(4.6-13%)                    | 9.9%<br>(5.3-15%)                   | 4.6<br>(2.4-7.1)     | 130<br>(70-210)     |
| Saint Vincent and the Grenadines | 2016 | Male   | 65 to 69 | 62%<br>(43-78%)                | 38%<br>(22-57%)          | 2.2<br>(1.2-3.6)                            | 7.1%<br>(3.8-11%)                    | 8.2%<br>(4.4-13%)                   | 3.8<br>(2-6.1)       | 92<br>(48-140)      |
| Saint Vincent and the Grenadines | 2016 | Male   | 70 to 74 | 58%<br>(41-74%)                | 42%<br>(26-59%)          | 1.9<br>(0.94-3.3)                           | 5.4%<br>(2.4-9.5%)                   | 6.1%<br>(2.6-11%)                   | 2.8<br>(1.2-5.1)     | 54<br>(24-95)       |

| Location                         | Year | Sex    | Age      | Prevalence of current drinkers | Prevalence of abstainers | Population average of standard drinks daily | Percent of total attributable deaths | Percent of total attributable DALYs | Attributable deaths    | Attributable DALYs  |
|----------------------------------|------|--------|----------|--------------------------------|--------------------------|---------------------------------------------|--------------------------------------|-------------------------------------|------------------------|---------------------|
| Saint Vincent and the Grenadines | 2016 | Male   | 75 to 79 | 53%<br>(35-71%)                | 47%<br>(29-65%)          | 1.6<br>(0.74-2.7)                           | 4%<br>(1.5-7.7%)                     | 4.5%<br>(1.6-8.7%)                  | 2.5<br>(0.9-5)         | 38<br>(14-73)       |
| Saint Vincent and the Grenadines | 2016 | Male   | 80 to 84 | 48%<br>(29-66%)                | 52%<br>(34-71%)          | 1.3<br>(0.64-2.3)                           | 3.1%<br>(1.1-6.1%)                   | 3.4%<br>(1.2-6.8%)                  | 1.9<br>(0.67-3.8)      | 21<br>(7.7-41)      |
| Saint Vincent and the Grenadines | 2016 | Male   | 85 to 89 | 43%<br>(27-60%)                | 57%<br>(40-73%)          | 1.2<br>(0.56-2.1)                           | 2.6%<br>(0.87-5.3%)                  | 2.8%<br>(0.86-6%)                   | 1<br>(0.32-2.2)        | 8.1<br>(2.8-17)     |
| Saint Vincent and the Grenadines | 2016 | Male   | 90 to 94 | 43%<br>(28-60%)                | 57%<br>(40-72%)          | 1.2<br>(0.52-2.2)                           | 2.2%<br>(0.57-5%)                    | 2.3%<br>(0.44-5.5%)                 | 0.41<br>(0.079-1)      | 2.4<br>(0.62-5.4)   |
| Saint Vincent and the Grenadines | 2016 | Male   | 95 plus  | 46%<br>(27-66%)                | 54%<br>(34-73%)          | 1.2<br>(0.49-2.5)                           | 2.3%<br>(0.3-5.6%)                   | 2.3%<br>(0.011-6.4%)                | 0.12<br>(0.00057-0.33) | 0.47<br>(0.063-1.2) |
| Suriname                         | 1990 | Female | All Ages | 33%<br>(27-40%)                | 67%<br>(60-73%)          | 0.91<br>(0.75-1.1)                          | 1.7%<br>(1.2-2.3%)                   | 2.2%<br>(1.2-3.4%)                  | 25<br>(14-39)          | 1100<br>(770-1400)  |
| Suriname                         | 1990 | Female | 15 to 19 | 40%<br>(26-56%)                | 60%<br>(44-74%)          | 1.1<br>(0.58-1.8)                           | 2.5%<br>(1.4-4.1%)                   | 5%<br>(2.2-8.5%)                    | 0.76<br>(0.34-1.3)     | 72<br>(39-120)      |
| Suriname                         | 1990 | Female | 20 to 24 | 46%<br>(30-62%)                | 54%<br>(38-70%)          | 1.7<br>(0.95-2.5)                           | 4%<br>(2.5-5.8%)                     | 6.9%<br>(3.7-11%)                   | 1.3<br>(0.67-2)        | 120<br>(76-180)     |
| Suriname                         | 1990 | Female | 25 to 29 | 45%<br>(29-62%)                | 55%<br>(38-71%)          | 1.7<br>(1.1-2.5)                            | 4%<br>(2.7-5.4%)                     | 6.6%<br>(4-9.7%)                    | 1.3<br>(0.82-2)        | 120<br>(84-170)     |
| Suriname                         | 1990 | Female | 30 to 34 | 43%<br>(27-61%)                | 57%<br>(39-73%)          | 1.6<br>(0.95-2.5)                           | 3.8%<br>(2.6-5.3%)                   | 6.5%<br>(4.1-9.7%)                  | 1.3<br>(0.85-1.9)      | 100<br>(71-150)     |
| Suriname                         | 1990 | Female | 35 to 39 | 43%<br>(28-60%)                | 57%<br>(40-72%)          | 1.5<br>(0.85-2.5)                           | 3.7%<br>(2.4-5.3%)                   | 6.5%<br>(4-9.4%)                    | 1.4<br>(0.86-2)        | 91<br>(59-130)      |
| Suriname                         | 1990 | Female | 40 to 44 | 41%<br>(27-60%)                | 59%<br>(40-73%)          | 1.5<br>(0.73-2.4)                           | 3.7%<br>(2.2-5.6%)                   | 6.4%<br>(3.7-9.8%)                  | 1.5<br>(0.87-2.4)      | 85<br>(51-130)      |
| Suriname                         | 1990 | Female | 45 to 49 | 39%<br>(24-57%)                | 61%<br>(43-76%)          | 1.4<br>(0.75-2.3)                           | 3.7%<br>(2-5.9%)                     | 6%<br>(3.3-9.7%)                    | 1.9<br>(1-3.1)         | 89<br>(49-150)      |
| Suriname                         | 1990 | Female | 50 to 54 | 36%<br>(22-52%)                | 64%<br>(48-78%)          | 1.3<br>(0.66-2.1)                           | 3.6%<br>(1.8-6.2%)                   | 5.5%<br>(2.7-9.2%)                  | 2.5<br>(1.2-4.2)       | 100<br>(51-170)     |
| Suriname                         | 1990 | Female | 55 to 59 | 32%<br>(19-48%)                | 68%<br>(52-81%)          | 1.1<br>(0.53-1.8)                           | 3.2%<br>(1.4-5.6%)                   | 4.5%<br>(2-7.9%)                    | 2.9<br>(1.3-5.2)       | 98<br>(43-180)      |
| Suriname                         | 1990 | Female | 60 to 64 | 28%<br>(17-44%)                | 72%<br>(56-83%)          | 0.91<br>(0.44-1.6)                          | 2.4%<br>(0.68-4.7%)                  | 3.2%<br>(0.92-6.3%)                 | 2.3<br>(0.67-4.5)      | 67<br>(20-130)      |
| Suriname                         | 1990 | Female | 65 to 69 | 26%<br>(16-40%)                | 74%<br>(60-84%)          | 0.79<br>(0.41-1.4)                          | 1.9%<br>(0.47-3.8%)                  | 2.5%<br>(0.61-5%)                   | 2<br>(0.49-4.1)        | 47<br>(12-95)       |
| Suriname                         | 1990 | Female | 70 to 74 | 23%<br>(14-36%)                | 77%<br>(64-86%)          | 0.67<br>(0.34-1.2)                          | 1.4%<br>(0.022-3.4%)                 | 1.8%<br>(0.038-4.3%)                | 1.5<br>(0.034-3.6)     | 28<br>(0.41-67)     |
| Suriname                         | 1990 | Female | 75 to 79 | 21%<br>(12-33%)                | 79%<br>(67-88%)          | 0.57<br>(0.26-1.1)                          | 1.1%<br>(-0.18-2.8%)                 | 1.3%<br>(-0.27-3.4%)                | 1.2<br>(-0.24-3.1)     | 17<br>(-3.1-47)     |
| Suriname                         | 1990 | Female | 80 to 84 | 19%<br>(11-30%)                | 81%<br>(70-89%)          | 0.54<br>(0.25-0.9)                          | 0.94%<br>(-0.078-2.3%)               | 1.1%<br>(-0.14-2.8%)                | 1.1<br>(-0.14-2.9)     | 12<br>(-1.1-31)     |
| Suriname                         | 1990 | Female | 85 to 89 | 19%<br>(11-30%)                | 81%<br>(70-89%)          | 0.55<br>(0.27-0.96)                         | 0.88%<br>(-0.084-2.4%)               | 0.99%<br>(-0.17-2.7%)               | 0.94<br>(-0.16-2.6)    | 7.5<br>(-0.72-20)   |
| Suriname                         | 1990 | Female | 90 to 94 | 21%<br>(12-33%)                | 79%<br>(67-88%)          | 0.63<br>(0.27-1.2)                          | 0.97%<br>(-0.14-2.8%)                | 1.1%<br>(-0.24-3.3%)                | 0.56<br>(-0.13-1.7)    | 3.1<br>(-0.42-9.1)  |

| Location | Year | Sex    | Age      | Prevalence of current drinkers | Prevalence of abstainers | Population average of standard drinks daily | Percent of total attributable deaths | Percent of total attributable DALYs | Attributable deaths   | Attributable DALYs  |
|----------|------|--------|----------|--------------------------------|--------------------------|---------------------------------------------|--------------------------------------|-------------------------------------|-----------------------|---------------------|
| Suriname | 1990 | Female | 95 plus  | 25%<br>(13-42%)                | 75%<br>(58-87%)          | 0.75<br>(0.27-1.5)                          | 1.2%<br>(-0.39-3.9%)                 | 1.3%<br>(-0.63-4.5%)                | 0.17<br>(-0.088-0.62) | 0.66<br>(-0.22-2.1) |
| Suriname | 1990 | Male   | All Ages | 54%<br>(46-63%)                | 46%<br>(37-54%)          | 2<br>(1.6-2.3)                              | 5.2%<br>(4-6.5%)                     | 6.6%<br>(4.5-8.9%)                  | 92<br>(63-120)        | 4100<br>(3200-5100) |
| Suriname | 1990 | Male   | 15 to 19 | 57%<br>(40-73%)                | 43%<br>(27-60%)          | 1.7<br>(0.92-2.6)                           | 5.6%<br>(3.5-8.3%)                   | 8%<br>(4.5-12%)                     | 2<br>(1.1-3.2)        | 190<br>(110-270)    |
| Suriname | 1990 | Male   | 20 to 24 | 67%<br>(50-81%)                | 33%<br>(19-50%)          | 3.1<br>(1.9-4.5)                            | 12%<br>(8-16%)                       | 15%<br>(9.3-21%)                    | 6.3<br>(3.9-9)        | 520<br>(360-710)    |
| Suriname | 1990 | Male   | 25 to 29 | 70%<br>(53-83%)                | 30%<br>(17-47%)          | 3.7<br>(2.4-5.2)                            | 13%<br>(9.4-17%)                     | 17%<br>(12-23%)                     | 7.4<br>(5-10)         | 560<br>(400-750)    |
| Suriname | 1990 | Male   | 30 to 34 | 71%<br>(53-84%)                | 29%<br>(16-47%)          | 3.9<br>(2.5-5.6)                            | 13%<br>(9.3-17%)                     | 17%<br>(12-23%)                     | 6.3<br>(4.3-8.5)      | 430<br>(310-570)    |
| Suriname | 1990 | Male   | 35 to 39 | 71%<br>(55-84%)                | 29%<br>(16-45%)          | 3.7<br>(2.2-5.6)                            | 13%<br>(8.4-17%)                     | 16%<br>(10-22%)                     | 6.9<br>(4.3-9.4)      | 410<br>(270-550)    |
| Suriname | 1990 | Male   | 40 to 44 | 70%<br>(54-83%)                | 30%<br>(17-46%)          | 3.5<br>(1.9-5.4)                            | 12%<br>(7.7-16%)                     | 15%<br>(9.5-22%)                    | 6.3<br>(3.9-8.9)      | 340<br>(220-460)    |
| Suriname | 1990 | Male   | 45 to 49 | 68%<br>(48-83%)                | 32%<br>(17-52%)          | 3.3<br>(1.9-5.4)                            | 11%<br>(7.1-15%)                     | 14%<br>(8.7-20%)                    | 7<br>(4.2-9.9)        | 330<br>(210-450)    |
| Suriname | 1990 | Male   | 50 to 54 | 67%<br>(48-82%)                | 33%<br>(18-52%)          | 3<br>(1.7-5)                                | 9.8%<br>(5.5-14%)                    | 12%<br>(6.6-18%)                    | 7.9<br>(4.2-12)       | 320<br>(180-470)    |
| Suriname | 1990 | Male   | 55 to 59 | 65%<br>(46-80%)                | 35%<br>(20-54%)          | 2.8<br>(1.5-4.5)                            | 9%<br>(4.9-13%)                      | 11%<br>(5.8-17%)                    | 9.6<br>(4.9-15)       | 330<br>(170-500)    |
| Suriname | 1990 | Male   | 60 to 64 | 63%<br>(43-79%)                | 37%<br>(21-57%)          | 2.5<br>(1.3-4.4)                            | 7.6%<br>(3.8-12%)                    | 9%<br>(4.5-15%)                     | 8.8<br>(4.3-15)       | 260<br>(130-410)    |
| Suriname | 1990 | Male   | 65 to 69 | 61%<br>(42-78%)                | 39%<br>(22-58%)          | 2.2<br>(1.2-3.6)                            | 6.5%<br>(3.1-11%)                    | 7.7%<br>(3.6-13%)                   | 7.7<br>(3.7-13)       | 190<br>(92-310)     |
| Suriname | 1990 | Male   | 70 to 74 | 58%<br>(39-74%)                | 42%<br>(26-61%)          | 1.8<br>(0.95-3.1)                           | 4.9%<br>(2-9.4%)                     | 5.7%<br>(2.2-11%)                   | 5.4<br>(2.1-10)       | 100<br>(42-200)     |
| Suriname | 1990 | Male   | 75 to 79 | 53%<br>(34-71%)                | 47%<br>(29-66%)          | 1.5<br>(0.74-2.7)                           | 3.8%<br>(1.3-7.3%)                   | 4.3%<br>(1.4-8.4%)                  | 4.3<br>(1.4-8.4)      | 64<br>(22-120)      |
| Suriname | 1990 | Male   | 80 to 84 | 47%<br>(29-65%)                | 53%<br>(35-71%)          | 1.3<br>(0.66-2.2)                           | 2.9%<br>(0.95-5.6%)                  | 3.2%<br>(0.95-6.4%)                 | 2.9<br>(0.85-5.7)     | 32<br>(10-63)       |
| Suriname | 1990 | Male   | 85 to 89 | 42%<br>(26-59%)                | 58%<br>(41-74%)          | 1.1<br>(0.56-2)                             | 2.5%<br>(0.81-4.9%)                  | 2.7%<br>(0.77-5.6%)                 | 1.8<br>(0.52-3.8)     | 15<br>(4.8-30)      |
| Suriname | 1990 | Male   | 90 to 94 | 43%<br>(28-60%)                | 57%<br>(40-72%)          | 1.2<br>(0.54-2.1)                           | 2.2%<br>(0.53-5.1%)                  | 2.3%<br>(0.41-5.7%)                 | 0.85<br>(0.15-2.1)    | 4.8<br>(1.2-11)     |
| Suriname | 1990 | Male   | 95 plus  | 46%<br>(26-66%)                | 54%<br>(34-74%)          | 1.3<br>(0.52-2.4)                           | 2.4%<br>(0.31-5.9%)                  | 2.4%<br>(0.032-6.6%)                | 0.22<br>(0.0029-0.59) | 0.84<br>(0.11-2.1)  |
| Suriname | 1995 | Female | All Ages | 32%<br>(26-40%)                | 68%<br>(60-74%)          | 0.85<br>(0.71-1)                            | 1.6%<br>(1.1-2.1%)                   | 2%<br>(1.1-3.3%)                    | 25<br>(13-41)         | 1100<br>(750-1500)  |
| Suriname | 1995 | Female | 15 to 19 | 39%<br>(26-56%)                | 61%<br>(44-74%)          | 1<br>(0.53-1.7)                             | 2.3%<br>(1.2-3.7%)                   | 4.6%<br>(2-8.4%)                    | 0.6<br>(0.25-1.1)     | 59<br>(31-95)       |
| Suriname | 1995 | Female | 20 to 24 | 45%<br>(30-62%)                | 55%<br>(38-70%)          | 1.6<br>(0.86-2.4)                           | 3.6%<br>(2.2-5.3%)                   | 6.2%<br>(3.1-9.9%)                  | 1.1<br>(0.55-1.8)     | 110<br>(68-170)     |

| Location | Year | Sex    | Age      | Prevalence of current drinkers | Prevalence of abstainers | Population average of standard drinks daily | Percent of total attributable deaths | Percent of total attributable DALYs | Attributable deaths  | Attributable DALYs  |
|----------|------|--------|----------|--------------------------------|--------------------------|---------------------------------------------|--------------------------------------|-------------------------------------|----------------------|---------------------|
| Suriname | 1995 | Female | 25 to 29 | 45%<br>(28-62%)                | 55%<br>(38-72%)          | 1.6<br>(0.97-2.4)                           | 3.5%<br>(2.4-4.9%)                   | 5.8%<br>(3.4-8.7%)                  | 1.2<br>(0.68-1.8)    | 110<br>(72-150)     |
| Suriname | 1995 | Female | 30 to 34 | 43%<br>(27-61%)                | 57%<br>(39-73%)          | 1.6<br>(0.92-2.3)                           | 3.4%<br>(2.3-4.6%)                   | 5.7%<br>(3.6-8.2%)                  | 1.4<br>(0.91-2.1)    | 120<br>(79-160)     |
| Suriname | 1995 | Female | 35 to 39 | 42%<br>(27-60%)                | 58%<br>(40-73%)          | 1.4<br>(0.81-2.3)                           | 3.4%<br>(2.2-4.8%)                   | 5.7%<br>(3.6-8.2%)                  | 1.6<br>(0.99-2.3)    | 110<br>(69-150)     |
| Suriname | 1995 | Female | 40 to 44 | 41%<br>(27-60%)                | 59%<br>(40-73%)          | 1.4<br>(0.72-2.2)                           | 3.4%<br>(2-5.1%)                     | 5.8%<br>(3.4-8.8%)                  | 1.8<br>(1-2.7)       | 97<br>(59-140)      |
| Suriname | 1995 | Female | 45 to 49 | 39%<br>(24-56%)                | 61%<br>(44-76%)          | 1.3<br>(0.69-2.2)                           | 3.3%<br>(1.8-5.5%)                   | 5.4%<br>(2.9-8.8%)                  | 1.9<br>(1-3.1)       | 89<br>(48-150)      |
| Suriname | 1995 | Female | 50 to 54 | 36%<br>(22-53%)                | 64%<br>(47-78%)          | 1.2<br>(0.61-2)                             | 3.3%<br>(1.6-5.7%)                   | 5%<br>(2.4-8.6%)                    | 2.3<br>(1.1-4.1)     | 93<br>(44-160)      |
| Suriname | 1995 | Female | 55 to 59 | 31%<br>(19-48%)                | 69%<br>(52-81%)          | 1<br>(0.5-1.7)                              | 2.8%<br>(1.1-5.1%)                   | 4.1%<br>(1.7-7.4%)                  | 2.6<br>(1-4.7)       | 89<br>(35-160)      |
| Suriname | 1995 | Female | 60 to 64 | 28%<br>(16-44%)                | 72%<br>(56-84%)          | 0.85<br>(0.41-1.5)                          | 2.2%<br>(0.58-4.2%)                  | 3%<br>(0.78-5.7%)                   | 2.5<br>(0.66-4.8)    | 72<br>(19-140)      |
| Suriname | 1995 | Female | 65 to 69 | 26%<br>(16-39%)                | 74%<br>(61-84%)          | 0.74<br>(0.38-1.3)                          | 1.7%<br>(0.33-3.6%)                  | 2.3%<br>(0.43-4.7%)                 | 2.2<br>(0.43-4.6)    | 52<br>(10-110)      |
| Suriname | 1995 | Female | 70 to 74 | 23%<br>(15-36%)                | 77%<br>(64-85%)          | 0.62<br>(0.31-1.1)                          | 1.3%<br>(-0.034-3.1%)                | 1.7%<br>(-0.015-4%)                 | 1.9<br>(-0.015-4.4)  | 35<br>(-0.86-83)    |
| Suriname | 1995 | Female | 75 to 79 | 21%<br>(12-33%)                | 79%<br>(67-88%)          | 0.54<br>(0.24-1)                            | 0.96%<br>(-0.23-2.7%)                | 1.2%<br>(-0.28-3.3%)                | 1.2<br>(-0.29-3.4)   | 18<br>(-4.3-49)     |
| Suriname | 1995 | Female | 80 to 84 | 19%<br>(11-31%)                | 81%<br>(69-89%)          | 0.51<br>(0.24-0.88)                         | 0.9%<br>(-0.11-2.4%)                 | 1.1%<br>(-0.18-2.9%)                | 1.2<br>(-0.19-3.1)   | 13<br>(-1.7-33)     |
| Suriname | 1995 | Female | 85 to 89 | 19%<br>(11-29%)                | 81%<br>(71-89%)          | 0.52<br>(0.25-0.93)                         | 0.86%<br>(-0.099-2.3%)               | 0.98%<br>(-0.14-2.7%)               | 0.96<br>(-0.14-2.6)  | 7.6<br>(-0.89-20)   |
| Suriname | 1995 | Female | 90 to 94 | 21%<br>(12-33%)                | 79%<br>(67-88%)          | 0.59<br>(0.26-1.2)                          | 0.94%<br>(-0.14-2.9%)                | 1%<br>(-0.24-3.3%)                  | 0.62<br>(-0.15-2)    | 3.5<br>(-0.48-10)   |
| Suriname | 1995 | Female | 95 plus  | 25%<br>(13-41%)                | 75%<br>(59-87%)          | 0.71<br>(0.26-1.4)                          | 1.1%<br>(-0.37-3.7%)                 | 1.2%<br>(-0.61-4.3%)                | 0.26<br>(-0.13-0.94) | 0.97<br>(-0.32-3.2) |
| Suriname | 1995 | Male   | All Ages | 54%<br>(46-63%)                | 46%<br>(37-54%)          | 1.8<br>(1.5-2.2)                            | 5.1%<br>(3.9-6.4%)                   | 6.4%<br>(4.3-8.6%)                  | 97<br>(67-130)       | 4300<br>(3400-5300) |
| Suriname | 1995 | Male   | 15 to 19 | 57%<br>(39-73%)                | 43%<br>(27-61%)          | 1.5<br>(0.8-2.4)                            | 5.4%<br>(3.3-8%)                     | 7.5%<br>(4-12%)                     | 1.8<br>(0.95-2.9)    | 160<br>(99-250)     |
| Suriname | 1995 | Male   | 20 to 24 | 67%<br>(50-81%)                | 33%<br>(19-50%)          | 2.9<br>(1.7-4.2)                            | 11%<br>(7.4-15%)                     | 14%<br>(8.3-20%)                    | 5.7<br>(3.4-8.3)     | 480<br>(320-650)    |
| Suriname | 1995 | Male   | 25 to 29 | 70%<br>(53-83%)                | 30%<br>(17-47%)          | 3.5<br>(2.2-4.9)                            | 12%<br>(8.7-16%)                     | 16%<br>(10-22%)                     | 7.3<br>(4.8-10)      | 560<br>(390-740)    |
| Suriname | 1995 | Male   | 30 to 34 | 71%<br>(53-84%)                | 29%<br>(16-47%)          | 3.6<br>(2.3-5.1)                            | 12%<br>(8.3-15%)                     | 15%<br>(10-21%)                     | 8.3<br>(5.6-11)      | 560<br>(400-750)    |
| Suriname | 1995 | Male   | 35 to 39 | 71%<br>(54-84%)                | 29%<br>(16-46%)          | 3.4<br>(2-5)                                | 11%<br>(7.4-15%)                     | 14%<br>(9.1-20%)                    | 7.6<br>(4.8-11)      | 460<br>(310-610)    |
| Suriname | 1995 | Male   | 40 to 44 | 70%<br>(54-83%)                | 30%<br>(17-46%)          | 3.2<br>(1.8-4.9)                            | 11%<br>(6.8-15%)                     | 14%<br>(8.4-19%)                    | 7<br>(4.3-10)        | 380<br>(250-520)    |

| Location | Year | Sex    | Age      | Prevalence of current drinkers | Prevalence of abstainers | Population average of standard drinks daily | Percent of total attributable deaths | Percent of total attributable DALYs | Attributable deaths   | Attributable DALYs |
|----------|------|--------|----------|--------------------------------|--------------------------|---------------------------------------------|--------------------------------------|-------------------------------------|-----------------------|--------------------|
| Suriname | 1995 | Male   | 45 to 49 | 68%<br>(48-82%)                | 32%<br>(18-52%)          | 3.1<br>(1.7-4.9)                            | 10%<br>(6.6-15%)                     | 13%<br>(7.8-19%)                    | 7.1<br>(4.3-10)       | 330<br>(210-480)   |
| Suriname | 1995 | Male   | 50 to 54 | 66%<br>(48-82%)                | 34%<br>(18-52%)          | 2.8<br>(1.5-4.7)                            | 9.3%<br>(5.2-14%)                    | 12%<br>(6.2-17%)                    | 7.9<br>(4.2-12)       | 320<br>(180-470)   |
| Suriname | 1995 | Male   | 55 to 59 | 65%<br>(46-80%)                | 35%<br>(20-54%)          | 2.6<br>(1.4-4.1)                            | 8.6%<br>(4.7-13%)                    | 11%<br>(5.7-16%)                    | 9.2<br>(4.9-14)       | 320<br>(170-490)   |
| Suriname | 1995 | Male   | 60 to 64 | 62%<br>(42-79%)                | 38%<br>(21-58%)          | 2.3<br>(1.2-4)                              | 7.3%<br>(3.6-12%)                    | 8.7%<br>(4.2-14%)                   | 9.7<br>(4.6-16)       | 280<br>(140-450)   |
| Suriname | 1995 | Male   | 65 to 69 | 61%<br>(41-77%)                | 39%<br>(23-59%)          | 2<br>(1.1-3.4)                              | 6.1%<br>(3-10%)                      | 7.3%<br>(3.5-12%)                   | 8.7<br>(4.2-15)       | 210<br>(100-350)   |
| Suriname | 1995 | Male   | 70 to 74 | 57%<br>(40-74%)                | 43%<br>(26-60%)          | 1.7<br>(0.91-3)                             | 4.7%<br>(1.9-8.8%)                   | 5.4%<br>(2.1-10%)                   | 6.7<br>(2.6-13)       | 130<br>(52-240)    |
| Suriname | 1995 | Male   | 75 to 79 | 52%<br>(33-71%)                | 48%<br>(29-67%)          | 1.4<br>(0.66-2.6)                           | 3.6%<br>(1.2-7.1%)                   | 4.1%<br>(1.3-8.2%)                  | 4<br>(1.3-8)          | 60<br>(21-120)     |
| Suriname | 1995 | Male   | 80 to 84 | 46%<br>(28-64%)                | 54%<br>(36-72%)          | 1.2<br>(0.59-2)                             | 2.7%<br>(0.95-5.3%)                  | 3%<br>(0.98-6%)                     | 2.7<br>(0.89-5.3)     | 30<br>(11-59)      |
| Suriname | 1995 | Male   | 85 to 89 | 42%<br>(25-59%)                | 58%<br>(41-75%)          | 1.1<br>(0.52-1.9)                           | 2.3%<br>(0.75-4.5%)                  | 2.5%<br>(0.76-5.1%)                 | 1.8<br>(0.56-3.8)     | 15<br>(5-30)       |
| Suriname | 1995 | Male   | 90 to 94 | 42%<br>(27-59%)                | 58%<br>(41-73%)          | 1.1<br>(0.48-2)                             | 2%<br>(0.5-4.7%)                     | 2.1%<br>(0.4-5.3%)                  | 0.79<br>(0.15-2)      | 4.5<br>(1.1-11)    |
| Suriname | 1995 | Male   | 95 plus  | 46%<br>(26-66%)                | 54%<br>(34-74%)          | 1.2<br>(0.46-2.3)                           | 2.1%<br>(0.3-5.4%)                   | 2.2%<br>(0.013-6%)                  | 0.26<br>(0.0016-0.73) | 1<br>(0.15-2.6)    |
| Suriname | 2000 | Female | All Ages | 32%<br>(27-39%)                | 68%<br>(61-73%)          | 0.95<br>(0.79-1.1)                          | 1.8%<br>(1.3-2.5%)                   | 2.5%<br>(1.3-4%)                    | 36<br>(19-58)         | 1300<br>(920-1900) |
| Suriname | 2000 | Female | 15 to 19 | 39%<br>(26-55%)                | 61%<br>(45-74%)          | 1.2<br>(0.59-2)                             | 2.5%<br>(1.3-4.1%)                   | 5.1%<br>(2.2-8.8%)                  | 0.77<br>(0.33-1.4)    | 73<br>(39-120)     |
| Suriname | 2000 | Female | 20 to 24 | 45%<br>(29-62%)                | 55%<br>(38-71%)          | 1.7<br>(0.95-2.7)                           | 3.7%<br>(2.2-5.4%)                   | 6.3%<br>(3.2-10%)                   | 1.1<br>(0.51-1.7)     | 110<br>(62-160)    |
| Suriname | 2000 | Female | 25 to 29 | 44%<br>(28-62%)                | 56%<br>(38-72%)          | 1.8<br>(1.1-2.7)                            | 3.4%<br>(2.3-4.7%)                   | 5.3%<br>(3-7.9%)                    | 1.1<br>(0.62-1.7)     | 110<br>(71-150)    |
| Suriname | 2000 | Female | 30 to 34 | 43%<br>(27-61%)                | 57%<br>(39-73%)          | 1.7<br>(1-2.6)                              | 3.3%<br>(2.3-4.6%)                   | 5.4%<br>(3.5-7.9%)                  | 1.4<br>(0.87-2)       | 110<br>(77-160)    |
| Suriname | 2000 | Female | 35 to 39 | 42%<br>(27-60%)                | 58%<br>(40-73%)          | 1.6<br>(0.93-2.5)                           | 3.3%<br>(2.1-4.7%)                   | 5.5%<br>(3.5-7.9%)                  | 2<br>(1.2-2.8)        | 130<br>(85-180)    |
| Suriname | 2000 | Female | 40 to 44 | 41%<br>(26-59%)                | 59%<br>(41-74%)          | 1.5<br>(0.8-2.4)                            | 3.5%<br>(2.1-5.2%)                   | 5.8%<br>(3.4-8.7%)                  | 2.3<br>(1.4-3.5)      | 130<br>(78-190)    |
| Suriname | 2000 | Female | 45 to 49 | 39%<br>(24-56%)                | 61%<br>(44-76%)          | 1.5<br>(0.78-2.4)                           | 3.6%<br>(1.9-5.8%)                   | 5.7%<br>(3.1-9.2%)                  | 2.6<br>(1.4-4.2)      | 120<br>(66-200)    |
| Suriname | 2000 | Female | 50 to 54 | 35%<br>(21-51%)                | 65%<br>(49-79%)          | 1.3<br>(0.7-2.3)                            | 3.7%<br>(1.7-6.3%)                   | 5.5%<br>(2.6-9.4%)                  | 3<br>(1.4-5.1)        | 120<br>(55-200)    |
| Suriname | 2000 | Female | 55 to 59 | 31%<br>(18-47%)                | 69%<br>(53-82%)          | 1.1<br>(0.54-1.9)                           | 3.3%<br>(1.4-5.9%)                   | 4.8%<br>(2.1-8.6%)                  | 3.4<br>(1.5-6)        | 110<br>(50-200)    |
| Suriname | 2000 | Female | 60 to 64 | 28%<br>(16-43%)                | 72%<br>(57-84%)          | 0.94<br>(0.46-1.7)                          | 2.7%<br>(0.84-5.2%)                  | 3.7%<br>(1.2-6.8%)                  | 3.6<br>(1.1-6.8)      | 100<br>(31-190)    |

| Location | Year | Sex    | Age      | Prevalence of current drinkers | Prevalence of abstainers | Population average of standard drinks daily | Percent of total attributable deaths | Percent of total attributable DALYs | Attributable deaths | Attributable DALYs  |
|----------|------|--------|----------|--------------------------------|--------------------------|---------------------------------------------|--------------------------------------|-------------------------------------|---------------------|---------------------|
| Suriname | 2000 | Female | 65 to 69 | 25%<br>(16-39%)                | 75%<br>(61-84%)          | 0.83<br>(0.43-1.4)                          | 2.3%<br>(0.57-4.5%)                  | 3%<br>(0.77-5.8%)                   | 3.8<br>(0.97-7.4)   | 87<br>(22-170)      |
| Suriname | 2000 | Female | 70 to 74 | 23%<br>(14-36%)                | 77%<br>(64-86%)          | 0.7<br>(0.35-1.2)                           | 1.8%<br>(0.25-4.2%)                  | 2.3%<br>(0.32-5.1%)                 | 3.4<br>(0.46-7.3)   | 62<br>(8-140)       |
| Suriname | 2000 | Female | 75 to 79 | 20%<br>(12-33%)                | 80%<br>(67-88%)          | 0.61<br>(0.27-1.1)                          | 1.4%<br>(0.025-3.4%)                 | 1.7%<br>(0.024-4.3%)                | 2.6<br>(0.035-6.3)  | 37<br>(0.66-91)     |
| Suriname | 2000 | Female | 80 to 84 | 19%<br>(11-30%)                | 81%<br>(70-89%)          | 0.57<br>(0.26-1)                            | 1.3%<br>(0.14-3.1%)                  | 1.6%<br>(0.17-3.8%)                 | 2.2<br>(0.24-5.2)   | 24<br>(2.7-55)      |
| Suriname | 2000 | Female | 85 to 89 | 19%<br>(11-29%)                | 81%<br>(71-89%)          | 0.58<br>(0.27-1.1)                          | 1.3%<br>(0.17-3%)                    | 1.5%<br>(0.17-3.5%)                 | 1.5<br>(0.17-3.7)   | 12<br>(1.6-28)      |
| Suriname | 2000 | Female | 90 to 94 | 21%<br>(12-32%)                | 79%<br>(68-88%)          | 0.66<br>(0.3-1.3)                           | 1.4%<br>(0.089-3.6%)                 | 1.5%<br>(0.04-4.2%)                 | 0.95<br>(0.025-2.6) | 5.1<br>(0.35-13)    |
| Suriname | 2000 | Female | 95 plus  | 25%<br>(13-41%)                | 75%<br>(59-87%)          | 0.79<br>(0.28-1.6)                          | 1.7%<br>(-0.14-4.6%)                 | 1.7%<br>(-0.32-5.2%)                | 0.42<br>(-0.08-1.3) | 1.5<br>(-0.13-4.5)  |
| Suriname | 2000 | Male   | All Ages | 54%<br>(46-63%)                | 46%<br>(37-54%)          | 2.1<br>(1.7-2.5)                            | 5.9%<br>(4.6-7.3%)                   | 7.4%<br>(5.2-9.7%)                  | 130<br>(89-170)     | 5400<br>(4200-6500) |
| Suriname | 2000 | Male   | 15 to 19 | 56%<br>(38-73%)                | 44%<br>(27-62%)          | 1.7<br>(0.9-2.8)                            | 5.9%<br>(3.5-9%)                     | 8.3%<br>(4.4-13%)                   | 2.5<br>(1.3-4)      | 220<br>(130-340)    |
| Suriname | 2000 | Male   | 20 to 24 | 67%<br>(49-81%)                | 33%<br>(19-51%)          | 3.2<br>(1.9-4.7)                            | 12%<br>(8.1-17%)                     | 16%<br>(9.5-22%)                    | 6.2<br>(3.7-8.8)    | 500<br>(330-680)    |
| Suriname | 2000 | Male   | 25 to 29 | 70%<br>(52-83%)                | 30%<br>(17-48%)          | 3.9<br>(2.4-5.5)                            | 13%<br>(8.8-17%)                     | 16%<br>(11-22%)                     | 8<br>(5.2-11)       | 600<br>(420-800)    |
| Suriname | 2000 | Male   | 30 to 34 | 71%<br>(52-84%)                | 29%<br>(16-48%)          | 4<br>(2.6-5.7)                              | 12%<br>(8.6-15%)                     | 15%<br>(11-21%)                     | 8.7<br>(6-12)       | 590<br>(430-770)    |
| Suriname | 2000 | Male   | 35 to 39 | 70%<br>(54-84%)                | 30%<br>(16-46%)          | 3.8<br>(2.4-5.6)                            | 11%<br>(7.7-15%)                     | 14%<br>(9.6-19%)                    | 10<br>(6.7-14)      | 620<br>(440-800)    |
| Suriname | 2000 | Male   | 40 to 44 | 69%<br>(53-83%)                | 31%<br>(17-47%)          | 3.7<br>(2.1-5.6)                            | 11%<br>(7.3-15%)                     | 14%<br>(8.9-19%)                    | 9.7<br>(6.1-13)     | 520<br>(350-690)    |
| Suriname | 2000 | Male   | 45 to 49 | 68%<br>(47-82%)                | 32%<br>(18-53%)          | 3.4<br>(1.9-5.5)                            | 11%<br>(7-15%)                       | 14%<br>(8.3-19%)                    | 9.8<br>(6-14)       | 460<br>(300-640)    |
| Suriname | 2000 | Male   | 50 to 54 | 66%<br>(47-81%)                | 34%<br>(19-53%)          | 3.2<br>(1.7-5.1)                            | 10%<br>(5.8-15%)                     | 13%<br>(6.9-18%)                    | 10<br>(5.5-15)      | 410<br>(230-580)    |
| Suriname | 2000 | Male   | 55 to 59 | 64%<br>(46-80%)                | 36%<br>(20-54%)          | 2.9<br>(1.6-4.7)                            | 9.7%<br>(5.4-14%)                    | 12%<br>(6.4-18%)                    | 12<br>(6.3-17)      | 400<br>(220-580)    |
| Suriname | 2000 | Male   | 60 to 64 | 62%<br>(42-79%)                | 38%<br>(21-58%)          | 2.6<br>(1.4-4.4)                            | 8.5%<br>(4.4-13%)                    | 10%<br>(5.2-16%)                    | 13<br>(6.4-20)      | 360<br>(190-560)    |
| Suriname | 2000 | Male   | 65 to 69 | 61%<br>(41-77%)                | 39%<br>(23-59%)          | 2.3<br>(1.3-3.7)                            | 7.4%<br>(3.8-12%)                    | 8.8%<br>(4.5-14%)                   | 13<br>(6.6-21)      | 310<br>(160-480)    |
| Suriname | 2000 | Male   | 70 to 74 | 57%<br>(38-73%)                | 43%<br>(27-62%)          | 1.9<br>(0.98-3.3)                           | 5.7%<br>(2.3-10%)                    | 6.6%<br>(2.7-12%)                   | 10<br>(4.1-19)      | 200<br>(83-350)     |
| Suriname | 2000 | Male   | 75 to 79 | 52%<br>(32-70%)                | 48%<br>(30-68%)          | 1.6<br>(0.74-2.8)                           | 4.4%<br>(1.6-8.2%)                   | 5%<br>(1.8-9.5%)                    | 7.1<br>(2.5-13)     | 100<br>(37-190)     |
| Suriname | 2000 | Male   | 80 to 84 | 46%<br>(28-64%)                | 54%<br>(36-72%)          | 1.3<br>(0.64-2.2)                           | 3.5%<br>(1.3-6.5%)                   | 3.9%<br>(1.4-7.4%)                  | 4.1<br>(1.4-7.8)    | 45<br>(16-84)       |

| Location | Year | Sex    | Age      | Prevalence of current drinkers | Prevalence of abstainers | Population average of standard drinks daily | Percent of total attributable deaths | Percent of total attributable DALYs | Attributable deaths  | Attributable DALYs  |
|----------|------|--------|----------|--------------------------------|--------------------------|---------------------------------------------|--------------------------------------|-------------------------------------|----------------------|---------------------|
| Suriname | 2000 | Male   | 85 to 89 | 41%<br>(25-59%)                | 59%<br>(41-75%)          | 1.2<br>(0.58-2)                             | 2.8%<br>(1.1-5.5%)                   | 3.1%<br>(1.1-6.2%)                  | 2.3<br>(0.81-4.7)    | 18<br>(6.9-36)      |
| Suriname | 2000 | Male   | 90 to 94 | 42%<br>(27-59%)                | 58%<br>(41-73%)          | 1.2<br>(0.54-2.2)                           | 2.5%<br>(0.83-5.5%)                  | 2.7%<br>(0.75-6.1%)                 | 1.1<br>(0.31-2.5)    | 6.2<br>(2.1-13)     |
| Suriname | 2000 | Male   | 95 plus  | 45%<br>(26-66%)                | 55%<br>(34-74%)          | 1.3<br>(0.51-2.5)                           | 2.7%<br>(0.67-6.3%)                  | 2.8%<br>(0.48-7%)                   | 0.35<br>(0.059-0.88) | 1.3<br>(0.33-3.1)   |
| Suriname | 2005 | Female | All Ages | 32%<br>(27-40%)                | 68%<br>(60-73%)          | 1.2<br>(0.95-1.4)                           | 2.3%<br>(1.6-3.2%)                   | 3.3%<br>(1.8-5.1%)                  | 52<br>(29-81)        | 1800<br>(1200-2400) |
| Suriname | 2005 | Female | 15 to 19 | 39%<br>(26-56%)                | 61%<br>(44-74%)          | 1.4<br>(0.7-2.3)                            | 2.9%<br>(1.5-4.8%)                   | 6.2%<br>(2.8-11%)                   | 0.99<br>(0.45-1.7)   | 92<br>(48-150)      |
| Suriname | 2005 | Female | 20 to 24 | 45%<br>(29-61%)                | 55%<br>(39-71%)          | 2<br>(1.1-3.3)                              | 4%<br>(2.4-5.8%)                     | 7.1%<br>(3.6-11%)                   | 1.3<br>(0.68-2.1)    | 130<br>(81-190)     |
| Suriname | 2005 | Female | 25 to 29 | 44%<br>(28-61%)                | 56%<br>(39-72%)          | 2.1<br>(1.2-3.2)                            | 3.5%<br>(2.3-4.8%)                   | 5.4%<br>(3.1-8.2%)                  | 1<br>(0.58-1.6)      | 100<br>(67-150)     |
| Suriname | 2005 | Female | 30 to 34 | 42%<br>(26-60%)                | 58%<br>(40-74%)          | 2<br>(1.2-3.2)                              | 3.2%<br>(2.2-4.5%)                   | 5.1%<br>(3.2-7.6%)                  | 1.3<br>(0.83-2)      | 110<br>(79-160)     |
| Suriname | 2005 | Female | 35 to 39 | 42%<br>(27-59%)                | 58%<br>(41-73%)          | 1.9<br>(1.1-2.9)                            | 3.6%<br>(2.4-5%)                     | 6%<br>(3.8-8.5%)                    | 2<br>(1.3-3)         | 140<br>(90-190)     |
| Suriname | 2005 | Female | 40 to 44 | 41%<br>(26-59%)                | 59%<br>(41-74%)          | 1.8<br>(0.94-2.9)                           | 3.8%<br>(2.3-5.6%)                   | 6.4%<br>(3.8-9.4%)                  | 3.2<br>(1.9-4.7)     | 170<br>(110-250)    |
| Suriname | 2005 | Female | 45 to 49 | 39%<br>(23-56%)                | 61%<br>(44-77%)          | 1.7<br>(0.9-2.9)                            | 4.1%<br>(2.3-6.6%)                   | 6.6%<br>(3.7-10%)                   | 3.7<br>(2.1-6)       | 170<br>(99-280)     |
| Suriname | 2005 | Female | 50 to 54 | 35%<br>(21-52%)                | 65%<br>(48-79%)          | 1.5<br>(0.79-2.7)                           | 4.4%<br>(2.2-7.4%)                   | 6.6%<br>(3.4-11%)                   | 4.4<br>(2.2-7.3)     | 170<br>(87-290)     |
| Suriname | 2005 | Female | 55 to 59 | 31%<br>(18-47%)                | 69%<br>(53-82%)          | 1.3<br>(0.65-2.3)                           | 4.1%<br>(1.9-7.1%)                   | 5.9%<br>(2.8-10%)                   | 4.6<br>(2.2-7.7)     | 150<br>(71-270)     |
| Suriname | 2005 | Female | 60 to 64 | 27%<br>(16-43%)                | 73%<br>(57-84%)          | 1.1<br>(0.54-2)                             | 3.5%<br>(1.4-6.5%)                   | 4.7%<br>(1.8-8.5%)                  | 4.9<br>(1.9-8.9)     | 140<br>(53-260)     |
| Suriname | 2005 | Female | 65 to 69 | 25%<br>(16-39%)                | 75%<br>(61-84%)          | 0.97<br>(0.52-1.6)                          | 3.1%<br>(1.1-5.6%)                   | 4%<br>(1.5-7.2%)                    | 5.6<br>(2.1-10)      | 130<br>(47-240)     |
| Suriname | 2005 | Female | 70 to 74 | 23%<br>(14-36%)                | 77%<br>(64-86%)          | 0.81<br>(0.41-1.5)                          | 2.5%<br>(0.68-5.2%)                  | 3.2%<br>(0.89-6.5%)                 | 5.7<br>(1.5-12)      | 110<br>(28-220)     |
| Suriname | 2005 | Female | 75 to 79 | 20%<br>(12-33%)                | 80%<br>(67-88%)          | 0.71<br>(0.32-1.3)                          | 2%<br>(0.39-4.5%)                    | 2.5%<br>(0.51-5.5%)                 | 4.6<br>(0.92-10)     | 66<br>(13-150)      |
| Suriname | 2005 | Female | 80 to 84 | 19%<br>(11-29%)                | 81%<br>(71-89%)          | 0.66<br>(0.32-1.1)                          | 1.9%<br>(0.49-4.1%)                  | 2.3%<br>(0.58-4.9%)                 | 4<br>(1-8.5)         | 42<br>(11-90)       |
| Suriname | 2005 | Female | 85 to 89 | 19%<br>(11-29%)                | 81%<br>(71-89%)          | 0.67<br>(0.32-1.2)                          | 1.8%<br>(0.43-3.9%)                  | 2.1%<br>(0.47-4.7%)                 | 2.7<br>(0.6-5.9)     | 21<br>(4.9-45)      |
| Suriname | 2005 | Female | 90 to 94 | 21%<br>(12-33%)                | 79%<br>(67-88%)          | 0.76<br>(0.34-1.5)                          | 1.9%<br>(0.35-4.6%)                  | 2.2%<br>(0.32-5.3%)                 | 1.4<br>(0.21-3.4)    | 7.3<br>(1.3-17)     |
| Suriname | 2005 | Female | 95 plus  | 24%<br>(13-41%)                | 76%<br>(59-87%)          | 0.91<br>(0.32-1.9)                          | 2.2%<br>(0.077-5.7%)                 | 2.4%<br>(-0.012-6.6%)               | 0.6<br>(-0.0028-1.6) | 2.1<br>(0.075-5.6)  |
| Suriname | 2005 | Male   | All Ages | 55%<br>(47-64%)                | 45%<br>(36-53%)          | 2.6<br>(2.1-3.1)                            | 7.4%<br>(5.8-9%)                     | 9.1%<br>(6.6-12%)                   | 180<br>(130-230)     | 7100<br>(5600-8500) |

| Location | Year | Sex    | Age      | Prevalence of current drinkers | Prevalence of abstainers | Population average of standard drinks daily | Percent of total attributable deaths | Percent of total attributable DALYs | Attributable deaths | Attributable DALYs  |
|----------|------|--------|----------|--------------------------------|--------------------------|---------------------------------------------|--------------------------------------|-------------------------------------|---------------------|---------------------|
| Suriname | 2005 | Male   | 15 to 19 | 56%<br>(38-73%)                | 44%<br>(27-62%)          | 2<br>(1.1-3.2)                              | 6.9%<br>(4.1-11%)                    | 9.8%<br>(5.4-16%)                   | 3.3<br>(1.8-5.3)    | 280<br>(170-430)    |
| Suriname | 2005 | Male   | 20 to 24 | 67%<br>(48-81%)                | 33%<br>(19-52%)          | 3.8<br>(2.2-5.6)                            | 14%<br>(9.4-19%)                     | 18%<br>(11-26%)                     | 9.2<br>(5.6-13)     | 710<br>(470-980)    |
| Suriname | 2005 | Male   | 25 to 29 | 70%<br>(51-83%)                | 30%<br>(17-49%)          | 4.6<br>(2.8-6.6)                            | 15%<br>(10-19%)                      | 19%<br>(13-25%)                     | 9.1<br>(6.1-12)     | 660<br>(470-860)    |
| Suriname | 2005 | Male   | 30 to 34 | 71%<br>(51-84%)                | 29%<br>(16-49%)          | 4.8<br>(3-6.9)                              | 13%<br>(9.3-16%)                     | 16%<br>(12-21%)                     | 9.8<br>(7-13)       | 660<br>(480-840)    |
| Suriname | 2005 | Male   | 35 to 39 | 70%<br>(54-84%)                | 30%<br>(16-46%)          | 4.5<br>(2.7-6.6)                            | 13%<br>(8.9-16%)                     | 16%<br>(11-21%)                     | 12<br>(8.5-16)      | 720<br>(520-910)    |
| Suriname | 2005 | Male   | 40 to 44 | 69%<br>(53-83%)                | 31%<br>(17-47%)          | 4.3<br>(2.4-6.5)                            | 12%<br>(8.2-16%)                     | 15%<br>(10-20%)                     | 14<br>(9.3-19)      | 760<br>(510-980)    |
| Suriname | 2005 | Male   | 45 to 49 | 68%<br>(47-82%)                | 32%<br>(18-53%)          | 4<br>(2.3-6.4)                              | 12%<br>(8.2-16%)                     | 15%<br>(10-20%)                     | 15<br>(9.8-20)      | 680<br>(460-900)    |
| Suriname | 2005 | Male   | 50 to 54 | 66%<br>(47-81%)                | 34%<br>(19-53%)          | 3.7<br>(2-5.9)                              | 12%<br>(7.2-16%)                     | 15%<br>(8.7-20%)                    | 15<br>(8.9-21)      | 600<br>(370-830)    |
| Suriname | 2005 | Male   | 55 to 59 | 64%<br>(46-80%)                | 36%<br>(20-54%)          | 3.4<br>(1.8-5.4)                            | 11%<br>(6.5-16%)                     | 14%<br>(7.9-19%)                    | 16<br>(9-22)        | 530<br>(310-730)    |
| Suriname | 2005 | Male   | 60 to 64 | 62%<br>(42-79%)                | 38%<br>(21-58%)          | 3<br>(1.6-5.2)                              | 9.8%<br>(5.2-14%)                    | 12%<br>(6.1-17%)                    | 16<br>(8.4-24)      | 470<br>(240-680)    |
| Suriname | 2005 | Male   | 65 to 69 | 60%<br>(41-77%)                | 40%<br>(23-59%)          | 2.7<br>(1.5-4.4)                            | 8.9%<br>(4.8-13%)                    | 10%<br>(5.7-16%)                    | 18<br>(9.6-27)      | 420<br>(230-620)    |
| Suriname | 2005 | Male   | 70 to 74 | 57%<br>(38-73%)                | 43%<br>(27-62%)          | 2.2<br>(1.1-3.9)                            | 7.1%<br>(3.3-12%)                    | 8.2%<br>(3.7-14%)                   | 16<br>(7.3-27)      | 300<br>(140-510)    |
| Suriname | 2005 | Male   | 75 to 79 | 52%<br>(32-71%)                | 48%<br>(29-68%)          | 1.9<br>(0.88-3.3)                           | 5.6%<br>(2.3-9.6%)                   | 6.4%<br>(2.6-11%)                   | 11<br>(4.4-20)      | 170<br>(67-290)     |
| Suriname | 2005 | Male   | 80 to 84 | 46%<br>(28-64%)                | 54%<br>(36-72%)          | 1.5<br>(0.77-2.6)                           | 4.5%<br>(1.8-7.9%)                   | 5.1%<br>(2-9%)                      | 6.8<br>(2.7-12)     | 74<br>(30-130)      |
| Suriname | 2005 | Male   | 85 to 89 | 41%<br>(25-57%)                | 59%<br>(43-75%)          | 1.4<br>(0.68-2.3)                           | 3.6%<br>(1.4-6.7%)                   | 4%<br>(1.5-7.6%)                    | 3.5<br>(1.3-6.7)    | 28<br>(11-51)       |
| Suriname | 2005 | Male   | 90 to 94 | 41%<br>(26-58%)                | 59%<br>(42-74%)          | 1.4<br>(0.62-2.5)                           | 3.2%<br>(1.2-6.3%)                   | 3.5%<br>(1.2-7.2%)                  | 1.4<br>(0.47-2.9)   | 7.7<br>(2.8-15)     |
| Suriname | 2005 | Male   | 95 plus  | 44%<br>(25-64%)                | 56%<br>(36-75%)          | 1.5<br>(0.58-2.9)                           | 3.4%<br>(1-7.1%)                     | 3.7%<br>(0.9-8.1%)                  | 0.5<br>(0.12-1.1)   | 1.9<br>(0.56-3.9)   |
| Suriname | 2010 | Female | All Ages | 32%<br>(27-39%)                | 68%<br>(61-73%)          | 1.3<br>(1-1.6)                              | 2.7%<br>(1.8-3.7%)                   | 3.8%<br>(2.1-5.8%)                  | 63<br>(34-96)       | 2100<br>(1400-2900) |
| Suriname | 2010 | Female | 15 to 19 | 39%<br>(26-55%)                | 61%<br>(45-74%)          | 1.5<br>(0.75-2.6)                           | 3.2%<br>(1.6-5.4%)                   | 7.5%<br>(3.2-13%)                   | 1<br>(0.43-1.8)     | 91<br>(47-150)      |
| Suriname | 2010 | Female | 20 to 24 | 45%<br>(29-61%)                | 55%<br>(39-71%)          | 2.3<br>(1.2-3.7)                            | 4.6%<br>(2.8-6.8%)                   | 9%<br>(4.8-14%)                     | 1.6<br>(0.83-2.6)   | 160<br>(94-230)     |
| Suriname | 2010 | Female | 25 to 29 | 44%<br>(28-61%)                | 56%<br>(39-72%)          | 2.3<br>(1.3-3.6)                            | 4%<br>(2.6-5.7%)                     | 7%<br>(4-11%)                       | 1.4<br>(0.76-2.2)   | 130<br>(86-190)     |
| Suriname | 2010 | Female | 30 to 34 | 42%<br>(26-60%)                | 58%<br>(40-74%)          | 2.2<br>(1.3-3.6)                            | 3.9%<br>(2.6-5.5%)                   | 6.7%<br>(3.9-10%)                   | 1.5<br>(0.84-2.2)   | 120<br>(77-170)     |



| Location | Year | Sex    | Age      | Prevalence of current drinkers | Prevalence of abstainers | Population average of standard drinks daily | Percent of total attributable deaths | Percent of total attributable DALYs | Attributable deaths | Attributable DALYs   |
|----------|------|--------|----------|--------------------------------|--------------------------|---------------------------------------------|--------------------------------------|-------------------------------------|---------------------|----------------------|
| Suriname | 2010 | Female | 35 to 39 | 41%<br>(27-59%)                | 59%<br>(41-73%)          | 2.1<br>(1.2-3.3)                            | 3.9%<br>(2.5-5.7%)                   | 7%<br>(4.3-10%)                     | 2.3<br>(1.4-3.4)    | 160<br>(100-220)     |
| Suriname | 2010 | Female | 40 to 44 | 40%<br>(26-59%)                | 60%<br>(41-74%)          | 2<br>(1.1-3.2)                              | 4.3%<br>(2.6-6.4%)                   | 7.6%<br>(4.6-11%)                   | 3.4<br>(2-4.9)      | 190<br>(110-270)     |
| Suriname | 2010 | Female | 45 to 49 | 38%<br>(23-56%)                | 62%<br>(44-77%)          | 1.9<br>(1-3.2)                              | 4.6%<br>(2.5-7.2%)                   | 7.5%<br>(4.3-12%)                   | 4.9<br>(2.8-7.8)    | 230<br>(130-370)     |
| Suriname | 2010 | Female | 50 to 54 | 35%<br>(21-52%)                | 65%<br>(48-79%)          | 1.7<br>(0.88-2.9)                           | 4.8%<br>(2.5-7.9%)                   | 7.4%<br>(3.9-12%)                   | 5.7<br>(3-9.2)      | 230<br>(120-380)     |
| Suriname | 2010 | Female | 55 to 59 | 31%<br>(18-47%)                | 69%<br>(53-82%)          | 1.4<br>(0.72-2.6)                           | 4.5%<br>(2.2-7.6%)                   | 6.5%<br>(3.2-11%)                   | 5.7<br>(2.8-9.6)    | 190<br>(93-330)      |
| Suriname | 2010 | Female | 60 to 64 | 27%<br>(16-42%)                | 73%<br>(58-84%)          | 1.2<br>(0.57-2.2)                           | 3.8%<br>(1.4-7%)                     | 5.2%<br>(2-9.3%)                    | 5.4<br>(2.1-9.5)    | 150<br>(58-290)      |
| Suriname | 2010 | Female | 65 to 69 | 25%<br>(16-38%)                | 75%<br>(62-84%)          | 1.1<br>(0.55-1.8)                           | 3.4%<br>(1.4-6%)                     | 4.5%<br>(1.9-7.8%)                  | 6<br>(2.4-10)       | 140<br>(56-250)      |
| Suriname | 2010 | Female | 70 to 74 | 23%<br>(14-35%)                | 77%<br>(65-86%)          | 0.89<br>(0.44-1.6)                          | 2.8%<br>(0.81-5.6%)                  | 3.6%<br>(1.1-7.5%)                  | 6.2<br>(1.8-13)     | 120<br>(33-240)      |
| Suriname | 2010 | Female | 75 to 79 | 20%<br>(12-33%)                | 80%<br>(67-88%)          | 0.77<br>(0.36-1.5)                          | 2.3%<br>(0.56-5.1%)                  | 2.9%<br>(0.7-6.2%)                  | 5.8<br>(1.4-13)     | 84<br>(20-180)       |
| Suriname | 2010 | Female | 80 to 84 | 18%<br>(10-29%)                | 82%<br>(71-90%)          | 0.73<br>(0.33-1.3)                          | 2.2%<br>(0.58-4.6%)                  | 2.6%<br>(0.68-5.5%)                 | 5.2<br>(1.3-11)     | 56<br>(15-120)       |
| Suriname | 2010 | Female | 85 to 89 | 18%<br>(11-28%)                | 82%<br>(72-89%)          | 0.74<br>(0.34-1.4)                          | 2.1%<br>(0.57-4.5%)                  | 2.5%<br>(0.63-5.2%)                 | 3.9<br>(0.99-8.3)   | 30<br>(7.8-63)       |
| Suriname | 2010 | Female | 90 to 94 | 20%<br>(12-32%)                | 80%<br>(68-88%)          | 0.84<br>(0.36-1.6)                          | 2.2%<br>(0.52-5.1%)                  | 2.6%<br>(0.54-6%)                   | 2.1<br>(0.44-4.7)   | 11<br>(2.5-25)       |
| Suriname | 2010 | Female | 95 plus  | 24%<br>(12-41%)                | 76%<br>(59-88%)          | 1<br>(0.36-2.1)                             | 2.7%<br>(0.32-6.5%)                  | 3%<br>(0.24-7.7%)                   | 0.77<br>(0.061-2)   | 2.7<br>(0.32-6.8)    |
| Suriname | 2010 | Male   | All Ages | 56%<br>(48-64%)                | 44%<br>(36-52%)          | 2.9<br>(2.3-3.6)                            | 8.7%<br>(6.8-11%)                    | 10%<br>(7.6-13%)                    | 220<br>(160-270)    | 8400<br>(6700-10000) |
| Suriname | 2010 | Male   | 15 to 19 | 56%<br>(38-72%)                | 44%<br>(28-62%)          | 2.2<br>(1.2-3.6)                            | 7.6%<br>(4.4-12%)                    | 11%<br>(5.8-18%)                    | 3.4<br>(1.8-5.4)    | 280<br>(160-430)     |
| Suriname | 2010 | Male   | 20 to 24 | 66%<br>(48-81%)                | 34%<br>(19-52%)          | 4.2<br>(2.4-6.4)                            | 16%<br>(10-21%)                      | 21%<br>(13-28%)                     | 10<br>(6.3-15)      | 790<br>(520-1100)    |
| Suriname | 2010 | Male   | 25 to 29 | 69%<br>(51-82%)                | 31%<br>(18-49%)          | 5.1<br>(3.1-7.5)                            | 16%<br>(12-21%)                      | 21%<br>(15-28%)                     | 12<br>(8-15)        | 820<br>(590-1100)    |
| Suriname | 2010 | Male   | 30 to 34 | 71%<br>(51-84%)                | 29%<br>(16-49%)          | 5.3<br>(3.2-7.8)                            | 15%<br>(11-20%)                      | 20%<br>(14-27%)                     | 11<br>(7.4-14)      | 690<br>(510-870)     |
| Suriname | 2010 | Male   | 35 to 39 | 70%<br>(54-84%)                | 30%<br>(16-46%)          | 5<br>(3-7.6)                                | 14%<br>(9.6-18%)                     | 18%<br>(12-24%)                     | 13<br>(8.9-17)      | 770<br>(550-1000)    |
| Suriname | 2010 | Male   | 40 to 44 | 69%<br>(53-83%)                | 31%<br>(17-47%)          | 4.7<br>(2.7-7.3)                            | 14%<br>(9.6-18%)                     | 18%<br>(12-23%)                     | 16<br>(11-21)       | 840<br>(580-1100)    |
| Suriname | 2010 | Male   | 45 to 49 | 67%<br>(46-82%)                | 33%<br>(18-54%)          | 4.5<br>(2.5-7.1)                            | 13%<br>(9-18%)                       | 17%<br>(11-22%)                     | 21<br>(13-27)       | 950<br>(640-1200)    |
| Suriname | 2010 | Male   | 50 to 54 | 66%<br>(47-81%)                | 34%<br>(19-53%)          | 4.1<br>(2.2-6.6)                            | 13%<br>(7.9-17%)                     | 16%<br>(9.6-21%)                    | 20<br>(12-27)       | 810<br>(500-1100)    |

| Location | Year | Sex    | Age      | Prevalence of current drinkers | Prevalence of abstainers | Population average of standard drinks daily | Percent of total attributable deaths | Percent of total attributable DALYs | Attributable deaths | Attributable DALYs  |
|----------|------|--------|----------|--------------------------------|--------------------------|---------------------------------------------|--------------------------------------|-------------------------------------|---------------------|---------------------|
| Suriname | 2010 | Male   | 55 to 59 | 64%<br>(45-79%)                | 36%<br>(21-55%)          | 3.7<br>(2-6.2)                              | 12%<br>(7.5-17%)                     | 15%<br>(9.2-20%)                    | 20<br>(13-28)       | 690<br>(430-950)    |
| Suriname | 2010 | Male   | 60 to 64 | 62%<br>(42-79%)                | 38%<br>(21-58%)          | 3.4<br>(1.8-5.9)                            | 11%<br>(6.2-15%)                     | 13%<br>(7.4-18%)                    | 19<br>(11-27)       | 550<br>(320-770)    |
| Suriname | 2010 | Male   | 65 to 69 | 60%<br>(40-77%)                | 40%<br>(23-60%)          | 3<br>(1.7-5)                                | 9.7%<br>(5.7-14%)                    | 11%<br>(6.6-17%)                    | 20<br>(11-29)       | 470<br>(270-690)    |
| Suriname | 2010 | Male   | 70 to 74 | 56%<br>(38-73%)                | 44%<br>(27-62%)          | 2.5<br>(1.2-4.3)                            | 7.9%<br>(4-12%)                      | 9.1%<br>(4.5-14%)                   | 19<br>(9.3-30)      | 350<br>(180-560)    |
| Suriname | 2010 | Male   | 75 to 79 | 51%<br>(32-70%)                | 49%<br>(30-68%)          | 2<br>(1-3.8)                                | 6.2%<br>(2.8-10%)                    | 7.1%<br>(3.2-12%)                   | 15<br>(6.5-25)      | 220<br>(97-360)     |
| Suriname | 2010 | Male   | 80 to 84 | 46%<br>(28-64%)                | 54%<br>(36-72%)          | 1.7<br>(0.85-2.9)                           | 5.1%<br>(2.3-8.5%)                   | 5.7%<br>(2.5-9.6%)                  | 9.2<br>(4-16)       | 100<br>(45-170)     |
| Suriname | 2010 | Male   | 85 to 89 | 41%<br>(24-58%)                | 59%<br>(42-76%)          | 1.5<br>(0.71-2.6)                           | 4.2%<br>(1.7-7.4%)                   | 4.6%<br>(1.8-8.2%)                  | 5.1<br>(2-9.1)      | 40<br>(16-70)       |
| Suriname | 2010 | Male   | 90 to 94 | 41%<br>(26-58%)                | 59%<br>(42-74%)          | 1.5<br>(0.68-2.8)                           | 3.7%<br>(1.4-6.7%)                   | 4%<br>(1.4-7.7%)                    | 1.9<br>(0.67-3.7)   | 11<br>(4-20)        |
| Suriname | 2010 | Male   | 95 plus  | 44%<br>(25-64%)                | 56%<br>(36-75%)          | 1.6<br>(0.64-3.2)                           | 3.9%<br>(1.2-7.8%)                   | 4.2%<br>(1-8.7%)                    | 0.56<br>(0.14-1.2)  | 2.1<br>(0.63-4.2)   |
| Suriname | 2016 | Female | All Ages | 32%<br>(27-39%)                | 68%<br>(61-73%)          | 1.4<br>(1-1.9)                              | 3%<br>(1.9-4.3%)                     | 4.1%<br>(2.2-6.3%)                  | 74<br>(39-120)      | 2400<br>(1400-3400) |
| Suriname | 2016 | Female | 15 to 19 | 38%<br>(25-55%)                | 62%<br>(45-75%)          | 1.6<br>(0.78-2.8)                           | 3.2%<br>(1.6-5.5%)                   | 7.6%<br>(3.2-14%)                   | 1<br>(0.42-1.9)     | 95<br>(47-160)      |
| Suriname | 2016 | Female | 20 to 24 | 44%<br>(28-61%)                | 56%<br>(39-72%)          | 2.4<br>(1.2-4.1)                            | 4.6%<br>(2.8-7%)                     | 9.5%<br>(4.8-15%)                   | 1.4<br>(0.72-2.4)   | 140<br>(82-210)     |
| Suriname | 2016 | Female | 25 to 29 | 44%<br>(27-61%)                | 56%<br>(39-73%)          | 2.5<br>(1.3-4.1)                            | 4.4%<br>(2.8-6.5%)                   | 8.3%<br>(4.7-13%)                   | 1.6<br>(0.87-2.6)   | 150<br>(95-220)     |
| Suriname | 2016 | Female | 30 to 34 | 42%<br>(26-60%)                | 58%<br>(40-74%)          | 2.4<br>(1.3-4)                              | 4.1%<br>(2.6-5.9%)                   | 7.5%<br>(4.1-11%)                   | 1.8<br>(0.97-2.8)   | 150<br>(89-210)     |
| Suriname | 2016 | Female | 35 to 39 | 41%<br>(26-58%)                | 59%<br>(42-74%)          | 2.2<br>(1.2-3.7)                            | 4.1%<br>(2.5-6.2%)                   | 7.7%<br>(4.5-11%)                   | 2.2<br>(1.2-3.3)    | 150<br>(89-220)     |
| Suriname | 2016 | Female | 40 to 44 | 40%<br>(25-58%)                | 60%<br>(42-75%)          | 2.1<br>(1.1-3.4)                            | 4.4%<br>(2.5-6.6%)                   | 7.8%<br>(4.4-12%)                   | 3.4<br>(1.9-5.1)    | 190<br>(110-290)    |
| Suriname | 2016 | Female | 45 to 49 | 38%<br>(23-55%)                | 62%<br>(45-77%)          | 2<br>(0.99-3.6)                             | 4.6%<br>(2.5-7.4%)                   | 7.8%<br>(4.3-12%)                   | 4.7<br>(2.6-7.4)    | 230<br>(120-360)    |
| Suriname | 2016 | Female | 50 to 54 | 34%<br>(21-50%)                | 66%<br>(50-79%)          | 1.8<br>(0.89-3.2)                           | 4.9%<br>(2.5-8.1%)                   | 7.7%<br>(4.1-12%)                   | 7.1<br>(3.7-11)     | 290<br>(150-470)    |
| Suriname | 2016 | Female | 55 to 59 | 30%<br>(18-46%)                | 70%<br>(54-82%)          | 1.5<br>(0.74-2.8)                           | 4.6%<br>(2.1-7.9%)                   | 6.7%<br>(3.3-11%)                   | 7.4<br>(3.6-12)     | 260<br>(120-440)    |
| Suriname | 2016 | Female | 60 to 64 | 27%<br>(16-42%)                | 73%<br>(58-84%)          | 1.3<br>(0.58-2.4)                           | 3.9%<br>(1.5-7.1%)                   | 5.4%<br>(2.2-9.8%)                  | 6.7<br>(2.7-12)     | 200<br>(73-370)     |
| Suriname | 2016 | Female | 65 to 69 | 25%<br>(15-38%)                | 75%<br>(62-85%)          | 1.1<br>(0.57-2)                             | 3.6%<br>(1.3-6.3%)                   | 4.8%<br>(1.9-8.2%)                  | 6.8<br>(2.6-12)     | 160<br>(61-290)     |
| Suriname | 2016 | Female | 70 to 74 | 22%<br>(14-36%)                | 78%<br>(64-86%)          | 0.95<br>(0.46-1.8)                          | 3%<br>(0.95-6.4%)                    | 3.9%<br>(1.3-8%)                    | 6.8<br>(2.2-14)     | 130<br>(41-260)     |

| Location | Year | Sex    | Age      | Prevalence of current drinkers | Prevalence of abstainers | Population average of standard drinks daily | Percent of total attributable deaths | Percent of total attributable DALYs | Attributable deaths | Attributable DALYs   |
|----------|------|--------|----------|--------------------------------|--------------------------|---------------------------------------------|--------------------------------------|-------------------------------------|---------------------|----------------------|
| Suriname | 2016 | Female | 75 to 79 | 20%<br>(12-32%)                | 80%<br>(68-88%)          | 0.83<br>(0.38-1.6)                          | 2.5%<br>(0.61-5.4%)                  | 3.2%<br>(0.79-6.7%)                 | 6.7<br>(1.7-15)     | 98<br>(24-210)       |
| Suriname | 2016 | Female | 80 to 84 | 18%<br>(10-29%)                | 82%<br>(71-90%)          | 0.77<br>(0.37-1.4)                          | 2.4%<br>(0.69-5%)                    | 2.9%<br>(0.82-6%)                   | 6.6<br>(1.9-14)     | 71<br>(21-150)       |
| Suriname | 2016 | Female | 85 to 89 | 18%<br>(10-28%)                | 82%<br>(72-90%)          | 0.78<br>(0.35-1.4)                          | 2.3%<br>(0.66-4.8%)                  | 2.7%<br>(0.74-5.7%)                 | 5.6<br>(1.5-12)     | 43<br>(12-89)        |
| Suriname | 2016 | Female | 90 to 94 | 20%<br>(12-32%)                | 80%<br>(68-88%)          | 0.89<br>(0.36-1.7)                          | 2.4%<br>(0.59-5.4%)                  | 2.8%<br>(0.61-6.5%)                 | 3.1<br>(0.69-7.2)   | 16<br>(4-37)         |
| Suriname | 2016 | Female | 95 plus  | 24%<br>(12-40%)                | 76%<br>(60-88%)          | 1.1<br>(0.37-2.2)                           | 2.8%<br>(0.42-6.5%)                  | 3.2%<br>(0.35-7.8%)                 | 1.2<br>(0.13-3)     | 4.2<br>(0.61-10)     |
| Suriname | 2016 | Male   | All Ages | 56%<br>(48-64%)                | 44%<br>(36-52%)          | 3.1<br>(2.3-4.2)                            | 9.3%<br>(7-12%)                      | 11%<br>(7.7-14%)                    | 240<br>(160-310)    | 9000<br>(6800-11000) |
| Suriname | 2016 | Male   | 15 to 19 | 56%<br>(37-73%)                | 44%<br>(27-63%)          | 2.3<br>(1.2-3.9)                            | 7.6%<br>(4.3-12%)                    | 12%<br>(5.8-19%)                    | 3.5<br>(1.7-5.9)    | 300<br>(170-480)     |
| Suriname | 2016 | Male   | 20 to 24 | 66%<br>(48-81%)                | 34%<br>(19-52%)          | 4.4<br>(2.4-7.1)                            | 16%<br>(10-21%)                      | 21%<br>(13-30%)                     | 9<br>(5.2-13)       | 700<br>(450-960)     |
| Suriname | 2016 | Male   | 25 to 29 | 69%<br>(51-82%)                | 31%<br>(18-49%)          | 5.3<br>(3-8.5)                              | 17%<br>(12-22%)                      | 23%<br>(15-31%)                     | 11<br>(7.4-15)      | 810<br>(560-1100)    |
| Suriname | 2016 | Male   | 30 to 34 | 70%<br>(51-84%)                | 30%<br>(16-49%)          | 5.5<br>(3.2-8.8)                            | 16%<br>(11-21%)                      | 22%<br>(16-29%)                     | 12<br>(8.6-17)      | 810<br>(580-1000)    |
| Suriname | 2016 | Male   | 35 to 39 | 70%<br>(54-84%)                | 30%<br>(16-46%)          | 5.3<br>(3.1-8.4)                            | 15%<br>(11-20%)                      | 21%<br>(14-27%)                     | 12<br>(8.3-17)      | 730<br>(520-960)     |
| Suriname | 2016 | Male   | 40 to 44 | 69%<br>(52-82%)                | 31%<br>(18-48%)          | 5<br>(2.7-8.1)                              | 14%<br>(10-19%)                      | 19%<br>(13-25%)                     | 16<br>(11-21)       | 830<br>(570-1100)    |
| Suriname | 2016 | Male   | 45 to 49 | 67%<br>(46-82%)                | 33%<br>(18-54%)          | 4.7<br>(2.5-8)                              | 14%<br>(9.2-18%)                     | 18%<br>(12-24%)                     | 20<br>(13-27)       | 930<br>(610-1200)    |
| Suriname | 2016 | Male   | 50 to 54 | 65%<br>(47-81%)                | 35%<br>(19-53%)          | 4.3<br>(2.2-7.2)                            | 13%<br>(8-17%)                       | 16%<br>(9.9-21%)                    | 25<br>(16-34)       | 1000<br>(640-1400)   |
| Suriname | 2016 | Male   | 55 to 59 | 63%<br>(46-79%)                | 37%<br>(21-54%)          | 3.9<br>(2-6.7)                              | 12%<br>(7.9-17%)                     | 15%<br>(9.8-20%)                    | 26<br>(16-36)       | 900<br>(580-1200)    |
| Suriname | 2016 | Male   | 60 to 64 | 61%<br>(41-78%)                | 39%<br>(22-59%)          | 3.5<br>(1.7-6.2)                            | 11%<br>(6.2-15%)                     | 13%<br>(7.3-18%)                    | 23<br>(13-34)       | 680<br>(380-970)     |
| Suriname | 2016 | Male   | 65 to 69 | 60%<br>(40-77%)                | 40%<br>(23-60%)          | 3.1<br>(1.6-5.4)                            | 9.8%<br>(5.6-14%)                    | 12%<br>(6.5-17%)                    | 22<br>(12-32)       | 520<br>(290-770)     |
| Suriname | 2016 | Male   | 70 to 74 | 56%<br>(38-73%)                | 44%<br>(27-62%)          | 2.6<br>(1.3-4.7)                            | 7.9%<br>(4-12%)                      | 9.1%<br>(4.6-14%)                   | 19<br>(9.3-30)      | 360<br>(180-560)     |
| Suriname | 2016 | Male   | 75 to 79 | 51%<br>(32-70%)                | 49%<br>(30-68%)          | 2.1<br>(1-4.1)                              | 6.2%<br>(2.8-10%)                    | 7.1%<br>(3.2-12%)                   | 15<br>(6.7-26)      | 230<br>(100-380)     |
| Suriname | 2016 | Male   | 80 to 84 | 45%<br>(27-63%)                | 55%<br>(37-73%)          | 1.8<br>(0.87-3.2)                           | 5.2%<br>(2.4-8.7%)                   | 5.8%<br>(2.6-9.8%)                  | 11<br>(4.9-19)      | 120<br>(55-200)      |
| Suriname | 2016 | Male   | 85 to 89 | 40%<br>(24-57%)                | 60%<br>(43-76%)          | 1.6<br>(0.75-2.8)                           | 4.3%<br>(1.8-7.5%)                   | 4.8%<br>(1.9-8.5%)                  | 6.6<br>(2.6-12)     | 51<br>(21-91)        |
| Suriname | 2016 | Male   | 90 to 94 | 40%<br>(26-57%)                | 60%<br>(43-74%)          | 1.6<br>(0.69-2.9)                           | 3.8%<br>(1.4-7%)                     | 4.2%<br>(1.4-7.8%)                  | 2.6<br>(0.87-4.9)   | 14<br>(5.2-26)       |

| Location            | Year | Sex    | Age      | Prevalence of current drinkers | Prevalence of abstainers | Population average of standard drinks daily | Percent of total attributable deaths | Percent of total attributable DALYs | Attributable deaths   | Attributable DALYs    |
|---------------------|------|--------|----------|--------------------------------|--------------------------|---------------------------------------------|--------------------------------------|-------------------------------------|-----------------------|-----------------------|
| Suriname            | 2016 | Male   | 95 plus  | 43%<br>(25-63%)                | 57%<br>(37-75%)          | 1.7<br>(0.63-3.2)                           | 4.1%<br>(1.2-8%)                     | 4.4%<br>(1.1-9%)                    | 0.77<br>(0.2-1.5)     | 2.9<br>(0.89-5.6)     |
| Trinidad and Tobago | 1990 | Female | All Ages | 31%<br>(26-38%)                | 69%<br>(62-74%)          | 0.69<br>(0.59-0.8)                          | 1.1%<br>(0.53-1.8%)                  | 0.85%<br>(-0.16-2.1%)               | 33<br>(-6-83)         | 1900<br>(900-3200)    |
| Trinidad and Tobago | 1990 | Female | 15 to 19 | 38%<br>(25-55%)                | 62%<br>(45-75%)          | 0.85<br>(0.45-1.4)                          | 1.8%<br>(1-2.9%)                     | 3.4%<br>(1.6-6%)                    | 1.2<br>(0.56-2.1)     | 130<br>(79-220)       |
| Trinidad and Tobago | 1990 | Female | 20 to 24 | 44%<br>(29-61%)                | 56%<br>(39-71%)          | 1.3<br>(0.72-2)                             | 3.2%<br>(2-4.7%)                     | 4.9%<br>(2.6-8%)                    | 2.6<br>(1.3-4.2)      | 270<br>(160-400)      |
| Trinidad and Tobago | 1990 | Female | 25 to 29 | 44%<br>(28-60%)                | 56%<br>(40-72%)          | 1.3<br>(0.8-1.9)                            | 2.8%<br>(1.9-3.8%)                   | 3.9%<br>(2.2-5.9%)                  | 2.4<br>(1.3-3.7)      | 260<br>(170-370)      |
| Trinidad and Tobago | 1990 | Female | 30 to 34 | 42%<br>(26-59%)                | 58%<br>(41-74%)          | 1.3<br>(0.74-1.9)                           | 2.8%<br>(1.9-3.9%)                   | 4.2%<br>(2.6-6.1%)                  | 3.1<br>(2-4.5)        | 260<br>(170-360)      |
| Trinidad and Tobago | 1990 | Female | 35 to 39 | 41%<br>(27-59%)                | 59%<br>(41-73%)          | 1.2<br>(0.66-1.8)                           | 2.6%<br>(1.7-3.8%)                   | 4.2%<br>(2.6-6.3%)                  | 3.4<br>(2.1-5.1)      | 230<br>(150-330)      |
| Trinidad and Tobago | 1990 | Female | 40 to 44 | 40%<br>(26-58%)                | 60%<br>(42-74%)          | 1.1<br>(0.6-1.8)                            | 2.3%<br>(1.1-3.8%)                   | 3.7%<br>(1.8-6.1%)                  | 3.4<br>(1.7-5.8)      | 190<br>(94-320)       |
| Trinidad and Tobago | 1990 | Female | 45 to 49 | 38%<br>(23-55%)                | 62%<br>(45-77%)          | 1.1<br>(0.55-1.8)                           | 2.1%<br>(0.58-4.2%)                  | 3.1%<br>(0.91-6%)                   | 4.5<br>(1.3-8.6)      | 210<br>(57-400)       |
| Trinidad and Tobago | 1990 | Female | 50 to 54 | 35%<br>(21-51%)                | 65%<br>(49-79%)          | 0.95<br>(0.5-1.6)                           | 1.6%<br>(-0.19-4%)                   | 2.2%<br>(-0.12-5.3%)                | 4.2<br>(-0.23-10)     | 160<br>(-18-390)      |
| Trinidad and Tobago | 1990 | Female | 55 to 59 | 30%<br>(18-47%)                | 70%<br>(53-82%)          | 0.8<br>(0.4-1.4)                            | 1.1%<br>(-0.63-3.3%)                 | 1.4%<br>(-0.75-4.1%)                | 3.2<br>(-1.7-9.6)     | 110<br>(-61-340)      |
| Trinidad and Tobago | 1990 | Female | 60 to 64 | 27%<br>(16-42%)                | 73%<br>(58-84%)          | 0.68<br>(0.34-1.2)                          | 0.49%<br>(-1.1-2.5%)                 | 0.62%<br>(-1.4-3.1%)                | 1.8<br>(-4.1-9.1)     | 52<br>(-120-260)      |
| Trinidad and Tobago | 1990 | Female | 65 to 69 | 25%<br>(15-38%)                | 75%<br>(62-85%)          | 0.6<br>(0.31-0.99)                          | 0.22%<br>(-1.1-1.9%)                 | 0.29%<br>(-1.3-2.3%)                | 1.1<br>(-5.3-8.9)     | 25<br>(-130-210)      |
| Trinidad and Tobago | 1990 | Female | 70 to 74 | 22%<br>(14-35%)                | 78%<br>(65-86%)          | 0.5<br>(0.25-0.91)                          | 0.098%<br>(-1.2-1.7%)                | 0.13%<br>(-1.4-2%)                  | 0.58<br>(-6.4-8.9)    | 9.8<br>(-130-170)     |
| Trinidad and Tobago | 1990 | Female | 75 to 79 | 20%<br>(11-32%)                | 80%<br>(68-89%)          | 0.43<br>(0.19-0.79)                         | 0.0039%<br>(-1.1-1.4%)               | -0.0009%<br>(-1.3-1.6%)             | -0.0095<br>(-6.4-7.7) | 0.29<br>(-93-120)     |
| Trinidad and Tobago | 1990 | Female | 80 to 84 | 18%<br>(10-29%)                | 82%<br>(71-90%)          | 0.4<br>(0.18-0.68)                          | 0.1%<br>(-0.77-1.2%)                 | 0.11%<br>(-0.96-1.4%)               | 0.46<br>(-4.1-6.4)    | 5.8<br>(-44-69)       |
| Trinidad and Tobago | 1990 | Female | 85 to 89 | 18%<br>(11-28%)                | 82%<br>(72-89%)          | 0.41<br>(0.19-0.72)                         | 0.19%<br>(-0.67-1.4%)                | 0.18%<br>(-0.82-1.6%)               | 0.6<br>(-2.7-5.2)     | 5.5<br>(-19-41)       |
| Trinidad and Tobago | 1990 | Female | 90 to 94 | 20%<br>(12-32%)                | 80%<br>(68-88%)          | 0.46<br>(0.21-0.85)                         | 0.26%<br>(-0.7-1.7%)                 | 0.24%<br>(-0.92-1.9%)               | 0.36<br>(-1.4-2.8)    | 2.4<br>(-6.3-15)      |
| Trinidad and Tobago | 1990 | Female | 95 plus  | 24%<br>(12-40%)                | 76%<br>(60-88%)          | 0.55<br>(0.2-1.1)                           | 0.35%<br>(-0.96-2.5%)                | 0.27%<br>(-1.2-2.7%)                | 0.11<br>(-0.51-1.1)   | 0.56<br>(-1.6-3.9)    |
| Trinidad and Tobago | 1990 | Male   | All Ages | 53%<br>(45-62%)                | 47%<br>(38-55%)          | 1.5<br>(1.3-1.7)                            | 4.9%<br>(3.5-6.2%)                   | 4.8%<br>(2.9-7.1%)                  | 230<br>(140-350)      | 10000<br>(7400-13000) |
| Trinidad and Tobago | 1990 | Male   | 15 to 19 | 56%<br>(38-72%)                | 44%<br>(28-62%)          | 1.3<br>(0.68-2)                             | 4.7%<br>(2.9-6.9%)                   | 6.3%<br>(3.3-10%)                   | 4.5<br>(2.4-7.2)      | 420<br>(270-620)      |
| Trinidad and Tobago | 1990 | Male   | 20 to 24 | 66%<br>(48-81%)                | 34%<br>(19-52%)          | 2.4<br>(1.5-3.4)                            | 9.6%<br>(6.5-13%)                    | 11%<br>(6.9-17%)                    | 12<br>(7.5-18)        | 1000<br>(690-1400)    |

| Location            | Year | Sex    | Age      | Prevalence of current drinkers | Prevalence of abstainers | Population average of standard drinks daily | Percent of total attributable deaths | Percent of total attributable DALYs | Attributable deaths | Attributable DALYs |
|---------------------|------|--------|----------|--------------------------------|--------------------------|---------------------------------------------|--------------------------------------|-------------------------------------|---------------------|--------------------|
| Trinidad and Tobago | 1990 | Male   | 25 to 29 | 69%<br>(51-83%)                | 31%<br>(17-49%)          | 2.9<br>(1.9-4)                              | 10%<br>(7.2-14%)                     | 12%<br>(7.7-17%)                    | 16<br>(10-23)       | 1300<br>(880-1700) |
| Trinidad and Tobago | 1990 | Male   | 30 to 34 | 70%<br>(51-84%)                | 30%<br>(16-49%)          | 3<br>(1.9-4.2)                              | 9.9%<br>(7.1-13%)                    | 12%<br>(8.1-17%)                    | 18<br>(12-25)       | 1200<br>(870-1700) |
| Trinidad and Tobago | 1990 | Male   | 35 to 39 | 70%<br>(53-84%)                | 30%<br>(16-47%)          | 2.8<br>(1.7-4.3)                            | 9.1%<br>(6-12%)                      | 11%<br>(7.3-16%)                    | 15<br>(9.8-22)      | 980<br>(660-1300)  |
| Trinidad and Tobago | 1990 | Male   | 40 to 44 | 69%<br>(52-83%)                | 31%<br>(17-48%)          | 2.7<br>(1.5-4.1)                            | 8.6%<br>(5.1-12%)                    | 11%<br>(6-16%)                      | 16<br>(8.8-23)      | 890<br>(540-1300)  |
| Trinidad and Tobago | 1990 | Male   | 45 to 49 | 67%<br>(47-82%)                | 33%<br>(18-53%)          | 2.5<br>(1.4-4.1)                            | 7.8%<br>(4.3-12%)                    | 9.4%<br>(4.9-15%)                   | 18<br>(9.5-30)      | 880<br>(480-1400)  |
| Trinidad and Tobago | 1990 | Male   | 50 to 54 | 65%<br>(47-81%)                | 35%<br>(19-53%)          | 2.3<br>(1.3-3.8)                            | 6.7%<br>(3-11%)                      | 7.8%<br>(3.3-13%)                   | 20<br>(8.1-34)      | 820<br>(360-1400)  |
| Trinidad and Tobago | 1990 | Male   | 55 to 59 | 63%<br>(45-79%)                | 37%<br>(21-55%)          | 2.1<br>(1.2-3.4)                            | 6%<br>(2.6-10%)                      | 6.8%<br>(2.8-12%)                   | 21<br>(8.5-36)      | 720<br>(310-1300)  |
| Trinidad and Tobago | 1990 | Male   | 60 to 64 | 61%<br>(41-78%)                | 39%<br>(22-59%)          | 1.9<br>(1-3.3)                              | 4.8%<br>(1.5-9.5%)                   | 5.4%<br>(1.6-11%)                   | 21<br>(6.3-43)      | 620<br>(190-1200)  |
| Trinidad and Tobago | 1990 | Male   | 65 to 69 | 60%<br>(41-77%)                | 40%<br>(23-59%)          | 1.7<br>(0.92-2.7)                           | 4.2%<br>(1.4-8%)                     | 4.6%<br>(1.5-9.1%)                  | 23<br>(7.7-46)      | 560<br>(180-1100)  |
| Trinidad and Tobago | 1990 | Male   | 70 to 74 | 56%<br>(37-72%)                | 44%<br>(28-63%)          | 1.4<br>(0.69-2.4)                           | 3.1%<br>(0.64-6.6%)                  | 3.3%<br>(0.58-7.3%)                 | 19<br>(3.3-41)      | 360<br>(73-770)    |
| Trinidad and Tobago | 1990 | Male   | 75 to 79 | 51%<br>(32-71%)                | 49%<br>(29-68%)          | 1.2<br>(0.56-2)                             | 2.3%<br>(0.26-5.3%)                  | 2.5%<br>(0.21-5.9%)                 | 14<br>(1.2-33)      | 210<br>(25-480)    |
| Trinidad and Tobago | 1990 | Male   | 80 to 84 | 45%<br>(27-64%)                | 55%<br>(36-73%)          | 0.97<br>(0.48-1.7)                          | 1.8%<br>(0.31-4.1%)                  | 1.9%<br>(0.25-4.4%)                 | 7.8<br>(1-19)       | 88<br>(15-200)     |
| Trinidad and Tobago | 1990 | Male   | 85 to 89 | 41%<br>(25-58%)                | 59%<br>(42-75%)          | 0.85<br>(0.42-1.5)                          | 1.3%<br>(0.12-3.3%)                  | 1.4%<br>(0.012-3.6%)                | 3.4<br>(0.03-8.9)   | 28<br>(2.5-70)     |
| Trinidad and Tobago | 1990 | Male   | 90 to 94 | 41%<br>(26-58%)                | 59%<br>(42-74%)          | 0.86<br>(0.42-1.5)                          | 1.1%<br>(-0.11-3.1%)                 | 1.1%<br>(-0.3-3.4%)                 | 1<br>(-0.28-3.3)    | 6.2<br>(-0.61-18)  |
| Trinidad and Tobago | 1990 | Male   | 95 plus  | 44%<br>(25-65%)                | 56%<br>(35-75%)          | 0.93<br>(0.39-1.8)                          | 1.1%<br>(-0.39-3.6%)                 | 0.98%<br>(-0.71-3.7%)               | 0.2<br>(-0.15-0.79) | 0.9<br>(-0.31-2.9) |
| Trinidad and Tobago | 1995 | Female | All Ages | 31%<br>(25-38%)                | 69%<br>(62-75%)          | 0.62<br>(0.53-0.72)                         | 0.9%<br>(0.35-1.5%)                  | 0.51%<br>(-0.34-1.6%)               | 21<br>(-14-66)      | 1600<br>(620-2700) |
| Trinidad and Tobago | 1995 | Female | 15 to 19 | 37%<br>(24-53%)                | 63%<br>(47-76%)          | 0.73<br>(0.38-1.2)                          | 1.6%<br>(0.91-2.6%)                  | 2.9%<br>(1.2-5.3%)                  | 1.1<br>(0.47-2.1)   | 130<br>(71-210)    |
| Trinidad and Tobago | 1995 | Female | 20 to 24 | 43%<br>(27-59%)                | 57%<br>(41-73%)          | 1.1<br>(0.61-1.7)                           | 2.7%<br>(1.7-4%)                     | 4%<br>(1.9-6.6%)                    | 2.1<br>(1-3.6)      | 230<br>(140-350)   |
| Trinidad and Tobago | 1995 | Female | 25 to 29 | 42%<br>(26-60%)                | 58%<br>(40-74%)          | 1.1<br>(0.67-1.7)                           | 2.5%<br>(1.7-3.6%)                   | 3.2%<br>(1.7-5.2%)                  | 2<br>(1-3.3)        | 210<br>(140-300)   |
| Trinidad and Tobago | 1995 | Female | 30 to 34 | 40%<br>(25-58%)                | 60%<br>(42-75%)          | 1.1<br>(0.64-1.7)                           | 2.4%<br>(1.6-3.3%)                   | 3.4%<br>(2.1-5%)                    | 2.9<br>(1.8-4.4)    | 260<br>(170-360)   |
| Trinidad and Tobago | 1995 | Female | 35 to 39 | 39%<br>(25-57%)                | 61%<br>(43-75%)          | 1<br>(0.57-1.6)                             | 2.3%<br>(1.4-3.3%)                   | 3.4%<br>(2-5.2%)                    | 3.4<br>(2-5.2)      | 230<br>(150-340)   |
| Trinidad and Tobago | 1995 | Female | 40 to 44 | 38%<br>(24-57%)                | 62%<br>(43-76%)          | 0.95<br>(0.52-1.5)                          | 1.9%<br>(0.89-3.2%)                  | 2.9%<br>(1.3-4.9%)                  | 3.6<br>(1.6-6.1)    | 200<br>(96-340)    |

| Location            | Year | Sex    | Age      | Prevalence of current drinkers | Prevalence of abstainers | Population average of standard drinks daily | Percent of total attributable deaths | Percent of total attributable DALYs | Attributable deaths  | Attributable DALYs   |
|---------------------|------|--------|----------|--------------------------------|--------------------------|---------------------------------------------|--------------------------------------|-------------------------------------|----------------------|----------------------|
| Trinidad and Tobago | 1995 | Female | 45 to 49 | 36%<br>(22-54%)                | 64%<br>(46-78%)          | 0.91<br>(0.47-1.5)                          | 1.6%<br>(0.24-3.4%)                  | 2.4%<br>(0.45-4.9%)                 | 3.6<br>(0.72-7.6)    | 170<br>(26-360)      |
| Trinidad and Tobago | 1995 | Female | 50 to 54 | 33%<br>(20-49%)                | 67%<br>(51-80%)          | 0.82<br>(0.44-1.4)                          | 1.1%<br>(-0.43-3.1%)                 | 1.5%<br>(-0.54-4.1%)                | 3.1<br>(-1.2-8.4)    | 120<br>(-52-340)     |
| Trinidad and Tobago | 1995 | Female | 55 to 59 | 29%<br>(18-45%)                | 71%<br>(55-82%)          | 0.69<br>(0.35-1.2)                          | 0.66%<br>(-0.8-2.4%)                 | 0.89%<br>(-0.99-3.1%)               | 2.2<br>(-2.4-7.9)    | 74<br>(-90-270)      |
| Trinidad and Tobago | 1995 | Female | 60 to 64 | 26%<br>(15-40%)                | 74%<br>(60-85%)          | 0.59<br>(0.29-1)                            | 0.15%<br>(-1.3-1.8%)                 | 0.2%<br>(-1.6-2.2%)                 | 0.62<br>(-5-6.9)     | 17<br>(-150-200)     |
| Trinidad and Tobago | 1995 | Female | 65 to 69 | 23%<br>(14-36%)                | 77%<br>(64-86%)          | 0.51<br>(0.26-0.86)                         | -0.12%<br>(-1.3-1.3%)                | -0.13%<br>(-1.6-1.7%)               | -0.49<br>(-6.2-6.5)  | -13<br>(-150-160)    |
| Trinidad and Tobago | 1995 | Female | 70 to 74 | 21%<br>(13-34%)                | 79%<br>(66-87%)          | 0.43<br>(0.21-0.81)                         | -0.18%<br>(-1.3-1.1%)                | -0.2%<br>(-1.6-1.4%)                | -0.93<br>(-7.3-6.1)  | -19<br>(-140-110)    |
| Trinidad and Tobago | 1995 | Female | 75 to 79 | 19%<br>(11-31%)                | 81%<br>(69-89%)          | 0.38<br>(0.17-0.71)                         | -0.22%<br>(-1.2-0.89%)               | -0.27%<br>(-1.5-1%)                 | -1.3<br>(-7-4.9)     | -19<br>(-100-75)     |
| Trinidad and Tobago | 1995 | Female | 80 to 84 | 17%<br>(9.5-28%)               | 83%<br>(72-90%)          | 0.35<br>(0.16-0.6)                          | -0.12%<br>(-0.94-0.81%)              | -0.16%<br>(-1.1-0.92%)              | -0.79<br>(-5.5-4.6)  | -7.6<br>(-58-52)     |
| Trinidad and Tobago | 1995 | Female | 85 to 89 | 17%<br>(9.8-27%)               | 83%<br>(73-90%)          | 0.36<br>(0.16-0.63)                         | -0.012%<br>(-0.8-1%)                 | -0.054%<br>(-0.98-1.1%)             | -0.22<br>(-4-4.5)    | -0.42<br>(-29-36)    |
| Trinidad and Tobago | 1995 | Female | 90 to 94 | 19%<br>(11-30%)                | 81%<br>(70-89%)          | 0.41<br>(0.17-0.77)                         | 0.069%<br>(-0.84-1.4%)               | 0.0093%<br>(-1.1-1.5%)              | 0.018<br>(-2.1-3)    | 0.84<br>(-10-17)     |
| Trinidad and Tobago | 1995 | Female | 95 plus  | 23%<br>(12-39%)                | 77%<br>(61-88%)          | 0.49<br>(0.18-1)                            | 0.14%<br>(-1.1-2.1%)                 | 0.035%<br>(-1.4-2.3%)               | 0.021<br>(-0.83-1.4) | 0.35<br>(-2.5-4.9)   |
| Trinidad and Tobago | 1995 | Male   | All Ages | 53%<br>(45-62%)                | 47%<br>(38-55%)          | 1.4<br>(1.2-1.6)                            | 4.3%<br>(3.1-5.6%)                   | 3.9%<br>(2.2-5.8%)                  | 200<br>(110-310)     | 9300<br>(6600-12000) |
| Trinidad and Tobago | 1995 | Male   | 15 to 19 | 54%<br>(36-71%)                | 46%<br>(29-64%)          | 1.1<br>(0.57-1.8)                           | 4.2%<br>(2.6-6.3%)                   | 5.8%<br>(3-9.3%)                    | 3.8<br>(2-6.2)       | 380<br>(230-570)     |
| Trinidad and Tobago | 1995 | Male   | 20 to 24 | 65%<br>(46-80%)                | 35%<br>(20-54%)          | 2.1<br>(1.3-3.1)                            | 8.8%<br>(6-12%)                      | 10%<br>(6.2-16%)                    | 11<br>(6.2-16)       | 940<br>(630-1300)    |
| Trinidad and Tobago | 1995 | Male   | 25 to 29 | 68%<br>(50-82%)                | 32%<br>(18-50%)          | 2.5<br>(1.6-3.6)                            | 9.3%<br>(6.4-13%)                    | 11%<br>(6.8-16%)                    | 13<br>(8.3-20)       | 1000<br>(710-1400)   |
| Trinidad and Tobago | 1995 | Male   | 30 to 34 | 69%<br>(49-83%)                | 31%<br>(17-51%)          | 2.6<br>(1.7-3.7)                            | 8.5%<br>(5.9-12%)                    | 10%<br>(6.5-15%)                    | 18<br>(11-26)        | 1200<br>(860-1700)   |
| Trinidad and Tobago | 1995 | Male   | 35 to 39 | 69%<br>(52-83%)                | 31%<br>(17-48%)          | 2.5<br>(1.5-3.6)                            | 7.5%<br>(4.9-10%)                    | 9%<br>(5.5-13%)                     | 16<br>(9.5-23)       | 1000<br>(660-1400)   |
| Trinidad and Tobago | 1995 | Male   | 40 to 44 | 68%<br>(51-82%)                | 32%<br>(18-49%)          | 2.4<br>(1.4-3.5)                            | 6.8%<br>(4-9.8%)                     | 8.2%<br>(4.5-12%)                   | 16<br>(8.7-25)       | 910<br>(540-1300)    |
| Trinidad and Tobago | 1995 | Male   | 45 to 49 | 66%<br>(44-81%)                | 34%<br>(19-56%)          | 2.2<br>(1.2-3.5)                            | 6.4%<br>(3.4-10%)                    | 7.6%<br>(3.8-12%)                   | 18<br>(9.1-30)       | 890<br>(460-1400)    |
| Trinidad and Tobago | 1995 | Male   | 50 to 54 | 64%<br>(44-80%)                | 36%<br>(20-56%)          | 2<br>(1.1-3.2)                              | 5.3%<br>(2.1-9.1%)                   | 6.2%<br>(2.2-11%)                   | 18<br>(6.3-31)       | 750<br>(300-1300)    |
| Trinidad and Tobago | 1995 | Male   | 55 to 59 | 62%<br>(43-78%)                | 38%<br>(22-57%)          | 1.8<br>(0.98-2.9)                           | 4.6%<br>(1.6-8.2%)                   | 5.2%<br>(1.7-9.5%)                  | 18<br>(6.1-33)       | 640<br>(230-1200)    |
| Trinidad and Tobago | 1995 | Male   | 60 to 64 | 60%<br>(40-77%)                | 40%<br>(23-60%)          | 1.6<br>(0.86-2.8)                           | 3.7%<br>(0.74-7.7%)                  | 4.1%<br>(0.77-8.8%)                 | 17<br>(3-36)         | 490<br>(98-1000)     |

| Location            | Year | Sex    | Age      | Prevalence of current drinkers | Prevalence of abstainers | Population average of standard drinks daily | Percent of total attributable deaths | Percent of total attributable DALYs | Attributable deaths  | Attributable DALYs  |
|---------------------|------|--------|----------|--------------------------------|--------------------------|---------------------------------------------|--------------------------------------|-------------------------------------|----------------------|---------------------|
| Trinidad and Tobago | 1995 | Male   | 65 to 69 | 58%<br>(39-75%)                | 42%<br>(25-61%)          | 1.4<br>(0.78-2.4)                           | 3.1%<br>(0.69-6.4%)                  | 3.4%<br>(0.74-7.2%)                 | 17<br>(3.6-35)       | 410<br>(94-840)     |
| Trinidad and Tobago | 1995 | Male   | 70 to 74 | 54%<br>(36-71%)                | 46%<br>(29-64%)          | 1.2<br>(0.6-2.1)                            | 2.3%<br>(0.15-5.4%)                  | 2.4%<br>(0.1-5.9%)                  | 15<br>(0.61-36)      | 290<br>(19-690)     |
| Trinidad and Tobago | 1995 | Male   | 75 to 79 | 49%<br>(31-68%)                | 51%<br>(32-69%)          | 1<br>(0.48-1.8)                             | 1.7%<br>(0.028-4.2%)                 | 1.8%<br>(-0.098-4.5%)               | 10<br>(-0.77-26)     | 160<br>(2.6-390)    |
| Trinidad and Tobago | 1995 | Male   | 80 to 84 | 43%<br>(26-61%)                | 57%<br>(39-74%)          | 0.83<br>(0.41-1.4)                          | 1.3%<br>(0.047-3.1%)                 | 1.3%<br>(-0.015-3.3%)               | 6.9<br>(-0.08-17)    | 78<br>(3-190)       |
| Trinidad and Tobago | 1995 | Male   | 85 to 89 | 39%<br>(23-56%)                | 61%<br>(44-77%)          | 0.73<br>(0.35-1.2)                          | 0.93%<br>(-0.12-2.5%)                | 0.93%<br>(-0.26-2.7%)               | 2.8<br>(-0.77-8.2)   | 24<br>(-3.1-64)     |
| Trinidad and Tobago | 1995 | Male   | 90 to 94 | 39%<br>(25-56%)                | 61%<br>(44-75%)          | 0.73<br>(0.35-1.4)                          | 0.72%<br>(-0.32-2.3%)                | 0.66%<br>(-0.52-2.5%)               | 0.77<br>(-0.6-2.9)   | 4.9<br>(-2.2-16)    |
| Trinidad and Tobago | 1995 | Male   | 95 plus  | 42%<br>(24-63%)                | 58%<br>(37-76%)          | 0.8<br>(0.32-1.5)                           | 0.69%<br>(-0.56-2.8%)                | 0.54%<br>(-0.92-2.9%)               | 0.16<br>(-0.28-0.89) | 0.82<br>(-0.66-3.3) |
| Trinidad and Tobago | 2000 | Female | All Ages | 30%<br>(24-37%)                | 70%<br>(63-76%)          | 0.6<br>(0.52-0.69)                          | 0.75%<br>(0.27-1.3%)                 | 0.33%<br>(-0.42-1.2%)               | 15<br>(-19-56)       | 1400<br>(510-2400)  |
| Trinidad and Tobago | 2000 | Female | 15 to 19 | 35%<br>(22-52%)                | 65%<br>(48-78%)          | 0.67<br>(0.36-1.1)                          | 1.5%<br>(0.82-2.4%)                  | 2.5%<br>(1.1-4.8%)                  | 1.2<br>(0.5-2.3)     | 140<br>(77-220)     |
| Trinidad and Tobago | 2000 | Female | 20 to 24 | 41%<br>(26-58%)                | 59%<br>(42-74%)          | 1<br>(0.56-1.6)                             | 2.3%<br>(1.5-3.3%)                   | 2.8%<br>(1.4-4.6%)                  | 1.8<br>(0.92-3)      | 220<br>(140-320)    |
| Trinidad and Tobago | 2000 | Female | 25 to 29 | 40%<br>(25-58%)                | 60%<br>(42-75%)          | 1<br>(0.59-1.6)                             | 2.1%<br>(1.4-2.9%)                   | 2.3%<br>(1.2-3.7%)                  | 1.7<br>(0.88-2.7)    | 190<br>(120-270)    |
| Trinidad and Tobago | 2000 | Female | 30 to 34 | 39%<br>(23-56%)                | 61%<br>(44-77%)          | 1<br>(0.57-1.5)                             | 2.1%<br>(1.4-2.9%)                   | 2.6%<br>(1.6-3.9%)                  | 2.2<br>(1.3-3.2)     | 200<br>(130-270)    |
| Trinidad and Tobago | 2000 | Female | 35 to 39 | 38%<br>(24-55%)                | 62%<br>(45-76%)          | 0.93<br>(0.52-1.4)                          | 1.9%<br>(1.2-2.6%)                   | 2.6%<br>(1.6-3.9%)                  | 3.2<br>(1.9-4.7)     | 230<br>(140-320)    |
| Trinidad and Tobago | 2000 | Female | 40 to 44 | 37%<br>(23-55%)                | 63%<br>(45-77%)          | 0.87<br>(0.47-1.4)                          | 1.7%<br>(0.84-2.8%)                  | 2.5%<br>(1.2-4.1%)                  | 3.8<br>(1.8-6.1)     | 210<br>(110-340)    |
| Trinidad and Tobago | 2000 | Female | 45 to 49 | 35%<br>(20-52%)                | 65%<br>(48-80%)          | 0.84<br>(0.43-1.4)                          | 1.3%<br>(0.21-2.8%)                  | 1.9%<br>(0.39-4%)                   | 3.4<br>(0.69-6.9)    | 160<br>(27-340)     |
| Trinidad and Tobago | 2000 | Female | 50 to 54 | 32%<br>(19-47%)                | 68%<br>(53-81%)          | 0.75<br>(0.4-1.3)                           | 0.88%<br>(-0.44-2.6%)                | 1.3%<br>(-0.56-3.5%)                | 2.8<br>(-1.3-7.7)    | 110<br>(-56-320)    |
| Trinidad and Tobago | 2000 | Female | 55 to 59 | 28%<br>(17-43%)                | 72%<br>(57-83%)          | 0.63<br>(0.32-1.1)                          | 0.44%<br>(-0.84-2%)                  | 0.63%<br>(-1-2.6%)                  | 1.8<br>(-2.8-7.4)    | 57<br>(-110-260)    |
| Trinidad and Tobago | 2000 | Female | 60 to 64 | 24%<br>(14-39%)                | 76%<br>(61-86%)          | 0.54<br>(0.26-0.98)                         | -0.038%<br>(-1.3-1.5%)               | -0.025%<br>(-1.6-1.8%)              | -0.084<br>(-5.5-6.4) | -4.7<br>(-170-190)  |
| Trinidad and Tobago | 2000 | Female | 65 to 69 | 22%<br>(14-35%)                | 78%<br>(65-86%)          | 0.46<br>(0.23-0.78)                         | -0.26%<br>(-1.4-0.99%)               | -0.28%<br>(-1.6-1.2%)               | -1.1<br>(-6.3-4.9)   | -30<br>(-160-110)   |
| Trinidad and Tobago | 2000 | Female | 70 to 74 | 20%<br>(12-32%)                | 80%<br>(68-88%)          | 0.39<br>(0.19-0.71)                         | -0.3%<br>(-1.3-0.83%)                | -0.34%<br>(-1.6-1%)                 | -1.5<br>(-7.1-4.7)   | -32<br>(-140-90)    |
| Trinidad and Tobago | 2000 | Female | 75 to 79 | 18%<br>(10-29%)                | 82%<br>(71-90%)          | 0.34<br>(0.16-0.62)                         | -0.31%<br>(-1.2-0.69%)               | -0.38%<br>(-1.5-0.81%)              | -1.9<br>(-7.6-4.1)   | -29<br>(-110-60)    |
| Trinidad and Tobago | 2000 | Female | 80 to 84 | 16%<br>(9.3-27%)               | 84%<br>(73-91%)          | 0.32<br>(0.15-0.54)                         | -0.21%<br>(-0.97-0.65%)              | -0.26%<br>(-1.2-0.75%)              | -1.3<br>(-6-3.8)     | -14<br>(-63-42)     |

| Location            | Year | Sex    | Age      | Prevalence of current drinkers | Prevalence of abstainers | Population average of standard drinks daily | Percent of total attributable deaths | Percent of total attributable DALYs | Attributable deaths  | Attributable DALYs   |
|---------------------|------|--------|----------|--------------------------------|--------------------------|---------------------------------------------|--------------------------------------|-------------------------------------|----------------------|----------------------|
| Trinidad and Tobago | 2000 | Female | 85 to 89 | 16%<br>(9.3-25%)               | 84%<br>(75-91%)          | 0.32<br>(0.15-0.58)                         | -0.098%<br>(-0.81-0.81%)             | -0.15%<br>(-1-0.89%)                | -0.68<br>(-4.5-4)    | -3.9<br>(-33-32)     |
| Trinidad and Tobago | 2000 | Female | 90 to 94 | 18%<br>(11-29%)                | 82%<br>(71-89%)          | 0.37<br>(0.16-0.69)                         | -0.00017%<br>(-0.79-1.2%)            | -0.069%<br>(-1-1.3%)                | -0.17<br>(-2.6-3.4)  | -0.0012<br>(-12-18)  |
| Trinidad and Tobago | 2000 | Female | 95 plus  | 22%<br>(11-37%)                | 78%<br>(63-89%)          | 0.45<br>(0.16-0.93)                         | 0.074%<br>(-0.99-1.8%)               | -0.043%<br>(-1.3-1.9%)              | -0.035<br>(-1-1.5)   | 0.24<br>(-3.2-5.6)   |
| Trinidad and Tobago | 2000 | Male   | All Ages | 53%<br>(44-62%)                | 47%<br>(38-56%)          | 1.4<br>(1.2-1.5)                            | 3.9%<br>(2.8-5.1%)                   | 3.4%<br>(2-5.2%)                    | 190<br>(110-280)     | 9100<br>(6500-12000) |
| Trinidad and Tobago | 2000 | Male   | 15 to 19 | 52%<br>(34-70%)                | 48%<br>(30-66%)          | 1<br>(0.53-1.6)                             | 4%<br>(2.5-5.9%)                     | 5.4%<br>(2.8-8.9%)                  | 4.1<br>(2.1-6.7)     | 420<br>(260-620)     |
| Trinidad and Tobago | 2000 | Male   | 20 to 24 | 63%<br>(44-79%)                | 37%<br>(21-56%)          | 1.9<br>(1.1-2.9)                            | 8.3%<br>(5.6-12%)                    | 9.6%<br>(5.6-15%)                   | 11<br>(6.4-17)       | 970<br>(630-1400)    |
| Trinidad and Tobago | 2000 | Male   | 25 to 29 | 67%<br>(47-81%)                | 33%<br>(19-53%)          | 2.3<br>(1.4-3.4)                            | 8.1%<br>(5.4-11%)                    | 8.9%<br>(5.3-13%)                   | 12<br>(7.1-18)       | 980<br>(650-1400)    |
| Trinidad and Tobago | 2000 | Male   | 30 to 34 | 68%<br>(47-82%)                | 32%<br>(18-53%)          | 2.4<br>(1.5-3.6)                            | 7.4%<br>(5.1-10%)                    | 8.4%<br>(5.2-12%)                   | 13<br>(8.1-19)       | 930<br>(630-1300)    |
| Trinidad and Tobago | 2000 | Male   | 35 to 39 | 67%<br>(50-82%)                | 33%<br>(18-50%)          | 2.3<br>(1.4-3.4)                            | 6.4%<br>(4.3-8.9%)                   | 7.2%<br>(4.4-10%)                   | 16<br>(9.8-24)       | 1100<br>(690-1500)   |
| Trinidad and Tobago | 2000 | Male   | 40 to 44 | 66%<br>(50-81%)                | 34%<br>(19-50%)          | 2.2<br>(1.3-3.3)                            | 6.1%<br>(3.8-8.9%)                   | 7%<br>(4-11%)                       | 17<br>(10-26)        | 990<br>(620-1400)    |
| Trinidad and Tobago | 2000 | Male   | 45 to 49 | 64%<br>(43-80%)                | 36%<br>(20-57%)          | 2<br>(1.1-3.3)                              | 5.5%<br>(3.1-8.7%)                   | 6.3%<br>(3.3-10%)                   | 18<br>(9.4-29)       | 900<br>(500-1400)    |
| Trinidad and Tobago | 2000 | Male   | 50 to 54 | 62%<br>(43-79%)                | 38%<br>(21-57%)          | 1.8<br>(1-2.9)                              | 4.7%<br>(2-8%)                       | 5.3%<br>(2.1-9.3%)                  | 19<br>(7.7-34)       | 820<br>(350-1400)    |
| Trinidad and Tobago | 2000 | Male   | 55 to 59 | 60%<br>(42-77%)                | 40%<br>(23-58%)          | 1.7<br>(0.91-2.7)                           | 4%<br>(1.5-7.3%)                     | 4.6%<br>(1.5-8.3%)                  | 19<br>(6.6-36)       | 690<br>(250-1200)    |
| Trinidad and Tobago | 2000 | Male   | 60 to 64 | 58%<br>(37-76%)                | 42%<br>(24-63%)          | 1.5<br>(0.79-2.6)                           | 3.2%<br>(0.59-6.8%)                  | 3.6%<br>(0.64-7.7%)                 | 16<br>(2.9-35)       | 490<br>(88-1000)     |
| Trinidad and Tobago | 2000 | Male   | 65 to 69 | 57%<br>(37-74%)                | 43%<br>(26-63%)          | 1.3<br>(0.71-2.2)                           | 2.7%<br>(0.5-5.6%)                   | 2.9%<br>(0.46-6.1%)                 | 15<br>(2.4-32)       | 370<br>(70-770)      |
| Trinidad and Tobago | 2000 | Male   | 70 to 74 | 53%<br>(35-70%)                | 47%<br>(30-65%)          | 1.1<br>(0.55-1.9)                           | 1.9%<br>(0.069-4.6%)                 | 2%<br>(-0.061-5.1%)                 | 12<br>(-0.35-30)     | 230<br>(8.7-580)     |
| Trinidad and Tobago | 2000 | Male   | 75 to 79 | 48%<br>(29-67%)                | 52%<br>(33-71%)          | 0.9<br>(0.43-1.6)                           | 1.4%<br>(-0.097-3.6%)                | 1.4%<br>(-0.17-3.9%)                | 8.6<br>(-1-23)       | 130<br>(-9.4-350)    |
| Trinidad and Tobago | 2000 | Male   | 80 to 84 | 42%<br>(25-60%)                | 58%<br>(40-75%)          | 0.74<br>(0.37-1.2)                          | 1%<br>(0.0041-2.5%)                  | 1.1%<br>(-0.092-2.7%)               | 5.4<br>(-0.47-14)    | 63<br>(0.27-150)     |
| Trinidad and Tobago | 2000 | Male   | 85 to 89 | 37%<br>(22-54%)                | 63%<br>(46-78%)          | 0.65<br>(0.32-1.1)                          | 0.74%<br>(-0.12-2%)                  | 0.72%<br>(-0.25-2.2%)               | 2.4<br>(-0.83-7)     | 21<br>(-3.3-57)      |
| Trinidad and Tobago | 2000 | Male   | 90 to 94 | 38%<br>(23-55%)                | 62%<br>(45-77%)          | 0.66<br>(0.31-1.2)                          | 0.55%<br>(-0.32-1.9%)                | 0.48%<br>(-0.53-2%)                 | 0.68<br>(-0.74-2.9)  | 4.6<br>(-2.6-16)     |
| Trinidad and Tobago | 2000 | Male   | 95 plus  | 41%<br>(22-61%)                | 59%<br>(39-78%)          | 0.72<br>(0.29-1.3)                          | 0.52%<br>(-0.59-2.3%)                | 0.35%<br>(-0.93-2.4%)               | 0.13<br>(-0.34-0.87) | 0.74<br>(-0.81-3.2)  |
| Trinidad and Tobago | 2005 | Female | All Ages | 32%<br>(26-39%)                | 68%<br>(61-74%)          | 0.69<br>(0.59-0.79)                         | 0.91%<br>(0.41-1.4%)                 | 0.49%<br>(-0.27-1.4%)               | 21<br>(-12-60)       | 1700<br>(740-2600)   |



| Location            | Year | Sex    | Age      | Prevalence of current drinkers | Prevalence of abstainers | Population average of standard drinks daily | Percent of total attributable deaths | Percent of total attributable DALYs | Attributable deaths  | Attributable DALYs    |
|---------------------|------|--------|----------|--------------------------------|--------------------------|---------------------------------------------|--------------------------------------|-------------------------------------|----------------------|-----------------------|
| Trinidad and Tobago | 2005 | Female | 15 to 19 | 37%<br>(24-53%)                | 63%<br>(47-76%)          | 0.73<br>(0.4-1.2)                           | 1.6%<br>(0.99-2.6%)                  | 3%<br>(1.4-5.3%)                    | 1.2<br>(0.53-2.1)    | 130<br>(76-200)       |
| Trinidad and Tobago | 2005 | Female | 20 to 24 | 42%<br>(27-60%)                | 58%<br>(40-73%)          | 1.1<br>(0.61-1.7)                           | 2.5%<br>(1.7-3.5%)                   | 3.5%<br>(1.9-5.6%)                  | 2<br>(1.1-3.2)       | 250<br>(160-360)      |
| Trinidad and Tobago | 2005 | Female | 25 to 29 | 42%<br>(26-59%)                | 58%<br>(41-74%)          | 1.1<br>(0.64-1.8)                           | 2.4%<br>(1.6-3.4%)                   | 3%<br>(1.7-4.8%)                    | 2.1<br>(1.1-3.3)     | 230<br>(150-330)      |
| Trinidad and Tobago | 2005 | Female | 30 to 34 | 40%<br>(24-58%)                | 60%<br>(42-76%)          | 1.1<br>(0.62-1.7)                           | 2.3%<br>(1.6-3.3%)                   | 3.1%<br>(1.9-4.6%)                  | 2.4<br>(1.4-3.5)     | 210<br>(140-300)      |
| Trinidad and Tobago | 2005 | Female | 35 to 39 | 39%<br>(25-57%)                | 61%<br>(43-75%)          | 1<br>(0.57-1.6)                             | 2.2%<br>(1.4-3.1%)                   | 3.4%<br>(2.1-4.9%)                  | 3.1<br>(1.9-4.5)     | 220<br>(140-310)      |
| Trinidad and Tobago | 2005 | Female | 40 to 44 | 38%<br>(24-56%)                | 62%<br>(44-76%)          | 0.94<br>(0.5-1.5)                           | 1.8%<br>(0.97-2.9%)                  | 2.9%<br>(1.5-4.6%)                  | 4.3<br>(2.2-6.8)     | 250<br>(130-390)      |
| Trinidad and Tobago | 2005 | Female | 45 to 49 | 36%<br>(22-53%)                | 64%<br>(47-78%)          | 0.91<br>(0.48-1.5)                          | 1.6%<br>(0.51-3.1%)                  | 2.6%<br>(1-4.7%)                    | 4.7<br>(1.8-8.6)     | 220<br>(70-410)       |
| Trinidad and Tobago | 2005 | Female | 50 to 54 | 33%<br>(20-50%)                | 67%<br>(50-80%)          | 0.81<br>(0.42-1.4)                          | 1.1%<br>(-0.12-2.7%)                 | 1.8%<br>(-0.015-4%)                 | 3.8<br>(-0.032-8.5)  | 150<br>(-16-350)      |
| Trinidad and Tobago | 2005 | Female | 55 to 59 | 29%<br>(17-45%)                | 71%<br>(55-83%)          | 0.68<br>(0.35-1.2)                          | 0.66%<br>(-0.59-2.2%)                | 1%<br>(-0.62-3%)                    | 2.7<br>(-1.7-8.1)    | 87<br>(-76-290)       |
| Trinidad and Tobago | 2005 | Female | 60 to 64 | 26%<br>(15-41%)                | 74%<br>(59-85%)          | 0.59<br>(0.29-1)                            | 0.11%<br>(-1.2-1.6%)                 | 0.21%<br>(-1.4-2.1%)                | 0.7<br>(-4.6-6.8)    | 14<br>(-150-200)      |
| Trinidad and Tobago | 2005 | Female | 65 to 69 | 23%<br>(14-36%)                | 77%<br>(64-86%)          | 0.51<br>(0.27-0.84)                         | -0.16%<br>(-1.3-1%)                  | -0.13%<br>(-1.5-1.4%)               | -0.5<br>(-5.9-5.2)   | -19<br>(-150-120)     |
| Trinidad and Tobago | 2005 | Female | 70 to 74 | 21%<br>(13-33%)                | 79%<br>(67-87%)          | 0.42<br>(0.21-0.77)                         | -0.26%<br>(-1.3-0.86%)               | -0.27%<br>(-1.6-1.1%)               | -1.1<br>(-6.5-4.5)   | -27<br>(-130-87)      |
| Trinidad and Tobago | 2005 | Female | 75 to 79 | 19%<br>(11-31%)                | 81%<br>(69-89%)          | 0.37<br>(0.17-0.69)                         | -0.3%<br>(-1.3-0.69%)                | -0.35%<br>(-1.5-0.82%)              | -1.7<br>(-7.5-4)     | -27<br>(-120-61)      |
| Trinidad and Tobago | 2005 | Female | 80 to 84 | 17%<br>(9.5-28%)               | 83%<br>(72-90%)          | 0.34<br>(0.16-0.59)                         | -0.19%<br>(-0.93-0.64%)              | -0.24%<br>(-1.2-0.77%)              | -1.3<br>(-6.1-4)     | -14<br>(-68-44)       |
| Trinidad and Tobago | 2005 | Female | 85 to 89 | 17%<br>(9.6-27%)               | 83%<br>(73-90%)          | 0.35<br>(0.16-0.63)                         | -0.097%<br>(-0.88-0.82%)             | -0.15%<br>(-1.1-0.95%)              | -0.68<br>(-4.9-4.2)  | -4<br>(-36-33)        |
| Trinidad and Tobago | 2005 | Female | 90 to 94 | 19%<br>(11-31%)                | 81%<br>(69-89%)          | 0.4<br>(0.18-0.76)                          | 0.00018%<br>(-0.84-1.2%)             | -0.069%<br>(-1.1-1.3%)              | -0.19<br>(-3-3.8)    | 0.0048<br>(-14-20)    |
| Trinidad and Tobago | 2005 | Female | 95 plus  | 23%<br>(12-39%)                | 77%<br>(61-88%)          | 0.48<br>(0.17-1)                            | 0.092%<br>(-0.99-1.7%)               | -0.027%<br>(-1.3-1.9%)              | -0.028<br>(-1.4-1.9) | 0.38<br>(-4-7)        |
| Trinidad and Tobago | 2005 | Male   | All Ages | 56%<br>(48-64%)                | 44%<br>(36-52%)          | 1.5<br>(1.4-1.7)                            | 4.9%<br>(3.7-6.1%)                   | 4.3%<br>(2.7-6%)                    | 230<br>(150-330)     | 11000<br>(8500-14000) |
| Trinidad and Tobago | 2005 | Male   | 15 to 19 | 54%<br>(36-71%)                | 46%<br>(29-64%)          | 1.1<br>(0.57-1.7)                           | 4.7%<br>(2.9-7.1%)                   | 6.3%<br>(3.2-10%)                   | 5.7<br>(2.9-9.4)     | 520<br>(310-800)      |
| Trinidad and Tobago | 2005 | Male   | 20 to 24 | 65%<br>(45-80%)                | 35%<br>(20-55%)          | 2<br>(1.3-3)                                | 9.4%<br>(6.3-13%)                    | 11%<br>(6.7-17%)                    | 18<br>(11-28)        | 1500<br>(990-2200)    |
| Trinidad and Tobago | 2005 | Male   | 25 to 29 | 68%<br>(48-82%)                | 32%<br>(18-52%)          | 2.5<br>(1.5-3.6)                            | 10%<br>(6.7-14%)                     | 12%<br>(7.1-17%)                    | 19<br>(11-27)        | 1400<br>(900-1900)    |
| Trinidad and Tobago | 2005 | Male   | 30 to 34 | 69%<br>(49-83%)                | 31%<br>(17-51%)          | 2.6<br>(1.6-3.7)                            | 9.2%<br>(6.3-13%)                    | 11%<br>(7-16%)                      | 18<br>(11-26)        | 1200<br>(830-1700)    |

| Location            | Year | Sex    | Age      | Prevalence of current drinkers | Prevalence of abstainers | Population average of standard drinks daily | Percent of total attributable deaths | Percent of total attributable DALYs | Attributable deaths | Attributable DALYs |
|---------------------|------|--------|----------|--------------------------------|--------------------------|---------------------------------------------|--------------------------------------|-------------------------------------|---------------------|--------------------|
| Trinidad and Tobago | 2005 | Male   | 35 to 39 | 69%<br>(52-83%)                | 31%<br>(17-48%)          | 2.5<br>(1.5-3.6)                            | 7.9%<br>(5.5-11%)                    | 9.6%<br>(6.3-14%)                   | 15<br>(10-22)       | 990<br>(670-1300)  |
| Trinidad and Tobago | 2005 | Male   | 40 to 44 | 67%<br>(51-82%)                | 33%<br>(18-49%)          | 2.3<br>(1.4-3.4)                            | 7.4%<br>(4.9-10%)                    | 9%<br>(5.7-13%)                     | 22<br>(14-31)       | 1200<br>(790-1700) |
| Trinidad and Tobago | 2005 | Male   | 45 to 49 | 65%<br>(45-81%)                | 35%<br>(19-55%)          | 2.2<br>(1.2-3.5)                            | 6.5%<br>(3.9-9.7%)                   | 7.8%<br>(4.5-12%)                   | 23<br>(13-36)       | 1100<br>(680-1700) |
| Trinidad and Tobago | 2005 | Male   | 50 to 54 | 64%<br>(45-80%)                | 36%<br>(20-55%)          | 2<br>(1.1-3.1)                              | 5.5%<br>(2.7-8.9%)                   | 6.5%<br>(3.2-11%)                   | 23<br>(11-37)       | 980<br>(470-1600)  |
| Trinidad and Tobago | 2005 | Male   | 55 to 59 | 62%<br>(43-78%)                | 38%<br>(22-57%)          | 1.8<br>(0.97-2.8)                           | 4.5%<br>(1.9-7.7%)                   | 5.3%<br>(2.2-9.1%)                  | 23<br>(9.3-40)      | 830<br>(350-1400)  |
| Trinidad and Tobago | 2005 | Male   | 60 to 64 | 59%<br>(39-77%)                | 41%<br>(23-61%)          | 1.6<br>(0.86-2.8)                           | 3.5%<br>(0.88-6.9%)                  | 4%<br>(1-8.1%)                      | 19<br>(4.7-38)      | 590<br>(140-1200)  |
| Trinidad and Tobago | 2005 | Male   | 65 to 69 | 58%<br>(38-75%)                | 42%<br>(25-62%)          | 1.4<br>(0.79-2.3)                           | 2.9%<br>(0.75-5.7%)                  | 3.3%<br>(0.79-6.5%)                 | 17<br>(4.1-34)      | 430<br>(110-840)   |
| Trinidad and Tobago | 2005 | Male   | 70 to 74 | 54%<br>(35-71%)                | 46%<br>(29-65%)          | 1.2<br>(0.61-2)                             | 2%<br>(0.12-4.9%)                    | 2.2%<br>(0.1-5.4%)                  | 12<br>(0.55-29)     | 240<br>(14-560)    |
| Trinidad and Tobago | 2005 | Male   | 75 to 79 | 49%<br>(30-69%)                | 51%<br>(31-70%)          | 0.98<br>(0.48-1.7)                          | 1.5%<br>(0.025-3.8%)                 | 1.6%<br>(-0.038-4.2%)               | 9.2<br>(-0.21-23)   | 140<br>(2.3-360)   |
| Trinidad and Tobago | 2005 | Male   | 80 to 84 | 43%<br>(26-62%)                | 57%<br>(38-74%)          | 0.82<br>(0.42-1.3)                          | 1.2%<br>(0.059-2.7%)                 | 1.2%<br>(-0.017-2.9%)               | 6.2<br>(-0.089-15)  | 73<br>(3.6-160)    |
| Trinidad and Tobago | 2005 | Male   | 85 to 89 | 39%<br>(23-55%)                | 61%<br>(45-77%)          | 0.71<br>(0.36-1.2)                          | 0.9%<br>(-0.023-2.3%)                | 0.9%<br>(-0.15-2.5%)                | 3.1<br>(-0.5-8.6)   | 27<br>(-0.68-69)   |
| Trinidad and Tobago | 2005 | Male   | 90 to 94 | 39%<br>(24-56%)                | 61%<br>(44-76%)          | 0.72<br>(0.35-1.3)                          | 0.69%<br>(-0.25-2.2%)                | 0.63%<br>(-0.43-2.3%)               | 0.97<br>(-0.68-3.6) | 6.3<br>(-2.2-20)   |
| Trinidad and Tobago | 2005 | Male   | 95 plus  | 42%<br>(23-62%)                | 58%<br>(38-77%)          | 0.78<br>(0.32-1.5)                          | 0.61%<br>(-0.65-2.5%)                | 0.44%<br>(-0.98-2.6%)               | 0.18<br>(-0.4-1.1)  | 0.99<br>(-1-4.4)   |
| Trinidad and Tobago | 2010 | Female | All Ages | 32%<br>(26-39%)                | 68%<br>(61-74%)          | 0.74<br>(0.63-0.88)                         | 1%<br>(0.48-1.6%)                    | 0.66%<br>(-0.15-1.7%)               | 28<br>(-6.5-72)     | 1900<br>(840-3000) |
| Trinidad and Tobago | 2010 | Female | 15 to 19 | 37%<br>(24-53%)                | 63%<br>(47-76%)          | 0.78<br>(0.41-1.3)                          | 1.7%<br>(1-2.7%)                     | 3.3%<br>(1.6-5.9%)                  | 0.94<br>(0.45-1.7)  | 110<br>(63-170)    |
| Trinidad and Tobago | 2010 | Female | 20 to 24 | 43%<br>(27-59%)                | 57%<br>(41-73%)          | 1.2<br>(0.64-1.9)                           | 2.8%<br>(1.8-4%)                     | 4.2%<br>(2.3-6.9%)                  | 2<br>(1.1-3.3)      | 240<br>(150-360)   |
| Trinidad and Tobago | 2010 | Female | 25 to 29 | 42%<br>(26-59%)                | 58%<br>(41-74%)          | 1.2<br>(0.68-1.8)                           | 2.5%<br>(1.7-3.5%)                   | 3.3%<br>(1.8-5.2%)                  | 2.3<br>(1.2-3.6)    | 260<br>(170-370)   |
| Trinidad and Tobago | 2010 | Female | 30 to 34 | 41%<br>(25-58%)                | 59%<br>(42-75%)          | 1.1<br>(0.66-1.8)                           | 2.5%<br>(1.8-3.5%)                   | 3.6%<br>(2.3-5.4%)                  | 2.7<br>(1.7-4.1)    | 240<br>(160-340)   |
| Trinidad and Tobago | 2010 | Female | 35 to 39 | 40%<br>(25-58%)                | 60%<br>(42-75%)          | 1.1<br>(0.63-1.7)                           | 2.3%<br>(1.5-3.3%)                   | 3.7%<br>(2.4-5.5%)                  | 3.1<br>(2-4.6)      | 220<br>(150-320)   |
| Trinidad and Tobago | 2010 | Female | 40 to 44 | 38%<br>(24-57%)                | 62%<br>(43-76%)          | 1<br>(0.53-1.6)                             | 2%<br>(1.1-3.2%)                     | 3.4%<br>(1.9-5.5%)                  | 3.8<br>(2.1-6)      | 220<br>(120-350)   |
| Trinidad and Tobago | 2010 | Female | 45 to 49 | 37%<br>(22-53%)                | 63%<br>(47-78%)          | 0.96<br>(0.5-1.6)                           | 1.8%<br>(0.69-3.2%)                  | 3%<br>(1.4-5.3%)                    | 5.4<br>(2.6-9.7)    | 260<br>(100-470)   |
| Trinidad and Tobago | 2010 | Female | 50 to 54 | 33%<br>(20-50%)                | 67%<br>(50-80%)          | 0.86<br>(0.46-1.5)                          | 1.3%<br>(0.085-3%)                   | 2.2%<br>(0.48-4.4%)                 | 5<br>(1.1-10)       | 200<br>(13-430)    |

| Location            | Year | Sex    | Age      | Prevalence of current drinkers | Prevalence of abstainers | Population average of standard drinks daily | Percent of total attributable deaths | Percent of total attributable DALYs | Attributable deaths | Attributable DALYs    |
|---------------------|------|--------|----------|--------------------------------|--------------------------|---------------------------------------------|--------------------------------------|-------------------------------------|---------------------|-----------------------|
| Trinidad and Tobago | 2010 | Female | 55 to 59 | 29%<br>(17-44%)                | 71%<br>(56-83%)          | 0.73<br>(0.37-1.2)                          | 0.84%<br>(-0.37-2.3%)                | 1.4%<br>(-0.22-3.3%)                | 3.7<br>(-0.59-8.8)  | 120<br>(-52-320)      |
| Trinidad and Tobago | 2010 | Female | 60 to 64 | 26%<br>(15-41%)                | 74%<br>(59-85%)          | 0.62<br>(0.32-1.1)                          | 0.26%<br>(-0.95-1.7%)                | 0.43%<br>(-1.1-2.3%)                | 1.5<br>(-3.9-7.8)   | 36<br>(-140-240)      |
| Trinidad and Tobago | 2010 | Female | 65 to 69 | 24%<br>(15-37%)                | 76%<br>(63-85%)          | 0.54<br>(0.28-0.9)                          | 0.021%<br>(-1.1-1.2%)                | 0.12%<br>(-1.3-1.6%)                | 0.47<br>(-5.2-6.8)  | 2.7<br>(-140-160)     |
| Trinidad and Tobago | 2010 | Female | 70 to 74 | 21%<br>(13-34%)                | 79%<br>(66-87%)          | 0.45<br>(0.23-0.85)                         | -0.15%<br>(-1.2-1%)                  | -0.14%<br>(-1.5-1.3%)               | -0.58<br>(-6.3-5.5) | -17<br>(-130-110)     |
| Trinidad and Tobago | 2010 | Female | 75 to 79 | 19%<br>(11-31%)                | 81%<br>(69-89%)          | 0.4<br>(0.18-0.73)                          | -0.21%<br>(-1.2-0.86%)               | -0.25%<br>(-1.5-1.1%)               | -1.2<br>(-7.3-5)    | -19<br>(-110-74)      |
| Trinidad and Tobago | 2010 | Female | 80 to 84 | 17%<br>(9.9-28%)               | 83%<br>(72-90%)          | 0.37<br>(0.18-0.63)                         | -0.11%<br>(-0.87-0.81%)              | -0.14%<br>(-1.1-0.99%)              | -0.73<br>(-5.7-5.1) | -7.6<br>(-63-59)      |
| Trinidad and Tobago | 2010 | Female | 85 to 89 | 17%<br>(10-27%)                | 83%<br>(73-90%)          | 0.37<br>(0.17-0.68)                         | 0.004%<br>(-0.74-1%)                 | -0.039%<br>(-0.95-1.2%)             | -0.18<br>(-4.2-5.4) | 0.18<br>(-32-44)      |
| Trinidad and Tobago | 2010 | Female | 90 to 94 | 19%<br>(11-31%)                | 81%<br>(69-89%)          | 0.43<br>(0.18-0.81)                         | 0.085%<br>(-0.8-1.3%)                | 0.018%<br>(-1.1-1.5%)               | 0.051<br>(-3.1-4.4) | 1.6<br>(-14-24)       |
| Trinidad and Tobago | 2010 | Female | 95 plus  | 23%<br>(12-39%)                | 77%<br>(61-88%)          | 0.52<br>(0.19-1.1)                          | 0.18%<br>(-0.95-2%)                  | 0.046%<br>(-1.3-2.2%)               | 0.05<br>(-1.5-2.4)  | 0.82<br>(-4.4-9)      |
| Trinidad and Tobago | 2010 | Male   | All Ages | 57%<br>(49-65%)                | 43%<br>(35-51%)          | 1.7<br>(1.5-2)                              | 5.5%<br>(4.2-7%)                     | 4.8%<br>(3.2-6.7%)                  | 280<br>(190-390)    | 13000<br>(9900-17000) |
| Trinidad and Tobago | 2010 | Male   | 15 to 19 | 54%<br>(36-71%)                | 46%<br>(29-64%)          | 1.1<br>(0.6-1.9)                            | 5.1%<br>(3.1-8%)                     | 6.8%<br>(3.4-11%)                   | 5.3<br>(2.6-8.8)    | 460<br>(260-720)      |
| Trinidad and Tobago | 2010 | Male   | 20 to 24 | 65%<br>(46-80%)                | 35%<br>(20-54%)          | 2.2<br>(1.3-3.3)                            | 10%<br>(6.6-15%)                     | 12%<br>(6.9-18%)                    | 20<br>(12-31)       | 1600<br>(990-2300)    |
| Trinidad and Tobago | 2010 | Male   | 25 to 29 | 68%<br>(49-82%)                | 32%<br>(18-51%)          | 2.6<br>(1.6-3.8)                            | 11%<br>(7.2-15%)                     | 13%<br>(7.7-18%)                    | 25<br>(15-35)       | 1800<br>(1200-2500)   |
| Trinidad and Tobago | 2010 | Male   | 30 to 34 | 69%<br>(50-83%)                | 31%<br>(17-50%)          | 2.8<br>(1.8-4)                              | 10%<br>(6.9-14%)                     | 12%<br>(7.6-18%)                    | 22<br>(14-32)       | 1500<br>(1000-2100)   |
| Trinidad and Tobago | 2010 | Male   | 35 to 39 | 69%<br>(52-83%)                | 31%<br>(17-48%)          | 2.6<br>(1.6-3.9)                            | 8.8%<br>(5.9-12%)                    | 11%<br>(7.1-16%)                    | 18<br>(11-26)       | 1100<br>(770-1600)    |
| Trinidad and Tobago | 2010 | Male   | 40 to 44 | 68%<br>(51-82%)                | 32%<br>(18-49%)          | 2.5<br>(1.5-3.8)                            | 8%<br>(5.1-11%)                      | 10%<br>(6.2-14%)                    | 19<br>(12-27)       | 1100<br>(670-1500)    |
| Trinidad and Tobago | 2010 | Male   | 45 to 49 | 66%<br>(45-81%)                | 34%<br>(19-55%)          | 2.3<br>(1.3-3.5)                            | 7.1%<br>(4.2-10%)                    | 8.7%<br>(5.1-13%)                   | 26<br>(15-40)       | 1300<br>(790-1900)    |
| Trinidad and Tobago | 2010 | Male   | 50 to 54 | 64%<br>(44-80%)                | 36%<br>(20-56%)          | 2.1<br>(1.2-3.3)                            | 6.1%<br>(3.2-9.5%)                   | 7.3%<br>(3.8-12%)                   | 27<br>(14-44)       | 1200<br>(620-1800)    |
| Trinidad and Tobago | 2010 | Male   | 55 to 59 | 62%<br>(43-78%)                | 38%<br>(22-57%)          | 1.9<br>(1.1-3)                              | 5.2%<br>(2.6-8.3%)                   | 6.3%<br>(3.1-10%)                   | 27<br>(13-45)       | 1000<br>(490-1600)    |
| Trinidad and Tobago | 2010 | Male   | 60 to 64 | 60%<br>(40-78%)                | 40%<br>(22-60%)          | 1.7<br>(0.95-2.9)                           | 4.1%<br>(1.4-7.5%)                   | 4.8%<br>(1.6-8.8%)                  | 25<br>(8.5-48)      | 790<br>(260-1400)     |
| Trinidad and Tobago | 2010 | Male   | 65 to 69 | 58%<br>(39-75%)                | 42%<br>(25-61%)          | 1.5<br>(0.87-2.5)                           | 3.4%<br>(1.2-6.3%)                   | 3.9%<br>(1.4-7.4%)                  | 22<br>(8-41)        | 560<br>(210-1000)     |
| Trinidad and Tobago | 2010 | Male   | 70 to 74 | 55%<br>(36-72%)                | 45%<br>(28-64%)          | 1.3<br>(0.67-2.2)                           | 2.4%<br>(0.47-5.3%)                  | 2.6%<br>(0.48-6%)                   | 15<br>(2.8-34)      | 310<br>(65-700)       |

| Location            | Year | Sex    | Age      | Prevalence of current drinkers | Prevalence of abstainers | Population average of standard drinks daily | Percent of total attributable deaths | Percent of total attributable DALYs | Attributable deaths  | Attributable DALYs  |
|---------------------|------|--------|----------|--------------------------------|--------------------------|---------------------------------------------|--------------------------------------|-------------------------------------|----------------------|---------------------|
| Trinidad and Tobago | 2010 | Male   | 75 to 79 | 50%<br>(31-69%)                | 50%<br>(31-69%)          | 1.1<br>(0.51-1.9)                           | 1.8%<br>(0.26-4.3%)                  | 2%<br>(0.25-4.7%)                   | 12<br>(1.5-28)       | 180<br>(26-420)     |
| Trinidad and Tobago | 2010 | Male   | 80 to 84 | 44%<br>(26-62%)                | 56%<br>(38-74%)          | 0.88<br>(0.46-1.5)                          | 1.4%<br>(0.24-3.2%)                  | 1.5%<br>(0.19-3.4%)                 | 7.5<br>(0.97-18)     | 89<br>(16-200)      |
| Trinidad and Tobago | 2010 | Male   | 85 to 89 | 39%<br>(24-56%)                | 61%<br>(44-76%)          | 0.76<br>(0.38-1.3)                          | 1.1%<br>(0.12-2.7%)                  | 1.1%<br>(0.037-2.9%)                | 4.5<br>(0.15-12)     | 38<br>(4.3-97)      |
| Trinidad and Tobago | 2010 | Male   | 90 to 94 | 39%<br>(24-56%)                | 61%<br>(44-76%)          | 0.77<br>(0.37-1.4)                          | 0.87%<br>(-0.16-2.7%)                | 0.82%<br>(-0.33-2.8%)               | 1.6<br>(-0.64-5.4)   | 9.9<br>(-1.9-30)    |
| Trinidad and Tobago | 2010 | Male   | 95 plus  | 42%<br>(23-63%)                | 58%<br>(37-77%)          | 0.84<br>(0.34-1.6)                          | 0.79%<br>(-0.56-2.9%)                | 0.64%<br>(-0.85-3.1%)               | 0.33<br>(-0.44-1.6)  | 1.6<br>(-1.1-5.8)   |
| Trinidad and Tobago | 2016 | Female | All Ages | 32%<br>(26-39%)                | 68%<br>(61-74%)          | 0.8<br>(0.6-1)                              | 1.1%<br>(0.44-2%)                    | 0.86%<br>(-0.18-2.3%)               | 40<br>(-7.9-110)     | 2200<br>(820-3800)  |
| Trinidad and Tobago | 2016 | Female | 15 to 19 | 37%<br>(24-53%)                | 63%<br>(47-76%)          | 0.85<br>(0.41-1.6)                          | 1.8%<br>(1-2.8%)                     | 3.6%<br>(1.6-6.7%)                  | 0.79<br>(0.35-1.5)   | 90<br>(50-140)      |
| Trinidad and Tobago | 2016 | Female | 20 to 24 | 42%<br>(27-59%)                | 58%<br>(41-73%)          | 1.3<br>(0.65-2.1)                           | 2.9%<br>(1.9-4.3%)                   | 4.6%<br>(2.4-7.7%)                  | 1.6<br>(0.77-2.6)    | 190<br>(120-280)    |
| Trinidad and Tobago | 2016 | Female | 25 to 29 | 42%<br>(26-59%)                | 58%<br>(41-74%)          | 1.3<br>(0.69-2.1)                           | 2.7%<br>(1.8-3.8%)                   | 3.7%<br>(2-5.9%)                    | 2.1<br>(1.1-3.4)     | 240<br>(150-350)    |
| Trinidad and Tobago | 2016 | Female | 30 to 34 | 40%<br>(25-57%)                | 60%<br>(43-75%)          | 1.3<br>(0.7-2)                              | 2.6%<br>(1.7-3.8%)                   | 3.9%<br>(2.4-5.9%)                  | 3.3<br>(1.9-4.9)     | 300<br>(200-430)    |
| Trinidad and Tobago | 2016 | Female | 35 to 39 | 40%<br>(25-57%)                | 60%<br>(43-75%)          | 1.2<br>(0.65-1.9)                           | 2.4%<br>(1.5-3.8%)                   | 4.1%<br>(2.5-6.2%)                  | 3.6<br>(2.1-5.5)     | 260<br>(160-400)    |
| Trinidad and Tobago | 2016 | Female | 40 to 44 | 38%<br>(24-56%)                | 62%<br>(44-76%)          | 1.1<br>(0.56-1.8)                           | 2.2%<br>(1.2-3.6%)                   | 3.8%<br>(2-6.1%)                    | 4.1<br>(2.2-6.9)     | 240<br>(130-410)    |
| Trinidad and Tobago | 2016 | Female | 45 to 49 | 36%<br>(22-53%)                | 64%<br>(47-78%)          | 1<br>(0.53-1.8)                             | 2%<br>(0.86-3.7%)                    | 3.3%<br>(1.6-6.1%)                  | 4.8<br>(2.3-8.9)     | 240<br>(100-440)    |
| Trinidad and Tobago | 2016 | Female | 50 to 54 | 33%<br>(19-50%)                | 67%<br>(50-81%)          | 0.93<br>(0.49-1.6)                          | 1.6%<br>(0.27-3.5%)                  | 2.5%<br>(0.57-5.4%)                 | 6.1<br>(1.4-13)      | 250<br>(43-580)     |
| Trinidad and Tobago | 2016 | Female | 55 to 59 | 29%<br>(17-44%)                | 71%<br>(56-83%)          | 0.79<br>(0.39-1.3)                          | 1.1%<br>(-0.26-2.9%)                 | 1.7%<br>(-0.15-4.1%)                | 5.2<br>(-0.46-13)    | 180<br>(-42-460)    |
| Trinidad and Tobago | 2016 | Female | 60 to 64 | 26%<br>(15-41%)                | 74%<br>(59-85%)          | 0.68<br>(0.33-1.2)                          | 0.54%<br>(-0.78-2.2%)                | 0.78%<br>(-0.93-2.9%)               | 3.1<br>(-3.8-11)     | 89<br>(-130-360)    |
| Trinidad and Tobago | 2016 | Female | 65 to 69 | 23%<br>(14-37%)                | 77%<br>(63-86%)          | 0.59<br>(0.3-0.99)                          | 0.26%<br>(-0.96-1.7%)                | 0.41%<br>(-1.2-2.3%)                | 1.8<br>(-5.4-10)     | 39<br>(-140-260)    |
| Trinidad and Tobago | 2016 | Female | 70 to 74 | 21%<br>(13-33%)                | 79%<br>(67-87%)          | 0.5<br>(0.25-0.96)                          | 0.076%<br>(-1.1-1.6%)                | 0.14%<br>(-1.3-2%)                  | 0.71<br>(-6.7-10)    | 9.9<br>(-140-200)   |
| Trinidad and Tobago | 2016 | Female | 75 to 79 | 19%<br>(11-31%)                | 81%<br>(69-89%)          | 0.43<br>(0.2-0.85)                          | -0.004%<br>(-1-1.3%)                 | -0.0019%<br>(-1.3-1.6%)             | -0.017<br>(-7.3-8.8) | -0.49<br>(-110-140) |
| Trinidad and Tobago | 2016 | Female | 80 to 84 | 17%<br>(9.7-27%)               | 83%<br>(73-90%)          | 0.4<br>(0.19-0.71)                          | 0.087%<br>(-0.75-1.2%)               | 0.091%<br>(-0.93-1.5%)              | 0.49<br>(-5.3-8.2)   | 6.7<br>(-58-95)     |
| Trinidad and Tobago | 2016 | Female | 85 to 89 | 17%<br>(9.8-27%)               | 83%<br>(73-90%)          | 0.41<br>(0.18-0.74)                         | 0.19%<br>(-0.6-1.4%)                 | 0.17%<br>(-0.8-1.6%)                | 0.86<br>(-4-7.8)     | 8.8<br>(-29-64)     |
| Trinidad and Tobago | 2016 | Female | 90 to 94 | 19%<br>(11-30%)                | 81%<br>(70-89%)          | 0.46<br>(0.2-0.9)                           | 0.28%<br>(-0.7-1.8%)                 | 0.25%<br>(-0.93-2%)                 | 0.88<br>(-3.3-7)     | 6.3<br>(-15-40)     |

| Location            | Year | Sex    | Age      | Prevalence of current drinkers | Prevalence of abstainers | Population average of standard drinks daily | Percent of total attributable deaths | Percent of total attributable DALYs | Attributable deaths | Attributable DALYs     |
|---------------------|------|--------|----------|--------------------------------|--------------------------|---------------------------------------------|--------------------------------------|-------------------------------------|---------------------|------------------------|
| Trinidad and Tobago | 2016 | Female | 95 plus  | 23%<br>(12-38%)                | 77%<br>(62-88%)          | 0.56<br>(0.2-1.2)                           | 0.41%<br>(-0.84-2.6%)                | 0.32%<br>(-1.2-2.9%)                | 0.43<br>(-1.6-3.9)  | 2.3<br>(-4.6-14)       |
| Trinidad and Tobago | 2016 | Male   | All Ages | 57%<br>(50-65%)                | 43%<br>(35-50%)          | 1.9<br>(1.4-2.4)                            | 5.8%<br>(4-7.7%)                     | 5.1%<br>(3.1-7.7%)                  | 320<br>(200-490)    | 14000<br>(9900-19000)  |
| Trinidad and Tobago | 2016 | Male   | 15 to 19 | 54%<br>(36-71%)                | 46%<br>(29-64%)          | 1.3<br>(0.61-2.2)                           | 5.2%<br>(3.1-7.9%)                   | 7.1%<br>(3.5-12%)                   | 4.1<br>(2.1-6.8)    | 370<br>(210-580)       |
| Trinidad and Tobago | 2016 | Male   | 20 to 24 | 65%<br>(47-80%)                | 35%<br>(20-53%)          | 2.4<br>(1.3-3.7)                            | 11%<br>(6.8-15%)                     | 13%<br>(7.3-19%)                    | 14<br>(8.1-22)      | 1200<br>(730-1700)     |
| Trinidad and Tobago | 2016 | Male   | 25 to 29 | 68%<br>(49-82%)                | 32%<br>(18-51%)          | 2.9<br>(1.6-4.3)                            | 11%<br>(7.4-16%)                     | 14%<br>(7.9-20%)                    | 21<br>(12-31)       | 1600<br>(1000-2200)    |
| Trinidad and Tobago | 2016 | Male   | 30 to 34 | 69%<br>(49-83%)                | 31%<br>(17-51%)          | 3<br>(1.8-4.6)                              | 11%<br>(7.1-15%)                     | 13%<br>(8-19%)                      | 26<br>(16-39)       | 1800<br>(1200-2600)    |
| Trinidad and Tobago | 2016 | Male   | 35 to 39 | 69%<br>(52-82%)                | 31%<br>(18-48%)          | 2.8<br>(1.7-4.5)                            | 9.4%<br>(6.2-13%)                    | 12%<br>(7.2-17%)                    | 22<br>(13-32)       | 1400<br>(890-1900)     |
| Trinidad and Tobago | 2016 | Male   | 40 to 44 | 67%<br>(51-82%)                | 33%<br>(18-49%)          | 2.7<br>(1.5-4.3)                            | 8.7%<br>(5.4-12%)                    | 11%<br>(6.5-16%)                    | 22<br>(13-32)       | 1200<br>(750-1700)     |
| Trinidad and Tobago | 2016 | Male   | 45 to 49 | 65%<br>(44-81%)                | 35%<br>(19-56%)          | 2.5<br>(1.4-4.1)                            | 7.7%<br>(4.4-12%)                    | 9.6%<br>(5.3-15%)                   | 24<br>(13-38)       | 1200<br>(680-1800)     |
| Trinidad and Tobago | 2016 | Male   | 50 to 54 | 64%<br>(44-80%)                | 36%<br>(20-56%)          | 2.3<br>(1.3-3.7)                            | 6.6%<br>(3.3-10%)                    | 8.1%<br>(4.1-13%)                   | 32<br>(16-53)       | 1400<br>(710-2300)     |
| Trinidad and Tobago | 2016 | Male   | 55 to 59 | 61%<br>(43-78%)                | 39%<br>(22-57%)          | 2<br>(1.1-3.2)                              | 5.7%<br>(2.6-9.2%)                   | 6.8%<br>(3.1-11%)                   | 36<br>(17-59)       | 1300<br>(610-2200)     |
| Trinidad and Tobago | 2016 | Male   | 60 to 64 | 59%<br>(39-77%)                | 41%<br>(23-61%)          | 1.8<br>(0.98-3.1)                           | 4.6%<br>(1.5-8.1%)                   | 5.3%<br>(1.7-9.5%)                  | 34<br>(11-61)       | 1100<br>(340-1900)     |
| Trinidad and Tobago | 2016 | Male   | 65 to 69 | 58%<br>(39-75%)                | 42%<br>(25-61%)          | 1.6<br>(0.9-2.7)                            | 3.9%<br>(1.4-7.4%)                   | 4.5%<br>(1.5-8.5%)                  | 31<br>(11-58)       | 780<br>(280-1500)      |
| Trinidad and Tobago | 2016 | Male   | 70 to 74 | 54%<br>(36-71%)                | 46%<br>(29-64%)          | 1.4<br>(0.71-2.5)                           | 2.8%<br>(0.61-6.2%)                  | 3.1%<br>(0.58-7%)                   | 23<br>(4.3-50)      | 460<br>(95-1000)       |
| Trinidad and Tobago | 2016 | Male   | 75 to 79 | 49%<br>(30-68%)                | 51%<br>(32-70%)          | 1.1<br>(0.54-2)                             | 2.2%<br>(0.32-5.3%)                  | 2.4%<br>(0.31-5.8%)                 | 17<br>(2.2-41)      | 260<br>(40-620)        |
| Trinidad and Tobago | 2016 | Male   | 80 to 84 | 43%<br>(26-62%)                | 57%<br>(38-74%)          | 0.94<br>(0.45-1.6)                          | 1.7%<br>(0.31-4%)                    | 1.8%<br>(0.24-4.4%)                 | 10<br>(1.4-26)      | 120<br>(23-300)        |
| Trinidad and Tobago | 2016 | Male   | 85 to 89 | 39%<br>(23-55%)                | 61%<br>(45-77%)          | 0.82<br>(0.38-1.5)                          | 1.3%<br>(0.16-3.3%)                  | 1.4%<br>(0.072-3.6%)                | 5.8<br>(0.32-15)    | 49<br>(5.9-120)        |
| Trinidad and Tobago | 2016 | Male   | 90 to 94 | 39%<br>(24-56%)                | 61%<br>(44-76%)          | 0.82<br>(0.38-1.6)                          | 1.1%<br>(-0.07-3.2%)                 | 1.1%<br>(-0.25-3.4%)                | 2.3<br>(-0.53-7.1)  | 14<br>(-0.87-39)       |
| Trinidad and Tobago | 2016 | Male   | 95 plus  | 42%<br>(23-62%)                | 58%<br>(38-77%)          | 0.89<br>(0.35-1.8)                          | 1.1%<br>(-0.37-3.6%)                 | 0.91%<br>(-0.75-3.8%)               | 0.5<br>(-0.4-2.1)   | 2.2<br>(-0.77-8)       |
| Bolivia             | 1990 | Female | All Ages | 42%<br>(38-46%)                | 58%<br>(54-62%)          | 0.68<br>(0.55-0.83)                         | 1.2%<br>(0.67-1.7%)                  | 1.8%<br>(0.79-2.9%)                 | 580<br>(260-960)    | 24000<br>(14000-36000) |
| Bolivia             | 1990 | Female | 15 to 19 | 37%<br>(27-45%)                | 63%<br>(55-73%)          | 0.51<br>(0.29-0.8)                          | 1.7%<br>(0.48-3.2%)                  | 2.4%<br>(0.21-5.1%)                 | 13<br>(1-27)        | 1100<br>(310-2200)     |
| Bolivia             | 1990 | Female | 20 to 24 | 57%<br>(48-65%)                | 43%<br>(35-52%)          | 1.1<br>(0.65-1.6)                           | 3.8%<br>(1.5-6.7%)                   | 5.3%<br>(1.4-9.7%)                  | 33<br>(8.6-63)      | 2600<br>(1000-4600)    |

| Location | Year | Sex    | Age      | Prevalence of current drinkers | Prevalence of abstainers | Population average of standard drinks daily | Percent of total attributable deaths | Percent of total attributable DALYs | Attributable deaths  | Attributable DALYs     |
|----------|------|--------|----------|--------------------------------|--------------------------|---------------------------------------------|--------------------------------------|-------------------------------------|----------------------|------------------------|
| Bolivia  | 1990 | Female | 25 to 29 | 63%<br>(54-70%)                | 37%<br>(30-46%)          | 1.3<br>(0.86-1.9)                           | 4.4%<br>(2.1-7.2%)                   | 6.3%<br>(2.6-11%)                   | 39<br>(16-66)        | 2800<br>(1300-4500)    |
| Bolivia  | 1990 | Female | 30 to 34 | 66%<br>(56-72%)                | 34%<br>(28-44%)          | 1.4<br>(0.93-2.1)                           | 4.5%<br>(2.2-7.5%)                   | 6.6%<br>(3-11%)                     | 43<br>(19-74)        | 2700<br>(1300-4400)    |
| Bolivia  | 1990 | Female | 35 to 39 | 66%<br>(56-72%)                | 34%<br>(28-44%)          | 1.4<br>(0.87-2.1)                           | 4.2%<br>(2-7%)                       | 6.2%<br>(2.7-10%)                   | 46<br>(20-77)        | 2600<br>(1200-4100)    |
| Bolivia  | 1990 | Female | 40 to 44 | 65%<br>(57-71%)                | 35%<br>(29-43%)          | 1.4<br>(0.87-2.1)                           | 4.2%<br>(2-6.9%)                     | 6.3%<br>(2.9-10%)                   | 45<br>(20-75)        | 2200<br>(990-3600)     |
| Bolivia  | 1990 | Female | 45 to 49 | 64%<br>(54-71%)                | 36%<br>(29-46%)          | 1.4<br>(0.88-2.2)                           | 4.1%<br>(1.7-7.2%)                   | 6.1%<br>(2.7-11%)                   | 51<br>(22-90)        | 2100<br>(890-3800)     |
| Bolivia  | 1990 | Female | 50 to 54 | 62%<br>(51-71%)                | 38%<br>(29-49%)          | 1.4<br>(0.83-2.2)                           | 4.1%<br>(1.7-7.3%)                   | 5.9%<br>(2.6-10%)                   | 55<br>(24-95)        | 2000<br>(830-3500)     |
| Bolivia  | 1990 | Female | 55 to 59 | 60%<br>(44-76%)                | 40%<br>(24-56%)          | 1.4<br>(0.78-2.3)                           | 3.9%<br>(1.4-7%)                     | 5.4%<br>(2-9.4%)                    | 65<br>(24-120)       | 2000<br>(730-3700)     |
| Bolivia  | 1990 | Female | 60 to 64 | 57%<br>(40-76%)                | 43%<br>(24-60%)          | 1.3<br>(0.74-2.2)                           | 3.1%<br>(0.7-6.4%)                   | 4.1%<br>(1.1-8.1%)                  | 70<br>(17-140)       | 1900<br>(430-3800)     |
| Bolivia  | 1990 | Female | 65 to 69 | 53%<br>(37-70%)                | 47%<br>(30-63%)          | 1.2<br>(0.66-1.8)                           | 2.1%<br>(0.017-4.6%)                 | 2.8%<br>(0.21-5.7%)                 | 58<br>(4.2-120)      | 1300<br>(9.3-2700)     |
| Bolivia  | 1990 | Female | 70 to 74 | 48%<br>(33-64%)                | 52%<br>(36-67%)          | 0.96<br>(0.52-1.6)                          | 1.3%<br>(-0.51-3.4%)                 | 1.7%<br>(-0.55-4.3%)                | 42<br>(-14-110)      | 720<br>(-290-1900)     |
| Bolivia  | 1990 | Female | 75 to 79 | 42%<br>(28-59%)                | 58%<br>(41-72%)          | 0.75<br>(0.37-1.3)                          | 0.61%<br>(-0.99-2.5%)                | 0.77%<br>(-1.1-3%)                  | 19<br>(-27-74)       | 250<br>(-410-1000)     |
| Bolivia  | 1990 | Female | 80 to 84 | 36%<br>(22-55%)                | 64%<br>(45-78%)          | 0.62<br>(0.32-1)                            | 0.24%<br>(-0.98-1.6%)                | 0.29%<br>(-1.2-1.9%)                | 4.8<br>(-19-31)      | 48<br>(-200-320)       |
| Bolivia  | 1990 | Female | 85 to 89 | 34%<br>(21-49%)                | 66%<br>(51-79%)          | 0.56<br>(0.3-0.96)                          | -0.057%<br>(-1.1-1.1%)               | -0.087%<br>(-1.3-1.3%)              | -0.84<br>(-13-12)    | -4.8<br>(-92-89)       |
| Bolivia  | 1990 | Female | 90 to 94 | 35%<br>(23-51%)                | 65%<br>(49-77%)          | 0.56<br>(0.29-0.99)                         | -0.35%<br>(-1.3-0.71%)               | -0.46%<br>(-1.7-0.8%)               | -1.7<br>(-6.4-3.1)   | -7.8<br>(-31-16)       |
| Bolivia  | 1990 | Female | 95 plus  | 39%<br>(23-58%)                | 61%<br>(42-77%)          | 0.58<br>(0.24-1.1)                          | -0.56%<br>(-1.8-0.79%)               | -0.76%<br>(-2.2-0.85%)              | -0.86<br>(-2.6-0.95) | -2.5<br>(-7.9-3.5)     |
| Bolivia  | 1990 | Male   | All Ages | 46%<br>(41-51%)                | 54%<br>(49-59%)          | 1.1<br>(0.94-1.4)                           | 3.1%<br>(2.4-3.9%)                   | 4.6%<br>(3.3-6%)                    | 1600<br>(1100-2100)  | 69000<br>(53000-87000) |
| Bolivia  | 1990 | Male   | 15 to 19 | 38%<br>(28-47%)                | 62%<br>(53-72%)          | 0.6<br>(0.33-0.97)                          | 3.5%<br>(2-5.2%)                     | 4.3%<br>(2-7.1%)                    | 24<br>(11-40)        | 2300<br>(1300-3500)    |
| Bolivia  | 1990 | Male   | 20 to 24 | 73%<br>(63-79%)                | 27%<br>(21-37%)          | 1.7<br>(1.1-2.4)                            | 9.5%<br>(6.2-13%)                    | 12%<br>(6.8-17%)                    | 86<br>(48-130)       | 7000<br>(4500-9900)    |
| Bolivia  | 1990 | Male   | 25 to 29 | 80%<br>(73-85%)                | 20%<br>(15-27%)          | 2.2<br>(1.4-3.2)                            | 12%<br>(8.2-16%)                     | 15%<br>(9.4-20%)                    | 110<br>(68-160)      | 8100<br>(5400-11000)   |
| Bolivia  | 1990 | Male   | 30 to 34 | 82%<br>(74-86%)                | 18%<br>(14-26%)          | 2.5<br>(1.7-3.6)                            | 13%<br>(8.7-17%)                     | 16%<br>(11-22%)                     | 130<br>(80-180)      | 8100<br>(5600-11000)   |
| Bolivia  | 1990 | Male   | 35 to 39 | 78%<br>(70-83%)                | 22%<br>(17-30%)          | 2.6<br>(1.6-3.7)                            | 13%<br>(8.8-18%)                     | 16%<br>(11-23%)                     | 140<br>(90-200)      | 8100<br>(5400-11000)   |
| Bolivia  | 1990 | Male   | 40 to 44 | 77%<br>(70-83%)                | 23%<br>(17-30%)          | 2.6<br>(1.6-3.9)                            | 13%<br>(8.6-17%)                     | 16%<br>(11-22%)                     | 140<br>(90-200)      | 7000<br>(4700-9700)    |

| Location | Year | Sex    | Age      | Prevalence of current drinkers | Prevalence of abstainers | Population average of standard drinks daily | Percent of total attributable deaths | Percent of total attributable DALYs | Attributable deaths  | Attributable DALYs     |
|----------|------|--------|----------|--------------------------------|--------------------------|---------------------------------------------|--------------------------------------|-------------------------------------|----------------------|------------------------|
| Bolivia  | 1990 | Male   | 45 to 49 | 79%<br>(70-84%)                | 21%<br>(16-30%)          | 2.7<br>(1.7-4.1)                            | 12%<br>(8-17%)                       | 16%<br>(10-22%)                     | 160<br>(98-230)      | 6900<br>(4500-9900)    |
| Bolivia  | 1990 | Male   | 50 to 54 | 76%<br>(69-82%)                | 24%<br>(18-31%)          | 2.7<br>(1.6-3.9)                            | 11%<br>(7.1-16%)                     | 14%<br>(8.8-20%)                    | 150<br>(90-220)      | 5700<br>(3500-8200)    |
| Bolivia  | 1990 | Male   | 55 to 59 | 70%<br>(61-77%)                | 30%<br>(23-39%)          | 2.5<br>(1.5-3.8)                            | 9.8%<br>(6-14%)                      | 12%<br>(7.4-18%)                    | 150<br>(92-230)      | 5100<br>(3100-7600)    |
| Bolivia  | 1990 | Male   | 60 to 64 | 70%<br>(59-77%)                | 30%<br>(23-41%)          | 2.4<br>(1.4-3.8)                            | 8.1%<br>(4.4-13%)                    | 9.8%<br>(5.3-16%)                   | 160<br>(85-260)      | 4500<br>(2500-7200)    |
| Bolivia  | 1990 | Male   | 65 to 69 | 73%<br>(61-83%)                | 27%<br>(17-39%)          | 2.1<br>(1.3-3.2)                            | 6.1%<br>(3.1-9.9%)                   | 7.4%<br>(3.8-12%)                   | 140<br>(66-220)      | 3200<br>(1600-5100)    |
| Bolivia  | 1990 | Male   | 70 to 74 | 71%<br>(56-83%)                | 29%<br>(17-44%)          | 1.7<br>(0.97-2.6)                           | 4.2%<br>(1.6-7.3%)                   | 4.9%<br>(1.7-8.5%)                  | 100<br>(36-180)      | 1900<br>(710-3300)     |
| Bolivia  | 1990 | Male   | 75 to 79 | 61%<br>(43-78%)                | 39%<br>(22-57%)          | 1.2<br>(0.61-2)                             | 2.7%<br>(0.71-5.2%)                  | 3.2%<br>(0.72-6.2%)                 | 65<br>(14-130)       | 940<br>(230-1800)      |
| Bolivia  | 1990 | Male   | 80 to 84 | 53%<br>(34-70%)                | 47%<br>(30-66%)          | 0.92<br>(0.5-1.5)                           | 1.8%<br>(0.43-3.4%)                  | 2%<br>(0.4-3.9%)                    | 28<br>(5.3-54)       | 310<br>(73-570)        |
| Bolivia  | 1990 | Male   | 85 to 89 | 49%<br>(32-65%)                | 51%<br>(35-68%)          | 0.8<br>(0.44-1.4)                           | 1.1%<br>(0.099-2.3%)                 | 1.2%<br>(0.007-2.6%)                | 9.3<br>(0.055-20)    | 74<br>(6.6-160)        |
| Bolivia  | 1990 | Male   | 90 to 94 | 49%<br>(33-66%)                | 51%<br>(34-67%)          | 0.78<br>(0.4-1.4)                           | 0.64%<br>(-0.36-1.8%)                | 0.59%<br>(-0.62-1.9%)               | 1.7<br>(-1.7-5.5)    | 11<br>(-6-30)          |
| Bolivia  | 1990 | Male   | 95 plus  | 51%<br>(30-71%)                | 49%<br>(29-70%)          | 0.8<br>(0.35-1.5)                           | 0.29%<br>(-0.89-1.7%)                | 0.083%<br>(-1.3-1.8%)               | 0.062<br>(-0.96-1.3) | 0.85<br>(-2.6-5)       |
| Bolivia  | 1995 | Female | All Ages | 42%<br>(38-47%)                | 58%<br>(53-62%)          | 0.63<br>(0.51-0.76)                         | 1.1%<br>(0.59-1.6%)                  | 1.5%<br>(0.56-2.6%)                 | 470<br>(170-820)     | 20000<br>(11000-31000) |
| Bolivia  | 1995 | Female | 15 to 19 | 36%<br>(27-45%)                | 64%<br>(55-73%)          | 0.46<br>(0.26-0.73)                         | 1.4%<br>(0.45-2.6%)                  | 2%<br>(0.27-4.1%)                   | 10<br>(1.3-22)       | 1000<br>(320-1800)     |
| Bolivia  | 1995 | Female | 20 to 24 | 57%<br>(47-65%)                | 43%<br>(35-53%)          | 0.97<br>(0.59-1.4)                          | 3.1%<br>(1.2-5.3%)                   | 4.3%<br>(1-7.9%)                    | 26<br>(6.3-49)       | 2200<br>(910-3800)     |
| Bolivia  | 1995 | Female | 25 to 29 | 63%<br>(54-70%)                | 37%<br>(30-46%)          | 1.2<br>(0.77-1.8)                           | 3.6%<br>(1.7-5.8%)                   | 5.2%<br>(2-9.1%)                    | 30<br>(11-54)        | 2300<br>(1100-3700)    |
| Bolivia  | 1995 | Female | 30 to 34 | 66%<br>(56-72%)                | 34%<br>(28-44%)          | 1.3<br>(0.85-1.9)                           | 3.6%<br>(1.8-5.9%)                   | 5.4%<br>(2.4-9.3%)                  | 33<br>(15-57)        | 2100<br>(1000-3500)    |
| Bolivia  | 1995 | Female | 35 to 39 | 66%<br>(57-71%)                | 34%<br>(29-43%)          | 1.3<br>(0.79-1.9)                           | 3.4%<br>(1.6-5.8%)                   | 5.2%<br>(2.2-8.9%)                  | 36<br>(16-62)        | 2000<br>(920-3400)     |
| Bolivia  | 1995 | Female | 40 to 44 | 65%<br>(56-71%)                | 35%<br>(29-44%)          | 1.3<br>(0.78-1.9)                           | 3.4%<br>(1.6-5.7%)                   | 5.3%<br>(2.3-8.9%)                  | 41<br>(18-69)        | 2000<br>(920-3300)     |
| Bolivia  | 1995 | Female | 45 to 49 | 64%<br>(54-71%)                | 36%<br>(29-46%)          | 1.3<br>(0.78-2)                             | 3.4%<br>(1.3-5.8%)                   | 5.2%<br>(2.1-8.8%)                  | 41<br>(17-71)        | 1700<br>(730-3000)     |
| Bolivia  | 1995 | Female | 50 to 54 | 62%<br>(52-71%)                | 38%<br>(29-48%)          | 1.3<br>(0.76-2)                             | 3.4%<br>(1.4-6.1%)                   | 5%<br>(2.2-8.9%)                    | 50<br>(22-87)        | 1800<br>(750-3200)     |
| Bolivia  | 1995 | Female | 55 to 59 | 60%<br>(44-76%)                | 40%<br>(24-56%)          | 1.3<br>(0.72-2.1)                           | 3.3%<br>(1.1-6%)                     | 4.6%<br>(1.6-8.3%)                  | 54<br>(19-99)        | 1700<br>(550-3200)     |
| Bolivia  | 1995 | Female | 60 to 64 | 57%<br>(40-75%)                | 43%<br>(25-60%)          | 1.2<br>(0.66-2)                             | 2.5%<br>(0.41-5.3%)                  | 3.4%<br>(0.65-7%)                   | 55<br>(10-110)       | 1500<br>(230-3100)     |

| Location | Year | Sex    | Age      | Prevalence of current drinkers | Prevalence of abstainers | Population average of standard drinks daily | Percent of total attributable deaths | Percent of total attributable DALYs | Attributable deaths | Attributable DALYs     |
|----------|------|--------|----------|--------------------------------|--------------------------|---------------------------------------------|--------------------------------------|-------------------------------------|---------------------|------------------------|
| Bolivia  | 1995 | Female | 65 to 69 | 53%<br>(36-71%)                | 47%<br>(29-64%)          | 1.1<br>(0.61-1.7)                           | 1.7%<br>(-0.17-3.8%)                 | 2.2%<br>(-0.084-4.8%)               | 50<br>(-1.7-110)    | 1100<br>(-110-2400)    |
| Bolivia  | 1995 | Female | 70 to 74 | 48%<br>(32-64%)                | 52%<br>(36-68%)          | 0.86<br>(0.47-1.4)                          | 0.97%<br>(-0.7-2.9%)                 | 1.3%<br>(-0.74-3.5%)                | 34<br>(-20-98)      | 570<br>(-400-1700)     |
| Bolivia  | 1995 | Female | 75 to 79 | 41%<br>(27-59%)                | 59%<br>(41-73%)          | 0.67<br>(0.34-1.2)                          | 0.4%<br>(-0.98-1.9%)                 | 0.53%<br>(-1.1-2.4%)                | 14<br>(-28-66)      | 180<br>(-420-900)      |
| Bolivia  | 1995 | Female | 80 to 84 | 36%<br>(22-53%)                | 64%<br>(47-78%)          | 0.55<br>(0.29-0.94)                         | 0.086%<br>(-1-1.2%)                  | 0.12%<br>(-1.2-1.5%)                | 2.5<br>(-25-31)     | 23<br>(-270-320)       |
| Bolivia  | 1995 | Female | 85 to 89 | 34%<br>(21-48%)                | 66%<br>(52-79%)          | 0.51<br>(0.27-0.87)                         | -0.16%<br>(-1.2-0.85%)               | -0.21%<br>(-1.4-0.98%)              | -2.8<br>(-19-13)    | -19<br>(-140-98)       |
| Bolivia  | 1995 | Female | 90 to 94 | 35%<br>(23-50%)                | 65%<br>(50-77%)          | 0.51<br>(0.26-0.91)                         | -0.44%<br>(-1.4-0.49%)               | -0.57%<br>(-1.8-0.55%)              | -2.9<br>(-9.1-2.8)  | -13<br>(-43-15)        |
| Bolivia  | 1995 | Female | 95 plus  | 38%<br>(23-57%)                | 62%<br>(43-77%)          | 0.53<br>(0.23-1)                            | -0.62%<br>(-1.8-0.55%)               | -0.84%<br>(-2.3-0.56%)              | -1.2<br>(-3.2-0.77) | -3.4<br>(-9.9-3)       |
| Bolivia  | 1995 | Male   | All Ages | 47%<br>(42-51%)                | 53%<br>(49-58%)          | 1.1<br>(0.89-1.3)                           | 3%<br>(2.3-3.8%)                     | 4.3%<br>(3-5.7%)                    | 1400<br>(960-1900)  | 62000<br>(46000-78000) |
| Bolivia  | 1995 | Male   | 15 to 19 | 38%<br>(28-47%)                | 62%<br>(53-72%)          | 0.56<br>(0.31-0.88)                         | 3.2%<br>(1.9-4.7%)                   | 3.9%<br>(1.9-6.4%)                  | 22<br>(11-37)       | 2200<br>(1300-3300)    |
| Bolivia  | 1995 | Male   | 20 to 24 | 72%<br>(63-79%)                | 28%<br>(21-37%)          | 1.5<br>(0.99-2.2)                           | 8.6%<br>(5.7-12%)                    | 10%<br>(6.1-15%)                    | 74<br>(44-110)      | 6400<br>(4100-8800)    |
| Bolivia  | 1995 | Male   | 25 to 29 | 80%<br>(73-85%)                | 20%<br>(15-27%)          | 2.1<br>(1.3-3)                              | 11%<br>(7.2-14%)                     | 13%<br>(8.4-18%)                    | 93<br>(58-130)      | 7100<br>(4800-9400)    |
| Bolivia  | 1995 | Male   | 30 to 34 | 82%<br>(75-86%)                | 18%<br>(14-25%)          | 2.4<br>(1.6-3.3)                            | 11%<br>(7.4-14%)                     | 14%<br>(8.8-19%)                    | 100<br>(63-140)     | 6800<br>(4600-9100)    |
| Bolivia  | 1995 | Male   | 35 to 39 | 78%<br>(71-83%)                | 22%<br>(17-29%)          | 2.4<br>(1.5-3.5)                            | 11%<br>(7.3-15%)                     | 14%<br>(9.2-20%)                    | 110<br>(71-170)     | 6600<br>(4400-9300)    |
| Bolivia  | 1995 | Male   | 40 to 44 | 77%<br>(69-82%)                | 23%<br>(18-31%)          | 2.4<br>(1.5-3.6)                            | 11%<br>(7.3-15%)                     | 14%<br>(9.3-20%)                    | 130<br>(81-180)     | 6500<br>(4300-9100)    |
| Bolivia  | 1995 | Male   | 45 to 49 | 78%<br>(70-84%)                | 22%<br>(16-30%)          | 2.5<br>(1.5-3.9)                            | 11%<br>(6.9-15%)                     | 14%<br>(8.9-20%)                    | 130<br>(79-190)     | 5800<br>(3700-8200)    |
| Bolivia  | 1995 | Male   | 50 to 54 | 76%<br>(69-82%)                | 24%<br>(18-31%)          | 2.5<br>(1.5-3.7)                            | 9.7%<br>(6.2-14%)                    | 13%<br>(8-18%)                      | 140<br>(87-210)     | 5500<br>(3500-7900)    |
| Bolivia  | 1995 | Male   | 55 to 59 | 70%<br>(61-77%)                | 30%<br>(23-39%)          | 2.3<br>(1.4-3.6)                            | 8.7%<br>(5.3-13%)                    | 11%<br>(6.7-16%)                    | 130<br>(78-200)     | 4500<br>(2700-6600)    |
| Bolivia  | 1995 | Male   | 60 to 64 | 69%<br>(59-77%)                | 31%<br>(23-41%)          | 2.2<br>(1.3-3.6)                            | 7.1%<br>(3.9-11%)                    | 8.8%<br>(4.8-14%)                   | 140<br>(74-220)     | 3900<br>(2100-6300)    |
| Bolivia  | 1995 | Male   | 65 to 69 | 73%<br>(60-83%)                | 27%<br>(17-40%)          | 2<br>(1.2-3)                                | 5.3%<br>(2.6-8.8%)                   | 6.5%<br>(3.2-11%)                   | 130<br>(63-210)     | 3000<br>(1500-4900)    |
| Bolivia  | 1995 | Male   | 70 to 74 | 71%<br>(56-83%)                | 29%<br>(17-44%)          | 1.5<br>(0.88-2.4)                           | 3.6%<br>(1.5-6.1%)                   | 4.3%<br>(1.7-7.3%)                  | 98<br>(38-170)      | 1800<br>(760-3100)     |
| Bolivia  | 1995 | Male   | 75 to 79 | 61%<br>(43-78%)                | 39%<br>(22-57%)          | 1.1<br>(0.56-1.8)                           | 2.3%<br>(0.74-4.4%)                  | 2.7%<br>(0.78-5.2%)                 | 60<br>(17-120)      | 870<br>(270-1700)      |
| Bolivia  | 1995 | Male   | 80 to 84 | 53%<br>(34-69%)                | 47%<br>(31-66%)          | 0.84<br>(0.46-1.4)                          | 1.5%<br>(0.37-2.8%)                  | 1.7%<br>(0.34-3.3%)                 | 30<br>(5.7-56)      | 320<br>(75-600)        |



| Location | Year | Sex    | Age      | Prevalence of current drinkers | Prevalence of abstainers | Population average of standard drinks daily | Percent of total attributable deaths | Percent of total attributable DALYs | Attributable deaths | Attributable DALYs     |
|----------|------|--------|----------|--------------------------------|--------------------------|---------------------------------------------|--------------------------------------|-------------------------------------|---------------------|------------------------|
| Bolivia  | 1995 | Male   | 85 to 89 | 48%<br>(31-65%)                | 52%<br>(35-69%)          | 0.74<br>(0.4-1.3)                           | 0.97%<br>(0.025-2%)                  | 1%<br>(-0.067-2.2%)                 | 11<br>(-0.67-23)    | 87<br>(2.3-180)        |
| Bolivia  | 1995 | Male   | 90 to 94 | 49%<br>(33-66%)                | 51%<br>(34-67%)          | 0.73<br>(0.38-1.3)                          | 0.54%<br>(-0.31-1.5%)                | 0.48%<br>(-0.6-1.7%)                | 1.8<br>(-2.3-6.2)   | 12<br>(-7.1-35)        |
| Bolivia  | 1995 | Male   | 95 plus  | 52%<br>(31-71%)                | 48%<br>(29-69%)          | 0.75<br>(0.33-1.4)                          | 0.26%<br>(-0.85-1.5%)                | 0.051%<br>(-1.3-1.5%)               | 0.046<br>(-1.1-1.3) | 0.93<br>(-2.9-5.2)     |
| Bolivia  | 2000 | Female | All Ages | 42%<br>(38-47%)                | 58%<br>(53-62%)          | 0.62<br>(0.5-0.76)                          | 0.96%<br>(0.56-1.4%)                 | 1.3%<br>(0.51-2.3%)                 | 380<br>(140-660)    | 16000<br>(9200-25000)  |
| Bolivia  | 2000 | Female | 15 to 19 | 36%<br>(27-44%)                | 64%<br>(56-73%)          | 0.44<br>(0.25-0.69)                         | 1.2%<br>(0.5-2%)                     | 1.8%<br>(0.34-3.5%)                 | 7.2<br>(1.4-14)     | 780<br>(320-1300)      |
| Bolivia  | 2000 | Female | 20 to 24 | 56%<br>(46-64%)                | 44%<br>(36-54%)          | 0.93<br>(0.57-1.4)                          | 2.6%<br>(1.2-4.2%)                   | 3.7%<br>(1.1-6.7%)                  | 18<br>(5.2-33)      | 1700<br>(830-2800)     |
| Bolivia  | 2000 | Female | 25 to 29 | 63%<br>(53-70%)                | 37%<br>(30-47%)          | 1.2<br>(0.73-1.7)                           | 2.9%<br>(1.6-4.5%)                   | 4.5%<br>(1.8-7.6%)                  | 21<br>(8.4-36)      | 1800<br>(970-2800)     |
| Bolivia  | 2000 | Female | 30 to 34 | 65%<br>(56-72%)                | 35%<br>(28-44%)          | 1.3<br>(0.81-1.8)                           | 2.9%<br>(1.6-4.6%)                   | 4.7%<br>(2.1-8%)                    | 23<br>(10-39)       | 1600<br>(880-2600)     |
| Bolivia  | 2000 | Female | 35 to 39 | 65%<br>(55-71%)                | 35%<br>(29-45%)          | 1.2<br>(0.77-1.8)                           | 2.8%<br>(1.5-4.5%)                   | 4.6%<br>(2.3-7.5%)                  | 27<br>(13-44)       | 1600<br>(850-2400)     |
| Bolivia  | 2000 | Female | 40 to 44 | 65%<br>(55-71%)                | 35%<br>(29-45%)          | 1.2<br>(0.75-1.9)                           | 2.8%<br>(1.3-4.6%)                   | 4.7%<br>(2.2-7.7%)                  | 31<br>(15-51)       | 1500<br>(760-2500)     |
| Bolivia  | 2000 | Female | 45 to 49 | 64%<br>(54-71%)                | 36%<br>(29-46%)          | 1.3<br>(0.75-1.9)                           | 2.8%<br>(1.3-4.9%)                   | 4.6%<br>(2.1-7.9%)                  | 37<br>(17-65)       | 1600<br>(700-2700)     |
| Bolivia  | 2000 | Female | 50 to 54 | 62%<br>(51-71%)                | 38%<br>(29-49%)          | 1.2<br>(0.7-1.9)                            | 2.8%<br>(1.1-5.1%)                   | 4.5%<br>(2-7.8%)                    | 39<br>(17-67)       | 1400<br>(570-2500)     |
| Bolivia  | 2000 | Female | 55 to 59 | 59%<br>(42-75%)                | 41%<br>(25-58%)          | 1.2<br>(0.66-2)                             | 2.8%<br>(0.85-5.1%)                  | 4.2%<br>(1.4-7.6%)                  | 46<br>(16-84)       | 1500<br>(450-2700)     |
| Bolivia  | 2000 | Female | 60 to 64 | 56%<br>(39-74%)                | 44%<br>(26-61%)          | 1.2<br>(0.63-2)                             | 2.2%<br>(0.43-4.5%)                  | 3.2%<br>(0.83-6.3%)                 | 43<br>(11-87)       | 1100<br>(230-2400)     |
| Bolivia  | 2000 | Female | 65 to 69 | 52%<br>(35-69%)                | 48%<br>(31-65%)          | 1<br>(0.56-1.6)                             | 1.5%<br>(-0.033-3.4%)                | 2.2%<br>(0.16-4.5%)                 | 40<br>(3-85)        | 830<br>(-18-1900)      |
| Bolivia  | 2000 | Female | 70 to 74 | 47%<br>(31-64%)                | 53%<br>(36-69%)          | 0.82<br>(0.45-1.3)                          | 0.93%<br>(-0.51-2.5%)                | 1.3%<br>(-0.47-3.3%)                | 33<br>(-11-85)      | 540<br>(-300-1500)     |
| Bolivia  | 2000 | Female | 75 to 79 | 40%<br>(27-58%)                | 60%<br>(42-73%)          | 0.64<br>(0.32-1.1)                          | 0.42%<br>(-0.77-1.8%)                | 0.6%<br>(-0.87-2.3%)                | 16<br>(-22-59)      | 190<br>(-360-800)      |
| Bolivia  | 2000 | Female | 80 to 84 | 35%<br>(22-53%)                | 65%<br>(47-78%)          | 0.53<br>(0.28-0.9)                          | 0.13%<br>(-0.89-1.1%)                | 0.18%<br>(-1.1-1.4%)                | 4.4<br>(-25-34)     | 40<br>(-270-330)       |
| Bolivia  | 2000 | Female | 85 to 89 | 33%<br>(21-47%)                | 67%<br>(53-79%)          | 0.48<br>(0.26-0.83)                         | -0.12%<br>(-1-0.75%)                 | -0.15%<br>(-1.3-0.89%)              | -2.5<br>(-21-15)    | -17<br>(-150-110)      |
| Bolivia  | 2000 | Female | 90 to 94 | 34%<br>(22-49%)                | 66%<br>(51-78%)          | 0.48<br>(0.24-0.85)                         | -0.4%<br>(-1.4-0.46%)                | -0.53%<br>(-1.7-0.51%)              | -3.7<br>(-12-3.6)   | -17<br>(-58-20)        |
| Bolivia  | 2000 | Female | 95 plus  | 37%<br>(22-56%)                | 63%<br>(44-78%)          | 0.5<br>(0.22-0.97)                          | -0.56%<br>(-1.7-0.41%)               | -0.78%<br>(-2.2-0.39%)              | -1.4<br>(-4.1-0.72) | -4.1<br>(-13-3.2)      |
| Bolivia  | 2000 | Male   | All Ages | 47%<br>(42-52%)                | 53%<br>(48-58%)          | 1.1<br>(0.87-1.3)                           | 3%<br>(2.3-3.8%)                     | 4%<br>(2.8-5.4%)                    | 1300<br>(870-1700)  | 57000<br>(43000-71000) |

| Location | Year | Sex    | Age      | Prevalence of current drinkers | Prevalence of abstainers | Population average of standard drinks daily | Percent of total attributable deaths | Percent of total attributable DALYs | Attributable deaths | Attributable DALYs    |
|----------|------|--------|----------|--------------------------------|--------------------------|---------------------------------------------|--------------------------------------|-------------------------------------|---------------------|-----------------------|
| Bolivia  | 2000 | Male   | 15 to 19 | 37%<br>(28-47%)                | 63%<br>(53-72%)          | 0.54<br>(0.3-0.87)                          | 3%<br>(1.9-4.3%)                     | 3.6%<br>(1.9-5.9%)                  | 20<br>(9.9-32)      | 2100<br>(1300-3100)   |
| Bolivia  | 2000 | Male   | 20 to 24 | 72%<br>(62-79%)                | 28%<br>(21-38%)          | 1.5<br>(0.96-2.2)                           | 7.8%<br>(5.3-10%)                    | 9.3%<br>(5.5-14%)                   | 66<br>(39-99)       | 6100<br>(4000-8200)   |
| Bolivia  | 2000 | Male   | 25 to 29 | 80%<br>(72-85%)                | 20%<br>(15-28%)          | 2<br>(1.3-2.9)                              | 9.3%<br>(6.4-12%)                    | 12%<br>(7.1-16%)                    | 80<br>(49-110)      | 6500<br>(4400-8600)   |
| Bolivia  | 2000 | Male   | 30 to 34 | 81%<br>(74-86%)                | 19%<br>(14-26%)          | 2.3<br>(1.5-3.3)                            | 9.5%<br>(6.6-13%)                    | 12%<br>(7.9-17%)                    | 86<br>(53-120)      | 6000<br>(4100-8100)   |
| Bolivia  | 2000 | Male   | 35 to 39 | 78%<br>(70-83%)                | 22%<br>(17-30%)          | 2.3<br>(1.4-3.4)                            | 9.6%<br>(6.4-13%)                    | 13%<br>(7.9-18%)                    | 95<br>(58-140)      | 5800<br>(3800-8000)   |
| Bolivia  | 2000 | Male   | 40 to 44 | 77%<br>(70-82%)                | 23%<br>(18-30%)          | 2.4<br>(1.5-3.6)                            | 9.5%<br>(6.4-13%)                    | 13%<br>(8.3-18%)                    | 110<br>(69-150)     | 5600<br>(3800-7800)   |
| Bolivia  | 2000 | Male   | 45 to 49 | 78%<br>(69-84%)                | 22%<br>(16-31%)          | 2.4<br>(1.4-3.7)                            | 9.3%<br>(6-13%)                      | 12%<br>(7.8-18%)                    | 120<br>(76-170)     | 5700<br>(3700-7900)   |
| Bolivia  | 2000 | Male   | 50 to 54 | 76%<br>(68-81%)                | 24%<br>(19-32%)          | 2.4<br>(1.4-3.5)                            | 8.7%<br>(5.5-13%)                    | 11%<br>(7.2-17%)                    | 120<br>(76-180)     | 4800<br>(3100-7000)   |
| Bolivia  | 2000 | Male   | 55 to 59 | 70%<br>(60-77%)                | 30%<br>(23-40%)          | 2.3<br>(1.3-3.5)                            | 7.7%<br>(4.9-11%)                    | 10%<br>(6.1-15%)                    | 130<br>(80-200)     | 4500<br>(2800-6600)   |
| Bolivia  | 2000 | Male   | 60 to 64 | 69%<br>(58-77%)                | 31%<br>(23-42%)          | 2.1<br>(1.2-3.4)                            | 6.4%<br>(3.5-10%)                    | 7.9%<br>(4.3-13%)                   | 120<br>(66-200)     | 3600<br>(1900-5800)   |
| Bolivia  | 2000 | Male   | 65 to 69 | 73%<br>(60-82%)                | 27%<br>(18-40%)          | 1.9<br>(1.1-2.9)                            | 4.8%<br>(2.5-7.8%)                   | 5.8%<br>(2.9-9.5%)                  | 120<br>(57-190)     | 2700<br>(1400-4400)   |
| Bolivia  | 2000 | Male   | 70 to 74 | 70%<br>(55-82%)                | 30%<br>(18-45%)          | 1.5<br>(0.87-2.3)                           | 3.2%<br>(1.4-5.4%)                   | 3.9%<br>(1.6-6.5%)                  | 98<br>(40-170)      | 1900<br>(810-3100)    |
| Bolivia  | 2000 | Male   | 75 to 79 | 60%<br>(42-77%)                | 40%<br>(23-58%)          | 1<br>(0.54-1.7)                             | 2.1%<br>(0.65-3.9%)                  | 2.4%<br>(0.73-4.6%)                 | 61<br>(18-120)      | 900<br>(270-1700)     |
| Bolivia  | 2000 | Male   | 80 to 84 | 52%<br>(33-69%)                | 48%<br>(31-67%)          | 0.8<br>(0.43-1.3)                           | 1.4%<br>(0.4-2.6%)                   | 1.6%<br>(0.4-3%)                    | 34<br>(8.5-64)      | 370<br>(100-670)      |
| Bolivia  | 2000 | Male   | 85 to 89 | 47%<br>(31-63%)                | 53%<br>(37-69%)          | 0.7<br>(0.37-1.2)                           | 0.9%<br>(0.049-1.8%)                 | 0.97%<br>(-0.078-2%)                | 13<br>(-1-28)       | 110<br>(5.8-210)      |
| Bolivia  | 2000 | Male   | 90 to 94 | 48%<br>(31-65%)                | 52%<br>(35-69%)          | 0.69<br>(0.34-1.2)                          | 0.51%<br>(-0.3-1.4%)                 | 0.46%<br>(-0.53-1.5%)               | 2.5<br>(-2.9-8.3)   | 17<br>(-9.7-46)       |
| Bolivia  | 2000 | Male   | 95 plus  | 51%<br>(30-70%)                | 49%<br>(30-70%)          | 0.71<br>(0.3-1.3)                           | 0.26%<br>(-0.65-1.3%)                | 0.073%<br>(-1.1-1.3%)               | 0.091<br>(-1.4-1.6) | 1.3<br>(-3.3-6.7)     |
| Bolivia  | 2005 | Female | All Ages | 40%<br>(37-44%)                | 60%<br>(56-63%)          | 0.6<br>(0.49-0.73)                          | 0.96%<br>(0.57-1.4%)                 | 1.3%<br>(0.49-2.2%)                 | 370<br>(140-620)    | 15000<br>(9100-22000) |
| Bolivia  | 2005 | Female | 15 to 19 | 27%<br>(22-35%)                | 73%<br>(65-78%)          | 0.32<br>(0.19-0.51)                         | 0.98%<br>(0.53-1.5%)                 | 1.4%<br>(0.38-2.6%)                 | 4.8<br>(1.3-9.3)    | 630<br>(320-990)      |
| Bolivia  | 2005 | Female | 20 to 24 | 52%<br>(46-58%)                | 48%<br>(42-54%)          | 0.84<br>(0.52-1.3)                          | 2.2%<br>(1.2-3.5%)                   | 3.1%<br>(1-5.5%)                    | 13<br>(4.4-24)      | 1500<br>(820-2300)    |
| Bolivia  | 2005 | Female | 25 to 29 | 62%<br>(56-67%)                | 38%<br>(33-44%)          | 1.1<br>(0.74-1.6)                           | 2.5%<br>(1.5-3.8%)                   | 3.9%<br>(1.7-6.4%)                  | 17<br>(7.6-30)      | 1600<br>(930-2400)    |
| Bolivia  | 2005 | Female | 30 to 34 | 64%<br>(58-69%)                | 36%<br>(31-42%)          | 1.2<br>(0.8-1.7)                            | 2.5%<br>(1.4-3.8%)                   | 4.1%<br>(2-6.6%)                    | 19<br>(9.1-31)      | 1400<br>(830-2200)    |

| Location | Year | Sex    | Age      | Prevalence of current drinkers | Prevalence of abstainers | Population average of standard drinks daily | Percent of total attributable deaths | Percent of total attributable DALYs | Attributable deaths | Attributable DALYs     |
|----------|------|--------|----------|--------------------------------|--------------------------|---------------------------------------------|--------------------------------------|-------------------------------------|---------------------|------------------------|
| Bolivia  | 2005 | Female | 35 to 39 | 64%<br>(58-69%)                | 36%<br>(31-42%)          | 1.2<br>(0.75-1.7)                           | 2.4%<br>(1.3-3.8%)                   | 4.2%<br>(2.1-6.7%)                  | 23<br>(12-38)       | 1400<br>(750-2200)     |
| Bolivia  | 2005 | Female | 40 to 44 | 63%<br>(58-68%)                | 37%<br>(32-42%)          | 1.2<br>(0.75-1.7)                           | 2.4%<br>(1.2-4%)                     | 4.3%<br>(2.2-7%)                    | 28<br>(14-46)       | 1400<br>(700-2300)     |
| Bolivia  | 2005 | Female | 45 to 49 | 63%<br>(57-68%)                | 37%<br>(32-43%)          | 1.2<br>(0.76-1.8)                           | 2.5%<br>(1.1-4.4%)                   | 4.3%<br>(2.1-7.2%)                  | 34<br>(16-57)       | 1400<br>(650-2500)     |
| Bolivia  | 2005 | Female | 50 to 54 | 60%<br>(50-69%)                | 40%<br>(31-50%)          | 1.2<br>(0.69-1.8)                           | 2.6%<br>(1.1-4.5%)                   | 4.3%<br>(2-7.2%)                    | 42<br>(20-71)       | 1500<br>(670-2700)     |
| Bolivia  | 2005 | Female | 55 to 59 | 59%<br>(41-75%)                | 41%<br>(25-59%)          | 1.2<br>(0.66-2)                             | 2.6%<br>(0.91-4.6%)                  | 4.1%<br>(1.6-7.1%)                  | 44<br>(18-77)       | 1400<br>(470-2500)     |
| Bolivia  | 2005 | Female | 60 to 64 | 56%<br>(38-74%)                | 44%<br>(26-62%)          | 1.1<br>(0.61-1.9)                           | 2.1%<br>(0.46-4.2%)                  | 3.1%<br>(0.92-6%)                   | 46<br>(14-90)       | 1200<br>(260-2500)     |
| Bolivia  | 2005 | Female | 65 to 69 | 52%<br>(35-69%)                | 48%<br>(31-65%)          | 1<br>(0.55-1.6)                             | 1.5%<br>(0.033-3.1%)                 | 2.2%<br>(0.27-4.3%)                 | 39<br>(4.7-77)      | 820<br>(17-1700)       |
| Bolivia  | 2005 | Female | 70 to 74 | 46%<br>(31-63%)                | 54%<br>(37-69%)          | 0.8<br>(0.44-1.3)                           | 0.95%<br>(-0.37-2.4%)                | 1.4%<br>(-0.27-3.2%)                | 34<br>(-6.7-79)     | 550<br>(-210-1400)     |
| Bolivia  | 2005 | Female | 75 to 79 | 39%<br>(26-56%)                | 61%<br>(44-74%)          | 0.62<br>(0.31-1.1)                          | 0.48%<br>(-0.69-1.7%)                | 0.7%<br>(-0.77-2.2%)                | 21<br>(-22-63)      | 250<br>(-340-880)      |
| Bolivia  | 2005 | Female | 80 to 84 | 34%<br>(20-51%)                | 66%<br>(49-80%)          | 0.51<br>(0.26-0.87)                         | 0.2%<br>(-0.8-1.1%)                  | 0.29%<br>(-0.95-1.4%)               | 8.6<br>(-29-42)     | 78<br>(-310-430)       |
| Bolivia  | 2005 | Female | 85 to 89 | 32%<br>(20-46%)                | 68%<br>(54-80%)          | 0.46<br>(0.24-0.77)                         | -0.058%<br>(-0.96-0.7%)              | -0.076%<br>(-1.2-0.84%)             | -1.6<br>(-26-19)    | -11<br>(-190-140)      |
| Bolivia  | 2005 | Female | 90 to 94 | 33%<br>(21-48%)                | 67%<br>(52-79%)          | 0.46<br>(0.23-0.8)                          | -0.33%<br>(-1.2-0.48%)               | -0.45%<br>(-1.5-0.54%)              | -4.5<br>(-16-5.5)   | -20<br>(-74-29)        |
| Bolivia  | 2005 | Female | 95 plus  | 36%<br>(21-55%)                | 64%<br>(45-79%)          | 0.48<br>(0.2-0.93)                          | -0.51%<br>(-1.6-0.45%)               | -0.72%<br>(-2-0.46%)                | -2.1<br>(-5.9-1.3)  | -5.9<br>(-18-5.1)      |
| Bolivia  | 2005 | Male   | All Ages | 51%<br>(47-54%)                | 49%<br>(46-53%)          | 1.2<br>(0.96-1.4)                           | 3.1%<br>(2.4-3.9%)                   | 3.9%<br>(2.7-5.2%)                  | 1200<br>(850-1600)  | 55000<br>(42000-70000) |
| Bolivia  | 2005 | Male   | 15 to 19 | 36%<br>(32-42%)                | 64%<br>(58-68%)          | 0.51<br>(0.3-0.78)                          | 2.8%<br>(1.8-4%)                     | 3.4%<br>(1.8-5.5%)                  | 17<br>(8.7-27)      | 1900<br>(1200-2800)    |
| Bolivia  | 2005 | Male   | 20 to 24 | 75%<br>(71-79%)                | 25%<br>(21-29%)          | 1.6<br>(1-2.3)                              | 7.7%<br>(5.1-10%)                    | 9.4%<br>(5.7-13%)                   | 62<br>(37-91)       | 5900<br>(3900-8100)    |
| Bolivia  | 2005 | Male   | 25 to 29 | 83%<br>(80-86%)                | 17%<br>(14-20%)          | 2.2<br>(1.4-3.1)                            | 9%<br>(6.3-12%)                      | 12%<br>(6.8-16%)                    | 77<br>(46-110)      | 6500<br>(4300-8800)    |
| Bolivia  | 2005 | Male   | 30 to 34 | 84%<br>(81-86%)                | 16%<br>(14-19%)          | 2.4<br>(1.6-3.4)                            | 8.9%<br>(6.3-12%)                    | 12%<br>(7.7-16%)                    | 80<br>(49-110)      | 5800<br>(4000-7800)    |
| Bolivia  | 2005 | Male   | 35 to 39 | 81%<br>(77-84%)                | 19%<br>(16-23%)          | 2.4<br>(1.6-3.6)                            | 8.9%<br>(6.1-12%)                    | 12%<br>(7.7-17%)                    | 87<br>(53-130)      | 5500<br>(3600-7500)    |
| Bolivia  | 2005 | Male   | 40 to 44 | 80%<br>(76-83%)                | 20%<br>(17-24%)          | 2.5<br>(1.6-3.7)                            | 8.8%<br>(6.1-13%)                    | 12%<br>(8-18%)                      | 96<br>(61-140)      | 5200<br>(3600-7300)    |
| Bolivia  | 2005 | Male   | 45 to 49 | 81%<br>(78-84%)                | 19%<br>(16-22%)          | 2.6<br>(1.6-3.9)                            | 8.8%<br>(5.9-12%)                    | 12%<br>(7.8-17%)                    | 110<br>(70-160)     | 5200<br>(3500-7400)    |
| Bolivia  | 2005 | Male   | 50 to 54 | 79%<br>(75-82%)                | 21%<br>(18-25%)          | 2.5<br>(1.5-3.8)                            | 8.1%<br>(5.2-12%)                    | 11%<br>(6.8-16%)                    | 120<br>(76-190)     | 5000<br>(3200-7300)    |

| Location | Year | Sex    | Age      | Prevalence of current drinkers | Prevalence of abstainers | Population average of standard drinks daily | Percent of total attributable deaths | Percent of total attributable DALYs | Attributable deaths | Attributable DALYs    |
|----------|------|--------|----------|--------------------------------|--------------------------|---------------------------------------------|--------------------------------------|-------------------------------------|---------------------|-----------------------|
| Bolivia  | 2005 | Male   | 55 to 59 | 72%<br>(67-76%)                | 28%<br>(24-33%)          | 2.4<br>(1.4-3.5)                            | 7.3%<br>(4.5-11%)                    | 9.6%<br>(5.7-14%)                   | 120<br>(72-180)     | 4200<br>(2500-6300)   |
| Bolivia  | 2005 | Male   | 60 to 64 | 72%<br>(66-76%)                | 28%<br>(24-34%)          | 2.2<br>(1.3-3.4)                            | 6%<br>(3.3-9.4%)                     | 7.6%<br>(4.1-12%)                   | 130<br>(67-210)     | 3800<br>(2000-6100)   |
| Bolivia  | 2005 | Male   | 65 to 69 | 74%<br>(62-83%)                | 26%<br>(17-38%)          | 1.9<br>(1.2-2.9)                            | 4.4%<br>(2.3-7%)                     | 5.4%<br>(2.8-8.7%)                  | 110<br>(54-170)     | 2600<br>(1300-4100)   |
| Bolivia  | 2005 | Male   | 70 to 74 | 69%<br>(54-82%)                | 31%<br>(18-46%)          | 1.4<br>(0.82-2.2)                           | 2.9%<br>(1.2-4.9%)                   | 3.5%<br>(1.4-6%)                    | 88<br>(35-150)      | 1700<br>(700-2900)    |
| Bolivia  | 2005 | Male   | 75 to 79 | 59%<br>(41-77%)                | 41%<br>(23-59%)          | 1<br>(0.53-1.7)                             | 1.9%<br>(0.66-3.5%)                  | 2.3%<br>(0.74-4.2%)                 | 64<br>(20-120)      | 940<br>(320-1700)     |
| Bolivia  | 2005 | Male   | 80 to 84 | 51%<br>(32-68%)                | 49%<br>(32-68%)          | 0.77<br>(0.41-1.3)                          | 1.3%<br>(0.41-2.4%)                  | 1.5%<br>(0.39-2.9%)                 | 40<br>(10-75)       | 440<br>(130-800)      |
| Bolivia  | 2005 | Male   | 85 to 89 | 47%<br>(31-63%)                | 53%<br>(37-69%)          | 0.68<br>(0.37-1.2)                          | 0.86%<br>(0.052-1.7%)                | 0.94%<br>(-0.066-1.9%)              | 16<br>(-1.1-33)     | 130<br>(8.1-260)      |
| Bolivia  | 2005 | Male   | 90 to 94 | 47%<br>(31-64%)                | 53%<br>(36-69%)          | 0.67<br>(0.34-1.2)                          | 0.5%<br>(-0.27-1.3%)                 | 0.45%<br>(-0.51-1.4%)               | 3.3<br>(-3.7-10)    | 23<br>(-12-58)        |
| Bolivia  | 2005 | Male   | 95 plus  | 49%<br>(28-69%)                | 51%<br>(31-72%)          | 0.69<br>(0.29-1.3)                          | 0.28%<br>(-0.58-1.3%)                | 0.095%<br>(-1-1.3%)                 | 0.18<br>(-1.9-2.4)  | 2.1<br>(-4.5-9.7)     |
| Bolivia  | 2010 | Female | All Ages | 41%<br>(38-45%)                | 59%<br>(55-62%)          | 0.65<br>(0.53-0.79)                         | 1.1%<br>(0.65-1.7%)                  | 1.4%<br>(0.52-2.4%)                 | 430<br>(160-770)    | 17000<br>(9900-26000) |
| Bolivia  | 2010 | Female | 15 to 19 | 27%<br>(22-37%)                | 73%<br>(63-78%)          | 0.34<br>(0.19-0.54)                         | 0.99%<br>(0.55-1.5%)                 | 1.4%<br>(0.46-2.7%)                 | 4.8<br>(1.6-9.4)    | 640<br>(360-1000)     |
| Bolivia  | 2010 | Female | 20 to 24 | 52%<br>(47-59%)                | 48%<br>(41-53%)          | 0.87<br>(0.54-1.3)                          | 2.2%<br>(1.3-3.4%)                   | 3.2%<br>(1.2-5.5%)                  | 13<br>(4.3-23)      | 1500<br>(830-2300)    |
| Bolivia  | 2010 | Female | 25 to 29 | 62%<br>(56-67%)                | 38%<br>(33-44%)          | 1.2<br>(0.77-1.7)                           | 2.5%<br>(1.5-3.7%)                   | 3.9%<br>(1.9-6.5%)                  | 17<br>(7.5-29)      | 1600<br>(940-2500)    |
| Bolivia  | 2010 | Female | 30 to 34 | 63%<br>(58-69%)                | 37%<br>(31-42%)          | 1.2<br>(0.82-1.8)                           | 2.4%<br>(1.5-3.6%)                   | 4%<br>(2.1-6.5%)                    | 19<br>(9.9-32)      | 1500<br>(890-2300)    |
| Bolivia  | 2010 | Female | 35 to 39 | 63%<br>(58-69%)                | 37%<br>(31-42%)          | 1.2<br>(0.76-1.8)                           | 2.4%<br>(1.3-3.7%)                   | 4.2%<br>(2.1-6.7%)                  | 24<br>(12-40)       | 1500<br>(820-2400)    |
| Bolivia  | 2010 | Female | 40 to 44 | 63%<br>(57-68%)                | 37%<br>(32-43%)          | 1.2<br>(0.77-1.8)                           | 2.5%<br>(1.2-4%)                     | 4.5%<br>(2.2-7.2%)                  | 30<br>(15-50)       | 1500<br>(760-2500)    |
| Bolivia  | 2010 | Female | 45 to 49 | 62%<br>(56-68%)                | 38%<br>(32-44%)          | 1.3<br>(0.79-1.9)                           | 2.6%<br>(1.2-4.4%)                   | 4.5%<br>(2.3-7.5%)                  | 38<br>(19-66)       | 1600<br>(760-2800)    |
| Bolivia  | 2010 | Female | 50 to 54 | 60%<br>(50-69%)                | 40%<br>(31-50%)          | 1.2<br>(0.73-1.9)                           | 2.7%<br>(1.1-4.6%)                   | 4.5%<br>(2.1-7.5%)                  | 47<br>(22-83)       | 1700<br>(740-3100)    |
| Bolivia  | 2010 | Female | 55 to 59 | 59%<br>(41-75%)                | 41%<br>(25-59%)          | 1.3<br>(0.7-2)                              | 2.7%<br>(1-4.8%)                     | 4.3%<br>(1.9-7.3%)                  | 58<br>(26-100)      | 1800<br>(710-3300)    |
| Bolivia  | 2010 | Female | 60 to 64 | 56%<br>(38-74%)                | 44%<br>(26-62%)          | 1.2<br>(0.65-2.1)                           | 2.2%<br>(0.47-4.4%)                  | 3.3%<br>(0.99-6.4%)                 | 52<br>(15-100)      | 1400<br>(290-2800)    |
| Bolivia  | 2010 | Female | 65 to 69 | 52%<br>(35-69%)                | 48%<br>(31-65%)          | 1<br>(0.59-1.6)                             | 1.6%<br>(0.076-3.2%)                 | 2.4%<br>(0.35-4.5%)                 | 51<br>(7.4-100)     | 1100<br>(53-2300)     |
| Bolivia  | 2010 | Female | 70 to 74 | 46%<br>(31-63%)                | 54%<br>(37-69%)          | 0.84<br>(0.45-1.4)                          | 1.1%<br>(-0.32-2.6%)                 | 1.6%<br>(-0.23-3.6%)                | 42<br>(-6-96)       | 690<br>(-200-1700)    |

| Location | Year | Sex    | Age      | Prevalence of current drinkers | Prevalence of abstainers | Population average of standard drinks daily | Percent of total attributable deaths | Percent of total attributable DALYs | Attributable deaths | Attributable DALYs     |
|----------|------|--------|----------|--------------------------------|--------------------------|---------------------------------------------|--------------------------------------|-------------------------------------|---------------------|------------------------|
| Bolivia  | 2010 | Female | 75 to 79 | 39%<br>(26-56%)                | 61%<br>(44-74%)          | 0.65<br>(0.32-1.1)                          | 0.61%<br>(-0.6-1.8%)                 | 0.86%<br>(-0.64-2.4%)               | 28<br>(-20-78)      | 360<br>(-360-1100)     |
| Bolivia  | 2010 | Female | 80 to 84 | 34%<br>(21-52%)                | 66%<br>(48-79%)          | 0.53<br>(0.28-0.9)                          | 0.3%<br>(-0.67-1.2%)                 | 0.4%<br>(-0.77-1.6%)                | 16<br>(-30-60)      | 150<br>(-330-610)      |
| Bolivia  | 2010 | Female | 85 to 89 | 32%<br>(20-46%)                | 68%<br>(54-80%)          | 0.48<br>(0.25-0.79)                         | 0.0051%<br>(-0.87-0.79%)             | -0.0038%<br>(-1-0.93%)              | -0.14<br>(-34-29)   | 1.5<br>(-240-220)      |
| Bolivia  | 2010 | Female | 90 to 94 | 33%<br>(21-48%)                | 67%<br>(52-79%)          | 0.48<br>(0.24-0.83)                         | -0.29%<br>(-1.2-0.52%)               | -0.4%<br>(-1.5-0.61%)               | -5.8<br>(-23-9)     | -26<br>(-110-48)       |
| Bolivia  | 2010 | Female | 95 plus  | 36%<br>(21-54%)                | 64%<br>(46-79%)          | 0.49<br>(0.21-0.91)                         | -0.47%<br>(-1.6-0.53%)               | -0.67%<br>(-2-0.53%)                | -3<br>(-9.1-2.3)    | -8.4<br>(-28-9.1)      |
| Bolivia  | 2010 | Male   | All Ages | 52%<br>(48-55%)                | 48%<br>(45-52%)          | 1.3<br>(1.1-1.6)                            | 3.5%<br>(2.7-4.5%)                   | 4.2%<br>(2.9-5.7%)                  | 1400<br>(870-1900)  | 60000<br>(43000-78000) |
| Bolivia  | 2010 | Male   | 15 to 19 | 36%<br>(31-40%)                | 64%<br>(60-69%)          | 0.54<br>(0.32-0.81)                         | 2.8%<br>(1.8-3.9%)                   | 3.5%<br>(1.8-5.7%)                  | 17<br>(8.5-28)      | 2000<br>(1300-2900)    |
| Bolivia  | 2010 | Male   | 20 to 24 | 75%<br>(72-78%)                | 25%<br>(22-28%)          | 1.7<br>(1.1-2.4)                            | 7.7%<br>(5.3-10%)                    | 9.6%<br>(5.7-14%)                   | 62<br>(34-94)       | 6000<br>(4000-8400)    |
| Bolivia  | 2010 | Male   | 25 to 29 | 83%<br>(80-85%)                | 17%<br>(15-20%)          | 2.3<br>(1.5-3.3)                            | 8.9%<br>(6.1-12%)                    | 12%<br>(6.8-17%)                    | 79<br>(43-120)      | 6800<br>(4300-9500)    |
| Bolivia  | 2010 | Male   | 30 to 34 | 84%<br>(81-86%)                | 16%<br>(14-19%)          | 2.6<br>(1.7-3.6)                            | 8.8%<br>(6.1-12%)                    | 12%<br>(7.3-17%)                    | 85<br>(49-130)      | 6300<br>(4200-8800)    |
| Bolivia  | 2010 | Male   | 35 to 39 | 81%<br>(77-83%)                | 19%<br>(17-23%)          | 2.6<br>(1.7-3.8)                            | 8.9%<br>(6-12%)                      | 13%<br>(7.9-18%)                    | 94<br>(56-140)      | 6000<br>(3800-8400)    |
| Bolivia  | 2010 | Male   | 40 to 44 | 79%<br>(76-82%)                | 21%<br>(18-24%)          | 2.6<br>(1.7-3.8)                            | 8.9%<br>(6.2-12%)                    | 13%<br>(8.3-18%)                    | 100<br>(62-150)     | 5700<br>(3600-8000)    |
| Bolivia  | 2010 | Male   | 45 to 49 | 81%<br>(78-84%)                | 19%<br>(16-22%)          | 2.8<br>(1.8-4.2)                            | 8.8%<br>(6-13%)                      | 12%<br>(8.3-18%)                    | 120<br>(74-190)     | 5600<br>(3700-8500)    |
| Bolivia  | 2010 | Male   | 50 to 54 | 78%<br>(75-81%)                | 22%<br>(19-25%)          | 2.7<br>(1.7-4)                              | 8.2%<br>(5.4-12%)                    | 11%<br>(7.1-16%)                    | 130<br>(78-210)     | 5400<br>(3300-8300)    |
| Bolivia  | 2010 | Male   | 55 to 59 | 72%<br>(67-76%)                | 28%<br>(24-33%)          | 2.5<br>(1.6-3.7)                            | 7.4%<br>(4.7-11%)                    | 9.9%<br>(6.1-14%)                   | 150<br>(82-220)     | 5100<br>(3000-7800)    |
| Bolivia  | 2010 | Male   | 60 to 64 | 71%<br>(66-76%)                | 29%<br>(24-34%)          | 2.4<br>(1.4-3.6)                            | 6.2%<br>(3.5-9.8%)                   | 7.9%<br>(4.3-13%)                   | 140<br>(71-230)     | 4100<br>(2100-6600)    |
| Bolivia  | 2010 | Male   | 65 to 69 | 74%<br>(62-83%)                | 26%<br>(17-38%)          | 2.1<br>(1.3-3.1)                            | 4.6%<br>(2.4-7.3%)                   | 5.7%<br>(3-9.1%)                    | 130<br>(66-210)     | 3100<br>(1600-5200)    |
| Bolivia  | 2010 | Male   | 70 to 74 | 69%<br>(53-82%)                | 31%<br>(18-47%)          | 1.5<br>(0.88-2.4)                           | 3.1%<br>(1.3-5.1%)                   | 3.7%<br>(1.5-6.3%)                  | 98<br>(39-170)      | 1900<br>(800-3200)     |
| Bolivia  | 2010 | Male   | 75 to 79 | 59%<br>(40-77%)                | 41%<br>(23-60%)          | 1.1<br>(0.56-1.8)                           | 2%<br>(0.77-3.7%)                    | 2.4%<br>(0.87-4.4%)                 | 72<br>(26-130)      | 1100<br>(400-2000)     |
| Bolivia  | 2010 | Male   | 80 to 84 | 51%<br>(33-68%)                | 49%<br>(32-67%)          | 0.83<br>(0.45-1.4)                          | 1.4%<br>(0.46-2.4%)                  | 1.6%<br>(0.43-2.9%)                 | 52<br>(14-93)       | 580<br>(180-1000)      |
| Bolivia  | 2010 | Male   | 85 to 89 | 47%<br>(30-63%)                | 53%<br>(37-70%)          | 0.72<br>(0.39-1.2)                          | 0.94%<br>(0.12-1.8%)                 | 1%<br>(0.027-2.1%)                  | 24<br>(0.57-48)     | 200<br>(25-370)        |
| Bolivia  | 2010 | Male   | 90 to 94 | 47%<br>(30-64%)                | 53%<br>(36-70%)          | 0.7<br>(0.36-1.2)                           | 0.56%<br>(-0.26-1.4%)                | 0.52%<br>(-0.5-1.5%)                | 5.4<br>(-5-16)      | 36<br>(-17-92)         |

| Location | Year | Sex    | Age      | Prevalence of current drinkers | Prevalence of abstainers | Population average of standard drinks daily | Percent of total attributable deaths | Percent of total attributable DALYs | Attributable deaths | Attributable DALYs      |
|----------|------|--------|----------|--------------------------------|--------------------------|---------------------------------------------|--------------------------------------|-------------------------------------|---------------------|-------------------------|
| Bolivia  | 2010 | Male   | 95 plus  | 49%<br>(28-69%)                | 51%<br>(31-72%)          | 0.71<br>(0.29-1.3)                          | 0.33%<br>(-0.58-1.4%)                | 0.15%<br>(-0.96-1.4%)               | 0.42<br>(-2.6-3.9)  | 3.8<br>(-6.2-15)        |
| Bolivia  | 2016 | Female | All Ages | 44%<br>(40-48%)                | 56%<br>(52-60%)          | 0.8<br>(0.58-1.1)                           | 1.4%<br>(0.79-2.3%)                  | 1.7%<br>(0.62-3%)                   | 590<br>(200-1100)   | 22000<br>(12000-36000)  |
| Bolivia  | 2016 | Female | 15 to 19 | 35%<br>(25-44%)                | 65%<br>(56-75%)          | 0.5<br>(0.26-0.81)                          | 1.2%<br>(0.66-1.9%)                  | 2%<br>(0.71-3.8%)                   | 6.2<br>(2.1-12)     | 780<br>(400-1300)       |
| Bolivia  | 2016 | Female | 20 to 24 | 55%<br>(45-63%)                | 45%<br>(37-55%)          | 1.1<br>(0.61-1.7)                           | 2.5%<br>(1.5-3.7%)                   | 3.9%<br>(1.5-6.8%)                  | 14<br>(5.2-26)      | 1600<br>(930-2500)      |
| Bolivia  | 2016 | Female | 25 to 29 | 62%<br>(52-69%)                | 38%<br>(31-48%)          | 1.4<br>(0.81-2.1)                           | 2.7%<br>(1.7-4.1%)                   | 4.6%<br>(2-7.7%)                    | 18<br>(7.6-32)      | 1800<br>(1000-2800)     |
| Bolivia  | 2016 | Female | 30 to 34 | 65%<br>(54-71%)                | 35%<br>(29-46%)          | 1.5<br>(0.87-2.3)                           | 2.6%<br>(1.5-4.1%)                   | 4.8%<br>(2.4-7.9%)                  | 22<br>(10-40)       | 1800<br>(960-2900)      |
| Bolivia  | 2016 | Female | 35 to 39 | 65%<br>(55-71%)                | 35%<br>(29-45%)          | 1.4<br>(0.83-2.3)                           | 2.6%<br>(1.4-4.3%)                   | 5%<br>(2.6-8.1%)                    | 29<br>(13-53)       | 1900<br>(910-3100)      |
| Bolivia  | 2016 | Female | 40 to 44 | 64%<br>(54-71%)                | 36%<br>(29-46%)          | 1.5<br>(0.83-2.3)                           | 2.8%<br>(1.3-4.6%)                   | 5.3%<br>(2.8-8.7%)                  | 38<br>(17-67)       | 2000<br>(860-3400)      |
| Bolivia  | 2016 | Female | 45 to 49 | 63%<br>(52-70%)                | 37%<br>(30-48%)          | 1.5<br>(0.82-2.4)                           | 2.9%<br>(1.3-5.2%)                   | 5.3%<br>(2.7-9%)                    | 48<br>(22-88)       | 2100<br>(910-3800)      |
| Bolivia  | 2016 | Female | 50 to 54 | 61%<br>(50-70%)                | 39%<br>(30-50%)          | 1.4<br>(0.79-2.3)                           | 3.1%<br>(1.3-5.5%)                   | 5.2%<br>(2.4-8.7%)                  | 61<br>(27-110)      | 2200<br>(900-4100)      |
| Bolivia  | 2016 | Female | 55 to 59 | 58%<br>(41-74%)                | 42%<br>(26-59%)          | 1.4<br>(0.75-2.3)                           | 3.2%<br>(1.3-5.6%)                   | 5%<br>(2.3-8.6%)                    | 74<br>(32-140)      | 2300<br>(920-4500)      |
| Bolivia  | 2016 | Female | 60 to 64 | 55%<br>(38-74%)                | 45%<br>(26-62%)          | 1.3<br>(0.71-2.4)                           | 2.6%<br>(0.71-5.3%)                  | 3.9%<br>(1.3-7.5%)                  | 78<br>(25-160)      | 2100<br>(540-4500)      |
| Bolivia  | 2016 | Female | 65 to 69 | 51%<br>(35-69%)                | 49%<br>(31-65%)          | 1.2<br>(0.64-2)                             | 2.9%<br>(0.31-4.1%)                  | 2.9%<br>(0.72-5.6%)                 | 68<br>(15-140)      | 1500<br>(220-3200)      |
| Bolivia  | 2016 | Female | 70 to 74 | 46%<br>(31-63%)                | 54%<br>(37-69%)          | 0.94<br>(0.48-1.6)                          | 1.4%<br>(-0.099-3.3%)                | 2%<br>(0.074-4.4%)                  | 61<br>(2.2-140)     | 1000<br>(-76-2600)      |
| Bolivia  | 2016 | Female | 75 to 79 | 39%<br>(25-57%)                | 61%<br>(43-75%)          | 0.73<br>(0.34-1.3)                          | 0.85%<br>(-0.41-2.4%)                | 1.2%<br>(-0.41-3.1%)                | 43<br>(-13-120)     | 560<br>(-240-1600)      |
| Bolivia  | 2016 | Female | 80 to 84 | 34%<br>(21-52%)                | 66%<br>(48-79%)          | 0.6<br>(0.3-1)                              | 0.48%<br>(-0.6-1.6%)                 | 0.63%<br>(-0.71-1.9%)               | 31<br>(-34-100)     | 300<br>(-380-1000)      |
| Bolivia  | 2016 | Female | 85 to 89 | 32%<br>(20-46%)                | 68%<br>(54-80%)          | 0.55<br>(0.28-0.97)                         | 0.15%<br>(-0.74-1.2%)                | 0.17%<br>(-0.92-1.4%)               | 7<br>(-40-60)       | 56<br>(-290-440)        |
| Bolivia  | 2016 | Female | 90 to 94 | 33%<br>(21-48%)                | 67%<br>(52-79%)          | 0.55<br>(0.27-0.99)                         | -0.17%<br>(-1.2-0.94%)               | -0.26%<br>(-1.5-1.1%)               | -5.8<br>(-34-25)    | -23<br>(-160-130)       |
| Bolivia  | 2016 | Female | 95 plus  | 36%<br>(21-55%)                | 64%<br>(45-79%)          | 0.58<br>(0.24-1.1)                          | -0.36%<br>(-1.6-0.96%)               | -0.55%<br>(-2-0.99%)                | -3.9<br>(-15-7.1)   | -10<br>(-46-27)         |
| Bolivia  | 2016 | Male   | All Ages | 50%<br>(45-54%)                | 50%<br>(46-55%)          | 1.4<br>(1-1.9)                              | 4.2%<br>(3-5.6%)                     | 4.7%<br>(3.1-6.7%)                  | 1600<br>(960-2500)  | 70000<br>(47000-100000) |
| Bolivia  | 2016 | Male   | 15 to 19 | 36%<br>(26-46%)                | 64%<br>(54-74%)          | 0.62<br>(0.32-1)                            | 3%<br>(2-4.4%)                       | 3.9%<br>(2-6.6%)                    | 19<br>(9.2-34)      | 2300<br>(1400-3400)     |
| Bolivia  | 2016 | Male   | 20 to 24 | 71%<br>(61-78%)                | 29%<br>(22-39%)          | 1.7<br>(1-2.7)                              | 7.9%<br>(5.4-11%)                    | 9.8%<br>(5.5-15%)                   | 65<br>(34-100)      | 6500<br>(4100-9300)     |

| Location | Year | Sex    | Age      | Prevalence of current drinkers | Prevalence of abstainers | Population average of standard drinks daily | Percent of total attributable deaths | Percent of total attributable DALYs | Attributable deaths | Attributable DALYs     |
|----------|------|--------|----------|--------------------------------|--------------------------|---------------------------------------------|--------------------------------------|-------------------------------------|---------------------|------------------------|
| Bolivia  | 2016 | Male   | 25 to 29 | 79%<br>(71-85%)                | 21%<br>(15-29%)          | 2.3<br>(1.4-3.6)                            | 9.1%<br>(5.8-12%)                    | 12%<br>(6.3-18%)                    | 83<br>(39-140)      | 7200<br>(4300-11000)   |
| Bolivia  | 2016 | Male   | 30 to 34 | 81%<br>(73-86%)                | 19%<br>(14-27%)          | 2.7<br>(1.7-4.1)                            | 9.1%<br>(5.8-13%)                    | 12%<br>(6.8-18%)                    | 94<br>(44-150)      | 7100<br>(4200-11000)   |
| Bolivia  | 2016 | Male   | 35 to 39 | 77%<br>(69-83%)                | 23%<br>(17-31%)          | 2.7<br>(1.6-4.2)                            | 9.2%<br>(5.9-13%)                    | 13%<br>(7.5-20%)                    | 110<br>(57-180)     | 7100<br>(4200-11000)   |
| Bolivia  | 2016 | Male   | 40 to 44 | 76%<br>(68-82%)                | 24%<br>(18-32%)          | 2.8<br>(1.6-4.5)                            | 9.2%<br>(6.1-13%)                    | 13%<br>(8.4-20%)                    | 120<br>(69-200)     | 6800<br>(4100-11000)   |
| Bolivia  | 2016 | Male   | 45 to 49 | 77%<br>(68-83%)                | 23%<br>(17-32%)          | 2.8<br>(1.6-4.6)                            | 9.2%<br>(6.2-13%)                    | 13%<br>(8.5-19%)                    | 140<br>(79-220)     | 6600<br>(4100-10000)   |
| Bolivia  | 2016 | Male   | 50 to 54 | 75%<br>(67-81%)                | 25%<br>(19-33%)          | 2.8<br>(1.6-4.3)                            | 8.6%<br>(5.4-13%)                    | 12%<br>(7.4-18%)                    | 150<br>(84-250)     | 6200<br>(3600-9900)    |
| Bolivia  | 2016 | Male   | 55 to 59 | 69%<br>(60-77%)                | 31%<br>(23-40%)          | 2.6<br>(1.5-4.1)                            | 7.9%<br>(4.7-12%)                    | 11%<br>(6.2-16%)                    | 170<br>(89-270)     | 5900<br>(3400-9200)    |
| Bolivia  | 2016 | Male   | 60 to 64 | 68%<br>(58-77%)                | 32%<br>(23-42%)          | 2.5<br>(1.4-4.3)                            | 6.6%<br>(3.7-11%)                    | 8.5%<br>(4.5-14%)                   | 180<br>(88-310)     | 5200<br>(2700-8900)    |
| Bolivia  | 2016 | Male   | 65 to 69 | 72%<br>(59-82%)                | 28%<br>(18-41%)          | 2.2<br>(1.3-3.5)                            | 5.1%<br>(2.6-8.5%)                   | 6.4%<br>(3.3-11%)                   | 150<br>(72-280)     | 3700<br>(1800-6600)    |
| Bolivia  | 2016 | Male   | 70 to 74 | 69%<br>(54-82%)                | 31%<br>(18-46%)          | 1.7<br>(0.91-2.8)                           | 3.4%<br>(1.5-6.1%)                   | 4.2%<br>(1.8-7.6%)                  | 130<br>(55-240)     | 2500<br>(1100-4600)    |
| Bolivia  | 2016 | Male   | 75 to 79 | 59%<br>(40-77%)                | 41%<br>(23-60%)          | 1.2<br>(0.58-2.1)                           | 2.3%<br>(0.9-4.3%)                   | 2.8%<br>(1-5.4%)                    | 91<br>(34-180)      | 1400<br>(530-2700)     |
| Bolivia  | 2016 | Male   | 80 to 84 | 51%<br>(32-68%)                | 49%<br>(32-68%)          | 0.91<br>(0.47-1.6)                          | 1.6%<br>(0.5-2.9%)                   | 1.9%<br>(0.52-3.5%)                 | 71<br>(19-130)      | 790<br>(240-1500)      |
| Bolivia  | 2016 | Male   | 85 to 89 | 46%<br>(30-63%)                | 54%<br>(37-70%)          | 0.8<br>(0.41-1.4)                           | 1.1%<br>(0.24-2.2%)                  | 1.2%<br>(0.17-2.5%)                 | 38<br>(5.2-80)      | 310<br>(64-630)        |
| Bolivia  | 2016 | Male   | 90 to 94 | 46%<br>(30-64%)                | 54%<br>(36-70%)          | 0.79<br>(0.38-1.4)                          | 0.72%<br>(-0.16-1.7%)                | 0.69%<br>(-0.38-1.9%)               | 11<br>(-5.8-30)     | 71<br>(-16-170)        |
| Bolivia  | 2016 | Male   | 95 plus  | 49%<br>(28-69%)                | 51%<br>(31-72%)          | 0.8<br>(0.32-1.6)                           | 0.5%<br>(-0.47-1.8%)                 | 0.32%<br>(-0.9-1.9%)                | 1.4<br>(-4-8.2)     | 8.8<br>(-8.5-33)       |
| Ecuador  | 1990 | Female | All Ages | 10%<br>(7.9-13%)               | 90%<br>(87-92%)          | 0.61<br>(0.47-0.77)                         | 2%<br>(1.6-2.5%)                     | 3.2%<br>(2.4-4.1%)                  | 790<br>(580-1000)   | 32000<br>(25000-39000) |
| Ecuador  | 1990 | Female | 15 to 19 | 9.4%<br>(5.4-15%)              | 91%<br>(85-95%)          | 0.4<br>(0.19-0.72)                          | 1.8%<br>(0.99-3%)                    | 2.9%<br>(1.3-5.3%)                  | 15<br>(6.8-27)      | 1400<br>(790-2400)     |
| Ecuador  | 1990 | Female | 20 to 24 | 14%<br>(8.2-20%)               | 86%<br>(80-92%)          | 0.89<br>(0.47-1.5)                          | 4%<br>(2.5-6%)                       | 6.3%<br>(3.4-10%)                   | 35<br>(19-55)       | 3200<br>(2000-4700)    |
| Ecuador  | 1990 | Female | 25 to 29 | 16%<br>(9.6-23%)               | 84%<br>(77-90%)          | 1.2<br>(0.67-2)                             | 5%<br>(3.3-6.9%)                     | 8.3%<br>(5-12%)                     | 42<br>(25-63)       | 3400<br>(2200-4800)    |
| Ecuador  | 1990 | Female | 30 to 34 | 17%<br>(11-26%)                | 83%<br>(74-89%)          | 1.3<br>(0.73-2.2)                           | 5.1%<br>(3.4-7.1%)                   | 8.7%<br>(5.6-12%)                   | 46<br>(29-66)       | 3300<br>(2300-4600)    |
| Ecuador  | 1990 | Female | 35 to 39 | 19%<br>(11-28%)                | 81%<br>(72-89%)          | 1.4<br>(0.76-2.2)                           | 5.2%<br>(3.6-7.3%)                   | 8.8%<br>(6-12%)                     | 53<br>(35-74)       | 3300<br>(2200-4500)    |
| Ecuador  | 1990 | Female | 40 to 44 | 19%<br>(12-27%)                | 81%<br>(73-88%)          | 1.3<br>(0.7-2.1)                            | 5.4%<br>(3.6-7.5%)                   | 9%<br>(5.8-13%)                     | 55<br>(35-77)       | 3000<br>(1900-4100)    |

| Location | Year | Sex    | Age      | Prevalence of current drinkers | Prevalence of abstainers | Population average of standard drinks daily | Percent of total attributable deaths | Percent of total attributable DALYs | Attributable deaths | Attributable DALYs        |
|----------|------|--------|----------|--------------------------------|--------------------------|---------------------------------------------|--------------------------------------|-------------------------------------|---------------------|---------------------------|
| Ecuador  | 1990 | Female | 45 to 49 | 17%<br>(10-25%)                | 83%<br>(75-90%)          | 1.1<br>(0.54-1.9)                           | 4.9%<br>(3.2-6.9%)                   | 8.1%<br>(5.1-11%)                   | 54<br>(35-78)       | 2600<br>(1700-3700)       |
| Ecuador  | 1990 | Female | 50 to 54 | 15%<br>(9.7-23%)               | 85%<br>(77-90%)          | 0.99<br>(0.48-1.7)                          | 4.7%<br>(3-6.8%)                     | 7.3%<br>(4.6-11%)                   | 58<br>(36-85)       | 2400<br>(1500-3400)       |
| Ecuador  | 1990 | Female | 55 to 59 | 15%<br>(9.6-23%)               | 85%<br>(77-90%)          | 1.1<br>(0.54-1.9)                           | 4.9%<br>(3.1-7.1%)                   | 7.3%<br>(4.8-11%)                   | 67<br>(44-99)       | 2300<br>(1500-3400)       |
| Ecuador  | 1990 | Female | 60 to 64 | 14%<br>(8.3-21%)               | 86%<br>(79-92%)          | 1<br>(0.49-1.8)                             | 4.6%<br>(3-6.7%)                     | 6.5%<br>(4.2-9.4%)                  | 74<br>(47-110)      | 2200<br>(1400-3200)       |
| Ecuador  | 1990 | Female | 65 to 69 | 11%<br>(7-17%)                 | 89%<br>(83-93%)          | 0.82<br>(0.39-1.4)                          | 3.9%<br>(2.4-5.8%)                   | 5.5%<br>(3.4-8.1%)                  | 70<br>(43-100)      | 1700<br>(1000-2500)       |
| Ecuador  | 1990 | Female | 70 to 74 | 9.5%<br>(6.1-14%)              | 91%<br>(86-94%)          | 0.64<br>(0.31-1.2)                          | 3.2%<br>(1.8-5%)                     | 4.3%<br>(2.5-6.7%)                  | 66<br>(39-100)      | 1300<br>(740-2000)        |
| Ecuador  | 1990 | Female | 75 to 79 | 8.3%<br>(4.6-13%)              | 92%<br>(87-95%)          | 0.5<br>(0.22-0.95)                          | 2.4%<br>(1.3-3.9%)                   | 3.1%<br>(1.7-5.2%)                  | 56<br>(30-93)       | 830<br>(440-1400)         |
| Ecuador  | 1990 | Female | 80 to 84 | 7.2%<br>(3.8-12%)              | 93%<br>(88-96%)          | 0.4<br>(0.18-0.73)                          | 1.9%<br>(1-3.2%)                     | 2.3%<br>(1.2-3.9%)                  | 45<br>(24-77)       | 490<br>(270-830)          |
| Ecuador  | 1990 | Female | 85 to 89 | 6.7%<br>(3.7-11%)              | 93%<br>(89-96%)          | 0.36<br>(0.16-0.66)                         | 1.5%<br>(0.76-2.7%)                  | 1.8%<br>(0.88-3.3%)                 | 32<br>(15-58)       | 240<br>(120-430)          |
| Ecuador  | 1990 | Female | 90 to 94 | 7.3%<br>(4.1-12%)              | 93%<br>(88-96%)          | 0.37<br>(0.16-0.75)                         | 1.3%<br>(0.54-2.6%)                  | 1.5%<br>(0.59-3.1%)                 | 16<br>(6.2-33)      | 83<br>(34-170)            |
| Ecuador  | 1990 | Female | 95 plus  | 8.5%<br>(4.2-15%)              | 91%<br>(85-96%)          | 0.41<br>(0.15-0.86)                         | 1.3%<br>(0.42-2.9%)                  | 1.4%<br>(0.4-3.3%)                  | 5.4<br>(1.5-13)     | 19<br>(6.5-44)            |
| Ecuador  | 1990 | Male   | All Ages | 21%<br>(17-25%)                | 79%<br>(75-83%)          | 1.9<br>(1.6-2.4)                            | 6.6%<br>(5.6-7.8%)                   | 9.2%<br>(7.8-11%)                   | 2900<br>(2400-3400) | 120000<br>(100000-150000) |
| Ecuador  | 1990 | Male   | 15 to 19 | 17%<br>(10-26%)                | 83%<br>(74-90%)          | 0.88<br>(0.43-1.5)                          | 4.9%<br>(3-7.5%)                     | 6.3%<br>(3.4-10%)                   | 51<br>(27-83)       | 4700<br>(2800-7200)       |
| Ecuador  | 1990 | Male   | 20 to 24 | 35%<br>(22-48%)                | 65%<br>(52-78%)          | 2.5<br>(1.4-4.1)                            | 13%<br>(9-17%)                       | 16%<br>(10-22%)                     | 170<br>(110-240)    | 14000<br>(9600-19000)     |
| Ecuador  | 1990 | Male   | 25 to 29 | 42%<br>(28-56%)                | 58%<br>(44-72%)          | 3.5<br>(2-5.3)                              | 16%<br>(12-21%)                      | 20%<br>(14-27%)                     | 210<br>(140-290)    | 16000<br>(11000-21000)    |
| Ecuador  | 1990 | Male   | 30 to 34 | 43%<br>(28-59%)                | 57%<br>(41-72%)          | 4.3<br>(2.6-6.5)                            | 17%<br>(13-21%)                      | 22%<br>(16-28%)                     | 220<br>(160-290)    | 15000<br>(11000-19000)    |
| Ecuador  | 1990 | Male   | 35 to 39 | 42%<br>(28-56%)                | 58%<br>(44-72%)          | 4.5<br>(2.6-7.1)                            | 17%<br>(14-22%)                      | 23%<br>(18-29%)                     | 240<br>(180-300)    | 14000<br>(11000-17000)    |
| Ecuador  | 1990 | Male   | 40 to 44 | 41%<br>(28-55%)                | 59%<br>(45-72%)          | 4.4<br>(2.4-7.1)                            | 17%<br>(14-21%)                      | 23%<br>(18-28%)                     | 220<br>(170-280)    | 12000<br>(9100-14000)     |
| Ecuador  | 1990 | Male   | 45 to 49 | 42%<br>(27-56%)                | 58%<br>(44-73%)          | 4.6<br>(2.4-7.5)                            | 17%<br>(14-21%)                      | 23%<br>(18-28%)                     | 250<br>(190-300)    | 11000<br>(8900-14000)     |
| Ecuador  | 1990 | Male   | 50 to 54 | 41%<br>(28-54%)                | 59%<br>(46-72%)          | 4.4<br>(2.3-7.2)                            | 16%<br>(12-19%)                      | 21%<br>(17-25%)                     | 250<br>(190-300)    | 9700<br>(7800-12000)      |
| Ecuador  | 1990 | Male   | 55 to 59 | 36%<br>(24-51%)                | 64%<br>(49-76%)          | 4.1<br>(2.2-6.9)                            | 14%<br>(11-17%)                      | 18%<br>(15-23%)                     | 250<br>(190-300)    | 8400<br>(6600-10000)      |
| Ecuador  | 1990 | Male   | 60 to 64 | 34%<br>(22-49%)                | 66%<br>(51-78%)          | 3.9<br>(2-6.8)                              | 12%<br>(9.4-15%)                     | 15%<br>(12-20%)                     | 240<br>(190-310)    | 7000<br>(5400-8900)       |



| Location | Year | Sex    | Age      | Prevalence of current drinkers | Prevalence of abstainers | Population average of standard drinks daily | Percent of total attributable deaths | Percent of total attributable DALYs | Attributable deaths | Attributable DALYs     |
|----------|------|--------|----------|--------------------------------|--------------------------|---------------------------------------------|--------------------------------------|-------------------------------------|---------------------|------------------------|
| Ecuador  | 1990 | Male   | 65 to 69 | 34%<br>(22-46%)                | 66%<br>(54-78%)          | 3.3<br>(1.7-5.4)                            | 11%<br>(8-14%)                       | 14%<br>(10-17%)                     | 230<br>(170-290)    | 5500<br>(4100-7000)    |
| Ecuador  | 1990 | Male   | 70 to 74 | 30%<br>(19-42%)                | 70%<br>(58-81%)          | 2.3<br>(1.2-4)                              | 8.2%<br>(5.7-11%)                    | 10%<br>(7.1-14%)                    | 200<br>(140-270)    | 3800<br>(2600-5000)    |
| Ecuador  | 1990 | Male   | 75 to 79 | 24%<br>(14-36%)                | 76%<br>(64-86%)          | 1.5<br>(0.71-2.7)                           | 5.6%<br>(3.3-8.2%)                   | 6.8%<br>(4-9.9%)                    | 150<br>(86-220)     | 2200<br>(1300-3100)    |
| Ecuador  | 1990 | Male   | 80 to 84 | 20%<br>(11-30%)                | 80%<br>(70-89%)          | 1.1<br>(0.5-1.9)                            | 4.1%<br>(2.4-6.1%)                   | 4.8%<br>(2.8-7.3%)                  | 96<br>(56-140)      | 1000<br>(610-1500)     |
| Ecuador  | 1990 | Male   | 85 to 89 | 18%<br>(9.9-27%)               | 82%<br>(73-90%)          | 0.91<br>(0.42-1.6)                          | 3.2%<br>(1.7-5%)                     | 3.7%<br>(2-5.9%)                    | 56<br>(29-88)       | 430<br>(230-670)       |
| Ecuador  | 1990 | Male   | 90 to 94 | 18%<br>(11-28%)                | 82%<br>(72-89%)          | 0.89<br>(0.4-1.7)                           | 2.7%<br>(1.3-4.7%)                   | 3.1%<br>(1.4-5.4%)                  | 24<br>(11-42)       | 130<br>(63-230)        |
| Ecuador  | 1990 | Male   | 95 plus  | 20%<br>(11-34%)                | 80%<br>(66-89%)          | 0.94<br>(0.36-1.9)                          | 2.6%<br>(0.98-5%)                    | 2.8%<br>(0.92-5.6%)                 | 6.7<br>(2.2-13)     | 25<br>(9.5-48)         |
| Ecuador  | 1995 | Female | All Ages | 10%<br>(8-13%)                 | 90%<br>(87-92%)          | 0.7<br>(0.53-0.9)                           | 2.3%<br>(1.9-2.9%)                   | 3.7%<br>(2.7-4.7%)                  | 940<br>(700-1200)   | 36000<br>(29000-45000) |
| Ecuador  | 1995 | Female | 15 to 19 | 9.2%<br>(5.3-14%)              | 91%<br>(86-95%)          | 0.44<br>(0.21-0.79)                         | 2%<br>(1.1-3.3%)                     | 3.1%<br>(1.4-5.5%)                  | 17<br>(8-31)        | 1700<br>(920-2800)     |
| Ecuador  | 1995 | Female | 20 to 24 | 13%<br>(8.1-20%)               | 87%<br>(80-92%)          | 0.99<br>(0.53-1.7)                          | 4.1%<br>(2.6-6%)                     | 6.6%<br>(3.6-10%)                   | 37<br>(21-57)       | 3400<br>(2200-4900)    |
| Ecuador  | 1995 | Female | 25 to 29 | 15%<br>(9.4-23%)               | 85%<br>(77-91%)          | 1.4<br>(0.74-2.2)                           | 5%<br>(3.3-6.9%)                     | 8.5%<br>(5.1-12%)                   | 46<br>(28-67)       | 3800<br>(2500-5200)    |
| Ecuador  | 1995 | Female | 30 to 34 | 17%<br>(10-26%)                | 83%<br>(74-90%)          | 1.5<br>(0.81-2.4)                           | 5%<br>(3.5-7%)                       | 8.9%<br>(5.9-12%)                   | 50<br>(33-70)       | 3600<br>(2500-4900)    |
| Ecuador  | 1995 | Female | 35 to 39 | 19%<br>(11-28%)                | 81%<br>(72-89%)          | 1.5<br>(0.81-2.4)                           | 5.1%<br>(3.6-7%)                     | 9.1%<br>(6.2-12%)                   | 56<br>(38-76)       | 3500<br>(2500-4700)    |
| Ecuador  | 1995 | Female | 40 to 44 | 18%<br>(11-27%)                | 82%<br>(73-89%)          | 1.4<br>(0.76-2.3)                           | 5.2%<br>(3.6-7.1%)                   | 9%<br>(5.9-12%)                     | 63<br>(42-87)       | 3500<br>(2400-4800)    |
| Ecuador  | 1995 | Female | 45 to 49 | 16%<br>(9.7-24%)               | 84%<br>(76-90%)          | 1.2<br>(0.59-2.1)                           | 5.1%<br>(3.4-7%)                     | 8.5%<br>(5.6-12%)                   | 64<br>(41-89)       | 3000<br>(2000-4100)    |
| Ecuador  | 1995 | Female | 50 to 54 | 15%<br>(9.6-22%)               | 85%<br>(78-90%)          | 1.1<br>(0.56-1.9)                           | 4.8%<br>(3.1-7%)                     | 7.8%<br>(5-11%)                     | 68<br>(43-97)       | 2800<br>(1800-4000)    |
| Ecuador  | 1995 | Female | 55 to 59 | 15%<br>(9.3-22%)               | 85%<br>(78-91%)          | 1.2<br>(0.58-2.2)                           | 5%<br>(3.3-7.1%)                     | 7.6%<br>(5.1-11%)                   | 77<br>(51-110)      | 2700<br>(1800-3800)    |
| Ecuador  | 1995 | Female | 60 to 64 | 14%<br>(7.9-21%)               | 86%<br>(79-92%)          | 1.1<br>(0.53-2.1)                           | 4.7%<br>(3-6.8%)                     | 6.8%<br>(4.4-9.7%)                  | 86<br>(56-120)      | 2500<br>(1600-3600)    |
| Ecuador  | 1995 | Female | 65 to 69 | 11%<br>(6.9-17%)               | 89%<br>(83-93%)          | 0.92<br>(0.43-1.6)                          | 4.2%<br>(2.6-6.1%)                   | 6%<br>(3.8-8.5%)                    | 87<br>(55-120)      | 2100<br>(1300-3000)    |
| Ecuador  | 1995 | Female | 70 to 74 | 9.4%<br>(6.1-14%)              | 91%<br>(86-94%)          | 0.72<br>(0.35-1.3)                          | 3.5%<br>(2.1-5.4%)                   | 4.8%<br>(3-7.3%)                    | 83<br>(51-130)      | 1600<br>(950-2500)     |
| Ecuador  | 1995 | Female | 75 to 79 | 8.2%<br>(4.8-13%)              | 92%<br>(87-95%)          | 0.56<br>(0.24-1.1)                          | 2.7%<br>(1.5-4.2%)                   | 3.5%<br>(2-5.6%)                    | 68<br>(38-110)      | 1000<br>(570-1600)     |
| Ecuador  | 1995 | Female | 80 to 84 | 7.1%<br>(3.8-12%)              | 93%<br>(88-96%)          | 0.45<br>(0.2-0.83)                          | 2.2%<br>(1.2-3.5%)                   | 2.7%<br>(1.5-4.5%)                  | 61<br>(33-100)      | 660<br>(370-1100)      |

| Location | Year | Sex    | Age      | Prevalence of current drinkers | Prevalence of abstainers | Population average of standard drinks daily | Percent of total attributable deaths | Percent of total attributable DALYs | Attributable deaths | Attributable DALYs        |
|----------|------|--------|----------|--------------------------------|--------------------------|---------------------------------------------|--------------------------------------|-------------------------------------|---------------------|---------------------------|
| Ecuador  | 1995 | Female | 85 to 89 | 6.6%<br>(3.5-11%)              | 93%<br>(89-97%)          | 0.4<br>(0.18-0.73)                          | 1.8%<br>(0.91-3%)                    | 2.2%<br>(1.1-3.7%)                  | 46<br>(23-80)       | 350<br>(180-600)          |
| Ecuador  | 1995 | Female | 90 to 94 | 7%<br>(4-11%)                  | 93%<br>(89-96%)          | 0.41<br>(0.18-0.82)                         | 1.5%<br>(0.69-2.8%)                  | 1.8%<br>(0.79-3.5%)                 | 24<br>(10-45)       | 120<br>(54-230)           |
| Ecuador  | 1995 | Female | 95 plus  | 8.3%<br>(4.2-14%)              | 92%<br>(86-96%)          | 0.45<br>(0.16-0.93)                         | 1.5%<br>(0.57-3.2%)                  | 1.7%<br>(0.59-3.7%)                 | 8.8<br>(3-19)       | 31<br>(12-65)             |
| Ecuador  | 1995 | Male   | All Ages | 21%<br>(17-25%)                | 79%<br>(75-83%)          | 2.3<br>(1.8-2.8)                            | 7.3%<br>(6.1-8.6%)                   | 9.8%<br>(8.3-11%)                   | 3200<br>(2700-3800) | 140000<br>(120000-170000) |
| Ecuador  | 1995 | Male   | 15 to 19 | 17%<br>(10-25%)                | 83%<br>(75-90%)          | 1<br>(0.49-1.8)                             | 5.3%<br>(3.2-8%)                     | 6.8%<br>(3.6-11%)                   | 63<br>(33-100)      | 5600<br>(3300-8600)       |
| Ecuador  | 1995 | Male   | 20 to 24 | 35%<br>(21-48%)                | 65%<br>(52-79%)          | 2.9<br>(1.6-4.8)                            | 13%<br>(9.3-18%)                     | 16%<br>(11-22%)                     | 210<br>(130-290)    | 17000<br>(11000-22000)    |
| Ecuador  | 1995 | Male   | 25 to 29 | 41%<br>(28-55%)                | 59%<br>(45-72%)          | 4<br>(2.3-6.1)                              | 16%<br>(12-21%)                      | 19%<br>(13-26%)                     | 250<br>(170-340)    | 18000<br>(13000-24000)    |
| Ecuador  | 1995 | Male   | 30 to 34 | 43%<br>(28-58%)                | 57%<br>(42-72%)          | 4.9<br>(2.9-7.3)                            | 17%<br>(13-21%)                      | 22%<br>(15-28%)                     | 260<br>(180-340)    | 17000<br>(13000-22000)    |
| Ecuador  | 1995 | Male   | 35 to 39 | 41%<br>(28-55%)                | 59%<br>(45-72%)          | 5.1<br>(3-8.1)                              | 17%<br>(13-21%)                      | 22%<br>(17-28%)                     | 260<br>(200-340)    | 16000<br>(12000-19000)    |
| Ecuador  | 1995 | Male   | 40 to 44 | 41%<br>(28-55%)                | 59%<br>(45-72%)          | 5.1<br>(2.8-8)                              | 16%<br>(13-20%)                      | 22%<br>(17-27%)                     | 260<br>(200-320)    | 13000<br>(11000-17000)    |
| Ecuador  | 1995 | Male   | 45 to 49 | 42%<br>(27-56%)                | 58%<br>(44-73%)          | 5.2<br>(2.8-8.5)                            | 16%<br>(13-20%)                      | 22%<br>(17-27%)                     | 260<br>(200-310)    | 12000<br>(9300-14000)     |
| Ecuador  | 1995 | Male   | 50 to 54 | 40%<br>(28-53%)                | 60%<br>(47-72%)          | 5<br>(2.7-8.3)                              | 15%<br>(12-18%)                      | 20%<br>(16-25%)                     | 260<br>(210-320)    | 10000<br>(8400-13000)     |
| Ecuador  | 1995 | Male   | 55 to 59 | 36%<br>(23-50%)                | 64%<br>(50-77%)          | 4.7<br>(2.4-7.9)                            | 13%<br>(10-16%)                      | 17%<br>(14-22%)                     | 250<br>(200-310)    | 8600<br>(6700-11000)      |
| Ecuador  | 1995 | Male   | 60 to 64 | 34%<br>(21-48%)                | 66%<br>(52-79%)          | 4.3<br>(2.3-7.7)                            | 12%<br>(9-15%)                       | 15%<br>(12-19%)                     | 260<br>(200-330)    | 7400<br>(5800-9400)       |
| Ecuador  | 1995 | Male   | 65 to 69 | 33%<br>(21-46%)                | 67%<br>(54-79%)          | 3.7<br>(1.9-6.3)                            | 11%<br>(7.9-13%)                     | 13%<br>(10-17%)                     | 260<br>(200-330)    | 6200<br>(4700-7900)       |
| Ecuador  | 1995 | Male   | 70 to 74 | 29%<br>(18-41%)                | 71%<br>(59-82%)          | 2.6<br>(1.3-4.5)                            | 8.3%<br>(6-11%)                      | 10%<br>(7.5-14%)                    | 220<br>(160-290)    | 4300<br>(3100-5700)       |
| Ecuador  | 1995 | Male   | 75 to 79 | 24%<br>(14-35%)                | 76%<br>(65-86%)          | 1.7<br>(0.79-3.1)                           | 5.9%<br>(3.7-8.3%)                   | 7.2%<br>(4.6-10%)                   | 160<br>(100-230)    | 2400<br>(1500-3400)       |
| Ecuador  | 1995 | Male   | 80 to 84 | 19%<br>(11-29%)                | 81%<br>(71-89%)          | 1.2<br>(0.57-2.1)                           | 4.3%<br>(2.7-6.3%)                   | 5.2%<br>(3.3-7.5%)                  | 120<br>(74-170)     | 1300<br>(820-1900)        |
| Ecuador  | 1995 | Male   | 85 to 89 | 17%<br>(9.8-27%)               | 83%<br>(73-90%)          | 1<br>(0.47-1.8)                             | 3.5%<br>(2.1-5.3%)                   | 4.2%<br>(2.3-6.3%)                  | 77<br>(43-120)      | 590<br>(340-890)          |
| Ecuador  | 1995 | Male   | 90 to 94 | 18%<br>(10-27%)                | 82%<br>(73-90%)          | 1<br>(0.45-1.9)                             | 3.1%<br>(1.6-4.9%)                   | 3.6%<br>(1.7-5.7%)                  | 34<br>(16-54)       | 180<br>(92-290)           |
| Ecuador  | 1995 | Male   | 95 plus  | 20%<br>(10-33%)                | 80%<br>(67-90%)          | 1.1<br>(0.4-2.2)                            | 3%<br>(1.3-5.4%)                     | 3.3%<br>(1.3-6.2%)                  | 9.8<br>(3.6-18)     | 36<br>(15-64)             |
| Ecuador  | 2000 | Female | All Ages | 9.6%<br>(7.7-12%)              | 90%<br>(88-92%)          | 0.82<br>(0.62-1)                            | 2.6%<br>(2.2-3.2%)                   | 4.2%<br>(3.3-5.2%)                  | 1100<br>(860-1400)  | 40000<br>(33000-49000)    |

| Location | Year | Sex    | Age      | Prevalence of current drinkers | Prevalence of abstainers | Population average of standard drinks daily | Percent of total attributable deaths | Percent of total attributable DALYs | Attributable deaths | Attributable DALYs        |
|----------|------|--------|----------|--------------------------------|--------------------------|---------------------------------------------|--------------------------------------|-------------------------------------|---------------------|---------------------------|
| Ecuador  | 2000 | Female | 15 to 19 | 9%<br>(5.3-14%)                | 91%<br>(86-95%)          | 0.54<br>(0.27-0.93)                         | 2.2%<br>(1.2-3.4%)                   | 3.6%<br>(1.8-6.2%)                  | 19<br>(9.5-33)      | 1900<br>(1100-2900)       |
| Ecuador  | 2000 | Female | 20 to 24 | 12%<br>(7.3-17%)               | 88%<br>(83-93%)          | 1.1<br>(0.59-1.8)                           | 4%<br>(2.7-5.6%)                     | 6.3%<br>(3.8-9.5%)                  | 35<br>(21-53)       | 3300<br>(2200-4700)       |
| Ecuador  | 2000 | Female | 25 to 29 | 13%<br>(8.2-19%)               | 87%<br>(81-92%)          | 1.4<br>(0.78-2.3)                           | 4.5%<br>(3.1-6.2%)                   | 7.7%<br>(5-11%)                     | 42<br>(27-59)       | 3600<br>(2500-4800)       |
| Ecuador  | 2000 | Female | 30 to 34 | 16%<br>(10-23%)                | 84%<br>(77-90%)          | 1.7<br>(0.96-2.7)                           | 4.8%<br>(3.4-6.4%)                   | 8.7%<br>(6.1-12%)                   | 49<br>(34-67)       | 3700<br>(2700-4800)       |
| Ecuador  | 2000 | Female | 35 to 39 | 19%<br>(12-27%)                | 81%<br>(73-88%)          | 1.9<br>(1.1-2.9)                            | 5.3%<br>(3.9-7.1%)                   | 9.7%<br>(7.1-13%)                   | 62<br>(45-80)       | 4000<br>(2900-5100)       |
| Ecuador  | 2000 | Female | 40 to 44 | 18%<br>(12-25%)                | 82%<br>(75-88%)          | 1.7<br>(0.96-2.7)                           | 5.3%<br>(3.8-7.1%)                   | 9.5%<br>(6.9-12%)                   | 69<br>(49-90)       | 3800<br>(2800-5000)       |
| Ecuador  | 2000 | Female | 45 to 49 | 14%<br>(8.7-21%)               | 86%<br>(79-91%)          | 1.3<br>(0.66-2.2)                           | 4.8%<br>(3.4-6.5%)                   | 8.4%<br>(5.9-11%)                   | 72<br>(51-96)       | 3500<br>(2500-4600)       |
| Ecuador  | 2000 | Female | 50 to 54 | 12%<br>(8.1-18%)               | 88%<br>(82-92%)          | 1.1<br>(0.58-1.9)                           | 4.7%<br>(3.2-6.4%)                   | 7.6%<br>(5.3-10%)                   | 72<br>(50-98)       | 2900<br>(2100-4000)       |
| Ecuador  | 2000 | Female | 55 to 59 | 13%<br>(8-19%)                 | 87%<br>(81-92%)          | 1.2<br>(0.62-2.2)                           | 4.9%<br>(3.4-6.8%)                   | 7.6%<br>(5.5-10%)                   | 85<br>(61-120)      | 3000<br>(2100-4200)       |
| Ecuador  | 2000 | Female | 60 to 64 | 12%<br>(7.2-18%)               | 88%<br>(82-93%)          | 1.2<br>(0.58-2.2)                           | 4.8%<br>(3.4-6.7%)                   | 7%<br>(5-9.7%)                      | 96<br>(68-130)      | 2800<br>(2000-3900)       |
| Ecuador  | 2000 | Female | 65 to 69 | 10%<br>(6.6-15%)               | 90%<br>(85-93%)          | 1<br>(0.5-1.7)                              | 4.6%<br>(3.1-6.2%)                   | 6.5%<br>(4.4-8.7%)                  | 110<br>(73-140)     | 2600<br>(1800-3500)       |
| Ecuador  | 2000 | Female | 70 to 74 | 9%<br>(5.7-14%)                | 91%<br>(86-94%)          | 0.85<br>(0.41-1.6)                          | 4.1%<br>(2.6-5.8%)                   | 5.6%<br>(3.7-8%)                    | 110<br>(72-150)     | 2100<br>(1400-3000)       |
| Ecuador  | 2000 | Female | 75 to 79 | 8.1%<br>(4.6-13%)              | 92%<br>(87-95%)          | 0.68<br>(0.29-1.3)                          | 3.2%<br>(1.9-4.7%)                   | 4.2%<br>(2.6-6.3%)                  | 92<br>(56-130)      | 1400<br>(820-2000)        |
| Ecuador  | 2000 | Female | 80 to 84 | 7%<br>(3.7-11%)                | 93%<br>(89-96%)          | 0.55<br>(0.24-0.99)                         | 2.5%<br>(1.5-4%)                     | 3.3%<br>(1.9-5.1%)                  | 80<br>(47-120)      | 870<br>(520-1300)         |
| Ecuador  | 2000 | Female | 85 to 89 | 6.5%<br>(3.5-10%)              | 94%<br>(90-97%)          | 0.49<br>(0.22-0.9)                          | 2.2%<br>(1.2-3.5%)                   | 2.7%<br>(1.5-4.3%)                  | 64<br>(35-100)      | 490<br>(270-790)          |
| Ecuador  | 2000 | Female | 90 to 94 | 6.9%<br>(3.9-11%)              | 93%<br>(89-96%)          | 0.5<br>(0.22-0.97)                          | 1.9%<br>(0.92-3.3%)                  | 2.3%<br>(1.1-3.9%)                  | 38<br>(18-65)       | 200<br>(95-340)           |
| Ecuador  | 2000 | Female | 95 plus  | 8.1%<br>(4-14%)                | 92%<br>(86-96%)          | 0.55<br>(0.2-1.1)                           | 1.9%<br>(0.79-3.7%)                  | 2.2%<br>(0.84-4.5%)                 | 14<br>(5.3-28)      | 49<br>(20-95)             |
| Ecuador  | 2000 | Male   | All Ages | 23%<br>(20-27%)                | 77%<br>(73-80%)          | 3.1<br>(2.5-3.8)                            | 8.4%<br>(7-9.9%)                     | 11%<br>(9.1-13%)                    | 3700<br>(3100-4400) | 160000<br>(130000-190000) |
| Ecuador  | 2000 | Male   | 15 to 19 | 21%<br>(14-30%)                | 79%<br>(70-86%)          | 1.6<br>(0.8-2.7)                            | 7.2%<br>(4.3-11%)                    | 9.8%<br>(5.5-15%)                   | 96<br>(53-150)      | 8100<br>(4900-12000)      |
| Ecuador  | 2000 | Male   | 20 to 24 | 39%<br>(26-51%)                | 61%<br>(49-74%)          | 4.2<br>(2.5-6.5)                            | 16%<br>(11-21%)                      | 20%<br>(13-26%)                     | 280<br>(190-370)    | 21000<br>(15000-28000)    |
| Ecuador  | 2000 | Male   | 25 to 29 | 42%<br>(30-54%)                | 58%<br>(46-70%)          | 5.1<br>(3-7.6)                              | 16%<br>(12-21%)                      | 20%<br>(14-27%)                     | 280<br>(190-370)    | 20000<br>(15000-26000)    |
| Ecuador  | 2000 | Male   | 30 to 34 | 44%<br>(32-57%)                | 56%<br>(43-68%)          | 6.3<br>(3.9-9.3)                            | 17%<br>(13-22%)                      | 22%<br>(16-29%)                     | 290<br>(210-380)    | 19000<br>(14000-24000)    |

| Location | Year | Sex    | Age      | Prevalence of current drinkers | Prevalence of abstainers | Population average of standard drinks daily | Percent of total attributable deaths | Percent of total attributable DALYs | Attributable deaths | Attributable DALYs     |
|----------|------|--------|----------|--------------------------------|--------------------------|---------------------------------------------|--------------------------------------|-------------------------------------|---------------------|------------------------|
| Ecuador  | 2000 | Male   | 35 to 39 | 42%<br>(30-55%)                | 58%<br>(45-70%)          | 6.5<br>(3.9-9.9)                            | 17%<br>(13-21%)                      | 23%<br>(18-28%)                     | 290<br>(220-370)    | 17000<br>(13000-21000) |
| Ecuador  | 2000 | Male   | 40 to 44 | 40%<br>(29-52%)                | 60%<br>(48-71%)          | 6.2<br>(3.7-9.4)                            | 16%<br>(13-19%)                      | 22%<br>(17-27%)                     | 280<br>(220-350)    | 15000<br>(12000-18000) |
| Ecuador  | 2000 | Male   | 45 to 49 | 44%<br>(31-55%)                | 56%<br>(45-69%)          | 6.8<br>(3.9-11)                             | 16%<br>(13-19%)                      | 22%<br>(18-27%)                     | 310<br>(250-380)    | 14000<br>(12000-17000) |
| Ecuador  | 2000 | Male   | 50 to 54 | 44%<br>(32-56%)                | 56%<br>(44-68%)          | 6.9<br>(3.9-11)                             | 15%<br>(13-19%)                      | 21%<br>(17-25%)                     | 300<br>(250-370)    | 12000<br>(9800-15000)  |
| Ecuador  | 2000 | Male   | 55 to 59 | 37%<br>(25-49%)                | 63%<br>(51-75%)          | 6<br>(3.3-9.9)                              | 13%<br>(11-16%)                      | 18%<br>(14-22%)                     | 290<br>(230-350)    | 9900<br>(8000-12000)   |
| Ecuador  | 2000 | Male   | 60 to 64 | 30%<br>(19-43%)                | 70%<br>(57-81%)          | 4.8<br>(2.5-8.4)                            | 11%<br>(8.6-14%)                     | 14%<br>(11-18%)                     | 270<br>(210-340)    | 7700<br>(6100-9700)    |
| Ecuador  | 2000 | Male   | 65 to 69 | 30%<br>(19-42%)                | 70%<br>(58-81%)          | 4.1<br>(2.1-6.8)                            | 10%<br>(7.6-13%)                     | 13%<br>(9.8-16%)                    | 280<br>(210-350)    | 6700<br>(5100-8400)    |
| Ecuador  | 2000 | Male   | 70 to 74 | 29%<br>(19-40%)                | 71%<br>(60-81%)          | 3.2<br>(1.6-5.5)                            | 8.5%<br>(6.4-11%)                    | 11%<br>(8.1-14%)                    | 270<br>(200-340)    | 5100<br>(3900-6600)    |
| Ecuador  | 2000 | Male   | 75 to 79 | 23%<br>(14-35%)                | 77%<br>(65-86%)          | 2<br>(0.97-3.8)                             | 6.2%<br>(4.3-8.3%)                   | 7.6%<br>(5.3-10%)                   | 200<br>(140-270)    | 2900<br>(2100-4000)    |
| Ecuador  | 2000 | Male   | 80 to 84 | 19%<br>(11-29%)                | 81%<br>(71-89%)          | 1.5<br>(0.71-2.5)                           | 4.5%<br>(3.1-6.1%)                   | 5.5%<br>(3.8-7.6%)                  | 140<br>(97-190)     | 1600<br>(1100-2200)    |
| Ecuador  | 2000 | Male   | 85 to 89 | 17%<br>(9.7-27%)               | 83%<br>(73-90%)          | 1.3<br>(0.59-2.2)                           | 3.8%<br>(2.4-5.5%)                   | 4.5%<br>(2.9-6.7%)                  | 96<br>(61-140)      | 750<br>(470-1100)      |
| Ecuador  | 2000 | Male   | 90 to 94 | 18%<br>(11-27%)                | 82%<br>(73-89%)          | 1.3<br>(0.56-2.3)                           | 3.5%<br>(2-5.2%)                     | 4%<br>(2.3-6%)                      | 48<br>(27-73)       | 260<br>(150-390)       |
| Ecuador  | 2000 | Male   | 95 plus  | 20%<br>(10-34%)                | 80%<br>(66-90%)          | 1.3<br>(0.5-2.7)                            | 3.4%<br>(1.7-5.7%)                   | 3.8%<br>(1.7-6.6%)                  | 14<br>(6.1-23)      | 50<br>(24-83)          |
| Ecuador  | 2005 | Female | All Ages | 9.5%<br>(7.7-12%)              | 90%<br>(88-92%)          | 0.95<br>(0.72-1.2)                          | 2.8%<br>(2.3-3.4%)                   | 4.5%<br>(3.7-5.5%)                  | 1200<br>(990-1500)  | 43000<br>(36000-52000) |
| Ecuador  | 2005 | Female | 15 to 19 | 8.7%<br>(5.2-13%)              | 91%<br>(87-95%)          | 0.61<br>(0.3-1.1)                           | 2.3%<br>(1.3-3.6%)                   | 4%<br>(2-6.7%)                      | 21<br>(10-35)       | 2000<br>(1200-3100)    |
| Ecuador  | 2005 | Female | 20 to 24 | 11%<br>(6.9-17%)               | 89%<br>(83-93%)          | 1.2<br>(0.65-2)                             | 4%<br>(2.7-5.6%)                     | 6.6%<br>(4.1-9.7%)                  | 36<br>(22-53)       | 3400<br>(2300-4900)    |
| Ecuador  | 2005 | Female | 25 to 29 | 13%<br>(7.9-19%)               | 87%<br>(81-92%)          | 1.6<br>(0.88-2.6)                           | 4.4%<br>(3.1-5.9%)                   | 7.7%<br>(5-11%)                     | 41<br>(27-57)       | 3600<br>(2500-4900)    |
| Ecuador  | 2005 | Female | 30 to 34 | 16%<br>(10-23%)                | 84%<br>(77-90%)          | 2<br>(1.1-3.2)                              | 4.4%<br>(3.2-5.9%)                   | 8.3%<br>(5.8-11%)                   | 45<br>(31-62)       | 3500<br>(2600-4600)    |
| Ecuador  | 2005 | Female | 35 to 39 | 18%<br>(12-26%)                | 82%<br>(74-88%)          | 2.1<br>(1.2-3.3)                            | 4.9%<br>(3.7-6.5%)                   | 9.5%<br>(7.1-12%)                   | 58<br>(43-77)       | 3900<br>(2900-5000)    |
| Ecuador  | 2005 | Female | 40 to 44 | 17%<br>(11-25%)                | 83%<br>(75-89%)          | 1.9<br>(1.1-3)                              | 5%<br>(3.7-6.6%)                     | 9.3%<br>(7-12%)                     | 69<br>(52-90)       | 3900<br>(2900-5100)    |
| Ecuador  | 2005 | Female | 45 to 49 | 14%<br>(8.4-20%)               | 86%<br>(80-92%)          | 1.5<br>(0.75-2.5)                           | 4.6%<br>(3.3-6.1%)                   | 8.2%<br>(6-11%)                     | 74<br>(54-98)       | 3600<br>(2700-4700)    |
| Ecuador  | 2005 | Female | 50 to 54 | 12%<br>(7.9-18%)               | 88%<br>(82-92%)          | 1.3<br>(0.65-2.2)                           | 4.4%<br>(3.1-5.9%)                   | 7.4%<br>(5.4-9.8%)                  | 81<br>(59-110)      | 3400<br>(2500-4500)    |

| Location | Year | Sex    | Age      | Prevalence of current drinkers | Prevalence of abstainers | Population average of standard drinks daily | Percent of total attributable deaths | Percent of total attributable DALYs | Attributable deaths | Attributable DALYs        |
|----------|------|--------|----------|--------------------------------|--------------------------|---------------------------------------------|--------------------------------------|-------------------------------------|---------------------|---------------------------|
| Ecuador  | 2005 | Female | 55 to 59 | 13%<br>(7.7-19%)               | 87%<br>(81-92%)          | 1.4<br>(0.71-2.4)                           | 4.8%<br>(3.5-6.6%)                   | 7.6%<br>(5.6-10%)                   | 93<br>(68-130)      | 3300<br>(2400-4500)       |
| Ecuador  | 2005 | Female | 60 to 64 | 12%<br>(7-18%)                 | 88%<br>(82-93%)          | 1.4<br>(0.67-2.4)                           | 4.8%<br>(3.4-6.6%)                   | 7.2%<br>(5.4-9.7%)                  | 110<br>(77-140)     | 3100<br>(2300-4300)       |
| Ecuador  | 2005 | Female | 65 to 69 | 10%<br>(6.4-15%)               | 90%<br>(85-94%)          | 1.2<br>(0.56-2)                             | 4.6%<br>(3.3-6.2%)                   | 6.8%<br>(5-8.9%)                    | 120<br>(87-150)     | 2800<br>(2100-3800)       |
| Ecuador  | 2005 | Female | 70 to 74 | 8.7%<br>(5.5-13%)              | 91%<br>(87-94%)          | 0.95<br>(0.46-1.8)                          | 4.2%<br>(2.9-5.9%)                   | 6%<br>(4.3-8.2%)                    | 130<br>(89-180)     | 2400<br>(1700-3400)       |
| Ecuador  | 2005 | Female | 75 to 79 | 7.8%<br>(4.3-13%)              | 92%<br>(87-96%)          | 0.76<br>(0.33-1.4)                          | 3.4%<br>(2.2-4.9%)                   | 4.7%<br>(3.1-6.6%)                  | 120<br>(76-170)     | 1700<br>(1100-2500)       |
| Ecuador  | 2005 | Female | 80 to 84 | 6.7%<br>(3.6-11%)              | 93%<br>(89-96%)          | 0.61<br>(0.28-1.1)                          | 2.8%<br>(1.8-4.1%)                   | 3.7%<br>(2.4-5.4%)                  | 100<br>(65-150)     | 1100<br>(720-1600)        |
| Ecuador  | 2005 | Female | 85 to 89 | 6.3%<br>(3.4-10%)              | 94%<br>(90-97%)          | 0.55<br>(0.24-1)                            | 2.4%<br>(1.4-3.7%)                   | 3.1%<br>(1.8-4.7%)                  | 81<br>(47-120)      | 620<br>(370-940)          |
| Ecuador  | 2005 | Female | 90 to 94 | 6.7%<br>(3.8-11%)              | 93%<br>(89-96%)          | 0.57<br>(0.25-1.1)                          | 2.2%<br>(1.1-3.5%)                   | 2.7%<br>(1.3-4.4%)                  | 53<br>(26-86)       | 280<br>(140-450)          |
| Ecuador  | 2005 | Female | 95 plus  | 8%<br>(3.9-14%)                | 92%<br>(86-96%)          | 0.63<br>(0.22-1.3)                          | 2.2%<br>(1-4.1%)                     | 2.6%<br>(1.1-4.8%)                  | 21<br>(9-39)        | 73<br>(33-130)            |
| Ecuador  | 2005 | Male   | All Ages | 23%<br>(20-27%)                | 77%<br>(73-80%)          | 3.7<br>(2.9-4.5)                            | 8.6%<br>(7.1-10%)                    | 11%<br>(9.1-13%)                    | 4000<br>(3300-4700) | 170000<br>(140000-200000) |
| Ecuador  | 2005 | Male   | 15 to 19 | 21%<br>(14-30%)                | 79%<br>(70-86%)          | 1.8<br>(0.9-3.1)                            | 7.3%<br>(4.5-11%)                    | 10%<br>(5.8-16%)                    | 99<br>(55-150)      | 8400<br>(5200-12000)      |
| Ecuador  | 2005 | Male   | 20 to 24 | 39%<br>(26-50%)                | 61%<br>(50-74%)          | 4.8<br>(2.8-7.4)                            | 16%<br>(11-21%)                      | 19%<br>(13-27%)                     | 290<br>(200-410)    | 23000<br>(16000-30000)    |
| Ecuador  | 2005 | Male   | 25 to 29 | 42%<br>(29-53%)                | 58%<br>(47-71%)          | 5.8<br>(3.4-8.8)                            | 16%<br>(11-20%)                      | 20%<br>(13-26%)                     | 280<br>(190-390)    | 21000<br>(15000-27000)    |
| Ecuador  | 2005 | Male   | 30 to 34 | 44%<br>(31-56%)                | 56%<br>(44-69%)          | 7.2<br>(4.5-11)                             | 16%<br>(12-20%)                      | 21%<br>(15-28%)                     | 290<br>(200-380)    | 19000<br>(14000-24000)    |
| Ecuador  | 2005 | Male   | 35 to 39 | 41%<br>(30-55%)                | 59%<br>(45-70%)          | 7.4<br>(4.5-11)                             | 16%<br>(12-20%)                      | 21%<br>(16-27%)                     | 280<br>(210-360)    | 17000<br>(13000-21000)    |
| Ecuador  | 2005 | Male   | 40 to 44 | 39%<br>(29-52%)                | 61%<br>(48-71%)          | 7<br>(4-11)                                 | 15%<br>(12-18%)                      | 21%<br>(16-26%)                     | 290<br>(220-360)    | 15000<br>(12000-19000)    |
| Ecuador  | 2005 | Male   | 45 to 49 | 43%<br>(31-56%)                | 57%<br>(44-69%)          | 7.8<br>(4.6-12)                             | 15%<br>(12-19%)                      | 21%<br>(17-26%)                     | 320<br>(260-400)    | 15000<br>(12000-18000)    |
| Ecuador  | 2005 | Male   | 50 to 54 | 43%<br>(31-54%)                | 57%<br>(46-69%)          | 8<br>(4.5-12)                               | 14%<br>(12-18%)                      | 20%<br>(16-24%)                     | 350<br>(280-430)    | 14000<br>(11000-17000)    |
| Ecuador  | 2005 | Male   | 55 to 59 | 36%<br>(25-49%)                | 64%<br>(51-75%)          | 6.9<br>(3.8-11)                             | 13%<br>(10-15%)                      | 17%<br>(14-21%)                     | 300<br>(240-370)    | 10000<br>(8400-13000)     |
| Ecuador  | 2005 | Male   | 60 to 64 | 30%<br>(19-42%)                | 70%<br>(58-81%)          | 5.4<br>(2.9-9.6)                            | 10%<br>(8.1-13%)                     | 14%<br>(11-17%)                     | 280<br>(220-360)    | 8300<br>(6500-10000)      |
| Ecuador  | 2005 | Male   | 65 to 69 | 29%<br>(19-41%)                | 71%<br>(59-81%)          | 4.6<br>(2.5-7.6)                            | 9.4%<br>(7.2-12%)                    | 12%<br>(9.6-15%)                    | 290<br>(220-360)    | 6900<br>(5300-8800)       |
| Ecuador  | 2005 | Male   | 70 to 74 | 28%<br>(18-39%)                | 72%<br>(61-82%)          | 3.6<br>(1.9-6.2)                            | 8.3%<br>(6.3-11%)                    | 11%<br>(8.1-13%)                    | 290<br>(220-370)    | 5700<br>(4300-7200)       |

| Location | Year | Sex    | Age      | Prevalence of current drinkers | Prevalence of abstainers | Population average of standard drinks daily | Percent of total attributable deaths | Percent of total attributable DALYs | Attributable deaths | Attributable DALYs     |
|----------|------|--------|----------|--------------------------------|--------------------------|---------------------------------------------|--------------------------------------|-------------------------------------|---------------------|------------------------|
| Ecuador  | 2005 | Male   | 75 to 79 | 23%<br>(14-35%)                | 77%<br>(65-86%)          | 2.3<br>(1.1-4.3)                            | 6.1%<br>(4.5-8.2%)                   | 7.7%<br>(5.6-10%)                   | 230<br>(170-310)    | 3500<br>(2500-4600)    |
| Ecuador  | 2005 | Male   | 80 to 84 | 18%<br>(11-28%)                | 82%<br>(72-89%)          | 1.7<br>(0.81-2.8)                           | 4.5%<br>(3.2-6.1%)                   | 5.6%<br>(4-7.7%)                    | 170<br>(120-230)    | 1800<br>(1300-2500)    |
| Ecuador  | 2005 | Male   | 85 to 89 | 17%<br>(9.4-26%)               | 83%<br>(74-91%)          | 1.5<br>(0.68-2.5)                           | 4%<br>(2.6-5.6%)                     | 4.8%<br>(3.2-6.7%)                  | 110<br>(75-160)     | 890<br>(590-1300)      |
| Ecuador  | 2005 | Male   | 90 to 94 | 17%<br>(10-26%)                | 83%<br>(74-90%)          | 1.4<br>(0.66-2.7)                           | 3.7%<br>(2.3-5.4%)                   | 4.3%<br>(2.6-6.5%)                  | 63<br>(38-93)       | 340<br>(210-500)       |
| Ecuador  | 2005 | Male   | 95 plus  | 19%<br>(10-32%)                | 81%<br>(68-90%)          | 1.5<br>(0.58-3.1)                           | 3.7%<br>(1.9-6%)                     | 4.2%<br>(2.1-7%)                    | 19<br>(9.5-32)      | 70<br>(36-110)         |
| Ecuador  | 2010 | Female | All Ages | 10%<br>(8.3-13%)               | 90%<br>(87-92%)          | 1.1<br>(0.79-1.4)                           | 2.9%<br>(2.4-3.5%)                   | 4.7%<br>(3.8-5.7%)                  | 1400<br>(1100-1700) | 47000<br>(38000-57000) |
| Ecuador  | 2010 | Female | 15 to 19 | 8.6%<br>(5-14%)                | 91%<br>(86-95%)          | 0.61<br>(0.29-1.1)                          | 2.1%<br>(1.2-3.4%)                   | 3.9%<br>(1.8-6.9%)                  | 19<br>(8.9-33)      | 1900<br>(1100-3000)    |
| Ecuador  | 2010 | Female | 20 to 24 | 13%<br>(7.4-19%)               | 87%<br>(81-93%)          | 1.4<br>(0.7-2.4)                            | 3.8%<br>(2.5-5.3%)                   | 6.4%<br>(3.9-9.6%)                  | 33<br>(20-51)       | 3400<br>(2300-4700)    |
| Ecuador  | 2010 | Female | 25 to 29 | 15%<br>(9-22%)                 | 85%<br>(78-91%)          | 1.9<br>(0.98-3.2)                           | 4.3%<br>(3.1-5.8%)                   | 7.7%<br>(4.9-11%)                   | 42<br>(27-60)       | 3800<br>(2600-5100)    |
| Ecuador  | 2010 | Female | 30 to 34 | 16%<br>(9.6-24%)               | 84%<br>(76-90%)          | 2<br>(1.1-3.4)                              | 4.1%<br>(2.9-5.5%)                   | 7.6%<br>(5.2-10%)                   | 43<br>(30-60)       | 3500<br>(2500-4700)    |
| Ecuador  | 2010 | Female | 35 to 39 | 18%<br>(10-27%)                | 82%<br>(73-90%)          | 2.1<br>(1.1-3.3)                            | 4.3%<br>(3.2-5.9%)                   | 8.4%<br>(5.9-11%)                   | 53<br>(38-70)       | 3700<br>(2700-4900)    |
| Ecuador  | 2010 | Female | 40 to 44 | 17%<br>(11-26%)                | 83%<br>(74-89%)          | 2<br>(1.1-3.2)                              | 4.5%<br>(3.3-6.1%)                   | 8.7%<br>(6.4-12%)                   | 67<br>(48-89)       | 3900<br>(2800-5200)    |
| Ecuador  | 2010 | Female | 45 to 49 | 15%<br>(9-23%)                 | 85%<br>(77-91%)          | 1.7<br>(0.84-2.9)                           | 4.5%<br>(3.2-6.1%)                   | 8.3%<br>(5.9-11%)                   | 79<br>(56-110)      | 3900<br>(2800-5300)    |
| Ecuador  | 2010 | Female | 50 to 54 | 14%<br>(9-21%)                 | 86%<br>(79-91%)          | 1.5<br>(0.77-2.6)                           | 4.5%<br>(3.1-6.3%)                   | 7.8%<br>(5.6-10%)                   | 94<br>(67-130)      | 4000<br>(2800-5400)    |
| Ecuador  | 2010 | Female | 55 to 59 | 14%<br>(8.9-21%)               | 86%<br>(79-91%)          | 1.6<br>(0.81-2.9)                           | 4.8%<br>(3.4-6.7%)                   | 7.9%<br>(5.8-11%)                   | 110<br>(83-160)     | 4100<br>(3000-5800)    |
| Ecuador  | 2010 | Female | 60 to 64 | 13%<br>(7.7-20%)               | 87%<br>(80-92%)          | 1.6<br>(0.74-2.8)                           | 5%<br>(3.5-6.9%)                     | 7.5%<br>(5.5-10%)                   | 120<br>(90-170)     | 3700<br>(2700-5100)    |
| Ecuador  | 2010 | Female | 65 to 69 | 11%<br>(6.5-16%)               | 89%<br>(84-94%)          | 1.3<br>(0.62-2.2)                           | 4.6%<br>(3.4-6.3%)                   | 6.9%<br>(5.3-9.2%)                  | 140<br>(100-180)    | 3300<br>(2500-4600)    |
| Ecuador  | 2010 | Female | 70 to 74 | 8.8%<br>(5.7-13%)              | 91%<br>(87-94%)          | 0.99<br>(0.47-1.8)                          | 4.2%<br>(3-5.8%)                     | 6.1%<br>(4.5-8.3%)                  | 140<br>(100-190)    | 2800<br>(2000-3900)    |
| Ecuador  | 2010 | Female | 75 to 79 | 7.7%<br>(4.3-12%)              | 92%<br>(88-96%)          | 0.77<br>(0.32-1.5)                          | 3.5%<br>(2.3-4.9%)                   | 4.8%<br>(3.3-6.6%)                  | 140<br>(95-200)     | 2100<br>(1400-2900)    |
| Ecuador  | 2010 | Female | 80 to 84 | 6.6%<br>(3.4-11%)              | 93%<br>(89-97%)          | 0.61<br>(0.27-1.1)                          | 2.8%<br>(1.9-4.1%)                   | 3.8%<br>(2.6-5.5%)                  | 130<br>(84-180)     | 1400<br>(920-2000)     |
| Ecuador  | 2010 | Female | 85 to 89 | 6.1%<br>(3.2-10%)              | 94%<br>(90-97%)          | 0.55<br>(0.24-1)                            | 2.4%<br>(1.5-3.7%)                   | 3.1%<br>(1.9-4.8%)                  | 99<br>(61-150)      | 760<br>(480-1200)      |
| Ecuador  | 2010 | Female | 90 to 94 | 6.5%<br>(3.7-11%)              | 94%<br>(89-96%)          | 0.56<br>(0.24-1.1)                          | 2.3%<br>(1.2-3.6%)                   | 2.7%<br>(1.5-4.5%)                  | 66<br>(35-110)      | 340<br>(190-550)       |

| Location | Year | Sex    | Age      | Prevalence of current drinkers | Prevalence of abstainers | Population average of standard drinks daily | Percent of total attributable deaths | Percent of total attributable DALYs | Attributable deaths | Attributable DALYs        |
|----------|------|--------|----------|--------------------------------|--------------------------|---------------------------------------------|--------------------------------------|-------------------------------------|---------------------|---------------------------|
| Ecuador  | 2010 | Female | 95 plus  | 7.7%<br>(3.8-13%)              | 92%<br>(87-96%)          | 0.62<br>(0.23-1.3)                          | 2.3%<br>(1-4.1%)                     | 2.7%<br>(1.2-4.9%)                  | 27<br>(12-49)       | 92<br>(43-170)            |
| Ecuador  | 2010 | Male   | All Ages | 22%<br>(18-26%)                | 78%<br>(74-82%)          | 3.7<br>(2.9-4.7)                            | 8.4%<br>(6.7-10%)                    | 10%<br>(8.7-12%)                    | 4000<br>(3300-4800) | 170000<br>(140000-200000) |
| Ecuador  | 2010 | Male   | 15 to 19 | 16%<br>(9.4-24%)               | 84%<br>(76-91%)          | 1.4<br>(0.67-2.6)                           | 5.9%<br>(3.6-9%)                     | 8.4%<br>(4.4-14%)                   | 76<br>(39-120)      | 6800<br>(4100-10000)      |
| Ecuador  | 2010 | Male   | 20 to 24 | 33%<br>(20-46%)                | 67%<br>(54-80%)          | 4.1<br>(2.2-6.8)                            | 14%<br>(9.1-19%)                     | 17%<br>(11-25%)                     | 250<br>(160-370)    | 20000<br>(13000-27000)    |
| Ecuador  | 2010 | Male   | 25 to 29 | 40%<br>(26-53%)                | 60%<br>(47-74%)          | 5.7<br>(3.2-8.9)                            | 15%<br>(10-20%)                      | 19%<br>(12-26%)                     | 280<br>(180-380)    | 20000<br>(14000-27000)    |
| Ecuador  | 2010 | Male   | 30 to 34 | 41%<br>(27-56%)                | 59%<br>(44-73%)          | 7.1<br>(4-11)                               | 15%<br>(10-19%)                      | 19%<br>(13-27%)                     | 260<br>(170-370)    | 18000<br>(13000-23000)    |
| Ecuador  | 2010 | Male   | 35 to 39 | 40%<br>(26-54%)                | 60%<br>(46-74%)          | 7.4<br>(4.2-12)                             | 14%<br>(11-19%)                      | 20%<br>(14-26%)                     | 270<br>(190-370)    | 17000<br>(12000-21000)    |
| Ecuador  | 2010 | Male   | 40 to 44 | 39%<br>(26-53%)                | 61%<br>(47-74%)          | 7.3<br>(3.9-12)                             | 14%<br>(11-18%)                      | 20%<br>(15-25%)                     | 280<br>(210-370)    | 15000<br>(11000-19000)    |
| Ecuador  | 2010 | Male   | 45 to 49 | 40%<br>(25-54%)                | 60%<br>(46-75%)          | 7.5<br>(4-12)                               | 14%<br>(10-17%)                      | 19%<br>(15-24%)                     | 310<br>(230-380)    | 14000<br>(11000-18000)    |
| Ecuador  | 2010 | Male   | 50 to 54 | 38%<br>(26-52%)                | 62%<br>(48-74%)          | 7.2<br>(3.9-12)                             | 13%<br>(9.9-16%)                     | 18%<br>(14-22%)                     | 330<br>(260-410)    | 13000<br>(11000-17000)    |
| Ecuador  | 2010 | Male   | 55 to 59 | 34%<br>(22-49%)                | 66%<br>(51-78%)          | 6.7<br>(3.6-11)                             | 11%<br>(8.8-14%)                     | 15%<br>(12-19%)                     | 330<br>(260-420)    | 12000<br>(9100-15000)     |
| Ecuador  | 2010 | Male   | 60 to 64 | 32%<br>(20-46%)                | 68%<br>(54-80%)          | 6.2<br>(3.2-11)                             | 10%<br>(7.9-13%)                     | 14%<br>(11-17%)                     | 300<br>(230-390)    | 9000<br>(6800-12000)      |
| Ecuador  | 2010 | Male   | 65 to 69 | 32%<br>(20-44%)                | 68%<br>(56-80%)          | 5.3<br>(2.7-8.9)                            | 9.5%<br>(7.1-12%)                    | 12%<br>(9.6-16%)                    | 330<br>(250-430)    | 8100<br>(6000-11000)      |
| Ecuador  | 2010 | Male   | 70 to 74 | 28%<br>(17-40%)                | 72%<br>(60-83%)          | 3.7<br>(1.8-6.5)                            | 7.9%<br>(6-10%)                      | 10%<br>(7.7-13%)                    | 310<br>(240-400)    | 6100<br>(4600-8000)       |
| Ecuador  | 2010 | Male   | 75 to 79 | 23%<br>(13-34%)                | 77%<br>(66-87%)          | 2.4<br>(1.1-4.5)                            | 6%<br>(4.4-8.1%)                     | 7.6%<br>(5.5-10%)                   | 260<br>(190-340)    | 3900<br>(2800-5200)       |
| Ecuador  | 2010 | Male   | 80 to 84 | 18%<br>(10-29%)                | 82%<br>(71-90%)          | 1.7<br>(0.82-3)                             | 4.6%<br>(3.3-6.2%)                   | 5.7%<br>(4.1-8%)                    | 190<br>(140-270)    | 2200<br>(1500-3000)       |
| Ecuador  | 2010 | Male   | 85 to 89 | 16%<br>(9.1-26%)               | 84%<br>(74-91%)          | 1.5<br>(0.67-2.6)                           | 4%<br>(2.7-5.7%)                     | 4.8%<br>(3.2-6.9%)                  | 140<br>(90-190)     | 1100<br>(720-1500)        |
| Ecuador  | 2010 | Male   | 90 to 94 | 17%<br>(9.8-26%)               | 83%<br>(74-90%)          | 1.4<br>(0.64-2.8)                           | 3.7%<br>(2.3-5.4%)                   | 4.3%<br>(2.7-6.4%)                  | 72<br>(44-110)      | 390<br>(240-570)          |
| Ecuador  | 2010 | Male   | 95 plus  | 19%<br>(9.7-31%)               | 81%<br>(69-90%)          | 1.5<br>(0.56-3.1)                           | 3.7%<br>(2-6%)                       | 4.2%<br>(2.2-7%)                    | 22<br>(12-38)       | 82<br>(44-130)            |
| Ecuador  | 2016 | Female | All Ages | 11%<br>(8.5-13%)               | 89%<br>(87-92%)          | 1.1<br>(0.76-1.6)                           | 2.9%<br>(2.4-3.6%)                   | 4.6%<br>(3.7-5.7%)                  | 1500<br>(1200-1900) | 50000<br>(40000-62000)    |
| Ecuador  | 2016 | Female | 15 to 19 | 8.7%<br>(5.1-14%)              | 91%<br>(86-95%)          | 0.62<br>(0.27-1.2)                          | 1.9%<br>(1.1-3.2%)                   | 3.5%<br>(1.5-6.3%)                  | 17<br>(7.2-30)      | 1800<br>(970-2800)        |
| Ecuador  | 2016 | Female | 20 to 24 | 13%<br>(7.6-19%)               | 87%<br>(81-92%)          | 1.4<br>(0.66-2.5)                           | 3.5%<br>(2.4-4.9%)                   | 5.8%<br>(3.4-8.7%)                  | 29<br>(17-45)       | 3200<br>(2100-4500)       |

| Location | Year | Sex    | Age      | Prevalence of current drinkers | Prevalence of abstainers | Population average of standard drinks daily | Percent of total attributable deaths | Percent of total attributable DALYs | Attributable deaths | Attributable DALYs        |
|----------|------|--------|----------|--------------------------------|--------------------------|---------------------------------------------|--------------------------------------|-------------------------------------|---------------------|---------------------------|
| Ecuador  | 2016 | Female | 25 to 29 | 15%<br>(8.9-21%)               | 85%<br>(79-91%)          | 1.9<br>(0.96-3.3)                           | 3.8%<br>(2.8-5.1%)                   | 6.7%<br>(4.2-9.4%)                  | 36<br>(23-53)       | 3600<br>(2500-4900)       |
| Ecuador  | 2016 | Female | 30 to 34 | 16%<br>(9.7-24%)               | 84%<br>(76-90%)          | 2.1<br>(1.1-3.5)                            | 3.7%<br>(2.7-5%)                     | 6.8%<br>(4.6-9.5%)                  | 40<br>(27-57)       | 3400<br>(2500-4700)       |
| Ecuador  | 2016 | Female | 35 to 39 | 18%<br>(11-26%)                | 82%<br>(74-89%)          | 2.1<br>(1.1-3.5)                            | 4%<br>(2.9-5.5%)                     | 7.8%<br>(5.5-10%)                   | 51<br>(35-70)       | 3700<br>(2700-5000)       |
| Ecuador  | 2016 | Female | 40 to 44 | 18%<br>(11-26%)                | 82%<br>(74-89%)          | 2<br>(1-3.4)                                | 4.1%<br>(3-5.6%)                     | 8.1%<br>(5.8-11%)                   | 65<br>(46-88)       | 4000<br>(2900-5400)       |
| Ecuador  | 2016 | Female | 45 to 49 | 16%<br>(8.9-23%)               | 84%<br>(77-91%)          | 1.7<br>(0.81-3)                             | 4.2%<br>(2.9-5.8%)                   | 7.9%<br>(5.5-11%)                   | 82<br>(57-110)      | 4200<br>(3000-5800)       |
| Ecuador  | 2016 | Female | 50 to 54 | 14%<br>(9-21%)                 | 86%<br>(79-91%)          | 1.5<br>(0.73-2.7)                           | 4.3%<br>(3-5.9%)                     | 7.5%<br>(5.3-10%)                   | 99<br>(69-130)      | 4300<br>(3000-5900)       |
| Ecuador  | 2016 | Female | 55 to 59 | 14%<br>(8.8-21%)               | 86%<br>(79-91%)          | 1.6<br>(0.78-3)                             | 4.6%<br>(3.2-6.3%)                   | 7.6%<br>(5.6-10%)                   | 120<br>(89-170)     | 4500<br>(3200-6300)       |
| Ecuador  | 2016 | Female | 60 to 64 | 13%<br>(7.5-20%)               | 87%<br>(80-93%)          | 1.5<br>(0.71-2.9)                           | 4.6%<br>(3.3-6.6%)                   | 7.2%<br>(5.2-9.7%)                  | 150<br>(110-210)    | 4600<br>(3300-6600)       |
| Ecuador  | 2016 | Female | 65 to 69 | 11%<br>(6.4-16%)               | 89%<br>(84-94%)          | 1.3<br>(0.6-2.2)                            | 4.4%<br>(3.2-6.1%)                   | 6.7%<br>(5.1-8.9%)                  | 150<br>(110-210)    | 3700<br>(2700-5200)       |
| Ecuador  | 2016 | Female | 70 to 74 | 8.8%<br>(5.6-13%)              | 91%<br>(87-94%)          | 0.98<br>(0.43-1.8)                          | 4%<br>(2.8-5.6%)                     | 6%<br>(4.3-8%)                      | 160<br>(110-220)    | 3200<br>(2200-4300)       |
| Ecuador  | 2016 | Female | 75 to 79 | 7.7%<br>(4.3-13%)              | 92%<br>(87-96%)          | 0.77<br>(0.31-1.5)                          | 3.3%<br>(2.2-4.6%)                   | 4.7%<br>(3.2-6.5%)                  | 160<br>(110-210)    | 2300<br>(1600-3400)       |
| Ecuador  | 2016 | Female | 80 to 84 | 6.7%<br>(3.5-11%)              | 93%<br>(89-97%)          | 0.62<br>(0.26-1.2)                          | 2.8%<br>(1.8-4.1%)                   | 3.8%<br>(2.6-5.4%)                  | 140<br>(96-210)     | 1600<br>(1100-2300)       |
| Ecuador  | 2016 | Female | 85 to 89 | 6.2%<br>(3.3-10%)              | 94%<br>(90-97%)          | 0.56<br>(0.25-1.1)                          | 2.4%<br>(1.4-3.7%)                   | 3.1%<br>(1.9-4.7%)                  | 120<br>(72-180)     | 930<br>(560-1400)         |
| Ecuador  | 2016 | Female | 90 to 94 | 6.7%<br>(3.8-11%)              | 93%<br>(89-96%)          | 0.57<br>(0.25-1.1)                          | 2.2%<br>(1.2-3.7%)                   | 2.7%<br>(1.5-4.4%)                  | 83<br>(44-140)      | 430<br>(230-720)          |
| Ecuador  | 2016 | Female | 95 plus  | 7.9%<br>(3.9-14%)              | 92%<br>(86-96%)          | 0.63<br>(0.23-1.4)                          | 2.3%<br>(1.1-4.1%)                   | 2.7%<br>(1.2-5%)                    | 33<br>(15-61)       | 110<br>(53-210)           |
| Ecuador  | 2016 | Male   | All Ages | 22%<br>(18-27%)                | 78%<br>(73-82%)          | 3.7<br>(2.7-5.1)                            | 8.1%<br>(6.6-9.7%)                   | 9.9%<br>(8.3-12%)                   | 4200<br>(3400-5100) | 170000<br>(140000-210000) |
| Ecuador  | 2016 | Male   | 15 to 19 | 15%<br>(9.3-23%)               | 85%<br>(77-91%)          | 1.4<br>(0.63-2.6)                           | 5.3%<br>(3.2-8%)                     | 7.4%<br>(3.7-12%)                   | 65<br>(33-110)      | 6000<br>(3600-9000)       |
| Ecuador  | 2016 | Male   | 20 to 24 | 33%<br>(20-45%)                | 67%<br>(55-80%)          | 4.1<br>(2-6.8)                              | 13%<br>(8.6-17%)                     | 16%<br>(9.9-23%)                    | 220<br>(140-330)    | 18000<br>(12000-26000)    |
| Ecuador  | 2016 | Male   | 25 to 29 | 39%<br>(26-53%)                | 61%<br>(47-74%)          | 5.6<br>(2.9-9.2)                            | 14%<br>(9.6-18%)                     | 17%<br>(11-24%)                     | 260<br>(160-360)    | 19000<br>(13000-26000)    |
| Ecuador  | 2016 | Male   | 30 to 34 | 41%<br>(26-56%)                | 59%<br>(44-74%)          | 6.9<br>(3.8-11)                             | 13%<br>(9.5-17%)                     | 18%<br>(12-24%)                     | 250<br>(160-350)    | 17000<br>(12000-23000)    |
| Ecuador  | 2016 | Male   | 35 to 39 | 39%<br>(26-53%)                | 61%<br>(47-74%)          | 7.2<br>(4.1-12)                             | 13%<br>(9.8-17%)                     | 18%<br>(13-24%)                     | 260<br>(180-350)    | 16000<br>(12000-21000)    |
| Ecuador  | 2016 | Male   | 40 to 44 | 38%<br>(26-53%)                | 62%<br>(47-74%)          | 7.1<br>(3.7-12)                             | 12%<br>(9.6-16%)                     | 18%<br>(13-23%)                     | 270<br>(200-360)    | 15000<br>(11000-19000)    |



| Location | Year | Sex    | Age      | Prevalence of current drinkers | Prevalence of abstainers | Population average of standard drinks daily | Percent of total attributable deaths | Percent of total attributable DALYs | Attributable deaths | Attributable DALYs       |
|----------|------|--------|----------|--------------------------------|--------------------------|---------------------------------------------|--------------------------------------|-------------------------------------|---------------------|--------------------------|
| Ecuador  | 2016 | Male   | 45 to 49 | 40%<br>(25-54%)                | 60%<br>(46-75%)          | 7.3<br>(3.7-12)                             | 13%<br>(9.7-16%)                     | 18%<br>(14-23%)                     | 310<br>(240-400)    | 15000<br>(12000-19000)   |
| Ecuador  | 2016 | Male   | 50 to 54 | 38%<br>(26-51%)                | 62%<br>(49-74%)          | 7<br>(3.5-12)                               | 12%<br>(9.3-15%)                     | 17%<br>(13-21%)                     | 340<br>(270-440)    | 14000<br>(11000-18000)   |
| Ecuador  | 2016 | Male   | 55 to 59 | 34%<br>(22-48%)                | 66%<br>(52-78%)          | 6.5<br>(3.2-11)                             | 10%<br>(8-13%)                       | 15%<br>(12-18%)                     | 350<br>(270-440)    | 12000<br>(9500-16000)    |
| Ecuador  | 2016 | Male   | 60 to 64 | 32%<br>(20-46%)                | 68%<br>(54-80%)          | 6.1<br>(2.9-11)                             | 9.5%<br>(7.3-12%)                    | 13%<br>(10-16%)                     | 370<br>(280-480)    | 11000<br>(8400-14000)    |
| Ecuador  | 2016 | Male   | 65 to 69 | 31%<br>(20-44%)                | 69%<br>(56-80%)          | 5.2<br>(2.6-8.9)                            | 9%<br>(6.7-12%)                      | 12%<br>(9.2-15%)                    | 360<br>(270-460)    | 8900<br>(6600-11000)     |
| Ecuador  | 2016 | Male   | 70 to 74 | 27%<br>(17-39%)                | 73%<br>(61-83%)          | 3.6<br>(1.7-6.5)                            | 7.6%<br>(5.5-9.8%)                   | 9.8%<br>(7.4-12%)                   | 350<br>(260-460)    | 6900<br>(5100-9000)      |
| Ecuador  | 2016 | Male   | 75 to 79 | 22%<br>(13-34%)                | 78%<br>(66-87%)          | 2.3<br>(1.1-4.5)                            | 5.8%<br>(4.1-7.8%)                   | 7.3%<br>(5.3-9.9%)                  | 290<br>(200-390)    | 4400<br>(3100-5900)      |
| Ecuador  | 2016 | Male   | 80 to 84 | 18%<br>(10-28%)                | 82%<br>(72-90%)          | 1.7<br>(0.76-3)                             | 4.4%<br>(3.1-5.9%)                   | 5.5%<br>(3.9-7.6%)                  | 220<br>(150-300)    | 2400<br>(1700-3400)      |
| Ecuador  | 2016 | Male   | 85 to 89 | 16%<br>(8.9-25%)               | 84%<br>(75-91%)          | 1.4<br>(0.63-2.6)                           | 3.8%<br>(2.6-5.4%)                   | 4.6%<br>(3.1-6.5%)                  | 160<br>(100-220)    | 1200<br>(820-1800)       |
| Ecuador  | 2016 | Male   | 90 to 94 | 16%<br>(9.6-25%)               | 84%<br>(75-90%)          | 1.4<br>(0.58-2.7)                           | 3.5%<br>(2.2-5.1%)                   | 4.1%<br>(2.5-6%)                    | 85<br>(52-120)      | 460<br>(290-670)         |
| Ecuador  | 2016 | Male   | 95 plus  | 18%<br>(9.5-31%)               | 82%<br>(69-91%)          | 1.4<br>(0.55-3)                             | 3.5%<br>(1.9-5.7%)                   | 4%<br>(2.1-6.7%)                    | 25<br>(13-42)       | 94<br>(51-150)           |
| Peru     | 1990 | Female | All Ages | 68%<br>(64-71%)                | 32%<br>(29-36%)          | 1.6<br>(1.4-1.9)                            | 2.6%<br>(1.9-3.3%)                   | 4.4%<br>(2.9-6.1%)                  | 2600<br>(1700-3600) | 110000<br>(77000-130000) |
| Peru     | 1990 | Female | 15 to 19 | 58%<br>(48-65%)                | 42%<br>(35-52%)          | 1.3<br>(0.75-1.9)                           | 3.6%<br>(1.8-5.8%)                   | 6.6%<br>(2.9-11%)                   | 68<br>(31-120)      | 5900<br>(3000-9400)      |
| Peru     | 1990 | Female | 20 to 24 | 84%<br>(78-88%)                | 16%<br>(12-22%)          | 2.5<br>(1.6-3.6)                            | 7%<br>(4.2-10%)                      | 12%<br>(6.7-17%)                    | 150<br>(83-230)     | 12000<br>(7500-17000)    |
| Peru     | 1990 | Female | 25 to 29 | 87%<br>(83-90%)                | 13%<br>(10-17%)          | 3<br>(2-4.2)                                | 7.6%<br>(4.9-11%)                    | 14%<br>(8.6-19%)                    | 160<br>(99-230)     | 12000<br>(7400-16000)    |
| Peru     | 1990 | Female | 30 to 34 | 89%<br>(85-91%)                | 11%<br>(8.8-15%)         | 3.2<br>(2.1-4.5)                            | 7.3%<br>(4.9-10%)                    | 13%<br>(8.6-19%)                    | 160<br>(100-240)    | 11000<br>(6900-15000)    |
| Peru     | 1990 | Female | 35 to 39 | 89%<br>(85-91%)                | 11%<br>(8.8-15%)         | 3.1<br>(2-4.3)                              | 7.1%<br>(4.5-10%)                    | 13%<br>(8-17%)                      | 170<br>(100-250)    | 9800<br>(6100-14000)     |
| Peru     | 1990 | Female | 40 to 44 | 89%<br>(86-92%)                | 11%<br>(8.3-14%)         | 3.1<br>(1.9-4.5)                            | 7.1%<br>(4.3-10%)                    | 13%<br>(7.6-18%)                    | 170<br>(100-240)    | 8600<br>(5100-12000)     |
| Peru     | 1990 | Female | 45 to 49 | 90%<br>(86-92%)                | 9.8%<br>(7.5-14%)        | 3.2<br>(2-4.9)                              | 7.4%<br>(4.5-11%)                    | 13%<br>(8-19%)                      | 190<br>(120-280)    | 8500<br>(5100-12000)     |
| Peru     | 1990 | Female | 50 to 54 | 90%<br>(86-92%)                | 10%<br>(7.9-14%)         | 3.2<br>(1.9-4.9)                            | 7.7%<br>(4.6-12%)                    | 13%<br>(7.9-19%)                    | 220<br>(130-320)    | 8500<br>(5000-13000)     |
| Peru     | 1990 | Female | 55 to 59 | 88%<br>(83-91%)                | 12%<br>(9.1-17%)         | 3.1<br>(1.9-4.8)                            | 7.7%<br>(4.5-12%)                    | 12%<br>(7.5-18%)                    | 250<br>(150-370)    | 8200<br>(4800-12000)     |
| Peru     | 1990 | Female | 60 to 64 | 85%<br>(80-89%)                | 15%<br>(11-20%)          | 3<br>(1.8-4.6)                              | 7.1%<br>(3.5-11%)                    | 10%<br>(5.4-16%)                    | 260<br>(130-410)    | 7300<br>(3700-12000)     |

| Location | Year | Sex    | Age      | Prevalence of current drinkers | Prevalence of abstainers | Population average of standard drinks daily | Percent of total attributable deaths | Percent of total attributable DALYs | Attributable deaths | Attributable DALYs        |
|----------|------|--------|----------|--------------------------------|--------------------------|---------------------------------------------|--------------------------------------|-------------------------------------|---------------------|---------------------------|
| Peru     | 1990 | Female | 65 to 69 | 82%<br>(75-87%)                | 18%<br>(13-25%)          | 2.8<br>(1.7-4.1)                            | 6.1%<br>(3-9.7%)                     | 8.8%<br>(4.4-14%)                   | 250<br>(120-390)    | 5800<br>(2700-9300)       |
| Peru     | 1990 | Female | 70 to 74 | 79%<br>(71-84%)                | 21%<br>(16-29%)          | 2.4<br>(1.3-3.7)                            | 4.6%<br>(1.5-8.3%)                   | 6.5%<br>(2.4-12%)                   | 210<br>(76-370)     | 3900<br>(1300-6900)       |
| Peru     | 1990 | Female | 75 to 79 | 76%<br>(66-84%)                | 24%<br>(16-34%)          | 2<br>(1.1-3.2)                              | 3.2%<br>(0.35-6.8%)                  | 4.3%<br>(0.58-9%)                   | 160<br>(23-330)     | 2300<br>(260-4800)        |
| Peru     | 1990 | Female | 80 to 84 | 70%<br>(58-79%)                | 30%<br>(21-42%)          | 1.7<br>(0.96-2.6)                           | 2.2%<br>(-0.29-5.3%)                 | 2.8%<br>(-0.37-6.7%)                | 99<br>(-13-240)     | 1100<br>(-140-2500)       |
| Peru     | 1990 | Female | 85 to 89 | 64%<br>(51-75%)                | 36%<br>(25-49%)          | 1.5<br>(0.86-2.4)                           | 1.4%<br>(-0.72-4.3%)                 | 1.7%<br>(-0.96-5.2%)                | 48<br>(-27-150)     | 370<br>(-190-1100)        |
| Peru     | 1990 | Female | 90 to 94 | 62%<br>(50-73%)                | 38%<br>(27-50%)          | 1.5<br>(0.77-2.4)                           | 0.78%<br>(-1.3-3.6%)                 | 0.83%<br>(-1.8-4.4%)                | 12<br>(-27-67)      | 72<br>(-120-350)          |
| Peru     | 1990 | Female | 95 plus  | 62%<br>(46-74%)                | 38%<br>(26-54%)          | 1.4<br>(0.67-2.4)                           | 0.46%<br>(-1.8-3.9%)                 | 0.36%<br>(-2.4-4.6%)                | 1.8<br>(-12-23)     | 9.3<br>(-37-79)           |
| Peru     | 1990 | Male   | All Ages | 75%<br>(71-79%)                | 25%<br>(21-29%)          | 2.8<br>(2.4-3.3)                            | 5.9%<br>(5-7%)                       | 9.3%<br>(7.3-11%)                   | 6500<br>(5000-8000) | 270000<br>(230000-320000) |
| Peru     | 1990 | Male   | 15 to 19 | 61%<br>(50-70%)                | 39%<br>(30-50%)          | 1.7<br>(0.97-2.5)                           | 6.6%<br>(4.1-9.4%)                   | 9.1%<br>(5.1-13%)                   | 150<br>(85-220)     | 13000<br>(7800-18000)     |
| Peru     | 1990 | Male   | 20 to 24 | 93%<br>(90-95%)                | 7.1%<br>(4.9-10%)        | 3.9<br>(2.5-5.4)                            | 15%<br>(11-19%)                      | 19%<br>(13-25%)                     | 400<br>(280-530)    | 32000<br>(23000-42000)    |
| Peru     | 1990 | Male   | 25 to 29 | 96%<br>(94-97%)                | 4.4%<br>(3.2-6.3%)       | 5<br>(3.4-7)                                | 18%<br>(13-22%)                      | 24%<br>(17-31%)                     | 450<br>(320-610)    | 33000<br>(24000-43000)    |
| Peru     | 1990 | Male   | 30 to 34 | 97%<br>(96-98%)                | 2.9%<br>(2-4.3%)         | 5.6<br>(4-7.6)                              | 18%<br>(14-22%)                      | 25%<br>(19-32%)                     | 430<br>(320-550)    | 28000<br>(22000-35000)    |
| Peru     | 1990 | Male   | 35 to 39 | 98%<br>(97-99%)                | 2.2%<br>(1.5-3.4%)       | 5.9<br>(3.9-8.3)                            | 18%<br>(14-23%)                      | 26%<br>(19-33%)                     | 460<br>(330-600)    | 27000<br>(20000-34000)    |
| Peru     | 1990 | Male   | 40 to 44 | 98%<br>(97-99%)                | 2%<br>(1.2-3%)           | 6<br>(3.8-8.6)                              | 18%<br>(14-23%)                      | 26%<br>(19-33%)                     | 470<br>(340-610)    | 24000<br>(18000-31000)    |
| Peru     | 1990 | Male   | 45 to 49 | 98%<br>(97-99%)                | 2.1%<br>(1.3-3.3%)       | 6<br>(3.7-9.2)                              | 18%<br>(13-23%)                      | 26%<br>(19-32%)                     | 530<br>(370-680)    | 24000<br>(17000-30000)    |
| Peru     | 1990 | Male   | 50 to 54 | 98%<br>(97-99%)                | 1.9%<br>(1.2-3%)         | 6.1<br>(3.7-9.2)                            | 18%<br>(13-22%)                      | 24%<br>(17-30%)                     | 580<br>(400-730)    | 23000<br>(16000-29000)    |
| Peru     | 1990 | Male   | 55 to 59 | 98%<br>(97-99%)                | 1.7%<br>(1-2.6%)         | 6.1<br>(3.9-9)                              | 17%<br>(12-21%)                      | 23%<br>(17-29%)                     | 630<br>(450-800)    | 21000<br>(15000-27000)    |
| Peru     | 1990 | Male   | 60 to 64 | 98%<br>(97-99%)                | 1.6%<br>(0.93-2.6%)      | 5.6<br>(3.4-8.4)                            | 15%<br>(9.8-20%)                     | 19%<br>(13-26%)                     | 630<br>(410-820)    | 18000<br>(12000-23000)    |
| Peru     | 1990 | Male   | 65 to 69 | 98%<br>(97-99%)                | 1.8%<br>(1.1-2.9%)       | 4.8<br>(3-7.2)                              | 13%<br>(7.8-17%)                     | 16%<br>(9.9-22%)                    | 570<br>(350-780)    | 13000<br>(8500-19000)     |
| Peru     | 1990 | Male   | 70 to 74 | 98%<br>(96-98%)                | 2.5%<br>(1.5-3.9%)       | 4<br>(2.3-6)                                | 9.6%<br>(5.1-15%)                    | 12%<br>(6.5-19%)                    | 450<br>(240-690)    | 8500<br>(4600-13000)      |
| Peru     | 1990 | Male   | 75 to 79 | 96%<br>(93-98%)                | 3.8%<br>(2.1-6.6%)       | 3.2<br>(1.7-5.1)                            | 7.1%<br>(2.9-12%)                    | 8.6%<br>(3.4-15%)                   | 340<br>(130-600)    | 5000<br>(2000-8600)       |
| Peru     | 1990 | Male   | 80 to 84 | 95%<br>(91-97%)                | 5.5%<br>(3.2-9.3%)       | 2.6<br>(1.5-4.1)                            | 5.4%<br>(2.1-9.7%)                   | 6.3%<br>(2.3-12%)                   | 210<br>(77-390)     | 2300<br>(890-4100)        |

| Location | Year | Sex    | Age      | Prevalence of current drinkers | Prevalence of abstainers | Population average of standard drinks daily | Percent of total attributable deaths | Percent of total attributable DALYs | Attributable deaths | Attributable DALYs        |
|----------|------|--------|----------|--------------------------------|--------------------------|---------------------------------------------|--------------------------------------|-------------------------------------|---------------------|---------------------------|
| Peru     | 1990 | Male   | 85 to 89 | 93%<br>(89-96%)                | 6.6%<br>(3.6-11%)        | 2.4<br>(1.4-3.8)                            | 3.9%<br>(1-7.8%)                     | 4.5%<br>(1-9.1%)                    | 110<br>(24-220)     | 830<br>(220-1700)         |
| Peru     | 1990 | Male   | 90 to 94 | 93%<br>(89-97%)                | 6.7%<br>(3.4-11%)        | 2.4<br>(1.3-3.9)                            | 2.9%<br>(-0.015-6.9%)                | 3.1%<br>(-0.36-7.9%)                | 37<br>(-4.4-97)     | 210<br>(-1.1-500)         |
| Peru     | 1990 | Male   | 95 plus  | 94%<br>(88-97%)                | 6.4%<br>(2.7-12%)        | 2.3<br>(1.2-4)                              | 2.2%<br>(-0.85-7.2%)                 | 2.2%<br>(-1.5-8.1%)                 | 8.1<br>(-5.6-30)    | 33<br>(-13-100)           |
| Peru     | 1995 | Female | All Ages | 69%<br>(65-72%)                | 31%<br>(28-35%)          | 1.6<br>(1.3-1.9)                            | 2.9%<br>(2.1-3.7%)                   | 4.5%<br>(2.8-6.4%)                  | 2700<br>(1600-3800) | 110000<br>(78000-140000)  |
| Peru     | 1995 | Female | 15 to 19 | 58%<br>(48-66%)                | 42%<br>(34-52%)          | 1.2<br>(0.7-1.8)                            | 3.2%<br>(1.6-5.4%)                   | 5.9%<br>(2.6-9.7%)                  | 65<br>(29-110)      | 5700<br>(2800-8900)       |
| Peru     | 1995 | Female | 20 to 24 | 84%<br>(79-88%)                | 16%<br>(12-21%)          | 2.4<br>(1.5-3.3)                            | 6.3%<br>(3.7-9%)                     | 11%<br>(6-16%)                      | 140<br>(77-210)     | 11000<br>(6800-16000)     |
| Peru     | 1995 | Female | 25 to 29 | 87%<br>(83-90%)                | 13%<br>(9.9-17%)         | 2.7<br>(1.8-3.9)                            | 6.7%<br>(4.2-9.1%)                   | 12%<br>(7.2-17%)                    | 150<br>(93-220)     | 11000<br>(7200-16000)     |
| Peru     | 1995 | Female | 30 to 34 | 89%<br>(85-91%)                | 11%<br>(8.9-15%)         | 2.9<br>(2-4)                                | 6.3%<br>(4.1-8.8%)                   | 12%<br>(7.4-16%)                    | 160<br>(99-220)     | 10000<br>(6800-15000)     |
| Peru     | 1995 | Female | 35 to 39 | 89%<br>(85-91%)                | 11%<br>(8.7-15%)         | 2.8<br>(1.8-4)                              | 6.2%<br>(4-8.7%)                     | 11%<br>(6.9-15%)                    | 170<br>(110-240)    | 9800<br>(6400-14000)      |
| Peru     | 1995 | Female | 40 to 44 | 89%<br>(86-92%)                | 11%<br>(8.3-14%)         | 2.8<br>(1.8-4.1)                            | 6.2%<br>(3.9-8.9%)                   | 11%<br>(6.7-16%)                    | 180<br>(110-260)    | 9100<br>(5700-13000)      |
| Peru     | 1995 | Female | 45 to 49 | 90%<br>(86-93%)                | 9.8%<br>(7.4-14%)        | 2.9<br>(1.8-4.5)                            | 6.6%<br>(4-9.9%)                     | 11%<br>(7.1-16%)                    | 200<br>(120-300)    | 8900<br>(5400-13000)      |
| Peru     | 1995 | Female | 50 to 54 | 90%<br>(86-92%)                | 10%<br>(7.9-14%)         | 2.9<br>(1.8-4.5)                            | 7.1%<br>(4-11%)                      | 12%<br>(7.1-17%)                    | 240<br>(140-350)    | 9000<br>(5100-14000)      |
| Peru     | 1995 | Female | 55 to 59 | 88%<br>(83-91%)                | 12%<br>(9.1-17%)         | 2.9<br>(1.8-4.3)                            | 7.1%<br>(4.1-11%)                    | 11%<br>(6.7-16%)                    | 260<br>(160-390)    | 8800<br>(5200-13000)      |
| Peru     | 1995 | Female | 60 to 64 | 85%<br>(80-89%)                | 15%<br>(11-20%)          | 2.8<br>(1.7-4.2)                            | 6.4%<br>(3.2-10%)                    | 9.3%<br>(4.9-15%)                   | 280<br>(150-450)    | 8000<br>(4100-13000)      |
| Peru     | 1995 | Female | 65 to 69 | 82%<br>(76-87%)                | 18%<br>(13-24%)          | 2.6<br>(1.6-3.8)                            | 5.5%<br>(2.5-9%)                     | 7.7%<br>(3.7-13%)                   | 280<br>(130-450)    | 6400<br>(3000-10000)      |
| Peru     | 1995 | Female | 70 to 74 | 79%<br>(72-85%)                | 21%<br>(15-28%)          | 2.2<br>(1.2-3.4)                            | 4.1%<br>(1.1-7.6%)                   | 5.6%<br>(1.7-10%)                   | 230<br>(70-410)     | 4100<br>(1200-7700)       |
| Peru     | 1995 | Female | 75 to 79 | 76%<br>(67-84%)                | 24%<br>(16-33%)          | 1.8<br>(0.99-3)                             | 2.7%<br>(-0.017-6%)                  | 3.6%<br>(0.099-7.8%)                | 160<br>(4.4-350)    | 2300<br>(-14-5000)        |
| Peru     | 1995 | Female | 80 to 84 | 71%<br>(60-80%)                | 29%<br>(20-40%)          | 1.6<br>(0.91-2.4)                           | 1.7%<br>(-0.62-4.5%)                 | 2.2%<br>(-0.81-5.7%)                | 98<br>(-35-260)     | 1000<br>(-360-2700)       |
| Peru     | 1995 | Female | 85 to 89 | 65%<br>(52-75%)                | 35%<br>(25-48%)          | 1.4<br>(0.8-2.2)                            | 1%<br>(-0.95-3.5%)                   | 1.2%<br>(-1.2-4.3%)                 | 47<br>(-49-170)     | 370<br>(-340-1300)        |
| Peru     | 1995 | Female | 90 to 94 | 63%<br>(51-74%)                | 37%<br>(26-49%)          | 1.4<br>(0.73-2.2)                           | 0.44%<br>(-1.7-3.1%)                 | 0.42%<br>(-2.1-3.7%)                | 8.9<br>(-46-81)     | 58<br>(-220-420)          |
| Peru     | 1995 | Female | 95 plus  | 63%<br>(48-75%)                | 37%<br>(25-52%)          | 1.3<br>(0.65-2.3)                           | 0.14%<br>(-2.1-3.3%)                 | -0.02%<br>(-2.7-3.8%)               | -0.15<br>(-20-27)   | 4<br>(-60-93)             |
| Peru     | 1995 | Male   | All Ages | 76%<br>(73-80%)                | 24%<br>(20-27%)          | 2.8<br>(2.4-3.3)                            | 6.9%<br>(5.7-8.1%)                   | 10%<br>(7.8-12%)                    | 6800<br>(5200-8600) | 290000<br>(240000-340000) |

| Location | Year | Sex    | Age      | Prevalence of current drinkers | Prevalence of abstainers | Population average of standard drinks daily | Percent of total attributable deaths | Percent of total attributable DALYs | Attributable deaths | Attributable DALYs      |
|----------|------|--------|----------|--------------------------------|--------------------------|---------------------------------------------|--------------------------------------|-------------------------------------|---------------------|-------------------------|
| Peru     | 1995 | Male   | 15 to 19 | 61%<br>(50-70%)                | 39%<br>(30-50%)          | 1.6<br>(0.92-2.4)                           | 6.2%<br>(3.9-8.6%)                   | 8.8%<br>(5-13%)                     | 140<br>(75-200)     | 12000<br>(7600-17000)   |
| Peru     | 1995 | Male   | 20 to 24 | 93%<br>(90-95%)                | 7.1%<br>(4.9-10%)        | 3.7<br>(2.4-5.1)                            | 14%<br>(11-18%)                      | 19%<br>(13-25%)                     | 380<br>(260-500)    | 31000<br>(22000-40000)  |
| Peru     | 1995 | Male   | 25 to 29 | 96%<br>(94-97%)                | 4.4%<br>(3.2-6.1%)       | 4.7<br>(3.2-6.7)                            | 17%<br>(13-21%)                      | 23%<br>(17-29%)                     | 460<br>(330-600)    | 34000<br>(25000-43000)  |
| Peru     | 1995 | Male   | 30 to 34 | 97%<br>(96-98%)                | 2.8%<br>(1.9-4.2%)       | 5.4<br>(3.7-7.3)                            | 17%<br>(13-21%)                      | 24%<br>(18-30%)                     | 470<br>(350-600)    | 31000<br>(24000-39000)  |
| Peru     | 1995 | Male   | 35 to 39 | 98%<br>(97-99%)                | 2.2%<br>(1.5-3.3%)       | 5.6<br>(3.7-8)                              | 17%<br>(13-22%)                      | 25%<br>(18-31%)                     | 490<br>(350-640)    | 29000<br>(21000-37000)  |
| Peru     | 1995 | Male   | 40 to 44 | 98%<br>(97-99%)                | 1.9%<br>(1.2-3%)         | 5.8<br>(3.7-8.2)                            | 17%<br>(13-22%)                      | 25%<br>(18-31%)                     | 510<br>(360-650)    | 26000<br>(19000-33000)  |
| Peru     | 1995 | Male   | 45 to 49 | 98%<br>(97-99%)                | 2%<br>(1.3-3.2%)         | 5.7<br>(3.6-8.7)                            | 17%<br>(13-22%)                      | 25%<br>(18-31%)                     | 570<br>(400-740)    | 26000<br>(18000-33000)  |
| Peru     | 1995 | Male   | 50 to 54 | 98%<br>(97-99%)                | 1.9%<br>(1.2-2.9%)       | 5.8<br>(3.5-8.7)                            | 17%<br>(12-21%)                      | 23%<br>(16-29%)                     | 600<br>(410-770)    | 23000<br>(16000-30000)  |
| Peru     | 1995 | Male   | 55 to 59 | 98%<br>(97-99%)                | 1.6%<br>(1-2.5%)         | 5.8<br>(3.7-8.5)                            | 16%<br>(11-20%)                      | 22%<br>(15-27%)                     | 660<br>(460-870)    | 22000<br>(16000-29000)  |
| Peru     | 1995 | Male   | 60 to 64 | 98%<br>(97-99%)                | 1.6%<br>(0.92-2.6%)      | 5.3<br>(3.2-8)                              | 14%<br>(9.2-19%)                     | 18%<br>(12-24%)                     | 680<br>(440-920)    | 19000<br>(13000-26000)  |
| Peru     | 1995 | Male   | 65 to 69 | 98%<br>(97-99%)                | 1.8%<br>(1.1-2.9%)       | 4.6<br>(2.9-6.8)                            | 12%<br>(7.3-16%)                     | 15%<br>(9.2-21%)                    | 620<br>(390-890)    | 15000<br>(9100-21000)   |
| Peru     | 1995 | Male   | 70 to 74 | 98%<br>(96-98%)                | 2.4%<br>(1.5-3.8%)       | 3.8<br>(2.3-5.8)                            | 8.7%<br>(4.6-14%)                    | 11%<br>(5.7-17%)                    | 500<br>(260-790)    | 9400<br>(5000-15000)    |
| Peru     | 1995 | Male   | 75 to 79 | 96%<br>(94-98%)                | 3.8%<br>(2.1-6.4%)       | 3<br>(1.6-4.8)                              | 6.3%<br>(2.6-11%)                    | 7.7%<br>(3.1-14%)                   | 360<br>(150-640)    | 5200<br>(2200-9200)     |
| Peru     | 1995 | Male   | 80 to 84 | 95%<br>(91-97%)                | 5.3%<br>(3-9.1%)         | 2.5<br>(1.5-3.8)                            | 4.7%<br>(1.7-8.6%)                   | 5.5%<br>(1.9-10%)                   | 230<br>(75-430)     | 2400<br>(860-4600)      |
| Peru     | 1995 | Male   | 85 to 89 | 94%<br>(89-96%)                | 6.4%<br>(3.5-11%)        | 2.3<br>(1.3-3.6)                            | 3.4%<br>(0.68-7.1%)                  | 3.8%<br>(0.63-8.1%)                 | 120<br>(20-260)     | 960<br>(200-2000)       |
| Peru     | 1995 | Male   | 90 to 94 | 94%<br>(89-97%)                | 6.5%<br>(3.3-11%)        | 2.3<br>(1.2-3.7)                            | 2.4%<br>(-0.26-6.2%)                 | 2.6%<br>(-0.66-7.2%)                | 41<br>(-11-110)     | 230<br>(-24-580)        |
| Peru     | 1995 | Male   | 95 plus  | 94%<br>(88-97%)                | 6.2%<br>(2.6-12%)        | 2.2<br>(1.1-3.8)                            | 1.9%<br>(-0.95-6.4%)                 | 1.8%<br>(-1.7-7%)                   | 8.7<br>(-7.6-33)    | 36<br>(-18-120)         |
| Peru     | 2000 | Female | All Ages | 69%<br>(66-72%)                | 31%<br>(28-34%)          | 1.5<br>(1.3-1.8)                            | 2.6%<br>(1.9-3.3%)                   | 4%<br>(2.5-5.7%)                    | 2000<br>(1200-2900) | 79000<br>(58000-100000) |
| Peru     | 2000 | Female | 15 to 19 | 60%<br>(54-66%)                | 40%<br>(34-46%)          | 1.2<br>(0.72-1.7)                           | 2.3%<br>(1.3-3.6%)                   | 4.6%<br>(2.1-7.5%)                  | 37<br>(17-62)       | 3700<br>(2100-5700)     |
| Peru     | 2000 | Female | 20 to 24 | 84%<br>(81-87%)                | 16%<br>(13-19%)          | 2.2<br>(1.4-3.2)                            | 4.5%<br>(2.8-6.4%)                   | 8.2%<br>(4.6-12%)                   | 81<br>(44-120)      | 7600<br>(4600-11000)    |
| Peru     | 2000 | Female | 25 to 29 | 86%<br>(84-89%)                | 14%<br>(11-16%)          | 2.5<br>(1.7-3.5)                            | 4.7%<br>(3-6.6%)                     | 9%<br>(5.4-13%)                     | 88<br>(53-130)      | 7300<br>(4700-10000)    |
| Peru     | 2000 | Female | 30 to 34 | 88%<br>(85-90%)                | 12%<br>(9.9-15%)         | 2.7<br>(1.8-3.7)                            | 4.5%<br>(2.9-6.2%)                   | 9%<br>(5.8-12%)                     | 95<br>(61-130)      | 6900<br>(4500-9500)     |

| Location | Year | Sex    | Age      | Prevalence of current drinkers | Prevalence of abstainers | Population average of standard drinks daily | Percent of total attributable deaths | Percent of total attributable DALYs | Attributable deaths | Attributable DALYs        |
|----------|------|--------|----------|--------------------------------|--------------------------|---------------------------------------------|--------------------------------------|-------------------------------------|---------------------|---------------------------|
| Peru     | 2000 | Female | 35 to 39 | 88%<br>(85-90%)                | 12%<br>(9.9-15%)         | 2.5<br>(1.7-3.6)                            | 4.4%<br>(2.9-6.2%)                   | 9%<br>(5.8-12%)                     | 110<br>(71-160)     | 6800<br>(4500-9600)       |
| Peru     | 2000 | Female | 40 to 44 | 88%<br>(85-91%)                | 12%<br>(9.2-15%)         | 2.5<br>(1.6-3.7)                            | 4.6%<br>(3-6.7%)                     | 9.4%<br>(6.1-13%)                   | 130<br>(83-180)     | 6800<br>(4400-9600)       |
| Peru     | 2000 | Female | 45 to 49 | 90%<br>(87-92%)                | 10%<br>(8.2-13%)         | 2.7<br>(1.7-4.2)                            | 5.1%<br>(3.1-7.6%)                   | 9.8%<br>(6.5-14%)                   | 160<br>(100-230)    | 7200<br>(4500-11000)      |
| Peru     | 2000 | Female | 50 to 54 | 89%<br>(86-91%)                | 11%<br>(8.7-14%)         | 2.7<br>(1.7-4.1)                            | 5.7%<br>(3.2-8.7%)                   | 10%<br>(6.3-15%)                    | 190<br>(120-280)    | 7400<br>(4400-11000)      |
| Peru     | 2000 | Female | 55 to 59 | 86%<br>(81-89%)                | 14%<br>(11-19%)          | 2.5<br>(1.5-3.7)                            | 5.5%<br>(3.3-8.3%)                   | 9.2%<br>(5.8-13%)                   | 200<br>(120-280)    | 6600<br>(4100-9800)       |
| Peru     | 2000 | Female | 60 to 64 | 84%<br>(79-87%)                | 16%<br>(13-21%)          | 2.4<br>(1.5-3.7)                            | 5.1%<br>(2.7-8.3%)                   | 7.9%<br>(4.6-12%)                   | 220<br>(120-340)    | 6200<br>(3300-9900)       |
| Peru     | 2000 | Female | 65 to 69 | 82%<br>(75-87%)                | 18%<br>(13-25%)          | 2.4<br>(1.5-3.6)                            | 4.5%<br>(2.2-7.4%)                   | 6.8%<br>(3.7-11%)                   | 230<br>(120-360)    | 5300<br>(2600-8700)       |
| Peru     | 2000 | Female | 70 to 74 | 79%<br>(72-84%)                | 21%<br>(16-28%)          | 2.1<br>(1.2-3.2)                            | 3.4%<br>(1.1-6.3%)                   | 5%<br>(1.8-9%)                      | 200<br>(73-350)     | 3600<br>(1200-6700)       |
| Peru     | 2000 | Female | 75 to 79 | 76%<br>(67-84%)                | 24%<br>(16-33%)          | 1.7<br>(0.93-2.8)                           | 2.4%<br>(0.27-5.1%)                  | 3.4%<br>(0.53-6.9%)                 | 150<br>(23-310)     | 2100<br>(220-4500)        |
| Peru     | 2000 | Female | 80 to 84 | 70%<br>(59-80%)                | 30%<br>(20-41%)          | 1.5<br>(0.84-2.3)                           | 1.6%<br>(-0.29-3.9%)                 | 2%<br>(-0.34-5%)                    | 94<br>(-15-230)     | 1000<br>(-180-2500)       |
| Peru     | 2000 | Female | 85 to 89 | 64%<br>(52-75%)                | 36%<br>(25-48%)          | 1.3<br>(0.73-2.1)                           | 0.98%<br>(-0.61-3.2%)                | 1.2%<br>(-0.87-3.9%)                | 49<br>(-36-160)     | 380<br>(-240-1200)        |
| Peru     | 2000 | Female | 90 to 94 | 62%<br>(49-73%)                | 38%<br>(27-51%)          | 1.3<br>(0.68-2.1)                           | 0.42%<br>(-1.3-2.5%)                 | 0.42%<br>(-1.7-3.2%)                | 11<br>(-47-85)      | 71<br>(-210-430)          |
| Peru     | 2000 | Female | 95 plus  | 62%<br>(47-75%)                | 38%<br>(25-53%)          | 1.2<br>(0.61-2.1)                           | 0.15%<br>(-1.8-2.9%)                 | -0.0018%<br>(-2.4-3.3%)             | -0.033<br>(-22-29)  | 5.7<br>(-66-100)          |
| Peru     | 2000 | Male   | All Ages | 80%<br>(77-83%)                | 20%<br>(17-23%)          | 2.8<br>(2.4-3.3)                            | 6.9%<br>(5.8-8.2%)                   | 9.5%<br>(7.3-12%)                   | 5900<br>(4400-7600) | 250000<br>(200000-300000) |
| Peru     | 2000 | Male   | 15 to 19 | 68%<br>(62-74%)                | 32%<br>(26-38%)          | 1.7<br>(1-2.6)                              | 5.7%<br>(3.8-7.8%)                   | 8.5%<br>(5.1-12%)                   | 100<br>(60-150)     | 10000<br>(6500-14000)     |
| Peru     | 2000 | Male   | 20 to 24 | 94%<br>(93-96%)                | 5.7%<br>(4.4-7.4%)       | 3.7<br>(2.4-5.1)                            | 13%<br>(9.3-16%)                     | 17%<br>(12-22%)                     | 280<br>(190-380)    | 25000<br>(19000-32000)    |
| Peru     | 2000 | Male   | 25 to 29 | 96%<br>(95-97%)                | 3.7%<br>(2.9-4.8%)       | 4.6<br>(3.1-6.4)                            | 14%<br>(11-18%)                      | 20%<br>(14-26%)                     | 320<br>(230-430)    | 26000<br>(19000-33000)    |
| Peru     | 2000 | Male   | 30 to 34 | 98%<br>(97-98%)                | 2.5%<br>(1.8-3.3%)       | 5.2<br>(3.6-7)                              | 14%<br>(11-18%)                      | 21%<br>(16-27%)                     | 350<br>(260-460)    | 25000<br>(19000-31000)    |
| Peru     | 2000 | Male   | 35 to 39 | 98%<br>(97-99%)                | 1.9%<br>(1.3-2.6%)       | 5.4<br>(3.6-7.6)                            | 14%<br>(11-18%)                      | 22%<br>(16-27%)                     | 400<br>(280-520)    | 24000<br>(18000-31000)    |
| Peru     | 2000 | Male   | 40 to 44 | 98%<br>(98-99%)                | 1.7%<br>(1.1-2.3%)       | 5.6<br>(3.6-7.9)                            | 15%<br>(11-18%)                      | 22%<br>(16-28%)                     | 420<br>(290-550)    | 22000<br>(16000-29000)    |
| Peru     | 2000 | Male   | 45 to 49 | 98%<br>(97-99%)                | 1.8%<br>(1.3-2.6%)       | 5.5<br>(3.5-8.4)                            | 15%<br>(11-19%)                      | 22%<br>(16-28%)                     | 490<br>(340-650)    | 23000<br>(16000-30000)    |
| Peru     | 2000 | Male   | 50 to 54 | 98%<br>(97-99%)                | 1.8%<br>(1.2-2.6%)       | 5.5<br>(3.3-8.3)                            | 15%<br>(10-19%)                      | 21%<br>(14-26%)                     | 530<br>(360-700)    | 21000<br>(14000-28000)    |

| Location | Year | Sex    | Age      | Prevalence of current drinkers | Prevalence of abstainers | Population average of standard drinks daily | Percent of total attributable deaths | Percent of total attributable DALYs | Attributable deaths | Attributable DALYs     |
|----------|------|--------|----------|--------------------------------|--------------------------|---------------------------------------------|--------------------------------------|-------------------------------------|---------------------|------------------------|
| Peru     | 2000 | Male   | 55 to 59 | 99%<br>(98-99%)                | 1.5%<br>(0.96-2.2%)      | 5.6<br>(3.6-8.2)                            | 14%<br>(9.6-18%)                     | 20%<br>(14-25%)                     | 570<br>(390-750)    | 20000<br>(14000-26000) |
| Peru     | 2000 | Male   | 60 to 64 | 98%<br>(98-99%)                | 1.6%<br>(0.97-2.4%)      | 4.9<br>(3-7.4)                              | 12%<br>(8-17%)                       | 16%<br>(11-22%)                     | 610<br>(390-840)    | 18000<br>(12000-24000) |
| Peru     | 2000 | Male   | 65 to 69 | 98%<br>(97-99%)                | 1.9%<br>(1.1-3%)         | 4.3<br>(2.7-6.3)                            | 10%<br>(6.4-14%)                     | 13%<br>(8.2-19%)                    | 590<br>(360-840)    | 14000<br>(8700-20000)  |
| Peru     | 2000 | Male   | 70 to 74 | 98%<br>(96-98%)                | 2.4%<br>(1.5-3.9%)       | 3.6<br>(2.1-5.5)                            | 7.5%<br>(4-12%)                      | 9.5%<br>(5.1-15%)                   | 470<br>(250-750)    | 8900<br>(4900-14000)   |
| Peru     | 2000 | Male   | 75 to 79 | 96%<br>(93-98%)                | 3.8%<br>(2.1-6.6%)       | 2.8<br>(1.6-4.5)                            | 5.4%<br>(2.3-9.6%)                   | 6.6%<br>(2.8-12%)                   | 330<br>(140-600)    | 4900<br>(2100-8900)    |
| Peru     | 2000 | Male   | 80 to 84 | 95%<br>(91-97%)                | 5.4%<br>(3.1-9.5%)       | 2.3<br>(1.4-3.6)                            | 4%<br>(1.5-7.3%)                     | 4.7%<br>(1.7-8.9%)                  | 230<br>(80-420)     | 2500<br>(950-4600)     |
| Peru     | 2000 | Male   | 85 to 89 | 94%<br>(89-96%)                | 6.5%<br>(3.5-11%)        | 2.1<br>(1.2-3.3)                            | 3%<br>(0.68-5.9%)                    | 3.3%<br>(0.6-6.9%)                  | 130<br>(23-260)     | 990<br>(230-2000)      |
| Peru     | 2000 | Male   | 90 to 94 | 93%<br>(89-97%)                | 6.6%<br>(3.3-11%)        | 2.1<br>(1.1-3.4)                            | 2.1%<br>(-0.17-5.1%)                 | 2.2%<br>(-0.55-5.9%)                | 44<br>(-11-120)     | 250<br>(-21-630)       |
| Peru     | 2000 | Male   | 95 plus  | 94%<br>(88-97%)                | 6.3%<br>(2.7-12%)        | 2.1<br>(1-3.6)                              | 1.7%<br>(-0.8-5.5%)                  | 1.6%<br>(-1.5-6.1%)                 | 9.4<br>(-8.8-36)    | 40<br>(-19-130)        |
| Peru     | 2005 | Female | All Ages | 69%<br>(65-71%)                | 31%<br>(29-35%)          | 1.5<br>(1.3-1.8)                            | 2.5%<br>(1.8-3.2%)                   | 3.8%<br>(2.3-5.6%)                  | 1900<br>(1200-2900) | 72000<br>(53000-95000) |
| Peru     | 2005 | Female | 15 to 19 | 58%<br>(51-64%)                | 42%<br>(36-49%)          | 1.1<br>(0.68-1.6)                           | 1.9%<br>(1.1-2.8%)                   | 3.7%<br>(1.7-6.1%)                  | 26<br>(12-43)       | 3000<br>(1700-4500)    |
| Peru     | 2005 | Female | 20 to 24 | 83%<br>(80-87%)                | 17%<br>(13-20%)          | 2.1<br>(1.3-3)                              | 3.7%<br>(2.4-5.2%)                   | 6.9%<br>(3.6-10%)                   | 57<br>(29-85)       | 5900<br>(3800-8400)    |
| Peru     | 2005 | Female | 25 to 29 | 86%<br>(82-88%)                | 14%<br>(12-18%)          | 2.4<br>(1.6-3.3)                            | 3.8%<br>(2.5-5.2%)                   | 7.5%<br>(4.4-11%)                   | 65<br>(37-95)       | 6000<br>(3900-8300)    |
| Peru     | 2005 | Female | 30 to 34 | 87%<br>(84-90%)                | 13%<br>(10-16%)          | 2.6<br>(1.7-3.5)                            | 3.7%<br>(2.5-5.1%)                   | 7.7%<br>(4.8-11%)                   | 71<br>(44-100)      | 5700<br>(3800-7900)    |
| Peru     | 2005 | Female | 35 to 39 | 87%<br>(84-90%)                | 13%<br>(10-16%)          | 2.4<br>(1.6-3.4)                            | 3.7%<br>(2.4-5.3%)                   | 7.9%<br>(5.2-11%)                   | 89<br>(56-130)      | 5800<br>(3800-8300)    |
| Peru     | 2005 | Female | 40 to 44 | 87%<br>(84-90%)                | 13%<br>(9.8-16%)         | 2.4<br>(1.6-3.5)                            | 3.9%<br>(2.5-5.7%)                   | 8.5%<br>(5.5-12%)                   | 110<br>(73-160)     | 6200<br>(3900-8800)    |
| Peru     | 2005 | Female | 45 to 49 | 89%<br>(86-91%)                | 11%<br>(8.7-14%)         | 2.6<br>(1.7-4)                              | 4.4%<br>(2.5-6.7%)                   | 8.9%<br>(5.8-13%)                   | 140<br>(91-220)     | 6700<br>(4000-10000)   |
| Peru     | 2005 | Female | 50 to 54 | 88%<br>(85-91%)                | 12%<br>(9.3-15%)         | 2.6<br>(1.6-4)                              | 4.9%<br>(2.7-7.6%)                   | 9.1%<br>(5.7-14%)                   | 180<br>(110-270)    | 7200<br>(4200-11000)   |
| Peru     | 2005 | Female | 55 to 59 | 85%<br>(80-89%)                | 15%<br>(11-20%)          | 2.4<br>(1.5-3.7)                            | 4.8%<br>(2.8-7.4%)                   | 8.3%<br>(5.2-12%)                   | 190<br>(120-280)    | 6300<br>(3800-9600)    |
| Peru     | 2005 | Female | 60 to 64 | 83%<br>(78-87%)                | 17%<br>(13-22%)          | 2.3<br>(1.4-3.7)                            | 4.6%<br>(2.4-7.5%)                   | 7.4%<br>(4.1-12%)                   | 200<br>(110-320)    | 5800<br>(3100-9400)    |
| Peru     | 2005 | Female | 65 to 69 | 81%<br>(74-86%)                | 19%<br>(14-26%)          | 2.3<br>(1.4-3.4)                            | 4.1%<br>(2.1-6.7%)                   | 6.5%<br>(3.5-9.9%)                  | 220<br>(120-360)    | 5200<br>(2600-8500)    |
| Peru     | 2005 | Female | 70 to 74 | 78%<br>(69-84%)                | 22%<br>(16-31%)          | 2<br>(1.1-3.1)                              | 3.2%<br>(1.1-5.8%)                   | 4.8%<br>(1.9-8.3%)                  | 210<br>(83-370)     | 3900<br>(1300-7100)    |

| Location | Year | Sex    | Age      | Prevalence of current drinkers | Prevalence of abstainers | Population average of standard drinks daily | Percent of total attributable deaths | Percent of total attributable DALYs | Attributable deaths | Attributable DALYs        |
|----------|------|--------|----------|--------------------------------|--------------------------|---------------------------------------------|--------------------------------------|-------------------------------------|---------------------|---------------------------|
| Peru     | 2005 | Female | 75 to 79 | 74%<br>(64-83%)                | 26%<br>(17-36%)          | 1.6<br>(0.87-2.7)                           | 2.3%<br>(0.41-4.7%)                  | 3.4%<br>(0.84-6.6%)                 | 190<br>(45-380)     | 2700<br>(480-5700)        |
| Peru     | 2005 | Female | 80 to 84 | 68%<br>(56-77%)                | 32%<br>(23-44%)          | 1.4<br>(0.77-2.2)                           | 1.5%<br>(-0.073-3.5%)                | 2.1%<br>(-0.07-4.6%)                | 110<br>(-3.7-250)   | 1200<br>(-56-2700)        |
| Peru     | 2005 | Female | 85 to 89 | 62%<br>(49-73%)                | 38%<br>(27-51%)          | 1.2<br>(0.67-2)                             | 0.97%<br>(-0.43-2.8%)                | 1.2%<br>(-0.62-3.6%)                | 57<br>(-29-170)     | 440<br>(-200-1300)        |
| Peru     | 2005 | Female | 90 to 94 | 60%<br>(47-71%)                | 40%<br>(29-53%)          | 1.2<br>(0.62-1.9)                           | 0.49%<br>(-1-2.3%)                   | 0.52%<br>(-1.4-2.9%)                | 16<br>(-43-89)      | 98<br>(-190-470)          |
| Peru     | 2005 | Female | 95 plus  | 60%<br>(44-72%)                | 40%<br>(28-56%)          | 1.2<br>(0.55-2)                             | 0.24%<br>(-1.5-2.6%)                 | 0.13%<br>(-2-3%)                    | 1.5<br>(-24-37)     | 12<br>(-73-130)           |
| Peru     | 2005 | Male   | All Ages | 80%<br>(78-83%)                | 20%<br>(17-22%)          | 2.9<br>(2.5-3.3)                            | 6.7%<br>(5.4-7.9%)                   | 8.8%<br>(6.6-11%)                   | 5200<br>(3800-6800) | 220000<br>(180000-270000) |
| Peru     | 2005 | Male   | 15 to 19 | 67%<br>(61-73%)                | 33%<br>(27-39%)          | 1.7<br>(1-2.5)                              | 4.9%<br>(3.4-6.8%)                   | 7.6%<br>(4.5-11%)                   | 79<br>(46-120)      | 8400<br>(5600-12000)      |
| Peru     | 2005 | Male   | 20 to 24 | 94%<br>(92-96%)                | 5.8%<br>(4.5-7.8%)       | 3.6<br>(2.3-5)                              | 11%<br>(8.2-14%)                     | 15%<br>(10-21%)                     | 220<br>(140-310)    | 21000<br>(15000-28000)    |
| Peru     | 2005 | Male   | 25 to 29 | 96%<br>(95-97%)                | 3.9%<br>(3.1-5%)         | 4.5<br>(3-6.2)                              | 13%<br>(9.4-16%)                     | 18%<br>(12-24%)                     | 280<br>(190-380)    | 23000<br>(17000-30000)    |
| Peru     | 2005 | Male   | 30 to 34 | 97%<br>(97-98%)                | 2.6%<br>(1.9-3.5%)       | 5.1<br>(3.6-6.7)                            | 12%<br>(9.3-16%)                     | 18%<br>(13-24%)                     | 290<br>(200-390)    | 21000<br>(16000-27000)    |
| Peru     | 2005 | Male   | 35 to 39 | 98%<br>(97-99%)                | 2%<br>(1.4-2.7%)         | 5.3<br>(3.6-7.4)                            | 13%<br>(9.2-16%)                     | 20%<br>(14-25%)                     | 330<br>(230-450)    | 21000<br>(15000-28000)    |
| Peru     | 2005 | Male   | 40 to 44 | 98%<br>(98-99%)                | 1.7%<br>(1.2-2.4%)       | 5.5<br>(3.6-7.7)                            | 13%<br>(9.2-16%)                     | 20%<br>(14-26%)                     | 380<br>(260-500)    | 21000<br>(15000-27000)    |
| Peru     | 2005 | Male   | 45 to 49 | 98%<br>(97-99%)                | 1.9%<br>(1.3-2.7%)       | 5.4<br>(3.4-8)                              | 13%<br>(9.1-17%)                     | 20%<br>(14-26%)                     | 430<br>(290-580)    | 20000<br>(14000-27000)    |
| Peru     | 2005 | Male   | 50 to 54 | 98%<br>(97-99%)                | 1.9%<br>(1.2-2.7%)       | 5.4<br>(3.2-7.9)                            | 13%<br>(8.8-17%)                     | 19%<br>(13-25%)                     | 480<br>(320-650)    | 20000<br>(13000-26000)    |
| Peru     | 2005 | Male   | 55 to 59 | 98%<br>(98-99%)                | 1.6%<br>(1-2.3%)         | 5.4<br>(3.5-8)                              | 13%<br>(8.6-17%)                     | 18%<br>(12-24%)                     | 520<br>(340-700)    | 18000<br>(12000-24000)    |
| Peru     | 2005 | Male   | 60 to 64 | 98%<br>(97-99%)                | 1.7%<br>(1.1-2.7%)       | 4.7<br>(2.9-7.2)                            | 11%<br>(7-15%)                       | 15%<br>(9.7-21%)                    | 530<br>(330-740)    | 16000<br>(10000-22000)    |
| Peru     | 2005 | Male   | 65 to 69 | 98%<br>(97-99%)                | 2%<br>(1.2-3.3%)         | 4.1<br>(2.6-6.1)                            | 8.9%<br>(5.4-13%)                    | 12%<br>(7.3-17%)                    | 520<br>(320-760)    | 13000<br>(7900-19000)     |
| Peru     | 2005 | Male   | 70 to 74 | 97%<br>(96-98%)                | 2.6%<br>(1.6-4.1%)       | 3.4<br>(2-5.2)                              | 6.6%<br>(3.5-11%)                    | 8.6%<br>(4.6-14%)                   | 440<br>(240-710)    | 8700<br>(4700-14000)      |
| Peru     | 2005 | Male   | 75 to 79 | 96%<br>(93-98%)                | 4.1%<br>(2.2-7.2%)       | 2.7<br>(1.5-4.3)                            | 4.7%<br>(1.9-8.6%)                   | 5.8%<br>(2.3-11%)                   | 320<br>(130-600)    | 4900<br>(2000-8900)       |
| Peru     | 2005 | Male   | 80 to 84 | 94%<br>(90-97%)                | 5.9%<br>(3.3-10%)        | 2.2<br>(1.3-3.4)                            | 3.5%<br>(1.3-6.4%)                   | 4.2%<br>(1.4-7.8%)                  | 220<br>(77-430)     | 2500<br>(900-4700)        |
| Peru     | 2005 | Male   | 85 to 89 | 93%<br>(88-96%)                | 7%<br>(3.8-12%)          | 2<br>(1.1-3.2)                              | 2.7%<br>(0.69-5.4%)                  | 3.1%<br>(0.64-6.3%)                 | 140<br>(27-280)     | 1100<br>(280-2200)        |
| Peru     | 2005 | Male   | 90 to 94 | 93%<br>(88-96%)                | 7.1%<br>(3.6-12%)        | 2<br>(1.1-3.2)                              | 2%<br>(-0.2-4.8%)                    | 2.1%<br>(-0.49-5.5%)                | 51<br>(-12-130)     | 300<br>(-30-710)          |

| Location | Year | Sex    | Age      | Prevalence of current drinkers | Prevalence of abstainers | Population average of standard drinks daily | Percent of total attributable deaths | Percent of total attributable DALYs | Attributable deaths | Attributable DALYs        |
|----------|------|--------|----------|--------------------------------|--------------------------|---------------------------------------------|--------------------------------------|-------------------------------------|---------------------|---------------------------|
| Peru     | 2005 | Male   | 95 plus  | 93%<br>(87-97%)                | 6.8%<br>(2.8-13%)        | 2<br>(0.97-3.4)                             | 1.7%<br>(-0.73-5.4%)                 | 1.6%<br>(-1.4-6.1%)                 | 12<br>(-11-46)      | 52<br>(-23-170)           |
| Peru     | 2010 | Female | All Ages | 69%<br>(66-71%)                | 31%<br>(29-34%)          | 1.4<br>(1.2-1.7)                            | 2.3%<br>(1.7-3.1%)                   | 3.4%<br>(2-4.9%)                    | 1900<br>(1100-2800) | 71000<br>(50000-94000)    |
| Peru     | 2010 | Female | 15 to 19 | 56%<br>(52-60%)                | 44%<br>(40-48%)          | 0.99<br>(0.62-1.5)                          | 1.6%<br>(0.91-2.4%)                  | 3.1%<br>(1.3-5.2%)                  | 21<br>(8.9-35)      | 2500<br>(1500-3800)       |
| Peru     | 2010 | Female | 20 to 24 | 83%<br>(81-86%)                | 17%<br>(14-19%)          | 2<br>(1.3-2.9)                              | 3.3%<br>(2.1-4.7%)                   | 5.9%<br>(2.9-9.2%)                  | 46<br>(22-72)       | 5300<br>(3300-7700)       |
| Peru     | 2010 | Female | 25 to 29 | 86%<br>(84-88%)                | 14%<br>(12-16%)          | 2.3<br>(1.5-3.2)                            | 3.4%<br>(2.2-4.8%)                   | 6.7%<br>(3.7-10%)                   | 54<br>(29-82)       | 5400<br>(3300-7700)       |
| Peru     | 2010 | Female | 30 to 34 | 87%<br>(85-89%)                | 13%<br>(11-15%)          | 2.4<br>(1.7-3.4)                            | 3.4%<br>(2.2-4.8%)                   | 7.1%<br>(4.3-10%)                   | 66<br>(39-96)       | 5500<br>(3500-7900)       |
| Peru     | 2010 | Female | 35 to 39 | 87%<br>(85-89%)                | 13%<br>(11-15%)          | 2.3<br>(1.5-3.2)                            | 3.3%<br>(2.1-4.8%)                   | 7.1%<br>(4.4-10%)                   | 80<br>(49-120)      | 5500<br>(3500-7800)       |
| Peru     | 2010 | Female | 40 to 44 | 88%<br>(86-90%)                | 12%<br>(10-14%)          | 2.3<br>(1.5-3.3)                            | 3.6%<br>(2.3-5.3%)                   | 7.7%<br>(4.9-11%)                   | 110<br>(69-160)     | 6100<br>(3800-9000)       |
| Peru     | 2010 | Female | 45 to 49 | 89%<br>(87-90%)                | 11%<br>(9.5-13%)         | 2.4<br>(1.5-3.7)                            | 3.8%<br>(2.2-5.9%)                   | 7.9%<br>(5-11%)                     | 140<br>(86-210)     | 6500<br>(3800-10000)      |
| Peru     | 2010 | Female | 50 to 54 | 87%<br>(85-89%)                | 13%<br>(11-15%)          | 2.4<br>(1.5-3.6)                            | 4.2%<br>(2.4-6.7%)                   | 8%<br>(5-12%)                       | 180<br>(110-280)    | 7200<br>(4200-11000)      |
| Peru     | 2010 | Female | 55 to 59 | 85%<br>(83-88%)                | 15%<br>(12-17%)          | 2.3<br>(1.4-3.3)                            | 4.4%<br>(2.4-6.9%)                   | 7.7%<br>(4.6-11%)                   | 210<br>(120-310)    | 7100<br>(4000-11000)      |
| Peru     | 2010 | Female | 60 to 64 | 81%<br>(79-84%)                | 19%<br>(16-21%)          | 2.1<br>(1.3-3.3)                            | 4.1%<br>(2-6.9%)                     | 6.6%<br>(3.6-11%)                   | 210<br>(120-350)    | 6200<br>(3100-10000)      |
| Peru     | 2010 | Female | 65 to 69 | 77%<br>(73-81%)                | 23%<br>(19-27%)          | 2<br>(1.3-2.9)                              | 3.6%<br>(1.9-5.9%)                   | 5.6%<br>(3.1-8.9%)                  | 220<br>(120-340)    | 5000<br>(2600-8200)       |
| Peru     | 2010 | Female | 70 to 74 | 71%<br>(67-76%)                | 29%<br>(24-33%)          | 1.6<br>(0.87-2.4)                           | 2.7%<br>(1.1-4.8%)                   | 4.2%<br>(1.8-7%)                    | 200<br>(86-350)     | 3700<br>(1400-6700)       |
| Peru     | 2010 | Female | 75 to 79 | 68%<br>(61-74%)                | 32%<br>(26-39%)          | 1.3<br>(0.7-2)                              | 2%<br>(0.5-3.8%)                     | 2.9%<br>(0.88-5.3%)                 | 170<br>(51-310)     | 2400<br>(620-4600)        |
| Peru     | 2010 | Female | 80 to 84 | 61%<br>(51-70%)                | 39%<br>(30-49%)          | 1.1<br>(0.6-1.6)                            | 1.3%<br>(0.12-2.8%)                  | 1.8%<br>(0.22-3.7%)                 | 120<br>(14-260)     | 1300<br>(120-2900)        |
| Peru     | 2010 | Female | 85 to 89 | 53%<br>(41-64%)                | 47%<br>(36-59%)          | 0.9<br>(0.5-1.5)                            | 0.82%<br>(-0.21-2.1%)                | 1%<br>(-0.31-2.6%)                  | 63<br>(-19-160)     | 490<br>(-130-1200)        |
| Peru     | 2010 | Female | 90 to 94 | 51%<br>(39-61%)                | 49%<br>(39-61%)          | 0.87<br>(0.46-1.4)                          | 0.43%<br>(-0.63-1.8%)                | 0.46%<br>(-0.93-2.1%)               | 18<br>(-37-84)      | 110<br>(-160-450)         |
| Peru     | 2010 | Female | 95 plus  | 51%<br>(37-64%)                | 49%<br>(36-63%)          | 0.86<br>(0.4-1.5)                           | 0.21%<br>(-1-1.8%)                   | 0.11%<br>(-1.5-2.1%)                | 1.7<br>(-23-33)     | 14<br>(-67-120)           |
| Peru     | 2010 | Male   | All Ages | 82%<br>(80-84%)                | 18%<br>(16-20%)          | 2.9<br>(2.4-3.4)                            | 6.7%<br>(5.4-8.2%)                   | 8.4%<br>(6.2-11%)                   | 5500<br>(4000-7500) | 230000<br>(180000-290000) |
| Peru     | 2010 | Male   | 15 to 19 | 68%<br>(64-72%)                | 32%<br>(28-36%)          | 1.6<br>(0.96-2.4)                           | 4.5%<br>(3.1-6.3%)                   | 6.9%<br>(4.1-10%)                   | 71<br>(42-110)      | 7700<br>(5200-11000)      |
| Peru     | 2010 | Male   | 20 to 24 | 94%<br>(93-95%)                | 5.8%<br>(4.6-7.4%)       | 3.4<br>(2.2-4.9)                            | 10%<br>(7.4-14%)                     | 14%<br>(9.2-20%)                    | 210<br>(130-310)    | 21000<br>(14000-27000)    |



| Location | Year | Sex    | Age      | Prevalence of current drinkers | Prevalence of abstainers | Population average of standard drinks daily | Percent of total attributable deaths | Percent of total attributable DALYs | Attributable deaths | Attributable DALYs     |
|----------|------|--------|----------|--------------------------------|--------------------------|---------------------------------------------|--------------------------------------|-------------------------------------|---------------------|------------------------|
| Peru     | 2010 | Male   | 25 to 29 | 96%<br>(95-97%)                | 3.8%<br>(3.1-4.6%)       | 4.3<br>(2.8-5.9)                            | 12%<br>(8.8-16%)                     | 18%<br>(12-24%)                     | 290<br>(190-400)    | 24000<br>(17000-31000) |
| Peru     | 2010 | Male   | 30 to 34 | 98%<br>(97-98%)                | 2.4%<br>(1.8-3.2%)       | 4.9<br>(3.5-6.6)                            | 12%<br>(8.6-15%)                     | 18%<br>(13-25%)                     | 310<br>(210-420)    | 23000<br>(16000-30000) |
| Peru     | 2010 | Male   | 35 to 39 | 98%<br>(97-99%)                | 1.9%<br>(1.4-2.6%)       | 5.1<br>(3.4-7.1)                            | 12%<br>(8.4-16%)                     | 19%<br>(13-26%)                     | 340<br>(230-480)    | 22000<br>(15000-30000) |
| Peru     | 2010 | Male   | 40 to 44 | 98%<br>(98-99%)                | 1.8%<br>(1.2-2.4%)       | 5.2<br>(3.5-7.5)                            | 12%<br>(8.7-16%)                     | 19%<br>(13-25%)                     | 390<br>(270-540)    | 22000<br>(15000-29000) |
| Peru     | 2010 | Male   | 45 to 49 | 98%<br>(98-99%)                | 1.8%<br>(1.3-2.5%)       | 5.2<br>(3.3-7.6)                            | 12%<br>(8.5-16%)                     | 19%<br>(13-26%)                     | 460<br>(310-630)    | 22000<br>(15000-30000) |
| Peru     | 2010 | Male   | 50 to 54 | 98%<br>(98-99%)                | 1.7%<br>(1.2-2.3%)       | 5.3<br>(3.3-7.9)                            | 12%<br>(8.2-16%)                     | 18%<br>(12-24%)                     | 510<br>(340-700)    | 21000<br>(14000-29000) |
| Peru     | 2010 | Male   | 55 to 59 | 98%<br>(98-99%)                | 1.6%<br>(1-2.2%)         | 5.2<br>(3.4-7.6)                            | 12%<br>(7.5-16%)                     | 17%<br>(11-23%)                     | 560<br>(350-780)    | 20000<br>(13000-27000) |
| Peru     | 2010 | Male   | 60 to 64 | 99%<br>(98-99%)                | 1.5%<br>(0.96-2.2%)      | 4.8<br>(2.9-7.2)                            | 10%<br>(6.3-15%)                     | 14%<br>(8.7-20%)                    | 580<br>(350-840)    | 17000<br>(10000-24000) |
| Peru     | 2010 | Male   | 65 to 69 | 98%<br>(97-99%)                | 1.8%<br>(1.2-2.6%)       | 4.1<br>(2.6-5.9)                            | 8.3%<br>(4.9-13%)                    | 11%<br>(6.6-17%)                    | 530<br>(300-790)    | 13000<br>(7600-19000)  |
| Peru     | 2010 | Male   | 70 to 74 | 97%<br>(96-98%)                | 2.6%<br>(1.8-3.6%)       | 3.3<br>(2-4.9)                              | 6.1%<br>(3.1-9.9%)                   | 7.8%<br>(4.1-13%)                   | 460<br>(230-750)    | 9000<br>(4700-15000)   |
| Peru     | 2010 | Male   | 75 to 79 | 96%<br>(94-97%)                | 4.1%<br>(2.5-6.2%)       | 2.6<br>(1.5-4)                              | 4.3%<br>(1.7-7.8%)                   | 5.3%<br>(2-9.8%)                    | 360<br>(130-660)    | 5400<br>(2100-9900)    |
| Peru     | 2010 | Male   | 80 to 84 | 94%<br>(90-96%)                | 6.3%<br>(3.8-10%)        | 2<br>(1.2-3.1)                              | 3.1%<br>(1-5.8%)                     | 3.7%<br>(1.1-7%)                    | 240<br>(74-460)     | 2700<br>(920-5000)     |
| Peru     | 2010 | Male   | 85 to 89 | 92%<br>(87-96%)                | 7.6%<br>(4.4-13%)        | 1.8<br>(1.1-2.9)                            | 2.4%<br>(0.56-4.8%)                  | 2.7%<br>(0.45-5.6%)                 | 150<br>(26-330)     | 1200<br>(290-2500)     |
| Peru     | 2010 | Male   | 90 to 94 | 92%<br>(87-96%)                | 7.7%<br>(4.3-13%)        | 1.8<br>(0.98-2.9)                           | 1.7%<br>(-0.2-4.3%)                  | 1.8%<br>(-0.61-5%)                  | 57<br>(-20-160)     | 330<br>(-40-850)       |
| Peru     | 2010 | Male   | 95 plus  | 93%<br>(86-97%)                | 7.3%<br>(3.2-14%)        | 1.8<br>(0.88-3.2)                           | 1.4%<br>(-0.85-4.6%)                 | 1.2%<br>(-1.5-5.1%)                 | 13<br>(-14-51)      | 56<br>(-35-190)        |
| Peru     | 2016 | Female | All Ages | 69%<br>(67-72%)                | 31%<br>(28-33%)          | 1.4<br>(1.1-1.9)                            | 2.1%<br>(1.3-3.1%)                   | 3%<br>(1.5-4.7%)                    | 1800<br>(890-3000)  | 66000<br>(40000-99000) |
| Peru     | 2016 | Female | 15 to 19 | 56%<br>(52-59%)                | 44%<br>(41-48%)          | 0.96<br>(0.56-1.5)                          | 1.5%<br>(0.85-2.3%)                  | 3%<br>(1.3-5.3%)                    | 15<br>(6.2-28)      | 2000<br>(1200-3200)    |
| Peru     | 2016 | Female | 20 to 24 | 84%<br>(81-86%)                | 16%<br>(14-19%)          | 2<br>(1.2-3)                                | 3%<br>(1.9-4.3%)                     | 5.5%<br>(2.6-9.1%)                  | 33<br>(15-58)       | 4500<br>(2700-6700)    |
| Peru     | 2016 | Female | 25 to 29 | 86%<br>(84-88%)                | 14%<br>(12-16%)          | 2.2<br>(1.4-3.3)                            | 3.1%<br>(2-4.4%)                     | 6.3%<br>(3.3-9.8%)                  | 41<br>(21-69)       | 4900<br>(3100-7200)    |
| Peru     | 2016 | Female | 30 to 34 | 87%<br>(85-89%)                | 13%<br>(11-15%)          | 2.4<br>(1.5-3.4)                            | 3%<br>(1.9-4.3%)                     | 6.7%<br>(3.8-10%)                   | 50<br>(29-80)       | 4800<br>(3000-7100)    |
| Peru     | 2016 | Female | 35 to 39 | 87%<br>(85-89%)                | 13%<br>(11-15%)          | 2.3<br>(1.4-3.4)                            | 2.9%<br>(1.8-4.4%)                   | 6.9%<br>(4.2-10%)                   | 65<br>(36-110)      | 4900<br>(3000-7700)    |
| Peru     | 2016 | Female | 40 to 44 | 88%<br>(86-90%)                | 12%<br>(10-14%)          | 2.3<br>(1.4-3.5)                            | 3.1%<br>(1.8-4.8%)                   | 7.4%<br>(4.7-11%)                   | 90<br>(51-150)      | 5300<br>(3000-8700)    |

| Location | Year | Sex    | Age      | Prevalence of current drinkers | Prevalence of abstainers | Population average of standard drinks daily | Percent of total attributable deaths | Percent of total attributable DALYs | Attributable deaths | Attributable DALYs        |
|----------|------|--------|----------|--------------------------------|--------------------------|---------------------------------------------|--------------------------------------|-------------------------------------|---------------------|---------------------------|
| Peru     | 2016 | Female | 45 to 49 | 89%<br>(87-90%)                | 11%<br>(9.6-13%)         | 2.4<br>(1.5-3.6)                            | 3.3%<br>(1.7-5.5%)                   | 7.5%<br>(4.6-11%)                   | 120<br>(67-200)     | 6000<br>(3200-10000)      |
| Peru     | 2016 | Female | 50 to 54 | 87%<br>(85-89%)                | 13%<br>(11-15%)          | 2.3<br>(1.4-3.4)                            | 3.6%<br>(1.8-6%)                     | 7.5%<br>(4.5-11%)                   | 170<br>(90-280)     | 6800<br>(3300-11000)      |
| Peru     | 2016 | Female | 55 to 59 | 85%<br>(83-88%)                | 15%<br>(12-17%)          | 2.2<br>(1.4-3.4)                            | 3.8%<br>(2-6.2%)                     | 7.2%<br>(4.2-11%)                   | 200<br>(100-330)    | 6900<br>(3300-12000)      |
| Peru     | 2016 | Female | 60 to 64 | 81%<br>(78-84%)                | 19%<br>(16-22%)          | 2<br>(1.2-3.3)                              | 3.5%<br>(1.6-6.4%)                   | 6.1%<br>(3.1-10%)                   | 220<br>(100-390)    | 6400<br>(2700-11000)      |
| Peru     | 2016 | Female | 65 to 69 | 76%<br>(72-80%)                | 24%<br>(20-28%)          | 1.9<br>(1.1-2.9)                            | 3.1%<br>(1.3-5.3%)                   | 5.2%<br>(2.6-8.3%)                  | 220<br>(100-380)    | 5100<br>(2100-9000)       |
| Peru     | 2016 | Female | 70 to 74 | 71%<br>(66-75%)                | 29%<br>(25-34%)          | 1.5<br>(0.81-2.3)                           | 2.4%<br>(0.85-4.5%)                  | 3.9%<br>(1.7-6.8%)                  | 200<br>(76-370)     | 3600<br>(1200-7000)       |
| Peru     | 2016 | Female | 75 to 79 | 67%<br>(60-74%)                | 33%<br>(26-40%)          | 1.2<br>(0.63-2)                             | 1.8%<br>(0.35-3.6%)                  | 2.7%<br>(0.73-5.2%)                 | 170<br>(44-330)     | 2300<br>(460-5000)        |
| Peru     | 2016 | Female | 80 to 84 | 60%<br>(50-70%)                | 40%<br>(30-50%)          | 1<br>(0.57-1.6)                             | 1.2%<br>(0.0016-2.7%)                | 1.7%<br>(0.11-3.6%)                 | 120<br>(8-270)      | 1300<br>(1.7-2900)        |
| Peru     | 2016 | Female | 85 to 89 | 52%<br>(41-62%)                | 48%<br>(38-59%)          | 0.85<br>(0.46-1.4)                          | 0.73%<br>(-0.32-2%)                  | 0.95%<br>(-0.41-2.6%)               | 79<br>(-34-220)     | 610<br>(-240-1700)        |
| Peru     | 2016 | Female | 90 to 94 | 50%<br>(38-61%)                | 50%<br>(39-62%)          | 0.82<br>(0.42-1.4)                          | 0.36%<br>(-0.68-1.8%)                | 0.38%<br>(-0.95-2.1%)               | 24<br>(-61-140)     | 150<br>(-300-750)         |
| Peru     | 2016 | Female | 95 plus  | 50%<br>(35-63%)                | 50%<br>(37-65%)          | 0.82<br>(0.36-1.5)                          | 0.15%<br>(-1-1.9%)                   | 0.035%<br>(-1.5-2.2%)               | 0.87<br>(-34-51)    | 15<br>(-100-190)          |
| Peru     | 2016 | Male   | All Ages | 83%<br>(81-85%)                | 17%<br>(15-19%)          | 2.8<br>(2.2-3.7)                            | 6.4%<br>(4.7-8.3%)                   | 7.6%<br>(5-11%)                     | 5200<br>(3100-7900) | 220000<br>(150000-300000) |
| Peru     | 2016 | Male   | 15 to 19 | 67%<br>(64-71%)                | 33%<br>(29-36%)          | 1.5<br>(0.87-2.5)                           | 4.2%<br>(2.8-5.9%)                   | 6.6%<br>(3.8-11%)                   | 53<br>(28-88)       | 6400<br>(4100-9700)       |
| Peru     | 2016 | Male   | 20 to 24 | 94%<br>(93-95%)                | 5.8%<br>(4.6-7.3%)       | 3.3<br>(2-5)                                | 9.8%<br>(7-13%)                      | 14%<br>(8.6-20%)                    | 170<br>(97-260)     | 18000<br>(12000-25000)    |
| Peru     | 2016 | Male   | 25 to 29 | 96%<br>(95-97%)                | 3.8%<br>(3.1-4.6%)       | 4.2<br>(2.6-6.2)                            | 11%<br>(8-15%)                       | 17%<br>(10-24%)                     | 230<br>(140-360)    | 21000<br>(14000-30000)    |
| Peru     | 2016 | Male   | 30 to 34 | 98%<br>(97-98%)                | 2.4%<br>(1.9-3.2%)       | 4.7<br>(3.2-6.8)                            | 11%<br>(7.9-15%)                     | 18%<br>(12-25%)                     | 260<br>(150-400)    | 20000<br>(14000-29000)    |
| Peru     | 2016 | Male   | 35 to 39 | 98%<br>(97-99%)                | 1.9%<br>(1.4-2.5%)       | 4.9<br>(3.1-7.4)                            | 11%<br>(7.4-15%)                     | 18%<br>(12-25%)                     | 300<br>(170-460)    | 20000<br>(13000-29000)    |
| Peru     | 2016 | Male   | 40 to 44 | 98%<br>(98-99%)                | 1.8%<br>(1.2-2.4%)       | 5<br>(3.2-7.6)                              | 11%<br>(7.3-15%)                     | 18%<br>(12-25%)                     | 340<br>(200-530)    | 20000<br>(13000-29000)    |
| Peru     | 2016 | Male   | 45 to 49 | 98%<br>(98-99%)                | 1.8%<br>(1.3-2.5%)       | 4.9<br>(3.1-7.5)                            | 11%<br>(7.1-15%)                     | 18%<br>(12-25%)                     | 410<br>(240-630)    | 21000<br>(13000-30000)    |
| Peru     | 2016 | Male   | 50 to 54 | 98%<br>(98-99%)                | 1.7%<br>(1.2-2.3%)       | 5<br>(3-7.6)                                | 11%<br>(6.9-15%)                     | 17%<br>(11-23%)                     | 500<br>(290-780)    | 21000<br>(13000-32000)    |
| Peru     | 2016 | Male   | 55 to 59 | 98%<br>(98-99%)                | 1.6%<br>(1-2.2%)         | 5<br>(3.1-7.6)                              | 11%<br>(6.7-15%)                     | 16%<br>(9.9-22%)                    | 550<br>(310-850)    | 20000<br>(12000-30000)    |
| Peru     | 2016 | Male   | 60 to 64 | 99%<br>(98-99%)                | 1.5%<br>(0.95-2.2%)      | 4.6<br>(2.8-7.3)                            | 9.6%<br>(5.4-14%)                    | 13%<br>(7.6-20%)                    | 610<br>(320-970)    | 18000<br>(10000-29000)    |

| Location | Year | Sex    | Age      | Prevalence of current drinkers | Prevalence of abstainers | Population average of standard drinks daily | Percent of total attributable deaths | Percent of total attributable DALYs | Attributable deaths | Attributable DALYs      |
|----------|------|--------|----------|--------------------------------|--------------------------|---------------------------------------------|--------------------------------------|-------------------------------------|---------------------|-------------------------|
| Peru     | 2016 | Male   | 65 to 69 | 98%<br>(97-99%)                | 1.8%<br>(1.2-2.7%)       | 3.9<br>(2.3-5.9)                            | 7.6%<br>(4.2-12%)                    | 10%<br>(5.6-16%)                    | 550<br>(280-920)    | 14000<br>(7100-23000)   |
| Peru     | 2016 | Male   | 70 to 74 | 97%<br>(96-98%)                | 2.6%<br>(1.8-3.7%)       | 3.1<br>(1.8-4.8)                            | 5.4%<br>(2.5-9.3%)                   | 7.1%<br>(3.3-12%)                   | 430<br>(180-800)    | 8700<br>(3800-16000)    |
| Peru     | 2016 | Male   | 75 to 79 | 96%<br>(94-97%)                | 4.1%<br>(2.6-6.2%)       | 2.4<br>(1.3-4)                              | 3.8%<br>(1.4-7.3%)                   | 4.8%<br>(1.7-9.2%)                  | 340<br>(110-680)    | 5200<br>(1800-10000)    |
| Peru     | 2016 | Male   | 80 to 84 | 93%<br>(89-96%)                | 6.6%<br>(4-11%)          | 1.9<br>(1.1-3.1)                            | 2.8%<br>(0.81-5.5%)                  | 3.3%<br>(0.86-6.6%)                 | 240<br>(57-500)     | 2800<br>(800-5500)      |
| Peru     | 2016 | Male   | 85 to 89 | 92%<br>(87-96%)                | 7.8%<br>(4.5-13%)        | 1.7<br>(0.98-2.9)                           | 2.1%<br>(0.36-4.6%)                  | 2.4%<br>(0.25-5.4%)                 | 170<br>(17-380)     | 1400<br>(240-3000)      |
| Peru     | 2016 | Male   | 90 to 94 | 92%<br>(87-96%)                | 7.8%<br>(4.3-13%)        | 1.7<br>(0.91-2.9)                           | 1.6%<br>(-0.37-4.3%)                 | 1.6%<br>(-0.76-5.1%)                | 70<br>(-33-210)     | 420<br>(-100-1200)      |
| Peru     | 2016 | Male   | 95 plus  | 93%<br>(87-97%)                | 7.4%<br>(3.2-13%)        | 1.7<br>(0.81-3.1)                           | 1.3%<br>(-0.83-4.5%)                 | 1.1%<br>(-1.5-5.1%)                 | 16<br>(-22-74)      | 76<br>(-48-280)         |
| Colombia | 1990 | Female | All Ages | 46%<br>(40-52%)                | 54%<br>(48-60%)          | 1<br>(0.81-1.2)                             | 1.9%<br>(1.1-2.7%)                   | 2.5%<br>(0.74-4.3%)                 | 1800<br>(530-3100)  | 77000<br>(47000-110000) |
| Colombia | 1990 | Female | 15 to 19 | 44%<br>(31-57%)                | 56%<br>(43-69%)          | 1.1<br>(0.63-1.7)                           | 2.6%<br>(1.5-4%)                     | 4.7%<br>(2.2-7.6%)                  | 54<br>(26-88)       | 5600<br>(3200-8600)     |
| Colombia | 1990 | Female | 20 to 24 | 59%<br>(46-71%)                | 41%<br>(29-54%)          | 1.6<br>(0.94-2.6)                           | 4.1%<br>(2.5-5.9%)                   | 6.4%<br>(3.2-10%)                   | 92<br>(45-150)      | 9600<br>(5600-14000)    |
| Colombia | 1990 | Female | 25 to 29 | 60%<br>(46-71%)                | 40%<br>(29-54%)          | 1.5<br>(0.93-2.2)                           | 3.7%<br>(2.3-5.2%)                   | 5.8%<br>(2.9-9%)                    | 84<br>(41-130)      | 8100<br>(5000-12000)    |
| Colombia | 1990 | Female | 30 to 34 | 60%<br>(47-71%)                | 40%<br>(29-53%)          | 1.5<br>(0.91-2.1)                           | 3.2%<br>(1.9-4.6%)                   | 5.3%<br>(2.8-8%)                    | 75<br>(40-120)      | 6400<br>(3800-9200)     |
| Colombia | 1990 | Female | 35 to 39 | 60%<br>(48-71%)                | 40%<br>(29-52%)          | 1.5<br>(0.98-2.2)                           | 3%<br>(1.8-4.4%)                     | 5.3%<br>(2.9-8%)                    | 87<br>(46-130)      | 5900<br>(3400-8700)     |
| Colombia | 1990 | Female | 40 to 44 | 61%<br>(49-71%)                | 39%<br>(29-51%)          | 1.7<br>(1.1-2.4)                            | 3.1%<br>(1.7-4.7%)                   | 5.6%<br>(2.9-8.5%)                  | 95<br>(50-140)      | 5400<br>(3000-8200)     |
| Colombia | 1990 | Female | 45 to 49 | 61%<br>(48-72%)                | 39%<br>(28-52%)          | 1.9<br>(1.1-2.9)                            | 3.7%<br>(1.8-6.2%)                   | 6.2%<br>(3-10%)                     | 130<br>(60-210)     | 5900<br>(2900-9900)     |
| Colombia | 1990 | Female | 50 to 54 | 61%<br>(47-73%)                | 39%<br>(27-53%)          | 2<br>(1.2-3.1)                              | 4.1%<br>(1.7-7%)                     | 6.3%<br>(2.7-11%)                   | 170<br>(75-290)     | 6700<br>(2800-11000)    |
| Colombia | 1990 | Female | 55 to 59 | 60%<br>(45-74%)                | 40%<br>(26-55%)          | 2.1<br>(1.2-3.3)                            | 4.2%<br>(1.5-7.6%)                   | 6.1%<br>(2.3-11%)                   | 210<br>(77-370)     | 7000<br>(2500-13000)    |
| Colombia | 1990 | Female | 60 to 64 | 57%<br>(41-72%)                | 43%<br>(28-59%)          | 1.9<br>(1-3.1)                              | 3.5%<br>(0.66-7.2%)                  | 4.8%<br>(1-9.7%)                    | 220<br>(44-440)     | 6200<br>(1100-13000)    |
| Colombia | 1990 | Female | 65 to 69 | 53%<br>(37-68%)                | 47%<br>(32-63%)          | 1.6<br>(0.78-2.5)                           | 2.7%<br>(0.1-5.5%)                   | 3.6%<br>(0.27-7.4%)                 | 190<br>(14-380)     | 4400<br>(180-9200)      |
| Colombia | 1990 | Female | 70 to 74 | 49%<br>(34-64%)                | 51%<br>(36-66%)          | 1.3<br>(0.58-2.3)                           | 1.9%<br>(-0.54-4.7%)                 | 2.4%<br>(-0.65-6.1%)                | 150<br>(-41-370)    | 2800<br>(-860-7100)     |
| Colombia | 1990 | Female | 75 to 79 | 43%<br>(28-60%)                | 57%<br>(40-72%)          | 1.1<br>(0.48-2)                             | 1.1%<br>(-0.96-3.6%)                 | 1.4%<br>(-1.3-4.6%)                 | 92<br>(-82-290)     | 1400<br>(-1200-4500)    |
| Colombia | 1990 | Female | 80 to 84 | 39%<br>(24-55%)                | 61%<br>(45-76%)          | 1<br>(0.48-1.7)                             | 0.88%<br>(-0.98-3%)                  | 1.1%<br>(-1.2-3.7%)                 | 66<br>(-77-230)     | 740<br>(-800-2500)      |

| Location | Year | Sex    | Age      | Prevalence of current drinkers | Prevalence of abstainers | Population average of standard drinks daily | Percent of total attributable deaths | Percent of total attributable DALYs | Attributable deaths   | Attributable DALYs        |
|----------|------|--------|----------|--------------------------------|--------------------------|---------------------------------------------|--------------------------------------|-------------------------------------|-----------------------|---------------------------|
| Colombia | 1990 | Female | 85 to 89 | 39%<br>(25-54%)                | 61%<br>(46-75%)          | 1<br>(0.49-1.7)                             | 0.73%<br>(-1.1-2.8%)                 | 0.81%<br>(-1.5-3.3%)                | 44<br>(-81-180)       | 360<br>(-570-1400)        |
| Colombia | 1990 | Female | 90 to 94 | 42%<br>(28-57%)                | 58%<br>(43-72%)          | 1.1<br>(0.56-2)                             | 0.47%<br>(-1.4-2.8%)                 | 0.42%<br>(-1.9-3.3%)                | 13<br>(-57-100)       | 87<br>(-270-520)          |
| Colombia | 1990 | Female | 95 plus  | 46%<br>(29-65%)                | 54%<br>(35-71%)          | 1.3<br>(0.54-2.3)                           | 0.36%<br>(-1.9-3.6%)                 | 0.2%<br>(-2.7-4.1%)                 | 2.1<br>(-29-44)       | 16<br>(-86-160)           |
| Colombia | 1990 | Male   | All Ages | 86%<br>(82-90%)                | 14%<br>(10-18%)          | 2.8<br>(2.3-3.2)                            | 9.7%<br>(7.5-12%)                    | 11%<br>(8.5-14%)                    | 12000<br>(8800-15000) | 570000<br>(440000-710000) |
| Colombia | 1990 | Male   | 15 to 19 | 84%<br>(73-91%)                | 16%<br>(8.5-27%)         | 2.5<br>(1.5-3.7)                            | 11%<br>(6.5-16%)                     | 14%<br>(7.8-21%)                    | 600<br>(320-900)      | 46000<br>(26000-68000)    |
| Colombia | 1990 | Male   | 20 to 24 | 93%<br>(88-96%)                | 6.9%<br>(4-12%)          | 4.3<br>(2.9-6.1)                            | 19%<br>(12-26%)                      | 22%<br>(13-30%)                     | 1600<br>(940-2200)    | 110000<br>(71000-150000)  |
| Colombia | 1990 | Male   | 25 to 29 | 95%<br>(91-97%)                | 5.1%<br>(3-8.5%)         | 4.7<br>(3.3-6.5)                            | 20%<br>(13-27%)                      | 23%<br>(14-32%)                     | 1600<br>(980-2200)    | 100000<br>(68000-140000)  |
| Colombia | 1990 | Male   | 30 to 34 | 95%<br>(92-97%)                | 4.7%<br>(2.7-8%)         | 4.8<br>(3.3-6.6)                            | 18%<br>(13-25%)                      | 22%<br>(15-31%)                     | 1200<br>(800-1700)    | 75000<br>(51000-100000)   |
| Colombia | 1990 | Male   | 35 to 39 | 95%<br>(92-97%)                | 5.3%<br>(3.1-8.2%)       | 4.9<br>(3.2-7.2)                            | 17%<br>(12-24%)                      | 21%<br>(14-30%)                     | 990<br>(650-1400)     | 56000<br>(37000-77000)    |
| Colombia | 1990 | Male   | 40 to 44 | 95%<br>(91-97%)                | 5.4%<br>(3.3-8.5%)       | 5.2<br>(3.4-7.3)                            | 16%<br>(11-21%)                      | 21%<br>(14-29%)                     | 750<br>(500-1100)     | 38000<br>(26000-52000)    |
| Colombia | 1990 | Male   | 45 to 49 | 95%<br>(92-97%)                | 4.8%<br>(2.6-8.4%)       | 5.6<br>(3.5-8.2)                            | 15%<br>(10-21%)                      | 20%<br>(13-27%)                     | 670<br>(450-940)      | 30000<br>(20000-41000)    |
| Colombia | 1990 | Male   | 50 to 54 | 94%<br>(91-97%)                | 5.7%<br>(3.3-9.3%)       | 5.8<br>(3.7-8.5)                            | 14%<br>(9.3-19%)                     | 18%<br>(12-24%)                     | 710<br>(460-940)      | 28000<br>(18000-37000)    |
| Colombia | 1990 | Male   | 55 to 59 | 92%<br>(87-95%)                | 8%<br>(4.6-13%)          | 6.1<br>(3.8-9)                              | 14%<br>(9.4-18%)                     | 17%<br>(12-23%)                     | 790<br>(530-1000)     | 27000<br>(18000-35000)    |
| Colombia | 1990 | Male   | 60 to 64 | 90%<br>(84-94%)                | 10%<br>(5.8-16%)         | 5.4<br>(3.2-8.2)                            | 12%<br>(7.2-16%)                     | 14%<br>(8.5-19%)                    | 840<br>(500-1200)     | 24000<br>(15000-33000)    |
| Colombia | 1990 | Male   | 65 to 69 | 88%<br>(82-93%)                | 12%<br>(6.7-18%)         | 4.1<br>(2.5-6.1)                            | 9%<br>(4.5-13%)                      | 11%<br>(5.4-16%)                    | 690<br>(340-1000)     | 17000<br>(8700-24000)     |
| Colombia | 1990 | Male   | 70 to 74 | 86%<br>(79-92%)                | 14%<br>(8.3-21%)         | 2.9<br>(1.7-4.7)                            | 5.7%<br>(2-10%)                      | 6.6%<br>(2.2-12%)                   | 470<br>(160-840)      | 9100<br>(3200-16000)      |
| Colombia | 1990 | Male   | 75 to 79 | 84%<br>(74-92%)                | 16%<br>(8.5-26%)         | 2.3<br>(1.2-3.8)                            | 3.8%<br>(0.87-8%)                    | 4.3%<br>(0.8-9.3%)                  | 300<br>(55-660)       | 4600<br>(1100-9800)       |
| Colombia | 1990 | Male   | 80 to 84 | 81%<br>(69-90%)                | 19%<br>(10-31%)          | 2<br>(1.1-3.2)                              | 3.1%<br>(0.67-6.5%)                  | 3.4%<br>(0.56-7.4%)                 | 200<br>(34-430)       | 2300<br>(520-4800)        |
| Colombia | 1990 | Male   | 85 to 89 | 79%<br>(67-88%)                | 21%<br>(12-33%)          | 1.9<br>(1-3)                                | 2.6%<br>(0.47-5.7%)                  | 2.8%<br>(0.24-6.4%)                 | 120<br>(10-270)       | 960<br>(170-2200)         |
| Colombia | 1990 | Male   | 90 to 94 | 80%<br>(68-89%)                | 20%<br>(11-32%)          | 2<br>(1-3.3)                                | 2.3%<br>(-0.11-5.8%)                 | 2.3%<br>(-0.45-6.4%)                | 44<br>(-8.5-120)      | 260<br>(-12-660)          |
| Colombia | 1990 | Male   | 95 plus  | 81%<br>(67-91%)                | 19%<br>(9-33%)           | 2.1<br>(1-3.8)                              | 2.2%<br>(-0.73-6.6%)                 | 2%<br>(-1.5-7.4%)                   | 10<br>(-7.5-37)       | 44<br>(-15-130)           |
| Colombia | 1995 | Female | All Ages | 52%<br>(47-57%)                | 48%<br>(43-53%)          | 1.1<br>(0.88-1.3)                           | 1.9%<br>(1.1-2.8%)                   | 2.4%<br>(0.48-4.4%)                 | 1800<br>(370-3400)    | 82000<br>(46000-120000)   |

| Location | Year | Sex    | Age      | Prevalence of current drinkers | Prevalence of abstainers | Population average of standard drinks daily | Percent of total attributable deaths | Percent of total attributable DALYs | Attributable deaths   | Attributable DALYs       |
|----------|------|--------|----------|--------------------------------|--------------------------|---------------------------------------------|--------------------------------------|-------------------------------------|-----------------------|--------------------------|
| Colombia | 1995 | Female | 15 to 19 | 54%<br>(43-64%)                | 46%<br>(36-57%)          | 1.3<br>(0.79-1.9)                           | 3.1%<br>(1.7-4.7%)                   | 5.8%<br>(2.6-9.2%)                  | 74<br>(33-120)        | 7200<br>(3800-11000)     |
| Colombia | 1995 | Female | 20 to 24 | 67%<br>(57-75%)                | 33%<br>(25-43%)          | 1.8<br>(1.1-2.7)                            | 4.4%<br>(2.6-6.3%)                   | 7.3%<br>(3.5-11%)                   | 97<br>(46-150)        | 9800<br>(5600-14000)     |
| Colombia | 1995 | Female | 25 to 29 | 65%<br>(56-74%)                | 35%<br>(26-44%)          | 1.6<br>(1-2.2)                              | 3.7%<br>(2.2-5.3%)                   | 6.3%<br>(3.1-9.7%)                  | 92<br>(45-140)        | 8700<br>(5200-13000)     |
| Colombia | 1995 | Female | 30 to 34 | 65%<br>(55-73%)                | 35%<br>(27-45%)          | 1.5<br>(0.99-2.2)                           | 3.1%<br>(1.8-4.5%)                   | 5.6%<br>(2.8-8.7%)                  | 87<br>(45-140)        | 7100<br>(4300-11000)     |
| Colombia | 1995 | Female | 35 to 39 | 64%<br>(55-73%)                | 36%<br>(27-45%)          | 1.5<br>(1-2.2)                              | 2.9%<br>(1.7-4.3%)                   | 5.4%<br>(2.9-8.2%)                  | 98<br>(52-150)        | 6500<br>(3600-9700)      |
| Colombia | 1995 | Female | 40 to 44 | 63%<br>(54-72%)                | 37%<br>(28-46%)          | 1.7<br>(1.1-2.3)                            | 2.8%<br>(1.5-4.3%)                   | 5.5%<br>(2.9-8.3%)                  | 110<br>(55-160)       | 6000<br>(3300-9100)      |
| Colombia | 1995 | Female | 45 to 49 | 63%<br>(52-73%)                | 37%<br>(27-48%)          | 1.9<br>(1.2-2.8)                            | 3.2%<br>(1.5-5.5%)                   | 6%<br>(2.9-9.7%)                    | 140<br>(65-220)       | 6400<br>(2900-11000)     |
| Colombia | 1995 | Female | 50 to 54 | 63%<br>(51-74%)                | 37%<br>(26-49%)          | 2<br>(1.2-3)                                | 3.6%<br>(1.4-6.4%)                   | 5.9%<br>(2.5-10%)                   | 170<br>(73-290)       | 6600<br>(2600-12000)     |
| Colombia | 1995 | Female | 55 to 59 | 64%<br>(51-75%)                | 36%<br>(25-49%)          | 2.1<br>(1.2-3.2)                            | 3.9%<br>(1.2-7.1%)                   | 5.8%<br>(2.1-10%)                   | 210<br>(74-370)       | 7000<br>(2300-13000)     |
| Colombia | 1995 | Female | 60 to 64 | 62%<br>(48-74%)                | 38%<br>(26-52%)          | 1.9<br>(1.1-3.1)                            | 3.3%<br>(0.49-7%)                    | 4.5%<br>(0.75-9.4%)                 | 230<br>(38-460)       | 6400<br>(950-14000)      |
| Colombia | 1995 | Female | 65 to 69 | 57%<br>(43-70%)                | 43%<br>(30-57%)          | 1.6<br>(0.85-2.5)                           | 2.4%<br>(-0.14-5.4%)                 | 3.2%<br>(-0.092-7.1%)               | 190<br>(-5.6-430)     | 4500<br>(-250-10000)     |
| Colombia | 1995 | Female | 70 to 74 | 57%<br>(44-69%)                | 43%<br>(31-56%)          | 1.5<br>(0.7-2.5)                            | 1.6%<br>(-0.95-4.8%)                 | 2.2%<br>(-1.1-6.1%)                 | 150<br>(-74-420)      | 2800<br>(-1700-8100)     |
| Colombia | 1995 | Female | 75 to 79 | 52%<br>(37-67%)                | 48%<br>(33-63%)          | 1.3<br>(0.58-2.3)                           | 0.92%<br>(-1.4-3.8%)                 | 1.2%<br>(-1.8-4.9%)                 | 89<br>(-130-360)      | 1300<br>(-2000-5300)     |
| Colombia | 1995 | Female | 80 to 84 | 43%<br>(28-60%)                | 57%<br>(40-72%)          | 1.1<br>(0.51-1.8)                           | 0.7%<br>(-1.2-2.9%)                  | 0.86%<br>(-1.4-3.5%)                | 60<br>(-100-250)      | 660<br>(-1100-2700)      |
| Colombia | 1995 | Female | 85 to 89 | 41%<br>(27-56%)                | 59%<br>(44-73%)          | 1<br>(0.51-1.7)                             | 0.54%<br>(-1.2-2.6%)                 | 0.6%<br>(-1.6-3%)                   | 40<br>(-110-200)      | 340<br>(-780-1600)       |
| Colombia | 1995 | Female | 90 to 94 | 45%<br>(30-60%)                | 55%<br>(40-70%)          | 1.1<br>(0.57-1.9)                           | 0.3%<br>(-1.6-2.6%)                  | 0.23%<br>(-2.1-3%)                  | 8.8<br>(-81-120)      | 73<br>(-380-630)         |
| Colombia | 1995 | Female | 95 plus  | 49%<br>(32-67%)                | 51%<br>(33-68%)          | 1.2<br>(0.55-2.2)                           | 0.11%<br>(-2.1-3.2%)                 | -0.11%<br>(-2.9-3.5%)               | -1.6<br>(-40-49)      | 6.2<br>(-120-170)        |
| Colombia | 1995 | Male   | All Ages | 88%<br>(84-91%)                | 12%<br>(9.2-16%)         | 2.8<br>(2.3-3.2)                            | 10%<br>(7.6-12%)                     | 11%<br>(8.2-14%)                    | 12000<br>(9200-16000) | 62000<br>(47000-78000)   |
| Colombia | 1995 | Male   | 15 to 19 | 87%<br>(80-93%)                | 13%<br>(7.2-20%)         | 2.5<br>(1.6-3.7)                            | 12%<br>(6.7-18%)                     | 15%<br>(7.7-22%)                    | 780<br>(400-1200)     | 60000<br>(32000-88000)   |
| Colombia | 1995 | Male   | 20 to 24 | 94%<br>(91-96%)                | 5.8%<br>(3.7-9.4%)       | 4.2<br>(2.8-5.9)                            | 19%<br>(12-26%)                      | 22%<br>(13-30%)                     | 1600<br>(950-2300)    | 120000<br>(73000-160000) |
| Colombia | 1995 | Male   | 25 to 29 | 95%<br>(92-97%)                | 4.7%<br>(2.8-7.9%)       | 4.4<br>(3.1-6.2)                            | 19%<br>(12-26%)                      | 22%<br>(14-30%)                     | 1600<br>(970-2200)    | 100000<br>(69000-140000) |
| Colombia | 1995 | Male   | 30 to 34 | 96%<br>(93-97%)                | 4.4%<br>(2.6-7.1%)       | 4.6<br>(3.2-6.3)                            | 17%<br>(12-24%)                      | 21%<br>(14-29%)                     | 1300<br>(830-1800)    | 80000<br>(54000-110000)  |

| Location | Year | Sex    | Age      | Prevalence of current drinkers | Prevalence of abstainers | Population average of standard drinks daily | Percent of total attributable deaths | Percent of total attributable DALYs | Attributable deaths | Attributable DALYs      |
|----------|------|--------|----------|--------------------------------|--------------------------|---------------------------------------------|--------------------------------------|-------------------------------------|---------------------|-------------------------|
| Colombia | 1995 | Male   | 35 to 39 | 95%<br>(92-97%)                | 5%<br>(3.1-7.7%)         | 4.6<br>(3.1-6.6)                            | 16%<br>(11-22%)                      | 20%<br>(13-28%)                     | 1100<br>(710-1500)  | 61000<br>(41000-84000)  |
| Colombia | 1995 | Male   | 40 to 44 | 95%<br>(92-97%)                | 5%<br>(3.1-7.6%)         | 4.9<br>(3.3-6.9)                            | 15%<br>(10-20%)                      | 19%<br>(13-27%)                     | 850<br>(540-1200)   | 44000<br>(29000-59000)  |
| Colombia | 1995 | Male   | 45 to 49 | 96%<br>(92-98%)                | 4.4%<br>(2.4-7.8%)       | 5.3<br>(3.4-7.7)                            | 14%<br>(9.1-19%)                     | 19%<br>(12-26%)                     | 760<br>(470-1000)   | 35000<br>(23000-47000)  |
| Colombia | 1995 | Male   | 50 to 54 | 95%<br>(92-97%)                | 5.2%<br>(3.1-8.2%)       | 5.6<br>(3.6-8)                              | 14%<br>(8.8-19%)                     | 18%<br>(11-24%)                     | 750<br>(470-1000)   | 30000<br>(20000-40000)  |
| Colombia | 1995 | Male   | 55 to 59 | 93%<br>(89-96%)                | 7.2%<br>(4.3-11%)        | 5.9<br>(3.9-8.5)                            | 14%<br>(9.2-18%)                     | 17%<br>(11-22%)                     | 830<br>(550-1100)   | 28000<br>(19000-38000)  |
| Colombia | 1995 | Male   | 60 to 64 | 91%<br>(87-94%)                | 9%<br>(5.6-13%)          | 5.3<br>(3.2-8)                              | 12%<br>(6.9-16%)                     | 14%<br>(8.2-19%)                    | 870<br>(520-1200)   | 25000<br>(15000-35000)  |
| Colombia | 1995 | Male   | 65 to 69 | 90%<br>(85-94%)                | 10%<br>(6.1-15%)         | 4<br>(2.5-6)                                | 8.7%<br>(4.5-13%)                    | 10%<br>(5.2-15%)                    | 760<br>(380-1100)   | 18000<br>(9500-27000)   |
| Colombia | 1995 | Male   | 70 to 74 | 89%<br>(83-93%)                | 11%<br>(7.3-17%)         | 3<br>(1.7-4.6)                              | 5.4%<br>(1.9-9.7%)                   | 6.2%<br>(2-11%)                     | 510<br>(160-930)    | 9900<br>(3500-18000)    |
| Colombia | 1995 | Male   | 75 to 79 | 87%<br>(80-93%)                | 13%<br>(7.4-20%)         | 2.4<br>(1.3-3.9)                            | 3.5%<br>(0.54-7.4%)                  | 3.9%<br>(0.37-8.4%)                 | 310<br>(31-670)     | 4800<br>(720-10000)     |
| Colombia | 1995 | Male   | 80 to 84 | 83%<br>(72-91%)                | 17%<br>(9.2-28%)         | 2<br>(1.1-3.2)                              | 2.8%<br>(0.58-6%)                    | 3.1%<br>(0.39-6.8%)                 | 210<br>(26-460)     | 2400<br>(490-5000)      |
| Colombia | 1995 | Male   | 85 to 89 | 80%<br>(67-88%)                | 20%<br>(12-33%)          | 1.8<br>(1-3)                                | 2.3%<br>(0.36-5.1%)                  | 2.5%<br>(0.17-5.8%)                 | 130<br>(8.7-300)    | 1100<br>(160-2300)      |
| Colombia | 1995 | Male   | 90 to 94 | 81%<br>(69-89%)                | 19%<br>(11-31%)          | 2<br>(1-3.2)                                | 2%<br>(-0.25-5.1%)                   | 2%<br>(-0.7-5.8%)                   | 48<br>(-17-140)     | 290<br>(-36-780)        |
| Colombia | 1995 | Male   | 95 plus  | 82%<br>(69-91%)                | 18%<br>(8.8-31%)         | 2.1<br>(1-3.7)                              | 1.9%<br>(-0.76-6.2%)                 | 1.8%<br>(-1.6-6.9%)                 | 12<br>(-11-46)      | 53<br>(-21-170)         |
| Colombia | 2000 | Female | All Ages | 53%<br>(48-58%)                | 47%<br>(42-52%)          | 1<br>(0.85-1.3)                             | 1.9%<br>(1.1-2.7%)                   | 2.1%<br>(0.34-4%)                   | 1700<br>(280-3300)  | 81000<br>(47000-120000) |
| Colombia | 2000 | Female | 15 to 19 | 55%<br>(44-65%)                | 45%<br>(35-56%)          | 1.2<br>(0.73-1.8)                           | 3%<br>(1.6-4.7%)                     | 5.6%<br>(2.4-9.3%)                  | 80<br>(35-130)      | 7700<br>(4200-12000)    |
| Colombia | 2000 | Female | 20 to 24 | 67%<br>(57-75%)                | 33%<br>(25-43%)          | 1.6<br>(0.97-2.5)                           | 4.2%<br>(2.4-6.1%)                   | 6.8%<br>(3.1-11%)                   | 98<br>(45-160)      | 10000<br>(5900-15000)   |
| Colombia | 2000 | Female | 25 to 29 | 66%<br>(56-74%)                | 34%<br>(26-44%)          | 1.5<br>(0.93-2.1)                           | 3.5%<br>(2.1-5%)                     | 5.9%<br>(2.7-9.1%)                  | 80<br>(37-130)      | 8000<br>(4800-11000)    |
| Colombia | 2000 | Female | 30 to 34 | 65%<br>(55-73%)                | 35%<br>(27-45%)          | 1.4<br>(0.92-2)                             | 2.9%<br>(1.7-4.2%)                   | 5.2%<br>(2.7-8.1%)                  | 83<br>(43-130)      | 7200<br>(4300-11000)    |
| Colombia | 2000 | Female | 35 to 39 | 64%<br>(55-73%)                | 36%<br>(27-45%)          | 1.4<br>(0.98-2)                             | 2.6%<br>(1.5-3.8%)                   | 5.1%<br>(2.7-7.7%)                  | 93<br>(49-140)      | 6600<br>(3800-9500)     |
| Colombia | 2000 | Female | 40 to 44 | 64%<br>(54-72%)                | 36%<br>(28-46%)          | 1.5<br>(1-2.1)                              | 2.6%<br>(1.4-4%)                     | 5.2%<br>(2.7-7.8%)                  | 110<br>(59-170)     | 6400<br>(3500-9600)     |
| Colombia | 2000 | Female | 45 to 49 | 64%<br>(54-74%)                | 36%<br>(26-46%)          | 1.7<br>(1.1-2.5)                            | 2.9%<br>(1.3-4.7%)                   | 5.5%<br>(2.8-8.9%)                  | 140<br>(70-230)     | 6700<br>(3100-11000)    |
| Colombia | 2000 | Female | 50 to 54 | 63%<br>(52-73%)                | 37%<br>(27-48%)          | 1.8<br>(1.1-2.8)                            | 3.1%<br>(1.2-5.4%)                   | 5.4%<br>(2.4-8.9%)                  | 160<br>(73-270)     | 6500<br>(2800-11000)    |

| Location | Year | Sex    | Age      | Prevalence of current drinkers | Prevalence of abstainers | Population average of standard drinks daily | Percent of total attributable deaths | Percent of total attributable DALYs | Attributable deaths   | Attributable DALYs        |
|----------|------|--------|----------|--------------------------------|--------------------------|---------------------------------------------|--------------------------------------|-------------------------------------|-----------------------|---------------------------|
| Colombia | 2000 | Female | 55 to 59 | 64%<br>(52-75%)                | 36%<br>(25-48%)          | 1.9<br>(1.1-3)                              | 3.3%<br>(1.1-6.2%)                   | 5.4%<br>(2-9.4%)                    | 190<br>(70-340)       | 6500<br>(2100-12000)      |
| Colombia | 2000 | Female | 60 to 64 | 62%<br>(48-74%)                | 38%<br>(26-52%)          | 1.8<br>(1-2.9)                              | 2.9%<br>(0.32-5.9%)                  | 4.1%<br>(0.66-8.3%)                 | 200<br>(33-410)       | 5800<br>(700-12000)       |
| Colombia | 2000 | Female | 65 to 69 | 57%<br>(44-71%)                | 43%<br>(29-56%)          | 1.5<br>(0.77-2.3)                           | 2.1%<br>(-0.15-4.8%)                 | 2.9%<br>(-0.025-6.3%)               | 180<br>(-1.6-400)     | 4300<br>(-320-9600)       |
| Colombia | 2000 | Female | 70 to 74 | 57%<br>(44-69%)                | 43%<br>(31-56%)          | 1.4<br>(0.63-2.3)                           | 1.3%<br>(-0.92-4.4%)                 | 1.9%<br>(-1.1-5.7%)                 | 140<br>(-84-440)      | 2600<br>(-1700-8300)      |
| Colombia | 2000 | Female | 75 to 79 | 53%<br>(38-67%)                | 47%<br>(33-62%)          | 1.2<br>(0.56-2.1)                           | 0.7%<br>(-1.4-3.3%)                  | 0.94%<br>(-1.7-4.3%)                | 77<br>(-140-350)      | 1100<br>(-2100-5100)      |
| Colombia | 2000 | Female | 80 to 84 | 44%<br>(28-60%)                | 56%<br>(40-72%)          | 1<br>(0.49-1.7)                             | 0.51%<br>(-1.2-2.5%)                 | 0.62%<br>(-1.5-3.1%)                | 51<br>(-120-260)      | 570<br>(-1300-2800)       |
| Colombia | 2000 | Female | 85 to 89 | 41%<br>(27-57%)                | 59%<br>(43-73%)          | 0.97<br>(0.47-1.6)                          | 0.36%<br>(-1.2-2.2%)                 | 0.37%<br>(-1.7-2.6%)                | 29<br>(-130-200)      | 260<br>(-910-1500)        |
| Colombia | 2000 | Female | 90 to 94 | 45%<br>(31-61%)                | 55%<br>(39-69%)          | 1.1<br>(0.53-1.8)                           | 0.11%<br>(-1.6-2.2%)                 | -0.0062%<br>(-2.1-2.4%)             | -0.3<br>(-110-120)    | 35<br>(-500-660)          |
| Colombia | 2000 | Female | 95 plus  | 49%<br>(32-67%)                | 51%<br>(33-68%)          | 1.2<br>(0.53-2.1)                           | -0.066%<br>(-2.1-2.7%)               | -0.34%<br>(-2.9-2.9%)               | -6.2<br>(-54-54)      | -5<br>(-160-200)          |
| Colombia | 2000 | Male   | All Ages | 88%<br>(85-91%)                | 12%<br>(8.8-15%)         | 2.7<br>(2.2-3.1)                            | 9.8%<br>(7.4-12%)                    | 10%<br>(7.6-13%)                    | 12000<br>(9000-16000) | 620000<br>(470000-780000) |
| Colombia | 2000 | Male   | 15 to 19 | 87%<br>(80-93%)                | 13%<br>(7.2-20%)         | 2.3<br>(1.4-3.4)                            | 11%<br>(6-17%)                       | 14%<br>(7-21%)                      | 760<br>(380-1100)     | 59000<br>(31000-86000)    |
| Colombia | 2000 | Male   | 20 to 24 | 94%<br>(91-96%)                | 5.8%<br>(3.7-9.4%)       | 3.9<br>(2.5-5.6)                            | 18%<br>(11-25%)                      | 20%<br>(12-29%)                     | 1600<br>(940-2400)    | 120000<br>(73000-170000)  |
| Colombia | 2000 | Male   | 25 to 29 | 95%<br>(92-97%)                | 4.7%<br>(2.8-7.9%)       | 4.1<br>(2.8-5.8)                            | 18%<br>(11-25%)                      | 20%<br>(12-29%)                     | 1500<br>(870-2100)    | 98000<br>(63000-140000)   |
| Colombia | 2000 | Male   | 30 to 34 | 96%<br>(93-98%)                | 4.4%<br>(2.5-7.1%)       | 4.2<br>(3-5.9)                              | 16%<br>(11-22%)                      | 19%<br>(12-28%)                     | 1200<br>(790-1700)    | 78000<br>(52000-110000)   |
| Colombia | 2000 | Male   | 35 to 39 | 95%<br>(92-97%)                | 5%<br>(3.1-7.6%)         | 4.3<br>(2.8-6.1)                            | 15%<br>(10-20%)                      | 19%<br>(12-26%)                     | 1100<br>(710-1500)    | 62000<br>(42000-84000)    |
| Colombia | 2000 | Male   | 40 to 44 | 95%<br>(92-97%)                | 5%<br>(3.2-7.7%)         | 4.5<br>(3-6.3)                              | 14%<br>(9.1-18%)                     | 18%<br>(11-24%)                     | 890<br>(570-1200)     | 46000<br>(31000-63000)    |
| Colombia | 2000 | Male   | 45 to 49 | 96%<br>(92-98%)                | 4.4%<br>(2.4-7.7%)       | 4.9<br>(3.1-7.1)                            | 13%<br>(8.2-18%)                     | 17%<br>(11-24%)                     | 830<br>(520-1200)     | 39000<br>(25000-54000)    |
| Colombia | 2000 | Male   | 50 to 54 | 95%<br>(92-97%)                | 5.2%<br>(3-8.2%)         | 5.2<br>(3.3-7.3)                            | 12%<br>(7.8-17%)                     | 16%<br>(10-22%)                     | 770<br>(470-1100)     | 32000<br>(20000-43000)    |
| Colombia | 2000 | Male   | 55 to 59 | 93%<br>(89-96%)                | 7.2%<br>(4.3-11%)        | 5.4<br>(3.5-7.8)                            | 12%<br>(8-17%)                       | 16%<br>(9.9-21%)                    | 780<br>(500-1100)     | 27000<br>(18000-37000)    |
| Colombia | 2000 | Male   | 60 to 64 | 91%<br>(87-95%)                | 9%<br>(5.4-13%)          | 4.9<br>(3-7.3)                              | 10%<br>(5.9-15%)                     | 13%<br>(7-18%)                      | 810<br>(450-1200)     | 24000<br>(14000-34000)    |
| Colombia | 2000 | Male   | 65 to 69 | 90%<br>(85-94%)                | 10%<br>(6-15%)           | 3.7<br>(2.3-5.4)                            | 7.7%<br>(3.9-12%)                    | 9.1%<br>(4.4-14%)                   | 710<br>(340-1100)     | 17000<br>(8700-26000)     |
| Colombia | 2000 | Male   | 70 to 74 | 89%<br>(83-93%)                | 11%<br>(7.1-17%)         | 2.8<br>(1.7-4.3)                            | 4.8%<br>(1.6-8.8%)                   | 5.4%<br>(1.7-10%)                   | 510<br>(160-940)      | 10000<br>(3400-18000)     |

| Location | Year | Sex    | Age      | Prevalence of current drinkers | Prevalence of abstainers | Population average of standard drinks daily | Percent of total attributable deaths | Percent of total attributable DALYs | Attributable deaths | Attributable DALYs      |
|----------|------|--------|----------|--------------------------------|--------------------------|---------------------------------------------|--------------------------------------|-------------------------------------|---------------------|-------------------------|
| Colombia | 2000 | Male   | 75 to 79 | 87%<br>(80-93%)                | 13%<br>(7.2-20%)         | 2.2<br>(1.2-3.6)                            | 3.1%<br>(0.47-6.7%)                  | 3.5%<br>(0.29-7.6%)                 | 310<br>(26-690)     | 4900<br>(760-11000)     |
| Colombia | 2000 | Male   | 80 to 84 | 83%<br>(72-91%)                | 17%<br>(9-28%)           | 1.9<br>(1.1-3)                              | 2.5%<br>(0.48-5.3%)                  | 2.7%<br>(0.37-6%)                   | 210<br>(30-480)     | 2500<br>(480-5300)      |
| Colombia | 2000 | Male   | 85 to 89 | 80%<br>(69-88%)                | 20%<br>(12-31%)          | 1.7<br>(0.94-2.7)                           | 2%<br>(0.25-4.4%)                    | 2.1%<br>(0.067-4.9%)                | 120<br>(4-300)      | 1100<br>(130-2400)      |
| Colombia | 2000 | Male   | 90 to 94 | 81%<br>(70-89%)                | 19%<br>(11-30%)          | 1.8<br>(0.95-2.9)                           | 1.6%<br>(-0.29-4.4%)                 | 1.5%<br>(-0.7-4.9%)                 | 47<br>(-21-150)     | 300<br>(-54-830)        |
| Colombia | 2000 | Male   | 95 plus  | 81%<br>(69-91%)                | 19%<br>(9-31%)           | 1.9<br>(0.91-3.3)                           | 1.5%<br>(-0.81-4.9%)                 | 1.2%<br>(-1.6-5.2%)                 | 11<br>(-14-46)      | 52<br>(-29-180)         |
| Colombia | 2005 | Female | All Ages | 46%<br>(41-51%)                | 54%<br>(49-59%)          | 0.94<br>(0.75-1.1)                          | 1.7%<br>(1-2.5%)                     | 2%<br>(0.42-3.7%)                   | 1700<br>(370-3200)  | 76000<br>(47000-110000) |
| Colombia | 2005 | Female | 15 to 19 | 43%<br>(32-56%)                | 57%<br>(44-68%)          | 0.95<br>(0.55-1.5)                          | 2.3%<br>(1.3-3.6%)                   | 4.4%<br>(1.9-7.3%)                  | 52<br>(23-89)       | 5700<br>(3200-8600)     |
| Colombia | 2005 | Female | 20 to 24 | 57%<br>(44-69%)                | 43%<br>(31-56%)          | 1.4<br>(0.78-2.2)                           | 3.5%<br>(2.2-5%)                     | 5.7%<br>(2.6-9.1%)                  | 76<br>(35-120)      | 8900<br>(5300-13000)    |
| Colombia | 2005 | Female | 25 to 29 | 56%<br>(43-67%)                | 44%<br>(33-57%)          | 1.2<br>(0.72-1.8)                           | 2.9%<br>(1.9-4.1%)                   | 4.8%<br>(2.3-7.6%)                  | 61<br>(29-96)       | 7000<br>(4400-10000)    |
| Colombia | 2005 | Female | 30 to 34 | 55%<br>(42-67%)                | 45%<br>(33-58%)          | 1.2<br>(0.68-1.7)                           | 2.4%<br>(1.6-3.5%)                   | 4.3%<br>(2.3-6.6%)                  | 58<br>(30-90)       | 5600<br>(3600-8100)     |
| Colombia | 2005 | Female | 35 to 39 | 55%<br>(43-67%)                | 45%<br>(33-57%)          | 1.2<br>(0.76-1.7)                           | 2.3%<br>(1.4-3.2%)                   | 4.4%<br>(2.5-6.4%)                  | 75<br>(43-110)      | 5900<br>(3800-8400)     |
| Colombia | 2005 | Female | 40 to 44 | 54%<br>(42-65%)                | 46%<br>(35-58%)          | 1.3<br>(0.8-1.8)                            | 2.3%<br>(1.4-3.3%)                   | 4.5%<br>(2.6-6.5%)                  | 98<br>(56-140)      | 6100<br>(3700-8900)     |
| Colombia | 2005 | Female | 45 to 49 | 56%<br>(41-68%)                | 44%<br>(32-59%)          | 1.5<br>(0.88-2.3)                           | 2.5%<br>(1.3-4.1%)                   | 5%<br>(2.6-7.8%)                    | 130<br>(71-210)     | 6600<br>(3600-10000)    |
| Colombia | 2005 | Female | 50 to 54 | 60%<br>(46-72%)                | 40%<br>(28-54%)          | 1.7<br>(1.1-2.7)                            | 2.8%<br>(1.2-4.8%)                   | 5.2%<br>(2.5-8.2%)                  | 170<br>(83-270)     | 7200<br>(3400-12000)    |
| Colombia | 2005 | Female | 55 to 59 | 61%<br>(47-74%)                | 39%<br>(26-53%)          | 1.8<br>(1.1-2.9)                            | 3.1%<br>(1.3-5.5%)                   | 5.3%<br>(2.4-8.9%)                  | 200<br>(91-340)     | 7100<br>(3000-13000)    |
| Colombia | 2005 | Female | 60 to 64 | 58%<br>(43-73%)                | 42%<br>(27-57%)          | 1.7<br>(0.92-2.8)                           | 2.7%<br>(0.6-5.3%)                   | 4.1%<br>(1.1-7.7%)                  | 190<br>(51-370)     | 5700<br>(1300-11000)    |
| Colombia | 2005 | Female | 65 to 69 | 55%<br>(39-70%)                | 45%<br>(30-61%)          | 1.5<br>(0.74-2.2)                           | 2.1%<br>(0.17-4.4%)                  | 3%<br>(0.34-6%)                     | 190<br>(22-380)     | 4500<br>(390-9200)      |
| Colombia | 2005 | Female | 70 to 74 | 52%<br>(37-65%)                | 48%<br>(35-63%)          | 1.2<br>(0.55-2.1)                           | 1.4%<br>(-0.46-3.9%)                 | 2%<br>(-0.48-5.2%)                  | 160<br>(-40-430)    | 3100<br>(-950-8400)     |
| Colombia | 2005 | Female | 75 to 79 | 46%<br>(32-63%)                | 54%<br>(37-68%)          | 1<br>(0.46-1.8)                             | 0.86%<br>(-0.84-3%)                  | 1.1%<br>(-1-3.8%)                   | 110<br>(-100-370)   | 1600<br>(-1500-5400)    |
| Colombia | 2005 | Female | 80 to 84 | 40%<br>(25-57%)                | 60%<br>(43-75%)          | 0.92<br>(0.45-1.5)                          | 0.62%<br>(-0.85-2.4%)                | 0.76%<br>(-1.1-2.9%)                | 77<br>(-110-300)    | 850<br>(-1100-3200)     |
| Colombia | 2005 | Female | 85 to 89 | 38%<br>(24-54%)                | 62%<br>(46-76%)          | 0.9<br>(0.43-1.5)                           | 0.44%<br>(-1-2%)                     | 0.46%<br>(-1.3-2.4%)                | 44<br>(-130-230)    | 390<br>(-920-1800)      |
| Colombia | 2005 | Female | 90 to 94 | 42%<br>(28-57%)                | 58%<br>(43-72%)          | 1<br>(0.5-1.7)                              | 0.19%<br>(-1.3-2.1%)                 | 0.085%<br>(-1.8-2.3%)               | 5.2<br>(-110-140)   | 72<br>(-520-780)        |



| Location | Year | Sex    | Age      | Prevalence of current drinkers | Prevalence of abstainers | Population average of standard drinks daily | Percent of total attributable deaths | Percent of total attributable DALYs | Attributable deaths   | Attributable DALYs        |
|----------|------|--------|----------|--------------------------------|--------------------------|---------------------------------------------|--------------------------------------|-------------------------------------|-----------------------|---------------------------|
| Colombia | 2005 | Female | 95 plus  | 46%<br>(30-64%)                | 54%<br>(36-70%)          | 1.1<br>(0.49-1.9)                           | 0.038%<br>(-1.8-2.4%)                | -0.21%<br>(-2.6-2.7%)               | -5.5<br>(-68-71)      | 4.2<br>(-200-260)         |
| Colombia | 2005 | Male   | All Ages | 89%<br>(86-92%)                | 11%<br>(8.5-14%)         | 2.9<br>(2.4-3.3)                            | 8.9%<br>(6.9-11%)                    | 9.1%<br>(6.6-12%)                   | 10000<br>(7600-13000) | 520000<br>(400000-650000) |
| Colombia | 2005 | Male   | 15 to 19 | 87%<br>(80-93%)                | 13%<br>(7.1-20%)         | 2.4<br>(1.5-3.4)                            | 10%<br>(5.8-15%)                     | 14%<br>(7-20%)                      | 490<br>(250-740)      | 40000<br>(23000-58000)    |
| Colombia | 2005 | Male   | 20 to 24 | 94%<br>(91-96%)                | 5.8%<br>(3.7-9.5%)       | 3.9<br>(2.6-5.7)                            | 17%<br>(11-23%)                      | 20%<br>(11-28%)                     | 1200<br>(700-1700)    | 92000<br>(59000-130000)   |
| Colombia | 2005 | Male   | 25 to 29 | 95%<br>(92-97%)                | 4.7%<br>(2.8-8%)         | 4.2<br>(2.8-5.9)                            | 17%<br>(11-23%)                      | 20%<br>(12-28%)                     | 1100<br>(700-1600)    | 81000<br>(53000-110000)   |
| Colombia | 2005 | Male   | 30 to 34 | 96%<br>(93-97%)                | 4.4%<br>(2.6-7.1%)       | 4.3<br>(3-6)                                | 15%<br>(11-20%)                      | 19%<br>(12-26%)                     | 910<br>(590-1300)     | 60000<br>(41000-80000)    |
| Colombia | 2005 | Male   | 35 to 39 | 95%<br>(92-97%)                | 5%<br>(3-7.6%)           | 4.3<br>(2.8-6.2)                            | 13%<br>(9.3-18%)                     | 18%<br>(12-24%)                     | 810<br>(540-1100)     | 49000<br>(34000-66000)    |
| Colombia | 2005 | Male   | 40 to 44 | 95%<br>(92-97%)                | 5%<br>(3.1-7.5%)         | 4.6<br>(3-6.4)                              | 12%<br>(8.6-16%)                     | 17%<br>(11-23%)                     | 740<br>(490-1000)     | 41000<br>(28000-54000)    |
| Colombia | 2005 | Male   | 45 to 49 | 96%<br>(92-98%)                | 4.4%<br>(2.4-7.8%)       | 4.9<br>(3.2-7.1)                            | 12%<br>(8-16%)                       | 16%<br>(11-23%)                     | 740<br>(470-1000)     | 36000<br>(24000-48000)    |
| Colombia | 2005 | Male   | 50 to 54 | 95%<br>(92-97%)                | 5.2%<br>(3.1-8.3%)       | 5.2<br>(3.4-7.4)                            | 12%<br>(7.5-16%)                     | 16%<br>(9.9-21%)                    | 780<br>(500-1100)     | 33000<br>(22000-44000)    |
| Colombia | 2005 | Male   | 55 to 59 | 93%<br>(89-96%)                | 7.2%<br>(4.3-11%)        | 5.5<br>(3.5-7.9)                            | 11%<br>(7.5-15%)                     | 15%<br>(9.7-20%)                    | 810<br>(520-1100)     | 29000<br>(19000-39000)    |
| Colombia | 2005 | Male   | 60 to 64 | 91%<br>(87-95%)                | 9%<br>(5.5-13%)          | 4.9<br>(3.1-7.3)                            | 9.9%<br>(5.6-14%)                    | 12%<br>(6.7-17%)                    | 780<br>(430-1100)     | 24000<br>(13000-33000)    |
| Colombia | 2005 | Male   | 65 to 69 | 90%<br>(85-94%)                | 10%<br>(5.9-15%)         | 3.8<br>(2.4-5.4)                            | 7.5%<br>(3.7-11%)                    | 8.9%<br>(4.2-14%)                   | 720<br>(340-1100)     | 18000<br>(8700-27000)     |
| Colombia | 2005 | Male   | 70 to 74 | 89%<br>(84-93%)                | 11%<br>(7-16%)           | 2.8<br>(1.7-4.3)                            | 4.6%<br>(1.6-8.5%)                   | 5.2%<br>(1.7-10%)                   | 510<br>(160-970)      | 10000<br>(3600-19000)     |
| Colombia | 2005 | Male   | 75 to 79 | 88%<br>(80-93%)                | 12%<br>(7.2-20%)         | 2.2<br>(1.2-3.7)                            | 2.9%<br>(0.37-6.6%)                  | 3.2%<br>(0.16-7.5%)                 | 340<br>(17-800)       | 5400<br>(680-12000)       |
| Colombia | 2005 | Male   | 80 to 84 | 84%<br>(73-91%)                | 16%<br>(8.9-27%)         | 1.9<br>(1.1-3)                              | 2.3%<br>(0.38-5%)                    | 2.5%<br>(0.22-5.6%)                 | 250<br>(22-550)       | 2900<br>(490-6200)        |
| Colombia | 2005 | Male   | 85 to 89 | 80%<br>(69-89%)                | 20%<br>(11-31%)          | 1.7<br>(0.96-2.8)                           | 1.9%<br>(0.25-4.2%)                  | 2%<br>(0.011-4.6%)                  | 150<br>(0.81-350)     | 1300<br>(170-2900)        |
| Colombia | 2005 | Male   | 90 to 94 | 80%<br>(69-89%)                | 20%<br>(11-31%)          | 1.8<br>(0.95-2.9)                           | 1.6%<br>(-0.27-4.4%)                 | 1.5%<br>(-0.75-4.9%)                | 58<br>(-29-190)       | 360<br>(-64-1100)         |
| Colombia | 2005 | Male   | 95 plus  | 81%<br>(68-91%)                | 19%<br>(8.9-32%)         | 1.9<br>(0.93-3.3)                           | 1.5%<br>(-0.68-5.1%)                 | 1.3%<br>(-1.4-5.7%)                 | 15<br>(-17-67)        | 71<br>(-33-250)           |
| Colombia | 2010 | Female | All Ages | 44%<br>(38-49%)                | 56%<br>(51-62%)          | 0.97<br>(0.76-1.2)                          | 1.9%<br>(1.2-2.6%)                   | 2.1%<br>(0.55-3.9%)                 | 2000<br>(500-3600)    | 86000<br>(54000-120000)   |
| Colombia | 2010 | Female | 15 to 19 | 39%<br>(28-52%)                | 61%<br>(48-72%)          | 0.9<br>(0.52-1.5)                           | 2.2%<br>(1.4-3.4%)                   | 4.2%<br>(1.9-7.2%)                  | 42<br>(19-72)         | 5100<br>(3000-7700)       |
| Colombia | 2010 | Female | 20 to 24 | 52%<br>(38-65%)                | 48%<br>(35-62%)          | 1.3<br>(0.71-2.2)                           | 3.5%<br>(2.3-5%)                     | 5.4%<br>(2.5-8.7%)                  | 62<br>(29-100)        | 8500<br>(5400-12000)      |

| Location | Year | Sex    | Age      | Prevalence of current drinkers | Prevalence of abstainers | Population average of standard drinks daily | Percent of total attributable deaths | Percent of total attributable DALYs | Attributable deaths   | Attributable DALYs        |
|----------|------|--------|----------|--------------------------------|--------------------------|---------------------------------------------|--------------------------------------|-------------------------------------|-----------------------|---------------------------|
| Colombia | 2010 | Female | 25 to 29 | 52%<br>(38-64%)                | 48%<br>(36-62%)          | 1.2<br>(0.68-1.8)                           | 3.2%<br>(2.2-4.4%)                   | 4.6%<br>(2.3-7.2%)                  | 57<br>(29-90)         | 7800<br>(5100-11000)      |
| Colombia | 2010 | Female | 30 to 34 | 51%<br>(37-64%)                | 49%<br>(36-63%)          | 1.1<br>(0.64-1.7)                           | 2.7%<br>(1.8-3.7%)                   | 4.1%<br>(2.2-6.3%)                  | 55<br>(30-85)         | 6500<br>(4200-9100)       |
| Colombia | 2010 | Female | 35 to 39 | 51%<br>(38-64%)                | 49%<br>(36-62%)          | 1.2<br>(0.7-1.7)                            | 2.4%<br>(1.6-3.3%)                   | 4.2%<br>(2.5-6.2%)                  | 65<br>(38-97)         | 6000<br>(4000-8300)       |
| Colombia | 2010 | Female | 40 to 44 | 50%<br>(37-62%)                | 50%<br>(38-63%)          | 1.2<br>(0.76-1.8)                           | 2.3%<br>(1.5-3.3%)                   | 4.4%<br>(2.7-6.3%)                  | 93<br>(56-130)        | 6600<br>(4300-9300)       |
| Colombia | 2010 | Female | 45 to 49 | 53%<br>(37-65%)                | 47%<br>(35-63%)          | 1.5<br>(0.86-2.3)                           | 2.6%<br>(1.5-4%)                     | 5.1%<br>(2.9-7.8%)                  | 140<br>(81-220)       | 7500<br>(4400-12000)      |
| Colombia | 2010 | Female | 50 to 54 | 58%<br>(44-72%)                | 42%<br>(28-56%)          | 1.8<br>(1.1-2.7)                            | 3%<br>(1.5-4.8%)                     | 5.5%<br>(2.9-8.6%)                  | 200<br>(110-310)      | 8500<br>(4400-14000)      |
| Colombia | 2010 | Female | 55 to 59 | 60%<br>(45-73%)                | 40%<br>(27-55%)          | 1.9<br>(1.1-3)                              | 3.1%<br>(1.4-5.4%)                   | 5.5%<br>(2.7-9.2%)                  | 240<br>(110-390)      | 8600<br>(3800-15000)      |
| Colombia | 2010 | Female | 60 to 64 | 57%<br>(40-72%)                | 43%<br>(28-60%)          | 1.7<br>(0.94-2.9)                           | 2.7%<br>(0.8-5.2%)                   | 4.4%<br>(1.4-8.1%)                  | 230<br>(74-410)       | 6900<br>(2000-13000)      |
| Colombia | 2010 | Female | 65 to 69 | 53%<br>(37-69%)                | 47%<br>(31-63%)          | 1.5<br>(0.74-2.3)                           | 2.3%<br>(0.45-4.5%)                  | 3.4%<br>(0.71-6.5%)                 | 220<br>(47-420)       | 5300<br>(1000-10000)      |
| Colombia | 2010 | Female | 70 to 74 | 49%<br>(34-64%)                | 51%<br>(36-66%)          | 1.2<br>(0.55-2.1)                           | 1.7%<br>(-0.13-4%)                   | 2.3%<br>(-0.094-5.4%)               | 200<br>(-7.8-460)     | 3700<br>(-310-9100)       |
| Colombia | 2010 | Female | 75 to 79 | 43%<br>(28-60%)                | 57%<br>(40-72%)          | 1<br>(0.47-1.9)                             | 1.1%<br>(-0.51-3.1%)                 | 1.4%<br>(-0.64-4%)                  | 150<br>(-67-420)      | 2200<br>(-1100-6200)      |
| Colombia | 2010 | Female | 80 to 84 | 38%<br>(24-55%)                | 62%<br>(45-76%)          | 0.94<br>(0.44-1.6)                          | 0.8%<br>(-0.57-2.5%)                 | 0.97%<br>(-0.73-3.2%)               | 110<br>(-85-370)      | 1300<br>(-880-4100)       |
| Colombia | 2010 | Female | 85 to 89 | 38%<br>(24-53%)                | 62%<br>(47-76%)          | 0.95<br>(0.46-1.6)                          | 0.62%<br>(-0.81-2.2%)                | 0.67%<br>(-1.1-2.6%)                | 78<br>(-130-300)      | 670<br>(-920-2400)        |
| Colombia | 2010 | Female | 90 to 94 | 41%<br>(28-56%)                | 59%<br>(44-72%)          | 1<br>(0.53-1.8)                             | 0.38%<br>(-1.1-2.3%)                 | 0.31%<br>(-1.5-2.6%)                | 24<br>(-120-200)      | 190<br>(-550-1100)        |
| Colombia | 2010 | Female | 95 plus  | 45%<br>(28-63%)                | 55%<br>(37-72%)          | 1.1<br>(0.49-2.1)                           | 0.26%<br>(-1.6-2.9%)                 | 0.038%<br>(-2.3-3.3%)               | 1.3<br>(-79-110)      | 35<br>(-220-390)          |
| Colombia | 2010 | Male   | All Ages | 88%<br>(85-91%)                | 12%<br>(9.1-15%)         | 3.1<br>(2.5-3.6)                            | 9.1%<br>(7.2-11%)                    | 9.1%<br>(6.7-12%)                   | 11000<br>(8000-14000) | 530000<br>(420000-650000) |
| Colombia | 2010 | Male   | 15 to 19 | 84%<br>(72-91%)                | 16%<br>(8.6-28%)         | 2.3<br>(1.4-3.4)                            | 9.7%<br>(5.8-14%)                    | 13%<br>(7-20%)                      | 450<br>(240-690)      | 37000<br>(22000-54000)    |
| Colombia | 2010 | Male   | 20 to 24 | 93%<br>(88-96%)                | 7%<br>(4.1-12%)          | 4<br>(2.5-5.8)                              | 17%<br>(11-23%)                      | 20%<br>(12-29%)                     | 1100<br>(660-1600)    | 83000<br>(55000-120000)   |
| Colombia | 2010 | Male   | 25 to 29 | 95%<br>(91-97%)                | 5.2%<br>(3-9%)           | 4.3<br>(2.9-6.2)                            | 17%<br>(12-23%)                      | 21%<br>(13-29%)                     | 1100<br>(740-1600)    | 81000<br>(55000-110000)   |
| Colombia | 2010 | Male   | 30 to 34 | 95%<br>(92-97%)                | 4.8%<br>(2.7-8.1%)       | 4.5<br>(3.1-6.3)                            | 15%<br>(11-20%)                      | 20%<br>(13-28%)                     | 920<br>(620-1300)     | 62000<br>(44000-82000)    |
| Colombia | 2010 | Male   | 35 to 39 | 95%<br>(91-97%)                | 5.4%<br>(3.2-8.5%)       | 4.5<br>(2.9-6.4)                            | 14%<br>(9.7-19%)                     | 19%<br>(12-26%)                     | 740<br>(480-1000)     | 46000<br>(31000-62000)    |
| Colombia | 2010 | Male   | 40 to 44 | 95%<br>(91-97%)                | 5.5%<br>(3.3-8.5%)       | 4.7<br>(3.1-6.6)                            | 12%<br>(8.7-16%)                     | 18%<br>(12-24%)                     | 720<br>(470-990)      | 41000<br>(29000-55000)    |

| Location | Year | Sex    | Age      | Prevalence of current drinkers | Prevalence of abstainers | Population average of standard drinks daily | Percent of total attributable deaths | Percent of total attributable DALYs | Attributable deaths | Attributable DALYs      |
|----------|------|--------|----------|--------------------------------|--------------------------|---------------------------------------------|--------------------------------------|-------------------------------------|---------------------|-------------------------|
| Colombia | 2010 | Male   | 45 to 49 | 95%<br>(91-97%)                | 4.9%<br>(2.6-8.9%)       | 5.1<br>(3.2-7.3)                            | 12%<br>(8-16%)                       | 17%<br>(11-23%)                     | 760<br>(500-1100)   | 38000<br>(26000-52000)  |
| Colombia | 2010 | Male   | 50 to 54 | 94%<br>(91-97%)                | 5.7%<br>(3.3-9.4%)       | 5.4<br>(3.5-7.7)                            | 11%<br>(7.7-15%)                     | 16%<br>(10-21%)                     | 830<br>(540-1100)   | 36000<br>(24000-48000)  |
| Colombia | 2010 | Male   | 55 to 59 | 92%<br>(87-95%)                | 8%<br>(4.6-13%)          | 5.6<br>(3.6-8.2)                            | 11%<br>(7.6-15%)                     | 15%<br>(10-20%)                     | 930<br>(620-1200)   | 34000<br>(24000-46000)  |
| Colombia | 2010 | Male   | 60 to 64 | 90%<br>(84-94%)                | 10%<br>(5.9-16%)         | 5<br>(3.1-7.7)                              | 9.6%<br>(5.7-13%)                    | 12%<br>(7-17%)                      | 880<br>(510-1200)   | 27000<br>(16000-38000)  |
| Colombia | 2010 | Male   | 65 to 69 | 88%<br>(82-93%)                | 12%<br>(6.6-18%)         | 3.8<br>(2.3-5.6)                            | 7.4%<br>(3.9-11%)                    | 9.1%<br>(4.6-14%)                   | 760<br>(390-1200)   | 19000<br>(10000-29000)  |
| Colombia | 2010 | Male   | 70 to 74 | 86%<br>(79-92%)                | 14%<br>(8.3-21%)         | 2.7<br>(1.6-4.4)                            | 4.6%<br>(1.7-8.2%)                   | 5.3%<br>(1.9-9.8%)                  | 550<br>(190-990)    | 11000<br>(4200-20000)   |
| Colombia | 2010 | Male   | 75 to 79 | 84%<br>(74-91%)                | 16%<br>(8.6-26%)         | 2.1<br>(1.1-3.5)                            | 3%<br>(0.65-6.2%)                    | 3.3%<br>(0.58-7.2%)                 | 380<br>(64-820)     | 6000<br>(1300-13000)    |
| Colombia | 2010 | Male   | 80 to 84 | 81%<br>(68-90%)                | 19%<br>(10-32%)          | 1.8<br>(1-2.9)                              | 2.4%<br>(0.54-5.1%)                  | 2.6%<br>(0.38-5.8%)                 | 290<br>(43-670)     | 3500<br>(760-7500)      |
| Colombia | 2010 | Male   | 85 to 89 | 78%<br>(66-87%)                | 22%<br>(13-34%)          | 1.7<br>(0.91-2.8)                           | 2%<br>(0.36-4.5%)                    | 2.1%<br>(0.14-5%)                   | 190<br>(13-460)     | 1600<br>(310-3700)      |
| Colombia | 2010 | Male   | 90 to 94 | 78%<br>(66-88%)                | 22%<br>(12-34%)          | 1.8<br>(0.93-2.9)                           | 1.7%<br>(-0.13-4.7%)                 | 1.6%<br>(-0.53-5.1%)                | 80<br>(-26-250)     | 500<br>(-37-1400)       |
| Colombia | 2010 | Male   | 95 plus  | 80%<br>(65-91%)                | 20%<br>(9.4-35%)         | 1.9<br>(0.92-3.4)                           | 1.6%<br>(-0.55-5.3%)                 | 1.4%<br>(-1.2-5.8%)                 | 21<br>(-18-86)      | 97<br>(-34-320)         |
| Colombia | 2016 | Female | All Ages | 50%<br>(44-55%)                | 50%<br>(45-56%)          | 1.1<br>(0.84-1.5)                           | 2%<br>(1.2-3.1%)                     | 2.3%<br>(0.6-4.2%)                  | 2200<br>(570-4100)  | 93000<br>(53000-140000) |
| Colombia | 2016 | Female | 15 to 19 | 43%<br>(30-55%)                | 57%<br>(45-70%)          | 1<br>(0.54-1.7)                             | 2.3%<br>(1.4-3.6%)                   | 4.6%<br>(2-8.2%)                    | 38<br>(17-69)       | 4800<br>(2700-7500)     |
| Colombia | 2016 | Female | 20 to 24 | 58%<br>(45-70%)                | 42%<br>(30-55%)          | 1.5<br>(0.79-2.6)                           | 3.8%<br>(2.5-5.4%)                   | 6.1%<br>(2.8-10%)                   | 59<br>(26-100)      | 8400<br>(5200-13000)    |
| Colombia | 2016 | Female | 25 to 29 | 60%<br>(45-71%)                | 40%<br>(29-55%)          | 1.4<br>(0.8-2.2)                            | 3.4%<br>(2.3-4.8%)                   | 5.4%<br>(2.5-8.8%)                  | 58<br>(27-96)       | 7900<br>(5100-11000)    |
| Colombia | 2016 | Female | 30 to 34 | 59%<br>(45-71%)                | 41%<br>(29-55%)          | 1.4<br>(0.79-2.1)                           | 2.8%<br>(1.8-4%)                     | 4.8%<br>(2.6-7.4%)                  | 60<br>(32-95)       | 7100<br>(4400-10000)    |
| Colombia | 2016 | Female | 35 to 39 | 59%<br>(47-71%)                | 41%<br>(29-53%)          | 1.4<br>(0.85-2.2)                           | 2.6%<br>(1.6-3.7%)                   | 4.9%<br>(2.8-7.6%)                  | 73<br>(40-120)      | 6700<br>(4200-9700)     |
| Colombia | 2016 | Female | 40 to 44 | 60%<br>(47-71%)                | 40%<br>(29-53%)          | 1.5<br>(0.95-2.3)                           | 2.4%<br>(1.4-3.7%)                   | 5.2%<br>(2.9-7.7%)                  | 93<br>(52-140)      | 6500<br>(3800-10000)    |
| Colombia | 2016 | Female | 45 to 49 | 60%<br>(46-72%)                | 40%<br>(28-54%)          | 1.8<br>(1-2.7)                              | 2.6%<br>(1.4-4.2%)                   | 5.5%<br>(2.9-8.7%)                  | 150<br>(78-240)     | 8000<br>(4200-13000)    |
| Colombia | 2016 | Female | 50 to 54 | 60%<br>(47-73%)                | 40%<br>(27-53%)          | 1.9<br>(1.1-2.9)                            | 2.8%<br>(1.3-4.7%)                   | 5.6%<br>(2.9-8.8%)                  | 210<br>(110-340)    | 9300<br>(4300-16000)    |
| Colombia | 2016 | Female | 55 to 59 | 60%<br>(45-73%)                | 40%<br>(27-55%)          | 1.9<br>(1.1-3)                              | 3%<br>(1.2-5.2%)                     | 5.4%<br>(2.6-9.1%)                  | 260<br>(120-430)    | 9400<br>(3900-16000)    |
| Colombia | 2016 | Female | 60 to 64 | 56%<br>(41-72%)                | 44%<br>(28-59%)          | 1.7<br>(0.93-2.9)                           | 2.6%<br>(0.72-5.2%)                  | 4.4%<br>(1.4-8.1%)                  | 270<br>(88-500)     | 8300<br>(2300-16000)    |

| Location | Year | Sex    | Age      | Prevalence of current drinkers | Prevalence of abstainers | Population average of standard drinks daily | Percent of total attributable deaths | Percent of total attributable DALYs | Attributable deaths   | Attributable DALYs        |
|----------|------|--------|----------|--------------------------------|--------------------------|---------------------------------------------|--------------------------------------|-------------------------------------|-----------------------|---------------------------|
| Colombia | 2016 | Female | 65 to 69 | 53%<br>(37-68%)                | 47%<br>(32-63%)          | 1.5<br>(0.74-2.4)                           | 2.2%<br>(0.46-4.6%)                  | 3.4%<br>(0.86-6.7%)                 | 270<br>(66-540)       | 6700<br>(1300-14000)      |
| Colombia | 2016 | Female | 70 to 74 | 49%<br>(34-63%)                | 51%<br>(37-66%)          | 1.2<br>(0.55-2.2)                           | 1.7%<br>(-0.074-4.1%)                | 2.4%<br>(-0.013-5.6%)               | 230<br>(-1.1-540)     | 4500<br>(-200-11000)      |
| Colombia | 2016 | Female | 75 to 79 | 43%<br>(28-60%)                | 57%<br>(40-72%)          | 1<br>(0.45-1.9)                             | 1.1%<br>(-0.44-3.3%)                 | 1.5%<br>(-0.61-4.3%)                | 170<br>(-69-490)      | 2500<br>(-1100-7300)      |
| Colombia | 2016 | Female | 80 to 84 | 38%<br>(24-54%)                | 62%<br>(46-76%)          | 0.94<br>(0.44-1.6)                          | 0.84%<br>(-0.55-2.6%)                | 1%<br>(-0.72-3.2%)                  | 130<br>(-93-420)      | 1500<br>(-1000-4800)      |
| Colombia | 2016 | Female | 85 to 89 | 37%<br>(23-52%)                | 63%<br>(48-77%)          | 0.94<br>(0.44-1.6)                          | 0.64%<br>(-0.72-2.4%)                | 0.71%<br>(-1.1-2.9%)                | 90<br>(-140-360)      | 780<br>(-910-2900)        |
| Colombia | 2016 | Female | 90 to 94 | 40%<br>(27-55%)                | 60%<br>(45-73%)          | 1<br>(0.49-1.9)                             | 0.42%<br>(-1-2.3%)                   | 0.35%<br>(-1.5-2.7%)                | 31<br>(-130-240)      | 240<br>(-600-1300)        |
| Colombia | 2016 | Female | 95 plus  | 44%<br>(28-63%)                | 56%<br>(37-72%)          | 1.1<br>(0.46-2.1)                           | 0.31%<br>(-1.5-2.9%)                 | 0.073%<br>(-2.3-3.2%)               | 3<br>(-89-130)        | 52<br>(-260-490)          |
| Colombia | 2016 | Male   | All Ages | 89%<br>(86-91%)                | 11%<br>(8.7-14%)         | 3.2<br>(2.4-4.2)                            | 9.2%<br>(7-12%)                      | 8.8%<br>(6.1-12%)                   | 11000<br>(7400-15000) | 520000<br>(380000-660000) |
| Colombia | 2016 | Male   | 15 to 19 | 83%<br>(72-91%)                | 17%<br>(8.8-28%)         | 2.3<br>(1.3-3.6)                            | 9.5%<br>(5.5-14%)                    | 13%<br>(6.7-21%)                    | 360<br>(180-560)      | 31000<br>(17000-45000)    |
| Colombia | 2016 | Male   | 20 to 24 | 93%<br>(88-96%)                | 7.1%<br>(4.1-12%)        | 4<br>(2.4-6.1)                              | 17%<br>(11-23%)                      | 21%<br>(12-29%)                     | 940<br>(530-1400)     | 74000<br>(46000-100000)   |
| Colombia | 2016 | Male   | 25 to 29 | 95%<br>(91-97%)                | 5.2%<br>(3-9.1%)         | 4.3<br>(2.7-6.5)                            | 17%<br>(12-23%)                      | 21%<br>(13-30%)                     | 990<br>(610-1500)     | 73000<br>(48000-100000)   |
| Colombia | 2016 | Male   | 30 to 34 | 95%<br>(92-97%)                | 4.8%<br>(2.7-8.3%)       | 4.5<br>(2.9-6.7)                            | 15%<br>(11-21%)                      | 20%<br>(13-28%)                     | 870<br>(560-1300)     | 61000<br>(42000-84000)    |
| Colombia | 2016 | Male   | 35 to 39 | 95%<br>(91-97%)                | 5.4%<br>(3.1-8.6%)       | 4.5<br>(2.8-6.9)                            | 14%<br>(9.3-19%)                     | 19%<br>(12-27%)                     | 710<br>(440-1100)     | 46000<br>(31000-64000)    |
| Colombia | 2016 | Male   | 40 to 44 | 95%<br>(91-97%)                | 5.5%<br>(3.3-8.6%)       | 4.8<br>(2.9-7.1)                            | 12%<br>(8.3-17%)                     | 18%<br>(11-25%)                     | 620<br>(380-900)      | 37000<br>(25000-51000)    |
| Colombia | 2016 | Male   | 45 to 49 | 95%<br>(91-97%)                | 4.9%<br>(2.6-8.9%)       | 5.1<br>(3.1-7.7)                            | 12%<br>(7.5-16%)                     | 17%<br>(10-24%)                     | 730<br>(430-1100)     | 39000<br>(25000-54000)    |
| Colombia | 2016 | Male   | 50 to 54 | 94%<br>(90-97%)                | 5.8%<br>(3.4-9.5%)       | 5.4<br>(3.4-8)                              | 11%<br>(7.2-15%)                     | 16%<br>(10-22%)                     | 870<br>(530-1200)     | 40000<br>(26000-54000)    |
| Colombia | 2016 | Male   | 55 to 59 | 92%<br>(87-95%)                | 8%<br>(4.6-13%)          | 5.6<br>(3.5-8.4)                            | 11%<br>(7.2-14%)                     | 15%<br>(9.6-20%)                    | 1000<br>(640-1400)    | 38000<br>(25000-52000)    |
| Colombia | 2016 | Male   | 60 to 64 | 90%<br>(84-94%)                | 10%<br>(5.9-16%)         | 5<br>(3-7.9)                                | 9.3%<br>(5.3-13%)                    | 12%<br>(6.7-17%)                    | 1000<br>(570-1500)    | 33000<br>(19000-46000)    |
| Colombia | 2016 | Male   | 65 to 69 | 88%<br>(82-93%)                | 12%<br>(6.7-18%)         | 3.8<br>(2.2-5.7)                            | 7.2%<br>(3.6-11%)                    | 8.9%<br>(4.2-14%)                   | 940<br>(460-1500)     | 24000<br>(12000-37000)    |
| Colombia | 2016 | Male   | 70 to 74 | 86%<br>(79-92%)                | 14%<br>(8.3-21%)         | 2.7<br>(1.5-4.5)                            | 4.5%<br>(1.8-8.5%)                   | 5.3%<br>(1.9-10%)                   | 630<br>(230-1200)     | 13000<br>(5000-24000)     |
| Colombia | 2016 | Male   | 75 to 79 | 84%<br>(74-91%)                | 16%<br>(8.6-26%)         | 2.1<br>(1.1-3.6)                            | 2.9%<br>(0.71-6.6%)                  | 3.3%<br>(0.59-7.7%)                 | 410<br>(73-950)       | 6700<br>(1500-15000)      |
| Colombia | 2016 | Male   | 80 to 84 | 81%<br>(68-89%)                | 19%<br>(11-32%)          | 1.8<br>(1-3)                                | 2.4%<br>(0.51-5.2%)                  | 2.6%<br>(0.32-6%)                   | 330<br>(43-750)       | 4000<br>(850-8700)        |

| Location   | Year | Sex    | Age      | Prevalence of current drinkers | Prevalence of abstainers | Population average of standard drinks daily | Percent of total attributable deaths | Percent of total attributable DALYs | Attributable deaths | Attributable DALYs     |
|------------|------|--------|----------|--------------------------------|--------------------------|---------------------------------------------|--------------------------------------|-------------------------------------|---------------------|------------------------|
| Colombia   | 2016 | Male   | 85 to 89 | 78%<br>(65-87%)                | 22%<br>(13-35%)          | 1.7<br>(0.89-2.9)                           | 2%<br>(0.35-4.7%)                    | 2.1%<br>(0.11-5.2%)                 | 220<br>(11-550)     | 1900<br>(330-4400)     |
| Colombia   | 2016 | Male   | 90 to 94 | 78%<br>(67-87%)                | 22%<br>(13-33%)          | 1.8<br>(0.93-3.1)                           | 1.7%<br>(-0.11-4.7%)                 | 1.6%<br>(-0.51-5.1%)                | 96<br>(-30-300)     | 620<br>(-43-1700)      |
| Colombia   | 2016 | Male   | 95 plus  | 79%<br>(65-90%)                | 21%<br>(9.6-35%)         | 1.9<br>(0.89-3.5)                           | 1.7%<br>(-0.6-5.6%)                  | 1.4%<br>(-1.3-6%)                   | 27<br>(-26-120)     | 130<br>(-50-450)       |
| Costa Rica | 1990 | Female | All Ages | 65%<br>(58-70%)                | 35%<br>(30-42%)          | 1<br>(0.88-1.2)                             | 2.2%<br>(1.5-3%)                     | 3.8%<br>(2-5.8%)                    | 190<br>(100-290)    | 6300<br>(4300-8400)    |
| Costa Rica | 1990 | Female | 15 to 19 | 65%<br>(49-77%)                | 35%<br>(23-51%)          | 1.1<br>(0.62-1.7)                           | 1.8%<br>(1-2.7%)                     | 3.8%<br>(1.9-6.2%)                  | 2<br>(0.94-3.2)     | 240<br>(130-360)       |
| Costa Rica | 1990 | Female | 20 to 24 | 77%<br>(65-86%)                | 23%<br>(14-35%)          | 1.3<br>(0.75-2)                             | 2.5%<br>(1.6-3.5%)                   | 4.3%<br>(2.3-6.8%)                  | 2.7<br>(1.5-4.4)    | 380<br>(240-560)       |
| Costa Rica | 1990 | Female | 25 to 29 | 77%<br>(65-85%)                | 23%<br>(15-35%)          | 1.3<br>(0.79-1.9)                           | 2.3%<br>(1.5-3.3%)                   | 4.1%<br>(2.2-6.1%)                  | 3<br>(1.6-4.5)      | 370<br>(230-540)       |
| Costa Rica | 1990 | Female | 30 to 34 | 76%<br>(65-85%)                | 24%<br>(15-35%)          | 1.3<br>(0.84-1.9)                           | 2.2%<br>(1.4-3.1%)                   | 4.3%<br>(2.7-6.3%)                  | 4<br>(2.5-5.9)      | 360<br>(220-520)       |
| Costa Rica | 1990 | Female | 35 to 39 | 77%<br>(66-85%)                | 23%<br>(15-34%)          | 1.5<br>(0.9-2.2)                            | 2.5%<br>(1.5-3.6%)                   | 5.4%<br>(3.2-7.8%)                  | 5.4<br>(3.2-7.8)    | 360<br>(220-530)       |
| Costa Rica | 1990 | Female | 40 to 44 | 78%<br>(68-86%)                | 22%<br>(14-32%)          | 1.8<br>(1.1-2.6)                            | 2.8%<br>(1.6-4.2%)                   | 6.5%<br>(4.2-9.1%)                  | 7.5<br>(4.8-11)     | 420<br>(250-610)       |
| Costa Rica | 1990 | Female | 45 to 49 | 79%<br>(67-87%)                | 21%<br>(13-33%)          | 2.2<br>(1.3-3.3)                            | 3.5%<br>(1.8-5.6%)                   | 7.3%<br>(4.4-11%)                   | 9.9<br>(5.8-15)     | 470<br>(250-750)       |
| Costa Rica | 1990 | Female | 50 to 54 | 76%<br>(65-84%)                | 24%<br>(16-35%)          | 2.6<br>(1.5-3.8)                            | 4.3%<br>(2.2-6.7%)                   | 7.9%<br>(4.6-12%)                   | 14<br>(7.6-21)      | 560<br>(290-880)       |
| Costa Rica | 1990 | Female | 55 to 59 | 70%<br>(57-80%)                | 30%<br>(20-43%)          | 2.7<br>(1.6-4.2)                            | 5.2%<br>(2.6-8.4%)                   | 8.6%<br>(4.8-14%)                   | 20<br>(11-31)       | 700<br>(360-1100)      |
| Costa Rica | 1990 | Female | 60 to 64 | 63%<br>(49-76%)                | 37%<br>(24-51%)          | 2.4<br>(1.3-4)                              | 5%<br>(2.3-8.6%)                     | 7.5%<br>(3.8-13%)                   | 23<br>(12-40)       | 700<br>(330-1200)      |
| Costa Rica | 1990 | Female | 65 to 69 | 60%<br>(46-74%)                | 40%<br>(26-54%)          | 2.1<br>(1.2-3.2)                            | 4.4%<br>(2.1-7.3%)                   | 6.4%<br>(3.1-10%)                   | 24<br>(12-39)       | 580<br>(270-950)       |
| Costa Rica | 1990 | Female | 70 to 74 | 56%<br>(43-70%)                | 44%<br>(30-57%)          | 1.9<br>(1.1-3.1)                            | 3.9%<br>(1.5-7.1%)                   | 5.3%<br>(2.2-9.7%)                  | 24<br>(9.9-45)      | 470<br>(180-870)       |
| Costa Rica | 1990 | Female | 75 to 79 | 49%<br>(34-65%)                | 51%<br>(35-66%)          | 1.6<br>(0.82-2.6)                           | 2.9%<br>(0.71-6%)                    | 3.7%<br>(0.88-7.4%)                 | 22<br>(5.4-44)      | 330<br>(78-670)        |
| Costa Rica | 1990 | Female | 80 to 84 | 45%<br>(29-60%)                | 55%<br>(40-71%)          | 1.4<br>(0.73-2.2)                           | 2.1%<br>(0.34-4.5%)                  | 2.6%<br>(0.28-5.6%)                 | 16<br>(1.7-35)      | 180<br>(30-380)        |
| Costa Rica | 1990 | Female | 85 to 89 | 44%<br>(29-60%)                | 56%<br>(40-71%)          | 1.4<br>(0.71-2.3)                           | 1.6%<br>(-0.22-4%)                   | 1.9%<br>(-0.36-5%)                  | 10<br>(-2-26)       | 81<br>(-11-200)        |
| Costa Rica | 1990 | Female | 90 to 94 | 48%<br>(33-63%)                | 52%<br>(37-67%)          | 1.4<br>(0.72-2.4)                           | 1.1%<br>(-0.78-4%)                   | 1.2%<br>(-1.2-4.7%)                 | 3.6<br>(-3.6-14)    | 21<br>(-15-74)         |
| Costa Rica | 1990 | Female | 95 plus  | 52%<br>(34-71%)                | 48%<br>(29-66%)          | 1.4<br>(0.6-2.7)                            | 0.7%<br>(-1.6-4.3%)                  | 0.6%<br>(-2.3-5%)                   | 0.59<br>(-2.2-5)    | 2.9<br>(-6.6-17)       |
| Costa Rica | 1990 | Male   | All Ages | 69%<br>(62-76%)                | 31%<br>(24-38%)          | 2.4<br>(2.1-2.7)                            | 6.9%<br>(5.8-8.1%)                   | 8.6%<br>(6.4-11%)                   | 570<br>(420-730)    | 24000<br>(20000-29000) |

| Location   | Year | Sex    | Age      | Prevalence of current drinkers | Prevalence of abstainers | Population average of standard drinks daily | Percent of total attributable deaths | Percent of total attributable DALYs | Attributable deaths | Attributable DALYs   |
|------------|------|--------|----------|--------------------------------|--------------------------|---------------------------------------------|--------------------------------------|-------------------------------------|---------------------|----------------------|
| Costa Rica | 1990 | Male   | 15 to 19 | 60%<br>(42-77%)                | 40%<br>(23-58%)          | 1.5<br>(0.75-2.4)                           | 5.4%<br>(3.5-7.8%)                   | 7.7%<br>(4.3-12%)                   | 8.6<br>(4.8-14)     | 900<br>(580-1300)    |
| Costa Rica | 1990 | Male   | 20 to 24 | 81%<br>(69-89%)                | 19%<br>(11-31%)          | 2.9<br>(1.7-4.5)                            | 11%<br>(7.7-15%)                     | 14%<br>(8.5-21%)                    | 24<br>(14-36)       | 2300<br>(1600-3200)  |
| Costa Rica | 1990 | Male   | 25 to 29 | 84%<br>(74-91%)                | 16%<br>(9.1-26%)         | 3.7<br>(2.3-5.5)                            | 12%<br>(8.8-17%)                     | 17%<br>(11-24%)                     | 33<br>(20-47)       | 2700<br>(1900-3700)  |
| Costa Rica | 1990 | Male   | 30 to 34 | 85%<br>(75-92%)                | 15%<br>(8.2-25%)         | 4.2<br>(2.7-5.9)                            | 13%<br>(9.1-17%)                     | 18%<br>(12-25%)                     | 36<br>(24-49)       | 2600<br>(1800-3500)  |
| Costa Rica | 1990 | Male   | 35 to 39 | 86%<br>(77-92%)                | 14%<br>(7.9-23%)         | 4.4<br>(2.5-6.6)                            | 13%<br>(9.1-17%)                     | 19%<br>(13-26%)                     | 37<br>(25-51)       | 2300<br>(1600-3100)  |
| Costa Rica | 1990 | Male   | 40 to 44 | 86%<br>(78-93%)                | 14%<br>(7.4-22%)         | 4.5<br>(2.6-6.6)                            | 13%<br>(9-17%)                       | 19%<br>(13-25%)                     | 40<br>(27-53)       | 2200<br>(1600-2900)  |
| Costa Rica | 1990 | Male   | 45 to 49 | 87%<br>(77-93%)                | 13%<br>(7.3-23%)         | 4.8<br>(2.7-8.1)                            | 12%<br>(8.3-16%)                     | 19%<br>(12-24%)                     | 40<br>(26-52)       | 1900<br>(1300-2500)  |
| Costa Rica | 1990 | Male   | 50 to 54 | 87%<br>(78-93%)                | 13%<br>(7.4-22%)         | 5.4<br>(3.1-8.6)                            | 13%<br>(8.5-16%)                     | 18%<br>(12-22%)                     | 49<br>(33-63)       | 2000<br>(1400-2600)  |
| Costa Rica | 1990 | Male   | 55 to 59 | 86%<br>(76-93%)                | 14%<br>(7.1-24%)         | 5.7<br>(3-8.9)                              | 12%<br>(7.7-16%)                     | 16%<br>(10-21%)                     | 55<br>(35-72)       | 2000<br>(1300-2600)  |
| Costa Rica | 1990 | Male   | 60 to 64 | 83%<br>(71-92%)                | 17%<br>(7.9-29%)         | 5<br>(2.6-8.4)                              | 10%<br>(6-14%)                       | 13%<br>(7.6-18%)                    | 58<br>(34-79)       | 1700<br>(1000-2400)  |
| Costa Rica | 1990 | Male   | 65 to 69 | 80%<br>(67-90%)                | 20%<br>(9.6-33%)         | 3.8<br>(2.2-6)                              | 8.5%<br>(4.7-12%)                    | 10%<br>(5.8-15%)                    | 54<br>(30-77)       | 1300<br>(780-1900)   |
| Costa Rica | 1990 | Male   | 70 to 74 | 76%<br>(62-86%)                | 24%<br>(14-38%)          | 2.9<br>(1.6-4.9)                            | 6.2%<br>(2.7-10%)                    | 7.4%<br>(3.1-12%)                   | 45<br>(18-76)       | 890<br>(380-1500)    |
| Costa Rica | 1990 | Male   | 75 to 79 | 70%<br>(53-83%)                | 30%<br>(17-47%)          | 2.3<br>(1.1-4)                              | 4.5%<br>(1.3-8.3%)                   | 5.2%<br>(1.4-9.6%)                  | 36<br>(9.7-68)      | 550<br>(170-1000)    |
| Costa Rica | 1990 | Male   | 80 to 84 | 64%<br>(46-79%)                | 36%<br>(21-54%)          | 1.9<br>(0.93-3.1)                           | 3.7%<br>(1.1-7.2%)                   | 4.2%<br>(1.1-8.2%)                  | 28<br>(7.4-54)      | 310<br>(94-590)      |
| Costa Rica | 1990 | Male   | 85 to 89 | 61%<br>(44-76%)                | 39%<br>(24-56%)          | 1.8<br>(0.85-3.1)                           | 3.2%<br>(0.75-6.8%)                  | 3.6%<br>(0.65-7.7%)                 | 17<br>(3.1-37)      | 140<br>(32-290)      |
| Costa Rica | 1990 | Male   | 90 to 94 | 63%<br>(45-78%)                | 37%<br>(22-55%)          | 1.9<br>(0.86-3.7)                           | 3%<br>(0.32-6.8%)                    | 3.3%<br>(0.06-7.8%)                 | 7.7<br>(0.14-19)    | 44<br>(4.7-99)       |
| Costa Rica | 1990 | Male   | 95 plus  | 66%<br>(46-83%)                | 34%<br>(17-54%)          | 2.2<br>(0.78-4.3)                           | 3.1%<br>(-0.22-7.4%)                 | 3.3%<br>(-0.64-8.4%)                | 2.1<br>(-0.42-5.4)  | 8.4<br>(-0.57-20)    |
| Costa Rica | 1995 | Female | All Ages | 65%<br>(58-71%)                | 35%<br>(29-42%)          | 1.1<br>(0.94-1.3)                           | 2.5%<br>(1.7-3.3%)                   | 4.2%<br>(2.5-6.3%)                  | 250<br>(140-370)    | 7700<br>(5400-10000) |
| Costa Rica | 1995 | Female | 15 to 19 | 65%<br>(49-77%)                | 35%<br>(23-51%)          | 1.1<br>(0.64-1.7)                           | 1.8%<br>(1.1-2.6%)                   | 3.9%<br>(1.9-6.4%)                  | 2.4<br>(1.2-4)      | 290<br>(170-440)     |
| Costa Rica | 1995 | Female | 20 to 24 | 77%<br>(64-85%)                | 23%<br>(15-36%)          | 1.3<br>(0.75-2.1)                           | 2.5%<br>(1.6-3.6%)                   | 4.5%<br>(2.3-7.1%)                  | 2.8<br>(1.4-4.6)    | 390<br>(240-570)     |
| Costa Rica | 1995 | Female | 25 to 29 | 76%<br>(64-85%)                | 24%<br>(15-36%)          | 1.3<br>(0.78-1.9)                           | 2.3%<br>(1.5-3.3%)                   | 4.1%<br>(2.2-6.1%)                  | 3.2<br>(1.8-4.8)    | 390<br>(250-570)     |
| Costa Rica | 1995 | Female | 30 to 34 | 76%<br>(65-85%)                | 24%<br>(15-35%)          | 1.4<br>(0.86-2)                             | 2.2%<br>(1.4-3.2%)                   | 4.5%<br>(2.9-6.5%)                  | 4.7<br>(3-6.8)      | 430<br>(280-600)     |

| Location   | Year | Sex    | Age      | Prevalence of current drinkers | Prevalence of abstainers | Population average of standard drinks daily | Percent of total attributable deaths | Percent of total attributable DALYs | Attributable deaths | Attributable DALYs     |
|------------|------|--------|----------|--------------------------------|--------------------------|---------------------------------------------|--------------------------------------|-------------------------------------|---------------------|------------------------|
| Costa Rica | 1995 | Female | 35 to 39 | 77%<br>(67-85%)                | 23%<br>(15-33%)          | 1.5<br>(0.9-2.2)                            | 2.5%<br>(1.5-3.7%)                   | 5.7%<br>(3.6-7.9%)                  | 6.9<br>(4.3-9.8)    | 470<br>(290-670)       |
| Costa Rica | 1995 | Female | 40 to 44 | 78%<br>(68-86%)                | 22%<br>(14-32%)          | 1.8<br>(1.2-2.6)                            | 3%<br>(1.8-4.4%)                     | 6.6%<br>(4.5-9.1%)                  | 9.5<br>(6.3-13)     | 520<br>(330-740)       |
| Costa Rica | 1995 | Female | 45 to 49 | 78%<br>(67-86%)                | 22%<br>(14-33%)          | 2.2<br>(1.3-3.4)                            | 3.6%<br>(2-5.6%)                     | 7.7%<br>(4.8-11%)                   | 13<br>(8.4-20)      | 630<br>(360-990)       |
| Costa Rica | 1995 | Female | 50 to 54 | 76%<br>(65-84%)                | 24%<br>(16-35%)          | 2.6<br>(1.6-3.9)                            | 4.4%<br>(2.4-6.7%)                   | 8.3%<br>(5.2-12%)                   | 16<br>(10-24)       | 680<br>(380-1000)      |
| Costa Rica | 1995 | Female | 55 to 59 | 69%<br>(57-80%)                | 31%<br>(20-43%)          | 2.7<br>(1.6-4.2)                            | 5.2%<br>(2.9-8.4%)                   | 8.7%<br>(5-14%)                     | 23<br>(13-36)       | 820<br>(450-1300)      |
| Costa Rica | 1995 | Female | 60 to 64 | 63%<br>(49-76%)                | 37%<br>(24-51%)          | 2.4<br>(1.4-4)                              | 5.1%<br>(2.5-8.6%)                   | 7.9%<br>(4.2-13%)                   | 27<br>(14-44)       | 820<br>(410-1400)      |
| Costa Rica | 1995 | Female | 65 to 69 | 60%<br>(46-73%)                | 40%<br>(27-54%)          | 2.1<br>(1.3-3.4)                            | 4.7%<br>(2.4-7.7%)                   | 6.7%<br>(3.6-11%)                   | 31<br>(16-51)       | 760<br>(380-1200)      |
| Costa Rica | 1995 | Female | 70 to 74 | 56%<br>(42-70%)                | 44%<br>(30-58%)          | 1.9<br>(1.1-3.1)                            | 4.2%<br>(1.9-7.5%)                   | 5.8%<br>(2.8-10%)                   | 32<br>(15-56)       | 630<br>(290-1100)      |
| Costa Rica | 1995 | Female | 75 to 79 | 49%<br>(33-65%)                | 51%<br>(35-67%)          | 1.6<br>(0.85-2.7)                           | 3.3%<br>(1-6.2%)                     | 4.3%<br>(1.4-8%)                    | 28<br>(9-53)        | 420<br>(130-800)       |
| Costa Rica | 1995 | Female | 80 to 84 | 44%<br>(29-60%)                | 56%<br>(40-71%)          | 1.4<br>(0.75-2.2)                           | 2.5%<br>(0.68-4.9%)                  | 3.1%<br>(0.83-6.1%)                 | 23<br>(6-45)        | 250<br>(70-500)        |
| Costa Rica | 1995 | Female | 85 to 89 | 44%<br>(29-59%)                | 56%<br>(41-71%)          | 1.4<br>(0.74-2.3)                           | 1.9%<br>(0.18-4.4%)                  | 2.3%<br>(0.096-5.3%)                | 15<br>(0.65-36)     | 120<br>(12-280)        |
| Costa Rica | 1995 | Female | 90 to 94 | 47%<br>(33-62%)                | 53%<br>(38-67%)          | 1.4<br>(0.72-2.4)                           | 1.5%<br>(-0.45-4.4%)                 | 1.6%<br>(-0.7-5.2%)                 | 6.8<br>(-2.8-22)    | 38<br>(-11-120)        |
| Costa Rica | 1995 | Female | 95 plus  | 51%<br>(33-70%)                | 49%<br>(30-67%)          | 1.4<br>(0.6-2.7)                            | 1%<br>(-1.2-4.7%)                    | 1%<br>(-1.8-5.4%)                   | 1.5<br>(-2.5-7.7)   | 6.2<br>(-6.8-27)       |
| Costa Rica | 1995 | Male   | All Ages | 70%<br>(63-77%)                | 30%<br>(23-37%)          | 2.5<br>(2.2-2.9)                            | 7.6%<br>(6.4-9%)                     | 9.1%<br>(6.9-11%)                   | 710<br>(540-890)    | 29000<br>(25000-34000) |
| Costa Rica | 1995 | Male   | 15 to 19 | 60%<br>(42-76%)                | 40%<br>(24-58%)          | 1.5<br>(0.78-2.5)                           | 5.5%<br>(3.6-8.2%)                   | 7.9%<br>(4.3-13%)                   | 12<br>(6.3-18)      | 1200<br>(730-1700)     |
| Costa Rica | 1995 | Male   | 20 to 24 | 81%<br>(69-89%)                | 19%<br>(11-31%)          | 3<br>(1.7-4.7)                              | 12%<br>(7.8-16%)                     | 15%<br>(8.6-22%)                    | 28<br>(16-41)       | 2500<br>(1700-3500)    |
| Costa Rica | 1995 | Male   | 25 to 29 | 84%<br>(75-91%)                | 16%<br>(9.1-25%)         | 3.8<br>(2.2-5.7)                            | 12%<br>(8.6-17%)                     | 16%<br>(10-24%)                     | 37<br>(23-54)       | 3000<br>(2000-4100)    |
| Costa Rica | 1995 | Male   | 30 to 34 | 85%<br>(75-92%)                | 15%<br>(8.2-25%)         | 4.3<br>(2.7-6.3)                            | 12%<br>(8.9-16%)                     | 17%<br>(12-23%)                     | 43<br>(30-60)       | 3100<br>(2200-4200)    |
| Costa Rica | 1995 | Male   | 35 to 39 | 86%<br>(77-92%)                | 14%<br>(8-23%)           | 4.4<br>(2.5-6.6)                            | 12%<br>(8.7-16%)                     | 18%<br>(12-24%)                     | 47<br>(31-63)       | 2900<br>(2000-3800)    |
| Costa Rica | 1995 | Male   | 40 to 44 | 86%<br>(78-93%)                | 14%<br>(7.4-22%)         | 4.5<br>(2.7-6.7)                            | 13%<br>(8.9-17%)                     | 19%<br>(13-24%)                     | 51<br>(35-67)       | 2800<br>(1900-3600)    |
| Costa Rica | 1995 | Male   | 45 to 49 | 87%<br>(77-93%)                | 13%<br>(7.3-23%)         | 4.9<br>(2.8-8.1)                            | 13%<br>(8.6-16%)                     | 19%<br>(12-24%)                     | 55<br>(36-72)       | 2600<br>(1800-3400)    |
| Costa Rica | 1995 | Male   | 50 to 54 | 87%<br>(78-92%)                | 13%<br>(7.6-22%)         | 5.5<br>(3.1-8.6)                            | 13%<br>(8.7-16%)                     | 18%<br>(12-23%)                     | 59<br>(40-75)       | 2400<br>(1700-3100)    |

| Location   | Year | Sex    | Age      | Prevalence of current drinkers | Prevalence of abstainers | Population average of standard drinks daily | Percent of total attributable deaths | Percent of total attributable DALYs | Attributable deaths | Attributable DALYs   |
|------------|------|--------|----------|--------------------------------|--------------------------|---------------------------------------------|--------------------------------------|-------------------------------------|---------------------|----------------------|
| Costa Rica | 1995 | Male   | 55 to 59 | 86%<br>(76-93%)                | 14%<br>(7.1-24%)         | 5.8<br>(3.2-9.3)                            | 12%<br>(8.1-16%)                     | 16%<br>(11-21%)                     | 66<br>(44-87)       | 2400<br>(1600-3100)  |
| Costa Rica | 1995 | Male   | 60 to 64 | 83%<br>(71-92%)                | 17%<br>(7.9-29%)         | 5.1<br>(2.7-8.5)                            | 10%<br>(6.4-14%)                     | 13%<br>(8.1-18%)                    | 69<br>(42-93)       | 2100<br>(1300-2800)  |
| Costa Rica | 1995 | Male   | 65 to 69 | 81%<br>(68-90%)                | 19%<br>(9.9-32%)         | 3.9<br>(2.3-6.2)                            | 8.7%<br>(5-12%)                      | 11%<br>(6.1-15%)                    | 68<br>(39-96)       | 1700<br>(980-2300)   |
| Costa Rica | 1995 | Male   | 70 to 74 | 76%<br>(62-86%)                | 24%<br>(14-38%)          | 3<br>(1.6-5.1)                              | 6.5%<br>(2.9-11%)                    | 7.7%<br>(3.3-13%)                   | 58<br>(25-95)       | 1100<br>(510-1900)   |
| Costa Rica | 1995 | Male   | 75 to 79 | 69%<br>(53-83%)                | 31%<br>(17-47%)          | 2.3<br>(1.1-4.1)                            | 4.6%<br>(1.5-8.4%)                   | 5.4%<br>(1.6-9.7%)                  | 42<br>(13-75)       | 640<br>(210-1100)    |
| Costa Rica | 1995 | Male   | 80 to 84 | 63%<br>(46-78%)                | 37%<br>(22-54%)          | 1.9<br>(0.95-3.2)                           | 3.9%<br>(1.4-7.1%)                   | 4.4%<br>(1.4-8.2%)                  | 35<br>(11-64)       | 390<br>(140-710)     |
| Costa Rica | 1995 | Male   | 85 to 89 | 60%<br>(44-76%)                | 40%<br>(24-56%)          | 1.8<br>(0.85-3.2)                           | 3.4%<br>(1.1-6.8%)                   | 3.8%<br>(0.99-7.8%)                 | 24<br>(6.1-48)      | 190<br>(57-370)      |
| Costa Rica | 1995 | Male   | 90 to 94 | 63%<br>(46-78%)                | 37%<br>(22-54%)          | 2<br>(0.89-3.8)                             | 3.3%<br>(0.53-7.2%)                  | 3.6%<br>(0.36-8.2%)                 | 12<br>(1.2-27)      | 66<br>(10-140)       |
| Costa Rica | 1995 | Male   | 95 plus  | 66%<br>(47-83%)                | 34%<br>(17-53%)          | 2.2<br>(0.82-4.4)                           | 3.4%<br>(0.017-7.8%)                 | 3.6%<br>(-0.39-8.7%)                | 3.5<br>(-0.38-8.5)  | 13<br>(0.068-31)     |
| Costa Rica | 2000 | Female | All Ages | 63%<br>(57-68%)                | 37%<br>(32-43%)          | 1<br>(0.84-1.2)                             | 2.3%<br>(1.7-3%)                     | 3.8%<br>(2.4-5.6%)                  | 250<br>(160-370)    | 7900<br>(5700-10000) |
| Costa Rica | 2000 | Female | 15 to 19 | 68%<br>(54-79%)                | 32%<br>(21-46%)          | 1.1<br>(0.68-1.7)                           | 1.9%<br>(1.1-2.9%)                   | 4.1%<br>(2-6.6%)                    | 3.1<br>(1.5-4.9)    | 360<br>(200-540)     |
| Costa Rica | 2000 | Female | 20 to 24 | 77%<br>(66-85%)                | 23%<br>(15-34%)          | 1.2<br>(0.74-1.9)                           | 2.4%<br>(1.6-3.4%)                   | 4.2%<br>(2.2-6.8%)                  | 3.1<br>(1.6-4.9)    | 430<br>(270-640)     |
| Costa Rica | 2000 | Female | 25 to 29 | 74%<br>(64-83%)                | 26%<br>(17-36%)          | 1.1<br>(0.68-1.7)                           | 2.2%<br>(1.5-3.1%)                   | 3.9%<br>(2.2-5.8%)                  | 3<br>(1.7-4.5)      | 380<br>(240-540)     |
| Costa Rica | 2000 | Female | 30 to 34 | 73%<br>(62-82%)                | 27%<br>(18-38%)          | 1.1<br>(0.74-1.7)                           | 2%<br>(1.3-2.8%)                     | 4.1%<br>(2.6-5.7%)                  | 4.1<br>(2.7-5.8)    | 400<br>(260-580)     |
| Costa Rica | 2000 | Female | 35 to 39 | 74%<br>(65-83%)                | 26%<br>(17-35%)          | 1.3<br>(0.8-1.9)                            | 2.2%<br>(1.4-3.1%)                   | 5.2%<br>(3.5-7.2%)                  | 6.6<br>(4.4-9.2)    | 470<br>(310-670)     |
| Costa Rica | 2000 | Female | 40 to 44 | 74%<br>(65-83%)                | 26%<br>(17-35%)          | 1.5<br>(0.99-2.2)                           | 2.7%<br>(1.7-4%)                     | 6.3%<br>(4.4-8.3%)                  | 11<br>(7.5-14)      | 600<br>(390-840)     |
| Costa Rica | 2000 | Female | 45 to 49 | 75%<br>(64-83%)                | 25%<br>(17-36%)          | 1.9<br>(1.1-2.8)                            | 3.3%<br>(1.9-4.9%)                   | 6.9%<br>(4.4-9.9%)                  | 14<br>(9-20)        | 660<br>(380-1000)    |
| Costa Rica | 2000 | Female | 50 to 54 | 73%<br>(62-81%)                | 27%<br>(19-38%)          | 2.2<br>(1.4-3.3)                            | 3.9%<br>(2.3-6%)                     | 7.5%<br>(5-11%)                     | 19<br>(12-27)       | 770<br>(460-1200)    |
| Costa Rica | 2000 | Female | 55 to 59 | 65%<br>(52-76%)                | 35%<br>(24-48%)          | 2.2<br>(1.3-3.5)                            | 4.4%<br>(2.6-6.9%)                   | 7.6%<br>(4.8-11%)                   | 22<br>(14-33)       | 800<br>(470-1200)    |
| Costa Rica | 2000 | Female | 60 to 64 | 56%<br>(43-70%)                | 44%<br>(30-57%)          | 1.9<br>(1.1-3.1)                            | 4.3%<br>(2.3-6.9%)                   | 6.9%<br>(4-11%)                     | 26<br>(15-40)       | 770<br>(430-1200)    |
| Costa Rica | 2000 | Female | 65 to 69 | 54%<br>(41-67%)                | 46%<br>(33-59%)          | 1.7<br>(0.96-2.6)                           | 3.9%<br>(2.1-6.1%)                   | 5.8%<br>(3.4-8.9%)                  | 28<br>(17-44)       | 700<br>(400-1100)    |
| Costa Rica | 2000 | Female | 70 to 74 | 50%<br>(38-64%)                | 50%<br>(36-62%)          | 1.5<br>(0.85-2.5)                           | 3.6%<br>(1.8-6.2%)                   | 5%<br>(2.7-8.3%)                    | 32<br>(17-54)       | 630<br>(320-1100)    |



| Location   | Year | Sex    | Age      | Prevalence of current drinkers | Prevalence of abstainers | Population average of standard drinks daily | Percent of total attributable deaths | Percent of total attributable DALYs | Attributable deaths | Attributable DALYs     |
|------------|------|--------|----------|--------------------------------|--------------------------|---------------------------------------------|--------------------------------------|-------------------------------------|---------------------|------------------------|
| Costa Rica | 2000 | Female | 75 to 79 | 45%<br>(30-61%)                | 55%<br>(39-70%)          | 1.3<br>(0.7-2.3)                            | 2.9%<br>(1.1-5.2%)                   | 3.8%<br>(1.5-6.9%)                  | 29<br>(11-52)       | 430<br>(170-780)       |
| Costa Rica | 2000 | Female | 80 to 84 | 42%<br>(27-58%)                | 58%<br>(42-73%)          | 1.2<br>(0.64-2)                             | 2.2%<br>(0.72-4.1%)                  | 2.8%<br>(0.98-5.3%)                 | 22<br>(7.8-42)      | 250<br>(85-460)        |
| Costa Rica | 2000 | Female | 85 to 89 | 42%<br>(28-57%)                | 58%<br>(43-72%)          | 1.2<br>(0.66-2)                             | 1.7%<br>(0.3-3.7%)                   | 2.1%<br>(0.35-4.6%)                 | 17<br>(2.7-36)      | 130<br>(23-280)        |
| Costa Rica | 2000 | Female | 90 to 94 | 45%<br>(31-60%)                | 55%<br>(40-69%)          | 1.3<br>(0.65-2.2)                           | 1.3%<br>(-0.28-3.5%)                 | 1.5%<br>(-0.49-4.2%)                | 7.9<br>(-2.7-23)    | 45<br>(-9.8-120)       |
| Costa Rica | 2000 | Female | 95 plus  | 50%<br>(32-68%)                | 50%<br>(32-68%)          | 1.3<br>(0.54-2.4)                           | 0.88%<br>(-0.92-3.7%)                | 0.87%<br>(-1.4-4.3%)                | 1.7<br>(-2.8-8.6)   | 7.4<br>(-7.6-31)       |
| Costa Rica | 2000 | Male   | All Ages | 73%<br>(66-79%)                | 27%<br>(21-34%)          | 2.6<br>(2.2-3)                              | 7.7%<br>(6.5-9.1%)                   | 8.8%<br>(6.7-11%)                   | 770<br>(590-960)    | 33000<br>(27000-39000) |
| Costa Rica | 2000 | Male   | 15 to 19 | 69%<br>(53-81%)                | 31%<br>(19-47%)          | 1.8<br>(0.92-2.8)                           | 6.2%<br>(4-9%)                       | 9.2%<br>(5.2-14%)                   | 16<br>(8.8-25)      | 1500<br>(970-2200)     |
| Costa Rica | 2000 | Male   | 20 to 24 | 85%<br>(76-91%)                | 15%<br>(9.5-24%)         | 3.1<br>(1.8-4.8)                            | 12%<br>(8.1-17%)                     | 15%<br>(9-23%)                      | 35<br>(21-52)       | 3100<br>(2100-4300)    |
| Costa Rica | 2000 | Male   | 25 to 29 | 85%<br>(77-91%)                | 15%<br>(9.1-23%)         | 3.6<br>(2.1-5.5)                            | 13%<br>(8.8-18%)                     | 17%<br>(11-25%)                     | 38<br>(23-55)       | 3100<br>(2100-4300)    |
| Costa Rica | 2000 | Male   | 30 to 34 | 86%<br>(78-92%)                | 14%<br>(8-22%)           | 4.1<br>(2.7-6.1)                            | 12%<br>(8.8-17%)                     | 17%<br>(12-24%)                     | 44<br>(30-62)       | 3200<br>(2300-4300)    |
| Costa Rica | 2000 | Male   | 35 to 39 | 86%<br>(79-92%)                | 14%<br>(7.8-21%)         | 4.2<br>(2.5-6.3)                            | 12%<br>(8.3-16%)                     | 17%<br>(12-24%)                     | 50<br>(33-68)       | 3200<br>(2200-4300)    |
| Costa Rica | 2000 | Male   | 40 to 44 | 86%<br>(77-92%)                | 14%<br>(7.9-23%)         | 4.2<br>(2.5-6.3)                            | 12%<br>(8.3-16%)                     | 18%<br>(12-23%)                     | 61<br>(40-81)       | 3300<br>(2300-4400)    |
| Costa Rica | 2000 | Male   | 45 to 49 | 86%<br>(77-92%)                | 14%<br>(7.9-23%)         | 4.6<br>(2.6-7.6)                            | 12%<br>(8.2-16%)                     | 17%<br>(12-23%)                     | 62<br>(42-82)       | 3000<br>(2000-3900)    |
| Costa Rica | 2000 | Male   | 50 to 54 | 87%<br>(78-92%)                | 13%<br>(7.8-22%)         | 5.2<br>(3-8.1)                              | 12%<br>(8.1-15%)                     | 17%<br>(11-21%)                     | 68<br>(46-87)       | 2900<br>(2000-3700)    |
| Costa Rica | 2000 | Male   | 55 to 59 | 86%<br>(77-93%)                | 14%<br>(7.5-23%)         | 5.5<br>(3.1-8.6)                            | 11%<br>(7.4-15%)                     | 16%<br>(10-20%)                     | 70<br>(45-90)       | 2500<br>(1700-3300)    |
| Costa Rica | 2000 | Male   | 60 to 64 | 83%<br>(72-92%)                | 17%<br>(8.3-28%)         | 4.8<br>(2.6-8)                              | 9.7%<br>(5.8-13%)                    | 13%<br>(7.4-17%)                    | 69<br>(41-94)       | 2100<br>(1300-2900)    |
| Costa Rica | 2000 | Male   | 65 to 69 | 81%<br>(68-90%)                | 19%<br>(9.9-32%)         | 3.7<br>(2.2-5.9)                            | 8%<br>(4.5-11%)                      | 10%<br>(5.6-14%)                    | 70<br>(39-98)       | 1800<br>(1000-2400)    |
| Costa Rica | 2000 | Male   | 70 to 74 | 77%<br>(64-87%)                | 23%<br>(13-36%)          | 3<br>(1.6-5.1)                              | 6.1%<br>(2.7-10%)                    | 7.3%<br>(3.2-12%)                   | 64<br>(27-110)      | 1300<br>(580-2100)     |
| Costa Rica | 2000 | Male   | 75 to 79 | 71%<br>(56-84%)                | 29%<br>(16-44%)          | 2.3<br>(1.1-4.1)                            | 4.3%<br>(1.5-7.8%)                   | 5%<br>(1.6-9.3%)                    | 44<br>(15-82)       | 690<br>(240-1300)      |
| Costa Rica | 2000 | Male   | 80 to 84 | 63%<br>(46-78%)                | 37%<br>(22-54%)          | 1.8<br>(0.91-3.1)                           | 3.4%<br>(1.3-6.3%)                   | 3.9%<br>(1.4-7.3%)                  | 33<br>(12-62)       | 380<br>(140-700)       |
| Costa Rica | 2000 | Male   | 85 to 89 | 60%<br>(42-75%)                | 40%<br>(25-58%)          | 1.7<br>(0.78-3)                             | 3%<br>(1-6.1%)                       | 3.4%<br>(0.99-6.9%)                 | 25<br>(7.2-51)      | 200<br>(66-400)        |
| Costa Rica | 2000 | Male   | 90 to 94 | 62%<br>(45-77%)                | 38%<br>(23-55%)          | 1.8<br>(0.8-3.6)                            | 2.9%<br>(0.49-6.5%)                  | 3.1%<br>(0.33-7.3%)                 | 14<br>(1.5-33)      | 79<br>(13-180)         |

| Location   | Year | Sex    | Age      | Prevalence of current drinkers | Prevalence of abstainers | Population average of standard drinks daily | Percent of total attributable deaths | Percent of total attributable DALYs | Attributable deaths | Attributable DALYs     |
|------------|------|--------|----------|--------------------------------|--------------------------|---------------------------------------------|--------------------------------------|-------------------------------------|---------------------|------------------------|
| Costa Rica | 2000 | Male   | 95 plus  | 65%<br>(45-83%)                | 35%<br>(17-55%)          | 2.1<br>(0.74-4.1)                           | 3%<br>(0.049-7%)                     | 3.1%<br>(-0.34-7.8%)                | 4<br>(-0.44-10)     | 16<br>(0.26-37)        |
| Costa Rica | 2005 | Female | All Ages | 63%<br>(57-68%)                | 37%<br>(32-43%)          | 0.98<br>(0.81-1.2)                          | 2.3%<br>(1.7-2.9%)                   | 3.7%<br>(2.4-5.4%)                  | 260<br>(170-380)    | 8200<br>(6100-11000)   |
| Costa Rica | 2005 | Female | 15 to 19 | 67%<br>(55-78%)                | 33%<br>(22-45%)          | 1<br>(0.62-1.6)                             | 1.7%<br>(1-2.6%)                     | 4%<br>(1.9-6.6%)                    | 2.9<br>(1.4-4.8)    | 350<br>(200-510)       |
| Costa Rica | 2005 | Female | 20 to 24 | 76%<br>(65-84%)                | 24%<br>(16-35%)          | 1.1<br>(0.67-1.8)                           | 2.4%<br>(1.5-3.4%)                   | 4.2%<br>(2.2-6.6%)                  | 3.4<br>(1.8-5.4)    | 470<br>(300-690)       |
| Costa Rica | 2005 | Female | 25 to 29 | 74%<br>(63-82%)                | 26%<br>(18-37%)          | 1.1<br>(0.62-1.6)                           | 2.1%<br>(1.4-2.9%)                   | 3.8%<br>(2.2-5.8%)                  | 3<br>(1.7-4.5)      | 400<br>(250-570)       |
| Costa Rica | 2005 | Female | 30 to 34 | 72%<br>(61-82%)                | 28%<br>(18-39%)          | 1.1<br>(0.68-1.6)                           | 2%<br>(1.4-2.8%)                     | 4.3%<br>(2.9-5.9%)                  | 4<br>(2.7-5.6)      | 390<br>(260-550)       |
| Costa Rica | 2005 | Female | 35 to 39 | 73%<br>(63-82%)                | 27%<br>(18-37%)          | 1.2<br>(0.7-1.8)                            | 2%<br>(1.3-2.9%)                     | 5.2%<br>(3.5-7%)                    | 6<br>(4.1-8.3)      | 450<br>(300-620)       |
| Costa Rica | 2005 | Female | 40 to 44 | 74%<br>(63-82%)                | 26%<br>(18-37%)          | 1.4<br>(0.91-2)                             | 2.5%<br>(1.6-3.4%)                   | 6.1%<br>(4.4-8%)                    | 11<br>(7.7-14)      | 610<br>(400-850)       |
| Costa Rica | 2005 | Female | 45 to 49 | 74%<br>(63-82%)                | 26%<br>(18-37%)          | 1.7<br>(1-2.6)                              | 3%<br>(1.8-4.5%)                     | 6.7%<br>(4.4-9.5%)                  | 16<br>(11-23)       | 760<br>(450-1100)      |
| Costa Rica | 2005 | Female | 50 to 54 | 72%<br>(61-81%)                | 28%<br>(19-39%)          | 2<br>(1.2-3)                                | 3.7%<br>(2.2-5.4%)                   | 7.3%<br>(5-10%)                     | 20<br>(13-27)       | 820<br>(510-1200)      |
| Costa Rica | 2005 | Female | 55 to 59 | 64%<br>(51-76%)                | 36%<br>(24-49%)          | 2.1<br>(1.2-3.2)                            | 4.1%<br>(2.4-6.2%)                   | 7.4%<br>(4.9-11%)                   | 25<br>(17-37)       | 920<br>(560-1400)      |
| Costa Rica | 2005 | Female | 60 to 64 | 56%<br>(41-69%)                | 44%<br>(31-59%)          | 1.7<br>(0.97-2.8)                           | 3.9%<br>(2.3-6.2%)                   | 6.6%<br>(4.2-9.9%)                  | 26<br>(17-39)       | 800<br>(470-1300)      |
| Costa Rica | 2005 | Female | 65 to 69 | 53%<br>(40-67%)                | 47%<br>(33-60%)          | 1.5<br>(0.91-2.4)                           | 3.7%<br>(2.2-5.5%)                   | 5.8%<br>(3.7-8.4%)                  | 30<br>(19-43)       | 730<br>(450-1100)      |
| Costa Rica | 2005 | Female | 70 to 74 | 50%<br>(37-63%)                | 50%<br>(37-63%)          | 1.4<br>(0.8-2.3)                            | 3.3%<br>(1.8-5.4%)                   | 4.9%<br>(2.9-7.7%)                  | 31<br>(19-50)       | 620<br>(350-1000)      |
| Costa Rica | 2005 | Female | 75 to 79 | 45%<br>(30-60%)                | 55%<br>(40-70%)          | 1.2<br>(0.66-2.1)                           | 2.6%<br>(1.2-4.7%)                   | 3.6%<br>(1.7-6.2%)                  | 30<br>(14-52)       | 450<br>(210-810)       |
| Costa Rica | 2005 | Female | 80 to 84 | 41%<br>(26-57%)                | 59%<br>(43-74%)          | 1.1<br>(0.6-1.9)                            | 2%<br>(0.74-3.6%)                    | 2.7%<br>(1-4.9%)                    | 23<br>(9.4-43)      | 260<br>(97-480)        |
| Costa Rica | 2005 | Female | 85 to 89 | 41%<br>(28-56%)                | 59%<br>(44-72%)          | 1.2<br>(0.62-1.9)                           | 1.6%<br>(0.33-3.3%)                  | 2.1%<br>(0.4-4.2%)                  | 17<br>(3.3-36)      | 140<br>(28-280)        |
| Costa Rica | 2005 | Female | 90 to 94 | 45%<br>(31-60%)                | 55%<br>(40-69%)          | 1.2<br>(0.61-2.1)                           | 1.3%<br>(-0.19-3.4%)                 | 1.5%<br>(-0.36-4.1%)                | 9.4<br>(-2.3-26)    | 52<br>(-8-140)         |
| Costa Rica | 2005 | Female | 95 plus  | 49%<br>(31-69%)                | 51%<br>(31-69%)          | 1.2<br>(0.5-2.3)                            | 0.94%<br>(-0.8-3.6%)                 | 0.98%<br>(-1.2-4.3%)                | 2.6<br>(-3.1-11)    | 11<br>(-8.8-41)        |
| Costa Rica | 2005 | Male   | All Ages | 74%<br>(67-79%)                | 26%<br>(21-33%)          | 2.5<br>(2.2-3)                              | 7.6%<br>(6.2-9%)                     | 8.4%<br>(6.4-11%)                   | 780<br>(600-990)    | 34000<br>(28000-40000) |
| Costa Rica | 2005 | Male   | 15 to 19 | 69%<br>(53-81%)                | 31%<br>(19-47%)          | 1.6<br>(0.86-2.6)                           | 6%<br>(3.7-8.6%)                     | 8.8%<br>(4.8-14%)                   | 16<br>(8.5-24)      | 1500<br>(960-2200)     |
| Costa Rica | 2005 | Male   | 20 to 24 | 85%<br>(75-90%)                | 15%<br>(9.6-25%)         | 2.9<br>(1.6-4.4)                            | 12%<br>(7.7-16%)                     | 15%<br>(8.5-22%)                    | 36<br>(21-53)       | 3300<br>(2200-4600)    |

| Location   | Year | Sex    | Age      | Prevalence of current drinkers | Prevalence of abstainers | Population average of standard drinks daily | Percent of total attributable deaths | Percent of total attributable DALYs | Attributable deaths | Attributable DALYs   |
|------------|------|--------|----------|--------------------------------|--------------------------|---------------------------------------------|--------------------------------------|-------------------------------------|---------------------|----------------------|
| Costa Rica | 2005 | Male   | 25 to 29 | 85%<br>(76-91%)                | 15%<br>(9.2-24%)         | 3.4<br>(2-5.4)                              | 12%<br>(8.3-17%)                     | 16%<br>(9.7-24%)                    | 38<br>(23-57)       | 3200<br>(2200-4500)  |
| Costa Rica | 2005 | Male   | 30 to 34 | 86%<br>(77-92%)                | 14%<br>(8-23%)           | 3.9<br>(2.4-5.9)                            | 12%<br>(8.4-16%)                     | 17%<br>(11-24%)                     | 39<br>(26-55)       | 2900<br>(2000-3900)  |
| Costa Rica | 2005 | Male   | 35 to 39 | 86%<br>(78-92%)                | 14%<br>(8.1-22%)         | 4<br>(2.2-6.2)                              | 11%<br>(7.6-15%)                     | 17%<br>(11-23%)                     | 45<br>(30-63)       | 3000<br>(2000-4000)  |
| Costa Rica | 2005 | Male   | 40 to 44 | 85%<br>(77-92%)                | 15%<br>(8-23%)           | 4<br>(2.3-5.9)                              | 11%<br>(7.6-14%)                     | 17%<br>(11-22%)                     | 59<br>(39-79)       | 3300<br>(2300-4400)  |
| Costa Rica | 2005 | Male   | 45 to 49 | 86%<br>(76-92%)                | 14%<br>(8-24%)           | 4.3<br>(2.4-7.1)                            | 11%<br>(7.6-15%)                     | 16%<br>(11-22%)                     | 71<br>(46-95)       | 3400<br>(2300-4600)  |
| Costa Rica | 2005 | Male   | 50 to 54 | 86%<br>(78-92%)                | 14%<br>(8-22%)           | 4.9<br>(2.8-7.8)                            | 11%<br>(7.6-15%)                     | 16%<br>(11-21%)                     | 76<br>(50-98)       | 3200<br>(2100-4200)  |
| Costa Rica | 2005 | Male   | 55 to 59 | 86%<br>(76-92%)                | 14%<br>(7.5-24%)         | 5.2<br>(2.9-8.2)                            | 11%<br>(6.9-14%)                     | 15%<br>(9.7-20%)                    | 81<br>(52-110)      | 3000<br>(1900-3900)  |
| Costa Rica | 2005 | Male   | 60 to 64 | 83%<br>(72-91%)                | 17%<br>(8.5-28%)         | 4.5<br>(2.4-7.5)                            | 9%<br>(5.3-12%)                      | 12%<br>(7-16%)                      | 70<br>(40-95)       | 2200<br>(1300-3000)  |
| Costa Rica | 2005 | Male   | 65 to 69 | 80%<br>(67-90%)                | 20%<br>(10-33%)          | 3.5<br>(2.1-5.5)                            | 7.3%<br>(4.2-10%)                    | 9.3%<br>(5.3-13%)                   | 70<br>(40-100)      | 1800<br>(1000-2600)  |
| Costa Rica | 2005 | Male   | 70 to 74 | 77%<br>(64-86%)                | 23%<br>(14-36%)          | 2.8<br>(1.6-4.8)                            | 5.5%<br>(2.6-9%)                     | 6.8%<br>(3.1-11%)                   | 59<br>(27-97)       | 1200<br>(550-2000)   |
| Costa Rica | 2005 | Male   | 75 to 79 | 70%<br>(54-83%)                | 30%<br>(17-46%)          | 2.2<br>(1-3.8)                              | 3.9%<br>(1.3-7.2%)                   | 4.6%<br>(1.5-8.5%)                  | 47<br>(15-87)       | 750<br>(260-1400)    |
| Costa Rica | 2005 | Male   | 80 to 84 | 63%<br>(45-78%)                | 37%<br>(22-55%)          | 1.7<br>(0.84-2.9)                           | 3%<br>(1.1-5.5%)                     | 3.5%<br>(1.3-6.5%)                  | 34<br>(12-64)       | 400<br>(150-730)     |
| Costa Rica | 2005 | Male   | 85 to 89 | 59%<br>(42-75%)                | 41%<br>(25-58%)          | 1.6<br>(0.71-2.9)                           | 2.7%<br>(0.93-5.2%)                  | 3%<br>(0.92-6.1%)                   | 23<br>(7.1-47)      | 190<br>(68-380)      |
| Costa Rica | 2005 | Male   | 90 to 94 | 60%<br>(43-76%)                | 40%<br>(24-57%)          | 1.7<br>(0.71-3.3)                           | 2.6%<br>(0.55-5.8%)                  | 2.8%<br>(0.39-6.6%)                 | 15<br>(2.1-35)      | 84<br>(18-190)       |
| Costa Rica | 2005 | Male   | 95 plus  | 63%<br>(43-81%)                | 37%<br>(19-57%)          | 1.8<br>(0.64-3.8)                           | 2.7%<br>(0.16-6.4%)                  | 2.7%<br>(-0.22-7.2%)                | 4.4<br>(-0.36-12)   | 18<br>(1.1-42)       |
| Costa Rica | 2010 | Female | All Ages | 66%<br>(60-71%)                | 34%<br>(29-40%)          | 1.1<br>(0.89-1.3)                           | 2.4%<br>(1.7-3.1%)                   | 4%<br>(2.5-5.7%)                    | 300<br>(190-440)    | 9400<br>(6700-12000) |
| Costa Rica | 2010 | Female | 15 to 19 | 63%<br>(47-76%)                | 37%<br>(24-53%)          | 0.93<br>(0.51-1.5)                          | 1.6%<br>(0.9-2.3%)                   | 3.5%<br>(1.6-6.1%)                  | 2.3<br>(1-4)        | 300<br>(180-450)     |
| Costa Rica | 2010 | Female | 20 to 24 | 76%<br>(62-85%)                | 24%<br>(15-38%)          | 1.1<br>(0.59-1.9)                           | 2.3%<br>(1.5-3.3%)                   | 4.1%<br>(2-6.7%)                    | 3.5<br>(1.7-5.8)    | 490<br>(290-730)     |
| Costa Rica | 2010 | Female | 25 to 29 | 75%<br>(63-85%)                | 25%<br>(15-37%)          | 1.1<br>(0.62-1.7)                           | 2.1%<br>(1.4-3%)                     | 4%<br>(2.1-5.9%)                    | 3.4<br>(1.8-5.1)    | 450<br>(280-650)     |
| Costa Rica | 2010 | Female | 30 to 34 | 75%<br>(63-84%)                | 25%<br>(16-37%)          | 1.1<br>(0.68-1.7)                           | 2%<br>(1.3-2.8%)                     | 4.4%<br>(2.9-6.3%)                  | 4.4<br>(2.9-6.4)    | 430<br>(280-620)     |
| Costa Rica | 2010 | Female | 35 to 39 | 76%<br>(65-85%)                | 24%<br>(15-35%)          | 1.3<br>(0.7-2)                              | 2.1%<br>(1.3-3%)                     | 5.2%<br>(3.4-7.3%)                  | 6.3<br>(4.2-9)      | 450<br>(290-650)     |
| Costa Rica | 2010 | Female | 40 to 44 | 77%<br>(67-85%)                | 23%<br>(15-33%)          | 1.5<br>(0.91-2.2)                           | 2.4%<br>(1.4-3.5%)                   | 6.3%<br>(4.4-8.3%)                  | 11<br>(7.6-15)      | 620<br>(390-890)     |

| Location   | Year | Sex    | Age      | Prevalence of current drinkers | Prevalence of abstainers | Population average of standard drinks daily | Percent of total attributable deaths | Percent of total attributable DALYs | Attributable deaths | Attributable DALYs     |
|------------|------|--------|----------|--------------------------------|--------------------------|---------------------------------------------|--------------------------------------|-------------------------------------|---------------------|------------------------|
| Costa Rica | 2010 | Female | 45 to 49 | 78%<br>(65-86%)                | 22%<br>(14-35%)          | 1.9<br>(1.1-2.8)                            | 2.9%<br>(1.6-4.5%)                   | 7.1%<br>(4.7-9.7%)                  | 18<br>(11-25)       | 830<br>(490-1300)      |
| Costa Rica | 2010 | Female | 50 to 54 | 75%<br>(64-84%)                | 25%<br>(16-36%)          | 2.2<br>(1.3-3.2)                            | 3.6%<br>(2.1-5.4%)                   | 7.5%<br>(5.1-10%)                   | 24<br>(16-33)       | 1000<br>(580-1500)     |
| Costa Rica | 2010 | Female | 55 to 59 | 69%<br>(55-80%)                | 31%<br>(20-45%)          | 2.3<br>(1.4-3.5)                            | 4.3%<br>(2.5-6.6%)                   | 7.8%<br>(5.1-11%)                   | 31<br>(21-45)       | 1100<br>(680-1700)     |
| Costa Rica | 2010 | Female | 60 to 64 | 63%<br>(48-75%)                | 37%<br>(25-52%)          | 2<br>(1.1-3.3)                              | 4.1%<br>(2.3-6.3%)                   | 7.2%<br>(4.5-11%)                   | 34<br>(21-50)       | 1000<br>(600-1600)     |
| Costa Rica | 2010 | Female | 65 to 69 | 60%<br>(46-73%)                | 40%<br>(27-54%)          | 1.8<br>(1.1-2.9)                            | 3.8%<br>(2.2-5.7%)                   | 6.2%<br>(4.1-9%)                    | 34<br>(22-50)       | 850<br>(520-1300)      |
| Costa Rica | 2010 | Female | 70 to 74 | 55%<br>(42-69%)                | 45%<br>(31-58%)          | 1.6<br>(0.9-2.7)                            | 3.4%<br>(1.8-5.6%)                   | 5.3%<br>(3-8.1%)                    | 36<br>(21-56)       | 720<br>(390-1200)      |
| Costa Rica | 2010 | Female | 75 to 79 | 48%<br>(32-65%)                | 52%<br>(35-68%)          | 1.4<br>(0.7-2.3)                            | 2.6%<br>(1.1-4.7%)                   | 3.8%<br>(1.8-6.7%)                  | 33<br>(16-58)       | 510<br>(220-940)       |
| Costa Rica | 2010 | Female | 80 to 84 | 43%<br>(28-59%)                | 57%<br>(41-72%)          | 1.2<br>(0.61-2)                             | 2%<br>(0.74-3.8%)                    | 2.8%<br>(1.1-5.1%)                  | 29<br>(12-53)       | 320<br>(120-610)       |
| Costa Rica | 2010 | Female | 85 to 89 | 42%<br>(28-58%)                | 58%<br>(42-72%)          | 1.2<br>(0.6-2)                              | 1.6%<br>(0.35-3.2%)                  | 2.1%<br>(0.46-4.2%)                 | 21<br>(4.5-42)      | 170<br>(38-340)        |
| Costa Rica | 2010 | Female | 90 to 94 | 45%<br>(31-60%)                | 55%<br>(40-69%)          | 1.2<br>(0.6-2)                              | 1.2%<br>(-0.086-3.1%)                | 1.5%<br>(-0.21-3.9%)                | 10<br>(-1.4-27)     | 60<br>(-4.1-150)       |
| Costa Rica | 2010 | Female | 95 plus  | 49%<br>(32-69%)                | 51%<br>(31-68%)          | 1.2<br>(0.48-2.3)                           | 0.95%<br>(-0.61-3.4%)                | 1%<br>(-1.1-4.2%)                   | 2.9<br>(-3-12)      | 12<br>(-8.1-45)        |
| Costa Rica | 2010 | Male   | All Ages | 73%<br>(66-79%)                | 27%<br>(21-34%)          | 2.5<br>(2.1-3)                              | 7.5%<br>(6.1-9%)                     | 8.3%<br>(6.2-10%)                   | 840<br>(630-1100)   | 36000<br>(29000-43000) |
| Costa Rica | 2010 | Male   | 15 to 19 | 58%<br>(40-75%)                | 42%<br>(25-60%)          | 1.3<br>(0.63-2.2)                           | 5.1%<br>(3.1-7.5%)                   | 7.1%<br>(3.5-12%)                   | 12<br>(6.1-21)      | 1300<br>(780-1900)     |
| Costa Rica | 2010 | Male   | 20 to 24 | 80%<br>(67-88%)                | 20%<br>(12-33%)          | 2.5<br>(1.4-4.1)                            | 11%<br>(7.2-15%)                     | 13%<br>(7.5-20%)                    | 35<br>(20-54)       | 3300<br>(2100-4700)    |
| Costa Rica | 2010 | Male   | 25 to 29 | 84%<br>(73-91%)                | 16%<br>(9.5-27%)         | 3.2<br>(1.8-5.1)                            | 12%<br>(8-16%)                       | 16%<br>(9.4-23%)                    | 43<br>(26-63)       | 3600<br>(2400-5000)    |
| Costa Rica | 2010 | Male   | 30 to 34 | 85%<br>(74-92%)                | 15%<br>(8.4-26%)         | 3.6<br>(2.2-5.5)                            | 11%<br>(8-16%)                       | 16%<br>(10-23%)                     | 42<br>(27-61)       | 3200<br>(2200-4300)    |
| Costa Rica | 2010 | Male   | 35 to 39 | 85%<br>(76-92%)                | 15%<br>(8.1-24%)         | 3.8<br>(2-5.9)                              | 11%<br>(7.2-15%)                     | 16%<br>(10-23%)                     | 43<br>(27-61)       | 2800<br>(1900-3900)    |
| Costa Rica | 2010 | Male   | 40 to 44 | 86%<br>(77-92%)                | 14%<br>(7.5-23%)         | 3.9<br>(2.2-5.9)                            | 11%<br>(7.2-14%)                     | 16%<br>(11-22%)                     | 57<br>(37-78)       | 3200<br>(2200-4300)    |
| Costa Rica | 2010 | Male   | 45 to 49 | 86%<br>(76-93%)                | 14%<br>(7.5-24%)         | 4.2<br>(2.3-7.1)                            | 11%<br>(7.1-14%)                     | 16%<br>(11-22%)                     | 74<br>(48-99)       | 3600<br>(2400-4900)    |
| Costa Rica | 2010 | Male   | 50 to 54 | 86%<br>(77-92%)                | 14%<br>(7.6-23%)         | 4.7<br>(2.8-7.4)                            | 11%<br>(7.3-14%)                     | 16%<br>(11-20%)                     | 90<br>(59-120)      | 3800<br>(2500-5000)    |
| Costa Rica | 2010 | Male   | 55 to 59 | 85%<br>(75-93%)                | 15%<br>(7.4-25%)         | 5<br>(2.8-7.7)                              | 11%<br>(7-14%)                       | 15%<br>(9.6-19%)                    | 94<br>(60-120)      | 3400<br>(2200-4500)    |
| Costa Rica | 2010 | Male   | 60 to 64 | 83%<br>(70-92%)                | 17%<br>(7.9-30%)         | 4.4<br>(2.3-7.2)                            | 8.8%<br>(5.1-12%)                    | 12%<br>(7-16%)                      | 86<br>(50-120)      | 2700<br>(1600-3700)    |

| Location   | Year | Sex    | Age      | Prevalence of current drinkers | Prevalence of abstainers | Population average of standard drinks daily | Percent of total attributable deaths | Percent of total attributable DALYs | Attributable deaths | Attributable DALYs    |
|------------|------|--------|----------|--------------------------------|--------------------------|---------------------------------------------|--------------------------------------|-------------------------------------|---------------------|-----------------------|
| Costa Rica | 2010 | Male   | 65 to 69 | 80%<br>(67-90%)                | 20%<br>(9.9-33%)         | 3.4<br>(1.9-5.4)                            | 7%<br>(4.1-9.9%)                     | 9.1%<br>(5.3-13%)                   | 74<br>(43-110)      | 1900<br>(1100-2800)   |
| Costa Rica | 2010 | Male   | 70 to 74 | 75%<br>(61-86%)                | 25%<br>(14-39%)          | 2.6<br>(1.4-4.5)                            | 5.1%<br>(2.5-8.4%)                   | 6.4%<br>(3.1-11%)                   | 60<br>(29-100)      | 1300<br>(600-2100)    |
| Costa Rica | 2010 | Male   | 75 to 79 | 69%<br>(53-83%)                | 31%<br>(17-47%)          | 2<br>(0.92-3.6)                             | 3.7%<br>(1.3-6.7%)                   | 4.4%<br>(1.6-8%)                    | 49<br>(18-89)       | 780<br>(300-1400)     |
| Costa Rica | 2010 | Male   | 80 to 84 | 63%<br>(45-78%)                | 37%<br>(22-55%)          | 1.6<br>(0.78-2.8)                           | 2.9%<br>(1.1-5.2%)                   | 3.4%<br>(1.3-6.3%)                  | 39<br>(15-71)       | 460<br>(180-860)      |
| Costa Rica | 2010 | Male   | 85 to 89 | 59%<br>(42-75%)                | 41%<br>(25-58%)          | 1.5<br>(0.69-2.7)                           | 2.5%<br>(0.97-4.7%)                  | 2.8%<br>(1-5.6%)                    | 26<br>(9.1-51)      | 220<br>(86-430)       |
| Costa Rica | 2010 | Male   | 90 to 94 | 60%<br>(43-75%)                | 40%<br>(25-57%)          | 1.6<br>(0.66-3.1)                           | 2.5%<br>(0.59-5.2%)                  | 2.7%<br>(0.46-5.9%)                 | 15<br>(2.6-33)      | 88<br>(21-190)        |
| Costa Rica | 2010 | Male   | 95 plus  | 63%<br>(43-81%)                | 37%<br>(19-57%)          | 1.8<br>(0.62-3.6)                           | 2.6%<br>(0.28-6%)                    | 2.7%<br>(-0.079-6.8%)               | 4.6<br>(-0.14-12)   | 19<br>(2-44)          |
| Costa Rica | 2016 | Female | All Ages | 66%<br>(60-71%)                | 34%<br>(29-40%)          | 1.2<br>(0.87-1.6)                           | 2.6%<br>(1.8-3.6%)                   | 4.1%<br>(2.4-6.2%)                  | 370<br>(220-570)    | 11000<br>(7400-16000) |
| Costa Rica | 2016 | Female | 15 to 19 | 63%<br>(46-76%)                | 37%<br>(24-54%)          | 0.95<br>(0.49-1.5)                          | 1.6%<br>(0.9-2.4%)                   | 3.6%<br>(1.6-6.3%)                  | 2.1<br>(0.91-3.6)   | 280<br>(160-440)      |
| Costa Rica | 2016 | Female | 20 to 24 | 75%<br>(62-85%)                | 25%<br>(15-38%)          | 1.1<br>(0.58-1.9)                           | 2.3%<br>(1.5-3.4%)                   | 4.1%<br>(2-7%)                      | 3.2<br>(1.5-5.6)    | 480<br>(290-730)      |
| Costa Rica | 2016 | Female | 25 to 29 | 75%<br>(63-84%)                | 25%<br>(16-37%)          | 1.1<br>(0.6-1.9)                            | 2.1%<br>(1.4-3.1%)                   | 4%<br>(2.2-6.3%)                    | 3.5<br>(1.9-5.5)    | 470<br>(290-690)      |
| Costa Rica | 2016 | Female | 30 to 34 | 75%<br>(63-84%)                | 25%<br>(16-37%)          | 1.1<br>(0.65-1.8)                           | 2%<br>(1.3-2.9%)                     | 4.5%<br>(2.9-6.6%)                  | 4.9<br>(3.1-7.3)    | 490<br>(320-730)      |
| Costa Rica | 2016 | Female | 35 to 39 | 76%<br>(64-85%)                | 24%<br>(15-36%)          | 1.3<br>(0.68-2.1)                           | 2.1%<br>(1.4-3.2%)                   | 5.3%<br>(3.5-7.6%)                  | 7<br>(4.4-10)       | 520<br>(330-780)      |
| Costa Rica | 2016 | Female | 40 to 44 | 76%<br>(66-85%)                | 24%<br>(15-34%)          | 1.6<br>(0.88-2.4)                           | 2.5%<br>(1.5-3.7%)                   | 6.5%<br>(4.3-8.9%)                  | 11<br>(7-15)        | 610<br>(380-910)      |
| Costa Rica | 2016 | Female | 45 to 49 | 77%<br>(65-86%)                | 23%<br>(14-35%)          | 1.9<br>(1.1-3.1)                            | 3%<br>(1.6-4.8%)                     | 7.2%<br>(4.6-11%)                   | 18<br>(11-26)       | 860<br>(500-1400)     |
| Costa Rica | 2016 | Female | 50 to 54 | 75%<br>(63-83%)                | 25%<br>(17-37%)          | 2.2<br>(1.3-3.5)                            | 3.6%<br>(2.1-5.7%)                   | 7.6%<br>(4.9-11%)                   | 28<br>(18-41)       | 1200<br>(680-1900)    |
| Costa Rica | 2016 | Female | 55 to 59 | 68%<br>(55-79%)                | 32%<br>(21-45%)          | 2.3<br>(1.3-3.7)                            | 4.3%<br>(2.5-6.7%)                   | 8%<br>(5-12%)                       | 40<br>(25-60)       | 1500<br>(860-2300)    |
| Costa Rica | 2016 | Female | 60 to 64 | 62%<br>(47-75%)                | 38%<br>(25-53%)          | 2.1<br>(1.1-3.4)                            | 4.2%<br>(2.4-6.7%)                   | 7.3%<br>(4.5-11%)                   | 40<br>(25-61)       | 1200<br>(720-2000)    |
| Costa Rica | 2016 | Female | 65 to 69 | 59%<br>(45-73%)                | 41%<br>(27-55%)          | 1.8<br>(1-3)                                | 3.9%<br>(2.3-5.9%)                   | 6.5%<br>(4.2-9.7%)                  | 45<br>(28-67)       | 1100<br>(670-1800)    |
| Costa Rica | 2016 | Female | 70 to 74 | 54%<br>(41-68%)                | 46%<br>(32-59%)          | 1.7<br>(0.9-2.8)                            | 3.5%<br>(1.8-5.9%)                   | 5.5%<br>(3.2-8.7%)                  | 46<br>(26-77)       | 930<br>(480-1600)     |
| Costa Rica | 2016 | Female | 75 to 79 | 48%<br>(32-64%)                | 52%<br>(36-68%)          | 1.4<br>(0.68-2.4)                           | 2.7%<br>(1.2-5%)                     | 4%<br>(1.8-7%)                      | 41<br>(19-74)       | 630<br>(270-1200)     |
| Costa Rica | 2016 | Female | 80 to 84 | 43%<br>(27-59%)                | 57%<br>(41-73%)          | 1.2<br>(0.58-2)                             | 2%<br>(0.69-4%)                      | 2.8%<br>(1-5.4%)                    | 36<br>(13-68)       | 400<br>(140-800)      |

| Location    | Year | Sex    | Age      | Prevalence of current drinkers | Prevalence of abstainers | Population average of standard drinks daily | Percent of total attributable deaths | Percent of total attributable DALYs | Attributable deaths | Attributable DALYs     |
|-------------|------|--------|----------|--------------------------------|--------------------------|---------------------------------------------|--------------------------------------|-------------------------------------|---------------------|------------------------|
| Costa Rica  | 2016 | Female | 85 to 89 | 41%<br>(28-56%)                | 59%<br>(44-72%)          | 1.2<br>(0.58-2.1)                           | 1.6%<br>(0.33-3.5%)                  | 2.1%<br>(0.43-4.6%)                 | 27<br>(5.3-59)      | 220<br>(47-470)        |
| Costa Rica  | 2016 | Female | 90 to 94 | 44%<br>(30-59%)                | 56%<br>(41-70%)          | 1.2<br>(0.56-2.1)                           | 1.3%<br>(-0.084-3.4%)                | 1.5%<br>(-0.23-4.2%)                | 15<br>(-2.3-42)     | 88<br>(-5.8-240)       |
| Costa Rica  | 2016 | Female | 95 plus  | 49%<br>(30-68%)                | 51%<br>(32-70%)          | 1.2<br>(0.47-2.3)                           | 0.98%<br>(-0.59-3.5%)                | 1%<br>(-1-4.2%)                     | 4.4<br>(-4-18)      | 19<br>(-11-68)         |
| Costa Rica  | 2016 | Male   | All Ages | 74%<br>(68-80%)                | 26%<br>(20-32%)          | 2.7<br>(2-3.5)                              | 7.9%<br>(6.2-9.7%)                   | 8.3%<br>(5.9-11%)                   | 1000<br>(700-1300)  | 41000<br>(31000-51000) |
| Costa Rica  | 2016 | Male   | 15 to 19 | 58%<br>(39-75%)                | 42%<br>(25-61%)          | 1.3<br>(0.6-2.3)                            | 5.1%<br>(3.1-7.6%)                   | 7.3%<br>(3.4-12%)                   | 11<br>(5.4-19)      | 1200<br>(710-1800)     |
| Costa Rica  | 2016 | Male   | 20 to 24 | 80%<br>(67-88%)                | 20%<br>(12-33%)          | 2.6<br>(1.3-4.3)                            | 11%<br>(7.2-16%)                     | 14%<br>(7.5-22%)                    | 34<br>(19-54)       | 3300<br>(2100-4800)    |
| Costa Rica  | 2016 | Male   | 25 to 29 | 84%<br>(73-90%)                | 16%<br>(9.6-27%)         | 3.3<br>(1.8-5.4)                            | 12%<br>(8.1-17%)                     | 16%<br>(9.4-24%)                    | 45<br>(25-69)       | 3900<br>(2600-5600)    |
| Costa Rica  | 2016 | Male   | 30 to 34 | 85%<br>(74-91%)                | 15%<br>(8.6-26%)         | 3.7<br>(2.1-5.9)                            | 12%<br>(8.1-16%)                     | 17%<br>(11-24%)                     | 49<br>(30-72)       | 3800<br>(2500-5200)    |
| Costa Rica  | 2016 | Male   | 35 to 39 | 85%<br>(76-92%)                | 15%<br>(8.4-24%)         | 3.9<br>(1.9-6.3)                            | 11%<br>(7.3-15%)                     | 17%<br>(10-24%)                     | 50<br>(29-73)       | 3400<br>(2100-4700)    |
| Costa Rica  | 2016 | Male   | 40 to 44 | 86%<br>(76-92%)                | 14%<br>(7.6-24%)         | 4<br>(2.1-6.4)                              | 11%<br>(7.3-15%)                     | 17%<br>(11-23%)                     | 56<br>(35-78)       | 3200<br>(2100-4400)    |
| Costa Rica  | 2016 | Male   | 45 to 49 | 86%<br>(76-92%)                | 14%<br>(7.5-24%)         | 4.3<br>(2.2-7.5)                            | 11%<br>(7.1-15%)                     | 17%<br>(11-22%)                     | 73<br>(47-100)      | 3600<br>(2400-5000)    |
| Costa Rica  | 2016 | Male   | 50 to 54 | 86%<br>(77-92%)                | 14%<br>(7.8-23%)         | 4.8<br>(2.6-7.8)                            | 11%<br>(7.3-15%)                     | 16%<br>(10-21%)                     | 100<br>(66-140)     | 4400<br>(2900-5900)    |
| Costa Rica  | 2016 | Male   | 55 to 59 | 85%<br>(75-93%)                | 15%<br>(7.4-25%)         | 5<br>(2.8-8)                                | 11%<br>(7.2-14%)                     | 15%<br>(10-20%)                     | 120<br>(80-160)     | 4500<br>(3000-6000)    |
| Costa Rica  | 2016 | Male   | 60 to 64 | 83%<br>(70-92%)                | 17%<br>(8-30%)           | 4.4<br>(2.3-7.3)                            | 9%<br>(5.3-12%)                      | 12%<br>(7.4-17%)                    | 100<br>(60-140)     | 3200<br>(1900-4400)    |
| Costa Rica  | 2016 | Male   | 65 to 69 | 80%<br>(67-90%)                | 20%<br>(10-33%)          | 3.4<br>(1.9-5.4)                            | 7.1%<br>(4.1-10%)                    | 9.3%<br>(5.3-13%)                   | 96<br>(55-140)      | 2500<br>(1500-3600)    |
| Costa Rica  | 2016 | Male   | 70 to 74 | 75%<br>(60-86%)                | 25%<br>(14-40%)          | 2.6<br>(1.4-4.5)                            | 5.1%<br>(2.4-8.5%)                   | 6.5%<br>(3.1-11%)                   | 77<br>(36-130)      | 1600<br>(750-2600)     |
| Costa Rica  | 2016 | Male   | 75 to 79 | 69%<br>(53-82%)                | 31%<br>(18-47%)          | 2<br>(0.87-3.6)                             | 3.7%<br>(1.4-6.7%)                   | 4.4%<br>(1.6-8.1%)                  | 60<br>(22-110)      | 970<br>(370-1800)      |
| Costa Rica  | 2016 | Male   | 80 to 84 | 62%<br>(45-78%)                | 38%<br>(22-55%)          | 1.7<br>(0.77-3)                             | 2.9%<br>(1.1-5.7%)                   | 3.5%<br>(1.3-6.8%)                  | 49<br>(19-95)       | 590<br>(230-1100)      |
| Costa Rica  | 2016 | Male   | 85 to 89 | 59%<br>(41-74%)                | 41%<br>(26-59%)          | 1.5<br>(0.68-2.9)                           | 2.6%<br>(0.91-5%)                    | 2.9%<br>(0.96-5.8%)                 | 36<br>(12-72)       | 310<br>(110-600)       |
| Costa Rica  | 2016 | Male   | 90 to 94 | 60%<br>(43-75%)                | 40%<br>(25-57%)          | 1.6<br>(0.66-3.2)                           | 2.5%<br>(0.66-5.4%)                  | 2.7%<br>(0.47-6.3%)                 | 22<br>(4-50)        | 130<br>(34-280)        |
| Costa Rica  | 2016 | Male   | 95 plus  | 62%<br>(42-81%)                | 38%<br>(19-58%)          | 1.8<br>(0.62-3.6)                           | 2.6%<br>(0.32-5.9%)                  | 2.7%<br>(-0.052-6.8%)               | 6.8<br>(-0.13-17)   | 28<br>(3.4-63)         |
| El Salvador | 1990 | Female | All Ages | 32%<br>(25-40%)                | 68%<br>(60-75%)          | 0.48<br>(0.38-0.59)                         | 1.3%<br>(0.83-1.7%)                  | 1.9%<br>(0.88-3.2%)                 | 270<br>(120-440)    | 11000<br>(6900-15000)  |

| Location    | Year | Sex    | Age      | Prevalence of current drinkers | Prevalence of abstainers | Population average of standard drinks daily | Percent of total attributable deaths | Percent of total attributable DALYs | Attributable deaths | Attributable DALYs      |
|-------------|------|--------|----------|--------------------------------|--------------------------|---------------------------------------------|--------------------------------------|-------------------------------------|---------------------|-------------------------|
| El Salvador | 1990 | Female | 15 to 19 | 29%<br>(16-46%)                | 71%<br>(54-84%)          | 0.44<br>(0.21-0.79)                         | 1.4%<br>(0.64-2.5%)                  | 1.9%<br>(0.54-4%)                   | 6.3<br>(1.8-13)     | 630<br>(290-1100)       |
| El Salvador | 1990 | Female | 20 to 24 | 38%<br>(21-58%)                | 62%<br>(42-79%)          | 0.56<br>(0.27-0.99)                         | 2%<br>(1.1-3.1%)                     | 2.3%<br>(0.83-4.3%)                 | 7.1<br>(2.6-14)     | 810<br>(450-1300)       |
| El Salvador | 1990 | Female | 25 to 29 | 42%<br>(23-62%)                | 58%<br>(38-77%)          | 0.59<br>(0.28-0.99)                         | 2.1%<br>(1.4-3%)                     | 2.5%<br>(1.2-4%)                    | 6.8<br>(3.2-11)     | 750<br>(460-1100)       |
| El Salvador | 1990 | Female | 30 to 34 | 43%<br>(24-63%)                | 57%<br>(37-76%)          | 0.63<br>(0.31-1)                            | 2.3%<br>(1.6-3.1%)                   | 3%<br>(1.7-4.5%)                    | 8.1<br>(4.8-12)     | 730<br>(490-1000)       |
| El Salvador | 1990 | Female | 35 to 39 | 45%<br>(26-65%)                | 55%<br>(35-74%)          | 0.73<br>(0.36-1.2)                          | 2.6%<br>(1.8-3.7%)                   | 3.9%<br>(2.5-5.6%)                  | 12<br>(7.6-17)      | 820<br>(560-1100)       |
| El Salvador | 1990 | Female | 40 to 44 | 46%<br>(29-65%)                | 54%<br>(35-71%)          | 0.88<br>(0.48-1.4)                          | 2.9%<br>(2-4.1%)                     | 4.5%<br>(2.9-6.6%)                  | 16<br>(9.9-23)      | 880<br>(590-1200)       |
| El Salvador | 1990 | Female | 45 to 49 | 46%<br>(26-66%)                | 54%<br>(34-74%)          | 1.1<br>(0.53-1.8)                           | 3.3%<br>(2-5%)                       | 5.2%<br>(3.1-8.1%)                  | 22<br>(13-33)       | 1000<br>(590-1500)      |
| El Salvador | 1990 | Female | 50 to 54 | 46%<br>(27-66%)                | 54%<br>(34-73%)          | 1.3<br>(0.66-2.1)                           | 3.6%<br>(2-5.3%)                     | 5.5%<br>(3.2-8.3%)                  | 26<br>(15-39)       | 1100<br>(590-1600)      |
| El Salvador | 1990 | Female | 55 to 59 | 43%<br>(25-63%)                | 57%<br>(37-75%)          | 1.4<br>(0.68-2.4)                           | 3.9%<br>(2-6.4%)                     | 5.8%<br>(3.1-9.4%)                  | 33<br>(18-55)       | 1100<br>(580-1900)      |
| El Salvador | 1990 | Female | 60 to 64 | 41%<br>(22-62%)                | 59%<br>(38-78%)          | 1.4<br>(0.65-2.4)                           | 3.6%<br>(1.4-6.5%)                   | 5%<br>(2.1-8.7%)                    | 37<br>(15-65)       | 1000<br>(430-1900)      |
| El Salvador | 1990 | Female | 65 to 69 | 40%<br>(22-60%)                | 60%<br>(40-78%)          | 1.3<br>(0.61-2.2)                           | 2.9%<br>(0.91-5.4%)                  | 3.9%<br>(1.3-7.1%)                  | 34<br>(12-62)       | 810<br>(260-1500)       |
| El Salvador | 1990 | Female | 70 to 74 | 36%<br>(20-55%)                | 64%<br>(45-80%)          | 1.1<br>(0.51-2.1)                           | 2.2%<br>(0.29-4.8%)                  | 2.9%<br>(0.43-6.3%)                 | 28<br>(4.1-60)      | 530<br>(74-1200)        |
| El Salvador | 1990 | Female | 75 to 79 | 32%<br>(16-53%)                | 68%<br>(47-84%)          | 0.94<br>(0.38-1.8)                          | 1.4%<br>(-0.35-3.9%)                 | 1.8%<br>(-0.5-4.8%)                 | 19<br>(-5.5-52)     | 280<br>(-72-770)        |
| El Salvador | 1990 | Female | 80 to 84 | 29%<br>(14-49%)                | 71%<br>(51-86%)          | 0.82<br>(0.31-1.6)                          | 0.86%<br>(-0.51-2.8%)                | 1%<br>(-0.72-3.3%)                  | 9.8<br>(-7-33)      | 110<br>(-70-350)        |
| El Salvador | 1990 | Female | 85 to 89 | 30%<br>(15-48%)                | 70%<br>(52-85%)          | 0.79<br>(0.34-1.5)                          | 0.4%<br>(-0.92-1.9%)                 | 0.4%<br>(-1.2-2.2%)                 | 3.3<br>(-10-19)     | 30<br>(-70-140)         |
| El Salvador | 1990 | Female | 90 to 94 | 34%<br>(18-52%)                | 66%<br>(48-82%)          | 0.83<br>(0.34-1.6)                          | -0.041%<br>(-1.4-1.8%)               | -0.17%<br>(-1.9-1.9%)               | -0.78<br>(-8.8-8.6) | -1.1<br>(-41-50)        |
| El Salvador | 1990 | Female | 95 plus  | 38%<br>(20-59%)                | 62%<br>(41-80%)          | 0.85<br>(0.3-1.7)                           | -0.34%<br>(-2-1.7%)                  | -0.59%<br>(-2.7-1.9%)               | -0.98<br>(-4.5-3.1) | -2.3<br>(-14-12)        |
| El Salvador | 1990 | Male   | All Ages | 47%<br>(37-57%)                | 53%<br>(43-63%)          | 1.2<br>(0.99-1.4)                           | 8.1%<br>(6.4-9.5%)                   | 10%<br>(7.9-12%)                    | 2000<br>(1600-2400) | 96000<br>(76000-110000) |
| El Salvador | 1990 | Male   | 15 to 19 | 38%<br>(20-59%)                | 62%<br>(41-80%)          | 0.69<br>(0.31-1.3)                          | 4.9%<br>(2.6-8.2%)                   | 5.3%<br>(2.3-9.6%)                  | 45<br>(19-82)       | 3900<br>(2000-6500)     |
| El Salvador | 1990 | Male   | 20 to 24 | 58%<br>(35-76%)                | 42%<br>(24-65%)          | 1.5<br>(0.71-2.4)                           | 11%<br>(7-15%)                       | 11%<br>(6.2-16%)                    | 140<br>(79-210)     | 11000<br>(6800-15000)   |
| El Salvador | 1990 | Male   | 25 to 29 | 66%<br>(46-82%)                | 34%<br>(18-54%)          | 2<br>(1-3.2)                                | 16%<br>(11-21%)                      | 16%<br>(10-22%)                     | 170<br>(110-230)    | 12000<br>(8600-16000)   |
| El Salvador | 1990 | Male   | 30 to 34 | 71%<br>(50-85%)                | 29%<br>(15-50%)          | 2.3<br>(1.3-3.6)                            | 19%<br>(14-25%)                      | 21%<br>(14-27%)                     | 180<br>(120-240)    | 12000<br>(8600-15000)   |

| Location    | Year | Sex    | Age      | Prevalence of current drinkers | Prevalence of abstainers | Population average of standard drinks daily | Percent of total attributable deaths | Percent of total attributable DALYs | Attributable deaths | Attributable DALYs    |
|-------------|------|--------|----------|--------------------------------|--------------------------|---------------------------------------------|--------------------------------------|-------------------------------------|---------------------|-----------------------|
| El Salvador | 1990 | Male   | 35 to 39 | 73%<br>(55-86%)                | 27%<br>(14-45%)          | 2.5<br>(1.3-4.1)                            | 22%<br>(16-27%)                      | 25%<br>(17-31%)                     | 200<br>(140-260)    | 11000<br>(8300-14000) |
| El Salvador | 1990 | Male   | 40 to 44 | 74%<br>(58-87%)                | 26%<br>(13-42%)          | 2.8<br>(1.5-4.4)                            | 22%<br>(16-27%)                      | 26%<br>(18-32%)                     | 200<br>(140-250)    | 10000<br>(7300-13000) |
| El Salvador | 1990 | Male   | 45 to 49 | 75%<br>(54-87%)                | 25%<br>(13-46%)          | 3<br>(1.5-5)                                | 22%<br>(16-27%)                      | 27%<br>(18-33%)                     | 210<br>(140-270)    | 9300<br>(6700-12000)  |
| El Salvador | 1990 | Male   | 50 to 54 | 74%<br>(55-87%)                | 26%<br>(13-45%)          | 3.2<br>(1.7-5)                              | 20%<br>(14-24%)                      | 24%<br>(17-31%)                     | 200<br>(140-260)    | 8000<br>(5700-10000)  |
| El Salvador | 1990 | Male   | 55 to 59 | 73%<br>(54-87%)                | 27%<br>(13-46%)          | 3.4<br>(1.8-5.4)                            | 17%<br>(12-23%)                      | 22%<br>(14-28%)                     | 190<br>(120-240)    | 6400<br>(4300-8300)   |
| El Salvador | 1990 | Male   | 60 to 64 | 71%<br>(50-86%)                | 29%<br>(14-50%)          | 3.1<br>(1.5-5.2)                            | 14%<br>(8.7-19%)                     | 17%<br>(11-23%)                     | 160<br>(100-220)    | 4800<br>(3100-6400)   |
| El Salvador | 1990 | Male   | 65 to 69 | 68%<br>(46-84%)                | 32%<br>(16-54%)          | 2.4<br>(1.2-4.1)                            | 10%<br>(6.6-15%)                     | 13%<br>(7.9-18%)                    | 130<br>(83-190)     | 3200<br>(2000-4500)   |
| El Salvador | 1990 | Male   | 70 to 74 | 63%<br>(42-80%)                | 37%<br>(20-58%)          | 1.8<br>(0.83-3.3)                           | 7%<br>(4.1-11%)                      | 8.4%<br>(4.8-13%)                   | 93<br>(52-150)      | 1800<br>(1000-2900)   |
| El Salvador | 1990 | Male   | 75 to 79 | 57%<br>(34-78%)                | 43%<br>(22-66%)          | 1.5<br>(0.56-3)                             | 4.6%<br>(2.1-8.5%)                   | 5.2%<br>(2.4-10%)                   | 60<br>(27-120)      | 900<br>(420-1700)     |
| El Salvador | 1990 | Male   | 80 to 84 | 53%<br>(31-75%)                | 47%<br>(25-69%)          | 1.3<br>(0.49-2.5)                           | 3.1%<br>(1.2-6.4%)                   | 3.4%<br>(1.2-7.1%)                  | 32<br>(11-69)       | 360<br>(130-750)      |
| El Salvador | 1990 | Male   | 85 to 89 | 52%<br>(29-72%)                | 48%<br>(28-71%)          | 1.2<br>(0.5-2.5)                            | 2.4%<br>(0.66-5.4%)                  | 2.6%<br>(0.59-6%)                   | 17<br>(3.9-39)      | 130<br>(36-310)       |
| El Salvador | 1990 | Male   | 90 to 94 | 54%<br>(33-74%)                | 46%<br>(26-67%)          | 1.3<br>(0.49-2.6)                           | 1.9%<br>(0.057-5.1%)                 | 1.9%<br>(-0.21-5.8%)                | 5.7<br>(-0.65-18)   | 34<br>(0.99-92)       |
| El Salvador | 1990 | Male   | 95 plus  | 57%<br>(32-78%)                | 43%<br>(22-68%)          | 1.5<br>(0.47-3)                             | 1.7%<br>(-0.54-5.6%)                 | 1.6%<br>(-1-6.1%)                   | 1.3<br>(-0.82-5.1)  | 5.8<br>(-1.8-18)      |
| El Salvador | 1995 | Female | All Ages | 32%<br>(25-40%)                | 68%<br>(60-75%)          | 0.52<br>(0.41-0.63)                         | 1.6%<br>(1.1-2.1%)                   | 2.3%<br>(1.1-3.7%)                  | 310<br>(150-500)    | 12000<br>(8200-17000) |
| El Salvador | 1995 | Female | 15 to 19 | 29%<br>(16-47%)                | 71%<br>(53-84%)          | 0.45<br>(0.21-0.82)                         | 1.7%<br>(0.77-3.1%)                  | 2.5%<br>(0.7-5.5%)                  | 7.9<br>(2.1-17)     | 750<br>(320-1400)     |
| El Salvador | 1995 | Female | 20 to 24 | 38%<br>(21-58%)                | 62%<br>(42-79%)          | 0.58<br>(0.27-1)                            | 2.3%<br>(1.3-3.6%)                   | 3%<br>(1.2-5.6%)                    | 8.3<br>(3.3-16)     | 910<br>(510-1500)     |
| El Salvador | 1995 | Female | 25 to 29 | 41%<br>(22-61%)                | 59%<br>(39-78%)          | 0.6<br>(0.29-1)                             | 2.4%<br>(1.6-3.4%)                   | 3.2%<br>(1.5-5.1%)                  | 8.2<br>(4-14)       | 870<br>(560-1200)     |
| El Salvador | 1995 | Female | 30 to 34 | 43%<br>(23-62%)                | 57%<br>(38-77%)          | 0.65<br>(0.32-1.1)                          | 2.6%<br>(1.8-3.6%)                   | 3.6%<br>(2.2-5.6%)                  | 10<br>(6.3-16)      | 890<br>(600-1200)     |
| El Salvador | 1995 | Female | 35 to 39 | 45%<br>(26-64%)                | 55%<br>(36-74%)          | 0.75<br>(0.36-1.3)                          | 2.9%<br>(2-4%)                       | 4.4%<br>(2.8-6.3%)                  | 15<br>(9.5-21)      | 1000<br>(690-1400)    |
| El Salvador | 1995 | Female | 40 to 44 | 45%<br>(28-65%)                | 55%<br>(35-72%)          | 0.9<br>(0.47-1.5)                           | 3%<br>(2.1-4.2%)                     | 4.8%<br>(3.2-6.7%)                  | 18<br>(12-25)       | 1000<br>(690-1400)    |
| El Salvador | 1995 | Female | 45 to 49 | 46%<br>(27-65%)                | 54%<br>(35-73%)          | 1.1<br>(0.53-1.8)                           | 3.3%<br>(2-5%)                       | 5.3%<br>(3.3-8%)                    | 23<br>(14-35)       | 1100<br>(660-1600)    |
| El Salvador | 1995 | Female | 50 to 54 | 45%<br>(27-66%)                | 55%<br>(34-73%)          | 1.3<br>(0.67-2)                             | 3.5%<br>(2-5.2%)                     | 5.6%<br>(3.5-8.2%)                  | 28<br>(17-41)       | 1100<br>(670-1700)    |



| Location    | Year | Sex    | Age      | Prevalence of current drinkers | Prevalence of abstainers | Population average of standard drinks daily | Percent of total attributable deaths | Percent of total attributable DALYs | Attributable deaths | Attributable DALYs       |
|-------------|------|--------|----------|--------------------------------|--------------------------|---------------------------------------------|--------------------------------------|-------------------------------------|---------------------|--------------------------|
| El Salvador | 1995 | Female | 55 to 59 | 43%<br>(25-64%)                | 57%<br>(36-75%)          | 1.4<br>(0.69-2.5)                           | 3.9%<br>(2.1-6.3%)                   | 5.8%<br>(3.1-9.5%)                  | 37<br>(20-59)       | 1300<br>(650-2100)       |
| El Salvador | 1995 | Female | 60 to 64 | 41%<br>(22-62%)                | 59%<br>(38-78%)          | 1.4<br>(0.68-2.4)                           | 3.6%<br>(1.5-6.4%)                   | 5.1%<br>(2.4-8.9%)                  | 39<br>(18-69)       | 1100<br>(520-2000)       |
| El Salvador | 1995 | Female | 65 to 69 | 40%<br>(22-60%)                | 60%<br>(40-78%)          | 1.3<br>(0.63-2.3)                           | 3%<br>(1.1-5.5%)                     | 4.1%<br>(1.6-7.3%)                  | 39<br>(15-70)       | 930<br>(340-1700)        |
| El Salvador | 1995 | Female | 70 to 74 | 36%<br>(19-57%)                | 64%<br>(43-81%)          | 1.2<br>(0.5-2.2)                            | 2.4%<br>(0.53-5.1%)                  | 3.1%<br>(0.72-6.6%)                 | 36<br>(7.9-75)      | 670<br>(150-1500)        |
| El Salvador | 1995 | Female | 75 to 79 | 31%<br>(15-52%)                | 69%<br>(48-85%)          | 0.96<br>(0.37-1.9)                          | 1.6%<br>(-0.082-3.9%)                | 2%<br>(-0.16-5%)                    | 25<br>(-2-62)       | 360<br>(-20-910)         |
| El Salvador | 1995 | Female | 80 to 84 | 29%<br>(13-48%)                | 71%<br>(52-87%)          | 0.83<br>(0.32-1.6)                          | 1%<br>(-0.34-2.8%)                   | 1.2%<br>(-0.49-3.3%)                | 14<br>(-5.5-39)     | 150<br>(-51-420)         |
| El Salvador | 1995 | Female | 85 to 89 | 29%<br>(15-47%)                | 71%<br>(53-85%)          | 0.81<br>(0.34-1.5)                          | 0.54%<br>(-0.75-2.2%)                | 0.57%<br>(-1-2.5%)                  | 5.8<br>(-10-25)     | 49<br>(-68-190)          |
| El Salvador | 1995 | Female | 90 to 94 | 33%<br>(17-51%)                | 67%<br>(49-83%)          | 0.85<br>(0.33-1.6)                          | 0.077%<br>(-1.3-1.7%)                | -0.025%<br>(-1.7-2%)                | -0.15<br>(-9.8-12)  | 2.8<br>(-45-62)          |
| El Salvador | 1995 | Female | 95 plus  | 38%<br>(19-59%)                | 62%<br>(41-81%)          | 0.87<br>(0.32-1.7)                          | -0.22%<br>(-1.9-1.9%)                | -0.45%<br>(-2.5-2.1%)               | -0.96<br>(-5.4-4.5) | -1.9<br>(-16-17)         |
| El Salvador | 1995 | Male   | All Ages | 48%<br>(38-58%)                | 52%<br>(42-62%)          | 1.3<br>(1.1-1.5)                            | 9.5%<br>(7.7-11%)                    | 11%<br>(9-13%)                      | 2200<br>(1700-2600) | 100000<br>(82000-120000) |
| El Salvador | 1995 | Male   | 15 to 19 | 38%<br>(20-60%)                | 62%<br>(40-80%)          | 0.72<br>(0.32-1.3)                          | 5.5%<br>(2.7-9.2%)                   | 6%<br>(2.5-11%)                     | 46<br>(19-84)       | 3900<br>(1900-6700)      |
| El Salvador | 1995 | Male   | 20 to 24 | 58%<br>(36-76%)                | 42%<br>(24-64%)          | 1.5<br>(0.74-2.5)                           | 12%<br>(7.8-17%)                     | 12%<br>(7-19%)                      | 130<br>(74-200)     | 10000<br>(6500-15000)    |
| El Salvador | 1995 | Male   | 25 to 29 | 66%<br>(45-82%)                | 34%<br>(18-55%)          | 2<br>(1.1-3.3)                              | 17%<br>(12-22%)                      | 17%<br>(11-24%)                     | 170<br>(110-240)    | 13000<br>(8700-17000)    |
| El Salvador | 1995 | Male   | 30 to 34 | 71%<br>(50-85%)                | 29%<br>(15-50%)          | 2.4<br>(1.3-3.7)                            | 20%<br>(14-25%)                      | 22%<br>(15-28%)                     | 210<br>(140-270)    | 13000<br>(9600-17000)    |
| El Salvador | 1995 | Male   | 35 to 39 | 73%<br>(55-86%)                | 27%<br>(14-45%)          | 2.6<br>(1.4-4.1)                            | 22%<br>(16-28%)                      | 25%<br>(18-32%)                     | 230<br>(160-300)    | 13000<br>(9600-16000)    |
| El Salvador | 1995 | Male   | 40 to 44 | 74%<br>(58-87%)                | 26%<br>(13-42%)          | 2.8<br>(1.5-4.5)                            | 22%<br>(16-27%)                      | 26%<br>(19-32%)                     | 220<br>(160-280)    | 11000<br>(8400-14000)    |
| El Salvador | 1995 | Male   | 45 to 49 | 75%<br>(54-87%)                | 25%<br>(13-46%)          | 3.1<br>(1.6-5.2)                            | 22%<br>(16-27%)                      | 26%<br>(19-33%)                     | 230<br>(160-290)    | 10000<br>(7500-13000)    |
| El Salvador | 1995 | Male   | 50 to 54 | 74%<br>(55-87%)                | 26%<br>(13-45%)          | 3.3<br>(1.8-5.2)                            | 20%<br>(14-24%)                      | 24%<br>(17-31%)                     | 210<br>(150-260)    | 8200<br>(6000-10000)     |
| El Salvador | 1995 | Male   | 55 to 59 | 73%<br>(54-87%)                | 27%<br>(13-46%)          | 3.5<br>(1.8-5.7)                            | 17%<br>(12-22%)                      | 22%<br>(15-28%)                     | 200<br>(140-260)    | 7000<br>(4800-9100)      |
| El Salvador | 1995 | Male   | 60 to 64 | 71%<br>(50-86%)                | 29%<br>(14-50%)          | 3.2<br>(1.6-5.4)                            | 14%<br>(9.1-18%)                     | 17%<br>(11-23%)                     | 180<br>(110-240)    | 5200<br>(3400-6900)      |
| El Salvador | 1995 | Male   | 65 to 69 | 68%<br>(46-84%)                | 32%<br>(16-54%)          | 2.5<br>(1.2-4.1)                            | 10%<br>(6.7-15%)                     | 13%<br>(8.1-18%)                    | 150<br>(95-210)     | 3600<br>(2300-5000)      |
| El Salvador | 1995 | Male   | 70 to 74 | 63%<br>(42-80%)                | 37%<br>(20-58%)          | 1.9<br>(0.83-3.4)                           | 7%<br>(4.3-11%)                      | 8.5%<br>(5.1-13%)                   | 100<br>(62-160)     | 2000<br>(1200-3100)      |

| Location    | Year | Sex    | Age      | Prevalence of current drinkers | Prevalence of abstainers | Population average of standard drinks daily | Percent of total attributable deaths | Percent of total attributable DALYs | Attributable deaths | Attributable DALYs    |
|-------------|------|--------|----------|--------------------------------|--------------------------|---------------------------------------------|--------------------------------------|-------------------------------------|---------------------|-----------------------|
| El Salvador | 1995 | Male   | 75 to 79 | 57%<br>(34-78%)                | 43%<br>(22-66%)          | 1.5<br>(0.57-3)                             | 4.5%<br>(2.3-8.1%)                   | 5.3%<br>(2.6-9.6%)                  | 65<br>(31-120)      | 980<br>(490-1800)     |
| El Salvador | 1995 | Male   | 80 to 84 | 53%<br>(30-74%)                | 47%<br>(26-70%)          | 1.3<br>(0.51-2.5)                           | 3.1%<br>(1.3-6.1%)                   | 3.5%<br>(1.3-7%)                    | 38<br>(14-77)       | 430<br>(180-850)      |
| El Salvador | 1995 | Male   | 85 to 89 | 51%<br>(29-72%)                | 49%<br>(28-71%)          | 1.3<br>(0.49-2.5)                           | 2.4%<br>(0.74-5.4%)                  | 2.6%<br>(0.65-6%)                   | 19<br>(4.7-44)      | 150<br>(46-340)       |
| El Salvador | 1995 | Male   | 90 to 94 | 54%<br>(32-73%)                | 46%<br>(27-68%)          | 1.4<br>(0.5-2.6)                            | 1.9%<br>(0.12-5.1%)                  | 2%<br>(-0.17-5.7%)                  | 6.6<br>(-0.59-19)   | 39<br>(2.4-100)       |
| El Salvador | 1995 | Male   | 95 plus  | 57%<br>(32-78%)                | 43%<br>(22-68%)          | 1.5<br>(0.48-3)                             | 1.8%<br>(-0.39-5.4%)                 | 1.7%<br>(-0.92-6%)                  | 1.7<br>(-0.9-5.9)   | 7.3<br>(-1.5-22)      |
| El Salvador | 2000 | Female | All Ages | 32%<br>(26-41%)                | 68%<br>(59-74%)          | 0.59<br>(0.47-0.73)                         | 1.9%<br>(1.3-2.6%)                   | 2.9%<br>(1.5-4.5%)                  | 370<br>(200-580)    | 13000<br>(9200-18000) |
| El Salvador | 2000 | Female | 15 to 19 | 29%<br>(16-46%)                | 71%<br>(54-84%)          | 0.5<br>(0.23-0.9)                           | 1.7%<br>(0.85-3%)                    | 2.8%<br>(0.88-5.7%)                 | 6.4<br>(2-13)       | 640<br>(320-1100)     |
| El Salvador | 2000 | Female | 20 to 24 | 38%<br>(21-58%)                | 62%<br>(42-79%)          | 0.63<br>(0.29-1.1)                          | 2.4%<br>(1.4-3.7%)                   | 3.3%<br>(1.3-6.2%)                  | 8.2<br>(3.3-15)     | 920<br>(520-1500)     |
| El Salvador | 2000 | Female | 25 to 29 | 41%<br>(22-62%)                | 59%<br>(38-78%)          | 0.66<br>(0.3-1.1)                           | 2.5%<br>(1.6-3.5%)                   | 3.4%<br>(1.7-5.5%)                  | 8.5<br>(4.4-14)     | 890<br>(580-1300)     |
| El Salvador | 2000 | Female | 30 to 34 | 43%<br>(22-63%)                | 57%<br>(37-78%)          | 0.72<br>(0.35-1.2)                          | 2.6%<br>(1.8-3.5%)                   | 3.9%<br>(2.4-5.9%)                  | 9.8<br>(6.1-15)     | 870<br>(600-1200)     |
| El Salvador | 2000 | Female | 35 to 39 | 45%<br>(26-64%)                | 55%<br>(36-74%)          | 0.83<br>(0.41-1.4)                          | 2.8%<br>(1.9-3.8%)                   | 4.6%<br>(3-6.6%)                    | 15<br>(9.4-21)      | 1000<br>(700-1400)    |
| El Salvador | 2000 | Female | 40 to 44 | 45%<br>(28-65%)                | 55%<br>(35-72%)          | 1<br>(0.52-1.6)                             | 3%<br>(2.1-4.2%)                     | 5.1%<br>(3.5-7%)                    | 18<br>(13-26)       | 1000<br>(710-1400)    |
| El Salvador | 2000 | Female | 45 to 49 | 45%<br>(26-66%)                | 55%<br>(34-74%)          | 1.2<br>(0.59-2)                             | 3.3%<br>(2-4.8%)                     | 5.7%<br>(3.7-8.2%)                  | 24<br>(15-34)       | 1100<br>(710-1700)    |
| El Salvador | 2000 | Female | 50 to 54 | 44%<br>(26-65%)                | 56%<br>(35-74%)          | 1.4<br>(0.72-2.3)                           | 3.7%<br>(2.1-5.5%)                   | 5.9%<br>(3.8-8.7%)                  | 30<br>(19-43)       | 1200<br>(710-1800)    |
| El Salvador | 2000 | Female | 55 to 59 | 42%<br>(24-63%)                | 58%<br>(37-76%)          | 1.6<br>(0.76-2.7)                           | 4.2%<br>(2.3-6.8%)                   | 6.3%<br>(3.7-10%)                   | 41<br>(24-66)       | 1400<br>(790-2300)    |
| El Salvador | 2000 | Female | 60 to 64 | 40%<br>(21-62%)                | 60%<br>(38-79%)          | 1.5<br>(0.74-2.8)                           | 3.9%<br>(1.9-6.7%)                   | 5.7%<br>(2.9-9.5%)                  | 44<br>(23-74)       | 1300<br>(630-2200)    |
| El Salvador | 2000 | Female | 65 to 69 | 39%<br>(21-59%)                | 61%<br>(41-79%)          | 1.4<br>(0.69-2.4)                           | 3.4%<br>(1.6-6%)                     | 4.9%<br>(2.4-8.4%)                  | 47<br>(23-81)       | 1100<br>(520-2000)    |
| El Salvador | 2000 | Female | 70 to 74 | 35%<br>(19-56%)                | 65%<br>(44-81%)          | 1.3<br>(0.56-2.4)                           | 2.9%<br>(1-5.9%)                     | 3.9%<br>(1.5-7.8%)                  | 46<br>(17-91)       | 880<br>(310-1800)     |
| El Salvador | 2000 | Female | 75 to 79 | 31%<br>(16-52%)                | 69%<br>(48-84%)          | 1.1<br>(0.42-2.2)                           | 2.1%<br>(0.46-4.7%)                  | 2.7%<br>(0.63-6.1%)                 | 36<br>(8.2-78)      | 530<br>(120-1200)     |
| El Salvador | 2000 | Female | 80 to 84 | 28%<br>(13-49%)                | 72%<br>(51-87%)          | 0.93<br>(0.35-1.9)                          | 1.5%<br>(0.092-3.6%)                 | 1.8%<br>(0.062-4.4%)                | 22<br>(0.76-55)     | 250<br>(15-600)       |
| El Salvador | 2000 | Female | 85 to 89 | 29%<br>(14-47%)                | 71%<br>(53-86%)          | 0.9<br>(0.37-1.7)                           | 0.97%<br>(-0.28-2.8%)                | 1.1%<br>(-0.43-3.5%)                | 13<br>(-5-38)       | 100<br>(-30-300)      |
| El Salvador | 2000 | Female | 90 to 94 | 33%<br>(17-52%)                | 67%<br>(48-83%)          | 0.94<br>(0.39-1.7)                          | 0.48%<br>(-0.91-2.5%)                | 0.45%<br>(-1.2-2.9%)                | 3.1<br>(-8.4-20)    | 20<br>(-37-100)       |

| Location    | Year | Sex    | Age      | Prevalence of current drinkers | Prevalence of abstainers | Population average of standard drinks daily | Percent of total attributable deaths | Percent of total attributable DALYs | Attributable deaths | Attributable DALYs       |
|-------------|------|--------|----------|--------------------------------|--------------------------|---------------------------------------------|--------------------------------------|-------------------------------------|---------------------|--------------------------|
| El Salvador | 2000 | Female | 95 plus  | 38%<br>(19-59%)                | 62%<br>(41-81%)          | 0.97<br>(0.35-1.9)                          | 0.19%<br>(-1.6-2.7%)                 | 0.016%<br>(-2.2-3%)                 | 0.04<br>(-5.5-7.9)  | 2<br>(-17-28)            |
| El Salvador | 2000 | Male   | All Ages | 48%<br>(39-58%)                | 52%<br>(42-61%)          | 1.5<br>(1.2-1.8)                            | 10%<br>(8.7-12%)                     | 12%<br>(9.9-14%)                    | 2300<br>(1800-2700) | 100000<br>(86000-120000) |
| El Salvador | 2000 | Male   | 15 to 19 | 38%<br>(20-59%)                | 62%<br>(41-80%)          | 0.81<br>(0.35-1.5)                          | 5.6%<br>(2.9-9.4%)                   | 6.4%<br>(2.6-12%)                   | 41<br>(17-73)       | 3500<br>(1800-5900)      |
| El Salvador | 2000 | Male   | 20 to 24 | 57%<br>(35-75%)                | 43%<br>(25-65%)          | 1.7<br>(0.83-2.8)                           | 12%<br>(8.1-18%)                     | 13%<br>(7.6-19%)                    | 140<br>(83-210)     | 11000<br>(7100-16000)    |
| El Salvador | 2000 | Male   | 25 to 29 | 66%<br>(45-82%)                | 34%<br>(18-55%)          | 2.3<br>(1.2-3.8)                            | 17%<br>(12-22%)                      | 17%<br>(11-24%)                     | 170<br>(110-250)    | 13000<br>(9100-17000)    |
| El Salvador | 2000 | Male   | 30 to 34 | 71%<br>(50-85%)                | 29%<br>(15-50%)          | 2.6<br>(1.5-4.1)                            | 19%<br>(14-25%)                      | 21%<br>(15-27%)                     | 200<br>(140-260)    | 13000<br>(9900-17000)    |
| El Salvador | 2000 | Male   | 35 to 39 | 73%<br>(54-86%)                | 27%<br>(14-46%)          | 2.9<br>(1.6-4.8)                            | 21%<br>(16-26%)                      | 24%<br>(18-30%)                     | 220<br>(170-280)    | 13000<br>(9900-16000)    |
| El Salvador | 2000 | Male   | 40 to 44 | 74%<br>(56-87%)                | 26%<br>(13-44%)          | 3.2<br>(1.7-5)                              | 21%<br>(17-26%)                      | 26%<br>(19-31%)                     | 220<br>(160-270)    | 11000<br>(8600-14000)    |
| El Salvador | 2000 | Male   | 45 to 49 | 74%<br>(54-87%)                | 26%<br>(13-46%)          | 3.5<br>(1.8-6)                              | 21%<br>(16-26%)                      | 26%<br>(19-32%)                     | 230<br>(170-290)    | 10000<br>(8000-13000)    |
| El Salvador | 2000 | Male   | 50 to 54 | 74%<br>(54-87%)                | 26%<br>(13-46%)          | 3.7<br>(2-5.9)                              | 19%<br>(14-24%)                      | 23%<br>(18-29%)                     | 200<br>(150-260)    | 8100<br>(6200-10000)     |
| El Salvador | 2000 | Male   | 55 to 59 | 73%<br>(54-87%)                | 27%<br>(13-46%)          | 4<br>(2-6.6)                                | 17%<br>(12-21%)                      | 21%<br>(15-27%)                     | 210<br>(150-270)    | 7200<br>(5200-9200)      |
| El Salvador | 2000 | Male   | 60 to 64 | 71%<br>(50-86%)                | 29%<br>(14-50%)          | 3.6<br>(1.8-6.1)                            | 13%<br>(9.3-17%)                     | 17%<br>(11-22%)                     | 180<br>(120-240)    | 5400<br>(3700-7100)      |
| El Salvador | 2000 | Male   | 65 to 69 | 67%<br>(45-84%)                | 33%<br>(16-55%)          | 2.8<br>(1.4-4.7)                            | 10%<br>(7-14%)                       | 13%<br>(8.6-18%)                    | 160<br>(110-220)    | 3900<br>(2600-5400)      |
| El Salvador | 2000 | Male   | 70 to 74 | 62%<br>(41-80%)                | 38%<br>(20-59%)          | 2.1<br>(0.94-3.9)                           | 7.2%<br>(4.3-11%)                    | 8.7%<br>(5.3-14%)                   | 110<br>(68-180)     | 2200<br>(1300-3500)      |
| El Salvador | 2000 | Male   | 75 to 79 | 56%<br>(33-78%)                | 44%<br>(22-67%)          | 1.7<br>(0.64-3.3)                           | 4.9%<br>(2.4-8.7%)                   | 5.8%<br>(2.8-10%)                   | 82<br>(40-140)      | 1200<br>(620-2200)       |
| El Salvador | 2000 | Male   | 80 to 84 | 52%<br>(29-74%)                | 48%<br>(26-71%)          | 1.5<br>(0.56-2.8)                           | 3.6%<br>(1.4-6.9%)                   | 4%<br>(1.6-7.9%)                    | 48<br>(19-93)       | 540<br>(220-1000)        |
| El Salvador | 2000 | Male   | 85 to 89 | 51%<br>(29-72%)                | 49%<br>(28-71%)          | 1.4<br>(0.55-2.8)                           | 2.9%<br>(0.92-6.2%)                  | 3.2%<br>(0.87-7.2%)                 | 27<br>(7.4-62)      | 220<br>(71-490)          |
| El Salvador | 2000 | Male   | 90 to 94 | 53%<br>(32-73%)                | 47%<br>(27-68%)          | 1.5<br>(0.55-3)                             | 2.4%<br>(0.28-5.9%)                  | 2.5%<br>(0.02-6.8%)                 | 10<br>(0.079-27)    | 58<br>(6.9-150)          |
| El Salvador | 2000 | Male   | 95 plus  | 56%<br>(31-78%)                | 44%<br>(22-69%)          | 1.7<br>(0.52-3.4)                           | 2.4%<br>(-0.18-6.6%)                 | 2.3%<br>(-0.73-7.4%)                | 2.7<br>(-0.84-8.6)  | 11<br>(-0.88-31)         |
| El Salvador | 2005 | Female | All Ages | 32%<br>(26-40%)                | 68%<br>(60-74%)          | 0.69<br>(0.54-0.83)                         | 2.3%<br>(1.6-3.2%)                   | 3.4%<br>(1.9-5.4%)                  | 480<br>(270-770)    | 16000<br>(11000-22000)   |
| El Salvador | 2005 | Female | 15 to 19 | 28%<br>(15-45%)                | 72%<br>(55-85%)          | 0.54<br>(0.24-0.99)                         | 1.8%<br>(0.91-3%)                    | 3%<br>(1.1-6%)                      | 7<br>(2.4-14)       | 690<br>(340-1200)        |
| El Salvador | 2005 | Female | 20 to 24 | 37%<br>(20-57%)                | 63%<br>(43-80%)          | 0.69<br>(0.32-1.2)                          | 2.5%<br>(1.4-4%)                     | 3.6%<br>(1.5-6.6%)                  | 9.1<br>(3.8-17)     | 970<br>(540-1600)        |

| Location    | Year | Sex    | Age      | Prevalence of current drinkers | Prevalence of abstainers | Population average of standard drinks daily | Percent of total attributable deaths | Percent of total attributable DALYs | Attributable deaths | Attributable DALYs       |
|-------------|------|--------|----------|--------------------------------|--------------------------|---------------------------------------------|--------------------------------------|-------------------------------------|---------------------|--------------------------|
| El Salvador | 2005 | Female | 25 to 29 | 40%<br>(22-60%)                | 60%<br>(40-78%)          | 0.73<br>(0.33-1.3)                          | 2.5%<br>(1.6-3.7%)                   | 3.6%<br>(1.8-6%)                    | 9.8<br>(4.8-16)     | 960<br>(600-1400)        |
| El Salvador | 2005 | Female | 30 to 34 | 42%<br>(22-62%)                | 58%<br>(38-78%)          | 0.8<br>(0.39-1.3)                           | 2.6%<br>(1.7-3.6%)                   | 4%<br>(2.5-6.3%)                    | 11<br>(7.1-18)      | 950<br>(630-1300)        |
| El Salvador | 2005 | Female | 35 to 39 | 44%<br>(26-64%)                | 56%<br>(36-74%)          | 0.92<br>(0.44-1.5)                          | 2.8%<br>(1.9-4%)                     | 4.8%<br>(3.2-6.9%)                  | 16<br>(11-23)       | 1100<br>(720-1500)       |
| El Salvador | 2005 | Female | 40 to 44 | 45%<br>(28-65%)                | 55%<br>(35-72%)          | 1.1<br>(0.59-1.8)                           | 3.1%<br>(2.1-4.4%)                   | 5.4%<br>(3.7-7.4%)                  | 21<br>(14-29)       | 1200<br>(800-1600)       |
| El Salvador | 2005 | Female | 45 to 49 | 45%<br>(25-64%)                | 55%<br>(36-75%)          | 1.4<br>(0.66-2.3)                           | 3.5%<br>(2.1-5.2%)                   | 6%<br>(3.9-8.6%)                    | 28<br>(18-42)       | 1300<br>(820-2000)       |
| El Salvador | 2005 | Female | 50 to 54 | 44%<br>(26-64%)                | 56%<br>(36-74%)          | 1.6<br>(0.82-2.6)                           | 3.9%<br>(2.2-6%)                     | 6.4%<br>(4-9.3%)                    | 36<br>(23-53)       | 1500<br>(860-2200)       |
| El Salvador | 2005 | Female | 55 to 59 | 42%<br>(25-63%)                | 58%<br>(37-75%)          | 1.8<br>(0.87-3.1)                           | 4.6%<br>(2.5-7.6%)                   | 7%<br>(4.1-11%)                     | 47<br>(27-75)       | 1600<br>(900-2700)       |
| El Salvador | 2005 | Female | 60 to 64 | 40%<br>(21-61%)                | 60%<br>(39-79%)          | 1.8<br>(0.84-3.1)                           | 4.5%<br>(2.3-7.7%)                   | 6.6%<br>(3.5-11%)                   | 57<br>(30-95)       | 1700<br>(850-2800)       |
| El Salvador | 2005 | Female | 65 to 69 | 39%<br>(21-59%)                | 61%<br>(41-79%)          | 1.6<br>(0.78-2.8)                           | 4%<br>(2-6.8%)                       | 5.7%<br>(3-9.4%)                    | 61<br>(32-100)      | 1500<br>(730-2500)       |
| El Salvador | 2005 | Female | 70 to 74 | 35%<br>(19-56%)                | 65%<br>(44-81%)          | 1.4<br>(0.62-2.7)                           | 3.4%<br>(1.4-6.7%)                   | 4.7%<br>(2-9%)                      | 61<br>(26-120)      | 1200<br>(480-2300)       |
| El Salvador | 2005 | Female | 75 to 79 | 31%<br>(15-51%)                | 69%<br>(49-85%)          | 1.2<br>(0.47-2.4)                           | 2.5%<br>(0.69-5.5%)                  | 3.3%<br>(0.93-7%)                   | 51<br>(14-110)      | 760<br>(210-1600)        |
| El Salvador | 2005 | Female | 80 to 84 | 28%<br>(13-47%)                | 72%<br>(53-87%)          | 1<br>(0.4-2)                                | 1.8%<br>(0.41-4.1%)                  | 2.3%<br>(0.47-5.2%)                 | 35<br>(7.1-80)      | 380<br>(82-870)          |
| El Salvador | 2005 | Female | 85 to 89 | 29%<br>(15-47%)                | 71%<br>(53-85%)          | 1<br>(0.42-1.9)                             | 1.3%<br>(-0.074-3.4%)                | 1.5%<br>(-0.17-4.2%)                | 23<br>(-2.6-64)     | 190<br>(-10-490)         |
| El Salvador | 2005 | Female | 90 to 94 | 33%<br>(17-50%)                | 67%<br>(50-83%)          | 1.1<br>(0.43-2)                             | 0.85%<br>(-0.69-3.2%)                | 0.91%<br>(-0.99-3.8%)               | 8.5<br>(-9.4-35)    | 50<br>(-40-190)          |
| El Salvador | 2005 | Female | 95 plus  | 38%<br>(18-58%)                | 62%<br>(42-82%)          | 1.1<br>(0.4-2.3)                            | 0.59%<br>(-1.3-3.6%)                 | 0.51%<br>(-1.8-4.2%)                | 1.8<br>(-6.6-15)    | 8.7<br>(-19-53)          |
| El Salvador | 2005 | Male   | All Ages | 48%<br>(39-58%)                | 52%<br>(42-61%)          | 1.7<br>(1.4-2)                              | 12%<br>(9.6-13%)                     | 13%<br>(10-15%)                     | 2400<br>(2000-2900) | 110000<br>(94000-130000) |
| El Salvador | 2005 | Male   | 15 to 19 | 37%<br>(19-58%)                | 63%<br>(42-81%)          | 0.89<br>(0.38-1.7)                          | 5.9%<br>(3-10%)                      | 6.8%<br>(2.8-12%)                   | 48<br>(20-89)       | 4100<br>(2100-6900)      |
| El Salvador | 2005 | Male   | 20 to 24 | 57%<br>(34-75%)                | 43%<br>(25-66%)          | 1.9<br>(0.92-3.1)                           | 13%<br>(8.2-19%)                     | 14%<br>(7.9-20%)                    | 150<br>(88-230)     | 12000<br>(7300-17000)    |
| El Salvador | 2005 | Male   | 25 to 29 | 66%<br>(45-81%)                | 34%<br>(19-55%)          | 2.5<br>(1.3-4.2)                            | 17%<br>(12-23%)                      | 18%<br>(11-25%)                     | 220<br>(140-320)    | 16000<br>(11000-21000)   |
| El Salvador | 2005 | Male   | 30 to 34 | 70%<br>(50-84%)                | 30%<br>(16-50%)          | 3<br>(1.6-4.7)                              | 20%<br>(15-25%)                      | 21%<br>(15-28%)                     | 220<br>(160-290)    | 14000<br>(11000-18000)   |
| El Salvador | 2005 | Male   | 35 to 39 | 73%<br>(55-86%)                | 27%<br>(14-45%)          | 3.3<br>(1.8-5.4)                            | 21%<br>(17-27%)                      | 24%<br>(18-31%)                     | 220<br>(170-290)    | 13000<br>(10000-17000)   |
| El Salvador | 2005 | Male   | 40 to 44 | 74%<br>(57-87%)                | 26%<br>(13-43%)          | 3.6<br>(1.9-5.6)                            | 21%<br>(17-26%)                      | 25%<br>(20-32%)                     | 230<br>(170-290)    | 12000<br>(9200-15000)    |

| Location    | Year | Sex    | Age      | Prevalence of current drinkers | Prevalence of abstainers | Population average of standard drinks daily | Percent of total attributable deaths | Percent of total attributable DALYs | Attributable deaths | Attributable DALYs     |
|-------------|------|--------|----------|--------------------------------|--------------------------|---------------------------------------------|--------------------------------------|-------------------------------------|---------------------|------------------------|
| El Salvador | 2005 | Male   | 45 to 49 | 74%<br>(53-87%)                | 26%<br>(13-47%)          | 3.9<br>(2.1-6.8)                            | 21%<br>(16-26%)                      | 26%<br>(20-32%)                     | 220<br>(170-280)    | 10000<br>(7800-13000)  |
| El Salvador | 2005 | Male   | 50 to 54 | 74%<br>(55-87%)                | 26%<br>(13-45%)          | 4.2<br>(2.3-6.8)                            | 19%<br>(14-23%)                      | 23%<br>(18-29%)                     | 210<br>(160-270)    | 8600<br>(6600-11000)   |
| El Salvador | 2005 | Male   | 55 to 59 | 73%<br>(54-87%)                | 27%<br>(13-46%)          | 4.5<br>(2.4-7.3)                            | 17%<br>(12-21%)                      | 20%<br>(15-25%)                     | 200<br>(150-260)    | 7100<br>(5300-9000)    |
| El Salvador | 2005 | Male   | 60 to 64 | 71%<br>(49-86%)                | 29%<br>(14-51%)          | 4.1<br>(2-7)                                | 13%<br>(9.4-17%)                     | 17%<br>(12-21%)                     | 180<br>(130-230)    | 5400<br>(3900-7000)    |
| El Salvador | 2005 | Male   | 65 to 69 | 67%<br>(46-84%)                | 33%<br>(16-54%)          | 3.2<br>(1.6-5.3)                            | 10%<br>(7-14%)                       | 13%<br>(8.9-18%)                    | 170<br>(110-230)    | 4100<br>(2800-5600)    |
| El Salvador | 2005 | Male   | 70 to 74 | 63%<br>(41-80%)                | 37%<br>(20-59%)          | 2.4<br>(1.1-4.4)                            | 7.2%<br>(4.2-11%)                    | 9%<br>(5.2-14%)                     | 120<br>(70-190)     | 2500<br>(1400-3900)    |
| El Salvador | 2005 | Male   | 75 to 79 | 57%<br>(33-77%)                | 43%<br>(23-67%)          | 1.9<br>(0.74-3.8)                           | 5.1%<br>(2.5-8.7%)                   | 6.1%<br>(2.9-11%)                   | 90<br>(43-160)      | 1400<br>(670-2400)     |
| El Salvador | 2005 | Male   | 80 to 84 | 52%<br>(29-74%)                | 48%<br>(26-71%)          | 1.7<br>(0.64-3.2)                           | 3.8%<br>(1.5-7.3%)                   | 4.4%<br>(1.7-8.5%)                  | 59<br>(22-110)      | 670<br>(270-1200)      |
| El Salvador | 2005 | Male   | 85 to 89 | 50%<br>(28-71%)                | 50%<br>(29-72%)          | 1.6<br>(0.59-3.2)                           | 3.2%<br>(0.99-6.7%)                  | 3.5%<br>(0.94-7.8%)                 | 40<br>(11-88)       | 320<br>(100-700)       |
| El Salvador | 2005 | Male   | 90 to 94 | 52%<br>(31-72%)                | 48%<br>(28-69%)          | 1.7<br>(0.61-3.4)                           | 2.7%<br>(0.42-6.4%)                  | 2.9%<br>(0.21-7.3%)                 | 17<br>(1.2-42)      | 97<br>(15-230)         |
| El Salvador | 2005 | Male   | 95 plus  | 56%<br>(30-77%)                | 44%<br>(23-70%)          | 1.8<br>(0.57-3.8)                           | 2.8%<br>(0.022-7.1%)                 | 2.8%<br>(-0.5-8.1%)                 | 4.4<br>(-0.79-13)   | 18<br>(0.14-47)        |
| El Salvador | 2010 | Female | All Ages | 33%<br>(26-41%)                | 67%<br>(59-74%)          | 0.78<br>(0.6-0.97)                          | 2.7%<br>(1.8-3.7%)                   | 3.9%<br>(2.1-6.1%)                  | 590<br>(320-930)    | 19000<br>(12000-26000) |
| El Salvador | 2010 | Female | 15 to 19 | 28%<br>(15-45%)                | 72%<br>(55-85%)          | 0.59<br>(0.26-1.1)                          | 1.9%<br>(0.91-3.3%)                  | 3.3%<br>(1.2-6.5%)                  | 8.3<br>(3-16)       | 800<br>(380-1400)      |
| El Salvador | 2010 | Female | 20 to 24 | 37%<br>(20-57%)                | 63%<br>(43-80%)          | 0.75<br>(0.34-1.4)                          | 2.6%<br>(1.5-4.1%)                   | 3.9%<br>(1.6-7.3%)                  | 8.8<br>(3.6-16)     | 970<br>(530-1500)      |
| El Salvador | 2010 | Female | 25 to 29 | 40%<br>(21-60%)                | 60%<br>(40-79%)          | 0.78<br>(0.35-1.4)                          | 2.6%<br>(1.6-3.9%)                   | 3.9%<br>(1.8-6.6%)                  | 9.6<br>(4.5-16)     | 950<br>(580-1400)      |
| El Salvador | 2010 | Female | 30 to 34 | 41%<br>(22-61%)                | 59%<br>(39-78%)          | 0.84<br>(0.4-1.4)                           | 2.8%<br>(1.8-4%)                     | 4.4%<br>(2.6-6.9%)                  | 13<br>(7.9-21)      | 1100<br>(690-1600)     |
| El Salvador | 2010 | Female | 35 to 39 | 43%<br>(25-63%)                | 57%<br>(37-75%)          | 0.97<br>(0.48-1.7)                          | 2.9%<br>(1.9-4.3%)                   | 5.1%<br>(3.3-7.5%)                  | 18<br>(11-26)       | 1200<br>(770-1700)     |
| El Salvador | 2010 | Female | 40 to 44 | 44%<br>(27-64%)                | 56%<br>(36-73%)          | 1.2<br>(0.61-1.9)                           | 3.1%<br>(2.1-4.5%)                   | 5.7%<br>(3.9-8.1%)                  | 22<br>(15-31)       | 1200<br>(810-1700)     |
| El Salvador | 2010 | Female | 45 to 49 | 44%<br>(25-64%)                | 56%<br>(36-75%)          | 1.5<br>(0.68-2.4)                           | 3.6%<br>(2.2-5.7%)                   | 6.2%<br>(3.9-9.4%)                  | 31<br>(20-48)       | 1500<br>(880-2300)     |
| El Salvador | 2010 | Female | 50 to 54 | 44%<br>(25-64%)                | 56%<br>(36-75%)          | 1.7<br>(0.87-2.8)                           | 4.2%<br>(2.4-6.6%)                   | 6.8%<br>(4.1-10%)                   | 42<br>(26-64)       | 1700<br>(1000-2700)    |
| El Salvador | 2010 | Female | 55 to 59 | 42%<br>(24-62%)                | 58%<br>(38-76%)          | 1.9<br>(0.94-3.3)                           | 5%<br>(2.8-8.2%)                     | 7.6%<br>(4.5-12%)                   | 59<br>(34-97)       | 2100<br>(1100-3500)    |
| El Salvador | 2010 | Female | 60 to 64 | 40%<br>(22-61%)                | 60%<br>(39-78%)          | 1.9<br>(0.91-3.4)                           | 5%<br>(2.7-8.5%)                     | 7.2%<br>(4-12%)                     | 68<br>(37-110)      | 2000<br>(1100-3400)    |

| Location    | Year | Sex    | Age      | Prevalence of current drinkers | Prevalence of abstainers | Population average of standard drinks daily | Percent of total attributable deaths | Percent of total attributable DALYs | Attributable deaths | Attributable DALYs       |
|-------------|------|--------|----------|--------------------------------|--------------------------|---------------------------------------------|--------------------------------------|-------------------------------------|---------------------|--------------------------|
| El Salvador | 2010 | Female | 65 to 69 | 39%<br>(21-59%)                | 61%<br>(41-79%)          | 1.8<br>(0.86-3)                             | 4.5%<br>(2.3-7.6%)                   | 6.4%<br>(3.4-10%)                   | 72<br>(38-120)      | 1800<br>(880-3000)       |
| El Salvador | 2010 | Female | 70 to 74 | 35%<br>(19-55%)                | 65%<br>(45-81%)          | 1.6<br>(0.7-3)                              | 3.8%<br>(1.7-7.5%)                   | 5.3%<br>(2.5-10%)                   | 73<br>(34-140)      | 1400<br>(650-2800)       |
| El Salvador | 2010 | Female | 75 to 79 | 30%<br>(15-51%)                | 70%<br>(49-85%)          | 1.3<br>(0.52-2.6)                           | 2.8%<br>(0.93-6.2%)                  | 3.8%<br>(1.3-8%)                    | 63<br>(22-130)      | 950<br>(320-2000)        |
| El Salvador | 2010 | Female | 80 to 84 | 28%<br>(13-48%)                | 72%<br>(52-87%)          | 1.1<br>(0.44-2.2)                           | 2.1%<br>(0.51-4.8%)                  | 2.7%<br>(0.63-5.9%)                 | 47<br>(11-110)      | 520<br>(120-1200)        |
| El Salvador | 2010 | Female | 85 to 89 | 28%<br>(14-46%)                | 72%<br>(54-86%)          | 1.1<br>(0.45-2)                             | 1.6%<br>(0.074-3.9%)                 | 1.9%<br>(0.025-4.7%)                | 33<br>(0.43-83)     | 260<br>(12-650)          |
| El Salvador | 2010 | Female | 90 to 94 | 32%<br>(16-50%)                | 68%<br>(50-84%)          | 1.1<br>(0.44-2.2)                           | 1.1%<br>(-0.54-3.6%)                 | 1.2%<br>(-0.87-4.3%)                | 15<br>(-10-53)      | 84<br>(-43-280)          |
| El Salvador | 2010 | Female | 95 plus  | 37%<br>(18-57%)                | 63%<br>(43-82%)          | 1.2<br>(0.42-2.4)                           | 0.85%<br>(-1.2-4.1%)                 | 0.81%<br>(-1.7-4.8%)                | 3.9<br>(-8-23)      | 17<br>(-23-79)           |
| El Salvador | 2010 | Male   | All Ages | 49%<br>(40-59%)                | 51%<br>(41-60%)          | 1.9<br>(1.5-2.3)                            | 12%<br>(10-15%)                      | 13%<br>(10-15%)                     | 2500<br>(2100-3100) | 110000<br>(94000-140000) |
| El Salvador | 2010 | Male   | 15 to 19 | 36%<br>(19-58%)                | 64%<br>(42-81%)          | 0.94<br>(0.39-1.8)                          | 6.1%<br>(3-11%)                      | 7%<br>(2.8-13%)                     | 57<br>(24-100)      | 4700<br>(2300-8200)      |
| El Salvador | 2010 | Male   | 20 to 24 | 56%<br>(34-75%)                | 44%<br>(25-66%)          | 2<br>(0.92-3.5)                             | 13%<br>(8.2-19%)                     | 14%<br>(7.7-22%)                    | 140<br>(78-220)     | 11000<br>(6700-16000)    |
| El Salvador | 2010 | Male   | 25 to 29 | 65%<br>(44-82%)                | 35%<br>(18-56%)          | 2.7<br>(1.4-4.7)                            | 18%<br>(12-25%)                      | 19%<br>(12-28%)                     | 190<br>(120-280)    | 14000<br>(9200-19000)    |
| El Salvador | 2010 | Male   | 30 to 34 | 70%<br>(49-85%)                | 30%<br>(15-51%)          | 3.2<br>(1.7-5.1)                            | 20%<br>(15-27%)                      | 22%<br>(16-31%)                     | 250<br>(170-340)    | 16000<br>(11000-21000)   |
| El Salvador | 2010 | Male   | 35 to 39 | 72%<br>(54-86%)                | 28%<br>(14-46%)          | 3.5<br>(1.9-5.8)                            | 22%<br>(17-28%)                      | 25%<br>(19-33%)                     | 230<br>(170-310)    | 14000<br>(10000-17000)   |
| El Salvador | 2010 | Male   | 40 to 44 | 74%<br>(56-87%)                | 26%<br>(13-44%)          | 3.9<br>(2-6.1)                              | 22%<br>(17-27%)                      | 26%<br>(20-33%)                     | 230<br>(170-290)    | 12000<br>(9100-15000)    |
| El Salvador | 2010 | Male   | 45 to 49 | 74%<br>(53-87%)                | 26%<br>(13-47%)          | 4.2<br>(2.2-7.2)                            | 21%<br>(16-26%)                      | 25%<br>(20-32%)                     | 230<br>(180-300)    | 11000<br>(8400-13000)    |
| El Salvador | 2010 | Male   | 50 to 54 | 74%<br>(54-87%)                | 26%<br>(13-46%)          | 4.5<br>(2.4-7.4)                            | 19%<br>(14-23%)                      | 23%<br>(18-29%)                     | 220<br>(170-280)    | 9000<br>(6900-11000)     |
| El Salvador | 2010 | Male   | 55 to 59 | 72%<br>(54-87%)                | 28%<br>(13-46%)          | 4.7<br>(2.5-7.8)                            | 16%<br>(12-20%)                      | 20%<br>(15-25%)                     | 210<br>(160-270)    | 7400<br>(5500-9500)      |
| El Salvador | 2010 | Male   | 60 to 64 | 70%<br>(48-86%)                | 30%<br>(14-52%)          | 4.3<br>(2.1-7.6)                            | 13%<br>(9.5-17%)                     | 16%<br>(11-21%)                     | 190<br>(130-250)    | 5600<br>(4000-7400)      |
| El Salvador | 2010 | Male   | 65 to 69 | 67%<br>(45-84%)                | 33%<br>(16-55%)          | 3.4<br>(1.7-5.7)                            | 10%<br>(7-14%)                       | 13%<br>(8.6-17%)                    | 170<br>(110-220)    | 4100<br>(2800-5600)      |
| El Salvador | 2010 | Male   | 70 to 74 | 62%<br>(41-79%)                | 38%<br>(21-59%)          | 2.6<br>(1.2-4.8)                            | 7.2%<br>(4-11%)                      | 8.9%<br>(5-14%)                     | 140<br>(75-210)     | 2700<br>(1600-4200)      |
| El Salvador | 2010 | Male   | 75 to 79 | 56%<br>(34-77%)                | 44%<br>(23-66%)          | 2<br>(0.81-4.1)                             | 5.1%<br>(2.4-8.7%)                   | 6.2%<br>(2.9-11%)                   | 110<br>(49-180)     | 1600<br>(790-2800)       |
| El Salvador | 2010 | Male   | 80 to 84 | 52%<br>(29-73%)                | 48%<br>(27-71%)          | 1.8<br>(0.67-3.6)                           | 4%<br>(1.7-7.4%)                     | 4.6%<br>(1.7-8.5%)                  | 74<br>(28-140)      | 860<br>(330-1500)        |

| Location    | Year | Sex    | Age      | Prevalence of current drinkers | Prevalence of abstainers | Population average of standard drinks daily | Percent of total attributable deaths | Percent of total attributable DALYs | Attributable deaths | Attributable DALYs       |
|-------------|------|--------|----------|--------------------------------|--------------------------|---------------------------------------------|--------------------------------------|-------------------------------------|---------------------|--------------------------|
| El Salvador | 2010 | Male   | 85 to 89 | 50%<br>(28-71%)                | 50%<br>(29-72%)          | 1.7<br>(0.67-3.5)                           | 3.4%<br>(1.1-7%)                     | 3.8%<br>(1.1-8.3%)                  | 53<br>(15-120)      | 440<br>(140-910)         |
| El Salvador | 2010 | Male   | 90 to 94 | 52%<br>(31-72%)                | 48%<br>(28-69%)          | 1.8<br>(0.65-3.6)                           | 3%<br>(0.5-6.7%)                     | 3.2%<br>(0.3-7.7%)                  | 27<br>(2.5-63)      | 150<br>(26-350)          |
| El Salvador | 2010 | Male   | 95 plus  | 55%<br>(29-77%)                | 45%<br>(23-71%)          | 2<br>(0.57-4.2)                             | 3%<br>(0.16-7.5%)                    | 3.1%<br>(-0.32-8.8%)                | 7.6<br>(-0.78-21)   | 31<br>(1.5-77)           |
| El Salvador | 2016 | Female | All Ages | 33%<br>(26-41%)                | 67%<br>(59-74%)          | 0.87<br>(0.61-1.2)                          | 2.9%<br>(1.8-4.3%)                   | 4%<br>(2-6.7%)                      | 680<br>(330-1200)   | 20000<br>(12000-30000)   |
| El Salvador | 2016 | Female | 15 to 19 | 27%<br>(15-43%)                | 73%<br>(57-85%)          | 0.6<br>(0.26-1.2)                           | 1.8%<br>(0.9-3.3%)                   | 3.3%<br>(1.1-6.8%)                  | 6.7<br>(2.3-14)     | 680<br>(330-1200)        |
| El Salvador | 2016 | Female | 20 to 24 | 36%<br>(19-56%)                | 64%<br>(44-81%)          | 0.77<br>(0.34-1.5)                          | 2.6%<br>(1.5-4.1%)                   | 4%<br>(1.6-7.7%)                    | 8.5<br>(3.4-16)     | 990<br>(560-1700)        |
| El Salvador | 2016 | Female | 25 to 29 | 39%<br>(21-60%)                | 61%<br>(40-79%)          | 0.81<br>(0.35-1.5)                          | 2.6%<br>(1.6-3.9%)                   | 4.1%<br>(1.9-7%)                    | 9.3<br>(4.2-16)     | 960<br>(590-1500)        |
| El Salvador | 2016 | Female | 30 to 34 | 41%<br>(21-61%)                | 59%<br>(39-79%)          | 0.89<br>(0.4-1.6)                           | 2.7%<br>(1.7-4.1%)                   | 4.7%<br>(2.8-7.7%)                  | 12<br>(7-20)        | 1000<br>(630-1500)       |
| El Salvador | 2016 | Female | 35 to 39 | 43%<br>(25-63%)                | 57%<br>(37-75%)          | 1<br>(0.48-1.8)                             | 2.9%<br>(1.9-4.5%)                   | 5.3%<br>(3.4-8.3%)                  | 18<br>(11-28)       | 1200<br>(720-1800)       |
| El Salvador | 2016 | Female | 40 to 44 | 44%<br>(27-64%)                | 56%<br>(36-73%)          | 1.2<br>(0.62-2.1)                           | 3.1%<br>(2-4.7%)                     | 5.9%<br>(4-8.6%)                    | 23<br>(15-34)       | 1300<br>(820-1900)       |
| El Salvador | 2016 | Female | 45 to 49 | 44%<br>(23-64%)                | 56%<br>(36-77%)          | 1.5<br>(0.67-2.6)                           | 3.7%<br>(2-6%)                       | 6.5%<br>(3.9-10%)                   | 34<br>(19-54)       | 1600<br>(880-2600)       |
| El Salvador | 2016 | Female | 50 to 54 | 43%<br>(24-64%)                | 57%<br>(36-76%)          | 1.7<br>(0.87-3.1)                           | 4.3%<br>(2.2-7.1%)                   | 7%<br>(4-11%)                       | 47<br>(26-79)       | 1900<br>(1000-3300)      |
| El Salvador | 2016 | Female | 55 to 59 | 41%<br>(23-62%)                | 59%<br>(38-77%)          | 1.9<br>(0.93-3.5)                           | 5%<br>(2.6-8.6%)                     | 7.7%<br>(4.3-13%)                   | 65<br>(34-110)      | 2300<br>(1200-4000)      |
| El Salvador | 2016 | Female | 60 to 64 | 39%<br>(21-60%)                | 61%<br>(40-79%)          | 1.9<br>(0.87-3.6)                           | 5%<br>(2.5-8.9%)                     | 7.3%<br>(3.8-12%)                   | 78<br>(40-140)      | 2300<br>(1100-4100)      |
| El Salvador | 2016 | Female | 65 to 69 | 37%<br>(20-58%)                | 63%<br>(42-80%)          | 1.8<br>(0.81-3.2)                           | 4.6%<br>(2.2-8.4%)                   | 6.6%<br>(3.3-12%)                   | 80<br>(39-140)      | 2000<br>(940-3600)       |
| El Salvador | 2016 | Female | 70 to 74 | 34%<br>(18-53%)                | 66%<br>(47-82%)          | 1.6<br>(0.7-3.1)                            | 3.9%<br>(1.6-7.5%)                   | 5.4%<br>(2.4-10%)                   | 82<br>(35-160)      | 1600<br>(660-3100)       |
| El Salvador | 2016 | Female | 75 to 79 | 29%<br>(15-49%)                | 71%<br>(51-85%)          | 1.3<br>(0.53-2.7)                           | 2.9%<br>(0.94-6.5%)                  | 3.9%<br>(1.4-8.5%)                  | 76<br>(25-170)      | 1200<br>(360-2600)       |
| El Salvador | 2016 | Female | 80 to 84 | 26%<br>(12-46%)                | 74%<br>(54-88%)          | 1.1<br>(0.41-2.3)                           | 2.2%<br>(0.52-5.3%)                  | 2.8%<br>(0.61-6.6%)                 | 65<br>(14-160)      | 720<br>(160-1800)        |
| El Salvador | 2016 | Female | 85 to 89 | 27%<br>(14-44%)                | 73%<br>(56-86%)          | 1.1<br>(0.44-2.1)                           | 1.7%<br>(0.11-4.2%)                  | 2%<br>(0.021-5.2%)                  | 47<br>(0.51-120)    | 370<br>(24-930)          |
| El Salvador | 2016 | Female | 90 to 94 | 31%<br>(16-49%)                | 69%<br>(51-84%)          | 1.1<br>(0.44-2.3)                           | 1.3%<br>(-0.5-4%)                    | 1.4%<br>(-0.79-4.8%)                | 22<br>(-12-77)      | 130<br>(-49-400)         |
| El Salvador | 2016 | Female | 95 plus  | 36%<br>(17-57%)                | 64%<br>(43-83%)          | 1.2<br>(0.41-2.5)                           | 1%<br>(-1.2-4.4%)                    | 1%<br>(-1.7-5.3%)                   | 7.2<br>(-12-37)     | 30<br>(-35-130)          |
| El Salvador | 2016 | Male   | All Ages | 51%<br>(42-61%)                | 49%<br>(39-58%)          | 2.2<br>(1.6-2.9)                            | 13%<br>(11-16%)                      | 13%<br>(9.9-16%)                    | 2600<br>(2000-3400) | 120000<br>(90000-140000) |

| Location    | Year | Sex    | Age      | Prevalence of current drinkers | Prevalence of abstainers | Population average of standard drinks daily | Percent of total attributable deaths | Percent of total attributable DALYs | Attributable deaths | Attributable DALYs     |
|-------------|------|--------|----------|--------------------------------|--------------------------|---------------------------------------------|--------------------------------------|-------------------------------------|---------------------|------------------------|
| El Salvador | 2016 | Male   | 15 to 19 | 36%<br>(19-57%)                | 64%<br>(43-81%)          | 0.98<br>(0.39-1.9)                          | 6.1%<br>(3-11%)                      | 7.3%<br>(2.9-14%)                   | 47<br>(19-88)       | 4000<br>(1900-7000)    |
| El Salvador | 2016 | Male   | 20 to 24 | 56%<br>(34-75%)                | 44%<br>(25-66%)          | 2.1<br>(0.96-3.8)                           | 13%<br>(8-20%)                       | 15%<br>(7.6-23%)                    | 140<br>(73-230)     | 11000<br>(6600-17000)  |
| El Salvador | 2016 | Male   | 25 to 29 | 65%<br>(43-82%)                | 35%<br>(18-57%)          | 2.9<br>(1.4-4.9)                            | 18%<br>(12-25%)                      | 20%<br>(12-29%)                     | 200<br>(120-300)    | 14000<br>(9500-21000)  |
| El Salvador | 2016 | Male   | 30 to 34 | 70%<br>(49-84%)                | 30%<br>(16-51%)          | 3.4<br>(1.8-5.6)                            | 21%<br>(16-27%)                      | 23%<br>(16-32%)                     | 230<br>(160-310)    | 15000<br>(11000-20000) |
| El Salvador | 2016 | Male   | 35 to 39 | 72%<br>(54-86%)                | 28%<br>(14-46%)          | 3.7<br>(1.9-6.4)                            | 22%<br>(17-29%)                      | 26%<br>(19-35%)                     | 230<br>(170-320)    | 14000<br>(10000-18000) |
| El Salvador | 2016 | Male   | 40 to 44 | 73%<br>(56-86%)                | 27%<br>(14-44%)          | 4.1<br>(2.1-6.7)                            | 22%<br>(17-27%)                      | 27%<br>(21-35%)                     | 230<br>(170-310)    | 12000<br>(9000-16000)  |
| El Salvador | 2016 | Male   | 45 to 49 | 74%<br>(52-87%)                | 26%<br>(13-48%)          | 4.4<br>(2.1-7.8)                            | 21%<br>(16-26%)                      | 26%<br>(20-33%)                     | 240<br>(170-310)    | 11000<br>(8100-14000)  |
| El Salvador | 2016 | Male   | 50 to 54 | 73%<br>(53-87%)                | 27%<br>(13-47%)          | 4.7<br>(2.4-7.8)                            | 19%<br>(14-23%)                      | 23%<br>(18-29%)                     | 230<br>(170-300)    | 9500<br>(6900-12000)   |
| El Salvador | 2016 | Male   | 55 to 59 | 72%<br>(53-86%)                | 28%<br>(14-47%)          | 5<br>(2.5-8.4)                              | 16%<br>(12-20%)                      | 20%<br>(15-26%)                     | 230<br>(160-300)    | 7900<br>(5800-10000)   |
| El Salvador | 2016 | Male   | 60 to 64 | 70%<br>(48-86%)                | 30%<br>(14-52%)          | 4.5<br>(2.1-8)                              | 16%<br>(9.4-17%)                     | 16%<br>(12-21%)                     | 200<br>(140-280)    | 6100<br>(4300-8100)    |
| El Salvador | 2016 | Male   | 65 to 69 | 67%<br>(44-84%)                | 33%<br>(16-56%)          | 3.5<br>(1.7-6.1)                            | 10%<br>(7-14%)                       | 13%<br>(8.8-17%)                    | 170<br>(110-230)    | 4200<br>(2800-5700)    |
| El Salvador | 2016 | Male   | 70 to 74 | 62%<br>(41-80%)                | 38%<br>(20-59%)          | 2.6<br>(1.1-4.9)                            | 7.2%<br>(4-11%)                      | 9.1%<br>(5-14%)                     | 140<br>(74-220)     | 2800<br>(1500-4400)    |
| El Salvador | 2016 | Male   | 75 to 79 | 56%<br>(32-77%)                | 44%<br>(23-68%)          | 2.1<br>(0.75-4.2)                           | 5.2%<br>(2.4-8.7%)                   | 6.4%<br>(2.9-11%)                   | 120<br>(52-200)     | 1800<br>(850-3200)     |
| El Salvador | 2016 | Male   | 80 to 84 | 51%<br>(28-73%)                | 49%<br>(27-72%)          | 1.8<br>(0.64-3.7)                           | 4.1%<br>(1.6-7.6%)                   | 4.8%<br>(1.8-9%)                    | 99<br>(36-180)      | 1100<br>(440-2000)     |
| El Salvador | 2016 | Male   | 85 to 89 | 49%<br>(27-70%)                | 51%<br>(30-73%)          | 1.7<br>(0.62-3.5)                           | 3.5%<br>(1-7%)                       | 4%<br>(1-8.3%)                      | 79<br>(20-160)      | 640<br>(190-1300)      |
| El Salvador | 2016 | Male   | 90 to 94 | 51%<br>(29-72%)                | 49%<br>(28-71%)          | 1.9<br>(0.63-3.8)                           | 3.2%<br>(0.55-6.8%)                  | 3.4%<br>(0.37-7.9%)                 | 41<br>(4.5-93)      | 230<br>(41-500)        |
| El Salvador | 2016 | Male   | 95 plus  | 54%<br>(29-77%)                | 46%<br>(23-71%)          | 2<br>(0.57-4.4)                             | 3.2%<br>(0.19-7.5%)                  | 3.3%<br>(-0.29-8.7%)                | 13<br>(-1.2-35)     | 54<br>(3.2-130)        |
| Guatemala   | 1990 | Female | All Ages | 10%<br>(8.4-12%)               | 90%<br>(88-92%)          | 1.2<br>(0.9-1.4)                            | 2.5%<br>(2.1-3.1%)                   | 4.3%<br>(3.5-5.3%)                  | 1400<br>(1100-1800) | 55000<br>(44000-67000) |
| Guatemala   | 1990 | Female | 15 to 19 | 9.4%<br>(6.8-13%)              | 91%<br>(87-93%)          | 0.99<br>(0.55-1.6)                          | 3.1%<br>(1.9-4.4%)                   | 4.7%<br>(2.7-7%)                    | 33<br>(19-48)       | 2700<br>(1700-3900)    |
| Guatemala   | 1990 | Female | 20 to 24 | 15%<br>(11-20%)                | 85%<br>(80-89%)          | 1.7<br>(0.94-2.7)                           | 5.2%<br>(3.6-7%)                     | 7.2%<br>(4.7-9.8%)                  | 56<br>(34-79)       | 4500<br>(3000-6100)    |
| Guatemala   | 1990 | Female | 25 to 29 | 18%<br>(12-23%)                | 82%<br>(77-88%)          | 1.9<br>(1.1-3)                              | 6.8%<br>(4.9-8.9%)                   | 9.1%<br>(6.3-12%)                   | 72<br>(47-100)      | 5300<br>(3700-7000)    |
| Guatemala   | 1990 | Female | 30 to 34 | 19%<br>(12-25%)                | 81%<br>(75-88%)          | 2.1<br>(1.2-3.2)                            | 8%<br>(6-10%)                        | 11%<br>(8.1-14%)                    | 89<br>(61-120)      | 5800<br>(4300-7600)    |



| Location  | Year | Sex    | Age      | Prevalence of current drinkers | Prevalence of abstainers | Population average of standard drinks daily | Percent of total attributable deaths | Percent of total attributable DALYs | Attributable deaths | Attributable DALYs        |
|-----------|------|--------|----------|--------------------------------|--------------------------|---------------------------------------------|--------------------------------------|-------------------------------------|---------------------|---------------------------|
| Guatemala | 1990 | Female | 35 to 39 | 21%<br>(14-26%)                | 79%<br>(74-86%)          | 2.5<br>(1.5-4)                              | 9.1%<br>(7.1-11%)                    | 13%<br>(9.9-15%)                    | 110<br>(82-150)     | 6600<br>(4900-8500)       |
| Guatemala | 1990 | Female | 40 to 44 | 20%<br>(14-25%)                | 80%<br>(75-86%)          | 2.9<br>(1.7-4.4)                            | 9.3%<br>(7.4-12%)                    | 13%<br>(11-16%)                     | 120<br>(88-160)     | 6100<br>(4600-7800)       |
| Guatemala | 1990 | Female | 45 to 49 | 17%<br>(10-24%)                | 83%<br>(76-90%)          | 3.1<br>(1.6-5.1)                            | 8.8%<br>(6.9-11%)                    | 13%<br>(10-16%)                     | 110<br>(79-140)     | 4800<br>(3600-6100)       |
| Guatemala | 1990 | Female | 50 to 54 | 15%<br>(9.9-22%)               | 85%<br>(78-90%)          | 3.1<br>(1.7-5.1)                            | 8.1%<br>(6.2-10%)                    | 12%<br>(8.9-14%)                    | 110<br>(81-150)     | 4300<br>(3200-5700)       |
| Guatemala | 1990 | Female | 55 to 59 | 14%<br>(8.9-20%)               | 86%<br>(80-91%)          | 3.2<br>(1.7-5.3)                            | 7.4%<br>(5.5-9.4%)                   | 10%<br>(7.9-13%)                    | 120<br>(85-150)     | 3900<br>(2900-5100)       |
| Guatemala | 1990 | Female | 60 to 64 | 12%<br>(7.4-18%)               | 88%<br>(82-93%)          | 2.8<br>(1.4-4.9)                            | 6.4%<br>(4.7-8.5%)                   | 8.3%<br>(6.2-11%)                   | 120<br>(86-170)     | 3400<br>(2500-4600)       |
| Guatemala | 1990 | Female | 65 to 69 | 11%<br>(6.8-16%)               | 89%<br>(84-93%)          | 2.4<br>(1.3-4)                              | 5.9%<br>(4.3-8%)                     | 7.5%<br>(5.5-10%)                   | 120<br>(83-160)     | 2700<br>(1900-3700)       |
| Guatemala | 1990 | Female | 70 to 74 | 9.7%<br>(6.2-14%)              | 90%<br>(86-94%)          | 2.1<br>(1-3.7)                              | 5.1%<br>(3.6-7.2%)                   | 6.3%<br>(4.5-8.8%)                  | 110<br>(72-150)     | 1900<br>(1400-2800)       |
| Guatemala | 1990 | Female | 75 to 79 | 8.5%<br>(5.1-13%)              | 91%<br>(87-95%)          | 1.7<br>(0.78-3.1)                           | 4.3%<br>(2.9-6.3%)                   | 5.1%<br>(3.4-7.4%)                  | 88<br>(57-130)      | 1300<br>(830-1900)        |
| Guatemala | 1990 | Female | 80 to 84 | 7.7%<br>(4.4-12%)              | 92%<br>(88-96%)          | 1.4<br>(0.69-2.5)                           | 3.7%<br>(2.3-5.4%)                   | 4.4%<br>(2.7-6.4%)                  | 66<br>(41-100)      | 700<br>(440-1000)         |
| Guatemala | 1990 | Female | 85 to 89 | 8%<br>(4.7-13%)                | 92%<br>(87-95%)          | 1.4<br>(0.69-2.6)                           | 3.6%<br>(2.1-5.7%)                   | 4.2%<br>(2.5-6.7%)                  | 50<br>(29-79)       | 370<br>(220-580)          |
| Guatemala | 1990 | Female | 90 to 94 | 9.5%<br>(5.7-14%)              | 90%<br>(86-94%)          | 1.5<br>(0.71-2.8)                           | 3.4%<br>(2-5.5%)                     | 4.1%<br>(2.3-6.6%)                  | 25<br>(15-41)       | 130<br>(76-210)           |
| Guatemala | 1990 | Female | 95 plus  | 12%<br>(6.5-18%)               | 88%<br>(82-93%)          | 1.7<br>(0.62-3.3)                           | 3.4%<br>(1.7-5.5%)                   | 3.9%<br>(1.8-6.5%)                  | 7.3<br>(3.5-12)     | 25<br>(13-42)             |
| Guatemala | 1990 | Male   | All Ages | 10%<br>(8.5-13%)               | 90%<br>(87-92%)          | 1.4<br>(1.1-1.7)                            | 5.3%<br>(4.4-6.1%)                   | 7.5%<br>(6.3-8.6%)                  | 2800<br>(2200-3400) | 130000<br>(100000-160000) |
| Guatemala | 1990 | Male   | 15 to 19 | 9%<br>(5.5-14%)                | 91%<br>(86-95%)          | 0.66<br>(0.32-1.2)                          | 4.4%<br>(3.1-6.2%)                   | 4.8%<br>(3-7.4%)                    | 45<br>(26-71)       | 4400<br>(2900-6400)       |
| Guatemala | 1990 | Male   | 20 to 24 | 19%<br>(12-28%)                | 81%<br>(72-88%)          | 2.1<br>(1.1-3.4)                            | 12%<br>(8.7-16%)                     | 12%<br>(8.1-17%)                    | 160<br>(100-230)    | 13000<br>(9500-18000)     |
| Guatemala | 1990 | Male   | 25 to 29 | 25%<br>(16-34%)                | 75%<br>(66-84%)          | 3.1<br>(1.7-5)                              | 16%<br>(13-20%)                      | 17%<br>(13-23%)                     | 230<br>(160-300)    | 17000<br>(12000-22000)    |
| Guatemala | 1990 | Male   | 30 to 34 | 26%<br>(16-37%)                | 74%<br>(63-84%)          | 3.5<br>(1.9-5.6)                            | 19%<br>(15-23%)                      | 21%<br>(16-27%)                     | 280<br>(210-370)    | 18000<br>(14000-23000)    |
| Guatemala | 1990 | Male   | 35 to 39 | 26%<br>(16-35%)                | 74%<br>(65-84%)          | 3.5<br>(1.9-5.8)                            | 20%<br>(17-24%)                      | 23%<br>(19-28%)                     | 310<br>(230-400)    | 18000<br>(14000-22000)    |
| Guatemala | 1990 | Male   | 40 to 44 | 25%<br>(17-35%)                | 75%<br>(65-83%)          | 3.5<br>(1.9-5.7)                            | 19%<br>(16-23%)                      | 23%<br>(20-28%)                     | 290<br>(220-370)    | 15000<br>(11000-18000)    |
| Guatemala | 1990 | Male   | 45 to 49 | 26%<br>(16-36%)                | 74%<br>(64-84%)          | 3.6<br>(1.9-6)                              | 18%<br>(16-22%)                      | 23%<br>(19-27%)                     | 270<br>(200-340)    | 12000<br>(9300-15000)     |
| Guatemala | 1990 | Male   | 50 to 54 | 25%<br>(17-35%)                | 75%<br>(65-83%)          | 3.8<br>(2.1-6.2)                            | 16%<br>(13-19%)                      | 20%<br>(17-24%)                     | 250<br>(190-310)    | 9800<br>(7700-12000)      |

| Location  | Year | Sex    | Age      | Prevalence of current drinkers | Prevalence of abstainers | Population average of standard drinks daily | Percent of total attributable deaths | Percent of total attributable DALYs | Attributable deaths | Attributable DALYs     |
|-----------|------|--------|----------|--------------------------------|--------------------------|---------------------------------------------|--------------------------------------|-------------------------------------|---------------------|------------------------|
| Guatemala | 1990 | Male   | 55 to 59 | 23%<br>(15-32%)                | 77%<br>(68-85%)          | 3.9<br>(2-6.4)                              | 14%<br>(11-16%)                      | 17%<br>(14-21%)                     | 240<br>(180-300)    | 8000<br>(6300-10000)   |
| Guatemala | 1990 | Male   | 60 to 64 | 20%<br>(12-29%)                | 80%<br>(71-88%)          | 3.2<br>(1.6-5.9)                            | 11%<br>(8.7-13%)                     | 13%<br>(11-16%)                     | 220<br>(170-280)    | 6200<br>(4800-7900)    |
| Guatemala | 1990 | Male   | 65 to 69 | 18%<br>(11-25%)                | 82%<br>(75-89%)          | 2.4<br>(1.3-4)                              | 8.7%<br>(7-11%)                      | 11%<br>(8.5-13%)                    | 190<br>(140-240)    | 4400<br>(3400-5600)    |
| Guatemala | 1990 | Male   | 70 to 74 | 15%<br>(9.7-22%)               | 85%<br>(78-90%)          | 1.7<br>(0.88-2.9)                           | 6.6%<br>(5.1-8.6%)                   | 7.8%<br>(6.1-10%)                   | 140<br>(110-190)    | 2700<br>(2000-3600)    |
| Guatemala | 1990 | Male   | 75 to 79 | 12%<br>(7.2-18%)               | 88%<br>(82-93%)          | 1.3<br>(0.58-2.3)                           | 4.7%<br>(3.4-6.3%)                   | 5.5%<br>(3.9-7.3%)                  | 94<br>(66-130)      | 1400<br>(960-1900)     |
| Guatemala | 1990 | Male   | 80 to 84 | 10%<br>(6-15%)                 | 90%<br>(85-94%)          | 0.97<br>(0.46-1.7)                          | 3.4%<br>(2.3-4.6%)                   | 3.9%<br>(2.7-5.4%)                  | 53<br>(35-75)       | 580<br>(390-800)       |
| Guatemala | 1990 | Male   | 85 to 89 | 10%<br>(5.9-16%)               | 90%<br>(84-94%)          | 0.88<br>(0.42-1.6)                          | 2.9%<br>(1.9-4.2%)                   | 3.3%<br>(2.1-4.9%)                  | 29<br>(18-43)       | 230<br>(140-330)       |
| Guatemala | 1990 | Male   | 90 to 94 | 12%<br>(7.2-19%)               | 88%<br>(81-93%)          | 1<br>(0.44-2)                               | 2.7%<br>(1.6-4.1%)                   | 3%<br>(1.7-4.7%)                    | 12<br>(7-20)        | 67<br>(40-110)         |
| Guatemala | 1990 | Male   | 95 plus  | 15%<br>(7.8-26%)               | 85%<br>(74-92%)          | 1.2<br>(0.46-2.5)                           | 2.7%<br>(1.3-4.4%)                   | 2.9%<br>(1.3-5.1%)                  | 3<br>(1.4-5.3)      | 11<br>(5.9-19)         |
| Guatemala | 1995 | Female | All Ages | 8.8%<br>(7.3-10%)              | 91%<br>(90-93%)          | 0.94<br>(0.73-1.2)                          | 2.5%<br>(2.1-3%)                     | 4.5%<br>(3.7-5.4%)                  | 1400<br>(1100-1700) | 51000<br>(41000-63000) |
| Guatemala | 1995 | Female | 15 to 19 | 8.5%<br>(5.4-12%)              | 92%<br>(88-95%)          | 0.84<br>(0.44-1.4)                          | 2.6%<br>(1.5-3.9%)                   | 4.2%<br>(2.3-6.5%)                  | 28<br>(15-43)       | 2400<br>(1400-3500)    |
| Guatemala | 1995 | Female | 20 to 24 | 13%<br>(8.1-18%)               | 87%<br>(82-92%)          | 1.3<br>(0.68-2.1)                           | 4.2%<br>(2.8-5.9%)                   | 5.9%<br>(3.6-8.5%)                  | 43<br>(25-64)       | 3700<br>(2400-5200)    |
| Guatemala | 1995 | Female | 25 to 29 | 14%<br>(8.7-20%)               | 86%<br>(80-91%)          | 1.4<br>(0.77-2.3)                           | 5.3%<br>(3.7-7.1%)                   | 7.4%<br>(4.9-10%)                   | 51<br>(31-74)       | 4100<br>(2700-5700)    |
| Guatemala | 1995 | Female | 30 to 34 | 15%<br>(9.2-22%)               | 85%<br>(78-91%)          | 1.5<br>(0.85-2.4)                           | 6.4%<br>(4.9-8.2%)                   | 8.9%<br>(6.5-12%)                   | 69<br>(46-95)       | 4800<br>(3400-6300)    |
| Guatemala | 1995 | Female | 35 to 39 | 15%<br>(9.2-21%)               | 85%<br>(79-91%)          | 1.7<br>(0.93-2.8)                           | 7.3%<br>(5.7-9.3%)                   | 10%<br>(8-13%)                      | 89<br>(63-120)      | 5300<br>(3900-6900)    |
| Guatemala | 1995 | Female | 40 to 44 | 15%<br>(10-22%)                | 85%<br>(78-90%)          | 2.1<br>(1.2-3.3)                            | 8.1%<br>(6.5-10%)                    | 12%<br>(9.6-15%)                    | 110<br>(79-140)     | 5600<br>(4200-7400)    |
| Guatemala | 1995 | Female | 45 to 49 | 16%<br>(9.5-22%)               | 84%<br>(78-90%)          | 2.6<br>(1.3-4.4)                            | 8.2%<br>(6.4-10%)                    | 12%<br>(9.8-15%)                    | 110<br>(82-150)     | 5100<br>(3800-6700)    |
| Guatemala | 1995 | Female | 50 to 54 | 16%<br>(10-22%)                | 84%<br>(78-90%)          | 3<br>(1.6-5)                                | 8.1%<br>(6.2-10%)                    | 12%<br>(9.3-15%)                    | 110<br>(84-150)     | 4400<br>(3300-5800)    |
| Guatemala | 1995 | Female | 55 to 59 | 14%<br>(9.3-20%)               | 86%<br>(80-91%)          | 3<br>(1.6-5.2)                              | 7.5%<br>(5.6-9.6%)                   | 11%<br>(8.3-14%)                    | 120<br>(85-150)     | 3900<br>(2900-5200)    |
| Guatemala | 1995 | Female | 60 to 64 | 12%<br>(7.6-18%)               | 88%<br>(82-92%)          | 2.6<br>(1.4-4.7)                            | 6.4%<br>(4.7-8.5%)                   | 8.7%<br>(6.5-11%)                   | 120<br>(89-170)     | 3600<br>(2500-4900)    |
| Guatemala | 1995 | Female | 65 to 69 | 11%<br>(6.8-15%)               | 89%<br>(85-93%)          | 2.3<br>(1.2-3.8)                            | 5.9%<br>(4.3-7.9%)                   | 7.8%<br>(5.8-10%)                   | 130<br>(92-180)     | 3100<br>(2100-4200)    |
| Guatemala | 1995 | Female | 70 to 74 | 9.8%<br>(6.3-14%)              | 90%<br>(86-94%)          | 2<br>(0.99-3.4)                             | 5.2%<br>(3.7-7.3%)                   | 6.7%<br>(4.8-9.3%)                  | 120<br>(86-180)     | 2300<br>(1600-3400)    |

| Location  | Year | Sex    | Age      | Prevalence of current drinkers | Prevalence of abstainers | Population average of standard drinks daily | Percent of total attributable deaths | Percent of total attributable DALYs | Attributable deaths | Attributable DALYs        |
|-----------|------|--------|----------|--------------------------------|--------------------------|---------------------------------------------|--------------------------------------|-------------------------------------|---------------------|---------------------------|
| Guatemala | 1995 | Female | 75 to 79 | 8.7%<br>(5.1-13%)              | 91%<br>(87-95%)          | 1.6<br>(0.74-2.9)                           | 4.3%<br>(2.9-6.3%)                   | 5.3%<br>(3.6-7.7%)                  | 94<br>(61-140)      | 1400<br>(900-2000)        |
| Guatemala | 1995 | Female | 80 to 84 | 7.8%<br>(4.5-12%)              | 92%<br>(88-96%)          | 1.4<br>(0.66-2.4)                           | 3.8%<br>(2.4-5.6%)                   | 4.5%<br>(2.9-6.7%)                  | 80<br>(49-120)      | 840<br>(520-1300)         |
| Guatemala | 1995 | Female | 85 to 89 | 8.1%<br>(4.6-12%)              | 92%<br>(88-95%)          | 1.3<br>(0.65-2.4)                           | 3.7%<br>(2.2-5.7%)                   | 4.4%<br>(2.6-6.9%)                  | 56<br>(32-89)       | 410<br>(250-650)          |
| Guatemala | 1995 | Female | 90 to 94 | 9.6%<br>(5.9-15%)              | 90%<br>(85-94%)          | 1.4<br>(0.68-2.7)                           | 3.6%<br>(2.1-5.7%)                   | 4.2%<br>(2.5-6.8%)                  | 28<br>(16-45)       | 140<br>(83-230)           |
| Guatemala | 1995 | Female | 95 plus  | 12%<br>(6.7-18%)               | 88%<br>(82-93%)          | 1.6<br>(0.6-3.1)                            | 3.6%<br>(1.7-5.8%)                   | 4.1%<br>(1.9-6.8%)                  | 9.8<br>(4.4-16)     | 34<br>(16-56)             |
| Guatemala | 1995 | Male   | All Ages | 10%<br>(8.4-13%)               | 90%<br>(87-92%)          | 1.3<br>(1-1.6)                              | 6.5%<br>(5.4-7.6%)                   | 8.8%<br>(7.6-10%)                   | 3500<br>(2700-4300) | 160000<br>(130000-200000) |
| Guatemala | 1995 | Male   | 15 to 19 | 9.1%<br>(5.6-14%)              | 91%<br>(86-94%)          | 0.64<br>(0.31-1.1)                          | 4.4%<br>(3-6.2%)                     | 4.9%<br>(2.9-7.6%)                  | 54<br>(31-87)       | 5200<br>(3400-7700)       |
| Guatemala | 1995 | Male   | 20 to 24 | 19%<br>(12-27%)                | 81%<br>(73-88%)          | 2<br>(1.1-3.3)                              | 12%<br>(8.8-16%)                     | 13%<br>(8.4-18%)                    | 200<br>(130-300)    | 17000<br>(12000-23000)    |
| Guatemala | 1995 | Male   | 25 to 29 | 25%<br>(16-34%)                | 75%<br>(66-84%)          | 2.9<br>(1.6-4.8)                            | 16%<br>(13-21%)                      | 18%<br>(13-23%)                     | 280<br>(190-380)    | 20000<br>(15000-27000)    |
| Guatemala | 1995 | Male   | 30 to 34 | 26%<br>(16-37%)                | 74%<br>(63-84%)          | 3.3<br>(1.8-5.2)                            | 19%<br>(16-24%)                      | 22%<br>(17-27%)                     | 350<br>(260-470)    | 23000<br>(18000-29000)    |
| Guatemala | 1995 | Male   | 35 to 39 | 26%<br>(17-35%)                | 74%<br>(65-83%)          | 3.4<br>(1.8-5.6)                            | 21%<br>(18-25%)                      | 24%<br>(20-29%)                     | 400<br>(310-520)    | 23000<br>(18000-28000)    |
| Guatemala | 1995 | Male   | 40 to 44 | 26%<br>(17-35%)                | 74%<br>(65-83%)          | 3.4<br>(1.8-5.5)                            | 21%<br>(18-24%)                      | 25%<br>(21-29%)                     | 380<br>(290-480)    | 19000<br>(15000-23000)    |
| Guatemala | 1995 | Male   | 45 to 49 | 26%<br>(16-36%)                | 74%<br>(64-84%)          | 3.5<br>(1.8-5.8)                            | 19%<br>(17-23%)                      | 24%<br>(21-28%)                     | 360<br>(280-460)    | 16000<br>(13000-20000)    |
| Guatemala | 1995 | Male   | 50 to 54 | 25%<br>(17-35%)                | 75%<br>(65-83%)          | 3.6<br>(1.9-5.8)                            | 17%<br>(14-20%)                      | 21%<br>(18-25%)                     | 300<br>(230-380)    | 12000<br>(9100-15000)     |
| Guatemala | 1995 | Male   | 55 to 59 | 23%<br>(15-32%)                | 77%<br>(68-85%)          | 3.7<br>(1.9-6.2)                            | 15%<br>(12-17%)                      | 18%<br>(15-22%)                     | 270<br>(210-350)    | 9100<br>(7100-12000)      |
| Guatemala | 1995 | Male   | 60 to 64 | 20%<br>(13-29%)                | 80%<br>(71-87%)          | 3.1<br>(1.6-5.6)                            | 11%<br>(9.3-14%)                     | 14%<br>(12-17%)                     | 250<br>(190-320)    | 7100<br>(5500-9000)       |
| Guatemala | 1995 | Male   | 65 to 69 | 18%<br>(11-25%)                | 82%<br>(75-89%)          | 2.3<br>(1.2-3.8)                            | 9.1%<br>(7.3-11%)                    | 11%<br>(9-14%)                      | 220<br>(170-290)    | 5200<br>(4000-6600)       |
| Guatemala | 1995 | Male   | 70 to 74 | 15%<br>(9.8-22%)               | 85%<br>(78-90%)          | 1.7<br>(0.85-2.8)                           | 6.7%<br>(5.2-8.5%)                   | 8%<br>(6.2-10%)                     | 170<br>(130-230)    | 3200<br>(2400-4200)       |
| Guatemala | 1995 | Male   | 75 to 79 | 12%<br>(7-19%)                 | 88%<br>(81-93%)          | 1.2<br>(0.54-2.2)                           | 4.8%<br>(3.5-6.4%)                   | 5.6%<br>(4-7.5%)                    | 110<br>(78-160)     | 1700<br>(1200-2300)       |
| Guatemala | 1995 | Male   | 80 to 84 | 10%<br>(5.9-15%)               | 90%<br>(85-94%)          | 0.92<br>(0.43-1.6)                          | 3.5%<br>(2.4-4.8%)                   | 4%<br>(2.7-5.6%)                    | 67<br>(45-96)       | 730<br>(490-1000)         |
| Guatemala | 1995 | Male   | 85 to 89 | 10%<br>(5.8-16%)               | 90%<br>(84-94%)          | 0.84<br>(0.39-1.5)                          | 3%<br>(1.9-4.3%)                     | 3.4%<br>(2.1-5%)                    | 36<br>(23-53)       | 270<br>(180-400)          |
| Guatemala | 1995 | Male   | 90 to 94 | 12%<br>(7.2-19%)               | 88%<br>(81-93%)          | 0.97<br>(0.42-1.9)                          | 2.7%<br>(1.6-4.2%)                   | 3.1%<br>(1.7-4.8%)                  | 14<br>(7.6-22)      | 75<br>(43-110)            |

| Location  | Year | Sex    | Age      | Prevalence of current drinkers | Prevalence of abstainers | Population average of standard drinks daily | Percent of total attributable deaths | Percent of total attributable DALYs | Attributable deaths | Attributable DALYs        |
|-----------|------|--------|----------|--------------------------------|--------------------------|---------------------------------------------|--------------------------------------|-------------------------------------|---------------------|---------------------------|
| Guatemala | 1995 | Male   | 95 plus  | 16%<br>(7.8-26%)               | 84%<br>(74-92%)          | 1.2<br>(0.44-2.4)                           | 2.8%<br>(1.4-4.6%)                   | 3%<br>(1.4-5.1%)                    | 3.9<br>(1.8-6.7)    | 15<br>(7.3-25)            |
| Guatemala | 2000 | Female | All Ages | 7.2%<br>(6-8.4%)               | 93%<br>(92-94%)          | 0.7<br>(0.53-0.88)                          | 2.5%<br>(2.1-3%)                     | 4.6%<br>(3.8-5.5%)                  | 1400<br>(1100-1800) | 49000<br>(39000-61000)    |
| Guatemala | 2000 | Female | 15 to 19 | 6.9%<br>(4.4-10%)              | 93%<br>(90-96%)          | 0.61<br>(0.32-1)                            | 2.1%<br>(1.2-3.3%)                   | 3.4%<br>(1.8-5.5%)                  | 23<br>(11-39)       | 2100<br>(1200-3300)       |
| Guatemala | 2000 | Female | 20 to 24 | 9.5%<br>(6.2-14%)              | 91%<br>(86-94%)          | 0.87<br>(0.47-1.5)                          | 3.3%<br>(2.2-4.7%)                   | 4.6%<br>(2.7-6.9%)                  | 35<br>(19-54)       | 3200<br>(2000-4600)       |
| Guatemala | 2000 | Female | 25 to 29 | 10%<br>(6.6-15%)               | 90%<br>(85-93%)          | 0.94<br>(0.52-1.5)                          | 4%<br>(2.9-5.5%)                     | 5.5%<br>(3.5-7.8%)                  | 39<br>(24-58)       | 3400<br>(2400-4700)       |
| Guatemala | 2000 | Female | 30 to 34 | 11%<br>(7.1-17%)               | 89%<br>(83-93%)          | 1<br>(0.58-1.7)                             | 5%<br>(3.8-6.4%)                     | 7.1%<br>(5.1-9.4%)                  | 53<br>(35-75)       | 4000<br>(2800-5300)       |
| Guatemala | 2000 | Female | 35 to 39 | 12%<br>(7.3-17%)               | 88%<br>(83-93%)          | 1.2<br>(0.66-2)                             | 5.8%<br>(4.5-7.4%)                   | 8.6%<br>(6.6-11%)                   | 71<br>(49-99)       | 4400<br>(3200-6000)       |
| Guatemala | 2000 | Female | 40 to 44 | 12%<br>(7.7-17%)               | 88%<br>(83-92%)          | 1.5<br>(0.78-2.3)                           | 6.7%<br>(5.3-8.4%)                   | 10%<br>(8.1-12%)                    | 92<br>(66-130)      | 4900<br>(3600-6600)       |
| Guatemala | 2000 | Female | 45 to 49 | 12%<br>(7.7-18%)               | 88%<br>(82-92%)          | 1.8<br>(0.94-3.2)                           | 7%<br>(5.6-8.9%)                     | 11%<br>(8.7-13%)                    | 100<br>(76-140)     | 4800<br>(3600-6400)       |
| Guatemala | 2000 | Female | 50 to 54 | 12%<br>(8.3-18%)               | 88%<br>(82-92%)          | 2.1<br>(1.2-3.6)                            | 7.2%<br>(5.6-9.2%)                   | 11%<br>(8.7-13%)                    | 120<br>(89-160)     | 4700<br>(3600-6400)       |
| Guatemala | 2000 | Female | 55 to 59 | 12%<br>(7.8-17%)               | 88%<br>(83-92%)          | 2.3<br>(1.2-3.9)                            | 6.9%<br>(5.3-8.9%)                   | 10%<br>(7.9-13%)                    | 120<br>(84-150)     | 4000<br>(2900-5300)       |
| Guatemala | 2000 | Female | 60 to 64 | 11%<br>(6.8-16%)               | 89%<br>(84-93%)          | 2.1<br>(1.1-3.8)                            | 6.3%<br>(4.6-8.3%)                   | 8.8%<br>(6.8-11%)                   | 120<br>(90-170)     | 3500<br>(2500-4800)       |
| Guatemala | 2000 | Female | 65 to 69 | 10%<br>(6.5-15%)               | 90%<br>(85-93%)          | 1.9<br>(1-3.2)                              | 5.9%<br>(4.4-8%)                     | 8.2%<br>(6.2-11%)                   | 140<br>(100-200)    | 3400<br>(2400-4700)       |
| Guatemala | 2000 | Female | 70 to 74 | 9.3%<br>(6.1-14%)              | 91%<br>(86-94%)          | 1.7<br>(0.85-2.9)                           | 5.3%<br>(3.9-7.2%)                   | 7%<br>(5.2-9.5%)                    | 150<br>(100-210)    | 2700<br>(2000-3900)       |
| Guatemala | 2000 | Female | 75 to 79 | 8.1%<br>(4.7-12%)              | 92%<br>(88-95%)          | 1.4<br>(0.62-2.5)                           | 4.2%<br>(3-6%)                       | 5.5%<br>(3.9-7.7%)                  | 120<br>(77-170)     | 1700<br>(1100-2400)       |
| Guatemala | 2000 | Female | 80 to 84 | 7.4%<br>(4.3-11%)              | 93%<br>(89-96%)          | 1.2<br>(0.56-2)                             | 3.7%<br>(2.4-5.3%)                   | 4.6%<br>(3.1-6.6%)                  | 89<br>(58-130)      | 940<br>(620-1400)         |
| Guatemala | 2000 | Female | 85 to 89 | 7.7%<br>(4.4-12%)              | 92%<br>(88-96%)          | 1.1<br>(0.56-2.1)                           | 3.6%<br>(2.2-5.4%)                   | 4.4%<br>(2.7-6.6%)                  | 63<br>(39-100)      | 470<br>(290-740)          |
| Guatemala | 2000 | Female | 90 to 94 | 9%<br>(5.6-14%)                | 91%<br>(86-94%)          | 1.2<br>(0.58-2.3)                           | 3.5%<br>(2-5.5%)                     | 4.2%<br>(2.3-6.7%)                  | 32<br>(18-51)       | 160<br>(93-260)           |
| Guatemala | 2000 | Female | 95 plus  | 11%<br>(6-17%)                 | 89%<br>(83-94%)          | 1.4<br>(0.5-2.7)                            | 3.5%<br>(1.6-5.9%)                   | 4.1%<br>(1.8-7.1%)                  | 11<br>(4.5-19)      | 38<br>(17-63)             |
| Guatemala | 2000 | Male   | All Ages | 12%<br>(9.8-14%)               | 88%<br>(86-90%)          | 1.3<br>(1.1-1.7)                            | 6.9%<br>(5.8-8.2%)                   | 9.1%<br>(7.9-10%)                   | 3600<br>(2800-4500) | 170000<br>(130000-210000) |
| Guatemala | 2000 | Male   | 15 to 19 | 9.7%<br>(6.5-14%)              | 90%<br>(86-94%)          | 0.64<br>(0.33-1.1)                          | 4.3%<br>(2.9-6.3%)                   | 4.7%<br>(2.8-7.5%)                  | 60<br>(33-100)      | 5800<br>(3800-8800)       |
| Guatemala | 2000 | Male   | 20 to 24 | 25%<br>(19-32%)                | 75%<br>(68-81%)          | 2.5<br>(1.5-3.8)                            | 13%<br>(9.7-18%)                     | 14%<br>(9.7-20%)                    | 260<br>(160-390)    | 21000<br>(15000-30000)    |

| Location  | Year | Sex    | Age      | Prevalence of current drinkers | Prevalence of abstainers | Population average of standard drinks daily | Percent of total attributable deaths | Percent of total attributable DALYs | Attributable deaths | Attributable DALYs     |
|-----------|------|--------|----------|--------------------------------|--------------------------|---------------------------------------------|--------------------------------------|-------------------------------------|---------------------|------------------------|
| Guatemala | 2000 | Male   | 25 to 29 | 31%<br>(23-37%)                | 69%<br>(63-77%)          | 3.5<br>(2.2-5.2)                            | 17%<br>(13-21%)                      | 18%<br>(14-24%)                     | 330<br>(230-450)    | 24000<br>(18000-32000) |
| Guatemala | 2000 | Male   | 30 to 34 | 25%<br>(19-33%)                | 75%<br>(67-81%)          | 3<br>(1.8-4.5)                              | 17%<br>(14-21%)                      | 19%<br>(15-24%)                     | 330<br>(240-430)    | 22000<br>(16000-28000) |
| Guatemala | 2000 | Male   | 35 to 39 | 24%<br>(18-32%)                | 76%<br>(68-82%)          | 2.9<br>(1.7-4.7)                            | 19%<br>(16-22%)                      | 22%<br>(18-26%)                     | 380<br>(280-500)    | 21000<br>(17000-27000) |
| Guatemala | 2000 | Male   | 40 to 44 | 26%<br>(20-33%)                | 74%<br>(67-80%)          | 3.2<br>(1.8-4.9)                            | 19%<br>(17-22%)                      | 23%<br>(19-26%)                     | 380<br>(290-490)    | 19000<br>(15000-24000) |
| Guatemala | 2000 | Male   | 45 to 49 | 26%<br>(19-34%)                | 74%<br>(66-81%)          | 3.3<br>(1.9-5.3)                            | 18%<br>(16-21%)                      | 22%<br>(19-25%)                     | 380<br>(280-480)    | 17000<br>(13000-21000) |
| Guatemala | 2000 | Male   | 50 to 54 | 26%<br>(19-33%)                | 74%<br>(67-81%)          | 3.4<br>(2-5.4)                              | 16%<br>(14-19%)                      | 20%<br>(17-23%)                     | 330<br>(250-430)    | 13000<br>(9900-16000)  |
| Guatemala | 2000 | Male   | 55 to 59 | 23%<br>(17-30%)                | 77%<br>(70-83%)          | 3.5<br>(2-5.7)                              | 14%<br>(11-16%)                      | 17%<br>(15-20%)                     | 260<br>(200-340)    | 9000<br>(7100-11000)   |
| Guatemala | 2000 | Male   | 60 to 64 | 19%<br>(13-25%)                | 81%<br>(75-87%)          | 2.7<br>(1.4-4.6)                            | 11%<br>(8.9-13%)                     | 13%<br>(11-15%)                     | 230<br>(180-300)    | 6800<br>(5400-8500)    |
| Guatemala | 2000 | Male   | 65 to 69 | 16%<br>(11-22%)                | 84%<br>(78-89%)          | 1.9<br>(1.1-3.1)                            | 8.4%<br>(7-10%)                      | 10%<br>(8.7-13%)                    | 210<br>(170-270)    | 5100<br>(4000-6400)    |
| Guatemala | 2000 | Male   | 70 to 74 | 16%<br>(11-21%)                | 84%<br>(79-89%)          | 1.6<br>(0.87-2.6)                           | 6.7%<br>(5.3-8.2%)                   | 8.2%<br>(6.5-10%)                   | 200<br>(150-260)    | 3700<br>(2800-4900)    |
| Guatemala | 2000 | Male   | 75 to 79 | 13%<br>(8.3-20%)               | 87%<br>(80-92%)          | 1.2<br>(0.6-2.2)                            | 5.1%<br>(3.7-6.6%)                   | 6.1%<br>(4.5-7.9%)                  | 140<br>(100-200)    | 2100<br>(1500-2900)    |
| Guatemala | 2000 | Male   | 80 to 84 | 10%<br>(6-15%)                 | 90%<br>(85-94%)          | 0.87<br>(0.43-1.5)                          | 3.5%<br>(2.5-4.8%)                   | 4.1%<br>(2.8-5.6%)                  | 83<br>(56-110)      | 900<br>(630-1200)      |
| Guatemala | 2000 | Male   | 85 to 89 | 9.7%<br>(5.5-15%)              | 90%<br>(85-94%)          | 0.74<br>(0.34-1.4)                          | 2.8%<br>(1.8-4.2%)                   | 3.2%<br>(2-4.8%)                    | 42<br>(26-63)       | 320<br>(200-480)       |
| Guatemala | 2000 | Male   | 90 to 94 | 11%<br>(6.6-18%)               | 89%<br>(82-93%)          | 0.83<br>(0.36-1.6)                          | 2.7%<br>(1.5-4.1%)                   | 3%<br>(1.7-4.8%)                    | 17<br>(9.1-27)      | 90<br>(51-140)         |
| Guatemala | 2000 | Male   | 95 plus  | 15%<br>(7.2-25%)               | 85%<br>(75-93%)          | 1<br>(0.38-2)                               | 2.7%<br>(1.3-4.5%)                   | 2.9%<br>(1.3-5.1%)                  | 4.3<br>(1.9-7.4)    | 16<br>(7.9-27)         |
| Guatemala | 2005 | Female | All Ages | 7.2%<br>(6-8.5%)               | 93%<br>(92-94%)          | 0.7<br>(0.54-0.87)                          | 2.7%<br>(2.3-3.3%)                   | 5%<br>(4.2-6%)                      | 1600<br>(1200-2000) | 54000<br>(43000-67000) |
| Guatemala | 2005 | Female | 15 to 19 | 6.9%<br>(4.5-10%)              | 93%<br>(90-96%)          | 0.59<br>(0.31-0.99)                         | 2%<br>(1.1-3.1%)                     | 3.2%<br>(1.7-5.2%)                  | 22<br>(12-37)       | 2100<br>(1300-3300)    |
| Guatemala | 2005 | Female | 20 to 24 | 9.4%<br>(6-14%)                | 91%<br>(86-94%)          | 0.84<br>(0.45-1.4)                          | 3.1%<br>(2.1-4.4%)                   | 4.3%<br>(2.5-6.5%)                  | 35<br>(20-56)       | 3400<br>(2100-4900)    |
| Guatemala | 2005 | Female | 25 to 29 | 10%<br>(6.5-15%)               | 90%<br>(85-93%)          | 0.89<br>(0.49-1.5)                          | 3.7%<br>(2.6-4.9%)                   | 5.2%<br>(3.4-7.2%)                  | 41<br>(25-60)       | 3600<br>(2500-5000)    |
| Guatemala | 2005 | Female | 30 to 34 | 11%<br>(6.8-17%)               | 89%<br>(83-93%)          | 0.99<br>(0.54-1.6)                          | 4.5%<br>(3.4-5.8%)                   | 6.9%<br>(5.2-8.8%)                  | 54<br>(37-76)       | 4000<br>(2900-5300)    |
| Guatemala | 2005 | Female | 35 to 39 | 11%<br>(7.2-16%)               | 89%<br>(84-93%)          | 1.2<br>(0.61-2)                             | 5.4%<br>(4.2-6.9%)                   | 8.5%<br>(6.6-11%)                   | 72<br>(51-100)      | 4500<br>(3300-6000)    |
| Guatemala | 2005 | Female | 40 to 44 | 12%<br>(7.5-16%)               | 88%<br>(84-92%)          | 1.4<br>(0.74-2.2)                           | 6.3%<br>(5-8%)                       | 9.9%<br>(8-12%)                     | 95<br>(70-130)      | 5100<br>(3800-6600)    |

| Location  | Year | Sex    | Age      | Prevalence of current drinkers | Prevalence of abstainers | Population average of standard drinks daily | Percent of total attributable deaths | Percent of total attributable DALYs | Attributable deaths | Attributable DALYs        |
|-----------|------|--------|----------|--------------------------------|--------------------------|---------------------------------------------|--------------------------------------|-------------------------------------|---------------------|---------------------------|
| Guatemala | 2005 | Female | 45 to 49 | 12%<br>(7.4-17%)               | 88%<br>(83-93%)          | 1.7<br>(0.9-3)                              | 6.9%<br>(5.4-8.8%)                   | 11%<br>(8.7-13%)                    | 110<br>(83-150)     | 5200<br>(3900-6800)       |
| Guatemala | 2005 | Female | 50 to 54 | 12%<br>(8.2-18%)               | 88%<br>(82-92%)          | 2.1<br>(1.1-3.4)                            | 7.2%<br>(5.5-9.3%)                   | 11%<br>(8.6-13%)                    | 140<br>(100-180)    | 5500<br>(4100-7400)       |
| Guatemala | 2005 | Female | 55 to 59 | 12%<br>(7.7-17%)               | 88%<br>(83-92%)          | 2.2<br>(1.2-3.8)                            | 6.9%<br>(5.2-9.1%)                   | 10%<br>(8-13%)                      | 150<br>(110-200)    | 5000<br>(3600-6900)       |
| Guatemala | 2005 | Female | 60 to 64 | 11%<br>(6.7-16%)               | 89%<br>(84-93%)          | 2.1<br>(1.1-3.7)                            | 6.5%<br>(4.8-8.7%)                   | 9.2%<br>(7.1-12%)                   | 140<br>(100-190)    | 4100<br>(2900-5600)       |
| Guatemala | 2005 | Female | 65 to 69 | 10%<br>(6.4-15%)               | 90%<br>(85-94%)          | 1.9<br>(1-3.2)                              | 6.2%<br>(4.6-8.3%)                   | 8.6%<br>(6.7-11%)                   | 160<br>(120-220)    | 3800<br>(2700-5200)       |
| Guatemala | 2005 | Female | 70 to 74 | 9.2%<br>(6.1-13%)              | 91%<br>(87-94%)          | 1.6<br>(0.84-2.8)                           | 5.5%<br>(4-7.5%)                     | 7.5%<br>(5.7-9.9%)                  | 170<br>(120-230)    | 3200<br>(2200-4400)       |
| Guatemala | 2005 | Female | 75 to 79 | 8%<br>(4.8-12%)                | 92%<br>(88-95%)          | 1.3<br>(0.61-2.4)                           | 4.4%<br>(3.1-6.1%)                   | 5.8%<br>(4.2-7.9%)                  | 150<br>(99-210)     | 2100<br>(1400-3100)       |
| Guatemala | 2005 | Female | 80 to 84 | 7.3%<br>(4.3-11%)              | 93%<br>(89-96%)          | 1.1<br>(0.55-1.9)                           | 3.7%<br>(2.5-5.2%)                   | 4.7%<br>(3.2-6.7%)                  | 120<br>(75-170)     | 1200<br>(810-1800)        |
| Guatemala | 2005 | Female | 85 to 89 | 7.6%<br>(4.3-12%)              | 92%<br>(88-96%)          | 1.1<br>(0.54-2.1)                           | 3.4%<br>(2.2-5.2%)                   | 4.3%<br>(2.7-6.5%)                  | 80<br>(50-120)      | 600<br>(380-920)          |
| Guatemala | 2005 | Female | 90 to 94 | 8.9%<br>(5.5-14%)              | 91%<br>(86-95%)          | 1.2<br>(0.56-2.2)                           | 3.5%<br>(2-5.5%)                     | 4.2%<br>(2.4-6.7%)                  | 43<br>(25-70)       | 220<br>(130-360)          |
| Guatemala | 2005 | Female | 95 plus  | 11%<br>(6-17%)                 | 89%<br>(83-94%)          | 1.3<br>(0.48-2.6)                           | 3.6%<br>(1.6-5.9%)                   | 4.2%<br>(1.8-7.1%)                  | 14<br>(5.9-24)      | 49<br>(22-82)             |
| Guatemala | 2005 | Male   | All Ages | 12%<br>(10-14%)                | 88%<br>(86-90%)          | 1.4<br>(1.1-1.7)                            | 7.9%<br>(6.6-9.4%)                   | 9.9%<br>(8.6-11%)                   | 4300<br>(3400-5500) | 200000<br>(160000-250000) |
| Guatemala | 2005 | Male   | 15 to 19 | 9.9%<br>(6.5-14%)              | 90%<br>(86-93%)          | 0.62<br>(0.31-1)                            | 4.3%<br>(2.9-6.3%)                   | 4.6%<br>(2.7-7.4%)                  | 77<br>(44-130)      | 7100<br>(4500-11000)      |
| Guatemala | 2005 | Male   | 20 to 24 | 26%<br>(19-33%)                | 74%<br>(67-81%)          | 2.4<br>(1.4-3.7)                            | 13%<br>(9.5-18%)                     | 14%<br>(9.5-21%)                    | 340<br>(210-510)    | 27000<br>(18000-38000)    |
| Guatemala | 2005 | Male   | 25 to 29 | 31%<br>(24-38%)                | 69%<br>(62-76%)          | 3.4<br>(2.1-5)                              | 17%<br>(13-21%)                      | 19%<br>(14-25%)                     | 420<br>(290-590)    | 30000<br>(22000-40000)    |
| Guatemala | 2005 | Male   | 30 to 34 | 26%<br>(19-34%)                | 74%<br>(66-81%)          | 2.9<br>(1.7-4.3)                            | 17%<br>(14-21%)                      | 19%<br>(15-24%)                     | 380<br>(270-520)    | 25000<br>(19000-33000)    |
| Guatemala | 2005 | Male   | 35 to 39 | 24%<br>(18-31%)                | 76%<br>(69-82%)          | 2.8<br>(1.6-4.5)                            | 19%<br>(16-22%)                      | 22%<br>(18-26%)                     | 410<br>(300-560)    | 24000<br>(18000-31000)    |
| Guatemala | 2005 | Male   | 40 to 44 | 26%<br>(20-33%)                | 74%<br>(67-80%)          | 3.1<br>(1.8-4.9)                            | 20%<br>(17-23%)                      | 24%<br>(21-27%)                     | 440<br>(340-570)    | 22000<br>(17000-28000)    |
| Guatemala | 2005 | Male   | 45 to 49 | 27%<br>(19-34%)                | 73%<br>(66-81%)          | 3.2<br>(1.8-5.1)                            | 19%<br>(16-22%)                      | 23%<br>(20-27%)                     | 430<br>(320-550)    | 19000<br>(15000-24000)    |
| Guatemala | 2005 | Male   | 50 to 54 | 26%<br>(19-33%)                | 74%<br>(67-81%)          | 3.3<br>(1.9-5.3)                            | 17%<br>(14-19%)                      | 21%<br>(18-24%)                     | 380<br>(290-500)    | 15000<br>(12000-19000)    |
| Guatemala | 2005 | Male   | 55 to 59 | 23%<br>(17-30%)                | 77%<br>(70-83%)          | 3.4<br>(2-5.4)                              | 14%<br>(12-16%)                      | 18%<br>(15-20%)                     | 330<br>(260-430)    | 11000<br>(9100-14000)     |
| Guatemala | 2005 | Male   | 60 to 64 | 19%<br>(13-26%)                | 81%<br>(74-87%)          | 2.6<br>(1.4-4.5)                            | 11%<br>(9.1-13%)                     | 14%<br>(12-16%)                     | 260<br>(210-330)    | 7500<br>(6000-9400)       |

| Location  | Year | Sex    | Age      | Prevalence of current drinkers | Prevalence of abstainers | Population average of standard drinks daily | Percent of total attributable deaths | Percent of total attributable DALYs | Attributable deaths | Attributable DALYs     |
|-----------|------|--------|----------|--------------------------------|--------------------------|---------------------------------------------|--------------------------------------|-------------------------------------|---------------------|------------------------|
| Guatemala | 2005 | Male   | 65 to 69 | 16%<br>(11-22%)                | 84%<br>(78-89%)          | 1.9<br>(1.1-3.1)                            | 8.6%<br>(7.2-10%)                    | 11%<br>(9.2-13%)                    | 240<br>(190-310)    | 5700<br>(4500-7200)    |
| Guatemala | 2005 | Male   | 70 to 74 | 16%<br>(11-22%)                | 84%<br>(78-89%)          | 1.6<br>(0.86-2.7)                           | 6.9%<br>(5.5-8.4%)                   | 8.6%<br>(6.9-10%)                   | 220<br>(160-290)    | 4200<br>(3200-5400)    |
| Guatemala | 2005 | Male   | 75 to 79 | 14%<br>(8.5-20%)               | 86%<br>(80-91%)          | 1.2<br>(0.58-2.2)                           | 5.1%<br>(3.8-6.6%)                   | 6.2%<br>(4.6-7.9%)                  | 180<br>(120-240)    | 2600<br>(1800-3500)    |
| Guatemala | 2005 | Male   | 80 to 84 | 11%<br>(6.3-16%)               | 89%<br>(84-94%)          | 0.86<br>(0.42-1.5)                          | 3.6%<br>(2.5-4.9%)                   | 4.2%<br>(3-5.7%)                    | 110<br>(74-150)     | 1200<br>(810-1600)     |
| Guatemala | 2005 | Male   | 85 to 89 | 9.9%<br>(5.7-15%)              | 90%<br>(85-94%)          | 0.72<br>(0.35-1.3)                          | 2.8%<br>(1.9-4.1%)                   | 3.2%<br>(2.1-4.7%)                  | 57<br>(37-83)       | 440<br>(290-640)       |
| Guatemala | 2005 | Male   | 90 to 94 | 11%<br>(6.6-18%)               | 89%<br>(82-93%)          | 0.79<br>(0.35-1.6)                          | 2.6%<br>(1.5-4.1%)                   | 2.9%<br>(1.6-4.7%)                  | 21<br>(12-35)       | 120<br>(67-190)        |
| Guatemala | 2005 | Male   | 95 plus  | 14%<br>(7-24%)                 | 86%<br>(76-93%)          | 0.93<br>(0.35-1.9)                          | 2.6%<br>(1.3-4.4%)                   | 2.8%<br>(1.2-4.9%)                  | 5.5<br>(2.3-10)     | 21<br>(10-35)          |
| Guatemala | 2010 | Female | All Ages | 8.7%<br>(7.3-10%)              | 91%<br>(90-93%)          | 0.91<br>(0.68-1.1)                          | 3.2%<br>(2.6-4%)                     | 5.6%<br>(4.6-6.8%)                  | 1900<br>(1400-2400) | 63000<br>(48000-79000) |
| Guatemala | 2010 | Female | 15 to 19 | 7.8%<br>(5-11%)                | 92%<br>(89-95%)          | 0.72<br>(0.37-1.2)                          | 2.2%<br>(1.3-3.3%)                   | 3.6%<br>(1.8-5.8%)                  | 26<br>(14-44)       | 2500<br>(1400-3800)    |
| Guatemala | 2010 | Female | 20 to 24 | 12%<br>(7.3-17%)               | 88%<br>(83-93%)          | 1.1<br>(0.57-1.8)                           | 3.5%<br>(2.3-4.9%)                   | 5.2%<br>(3-7.7%)                    | 39<br>(21-62)       | 3700<br>(2300-5400)    |
| Guatemala | 2010 | Female | 25 to 29 | 13%<br>(8.1-19%)               | 87%<br>(81-92%)          | 1.2<br>(0.66-2)                             | 4%<br>(2.9-5.4%)                     | 6%<br>(3.9-8.5%)                    | 49<br>(29-74)       | 4300<br>(2900-5900)    |
| Guatemala | 2010 | Female | 30 to 34 | 13%<br>(8.4-20%)               | 87%<br>(80-92%)          | 1.3<br>(0.71-2)                             | 4.7%<br>(3.6-6.2%)                   | 7.5%<br>(5.4-9.8%)                  | 63<br>(42-91)       | 4800<br>(3400-6400)    |
| Guatemala | 2010 | Female | 35 to 39 | 14%<br>(8.4-20%)               | 86%<br>(80-92%)          | 1.5<br>(0.76-2.5)                           | 5.5%<br>(4.1-7.2%)                   | 9%<br>(6.8-11%)                     | 79<br>(53-110)      | 5100<br>(3700-6900)    |
| Guatemala | 2010 | Female | 40 to 44 | 14%<br>(9.2-20%)               | 86%<br>(80-91%)          | 1.8<br>(1-2.9)                              | 6.3%<br>(4.8-8.3%)                   | 11%<br>(8.3-13%)                    | 99<br>(71-130)      | 5500<br>(4000-7400)    |
| Guatemala | 2010 | Female | 45 to 49 | 15%<br>(8.7-21%)               | 85%<br>(79-91%)          | 2.2<br>(1.1-3.8)                            | 7%<br>(5.3-9.1%)                     | 11%<br>(8.7-14%)                    | 130<br>(93-170)     | 6000<br>(4300-8100)    |
| Guatemala | 2010 | Female | 50 to 54 | 14%<br>(9.5-21%)               | 86%<br>(79-90%)          | 2.5<br>(1.4-4.2)                            | 7.4%<br>(5.5-9.8%)                   | 11%<br>(8.5-14%)                    | 160<br>(110-220)    | 6400<br>(4500-8800)    |
| Guatemala | 2010 | Female | 55 to 59 | 13%<br>(8.5-19%)               | 87%<br>(81-92%)          | 2.6<br>(1.4-4.5)                            | 7.3%<br>(5.3-9.8%)                   | 10%<br>(8-14%)                      | 180<br>(130-250)    | 6300<br>(4400-8800)    |
| Guatemala | 2010 | Female | 60 to 64 | 12%<br>(7-17%)                 | 88%<br>(83-93%)          | 2.3<br>(1.1-4.3)                            | 6.6%<br>(4.8-9%)                     | 9.2%<br>(6.9-12%)                   | 180<br>(130-250)    | 5300<br>(3700-7200)    |
| Guatemala | 2010 | Female | 65 to 69 | 10%<br>(6.5-15%)               | 90%<br>(85-93%)          | 2<br>(1-3.4)                                | 6.3%<br>(4.7-8.6%)                   | 8.6%<br>(6.6-11%)                   | 180<br>(130-260)    | 4300<br>(3100-6100)    |
| Guatemala | 2010 | Female | 70 to 74 | 9.3%<br>(6-14%)                | 91%<br>(86-94%)          | 1.8<br>(0.88-3.1)                           | 5.5%<br>(4.1-7.5%)                   | 7.5%<br>(5.6-10%)                   | 180<br>(130-260)    | 3500<br>(2400-5000)    |
| Guatemala | 2010 | Female | 75 to 79 | 8.2%<br>(4.7-13%)              | 92%<br>(87-95%)          | 1.4<br>(0.65-2.6)                           | 4.5%<br>(3.1-6.3%)                   | 5.9%<br>(4.3-8.2%)                  | 170<br>(120-240)    | 2500<br>(1700-3600)    |
| Guatemala | 2010 | Female | 80 to 84 | 7.3%<br>(4.3-11%)              | 93%<br>(89-96%)          | 1.2<br>(0.57-2.1)                           | 3.7%<br>(2.5-5.4%)                   | 4.8%<br>(3.2-6.8%)                  | 150<br>(98-220)     | 1600<br>(1100-2400)    |

| Location  | Year | Sex    | Age      | Prevalence of current drinkers | Prevalence of abstainers | Population average of standard drinks daily | Percent of total attributable deaths | Percent of total attributable DALYs | Attributable deaths | Attributable DALYs        |
|-----------|------|--------|----------|--------------------------------|--------------------------|---------------------------------------------|--------------------------------------|-------------------------------------|---------------------|---------------------------|
| Guatemala | 2010 | Female | 85 to 89 | 7.4%<br>(4.1-12%)              | 93%<br>(88-96%)          | 1.1<br>(0.55-2.1)                           | 3.4%<br>(2.2-5.1%)                   | 4.2%<br>(2.7-6.4%)                  | 110<br>(66-160)     | 800<br>(500-1200)         |
| Guatemala | 2010 | Female | 90 to 94 | 8.7%<br>(5.5-14%)              | 91%<br>(86-95%)          | 1.2<br>(0.56-2.3)                           | 3.4%<br>(2-5.3%)                     | 4.1%<br>(2.4-6.5%)                  | 55<br>(32-90)       | 290<br>(170-460)          |
| Guatemala | 2010 | Female | 95 plus  | 11%<br>(6.1-17%)               | 89%<br>(83-94%)          | 1.4<br>(0.51-2.7)                           | 3.5%<br>(1.6-5.7%)                   | 4.1%<br>(1.8-6.9%)                  | 17<br>(7.2-28)      | 58<br>(26-95)             |
| Guatemala | 2010 | Male   | All Ages | 11%<br>(8.8-13%)               | 89%<br>(87-91%)          | 1.3<br>(1-1.6)                              | 8%<br>(6.8-9.4%)                     | 9.7%<br>(8.3-11%)                   | 4300<br>(3300-5400) | 200000<br>(160000-250000) |
| Guatemala | 2010 | Male   | 15 to 19 | 8.6%<br>(5.2-13%)              | 91%<br>(87-95%)          | 0.56<br>(0.27-1)                            | 4.1%<br>(2.8-6%)                     | 4.3%<br>(2.5-7%)                    | 75<br>(41-120)      | 7200<br>(4700-11000)      |
| Guatemala | 2010 | Male   | 20 to 24 | 18%<br>(11-26%)                | 82%<br>(74-89%)          | 1.7<br>(0.93-2.8)                           | 11%<br>(7.6-15%)                     | 11%<br>(6.9-17%)                    | 260<br>(150-400)    | 22000<br>(14000-31000)    |
| Guatemala | 2010 | Male   | 25 to 29 | 23%<br>(15-33%)                | 77%<br>(67-85%)          | 2.6<br>(1.4-4.2)                            | 14%<br>(11-19%)                      | 15%<br>(11-21%)                     | 370<br>(240-540)    | 28000<br>(20000-39000)    |
| Guatemala | 2010 | Male   | 30 to 34 | 25%<br>(16-35%)                | 75%<br>(65-84%)          | 2.9<br>(1.6-4.6)                            | 16%<br>(13-20%)                      | 18%<br>(14-24%)                     | 410<br>(290-560)    | 27000<br>(20000-36000)    |
| Guatemala | 2010 | Male   | 35 to 39 | 24%<br>(15-34%)                | 76%<br>(66-85%)          | 3<br>(1.6-4.9)                              | 18%<br>(15-22%)                      | 21%<br>(17-26%)                     | 420<br>(300-560)    | 25000<br>(18000-32000)    |
| Guatemala | 2010 | Male   | 40 to 44 | 24%<br>(16-33%)                | 76%<br>(67-84%)          | 3<br>(1.6-4.9)                              | 19%<br>(16-22%)                      | 23%<br>(19-27%)                     | 430<br>(310-550)    | 22000<br>(17000-27000)    |
| Guatemala | 2010 | Male   | 45 to 49 | 25%<br>(15-34%)                | 75%<br>(66-85%)          | 3.1<br>(1.6-5.2)                            | 18%<br>(15-21%)                      | 22%<br>(19-25%)                     | 420<br>(310-550)    | 19000<br>(14000-24000)    |
| Guatemala | 2010 | Male   | 50 to 54 | 24%<br>(16-33%)                | 76%<br>(67-84%)          | 3.2<br>(1.7-5.5)                            | 16%<br>(13-19%)                      | 20%<br>(17-23%)                     | 400<br>(300-510)    | 16000<br>(12000-20000)    |
| Guatemala | 2010 | Male   | 55 to 59 | 22%<br>(14-31%)                | 78%<br>(69-86%)          | 3.3<br>(1.7-5.6)                            | 13%<br>(11-16%)                      | 16%<br>(14-19%)                     | 350<br>(260-460)    | 12000<br>(9200-15000)     |
| Guatemala | 2010 | Male   | 60 to 64 | 19%<br>(12-28%)                | 81%<br>(72-88%)          | 2.8<br>(1.4-5.1)                            | 11%<br>(8.6-13%)                     | 13%<br>(11-16%)                     | 300<br>(230-390)    | 8800<br>(6600-11000)      |
| Guatemala | 2010 | Male   | 65 to 69 | 17%<br>(11-24%)                | 83%<br>(76-89%)          | 2.1<br>(1.1-3.6)                            | 8.7%<br>(7.2-11%)                    | 11%<br>(9.2-13%)                    | 250<br>(190-320)    | 6100<br>(4600-7700)       |
| Guatemala | 2010 | Male   | 70 to 74 | 15%<br>(9.5-21%)               | 85%<br>(79-91%)          | 1.5<br>(0.78-2.6)                           | 6.7%<br>(5.2-8.3%)                   | 8.3%<br>(6.7-10%)                   | 220<br>(170-290)    | 4300<br>(3200-5600)       |
| Guatemala | 2010 | Male   | 75 to 79 | 12%<br>(6.7-18%)               | 88%<br>(82-93%)          | 1.1<br>(0.5-2)                              | 4.8%<br>(3.6-6.2%)                   | 5.9%<br>(4.4-7.5%)                  | 180<br>(130-240)    | 2700<br>(1900-3600)       |
| Guatemala | 2010 | Male   | 80 to 84 | 9.8%<br>(5.5-15%)              | 90%<br>(85-94%)          | 0.83<br>(0.39-1.5)                          | 3.5%<br>(2.6-4.7%)                   | 4.2%<br>(3.1-5.6%)                  | 130<br>(91-180)     | 1400<br>(1000-1900)       |
| Guatemala | 2010 | Male   | 85 to 89 | 9.4%<br>(5.3-15%)              | 91%<br>(85-95%)          | 0.73<br>(0.35-1.3)                          | 2.8%<br>(1.9-4%)                     | 3.2%<br>(2.1-4.7%)                  | 75<br>(49-110)      | 590<br>(390-840)          |
| Guatemala | 2010 | Male   | 90 to 94 | 11%<br>(6.4-17%)               | 89%<br>(83-94%)          | 0.8<br>(0.36-1.5)                           | 2.6%<br>(1.5-4%)                     | 2.9%<br>(1.7-4.5%)                  | 32<br>(18-50)       | 170<br>(100-270)          |
| Guatemala | 2010 | Male   | 95 plus  | 14%<br>(6.7-23%)               | 86%<br>(77-93%)          | 0.96<br>(0.35-1.9)                          | 2.7%<br>(1.4-4.4%)                   | 2.9%<br>(1.4-5%)                    | 8.1<br>(3.7-14)     | 30<br>(15-51)             |
| Guatemala | 2016 | Female | All Ages | 8.9%<br>(7.4-10%)              | 91%<br>(90-93%)          | 1<br>(0.73-1.4)                             | 3.6%<br>(2.7-4.6%)                   | 5.9%<br>(4.8-7.3%)                  | 2200<br>(1400-3100) | 70000<br>(49000-98000)    |



| Location  | Year | Sex    | Age      | Prevalence of current drinkers | Prevalence of abstainers | Population average of standard drinks daily | Percent of total attributable deaths | Percent of total attributable DALYs | Attributable deaths | Attributable DALYs     |
|-----------|------|--------|----------|--------------------------------|--------------------------|---------------------------------------------|--------------------------------------|-------------------------------------|---------------------|------------------------|
| Guatemala | 2016 | Female | 15 to 19 | 7.8%<br>(4.9-11%)              | 92%<br>(89-95%)          | 0.79<br>(0.39-1.4)                          | 2.2%<br>(1.3-3.4%)                   | 3.7%<br>(1.9-6.1%)                  | 28<br>(12-50)       | 2600<br>(1400-4200)    |
| Guatemala | 2016 | Female | 20 to 24 | 11%<br>(7.3-16%)               | 89%<br>(84-93%)          | 1.2<br>(0.58-2.1)                           | 3.4%<br>(2.3-4.8%)                   | 5.3%<br>(3-7.8%)                    | 40<br>(21-68)       | 4000<br>(2500-5900)    |
| Guatemala | 2016 | Female | 25 to 29 | 13%<br>(7.9-19%)               | 87%<br>(81-92%)          | 1.3<br>(0.65-2.2)                           | 3.9%<br>(2.8-5.3%)                   | 6.1%<br>(4-8.7%)                    | 48<br>(26-80)       | 4300<br>(2800-6300)    |
| Guatemala | 2016 | Female | 30 to 34 | 13%<br>(8-20%)                 | 87%<br>(80-92%)          | 1.4<br>(0.73-2.3)                           | 4.6%<br>(3.4-6.2%)                   | 7.7%<br>(5.6-10%)                   | 68<br>(38-110)      | 5100<br>(3400-7400)    |
| Guatemala | 2016 | Female | 35 to 39 | 14%<br>(8.4-20%)               | 86%<br>(80-92%)          | 1.6<br>(0.81-2.7)                           | 5.4%<br>(3.9-7.3%)                   | 9.4%<br>(7.1-12%)                   | 91<br>(51-150)      | 5900<br>(3700-8900)    |
| Guatemala | 2016 | Female | 40 to 44 | 14%<br>(8.9-20%)               | 86%<br>(80-91%)          | 1.9<br>(1-3.2)                              | 6.2%<br>(4.6-8.3%)                   | 11%<br>(8.5-13%)                    | 120<br>(69-180)     | 6400<br>(4100-9600)    |
| Guatemala | 2016 | Female | 45 to 49 | 14%<br>(8.4-20%)               | 86%<br>(80-92%)          | 2.4<br>(1.2-4.2)                            | 6.7%<br>(4.9-9.1%)                   | 11%<br>(8.5-14%)                    | 140<br>(86-220)     | 6800<br>(4300-10000)   |
| Guatemala | 2016 | Female | 50 to 54 | 14%<br>(9.1-20%)               | 86%<br>(80-91%)          | 2.7<br>(1.4-4.6)                            | 7.2%<br>(5.2-9.8%)                   | 11%<br>(8.3-14%)                    | 180<br>(110-270)    | 7200<br>(4500-11000)   |
| Guatemala | 2016 | Female | 55 to 59 | 13%<br>(8.5-19%)               | 87%<br>(81-91%)          | 2.8<br>(1.4-5)                              | 7.1%<br>(5.1-9.8%)                   | 10%<br>(7.8-14%)                    | 200<br>(120-310)    | 6800<br>(4200-10000)   |
| Guatemala | 2016 | Female | 60 to 64 | 11%<br>(6.9-17%)               | 89%<br>(83-93%)          | 2.5<br>(1.2-4.7)                            | 6.4%<br>(4.6-8.9%)                   | 9.2%<br>(6.9-12%)                   | 210<br>(130-320)    | 6000<br>(3800-9000)    |
| Guatemala | 2016 | Female | 65 to 69 | 10%<br>(6.4-14%)               | 90%<br>(86-94%)          | 2.2<br>(1.1-3.8)                            | 6.1%<br>(4.5-8.3%)                   | 8.6%<br>(6.5-11%)                   | 230<br>(140-340)    | 5400<br>(3400-7900)    |
| Guatemala | 2016 | Female | 70 to 74 | 9.2%<br>(6-13%)                | 91%<br>(87-94%)          | 1.9<br>(0.95-3.5)                           | 5.4%<br>(3.9-7.4%)                   | 7.4%<br>(5.5-10%)                   | 200<br>(130-300)    | 3900<br>(2500-5800)    |
| Guatemala | 2016 | Female | 75 to 79 | 8%<br>(4.6-12%)                | 92%<br>(88-95%)          | 1.6<br>(0.66-2.9)                           | 4.3%<br>(3-6.2%)                     | 5.8%<br>(4.2-8.1%)                  | 180<br>(100-270)    | 2600<br>(1600-4000)    |
| Guatemala | 2016 | Female | 80 to 84 | 7.1%<br>(4.1-10%)              | 93%<br>(90-96%)          | 1.3<br>(0.59-2.3)                           | 3.6%<br>(2.5-5.2%)                   | 4.7%<br>(3.2-6.7%)                  | 180<br>(110-270)    | 1900<br>(1200-2900)    |
| Guatemala | 2016 | Female | 85 to 89 | 7.2%<br>(4.1-11%)              | 93%<br>(89-96%)          | 1.2<br>(0.55-2.2)                           | 3.3%<br>(2.1-5%)                     | 4.2%<br>(2.7-6.3%)                  | 140<br>(83-220)     | 1100<br>(650-1700)     |
| Guatemala | 2016 | Female | 90 to 94 | 8.4%<br>(5.2-13%)              | 92%<br>(87-95%)          | 1.3<br>(0.57-2.5)                           | 3.3%<br>(2-5.2%)                     | 4.1%<br>(2.4-6.5%)                  | 80<br>(45-130)      | 420<br>(240-680)       |
| Guatemala | 2016 | Female | 95 plus  | 10%<br>(5.7-16%)               | 90%<br>(84-94%)          | 1.5<br>(0.54-3)                             | 3.5%<br>(1.7-5.6%)                   | 4.2%<br>(2-6.9%)                    | 27<br>(12-47)       | 93<br>(45-160)         |
| Guatemala | 2016 | Male   | All Ages | 11%<br>(9.2-14%)               | 89%<br>(86-91%)          | 1.5<br>(1-2)                                | 8.8%<br>(7.3-10%)                    | 10%<br>(8.7-12%)                    | 4900<br>(3400-6800) | 23000<br>(16000-31000) |
| Guatemala | 2016 | Male   | 15 to 19 | 8.3%<br>(5.1-13%)              | 92%<br>(87-95%)          | 0.59<br>(0.27-1.1)                          | 4.2%<br>(2.8-6.2%)                   | 4.5%<br>(2.6-7.3%)                  | 78<br>(38-140)      | 7600<br>(4500-12000)   |
| Guatemala | 2016 | Male   | 20 to 24 | 18%<br>(11-25%)                | 82%<br>(75-89%)          | 1.9<br>(0.95-3.2)                           | 11%<br>(7.6-15%)                     | 11%<br>(7-17%)                      | 270<br>(140-450)    | 23000<br>(15000-36000) |
| Guatemala | 2016 | Male   | 25 to 29 | 23%<br>(15-32%)                | 77%<br>(68-85%)          | 2.7<br>(1.5-4.6)                            | 14%<br>(11-19%)                      | 15%<br>(11-21%)                     | 360<br>(220-560)    | 28000<br>(19000-40000) |
| Guatemala | 2016 | Male   | 30 to 34 | 24%<br>(15-35%)                | 76%<br>(65-85%)          | 3.1<br>(1.6-5.1)                            | 16%<br>(13-20%)                      | 19%<br>(14-24%)                     | 450<br>(300-670)    | 31000<br>(22000-43000) |

| Location  | Year | Sex    | Age      | Prevalence of current drinkers | Prevalence of abstainers | Population average of standard drinks daily | Percent of total attributable deaths | Percent of total attributable DALYs | Attributable deaths | Attributable DALYs     |
|-----------|------|--------|----------|--------------------------------|--------------------------|---------------------------------------------|--------------------------------------|-------------------------------------|---------------------|------------------------|
| Guatemala | 2016 | Male   | 35 to 39 | 24%<br>(15-33%)                | 76%<br>(67-85%)          | 3.1<br>(1.6-5.2)                            | 18%<br>(15-22%)                      | 22%<br>(17-26%)                     | 500<br>(330-750)    | 29000<br>(21000-41000) |
| Guatemala | 2016 | Male   | 40 to 44 | 24%<br>(15-33%)                | 76%<br>(67-85%)          | 3.2<br>(1.6-5.3)                            | 18%<br>(15-22%)                      | 23%<br>(19-27%)                     | 510<br>(320-730)    | 26000<br>(18000-36000) |
| Guatemala | 2016 | Male   | 45 to 49 | 24%<br>(15-34%)                | 76%<br>(66-85%)          | 3.3<br>(1.7-5.8)                            | 18%<br>(15-21%)                      | 22%<br>(19-26%)                     | 480<br>(310-710)    | 22000<br>(15000-30000) |
| Guatemala | 2016 | Male   | 50 to 54 | 23%<br>(16-33%)                | 77%<br>(67-84%)          | 3.4<br>(1.7-5.9)                            | 16%<br>(13-19%)                      | 20%<br>(17-23%)                     | 450<br>(290-650)    | 18000<br>(12000-25000) |
| Guatemala | 2016 | Male   | 55 to 59 | 21%<br>(14-30%)                | 79%<br>(70-86%)          | 3.5<br>(1.7-6.3)                            | 13%<br>(11-16%)                      | 17%<br>(14-20%)                     | 380<br>(250-530)    | 13000<br>(8900-18000)  |
| Guatemala | 2016 | Male   | 60 to 64 | 19%<br>(12-28%)                | 81%<br>(72-88%)          | 3<br>(1.4-5.7)                              | 10%<br>(8.5-13%)                     | 13%<br>(11-16%)                     | 340<br>(220-470)    | 9700<br>(6700-13000)   |
| Guatemala | 2016 | Male   | 65 to 69 | 17%<br>(10-24%)                | 83%<br>(76-90%)          | 2.2<br>(1.1-3.9)                            | 8.6%<br>(7-11%)                      | 11%<br>(9.2-13%)                    | 320<br>(210-440)    | 7500<br>(5300-10000)   |
| Guatemala | 2016 | Male   | 70 to 74 | 14%<br>(9.2-21%)               | 86%<br>(79-91%)          | 1.6<br>(0.77-2.8)                           | 6.7%<br>(5.3-8.4%)                   | 8.4%<br>(6.9-10%)                   | 260<br>(170-360)    | 5000<br>(3400-6800)    |
| Guatemala | 2016 | Male   | 75 to 79 | 11%<br>(6.6-18%)               | 89%<br>(82-93%)          | 1.2<br>(0.49-2.2)                           | 4.8%<br>(3.6-6.1%)                   | 6%<br>(4.6-7.5%)                    | 200<br>(130-280)    | 2900<br>(1900-4100)    |
| Guatemala | 2016 | Male   | 80 to 84 | 9.6%<br>(5.5-14%)              | 90%<br>(86-95%)          | 0.88<br>(0.41-1.6)                          | 3.6%<br>(2.7-4.7%)                   | 4.3%<br>(3.2-5.7%)                  | 160<br>(100-220)    | 1700<br>(1200-2400)    |
| Guatemala | 2016 | Male   | 85 to 89 | 9.2%<br>(5.1-15%)              | 91%<br>(85-95%)          | 0.77<br>(0.34-1.4)                          | 2.9%<br>(2-4.1%)                     | 3.3%<br>(2.2-4.8%)                  | 110<br>(67-160)     | 840<br>(550-1200)      |
| Guatemala | 2016 | Male   | 90 to 94 | 11%<br>(6.2-17%)               | 89%<br>(83-94%)          | 0.85<br>(0.37-1.7)                          | 2.6%<br>(1.6-3.9%)                   | 2.9%<br>(1.8-4.5%)                  | 53<br>(31-83)       | 290<br>(180-440)       |
| Guatemala | 2016 | Male   | 95 plus  | 13%<br>(6.4-22%)               | 87%<br>(78-94%)          | 1<br>(0.37-2.1)                             | 2.7%<br>(1.5-4.4%)                   | 2.9%<br>(1.4-5%)                    | 15<br>(7.1-25)      | 55<br>(29-90)          |
| Honduras  | 1990 | Female | All Ages | 5.4%<br>(4.5-6.6%)             | 95%<br>(93-96%)          | 0.19<br>(0.16-0.23)                         | 1.2%<br>(1-1.5%)                     | 2.3%<br>(1.8-2.9%)                  | 370<br>(280-480)    | 11000<br>(9000-14000)  |
| Honduras  | 1990 | Female | 15 to 19 | 5.5%<br>(3.4-8.1%)             | 95%<br>(92-97%)          | 0.19<br>(0.096-0.33)                        | 0.87%<br>(0.53-1.3%)                 | 0.94%<br>(0.44-1.7%)                | 2.6<br>(1.2-4.6)    | 350<br>(210-540)       |
| Honduras  | 1990 | Female | 20 to 24 | 8.3%<br>(5.1-12%)              | 92%<br>(88-95%)          | 0.28<br>(0.14-0.47)                         | 1.5%<br>(0.97-2.2%)                  | 1.4%<br>(0.71-2.4%)                 | 4.5<br>(2.3-7.6)    | 600<br>(380-900)       |
| Honduras  | 1990 | Female | 25 to 29 | 8.7%<br>(5.4-13%)              | 91%<br>(87-95%)          | 0.28<br>(0.15-0.47)                         | 1.6%<br>(1.1-2.2%)                   | 1.6%<br>(0.92-2.6%)                 | 5.2<br>(2.9-8.4)    | 590<br>(400-850)       |
| Honduras  | 1990 | Female | 30 to 34 | 9%<br>(5.4-14%)                | 91%<br>(86-95%)          | 0.3<br>(0.16-0.49)                          | 1.9%<br>(1.4-2.5%)                   | 2.3%<br>(1.6-3.2%)                  | 8<br>(5.3-11)       | 650<br>(460-880)       |
| Honduras  | 1990 | Female | 35 to 39 | 9.5%<br>(5.6-14%)              | 91%<br>(86-94%)          | 0.35<br>(0.18-0.59)                         | 2.3%<br>(1.7-3.1%)                   | 3%<br>(2.1-4.2%)                    | 12<br>(8-18)        | 770<br>(540-1100)      |
| Honduras  | 1990 | Female | 40 to 44 | 9.6%<br>(6-14%)                | 90%<br>(86-94%)          | 0.43<br>(0.23-0.69)                         | 2.7%<br>(1.9-3.7%)                   | 3.7%<br>(2.5-5.2%)                  | 15<br>(9.6-21)      | 780<br>(540-1100)      |
| Honduras  | 1990 | Female | 45 to 49 | 9.6%<br>(5.5-14%)              | 90%<br>(86-94%)          | 0.52<br>(0.25-0.91)                         | 3.4%<br>(2.3-4.9%)                   | 4.7%<br>(3.1-6.8%)                  | 20<br>(13-30)       | 900<br>(590-1300)      |
| Honduras  | 1990 | Female | 50 to 54 | 9.7%<br>(6.1-14%)              | 90%<br>(86-94%)          | 0.62<br>(0.32-1)                            | 4%<br>(2.8-5.6%)                     | 5.3%<br>(3.6-7.3%)                  | 29<br>(19-42)       | 1100<br>(740-1600)     |

| Location | Year | Sex    | Age      | Prevalence of current drinkers | Prevalence of abstainers | Population average of standard drinks daily | Percent of total attributable deaths | Percent of total attributable DALYs | Attributable deaths | Attributable DALYs     |
|----------|------|--------|----------|--------------------------------|--------------------------|---------------------------------------------|--------------------------------------|-------------------------------------|---------------------|------------------------|
| Honduras | 1990 | Female | 55 to 59 | 9.7%<br>(5.6-16%)              | 90%<br>(84-94%)          | 0.69<br>(0.32-1.2)                          | 4.5%<br>(3.1-6.2%)                   | 5.8%<br>(4-8.1%)                    | 41<br>(28-58)       | 1300<br>(900-1900)     |
| Honduras | 1990 | Female | 60 to 64 | 8.8%<br>(4.8-15%)              | 91%<br>(85-95%)          | 0.63<br>(0.3-1.2)                           | 4%<br>(2.7-5.7%)                     | 5%<br>(3.4-7%)                      | 44<br>(29-62)       | 1200<br>(810-1700)     |
| Honduras | 1990 | Female | 65 to 69 | 8.1%<br>(4.6-13%)              | 92%<br>(87-95%)          | 0.56<br>(0.27-1)                            | 3.9%<br>(2.6-5.4%)                   | 4.7%<br>(3.2-6.6%)                  | 52<br>(35-73)       | 1200<br>(790-1700)     |
| Honduras | 1990 | Female | 70 to 74 | 7.1%<br>(4.3-12%)              | 93%<br>(88-96%)          | 0.48<br>(0.24-0.86)                         | 3.3%<br>(2.2-4.7%)                   | 3.9%<br>(2.7-5.5%)                  | 45<br>(29-64)       | 810<br>(540-1200)      |
| Honduras | 1990 | Female | 75 to 79 | 5.8%<br>(3.3-9.7%)             | 94%<br>(90-97%)          | 0.38<br>(0.16-0.71)                         | 2.5%<br>(1.6-3.7%)                   | 2.9%<br>(1.9-4.4%)                  | 39<br>(25-58)       | 550<br>(360-820)       |
| Honduras | 1990 | Female | 80 to 84 | 5.1%<br>(2.8-8.2%)             | 95%<br>(92-97%)          | 0.32<br>(0.14-0.57)                         | 2%<br>(1.3-3%)                       | 2.3%<br>(1.5-3.5%)                  | 25<br>(16-39)       | 260<br>(170-400)       |
| Honduras | 1990 | Female | 85 to 89 | 5.3%<br>(2.9-8.7%)             | 95%<br>(91-97%)          | 0.32<br>(0.14-0.61)                         | 1.7%<br>(1.1-2.7%)                   | 2%<br>(1.2-3.2%)                    | 17<br>(10-27)       | 130<br>(77-200)        |
| Honduras | 1990 | Female | 90 to 94 | 6.4%<br>(3.6-10%)              | 94%<br>(90-96%)          | 0.35<br>(0.15-0.7)                          | 1.4%<br>(0.8-2.5%)                   | 1.6%<br>(0.88-2.9%)                 | 8.1<br>(4.5-15)     | 43<br>(24-75)          |
| Honduras | 1990 | Female | 95 plus  | 8%<br>(4.3-13%)                | 92%<br>(87-96%)          | 0.38<br>(0.14-0.78)                         | 1.5%<br>(0.78-2.9%)                  | 1.7%<br>(0.82-3.2%)                 | 3.3<br>(1.6-6.2)    | 12<br>(5.9-21)         |
| Honduras | 1990 | Male   | All Ages | 16%<br>(13-19%)                | 84%<br>(81-87%)          | 1.1<br>(0.98-1.3)                           | 3.7%<br>(2.9-4.7%)                   | 5.5%<br>(4.3-6.7%)                  | 830<br>(580-1200)   | 37000<br>(27000-50000) |
| Honduras | 1990 | Male   | 15 to 19 | 14%<br>(9-20%)                 | 86%<br>(80-91%)          | 0.61<br>(0.3-1.1)                           | 3.4%<br>(2.1-5.2%)                   | 3.8%<br>(2-6.6%)                    | 13<br>(6.1-24)      | 1400<br>(850-2200)     |
| Honduras | 1990 | Male   | 20 to 24 | 29%<br>(20-39%)                | 71%<br>(61-80%)          | 1.7<br>(0.93-2.8)                           | 8.9%<br>(5.8-13%)                    | 10%<br>(5.8-16%)                    | 48<br>(25-82)       | 4200<br>(2600-6500)    |
| Honduras | 1990 | Male   | 25 to 29 | 34%<br>(24-45%)                | 66%<br>(55-76%)          | 2.4<br>(1.3-3.7)                            | 11%<br>(7.5-15%)                     | 13%<br>(8-19%)                      | 60<br>(32-100)      | 4600<br>(2900-7000)    |
| Honduras | 1990 | Male   | 30 to 34 | 35%<br>(25-47%)                | 65%<br>(53-75%)          | 2.7<br>(1.5-4.1)                            | 12%<br>(8.5-16%)                     | 15%<br>(9.9-20%)                    | 66<br>(39-100)      | 4400<br>(2800-6400)    |
| Honduras | 1990 | Male   | 35 to 39 | 34%<br>(24-44%)                | 66%<br>(56-76%)          | 2.8<br>(1.5-4.6)                            | 12%<br>(8.9-17%)                     | 16%<br>(11-21%)                     | 70<br>(40-110)      | 4100<br>(2600-6100)    |
| Honduras | 1990 | Male   | 40 to 44 | 33%<br>(23-43%)                | 67%<br>(57-77%)          | 3<br>(1.5-4.8)                              | 13%<br>(9.4-17%)                     | 16%<br>(12-22%)                     | 70<br>(43-110)      | 3600<br>(2400-5200)    |
| Honduras | 1990 | Male   | 45 to 49 | 33%<br>(22-43%)                | 67%<br>(57-78%)          | 3.2<br>(1.5-5.6)                            | 13%<br>(9.4-16%)                     | 16%<br>(12-21%)                     | 72<br>(45-110)      | 3300<br>(2100-4800)    |
| Honduras | 1990 | Male   | 50 to 54 | 31%<br>(22-41%)                | 69%<br>(59-78%)          | 3.3<br>(1.7-5.5)                            | 12%<br>(8.7-15%)                     | 15%<br>(11-19%)                     | 79<br>(50-110)      | 3100<br>(2100-4400)    |
| Honduras | 1990 | Male   | 55 to 59 | 27%<br>(19-36%)                | 73%<br>(64-81%)          | 3.2<br>(1.6-5.5)                            | 9.9%<br>(7.3-13%)                    | 12%<br>(9-16%)                      | 78<br>(52-120)      | 2700<br>(1800-3900)    |
| Honduras | 1990 | Male   | 60 to 64 | 25%<br>(17-35%)                | 75%<br>(65-83%)          | 2.7<br>(1.3-4.9)                            | 8%<br>(5.9-11%)                      | 9.7%<br>(7.1-13%)                   | 70<br>(46-100)      | 2000<br>(1400-2900)    |
| Honduras | 1990 | Male   | 65 to 69 | 24%<br>(14-36%)                | 76%<br>(64-86%)          | 2.1<br>(1-3.6)                              | 6.9%<br>(4.8-9.4%)                   | 8.4%<br>(5.9-12%)                   | 67<br>(43-100)      | 1600<br>(1100-2300)    |
| Honduras | 1990 | Male   | 70 to 74 | 22%<br>(13-34%)                | 78%<br>(66-87%)          | 1.5<br>(0.71-2.9)                           | 5.3%<br>(3.4-7.7%)                   | 6.3%<br>(4.1-9.1%)                  | 51<br>(30-77)       | 960<br>(590-1400)      |

| Location | Year | Sex    | Age      | Prevalence of current drinkers | Prevalence of abstainers | Population average of standard drinks daily | Percent of total attributable deaths | Percent of total attributable DALYs | Attributable deaths | Attributable DALYs    |
|----------|------|--------|----------|--------------------------------|--------------------------|---------------------------------------------|--------------------------------------|-------------------------------------|---------------------|-----------------------|
| Honduras | 1990 | Male   | 75 to 79 | 18%<br>(11-28%)                | 82%<br>(72-89%)          | 1.1<br>(0.45-2.2)                           | 3.9%<br>(2.2-5.8%)                   | 4.6%<br>(2.6-6.9%)                  | 39<br>(21-62)       | 580<br>(320-900)      |
| Honduras | 1990 | Male   | 80 to 84 | 16%<br>(8.9-25%)               | 84%<br>(75-91%)          | 0.95<br>(0.4-1.7)                           | 3.3%<br>(1.9-5%)                     | 3.8%<br>(2.1-5.9%)                  | 27<br>(15-42)       | 290<br>(170-450)      |
| Honduras | 1990 | Male   | 85 to 89 | 15%<br>(8.9-24%)               | 85%<br>(76-91%)          | 0.92<br>(0.37-1.8)                          | 2.8%<br>(1.4-4.4%)                   | 3.2%<br>(1.6-5.1%)                  | 16<br>(7.7-26)      | 120<br>(63-200)       |
| Honduras | 1990 | Male   | 90 to 94 | 18%<br>(11-27%)                | 82%<br>(73-89%)          | 1.1<br>(0.42-2.2)                           | 2.7%<br>(1.1-4.5%)                   | 3%<br>(1.1-5.2%)                    | 7.1<br>(2.8-13)     | 39<br>(17-66)         |
| Honduras | 1990 | Male   | 95 plus  | 22%<br>(12-36%)                | 78%<br>(64-88%)          | 1.3<br>(0.41-2.8)                           | 3%<br>(1.1-5.3%)                     | 3.3%<br>(1-6.1%)                    | 2.1<br>(0.64-3.9)   | 7.8<br>(2.8-14)       |
| Honduras | 1995 | Female | All Ages | 5.6%<br>(4.6-6.9%)             | 94%<br>(93-95%)          | 0.21<br>(0.17-0.26)                         | 1.4%<br>(1.2-1.7%)                   | 2.6%<br>(2-3.3%)                    | 420<br>(310-550)    | 13000<br>(9700-16000) |
| Honduras | 1995 | Female | 15 to 19 | 5.5%<br>(3.5-8.2%)             | 94%<br>(92-96%)          | 0.2<br>(0.1-0.36)                           | 0.91%<br>(0.57-1.4%)                 | 1%<br>(0.5-1.8%)                    | 2.8<br>(1.4-5)      | 400<br>(240-620)      |
| Honduras | 1995 | Female | 20 to 24 | 8.4%<br>(5.2-12%)              | 92%<br>(88-95%)          | 0.3<br>(0.15-0.52)                          | 1.6%<br>(1-2.3%)                     | 1.5%<br>(0.78-2.6%)                 | 4.7<br>(2.4-8.1)    | 650<br>(410-960)      |
| Honduras | 1995 | Female | 25 to 29 | 8.8%<br>(5.5-13%)              | 91%<br>(87-94%)          | 0.31<br>(0.16-0.51)                         | 1.7%<br>(1.2-2.2%)                   | 1.7%<br>(1-2.7%)                    | 5.6<br>(3.2-9.3)    | 660<br>(440-940)      |
| Honduras | 1995 | Female | 30 to 34 | 9%<br>(5.4-14%)                | 91%<br>(86-95%)          | 0.32<br>(0.17-0.53)                         | 2%<br>(1.4-2.6%)                     | 2.4%<br>(1.7-3.3%)                  | 8.7<br>(5.7-13)     | 730<br>(520-1000)     |
| Honduras | 1995 | Female | 35 to 39 | 9.6%<br>(5.7-14%)              | 90%<br>(86-94%)          | 0.38<br>(0.19-0.64)                         | 2.3%<br>(1.7-3.2%)                   | 3.2%<br>(2.3-4.4%)                  | 13<br>(8.4-19)      | 840<br>(580-1200)     |
| Honduras | 1995 | Female | 40 to 44 | 9.8%<br>(6.1-14%)              | 90%<br>(86-94%)          | 0.46<br>(0.24-0.74)                         | 2.7%<br>(1.9-3.7%)                   | 3.8%<br>(2.6-5.2%)                  | 17<br>(11-26)       | 940<br>(640-1400)     |
| Honduras | 1995 | Female | 45 to 49 | 9.8%<br>(5.7-14%)              | 90%<br>(86-94%)          | 0.56<br>(0.26-0.98)                         | 3.4%<br>(2.3-4.9%)                   | 4.7%<br>(3.2-6.8%)                  | 23<br>(15-35)       | 1000<br>(670-1500)    |
| Honduras | 1995 | Female | 50 to 54 | 9.8%<br>(6.2-14%)              | 90%<br>(86-94%)          | 0.66<br>(0.35-1.1)                          | 4%<br>(2.8-5.6%)                     | 5.3%<br>(3.6-7.4%)                  | 30<br>(20-45)       | 1200<br>(750-1700)    |
| Honduras | 1995 | Female | 55 to 59 | 9.8%<br>(5.6-16%)              | 90%<br>(84-94%)          | 0.74<br>(0.34-1.3)                          | 4.5%<br>(3.1-6.2%)                   | 5.9%<br>(4.1-8%)                    | 42<br>(28-62)       | 1400<br>(930-2000)    |
| Honduras | 1995 | Female | 60 to 64 | 8.9%<br>(4.8-15%)              | 91%<br>(85-95%)          | 0.68<br>(0.32-1.3)                          | 4%<br>(2.8-5.7%)                     | 5.1%<br>(3.5-7.1%)                  | 47<br>(31-68)       | 1300<br>(870-1900)    |
| Honduras | 1995 | Female | 65 to 69 | 8.1%<br>(4.6-13%)              | 92%<br>(87-95%)          | 0.6<br>(0.3-1.1)                            | 3.9%<br>(2.7-5.5%)                   | 4.8%<br>(3.4-6.7%)                  | 56<br>(37-80)       | 1300<br>(860-1800)    |
| Honduras | 1995 | Female | 70 to 74 | 7.3%<br>(4.3-12%)              | 93%<br>(88-96%)          | 0.52<br>(0.25-0.92)                         | 3.4%<br>(2.3-4.9%)                   | 4.1%<br>(2.7-5.8%)                  | 58<br>(38-84)       | 1100<br>(700-1500)    |
| Honduras | 1995 | Female | 75 to 79 | 5.9%<br>(3.3-10%)              | 94%<br>(90-97%)          | 0.42<br>(0.18-0.77)                         | 2.6%<br>(1.7-3.8%)                   | 3.1%<br>(2-4.6%)                    | 43<br>(28-64)       | 610<br>(400-910)      |
| Honduras | 1995 | Female | 80 to 84 | 5.1%<br>(2.8-8.4%)             | 95%<br>(92-97%)          | 0.34<br>(0.15-0.63)                         | 2.1%<br>(1.4-3.2%)                   | 2.5%<br>(1.6-3.9%)                  | 32<br>(20-51)       | 340<br>(210-520)      |
| Honduras | 1995 | Female | 85 to 89 | 5.3%<br>(3-8.9%)               | 95%<br>(91-97%)          | 0.34<br>(0.15-0.63)                         | 1.8%<br>(1.1-2.8%)                   | 2.1%<br>(1.3-3.3%)                  | 23<br>(14-36)       | 170<br>(110-270)      |
| Honduras | 1995 | Female | 90 to 94 | 6.4%<br>(3.7-10%)              | 94%<br>(90-96%)          | 0.37<br>(0.16-0.73)                         | 1.5%<br>(0.85-2.6%)                  | 1.8%<br>(0.95-3.1%)                 | 10<br>(5.5-18)      | 54<br>(30-94)         |

| Location | Year | Sex    | Age      | Prevalence of current drinkers | Prevalence of abstainers | Population average of standard drinks daily | Percent of total attributable deaths | Percent of total attributable DALYs | Attributable deaths | Attributable DALYs     |
|----------|------|--------|----------|--------------------------------|--------------------------|---------------------------------------------|--------------------------------------|-------------------------------------|---------------------|------------------------|
| Honduras | 1995 | Female | 95 plus  | 8%<br>(4.3-14%)                | 92%<br>(86-96%)          | 0.41<br>(0.15-0.84)                         | 1.7%<br>(0.8-3%)                     | 1.8%<br>(0.85-3.4%)                 | 4.5<br>(2.1-8.3)    | 16<br>(7.8-29)         |
| Honduras | 1995 | Male   | All Ages | 17%<br>(14-20%)                | 83%<br>(80-86%)          | 1.3<br>(1.1-1.4)                            | 4.4%<br>(3.4-5.7%)                   | 6.2%<br>(4.9-7.7%)                  | 990<br>(660-1400)   | 43000<br>(30000-60000) |
| Honduras | 1995 | Male   | 15 to 19 | 14%<br>(9.3-21%)               | 86%<br>(79-91%)          | 0.66<br>(0.32-1.2)                          | 3.5%<br>(2.2-5.6%)                   | 4.1%<br>(2-7.1%)                    | 16<br>(7.1-30)      | 1700<br>(980-2800)     |
| Honduras | 1995 | Male   | 20 to 24 | 29%<br>(20-39%)                | 71%<br>(61-80%)          | 1.8<br>(0.97-2.9)                           | 9.1%<br>(6-13%)                      | 10%<br>(6-16%)                      | 52<br>(25-95)       | 4600<br>(2700-7400)    |
| Honduras | 1995 | Male   | 25 to 29 | 34%<br>(24-45%)                | 66%<br>(55-76%)          | 2.5<br>(1.4-4.1)                            | 11%<br>(7.4-15%)                     | 13%<br>(7.9-19%)                    | 64<br>(33-120)      | 5000<br>(3000-8100)    |
| Honduras | 1995 | Male   | 30 to 34 | 35%<br>(24-48%)                | 65%<br>(52-76%)          | 2.8<br>(1.6-4.3)                            | 11%<br>(8-15%)                       | 14%<br>(9.5-20%)                    | 68<br>(36-110)      | 4700<br>(2900-7200)    |
| Honduras | 1995 | Male   | 35 to 39 | 34%<br>(24-45%)                | 66%<br>(55-76%)          | 3<br>(1.6-5)                                | 12%<br>(8.6-16%)                     | 15%<br>(10-21%)                     | 76<br>(41-120)      | 4500<br>(2700-7000)    |
| Honduras | 1995 | Male   | 40 to 44 | 34%<br>(24-44%)                | 66%<br>(56-76%)          | 3.2<br>(1.7-5.1)                            | 13%<br>(9.2-16%)                     | 16%<br>(12-21%)                     | 84<br>(47-130)      | 4400<br>(2700-6500)    |
| Honduras | 1995 | Male   | 45 to 49 | 33%<br>(22-44%)                | 67%<br>(56-78%)          | 3.4<br>(1.7-6)                              | 13%<br>(9.4-16%)                     | 16%<br>(12-20%)                     | 86<br>(50-130)      | 3900<br>(2400-5600)    |
| Honduras | 1995 | Male   | 50 to 54 | 31%<br>(22-41%)                | 69%<br>(59-78%)          | 3.5<br>(1.9-5.9)                            | 12%<br>(8.8-15%)                     | 15%<br>(11-19%)                     | 87<br>(53-130)      | 3500<br>(2200-5000)    |
| Honduras | 1995 | Male   | 55 to 59 | 28%<br>(19-37%)                | 72%<br>(63-81%)          | 3.4<br>(1.7-6)                              | 10%<br>(7.4-13%)                     | 12%<br>(9.1-16%)                    | 88<br>(56-130)      | 3000<br>(2000-4400)    |
| Honduras | 1995 | Male   | 60 to 64 | 25%<br>(17-36%)                | 75%<br>(64-83%)          | 2.9<br>(1.3-5.2)                            | 8.2%<br>(6.1-11%)                    | 9.8%<br>(7.3-13%)                   | 87<br>(56-130)      | 2500<br>(1700-3800)    |
| Honduras | 1995 | Male   | 65 to 69 | 25%<br>(15-37%)                | 75%<br>(63-85%)          | 2.2<br>(1.1-3.9)                            | 7.1%<br>(5.1-9.7%)                   | 8.5%<br>(6-12%)                     | 85<br>(53-130)      | 2000<br>(1300-3000)    |
| Honduras | 1995 | Male   | 70 to 74 | 22%<br>(14-34%)                | 78%<br>(66-86%)          | 1.6<br>(0.77-3.1)                           | 5.5%<br>(3.5-7.8%)                   | 6.5%<br>(4.1-9.3%)                  | 73<br>(42-120)      | 1400<br>(820-2100)     |
| Honduras | 1995 | Male   | 75 to 79 | 18%<br>(11-29%)                | 82%<br>(71-89%)          | 1.2<br>(0.49-2.4)                           | 4.1%<br>(2.3-6.1%)                   | 4.8%<br>(2.7-7%)                    | 48<br>(25-78)       | 710<br>(380-1100)      |
| Honduras | 1995 | Male   | 80 to 84 | 16%<br>(9.2-25%)               | 84%<br>(75-91%)          | 1<br>(0.44-1.9)                             | 3.4%<br>(2-5.2%)                     | 3.9%<br>(2.2-6.1%)                  | 35<br>(19-57)       | 390<br>(220-610)       |
| Honduras | 1995 | Male   | 85 to 89 | 15%<br>(9-24%)                 | 85%<br>(76-91%)          | 0.97<br>(0.4-1.9)                           | 2.9%<br>(1.5-4.7%)                   | 3.3%<br>(1.7-5.4%)                  | 24<br>(12-41)       | 190<br>(94-310)        |
| Honduras | 1995 | Male   | 90 to 94 | 18%<br>(11-28%)                | 82%<br>(72-89%)          | 1.1<br>(0.45-2.3)                           | 2.8%<br>(1.2-4.7%)                   | 3.2%<br>(1.3-5.4%)                  | 10<br>(4.2-18)      | 57<br>(25-96)          |
| Honduras | 1995 | Male   | 95 plus  | 22%<br>(13-37%)                | 78%<br>(63-87%)          | 1.4<br>(0.43-3)                             | 3.2%<br>(1.2-5.6%)                   | 3.5%<br>(1.1-6.4%)                  | 3.3<br>(0.97-6)     | 12<br>(4.3-22)         |
| Honduras | 2000 | Female | All Ages | 5.7%<br>(4.7-6.9%)             | 94%<br>(93-95%)          | 0.24<br>(0.2-0.29)                          | 1.7%<br>(1.3-2%)                     | 2.9%<br>(2.3-3.6%)                  | 500<br>(350-670)    | 15000<br>(11000-19000) |
| Honduras | 2000 | Female | 15 to 19 | 5.5%<br>(3.5-8.2%)             | 94%<br>(92-97%)          | 0.22<br>(0.11-0.4)                          | 0.96%<br>(0.61-1.5%)                 | 1.1%<br>(0.56-2.1%)                 | 3.2<br>(1.4-5.8)    | 450<br>(270-700)       |
| Honduras | 2000 | Female | 20 to 24 | 8.3%<br>(5-12%)                | 92%<br>(88-95%)          | 0.33<br>(0.16-0.57)                         | 1.6%<br>(1.1-2.4%)                   | 1.6%<br>(0.83-2.7%)                 | 5<br>(2.5-9)        | 740<br>(450-1100)      |

| Location | Year | Sex    | Age      | Prevalence of current drinkers | Prevalence of abstainers | Population average of standard drinks daily | Percent of total attributable deaths | Percent of total attributable DALYs | Attributable deaths | Attributable DALYs     |
|----------|------|--------|----------|--------------------------------|--------------------------|---------------------------------------------|--------------------------------------|-------------------------------------|---------------------|------------------------|
| Honduras | 2000 | Female | 25 to 29 | 8.7%<br>(5.4-13%)              | 91%<br>(87-95%)          | 0.33<br>(0.18-0.57)                         | 1.7%<br>(1.2-2.3%)                   | 1.7%<br>(1-2.7%)                    | 5.7<br>(3.1-10)     | 700<br>(450-1000)      |
| Honduras | 2000 | Female | 30 to 34 | 9%<br>(5.5-14%)                | 91%<br>(86-94%)          | 0.36<br>(0.19-0.58)                         | 2%<br>(1.5-2.6%)                     | 2.5%<br>(1.7-3.5%)                  | 9.3<br>(5.5-15)     | 810<br>(550-1200)      |
| Honduras | 2000 | Female | 35 to 39 | 9.5%<br>(5.5-14%)              | 91%<br>(86-94%)          | 0.41<br>(0.21-0.68)                         | 2.4%<br>(1.7-3.2%)                   | 3.3%<br>(2.3-4.5%)                  | 14<br>(8.2-23)      | 940<br>(620-1400)      |
| Honduras | 2000 | Female | 40 to 44 | 9.6%<br>(5.7-14%)              | 90%<br>(86-94%)          | 0.5<br>(0.26-0.81)                          | 2.7%<br>(1.9-3.8%)                   | 3.8%<br>(2.6-5.3%)                  | 19<br>(11-30)       | 1000<br>(650-1600)     |
| Honduras | 2000 | Female | 45 to 49 | 9.6%<br>(5.7-14%)              | 90%<br>(86-94%)          | 0.61<br>(0.29-1.1)                          | 3.4%<br>(2.3-4.9%)                   | 4.8%<br>(3.3-6.9%)                  | 28<br>(17-44)       | 1300<br>(810-2000)     |
| Honduras | 2000 | Female | 50 to 54 | 9.7%<br>(6.3-14%)              | 90%<br>(86-94%)          | 0.73<br>(0.38-1.2)                          | 4%<br>(2.7-5.7%)                     | 5.4%<br>(3.7-7.5%)                  | 36<br>(22-55)       | 1400<br>(870-2100)     |
| Honduras | 2000 | Female | 55 to 59 | 9.8%<br>(5.7-16%)              | 90%<br>(84-94%)          | 0.82<br>(0.38-1.5)                          | 4.5%<br>(3.1-6.2%)                   | 6%<br>(4.1-8.1%)                    | 45<br>(29-68)       | 1500<br>(960-2200)     |
| Honduras | 2000 | Female | 60 to 64 | 8.9%<br>(4.7-15%)              | 91%<br>(85-95%)          | 0.76<br>(0.35-1.5)                          | 4.1%<br>(2.9-5.7%)                   | 5.2%<br>(3.6-7.3%)                  | 51<br>(33-75)       | 1400<br>(920-2100)     |
| Honduras | 2000 | Female | 65 to 69 | 8.1%<br>(4.7-13%)              | 92%<br>(87-95%)          | 0.67<br>(0.34-1.2)                          | 4%<br>(2.8-5.6%)                     | 5%<br>(3.5-7%)                      | 64<br>(42-94)       | 1500<br>(960-2100)     |
| Honduras | 2000 | Female | 70 to 74 | 7.2%<br>(4.3-12%)              | 93%<br>(88-96%)          | 0.58<br>(0.28-1)                            | 3.6%<br>(2.4-5%)                     | 4.3%<br>(2.9-6.1%)                  | 66<br>(42-96)       | 1200<br>(760-1700)     |
| Honduras | 2000 | Female | 75 to 79 | 5.9%<br>(3.3-9.5%)             | 94%<br>(90-97%)          | 0.46<br>(0.2-0.85)                          | 2.8%<br>(1.8-4%)                     | 3.3%<br>(2.2-4.8%)                  | 59<br>(37-88)       | 840<br>(520-1200)      |
| Honduras | 2000 | Female | 80 to 84 | 5.1%<br>(2.7-8.3%)             | 95%<br>(92-97%)          | 0.38<br>(0.17-0.69)                         | 2.3%<br>(1.5-3.4%)                   | 2.7%<br>(1.7-4%)                    | 46<br>(29-70)       | 490<br>(300-740)       |
| Honduras | 2000 | Female | 85 to 89 | 5.3%<br>(2.9-8.7%)             | 95%<br>(91-97%)          | 0.37<br>(0.17-0.7)                          | 2%<br>(1.3-3.1%)                     | 2.3%<br>(1.5-3.6%)                  | 29<br>(18-46)       | 210<br>(140-340)       |
| Honduras | 2000 | Female | 90 to 94 | 6.3%<br>(3.7-10%)              | 94%<br>(90-96%)          | 0.41<br>(0.17-0.81)                         | 1.7%<br>(0.95-2.8%)                  | 2%<br>(1.1-3.4%)                    | 14<br>(7.2-24)      | 71<br>(38-120)         |
| Honduras | 2000 | Female | 95 plus  | 8%<br>(4.2-13%)                | 92%<br>(87-96%)          | 0.45<br>(0.16-0.91)                         | 1.8%<br>(0.88-3.3%)                  | 2%<br>(0.94-3.8%)                   | 5.1<br>(2.4-9.6)    | 18<br>(8.9-33)         |
| Honduras | 2000 | Male   | All Ages | 17%<br>(14-20%)                | 83%<br>(80-86%)          | 1.5<br>(1.3-1.7)                            | 5.2%<br>(4-6.6%)                     | 6.9%<br>(5.5-8.5%)                  | 1200<br>(760-1700)  | 50000<br>(34000-71000) |
| Honduras | 2000 | Male   | 15 to 19 | 14%<br>(9.2-20%)               | 86%<br>(80-91%)          | 0.75<br>(0.36-1.3)                          | 3.9%<br>(2.4-6.2%)                   | 4.6%<br>(2.4-8.2%)                  | 20<br>(8.7-40)      | 2100<br>(1200-3500)    |
| Honduras | 2000 | Male   | 20 to 24 | 29%<br>(20-38%)                | 71%<br>(62-80%)          | 2.1<br>(1.1-3.4)                            | 9.8%<br>(6.4-14%)                    | 11%<br>(6.7-18%)                    | 64<br>(30-130)      | 5500<br>(3200-9700)    |
| Honduras | 2000 | Male   | 25 to 29 | 34%<br>(24-45%)                | 66%<br>(55-76%)          | 2.8<br>(1.6-4.6)                            | 11%<br>(7.8-16%)                     | 13%<br>(8.5-20%)                    | 71<br>(35-130)      | 5500<br>(3200-9000)    |
| Honduras | 2000 | Male   | 30 to 34 | 35%<br>(25-47%)                | 65%<br>(53-75%)          | 3.2<br>(1.9-4.9)                            | 12%<br>(8.2-16%)                     | 14%<br>(9.7-20%)                    | 76<br>(38-130)      | 5200<br>(3200-8300)    |
| Honduras | 2000 | Male   | 35 to 39 | 34%<br>(24-45%)                | 66%<br>(55-76%)          | 3.4<br>(1.8-5.5)                            | 12%<br>(8.7-17%)                     | 16%<br>(11-21%)                     | 85<br>(45-140)      | 5100<br>(3000-7900)    |
| Honduras | 2000 | Male   | 40 to 44 | 34%<br>(24-44%)                | 66%<br>(56-76%)          | 3.6<br>(1.9-5.8)                            | 13%<br>(9.1-17%)                     | 16%<br>(12-21%)                     | 95<br>(52-150)      | 5000<br>(3000-7500)    |

| Location | Year | Sex    | Age      | Prevalence of current drinkers | Prevalence of abstainers | Population average of standard drinks daily | Percent of total attributable deaths | Percent of total attributable DALYs | Attributable deaths | Attributable DALYs     |
|----------|------|--------|----------|--------------------------------|--------------------------|---------------------------------------------|--------------------------------------|-------------------------------------|---------------------|------------------------|
| Honduras | 2000 | Male   | 45 to 49 | 33%<br>(22-43%)                | 67%<br>(57-78%)          | 3.8<br>(1.9-6.6)                            | 13%<br>(9.5-16%)                     | 16%<br>(12-21%)                     | 110<br>(61-160)     | 4900<br>(3100-7200)    |
| Honduras | 2000 | Male   | 50 to 54 | 31%<br>(22-41%)                | 69%<br>(59-78%)          | 3.9<br>(2.1-6.5)                            | 12%<br>(8.9-15%)                     | 15%<br>(11-19%)                     | 110<br>(63-160)     | 4200<br>(2700-6000)    |
| Honduras | 2000 | Male   | 55 to 59 | 28%<br>(19-37%)                | 72%<br>(63-81%)          | 3.9<br>(1.9-6.8)                            | 10%<br>(7.5-13%)                     | 12%<br>(9.1-16%)                    | 98<br>(60-150)      | 3400<br>(2100-4900)    |
| Honduras | 2000 | Male   | 60 to 64 | 25%<br>(17-35%)                | 75%<br>(65-83%)          | 3.3<br>(1.5-5.9)                            | 8.3%<br>(6.1-11%)                    | 10%<br>(7.3-14%)                    | 98<br>(60-150)      | 2800<br>(1800-4300)    |
| Honduras | 2000 | Male   | 65 to 69 | 25%<br>(15-37%)                | 75%<br>(63-85%)          | 2.6<br>(1.2-4.5)                            | 7.3%<br>(5.2-9.8%)                   | 8.8%<br>(6.2-12%)                   | 100<br>(63-160)     | 2500<br>(1500-3700)    |
| Honduras | 2000 | Male   | 70 to 74 | 22%<br>(14-34%)                | 78%<br>(66-86%)          | 1.9<br>(0.87-3.5)                           | 5.8%<br>(3.8-8.1%)                   | 6.9%<br>(4.5-9.8%)                  | 91<br>(52-150)      | 1700<br>(1000-2800)    |
| Honduras | 2000 | Male   | 75 to 79 | 18%<br>(11-30%)                | 82%<br>(70-89%)          | 1.4<br>(0.56-2.7)                           | 4.3%<br>(2.7-6.4%)                   | 5.1%<br>(3-7.4%)                    | 70<br>(37-120)      | 1000<br>(560-1600)     |
| Honduras | 2000 | Male   | 80 to 84 | 16%<br>(9.2-25%)               | 84%<br>(75-91%)          | 1.1<br>(0.49-2.1)                           | 3.7%<br>(2.2-5.4%)                   | 4.2%<br>(2.5-6.3%)                  | 49<br>(27-79)       | 530<br>(300-850)       |
| Honduras | 2000 | Male   | 85 to 89 | 15%<br>(8.9-24%)               | 85%<br>(76-91%)          | 1.1<br>(0.44-2.1)                           | 3.1%<br>(1.6-4.9%)                   | 3.5%<br>(1.8-5.6%)                  | 30<br>(16-49)       | 230<br>(120-370)       |
| Honduras | 2000 | Male   | 90 to 94 | 18%<br>(11-27%)                | 82%<br>(73-89%)          | 1.3<br>(0.49-2.6)                           | 3%<br>(1.5-5%)                       | 3.4%<br>(1.5-5.6%)                  | 15<br>(6.7-26)      | 83<br>(39-140)         |
| Honduras | 2000 | Male   | 95 plus  | 22%<br>(12-36%)                | 78%<br>(64-88%)          | 1.6<br>(0.47-3.3)                           | 3.4%<br>(1.3-5.7%)                   | 3.7%<br>(1.2-6.5%)                  | 4.6<br>(1.5-8.2)    | 17<br>(6.7-29)         |
| Honduras | 2005 | Female | All Ages | 5.8%<br>(4.8-7%)               | 94%<br>(93-95%)          | 0.27<br>(0.22-0.33)                         | 1.9%<br>(1.5-2.3%)                   | 3.2%<br>(2.6-4%)                    | 590<br>(400-800)    | 17000<br>(12000-23000) |
| Honduras | 2005 | Female | 15 to 19 | 5.4%<br>(3.4-7.9%)             | 95%<br>(92-97%)          | 0.24<br>(0.12-0.42)                         | 0.99%<br>(0.64-1.5%)                 | 1.2%<br>(0.61-2.3%)                 | 3.4<br>(1.6-6.3)    | 490<br>(300-770)       |
| Honduras | 2005 | Female | 20 to 24 | 8.1%<br>(5-12%)                | 92%<br>(88-95%)          | 0.35<br>(0.18-0.61)                         | 1.7%<br>(1.1-2.5%)                   | 1.8%<br>(0.94-3.1%)                 | 5.7<br>(2.7-10)     | 840<br>(520-1300)      |
| Honduras | 2005 | Female | 25 to 29 | 8.5%<br>(5.3-13%)              | 91%<br>(87-95%)          | 0.36<br>(0.18-0.59)                         | 1.8%<br>(1.3-2.5%)                   | 1.9%<br>(1.2-3%)                    | 6.6<br>(3.3-12)     | 820<br>(510-1200)      |
| Honduras | 2005 | Female | 30 to 34 | 8.8%<br>(5.3-14%)              | 91%<br>(86-95%)          | 0.38<br>(0.2-0.62)                          | 2.1%<br>(1.5-2.8%)                   | 2.7%<br>(1.9-3.9%)                  | 10<br>(5.6-18)      | 900<br>(580-1300)      |
| Honduras | 2005 | Female | 35 to 39 | 9.2%<br>(5.4-14%)              | 91%<br>(86-95%)          | 0.44<br>(0.23-0.72)                         | 2.5%<br>(1.8-3.4%)                   | 3.6%<br>(2.6-5%)                    | 17<br>(9.1-28)      | 1100<br>(700-1700)     |
| Honduras | 2005 | Female | 40 to 44 | 9.4%<br>(5.6-14%)              | 91%<br>(86-94%)          | 0.53<br>(0.28-0.85)                         | 2.9%<br>(2-4%)                       | 4.2%<br>(2.9-5.7%)                  | 23<br>(12-36)       | 1200<br>(730-1900)     |
| Honduras | 2005 | Female | 45 to 49 | 9.4%<br>(5.4-14%)              | 91%<br>(86-95%)          | 0.66<br>(0.32-1.2)                          | 3.6%<br>(2.5-5.2%)                   | 5.3%<br>(3.6-7.5%)                  | 34<br>(20-54)       | 1500<br>(920-2400)     |
| Honduras | 2005 | Female | 50 to 54 | 9.5%<br>(6.1-14%)              | 90%<br>(86-94%)          | 0.78<br>(0.41-1.3)                          | 4.1%<br>(2.9-5.8%)                   | 5.7%<br>(4-7.9%)                    | 45<br>(27-72)       | 1800<br>(1100-2700)    |
| Honduras | 2005 | Female | 55 to 59 | 9.6%<br>(5.5-16%)              | 90%<br>(84-94%)          | 0.87<br>(0.41-1.6)                          | 4.6%<br>(3.1-6.2%)                   | 6.1%<br>(4.3-8.2%)                  | 53<br>(32-79)       | 1800<br>(1100-2600)    |
| Honduras | 2005 | Female | 60 to 64 | 8.8%<br>(4.7-15%)              | 91%<br>(85-95%)          | 0.82<br>(0.38-1.6)                          | 4.2%<br>(2.9-5.9%)                   | 5.4%<br>(3.8-7.4%)                  | 55<br>(34-82)       | 1500<br>(970-2300)     |

| Location | Year | Sex    | Age      | Prevalence of current drinkers | Prevalence of abstainers | Population average of standard drinks daily | Percent of total attributable deaths | Percent of total attributable DALYs | Attributable deaths | Attributable DALYs     |
|----------|------|--------|----------|--------------------------------|--------------------------|---------------------------------------------|--------------------------------------|-------------------------------------|---------------------|------------------------|
| Honduras | 2005 | Female | 65 to 69 | 8.1%<br>(4.7-13%)              | 92%<br>(87-95%)          | 0.74<br>(0.37-1.3)                          | 4.2%<br>(3-5.7%)                     | 5.2%<br>(3.7-7.1%)                  | 68<br>(44-100)      | 1600<br>(1000-2300)    |
| Honduras | 2005 | Female | 70 to 74 | 7.2%<br>(4.4-12%)              | 93%<br>(88-96%)          | 0.64<br>(0.31-1.1)                          | 3.7%<br>(2.5-5.1%)                   | 4.5%<br>(3.1-6.3%)                  | 76<br>(46-110)      | 1400<br>(850-2100)     |
| Honduras | 2005 | Female | 75 to 79 | 5.9%<br>(3.3-9.8%)             | 94%<br>(90-97%)          | 0.51<br>(0.22-0.93)                         | 2.9%<br>(1.9-4.1%)                   | 3.5%<br>(2.3-4.9%)                  | 69<br>(41-100)      | 970<br>(600-1400)      |
| Honduras | 2005 | Female | 80 to 84 | 5.1%<br>(2.7-8.2%)             | 95%<br>(92-97%)          | 0.42<br>(0.18-0.75)                         | 2.4%<br>(1.6-3.6%)                   | 2.9%<br>(1.9-4.3%)                  | 65<br>(41-98)       | 680<br>(430-1000)      |
| Honduras | 2005 | Female | 85 to 89 | 5.3%<br>(2.8-8.5%)             | 95%<br>(91-97%)          | 0.41<br>(0.18-0.77)                         | 2.1%<br>(1.3-3.3%)                   | 2.5%<br>(1.5-3.9%)                  | 38<br>(23-60)       | 280<br>(170-450)       |
| Honduras | 2005 | Female | 90 to 94 | 6.3%<br>(3.6-10%)              | 94%<br>(90-96%)          | 0.44<br>(0.19-0.88)                         | 1.9%<br>(1-3.1%)                     | 2.2%<br>(1.2-3.7%)                  | 15<br>(8.1-27)      | 80<br>(44-140)         |
| Honduras | 2005 | Female | 95 plus  | 7.8%<br>(4.2-13%)              | 92%<br>(87-96%)          | 0.49<br>(0.18-0.99)                         | 2%<br>(1-3.5%)                       | 2.2%<br>(1.1-4.1%)                  | 6<br>(2.9-11)       | 21<br>(11-38)          |
| Honduras | 2005 | Male   | All Ages | 18%<br>(15-21%)                | 82%<br>(79-85%)          | 1.7<br>(1.5-1.9)                            | 5.9%<br>(4.6-7.6%)                   | 7.6%<br>(6.1-9.3%)                  | 1400<br>(890-2100)  | 58000<br>(39000-84000) |
| Honduras | 2005 | Male   | 15 to 19 | 14%<br>(9-20%)                 | 86%<br>(80-91%)          | 0.8<br>(0.38-1.4)                           | 4%<br>(2.4-6.3%)                     | 4.9%<br>(2.5-8.5%)                  | 23<br>(9.5-49)      | 2400<br>(1300-4300)    |
| Honduras | 2005 | Male   | 20 to 24 | 29%<br>(20-38%)                | 71%<br>(62-80%)          | 2.2<br>(1.2-3.6)                            | 10%<br>(6.7-15%)                     | 12%<br>(7.2-18%)                    | 74<br>(36-140)      | 6400<br>(3600-11000)   |
| Honduras | 2005 | Male   | 25 to 29 | 34%<br>(24-45%)                | 66%<br>(55-76%)          | 3.1<br>(1.7-4.9)                            | 12%<br>(8.1-16%)                     | 14%<br>(8.8-20%)                    | 83<br>(40-150)      | 6500<br>(3800-11000)   |
| Honduras | 2005 | Male   | 30 to 34 | 35%<br>(24-47%)                | 65%<br>(53-76%)          | 3.5<br>(2-5.3)                              | 12%<br>(8.6-16%)                     | 15%<br>(10-21%)                     | 84<br>(45-150)      | 5800<br>(3600-9300)    |
| Honduras | 2005 | Male   | 35 to 39 | 34%<br>(23-45%)                | 66%<br>(55-77%)          | 3.6<br>(1.9-5.9)                            | 13%<br>(9.1-17%)                     | 16%<br>(11-22%)                     | 96<br>(53-160)      | 5800<br>(3500-9000)    |
| Honduras | 2005 | Male   | 40 to 44 | 33%<br>(23-44%)                | 67%<br>(56-77%)          | 3.9<br>(2-6.2)                              | 13%<br>(9.7-17%)                     | 17%<br>(12-22%)                     | 110<br>(60-170)     | 5800<br>(3600-8800)    |
| Honduras | 2005 | Male   | 45 to 49 | 33%<br>(22-43%)                | 67%<br>(57-78%)          | 4.2<br>(2.1-7.2)                            | 13%<br>(9.9-17%)                     | 17%<br>(13-21%)                     | 130<br>(74-190)     | 5800<br>(3700-8400)    |
| Honduras | 2005 | Male   | 50 to 54 | 31%<br>(22-41%)                | 69%<br>(59-78%)          | 4.3<br>(2.3-7.2)                            | 12%<br>(9.3-16%)                     | 15%<br>(12-20%)                     | 130<br>(80-210)     | 5400<br>(3400-8000)    |
| Honduras | 2005 | Male   | 55 to 59 | 28%<br>(19-37%)                | 72%<br>(63-81%)          | 4.3<br>(2.1-7.5)                            | 10%<br>(7.6-14%)                     | 13%<br>(9.5-17%)                    | 120<br>(70-180)     | 4100<br>(2600-6200)    |
| Honduras | 2005 | Male   | 60 to 64 | 25%<br>(17-36%)                | 75%<br>(64-83%)          | 3.7<br>(1.7-6.6)                            | 8.4%<br>(6.2-11%)                    | 10%<br>(7.5-14%)                    | 110<br>(67-170)     | 3200<br>(2000-4800)    |
| Honduras | 2005 | Male   | 65 to 69 | 25%<br>(15-37%)                | 75%<br>(63-85%)          | 2.8<br>(1.4-5)                              | 7.5%<br>(5.3-10%)                    | 8.9%<br>(6.4-12%)                   | 120<br>(69-180)     | 2800<br>(1700-4300)    |
| Honduras | 2005 | Male   | 70 to 74 | 22%<br>(14-34%)                | 78%<br>(66-86%)          | 2.1<br>(0.98-4)                             | 6%<br>(4-8.4%)                       | 7.1%<br>(4.8-10%)                   | 110<br>(64-190)     | 2100<br>(1300-3400)    |
| Honduras | 2005 | Male   | 75 to 79 | 19%<br>(11-29%)                | 81%<br>(71-89%)          | 1.5<br>(0.62-3)                             | 4.5%<br>(2.8-6.5%)                   | 5.3%<br>(3.3-7.7%)                  | 85<br>(46-140)      | 1300<br>(690-2100)     |
| Honduras | 2005 | Male   | 80 to 84 | 16%<br>(9.4-26%)               | 84%<br>(74-91%)          | 1.3<br>(0.55-2.3)                           | 3.8%<br>(2.3-5.6%)                   | 4.4%<br>(2.7-6.5%)                  | 67<br>(38-110)      | 730<br>(410-1200)      |



| Location | Year | Sex    | Age      | Prevalence of current drinkers | Prevalence of abstainers | Population average of standard drinks daily | Percent of total attributable deaths | Percent of total attributable DALYs | Attributable deaths | Attributable DALYs      |
|----------|------|--------|----------|--------------------------------|--------------------------|---------------------------------------------|--------------------------------------|-------------------------------------|---------------------|-------------------------|
| Honduras | 2005 | Male   | 85 to 89 | 15%<br>(8.8-24%)               | 85%<br>(76-91%)          | 1.2<br>(0.49-2.3)                           | 3.3%<br>(1.9-5%)                     | 3.7%<br>(2.1-5.8%)                  | 40<br>(22-65)       | 310<br>(170-490)        |
| Honduras | 2005 | Male   | 90 to 94 | 17%<br>(11-26%)                | 83%<br>(74-89%)          | 1.3<br>(0.52-2.7)                           | 3.1%<br>(1.6-5.1%)                   | 3.5%<br>(1.7-5.8%)                  | 18<br>(9-30)        | 98<br>(51-160)          |
| Honduras | 2005 | Male   | 95 plus  | 21%<br>(12-34%)                | 79%<br>(66-88%)          | 1.6<br>(0.49-3.5)                           | 3.5%<br>(1.5-5.8%)                   | 3.8%<br>(1.4-6.6%)                  | 6.4<br>(2.3-11)     | 24<br>(9.9-40)          |
| Honduras | 2010 | Female | All Ages | 5.2%<br>(4.4-6.2%)             | 95%<br>(94-96%)          | 0.22<br>(0.17-0.28)                         | 1.8%<br>(1.4-2.3%)                   | 3%<br>(2.4-3.8%)                    | 600<br>(380-850)    | 17000<br>(12000-23000)  |
| Honduras | 2010 | Female | 15 to 19 | 5.5%<br>(3.9-7.4%)             | 95%<br>(93-96%)          | 0.22<br>(0.12-0.36)                         | 0.93%<br>(0.6-1.4%)                  | 1.1%<br>(0.6-1.9%)                  | 3.1<br>(1.5-5.5)    | 490<br>(310-730)        |
| Honduras | 2010 | Female | 20 to 24 | 7.9%<br>(5.6-10%)              | 92%<br>(90-94%)          | 0.3<br>(0.16-0.51)                          | 1.6%<br>(1.1-2.3%)                   | 1.6%<br>(0.88-2.6%)                 | 5.2<br>(2.5-9.6)    | 850<br>(530-1300)       |
| Honduras | 2010 | Female | 25 to 29 | 7.3%<br>(5.1-10%)              | 93%<br>(90-95%)          | 0.27<br>(0.15-0.44)                         | 1.6%<br>(1.2-2.2%)                   | 1.6%<br>(1-2.5%)                    | 6<br>(3-11)         | 830<br>(530-1200)       |
| Honduras | 2010 | Female | 30 to 34 | 6.6%<br>(4.6-10%)              | 93%<br>(90-95%)          | 0.25<br>(0.14-0.42)                         | 1.8%<br>(1.4-2.4%)                   | 2.3%<br>(1.7-3.3%)                  | 9.5<br>(5-17)       | 900<br>(590-1400)       |
| Honduras | 2010 | Female | 35 to 39 | 6.6%<br>(4.4-10%)              | 93%<br>(90-96%)          | 0.28<br>(0.15-0.48)                         | 2.2%<br>(1.6-2.9%)                   | 3.1%<br>(2.3-4.2%)                  | 15<br>(7.7-25)      | 1000<br>(640-1600)      |
| Honduras | 2010 | Female | 40 to 44 | 6.4%<br>(4.2-9.5%)             | 94%<br>(90-96%)          | 0.32<br>(0.17-0.54)                         | 2.4%<br>(1.7-3.2%)                   | 3.5%<br>(2.5-4.8%)                  | 20<br>(11-34)       | 1200<br>(690-1800)      |
| Honduras | 2010 | Female | 45 to 49 | 6.7%<br>(4.2-9.6%)             | 93%<br>(90-96%)          | 0.41<br>(0.2-0.74)                          | 2.9%<br>(2-4.1%)                     | 4.3%<br>(3-6%)                      | 30<br>(17-49)       | 1400<br>(830-2200)      |
| Honduras | 2010 | Female | 50 to 54 | 8.2%<br>(5.3-12%)              | 92%<br>(88-95%)          | 0.59<br>(0.32-1)                            | 3.6%<br>(2.4-4.9%)                   | 5%<br>(3.5-6.8%)                    | 44<br>(26-69)       | 1700<br>(1000-2600)     |
| Honduras | 2010 | Female | 55 to 59 | 9.5%<br>(5.4-16%)              | 91%<br>(84-95%)          | 0.77<br>(0.37-1.4)                          | 4.2%<br>(2.9-5.7%)                   | 5.8%<br>(4.1-7.7%)                  | 61<br>(36-92)       | 2000<br>(1300-3000)     |
| Honduras | 2010 | Female | 60 to 64 | 8.8%<br>(4.6-15%)              | 91%<br>(85-95%)          | 0.73<br>(0.34-1.4)                          | 3.9%<br>(2.8-5.6%)                   | 5.1%<br>(3.6-7.1%)                  | 60<br>(36-90)       | 1700<br>(1000-2500)     |
| Honduras | 2010 | Female | 65 to 69 | 8.1%<br>(4.6-13%)              | 92%<br>(87-95%)          | 0.65<br>(0.33-1.2)                          | 3.9%<br>(2.7-5.3%)                   | 4.9%<br>(3.5-6.8%)                  | 68<br>(41-100)      | 1600<br>(990-2300)      |
| Honduras | 2010 | Female | 70 to 74 | 7.2%<br>(4.2-12%)              | 93%<br>(88-96%)          | 0.56<br>(0.27-1)                            | 3.4%<br>(2.3-4.8%)                   | 4.3%<br>(2.9-6%)                    | 74<br>(43-110)      | 1400<br>(810-2000)      |
| Honduras | 2010 | Female | 75 to 79 | 5.8%<br>(3.2-9.8%)             | 94%<br>(90-97%)          | 0.44<br>(0.19-0.81)                         | 2.7%<br>(1.8-3.8%)                   | 3.3%<br>(2.2-4.6%)                  | 70<br>(40-110)      | 1000<br>(580-1500)      |
| Honduras | 2010 | Female | 80 to 84 | 5%<br>(2.7-8.1%)               | 95%<br>(92-97%)          | 0.36<br>(0.16-0.66)                         | 2.2%<br>(1.5-3.3%)                   | 2.7%<br>(1.8-3.9%)                  | 71<br>(43-110)      | 750<br>(460-1100)       |
| Honduras | 2010 | Female | 85 to 89 | 5.1%<br>(2.8-8.4%)             | 95%<br>(92-97%)          | 0.35<br>(0.16-0.67)                         | 1.9%<br>(1.2-3%)                     | 2.3%<br>(1.5-3.6%)                  | 45<br>(26-73)       | 340<br>(200-540)        |
| Honduras | 2010 | Female | 90 to 94 | 6%<br>(3.5-9.7%)               | 94%<br>(90-97%)          | 0.38<br>(0.16-0.75)                         | 1.7%<br>(0.97-2.7%)                  | 1.9%<br>(1.1-3.3%)                  | 17<br>(9.3-29)      | 88<br>(50-150)          |
| Honduras | 2010 | Female | 95 plus  | 7.5%<br>(4-13%)                | 92%<br>(87-96%)          | 0.41<br>(0.15-0.83)                         | 1.8%<br>(0.93-3.2%)                  | 2%<br>(0.99-3.7%)                   | 5.5<br>(2.7-10)     | 19<br>(10-34)           |
| Honduras | 2010 | Male   | All Ages | 22%<br>(20-24%)                | 78%<br>(76-80%)          | 1.8<br>(1.6-2.1)                            | 6.6%<br>(5.2-8.4%)                   | 7.9%<br>(6.4-9.7%)                  | 1600<br>(1000-2500) | 68000<br>(46000-100000) |

| Location | Year | Sex    | Age      | Prevalence of current drinkers | Prevalence of abstainers | Population average of standard drinks daily | Percent of total attributable deaths | Percent of total attributable DALYs | Attributable deaths | Attributable DALYs     |
|----------|------|--------|----------|--------------------------------|--------------------------|---------------------------------------------|--------------------------------------|-------------------------------------|---------------------|------------------------|
| Honduras | 2010 | Male   | 15 to 19 | 16%<br>(14-19%)                | 84%<br>(81-86%)          | 0.83<br>(0.46-1.3)                          | 4.1%<br>(2.6-5.9%)                   | 5%<br>(2.7-8.1%)                    | 25<br>(12-49)       | 2600<br>(1500-4500)    |
| Honduras | 2010 | Male   | 20 to 24 | 36%<br>(32-40%)                | 64%<br>(60-68%)          | 2.5<br>(1.5-3.9)                            | 11%<br>(7.3-16%)                     | 13%<br>(7.7-20%)                    | 89<br>(43-170)      | 7700<br>(4500-13000)   |
| Honduras | 2010 | Male   | 25 to 29 | 42%<br>(37-46%)                | 58%<br>(54-63%)          | 3.4<br>(2.1-5.2)                            | 12%<br>(8.8-17%)                     | 16%<br>(10-22%)                     | 100<br>(53-180)     | 8000<br>(4900-13000)   |
| Honduras | 2010 | Male   | 30 to 34 | 40%<br>(35-44%)                | 60%<br>(56-65%)          | 3.5<br>(2.3-5)                              | 13%<br>(9-17%)                       | 16%<br>(11-22%)                     | 100<br>(54-170)     | 7000<br>(4300-11000)   |
| Honduras | 2010 | Male   | 35 to 39 | 38%<br>(34-42%)                | 62%<br>(58-66%)          | 3.6<br>(2-5.5)                              | 13%<br>(9.5-17%)                     | 17%<br>(12-23%)                     | 110<br>(59-180)     | 6500<br>(4000-10000)   |
| Honduras | 2010 | Male   | 40 to 44 | 37%<br>(33-42%)                | 63%<br>(58-67%)          | 3.9<br>(2.1-5.8)                            | 14%<br>(10-17%)                      | 18%<br>(14-23%)                     | 130<br>(72-210)     | 6800<br>(4200-11000)   |
| Honduras | 2010 | Male   | 45 to 49 | 37%<br>(32-41%)                | 63%<br>(59-68%)          | 4.2<br>(2.3-7)                              | 14%<br>(11-17%)                      | 18%<br>(14-22%)                     | 150<br>(83-230)     | 6700<br>(4200-10000)   |
| Honduras | 2010 | Male   | 50 to 54 | 33%<br>(29-37%)                | 67%<br>(63-71%)          | 4.1<br>(2.3-6.6)                            | 12%<br>(9.8-15%)                     | 16%<br>(13-19%)                     | 160<br>(94-240)     | 6200<br>(4000-9300)    |
| Honduras | 2010 | Male   | 55 to 59 | 28%<br>(24-33%)                | 72%<br>(67-76%)          | 3.9<br>(2.1-6.3)                            | 10%<br>(8-13%)                       | 13%<br>(10-16%)                     | 150<br>(88-220)     | 5100<br>(3200-7500)    |
| Honduras | 2010 | Male   | 60 to 64 | 26%<br>(18-35%)                | 74%<br>(65-82%)          | 3.3<br>(1.6-5.9)                            | 8.4%<br>(6.2-11%)                    | 10%<br>(7.6-13%)                    | 130<br>(76-200)     | 3700<br>(2300-5500)    |
| Honduras | 2010 | Male   | 65 to 69 | 25%<br>(15-37%)                | 75%<br>(63-85%)          | 2.5<br>(1.2-4.4)                            | 7.3%<br>(5.2-9.8%)                   | 8.8%<br>(6.3-12%)                   | 120<br>(72-200)     | 3000<br>(1800-4600)    |
| Honduras | 2010 | Male   | 70 to 74 | 22%<br>(14-34%)                | 78%<br>(66-86%)          | 1.8<br>(0.86-3.5)                           | 5.7%<br>(3.8-8.1%)                   | 6.8%<br>(4.4-9.5%)                  | 110<br>(65-190)     | 2200<br>(1300-3500)    |
| Honduras | 2010 | Male   | 75 to 79 | 18%<br>(11-29%)                | 82%<br>(71-89%)          | 1.3<br>(0.56-2.6)                           | 4.3%<br>(2.5-6.2%)                   | 5%<br>(2.9-7.4%)                    | 94<br>(48-160)      | 1400<br>(730-2300)     |
| Honduras | 2010 | Male   | 80 to 84 | 16%<br>(9.2-25%)               | 84%<br>(75-91%)          | 1.1<br>(0.47-2)                             | 3.6%<br>(2.2-5.4%)                   | 4.2%<br>(2.5-6.3%)                  | 78<br>(44-130)      | 850<br>(490-1400)      |
| Honduras | 2010 | Male   | 85 to 89 | 15%<br>(8.7-24%)               | 85%<br>(76-91%)          | 1<br>(0.43-2)                               | 3.1%<br>(1.7-4.8%)                   | 3.5%<br>(1.9-5.4%)                  | 49<br>(25-82)       | 380<br>(200-620)       |
| Honduras | 2010 | Male   | 90 to 94 | 17%<br>(10-26%)                | 83%<br>(74-90%)          | 1.2<br>(0.46-2.4)                           | 2.9%<br>(1.4-4.8%)                   | 3.2%<br>(1.5-5.4%)                  | 22<br>(10-37)       | 120<br>(58-190)        |
| Honduras | 2010 | Male   | 95 plus  | 21%<br>(11-34%)                | 79%<br>(66-89%)          | 1.4<br>(0.43-3)                             | 3.2%<br>(1.3-5.7%)                   | 3.5%<br>(1.2-6.4%)                  | 6.8<br>(2.2-12)     | 25<br>(9.8-44)         |
| Honduras | 2016 | Female | All Ages | 5.5%<br>(4.7-6.5%)             | 95%<br>(94-95%)          | 0.25<br>(0.18-0.33)                         | 2%<br>(1.5-2.5%)                     | 3.1%<br>(2.4-3.9%)                  | 690<br>(460-970)    | 20000<br>(14000-27000) |
| Honduras | 2016 | Female | 15 to 19 | 5.6%<br>(3.9-7.5%)             | 94%<br>(93-96%)          | 0.23<br>(0.11-0.38)                         | 0.97%<br>(0.62-1.4%)                 | 1.2%<br>(0.6-2%)                    | 3.1<br>(1.5-5.6)    | 500<br>(320-790)       |
| Honduras | 2016 | Female | 20 to 24 | 8.1%<br>(5.6-11%)              | 92%<br>(89-94%)          | 0.31<br>(0.16-0.55)                         | 1.7%<br>(1.2-2.4%)                   | 1.7%<br>(0.92-2.9%)                 | 5.6<br>(2.7-10)     | 950<br>(590-1400)      |
| Honduras | 2016 | Female | 25 to 29 | 7.4%<br>(5.2-10%)              | 93%<br>(90-95%)          | 0.28<br>(0.15-0.47)                         | 1.7%<br>(1.2-2.2%)                   | 1.7%<br>(1.1-2.7%)                  | 6.6<br>(3.2-12)     | 940<br>(610-1400)      |
| Honduras | 2016 | Female | 30 to 34 | 6.7%<br>(4.6-10%)              | 93%<br>(90-95%)          | 0.26<br>(0.15-0.45)                         | 1.8%<br>(1.4-2.5%)                   | 2.4%<br>(1.7-3.5%)                  | 11<br>(5.4-19)      | 1100<br>(680-1600)     |

| Location | Year | Sex    | Age      | Prevalence of current drinkers | Prevalence of abstainers | Population average of standard drinks daily | Percent of total attributable deaths | Percent of total attributable DALYs | Attributable deaths | Attributable DALYs      |
|----------|------|--------|----------|--------------------------------|--------------------------|---------------------------------------------|--------------------------------------|-------------------------------------|---------------------|-------------------------|
| Honduras | 2016 | Female | 35 to 39 | 6.7%<br>(4.4-10%)              | 93%<br>(90-96%)          | 0.28<br>(0.14-0.51)                         | 2.1%<br>(1.5-2.9%)                   | 3.2%<br>(2.3-4.4%)                  | 17<br>(8.6-30)      | 1200<br>(740-1900)      |
| Honduras | 2016 | Female | 40 to 44 | 6.4%<br>(4.3-9.6%)             | 94%<br>(90-96%)          | 0.32<br>(0.16-0.54)                         | 2.3%<br>(1.6-3.1%)                   | 3.5%<br>(2.5-4.8%)                  | 23<br>(12-38)       | 1300<br>(750-2000)      |
| Honduras | 2016 | Female | 45 to 49 | 6.7%<br>(4.2-9.7%)             | 93%<br>(90-96%)          | 0.41<br>(0.2-0.75)                          | 2.8%<br>(2-3.9%)                     | 4.2%<br>(3-5.8%)                    | 34<br>(19-56)       | 1600<br>(950-2500)      |
| Honduras | 2016 | Female | 50 to 54 | 8.2%<br>(5.4-12%)              | 92%<br>(88-95%)          | 0.6<br>(0.31-1)                             | 3.5%<br>(2.4-4.7%)                   | 5%<br>(3.4-6.8%)                    | 49<br>(27-78)       | 2000<br>(1100-3000)     |
| Honduras | 2016 | Female | 55 to 59 | 9.5%<br>(5.5-16%)              | 90%<br>(84-94%)          | 0.78<br>(0.37-1.4)                          | 4.1%<br>(2.8-5.7%)                   | 5.6%<br>(4-7.5%)                    | 67<br>(41-100)      | 2300<br>(1400-3500)     |
| Honduras | 2016 | Female | 60 to 64 | 8.8%<br>(4.7-15%)              | 91%<br>(85-95%)          | 0.73<br>(0.34-1.4)                          | 3.8%<br>(2.7-5.3%)                   | 5%<br>(3.6-6.9%)                    | 74<br>(46-110)      | 2100<br>(1300-3200)     |
| Honduras | 2016 | Female | 65 to 69 | 8.1%<br>(4.7-13%)              | 92%<br>(87-95%)          | 0.66<br>(0.33-1.2)                          | 3.8%<br>(2.6-5.2%)                   | 4.8%<br>(3.4-6.6%)                  | 80<br>(51-120)      | 1900<br>(1200-2700)     |
| Honduras | 2016 | Female | 70 to 74 | 7.2%<br>(4.3-12%)              | 93%<br>(88-96%)          | 0.57<br>(0.26-1.1)                          | 3.4%<br>(2.2-4.8%)                   | 4.2%<br>(2.8-6.1%)                  | 80<br>(48-120)      | 1500<br>(910-2300)      |
| Honduras | 2016 | Female | 75 to 79 | 5.8%<br>(3.3-9.6%)             | 94%<br>(90-97%)          | 0.45<br>(0.18-0.85)                         | 2.6%<br>(1.7-3.9%)                   | 3.2%<br>(2.2-4.7%)                  | 74<br>(43-110)      | 1100<br>(630-1600)      |
| Honduras | 2016 | Female | 80 to 84 | 5%<br>(2.7-8.1%)               | 95%<br>(92-97%)          | 0.37<br>(0.16-0.68)                         | 2.2%<br>(1.4-3.3%)                   | 2.6%<br>(1.7-4%)                    | 83<br>(50-130)      | 870<br>(520-1300)       |
| Honduras | 2016 | Female | 85 to 89 | 5.1%<br>(2.8-8.5%)             | 95%<br>(91-97%)          | 0.35<br>(0.15-0.7)                          | 1.9%<br>(1.2-3%)                     | 2.3%<br>(1.4-3.5%)                  | 56<br>(33-90)       | 420<br>(250-660)        |
| Honduras | 2016 | Female | 90 to 94 | 6.1%<br>(3.4-9.8%)             | 94%<br>(90-97%)          | 0.38<br>(0.16-0.76)                         | 1.7%<br>(0.95-2.8%)                  | 1.9%<br>(1.1-3.2%)                  | 23<br>(13-39)       | 120<br>(68-200)         |
| Honduras | 2016 | Female | 95 plus  | 7.6%<br>(4-13%)                | 92%<br>(87-96%)          | 0.41<br>(0.15-0.83)                         | 1.8%<br>(0.94-3.2%)                  | 2%<br>(1-3.7%)                      | 7.4<br>(3.6-14)     | 26<br>(14-47)           |
| Honduras | 2016 | Male   | All Ages | 23%<br>(21-25%)                | 77%<br>(75-79%)          | 2<br>(1.5-2.5)                              | 7.2%<br>(5.7-9%)                     | 8.2%<br>(6.6-10%)                   | 1900<br>(1200-2900) | 79000<br>(53000-110000) |
| Honduras | 2016 | Male   | 15 to 19 | 16%<br>(14-19%)                | 84%<br>(81-86%)          | 0.84<br>(0.42-1.4)                          | 4.2%<br>(2.7-6.2%)                   | 5.2%<br>(2.7-8.7%)                  | 26<br>(12-53)       | 2700<br>(1600-4700)     |
| Honduras | 2016 | Male   | 20 to 24 | 36%<br>(32-40%)                | 64%<br>(60-68%)          | 2.6<br>(1.4-4.1)                            | 11%<br>(7.5-16%)                     | 14%<br>(8-22%)                      | 98<br>(48-190)      | 8600<br>(5100-14000)    |
| Honduras | 2016 | Male   | 25 to 29 | 42%<br>(37-46%)                | 58%<br>(54-63%)          | 3.5<br>(2-5.6)                              | 13%<br>(9.1-18%)                     | 16%<br>(10-24%)                     | 120<br>(61-200)     | 9100<br>(5700-14000)    |
| Honduras | 2016 | Male   | 30 to 34 | 40%<br>(35-44%)                | 60%<br>(56-65%)          | 3.6<br>(2.2-5.4)                            | 12%<br>(9.2-17%)                     | 16%<br>(12-22%)                     | 120<br>(65-200)     | 8200<br>(5300-13000)    |
| Honduras | 2016 | Male   | 35 to 39 | 38%<br>(33-42%)                | 62%<br>(58-67%)          | 3.6<br>(1.9-5.7)                            | 13%<br>(9.4-17%)                     | 17%<br>(12-23%)                     | 120<br>(68-210)     | 7700<br>(4800-12000)    |
| Honduras | 2016 | Male   | 40 to 44 | 37%<br>(33-42%)                | 63%<br>(58-67%)          | 3.9<br>(2.1-6)                              | 14%<br>(10-17%)                      | 18%<br>(14-23%)                     | 140<br>(80-230)     | 7500<br>(4800-12000)    |
| Honduras | 2016 | Male   | 45 to 49 | 37%<br>(32-41%)                | 63%<br>(59-68%)          | 4.2<br>(2.4-7.2)                            | 14%<br>(11-17%)                      | 18%<br>(14-22%)                     | 170<br>(97-260)     | 7700<br>(4900-12000)    |
| Honduras | 2016 | Male   | 50 to 54 | 33%<br>(29-37%)                | 67%<br>(63-71%)          | 4.1<br>(2.3-6.7)                            | 12%<br>(9.6-15%)                     | 16%<br>(13-19%)                     | 180<br>(110-280)    | 7200<br>(4700-11000)    |

| Location | Year | Sex    | Age      | Prevalence of current drinkers | Prevalence of abstainers | Population average of standard drinks daily | Percent of total attributable deaths | Percent of total attributable DALYs | Attributable deaths | Attributable DALYs       |
|----------|------|--------|----------|--------------------------------|--------------------------|---------------------------------------------|--------------------------------------|-------------------------------------|---------------------|--------------------------|
| Honduras | 2016 | Male   | 55 to 59 | 28%<br>(24-33%)                | 72%<br>(67-76%)          | 3.9<br>(2.1-6.5)                            | 10%<br>(7.9-13%)                     | 13%<br>(9.9-16%)                    | 170<br>(110-270)    | 6000<br>(3800-8800)      |
| Honduras | 2016 | Male   | 60 to 64 | 26%<br>(18-35%)                | 74%<br>(65-82%)          | 3.3<br>(1.5-6.1)                            | 8.3%<br>(6.2-11%)                    | 10%<br>(7.5-13%)                    | 170<br>(100-260)    | 4800<br>(3100-7400)      |
| Honduras | 2016 | Male   | 65 to 69 | 25%<br>(15-38%)                | 75%<br>(62-85%)          | 2.5<br>(1.2-4.5)                            | 7.2%<br>(5.2-9.6%)                   | 8.7%<br>(6.2-12%)                   | 150<br>(92-240)     | 3700<br>(2300-5600)      |
| Honduras | 2016 | Male   | 70 to 74 | 22%<br>(14-35%)                | 78%<br>(65-86%)          | 1.8<br>(0.84-3.5)                           | 5.7%<br>(3.7-7.9%)                   | 6.7%<br>(4.4-9.5%)                  | 130<br>(73-210)     | 2400<br>(1500-3900)      |
| Honduras | 2016 | Male   | 75 to 79 | 19%<br>(12-29%)                | 81%<br>(71-88%)          | 1.3<br>(0.55-2.6)                           | 4.3%<br>(2.5-6.3%)                   | 5%<br>(2.9-7.4%)                    | 100<br>(53-170)     | 1500<br>(830-2500)       |
| Honduras | 2016 | Male   | 80 to 84 | 16%<br>(9.4-26%)               | 84%<br>(74-91%)          | 1.1<br>(0.48-2)                             | 3.6%<br>(2.2-5.3%)                   | 4.2%<br>(2.5-6.2%)                  | 95<br>(52-150)      | 1000<br>(580-1700)       |
| Honduras | 2016 | Male   | 85 to 89 | 15%<br>(8.8-24%)               | 85%<br>(76-91%)          | 1.1<br>(0.43-2.1)                           | 3.1%<br>(1.7-4.8%)                   | 3.5%<br>(1.8-5.5%)                  | 64<br>(32-100)      | 500<br>(270-800)         |
| Honduras | 2016 | Male   | 90 to 94 | 17%<br>(11-26%)                | 83%<br>(74-89%)          | 1.2<br>(0.46-2.4)                           | 2.9%<br>(1.4-4.9%)                   | 3.2%<br>(1.5-5.5%)                  | 30<br>(14-52)       | 170<br>(80-280)          |
| Honduras | 2016 | Male   | 95 plus  | 21%<br>(12-34%)                | 79%<br>(66-88%)          | 1.4<br>(0.44-3)                             | 3.2%<br>(1.3-5.6%)                   | 3.5%<br>(1.2-6.3%)                  | 9.7<br>(3.4-18)     | 37<br>(15-64)            |
| Mexico   | 1990 | Female | All Ages | 29%<br>(23-35%)                | 71%<br>(65-77%)          | 0.34<br>(0.27-0.42)                         | 1%<br>(0.74-1.4%)                    | 2.1%<br>(1.3-3%)                    | 4000<br>(2600-5800) | 120000<br>(86000-160000) |
| Mexico   | 1990 | Female | 15 to 19 | 26%<br>(15-39%)                | 74%<br>(61-85%)          | 0.31<br>(0.15-0.52)                         | 0.78%<br>(0.47-1.2%)                 | 1.3%<br>(0.57-2.2%)                 | 36<br>(16-63)       | 4500<br>(2600-6800)      |
| Mexico   | 1990 | Female | 20 to 24 | 37%<br>(21-52%)                | 63%<br>(48-79%)          | 0.37<br>(0.18-0.63)                         | 1.1%<br>(0.7-1.7%)                   | 1.4%<br>(0.64-2.4%)                 | 43<br>(19-75)       | 5900<br>(3500-8800)      |
| Mexico   | 1990 | Female | 25 to 29 | 41%<br>(23-57%)                | 59%<br>(43-77%)          | 0.38<br>(0.19-0.64)                         | 1.2%<br>(0.83-1.7%)                  | 1.8%<br>(1-2.7%)                    | 56<br>(32-86)       | 6000<br>(4000-8400)      |
| Mexico   | 1990 | Female | 30 to 34 | 43%<br>(25-59%)                | 57%<br>(41-75%)          | 0.42<br>(0.21-0.68)                         | 1.6%<br>(1.1-2.1%)                   | 2.9%<br>(2.2-3.7%)                  | 99<br>(75-130)      | 7200<br>(5200-9300)      |
| Mexico   | 1990 | Female | 35 to 39 | 45%<br>(28-59%)                | 55%<br>(41-72%)          | 0.5<br>(0.26-0.83)                          | 2.2%<br>(1.7-2.9%)                   | 4.6%<br>(3.7-5.6%)                  | 190<br>(150-230)    | 10000<br>(8100-13000)    |
| Mexico   | 1990 | Female | 40 to 44 | 45%<br>(30-60%)                | 55%<br>(40-70%)          | 0.6<br>(0.33-0.95)                          | 2.6%<br>(1.9-3.4%)                   | 5.3%<br>(4.4-6.3%)                  | 230<br>(190-280)    | 11000<br>(8100-13000)    |
| Mexico   | 1990 | Female | 45 to 49 | 43%<br>(26-58%)                | 57%<br>(42-74%)          | 0.73<br>(0.36-1.2)                          | 2.9%<br>(2-4%)                       | 5.6%<br>(4.4-7%)                    | 310<br>(250-400)    | 12000<br>(8600-16000)    |
| Mexico   | 1990 | Female | 50 to 54 | 43%<br>(26-58%)                | 57%<br>(42-74%)          | 0.89<br>(0.47-1.4)                          | 2.9%<br>(1.7-4.2%)                   | 5.1%<br>(3.8-6.8%)                  | 350<br>(250-460)    | 12000<br>(7300-17000)    |
| Mexico   | 1990 | Female | 55 to 59 | 43%<br>(27-59%)                | 57%<br>(41-73%)          | 1.1<br>(0.55-1.8)                           | 2.8%<br>(1.5-4.7%)                   | 4.8%<br>(3-7.2%)                    | 420<br>(270-640)    | 13000<br>(6900-21000)    |
| Mexico   | 1990 | Female | 60 to 64 | 43%<br>(26-61%)                | 57%<br>(39-74%)          | 1.2<br>(0.62-2)                             | 2.5%<br>(1-4.6%)                     | 4.1%<br>(2.1-6.6%)                  | 440<br>(230-710)    | 11000<br>(4700-20000)    |
| Mexico   | 1990 | Female | 65 to 69 | 41%<br>(24-57%)                | 59%<br>(43-76%)          | 1.3<br>(0.67-2)                             | 2.5%<br>(1-4.4%)                     | 3.7%<br>(1.9-6.1%)                  | 470<br>(240-770)    | 10000<br>(4300-18000)    |
| Mexico   | 1990 | Female | 70 to 74 | 35%<br>(21-51%)                | 65%<br>(49-79%)          | 1.2<br>(0.59-2.1)                           | 2.4%<br>(0.84-4.6%)                  | 3.5%<br>(1.4-6.1%)                  | 440<br>(180-790)    | 8100<br>(2700-15000)     |

| Location | Year | Sex    | Age      | Prevalence of current drinkers | Prevalence of abstainers | Population average of standard drinks daily | Percent of total attributable deaths | Percent of total attributable DALYs | Attributable deaths    | Attributable DALYs           |
|----------|------|--------|----------|--------------------------------|--------------------------|---------------------------------------------|--------------------------------------|-------------------------------------|------------------------|------------------------------|
| Mexico   | 1990 | Female | 75 to 79 | 28%<br>(15-43%)                | 72%<br>(57-85%)          | 0.96<br>(0.43-1.7)                          | 1.9%<br>(0.63-3.7%)                  | 2.6%<br>(1-4.8%)                    | 400<br>(160-750)       | 5800<br>(1900-11000)         |
| Mexico   | 1990 | Female | 80 to 84 | 24%<br>(13-38%)                | 76%<br>(62-87%)          | 0.78<br>(0.35-1.4)                          | 1.3%<br>(0.36-2.6%)                  | 1.8%<br>(0.54-3.3%)                 | 280<br>(86-540)        | 3000<br>(790-5900)           |
| Mexico   | 1990 | Female | 85 to 89 | 25%<br>(13-39%)                | 75%<br>(61-87%)          | 0.77<br>(0.36-1.4)                          | 1%<br>(0.065-2.2%)                   | 1.2%<br>(0.08-2.7%)                 | 190<br>(12-410)        | 1400<br>(88-3300)            |
| Mexico   | 1990 | Female | 90 to 94 | 28%<br>(16-43%)                | 72%<br>(57-84%)          | 0.83<br>(0.36-1.5)                          | 0.64%<br>(-0.41-2.1%)                | 0.71%<br>(-0.55-2.4%)               | 65<br>(-51-220)        | 370<br>(-230-1200)           |
| Mexico   | 1990 | Female | 95 plus  | 33%<br>(17-49%)                | 67%<br>(51-83%)          | 0.9<br>(0.33-1.8)                           | 0.44%<br>(-0.89-2.4%)                | 0.39%<br>(-1.2-2.7%)                | 12<br>(-38-87)         | 60<br>(-120-310)             |
| Mexico   | 1990 | Male   | All Ages | 46%<br>(40-51%)                | 54%<br>(49-60%)          | 2.9<br>(2.5-3.3)                            | 8.6%<br>(7.6-9.6%)                   | 12%<br>(11-14%)                     | 31000<br>(27000-35000) | 1300000<br>(1100000-1500000) |
| Mexico   | 1990 | Male   | 15 to 19 | 34%<br>(24-45%)                | 66%<br>(55-76%)          | 1.3<br>(0.83-1.9)                           | 5.7%<br>(4-8%)                       | 7.6%<br>(5-11%)                     | 520<br>(340-760)       | 46000<br>(32000-63000)       |
| Mexico   | 1990 | Male   | 20 to 24 | 63%<br>(51-73%)                | 37%<br>(27-49%)          | 3.5<br>(2.5-4.7)                            | 14%<br>(11-18%)                      | 18%<br>(13-23%)                     | 1600<br>(1100-2000)    | 120000<br>(93000-160000)     |
| Mexico   | 1990 | Male   | 25 to 29 | 73%<br>(63-81%)                | 27%<br>(19-37%)          | 4.8<br>(3.4-6.3)                            | 18%<br>(14-22%)                      | 22%<br>(17-27%)                     | 2000<br>(1500-2500)    | 140000<br>(110000-180000)    |
| Mexico   | 1990 | Male   | 30 to 34 | 76%<br>(65-83%)                | 24%<br>(17-35%)          | 5.6<br>(4-7.3)                              | 20%<br>(16-23%)                      | 24%<br>(20-29%)                     | 2100<br>(1700-2600)    | 140000<br>(110000-170000)    |
| Mexico   | 1990 | Male   | 35 to 39 | 77%<br>(68-84%)                | 23%<br>(16-32%)          | 6.2<br>(4.4-8.3)                            | 21%<br>(18-25%)                      | 27%<br>(23-31%)                     | 2500<br>(2100-2900)    | 140000<br>(120000-170000)    |
| Mexico   | 1990 | Male   | 40 to 44 | 78%<br>(69-85%)                | 22%<br>(15-31%)          | 6.7<br>(5-8.9)                              | 22%<br>(18-25%)                      | 28%<br>(24-32%)                     | 2400<br>(2100-2800)    | 130000<br>(110000-140000)    |
| Mexico   | 1990 | Male   | 45 to 49 | 78%<br>(67-85%)                | 22%<br>(15-33%)          | 7.2<br>(4.9-10)                             | 21%<br>(18-24%)                      | 27%<br>(24-30%)                     | 2800<br>(2400-3100)    | 130000<br>(110000-140000)    |
| Mexico   | 1990 | Male   | 50 to 54 | 78%<br>(69-85%)                | 22%<br>(15-31%)          | 8.2<br>(5.8-11)                             | 20%<br>(17-23%)                      | 26%<br>(22-29%)                     | 2800<br>(2400-3100)    | 110000<br>(95000-130000)     |
| Mexico   | 1990 | Male   | 55 to 59 | 78%<br>(69-86%)                | 22%<br>(14-31%)          | 10<br>(7.1-13)                              | 19%<br>(15-22%)                      | 23%<br>(20-27%)                     | 3000<br>(2500-3500)    | 100000<br>(85000-120000)     |
| Mexico   | 1990 | Male   | 60 to 64 | 76%<br>(65-85%)                | 24%<br>(15-35%)          | 9.4<br>(6.5-13)                             | 16%<br>(13-20%)                      | 20%<br>(16-23%)                     | 2800<br>(2300-3300)    | 82000<br>(66000-100000)      |
| Mexico   | 1990 | Male   | 65 to 69 | 70%<br>(58-81%)                | 30%<br>(19-42%)          | 6.8<br>(4.6-9.3)                            | 14%<br>(11-17%)                      | 17%<br>(13-20%)                     | 2600<br>(2100-3100)    | 63000<br>(50000-77000)       |
| Mexico   | 1990 | Male   | 70 to 74 | 61%<br>(49-73%)                | 39%<br>(27-51%)          | 4.5<br>(2.9-6.5)                            | 10%<br>(8.1-13%)                     | 13%<br>(9.9-15%)                    | 1900<br>(1500-2300)    | 37000<br>(29000-46000)       |
| Mexico   | 1990 | Male   | 75 to 79 | 51%<br>(37-65%)                | 49%<br>(35-63%)          | 3.1<br>(1.9-4.8)                            | 7.7%<br>(5.7-10%)                    | 9.1%<br>(6.7-12%)                   | 1500<br>(1100-2000)    | 23000<br>(17000-30000)       |
| Mexico   | 1990 | Male   | 80 to 84 | 45%<br>(32-58%)                | 55%<br>(42-68%)          | 2.6<br>(1.6-3.9)                            | 6.1%<br>(4.4-8.1%)                   | 7.2%<br>(5.2-9.5%)                  | 1100<br>(800-1500)     | 13000<br>(9100-17000)        |
| Mexico   | 1990 | Male   | 85 to 89 | 43%<br>(31-56%)                | 57%<br>(44-69%)          | 2.5<br>(1.5-3.8)                            | 5.4%<br>(3.8-7.4%)                   | 6.2%<br>(4.3-8.5%)                  | 780<br>(540-1100)      | 6300<br>(4400-8500)          |

| Location | Year | Sex    | Age      | Prevalence of current drinkers | Prevalence of abstainers | Population average of standard drinks daily | Percent of total attributable deaths | Percent of total attributable DALYs | Attributable deaths    | Attributable DALYs           |
|----------|------|--------|----------|--------------------------------|--------------------------|---------------------------------------------|--------------------------------------|-------------------------------------|------------------------|------------------------------|
| Mexico   | 1990 | Male   | 90 to 94 | 46%<br>(34-58%)                | 54%<br>(42-66%)          | 2.6<br>(1.6-4)                              | 5%<br>(3.1-6.9%)                     | 5.6%<br>(3.3-8%)                    | 370<br>(220-540)       | 2100<br>(1300-3000)          |
| Mexico   | 1990 | Male   | 95 plus  | 51%<br>(35-65%)                | 49%<br>(35-65%)          | 2.8<br>(1.6-4.6)                            | 5%<br>(2.5-7.7%)                     | 5.4%<br>(2.5-8.7%)                  | 110<br>(49-170)        | 410<br>(200-620)             |
| Mexico   | 1995 | Female | All Ages | 30%<br>(25-36%)                | 70%<br>(64-75%)          | 0.37<br>(0.3-0.46)                          | 1.2%<br>(0.82-1.6%)                  | 2.3%<br>(1.4-3.4%)                  | 4800<br>(2900-7000)    | 140000<br>(94000-190000)     |
| Mexico   | 1995 | Female | 15 to 19 | 28%<br>(17-41%)                | 72%<br>(59-83%)          | 0.34<br>(0.17-0.56)                         | 0.8%<br>(0.48-1.3%)                  | 1.4%<br>(0.61-2.4%)                 | 35<br>(16-62)          | 4400<br>(2600-6800)          |
| Mexico   | 1995 | Female | 20 to 24 | 38%<br>(23-53%)                | 62%<br>(47-77%)          | 0.39<br>(0.19-0.66)                         | 1.1%<br>(0.69-1.6%)                  | 1.4%<br>(0.67-2.5%)                 | 44<br>(20-75)          | 6500<br>(3900-9800)          |
| Mexico   | 1995 | Female | 25 to 29 | 41%<br>(25-56%)                | 59%<br>(44-75%)          | 0.4<br>(0.2-0.66)                           | 1.1%<br>(0.74-1.6%)                  | 1.7%<br>(1-2.6%)                    | 52<br>(31-81)          | 5900<br>(3900-8300)          |
| Mexico   | 1995 | Female | 30 to 34 | 43%<br>(26-58%)                | 57%<br>(42-74%)          | 0.43<br>(0.23-0.68)                         | 1.4%<br>(0.94-1.9%)                  | 2.8%<br>(2.2-3.6%)                  | 98<br>(75-130)         | 7100<br>(5000-9200)          |
| Mexico   | 1995 | Female | 35 to 39 | 45%<br>(28-59%)                | 55%<br>(41-72%)          | 0.51<br>(0.27-0.83)                         | 1.9%<br>(1.3-2.5%)                   | 4.4%<br>(3.6-5.4%)                  | 190<br>(150-230)       | 10000<br>(7500-13000)        |
| Mexico   | 1995 | Female | 40 to 44 | 44%<br>(30-58%)                | 56%<br>(42-70%)          | 0.61<br>(0.33-0.97)                         | 2.2%<br>(1.5-2.9%)                   | 5.1%<br>(4.2-6.2%)                  | 250<br>(210-310)       | 11000<br>(8000-14000)        |
| Mexico   | 1995 | Female | 45 to 49 | 42%<br>(25-56%)                | 58%<br>(44-75%)          | 0.74<br>(0.36-1.3)                          | 2.6%<br>(1.7-3.8%)                   | 5.4%<br>(4.2-6.8%)                  | 320<br>(260-410)       | 12000<br>(8200-17000)        |
| Mexico   | 1995 | Female | 50 to 54 | 42%<br>(26-56%)                | 58%<br>(44-74%)          | 0.9<br>(0.48-1.5)                           | 2.7%<br>(1.6-4.1%)                   | 5.1%<br>(3.7-6.7%)                  | 390<br>(290-520)       | 13000<br>(7900-19000)        |
| Mexico   | 1995 | Female | 55 to 59 | 42%<br>(27-57%)                | 58%<br>(43-73%)          | 1.1<br>(0.56-1.8)                           | 2.9%<br>(1.6-4.8%)                   | 4.9%<br>(3.2-7.3%)                  | 470<br>(310-710)       | 14000<br>(7900-23000)        |
| Mexico   | 1995 | Female | 60 to 64 | 42%<br>(27-59%)                | 58%<br>(41-73%)          | 1.2<br>(0.64-2)                             | 2.7%<br>(1.1-4.9%)                   | 4.2%<br>(2.3-6.8%)                  | 530<br>(280-870)       | 14000<br>(5900-25000)        |
| Mexico   | 1995 | Female | 65 to 69 | 42%<br>(26-58%)                | 58%<br>(42-74%)          | 1.4<br>(0.75-2.2)                           | 2.6%<br>(1.1-4.8%)                   | 4%<br>(2-6.7%)                      | 590<br>(290-980)       | 13000<br>(5200-23000)        |
| Mexico   | 1995 | Female | 70 to 74 | 38%<br>(24-54%)                | 62%<br>(46-76%)          | 1.4<br>(0.7-2.3)                            | 2.6%<br>(0.82-5.1%)                  | 3.8%<br>(1.5-6.7%)                  | 620<br>(240-1100)      | 11000<br>(3500-22000)        |
| Mexico   | 1995 | Female | 75 to 79 | 31%<br>(18-46%)                | 69%<br>(54-82%)          | 1.1<br>(0.52-2)                             | 2.1%<br>(0.6-4.1%)                   | 2.9%<br>(0.98-5.4%)                 | 450<br>(150-870)       | 6600<br>(1900-13000)         |
| Mexico   | 1995 | Female | 80 to 84 | 26%<br>(15-40%)                | 74%<br>(60-85%)          | 0.91<br>(0.42-1.6)                          | 1.5%<br>(0.37-3%)                    | 2%<br>(0.54-3.8%)                   | 360<br>(100-700)       | 3800<br>(920-7700)           |
| Mexico   | 1995 | Female | 85 to 89 | 26%<br>(15-42%)                | 74%<br>(58-85%)          | 0.86<br>(0.42-1.6)                          | 1.1%<br>(0.081-2.4%)                 | 1.3%<br>(0.11-3%)                   | 240<br>(20-550)        | 1900<br>(140-4400)           |
| Mexico   | 1995 | Female | 90 to 94 | 30%<br>(17-44%)                | 70%<br>(56-83%)          | 0.92<br>(0.43-1.7)                          | 0.72%<br>(-0.42-2.3%)                | 0.8%<br>(-0.56-2.7%)                | 93<br>(-65-310)        | 530<br>(-320-1700)           |
| Mexico   | 1995 | Female | 95 plus  | 34%<br>(19-51%)                | 66%<br>(49-81%)          | 0.99<br>(0.37-1.9)                          | 0.5%<br>(-0.93-2.7%)                 | 0.45%<br>(-1.3-3.1%)                | 20<br>(-57-140)        | 92<br>(-170-500)             |
| Mexico   | 1995 | Male   | All Ages | 49%<br>(44-54%)                | 51%<br>(46-56%)          | 3.2<br>(2.8-3.7)                            | 9.3%<br>(8.1-10%)                    | 12%<br>(11-14%)                     | 33000<br>(29000-37000) | 1400000<br>(1200000-1600000) |

| Location | Year | Sex    | Age      | Prevalence of current drinkers | Prevalence of abstainers | Population average of standard drinks daily | Percent of total attributable deaths | Percent of total attributable DALYs | Attributable deaths | Attributable DALYs        |
|----------|------|--------|----------|--------------------------------|--------------------------|---------------------------------------------|--------------------------------------|-------------------------------------|---------------------|---------------------------|
| Mexico   | 1995 | Male   | 15 to 19 | 40%<br>(30-51%)                | 60%<br>(49-70%)          | 1.6<br>(1-2.3)                              | 6.4%<br>(4.5-8.8%)                   | 8.9%<br>(6-13%)                     | 550<br>(370-790)    | 48000<br>(34000-66000)    |
| Mexico   | 1995 | Male   | 20 to 24 | 66%<br>(55-76%)                | 34%<br>(24-45%)          | 3.9<br>(2.8-5.1)                            | 15%<br>(11-18%)                      | 18%<br>(14-24%)                     | 1700<br>(1300-2200) | 130000<br>(100000-170000) |
| Mexico   | 1995 | Male   | 25 to 29 | 73%<br>(63-81%)                | 27%<br>(19-37%)          | 5<br>(3.7-6.6)                              | 17%<br>(14-21%)                      | 21%<br>(17-27%)                     | 2000<br>(1500-2500) | 140000<br>(110000-170000) |
| Mexico   | 1995 | Male   | 30 to 34 | 76%<br>(66-83%)                | 24%<br>(17-34%)          | 5.8<br>(4.2-7.5)                            | 18%<br>(15-22%)                      | 23%<br>(19-28%)                     | 2200<br>(1800-2700) | 140000<br>(120000-170000) |
| Mexico   | 1995 | Male   | 35 to 39 | 77%<br>(68-84%)                | 23%<br>(16-32%)          | 6.5<br>(4.7-8.7)                            | 20%<br>(17-23%)                      | 26%<br>(22-30%)                     | 2600<br>(2200-3100) | 150000<br>(130000-180000) |
| Mexico   | 1995 | Male   | 40 to 44 | 78%<br>(69-85%)                | 22%<br>(15-31%)          | 7<br>(5.1-9.3)                              | 20%<br>(17-23%)                      | 27%<br>(24-31%)                     | 2700<br>(2400-3100) | 140000<br>(120000-160000) |
| Mexico   | 1995 | Male   | 45 to 49 | 78%<br>(67-85%)                | 22%<br>(15-33%)          | 7.4<br>(5.1-10)                             | 20%<br>(17-23%)                      | 26%<br>(23-29%)                     | 2800<br>(2500-3200) | 130000<br>(110000-150000) |
| Mexico   | 1995 | Male   | 50 to 54 | 78%<br>(68-85%)                | 22%<br>(15-32%)          | 8.5<br>(6.1-11)                             | 19%<br>(16-23%)                      | 25%<br>(22-28%)                     | 3000<br>(2600-3400) | 120000<br>(100000-140000) |
| Mexico   | 1995 | Male   | 55 to 59 | 78%<br>(69-85%)                | 22%<br>(15-31%)          | 10<br>(7.4-14)                              | 18%<br>(15-22%)                      | 23%<br>(19-27%)                     | 3100<br>(2600-3600) | 110000<br>(88000-130000)  |
| Mexico   | 1995 | Male   | 60 to 64 | 75%<br>(64-84%)                | 25%<br>(16-36%)          | 9.6<br>(6.7-14)                             | 16%<br>(12-19%)                      | 19%<br>(15-23%)                     | 3000<br>(2400-3600) | 90000<br>(70000-110000)   |
| Mexico   | 1995 | Male   | 65 to 69 | 68%<br>(55-79%)                | 32%<br>(21-45%)          | 6.7<br>(4.5-9.3)                            | 13%<br>(10-16%)                      | 16%<br>(12-19%)                     | 2700<br>(2200-3300) | 67000<br>(52000-83000)    |
| Mexico   | 1995 | Male   | 70 to 74 | 57%<br>(44-69%)                | 43%<br>(31-56%)          | 4.2<br>(2.6-6.1)                            | 9.7%<br>(7.4-12%)                    | 12%<br>(9-14%)                      | 2300<br>(1800-2800) | 44000<br>(34000-56000)    |
| Mexico   | 1995 | Male   | 75 to 79 | 46%<br>(33-61%)                | 54%<br>(39-67%)          | 2.9<br>(1.7-4.5)                            | 7%<br>(5.2-9.3%)                     | 8.3%<br>(6.2-11%)                   | 1400<br>(1100-1900) | 22000<br>(16000-29000)    |
| Mexico   | 1995 | Male   | 80 to 84 | 41%<br>(29-55%)                | 59%<br>(45-71%)          | 2.5<br>(1.5-3.7)                            | 5.7%<br>(4.1-7.7%)                   | 6.7%<br>(4.8-8.9%)                  | 1200<br>(840-1600)  | 13000<br>(9500-18000)     |
| Mexico   | 1995 | Male   | 85 to 89 | 41%<br>(29-54%)                | 59%<br>(46-71%)          | 2.4<br>(1.4-3.7)                            | 5.1%<br>(3.6-6.9%)                   | 5.8%<br>(4.1-7.9%)                  | 860<br>(600-1200)   | 6900<br>(4900-9400)       |
| Mexico   | 1995 | Male   | 90 to 94 | 44%<br>(32-56%)                | 56%<br>(44-68%)          | 2.5<br>(1.5-3.9)                            | 4.7%<br>(3-6.5%)                     | 5.2%<br>(3.2-7.4%)                  | 420<br>(260-590)    | 2300<br>(1500-3300)       |
| Mexico   | 1995 | Male   | 95 plus  | 48%<br>(32-63%)                | 52%<br>(37-68%)          | 2.7<br>(1.5-4.4)                            | 4.7%<br>(2.5-7.1%)                   | 5.1%<br>(2.4-7.9%)                  | 130<br>(61-200)     | 490<br>(260-750)          |
| Mexico   | 2000 | Female | All Ages | 28%<br>(25-32%)                | 72%<br>(68-75%)          | 0.33<br>(0.27-0.41)                         | 1.3%<br>(0.99-1.7%)                  | 2.5%<br>(1.8-3.5%)                  | 5200<br>(3700-7100) | 150000<br>(110000-190000) |
| Mexico   | 2000 | Female | 15 to 19 | 32%<br>(24-41%)                | 68%<br>(59-76%)          | 0.41<br>(0.24-0.62)                         | 0.88%<br>(0.52-1.4%)                 | 1.6%<br>(0.71-2.7%)                 | 37<br>(17-63)       | 4700<br>(2800-7200)       |
| Mexico   | 2000 | Female | 20 to 24 | 37%<br>(27-48%)                | 63%<br>(52-73%)          | 0.39<br>(0.22-0.62)                         | 1.1%<br>(0.71-1.6%)                  | 1.4%<br>(0.69-2.4%)                 | 39<br>(18-63)       | 6200<br>(3800-9300)       |
| Mexico   | 2000 | Female | 25 to 29 | 35%<br>(25-46%)                | 65%<br>(54-75%)          | 0.34<br>(0.19-0.54)                         | 1.1%<br>(0.74-1.5%)                  | 1.6%<br>(1-2.4%)                    | 47<br>(30-69)       | 6100<br>(4100-8300)       |
| Mexico   | 2000 | Female | 30 to 34 | 35%<br>(24-46%)                | 65%<br>(54-76%)          | 0.35<br>(0.21-0.54)                         | 1.2%<br>(0.87-1.6%)                  | 2.6%<br>(2.1-3.3%)                  | 87<br>(69-110)      | 6900<br>(5100-9000)       |

| Location | Year | Sex    | Age      | Prevalence of current drinkers | Prevalence of abstainers | Population average of standard drinks daily | Percent of total attributable deaths | Percent of total attributable DALYs | Attributable deaths    | Attributable DALYs           |
|----------|------|--------|----------|--------------------------------|--------------------------|---------------------------------------------|--------------------------------------|-------------------------------------|------------------------|------------------------------|
| Mexico   | 2000 | Female | 35 to 39 | 35%<br>(25-47%)                | 65%<br>(53-75%)          | 0.4<br>(0.22-0.64)                          | 1.7%<br>(1.3-2.2%)                   | 4.1%<br>(3.5-4.9%)                  | 170<br>(140-200)       | 9500<br>(7400-12000)         |
| Mexico   | 2000 | Female | 40 to 44 | 35%<br>(26-47%)                | 65%<br>(53-74%)          | 0.48<br>(0.28-0.75)                         | 2%<br>(1.5-2.7%)                     | 4.9%<br>(4.1-5.7%)                  | 250<br>(210-290)       | 11000<br>(8900-14000)        |
| Mexico   | 2000 | Female | 45 to 49 | 35%<br>(24-47%)                | 65%<br>(53-76%)          | 0.61<br>(0.34-1)                            | 2.4%<br>(1.6-3.3%)                   | 5.1%<br>(4.2-6.4%)                  | 340<br>(280-430)       | 14000<br>(9800-18000)        |
| Mexico   | 2000 | Female | 50 to 54 | 35%<br>(25-47%)                | 65%<br>(53-75%)          | 0.75<br>(0.45-1.2)                          | 2.8%<br>(1.8-3.8%)                   | 5%<br>(3.9-6.3%)                    | 420<br>(330-530)       | 15000<br>(10000-19000)       |
| Mexico   | 2000 | Female | 55 to 59 | 36%<br>(25-48%)                | 64%<br>(52-75%)          | 0.92<br>(0.51-1.5)                          | 2.9%<br>(1.9-4.5%)                   | 4.9%<br>(3.5-6.7%)                  | 530<br>(380-730)       | 16000<br>(10000-24000)       |
| Mexico   | 2000 | Female | 60 to 64 | 36%<br>(24-50%)                | 64%<br>(50-76%)          | 1<br>(0.58-1.7)                             | 2.9%<br>(1.7-4.5%)                   | 4.3%<br>(2.8-6.4%)                  | 590<br>(390-870)       | 16000<br>(9100-24000)        |
| Mexico   | 2000 | Female | 65 to 69 | 33%<br>(22-46%)                | 67%<br>(54-78%)          | 1.1<br>(0.61-1.7)                           | 2.8%<br>(1.7-4.4%)                   | 4.1%<br>(2.7-6%)                    | 690<br>(450-1000)      | 15000<br>(9000-24000)        |
| Mexico   | 2000 | Female | 70 to 74 | 28%<br>(18-39%)                | 72%<br>(61-82%)          | 1<br>(0.54-1.6)                             | 2.7%<br>(1.4-4.5%)                   | 3.8%<br>(2.2-6%)                    | 710<br>(410-1100)      | 13000<br>(7100-22000)        |
| Mexico   | 2000 | Female | 75 to 79 | 22%<br>(15-33%)                | 78%<br>(67-85%)          | 0.83<br>(0.43-1.4)                          | 2.1%<br>(1.1-3.7%)                   | 2.9%<br>(1.6-4.8%)                  | 580<br>(310-950)       | 8400<br>(4200-15000)         |
| Mexico   | 2000 | Female | 80 to 84 | 20%<br>(13-28%)                | 80%<br>(72-87%)          | 0.7<br>(0.39-1.1)                           | 1.5%<br>(0.72-2.6%)                  | 2%<br>(1-3.4%)                      | 380<br>(190-640)       | 4100<br>(1900-7100)          |
| Mexico   | 2000 | Female | 85 to 89 | 20%<br>(13-29%)                | 80%<br>(71-87%)          | 0.67<br>(0.36-1.1)                          | 1.1%<br>(0.33-2.1%)                  | 1.3%<br>(0.43-2.6%)                 | 240<br>(76-460)        | 1900<br>(580-3700)           |
| Mexico   | 2000 | Female | 90 to 94 | 23%<br>(15-32%)                | 77%<br>(68-85%)          | 0.72<br>(0.36-1.3)                          | 0.71%<br>(-0.11-1.9%)                | 0.81%<br>(-0.22-2.2%)               | 95<br>(-27-260)        | 560<br>(-89-1500)            |
| Mexico   | 2000 | Female | 95 plus  | 27%<br>(16-39%)                | 73%<br>(61-84%)          | 0.78<br>(0.31-1.5)                          | 0.54%<br>(-0.5-2.2%)                 | 0.49%<br>(-0.83-2.5%)               | 24<br>(-40-120)        | 110<br>(-100-450)            |
| Mexico   | 2000 | Male   | All Ages | 50%<br>(46-55%)                | 50%<br>(45-54%)          | 3.5<br>(3-3.9)                              | 9.8%<br>(8.5-11%)                    | 13%<br>(11-14%)                     | 33000<br>(29000-37000) | 1400000<br>(1200000-1600000) |
| Mexico   | 2000 | Male   | 15 to 19 | 44%<br>(35-53%)                | 56%<br>(47-65%)          | 1.8<br>(1.2-2.5)                            | 6.5%<br>(4.7-8.9%)                   | 9.4%<br>(6.4-13%)                   | 500<br>(340-700)       | 45000<br>(32000-61000)       |
| Mexico   | 2000 | Male   | 20 to 24 | 67%<br>(58-75%)                | 33%<br>(25-42%)          | 4<br>(2.9-5.3)                              | 14%<br>(11-18%)                      | 18%<br>(13-24%)                     | 1400<br>(1000-1800)    | 120000<br>(89000-150000)     |
| Mexico   | 2000 | Male   | 25 to 29 | 72%<br>(63-79%)                | 28%<br>(21-37%)          | 5<br>(3.6-6.5)                              | 16%<br>(13-20%)                      | 21%<br>(16-26%)                     | 1800<br>(1400-2200)    | 140000<br>(110000-170000)    |
| Mexico   | 2000 | Male   | 30 to 34 | 75%<br>(66-82%)                | 25%<br>(18-34%)          | 5.7<br>(4.3-7.3)                            | 17%<br>(14-20%)                      | 22%<br>(19-27%)                     | 2000<br>(1700-2400)    | 140000<br>(120000-160000)    |
| Mexico   | 2000 | Male   | 35 to 39 | 76%<br>(69-83%)                | 24%<br>(17-31%)          | 6.4<br>(4.7-8.6)                            | 19%<br>(16-22%)                      | 25%<br>(21-29%)                     | 2400<br>(2100-2800)    | 150000<br>(120000-170000)    |
| Mexico   | 2000 | Male   | 40 to 44 | 77%<br>(69-84%)                | 23%<br>(16-31%)          | 6.9<br>(5.2-9.1)                            | 19%<br>(17-22%)                      | 26%<br>(23-29%)                     | 2700<br>(2400-3000)    | 140000<br>(120000-160000)    |
| Mexico   | 2000 | Male   | 45 to 49 | 77%<br>(67-84%)                | 23%<br>(16-33%)          | 7.3<br>(5.2-10)                             | 19%<br>(16-22%)                      | 25%<br>(22-28%)                     | 2900<br>(2600-3300)    | 140000<br>(120000-160000)    |



| Location | Year | Sex    | Age      | Prevalence of current drinkers | Prevalence of abstainers | Population average of standard drinks daily | Percent of total attributable deaths | Percent of total attributable DALYs | Attributable deaths | Attributable DALYs        |
|----------|------|--------|----------|--------------------------------|--------------------------|---------------------------------------------|--------------------------------------|-------------------------------------|---------------------|---------------------------|
| Mexico   | 2000 | Male   | 50 to 54 | 77%<br>(68-84%)                | 23%<br>(16-32%)          | 8.4<br>(6.1-11)                             | 18%<br>(15-21%)                      | 23%<br>(20-27%)                     | 3000<br>(2600-3400) | 120000<br>(100000-140000) |
| Mexico   | 2000 | Male   | 55 to 59 | 78%<br>(70-85%)                | 22%<br>(15-30%)          | 11<br>(7.6-14)                              | 17%<br>(14-21%)                      | 22%<br>(18-25%)                     | 3200<br>(2700-3800) | 110000<br>(93000-140000)  |
| Mexico   | 2000 | Male   | 60 to 64 | 76%<br>(66-84%)                | 24%<br>(16-34%)          | 10<br>(7.2-14)                              | 15%<br>(12-19%)                      | 18%<br>(15-22%)                     | 3100<br>(2500-3800) | 94000<br>(74000-120000)   |
| Mexico   | 2000 | Male   | 65 to 69 | 69%<br>(57-79%)                | 31%<br>(21-43%)          | 7<br>(4.9-9.7)                              | 13%<br>(9.8-16%)                     | 15%<br>(12-18%)                     | 3000<br>(2400-3700) | 75000<br>(58000-92000)    |
| Mexico   | 2000 | Male   | 70 to 74 | 59%<br>(46-70%)                | 41%<br>(30-54%)          | 4.5<br>(2.9-6.5)                            | 9.6%<br>(7.5-12%)                    | 12%<br>(9.1-14%)                    | 2500<br>(1900-3000) | 49000<br>(38000-62000)    |
| Mexico   | 2000 | Male   | 75 to 79 | 50%<br>(37-64%)                | 50%<br>(36-63%)          | 3.3<br>(2-4.9)                              | 7.4%<br>(5.4-9.6%)                   | 8.7%<br>(6.5-11%)                   | 1900<br>(1400-2500) | 30000<br>(22000-39000)    |
| Mexico   | 2000 | Male   | 80 to 84 | 45%<br>(32-58%)                | 55%<br>(42-68%)          | 2.9<br>(1.8-4.2)                            | 6.1%<br>(4.5-8%)                     | 7.1%<br>(5.3-9.4%)                  | 1300<br>(930-1700)  | 15000<br>(11000-20000)    |
| Mexico   | 2000 | Male   | 85 to 89 | 44%<br>(32-55%)                | 56%<br>(45-68%)          | 2.6<br>(1.6-4)                              | 5.2%<br>(3.7-7%)                     | 6%<br>(4.2-8.1%)                    | 890<br>(620-1200)   | 7300<br>(5200-9900)       |
| Mexico   | 2000 | Male   | 90 to 94 | 46%<br>(35-57%)                | 54%<br>(43-65%)          | 2.7<br>(1.7-4.1)                            | 4.7%<br>(3.1-6.5%)                   | 5.3%<br>(3.3-7.5%)                  | 440<br>(280-620)    | 2600<br>(1700-3600)       |
| Mexico   | 2000 | Male   | 95 plus  | 51%<br>(35-65%)                | 49%<br>(35-65%)          | 3<br>(1.6-4.7)                              | 4.8%<br>(2.6-7.2%)                   | 5.2%<br>(2.6-8%)                    | 150<br>(74-230)     | 570<br>(310-870)          |
| Mexico   | 2005 | Female | All Ages | 26%<br>(23-29%)                | 74%<br>(71-77%)          | 0.33<br>(0.26-0.39)                         | 1.4%<br>(1.1-1.8%)                   | 2.6%<br>(1.9-3.5%)                  | 6000<br>(4300-7900) | 160000<br>(120000-200000) |
| Mexico   | 2005 | Female | 15 to 19 | 26%<br>(20-34%)                | 74%<br>(66-80%)          | 0.33<br>(0.2-0.51)                          | 0.85%<br>(0.53-1.3%)                 | 1.4%<br>(0.62-2.4%)                 | 33<br>(15-56)       | 4600<br>(2700-6800)       |
| Mexico   | 2005 | Female | 20 to 24 | 36%<br>(27-45%)                | 64%<br>(55-73%)          | 0.38<br>(0.21-0.59)                         | 1.1%<br>(0.74-1.6%)                  | 1.4%<br>(0.62-2.3%)                 | 37<br>(16-60)       | 6200<br>(3800-9200)       |
| Mexico   | 2005 | Female | 25 to 29 | 36%<br>(27-45%)                | 64%<br>(55-73%)          | 0.34<br>(0.21-0.54)                         | 1%<br>(0.68-1.4%)                    | 1.5%<br>(0.91-2.3%)                 | 45<br>(27-67)       | 5900<br>(3900-8200)       |
| Mexico   | 2005 | Female | 30 to 34 | 34%<br>(26-44%)                | 66%<br>(56-74%)          | 0.34<br>(0.21-0.52)                         | 1.1%<br>(0.73-1.5%)                  | 2.3%<br>(1.8-3%)                    | 80<br>(62-100)      | 6600<br>(4600-8700)       |
| Mexico   | 2005 | Female | 35 to 39 | 34%<br>(26-44%)                | 66%<br>(56-74%)          | 0.38<br>(0.22-0.6)                          | 1.4%<br>(1-1.9%)                     | 3.7%<br>(3.1-4.5%)                  | 160<br>(130-190)    | 8800<br>(6700-11000)      |
| Mexico   | 2005 | Female | 40 to 44 | 34%<br>(25-44%)                | 66%<br>(56-75%)          | 0.46<br>(0.28-0.71)                         | 1.8%<br>(1.3-2.4%)                   | 4.4%<br>(3.8-5.2%)                  | 250<br>(210-290)    | 11000<br>(8800-14000)     |
| Mexico   | 2005 | Female | 45 to 49 | 33%<br>(22-43%)                | 67%<br>(57-78%)          | 0.56<br>(0.31-0.91)                         | 2.2%<br>(1.5-3%)                     | 4.7%<br>(3.9-5.7%)                  | 360<br>(300-440)    | 14000<br>(11000-18000)    |
| Mexico   | 2005 | Female | 50 to 54 | 32%<br>(22-42%)                | 68%<br>(58-78%)          | 0.67<br>(0.4-1)                             | 2.5%<br>(1.7-3.4%)                   | 4.7%<br>(3.8-5.8%)                  | 470<br>(380-580)    | 16000<br>(12000-22000)    |
| Mexico   | 2005 | Female | 55 to 59 | 32%<br>(23-44%)                | 68%<br>(56-77%)          | 0.82<br>(0.46-1.3)                          | 2.8%<br>(1.9-4.1%)                   | 4.6%<br>(3.5-6.2%)                  | 570<br>(430-770)    | 17000<br>(12000-25000)    |
| Mexico   | 2005 | Female | 60 to 64 | 32%<br>(21-45%)                | 68%<br>(55-79%)          | 0.93<br>(0.52-1.5)                          | 2.8%<br>(1.8-4.3%)                   | 4.3%<br>(3-6%)                      | 680<br>(470-950)    | 18000<br>(11000-27000)    |
| Mexico   | 2005 | Female | 65 to 69 | 30%<br>(20-42%)                | 70%<br>(58-80%)          | 0.99<br>(0.56-1.5)                          | 2.9%<br>(1.8-4.3%)                   | 4.2%<br>(2.9-5.8%)                  | 770<br>(530-1100)   | 17000<br>(11000-25000)    |

| Location | Year | Sex    | Age      | Prevalence of current drinkers | Prevalence of abstainers | Population average of standard drinks daily | Percent of total attributable deaths | Percent of total attributable DALYs | Attributable deaths    | Attributable DALYs           |
|----------|------|--------|----------|--------------------------------|--------------------------|---------------------------------------------|--------------------------------------|-------------------------------------|------------------------|------------------------------|
| Mexico   | 2005 | Female | 70 to 74 | 26%<br>(17-36%)                | 74%<br>(64-83%)          | 0.96<br>(0.54-1.6)                          | 2.8%<br>(1.6-4.5%)                   | 3.9%<br>(2.4-5.9%)                  | 860<br>(530-1300)      | 16000<br>(9100-26000)        |
| Mexico   | 2005 | Female | 75 to 79 | 21%<br>(14-30%)                | 79%<br>(70-86%)          | 0.8<br>(0.42-1.3)                           | 2.2%<br>(1.2-3.7%)                   | 3%<br>(1.8-4.8%)                    | 720<br>(420-1200)      | 11000<br>(5600-18000)        |
| Mexico   | 2005 | Female | 80 to 84 | 18%<br>(12-26%)                | 82%<br>(74-88%)          | 0.67<br>(0.38-1.1)                          | 1.6%<br>(0.83-2.7%)                  | 2.1%<br>(1.1-3.5%)                  | 510<br>(270-840)       | 5500<br>(2800-9400)          |
| Mexico   | 2005 | Female | 85 to 89 | 19%<br>(12-27%)                | 81%<br>(73-88%)          | 0.66<br>(0.37-1.1)                          | 1.1%<br>(0.39-2%)                    | 1.4%<br>(0.5-2.6%)                  | 270<br>(98-510)        | 2100<br>(730-4100)           |
| Mexico   | 2005 | Female | 90 to 94 | 22%<br>(14-30%)                | 78%<br>(70-86%)          | 0.7<br>(0.36-1.2)                           | 0.69%<br>(-0.092-1.8%)               | 0.78%<br>(-0.16-2.2%)               | 110<br>(-23-310)       | 670<br>(-90-1800)            |
| Mexico   | 2005 | Female | 95 plus  | 25%<br>(16-37%)                | 75%<br>(63-84%)          | 0.75<br>(0.3-1.4)                           | 0.48%<br>(-0.52-2.1%)                | 0.41%<br>(-0.83-2.3%)               | 26<br>(-52-150)        | 130<br>(-140-570)            |
| Mexico   | 2005 | Male   | All Ages | 50%<br>(46-54%)                | 50%<br>(46-54%)          | 3.6<br>(3.1-4.1)                            | 10%<br>(8.7-11%)                     | 13%<br>(11-14%)                     | 35000<br>(30000-40000) | 1400000<br>(1200000-1600000) |
| Mexico   | 2005 | Male   | 15 to 19 | 40%<br>(33-49%)                | 60%<br>(51-67%)          | 1.7<br>(1.1-2.3)                            | 6.2%<br>(4.5-8.4%)                   | 8.5%<br>(5.8-12%)                   | 440<br>(300-630)       | 43000<br>(31000-58000)       |
| Mexico   | 2005 | Male   | 20 to 24 | 66%<br>(57-74%)                | 34%<br>(26-43%)          | 3.9<br>(2.8-5.3)                            | 14%<br>(11-18%)                      | 18%<br>(13-23%)                     | 1300<br>(930-1700)     | 110000<br>(87000-140000)     |
| Mexico   | 2005 | Male   | 25 to 29 | 72%<br>(64-78%)                | 28%<br>(22-36%)          | 4.9<br>(3.6-6.4)                            | 16%<br>(13-19%)                      | 20%<br>(16-26%)                     | 1600<br>(1300-2100)    | 130000<br>(110000-160000)    |
| Mexico   | 2005 | Male   | 30 to 34 | 74%<br>(67-81%)                | 26%<br>(19-33%)          | 5.7<br>(4.3-7.3)                            | 17%<br>(14-19%)                      | 22%<br>(18-26%)                     | 2000<br>(1700-2400)    | 140000<br>(120000-170000)    |
| Mexico   | 2005 | Male   | 35 to 39 | 75%<br>(68-82%)                | 25%<br>(18-32%)          | 6.2<br>(4.6-8.3)                            | 17%<br>(15-20%)                      | 23%<br>(20-28%)                     | 2400<br>(2000-2800)    | 150000<br>(120000-170000)    |
| Mexico   | 2005 | Male   | 40 to 44 | 75%<br>(68-82%)                | 25%<br>(18-32%)          | 6.8<br>(5.1-8.8)                            | 18%<br>(15-21%)                      | 24%<br>(21-27%)                     | 2700<br>(2400-3100)    | 150000<br>(130000-170000)    |
| Mexico   | 2005 | Male   | 45 to 49 | 76%<br>(66-83%)                | 24%<br>(17-34%)          | 7.2<br>(5.1-9.7)                            | 18%<br>(15-20%)                      | 23%<br>(21-26%)                     | 3100<br>(2700-3500)    | 140000<br>(120000-170000)    |
| Mexico   | 2005 | Male   | 50 to 54 | 76%<br>(67-83%)                | 24%<br>(17-33%)          | 8.2<br>(5.9-11)                             | 17%<br>(14-20%)                      | 22%<br>(19-25%)                     | 3300<br>(2800-3800)    | 140000<br>(110000-160000)    |
| Mexico   | 2005 | Male   | 55 to 59 | 76%<br>(68-84%)                | 24%<br>(16-32%)          | 10<br>(7.3-13)                              | 16%<br>(13-19%)                      | 20%<br>(17-24%)                     | 3400<br>(2800-4000)    | 120000<br>(96000-150000)     |
| Mexico   | 2005 | Male   | 60 to 64 | 74%<br>(64-83%)                | 26%<br>(17-36%)          | 9.7<br>(6.9-13)                             | 14%<br>(11-17%)                      | 17%<br>(14-21%)                     | 3400<br>(2700-4100)    | 100000<br>(79000-130000)     |
| Mexico   | 2005 | Male   | 65 to 69 | 68%<br>(56-79%)                | 32%<br>(21-44%)          | 6.9<br>(4.7-9.5)                            | 12%<br>(9.2-15%)                     | 14%<br>(11-18%)                     | 3200<br>(2500-3900)    | 79000<br>(61000-98000)       |
| Mexico   | 2005 | Male   | 70 to 74 | 60%<br>(48-71%)                | 40%<br>(29-52%)          | 4.7<br>(3.1-6.6)                            | 9.6%<br>(7.3-12%)                    | 11%<br>(8.9-14%)                    | 2800<br>(2200-3600)    | 56000<br>(43000-71000)       |
| Mexico   | 2005 | Male   | 75 to 79 | 52%<br>(40-65%)                | 48%<br>(35-60%)          | 3.5<br>(2.2-5.2)                            | 7.4%<br>(5.4-9.6%)                   | 8.8%<br>(6.5-11%)                   | 2200<br>(1600-2900)    | 34000<br>(25000-45000)       |
| Mexico   | 2005 | Male   | 80 to 84 | 47%<br>(34-58%)                | 53%<br>(42-66%)          | 3<br>(2-4.4)                                | 6.3%<br>(4.6-8.2%)                   | 7.3%<br>(5.4-9.7%)                  | 1700<br>(1300-2300)    | 20000<br>(15000-26000)       |

| Location | Year | Sex    | Age      | Prevalence of current drinkers | Prevalence of abstainers | Population average of standard drinks daily | Percent of total attributable deaths | Percent of total attributable DALYs | Attributable deaths | Attributable DALYs        |
|----------|------|--------|----------|--------------------------------|--------------------------|---------------------------------------------|--------------------------------------|-------------------------------------|---------------------|---------------------------|
| Mexico   | 2005 | Male   | 85 to 89 | 44%<br>(32-55%)                | 56%<br>(45-68%)          | 2.7<br>(1.8-4.1)                            | 5.1%<br>(3.7-6.9%)                   | 5.9%<br>(4.2-8%)                    | 990<br>(700-1300)   | 8200<br>(5900-11000)      |
| Mexico   | 2005 | Male   | 90 to 94 | 46%<br>(35-58%)                | 54%<br>(42-65%)          | 2.8<br>(1.7-4.2)                            | 4.6%<br>(3-6.4%)                     | 5.2%<br>(3.3-7.3%)                  | 540<br>(340-770)    | 3100<br>(2000-4400)       |
| Mexico   | 2005 | Male   | 95 plus  | 51%<br>(36-65%)                | 49%<br>(35-64%)          | 3<br>(1.7-4.7)                              | 4.7%<br>(2.5-7%)                     | 5.1%<br>(2.4-7.9%)                  | 170<br>(80-260)     | 660<br>(350-990)          |
| Mexico   | 2010 | Female | All Ages | 29%<br>(25-32%)                | 71%<br>(68-75%)          | 0.33<br>(0.27-0.41)                         | 1.3%<br>(0.88-1.7%)                  | 2.4%<br>(1.7-3.2%)                  | 6000<br>(4200-8200) | 150000<br>(110000-200000) |
| Mexico   | 2010 | Female | 15 to 19 | 24%<br>(16-32%)                | 76%<br>(68-84%)          | 0.26<br>(0.15-0.41)                         | 0.77%<br>(0.48-1.2%)                 | 1.1%<br>(0.46-2.1%)                 | 30<br>(12-56)       | 4600<br>(2700-6800)       |
| Mexico   | 2010 | Female | 20 to 24 | 35%<br>(25-46%)                | 65%<br>(54-75%)          | 0.32<br>(0.17-0.52)                         | 1.1%<br>(0.69-1.6%)                  | 1.2%<br>(0.49-2.2%)                 | 36<br>(14-64)       | 6500<br>(4000-9700)       |
| Mexico   | 2010 | Female | 25 to 29 | 38%<br>(28-48%)                | 62%<br>(52-72%)          | 0.32<br>(0.19-0.51)                         | 0.97%<br>(0.62-1.4%)                 | 1.4%<br>(0.78-2.3%)                 | 45<br>(24-70)       | 5900<br>(3800-8400)       |
| Mexico   | 2010 | Female | 30 to 34 | 39%<br>(29-50%)                | 61%<br>(50-71%)          | 0.34<br>(0.2-0.53)                          | 0.92%<br>(0.51-1.3%)                 | 2.1%<br>(1.6-2.8%)                  | 77<br>(57-100)      | 6000<br>(3500-8400)       |
| Mexico   | 2010 | Female | 35 to 39 | 39%<br>(29-50%)                | 61%<br>(50-71%)          | 0.39<br>(0.22-0.62)                         | 1.1%<br>(0.68-1.5%)                  | 3.2%<br>(2.6-3.9%)                  | 150<br>(120-190)    | 7900<br>(5100-11000)      |
| Mexico   | 2010 | Female | 40 to 44 | 40%<br>(30-51%)                | 60%<br>(49-70%)          | 0.47<br>(0.29-0.71)                         | 1.3%<br>(0.76-1.9%)                  | 3.8%<br>(3.2-4.5%)                  | 230<br>(190-280)    | 9500<br>(6100-13000)      |
| Mexico   | 2010 | Female | 45 to 49 | 40%<br>(28-52%)                | 60%<br>(48-72%)          | 0.61<br>(0.34-1)                            | 1.6%<br>(0.93-2.4%)                  | 4%<br>(3.2-5%)                      | 350<br>(270-430)    | 12000<br>(7500-17000)     |
| Mexico   | 2010 | Female | 50 to 54 | 40%<br>(29-51%)                | 60%<br>(49-71%)          | 0.75<br>(0.46-1.1)                          | 1.9%<br>(1.1-2.9%)                   | 4.1%<br>(3.2-5.2%)                  | 480<br>(370-600)    | 15000<br>(8800-21000)     |
| Mexico   | 2010 | Female | 55 to 59 | 38%<br>(27-50%)                | 62%<br>(50-73%)          | 0.83<br>(0.48-1.4)                          | 2.3%<br>(1.4-3.4%)                   | 4.2%<br>(3.1-5.6%)                  | 610<br>(450-830)    | 18000<br>(11000-26000)    |
| Mexico   | 2010 | Female | 60 to 64 | 34%<br>(21-48%)                | 66%<br>(52-79%)          | 0.85<br>(0.46-1.4)                          | 2.4%<br>(1.5-3.7%)                   | 3.8%<br>(2.7-5.3%)                  | 670<br>(470-930)    | 17000<br>(11000-26000)    |
| Mexico   | 2010 | Female | 65 to 69 | 32%<br>(20-47%)                | 68%<br>(53-80%)          | 0.91<br>(0.49-1.5)                          | 2.6%<br>(1.6-3.8%)                   | 3.8%<br>(2.7-5.3%)                  | 800<br>(560-1100)   | 17000<br>(11000-26000)    |
| Mexico   | 2010 | Female | 70 to 74 | 29%<br>(18-40%)                | 71%<br>(60-82%)          | 0.92<br>(0.51-1.6)                          | 2.5%<br>(1.3-4.1%)                   | 3.5%<br>(2.1-5.4%)                  | 860<br>(520-1300)   | 15000<br>(8100-25000)     |
| Mexico   | 2010 | Female | 75 to 79 | 23%<br>(14-35%)                | 77%<br>(65-86%)          | 0.78<br>(0.39-1.3)                          | 2%<br>(1-3.4%)                       | 2.8%<br>(1.5-4.3%)                  | 780<br>(440-1200)   | 11000<br>(5600-18000)     |
| Mexico   | 2010 | Female | 80 to 84 | 21%<br>(13-31%)                | 79%<br>(69-87%)          | 0.67<br>(0.34-1.1)                          | 1.3%<br>(0.55-2.3%)                  | 1.8%<br>(0.82-3%)                   | 520<br>(230-860)    | 5500<br>(2300-9500)       |
| Mexico   | 2010 | Female | 85 to 89 | 22%<br>(14-34%)                | 78%<br>(66-86%)          | 0.68<br>(0.35-1.2)                          | 0.82%<br>(0.088-1.8%)                | 1.1%<br>(0.13-2.2%)                 | 290<br>(36-600)     | 2200<br>(220-4800)        |
| Mexico   | 2010 | Female | 90 to 94 | 27%<br>(17-38%)                | 73%<br>(62-83%)          | 0.76<br>(0.38-1.4)                          | 0.39%<br>(-0.46-1.5%)                | 0.42%<br>(-0.69-1.8%)               | 72<br>(-120-310)    | 480<br>(-550-1800)        |
| Mexico   | 2010 | Female | 95 plus  | 32%<br>(19-46%)                | 68%<br>(54-81%)          | 0.84<br>(0.34-1.6)                          | 0.14%<br>(-1-1.7%)                   | -0.05%<br>(-1.5-2%)                 | -4.2<br>(-130-170)  | 55<br>(-380-640)          |

| Location | Year | Sex    | Age      | Prevalence of current drinkers | Prevalence of abstainers | Population average of standard drinks daily | Percent of total attributable deaths | Percent of total attributable DALYs | Attributable deaths    | Attributable DALYs           |
|----------|------|--------|----------|--------------------------------|--------------------------|---------------------------------------------|--------------------------------------|-------------------------------------|------------------------|------------------------------|
| Mexico   | 2010 | Male   | All Ages | 52%<br>(49-57%)                | 48%<br>(43-51%)          | 3.4<br>(2.9-3.8)                            | 10%<br>(8.9-12%)                     | 12%<br>(11-14%)                     | 40000<br>(35000-46000) | 1600000<br>(1400000-1900000) |
| Mexico   | 2010 | Male   | 15 to 19 | 38%<br>(30-47%)                | 62%<br>(53-70%)          | 1.4<br>(0.9-1.9)                            | 5.6%<br>(4-7.7%)                     | 7.2%<br>(4.7-11%)                   | 490<br>(330-720)       | 47000<br>(33000-64000)       |
| Mexico   | 2010 | Male   | 20 to 24 | 66%<br>(57-74%)                | 34%<br>(26-43%)          | 3.4<br>(2.4-4.6)                            | 13%<br>(10-17%)                      | 16%<br>(11-21%)                     | 1600<br>(1100-2100)    | 130000<br>(99000-170000)     |
| Mexico   | 2010 | Male   | 25 to 29 | 73%<br>(66-80%)                | 27%<br>(20-34%)          | 4.4<br>(3.2-5.8)                            | 15%<br>(12-19%)                      | 19%<br>(14-24%)                     | 2000<br>(1500-2600)    | 160000<br>(120000-190000)    |
| Mexico   | 2010 | Male   | 30 to 34 | 76%<br>(68-82%)                | 24%<br>(18-32%)          | 5.1<br>(3.8-6.5)                            | 16%<br>(13-19%)                      | 21%<br>(16-25%)                     | 2400<br>(1900-2900)    | 160000<br>(130000-200000)    |
| Mexico   | 2010 | Male   | 35 to 39 | 76%<br>(69-83%)                | 24%<br>(17-31%)          | 5.6<br>(4.1-7.3)                            | 17%<br>(14-20%)                      | 22%<br>(18-26%)                     | 2900<br>(2300-3400)    | 170000<br>(140000-200000)    |
| Mexico   | 2010 | Male   | 40 to 44 | 77%<br>(69-84%)                | 23%<br>(16-31%)          | 6<br>(4.5-7.8)                              | 17%<br>(14-20%)                      | 22%<br>(19-26%)                     | 3100<br>(2600-3500)    | 160000<br>(140000-190000)    |
| Mexico   | 2010 | Male   | 45 to 49 | 78%<br>(69-84%)                | 22%<br>(16-31%)          | 6.5<br>(4.6-8.7)                            | 17%<br>(14-19%)                      | 22%<br>(19-25%)                     | 3400<br>(2900-3900)    | 160000<br>(140000-190000)    |
| Mexico   | 2010 | Male   | 50 to 54 | 77%<br>(69-84%)                | 23%<br>(16-31%)          | 7.4<br>(5.4-9.7)                            | 16%<br>(13-19%)                      | 21%<br>(18-24%)                     | 3800<br>(3200-4300)    | 160000<br>(130000-180000)    |
| Mexico   | 2010 | Male   | 55 to 59 | 76%<br>(68-83%)                | 24%<br>(17-32%)          | 8.8<br>(6.4-12)                             | 15%<br>(12-18%)                      | 19%<br>(16-22%)                     | 3900<br>(3200-4600)    | 140000<br>(110000-170000)    |
| Mexico   | 2010 | Male   | 60 to 64 | 72%<br>(61-82%)                | 28%<br>(18-39%)          | 8<br>(5.6-11)                               | 13%<br>(10-16%)                      | 16%<br>(13-19%)                     | 3600<br>(2900-4400)    | 110000<br>(85000-140000)     |
| Mexico   | 2010 | Male   | 65 to 69 | 68%<br>(56-79%)                | 32%<br>(21-44%)          | 6<br>(4.1-8.3)                              | 11%<br>(8.6-14%)                     | 14%<br>(11-17%)                     | 3500<br>(2800-4300)    | 87000<br>(67000-110000)      |
| Mexico   | 2010 | Male   | 70 to 74 | 63%<br>(51-74%)                | 37%<br>(26-49%)          | 4.4<br>(2.9-6.2)                            | 9.1%<br>(6.9-12%)                    | 11%<br>(8.3-14%)                    | 3100<br>(2400-4000)    | 62000<br>(47000-80000)       |
| Mexico   | 2010 | Male   | 75 to 79 | 55%<br>(42-68%)                | 45%<br>(32-58%)          | 3.3<br>(2-4.9)                              | 7%<br>(4.9-9.2%)                     | 8.2%<br>(5.7-11%)                   | 2500<br>(1800-3300)    | 39000<br>(27000-52000)       |
| Mexico   | 2010 | Male   | 80 to 84 | 49%<br>(36-61%)                | 51%<br>(39-64%)          | 2.8<br>(1.8-4.1)                            | 5.7%<br>(4-7.7%)                     | 6.6%<br>(4.6-9%)                    | 1900<br>(1300-2500)    | 21000<br>(15000-29000)       |
| Mexico   | 2010 | Male   | 85 to 89 | 47%<br>(35-59%)                | 53%<br>(41-65%)          | 2.6<br>(1.6-3.8)                            | 4.8%<br>(3.3-6.6%)                   | 5.5%<br>(3.7-7.7%)                  | 1300<br>(880-1800)     | 11000<br>(7400-15000)        |
| Mexico   | 2010 | Male   | 90 to 94 | 50%<br>(39-62%)                | 50%<br>(38-61%)          | 2.7<br>(1.7-4.1)                            | 4.2%<br>(2.5-6.1%)                   | 4.7%<br>(2.7-6.9%)                  | 590<br>(330-860)       | 3500<br>(2100-5000)          |
| Mexico   | 2010 | Male   | 95 plus  | 56%<br>(41-70%)                | 44%<br>(30-59%)          | 2.9<br>(1.7-4.6)                            | 4.2%<br>(1.9-6.6%)                   | 4.5%<br>(1.7-7.5%)                  | 220<br>(83-370)        | 910<br>(420-1500)            |
| Mexico   | 2016 | Female | All Ages | 39%<br>(35-43%)                | 61%<br>(57-65%)          | 0.43<br>(0.32-0.56)                         | 1.2%<br>(0.67-1.7%)                  | 2.1%<br>(1.2-3.1%)                  | 6100<br>(3400-9200)    | 150000<br>(91000-230000)     |
| Mexico   | 2016 | Female | 15 to 19 | 30%<br>(19-42%)                | 70%<br>(58-81%)          | 0.3<br>(0.15-0.51)                          | 0.77%<br>(0.44-1.2%)                 | 1.3%<br>(0.46-2.5%)                 | 31<br>(11-61)          | 4500<br>(2500-7000)          |
| Mexico   | 2016 | Female | 20 to 24 | 48%<br>(35-58%)                | 52%<br>(42-65%)          | 0.41<br>(0.22-0.67)                         | 1.1%<br>(0.69-1.7%)                  | 1.5%<br>(0.53-2.7%)                 | 43<br>(16-79)          | 7100<br>(4000-11000)         |

| Location | Year | Sex    | Age      | Prevalence of current drinkers | Prevalence of abstainers | Population average of standard drinks daily | Percent of total attributable deaths | Percent of total attributable DALYs | Attributable deaths    | Attributable DALYs           |
|----------|------|--------|----------|--------------------------------|--------------------------|---------------------------------------------|--------------------------------------|-------------------------------------|------------------------|------------------------------|
| Mexico   | 2016 | Female | 25 to 29 | 54%<br>(41-62%)                | 46%<br>(38-59%)          | 0.43<br>(0.25-0.67)                         | 0.98%<br>(0.57-1.5%)                 | 1.6%<br>(0.72-2.7%)                 | 50<br>(22-84)          | 6200<br>(3500-9200)          |
| Mexico   | 2016 | Female | 30 to 34 | 53%<br>(41-61%)                | 47%<br>(39-59%)          | 0.44<br>(0.26-0.68)                         | 0.87%<br>(0.41-1.3%)                 | 2.1%<br>(1.4-3%)                    | 78<br>(52-110)         | 5800<br>(3000-8700)          |
| Mexico   | 2016 | Female | 35 to 39 | 52%<br>(43-61%)                | 48%<br>(39-57%)          | 0.48<br>(0.28-0.78)                         | 0.98%<br>(0.47-1.5%)                 | 3.1%<br>(2.4-4%)                    | 150<br>(120-200)       | 7200<br>(3700-11000)         |
| Mexico   | 2016 | Female | 40 to 44 | 51%<br>(42-61%)                | 49%<br>(39-58%)          | 0.57<br>(0.35-0.86)                         | 1%<br>(0.44-1.7%)                    | 3.5%<br>(2.8-4.4%)                  | 240<br>(190-310)       | 8700<br>(3900-13000)         |
| Mexico   | 2016 | Female | 45 to 49 | 49%<br>(38-59%)                | 51%<br>(41-62%)          | 0.69<br>(0.4-1.1)                           | 1.3%<br>(0.53-2.1%)                  | 3.7%<br>(2.8-4.8%)                  | 360<br>(270-480)       | 11000<br>(5100-18000)        |
| Mexico   | 2016 | Female | 50 to 54 | 48%<br>(38-57%)                | 52%<br>(43-62%)          | 0.82<br>(0.49-1.2)                          | 1.6%<br>(0.68-2.6%)                  | 3.7%<br>(2.6-5%)                    | 500<br>(360-680)       | 14000<br>(6500-23000)        |
| Mexico   | 2016 | Female | 55 to 59 | 47%<br>(35-57%)                | 53%<br>(43-65%)          | 0.95<br>(0.55-1.5)                          | 1.8%<br>(0.8-3.2%)                   | 3.7%<br>(2.5-5.4%)                  | 650<br>(440-930)       | 17000<br>(8000-29000)        |
| Mexico   | 2016 | Female | 60 to 64 | 45%<br>(29-61%)                | 55%<br>(39-71%)          | 1<br>(0.55-1.7)                             | 1.9%<br>(0.73-3.5%)                  | 3.4%<br>(2-5.3%)                    | 770<br>(440-1200)      | 18000<br>(6800-32000)        |
| Mexico   | 2016 | Female | 65 to 69 | 41%<br>(25-57%)                | 59%<br>(43-75%)          | 1.1<br>(0.53-1.7)                           | 2.1%<br>(0.92-3.6%)                  | 3.4%<br>(1.9-5.1%)                  | 850<br>(480-1300)      | 18000<br>(7800-30000)        |
| Mexico   | 2016 | Female | 70 to 74 | 35%<br>(20-49%)                | 65%<br>(51-80%)          | 1<br>(0.49-1.8)                             | 2.2%<br>(0.86-3.8%)                  | 3.2%<br>(1.6-5.2%)                  | 890<br>(440-1500)      | 16000<br>(6100-28000)        |
| Mexico   | 2016 | Female | 75 to 79 | 28%<br>(15-43%)                | 72%<br>(57-85%)          | 0.83<br>(0.36-1.5)                          | 1.8%<br>(0.57-3.2%)                  | 2.5%<br>(1-4.2%)                    | 780<br>(330-1300)      | 11000<br>(3600-20000)        |
| Mexico   | 2016 | Female | 80 to 84 | 25%<br>(14-39%)                | 75%<br>(61-86%)          | 0.74<br>(0.33-1.3)                          | 1.1%<br>(0.052-2.2%)                 | 1.5%<br>(0.22-2.8%)                 | 520<br>(76-980)        | 5400<br>(240-11000)          |
| Mexico   | 2016 | Female | 85 to 89 | 28%<br>(15-43%)                | 72%<br>(57-85%)          | 0.77<br>(0.34-1.4)                          | 0.54%<br>(-0.41-1.6%)                | 0.73%<br>(-0.48-2%)                 | 240<br>(-160-640)      | 1800<br>(-1300-5200)         |
| Mexico   | 2016 | Female | 90 to 94 | 33%<br>(19-47%)                | 67%<br>(53-81%)          | 0.85<br>(0.37-1.6)                          | 0.092%<br>(-0.94-1.3%)               | 0.045%<br>(-1.3-1.6%)               | 11<br>(-300-380)       | 160<br>(-1600-2200)          |
| Mexico   | 2016 | Female | 95 plus  | 38%<br>(22-53%)                | 62%<br>(47-78%)          | 0.91<br>(0.34-1.8)                          | -0.17%<br>(-1.5-1.5%)                | -0.44%<br>(-2.1-1.7%)               | -53<br>(-250-210)      | -93<br>(-780-820)            |
| Mexico   | 2016 | Male   | All Ages | 57%<br>(53-61%)                | 43%<br>(39-47%)          | 3.4<br>(2.6-4.3)                            | 11%<br>(9-12%)                       | 12%<br>(9.9-14%)                    | 43000<br>(36000-51000) | 1700000<br>(1500000-2000000) |
| Mexico   | 2016 | Male   | 15 to 19 | 40%<br>(29-51%)                | 60%<br>(49-71%)          | 1.3<br>(0.79-2)                             | 5.4%<br>(3.8-7.6%)                   | 7.3%<br>(4.3-11%)                   | 430<br>(260-650)       | 42000<br>(29000-60000)       |
| Mexico   | 2016 | Male   | 20 to 24 | 69%<br>(60-77%)                | 31%<br>(23-40%)          | 3.3<br>(2.2-4.6)                            | 13%<br>(9.8-17%)                     | 16%<br>(11-22%)                     | 1500<br>(1000-2100)    | 130000<br>(96000-170000)     |
| Mexico   | 2016 | Male   | 25 to 29 | 77%<br>(69-83%)                | 23%<br>(17-31%)          | 4.3<br>(2.9-5.9)                            | 15%<br>(12-19%)                      | 19%<br>(14-24%)                     | 1900<br>(1400-2400)    | 150000<br>(110000-190000)    |
| Mexico   | 2016 | Male   | 30 to 34 | 78%<br>(71-84%)                | 22%<br>(16-29%)          | 4.9<br>(3.5-6.7)                            | 16%<br>(12-19%)                      | 20%<br>(16-25%)                     | 2200<br>(1700-2700)    | 160000<br>(120000-190000)    |
| Mexico   | 2016 | Male   | 35 to 39 | 78%<br>(72-84%)                | 22%<br>(16-28%)          | 5.3<br>(3.6-7.6)                            | 16%<br>(13-20%)                      | 22%<br>(17-26%)                     | 2700<br>(2200-3300)    | 170000<br>(140000-200000)    |

| Location  | Year | Sex    | Age      | Prevalence of current drinkers | Prevalence of abstainers | Population average of standard drinks daily | Percent of total attributable deaths | Percent of total attributable DALYs | Attributable deaths | Attributable DALYs        |
|-----------|------|--------|----------|--------------------------------|--------------------------|---------------------------------------------|--------------------------------------|-------------------------------------|---------------------|---------------------------|
| Mexico    | 2016 | Male   | 40 to 44 | 79%<br>(72-85%)                | 21%<br>(15-28%)          | 5.7<br>(4-7.8)                              | 16%<br>(13-19%)                      | 22%<br>(18-26%)                     | 3200<br>(2700-3800) | 180000<br>(150000-210000) |
| Mexico    | 2016 | Male   | 45 to 49 | 79%<br>(71-85%)                | 21%<br>(15-29%)          | 6<br>(4.1-8.3)                              | 16%<br>(13-19%)                      | 21%<br>(18-24%)                     | 3800<br>(3100-4400) | 180000<br>(150000-210000) |
| Mexico    | 2016 | Male   | 50 to 54 | 78%<br>(70-84%)                | 22%<br>(16-30%)          | 6.8<br>(4.8-9.4)                            | 15%<br>(13-18%)                      | 20%<br>(17-23%)                     | 4200<br>(3600-4900) | 180000<br>(150000-210000) |
| Mexico    | 2016 | Male   | 55 to 59 | 78%<br>(70-84%)                | 22%<br>(16-30%)          | 8.2<br>(5.7-11)                             | 15%<br>(12-18%)                      | 18%<br>(15-22%)                     | 4500<br>(3700-5400) | 160000<br>(130000-200000) |
| Mexico    | 2016 | Male   | 60 to 64 | 75%<br>(64-84%)                | 25%<br>(16-36%)          | 7.7<br>(5.2-11)                             | 13%<br>(9.8-16%)                     | 16%<br>(13-19%)                     | 4400<br>(3600-5400) | 140000<br>(110000-170000) |
| Mexico    | 2016 | Male   | 65 to 69 | 69%<br>(56-80%)                | 31%<br>(20-44%)          | 5.5<br>(3.6-8.1)                            | 11%<br>(8.1-13%)                     | 13%<br>(10-16%)                     | 4000<br>(3100-4900) | 100000<br>(77000-130000)  |
| Mexico    | 2016 | Male   | 70 to 74 | 60%<br>(47-71%)                | 40%<br>(29-53%)          | 3.7<br>(2.2-5.5)                            | 8%<br>(5.8-11%)                      | 9.6%<br>(7.1-13%)                   | 3200<br>(2400-4300) | 65000<br>(48000-87000)    |
| Mexico    | 2016 | Male   | 75 to 79 | 50%<br>(36-64%)                | 50%<br>(36-64%)          | 2.6<br>(1.5-4.1)                            | 5.9%<br>(3.9-8.3%)                   | 7%<br>(4.6-9.8%)                    | 2500<br>(1700-3600) | 39000<br>(26000-55000)    |
| Mexico    | 2016 | Male   | 80 to 84 | 46%<br>(32-59%)                | 54%<br>(41-68%)          | 2.3<br>(1.3-3.7)                            | 4.9%<br>(3.1-7.1%)                   | 5.7%<br>(3.7-8.3%)                  | 2000<br>(1300-2900) | 23000<br>(15000-33000)    |
| Mexico    | 2016 | Male   | 85 to 89 | 47%<br>(34-60%)                | 53%<br>(40-66%)          | 2.3<br>(1.3-3.8)                            | 4.2%<br>(2.5-6.2%)                   | 4.9%<br>(2.9-7.2%)                  | 1300<br>(790-2000)  | 11000<br>(6700-17000)     |
| Mexico    | 2016 | Male   | 90 to 94 | 52%<br>(39-64%)                | 48%<br>(36-61%)          | 2.6<br>(1.5-4)                              | 3.8%<br>(1.9-6%)                     | 4.2%<br>(1.9-6.9%)                  | 740<br>(340-1200)   | 4400<br>(2200-6900)       |
| Mexico    | 2016 | Male   | 95 plus  | 57%<br>(41-71%)                | 43%<br>(29-59%)          | 2.8<br>(1.5-4.5)                            | 3.7%<br>(1.4-6.5%)                   | 4%<br>(1.1-7.3%)                    | 270<br>(73-490)     | 1100<br>(400-1900)        |
| Nicaragua | 1990 | Female | All Ages | 14%<br>(11-17%)                | 86%<br>(83-89%)          | 0.38<br>(0.3-0.48)                          | 1%<br>(0.81-1.3%)                    | 2%<br>(1.5-2.6%)                    | 150<br>(110-200)    | 6200<br>(4900-7700)       |
| Nicaragua | 1990 | Female | 15 to 19 | 15%<br>(9.2-22%)               | 85%<br>(78-91%)          | 0.37<br>(0.19-0.63)                         | 1.3%<br>(0.76-2%)                    | 1.9%<br>(0.9-3.5%)                  | 2.7<br>(1.3-5)      | 350<br>(210-560)          |
| Nicaragua | 1990 | Female | 20 to 24 | 26%<br>(16-36%)                | 74%<br>(64-84%)          | 0.56<br>(0.3-0.93)                          | 2.2%<br>(1.3-3.1%)                   | 2.8%<br>(1.4-4.7%)                  | 4.3<br>(2.1-7.3)    | 540<br>(320-790)          |
| Nicaragua | 1990 | Female | 25 to 29 | 25%<br>(16-35%)                | 75%<br>(65-84%)          | 0.57<br>(0.31-0.9)                          | 2.2%<br>(1.5-3.1%)                   | 3.1%<br>(1.7-4.9%)                  | 4.2<br>(2.3-6.6)    | 480<br>(310-680)          |
| Nicaragua | 1990 | Female | 30 to 34 | 25%<br>(16-36%)                | 75%<br>(64-84%)          | 0.62<br>(0.35-1)                            | 2.3%<br>(1.6-3.2%)                   | 3.6%<br>(2.3-5.3%)                  | 5.2<br>(3.3-7.8)    | 480<br>(340-680)          |
| Nicaragua | 1990 | Female | 35 to 39 | 25%<br>(16-34%)                | 75%<br>(66-84%)          | 0.72<br>(0.37-1.2)                          | 2.6%<br>(1.7-3.7%)                   | 4.2%<br>(2.7-6.2%)                  | 7.3<br>(4.6-11)     | 520<br>(340-740)          |
| Nicaragua | 1990 | Female | 40 to 44 | 25%<br>(17-35%)                | 75%<br>(65-83%)          | 0.84<br>(0.42-1.3)                          | 3.1%<br>(2-4.4%)                     | 5.4%<br>(3.4-7.8%)                  | 7.9<br>(4.9-11)     | 450<br>(290-640)          |
| Nicaragua | 1990 | Female | 45 to 49 | 28%<br>(17-37%)                | 72%<br>(63-83%)          | 1.1<br>(0.52-1.8)                           | 3.7%<br>(2.2-5.7%)                   | 6.5%<br>(3.9-9.8%)                  | 11<br>(6.6-17)      | 540<br>(330-840)          |
| Nicaragua | 1990 | Female | 50 to 54 | 26%<br>(17-36%)                | 74%<br>(64-83%)          | 1.2<br>(0.62-2.1)                           | 4.2%<br>(2.6-6.3%)                   | 7.2%<br>(4.6-11%)                   | 14<br>(8.9-20)      | 580<br>(370-870)          |
| Nicaragua | 1990 | Female | 55 to 59 | 20%<br>(13-28%)                | 80%<br>(72-87%)          | 1.2<br>(0.58-2)                             | 4.4%<br>(2.7-6.4%)                   | 7.1%<br>(4.6-10%)                   | 18<br>(11-26)       | 620<br>(400-920)          |

| Location  | Year | Sex    | Age      | Prevalence of current drinkers | Prevalence of abstainers | Population average of standard drinks daily | Percent of total attributable deaths | Percent of total attributable DALYs | Attributable deaths | Attributable DALYs     |
|-----------|------|--------|----------|--------------------------------|--------------------------|---------------------------------------------|--------------------------------------|-------------------------------------|---------------------|------------------------|
| Nicaragua | 1990 | Female | 60 to 64 | 15%<br>(9.2-22%)               | 85%<br>(78-91%)          | 1<br>(0.49-1.8)                             | 3.8%<br>(2.4-5.7%)                   | 6.1%<br>(4-8.8%)                    | 17<br>(11-25)       | 520<br>(340-770)       |
| Nicaragua | 1990 | Female | 65 to 69 | 13%<br>(8-18%)                 | 87%<br>(82-92%)          | 0.83<br>(0.41-1.5)                          | 3.4%<br>(2.1-4.9%)                   | 5.3%<br>(3.4-7.7%)                  | 16<br>(11-24)       | 410<br>(260-610)       |
| Nicaragua | 1990 | Female | 70 to 74 | 12%<br>(7.5-17%)               | 88%<br>(83-92%)          | 0.69<br>(0.34-1.2)                          | 2.9%<br>(1.8-4.5%)                   | 4.5%<br>(2.8-6.8%)                  | 15<br>(9.3-23)      | 300<br>(180-460)       |
| Nicaragua | 1990 | Female | 75 to 79 | 11%<br>(6.4-18%)               | 89%<br>(82-94%)          | 0.58<br>(0.27-1.1)                          | 2.3%<br>(1.3-3.8%)                   | 3.3%<br>(1.9-5.3%)                  | 12<br>(7-20)        | 190<br>(110-310)       |
| Nicaragua | 1990 | Female | 80 to 84 | 10%<br>(5.5-18%)               | 90%<br>(82-94%)          | 0.51<br>(0.24-0.9)                          | 1.9%<br>(1-3.3%)                     | 2.5%<br>(1.4-4.3%)                  | 7.9<br>(4.3-14)     | 89<br>(48-150)         |
| Nicaragua | 1990 | Female | 85 to 89 | 11%<br>(5.6-17%)               | 89%<br>(83-94%)          | 0.5<br>(0.23-0.94)                          | 1.6%<br>(0.79-3.1%)                  | 2.1%<br>(0.97-4%)                   | 6.6<br>(3.1-13)     | 52<br>(25-99)          |
| Nicaragua | 1990 | Female | 90 to 94 | 12%<br>(6.9-20%)               | 88%<br>(80-93%)          | 0.54<br>(0.24-1.1)                          | 1.4%<br>(0.51-3.1%)                  | 1.7%<br>(0.53-3.9%)                 | 3.6<br>(1.1-8.1)    | 19<br>(6.8-42)         |
| Nicaragua | 1990 | Female | 95 plus  | 15%<br>(8-27%)                 | 85%<br>(73-92%)          | 0.6<br>(0.22-1.2)                           | 1.4%<br>(0.19-3.4%)                  | 1.6%<br>(0.051-4.3%)                | 1.2<br>(0.039-3.3)  | 4.6<br>(0.62-11)       |
| Nicaragua | 1990 | Male   | All Ages | 44%<br>(35-53%)                | 56%<br>(47-65%)          | 1.6<br>(1.4-1.9)                            | 4.4%<br>(3.8-5%)                     | 6.6%<br>(5.7-7.7%)                  | 650<br>(560-760)    | 32000<br>(27000-37000) |
| Nicaragua | 1990 | Male   | 15 to 19 | 39%<br>(25-55%)                | 61%<br>(45-75%)          | 1<br>(0.49-1.7)                             | 4.8%<br>(2.9-7.2%)                   | 6%<br>(3.1-10%)                     | 17<br>(8.6-27)      | 1600<br>(980-2500)     |
| Nicaragua | 1990 | Male   | 20 to 24 | 67%<br>(51-79%)                | 33%<br>(21-49%)          | 2.5<br>(1.4-3.9)                            | 12%<br>(7.9-16%)                     | 14%<br>(8.4-21%)                    | 46<br>(27-68)       | 4000<br>(2600-5500)    |
| Nicaragua | 1990 | Male   | 25 to 29 | 75%<br>(60-86%)                | 25%<br>(14-40%)          | 3.3<br>(1.9-5.1)                            | 15%<br>(11-20%)                      | 19%<br>(12-26%)                     | 59<br>(38-83)       | 4600<br>(3200-6100)    |
| Nicaragua | 1990 | Male   | 30 to 34 | 75%<br>(60-86%)                | 25%<br>(14-40%)          | 3.6<br>(2.2-5.5)                            | 16%<br>(12-20%)                      | 21%<br>(15-27%)                     | 57<br>(41-73)       | 4100<br>(3100-5100)    |
| Nicaragua | 1990 | Male   | 35 to 39 | 71%<br>(57-82%)                | 29%<br>(18-43%)          | 3.8<br>(2.1-6.1)                            | 17%<br>(13-21%)                      | 23%<br>(17-29%)                     | 59<br>(43-76)       | 3700<br>(2800-4600)    |
| Nicaragua | 1990 | Male   | 40 to 44 | 70%<br>(56-82%)                | 30%<br>(18-44%)          | 4<br>(2.1-6.4)                              | 17%<br>(14-21%)                      | 24%<br>(18-29%)                     | 54<br>(41-67)       | 2900<br>(2300-3500)    |
| Nicaragua | 1990 | Male   | 45 to 49 | 72%<br>(57-84%)                | 28%<br>(16-43%)          | 4.3<br>(2.2-7.6)                            | 17%<br>(13-20%)                      | 23%<br>(18-28%)                     | 58<br>(45-71)       | 2700<br>(2100-3300)    |
| Nicaragua | 1990 | Male   | 50 to 54 | 73%<br>(59-84%)                | 27%<br>(16-41%)          | 4.5<br>(2.3-7.6)                            | 15%<br>(11-18%)                      | 21%<br>(17-26%)                     | 53<br>(42-65)       | 2200<br>(1800-2700)    |
| Nicaragua | 1990 | Male   | 55 to 59 | 71%<br>(56-83%)                | 29%<br>(17-44%)          | 4.5<br>(2.3-7.8)                            | 13%<br>(10-16%)                      | 18%<br>(14-22%)                     | 56<br>(43-69)       | 2000<br>(1500-2500)    |
| Nicaragua | 1990 | Male   | 60 to 64 | 66%<br>(49-80%)                | 34%<br>(20-51%)          | 3.7<br>(1.8-6.7)                            | 11%<br>(7.9-13%)                     | 14%<br>(11-18%)                     | 53<br>(40-67)       | 1600<br>(1200-2000)    |
| Nicaragua | 1990 | Male   | 65 to 69 | 60%<br>(42-77%)                | 40%<br>(23-58%)          | 2.7<br>(1.4-4.7)                            | 8.6%<br>(6.3-11%)                    | 12%<br>(8.4-15%)                    | 42<br>(31-55)       | 1100<br>(790-1400)     |
| Nicaragua | 1990 | Male   | 70 to 74 | 54%<br>(35-70%)                | 46%<br>(30-65%)          | 2<br>(0.94-3.5)                             | 6.9%<br>(4.5-9.4%)                   | 8.9%<br>(5.8-12%)                   | 36<br>(24-49)       | 710<br>(470-990)       |
| Nicaragua | 1990 | Male   | 75 to 79 | 47%<br>(29-65%)                | 53%<br>(35-71%)          | 1.5<br>(0.67-2.9)                           | 5.3%<br>(3.1-7.7%)                   | 6.6%<br>(3.8-9.4%)                  | 27<br>(16-39)       | 410<br>(240-590)       |

| Location  | Year | Sex    | Age      | Prevalence of current drinkers | Prevalence of abstainers | Population average of standard drinks daily | Percent of total attributable deaths | Percent of total attributable DALYs | Attributable deaths | Attributable DALYs  |
|-----------|------|--------|----------|--------------------------------|--------------------------|---------------------------------------------|--------------------------------------|-------------------------------------|---------------------|---------------------|
| Nicaragua | 1990 | Male   | 80 to 84 | 42%<br>(25-59%)                | 58%<br>(41-75%)          | 1.3<br>(0.6-2.2)                            | 4.4%<br>(2.6-6.4%)                   | 5.3%<br>(3.1-7.6%)                  | 16<br>(9.5-24)      | 180<br>(110-270)    |
| Nicaragua | 1990 | Male   | 85 to 89 | 40%<br>(24-58%)                | 60%<br>(42-76%)          | 1.2<br>(0.55-2.3)                           | 3.9%<br>(2-6.1%)                     | 4.5%<br>(2.3-7.2%)                  | 12<br>(6-19)        | 93<br>(50-140)      |
| Nicaragua | 1990 | Male   | 90 to 94 | 43%<br>(27-61%)                | 57%<br>(39-73%)          | 1.4<br>(0.56-2.7)                           | 3.6%<br>(1.5-6.1%)                   | 4.1%<br>(1.6-7.1%)                  | 6.1<br>(2.4-11)     | 34<br>(14-57)       |
| Nicaragua | 1990 | Male   | 95 plus  | 49%<br>(28-70%)                | 51%<br>(30-72%)          | 1.7<br>(0.56-3.7)                           | 3.9%<br>(1.2-6.9%)                   | 4.3%<br>(1.1-7.9%)                  | 2<br>(0.48-3.6)     | 7.4<br>(2.2-13)     |
| Nicaragua | 1995 | Female | All Ages | 14%<br>(11-17%)                | 86%<br>(83-89%)          | 0.37<br>(0.29-0.47)                         | 1.2%<br>(0.95-1.5%)                  | 2.3%<br>(1.7-3.1%)                  | 200<br>(140-260)    | 7300<br>(5800-9100) |
| Nicaragua | 1995 | Female | 15 to 19 | 15%<br>(9.2-21%)               | 85%<br>(79-91%)          | 0.36<br>(0.18-0.6)                          | 1.2%<br>(0.76-2%)                    | 1.8%<br>(0.84-3.3%)                 | 3.2<br>(1.5-6)      | 400<br>(240-650)    |
| Nicaragua | 1995 | Female | 20 to 24 | 26%<br>(17-36%)                | 74%<br>(64-83%)          | 0.54<br>(0.29-0.91)                         | 2.1%<br>(1.3-3%)                     | 2.6%<br>(1.3-4.4%)                  | 4.6<br>(2.2-7.9)    | 600<br>(370-900)    |
| Nicaragua | 1995 | Female | 25 to 29 | 25%<br>(17-35%)                | 75%<br>(65-83%)          | 0.55<br>(0.3-0.9)                           | 2.1%<br>(1.5-2.9%)                   | 2.9%<br>(1.6-4.5%)                  | 4.4<br>(2.5-7)      | 520<br>(340-740)    |
| Nicaragua | 1995 | Female | 30 to 34 | 25%<br>(16-36%)                | 75%<br>(64-84%)          | 0.6<br>(0.33-0.95)                          | 2.2%<br>(1.6-3.1%)                   | 3.4%<br>(2.2-5%)                    | 5.7<br>(3.7-8.3)    | 520<br>(360-720)    |
| Nicaragua | 1995 | Female | 35 to 39 | 24%<br>(15-34%)                | 76%<br>(66-85%)          | 0.68<br>(0.36-1.1)                          | 2.5%<br>(1.7-3.5%)                   | 4.1%<br>(2.7-6.1%)                  | 8.2<br>(5.4-12)     | 580<br>(400-850)    |
| Nicaragua | 1995 | Female | 40 to 44 | 25%<br>(17-35%)                | 75%<br>(65-83%)          | 0.79<br>(0.41-1.3)                          | 2.9%<br>(2-4.1%)                     | 5.3%<br>(3.5-7.4%)                  | 11<br>(7.1-15)      | 630<br>(420-870)    |
| Nicaragua | 1995 | Female | 45 to 49 | 28%<br>(17-38%)                | 72%<br>(62-83%)          | 0.99<br>(0.49-1.7)                          | 3.8%<br>(2.4-5.7%)                   | 6.3%<br>(4-9.6%)                    | 13<br>(8.3-21)      | 630<br>(390-950)    |
| Nicaragua | 1995 | Female | 50 to 54 | 26%<br>(17-36%)                | 74%<br>(64-83%)          | 1.1<br>(0.59-2)                             | 4.2%<br>(2.6-6.4%)                   | 7%<br>(4.5-10%)                     | 17<br>(11-24)       | 680<br>(440-1000)   |
| Nicaragua | 1995 | Female | 55 to 59 | 20%<br>(13-28%)                | 80%<br>(72-87%)          | 1.1<br>(0.54-1.9)                           | 4.3%<br>(2.7-6.3%)                   | 6.9%<br>(4.4-9.9%)                  | 19<br>(12-28)       | 680<br>(430-990)    |
| Nicaragua | 1995 | Female | 60 to 64 | 15%<br>(9.2-23%)               | 85%<br>(77-91%)          | 0.96<br>(0.46-1.8)                          | 4%<br>(2.5-6%)                       | 6.1%<br>(4-8.9%)                    | 22<br>(14-32)       | 640<br>(420-950)    |
| Nicaragua | 1995 | Female | 65 to 69 | 13%<br>(8.2-18%)               | 87%<br>(82-92%)          | 0.8<br>(0.4-1.4)                            | 3.5%<br>(2.3-5.3%)                   | 5.3%<br>(3.5-7.8%)                  | 22<br>(14-32)       | 540<br>(350-800)    |
| Nicaragua | 1995 | Female | 70 to 74 | 12%<br>(7.7-17%)               | 88%<br>(83-92%)          | 0.67<br>(0.33-1.2)                          | 3%<br>(1.8-4.7%)                     | 4.4%<br>(2.8-6.8%)                  | 21<br>(13-32)       | 400<br>(250-630)    |
| Nicaragua | 1995 | Female | 75 to 79 | 11%<br>(6.5-18%)               | 89%<br>(82-94%)          | 0.57<br>(0.25-1)                            | 2.4%<br>(1.3-3.8%)                   | 3.3%<br>(1.9-5.4%)                  | 16<br>(9.1-26)      | 240<br>(140-390)    |
| Nicaragua | 1995 | Female | 80 to 84 | 11%<br>(5.7-18%)               | 89%<br>(82-94%)          | 0.5<br>(0.24-0.88)                          | 2%<br>(1.1-3.4%)                     | 2.6%<br>(1.4-4.4%)                  | 11<br>(6-19)        | 120<br>(67-210)     |
| Nicaragua | 1995 | Female | 85 to 89 | 11%<br>(5.8-18%)               | 89%<br>(82-94%)          | 0.49<br>(0.23-0.94)                         | 1.7%<br>(0.77-3.1%)                  | 2.1%<br>(0.95-3.9%)                 | 9.7<br>(4.4-19)     | 75<br>(36-140)      |
| Nicaragua | 1995 | Female | 90 to 94 | 13%<br>(7.2-20%)               | 87%<br>(80-93%)          | 0.53<br>(0.24-1)                            | 1.4%<br>(0.46-3.2%)                  | 1.7%<br>(0.48-3.9%)                 | 5.6<br>(1.6-13)     | 30<br>(9.6-67)      |
| Nicaragua | 1995 | Female | 95 plus  | 16%<br>(8-28%)                 | 84%<br>(72-92%)          | 0.58<br>(0.21-1.2)                          | 1.4%<br>(0.13-3.6%)                  | 1.5%<br>(-0.006-4.3%)               | 2<br>(-0.0078-5.5)  | 7.2<br>(0.7-19)     |



| Location  | Year | Sex    | Age      | Prevalence of current drinkers | Prevalence of abstainers | Population average of standard drinks daily | Percent of total attributable deaths | Percent of total attributable DALYs | Attributable deaths | Attributable DALYs     |
|-----------|------|--------|----------|--------------------------------|--------------------------|---------------------------------------------|--------------------------------------|-------------------------------------|---------------------|------------------------|
| Nicaragua | 1995 | Male   | All Ages | 45%<br>(37-54%)                | 55%<br>(46-63%)          | 1.6<br>(1.3-1.8)                            | 5.4%<br>(4.8-6.1%)                   | 8%<br>(6.9-9.1%)                    | 870<br>(750-1000)   | 41000<br>(35000-47000) |
| Nicaragua | 1995 | Male   | 15 to 19 | 40%<br>(25-56%)                | 60%<br>(44-75%)          | 0.98<br>(0.48-1.7)                          | 4.8%<br>(2.9-7.2%)                   | 6.1%<br>(3.2-10%)                   | 18<br>(9.6-30)      | 1800<br>(1100-2700)    |
| Nicaragua | 1995 | Male   | 20 to 24 | 68%<br>(52-80%)                | 32%<br>(20-48%)          | 2.4<br>(1.4-3.8)                            | 12%<br>(8.1-16%)                     | 15%<br>(8.8-21%)                    | 53<br>(32-78)       | 4600<br>(3100-6300)    |
| Nicaragua | 1995 | Male   | 25 to 29 | 76%<br>(61-86%)                | 24%<br>(14-39%)          | 3.2<br>(1.9-4.9)                            | 15%<br>(11-20%)                      | 19%<br>(13-26%)                     | 61<br>(42-84)       | 4800<br>(3500-6400)    |
| Nicaragua | 1995 | Male   | 30 to 34 | 76%<br>(61-86%)                | 24%<br>(14-39%)          | 3.5<br>(2.1-5.3)                            | 17%<br>(13-21%)                      | 22%<br>(16-27%)                     | 74<br>(56-95)       | 5100<br>(3900-6400)    |
| Nicaragua | 1995 | Male   | 35 to 39 | 71%<br>(57-83%)                | 29%<br>(17-43%)          | 3.7<br>(2-5.9)                              | 18%<br>(14-22%)                      | 24%<br>(18-29%)                     | 86<br>(65-110)      | 5200<br>(4100-6300)    |
| Nicaragua | 1995 | Male   | 40 to 44 | 70%<br>(56-82%)                | 30%<br>(18-44%)          | 3.9<br>(2-6.1)                              | 18%<br>(14-22%)                      | 24%<br>(19-29%)                     | 85<br>(66-100)      | 4500<br>(3500-5500)    |
| Nicaragua | 1995 | Male   | 45 to 49 | 73%<br>(57-84%)                | 27%<br>(16-43%)          | 4.1<br>(2-7.2)                              | 18%<br>(14-21%)                      | 23%<br>(18-28%)                     | 75<br>(58-90)       | 3400<br>(2700-4100)    |
| Nicaragua | 1995 | Male   | 50 to 54 | 73%<br>(59-84%)                | 27%<br>(16-41%)          | 4.3<br>(2.3-7.4)                            | 16%<br>(12-19%)                      | 21%<br>(17-25%)                     | 75<br>(58-91)       | 3000<br>(2400-3600)    |
| Nicaragua | 1995 | Male   | 55 to 59 | 71%<br>(57-84%)                | 29%<br>(16-43%)          | 4.4<br>(2.2-7.6)                            | 14%<br>(11-17%)                      | 18%<br>(15-22%)                     | 73<br>(57-90)       | 2500<br>(2000-3100)    |
| Nicaragua | 1995 | Male   | 60 to 64 | 67%<br>(49-81%)                | 33%<br>(19-51%)          | 3.6<br>(1.8-6.5)                            | 11%<br>(8.4-14%)                     | 14%<br>(11-18%)                     | 69<br>(52-88)       | 2000<br>(1500-2600)    |
| Nicaragua | 1995 | Male   | 65 to 69 | 61%<br>(42-77%)                | 39%<br>(23-58%)          | 2.6<br>(1.4-4.5)                            | 9%<br>(6.7-12%)                      | 12%<br>(8.6-15%)                    | 61<br>(44-78)       | 1500<br>(1100-1900)    |
| Nicaragua | 1995 | Male   | 70 to 74 | 54%<br>(37-71%)                | 46%<br>(29-63%)          | 1.9<br>(0.93-3.4)                           | 7.1%<br>(4.6-9.6%)                   | 9%<br>(5.9-12%)                     | 50<br>(32-68)       | 980<br>(640-1300)      |
| Nicaragua | 1995 | Male   | 75 to 79 | 48%<br>(30-66%)                | 52%<br>(34-70%)          | 1.5<br>(0.63-2.8)                           | 5.3%<br>(3.1-7.8%)                   | 6.6%<br>(3.7-9.6%)                  | 36<br>(20-52)       | 540<br>(310-780)       |
| Nicaragua | 1995 | Male   | 80 to 84 | 42%<br>(25-60%)                | 58%<br>(40-75%)          | 1.2<br>(0.57-2.2)                           | 4.4%<br>(2.6-6.5%)                   | 5.2%<br>(2.9-7.8%)                  | 24<br>(14-36)       | 270<br>(150-400)       |
| Nicaragua | 1995 | Male   | 85 to 89 | 40%<br>(24-58%)                | 60%<br>(42-76%)          | 1.2<br>(0.52-2.2)                           | 3.9%<br>(2-6.2%)                     | 4.5%<br>(2.3-7.3%)                  | 17<br>(8.4-27)      | 130<br>(69-210)        |
| Nicaragua | 1995 | Male   | 90 to 94 | 44%<br>(28-62%)                | 56%<br>(38-72%)          | 1.3<br>(0.54-2.7)                           | 3.7%<br>(1.5-6.2%)                   | 4.1%<br>(1.6-7.2%)                  | 8.5<br>(3.3-15)     | 46<br>(19-78)          |
| Nicaragua | 1995 | Male   | 95 plus  | 49%<br>(29-70%)                | 51%<br>(30-71%)          | 1.7<br>(0.52-3.5)                           | 3.9%<br>(1.1-7%)                     | 4.3%<br>(0.97-8.1%)                 | 2.8<br>(0.64-5.3)   | 10<br>(3-19)           |
| Nicaragua | 2000 | Female | All Ages | 13%<br>(11-16%)                | 87%<br>(84-89%)          | 0.33<br>(0.26-0.41)                         | 1.3%<br>(1.1-1.6%)                   | 2.6%<br>(1.9-3.4%)                  | 210<br>(150-280)    | 7600<br>(6000-9300)    |
| Nicaragua | 2000 | Female | 15 to 19 | 15%<br>(10-20%)                | 85%<br>(80-90%)          | 0.34<br>(0.18-0.54)                         | 1.2%<br>(0.7-1.8%)                   | 1.7%<br>(0.75-3.2%)                 | 3.2<br>(1.4-6)      | 420<br>(250-650)       |
| Nicaragua | 2000 | Female | 20 to 24 | 25%<br>(18-33%)                | 75%<br>(67-82%)          | 0.5<br>(0.29-0.79)                          | 1.9%<br>(1.2-2.8%)                   | 2.3%<br>(1.1-4%)                    | 3.9<br>(1.9-6.7)    | 600<br>(370-870)       |
| Nicaragua | 2000 | Female | 25 to 29 | 24%<br>(17-31%)                | 76%<br>(69-83%)          | 0.48<br>(0.29-0.74)                         | 1.9%<br>(1.4-2.6%)                   | 2.5%<br>(1.5-3.8%)                  | 3.8<br>(2.4-5.8)    | 520<br>(360-740)       |

| Location  | Year | Sex    | Age      | Prevalence of current drinkers | Prevalence of abstainers | Population average of standard drinks daily | Percent of total attributable deaths | Percent of total attributable DALYs | Attributable deaths | Attributable DALYs     |
|-----------|------|--------|----------|--------------------------------|--------------------------|---------------------------------------------|--------------------------------------|-------------------------------------|---------------------|------------------------|
| Nicaragua | 2000 | Female | 30 to 34 | 21%<br>(15-29%)                | 79%<br>(71-85%)          | 0.48<br>(0.28-0.75)                         | 2%<br>(1.4-2.6%)                     | 3%<br>(2.1-4.1%)                    | 4.7<br>(3.3-6.6)    | 480<br>(350-650)       |
| Nicaragua | 2000 | Female | 35 to 39 | 20%<br>(14-28%)                | 80%<br>(72-86%)          | 0.51<br>(0.28-0.86)                         | 2.1%<br>(1.5-2.9%)                   | 3.7%<br>(2.6-5.2%)                  | 6.7<br>(4.7-9.4)    | 510<br>(370-690)       |
| Nicaragua | 2000 | Female | 40 to 44 | 20%<br>(14-28%)                | 80%<br>(72-86%)          | 0.58<br>(0.31-0.95)                         | 2.5%<br>(1.8-3.3%)                   | 4.6%<br>(3.3-6.2%)                  | 10<br>(7.3-14)      | 610<br>(440-810)       |
| Nicaragua | 2000 | Female | 45 to 49 | 22%<br>(15-30%)                | 78%<br>(70-85%)          | 0.74<br>(0.38-1.3)                          | 3.1%<br>(2.1-4.5%)                   | 5.5%<br>(3.8-7.7%)                  | 14<br>(10-21)       | 710<br>(480-1000)      |
| Nicaragua | 2000 | Female | 50 to 54 | 21%<br>(14-29%)                | 79%<br>(71-86%)          | 0.85<br>(0.44-1.5)                          | 3.7%<br>(2.5-5.5%)                   | 6.2%<br>(4.3-8.9%)                  | 15<br>(10-22)       | 610<br>(420-880)       |
| Nicaragua | 2000 | Female | 55 to 59 | 16%<br>(11-23%)                | 84%<br>(77-89%)          | 0.87<br>(0.44-1.5)                          | 3.9%<br>(2.6-5.6%)                   | 6.2%<br>(4.2-8.7%)                  | 20<br>(14-29)       | 710<br>(470-1000)      |
| Nicaragua | 2000 | Female | 60 to 64 | 14%<br>(8.5-20%)               | 86%<br>(80-92%)          | 0.84<br>(0.42-1.5)                          | 3.8%<br>(2.5-5.6%)                   | 5.9%<br>(4-8.3%)                    | 23<br>(16-33)       | 680<br>(460-980)       |
| Nicaragua | 2000 | Female | 65 to 69 | 13%<br>(8-18%)                 | 87%<br>(82-92%)          | 0.76<br>(0.39-1.3)                          | 3.6%<br>(2.4-5.3%)                   | 5.4%<br>(3.7-7.8%)                  | 25<br>(17-36)       | 610<br>(410-890)       |
| Nicaragua | 2000 | Female | 70 to 74 | 12%<br>(7.6-17%)               | 88%<br>(83-92%)          | 0.64<br>(0.31-1.2)                          | 3%<br>(1.9-4.7%)                     | 4.5%<br>(2.9-6.8%)                  | 24<br>(15-36)       | 460<br>(290-710)       |
| Nicaragua | 2000 | Female | 75 to 79 | 11%<br>(6.2-19%)               | 89%<br>(81-94%)          | 0.54<br>(0.24-1)                            | 2.4%<br>(1.4-3.8%)                   | 3.4%<br>(2-5.3%)                    | 20<br>(12-31)       | 300<br>(180-480)       |
| Nicaragua | 2000 | Female | 80 to 84 | 10%<br>(5.4-18%)               | 90%<br>(82-95%)          | 0.47<br>(0.22-0.82)                         | 2%<br>(1.1-3.3%)                     | 2.7%<br>(1.5-4.4%)                  | 15<br>(8.5-24)      | 160<br>(93-260)        |
| Nicaragua | 2000 | Female | 85 to 89 | 11%<br>(5.8-17%)               | 89%<br>(83-94%)          | 0.46<br>(0.21-0.88)                         | 1.6%<br>(0.78-3%)                    | 2%<br>(0.94-3.8%)                   | 12<br>(5.6-22)      | 92<br>(45-170)         |
| Nicaragua | 2000 | Female | 90 to 94 | 12%<br>(7-20%)                 | 88%<br>(80-93%)          | 0.49<br>(0.22-0.96)                         | 1.4%<br>(0.48-3%)                    | 1.6%<br>(0.49-3.6%)                 | 7.2<br>(2.2-17)     | 39<br>(14-85)          |
| Nicaragua | 2000 | Female | 95 plus  | 15%<br>(7.6-27%)               | 85%<br>(73-92%)          | 0.54<br>(0.2-1.1)                           | 1.2%<br>(0.15-3.3%)                  | 1.4%<br>(0.024-4%)                  | 2.7<br>(0.045-7.9)  | 10<br>(1.3-27)         |
| Nicaragua | 2000 | Male   | All Ages | 52%<br>(44-61%)                | 48%<br>(39-56%)          | 1.8<br>(1.5-2.1)                            | 6.6%<br>(5.8-7.4%)                   | 9%<br>(7.8-10%)                     | 950<br>(820-1100)   | 45000<br>(39000-52000) |
| Nicaragua | 2000 | Male   | 15 to 19 | 53%<br>(37-67%)                | 47%<br>(33-63%)          | 1.4<br>(0.73-2.2)                           | 5.9%<br>(3.6-8.6%)                   | 8.2%<br>(4.5-13%)                   | 27<br>(15-43)       | 2500<br>(1500-3700)    |
| Nicaragua | 2000 | Male   | 20 to 24 | 77%<br>(64-85%)                | 23%<br>(15-36%)          | 3<br>(1.8-4.6)                              | 13%<br>(9.2-18%)                     | 17%<br>(11-24%)                     | 65<br>(40-92)       | 5600<br>(3700-7600)    |
| Nicaragua | 2000 | Male   | 25 to 29 | 81%<br>(71-88%)                | 19%<br>(12-29%)          | 3.7<br>(2.3-5.6)                            | 16%<br>(12-20%)                      | 21%<br>(15-28%)                     | 69<br>(48-93)       | 5600<br>(4200-7200)    |
| Nicaragua | 2000 | Male   | 30 to 34 | 79%<br>(68-87%)                | 21%<br>(13-32%)          | 3.8<br>(2.5-5.6)                            | 17%<br>(13-21%)                      | 22%<br>(17-28%)                     | 74<br>(56-93)       | 5300<br>(4100-6500)    |
| Nicaragua | 2000 | Male   | 35 to 39 | 72%<br>(62-82%)                | 28%<br>(18-38%)          | 3.7<br>(2.1-5.8)                            | 18%<br>(14-21%)                      | 23%<br>(18-29%)                     | 85<br>(64-100)      | 5200<br>(4100-6300)    |
| Nicaragua | 2000 | Male   | 40 to 44 | 71%<br>(60-81%)                | 29%<br>(19-40%)          | 3.9<br>(2.1-6)                              | 17%<br>(14-21%)                      | 24%<br>(19-28%)                     | 94<br>(73-110)      | 5000<br>(4000-6000)    |
| Nicaragua | 2000 | Male   | 45 to 49 | 74%<br>(62-83%)                | 26%<br>(17-38%)          | 4.2<br>(2.2-7.1)                            | 17%<br>(14-20%)                      | 23%<br>(18-27%)                     | 99<br>(78-120)      | 4600<br>(3700-5400)    |

| Location  | Year | Sex    | Age      | Prevalence of current drinkers | Prevalence of abstainers | Population average of standard drinks daily | Percent of total attributable deaths | Percent of total attributable DALYs | Attributable deaths | Attributable DALYs   |
|-----------|------|--------|----------|--------------------------------|--------------------------|---------------------------------------------|--------------------------------------|-------------------------------------|---------------------|----------------------|
| Nicaragua | 2000 | Male   | 50 to 54 | 73%<br>(61-83%)                | 27%<br>(17-39%)          | 4.3<br>(2.3-7.2)                            | 15%<br>(12-18%)                      | 20%<br>(16-24%)                     | 77<br>(62-93)       | 3100<br>(2500-3700)  |
| Nicaragua | 2000 | Male   | 55 to 59 | 70%<br>(56-82%)                | 30%<br>(18-44%)          | 4.2<br>(2.1-7.3)                            | 13%<br>(10-16%)                      | 17%<br>(14-21%)                     | 75<br>(59-91)       | 2600<br>(2100-3200)  |
| Nicaragua | 2000 | Male   | 60 to 64 | 65%<br>(48-79%)                | 35%<br>(21-52%)          | 3.4<br>(1.6-6.1)                            | 10%<br>(7.7-13%)                     | 13%<br>(10-16%)                     | 66<br>(51-84)       | 2000<br>(1500-2500)  |
| Nicaragua | 2000 | Male   | 65 to 69 | 60%<br>(41-76%)                | 40%<br>(24-59%)          | 2.5<br>(1.3-4.3)                            | 8.4%<br>(6.3-11%)                    | 11%<br>(8.1-14%)                    | 65<br>(48-84)       | 1600<br>(1200-2000)  |
| Nicaragua | 2000 | Male   | 70 to 74 | 54%<br>(36-70%)                | 46%<br>(30-64%)          | 1.9<br>(0.9-3.4)                            | 6.7%<br>(4.4-9.2%)                   | 8.6%<br>(5.6-12%)                   | 54<br>(35-75)       | 1100<br>(710-1500)   |
| Nicaragua | 2000 | Male   | 75 to 79 | 48%<br>(30-66%)                | 52%<br>(34-70%)          | 1.4<br>(0.62-2.8)                           | 5%<br>(2.9-7.3%)                     | 6.3%<br>(3.7-9.1%)                  | 38<br>(23-56)       | 590<br>(350-860)     |
| Nicaragua | 2000 | Male   | 80 to 84 | 43%<br>(26-60%)                | 57%<br>(40-74%)          | 1.2<br>(0.57-2.1)                           | 4.2%<br>(2.4-6.1%)                   | 5%<br>(2.9-7.4%)                    | 27<br>(15-40)       | 310<br>(180-450)     |
| Nicaragua | 2000 | Male   | 85 to 89 | 41%<br>(25-59%)                | 59%<br>(41-75%)          | 1.2<br>(0.53-2.2)                           | 3.7%<br>(2-5.9%)                     | 4.3%<br>(2.2-6.8%)                  | 20<br>(10-32)       | 160<br>(83-250)      |
| Nicaragua | 2000 | Male   | 90 to 94 | 44%<br>(28-62%)                | 56%<br>(38-72%)          | 1.3<br>(0.54-2.6)                           | 3.5%<br>(1.5-5.9%)                   | 4%<br>(1.5-6.9%)                    | 11<br>(4.1-18)      | 58<br>(25-97)        |
| Nicaragua | 2000 | Male   | 95 plus  | 49%<br>(29-71%)                | 51%<br>(29-71%)          | 1.6<br>(0.53-3.5)                           | 3.7%<br>(1.1-6.8%)                   | 4.1%<br>(0.97-8%)                   | 3.5<br>(0.82-6.8)   | 13<br>(4-24)         |
| Nicaragua | 2005 | Female | All Ages | 13%<br>(11-16%)                | 87%<br>(84-89%)          | 0.36<br>(0.28-0.44)                         | 1.6%<br>(1.3-2%)                     | 3%<br>(2.2-4%)                      | 260<br>(190-340)    | 8600<br>(6800-11000) |
| Nicaragua | 2005 | Female | 15 to 19 | 14%<br>(9.8-20%)               | 86%<br>(80-90%)          | 0.34<br>(0.19-0.56)                         | 1.1%<br>(0.69-1.7%)                  | 1.7%<br>(0.77-3.2%)                 | 2.6<br>(1.1-4.8)    | 380<br>(230-570)     |
| Nicaragua | 2005 | Female | 20 to 24 | 25%<br>(18-33%)                | 75%<br>(67-82%)          | 0.51<br>(0.3-0.82)                          | 1.9%<br>(1.2-2.6%)                   | 2.3%<br>(1.1-3.9%)                  | 3.7<br>(1.9-6.3)    | 620<br>(390-910)     |
| Nicaragua | 2005 | Female | 25 to 29 | 23%<br>(17-30%)                | 77%<br>(70-83%)          | 0.49<br>(0.29-0.75)                         | 1.9%<br>(1.3-2.5%)                   | 2.4%<br>(1.5-3.5%)                  | 3.4<br>(2-5)        | 540<br>(360-760)     |
| Nicaragua | 2005 | Female | 30 to 34 | 21%<br>(15-29%)                | 79%<br>(71-85%)          | 0.49<br>(0.28-0.77)                         | 1.9%<br>(1.4-2.5%)                   | 3%<br>(2.1-4.1%)                    | 4.5<br>(3.2-6.1)    | 510<br>(360-690)     |
| Nicaragua | 2005 | Female | 35 to 39 | 19%<br>(13-27%)                | 81%<br>(73-87%)          | 0.52<br>(0.27-0.87)                         | 2.1%<br>(1.5-2.8%)                   | 3.8%<br>(2.7-5.2%)                  | 6.9<br>(4.9-9.5)    | 540<br>(390-740)     |
| Nicaragua | 2005 | Female | 40 to 44 | 20%<br>(13-27%)                | 80%<br>(73-87%)          | 0.59<br>(0.31-0.97)                         | 2.5%<br>(1.8-3.3%)                   | 4.8%<br>(3.4-6.3%)                  | 10<br>(7.2-14)      | 620<br>(450-820)     |
| Nicaragua | 2005 | Female | 45 to 49 | 22%<br>(14-30%)                | 78%<br>(70-86%)          | 0.75<br>(0.39-1.3)                          | 3%<br>(2.1-4.2%)                     | 5.5%<br>(3.9-7.8%)                  | 16<br>(11-22)       | 780<br>(540-1100)    |
| Nicaragua | 2005 | Female | 50 to 54 | 20%<br>(14-29%)                | 80%<br>(71-86%)          | 0.86<br>(0.44-1.5)                          | 3.6%<br>(2.5-5.2%)                   | 6.3%<br>(4.5-8.8%)                  | 21<br>(15-30)       | 890<br>(620-1300)    |
| Nicaragua | 2005 | Female | 55 to 59 | 16%<br>(10-23%)                | 84%<br>(77-90%)          | 0.88<br>(0.45-1.5)                          | 4.1%<br>(2.8-5.8%)                   | 6.4%<br>(4.4-8.8%)                  | 24<br>(17-33)       | 830<br>(570-1200)    |
| Nicaragua | 2005 | Female | 60 to 64 | 13%<br>(8.5-20%)               | 87%<br>(80-92%)          | 0.85<br>(0.42-1.5)                          | 3.9%<br>(2.6-5.5%)                   | 5.9%<br>(4.2-8.3%)                  | 26<br>(18-36)       | 770<br>(540-1100)    |
| Nicaragua | 2005 | Female | 65 to 69 | 12%<br>(7.9-18%)               | 88%<br>(82-92%)          | 0.77<br>(0.39-1.3)                          | 3.7%<br>(2.5-5.3%)                   | 5.5%<br>(3.9-7.7%)                  | 29<br>(20-41)       | 690<br>(480-1000)    |

| Location  | Year | Sex    | Age      | Prevalence of current drinkers | Prevalence of abstainers | Population average of standard drinks daily | Percent of total attributable deaths | Percent of total attributable DALYs | Attributable deaths | Attributable DALYs     |
|-----------|------|--------|----------|--------------------------------|--------------------------|---------------------------------------------|--------------------------------------|-------------------------------------|---------------------|------------------------|
| Nicaragua | 2005 | Female | 70 to 74 | 12%<br>(7.6-17%)               | 88%<br>(83-92%)          | 0.66<br>(0.33-1.2)                          | 3.2%<br>(2.1-4.8%)                   | 4.8%<br>(3.2-7%)                    | 28<br>(19-42)       | 550<br>(360-830)       |
| Nicaragua | 2005 | Female | 75 to 79 | 11%<br>(6.5-18%)               | 89%<br>(82-94%)          | 0.57<br>(0.26-1)                            | 2.6%<br>(1.5-4%)                     | 3.7%<br>(2.3-5.5%)                  | 25<br>(16-39)       | 380<br>(230-590)       |
| Nicaragua | 2005 | Female | 80 to 84 | 10%<br>(5.6-18%)               | 90%<br>(82-94%)          | 0.49<br>(0.23-0.87)                         | 2.2%<br>(1.3-3.5%)                   | 2.9%<br>(1.7-4.7%)                  | 22<br>(13-36)       | 240<br>(140-390)       |
| Nicaragua | 2005 | Female | 85 to 89 | 10%<br>(5.7-17%)               | 90%<br>(83-94%)          | 0.47<br>(0.22-0.91)                         | 1.7%<br>(0.88-3.1%)                  | 2.2%<br>(1.1-4.1%)                  | 18<br>(9.1-33)      | 140<br>(72-260)        |
| Nicaragua | 2005 | Female | 90 to 94 | 12%<br>(7-20%)                 | 88%<br>(80-93%)          | 0.51<br>(0.23-0.98)                         | 1.4%<br>(0.52-3.1%)                  | 1.7%<br>(0.56-3.8%)                 | 10<br>(3.4-23)      | 57<br>(21-120)         |
| Nicaragua | 2005 | Female | 95 plus  | 15%<br>(7.6-26%)               | 85%<br>(74-92%)          | 0.56<br>(0.21-1.1)                          | 1.3%<br>(0.2-3.4%)                   | 1.5%<br>(0.064-4.1%)                | 4.1<br>(0.19-12)    | 15<br>(2.4-41)         |
| Nicaragua | 2005 | Male   | All Ages | 54%<br>(46-62%)                | 46%<br>(38-54%)          | 2<br>(1.7-2.3)                              | 7.8%<br>(6.9-8.9%)                   | 10%<br>(8.6-11%)                    | 1100<br>(940-1300)  | 52000<br>(45000-59000) |
| Nicaragua | 2005 | Male   | 15 to 19 | 52%<br>(37-67%)                | 48%<br>(33-63%)          | 1.4<br>(0.75-2.4)                           | 5.9%<br>(3.7-8.7%)                   | 8.4%<br>(4.6-13%)                   | 25<br>(13-39)       | 2400<br>(1500-3600)    |
| Nicaragua | 2005 | Male   | 20 to 24 | 77%<br>(64-85%)                | 23%<br>(15-36%)          | 3.2<br>(1.9-4.8)                            | 14%<br>(9.4-18%)                     | 17%<br>(11-25%)                     | 76<br>(47-110)      | 6400<br>(4400-8700)    |
| Nicaragua | 2005 | Male   | 25 to 29 | 81%<br>(70-89%)                | 19%<br>(11-30%)          | 3.8<br>(2.3-5.7)                            | 16%<br>(12-20%)                      | 20%<br>(15-28%)                     | 80<br>(56-110)      | 6400<br>(4700-8200)    |
| Nicaragua | 2005 | Male   | 30 to 34 | 79%<br>(68-87%)                | 21%<br>(13-32%)          | 3.9<br>(2.5-5.8)                            | 17%<br>(13-20%)                      | 22%<br>(17-27%)                     | 85<br>(64-110)      | 6100<br>(4700-7400)    |
| Nicaragua | 2005 | Male   | 35 to 39 | 72%<br>(63-82%)                | 28%<br>(18-37%)          | 3.8<br>(2.1-6)                              | 17%<br>(14-21%)                      | 23%<br>(18-28%)                     | 90<br>(70-110)      | 5500<br>(4400-6700)    |
| Nicaragua | 2005 | Male   | 40 to 44 | 71%<br>(60-81%)                | 29%<br>(19-40%)          | 4<br>(2.2-6.2)                              | 17%<br>(14-21%)                      | 23%<br>(19-28%)                     | 100<br>(82-130)     | 5500<br>(4400-6600)    |
| Nicaragua | 2005 | Male   | 45 to 49 | 74%<br>(62-83%)                | 26%<br>(17-38%)          | 4.4<br>(2.3-7.4)                            | 17%<br>(14-20%)                      | 22%<br>(18-26%)                     | 120<br>(93-140)     | 5400<br>(4400-6400)    |
| Nicaragua | 2005 | Male   | 50 to 54 | 73%<br>(61-83%)                | 27%<br>(17-39%)          | 4.4<br>(2.4-7.4)                            | 15%<br>(12-18%)                      | 20%<br>(16-23%)                     | 100<br>(82-120)     | 4200<br>(3400-5000)    |
| Nicaragua | 2005 | Male   | 55 to 59 | 70%<br>(57-82%)                | 30%<br>(18-43%)          | 4.4<br>(2.3-7.5)                            | 13%<br>(11-16%)                      | 17%<br>(13-20%)                     | 83<br>(65-100)      | 2900<br>(2300-3500)    |
| Nicaragua | 2005 | Male   | 60 to 64 | 65%<br>(49-79%)                | 35%<br>(21-51%)          | 3.5<br>(1.8-6.5)                            | 10%<br>(7.9-13%)                     | 13%<br>(10-16%)                     | 75<br>(59-94)       | 2200<br>(1800-2800)    |
| Nicaragua | 2005 | Male   | 65 to 69 | 60%<br>(42-77%)                | 40%<br>(23-58%)          | 2.7<br>(1.4-4.6)                            | 8.4%<br>(6.3-11%)                    | 11%<br>(8.2-14%)                    | 71<br>(54-92)       | 1800<br>(1300-2300)    |
| Nicaragua | 2005 | Male   | 70 to 74 | 55%<br>(37-71%)                | 45%<br>(29-63%)          | 2<br>(0.95-3.6)                             | 6.8%<br>(4.5-9.2%)                   | 8.6%<br>(5.7-12%)                   | 64<br>(42-87)       | 1300<br>(850-1700)     |
| Nicaragua | 2005 | Male   | 75 to 79 | 48%<br>(31-66%)                | 52%<br>(34-69%)          | 1.5<br>(0.66-2.9)                           | 5%<br>(2.9-7.2%)                     | 6.2%<br>(3.6-9%)                    | 46<br>(27-68)       | 720<br>(420-1000)      |
| Nicaragua | 2005 | Male   | 80 to 84 | 43%<br>(27-61%)                | 57%<br>(39-73%)          | 1.3<br>(0.61-2.3)                           | 4.2%<br>(2.5-6.2%)                   | 5%<br>(2.9-7.5%)                    | 37<br>(21-55)       | 420<br>(240-620)       |
| Nicaragua | 2005 | Male   | 85 to 89 | 41%<br>(25-59%)                | 59%<br>(41-75%)          | 1.2<br>(0.55-2.3)                           | 3.7%<br>(1.9-5.9%)                   | 4.3%<br>(2.2-6.9%)                  | 29<br>(15-46)       | 230<br>(120-370)       |

| Location  | Year | Sex    | Age      | Prevalence of current drinkers | Prevalence of abstainers | Population average of standard drinks daily | Percent of total attributable deaths | Percent of total attributable DALYs | Attributable deaths | Attributable DALYs     |
|-----------|------|--------|----------|--------------------------------|--------------------------|---------------------------------------------|--------------------------------------|-------------------------------------|---------------------|------------------------|
| Nicaragua | 2005 | Male   | 90 to 94 | 43%<br>(27-61%)                | 57%<br>(39-73%)          | 1.4<br>(0.54-2.7)                           | 3.5%<br>(1.5-5.9%)                   | 3.9%<br>(1.5-6.8%)                  | 15<br>(5.9-26)      | 84<br>(36-140)         |
| Nicaragua | 2005 | Male   | 95 plus  | 48%<br>(28-69%)                | 52%<br>(31-72%)          | 1.6<br>(0.5-3.5)                            | 3.7%<br>(1.1-6.8%)                   | 4%<br>(0.88-7.7%)                   | 4.9<br>(1.1-9.6)    | 19<br>(5.4-34)         |
| Nicaragua | 2010 | Female | All Ages | 14%<br>(12-17%)                | 86%<br>(83-88%)          | 0.37<br>(0.29-0.47)                         | 1.8%<br>(1.4-2.2%)                   | 3.1%<br>(2.3-4.2%)                  | 290<br>(220-400)    | 9500<br>(7600-12000)   |
| Nicaragua | 2010 | Female | 15 to 19 | 15%<br>(10-20%)                | 85%<br>(80-90%)          | 0.34<br>(0.18-0.56)                         | 1.1%<br>(0.66-1.7%)                  | 1.6%<br>(0.67-3.1%)                 | 2.2<br>(0.93-4.1)   | 350<br>(210-540)       |
| Nicaragua | 2010 | Female | 20 to 24 | 25%<br>(18-33%)                | 75%<br>(67-82%)          | 0.5<br>(0.29-0.82)                          | 1.8%<br>(1.2-2.6%)                   | 2.1%<br>(1.1-3.7%)                  | 3<br>(1.5-5.3)      | 590<br>(370-870)       |
| Nicaragua | 2010 | Female | 25 to 29 | 24%<br>(17-31%)                | 76%<br>(69-83%)          | 0.48<br>(0.29-0.74)                         | 1.8%<br>(1.3-2.4%)                   | 2.2%<br>(1.4-3.2%)                  | 3.3<br>(2-4.8)      | 570<br>(390-810)       |
| Nicaragua | 2010 | Female | 30 to 34 | 21%<br>(15-29%)                | 79%<br>(71-85%)          | 0.47<br>(0.27-0.75)                         | 1.8%<br>(1.3-2.4%)                   | 2.8%<br>(2.1-3.8%)                  | 4.4<br>(3.2-6)      | 540<br>(390-750)       |
| Nicaragua | 2010 | Female | 35 to 39 | 20%<br>(13-28%)                | 80%<br>(72-87%)          | 0.5<br>(0.27-0.84)                          | 2%<br>(1.5-2.6%)                     | 3.7%<br>(2.7-4.9%)                  | 7<br>(5-9.6)        | 580<br>(430-780)       |
| Nicaragua | 2010 | Female | 40 to 44 | 20%<br>(13-28%)                | 80%<br>(72-87%)          | 0.57<br>(0.31-0.95)                         | 2.3%<br>(1.7-3.1%)                   | 4.6%<br>(3.3-6%)                    | 11<br>(7.7-14)      | 660<br>(480-870)       |
| Nicaragua | 2010 | Female | 45 to 49 | 22%<br>(14-30%)                | 78%<br>(70-86%)          | 0.73<br>(0.38-1.2)                          | 2.8%<br>(1.9-4.1%)                   | 5.3%<br>(3.7-7.4%)                  | 16<br>(11-23)       | 810<br>(560-1100)      |
| Nicaragua | 2010 | Female | 50 to 54 | 21%<br>(14-29%)                | 79%<br>(71-86%)          | 0.85<br>(0.45-1.5)                          | 3.5%<br>(2.4-5%)                     | 6.1%<br>(4.4-8.4%)                  | 25<br>(18-35)       | 1000<br>(730-1500)     |
| Nicaragua | 2010 | Female | 55 to 59 | 16%<br>(11-23%)                | 84%<br>(77-89%)          | 0.85<br>(0.43-1.5)                          | 3.8%<br>(2.6-5.3%)                   | 6.2%<br>(4.3-8.4%)                  | 30<br>(21-42)       | 1100<br>(740-1500)     |
| Nicaragua | 2010 | Female | 60 to 64 | 14%<br>(8.4-20%)               | 86%<br>(80-92%)          | 0.83<br>(0.42-1.5)                          | 3.9%<br>(2.7-5.6%)                   | 5.8%<br>(4-8.1%)                    | 30<br>(21-43)       | 890<br>(620-1300)      |
| Nicaragua | 2010 | Female | 65 to 69 | 13%<br>(8.2-18%)               | 87%<br>(82-92%)          | 0.75<br>(0.38-1.3)                          | 3.5%<br>(2.4-5.2%)                   | 5.3%<br>(3.7-7.5%)                  | 32<br>(22-44)       | 770<br>(530-1100)      |
| Nicaragua | 2010 | Female | 70 to 74 | 12%<br>(7.8-18%)               | 88%<br>(82-92%)          | 0.65<br>(0.32-1.2)                          | 3.2%<br>(2.1-4.8%)                   | 4.7%<br>(3.2-7%)                    | 33<br>(22-48)       | 640<br>(420-970)       |
| Nicaragua | 2010 | Female | 75 to 79 | 11%<br>(6.5-19%)               | 89%<br>(81-93%)          | 0.55<br>(0.25-1)                            | 2.5%<br>(1.5-3.9%)                   | 3.5%<br>(2.2-5.4%)                  | 28<br>(17-43)       | 420<br>(260-650)       |
| Nicaragua | 2010 | Female | 80 to 84 | 10%<br>(5.5-18%)               | 90%<br>(82-94%)          | 0.48<br>(0.23-0.85)                         | 2.1%<br>(1.2-3.5%)                   | 2.8%<br>(1.7-4.6%)                  | 27<br>(17-44)       | 300<br>(180-480)       |
| Nicaragua | 2010 | Female | 85 to 89 | 10%<br>(5.7-17%)               | 90%<br>(83-94%)          | 0.46<br>(0.21-0.87)                         | 1.6%<br>(0.89-3%)                    | 2.1%<br>(1.1-3.8%)                  | 24<br>(12-44)       | 180<br>(99-340)        |
| Nicaragua | 2010 | Female | 90 to 94 | 12%<br>(6.8-20%)               | 88%<br>(80-93%)          | 0.49<br>(0.22-0.98)                         | 1.3%<br>(0.48-2.8%)                  | 1.6%<br>(0.49-3.4%)                 | 14<br>(4.3-30)      | 74<br>(26-160)         |
| Nicaragua | 2010 | Female | 95 plus  | 15%<br>(7.6-27%)               | 85%<br>(73-92%)          | 0.54<br>(0.2-1.1)                           | 1.2%<br>(0.15-3.2%)                  | 1.3%<br>(-0.024-3.7%)               | 4.9<br>(-0.088-14)  | 19<br>(2.3-50)         |
| Nicaragua | 2010 | Male   | All Ages | 56%<br>(48-64%)                | 44%<br>(36-52%)          | 2.1<br>(1.7-2.4)                            | 8.5%<br>(7.5-9.7%)                   | 10%<br>(8.9-12%)                    | 1200<br>(1000-1400) | 55000<br>(47000-62000) |
| Nicaragua | 2010 | Male   | 15 to 19 | 52%<br>(36-67%)                | 48%<br>(33-64%)          | 1.4<br>(0.7-2.3)                            | 5.5%<br>(3.5-8.2%)                   | 7.8%<br>(4.2-12%)                   | 21<br>(11-33)       | 2100<br>(1300-3100)    |

| Location  | Year | Sex    | Age      | Prevalence of current drinkers | Prevalence of abstainers | Population average of standard drinks daily | Percent of total attributable deaths | Percent of total attributable DALYs | Attributable deaths | Attributable DALYs    |
|-----------|------|--------|----------|--------------------------------|--------------------------|---------------------------------------------|--------------------------------------|-------------------------------------|---------------------|-----------------------|
| Nicaragua | 2010 | Male   | 20 to 24 | 77%<br>(64-85%)                | 23%<br>(15-36%)          | 3<br>(1.8-4.7)                              | 13%<br>(8.8-17%)                     | 16%<br>(10-23%)                     | 62<br>(38-88)       | 5600<br>(3900-7700)   |
| Nicaragua | 2010 | Male   | 25 to 29 | 81%<br>(70-89%)                | 19%<br>(11-30%)          | 3.7<br>(2.2-5.5)                            | 15%<br>(11-19%)                      | 19%<br>(14-27%)                     | 85<br>(59-120)      | 6900<br>(5200-8900)   |
| Nicaragua | 2010 | Male   | 30 to 34 | 79%<br>(68-87%)                | 21%<br>(13-32%)          | 3.7<br>(2.4-5.6)                            | 16%<br>(13-20%)                      | 21%<br>(16-27%)                     | 89<br>(68-110)      | 6500<br>(5000-7900)   |
| Nicaragua | 2010 | Male   | 35 to 39 | 72%<br>(62-82%)                | 28%<br>(18-38%)          | 3.6<br>(2-5.8)                              | 17%<br>(13-20%)                      | 23%<br>(18-28%)                     | 100<br>(78-130)     | 6300<br>(4900-7700)   |
| Nicaragua | 2010 | Male   | 40 to 44 | 71%<br>(60-81%)                | 29%<br>(19-40%)          | 3.8<br>(2.2-6)                              | 17%<br>(14-20%)                      | 23%<br>(18-27%)                     | 110<br>(85-130)     | 5700<br>(4600-6900)   |
| Nicaragua | 2010 | Male   | 45 to 49 | 74%<br>(62-83%)                | 26%<br>(17-38%)          | 4.2<br>(2.1-7)                              | 16%<br>(13-19%)                      | 22%<br>(18-26%)                     | 110<br>(90-130)     | 5300<br>(4300-6300)   |
| Nicaragua | 2010 | Male   | 50 to 54 | 73%<br>(61-83%)                | 27%<br>(17-39%)          | 4.2<br>(2.2-7.1)                            | 14%<br>(11-17%)                      | 19%<br>(16-22%)                     | 120<br>(95-140)     | 4900<br>(4000-5800)   |
| Nicaragua | 2010 | Male   | 55 to 59 | 71%<br>(57-82%)                | 29%<br>(18-43%)          | 4.1<br>(2.1-7.1)                            | 13%<br>(10-15%)                      | 16%<br>(13-20%)                     | 110<br>(91-140)     | 4000<br>(3200-4900)   |
| Nicaragua | 2010 | Male   | 60 to 64 | 66%<br>(48-80%)                | 34%<br>(20-52%)          | 3.4<br>(1.7-6.1)                            | 10%<br>(7.8-13%)                     | 13%<br>(9.7-16%)                    | 84<br>(64-110)      | 2500<br>(1900-3100)   |
| Nicaragua | 2010 | Male   | 65 to 69 | 60%<br>(42-77%)                | 40%<br>(23-58%)          | 2.5<br>(1.3-4.4)                            | 8.2%<br>(6.2-11%)                    | 11%<br>(8-13%)                      | 76<br>(58-98)       | 1900<br>(1400-2400)   |
| Nicaragua | 2010 | Male   | 70 to 74 | 55%<br>(37-71%)                | 45%<br>(29-63%)          | 1.9<br>(0.93-3.5)                           | 6.5%<br>(4.4-8.9%)                   | 8.2%<br>(5.6-11%)                   | 68<br>(46-95)       | 1400<br>(930-1900)    |
| Nicaragua | 2010 | Male   | 75 to 79 | 48%<br>(30-66%)                | 52%<br>(34-70%)          | 1.5<br>(0.63-2.8)                           | 4.8%<br>(2.9-7%)                     | 6%<br>(3.6-8.8%)                    | 53<br>(31-77)       | 820<br>(490-1200)     |
| Nicaragua | 2010 | Male   | 80 to 84 | 44%<br>(27-61%)                | 56%<br>(39-73%)          | 1.2<br>(0.58-2.2)                           | 4%<br>(2.3-5.9%)                     | 4.8%<br>(2.7-7.1%)                  | 45<br>(25-67)       | 510<br>(290-750)      |
| Nicaragua | 2010 | Male   | 85 to 89 | 41%<br>(26-58%)                | 59%<br>(42-74%)          | 1.2<br>(0.52-2.2)                           | 3.5%<br>(1.8-5.5%)                   | 4.1%<br>(2.1-6.5%)                  | 36<br>(19-58)       | 290<br>(150-460)      |
| Nicaragua | 2010 | Male   | 90 to 94 | 43%<br>(27-61%)                | 57%<br>(39-73%)          | 1.3<br>(0.52-2.5)                           | 3.3%<br>(1.4-5.5%)                   | 3.7%<br>(1.4-6.4%)                  | 20<br>(7.8-35)      | 110<br>(48-190)       |
| Nicaragua | 2010 | Male   | 95 plus  | 48%<br>(28-70%)                | 52%<br>(30-72%)          | 1.6<br>(0.49-3.4)                           | 3.4%<br>(1-6.4%)                     | 3.7%<br>(0.85-7.3%)                 | 6.5<br>(1.5-13)     | 25<br>(7.5-47)        |
| Nicaragua | 2016 | Female | All Ages | 16%<br>(13-19%)                | 84%<br>(81-87%)          | 0.48<br>(0.34-0.66)                         | 2.1%<br>(1.6-2.7%)                   | 3.4%<br>(2.4-4.8%)                  | 360<br>(240-520)    | 12000<br>(8400-16000) |
| Nicaragua | 2016 | Female | 15 to 19 | 14%<br>(9-21%)                 | 86%<br>(79-91%)          | 0.35<br>(0.17-0.64)                         | 1.1%<br>(0.64-1.8%)                  | 1.7%<br>(0.67-3.5%)                 | 2<br>(0.79-4.2)     | 330<br>(190-530)      |
| Nicaragua | 2016 | Female | 20 to 24 | 25%<br>(16-35%)                | 75%<br>(65-84%)          | 0.53<br>(0.26-0.96)                         | 1.9%<br>(1.2-2.7%)                   | 2.3%<br>(1.1-4.4%)                  | 3<br>(1.3-5.9)      | 590<br>(350-920)      |
| Nicaragua | 2016 | Female | 25 to 29 | 25%<br>(16-34%)                | 75%<br>(66-84%)          | 0.53<br>(0.28-0.9)                          | 1.9%<br>(1.3-2.6%)                   | 2.5%<br>(1.4-3.8%)                  | 3.4<br>(1.8-5.6)    | 610<br>(390-880)      |
| Nicaragua | 2016 | Female | 30 to 34 | 24%<br>(16-34%)                | 76%<br>(66-84%)          | 0.58<br>(0.31-0.98)                         | 1.9%<br>(1.4-2.6%)                   | 3.2%<br>(2.2-4.7%)                  | 5.4<br>(3.4-8.2)    | 650<br>(440-920)      |
| Nicaragua | 2016 | Female | 35 to 39 | 24%<br>(15-33%)                | 76%<br>(67-85%)          | 0.66<br>(0.34-1.1)                          | 2.1%<br>(1.5-2.9%)                   | 4.2%<br>(2.9-5.9%)                  | 9.1<br>(5.7-14)     | 740<br>(500-1000)     |

| Location  | Year | Sex    | Age      | Prevalence of current drinkers | Prevalence of abstainers | Population average of standard drinks daily | Percent of total attributable deaths | Percent of total attributable DALYs | Attributable deaths  | Attributable DALYs     |
|-----------|------|--------|----------|--------------------------------|--------------------------|---------------------------------------------|--------------------------------------|-------------------------------------|----------------------|------------------------|
| Nicaragua | 2016 | Female | 40 to 44 | 24%<br>(16-34%)                | 76%<br>(66-84%)          | 0.77<br>(0.4-1.3)                           | 2.5%<br>(1.7-3.5%)                   | 5.1%<br>(3.5-7.1%)                  | 14<br>(8.6-20)       | 850<br>(560-1200)      |
| Nicaragua | 2016 | Female | 45 to 49 | 27%<br>(16-37%)                | 73%<br>(63-84%)          | 0.98<br>(0.48-1.7)                          | 3.1%<br>(2-4.8%)                     | 6%<br>(3.9-8.9%)                    | 20<br>(12-31)        | 1000<br>(660-1600)     |
| Nicaragua | 2016 | Female | 50 to 54 | 25%<br>(17-35%)                | 75%<br>(65-83%)          | 1.1<br>(0.58-2)                             | 3.8%<br>(2.5-5.7%)                   | 6.7%<br>(4.5-9.8%)                  | 28<br>(18-43)        | 1200<br>(760-1900)     |
| Nicaragua | 2016 | Female | 55 to 59 | 19%<br>(12-27%)                | 81%<br>(73-88%)          | 1.1<br>(0.53-1.9)                           | 4.1%<br>(2.7-6%)                     | 6.7%<br>(4.4-9.4%)                  | 40<br>(26-61)        | 1400<br>(920-2200)     |
| Nicaragua | 2016 | Female | 60 to 64 | 15%<br>(9-23%)                 | 85%<br>(77-91%)          | 0.97<br>(0.46-1.8)                          | 3.9%<br>(2.5-5.8%)                   | 6%<br>(4-8.6%)                      | 48<br>(30-72)        | 1400<br>(880-2200)     |
| Nicaragua | 2016 | Female | 65 to 69 | 13%<br>(8.2-19%)               | 87%<br>(81-92%)          | 0.82<br>(0.4-1.5)                           | 3.5%<br>(2.3-5.2%)                   | 5.4%<br>(3.6-7.7%)                  | 34<br>(21-52)        | 840<br>(520-1300)      |
| Nicaragua | 2016 | Female | 70 to 74 | 12%<br>(7.7-18%)               | 88%<br>(82-92%)          | 0.68<br>(0.32-1.3)                          | 3.1%<br>(2-4.8%)                     | 4.7%<br>(3.1-7%)                    | 35<br>(21-54)        | 690<br>(430-1100)      |
| Nicaragua | 2016 | Female | 75 to 79 | 11%<br>(6.4-19%)               | 89%<br>(81-94%)          | 0.58<br>(0.26-1.1)                          | 2.4%<br>(1.4-3.9%)                   | 3.5%<br>(2.1-5.6%)                  | 31<br>(18-49)        | 470<br>(270-770)       |
| Nicaragua | 2016 | Female | 80 to 84 | 10%<br>(5.4-18%)               | 90%<br>(82-95%)          | 0.5<br>(0.23-0.94)                          | 2.1%<br>(1.2-3.4%)                   | 2.8%<br>(1.6-4.6%)                  | 32<br>(18-53)        | 360<br>(200-590)       |
| Nicaragua | 2016 | Female | 85 to 89 | 10%<br>(5.4-17%)               | 90%<br>(83-95%)          | 0.48<br>(0.21-0.9)                          | 1.7%<br>(0.85-3.1%)                  | 2.1%<br>(1-4%)                      | 29<br>(14-53)        | 230<br>(110-410)       |
| Nicaragua | 2016 | Female | 90 to 94 | 12%<br>(6.7-19%)               | 88%<br>(81-93%)          | 0.51<br>(0.21-1)                            | 1.4%<br>(0.47-3.1%)                  | 1.7%<br>(0.49-3.8%)                 | 19<br>(5.5-42)       | 100<br>(34-220)        |
| Nicaragua | 2016 | Female | 95 plus  | 15%<br>(7.4-26%)               | 85%<br>(74-93%)          | 0.56<br>(0.2-1.2)                           | 1.3%<br>(0.16-3.5%)                  | 1.4%<br>(-0.00015-4.1%)             | 7.4<br>(-0.00076-22) | 28<br>(3.6-76)         |
| Nicaragua | 2016 | Male   | All Ages | 53%<br>(44-60%)                | 47%<br>(40-56%)          | 2.1<br>(1.6-2.7)                            | 9.5%<br>(8.1-11%)                    | 11%<br>(9.1-13%)                    | 1400<br>(1100-1900)  | 63000<br>(50000-79000) |
| Nicaragua | 2016 | Male   | 15 to 19 | 39%<br>(25-55%)                | 61%<br>(45-75%)          | 0.98<br>(0.44-1.9)                          | 4.6%<br>(2.9-6.9%)                   | 6.1%<br>(3.1-11%)                   | 15<br>(7.4-27)       | 1700<br>(1000-2600)    |
| Nicaragua | 2016 | Male   | 20 to 24 | 67%<br>(51-79%)                | 33%<br>(21-49%)          | 2.4<br>(1.2-4.1)                            | 11%<br>(7.7-16%)                     | 14%<br>(8-21%)                      | 56<br>(30-88)        | 5200<br>(3300-7500)    |
| Nicaragua | 2016 | Male   | 25 to 29 | 75%<br>(60-86%)                | 25%<br>(14-40%)          | 3.2<br>(1.8-5.2)                            | 14%<br>(10-19%)                      | 18%<br>(12-25%)                     | 84<br>(52-120)       | 7000<br>(4800-9500)    |
| Nicaragua | 2016 | Male   | 30 to 34 | 75%<br>(61-86%)                | 25%<br>(14-39%)          | 3.5<br>(2-5.7)                              | 15%<br>(12-19%)                      | 20%<br>(15-26%)                     | 100<br>(70-140)      | 7500<br>(5500-9800)    |
| Nicaragua | 2016 | Male   | 35 to 39 | 71%<br>(57-82%)                | 29%<br>(18-43%)          | 3.7<br>(1.9-6)                              | 17%<br>(13-20%)                      | 23%<br>(17-28%)                     | 120<br>(85-170)      | 7700<br>(5600-10000)   |
| Nicaragua | 2016 | Male   | 40 to 44 | 70%<br>(56-82%)                | 30%<br>(18-44%)          | 3.9<br>(2.1-6.2)                            | 17%<br>(13-21%)                      | 23%<br>(18-28%)                     | 130<br>(95-190)      | 7200<br>(5300-9500)    |
| Nicaragua | 2016 | Male   | 45 to 49 | 72%<br>(57-84%)                | 28%<br>(16-43%)          | 4.2<br>(2-7.5)                              | 16%<br>(13-20%)                      | 22%<br>(17-26%)                     | 130<br>(95-180)      | 6300<br>(4700-8200)    |
| Nicaragua | 2016 | Male   | 50 to 54 | 73%<br>(60-84%)                | 27%<br>(16-40%)          | 4.5<br>(2.3-7.7)                            | 15%<br>(12-18%)                      | 20%<br>(16-24%)                     | 130<br>(95-180)      | 5500<br>(4000-7200)    |
| Nicaragua | 2016 | Male   | 55 to 59 | 71%<br>(57-84%)                | 29%<br>(16-43%)          | 4.6<br>(2.2-8.1)                            | 13%<br>(10-16%)                      | 17%<br>(13-20%)                     | 150<br>(110-210)     | 5300<br>(3900-7100)    |

| Location  | Year | Sex    | Age      | Prevalence of current drinkers | Prevalence of abstainers | Population average of standard drinks daily | Percent of total attributable deaths | Percent of total attributable DALYs | Attributable deaths | Attributable DALYs  |
|-----------|------|--------|----------|--------------------------------|--------------------------|---------------------------------------------|--------------------------------------|-------------------------------------|---------------------|---------------------|
| Nicaragua | 2016 | Male   | 60 to 64 | 67%<br>(49-81%)                | 33%<br>(19-51%)          | 3.8<br>(1.8-6.9)                            | 10%<br>(7.8-13%)                     | 13%<br>(9.9-16%)                    | 140<br>(96-180)     | 4100<br>(2900-5400) |
| Nicaragua | 2016 | Male   | 65 to 69 | 61%<br>(43-77%)                | 39%<br>(23-57%)          | 2.8<br>(1.4-4.8)                            | 8.4%<br>(6.3-11%)                    | 11%<br>(8.1-14%)                    | 84<br>(58-120)      | 2100<br>(1500-2900) |
| Nicaragua | 2016 | Male   | 70 to 74 | 55%<br>(37-71%)                | 45%<br>(29-63%)          | 2<br>(0.93-3.7)                             | 6.6%<br>(4.4-8.9%)                   | 8.4%<br>(5.7-11%)                   | 78<br>(50-110)      | 1600<br>(1000-2200) |
| Nicaragua | 2016 | Male   | 75 to 79 | 48%<br>(31-66%)                | 52%<br>(34-69%)          | 1.5<br>(0.64-3)                             | 4.9%<br>(3-7%)                       | 6.1%<br>(3.7-8.8%)                  | 65<br>(37-96)       | 1000<br>(580-1500)  |
| Nicaragua | 2016 | Male   | 80 to 84 | 43%<br>(26-61%)                | 57%<br>(39-74%)          | 1.3<br>(0.57-2.4)                           | 4%<br>(2.3-5.9%)                     | 4.8%<br>(2.8-7.2%)                  | 59<br>(32-89)       | 670<br>(380-1000)   |
| Nicaragua | 2016 | Male   | 85 to 89 | 40%<br>(24-58%)                | 60%<br>(42-76%)          | 1.2<br>(0.51-2.3)                           | 3.6%<br>(1.9-5.7%)                   | 4.1%<br>(2.1-6.6%)                  | 49<br>(25-80)       | 390<br>(210-630)    |
| Nicaragua | 2016 | Male   | 90 to 94 | 42%<br>(26-60%)                | 58%<br>(40-74%)          | 1.3<br>(0.52-2.6)                           | 3.3%<br>(1.5-5.6%)                   | 3.7%<br>(1.5-6.4%)                  | 28<br>(11-49)       | 160<br>(67-260)     |
| Nicaragua | 2016 | Male   | 95 plus  | 47%<br>(27-68%)                | 53%<br>(32-73%)          | 1.5<br>(0.49-3.3)                           | 3.4%<br>(1.1-6.2%)                   | 3.7%<br>(0.96-6.9%)                 | 9.6<br>(2.5-18)     | 37<br>(12-67)       |
| Panama    | 1990 | Female | All Ages | 23%<br>(17-31%)                | 77%<br>(69-83%)          | 0.62<br>(0.52-0.74)                         | 2%<br>(1.5-2.7%)                     | 3.8%<br>(2.2-5.8%)                  | 170<br>(98-260)     | 5200<br>(3800-7000) |
| Panama    | 1990 | Female | 15 to 19 | 20%<br>(10-35%)                | 80%<br>(65-90%)          | 0.51<br>(0.22-0.97)                         | 1.4%<br>(0.82-2.4%)                  | 2.4%<br>(0.99-4.9%)                 | 1.8<br>(0.69-3.4)   | 210<br>(120-350)    |
| Panama    | 1990 | Female | 20 to 24 | 28%<br>(14-45%)                | 72%<br>(55-86%)          | 0.68<br>(0.3-1.2)                           | 2.3%<br>(1.4-3.4%)                   | 3.2%<br>(1.4-5.8%)                  | 2.5<br>(1.1-4.7)    | 330<br>(190-500)    |
| Panama    | 1990 | Female | 25 to 29 | 30%<br>(15-50%)                | 70%<br>(50-85%)          | 0.72<br>(0.33-1.3)                          | 2.3%<br>(1.4-3.4%)                   | 3.4%<br>(1.6-5.8%)                  | 3<br>(1.4-5.1)      | 330<br>(190-490)    |
| Panama    | 1990 | Female | 30 to 34 | 33%<br>(16-53%)                | 67%<br>(47-84%)          | 0.81<br>(0.4-1.4)                           | 2.2%<br>(1.4-3.3%)                   | 3.7%<br>(2-5.9%)                    | 3.3<br>(1.8-5.4)    | 300<br>(190-430)    |
| Panama    | 1990 | Female | 35 to 39 | 35%<br>(18-55%)                | 65%<br>(45-82%)          | 0.96<br>(0.42-1.6)                          | 2.3%<br>(1.4-3.6%)                   | 4.1%<br>(2.3-6.8%)                  | 3.8<br>(2.1-6.3)    | 280<br>(170-430)    |
| Panama    | 1990 | Female | 40 to 44 | 35%<br>(19-56%)                | 65%<br>(44-81%)          | 1.2<br>(0.6-2)                              | 2.9%<br>(1.7-4.5%)                   | 5.4%<br>(3.2-8.4%)                  | 6<br>(3.4-9.4)      | 340<br>(200-510)    |
| Panama    | 1990 | Female | 45 to 49 | 35%<br>(17-55%)                | 65%<br>(45-83%)          | 1.4<br>(0.61-2.5)                           | 3.7%<br>(2-6%)                       | 6.8%<br>(3.6-11%)                   | 8.7<br>(4.8-14)     | 410<br>(220-670)    |
| Panama    | 1990 | Female | 50 to 54 | 35%<br>(18-55%)                | 65%<br>(45-82%)          | 1.6<br>(0.74-2.8)                           | 4.4%<br>(2.5-7%)                     | 7.8%<br>(4.4-12%)                   | 11<br>(6.3-17)      | 460<br>(260-730)    |
| Panama    | 1990 | Female | 55 to 59 | 33%<br>(17-54%)                | 67%<br>(46-83%)          | 1.8<br>(0.81-3.3)                           | 5.3%<br>(2.8-8.5%)                   | 8.5%<br>(4.8-13%)                   | 16<br>(8.8-25)      | 550<br>(300-890)    |
| Panama    | 1990 | Female | 60 to 64 | 30%<br>(15-51%)                | 70%<br>(49-85%)          | 1.7<br>(0.72-3.4)                           | 5%<br>(2.5-8.2%)                     | 7.5%<br>(3.8-12%)                   | 17<br>(8.8-29)      | 510<br>(250-850)    |
| Panama    | 1990 | Female | 65 to 69 | 28%<br>(13-48%)                | 72%<br>(52-87%)          | 1.5<br>(0.66-2.8)                           | 4.9%<br>(2.5-8.2%)                   | 6.9%<br>(3.5-11%)                   | 21<br>(11-35)       | 510<br>(250-860)    |
| Panama    | 1990 | Female | 70 to 74 | 25%<br>(12-43%)                | 75%<br>(57-88%)          | 1.3<br>(0.53-2.7)                           | 4.3%<br>(1.9-8.2%)                   | 5.8%<br>(2.5-11%)                   | 24<br>(10-44)       | 450<br>(190-850)    |
| Panama    | 1990 | Female | 75 to 79 | 22%<br>(9.7-39%)               | 78%<br>(61-90%)          | 1.1<br>(0.38-2.2)                           | 3.3%<br>(1.2-6.6%)                   | 4.3%<br>(1.5-8.4%)                  | 20<br>(6.9-40)      | 290<br>(100-590)    |



| Location | Year | Sex    | Age      | Prevalence of current drinkers | Prevalence of abstainers | Population average of standard drinks daily | Percent of total attributable deaths | Percent of total attributable DALYs | Attributable deaths | Attributable DALYs     |
|----------|------|--------|----------|--------------------------------|--------------------------|---------------------------------------------|--------------------------------------|-------------------------------------|---------------------|------------------------|
| Panama   | 1990 | Female | 80 to 84 | 20%<br>(8.7-36%)               | 80%<br>(64-91%)          | 0.95<br>(0.33-1.9)                          | 2.5%<br>(0.78-5.4%)                  | 3.2%<br>(0.98-6.9%)                 | 14<br>(4.3-30)      | 150<br>(48-320)        |
| Panama   | 1990 | Female | 85 to 89 | 20%<br>(9.5-36%)               | 80%<br>(64-91%)          | 0.94<br>(0.38-1.9)                          | 2.1%<br>(0.35-4.9%)                  | 2.5%<br>(0.39-6.1%)                 | 11<br>(1.7-26)      | 84<br>(14-200)         |
| Panama   | 1990 | Female | 90 to 94 | 24%<br>(11-42%)                | 76%<br>(58-89%)          | 1<br>(0.4-2.1)                              | 1.7%<br>(-0.098-4.7%)                | 2%<br>(-0.27-5.8%)                  | 5.4<br>(-0.76-16)   | 29<br>(-1.8-83)        |
| Panama   | 1990 | Female | 95 plus  | 30%<br>(12-52%)                | 70%<br>(48-88%)          | 1.1<br>(0.35-2.5)                           | 1.4%<br>(-0.91-5.4%)                 | 1.5%<br>(-1.4-6.4%)                 | 1.5<br>(-1.4-6.3)   | 5.6<br>(-3.7-22)       |
| Panama   | 1990 | Male   | All Ages | 40%<br>(31-51%)                | 60%<br>(49-69%)          | 1.9<br>(1.7-2.1)                            | 6.5%<br>(5.5-7.6%)                   | 8.4%<br>(6.5-11%)                   | 520<br>(400-660)    | 21000<br>(17000-25000) |
| Panama   | 1990 | Male   | 15 to 19 | 28%<br>(13-46%)                | 72%<br>(54-87%)          | 0.87<br>(0.33-1.6)                          | 4.2%<br>(2.5-6.7%)                   | 5.2%<br>(2.3-9.3%)                  | 7.9<br>(3.5-14)     | 820<br>(470-1300)      |
| Panama   | 1990 | Male   | 20 to 24 | 47%<br>(26-68%)                | 53%<br>(32-74%)          | 2<br>(0.89-3.5)                             | 9.9%<br>(6-14%)                      | 11%<br>(5.8-19%)                    | 24<br>(12-39)       | 2200<br>(1300-3200)    |
| Panama   | 1990 | Male   | 25 to 29 | 57%<br>(34-77%)                | 43%<br>(23-66%)          | 2.8<br>(1.4-4.6)                            | 12%<br>(7.8-17%)                     | 15%<br>(8.6-23%)                    | 33<br>(18-50)       | 2500<br>(1600-3600)    |
| Panama   | 1990 | Male   | 30 to 34 | 64%<br>(38-82%)                | 36%<br>(18-62%)          | 3.4<br>(1.8-5.3)                            | 13%<br>(8.3-17%)                     | 17%<br>(10-23%)                     | 32<br>(20-47)       | 2200<br>(1500-3100)    |
| Panama   | 1990 | Male   | 35 to 39 | 67%<br>(45-83%)                | 33%<br>(17-55%)          | 3.9<br>(2-6.2)                              | 13%<br>(8.3-18%)                     | 18%<br>(11-25%)                     | 32<br>(19-46)       | 1900<br>(1200-2700)    |
| Panama   | 1990 | Male   | 40 to 44 | 68%<br>(47-84%)                | 32%<br>(16-53%)          | 4.3<br>(2.2-6.7)                            | 12%<br>(8-17%)                       | 18%<br>(11-24%)                     | 32<br>(20-45)       | 1700<br>(1100-2300)    |
| Panama   | 1990 | Male   | 45 to 49 | 68%<br>(44-84%)                | 32%<br>(16-56%)          | 4.6<br>(2.2-7.9)                            | 12%<br>(7.9-16%)                     | 18%<br>(11-24%)                     | 35<br>(21-47)       | 1600<br>(1000-2100)    |
| Panama   | 1990 | Male   | 50 to 54 | 68%<br>(46-85%)                | 32%<br>(15-54%)          | 4.8<br>(2.4-8.2)                            | 12%<br>(8.3-16%)                     | 17%<br>(12-22%)                     | 38<br>(25-50)       | 1500<br>(1100-2000)    |
| Panama   | 1990 | Male   | 55 to 59 | 66%<br>(45-85%)                | 34%<br>(15-55%)          | 5.1<br>(2.5-8.7)                            | 12%<br>(8.1-16%)                     | 16%<br>(11-21%)                     | 44<br>(29-59)       | 1500<br>(1000-2100)    |
| Panama   | 1990 | Male   | 60 to 64 | 63%<br>(40-82%)                | 37%<br>(18-60%)          | 4.5<br>(2.1-8.1)                            | 10%<br>(6.7-14%)                     | 13%<br>(8.6-18%)                    | 48<br>(31-67)       | 1400<br>(910-2000)     |
| Panama   | 1990 | Male   | 65 to 69 | 59%<br>(35-79%)                | 41%<br>(21-65%)          | 3.5<br>(1.6-6)                              | 9.2%<br>(5.6-13%)                    | 11%<br>(6.9-16%)                    | 52<br>(31-74)       | 1300<br>(750-1800)     |
| Panama   | 1990 | Male   | 70 to 74 | 54%<br>(33-74%)                | 46%<br>(26-67%)          | 2.5<br>(1.1-4.9)                            | 6.9%<br>(3.4-11%)                    | 8.3%<br>(4-14%)                     | 49<br>(24-82)       | 940<br>(470-1600)      |
| Panama   | 1990 | Male   | 75 to 79 | 47%<br>(25-69%)                | 53%<br>(31-75%)          | 1.9<br>(0.66-4.2)                           | 5.1%<br>(1.8-9.2%)                   | 5.9%<br>(2-11%)                     | 37<br>(12-67)       | 550<br>(190-990)       |
| Panama   | 1990 | Male   | 80 to 84 | 42%<br>(20-64%)                | 58%<br>(36-80%)          | 1.7<br>(0.6-3.5)                            | 4.3%<br>(1.6-7.9%)                   | 5.1%<br>(1.8-9.4%)                  | 25<br>(8.7-47)      | 280<br>(100-510)       |
| Panama   | 1990 | Male   | 85 to 89 | 40%<br>(20-64%)                | 60%<br>(36-80%)          | 1.6<br>(0.59-3.4)                           | 3.8%<br>(1.2-7.3%)                   | 4.4%<br>(1.3-8.6%)                  | 18<br>(5.1-36)      | 140<br>(44-280)        |
| Panama   | 1990 | Male   | 90 to 94 | 44%<br>(23-67%)                | 56%<br>(33-77%)          | 1.8<br>(0.62-3.9)                           | 3.6%<br>(0.8-7.4%)                   | 4.1%<br>(0.72-8.7%)                 | 9.3<br>(1.6-20)     | 51<br>(11-110)         |
| Panama   | 1990 | Male   | 95 plus  | 50%<br>(23-74%)                | 50%<br>(26-77%)          | 2.1<br>(0.64-4.8)                           | 3.6%<br>(0.19-8.4%)                  | 4%<br>(-0.19-9.6%)                  | 2.9<br>(-0.14-7.1)  | 11<br>(0.55-25)        |

| Location | Year | Sex    | Age      | Prevalence of current drinkers | Prevalence of abstainers | Population average of standard drinks daily | Percent of total attributable deaths | Percent of total attributable DALYs | Attributable deaths | Attributable DALYs     |
|----------|------|--------|----------|--------------------------------|--------------------------|---------------------------------------------|--------------------------------------|-------------------------------------|---------------------|------------------------|
| Panama   | 1995 | Female | All Ages | 23%<br>(17-31%)                | 77%<br>(69-83%)          | 0.66<br>(0.55-0.78)                         | 2.1%<br>(1.5-2.7%)                   | 3.8%<br>(2.3-5.9%)                  | 190<br>(110-290)    | 5700<br>(4100-7600)    |
| Panama   | 1995 | Female | 15 to 19 | 20%<br>(10-34%)                | 80%<br>(66-90%)          | 0.52<br>(0.22-1)                            | 1.4%<br>(0.83-2.3%)                  | 2.5%<br>(1-4.9%)                    | 1.8<br>(0.74-3.5)   | 220<br>(120-360)       |
| Panama   | 1995 | Female | 20 to 24 | 27%<br>(14-46%)                | 73%<br>(54-86%)          | 0.69<br>(0.3-1.3)                           | 2.2%<br>(1.4-3.4%)                   | 3.1%<br>(1.3-5.5%)                  | 2.7<br>(1.1-4.8)    | 360<br>(210-550)       |
| Panama   | 1995 | Female | 25 to 29 | 30%<br>(15-49%)                | 70%<br>(51-85%)          | 0.73<br>(0.34-1.3)                          | 2.2%<br>(1.4-3.2%)                   | 3.2%<br>(1.5-5.4%)                  | 3<br>(1.4-5.1)      | 340<br>(210-500)       |
| Panama   | 1995 | Female | 30 to 34 | 32%<br>(15-53%)                | 68%<br>(47-85%)          | 0.81<br>(0.4-1.4)                           | 2.1%<br>(1.3-3%)                     | 3.2%<br>(1.8-5.1%)                  | 3.3<br>(1.8-5.3)    | 310<br>(200-450)       |
| Panama   | 1995 | Female | 35 to 39 | 34%<br>(18-53%)                | 66%<br>(47-82%)          | 0.95<br>(0.45-1.6)                          | 2.1%<br>(1.3-3.2%)                   | 3.7%<br>(2.1-5.8%)                  | 4.1<br>(2.3-6.6)    | 310<br>(200-460)       |
| Panama   | 1995 | Female | 40 to 44 | 35%<br>(19-55%)                | 65%<br>(45-81%)          | 1.2<br>(0.62-1.9)                           | 2.7%<br>(1.6-4.2%)                   | 5.1%<br>(3-7.8%)                    | 6.4<br>(3.8-9.9)    | 370<br>(230-570)       |
| Panama   | 1995 | Female | 45 to 49 | 35%<br>(17-55%)                | 65%<br>(45-83%)          | 1.4<br>(0.65-2.5)                           | 3.5%<br>(1.9-5.6%)                   | 6.5%<br>(3.7-10%)                   | 9<br>(4.9-14)       | 440<br>(250-690)       |
| Panama   | 1995 | Female | 50 to 54 | 34%<br>(17-55%)                | 66%<br>(45-83%)          | 1.7<br>(0.78-2.8)                           | 4.2%<br>(2.4-6.6%)                   | 7.4%<br>(4.3-11%)                   | 12<br>(6.9-19)      | 520<br>(300-810)       |
| Panama   | 1995 | Female | 55 to 59 | 32%<br>(17-53%)                | 68%<br>(47-83%)          | 1.8<br>(0.83-3.3)                           | 4.8%<br>(2.6-7.8%)                   | 8%<br>(4.6-13%)                     | 15<br>(8.6-24)      | 540<br>(300-870)       |
| Panama   | 1995 | Female | 60 to 64 | 30%<br>(15-51%)                | 70%<br>(49-85%)          | 1.7<br>(0.77-3.3)                           | 4.9%<br>(2.5-8%)                     | 7.5%<br>(4-12%)                     | 18<br>(9.7-30)      | 550<br>(290-920)       |
| Panama   | 1995 | Female | 65 to 69 | 28%<br>(14-48%)                | 72%<br>(52-86%)          | 1.6<br>(0.67-2.9)                           | 4.9%<br>(2.5-8.1%)                   | 7%<br>(3.7-11%)                     | 23<br>(12-37)       | 560<br>(290-920)       |
| Panama   | 1995 | Female | 70 to 74 | 26%<br>(12-43%)                | 74%<br>(57-88%)          | 1.4<br>(0.57-2.8)                           | 4.3%<br>(1.9-8.1%)                   | 6%<br>(2.7-11%)                     | 24<br>(11-46)       | 470<br>(210-890)       |
| Panama   | 1995 | Female | 75 to 79 | 22%<br>(10-39%)                | 78%<br>(61-90%)          | 1.2<br>(0.41-2.3)                           | 3.4%<br>(1.3-6.7%)                   | 4.5%<br>(1.7-8.7%)                  | 23<br>(8.8-45)      | 340<br>(130-670)       |
| Panama   | 1995 | Female | 80 to 84 | 20%<br>(8.6-37%)               | 80%<br>(63-91%)          | 1<br>(0.37-2.1)                             | 2.7%<br>(0.89-5.9%)                  | 3.4%<br>(1.1-7.5%)                  | 19<br>(6-41)        | 210<br>(68-450)        |
| Panama   | 1995 | Female | 85 to 89 | 21%<br>(9.3-36%)               | 79%<br>(64-91%)          | 0.98<br>(0.38-2)                            | 2.2%<br>(0.49-5.1%)                  | 2.7%<br>(0.54-6.3%)                 | 14<br>(2.8-33)      | 110<br>(23-250)        |
| Panama   | 1995 | Female | 90 to 94 | 25%<br>(11-43%)                | 75%<br>(57-89%)          | 1.1<br>(0.41-2.2)                           | 1.8%<br>(0.032-4.9%)                 | 2.2%<br>(-0.1-6.1%)                 | 6.9<br>(-0.32-19)   | 38<br>(0.62-100)       |
| Panama   | 1995 | Female | 95 plus  | 30%<br>(13-52%)                | 70%<br>(48-87%)          | 1.2<br>(0.37-2.6)                           | 1.5%<br>(-0.72-5.7%)                 | 1.7%<br>(-1.1-6.9%)                 | 2.1<br>(-1.4-8.8)   | 8.1<br>(-3.7-30)       |
| Panama   | 1995 | Male   | All Ages | 42%<br>(32-53%)                | 58%<br>(47-68%)          | 2.1<br>(1.9-2.3)                            | 6.8%<br>(5.8-8.1%)                   | 8.6%<br>(6.8-11%)                   | 620<br>(490-780)    | 25000<br>(21000-29000) |
| Panama   | 1995 | Male   | 15 to 19 | 28%<br>(13-47%)                | 72%<br>(53-87%)          | 0.89<br>(0.34-1.7)                          | 4.3%<br>(2.6-6.9%)                   | 5.3%<br>(2.4-9.5%)                  | 8.4<br>(3.8-15)     | 870<br>(490-1400)      |
| Panama   | 1995 | Male   | 20 to 24 | 47%<br>(25-69%)                | 53%<br>(31-75%)          | 2.1<br>(0.92-3.5)                           | 10%<br>(6.1-15%)                     | 12%<br>(5.8-19%)                    | 30<br>(15-49)       | 2600<br>(1500-3900)    |
| Panama   | 1995 | Male   | 25 to 29 | 57%<br>(34-77%)                | 43%<br>(23-66%)          | 2.9<br>(1.5-4.8)                            | 12%<br>(7.4-17%)                     | 14%<br>(8-22%)                      | 37<br>(21-57)       | 2900<br>(1800-4100)    |

| Location | Year | Sex    | Age      | Prevalence of current drinkers | Prevalence of abstainers | Population average of standard drinks daily | Percent of total attributable deaths | Percent of total attributable DALYs | Attributable deaths | Attributable DALYs  |
|----------|------|--------|----------|--------------------------------|--------------------------|---------------------------------------------|--------------------------------------|-------------------------------------|---------------------|---------------------|
| Panama   | 1995 | Male   | 30 to 34 | 64%<br>(40-82%)                | 36%<br>(18-60%)          | 3.5<br>(1.9-5.3)                            | 12%<br>(8-16%)                       | 15%<br>(9.4-21%)                    | 41<br>(25-59)       | 2800<br>(1800-3800) |
| Panama   | 1995 | Male   | 35 to 39 | 67%<br>(45-83%)                | 33%<br>(17-55%)          | 3.9<br>(2.1-6.3)                            | 12%<br>(8-17%)                       | 17%<br>(10-23%)                     | 39<br>(24-56)       | 2400<br>(1600-3300) |
| Panama   | 1995 | Male   | 40 to 44 | 68%<br>(48-84%)                | 32%<br>(16-52%)          | 4.3<br>(2.3-6.8)                            | 12%<br>(7.7-16%)                     | 17%<br>(11-23%)                     | 39<br>(24-53)       | 2000<br>(1300-2700) |
| Panama   | 1995 | Male   | 45 to 49 | 68%<br>(43-84%)                | 32%<br>(16-57%)          | 4.7<br>(2.3-8.2)                            | 12%<br>(7.8-16%)                     | 17%<br>(11-23%)                     | 43<br>(27-58)       | 2000<br>(1300-2700) |
| Panama   | 1995 | Male   | 50 to 54 | 68%<br>(44-85%)                | 32%<br>(15-56%)          | 5<br>(2.5-8.3)                              | 12%<br>(8.3-16%)                     | 17%<br>(11-22%)                     | 46<br>(31-61)       | 1900<br>(1300-2500) |
| Panama   | 1995 | Male   | 55 to 59 | 66%<br>(44-84%)                | 34%<br>(16-56%)          | 5.2<br>(2.5-8.7)                            | 12%<br>(8.2-16%)                     | 16%<br>(11-21%)                     | 52<br>(35-70)       | 1800<br>(1200-2400) |
| Panama   | 1995 | Male   | 60 to 64 | 63%<br>(40-82%)                | 37%<br>(18-60%)          | 4.7<br>(2.2-8.3)                            | 10%<br>(6.8-14%)                     | 13%<br>(8.8-18%)                    | 54<br>(36-76)       | 1600<br>(1000-2200) |
| Panama   | 1995 | Male   | 65 to 69 | 59%<br>(36-79%)                | 41%<br>(21-64%)          | 3.6<br>(1.6-6.2)                            | 9.1%<br>(5.4-13%)                    | 11%<br>(6.8-16%)                    | 57<br>(35-81)       | 1400<br>(850-2000)  |
| Panama   | 1995 | Male   | 70 to 74 | 53%<br>(32-74%)                | 47%<br>(26-68%)          | 2.6<br>(1.1-5.2)                            | 6.9%<br>(3.4-11%)                    | 8.3%<br>(4.2-14%)                   | 53<br>(26-87)       | 1000<br>(510-1700)  |
| Panama   | 1995 | Male   | 75 to 79 | 47%<br>(24-70%)                | 53%<br>(30-76%)          | 2<br>(0.72-4.2)                             | 5.1%<br>(1.8-9.1%)                   | 6%<br>(2.1-11%)                     | 44<br>(16-81)       | 660<br>(240-1200)   |
| Panama   | 1995 | Male   | 80 to 84 | 42%<br>(21-65%)                | 58%<br>(35-79%)          | 1.7<br>(0.61-3.7)                           | 4.5%<br>(1.8-8.2%)                   | 5.3%<br>(2-9.5%)                    | 36<br>(13-65)       | 390<br>(150-720)    |
| Panama   | 1995 | Male   | 85 to 89 | 41%<br>(20-63%)                | 59%<br>(37-80%)          | 1.7<br>(0.61-3.5)                           | 3.9%<br>(1.2-7.3%)                   | 4.5%<br>(1.4-8.5%)                  | 23<br>(7.1-44)      | 180<br>(58-340)     |
| Panama   | 1995 | Male   | 90 to 94 | 44%<br>(22-67%)                | 56%<br>(33-78%)          | 1.9<br>(0.64-4)                             | 3.6%<br>(0.92-7.2%)                  | 4.1%<br>(0.87-8.4%)                 | 11<br>(2.3-22)      | 60<br>(15-120)      |
| Panama   | 1995 | Male   | 95 plus  | 49%<br>(24-74%)                | 51%<br>(26-76%)          | 2.2<br>(0.63-4.9)                           | 3.7%<br>(0.38-7.9%)                  | 4%<br>(0.061-9.3%)                  | 3.4<br>(0.052-7.7)  | 13<br>(1.3-28)      |
| Panama   | 2000 | Female | All Ages | 23%<br>(18-31%)                | 77%<br>(69-82%)          | 0.7<br>(0.59-0.84)                          | 2.1%<br>(1.6-2.8%)                   | 4%<br>(2.5-5.9%)                    | 210<br>(130-320)    | 6300<br>(4600-8300) |
| Panama   | 2000 | Female | 15 to 19 | 20%<br>(10-34%)                | 80%<br>(66-90%)          | 0.53<br>(0.23-1)                            | 1.4%<br>(0.8-2.3%)                   | 2.4%<br>(0.99-4.8%)                 | 1.7<br>(0.69-3.4)   | 210<br>(120-360)    |
| Panama   | 2000 | Female | 20 to 24 | 27%<br>(13-45%)                | 73%<br>(55-87%)          | 0.71<br>(0.3-1.3)                           | 2.1%<br>(1.3-3.2%)                   | 2.8%<br>(1.2-5%)                    | 2.5<br>(1.1-4.5)    | 350<br>(210-540)    |
| Panama   | 2000 | Female | 25 to 29 | 30%<br>(14-50%)                | 70%<br>(50-86%)          | 0.75<br>(0.34-1.3)                          | 2.2%<br>(1.4-3.1%)                   | 3%<br>(1.4-5%)                      | 3<br>(1.4-5.1)      | 360<br>(220-540)    |
| Panama   | 2000 | Female | 30 to 34 | 32%<br>(15-54%)                | 68%<br>(46-85%)          | 0.83<br>(0.4-1.4)                           | 1.8%<br>(1.2-2.6%)                   | 2.6%<br>(1.4-4.1%)                  | 2.9<br>(1.6-4.7)    | 310<br>(200-460)    |
| Panama   | 2000 | Female | 35 to 39 | 33%<br>(17-53%)                | 67%<br>(47-83%)          | 0.97<br>(0.45-1.6)                          | 2%<br>(1.3-2.9%)                     | 3.4%<br>(2-5.2%)                    | 4.4<br>(2.5-6.9)    | 340<br>(220-500)    |
| Panama   | 2000 | Female | 40 to 44 | 34%<br>(19-55%)                | 66%<br>(45-81%)          | 1.2<br>(0.6-1.9)                            | 2.5%<br>(1.6-3.9%)                   | 4.8%<br>(2.9-7.2%)                  | 7<br>(4.1-11)       | 420<br>(250-620)    |
| Panama   | 2000 | Female | 45 to 49 | 34%<br>(17-54%)                | 66%<br>(46-83%)          | 1.4<br>(0.64-2.5)                           | 3.2%<br>(1.9-5.1%)                   | 6.2%<br>(3.6-9.8%)                  | 9.5<br>(5.6-15)     | 480<br>(280-750)    |

| Location | Year | Sex    | Age      | Prevalence of current drinkers | Prevalence of abstainers | Population average of standard drinks daily | Percent of total attributable deaths | Percent of total attributable DALYs | Attributable deaths | Attributable DALYs     |
|----------|------|--------|----------|--------------------------------|--------------------------|---------------------------------------------|--------------------------------------|-------------------------------------|---------------------|------------------------|
| Panama   | 2000 | Female | 50 to 54 | 34%<br>(18-55%)                | 66%<br>(45-82%)          | 1.7<br>(0.79-2.8)                           | 4%<br>(2.4-6.3%)                     | 7%<br>(4.2-11%)                     | 13<br>(8-21)        | 570<br>(340-890)       |
| Panama   | 2000 | Female | 55 to 59 | 32%<br>(16-52%)                | 68%<br>(48-84%)          | 1.8<br>(0.84-3.3)                           | 4.6%<br>(2.7-7.6%)                   | 7.8%<br>(4.5-12%)                   | 17<br>(9.8-27)      | 620<br>(350-1000)      |
| Panama   | 2000 | Female | 60 to 64 | 30%<br>(14-50%)                | 70%<br>(50-86%)          | 1.8<br>(0.77-3.4)                           | 4.9%<br>(2.6-7.9%)                   | 7.5%<br>(4.2-12%)                   | 21<br>(12-34)       | 640<br>(350-1100)      |
| Panama   | 2000 | Female | 65 to 69 | 28%<br>(14-48%)                | 72%<br>(52-86%)          | 1.7<br>(0.71-3)                             | 4.9%<br>(2.7-8.2%)                   | 7.2%<br>(4.1-12%)                   | 26<br>(14-41)       | 630<br>(340-1000)      |
| Panama   | 2000 | Female | 70 to 74 | 25%<br>(12-43%)                | 75%<br>(57-88%)          | 1.4<br>(0.59-2.8)                           | 4.4%<br>(2.1-8%)                     | 6.2%<br>(3-11%)                     | 27<br>(13-48)       | 540<br>(260-970)       |
| Panama   | 2000 | Female | 75 to 79 | 22%<br>(9.5-38%)               | 78%<br>(62-90%)          | 1.2<br>(0.42-2.4)                           | 3.5%<br>(1.4-6.6%)                   | 4.7%<br>(1.9-8.7%)                  | 26<br>(11-48)       | 390<br>(150-730)       |
| Panama   | 2000 | Female | 80 to 84 | 20%<br>(8.2-37%)               | 80%<br>(63-92%)          | 1<br>(0.36-2.2)                             | 2.9%<br>(1.1-6%)                     | 3.7%<br>(1.4-7.8%)                  | 23<br>(8.7-49)      | 250<br>(95-530)        |
| Panama   | 2000 | Female | 85 to 89 | 20%<br>(9.1-36%)               | 80%<br>(64-91%)          | 1<br>(0.4-2)                                | 2.3%<br>(0.7-5%)                     | 2.9%<br>(0.84-6.5%)                 | 16<br>(4.6-37)      | 130<br>(39-290)        |
| Panama   | 2000 | Female | 90 to 94 | 24%<br>(11-42%)                | 76%<br>(58-89%)          | 1.1<br>(0.42-2.3)                           | 1.9%<br>(0.25-4.8%)                  | 2.3%<br>(0.16-6.2%)                 | 7.9<br>(0.54-21)    | 44<br>(5.5-110)        |
| Panama   | 2000 | Female | 95 plus  | 29%<br>(13-51%)                | 71%<br>(49-87%)          | 1.2<br>(0.37-2.6)                           | 1.6%<br>(-0.4-5.3%)                  | 1.8%<br>(-0.84-6.7%)                | 2.6<br>(-1.2-9.4)   | 10<br>(-2.6-33)        |
| Panama   | 2000 | Male   | All Ages | 42%<br>(32-53%)                | 58%<br>(47-68%)          | 2.2<br>(2-2.4)                              | 6.6%<br>(5.6-7.7%)                   | 8.4%<br>(6.7-10%)                   | 620<br>(490-780)    | 25000<br>(21000-30000) |
| Panama   | 2000 | Male   | 15 to 19 | 27%<br>(13-47%)                | 73%<br>(53-87%)          | 0.93<br>(0.35-1.8)                          | 4.3%<br>(2.5-7%)                     | 5.4%<br>(2.4-10%)                   | 8.5<br>(3.7-16)     | 890<br>(500-1500)      |
| Panama   | 2000 | Male   | 20 to 24 | 46%<br>(25-67%)                | 54%<br>(33-75%)          | 2.1<br>(0.92-3.8)                           | 9.8%<br>(6-15%)                      | 11%<br>(5.6-18%)                    | 26<br>(13-44)       | 2400<br>(1400-3600)    |
| Panama   | 2000 | Male   | 25 to 29 | 57%<br>(33-76%)                | 43%<br>(24-67%)          | 3<br>(1.5-5)                                | 11%<br>(7.1-15%)                     | 13%<br>(7.3-20%)                    | 33<br>(18-50)       | 2700<br>(1800-3900)    |
| Panama   | 2000 | Male   | 30 to 34 | 63%<br>(39-82%)                | 37%<br>(18-61%)          | 3.6<br>(1.9-5.5)                            | 11%<br>(7.1-14%)                     | 13%<br>(8-18%)                      | 36<br>(21-51)       | 2600<br>(1700-3500)    |
| Panama   | 2000 | Male   | 35 to 39 | 66%<br>(45-83%)                | 34%<br>(17-55%)          | 4<br>(2.1-6.5)                              | 10%<br>(6.9-14%)                     | 14%<br>(8.6-19%)                    | 35<br>(22-50)       | 2200<br>(1500-3100)    |
| Panama   | 2000 | Male   | 40 to 44 | 67%<br>(46-83%)                | 33%<br>(17-54%)          | 4.4<br>(2.4-7)                              | 11%<br>(7.1-14%)                     | 15%<br>(9.4-20%)                    | 39<br>(24-54)       | 2100<br>(1400-2900)    |
| Panama   | 2000 | Male   | 45 to 49 | 67%<br>(43-83%)                | 33%<br>(17-57%)          | 4.8<br>(2.3-8.3)                            | 11%<br>(7.3-14%)                     | 16%<br>(10-20%)                     | 41<br>(27-55)       | 2000<br>(1300-2600)    |
| Panama   | 2000 | Male   | 50 to 54 | 67%<br>(45-83%)                | 33%<br>(17-55%)          | 5.1<br>(2.6-8.5)                            | 11%<br>(8-15%)                       | 16%<br>(11-20%)                     | 50<br>(34-66)       | 2000<br>(1400-2700)    |
| Panama   | 2000 | Male   | 55 to 59 | 65%<br>(44-84%)                | 35%<br>(16-56%)          | 5.4<br>(2.6-9)                              | 11%<br>(7.8-15%)                     | 15%<br>(10-20%)                     | 54<br>(37-73)       | 1900<br>(1300-2600)    |
| Panama   | 2000 | Male   | 60 to 64 | 63%<br>(39-82%)                | 37%<br>(18-61%)          | 4.8<br>(2.2-8.7)                            | 10%<br>(6.9-14%)                     | 13%<br>(9-18%)                      | 61<br>(40-85)       | 1800<br>(1200-2500)    |
| Panama   | 2000 | Male   | 65 to 69 | 59%<br>(35-78%)                | 41%<br>(22-65%)          | 3.7<br>(1.7-6.4)                            | 8.8%<br>(5.4-12%)                    | 11%<br>(7.1-16%)                    | 60<br>(37-85)       | 1500<br>(910-2100)     |

| Location | Year | Sex    | Age      | Prevalence of current drinkers | Prevalence of abstainers | Population average of standard drinks daily | Percent of total attributable deaths | Percent of total attributable DALYs | Attributable deaths | Attributable DALYs  |
|----------|------|--------|----------|--------------------------------|--------------------------|---------------------------------------------|--------------------------------------|-------------------------------------|---------------------|---------------------|
| Panama   | 2000 | Male   | 70 to 74 | 52%<br>(31-72%)                | 48%<br>(28-69%)          | 2.7<br>(1.2-5.3)                            | 6.8%<br>(3.5-11%)                    | 8.3%<br>(4.3-13%)                   | 54<br>(28-87)       | 1100<br>(560-1700)  |
| Panama   | 2000 | Male   | 75 to 79 | 46%<br>(24-69%)                | 54%<br>(31-76%)          | 2<br>(0.73-4.4)                             | 5%<br>(2-8.7%)                       | 6%<br>(2.3-11%)                     | 45<br>(17-78)       | 680<br>(270-1200)   |
| Panama   | 2000 | Male   | 80 to 84 | 41%<br>(20-63%)                | 59%<br>(37-80%)          | 1.7<br>(0.62-3.8)                           | 4.4%<br>(1.8-7.8%)                   | 5.2%<br>(2.1-9.3%)                  | 39<br>(15-70)       | 430<br>(170-770)    |
| Panama   | 2000 | Male   | 85 to 89 | 39%<br>(19-62%)                | 61%<br>(38-81%)          | 1.7<br>(0.6-3.7)                            | 3.9%<br>(1.4-7%)                     | 4.5%<br>(1.5-8.2%)                  | 25<br>(8.6-47)      | 200<br>(73-370)     |
| Panama   | 2000 | Male   | 90 to 94 | 43%<br>(22-66%)                | 57%<br>(34-78%)          | 1.9<br>(0.64-4.1)                           | 3.5%<br>(1.1-6.7%)                   | 4%<br>(1.1-7.9%)                    | 11<br>(2.9-22)      | 62<br>(19-120)      |
| Panama   | 2000 | Male   | 95 plus  | 48%<br>(23-73%)                | 52%<br>(27-77%)          | 2.2<br>(0.63-5)                             | 3.6%<br>(0.6-7.4%)                   | 4%<br>(0.37-8.6%)                   | 3.5<br>(0.34-7.8)   | 14<br>(2.3-28)      |
| Panama   | 2005 | Female | All Ages | 23%<br>(17-30%)                | 77%<br>(70-83%)          | 0.73<br>(0.61-0.87)                         | 2.3%<br>(1.7-3%)                     | 4.1%<br>(2.6-6.2%)                  | 250<br>(160-380)    | 7200<br>(5300-9500) |
| Panama   | 2005 | Female | 15 to 19 | 19%<br>(9.6-32%)               | 81%<br>(68-90%)          | 0.53<br>(0.23-1)                            | 1.4%<br>(0.78-2.2%)                  | 2.4%<br>(0.98-4.7%)                 | 1.8<br>(0.73-3.5)   | 220<br>(120-380)    |
| Panama   | 2005 | Female | 20 to 24 | 26%<br>(13-44%)                | 74%<br>(56-87%)          | 0.7<br>(0.29-1.3)                           | 2.1%<br>(1.3-3.1%)                   | 2.8%<br>(1.2-5.1%)                  | 2.6<br>(1.1-4.7)    | 360<br>(220-540)    |
| Panama   | 2005 | Female | 25 to 29 | 29%<br>(13-47%)                | 71%<br>(53-87%)          | 0.74<br>(0.32-1.3)                          | 2.1%<br>(1.4-3.1%)                   | 2.9%<br>(1.3-4.9%)                  | 2.9<br>(1.3-5)      | 370<br>(230-540)    |
| Panama   | 2005 | Female | 30 to 34 | 31%<br>(14-51%)                | 69%<br>(49-86%)          | 0.82<br>(0.38-1.4)                          | 1.9%<br>(1.3-2.7%)                   | 2.7%<br>(1.5-4.4%)                  | 3.2<br>(1.7-5.3)    | 350<br>(220-510)    |
| Panama   | 2005 | Female | 35 to 39 | 32%<br>(16-52%)                | 68%<br>(48-84%)          | 0.97<br>(0.43-1.7)                          | 2.1%<br>(1.3-3%)                     | 3.5%<br>(2-5.5%)                    | 4.9<br>(2.8-7.8)    | 390<br>(250-570)    |
| Panama   | 2005 | Female | 40 to 44 | 33%<br>(17-54%)                | 67%<br>(46-83%)          | 1.2<br>(0.6-1.9)                            | 2.4%<br>(1.5-3.7%)                   | 4.8%<br>(2.9-7.2%)                  | 7.3<br>(4.3-11)     | 460<br>(280-670)    |
| Panama   | 2005 | Female | 45 to 49 | 33%<br>(17-53%)                | 67%<br>(47-83%)          | 1.4<br>(0.64-2.5)                           | 3.1%<br>(1.9-4.9%)                   | 6%<br>(3.4-9.5%)                    | 11<br>(6.2-17)      | 560<br>(330-880)    |
| Panama   | 2005 | Female | 50 to 54 | 32%<br>(16-54%)                | 68%<br>(46-84%)          | 1.6<br>(0.78-2.8)                           | 3.9%<br>(2.3-6.2%)                   | 7.1%<br>(4.2-11%)                   | 15<br>(9.2-23)      | 660<br>(390-1000)   |
| Panama   | 2005 | Female | 55 to 59 | 31%<br>(16-51%)                | 69%<br>(49-84%)          | 1.8<br>(0.85-3.3)                           | 4.7%<br>(2.7-7.6%)                   | 7.8%<br>(4.6-12%)                   | 20<br>(12-32)       | 740<br>(430-1200)   |
| Panama   | 2005 | Female | 60 to 64 | 29%<br>(14-49%)                | 71%<br>(51-86%)          | 1.8<br>(0.78-3.4)                           | 4.8%<br>(2.6-7.9%)                   | 7.5%<br>(4.3-12%)                   | 25<br>(14-38)       | 760<br>(420-1200)   |
| Panama   | 2005 | Female | 65 to 69 | 27%<br>(13-46%)                | 73%<br>(54-87%)          | 1.6<br>(0.71-2.9)                           | 4.8%<br>(2.7-7.7%)                   | 7.2%<br>(4.1-11%)                   | 28<br>(16-45)       | 710<br>(390-1100)   |
| Panama   | 2005 | Female | 70 to 74 | 24%<br>(12-42%)                | 76%<br>(58-88%)          | 1.4<br>(0.57-2.8)                           | 4.4%<br>(2.2-7.7%)                   | 6.3%<br>(3.3-11%)                   | 32<br>(17-55)       | 630<br>(320-1100)   |
| Panama   | 2005 | Female | 75 to 79 | 21%<br>(9.2-38%)               | 79%<br>(62-91%)          | 1.2<br>(0.43-2.4)                           | 3.5%<br>(1.5-6.5%)                   | 4.7%<br>(2-8.7%)                    | 29<br>(13-54)       | 440<br>(180-830)    |
| Panama   | 2005 | Female | 80 to 84 | 19%<br>(8.1-35%)               | 81%<br>(65-92%)          | 1<br>(0.35-2.1)                             | 2.8%<br>(1.1-5.7%)                   | 3.7%<br>(1.5-7.5%)                  | 26<br>(10-53)       | 290<br>(120-590)    |
| Panama   | 2005 | Female | 85 to 89 | 20%<br>(8.9-35%)               | 80%<br>(65-91%)          | 1<br>(0.41-2.1)                             | 2.5%<br>(0.84-5.3%)                  | 3.1%<br>(1-6.7%)                    | 22<br>(7.2-47)      | 170<br>(58-360)     |

| Location | Year | Sex    | Age      | Prevalence of current drinkers | Prevalence of abstainers | Population average of standard drinks daily | Percent of total attributable deaths | Percent of total attributable DALYs | Attributable deaths | Attributable DALYs     |
|----------|------|--------|----------|--------------------------------|--------------------------|---------------------------------------------|--------------------------------------|-------------------------------------|---------------------|------------------------|
| Panama   | 2005 | Female | 90 to 94 | 24%<br>(11-42%)                | 76%<br>(58-89%)          | 1.1<br>(0.43-2.4)                           | 2.1%<br>(0.36-5.3%)                  | 2.6%<br>(0.36-6.6%)                 | 13<br>(1.7-33)      | 70<br>(11-170)         |
| Panama   | 2005 | Female | 95 plus  | 29%<br>(13-51%)                | 71%<br>(49-87%)          | 1.2<br>(0.39-2.7)                           | 1.9%<br>(-0.29-5.9%)                 | 2.2%<br>(-0.59-7.4%)                | 4.7<br>(-1.3-16)    | 17<br>(-2.5-55)        |
| Panama   | 2005 | Male   | All Ages | 43%<br>(33-54%)                | 57%<br>(46-67%)          | 2.4<br>(2.2-2.6)                            | 7%<br>(5.9-8.2%)                     | 8.6%<br>(6.9-11%)                   | 720<br>(560-890)    | 28000<br>(23000-33000) |
| Panama   | 2005 | Male   | 15 to 19 | 27%<br>(13-46%)                | 73%<br>(54-87%)          | 0.92<br>(0.35-1.8)                          | 4.4%<br>(2.5-7.2%)                   | 5.4%<br>(2.3-10%)                   | 9.3<br>(4-18)       | 960<br>(530-1600)      |
| Panama   | 2005 | Male   | 20 to 24 | 46%<br>(24-68%)                | 54%<br>(32-76%)          | 2.1<br>(0.91-3.9)                           | 10%<br>(6-15%)                       | 11%<br>(5.7-19%)                    | 29<br>(14-49)       | 2600<br>(1500-4100)    |
| Panama   | 2005 | Male   | 25 to 29 | 56%<br>(33-76%)                | 44%<br>(24-67%)          | 3<br>(1.5-5.1)                              | 11%<br>(7.2-16%)                     | 14%<br>(7.5-20%)                    | 36<br>(19-55)       | 2900<br>(1900-4200)    |
| Panama   | 2005 | Male   | 30 to 34 | 62%<br>(38-81%)                | 38%<br>(19-62%)          | 3.7<br>(2-5.7)                              | 11%<br>(7.5-15%)                     | 14%<br>(8.8-20%)                    | 39<br>(24-57)       | 2900<br>(1900-3900)    |
| Panama   | 2005 | Male   | 35 to 39 | 65%<br>(44-82%)                | 35%<br>(18-56%)          | 4.1<br>(2.2-6.6)                            | 11%<br>(7.3-15%)                     | 15%<br>(9.1-20%)                    | 41<br>(26-58)       | 2600<br>(1700-3600)    |
| Panama   | 2005 | Male   | 40 to 44 | 67%<br>(47-83%)                | 33%<br>(17-53%)          | 4.5<br>(2.4-7)                              | 11%<br>(7.1-14%)                     | 15%<br>(9.7-20%)                    | 45<br>(28-62)       | 2500<br>(1700-3300)    |
| Panama   | 2005 | Male   | 45 to 49 | 67%<br>(42-83%)                | 33%<br>(17-58%)          | 4.9<br>(2.4-8.4)                            | 11%<br>(7.4-15%)                     | 16%<br>(11-21%)                     | 49<br>(32-67)       | 2400<br>(1600-3200)    |
| Panama   | 2005 | Male   | 50 to 54 | 66%<br>(43-83%)                | 34%<br>(17-57%)          | 5.2<br>(2.7-8.7)                            | 11%<br>(7.7-14%)                     | 15%<br>(11-20%)                     | 55<br>(38-73)       | 2300<br>(1600-3000)    |
| Panama   | 2005 | Male   | 55 to 59 | 65%<br>(43-83%)                | 35%<br>(17-57%)          | 5.4<br>(2.7-9.1)                            | 11%<br>(7.9-15%)                     | 15%<br>(10-20%)                     | 65<br>(44-86)       | 2300<br>(1600-3100)    |
| Panama   | 2005 | Male   | 60 to 64 | 62%<br>(39-82%)                | 38%<br>(18-61%)          | 4.9<br>(2.2-8.7)                            | 10%<br>(6.7-14%)                     | 13%<br>(8.6-18%)                    | 69<br>(45-96)       | 2100<br>(1300-2900)    |
| Panama   | 2005 | Male   | 65 to 69 | 58%<br>(34-78%)                | 42%<br>(22-66%)          | 3.7<br>(1.7-6.5)                            | 8.7%<br>(5.4-12%)                    | 11%<br>(7.1-15%)                    | 67<br>(42-96)       | 1700<br>(1100-2400)    |
| Panama   | 2005 | Male   | 70 to 74 | 52%<br>(31-73%)                | 48%<br>(27-69%)          | 2.7<br>(1.2-5.5)                            | 6.8%<br>(3.6-11%)                    | 8.4%<br>(4.4-13%)                   | 62<br>(33-99)       | 1200<br>(640-1900)     |
| Panama   | 2005 | Male   | 75 to 79 | 45%<br>(24-68%)                | 55%<br>(32-76%)          | 2.1<br>(0.73-4.5)                           | 5.1%<br>(2.1-8.7%)                   | 6.1%<br>(2.5-11%)                   | 50<br>(19-86)       | 760<br>(300-1300)      |
| Panama   | 2005 | Male   | 80 to 84 | 41%<br>(20-63%)                | 59%<br>(37-80%)          | 1.8<br>(0.63-3.9)                           | 4.4%<br>(1.8-7.8%)                   | 5.3%<br>(2.1-9.5%)                  | 44<br>(18-78)       | 500<br>(210-870)       |
| Panama   | 2005 | Male   | 85 to 89 | 39%<br>(19-62%)                | 61%<br>(38-81%)          | 1.7<br>(0.61-3.7)                           | 3.9%<br>(1.4-7.2%)                   | 4.6%<br>(1.6-8.4%)                  | 32<br>(11-61)       | 260<br>(96-480)        |
| Panama   | 2005 | Male   | 90 to 94 | 42%<br>(22-65%)                | 58%<br>(35-78%)          | 1.9<br>(0.65-4.1)                           | 3.7%<br>(1.2-7.1%)                   | 4.3%<br>(1.2-8.5%)                  | 17<br>(4.9-34)      | 96<br>(31-190)         |
| Panama   | 2005 | Male   | 95 plus  | 47%<br>(22-72%)                | 53%<br>(28-78%)          | 2.2<br>(0.63-5)                             | 3.8%<br>(0.64-7.8%)                  | 4.2%<br>(0.46-9.1%)                 | 5.6<br>(0.62-12)    | 21<br>(3.5-44)         |
| Panama   | 2010 | Female | All Ages | 23%<br>(18-30%)                | 77%<br>(70-82%)          | 0.82<br>(0.68-0.97)                         | 2.5%<br>(1.8-3.3%)                   | 4.5%<br>(2.9-6.7%)                  | 310<br>(190-460)    | 8700<br>(6400-11000)   |
| Panama   | 2010 | Female | 15 to 19 | 19%<br>(9.9-32%)               | 81%<br>(68-90%)          | 0.56<br>(0.24-1.1)                          | 1.4%<br>(0.8-2.3%)                   | 2.5%<br>(1-4.8%)                    | 1.9<br>(0.8-3.8)    | 240<br>(130-400)       |

| Location | Year | Sex    | Age      | Prevalence of current drinkers | Prevalence of abstainers | Population average of standard drinks daily | Percent of total attributable deaths | Percent of total attributable DALYs | Attributable deaths | Attributable DALYs     |
|----------|------|--------|----------|--------------------------------|--------------------------|---------------------------------------------|--------------------------------------|-------------------------------------|---------------------|------------------------|
| Panama   | 2010 | Female | 20 to 24 | 26%<br>(13-43%)                | 74%<br>(57-87%)          | 0.75<br>(0.32-1.4)                          | 2.2%<br>(1.3-3.2%)                   | 2.9%<br>(1.3-5.3%)                  | 2.8<br>(1.2-5.1)    | 390<br>(220-590)       |
| Panama   | 2010 | Female | 25 to 29 | 29%<br>(14-48%)                | 71%<br>(52-86%)          | 0.8<br>(0.35-1.4)                           | 2.2%<br>(1.4-3.1%)                   | 3%<br>(1.3-5.1%)                    | 3.2<br>(1.4-5.6)    | 400<br>(240-590)       |
| Panama   | 2010 | Female | 30 to 34 | 31%<br>(14-51%)                | 69%<br>(49-86%)          | 0.87<br>(0.4-1.6)                           | 1.9%<br>(1.3-2.8%)                   | 2.9%<br>(1.6-4.6%)                  | 3.6<br>(1.9-5.8)    | 380<br>(250-560)       |
| Panama   | 2010 | Female | 35 to 39 | 32%<br>(17-51%)                | 68%<br>(49-83%)          | 1<br>(0.46-1.7)                             | 2.1%<br>(1.4-3.2%)                   | 3.8%<br>(2.3-5.9%)                  | 5.6<br>(3.2-8.7)    | 440<br>(290-660)       |
| Panama   | 2010 | Female | 40 to 44 | 33%<br>(18-54%)                | 67%<br>(46-82%)          | 1.2<br>(0.64-2)                             | 2.5%<br>(1.6-3.7%)                   | 4.8%<br>(3-7.1%)                    | 8.2<br>(5-12)       | 520<br>(320-770)       |
| Panama   | 2010 | Female | 45 to 49 | 33%<br>(16-52%)                | 67%<br>(48-84%)          | 1.5<br>(0.69-2.6)                           | 3.3%<br>(1.9-5.2%)                   | 6.2%<br>(3.6-9.7%)                  | 14<br>(7.9-21)      | 700<br>(410-1100)      |
| Panama   | 2010 | Female | 50 to 54 | 33%<br>(17-54%)                | 67%<br>(46-83%)          | 1.8<br>(0.85-3)                             | 4.2%<br>(2.5-6.5%)                   | 7.6%<br>(4.6-11%)                   | 20<br>(13-30)       | 870<br>(540-1300)      |
| Panama   | 2010 | Female | 55 to 59 | 31%<br>(16-53%)                | 69%<br>(47-84%)          | 2<br>(0.92-3.5)                             | 4.9%<br>(2.9-7.9%)                   | 8.3%<br>(5-13%)                     | 25<br>(15-38)       | 930<br>(550-1500)      |
| Panama   | 2010 | Female | 60 to 64 | 29%<br>(14-50%)                | 71%<br>(50-86%)          | 1.9<br>(0.82-3.7)                           | 5%<br>(2.8-8.2%)                     | 7.9%<br>(4.6-12%)                   | 30<br>(17-47)       | 920<br>(520-1500)      |
| Panama   | 2010 | Female | 65 to 69 | 28%<br>(13-47%)                | 72%<br>(53-87%)          | 1.8<br>(0.75-3.1)                           | 5%<br>(2.8-8%)                       | 7.6%<br>(4.4-12%)                   | 35<br>(20-53)       | 870<br>(490-1400)      |
| Panama   | 2010 | Female | 70 to 74 | 25%<br>(12-42%)                | 75%<br>(58-88%)          | 1.5<br>(0.64-3)                             | 4.6%<br>(2.4-8.1%)                   | 6.7%<br>(3.6-11%)                   | 39<br>(21-66)       | 770<br>(410-1300)      |
| Panama   | 2010 | Female | 75 to 79 | 21%<br>(9.2-38%)               | 79%<br>(62-91%)          | 1.3<br>(0.46-2.6)                           | 3.7%<br>(1.6-6.7%)                   | 5.1%<br>(2.3-9.2%)                  | 35<br>(15-64)       | 540<br>(230-990)       |
| Panama   | 2010 | Female | 80 to 84 | 19%<br>(8.1-36%)               | 81%<br>(64-92%)          | 1.1<br>(0.37-2.3)                           | 3%<br>(1.2-5.8%)                     | 4%<br>(1.7-7.9%)                    | 31<br>(13-64)       | 350<br>(150-710)       |
| Panama   | 2010 | Female | 85 to 89 | 20%<br>(8.5-35%)               | 80%<br>(65-92%)          | 1.1<br>(0.41-2.2)                           | 2.6%<br>(0.96-5.5%)                  | 3.4%<br>(1.2-7.1%)                  | 27<br>(9.6-59)      | 210<br>(78-460)        |
| Panama   | 2010 | Female | 90 to 94 | 23%<br>(11-41%)                | 77%<br>(59-89%)          | 1.2<br>(0.45-2.5)                           | 2.4%<br>(0.56-5.6%)                  | 2.9%<br>(0.56-7.2%)                 | 19<br>(3.4-46)      | 100<br>(23-240)        |
| Panama   | 2010 | Female | 95 plus  | 29%<br>(12-51%)                | 71%<br>(49-88%)          | 1.3<br>(0.4-2.9)                            | 2.1%<br>(-0.14-6.3%)                 | 2.5%<br>(-0.44-8%)                  | 7.1<br>(-1.3-23)    | 26<br>(-1.7-78)        |
| Panama   | 2010 | Male   | All Ages | 43%<br>(34-54%)                | 57%<br>(46-66%)          | 2.6<br>(2.3-2.8)                            | 7.6%<br>(6.3-8.8%)                   | 9.1%<br>(7.4-11%)                   | 890<br>(700-1100)   | 35000<br>(28000-41000) |
| Panama   | 2010 | Male   | 15 to 19 | 26%<br>(12-45%)                | 74%<br>(55-88%)          | 0.96<br>(0.35-1.8)                          | 4.7%<br>(2.5-7.9%)                   | 5.7%<br>(2.5-11%)                   | 13<br>(5.6-25)      | 1200<br>(650-2100)     |
| Panama   | 2010 | Male   | 20 to 24 | 45%<br>(24-67%)                | 55%<br>(33-76%)          | 2.2<br>(0.95-4)                             | 11%<br>(6-16%)                       | 12%<br>(5.9-20%)                    | 40<br>(19-67)       | 3400<br>(1900-5200)    |
| Panama   | 2010 | Male   | 25 to 29 | 56%<br>(33-76%)                | 44%<br>(24-67%)          | 3.2<br>(1.5-5.4)                            | 12%<br>(7.3-17%)                     | 14%<br>(7.7-22%)                    | 46<br>(25-71)       | 3600<br>(2200-5300)    |
| Panama   | 2010 | Male   | 30 to 34 | 62%<br>(39-81%)                | 38%<br>(19-61%)          | 3.9<br>(2-6.2)                              | 12%<br>(7.9-16%)                     | 15%<br>(9.3-22%)                    | 48<br>(29-70)       | 3400<br>(2200-4700)    |
| Panama   | 2010 | Male   | 35 to 39 | 65%<br>(44-82%)                | 35%<br>(18-56%)          | 4.3<br>(2.3-7)                              | 11%<br>(7.6-15%)                     | 15%<br>(9.5-21%)                    | 48<br>(30-69)       | 3100<br>(2000-4200)    |

| Location | Year | Sex    | Age      | Prevalence of current drinkers | Prevalence of abstainers | Population average of standard drinks daily | Percent of total attributable deaths | Percent of total attributable DALYs | Attributable deaths | Attributable DALYs    |
|----------|------|--------|----------|--------------------------------|--------------------------|---------------------------------------------|--------------------------------------|-------------------------------------|---------------------|-----------------------|
| Panama   | 2010 | Male   | 40 to 44 | 66%<br>(46-83%)                | 34%<br>(17-54%)          | 4.7<br>(2.6-7.3)                            | 11%<br>(7.6-15%)                     | 16%<br>(10-21%)                     | 54<br>(35-74)       | 3000<br>(2000-3900)   |
| Panama   | 2010 | Male   | 45 to 49 | 67%<br>(43-83%)                | 33%<br>(17-57%)          | 5.1<br>(2.5-8.7)                            | 11%<br>(7.7-15%)                     | 16%<br>(11-21%)                     | 62<br>(41-82)       | 3000<br>(2000-3900)   |
| Panama   | 2010 | Male   | 50 to 54 | 67%<br>(45-83%)                | 33%<br>(17-55%)          | 5.5<br>(2.9-9)                              | 11%<br>(8.1-15%)                     | 16%<br>(12-21%)                     | 70<br>(49-92)       | 2900<br>(2100-3800)   |
| Panama   | 2010 | Male   | 55 to 59 | 65%<br>(43-83%)                | 35%<br>(17-57%)          | 5.8<br>(2.9-9.8)                            | 11%<br>(8-15%)                       | 15%<br>(11-20%)                     | 79<br>(54-100)      | 2800<br>(1900-3700)   |
| Panama   | 2010 | Male   | 60 to 64 | 62%<br>(39-82%)                | 38%<br>(18-61%)          | 5.2<br>(2.4-9.2)                            | 10%<br>(7-14%)                       | 13%<br>(9.1-18%)                    | 86<br>(57-120)      | 2600<br>(1700-3600)   |
| Panama   | 2010 | Male   | 65 to 69 | 59%<br>(35-78%)                | 41%<br>(22-65%)          | 4<br>(1.8-6.9)                              | 9.1%<br>(5.8-12%)                    | 12%<br>(7.6-16%)                    | 84<br>(54-120)      | 2100<br>(1300-2900)   |
| Panama   | 2010 | Male   | 70 to 74 | 52%<br>(31-74%)                | 48%<br>(26-69%)          | 2.9<br>(1.3-5.7)                            | 7%<br>(3.9-11%)                      | 8.7%<br>(4.9-13%)                   | 74<br>(41-110)      | 1500<br>(810-2300)    |
| Panama   | 2010 | Male   | 75 to 79 | 46%<br>(24-69%)                | 54%<br>(31-76%)          | 2.2<br>(0.78-4.8)                           | 5.3%<br>(2.3-9.1%)                   | 6.5%<br>(2.8-11%)                   | 61<br>(26-110)      | 940<br>(400-1600)     |
| Panama   | 2010 | Male   | 80 to 84 | 41%<br>(19-63%)                | 59%<br>(37-81%)          | 1.9<br>(0.69-4.1)                           | 4.5%<br>(1.9-8%)                     | 5.5%<br>(2.3-9.7%)                  | 53<br>(22-94)       | 600<br>(250-1100)     |
| Panama   | 2010 | Male   | 85 to 89 | 39%<br>(19-61%)                | 61%<br>(39-81%)          | 1.8<br>(0.66-3.9)                           | 4.1%<br>(1.7-7.4%)                   | 4.9%<br>(1.9-8.9%)                  | 41<br>(16-74)       | 330<br>(130-590)      |
| Panama   | 2010 | Male   | 90 to 94 | 42%<br>(21-65%)                | 58%<br>(35-79%)          | 2<br>(0.68-4.3)                             | 4%<br>(1.3-7.5%)                     | 4.6%<br>(1.4-8.9%)                  | 25<br>(7.5-48)      | 140<br>(46-260)       |
| Panama   | 2010 | Male   | 95 plus  | 47%<br>(21-72%)                | 53%<br>(28-79%)          | 2.3<br>(0.66-5.3)                           | 4%<br>(0.84-8.2%)                    | 4.5%<br>(0.55-9.5%)                 | 7.9<br>(1-17)       | 30<br>(5.9-61)        |
| Panama   | 2016 | Female | All Ages | 23%<br>(18-31%)                | 77%<br>(69-82%)          | 0.92<br>(0.7-1.2)                           | 2.7%<br>(1.9-3.7%)                   | 4.7%<br>(2.8-7.1%)                  | 370<br>(220-550)    | 10000<br>(6900-14000) |
| Panama   | 2016 | Female | 15 to 19 | 19%<br>(9.3-32%)               | 81%<br>(68-91%)          | 0.6<br>(0.23-1.2)                           | 1.4%<br>(0.81-2.4%)                  | 2.5%<br>(0.98-5.1%)                 | 1.9<br>(0.76-3.9)   | 250<br>(140-430)      |
| Panama   | 2016 | Female | 20 to 24 | 26%<br>(12-44%)                | 74%<br>(56-88%)          | 0.8<br>(0.31-1.5)                           | 2.2%<br>(1.4-3.4%)                   | 3.1%<br>(1.3-5.6%)                  | 2.7<br>(1.1-5.3)    | 400<br>(240-640)      |
| Panama   | 2016 | Female | 25 to 29 | 28%<br>(14-47%)                | 72%<br>(53-86%)          | 0.85<br>(0.35-1.6)                          | 2.1%<br>(1.4-3.1%)                   | 3%<br>(1.3-5.1%)                    | 3<br>(1.3-5.5)      | 410<br>(250-620)      |
| Panama   | 2016 | Female | 30 to 34 | 30%<br>(14-50%)                | 70%<br>(50-86%)          | 0.95<br>(0.41-1.7)                          | 2.1%<br>(1.3-3.1%)                   | 3.4%<br>(1.8-5.5%)                  | 4<br>(2-6.8)        | 420<br>(260-640)      |
| Panama   | 2016 | Female | 35 to 39 | 32%<br>(16-52%)                | 68%<br>(48-84%)          | 1.1<br>(0.48-1.9)                           | 2.2%<br>(1.4-3.3%)                   | 4%<br>(2.3-6.2%)                    | 5.5<br>(3.1-9.3)    | 470<br>(290-730)      |
| Panama   | 2016 | Female | 40 to 44 | 33%<br>(18-53%)                | 67%<br>(47-82%)          | 1.3<br>(0.67-2.3)                           | 2.6%<br>(1.5-3.9%)                   | 5.2%<br>(3.2-7.8%)                  | 8.9<br>(5.2-14)     | 590<br>(360-900)      |
| Panama   | 2016 | Female | 45 to 49 | 33%<br>(16-52%)                | 67%<br>(48-84%)          | 1.6<br>(0.75-2.9)                           | 3.3%<br>(1.9-5.2%)                   | 6.5%<br>(3.7-10%)                   | 15<br>(8.2-24)      | 800<br>(450-1300)     |
| Panama   | 2016 | Female | 50 to 54 | 32%<br>(16-53%)                | 68%<br>(47-84%)          | 1.9<br>(0.86-3.3)                           | 4.1%<br>(2.3-6.4%)                   | 7.5%<br>(4.4-11%)                   | 22<br>(12-35)       | 1000<br>(570-1600)    |
| Panama   | 2016 | Female | 55 to 59 | 30%<br>(16-50%)                | 70%<br>(50-84%)          | 2<br>(0.95-3.7)                             | 4.8%<br>(2.8-7.9%)                   | 8.3%<br>(4.9-13%)                   | 29<br>(17-48)       | 1100<br>(630-1800)    |



| Location | Year | Sex    | Age      | Prevalence of current drinkers | Prevalence of abstainers | Population average of standard drinks daily | Percent of total attributable deaths | Percent of total attributable DALYs | Attributable deaths | Attributable DALYs     |
|----------|------|--------|----------|--------------------------------|--------------------------|---------------------------------------------|--------------------------------------|-------------------------------------|---------------------|------------------------|
| Panama   | 2016 | Female | 60 to 64 | 28%<br>(13-49%)                | 72%<br>(51-87%)          | 2<br>(0.87-3.8)                             | 5%<br>(2.8-8.2%)                     | 8%<br>(4.6-13%)                     | 35<br>(20-57)       | 1100<br>(610-1800)     |
| Panama   | 2016 | Female | 65 to 69 | 27%<br>(13-46%)                | 73%<br>(54-87%)          | 1.9<br>(0.81-3.3)                           | 5.1%<br>(2.9-8.3%)                   | 7.9%<br>(4.7-12%)                   | 42<br>(24-67)       | 1100<br>(600-1800)     |
| Panama   | 2016 | Female | 70 to 74 | 24%<br>(12-41%)                | 76%<br>(59-88%)          | 1.6<br>(0.64-3.2)                           | 4.6%<br>(2.4-7.8%)                   | 6.9%<br>(3.8-11%)                   | 45<br>(23-75)       | 910<br>(460-1500)      |
| Panama   | 2016 | Female | 75 to 79 | 20%<br>(9.3-36%)               | 80%<br>(64-91%)          | 1.3<br>(0.49-2.7)                           | 3.7%<br>(1.6-6.7%)                   | 5.3%<br>(2.3-9.4%)                  | 42<br>(19-77)       | 660<br>(280-1200)      |
| Panama   | 2016 | Female | 80 to 84 | 18%<br>(7.9-34%)               | 82%<br>(66-92%)          | 1.1<br>(0.4-2.3)                            | 3%<br>(1.2-6%)                       | 4.1%<br>(1.7-8.1%)                  | 39<br>(16-77)       | 450<br>(180-860)       |
| Panama   | 2016 | Female | 85 to 89 | 19%<br>(8.2-33%)               | 81%<br>(67-92%)          | 1.1<br>(0.42-2.3)                           | 2.7%<br>(1.3-5.5%)                   | 3.5%<br>(1.3-7.1%)                  | 35<br>(12-72)       | 280<br>(100-580)       |
| Panama   | 2016 | Female | 90 to 94 | 23%<br>(10-40%)                | 77%<br>(60-90%)          | 1.2<br>(0.47-2.6)                           | 2.6%<br>(0.62-5.9%)                  | 3.2%<br>(0.66-7.5%)                 | 26<br>(5.4-62)      | 140<br>(33-330)        |
| Panama   | 2016 | Female | 95 plus  | 28%<br>(12-50%)                | 72%<br>(50-88%)          | 1.3<br>(0.42-3)                             | 2.3%<br>(-0.077-6.5%)                | 2.7%<br>(-0.4-8.1%)                 | 10<br>(-1.6-31)     | 38<br>(-1.1-110)       |
| Panama   | 2016 | Male   | All Ages | 44%<br>(35-54%)                | 56%<br>(46-65%)          | 2.9<br>(2.3-3.6)                            | 8.1%<br>(6.6-9.8%)                   | 9.5%<br>(7.4-12%)                   | 1000<br>(760-1400)  | 39000<br>(31000-50000) |
| Panama   | 2016 | Male   | 15 to 19 | 26%<br>(13-45%)                | 74%<br>(55-87%)          | 1<br>(0.39-2.1)                             | 4.9%<br>(2.7-8.4%)                   | 6.1%<br>(2.6-12%)                   | 14<br>(5.8-28)      | 1300<br>(700-2300)     |
| Panama   | 2016 | Male   | 20 to 24 | 45%<br>(24-67%)                | 55%<br>(33-76%)          | 2.4<br>(1-4.5)                              | 11%<br>(6.3-17%)                     | 13%<br>(6.1-21%)                    | 39<br>(19-67)       | 3400<br>(2000-5400)    |
| Panama   | 2016 | Male   | 25 to 29 | 56%<br>(33-75%)                | 44%<br>(25-67%)          | 3.5<br>(1.6-6.2)                            | 13%<br>(8-18%)                       | 15%<br>(8.6-24%)                    | 49<br>(26-77)       | 3900<br>(2400-5800)    |
| Panama   | 2016 | Male   | 30 to 34 | 62%<br>(38-81%)                | 38%<br>(19-62%)          | 4.2<br>(2.1-7)                              | 13%<br>(8.5-17%)                     | 16%<br>(10-24%)                     | 51<br>(30-78)       | 3700<br>(2400-5300)    |
| Panama   | 2016 | Male   | 35 to 39 | 65%<br>(43-82%)                | 35%<br>(18-57%)          | 4.7<br>(2.3-7.7)                            | 12%<br>(8.2-17%)                     | 17%<br>(11-23%)                     | 52<br>(31-79)       | 3400<br>(2200-4800)    |
| Panama   | 2016 | Male   | 40 to 44 | 66%<br>(46-83%)                | 34%<br>(17-54%)          | 5.2<br>(2.6-8.3)                            | 12%<br>(8.1-16%)                     | 17%<br>(11-22%)                     | 60<br>(37-87)       | 3400<br>(2300-4700)    |
| Panama   | 2016 | Male   | 45 to 49 | 67%<br>(42-83%)                | 33%<br>(17-58%)          | 5.6<br>(2.7-9.6)                            | 12%<br>(8.3-15%)                     | 17%<br>(12-22%)                     | 70<br>(44-97)       | 3500<br>(2300-4700)    |
| Panama   | 2016 | Male   | 50 to 54 | 66%<br>(44-83%)                | 34%<br>(17-56%)          | 6<br>(3.1-9.9)                              | 12%<br>(8.4-15%)                     | 17%<br>(12-21%)                     | 81<br>(55-110)      | 3500<br>(2400-4600)    |
| Panama   | 2016 | Male   | 55 to 59 | 65%<br>(43-83%)                | 35%<br>(17-57%)          | 6.2<br>(3-10)                               | 11%<br>(8-15%)                       | 16%<br>(11-20%)                     | 93<br>(62-130)      | 3400<br>(2300-4700)    |
| Panama   | 2016 | Male   | 60 to 64 | 62%<br>(38-81%)                | 38%<br>(19-62%)          | 5.6<br>(2.6-9.9)                            | 10%<br>(7-14%)                       | 13%<br>(9.3-18%)                    | 100<br>(64-140)     | 3000<br>(2000-4300)    |
| Panama   | 2016 | Male   | 65 to 69 | 58%<br>(35-79%)                | 42%<br>(21-65%)          | 4.3<br>(2-7.4)                              | 9.2%<br>(5.9-12%)                    | 12%<br>(7.8-16%)                    | 98<br>(63-140)      | 2500<br>(1600-3500)    |
| Panama   | 2016 | Male   | 70 to 74 | 52%<br>(31-73%)                | 48%<br>(27-69%)          | 3.1<br>(1.4-6.1)                            | 7.1%<br>(4-11%)                      | 8.9%<br>(5.1-13%)                   | 86<br>(48-130)      | 1700<br>(980-2700)     |
| Panama   | 2016 | Male   | 75 to 79 | 45%<br>(23-69%)                | 55%<br>(31-77%)          | 2.3<br>(0.8-4.9)                            | 5.4%<br>(2.4-8.9%)                   | 6.6%<br>(3-11%)                     | 73<br>(31-120)      | 1100<br>(480-1900)     |

| Location  | Year | Sex    | Age      | Prevalence of current drinkers | Prevalence of abstainers | Population average of standard drinks daily | Percent of total attributable deaths | Percent of total attributable DALYs | Attributable deaths | Attributable DALYs     |
|-----------|------|--------|----------|--------------------------------|--------------------------|---------------------------------------------|--------------------------------------|-------------------------------------|---------------------|------------------------|
| Panama    | 2016 | Male   | 80 to 84 | 40%<br>(19-63%)                | 60%<br>(37-81%)          | 2<br>(0.7-4.4)                              | 4.6%<br>(2.1-7.9%)                   | 5.7%<br>(2.5-9.6%)                  | 65<br>(28-110)      | 750<br>(320-1300)      |
| Panama    | 2016 | Male   | 85 to 89 | 39%<br>(19-62%)                | 61%<br>(38-81%)          | 1.9<br>(0.66-4.3)                           | 4.3%<br>(1.8-7.4%)                   | 5.1%<br>(2.1-9%)                    | 51<br>(21-91)       | 420<br>(180-740)       |
| Panama    | 2016 | Male   | 90 to 94 | 41%<br>(20-65%)                | 59%<br>(35-80%)          | 2.1<br>(0.73-4.6)                           | 4.1%<br>(1.5-7.4%)                   | 4.8%<br>(1.6-8.9%)                  | 33<br>(11-62)       | 180<br>(67-340)        |
| Panama    | 2016 | Male   | 95 plus  | 46%<br>(21-72%)                | 54%<br>(28-79%)          | 2.4<br>(0.68-5.9)                           | 4.2%<br>(1-8.2%)                     | 4.7%<br>(0.82-9.7%)                 | 11<br>(2-24)        | 43<br>(10-84)          |
| Venezuela | 1990 | Female | All Ages | 24%<br>(18-31%)                | 76%<br>(69-82%)          | 1<br>(0.82-1.2)                             | 3.2%<br>(2.4-4.1%)                   | 6.4%<br>(4-8.9%)                    | 2300<br>(1500-3300) | 69000<br>(51000-91000) |
| Venezuela | 1990 | Female | 15 to 19 | 21%<br>(11-36%)                | 79%<br>(64-89%)          | 0.85<br>(0.39-1.6)                          | 2.1%<br>(1.1-3.5%)                   | 3.7%<br>(1.6-6.9%)                  | 21<br>(9.1-39)      | 2300<br>(1200-4000)    |
| Venezuela | 1990 | Female | 20 to 24 | 29%<br>(14-48%)                | 71%<br>(52-86%)          | 1.1<br>(0.51-2)                             | 3%<br>(1.8-4.6%)                     | 4.6%<br>(2.2-8.1%)                  | 30<br>(14-52)       | 3500<br>(2000-5500)    |
| Venezuela | 1990 | Female | 25 to 29 | 32%<br>(16-52%)                | 68%<br>(48-84%)          | 1.2<br>(0.56-2.1)                           | 3%<br>(1.8-4.3%)                     | 4.6%<br>(2.3-7.6%)                  | 33<br>(16-55)       | 3500<br>(2100-5300)    |
| Venezuela | 1990 | Female | 30 to 34 | 34%<br>(16-55%)                | 66%<br>(45-84%)          | 1.3<br>(0.66-2.3)                           | 3.1%<br>(1.9-4.7%)                   | 5.2%<br>(2.9-8.2%)                  | 41<br>(23-67)       | 3500<br>(2100-5300)    |
| Venezuela | 1990 | Female | 35 to 39 | 36%<br>(18-56%)                | 64%<br>(44-82%)          | 1.6<br>(0.72-2.6)                           | 3.7%<br>(2.1-5.5%)                   | 6.3%<br>(3.4-9.8%)                  | 58<br>(31-92)       | 3800<br>(2200-5800)    |
| Venezuela | 1990 | Female | 40 to 44 | 37%<br>(21-58%)                | 63%<br>(42-79%)          | 1.9<br>(0.98-3.2)                           | 4.6%<br>(2.7-7.1%)                   | 8.1%<br>(4.7-12%)                   | 85<br>(49-130)      | 4700<br>(2700-7100)    |
| Venezuela | 1990 | Female | 45 to 49 | 37%<br>(18-57%)                | 63%<br>(43-82%)          | 2.4<br>(1-4.1)                              | 5.8%<br>(3.2-9.2%)                   | 9.7%<br>(5.3-15%)                   | 110<br>(60-180)     | 5400<br>(2900-8500)    |
| Venezuela | 1990 | Female | 50 to 54 | 36%<br>(19-58%)                | 64%<br>(42-81%)          | 2.7<br>(1.3-4.7)                            | 7.2%<br>(4.1-11%)                    | 11%<br>(6.6-17%)                    | 170<br>(99-250)     | 6800<br>(4000-10000)   |
| Venezuela | 1990 | Female | 55 to 59 | 34%<br>(18-56%)                | 66%<br>(44-82%)          | 2.9<br>(1.4-5.2)                            | 7.8%<br>(4.5-12%)                    | 11%<br>(6.7-17%)                    | 220<br>(130-330)    | 7500<br>(4300-12000)   |
| Venezuela | 1990 | Female | 60 to 64 | 32%<br>(16-54%)                | 68%<br>(46-84%)          | 2.9<br>(1.2-5.5)                            | 7.9%<br>(4.4-13%)                    | 11%<br>(6.1-17%)                    | 260<br>(150-420)    | 7700<br>(4300-12000)   |
| Venezuela | 1990 | Female | 65 to 69 | 30%<br>(15-51%)                | 70%<br>(49-85%)          | 2.7<br>(1.1-4.9)                            | 7.9%<br>(4.1-13%)                    | 10%<br>(5.5-17%)                    | 290<br>(160-470)    | 7000<br>(3700-11000)   |
| Venezuela | 1990 | Female | 70 to 74 | 27%<br>(14-45%)                | 73%<br>(55-86%)          | 2.3<br>(0.93-4.5)                           | 7.2%<br>(3.5-12%)                    | 9.2%<br>(4.6-15%)                   | 300<br>(140-500)    | 5600<br>(2700-9300)    |
| Venezuela | 1990 | Female | 75 to 79 | 23%<br>(11-41%)                | 77%<br>(59-89%)          | 1.9<br>(0.68-3.9)                           | 6%<br>(2.3-11%)                      | 7.4%<br>(2.9-14%)                   | 260<br>(100-490)    | 3800<br>(1500-7000)    |
| Venezuela | 1990 | Female | 80 to 84 | 21%<br>(9.1-39%)               | 79%<br>(61-91%)          | 1.6<br>(0.54-3.4)                           | 5.2%<br>(1.9-10%)                    | 6.4%<br>(2.3-12%)                   | 220<br>(77-420)     | 2300<br>(850-4500)     |
| Venezuela | 1990 | Female | 85 to 89 | 22%<br>(11-38%)                | 78%<br>(62-89%)          | 1.6<br>(0.62-3.2)                           | 4.9%<br>(1.7-9.7%)                   | 5.9%<br>(2.1-12%)                   | 150<br>(54-310)     | 1200<br>(420-2300)     |
| Venezuela | 1990 | Female | 90 to 94 | 26%<br>(12-44%)                | 74%<br>(56-88%)          | 1.7<br>(0.65-3.5)                           | 4.7%<br>(1.4-10%)                    | 5.6%<br>(1.5-12%)                   | 69<br>(19-150)      | 360<br>(110-770)       |
| Venezuela | 1990 | Female | 95 plus  | 32%<br>(14-54%)                | 68%<br>(46-86%)          | 1.9<br>(0.61-4.1)                           | 4.6%<br>(0.64-11%)                   | 5.3%<br>(0.58-13%)                  | 20<br>(2.2-50)      | 70<br>(9.8-170)        |

| Location  | Year | Sex    | Age      | Prevalence of current drinkers | Prevalence of abstainers | Population average of standard drinks daily | Percent of total attributable deaths | Percent of total attributable DALYs | Attributable deaths | Attributable DALYs        |
|-----------|------|--------|----------|--------------------------------|--------------------------|---------------------------------------------|--------------------------------------|-------------------------------------|---------------------|---------------------------|
| Venezuela | 1990 | Male   | All Ages | 41%<br>(32-52%)                | 59%<br>(48-68%)          | 3.1<br>(2.7-3.5)                            | 8.7%<br>(7.2-10%)                    | 12%<br>(9.8-14%)                    | 5900<br>(4800-7300) | 250000<br>(200000-290000) |
| Venezuela | 1990 | Male   | 15 to 19 | 29%<br>(14-49%)                | 71%<br>(51-86%)          | 1.4<br>(0.57-2.7)                           | 6.4%<br>(3.5-11%)                    | 8.2%<br>(3.7-15%)                   | 120<br>(56-230)     | 11000<br>(5900-19000)     |
| Venezuela | 1990 | Male   | 20 to 24 | 49%<br>(27-70%)                | 51%<br>(30-73%)          | 3.3<br>(1.6-5.7)                            | 14%<br>(8.6-21%)                     | 17%<br>(9.2-27%)                    | 360<br>(190-570)    | 29000<br>(17000-43000)    |
| Venezuela | 1990 | Male   | 25 to 29 | 59%<br>(36-78%)                | 41%<br>(22-64%)          | 4.7<br>(2.4-7.6)                            | 17%<br>(11-23%)                      | 21%<br>(13-31%)                     | 420<br>(250-610)    | 30000<br>(20000-43000)    |
| Venezuela | 1990 | Male   | 30 to 34 | 65%<br>(40-82%)                | 35%<br>(18-60%)          | 5.6<br>(3.1-8.5)                            | 17%<br>(12-22%)                      | 23%<br>(15-30%)                     | 400<br>(270-540)    | 27000<br>(18000-35000)    |
| Venezuela | 1990 | Male   | 35 to 39 | 68%<br>(48-84%)                | 32%<br>(16-52%)          | 6.3<br>(3.3-10)                             | 17%<br>(12-22%)                      | 23%<br>(16-31%)                     | 380<br>(260-510)    | 22000<br>(16000-29000)    |
| Venezuela | 1990 | Male   | 40 to 44 | 69%<br>(50-85%)                | 31%<br>(15-50%)          | 7<br>(3.7-11)                               | 17%<br>(13-22%)                      | 23%<br>(17-29%)                     | 400<br>(290-520)    | 21000<br>(16000-27000)    |
| Venezuela | 1990 | Male   | 45 to 49 | 70%<br>(46-85%)                | 30%<br>(15-54%)          | 7.5<br>(3.6-13)                             | 16%<br>(12-21%)                      | 22%<br>(16-28%)                     | 410<br>(290-540)    | 19000<br>(14000-24000)    |
| Venezuela | 1990 | Male   | 50 to 54 | 69%<br>(47-85%)                | 31%<br>(15-53%)          | 8<br>(4.1-13)                               | 16%<br>(11-20%)                      | 20%<br>(15-26%)                     | 490<br>(350-630)    | 19000<br>(14000-25000)    |
| Venezuela | 1990 | Male   | 55 to 59 | 68%<br>(46-85%)                | 32%<br>(15-54%)          | 8.5<br>(4.1-14)                             | 15%<br>(11-20%)                      | 19%<br>(13-24%)                     | 550<br>(380-730)    | 19000<br>(13000-25000)    |
| Venezuela | 1990 | Male   | 60 to 64 | 65%<br>(41-83%)                | 35%<br>(17-59%)          | 7.6<br>(3.5-13)                             | 13%<br>(9.2-18%)                     | 16%<br>(11-22%)                     | 580<br>(400-800)    | 17000<br>(12000-23000)    |
| Venezuela | 1990 | Male   | 65 to 69 | 61%<br>(37-80%)                | 39%<br>(20-63%)          | 5.8<br>(2.7-10)                             | 12%<br>(7.8-17%)                     | 14%<br>(9.4-20%)                    | 550<br>(360-770)    | 13000<br>(8600-18000)     |
| Venezuela | 1990 | Male   | 70 to 74 | 55%<br>(33-75%)                | 45%<br>(25-67%)          | 4.2<br>(1.8-8.3)                            | 9.7%<br>(5.9-14%)                    | 11%<br>(6.8-17%)                    | 460<br>(270-680)    | 8700<br>(5300-13000)      |
| Venezuela | 1990 | Male   | 75 to 79 | 48%<br>(25-71%)                | 52%<br>(29-75%)          | 3.2<br>(1.2-6.9)                            | 7.7%<br>(3.8-12%)                    | 8.9%<br>(4.3-14%)                   | 340<br>(170-540)    | 5000<br>(2500-8000)       |
| Venezuela | 1990 | Male   | 80 to 84 | 43%<br>(22-66%)                | 57%<br>(34-78%)          | 2.8<br>(1-5.6)                              | 7%<br>(3.5-11%)                      | 8%<br>(3.9-13%)                     | 240<br>(120-400)    | 2600<br>(1300-4300)       |
| Venezuela | 1990 | Male   | 85 to 89 | 42%<br>(21-65%)                | 58%<br>(35-79%)          | 2.7<br>(1-5.7)                              | 6.6%<br>(3.1-11%)                    | 7.6%<br>(3.4-13%)                   | 150<br>(71-260)     | 1200<br>(560-2000)        |
| Venezuela | 1990 | Male   | 90 to 94 | 46%<br>(25-68%)                | 54%<br>(32-75%)          | 3<br>(1.1-6.4)                              | 6.4%<br>(2.6-10%)                    | 7.3%<br>(2.8-12%)                   | 65<br>(25-110)      | 350<br>(140-570)          |
| Venezuela | 1990 | Male   | 95 plus  | 50%<br>(25-74%)                | 50%<br>(26-75%)          | 3.4<br>(1-7.7)                              | 6.6%<br>(2.2-12%)                    | 7.4%<br>(2.1-14%)                   | 17<br>(4.9-32)      | 64<br>(20-110)            |
| Venezuela | 1995 | Female | All Ages | 23%<br>(18-31%)                | 77%<br>(69-82%)          | 0.97<br>(0.79-1.2)                          | 3.1%<br>(2.3-4.1%)                   | 6.1%<br>(3.9-8.7%)                  | 2500<br>(1600-3600) | 73000<br>(54000-97000)    |
| Venezuela | 1995 | Female | 15 to 19 | 21%<br>(10-36%)                | 79%<br>(64-90%)          | 0.8<br>(0.35-1.5)                           | 2%<br>(1.1-3.3%)                     | 3.5%<br>(1.5-6.6%)                  | 22<br>(9.3-43)      | 2500<br>(1300-4200)       |
| Venezuela | 1995 | Female | 20 to 24 | 29%<br>(14-47%)                | 71%<br>(53-86%)          | 1.1<br>(0.47-2)                             | 2.9%<br>(1.7-4.5%)                   | 4.4%<br>(2-8%)                      | 30<br>(14-53)       | 3500<br>(2000-5600)       |
| Venezuela | 1995 | Female | 25 to 29 | 31%<br>(16-51%)                | 69%<br>(49-84%)          | 1.1<br>(0.52-2)                             | 2.9%<br>(1.8-4.2%)                   | 4.4%<br>(2.2-7.4%)                  | 33<br>(16-55)       | 3600<br>(2200-5500)       |

| Location  | Year | Sex    | Age      | Prevalence of current drinkers | Prevalence of abstainers | Population average of standard drinks daily | Percent of total attributable deaths | Percent of total attributable DALYs | Attributable deaths | Attributable DALYs        |
|-----------|------|--------|----------|--------------------------------|--------------------------|---------------------------------------------|--------------------------------------|-------------------------------------|---------------------|---------------------------|
| Venezuela | 1995 | Female | 30 to 34 | 33%<br>(16-53%)                | 67%<br>(47-84%)          | 1.2<br>(0.61-2.1)                           | 2.9%<br>(1.8-4.2%)                   | 4.8%<br>(2.7-7.7%)                  | 43<br>(24-69)       | 3800<br>(2300-5600)       |
| Venezuela | 1995 | Female | 35 to 39 | 35%<br>(18-55%)                | 65%<br>(45-82%)          | 1.5<br>(0.71-2.5)                           | 3.3%<br>(1.9-5%)                     | 5.8%<br>(3.1-8.9%)                  | 61<br>(32-96)       | 4200<br>(2400-6300)       |
| Venezuela | 1995 | Female | 40 to 44 | 35%<br>(19-56%)                | 65%<br>(44-81%)          | 1.8<br>(0.91-3)                             | 4.2%<br>(2.5-6.6%)                   | 7.3%<br>(4.2-11%)                   | 91<br>(50-140)      | 5100<br>(3000-7900)       |
| Venezuela | 1995 | Female | 45 to 49 | 36%<br>(18-55%)                | 64%<br>(45-82%)          | 2.2<br>(0.96-3.7)                           | 5.2%<br>(3-8.4%)                     | 8.8%<br>(4.9-14%)                   | 120<br>(69-200)     | 6000<br>(3300-9700)       |
| Venezuela | 1995 | Female | 50 to 54 | 35%<br>(18-56%)                | 65%<br>(44-82%)          | 2.5<br>(1.2-4.5)                            | 6.5%<br>(3.7-10%)                    | 10%<br>(5.9-16%)                    | 170<br>(95-270)     | 7100<br>(4000-11000)      |
| Venezuela | 1995 | Female | 55 to 59 | 33%<br>(17-55%)                | 67%<br>(45-83%)          | 2.8<br>(1.3-5.1)                            | 7.2%<br>(4-11%)                      | 11%<br>(6-17%)                      | 220<br>(120-340)    | 7600<br>(4300-12000)      |
| Venezuela | 1995 | Female | 60 to 64 | 31%<br>(16-52%)                | 69%<br>(48-84%)          | 2.8<br>(1.2-5.3)                            | 7.3%<br>(4-12%)                      | 10%<br>(5.6-16%)                    | 270<br>(150-420)    | 7800<br>(4200-13000)      |
| Venezuela | 1995 | Female | 65 to 69 | 30%<br>(15-49%)                | 70%<br>(51-85%)          | 2.5<br>(1-4.5)                              | 7.4%<br>(3.8-12%)                    | 9.9%<br>(5.1-16%)                   | 310<br>(160-500)    | 7600<br>(3800-12000)      |
| Venezuela | 1995 | Female | 70 to 74 | 26%<br>(12-44%)                | 74%<br>(56-88%)          | 2.2<br>(0.87-4.3)                           | 6.7%<br>(3.3-11%)                    | 8.7%<br>(4.3-15%)                   | 310<br>(150-530)    | 6000<br>(2900-10000)      |
| Venezuela | 1995 | Female | 75 to 79 | 22%<br>(9.8-39%)               | 78%<br>(61-90%)          | 1.7<br>(0.63-3.6)                           | 5.6%<br>(2.1-10%)                    | 6.9%<br>(2.6-13%)                   | 270<br>(100-500)    | 4000<br>(1500-7200)       |
| Venezuela | 1995 | Female | 80 to 84 | 20%<br>(8.5-38%)               | 80%<br>(62-91%)          | 1.5<br>(0.5-3.2)                            | 4.8%<br>(1.7-9.1%)                   | 6%<br>(2.1-11%)                     | 240<br>(86-450)     | 2600<br>(940-4900)        |
| Venezuela | 1995 | Female | 85 to 89 | 21%<br>(9.4-37%)               | 79%<br>(63-91%)          | 1.5<br>(0.57-3)                             | 4.4%<br>(1.6-8.9%)                   | 5.4%<br>(1.9-11%)                   | 170<br>(58-340)     | 1300<br>(460-2600)        |
| Venezuela | 1995 | Female | 90 to 94 | 25%<br>(12-43%)                | 75%<br>(57-88%)          | 1.6<br>(0.59-3.3)                           | 4.3%<br>(1.3-9.2%)                   | 5.1%<br>(1.5-11%)                   | 83<br>(24-180)      | 440<br>(130-920)          |
| Venezuela | 1995 | Female | 95 plus  | 31%<br>(13-52%)                | 69%<br>(48-87%)          | 1.8<br>(0.54-4)                             | 4.1%<br>(0.54-10%)                   | 4.9%<br>(0.45-12%)                  | 24<br>(2.2-60)      | 84<br>(11-200)            |
| Venezuela | 1995 | Male   | All Ages | 42%<br>(32-53%)                | 58%<br>(47-68%)          | 3<br>(2.7-3.4)                              | 9.1%<br>(7.5-11%)                    | 12%<br>(9.9-14%)                    | 6900<br>(5500-8500) | 290000<br>(230000-350000) |
| Venezuela | 1995 | Male   | 15 to 19 | 29%<br>(14-48%)                | 71%<br>(52-86%)          | 1.4<br>(0.53-2.6)                           | 6.4%<br>(3.4-11%)                    | 8%<br>(3.6-15%)                     | 160<br>(70-300)     | 14000<br>(7100-24000)     |
| Venezuela | 1995 | Male   | 20 to 24 | 48%<br>(26-70%)                | 52%<br>(30-74%)          | 3.1<br>(1.5-5.5)                            | 14%<br>(8.1-21%)                     | 17%<br>(8.7-26%)                    | 450<br>(230-720)    | 35000<br>(20000-53000)    |
| Venezuela | 1995 | Male   | 25 to 29 | 58%<br>(36-78%)                | 42%<br>(22-64%)          | 4.4<br>(2.3-7.3)                            | 16%<br>(11-23%)                      | 20%<br>(12-30%)                     | 510<br>(300-750)    | 36000<br>(23000-52000)    |
| Venezuela | 1995 | Male   | 30 to 34 | 64%<br>(41-82%)                | 36%<br>(18-59%)          | 5.4<br>(3-8.1)                              | 16%<br>(12-21%)                      | 22%<br>(14-29%)                     | 500<br>(330-680)    | 33000<br>(23000-43000)    |
| Venezuela | 1995 | Male   | 35 to 39 | 68%<br>(46-84%)                | 32%<br>(16-54%)          | 6<br>(3.2-9.7)                              | 16%<br>(11-22%)                      | 22%<br>(15-30%)                     | 470<br>(310-640)    | 27000<br>(19000-36000)    |
| Venezuela | 1995 | Male   | 40 to 44 | 69%<br>(50-84%)                | 31%<br>(16-50%)          | 6.7<br>(3.6-10)                             | 16%<br>(12-21%)                      | 22%<br>(16-29%)                     | 500<br>(350-660)    | 26000<br>(19000-33000)    |
| Venezuela | 1995 | Male   | 45 to 49 | 69%<br>(45-84%)                | 31%<br>(16-55%)          | 7.2<br>(3.5-12)                             | 16%<br>(11-20%)                      | 21%<br>(15-27%)                     | 520<br>(370-670)    | 23000<br>(17000-30000)    |

| Location  | Year | Sex    | Age      | Prevalence of current drinkers | Prevalence of abstainers | Population average of standard drinks daily | Percent of total attributable deaths | Percent of total attributable DALYs | Attributable deaths | Attributable DALYs     |
|-----------|------|--------|----------|--------------------------------|--------------------------|---------------------------------------------|--------------------------------------|-------------------------------------|---------------------|------------------------|
| Venezuela | 1995 | Male   | 50 to 54 | 68%<br>(46-84%)                | 32%<br>(16-54%)          | 7.6<br>(3.9-13)                             | 15%<br>(11-20%)                      | 20%<br>(14-25%)                     | 540<br>(390-720)    | 22000<br>(16000-28000) |
| Venezuela | 1995 | Male   | 55 to 59 | 67%<br>(45-85%)                | 33%<br>(15-55%)          | 8<br>(3.9-13)                               | 14%<br>(10-19%)                      | 18%<br>(13-23%)                     | 580<br>(410-770)    | 20000<br>(14000-26000) |
| Venezuela | 1995 | Male   | 60 to 64 | 64%<br>(40-83%)                | 36%<br>(17-60%)          | 7.1<br>(3.4-13)                             | 13%<br>(8.8-17%)                     | 15%<br>(11-21%)                     | 610<br>(420-830)    | 18000<br>(12000-24000) |
| Venezuela | 1995 | Male   | 65 to 69 | 60%<br>(36-79%)                | 40%<br>(21-64%)          | 5.5<br>(2.5-9.6)                            | 11%<br>(7.5-16%)                     | 14%<br>(8.9-19%)                    | 610<br>(400-850)    | 15000<br>(9500-20000)  |
| Venezuela | 1995 | Male   | 70 to 74 | 54%<br>(32-74%)                | 46%<br>(26-68%)          | 4<br>(1.7-7.7)                              | 9.1%<br>(5.6-13%)                    | 11%<br>(6.3-16%)                    | 500<br>(300-740)    | 9600<br>(5800-14000)   |
| Venezuela | 1995 | Male   | 75 to 79 | 47%<br>(25-70%)                | 53%<br>(30-75%)          | 3<br>(1.1-6.6)                              | 7.2%<br>(3.5-11%)                    | 8.3%<br>(3.9-13%)                   | 370<br>(180-600)    | 5400<br>(2600-8700)    |
| Venezuela | 1995 | Male   | 80 to 84 | 42%<br>(21-65%)                | 58%<br>(35-79%)          | 2.6<br>(1-5.2)                              | 6.5%<br>(3.2-10%)                    | 7.5%<br>(3.7-12%)                   | 270<br>(130-450)    | 3000<br>(1500-4800)    |
| Venezuela | 1995 | Male   | 85 to 89 | 41%<br>(20-64%)                | 59%<br>(36-80%)          | 2.6<br>(0.94-5.3)                           | 6.1%<br>(2.8-10%)                    | 7%<br>(3.1-12%)                     | 170<br>(78-290)     | 1400<br>(610-2300)     |
| Venezuela | 1995 | Male   | 90 to 94 | 45%<br>(23-67%)                | 55%<br>(33-77%)          | 2.9<br>(0.99-6.2)                           | 5.8%<br>(2.4-9.7%)                   | 6.7%<br>(2.6-11%)                   | 72<br>(27-120)      | 390<br>(160-650)       |
| Venezuela | 1995 | Male   | 95 plus  | 50%<br>(24-74%)                | 50%<br>(26-76%)          | 3.3<br>(1-7.5)                              | 6.1%<br>(1.9-11%)                    | 6.8%<br>(1.8-13%)                   | 19<br>(5-35)        | 71<br>(22-130)         |
| Venezuela | 2000 | Female | All Ages | 23%<br>(17-30%)                | 77%<br>(70-83%)          | 0.92<br>(0.75-1.1)                          | 3%<br>(2.2-3.9%)                     | 5.7%<br>(3.6-8.2%)                  | 2400<br>(1500-3500) | 72000<br>(52000-94000) |
| Venezuela | 2000 | Female | 15 to 19 | 20%<br>(10-34%)                | 80%<br>(66-90%)          | 0.72<br>(0.32-1.3)                          | 1.8%<br>(1-3%)                       | 3.3%<br>(1.4-6.3%)                  | 21<br>(8.8-40)      | 2400<br>(1300-4100)    |
| Venezuela | 2000 | Female | 20 to 24 | 27%<br>(13-44%)                | 73%<br>(56-87%)          | 0.96<br>(0.41-1.7)                          | 2.7%<br>(1.6-4.1%)                   | 4%<br>(1.8-7%)                      | 29<br>(13-52)       | 3600<br>(2100-5600)    |
| Venezuela | 2000 | Female | 25 to 29 | 30%<br>(15-50%)                | 70%<br>(50-85%)          | 1<br>(0.46-1.8)                             | 2.6%<br>(1.6-3.9%)                   | 4%<br>(1.9-6.8%)                    | 30<br>(14-52)       | 3400<br>(2000-5200)    |
| Venezuela | 2000 | Female | 30 to 34 | 32%<br>(15-52%)                | 68%<br>(48-85%)          | 1.1<br>(0.56-2)                             | 2.6%<br>(1.6-3.8%)                   | 4.3%<br>(2.3-7%)                    | 37<br>(20-62)       | 3500<br>(2100-5200)    |
| Venezuela | 2000 | Female | 35 to 39 | 34%<br>(17-54%)                | 66%<br>(46-83%)          | 1.3<br>(0.61-2.3)                           | 2.8%<br>(1.7-4.4%)                   | 5.1%<br>(2.7-8.1%)                  | 56<br>(30-91)       | 4100<br>(2400-6300)    |
| Venezuela | 2000 | Female | 40 to 44 | 34%<br>(19-55%)                | 66%<br>(45-81%)          | 1.6<br>(0.8-2.8)                            | 3.6%<br>(2.1-5.7%)                   | 6.4%<br>(3.7-10%)                   | 87<br>(48-140)      | 5100<br>(2900-8100)    |
| Venezuela | 2000 | Female | 45 to 49 | 34%<br>(17-54%)                | 66%<br>(46-83%)          | 2<br>(0.89-3.5)                             | 4.7%<br>(2.6-7.7%)                   | 7.9%<br>(4.3-13%)                   | 130<br>(71-210)     | 6400<br>(3500-10000)   |
| Venezuela | 2000 | Female | 50 to 54 | 34%<br>(17-54%)                | 66%<br>(46-83%)          | 2.3<br>(1.1-4.1)                            | 5.7%<br>(3.2-8.9%)                   | 9.1%<br>(5.1-14%)                   | 170<br>(98-270)     | 7300<br>(4200-12000)   |
| Venezuela | 2000 | Female | 55 to 59 | 32%<br>(16-51%)                | 68%<br>(49-84%)          | 2.5<br>(1.2-4.5)                            | 6.1%<br>(3.4-10%)                    | 9.4%<br>(5.4-15%)                   | 200<br>(110-320)    | 7200<br>(4000-12000)   |
| Venezuela | 2000 | Female | 60 to 64 | 30%<br>(14-50%)                | 70%<br>(50-86%)          | 2.5<br>(1-4.8)                              | 6.2%<br>(3.3-10%)                    | 8.9%<br>(4.8-14%)                   | 240<br>(130-390)    | 7200<br>(3800-12000)   |
| Venezuela | 2000 | Female | 65 to 69 | 28%<br>(14-48%)                | 72%<br>(52-86%)          | 2.3<br>(0.96-4.2)                           | 6.4%<br>(3.3-11%)                    | 8.7%<br>(4.5-14%)                   | 290<br>(150-480)    | 7100<br>(3700-12000)   |

| Location  | Year | Sex    | Age      | Prevalence of current drinkers | Prevalence of abstainers | Population average of standard drinks daily | Percent of total attributable deaths | Percent of total attributable DALYs | Attributable deaths | Attributable DALYs        |
|-----------|------|--------|----------|--------------------------------|--------------------------|---------------------------------------------|--------------------------------------|-------------------------------------|---------------------|---------------------------|
| Venezuela | 2000 | Female | 70 to 74 | 25%<br>(12-42%)                | 75%<br>(58-88%)          | 2<br>(0.8-4)                                | 5.9%<br>(2.9-10%)                    | 7.8%<br>(3.7-13%)                   | 310<br>(150-520)    | 5900<br>(2800-10000)      |
| Venezuela | 2000 | Female | 75 to 79 | 22%<br>(9.8-39%)               | 78%<br>(61-90%)          | 1.6<br>(0.59-3.3)                           | 4.9%<br>(1.9-9.1%)                   | 6.2%<br>(2.4-11%)                   | 270<br>(100-490)    | 4000<br>(1500-7300)       |
| Venezuela | 2000 | Female | 80 to 84 | 20%<br>(8.5-37%)               | 80%<br>(63-91%)          | 1.4<br>(0.47-3)                             | 4.1%<br>(1.5-7.9%)                   | 5.3%<br>(1.9-10%)                   | 220<br>(78-430)     | 2400<br>(880-4800)        |
| Venezuela | 2000 | Female | 85 to 89 | 20%<br>(9.1-36%)               | 80%<br>(64-91%)          | 1.4<br>(0.53-2.8)                           | 3.8%<br>(1.3-7.8%)                   | 4.7%<br>(1.6-9.7%)                  | 160<br>(54-350)     | 1300<br>(450-2700)        |
| Venezuela | 2000 | Female | 90 to 94 | 24%<br>(11-42%)                | 76%<br>(58-89%)          | 1.5<br>(0.54-3)                             | 3.6%<br>(1-8%)                       | 4.4%<br>(1.2-9.9%)                  | 90<br>(24-200)      | 480<br>(140-1000)         |
| Venezuela | 2000 | Female | 95 plus  | 29%<br>(13-52%)                | 71%<br>(48-87%)          | 1.6<br>(0.49-3.5)                           | 3.6%<br>(0.45-9%)                    | 4.2%<br>(0.32-11%)                  | 28<br>(2.2-75)      | 100<br>(13-250)           |
| Venezuela | 2000 | Male   | All Ages | 41%<br>(31-53%)                | 59%<br>(47-69%)          | 2.9<br>(2.5-3.4)                            | 9.5%<br>(7.9-11%)                    | 12%<br>(9.7-14%)                    | 7600<br>(6100-9200) | 320000<br>(260000-400000) |
| Venezuela | 2000 | Male   | 15 to 19 | 27%<br>(13-46%)                | 73%<br>(54-87%)          | 1.3<br>(0.5-2.4)                            | 6.1%<br>(3.1-11%)                    | 7.4%<br>(3.2-14%)                   | 190<br>(80-360)     | 16000<br>(8000-28000)     |
| Venezuela | 2000 | Male   | 20 to 24 | 46%<br>(25-68%)                | 54%<br>(32-75%)          | 2.9<br>(1.3-5.1)                            | 14%<br>(7.5-21%)                     | 15%<br>(7.8-25%)                    | 580<br>(290-960)    | 43000<br>(24000-69000)    |
| Venezuela | 2000 | Male   | 25 to 29 | 57%<br>(33-77%)                | 43%<br>(23-67%)          | 4.1<br>(2-6.9)                              | 16%<br>(9.9-23%)                     | 19%<br>(11-28%)                     | 590<br>(340-880)    | 41000<br>(26000-59000)    |
| Venezuela | 2000 | Male   | 30 to 34 | 63%<br>(39-82%)                | 37%<br>(18-61%)          | 5<br>(2.8-7.8)                              | 16%<br>(11-21%)                      | 20%<br>(13-28%)                     | 550<br>(350-760)    | 36000<br>(25000-48000)    |
| Venezuela | 2000 | Male   | 35 to 39 | 66%<br>(44-83%)                | 34%<br>(17-56%)          | 5.6<br>(3-9)                                | 15%<br>(11-21%)                      | 21%<br>(14-28%)                     | 540<br>(360-740)    | 32000<br>(22000-43000)    |
| Venezuela | 2000 | Male   | 40 to 44 | 67%<br>(47-84%)                | 33%<br>(16-53%)          | 6.2<br>(3.3-9.6)                            | 15%<br>(11-20%)                      | 21%<br>(15-27%)                     | 560<br>(400-760)    | 29000<br>(21000-39000)    |
| Venezuela | 2000 | Male   | 45 to 49 | 67%<br>(44-83%)                | 33%<br>(17-56%)          | 6.6<br>(3.2-11)                             | 15%<br>(11-20%)                      | 20%<br>(14-26%)                     | 600<br>(420-800)    | 28000<br>(20000-36000)    |
| Venezuela | 2000 | Male   | 50 to 54 | 67%<br>(45-83%)                | 33%<br>(17-55%)          | 7<br>(3.6-12)                               | 14%<br>(10-19%)                      | 19%<br>(13-24%)                     | 620<br>(440-830)    | 25000<br>(18000-33000)    |
| Venezuela | 2000 | Male   | 55 to 59 | 65%<br>(43-84%)                | 35%<br>(16-57%)          | 7.4<br>(3.5-13)                             | 13%<br>(9.6-18%)                     | 17%<br>(12-22%)                     | 610<br>(430-820)    | 21000<br>(15000-28000)    |
| Venezuela | 2000 | Male   | 60 to 64 | 63%<br>(39-82%)                | 37%<br>(18-61%)          | 6.7<br>(3.1-12)                             | 12%<br>(8.1-16%)                     | 14%<br>(10-20%)                     | 600<br>(420-840)    | 18000<br>(12000-24000)    |
| Venezuela | 2000 | Male   | 65 to 69 | 59%<br>(35-78%)                | 41%<br>(22-65%)          | 5.1<br>(2.3-8.9)                            | 11%<br>(7-15%)                       | 13%<br>(8.4-18%)                    | 630<br>(420-880)    | 15000<br>(10000-21000)    |
| Venezuela | 2000 | Male   | 70 to 74 | 52%<br>(31-73%)                | 48%<br>(27-69%)          | 3.7<br>(1.5-7.5)                            | 8.4%<br>(5-12%)                      | 9.8%<br>(5.9-15%)                   | 530<br>(310-790)    | 10000<br>(6100-15000)     |
| Venezuela | 2000 | Male   | 75 to 79 | 46%<br>(24-69%)                | 54%<br>(31-76%)          | 2.8<br>(1-6.2)                              | 6.6%<br>(3.2-11%)                    | 7.7%<br>(3.7-13%)                   | 380<br>(180-630)    | 5700<br>(2800-9300)       |
| Venezuela | 2000 | Male   | 80 to 84 | 41%<br>(20-64%)                | 59%<br>(36-80%)          | 2.4<br>(0.88-4.8)                           | 5.9%<br>(2.8-9.7%)                   | 6.8%<br>(3.2-11%)                   | 290<br>(140-470)    | 3200<br>(1500-5200)       |
| Venezuela | 2000 | Male   | 85 to 89 | 40%<br>(20-63%)                | 60%<br>(37-80%)          | 2.4<br>(0.86-5)                             | 5.5%<br>(2.4-9.3%)                   | 6.3%<br>(2.7-11%)                   | 180<br>(77-310)     | 1400<br>(620-2500)        |

| Location  | Year | Sex    | Age      | Prevalence of current drinkers | Prevalence of abstainers | Population average of standard drinks daily | Percent of total attributable deaths | Percent of total attributable DALYs | Attributable deaths  | Attributable DALYs        |
|-----------|------|--------|----------|--------------------------------|--------------------------|---------------------------------------------|--------------------------------------|-------------------------------------|----------------------|---------------------------|
| Venezuela | 2000 | Male   | 90 to 94 | 43%<br>(23-66%)                | 57%<br>(34-77%)          | 2.6<br>(0.92-5.7)                           | 5.3%<br>(2-9%)                       | 6.1%<br>(2.2-11%)                   | 80<br>(28-140)       | 440<br>(170-750)          |
| Venezuela | 2000 | Male   | 95 plus  | 49%<br>(23-73%)                | 51%<br>(27-77%)          | 3<br>(0.88-7.1)                             | 5.5%<br>(1.7-10%)                    | 6.2%<br>(1.5-12%)                   | 22<br>(5.5-42)       | 83<br>(25-150)            |
| Venezuela | 2005 | Female | All Ages | 22%<br>(17-30%)                | 78%<br>(70-83%)          | 0.93<br>(0.76-1.1)                          | 3%<br>(2.2-4%)                       | 5.6%<br>(3.5-8.1%)                  | 2600<br>(1600-3800)  | 78000<br>(57000-100000)   |
| Venezuela | 2005 | Female | 15 to 19 | 19%<br>(9.4-32%)               | 81%<br>(68-91%)          | 0.69<br>(0.3-1.3)                           | 1.8%<br>(0.99-2.9%)                  | 3.2%<br>(1.4-6.1%)                  | 23<br>(9.8-43)       | 2600<br>(1400-4400)       |
| Venezuela | 2005 | Female | 20 to 24 | 26%<br>(12-44%)                | 74%<br>(56-88%)          | 0.92<br>(0.4-1.7)                           | 2.6%<br>(1.5-4.1%)                   | 3.9%<br>(1.7-7%)                    | 31<br>(14-57)        | 3800<br>(2100-6000)       |
| Venezuela | 2005 | Female | 25 to 29 | 29%<br>(13-47%)                | 71%<br>(53-87%)          | 0.99<br>(0.41-1.7)                          | 2.6%<br>(1.6-3.8%)                   | 3.8%<br>(1.7-6.6%)                  | 33<br>(14-59)        | 3700<br>(2200-5700)       |
| Venezuela | 2005 | Female | 30 to 34 | 31%<br>(14-51%)                | 69%<br>(49-86%)          | 1.1<br>(0.5-1.9)                            | 2.5%<br>(1.5-3.8%)                   | 4.1%<br>(2.2-6.9%)                  | 38<br>(20-65)        | 3500<br>(2200-5400)       |
| Venezuela | 2005 | Female | 35 to 39 | 32%<br>(17-52%)                | 68%<br>(48-83%)          | 1.3<br>(0.59-2.2)                           | 2.7%<br>(1.6-4.2%)                   | 4.9%<br>(2.6-7.7%)                  | 55<br>(29-88)        | 4100<br>(2400-6300)       |
| Venezuela | 2005 | Female | 40 to 44 | 33%<br>(17-53%)                | 67%<br>(47-83%)          | 1.5<br>(0.78-2.6)                           | 3.3%<br>(1.9-5.1%)                   | 6.1%<br>(3.5-9.6%)                  | 90<br>(52-140)       | 5500<br>(3300-8600)       |
| Venezuela | 2005 | Female | 45 to 49 | 33%<br>(16-52%)                | 67%<br>(48-84%)          | 1.9<br>(0.86-3.2)                           | 4.4%<br>(2.5-7.1%)                   | 7.5%<br>(4.2-12%)                   | 140<br>(79-230)      | 7100<br>(4100-11000)      |
| Venezuela | 2005 | Female | 50 to 54 | 32%<br>(16-53%)                | 68%<br>(47-84%)          | 2.2<br>(1.1-3.8)                            | 5.5%<br>(3.1-8.5%)                   | 8.7%<br>(5-14%)                     | 200<br>(110-320)     | 8400<br>(4800-13000)      |
| Venezuela | 2005 | Female | 55 to 59 | 31%<br>(15-51%)                | 69%<br>(49-85%)          | 2.4<br>(1.1-4.3)                            | 5.9%<br>(3.3-9.5%)                   | 9%<br>(5.1-14%)                     | 230<br>(130-370)     | 8500<br>(4700-13000)      |
| Venezuela | 2005 | Female | 60 to 64 | 29%<br>(14-49%)                | 71%<br>(51-86%)          | 2.4<br>(1-4.6)                              | 5.8%<br>(3-9.5%)                     | 8.5%<br>(4.6-14%)                   | 250<br>(130-400)     | 7600<br>(3900-12000)      |
| Venezuela | 2005 | Female | 65 to 69 | 27%<br>(13-47%)                | 73%<br>(53-87%)          | 2.2<br>(0.94-4.1)                           | 5.9%<br>(3-10%)                      | 8.3%<br>(4.3-14%)                   | 300<br>(150-490)     | 7400<br>(3800-12000)      |
| Venezuela | 2005 | Female | 70 to 74 | 25%<br>(12-42%)                | 75%<br>(58-88%)          | 1.9<br>(0.77-3.8)                           | 5.5%<br>(2.7-9.4%)                   | 7.4%<br>(3.6-12%)                   | 320<br>(160-540)     | 6200<br>(3000-10000)      |
| Venezuela | 2005 | Female | 75 to 79 | 21%<br>(9.1-37%)               | 79%<br>(63-91%)          | 1.6<br>(0.56-3.3)                           | 4.7%<br>(1.9-8.8%)                   | 6%<br>(2.4-11%)                     | 300<br>(120-560)     | 4500<br>(1800-8200)       |
| Venezuela | 2005 | Female | 80 to 84 | 19%<br>(8.2-35%)               | 81%<br>(65-92%)          | 1.3<br>(0.46-2.8)                           | 3.9%<br>(1.5-7.5%)                   | 5.1%<br>(1.9-9.9%)                  | 250<br>(90-490)      | 2800<br>(1000-5500)       |
| Venezuela | 2005 | Female | 85 to 89 | 19%<br>(8.9-34%)               | 81%<br>(66-91%)          | 1.3<br>(0.51-2.7)                           | 3.6%<br>(1.3-7.2%)                   | 4.5%<br>(1.6-9.3%)                  | 190<br>(66-390)      | 1500<br>(550-3100)        |
| Venezuela | 2005 | Female | 90 to 94 | 23%<br>(11-40%)                | 77%<br>(60-89%)          | 1.4<br>(0.53-3.1)                           | 3.6%<br>(1-7.9%)                     | 4.4%<br>(1.2-9.8%)                  | 120<br>(32-270)      | 610<br>(180-1400)         |
| Venezuela | 2005 | Female | 95 plus  | 28%<br>(12-50%)                | 72%<br>(50-88%)          | 1.6<br>(0.49-3.6)                           | 3.5%<br>(0.45-8.8%)                  | 4.2%<br>(0.35-11%)                  | 39<br>(3.2-100)      | 140<br>(17-350)           |
| Venezuela | 2005 | Male   | All Ages | 41%<br>(31-53%)                | 59%<br>(47-69%)          | 3<br>(2.6-3.5)                              | 9.9%<br>(7.9-12%)                    | 12%<br>(9.7-14%)                    | 8400<br>(6800-11000) | 370000<br>(290000-470000) |
| Venezuela | 2005 | Male   | 15 to 19 | 26%<br>(12-45%)                | 74%<br>(55-88%)          | 1.2<br>(0.46-2.3)                           | 6.1%<br>(3-11%)                      | 7.3%<br>(3-15%)                     | 230<br>(94-440)      | 19000<br>(9100-34000)     |

| Location  | Year | Sex    | Age      | Prevalence of current drinkers | Prevalence of abstainers | Population average of standard drinks daily | Percent of total attributable deaths | Percent of total attributable DALYs | Attributable deaths | Attributable DALYs      |
|-----------|------|--------|----------|--------------------------------|--------------------------|---------------------------------------------|--------------------------------------|-------------------------------------|---------------------|-------------------------|
| Venezuela | 2005 | Male   | 20 to 24 | 45%<br>(24-67%)                | 55%<br>(33-76%)          | 2.8<br>(1.2-5)                              | 14%<br>(7.3-22%)                     | 15%<br>(7.3-26%)                    | 720<br>(340-1200)   | 53000<br>(28000-87000)  |
| Venezuela | 2005 | Male   | 25 to 29 | 55%<br>(33-75%)                | 45%<br>(25-67%)          | 4<br>(1.9-6.6)                              | 16%<br>(9.7-24%)                     | 19%<br>(10-29%)                     | 760<br>(410-1200)   | 52000<br>(31000-78000)  |
| Venezuela | 2005 | Male   | 30 to 34 | 62%<br>(38-80%)                | 38%<br>(20-62%)          | 4.8<br>(2.6-7.6)                            | 16%<br>(11-22%)                      | 20%<br>(13-29%)                     | 630<br>(380-910)    | 40000<br>(27000-56000)  |
| Venezuela | 2005 | Male   | 35 to 39 | 65%<br>(43-83%)                | 35%<br>(17-57%)          | 5.5<br>(2.9-8.9)                            | 15%<br>(10-21%)                      | 21%<br>(14-29%)                     | 580<br>(370-820)    | 34000<br>(23000-47000)  |
| Venezuela | 2005 | Male   | 40 to 44 | 66%<br>(46-83%)                | 34%<br>(17-54%)          | 6.1<br>(3.2-9.4)                            | 15%<br>(10-20%)                      | 20%<br>(14-27%)                     | 610<br>(420-830)    | 32000<br>(23000-43000)  |
| Venezuela | 2005 | Male   | 45 to 49 | 67%<br>(42-83%)                | 33%<br>(17-58%)          | 6.5<br>(3.2-11)                             | 14%<br>(10-19%)                      | 19%<br>(14-25%)                     | 650<br>(440-860)    | 30000<br>(21000-39000)  |
| Venezuela | 2005 | Male   | 50 to 54 | 66%<br>(43-84%)                | 34%<br>(16-57%)          | 7<br>(3.5-12)                               | 14%<br>(9.8-18%)                     | 18%<br>(13-24%)                     | 710<br>(490-940)    | 28000<br>(20000-37000)  |
| Venezuela | 2005 | Male   | 55 to 59 | 64%<br>(43-83%)                | 36%<br>(17-57%)          | 7.3<br>(3.5-12)                             | 13%<br>(9-17%)                       | 16%<br>(11-22%)                     | 700<br>(480-960)    | 24000<br>(17000-33000)  |
| Venezuela | 2005 | Male   | 60 to 64 | 62%<br>(38-81%)                | 38%<br>(19-62%)          | 6.5<br>(3-12)                               | 11%<br>(7.5-15%)                     | 14%<br>(9.5-19%)                    | 630<br>(430-890)    | 19000<br>(13000-26000)  |
| Venezuela | 2005 | Male   | 65 to 69 | 58%<br>(34-77%)                | 42%<br>(23-66%)          | 5<br>(2.3-8.9)                              | 9.9%<br>(6.5-14%)                    | 12%<br>(8-17%)                      | 620<br>(420-900)    | 15000<br>(10000-22000)  |
| Venezuela | 2005 | Male   | 70 to 74 | 52%<br>(31-73%)                | 48%<br>(27-69%)          | 3.6<br>(1.6-7.3)                            | 7.9%<br>(4.8-12%)                    | 9.5%<br>(5.6-14%)                   | 530<br>(320-810)    | 10000<br>(6300-16000)   |
| Venezuela | 2005 | Male   | 75 to 79 | 45%<br>(23-68%)                | 55%<br>(32-77%)          | 2.8<br>(0.98-6.2)                           | 6.3%<br>(3-10%)                      | 7.4%<br>(3.5-12%)                   | 420<br>(200-690)    | 6300<br>(3000-10000)    |
| Venezuela | 2005 | Male   | 80 to 84 | 40%<br>(19-63%)                | 60%<br>(37-81%)          | 2.4<br>(0.82-4.7)                           | 5.6%<br>(2.6-9.4%)                   | 6.5%<br>(2.9-11%)                   | 310<br>(140-530)    | 3500<br>(1600-5900)     |
| Venezuela | 2005 | Male   | 85 to 89 | 39%<br>(19-62%)                | 61%<br>(38-81%)          | 2.3<br>(0.81-4.9)                           | 5.2%<br>(2.2-8.9%)                   | 6%<br>(2.5-10%)                     | 200<br>(84-350)     | 1600<br>(690-2700)      |
| Venezuela | 2005 | Male   | 90 to 94 | 42%<br>(21-65%)                | 58%<br>(35-79%)          | 2.5<br>(0.84-5.6)                           | 5.1%<br>(1.9-8.8%)                   | 5.8%<br>(2.1-10%)                   | 98<br>(35-170)      | 540<br>(210-930)        |
| Venezuela | 2005 | Male   | 95 plus  | 47%<br>(22-72%)                | 53%<br>(28-78%)          | 2.9<br>(0.81-7)                             | 5.4%<br>(1.6-10%)                    | 6%<br>(1.5-12%)                     | 28<br>(7-53)        | 100<br>(32-200)         |
| Venezuela | 2010 | Female | All Ages | 22%<br>(16-28%)                | 78%<br>(72-84%)          | 0.99<br>(0.78-1.2)                          | 3.1%<br>(2.2-4.2%)                   | 5.6%<br>(3.5-8.2%)                  | 3000<br>(1800-4300) | 88000<br>(62000-120000) |
| Venezuela | 2010 | Female | 15 to 19 | 18%<br>(8.9-31%)               | 82%<br>(69-91%)          | 0.7<br>(0.31-1.3)                           | 1.8%<br>(0.95-2.9%)                  | 3.2%<br>(1.3-6.1%)                  | 23<br>(9.6-44)      | 2600<br>(1400-4500)     |
| Venezuela | 2010 | Female | 20 to 24 | 25%<br>(12-42%)                | 75%<br>(58-88%)          | 0.92<br>(0.39-1.7)                          | 2.6%<br>(1.5-4%)                     | 3.8%<br>(1.7-7.1%)                  | 32<br>(14-59)       | 4100<br>(2400-6400)     |
| Venezuela | 2010 | Female | 25 to 29 | 27%<br>(13-46%)                | 73%<br>(54-87%)          | 0.97<br>(0.4-1.8)                           | 2.5%<br>(1.6-3.8%)                   | 3.7%<br>(1.6-6.5%)                  | 35<br>(15-62)       | 4000<br>(2400-6200)     |
| Venezuela | 2010 | Female | 30 to 34 | 29%<br>(13-49%)                | 71%<br>(51-87%)          | 1.1<br>(0.48-1.9)                           | 2.4%<br>(1.5-3.7%)                   | 3.9%<br>(2-6.5%)                    | 41<br>(20-67)       | 3900<br>(2400-5900)     |
| Venezuela | 2010 | Female | 35 to 39 | 31%<br>(15-49%)                | 69%<br>(51-85%)          | 1.3<br>(0.56-2.2)                           | 2.7%<br>(1.6-4.1%)                   | 4.7%<br>(2.4-7.4%)                  | 55<br>(28-89)       | 4200<br>(2500-6300)     |



| Location  | Year | Sex    | Age      | Prevalence of current drinkers | Prevalence of abstainers | Population average of standard drinks daily | Percent of total attributable deaths | Percent of total attributable DALYs | Attributable deaths  | Attributable DALYs        |
|-----------|------|--------|----------|--------------------------------|--------------------------|---------------------------------------------|--------------------------------------|-------------------------------------|----------------------|---------------------------|
| Venezuela | 2010 | Female | 40 to 44 | 32%<br>(17-50%)                | 68%<br>(50-83%)          | 1.5<br>(0.78-2.6)                           | 3.2%<br>(1.9-5%)                     | 5.9%<br>(3.3-9.1%)                  | 91<br>(50-150)       | 5600<br>(3300-8800)       |
| Venezuela | 2010 | Female | 45 to 49 | 32%<br>(15-51%)                | 68%<br>(49-85%)          | 1.9<br>(0.83-3.4)                           | 4.2%<br>(2.3-6.7%)                   | 7.4%<br>(4-12%)                     | 150<br>(83-250)      | 7900<br>(4300-13000)      |
| Venezuela | 2010 | Female | 50 to 54 | 31%<br>(16-52%)                | 69%<br>(48-84%)          | 2.2<br>(1-3.9)                              | 5.2%<br>(2.9-8.3%)                   | 8.4%<br>(4.8-13%)                   | 220<br>(120-350)     | 9600<br>(5600-15000)      |
| Venezuela | 2010 | Female | 55 to 59 | 30%<br>(15-50%)                | 70%<br>(50-85%)          | 2.4<br>(1.1-4.3)                            | 5.8%<br>(3.2-9.5%)                   | 8.8%<br>(4.8-14%)                   | 280<br>(160-460)     | 10000<br>(5700-17000)     |
| Venezuela | 2010 | Female | 60 to 64 | 28%<br>(13-48%)                | 72%<br>(52-87%)          | 2.4<br>(1-4.5)                              | 5.8%<br>(3-9.5%)                     | 8.3%<br>(4.5-14%)                   | 300<br>(160-500)     | 9200<br>(4900-15000)      |
| Venezuela | 2010 | Female | 65 to 69 | 27%<br>(13-45%)                | 73%<br>(55-87%)          | 2.2<br>(0.92-4.1)                           | 5.7%<br>(2.8-9.6%)                   | 8.1%<br>(4.1-13%)                   | 320<br>(160-520)     | 8100<br>(4100-13000)      |
| Venezuela | 2010 | Female | 70 to 74 | 24%<br>(12-40%)                | 76%<br>(60-88%)          | 1.9<br>(0.77-4)                             | 5.3%<br>(2.6-9%)                     | 7.2%<br>(3.5-12%)                   | 340<br>(160-590)     | 6800<br>(3200-12000)      |
| Venezuela | 2010 | Female | 75 to 79 | 20%<br>(9.2-36%)               | 80%<br>(64-91%)          | 1.6<br>(0.57-3.3)                           | 4.5%<br>(1.8-8.3%)                   | 5.8%<br>(2.3-11%)                   | 320<br>(130-600)     | 4900<br>(2000-9100)       |
| Venezuela | 2010 | Female | 80 to 84 | 18%<br>(7.7-34%)               | 82%<br>(66-92%)          | 1.4<br>(0.45-2.8)                           | 3.9%<br>(1.4-7.5%)                   | 5%<br>(1.8-9.8%)                    | 310<br>(110-590)     | 3400<br>(1300-6600)       |
| Venezuela | 2010 | Female | 85 to 89 | 19%<br>(8.6-34%)               | 81%<br>(66-91%)          | 1.3<br>(0.51-2.8)                           | 3.6%<br>(1.3-7.4%)                   | 4.6%<br>(1.6-9.5%)                  | 240<br>(83-500)      | 1900<br>(670-4000)        |
| Venezuela | 2010 | Female | 90 to 94 | 22%<br>(10-40%)                | 78%<br>(60-90%)          | 1.5<br>(0.55-3.2)                           | 3.6%<br>(1.1-8.1%)                   | 4.5%<br>(1.2-10%)                   | 150<br>(41-330)      | 800<br>(240-1800)         |
| Venezuela | 2010 | Female | 95 plus  | 27%<br>(11-50%)                | 73%<br>(50-89%)          | 1.6<br>(0.48-3.7)                           | 3.6%<br>(0.56-8.9%)                  | 4.4%<br>(0.41-11%)                  | 53<br>(5.2-140)      | 190<br>(28-480)           |
| Venezuela | 2010 | Male   | All Ages | 41%<br>(32-52%)                | 59%<br>(48-68%)          | 3.2<br>(2.6-3.8)                            | 10%<br>(8.1-13%)                     | 12%<br>(9.5-15%)                    | 9900<br>(7800-12000) | 430000<br>(340000-550000) |
| Venezuela | 2010 | Male   | 15 to 19 | 25%<br>(12-44%)                | 75%<br>(56-88%)          | 1.2<br>(0.47-2.4)                           | 6.4%<br>(3-12%)                      | 7.5%<br>(3-15%)                     | 280<br>(120-560)     | 22000<br>(10000-43000)    |
| Venezuela | 2010 | Male   | 20 to 24 | 44%<br>(23-66%)                | 56%<br>(34-77%)          | 2.8<br>(1.2-5)                              | 14%<br>(7.4-22%)                     | 15%<br>(7.4-26%)                    | 870<br>(420-1500)    | 63000<br>(33000-110000)   |
| Venezuela | 2010 | Male   | 25 to 29 | 54%<br>(32-74%)                | 46%<br>(26-68%)          | 4<br>(1.8-7)                                | 16%<br>(9.6-24%)                     | 19%<br>(10-29%)                     | 900<br>(490-1400)    | 61000<br>(36000-92000)    |
| Venezuela | 2010 | Male   | 30 to 34 | 61%<br>(37-80%)                | 39%<br>(20-63%)          | 4.9<br>(2.5-7.9)                            | 16%<br>(10-23%)                      | 20%<br>(12-29%)                     | 760<br>(460-1100)    | 48000<br>(31000-68000)    |
| Venezuela | 2010 | Male   | 35 to 39 | 64%<br>(43-81%)                | 36%<br>(19-57%)          | 5.5<br>(2.8-9.2)                            | 16%<br>(10-22%)                      | 21%<br>(13-29%)                     | 630<br>(400-910)     | 37000<br>(25000-52000)    |
| Venezuela | 2010 | Male   | 40 to 44 | 65%<br>(44-82%)                | 35%<br>(18-56%)          | 6.1<br>(3.1-9.7)                            | 15%<br>(10-19%)                      | 20%<br>(14-27%)                     | 640<br>(430-860)     | 34000<br>(24000-45000)    |
| Venezuela | 2010 | Male   | 45 to 49 | 66%<br>(41-82%)                | 34%<br>(18-59%)          | 6.6<br>(3.2-11)                             | 14%<br>(9.8-18%)                     | 19%<br>(13-25%)                     | 720<br>(500-950)     | 34000<br>(24000-44000)    |
| Venezuela | 2010 | Male   | 50 to 54 | 65%<br>(42-82%)                | 35%<br>(18-58%)          | 6.9<br>(3.6-12)                             | 14%<br>(9.5-18%)                     | 18%<br>(13-23%)                     | 830<br>(570-1100)    | 33000<br>(23000-44000)    |
| Venezuela | 2010 | Male   | 55 to 59 | 63%<br>(41-83%)                | 37%<br>(17-59%)          | 7.3<br>(3.5-12)                             | 13%<br>(8.9-17%)                     | 16%<br>(11-21%)                     | 870<br>(590-1200)    | 30000<br>(20000-41000)    |

| Location  | Year | Sex    | Age      | Prevalence of current drinkers | Prevalence of abstainers | Population average of standard drinks daily | Percent of total attributable deaths | Percent of total attributable DALYs | Attributable deaths | Attributable DALYs       |
|-----------|------|--------|----------|--------------------------------|--------------------------|---------------------------------------------|--------------------------------------|-------------------------------------|---------------------|--------------------------|
| Venezuela | 2010 | Male   | 60 to 64 | 61%<br>(38-81%)                | 39%<br>(19-62%)          | 6.6<br>(3-12)                               | 11%<br>(7.4-15%)                     | 13%<br>(9-19%)                      | 780<br>(520-1100)   | 23000<br>(16000-33000)   |
| Venezuela | 2010 | Male   | 65 to 69 | 57%<br>(33-77%)                | 43%<br>(23-67%)          | 5.1<br>(2.3-9.1)                            | 9.8%<br>(6.3-14%)                    | 12%<br>(7.7-17%)                    | 710<br>(460-1000)   | 18000<br>(11000-25000)   |
| Venezuela | 2010 | Male   | 70 to 74 | 51%<br>(30-72%)                | 49%<br>(28-70%)          | 3.7<br>(1.5-7.8)                            | 7.8%<br>(4.6-12%)                    | 9.4%<br>(5.5-14%)                   | 600<br>(350-910)    | 12000<br>(6900-18000)    |
| Venezuela | 2010 | Male   | 75 to 79 | 44%<br>(23-68%)                | 56%<br>(32-77%)          | 2.8<br>(0.95-6.3)                           | 6.1%<br>(3-10%)                      | 7.1%<br>(3.4-12%)                   | 480<br>(230-780)    | 7300<br>(3500-12000)     |
| Venezuela | 2010 | Male   | 80 to 84 | 39%<br>(19-62%)                | 61%<br>(38-81%)          | 2.4<br>(0.82-4.7)                           | 5.4%<br>(2.6-9.1%)                   | 6.3%<br>(2.8-11%)                   | 380<br>(180-640)    | 4200<br>(2000-7100)      |
| Venezuela | 2010 | Male   | 85 to 89 | 37%<br>(18-60%)                | 63%<br>(40-82%)          | 2.3<br>(0.84-4.8)                           | 5%<br>(2.4-8.6%)                     | 5.8%<br>(2.6-10%)                   | 240<br>(110-420)    | 1900<br>(890-3300)       |
| Venezuela | 2010 | Male   | 90 to 94 | 40%<br>(21-64%)                | 60%<br>(36-79%)          | 2.5<br>(0.82-5.6)                           | 5.1%<br>(2-8.7%)                     | 5.7%<br>(2.1-10%)                   | 120<br>(46-210)     | 670<br>(270-1200)        |
| Venezuela | 2010 | Male   | 95 plus  | 45%<br>(20-71%)                | 55%<br>(29-80%)          | 2.9<br>(0.78-7.2)                           | 5.4%<br>(1.7-9.9%)                   | 6%<br>(1.6-11%)                     | 36<br>(9.8-69)      | 130<br>(41-250)          |
| Venezuela | 2016 | Female | All Ages | 22%<br>(17-29%)                | 78%<br>(71-83%)          | 1.1<br>(0.77-1.5)                           | 3.3%<br>(2.2-4.5%)                   | 5.6%<br>(3.3-8.4%)                  | 3600<br>(2000-5700) | 100000<br>(67000-150000) |
| Venezuela | 2016 | Female | 15 to 19 | 18%<br>(8.6-31%)               | 82%<br>(69-91%)          | 0.7<br>(0.28-1.4)                           | 1.7%<br>(0.91-3.1%)                  | 3.2%<br>(1.2-6.6%)                  | 22<br>(8.6-47)      | 2600<br>(1300-4700)      |
| Venezuela | 2016 | Female | 20 to 24 | 25%<br>(12-42%)                | 75%<br>(58-88%)          | 0.94<br>(0.36-1.9)                          | 2.6%<br>(1.5-4.2%)                   | 3.9%<br>(1.6-7.4%)                  | 32<br>(12-63)       | 4100<br>(2200-6900)      |
| Venezuela | 2016 | Female | 25 to 29 | 27%<br>(13-46%)                | 73%<br>(54-87%)          | 1<br>(0.38-2)                               | 2.6%<br>(1.5-4.1%)                   | 3.9%<br>(1.6-7%)                    | 39<br>(15-75)       | 4400<br>(2400-7300)      |
| Venezuela | 2016 | Female | 30 to 34 | 29%<br>(13-51%)                | 71%<br>(49-87%)          | 1.1<br>(0.48-2.1)                           | 2.5%<br>(1.5-4%)                     | 4%<br>(1.9-7.1%)                    | 46<br>(20-86)       | 4400<br>(2600-7300)      |
| Venezuela | 2016 | Female | 35 to 39 | 31%<br>(15-51%)                | 69%<br>(49-85%)          | 1.3<br>(0.55-2.5)                           | 2.8%<br>(1.5-4.4%)                   | 4.9%<br>(2.4-8.3%)                  | 63<br>(30-110)      | 4900<br>(2700-7800)      |
| Venezuela | 2016 | Female | 40 to 44 | 32%<br>(17-51%)                | 68%<br>(49-83%)          | 1.6<br>(0.75-2.8)                           | 3.2%<br>(1.8-5.2%)                   | 6%<br>(3.1-9.7%)                    | 92<br>(48-160)      | 5800<br>(3100-9700)      |
| Venezuela | 2016 | Female | 45 to 49 | 32%<br>(16-51%)                | 68%<br>(49-84%)          | 1.9<br>(0.8-3.5)                            | 4.1%<br>(2.2-6.7%)                   | 7.3%<br>(3.7-12%)                   | 160<br>(81-280)     | 8300<br>(4400-14000)     |
| Venezuela | 2016 | Female | 50 to 54 | 31%<br>(15-51%)                | 69%<br>(49-85%)          | 2.2<br>(1-4)                                | 5.1%<br>(2.8-8.5%)                   | 8.2%<br>(4.6-13%)                   | 270<br>(150-470)    | 12000<br>(6500-20000)    |
| Venezuela | 2016 | Female | 55 to 59 | 29%<br>(15-50%)                | 71%<br>(50-85%)          | 2.4<br>(1-4.6)                              | 5.6%<br>(3-9.2%)                     | 8.5%<br>(4.7-14%)                   | 350<br>(180-570)    | 13000<br>(6700-21000)    |
| Venezuela | 2016 | Female | 60 to 64 | 28%<br>(13-47%)                | 72%<br>(53-87%)          | 2.4<br>(0.96-4.6)                           | 5.5%<br>(2.8-9.1%)                   | 8.1%<br>(4.2-13%)                   | 360<br>(170-610)    | 11000<br>(5400-19000)    |
| Venezuela | 2016 | Female | 65 to 69 | 26%<br>(12-45%)                | 74%<br>(55-88%)          | 2.2<br>(0.84-4.2)                           | 5.5%<br>(2.7-9.2%)                   | 7.9%<br>(3.9-13%)                   | 380<br>(180-660)    | 9800<br>(4500-17000)     |
| Venezuela | 2016 | Female | 70 to 74 | 24%<br>(11-41%)                | 76%<br>(59-89%)          | 2<br>(0.77-4.1)                             | 5.2%<br>(2.5-9%)                     | 7.1%<br>(3.5-12%)                   | 410<br>(190-760)    | 8300<br>(3900-15000)     |
| Venezuela | 2016 | Female | 75 to 79 | 20%<br>(8.9-37%)               | 80%<br>(63-91%)          | 1.6<br>(0.56-3.6)                           | 4.4%<br>(1.7-8.1%)                   | 5.7%<br>(2.3-10%)                   | 400<br>(150-760)    | 6100<br>(2400-12000)     |

| Location  | Year | Sex    | Age      | Prevalence of current drinkers | Prevalence of abstainers | Population average of standard drinks daily | Percent of total attributable deaths | Percent of total attributable DALYs | Attributable deaths   | Attributable DALYs        |
|-----------|------|--------|----------|--------------------------------|--------------------------|---------------------------------------------|--------------------------------------|-------------------------------------|-----------------------|---------------------------|
| Venezuela | 2016 | Female | 80 to 84 | 18%<br>(7.6-33%)               | 82%<br>(67-92%)          | 1.3<br>(0.44-2.8)                           | 3.8%<br>(1.3-7.2%)                   | 4.9%<br>(1.7-9.3%)                  | 370<br>(130-720)      | 4200<br>(1500-8200)       |
| Venezuela | 2016 | Female | 85 to 89 | 18%<br>(8.5-33%)               | 82%<br>(67-91%)          | 1.3<br>(0.48-2.8)                           | 3.5%<br>(1.2-7.3%)                   | 4.5%<br>(1.5-9.3%)                  | 310<br>(98-640)       | 2400<br>(810-5000)        |
| Venezuela | 2016 | Female | 90 to 94 | 22%<br>(9.7-39%)               | 78%<br>(61-90%)          | 1.4<br>(0.53-3.1)                           | 3.5%<br>(0.98-7.6%)                  | 4.4%<br>(1.1-9.6%)                  | 200<br>(50-450)       | 1100<br>(290-2300)        |
| Venezuela | 2016 | Female | 95 plus  | 27%<br>(11-48%)                | 73%<br>(52-89%)          | 1.6<br>(0.5-3.8)                            | 3.6%<br>(0.52-8.9%)                  | 4.3%<br>(0.39-11%)                  | 74<br>(6.5-190)       | 260<br>(39-640)           |
| Venezuela | 2016 | Male   | All Ages | 42%<br>(33-53%)                | 58%<br>(47-67%)          | 3.4<br>(2.5-4.4)                            | 10%<br>(8-13%)                       | 12%<br>(9.3-15%)                    | 11000<br>(8300-15000) | 490000<br>(350000-660000) |
| Venezuela | 2016 | Male   | 15 to 19 | 25%<br>(12-43%)                | 75%<br>(57-88%)          | 1.2<br>(0.45-2.5)                           | 6.5%<br>(3-12%)                      | 7.6%<br>(3-15%)                     | 280<br>(110-580)      | 23000<br>(10000-44000)    |
| Venezuela | 2016 | Male   | 20 to 24 | 44%<br>(23-66%)                | 56%<br>(34-77%)          | 2.9<br>(1.2-5.4)                            | 14%<br>(7.1-23%)                     | 15%<br>(7.1-27%)                    | 880<br>(400-1600)     | 65000<br>(32000-110000)   |
| Venezuela | 2016 | Male   | 25 to 29 | 54%<br>(32-74%)                | 46%<br>(26-68%)          | 4.1<br>(1.8-7.4)                            | 16%<br>(9.5-25%)                     | 19%<br>(9.8-30%)                    | 1000<br>(510-1700)    | 68000<br>(38000-110000)   |
| Venezuela | 2016 | Male   | 30 to 34 | 61%<br>(37-80%)                | 39%<br>(20-63%)          | 5<br>(2.3-8.7)                              | 17%<br>(11-24%)                      | 21%<br>(12-30%)                     | 850<br>(490-1300)     | 55000<br>(34000-82000)    |
| Venezuela | 2016 | Male   | 35 to 39 | 64%<br>(42-82%)                | 36%<br>(18-58%)          | 5.6<br>(2.6-10)                             | 16%<br>(10-22%)                      | 21%<br>(13-30%)                     | 720<br>(430-1100)     | 43000<br>(27000-63000)    |
| Venezuela | 2016 | Male   | 40 to 44 | 65%<br>(45-82%)                | 35%<br>(18-55%)          | 6.2<br>(3-10)                               | 15%<br>(10-19%)                      | 20%<br>(13-27%)                     | 650<br>(400-960)      | 35000<br>(23000-50000)    |
| Venezuela | 2016 | Male   | 45 to 49 | 66%<br>(41-82%)                | 34%<br>(18-59%)          | 6.7<br>(3.1-12)                             | 14%<br>(9.8-18%)                     | 19%<br>(13-25%)                     | 770<br>(490-1100)     | 37000<br>(24000-51000)    |
| Venezuela | 2016 | Male   | 50 to 54 | 65%<br>(42-82%)                | 35%<br>(18-58%)          | 7<br>(3.6-13)                               | 14%<br>(9.5-18%)                     | 18%<br>(13-23%)                     | 1000<br>(670-1500)    | 43000<br>(28000-59000)    |
| Venezuela | 2016 | Male   | 55 to 59 | 63%<br>(41-82%)                | 37%<br>(18-59%)          | 7.3<br>(3.4-13)                             | 13%<br>(8.7-17%)                     | 16%<br>(11-21%)                     | 1100<br>(720-1600)    | 39000<br>(25000-55000)    |
| Venezuela | 2016 | Male   | 60 to 64 | 60%<br>(37-80%)                | 40%<br>(20-63%)          | 6.5<br>(2.8-12)                             | 11%<br>(7.2-15%)                     | 13%<br>(8.9-18%)                    | 970<br>(610-1400)     | 29000<br>(18000-42000)    |
| Venezuela | 2016 | Male   | 65 to 69 | 56%<br>(33-77%)                | 44%<br>(23-67%)          | 5<br>(2.2-9)                                | 9.4%<br>(6.1-13%)                    | 12%<br>(7.5-16%)                    | 870<br>(530-1300)     | 21000<br>(14000-32000)    |
| Venezuela | 2016 | Male   | 70 to 74 | 50%<br>(30-71%)                | 50%<br>(29-70%)          | 3.6<br>(1.5-7.6)                            | 7.5%<br>(4.5-11%)                    | 9%<br>(5.4-13%)                     | 730<br>(410-1100)     | 14000<br>(8300-22000)     |
| Venezuela | 2016 | Male   | 75 to 79 | 44%<br>(22-66%)                | 56%<br>(34-78%)          | 2.8<br>(0.93-6.2)                           | 6%<br>(2.8-9.6%)                     | 7%<br>(3.3-11%)                     | 600<br>(280-1000)     | 9100<br>(4300-15000)      |
| Venezuela | 2016 | Male   | 80 to 84 | 39%<br>(18-61%)                | 61%<br>(39-82%)          | 2.4<br>(0.78-4.9)                           | 5.3%<br>(2.4-8.9%)                   | 6.1%<br>(2.7-10%)                   | 470<br>(200-810)      | 5200<br>(2300-8900)       |
| Venezuela | 2016 | Male   | 85 to 89 | 37%<br>(18-60%)                | 63%<br>(40-82%)          | 2.3<br>(0.77-5.2)                           | 4.9%<br>(2.2-8.7%)                   | 5.7%<br>(2.5-10%)                   | 310<br>(130-540)      | 2400<br>(1100-4200)       |
| Venezuela | 2016 | Male   | 90 to 94 | 40%<br>(19-62%)                | 60%<br>(38-81%)          | 2.5<br>(0.77-5.6)                           | 4.9%<br>(2-8.4%)                     | 5.5%<br>(2.1-9.8%)                  | 160<br>(57-280)       | 850<br>(340-1500)         |
| Venezuela | 2016 | Male   | 95 plus  | 44%<br>(20-70%)                | 56%<br>(30-80%)          | 2.8<br>(0.76-7)                             | 5.2%<br>(1.5-9.6%)                   | 5.8%<br>(1.4-11%)                   | 46<br>(11-90)         | 170<br>(48-320)           |

| Location | Year | Sex    | Age      | Prevalence of current drinkers | Prevalence of abstainers | Population average of standard drinks daily | Percent of total attributable deaths | Percent of total attributable DALYs | Attributable deaths    | Attributable DALYs           |
|----------|------|--------|----------|--------------------------------|--------------------------|---------------------------------------------|--------------------------------------|-------------------------------------|------------------------|------------------------------|
| Brazil   | 1990 | Female | All Ages | 45%<br>(37-52%)                | 55%<br>(48-63%)          | 0.95<br>(0.83-1.1)                          | 1.9%<br>(1.5-2.4%)                   | 2.2%<br>(1.4-3.1%)                  | 8200<br>(5000-12000)   | 430000<br>(330000-540000)    |
| Brazil   | 1990 | Female | 15 to 19 | 47%<br>(32-63%)                | 53%<br>(37-68%)          | 0.94<br>(0.5-1.5)                           | 2%<br>(1.3-3.1%)                     | 4%<br>(2.1-6.6%)                    | 180<br>(93-300)        | 20000<br>(13000-30000)       |
| Brazil   | 1990 | Female | 20 to 24 | 57%<br>(39-73%)                | 43%<br>(27-61%)          | 1.5<br>(0.86-2.4)                           | 3.8%<br>(2.6-5.2%)                   | 6.1%<br>(3.5-9.2%)                  | 340<br>(190-510)       | 40000<br>(27000-55000)       |
| Brazil   | 1990 | Female | 25 to 29 | 59%<br>(40-74%)                | 41%<br>(26-60%)          | 1.7<br>(1-2.6)                              | 4.4%<br>(3.2-5.7%)                   | 6.9%<br>(4.3-9.8%)                  | 450<br>(280-640)       | 48000<br>(34000-64000)       |
| Brazil   | 1990 | Female | 30 to 34 | 59%<br>(40-75%)                | 41%<br>(25-60%)          | 1.7<br>(0.95-2.7)                           | 4.5%<br>(3.3-6%)                     | 7.4%<br>(4.8-11%)                   | 560<br>(360-810)       | 49000<br>(35000-65000)       |
| Brazil   | 1990 | Female | 35 to 39 | 58%<br>(41-73%)                | 42%<br>(27-59%)          | 1.7<br>(0.92-2.7)                           | 4.6%<br>(3.2-6.4%)                   | 7.8%<br>(4.9-11%)                   | 680<br>(430-980)       | 48000<br>(33000-67000)       |
| Brazil   | 1990 | Female | 40 to 44 | 55%<br>(39-70%)                | 45%<br>(30-61%)          | 1.7<br>(0.89-2.6)                           | 4.8%<br>(3-6.9%)                     | 8%<br>(4.6-12%)                     | 830<br>(480-1200)      | 48000<br>(30000-68000)       |
| Brazil   | 1990 | Female | 45 to 49 | 50%<br>(31-65%)                | 50%<br>(35-69%)          | 1.6<br>(0.79-2.7)                           | 4.5%<br>(2.6-6.9%)                   | 7.1%<br>(4-11%)                     | 870<br>(490-1400)      | 43000<br>(25000-64000)       |
| Brazil   | 1990 | Female | 50 to 54 | 45%<br>(28-62%)                | 55%<br>(38-72%)          | 1.5<br>(0.75-2.6)                           | 4.3%<br>(2.3-6.9%)                   | 6.5%<br>(3.4-11%)                   | 1000<br>(540-1600)     | 42000<br>(24000-66000)       |
| Brazil   | 1990 | Female | 55 to 59 | 42%<br>(27-59%)                | 58%<br>(41-73%)          | 1.4<br>(0.72-2.4)                           | 3.9%<br>(2-6.3%)                     | 5.7%<br>(2.9-9.4%)                  | 1100<br>(540-1700)     | 37000<br>(20000-60000)       |
| Brazil   | 1990 | Female | 60 to 64 | 41%<br>(24-58%)                | 59%<br>(42-76%)          | 1.2<br>(0.64-2.3)                           | 2.9%<br>(1.1-5.4%)                   | 3.9%<br>(1.3-7.5%)                  | 930<br>(310-1800)      | 27000<br>(10000-51000)       |
| Brazil   | 1990 | Female | 65 to 69 | 42%<br>(26-57%)                | 58%<br>(43-74%)          | 0.96<br>(0.5-1.6)                           | 1.7%<br>(0.37-3.5%)                  | 2.2%<br>(0.41-4.7%)                 | 610<br>(110-1300)      | 15000<br>(3300-30000)        |
| Brazil   | 1990 | Female | 70 to 74 | 39%<br>(25-54%)                | 61%<br>(46-75%)          | 0.67<br>(0.32-1.2)                          | 0.63%<br>(-0.48-1.9%)                | 0.74%<br>(-0.73-2.4%)               | 240<br>(-230-760)      | 4800<br>(-3800-15000)        |
| Brazil   | 1990 | Female | 75 to 79 | 33%<br>(20-49%)                | 67%<br>(51-80%)          | 0.52<br>(0.23-0.95)                         | 0.19%<br>(-0.83-1.3%)                | 0.16%<br>(-1.1-1.5%)                | 58<br>(-400-550)       | 1200<br>(-5300-8500)         |
| Brazil   | 1990 | Female | 80 to 84 | 27%<br>(15-41%)                | 73%<br>(59-85%)          | 0.5<br>(0.24-0.84)                          | 0.34%<br>(-0.47-1.3%)                | 0.34%<br>(-0.64-1.5%)               | 110<br>(-220-500)      | 1500<br>(-2000-5600)         |
| Brazil   | 1990 | Female | 85 to 89 | 24%<br>(13-37%)                | 76%<br>(63-87%)          | 0.51<br>(0.24-0.93)                         | 0.52%<br>(-0.28-1.6%)                | 0.53%<br>(-0.43-1.8%)               | 110<br>(-94-390)       | 980<br>(-510-3100)           |
| Brazil   | 1990 | Female | 90 to 94 | 25%<br>(14-38%)                | 75%<br>(62-86%)          | 0.6<br>(0.27-1.1)                           | 0.68%<br>(-0.18-2.1%)                | 0.7%<br>(-0.36-2.4%)                | 69<br>(-35-240)        | 420<br>(-110-1300)           |
| Brazil   | 1990 | Female | 95 plus  | 28%<br>(14-46%)                | 72%<br>(54-86%)          | 0.73<br>(0.29-1.5)                          | 0.97%<br>(-0.2-2.7%)                 | 0.99%<br>(-0.43-3.1%)               | 33<br>(-14-100)        | 130<br>(-27-370)             |
| Brazil   | 1990 | Male   | All Ages | 68%<br>(63-73%)                | 32%<br>(27-37%)          | 1.8<br>(1.6-2)                              | 6.6%<br>(5.6-7.7%)                   | 7.5%<br>(5.9-9.2%)                  | 39000<br>(31000-48000) | 1900000<br>(1600000-2300000) |
| Brazil   | 1990 | Male   | 15 to 19 | 70%<br>(59-81%)                | 30%<br>(19-41%)          | 1.3<br>(0.75-2)                             | 6.2%<br>(3.7-9.3%)                   | 8.5%<br>(4.6-13%)                   | 1100<br>(590-1700)     | 90000<br>(53000-130000)      |
| Brazil   | 1990 | Male   | 20 to 24 | 81%<br>(72-88%)                | 19%<br>(12-28%)          | 2.8<br>(1.8-3.8)                            | 13%<br>(9.2-17%)                     | 16%<br>(10-21%)                     | 2800<br>(1900-3900)    | 220000<br>(150000-290000)    |

| Location | Year | Sex    | Age      | Prevalence of current drinkers | Prevalence of abstainers | Population average of standard drinks daily | Percent of total attributable deaths | Percent of total attributable DALYs | Attributable deaths   | Attributable DALYs        |
|----------|------|--------|----------|--------------------------------|--------------------------|---------------------------------------------|--------------------------------------|-------------------------------------|-----------------------|---------------------------|
| Brazil   | 1990 | Male   | 25 to 29 | 83%<br>(73-89%)                | 17%<br>(11-27%)          | 3.5<br>(2.4-4.7)                            | 15%<br>(12-19%)                      | 18%<br>(13-24%)                     | 3500<br>(2500-4600)   | 270000<br>(200000-340000) |
| Brazil   | 1990 | Male   | 30 to 34 | 83%<br>(73-89%)                | 17%<br>(11-27%)          | 3.6<br>(2.4-4.9)                            | 16%<br>(12-19%)                      | 19%<br>(14-24%)                     | 3700<br>(2800-4700)   | 260000<br>(200000-320000) |
| Brazil   | 1990 | Male   | 35 to 39 | 83%<br>(75-89%)                | 17%<br>(11-25%)          | 3.3<br>(2.2-4.6)                            | 15%<br>(12-19%)                      | 18%<br>(14-23%)                     | 3700<br>(2800-4700)   | 230000<br>(180000-280000) |
| Brazil   | 1990 | Male   | 40 to 44 | 82%<br>(73-88%)                | 18%<br>(12-27%)          | 3.2<br>(2-4.6)                              | 14%<br>(11-18%)                      | 17%<br>(13-22%)                     | 3800<br>(2800-4800)   | 200000<br>(150000-250000) |
| Brazil   | 1990 | Male   | 45 to 49 | 80%<br>(69-87%)                | 20%<br>(13-31%)          | 3.4<br>(2.1-5)                              | 14%<br>(10-18%)                      | 17%<br>(12-22%)                     | 3900<br>(2700-5100)   | 180000<br>(130000-230000) |
| Brazil   | 1990 | Male   | 50 to 54 | 78%<br>(68-86%)                | 22%<br>(14-32%)          | 3.3<br>(1.9-5)                              | 12%<br>(8.2-16%)                     | 15%<br>(9.6-20%)                    | 4200<br>(2700-5600)   | 170000<br>(110000-220000) |
| Brazil   | 1990 | Male   | 55 to 59 | 77%<br>(67-85%)                | 23%<br>(15-33%)          | 3.1<br>(1.9-4.7)                            | 10%<br>(6.9-14%)                     | 12%<br>(8-17%)                      | 3900<br>(2500-5500)   | 130000<br>(87000-180000)  |
| Brazil   | 1990 | Male   | 60 to 64 | 76%<br>(66-85%)                | 24%<br>(15-34%)          | 2.8<br>(1.7-4.4)                            | 7.9%<br>(4.5-12%)                    | 9.2%<br>(5-14%)                     | 3500<br>(1900-5300)   | 100000<br>(56000-150000)  |
| Brazil   | 1990 | Male   | 65 to 69 | 75%<br>(65-84%)                | 25%<br>(16-35%)          | 2.3<br>(1.4-3.5)                            | 5.5%<br>(2.8-8.9%)                   | 6.3%<br>(3.1-10%)                   | 2500<br>(1200-4100)   | 59000<br>(30000-96000)    |
| Brazil   | 1990 | Male   | 70 to 74 | 71%<br>(59-80%)                | 29%<br>(20-41%)          | 1.7<br>(0.96-2.6)                           | 3.3%<br>(1.1-6.1%)                   | 3.6%<br>(1-6.9%)                    | 1400<br>(400-2800)    | 28000<br>(9100-52000)     |
| Brazil   | 1990 | Male   | 75 to 79 | 64%<br>(51-76%)                | 36%<br>(24-49%)          | 1.2<br>(0.64-1.9)                           | 1.8%<br>(0.23-3.8%)                  | 1.9%<br>(0.097-4.2%)                | 750<br>(38-1600)      | 12000<br>(1500-24000)     |
| Brazil   | 1990 | Male   | 80 to 84 | 55%<br>(42-67%)                | 45%<br>(33-58%)          | 0.93<br>(0.54-1.4)                          | 1.2%<br>(0.037-2.5%)                 | 1.2%<br>(-0.12-2.7%)                | 360<br>(-39-830)      | 4300<br>(130-9200)        |
| Brazil   | 1990 | Male   | 85 to 89 | 47%<br>(35-59%)                | 53%<br>(41-65%)          | 0.8<br>(0.46-1.3)                           | 0.75%<br>(-0.14-1.8%)                | 0.67%<br>(-0.33-1.9%)               | 92<br>(-45-260)       | 870<br>(-160-2200)        |
| Brazil   | 1990 | Male   | 90 to 94 | 44%<br>(32-56%)                | 56%<br>(44-68%)          | 0.73<br>(0.4-1.2)                           | 0.48%<br>(-0.29-1.4%)                | 0.32%<br>(-0.58-1.4%)               | 16<br>(-29-70)        | 140<br>(-87-420)          |
| Brazil   | 1990 | Male   | 95 plus  | 43%<br>(29-58%)                | 57%<br>(42-71%)          | 0.68<br>(0.32-1.2)                          | 0.48%<br>(-0.35-1.5%)                | 0.19%<br>(-0.86-1.3%)               | 2.5<br>(-11-18)       | 25<br>(-19-79)            |
| Brazil   | 1995 | Female | All Ages | 45%<br>(38-53%)                | 55%<br>(47-62%)          | 1.2<br>(1-1.3)                              | 2.5%<br>(2-3.1%)                     | 3.1%<br>(2.1-4.3%)                  | 12000<br>(8000-17000) | 560000<br>(440000-690000) |
| Brazil   | 1995 | Female | 15 to 19 | 46%<br>(31-63%)                | 54%<br>(37-69%)          | 1.1<br>(0.58-1.8)                           | 2.3%<br>(1.4-3.5%)                   | 4.7%<br>(2.5-7.7%)                  | 230<br>(120-380)      | 25000<br>(15000-37000)    |
| Brazil   | 1995 | Female | 20 to 24 | 56%<br>(38-72%)                | 44%<br>(28-62%)          | 1.8<br>(0.98-2.9)                           | 4.1%<br>(2.8-5.6%)                   | 6.9%<br>(4-10%)                     | 390<br>(230-570)      | 44000<br>(30000-61000)    |
| Brazil   | 1995 | Female | 25 to 29 | 58%<br>(39-74%)                | 42%<br>(26-61%)          | 2<br>(1.2-3.1)                              | 4.6%<br>(3.4-6%)                     | 7.5%<br>(4.7-10%)                   | 500<br>(320-700)      | 52000<br>(36000-69000)    |
| Brazil   | 1995 | Female | 30 to 34 | 58%<br>(39-74%)                | 42%<br>(26-61%)          | 2<br>(1.1-3.1)                              | 4.8%<br>(3.5-6.2%)                   | 8.1%<br>(5.3-11%)                   | 680<br>(450-930)      | 59000<br>(42000-77000)    |
| Brazil   | 1995 | Female | 35 to 39 | 58%<br>(40-73%)                | 42%<br>(27-60%)          | 2<br>(1.1-3.2)                              | 5%<br>(3.6-6.8%)                     | 8.8%<br>(5.8-12%)                   | 860<br>(570-1200)     | 60000<br>(42000-82000)    |
| Brazil   | 1995 | Female | 40 to 44 | 55%<br>(38-70%)                | 45%<br>(30-62%)          | 2<br>(1-3)                                  | 5.3%<br>(3.5-7.4%)                   | 9.1%<br>(5.6-13%)                   | 1100<br>(670-1600)    | 63000<br>(42000-88000)    |

| Location | Year | Sex    | Age      | Prevalence of current drinkers | Prevalence of abstainers | Population average of standard drinks daily | Percent of total attributable deaths | Percent of total attributable DALYs | Attributable deaths    | Attributable DALYs           |
|----------|------|--------|----------|--------------------------------|--------------------------|---------------------------------------------|--------------------------------------|-------------------------------------|------------------------|------------------------------|
| Brazil   | 1995 | Female | 45 to 49 | 50%<br>(31-65%)                | 50%<br>(35-69%)          | 1.9<br>(0.95-3.2)                           | 5.1%<br>(3.1-7.7%)                   | 8.4%<br>(4.8-13%)                   | 1200<br>(690-1900)     | 58000<br>(35000-87000)       |
| Brazil   | 1995 | Female | 50 to 54 | 46%<br>(28-63%)                | 54%<br>(37-72%)          | 1.9<br>(0.94-3.1)                           | 5.1%<br>(2.9-8%)                     | 7.9%<br>(4.5-12%)                   | 1300<br>(760-2000)     | 54000<br>(32000-82000)       |
| Brazil   | 1995 | Female | 55 to 59 | 44%<br>(29-61%)                | 56%<br>(39-71%)          | 1.8<br>(0.95-3.1)                           | 4.9%<br>(2.7-7.6%)                   | 7.2%<br>(4-11%)                     | 1500<br>(840-2400)     | 54000<br>(30000-84000)       |
| Brazil   | 1995 | Female | 60 to 64 | 45%<br>(29-61%)                | 55%<br>(39-71%)          | 1.7<br>(0.89-2.9)                           | 3.9%<br>(1.7-6.8%)                   | 5.4%<br>(2.3-9.4%)                  | 1400<br>(610-2400)     | 41000<br>(18000-72000)       |
| Brazil   | 1995 | Female | 65 to 69 | 45%<br>(31-60%)                | 55%<br>(40-69%)          | 1.3<br>(0.72-2.1)                           | 2.6%<br>(0.92-4.7%)                  | 3.4%<br>(1.2-6.3%)                  | 1100<br>(380-2100)     | 27000<br>(9600-49000)        |
| Brazil   | 1995 | Female | 70 to 74 | 43%<br>(29-57%)                | 57%<br>(43-71%)          | 0.9<br>(0.46-1.5)                           | 1.2%<br>(-0.21-2.9%)                 | 1.5%<br>(-0.3-3.7%)                 | 530<br>(-110-1300)     | 10000<br>(-1800-25000)       |
| Brazil   | 1995 | Female | 75 to 79 | 36%<br>(22-52%)                | 64%<br>(48-78%)          | 0.69<br>(0.32-1.2)                          | 0.61%<br>(-0.58-2.1%)                | 0.71%<br>(-0.77-2.5%)               | 280<br>(-300-970)      | 4300<br>(-4100-14000)        |
| Brazil   | 1995 | Female | 80 to 84 | 29%<br>(16-44%)                | 71%<br>(56-84%)          | 0.65<br>(0.32-1.1)                          | 0.82%<br>(-0.18-2%)                  | 0.92%<br>(-0.28-2.4%)               | 350<br>(-110-910)      | 4000<br>(-880-9900)          |
| Brazil   | 1995 | Female | 85 to 89 | 26%<br>(15-40%)                | 74%<br>(60-85%)          | 0.67<br>(0.31-1.2)                          | 1%<br>(0.069-2.5%)                   | 1.2%<br>(-0.0038-2.9%)              | 320<br>(-1.1-820)      | 2600<br>(170-6200)           |
| Brazil   | 1995 | Female | 90 to 94 | 27%<br>(15-40%)                | 73%<br>(60-85%)          | 0.78<br>(0.36-1.4)                          | 1.3%<br>(0.16-3.2%)                  | 1.4%<br>(0.069-3.7%)                | 180<br>(9.2-470)       | 1000<br>(120-2400)           |
| Brazil   | 1995 | Female | 95 plus  | 30%<br>(15-48%)                | 70%<br>(52-85%)          | 0.96<br>(0.38-1.9)                          | 1.7%<br>(0.13-4%)                    | 1.9%<br>(0.0018-4.6%)               | 75<br>(0.07-190)       | 270<br>(21-650)              |
| Brazil   | 1995 | Male   | All Ages | 69%<br>(64-74%)                | 31%<br>(26-36%)          | 2.2<br>(2-2.4)                              | 8.2%<br>(7.1-9.4%)                   | 9.2%<br>(7.4-11%)                   | 50000<br>(40000-61000) | 2400000<br>(2100000-2800000) |
| Brazil   | 1995 | Male   | 15 to 19 | 70%<br>(58-81%)                | 30%<br>(19-42%)          | 1.5<br>(0.85-2.3)                           | 6.8%<br>(4.2-10%)                    | 9.4%<br>(5.2-15%)                   | 1400<br>(750-2100)     | 110000<br>(66000-160000)     |
| Brazil   | 1995 | Male   | 20 to 24 | 81%<br>(71-88%)                | 19%<br>(12-29%)          | 3.2<br>(2.1-4.4)                            | 14%<br>(10-18%)                      | 17%<br>(12-24%)                     | 3400<br>(2200-4600)    | 260000<br>(180000-340000)    |
| Brazil   | 1995 | Male   | 25 to 29 | 82%<br>(72-89%)                | 18%<br>(11-28%)          | 4<br>(2.7-5.5)                              | 16%<br>(12-20%)                      | 19%<br>(14-25%)                     | 4000<br>(2900-5200)    | 300000<br>(220000-380000)    |
| Brazil   | 1995 | Male   | 30 to 34 | 82%<br>(73-89%)                | 18%<br>(11-27%)          | 4.2<br>(2.8-5.7)                            | 16%<br>(13-20%)                      | 19%<br>(15-24%)                     | 4300<br>(3300-5500)    | 300000<br>(240000-370000)    |
| Brazil   | 1995 | Male   | 35 to 39 | 83%<br>(74-89%)                | 17%<br>(11-26%)          | 3.8<br>(2.6-5.4)                            | 16%<br>(13-19%)                      | 19%<br>(15-24%)                     | 4600<br>(3500-5700)    | 280000<br>(220000-340000)    |
| Brazil   | 1995 | Male   | 40 to 44 | 81%<br>(73-88%)                | 19%<br>(12-27%)          | 3.8<br>(2.4-5.3)                            | 16%<br>(12-19%)                      | 19%<br>(14-24%)                     | 4900<br>(3700-6100)    | 260000<br>(200000-320000)    |
| Brazil   | 1995 | Male   | 45 to 49 | 79%<br>(69-87%)                | 21%<br>(13-31%)          | 3.9<br>(2.4-5.9)                            | 15%<br>(11-19%)                      | 19%<br>(14-24%)                     | 5100<br>(3700-6400)    | 230000<br>(170000-290000)    |
| Brazil   | 1995 | Male   | 50 to 54 | 78%<br>(68-86%)                | 22%<br>(14-32%)          | 3.8<br>(2.3-5.6)                            | 14%<br>(9.8-17%)                     | 17%<br>(12-22%)                     | 5000<br>(3400-6400)    | 200000<br>(140000-250000)    |
| Brazil   | 1995 | Male   | 55 to 59 | 77%<br>(68-86%)                | 23%<br>(14-32%)          | 3.7<br>(2.2-5.5)                            | 12%<br>(8.4-16%)                     | 15%<br>(10-19%)                     | 5100<br>(3500-6800)    | 170000<br>(120000-230000)    |

| Location | Year | Sex    | Age      | Prevalence of current drinkers | Prevalence of abstainers | Population average of standard drinks daily | Percent of total attributable deaths | Percent of total attributable DALYs | Attributable deaths    | Attributable DALYs        |
|----------|------|--------|----------|--------------------------------|--------------------------|---------------------------------------------|--------------------------------------|-------------------------------------|------------------------|---------------------------|
| Brazil   | 1995 | Male   | 60 to 64 | 78%<br>(69-86%)                | 22%<br>(14-31%)          | 3.5<br>(2.1-5.3)                            | 9.7%<br>(5.9-14%)                    | 11%<br>(6.8-16%)                    | 4500<br>(2700-6400)    | 130000<br>(78000-180000)  |
| Brazil   | 1995 | Male   | 65 to 69 | 77%<br>(68-85%)                | 23%<br>(15-32%)          | 2.9<br>(1.9-4.3)                            | 7.1%<br>(4-11%)                      | 8.1%<br>(4.5-12%)                   | 3800<br>(2100-5700)    | 89000<br>(50000-130000)   |
| Brazil   | 1995 | Male   | 70 to 74 | 73%<br>(63-81%)                | 27%<br>(19-37%)          | 2.1<br>(1.2-3.2)                            | 4.4%<br>(1.8-7.5%)                   | 4.9%<br>(2-8.7%)                    | 2300<br>(900-3900)     | 43000<br>(18000-74000)    |
| Brazil   | 1995 | Male   | 75 to 79 | 66%<br>(53-78%)                | 34%<br>(22-47%)          | 1.5<br>(0.81-2.4)                           | 2.6%<br>(0.68-5%)                    | 2.8%<br>(0.61-5.6%)                 | 1200<br>(250-2400)     | 18000<br>(4800-35000)     |
| Brazil   | 1995 | Male   | 80 to 84 | 57%<br>(44-69%)                | 43%<br>(31-56%)          | 1.2<br>(0.68-1.8)                           | 1.8%<br>(0.4-3.5%)                   | 1.9%<br>(0.32-3.7%)                 | 670<br>(110-1300)      | 7500<br>(1700-15000)      |
| Brazil   | 1995 | Male   | 85 to 89 | 49%<br>(37-62%)                | 51%<br>(38-63%)          | 1<br>(0.57-1.6)                             | 1.3%<br>(0.21-2.7%)                  | 1.3%<br>(0.056-2.9%)                | 240<br>(11-540)        | 2000<br>(330-4400)        |
| Brazil   | 1995 | Male   | 90 to 94 | 47%<br>(35-59%)                | 53%<br>(41-65%)          | 0.92<br>(0.51-1.5)                          | 0.9%<br>(-0.0071-2.1%)               | 0.81%<br>(-0.25-2.2%)               | 49<br>(-15-140)        | 320<br>(-2.6-770)         |
| Brazil   | 1995 | Male   | 95 plus  | 47%<br>(32-62%)                | 53%<br>(38-68%)          | 0.88<br>(0.42-1.6)                          | 0.81%<br>(-0.19-2.4%)                | 0.59%<br>(-0.57-2.4%)               | 8.8<br>(-8.7-36)       | 48<br>(-11-140)           |
| Brazil   | 2000 | Female | All Ages | 47%<br>(40-54%)                | 53%<br>(46-60%)          | 1.5<br>(1.3-1.7)                            | 3.1%<br>(2.5-3.8%)                   | 4%<br>(2.8-5.4%)                    | 16000<br>(11000-22000) | 690000<br>(550000-840000) |
| Brazil   | 2000 | Female | 15 to 19 | 48%<br>(33-64%)                | 52%<br>(36-67%)          | 1.4<br>(0.74-2.2)                           | 2.5%<br>(1.6-3.7%)                   | 5.8%<br>(3.1-9.1%)                  | 270<br>(150-430)       | 28000<br>(18000-42000)    |
| Brazil   | 2000 | Female | 20 to 24 | 58%<br>(41-73%)                | 42%<br>(27-59%)          | 2.2<br>(1.2-3.4)                            | 4.3%<br>(3.1-5.9%)                   | 8.3%<br>(5-12%)                     | 450<br>(270-660)       | 51000<br>(35000-69000)    |
| Brazil   | 2000 | Female | 25 to 29 | 59%<br>(40-74%)                | 41%<br>(26-60%)          | 2.4<br>(1.4-3.7)                            | 4.7%<br>(3.5-6.2%)                   | 8.5%<br>(5.6-12%)                   | 520<br>(340-720)       | 54000<br>(39000-71000)    |
| Brazil   | 2000 | Female | 30 to 34 | 58%<br>(39-74%)                | 42%<br>(26-61%)          | 2.4<br>(1.3-3.6)                            | 4.9%<br>(3.7-6.3%)                   | 9.1%<br>(6.1-12%)                   | 700<br>(470-950)       | 61000<br>(45000-78000)    |
| Brazil   | 2000 | Female | 35 to 39 | 57%<br>(41-72%)                | 43%<br>(28-59%)          | 2.3<br>(1.3-3.7)                            | 5.2%<br>(3.8-6.9%)                   | 9.7%<br>(6.6-13%)                   | 980<br>(660-1300)      | 70000<br>(49000-91000)    |
| Brazil   | 2000 | Female | 40 to 44 | 54%<br>(38-70%)                | 46%<br>(30-62%)          | 2.3<br>(1.2-3.5)                            | 5.5%<br>(3.7-7.7%)                   | 10%<br>(6.4-14%)                    | 1300<br>(830-1800)     | 75000<br>(52000-100000)   |
| Brazil   | 2000 | Female | 45 to 49 | 49%<br>(31-65%)                | 51%<br>(35-69%)          | 2.2<br>(1.1-3.7)                            | 5.5%<br>(3.5-8%)                     | 9.5%<br>(5.7-14%)                   | 1500<br>(910-2300)     | 74000<br>(47000-110000)   |
| Brazil   | 2000 | Female | 50 to 54 | 47%<br>(30-64%)                | 53%<br>(36-70%)          | 2.3<br>(1.2-3.8)                            | 5.7%<br>(3.5-8.6%)                   | 9.2%<br>(5.5-14%)                   | 1800<br>(1100-2600)    | 72000<br>(45000-110000)   |
| Brazil   | 2000 | Female | 55 to 59 | 46%<br>(31-63%)                | 54%<br>(37-69%)          | 2.3<br>(1.2-3.8)                            | 5.7%<br>(3.2-8.4%)                   | 8.6%<br>(4.9-13%)                   | 1900<br>(1100-2800)    | 66000<br>(38000-98000)    |
| Brazil   | 2000 | Female | 60 to 64 | 47%<br>(31-63%)                | 53%<br>(37-69%)          | 2.1<br>(1.1-3.6)                            | 4.7%<br>(2.3-7.7%)                   | 6.7%<br>(3.2-11%)                   | 1900<br>(920-3200)     | 57000<br>(26000-93000)    |
| Brazil   | 2000 | Female | 65 to 69 | 48%<br>(32-63%)                | 52%<br>(37-68%)          | 1.6<br>(0.91-2.6)                           | 3.4%<br>(1.5-5.8%)                   | 4.6%<br>(2-7.9%)                    | 1600<br>(690-2700)     | 38000<br>(17000-64000)    |
| Brazil   | 2000 | Female | 70 to 74 | 47%<br>(33-61%)                | 53%<br>(39-67%)          | 1.2<br>(0.61-2)                             | 1.8%<br>(0.2-3.8%)                   | 2.4%<br>(0.22-5%)                   | 1000<br>(92-2100)      | 19000<br>(2000-42000)     |
| Brazil   | 2000 | Female | 75 to 79 | 41%<br>(26-57%)                | 59%<br>(43-74%)          | 0.96<br>(0.46-1.7)                          | 1.1%<br>(-0.32-3%)                   | 1.4%<br>(-0.46-3.7%)                | 600<br>(-200-1600)     | 9200<br>(-2600-24000)     |

| Location | Year | Sex    | Age      | Prevalence of current drinkers | Prevalence of abstainers | Population average of standard drinks daily | Percent of total attributable deaths | Percent of total attributable DALYs | Attributable deaths    | Attributable DALYs           |
|----------|------|--------|----------|--------------------------------|--------------------------|---------------------------------------------|--------------------------------------|-------------------------------------|------------------------|------------------------------|
| Brazil   | 2000 | Female | 80 to 84 | 33%<br>(19-49%)                | 67%<br>(51-81%)          | 0.9<br>(0.43-1.5)                           | 1.4%<br>(0.16-2.9%)                  | 1.6%<br>(0.13-3.6%)                 | 700<br>(53-1500)       | 7800<br>(890-16000)          |
| Brazil   | 2000 | Female | 85 to 89 | 29%<br>(16-43%)                | 71%<br>(57-84%)          | 0.89<br>(0.41-1.6)                          | 1.6%<br>(0.43-3.5%)                  | 1.9%<br>(0.43-4.2%)                 | 660<br>(150-1500)      | 5200<br>(1400-11000)         |
| Brazil   | 2000 | Female | 90 to 94 | 29%<br>(17-44%)                | 71%<br>(56-83%)          | 1<br>(0.47-1.9)                             | 2%<br>(0.53-4.4%)                    | 2.3%<br>(0.53-5.1%)                 | 450<br>(99-1000)       | 2400<br>(610-5200)           |
| Brazil   | 2000 | Female | 95 plus  | 32%<br>(16-52%)                | 68%<br>(48-84%)          | 1.2<br>(0.51-2.5)                           | 2.6%<br>(0.56-5.4%)                  | 2.9%<br>(0.49-6.2%)                 | 160<br>(28-360)        | 580<br>(120-1200)            |
| Brazil   | 2000 | Male   | All Ages | 71%<br>(66-75%)                | 29%<br>(25-34%)          | 2.7<br>(2.4-3)                              | 9.9%<br>(8.5-11%)                    | 11%<br>(8.7-12%)                    | 61000<br>(50000-72000) | 2900000<br>(2500000-3300000) |
| Brazil   | 2000 | Male   | 15 to 19 | 73%<br>(63-83%)                | 27%<br>(17-37%)          | 1.9<br>(1.1-2.9)                            | 8.2%<br>(4.9-12%)                    | 11%<br>(6.4-17%)                    | 1800<br>(1000-2700)    | 150000<br>(87000-210000)     |
| Brazil   | 2000 | Male   | 20 to 24 | 82%<br>(74-89%)                | 18%<br>(11-26%)          | 3.9<br>(2.6-5.2)                            | 16%<br>(12-21%)                      | 20%<br>(14-27%)                     | 4400<br>(2900-5900)    | 340000<br>(240000-440000)    |
| Brazil   | 2000 | Male   | 25 to 29 | 82%<br>(73-89%)                | 18%<br>(11-27%)          | 4.6<br>(3.2-6.4)                            | 18%<br>(14-23%)                      | 22%<br>(16-29%)                     | 4500<br>(3200-5800)    | 340000<br>(260000-420000)    |
| Brazil   | 2000 | Male   | 30 to 34 | 82%<br>(72-89%)                | 18%<br>(11-28%)          | 4.7<br>(3.2-6.6)                            | 18%<br>(14-22%)                      | 22%<br>(17-27%)                     | 4600<br>(3600-5900)    | 320000<br>(260000-400000)    |
| Brazil   | 2000 | Male   | 35 to 39 | 82%<br>(74-89%)                | 18%<br>(11-26%)          | 4.3<br>(2.9-6.2)                            | 17%<br>(14-21%)                      | 21%<br>(16-27%)                     | 5100<br>(3900-6400)    | 320000<br>(260000-390000)    |
| Brazil   | 2000 | Male   | 40 to 44 | 82%<br>(74-89%)                | 18%<br>(11-26%)          | 4.4<br>(2.8-6.1)                            | 17%<br>(13-20%)                      | 21%<br>(17-26%)                     | 5800<br>(4400-7000)    | 310000<br>(250000-370000)    |
| Brazil   | 2000 | Male   | 45 to 49 | 80%<br>(69-87%)                | 20%<br>(13-31%)          | 4.5<br>(2.9-6.6)                            | 16%<br>(13-20%)                      | 21%<br>(16-25%)                     | 6300<br>(4800-7700)    | 290000<br>(230000-350000)    |
| Brazil   | 2000 | Male   | 50 to 54 | 78%<br>(67-85%)                | 22%<br>(15-33%)          | 4.3<br>(2.6-6.4)                            | 15%<br>(11-18%)                      | 19%<br>(14-23%)                     | 6200<br>(4500-7800)    | 250000<br>(180000-310000)    |
| Brazil   | 2000 | Male   | 55 to 59 | 77%<br>(67-86%)                | 23%<br>(14-33%)          | 4.2<br>(2.5-6.3)                            | 13%<br>(9.6-17%)                     | 16%<br>(12-21%)                     | 5900<br>(4200-7500)    | 200000<br>(150000-250000)    |
| Brazil   | 2000 | Male   | 60 to 64 | 76%<br>(66-85%)                | 24%<br>(15-34%)          | 3.8<br>(2.3-5.9)                            | 10%<br>(6.8-14%)                     | 13%<br>(8-17%)                      | 5400<br>(3500-7400)    | 160000<br>(100000-210000)    |
| Brazil   | 2000 | Male   | 65 to 69 | 75%<br>(64-83%)                | 25%<br>(17-36%)          | 3.1<br>(2-4.5)                              | 7.8%<br>(4.8-11%)                    | 9.2%<br>(5.6-13%)                   | 4400<br>(2600-6200)    | 100000<br>(65000-150000)     |
| Brazil   | 2000 | Male   | 70 to 74 | 70%<br>(59-79%)                | 30%<br>(21-41%)          | 2.2<br>(1.3-3.5)                            | 5.1%<br>(2.5-8.2%)                   | 5.8%<br>(2.8-9.5%)                  | 3100<br>(1500-5000)    | 60000<br>(30000-95000)       |
| Brazil   | 2000 | Male   | 75 to 79 | 64%<br>(50-77%)                | 36%<br>(23-50%)          | 1.6<br>(0.86-2.6)                           | 3.2%<br>(1.3-5.6%)                   | 3.6%<br>(1.3-6.4%)                  | 1700<br>(630-3100)     | 26000<br>(10000-46000)       |
| Brazil   | 2000 | Male   | 80 to 84 | 55%<br>(41-68%)                | 45%<br>(32-59%)          | 1.3<br>(0.73-2)                             | 2.3%<br>(0.87-4.1%)                  | 2.5%<br>(0.86-4.5%)                 | 980<br>(340-1800)      | 11000<br>(4200-20000)        |
| Brazil   | 2000 | Male   | 85 to 89 | 47%<br>(34-61%)                | 53%<br>(39-66%)          | 1.1<br>(0.59-1.8)                           | 1.7%<br>(0.56-3.4%)                  | 1.8%<br>(0.48-3.7%)                 | 490<br>(130-1000)      | 3900<br>(1300-7900)          |
| Brazil   | 2000 | Male   | 90 to 94 | 46%<br>(33-59%)                | 54%<br>(41-67%)          | 1<br>(0.56-1.8)                             | 1.3%<br>(0.21-2.9%)                  | 1.3%<br>(0.057-3%)                  | 150<br>(6.4-340)       | 870<br>(140-1900)            |



| Location | Year | Sex    | Age      | Prevalence of current drinkers | Prevalence of abstainers | Population average of standard drinks daily | Percent of total attributable deaths | Percent of total attributable DALYs | Attributable deaths    | Attributable DALYs        |
|----------|------|--------|----------|--------------------------------|--------------------------|---------------------------------------------|--------------------------------------|-------------------------------------|------------------------|---------------------------|
| Brazil   | 2000 | Male   | 95 plus  | 47%<br>(31-63%)                | 53%<br>(37-69%)          | 1<br>(0.46-1.8)                             | 1.1%<br>(-0.058-3.1%)                | 1%<br>(-0.31-3.2%)                  | 25<br>(-7.7-78)        | 110<br>(-5.4-300)         |
| Brazil   | 2005 | Female | All Ages | 44%<br>(40-49%)                | 56%<br>(51-60%)          | 1.5<br>(1.4-1.7)                            | 3.1%<br>(2.6-3.7%)                   | 3.8%<br>(2.8-5%)                    | 17000<br>(12000-22000) | 710000<br>(580000-860000) |
| Brazil   | 2005 | Female | 15 to 19 | 51%<br>(40-63%)                | 49%<br>(37-60%)          | 1.6<br>(1-2.5)                              | 2.8%<br>(1.9-3.8%)                   | 6.7%<br>(4.1-10%)                   | 290<br>(180-440)       | 30000<br>(20000-42000)    |
| Brazil   | 2005 | Female | 20 to 24 | 58%<br>(47-69%)                | 42%<br>(31-53%)          | 2.5<br>(1.6-3.5)                            | 4.5%<br>(3.4-5.9%)                   | 9.1%<br>(5.9-13%)                   | 480<br>(310-670)       | 56000<br>(41000-74000)    |
| Brazil   | 2005 | Female | 25 to 29 | 59%<br>(48-69%)                | 41%<br>(31-52%)          | 2.6<br>(1.8-3.6)                            | 4.8%<br>(3.8-6%)                     | 9.1%<br>(6.5-12%)                   | 560<br>(410-750)       | 60000<br>(46000-77000)    |
| Brazil   | 2005 | Female | 30 to 34 | 55%<br>(44-66%)                | 45%<br>(34-56%)          | 2.4<br>(1.6-3.3)                            | 4.7%<br>(3.7-5.8%)                   | 8.9%<br>(6.5-11%)                   | 650<br>(470-820)       | 59000<br>(45000-74000)    |
| Brazil   | 2005 | Female | 35 to 39 | 53%<br>(43-64%)                | 47%<br>(36-57%)          | 2.2<br>(1.4-3.2)                            | 4.8%<br>(3.6-6.1%)                   | 9.2%<br>(6.5-12%)                   | 870<br>(620-1100)      | 65000<br>(48000-82000)    |
| Brazil   | 2005 | Female | 40 to 44 | 51%<br>(41-61%)                | 49%<br>(39-59%)          | 2.2<br>(1.4-3.2)                            | 5.2%<br>(3.7-6.9%)                   | 9.8%<br>(6.6-13%)                   | 1300<br>(880-1800)     | 78000<br>(56000-100000)   |
| Brazil   | 2005 | Female | 45 to 49 | 46%<br>(36-58%)                | 54%<br>(42-64%)          | 2.2<br>(1.4-3.4)                            | 5.4%<br>(3.7-7.4%)                   | 9.5%<br>(6.4-13%)                   | 1700<br>(1100-2300)    | 82000<br>(58000-110000)   |
| Brazil   | 2005 | Female | 50 to 54 | 40%<br>(30-51%)                | 60%<br>(49-70%)          | 2<br>(1.2-3.1)                              | 5.2%<br>(3.5-7.2%)                   | 8.5%<br>(5.7-12%)                   | 1800<br>(1200-2500)    | 76000<br>(52000-100000)   |
| Brazil   | 2005 | Female | 55 to 59 | 36%<br>(28-47%)                | 64%<br>(53-72%)          | 1.8<br>(1.1-2.8)                            | 4.8%<br>(3-6.7%)                     | 7.5%<br>(4.9-11%)                   | 1900<br>(1200-2600)    | 66000<br>(43000-93000)    |
| Brazil   | 2005 | Female | 60 to 64 | 35%<br>(24-47%)                | 65%<br>(53-76%)          | 1.6<br>(0.89-2.6)                           | 3.9%<br>(2.2-6%)                     | 5.7%<br>(3.2-8.7%)                  | 1700<br>(930-2500)     | 49000<br>(28000-76000)    |
| Brazil   | 2005 | Female | 65 to 69 | 35%<br>(25-47%)                | 65%<br>(53-75%)          | 1.2<br>(0.7-1.9)                            | 2.9%<br>(1.6-4.5%)                   | 4%<br>(2.2-6.3%)                    | 1500<br>(830-2400)     | 37000<br>(21000-58000)    |
| Brazil   | 2005 | Female | 70 to 74 | 37%<br>(26-49%)                | 63%<br>(51-74%)          | 0.96<br>(0.52-1.6)                          | 1.9%<br>(0.66-3.5%)                  | 2.5%<br>(0.87-4.7%)                 | 1100<br>(380-2000)     | 21000<br>(7600-40000)     |
| Brazil   | 2005 | Female | 75 to 79 | 33%<br>(21-46%)                | 67%<br>(54-79%)          | 0.8<br>(0.42-1.3)                           | 1.3%<br>(0.17-2.7%)                  | 1.7%<br>(0.18-3.5%)                 | 860<br>(96-1800)       | 13000<br>(1700-27000)     |
| Brazil   | 2005 | Female | 80 to 84 | 25%<br>(15-37%)                | 75%<br>(63-85%)          | 0.7<br>(0.37-1.1)                           | 1.4%<br>(0.5-2.6%)                   | 1.7%<br>(0.59-3.1%)                 | 840<br>(300-1600)      | 9400<br>(3500-17000)      |
| Brazil   | 2005 | Female | 85 to 89 | 21%<br>(12-30%)                | 79%<br>(70-88%)          | 0.67<br>(0.34-1.2)                          | 1.5%<br>(0.66-2.9%)                  | 1.8%<br>(0.74-3.4%)                 | 760<br>(310-1400)      | 6000<br>(2500-11000)      |
| Brazil   | 2005 | Female | 90 to 94 | 21%<br>(13-31%)                | 79%<br>(69-87%)          | 0.76<br>(0.37-1.4)                          | 1.8%<br>(0.71-3.5%)                  | 2.1%<br>(0.75-4.2%)                 | 540<br>(190-1100)      | 2900<br>(1100-5600)       |
| Brazil   | 2005 | Female | 95 plus  | 23%<br>(12-37%)                | 77%<br>(63-88%)          | 0.92<br>(0.39-1.7)                          | 2.3%<br>(0.73-4.5%)                  | 2.6%<br>(0.74-5.2%)                 | 220<br>(64-440)        | 790<br>(260-1500)         |
| Brazil   | 2005 | Male   | All Ages | 72%<br>(68-75%)                | 28%<br>(25-32%)          | 3<br>(2.7-3.3)                              | 11%<br>(9.3-12%)                     | 11%<br>(9.4-13%)                    | 68000<br>(57000-79000) | 320000<br>(280000-360000) |
| Brazil   | 2005 | Male   | 15 to 19 | 76%<br>(68-84%)                | 24%<br>(16-32%)          | 2.2<br>(1.3-3.3)                            | 8.9%<br>(5.4-13%)                    | 12%<br>(7.1-18%)                    | 2000<br>(1100-2900)    | 160000<br>(98000-220000)  |

| Location | Year | Sex    | Age      | Prevalence of current drinkers | Prevalence of abstainers | Population average of standard drinks daily | Percent of total attributable deaths | Percent of total attributable DALYs | Attributable deaths    | Attributable DALYs        |
|----------|------|--------|----------|--------------------------------|--------------------------|---------------------------------------------|--------------------------------------|-------------------------------------|------------------------|---------------------------|
| Brazil   | 2005 | Male   | 20 to 24 | 83%<br>(76-88%)                | 17%<br>(12-24%)          | 4.2<br>(2.8-5.7)                            | 17%<br>(13-22%)                      | 21%<br>(15-28%)                     | 4800<br>(3300-6400)    | 370000<br>(270000-480000) |
| Brazil   | 2005 | Male   | 25 to 29 | 83%<br>(76-89%)                | 17%<br>(11-24%)          | 5<br>(3.5-6.7)                              | 19%<br>(14-23%)                      | 23%<br>(17-30%)                     | 5000<br>(3700-6500)    | 370000<br>(290000-470000) |
| Brazil   | 2005 | Male   | 30 to 34 | 83%<br>(76-88%)                | 17%<br>(12-24%)          | 5.1<br>(3.6-6.9)                            | 18%<br>(15-22%)                      | 23%<br>(18-29%)                     | 4700<br>(3700-5900)    | 330000<br>(270000-400000) |
| Brazil   | 2005 | Male   | 35 to 39 | 82%<br>(76-88%)                | 18%<br>(12-24%)          | 4.5<br>(3.1-6.3)                            | 17%<br>(14-21%)                      | 22%<br>(17-27%)                     | 5100<br>(3900-6200)    | 320000<br>(250000-380000) |
| Brazil   | 2005 | Male   | 40 to 44 | 81%<br>(75-87%)                | 19%<br>(13-25%)          | 4.5<br>(2.9-6.2)                            | 17%<br>(13-20%)                      | 22%<br>(17-27%)                     | 6100<br>(4700-7300)    | 330000<br>(270000-390000) |
| Brazil   | 2005 | Male   | 45 to 49 | 80%<br>(72-86%)                | 20%<br>(14-28%)          | 4.8<br>(3.1-6.9)                            | 17%<br>(13-20%)                      | 22%<br>(17-26%)                     | 7100<br>(5600-8500)    | 330000<br>(270000-400000) |
| Brazil   | 2005 | Male   | 50 to 54 | 78%<br>(70-84%)                | 22%<br>(16-30%)          | 4.6<br>(2.9-6.8)                            | 15%<br>(12-19%)                      | 20%<br>(15-24%)                     | 7400<br>(5700-9000)    | 300000<br>(230000-360000) |
| Brazil   | 2005 | Male   | 55 to 59 | 76%<br>(68-83%)                | 24%<br>(17-32%)          | 4.2<br>(2.8-6.2)                            | 13%<br>(10-17%)                      | 17%<br>(13-21%)                     | 6900<br>(5200-8500)    | 240000<br>(180000-290000) |
| Brazil   | 2005 | Male   | 60 to 64 | 75%<br>(67-83%)                | 25%<br>(17-33%)          | 3.9<br>(2.4-6)                              | 11%<br>(7.3-14%)                     | 13%<br>(8.9-17%)                    | 5900<br>(4000-7700)    | 170000<br>(120000-220000) |
| Brazil   | 2005 | Male   | 65 to 69 | 74%<br>(65-82%)                | 26%<br>(18-35%)          | 3.2<br>(2-4.7)                              | 8.3%<br>(5.3-11%)                    | 9.9%<br>(6.3-14%)                   | 5200<br>(3300-7100)    | 130000<br>(81000-170000)  |
| Brazil   | 2005 | Male   | 70 to 74 | 70%<br>(59-79%)                | 30%<br>(21-41%)          | 2.3<br>(1.4-3.6)                            | 5.4%<br>(2.9-8.3%)                   | 6.3%<br>(3.3-9.9%)                  | 3500<br>(1800-5500)    | 68000<br>(36000-110000)   |
| Brazil   | 2005 | Male   | 75 to 79 | 63%<br>(50-75%)                | 37%<br>(25-50%)          | 1.6<br>(0.91-2.6)                           | 3.4%<br>(1.5-5.6%)                   | 3.8%<br>(1.6-6.5%)                  | 2200<br>(890-3800)     | 33000<br>(14000-57000)    |
| Brazil   | 2005 | Male   | 80 to 84 | 53%<br>(40-66%)                | 47%<br>(34-60%)          | 1.3<br>(0.72-2)                             | 2.4%<br>(1-4%)                       | 2.6%<br>(1.1-4.6%)                  | 1200<br>(510-2200)     | 14000<br>(6200-24000)     |
| Brazil   | 2005 | Male   | 85 to 89 | 45%<br>(33-57%)                | 55%<br>(43-67%)          | 1.1<br>(0.61-1.7)                           | 1.9%<br>(0.77-3.4%)                  | 2%<br>(0.71-3.7%)                   | 630<br>(230-1200)      | 5100<br>(2100-9300)       |
| Brazil   | 2005 | Male   | 90 to 94 | 43%<br>(31-55%)                | 57%<br>(45-69%)          | 1<br>(0.55-1.6)                             | 1.5%<br>(0.47-3%)                    | 1.5%<br>(0.34-3.1%)                 | 230<br>(52-490)        | 1300<br>(410-2600)        |
| Brazil   | 2005 | Male   | 95 plus  | 44%<br>(29-59%)                | 56%<br>(41-71%)          | 0.97<br>(0.47-1.8)                          | 1.3%<br>(0.2-3.2%)                   | 1.2%<br>(-0.017-3.3%)               | 44<br>(-0.59-120)      | 180<br>(27-450)           |
| Brazil   | 2010 | Female | All Ages | 43%<br>(39-47%)                | 57%<br>(53-61%)          | 1.4<br>(1.3-1.6)                            | 3%<br>(2.5-3.6%)                     | 3.5%<br>(2.6-4.6%)                  | 17000<br>(12000-22000) | 720000<br>(590000-860000) |
| Brazil   | 2010 | Female | 15 to 19 | 50%<br>(39-62%)                | 50%<br>(38-61%)          | 1.5<br>(0.95-2.3)                           | 2.7%<br>(1.9-3.8%)                   | 6.3%<br>(3.8-9.5%)                  | 260<br>(160-400)       | 28000<br>(19000-40000)    |
| Brazil   | 2010 | Female | 20 to 24 | 58%<br>(47-68%)                | 42%<br>(32-53%)          | 2.3<br>(1.4-3.4)                            | 4.6%<br>(3.4-5.9%)                   | 8.7%<br>(5.5-12%)                   | 450<br>(290-640)       | 53000<br>(38000-70000)    |
| Brazil   | 2010 | Female | 25 to 29 | 58%<br>(48-68%)                | 42%<br>(32-52%)          | 2.4<br>(1.6-3.4)                            | 4.8%<br>(3.7-5.9%)                   | 8.7%<br>(6.2-12%)                   | 560<br>(400-760)       | 62000<br>(46000-79000)    |
| Brazil   | 2010 | Female | 30 to 34 | 54%<br>(44-64%)                | 46%<br>(36-56%)          | 2.2<br>(1.5-3)                              | 4.5%<br>(3.5-5.6%)                   | 8.2%<br>(6.1-11%)                   | 650<br>(480-840)       | 61000<br>(46000-76000)    |
| Brazil   | 2010 | Female | 35 to 39 | 52%<br>(42-63%)                | 48%<br>(37-58%)          | 2.1<br>(1.3-3)                              | 4.5%<br>(3.4-5.7%)                   | 8.5%<br>(6-11%)                     | 810<br>(570-1100)      | 62000<br>(46000-78000)    |

| Location | Year | Sex    | Age      | Prevalence of current drinkers | Prevalence of abstainers | Population average of standard drinks daily | Percent of total attributable deaths | Percent of total attributable DALYs | Attributable deaths    | Attributable DALYs        |
|----------|------|--------|----------|--------------------------------|--------------------------|---------------------------------------------|--------------------------------------|-------------------------------------|------------------------|---------------------------|
| Brazil   | 2010 | Female | 40 to 44 | 50%<br>(40-60%)                | 50%<br>(40-60%)          | 2.1<br>(1.3-2.9)                            | 4.9%<br>(3.5-6.5%)                   | 9.1%<br>(6.3-12%)                   | 1200<br>(830-1600)     | 74000<br>(53000-96000)    |
| Brazil   | 2010 | Female | 45 to 49 | 45%<br>(35-56%)                | 55%<br>(44-65%)          | 2.1<br>(1.3-3.1)                            | 5%<br>(3.5-6.8%)                     | 8.8%<br>(6.1-12%)                   | 1600<br>(1100-2300)    | 83000<br>(59000-110000)   |
| Brazil   | 2010 | Female | 50 to 54 | 40%<br>(30-49%)                | 60%<br>(51-70%)          | 1.9<br>(1.2-2.8)                            | 4.8%<br>(3.2-6.7%)                   | 8%<br>(5.2-11%)                     | 1900<br>(1200-2600)    | 79000<br>(54000-110000)   |
| Brazil   | 2010 | Female | 55 to 59 | 35%<br>(26-44%)                | 65%<br>(56-74%)          | 1.7<br>(1.1-2.6)                            | 4.4%<br>(2.9-6.2%)                   | 6.9%<br>(4.6-9.8%)                  | 2000<br>(1300-2800)    | 71000<br>(48000-100000)   |
| Brazil   | 2010 | Female | 60 to 64 | 32%<br>(21-44%)                | 68%<br>(56-79%)          | 1.3<br>(0.77-2.2)                           | 3.5%<br>(2-5.2%)                     | 5.1%<br>(2.9-7.8%)                  | 1700<br>(970-2600)     | 51000<br>(30000-78000)    |
| Brazil   | 2010 | Female | 65 to 69 | 31%<br>(22-43%)                | 69%<br>(57-78%)          | 1<br>(0.6-1.6)                              | 2.5%<br>(1.5-3.9%)                   | 3.5%<br>(2.1-5.5%)                  | 1400<br>(820-2100)     | 34000<br>(20000-54000)    |
| Brazil   | 2010 | Female | 70 to 74 | 31%<br>(21-43%)                | 69%<br>(57-79%)          | 0.76<br>(0.4-1.3)                           | 1.6%<br>(0.65-2.9%)                  | 2.2%<br>(0.88-3.8%)                 | 1100<br>(430-1900)     | 21000<br>(8500-37000)     |
| Brazil   | 2010 | Female | 75 to 79 | 28%<br>(18-40%)                | 72%<br>(60-82%)          | 0.63<br>(0.32-1.1)                          | 1.1%<br>(0.26-2.3%)                  | 1.4%<br>(0.29-2.9%)                 | 800<br>(160-1600)      | 12000<br>(2900-25000)     |
| Brazil   | 2010 | Female | 80 to 84 | 24%<br>(14-35%)                | 76%<br>(65-86%)          | 0.63<br>(0.34-1)                            | 1.2%<br>(0.45-2.3%)                  | 1.5%<br>(0.52-2.9%)                 | 930<br>(320-1800)      | 10000<br>(3800-20000)     |
| Brazil   | 2010 | Female | 85 to 89 | 21%<br>(13-31%)                | 79%<br>(69-87%)          | 0.66<br>(0.34-1.1)                          | 1.4%<br>(0.58-2.6%)                  | 1.7%<br>(0.65-3.2%)                 | 860<br>(340-1700)      | 7000<br>(3000-13000)      |
| Brazil   | 2010 | Female | 90 to 94 | 22%<br>(13-32%)                | 78%<br>(68-87%)          | 0.78<br>(0.38-1.3)                          | 1.7%<br>(0.66-3.3%)                  | 2%<br>(0.68-3.9%)                   | 660<br>(230-1300)      | 3600<br>(1400-6800)       |
| Brazil   | 2010 | Female | 95 plus  | 25%<br>(13-38%)                | 75%<br>(62-87%)          | 0.96<br>(0.41-1.8)                          | 2.2%<br>(0.68-4.2%)                  | 2.5%<br>(0.68-5%)                   | 280<br>(77-570)        | 1000<br>(320-2000)        |
| Brazil   | 2010 | Male   | All Ages | 72%<br>(68-75%)                | 28%<br>(25-32%)          | 2.9<br>(2.6-3.2)                            | 11%<br>(9.2-12%)                     | 11%<br>(9-13%)                      | 70000<br>(59000-82000) | 330000<br>(280000-370000) |
| Brazil   | 2010 | Male   | 15 to 19 | 75%<br>(66-83%)                | 25%<br>(17-34%)          | 2<br>(1.2-3.1)                              | 8.5%<br>(5.1-12%)                    | 12%<br>(6.5-17%)                    | 1900<br>(1000-2800)    | 150000<br>(90000-210000)  |
| Brazil   | 2010 | Male   | 20 to 24 | 83%<br>(76-88%)                | 17%<br>(12-24%)          | 4<br>(2.6-5.6)                              | 16%<br>(12-21%)                      | 20%<br>(14-27%)                     | 4600<br>(3100-6300)    | 350000<br>(250000-470000) |
| Brazil   | 2010 | Male   | 25 to 29 | 83%<br>(76-88%)                | 17%<br>(12-24%)          | 4.8<br>(3.3-6.5)                            | 18%<br>(14-22%)                      | 23%<br>(16-29%)                     | 5100<br>(3700-6700)    | 380000<br>(290000-480000) |
| Brazil   | 2010 | Male   | 30 to 34 | 82%<br>(75-88%)                | 18%<br>(12-25%)          | 4.8<br>(3.4-6.5)                            | 17%<br>(14-21%)                      | 22%<br>(17-28%)                     | 4900<br>(3800-6300)    | 350000<br>(280000-420000) |
| Brazil   | 2010 | Male   | 35 to 39 | 82%<br>(76-88%)                | 18%<br>(12-24%)          | 4.4<br>(2.9-6)                              | 17%<br>(13-20%)                      | 22%<br>(17-27%)                     | 4900<br>(3800-6000)    | 310000<br>(240000-370000) |
| Brazil   | 2010 | Male   | 40 to 44 | 81%<br>(74-87%)                | 19%<br>(13-26%)          | 4.3<br>(2.8-6.1)                            | 16%<br>(13-19%)                      | 21%<br>(16-26%)                     | 5800<br>(4500-7100)    | 320000<br>(260000-380000) |
| Brazil   | 2010 | Male   | 45 to 49 | 79%<br>(71-86%)                | 21%<br>(14-29%)          | 4.5<br>(3-6.5)                              | 16%<br>(13-19%)                      | 21%<br>(17-25%)                     | 7300<br>(5800-8700)    | 350000<br>(280000-410000) |
| Brazil   | 2010 | Male   | 50 to 54 | 78%<br>(70-84%)                | 22%<br>(16-30%)          | 4.4<br>(2.7-6.3)                            | 15%<br>(12-18%)                      | 19%<br>(15-23%)                     | 7900<br>(6000-9600)    | 320000<br>(250000-390000) |

| Location | Year | Sex    | Age      | Prevalence of current drinkers | Prevalence of abstainers | Population average of standard drinks daily | Percent of total attributable deaths | Percent of total attributable DALYs | Attributable deaths    | Attributable DALYs         |
|----------|------|--------|----------|--------------------------------|--------------------------|---------------------------------------------|--------------------------------------|-------------------------------------|------------------------|----------------------------|
| Brazil   | 2010 | Male   | 55 to 59 | 75%<br>(67-83%)                | 25%<br>(17-33%)          | 4<br>(2.6-5.9)                              | 13%<br>(9.8-16%)                     | 16%<br>(12-20%)                     | 7700<br>(5800-9600)    | 270000<br>(200000-330000)  |
| Brazil   | 2010 | Male   | 60 to 64 | 75%<br>(65-83%)                | 25%<br>(17-35%)          | 3.7<br>(2.3-5.7)                            | 10%<br>(7-14%)                       | 13%<br>(8.5-17%)                    | 6600<br>(4400-8700)    | 190000<br>(130000-260000)  |
| Brazil   | 2010 | Male   | 65 to 69 | 74%<br>(65-82%)                | 26%<br>(18-35%)          | 3.1<br>(2-4.5)                              | 7.9%<br>(5.1-11%)                    | 9.5%<br>(6-13%)                     | 5300<br>(3300-7300)    | 130000<br>(83000-180000)   |
| Brazil   | 2010 | Male   | 70 to 74 | 69%<br>(58-79%)                | 31%<br>(21-42%)          | 2.2<br>(1.3-3.4)                            | 5.1%<br>(2.7-7.8%)                   | 6%<br>(3.1-9.4%)                    | 3700<br>(2000-5800)    | 74000<br>(40000-110000)    |
| Brazil   | 2010 | Male   | 75 to 79 | 62%<br>(50-75%)                | 38%<br>(25-50%)          | 1.6<br>(0.86-2.5)                           | 3.1%<br>(1.4-5.3%)                   | 3.6%<br>(1.5-6.2%)                  | 2200<br>(920-3800)     | 34000<br>(15000-58000)     |
| Brazil   | 2010 | Male   | 80 to 84 | 53%<br>(40-65%)                | 47%<br>(35-60%)          | 1.2<br>(0.72-1.9)                           | 2.2%<br>(1-3.8%)                     | 2.5%<br>(1-4.3%)                    | 1400<br>(580-2400)     | 16000<br>(7200-27000)      |
| Brazil   | 2010 | Male   | 85 to 89 | 45%<br>(33-57%)                | 55%<br>(43-67%)          | 1<br>(0.6-1.7)                              | 1.7%<br>(0.74-3.2%)                  | 1.9%<br>(0.7-3.5%)                  | 740<br>(280-1400)      | 6200<br>(2700-11000)       |
| Brazil   | 2010 | Male   | 90 to 94 | 43%<br>(30-55%)                | 57%<br>(45-70%)          | 0.97<br>(0.53-1.6)                          | 1.4%<br>(0.47-2.8%)                  | 1.4%<br>(0.35-3%)                   | 290<br>(69-610)        | 1700<br>(550-3400)         |
| Brazil   | 2010 | Male   | 95 plus  | 43%<br>(28-58%)                | 57%<br>(42-72%)          | 0.92<br>(0.42-1.7)                          | 1.3%<br>(0.27-3.1%)                  | 1.2%<br>(0.039-3.2%)                | 55<br>(1.8-140)        | 230<br>(48-540)            |
| Brazil   | 2016 | Female | All Ages | 42%<br>(38-47%)                | 58%<br>(53-62%)          | 1.5<br>(1.2-1.9)                            | 3.2%<br>(2.5-4%)                     | 3.7%<br>(2.5-5.2%)                  | 21000<br>(14000-29000) | 800000<br>(620000-1000000) |
| Brazil   | 2016 | Female | 15 to 19 | 49%<br>(37-61%)                | 51%<br>(39-63%)          | 1.6<br>(0.91-2.5)                           | 2.8%<br>(1.8-3.9%)                   | 6.5%<br>(3.7-10%)                   | 260<br>(150-400)       | 29000<br>(19000-41000)     |
| Brazil   | 2016 | Female | 20 to 24 | 57%<br>(45-68%)                | 43%<br>(32-55%)          | 2.4<br>(1.4-3.7)                            | 4.8%<br>(3.5-6.3%)                   | 8.9%<br>(5.5-13%)                   | 400<br>(250-590)       | 51000<br>(36000-69000)     |
| Brazil   | 2016 | Female | 25 to 29 | 56%<br>(45-67%)                | 44%<br>(33-55%)          | 2.5<br>(1.6-3.7)                            | 5%<br>(3.8-6.2%)                     | 8.8%<br>(6.1-12%)                   | 490<br>(330-680)       | 59000<br>(43000-76000)     |
| Brazil   | 2016 | Female | 30 to 34 | 53%<br>(41-65%)                | 47%<br>(35-59%)          | 2.3<br>(1.4-3.3)                            | 4.7%<br>(3.6-5.9%)                   | 8.5%<br>(6-11%)                     | 660<br>(470-880)       | 66000<br>(50000-85000)     |
| Brazil   | 2016 | Female | 35 to 39 | 52%<br>(41-63%)                | 48%<br>(37-59%)          | 2.2<br>(1.3-3.4)                            | 4.7%<br>(3.4-6%)                     | 8.7%<br>(6.1-12%)                   | 880<br>(610-1200)      | 70000<br>(52000-90000)     |
| Brazil   | 2016 | Female | 40 to 44 | 48%<br>(38-59%)                | 52%<br>(41-62%)          | 2.1<br>(1.3-3.2)                            | 4.9%<br>(3.5-6.5%)                   | 9.1%<br>(6.3-12%)                   | 1200<br>(820-1600)     | 76000<br>(55000-99000)     |
| Brazil   | 2016 | Female | 45 to 49 | 43%<br>(32-56%)                | 57%<br>(44-68%)          | 2.1<br>(1.3-3.3)                            | 4.9%<br>(3.5-6.7%)                   | 8.8%<br>(6-12%)                     | 1600<br>(1100-2200)    | 82000<br>(58000-110000)    |
| Brazil   | 2016 | Female | 50 to 54 | 40%<br>(29-51%)                | 60%<br>(49-71%)          | 2<br>(1.2-3)                                | 4.9%<br>(3.4-6.7%)                   | 8.2%<br>(5.5-11%)                   | 2100<br>(1400-2900)    | 90000<br>(62000-120000)    |
| Brazil   | 2016 | Female | 55 to 59 | 36%<br>(27-47%)                | 64%<br>(53-73%)          | 1.9<br>(1.1-2.9)                            | 4.6%<br>(3-6.3%)                     | 7.3%<br>(4.7-10%)                   | 2400<br>(1500-3300)    | 86000<br>(56000-120000)    |
| Brazil   | 2016 | Female | 60 to 64 | 34%<br>(22-48%)                | 66%<br>(52-78%)          | 1.6<br>(0.85-2.7)                           | 3.8%<br>(2.2-5.8%)                   | 5.6%<br>(3.2-8.8%)                  | 2200<br>(1300-3500)    | 68000<br>(39000-100000)    |
| Brazil   | 2016 | Female | 65 to 69 | 36%<br>(24-49%)                | 64%<br>(51-76%)          | 1.3<br>(0.69-2.1)                           | 2.9%<br>(1.6-4.7%)                   | 4.2%<br>(2.3-6.7%)                  | 2000<br>(1100-3200)    | 50000<br>(28000-78000)     |

| Location | Year | Sex    | Age      | Prevalence of current drinkers | Prevalence of abstainers | Population average of standard drinks daily | Percent of total attributable deaths | Percent of total attributable DALYs | Attributable deaths    | Attributable DALYs           |
|----------|------|--------|----------|--------------------------------|--------------------------|---------------------------------------------|--------------------------------------|-------------------------------------|------------------------|------------------------------|
| Brazil   | 2016 | Female | 70 to 74 | 34%<br>(22-47%)                | 66%<br>(53-78%)          | 0.89<br>(0.45-1.5)                          | 1.8%<br>(0.71-3.4%)                  | 2.5%<br>(1-4.6%)                    | 1300<br>(530-2500)     | 27000<br>(11000-50000)       |
| Brazil   | 2016 | Female | 75 to 79 | 29%<br>(18-42%)                | 71%<br>(58-82%)          | 0.72<br>(0.35-1.3)                          | 1.3%<br>(0.32-2.6%)                  | 1.6%<br>(0.4-3.5%)                  | 1100<br>(260-2300)     | 17000<br>(4200-35000)        |
| Brazil   | 2016 | Female | 80 to 84 | 25%<br>(15-36%)                | 75%<br>(64-85%)          | 0.71<br>(0.36-1.2)                          | 1.4%<br>(0.49-2.6%)                  | 1.7%<br>(0.6-3.3%)                  | 1300<br>(440-2500)     | 15000<br>(5300-28000)        |
| Brazil   | 2016 | Female | 85 to 89 | 23%<br>(14-32%)                | 77%<br>(68-86%)          | 0.75<br>(0.37-1.3)                          | 1.6%<br>(0.64-3%)                    | 1.9%<br>(0.72-3.6%)                 | 1300<br>(470-2400)     | 10000<br>(4100-19000)        |
| Brazil   | 2016 | Female | 90 to 94 | 23%<br>(14-33%)                | 77%<br>(67-86%)          | 0.88<br>(0.41-1.6)                          | 1.9%<br>(0.68-3.6%)                  | 2.2%<br>(0.73-4.3%)                 | 1000<br>(340-2100)     | 5700<br>(2100-11000)         |
| Brazil   | 2016 | Female | 95 plus  | 25%<br>(13-40%)                | 75%<br>(60-87%)          | 1.1<br>(0.44-2.1)                           | 2.3%<br>(0.74-4.6%)                  | 2.7%<br>(0.72-5.5%)                 | 460<br>(120-940)       | 1700<br>(540-3200)           |
| Brazil   | 2016 | Male   | All Ages | 71%<br>(68-75%)                | 29%<br>(25-32%)          | 3<br>(2.4-3.7)                              | 11%<br>(8.9-13%)                     | 10%<br>(8.1-13%)                    | 76000<br>(60000-93000) | 3400000<br>(2900000-4000000) |
| Brazil   | 2016 | Male   | 15 to 19 | 71%<br>(62-81%)                | 29%<br>(19-38%)          | 1.9<br>(1-3)                                | 8.1%<br>(4.8-12%)                    | 11%<br>(5.8-17%)                    | 1800<br>(1000-2800)    | 150000<br>(86000-220000)     |
| Brazil   | 2016 | Male   | 20 to 24 | 81%<br>(74-87%)                | 19%<br>(13-26%)          | 3.9<br>(2.5-5.8)                            | 16%<br>(11-22%)                      | 20%<br>(13-28%)                     | 4300<br>(2800-6000)    | 330000<br>(230000-450000)    |
| Brazil   | 2016 | Male   | 25 to 29 | 82%<br>(74-88%)                | 18%<br>(12-26%)          | 4.8<br>(3.2-7)                              | 18%<br>(14-23%)                      | 22%<br>(16-30%)                     | 4700<br>(3300-6300)    | 350000<br>(260000-460000)    |
| Brazil   | 2016 | Male   | 30 to 34 | 82%<br>(74-88%)                | 18%<br>(12-26%)          | 4.8<br>(3.2-7)                              | 17%<br>(14-21%)                      | 22%<br>(17-28%)                     | 5000<br>(3800-6500)    | 360000<br>(280000-450000)    |
| Brazil   | 2016 | Male   | 35 to 39 | 81%<br>(75-88%)                | 19%<br>(12-25%)          | 4.4<br>(2.8-6.3)                            | 16%<br>(13-20%)                      | 21%<br>(16-27%)                     | 5200<br>(3900-6600)    | 340000<br>(270000-410000)    |
| Brazil   | 2016 | Male   | 40 to 44 | 80%<br>(73-86%)                | 20%<br>(14-27%)          | 4.3<br>(2.7-6.3)                            | 16%<br>(13-20%)                      | 21%<br>(16-26%)                     | 5900<br>(4500-7200)    | 330000<br>(260000-400000)    |
| Brazil   | 2016 | Male   | 45 to 49 | 78%<br>(70-85%)                | 22%<br>(15-30%)          | 4.5<br>(2.9-6.8)                            | 16%<br>(13-19%)                      | 21%<br>(16-25%)                     | 7100<br>(5500-8600)    | 340000<br>(270000-410000)    |
| Brazil   | 2016 | Male   | 50 to 54 | 77%<br>(69-84%)                | 23%<br>(16-31%)          | 4.4<br>(2.7-6.4)                            | 15%<br>(11-18%)                      | 19%<br>(15-23%)                     | 8600<br>(6600-11000)   | 360000<br>(270000-430000)    |
| Brazil   | 2016 | Male   | 55 to 59 | 75%<br>(67-83%)                | 25%<br>(17-33%)          | 4.1<br>(2.6-6)                              | 13%<br>(9.7-16%)                     | 16%<br>(12-20%)                     | 8900<br>(6600-11000)   | 310000<br>(230000-380000)    |
| Brazil   | 2016 | Male   | 60 to 64 | 74%<br>(63-83%)                | 26%<br>(17-37%)          | 3.7<br>(2.2-5.8)                            | 10%<br>(6.7-14%)                     | 13%<br>(8.3-17%)                    | 7900<br>(5200-11000)   | 230000<br>(160000-310000)    |
| Brazil   | 2016 | Male   | 65 to 69 | 73%<br>(62-82%)                | 27%<br>(18-38%)          | 3<br>(1.9-4.6)                              | 7.9%<br>(4.9-11%)                    | 9.5%<br>(5.9-13%)                   | 6500<br>(4000-9100)    | 160000<br>(100000-220000)    |
| Brazil   | 2016 | Male   | 70 to 74 | 69%<br>(58-79%)                | 31%<br>(21-42%)          | 2.3<br>(1.3-3.6)                            | 5.2%<br>(2.8-8.2%)                   | 6.1%<br>(3.2-9.7%)                  | 4300<br>(2200-6900)    | 84000<br>(44000-130000)      |
| Brazil   | 2016 | Male   | 75 to 79 | 64%<br>(52-76%)                | 36%<br>(24-48%)          | 1.7<br>(0.9-2.7)                            | 3.3%<br>(1.4-5.8%)                   | 3.8%<br>(1.5-6.8%)                  | 2800<br>(1100-5100)    | 43000<br>(19000-77000)       |
| Brazil   | 2016 | Male   | 80 to 84 | 55%<br>(42-67%)                | 45%<br>(33-58%)          | 1.3<br>(0.74-2.2)                           | 2.4%<br>(1-4.3%)                     | 2.6%<br>(1-4.9%)                    | 1800<br>(720-3400)     | 21000<br>(9100-39000)        |

| Location | Year | Sex    | Age      | Prevalence of current drinkers | Prevalence of abstainers | Population average of standard drinks daily | Percent of total attributable deaths | Percent of total attributable DALYs | Attributable deaths | Attributable DALYs     |
|----------|------|--------|----------|--------------------------------|--------------------------|---------------------------------------------|--------------------------------------|-------------------------------------|---------------------|------------------------|
| Brazil   | 2016 | Male   | 85 to 89 | 47%<br>(35-59%)                | 53%<br>(41-65%)          | 1.1<br>(0.64-1.9)                           | 1.8%<br>(0.75-3.5%)                  | 1.9%<br>(0.7-3.9%)                  | 1000<br>(370-2000)  | 8500<br>(3600-16000)   |
| Brazil   | 2016 | Male   | 90 to 94 | 45%<br>(33-58%)                | 55%<br>(42-67%)          | 1.1<br>(0.56-1.8)                           | 1.5%<br>(0.45-3.2%)                  | 1.5%<br>(0.31-3.5%)                 | 480<br>(98-1100)    | 2800<br>(850-6100)     |
| Brazil   | 2016 | Male   | 95 plus  | 46%<br>(31-60%)                | 54%<br>(40-69%)          | 1<br>(0.46-1.9)                             | 1.4%<br>(0.25-3.3%)                  | 1.3%<br>(-0.0038-3.5%)              | 96<br>(-0.29-260)   | 410<br>(74-990)        |
| Paraguay | 1990 | Female | All Ages | 49%<br>(42-55%)                | 51%<br>(45-58%)          | 0.94<br>(0.74-1.2)                          | 1.5%<br>(1-2%)                       | 1.7%<br>(0.74-2.8%)                 | 130<br>(60-220)     | 7800<br>(5400-10000)   |
| Paraguay | 1990 | Female | 15 to 19 | 62%<br>(49-74%)                | 38%<br>(26-51%)          | 1.2<br>(0.74-1.8)                           | 2.1%<br>(1.4-3%)                     | 4.5%<br>(2.5-7%)                    | 4.4<br>(2.4-7)      | 540<br>(340-770)       |
| Paraguay | 1990 | Female | 20 to 24 | 71%<br>(59-80%)                | 29%<br>(20-41%)          | 1.9<br>(1.2-2.8)                            | 3.8%<br>(2.6-5.1%)                   | 6%<br>(3.6-8.9%)                    | 7.5<br>(4.6-11)     | 1000<br>(670-1400)     |
| Paraguay | 1990 | Female | 25 to 29 | 71%<br>(59-80%)                | 29%<br>(20-41%)          | 1.9<br>(1.3-2.8)                            | 3.8%<br>(2.7-5%)                     | 5.7%<br>(3.5-8.4%)                  | 7.6<br>(4.7-11)     | 910<br>(630-1200)      |
| Paraguay | 1990 | Female | 30 to 34 | 67%<br>(54-77%)                | 33%<br>(23-46%)          | 1.8<br>(1.2-2.7)                            | 3.4%<br>(2.3-4.7%)                   | 5.3%<br>(3.1-7.8%)                  | 7.8<br>(4.7-12)     | 780<br>(530-1100)      |
| Paraguay | 1990 | Female | 35 to 39 | 60%<br>(46-71%)                | 40%<br>(29-54%)          | 1.7<br>(1-2.6)                              | 3.3%<br>(2-4.8%)                     | 5.3%<br>(2.9-8.2%)                  | 9.4<br>(5.1-15)     | 740<br>(440-1100)      |
| Paraguay | 1990 | Female | 40 to 44 | 57%<br>(44-68%)                | 43%<br>(32-56%)          | 1.8<br>(1.1-2.6)                            | 3.7%<br>(2.2-5.7%)                   | 6.6%<br>(3.7-10%)                   | 13<br>(7-20)        | 770<br>(460-1200)      |
| Paraguay | 1990 | Female | 45 to 49 | 55%<br>(40-66%)                | 45%<br>(34-60%)          | 1.9<br>(1.1-2.9)                            | 4.3%<br>(2.2-7%)                     | 7.4%<br>(3.6-12%)                   | 17<br>(8.1-28)      | 820<br>(430-1300)      |
| Paraguay | 1990 | Female | 50 to 54 | 48%<br>(36-60%)                | 52%<br>(40-64%)          | 1.6<br>(0.96-2.5)                           | 4.2%<br>(2-7%)                       | 6.9%<br>(3.2-12%)                   | 19<br>(9-33)        | 800<br>(390-1300)      |
| Paraguay | 1990 | Female | 55 to 59 | 39%<br>(28-51%)                | 61%<br>(49-72%)          | 1.3<br>(0.75-2.1)                           | 3.5%<br>(1.6-6.1%)                   | 5.4%<br>(2.3-9.4%)                  | 18<br>(7.6-31)      | 620<br>(270-1100)      |
| Paraguay | 1990 | Female | 60 to 64 | 33%<br>(22-46%)                | 67%<br>(54-78%)          | 1.1<br>(0.57-1.8)                           | 2.4%<br>(0.65-4.9%)                  | 3.5%<br>(0.92-7.1%)                 | 16<br>(4.2-33)      | 470<br>(130-970)       |
| Paraguay | 1990 | Female | 65 to 69 | 32%<br>(22-43%)                | 68%<br>(57-78%)          | 0.83<br>(0.47-1.3)                          | 1.3%<br>(0.0067-3.1%)                | 1.8%<br>(-0.0025-4.4%)              | 9.8<br>(-0.014-23)  | 240<br>(1.2-560)       |
| Paraguay | 1990 | Female | 70 to 74 | 31%<br>(22-42%)                | 69%<br>(58-78%)          | 0.59<br>(0.33-0.99)                         | 0.25%<br>(-0.79-1.6%)                | 0.36%<br>(-1.1-2.3%)                | 2.2<br>(-7.1-14)    | 42<br>(-130-270)       |
| Paraguay | 1990 | Female | 75 to 79 | 27%<br>(18-39%)                | 73%<br>(61-82%)          | 0.46<br>(0.24-0.8)                          | -0.15%<br>(-1.1-0.88%)               | -0.22%<br>(-1.4-1.1%)               | -1.6<br>(-10-7.9)   | -20<br>(-150-120)      |
| Paraguay | 1990 | Female | 80 to 84 | 22%<br>(13-32%)                | 78%<br>(68-87%)          | 0.43<br>(0.23-0.71)                         | 0.091%<br>(-0.67-1%)                 | 0.064%<br>(-0.92-1.2%)              | 0.43<br>(-6.1-8.2)  | 8.1<br>(-60-92)        |
| Paraguay | 1990 | Female | 85 to 89 | 20%<br>(12-29%)                | 80%<br>(71-88%)          | 0.44<br>(0.23-0.76)                         | 0.3%<br>(-0.44-1.2%)                 | 0.3%<br>(-0.62-1.4%)                | 1.8<br>(-3.6-8.4)   | 17<br>(-24-66)         |
| Paraguay | 1990 | Female | 90 to 94 | 21%<br>(13-30%)                | 79%<br>(70-87%)          | 0.53<br>(0.25-0.96)                         | 0.48%<br>(-0.41-1.7%)                | 0.49%<br>(-0.6-1.9%)                | 1.7<br>(-2-6.7)     | 10<br>(-8.5-36)        |
| Paraguay | 1990 | Female | 95 plus  | 23%<br>(12-38%)                | 77%<br>(62-88%)          | 0.66<br>(0.28-1.3)                          | 0.78%<br>(-0.41-2.6%)                | 0.81%<br>(-0.66-3.1%)               | 0.99<br>(-0.8-3.8)  | 3.9<br>(-2.1-13)       |
| Paraguay | 1990 | Male   | All Ages | 76%<br>(70-81%)                | 24%<br>(19-30%)          | 3.3<br>(2.9-3.9)                            | 7.4%<br>(6.3-8.6%)                   | 11%<br>(8.6-13%)                    | 1000<br>(810-1200)  | 44000<br>(37000-52000) |

| Location | Year | Sex    | Age      | Prevalence of current drinkers | Prevalence of abstainers | Population average of standard drinks daily | Percent of total attributable deaths | Percent of total attributable DALYs | Attributable deaths | Attributable DALYs    |
|----------|------|--------|----------|--------------------------------|--------------------------|---------------------------------------------|--------------------------------------|-------------------------------------|---------------------|-----------------------|
| Paraguay | 1990 | Male   | 15 to 19 | 77%<br>(66-86%)                | 23%<br>(14-34%)          | 3.1<br>(2.1-4.4)                            | 8.2%<br>(5.9-11%)                    | 14%<br>(9.4-20%)                    | 22<br>(15-31)       | 2100<br>(1500-2900)   |
| Paraguay | 1990 | Male   | 20 to 24 | 88%<br>(81-93%)                | 12%<br>(7.3-19%)         | 5.8<br>(4.2-7.6)                            | 17%<br>(13-22%)                      | 26%<br>(19-35%)                     | 53<br>(39-71)       | 4800<br>(3700-6000)   |
| Paraguay | 1990 | Male   | 25 to 29 | 89%<br>(82-93%)                | 11%<br>(6.6-18%)         | 5.9<br>(4.5-7.7)                            | 17%<br>(14-22%)                      | 27%<br>(20-34%)                     | 54<br>(40-70)       | 4500<br>(3500-5500)   |
| Paraguay | 1990 | Male   | 30 to 34 | 90%<br>(84-94%)                | 9.7%<br>(5.7-16%)        | 6.4<br>(4.8-8.3)                            | 17%<br>(14-21%)                      | 27%<br>(21-34%)                     | 56<br>(43-71)       | 4100<br>(3300-5100)   |
| Paraguay | 1990 | Male   | 35 to 39 | 91%<br>(86-95%)                | 9%<br>(5.3-14%)          | 7<br>(4.9-9.2)                              | 18%<br>(14-22%)                      | 28%<br>(21-35%)                     | 64<br>(48-80)       | 4100<br>(3200-5000)   |
| Paraguay | 1990 | Male   | 40 to 44 | 91%<br>(85-94%)                | 9.1%<br>(5.5-15%)        | 7.1<br>(4.9-9.3)                            | 18%<br>(14-22%)                      | 28%<br>(22-34%)                     | 69<br>(53-85)       | 3800<br>(3000-4600)   |
| Paraguay | 1990 | Male   | 45 to 49 | 90%<br>(83-94%)                | 9.9%<br>(5.6-17%)        | 7.2<br>(5-9.9)                              | 18%<br>(15-22%)                      | 27%<br>(22-32%)                     | 80<br>(64-97)       | 3800<br>(3100-4600)   |
| Paraguay | 1990 | Male   | 50 to 54 | 89%<br>(82-93%)                | 11%<br>(6.9-18%)         | 7<br>(4.8-9.5)                              | 18%<br>(14-22%)                      | 25%<br>(20-30%)                     | 94<br>(74-110)      | 3800<br>(3100-4700)   |
| Paraguay | 1990 | Male   | 55 to 59 | 87%<br>(78-92%)                | 13%<br>(8-22%)           | 6.4<br>(4.4-9)                              | 17%<br>(13-21%)                      | 23%<br>(17-28%)                     | 95<br>(73-120)      | 3300<br>(2600-4100)   |
| Paraguay | 1990 | Male   | 60 to 64 | 84%<br>(75-91%)                | 16%<br>(9.2-25%)         | 5.6<br>(3.7-8.1)                            | 15%<br>(10-18%)                      | 19%<br>(14-24%)                     | 110<br>(77-140)     | 3200<br>(2300-4000)   |
| Paraguay | 1990 | Male   | 65 to 69 | 81%<br>(71-89%)                | 19%<br>(11-29%)          | 4.9<br>(3.3-6.9)                            | 13%<br>(9-17%)                       | 17%<br>(11-22%)                     | 110<br>(75-140)     | 2600<br>(1800-3500)   |
| Paraguay | 1990 | Male   | 70 to 74 | 77%<br>(65-85%)                | 23%<br>(15-35%)          | 4.2<br>(2.6-6.1)                            | 11%<br>(5.9-15%)                     | 13%<br>(7.3-19%)                    | 95<br>(53-130)      | 1800<br>(1100-2600)   |
| Paraguay | 1990 | Male   | 75 to 79 | 72%<br>(57-83%)                | 28%<br>(17-43%)          | 2.9<br>(1.7-4.5)                            | 7.1%<br>(3.1-11%)                    | 8.4%<br>(3.7-14%)                   | 64<br>(27-100)      | 950<br>(430-1500)     |
| Paraguay | 1990 | Male   | 80 to 84 | 66%<br>(51-79%)                | 34%<br>(21-49%)          | 2.2<br>(1.3-3.4)                            | 4.8%<br>(2.1-8.5%)                   | 5.6%<br>(2.2-10%)                   | 33<br>(13-61)       | 370<br>(160-660)      |
| Paraguay | 1990 | Male   | 85 to 89 | 63%<br>(46-76%)                | 37%<br>(24-54%)          | 1.9<br>(1.1-3)                              | 3.3%<br>(1.1-6.8%)                   | 3.7%<br>(1.1-7.9%)                  | 17<br>(4.8-35)      | 130<br>(44-270)       |
| Paraguay | 1990 | Male   | 90 to 94 | 63%<br>(48-76%)                | 37%<br>(24-52%)          | 1.6<br>(0.92-2.7)                           | 1.8%<br>(-0.055-4.8%)                | 1.9%<br>(-0.4-5.4%)                 | 4.3<br>(-0.92-13)   | 26<br>(-0.77-69)      |
| Paraguay | 1990 | Male   | 95 plus  | 64%<br>(45-80%)                | 36%<br>(20-55%)          | 1.3<br>(0.62-2.4)                           | 1%<br>(-0.68-4.2%)                   | 0.78%<br>(-1.3-4.5%)                | 0.53<br>(-0.88-3.1) | 2.9<br>(-1.9-12)      |
| Paraguay | 1995 | Female | All Ages | 50%<br>(43-56%)                | 50%<br>(44-57%)          | 1.1<br>(0.83-1.3)                           | 1.8%<br>(1.2-2.5%)                   | 2.1%<br>(1-3.4%)                    | 190<br>(92-310)     | 10000<br>(6900-14000) |
| Paraguay | 1995 | Female | 15 to 19 | 64%<br>(50-75%)                | 36%<br>(25-50%)          | 1.4<br>(0.84-2)                             | 2.4%<br>(1.6-3.5%)                   | 5.6%<br>(3.1-8.8%)                  | 6.4<br>(3.5-10)     | 720<br>(470-1000)     |
| Paraguay | 1995 | Female | 20 to 24 | 72%<br>(60-81%)                | 28%<br>(19-40%)          | 2.1<br>(1.3-3.1)                            | 4.2%<br>(2.9-5.6%)                   | 7.5%<br>(4.6-11%)                   | 9<br>(5.5-13)       | 1100<br>(770-1500)    |
| Paraguay | 1995 | Female | 25 to 29 | 72%<br>(60-81%)                | 28%<br>(19-40%)          | 2.1<br>(1.4-3.1)                            | 4.1%<br>(2.9-5.4%)                   | 6.8%<br>(4.4-9.7%)                  | 9<br>(5.8-13)       | 1100<br>(740-1400)    |
| Paraguay | 1995 | Female | 30 to 34 | 68%<br>(54-78%)                | 32%<br>(22-46%)          | 2<br>(1.3-3)                                | 3.7%<br>(2.5-5.1%)                   | 6.3%<br>(3.8-9.1%)                  | 9.4<br>(5.7-14)     | 930<br>(630-1300)     |

| Location | Year | Sex    | Age      | Prevalence of current drinkers | Prevalence of abstainers | Population average of standard drinks daily | Percent of total attributable deaths | Percent of total attributable DALYs | Attributable deaths | Attributable DALYs     |
|----------|------|--------|----------|--------------------------------|--------------------------|---------------------------------------------|--------------------------------------|-------------------------------------|---------------------|------------------------|
| Paraguay | 1995 | Female | 35 to 39 | 61%<br>(48-72%)                | 39%<br>(28-52%)          | 1.9<br>(1.2-2.9)                            | 3.5%<br>(2.2-5.1%)                   | 6.1%<br>(3.5-9.4%)                  | 12<br>(6.6-18)      | 900<br>(570-1300)      |
| Paraguay | 1995 | Female | 40 to 44 | 58%<br>(45-68%)                | 42%<br>(32-55%)          | 2<br>(1.2-2.8)                              | 4.1%<br>(2.4-6%)                     | 7.4%<br>(4.2-11%)                   | 17<br>(9.7-26)      | 1000<br>(630-1500)     |
| Paraguay | 1995 | Female | 45 to 49 | 56%<br>(42-67%)                | 44%<br>(33-58%)          | 2<br>(1.2-3.2)                              | 4.7%<br>(2.3-7.5%)                   | 8.2%<br>(4-13%)                     | 23<br>(11-36)       | 1100<br>(580-1700)     |
| Paraguay | 1995 | Female | 50 to 54 | 49%<br>(37-61%)                | 51%<br>(39-63%)          | 1.8<br>(1.1-2.8)                            | 4.8%<br>(2.3-7.7%)                   | 7.7%<br>(3.5-12%)                   | 26<br>(12-43)       | 1100<br>(530-1700)     |
| Paraguay | 1995 | Female | 55 to 59 | 40%<br>(28-51%)                | 60%<br>(49-72%)          | 1.5<br>(0.85-2.4)                           | 4%<br>(1.9-6.9%)                     | 6.1%<br>(2.8-11%)                   | 26<br>(12-45)       | 900<br>(430-1600)      |
| Paraguay | 1995 | Female | 60 to 64 | 34%<br>(23-46%)                | 66%<br>(54-77%)          | 1.2<br>(0.64-2)                             | 2.9%<br>(0.85-5.7%)                  | 4.1%<br>(1.2-8%)                    | 20<br>(6.1-40)      | 600<br>(190-1200)      |
| Paraguay | 1995 | Female | 65 to 69 | 33%<br>(23-44%)                | 67%<br>(56-77%)          | 0.93<br>(0.52-1.5)                          | 1.6%<br>(0.22-3.7%)                  | 2.3%<br>(0.29-5.1%)                 | 15<br>(2-36)        | 370<br>(45-850)        |
| Paraguay | 1995 | Female | 70 to 74 | 32%<br>(23-43%)                | 68%<br>(57-77%)          | 0.66<br>(0.37-1.1)                          | 0.43%<br>(-0.78-2%)                  | 0.59%<br>(-1.1-2.7%)                | 4.7<br>(-8.3-21)    | 87<br>(-160-410)       |
| Paraguay | 1995 | Female | 75 to 79 | 28%<br>(19-40%)                | 72%<br>(60-81%)          | 0.52<br>(0.28-0.9)                          | -0.012%<br>(-1-1.2%)                 | -0.035%<br>(-1.3-1.6%)              | -0.29<br>(-12-14)   | -2<br>(-170-210)       |
| Paraguay | 1995 | Female | 80 to 84 | 23%<br>(14-33%)                | 77%<br>(67-86%)          | 0.49<br>(0.27-0.82)                         | 0.26%<br>(-0.55-1.3%)                | 0.28%<br>(-0.76-1.6%)               | 2.4<br>(-6.2-13)    | 29<br>(-61-150)        |
| Paraguay | 1995 | Female | 85 to 89 | 21%<br>(12-31%)                | 79%<br>(69-88%)          | 0.51<br>(0.26-0.88)                         | 0.51%<br>(-0.33-1.7%)                | 0.55%<br>(-0.47-2%)                 | 4.1<br>(-3.6-15)    | 35<br>(-22-120)        |
| Paraguay | 1995 | Female | 90 to 94 | 22%<br>(13-32%)                | 78%<br>(68-87%)          | 0.61<br>(0.29-1.1)                          | 0.73%<br>(-0.29-2.3%)                | 0.79%<br>(-0.46-2.7%)               | 3.5<br>(-2-12)      | 20<br>(-8-63)          |
| Paraguay | 1995 | Female | 95 plus  | 24%<br>(13-39%)                | 76%<br>(61-87%)          | 0.77<br>(0.32-1.5)                          | 1.1%<br>(-0.25-3.4%)                 | 1.2%<br>(-0.48-4.1%)                | 2<br>(-0.8-6.7)     | 7.4<br>(-1.7-23)       |
| Paraguay | 1995 | Male   | All Ages | 76%<br>(70-82%)                | 24%<br>(18-30%)          | 3.7<br>(3.1-4.3)                            | 9%<br>(7.5-11%)                      | 13%<br>(10-15%)                     | 1400<br>(1100-1700) | 58000<br>(49000-69000) |
| Paraguay | 1995 | Male   | 15 to 19 | 78%<br>(66-86%)                | 22%<br>(14-34%)          | 3.4<br>(2.3-4.8)                            | 9.3%<br>(6.7-13%)                    | 16%<br>(11-22%)                     | 33<br>(22-47)       | 3000<br>(2100-4000)    |
| Paraguay | 1995 | Male   | 20 to 24 | 88%<br>(81-93%)                | 12%<br>(7.2-19%)         | 6.3<br>(4.5-8.3)                            | 19%<br>(14-24%)                      | 28%<br>(20-37%)                     | 72<br>(51-94)       | 6000<br>(4500-7700)    |
| Paraguay | 1995 | Male   | 25 to 29 | 90%<br>(83-93%)                | 10%<br>(6.6-17%)         | 6.4<br>(4.8-8.5)                            | 19%<br>(15-24%)                      | 28%<br>(21-36%)                     | 75<br>(55-98)       | 5900<br>(4600-7500)    |
| Paraguay | 1995 | Male   | 30 to 34 | 90%<br>(84-94%)                | 9.6%<br>(5.7-16%)        | 6.9<br>(5.1-9)                              | 19%<br>(15-23%)                      | 28%<br>(22-35%)                     | 78<br>(59-98)       | 5500<br>(4400-6900)    |
| Paraguay | 1995 | Male   | 35 to 39 | 91%<br>(86-95%)                | 8.9%<br>(5.4-14%)        | 7.5<br>(5.2-9.9)                            | 19%<br>(15-23%)                      | 29%<br>(22-36%)                     | 89<br>(68-110)      | 5500<br>(4300-6800)    |
| Paraguay | 1995 | Male   | 40 to 44 | 91%<br>(86-95%)                | 9%<br>(5.4-14%)          | 7.6<br>(5.3-10)                             | 19%<br>(16-23%)                      | 29%<br>(23-34%)                     | 110<br>(83-130)     | 5700<br>(4600-6800)    |
| Paraguay | 1995 | Male   | 45 to 49 | 90%<br>(83-94%)                | 9.8%<br>(5.7-17%)        | 7.8<br>(5.4-11)                             | 20%<br>(16-23%)                      | 28%<br>(23-33%)                     | 110<br>(92-140)     | 5300<br>(4400-6400)    |
| Paraguay | 1995 | Male   | 50 to 54 | 89%<br>(82-93%)                | 11%<br>(6.8-18%)         | 7.6<br>(5.3-10)                             | 19%<br>(15-23%)                      | 26%<br>(21-31%)                     | 120<br>(98-150)     | 5000<br>(4000-6000)    |



| Location | Year | Sex    | Age      | Prevalence of current drinkers | Prevalence of abstainers | Population average of standard drinks daily | Percent of total attributable deaths | Percent of total attributable DALYs | Attributable deaths | Attributable DALYs   |
|----------|------|--------|----------|--------------------------------|--------------------------|---------------------------------------------|--------------------------------------|-------------------------------------|---------------------|----------------------|
| Paraguay | 1995 | Male   | 55 to 59 | 87%<br>(78-92%)                | 13%<br>(7.7-22%)         | 7<br>(4.7-9.8)                              | 18%<br>(14-22%)                      | 24%<br>(19-29%)                     | 140<br>(110-170)    | 4700<br>(3700-5700)  |
| Paraguay | 1995 | Male   | 60 to 64 | 84%<br>(75-91%)                | 16%<br>(9.2-25%)         | 6<br>(3.9-8.7)                              | 16%<br>(11-20%)                      | 20%<br>(15-25%)                     | 130<br>(95-160)     | 3700<br>(2800-4600)  |
| Paraguay | 1995 | Male   | 65 to 69 | 81%<br>(71-89%)                | 19%<br>(11-29%)          | 5.3<br>(3.6-7.5)                            | 14%<br>(10-18%)                      | 18%<br>(13-23%)                     | 140<br>(100-180)    | 3500<br>(2500-4400)  |
| Paraguay | 1995 | Male   | 70 to 74 | 77%<br>(66-85%)                | 23%<br>(15-34%)          | 4.5<br>(2.9-6.5)                            | 12%<br>(7-16%)                       | 14%<br>(8.4-20%)                    | 130<br>(77-180)     | 2500<br>(1500-3400)  |
| Paraguay | 1995 | Male   | 75 to 79 | 72%<br>(58-83%)                | 28%<br>(17-42%)          | 3.1<br>(1.9-4.9)                            | 7.9%<br>(3.9-12%)                    | 9.4%<br>(4.5-15%)                   | 87<br>(41-130)      | 1300<br>(640-2000)   |
| Paraguay | 1995 | Male   | 80 to 84 | 67%<br>(51-80%)                | 33%<br>(20-49%)          | 2.4<br>(1.4-3.6)                            | 5.5%<br>(2.5-9.3%)                   | 6.4%<br>(2.7-11%)                   | 49<br>(21-84)       | 540<br>(250-920)     |
| Paraguay | 1995 | Male   | 85 to 89 | 63%<br>(48-76%)                | 37%<br>(24-52%)          | 2.1<br>(1.2-3.2)                            | 3.9%<br>(1.5-7.7%)                   | 4.4%<br>(1.5-8.9%)                  | 26<br>(8.8-53)      | 210<br>(76-400)      |
| Paraguay | 1995 | Male   | 90 to 94 | 63%<br>(48-77%)                | 37%<br>(23-52%)          | 1.8<br>(1-2.9)                              | 2.3%<br>(0.37-5.7%)                  | 2.5%<br>(0.09-6.4%)                 | 7.4<br>(0.28-19)    | 43<br>(6.7-100)      |
| Paraguay | 1995 | Male   | 95 plus  | 65%<br>(46-81%)                | 35%<br>(19-54%)          | 1.5<br>(0.71-2.8)                           | 1.5%<br>(-0.44-5%)                   | 1.2%<br>(-1.1-5.6%)                 | 1.1<br>(-0.99-5.1)  | 5.3<br>(-1.6-19)     |
| Paraguay | 2000 | Female | All Ages | 46%<br>(40-52%)                | 54%<br>(48-60%)          | 0.85<br>(0.67-1.1)                          | 1.5%<br>(1-2%)                       | 1.5%<br>(0.67-2.5%)                 | 160<br>(69-260)     | 9000<br>(6100-12000) |
| Paraguay | 2000 | Female | 15 to 19 | 63%<br>(52-73%)                | 37%<br>(27-48%)          | 1.2<br>(0.77-1.7)                           | 2.2%<br>(1.4-3.2%)                   | 5%<br>(2.7-7.8%)                    | 6.6<br>(3.6-10)     | 770<br>(510-1100)    |
| Paraguay | 2000 | Female | 20 to 24 | 68%<br>(59-76%)                | 32%<br>(24-41%)          | 1.7<br>(1.2-2.4)                            | 3.7%<br>(2.5-4.9%)                   | 6%<br>(3.8-8.9%)                    | 8.1<br>(4.9-12)     | 1100<br>(760-1600)   |
| Paraguay | 2000 | Female | 25 to 29 | 68%<br>(60-76%)                | 32%<br>(24-40%)          | 1.7<br>(1.2-2.3)                            | 3.5%<br>(2.6-4.6%)                   | 5.4%<br>(3.5-7.7%)                  | 7.2<br>(4.6-10)     | 960<br>(670-1300)    |
| Paraguay | 2000 | Female | 30 to 34 | 64%<br>(55-73%)                | 36%<br>(27-45%)          | 1.6<br>(1.1-2.4)                            | 3.2%<br>(2.2-4.3%)                   | 5%<br>(3.1-7.3%)                    | 7.9<br>(4.8-11)     | 870<br>(600-1200)    |
| Paraguay | 2000 | Female | 35 to 39 | 55%<br>(46-65%)                | 45%<br>(35-54%)          | 1.4<br>(0.93-2.2)                           | 2.9%<br>(1.9-4.1%)                   | 4.7%<br>(2.8-7.4%)                  | 9.4<br>(5.5-15)     | 810<br>(550-1200)    |
| Paraguay | 2000 | Female | 40 to 44 | 51%<br>(42-60%)                | 49%<br>(40-58%)          | 1.5<br>(0.94-2.1)                           | 3.1%<br>(1.9-4.7%)                   | 5.5%<br>(3.2-8.5%)                  | 14<br>(7.9-22)      | 900<br>(550-1300)    |
| Paraguay | 2000 | Female | 45 to 49 | 49%<br>(38-59%)                | 51%<br>(41-62%)          | 1.5<br>(0.95-2.3)                           | 3.5%<br>(1.9-5.7%)                   | 6.1%<br>(3.2-9.9%)                  | 21<br>(11-34)       | 1000<br>(550-1600)   |
| Paraguay | 2000 | Female | 50 to 54 | 42%<br>(32-52%)                | 58%<br>(48-68%)          | 1.3<br>(0.81-2)                             | 3.5%<br>(1.7-5.8%)                   | 5.5%<br>(2.5-9.2%)                  | 23<br>(11-38)       | 940<br>(460-1500)    |
| Paraguay | 2000 | Female | 55 to 59 | 31%<br>(23-42%)                | 69%<br>(58-77%)          | 1<br>(0.61-1.6)                             | 2.7%<br>(1.3-4.6%)                   | 4%<br>(1.8-7.1%)                    | 20<br>(8.9-34)      | 700<br>(330-1200)    |
| Paraguay | 2000 | Female | 60 to 64 | 29%<br>(20-39%)                | 71%<br>(61-80%)          | 0.88<br>(0.49-1.4)                          | 2%<br>(0.61-4.2%)                    | 2.8%<br>(0.77-5.9%)                 | 18<br>(4.8-37)      | 520<br>(160-1100)    |
| Paraguay | 2000 | Female | 65 to 69 | 31%<br>(23-40%)                | 69%<br>(60-77%)          | 0.77<br>(0.47-1.2)                          | 1.2%<br>(-0.026-2.8%)                | 1.6%<br>(-0.11-3.9%)                | 11<br>(-0.78-27)    | 260<br>(-6.3-640)    |
| Paraguay | 2000 | Female | 70 to 74 | 29%<br>(21-39%)                | 71%<br>(61-79%)          | 0.52<br>(0.29-0.86)                         | 0.27%<br>(-0.65-1.4%)                | 0.38%<br>(-0.86-1.9%)               | 3.5<br>(-8.1-18)    | 63<br>(-160-340)     |

| Location | Year | Sex    | Age      | Prevalence of current drinkers | Prevalence of abstainers | Population average of standard drinks daily | Percent of total attributable deaths | Percent of total attributable DALYs | Attributable deaths | Attributable DALYs     |
|----------|------|--------|----------|--------------------------------|--------------------------|---------------------------------------------|--------------------------------------|-------------------------------------|---------------------|------------------------|
| Paraguay | 2000 | Female | 75 to 79 | 24%<br>(16-35%)                | 76%<br>(65-84%)          | 0.4<br>(0.21-0.68)                          | -0.021%<br>(-0.78-0.86%)             | -0.035%<br>(-1-1.1%)                | -0.35<br>(-11-11)   | -4.1<br>(-160-170)     |
| Paraguay | 2000 | Female | 80 to 84 | 21%<br>(13-31%)                | 79%<br>(69-87%)          | 0.41<br>(0.23-0.68)                         | 0.13%<br>(-0.54-0.93%)               | 0.13%<br>(-0.73-1.2%)               | 1.3<br>(-7.2-12)    | 18<br>(-74-130)        |
| Paraguay | 2000 | Female | 85 to 89 | 20%<br>(12-29%)                | 80%<br>(71-88%)          | 0.44<br>(0.23-0.75)                         | 0.35%<br>(-0.38-1.3%)                | 0.37%<br>(-0.53-1.5%)               | 3.4<br>(-4.9-14)    | 30<br>(-32-110)        |
| Paraguay | 2000 | Female | 90 to 94 | 21%<br>(13-31%)                | 79%<br>(69-87%)          | 0.53<br>(0.25-0.93)                         | 0.51%<br>(-0.31-1.7%)                | 0.53%<br>(-0.46-1.9%)               | 3<br>(-2.6-11)      | 18<br>(-11-57)         |
| Paraguay | 2000 | Female | 95 plus  | 24%<br>(13-38%)                | 76%<br>(62-87%)          | 0.66<br>(0.28-1.3)                          | 0.8%<br>(-0.31-2.6%)                 | 0.83%<br>(-0.53-3%)                 | 1.8<br>(-1.1-6.3)   | 7.1<br>(-2.6-22)       |
| Paraguay | 2000 | Male   | All Ages | 80%<br>(75-84%)                | 20%<br>(16-25%)          | 3.6<br>(3.1-4.2)                            | 9.2%<br>(7.7-11%)                    | 12%<br>(9.8-15%)                    | 1600<br>(1200-1900) | 67000<br>(57000-79000) |
| Paraguay | 2000 | Male   | 15 to 19 | 83%<br>(76-89%)                | 17%<br>(11-24%)          | 3.5<br>(2.4-4.7)                            | 9.6%<br>(6.8-13%)                    | 17%<br>(11-22%)                     | 43<br>(28-59)       | 3800<br>(2700-5000)    |
| Paraguay | 2000 | Male   | 20 to 24 | 90%<br>(85-93%)                | 9.9%<br>(6.6-15%)        | 6<br>(4.5-7.7)                              | 18%<br>(14-23%)                      | 27%<br>(20-35%)                     | 87<br>(63-110)      | 7200<br>(5500-9200)    |
| Paraguay | 2000 | Male   | 25 to 29 | 90%<br>(86-93%)                | 9.7%<br>(6.7-14%)        | 5.9<br>(4.4-7.8)                            | 18%<br>(14-23%)                      | 27%<br>(20-34%)                     | 80<br>(59-100)      | 6300<br>(5000-8000)    |
| Paraguay | 2000 | Male   | 30 to 34 | 92%<br>(88-95%)                | 8.1%<br>(5.3-12%)        | 6.6<br>(4.9-8.5)                            | 18%<br>(14-22%)                      | 27%<br>(20-34%)                     | 87<br>(65-110)      | 6100<br>(4900-7700)    |
| Paraguay | 2000 | Male   | 35 to 39 | 93%<br>(90-95%)                | 7.2%<br>(4.7-10%)        | 7.1<br>(5-9.4)                              | 19%<br>(15-23%)                      | 28%<br>(21-34%)                     | 100<br>(77-130)     | 6400<br>(4900-7900)    |
| Paraguay | 2000 | Male   | 40 to 44 | 92%<br>(89-95%)                | 7.6%<br>(5-11%)          | 7.2<br>(5.1-9.3)                            | 19%<br>(15-23%)                      | 27%<br>(22-33%)                     | 120<br>(93-150)     | 6600<br>(5200-7900)    |
| Paraguay | 2000 | Male   | 45 to 49 | 92%<br>(88-95%)                | 8%<br>(5.1-12%)          | 7.4<br>(5.3-9.9)                            | 19%<br>(15-23%)                      | 27%<br>(22-32%)                     | 140<br>(120-170)    | 6800<br>(5500-8100)    |
| Paraguay | 2000 | Male   | 50 to 54 | 91%<br>(86-94%)                | 9.1%<br>(5.9-14%)        | 7.3<br>(5.1-10)                             | 18%<br>(15-22%)                      | 25%<br>(20-30%)                     | 150<br>(120-180)    | 6100<br>(4900-7400)    |
| Paraguay | 2000 | Male   | 55 to 59 | 88%<br>(81-92%)                | 12%<br>(7.6-19%)         | 6.5<br>(4.5-8.9)                            | 17%<br>(13-21%)                      | 22%<br>(17-27%)                     | 150<br>(120-190)    | 5300<br>(4100-6400)    |
| Paraguay | 2000 | Male   | 60 to 64 | 84%<br>(76-90%)                | 16%<br>(10-24%)          | 5.4<br>(3.6-7.8)                            | 14%<br>(10-18%)                      | 18%<br>(13-23%)                     | 150<br>(110-190)    | 4400<br>(3100-5500)    |
| Paraguay | 2000 | Male   | 65 to 69 | 81%<br>(73-88%)                | 19%<br>(12-27%)          | 4.8<br>(3.4-6.5)                            | 13%<br>(8.7-17%)                     | 16%<br>(11-20%)                     | 140<br>(95-180)     | 3400<br>(2300-4300)    |
| Paraguay | 2000 | Male   | 70 to 74 | 78%<br>(69-85%)                | 22%<br>(15-31%)          | 4.1<br>(2.7-5.8)                            | 10%<br>(6-14%)                       | 13%<br>(7.3-18%)                    | 140<br>(80-200)     | 2700<br>(1600-3700)    |
| Paraguay | 2000 | Male   | 75 to 79 | 71%<br>(57-82%)                | 29%<br>(18-43%)          | 2.7<br>(1.6-4.2)                            | 6.6%<br>(3.2-10%)                    | 7.8%<br>(3.8-12%)                   | 87<br>(41-140)      | 1300<br>(650-2100)     |
| Paraguay | 2000 | Male   | 80 to 84 | 66%<br>(50-79%)                | 34%<br>(21-50%)          | 2<br>(1.2-3.2)                              | 4.5%<br>(2-7.8%)                     | 5.1%<br>(2.1-9.1%)                  | 50<br>(21-89)       | 560<br>(250-960)       |
| Paraguay | 2000 | Male   | 85 to 89 | 64%<br>(49-77%)                | 36%<br>(23-51%)          | 1.9<br>(1.1-2.9)                            | 3.2%<br>(1.2-6.1%)                   | 3.6%<br>(1.2-7%)                    | 27<br>(8.9-53)      | 220<br>(80-420)        |
| Paraguay | 2000 | Male   | 90 to 94 | 64%<br>(50-78%)                | 36%<br>(22-50%)          | 1.6<br>(0.93-2.6)                           | 1.8%<br>(0.16-4.3%)                  | 1.9%<br>(-0.17-4.8%)                | 7.4<br>(-0.68-19)   | 44<br>(4-100)          |

| Location | Year | Sex    | Age      | Prevalence of current drinkers | Prevalence of abstainers | Population average of standard drinks daily | Percent of total attributable deaths | Percent of total attributable DALYs | Attributable deaths | Attributable DALYs     |
|----------|------|--------|----------|--------------------------------|--------------------------|---------------------------------------------|--------------------------------------|-------------------------------------|---------------------|------------------------|
| Paraguay | 2000 | Male   | 95 plus  | 66%<br>(47-81%)                | 34%<br>(19-53%)          | 1.4<br>(0.65-2.5)                           | 1.1%<br>(-0.44-3.8%)                 | 0.88%<br>(-1.1-4%)                  | 1<br>(-1.2-4.8)     | 5.4<br>(-2.1-19)       |
| Paraguay | 2005 | Female | All Ages | 47%<br>(41-52%)                | 53%<br>(48-59%)          | 0.76<br>(0.6-0.96)                          | 1.3%<br>(0.88-1.8%)                  | 1.1%<br>(0.33-2%)                   | 130<br>(39-250)     | 8800<br>(5800-12000)   |
| Paraguay | 2005 | Female | 15 to 19 | 63%<br>(52-73%)                | 37%<br>(27-48%)          | 1<br>(0.66-1.5)                             | 2%<br>(1.3-2.9%)                     | 4.4%<br>(2.3-7.3%)                  | 6.6<br>(3.4-11)     | 790<br>(500-1100)      |
| Paraguay | 2005 | Female | 20 to 24 | 68%<br>(59-76%)                | 32%<br>(24-41%)          | 1.5<br>(0.97-2.1)                           | 3.4%<br>(2.4-4.6%)                   | 5.2%<br>(3-7.8%)                    | 8.4<br>(4.9-13)     | 1200<br>(850-1800)     |
| Paraguay | 2005 | Female | 25 to 29 | 68%<br>(59-76%)                | 32%<br>(24-41%)          | 1.4<br>(0.99-2)                             | 3.2%<br>(2.3-4.3%)                   | 4.5%<br>(2.8-6.8%)                  | 7.2<br>(4.2-11)     | 1000<br>(720-1400)     |
| Paraguay | 2005 | Female | 30 to 34 | 64%<br>(55-73%)                | 36%<br>(27-45%)          | 1.4<br>(0.92-2)                             | 2.8%<br>(1.9-4%)                     | 4.1%<br>(2.5-6.4%)                  | 7<br>(4.2-11)       | 830<br>(560-1200)      |
| Paraguay | 2005 | Female | 35 to 39 | 55%<br>(46-64%)                | 45%<br>(36-54%)          | 1.2<br>(0.77-1.9)                           | 2.5%<br>(1.7-3.7%)                   | 3.9%<br>(2.2-6.1%)                  | 8.9<br>(5-14)       | 790<br>(510-1100)      |
| Paraguay | 2005 | Female | 40 to 44 | 51%<br>(42-60%)                | 49%<br>(40-58%)          | 1.2<br>(0.8-1.9)                            | 2.7%<br>(1.6-3.9%)                   | 4.5%<br>(2.5-7.1%)                  | 14<br>(7.5-22)      | 880<br>(540-1300)      |
| Paraguay | 2005 | Female | 45 to 49 | 49%<br>(38-59%)                | 51%<br>(41-62%)          | 1.3<br>(0.82-2)                             | 2.9%<br>(1.5-4.7%)                   | 4.8%<br>(2.3-8.1%)                  | 19<br>(9.2-33)      | 980<br>(510-1600)      |
| Paraguay | 2005 | Female | 50 to 54 | 42%<br>(32-52%)                | 58%<br>(48-68%)          | 1.1<br>(0.71-1.7)                           | 2.8%<br>(1.3-4.6%)                   | 4.3%<br>(1.8-7.3%)                  | 23<br>(9.9-40)      | 960<br>(450-1600)      |
| Paraguay | 2005 | Female | 55 to 59 | 31%<br>(23-42%)                | 69%<br>(58-77%)          | 0.88<br>(0.52-1.4)                          | 2.1%<br>(0.89-3.8%)                  | 3%<br>(1.2-5.6%)                    | 19<br>(7.8-35)      | 680<br>(290-1300)      |
| Paraguay | 2005 | Female | 60 to 64 | 29%<br>(20-39%)                | 71%<br>(61-80%)          | 0.76<br>(0.42-1.2)                          | 1.4%<br>(0.2-3.3%)                   | 2%<br>(0.28-4.6%)                   | 15<br>(2.2-34)      | 440<br>(62-1000)       |
| Paraguay | 2005 | Female | 65 to 69 | 31%<br>(23-40%)                | 69%<br>(60-77%)          | 0.67<br>(0.4-1)                             | 0.64%<br>(-0.42-2%)                  | 0.92%<br>(-0.52-2.8%)               | 8.2<br>(-4.6-25)    | 190<br>(-130-600)      |
| Paraguay | 2005 | Female | 70 to 74 | 29%<br>(21-39%)                | 71%<br>(61-79%)          | 0.45<br>(0.26-0.75)                         | -0.068%<br>(-0.9-0.85%)              | -0.047%<br>(-1.2-1.2%)              | -0.48<br>(-12-12)   | -18<br>(-240-220)      |
| Paraguay | 2005 | Female | 75 to 79 | 25%<br>(16-35%)                | 75%<br>(65-84%)          | 0.35<br>(0.18-0.6)                          | -0.24%<br>(-0.93-0.46%)              | -0.3%<br>(-1.2-0.6%)                | -4.1<br>(-16-7.8)   | -62<br>(-240-120)      |
| Paraguay | 2005 | Female | 80 to 84 | 22%<br>(14-31%)                | 78%<br>(69-86%)          | 0.36<br>(0.2-0.6)                           | -0.084%<br>(-0.76-0.58%)             | -0.12%<br>(-0.97-0.69%)             | -1.7<br>(-13-9.9)   | -15<br>(-140-110)      |
| Paraguay | 2005 | Female | 85 to 89 | 20%<br>(12-30%)                | 80%<br>(70-88%)          | 0.39<br>(0.2-0.65)                          | 0.12%<br>(-0.54-0.91%)               | 0.097%<br>(-0.75-1.1%)              | 1.2<br>(-8.8-13)    | 14<br>(-60-100)        |
| Paraguay | 2005 | Female | 90 to 94 | 21%<br>(13-31%)                | 79%<br>(69-87%)          | 0.47<br>(0.23-0.83)                         | 0.26%<br>(-0.49-1.2%)                | 0.23%<br>(-0.72-1.3%)               | 1.7<br>(-5.2-10)    | 12<br>(-23-55)         |
| Paraguay | 2005 | Female | 95 plus  | 24%<br>(13-39%)                | 76%<br>(61-87%)          | 0.58<br>(0.25-1.1)                          | 0.44%<br>(-0.5-1.9%)                 | 0.41%<br>(-0.78-2.1%)               | 1.2<br>(-2.2-6)     | 5.2<br>(-5.8-21)       |
| Paraguay | 2005 | Male   | All Ages | 81%<br>(76-85%)                | 19%<br>(15-24%)          | 3.2<br>(2.8-3.8)                            | 9.2%<br>(7.5-11%)                    | 11%<br>(8.5-14%)                    | 1700<br>(1300-2100) | 73000<br>(60000-87000) |
| Paraguay | 2005 | Male   | 15 to 19 | 84%<br>(76-90%)                | 16%<br>(10-24%)          | 3.1<br>(2.1-4.1)                            | 9%<br>(6.3-12%)                      | 15%<br>(9.9-21%)                    | 45<br>(29-63)       | 4000<br>(2800-5300)    |
| Paraguay | 2005 | Male   | 20 to 24 | 90%<br>(85-93%)                | 9.8%<br>(6.5-15%)        | 5.2<br>(3.9-6.7)                            | 17%<br>(13-22%)                      | 24%<br>(17-32%)                     | 97<br>(69-130)      | 8200<br>(6100-10000)   |

| Location | Year | Sex    | Age      | Prevalence of current drinkers | Prevalence of abstainers | Population average of standard drinks daily | Percent of total attributable deaths | Percent of total attributable DALYs | Attributable deaths | Attributable DALYs    |
|----------|------|--------|----------|--------------------------------|--------------------------|---------------------------------------------|--------------------------------------|-------------------------------------|---------------------|-----------------------|
| Paraguay | 2005 | Male   | 25 to 29 | 90%<br>(86-93%)                | 9.6%<br>(6.6-14%)        | 5.1<br>(3.8-6.6)                            | 17%<br>(13-21%)                      | 23%<br>(17-31%)                     | 90<br>(65-120)      | 7200<br>(5500-9100)   |
| Paraguay | 2005 | Male   | 30 to 34 | 92%<br>(88-95%)                | 8.1%<br>(5.3-12%)        | 5.6<br>(4.2-7.4)                            | 17%<br>(13-21%)                      | 24%<br>(17-30%)                     | 88<br>(64-110)      | 6300<br>(4800-8000)   |
| Paraguay | 2005 | Male   | 35 to 39 | 93%<br>(90-95%)                | 7.2%<br>(4.6-10%)        | 6.2<br>(4.3-8.1)                            | 17%<br>(13-22%)                      | 25%<br>(18-31%)                     | 110<br>(78-140)     | 6700<br>(5100-8500)   |
| Paraguay | 2005 | Male   | 40 to 44 | 93%<br>(89-95%)                | 7.5%<br>(4.9-11%)        | 6.2<br>(4.3-8.2)                            | 17%<br>(13-21%)                      | 24%<br>(18-30%)                     | 130<br>(95-160)     | 7000<br>(5300-8800)   |
| Paraguay | 2005 | Male   | 45 to 49 | 92%<br>(88-95%)                | 8%<br>(5-12%)            | 6.4<br>(4.6-8.6)                            | 17%<br>(14-21%)                      | 24%<br>(19-29%)                     | 160<br>(120-190)    | 7400<br>(5800-9000)   |
| Paraguay | 2005 | Male   | 50 to 54 | 91%<br>(87-94%)                | 9%<br>(5.9-13%)          | 6.3<br>(4.4-8.4)                            | 17%<br>(13-20%)                      | 22%<br>(17-27%)                     | 180<br>(130-220)    | 7300<br>(5600-9000)   |
| Paraguay | 2005 | Male   | 55 to 59 | 88%<br>(81-92%)                | 12%<br>(7.5-19%)         | 5.5<br>(3.9-7.5)                            | 15%<br>(11-19%)                      | 20%<br>(14-25%)                     | 180<br>(130-220)    | 6200<br>(4500-7700)   |
| Paraguay | 2005 | Male   | 60 to 64 | 84%<br>(76-90%)                | 16%<br>(9.8-24%)         | 4.6<br>(3.1-6.6)                            | 12%<br>(8.3-16%)                     | 15%<br>(10-20%)                     | 160<br>(100-210)    | 4600<br>(3100-6100)   |
| Paraguay | 2005 | Male   | 65 to 69 | 82%<br>(73-89%)                | 18%<br>(11-27%)          | 4.1<br>(2.9-5.5)                            | 11%<br>(6.6-15%)                     | 13%<br>(8.1-18%)                    | 150<br>(94-210)     | 3700<br>(2300-5000)   |
| Paraguay | 2005 | Male   | 70 to 74 | 78%<br>(69-85%)                | 22%<br>(15-31%)          | 3.6<br>(2.4-4.9)                            | 8.4%<br>(4.4-13%)                    | 10%<br>(5.2-15%)                    | 120<br>(62-180)     | 2300<br>(1200-3500)   |
| Paraguay | 2005 | Male   | 75 to 79 | 71%<br>(58-82%)                | 29%<br>(18-42%)          | 2.3<br>(1.4-3.5)                            | 5.2%<br>(2.3-8.7%)                   | 6.1%<br>(2.6-10%)                   | 83<br>(35-140)      | 1300<br>(560-2100)    |
| Paraguay | 2005 | Male   | 80 to 84 | 66%<br>(49-79%)                | 34%<br>(21-51%)          | 1.8<br>(1.1-2.7)                            | 3.4%<br>(1.4-6%)                     | 3.8%<br>(1.4-6.9%)                  | 48<br>(18-88)       | 550<br>(220-980)      |
| Paraguay | 2005 | Male   | 85 to 89 | 64%<br>(49-78%)                | 36%<br>(22-51%)          | 1.6<br>(0.95-2.5)                           | 2.3%<br>(0.65-4.4%)                  | 2.5%<br>(0.55-5%)                   | 24<br>(5.4-49)      | 200<br>(56-390)       |
| Paraguay | 2005 | Male   | 90 to 94 | 65%<br>(51-77%)                | 35%<br>(23-49%)          | 1.4<br>(0.83-2.2)                           | 1.2%<br>(-0.21-3.1%)                 | 1.2%<br>(-0.62-3.4%)                | 6<br>(-3.2-17)      | 38<br>(-6.7-97)       |
| Paraguay | 2005 | Male   | 95 plus  | 66%<br>(47-81%)                | 34%<br>(19-53%)          | 1.2<br>(0.57-2.1)                           | 0.71%<br>(-0.65-2.7%)                | 0.4%<br>(-1.3-2.7%)                 | 0.62<br>(-2.4-2)    | 4.5<br>(-4.1-17)      |
| Paraguay | 2010 | Female | All Ages | 52%<br>(45-58%)                | 48%<br>(42-55%)          | 0.87<br>(0.67-1.1)                          | 1.4%<br>(0.88-2%)                    | 1.1%<br>(0.22-2.1%)                 | 150<br>(31-300)     | 10000<br>(6200-14000) |
| Paraguay | 2010 | Female | 15 to 19 | 64%<br>(51-75%)                | 36%<br>(25-49%)          | 1<br>(0.61-1.5)                             | 2.1%<br>(1.3-3%)                     | 4.5%<br>(2.2-7.5%)                  | 7.1<br>(3.6-12)     | 830<br>(520-1200)     |
| Paraguay | 2010 | Female | 20 to 24 | 72%<br>(60-81%)                | 28%<br>(19-40%)          | 1.5<br>(0.98-2.3)                           | 3.5%<br>(2.4-4.8%)                   | 5.5%<br>(3.2-8.5%)                  | 9.9<br>(5.7-16)     | 1400<br>(930-2000)    |
| Paraguay | 2010 | Female | 25 to 29 | 72%<br>(60-81%)                | 28%<br>(19-40%)          | 1.5<br>(1-2.2)                              | 3.3%<br>(2.4-4.4%)                   | 4.9%<br>(2.9-7.4%)                  | 9.2<br>(5.4-14)     | 1300<br>(860-1700)    |
| Paraguay | 2010 | Female | 30 to 34 | 68%<br>(55-78%)                | 32%<br>(22-45%)          | 1.5<br>(0.9-2.2)                            | 2.9%<br>(1.9-4%)                     | 4.4%<br>(2.5-6.7%)                  | 8.8<br>(5-14)       | 990<br>(650-1400)     |
| Paraguay | 2010 | Female | 35 to 39 | 61%<br>(48-73%)                | 39%<br>(27-52%)          | 1.4<br>(0.81-2.1)                           | 2.7%<br>(1.7-3.8%)                   | 4.4%<br>(2.4-7.1%)                  | 10<br>(5.4-16)      | 850<br>(540-1200)     |
| Paraguay | 2010 | Female | 40 to 44 | 58%<br>(45-68%)                | 42%<br>(32-55%)          | 1.4<br>(0.87-2.2)                           | 2.8%<br>(1.6-4.3%)                   | 5%<br>(2.5-7.9%)                    | 16<br>(8.1-25)      | 980<br>(560-1500)     |

| Location | Year | Sex    | Age      | Prevalence of current drinkers | Prevalence of abstainers | Population average of standard drinks daily | Percent of total attributable deaths | Percent of total attributable DALYs | Attributable deaths | Attributable DALYs      |
|----------|------|--------|----------|--------------------------------|--------------------------|---------------------------------------------|--------------------------------------|-------------------------------------|---------------------|-------------------------|
| Paraguay | 2010 | Female | 45 to 49 | 56%<br>(41-67%)                | 44%<br>(33-59%)          | 1.5<br>(0.88-2.3)                           | 2.9%<br>(1.3-5%)                     | 5%<br>(2.1-8.5%)                    | 22<br>(9-37)        | 1100<br>(510-1800)      |
| Paraguay | 2010 | Female | 50 to 54 | 49%<br>(37-61%)                | 51%<br>(39-63%)          | 1.3<br>(0.81-2.1)                           | 2.9%<br>(1.2-5%)                     | 4.6%<br>(1.9-8%)                    | 27<br>(11-47)       | 1100<br>(460-1900)      |
| Paraguay | 2010 | Female | 55 to 59 | 39%<br>(28-52%)                | 61%<br>(48-72%)          | 1.1<br>(0.64-1.8)                           | 2.2%<br>(0.74-4.3%)                  | 3.3%<br>(1.1-6.4%)                  | 25<br>(8.8-49)      | 890<br>(300-1700)       |
| Paraguay | 2010 | Female | 60 to 64 | 34%<br>(23-46%)                | 66%<br>(54-77%)          | 0.89<br>(0.47-1.5)                          | 1.4%<br>(-0.00052-3.3%)              | 2%<br>(0.025-4.6%)                  | 18<br>(0.23-42)     | 520<br>(-0.21-1200)     |
| Paraguay | 2010 | Female | 65 to 69 | 33%<br>(23-45%)                | 67%<br>(55-77%)          | 0.7<br>(0.39-1.1)                           | 0.52%<br>(-0.57-2%)                  | 0.75%<br>(-0.7-2.7%)                | 7.9<br>(-7.1-29)    | 180<br>(-200-690)       |
| Paraguay | 2010 | Female | 70 to 74 | 32%<br>(23-43%)                | 68%<br>(57-77%)          | 0.5<br>(0.27-0.84)                          | -0.21%<br>(-1.2-0.85%)               | -0.22%<br>(-1.4-1.1%)               | -2.9<br>(-18-15)    | -68<br>(-360-280)       |
| Paraguay | 2010 | Female | 75 to 79 | 28%<br>(18-41%)                | 72%<br>(59-82%)          | 0.39<br>(0.2-0.7)                           | -0.39%<br>(-1.2-0.43%)               | -0.48%<br>(-1.5-0.57%)              | -6.9<br>(-22-8)     | -100<br>(-320-120)      |
| Paraguay | 2010 | Female | 80 to 84 | 23%<br>(14-33%)                | 77%<br>(67-86%)          | 0.36<br>(0.2-0.59)                          | -0.13%<br>(-0.84-0.57%)              | -0.18%<br>(-1.1-0.72%)              | -3<br>(-18-12)      | -29<br>(-190-130)       |
| Paraguay | 2010 | Female | 85 to 89 | 20%<br>(13-30%)                | 80%<br>(70-87%)          | 0.38<br>(0.2-0.65)                          | 0.083%<br>(-0.56-0.83%)              | 0.048%<br>(-0.75-1%)                | 0.81<br>(-12-16)    | 12<br>(-84-130)         |
| Paraguay | 2010 | Female | 90 to 94 | 22%<br>(13-32%)                | 78%<br>(68-87%)          | 0.45<br>(0.22-0.81)                         | 0.21%<br>(-0.5-1.1%)                 | 0.17%<br>(-0.71-1.3%)               | 1.7<br>(-6.8-13)    | 13<br>(-30-68)          |
| Paraguay | 2010 | Female | 95 plus  | 24%<br>(13-40%)                | 76%<br>(60-87%)          | 0.57<br>(0.24-1.1)                          | 0.39%<br>(-0.57-1.8%)                | 0.34%<br>(-0.83-2.1%)               | 1.3<br>(-3-7.7)     | 5.9<br>(-8.3-28)        |
| Paraguay | 2010 | Male   | All Ages | 79%<br>(74-83%)                | 21%<br>(17-26%)          | 3.1<br>(2.5-3.7)                            | 9.7%<br>(7.7-12%)                    | 11%<br>(8-14%)                      | 1900<br>(1400-2400) | 83000<br>(67000-100000) |
| Paraguay | 2010 | Male   | 15 to 19 | 78%<br>(67-87%)                | 22%<br>(13-33%)          | 2.5<br>(1.7-3.6)                            | 8.2%<br>(5.6-12%)                    | 13%<br>(8.1-19%)                    | 44<br>(27-65)       | 3900<br>(2700-5500)     |
| Paraguay | 2010 | Male   | 20 to 24 | 88%<br>(81-93%)                | 12%<br>(7.1-19%)         | 4.7<br>(3.3-6.3)                            | 17%<br>(12-21%)                      | 23%<br>(16-31%)                     | 110<br>(74-150)     | 9100<br>(6600-12000)    |
| Paraguay | 2010 | Male   | 25 to 29 | 89%<br>(83-93%)                | 11%<br>(6.6-17%)         | 4.8<br>(3.5-6.4)                            | 17%<br>(13-21%)                      | 23%<br>(16-31%)                     | 110<br>(79-150)     | 8800<br>(6600-11000)    |
| Paraguay | 2010 | Male   | 30 to 34 | 90%<br>(84-94%)                | 9.8%<br>(5.8-16%)        | 5.1<br>(3.7-6.8)                            | 17%<br>(13-21%)                      | 23%<br>(16-30%)                     | 110<br>(77-150)     | 7700<br>(5800-9900)     |
| Paraguay | 2010 | Male   | 35 to 39 | 91%<br>(86-95%)                | 9.1%<br>(5.5-14%)        | 5.5<br>(3.7-7.6)                            | 17%<br>(13-22%)                      | 24%<br>(17-31%)                     | 120<br>(81-150)     | 7200<br>(5400-9100)     |
| Paraguay | 2010 | Male   | 40 to 44 | 91%<br>(85-95%)                | 9.2%<br>(5.5-15%)        | 5.6<br>(3.7-7.7)                            | 17%<br>(13-21%)                      | 24%<br>(17-30%)                     | 140<br>(100-180)    | 7500<br>(5600-9400)     |
| Paraguay | 2010 | Male   | 45 to 49 | 90%<br>(83-94%)                | 10%<br>(5.6-17%)         | 5.7<br>(3.9-7.9)                            | 17%<br>(13-21%)                      | 23%<br>(17-28%)                     | 170<br>(130-210)    | 8100<br>(6100-9900)     |
| Paraguay | 2010 | Male   | 50 to 54 | 89%<br>(82-93%)                | 11%<br>(6.8-18%)         | 5.6<br>(3.8-7.7)                            | 16%<br>(12-20%)                      | 21%<br>(15-26%)                     | 200<br>(140-250)    | 8100<br>(6000-10000)    |
| Paraguay | 2010 | Male   | 55 to 59 | 86%<br>(78-92%)                | 14%<br>(8-22%)           | 5.1<br>(3.4-7.1)                            | 15%<br>(10-19%)                      | 19%<br>(13-24%)                     | 220<br>(150-290)    | 7700<br>(5400-9900)     |
| Paraguay | 2010 | Male   | 60 to 64 | 84%<br>(75-91%)                | 16%<br>(9.5-25%)         | 4.4<br>(2.9-6.4)                            | 12%<br>(7.7-16%)                     | 15%<br>(9.2-20%)                    | 190<br>(120-270)    | 5700<br>(3700-7700)     |

| Location | Year | Sex    | Age      | Prevalence of current drinkers | Prevalence of abstainers | Population average of standard drinks daily | Percent of total attributable deaths | Percent of total attributable DALYs | Attributable deaths | Attributable DALYs    |
|----------|------|--------|----------|--------------------------------|--------------------------|---------------------------------------------|--------------------------------------|-------------------------------------|---------------------|-----------------------|
| Paraguay | 2010 | Male   | 65 to 69 | 81%<br>(71-89%)                | 19%<br>(11-29%)          | 3.9<br>(2.5-5.4)                            | 10%<br>(5.8-14%)                     | 12%<br>(6.9-17%)                    | 180<br>(100-250)    | 4300<br>(2500-5900)   |
| Paraguay | 2010 | Male   | 70 to 74 | 77%<br>(65-85%)                | 23%<br>(15-35%)          | 3.3<br>(2-4.7)                              | 7.8%<br>(4-12%)                      | 9.3%<br>(4.7-14%)                   | 150<br>(74-230)     | 2900<br>(1500-4400)   |
| Paraguay | 2010 | Male   | 75 to 79 | 72%<br>(57-83%)                | 28%<br>(17-43%)          | 2.3<br>(1.3-3.5)                            | 4.9%<br>(2-8.5%)                     | 5.7%<br>(2.3-10%)                   | 87<br>(34-160)      | 1300<br>(540-2300)    |
| Paraguay | 2010 | Male   | 80 to 84 | 67%<br>(51-80%)                | 33%<br>(20-49%)          | 1.7<br>(1-2.7)                              | 3.2%<br>(1.2-5.8%)                   | 3.6%<br>(1.2-6.6%)                  | 56<br>(19-100)      | 630<br>(240-1200)     |
| Paraguay | 2010 | Male   | 85 to 89 | 63%<br>(47-77%)                | 37%<br>(23-53%)          | 1.5<br>(0.87-2.4)                           | 2.1%<br>(0.55-4.2%)                  | 2.3%<br>(0.4-4.8%)                  | 30<br>(5.4-62)      | 250<br>(63-490)       |
| Paraguay | 2010 | Male   | 90 to 94 | 63%<br>(48-77%)                | 37%<br>(23-52%)          | 1.3<br>(0.73-2.2)                           | 1.1%<br>(-0.3-3.1%)                  | 1.1%<br>(-0.66-3.4%)                | 7<br>(-4.3-22)      | 46<br>(-12-130)       |
| Paraguay | 2010 | Male   | 95 plus  | 64%<br>(45-80%)                | 36%<br>(20-55%)          | 1.1<br>(0.5-2)                              | 0.66%<br>(-0.7-2.7%)                 | 0.35%<br>(-1.3-2.7%)                | 0.71<br>(-2.7-5.5)  | 5.5<br>(-5.8-23)      |
| Paraguay | 2016 | Female | All Ages | 53%<br>(46-59%)                | 47%<br>(41-54%)          | 0.94<br>(0.65-1.3)                          | 1.6%<br>(0.86-2.4%)                  | 1.2%<br>(0.085-2.4%)                | 180<br>(13-380)     | 11000<br>(6200-17000) |
| Paraguay | 2016 | Female | 15 to 19 | 64%<br>(51-75%)                | 36%<br>(25-49%)          | 1<br>(0.6-1.6)                              | 2.1%<br>(1.3-3.1%)                   | 4.8%<br>(2.4-8.2%)                  | 7.4<br>(3.5-13)     | 860<br>(540-1300)     |
| Paraguay | 2016 | Female | 20 to 24 | 72%<br>(60-81%)                | 28%<br>(19-40%)          | 1.6<br>(0.95-2.5)                           | 3.6%<br>(2.4-5%)                     | 6%<br>(3.1-9.8%)                    | 11<br>(5.6-18)      | 1500<br>(980-2200)    |
| Paraguay | 2016 | Female | 25 to 29 | 73%<br>(60-81%)                | 27%<br>(19-40%)          | 1.6<br>(1-2.5)                              | 3.4%<br>(2.4-4.7%)                   | 5.3%<br>(2.9-8.2%)                  | 10<br>(5.6-17)      | 1400<br>(950-2000)    |
| Paraguay | 2016 | Female | 30 to 34 | 68%<br>(55-78%)                | 32%<br>(22-45%)          | 1.5<br>(0.88-2.3)                           | 3%<br>(2-4.3%)                       | 4.7%<br>(2.5-7.4%)                  | 11<br>(5.6-18)      | 1300<br>(820-1800)    |
| Paraguay | 2016 | Female | 35 to 39 | 61%<br>(48-73%)                | 39%<br>(27-52%)          | 1.4<br>(0.8-2.3)                            | 2.8%<br>(1.7-4.2%)                   | 4.7%<br>(2.5-7.6%)                  | 12<br>(6.2-21)      | 1100<br>(650-1600)    |
| Paraguay | 2016 | Female | 40 to 44 | 58%<br>(45-69%)                | 42%<br>(31-55%)          | 1.5<br>(0.83-2.3)                           | 2.9%<br>(1.6-4.6%)                   | 5.2%<br>(2.6-8.5%)                  | 16<br>(7.7-28)      | 1000<br>(560-1700)    |
| Paraguay | 2016 | Female | 45 to 49 | 56%<br>(42-67%)                | 44%<br>(33-58%)          | 1.6<br>(0.87-2.6)                           | 3%<br>(1.2-5.2%)                     | 5.2%<br>(2.1-9.1%)                  | 23<br>(9.6-41)      | 1200<br>(500-2100)    |
| Paraguay | 2016 | Female | 50 to 54 | 49%<br>(37-61%)                | 51%<br>(39-63%)          | 1.4<br>(0.78-2.3)                           | 2.9%<br>(1.1-5.5%)                   | 4.8%<br>(1.7-8.6%)                  | 30<br>(11-55)       | 1200<br>(470-2300)    |
| Paraguay | 2016 | Female | 55 to 59 | 40%<br>(28-52%)                | 60%<br>(48-72%)          | 1.2<br>(0.62-2)                             | 2.3%<br>(0.65-4.7%)                  | 3.5%<br>(1.1-7.1%)                  | 29<br>(8.9-58)      | 1000<br>(290-2100)    |
| Paraguay | 2016 | Female | 60 to 64 | 34%<br>(23-46%)                | 66%<br>(54-77%)          | 0.93<br>(0.47-1.6)                          | 1.5%<br>(-0.085-3.6%)                | 2.1%<br>(-0.02-5%)                  | 23<br>(-0.23-56)    | 690<br>(-39-1700)     |
| Paraguay | 2016 | Female | 65 to 69 | 33%<br>(23-44%)                | 67%<br>(56-77%)          | 0.72<br>(0.39-1.2)                          | 0.61%<br>(-0.56-2.2%)                | 0.89%<br>(-0.69-3.1%)               | 12<br>(-9-40)       | 260<br>(-250-950)     |
| Paraguay | 2016 | Female | 70 to 74 | 32%<br>(23-43%)                | 68%<br>(57-77%)          | 0.52<br>(0.27-0.91)                         | -0.14%<br>(-1.1-0.98%)               | -0.12%<br>(-1.4-1.4%)               | -1.8<br>(-21-19)    | -54<br>(-430-360)     |
| Paraguay | 2016 | Female | 75 to 79 | 28%<br>(18-40%)                | 72%<br>(60-82%)          | 0.41<br>(0.21-0.73)                         | -0.35%<br>(-1.2-0.51%)               | -0.43%<br>(-1.5-0.66%)              | -7.7<br>(-27-11)    | -120<br>(-410-170)    |
| Paraguay | 2016 | Female | 80 to 84 | 23%<br>(14-33%)                | 77%<br>(67-86%)          | 0.39<br>(0.2-0.66)                          | -0.098%<br>(-0.87-0.7%)              | -0.14%<br>(-1.1-0.86%)              | -2.8<br>(-22-16)    | -26<br>(-230-180)     |

| Location | Year | Sex    | Age      | Prevalence of current drinkers | Prevalence of abstainers | Population average of standard drinks daily | Percent of total attributable deaths | Percent of total attributable DALYs | Attributable deaths | Attributable DALYs      |
|----------|------|--------|----------|--------------------------------|--------------------------|---------------------------------------------|--------------------------------------|-------------------------------------|---------------------|-------------------------|
| Paraguay | 2016 | Female | 85 to 89 | 21%<br>(13-31%)                | 79%<br>(69-87%)          | 0.4<br>(0.2-0.72)                           | 0.13%<br>(-0.62-1.1%)                | 0.1%<br>(-0.83-1.3%)                | 1.8<br>(-14-22)     | 21<br>(-100-170)        |
| Paraguay | 2016 | Female | 90 to 94 | 22%<br>(13-32%)                | 78%<br>(68-87%)          | 0.47<br>(0.23-0.89)                         | 0.28%<br>(-0.49-1.4%)                | 0.24%<br>(-0.73-1.6%)               | 2.9<br>(-8.8-20)    | 21<br>(-39-110)         |
| Paraguay | 2016 | Female | 95 plus  | 24%<br>(13-39%)                | 76%<br>(61-87%)          | 0.59<br>(0.24-1.2)                          | 0.46%<br>(-0.59-2.1%)                | 0.42%<br>(-0.88-2.4%)               | 1.9<br>(-4.1-11)    | 8.8<br>(-11-40)         |
| Paraguay | 2016 | Male   | All Ages | 80%<br>(75-84%)                | 20%<br>(16-25%)          | 3.4<br>(2.5-4.4)                            | 11%<br>(8-13%)                       | 11%<br>(7.6-15%)                    | 2300<br>(1500-3100) | 99000<br>(71000-130000) |
| Paraguay | 2016 | Male   | 15 to 19 | 78%<br>(68-87%)                | 22%<br>(13-32%)          | 2.6<br>(1.6-3.9)                            | 8.7%<br>(5.8-12%)                    | 14%<br>(8.3-20%)                    | 49<br>(27-79)       | 4300<br>(2700-6400)     |
| Paraguay | 2016 | Male   | 20 to 24 | 88%<br>(81-93%)                | 12%<br>(7.1-19%)         | 4.8<br>(3.1-7)                              | 17%<br>(12-23%)                      | 24%<br>(16-33%)                     | 120<br>(74-180)     | 10000<br>(6900-14000)   |
| Paraguay | 2016 | Male   | 25 to 29 | 90%<br>(83-93%)                | 10%<br>(6.5-17%)         | 5<br>(3.4-7.1)                              | 18%<br>(13-23%)                      | 24%<br>(16-33%)                     | 130<br>(83-180)     | 10000<br>(7200-13000)   |
| Paraguay | 2016 | Male   | 30 to 34 | 90%<br>(85-94%)                | 9.6%<br>(5.7-15%)        | 5.3<br>(3.6-7.5)                            | 17%<br>(13-22%)                      | 24%<br>(17-32%)                     | 130<br>(90-180)     | 9600<br>(6900-13000)    |
| Paraguay | 2016 | Male   | 35 to 39 | 91%<br>(86-95%)                | 8.9%<br>(5.3-14%)        | 5.7<br>(3.6-8.3)                            | 18%<br>(13-23%)                      | 25%<br>(17-32%)                     | 140<br>(94-190)     | 8900<br>(6300-12000)    |
| Paraguay | 2016 | Male   | 40 to 44 | 91%<br>(86-95%)                | 9%<br>(5.4-14%)          | 5.8<br>(3.6-8.5)                            | 17%<br>(13-22%)                      | 24%<br>(17-31%)                     | 150<br>(98-200)     | 8100<br>(5700-11000)    |
| Paraguay | 2016 | Male   | 45 to 49 | 90%<br>(83-94%)                | 9.8%<br>(5.5-17%)        | 6<br>(3.8-8.7)                              | 17%<br>(13-22%)                      | 23%<br>(17-29%)                     | 180<br>(130-240)    | 8700<br>(6300-11000)    |
| Paraguay | 2016 | Male   | 50 to 54 | 89%<br>(83-93%)                | 11%<br>(6.7-17%)         | 5.9<br>(3.7-8.7)                            | 17%<br>(12-21%)                      | 22%<br>(15-28%)                     | 220<br>(150-290)    | 9200<br>(6300-12000)    |
| Paraguay | 2016 | Male   | 55 to 59 | 87%<br>(78-92%)                | 13%<br>(7.8-22%)         | 5.3<br>(3.4-8.1)                            | 15%<br>(10-20%)                      | 19%<br>(13-25%)                     | 250<br>(170-340)    | 8900<br>(6000-12000)    |
| Paraguay | 2016 | Male   | 60 to 64 | 84%<br>(75-91%)                | 16%<br>(9.3-25%)         | 4.6<br>(2.8-7.1)                            | 12%<br>(7.8-17%)                     | 15%<br>(9.4-21%)                    | 260<br>(160-370)    | 7700<br>(4800-11000)    |
| Paraguay | 2016 | Male   | 65 to 69 | 81%<br>(71-89%)                | 19%<br>(11-29%)          | 4.1<br>(2.5-6)                              | 11%<br>(5.8-15%)                     | 13%<br>(7-18%)                      | 240<br>(130-350)    | 5900<br>(3300-8400)     |
| Paraguay | 2016 | Male   | 70 to 74 | 77%<br>(66-85%)                | 23%<br>(15-34%)          | 3.4<br>(2-5.2)                              | 8.1%<br>(3.7-13%)                    | 9.6%<br>(4.2-15%)                   | 190<br>(85-310)     | 3800<br>(1700-6000)     |
| Paraguay | 2016 | Male   | 75 to 79 | 72%<br>(58-84%)                | 28%<br>(16-42%)          | 2.4<br>(1.3-3.9)                            | 5.2%<br>(1.8-9.4%)                   | 6%<br>(2-11%)                       | 130<br>(42-230)     | 1900<br>(670-3500)      |
| Paraguay | 2016 | Male   | 80 to 84 | 67%<br>(51-80%)                | 33%<br>(20-49%)          | 1.8<br>(1-2.9)                              | 3.4%<br>(1.1-6.7%)                   | 3.8%<br>(1-7.6%)                    | 77<br>(21-160)      | 870<br>(280-1700)       |
| Paraguay | 2016 | Male   | 85 to 89 | 64%<br>(48-77%)                | 36%<br>(23-52%)          | 1.6<br>(0.88-2.6)                           | 2.3%<br>(0.45-5.1%)                  | 2.5%<br>(0.33-5.7%)                 | 38<br>(4.8-87)      | 320<br>(60-690)         |
| Paraguay | 2016 | Male   | 90 to 94 | 63%<br>(49-77%)                | 37%<br>(23-51%)          | 1.4<br>(0.77-2.4)                           | 1.3%<br>(-0.33-3.6%)                 | 1.2%<br>(-0.7-4%)                   | 10<br>(-6.4-34)     | 67<br>(-18-190)         |
| Paraguay | 2016 | Male   | 95 plus  | 65%<br>(46-81%)                | 35%<br>(19-54%)          | 1.2<br>(0.51-2.2)                           | 0.77%<br>(-0.7-3.2%)                 | 0.45%<br>(-1.3-3.3%)                | 1.2<br>(-3.5-8.6)   | 8.2<br>(-7.8-35)        |
| Algeria  | 1990 | Female | All Ages | 9.9%<br>(6.1-16%)              | 90%<br>(84-94%)          | 0.16<br>(0.12-0.2)                          | 0.23%<br>(0.03-0.47%)                | 0.069%<br>(-0.48-0.7%)              | 41<br>(-270-420)    | 9500<br>(1200-20000)    |

| Location | Year | Sex    | Age      | Prevalence of current drinkers | Prevalence of abstainers | Population average of standard drinks daily | Percent of total attributable deaths | Percent of total attributable DALYs | Attributable deaths | Attributable DALYs     |
|----------|------|--------|----------|--------------------------------|--------------------------|---------------------------------------------|--------------------------------------|-------------------------------------|---------------------|------------------------|
| Algeria  | 1990 | Female | 15 to 19 | 8.7%<br>(2.8-20%)              | 91%<br>(80-97%)          | 0.13<br>(0.037-0.31)                        | 0.45%<br>(0.24-0.74%)                | 0.5%<br>(0.16-1.1%)                 | 5.3<br>(1.7-13)     | 920<br>(480-1600)      |
| Algeria  | 1990 | Female | 20 to 24 | 11%<br>(3.3-26%)               | 89%<br>(74-97%)          | 0.21<br>(0.065-0.43)                        | 0.79%<br>(0.47-1.2%)                 | 0.72%<br>(0.22-1.6%)                | 8.6<br>(2.6-20)     | 1600<br>(960-2600)     |
| Algeria  | 1990 | Female | 25 to 29 | 13%<br>(3.5-28%)               | 87%<br>(72-96%)          | 0.25<br>(0.076-0.51)                        | 0.9%<br>(0.57-1.3%)                  | 0.96%<br>(0.31-2%)                  | 11<br>(3.6-24)      | 1700<br>(1000-2600)    |
| Algeria  | 1990 | Female | 30 to 34 | 14%<br>(3.7-31%)               | 86%<br>(69-96%)          | 0.3<br>(0.1-0.58)                           | 0.9%<br>(0.51-1.4%)                  | 1.2%<br>(0.39-2.3%)                 | 14<br>(4.7-29)      | 1600<br>(870-2500)     |
| Algeria  | 1990 | Female | 35 to 39 | 16%<br>(4.2-32%)               | 84%<br>(68-96%)          | 0.36<br>(0.12-0.69)                         | 0.86%<br>(0.42-1.6%)                 | 1.3%<br>(0.38-2.8%)                 | 18<br>(5.3-39)      | 1400<br>(660-2600)     |
| Algeria  | 1990 | Female | 40 to 44 | 17%<br>(5.8-32%)               | 83%<br>(68-94%)          | 0.4<br>(0.14-0.8)                           | 0.87%<br>(0.28-1.8%)                 | 1.5%<br>(0.32-3.4%)                 | 18<br>(3.9-41)      | 1100<br>(330-2200)     |
| Algeria  | 1990 | Female | 45 to 49 | 17%<br>(5.9-33%)               | 83%<br>(67-94%)          | 0.44<br>(0.14-0.92)                         | 0.77%<br>(0.023-2.1%)                | 1.3%<br>(0.039-3.7%)                | 19<br>(0.55-52)     | 920<br>(26-2500)       |
| Algeria  | 1990 | Female | 50 to 54 | 18%<br>(7.4-35%)               | 82%<br>(65-93%)          | 0.45<br>(0.14-0.95)                         | 0.62%<br>(-0.29-2%)                  | 1%<br>(-0.47-3.4%)                  | 20<br>(-8.6-65)     | 800<br>(-370-2600)     |
| Algeria  | 1990 | Female | 55 to 59 | 19%<br>(8-37%)                 | 81%<br>(63-92%)          | 0.45<br>(0.13-0.98)                         | 0.41%<br>(-0.62-1.7%)                | 0.69%<br>(-0.86-2.8%)               | 17<br>(-22-66)      | 550<br>(-860-2300)     |
| Algeria  | 1990 | Female | 60 to 64 | 21%<br>(8-40%)                 | 79%<br>(60-92%)          | 0.44<br>(0.11-1.1)                          | 0.13%<br>(-1-1.6%)                   | 0.23%<br>(-1.4-2.4%)                | 7.1<br>(-43-75)     | 170<br>(-1300-2200)    |
| Algeria  | 1990 | Female | 65 to 69 | 21%<br>(8.7-39%)               | 79%<br>(61-91%)          | 0.39<br>(0.097-0.86)                        | -0.17%<br>(-1.3-1%)                  | -0.2%<br>(-1.8-1.5%)                | -6.7<br>(-60-50)    | -200<br>(-1500-1200)   |
| Algeria  | 1990 | Female | 70 to 74 | 20%<br>(7.4-37%)               | 80%<br>(63-93%)          | 0.31<br>(0.068-0.79)                        | -0.36%<br>(-1.5-0.78%)               | -0.46%<br>(-1.9-1%)                 | -21<br>(-90-47)     | -420<br>(-1700-870)    |
| Algeria  | 1990 | Female | 75 to 79 | 18%<br>(6.6-38%)               | 82%<br>(62-93%)          | 0.25<br>(0.054-0.75)                        | -0.42%<br>(-1.5-0.54%)               | -0.53%<br>(-1.9-0.71%)              | -25<br>(-91-34)     | -370<br>(-1400-480)    |
| Algeria  | 1990 | Female | 80 to 84 | 16%<br>(5.6-37%)               | 84%<br>(63-94%)          | 0.23<br>(0.048-0.69)                        | -0.37%<br>(-1.4-0.45%)               | -0.46%<br>(-1.8-0.59%)              | -18<br>(-67-23)     | -190<br>(-720-250)     |
| Algeria  | 1990 | Female | 85 to 89 | 17%<br>(5.5-37%)               | 83%<br>(63-94%)          | 0.23<br>(0.048-0.7)                         | -0.43%<br>(-1.5-0.33%)               | -0.54%<br>(-1.9-0.39%)              | -16<br>(-55-11)     | -110<br>(-400-86)      |
| Algeria  | 1990 | Female | 90 to 94 | 19%<br>(6.2-41%)               | 81%<br>(59-94%)          | 0.26<br>(0.052-0.77)                        | -0.52%<br>(-1.6-0.32%)               | -0.67%<br>(-2-0.37%)                | -8.4<br>(-25-4.7)   | -41<br>(-120-26)       |
| Algeria  | 1990 | Female | 95 plus  | 24%<br>(7.2-47%)               | 76%<br>(53-93%)          | 0.31<br>(0.056-0.94)                        | -0.59%<br>(-2-0.53%)                 | -0.79%<br>(-2.5-0.59%)              | -3.1<br>(-9.7-2.3)  | -9.5<br>(-32-8.3)      |
| Algeria  | 1990 | Male   | All Ages | 7.5%<br>(5-11%)                | 92%<br>(89-95%)          | 0.18<br>(0.14-0.24)                         | 0.61%<br>(0.41-0.88%)                | 0.67%<br>(0.29-1.3%)                | 450<br>(190-860)    | 27000<br>(18000-40000) |
| Algeria  | 1990 | Male   | 15 to 19 | 6.4%<br>(2.7-13%)              | 94%<br>(87-97%)          | 0.093<br>(0.029-0.2)                        | 0.73%<br>(0.42-1.2%)                 | 0.71%<br>(0.24-1.5%)                | 11<br>(3.3-23)      | 1600<br>(890-2600)     |
| Algeria  | 1990 | Male   | 20 to 24 | 9.8%<br>(4-19%)                | 90%<br>(81-96%)          | 0.21<br>(0.076-0.42)                        | 1.6%<br>(0.99-2.5%)                  | 1.5%<br>(0.58-3%)                   | 27<br>(10-55)       | 3500<br>(2100-5500)    |
| Algeria  | 1990 | Male   | 25 to 29 | 12%<br>(4.8-23%)               | 88%<br>(77-95%)          | 0.32<br>(0.13-0.62)                         | 1.9%<br>(1.2-2.9%)                   | 2.2%<br>(0.89-4.1%)                 | 38<br>(15-72)       | 3900<br>(2300-6200)    |
| Algeria  | 1990 | Male   | 30 to 34 | 14%<br>(5-28%)                 | 86%<br>(72-95%)          | 0.41<br>(0.17-0.73)                         | 2%<br>(1.2-3.1%)                     | 2.4%<br>(1.1-4.4%)                  | 42<br>(19-78)       | 3600<br>(2100-5900)    |



| Location | Year | Sex    | Age      | Prevalence of current drinkers | Prevalence of abstainers | Population average of standard drinks daily | Percent of total attributable deaths | Percent of total attributable DALYs | Attributable deaths | Attributable DALYs  |
|----------|------|--------|----------|--------------------------------|--------------------------|---------------------------------------------|--------------------------------------|-------------------------------------|---------------------|---------------------|
| Algeria  | 1990 | Male   | 35 to 39 | 15%<br>(5.7-28%)               | 85%<br>(72-94%)          | 0.47<br>(0.18-0.9)                          | 2%<br>(1.1-3.3%)                     | 2.6%<br>(1.2-5%)                    | 48<br>(21-91)       | 3400<br>(1900-5900) |
| Algeria  | 1990 | Male   | 40 to 44 | 15%<br>(6.8-27%)               | 85%<br>(73-93%)          | 0.5<br>(0.18-1)                             | 1.9%<br>(0.96-3.4%)                  | 2.5%<br>(1-4.9%)                    | 38<br>(16-76)       | 2400<br>(1200-4300) |
| Algeria  | 1990 | Male   | 45 to 49 | 15%<br>(5.8-28%)               | 85%<br>(72-94%)          | 0.52<br>(0.16-1.1)                          | 1.8%<br>(0.81-3.5%)                  | 2.4%<br>(0.88-5.1%)                 | 40<br>(15-84)       | 2100<br>(950-4000)  |
| Algeria  | 1990 | Male   | 50 to 54 | 14%<br>(6.2-28%)               | 86%<br>(72-94%)          | 0.52<br>(0.17-1.1)                          | 1.5%<br>(0.54-3.1%)                  | 2%<br>(0.53-4.3%)                   | 43<br>(11-98)       | 1900<br>(680-4100)  |
| Algeria  | 1990 | Male   | 55 to 59 | 14%<br>(5.9-27%)               | 86%<br>(73-94%)          | 0.5<br>(0.15-1.1)                           | 1.3%<br>(0.39-2.9%)                  | 1.7%<br>(0.38-4%)                   | 52<br>(12-130)      | 1900<br>(570-4400)  |
| Algeria  | 1990 | Male   | 60 to 64 | 13%<br>(5.5-26%)               | 87%<br>(74-94%)          | 0.45<br>(0.13-1)                            | 1%<br>(0.15-2.7%)                    | 1.3%<br>(0.11-3.5%)                 | 47<br>(3.8-130)     | 1400<br>(220-3900)  |
| Algeria  | 1990 | Male   | 65 to 69 | 13%<br>(5.9-24%)               | 87%<br>(76-94%)          | 0.37<br>(0.11-0.81)                         | 0.66%<br>(-0.045-2%)                 | 0.79%<br>(-0.16-2.5%)               | 32<br>(-6.3-100)    | 810<br>(-56-2500)   |
| Algeria  | 1990 | Male   | 70 to 74 | 12%<br>(5.5-21%)               | 88%<br>(79-95%)          | 0.27<br>(0.08-0.66)                         | 0.37%<br>(-0.2-1.4%)                 | 0.42%<br>(-0.31-1.7%)               | 21<br>(-15-82)      | 430<br>(-220-1600)  |
| Algeria  | 1990 | Male   | 75 to 79 | 10%<br>(4.5-20%)               | 90%<br>(80-96%)          | 0.21<br>(0.053-0.57)                        | 0.18%<br>(-0.29-0.95%)               | 0.19%<br>(-0.41-1.1%)               | 8.6<br>(-20-52)     | 150<br>(-250-800)   |
| Algeria  | 1990 | Male   | 80 to 84 | 9.1%<br>(3.5-18%)              | 91%<br>(82-97%)          | 0.18<br>(0.045-0.44)                        | 0.14%<br>(-0.25-0.7%)                | 0.14%<br>(-0.34-0.82%)              | 4.7<br>(-12-27)     | 63<br>(-110-300)    |
| Algeria  | 1990 | Male   | 85 to 89 | 8.8%<br>(3.4-18%)              | 91%<br>(82-97%)          | 0.16<br>(0.041-0.41)                        | 0.075%<br>(-0.29-0.5%)               | 0.047%<br>(-0.4-0.54%)              | 1.1<br>(-9.4-12)    | 16<br>(-60-100)     |
| Algeria  | 1990 | Male   | 90 to 94 | 9.7%<br>(4-19%)                | 90%<br>(81-96%)          | 0.17<br>(0.042-0.47)                        | 0.01%<br>(-0.38-0.5%)                | -0.045%<br>(-0.52-0.54%)            | -0.45<br>(-5.2-5.5) | 0.64<br>(-23-30)    |
| Algeria  | 1990 | Male   | 95 plus  | 12%<br>(4.4-26%)               | 88%<br>(74-96%)          | 0.2<br>(0.036-0.56)                         | 0.0074%<br>(-0.49-0.73%)             | -0.085%<br>(-0.68-0.77%)            | 0.23<br>(-1.9-2.1)  | 0.084<br>(-5.3-8.3) |
| Algeria  | 1995 | Female | All Ages | 10%<br>(6-16%)                 | 90%<br>(84-94%)          | 0.16<br>(0.12-0.21)                         | 0.23%<br>(0.024-0.46%)               | -0.00015%<br>(-0.56-0.63%)          | 0.42<br>(-340-390)  | 9600<br>(970-20000) |
| Algeria  | 1995 | Female | 15 to 19 | 9%<br>(2.9-20%)                | 91%<br>(80-97%)          | 0.13<br>(0.036-0.3)                         | 0.42%<br>(0.23-0.68%)                | 0.43%<br>(0.15-1%)                  | 4.9<br>(1.6-12)     | 970<br>(530-1600)   |
| Algeria  | 1995 | Female | 20 to 24 | 12%<br>(3.4-26%)               | 88%<br>(74-97%)          | 0.2<br>(0.067-0.43)                         | 0.78%<br>(0.48-1.2%)                 | 0.65%<br>(0.21-1.5%)                | 7.8<br>(2.6-18)     | 1800<br>(1000-2800) |
| Algeria  | 1995 | Female | 25 to 29 | 13%<br>(3.7-28%)               | 87%<br>(72-96%)          | 0.25<br>(0.08-0.5)                          | 0.87%<br>(0.55-1.3%)                 | 0.87%<br>(0.3-1.7%)                 | 10<br>(3.5-21)      | 1800<br>(1100-2700) |
| Algeria  | 1995 | Female | 30 to 34 | 15%<br>(3.9-31%)               | 85%<br>(69-96%)          | 0.3<br>(0.096-0.56)                         | 0.85%<br>(0.5-1.3%)                  | 1.1%<br>(0.37-2.1%)                 | 13<br>(4.7-27)      | 1700<br>(950-2600)  |
| Algeria  | 1995 | Female | 35 to 39 | 16%<br>(4.5-31%)               | 84%<br>(69-95%)          | 0.35<br>(0.11-0.65)                         | 0.8%<br>(0.41-1.4%)                  | 1.2%<br>(0.39-2.6%)                 | 17<br>(5.6-36)      | 1500<br>(740-2600)  |
| Algeria  | 1995 | Female | 40 to 44 | 17%<br>(6.4-32%)               | 83%<br>(68-94%)          | 0.39<br>(0.14-0.74)                         | 0.79%<br>(0.28-1.6%)                 | 1.4%<br>(0.32-3.1%)                 | 22<br>(5.1-50)      | 1400<br>(490-2800)  |
| Algeria  | 1995 | Female | 45 to 49 | 18%<br>(6.1-32%)               | 82%<br>(68-94%)          | 0.42<br>(0.14-0.88)                         | 0.69%<br>(0.04-1.8%)                 | 1.2%<br>(0.02-3.4%)                 | 18<br>(0.32-52)     | 920<br>(51-2500)    |
| Algeria  | 1995 | Female | 50 to 54 | 18%<br>(7.1-36%)               | 82%<br>(64-93%)          | 0.44<br>(0.13-0.95)                         | 0.53%<br>(-0.27-1.8%)                | 0.91%<br>(-0.42-3%)                 | 17<br>(-7.5-56)     | 690<br>(-340-2300)  |

| Location | Year | Sex    | Age      | Prevalence of current drinkers | Prevalence of abstainers | Population average of standard drinks daily | Percent of total attributable deaths | Percent of total attributable DALYs | Attributable deaths | Attributable DALYs     |
|----------|------|--------|----------|--------------------------------|--------------------------|---------------------------------------------|--------------------------------------|-------------------------------------|---------------------|------------------------|
| Algeria  | 1995 | Female | 55 to 59 | 19%<br>(7.7-39%)               | 81%<br>(61-92%)          | 0.44<br>(0.12-1)                            | 0.33%<br>(-0.61-1.6%)                | 0.57%<br>(-0.85-2.7%)               | 14<br>(-21-65)      | 460<br>(-870-2300)     |
| Algeria  | 1995 | Female | 60 to 64 | 20%<br>(8.1-39%)               | 80%<br>(61-92%)          | 0.42<br>(0.11-1)                            | 0.046%<br>(-1-1.4%)                  | 0.12%<br>(-1.4-2.1%)                | 4<br>(-46-73)       | 72<br>(-1500-2200)     |
| Algeria  | 1995 | Female | 65 to 69 | 21%<br>(8.5-38%)               | 79%<br>(62-91%)          | 0.36<br>(0.088-0.79)                        | -0.24%<br>(-1.3-0.84%)               | -0.29%<br>(-1.8-1.2%)               | -12<br>(-72-51)     | -330<br>(-1800-1200)   |
| Algeria  | 1995 | Female | 70 to 74 | 20%<br>(7.9-38%)               | 80%<br>(62-92%)          | 0.29<br>(0.072-0.71)                        | -0.4%<br>(-1.4-0.58%)                | -0.52%<br>(-1.9-0.77%)              | -23<br>(-84-35)     | -460<br>(-1700-670)    |
| Algeria  | 1995 | Female | 75 to 79 | 17%<br>(6.1-38%)               | 83%<br>(62-94%)          | 0.24<br>(0.048-0.71)                        | -0.46%<br>(-1.7-0.42%)               | -0.59%<br>(-2.1-0.56%)              | -31<br>(-110-29)    | -470<br>(-1700-430)    |
| Algeria  | 1995 | Female | 80 to 84 | 16%<br>(5.1-37%)               | 84%<br>(63-95%)          | 0.21<br>(0.043-0.63)                        | -0.42%<br>(-1.6-0.33%)               | -0.53%<br>(-2-0.43%)                | -23<br>(-83-19)     | -240<br>(-900-200)     |
| Algeria  | 1995 | Female | 85 to 89 | 17%<br>(5.2-38%)               | 83%<br>(62-95%)          | 0.22<br>(0.043-0.68)                        | -0.48%<br>(-1.6-0.22%)               | -0.61%<br>(-2-0.28%)                | -22<br>(-76-10)     | -160<br>(-560-78)      |
| Algeria  | 1995 | Female | 90 to 94 | 19%<br>(6.1-42%)               | 81%<br>(58-94%)          | 0.25<br>(0.047-0.74)                        | -0.58%<br>(-1.8-0.17%)               | -0.74%<br>(-2.3-0.2%)               | -14<br>(-43-3.7)    | -68<br>(-210-21)       |
| Algeria  | 1995 | Female | 95 plus  | 24%<br>(6.7-48%)               | 76%<br>(52-93%)          | 0.3<br>(0.051-0.89)                         | -0.66%<br>(-2-0.32%)                 | -0.87%<br>(-2.5-0.34%)              | -4.6<br>(-13-1.9)   | -14<br>(-44-7.2)       |
| Algeria  | 1995 | Male   | All Ages | 7.7%<br>(5.2-11%)              | 92%<br>(89-95%)          | 0.18<br>(0.13-0.23)                         | 0.59%<br>(0.4-0.85%)                 | 0.59%<br>(0.23-1.1%)                | 420<br>(170-800)    | 28000<br>(19000-41000) |
| Algeria  | 1995 | Male   | 15 to 19 | 6.3%<br>(2.6-13%)              | 94%<br>(87-97%)          | 0.085<br>(0.026-0.18)                       | 0.67%<br>(0.39-1%)                   | 0.56%<br>(0.17-1.2%)                | 11<br>(3.4-23)      | 1800<br>(1000-2800)    |
| Algeria  | 1995 | Male   | 20 to 24 | 9.6%<br>(3.8-19%)              | 90%<br>(81-96%)          | 0.19<br>(0.068-0.38)                        | 1.4%<br>(0.83-2.1%)                  | 1.1%<br>(0.42-2.2%)                 | 26<br>(10-54)       | 3800<br>(2300-5900)    |
| Algeria  | 1995 | Male   | 25 to 29 | 12%<br>(4.4-23%)               | 88%<br>(77-96%)          | 0.29<br>(0.11-0.55)                         | 1.7%<br>(1-2.6%)                     | 1.7%<br>(0.67-3.2%)                 | 37<br>(15-68)       | 4100<br>(2400-6300)    |
| Algeria  | 1995 | Male   | 30 to 34 | 14%<br>(5-27%)                 | 86%<br>(73-95%)          | 0.38<br>(0.15-0.67)                         | 1.7%<br>(1.1-2.6%)                   | 2%<br>(0.92-3.6%)                   | 41<br>(19-76)       | 3800<br>(2200-5900)    |
| Algeria  | 1995 | Male   | 35 to 39 | 15%<br>(5.8-27%)               | 85%<br>(73-94%)          | 0.43<br>(0.17-0.81)                         | 1.8%<br>(1-2.8%)                     | 2.2%<br>(1.1-4%)                    | 46<br>(20-84)       | 3500<br>(2000-5600)    |
| Algeria  | 1995 | Male   | 40 to 44 | 15%<br>(6.8-28%)               | 85%<br>(72-93%)          | 0.47<br>(0.18-0.88)                         | 1.6%<br>(0.88-2.7%)                  | 2.1%<br>(0.91-4%)                   | 46<br>(19-89)       | 3000<br>(1600-5100)    |
| Algeria  | 1995 | Male   | 45 to 49 | 15%<br>(5.7-27%)               | 85%<br>(73-94%)          | 0.48<br>(0.15-1.1)                          | 1.5%<br>(0.74-3%)                    | 2%<br>(0.75-4.4%)                   | 40<br>(14-86)       | 2100<br>(1000-4200)    |
| Algeria  | 1995 | Male   | 50 to 54 | 14%<br>(6-28%)                 | 86%<br>(72-94%)          | 0.48<br>(0.15-1)                            | 1.3%<br>(0.47-2.8%)                  | 1.7%<br>(0.44-3.9%)                 | 36<br>(9-88)        | 1700<br>(610-3700)     |
| Algeria  | 1995 | Male   | 55 to 59 | 14%<br>(5.9-27%)               | 86%<br>(73-94%)          | 0.46<br>(0.14-1)                            | 1.1%<br>(0.32-2.6%)                  | 1.4%<br>(0.29-3.5%)                 | 42<br>(8.1-110)     | 1600<br>(450-3800)     |
| Algeria  | 1995 | Male   | 60 to 64 | 13%<br>(5.7-26%)               | 87%<br>(74-94%)          | 0.42<br>(0.12-1)                            | 0.84%<br>(0.076-2.3%)                | 1%<br>(-0.0059-3%)                  | 45<br>(-0.27-140)   | 1400<br>(120-3900)     |
| Algeria  | 1995 | Male   | 65 to 69 | 13%<br>(5.8-24%)               | 87%<br>(76-94%)          | 0.34<br>(0.1-0.74)                          | 0.51%<br>(-0.12-1.7%)                | 0.6%<br>(-0.25-2.1%)                | 29<br>(-13-100)     | 770<br>(-180-2500)     |
| Algeria  | 1995 | Male   | 70 to 74 | 11%<br>(5.1-21%)               | 89%<br>(79-95%)          | 0.25<br>(0.076-0.6)                         | 0.27%<br>(-0.23-1.1%)                | 0.3%<br>(-0.38-1.4%)                | 15<br>(-19-70)      | 340<br>(-280-1400)     |

| Location | Year | Sex    | Age      | Prevalence of current drinkers | Prevalence of abstainers | Population average of standard drinks daily | Percent of total attributable deaths | Percent of total attributable DALYs | Attributable deaths | Attributable DALYs    |
|----------|------|--------|----------|--------------------------------|--------------------------|---------------------------------------------|--------------------------------------|-------------------------------------|---------------------|-----------------------|
| Algeria  | 1995 | Male   | 75 to 79 | 9.9%<br>(4.4-19%)              | 90%<br>(81-96%)          | 0.19<br>(0.049-0.5)                         | 0.12%<br>(-0.3-0.75%)                | 0.11%<br>(-0.45-0.87%)              | 6.3<br>(-26-49)     | 120<br>(-310-730)     |
| Algeria  | 1995 | Male   | 80 to 84 | 8.9%<br>(3.5-17%)              | 91%<br>(83-96%)          | 0.16<br>(0.04-0.39)                         | 0.089%<br>(-0.29-0.53%)              | 0.073%<br>(-0.4-0.61%)              | 3.1<br>(-17-26)     | 49<br>(-160-290)      |
| Algeria  | 1995 | Male   | 85 to 89 | 8.7%<br>(3.5-18%)              | 91%<br>(82-97%)          | 0.15<br>(0.036-0.39)                        | 0.031%<br>(-0.33-0.38%)              | -0.0039%<br>(-0.45-0.41%)           | -0.11<br>(-13-12)   | 8<br>(-82-97)         |
| Algeria  | 1995 | Male   | 90 to 94 | 9.8%<br>(4-20%)                | 90%<br>(80-96%)          | 0.16<br>(0.036-0.43)                        | -0.032%<br>(-0.43-0.37%)             | -0.094%<br>(-0.6-0.39%)             | -1.2<br>(-7.8-5.1)  | -2.6<br>(-35-30)      |
| Algeria  | 1995 | Male   | 95 plus  | 12%<br>(4.5-26%)               | 88%<br>(74-96%)          | 0.18<br>(0.032-0.54)                        | -0.042%<br>(-0.5-0.48%)              | -0.14%<br>(-0.74-0.49%)             | -0.5<br>(-2.5-1.7)  | -0.6<br>(-7.2-6.8)    |
| Algeria  | 2000 | Female | All Ages | 11%<br>(6.4-16%)               | 89%<br>(84-94%)          | 0.19<br>(0.15-0.24)                         | 0.28%<br>(0.047-0.54%)               | 0.041%<br>(-0.58-0.76%)             | 27<br>(-360-480)    | 12000<br>(1900-24000) |
| Algeria  | 2000 | Female | 15 to 19 | 9.1%<br>(3-20%)                | 91%<br>(80-97%)          | 0.14<br>(0.042-0.32)                        | 0.46%<br>(0.27-0.74%)                | 0.52%<br>(0.18-1.1%)                | 5.4<br>(1.9-12)     | 1100<br>(610-1800)    |
| Algeria  | 2000 | Female | 20 to 24 | 12%<br>(3.5-24%)               | 88%<br>(76-96%)          | 0.22<br>(0.072-0.47)                        | 0.84%<br>(0.53-1.3%)                 | 0.76%<br>(0.27-1.7%)                | 8.7<br>(3-19)       | 2000<br>(1200-3100)   |
| Algeria  | 2000 | Female | 25 to 29 | 13%<br>(3.8-28%)               | 87%<br>(72-96%)          | 0.27<br>(0.085-0.54)                        | 0.92%<br>(0.58-1.3%)                 | 0.99%<br>(0.37-1.9%)                | 11<br>(4.1-22)      | 2000<br>(1200-3100)   |
| Algeria  | 2000 | Female | 30 to 34 | 15%<br>(3.7-31%)               | 85%<br>(69-96%)          | 0.32<br>(0.1-0.62)                          | 0.9%<br>(0.54-1.4%)                  | 1.2%<br>(0.49-2.3%)                 | 15<br>(5.9-28)      | 1900<br>(1100-3000)   |
| Algeria  | 2000 | Female | 35 to 39 | 16%<br>(4.4-31%)               | 84%<br>(69-96%)          | 0.38<br>(0.12-0.72)                         | 0.85%<br>(0.44-1.5%)                 | 1.4%<br>(0.47-2.8%)                 | 20<br>(6.8-42)      | 1800<br>(910-3000)    |
| Algeria  | 2000 | Female | 40 to 44 | 17%<br>(6-32%)                 | 83%<br>(68-94%)          | 0.43<br>(0.15-0.82)                         | 0.85%<br>(0.31-1.6%)                 | 1.6%<br>(0.43-3.4%)                 | 26<br>(7-56)        | 1600<br>(570-3200)    |
| Algeria  | 2000 | Female | 45 to 49 | 18%<br>(6.1-33%)               | 82%<br>(67-94%)          | 0.46<br>(0.15-0.95)                         | 0.77%<br>(0.079-1.9%)                | 1.4%<br>(0.19-3.6%)                 | 28<br>(3.8-74)      | 1400<br>(160-3500)    |
| Algeria  | 2000 | Female | 50 to 54 | 19%<br>(7.1-36%)               | 81%<br>(64-93%)          | 0.48<br>(0.15-1)                            | 0.63%<br>(-0.2-1.9%)                 | 1.1%<br>(-0.26-3.6%)                | 22<br>(-5-69)       | 920<br>(-310-3000)    |
| Algeria  | 2000 | Female | 55 to 59 | 19%<br>(7.4-38%)               | 81%<br>(62-93%)          | 0.48<br>(0.12-1.1)                          | 0.44%<br>(-0.52-1.9%)                | 0.77%<br>(-0.76-3.1%)               | 19<br>(-17-77)      | 640<br>(-730-2800)    |
| Algeria  | 2000 | Female | 60 to 64 | 20%<br>(7.7-40%)               | 80%<br>(60-92%)          | 0.46<br>(0.12-1.1)                          | 0.14%<br>(-0.99-1.7%)                | 0.26%<br>(-1.4-2.5%)                | 9.8<br>(-49-95)     | 240<br>(-1600-2800)   |
| Algeria  | 2000 | Female | 65 to 69 | 21%<br>(8.9-38%)               | 79%<br>(62-91%)          | 0.4<br>(0.1-0.88)                           | -0.17%<br>(-1.2-1%)                  | -0.19%<br>(-1.8-1.5%)               | -9<br>(-81-70)      | -280<br>(-2100-1700)  |
| Algeria  | 2000 | Female | 70 to 74 | 19%<br>(8.4-37%)               | 81%<br>(63-92%)          | 0.31<br>(0.083-0.77)                        | -0.35%<br>(-1.4-0.61%)               | -0.46%<br>(-1.9-0.89%)              | -25<br>(-100-47)    | -520<br>(-2100-890)   |
| Algeria  | 2000 | Female | 75 to 79 | 17%<br>(6.5-35%)               | 83%<br>(65-93%)          | 0.25<br>(0.053-0.71)                        | -0.42%<br>(-1.5-0.41%)               | -0.55%<br>(-1.9-0.54%)              | -30<br>(-110-31)    | -460<br>(-1600-470)   |
| Algeria  | 2000 | Female | 80 to 84 | 16%<br>(5.5-36%)               | 84%<br>(64-95%)          | 0.23<br>(0.049-0.66)                        | -0.38%<br>(-1.4-0.4%)                | -0.49%<br>(-1.8-0.49%)              | -25<br>(-95-25)     | -270<br>(-1000-280)   |
| Algeria  | 2000 | Female | 85 to 89 | 16%<br>(5.3-37%)               | 84%<br>(63-95%)          | 0.23<br>(0.048-0.73)                        | -0.44%<br>(-1.6-0.28%)               | -0.56%<br>(-1.9-0.33%)              | -25<br>(-90-14)     | -180<br>(-650-120)    |
| Algeria  | 2000 | Female | 90 to 94 | 19%<br>(6.3-42%)               | 81%<br>(58-94%)          | 0.26<br>(0.051-0.78)                        | -0.52%<br>(-1.7-0.26%)               | -0.68%<br>(-2.2-0.28%)              | -17<br>(-55-7.3)    | -84<br>(-270-42)      |

| Location | Year | Sex    | Age      | Prevalence of current drinkers | Prevalence of abstainers | Population average of standard drinks daily | Percent of total attributable deaths | Percent of total attributable DALYs | Attributable deaths | Attributable DALYs     |
|----------|------|--------|----------|--------------------------------|--------------------------|---------------------------------------------|--------------------------------------|-------------------------------------|---------------------|------------------------|
| Algeria  | 2000 | Female | 95 plus  | 23%<br>(6.9-48%)               | 77%<br>(52-93%)          | 0.32<br>(0.054-0.96)                        | -0.6%<br>(-2-0.56%)                  | -0.8%<br>(-2.5-0.59%)               | -6.9<br>(-22-5)     | -21<br>(-69-20)        |
| Algeria  | 2000 | Male   | All Ages | 8.1%<br>(5.6-12%)              | 92%<br>(88-94%)          | 0.21<br>(0.16-0.26)                         | 0.72%<br>(0.48-1%)                   | 0.71%<br>(0.3-1.3%)                 | 540<br>(230-1000)   | 34000<br>(23000-50000) |
| Algeria  | 2000 | Male   | 15 to 19 | 6.3%<br>(2.6-12%)              | 94%<br>(88-97%)          | 0.093<br>(0.028-0.2)                        | 0.73%<br>(0.44-1.2%)                 | 0.68%<br>(0.23-1.5%)                | 12<br>(3.9-26)      | 2000<br>(1100-3200)    |
| Algeria  | 2000 | Male   | 20 to 24 | 9.8%<br>(3.8-19%)              | 90%<br>(81-96%)          | 0.21<br>(0.075-0.41)                        | 1.6%<br>(0.99-2.4%)                  | 1.4%<br>(0.53-2.7%)                 | 31<br>(12-65)       | 4500<br>(2700-6900)    |
| Algeria  | 2000 | Male   | 25 to 29 | 12%<br>(4.8-24%)               | 88%<br>(76-95%)          | 0.33<br>(0.12-0.63)                         | 1.9%<br>(1.2-2.9%)                   | 2.1%<br>(0.88-3.9%)                 | 44<br>(19-82)       | 4800<br>(2900-7400)    |
| Algeria  | 2000 | Male   | 30 to 34 | 14%<br>(5-27%)                 | 86%<br>(73-95%)          | 0.42<br>(0.17-0.76)                         | 1.9%<br>(1.2-2.9%)                   | 2.4%<br>(1.1-4.2%)                  | 47<br>(21-85)       | 4300<br>(2600-6800)    |
| Algeria  | 2000 | Male   | 35 to 39 | 15%<br>(5.8-28%)               | 85%<br>(72-94%)          | 0.48<br>(0.18-0.9)                          | 1.9%<br>(1.1-3.1%)                   | 2.6%<br>(1.2-4.7%)                  | 54<br>(25-98)       | 4100<br>(2400-6600)    |
| Algeria  | 2000 | Male   | 40 to 44 | 15%<br>(6.8-27%)               | 85%<br>(73-93%)          | 0.51<br>(0.2-0.98)                          | 1.8%<br>(0.99-3%)                    | 2.5%<br>(1.1-4.7%)                  | 55<br>(24-100)      | 3600<br>(1900-6000)    |
| Algeria  | 2000 | Male   | 45 to 49 | 15%<br>(5.8-28%)               | 85%<br>(72-94%)          | 0.53<br>(0.17-1.1)                          | 1.7%<br>(0.83-3.2%)                  | 2.3%<br>(0.9-4.7%)                  | 61<br>(23-130)      | 3300<br>(1600-6200)    |
| Algeria  | 2000 | Male   | 50 to 54 | 14%<br>(6-28%)                 | 86%<br>(72-94%)          | 0.52<br>(0.17-1.1)                          | 1.5%<br>(0.56-3%)                    | 2%<br>(0.54-4.3%)                   | 49<br>(14-110)      | 2200<br>(850-4700)     |
| Algeria  | 2000 | Male   | 55 to 59 | 14%<br>(5.7-26%)               | 86%<br>(74-94%)          | 0.5<br>(0.15-1.1)                           | 1.3%<br>(0.39-2.8%)                  | 1.7%<br>(0.36-4%)                   | 50<br>(11-120)      | 1900<br>(580-4400)     |
| Algeria  | 2000 | Male   | 60 to 64 | 13%<br>(5.4-25%)               | 87%<br>(75-95%)          | 0.44<br>(0.13-1.1)                          | 0.96%<br>(0.14-2.6%)                 | 1.2%<br>(0.074-3.4%)                | 53<br>(3.3-150)     | 1700<br>(230-4400)     |
| Algeria  | 2000 | Male   | 65 to 69 | 12%<br>(5.5-23%)               | 88%<br>(77-94%)          | 0.36<br>(0.11-0.79)                         | 0.6%<br>(-0.041-1.8%)                | 0.73%<br>(-0.14-2.4%)               | 42<br>(-7.9-140)    | 1100<br>(-74-3500)     |
| Algeria  | 2000 | Male   | 70 to 74 | 11%<br>(5-20%)                 | 89%<br>(80-95%)          | 0.27<br>(0.078-0.65)                        | 0.33%<br>(-0.2-1.3%)                 | 0.38%<br>(-0.31-1.5%)               | 24<br>(-21-100)     | 530<br>(-310-2000)     |
| Algeria  | 2000 | Male   | 75 to 79 | 9.9%<br>(4.1-20%)              | 90%<br>(80-96%)          | 0.21<br>(0.05-0.55)                         | 0.17%<br>(-0.28-0.87%)               | 0.17%<br>(-0.4-1%)                  | 10<br>(-26-65)      | 190<br>(-310-1000)     |
| Algeria  | 2000 | Male   | 80 to 84 | 8.9%<br>(3.4-18%)              | 91%<br>(82-97%)          | 0.18<br>(0.041-0.44)                        | 0.12%<br>(-0.26-0.64%)               | 0.11%<br>(-0.37-0.73%)              | 5.8<br>(-19-37)     | 82<br>(-170-420)       |
| Algeria  | 2000 | Male   | 85 to 89 | 8.8%<br>(3.2-18%)              | 91%<br>(82-97%)          | 0.16<br>(0.038-0.44)                        | 0.059%<br>(-0.31-0.5%)               | 0.028%<br>(-0.43-0.57%)             | 1<br>(-16-21)       | 20<br>(-100-170)       |
| Algeria  | 2000 | Male   | 90 to 94 | 9.9%<br>(3.9-20%)              | 90%<br>(80-96%)          | 0.18<br>(0.042-0.49)                        | -0.005%<br>(-0.41-0.5%)              | -0.064%<br>(-0.57-0.52%)            | -1.1<br>(-9.7-8.7)  | -0.54<br>(-42-51)      |
| Algeria  | 2000 | Male   | 95 plus  | 12%<br>(4.4-25%)               | 88%<br>(75-96%)          | 0.2<br>(0.035-0.56)                         | -0.011%<br>(-0.5-0.67%)              | -0.11%<br>(-0.72-0.7%)              | -0.54<br>(-3.6-3.3) | -0.22<br>(-9.9-13)     |
| Algeria  | 2005 | Female | All Ages | 11%<br>(6.8-16%)               | 89%<br>(84-93%)          | 0.24<br>(0.18-0.31)                         | 0.39%<br>(0.12-0.72%)                | 0.21%<br>(-0.52-1.1%)               | 140<br>(-350-720)   | 17000<br>(5000-32000)  |
| Algeria  | 2005 | Female | 15 to 19 | 8.7%<br>(2.9-19%)              | 91%<br>(81-97%)          | 0.16<br>(0.049-0.37)                        | 0.49%<br>(0.28-0.78%)                | 0.63%<br>(0.23-1.4%)                | 5.6<br>(2-12)       | 1100<br>(630-1800)     |
| Algeria  | 2005 | Female | 20 to 24 | 11%<br>(3.6-24%)               | 89%<br>(76-96%)          | 0.26<br>(0.083-0.52)                        | 0.9%<br>(0.57-1.4%)                  | 0.94%<br>(0.37-2%)                  | 9.8<br>(3.8-21)     | 2300<br>(1400-3600)    |

| Location | Year | Sex    | Age      | Prevalence of current drinkers | Prevalence of abstainers | Population average of standard drinks daily | Percent of total attributable deaths | Percent of total attributable DALYs | Attributable deaths | Attributable DALYs     |
|----------|------|--------|----------|--------------------------------|--------------------------|---------------------------------------------|--------------------------------------|-------------------------------------|---------------------|------------------------|
| Algeria  | 2005 | Female | 25 to 29 | 13%<br>(3.8-27%)               | 87%<br>(73-96%)          | 0.32<br>(0.1-0.63)                          | 0.99%<br>(0.64-1.4%)                 | 1.2%<br>(0.46-2.3%)                 | 13<br>(5-25)        | 2400<br>(1500-3600)    |
| Algeria  | 2005 | Female | 30 to 34 | 15%<br>(4.1-30%)               | 85%<br>(70-96%)          | 0.38<br>(0.13-0.73)                         | 0.98%<br>(0.61-1.5%)                 | 1.5%<br>(0.63-2.8%)                 | 18<br>(7.5-33)      | 2300<br>(1400-3400)    |
| Algeria  | 2005 | Female | 35 to 39 | 17%<br>(4.5-32%)               | 83%<br>(68-95%)          | 0.45<br>(0.15-0.87)                         | 0.96%<br>(0.52-1.6%)                 | 1.8%<br>(0.66-3.5%)                 | 25<br>(9-49)        | 2200<br>(1100-3600)    |
| Algeria  | 2005 | Female | 40 to 44 | 17%<br>(6.2-33%)               | 83%<br>(67-94%)          | 0.5<br>(0.19-0.97)                          | 1%<br>(0.42-1.9%)                    | 2.1%<br>(0.68-4%)                   | 36<br>(12-70)       | 2200<br>(910-4100)     |
| Algeria  | 2005 | Female | 45 to 49 | 18%<br>(6.3-33%)               | 82%<br>(67-94%)          | 0.54<br>(0.19-1.1)                          | 0.99%<br>(0.27-2.3%)                 | 1.9%<br>(0.51-4.6%)                 | 41<br>(9.8-97)      | 2000<br>(520-4800)     |
| Algeria  | 2005 | Female | 50 to 54 | 18%<br>(6.7-36%)               | 82%<br>(64-93%)          | 0.55<br>(0.17-1.2)                          | 0.88%<br>(-0.013-2.3%)               | 1.6%<br>(0.14-4.2%)                 | 44<br>(3.5-120)     | 1800<br>(-29-4800)     |
| Algeria  | 2005 | Female | 55 to 59 | 19%<br>(7-37%)                 | 81%<br>(63-93%)          | 0.55<br>(0.14-1.2)                          | 0.72%<br>(-0.27-2.3%)                | 1.3%<br>(-0.3-3.7%)                 | 36<br>(-8.2-110)    | 1200<br>(-440-3800)    |
| Algeria  | 2005 | Female | 60 to 64 | 20%<br>(7.5-38%)               | 80%<br>(62-92%)          | 0.52<br>(0.13-1.2)                          | 0.4%<br>(-0.71-2.1%)                 | 0.66%<br>(-0.92-3.2%)               | 25<br>(-36-120)     | 690<br>(-1300-3600)    |
| Algeria  | 2005 | Female | 65 to 69 | 21%<br>(8.7-37%)               | 79%<br>(63-91%)          | 0.46<br>(0.12-1)                            | 0.055%<br>(-1-1.4%)                  | 0.14%<br>(-1.5-2.1%)                | 7.4<br>(-7.5-110)   | 110<br>(-2000-2700)    |
| Algeria  | 2005 | Female | 70 to 74 | 19%<br>(8.4-35%)               | 81%<br>(65-92%)          | 0.36<br>(0.095-0.88)                        | -0.19%<br>(-1.3-0.98%)               | -0.22%<br>(-1.7-1.3%)               | -15<br>(-110-91)    | -340<br>(-2300-1800)   |
| Algeria  | 2005 | Female | 75 to 79 | 17%<br>(6.7-34%)               | 83%<br>(66-93%)          | 0.3<br>(0.064-0.82)                         | -0.3%<br>(-1.3-0.73%)                | -0.39%<br>(-1.7-0.95%)              | -28<br>(-120-67)    | -430<br>(-1800-1000)   |
| Algeria  | 2005 | Female | 80 to 84 | 16%<br>(5.4-35%)               | 84%<br>(65-95%)          | 0.27<br>(0.056-0.76)                        | -0.28%<br>(-1.3-0.64%)               | -0.37%<br>(-1.6-0.8%)               | -23<br>(-100-52)    | -250<br>(-1100-610)    |
| Algeria  | 2005 | Female | 85 to 89 | 16%<br>(5.5-37%)               | 84%<br>(63-94%)          | 0.28<br>(0.056-0.84)                        | -0.35%<br>(-1.4-0.55%)               | -0.46%<br>(-1.7-0.66%)              | -24<br>(-89-34)     | -170<br>(-690-270)     |
| Algeria  | 2005 | Female | 90 to 94 | 19%<br>(6.4-41%)               | 81%<br>(59-94%)          | 0.32<br>(0.064-0.96)                        | -0.43%<br>(-1.6-0.64%)               | -0.58%<br>(-2.1-0.75%)              | -18<br>(-65-23)     | -87<br>(-320-130)      |
| Algeria  | 2005 | Female | 95 plus  | 23%<br>(7.3-49%)               | 77%<br>(51-93%)          | 0.37<br>(0.066-1.2)                         | -0.48%<br>(-1.8-1.1%)                | -0.67%<br>(-2.3-1.2%)               | -7.7<br>(-27-14)    | -23<br>(-88-52)        |
| Algeria  | 2005 | Male   | All Ages | 8.4%<br>(5.7-12%)              | 92%<br>(88-94%)          | 0.26<br>(0.2-0.33)                          | 0.89%<br>(0.6-1.2%)                  | 0.93%<br>(0.45-1.7%)                | 720<br>(340-1300)   | 43000<br>(29000-60000) |
| Algeria  | 2005 | Male   | 15 to 19 | 6.2%<br>(2.6-13%)              | 94%<br>(87-97%)          | 0.11<br>(0.033-0.24)                        | 0.79%<br>(0.48-1.3%)                 | 0.81%<br>(0.27-1.8%)                | 12<br>(3.9-26)      | 2000<br>(1200-3300)    |
| Algeria  | 2005 | Male   | 20 to 24 | 9.7%<br>(3.7-19%)              | 90%<br>(81-96%)          | 0.24<br>(0.086-0.49)                        | 1.7%<br>(1.1-2.6%)                   | 1.7%<br>(0.65-3.3%)                 | 34<br>(13-69)       | 5000<br>(3000-7700)    |
| Algeria  | 2005 | Male   | 25 to 29 | 12%<br>(4.9-23%)               | 88%<br>(77-95%)          | 0.38<br>(0.15-0.73)                         | 2%<br>(1.3-3.1%)                     | 2.5%<br>(1.1-4.7%)                  | 49<br>(21-91)       | 5500<br>(3400-8600)    |
| Algeria  | 2005 | Male   | 30 to 34 | 14%<br>(5-26%)                 | 86%<br>(74-95%)          | 0.48<br>(0.2-0.87)                          | 2.1%<br>(1.3-3.2%)                   | 2.8%<br>(1.3-5%)                    | 53<br>(24-96)       | 4900<br>(2900-7500)    |
| Algeria  | 2005 | Male   | 35 to 39 | 15%<br>(5.5-27%)               | 85%<br>(73-94%)          | 0.54<br>(0.2-1)                             | 2.1%<br>(1.2-3.3%)                   | 3.1%<br>(1.4-5.4%)                  | 60<br>(27-110)      | 4600<br>(2700-7500)    |
| Algeria  | 2005 | Male   | 40 to 44 | 15%<br>(6.5-27%)               | 85%<br>(73-94%)          | 0.58<br>(0.23-1.1)                          | 2%<br>(1.1-3.4%)                     | 2.9%<br>(1.3-5.4%)                  | 67<br>(29-120)      | 4400<br>(2400-7300)    |

| Location | Year | Sex    | Age      | Prevalence of current drinkers | Prevalence of abstainers | Population average of standard drinks daily | Percent of total attributable deaths | Percent of total attributable DALYs | Attributable deaths | Attributable DALYs    |
|----------|------|--------|----------|--------------------------------|--------------------------|---------------------------------------------|--------------------------------------|-------------------------------------|---------------------|-----------------------|
| Algeria  | 2005 | Male   | 45 to 49 | 15%<br>(6-28%)                 | 85%<br>(72-94%)          | 0.61<br>(0.2-1.2)                           | 2%<br>(0.96-3.6%)                    | 2.9%<br>(1.2-5.7%)                  | 77<br>(32-160)      | 4200<br>(2100-7800)   |
| Algeria  | 2005 | Male   | 50 to 54 | 14%<br>(6.1-28%)               | 86%<br>(72-94%)          | 0.61<br>(0.2-1.2)                           | 1.8%<br>(0.69-3.4%)                  | 2.5%<br>(0.85-5%)                   | 85<br>(27-170)      | 3800<br>(1500-7600)   |
| Algeria  | 2005 | Male   | 55 to 59 | 14%<br>(5.8-27%)               | 86%<br>(73-94%)          | 0.58<br>(0.18-1.3)                          | 1.6%<br>(0.55-3.2%)                  | 2.1%<br>(0.65-4.7%)                 | 71<br>(22-160)      | 2700<br>(930-5700)    |
| Algeria  | 2005 | Male   | 60 to 64 | 13%<br>(5.5-26%)               | 87%<br>(74-94%)          | 0.52<br>(0.16-1.2)                          | 1.2%<br>(0.27-3%)                    | 1.6%<br>(0.27-4.2%)                 | 69<br>(12-180)      | 2200<br>(480-5400)    |
| Algeria  | 2005 | Male   | 65 to 69 | 13%<br>(5.6-24%)               | 87%<br>(76-94%)          | 0.43<br>(0.13-0.94)                         | 0.83%<br>(0.086-2.3%)                | 1%<br>(0.036-3%)                    | 60<br>(2-170)       | 1600<br>(170-4400)    |
| Algeria  | 2005 | Male   | 70 to 74 | 11%<br>(5-21%)                 | 89%<br>(79-95%)          | 0.32<br>(0.089-0.73)                        | 0.5%<br>(-0.068-1.6%)                | 0.6%<br>(-0.16-2.1%)                | 44<br>(-11-150)     | 920<br>(-120-2900)    |
| Algeria  | 2005 | Male   | 75 to 79 | 9.8%<br>(4.1-19%)              | 90%<br>(81-96%)          | 0.24<br>(0.061-0.65)                        | 0.29%<br>(-0.15-1.2%)                | 0.32%<br>(-0.25-1.5%)               | 23<br>(-18-110)     | 390<br>(-210-1700)    |
| Algeria  | 2005 | Male   | 80 to 84 | 8.7%<br>(3.5-17%)              | 91%<br>(83-96%)          | 0.2<br>(0.05-0.51)                          | 0.2%<br>(-0.18-0.86%)                | 0.21%<br>(-0.28-1%)                 | 13<br>(-18-65)      | 170<br>(-160-740)     |
| Algeria  | 2005 | Male   | 85 to 89 | 8.4%<br>(3.4-17%)              | 92%<br>(83-97%)          | 0.18<br>(0.044-0.46)                        | 0.13%<br>(-0.24-0.72%)               | 0.11%<br>(-0.33-0.81%)              | 4.9<br>(-16-37)     | 54<br>(-96-300)       |
| Algeria  | 2005 | Male   | 90 to 94 | 9.5%<br>(4-20%)                | 90%<br>(80-96%)          | 0.19<br>(0.047-0.51)                        | 0.059%<br>(-0.33-0.71%)              | 0.01%<br>(-0.49-0.79%)              | 0.23<br>(-11-18)    | 8.4<br>(-48-100)      |
| Algeria  | 2005 | Male   | 95 plus  | 12%<br>(4.3-25%)               | 88%<br>(75-96%)          | 0.23<br>(0.04-0.68)                         | 0.061%<br>(-0.45-0.87%)              | -0.03%<br>(-0.66-0.92%)             | -0.19<br>(-4.1-5.7) | 1.6<br>(-11-22)       |
| Algeria  | 2010 | Female | All Ages | 12%<br>(7.2-17%)               | 88%<br>(83-93%)          | 0.26<br>(0.19-0.35)                         | 0.41%<br>(0.11-0.8%)                 | 0.18%<br>(-0.59-1.2%)               | 140<br>(-420-880)   | 18000<br>(4700-36000) |
| Algeria  | 2010 | Female | 15 to 19 | 8.8%<br>(2.8-20%)              | 91%<br>(80-97%)          | 0.17<br>(0.047-0.39)                        | 0.5%<br>(0.29-0.8%)                  | 0.67%<br>(0.24-1.5%)                | 5.1<br>(1.8-11)     | 1100<br>(620-1800)    |
| Algeria  | 2010 | Female | 20 to 24 | 11%<br>(3.3-25%)               | 89%<br>(75-97%)          | 0.26<br>(0.074-0.59)                        | 0.92%<br>(0.56-1.4%)                 | 0.98%<br>(0.37-2.1%)                | 9.5<br>(3.6-20)     | 2300<br>(1300-3700)   |
| Algeria  | 2010 | Female | 25 to 29 | 13%<br>(3.6-27%)               | 87%<br>(73-96%)          | 0.32<br>(0.092-0.66)                        | 1%<br>(0.65-1.5%)                    | 1.2%<br>(0.46-2.5%)                 | 14<br>(5.1-27)      | 2700<br>(1600-4000)   |
| Algeria  | 2010 | Female | 30 to 34 | 14%<br>(3.8-30%)               | 86%<br>(70-96%)          | 0.37<br>(0.12-0.72)                         | 0.98%<br>(0.62-1.5%)                 | 1.5%<br>(0.64-2.9%)                 | 19<br>(7.9-36)      | 2600<br>(1500-3900)   |
| Algeria  | 2010 | Female | 35 to 39 | 16%<br>(4.6-31%)               | 84%<br>(69-95%)          | 0.44<br>(0.15-0.83)                         | 0.93%<br>(0.51-1.5%)                 | 1.8%<br>(0.68-3.4%)                 | 25<br>(9.4-49)      | 2300<br>(1300-3700)   |
| Algeria  | 2010 | Female | 40 to 44 | 17%<br>(6.2-32%)               | 83%<br>(68-94%)          | 0.48<br>(0.18-0.93)                         | 0.95%<br>(0.42-1.8%)                 | 2%<br>(0.74-4.1%)                   | 36<br>(13-74)       | 2300<br>(990-4400)    |
| Algeria  | 2010 | Female | 45 to 49 | 17%<br>(6-33%)                 | 83%<br>(67-94%)          | 0.52<br>(0.18-1.1)                          | 0.92%<br>(0.25-2.1%)                 | 1.9%<br>(0.5-4.3%)                  | 43<br>(11-100)      | 2200<br>(600-5100)    |
| Algeria  | 2010 | Female | 50 to 54 | 18%<br>(6.7-36%)               | 82%<br>(64-93%)          | 0.54<br>(0.17-1.1)                          | 0.82%<br>(-0.039-2.2%)               | 1.6%<br>(0.067-4%)                  | 45<br>(1.9-120)     | 1900<br>(-97-5200)    |
| Algeria  | 2010 | Female | 55 to 59 | 19%<br>(7.2-37%)               | 81%<br>(63-93%)          | 0.54<br>(0.15-1.2)                          | 0.67%<br>(-0.35-2.1%)                | 1.2%<br>(-0.35-3.6%)                | 46<br>(-14-140)     | 1600<br>(-820-5100)   |
| Algeria  | 2010 | Female | 60 to 64 | 20%<br>(7.6-40%)               | 80%<br>(60-92%)          | 0.52<br>(0.14-1.3)                          | 0.36%<br>(-0.77-2%)                  | 0.63%<br>(-0.98-3.1%)               | 27<br>(-42-140)     | 720<br>(-1500-4100)   |

| Location | Year | Sex    | Age      | Prevalence of current drinkers | Prevalence of abstainers | Population average of standard drinks daily | Percent of total attributable deaths | Percent of total attributable DALYs | Attributable deaths | Attributable DALYs     |
|----------|------|--------|----------|--------------------------------|--------------------------|---------------------------------------------|--------------------------------------|-------------------------------------|---------------------|------------------------|
| Algeria  | 2010 | Female | 65 to 69 | 20%<br>(8.4-39%)               | 80%<br>(61-92%)          | 0.46<br>(0.12-1)                            | 0.048%<br>(-1-1.5%)                  | 0.15%<br>(-1.4-2.2%)                | 8<br>(-74-120)      | 100<br>(-2000-2900)    |
| Algeria  | 2010 | Female | 70 to 74 | 19%<br>(7.8-36%)               | 81%<br>(64-92%)          | 0.36<br>(0.09-0.97)                         | -0.18%<br>(-1.3-1.1%)                | -0.2%<br>(-1.7-1.5%)                | -15<br>(-130-110)   | -360<br>(-2600-2300)   |
| Algeria  | 2010 | Female | 75 to 79 | 17%<br>(6.5-34%)               | 83%<br>(66-94%)          | 0.29<br>(0.065-0.85)                        | -0.28%<br>(-1.2-0.79%)               | -0.37%<br>(-1.6-1%)                 | -32<br>(-140-89)    | -500<br>(-2200-1400)   |
| Algeria  | 2010 | Female | 80 to 84 | 16%<br>(5.3-33%)               | 84%<br>(67-95%)          | 0.26<br>(0.056-0.75)                        | -0.28%<br>(-1.2-0.62%)               | -0.36%<br>(-1.5-0.75%)              | -31<br>(-130-65)    | -340<br>(-1400-720)    |
| Algeria  | 2010 | Female | 85 to 89 | 16%<br>(5.2-35%)               | 84%<br>(65-95%)          | 0.26<br>(0.054-0.77)                        | -0.34%<br>(-1.2-0.55%)               | -0.45%<br>(-1.6-0.63%)              | -31<br>(-110-43)    | -220<br>(-810-330)     |
| Algeria  | 2010 | Female | 90 to 94 | 19%<br>(6.2-40%)               | 81%<br>(60-94%)          | 0.3<br>(0.06-0.9)                           | -0.43%<br>(-1.5-0.59%)               | -0.57%<br>(-1.9-0.67%)              | -21<br>(-71-25)     | -100<br>(-350-140)     |
| Algeria  | 2010 | Female | 95 plus  | 23%<br>(7-48%)                 | 77%<br>(52-93%)          | 0.37<br>(0.063-1.1)                         | -0.5%<br>(-1.8-0.88%)                | -0.69%<br>(-2.3-1%)                 | -10<br>(-34-15)     | -31<br>(-110-55)       |
| Algeria  | 2010 | Male   | All Ages | 9%<br>(6.1-13%)                | 91%<br>(87-94%)          | 0.28<br>(0.21-0.37)                         | 0.97%<br>(0.64-1.4%)                 | 0.94%<br>(0.41-1.8%)                | 770<br>(340-1500)   | 45000<br>(30000-66000) |
| Algeria  | 2010 | Male   | 15 to 19 | 6.4%<br>(2.6-13%)              | 94%<br>(87-97%)          | 0.11<br>(0.031-0.25)                        | 0.81%<br>(0.48-1.3%)                 | 0.84%<br>(0.28-1.9%)                | 10<br>(3.5-22)      | 1800<br>(1000-2900)    |
| Algeria  | 2010 | Male   | 20 to 24 | 9.7%<br>(3.7-19%)              | 90%<br>(81-96%)          | 0.24<br>(0.082-0.5)                         | 1.7%<br>(1.1-2.7%)                   | 1.7%<br>(0.65-3.5%)                 | 31<br>(12-65)       | 4900<br>(3000-7800)    |
| Algeria  | 2010 | Male   | 25 to 29 | 12%<br>(4.7-23%)               | 88%<br>(77-95%)          | 0.38<br>(0.14-0.74)                         | 2%<br>(1.3-3%)                       | 2.5%<br>(1-4.7%)                    | 49<br>(20-94)       | 5900<br>(3600-9100)    |
| Algeria  | 2010 | Male   | 30 to 34 | 14%<br>(5-27%)                 | 86%<br>(73-95%)          | 0.48<br>(0.2-0.9)                           | 2%<br>(1.3-3.1%)                     | 2.8%<br>(1.3-5.1%)                  | 55<br>(25-99)       | 5400<br>(3400-8400)    |
| Algeria  | 2010 | Male   | 35 to 39 | 15%<br>(5.7-28%)               | 85%<br>(72-94%)          | 0.55<br>(0.2-1)                             | 2.1%<br>(1.3-3.3%)                   | 3.1%<br>(1.5-5.6%)                  | 60<br>(28-110)      | 4900<br>(2900-7600)    |
| Algeria  | 2010 | Male   | 40 to 44 | 15%<br>(6.7-27%)               | 85%<br>(73-93%)          | 0.58<br>(0.23-1.1)                          | 2%<br>(1.1-3.3%)                     | 3%<br>(1.3-5.5%)                    | 66<br>(30-120)      | 4500<br>(2500-7600)    |
| Algeria  | 2010 | Male   | 45 to 49 | 15%<br>(5.9-28%)               | 85%<br>(72-94%)          | 0.6<br>(0.2-1.2)                            | 1.9%<br>(0.97-3.5%)                  | 2.9%<br>(1.2-5.7%)                  | 80<br>(35-160)      | 4400<br>(2300-8100)    |
| Algeria  | 2010 | Male   | 50 to 54 | 14%<br>(5.9-28%)               | 86%<br>(72-94%)          | 0.59<br>(0.19-1.2)                          | 1.7%<br>(0.71-3.3%)                  | 2.5%<br>(0.89-5%)                   | 86<br>(30-170)      | 4000<br>(1700-7700)    |
| Algeria  | 2010 | Male   | 55 to 59 | 13%<br>(6-26%)                 | 87%<br>(74-94%)          | 0.57<br>(0.18-1.2)                          | 1.5%<br>(0.54-3.2%)                  | 2.1%<br>(0.68-4.7%)                 | 94<br>(30-210)      | 3600<br>(1300-7700)    |
| Algeria  | 2010 | Male   | 60 to 64 | 13%<br>(5.4-25%)               | 87%<br>(75-95%)          | 0.51<br>(0.16-1.2)                          | 1.2%<br>(0.3-2.9%)                   | 1.6%<br>(0.33-4%)                   | 78<br>(15-190)      | 2500<br>(630-5900)     |
| Algeria  | 2010 | Male   | 65 to 69 | 13%<br>(5.7-23%)               | 87%<br>(77-94%)          | 0.42<br>(0.13-0.93)                         | 0.82%<br>(0.11-2.2%)                 | 1.1%<br>(0.067-3%)                  | 61<br>(3.8-180)     | 1600<br>(200-4400)     |
| Algeria  | 2010 | Male   | 70 to 74 | 11%<br>(5.1-21%)               | 89%<br>(79-95%)          | 0.31<br>(0.093-0.74)                        | 0.5%<br>(-0.037-1.6%)                | 0.61%<br>(-0.13-2.1%)               | 46<br>(-9.7-160)    | 970<br>(-68-3200)      |
| Algeria  | 2010 | Male   | 75 to 79 | 9.8%<br>(4.1-19%)              | 90%<br>(81-96%)          | 0.24<br>(0.059-0.68)                        | 0.29%<br>(-0.14-1.2%)                | 0.33%<br>(-0.25-1.5%)               | 29<br>(-22-130)     | 500<br>(-250-2100)     |
| Algeria  | 2010 | Male   | 80 to 84 | 8.7%<br>(3.5-17%)              | 91%<br>(83-97%)          | 0.2<br>(0.049-0.51)                         | 0.2%<br>(-0.18-0.83%)                | 0.21%<br>(-0.28-0.99%)              | 18<br>(-25-83)      | 230<br>(-210-960)      |

| Location | Year | Sex    | Age      | Prevalence of current drinkers | Prevalence of abstainers | Population average of standard drinks daily | Percent of total attributable deaths | Percent of total attributable DALYs | Attributable deaths | Attributable DALYs     |
|----------|------|--------|----------|--------------------------------|--------------------------|---------------------------------------------|--------------------------------------|-------------------------------------|---------------------|------------------------|
| Algeria  | 2010 | Male   | 85 to 89 | 8.5%<br>(3.5-17%)              | 91%<br>(83-97%)          | 0.18<br>(0.049-0.47)                        | 0.13%<br>(-0.21-0.66%)               | 0.11%<br>(-0.33-0.72%)              | 6.5<br>(-20-44)     | 72<br>(-120-370)       |
| Algeria  | 2010 | Male   | 90 to 94 | 9.7%<br>(4-20%)                | 90%<br>(80-96%)          | 0.2<br>(0.049-0.52)                         | 0.06%<br>(-0.34-0.66%)               | 0.0096%<br>(-0.5-0.7%)              | 0.28<br>(-15-21)    | 11<br>(-65-130)        |
| Algeria  | 2010 | Male   | 95 plus  | 12%<br>(4.5-25%)               | 88%<br>(75-96%)          | 0.23<br>(0.042-0.65)                        | 0.059%<br>(-0.42-0.78%)              | -0.037%<br>(-0.66-0.85%)            | -0.34<br>(-5.9-7.7) | 2.2<br>(-16-30)        |
| Algeria  | 2016 | Female | All Ages | 12%<br>(7.1-17%)               | 88%<br>(83-93%)          | 0.26<br>(0.15-0.4)                          | 0.41%<br>(0.043-0.93%)               | 0.13%<br>(-0.74-1.3%)               | 110<br>(-630-1100)  | 19000<br>(2000-44000)  |
| Algeria  | 2016 | Female | 15 to 19 | 8.6%<br>(2.5-20%)              | 91%<br>(80-98%)          | 0.16<br>(0.038-0.41)                        | 0.5%<br>(0.29-0.84%)                 | 0.68%<br>(0.23-1.7%)                | 3.8<br>(1.3-9.4)    | 820<br>(450-1400)      |
| Algeria  | 2016 | Female | 20 to 24 | 11%<br>(3.1-24%)               | 89%<br>(76-97%)          | 0.25<br>(0.058-0.58)                        | 0.92%<br>(0.56-1.4%)                 | 1%<br>(0.33-2.3%)                   | 7.8<br>(2.6-19)     | 2100<br>(1200-3300)    |
| Algeria  | 2016 | Female | 25 to 29 | 12%<br>(3.2-27%)               | 88%<br>(73-97%)          | 0.29<br>(0.074-0.68)                        | 0.99%<br>(0.63-1.4%)                 | 1.2%<br>(0.43-2.7%)                 | 12<br>(4.4-27)      | 2700<br>(1600-4200)    |
| Algeria  | 2016 | Female | 30 to 34 | 14%<br>(3.5-30%)               | 86%<br>(70-97%)          | 0.34<br>(0.1-0.73)                          | 0.96%<br>(0.6-1.5%)                  | 1.5%<br>(0.58-3%)                   | 19<br>(7.3-38)      | 2900<br>(1700-4600)    |
| Algeria  | 2016 | Female | 35 to 39 | 16%<br>(4.1-31%)               | 84%<br>(69-96%)          | 0.41<br>(0.12-0.86)                         | 0.9%<br>(0.49-1.5%)                  | 1.8%<br>(0.67-3.6%)                 | 28<br>(10-57)       | 2700<br>(1500-4600)    |
| Algeria  | 2016 | Female | 40 to 44 | 16%<br>(5.8-32%)               | 84%<br>(68-94%)          | 0.46<br>(0.15-0.95)                         | 0.9%<br>(0.37-1.7%)                  | 2%<br>(0.64-4.1%)                   | 39<br>(12-82)       | 2600<br>(1000-4900)    |
| Algeria  | 2016 | Female | 45 to 49 | 17%<br>(5.8-33%)               | 83%<br>(67-94%)          | 0.51<br>(0.15-1.1)                          | 0.87%<br>(0.16-2.1%)                 | 1.8%<br>(0.38-4.5%)                 | 47<br>(10-120)      | 2400<br>(460-5900)     |
| Algeria  | 2016 | Female | 50 to 54 | 18%<br>(6.8-34%)               | 82%<br>(66-93%)          | 0.52<br>(0.15-1.2)                          | 0.77%<br>(-0.1-2.2%)                 | 1.5%<br>(0.016-4.2%)                | 51<br>(0.47-140)    | 2200<br>(-290-6300)    |
| Algeria  | 2016 | Female | 55 to 59 | 19%<br>(7.3-37%)               | 81%<br>(63-93%)          | 0.53<br>(0.14-1.2)                          | 0.62%<br>(-0.43-2.2%)                | 1.2%<br>(-0.44-3.9%)                | 49<br>(-19-160)     | 1700<br>(-1100-6000)   |
| Algeria  | 2016 | Female | 60 to 64 | 20%<br>(7.9-38%)               | 80%<br>(62-92%)          | 0.51<br>(0.13-1.3)                          | 0.32%<br>(-0.77-2.2%)                | 0.6%<br>(-0.99-3.5%)                | 34<br>(-58-190)     | 910<br>(-2200-6100)    |
| Algeria  | 2016 | Female | 65 to 69 | 21%<br>(8.8-37%)               | 79%<br>(63-91%)          | 0.45<br>(0.12-1)                            | 0.036%<br>(-0.98-1.6%)               | 0.14%<br>(-1.4-2.5%)                | 8.5<br>(-84-150)    | 87<br>(-2300-3800)     |
| Algeria  | 2016 | Female | 70 to 74 | 19%<br>(8.2-34%)               | 81%<br>(66-92%)          | 0.36<br>(0.091-0.93)                        | -0.17%<br>(-1.2-1.2%)                | -0.2%<br>(-1.6-1.6%)                | -15<br>(-120-120)   | -380<br>(-2600-2600)   |
| Algeria  | 2016 | Female | 75 to 79 | 17%<br>(6.5-34%)               | 83%<br>(66-94%)          | 0.29<br>(0.067-0.83)                        | -0.28%<br>(-1.2-0.85%)               | -0.37%<br>(-1.6-1.1%)               | -37<br>(-160-110)   | -580<br>(-2500-1800)   |
| Algeria  | 2016 | Female | 80 to 84 | 16%<br>(5.6-35%)               | 84%<br>(65-94%)          | 0.27<br>(0.056-0.8)                         | -0.3%<br>(-1.3-0.72%)                | -0.38%<br>(-1.7-0.91%)              | -45<br>(-190-110)   | -480<br>(-2100-1200)   |
| Algeria  | 2016 | Female | 85 to 89 | 17%<br>(5.6-37%)               | 83%<br>(63-94%)          | 0.27<br>(0.055-0.87)                        | -0.36%<br>(-1.4-0.56%)               | -0.47%<br>(-1.8-0.71%)              | -49<br>(-190-75)    | -360<br>(-1500-600)    |
| Algeria  | 2016 | Female | 90 to 94 | 19%<br>(7.1-40%)               | 81%<br>(60-93%)          | 0.31<br>(0.062-0.93)                        | -0.43%<br>(-1.6-0.72%)               | -0.57%<br>(-2-0.87%)                | -33<br>(-110-49)    | -160<br>(-570-280)     |
| Algeria  | 2016 | Female | 95 plus  | 23%<br>(7.9-48%)               | 77%<br>(52-92%)          | 0.37<br>(0.063-1.2)                         | -0.48%<br>(-1.8-1.1%)                | -0.66%<br>(-2.4-1.3%)               | -13<br>(-46-25)     | -38<br>(-150-90)       |
| Algeria  | 2016 | Male   | All Ages | 9.3%<br>(6.3-13%)              | 91%<br>(87-94%)          | 0.29<br>(0.17-0.44)                         | 1%<br>(0.65-1.6%)                    | 0.93%<br>(0.33-1.9%)                | 870<br>(300-1800)   | 50000<br>(30000-79000) |



| Location | Year | Sex    | Age      | Prevalence of current drinkers | Prevalence of abstainers | Population average of standard drinks daily | Percent of total attributable deaths | Percent of total attributable DALYs | Attributable deaths | Attributable DALYs   |
|----------|------|--------|----------|--------------------------------|--------------------------|---------------------------------------------|--------------------------------------|-------------------------------------|---------------------|----------------------|
| Algeria  | 2016 | Male   | 15 to 19 | 6.2%<br>(2.6-12%)              | 94%<br>(88-97%)          | 0.1<br>(0.029-0.25)                         | 0.81%<br>(0.49-1.3%)                 | 0.84%<br>(0.28-1.9%)                | 7.9<br>(2.7-18)     | 1400<br>(830-2400)   |
| Algeria  | 2016 | Male   | 20 to 24 | 9.6%<br>(3.6-19%)              | 90%<br>(81-96%)          | 0.24<br>(0.065-0.54)                        | 1.8%<br>(1.1-2.8%)                   | 1.7%<br>(0.62-3.8%)                 | 27<br>(9.5-62)      | 4400<br>(2600-7000)  |
| Algeria  | 2016 | Male   | 25 to 29 | 12%<br>(4.6-23%)               | 88%<br>(77-95%)          | 0.37<br>(0.11-0.79)                         | 2.1%<br>(1.3-3.1%)                   | 2.5%<br>(0.97-4.9%)                 | 48<br>(18-96)       | 5900<br>(3500-9600)  |
| Algeria  | 2016 | Male   | 30 to 34 | 14%<br>(4.7-26%)               | 86%<br>(74-95%)          | 0.47<br>(0.17-0.9)                          | 2%<br>(1.2-3.1%)                     | 2.8%<br>(1.2-5.2%)                  | 60<br>(26-110)      | 6100<br>(3700-10000) |
| Algeria  | 2016 | Male   | 35 to 39 | 15%<br>(5.5-27%)               | 85%<br>(73-94%)          | 0.53<br>(0.19-1)                            | 2%<br>(1.2-3.3%)                     | 3%<br>(1.4-5.6%)                    | 69<br>(31-130)      | 5800<br>(3400-9500)  |
| Algeria  | 2016 | Male   | 40 to 44 | 15%<br>(6.6-27%)               | 85%<br>(73-93%)          | 0.56<br>(0.2-1.1)                           | 1.9%<br>(1.1-3.2%)                   | 2.9%<br>(1.3-5.6%)                  | 72<br>(31-140)      | 5100<br>(2900-8700)  |
| Algeria  | 2016 | Male   | 45 to 49 | 15%<br>(5.9-27%)               | 85%<br>(73-94%)          | 0.58<br>(0.18-1.2)                          | 1.8%<br>(0.89-3.3%)                  | 2.8%<br>(1.1-5.5%)                  | 85<br>(33-170)      | 4800<br>(2300-8900)  |
| Algeria  | 2016 | Male   | 50 to 54 | 14%<br>(6-27%)                 | 86%<br>(73-94%)          | 0.57<br>(0.18-1.2)                          | 1.6%<br>(0.64-3.2%)                  | 2.4%<br>(0.79-5%)                   | 96<br>(32-210)      | 4500<br>(1800-9200)  |
| Algeria  | 2016 | Male   | 55 to 59 | 14%<br>(5.9-26%)               | 86%<br>(74-94%)          | 0.55<br>(0.17-1.3)                          | 1.4%<br>(0.5-3.1%)                   | 2%<br>(0.59-4.6%)                   | 100<br>(29-230)     | 4000<br>(1400-8600)  |
| Algeria  | 2016 | Male   | 60 to 64 | 13%<br>(5.5-25%)               | 87%<br>(75-94%)          | 0.49<br>(0.14-1.2)                          | 1.1%<br>(0.28-2.8%)                  | 1.5%<br>(0.3-4%)                    | 110<br>(21-280)     | 3500<br>(860-8800)   |
| Algeria  | 2016 | Male   | 65 to 69 | 12%<br>(5.4-23%)               | 88%<br>(77-95%)          | 0.4<br>(0.11-0.94)                          | 0.79%<br>(0.09-2.2%)                 | 1%<br>(0.065-3%)                    | 75<br>(4.6-220)     | 2000<br>(230-5500)   |
| Algeria  | 2016 | Male   | 70 to 74 | 11%<br>(4.8-20%)               | 89%<br>(80-95%)          | 0.3<br>(0.082-0.74)                         | 0.49%<br>(-0.04-1.6%)                | 0.61%<br>(-0.11-2.1%)               | 50<br>(-9.1-170)    | 1100<br>(-81-3600)   |
| Algeria  | 2016 | Male   | 75 to 79 | 9.6%<br>(3.9-19%)              | 90%<br>(81-96%)          | 0.23<br>(0.054-0.66)                        | 0.3%<br>(-0.15-1.2%)                 | 0.34%<br>(-0.24-1.5%)               | 33<br>(-23-150)     | 570<br>(-280-2400)   |
| Algeria  | 2016 | Male   | 80 to 84 | 8.6%<br>(3.3-17%)              | 91%<br>(83-97%)          | 0.19<br>(0.046-0.52)                        | 0.21%<br>(-0.17-0.87%)               | 0.22%<br>(-0.27-1%)                 | 24<br>(-30-110)     | 310<br>(-260-1300)   |
| Algeria  | 2016 | Male   | 85 to 89 | 8.4%<br>(3.3-17%)              | 92%<br>(83-97%)          | 0.18<br>(0.045-0.5)                         | 0.14%<br>(-0.22-0.64%)               | 0.12%<br>(-0.33-0.72%)              | 12<br>(-31-70)      | 120<br>(-200-590)    |
| Algeria  | 2016 | Male   | 90 to 94 | 9.6%<br>(3.8-20%)              | 90%<br>(80-96%)          | 0.19<br>(0.044-0.54)                        | 0.07%<br>(-0.31-0.68%)               | 0.024%<br>(-0.45-0.73%)             | 1.2<br>(-22-37)     | 21<br>(-97-210)      |
| Algeria  | 2016 | Male   | 95 plus  | 12%<br>(4.2-26%)               | 88%<br>(74-96%)          | 0.22<br>(0.039-0.68)                        | 0.07%<br>(-0.41-0.85%)               | -0.02%<br>(-0.6-0.92%)              | -0.28<br>(-8.7-14)  | 4.2<br>(-24-53)      |
| Bahrain  | 1990 | Female | All Ages | 13%<br>(7.2-20%)               | 87%<br>(80-93%)          | 0.75<br>(0.56-0.95)                         | 1.7%<br>(0.85-2.8%)                  | 3%<br>(0.72-6.1%)                   | 25<br>(6.1-50)      | 920<br>(450-1500)    |
| Bahrain  | 1990 | Female | 15 to 19 | 11%<br>(3.1-24%)               | 89%<br>(76-97%)          | 0.55<br>(0.15-1.3)                          | 1.1%<br>(0.51-2.1%)                  | 2.3%<br>(0.89-5.1%)                 | 0.21<br>(0.08-0.47) | 25<br>(12-48)        |
| Bahrain  | 1990 | Female | 20 to 24 | 14%<br>(4-30%)                 | 86%<br>(70-96%)          | 0.89<br>(0.25-2)                            | 1.7%<br>(0.91-2.8%)                  | 3.5%<br>(1.3-7.1%)                  | 0.38<br>(0.14-0.74) | 48<br>(26-81)        |
| Bahrain  | 1990 | Female | 25 to 29 | 16%<br>(4.3-33%)               | 84%<br>(67-96%)          | 1.1<br>(0.32-2.1)                           | 2%<br>(1.1-3.3%)                     | 4.2%<br>(1.7-7.7%)                  | 0.79<br>(0.3-1.5)   | 80<br>(42-130)       |
| Bahrain  | 1990 | Female | 30 to 34 | 18%<br>(4.5-36%)               | 82%<br>(64-96%)          | 1.2<br>(0.45-2.2)                           | 2%<br>(1.2-3.1%)                     | 4.8%<br>(2.1-7.9%)                  | 0.83<br>(0.35-1.4)  | 79<br>(45-120)       |

| Location | Year | Sex    | Age      | Prevalence of current drinkers | Prevalence of abstainers | Population average of standard drinks daily | Percent of total attributable deaths | Percent of total attributable DALYs | Attributable deaths    | Attributable DALYs  |
|----------|------|--------|----------|--------------------------------|--------------------------|---------------------------------------------|--------------------------------------|-------------------------------------|------------------------|---------------------|
| Bahrain  | 1990 | Female | 35 to 39 | 19%<br>(5.2-37%)               | 81%<br>(63-95%)          | 1.5<br>(0.52-2.6)                           | 2.3%<br>(1.1-3.7%)                   | 5.3%<br>(2.2-8.7%)                  | 0.94<br>(0.39-1.6)     | 72<br>(36-110)      |
| Bahrain  | 1990 | Female | 40 to 44 | 20%<br>(7.2-36%)               | 80%<br>(64-93%)          | 1.6<br>(0.62-3.1)                           | 2.7%<br>(1.2-4.8%)                   | 5.9%<br>(2.5-10%)                   | 0.88<br>(0.38-1.6)     | 55<br>(25-96)       |
| Bahrain  | 1990 | Female | 45 to 49 | 21%<br>(7.4-38%)               | 79%<br>(62-93%)          | 1.8<br>(0.59-3.7)                           | 3.2%<br>(1.1-6.4%)                   | 5.9%<br>(2.1-12%)                   | 1.2<br>(0.44-2.5)      | 63<br>(22-130)      |
| Bahrain  | 1990 | Female | 50 to 54 | 22%<br>(8.9-39%)               | 78%<br>(61-91%)          | 1.9<br>(0.61-4)                             | 4%<br>(0.95-8%)                      | 5.9%<br>(1.5-12%)                   | 2.6<br>(0.64-5.1)      | 100<br>(26-210)     |
| Bahrain  | 1990 | Female | 55 to 59 | 22%<br>(9.6-42%)               | 78%<br>(58-90%)          | 1.9<br>(0.57-4.2)                           | 4.3%<br>(0.78-9.3%)                  | 5.8%<br>(1.1-12%)                   | 3.1<br>(0.57-6.8)      | 110<br>(19-240)     |
| Bahrain  | 1990 | Female | 60 to 64 | 24%<br>(9.8-45%)               | 76%<br>(55-90%)          | 1.8<br>(0.5-4.4)                            | 3.9%<br>(0.22-9.4%)                  | 4.9%<br>(0.33-12%)                  | 4.1<br>(0.27-9.8)      | 120<br>(6.6-280)    |
| Bahrain  | 1990 | Female | 65 to 69 | 25%<br>(11-43%)                | 75%<br>(57-89%)          | 1.6<br>(0.45-3.8)                           | 3.5%<br>(-0.034-8.6%)                | 4.2%<br>(-0.061-11%)                | 3.1<br>(-0.044-7.9)    | 73<br>(-0.7-190)    |
| Bahrain  | 1990 | Female | 70 to 74 | 23%<br>(10-43%)                | 77%<br>(57-90%)          | 1.3<br>(0.34-3.6)                           | 2.5%<br>(-0.56-7.8%)                 | 3%<br>(-0.68-9.2%)                  | 2.7<br>(-0.61-8.5)     | 50<br>(-11-160)     |
| Bahrain  | 1990 | Female | 75 to 79 | 21%<br>(8.3-43%)               | 79%<br>(57-92%)          | 1.1<br>(0.24-3.3)                           | 1.8%<br>(-0.79-6.6%)                 | 2.1%<br>(-0.96-7.8%)                | 1.3<br>(-0.58-4.8)     | 19<br>(-8.2-70)     |
| Bahrain  | 1990 | Female | 80 to 84 | 20%<br>(6.2-41%)               | 80%<br>(59-94%)          | 1<br>(0.19-2.9)                             | 1.7%<br>(-0.45-6.3%)                 | 1.9%<br>(-0.57-7.4%)                | 1.3<br>(-0.4-5)        | 14<br>(-3.8-52)     |
| Bahrain  | 1990 | Female | 85 to 89 | 20%<br>(6.5-42%)               | 80%<br>(58-93%)          | 0.98<br>(0.19-2.9)                          | 1.6%<br>(-0.52-6.6%)                 | 1.7%<br>(-0.72-7.7%)                | 0.86<br>(-0.32-3.8)    | 6.8<br>(-2.2-29)    |
| Bahrain  | 1990 | Female | 90 to 94 | 23%<br>(7.5-45%)               | 77%<br>(55-92%)          | 1.1<br>(0.22-3)                             | 1.5%<br>(-0.77-6%)                   | 1.7%<br>(-1-7.1%)                   | 0.27<br>(-0.16-1.2)    | 1.5<br>(-0.74-6.2)  |
| Bahrain  | 1990 | Female | 95 plus  | 27%<br>(8.9-51%)               | 73%<br>(49-91%)          | 1.3<br>(0.24-3.6)                           | 1.6%<br>(-1.2-7%)                    | 1.7%<br>(-1.5-8.1%)                 | 0.095<br>(-0.086-0.44) | 0.35<br>(-0.27-1.5) |
| Bahrain  | 1990 | Male   | All Ages | 12%<br>(7.6-18%)               | 88%<br>(82-92%)          | 1.1<br>(0.92-1.3)                           | 2.9%<br>(2.2-3.7%)                   | 3.8%<br>(2.5-5.2%)                  | 46<br>(29-67)          | 2200<br>(1600-2800) |
| Bahrain  | 1990 | Male   | 15 to 19 | 7.9%<br>(3.4-15%)              | 92%<br>(85-97%)          | 0.4<br>(0.12-0.9)                           | 1.7%<br>(0.87-3.1%)                  | 2.4%<br>(0.98-5.2%)                 | 0.48<br>(0.19-1)       | 48<br>(25-89)       |
| Bahrain  | 1990 | Male   | 20 to 24 | 12%<br>(4.8-23%)               | 88%<br>(77-95%)          | 0.89<br>(0.31-1.8)                          | 3.6%<br>(2.1-5.8%)                   | 5.3%<br>(2.3-9.4%)                  | 1.5<br>(0.64-2.7)      | 140<br>(78-220)     |
| Bahrain  | 1990 | Male   | 25 to 29 | 15%<br>(6.2-28%)               | 85%<br>(72-94%)          | 1.4<br>(0.58-2.4)                           | 4.5%<br>(2.7-6.9%)                   | 7.2%<br>(3.7-12%)                   | 3.5<br>(1.8-5.7)       | 280<br>(170-440)    |
| Bahrain  | 1990 | Male   | 30 to 34 | 17%<br>(6.8-32%)               | 83%<br>(68-93%)          | 1.7<br>(0.9-2.8)                            | 4.6%<br>(3-6.6%)                     | 8%<br>(4.7-12%)                     | 4.5<br>(2.5-6.8)       | 340<br>(210-490)    |
| Bahrain  | 1990 | Male   | 35 to 39 | 19%<br>(7.7-33%)               | 81%<br>(67-92%)          | 2<br>(0.88-3.4)                             | 4.6%<br>(2.7-6.9%)                   | 8%<br>(4.3-12%)                     | 4.5<br>(2.4-7.1)       | 310<br>(180-450)    |
| Bahrain  | 1990 | Male   | 40 to 44 | 19%<br>(8.9-33%)               | 81%<br>(67-91%)          | 2.2<br>(0.89-4)                             | 4.6%<br>(2.7-7.2%)                   | 7.4%<br>(4-12%)                     | 3.8<br>(1.9-6.1)       | 220<br>(130-350)    |
| Bahrain  | 1990 | Male   | 45 to 49 | 19%<br>(7.8-33%)               | 81%<br>(67-92%)          | 2.3<br>(0.76-4.7)                           | 4.8%<br>(2.5-7.6%)                   | 6.9%<br>(3.5-11%)                   | 3.3<br>(1.6-5.5)       | 160<br>(85-260)     |
| Bahrain  | 1990 | Male   | 50 to 54 | 18%<br>(8-33%)                 | 82%<br>(67-92%)          | 2.2<br>(0.73-4.7)                           | 4.5%<br>(2.2-7.3%)                   | 5.9%<br>(2.7-9.9%)                  | 3.8<br>(1.7-6.4)       | 160<br>(78-260)     |

| Location | Year | Sex    | Age      | Prevalence of current drinkers | Prevalence of abstainers | Population average of standard drinks daily | Percent of total attributable deaths | Percent of total attributable DALYs | Attributable deaths    | Attributable DALYs   |
|----------|------|--------|----------|--------------------------------|--------------------------|---------------------------------------------|--------------------------------------|-------------------------------------|------------------------|----------------------|
| Bahrain  | 1990 | Male   | 55 to 59 | 17%<br>(7.7-31%)               | 83%<br>(69-92%)          | 2.1<br>(0.67-4.6)                           | 4.3%<br>(2-7.4%)                     | 5.3%<br>(2.3-9.4%)                  | 3.8<br>(1.6-6.8)       | 140<br>(58-240)      |
| Bahrain  | 1990 | Male   | 60 to 64 | 16%<br>(6.9-31%)               | 84%<br>(69-93%)          | 1.9<br>(0.56-4.6)                           | 3.8%<br>(1.4-6.9%)                   | 4.4%<br>(1.6-8.2%)                  | 5<br>(1.8-9.4)         | 140<br>(54-270)      |
| Bahrain  | 1990 | Male   | 65 to 69 | 16%<br>(7.1-28%)               | 84%<br>(72-93%)          | 1.6<br>(0.48-3.5)                           | 3.3%<br>(1.1-6.2%)                   | 3.8%<br>(1.2-7.1%)                  | 4.5<br>(1.5-8.6)       | 110<br>(38-200)      |
| Bahrain  | 1990 | Male   | 70 to 74 | 14%<br>(6.5-25%)               | 86%<br>(75-93%)          | 1.2<br>(0.36-2.8)                           | 2.6%<br>(0.54-5.5%)                  | 2.9%<br>(0.55-6%)                   | 2.9<br>(0.58-6.2)      | 55<br>(11-110)       |
| Bahrain  | 1990 | Male   | 75 to 79 | 12%<br>(5.3-24%)               | 88%<br>(76-95%)          | 0.9<br>(0.22-2.4)                           | 1.9%<br>(0.26-4.5%)                  | 2.1%<br>(0.25-5%)                   | 2<br>(0.25-4.9)        | 30<br>(4.2-71)       |
| Bahrain  | 1990 | Male   | 80 to 84 | 11%<br>(4.5-22%)               | 89%<br>(78-96%)          | 0.76<br>(0.19-2)                            | 1.6%<br>(0.29-3.9%)                  | 1.8%<br>(0.28-4.3%)                 | 1.6<br>(0.28-4)        | 18<br>(3.4-43)       |
| Bahrain  | 1990 | Male   | 85 to 89 | 11%<br>(4.5-22%)               | 89%<br>(78-95%)          | 0.7<br>(0.18-1.8)                           | 1.4%<br>(0.15-3.3%)                  | 1.5%<br>(0.12-3.7%)                 | 0.89<br>(0.068-2.3)    | 7.1<br>(0.79-18)     |
| Bahrain  | 1990 | Male   | 90 to 94 | 12%<br>(5.2-24%)               | 88%<br>(76-95%)          | 0.74<br>(0.19-1.9)                          | 1.2%<br>(0.022-3.2%)                 | 1.3%<br>(-0.069-3.6%)               | 0.22<br>(-0.011-0.61)  | 1.2<br>(0.022-3.3)   |
| Bahrain  | 1990 | Male   | 95 plus  | 15%<br>(5.6-32%)               | 85%<br>(68-94%)          | 0.84<br>(0.17-2.4)                          | 1.1%<br>(-0.21-3.6%)                 | 1.2%<br>(-0.4-3.9%)                 | 0.047<br>(-0.016-0.16) | 0.19<br>(-0.033-0.6) |
| Bahrain  | 1995 | Female | All Ages | 13%<br>(7.7-20%)               | 87%<br>(80-92%)          | 0.71<br>(0.53-0.92)                         | 1.7%<br>(0.76-2.8%)                  | 2.6%<br>(0.49-5.6%)                 | 25<br>(4.8-54)         | 960<br>(440-1700)    |
| Bahrain  | 1995 | Female | 15 to 19 | 11%<br>(3.3-23%)               | 89%<br>(77-97%)          | 0.5<br>(0.13-1.2)                           | 0.97%<br>(0.49-1.9%)                 | 2.1%<br>(0.79-4.7%)                 | 0.2<br>(0.076-0.45)    | 25<br>(12-49)        |
| Bahrain  | 1995 | Female | 20 to 24 | 14%<br>(4.2-30%)               | 86%<br>(70-96%)          | 0.8<br>(0.23-1.8)                           | 1.6%<br>(0.89-2.7%)                  | 3.2%<br>(1.2-6.6%)                  | 0.43<br>(0.15-0.9)     | 55<br>(30-93)        |
| Bahrain  | 1995 | Female | 25 to 29 | 16%<br>(4.5-34%)               | 84%<br>(66-96%)          | 0.97<br>(0.29-1.9)                          | 1.9%<br>(1-3.1%)                     | 3.9%<br>(1.5-7.2%)                  | 0.75<br>(0.27-1.4)     | 79<br>(43-130)       |
| Bahrain  | 1995 | Female | 30 to 34 | 18%<br>(5.2-36%)               | 82%<br>(64-95%)          | 1.1<br>(0.41-2.1)                           | 1.9%<br>(1.1-3.1%)                   | 4.4%<br>(2-7.3%)                    | 0.95<br>(0.42-1.7)     | 88<br>(48-140)       |
| Bahrain  | 1995 | Female | 35 to 39 | 19%<br>(5.6-37%)               | 81%<br>(63-94%)          | 1.3<br>(0.52-2.3)                           | 2%<br>(1-3.3%)                       | 4.8%<br>(2.2-7.7%)                  | 1<br>(0.45-1.8)        | 83<br>(41-130)       |
| Bahrain  | 1995 | Female | 40 to 44 | 20%<br>(7.6-37%)               | 80%<br>(63-92%)          | 1.5<br>(0.58-2.7)                           | 2.6%<br>(1.1-4.6%)                   | 5.4%<br>(2.3-9.3%)                  | 1.3<br>(0.56-2.5)      | 81<br>(35-140)       |
| Bahrain  | 1995 | Female | 45 to 49 | 21%<br>(7.6-38%)               | 79%<br>(62-92%)          | 1.6<br>(0.56-3.3)                           | 2.7%<br>(0.93-5.3%)                  | 5.3%<br>(1.9-10%)                   | 1.3<br>(0.48-2.6)      | 72<br>(25-140)       |
| Bahrain  | 1995 | Female | 50 to 54 | 22%<br>(9-40%)                 | 78%<br>(60-91%)          | 1.7<br>(0.54-3.7)                           | 3.4%<br>(0.83-7.2%)                  | 5.3%<br>(1.4-11%)                   | 2.1<br>(0.51-4.3)      | 89<br>(22-190)       |
| Bahrain  | 1995 | Female | 55 to 59 | 23%<br>(10-42%)                | 77%<br>(58-90%)          | 1.7<br>(0.54-3.9)                           | 3.8%<br>(0.61-8.6%)                  | 5.1%<br>(0.89-12%)                  | 3<br>(0.51-6.6)        | 100<br>(16-240)      |
| Bahrain  | 1995 | Female | 60 to 64 | 24%<br>(10-44%)                | 76%<br>(56-90%)          | 1.7<br>(0.45-3.9)                           | 3.3%<br>(-0.11-8.7%)                 | 4.2%<br>(-0.07-11%)                 | 3.9<br>(-0.061-10)     | 110<br>(-3.4-300)    |
| Bahrain  | 1995 | Female | 65 to 69 | 25%<br>(11-42%)                | 75%<br>(58-89%)          | 1.5<br>(0.42-3.3)                           | 2.9%<br>(-0.41-8%)                   | 3.4%<br>(-0.45-9.5%)                | 3.5<br>(-0.49-9.8)     | 83<br>(-12-230)      |
| Bahrain  | 1995 | Female | 70 to 74 | 23%<br>(10-41%)                | 77%<br>(59-90%)          | 1.2<br>(0.3-2.9)                            | 1.9%<br>(-0.87-6.7%)                 | 2.2%<br>(-1-7.7%)                   | 2.7<br>(-1.1-9.5)      | 51<br>(-23-180)      |

| Location | Year | Sex    | Age      | Prevalence of current drinkers | Prevalence of abstainers | Population average of standard drinks daily | Percent of total attributable deaths | Percent of total attributable DALYs | Attributable deaths   | Attributable DALYs  |
|----------|------|--------|----------|--------------------------------|--------------------------|---------------------------------------------|--------------------------------------|-------------------------------------|-----------------------|---------------------|
| Bahrain  | 1995 | Female | 75 to 79 | 20%<br>(8.2-40%)               | 80%<br>(60-92%)          | 0.94<br>(0.21-2.7)                          | 1.3%<br>(-1.5-5.5%)                  | 1.5%<br>(-1.2-6.4%)                 | 1.3<br>(-0.96-5.7)    | 19<br>(-14-87)      |
| Bahrain  | 1995 | Female | 80 to 84 | 19%<br>(6.8-40%)               | 81%<br>(60-93%)          | 0.85<br>(0.18-2.5)                          | 1.2%<br>(-0.67-5.4%)                 | 1.4%<br>(-0.8-6%)                   | 1<br>(-0.57-4.8)      | 11<br>(-5.7-52)     |
| Bahrain  | 1995 | Female | 85 to 89 | 19%<br>(6.6-41%)               | 81%<br>(59-93%)          | 0.84<br>(0.18-2.5)                          | 1.1%<br>(-0.66-5.3%)                 | 1.2%<br>(-0.79-6%)                  | 0.88<br>(-0.57-4.5)   | 7<br>(-4.1-34)      |
| Bahrain  | 1995 | Female | 90 to 94 | 22%<br>(7.6-44%)               | 78%<br>(56-92%)          | 0.94<br>(0.19-2.7)                          | 1.1%<br>(-0.86-5.4%)                 | 1.2%<br>(-1.1-6.2%)                 | 0.44<br>(-0.39-2.2)   | 2.4<br>(-1.9-12)    |
| Bahrain  | 1995 | Female | 95 plus  | 27%<br>(8.8-51%)               | 73%<br>(49-91%)          | 1.1<br>(0.21-3.1)                           | 1.2%<br>(-1.5-5.7%)                  | 1.2%<br>(-1.8-6.5%)                 | 0.099<br>(-0.15-0.51) | 0.37<br>(-0.46-1.8) |
| Bahrain  | 1995 | Male   | All Ages | 12%<br>(8-18%)                 | 88%<br>(82-92%)          | 1<br>(0.83-1.2)                             | 2.9%<br>(2.2-3.7%)                   | 3.5%<br>(2.3-5%)                    | 49<br>(30-71)         | 2400<br>(1800-3100) |
| Bahrain  | 1995 | Male   | 15 to 19 | 8%<br>(3.3-15%)                | 92%<br>(85-97%)          | 0.35<br>(0.11-0.79)                         | 1.5%<br>(0.81-2.7%)                  | 2.1%<br>(0.91-4.5%)                 | 0.46<br>(0.19-0.98)   | 48<br>(25-89)       |
| Bahrain  | 1995 | Male   | 20 to 24 | 12%<br>(5-23%)                 | 88%<br>(77-95%)          | 0.78<br>(0.27-1.6)                          | 3.2%<br>(1.9-5.2%)                   | 4.4%<br>(2-8.2%)                    | 1.5<br>(0.66-2.9)     | 150<br>(84-250)     |
| Bahrain  | 1995 | Male   | 25 to 29 | 15%<br>(6-28%)                 | 85%<br>(72-94%)          | 1.2<br>(0.51-2.1)                           | 4.2%<br>(2.5-6.2%)                   | 6.4%<br>(3.2-10%)                   | 3.5<br>(1.7-5.9)      | 290<br>(170-450)    |
| Bahrain  | 1995 | Male   | 30 to 34 | 17%<br>(6.5-32%)               | 83%<br>(68-94%)          | 1.5<br>(0.77-2.4)                           | 4.3%<br>(2.7-6.4%)                   | 7.3%<br>(4.1-11%)                   | 4.6<br>(2.5-7.4)      | 350<br>(220-520)    |
| Bahrain  | 1995 | Male   | 35 to 39 | 19%<br>(7.4-34%)               | 81%<br>(66-93%)          | 1.8<br>(0.78-3)                             | 4.4%<br>(2.6-6.4%)                   | 7.5%<br>(4.1-11%)                   | 4.9<br>(2.5-8)        | 340<br>(200-500)    |
| Bahrain  | 1995 | Male   | 40 to 44 | 19%<br>(8.7-33%)               | 81%<br>(67-91%)          | 1.9<br>(0.79-3.3)                           | 4.3%<br>(2.5-6.9%)                   | 7%<br>(3.6-11%)                     | 4.6<br>(2.3-7.6)      | 280<br>(150-430)    |
| Bahrain  | 1995 | Male   | 45 to 49 | 18%<br>(7.3-34%)               | 82%<br>(66-93%)          | 1.9<br>(0.67-3.9)                           | 4.4%<br>(2.2-7.1%)                   | 6.5%<br>(3.2-10%)                   | 4.5<br>(2.1-7.6)      | 230<br>(120-370)    |
| Bahrain  | 1995 | Male   | 50 to 54 | 18%<br>(7.7-34%)               | 82%<br>(66-92%)          | 1.9<br>(0.65-4.1)                           | 4.1%<br>(1.9-6.8%)                   | 5.6%<br>(2.5-9.4%)                  | 3.9<br>(1.7-6.7)      | 170<br>(82-290)     |
| Bahrain  | 1995 | Male   | 55 to 59 | 17%<br>(7.6-32%)               | 83%<br>(68-92%)          | 1.9<br>(0.61-4)                             | 4%<br>(1.7-7%)                       | 5%<br>(2.1-9%)                      | 3.8<br>(1.6-7)        | 140<br>(61-250)     |
| Bahrain  | 1995 | Male   | 60 to 64 | 16%<br>(7.4-30%)               | 84%<br>(70-93%)          | 1.7<br>(0.51-4)                             | 3.5%<br>(1.2-6.6%)                   | 4.1%<br>(1.4-7.8%)                  | 4.4<br>(1.5-8.2)      | 130<br>(44-240)     |
| Bahrain  | 1995 | Male   | 65 to 69 | 16%<br>(7.1-29%)               | 84%<br>(71-93%)          | 1.4<br>(0.43-3)                             | 3%<br>(0.91-5.6%)                    | 3.4%<br>(0.99-6.5%)                 | 4.6<br>(1.3-8.8)      | 110<br>(34-210)     |
| Bahrain  | 1995 | Male   | 70 to 74 | 14%<br>(6.6-25%)               | 86%<br>(75-93%)          | 1<br>(0.31-2.4)                             | 2.2%<br>(0.41-5%)                    | 2.5%<br>(0.42-5.5%)                 | 3.3<br>(0.56-7.7)     | 63<br>(11-140)      |
| Bahrain  | 1995 | Male   | 75 to 79 | 12%<br>(5.3-23%)               | 88%<br>(77-95%)          | 0.75<br>(0.19-2.1)                          | 1.6%<br>(0.23-4.1%)                  | 1.8%<br>(0.25-4.6%)                 | 2.3<br>(0.31-5.9)     | 34<br>(5-87)        |
| Bahrain  | 1995 | Male   | 80 to 84 | 11%<br>(4.4-21%)               | 89%<br>(79-96%)          | 0.64<br>(0.16-1.6)                          | 1.4%<br>(0.21-3.5%)                  | 1.5%<br>(0.2-3.8%)                  | 1.3<br>(0.19-3.3)     | 15<br>(2.3-36)      |
| Bahrain  | 1995 | Male   | 85 to 89 | 11%<br>(4.4-22%)               | 89%<br>(78-96%)          | 0.59<br>(0.16-1.5)                          | 1.2%<br>(0.15-3%)                    | 1.2%<br>(0.12-3.2%)                 | 0.99<br>(0.092-2.6)   | 7.9<br>(1-21)       |
| Bahrain  | 1995 | Male   | 90 to 94 | 12%<br>(5-24%)                 | 88%<br>(76-95%)          | 0.62<br>(0.16-1.6)                          | 1%<br>(0.02-2.8%)                    | 1%<br>(-0.056-3.1%)                 | 0.38<br>(-0.02-1.1)   | 2.2<br>(0.043-5.9)  |

| Location | Year | Sex    | Age      | Prevalence of current drinkers | Prevalence of abstainers | Population average of standard drinks daily | Percent of total attributable deaths | Percent of total attributable DALYs | Attributable deaths    | Attributable DALYs   |
|----------|------|--------|----------|--------------------------------|--------------------------|---------------------------------------------|--------------------------------------|-------------------------------------|------------------------|----------------------|
| Bahrain  | 1995 | Male   | 95 plus  | 15%<br>(5.6-31%)               | 85%<br>(69-94%)          | 0.71<br>(0.15-2)                            | 0.95%<br>(-0.21-3%)                  | 0.94%<br>(-0.39-3.3%)               | 0.062<br>(-0.025-0.22) | 0.25<br>(-0.053-0.8) |
| Bahrain  | 2000 | Female | All Ages | 13%<br>(7.6-21%)               | 87%<br>(79-92%)          | 0.58<br>(0.42-0.73)                         | 1.3%<br>(0.56-2.3%)                  | 1.8%<br>(0.16-4.4%)                 | 17<br>(1.5-43)         | 800<br>(360-1400)    |
| Bahrain  | 2000 | Female | 15 to 19 | 11%<br>(3.1-25%)               | 89%<br>(75-97%)          | 0.4<br>(0.1-0.98)                           | 0.9%<br>(0.45-1.7%)                  | 1.9%<br>(0.74-4.4%)                 | 0.23<br>(0.084-0.52)   | 27<br>(13-54)        |
| Bahrain  | 2000 | Female | 20 to 24 | 14%<br>(3.9-30%)               | 86%<br>(70-96%)          | 0.64<br>(0.17-1.4)                          | 1.5%<br>(0.82-2.6%)                  | 2.8%<br>(0.98-5.9%)                 | 0.46<br>(0.15-0.98)    | 58<br>(30-100)       |
| Bahrain  | 2000 | Female | 25 to 29 | 16%<br>(4.3-33%)               | 84%<br>(67-96%)          | 0.77<br>(0.21-1.6)                          | 1.6%<br>(0.88-2.7%)                  | 3.4%<br>(1.1-6.3%)                  | 0.6<br>(0.21-1.1)      | 69<br>(37-110)       |
| Bahrain  | 2000 | Female | 30 to 34 | 17%<br>(4.6-37%)               | 83%<br>(63-95%)          | 0.89<br>(0.3-1.7)                           | 1.7%<br>(0.91-2.7%)                  | 3.6%<br>(1.5-6.4%)                  | 0.86<br>(0.35-1.6)     | 82<br>(45-130)       |
| Bahrain  | 2000 | Female | 35 to 39 | 19%<br>(5.2-37%)               | 81%<br>(63-95%)          | 1<br>(0.38-1.8)                             | 1.7%<br>(0.88-2.8%)                  | 3.9%<br>(1.7-6.5%)                  | 1.2<br>(0.52-2.2)      | 94<br>(46-150)       |
| Bahrain  | 2000 | Female | 40 to 44 | 20%<br>(7-38%)                 | 80%<br>(62-93%)          | 1.1<br>(0.48-2)                             | 2%<br>(0.85-3.5%)                    | 4.3%<br>(1.8-7.4%)                  | 1.6<br>(0.66-2.9)      | 100<br>(41-170)      |
| Bahrain  | 2000 | Female | 45 to 49 | 20%<br>(7.1-37%)               | 80%<br>(63-93%)          | 1.2<br>(0.44-2.5)                           | 2.1%<br>(0.66-4.3%)                  | 4.2%<br>(1.4-8.6%)                  | 1.3<br>(0.46-2.8)      | 72<br>(23-160)       |
| Bahrain  | 2000 | Female | 50 to 54 | 21%<br>(8.4-40%)               | 79%<br>(60-92%)          | 1.3<br>(0.43-2.8)                           | 2.4%<br>(0.39-5.4%)                  | 4%<br>(0.9-9%)                      | 1.3<br>(0.28-2.9)      | 57<br>(9.4-130)      |
| Bahrain  | 2000 | Female | 55 to 59 | 22%<br>(9.3-42%)               | 78%<br>(58-91%)          | 1.3<br>(0.39-2.9)                           | 2.5%<br>(0.11-6.4%)                  | 3.7%<br>(0.39-9%)                   | 2<br>(0.21-5)          | 72<br>(2.9-190)      |
| Bahrain  | 2000 | Female | 60 to 64 | 24%<br>(9.8-44%)               | 76%<br>(56-90%)          | 1.3<br>(0.34-3)                             | 2.1%<br>(-0.6-6.7%)                  | 2.8%<br>(-0.58-8.4%)                | 2.5<br>(-0.56-7.3)     | 73<br>(-20-230)      |
| Bahrain  | 2000 | Female | 65 to 69 | 24%<br>(10-42%)                | 76%<br>(58-90%)          | 1.1<br>(0.3-2.6)                            | 1.6%<br>(-1-5.7%)                    | 2%<br>(-1.1-6.9%)                   | 2.1<br>(-1.2-7.6)      | 50<br>(-32-180)      |
| Bahrain  | 2000 | Female | 70 to 74 | 23%<br>(9.1-40%)               | 77%<br>(60-91%)          | 0.89<br>(0.23-2.3)                          | 0.88%<br>(-1.3-4.9%)                 | 1.1%<br>(-1.5-5.7%)                 | 1.6<br>(-2.2-8.4)      | 29<br>(-43-160)      |
| Bahrain  | 2000 | Female | 75 to 79 | 20%<br>(7.6-40%)               | 80%<br>(60-92%)          | 0.73<br>(0.16-2.1)                          | 0.48%<br>(-1.2-3.8%)                 | 0.58%<br>(-1.4-4.5%)                | 0.4<br>(-0.98-3.2)     | 6.2<br>(-15-50)      |
| Bahrain  | 2000 | Female | 80 to 84 | 19%<br>(6.6-41%)               | 81%<br>(59-93%)          | 0.66<br>(0.13-1.9)                          | 0.48%<br>(-0.93-3.4%)                | 0.54%<br>(-1.1-4%)                  | 0.46<br>(-0.95-3.3)    | 5.3<br>(-10-38)      |
| Bahrain  | 2000 | Female | 85 to 89 | 19%<br>(6.5-40%)               | 81%<br>(60-93%)          | 0.66<br>(0.13-1.9)                          | 0.45%<br>(-1.1-3.4%)                 | 0.48%<br>(-1.3-3.8%)                | 0.3<br>(-0.79-2.5)     | 2.5<br>(-5.9-19)     |
| Bahrain  | 2000 | Female | 90 to 94 | 22%<br>(7.4-43%)               | 78%<br>(57-93%)          | 0.74<br>(0.15-2.1)                          | 0.45%<br>(-1.3-3.6%)                 | 0.45%<br>(-1.6-4.1%)                | 0.18<br>(-0.63-1.7)    | 1.1<br>(-3.3-8.8)    |
| Bahrain  | 2000 | Female | 95 plus  | 27%<br>(9.1-51%)               | 73%<br>(49-91%)          | 0.87<br>(0.17-2.4)                          | 0.49%<br>(-1.8-4.3%)                 | 0.47%<br>(-2.1-4.9%)                | 0.072<br>(-0.32-0.74)  | 0.29<br>(-1-2.6)     |
| Bahrain  | 2000 | Male   | All Ages | 12%<br>(8-18%)                 | 88%<br>(82-92%)          | 0.81<br>(0.66-1)                            | 3%<br>(2.2-3.9%)                     | 3.5%<br>(2.2-5%)                    | 55<br>(33-80)          | 2800<br>(2000-3800)  |
| Bahrain  | 2000 | Male   | 15 to 19 | 7.8%<br>(3.3-15%)              | 92%<br>(85-97%)          | 0.27<br>(0.079-0.63)                        | 1.5%<br>(0.81-2.7%)                  | 2%<br>(0.85-4.3%)                   | 0.57<br>(0.23-1.2)     | 57<br>(30-110)       |
| Bahrain  | 2000 | Male   | 20 to 24 | 12%<br>(4.9-23%)               | 88%<br>(77-95%)          | 0.62<br>(0.22-1.3)                          | 3.3%<br>(1.8-5.5%)                   | 4.3%<br>(1.8-8.2%)                  | 2.1<br>(0.86-4.2)      | 190<br>(100-340)     |

| Location | Year | Sex    | Age      | Prevalence of current drinkers | Prevalence of abstainers | Population average of standard drinks daily | Percent of total attributable deaths | Percent of total attributable DALYs | Attributable deaths    | Attributable DALYs  |
|----------|------|--------|----------|--------------------------------|--------------------------|---------------------------------------------|--------------------------------------|-------------------------------------|------------------------|---------------------|
| Bahrain  | 2000 | Male   | 25 to 29 | 15%<br>(6.1-28%)               | 85%<br>(72-94%)          | 0.97<br>(0.38-1.8)                          | 4.2%<br>(2.3-6.7%)                   | 6.2%<br>(2.9-11%)                   | 4.3<br>(1.9-7.7)       | 340<br>(180-550)    |
| Bahrain  | 2000 | Male   | 30 to 34 | 17%<br>(6.6-32%)               | 83%<br>(68-93%)          | 1.2<br>(0.59-2)                             | 4.4%<br>(2.6-6.9%)                   | 6.9%<br>(3.7-11%)                   | 5.9<br>(3-10)          | 420<br>(240-670)    |
| Bahrain  | 2000 | Male   | 35 to 39 | 19%<br>(7.4-33%)               | 81%<br>(67-93%)          | 1.4<br>(0.62-2.3)                           | 4.4%<br>(2.5-6.7%)                   | 7.1%<br>(3.7-11%)                   | 6<br>(2.9-10)          | 390<br>(210-630)    |
| Bahrain  | 2000 | Male   | 40 to 44 | 19%<br>(8.5-32%)               | 81%<br>(68-92%)          | 1.5<br>(0.63-2.5)                           | 4.3%<br>(2.3-6.9%)                   | 6.6%<br>(3.2-11%)                   | 6.6<br>(3.1-11)        | 380<br>(200-620)    |
| Bahrain  | 2000 | Male   | 45 to 49 | 18%<br>(7.4-33%)               | 82%<br>(67-93%)          | 1.5<br>(0.55-3)                             | 4.1%<br>(2-6.8%)                     | 6%<br>(2.8-10%)                     | 6.7<br>(2.8-12)        | 330<br>(160-560)    |
| Bahrain  | 2000 | Male   | 50 to 54 | 18%<br>(7.7-33%)               | 82%<br>(67-92%)          | 1.5<br>(0.52-3.2)                           | 3.8%<br>(1.6-6.6%)                   | 5.2%<br>(2.1-9.1%)                  | 4.9<br>(2-8.7)         | 210<br>(90-370)     |
| Bahrain  | 2000 | Male   | 55 to 59 | 17%<br>(7.6-32%)               | 83%<br>(68-92%)          | 1.5<br>(0.48-3.2)                           | 3.6%<br>(1.4-6.6%)                   | 4.5%<br>(1.7-8.4%)                  | 3.8<br>(1.4-7)         | 140<br>(55-260)     |
| Bahrain  | 2000 | Male   | 60 to 64 | 16%<br>(6.9-31%)               | 84%<br>(69-93%)          | 1.3<br>(0.37-3.1)                           | 3%<br>(0.88-5.9%)                    | 3.5%<br>(1-7.1%)                    | 3.7<br>(1-7.4)         | 110<br>(32-220)     |
| Bahrain  | 2000 | Male   | 65 to 69 | 15%<br>(6.8-28%)               | 85%<br>(72-93%)          | 1.1<br>(0.33-2.4)                           | 2.4%<br>(0.62-4.9%)                  | 2.7%<br>(0.65-5.7%)                 | 3.7<br>(0.89-7.8)      | 90<br>(23-190)      |
| Bahrain  | 2000 | Male   | 70 to 74 | 14%<br>(6.5-25%)               | 86%<br>(75-94%)          | 0.79<br>(0.25-1.9)                          | 1.7%<br>(0.26-4.1%)                  | 1.9%<br>(0.28-4.6%)                 | 2.9<br>(0.41-7.2)      | 57<br>(8.5-140)     |
| Bahrain  | 2000 | Male   | 75 to 79 | 12%<br>(5.4-23%)               | 88%<br>(77-95%)          | 0.61<br>(0.16-1.6)                          | 1.2%<br>(0.13-3.3%)                  | 1.4%<br>(0.12-3.8%)                 | 1.6<br>(0.15-4.5)      | 25<br>(2.6-68)      |
| Bahrain  | 2000 | Male   | 80 to 84 | 11%<br>(4.5-22%)               | 89%<br>(78-95%)          | 0.51<br>(0.14-1.3)                          | 1%<br>(0.14-2.9%)                    | 1.1%<br>(0.13-3.2%)                 | 1.1<br>(0.13-3.1)      | 13<br>(1.8-35)      |
| Bahrain  | 2000 | Male   | 85 to 89 | 11%<br>(4.4-22%)               | 89%<br>(78-96%)          | 0.47<br>(0.13-1.2)                          | 0.85%<br>(0.043-2.5%)                | 0.89%<br>(-0.0072-2.7%)             | 0.58<br>(-0.0048-1.7)  | 4.8<br>(0.23-14)    |
| Bahrain  | 2000 | Male   | 90 to 94 | 12%<br>(5-24%)                 | 88%<br>(76-95%)          | 0.49<br>(0.13-1.2)                          | 0.71%<br>(-0.09-2.2%)                | 0.71%<br>(-0.2-2.4%)                | 0.3<br>(-0.084-1)      | 1.8<br>(-0.23-5.5)  |
| Bahrain  | 2000 | Male   | 95 plus  | 15%<br>(5.4-30%)               | 85%<br>(70-95%)          | 0.56<br>(0.12-1.6)                          | 0.67%<br>(-0.31-2.6%)                | 0.62%<br>(-0.5-2.7%)                | 0.083<br>(-0.067-0.37) | 0.35<br>(-0.16-1.3) |
| Bahrain  | 2005 | Female | All Ages | 13%<br>(7.8-19%)               | 87%<br>(81-92%)          | 0.52<br>(0.39-0.67)                         | 1%<br>(0.42-1.9%)                    | 1.3%<br>(-0.079-3.6%)               | 13<br>(-0.84-38)       | 720<br>(280-1300)   |
| Bahrain  | 2005 | Female | 15 to 19 | 10%<br>(2.9-21%)               | 90%<br>(79-97%)          | 0.34<br>(0.086-0.8)                         | 0.69%<br>(0.36-1.3%)                 | 1.4%<br>(0.53-3.4%)                 | 0.15<br>(0.051-0.34)   | 23<br>(11-41)       |
| Bahrain  | 2005 | Female | 20 to 24 | 13%<br>(3.8-28%)               | 87%<br>(72-96%)          | 0.54<br>(0.15-1.2)                          | 1.3%<br>(0.7-2.1%)                   | 2.2%<br>(0.76-5%)                   | 0.35<br>(0.12-0.78)    | 55<br>(30-92)       |
| Bahrain  | 2005 | Female | 25 to 29 | 14%<br>(3.9-30%)               | 86%<br>(70-96%)          | 0.64<br>(0.19-1.3)                          | 1.4%<br>(0.8-2.2%)                   | 2.6%<br>(0.87-5.3%)                 | 0.52<br>(0.16-1)       | 71<br>(40-110)      |
| Bahrain  | 2005 | Female | 30 to 34 | 16%<br>(4.2-33%)               | 84%<br>(67-96%)          | 0.74<br>(0.25-1.3)                          | 1.3%<br>(0.8-2.1%)                   | 2.9%<br>(1.2-5.1%)                  | 0.68<br>(0.27-1.2)     | 77<br>(44-120)      |
| Bahrain  | 2005 | Female | 35 to 39 | 18%<br>(4.8-33%)               | 82%<br>(67-95%)          | 0.86<br>(0.32-1.5)                          | 1.4%<br>(0.73-2.3%)                  | 3.3%<br>(1.4-5.5%)                  | 0.93<br>(0.39-1.6)     | 79<br>(41-130)      |
| Bahrain  | 2005 | Female | 40 to 44 | 19%<br>(7.3-33%)               | 81%<br>(67-93%)          | 0.96<br>(0.41-1.7)                          | 1.5%<br>(0.7-2.7%)                   | 3.6%<br>(1.6-6.3%)                  | 1.3<br>(0.54-2.2)      | 83<br>(37-140)      |

| Location | Year | Sex    | Age      | Prevalence of current drinkers | Prevalence of abstainers | Population average of standard drinks daily | Percent of total attributable deaths | Percent of total attributable DALYs | Attributable deaths  | Attributable DALYs  |
|----------|------|--------|----------|--------------------------------|--------------------------|---------------------------------------------|--------------------------------------|-------------------------------------|----------------------|---------------------|
| Bahrain  | 2005 | Female | 45 to 49 | 19%<br>(6.7-36%)               | 81%<br>(64-93%)          | 1.1<br>(0.39-2.1)                           | 1.6%<br>(0.46-3.5%)                  | 3.5%<br>(1.2-7.4%)                  | 1.5<br>(0.48-3.3)    | 86<br>(23-190)      |
| Bahrain  | 2005 | Female | 50 to 54 | 20%<br>(7.7-38%)               | 80%<br>(62-92%)          | 1.1<br>(0.35-2.3)                           | 1.7%<br>(0.14-4.3%)                  | 3.3%<br>(0.66-7.5%)                 | 1.5<br>(0.31-3.5)    | 70<br>(5.5-180)     |
| Bahrain  | 2005 | Female | 55 to 59 | 21%<br>(8.4-40%)               | 79%<br>(60-92%)          | 1.1<br>(0.32-2.5)                           | 1.9%<br>(-0.11-5.4%)                 | 2.9%<br>(0.16-7.8%)                 | 1.5<br>(0.085-4.1)   | 56<br>(-3.2-170)    |
| Bahrain  | 2005 | Female | 60 to 64 | 22%<br>(8.6-43%)               | 78%<br>(57-91%)          | 1.1<br>(0.29-2.7)                           | 1.5%<br>(-0.77-5.4%)                 | 2.1%<br>(-0.8-7.1%)                 | 1.6<br>(-0.57-5.5)   | 49<br>(-25-180)     |
| Bahrain  | 2005 | Female | 65 to 69 | 23%<br>(9.8-41%)               | 77%<br>(59-90%)          | 0.97<br>(0.26-2.2)                          | 1%<br>(-1.2-4.7%)                    | 1.4%<br>(-1.3-5.9%)                 | 1.7<br>(-1.7-7.5)    | 41<br>(-44-180)     |
| Bahrain  | 2005 | Female | 70 to 74 | 21%<br>(9.3-39%)               | 79%<br>(61-91%)          | 0.77<br>(0.2-1.9)                           | 0.5%<br>(-1.4-4.1%)                  | 0.62%<br>(-1.6-4.8%)                | 0.81<br>(-2.2-6.4)   | 15<br>(-44-130)     |
| Bahrain  | 2005 | Female | 75 to 79 | 19%<br>(7.4-38%)               | 81%<br>(62-93%)          | 0.63<br>(0.13-1.8)                          | 0.21%<br>(-1.3-3.2%)                 | 0.27%<br>(-1.5-3.7%)                | 0.32<br>(-1.9-4.6)   | 4.8<br>(-31-74)     |
| Bahrain  | 2005 | Female | 80 to 84 | 18%<br>(6.1-38%)               | 82%<br>(62-94%)          | 0.57<br>(0.12-1.7)                          | 0.23%<br>(-1.1-2.6%)                 | 0.26%<br>(-1.2-3.1%)                | 0.25<br>(-1.2-3.1)   | 2.9<br>(-14-35)     |
| Bahrain  | 2005 | Female | 85 to 89 | 18%<br>(6.5-40%)               | 82%<br>(60-93%)          | 0.57<br>(0.12-1.6)                          | 0.2%<br>(-1.1-2.7%)                  | 0.2%<br>(-1.3-3%)                   | 0.14<br>(-0.9-2.2)   | 1.2<br>(-6.9-17)    |
| Bahrain  | 2005 | Female | 90 to 94 | 21%<br>(7.5-43%)               | 79%<br>(57-93%)          | 0.64<br>(0.13-1.7)                          | 0.18%<br>(-1.4-2.8%)                 | 0.16%<br>(-1.6-3.2%)                | 0.052<br>(-0.54-1.1) | 0.36<br>(-2.7-5.6)  |
| Bahrain  | 2005 | Female | 95 plus  | 25%<br>(8.3-50%)               | 75%<br>(50-92%)          | 0.75<br>(0.14-2.2)                          | 0.2%<br>(-1.7-3.5%)                  | 0.14%<br>(-2.1-4%)                  | 0.02<br>(-0.29-0.53) | 0.11<br>(-0.93-1.9) |
| Bahrain  | 2005 | Male   | All Ages | 12%<br>(7.9-18%)               | 88%<br>(82-92%)          | 0.74<br>(0.62-0.9)                          | 2.4%<br>(1.8-3%)                     | 2.9%<br>(1.8-4.1%)                  | 45<br>(27-66)        | 2500<br>(1900-3300) |
| Bahrain  | 2005 | Male   | 15 to 19 | 7.3%<br>(3-14%)                | 93%<br>(86-97%)          | 0.23<br>(0.067-0.53)                        | 1.2%<br>(0.71-2%)                    | 1.6%<br>(0.7-3.4%)                  | 0.41<br>(0.18-0.88)  | 51<br>(30-90)       |
| Bahrain  | 2005 | Male   | 20 to 24 | 11%<br>(4.5-22%)               | 89%<br>(78-96%)          | 0.52<br>(0.17-1.1)                          | 2.6%<br>(1.6-4.1%)                   | 3.4%<br>(1.5-6.7%)                  | 1.7<br>(0.71-3.3)    | 200<br>(120-330)    |
| Bahrain  | 2005 | Male   | 25 to 29 | 14%<br>(5.8-27%)               | 86%<br>(73-94%)          | 0.81<br>(0.33-1.5)                          | 3.3%<br>(2-4.9%)                     | 5.2%<br>(2.5-8.9%)                  | 3.4<br>(1.6-5.9)     | 320<br>(190-500)    |
| Bahrain  | 2005 | Male   | 30 to 34 | 16%<br>(6.3-31%)               | 84%<br>(69-94%)          | 1<br>(0.49-1.7)                             | 3.4%<br>(2.2-4.9%)                   | 5.9%<br>(3.3-9.2%)                  | 4.1<br>(2.3-6.6)     | 350<br>(220-510)    |
| Bahrain  | 2005 | Male   | 35 to 39 | 18%<br>(7.3-32%)               | 82%<br>(68-93%)          | 1.2<br>(0.52-2)                             | 3.3%<br>(2-4.9%)                     | 6%<br>(3.2-9.4%)                    | 4.6<br>(2.4-7.6)     | 350<br>(210-530)    |
| Bahrain  | 2005 | Male   | 40 to 44 | 18%<br>(8.2-31%)               | 82%<br>(69-92%)          | 1.3<br>(0.53-2.2)                           | 3.3%<br>(1.9-5%)                     | 5.6%<br>(2.8-9%)                    | 5.3<br>(2.6-8.9)     | 350<br>(190-530)    |
| Bahrain  | 2005 | Male   | 45 to 49 | 17%<br>(6.8-32%)               | 83%<br>(68-93%)          | 1.3<br>(0.46-2.5)                           | 3.3%<br>(1.7-5.4%)                   | 5.1%<br>(2.3-8.5%)                  | 6<br>(2.5-10)        | 320<br>(160-530)    |
| Bahrain  | 2005 | Male   | 50 to 54 | 17%<br>(7.1-32%)               | 83%<br>(68-93%)          | 1.3<br>(0.42-2.6)                           | 3.1%<br>(1.2-5.2%)                   | 4.3%<br>(1.6-7.5%)                  | 4.6<br>(1.8-8.3)     | 210<br>(84-380)     |
| Bahrain  | 2005 | Male   | 55 to 59 | 16%<br>(7.2-30%)               | 84%<br>(70-93%)          | 1.2<br>(0.4-2.8)                            | 2.8%<br>(1-5.2%)                     | 3.7%<br>(1.2-6.9%)                  | 3.4<br>(1.1-6.5)     | 130<br>(45-250)     |
| Bahrain  | 2005 | Male   | 60 to 64 | 15%<br>(6.7-30%)               | 85%<br>(70-93%)          | 1.1<br>(0.31-2.9)                           | 2.4%<br>(0.62-5%)                    | 2.9%<br>(0.71-6%)                   | 2.8<br>(0.67-5.7)    | 88<br>(22-180)      |

| Location | Year | Sex    | Age      | Prevalence of current drinkers | Prevalence of abstainers | Population average of standard drinks daily | Percent of total attributable deaths | Percent of total attributable DALYs | Attributable deaths   | Attributable DALYs  |
|----------|------|--------|----------|--------------------------------|--------------------------|---------------------------------------------|--------------------------------------|-------------------------------------|-----------------------|---------------------|
| Bahrain  | 2005 | Male   | 65 to 69 | 15%<br>(6.3-26%)               | 85%<br>(74-94%)          | 0.91<br>(0.28-2.1)                          | 1.9%<br>(0.42-4.2%)                  | 2.3%<br>(0.45-4.8%)                 | 3<br>(0.6-6.7)        | 75<br>(16-170)      |
| Bahrain  | 2005 | Male   | 70 to 74 | 13%<br>(5.9-23%)               | 87%<br>(77-94%)          | 0.67<br>(0.21-1.6)                          | 1.4%<br>(0.17-3.6%)                  | 1.5%<br>(0.18-4.1%)                 | 2.4<br>(0.28-6.3)     | 47<br>(6.3-130)     |
| Bahrain  | 2005 | Male   | 75 to 79 | 11%<br>(4.8-22%)               | 89%<br>(78-95%)          | 0.51<br>(0.13-1.3)                          | 0.95%<br>(0.039-2.7%)                | 1%<br>(0.0087-3.1%)                 | 1.4<br>(0.013-4.3)    | 22<br>(0.92-66)     |
| Bahrain  | 2005 | Male   | 80 to 84 | 10%<br>(4.1-20%)               | 90%<br>(80-96%)          | 0.43<br>(0.11-1.1)                          | 0.77%<br>(0.064-2.2%)                | 0.83%<br>(0.034-2.4%)               | 0.95<br>(0.035-2.8)   | 11<br>(0.92-32)     |
| Bahrain  | 2005 | Male   | 85 to 89 | 10%<br>(4-20%)                 | 90%<br>(80-96%)          | 0.39<br>(0.1-0.99)                          | 0.63%<br>(0.001-1.9%)                | 0.66%<br>(-0.046-2.1%)              | 0.55<br>(-0.038-1.8)  | 4.6<br>(0.007-14)   |
| Bahrain  | 2005 | Male   | 90 to 94 | 11%<br>(4.4-23%)               | 89%<br>(77-96%)          | 0.41<br>(0.1-1)                             | 0.52%<br>(-0.14-1.8%)                | 0.52%<br>(-0.23-1.9%)               | 0.18<br>(-0.081-0.67) | 1.1<br>(-0.28-3.8)  |
| Bahrain  | 2005 | Male   | 95 plus  | 14%<br>(5.1-30%)               | 86%<br>(70-95%)          | 0.48<br>(0.098-1.4)                         | 0.5%<br>(-0.34-2.2%)                 | 0.44%<br>(-0.52-2.3%)               | 0.058<br>(-0.068-0.3) | 0.25<br>(-0.18-1.1) |
| Bahrain  | 2010 | Female | All Ages | 14%<br>(7.8-21%)               | 86%<br>(79-92%)          | 0.5<br>(0.36-0.67)                          | 0.87%<br>(0.3-1.7%)                  | 0.98%<br>(-0.31-3.1%)               | 12<br>(-3.8-37)       | 790<br>(260-1600)   |
| Bahrain  | 2010 | Female | 15 to 19 | 9.7%<br>(3.2-22%)              | 90%<br>(78-97%)          | 0.29<br>(0.077-0.73)                        | 0.64%<br>(0.35-1.1%)                 | 1.3%<br>(0.51-3%)                   | 0.15<br>(0.054-0.36)  | 26<br>(14-47)       |
| Bahrain  | 2010 | Female | 20 to 24 | 12%<br>(3.9-26%)               | 88%<br>(74-96%)          | 0.46<br>(0.12-1.1)                          | 1.1%<br>(0.68-1.9%)                  | 1.9%<br>(0.67-4.3%)                 | 0.37<br>(0.13-0.85)   | 69<br>(40-120)      |
| Bahrain  | 2010 | Female | 25 to 29 | 14%<br>(4.3-30%)               | 86%<br>(70-96%)          | 0.55<br>(0.17-1.2)                          | 1.2%<br>(0.73-1.9%)                  | 2.2%<br>(0.76-4.4%)                 | 0.57<br>(0.2-1.2)     | 98<br>(56-150)      |
| Bahrain  | 2010 | Female | 30 to 34 | 16%<br>(4.4-33%)               | 84%<br>(67-96%)          | 0.64<br>(0.23-1.2)                          | 1.2%<br>(0.7-1.8%)                   | 2.5%<br>(1.1-4.5%)                  | 0.68<br>(0.29-1.2)    | 93<br>(54-150)      |
| Bahrain  | 2010 | Female | 35 to 39 | 18%<br>(4.8-34%)               | 82%<br>(66-95%)          | 0.76<br>(0.27-1.4)                          | 1.1%<br>(0.58-1.9%)                  | 2.8%<br>(1.2-5%)                    | 0.97<br>(0.39-1.8)    | 95<br>(48-160)      |
| Bahrain  | 2010 | Female | 40 to 44 | 19%<br>(6.6-34%)               | 81%<br>(66-93%)          | 0.85<br>(0.34-1.6)                          | 1.2%<br>(0.47-2.2%)                  | 3.1%<br>(1.3-5.8%)                  | 1.3<br>(0.56-2.5)     | 95<br>(37-170)      |
| Bahrain  | 2010 | Female | 45 to 49 | 19%<br>(6.5-35%)               | 81%<br>(65-93%)          | 0.92<br>(0.32-1.8)                          | 1.3%<br>(0.21-3%)                    | 3%<br>(0.92-6.3%)                   | 1.6<br>(0.47-3.4)     | 90<br>(15-200)      |
| Bahrain  | 2010 | Female | 50 to 54 | 20%<br>(7.8-37%)               | 80%<br>(63-92%)          | 0.96<br>(0.31-1.9)                          | 1.3%<br>(-0.15-3.5%)                 | 2.7%<br>(0.34-6.4%)                 | 1.9<br>(0.23-4.6)     | 91<br>(-8.9-250)    |
| Bahrain  | 2010 | Female | 55 to 59 | 21%<br>(8.6-39%)               | 79%<br>(61-91%)          | 0.98<br>(0.29-2.3)                          | 1.4%<br>(-0.37-4.3%)                 | 2.3%<br>(-0.2-6.4%)                 | 1.9<br>(-0.16-5.3)    | 69<br>(-18-220)     |
| Bahrain  | 2010 | Female | 60 to 64 | 22%<br>(8.9-43%)               | 78%<br>(57-91%)          | 0.95<br>(0.25-2.4)                          | 1%<br>(-0.96-4.6%)                   | 1.6%<br>(-1-6.1%)                   | 1.2<br>(-0.78-4.6)    | 35<br>(-35-160)     |
| Bahrain  | 2010 | Female | 65 to 69 | 23%<br>(9.2-41%)               | 77%<br>(59-91%)          | 0.84<br>(0.21-2.1)                          | 0.56%<br>(-1.4-3.7%)                 | 0.82%<br>(-1.6-4.8%)                | 0.94<br>(-2-5.6)      | 22<br>(-56-140)     |
| Bahrain  | 2010 | Female | 70 to 74 | 21%<br>(8.9-39%)               | 79%<br>(61-91%)          | 0.67<br>(0.16-1.8)                          | 0.12%<br>(-1.7-3.3%)                 | 0.19%<br>(-1.9-4%)                  | 0.32<br>(-3.4-7)      | 5.1<br>(-70-140)    |
| Bahrain  | 2010 | Female | 75 to 79 | 19%<br>(7.4-37%)               | 81%<br>(63-93%)          | 0.54<br>(0.11-1.5)                          | -0.059%<br>(-1.5-2.5%)               | -0.067%<br>(-1.8-3%)                | -0.084<br>(-2.3-3.8)  | -1.4<br>(-36-58)    |
| Bahrain  | 2010 | Female | 80 to 84 | 17%<br>(5.9-36%)               | 83%<br>(64-94%)          | 0.48<br>(0.097-1.4)                         | -0.014%<br>(-1.3-2.3%)               | -0.028%<br>(-1.6-2.6%)              | -0.034<br>(-1.9-3)    | -0.22<br>(-21-34)   |



| Location | Year | Sex    | Age      | Prevalence of current drinkers | Prevalence of abstainers | Population average of standard drinks daily | Percent of total attributable deaths | Percent of total attributable DALYs | Attributable deaths    | Attributable DALYs    |
|----------|------|--------|----------|--------------------------------|--------------------------|---------------------------------------------|--------------------------------------|-------------------------------------|------------------------|-----------------------|
| Bahrain  | 2010 | Female | 85 to 89 | 17%<br>(6.3-38%)               | 83%<br>(62-94%)          | 0.48<br>(0.098-1.5)                         | -0.026%<br>(-1.2-1.9%)               | -0.058%<br>(-1.5-2.2%)              | -0.051<br>(-1.2-1.8)   | -0.21<br>(-9.3-15)    |
| Bahrain  | 2010 | Female | 90 to 94 | 20%<br>(7-41%)                 | 80%<br>(59-93%)          | 0.54<br>(0.11-1.6)                          | -0.037%<br>(-1.4-2%)                 | -0.094%<br>(-1.6-2.3%)              | -0.036<br>(-0.62-0.88) | -0.087<br>(-3.1-5)    |
| Bahrain  | 2010 | Female | 95 plus  | 25%<br>(8.1-48%)               | 75%<br>(52-92%)          | 0.64<br>(0.12-2)                            | -0.025%<br>(-1.7-2.9%)               | -0.12%<br>(-2.1-3.1%)               | -0.015<br>(-0.26-0.37) | -0.013<br>(-0.87-1.4) |
| Bahrain  | 2010 | Male   | All Ages | 13%<br>(8.2-19%)               | 87%<br>(81-92%)          | 0.7<br>(0.53-0.92)                          | 2.2%<br>(1.6-2.8%)                   | 2.6%<br>(1.5-3.8%)                  | 47<br>(27-73)          | 3100<br>(2200-4200)   |
| Bahrain  | 2010 | Male   | 15 to 19 | 7.3%<br>(3-15%)                | 93%<br>(85-97%)          | 0.2<br>(0.056-0.48)                         | 1.1%<br>(0.68-1.8%)                  | 1.5%<br>(0.65-3.1%)                 | 0.38<br>(0.16-0.82)    | 52<br>(31-87)         |
| Bahrain  | 2010 | Male   | 20 to 24 | 11%<br>(4.6-22%)               | 89%<br>(78-95%)          | 0.45<br>(0.15-1)                            | 2.4%<br>(1.5-3.8%)                   | 3.1%<br>(1.4-6.1%)                  | 1.7<br>(0.74-3.5)      | 220<br>(140-370)      |
| Bahrain  | 2010 | Male   | 25 to 29 | 14%<br>(5.6-26%)               | 86%<br>(74-94%)          | 0.7<br>(0.27-1.3)                           | 2.8%<br>(1.8-4.1%)                   | 4.5%<br>(2.2-7.8%)                  | 4<br>(2-7.4)           | 460<br>(290-710)      |
| Bahrain  | 2010 | Male   | 30 to 34 | 16%<br>(5.9-30%)               | 84%<br>(70-94%)          | 0.89<br>(0.41-1.5)                          | 2.7%<br>(1.8-4%)                     | 5.1%<br>(2.8-8.2%)                  | 4.7<br>(2.5-7.9)       | 480<br>(300-700)      |
| Bahrain  | 2010 | Male   | 35 to 39 | 17%<br>(6.6-31%)               | 83%<br>(69-93%)          | 1<br>(0.41-1.8)                             | 2.7%<br>(1.7-3.9%)                   | 5.3%<br>(2.8-8.6%)                  | 4.4<br>(2.3-7.4)       | 400<br>(250-590)      |
| Bahrain  | 2010 | Male   | 40 to 44 | 17%<br>(7.8-31%)               | 83%<br>(69-92%)          | 1.1<br>(0.45-2)                             | 2.6%<br>(1.5-4.2%)                   | 4.9%<br>(2.4-8.1%)                  | 5.2<br>(2.5-9)         | 390<br>(210-600)      |
| Bahrain  | 2010 | Male   | 45 to 49 | 17%<br>(6.8-30%)               | 83%<br>(70-93%)          | 1.1<br>(0.39-2.2)                           | 2.7%<br>(1.3-4.5%)                   | 4.5%<br>(2.1-7.6%)                  | 5.6<br>(2.5-9.8)       | 330<br>(170-560)      |
| Bahrain  | 2010 | Male   | 50 to 54 | 16%<br>(7-32%)                 | 84%<br>(68-93%)          | 1.1<br>(0.36-2.3)                           | 2.5%<br>(1-4.3%)                     | 3.8%<br>(1.4-6.6%)                  | 5.9<br>(2.1-11)        | 300<br>(120-530)      |
| Bahrain  | 2010 | Male   | 55 to 59 | 15%<br>(6.6-29%)               | 85%<br>(71-93%)          | 1<br>(0.32-2.3)                             | 2.3%<br>(0.74-4.4%)                  | 3.2%<br>(0.94-6.2%)                 | 5.2<br>(1.5-10)        | 210<br>(68-410)       |
| Bahrain  | 2010 | Male   | 60 to 64 | 15%<br>(6.1-29%)               | 85%<br>(71-94%)          | 0.94<br>(0.28-2.4)                          | 1.9%<br>(0.5-4%)                     | 2.5%<br>(0.62-5.3%)                 | 3.4<br>(0.89-7.5)      | 120<br>(31-250)       |
| Bahrain  | 2010 | Male   | 65 to 69 | 14%<br>(6.3-26%)               | 86%<br>(74-94%)          | 0.77<br>(0.22-1.8)                          | 1.5%<br>(0.29-3.6%)                  | 1.9%<br>(0.32-4.4%)                 | 2.4<br>(0.42-5.8)      | 63<br>(12-150)        |
| Bahrain  | 2010 | Male   | 70 to 74 | 13%<br>(5.8-23%)               | 87%<br>(77-94%)          | 0.58<br>(0.16-1.4)                          | 1.1%<br>(0.064-3.1%)                 | 1.2%<br>(0.05-3.6%)                 | 1.9<br>(0.082-6.1)     | 40<br>(2.3-120)       |
| Bahrain  | 2010 | Male   | 75 to 79 | 11%<br>(4.8-22%)               | 89%<br>(78-95%)          | 0.44<br>(0.1-1.2)                           | 0.73%<br>(-0.059-2.4%)               | 0.81%<br>(-0.09-2.7%)               | 1.1<br>(-0.12-3.8)     | 18<br>(-1.4-59)       |
| Bahrain  | 2010 | Male   | 80 to 84 | 10%<br>(3.8-20%)               | 90%<br>(80-96%)          | 0.37<br>(0.092-1)                           | 0.58%<br>(-0.036-2%)                 | 0.62%<br>(-0.083-2.2%)              | 0.8<br>(-0.11-2.7)     | 9.3<br>(-0.58-31)     |
| Bahrain  | 2010 | Male   | 85 to 89 | 9.9%<br>(3.9-20%)              | 90%<br>(80-96%)          | 0.34<br>(0.093-0.89)                        | 0.48%<br>(-0.057-1.6%)               | 0.5%<br>(-0.11-1.7%)                | 0.43<br>(-0.099-1.5)   | 3.7<br>(-0.45-12)     |
| Bahrain  | 2010 | Male   | 90 to 94 | 11%<br>(4.5-23%)               | 89%<br>(77-95%)          | 0.36<br>(0.092-0.94)                        | 0.4%<br>(-0.17-1.5%)                 | 0.38%<br>(-0.26-1.6%)               | 0.15<br>(-0.1-0.66)    | 0.95<br>(-0.39-3.6)   |
| Bahrain  | 2010 | Male   | 95 plus  | 14%<br>(5.2-29%)               | 86%<br>(71-95%)          | 0.41<br>(0.082-1.3)                         | 0.39%<br>(-0.32-1.8%)                | 0.32%<br>(-0.49-1.9%)               | 0.034<br>(-0.053-0.2)  | 0.16<br>(-0.13-0.78)  |
| Bahrain  | 2016 | Female | All Ages | 14%<br>(8.5-21%)               | 86%<br>(79-91%)          | 0.52<br>(0.28-0.83)                         | 0.87%<br>(0.12-2%)                   | 1%<br>(-0.51-3.7%)                  | 14<br>(-7.5-53)        | 880<br>(130-2100)     |

| Location | Year | Sex    | Age      | Prevalence of current drinkers | Prevalence of abstainers | Population average of standard drinks daily | Percent of total attributable deaths | Percent of total attributable DALYs | Attributable deaths    | Attributable DALYs   |
|----------|------|--------|----------|--------------------------------|--------------------------|---------------------------------------------|--------------------------------------|-------------------------------------|------------------------|----------------------|
| Bahrain  | 2016 | Female | 15 to 19 | 10%<br>(3.1-22%)               | 90%<br>(78-97%)          | 0.3<br>(0.067-0.8)                          | 0.64%<br>(0.35-1.2%)                 | 1.4%<br>(0.52-3.4%)                 | 0.16<br>(0.058-0.38)   | 28<br>(15-54)        |
| Bahrain  | 2016 | Female | 20 to 24 | 13%<br>(3.8-28%)               | 87%<br>(72-96%)          | 0.49<br>(0.11-1.2)                          | 1.2%<br>(0.67-1.9%)                  | 2%<br>(0.65-4.8%)                   | 0.31<br>(0.098-0.78)   | 61<br>(34-110)       |
| Bahrain  | 2016 | Female | 25 to 29 | 15%<br>(4.5-31%)               | 85%<br>(69-96%)          | 0.58<br>(0.15-1.4)                          | 1.2%<br>(0.71-2%)                    | 2.3%<br>(0.75-5%)                   | 0.49<br>(0.15-1.2)     | 88<br>(49-140)       |
| Bahrain  | 2016 | Female | 30 to 34 | 17%<br>(4.5-34%)               | 83%<br>(66-95%)          | 0.67<br>(0.21-1.4)                          | 1.2%<br>(0.65-2%)                    | 2.6%<br>(1-5.3%)                    | 0.75<br>(0.26-1.6)     | 100<br>(55-180)      |
| Bahrain  | 2016 | Female | 35 to 39 | 18%<br>(4.9-35%)               | 82%<br>(65-95%)          | 0.78<br>(0.24-1.5)                          | 1.1%<br>(0.53-2%)                    | 2.9%<br>(1-5.7%)                    | 0.97<br>(0.31-2)       | 96<br>(46-170)       |
| Bahrain  | 2016 | Female | 40 to 44 | 19%<br>(7.2-35%)               | 81%<br>(65-93%)          | 0.87<br>(0.31-1.8)                          | 1.2%<br>(0.38-2.4%)                  | 3.1%<br>(1.1-6.3%)                  | 1.4<br>(0.47-2.9)      | 99<br>(32-200)       |
| Bahrain  | 2016 | Female | 45 to 49 | 20%<br>(7-37%)                 | 80%<br>(63-93%)          | 0.96<br>(0.31-2)                            | 1.3%<br>(0.15-3%)                    | 3.1%<br>(0.78-7%)                   | 1.9<br>(0.48-4.5)      | 110<br>(14-270)      |
| Bahrain  | 2016 | Female | 50 to 54 | 21%<br>(8.3-39%)               | 79%<br>(61-92%)          | 1<br>(0.31-2.2)                             | 1.3%<br>(-0.19-3.8%)                 | 2.7%<br>(0.22-6.9%)                 | 2.4<br>(0.21-6.2)      | 110<br>(-16-320)     |
| Bahrain  | 2016 | Female | 55 to 59 | 22%<br>(9.2-41%)               | 78%<br>(59-91%)          | 1<br>(0.3-2.4)                              | 1.3%<br>(-0.6-4.5%)                  | 2.3%<br>(-0.36-6.9%)                | 2.9<br>(-0.46-8.9)     | 110<br>(-47-390)     |
| Bahrain  | 2016 | Female | 60 to 64 | 23%<br>(9.7-41%)               | 77%<br>(59-90%)          | 0.98<br>(0.24-2.5)                          | 0.95%<br>(-1.2-4.5%)                 | 1.5%<br>(-1.3-6.3%)                 | 1.6<br>(-1.4-6.6)      | 49<br>(-62-230)      |
| Bahrain  | 2016 | Female | 65 to 69 | 23%<br>(9.5-41%)               | 77%<br>(59-90%)          | 0.86<br>(0.23-2.1)                          | 0.53%<br>(-1.5-4.1%)                 | 0.8%<br>(-1.7-5.2%)                 | 0.92<br>(-2.1-6.1)     | 21<br>(-60-160)      |
| Bahrain  | 2016 | Female | 70 to 74 | 22%<br>(9.2-39%)               | 78%<br>(61-91%)          | 0.69<br>(0.15-1.8)                          | 0.11%<br>(-1.7-3.7%)                 | 0.19%<br>(-2-4.5%)                  | 0.3<br>(-3.4-7.1)      | 4.6<br>(-73-140)     |
| Bahrain  | 2016 | Female | 75 to 79 | 19%<br>(7.1-37%)               | 81%<br>(63-93%)          | 0.56<br>(0.1-1.7)                           | -0.05%<br>(-1.6-2.8%)                | -0.054%<br>(-1.9-3.4%)              | -0.098<br>(-3.4-6.2)   | -1.7<br>(-55-98)     |
| Bahrain  | 2016 | Female | 80 to 84 | 18%<br>(6.2-39%)               | 82%<br>(61-94%)          | 0.51<br>(0.1-1.6)                           | 0.0014%<br>(-1.4-2.4%)               | -0.0075%<br>(-1.6-2.9%)             | -0.013<br>(-2.3-4)     | 0.022<br>(-27-46)    |
| Bahrain  | 2016 | Female | 85 to 89 | 19%<br>(6.3-40%)               | 81%<br>(60-94%)          | 0.51<br>(0.096-1.7)                         | -0.037%<br>(-1.4-2.4%)               | -0.073%<br>(-1.6-2.8%)              | -0.071<br>(-1.6-2.5)   | -0.33<br>(-12-21)    |
| Bahrain  | 2016 | Female | 90 to 94 | 22%<br>(7.1-43%)               | 78%<br>(57-93%)          | 0.57<br>(0.11-1.8)                          | -0.051%<br>(-1.5-2.2%)               | -0.12%<br>(-1.9-2.6%)               | -0.069<br>(-1.1-1.4)   | -0.19<br>(-5.8-8.1)  |
| Bahrain  | 2016 | Female | 95 plus  | 26%<br>(8.2-51%)               | 74%<br>(49-92%)          | 0.67<br>(0.12-2.1)                          | -0.04%<br>(-1.8-2.9%)                | -0.15%<br>(-2.3-3.3%)               | -0.024<br>(-0.38-0.53) | -0.028<br>(-1.3-1.9) |
| Bahrain  | 2016 | Male   | All Ages | 13%<br>(8.3-19%)               | 87%<br>(81-92%)          | 0.68<br>(0.38-1.1)                          | 2.1%<br>(1.3-3%)                     | 2.5%<br>(1.1-4%)                    | 54<br>(24-94)          | 3300<br>(2000-5000)  |
| Bahrain  | 2016 | Male   | 15 to 19 | 7.2%<br>(3-14%)                | 93%<br>(86-97%)          | 0.2<br>(0.047-0.52)                         | 1.1%<br>(0.64-1.8%)                  | 1.5%<br>(0.63-3.3%)                 | 0.44<br>(0.18-1)       | 63<br>(36-110)       |
| Bahrain  | 2016 | Male   | 20 to 24 | 11%<br>(4.4-22%)               | 89%<br>(78-96%)          | 0.45<br>(0.12-1.1)                          | 2.4%<br>(1.4-3.8%)                   | 3.1%<br>(1.2-6.4%)                  | 1.8<br>(0.71-3.9)      | 250<br>(140-410)     |
| Bahrain  | 2016 | Male   | 25 to 29 | 14%<br>(5.6-26%)               | 86%<br>(74-94%)          | 0.69<br>(0.23-1.4)                          | 2.8%<br>(1.8-4.2%)                   | 4.5%<br>(2.1-8.3%)                  | 3.9<br>(1.7-7.3)       | 440<br>(270-700)     |
| Bahrain  | 2016 | Male   | 30 to 34 | 16%<br>(5.9-31%)               | 84%<br>(69-94%)          | 0.88<br>(0.34-1.7)                          | 2.7%<br>(1.7-4.2%)                   | 5%<br>(2.4-8.5%)                    | 4.9<br>(2.2-8.8)       | 490<br>(290-750)     |

| Location | Year | Sex    | Age      | Prevalence of current drinkers | Prevalence of abstainers | Population average of standard drinks daily | Percent of total attributable deaths | Percent of total attributable DALYs | Attributable deaths   | Attributable DALYs     |
|----------|------|--------|----------|--------------------------------|--------------------------|---------------------------------------------|--------------------------------------|-------------------------------------|-----------------------|------------------------|
| Bahrain  | 2016 | Male   | 35 to 39 | 17%<br>(6.8-32%)               | 83%<br>(68-93%)          | 1<br>(0.34-2)                               | 2.7%<br>(1.6-4.1%)                   | 5.3%<br>(2.5-8.9%)                  | 4.4<br>(1.9-8)        | 390<br>(220-610)       |
| Bahrain  | 2016 | Male   | 40 to 44 | 18%<br>(8.1-31%)               | 82%<br>(69-92%)          | 1.1<br>(0.4-2.1)                            | 2.6%<br>(1.5-4.2%)                   | 4.8%<br>(2.2-8.3%)                  | 5.4<br>(2.3-10)       | 400<br>(210-670)       |
| Bahrain  | 2016 | Male   | 45 to 49 | 17%<br>(6.7-31%)               | 83%<br>(69-93%)          | 1.1<br>(0.37-2.3)                           | 2.6%<br>(1.2-4.5%)                   | 4.4%<br>(1.9-7.7%)                  | 6.3<br>(2.5-12)       | 380<br>(180-670)       |
| Bahrain  | 2016 | Male   | 50 to 54 | 16%<br>(7.3-32%)               | 84%<br>(68-93%)          | 1.1<br>(0.36-2.4)                           | 2.4%<br>(0.96-4.3%)                  | 3.7%<br>(1.3-6.6%)                  | 6.4<br>(2.1-13)       | 320<br>(130-580)       |
| Bahrain  | 2016 | Male   | 55 to 59 | 16%<br>(6.7-30%)               | 84%<br>(70-93%)          | 1<br>(0.31-2.4)                             | 2.2%<br>(0.68-4.4%)                  | 3.1%<br>(0.91-6.1%)                 | 7.4<br>(2-16)         | 300<br>(90-610)        |
| Bahrain  | 2016 | Male   | 60 to 64 | 15%<br>(6.4-29%)               | 85%<br>(71-94%)          | 0.93<br>(0.25-2.4)                          | 1.8%<br>(0.42-4%)                    | 2.4%<br>(0.53-5.2%)                 | 4<br>(0.84-8.8)       | 130<br>(30-290)        |
| Bahrain  | 2016 | Male   | 65 to 69 | 14%<br>(6.2-26%)               | 86%<br>(74-94%)          | 0.76<br>(0.21-1.8)                          | 1.5%<br>(0.19-3.4%)                  | 1.8%<br>(0.22-4.2%)                 | 3.3<br>(0.41-8.5)     | 89<br>(11-210)         |
| Bahrain  | 2016 | Male   | 70 to 74 | 13%<br>(6-24%)                 | 87%<br>(76-94%)          | 0.57<br>(0.14-1.5)                          | 1%<br>(0.062-2.9%)                   | 1.2%<br>(0.044-3.4%)                | 2.4<br>(0.098-7.2)    | 50<br>(3-150)          |
| Bahrain  | 2016 | Male   | 75 to 79 | 11%<br>(5-22%)                 | 89%<br>(78-95%)          | 0.43<br>(0.099-1.3)                         | 0.7%<br>(-0.027-2.4%)                | 0.78%<br>(-0.074-2.7%)              | 1.4<br>(-0.12-4.6)    | 22<br>(-0.97-72)       |
| Bahrain  | 2016 | Male   | 80 to 84 | 10%<br>(4-20%)                 | 90%<br>(80-96%)          | 0.37<br>(0.093-1.1)                         | 0.57%<br>(-0.076-1.9%)               | 0.62%<br>(-0.14-2.2%)               | 0.9<br>(-0.19-3.3)    | 11<br>(-1.3-37)        |
| Bahrain  | 2016 | Male   | 85 to 89 | 10%<br>(4.2-20%)               | 90%<br>(80-96%)          | 0.34<br>(0.088-0.93)                        | 0.49%<br>(-0.068-1.8%)               | 0.51%<br>(-0.13-1.9%)               | 0.56<br>(-0.14-2.1)   | 4.8<br>(-0.67-17)      |
| Bahrain  | 2016 | Male   | 90 to 94 | 12%<br>(4.7-23%)               | 88%<br>(77-95%)          | 0.36<br>(0.091-0.99)                        | 0.42%<br>(-0.16-1.7%)                | 0.41%<br>(-0.25-1.8%)               | 0.22<br>(-0.14-0.95)  | 1.4<br>(-0.51-5.2)     |
| Bahrain  | 2016 | Male   | 95 plus  | 14%<br>(5.4-29%)               | 86%<br>(71-95%)          | 0.42<br>(0.08-1.3)                          | 0.42%<br>(-0.28-1.8%)                | 0.36%<br>(-0.46-1.9%)               | 0.056<br>(-0.073-0.3) | 0.27<br>(-0.18-1.2)    |
| Egypt    | 1990 | Female | All Ages | 1.4%<br>(1-1.8%)               | 99%<br>(98-99%)          | 0.21<br>(0.15-0.28)                         | 0.5%<br>(0.41-0.62%)                 | 1.1%<br>(0.85-1.4%)                 | 2300<br>(1800-3000)   | 66000<br>(53000-81000) |
| Egypt    | 1990 | Female | 15 to 19 | 1.5%<br>(0.72-2.6%)            | 99%<br>(97-99%)          | 0.21<br>(0.083-0.44)                        | 0.58%<br>(0.37-0.88%)                | 0.78%<br>(0.42-1.3%)                | 21<br>(11-35)         | 2500<br>(1600-3800)    |
| Egypt    | 1990 | Female | 20 to 24 | 1.9%<br>(0.92-3.4%)            | 98%<br>(97-99%)          | 0.35<br>(0.15-0.65)                         | 0.94%<br>(0.64-1.3%)                 | 1%<br>(0.56-1.7%)                   | 27<br>(15-45)         | 3900<br>(2600-5700)    |
| Egypt    | 1990 | Female | 25 to 29 | 2%<br>(0.98-3.4%)              | 98%<br>(97-99%)          | 0.36<br>(0.16-0.65)                         | 1%<br>(0.72-1.4%)                    | 1.2%<br>(0.69-1.8%)                 | 35<br>(21-56)         | 4300<br>(3000-6000)    |
| Egypt    | 1990 | Female | 30 to 34 | 1.9%<br>(0.92-3.4%)            | 98%<br>(97-99%)          | 0.37<br>(0.17-0.67)                         | 1%<br>(0.73-1.4%)                    | 1.4%<br>(0.86-2.2%)                 | 39<br>(24-61)         | 4100<br>(2900-5800)    |
| Egypt    | 1990 | Female | 35 to 39 | 2%<br>(0.92-3.5%)              | 98%<br>(97-99%)          | 0.4<br>(0.18-0.76)                          | 1%<br>(0.74-1.5%)                    | 1.5%<br>(0.94-2.4%)                 | 54<br>(34-84)         | 4100<br>(2900-5800)    |
| Egypt    | 1990 | Female | 40 to 44 | 2%<br>(0.97-3.7%)              | 98%<br>(96-99%)          | 0.43<br>(0.18-0.81)                         | 1.1%<br>(0.73-1.5%)                  | 1.8%<br>(1.2-2.7%)                  | 65<br>(44-100)        | 4100<br>(2800-6100)    |
| Egypt    | 1990 | Female | 45 to 49 | 2%<br>(0.89-3.6%)              | 98%<br>(96-99%)          | 0.45<br>(0.18-0.84)                         | 1.2%<br>(0.79-1.8%)                  | 1.9%<br>(1.2-2.9%)                  | 88<br>(56-140)        | 4300<br>(3000-6400)    |
| Egypt    | 1990 | Female | 50 to 54 | 2%<br>(0.93-3.9%)              | 98%<br>(96-99%)          | 0.43<br>(0.17-0.85)                         | 1.3%<br>(0.88-2%)                    | 2%<br>(1.3-2.9%)                    | 150<br>(94-220)       | 5800<br>(3900-8500)    |

| Location | Year | Sex    | Age      | Prevalence of current drinkers | Prevalence of abstainers | Population average of standard drinks daily | Percent of total attributable deaths | Percent of total attributable DALYs | Attributable deaths | Attributable DALYs      |
|----------|------|--------|----------|--------------------------------|--------------------------|---------------------------------------------|--------------------------------------|-------------------------------------|---------------------|-------------------------|
| Egypt    | 1990 | Female | 55 to 59 | 2%<br>(0.94-3.7%)              | 98%<br>(96-99%)          | 0.39<br>(0.15-0.82)                         | 1.3%<br>(0.83-1.9%)                  | 1.9%<br>(1.2-2.8%)                  | 160<br>(100-250)    | 5500<br>(3600-8300)     |
| Egypt    | 1990 | Female | 60 to 64 | 1.9%<br>(0.9-3.7%)             | 98%<br>(96-99%)          | 0.35<br>(0.13-0.73)                         | 1.3%<br>(0.82-1.9%)                  | 1.7%<br>(1.1-2.6%)                  | 220<br>(150-350)    | 6300<br>(4200-9800)     |
| Egypt    | 1990 | Female | 65 to 69 | 1.9%<br>(0.88-3.4%)            | 98%<br>(97-99%)          | 0.3<br>(0.11-0.6)                           | 1.3%<br>(0.87-2%)                    | 1.7%<br>(1.2-2.7%)                  | 280<br>(190-420)    | 6400<br>(4300-9700)     |
| Egypt    | 1990 | Female | 70 to 74 | 1.9%<br>(0.95-3.3%)            | 98%<br>(97-99%)          | 0.24<br>(0.088-0.52)                        | 1.4%<br>(0.94-2%)                    | 1.8%<br>(1.2-2.6%)                  | 330<br>(220-490)    | 6000<br>(4100-8800)     |
| Egypt    | 1990 | Female | 75 to 79 | 1.7%<br>(0.81-3.2%)            | 98%<br>(97-99%)          | 0.2<br>(0.065-0.47)                         | 1.2%<br>(0.81-1.8%)                  | 1.7%<br>(1.1-2.4%)                  | 220<br>(150-320)    | 3100<br>(2100-4600)     |
| Egypt    | 1990 | Female | 80 to 84 | 1.5%<br>(0.73-2.8%)            | 98%<br>(97-99%)          | 0.18<br>(0.057-0.4)                         | 1.4%<br>(0.95-1.9%)                  | 1.7%<br>(1.2-2.4%)                  | 260<br>(180-360)    | 2600<br>(1900-3600)     |
| Egypt    | 1990 | Female | 85 to 89 | 1.5%<br>(0.72-2.7%)            | 99%<br>(97-99%)          | 0.16<br>(0.058-0.35)                        | 1.4%<br>(1-2%)                       | 1.7%<br>(1.2-2.4%)                  | 220<br>(160-310)    | 1600<br>(1100-2200)     |
| Egypt    | 1990 | Female | 90 to 94 | 1.6%<br>(0.82-3%)              | 98%<br>(97-99%)          | 0.17<br>(0.056-0.39)                        | 1.4%<br>(1-2%)                       | 1.7%<br>(1.2-2.5%)                  | 100<br>(72-140)     | 500<br>(360-710)        |
| Egypt    | 1990 | Female | 95 plus  | 2%<br>(0.88-4.1%)              | 98%<br>(96-99%)          | 0.2<br>(0.054-0.51)                         | 1.5%<br>(0.98-2.3%)                  | 1.8%<br>(1.2-2.7%)                  | 34<br>(22-50)       | 110<br>(72-170)         |
| Egypt    | 1990 | Male   | All Ages | 1.1%<br>(0.81-1.4%)            | 99%<br>(99-99%)          | 0.17<br>(0.12-0.23)                         | 0.69%<br>(0.58-0.81%)                | 1.2%<br>(1-1.4%)                    | 2900<br>(2300-3400) | 94000<br>(79000-110000) |
| Egypt    | 1990 | Male   | 15 to 19 | 0.93%<br>(0.44-1.6%)           | 99%<br>(98-100%)         | 0.09<br>(0.033-0.19)                        | 0.65%<br>(0.41-0.98%)                | 0.59%<br>(0.29-1.1%)                | 21<br>(10-40)       | 3000<br>(1900-4500)     |
| Egypt    | 1990 | Male   | 20 to 24 | 1.4%<br>(0.62-2.4%)            | 99%<br>(98-99%)          | 0.2<br>(0.085-0.38)                         | 1.4%<br>(0.95-1.9%)                  | 1.2%<br>(0.61-2.1%)                 | 42<br>(21-72)       | 6100<br>(3900-8700)     |
| Egypt    | 1990 | Male   | 25 to 29 | 1.6%<br>(0.81-2.8%)            | 98%<br>(97-99%)          | 0.32<br>(0.15-0.6)                          | 1.5%<br>(1.1-2.1%)                   | 1.5%<br>(0.83-2.5%)                 | 58<br>(31-96)       | 6500<br>(4300-9000)     |
| Egypt    | 1990 | Male   | 30 to 34 | 1.7%<br>(0.87-3%)              | 98%<br>(97-99%)          | 0.37<br>(0.17-0.64)                         | 1.5%<br>(1.1-2.1%)                   | 1.7%<br>(1.1-2.8%)                  | 69<br>(42-110)      | 6300<br>(4300-8800)     |
| Egypt    | 1990 | Male   | 35 to 39 | 1.9%<br>(0.91-3.2%)            | 98%<br>(97-99%)          | 0.38<br>(0.17-0.69)                         | 1.6%<br>(1.2-2.2%)                   | 2%<br>(1.3-2.9%)                    | 98<br>(65-140)      | 6900<br>(4900-9400)     |
| Egypt    | 1990 | Male   | 40 to 44 | 1.9%<br>(1-3.3%)               | 98%<br>(97-99%)          | 0.4<br>(0.17-0.72)                          | 1.7%<br>(1.3-2.2%)                   | 2.2%<br>(1.6-3%)                    | 130<br>(94-180)     | 7600<br>(5700-10000)    |
| Egypt    | 1990 | Male   | 45 to 49 | 1.8%<br>(0.82-3%)              | 98%<br>(97-99%)          | 0.43<br>(0.18-0.8)                          | 1.8%<br>(1.3-2.3%)                   | 2.3%<br>(1.7-3.1%)                  | 160<br>(120-220)    | 7600<br>(5700-9800)     |
| Egypt    | 1990 | Male   | 50 to 54 | 1.7%<br>(0.86-2.9%)            | 98%<br>(97-99%)          | 0.42<br>(0.17-0.8)                          | 1.8%<br>(1.3-2.4%)                   | 2.3%<br>(1.6-3%)                    | 250<br>(180-330)    | 9600<br>(7100-13000)    |
| Egypt    | 1990 | Male   | 55 to 59 | 1.6%<br>(0.79-2.8%)            | 98%<br>(97-99%)          | 0.36<br>(0.14-0.7)                          | 1.7%<br>(1.2-2.2%)                   | 2.1%<br>(1.5-2.8%)                  | 290<br>(210-390)    | 9600<br>(6900-13000)    |
| Egypt    | 1990 | Male   | 60 to 64 | 1.5%<br>(0.7-2.8%)             | 98%<br>(97-99%)          | 0.3<br>(0.11-0.62)                          | 1.5%<br>(1.1-2.1%)                   | 1.9%<br>(1.3-2.6%)                  | 340<br>(240-480)    | 9400<br>(6700-13000)    |
| Egypt    | 1990 | Male   | 65 to 69 | 1.5%<br>(0.71-2.6%)            | 99%<br>(97-99%)          | 0.25<br>(0.096-0.52)                        | 1.5%<br>(1.1-2%)                     | 1.8%<br>(1.3-2.3%)                  | 370<br>(270-500)    | 8400<br>(6100-11000)    |
| Egypt    | 1990 | Male   | 70 to 74 | 1.4%<br>(0.69-2.4%)            | 99%<br>(98-99%)          | 0.19<br>(0.074-0.42)                        | 1.6%<br>(1.1-2.1%)                   | 1.9%<br>(1.3-2.5%)                  | 360<br>(260-490)    | 6500<br>(4600-8800)     |

| Location | Year | Sex    | Age      | Prevalence of current drinkers | Prevalence of abstainers | Population average of standard drinks daily | Percent of total attributable deaths | Percent of total attributable DALYs | Attributable deaths | Attributable DALYs     |
|----------|------|--------|----------|--------------------------------|--------------------------|---------------------------------------------|--------------------------------------|-------------------------------------|---------------------|------------------------|
| Egypt    | 1990 | Male   | 75 to 79 | 1.2%<br>(0.57-2.2%)            | 99%<br>(98-99%)          | 0.15<br>(0.049-0.33)                        | 1.4%<br>(0.95-2%)                    | 1.8%<br>(1.2-2.5%)                  | 230<br>(150-330)    | 3300<br>(2100-4500)    |
| Egypt    | 1990 | Male   | 80 to 84 | 1.1%<br>(0.51-1.9%)            | 99%<br>(98-99%)          | 0.12<br>(0.042-0.26)                        | 1.6%<br>(0.98-2.2%)                  | 1.9%<br>(1.1-2.6%)                  | 210<br>(130-290)    | 2100<br>(1300-3000)    |
| Egypt    | 1990 | Male   | 85 to 89 | 1%<br>(0.49-1.8%)              | 99%<br>(98-100%)         | 0.11<br>(0.038-0.23)                        | 1.6%<br>(0.87-2.1%)                  | 1.8%<br>(0.99-2.5%)                 | 150<br>(80-200)     | 1100<br>(590-1400)     |
| Egypt    | 1990 | Male   | 90 to 94 | 1.1%<br>(0.53-2%)              | 99%<br>(98-99%)          | 0.11<br>(0.037-0.24)                        | 1.5%<br>(0.73-2%)                    | 1.7%<br>(0.84-2.4%)                 | 55<br>(26-75)       | 270<br>(130-370)       |
| Egypt    | 1990 | Male   | 95 plus  | 1.4%<br>(0.55-2.7%)            | 99%<br>(97-99%)          | 0.12<br>(0.03-0.27)                         | 1.5%<br>(0.71-2.2%)                  | 1.8%<br>(0.78-2.6%)                 | 14<br>(6.2-20)      | 46<br>(21-67)          |
| Egypt    | 1995 | Female | All Ages | 1.3%<br>(1-1.7%)               | 99%<br>(98-99%)          | 0.21<br>(0.15-0.29)                         | 0.6%<br>(0.49-0.75%)                 | 1.3%<br>(0.98-1.6%)                 | 2500<br>(1900-3200) | 69000<br>(55000-86000) |
| Egypt    | 1995 | Female | 15 to 19 | 1.5%<br>(0.71-2.6%)            | 99%<br>(97-99%)          | 0.22<br>(0.085-0.47)                        | 0.57%<br>(0.36-0.85%)                | 0.8%<br>(0.42-1.4%)                 | 21<br>(11-35)       | 2700<br>(1700-4000)    |
| Egypt    | 1995 | Female | 20 to 24 | 1.8%<br>(0.85-3.2%)            | 98%<br>(97-99%)          | 0.34<br>(0.14-0.65)                         | 0.92%<br>(0.64-1.3%)                 | 1%<br>(0.55-1.7%)                   | 23<br>(12-37)       | 3800<br>(2500-5400)    |
| Egypt    | 1995 | Female | 25 to 29 | 1.7%<br>(0.82-2.9%)            | 98%<br>(97-99%)          | 0.33<br>(0.14-0.61)                         | 0.97%<br>(0.7-1.3%)                  | 1.1%<br>(0.67-1.7%)                 | 28<br>(17-43)       | 4000<br>(2800-5600)    |
| Egypt    | 1995 | Female | 30 to 34 | 1.6%<br>(0.78-3%)              | 98%<br>(97-99%)          | 0.33<br>(0.15-0.63)                         | 0.96%<br>(0.68-1.3%)                 | 1.3%<br>(0.82-2%)                   | 34<br>(21-53)       | 4000<br>(2800-5600)    |
| Egypt    | 1995 | Female | 35 to 39 | 1.8%<br>(0.83-3.3%)            | 98%<br>(97-99%)          | 0.4<br>(0.17-0.76)                          | 0.99%<br>(0.71-1.4%)                 | 1.5%<br>(0.97-2.3%)                 | 51<br>(32-77)       | 4200<br>(2900-5800)    |
| Egypt    | 1995 | Female | 40 to 44 | 2%<br>(0.94-3.6%)              | 98%<br>(96-99%)          | 0.45<br>(0.19-0.85)                         | 1.1%<br>(0.75-1.5%)                  | 1.8%<br>(1.2-2.8%)                  | 64<br>(43-97)       | 4100<br>(2800-5800)    |
| Egypt    | 1995 | Female | 45 to 49 | 2%<br>(0.86-3.6%)              | 98%<br>(96-99%)          | 0.47<br>(0.19-0.91)                         | 1.1%<br>(0.76-1.7%)                  | 1.9%<br>(1.2-2.9%)                  | 100<br>(65-160)     | 5200<br>(3600-7600)    |
| Egypt    | 1995 | Female | 50 to 54 | 2%<br>(0.93-3.8%)              | 98%<br>(96-99%)          | 0.46<br>(0.18-0.92)                         | 1.3%<br>(0.88-1.9%)                  | 2%<br>(1.3-3%)                      | 140<br>(92-210)     | 5700<br>(3800-8300)    |
| Egypt    | 1995 | Female | 55 to 59 | 2%<br>(0.94-3.5%)              | 98%<br>(96-99%)          | 0.42<br>(0.16-0.84)                         | 1.3%<br>(0.84-1.9%)                  | 1.9%<br>(1.2-2.8%)                  | 160<br>(110-250)    | 5600<br>(3800-8400)    |
| Egypt    | 1995 | Female | 60 to 64 | 1.9%<br>(0.89-3.5%)            | 98%<br>(97-99%)          | 0.37<br>(0.13-0.79)                         | 1.3%<br>(0.85-1.9%)                  | 1.7%<br>(1.2-2.6%)                  | 240<br>(160-370)    | 6800<br>(4500-10000)   |
| Egypt    | 1995 | Female | 65 to 69 | 1.9%<br>(0.92-3.4%)            | 98%<br>(97-99%)          | 0.32<br>(0.12-0.66)                         | 1.3%<br>(0.87-2%)                    | 1.8%<br>(1.2-2.7%)                  | 300<br>(200-450)    | 6900<br>(4600-11000)   |
| Egypt    | 1995 | Female | 70 to 74 | 1.9%<br>(0.94-3.4%)            | 98%<br>(97-99%)          | 0.26<br>(0.09-0.58)                         | 1.4%<br>(0.94-2.1%)                  | 1.8%<br>(1.2-2.6%)                  | 360<br>(240-530)    | 6600<br>(4500-9700)    |
| Egypt    | 1995 | Female | 75 to 79 | 1.7%<br>(0.79-3.3%)            | 98%<br>(97-99%)          | 0.21<br>(0.066-0.5)                         | 1.3%<br>(0.87-1.9%)                  | 1.7%<br>(1.2-2.5%)                  | 300<br>(200-430)    | 4200<br>(2800-6100)    |
| Egypt    | 1995 | Female | 80 to 84 | 1.5%<br>(0.72-2.8%)            | 98%<br>(97-99%)          | 0.18<br>(0.061-0.4)                         | 1.4%<br>(0.94-1.9%)                  | 1.8%<br>(1.2-2.5%)                  | 290<br>(190-400)    | 3000<br>(2000-4100)    |
| Egypt    | 1995 | Female | 85 to 89 | 1.5%<br>(0.72-2.7%)            | 99%<br>(97-99%)          | 0.17<br>(0.061-0.38)                        | 1.4%<br>(1-2%)                       | 1.8%<br>(1.2-2.4%)                  | 220<br>(160-310)    | 1600<br>(1200-2200)    |
| Egypt    | 1995 | Female | 90 to 94 | 1.7%<br>(0.83-3%)              | 98%<br>(97-99%)          | 0.19<br>(0.061-0.41)                        | 1.4%<br>(1-2%)                       | 1.8%<br>(1.2-2.5%)                  | 100<br>(72-140)     | 500<br>(360-710)       |

| Location | Year | Sex    | Age      | Prevalence of current drinkers | Prevalence of abstainers | Population average of standard drinks daily | Percent of total attributable deaths | Percent of total attributable DALYs | Attributable deaths | Attributable DALYs       |
|----------|------|--------|----------|--------------------------------|--------------------------|---------------------------------------------|--------------------------------------|-------------------------------------|---------------------|--------------------------|
| Egypt    | 1995 | Female | 95 plus  | 2.1%<br>(0.87-4.3%)            | 98%<br>(96-99%)          | 0.22<br>(0.056-0.55)                        | 1.5%<br>(0.98-2.2%)                  | 1.8%<br>(1.2-2.7%)                  | 34<br>(22-50)       | 110<br>(71-160)          |
| Egypt    | 1995 | Male   | All Ages | 1.1%<br>(0.82-1.3%)            | 99%<br>(99-99%)          | 0.18<br>(0.12-0.24)                         | 0.83%<br>(0.7-0.98%)                 | 1.4%<br>(1.2-1.7%)                  | 3200<br>(2600-3800) | 100000<br>(88000-120000) |
| Egypt    | 1995 | Male   | 15 to 19 | 0.91%<br>(0.44-1.6%)           | 99%<br>(98-100%)         | 0.092<br>(0.034-0.19)                       | 0.65%<br>(0.42-0.94%)                | 0.6%<br>(0.3-1.1%)                  | 23<br>(11-42)       | 3500<br>(2200-5100)      |
| Egypt    | 1995 | Male   | 20 to 24 | 1.4%<br>(0.65-2.3%)            | 99%<br>(98-99%)          | 0.21<br>(0.088-0.4)                         | 1.4%<br>(0.93-1.9%)                  | 1.2%<br>(0.63-2.1%)                 | 41<br>(21-71)       | 6100<br>(4000-8800)      |
| Egypt    | 1995 | Male   | 25 to 29 | 1.7%<br>(0.86-2.8%)            | 98%<br>(97-99%)          | 0.34<br>(0.15-0.63)                         | 1.5%<br>(1.1-2.1%)                   | 1.6%<br>(0.88-2.5%)                 | 55<br>(30-89)       | 6400<br>(4400-8900)      |
| Egypt    | 1995 | Male   | 30 to 34 | 1.7%<br>(0.88-3%)              | 98%<br>(97-99%)          | 0.38<br>(0.18-0.67)                         | 1.5%<br>(1.1-2%)                     | 1.8%<br>(1.1-2.7%)                  | 71<br>(45-110)      | 6700<br>(4700-9200)      |
| Egypt    | 1995 | Male   | 35 to 39 | 1.7%<br>(0.85-2.9%)            | 98%<br>(97-99%)          | 0.35<br>(0.16-0.65)                         | 1.5%<br>(1.1-2%)                     | 2%<br>(1.3-2.8%)                    | 99<br>(68-140)      | 7200<br>(5300-9500)      |
| Egypt    | 1995 | Male   | 40 to 44 | 1.7%<br>(0.93-3%)              | 98%<br>(97-99%)          | 0.38<br>(0.17-0.68)                         | 1.7%<br>(1.3-2.2%)                   | 2.2%<br>(1.6-2.9%)                  | 140<br>(100-190)    | 8300<br>(6200-11000)     |
| Egypt    | 1995 | Male   | 45 to 49 | 1.8%<br>(0.85-3%)              | 98%<br>(97-99%)          | 0.47<br>(0.2-0.85)                          | 1.8%<br>(1.4-2.4%)                   | 2.4%<br>(1.8-3.2%)                  | 230<br>(160-300)    | 11000<br>(8000-14000)    |
| Egypt    | 1995 | Male   | 50 to 54 | 1.8%<br>(0.92-3%)              | 98%<br>(97-99%)          | 0.46<br>(0.19-0.88)                         | 1.9%<br>(1.4-2.5%)                   | 2.4%<br>(1.7-3.2%)                  | 260<br>(190-350)    | 10000<br>(7500-13000)    |
| Egypt    | 1995 | Male   | 55 to 59 | 1.6%<br>(0.8-2.8%)             | 98%<br>(97-99%)          | 0.38<br>(0.14-0.74)                         | 1.7%<br>(1.2-2.3%)                   | 2.1%<br>(1.5-2.9%)                  | 300<br>(220-410)    | 10000<br>(7200-13000)    |
| Egypt    | 1995 | Male   | 60 to 64 | 1.5%<br>(0.69-2.7%)            | 99%<br>(97-99%)          | 0.31<br>(0.11-0.64)                         | 1.6%<br>(1.1-2.2%)                   | 1.9%<br>(1.4-2.6%)                  | 370<br>(270-510)    | 10000<br>(7300-14000)    |
| Egypt    | 1995 | Male   | 65 to 69 | 1.4%<br>(0.66-2.5%)            | 99%<br>(98-99%)          | 0.26<br>(0.094-0.52)                        | 1.5%<br>(1.1-2%)                     | 1.9%<br>(1.4-2.5%)                  | 410<br>(300-550)    | 9300<br>(6800-12000)     |
| Egypt    | 1995 | Male   | 70 to 74 | 1.3%<br>(0.67-2.3%)            | 99%<br>(98-99%)          | 0.2<br>(0.075-0.42)                         | 1.6%<br>(1.1-2.1%)                   | 1.9%<br>(1.4-2.5%)                  | 430<br>(310-570)    | 7700<br>(5600-10000)     |
| Egypt    | 1995 | Male   | 75 to 79 | 1.2%<br>(0.55-2.1%)            | 99%<br>(98-99%)          | 0.15<br>(0.05-0.34)                         | 1.5%<br>(1-2.1%)                     | 1.8%<br>(1.2-2.5%)                  | 310<br>(200-420)    | 4200<br>(2900-5900)      |
| Egypt    | 1995 | Male   | 80 to 84 | 1%<br>(0.46-1.8%)              | 99%<br>(98-100%)         | 0.12<br>(0.043-0.27)                        | 1.6%<br>(0.99-2.2%)                  | 1.9%<br>(1.2-2.7%)                  | 230<br>(140-330)    | 2400<br>(1500-3300)      |
| Egypt    | 1995 | Male   | 85 to 89 | 0.99%<br>(0.47-1.7%)           | 99%<br>(98-100%)         | 0.11<br>(0.038-0.23)                        | 1.6%<br>(0.89-2.1%)                  | 1.9%<br>(1-2.5%)                    | 150<br>(81-200)     | 1100<br>(590-1400)       |
| Egypt    | 1995 | Male   | 90 to 94 | 1.1%<br>(0.52-1.9%)            | 99%<br>(98-99%)          | 0.11<br>(0.037-0.23)                        | 1.5%<br>(0.73-2.1%)                  | 1.8%<br>(0.85-2.5%)                 | 52<br>(25-74)       | 260<br>(130-360)         |
| Egypt    | 1995 | Male   | 95 plus  | 1.3%<br>(0.53-2.6%)            | 99%<br>(97-99%)          | 0.12<br>(0.031-0.27)                        | 1.5%<br>(0.71-2.3%)                  | 1.8%<br>(0.8-2.7%)                  | 14<br>(6.1-21)      | 46<br>(21-69)            |
| Egypt    | 2000 | Female | All Ages | 1.4%<br>(1.1-1.8%)             | 99%<br>(98-99%)          | 0.22<br>(0.16-0.31)                         | 0.69%<br>(0.56-0.85%)                | 1.3%<br>(1.1-1.7%)                  | 2500<br>(1900-3200) | 74000<br>(59000-91000)   |
| Egypt    | 2000 | Female | 15 to 19 | 1.5%<br>(0.75-2.6%)            | 99%<br>(97-99%)          | 0.22<br>(0.087-0.44)                        | 0.57%<br>(0.37-0.83%)                | 0.84%<br>(0.46-1.4%)                | 19<br>(11-33)       | 2900<br>(1800-4400)      |
| Egypt    | 2000 | Female | 20 to 24 | 1.8%<br>(0.85-3.3%)            | 98%<br>(97-99%)          | 0.34<br>(0.14-0.66)                         | 0.94%<br>(0.64-1.3%)                 | 1.1%<br>(0.59-1.7%)                 | 23<br>(13-38)       | 4400<br>(2800-6300)      |

| Location | Year | Sex    | Age      | Prevalence of current drinkers | Prevalence of abstainers | Population average of standard drinks daily | Percent of total attributable deaths | Percent of total attributable DALYs | Attributable deaths | Attributable DALYs    |
|----------|------|--------|----------|--------------------------------|--------------------------|---------------------------------------------|--------------------------------------|-------------------------------------|---------------------|-----------------------|
| Egypt    | 2000 | Female | 25 to 29 | 1.7%<br>(0.86-3.1%)            | 98%<br>(97-99%)          | 0.33<br>(0.14-0.63)                         | 0.98%<br>(0.7-1.3%)                  | 1.2%<br>(0.71-1.8%)                 | 24<br>(15-39)       | 4100<br>(2800-5700)   |
| Egypt    | 2000 | Female | 30 to 34 | 1.7%<br>(0.8-3.1%)             | 98%<br>(97-99%)          | 0.33<br>(0.14-0.65)                         | 0.96%<br>(0.7-1.3%)                  | 1.4%<br>(0.87-2.1%)                 | 31<br>(19-48)       | 4000<br>(2800-5700)   |
| Egypt    | 2000 | Female | 35 to 39 | 1.9%<br>(0.87-3.3%)            | 98%<br>(97-99%)          | 0.4<br>(0.18-0.76)                          | 0.97%<br>(0.71-1.4%)                 | 1.6%<br>(1-2.4%)                    | 49<br>(31-75)       | 4300<br>(3100-6100)   |
| Egypt    | 2000 | Female | 40 to 44 | 2%<br>(1-3.8%)                 | 98%<br>(96-99%)          | 0.45<br>(0.19-0.85)                         | 1%<br>(0.73-1.5%)                    | 1.8%<br>(1.2-2.8%)                  | 69<br>(46-100)      | 4600<br>(3200-6600)   |
| Egypt    | 2000 | Female | 45 to 49 | 2.1%<br>(0.9-3.6%)             | 98%<br>(96-99%)          | 0.47<br>(0.19-0.88)                         | 1.1%<br>(0.78-1.7%)                  | 1.9%<br>(1.2-2.9%)                  | 100<br>(63-150)     | 5100<br>(3500-7600)   |
| Egypt    | 2000 | Female | 50 to 54 | 2.1%<br>(0.97-3.9%)            | 98%<br>(96-99%)          | 0.46<br>(0.18-0.89)                         | 1.3%<br>(0.86-1.9%)                  | 2%<br>(1.3-3%)                      | 180<br>(120-270)    | 7500<br>(5000-11000)  |
| Egypt    | 2000 | Female | 55 to 59 | 2%<br>(0.94-3.9%)              | 98%<br>(96-99%)          | 0.41<br>(0.15-0.86)                         | 1.3%<br>(0.86-2%)                    | 1.9%<br>(1.3-2.9%)                  | 180<br>(120-270)    | 6100<br>(4100-9200)   |
| Egypt    | 2000 | Female | 60 to 64 | 2%<br>(0.89-3.7%)              | 98%<br>(96-99%)          | 0.36<br>(0.13-0.79)                         | 1.3%<br>(0.84-1.9%)                  | 1.7%<br>(1.2-2.6%)                  | 250<br>(160-380)    | 7000<br>(4700-11000)  |
| Egypt    | 2000 | Female | 65 to 69 | 2%<br>(0.93-3.5%)              | 98%<br>(97-99%)          | 0.31<br>(0.11-0.68)                         | 1.3%<br>(0.84-1.9%)                  | 1.8%<br>(1.2-2.7%)                  | 310<br>(200-470)    | 7200<br>(4800-11000)  |
| Egypt    | 2000 | Female | 70 to 74 | 1.9%<br>(0.95-3.4%)            | 98%<br>(97-99%)          | 0.25<br>(0.088-0.55)                        | 1.3%<br>(0.89-1.9%)                  | 1.8%<br>(1.2-2.6%)                  | 390<br>(260-580)    | 7200<br>(4800-11000)  |
| Egypt    | 2000 | Female | 75 to 79 | 1.7%<br>(0.83-3.2%)            | 98%<br>(97-99%)          | 0.21<br>(0.067-0.5)                         | 1.2%<br>(0.85-1.8%)                  | 1.7%<br>(1.1-2.4%)                  | 310<br>(210-450)    | 4400<br>(3000-6300)   |
| Egypt    | 2000 | Female | 80 to 84 | 1.6%<br>(0.75-3%)              | 98%<br>(97-99%)          | 0.18<br>(0.059-0.41)                        | 1.3%<br>(0.88-1.8%)                  | 1.7%<br>(1.1-2.4%)                  | 280<br>(190-390)    | 2900<br>(1900-4100)   |
| Egypt    | 2000 | Female | 85 to 89 | 1.5%<br>(0.72-2.7%)            | 98%<br>(97-99%)          | 0.17<br>(0.062-0.37)                        | 1.3%<br>(0.89-1.7%)                  | 1.7%<br>(1.2-2.3%)                  | 180<br>(130-250)    | 1300<br>(950-1800)    |
| Egypt    | 2000 | Female | 90 to 94 | 1.7%<br>(0.86-3%)              | 98%<br>(97-99%)          | 0.18<br>(0.061-0.4)                         | 1.3%<br>(0.9-1.8%)                   | 1.7%<br>(1.2-2.3%)                  | 89<br>(63-120)      | 440<br>(310-620)      |
| Egypt    | 2000 | Female | 95 plus  | 2%<br>(0.88-4.1%)              | 98%<br>(96-99%)          | 0.21<br>(0.057-0.53)                        | 1.3%<br>(0.86-2%)                    | 1.7%<br>(1.1-2.6%)                  | 29<br>(18-44)       | 94<br>(61-140)        |
| Egypt    | 2000 | Male   | All Ages | 1.1%<br>(0.84-1.4%)            | 99%<br>(99-99%)          | 0.17<br>(0.12-0.24)                         | 0.94%<br>(0.79-1.1%)                 | 1.5%<br>(1.2-1.8%)                  | 3400<br>(2800-4000) | 11000<br>(9500-13000) |
| Egypt    | 2000 | Male   | 15 to 19 | 0.91%<br>(0.45-1.5%)           | 99%<br>(98-100%)         | 0.086<br>(0.033-0.17)                       | 0.67%<br>(0.45-0.97%)                | 0.58%<br>(0.29-1%)                  | 23<br>(12-41)       | 3900<br>(2500-5900)   |
| Egypt    | 2000 | Male   | 20 to 24 | 1.4%<br>(0.66-2.2%)            | 99%<br>(98-99%)          | 0.2<br>(0.086-0.37)                         | 1.4%<br>(0.96-2%)                    | 1.2%<br>(0.61-2%)                   | 44<br>(23-75)       | 7300<br>(4900-11000)  |
| Egypt    | 2000 | Male   | 25 to 29 | 1.7%<br>(0.86-2.7%)            | 98%<br>(97-99%)          | 0.32<br>(0.14-0.58)                         | 1.5%<br>(1.1-2.1%)                   | 1.6%<br>(0.88-2.5%)                 | 49<br>(28-80)       | 6500<br>(4500-8900)   |
| Egypt    | 2000 | Male   | 30 to 34 | 1.7%<br>(0.86-3%)              | 98%<br>(97-99%)          | 0.36<br>(0.17-0.64)                         | 1.5%<br>(1.1-2%)                     | 1.7%<br>(1.1-2.7%)                  | 61<br>(39-95)       | 6200<br>(4400-8500)   |
| Egypt    | 2000 | Male   | 35 to 39 | 1.7%<br>(0.85-2.8%)            | 98%<br>(97-99%)          | 0.34<br>(0.15-0.64)                         | 1.5%<br>(1.1-2%)                     | 1.9%<br>(1.4-2.8%)                  | 96<br>(66-140)      | 7300<br>(5500-9800)   |
| Egypt    | 2000 | Male   | 40 to 44 | 1.7%<br>(0.92-3%)              | 98%<br>(97-99%)          | 0.37<br>(0.16-0.64)                         | 1.6%<br>(1.3-2.2%)                   | 2.2%<br>(1.6-2.9%)                  | 160<br>(120-210)    | 9200<br>(6900-12000)  |

| Location | Year | Sex    | Age      | Prevalence of current drinkers | Prevalence of abstainers | Population average of standard drinks daily | Percent of total attributable deaths | Percent of total attributable DALYs | Attributable deaths | Attributable DALYs      |
|----------|------|--------|----------|--------------------------------|--------------------------|---------------------------------------------|--------------------------------------|-------------------------------------|---------------------|-------------------------|
| Egypt    | 2000 | Male   | 45 to 49 | 1.8%<br>(0.85-3%)              | 98%<br>(97-99%)          | 0.44<br>(0.18-0.82)                         | 1.8%<br>(1.3-2.3%)                   | 2.4%<br>(1.7-3.1%)                  | 250<br>(180-330)    | 12000<br>(8700-15000)   |
| Egypt    | 2000 | Male   | 50 to 54 | 1.8%<br>(0.94-2.9%)            | 98%<br>(97-99%)          | 0.44<br>(0.19-0.84)                         | 1.9%<br>(1.4-2.4%)                   | 2.4%<br>(1.7-3.1%)                  | 350<br>(250-470)    | 14000<br>(10000-18000)  |
| Egypt    | 2000 | Male   | 55 to 59 | 1.6%<br>(0.77-2.8%)            | 98%<br>(97-99%)          | 0.36<br>(0.14-0.71)                         | 1.7%<br>(1.2-2.3%)                   | 2.1%<br>(1.5-2.9%)                  | 310<br>(230-420)    | 10000<br>(7600-14000)   |
| Egypt    | 2000 | Male   | 60 to 64 | 1.4%<br>(0.68-2.7%)            | 99%<br>(97-99%)          | 0.29<br>(0.1-0.61)                          | 1.5%<br>(1.1-2.1%)                   | 1.9%<br>(1.4-2.6%)                  | 380<br>(270-520)    | 10000<br>(7500-14000)   |
| Egypt    | 2000 | Male   | 65 to 69 | 1.4%<br>(0.65-2.5%)            | 99%<br>(98-99%)          | 0.24<br>(0.09-0.48)                         | 1.5%<br>(1.1-2%)                     | 1.9%<br>(1.4-2.4%)                  | 420<br>(300-560)    | 9500<br>(6900-13000)    |
| Egypt    | 2000 | Male   | 70 to 74 | 1.3%<br>(0.66-2.2%)            | 99%<br>(98-99%)          | 0.18<br>(0.071-0.41)                        | 1.5%<br>(1.1-2.1%)                   | 1.9%<br>(1.3-2.5%)                  | 460<br>(320-620)    | 8200<br>(5800-11000)    |
| Egypt    | 2000 | Male   | 75 to 79 | 1.1%<br>(0.54-2%)              | 99%<br>(98-99%)          | 0.14<br>(0.047-0.33)                        | 1.5%<br>(1-2%)                       | 1.8%<br>(1.2-2.4%)                  | 340<br>(230-480)    | 4800<br>(3300-6600)     |
| Egypt    | 2000 | Male   | 80 to 84 | 1%<br>(0.48-1.8%)              | 99%<br>(98-100%)         | 0.12<br>(0.038-0.27)                        | 1.5%<br>(0.96-2.2%)                  | 1.9%<br>(1.2-2.7%)                  | 250<br>(150-360)    | 2600<br>(1600-3600)     |
| Egypt    | 2000 | Male   | 85 to 89 | 1%<br>(0.46-1.7%)              | 99%<br>(98-100%)         | 0.11<br>(0.036-0.23)                        | 1.4%<br>(0.82-2%)                    | 1.8%<br>(0.99-2.5%)                 | 120<br>(69-170)     | 880<br>(500-1200)       |
| Egypt    | 2000 | Male   | 90 to 94 | 1.1%<br>(0.52-1.9%)            | 99%<br>(98-99%)          | 0.11<br>(0.036-0.23)                        | 1.4%<br>(0.7-1.9%)                   | 1.7%<br>(0.83-2.4%)                 | 48<br>(24-68)       | 240<br>(120-340)        |
| Egypt    | 2000 | Male   | 95 plus  | 1.3%<br>(0.56-2.7%)            | 99%<br>(97-99%)          | 0.12<br>(0.029-0.28)                        | 1.4%<br>(0.67-2.2%)                  | 1.8%<br>(0.77-2.7%)                 | 12<br>(5.4-19)      | 40<br>(19-62)           |
| Egypt    | 2005 | Female | All Ages | 1.4%<br>(1.1-1.9%)             | 99%<br>(98-99%)          | 0.23<br>(0.17-0.32)                         | 0.78%<br>(0.63-0.97%)                | 1.5%<br>(1.1-1.9%)                  | 3000<br>(2300-3900) | 87000<br>(69000-110000) |
| Egypt    | 2005 | Female | 15 to 19 | 1.5%<br>(0.72-2.7%)            | 98%<br>(97-99%)          | 0.22<br>(0.083-0.44)                        | 0.56%<br>(0.36-0.84%)                | 0.84%<br>(0.45-1.5%)                | 19<br>(9.9-32)      | 3000<br>(1900-4600)     |
| Egypt    | 2005 | Female | 20 to 24 | 1.8%<br>(0.83-3.4%)            | 98%<br>(97-99%)          | 0.33<br>(0.14-0.64)                         | 0.95%<br>(0.66-1.3%)                 | 1.1%<br>(0.59-1.8%)                 | 25<br>(14-42)       | 5100<br>(3400-7500)     |
| Egypt    | 2005 | Female | 25 to 29 | 1.7%<br>(0.82-3%)              | 98%<br>(97-99%)          | 0.33<br>(0.14-0.61)                         | 0.98%<br>(0.73-1.3%)                 | 1.2%<br>(0.71-1.9%)                 | 27<br>(16-43)       | 4800<br>(3300-6900)     |
| Egypt    | 2005 | Female | 30 to 34 | 1.7%<br>(0.79-3%)              | 98%<br>(97-99%)          | 0.33<br>(0.15-0.63)                         | 0.96%<br>(0.68-1.3%)                 | 1.4%<br>(0.86-2.1%)                 | 31<br>(20-49)       | 4300<br>(3000-6100)     |
| Egypt    | 2005 | Female | 35 to 39 | 1.9%<br>(0.89-3.5%)            | 98%<br>(97-99%)          | 0.4<br>(0.18-0.76)                          | 0.98%<br>(0.71-1.3%)                 | 1.6%<br>(1-2.4%)                    | 49<br>(31-74)       | 4500<br>(3200-6400)     |
| Egypt    | 2005 | Female | 40 to 44 | 2.1%<br>(1-3.8%)               | 98%<br>(96-99%)          | 0.45<br>(0.19-0.87)                         | 1.1%<br>(0.74-1.5%)                  | 1.9%<br>(1.2-2.9%)                  | 79<br>(53-120)      | 5300<br>(3600-7400)     |
| Egypt    | 2005 | Female | 45 to 49 | 2.1%<br>(0.97-3.7%)            | 98%<br>(96-99%)          | 0.47<br>(0.2-0.94)                          | 1.1%<br>(0.76-1.7%)                  | 1.9%<br>(1.3-2.9%)                  | 120<br>(75-180)     | 6100<br>(4200-9100)     |
| Egypt    | 2005 | Female | 50 to 54 | 2.2%<br>(1-4.2%)               | 98%<br>(96-99%)          | 0.47<br>(0.19-0.92)                         | 1.4%<br>(0.91-2%)                    | 2%<br>(1.3-3%)                      | 210<br>(140-320)    | 8600<br>(5700-13000)    |
| Egypt    | 2005 | Female | 55 to 59 | 2.1%<br>(0.99-4.1%)            | 98%<br>(96-99%)          | 0.43<br>(0.16-0.86)                         | 1.4%<br>(0.87-2.1%)                  | 1.9%<br>(1.2-3%)                    | 270<br>(170-420)    | 9200<br>(6000-14000)    |
| Egypt    | 2005 | Female | 60 to 64 | 2.1%<br>(0.92-3.9%)            | 98%<br>(96-99%)          | 0.38<br>(0.13-0.8)                          | 1.3%<br>(0.86-2%)                    | 1.8%<br>(1.2-2.7%)                  | 280<br>(180-430)    | 8000<br>(5300-12000)    |



| Location | Year | Sex    | Age      | Prevalence of current drinkers | Prevalence of abstainers | Population average of standard drinks daily | Percent of total attributable deaths | Percent of total attributable DALYs | Attributable deaths | Attributable DALYs        |
|----------|------|--------|----------|--------------------------------|--------------------------|---------------------------------------------|--------------------------------------|-------------------------------------|---------------------|---------------------------|
| Egypt    | 2005 | Female | 65 to 69 | 2.1%<br>(0.97-3.6%)            | 98%<br>(96-99%)          | 0.33<br>(0.12-0.67)                         | 1.3%<br>(0.86-2%)                    | 1.8%<br>(1.2-2.7%)                  | 350<br>(230-530)    | 8100<br>(5400-12000)      |
| Egypt    | 2005 | Female | 70 to 74 | 2%<br>(1-3.6%)                 | 98%<br>(96-99%)          | 0.27<br>(0.097-0.58)                        | 1.4%<br>(0.91-2.1%)                  | 1.8%<br>(1.2-2.7%)                  | 450<br>(300-660)    | 8300<br>(5600-12000)      |
| Egypt    | 2005 | Female | 75 to 79 | 1.8%<br>(0.88-3.4%)            | 98%<br>(97-99%)          | 0.22<br>(0.07-0.51)                         | 1.3%<br>(0.85-1.9%)                  | 1.7%<br>(1.1-2.5%)                  | 390<br>(260-570)    | 5500<br>(3700-8100)       |
| Egypt    | 2005 | Female | 80 to 84 | 1.6%<br>(0.75-3.1%)            | 98%<br>(97-99%)          | 0.19<br>(0.062-0.41)                        | 1.3%<br>(0.9-1.9%)                   | 1.7%<br>(1.2-2.4%)                  | 350<br>(230-500)    | 3600<br>(2400-5100)       |
| Egypt    | 2005 | Female | 85 to 89 | 1.6%<br>(0.76-2.8%)            | 98%<br>(97-99%)          | 0.18<br>(0.062-0.41)                        | 1.2%<br>(0.88-1.7%)                  | 1.7%<br>(1.2-2.3%)                  | 210<br>(150-280)    | 1500<br>(1100-2100)       |
| Egypt    | 2005 | Female | 90 to 94 | 1.8%<br>(0.87-3.2%)            | 98%<br>(97-99%)          | 0.19<br>(0.06-0.42)                         | 1.3%<br>(0.88-1.8%)                  | 1.7%<br>(1.2-2.3%)                  | 100<br>(72-140)     | 510<br>(360-720)          |
| Egypt    | 2005 | Female | 95 plus  | 2.2%<br>(0.91-4.4%)            | 98%<br>(96-99%)          | 0.22<br>(0.058-0.54)                        | 1.3%<br>(0.87-2%)                    | 1.7%<br>(1.1-2.6%)                  | 35<br>(22-53)       | 110<br>(73-170)           |
| Egypt    | 2005 | Male   | All Ages | 1.1%<br>(0.88-1.5%)            | 99%<br>(99-99%)          | 0.19<br>(0.13-0.26)                         | 1%<br>(0.88-1.2%)                    | 1.6%<br>(1.3-1.9%)                  | 4000<br>(3300-4800) | 130000<br>(110000-160000) |
| Egypt    | 2005 | Male   | 15 to 19 | 0.92%<br>(0.45-1.6%)           | 99%<br>(98-100%)         | 0.087<br>(0.033-0.18)                       | 0.67%<br>(0.43-0.98%)                | 0.59%<br>(0.29-1%)                  | 25<br>(12-45)       | 4300<br>(2700-6500)       |
| Egypt    | 2005 | Male   | 20 to 24 | 1.4%<br>(0.67-2.3%)            | 99%<br>(98-99%)          | 0.2<br>(0.089-0.37)                         | 1.4%<br>(0.97-2%)                    | 1.2%<br>(0.62-2%)                   | 50<br>(26-85)       | 8600<br>(5600-12000)      |
| Egypt    | 2005 | Male   | 25 to 29 | 1.7%<br>(0.87-2.8%)            | 98%<br>(97-99%)          | 0.33<br>(0.15-0.59)                         | 1.5%<br>(1.1-2.1%)                   | 1.6%<br>(0.87-2.5%)                 | 57<br>(31-92)       | 7900<br>(5500-11000)      |
| Egypt    | 2005 | Male   | 30 to 34 | 1.7%<br>(0.89-3%)              | 98%<br>(97-99%)          | 0.37<br>(0.17-0.64)                         | 1.5%<br>(1.1-2%)                     | 1.8%<br>(1.1-2.7%)                  | 61<br>(40-93)       | 6500<br>(4600-9100)       |
| Egypt    | 2005 | Male   | 35 to 39 | 1.7%<br>(0.88-2.9%)            | 98%<br>(97-99%)          | 0.34<br>(0.15-0.64)                         | 1.5%<br>(1.2-2%)                     | 2%<br>(1.4-2.9%)                    | 93<br>(65-130)      | 7300<br>(5500-9500)       |
| Egypt    | 2005 | Male   | 40 to 44 | 1.7%<br>(0.93-3%)              | 98%<br>(97-99%)          | 0.37<br>(0.17-0.66)                         | 1.7%<br>(1.3-2.2%)                   | 2.2%<br>(1.6-3%)                    | 170<br>(130-240)    | 10000<br>(7600-13000)     |
| Egypt    | 2005 | Male   | 45 to 49 | 1.8%<br>(0.87-3.1%)            | 98%<br>(97-99%)          | 0.44<br>(0.19-0.83)                         | 1.8%<br>(1.4-2.4%)                   | 2.4%<br>(1.8-3.1%)                  | 300<br>(220-400)    | 14000<br>(11000-18000)    |
| Egypt    | 2005 | Male   | 50 to 54 | 1.8%<br>(0.94-3%)              | 98%<br>(97-99%)          | 0.44<br>(0.19-0.84)                         | 1.9%<br>(1.4-2.5%)                   | 2.4%<br>(1.7-3.2%)                  | 430<br>(310-590)    | 17000<br>(12000-22000)    |
| Egypt    | 2005 | Male   | 55 to 59 | 1.6%<br>(0.79-2.9%)            | 98%<br>(97-99%)          | 0.37<br>(0.14-0.71)                         | 1.7%<br>(1.3-2.4%)                   | 2.2%<br>(1.6-2.9%)                  | 480<br>(340-670)    | 16000<br>(11000-22000)    |
| Egypt    | 2005 | Male   | 60 to 64 | 1.5%<br>(0.7-2.7%)             | 99%<br>(97-99%)          | 0.3<br>(0.11-0.62)                          | 1.6%<br>(1.2-2.1%)                   | 1.9%<br>(1.4-2.6%)                  | 420<br>(300-560)    | 11000<br>(8400-15000)     |
| Egypt    | 2005 | Male   | 65 to 69 | 1.4%<br>(0.66-2.4%)            | 99%<br>(98-99%)          | 0.25<br>(0.093-0.49)                        | 1.5%<br>(1.1-2%)                     | 1.9%<br>(1.4-2.5%)                  | 460<br>(340-610)    | 10000<br>(7600-14000)     |
| Egypt    | 2005 | Male   | 70 to 74 | 1.3%<br>(0.68-2.3%)            | 99%<br>(98-99%)          | 0.19<br>(0.07-0.39)                         | 1.5%<br>(1.1-2%)                     | 1.9%<br>(1.4-2.5%)                  | 500<br>(350-670)    | 9000<br>(6400-12000)      |
| Egypt    | 2005 | Male   | 75 to 79 | 1.2%<br>(0.54-2.1%)            | 99%<br>(98-99%)          | 0.15<br>(0.047-0.33)                        | 1.5%<br>(1-2%)                       | 1.8%<br>(1.2-2.5%)                  | 410<br>(280-570)    | 5700<br>(4000-7900)       |
| Egypt    | 2005 | Male   | 80 to 84 | 1%<br>(0.48-1.8%)              | 99%<br>(98-100%)         | 0.12<br>(0.038-0.27)                        | 1.5%<br>(0.99-2.2%)                  | 1.9%<br>(1.2-2.6%)                  | 310<br>(200-440)    | 3200<br>(2000-4500)       |

| Location | Year | Sex    | Age      | Prevalence of current drinkers | Prevalence of abstainers | Population average of standard drinks daily | Percent of total attributable deaths | Percent of total attributable DALYs | Attributable deaths | Attributable DALYs        |
|----------|------|--------|----------|--------------------------------|--------------------------|---------------------------------------------|--------------------------------------|-------------------------------------|---------------------|---------------------------|
| Egypt    | 2005 | Male   | 85 to 89 | 1%<br>(0.46-1.8%)              | 99%<br>(98-100%)         | 0.11<br>(0.038-0.23)                        | 1.4%<br>(0.82-2%)                    | 1.8%<br>(1-2.5%)                    | 140<br>(81-200)     | 1000<br>(600-1400)        |
| Egypt    | 2005 | Male   | 90 to 94 | 1.1%<br>(0.53-2%)              | 99%<br>(98-99%)          | 0.11<br>(0.036-0.23)                        | 1.3%<br>(0.7-1.9%)                   | 1.7%<br>(0.84-2.4%)                 | 56<br>(27-78)       | 280<br>(140-380)          |
| Egypt    | 2005 | Male   | 95 plus  | 1.3%<br>(0.55-2.7%)            | 99%<br>(97-99%)          | 0.11<br>(0.028-0.26)                        | 1.4%<br>(0.67-2.1%)                  | 1.7%<br>(0.77-2.6%)                 | 15<br>(6.6-23)      | 49<br>(22-73)             |
| Egypt    | 2010 | Female | All Ages | 1.5%<br>(1.2-2%)               | 98%<br>(98-99%)          | 0.24<br>(0.16-0.32)                         | 0.84%<br>(0.67-1.1%)                 | 1.5%<br>(1.1-1.9%)                  | 3400<br>(2500-4500) | 99000<br>(77000-120000)   |
| Egypt    | 2010 | Female | 15 to 19 | 1.5%<br>(0.76-2.7%)            | 98%<br>(97-99%)          | 0.21<br>(0.081-0.41)                        | 0.56%<br>(0.36-0.81%)                | 0.84%<br>(0.46-1.4%)                | 16<br>(8.9-28)      | 2700<br>(1700-4200)       |
| Egypt    | 2010 | Female | 20 to 24 | 2%<br>(0.96-3.5%)              | 98%<br>(96-99%)          | 0.34<br>(0.14-0.63)                         | 0.97%<br>(0.67-1.4%)                 | 1.1%<br>(0.64-1.8%)                 | 28<br>(16-45)       | 5700<br>(3800-8400)       |
| Egypt    | 2010 | Female | 25 to 29 | 2%<br>(1-3.5%)                 | 98%<br>(97-99%)          | 0.35<br>(0.16-0.65)                         | 1%<br>(0.74-1.4%)                    | 1.3%<br>(0.8-2%)                    | 35<br>(21-54)       | 6000<br>(4100-8400)       |
| Egypt    | 2010 | Female | 30 to 34 | 2%<br>(0.97-3.5%)              | 98%<br>(96-99%)          | 0.36<br>(0.16-0.64)                         | 1%<br>(0.73-1.4%)                    | 1.5%<br>(0.93-2.3%)                 | 42<br>(25-63)       | 5500<br>(3900-7600)       |
| Egypt    | 2010 | Female | 35 to 39 | 2.1%<br>(0.99-3.7%)            | 98%<br>(96-99%)          | 0.39<br>(0.17-0.76)                         | 0.99%<br>(0.73-1.3%)                 | 1.6%<br>(1.1-2.4%)                  | 52<br>(34-79)       | 5000<br>(3500-6800)       |
| Egypt    | 2010 | Female | 40 to 44 | 2.1%<br>(1.1-4%)               | 98%<br>(96-99%)          | 0.43<br>(0.18-0.81)                         | 1.1%<br>(0.75-1.5%)                  | 1.9%<br>(1.3-2.8%)                  | 85<br>(56-130)      | 5700<br>(3900-8100)       |
| Egypt    | 2010 | Female | 45 to 49 | 2.2%<br>(0.98-4%)              | 98%<br>(96-99%)          | 0.45<br>(0.18-0.87)                         | 1.2%<br>(0.78-1.7%)                  | 1.9%<br>(1.2-3%)                    | 140<br>(88-210)     | 7100<br>(4800-11000)      |
| Egypt    | 2010 | Female | 50 to 54 | 2.2%<br>(1-4.2%)               | 98%<br>(96-99%)          | 0.44<br>(0.17-0.85)                         | 1.3%<br>(0.89-2%)                    | 2%<br>(1.3-3%)                      | 240<br>(150-360)    | 9800<br>(6500-15000)      |
| Egypt    | 2010 | Female | 55 to 59 | 2.1%<br>(1-4%)                 | 98%<br>(96-99%)          | 0.4<br>(0.15-0.8)                           | 1.4%<br>(0.89-2.1%)                  | 1.9%<br>(1.2-2.9%)                  | 310<br>(190-470)    | 10000<br>(6700-16000)     |
| Egypt    | 2010 | Female | 60 to 64 | 2.1%<br>(0.95-4%)              | 98%<br>(96-99%)          | 0.35<br>(0.12-0.74)                         | 1.3%<br>(0.82-2%)                    | 1.7%<br>(1.1-2.6%)                  | 380<br>(250-590)    | 11000<br>(7100-17000)     |
| Egypt    | 2010 | Female | 65 to 69 | 2.1%<br>(0.99-3.6%)            | 98%<br>(96-99%)          | 0.3<br>(0.11-0.62)                          | 1.3%<br>(0.84-2%)                    | 1.8%<br>(1.1-2.7%)                  | 380<br>(240-580)    | 8700<br>(5600-13000)      |
| Egypt    | 2010 | Female | 70 to 74 | 2%<br>(1-3.5%)                 | 98%<br>(96-99%)          | 0.24<br>(0.082-0.53)                        | 1.3%<br>(0.88-2%)                    | 1.7%<br>(1.1-2.6%)                  | 460<br>(300-710)    | 8500<br>(5600-13000)      |
| Egypt    | 2010 | Female | 75 to 79 | 1.8%<br>(0.85-3.5%)            | 98%<br>(97-99%)          | 0.2<br>(0.06-0.48)                          | 1.2%<br>(0.81-1.8%)                  | 1.6%<br>(1.1-2.4%)                  | 420<br>(270-620)    | 5900<br>(3900-8700)       |
| Egypt    | 2010 | Female | 80 to 84 | 1.7%<br>(0.74-3.1%)            | 98%<br>(97-99%)          | 0.17<br>(0.053-0.37)                        | 1.3%<br>(0.85-1.9%)                  | 1.7%<br>(1.1-2.4%)                  | 390<br>(260-570)    | 4100<br>(2600-5800)       |
| Egypt    | 2010 | Female | 85 to 89 | 1.6%<br>(0.75-2.8%)            | 98%<br>(97-99%)          | 0.16<br>(0.057-0.36)                        | 1.2%<br>(0.85-1.7%)                  | 1.6%<br>(1.1-2.2%)                  | 250<br>(180-350)    | 1800<br>(1300-2600)       |
| Egypt    | 2010 | Female | 90 to 94 | 1.8%<br>(0.88-3.1%)            | 98%<br>(97-99%)          | 0.17<br>(0.055-0.39)                        | 1.2%<br>(0.84-1.7%)                  | 1.6%<br>(1.1-2.3%)                  | 120<br>(84-170)     | 610<br>(420-880)          |
| Egypt    | 2010 | Female | 95 plus  | 2.2%<br>(0.93-4.4%)            | 98%<br>(96-99%)          | 0.2<br>(0.054-0.51)                         | 1.3%<br>(0.82-2%)                    | 1.7%<br>(1.1-2.6%)                  | 42<br>(27-65)       | 140<br>(90-210)           |
| Egypt    | 2010 | Male   | All Ages | 1.2%<br>(0.92-1.6%)            | 99%<br>(98-99%)          | 0.18<br>(0.12-0.25)                         | 1.1%<br>(0.92-1.3%)                  | 1.6%<br>(1.3-1.9%)                  | 4500<br>(3600-5500) | 150000<br>(130000-180000) |

| Location | Year | Sex    | Age      | Prevalence of current drinkers | Prevalence of abstainers | Population average of standard drinks daily | Percent of total attributable deaths | Percent of total attributable DALYs | Attributable deaths | Attributable DALYs       |
|----------|------|--------|----------|--------------------------------|--------------------------|---------------------------------------------|--------------------------------------|-------------------------------------|---------------------|--------------------------|
| Egypt    | 2010 | Male   | 15 to 19 | 0.95%<br>(0.44-1.7%)           | 99%<br>(98-100%)         | 0.082<br>(0.028-0.17)                       | 0.67%<br>(0.43-1%)                   | 0.57%<br>(0.29-1.1%)                | 26<br>(13-47)       | 4200<br>(2600-6400)      |
| Egypt    | 2010 | Male   | 20 to 24 | 1.4%<br>(0.65-2.5%)            | 99%<br>(98-99%)          | 0.19<br>(0.078-0.35)                        | 1.4%<br>(0.98-2%)                    | 1.1%<br>(0.59-2%)                   | 61<br>(31-110)      | 10000<br>(6600-15000)    |
| Egypt    | 2010 | Male   | 25 to 29 | 1.7%<br>(0.86-2.8%)            | 98%<br>(97-99%)          | 0.29<br>(0.13-0.54)                         | 1.6%<br>(1.1-2.1%)                   | 1.5%<br>(0.84-2.4%)                 | 73<br>(40-120)      | 10000<br>(6800-14000)    |
| Egypt    | 2010 | Male   | 30 to 34 | 1.8%<br>(0.87-3.2%)            | 98%<br>(97-99%)          | 0.35<br>(0.16-0.63)                         | 1.5%<br>(1.1-2.1%)                   | 1.7%<br>(1.1-2.7%)                  | 80<br>(50-120)      | 8900<br>(6300-12000)     |
| Egypt    | 2010 | Male   | 35 to 39 | 1.9%<br>(0.96-3.4%)            | 98%<br>(97-99%)          | 0.36<br>(0.16-0.67)                         | 1.6%<br>(1.2-2.1%)                   | 2.1%<br>(1.5-3%)                    | 100<br>(70-150)     | 8300<br>(6000-11000)     |
| Egypt    | 2010 | Male   | 40 to 44 | 1.9%<br>(1.1-3.5%)             | 98%<br>(97-99%)          | 0.38<br>(0.17-0.7)                          | 1.7%<br>(1.3-2.2%)                   | 2.3%<br>(1.7-3.1%)                  | 170<br>(130-240)    | 11000<br>(7900-14000)    |
| Egypt    | 2010 | Male   | 45 to 49 | 1.8%<br>(0.85-3.1%)            | 98%<br>(97-99%)          | 0.41<br>(0.17-0.75)                         | 1.8%<br>(1.3-2.3%)                   | 2.4%<br>(1.7-3.1%)                  | 320<br>(230-430)    | 15000<br>(11000-20000)   |
| Egypt    | 2010 | Male   | 50 to 54 | 1.7%<br>(0.87-3%)              | 98%<br>(97-99%)          | 0.39<br>(0.15-0.74)                         | 1.9%<br>(1.3-2.5%)                   | 2.3%<br>(1.7-3.1%)                  | 490<br>(340-670)    | 19000<br>(14000-25000)   |
| Egypt    | 2010 | Male   | 55 to 59 | 1.6%<br>(0.78-2.9%)            | 98%<br>(97-99%)          | 0.34<br>(0.13-0.65)                         | 1.7%<br>(1.2-2.4%)                   | 2.1%<br>(1.4-2.9%)                  | 560<br>(380-780)    | 18000<br>(13000-25000)   |
| Egypt    | 2010 | Male   | 60 to 64 | 1.5%<br>(0.74-2.8%)            | 98%<br>(97-99%)          | 0.29<br>(0.1-0.6)                           | 1.6%<br>(1.1-2.1%)                   | 1.9%<br>(1.4-2.6%)                  | 590<br>(410-810)    | 16000<br>(12000-22000)   |
| Egypt    | 2010 | Male   | 65 to 69 | 1.5%<br>(0.72-2.6%)            | 98%<br>(97-99%)          | 0.24<br>(0.088-0.46)                        | 1.5%<br>(1.1-2%)                     | 1.8%<br>(1.3-2.4%)                  | 480<br>(350-640)    | 11000<br>(8000-15000)    |
| Egypt    | 2010 | Male   | 70 to 74 | 1.4%<br>(0.72-2.4%)            | 99%<br>(98-99%)          | 0.18<br>(0.063-0.4)                         | 1.5%<br>(1.1-2%)                     | 1.8%<br>(1.3-2.4%)                  | 510<br>(360-690)    | 9300<br>(6500-12000)     |
| Egypt    | 2010 | Male   | 75 to 79 | 1.2%<br>(0.58-2.1%)            | 99%<br>(98-99%)          | 0.14<br>(0.044-0.32)                        | 1.4%<br>(0.94-2%)                    | 1.7%<br>(1.1-2.4%)                  | 420<br>(280-590)    | 5800<br>(3900-8200)      |
| Egypt    | 2010 | Male   | 80 to 84 | 1.1%<br>(0.53-1.9%)            | 99%<br>(98-99%)          | 0.11<br>(0.038-0.25)                        | 1.5%<br>(0.92-2.1%)                  | 1.8%<br>(1.1-2.5%)                  | 340<br>(210-490)    | 3500<br>(2200-4900)      |
| Egypt    | 2010 | Male   | 85 to 89 | 1%<br>(0.48-1.9%)              | 99%<br>(98-100%)         | 0.1<br>(0.035-0.22)                         | 1.4%<br>(0.75-1.9%)                  | 1.7%<br>(0.89-2.4%)                 | 190<br>(97-260)     | 1300<br>(720-1800)       |
| Egypt    | 2010 | Male   | 90 to 94 | 1.1%<br>(0.54-2%)              | 99%<br>(98-99%)          | 0.099<br>(0.033-0.22)                       | 1.3%<br>(0.64-1.8%)                  | 1.6%<br>(0.75-2.3%)                 | 69<br>(32-98)       | 340<br>(170-480)         |
| Egypt    | 2010 | Male   | 95 plus  | 1.4%<br>(0.57-2.8%)            | 99%<br>(97-99%)          | 0.11<br>(0.027-0.25)                        | 1.3%<br>(0.58-2%)                    | 1.7%<br>(0.67-2.6%)                 | 18<br>(7.2-28)      | 59<br>(26-90)            |
| Egypt    | 2016 | Female | All Ages | 1.5%<br>(1.2-2%)               | 98%<br>(98-99%)          | 0.24<br>(0.13-0.39)                         | 0.87%<br>(0.7-1.1%)                  | 1.5%<br>(1.1-1.9%)                  | 3400<br>(2500-4600) | 100000<br>(76000-130000) |
| Egypt    | 2016 | Female | 15 to 19 | 1.5%<br>(0.76-2.9%)            | 98%<br>(97-99%)          | 0.21<br>(0.073-0.45)                        | 0.53%<br>(0.34-0.78%)                | 0.78%<br>(0.41-1.3%)                | 13<br>(6.8-23)      | 2500<br>(1500-3800)      |
| Egypt    | 2016 | Female | 20 to 24 | 2%<br>(0.93-3.6%)              | 98%<br>(96-99%)          | 0.34<br>(0.13-0.73)                         | 0.96%<br>(0.65-1.3%)                 | 1.1%<br>(0.61-1.7%)                 | 21<br>(11-34)       | 4900<br>(3200-7200)      |
| Egypt    | 2016 | Female | 25 to 29 | 2%<br>(1-3.6%)                 | 98%<br>(96-99%)          | 0.36<br>(0.14-0.7)                          | 1%<br>(0.73-1.4%)                    | 1.2%<br>(0.73-1.9%)                 | 31<br>(17-49)       | 6300<br>(4300-8800)      |
| Egypt    | 2016 | Female | 30 to 34 | 2%<br>(0.94-3.6%)              | 98%<br>(96-99%)          | 0.36<br>(0.15-0.74)                         | 0.99%<br>(0.72-1.3%)                 | 1.4%<br>(0.91-2.1%)                 | 42<br>(26-64)       | 6300<br>(4500-8800)      |

| Location | Year | Sex    | Age      | Prevalence of current drinkers | Prevalence of abstainers | Population average of standard drinks daily | Percent of total attributable deaths | Percent of total attributable DALYs | Attributable deaths | Attributable DALYs        |
|----------|------|--------|----------|--------------------------------|--------------------------|---------------------------------------------|--------------------------------------|-------------------------------------|---------------------|---------------------------|
| Egypt    | 2016 | Female | 35 to 39 | 2%<br>(0.98-3.6%)              | 98%<br>(96-99%)          | 0.39<br>(0.15-0.83)                         | 0.95%<br>(0.69-1.3%)                 | 1.6%<br>(1-2.3%)                    | 55<br>(35-85)       | 5800<br>(4000-8000)       |
| Egypt    | 2016 | Female | 40 to 44 | 2.1%<br>(1-3.9%)               | 98%<br>(96-99%)          | 0.43<br>(0.17-0.89)                         | 1%<br>(0.71-1.4%)                    | 1.8%<br>(1.2-2.6%)                  | 80<br>(51-130)      | 5800<br>(4000-8400)       |
| Egypt    | 2016 | Female | 45 to 49 | 2.1%<br>(0.91-3.8%)            | 98%<br>(96-99%)          | 0.45<br>(0.15-0.94)                         | 1.1%<br>(0.73-1.5%)                  | 1.8%<br>(1.2-2.7%)                  | 130<br>(78-200)     | 6900<br>(4600-10000)      |
| Egypt    | 2016 | Female | 50 to 54 | 2.2%<br>(1-4.1%)               | 98%<br>(96-99%)          | 0.44<br>(0.15-0.92)                         | 1.2%<br>(0.81-1.8%)                  | 1.9%<br>(1.2-2.8%)                  | 230<br>(140-350)    | 9700<br>(6200-14000)      |
| Egypt    | 2016 | Female | 55 to 59 | 2.1%<br>(0.96-4%)              | 98%<br>(96-99%)          | 0.4<br>(0.13-0.91)                          | 1.3%<br>(0.84-2%)                    | 1.8%<br>(1.2-2.8%)                  | 330<br>(210-510)    | 11000<br>(7100-17000)     |
| Egypt    | 2016 | Female | 60 to 64 | 2.1%<br>(0.95-4%)              | 98%<br>(96-99%)          | 0.35<br>(0.11-0.82)                         | 1.2%<br>(0.79-1.8%)                  | 1.7%<br>(1.1-2.5%)                  | 350<br>(220-570)    | 10000<br>(6500-16000)     |
| Egypt    | 2016 | Female | 65 to 69 | 2.1%<br>(0.92-3.5%)            | 98%<br>(97-99%)          | 0.3<br>(0.093-0.68)                         | 1.2%<br>(0.81-1.9%)                  | 1.7%<br>(1.1-2.5%)                  | 440<br>(280-690)    | 10000<br>(6700-16000)     |
| Egypt    | 2016 | Female | 70 to 74 | 2%<br>(1-3.6%)                 | 98%<br>(96-99%)          | 0.25<br>(0.073-0.59)                        | 1.3%<br>(0.84-1.9%)                  | 1.7%<br>(1.1-2.5%)                  | 460<br>(290-700)    | 8500<br>(5400-13000)      |
| Egypt    | 2016 | Female | 75 to 79 | 1.8%<br>(0.85-3.5%)            | 98%<br>(97-99%)          | 0.21<br>(0.053-0.5)                         | 1.2%<br>(0.76-1.7%)                  | 1.6%<br>(1-2.3%)                    | 370<br>(230-550)    | 5300<br>(3400-7800)       |
| Egypt    | 2016 | Female | 80 to 84 | 1.6%<br>(0.71-3%)              | 98%<br>(97-99%)          | 0.18<br>(0.05-0.42)                         | 1.3%<br>(0.82-1.8%)                  | 1.7%<br>(1.1-2.3%)                  | 390<br>(250-550)    | 4000<br>(2500-5700)       |
| Egypt    | 2016 | Female | 85 to 89 | 1.6%<br>(0.73-2.8%)            | 98%<br>(97-99%)          | 0.16<br>(0.048-0.39)                        | 1.2%<br>(0.82-1.7%)                  | 1.6%<br>(1.1-2.2%)                  | 270<br>(180-380)    | 2000<br>(1300-2800)       |
| Egypt    | 2016 | Female | 90 to 94 | 1.7%<br>(0.87-3.1%)            | 98%<br>(97-99%)          | 0.17<br>(0.05-0.41)                         | 1.2%<br>(0.81-1.7%)                  | 1.6%<br>(1.1-2.2%)                  | 150<br>(97-210)     | 730<br>(490-1000)         |
| Egypt    | 2016 | Female | 95 plus  | 2.2%<br>(0.92-4.4%)            | 98%<br>(96-99%)          | 0.2<br>(0.049-0.53)                         | 1.3%<br>(0.77-1.9%)                  | 1.7%<br>(1-2.5%)                    | 53<br>(32-80)       | 170<br>(110-260)          |
| Egypt    | 2016 | Male   | All Ages | 1.2%<br>(0.91-1.5%)            | 99%<br>(98-99%)          | 0.19<br>(0.1-0.3)                           | 1.2%<br>(0.98-1.4%)                  | 1.7%<br>(1.4-2%)                    | 5000<br>(3700-6200) | 170000<br>(130000-200000) |
| Egypt    | 2016 | Male   | 15 to 19 | 0.95%<br>(0.45-1.7%)           | 99%<br>(98-100%)         | 0.083<br>(0.026-0.19)                       | 0.67%<br>(0.43-0.97%)                | 0.55%<br>(0.27-1%)                  | 23<br>(11-46)       | 4000<br>(2500-6000)       |
| Egypt    | 2016 | Male   | 20 to 24 | 1.4%<br>(0.63-2.3%)            | 99%<br>(98-99%)          | 0.19<br>(0.069-0.39)                        | 1.4%<br>(0.97-2%)                    | 1.1%<br>(0.57-1.8%)                 | 51<br>(26-90)       | 9000<br>(5700-13000)      |
| Egypt    | 2016 | Male   | 25 to 29 | 1.6%<br>(0.81-2.8%)            | 98%<br>(97-99%)          | 0.29<br>(0.12-0.58)                         | 1.5%<br>(1.1-2%)                     | 1.4%<br>(0.78-2.1%)                 | 71<br>(39-120)      | 11000<br>(7300-15000)     |
| Egypt    | 2016 | Male   | 30 to 34 | 1.8%<br>(0.85-3.1%)            | 98%<br>(97-99%)          | 0.34<br>(0.14-0.71)                         | 1.5%<br>(1.1-2%)                     | 1.6%<br>(1-2.5%)                    | 88<br>(55-140)      | 10000<br>(7300-14000)     |
| Egypt    | 2016 | Male   | 35 to 39 | 1.9%<br>(0.97-3.2%)            | 98%<br>(97-99%)          | 0.36<br>(0.14-0.72)                         | 1.6%<br>(1.2-2%)                     | 2%<br>(1.4-2.7%)                    | 120<br>(80-180)     | 11000<br>(7800-14000)     |
| Egypt    | 2016 | Male   | 40 to 44 | 1.9%<br>(1-3.4%)               | 98%<br>(97-99%)          | 0.38<br>(0.14-0.75)                         | 1.7%<br>(1.3-2.2%)                   | 2.2%<br>(1.7-3%)                    | 180<br>(130-260)    | 11000<br>(8400-15000)     |
| Egypt    | 2016 | Male   | 45 to 49 | 1.8%<br>(0.81-3.1%)            | 98%<br>(97-99%)          | 0.4<br>(0.14-0.79)                          | 1.8%<br>(1.3-2.3%)                   | 2.3%<br>(1.7-3.1%)                  | 310<br>(220-440)    | 15000<br>(11000-20000)    |
| Egypt    | 2016 | Male   | 50 to 54 | 1.7%<br>(0.86-2.9%)            | 98%<br>(97-99%)          | 0.38<br>(0.14-0.77)                         | 1.8%<br>(1.3-2.4%)                   | 2.3%<br>(1.6-3.1%)                  | 510<br>(340-720)    | 20000<br>(14000-27000)    |

| Location | Year | Sex    | Age      | Prevalence of current drinkers | Prevalence of abstainers | Population average of standard drinks daily | Percent of total attributable deaths | Percent of total attributable DALYs | Attributable deaths | Attributable DALYs     |
|----------|------|--------|----------|--------------------------------|--------------------------|---------------------------------------------|--------------------------------------|-------------------------------------|---------------------|------------------------|
| Egypt    | 2016 | Male   | 55 to 59 | 1.6%<br>(0.79-2.8%)            | 98%<br>(97-99%)          | 0.33<br>(0.12-0.7)                          | 1.7%<br>(1.2-2.3%)                   | 2.1%<br>(1.4-2.8%)                  | 630<br>(410-900)    | 21000<br>(14000-29000) |
| Egypt    | 2016 | Male   | 60 to 64 | 1.5%<br>(0.71-2.7%)            | 98%<br>(97-99%)          | 0.28<br>(0.087-0.64)                        | 1.6%<br>(1.1-2.1%)                   | 1.9%<br>(1.4-2.6%)                  | 620<br>(420-880)    | 17000<br>(12000-24000) |
| Egypt    | 2016 | Male   | 65 to 69 | 1.5%<br>(0.7-2.5%)             | 99%<br>(97-99%)          | 0.23<br>(0.075-0.49)                        | 1.5%<br>(1-2%)                       | 1.8%<br>(1.3-2.4%)                  | 650<br>(440-900)    | 15000<br>(10000-20000) |
| Egypt    | 2016 | Male   | 70 to 74 | 1.4%<br>(0.68-2.4%)            | 99%<br>(98-99%)          | 0.18<br>(0.053-0.41)                        | 1.5%<br>(1-2%)                       | 1.8%<br>(1.3-2.5%)                  | 550<br>(370-760)    | 10000<br>(6700-14000)  |
| Egypt    | 2016 | Male   | 75 to 79 | 1.2%<br>(0.56-2.1%)            | 99%<br>(98-99%)          | 0.13<br>(0.035-0.32)                        | 1.4%<br>(0.9-2%)                     | 1.8%<br>(1.2-2.4%)                  | 420<br>(250-610)    | 5800<br>(3600-8300)    |
| Egypt    | 2016 | Male   | 80 to 84 | 1.1%<br>(0.48-1.9%)            | 99%<br>(98-100%)         | 0.11<br>(0.033-0.25)                        | 1.5%<br>(0.92-2.1%)                  | 1.8%<br>(1.1-2.6%)                  | 380<br>(230-550)    | 3800<br>(2400-5500)    |
| Egypt    | 2016 | Male   | 85 to 89 | 1%<br>(0.48-1.9%)              | 99%<br>(98-100%)         | 0.1<br>(0.029-0.25)                         | 1.4%<br>(0.74-1.9%)                  | 1.8%<br>(0.89-2.4%)                 | 220<br>(110-300)    | 1600<br>(800-2200)     |
| Egypt    | 2016 | Male   | 90 to 94 | 1.1%<br>(0.54-2%)              | 99%<br>(98-99%)          | 0.1<br>(0.028-0.23)                         | 1.3%<br>(0.62-1.8%)                  | 1.6%<br>(0.77-2.3%)                 | 89<br>(42-130)      | 440<br>(210-620)       |
| Egypt    | 2016 | Male   | 95 plus  | 1.4%<br>(0.56-2.8%)            | 99%<br>(97-99%)          | 0.11<br>(0.025-0.28)                        | 1.4%<br>(0.6-2.1%)                   | 1.7%<br>(0.7-2.6%)                  | 24<br>(9.8-37)      | 79<br>(34-120)         |
| Iran     | 1990 | Female | All Ages | 9.3%<br>(5.6-14%)              | 91%<br>(86-94%)          | 0.0015<br>(0.00058-0.003)                   | 0.092%<br>(0.067-0.12%)              | 0.062%<br>(0.038-0.085%)            | 86<br>(53-120)      | 10000<br>(7100-14000)  |
| Iran     | 1990 | Female | 20 to 24 | 11%<br>(3.1-24%)               | 89%<br>(76-97%)          | 0.002<br>(0.00043-0.0053)                   | 0.35%<br>(0.2-0.56%)                 | 0.043%<br>(0.024-0.072%)            | 1.2<br>(0.66-2)     | 1500<br>(790-2500)     |
| Iran     | 1990 | Female | 25 to 29 | 12%<br>(3.4-27%)               | 88%<br>(73-97%)          | 0.0024<br>(0.0005-0.0065)                   | 0.39%<br>(0.24-0.58%)                | 0.052%<br>(0.032-0.084%)            | 1.4<br>(0.85-2.3)   | 1600<br>(950-2500)     |
| Iran     | 1990 | Female | 30 to 34 | 14%<br>(3.5-30%)               | 86%<br>(70-97%)          | 0.0029<br>(0.00063-0.0073)                  | 0.37%<br>(0.22-0.55%)                | 0.09%<br>(0.053-0.15%)              | 2.5<br>(1.4-4.5)    | 1400<br>(830-2300)     |
| Iran     | 1990 | Female | 35 to 39 | 16%<br>(4.4-30%)               | 84%<br>(70-96%)          | 0.0034<br>(0.00079-0.0084)                  | 0.3%<br>(0.19-0.44%)                 | 0.11%<br>(0.067-0.17%)              | 3.4<br>(1.9-5.4)    | 1100<br>(660-1600)     |
| Iran     | 1990 | Female | 40 to 44 | 16%<br>(5.5-30%)               | 84%<br>(70-94%)          | 0.0038<br>(0.00095-0.0095)                  | 0.26%<br>(0.17-0.37%)                | 0.17%<br>(0.091-0.28%)              | 4.8<br>(2.4-8)      | 750<br>(460-1100)      |
| Iran     | 1990 | Female | 45 to 49 | 17%<br>(5.5-34%)               | 83%<br>(66-94%)          | 0.0042<br>(0.00086-0.011)                   | 0.22%<br>(0.15-0.3%)                 | 0.18%<br>(0.094-0.28%)              | 5.1<br>(2.6-8.6)    | 550<br>(360-790)       |
| Iran     | 1990 | Female | 50 to 54 | 18%<br>(6.5-36%)               | 82%<br>(64-93%)          | 0.0043<br>(0.00092-0.012)                   | 0.18%<br>(0.12-0.25%)                | 0.17%<br>(0.1-0.25%)                | 6.6<br>(3.5-10)     | 510<br>(330-730)       |
| Iran     | 1990 | Female | 55 to 59 | 19%<br>(6.9-38%)               | 81%<br>(62-93%)          | 0.0043<br>(0.00089-0.012)                   | 0.15%<br>(0.1-0.21%)                 | 0.16%<br>(0.09-0.24%)               | 8<br>(4.3-13)       | 450<br>(290-630)       |
| Iran     | 1990 | Female | 60 to 64 | 19%<br>(7.3-38%)               | 81%<br>(62-93%)          | 0.0041<br>(0.0008-0.012)                    | 0.14%<br>(0.093-0.2%)                | 0.16%<br>(0.09-0.26%)               | 10<br>(5.5-17)      | 410<br>(250-610)       |
| Iran     | 1990 | Female | 65 to 69 | 20%<br>(8.5-36%)               | 80%<br>(64-91%)          | 0.0035<br>(0.00066-0.01)                    | 0.13%<br>(0.086-0.2%)                | 0.16%<br>(0.093-0.26%)              | 13<br>(7-22)        | 370<br>(240-560)       |
| Iran     | 1990 | Female | 70 to 74 | 18%<br>(7.7-34%)               | 82%<br>(66-92%)          | 0.0028<br>(0.00054-0.0083)                  | 0.12%<br>(0.075-0.18%)               | 0.14%<br>(0.081-0.23%)              | 11<br>(6-18)        | 230<br>(140-350)       |
| Iran     | 1990 | Female | 75 to 79 | 17%<br>(6.2-34%)               | 83%<br>(66-94%)          | 0.0023<br>(0.00035-0.0078)                  | 0.1%<br>(0.063-0.15%)                | 0.12%<br>(0.07-0.2%)                | 8.1<br>(4.5-13)     | 130<br>(78-200)        |

| Location | Year | Sex    | Age      | Prevalence of current drinkers | Prevalence of abstainers | Population average of standard drinks daily | Percent of total attributable deaths | Percent of total attributable DALYs | Attributable deaths | Attributable DALYs     |
|----------|------|--------|----------|--------------------------------|--------------------------|---------------------------------------------|--------------------------------------|-------------------------------------|---------------------|------------------------|
| Iran     | 1990 | Female | 80 to 84 | 15%<br>(4.9-34%)               | 85%<br>(66-95%)          | 0.0021<br>(0.00029-0.0068)                  | 0.082%<br>(0.054-0.12%)              | 0.096%<br>(0.058-0.15%)             | 4.7<br>(2.8-7.6)    | 55<br>(35-83)          |
| Iran     | 1990 | Female | 85 to 89 | 16%<br>(4.6-37%)               | 84%<br>(63-95%)          | 0.0021<br>(0.0003-0.0077)                   | 0.071%<br>(0.046-0.11%)              | 0.08%<br>(0.048-0.13%)              | 3.5<br>(2.1-6)      | 29<br>(19-47)          |
| Iran     | 1990 | Female | 90 to 94 | 18%<br>(5.4-40%)               | 82%<br>(60-95%)          | 0.0024<br>(0.00035-0.0085)                  | 0.061%<br>(0.038-0.098%)             | 0.065%<br>(0.037-0.11%)             | 1.5<br>(0.88-2.8)   | 9.1<br>(5.7-15)        |
| Iran     | 1990 | Female | 95 plus  | 22%<br>(6.3-48%)               | 78%<br>(52-94%)          | 0.0028<br>(0.00036-0.01)                    | 0.064%<br>(0.04-0.11%)               | 0.06%<br>(0.032-0.11%)              | 0.5<br>(0.26-0.92)  | 2.2<br>(1.4-3.6)       |
| Iran     | 1990 | Male   | All Ages | 7%<br>(4.8-9.7%)               | 93%<br>(90-95%)          | 0.0017<br>(0.00062-0.0033)                  | 0.14%<br>(0.11-0.19%)                | 0.099%<br>(0.074-0.13%)             | 200<br>(150-270)    | 20000<br>(15000-26000) |
| Iran     | 1990 | Male   | 20 to 24 | 9.3%<br>(3.5-18%)              | 91%<br>(82-96%)          | 0.0019<br>(0.00047-0.0047)                  | 0.49%<br>(0.29-0.79%)                | 0.033%<br>(0.016-0.059%)            | 2<br>(1-3.4)        | 3000<br>(1800-4700)    |
| Iran     | 1990 | Male   | 25 to 29 | 11%<br>(4.3-22%)               | 89%<br>(78-96%)          | 0.003<br>(0.00072-0.0074)                   | 0.49%<br>(0.31-0.73%)                | 0.057%<br>(0.029-0.11%)             | 3.2<br>(1.7-6)      | 2800<br>(1700-4200)    |
| Iran     | 1990 | Male   | 30 to 34 | 13%<br>(4.6-25%)               | 87%<br>(75-95%)          | 0.0038<br>(0.00098-0.0092)                  | 0.46%<br>(0.31-0.67%)                | 0.098%<br>(0.057-0.17%)             | 5.5<br>(3.3-9.5)    | 2400<br>(1500-3500)    |
| Iran     | 1990 | Male   | 35 to 39 | 14%<br>(5.2-27%)               | 86%<br>(73-95%)          | 0.0043<br>(0.0011-0.011)                    | 0.45%<br>(0.32-0.62%)                | 0.18%<br>(0.1-0.3%)                 | 10<br>(6.2-17)      | 2200<br>(1400-3100)    |
| Iran     | 1990 | Male   | 40 to 44 | 14%<br>(6.3-26%)               | 86%<br>(74-94%)          | 0.0046<br>(0.0012-0.012)                    | 0.41%<br>(0.28-0.57%)                | 0.22%<br>(0.15-0.33%)               | 11<br>(7.3-17)      | 1500<br>(1000-2100)    |
| Iran     | 1990 | Male   | 45 to 49 | 14%<br>(5.7-27%)               | 86%<br>(73-94%)          | 0.0049<br>(0.0011-0.013)                    | 0.39%<br>(0.28-0.5%)                 | 0.29%<br>(0.2-0.43%)                | 15<br>(9.5-23)      | 1300<br>(880-1700)     |
| Iran     | 1990 | Male   | 50 to 54 | 14%<br>(5.9-27%)               | 86%<br>(73-94%)          | 0.0049<br>(0.0012-0.013)                    | 0.33%<br>(0.24-0.43%)                | 0.28%<br>(0.2-0.4%)                 | 19<br>(12-28)       | 1200<br>(860-1600)     |
| Iran     | 1990 | Male   | 55 to 59 | 13%<br>(5.4-26%)               | 87%<br>(74-95%)          | 0.0046<br>(0.001-0.012)                     | 0.27%<br>(0.2-0.35%)                 | 0.26%<br>(0.18-0.38%)               | 22<br>(14-34)       | 1000<br>(740-1500)     |
| Iran     | 1990 | Male   | 60 to 64 | 13%<br>(5.3-25%)               | 87%<br>(75-95%)          | 0.0042<br>(0.00086-0.012)                   | 0.24%<br>(0.17-0.32%)                | 0.25%<br>(0.17-0.37%)               | 27<br>(17-43)       | 940<br>(660-1400)      |
| Iran     | 1990 | Male   | 65 to 69 | 12%<br>(5.4-23%)               | 88%<br>(77-95%)          | 0.0034<br>(0.00073-0.0093)                  | 0.21%<br>(0.15-0.28%)                | 0.23%<br>(0.16-0.33%)               | 29<br>(18-46)       | 790<br>(530-1100)      |
| Iran     | 1990 | Male   | 70 to 74 | 11%<br>(4.9-20%)               | 89%<br>(80-95%)          | 0.0026<br>(0.00049-0.0073)                  | 0.17%<br>(0.12-0.23%)                | 0.19%<br>(0.13-0.28%)               | 22<br>(14-34)       | 450<br>(310-670)       |
| Iran     | 1990 | Male   | 75 to 79 | 9.5%<br>(4.1-18%)              | 91%<br>(82-96%)          | 0.0019<br>(0.00035-0.0059)                  | 0.14%<br>(0.1-0.19%)                 | 0.15%<br>(0.11-0.22%)               | 15<br>(10-22)       | 240<br>(170-340)       |
| Iran     | 1990 | Male   | 80 to 84 | 8.4%<br>(3.3-17%)              | 92%<br>(83-97%)          | 0.0016<br>(0.0003-0.0048)                   | 0.11%<br>(0.078-0.16%)               | 0.12%<br>(0.082-0.18%)              | 9.3<br>(5.9-14)     | 110<br>(72-150)        |
| Iran     | 1990 | Male   | 85 to 89 | 8.3%<br>(3.3-17%)              | 92%<br>(83-97%)          | 0.0015<br>(0.00029-0.0045)                  | 0.094%<br>(0.068-0.13%)              | 0.098%<br>(0.068-0.15%)             | 4.6<br>(3.1-7)      | 40<br>(28-56)          |
| Iran     | 1990 | Male   | 90 to 94 | 9.4%<br>(3.8-20%)              | 91%<br>(80-96%)          | 0.0016<br>(0.00028-0.0048)                  | 0.08%<br>(0.058-0.11%)               | 0.078%<br>(0.052-0.12%)             | 1.5<br>(0.99-2.4)   | 9.5<br>(6.8-14)        |
| Iran     | 1990 | Male   | 95 plus  | 12%<br>(4.2-25%)               | 88%<br>(75-96%)          | 0.0018<br>(0.00026-0.0064)                  | 0.087%<br>(0.063-0.12%)              | 0.068%<br>(0.044-0.1%)              | 0.36<br>(0.23-0.55) | 1.9<br>(1.3-2.6)       |
| Iran     | 1995 | Female | All Ages | 9.7%<br>(6.2-15%)              | 90%<br>(85-94%)          | 0.002<br>(0.0009-0.004)                     | 0.14%<br>(0.11-0.18%)                | 0.096%<br>(0.066-0.12%)             | 110<br>(71-140)     | 12000<br>(8300-16000)  |

| Location | Year | Sex    | Age      | Prevalence of current drinkers | Prevalence of abstainers | Population average of standard drinks daily | Percent of total attributable deaths | Percent of total attributable DALYs | Attributable deaths | Attributable DALYs     |
|----------|------|--------|----------|--------------------------------|--------------------------|---------------------------------------------|--------------------------------------|-------------------------------------|---------------------|------------------------|
| Iran     | 1995 | Female | 20 to 24 | 11%<br>(3.3-24%)               | 89%<br>(76-97%)          | 0.0026<br>(0.00065-0.0068)                  | 0.42%<br>(0.24-0.66%)                | 0.074%<br>(0.048-0.11%)             | 1.4<br>(0.86-2.2)   | 1700<br>(910-2800)     |
| Iran     | 1995 | Female | 25 to 29 | 12%<br>(3.4-26%)               | 88%<br>(74-97%)          | 0.0031<br>(0.00077-0.0078)                  | 0.45%<br>(0.29-0.67%)                | 0.085%<br>(0.058-0.12%)             | 1.7<br>(1-2.6)      | 1700<br>(1000-2700)    |
| Iran     | 1995 | Female | 30 to 34 | 14%<br>(3.5-30%)               | 86%<br>(70-96%)          | 0.0037<br>(0.00093-0.0092)                  | 0.42%<br>(0.26-0.62%)                | 0.14%<br>(0.087-0.21%)              | 2.9<br>(1.8-4.8)    | 1600<br>(930-2500)     |
| Iran     | 1995 | Female | 35 to 39 | 15%<br>(4.3-30%)               | 85%<br>(70-96%)          | 0.0044<br>(0.0011-0.011)                    | 0.34%<br>(0.22-0.47%)                | 0.16%<br>(0.1-0.23%)                | 4.1<br>(2.4-6.2)    | 1200<br>(770-1800)     |
| Iran     | 1995 | Female | 40 to 44 | 16%<br>(5.8-30%)               | 84%<br>(70-94%)          | 0.0049<br>(0.0014-0.011)                    | 0.29%<br>(0.18-0.42%)                | 0.22%<br>(0.13-0.33%)               | 6.6<br>(3.7-11)     | 1000<br>(620-1600)     |
| Iran     | 1995 | Female | 45 to 49 | 17%<br>(6-32%)                 | 83%<br>(68-94%)          | 0.0054<br>(0.0014-0.014)                    | 0.24%<br>(0.16-0.32%)                | 0.22%<br>(0.12-0.33%)               | 6.5<br>(3.6-11)     | 690<br>(440-970)       |
| Iran     | 1995 | Female | 50 to 54 | 18%<br>(6.6-35%)               | 82%<br>(65-93%)          | 0.0057<br>(0.0014-0.015)                    | 0.2%<br>(0.14-0.27%)                 | 0.2%<br>(0.12-0.29%)                | 6.7<br>(3.8-10)     | 500<br>(330-710)       |
| Iran     | 1995 | Female | 55 to 59 | 19%<br>(7.2-37%)               | 81%<br>(63-93%)          | 0.0057<br>(0.0013-0.015)                    | 0.17%<br>(0.11-0.23%)                | 0.18%<br>(0.11-0.28%)               | 8.5<br>(5-13)       | 460<br>(320-650)       |
| Iran     | 1995 | Female | 60 to 64 | 20%<br>(7.6-39%)               | 80%<br>(61-92%)          | 0.0054<br>(0.0012-0.016)                    | 0.15%<br>(0.1-0.21%)                 | 0.18%<br>(0.11-0.27%)               | 12<br>(7.2-20)      | 470<br>(300-680)       |
| Iran     | 1995 | Female | 65 to 69 | 20%<br>(8.2-37%)               | 80%<br>(63-92%)          | 0.0047<br>(0.00099-0.013)                   | 0.14%<br>(0.095-0.21%)               | 0.18%<br>(0.11-0.27%)               | 15<br>(9-24)        | 420<br>(270-610)       |
| Iran     | 1995 | Female | 70 to 74 | 19%<br>(7.8-34%)               | 81%<br>(66-92%)          | 0.0037<br>(0.00077-0.0098)                  | 0.12%<br>(0.084-0.19%)               | 0.16%<br>(0.096-0.25%)              | 16<br>(9.6-26)      | 340<br>(220-510)       |
| Iran     | 1995 | Female | 75 to 79 | 17%<br>(6-35%)                 | 83%<br>(65-94%)          | 0.003<br>(0.00048-0.0095)                   | 0.11%<br>(0.072-0.16%)               | 0.13%<br>(0.081-0.21%)              | 11<br>(6.8-17)      | 180<br>(120-260)       |
| Iran     | 1995 | Female | 80 to 84 | 15%<br>(5.2-34%)               | 85%<br>(66-95%)          | 0.0027<br>(0.00041-0.0084)                  | 0.088%<br>(0.06-0.13%)               | 0.1%<br>(0.067-0.16%)               | 6.1<br>(3.9-9.3)    | 70<br>(47-100)         |
| Iran     | 1995 | Female | 85 to 89 | 16%<br>(5.2-35%)               | 84%<br>(65-95%)          | 0.0027<br>(0.00043-0.0092)                  | 0.076%<br>(0.051-0.12%)              | 0.086%<br>(0.054-0.14%)             | 4.2<br>(2.6-6.9)    | 34<br>(22-53)          |
| Iran     | 1995 | Female | 90 to 94 | 19%<br>(6.1-41%)               | 81%<br>(59-94%)          | 0.0031<br>(0.0005-0.01)                     | 0.065%<br>(0.044-0.1%)               | 0.071%<br>(0.043-0.12%)             | 2<br>(1.2-3.4)      | 12<br>(7.7-18)         |
| Iran     | 1995 | Female | 95 plus  | 23%<br>(7.2-47%)               | 77%<br>(53-93%)          | 0.0037<br>(0.00049-0.013)                   | 0.068%<br>(0.044-0.1%)               | 0.064%<br>(0.036-0.11%)             | 0.65<br>(0.36-1.1)  | 2.8<br>(1.8-4.3)       |
| Iran     | 1995 | Male   | All Ages | 7.3%<br>(5.1-10%)              | 93%<br>(90-95%)          | 0.0022<br>(0.00099-0.0042)                  | 0.22%<br>(0.17-0.28%)                | 0.15%<br>(0.12-0.18%)               | 250<br>(190-320)    | 23000<br>(17000-30000) |
| Iran     | 1995 | Male   | 20 to 24 | 9.2%<br>(3.5-18%)              | 91%<br>(82-97%)          | 0.0024<br>(0.00067-0.0058)                  | 0.62%<br>(0.39-0.95%)                | 0.057%<br>(0.034-0.092%)            | 2.5<br>(1.5-4.2)    | 3300<br>(2000-5400)    |
| Iran     | 1995 | Male   | 25 to 29 | 12%<br>(4.6-22%)               | 88%<br>(78-95%)          | 0.0039<br>(0.0011-0.0094)                   | 0.61%<br>(0.4-0.87%)                 | 0.094%<br>(0.059-0.16%)             | 4.1<br>(2.4-7.1)    | 3000<br>(2000-4500)    |
| Iran     | 1995 | Male   | 30 to 34 | 13%<br>(4.9-26%)               | 87%<br>(74-95%)          | 0.0049<br>(0.0015-0.011)                    | 0.55%<br>(0.37-0.8%)                 | 0.15%<br>(0.1-0.26%)                | 6.8<br>(4.2-12)     | 2600<br>(1700-3900)    |
| Iran     | 1995 | Male   | 35 to 39 | 15%<br>(5.5-27%)               | 85%<br>(73-95%)          | 0.0055<br>(0.0016-0.013)                    | 0.53%<br>(0.37-0.72%)                | 0.26%<br>(0.18-0.41%)               | 13<br>(8.2-21)      | 2500<br>(1600-3500)    |
| Iran     | 1995 | Male   | 40 to 44 | 15%<br>(6.4-27%)               | 85%<br>(73-94%)          | 0.0059<br>(0.0018-0.014)                    | 0.48%<br>(0.34-0.64%)                | 0.3%<br>(0.21-0.43%)                | 17<br>(11-26)       | 2200<br>(1500-3000)    |

| Location | Year | Sex    | Age      | Prevalence of current drinkers | Prevalence of abstainers | Population average of standard drinks daily | Percent of total attributable deaths | Percent of total attributable DALYs | Attributable deaths | Attributable DALYs     |
|----------|------|--------|----------|--------------------------------|--------------------------|---------------------------------------------|--------------------------------------|-------------------------------------|---------------------|------------------------|
| Iran     | 1995 | Male   | 45 to 49 | 14%<br>(5.9-27%)               | 86%<br>(73-94%)          | 0.0062<br>(0.0016-0.016)                    | 0.45%<br>(0.34-0.57%)                | 0.38%<br>(0.27-0.52%)               | 20<br>(14-31)       | 1600<br>(1200-2200)    |
| Iran     | 1995 | Male   | 50 to 54 | 14%<br>(5.8-27%)               | 86%<br>(73-94%)          | 0.0061<br>(0.0015-0.016)                    | 0.37%<br>(0.28-0.46%)                | 0.34%<br>(0.25-0.47%)               | 20<br>(13-30)       | 1200<br>(870-1600)     |
| Iran     | 1995 | Male   | 55 to 59 | 13%<br>(5.4-26%)               | 87%<br>(74-95%)          | 0.0058<br>(0.0015-0.014)                    | 0.3%<br>(0.22-0.38%)                 | 0.3%<br>(0.21-0.41%)                | 25<br>(16-35)       | 1100<br>(800-1500)     |
| Iran     | 1995 | Male   | 60 to 64 | 13%<br>(5.2-25%)               | 87%<br>(75-95%)          | 0.0052<br>(0.0013-0.014)                    | 0.26%<br>(0.19-0.34%)                | 0.28%<br>(0.2-0.39%)                | 33<br>(22-48)       | 1100<br>(790-1500)     |
| Iran     | 1995 | Male   | 65 to 69 | 12%<br>(5.2-23%)               | 88%<br>(77-95%)          | 0.0043<br>(0.00099-0.011)                   | 0.22%<br>(0.17-0.29%)                | 0.25%<br>(0.18-0.34%)               | 35<br>(23-49)       | 930<br>(680-1200)      |
| Iran     | 1995 | Male   | 70 to 74 | 11%<br>(5-20%)                 | 89%<br>(80-95%)          | 0.0032<br>(0.00072-0.0082)                  | 0.18%<br>(0.14-0.24%)                | 0.21%<br>(0.15-0.29%)               | 33<br>(22-47)       | 680<br>(480-930)       |
| Iran     | 1995 | Male   | 75 to 79 | 9.5%<br>(4-18%)                | 90%<br>(82-96%)          | 0.0024<br>(0.00047-0.0073)                  | 0.15%<br>(0.11-0.2%)                 | 0.17%<br>(0.12-0.23%)               | 20<br>(15-28)       | 320<br>(240-420)       |
| Iran     | 1995 | Male   | 80 to 84 | 8.4%<br>(3.2-17%)              | 92%<br>(83-97%)          | 0.002<br>(0.00037-0.0059)                   | 0.12%<br>(0.089-0.16%)               | 0.13%<br>(0.094-0.18%)              | 12<br>(8.4-16)      | 140<br>(100-180)       |
| Iran     | 1995 | Male   | 85 to 89 | 8.2%<br>(3.2-16%)              | 92%<br>(84-97%)          | 0.0019<br>(0.00038-0.0056)                  | 0.1%<br>(0.077-0.14%)                | 0.11%<br>(0.077-0.15%)              | 6.1<br>(4.3-8.5)    | 51<br>(37-68)          |
| Iran     | 1995 | Male   | 90 to 94 | 9.3%<br>(3.8-19%)              | 91%<br>(81-96%)          | 0.002<br>(0.00039-0.0057)                   | 0.087%<br>(0.065-0.12%)              | 0.086%<br>(0.06-0.12%)              | 2.1<br>(1.4-2.9)    | 13<br>(9.3-17)         |
| Iran     | 1995 | Male   | 95 plus  | 12%<br>(4.1-25%)               | 88%<br>(75-96%)          | 0.0023<br>(0.00034-0.0071)                  | 0.094%<br>(0.071-0.12%)              | 0.076%<br>(0.052-0.11%)             | 0.46<br>(0.32-0.65) | 2.3<br>(1.7-3.1)       |
| Iran     | 2000 | Female | All Ages | 10%<br>(6.3-16%)               | 90%<br>(84-94%)          | 0.0026<br>(0.0013-0.0048)                   | 0.17%<br>(0.13-0.22%)                | 0.11%<br>(0.079-0.13%)              | 130<br>(94-160)     | 14000<br>(10000-19000) |
| Iran     | 2000 | Female | 20 to 24 | 11%<br>(3.2-25%)               | 89%<br>(75-97%)          | 0.0029<br>(0.00078-0.0077)                  | 0.42%<br>(0.24-0.65%)                | 0.079%<br>(0.055-0.11%)             | 1.9<br>(1.3-3)      | 2200<br>(1200-3700)    |
| Iran     | 2000 | Female | 25 to 29 | 12%<br>(3.5-26%)               | 88%<br>(74-97%)          | 0.0036<br>(0.00095-0.0087)                  | 0.45%<br>(0.28-0.65%)                | 0.093%<br>(0.066-0.13%)             | 2.1<br>(1.4-2.9)    | 2000<br>(1200-3100)    |
| Iran     | 2000 | Female | 30 to 34 | 14%<br>(3.7-29%)               | 86%<br>(71-96%)          | 0.0043<br>(0.0011-0.01)                     | 0.42%<br>(0.26-0.62%)                | 0.14%<br>(0.096-0.2%)               | 3.3<br>(2.2-4.8)    | 1800<br>(1100-2800)    |
| Iran     | 2000 | Female | 35 to 39 | 15%<br>(4.2-31%)               | 85%<br>(69-96%)          | 0.005<br>(0.0014-0.012)                     | 0.33%<br>(0.23-0.47%)                | 0.17%<br>(0.12-0.23%)               | 4.7<br>(3-7.1)      | 1400<br>(890-2100)     |
| Iran     | 2000 | Female | 40 to 44 | 16%<br>(5.4-31%)               | 84%<br>(69-95%)          | 0.0055<br>(0.0017-0.013)                    | 0.28%<br>(0.19-0.39%)                | 0.22%<br>(0.14-0.3%)                | 7.3<br>(4.4-11)     | 1100<br>(720-1700)     |
| Iran     | 2000 | Female | 45 to 49 | 16%<br>(5.9-31%)               | 84%<br>(69-94%)          | 0.006<br>(0.0016-0.014)                     | 0.24%<br>(0.16-0.32%)                | 0.22%<br>(0.13-0.31%)               | 9.1<br>(5.2-14)     | 960<br>(630-1400)      |
| Iran     | 2000 | Female | 50 to 54 | 17%<br>(7-33%)                 | 83%<br>(67-93%)          | 0.0062<br>(0.0016-0.016)                    | 0.2%<br>(0.14-0.27%)                 | 0.2%<br>(0.13-0.27%)                | 8.7<br>(5.2-13)     | 650<br>(430-930)       |
| Iran     | 2000 | Female | 55 to 59 | 18%<br>(7.2-37%)               | 82%<br>(63-93%)          | 0.0063<br>(0.0016-0.016)                    | 0.16%<br>(0.11-0.22%)                | 0.17%<br>(0.11-0.25%)               | 8.6<br>(5.3-13)     | 470<br>(320-660)       |
| Iran     | 2000 | Female | 60 to 64 | 19%<br>(7.3-39%)               | 81%<br>(61-93%)          | 0.006<br>(0.0013-0.017)                     | 0.14%<br>(0.1-0.2%)                  | 0.17%<br>(0.11-0.24%)               | 13<br>(7.9-19)      | 480<br>(330-680)       |
| Iran     | 2000 | Female | 65 to 69 | 20%<br>(8.3-37%)               | 80%<br>(63-92%)          | 0.0053<br>(0.0011-0.013)                    | 0.14%<br>(0.097-0.18%)               | 0.17%<br>(0.11-0.24%)               | 17<br>(11-25)       | 480<br>(330-670)       |



| Location | Year | Sex    | Age      | Prevalence of current drinkers | Prevalence of abstainers | Population average of standard drinks daily | Percent of total attributable deaths | Percent of total attributable DALYs | Attributable deaths | Attributable DALYs     |
|----------|------|--------|----------|--------------------------------|--------------------------|---------------------------------------------|--------------------------------------|-------------------------------------|---------------------|------------------------|
| Iran     | 2000 | Female | 70 to 74 | 19%<br>(7.7-34%)               | 81%<br>(66-92%)          | 0.0042<br>(0.00093-0.011)                   | 0.12%<br>(0.085-0.17%)               | 0.15%<br>(0.099-0.22%)              | 19<br>(12-28)       | 390<br>(270-570)       |
| Iran     | 2000 | Female | 75 to 79 | 17%<br>(6.4-34%)               | 83%<br>(66-94%)          | 0.0034<br>(0.00058-0.011)                   | 0.1%<br>(0.074-0.14%)                | 0.12%<br>(0.084-0.18%)              | 17<br>(11-24)       | 260<br>(180-360)       |
| Iran     | 2000 | Female | 80 to 84 | 15%<br>(5.3-35%)               | 85%<br>(65-95%)          | 0.0031<br>(0.00047-0.0097)                  | 0.085%<br>(0.061-0.12%)              | 0.098%<br>(0.07-0.14%)              | 9.2<br>(6.2-13)     | 100<br>(75-150)        |
| Iran     | 2000 | Female | 85 to 89 | 16%<br>(5.1-36%)               | 84%<br>(64-95%)          | 0.0031<br>(0.00055-0.011)                   | 0.072%<br>(0.052-0.1%)               | 0.081%<br>(0.055-0.12%)             | 5<br>(3.3-7.7)      | 40<br>(29-59)          |
| Iran     | 2000 | Female | 90 to 94 | 18%<br>(5.8-40%)               | 82%<br>(60-94%)          | 0.0036<br>(0.00061-0.012)                   | 0.06%<br>(0.043-0.087%)              | 0.064%<br>(0.043-0.097%)            | 2.1<br>(1.4-3.2)    | 12<br>(8.5-18)         |
| Iran     | 2000 | Female | 95 plus  | 23%<br>(7.1-48%)               | 77%<br>(52-93%)          | 0.0043<br>(0.00063-0.014)                   | 0.062%<br>(0.043-0.089%)             | 0.056%<br>(0.035-0.088%)            | 0.71<br>(0.44-1.1)  | 3.2<br>(2.2-4.6)       |
| Iran     | 2000 | Male   | All Ages | 7.9%<br>(5.4-11%)              | 92%<br>(89-95%)          | 0.0028<br>(0.0014-0.0051)                   | 0.27%<br>(0.21-0.34%)                | 0.17%<br>(0.14-0.21%)               | 310<br>(250-400)    | 28000<br>(21000-37000) |
| Iran     | 2000 | Male   | 20 to 24 | 9.2%<br>(3.6-18%)              | 91%<br>(82-96%)          | 0.0028<br>(0.00082-0.0064)                  | 0.6%<br>(0.38-0.9%)                  | 0.059%<br>(0.039-0.09%)             | 3.8<br>(2.3-5.8)    | 4500<br>(2700-7100)    |
| Iran     | 2000 | Male   | 25 to 29 | 11%<br>(4.4-22%)               | 89%<br>(78-96%)          | 0.0043<br>(0.0014-0.0099)                   | 0.6%<br>(0.41-0.84%)                 | 0.098%<br>(0.064-0.18%)             | 5.3<br>(3.2-9.7)    | 3700<br>(2300-5400)    |
| Iran     | 2000 | Male   | 30 to 34 | 13%<br>(4.7-26%)               | 87%<br>(74-95%)          | 0.0055<br>(0.0017-0.013)                    | 0.55%<br>(0.37-0.79%)                | 0.16%<br>(0.11-0.26%)               | 8.1<br>(5.1-14)     | 3000<br>(1900-4500)    |
| Iran     | 2000 | Male   | 35 to 39 | 14%<br>(5.6-27%)               | 86%<br>(73-94%)          | 0.0063<br>(0.0018-0.015)                    | 0.54%<br>(0.39-0.73%)                | 0.27%<br>(0.19-0.42%)               | 15<br>(9.8-24)      | 2800<br>(1900-4000)    |
| Iran     | 2000 | Male   | 40 to 44 | 15%<br>(6.5-26%)               | 85%<br>(74-94%)          | 0.0067<br>(0.0021-0.016)                    | 0.49%<br>(0.36-0.65%)                | 0.31%<br>(0.22-0.44%)               | 20<br>(14-30)       | 2600<br>(1800-3600)    |
| Iran     | 2000 | Male   | 45 to 49 | 14%<br>(5.4-27%)               | 86%<br>(73-95%)          | 0.007<br>(0.0019-0.016)                     | 0.46%<br>(0.35-0.58%)                | 0.39%<br>(0.28-0.53%)               | 31<br>(21-45)       | 2400<br>(1700-3200)    |
| Iran     | 2000 | Male   | 50 to 54 | 14%<br>(5.9-28%)               | 86%<br>(72-94%)          | 0.007<br>(0.0019-0.018)                     | 0.38%<br>(0.29-0.48%)                | 0.35%<br>(0.26-0.48%)               | 27<br>(19-38)       | 1600<br>(1200-2100)    |
| Iran     | 2000 | Male   | 55 to 59 | 13%<br>(5.5-26%)               | 87%<br>(74-94%)          | 0.0067<br>(0.0018-0.017)                    | 0.31%<br>(0.24-0.4%)                 | 0.31%<br>(0.23-0.42%)               | 26<br>(18-36)       | 1200<br>(860-1500)     |
| Iran     | 2000 | Male   | 60 to 64 | 13%<br>(5.3-25%)               | 87%<br>(75-95%)          | 0.006<br>(0.0015-0.016)                     | 0.27%<br>(0.2-0.35%)                 | 0.29%<br>(0.21-0.41%)               | 35<br>(24-49)       | 1200<br>(830-1600)     |
| Iran     | 2000 | Male   | 65 to 69 | 12%<br>(5.3-23%)               | 88%<br>(77-95%)          | 0.0049<br>(0.0012-0.012)                    | 0.23%<br>(0.18-0.3%)                 | 0.26%<br>(0.19-0.35%)               | 41<br>(29-58)       | 1100<br>(810-1500)     |
| Iran     | 2000 | Male   | 70 to 74 | 11%<br>(4.6-20%)               | 89%<br>(80-95%)          | 0.0036<br>(0.00086-0.0096)                  | 0.19%<br>(0.14-0.25%)                | 0.21%<br>(0.15-0.29%)               | 38<br>(27-54)       | 780<br>(570-1100)      |
| Iran     | 2000 | Male   | 75 to 79 | 9.4%<br>(3.8-18%)              | 91%<br>(82-96%)          | 0.0027<br>(0.00053-0.0083)                  | 0.15%<br>(0.12-0.2%)                 | 0.17%<br>(0.12-0.23%)               | 31<br>(22-43)       | 470<br>(350-640)       |
| Iran     | 2000 | Male   | 80 to 84 | 8.4%<br>(3.1-17%)              | 92%<br>(83-97%)          | 0.0023<br>(0.00045-0.0066)                  | 0.12%<br>(0.091-0.16%)               | 0.13%<br>(0.095-0.18%)              | 17<br>(12-24)       | 190<br>(140-270)       |
| Iran     | 2000 | Male   | 85 to 89 | 8.2%<br>(3.3-16%)              | 92%<br>(84-97%)          | 0.0022<br>(0.00047-0.0057)                  | 0.1%<br>(0.079-0.13%)                | 0.11%<br>(0.079-0.15%)              | 7.7<br>(5.6-11)     | 65<br>(49-84)          |
| Iran     | 2000 | Male   | 90 to 94 | 9.2%<br>(3.8-19%)              | 91%<br>(81-96%)          | 0.0023<br>(0.00045-0.0064)                  | 0.09%<br>(0.068-0.12%)               | 0.088%<br>(0.063-0.12%)             | 2.6<br>(1.9-3.7)    | 16<br>(12-21)          |

| Location | Year | Sex    | Age      | Prevalence of current drinkers | Prevalence of abstainers | Population average of standard drinks daily | Percent of total attributable deaths | Percent of total attributable DALYs | Attributable deaths | Attributable DALYs     |
|----------|------|--------|----------|--------------------------------|--------------------------|---------------------------------------------|--------------------------------------|-------------------------------------|---------------------|------------------------|
| Iran     | 2000 | Male   | 95 plus  | 12%<br>(4.1-24%)               | 88%<br>(76-96%)          | 0.0026<br>(0.00038-0.008)                   | 0.098%<br>(0.074-0.13%)              | 0.079%<br>(0.055-0.11%)             | 0.61<br>(0.43-0.83) | 3<br>(2.3-3.9)         |
| Iran     | 2005 | Female | All Ages | 11%<br>(6.3-17%)               | 89%<br>(83-94%)          | 0.0031<br>(0.0015-0.0053)                   | 0.18%<br>(0.14-0.23%)                | 0.11%<br>(0.086-0.13%)              | 160<br>(110-210)    | 16000<br>(12000-21000) |
| Iran     | 2005 | Female | 20 to 24 | 11%<br>(3.1-25%)               | 89%<br>(75-97%)          | 0.0031<br>(0.00084-0.0077)                  | 0.4%<br>(0.24-0.63%)                 | 0.085%<br>(0.061-0.12%)             | 2.7<br>(1.7-3.9)    | 2800<br>(1500-4600)    |
| Iran     | 2005 | Female | 25 to 29 | 12%<br>(3.3-27%)               | 88%<br>(73-97%)          | 0.0038<br>(0.00096-0.0089)                  | 0.43%<br>(0.28-0.63%)                | 0.1%<br>(0.074-0.14%)               | 2.7<br>(1.8-3.8)    | 2500<br>(1400-3900)    |
| Iran     | 2005 | Female | 30 to 34 | 14%<br>(3.7-29%)               | 86%<br>(71-96%)          | 0.0044<br>(0.0012-0.01)                     | 0.4%<br>(0.25-0.59%)                 | 0.14%<br>(0.1-0.19%)                | 3.3<br>(2.2-5)      | 1900<br>(1100-2900)    |
| Iran     | 2005 | Female | 35 to 39 | 15%<br>(4.2-30%)               | 85%<br>(70-96%)          | 0.0052<br>(0.0015-0.013)                    | 0.33%<br>(0.22-0.46%)                | 0.17%<br>(0.13-0.23%)               | 4.6<br>(3-6.8)      | 1500<br>(940-2200)     |
| Iran     | 2005 | Female | 40 to 44 | 16%<br>(5.7-31%)               | 84%<br>(69-94%)          | 0.0058<br>(0.0018-0.013)                    | 0.27%<br>(0.18-0.38%)                | 0.22%<br>(0.15-0.3%)                | 7.1<br>(4.4-11)     | 1200<br>(720-1900)     |
| Iran     | 2005 | Female | 45 to 49 | 17%<br>(6-31%)                 | 83%<br>(69-94%)          | 0.0064<br>(0.0017-0.015)                    | 0.23%<br>(0.16-0.32%)                | 0.22%<br>(0.14-0.32%)               | 9.4<br>(5.7-15)     | 1000<br>(670-1500)     |
| Iran     | 2005 | Female | 50 to 54 | 17%<br>(6.8-34%)               | 83%<br>(66-93%)          | 0.0067<br>(0.0017-0.016)                    | 0.19%<br>(0.14-0.26%)                | 0.2%<br>(0.13-0.27%)                | 11<br>(7-17)        | 850<br>(570-1200)      |
| Iran     | 2005 | Female | 55 to 59 | 18%<br>(7.5-35%)               | 82%<br>(65-92%)          | 0.0066<br>(0.0017-0.017)                    | 0.16%<br>(0.11-0.21%)                | 0.17%<br>(0.11-0.24%)               | 10<br>(6.2-15)      | 560<br>(380-770)       |
| Iran     | 2005 | Female | 60 to 64 | 19%<br>(7.7-36%)               | 81%<br>(64-92%)          | 0.0063<br>(0.0014-0.016)                    | 0.14%<br>(0.1-0.19%)                 | 0.16%<br>(0.11-0.23%)               | 13<br>(8-18)        | 480<br>(320-670)       |
| Iran     | 2005 | Female | 65 to 69 | 20%<br>(8.2-37%)               | 80%<br>(63-92%)          | 0.0056<br>(0.0012-0.014)                    | 0.13%<br>(0.098-0.18%)               | 0.16%<br>(0.11-0.23%)               | 18<br>(11-26)       | 510<br>(350-720)       |
| Iran     | 2005 | Female | 70 to 74 | 19%<br>(7.8-36%)               | 81%<br>(64-92%)          | 0.0045<br>(0.00098-0.013)                   | 0.14%<br>(0.086-0.16%)               | 0.14%<br>(0.098-0.2%)               | 24<br>(15-35)       | 500<br>(330-710)       |
| Iran     | 2005 | Female | 75 to 79 | 17%<br>(6.3-34%)               | 83%<br>(66-94%)          | 0.0037<br>(0.00066-0.012)                   | 0.1%<br>(0.074-0.14%)                | 0.12%<br>(0.083-0.16%)              | 22<br>(15-33)       | 340<br>(240-490)       |
| Iran     | 2005 | Female | 80 to 84 | 15%<br>(5.2-34%)               | 85%<br>(66-95%)          | 0.0033<br>(0.00055-0.011)                   | 0.083%<br>(0.063-0.11%)              | 0.095%<br>(0.069-0.13%)             | 15<br>(10-21)       | 170<br>(120-230)       |
| Iran     | 2005 | Female | 85 to 89 | 16%<br>(5.1-36%)               | 84%<br>(64-95%)          | 0.0033<br>(0.00061-0.011)                   | 0.069%<br>(0.051-0.096%)             | 0.076%<br>(0.054-0.11%)             | 8.3<br>(5.8-12)     | 67<br>(49-96)          |
| Iran     | 2005 | Female | 90 to 94 | 18%<br>(5.8-41%)               | 82%<br>(59-94%)          | 0.0037<br>(0.00067-0.012)                   | 0.057%<br>(0.043-0.078%)             | 0.059%<br>(0.042-0.086%)            | 2.7<br>(1.8-3.9)    | 16<br>(11-22)          |
| Iran     | 2005 | Female | 95 plus  | 23%<br>(6.4-47%)               | 77%<br>(53-94%)          | 0.0044<br>(0.00064-0.013)                   | 0.058%<br>(0.043-0.081%)             | 0.051%<br>(0.034-0.08%)             | 0.78<br>(0.51-1.2)  | 3.6<br>(2.5-5)         |
| Iran     | 2005 | Male   | All Ages | 8.7%<br>(6-13%)                | 91%<br>(87-94%)          | 0.0034<br>(0.0017-0.006)                    | 0.3%<br>(0.23-0.37%)                 | 0.18%<br>(0.15-0.22%)               | 390<br>(300-510)    | 34000<br>(26000-44000) |
| Iran     | 2005 | Male   | 20 to 24 | 9.2%<br>(3.6-18%)              | 91%<br>(82-96%)          | 0.0029<br>(0.0009-0.0067)                   | 0.56%<br>(0.35-0.81%)                | 0.061%<br>(0.041-0.092%)            | 5.9<br>(3.6-9.3)    | 5900<br>(3500-8900)    |
| Iran     | 2005 | Male   | 25 to 29 | 12%<br>(4.4-23%)               | 88%<br>(77-96%)          | 0.0046<br>(0.0015-0.01)                     | 0.55%<br>(0.38-0.77%)                | 0.1%<br>(0.067-0.18%)               | 7.9<br>(4.9-14)     | 4500<br>(2900-6700)    |
| Iran     | 2005 | Male   | 30 to 34 | 13%<br>(4.7-27%)               | 87%<br>(73-95%)          | 0.0059<br>(0.002-0.013)                     | 0.51%<br>(0.34-0.72%)                | 0.16%<br>(0.12-0.26%)               | 11<br>(7-17)        | 3400<br>(2200-4900)    |

| Location | Year | Sex    | Age      | Prevalence of current drinkers | Prevalence of abstainers | Population average of standard drinks daily | Percent of total attributable deaths | Percent of total attributable DALYs | Attributable deaths | Attributable DALYs     |
|----------|------|--------|----------|--------------------------------|--------------------------|---------------------------------------------|--------------------------------------|-------------------------------------|---------------------|------------------------|
| Iran     | 2005 | Male   | 35 to 39 | 15%<br>(5.4-27%)               | 85%<br>(73-95%)          | 0.0068<br>(0.0021-0.015)                    | 0.54%<br>(0.39-0.71%)                | 0.29%<br>(0.2-0.43%)                | 19<br>(12-30)       | 3300<br>(2300-4700)    |
| Iran     | 2005 | Male   | 40 to 44 | 15%<br>(6.5-26%)               | 85%<br>(74-93%)          | 0.0072<br>(0.0023-0.016)                    | 0.49%<br>(0.36-0.64%)                | 0.33%<br>(0.25-0.44%)               | 24<br>(16-36)       | 3000<br>(2100-4100)    |
| Iran     | 2005 | Male   | 45 to 49 | 14%<br>(5.6-27%)               | 86%<br>(73-94%)          | 0.0074<br>(0.002-0.017)                     | 0.46%<br>(0.37-0.58%)                | 0.41%<br>(0.3-0.54%)                | 36<br>(25-52)       | 2800<br>(2100-3700)    |
| Iran     | 2005 | Male   | 50 to 54 | 14%<br>(5.8-27%)               | 86%<br>(73-94%)          | 0.0073<br>(0.0021-0.019)                    | 0.39%<br>(0.3-0.48%)                 | 0.37%<br>(0.28-0.48%)               | 37<br>(26-53)       | 2200<br>(1600-3000)    |
| Iran     | 2005 | Male   | 55 to 59 | 13%<br>(5.6-25%)               | 87%<br>(75-94%)          | 0.007<br>(0.0019-0.017)                     | 0.32%<br>(0.24-0.4%)                 | 0.32%<br>(0.24-0.44%)               | 30<br>(20-45)       | 1400<br>(980-1900)     |
| Iran     | 2005 | Male   | 60 to 64 | 13%<br>(5.3-25%)               | 87%<br>(75-95%)          | 0.0063<br>(0.0016-0.016)                    | 0.28%<br>(0.21-0.36%)                | 0.31%<br>(0.22-0.41%)               | 34<br>(23-49)       | 1200<br>(830-1600)     |
| Iran     | 2005 | Male   | 65 to 69 | 12%<br>(5.4-22%)               | 88%<br>(78-95%)          | 0.0052<br>(0.0013-0.012)                    | 0.25%<br>(0.19-0.32%)                | 0.28%<br>(0.21-0.38%)               | 45<br>(31-65)       | 1200<br>(870-1600)     |
| Iran     | 2005 | Male   | 70 to 74 | 11%<br>(4.9-20%)               | 89%<br>(80-95%)          | 0.0039<br>(0.00093-0.01)                    | 0.19%<br>(0.15-0.25%)                | 0.22%<br>(0.16-0.3%)                | 51<br>(36-73)       | 1000<br>(750-1400)     |
| Iran     | 2005 | Male   | 75 to 79 | 9.6%<br>(4-19%)                | 90%<br>(81-96%)          | 0.0029<br>(0.00063-0.0084)                  | 0.16%<br>(0.12-0.2%)                 | 0.18%<br>(0.13-0.23%)               | 43<br>(31-60)       | 660<br>(490-880)       |
| Iran     | 2005 | Male   | 80 to 84 | 8.4%<br>(3.4-17%)              | 92%<br>(83-97%)          | 0.0024<br>(0.00051-0.0068)                  | 0.12%<br>(0.094-0.16%)               | 0.13%<br>(0.097-0.18%)              | 26<br>(18-37)       | 300<br>(220-400)       |
| Iran     | 2005 | Male   | 85 to 89 | 8.2%<br>(3.3-16%)              | 92%<br>(84-97%)          | 0.0022<br>(0.0005-0.0061)                   | 0.1%<br>(0.08-0.14%)                 | 0.11%<br>(0.081-0.15%)              | 13<br>(9.1-18)      | 110<br>(78-140)        |
| Iran     | 2005 | Male   | 90 to 94 | 9.3%<br>(3.6-19%)              | 91%<br>(81-96%)          | 0.0024<br>(0.00049-0.0066)                  | 0.091%<br>(0.071-0.12%)              | 0.089%<br>(0.067-0.12%)             | 3.7<br>(2.7-5.2)    | 23<br>(17-30)          |
| Iran     | 2005 | Male   | 95 plus  | 12%<br>(4.2-24%)               | 88%<br>(76-96%)          | 0.0028<br>(0.00043-0.0082)                  | 0.1%<br>(0.077-0.13%)                | 0.081%<br>(0.059-0.11%)             | 0.85<br>(0.6-1.2)   | 4.2<br>(3.2-5.5)       |
| Iran     | 2010 | Female | All Ages | 11%<br>(6.7-17%)               | 89%<br>(83-93%)          | 0.0034<br>(0.0017-0.0059)                   | 0.21%<br>(0.16-0.26%)                | 0.13%<br>(0.1-0.15%)                | 180<br>(130-250)    | 18000<br>(13000-24000) |
| Iran     | 2010 | Female | 20 to 24 | 11%<br>(3-24%)                 | 89%<br>(76-97%)          | 0.0032<br>(0.00074-0.0083)                  | 0.43%<br>(0.25-0.65%)                | 0.11%<br>(0.081-0.16%)              | 3.1<br>(2-4.6)      | 2800<br>(1600-4600)    |
| Iran     | 2010 | Female | 25 to 29 | 12%<br>(3.4-27%)               | 88%<br>(73-97%)          | 0.0039<br>(0.001-0.0092)                    | 0.46%<br>(0.3-0.67%)                 | 0.13%<br>(0.099-0.17%)              | 3.8<br>(2.4-5.3)    | 3300<br>(2000-5200)    |
| Iran     | 2010 | Female | 30 to 34 | 14%<br>(3.9-29%)               | 86%<br>(71-96%)          | 0.0046<br>(0.0014-0.01)                     | 0.42%<br>(0.27-0.63%)                | 0.16%<br>(0.13-0.21%)               | 4.4<br>(2.9-6.1)    | 2600<br>(1500-4100)    |
| Iran     | 2010 | Female | 35 to 39 | 15%<br>(4.3-31%)               | 85%<br>(69-96%)          | 0.0054<br>(0.0015-0.013)                    | 0.33%<br>(0.22-0.47%)                | 0.19%<br>(0.14-0.26%)               | 5.1<br>(3.3-7.7)    | 1700<br>(1000-2500)    |
| Iran     | 2010 | Female | 40 to 44 | 16%<br>(5.7-31%)               | 84%<br>(69-94%)          | 0.006<br>(0.0018-0.013)                     | 0.27%<br>(0.17-0.39%)                | 0.24%<br>(0.17-0.32%)               | 7.5<br>(4.7-11)     | 1300<br>(780-2000)     |
| Iran     | 2010 | Female | 45 to 49 | 17%<br>(6-32%)                 | 83%<br>(68-94%)          | 0.0065<br>(0.0017-0.015)                    | 0.24%<br>(0.17-0.33%)                | 0.24%<br>(0.17-0.33%)               | 10<br>(6.2-15)      | 1200<br>(760-1700)     |
| Iran     | 2010 | Female | 50 to 54 | 17%<br>(6.6-34%)               | 83%<br>(66-93%)          | 0.0068<br>(0.0017-0.015)                    | 0.2%<br>(0.14-0.27%)                 | 0.23%<br>(0.16-0.31%)               | 13<br>(8.2-19)      | 1000<br>(680-1500)     |
| Iran     | 2010 | Female | 55 to 59 | 18%<br>(6.6-36%)               | 82%<br>(64-93%)          | 0.0069<br>(0.0017-0.017)                    | 0.17%<br>(0.12-0.23%)                | 0.21%<br>(0.14-0.29%)               | 15<br>(9.2-23)      | 850<br>(570-1200)      |

| Location | Year | Sex    | Age      | Prevalence of current drinkers | Prevalence of abstainers | Population average of standard drinks daily | Percent of total attributable deaths | Percent of total attributable DALYs | Attributable deaths | Attributable DALYs     |
|----------|------|--------|----------|--------------------------------|--------------------------|---------------------------------------------|--------------------------------------|-------------------------------------|---------------------|------------------------|
| Iran     | 2010 | Female | 60 to 64 | 19%<br>(7.1-39%)               | 81%<br>(61-93%)          | 0.0066<br>(0.0015-0.017)                    | 0.16%<br>(0.11-0.21%)                | 0.2%<br>(0.13-0.29%)                | 17<br>(11-26)       | 640<br>(440-900)       |
| Iran     | 2010 | Female | 65 to 69 | 20%<br>(7.7-36%)               | 80%<br>(64-92%)          | 0.0057<br>(0.0013-0.014)                    | 0.15%<br>(0.11-0.2%)                 | 0.19%<br>(0.13-0.27%)               | 19<br>(12-29)       | 530<br>(360-750)       |
| Iran     | 2010 | Female | 70 to 74 | 18%<br>(7.4-34%)               | 82%<br>(66-93%)          | 0.0046<br>(0.00096-0.013)                   | 0.13%<br>(0.095-0.18%)               | 0.16%<br>(0.11-0.24%)               | 24<br>(15-37)       | 500<br>(340-720)       |
| Iran     | 2010 | Female | 75 to 79 | 16%<br>(6.1-33%)               | 84%<br>(67-94%)          | 0.0037<br>(0.00065-0.011)                   | 0.11%<br>(0.079-0.14%)               | 0.13%<br>(0.091-0.17%)              | 25<br>(16-35)       | 390<br>(270-530)       |
| Iran     | 2010 | Female | 80 to 84 | 15%<br>(4.9-33%)               | 85%<br>(67-95%)          | 0.0033<br>(0.00057-0.011)                   | 0.089%<br>(0.067-0.12%)              | 0.1%<br>(0.075-0.14%)               | 19<br>(13-27)       | 220<br>(150-300)       |
| Iran     | 2010 | Female | 85 to 89 | 15%<br>(4.9-35%)               | 85%<br>(65-95%)          | 0.0034<br>(0.0006-0.011)                    | 0.073%<br>(0.056-0.095%)             | 0.08%<br>(0.061-0.11%)              | 11<br>(8-15)        | 91<br>(67-120)         |
| Iran     | 2010 | Female | 90 to 94 | 18%<br>(5.9-41%)               | 82%<br>(59-94%)          | 0.0038<br>(0.00065-0.013)                   | 0.058%<br>(0.045-0.076%)             | 0.06%<br>(0.045-0.081%)             | 3.8<br>(2.8-5.3)    | 23<br>(17-31)          |
| Iran     | 2010 | Female | 95 plus  | 22%<br>(6.8-48%)               | 78%<br>(52-93%)          | 0.0046<br>(0.00067-0.015)                   | 0.057%<br>(0.043-0.077%)             | 0.051%<br>(0.037-0.071%)            | 0.88<br>(0.62-1.2)  | 4<br>(2.9-5.4)         |
| Iran     | 2010 | Male   | All Ages | 9.2%<br>(6.2-13%)              | 91%<br>(87-94%)          | 0.0038<br>(0.0019-0.0064)                   | 0.34%<br>(0.27-0.42%)                | 0.22%<br>(0.18-0.25%)               | 460<br>(350-610)    | 38000<br>(29000-49000) |
| Iran     | 2010 | Male   | 20 to 24 | 9.3%<br>(3.7-18%)              | 91%<br>(82-96%)          | 0.0031<br>(0.00092-0.0072)                  | 0.63%<br>(0.41-0.92%)                | 0.084%<br>(0.052-0.12%)             | 6.8<br>(3.9-10)     | 600<br>(3600-9000)     |
| Iran     | 2010 | Male   | 25 to 29 | 11%<br>(4.7-22%)               | 89%<br>(78-95%)          | 0.0047<br>(0.0016-0.0099)                   | 0.63%<br>(0.45-0.88%)                | 0.14%<br>(0.092-0.2%)               | 11<br>(6.9-16)      | 5900<br>(3800-8600)    |
| Iran     | 2010 | Male   | 30 to 34 | 13%<br>(4.9-25%)               | 87%<br>(75-95%)          | 0.006<br>(0.0021-0.013)                     | 0.58%<br>(0.4-0.79%)                 | 0.21%<br>(0.15-0.3%)                | 14<br>(8.7-21)      | 4300<br>(2800-6000)    |
| Iran     | 2010 | Male   | 35 to 39 | 15%<br>(5.6-26%)               | 85%<br>(74-94%)          | 0.0069<br>(0.0022-0.015)                    | 0.58%<br>(0.43-0.75%)                | 0.34%<br>(0.25-0.47%)               | 21<br>(14-32)       | 3700<br>(2500-5000)    |
| Iran     | 2010 | Male   | 40 to 44 | 15%<br>(6.7-27%)               | 85%<br>(73-93%)          | 0.0074<br>(0.0024-0.016)                    | 0.53%<br>(0.39-0.7%)                 | 0.38%<br>(0.29-0.5%)                | 27<br>(18-40)       | 3400<br>(2300-4800)    |
| Iran     | 2010 | Male   | 45 to 49 | 14%<br>(5.7-27%)               | 86%<br>(73-94%)          | 0.0076<br>(0.0022-0.017)                    | 0.5%<br>(0.39-0.62%)                 | 0.46%<br>(0.35-0.59%)               | 39<br>(26-56)       | 3100<br>(2300-4100)    |
| Iran     | 2010 | Male   | 50 to 54 | 14%<br>(5.8-28%)               | 86%<br>(72-94%)          | 0.0075<br>(0.0021-0.017)                    | 0.41%<br>(0.32-0.51%)                | 0.41%<br>(0.31-0.52%)               | 43<br>(29-63)       | 2600<br>(1900-3500)    |
| Iran     | 2010 | Male   | 55 to 59 | 13%<br>(5.5-26%)               | 87%<br>(74-95%)          | 0.0072<br>(0.0019-0.017)                    | 0.34%<br>(0.26-0.42%)                | 0.36%<br>(0.26-0.47%)               | 43<br>(29-64)       | 2000<br>(1400-2700)    |
| Iran     | 2010 | Male   | 60 to 64 | 13%<br>(5.2-25%)               | 87%<br>(75-95%)          | 0.0064<br>(0.0016-0.016)                    | 0.3%<br>(0.22-0.39%)                 | 0.34%<br>(0.25-0.45%)               | 40<br>(27-57)       | 1400<br>(960-1800)     |
| Iran     | 2010 | Male   | 65 to 69 | 12%<br>(5.4-23%)               | 88%<br>(77-95%)          | 0.0053<br>(0.0014-0.013)                    | 0.27%<br>(0.2-0.35%)                 | 0.32%<br>(0.24-0.43%)               | 43<br>(29-62)       | 1100<br>(800-1600)     |
| Iran     | 2010 | Male   | 70 to 74 | 11%<br>(5-20%)                 | 89%<br>(80-95%)          | 0.004<br>(0.00096-0.011)                    | 0.22%<br>(0.17-0.29%)                | 0.26%<br>(0.19-0.36%)               | 53<br>(36-76)       | 1100<br>(770-1500)     |
| Iran     | 2010 | Male   | 75 to 79 | 9.6%<br>(4.1-18%)              | 90%<br>(82-96%)          | 0.003<br>(0.00068-0.0085)                   | 0.18%<br>(0.14-0.23%)                | 0.21%<br>(0.16-0.27%)               | 53<br>(37-74)       | 820<br>(600-1100)      |
| Iran     | 2010 | Male   | 80 to 84 | 8.6%<br>(3.4-17%)              | 91%<br>(83-97%)          | 0.0025<br>(0.00059-0.007)                   | 0.14%<br>(0.11-0.18%)                | 0.15%<br>(0.11-0.2%)                | 34<br>(24-48)       | 400<br>(290-540)       |

| Location | Year | Sex    | Age      | Prevalence of current drinkers | Prevalence of abstainers | Population average of standard drinks daily | Percent of total attributable deaths | Percent of total attributable DALYs | Attributable deaths | Attributable DALYs     |
|----------|------|--------|----------|--------------------------------|--------------------------|---------------------------------------------|--------------------------------------|-------------------------------------|---------------------|------------------------|
| Iran     | 2010 | Male   | 85 to 89 | 8.4%<br>(3.3-17%)              | 92%<br>(83-97%)          | 0.0024<br>(0.00053-0.0065)                  | 0.11%<br>(0.09-0.14%)                | 0.12%<br>(0.092-0.16%)              | 17<br>(13-23)       | 140<br>(110-190)       |
| Iran     | 2010 | Male   | 90 to 94 | 9.4%<br>(3.8-19%)              | 91%<br>(81-96%)          | 0.0025<br>(0.00055-0.0071)                  | 0.097%<br>(0.077-0.12%)              | 0.095%<br>(0.073-0.13%)             | 5.4<br>(4-7.2)      | 33<br>(26-43)          |
| Iran     | 2010 | Male   | 95 plus  | 12%<br>(4.2-25%)               | 88%<br>(75-96%)          | 0.0029<br>(0.0005-0.0091)                   | 0.11%<br>(0.083-0.14%)               | 0.086%<br>(0.064-0.11%)             | 1<br>(0.75-1.4)     | 5.1<br>(3.9-6.7)       |
| Iran     | 2016 | Female | All Ages | 12%<br>(7.1-19%)               | 88%<br>(81-93%)          | 0.0034<br>(0.0014-0.0064)                   | 0.23%<br>(0.18-0.29%)                | 0.14%<br>(0.11-0.17%)               | 200<br>(140-270)    | 20000<br>(15000-27000) |
| Iran     | 2016 | Female | 20 to 24 | 11%<br>(3.2-25%)               | 89%<br>(75-97%)          | 0.003<br>(0.00063-0.0081)                   | 0.47%<br>(0.28-0.69%)                | 0.16%<br>(0.11-0.24%)               | 2.4<br>(1.5-3.6)    | 2000<br>(1200-3200)    |
| Iran     | 2016 | Female | 25 to 29 | 12%<br>(3.3-27%)               | 88%<br>(73-97%)          | 0.0036<br>(0.00074-0.0088)                  | 0.5%<br>(0.32-0.74%)                 | 0.17%<br>(0.12-0.23%)               | 3.9<br>(2.6-5.5)    | 3400<br>(1900-5200)    |
| Iran     | 2016 | Female | 30 to 34 | 14%<br>(3.7-29%)               | 86%<br>(71-96%)          | 0.0041<br>(0.0011-0.0099)                   | 0.46%<br>(0.28-0.7%)                 | 0.19%<br>(0.15-0.25%)               | 5.9<br>(4.1-8.3)    | 3700<br>(2100-6000)    |
| Iran     | 2016 | Female | 35 to 39 | 15%<br>(4.5-30%)               | 85%<br>(70-96%)          | 0.0049<br>(0.0014-0.012)                    | 0.36%<br>(0.23-0.51%)                | 0.21%<br>(0.16-0.28%)               | 6.9<br>(4.5-10)     | 2500<br>(1500-3900)    |
| Iran     | 2016 | Female | 40 to 44 | 16%<br>(5.8-31%)               | 84%<br>(69-94%)          | 0.0056<br>(0.0016-0.013)                    | 0.28%<br>(0.19-0.4%)                 | 0.24%<br>(0.17-0.33%)               | 8.1<br>(5.2-12)     | 1600<br>(960-2400)     |
| Iran     | 2016 | Female | 45 to 49 | 17%<br>(5.7-32%)               | 83%<br>(68-94%)          | 0.0061<br>(0.0016-0.015)                    | 0.24%<br>(0.17-0.33%)                | 0.24%<br>(0.17-0.34%)               | 10<br>(6.3-15)      | 1300<br>(840-1900)     |
| Iran     | 2016 | Female | 50 to 54 | 18%<br>(6.9-35%)               | 82%<br>(65-93%)          | 0.0063<br>(0.0017-0.015)                    | 0.21%<br>(0.15-0.29%)                | 0.24%<br>(0.16-0.35%)               | 15<br>(8.9-23)      | 1200<br>(770-1700)     |
| Iran     | 2016 | Female | 55 to 59 | 19%<br>(7.5-37%)               | 81%<br>(63-93%)          | 0.0064<br>(0.0015-0.016)                    | 0.18%<br>(0.12-0.25%)                | 0.22%<br>(0.14-0.32%)               | 18<br>(10-29)       | 1000<br>(620-1500)     |
| Iran     | 2016 | Female | 60 to 64 | 20%<br>(7.3-39%)               | 80%<br>(61-93%)          | 0.0061<br>(0.0013-0.018)                    | 0.17%<br>(0.12-0.23%)                | 0.22%<br>(0.14-0.31%)               | 25<br>(15-40)       | 970<br>(650-1400)      |
| Iran     | 2016 | Female | 65 to 69 | 20%<br>(8.4-37%)               | 80%<br>(63-92%)          | 0.0054<br>(0.0012-0.014)                    | 0.16%<br>(0.11-0.22%)                | 0.21%<br>(0.14-0.31%)               | 25<br>(15-40)       | 720<br>(490-1100)      |
| Iran     | 2016 | Female | 70 to 74 | 19%<br>(8.1-35%)               | 81%<br>(65-92%)          | 0.0044<br>(0.00085-0.012)                   | 0.14%<br>(0.098-0.19%)               | 0.18%<br>(0.12-0.26%)               | 22<br>(13-35)       | 470<br>(310-700)       |
| Iran     | 2016 | Female | 75 to 79 | 17%<br>(6.5-35%)               | 83%<br>(65-94%)          | 0.0037<br>(0.00059-0.012)                   | 0.11%<br>(0.079-0.14%)               | 0.13%<br>(0.092-0.18%)              | 21<br>(13-30)       | 330<br>(230-460)       |
| Iran     | 2016 | Female | 80 to 84 | 16%<br>(5.4-35%)               | 84%<br>(65-95%)          | 0.0034<br>(0.00056-0.011)                   | 0.09%<br>(0.068-0.12%)               | 0.11%<br>(0.076-0.14%)              | 18<br>(12-25)       | 210<br>(150-280)       |
| Iran     | 2016 | Female | 85 to 89 | 17%<br>(5.6-38%)               | 83%<br>(62-94%)          | 0.0034<br>(0.00058-0.012)                   | 0.072%<br>(0.056-0.091%)             | 0.079%<br>(0.06-0.1%)               | 13<br>(9.3-18)      | 110<br>(81-140)        |
| Iran     | 2016 | Female | 90 to 94 | 20%<br>(6.7-42%)               | 80%<br>(58-93%)          | 0.0039<br>(0.00066-0.014)                   | 0.058%<br>(0.046-0.073%)             | 0.058%<br>(0.045-0.077%)            | 4.6<br>(3.5-6.3)    | 29<br>(22-38)          |
| Iran     | 2016 | Female | 95 plus  | 24%<br>(7.7-48%)               | 76%<br>(52-92%)          | 0.0046<br>(0.00061-0.016)                   | 0.057%<br>(0.043-0.076%)             | 0.048%<br>(0.035-0.066%)            | 1.2<br>(0.88-1.7)   | 6<br>(4.4-8.2)         |
| Iran     | 2016 | Male   | All Ages | 9.6%<br>(6.4-13%)              | 90%<br>(87-94%)          | 0.0037<br>(0.0016-0.0071)                   | 0.38%<br>(0.31-0.46%)                | 0.25%<br>(0.21-0.29%)               | 540<br>(410-710)    | 43000<br>(32000-54000) |
| Iran     | 2016 | Male   | 20 to 24 | 9.3%<br>(3.7-18%)              | 91%<br>(82-96%)          | 0.0028<br>(0.00069-0.0071)                  | 0.73%<br>(0.47-1.1%)                 | 0.13%<br>(0.059-0.19%)              | 5.8<br>(2.7-9.4)    | 4500<br>(2800-6800)    |

| Location | Year | Sex    | Age      | Prevalence of current drinkers | Prevalence of abstainers | Population average of standard drinks daily | Percent of total attributable deaths | Percent of total attributable DALYs | Attributable deaths | Attributable DALYs     |
|----------|------|--------|----------|--------------------------------|--------------------------|---------------------------------------------|--------------------------------------|-------------------------------------|---------------------|------------------------|
| Iran     | 2016 | Male   | 25 to 29 | 12%<br>(4.4-23%)               | 88%<br>(77-96%)          | 0.0043<br>(0.0012-0.01)                     | 0.73%<br>(0.51-1%)                   | 0.19%<br>(0.11-0.29%)               | 12<br>(6.4-19)      | 6000<br>(3900-8800)    |
| Iran     | 2016 | Male   | 30 to 34 | 13%<br>(4.6-25%)               | 87%<br>(75-95%)          | 0.0055<br>(0.0016-0.012)                    | 0.66%<br>(0.46-0.91%)                | 0.27%<br>(0.17-0.38%)               | 19<br>(11-30)       | 5900<br>(3800-8700)    |
| Iran     | 2016 | Male   | 35 to 39 | 15%<br>(5.8-26%)               | 85%<br>(74-94%)          | 0.0063<br>(0.0018-0.014)                    | 0.63%<br>(0.47-0.82%)                | 0.4%<br>(0.28-0.55%)                | 28<br>(17-41)       | 4900<br>(3400-6700)    |
| Iran     | 2016 | Male   | 40 to 44 | 15%<br>(6.8-27%)               | 85%<br>(73-93%)          | 0.0068<br>(0.0018-0.016)                    | 0.57%<br>(0.42-0.73%)                | 0.42%<br>(0.31-0.56%)               | 31<br>(21-43)       | 3900<br>(2700-5300)    |
| Iran     | 2016 | Male   | 45 to 49 | 15%<br>(5.4-27%)               | 85%<br>(73-95%)          | 0.007<br>(0.0017-0.017)                     | 0.52%<br>(0.41-0.66%)                | 0.49%<br>(0.37-0.65%)               | 45<br>(30-66)       | 3700<br>(2700-5000)    |
| Iran     | 2016 | Male   | 50 to 54 | 14%<br>(5.9-27%)               | 86%<br>(73-94%)          | 0.0068<br>(0.0018-0.017)                    | 0.42%<br>(0.33-0.53%)                | 0.43%<br>(0.32-0.55%)               | 51<br>(35-74)       | 3100<br>(2300-4200)    |
| Iran     | 2016 | Male   | 55 to 59 | 13%<br>(5.5-26%)               | 87%<br>(74-94%)          | 0.0065<br>(0.0017-0.017)                    | 0.34%<br>(0.27-0.44%)                | 0.37%<br>(0.27-0.49%)               | 52<br>(35-75)       | 2400<br>(1800-3200)    |
| Iran     | 2016 | Male   | 60 to 64 | 13%<br>(5.4-25%)               | 87%<br>(75-95%)          | 0.0058<br>(0.0014-0.016)                    | 0.31%<br>(0.23-0.41%)                | 0.36%<br>(0.25-0.49%)               | 64<br>(42-91)       | 2200<br>(1600-3000)    |
| Iran     | 2016 | Male   | 65 to 69 | 12%<br>(5.4-23%)               | 88%<br>(77-95%)          | 0.0048<br>(0.0012-0.012)                    | 0.27%<br>(0.2-0.35%)                 | 0.32%<br>(0.23-0.44%)               | 55<br>(36-80)       | 1500<br>(1000-2000)    |
| Iran     | 2016 | Male   | 70 to 74 | 11%<br>(5-20%)                 | 89%<br>(80-95%)          | 0.0035<br>(0.0008-0.0095)                   | 0.23%<br>(0.17-0.3%)                 | 0.28%<br>(0.2-0.38%)                | 49<br>(33-70)       | 1000<br>(690-1400)     |
| Iran     | 2016 | Male   | 75 to 79 | 9.5%<br>(4-19%)                | 90%<br>(81-96%)          | 0.0027<br>(0.00054-0.0083)                  | 0.18%<br>(0.14-0.24%)                | 0.22%<br>(0.16-0.29%)               | 50<br>(35-71)       | 780<br>(560-1100)      |
| Iran     | 2016 | Male   | 80 to 84 | 8.6%<br>(3.3-17%)              | 91%<br>(83-97%)          | 0.0023<br>(0.00047-0.0067)                  | 0.14%<br>(0.11-0.19%)                | 0.16%<br>(0.12-0.22%)               | 38<br>(27-55)       | 440<br>(320-610)       |
| Iran     | 2016 | Male   | 85 to 89 | 8.4%<br>(3.4-17%)              | 92%<br>(83-97%)          | 0.0021<br>(0.00047-0.0062)                  | 0.12%<br>(0.091-0.15%)               | 0.12%<br>(0.093-0.16%)              | 25<br>(18-34)       | 210<br>(160-280)       |
| Iran     | 2016 | Male   | 90 to 94 | 9.5%<br>(3.8-19%)              | 91%<br>(81-96%)          | 0.0023<br>(0.00047-0.0071)                  | 0.098%<br>(0.077-0.13%)              | 0.096%<br>(0.073-0.13%)             | 7.8<br>(5.7-11)     | 49<br>(37-63)          |
| Iran     | 2016 | Male   | 95 plus  | 12%<br>(4.3-25%)               | 88%<br>(75-96%)          | 0.0027<br>(0.00038-0.0092)                  | 0.11%<br>(0.085-0.14%)               | 0.087%<br>(0.064-0.12%)             | 1.7<br>(1.2-2.3)    | 8.5<br>(6.4-11)        |
| Iraq     | 1990 | Female | All Ages | 11%<br>(7-17%)                 | 89%<br>(83-93%)          | 0.45<br>(0.33-0.6)                          | 1.1%<br>(0.45-2%)                    | 1.7%<br>(0.22-4%)                   | 990<br>(130-2300)   | 38000<br>(16000-65000) |
| Iraq     | 1990 | Female | 15 to 19 | 10%<br>(3.3-23%)               | 90%<br>(77-97%)          | 0.38<br>(0.11-0.88)                         | 0.95%<br>(0.47-1.8%)                 | 1.6%<br>(0.61-3.5%)                 | 16<br>(5.9-35)      | 1600<br>(770-3100)     |
| Iraq     | 1990 | Female | 20 to 24 | 13%<br>(4.3-29%)               | 87%<br>(71-96%)          | 0.62<br>(0.2-1.3)                           | 1.7%<br>(0.89-3.1%)                  | 2.7%<br>(0.96-5.3%)                 | 30<br>(10-61)       | 2900<br>(1400-5000)    |
| Iraq     | 1990 | Female | 25 to 29 | 15%<br>(4.2-31%)               | 85%<br>(69-96%)          | 0.75<br>(0.22-1.6)                          | 2%<br>(1-3.6%)                       | 3.3%<br>(1.3-6.4%)                  | 32<br>(11-62)       | 2700<br>(1300-4800)    |
| Iraq     | 1990 | Female | 30 to 34 | 17%<br>(4.7-35%)               | 83%<br>(65-95%)          | 0.9<br>(0.28-1.8)                           | 2.3%<br>(1.1-3.8%)                   | 3.8%<br>(1.5-6.7%)                  | 36<br>(14-68)       | 2600<br>(1200-4400)    |
| Iraq     | 1990 | Female | 35 to 39 | 19%<br>(5.4-36%)               | 81%<br>(64-95%)          | 1.1<br>(0.33-2.1)                           | 2.4%<br>(0.99-4.6%)                  | 4%<br>(1.5-7.9%)                    | 54<br>(19-110)      | 3300<br>(1300-6300)    |
| Iraq     | 1990 | Female | 40 to 44 | 20%<br>(7.7-37%)               | 80%<br>(63-92%)          | 1.2<br>(0.43-2.3)                           | 2.9%<br>(1.1-5.6%)                   | 4.8%<br>(1.8-9.3%)                  | 55<br>(19-110)      | 2900<br>(1100-5600)    |

| Location | Year | Sex    | Age      | Prevalence of current drinkers | Prevalence of abstainers | Population average of standard drinks daily | Percent of total attributable deaths | Percent of total attributable DALYs | Attributable deaths | Attributable DALYs     |
|----------|------|--------|----------|--------------------------------|--------------------------|---------------------------------------------|--------------------------------------|-------------------------------------|---------------------|------------------------|
| Iraq     | 1990 | Female | 45 to 49 | 21%<br>(7.7-38%)               | 79%<br>(62-92%)          | 1.3<br>(0.44-2.7)                           | 3.3%<br>(1-6.7%)                     | 5.1%<br>(1.6-11%)                   | 82<br>(25-180)      | 3700<br>(1200-7900)    |
| Iraq     | 1990 | Female | 50 to 54 | 22%<br>(8.6-40%)               | 78%<br>(60-91%)          | 1.3<br>(0.42-2.9)                           | 3.5%<br>(0.83-7.7%)                  | 5%<br>(1.3-11%)                     | 110<br>(27-250)     | 4200<br>(970-9800)     |
| Iraq     | 1990 | Female | 55 to 59 | 23%<br>(9-43%)                 | 77%<br>(57-91%)          | 1.3<br>(0.4-2.9)                            | 3.5%<br>(0.44-8%)                    | 4.8%<br>(0.71-11%)                  | 130<br>(18-300)     | 4300<br>(520-10000)    |
| Iraq     | 1990 | Female | 60 to 64 | 24%<br>(9.5-45%)               | 76%<br>(55-90%)          | 1.3<br>(0.33-2.9)                           | 2.8%<br>(-0.32-7.3%)                 | 3.7%<br>(-0.34-9.5%)                | 120<br>(-11-320)    | 3400<br>(-360-9200)    |
| Iraq     | 1990 | Female | 65 to 69 | 24%<br>(10-43%)                | 76%<br>(57-90%)          | 1.1<br>(0.29-2.4)                           | 2.3%<br>(-0.56-6.5%)                 | 2.9%<br>(-0.65-8.2%)                | 120<br>(-27-350)    | 2900<br>(-710-8100)    |
| Iraq     | 1990 | Female | 70 to 74 | 23%<br>(9.2-41%)               | 77%<br>(59-91%)          | 0.88<br>(0.21-2.1)                          | 1.3%<br>(-1.1-5.6%)                  | 1.7%<br>(-1.3-6.7%)                 | 89<br>(-66-380)     | 1700<br>(-1300-7300)   |
| Iraq     | 1990 | Female | 75 to 79 | 21%<br>(7.5-41%)               | 79%<br>(59-92%)          | 0.72<br>(0.15-2)                            | 0.77%<br>(-1.4-4.9%)                 | 0.91%<br>(-1.7-5.8%)                | 52<br>(-97-330)     | 760<br>(-1400-4900)    |
| Iraq     | 1990 | Female | 80 to 84 | 19%<br>(6.6-40%)               | 81%<br>(60-93%)          | 0.65<br>(0.13-1.9)                          | 0.72%<br>(-1.1-4.2%)                 | 0.83%<br>(-1.4-4.8%)                | 37<br>(-61-220)     | 410<br>(-630-2400)     |
| Iraq     | 1990 | Female | 85 to 89 | 19%<br>(6.7-40%)               | 81%<br>(60-93%)          | 0.64<br>(0.13-1.8)                          | 0.59%<br>(-1.1-3.9%)                 | 0.66%<br>(-1.3-4.6%)                | 20<br>(-40-140)     | 160<br>(-290-1000)     |
| Iraq     | 1990 | Female | 90 to 94 | 22%<br>(7.4-43%)               | 78%<br>(57-93%)          | 0.72<br>(0.14-1.9)                          | 0.55%<br>(-1.3-4%)                   | 0.6%<br>(-1.6-4.6%)                 | 7.7<br>(-21-61)     | 43<br>(-100-310)       |
| Iraq     | 1990 | Female | 95 plus  | 27%<br>(8.6-50%)               | 73%<br>(50-91%)          | 0.85<br>(0.16-2.3)                          | 0.63%<br>(-1.8-4.9%)                 | 0.66%<br>(-2.3-5.7%)                | 2.4<br>(-8.3-21)    | 9.1<br>(-27-71)        |
| Iraq     | 1990 | Male   | All Ages | 8.7%<br>(6.1-12%)              | 91%<br>(88-94%)          | 0.5<br>(0.37-0.65)                          | 1.4%<br>(0.85-2.1%)                  | 2%<br>(1-3.2%)                      | 1300<br>(620-2100)  | 55000<br>(34000-78000) |
| Iraq     | 1990 | Male   | 15 to 19 | 7.7%<br>(3.3-15%)              | 92%<br>(85-97%)          | 0.27<br>(0.089-0.58)                        | 1%<br>(0.53-1.9%)                    | 1.3%<br>(0.47-2.7%)                 | 20<br>(7.4-43)      | 2100<br>(1000-3900)    |
| Iraq     | 1990 | Male   | 20 to 24 | 12%<br>(4.9-22%)               | 88%<br>(78-95%)          | 0.62<br>(0.22-1.2)                          | 2.4%<br>(1.2-4.1%)                   | 3%<br>(1.2-5.8%)                    | 60<br>(24-120)      | 5200<br>(2600-9500)    |
| Iraq     | 1990 | Male   | 25 to 29 | 15%<br>(6.2-27%)               | 85%<br>(73-94%)          | 0.97<br>(0.38-1.9)                          | 3.3%<br>(1.7-5.4%)                   | 4.7%<br>(2.1-8.2%)                  | 72<br>(31-130)      | 5300<br>(2700-9400)    |
| Iraq     | 1990 | Male   | 30 to 34 | 17%<br>(6.4-32%)               | 83%<br>(68-94%)          | 1.2<br>(0.52-2.3)                           | 3.7%<br>(2-6%)                       | 5.5%<br>(2.6-9%)                    | 75<br>(35-130)      | 5000<br>(2600-8200)    |
| Iraq     | 1990 | Male   | 35 to 39 | 18%<br>(7.4-33%)               | 82%<br>(67-93%)          | 1.4<br>(0.53-2.6)                           | 4%<br>(1.9-6.7%)                     | 5.8%<br>(2.5-9.8%)                  | 110<br>(45-190)     | 6200<br>(2900-11000)   |
| Iraq     | 1990 | Male   | 40 to 44 | 19%<br>(8.3-32%)               | 81%<br>(68-92%)          | 1.5<br>(0.6-2.8)                            | 4.1%<br>(1.9-7%)                     | 5.7%<br>(2.5-9.9%)                  | 92<br>(39-170)      | 4800<br>(2200-8400)    |
| Iraq     | 1990 | Male   | 45 to 49 | 18%<br>(7.4-32%)               | 82%<br>(68-93%)          | 1.6<br>(0.54-3.3)                           | 4.2%<br>(1.9-7.1%)                   | 5.6%<br>(2.3-9.5%)                  | 120<br>(51-210)     | 5600<br>(2500-9700)    |
| Iraq     | 1990 | Male   | 50 to 54 | 18%<br>(7.7-33%)               | 82%<br>(67-92%)          | 1.6<br>(0.51-3.2)                           | 3.9%<br>(1.6-6.9%)                   | 5%<br>(1.9-8.9%)                    | 130<br>(46-240)     | 5100<br>(2000-9300)    |
| Iraq     | 1990 | Male   | 55 to 59 | 17%<br>(7.5-31%)               | 83%<br>(69-92%)          | 1.5<br>(0.48-3.2)                           | 3.7%<br>(1.2-6.9%)                   | 4.6%<br>(1.4-8.8%)                  | 140<br>(42-280)     | 4800<br>(1600-9400)    |
| Iraq     | 1990 | Male   | 60 to 64 | 16%<br>(7.2-30%)               | 84%<br>(70-93%)          | 1.3<br>(0.4-3)                              | 3.1%<br>(0.74-6.3%)                  | 3.8%<br>(0.82-7.7%)                 | 130<br>(28-280)     | 3900<br>(940-7900)     |

| Location | Year | Sex    | Age      | Prevalence of current drinkers | Prevalence of abstainers | Population average of standard drinks daily | Percent of total attributable deaths | Percent of total attributable DALYs | Attributable deaths | Attributable DALYs    |
|----------|------|--------|----------|--------------------------------|--------------------------|---------------------------------------------|--------------------------------------|-------------------------------------|---------------------|-----------------------|
| Iraq     | 1990 | Male   | 65 to 69 | 15%<br>(7.1-28%)               | 85%<br>(72-93%)          | 1.1<br>(0.35-2.3)                           | 2.6%<br>(0.44-5.5%)                  | 3.1%<br>(0.47-6.7%)                 | 130<br>(20-290)     | 3100<br>(520-6700)    |
| Iraq     | 1990 | Male   | 70 to 74 | 14%<br>(6.4-25%)               | 86%<br>(75-94%)          | 0.81<br>(0.24-1.9)                          | 1.7%<br>(0.057-4.4%)                 | 2%<br>(-0.0088-5.3%)                | 100<br>(-0.38-280)  | 2000<br>(66-5200)     |
| Iraq     | 1990 | Male   | 75 to 79 | 12%<br>(5.5-24%)               | 88%<br>(76-95%)          | 0.61<br>(0.16-1.6)                          | 1.1%<br>(-0.18-3.5%)                 | 1.3%<br>(-0.29-4.1%)                | 62<br>(-14-200)     | 930<br>(-150-3000)    |
| Iraq     | 1990 | Male   | 80 to 84 | 11%<br>(4.4-21%)               | 89%<br>(79-96%)          | 0.51<br>(0.13-1.2)                          | 0.88%<br>(-0.17-2.8%)                | 0.97%<br>(-0.26-3.2%)               | 33<br>(-9.1-110)    | 380<br>(-73-1200)     |
| Iraq     | 1990 | Male   | 85 to 89 | 10%<br>(4.4-20%)               | 90%<br>(80-96%)          | 0.46<br>(0.13-1.1)                          | 0.68%<br>(-0.22-2.3%)                | 0.73%<br>(-0.33-2.6%)               | 16<br>(-7.2-58)     | 130<br>(-44-440)      |
| Iraq     | 1990 | Male   | 90 to 94 | 12%<br>(4.9-24%)               | 88%<br>(76-95%)          | 0.49<br>(0.13-1.3)                          | 0.6%<br>(-0.33-2.3%)                 | 0.63%<br>(-0.48-2.6%)               | 5.5<br>(-4.2-23)    | 32<br>(-17-120)       |
| Iraq     | 1990 | Male   | 95 plus  | 15%<br>(5.5-30%)               | 85%<br>(70-95%)          | 0.56<br>(0.12-1.6)                          | 0.54%<br>(-0.56-2.8%)                | 0.51%<br>(-0.77-3.1%)               | 1<br>(-1.5-6.2)     | 4.4<br>(-4.3-23)      |
| Iraq     | 1995 | Female | All Ages | 12%<br>(7.5-18%)               | 88%<br>(82-92%)          | 0.35<br>(0.25-0.46)                         | 0.77%<br>(0.23-1.5%)                 | 0.94%<br>(-0.27-2.7%)               | 640<br>(-180-1900)  | 30000<br>(9000-58000) |
| Iraq     | 1995 | Female | 15 to 19 | 11%<br>(3.5-23%)               | 89%<br>(77-96%)          | 0.3<br>(0.091-0.65)                         | 0.77%<br>(0.4-1.4%)                  | 1.2%<br>(0.5-2.6%)                  | 14<br>(5.7-31)      | 1500<br>(790-2800)    |
| Iraq     | 1995 | Female | 20 to 24 | 14%<br>(4.2-28%)               | 86%<br>(72-96%)          | 0.47<br>(0.16-0.97)                         | 1.4%<br>(0.79-2.4%)                  | 2%<br>(0.77-3.9%)                   | 28<br>(11-56)       | 2900<br>(1500-4800)   |
| Iraq     | 1995 | Female | 25 to 29 | 15%<br>(4.5-31%)               | 85%<br>(69-95%)          | 0.57<br>(0.17-1.2)                          | 1.6%<br>(0.89-2.8%)                  | 2.5%<br>(1-4.7%)                    | 36<br>(14-70)       | 3100<br>(1600-5300)   |
| Iraq     | 1995 | Female | 30 to 34 | 17%<br>(4.9-34%)               | 83%<br>(66-95%)          | 0.67<br>(0.21-1.3)                          | 1.8%<br>(0.89-3%)                    | 2.7%<br>(1.1-4.9%)                  | 37<br>(14-69)       | 2700<br>(1400-4800)   |
| Iraq     | 1995 | Female | 35 to 39 | 19%<br>(5.9-36%)               | 81%<br>(64-94%)          | 0.79<br>(0.27-1.5)                          | 1.9%<br>(0.73-3.7%)                  | 3%<br>(0.99-5.9%)                   | 43<br>(15-90)       | 2600<br>(990-5100)    |
| Iraq     | 1995 | Female | 40 to 44 | 20%<br>(7.9-37%)               | 80%<br>(63-92%)          | 0.89<br>(0.34-1.7)                          | 2.2%<br>(0.74-4.5%)                  | 3.6%<br>(1.1-7.1%)                  | 73<br>(22-150)      | 3700<br>(1200-7700)   |
| Iraq     | 1995 | Female | 45 to 49 | 21%<br>(7.6-39%)               | 79%<br>(61-92%)          | 0.97<br>(0.31-2.1)                          | 2.4%<br>(0.56-5.6%)                  | 3.6%<br>(0.87-8.2%)                 | 65<br>(15-150)      | 2900<br>(660-6700)    |
| Iraq     | 1995 | Female | 50 to 54 | 22%<br>(8.7-41%)               | 78%<br>(59-91%)          | 1<br>(0.31-2.2)                             | 2.5%<br>(0.17-6.1%)                  | 3.5%<br>(0.37-8.6%)                 | 92<br>(9.9-230)     | 3500<br>(250-9100)    |
| Iraq     | 1995 | Female | 55 to 59 | 23%<br>(10-43%)                | 77%<br>(57-90%)          | 0.99<br>(0.31-2.2)                          | 2.3%<br>(-0.19-6%)                   | 3.1%<br>(-0.098-8.2%)               | 100<br>(-3-270)     | 3400<br>(-270-9000)   |
| Iraq     | 1995 | Female | 60 to 64 | 24%<br>(10-44%)                | 76%<br>(56-90%)          | 0.94<br>(0.27-2.2)                          | 1.6%<br>(-0.94-5.5%)                 | 2.1%<br>(-1.1-7%)                   | 85<br>(-45-290)     | 2400<br>(-1400-8200)  |
| Iraq     | 1995 | Female | 65 to 69 | 25%<br>(11-43%)                | 75%<br>(57-89%)          | 0.83<br>(0.23-1.9)                          | 0.99%<br>(-1.3-4.5%)                 | 1.3%<br>(-1.6-5.7%)                 | 63<br>(-77-290)     | 1400<br>(-1900-6800)  |
| Iraq     | 1995 | Female | 70 to 74 | 23%<br>(10-40%)                | 77%<br>(60-90%)          | 0.65<br>(0.17-1.6)                          | 0.3%<br>(-1.6-3.5%)                  | 0.38%<br>(-1.9-4.2%)                | 22<br>(-110-250)    | 400<br>(-2100-4600)   |
| Iraq     | 1995 | Female | 75 to 79 | 21%<br>(8.1-40%)               | 79%<br>(60-92%)          | 0.52<br>(0.12-1.4)                          | -0.071%<br>(-1.9-2.9%)               | -0.091%<br>(-2.2-3.3%)              | -5.9<br>(-150-230)  | -77<br>(-2100-3400)   |
| Iraq     | 1995 | Female | 80 to 84 | 19%<br>(6.5-40%)               | 81%<br>(60-93%)          | 0.47<br>(0.1-1.4)                           | -0.059%<br>(-1.6-2.3%)               | -0.083%<br>(-1.8-2.6%)              | -4.6<br>(-100-150)  | -39<br>(-1100-1600)   |



| Location | Year | Sex    | Age      | Prevalence of current drinkers | Prevalence of abstainers | Population average of standard drinks daily | Percent of total attributable deaths | Percent of total attributable DALYs | Attributable deaths | Attributable DALYs     |
|----------|------|--------|----------|--------------------------------|--------------------------|---------------------------------------------|--------------------------------------|-------------------------------------|---------------------|------------------------|
| Iraq     | 1995 | Female | 85 to 89 | 19%<br>(6.6-41%)               | 81%<br>(59-93%)          | 0.47<br>(0.094-1.3)                         | -0.15%<br>(-1.6-2%)                  | -0.2%<br>(-1.9-2.3%)                | -7.2<br>(-69-83)    | -46<br>(-510-630)      |
| Iraq     | 1995 | Female | 90 to 94 | 22%<br>(7.7-43%)               | 78%<br>(57-92%)          | 0.53<br>(0.11-1.4)                          | -0.19%<br>(-1.8-2.1%)                | -0.27%<br>(-2.1-2.5%)               | -4.1<br>(-32-37)    | -17<br>(-160-200)      |
| Iraq     | 1995 | Female | 95 plus  | 27%<br>(8.2-51%)               | 73%<br>(49-92%)          | 0.63<br>(0.11-1.7)                          | -0.19%<br>(-2.3-2.8%)                | -0.31%<br>(-2.9-3.3%)               | -1.4<br>(-13-15)    | -3.5<br>(-41-51)       |
| Iraq     | 1995 | Male   | All Ages | 9%<br>(6.2-13%)                | 91%<br>(87-94%)          | 0.37<br>(0.28-0.49)                         | 1.1%<br>(0.65-1.8%)                  | 1.5%<br>(0.62-2.6%)                 | 1100<br>(470-2000)  | 53000<br>(31000-78000) |
| Iraq     | 1995 | Male   | 15 to 19 | 7.9%<br>(3.3-15%)              | 92%<br>(85-97%)          | 0.2<br>(0.069-0.43)                         | 0.85%<br>(0.46-1.5%)                 | 0.95%<br>(0.37-2%)                  | 20<br>(7.4-43)      | 2100<br>(1100-3800)    |
| Iraq     | 1995 | Male   | 20 to 24 | 12%<br>(4.8-23%)               | 88%<br>(77-95%)          | 0.45<br>(0.17-0.87)                         | 1.9%<br>(1-3.3%)                     | 2.2%<br>(0.93-4.3%)                 | 61<br>(25-120)      | 5500<br>(2900-10000)   |
| Iraq     | 1995 | Male   | 25 to 29 | 15%<br>(6.1-28%)               | 85%<br>(72-94%)          | 0.71<br>(0.28-1.3)                          | 2.6%<br>(1.4-4.5%)                   | 3.4%<br>(1.5-6.2%)                  | 88<br>(37-160)      | 6600<br>(3200-11000)   |
| Iraq     | 1995 | Male   | 30 to 34 | 17%<br>(6.6-31%)               | 83%<br>(69-93%)          | 0.91<br>(0.38-1.6)                          | 3%<br>(1.5-4.8%)                     | 4.1%<br>(1.8-7.1%)                  | 81<br>(35-140)      | 5400<br>(2700-8900)    |
| Iraq     | 1995 | Male   | 35 to 39 | 19%<br>(7.5-34%)               | 81%<br>(66-92%)          | 1<br>(0.39-2)                               | 3.2%<br>(1.4-5.6%)                   | 4.4%<br>(1.6-8%)                    | 86<br>(32-160)      | 5000<br>(2200-8800)    |
| Iraq     | 1995 | Male   | 40 to 44 | 19%<br>(8.7-33%)               | 81%<br>(67-91%)          | 1.1<br>(0.45-2.1)                           | 3.2%<br>(1.3-5.9%)                   | 4.3%<br>(1.6-8%)                    | 110<br>(39-220)     | 5900<br>(2300-11000)   |
| Iraq     | 1995 | Male   | 45 to 49 | 19%<br>(7.6-33%)               | 81%<br>(67-92%)          | 1.2<br>(0.4-2.5)                            | 3.3%<br>(1.3-6.2%)                   | 4.2%<br>(1.5-8.1%)                  | 100<br>(36-200)     | 4700<br>(1800-8900)    |
| Iraq     | 1995 | Male   | 50 to 54 | 18%<br>(7.8-34%)               | 82%<br>(66-92%)          | 1.1<br>(0.36-2.4)                           | 3%<br>(0.89-5.8%)                    | 3.7%<br>(0.99-7.4%)                 | 120<br>(31-260)     | 4900<br>(1400-10000)   |
| Iraq     | 1995 | Male   | 55 to 59 | 17%<br>(7.5-32%)               | 83%<br>(68-93%)          | 1.1<br>(0.33-2.4)                           | 2.8%<br>(0.63-5.8%)                  | 3.4%<br>(0.66-7.2%)                 | 130<br>(23-290)     | 4400<br>(960-9600)     |
| Iraq     | 1995 | Male   | 60 to 64 | 16%<br>(6.9-31%)               | 84%<br>(69-93%)          | 0.97<br>(0.27-2.2)                          | 2.2%<br>(0.25-5.3%)                  | 2.7%<br>(0.24-6.3%)                 | 120<br>(11-290)     | 3500<br>(390-8200)     |
| Iraq     | 1995 | Male   | 65 to 69 | 16%<br>(7.4-28%)               | 84%<br>(72-93%)          | 0.79<br>(0.25-1.7)                          | 1.7%<br>(0.028-4.4%)                 | 1.9%<br>(-0.046-5.2%)               | 95<br>(-2.3-260)    | 2300<br>(38-6100)      |
| Iraq     | 1995 | Male   | 70 to 74 | 14%<br>(7-25%)                 | 86%<br>(75-93%)          | 0.59<br>(0.18-1.4)                          | 0.97%<br>(-0.27-3.4%)                | 1.1%<br>(-0.41-3.9%)                | 61<br>(-22-220)     | 1200<br>(-330-4300)    |
| Iraq     | 1995 | Male   | 75 to 79 | 12%<br>(5.6-23%)               | 88%<br>(77-94%)          | 0.44<br>(0.11-1.1)                          | 0.56%<br>(-0.4-2.5%)                 | 0.6%<br>(-0.53-2.8%)                | 35<br>(-30-170)     | 550<br>(-380-2500)     |
| Iraq     | 1995 | Male   | 80 to 84 | 11%<br>(4.5-21%)               | 89%<br>(79-96%)          | 0.37<br>(0.096-0.92)                        | 0.38%<br>(-0.42-1.8%)                | 0.39%<br>(-0.54-2%)                 | 17<br>(-24-88)      | 200<br>(-210-950)      |
| Iraq     | 1995 | Male   | 85 to 89 | 11%<br>(4.2-20%)               | 89%<br>(80-96%)          | 0.34<br>(0.09-0.87)                         | 0.24%<br>(-0.45-1.5%)                | 0.22%<br>(-0.59-1.6%)               | 5.9<br>(-16-45)     | 56<br>(-110-350)       |
| Iraq     | 1995 | Male   | 90 to 94 | 12%<br>(4.8-23%)               | 88%<br>(77-95%)          | 0.36<br>(0.09-0.93)                         | 0.2%<br>(-0.49-1.4%)                 | 0.16%<br>(-0.68-1.6%)               | 1.7<br>(-7.7-18)    | 13<br>(-35-97)         |
| Iraq     | 1995 | Male   | 95 plus  | 15%<br>(5.2-31%)               | 85%<br>(69-95%)          | 0.41<br>(0.078-1.2)                         | 0.13%<br>(-0.77-1.6%)                | 0.041%<br>(-1.1-1.7%)               | 0.11<br>(-3.1-4.9)  | 1.5<br>(-8.6-18)       |
| Iraq     | 2000 | Female | All Ages | 12%<br>(7.4-18%)               | 88%<br>(82-93%)          | 0.23<br>(0.17-0.31)                         | 0.34%<br>(-0.062-0.85%)              | 0.053%<br>(-0.87-1.2%)              | 39<br>(-650-860)    | 14000<br>(-2600-35000) |

| Location | Year | Sex    | Age      | Prevalence of current drinkers | Prevalence of abstainers | Population average of standard drinks daily | Percent of total attributable deaths | Percent of total attributable DALYs | Attributable deaths | Attributable DALYs     |
|----------|------|--------|----------|--------------------------------|--------------------------|---------------------------------------------|--------------------------------------|-------------------------------------|---------------------|------------------------|
| Iraq     | 2000 | Female | 15 to 19 | 11%<br>(3.6-24%)               | 89%<br>(76-96%)          | 0.2<br>(0.058-0.44)                         | 0.6%<br>(0.35-1%)                    | 0.88%<br>(0.39-1.8%)                | 10<br>(4.4-22)      | 1200<br>(670-2200)     |
| Iraq     | 2000 | Female | 20 to 24 | 14%<br>(4.4-30%)               | 86%<br>(70-96%)          | 0.31<br>(0.1-0.64)                          | 1%<br>(0.62-1.7%)                    | 1.4%<br>(0.54-2.7%)                 | 20<br>(7.5-40)      | 2400<br>(1400-3900)    |
| Iraq     | 2000 | Female | 25 to 29 | 16%<br>(4.5-32%)               | 84%<br>(68-95%)          | 0.37<br>(0.12-0.75)                         | 1.2%<br>(0.72-1.8%)                  | 1.6%<br>(0.73-3%)                   | 26<br>(11-48)       | 2600<br>(1500-4200)    |
| Iraq     | 2000 | Female | 30 to 34 | 17%<br>(4.5-35%)               | 83%<br>(65-95%)          | 0.43<br>(0.13-0.81)                         | 1.1%<br>(0.6-1.9%)                   | 1.6%<br>(0.62-3%)                   | 30<br>(11-57)       | 2400<br>(1200-4100)    |
| Iraq     | 2000 | Female | 35 to 39 | 19%<br>(5.1-36%)               | 81%<br>(64-95%)          | 0.5<br>(0.17-0.96)                          | 1.1%<br>(0.37-2.2%)                  | 1.6%<br>(0.41-3.5%)                 | 30<br>(7.9-68)      | 1900<br>(700-3900)     |
| Iraq     | 2000 | Female | 40 to 44 | 20%<br>(7.4-36%)               | 80%<br>(64-93%)          | 0.56<br>(0.2-1.1)                           | 1.2%<br>(0.23-2.6%)                  | 1.9%<br>(0.32-4.2%)                 | 37<br>(6.2-83)      | 1900<br>(400-4100)     |
| Iraq     | 2000 | Female | 45 to 49 | 21%<br>(7.2-38%)               | 79%<br>(62-93%)          | 0.61<br>(0.2-1.3)                           | 1.2%<br>(-0.13-3.2%)                 | 1.8%<br>(-0.036-4.8%)               | 51<br>(-0.94-140)   | 2200<br>(-250-6400)    |
| Iraq     | 2000 | Female | 50 to 54 | 21%<br>(8.6-40%)               | 79%<br>(60-91%)          | 0.63<br>(0.19-1.4)                          | 1%<br>(-0.55-3.6%)                   | 1.5%<br>(-0.61-5%)                  | 39<br>(-16-140)     | 1500<br>(-780-5300)    |
| Iraq     | 2000 | Female | 55 to 59 | 22%<br>(9.4-42%)               | 78%<br>(58-91%)          | 0.62<br>(0.18-1.4)                          | 0.71%<br>(-1.3-1.1%)                 | 1%<br>(-1.2-4.2%)                   | 38<br>(-43-150)     | 1200<br>(-1600-5200)   |
| Iraq     | 2000 | Female | 60 to 64 | 24%<br>(9.8-44%)               | 76%<br>(56-90%)          | 0.59<br>(0.16-1.4)                          | 0.12%<br>(-1.9-2.8%)                 | 0.21%<br>(-2.2-3.6%)                | 9.6<br>(-100-160)   | 200<br>(-3000-4500)    |
| Iraq     | 2000 | Female | 65 to 69 | 24%<br>(11-42%)                | 76%<br>(58-89%)          | 0.53<br>(0.14-1.2)                          | -0.34%<br>(-2.1-1.8%)                | -0.37%<br>(-2.5-2.3%)               | -21<br>(-140-130)   | -550<br>(-3400-3000)   |
| Iraq     | 2000 | Female | 70 to 74 | 23%<br>(11-40%)                | 77%<br>(60-89%)          | 0.42<br>(0.11-1)                            | -0.67%<br>(-2.3-1.1%)                | -0.78%<br>(-2.7-1.4%)               | -50<br>(-180-85)    | -970<br>(-3400-1600)   |
| Iraq     | 2000 | Female | 75 to 79 | 21%<br>(7.8-39%)               | 79%<br>(61-92%)          | 0.34<br>(0.074-0.93)                        | -0.79%<br>(-2.4-0.56%)               | -0.93%<br>(-2.7-0.71%)              | -64<br>(-190-45)    | -930<br>(-2800-640)    |
| Iraq     | 2000 | Female | 80 to 84 | 19%<br>(6.7-40%)               | 81%<br>(60-93%)          | 0.3<br>(0.063-0.86)                         | -0.71%<br>(-2.3-0.42%)               | -0.84%<br>(-2.6-0.48%)              | -54<br>(-170-30)    | -570<br>(-1800-330)    |
| Iraq     | 2000 | Female | 85 to 89 | 19%<br>(6.8-41%)               | 81%<br>(59-93%)          | 0.3<br>(0.062-0.9)                          | -0.77%<br>(-2.2-0.33%)               | -0.93%<br>(-2.6-0.35%)              | -39<br>(-110-14)    | -280<br>(-810-120)     |
| Iraq     | 2000 | Female | 90 to 94 | 22%<br>(7.4-45%)               | 78%<br>(55-93%)          | 0.35<br>(0.068-0.93)                        | -0.86%<br>(-2.4-0.33%)               | -1.1%<br>(-2.9-0.33%)               | -18<br>(-48-5.7)    | -88<br>(-240-33)       |
| Iraq     | 2000 | Female | 95 plus  | 27%<br>(8.8-52%)               | 73%<br>(48-91%)          | 0.41<br>(0.069-1.1)                         | -0.98%<br>(-2.9-0.77%)               | -1.2%<br>(-3.5-0.85%)               | -6.1<br>(-17-4.2)   | -19<br>(-56-15)        |
| Iraq     | 2000 | Male   | All Ages | 9.4%<br>(6.5-13%)              | 91%<br>(87-94%)          | 0.25<br>(0.18-0.34)                         | 0.81%<br>(0.44-1.3%)                 | 0.85%<br>(0.23-1.7%)                | 710<br>(180-1500)   | 40000<br>(22000-64000) |
| Iraq     | 2000 | Male   | 15 to 19 | 7.9%<br>(3.3-15%)              | 92%<br>(85-97%)          | 0.13<br>(0.04-0.29)                         | 0.71%<br>(0.4-1.2%)                  | 0.72%<br>(0.25-1.5%)                | 16<br>(5.6-37)      | 2000<br>(1000-3500)    |
| Iraq     | 2000 | Male   | 20 to 24 | 12%<br>(4.9-24%)               | 88%<br>(76-95%)          | 0.29<br>(0.11-0.59)                         | 1.6%<br>(0.88-2.7%)                  | 1.6%<br>(0.67-3.3%)                 | 52<br>(21-110)      | 5100<br>(2800-9000)    |
| Iraq     | 2000 | Male   | 25 to 29 | 15%<br>(6.6-28%)               | 85%<br>(72-93%)          | 0.46<br>(0.19-0.84)                         | 2%<br>(1.1-3.3%)                     | 2.5%<br>(1.1-4.4%)                  | 76<br>(33-140)      | 6100<br>(3300-10000)   |
| Iraq     | 2000 | Male   | 30 to 34 | 17%<br>(6.6-32%)               | 83%<br>(68-93%)          | 0.59<br>(0.25-1)                            | 2.1%<br>(1.2-3.5%)                   | 2.7%<br>(1.2-4.8%)                  | 79<br>(35-140)      | 5600<br>(3000-9100)    |

| Location | Year | Sex    | Age      | Prevalence of current drinkers | Prevalence of abstainers | Population average of standard drinks daily | Percent of total attributable deaths | Percent of total attributable DALYs | Attributable deaths | Attributable DALYs    |
|----------|------|--------|----------|--------------------------------|--------------------------|---------------------------------------------|--------------------------------------|-------------------------------------|---------------------|-----------------------|
| Iraq     | 2000 | Male   | 35 to 39 | 19%<br>(7.4-34%)               | 81%<br>(66-93%)          | 0.68<br>(0.25-1.3)                          | 2.2%<br>(0.98-3.9%)                  | 2.8%<br>(1.1-5.5%)                  | 69<br>(25-140)      | 4300<br>(1900-7900)   |
| Iraq     | 2000 | Male   | 40 to 44 | 19%<br>(8.7-34%)               | 81%<br>(66-91%)          | 0.72<br>(0.28-1.4)                          | 2.1%<br>(0.83-4%)                    | 2.7%<br>(0.85-5.4%)                 | 67<br>(19-140)      | 3600<br>(1300-7300)   |
| Iraq     | 2000 | Male   | 45 to 49 | 18%<br>(7.7-33%)               | 82%<br>(67-92%)          | 0.75<br>(0.24-1.6)                          | 2%<br>(0.64-4.4%)                    | 2.5%<br>(0.65-5.7%)                 | 91<br>(24-210)      | 4300<br>(1400-9400)   |
| Iraq     | 2000 | Male   | 50 to 54 | 18%<br>(7.7-33%)               | 82%<br>(67-92%)          | 0.73<br>(0.23-1.6)                          | 1.7%<br>(0.35-4.1%)                  | 2.1%<br>(0.23-5.2%)                 | 71<br>(7.7-180)     | 2900<br>(560-7100)    |
| Iraq     | 2000 | Male   | 55 to 59 | 17%<br>(7.3-32%)               | 83%<br>(68-93%)          | 0.7<br>(0.21-1.6)                           | 1.5%<br>(0.1-3.9%)                   | 1.8%<br>(-0.028-4.8%)               | 81<br>(-1.2-220)    | 2900<br>(190-7600)    |
| Iraq     | 2000 | Male   | 60 to 64 | 16%<br>(6.9-31%)               | 84%<br>(69-93%)          | 0.63<br>(0.18-1.5)                          | 1.1%<br>(-0.2-3.5%)                  | 1.3%<br>(-0.35-4.2%)                | 68<br>(-18-230)     | 2000<br>(-340-6600)   |
| Iraq     | 2000 | Male   | 65 to 69 | 16%<br>(7.1-29%)               | 84%<br>(71-93%)          | 0.51<br>(0.15-1.1)                          | 0.61%<br>(-0.46-2.4%)                | 0.65%<br>(-0.63-2.9%)               | 39<br>(-40-180)     | 1000<br>(-810-4100)   |
| Iraq     | 2000 | Male   | 70 to 74 | 14%<br>(6.5-25%)               | 86%<br>(75-94%)          | 0.38<br>(0.11-0.88)                         | 0.23%<br>(-0.58-1.7%)                | 0.21%<br>(-0.76-1.9%)               | 14<br>(-49-130)     | 320<br>(-830-2400)    |
| Iraq     | 2000 | Male   | 75 to 79 | 12%<br>(5.4-23%)               | 88%<br>(77-95%)          | 0.29<br>(0.074-0.72)                        | 0.053%<br>(-0.66-1.2%)               | 0.016%<br>(-0.85-1.4%)              | 1.1<br>(-55-86)     | 57<br>(-730-1300)     |
| Iraq     | 2000 | Male   | 80 to 84 | 11%<br>(4.5-22%)               | 89%<br>(78-96%)          | 0.24<br>(0.064-0.59)                        | -0.037%<br>(-0.61-0.78%)             | -0.087%<br>(-0.76-0.83%)            | -4.2<br>(-38-41)    | -21<br>(-370-460)     |
| Iraq     | 2000 | Male   | 85 to 89 | 11%<br>(4.3-21%)               | 89%<br>(79-96%)          | 0.22<br>(0.058-0.56)                        | -0.1%<br>(-0.62-0.53%)               | -0.17%<br>(-0.78-0.56%)             | -5.2<br>(-24-17)    | -26<br>(-170-140)     |
| Iraq     | 2000 | Male   | 90 to 94 | 12%<br>(4.8-24%)               | 88%<br>(76-95%)          | 0.23<br>(0.058-0.61)                        | -0.12%<br>(-0.69-0.48%)              | -0.21%<br>(-0.9-0.49%)              | -2.6<br>(-11-6.1)   | -9.1<br>(-52-37)      |
| Iraq     | 2000 | Male   | 95 plus  | 15%<br>(5.7-31%)               | 85%<br>(69-94%)          | 0.26<br>(0.053-0.75)                        | -0.2%<br>(-0.95-0.59%)               | -0.34%<br>(-1.3-0.56%)              | -1.2<br>(-4.3-2)    | -2.7<br>(-13-8.5)     |
| Iraq     | 2005 | Female | All Ages | 12%<br>(7.1-18%)               | 88%<br>(82-93%)          | 0.18<br>(0.13-0.25)                         | 0.16%<br>(-0.15-0.52%)               | -0.22%<br>(-0.93-0.54%)             | -180<br>(-800-470)  | 8100<br>(-8200-27000) |
| Iraq     | 2005 | Female | 15 to 19 | 11%<br>(3.2-23%)               | 89%<br>(77-97%)          | 0.15<br>(0.038-0.34)                        | 0.44%<br>(0.26-0.71%)                | 0.47%<br>(0.21-0.96%)               | 8.7<br>(3.8-17)     | 1200<br>(690-1900)    |
| Iraq     | 2005 | Female | 20 to 24 | 14%<br>(4.1-29%)               | 86%<br>(71-96%)          | 0.24<br>(0.073-0.49)                        | 0.79%<br>(0.49-1.2%)                 | 0.75%<br>(0.3-1.5%)                 | 15<br>(6-30)        | 2200<br>(1300-3300)   |
| Iraq     | 2005 | Female | 25 to 29 | 16%<br>(4.3-31%)               | 84%<br>(69-96%)          | 0.29<br>(0.081-0.58)                        | 0.91%<br>(0.58-1.4%)                 | 0.99%<br>(0.44-1.8%)                | 21<br>(8.8-39)      | 2400<br>(1400-3700)   |
| Iraq     | 2005 | Female | 30 to 34 | 17%<br>(4.3-35%)               | 83%<br>(65-96%)          | 0.34<br>(0.11-0.64)                         | 0.84%<br>(0.43-1.4%)                 | 1%<br>(0.32-1.9%)                   | 23<br>(7-47)        | 2200<br>(1100-3700)   |
| Iraq     | 2005 | Female | 35 to 39 | 19%<br>(4.9-36%)               | 81%<br>(64-95%)          | 0.4<br>(0.13-0.74)                          | 0.74%<br>(0.23-1.5%)                 | 1%<br>(0.16-2.3%)                   | 27<br>(4.9-61)      | 1900<br>(580-3900)    |
| Iraq     | 2005 | Female | 40 to 44 | 20%<br>(7.4-36%)               | 80%<br>(64-93%)          | 0.44<br>(0.16-0.83)                         | 0.78%<br>(0.092-1.8%)                | 1.2%<br>(0.16-2.8%)                 | 30<br>(3.1-75)      | 1600<br>(180-3700)    |
| Iraq     | 2005 | Female | 45 to 49 | 20%<br>(7.4-37%)               | 80%<br>(63-93%)          | 0.47<br>(0.16-0.96)                         | 0.67%<br>(-0.37-2.1%)                | 1%<br>(-0.35-3.2%)                  | 29<br>(-9.9-92)     | 1300<br>(-640-4100)   |
| Iraq     | 2005 | Female | 50 to 54 | 21%<br>(8.7-39%)               | 79%<br>(61-91%)          | 0.48<br>(0.15-1.1)                          | 0.46%<br>(-0.79-2.2%)                | 0.73%<br>(-0.93-3.2%)               | 30<br>(-38-140)     | 1100<br>(-1800-5300)  |

| Location | Year | Sex    | Age      | Prevalence of current drinkers | Prevalence of abstainers | Population average of standard drinks daily | Percent of total attributable deaths | Percent of total attributable DALYs | Attributable deaths | Attributable DALYs     |
|----------|------|--------|----------|--------------------------------|--------------------------|---------------------------------------------|--------------------------------------|-------------------------------------|---------------------|------------------------|
| Iraq     | 2005 | Female | 55 to 59 | 22%<br>(9-41%)                 | 78%<br>(59-91%)          | 0.48<br>(0.13-1.1)                          | 0.16%<br>(-1.3-1.9%)                 | 0.31%<br>(-1.5-2.8%)                | 11<br>(-53-98)      | 260<br>(-2000-3200)    |
| Iraq     | 2005 | Female | 60 to 64 | 23%<br>(9.6-43%)               | 77%<br>(57-90%)          | 0.46<br>(0.12-1.1)                          | -0.36%<br>(-2.1-4%)                  | -0.39%<br>(-2.4-1.9%)               | -19<br>(-120-91)    | -660<br>(-3700-2500)   |
| Iraq     | 2005 | Female | 65 to 69 | 24%<br>(11-42%)                | 76%<br>(58-89%)          | 0.41<br>(0.1-0.91)                          | -0.73%<br>(-2.2-0.72%)               | -0.85%<br>(-2.7-0.96%)              | -53<br>(-170-62)    | -1300<br>(-4100-1400)  |
| Iraq     | 2005 | Female | 70 to 74 | 23%<br>(9.9-41%)               | 77%<br>(59-90%)          | 0.32<br>(0.081-0.81)                        | -0.92%<br>(-2.4-0.3%)                | -1.1%<br>(-2.9-0.38%)               | -77<br>(-210-25)    | -1500<br>(-3900-450)   |
| Iraq     | 2005 | Female | 75 to 79 | 20%<br>(8-40%)                 | 80%<br>(60-92%)          | 0.26<br>(0.057-0.77)                        | -0.95%<br>(-2.6-0.056%)              | -1.1%<br>(-3-0.069%)                | -82<br>(-220-5.1)   | -1200<br>(-3200-74)    |
| Iraq     | 2005 | Female | 80 to 84 | 19%<br>(6.1-40%)               | 81%<br>(60-94%)          | 0.23<br>(0.048-0.7)                         | -0.86%<br>(-2.3--0.005%)             | -1%<br>(-2.7--0.02%)                | -69<br>(-190--1.3)  | -740<br>(-2000--4.2)   |
| Iraq     | 2005 | Female | 85 to 89 | 19%<br>(6.3-41%)               | 81%<br>(59-94%)          | 0.24<br>(0.041-0.73)                        | -0.91%<br>(-2.4--0.076%)             | -1.1%<br>(-2.9--0.11%)              | -49<br>(-130--4.6)  | -360<br>(-950--29)     |
| Iraq     | 2005 | Female | 90 to 94 | 22%<br>(7.8-44%)               | 78%<br>(56-92%)          | 0.27<br>(0.051-0.76)                        | -1%<br>(-2.6--0.1%)                  | -1.2%<br>(-3.1--0.15%)              | -23<br>(-58--2.7)   | -110<br>(-290--11)     |
| Iraq     | 2005 | Female | 95 plus  | 27%<br>(8.6-51%)               | 73%<br>(49-91%)          | 0.32<br>(0.052-0.93)                        | -1.1%<br>(-2.9-0.00071%)             | -1.4%<br>(-3.6--0.037%)             | -7.3<br>(-19--0.18) | -24<br>(-61-0.016)     |
| Iraq     | 2005 | Male   | All Ages | 9.4%<br>(6.4-13%)              | 91%<br>(87-94%)          | 0.2<br>(0.14-0.27)                          | 0.54%<br>(0.29-0.91%)                | 0.47%<br>(0.06-1.1%)                | 500<br>(64-1200)    | 34000<br>(18000-56000) |
| Iraq     | 2005 | Male   | 15 to 19 | 7.9%<br>(3.2-15%)              | 92%<br>(85-97%)          | 0.1<br>(0.031-0.22)                         | 0.46%<br>(0.24-0.8%)                 | 0.34%<br>(0.12-0.79%)               | 15<br>(5.1-33)      | 2000<br>(1100-3500)    |
| Iraq     | 2005 | Male   | 20 to 24 | 12%<br>(4.9-23%)               | 88%<br>(77-95%)          | 0.23<br>(0.079-0.46)                        | 0.86%<br>(0.46-1.5%)                 | 0.69%<br>(0.25-1.5%)                | 46<br>(18-96)       | 4900<br>(2700-8300)    |
| Iraq     | 2005 | Male   | 25 to 29 | 15%<br>(6.3-28%)               | 85%<br>(72-94%)          | 0.35<br>(0.14-0.67)                         | 1.2%<br>(0.66-2%)                    | 1.2%<br>(0.47-2.3%)                 | 67<br>(27-120)      | 5800<br>(3100-9600)    |
| Iraq     | 2005 | Male   | 30 to 34 | 17%<br>(6.4-33%)               | 83%<br>(67-94%)          | 0.45<br>(0.19-0.78)                         | 1.3%<br>(0.72-2.2%)                  | 1.4%<br>(0.61-2.6%)                 | 71<br>(31-130)      | 5300<br>(2800-8800)    |
| Iraq     | 2005 | Male   | 35 to 39 | 19%<br>(7.1-34%)               | 81%<br>(66-93%)          | 0.52<br>(0.19-0.98)                         | 1.4%<br>(0.67-2.6%)                  | 1.6%<br>(0.57-3.2%)                 | 70<br>(24-140)      | 4600<br>(2100-8400)    |
| Iraq     | 2005 | Male   | 40 to 44 | 19%<br>(8.4-33%)               | 81%<br>(67-92%)          | 0.55<br>(0.21-1.1)                          | 1.4%<br>(0.58-2.6%)                  | 1.6%<br>(0.5-3.3%)                  | 56<br>(17-120)      | 3300<br>(1300-6400)    |
| Iraq     | 2005 | Male   | 45 to 49 | 18%<br>(7.6-33%)               | 82%<br>(67-92%)          | 0.58<br>(0.19-1.2)                          | 1.3%<br>(0.41-3%)                    | 1.5%<br>(0.31-3.9%)                 | 56<br>(12-140)      | 2800<br>(860-6500)     |
| Iraq     | 2005 | Male   | 50 to 54 | 18%<br>(7.7-33%)               | 82%<br>(67-92%)          | 0.57<br>(0.18-1.3)                          | 1.1%<br>(0.056-2.9%)                 | 1.2%<br>(-0.11-3.6%)                | 63<br>(-5.7-190)    | 2800<br>(140-7500)     |
| Iraq     | 2005 | Male   | 55 to 59 | 17%<br>(7.4-32%)               | 83%<br>(68-93%)          | 0.55<br>(0.16-1.3)                          | 0.88%<br>(-0.16-2.8%)                | 0.96%<br>(-0.33-3.4%)               | 46<br>(-16-170)     | 1700<br>(-310-5600)    |
| Iraq     | 2005 | Male   | 60 to 64 | 16%<br>(7-31%)                 | 84%<br>(69-93%)          | 0.49<br>(0.14-1.1)                          | 0.57%<br>(-0.44-2.5%)                | 0.6%<br>(-0.64-2.9%)                | 38<br>(-38-190)     | 1200<br>(-870-5400)    |
| Iraq     | 2005 | Male   | 65 to 69 | 15%<br>(6.9-28%)               | 85%<br>(72-93%)          | 0.39<br>(0.12-0.84)                         | 0.2%<br>(-0.64-1.5%)                 | 0.17%<br>(-0.84-1.7%)               | 12<br>(-56-120)     | 390<br>(-1200-2900)    |
| Iraq     | 2005 | Male   | 70 to 74 | 14%<br>(6.6-25%)               | 86%<br>(75-93%)          | 0.29<br>(0.083-0.69)                        | -0.021%<br>(-0.69-0.96%)             | -0.076%<br>(-0.86-1%)               | -5.5<br>(-65-77)    | -32<br>(-1100-1500)    |

| Location | Year | Sex    | Age      | Prevalence of current drinkers | Prevalence of abstainers | Population average of standard drinks daily | Percent of total attributable deaths | Percent of total attributable DALYs | Attributable deaths | Attributable DALYs    |
|----------|------|--------|----------|--------------------------------|--------------------------|---------------------------------------------|--------------------------------------|-------------------------------------|---------------------|-----------------------|
| Iraq     | 2005 | Male   | 75 to 79 | 12%<br>(5.2-23%)               | 88%<br>(77-95%)          | 0.22<br>(0.057-0.58)                        | -0.11%<br>(-0.7-0.64%)               | -0.16%<br>(-0.87-0.68%)             | -11<br>(-58-46)     | -120<br>(-780-690)    |
| Iraq     | 2005 | Male   | 80 to 84 | 11%<br>(4.4-21%)               | 89%<br>(79-96%)          | 0.19<br>(0.048-0.47)                        | -0.16%<br>(-0.71-0.33%)              | -0.22%<br>(-0.89-0.35%)             | -11<br>(-46-17)     | -99<br>(-450-210)     |
| Iraq     | 2005 | Male   | 85 to 89 | 11%<br>(4.2-22%)               | 89%<br>(78-96%)          | 0.17<br>(0.045-0.44)                        | -0.19%<br>(-0.68-0.2%)               | -0.28%<br>(-0.86-0.19%)             | -8.9<br>(-28-6.4)   | -54<br>(-190-57)      |
| Iraq     | 2005 | Male   | 90 to 94 | 12%<br>(4.9-23%)               | 88%<br>(77-95%)          | 0.18<br>(0.044-0.48)                        | -0.2%<br>(-0.73-0.22%)               | -0.3%<br>(-0.96-0.19%)              | -4<br>(-13-2.6)     | -16<br>(-59-17)       |
| Iraq     | 2005 | Male   | 95 plus  | 15%<br>(5.4-31%)               | 85%<br>(69-95%)          | 0.2<br>(0.042-0.61)                         | -0.28%<br>(-0.92-0.25%)              | -0.42%<br>(-1.2-0.18%)              | -1.5<br>(-4.5-0.66) | -4<br>(-13-3.6)       |
| Iraq     | 2010 | Female | All Ages | 12%<br>(7.4-18%)               | 88%<br>(82-93%)          | 0.18<br>(0.12-0.24)                         | 0.15%<br>(-0.16-0.53%)               | -0.22%<br>(-0.95-0.58%)             | -200<br>(-870-490)  | 8200<br>(-8600-28000) |
| Iraq     | 2010 | Female | 15 to 19 | 10%<br>(3.8-22%)               | 90%<br>(78-96%)          | 0.14<br>(0.044-0.33)                        | 0.51%<br>(0.32-0.82%)                | 0.63%<br>(0.3-1.2%)                 | 8.8<br>(4.1-18)     | 1200<br>(740-2000)    |
| Iraq     | 2010 | Female | 20 to 24 | 14%<br>(4.5-28%)               | 86%<br>(72-96%)          | 0.23<br>(0.07-0.47)                         | 0.87%<br>(0.55-1.3%)                 | 0.92%<br>(0.39-1.8%)                | 15<br>(6-30)        | 2200<br>(1300-3500)   |
| Iraq     | 2010 | Female | 25 to 29 | 15%<br>(4.4-31%)               | 85%<br>(69-96%)          | 0.27<br>(0.081-0.56)                        | 0.94%<br>(0.61-1.4%)                 | 1.1%<br>(0.45-2.1%)                 | 19<br>(7.2-40)      | 2400<br>(1400-3800)   |
| Iraq     | 2010 | Female | 30 to 34 | 17%<br>(4.5-35%)               | 83%<br>(65-95%)          | 0.32<br>(0.098-0.61)                        | 0.83%<br>(0.43-1.3%)                 | 1%<br>(0.32-2%)                     | 22<br>(6.6-49)      | 2200<br>(1100-3900)   |
| Iraq     | 2010 | Female | 35 to 39 | 19%<br>(5-37%)                 | 81%<br>(63-95%)          | 0.38<br>(0.12-0.7)                          | 0.7%<br>(0.22-1.4%)                  | 0.99%<br>(0.15-2.2%)                | 26<br>(4.1-63)      | 1900<br>(580-4000)    |
| Iraq     | 2010 | Female | 40 to 44 | 20%<br>(7.1-38%)               | 80%<br>(62-93%)          | 0.42<br>(0.15-0.81)                         | 0.71%<br>(0.025-1.7%)                | 1.1%<br>(0.099-2.8%)                | 36<br>(3.1-91)      | 1900<br>(70-4600)     |
| Iraq     | 2010 | Female | 45 to 49 | 21%<br>(7.2-38%)               | 79%<br>(62-93%)          | 0.47<br>(0.15-1)                            | 0.61%<br>(-0.4-2%)                   | 1%<br>(-0.37-3.1%)                  | 32<br>(-12-100)     | 1400<br>(-810-4500)   |
| Iraq     | 2010 | Female | 50 to 54 | 21%<br>(8.6-40%)               | 79%<br>(60-91%)          | 0.48<br>(0.14-1)                            | 0.4%<br>(-0.86-2.1%)                 | 0.67%<br>(-1.1-3.2%)                | 25<br>(-37-120)     | 830<br>(-1700-4600)   |
| Iraq     | 2010 | Female | 55 to 59 | 22%<br>(9-41%)                 | 78%<br>(59-91%)          | 0.48<br>(0.14-1.1)                          | 0.093%<br>(-1.3-1.8%)                | 0.24%<br>(-1.6-2.7%)                | 13<br>(-86-140)     | 240<br>(-3200-4700)   |
| Iraq     | 2010 | Female | 60 to 64 | 23%<br>(9.8-43%)               | 77%<br>(57-90%)          | 0.45<br>(0.12-1.1)                          | -0.4%<br>(-2-1.4%)                   | -0.44%<br>(-2.5-1.9%)               | -20<br>(-110-86)    | -690<br>(-3400-2500)  |
| Iraq     | 2010 | Female | 65 to 69 | 24%<br>(11-41%)                | 76%<br>(59-89%)          | 0.39<br>(0.11-0.91)                         | -0.74%<br>(-2.3-0.71%)               | -0.87%<br>(-2.8-0.94%)              | -56<br>(-180-58)    | -1400<br>(-4400-1300) |
| Iraq     | 2010 | Female | 70 to 74 | 22%<br>(9.7-39%)               | 78%<br>(61-90%)          | 0.31<br>(0.079-0.78)                        | -0.88%<br>(-2.3-0.26%)               | -1%<br>(-2.8-0.37%)                 | -79<br>(-210-25)    | -1500<br>(-4000-440)  |
| Iraq     | 2010 | Female | 75 to 79 | 20%<br>(7.7-41%)               | 80%<br>(59-92%)          | 0.25<br>(0.052-0.75)                        | -0.9%<br>(-2.5-0.043%)               | -1.1%<br>(-2.9-0.018%)              | -86<br>(-230-1.5)   | -1300<br>(-3400-60)   |
| Iraq     | 2010 | Female | 80 to 84 | 18%<br>(6.3-40%)               | 82%<br>(60-94%)          | 0.23<br>(0.047-0.7)                         | -0.83%<br>(-2.3--0.013%)             | -0.99%<br>(-2.8--0.023%)            | -71<br>(-200--1.6)  | -750<br>(-2100--12)   |
| Iraq     | 2010 | Female | 85 to 89 | 19%<br>(6.5-41%)               | 81%<br>(59-93%)          | 0.23<br>(0.044-0.67)                        | -0.9%<br>(-2.5--0.097%)              | -1.1%<br>(-3--0.13%)                | -50<br>(-140--6)    | -370<br>(-1000--40)   |
| Iraq     | 2010 | Female | 90 to 94 | 21%<br>(7.5-43%)               | 79%<br>(57-93%)          | 0.25<br>(0.05-0.68)                         | -0.98%<br>(-2.5--0.11%)              | -1.2%<br>(-3--0.19%)                | -23<br>(-58--3.5)   | -120<br>(-290--13)    |

| Location | Year | Sex    | Age      | Prevalence of current drinkers | Prevalence of abstainers | Population average of standard drinks daily | Percent of total attributable deaths | Percent of total attributable DALYs | Attributable deaths | Attributable DALYs     |
|----------|------|--------|----------|--------------------------------|--------------------------|---------------------------------------------|--------------------------------------|-------------------------------------|---------------------|------------------------|
| Iraq     | 2010 | Female | 95 plus  | 26%<br>(9-49%)                 | 74%<br>(51-91%)          | 0.3<br>(0.053-0.84)                         | -1.1%<br>(-2.8--0.022%)              | -1.4%<br>(-3.4--0.084%)             | -7.8<br>(-19--0.45) | -25<br>(-63--0.46)     |
| Iraq     | 2010 | Male   | All Ages | 9.2%<br>(6.3-13%)              | 91%<br>(87-94%)          | 0.19<br>(0.13-0.26)                         | 0.56%<br>(0.29-0.95%)                | 0.47%<br>(0.0099-1.2%)              | 490<br>(11-1300)    | 36000<br>(18000-62000) |
| Iraq     | 2010 | Male   | 15 to 19 | 7.7%<br>(3.3-15%)              | 92%<br>(85-97%)          | 0.097<br>(0.03-0.21)                        | 0.58%<br>(0.33-0.97%)                | 0.48%<br>(0.16-1.1%)                | 15<br>(5-35)        | 2100<br>(1100-3500)    |
| Iraq     | 2010 | Male   | 20 to 24 | 12%<br>(4.8-23%)               | 88%<br>(77-95%)          | 0.22<br>(0.074-0.43)                        | 1.2%<br>(0.68-1.9%)                  | 1%<br>(0.39-2.1%)                   | 46<br>(17-99)       | 5100<br>(2800-8700)    |
| Iraq     | 2010 | Male   | 25 to 29 | 15%<br>(6.1-28%)               | 85%<br>(72-94%)          | 0.34<br>(0.13-0.66)                         | 1.5%<br>(0.86-2.4%)                  | 1.6%<br>(0.66-2.9%)                 | 65<br>(26-130)      | 5800<br>(3200-9900)    |
| Iraq     | 2010 | Male   | 30 to 34 | 17%<br>(6.3-32%)               | 83%<br>(68-94%)          | 0.43<br>(0.18-0.76)                         | 1.5%<br>(0.87-2.4%)                  | 1.8%<br>(0.81-3.1%)                 | 73<br>(31-140)      | 5700<br>(3100-9400)    |
| Iraq     | 2010 | Male   | 35 to 39 | 18%<br>(7.3-33%)               | 82%<br>(67-93%)          | 0.49<br>(0.18-0.91)                         | 1.5%<br>(0.75-2.7%)                  | 1.8%<br>(0.67-3.5%)                 | 73<br>(25-150)      | 5000<br>(2400-9100)    |
| Iraq     | 2010 | Male   | 40 to 44 | 19%<br>(8.6-32%)               | 81%<br>(68-91%)          | 0.52<br>(0.2-0.98)                          | 1.4%<br>(0.6-2.7%)                   | 1.6%<br>(0.52-3.5%)                 | 71<br>(21-150)      | 4200<br>(1700-8300)    |
| Iraq     | 2010 | Male   | 45 to 49 | 18%<br>(7.3-33%)               | 82%<br>(67-93%)          | 0.55<br>(0.18-1.1)                          | 1.3%<br>(0.4-3%)                     | 1.5%<br>(0.28-3.9%)                 | 60<br>(10-160)      | 3100<br>(910-7200)     |
| Iraq     | 2010 | Male   | 50 to 54 | 17%<br>(7.5-33%)               | 83%<br>(67-93%)          | 0.55<br>(0.17-1.2)                          | 1%<br>(0.038-2.7%)                   | 1.2%<br>(-0.14-3.4%)                | 50<br>(-6.1-150)    | 2200<br>(88-6200)      |
| Iraq     | 2010 | Male   | 55 to 59 | 17%<br>(7.4-31%)               | 83%<br>(69-93%)          | 0.52<br>(0.16-1.2)                          | 0.8%<br>(-0.24-2.6%)                 | 0.87%<br>(-0.45-3.2%)               | 55<br>(-27-210)     | 2100<br>(-610-7300)    |
| Iraq     | 2010 | Male   | 60 to 64 | 16%<br>(6.8-30%)               | 84%<br>(70-93%)          | 0.46<br>(0.13-1.1)                          | 0.49%<br>(-0.48-2.2%)                | 0.5%<br>(-0.68-2.7%)                | 30<br>(-40-160)     | 990<br>(-930-4600)     |
| Iraq     | 2010 | Male   | 65 to 69 | 15%<br>(7-28%)                 | 85%<br>(72-93%)          | 0.38<br>(0.12-0.85)                         | 0.14%<br>(-0.66-1.4%)                | 0.099%<br>(-0.87-1.6%)              | 7.5<br>(-65-120)    | 300<br>(-1400-3000)    |
| Iraq     | 2010 | Male   | 70 to 74 | 14%<br>(6.5-25%)               | 86%<br>(75-93%)          | 0.28<br>(0.085-0.69)                        | -0.061%<br>(-0.76-0.88%)             | -0.13%<br>(-0.96-0.96%)             | -9.7<br>(-78-76)    | -100<br>(-1300-1500)   |
| Iraq     | 2010 | Male   | 75 to 79 | 12%<br>(5.4-23%)               | 88%<br>(77-95%)          | 0.22<br>(0.053-0.58)                        | -0.13%<br>(-0.76-0.5%)               | -0.2%<br>(-0.93-0.53%)              | -14<br>(-67-39)     | -160<br>(-890-610)     |
| Iraq     | 2010 | Male   | 80 to 84 | 11%<br>(4.2-21%)               | 89%<br>(79-96%)          | 0.18<br>(0.046-0.46)                        | -0.18%<br>(-0.72-0.32%)              | -0.25%<br>(-0.9-0.31%)              | -13<br>(-47-16)     | -120<br>(-470-200)     |
| Iraq     | 2010 | Male   | 85 to 89 | 11%<br>(4.4-20%)               | 89%<br>(80-96%)          | 0.17<br>(0.044-0.42)                        | -0.21%<br>(-0.7-0.16%)               | -0.3%<br>(-0.89-0.14%)              | -9.3<br>(-28-4.3)   | -57<br>(-190-45)       |
| Iraq     | 2010 | Male   | 90 to 94 | 12%<br>(5.1-24%)               | 88%<br>(76-95%)          | 0.18<br>(0.044-0.47)                        | -0.22%<br>(-0.77-0.19%)              | -0.32%<br>(-1-0.16%)                | -4.2<br>(-13-2.1)   | -17<br>(-61-15)        |
| Iraq     | 2010 | Male   | 95 plus  | 15%<br>(5.6-31%)               | 85%<br>(69-94%)          | 0.2<br>(0.042-0.59)                         | -0.3%<br>(-0.99-0.2%)                | -0.46%<br>(-1.3-0.15%)              | -1.7<br>(-4.7-0.55) | -4.4<br>(-14-2.9)      |
| Iraq     | 2016 | Female | All Ages | 12%<br>(7.2-18%)               | 88%<br>(82-93%)          | 0.21<br>(0.12-0.34)                         | 0.24%<br>(-0.15-0.84%)               | -0.047%<br>(-0.9-1.2%)              | -43<br>(-890-1200)  | 15000<br>(-8800-54000) |
| Iraq     | 2016 | Female | 15 to 19 | 11%<br>(3.4-24%)               | 89%<br>(76-97%)          | 0.17<br>(0.041-0.43)                        | 0.47%<br>(0.27-0.79%)                | 0.52%<br>(0.2-1.2%)                 | 11<br>(4.5-23)      | 1500<br>(820-2500)     |
| Iraq     | 2016 | Female | 20 to 24 | 14%<br>(4-29%)                 | 86%<br>(71-96%)          | 0.27<br>(0.066-0.6)                         | 0.84%<br>(0.5-1.4%)                  | 0.82%<br>(0.32-1.8%)                | 18<br>(6.6-40)      | 2700<br>(1600-4500)    |

| Location | Year | Sex    | Age      | Prevalence of current drinkers | Prevalence of abstainers | Population average of standard drinks daily | Percent of total attributable deaths | Percent of total attributable DALYs | Attributable deaths | Attributable DALYs     |
|----------|------|--------|----------|--------------------------------|--------------------------|---------------------------------------------|--------------------------------------|-------------------------------------|---------------------|------------------------|
| Iraq     | 2016 | Female | 25 to 29 | 15%<br>(4-33%)                 | 85%<br>(67-96%)          | 0.32<br>(0.078-0.7)                         | 0.95%<br>(0.58-1.5%)                 | 1.1%<br>(0.41-2.3%)                 | 23<br>(8.7-54)      | 2900<br>(1700-4800)    |
| Iraq     | 2016 | Female | 30 to 34 | 17%<br>(5-36%)                 | 83%<br>(64-95%)          | 0.37<br>(0.11-0.78)                         | 0.88%<br>(0.43-1.6%)                 | 1.1%<br>(0.35-2.4%)                 | 28<br>(8-68)        | 2700<br>(1300-5400)    |
| Iraq     | 2016 | Female | 35 to 39 | 19%<br>(5.9-36%)               | 81%<br>(64-94%)          | 0.44<br>(0.14-0.89)                         | 0.8%<br>(0.23-1.7%)                  | 1.2%<br>(0.2-2.8%)                  | 36<br>(5.6-97)      | 2600<br>(720-6100)     |
| Iraq     | 2016 | Female | 40 to 44 | 20%<br>(7.9-37%)               | 80%<br>(63-92%)          | 0.49<br>(0.17-1)                            | 0.84%<br>(0.074-2.2%)                | 1.4%<br>(0.16-3.6%)                 | 51<br>(6.3-140)     | 2700<br>(240-7300)     |
| Iraq     | 2016 | Female | 45 to 49 | 21%<br>(7.2-39%)               | 79%<br>(61-93%)          | 0.53<br>(0.16-1.2)                          | 0.78%<br>(-0.3-2.5%)                 | 1.3%<br>(-0.25-4%)                  | 57<br>(-11-180)     | 2500<br>(-930-8200)    |
| Iraq     | 2016 | Female | 50 to 54 | 22%<br>(8.1-41%)               | 78%<br>(59-92%)          | 0.55<br>(0.15-1.3)                          | 0.61%<br>(-0.81-2.9%)                | 1%<br>(-0.95-4.3%)                  | 47<br>(-42-210)     | 1700<br>(-2100-8000)   |
| Iraq     | 2016 | Female | 55 to 59 | 23%<br>(8.6-42%)               | 77%<br>(58-91%)          | 0.55<br>(0.14-1.3)                          | 0.35%<br>(-1.2-2.7%)                 | 0.6%<br>(-1.4-3.7%)                 | 30<br>(-67-190)     | 830<br>(-2700-6300)    |
| Iraq     | 2016 | Female | 60 to 64 | 24%<br>(9.7-42%)               | 76%<br>(58-90%)          | 0.52<br>(0.12-1.3)                          | -0.13%<br>(-1.8-2.2%)                | -0.09%<br>(-2.1-3%)                 | -5.7<br>(-160-210)  | -340<br>(-4900-6100)   |
| Iraq     | 2016 | Female | 65 to 69 | 24%<br>(10-42%)                | 76%<br>(58-90%)          | 0.46<br>(0.11-1.1)                          | -0.49%<br>(-2.2-1.7%)                | -0.57%<br>(-2.6-2.2%)               | -36<br>(-170-140)   | -970<br>(-4200-3500)   |
| Iraq     | 2016 | Female | 70 to 74 | 23%<br>(9.9-41%)               | 77%<br>(59-90%)          | 0.38<br>(0.086-0.99)                        | -0.71%<br>(-2.2-1.1%)                | -0.86%<br>(-2.7-1.4%)               | -65<br>(-200-97)    | -1300<br>(-3900-1900)  |
| Iraq     | 2016 | Female | 75 to 79 | 21%<br>(8.4-40%)               | 79%<br>(60-92%)          | 0.31<br>(0.062-0.95)                        | -0.8%<br>(-2.3-0.66%)                | -0.97%<br>(-2.8-0.73%)              | -82<br>(-240-57)    | -1200<br>(-3500-900)   |
| Iraq     | 2016 | Female | 80 to 84 | 19%<br>(7-40%)                 | 81%<br>(60-93%)          | 0.28<br>(0.056-0.82)                        | -0.75%<br>(-2.2-0.37%)               | -0.91%<br>(-2.7-0.41%)              | -70<br>(-210-29)    | -740<br>(-2200-360)    |
| Iraq     | 2016 | Female | 85 to 89 | 20%<br>(7-41%)                 | 80%<br>(59-93%)          | 0.28<br>(0.054-0.86)                        | -0.84%<br>(-2.4-0.17%)               | -1%<br>(-2.9-0.13%)                 | -52<br>(-150-7.8)   | -380<br>(-1100-77)     |
| Iraq     | 2016 | Female | 90 to 94 | 23%<br>(8.3-45%)               | 77%<br>(55-92%)          | 0.31<br>(0.055-0.87)                        | -0.92%<br>(-2.5-0.21%)               | -1.1%<br>(-3-0.2%)                  | -24<br>(-65-4.2)    | -120<br>(-330-28)      |
| Iraq     | 2016 | Female | 95 plus  | 27%<br>(9.2-52%)               | 73%<br>(48-91%)          | 0.36<br>(0.061-1)                           | -1%<br>(-2.9-0.33%)                  | -1.3%<br>(-3.5-0.32%)               | -8.1<br>(-21-2)     | -26<br>(-70-8.2)       |
| Iraq     | 2016 | Male   | All Ages | 9.2%<br>(6.3-13%)              | 91%<br>(87-94%)          | 0.22<br>(0.13-0.36)                         | 0.64%<br>(0.29-1.2%)                 | 0.59%<br>(0.032-1.5%)               | 760<br>(36-1900)    | 50000<br>(23000-93000) |
| Iraq     | 2016 | Male   | 15 to 19 | 7.7%<br>(3.2-15%)              | 92%<br>(85-97%)          | 0.11<br>(0.031-0.26)                        | 0.49%<br>(0.26-0.89%)                | 0.37%<br>(0.11-0.88%)               | 19<br>(5.8-44)      | 2500<br>(1300-4400)    |
| Iraq     | 2016 | Male   | 20 to 24 | 12%<br>(4.9-23%)               | 88%<br>(77-95%)          | 0.25<br>(0.077-0.52)                        | 0.94%<br>(0.48-1.7%)                 | 0.74%<br>(0.23-1.7%)                | 56<br>(19-120)      | 6200<br>(3300-11000)   |
| Iraq     | 2016 | Male   | 25 to 29 | 15%<br>(6.2-27%)               | 85%<br>(73-94%)          | 0.39<br>(0.13-0.82)                         | 1.3%<br>(0.68-2.2%)                  | 1.2%<br>(0.43-2.7%)                 | 81<br>(26-170)      | 7300<br>(3800-13000)   |
| Iraq     | 2016 | Male   | 30 to 34 | 17%<br>(6.6-32%)               | 83%<br>(68-93%)          | 0.5<br>(0.18-1)                             | 1.4%<br>(0.76-2.6%)                  | 1.6%<br>(0.58-3.1%)                 | 90<br>(33-190)      | 7000<br>(3500-13000)   |
| Iraq     | 2016 | Male   | 35 to 39 | 18%<br>(7.4-33%)               | 82%<br>(67-93%)          | 0.56<br>(0.19-1.1)                          | 1.5%<br>(0.71-3%)                    | 1.7%<br>(0.57-3.8%)                 | 97<br>(29-220)      | 6600<br>(2900-13000)   |
| Iraq     | 2016 | Male   | 40 to 44 | 19%<br>(8.4-33%)               | 81%<br>(67-92%)          | 0.59<br>(0.22-1.2)                          | 1.5%<br>(0.62-3%)                    | 1.7%<br>(0.53-3.9%)                 | 100<br>(27-230)     | 5900<br>(2300-12000)   |

| Location | Year | Sex    | Age      | Prevalence of current drinkers | Prevalence of abstainers | Population average of standard drinks daily | Percent of total attributable deaths | Percent of total attributable DALYs | Attributable deaths  | Attributable DALYs   |
|----------|------|--------|----------|--------------------------------|--------------------------|---------------------------------------------|--------------------------------------|-------------------------------------|----------------------|----------------------|
| Iraq     | 2016 | Male   | 45 to 49 | 18%<br>(7.3-33%)               | 82%<br>(67-93%)          | 0.61<br>(0.19-1.4)                          | 1.4%<br>(0.43-3.4%)                  | 1.7%<br>(0.33-4.3%)                 | 110<br>(19-280)      | 5400<br>(1500-13000) |
| Iraq     | 2016 | Male   | 50 to 54 | 17%<br>(7.4-33%)               | 83%<br>(67-93%)          | 0.61<br>(0.19-1.4)                          | 1.2%<br>(0.11-3.3%)                  | 1.4%<br>(-0.055-4.2%)               | 82<br>(-2.7-250)     | 3600<br>(330-10000)  |
| Iraq     | 2016 | Male   | 55 to 59 | 16%<br>(7.2-31%)               | 84%<br>(69-93%)          | 0.58<br>(0.15-1.4)                          | 1%<br>(-0.11-3.2%)                   | 1.1%<br>(-0.29-4%)                  | 66<br>(-16-230)      | 2500<br>(-240-7800)  |
| Iraq     | 2016 | Male   | 60 to 64 | 16%<br>(6.9-30%)               | 84%<br>(70-93%)          | 0.52<br>(0.13-1.3)                          | 0.69%<br>(-0.37-2.8%)                | 0.75%<br>(-0.56-3.3%)               | 62<br>(-45-280)      | 2000<br>(-1000-8200) |
| Iraq     | 2016 | Male   | 65 to 69 | 15%<br>(6.8-27%)               | 85%<br>(73-93%)          | 0.43<br>(0.11-1)                            | 0.33%<br>(-0.57-2%)                  | 0.32%<br>(-0.79-2.3%)               | 25<br>(-61-190)      | 730<br>(-1300-4600)  |
| Iraq     | 2016 | Male   | 70 to 74 | 14%<br>(6.2-25%)               | 86%<br>(75-94%)          | 0.32<br>(0.086-0.73)                        | 0.076%<br>(-0.65-1.4%)               | 0.032%<br>(-0.86-1.6%)              | 2.8<br>(-76-140)     | 150<br>(-1300-2700)  |
| Iraq     | 2016 | Male   | 75 to 79 | 12%<br>(5.1-23%)               | 88%<br>(77-95%)          | 0.24<br>(0.056-0.67)                        | -0.026%<br>(-0.64-1%)                | -0.079%<br>(-0.81-1.1%)             | -6.6<br>(-69-83)     | -37<br>(-900-1300)   |
| Iraq     | 2016 | Male   | 80 to 84 | 11%<br>(4.3-21%)               | 89%<br>(79-96%)          | 0.2<br>(0.05-0.55)                          | -0.093%<br>(-0.63-0.6%)              | -0.16%<br>(-0.79-0.64%)             | -9.3<br>(-48-39)     | -68<br>(-460-440)    |
| Iraq     | 2016 | Male   | 85 to 89 | 11%<br>(4.2-20%)               | 89%<br>(80-96%)          | 0.19<br>(0.048-0.49)                        | -0.14%<br>(-0.62-0.42%)              | -0.22%<br>(-0.8-0.43%)              | -7.5<br>(-28-16)     | -42<br>(-190-130)    |
| Iraq     | 2016 | Male   | 90 to 94 | 12%<br>(4.8-23%)               | 88%<br>(77-95%)          | 0.19<br>(0.046-0.51)                        | -0.15%<br>(-0.69-0.43%)              | -0.25%<br>(-0.92-0.4%)              | -3.4<br>(-13-5.5)    | -12<br>(-58-35)      |
| Iraq     | 2016 | Male   | 95 plus  | 14%<br>(5.5-30%)               | 86%<br>(70-94%)          | 0.22<br>(0.042-0.64)                        | -0.22%<br>(-0.86-0.41%)              | -0.36%<br>(-1.2-0.35%)              | -1.4<br>(-4.4-1.3)   | -3.3<br>(-13-6.4)    |
| Jordan   | 1990 | Female | All Ages | 10%<br>(6.4-16%)               | 90%<br>(84-94%)          | 0.057<br>(0.04-0.076)                       | -0.015%<br>(-0.19-0.12%)             | -0.42%<br>(-0.94--0.056%)           | -29<br>(-64--3.6)    | -63<br>(-840-520)    |
| Jordan   | 1990 | Female | 15 to 19 | 9.5%<br>(3.3-21%)              | 90%<br>(79-97%)          | 0.05<br>(0.016-0.11)                        | 0.37%<br>(0.23-0.55%)                | 0.34%<br>(0.18-0.63%)               | 0.4<br>(0.21-0.75)   | 96<br>(57-150)       |
| Jordan   | 1990 | Female | 20 to 24 | 12%<br>(3.8-27%)               | 88%<br>(73-96%)          | 0.079<br>(0.026-0.16)                       | 0.67%<br>(0.43-0.95%)                | 0.42%<br>(0.19-0.75%)               | 0.48<br>(0.22-0.91)  | 150<br>(94-240)      |
| Jordan   | 1990 | Female | 25 to 29 | 14%<br>(3.8-29%)               | 86%<br>(71-96%)          | 0.097<br>(0.029-0.2)                        | 0.66%<br>(0.45-0.92%)                | 0.39%<br>(0.18-0.72%)               | 0.41<br>(0.19-0.8)   | 130<br>(82-190)      |
| Jordan   | 1990 | Female | 30 to 34 | 16%<br>(3.7-33%)               | 84%<br>(67-96%)          | 0.12<br>(0.035-0.25)                        | 0.56%<br>(0.37-0.8%)                 | 0.41%<br>(0.18-0.74%)               | 0.4<br>(0.19-0.75)   | 90<br>(55-130)       |
| Jordan   | 1990 | Female | 35 to 39 | 18%<br>(4.5-35%)               | 82%<br>(65-95%)          | 0.14<br>(0.041-0.28)                        | 0.43%<br>(0.24-0.63%)                | 0.43%<br>(0.17-0.83%)               | 0.47<br>(0.18-0.93)  | 61<br>(34-93)        |
| Jordan   | 1990 | Female | 40 to 44 | 19%<br>(6.5-36%)               | 81%<br>(64-94%)          | 0.16<br>(0.054-0.32)                        | 0.29%<br>(0.017-0.51%)               | 0.4%<br>(0.031-0.84%)               | 0.56<br>(0.042-1.2)  | 43<br>(2.3-78)       |
| Jordan   | 1990 | Female | 45 to 49 | 19%<br>(6.6-36%)               | 81%<br>(64-93%)          | 0.17<br>(0.052-0.35)                        | 0.029%<br>(-0.42-0.36%)              | 0.053%<br>(-0.63-0.6%)              | 0.1<br>(-1.2-1.2)    | 4.8<br>(-70-57)      |
| Jordan   | 1990 | Female | 50 to 54 | 20%<br>(7.7-39%)               | 80%<br>(61-92%)          | 0.17<br>(0.055-0.36)                        | -0.24%<br>(-0.92-0.19%)              | -0.28%<br>(-1.2-0.31%)              | -0.77<br>(-3.3-0.85) | -43<br>(-170-34)     |
| Jordan   | 1990 | Female | 55 to 59 | 21%<br>(7.9-41%)               | 79%<br>(59-92%)          | 0.17<br>(0.052-0.37)                        | -0.49%<br>(-1.5-0.028%)              | -0.61%<br>(-1.9-0.1%)               | -2<br>(-6-0.32)      | -85<br>(-260-5.6)    |
| Jordan   | 1990 | Female | 60 to 64 | 22%<br>(8.4-41%)               | 78%<br>(59-92%)          | 0.16<br>(0.044-0.37)                        | -0.72%<br>(-1.9--0.054%)             | -0.9%<br>(-2.4--0.059%)             | -3.6<br>(-9.9--0.23) | -120<br>(-320--9.1)  |



| Location | Year | Sex    | Age      | Prevalence of current drinkers | Prevalence of abstainers | Population average of standard drinks daily | Percent of total attributable deaths | Percent of total attributable DALYs | Attributable deaths    | Attributable DALYs   |
|----------|------|--------|----------|--------------------------------|--------------------------|---------------------------------------------|--------------------------------------|-------------------------------------|------------------------|----------------------|
| Jordan   | 1990 | Female | 65 to 69 | 22%<br>(9.6-40%)               | 78%<br>(60-90%)          | 0.14<br>(0.036-0.31)                        | -0.86%<br>(-2--0.14%)                | -1.1%<br>(-2.5--0.16%)              | -5.4<br>(-13--0.72)    | -140<br>(-330--22)   |
| Jordan   | 1990 | Female | 70 to 74 | 21%<br>(8.8-38%)               | 79%<br>(62-91%)          | 0.11<br>(0.028-0.27)                        | -0.75%<br>(-1.8--0.1%)               | -0.92%<br>(-2.2--0.11%)             | -4.9<br>(-12--0.57)    | -99<br>(-240--13)    |
| Jordan   | 1990 | Female | 75 to 79 | 19%<br>(7.1-38%)               | 81%<br>(62-93%)          | 0.093<br>(0.021-0.25)                       | -0.67%<br>(-1.9--0.081%)             | -0.81%<br>(-2.2--0.096%)            | -5.1<br>(-14--0.6)     | -78<br>(-210--9.1)   |
| Jordan   | 1990 | Female | 80 to 84 | 17%<br>(6.3-37%)               | 83%<br>(63-94%)          | 0.084<br>(0.018-0.23)                       | -0.62%<br>(-1.9--0.069%)             | -0.75%<br>(-2.2--0.083%)            | -4.6<br>(-13--0.48)    | -50<br>(-140--5.1)   |
| Jordan   | 1990 | Female | 85 to 89 | 18%<br>(6.2-38%)               | 82%<br>(62-94%)          | 0.085<br>(0.018-0.25)                       | -0.62%<br>(-1.9--0.066%)             | -0.75%<br>(-2.3--0.087%)            | -3.2<br>(-9.8--0.35)   | -24<br>(-74--2.5)    |
| Jordan   | 1990 | Female | 90 to 94 | 21%<br>(7.5-43%)               | 79%<br>(57-92%)          | 0.097<br>(0.02-0.28)                        | -0.66%<br>(-1.9--0.07%)              | -0.82%<br>(-2.3--0.097%)            | -1.4<br>(-4--0.17)     | -7.1<br>(-20--0.74)  |
| Jordan   | 1990 | Female | 95 plus  | 25%<br>(7.9-50%)               | 75%<br>(50-92%)          | 0.12<br>(0.021-0.33)                        | -0.74%<br>(-2.1--0.05%)              | -0.93%<br>(-2.6--0.091%)            | -0.48<br>(-1.4--0.045) | -1.5<br>(-4.5--0.11) |
| Jordan   | 1990 | Male   | All Ages | 8%<br>(5.6-11%)                | 92%<br>(89-94%)          | 0.065<br>(0.048-0.087)                      | 0.3%<br>(0.16-0.43%)                 | 0.095%<br>(-0.13-0.3%)              | 7.6<br>(-10-24)        | 1500<br>(780-2200)   |
| Jordan   | 1990 | Male   | 15 to 19 | 7.1%<br>(3-14%)                | 93%<br>(86-97%)          | 0.036<br>(0.012-0.079)                      | 0.55%<br>(0.33-0.83%)                | 0.34%<br>(0.11-0.78%)               | 0.69<br>(0.21-1.6)     | 170<br>(100-270)     |
| Jordan   | 1990 | Male   | 20 to 24 | 11%<br>(4.4-21%)               | 89%<br>(79-96%)          | 0.081<br>(0.029-0.16)                       | 1.2%<br>(0.73-1.7%)                  | 0.71%<br>(0.23-1.5%)                | 1.7<br>(0.54-3.8)      | 370<br>(220-550)     |
| Jordan   | 1990 | Male   | 25 to 29 | 14%<br>(5.3-26%)               | 86%<br>(74-95%)          | 0.13<br>(0.05-0.25)                         | 1.3%<br>(0.86-1.8%)                  | 1.1%<br>(0.43-2%)                   | 2.2<br>(0.88-4.3)      | 330<br>(220-490)     |
| Jordan   | 1990 | Male   | 30 to 34 | 15%<br>(5.8-29%)               | 85%<br>(71-94%)          | 0.16<br>(0.066-0.3)                         | 1.1%<br>(0.72-1.6%)                  | 0.99%<br>(0.39-1.9%)                | 1.8<br>(0.69-3.4)      | 220<br>(140-340)     |
| Jordan   | 1990 | Male   | 35 to 39 | 17%<br>(6.5-30%)               | 83%<br>(70-93%)          | 0.18<br>(0.068-0.36)                        | 0.96%<br>(0.57-1.4%)                 | 0.88%<br>(0.28-1.6%)                | 1.4<br>(0.45-2.7)      | 160<br>(89-230)      |
| Jordan   | 1990 | Male   | 40 to 44 | 17%<br>(7.6-30%)               | 83%<br>(70-92%)          | 0.2<br>(0.072-0.38)                         | 0.68%<br>(0.29-1.1%)                 | 0.53%<br>(-0.09-1.1%)               | 0.97<br>(-0.15-2.2)    | 100<br>(43-170)      |
| Jordan   | 1990 | Male   | 45 to 49 | 16%<br>(6.6-30%)               | 84%<br>(70-93%)          | 0.2<br>(0.068-0.43)                         | 0.41%<br>(-0.029-0.77%)              | 0.26%<br>(-0.47-0.83%)              | 0.61<br>(-1.1-2)       | 69<br>(-4.8-130)     |
| Jordan   | 1990 | Male   | 50 to 54 | 16%<br>(6.9-30%)               | 84%<br>(70-93%)          | 0.2<br>(0.068-0.41)                         | 0.22%<br>(-0.27-0.59%)               | 0.1%<br>(-0.68-0.65%)               | 0.32<br>(-2.1-2.1)     | 42<br>(-53-110)      |
| Jordan   | 1990 | Male   | 55 to 59 | 15%<br>(6.6-29%)               | 85%<br>(71-93%)          | 0.19<br>(0.062-0.38)                        | 0.1%<br>(-0.38-0.49%)                | 0.0077%<br>(-0.71-0.56%)            | 0.029<br>(-2.8-2.2)    | 19<br>(-70-93)       |
| Jordan   | 1990 | Male   | 60 to 64 | 15%<br>(6.2-28%)               | 85%<br>(72-94%)          | 0.17<br>(0.05-0.38)                         | 0.027%<br>(-0.46-0.39%)              | -0.042%<br>(-0.7-0.45%)             | -0.2<br>(-3.3-2.1)     | 4.7<br>(-81-68)      |
| Jordan   | 1990 | Male   | 65 to 69 | 14%<br>(6-26%)                 | 86%<br>(74-94%)          | 0.14<br>(0.043-0.3)                         | -0.043%<br>(-0.5-0.26%)              | -0.1%<br>(-0.74-0.31%)              | -0.55<br>(-3.8-1.6)    | -6.9<br>(-81-42)     |
| Jordan   | 1990 | Male   | 70 to 74 | 13%<br>(5.8-23%)               | 87%<br>(77-94%)          | 0.11<br>(0.032-0.25)                        | -0.035%<br>(-0.41-0.21%)             | -0.074%<br>(-0.56-0.24%)            | -0.39<br>(-2.9-1.3)    | -4.4<br>(-51-27)     |
| Jordan   | 1990 | Male   | 75 to 79 | 11%<br>(4.9-21%)               | 89%<br>(79-95%)          | 0.08<br>(0.02-0.21)                         | -0.022%<br>(-0.36-0.18%)             | -0.051%<br>(-0.49-0.22%)            | -0.34<br>(-3.3-1.4)    | -2.6<br>(-44-23)     |
| Jordan   | 1990 | Male   | 80 to 84 | 10%<br>(3.7-20%)               | 90%<br>(80-96%)          | 0.067<br>(0.017-0.16)                       | -0.016%<br>(-0.33-0.16%)             | -0.041%<br>(-0.46-0.19%)            | -0.3<br>(-3.3-1.4)     | -1.5<br>(-33-16)     |

| Location | Year | Sex    | Age      | Prevalence of current drinkers | Prevalence of abstainers | Population average of standard drinks daily | Percent of total attributable deaths | Percent of total attributable DALYs | Attributable deaths    | Attributable DALYs     |
|----------|------|--------|----------|--------------------------------|--------------------------|---------------------------------------------|--------------------------------------|-------------------------------------|------------------------|------------------------|
| Jordan   | 1990 | Male   | 85 to 89 | 9.7%<br>(3.9-19%)              | 90%<br>(81-96%)          | 0.061<br>(0.016-0.16)                       | -0.034%<br>(-0.33-0.14%)             | -0.07%<br>(-0.44-0.14%)             | -0.31<br>(-1.9-0.64)   | -1.3<br>(-13-5.5)      |
| Jordan   | 1990 | Male   | 90 to 94 | 11%<br>(4.5-22%)               | 89%<br>(78-96%)          | 0.064<br>(0.016-0.16)                       | -0.054%<br>(-0.35-0.12%)             | -0.11%<br>(-0.48-0.12%)             | -0.15<br>(-0.69-0.17)  | -0.48<br>(-3.1-1.1)    |
| Jordan   | 1990 | Male   | 95 plus  | 13%<br>(5-28%)                 | 87%<br>(72-95%)          | 0.074<br>(0.015-0.21)                       | -0.045%<br>(-0.41-0.15%)             | -0.13%<br>(-0.59-0.11%)             | -0.046<br>(-0.21-0.04) | -0.065<br>(-0.59-0.22) |
| Jordan   | 1995 | Female | All Ages | 11%<br>(6.2-17%)               | 89%<br>(83-94%)          | 0.062<br>(0.044-0.084)                      | 0.029%<br>(-0.15-0.16%)              | -0.37%<br>(-0.88--0.025%)           | -30<br>(-71--1.9)      | 160<br>(-790-920)      |
| Jordan   | 1995 | Female | 15 to 19 | 9.5%<br>(2.9-22%)              | 91%<br>(78-97%)          | 0.05<br>(0.014-0.12)                        | 0.38%<br>(0.23-0.57%)                | 0.35%<br>(0.19-0.64%)               | 0.46<br>(0.24-0.85)    | 120<br>(68-180)        |
| Jordan   | 1995 | Female | 20 to 24 | 12%<br>(3.5-27%)               | 88%<br>(73-97%)          | 0.08<br>(0.025-0.17)                        | 0.7%<br>(0.43-0.99%)                 | 0.43%<br>(0.21-0.77%)               | 0.66<br>(0.32-1.3)     | 230<br>(130-340)       |
| Jordan   | 1995 | Female | 25 to 29 | 14%<br>(3.5-29%)               | 86%<br>(71-96%)          | 0.097<br>(0.03-0.2)                         | 0.68%<br>(0.47-0.94%)                | 0.39%<br>(0.19-0.72%)               | 0.59<br>(0.27-1.1)     | 200<br>(130-300)       |
| Jordan   | 1995 | Female | 30 to 34 | 16%<br>(4-32%)                 | 84%<br>(68-96%)          | 0.12<br>(0.036-0.23)                        | 0.59%<br>(0.37-0.84%)                | 0.43%<br>(0.2-0.77%)                | 0.66<br>(0.31-1.3)     | 150<br>(94-230)        |
| Jordan   | 1995 | Female | 35 to 39 | 17%<br>(4.7-34%)               | 83%<br>(66-95%)          | 0.14<br>(0.042-0.28)                        | 0.45%<br>(0.27-0.65%)                | 0.47%<br>(0.21-0.89%)               | 0.75<br>(0.31-1.4)     | 99<br>(59-150)         |
| Jordan   | 1995 | Female | 40 to 44 | 18%<br>(6.4-34%)               | 82%<br>(66-94%)          | 0.15<br>(0.049-0.31)                        | 0.32%<br>(0.079-0.56%)               | 0.47%<br>(0.12-0.9%)                | 0.78<br>(0.19-1.6)     | 60<br>(14-110)         |
| Jordan   | 1995 | Female | 45 to 49 | 19%<br>(6.6-36%)               | 81%<br>(64-93%)          | 0.17<br>(0.052-0.36)                        | 0.081%<br>(-0.33-0.41%)              | 0.15%<br>(-0.47-0.68%)              | 0.32<br>(-1.1.6)       | 16<br>(-64-80)         |
| Jordan   | 1995 | Female | 50 to 54 | 20%<br>(7.9-38%)               | 80%<br>(62-92%)          | 0.17<br>(0.052-0.37)                        | -0.17%<br>(-0.8-0.25%)               | -0.18%<br>(-1-0.44%)                | -0.6<br>(-3.3-1.5)     | -38<br>(-180-56)       |
| Jordan   | 1995 | Female | 55 to 59 | 21%<br>(8.2-40%)               | 79%<br>(60-92%)          | 0.17<br>(0.048-0.38)                        | -0.44%<br>(-1.4-0.064%)              | -0.53%<br>(-1.8-0.14%)              | -2.2<br>(-7.1-0.61)    | -98<br>(-310-15)       |
| Jordan   | 1995 | Female | 60 to 64 | 22%<br>(8.4-43%)               | 78%<br>(57-92%)          | 0.16<br>(0.04-0.38)                         | -0.68%<br>(-1.9--0.019%)             | -0.85%<br>(-2.4--0.013%)            | -4.3<br>(-13--0.065)   | -150<br>(-420--4.3)    |
| Jordan   | 1995 | Female | 65 to 69 | 23%<br>(9.4-41%)               | 77%<br>(59-91%)          | 0.14<br>(0.034-0.32)                        | -0.83%<br>(-2--0.12%)                | -1%<br>(-2.5--0.14%)                | -6.2<br>(-15--0.79)    | -160<br>(-390--22)     |
| Jordan   | 1995 | Female | 70 to 74 | 21%<br>(8.6-38%)               | 79%<br>(62-91%)          | 0.11<br>(0.027-0.28)                        | -0.71%<br>(-1.7--0.084%)             | -0.87%<br>(-2.1--0.095%)            | -5.9<br>(-15--0.6)     | -120<br>(-290--14)     |
| Jordan   | 1995 | Female | 75 to 79 | 18%<br>(7.1-37%)               | 82%<br>(63-93%)          | 0.09<br>(0.019-0.25)                        | -0.63%<br>(-1.8--0.071%)             | -0.76%<br>(-2.2--0.082%)            | -4.8<br>(-13--0.52)    | -73<br>(-210--8.2)     |
| Jordan   | 1995 | Female | 80 to 84 | 17%<br>(5.9-37%)               | 83%<br>(63-94%)          | 0.081<br>(0.016-0.23)                       | -0.58%<br>(-1.7--0.034%)             | -0.7%<br>(-2.1--0.045%)             | -4.1<br>(-12--0.25)    | -45<br>(-130--2.9)     |
| Jordan   | 1995 | Female | 85 to 89 | 17%<br>(5.9-38%)               | 83%<br>(62-94%)          | 0.082<br>(0.017-0.25)                       | -0.58%<br>(-1.9--0.047%)             | -0.7%<br>(-2.3--0.062%)             | -3.5<br>(-11--0.33)    | -27<br>(-87--2.2)      |
| Jordan   | 1995 | Female | 90 to 94 | 20%<br>(6.8-42%)               | 80%<br>(58-93%)          | 0.093<br>(0.018-0.28)                       | -0.61%<br>(-1.8--0.058%)             | -0.75%<br>(-2.2--0.083%)            | -1.8<br>(-5.3--0.2)    | -9.1<br>(-27--0.87)    |
| Jordan   | 1995 | Female | 95 plus  | 24%<br>(8.3-48%)               | 76%<br>(52-92%)          | 0.11<br>(0.02-0.31)                         | -0.68%<br>(-2--0.05%)                | -0.86%<br>(-2.5--0.093%)            | -0.56<br>(-1.6--0.059) | -1.8<br>(-5.2--0.13)   |
| Jordan   | 1995 | Male   | All Ages | 8.7%<br>(5.7-12%)              | 91%<br>(88-94%)          | 0.072<br>(0.052-0.095)                      | 0.35%<br>(0.21-0.49%)                | 0.13%<br>(-0.096-0.34%)             | 12<br>(-9.1-33)        | 2200<br>(1300-3200)    |

| Location | Year | Sex    | Age      | Prevalence of current drinkers | Prevalence of abstainers | Population average of standard drinks daily | Percent of total attributable deaths | Percent of total attributable DALYs | Attributable deaths     | Attributable DALYs     |
|----------|------|--------|----------|--------------------------------|--------------------------|---------------------------------------------|--------------------------------------|-------------------------------------|-------------------------|------------------------|
| Jordan   | 1995 | Male   | 15 to 19 | 6.9%<br>(2.9-14%)              | 93%<br>(86-97%)          | 0.035<br>(0.011-0.077)                      | 0.56%<br>(0.34-0.85%)                | 0.33%<br>(0.11-0.74%)               | 0.74<br>(0.25-1.7)      | 200<br>(120-310)       |
| Jordan   | 1995 | Male   | 20 to 24 | 11%<br>(4.2-20%)               | 89%<br>(80-96%)          | 0.076<br>(0.029-0.14)                       | 1.2%<br>(0.74-1.7%)                  | 0.68%<br>(0.24-1.4%)                | 2.1<br>(0.73-4.5)       | 480<br>(300-740)       |
| Jordan   | 1995 | Male   | 25 to 29 | 13%<br>(5.3-25%)               | 87%<br>(75-95%)          | 0.12<br>(0.048-0.22)                        | 1.3%<br>(0.86-1.8%)                  | 1%<br>(0.47-1.9%)                   | 3.2<br>(1.4-6.2)        | 510<br>(330-730)       |
| Jordan   | 1995 | Male   | 30 to 34 | 15%<br>(5.7-29%)               | 85%<br>(71-94%)          | 0.15<br>(0.064-0.28)                        | 1.1%<br>(0.76-1.6%)                  | 0.96%<br>(0.39-1.8%)                | 2.8<br>(1.1-5.4)        | 380<br>(240-570)       |
| Jordan   | 1995 | Male   | 35 to 39 | 17%<br>(6.5-31%)               | 83%<br>(69-93%)          | 0.18<br>(0.069-0.35)                        | 0.97%<br>(0.62-1.4%)                 | 0.88%<br>(0.28-1.6%)                | 2.3<br>(0.67-4.2)       | 260<br>(150-380)       |
| Jordan   | 1995 | Male   | 40 to 44 | 17%<br>(7.6-30%)               | 83%<br>(70-92%)          | 0.19<br>(0.066-0.38)                        | 0.7%<br>(0.32-1.1%)                  | 0.57%<br>(-0.036-1.2%)              | 1.4<br>(-0.093-3.1)     | 150<br>(69-240)        |
| Jordan   | 1995 | Male   | 45 to 49 | 16%<br>(6.6-31%)               | 84%<br>(69-93%)          | 0.2<br>(0.064-0.43)                         | 0.44%<br>(0.02-0.83%)                | 0.3%<br>(-0.37-0.89%)               | 0.88<br>(-1.1-2.7)      | 93<br>(4.4-180)        |
| Jordan   | 1995 | Male   | 50 to 54 | 16%<br>(6.7-30%)               | 84%<br>(70-93%)          | 0.19<br>(0.062-0.42)                        | 0.25%<br>(-0.25-0.62%)               | 0.14%<br>(-0.61-0.69%)              | 0.55<br>(-2.5-2.8)      | 59<br>(-56-150)        |
| Jordan   | 1995 | Male   | 55 to 59 | 15%<br>(6.4-28%)               | 85%<br>(72-94%)          | 0.18<br>(0.057-0.39)                        | 0.12%<br>(-0.35-0.48%)               | 0.037%<br>(-0.68-0.54%)             | 0.2<br>(-3.7-3.1)       | 32<br>(-94-130)        |
| Jordan   | 1995 | Male   | 60 to 64 | 14%<br>(6.2-28%)               | 86%<br>(72-94%)          | 0.16<br>(0.046-0.37)                        | 0.044%<br>(-0.43-0.39%)              | -0.018%<br>(-0.65-0.46%)            | -0.11<br>(-4.2-2.9)     | 11<br>(-100-98)        |
| Jordan   | 1995 | Male   | 65 to 69 | 14%<br>(5.9-25%)               | 86%<br>(75-94%)          | 0.14<br>(0.041-0.29)                        | -0.023%<br>(-0.44-0.28%)             | -0.076%<br>(-0.66-0.32%)            | -0.5<br>(-4.2-2)        | -4.7<br>(-90-57)       |
| Jordan   | 1995 | Male   | 70 to 74 | 13%<br>(5.4-23%)               | 87%<br>(77-95%)          | 0.1<br>(0.029-0.23)                         | -0.015%<br>(-0.36-0.22%)             | -0.047%<br>(-0.51-0.25%)            | -0.3<br>(-3.3-1.6)      | -2.3<br>(-57-34)       |
| Jordan   | 1995 | Male   | 75 to 79 | 11%<br>(4.7-21%)               | 89%<br>(79-95%)          | 0.078<br>(0.018-0.19)                       | -0.0044%<br>(-0.34-0.2%)             | -0.028%<br>(-0.46-0.23%)            | -0.16<br>(-2.6-1.3)     | -0.49<br>(-35-21)      |
| Jordan   | 1995 | Male   | 80 to 84 | 9.8%<br>(3.9-19%)              | 90%<br>(81-96%)          | 0.065<br>(0.016-0.16)                       | 0.00019%<br>(-0.31-0.18%)            | -0.021%<br>(-0.37-0.2%)             | -0.12<br>(-2.2-1.2)     | 0.008<br>(-22-14)      |
| Jordan   | 1995 | Male   | 85 to 89 | 9.5%<br>(3.8-19%)              | 90%<br>(81-96%)          | 0.059<br>(0.015-0.15)                       | -0.019%<br>(-0.33-0.15%)             | -0.052%<br>(-0.43-0.16%)            | -0.3<br>(-2.5-0.93)     | -1<br>(-17-8)          |
| Jordan   | 1995 | Male   | 90 to 94 | 11%<br>(4.4-22%)               | 89%<br>(78-96%)          | 0.063<br>(0.015-0.17)                       | -0.043%<br>(-0.36-0.13%)             | -0.096%<br>(-0.48-0.12%)            | -0.23<br>(-1.2-0.3)     | -0.64<br>(-5.3-2)      |
| Jordan   | 1995 | Male   | 95 plus  | 13%<br>(5-29%)                 | 87%<br>(71-95%)          | 0.072<br>(0.014-0.2)                        | -0.035%<br>(-0.4-0.17%)              | -0.12%<br>(-0.57-0.12%)             | -0.055<br>(-0.27-0.058) | -0.066<br>(-0.76-0.32) |
| Jordan   | 2000 | Female | All Ages | 11%<br>(6.3-17%)               | 89%<br>(83-94%)          | 0.09<br>(0.065-0.12)                        | 0.053%<br>(-0.13-0.22%)              | -0.39%<br>(-0.96--0.0034%)          | -34<br>(-85--0.25)      | 300<br>(-750-1200)     |
| Jordan   | 2000 | Female | 15 to 19 | 9.5%<br>(2.8-21%)              | 90%<br>(79-97%)          | 0.071<br>(0.019-0.16)                       | 0.4%<br>(0.25-0.62%)                 | 0.42%<br>(0.22-0.83%)               | 0.61<br>(0.29-1.2)      | 140<br>(80-220)        |
| Jordan   | 2000 | Female | 20 to 24 | 12%<br>(3.6-26%)               | 88%<br>(74-96%)          | 0.11<br>(0.037-0.24)                        | 0.75%<br>(0.49-1.1%)                 | 0.55%<br>(0.26-1%)                  | 0.85<br>(0.4-1.6)       | 250<br>(160-380)       |
| Jordan   | 2000 | Female | 25 to 29 | 14%<br>(4-30%)                 | 86%<br>(70-96%)          | 0.14<br>(0.044-0.28)                        | 0.75%<br>(0.52-1%)                   | 0.55%<br>(0.25-1%)                  | 0.91<br>(0.4-1.8)       | 250<br>(160-370)       |
| Jordan   | 2000 | Female | 30 to 34 | 15%<br>(4-33%)                 | 85%<br>(67-96%)          | 0.16<br>(0.051-0.32)                        | 0.65%<br>(0.42-0.94%)                | 0.61%<br>(0.3-1.1%)                 | 1.1<br>(0.49-2.1)       | 200<br>(120-300)       |

| Location | Year | Sex    | Age      | Prevalence of current drinkers | Prevalence of abstainers | Population average of standard drinks daily | Percent of total attributable deaths | Percent of total attributable DALYs | Attributable deaths   | Attributable DALYs   |
|----------|------|--------|----------|--------------------------------|--------------------------|---------------------------------------------|--------------------------------------|-------------------------------------|-----------------------|----------------------|
| Jordan   | 2000 | Female | 35 to 39 | 17%<br>(4.5-34%)               | 83%<br>(66-95%)          | 0.2<br>(0.061-0.39)                         | 0.54%<br>(0.31-0.82%)                | 0.71%<br>(0.32-1.4%)                | 1.4<br>(0.59-2.8)     | 150<br>(87-230)      |
| Jordan   | 2000 | Female | 40 to 44 | 18%<br>(6.7-36%)               | 82%<br>(64-93%)          | 0.22<br>(0.076-0.45)                        | 0.42%<br>(0.12-0.77%)                | 0.73%<br>(0.24-1.5%)                | 1.5<br>(0.49-3.2)     | 97<br>(29-190)       |
| Jordan   | 2000 | Female | 45 to 49 | 19%<br>(6.5-35%)               | 81%<br>(65-93%)          | 0.23<br>(0.073-0.53)                        | 0.18%<br>(-0.3-0.68%)                | 0.39%<br>(-0.29-1.3%)               | 0.89<br>(-0.64-3.1)   | 37<br>(-62-140)      |
| Jordan   | 2000 | Female | 50 to 54 | 19%<br>(7-37%)                 | 81%<br>(63-93%)          | 0.24<br>(0.07-0.52)                         | -0.069%<br>(-0.72-0.54%)             | 0.03%<br>(-0.9-1%)                  | 0.1<br>(-2.9-3.4)     | -15<br>(-160-120)    |
| Jordan   | 2000 | Female | 55 to 59 | 20%<br>(7.4-38%)               | 80%<br>(62-93%)          | 0.23<br>(0.065-0.52)                        | -0.35%<br>(-1.3-0.33%)               | -0.37%<br>(-1.7-0.64%)              | -1.8<br>(-7.9-3)      | -91<br>(-330-86)     |
| Jordan   | 2000 | Female | 60 to 64 | 21%<br>(8.1-40%)               | 79%<br>(60-92%)          | 0.22<br>(0.058-0.52)                        | -0.64%<br>(-1.9-0.099%)              | -0.76%<br>(-2.3-0.23%)              | -4.6<br>(-14-1.4)     | -160<br>(-480-25)    |
| Jordan   | 2000 | Female | 65 to 69 | 22%<br>(9.4-38%)               | 78%<br>(62-91%)          | 0.2<br>(0.055-0.42)                         | -0.87%<br>(-2.1--0.14%)              | -1.1%<br>(-2.6--0.13%)              | -7.7<br>(-18--0.93)   | -200<br>(-480--31)   |
| Jordan   | 2000 | Female | 70 to 74 | 20%<br>(9-37%)                 | 80%<br>(63-91%)          | 0.16<br>(0.039-0.4)                         | -0.8%<br>(-1.9--0.12%)               | -0.96%<br>(-2.3--0.13%)             | -7.4<br>(-18--0.98)   | -150<br>(-370--24)   |
| Jordan   | 2000 | Female | 75 to 79 | 18%<br>(7.1-36%)               | 82%<br>(64-93%)          | 0.13<br>(0.027-0.36)                        | -0.73%<br>(-2--0.11%)                | -0.87%<br>(-2.4--0.13%)             | -6.6<br>(-18--0.93)   | -100<br>(-280--15)   |
| Jordan   | 2000 | Female | 80 to 84 | 17%<br>(6-36%)                 | 83%<br>(64-94%)          | 0.12<br>(0.025-0.33)                        | -0.69%<br>(-2--0.096%)               | -0.82%<br>(-2.4--0.12%)             | -5.2<br>(-15--0.69)   | -57<br>(-170--7.7)   |
| Jordan   | 2000 | Female | 85 to 89 | 18%<br>(6-39%)                 | 82%<br>(61-94%)          | 0.12<br>(0.023-0.36)                        | -0.7%<br>(-2.1--0.084%)              | -0.84%<br>(-2.6--0.11%)             | -4.2<br>(-13--0.54)   | -32<br>(-98--3.7)    |
| Jordan   | 2000 | Female | 90 to 94 | 20%<br>(6.9-43%)               | 80%<br>(57-93%)          | 0.14<br>(0.026-0.39)                        | -0.74%<br>(-2.2--0.1%)               | -0.91%<br>(-2.6--0.13%)             | -2.6<br>(-7.3--0.36)  | -13<br>(-37--1.7)    |
| Jordan   | 2000 | Female | 95 plus  | 25%<br>(7.9-49%)               | 75%<br>(51-92%)          | 0.16<br>(0.028-0.47)                        | -0.81%<br>(-2.3--0.063%)             | -1%<br>(-2.8--0.11%)                | -0.94<br>(-2.6--0.11) | -3.1<br>(-8.4--0.24) |
| Jordan   | 2000 | Male   | All Ages | 8.6%<br>(5.7-12%)              | 91%<br>(88-94%)          | 0.1<br>(0.074-0.14)                         | 0.43%<br>(0.27-0.59%)                | 0.21%<br>(-0.059-0.47%)             | 20<br>(-5.3-47)       | 2700<br>(1600-3900)  |
| Jordan   | 2000 | Male   | 15 to 19 | 6.7%<br>(2.8-13%)              | 93%<br>(87-97%)          | 0.048<br>(0.015-0.11)                       | 0.6%<br>(0.35-0.91%)                 | 0.41%<br>(0.14-0.9%)                | 0.97<br>(0.32-2.2)    | 230<br>(140-360)     |
| Jordan   | 2000 | Male   | 20 to 24 | 10%<br>(4-20%)                 | 90%<br>(80-96%)          | 0.11<br>(0.038-0.2)                         | 1.3%<br>(0.82-1.8%)                  | 0.86%<br>(0.32-1.8%)                | 2.5<br>(0.87-5.3)     | 520<br>(320-790)     |
| Jordan   | 2000 | Male   | 25 to 29 | 13%<br>(5.1-24%)               | 87%<br>(76-95%)          | 0.17<br>(0.066-0.31)                        | 1.4%<br>(0.94-2%)                    | 1.3%<br>(0.6-2.2%)                  | 3.9<br>(1.7-7.1)      | 570<br>(370-830)     |
| Jordan   | 2000 | Male   | 30 to 34 | 15%<br>(5.5-29%)               | 85%<br>(71-95%)          | 0.22<br>(0.092-0.39)                        | 1.2%<br>(0.85-1.8%)                  | 1.2%<br>(0.56-2.2%)                 | 3.6<br>(1.6-6.5)      | 460<br>(290-680)     |
| Jordan   | 2000 | Male   | 35 to 39 | 16%<br>(6.5-29%)               | 84%<br>(71-93%)          | 0.25<br>(0.096-0.48)                        | 1.1%<br>(0.72-1.6%)                  | 1.1%<br>(0.47-2%)                   | 3.2<br>(1.2-6.1)      | 340<br>(210-500)     |
| Jordan   | 2000 | Male   | 40 to 44 | 17%<br>(7.3-30%)               | 83%<br>(70-93%)          | 0.27<br>(0.1-0.52)                          | 0.83%<br>(0.44-1.3%)                 | 0.79%<br>(0.14-1.5%)                | 2.2<br>(0.39-4.4)     | 200<br>(110-330)     |
| Jordan   | 2000 | Male   | 45 to 49 | 16%<br>(6.4-30%)               | 84%<br>(70-94%)          | 0.28<br>(0.092-0.62)                        | 0.57%<br>(0.074-1.1%)                | 0.51%<br>(-0.3-1.4%)                | 1.5<br>(-0.89-4.2)    | 120<br>(16-250)      |
| Jordan   | 2000 | Male   | 50 to 54 | 16%<br>(6.7-31%)               | 84%<br>(69-93%)          | 0.27<br>(0.086-0.59)                        | 0.39%<br>(-0.15-1%)                  | 0.34%<br>(-0.5-1.2%)                | 1.3<br>(-1.8-4.8)     | 90<br>(-33-230)      |

| Location | Year | Sex    | Age      | Prevalence of current drinkers | Prevalence of abstainers | Population average of standard drinks daily | Percent of total attributable deaths | Percent of total attributable DALYs | Attributable deaths  | Attributable DALYs   |
|----------|------|--------|----------|--------------------------------|--------------------------|---------------------------------------------|--------------------------------------|-------------------------------------|----------------------|----------------------|
| Jordan   | 2000 | Male   | 55 to 59 | 15%<br>(6.4-29%)               | 85%<br>(71-94%)          | 0.26<br>(0.082-0.56)                        | 0.26%<br>(-0.27-0.82%)               | 0.23%<br>(-0.53-1.1%)               | 1.2<br>(-2.8-5.9)    | 68<br>(-72-220)      |
| Jordan   | 2000 | Male   | 60 to 64 | 14%<br>(6.1-28%)               | 86%<br>(72-94%)          | 0.23<br>(0.064-0.53)                        | 0.15%<br>(-0.36-0.73%)               | 0.12%<br>(-0.56-0.85%)              | 0.92<br>(-4.2-6.8)   | 43<br>(-100-220)     |
| Jordan   | 2000 | Male   | 65 to 69 | 14%<br>(5.9-25%)               | 86%<br>(75-94%)          | 0.19<br>(0.056-0.4)                         | 0.043%<br>(-0.39-0.43%)              | 0.011%<br>(-0.62-0.53%)             | 0.1<br>(-4.7-4.2)    | 11<br>(-100-110)     |
| Jordan   | 2000 | Male   | 70 to 74 | 12%<br>(5.4-22%)               | 88%<br>(78-95%)          | 0.14<br>(0.041-0.33)                        | 0.01%<br>(-0.37-0.29%)               | -0.013%<br>(-0.49-0.34%)            | -0.1<br>(-3.8-2.6)   | 1.9<br>(-68-53)      |
| Jordan   | 2000 | Male   | 75 to 79 | 11%<br>(4.4-20%)               | 89%<br>(80-96%)          | 0.11<br>(0.026-0.27)                        | 0.00097%<br>(-0.35-0.22%)            | -0.021%<br>(-0.46-0.26%)            | -0.14<br>(-3.1-1.8)  | 0.069<br>(-45-28)    |
| Jordan   | 2000 | Male   | 80 to 84 | 9.5%<br>(3.8-18%)              | 90%<br>(82-96%)          | 0.09<br>(0.024-0.23)                        | -0.0026%<br>(-0.31-0.19%)            | -0.025%<br>(-0.4-0.21%)             | -0.13<br>(-2.1-1.1)  | -0.19<br>(-21-13)    |
| Jordan   | 2000 | Male   | 85 to 89 | 9.4%<br>(3.7-18%)              | 91%<br>(82-96%)          | 0.083<br>(0.021-0.22)                       | -0.03%<br>(-0.36-0.16%)              | -0.068%<br>(-0.46-0.16%)            | -0.31<br>(-2.1-0.74) | -1.2<br>(-15-6.8)    |
| Jordan   | 2000 | Male   | 90 to 94 | 11%<br>(4.1-21%)               | 89%<br>(79-96%)          | 0.088<br>(0.021-0.24)                       | -0.056%<br>(-0.38-0.14%)             | -0.11%<br>(-0.51-0.13%)             | -0.36<br>(-1.6-0.41) | -1.1<br>(-7.2-2.8)   |
| Jordan   | 2000 | Male   | 95 plus  | 13%<br>(4.7-27%)               | 87%<br>(73-95%)          | 0.1<br>(0.02-0.29)                          | -0.047%<br>(-0.44-0.18%)             | -0.14%<br>(-0.62-0.14%)             | -0.11<br>(-0.5-0.11) | -0.15<br>(-1.4-0.61) |
| Jordan   | 2005 | Female | All Ages | 11%<br>(6.5-17%)               | 89%<br>(83-93%)          | 0.14<br>(0.1-0.18)                          | -0.11%<br>(-0.13-0.35%)              | -0.32%<br>(-0.95-0.26%)             | -32<br>(-97-25)      | 690<br>(-810-2200)   |
| Jordan   | 2005 | Female | 15 to 19 | 9.3%<br>(2.9-20%)              | 91%<br>(80-97%)          | 0.1<br>(0.029-0.23)                         | 0.42%<br>(0.26-0.64%)                | 0.47%<br>(0.23-0.93%)               | 0.66<br>(0.31-1.3)   | 150<br>(86-230)      |
| Jordan   | 2005 | Female | 20 to 24 | 12%<br>(3.5-26%)               | 88%<br>(74-96%)          | 0.16<br>(0.052-0.35)                        | 0.78%<br>(0.51-1.1%)                 | 0.66%<br>(0.31-1.2%)                | 1.1<br>(0.51-2.2)    | 300<br>(180-460)     |
| Jordan   | 2005 | Female | 25 to 29 | 14%<br>(4-29%)                 | 86%<br>(71-96%)          | 0.19<br>(0.065-0.4)                         | 0.81%<br>(0.54-1.1%)                 | 0.72%<br>(0.33-1.4%)                | 1.2<br>(0.5-2.4)     | 290<br>(180-430)     |
| Jordan   | 2005 | Female | 30 to 34 | 15%<br>(4.3-33%)               | 85%<br>(67-96%)          | 0.23<br>(0.079-0.46)                        | 0.72%<br>(0.47-1%)                   | 0.83%<br>(0.42-1.5%)                | 1.5<br>(0.68-2.9)    | 260<br>(160-390)     |
| Jordan   | 2005 | Female | 35 to 39 | 17%<br>(4.9-33%)               | 83%<br>(67-95%)          | 0.28<br>(0.093-0.53)                        | 0.65%<br>(0.37-1%)                   | 1%<br>(0.45-1.9%)                   | 2.3<br>(0.9-4.5)     | 220<br>(120-350)     |
| Jordan   | 2005 | Female | 40 to 44 | 18%<br>(6.7-34%)               | 82%<br>(66-93%)          | 0.31<br>(0.11-0.6)                          | 0.59%<br>(0.23-1.1%)                 | 1.2%<br>(0.5-2.2%)                  | 3<br>(1.2-6)         | 180<br>(71-330)      |
| Jordan   | 2005 | Female | 45 to 49 | 18%<br>(6.5-34%)               | 82%<br>(66-94%)          | 0.33<br>(0.11-0.71)                         | 0.41%<br>(-0.12-1.1%)                | 0.9%<br>(0.093-2.3%)                | 2.3<br>(0.23-6.3)    | 100<br>(-31-290)     |
| Jordan   | 2005 | Female | 50 to 54 | 19%<br>(7.3-36%)               | 81%<br>(64-93%)          | 0.34<br>(0.11-0.74)                         | 0.2%<br>(-0.56-1.1%)                 | 0.51%<br>(-0.58-2%)                 | 1.6<br>(-1.7-6.4)    | 45<br>(-130-240)     |
| Jordan   | 2005 | Female | 55 to 59 | 20%<br>(7.9-38%)               | 80%<br>(62-92%)          | 0.34<br>(0.1-0.75)                          | -0.087%<br>(-1.1-0.98%)              | 0.047%<br>(-1.3-1.6%)               | 0.23<br>(-6.7-8.1)   | -24<br>(-310-260)    |
| Jordan   | 2005 | Female | 60 to 64 | 21%<br>(8.4-42%)               | 79%<br>(58-92%)          | 0.33<br>(0.087-0.78)                        | -0.45%<br>(-1.8-0.65%)               | -0.47%<br>(-2.2-1%)                 | -3.8<br>(-17-8.3)    | -140<br>(-600-220)   |
| Jordan   | 2005 | Female | 65 to 69 | 21%<br>(8.9-38%)               | 79%<br>(62-91%)          | 0.29<br>(0.074-0.63)                        | -0.8%<br>(-2.1-0.24%)                | -0.95%<br>(-2.6-0.34%)              | -9.5<br>(-27-3.3)    | -250<br>(-670-72)    |
| Jordan   | 2005 | Female | 70 to 74 | 20%<br>(8.2-36%)               | 80%<br>(64-92%)          | 0.22<br>(0.054-0.56)                        | -0.77%<br>(-2-0.025%)                | -0.9%<br>(-2.3-0.069%)              | -10<br>(-26-0.78)    | -200<br>(-510-6.8)   |

| Location | Year | Sex    | Age      | Prevalence of current drinkers | Prevalence of abstainers | Population average of standard drinks daily | Percent of total attributable deaths | Percent of total attributable DALYs | Attributable deaths   | Attributable DALYs    |
|----------|------|--------|----------|--------------------------------|--------------------------|---------------------------------------------|--------------------------------------|-------------------------------------|-----------------------|-----------------------|
| Jordan   | 2005 | Female | 75 to 79 | 17%<br>(6.6-34%)               | 83%<br>(66-93%)          | 0.18<br>(0.039-0.5)                         | -0.7%<br>(-1.9--0.04%)               | -0.83%<br>(-2.2--0.041%)            | -7.8<br>(-20--0.34)   | -120<br>(-320--7)     |
| Jordan   | 2005 | Female | 80 to 84 | 16%<br>(5.5-35%)               | 84%<br>(65-95%)          | 0.16<br>(0.035-0.46)                        | -0.67%<br>(-1.9--0.065%)             | -0.79%<br>(-2.2--0.079%)            | -5.8<br>(-16--0.53)   | -64<br>(-180--5.8)    |
| Jordan   | 2005 | Female | 85 to 89 | 17%<br>(5.5-37%)               | 83%<br>(63-94%)          | 0.16<br>(0.034-0.51)                        | -0.68%<br>(-2--0.056%)               | -0.81%<br>(-2.3--0.076%)            | -5<br>(-14--0.48)     | -38<br>(-110--3.2)    |
| Jordan   | 2005 | Female | 90 to 94 | 20%<br>(6.6-43%)               | 80%<br>(57-93%)          | 0.19<br>(0.037-0.55)                        | -0.72%<br>(-2--0.06%)                | -0.88%<br>(-2.4--0.088%)            | -2.9<br>(-8.3--0.29)  | -15<br>(-41--1.2)     |
| Jordan   | 2005 | Female | 95 plus  | 24%<br>(7.3-49%)               | 76%<br>(51-93%)          | 0.23<br>(0.039-0.67)                        | -0.8%<br>(-2.2--0.00057%)            | -1%<br>(-2.7--0.031%)               | -1.3<br>(-3.6--0.042) | -4.3<br>(-12--0.0028) |
| Jordan   | 2005 | Male   | All Ages | 8.7%<br>(5.8-12%)              | 91%<br>(88-94%)          | 0.15<br>(0.11-0.19)                         | 0.52%<br>(0.32-0.75%)                | 0.33%<br>(0.022-0.78%)              | 36<br>(2-85)          | 3500<br>(2100-5100)   |
| Jordan   | 2005 | Male   | 15 to 19 | 6.5%<br>(2.8-13%)              | 93%<br>(87-97%)          | 0.067<br>(0.022-0.15)                       | 0.62%<br>(0.38-0.94%)                | 0.43%<br>(0.16-0.93%)               | 1<br>(0.35-2.3)       | 240<br>(140-370)      |
| Jordan   | 2005 | Male   | 20 to 24 | 10%<br>(3.9-20%)               | 90%<br>(80-96%)          | 0.15<br>(0.051-0.29)                        | 1.3%<br>(0.83-1.9%)                  | 0.85%<br>(0.34-1.7%)                | 2.8<br>(1-5.7)        | 590<br>(360-900)      |
| Jordan   | 2005 | Male   | 25 to 29 | 13%<br>(4.8-24%)               | 87%<br>(76-95%)          | 0.24<br>(0.095-0.44)                        | 1.5%<br>(1-2%)                       | 1.4%<br>(0.65-2.4%)                 | 4<br>(1.8-7.5)        | 610<br>(400-890)      |
| Jordan   | 2005 | Male   | 30 to 34 | 15%<br>(5.4-28%)               | 85%<br>(72-95%)          | 0.3<br>(0.13-0.54)                          | 1.4%<br>(0.91-1.9%)                  | 1.4%<br>(0.69-2.5%)                 | 3.9<br>(1.8-7)        | 530<br>(340-770)      |
| Jordan   | 2005 | Male   | 35 to 39 | 16%<br>(6.3-29%)               | 84%<br>(71-94%)          | 0.35<br>(0.14-0.65)                         | 1.2%<br>(0.82-1.8%)                  | 1.4%<br>(0.66-2.5%)                 | 4.2<br>(1.9-7.8)      | 440<br>(280-660)      |
| Jordan   | 2005 | Male   | 40 to 44 | 16%<br>(7.3-29%)               | 84%<br>(71-93%)          | 0.37<br>(0.15-0.74)                         | 1%<br>(0.56-1.6%)                    | 1.1%<br>(0.38-2.2%)                 | 3.6<br>(1.2-7.3)      | 320<br>(170-530)      |
| Jordan   | 2005 | Male   | 45 to 49 | 16%<br>(6.4-29%)               | 84%<br>(71-94%)          | 0.39<br>(0.14-0.81)                         | 0.8%<br>(0.24-1.6%)                  | 0.86%<br>(-0.0075-2.2%)             | 3.1<br>(-0.033-7.9)   | 210<br>(61-440)       |
| Jordan   | 2005 | Male   | 50 to 54 | 15%<br>(6.5-29%)               | 85%<br>(71-94%)          | 0.39<br>(0.13-0.86)                         | 0.65%<br>(0.013-1.7%)                | 0.73%<br>(-0.23-2.2%)               | 2.9<br>(-0.94-9.3)    | 160<br>(2.9-410)      |
| Jordan   | 2005 | Male   | 55 to 59 | 14%<br>(6.2-27%)               | 86%<br>(73-94%)          | 0.37<br>(0.12-0.8)                          | 0.52%<br>(-0.088-1.6%)               | 0.59%<br>(-0.26-2%)                 | 3.2<br>(-1.4-11)      | 140<br>(-22-430)      |
| Jordan   | 2005 | Male   | 60 to 64 | 14%<br>(5.8-27%)               | 86%<br>(73-94%)          | 0.33<br>(0.096-0.74)                        | 0.36%<br>(-0.22-1.4%)                | 0.4%<br>(-0.37-1.7%)                | 3.5<br>(-3.1-15)      | 120<br>(-68-480)      |
| Jordan   | 2005 | Male   | 65 to 69 | 13%<br>(5.8-25%)               | 87%<br>(75-94%)          | 0.27<br>(0.082-0.58)                        | 0.21%<br>(-0.29-0.97%)               | 0.23%<br>(-0.4-1.2%)                | 2.4<br>(-4.3-13)      | 67<br>(-93-320)       |
| Jordan   | 2005 | Male   | 70 to 74 | 12%<br>(5.4-22%)               | 88%<br>(78-95%)          | 0.2<br>(0.057-0.48)                         | 0.1%<br>(-0.3-0.61%)                 | 0.1%<br>(-0.41-0.74%)               | 1<br>(-4-7.6)         | 25<br>(-71-150)       |
| Jordan   | 2005 | Male   | 75 to 79 | 10%<br>(4.4-20%)               | 90%<br>(80-96%)          | 0.15<br>(0.039-0.39)                        | 0.049%<br>(-0.33-0.43%)              | 0.039%<br>(-0.43-0.49%)             | 0.34<br>(-3.9-4.5)    | 7.8<br>(-53-70)       |
| Jordan   | 2005 | Male   | 80 to 84 | 9.3%<br>(3.7-19%)              | 91%<br>(81-96%)          | 0.13<br>(0.033-0.33)                        | 0.028%<br>(-0.3-0.3%)                | 0.013%<br>(-0.39-0.33%)             | 0.079<br>(-2.6-2.2)   | 2.3<br>(-26-25)       |
| Jordan   | 2005 | Male   | 85 to 89 | 9.1%<br>(3.6-18%)              | 91%<br>(82-96%)          | 0.12<br>(0.031-0.31)                        | -0.0074%<br>(-0.32-0.22%)            | -0.039%<br>(-0.41-0.24%)            | -0.19<br>(-2.1-1.2)   | -0.34<br>(-14-9.6)    |
| Jordan   | 2005 | Male   | 90 to 94 | 10%<br>(4.2-20%)               | 90%<br>(80-96%)          | 0.12<br>(0.031-0.32)                        | -0.036%<br>(-0.35-0.22%)             | -0.089%<br>(-0.47-0.21%)            | -0.25<br>(-1.3-0.58)  | -0.61<br>(-6.1-3.8)   |

| Location | Year | Sex    | Age      | Prevalence of current drinkers | Prevalence of abstainers | Population average of standard drinks daily | Percent of total attributable deaths | Percent of total attributable DALYs | Attributable deaths   | Attributable DALYs  |
|----------|------|--------|----------|--------------------------------|--------------------------|---------------------------------------------|--------------------------------------|-------------------------------------|-----------------------|---------------------|
| Jordan   | 2005 | Male   | 95 plus  | 13%<br>(4.6-26%)               | 87%<br>(74-95%)          | 0.14<br>(0.028-0.42)                        | -0.025%<br>(-0.42-0.32%)             | -0.11%<br>(-0.59-0.27%)             | -0.13<br>(-0.69-0.32) | -0.12<br>(-2-1.5)   |
| Jordan   | 2010 | Female | All Ages | 11%<br>(6.8-16%)               | 89%<br>(84-93%)          | 0.14<br>(0.097-0.19)                        | 0.17%<br>(-0.029-0.4%)               | -0.18%<br>(-0.79-0.41%)             | -17<br>(-75-39)       | 1200<br>(-180-2900) |
| Jordan   | 2010 | Female | 15 to 19 | 9%<br>(3-19%)                  | 91%<br>(81-97%)          | 0.099<br>(0.028-0.23)                       | 0.43%<br>(0.27-0.64%)                | 0.51%<br>(0.25-1%)                  | 0.65<br>(0.3-1.4)     | 160<br>(94-250)     |
| Jordan   | 2010 | Female | 20 to 24 | 12%<br>(3.5-25%)               | 88%<br>(75-96%)          | 0.16<br>(0.047-0.34)                        | 0.82%<br>(0.52-1.2%)                 | 0.7%<br>(0.33-1.4%)                 | 0.92<br>(0.41-1.9)    | 320<br>(190-480)    |
| Jordan   | 2010 | Female | 25 to 29 | 13%<br>(3.8-27%)               | 87%<br>(73-96%)          | 0.19<br>(0.056-0.39)                        | 0.83%<br>(0.57-1.1%)                 | 0.77%<br>(0.35-1.4%)                | 1.1<br>(0.48-2.2)     | 350<br>(220-510)    |
| Jordan   | 2010 | Female | 30 to 34 | 15%<br>(4-31%)                 | 85%<br>(69-96%)          | 0.23<br>(0.073-0.44)                        | 0.74%<br>(0.49-1.1%)                 | 0.88%<br>(0.41-1.6%)                | 1.5<br>(0.63-3)       | 300<br>(180-450)    |
| Jordan   | 2010 | Female | 35 to 39 | 17%<br>(4.8-32%)               | 83%<br>(68-95%)          | 0.27<br>(0.088-0.52)                        | 0.63%<br>(0.38-0.97%)                | 1.1%<br>(0.47-2%)                   | 2.5<br>(1-4.7)        | 260<br>(150-410)    |
| Jordan   | 2010 | Female | 40 to 44 | 18%<br>(6.2-33%)               | 82%<br>(67-94%)          | 0.3<br>(0.11-0.58)                          | 0.55%<br>(0.21-0.97%)                | 1.2%<br>(0.56-2.3%)                 | 3.1<br>(1.3-6)        | 200<br>(78-370)     |
| Jordan   | 2010 | Female | 45 to 49 | 18%<br>(6-34%)                 | 82%<br>(66-94%)          | 0.33<br>(0.11-0.65)                         | 0.42%<br>(-0.039-1%)                 | 1.1%<br>(0.31-2.4%)                 | 3.2<br>(0.84-7.6)     | 140<br>(-13-350)    |
| Jordan   | 2010 | Female | 50 to 54 | 19%<br>(7.3-36%)               | 81%<br>(64-93%)          | 0.34<br>(0.11-0.73)                         | 0.23%<br>(-0.42-1.1%)                | 0.68%<br>(-0.24-2.2%)               | 2.5<br>(-0.91-8.3)    | 70<br>(-130-350)    |
| Jordan   | 2010 | Female | 55 to 59 | 20%<br>(7.8-38%)               | 80%<br>(62-92%)          | 0.34<br>(0.1-0.78)                          | 0.0028%<br>(-0.87-0.96%)             | 0.26%<br>(-0.91-1.8%)               | 1.2<br>(-4.1-8.4)     | 1.1<br>(-240-280)   |
| Jordan   | 2010 | Female | 60 to 64 | 21%<br>(8.5-40%)               | 79%<br>(60-92%)          | 0.32<br>(0.084-0.78)                        | -0.27%<br>(-1.4-0.75%)               | -0.19%<br>(-1.5-1.3%)               | -1.3<br>(-10-8.6)     | -81<br>(-410-240)   |
| Jordan   | 2010 | Female | 65 to 69 | 21%<br>(9.3-38%)               | 79%<br>(62-91%)          | 0.28<br>(0.076-0.64)                        | -0.54%<br>(-1.6-0.38%)               | -0.61%<br>(-2-0.63%)                | -5.7<br>(-18-5.9)     | -180<br>(-510-120)  |
| Jordan   | 2010 | Female | 70 to 74 | 20%<br>(8-36%)                 | 80%<br>(64-92%)          | 0.22<br>(0.054-0.57)                        | -0.57%<br>(-1.6-0.17%)               | -0.66%<br>(-2-0.34%)                | -7<br>(-22-3.2)       | -160<br>(-470-49)   |
| Jordan   | 2010 | Female | 75 to 79 | 17%<br>(6.4-35%)               | 83%<br>(65-94%)          | 0.18<br>(0.036-0.49)                        | -0.54%<br>(-1.6-0.077%)              | -0.65%<br>(-1.9-0.13%)              | -6.3<br>(-19-1.2)     | -110<br>(-310-17)   |
| Jordan   | 2010 | Female | 80 to 84 | 16%<br>(5.5-36%)               | 84%<br>(64-95%)          | 0.16<br>(0.033-0.47)                        | -0.53%<br>(-1.7-0.0076%)             | -0.64%<br>(-2-0.033%)               | -4.9<br>(-15-0.23)    | -57<br>(-180-0.91)  |
| Jordan   | 2010 | Female | 85 to 89 | 16%<br>(5.5-37%)               | 84%<br>(63-95%)          | 0.16<br>(0.034-0.5)                         | -0.56%<br>(-1.7-0.0052%)             | -0.68%<br>(-2.1-0.015%)             | -4.3<br>(-13-0.092)   | -34<br>(-100-0.31)  |
| Jordan   | 2010 | Female | 90 to 94 | 19%<br>(6.5-41%)               | 81%<br>(59-94%)          | 0.18<br>(0.037-0.55)                        | -0.6%<br>(-1.7-0.025%)               | -0.74%<br>(-2.2-0.024%)             | -3<br>(-9.1-0.11)     | -15<br>(-46-0.65)   |
| Jordan   | 2010 | Female | 95 plus  | 23%<br>(7-48%)                 | 77%<br>(52-93%)          | 0.22<br>(0.038-0.65)                        | -0.64%<br>(-1.9-0.1%)                | -0.82%<br>(-2.4-0.097%)             | -1.3<br>(-3.7-0.15)   | -4.1<br>(-12-0.71)  |
| Jordan   | 2010 | Male   | All Ages | 8.7%<br>(5.9-12%)              | 91%<br>(88-94%)          | 0.15<br>(0.11-0.21)                         | 0.57%<br>(0.37-0.82%)                | 0.38%<br>(0.049-0.84%)              | 44<br>(5.4-100)       | 4200<br>(2600-6400) |
| Jordan   | 2010 | Male   | 15 to 19 | 6.4%<br>(2.7-13%)              | 94%<br>(87-97%)          | 0.066<br>(0.019-0.15)                       | 0.66%<br>(0.4-1%)                    | 0.5%<br>(0.17-1.1%)                 | 1.1<br>(0.35-2.5)     | 270<br>(160-420)    |
| Jordan   | 2010 | Male   | 20 to 24 | 9.9%<br>(3.8-19%)              | 90%<br>(81-96%)          | 0.15<br>(0.049-0.31)                        | 1.4%<br>(0.93-2%)                    | 1.1%<br>(0.41-2.3%)                 | 3<br>(1.1-6.3)        | 640<br>(390-960)    |

| Location | Year | Sex    | Age      | Prevalence of current drinkers | Prevalence of abstainers | Population average of standard drinks daily | Percent of total attributable deaths | Percent of total attributable DALYs | Attributable deaths    | Attributable DALYs  |
|----------|------|--------|----------|--------------------------------|--------------------------|---------------------------------------------|--------------------------------------|-------------------------------------|------------------------|---------------------|
| Jordan   | 2010 | Male   | 25 to 29 | 12%<br>(4.8-23%)               | 88%<br>(77-95%)          | 0.23<br>(0.087-0.45)                        | 1.6%<br>(1.1-2.2%)                   | 1.6%<br>(0.74-2.8%)                 | 4.5<br>(1.9-8.3)       | 730<br>(470-1100)   |
| Jordan   | 2010 | Male   | 30 to 34 | 14%<br>(5.2-27%)               | 86%<br>(73-95%)          | 0.29<br>(0.12-0.52)                         | 1.4%<br>(0.97-2%)                    | 1.5%<br>(0.73-2.8%)                 | 4.1<br>(1.9-7.6)       | 600<br>(390-900)    |
| Jordan   | 2010 | Male   | 35 to 39 | 16%<br>(6.1-29%)               | 84%<br>(71-94%)          | 0.33<br>(0.13-0.62)                         | 1.3%<br>(0.86-1.8%)                  | 1.5%<br>(0.67-2.6%)                 | 4.8<br>(2.1-9)         | 550<br>(360-810)    |
| Jordan   | 2010 | Male   | 40 to 44 | 16%<br>(7.1-28%)               | 84%<br>(72-93%)          | 0.36<br>(0.15-0.69)                         | 1%<br>(0.6-1.6%)                     | 1.2%<br>(0.4-2.2%)                  | 4.5<br>(1.4-9.3)       | 430<br>(240-710)    |
| Jordan   | 2010 | Male   | 45 to 49 | 16%<br>(6.1-29%)               | 84%<br>(71-94%)          | 0.38<br>(0.13-0.77)                         | 0.82%<br>(0.27-1.6%)                 | 0.92%<br>(0.039-2.2%)               | 4.3<br>(0.23-11)       | 310<br>(110-650)    |
| Jordan   | 2010 | Male   | 50 to 54 | 15%<br>(6.2-30%)               | 85%<br>(70-94%)          | 0.38<br>(0.12-0.81)                         | 0.66%<br>(0.03-1.6%)                 | 0.76%<br>(-0.16-2.2%)               | 4.2<br>(-0.9-13)       | 230<br>(11-590)     |
| Jordan   | 2010 | Male   | 55 to 59 | 14%<br>(6-27%)                 | 86%<br>(73-94%)          | 0.36<br>(0.11-0.8)                          | 0.54%<br>(-0.05-1.5%)                | 0.62%<br>(-0.21-2.1%)               | 3.7<br>(-1.2-13)       | 160<br>(-16-490)    |
| Jordan   | 2010 | Male   | 60 to 64 | 14%<br>(5.7-26%)               | 86%<br>(74-94%)          | 0.32<br>(0.092-0.76)                        | 0.41%<br>(-0.13-1.4%)                | 0.47%<br>(-0.25-1.8%)               | 3.8<br>(-1.9-15)       | 130<br>(-39-480)    |
| Jordan   | 2010 | Male   | 65 to 69 | 13%<br>(5.9-24%)               | 87%<br>(76-94%)          | 0.26<br>(0.078-0.57)                        | 0.24%<br>(-0.24-1%)                  | 0.27%<br>(-0.38-1.3%)               | 3.1<br>(-3.8-15)       | 85<br>(-83-390)     |
| Jordan   | 2010 | Male   | 70 to 74 | 12%<br>(5.3-21%)               | 88%<br>(79-95%)          | 0.19<br>(0.054-0.45)                        | 0.13%<br>(-0.25-0.69%)               | 0.14%<br>(-0.35-0.86%)              | 1.7<br>(-4.3-10)       | 40<br>(-78-220)     |
| Jordan   | 2010 | Male   | 75 to 79 | 10%<br>(4.2-19%)               | 90%<br>(81-96%)          | 0.14<br>(0.036-0.37)                        | 0.08%<br>(-0.26-0.48%)               | 0.08%<br>(-0.32-0.59%)              | 0.85<br>(-3.5-6.2)     | 16<br>(-49-98)      |
| Jordan   | 2010 | Male   | 80 to 84 | 9.1%<br>(3.5-18%)              | 91%<br>(82-96%)          | 0.12<br>(0.029-0.32)                        | 0.049%<br>(-0.24-0.35%)              | 0.038%<br>(-0.35-0.4%)              | 0.29<br>(-2.6-3.1)     | 5<br>(-26-35)       |
| Jordan   | 2010 | Male   | 85 to 89 | 9.1%<br>(3.6-19%)              | 91%<br>(81-96%)          | 0.12<br>(0.029-0.3)                         | 0.015%<br>(-0.29-0.25%)              | -0.013%<br>(-0.38-0.27%)            | -0.073<br>(-2.2-1.6)   | 0.79<br>(-15-13)    |
| Jordan   | 2010 | Male   | 90 to 94 | 10%<br>(4-21%)                 | 90%<br>(79-96%)          | 0.12<br>(0.03-0.35)                         | -0.013%<br>(-0.33-0.28%)             | -0.064%<br>(-0.45-0.27%)            | -0.19<br>(-1.4-0.81)   | -0.24<br>(-6.2-5.1) |
| Jordan   | 2010 | Male   | 95 plus  | 13%<br>(4.6-27%)               | 87%<br>(73-95%)          | 0.14<br>(0.027-0.43)                        | 0.0056%<br>(-0.39-0.38%)             | -0.082%<br>(-0.55-0.35%)            | -0.083<br>(-0.54-0.35) | 0.024<br>(-1.5-1.6) |
| Jordan   | 2016 | Female | All Ages | 12%<br>(6.8-17%)               | 88%<br>(83-93%)          | 0.15<br>(0.085-0.25)                        | 0.23%<br>(0.0088-0.51%)              | -0.08%<br>(-0.69-0.63%)             | -8.7<br>(-82-69)       | 1800<br>(69-4300)   |
| Jordan   | 2016 | Female | 15 to 19 | 9.3%<br>(3-20%)                | 91%<br>(80-97%)          | 0.1<br>(0.026-0.26)                         | 0.41%<br>(0.25-0.64%)                | 0.41%<br>(0.18-0.85%)               | 0.74<br>(0.31-1.6)     | 190<br>(110-310)    |
| Jordan   | 2016 | Female | 20 to 24 | 12%<br>(3.3-26%)               | 88%<br>(74-97%)          | 0.16<br>(0.045-0.39)                        | 0.8%<br>(0.5-1.2%)                   | 0.6%<br>(0.25-1.3%)                 | 1.1<br>(0.44-2.5)      | 370<br>(220-570)    |
| Jordan   | 2016 | Female | 25 to 29 | 13%<br>(3.7-29%)               | 87%<br>(71-96%)          | 0.2<br>(0.05-0.47)                          | 0.82%<br>(0.55-1.1%)                 | 0.71%<br>(0.3-1.4%)                 | 1.3<br>(0.51-2.7)      | 390<br>(240-570)    |
| Jordan   | 2016 | Female | 30 to 34 | 15%<br>(3.8-31%)               | 85%<br>(69-96%)          | 0.23<br>(0.061-0.53)                        | 0.75%<br>(0.49-1.1%)                 | 0.84%<br>(0.36-1.7%)                | 1.9<br>(0.75-4.1)      | 380<br>(230-590)    |
| Jordan   | 2016 | Female | 35 to 39 | 17%<br>(4.3-32%)               | 83%<br>(68-96%)          | 0.27<br>(0.077-0.61)                        | 0.65%<br>(0.38-1%)                   | 1.1%<br>(0.43-2.2%)                 | 2.9<br>(1-6)           | 320<br>(180-530)    |
| Jordan   | 2016 | Female | 40 to 44 | 18%<br>(6.3-34%)               | 82%<br>(66-94%)          | 0.3<br>(0.1-0.64)                           | 0.58%<br>(0.23-1.1%)                 | 1.3%<br>(0.54-2.6%)                 | 4.2<br>(1.6-9.3)       | 290<br>(110-550)    |



| Location | Year | Sex    | Age      | Prevalence of current drinkers | Prevalence of abstainers | Population average of standard drinks daily | Percent of total attributable deaths | Percent of total attributable DALYs | Attributable deaths  | Attributable DALYs  |
|----------|------|--------|----------|--------------------------------|--------------------------|---------------------------------------------|--------------------------------------|-------------------------------------|----------------------|---------------------|
| Jordan   | 2016 | Female | 45 to 49 | 18%<br>(6.6-35%)               | 82%<br>(65-93%)          | 0.33<br>(0.11-0.74)                         | 0.48%<br>(0.0077-1.2%)               | 1.1%<br>(0.32-2.6%)                 | 4.7<br>(1.2-12)      | 220<br>(4.1-560)    |
| Jordan   | 2016 | Female | 50 to 54 | 19%<br>(7.5-38%)               | 81%<br>(62-93%)          | 0.35<br>(0.1-0.78)                          | 0.32%<br>(-0.33-1.2%)                | 0.81%<br>(-0.13-2.5%)               | 4.2<br>(-0.69-13)    | 140<br>(-140-550)   |
| Jordan   | 2016 | Female | 55 to 59 | 20%<br>(8-40%)                 | 80%<br>(60-92%)          | 0.35<br>(0.1-0.85)                          | 0.12%<br>(-0.66-1.2%)                | 0.47%<br>(-0.61-2.3%)               | 2.8<br>(-3.7-14)     | 48<br>(-260-470)    |
| Jordan   | 2016 | Female | 60 to 64 | 22%<br>(8.7-41%)               | 78%<br>(59-91%)          | 0.34<br>(0.085-0.86)                        | -0.14%<br>(-1.1-1.1%)                | -0.0037%<br>(-1.3-1.8%)             | -0.0026<br>(-8.7-12) | -44<br>(-340-340)   |
| Jordan   | 2016 | Female | 65 to 69 | 22%<br>(9.7-40%)               | 78%<br>(60-90%)          | 0.3<br>(0.08-0.78)                          | -0.4%<br>(-1.4-0.62%)                | -0.42%<br>(-1.7-1.1%)               | -3.5<br>(-15-8.9)    | -130<br>(-430-200)  |
| Jordan   | 2016 | Female | 70 to 74 | 20%<br>(8.7-38%)               | 80%<br>(62-91%)          | 0.24<br>(0.052-0.65)                        | -0.45%<br>(-1.4-0.37%)               | -0.52%<br>(-1.8-0.6%)               | -6<br>(-21-6.6)      | -140<br>(-460-110)  |
| Jordan   | 2016 | Female | 75 to 79 | 18%<br>(6.7-37%)               | 82%<br>(63-93%)          | 0.19<br>(0.034-0.56)                        | -0.47%<br>(-1.4-0.22%)               | -0.56%<br>(-1.8-0.31%)              | -7<br>(-23-3.8)      | -120<br>(-370-54)   |
| Jordan   | 2016 | Female | 80 to 84 | 17%<br>(5.7-37%)               | 83%<br>(63-94%)          | 0.17<br>(0.033-0.5)                         | -0.46%<br>(-1.5-0.15%)               | -0.56%<br>(-1.8-0.19%)              | -5.9<br>(-20-2)      | -69<br>(-230-22)    |
| Jordan   | 2016 | Female | 85 to 89 | 17%<br>(5.6-38%)               | 83%<br>(62-94%)          | 0.17<br>(0.033-0.53)                        | -0.5%<br>(-1.6-0.096%)               | -0.62%<br>(-2-0.12%)                | -5.4<br>(-17-0.99)   | -42<br>(-130-8.3)   |
| Jordan   | 2016 | Female | 90 to 94 | 20%<br>(6.8-42%)               | 80%<br>(58-93%)          | 0.2<br>(0.035-0.59)                         | -0.54%<br>(-1.6-0.11%)               | -0.68%<br>(-2-0.13%)                | -3.2<br>(-9.9-0.62)  | -17<br>(-50-3.5)    |
| Jordan   | 2016 | Female | 95 plus  | 24%<br>(7.4-50%)               | 76%<br>(50-93%)          | 0.23<br>(0.037-0.73)                        | -0.58%<br>(-1.8-0.29%)               | -0.76%<br>(-2.3-0.28%)              | -1.5<br>(-4.6-0.49)  | -4.9<br>(-15-2.2)   |
| Jordan   | 2016 | Male   | All Ages | 9%<br>(6-13%)                  | 91%<br>(87-94%)          | 0.16<br>(0.092-0.26)                        | 0.6%<br>(0.38-0.93%)                 | 0.41%<br>(0.054-1%)                 | 60<br>(7.2-160)      | 5400<br>(3200-8500) |
| Jordan   | 2016 | Male   | 15 to 19 | 6.5%<br>(2.7-13%)              | 94%<br>(87-97%)          | 0.067<br>(0.017-0.16)                       | 0.58%<br>(0.35-0.86%)                | 0.37%<br>(0.11-0.86%)               | 1.4<br>(0.4-3.4)     | 320<br>(190-510)    |
| Jordan   | 2016 | Male   | 20 to 24 | 10%<br>(3.9-19%)               | 90%<br>(81-96%)          | 0.15<br>(0.045-0.35)                        | 1.2%<br>(0.74-1.8%)                  | 0.71%<br>(0.24-1.5%)                | 3.7<br>(1.2-8.4)     | 750<br>(440-1200)   |
| Jordan   | 2016 | Male   | 25 to 29 | 12%<br>(5.1-24%)               | 88%<br>(76-95%)          | 0.23<br>(0.076-0.51)                        | 1.4%<br>(0.93-2%)                    | 1.2%<br>(0.47-2.2%)                 | 5.6<br>(2.2-11)      | 830<br>(520-1300)   |
| Jordan   | 2016 | Male   | 30 to 34 | 14%<br>(5.2-27%)               | 86%<br>(73-95%)          | 0.29<br>(0.11-0.61)                         | 1.3%<br>(0.85-1.9%)                  | 1.2%<br>(0.53-2.4%)                 | 6<br>(2.4-13)        | 780<br>(490-1200)   |
| Jordan   | 2016 | Male   | 35 to 39 | 16%<br>(5.9-29%)               | 84%<br>(71-94%)          | 0.33<br>(0.12-0.69)                         | 1.2%<br>(0.8-1.9%)                   | 1.3%<br>(0.54-2.6%)                 | 6.4<br>(2.4-14)      | 690<br>(420-1100)   |
| Jordan   | 2016 | Male   | 40 to 44 | 16%<br>(7.2-28%)               | 84%<br>(72-93%)          | 0.35<br>(0.13-0.73)                         | 1%<br>(0.56-1.8%)                    | 1.1%<br>(0.33-2.3%)                 | 6.2<br>(1.7-15)      | 580<br>(300-1000)   |
| Jordan   | 2016 | Male   | 45 to 49 | 16%<br>(6-28%)                 | 84%<br>(72-94%)          | 0.37<br>(0.12-0.77)                         | 0.83%<br>(0.32-1.7%)                 | 0.91%<br>(0.066-2.2%)               | 6.4<br>(0.47-18)     | 470<br>(170-1000)   |
| Jordan   | 2016 | Male   | 50 to 54 | 15%<br>(6.5-29%)               | 85%<br>(71-94%)          | 0.37<br>(0.12-0.85)                         | 0.69%<br>(0.1-1.7%)                  | 0.79%<br>(-0.1-2.5%)                | 6.4<br>(-0.86-20)    | 360<br>(52-960)     |
| Jordan   | 2016 | Male   | 55 to 59 | 14%<br>(6.3-27%)               | 86%<br>(73-94%)          | 0.35<br>(0.11-0.83)                         | 0.56%<br>(-0.0044-1.7%)              | 0.65%<br>(-0.17-2.3%)               | 5.3<br>(-1.3-20)     | 230<br>(-2-760)     |
| Jordan   | 2016 | Male   | 60 to 64 | 14%<br>(5.8-26%)               | 86%<br>(74-94%)          | 0.32<br>(0.089-0.79)                        | 0.44%<br>(-0.092-1.6%)               | 0.52%<br>(-0.24-2%)                 | 4.5<br>(-2-19)       | 160<br>(-33-600)    |

| Location | Year | Sex    | Age      | Prevalence of current drinkers | Prevalence of abstainers | Population average of standard drinks daily | Percent of total attributable deaths | Percent of total attributable DALYs | Attributable deaths    | Attributable DALYs |
|----------|------|--------|----------|--------------------------------|--------------------------|---------------------------------------------|--------------------------------------|-------------------------------------|------------------------|--------------------|
| Jordan   | 2016 | Male   | 65 to 69 | 13%<br>(5.9-25%)               | 87%<br>(75-94%)          | 0.26<br>(0.071-0.63)                        | 0.28%<br>(-0.19-1.2%)                | 0.33%<br>(-0.29-1.5%)               | 3.4<br>(-2.9-16)       | 95<br>(-60-390)    |
| Jordan   | 2016 | Male   | 70 to 74 | 12%<br>(5.2-21%)               | 88%<br>(79-95%)          | 0.19<br>(0.05-0.49)                         | 0.16%<br>(-0.22-0.76%)               | 0.18%<br>(-0.34-0.93%)              | 2.3<br>(-4.1-13)       | 53<br>(-72-250)    |
| Jordan   | 2016 | Male   | 75 to 79 | 10%<br>(4.3-20%)               | 90%<br>(80-96%)          | 0.15<br>(0.032-0.39)                        | 0.11%<br>(-0.23-0.57%)               | 0.11%<br>(-0.32-0.71%)              | 1.6<br>(-4.5-9.7)      | 29<br>(-60-150)    |
| Jordan   | 2016 | Male   | 80 to 84 | 9.2%<br>(3.5-19%)              | 91%<br>(81-97%)          | 0.12<br>(0.025-0.32)                        | 0.073%<br>(-0.22-0.41%)              | 0.066%<br>(-0.3-0.48%)              | 0.73<br>(-3.3-5.3)     | 11<br>(-32-62)     |
| Jordan   | 2016 | Male   | 85 to 89 | 8.9%<br>(3.5-18%)              | 91%<br>(82-96%)          | 0.11<br>(0.027-0.31)                        | 0.04%<br>(-0.23-0.33%)               | 0.016%<br>(-0.32-0.35%)             | 0.13<br>(-2.5-3)       | 3<br>(-17-26)      |
| Jordan   | 2016 | Male   | 90 to 94 | 10%<br>(4.2-20%)               | 90%<br>(80-96%)          | 0.12<br>(0.028-0.32)                        | 0.017%<br>(-0.28-0.31%)              | -0.029%<br>(-0.39-0.33%)            | -0.11<br>(-1.5-1.3)    | 0.43<br>(-6.7-7.8) |
| Jordan   | 2016 | Male   | 95 plus  | 13%<br>(4.6-26%)               | 87%<br>(74-95%)          | 0.14<br>(0.025-0.43)                        | 0.036%<br>(-0.34-0.46%)              | -0.048%<br>(-0.51-0.43%)            | -0.057<br>(-0.62-0.55) | 0.18<br>(-1.7-2.3) |
| Kuwait   | 1990 | Female | All Ages | 10%<br>(6-16%)                 | 90%<br>(84-94%)          | 0.0076<br>(0.0013-0.017)                    | 0.28%<br>(0.2-0.37%)                 | 0.073%<br>(-0.048-0.12%)            | 1.3<br>(-0.87-2.3)     | 480<br>(320-660)   |
| Kuwait   | 1990 | Female | 15 to 19 | 8.8%<br>(2.9-19%)              | 91%<br>(81-97%)          | 0.0057<br>(0.00074-0.019)                   | 0.3%<br>(0.16-0.46%)                 | 0.08%<br>(0.047-0.14%)              | 0.044<br>(0.03-0.067)  | 41<br>(21-68)      |
| Kuwait   | 1990 | Female | 20 to 24 | 11%<br>(3.4-24%)               | 89%<br>(76-97%)          | 0.009<br>(0.0012-0.026)                     | 0.65%<br>(0.4-0.99%)                 | 0.091%<br>(0.054-0.16%)             | 0.051<br>(0.034-0.079) | 93<br>(53-150)     |
| Kuwait   | 1990 | Female | 25 to 29 | 13%<br>(3.8-27%)               | 87%<br>(73-96%)          | 0.011<br>(0.0016-0.03)                      | 0.7%<br>(0.47-0.98%)                 | 0.17%<br>(0.11-0.26%)               | 0.091<br>(0.059-0.14)  | 96<br>(58-140)     |
| Kuwait   | 1990 | Female | 30 to 34 | 15%<br>(4-30%)                 | 85%<br>(70-96%)          | 0.013<br>(0.002-0.036)                      | 0.62%<br>(0.41-0.88%)                | 0.16%<br>(0.11-0.25%)               | 0.083<br>(0.056-0.12)  | 80<br>(48-120)     |
| Kuwait   | 1990 | Female | 35 to 39 | 16%<br>(4.2-32%)               | 84%<br>(68-96%)          | 0.015<br>(0.0024-0.04)                      | 0.49%<br>(0.33-0.69%)                | 0.2%<br>(0.14-0.29%)                | 0.13<br>(0.081-0.18)   | 64<br>(39-94)      |
| Kuwait   | 1990 | Female | 40 to 44 | 17%<br>(6.2-32%)               | 83%<br>(68-94%)          | 0.017<br>(0.0025-0.045)                     | 0.37%<br>(0.22-0.55%)                | 0.22%<br>(0.14-0.32%)               | 0.14<br>(0.091-0.21)   | 41<br>(23-66)      |
| Kuwait   | 1990 | Female | 45 to 49 | 17%<br>(6.1-33%)               | 83%<br>(67-94%)          | 0.018<br>(0.0023-0.05)                      | 0.28%<br>(0.14-0.41%)                | 0.19%<br>(0.067-0.28%)              | 0.14<br>(0.049-0.22)   | 26<br>(13-40)      |
| Kuwait   | 1990 | Female | 50 to 54 | 18%<br>(7.3-35%)               | 82%<br>(65-93%)          | 0.019<br>(0.0023-0.054)                     | 0.2%<br>(0.036-0.33%)                | 0.16%<br>(-0.063-0.28%)             | 0.13<br>(-0.045-0.24)  | 15<br>(2.4-25)     |
| Kuwait   | 1990 | Female | 55 to 59 | 19%<br>(7.6-38%)               | 81%<br>(62-92%)          | 0.018<br>(0.0018-0.057)                     | 0.13%<br>(-0.086-0.25%)              | 0.11%<br>(-0.18-0.25%)              | 0.086<br>(-0.14-0.21)  | 6.4<br>(-4.3-12)   |
| Kuwait   | 1990 | Female | 60 to 64 | 21%<br>(7.8-41%)               | 79%<br>(59-92%)          | 0.018<br>(0.0017-0.052)                     | 0.082%<br>(-0.19-0.21%)              | 0.073%<br>(-0.28-0.23%)             | 0.073<br>(-0.27-0.24)  | 3.5<br>(-8.1-9.3)  |
| Kuwait   | 1990 | Female | 65 to 69 | 21%<br>(8.3-39%)               | 79%<br>(61-92%)          | 0.016<br>(0.0014-0.047)                     | 0.071%<br>(-0.2-0.18%)               | 0.074%<br>(-0.26-0.22%)             | 0.095<br>(-0.35-0.3)   | 3.1<br>(-8.7-8.3)  |
| Kuwait   | 1990 | Female | 70 to 74 | 20%<br>(8-36%)                 | 80%<br>(64-92%)          | 0.013<br>(0.0014-0.04)                      | 0.066%<br>(-0.2-0.16%)               | 0.072%<br>(-0.27-0.19%)             | 0.072<br>(-0.26-0.2)   | 1.7<br>(-4.8-4.2)  |
| Kuwait   | 1990 | Female | 75 to 79 | 17%<br>(6.4-36%)               | 83%<br>(64-94%)          | 0.01<br>(0.00098-0.034)                     | 0.057%<br>(-0.21-0.13%)              | 0.061%<br>(-0.26-0.16%)             | 0.06<br>(-0.24-0.16)   | 1<br>(-3.6-2.6)    |
| Kuwait   | 1990 | Female | 80 to 84 | 16%<br>(5.1-36%)               | 84%<br>(64-95%)          | 0.0092<br>(0.00077-0.032)                   | 0.036%<br>(-0.22-0.1%)               | 0.034%<br>(-0.26-0.11%)             | 0.044<br>(-0.33-0.15)  | 0.6<br>(-3.5-1.7)  |

| Location | Year | Sex    | Age      | Prevalence of current drinkers | Prevalence of abstainers | Population average of standard drinks daily | Percent of total attributable deaths | Percent of total attributable DALYs | Attributable deaths      | Attributable DALYs     |
|----------|------|--------|----------|--------------------------------|--------------------------|---------------------------------------------|--------------------------------------|-------------------------------------|--------------------------|------------------------|
| Kuwait   | 1990 | Female | 85 to 89 | 16%<br>(5.1-38%)               | 84%<br>(62-95%)          | 0.0092<br>(0.00081-0.033)                   | 0.02%<br>(-0.2-0.072%)               | 0.013%<br>(-0.25-0.076%)            | 0.011<br>(-0.21-0.068)   | 0.17<br>(-1.6-0.63)    |
| Kuwait   | 1990 | Female | 90 to 94 | 19%<br>(6.1-42%)               | 81%<br>(58-94%)          | 0.01<br>(0.00078-0.036)                     | 0.02%<br>(-0.2-0.072%)               | 0.0085%<br>(-0.27-0.073%)           | 0.0039<br>(-0.12-0.033)  | 0.059<br>(-0.58-0.22)  |
| Kuwait   | 1990 | Female | 95 plus  | 23%<br>(7.3-49%)               | 77%<br>(51-93%)          | 0.013<br>(0.00094-0.045)                    | 0.011%<br>(-0.26-0.074%)             | -0.015%<br>(-0.37-0.057%)           | -0.0026<br>(-0.064-0.01) | 0.0087<br>(-0.21-0.06) |
| Kuwait   | 1990 | Male   | All Ages | 9.4%<br>(6.2-14%)              | 91%<br>(86-94%)          | 0.01<br>(0.0018-0.023)                      | 0.45%<br>(0.34-0.57%)                | 0.25%<br>(0.16-0.34%)               | 7.6<br>(4.8-10)          | 1100<br>(770-1400)     |
| Kuwait   | 1990 | Male   | 15 to 19 | 6.4%<br>(2.6-13%)              | 94%<br>(87-97%)          | 0.004<br>(0.00051-0.012)                    | 0.36%<br>(0.2-0.57%)                 | 0.049%<br>(0.023-0.12%)             | 0.066<br>(0.035-0.15)    | 62<br>(35-100)         |
| Kuwait   | 1990 | Male   | 20 to 24 | 9.8%<br>(3.8-19%)              | 90%<br>(81-96%)          | 0.0088<br>(0.0012-0.026)                    | 0.72%<br>(0.41-1.2%)                 | 0.14%<br>(0.067-0.3%)               | 0.22<br>(0.13-0.39)      | 120<br>(72-180)        |
| Kuwait   | 1990 | Male   | 25 to 29 | 12%<br>(4.8-24%)               | 88%<br>(76-95%)          | 0.014<br>(0.0022-0.038)                     | 0.8%<br>(0.49-1.2%)                  | 0.17%<br>(0.082-0.34%)              | 0.26<br>(0.15-0.45)      | 130<br>(86-190)        |
| Kuwait   | 1990 | Male   | 30 to 34 | 14%<br>(5.3-27%)               | 86%<br>(73-95%)          | 0.017<br>(0.0029-0.045)                     | 0.8%<br>(0.52-1.1%)                  | 0.28%<br>(0.16-0.51%)               | 0.55<br>(0.35-0.83)      | 180<br>(120-260)       |
| Kuwait   | 1990 | Male   | 35 to 39 | 16%<br>(6.2-28%)               | 84%<br>(72-94%)          | 0.02<br>(0.0032-0.05)                       | 0.81%<br>(0.57-1.1%)                 | 0.45%<br>(0.28-0.7%)                | 0.77<br>(0.51-1.1)       | 160<br>(110-220)       |
| Kuwait   | 1990 | Male   | 40 to 44 | 16%<br>(6.8-28%)               | 84%<br>(72-93%)          | 0.021<br>(0.0032-0.055)                     | 0.75%<br>(0.54-1%)                   | 0.54%<br>(0.35-0.75%)               | 0.86<br>(0.57-1.2)       | 130<br>(85-180)        |
| Kuwait   | 1990 | Male   | 45 to 49 | 15%<br>(6-29%)                 | 85%<br>(71-94%)          | 0.022<br>(0.0028-0.063)                     | 0.64%<br>(0.48-0.81%)                | 0.59%<br>(0.35-0.8%)                | 1.3<br>(0.75-1.8)        | 120<br>(84-160)        |
| Kuwait   | 1990 | Male   | 50 to 54 | 15%<br>(6.3-29%)               | 85%<br>(71-94%)          | 0.022<br>(0.003-0.064)                      | 0.47%<br>(0.29-0.62%)                | 0.45%<br>(0.19-0.64%)               | 0.92<br>(0.4-1.4)        | 66<br>(41-90)          |
| Kuwait   | 1990 | Male   | 55 to 59 | 14%<br>(6-27%)                 | 86%<br>(73-94%)          | 0.021<br>(0.0023-0.06)                      | 0.35%<br>(0.19-0.48%)                | 0.34%<br>(0.073-0.54%)              | 0.73<br>(0.17-1.2)       | 40<br>(21-57)          |
| Kuwait   | 1990 | Male   | 60 to 64 | 13%<br>(5.5-26%)               | 87%<br>(74-94%)          | 0.019<br>(0.0021-0.053)                     | 0.3%<br>(0.12-0.44%)                 | 0.32%<br>(0.08-0.52%)               | 0.77<br>(0.19-1.3)       | 29<br>(12-43)          |
| Kuwait   | 1990 | Male   | 65 to 69 | 13%<br>(5.8-24%)               | 87%<br>(76-94%)          | 0.015<br>(0.0017-0.044)                     | 0.24%<br>(0.096-0.35%)               | 0.28%<br>(0.074-0.45%)              | 0.41<br>(0.11-0.67)      | 12<br>(4.7-18)         |
| Kuwait   | 1990 | Male   | 70 to 74 | 12%<br>(5.2-21%)               | 88%<br>(79-95%)          | 0.012<br>(0.0015-0.035)                     | 0.18%<br>(0.054-0.28%)               | 0.21%<br>(0.032-0.33%)              | 0.29<br>(0.047-0.49)     | 6.2<br>(1.9-9.7)       |
| Kuwait   | 1990 | Male   | 75 to 79 | 10%<br>(4.3-19%)               | 90%<br>(81-96%)          | 0.0088<br>(0.001-0.028)                     | 0.17%<br>(0.071-0.24%)               | 0.19%<br>(0.061-0.29%)              | 0.17<br>(0.055-0.25)     | 2.7<br>(1.1-3.9)       |
| Kuwait   | 1990 | Male   | 80 to 84 | 9.1%<br>(3.6-18%)              | 91%<br>(82-96%)          | 0.0073<br>(0.00089-0.022)                   | 0.13%<br>(0.043-0.2%)                | 0.15%<br>(0.036-0.22%)              | 0.16<br>(0.039-0.25)     | 1.9<br>(0.59-2.8)      |
| Kuwait   | 1990 | Male   | 85 to 89 | 8.8%<br>(3.6-17%)              | 91%<br>(83-96%)          | 0.0066<br>(0.0008-0.02)                     | 0.12%<br>(0.053-0.17%)               | 0.13%<br>(0.04-0.19%)               | 0.12<br>(0.037-0.18)     | 1<br>(0.46-1.5)        |
| Kuwait   | 1990 | Male   | 90 to 94 | 9.9%<br>(4-21%)                | 90%<br>(79-96%)          | 0.007<br>(0.00076-0.022)                    | 0.086%<br>(0.017-0.12%)              | 0.079%<br>(-0.0054-0.12%)           | 0.038<br>(-0.0026-0.058) | 0.27<br>(0.055-0.39)   |
| Kuwait   | 1990 | Male   | 95 plus  | 12%<br>(4.5-25%)               | 88%<br>(75-96%)          | 0.008<br>(0.00071-0.028)                    | 0.12%<br>(0.039-0.17%)               | 0.086%<br>(-0.025-0.13%)            | 0.012<br>(-0.0034-0.018) | 0.07<br>(0.022-0.099)  |
| Kuwait   | 1995 | Female | All Ages | 11%<br>(6.1-17%)               | 89%<br>(83-94%)          | 0.0074<br>(0.0028-0.014)                    | 0.29%<br>(0.21-0.38%)                | 0.079%<br>(-0.056-0.13%)            | 1.1<br>(-0.74-1.9)       | 360<br>(240-500)       |

| Location | Year | Sex    | Age      | Prevalence of current drinkers | Prevalence of abstainers | Population average of standard drinks daily | Percent of total attributable deaths | Percent of total attributable DALYs | Attributable deaths        | Attributable DALYs    |
|----------|------|--------|----------|--------------------------------|--------------------------|---------------------------------------------|--------------------------------------|-------------------------------------|----------------------------|-----------------------|
| Kuwait   | 1995 | Female | 15 to 19 | 8.9%<br>(3-20%)                | 91%<br>(80-97%)          | 0.0054<br>(0.001-0.016)                     | 0.34%<br>(0.18-0.51%)                | 0.12%<br>(0.086-0.17%)              | 0.019<br>(0.013-0.028)     | 20<br>(10-32)         |
| Kuwait   | 1995 | Female | 20 to 24 | 12%<br>(3.6-25%)               | 88%<br>(75-96%)          | 0.0085<br>(0.0018-0.023)                    | 0.7%<br>(0.42-1.1%)                  | 0.12%<br>(0.09-0.18%)               | 0.028<br>(0.02-0.042)      | 55<br>(31-89)         |
| Kuwait   | 1995 | Female | 25 to 29 | 13%<br>(3.8-28%)               | 87%<br>(72-96%)          | 0.01<br>(0.0023-0.025)                      | 0.74%<br>(0.51-1%)                   | 0.19%<br>(0.14-0.28%)               | 0.07<br>(0.048-0.1)        | 85<br>(53-130)        |
| Kuwait   | 1995 | Female | 30 to 34 | 15%<br>(4.1-31%)               | 85%<br>(69-96%)          | 0.012<br>(0.0031-0.027)                     | 0.63%<br>(0.41-0.92%)                | 0.18%<br>(0.13-0.25%)               | 0.069<br>(0.046-0.098)     | 71<br>(44-110)        |
| Kuwait   | 1995 | Female | 35 to 39 | 17%<br>(4.5-32%)               | 83%<br>(68-95%)          | 0.014<br>(0.0041-0.032)                     | 0.49%<br>(0.33-0.71%)                | 0.21%<br>(0.15-0.29%)               | 0.096<br>(0.064-0.14)      | 51<br>(30-76)         |
| Kuwait   | 1995 | Female | 40 to 44 | 17%<br>(6.7-33%)               | 83%<br>(67-93%)          | 0.016<br>(0.0046-0.037)                     | 0.37%<br>(0.24-0.55%)                | 0.22%<br>(0.14-0.31%)               | 0.11<br>(0.063-0.15)       | 32<br>(19-50)         |
| Kuwait   | 1995 | Female | 45 to 49 | 18%<br>(6.1-34%)               | 82%<br>(66-94%)          | 0.018<br>(0.0039-0.044)                     | 0.28%<br>(0.15-0.41%)                | 0.19%<br>(0.028-0.28%)              | 0.085<br>(0.013-0.13)      | 16<br>(8.2-24)        |
| Kuwait   | 1995 | Female | 50 to 54 | 19%<br>(6.8-37%)               | 81%<br>(63-93%)          | 0.018<br>(0.0036-0.049)                     | 0.21%<br>(0.031-0.33%)               | 0.16%<br>(-0.066-0.3%)              | 0.096<br>(-0.037-0.18)     | 11<br>(1.5-18)        |
| Kuwait   | 1995 | Female | 55 to 59 | 20%<br>(7.7-38%)               | 80%<br>(62-92%)          | 0.018<br>(0.0033-0.048)                     | 0.13%<br>(-0.082-0.24%)              | 0.098%<br>(-0.18-0.24%)             | 0.06<br>(-0.11-0.16)       | 4.7<br>(-3-9.3)       |
| Kuwait   | 1995 | Female | 60 to 64 | 21%<br>(8.1-39%)               | 79%<br>(61-92%)          | 0.017<br>(0.0028-0.045)                     | 0.081%<br>(-0.19-0.2%)               | 0.068%<br>(-0.27-0.22%)             | 0.079<br>(-0.32-0.26)      | 4<br>(-9.8-10)        |
| Kuwait   | 1995 | Female | 65 to 69 | 21%<br>(9-38%)                 | 79%<br>(62-91%)          | 0.015<br>(0.0027-0.04)                      | 0.08%<br>(-0.16-0.19%)               | 0.084%<br>(-0.23-0.22%)             | 0.06<br>(-0.17-0.16)       | 1.9<br>(-3.8-4.4)     |
| Kuwait   | 1995 | Female | 70 to 74 | 20%<br>(8.2-37%)               | 80%<br>(63-92%)          | 0.012<br>(0.002-0.034)                      | 0.082%<br>(-0.17-0.16%)              | 0.091%<br>(-0.22-0.19%)             | 0.15<br>(-0.35-0.32)       | 3.3<br>(-6.9-6.7)     |
| Kuwait   | 1995 | Female | 75 to 79 | 18%<br>(7-36%)                 | 82%<br>(64-93%)          | 0.0095<br>(0.0015-0.03)                     | 0.072%<br>(-0.15-0.14%)              | 0.08%<br>(-0.2-0.17%)               | 0.077<br>(-0.19-0.16)      | 1.3<br>(-2.7-2.6)     |
| Kuwait   | 1995 | Female | 80 to 84 | 17%<br>(5.7-37%)               | 83%<br>(63-94%)          | 0.0085<br>(0.0012-0.027)                    | 0.048%<br>(-0.17-0.1%)               | 0.048%<br>(-0.2-0.11%)              | 0.037<br>(-0.16-0.088)     | 0.47<br>(-1.7-1)      |
| Kuwait   | 1995 | Female | 85 to 89 | 17%<br>(5.6-38%)               | 83%<br>(62-94%)          | 0.0086<br>(0.0012-0.026)                    | 0.033%<br>(-0.14-0.071%)             | 0.029%<br>(-0.18-0.076%)            | 0.026<br>(-0.16-0.072)     | 0.29<br>(-1.2-0.65)   |
| Kuwait   | 1995 | Female | 90 to 94 | 20%<br>(6.8-43%)               | 80%<br>(57-93%)          | 0.01<br>(0.0012-0.032)                      | 0.031%<br>(-0.16-0.073%)             | 0.022%<br>(-0.21-0.074%)            | 0.014<br>(-0.12-0.046)     | 0.12<br>(-0.62-0.3)   |
| Kuwait   | 1995 | Female | 95 plus  | 24%<br>(7.1-49%)               | 76%<br>(51-93%)          | 0.012<br>(0.0014-0.04)                      | 0.021%<br>(-0.22-0.076%)             | -0.00079%<br>(-0.3-0.06%)           | -0.00014<br>(-0.066-0.013) | 0.02<br>(-0.21-0.072) |
| Kuwait   | 1995 | Male   | All Ages | 10%<br>(6.4-15%)               | 90%<br>(85-94%)          | 0.01<br>(0.0041-0.019)                      | 0.58%<br>(0.47-0.72%)                | 0.32%<br>(0.22-0.39%)               | 7.4<br>(5.1-9.6)           | 1100<br>(800-1400)    |
| Kuwait   | 1995 | Male   | 15 to 19 | 6.4%<br>(2.6-13%)              | 94%<br>(87-97%)          | 0.0037<br>(0.00071-0.011)                   | 0.46%<br>(0.27-0.69%)                | 0.073%<br>(0.044-0.17%)             | 0.031<br>(0.018-0.076)     | 33<br>(19-53)         |
| Kuwait   | 1995 | Male   | 20 to 24 | 9.8%<br>(3.9-19%)              | 90%<br>(81-96%)          | 0.008<br>(0.0018-0.022)                     | 1.1%<br>(0.72-1.6%)                  | 0.3%<br>(0.2-0.5%)                  | 0.22<br>(0.14-0.36)        | 120<br>(75-190)       |
| Kuwait   | 1995 | Male   | 25 to 29 | 12%<br>(4.8-23%)               | 88%<br>(77-95%)          | 0.012<br>(0.0032-0.028)                     | 1.1%<br>(0.79-1.6%)                  | 0.32%<br>(0.21-0.49%)               | 0.37<br>(0.24-0.58)        | 210<br>(140-320)      |
| Kuwait   | 1995 | Male   | 30 to 34 | 14%<br>(5.3-28%)               | 86%<br>(72-95%)          | 0.015<br>(0.0048-0.033)                     | 1%<br>(0.72-1.4%)                    | 0.47%<br>(0.34-0.65%)               | 0.63<br>(0.44-0.89)        | 210<br>(140-310)      |

| Location | Year | Sex    | Age      | Prevalence of current drinkers | Prevalence of abstainers | Population average of standard drinks daily | Percent of total attributable deaths | Percent of total attributable DALYs | Attributable deaths     | Attributable DALYs   |
|----------|------|--------|----------|--------------------------------|--------------------------|---------------------------------------------|--------------------------------------|-------------------------------------|-------------------------|----------------------|
| Kuwait   | 1995 | Male   | 35 to 39 | 16%<br>(5.9-29%)               | 84%<br>(71-94%)          | 0.017<br>(0.0053-0.038)                     | 0.94%<br>(0.68-1.2%)                 | 0.66%<br>(0.49-0.84%)               | 0.84<br>(0.59-1.2)      | 170<br>(110-230)     |
| Kuwait   | 1995 | Male   | 40 to 44 | 16%<br>(7-28%)                 | 84%<br>(72-93%)          | 0.019<br>(0.0055-0.043)                     | 0.79%<br>(0.59-1%)                   | 0.63%<br>(0.43-0.81%)               | 0.96<br>(0.63-1.3)      | 140<br>(95-190)      |
| Kuwait   | 1995 | Male   | 45 to 49 | 16%<br>(6.2-29%)               | 84%<br>(71-94%)          | 0.02<br>(0.0044-0.049)                      | 0.66%<br>(0.5-0.83%)                 | 0.64%<br>(0.38-0.83%)               | 0.88<br>(0.5-1.2)       | 76<br>(54-100)       |
| Kuwait   | 1995 | Male   | 50 to 54 | 15%<br>(6.4-29%)               | 85%<br>(71-94%)          | 0.02<br>(0.0041-0.052)                      | 0.48%<br>(0.32-0.64%)                | 0.48%<br>(0.23-0.68%)               | 0.77<br>(0.36-1.1)      | 53<br>(33-72)        |
| Kuwait   | 1995 | Male   | 55 to 59 | 14%<br>(6.3-27%)               | 86%<br>(73-94%)          | 0.019<br>(0.0036-0.048)                     | 0.35%<br>(0.18-0.5%)                 | 0.35%<br>(0.098-0.55%)              | 0.51<br>(0.13-0.84)     | 26<br>(14-38)        |
| Kuwait   | 1995 | Male   | 60 to 64 | 14%<br>(6.1-26%)               | 86%<br>(74-94%)          | 0.017<br>(0.003-0.044)                      | 0.31%<br>(0.14-0.45%)                | 0.33%<br>(0.1-0.54%)                | 0.59<br>(0.19-0.98)     | 21<br>(9.2-32)       |
| Kuwait   | 1995 | Male   | 65 to 69 | 13%<br>(5.8-24%)               | 87%<br>(76-94%)          | 0.014<br>(0.0027-0.036)                     | 0.26%<br>(0.13-0.38%)                | 0.31%<br>(0.12-0.49%)               | 0.54<br>(0.2-0.87)      | 15<br>(7.5-23)       |
| Kuwait   | 1995 | Male   | 70 to 74 | 12%<br>(5.3-21%)               | 88%<br>(79-95%)          | 0.01<br>(0.0021-0.028)                      | 0.2%<br>(0.094-0.31%)                | 0.24%<br>(0.09-0.38%)               | 0.38<br>(0.14-0.62)     | 8<br>(3.7-12)        |
| Kuwait   | 1995 | Male   | 75 to 79 | 10%<br>(4.3-20%)               | 90%<br>(80-96%)          | 0.0078<br>(0.0014-0.023)                    | 0.19%<br>(0.1-0.27%)                 | 0.22%<br>(0.1-0.33%)                | 0.29<br>(0.13-0.44)     | 4.5<br>(2.4-6.7)     |
| Kuwait   | 1995 | Male   | 80 to 84 | 9%<br>(3.5-18%)                | 91%<br>(82-97%)          | 0.0064<br>(0.0011-0.018)                    | 0.15%<br>(0.07-0.22%)                | 0.17%<br>(0.068-0.26%)              | 0.15<br>(0.059-0.23)    | 1.7<br>(0.78-2.5)    |
| Kuwait   | 1995 | Male   | 85 to 89 | 8.8%<br>(3.4-18%)              | 91%<br>(82-97%)          | 0.0059<br>(0.0011-0.016)                    | 0.14%<br>(0.072-0.19%)               | 0.15%<br>(0.071-0.22%)              | 0.12<br>(0.056-0.17)    | 1<br>(0.51-1.4)      |
| Kuwait   | 1995 | Male   | 90 to 94 | 10%<br>(4-21%)                 | 90%<br>(79-96%)          | 0.0062<br>(0.001-0.019)                     | 0.095%<br>(0.034-0.13%)              | 0.091%<br>(0.014-0.13%)             | 0.049<br>(0.0072-0.071) | 0.33<br>(0.11-0.45)  |
| Kuwait   | 1995 | Male   | 95 plus  | 12%<br>(4.6-26%)               | 88%<br>(74-95%)          | 0.0071<br>(0.001-0.022)                     | 0.13%<br>(0.064-0.17%)               | 0.1%<br>(0.012-0.14%)               | 0.019<br>(0.0021-0.027) | 0.11<br>(0.051-0.15) |
| Kuwait   | 2000 | Female | All Ages | 11%<br>(6.2-17%)               | 89%<br>(83-94%)          | 0.0061<br>(0.0033-0.0093)                   | 0.33%<br>(0.25-0.42%)                | 0.15%<br>(0.062-0.19%)              | 2.4<br>(0.97-3.2)       | 460<br>(320-630)     |
| Kuwait   | 2000 | Female | 15 to 19 | 8.9%<br>(2.8-19%)              | 91%<br>(81-97%)          | 0.0042<br>(0.001-0.011)                     | 0.34%<br>(0.19-0.53%)                | 0.087%<br>(0.067-0.12%)             | 0.018<br>(0.013-0.024)  | 27<br>(14-44)        |
| Kuwait   | 2000 | Female | 20 to 24 | 11%<br>(3.5-24%)               | 89%<br>(76-97%)          | 0.0066<br>(0.0016-0.016)                    | 0.71%<br>(0.42-1%)                   | 0.11%<br>(0.083-0.15%)              | 0.028<br>(0.02-0.04)    | 65<br>(36-100)       |
| Kuwait   | 2000 | Female | 25 to 29 | 13%<br>(3.6-27%)               | 87%<br>(73-96%)          | 0.0079<br>(0.0021-0.017)                    | 0.75%<br>(0.49-1.1%)                 | 0.18%<br>(0.14-0.24%)               | 0.067<br>(0.048-0.092)  | 92<br>(57-140)       |
| Kuwait   | 2000 | Female | 30 to 34 | 15%<br>(3.7-31%)               | 85%<br>(69-96%)          | 0.0092<br>(0.0028-0.019)                    | 0.65%<br>(0.43-0.93%)                | 0.19%<br>(0.14-0.24%)               | 0.088<br>(0.064-0.12)   | 88<br>(53-140)       |
| Kuwait   | 2000 | Female | 35 to 39 | 16%<br>(4.4-31%)               | 84%<br>(69-96%)          | 0.011<br>(0.0037-0.022)                     | 0.51%<br>(0.35-0.71%)                | 0.24%<br>(0.18-0.3%)                | 0.13<br>(0.088-0.17)    | 62<br>(39-92)        |
| Kuwait   | 2000 | Female | 40 to 44 | 17%<br>(5.9-32%)               | 83%<br>(68-94%)          | 0.012<br>(0.0041-0.025)                     | 0.4%<br>(0.26-0.56%)                 | 0.28%<br>(0.21-0.36%)               | 0.18<br>(0.13-0.24)     | 46<br>(27-68)        |
| Kuwait   | 2000 | Female | 45 to 49 | 17%<br>(6.2-33%)               | 83%<br>(67-94%)          | 0.013<br>(0.0042-0.029)                     | 0.32%<br>(0.21-0.44%)                | 0.28%<br>(0.17-0.38%)               | 0.17<br>(0.099-0.24)    | 24<br>(15-36)        |
| Kuwait   | 2000 | Female | 50 to 54 | 18%<br>(6.8-36%)               | 82%<br>(64-93%)          | 0.013<br>(0.0036-0.032)                     | 0.27%<br>(0.13-0.38%)                | 0.29%<br>(0.1-0.42%)                | 0.23<br>(0.078-0.35)    | 19<br>(9.3-28)       |

| Location | Year | Sex    | Age      | Prevalence of current drinkers | Prevalence of abstainers | Population average of standard drinks daily | Percent of total attributable deaths | Percent of total attributable DALYs | Attributable deaths     | Attributable DALYs    |
|----------|------|--------|----------|--------------------------------|--------------------------|---------------------------------------------|--------------------------------------|-------------------------------------|-------------------------|-----------------------|
| Kuwait   | 2000 | Female | 55 to 59 | 19%<br>(7.2-37%)               | 81%<br>(63-93%)          | 0.013<br>(0.0033-0.032)                     | 0.2%<br>(0.052-0.29%)                | 0.22%<br>(0.02-0.34%)               | 0.17<br>(0.015-0.27)    | 9.4<br>(2.5-14)       |
| Kuwait   | 2000 | Female | 60 to 64 | 20%<br>(7.7-38%)               | 80%<br>(62-92%)          | 0.013<br>(0.0028-0.033)                     | 0.18%<br>(-0.022-0.29%)              | 0.21%<br>(-0.044-0.35%)             | 0.22<br>(-0.047-0.39)   | 7.8<br>(-0.97-13)     |
| Kuwait   | 2000 | Female | 65 to 69 | 20%<br>(8.6-37%)               | 80%<br>(63-91%)          | 0.011<br>(0.0025-0.028)                     | 0.18%<br>(-0.0063-0.27%)             | 0.23%<br>(-0.012-0.36%)             | 0.35<br>(-0.016-0.57)   | 9.3<br>(-0.35-15)     |
| Kuwait   | 2000 | Female | 70 to 74 | 19%<br>(8.2-36%)               | 81%<br>(64-92%)          | 0.0088<br>(0.002-0.024)                     | 0.16%<br>(-0.032-0.24%)              | 0.19%<br>(-0.036-0.29%)             | 0.22<br>(-0.041-0.34)   | 4.4<br>(-0.86-6.6)    |
| Kuwait   | 2000 | Female | 75 to 79 | 17%<br>(6.4-35%)               | 83%<br>(65-94%)          | 0.0072<br>(0.0013-0.022)                    | 0.13%<br>(-0.032-0.19%)              | 0.16%<br>(-0.036-0.24%)             | 0.27<br>(-0.067-0.41)   | 4.1<br>(-1.1-6.2)     |
| Kuwait   | 2000 | Female | 80 to 84 | 16%<br>(5.4-35%)               | 84%<br>(65-95%)          | 0.0065<br>(0.0011-0.021)                    | 0.098%<br>(-0.024-0.14%)             | 0.11%<br>(-0.035-0.16%)             | 0.11<br>(-0.037-0.17)   | 1.3<br>(-0.34-1.8)    |
| Kuwait   | 2000 | Female | 85 to 89 | 16%<br>(5.2-37%)               | 84%<br>(63-95%)          | 0.0065<br>(0.0011-0.02)                     | 0.071%<br>(-0.037-0.098%)            | 0.077%<br>(-0.048-0.11%)            | 0.042<br>(-0.025-0.061) | 0.36<br>(-0.18-0.51)  |
| Kuwait   | 2000 | Female | 90 to 94 | 19%<br>(5.7-40%)               | 81%<br>(60-94%)          | 0.0074<br>(0.0013-0.023)                    | 0.071%<br>(-0.05-0.1%)               | 0.074%<br>(-0.065-0.11%)            | 0.047<br>(-0.04-0.069)  | 0.28<br>(-0.19-0.4)   |
| Kuwait   | 2000 | Female | 95 plus  | 23%<br>(7.1-48%)               | 77%<br>(52-93%)          | 0.0092<br>(0.0013-0.029)                    | 0.056%<br>(-0.11-0.091%)             | 0.046%<br>(-0.18-0.085%)            | 0.014<br>(-0.051-0.026) | 0.071<br>(-0.15-0.12) |
| Kuwait   | 2000 | Male   | All Ages | 10%<br>(6.6-15%)               | 90%<br>(85-93%)          | 0.0082<br>(0.0047-0.012)                    | 0.62%<br>(0.5-0.75%)                 | 0.37%<br>(0.3-0.44%)                | 10<br>(7.7-13)          | 1300<br>(980-1700)    |
| Kuwait   | 2000 | Male   | 15 to 19 | 6.4%<br>(2.7-13%)              | 94%<br>(87-97%)          | 0.0028<br>(0.00072-0.0075)                  | 0.48%<br>(0.29-0.74%)                | 0.076%<br>(0.053-0.12%)             | 0.039<br>(0.026-0.063)  | 44<br>(25-71)         |
| Kuwait   | 2000 | Male   | 20 to 24 | 9.6%<br>(3.7-18%)              | 90%<br>(82-96%)          | 0.0061<br>(0.0018-0.014)                    | 1.1%<br>(0.68-1.6%)                  | 0.27%<br>(0.19-0.41%)               | 0.21<br>(0.14-0.33)     | 130<br>(78-210)       |
| Kuwait   | 2000 | Male   | 25 to 29 | 12%<br>(4.6-23%)               | 88%<br>(77-95%)          | 0.0092<br>(0.003-0.019)                     | 1.1%<br>(0.81-1.6%)                  | 0.32%<br>(0.22-0.46%)               | 0.38<br>(0.25-0.56)     | 240<br>(150-350)      |
| Kuwait   | 2000 | Male   | 30 to 34 | 14%<br>(5.2-27%)               | 86%<br>(73-95%)          | 0.012<br>(0.0046-0.022)                     | 1%<br>(0.72-1.4%)                    | 0.47%<br>(0.36-0.6%)                | 0.62<br>(0.45-0.84)     | 230<br>(150-330)      |
| Kuwait   | 2000 | Male   | 35 to 39 | 15%<br>(5.9-28%)               | 85%<br>(72-94%)          | 0.013<br>(0.0051-0.025)                     | 0.95%<br>(0.72-1.2%)                 | 0.69%<br>(0.54-0.87%)               | 1<br>(0.72-1.3)         | 200<br>(140-280)      |
| Kuwait   | 2000 | Male   | 40 to 44 | 15%<br>(6.9-27%)               | 85%<br>(73-93%)          | 0.014<br>(0.0053-0.027)                     | 0.81%<br>(0.6-1.1%)                  | 0.68%<br>(0.52-0.85%)               | 1.3<br>(0.93-1.7)       | 170<br>(120-230)      |
| Kuwait   | 2000 | Male   | 45 to 49 | 15%<br>(5.9-28%)               | 85%<br>(72-94%)          | 0.015<br>(0.0048-0.032)                     | 0.71%<br>(0.56-0.89%)                | 0.74%<br>(0.54-0.93%)               | 1.4<br>(0.94-1.9)       | 110<br>(83-150)       |
| Kuwait   | 2000 | Male   | 50 to 54 | 14%<br>(6.1-29%)               | 86%<br>(71-94%)          | 0.015<br>(0.0043-0.034)                     | 0.53%<br>(0.38-0.68%)                | 0.56%<br>(0.36-0.76%)               | 1.2<br>(0.73-1.7)       | 76<br>(52-100)        |
| Kuwait   | 2000 | Male   | 55 to 59 | 14%<br>(5.8-27%)               | 86%<br>(73-94%)          | 0.014<br>(0.0037-0.034)                     | 0.42%<br>(0.29-0.55%)                | 0.46%<br>(0.27-0.65%)               | 0.95<br>(0.54-1.4)      | 46<br>(31-63)         |
| Kuwait   | 2000 | Male   | 60 to 64 | 13%<br>(5.6-25%)               | 87%<br>(75-94%)          | 0.013<br>(0.0031-0.032)                     | 0.37%<br>(0.23-0.5%)                 | 0.42%<br>(0.22-0.61%)               | 0.83<br>(0.46-1.3)      | 29<br>(17-40)         |
| Kuwait   | 2000 | Male   | 65 to 69 | 13%<br>(5.5-23%)               | 87%<br>(77-94%)          | 0.01<br>(0.0029-0.026)                      | 0.29%<br>(0.19-0.39%)                | 0.35%<br>(0.19-0.51%)               | 0.73<br>(0.4-1.1)       | 20<br>(13-28)         |
| Kuwait   | 2000 | Male   | 70 to 74 | 11%<br>(5.1-21%)               | 89%<br>(79-95%)          | 0.0078<br>(0.002-0.02)                      | 0.23%<br>(0.15-0.33%)                | 0.29%<br>(0.16-0.43%)               | 0.66<br>(0.38-0.99)     | 14<br>(8.4-20)        |

| Location | Year | Sex    | Age      | Prevalence of current drinkers | Prevalence of abstainers | Population average of standard drinks daily | Percent of total attributable deaths | Percent of total attributable DALYs | Attributable deaths     | Attributable DALYs   |
|----------|------|--------|----------|--------------------------------|--------------------------|---------------------------------------------|--------------------------------------|-------------------------------------|-------------------------|----------------------|
| Kuwait   | 2000 | Male   | 75 to 79 | 9.8%<br>(4.2-19%)              | 90%<br>(81-96%)          | 0.0059<br>(0.0012-0.016)                    | 0.21%<br>(0.14-0.27%)                | 0.25%<br>(0.16-0.34%)               | 0.39<br>(0.24-0.55)     | 6.1<br>(3.9-8.4)     |
| Kuwait   | 2000 | Male   | 80 to 84 | 8.8%<br>(3.5-18%)              | 91%<br>(82-96%)          | 0.005<br>(0.0011-0.013)                     | 0.17%<br>(0.11-0.24%)                | 0.2%<br>(0.12-0.28%)                | 0.21<br>(0.13-0.3)      | 2.3<br>(1.5-3.2)     |
| Kuwait   | 2000 | Male   | 85 to 89 | 8.6%<br>(3.4-17%)              | 91%<br>(83-97%)          | 0.0045<br>(0.001-0.011)                     | 0.15%<br>(0.11-0.19%)                | 0.17%<br>(0.12-0.23%)               | 0.11<br>(0.074-0.15)    | 0.92<br>(0.65-1.2)   |
| Kuwait   | 2000 | Male   | 90 to 94 | 9.7%<br>(3.8-19%)              | 90%<br>(81-96%)          | 0.0048<br>(0.001-0.013)                     | 0.11%<br>(0.069-0.14%)               | 0.11%<br>(0.06-0.15%)               | 0.051<br>(0.028-0.068)  | 0.32<br>(0.2-0.42)   |
| Kuwait   | 2000 | Male   | 95 plus  | 12%<br>(4.5-26%)               | 88%<br>(74-95%)          | 0.0056<br>(0.001-0.017)                     | 0.15%<br>(0.097-0.19%)               | 0.13%<br>(0.058-0.17%)              | 0.026<br>(0.011-0.035)  | 0.13<br>(0.086-0.17) |
| Kuwait   | 2005 | Female | All Ages | 11%<br>(6.5-18%)               | 89%<br>(82-94%)          | 0.0051<br>(0.0028-0.0078)                   | 0.35%<br>(0.27-0.44%)                | 0.18%<br>(0.12-0.21%)               | 3<br>(1.9-3.8)          | 560<br>(390-750)     |
| Kuwait   | 2005 | Female | 15 to 19 | 8.5%<br>(2.8-19%)              | 91%<br>(81-97%)          | 0.0033<br>(0.00075-0.0086)                  | 0.34%<br>(0.19-0.56%)                | 0.085%<br>(0.068-0.11%)             | 0.016<br>(0.012-0.021)  | 27<br>(14-46)        |
| Kuwait   | 2005 | Female | 20 to 24 | 11%<br>(3.2-24%)               | 89%<br>(76-97%)          | 0.0052<br>(0.0013-0.012)                    | 0.73%<br>(0.44-1.1%)                 | 0.1%<br>(0.078-0.13%)               | 0.028<br>(0.021-0.039)  | 83<br>(45-140)       |
| Kuwait   | 2005 | Female | 25 to 29 | 12%<br>(3.5-27%)               | 88%<br>(73-96%)          | 0.0062<br>(0.0016-0.014)                    | 0.76%<br>(0.51-1.1%)                 | 0.17%<br>(0.13-0.22%)               | 0.064<br>(0.046-0.089)  | 110<br>(63-160)      |
| Kuwait   | 2005 | Female | 30 to 34 | 14%<br>(3.7-30%)               | 86%<br>(70-96%)          | 0.0074<br>(0.0022-0.015)                    | 0.66%<br>(0.43-0.97%)                | 0.17%<br>(0.14-0.22%)               | 0.079<br>(0.058-0.11)   | 97<br>(57-150)       |
| Kuwait   | 2005 | Female | 35 to 39 | 16%<br>(4.3-32%)               | 84%<br>(68-96%)          | 0.0087<br>(0.0027-0.017)                    | 0.52%<br>(0.35-0.71%)                | 0.22%<br>(0.17-0.28%)               | 0.12<br>(0.085-0.17)    | 74<br>(46-110)       |
| Kuwait   | 2005 | Female | 40 to 44 | 17%<br>(5.6-33%)               | 83%<br>(67-94%)          | 0.0098<br>(0.0032-0.02)                     | 0.4%<br>(0.27-0.58%)                 | 0.27%<br>(0.2-0.34%)                | 0.16<br>(0.12-0.23)     | 49<br>(30-75)        |
| Kuwait   | 2005 | Female | 45 to 49 | 17%<br>(5.9-33%)               | 83%<br>(67-94%)          | 0.011<br>(0.0029-0.023)                     | 0.33%<br>(0.22-0.46%)                | 0.29%<br>(0.2-0.39%)                | 0.23<br>(0.15-0.32)     | 38<br>(25-54)        |
| Kuwait   | 2005 | Female | 50 to 54 | 18%<br>(6.8-35%)               | 82%<br>(65-93%)          | 0.011<br>(0.0027-0.025)                     | 0.29%<br>(0.16-0.39%)                | 0.32%<br>(0.2-0.45%)                | 0.25<br>(0.14-0.36)     | 22<br>(12-31)        |
| Kuwait   | 2005 | Female | 55 to 59 | 18%<br>(7.2-37%)               | 82%<br>(63-93%)          | 0.011<br>(0.0026-0.027)                     | 0.23%<br>(0.11-0.31%)                | 0.27%<br>(0.12-0.38%)               | 0.3<br>(0.14-0.44)      | 17<br>(7.5-24)       |
| Kuwait   | 2005 | Female | 60 to 64 | 20%<br>(7.4-38%)               | 80%<br>(62-93%)          | 0.01<br>(0.0022-0.026)                      | 0.21%<br>(0.043-0.31%)               | 0.27%<br>(0.076-0.4%)               | 0.35<br>(0.1-0.54)      | 12<br>(2.4-18)       |
| Kuwait   | 2005 | Female | 65 to 69 | 20%<br>(8.5-37%)               | 80%<br>(63-91%)          | 0.0091<br>(0.0019-0.023)                    | 0.2%<br>(0.058-0.27%)                | 0.25%<br>(0.078-0.35%)              | 0.42<br>(0.14-0.6)      | 11<br>(3.3-16)       |
| Kuwait   | 2005 | Female | 70 to 74 | 19%<br>(8.2-36%)               | 81%<br>(64-92%)          | 0.0073<br>(0.0016-0.021)                    | 0.17%<br>(0.054-0.24%)               | 0.22%<br>(0.081-0.31%)              | 0.52<br>(0.19-0.73)     | 11<br>(3.2-14)       |
| Kuwait   | 2005 | Female | 75 to 79 | 17%<br>(6.4-35%)               | 83%<br>(65-94%)          | 0.006<br>(0.0011-0.019)                     | 0.15%<br>(0.051-0.2%)                | 0.18%<br>(0.069-0.24%)              | 0.22<br>(0.087-0.31)    | 3.3<br>(1.2-4.6)     |
| Kuwait   | 2005 | Female | 80 to 84 | 16%<br>(5.3-35%)               | 84%<br>(65-95%)          | 0.0054<br>(0.00095-0.017)                   | 0.1%<br>(0.058-0.14%)                | 0.11%<br>(0.064-0.15%)              | 0.13<br>(0.073-0.18)    | 1.5<br>(0.84-2)      |
| Kuwait   | 2005 | Female | 85 to 89 | 16%<br>(5.4-36%)               | 84%<br>(64-95%)          | 0.0055<br>(0.00092-0.017)                   | 0.079%<br>(0.047-0.1%)               | 0.088%<br>(0.046-0.11%)             | 0.072<br>(0.038-0.096)  | 0.62<br>(0.35-0.81)  |
| Kuwait   | 2005 | Female | 90 to 94 | 19%<br>(6.3-40%)               | 81%<br>(60-94%)          | 0.0063<br>(0.0011-0.02)                     | 0.082%<br>(0.018-0.11%)              | 0.089%<br>(0.0091-0.12%)            | 0.032<br>(0.0031-0.044) | 0.19<br>(0.04-0.25)  |

| Location | Year | Sex    | Age      | Prevalence of current drinkers | Prevalence of abstainers | Population average of standard drinks daily | Percent of total attributable deaths | Percent of total attributable DALYs | Attributable deaths     | Attributable DALYs     |
|----------|------|--------|----------|--------------------------------|--------------------------|---------------------------------------------|--------------------------------------|-------------------------------------|-------------------------|------------------------|
| Kuwait   | 2005 | Female | 95 plus  | 23%<br>(7.7-48%)               | 77%<br>(52-92%)          | 0.0076<br>(0.0011-0.024)                    | 0.069%<br>(-0.031-0.098%)            | 0.063%<br>(-0.055-0.095%)           | 0.018<br>(-0.016-0.027) | 0.084<br>(-0.039-0.12) |
| Kuwait   | 2005 | Male   | All Ages | 10%<br>(6.3-15%)               | 90%<br>(85-94%)          | 0.0066<br>(0.0038-0.0099)                   | 0.62%<br>(0.5-0.74%)                 | 0.39%<br>(0.33-0.45%)               | 13<br>(9.7-16)          | 1600<br>(1200-2100)    |
| Kuwait   | 2005 | Male   | 15 to 19 | 6.1%<br>(2.6-12%)              | 94%<br>(88-97%)          | 0.0022<br>(0.00058-0.0055)                  | 0.46%<br>(0.28-0.7%)                 | 0.066%<br>(0.046-0.096%)            | 0.046<br>(0.03-0.067)   | 51<br>(29-81)          |
| Kuwait   | 2005 | Male   | 20 to 24 | 9.4%<br>(3.7-18%)              | 91%<br>(82-96%)          | 0.0048<br>(0.0014-0.01)                     | 1%<br>(0.66-1.5%)                    | 0.18%<br>(0.13-0.27%)               | 0.2<br>(0.14-0.31)      | 170<br>(100-260)       |
| Kuwait   | 2005 | Male   | 25 to 29 | 12%<br>(4.6-23%)               | 88%<br>(77-95%)          | 0.0072<br>(0.0024-0.015)                    | 1%<br>(0.71-1.4%)                    | 0.23%<br>(0.16-0.33%)               | 0.36<br>(0.24-0.55)     | 260<br>(160-380)       |
| Kuwait   | 2005 | Male   | 30 to 34 | 13%<br>(4.9-26%)               | 87%<br>(74-95%)          | 0.0092<br>(0.0035-0.017)                    | 0.99%<br>(0.68-1.3%)                 | 0.38%<br>(0.3-0.49%)                | 0.66<br>(0.49-0.9)      | 280<br>(180-410)       |
| Kuwait   | 2005 | Male   | 35 to 39 | 15%<br>(5.5-27%)               | 85%<br>(73-94%)          | 0.01<br>(0.0037-0.02)                       | 0.91%<br>(0.68-1.2%)                 | 0.58%<br>(0.46-0.74%)               | 1.1<br>(0.79-1.4)       | 230<br>(160-320)       |
| Kuwait   | 2005 | Male   | 40 to 44 | 15%<br>(6.5-27%)               | 85%<br>(73-94%)          | 0.011<br>(0.004-0.023)                      | 0.79%<br>(0.58-1%)                   | 0.63%<br>(0.49-0.79%)               | 1.3<br>(0.97-1.8)       | 190<br>(130-260)       |
| Kuwait   | 2005 | Male   | 45 to 49 | 15%<br>(5.7-27%)               | 85%<br>(73-94%)          | 0.012<br>(0.0034-0.026)                     | 0.71%<br>(0.55-0.89%)                | 0.76%<br>(0.57-0.95%)               | 2<br>(1.4-2.6)          | 160<br>(120-200)       |
| Kuwait   | 2005 | Male   | 50 to 54 | 14%<br>(5.9-28%)               | 86%<br>(72-94%)          | 0.012<br>(0.0033-0.027)                     | 0.56%<br>(0.42-0.72%)                | 0.62%<br>(0.42-0.83%)               | 1.5<br>(0.95-2.1)       | 86<br>(61-110)         |
| Kuwait   | 2005 | Male   | 55 to 59 | 13%<br>(5.7-26%)               | 87%<br>(74-94%)          | 0.012<br>(0.0029-0.027)                     | 0.45%<br>(0.32-0.6%)                 | 0.52%<br>(0.32-0.72%)               | 1.2<br>(0.71-1.7)       | 53<br>(37-72)          |
| Kuwait   | 2005 | Male   | 60 to 64 | 13%<br>(5.4-25%)               | 87%<br>(75-95%)          | 0.01<br>(0.0025-0.027)                      | 0.41%<br>(0.29-0.57%)                | 0.5%<br>(0.31-0.72%)                | 1.1<br>(0.7-1.6)        | 38<br>(25-52)          |
| Kuwait   | 2005 | Male   | 65 to 69 | 12%<br>(5.3-22%)               | 88%<br>(78-95%)          | 0.0084<br>(0.0021-0.021)                    | 0.32%<br>(0.22-0.42%)                | 0.39%<br>(0.25-0.54%)               | 1.1<br>(0.68-1.6)       | 29<br>(19-41)          |
| Kuwait   | 2005 | Male   | 70 to 74 | 11%<br>(4.9-20%)               | 89%<br>(80-95%)          | 0.0062<br>(0.0015-0.016)                    | 0.25%<br>(0.18-0.36%)                | 0.33%<br>(0.21-0.47%)               | 0.84<br>(0.53-1.3)      | 18<br>(12-25)          |
| Kuwait   | 2005 | Male   | 75 to 79 | 9.5%<br>(3.9-19%)              | 91%<br>(81-96%)          | 0.0047<br>(0.001-0.014)                     | 0.23%<br>(0.17-0.3%)                 | 0.29%<br>(0.21-0.4%)                | 0.63<br>(0.42-0.88)     | 9.9<br>(6.8-13)        |
| Kuwait   | 2005 | Male   | 80 to 84 | 8.5%<br>(3.4-17%)              | 91%<br>(83-97%)          | 0.004<br>(0.00088-0.012)                    | 0.19%<br>(0.14-0.26%)                | 0.23%<br>(0.15-0.32%)               | 0.31<br>(0.21-0.43)     | 3.5<br>(2.4-4.8)       |
| Kuwait   | 2005 | Male   | 85 to 89 | 8.4%<br>(3.4-17%)              | 92%<br>(83-97%)          | 0.0036<br>(0.00078-0.0094)                  | 0.17%<br>(0.12-0.21%)                | 0.19%<br>(0.14-0.24%)               | 0.16<br>(0.11-0.21)     | 1.3<br>(0.96-1.7)      |
| Kuwait   | 2005 | Male   | 90 to 94 | 9.3%<br>(3.7-19%)              | 91%<br>(81-96%)          | 0.0038<br>(0.00073-0.01)                    | 0.12%<br>(0.091-0.15%)               | 0.13%<br>(0.092-0.16%)              | 0.05<br>(0.036-0.066)   | 0.31<br>(0.23-0.4)     |
| Kuwait   | 2005 | Male   | 95 plus  | 12%<br>(4.1-25%)               | 88%<br>(75-96%)          | 0.0044<br>(0.00071-0.014)                   | 0.15%<br>(0.12-0.2%)                 | 0.14%<br>(0.093-0.18%)              | 0.022<br>(0.015-0.03)   | 0.11<br>(0.08-0.14)    |
| Kuwait   | 2010 | Female | All Ages | 11%<br>(6.5-18%)               | 89%<br>(82-94%)          | 0.0057<br>(0.0019-0.0098)                   | 0.39%<br>(0.3-0.49%)                 | 0.18%<br>(0.11-0.22%)               | 3.9<br>(2.3-5.1)        | 850<br>(590-1200)      |
| Kuwait   | 2010 | Female | 15 to 19 | 8.6%<br>(2.8-18%)              | 91%<br>(82-97%)          | 0.0035<br>(0.00054-0.0097)                  | 0.36%<br>(0.2-0.55%)                 | 0.1%<br>(0.083-0.14%)               | 0.024<br>(0.018-0.032)  | 41<br>(21-67)          |
| Kuwait   | 2010 | Female | 20 to 24 | 11%<br>(3.4-25%)               | 89%<br>(75-97%)          | 0.0055<br>(0.00098-0.014)                   | 0.77%<br>(0.47-1.1%)                 | 0.11%<br>(0.087-0.15%)              | 0.038<br>(0.028-0.053)  | 130<br>(72-210)        |



| Location | Year | Sex    | Age      | Prevalence of current drinkers | Prevalence of abstainers | Population average of standard drinks daily | Percent of total attributable deaths | Percent of total attributable DALYs | Attributable deaths     | Attributable DALYs      |
|----------|------|--------|----------|--------------------------------|--------------------------|---------------------------------------------|--------------------------------------|-------------------------------------|-------------------------|-------------------------|
| Kuwait   | 2010 | Female | 25 to 29 | 13%<br>(3.6-27%)               | 87%<br>(73-96%)          | 0.0065<br>(0.0014-0.015)                    | 0.79%<br>(0.53-1.1%)                 | 0.18%<br>(0.14-0.23%)               | 0.095<br>(0.068-0.13)   | 180<br>(110-270)        |
| Kuwait   | 2010 | Female | 30 to 34 | 14%<br>(3.8-29%)               | 86%<br>(71-96%)          | 0.0077<br>(0.0017-0.016)                    | 0.69%<br>(0.44-1%)                   | 0.18%<br>(0.15-0.24%)               | 0.1<br>(0.077-0.14)     | 160<br>(91-240)         |
| Kuwait   | 2010 | Female | 35 to 39 | 16%<br>(4.3-30%)               | 84%<br>(70-96%)          | 0.009<br>(0.0022-0.019)                     | 0.53%<br>(0.35-0.74%)                | 0.22%<br>(0.17-0.28%)               | 0.15<br>(0.11-0.21)     | 110<br>(66-160)         |
| Kuwait   | 2010 | Female | 40 to 44 | 16%<br>(6-31%)                 | 84%<br>(69-94%)          | 0.01<br>(0.0026-0.022)                      | 0.41%<br>(0.27-0.6%)                 | 0.27%<br>(0.2-0.35%)                | 0.22<br>(0.15-0.3)      | 77<br>(44-120)          |
| Kuwait   | 2010 | Female | 45 to 49 | 17%<br>(6-31%)                 | 83%<br>(69-94%)          | 0.011<br>(0.0025-0.027)                     | 0.34%<br>(0.22-0.46%)                | 0.29%<br>(0.21-0.4%)                | 0.22<br>(0.15-0.31)     | 42<br>(25-62)           |
| Kuwait   | 2010 | Female | 50 to 54 | 17%<br>(6.6-34%)               | 83%<br>(66-93%)          | 0.011<br>(0.0025-0.027)                     | 0.28%<br>(0.16-0.4%)                 | 0.33%<br>(0.2-0.46%)                | 0.35<br>(0.2-0.51)      | 35<br>(19-52)           |
| Kuwait   | 2010 | Female | 55 to 59 | 18%<br>(7.1-36%)               | 82%<br>(64-93%)          | 0.011<br>(0.0022-0.031)                     | 0.23%<br>(0.1-0.33%)                 | 0.3%<br>(0.15-0.42%)                | 0.34<br>(0.16-0.5)      | 20<br>(8.2-28)          |
| Kuwait   | 2010 | Female | 60 to 64 | 19%<br>(7.3-38%)               | 81%<br>(62-93%)          | 0.011<br>(0.0019-0.031)                     | 0.22%<br>(0.055-0.32%)               | 0.3%<br>(0.085-0.45%)               | 0.5<br>(0.15-0.78)      | 18<br>(4.5-28)          |
| Kuwait   | 2010 | Female | 65 to 69 | 20%<br>(8-37%)                 | 80%<br>(63-92%)          | 0.0094<br>(0.0016-0.024)                    | 0.21%<br>(0.059-0.3%)                | 0.28%<br>(0.09-0.39%)               | 0.52<br>(0.16-0.78)     | 14<br>(3.5-20)          |
| Kuwait   | 2010 | Female | 70 to 74 | 19%<br>(7.4-35%)               | 81%<br>(65-93%)          | 0.0075<br>(0.0012-0.023)                    | 0.18%<br>(0.042-0.25%)               | 0.23%<br>(0.062-0.31%)              | 0.53<br>(0.14-0.75)     | 11<br>(2.4-15)          |
| Kuwait   | 2010 | Female | 75 to 79 | 17%<br>(5.9-35%)               | 83%<br>(65-94%)          | 0.0061<br>(0.00092-0.02)                    | 0.15%<br>(0.02-0.2%)                 | 0.19%<br>(0.032-0.26%)              | 0.49<br>(0.086-0.71)    | 7.6<br>(1.1-11)         |
| Kuwait   | 2010 | Female | 80 to 84 | 15%<br>(4.8-33%)               | 85%<br>(67-95%)          | 0.0054<br>(0.00079-0.018)                   | 0.11%<br>(0.0013-0.14%)              | 0.12%<br>(0.0023-0.16%)             | 0.21<br>(0.0042-0.3)    | 2.4<br>(0.03-3.2)       |
| Kuwait   | 2010 | Female | 85 to 89 | 16%<br>(5-36%)                 | 84%<br>(64-95%)          | 0.0054<br>(0.00078-0.017)                   | 0.081%<br>(0.0083-0.11%)             | 0.089%<br>(0.0032-0.12%)            | 0.082<br>(0.0032-0.11)  | 0.68<br>(0.065-0.93)    |
| Kuwait   | 2010 | Female | 90 to 94 | 18%<br>(5.9-40%)               | 82%<br>(60-94%)          | 0.0062<br>(0.00086-0.02)                    | 0.084%<br>(-0.02-0.11%)              | 0.091%<br>(-0.031-0.12%)            | 0.052<br>(-0.019-0.073) | 0.31<br>(-0.078-0.42)   |
| Kuwait   | 2010 | Female | 95 plus  | 22%<br>(6.5-47%)               | 78%<br>(53-94%)          | 0.0076<br>(0.00085-0.027)                   | 0.068%<br>(-0.075-0.1%)              | 0.062%<br>(-0.12-0.1%)              | 0.011<br>(-0.02-0.017)  | 0.049<br>(-0.056-0.075) |
| Kuwait   | 2010 | Male   | All Ages | 10%<br>(6.5-15%)               | 90%<br>(85-93%)          | 0.0072<br>(0.0027-0.012)                    | 0.66%<br>(0.54-0.79%)                | 0.4%<br>(0.32-0.46%)                | 14<br>(11-18)           | 2000<br>(1500-2700)     |
| Kuwait   | 2010 | Male   | 15 to 19 | 6.1%<br>(2.6-12%)              | 94%<br>(88-97%)          | 0.0023<br>(0.00042-0.0061)                  | 0.47%<br>(0.29-0.72%)                | 0.075%<br>(0.048-0.12%)             | 0.058<br>(0.035-0.097)  | 60<br>(34-98)           |
| Kuwait   | 2010 | Male   | 20 to 24 | 9.4%<br>(3.6-18%)              | 91%<br>(82-96%)          | 0.005<br>(0.0011-0.012)                     | 1.1%<br>(0.71-1.7%)                  | 0.19%<br>(0.14-0.31%)               | 0.2<br>(0.13-0.34)      | 210<br>(120-320)        |
| Kuwait   | 2010 | Male   | 25 to 29 | 12%<br>(4.5-23%)               | 88%<br>(77-95%)          | 0.0076<br>(0.0019-0.017)                    | 1.2%<br>(0.8-1.6%)                   | 0.25%<br>(0.18-0.37%)               | 0.41<br>(0.28-0.62)     | 350<br>(220-520)        |
| Kuwait   | 2010 | Male   | 30 to 34 | 13%<br>(4.7-26%)               | 87%<br>(74-95%)          | 0.0096<br>(0.0026-0.02)                     | 1.1%<br>(0.74-1.5%)                  | 0.42%<br>(0.32-0.55%)               | 0.69<br>(0.52-0.94)     | 360<br>(230-530)        |
| Kuwait   | 2010 | Male   | 35 to 39 | 15%<br>(5.4-27%)               | 85%<br>(73-95%)          | 0.011<br>(0.0028-0.023)                     | 0.95%<br>(0.7-1.3%)                  | 0.63%<br>(0.49-0.8%)                | 1.3<br>(0.94-1.7)       | 320<br>(220-460)        |
| Kuwait   | 2010 | Male   | 40 to 44 | 15%<br>(6.7-26%)               | 85%<br>(74-93%)          | 0.012<br>(0.0029-0.024)                     | 0.8%<br>(0.59-1.1%)                  | 0.64%<br>(0.49-0.8%)                | 1.5<br>(1-2)            | 230<br>(160-340)        |

| Location | Year | Sex    | Age      | Prevalence of current drinkers | Prevalence of abstainers | Population average of standard drinks daily | Percent of total attributable deaths | Percent of total attributable DALYs | Attributable deaths    | Attributable DALYs    |
|----------|------|--------|----------|--------------------------------|--------------------------|---------------------------------------------|--------------------------------------|-------------------------------------|------------------------|-----------------------|
| Kuwait   | 2010 | Male   | 45 to 49 | 14%<br>(5.6-26%)               | 86%<br>(74-94%)          | 0.012<br>(0.0027-0.028)                     | 0.71%<br>(0.55-0.88%)                | 0.76%<br>(0.57-0.95%)               | 2<br>(1.4-2.7)         | 180<br>(130-230)      |
| Kuwait   | 2010 | Male   | 50 to 54 | 14%<br>(5.6-28%)               | 86%<br>(72-94%)          | 0.012<br>(0.0026-0.03)                      | 0.57%<br>(0.43-0.71%)                | 0.65%<br>(0.44-0.86%)               | 2.1<br>(1.4-2.9)       | 130<br>(95-170)       |
| Kuwait   | 2010 | Male   | 55 to 59 | 13%<br>(5.5-25%)               | 87%<br>(75-95%)          | 0.012<br>(0.0021-0.03)                      | 0.44%<br>(0.3-0.58%)                 | 0.51%<br>(0.31-0.72%)               | 1.3<br>(0.79-2)        | 63<br>(41-84)         |
| Kuwait   | 2010 | Male   | 60 to 64 | 13%<br>(5.2-24%)               | 87%<br>(76-95%)          | 0.011<br>(0.0019-0.028)                     | 0.41%<br>(0.28-0.57%)                | 0.53%<br>(0.34-0.76%)               | 1.4<br>(0.85-2)        | 47<br>(31-66)         |
| Kuwait   | 2010 | Male   | 65 to 69 | 12%<br>(5.2-22%)               | 88%<br>(78-95%)          | 0.0086<br>(0.0015-0.022)                    | 0.32%<br>(0.22-0.43%)                | 0.4%<br>(0.25-0.58%)                | 0.93<br>(0.54-1.4)     | 25<br>(16-36)         |
| Kuwait   | 2010 | Male   | 70 to 74 | 11%<br>(4.9-20%)               | 89%<br>(80-95%)          | 0.0064<br>(0.0013-0.017)                    | 0.26%<br>(0.18-0.36%)                | 0.33%<br>(0.21-0.47%)               | 0.89<br>(0.55-1.3)     | 19<br>(12-27)         |
| Kuwait   | 2010 | Male   | 75 to 79 | 9.5%<br>(3.9-19%)              | 91%<br>(81-96%)          | 0.0049<br>(0.00081-0.015)                   | 0.22%<br>(0.16-0.28%)                | 0.29%<br>(0.2-0.39%)                | 0.66<br>(0.45-0.93)    | 11<br>(7.5-14)        |
| Kuwait   | 2010 | Male   | 80 to 84 | 8.4%<br>(3.2-17%)              | 92%<br>(83-97%)          | 0.0041<br>(0.00072-0.012)                   | 0.19%<br>(0.13-0.25%)                | 0.23%<br>(0.16-0.31%)               | 0.37<br>(0.25-0.52)    | 4.3<br>(3-5.8)        |
| Kuwait   | 2010 | Male   | 85 to 89 | 8.3%<br>(3.3-16%)              | 92%<br>(84-97%)          | 0.0037<br>(0.00068-0.01)                    | 0.17%<br>(0.13-0.21%)                | 0.2%<br>(0.14-0.26%)                | 0.23<br>(0.16-0.3)     | 1.9<br>(1.4-2.5)      |
| Kuwait   | 2010 | Male   | 90 to 94 | 9.4%<br>(4-19%)                | 91%<br>(81-96%)          | 0.004<br>(0.0007-0.011)                     | 0.12%<br>(0.091-0.16%)               | 0.13%<br>(0.09-0.17%)               | 0.058<br>(0.041-0.077) | 0.38<br>(0.28-0.49)   |
| Kuwait   | 2010 | Male   | 95 plus  | 12%<br>(4.3-25%)               | 88%<br>(75-96%)          | 0.0046<br>(0.00063-0.015)                   | 0.16%<br>(0.12-0.21%)                | 0.14%<br>(0.097-0.19%)              | 0.019<br>(0.013-0.025) | 0.097<br>(0.071-0.13) |
| Kuwait   | 2016 | Female | All Ages | 12%<br>(7-19%)                 | 88%<br>(81-93%)          | 0.013<br>(0.0027-0.028)                     | 0.39%<br>(0.28-0.5%)                 | 0.15%<br>(-0.0068-0.23%)            | 3.8<br>(-0.16-7.1)     | 1100<br>(710-1500)    |
| Kuwait   | 2016 | Female | 15 to 19 | 8.7%<br>(2.8-18%)              | 91%<br>(82-97%)          | 0.0074<br>(0.00093-0.024)                   | 0.36%<br>(0.2-0.57%)                 | 0.14%<br>(0.093-0.22%)              | 0.024<br>(0.014-0.043) | 38<br>(20-64)         |
| Kuwait   | 2016 | Female | 20 to 24 | 11%<br>(3.2-24%)               | 89%<br>(76-97%)          | 0.012<br>(0.0015-0.037)                     | 0.79%<br>(0.49-1.2%)                 | 0.14%<br>(0.1-0.24%)                | 0.04<br>(0.022-0.08)   | 130<br>(74-220)       |
| Kuwait   | 2016 | Female | 25 to 29 | 13%<br>(3.5-26%)               | 87%<br>(74-96%)          | 0.014<br>(0.0017-0.038)                     | 0.82%<br>(0.55-1.2%)                 | 0.21%<br>(0.14-0.33%)               | 0.098<br>(0.051-0.18)  | 210<br>(120-320)      |
| Kuwait   | 2016 | Female | 30 to 34 | 14%<br>(3.5-30%)               | 86%<br>(70-96%)          | 0.016<br>(0.0024-0.042)                     | 0.72%<br>(0.46-1.1%)                 | 0.21%<br>(0.15-0.32%)               | 0.13<br>(0.072-0.23)   | 220<br>(130-350)      |
| Kuwait   | 2016 | Female | 35 to 39 | 16%<br>(4.2-31%)               | 84%<br>(69-96%)          | 0.019<br>(0.0027-0.049)                     | 0.55%<br>(0.36-0.77%)                | 0.24%<br>(0.17-0.36%)               | 0.19<br>(0.094-0.33)   | 160<br>(96-240)       |
| Kuwait   | 2016 | Female | 40 to 44 | 17%<br>(5.8-32%)               | 83%<br>(68-94%)          | 0.021<br>(0.0032-0.054)                     | 0.41%<br>(0.23-0.61%)                | 0.28%<br>(0.19-0.41%)               | 0.26<br>(0.13-0.45)    | 110<br>(56-160)       |
| Kuwait   | 2016 | Female | 45 to 49 | 17%<br>(6-32%)                 | 83%<br>(68-94%)          | 0.023<br>(0.0033-0.06)                      | 0.33%<br>(0.18-0.48%)                | 0.3%<br>(0.16-0.44%)                | 0.35<br>(0.16-0.62)    | 78<br>(40-120)        |
| Kuwait   | 2016 | Female | 50 to 54 | 18%<br>(6.9-35%)               | 82%<br>(65-93%)          | 0.024<br>(0.003-0.069)                      | 0.25%<br>(0.074-0.39%)               | 0.29%<br>(0.1-0.45%)                | 0.39<br>(0.13-0.71)    | 44<br>(12-72)         |
| Kuwait   | 2016 | Female | 55 to 59 | 18%<br>(7.1-36%)               | 82%<br>(64-93%)          | 0.023<br>(0.0027-0.074)                     | 0.19%<br>(-0.0049-0.31%)             | 0.26%<br>(0.051-0.42%)              | 0.47<br>(0.08-0.86)    | 29<br>(-0.98-52)      |
| Kuwait   | 2016 | Female | 60 to 64 | 19%<br>(7.1-36%)               | 81%<br>(64-93%)          | 0.022<br>(0.0025-0.073)                     | 0.15%<br>(-0.099-0.29%)              | 0.22%<br>(-0.092-0.41%)             | 0.5<br>(-0.22-1)       | 18<br>(-12-38)        |

| Location | Year | Sex    | Age      | Prevalence of current drinkers | Prevalence of abstainers | Population average of standard drinks daily | Percent of total attributable deaths | Percent of total attributable DALYs | Attributable deaths     | Attributable DALYs    |
|----------|------|--------|----------|--------------------------------|--------------------------|---------------------------------------------|--------------------------------------|-------------------------------------|-------------------------|-----------------------|
| Kuwait   | 2016 | Female | 65 to 69 | 19%<br>(8.1-35%)               | 81%<br>(65-92%)          | 0.019<br>(0.0022-0.058)                     | 0.14%<br>(-0.11-0.28%)               | 0.2%<br>(-0.11-0.39%)               | 0.59<br>(-0.32-1.3)     | 15<br>(-11-33)        |
| Kuwait   | 2016 | Female | 70 to 74 | 18%<br>(7.6-34%)               | 82%<br>(66-92%)          | 0.015<br>(0.002-0.047)                      | 0.11%<br>(-0.13-0.23%)               | 0.15%<br>(-0.17-0.3%)               | 0.39<br>(-0.41-0.92)    | 7.7<br>(-8.9-18)      |
| Kuwait   | 2016 | Female | 75 to 79 | 16%<br>(6-34%)                 | 84%<br>(66-94%)          | 0.012<br>(0.0012-0.045)                     | 0.088%<br>(-0.17-0.19%)              | 0.11%<br>(-0.2-0.24%)               | 0.24<br>(-0.4-0.58)     | 3.7<br>(-7.1-8.8)     |
| Kuwait   | 2016 | Female | 80 to 84 | 15%<br>(4.8-33%)               | 85%<br>(67-95%)          | 0.011<br>(0.00099-0.041)                    | 0.048%<br>(-0.22-0.13%)              | 0.052%<br>(-0.25-0.15%)             | 0.13<br>(-0.56-0.41)    | 1.5<br>(-6.4-4.6)     |
| Kuwait   | 2016 | Female | 85 to 89 | 16%<br>(4.9-35%)               | 84%<br>(65-95%)          | 0.011<br>(0.00083-0.041)                    | 0.026%<br>(-0.23-0.1%)               | 0.024%<br>(-0.27-0.11%)             | 0.042<br>(-0.46-0.21)   | 0.42<br>(-3.5-1.8)    |
| Kuwait   | 2016 | Female | 90 to 94 | 18%<br>(5.6-40%)               | 82%<br>(60-94%)          | 0.013<br>(0.0011-0.047)                     | 0.029%<br>(-0.22-0.1%)               | 0.024%<br>(-0.26-0.11%)             | 0.011<br>(-0.13-0.06)   | 0.091<br>(-0.68-0.35) |
| Kuwait   | 2016 | Female | 95 plus  | 23%<br>(6.5-47%)               | 77%<br>(53-94%)          | 0.016<br>(0.0011-0.065)                     | 0.013%<br>(-0.28-0.1%)               | -0.0094%<br>(-0.39-0.093%)          | -0.0028<br>(-0.12-0.03) | 0.018<br>(-0.39-0.14) |
| Kuwait   | 2016 | Male   | All Ages | 10%<br>(6.4-15%)               | 90%<br>(85-94%)          | 0.015<br>(0.0029-0.032)                     | 0.7%<br>(0.55-0.84%)                 | 0.4%<br>(0.26-0.49%)                | 17<br>(9.6-26)          | 2600<br>(1900-3500)   |
| Kuwait   | 2016 | Male   | 15 to 19 | 5.9%<br>(2.5-12%)              | 94%<br>(88-97%)          | 0.0046<br>(0.00058-0.014)                   | 0.49%<br>(0.29-0.73%)                | 0.1%<br>(0.052-0.23%)               | 0.087<br>(0.038-0.22)   | 76<br>(43-120)        |
| Kuwait   | 2016 | Male   | 20 to 24 | 9.1%<br>(3.5-18%)              | 91%<br>(82-96%)          | 0.01<br>(0.0014-0.029)                      | 1.2%<br>(0.77-1.8%)                  | 0.28%<br>(0.16-0.52%)               | 0.28<br>(0.13-0.59)     | 230<br>(140-370)      |
| Kuwait   | 2016 | Male   | 25 to 29 | 11%<br>(4.4-22%)               | 89%<br>(78-96%)          | 0.015<br>(0.0024-0.042)                     | 1.2%<br>(0.84-1.7%)                  | 0.35%<br>(0.21-0.62%)               | 0.53<br>(0.29-1)        | 390<br>(240-580)      |
| Kuwait   | 2016 | Male   | 30 to 34 | 13%<br>(4.8-25%)               | 87%<br>(75-95%)          | 0.019<br>(0.0033-0.047)                     | 1.1%<br>(0.79-1.6%)                  | 0.5%<br>(0.35-0.72%)                | 0.97<br>(0.56-1.6)      | 500<br>(310-730)      |
| Kuwait   | 2016 | Male   | 35 to 39 | 14%<br>(5.5-26%)               | 86%<br>(74-95%)          | 0.022<br>(0.0034-0.057)                     | 1%<br>(0.75-1.3%)                    | 0.69%<br>(0.5-0.92%)                | 1.6<br>(0.94-2.6)       | 450<br>(300-630)      |
| Kuwait   | 2016 | Male   | 40 to 44 | 14%<br>(6.4-26%)               | 86%<br>(74-94%)          | 0.024<br>(0.0039-0.064)                     | 0.84%<br>(0.59-1.1%)                 | 0.64%<br>(0.44-0.84%)               | 1.8<br>(0.99-2.9)       | 340<br>(210-480)      |
| Kuwait   | 2016 | Male   | 45 to 49 | 14%<br>(5.3-26%)               | 86%<br>(74-95%)          | 0.025<br>(0.0036-0.068)                     | 0.7%<br>(0.53-0.9%)                  | 0.7%<br>(0.41-0.93%)                | 2.4<br>(1.2-4)          | 250<br>(160-340)      |
| Kuwait   | 2016 | Male   | 50 to 54 | 13%<br>(5.4-26%)               | 87%<br>(74-95%)          | 0.025<br>(0.0036-0.068)                     | 0.54%<br>(0.34-0.7%)                 | 0.58%<br>(0.26-0.8%)                | 2.2<br>(0.86-3.8)       | 160<br>(94-220)       |
| Kuwait   | 2016 | Male   | 55 to 59 | 13%<br>(5.4-24%)               | 87%<br>(76-95%)          | 0.024<br>(0.0029-0.071)                     | 0.4%<br>(0.2-0.55%)                  | 0.43%<br>(0.089-0.67%)              | 1.9<br>(0.43-3.5)       | 100<br>(52-150)       |
| Kuwait   | 2016 | Male   | 60 to 64 | 12%<br>(5.1-23%)               | 88%<br>(77-95%)          | 0.021<br>(0.0026-0.068)                     | 0.37%<br>(0.18-0.53%)                | 0.45%<br>(0.15-0.72%)               | 1.6<br>(0.46-2.8)       | 58<br>(27-90)         |
| Kuwait   | 2016 | Male   | 65 to 69 | 12%<br>(4.8-21%)               | 88%<br>(79-95%)          | 0.017<br>(0.0023-0.052)                     | 0.29%<br>(0.15-0.42%)                | 0.36%<br>(0.13-0.56%)               | 1.2<br>(0.44-2.1)       | 34<br>(17-54)         |
| Kuwait   | 2016 | Male   | 70 to 74 | 10%<br>(4.7-19%)               | 90%<br>(81-95%)          | 0.013<br>(0.0018-0.038)                     | 0.24%<br>(0.13-0.36%)                | 0.3%<br>(0.14-0.47%)                | 0.84<br>(0.35-1.5)      | 18<br>(8.8-29)        |
| Kuwait   | 2016 | Male   | 75 to 79 | 9.1%<br>(3.8-18%)              | 91%<br>(82-96%)          | 0.0097<br>(0.0011-0.029)                    | 0.2%<br>(0.12-0.28%)                 | 0.26%<br>(0.14-0.37%)               | 0.59<br>(0.29-0.99)     | 9.9<br>(5.4-15)       |
| Kuwait   | 2016 | Male   | 80 to 84 | 8.1%<br>(3.2-17%)              | 92%<br>(83-97%)          | 0.0081<br>(0.00082-0.026)                   | 0.16%<br>(0.085-0.23%)               | 0.2%<br>(0.096-0.3%)                | 0.37<br>(0.16-0.61)     | 4.4<br>(2.3-6.8)      |

| Location | Year | Sex    | Age      | Prevalence of current drinkers | Prevalence of abstainers | Population average of standard drinks daily | Percent of total attributable deaths | Percent of total attributable DALYs | Attributable deaths     | Attributable DALYs     |
|----------|------|--------|----------|--------------------------------|--------------------------|---------------------------------------------|--------------------------------------|-------------------------------------|-------------------------|------------------------|
| Kuwait   | 2016 | Male   | 85 to 89 | 8%<br>(3.3-16%)                | 92%<br>(84-97%)          | 0.0074<br>(0.00084-0.023)                   | 0.15%<br>(0.086-0.2%)                | 0.17%<br>(0.091-0.24%)              | 0.28<br>(0.14-0.42)     | 2.4<br>(1.4-3.5)       |
| Kuwait   | 2016 | Male   | 90 to 94 | 9.1%<br>(3.7-19%)              | 91%<br>(81-96%)          | 0.0079<br>(0.0009-0.027)                    | 0.11%<br>(0.047-0.15%)               | 0.11%<br>(0.025-0.16%)              | 0.092<br>(0.021-0.14)   | 0.65<br>(0.26-0.94)    |
| Kuwait   | 2016 | Male   | 95 plus  | 11%<br>(4.1-24%)               | 89%<br>(76-96%)          | 0.0092<br>(0.00075-0.034)                   | 0.15%<br>(0.069-0.2%)                | 0.12%<br>(0.0065-0.18%)             | 0.025<br>(0.0011-0.039) | 0.14<br>(0.064-0.2)    |
| Lebanon  | 1990 | Female | All Ages | 15%<br>(12-18%)                | 85%<br>(82-88%)          | 0.35<br>(0.27-0.44)                         | 0.52%<br>(0.24-0.85%)                | 0.38%<br>(-0.23-1%)                 | 32<br>(-19-93)          | 2400<br>(1000-3800)    |
| Lebanon  | 1990 | Female | 15 to 19 | 15%<br>(9.5-22%)               | 85%<br>(78-90%)          | 0.34<br>(0.18-0.58)                         | 0.55%<br>(0.33-0.86%)                | 0.59%<br>(0.27-1.1%)                | 0.83<br>(0.37-1.6)      | 130<br>(75-200)        |
| Lebanon  | 1990 | Female | 20 to 24 | 20%<br>(13-28%)                | 80%<br>(72-87%)          | 0.55<br>(0.32-0.88)                         | 1.1%<br>(0.73-1.6%)                  | 1.1%<br>(0.52-1.9%)                 | 1.7<br>(0.77-3)         | 270<br>(170-410)       |
| Lebanon  | 1990 | Female | 25 to 29 | 20%<br>(13-29%)                | 80%<br>(71-87%)          | 0.61<br>(0.35-0.94)                         | 1.3%<br>(0.88-1.9%)                  | 1.5%<br>(0.77-2.6%)                 | 2.4<br>(1.2-4.2)        | 320<br>(200-490)       |
| Lebanon  | 1990 | Female | 30 to 34 | 19%<br>(12-28%)                | 81%<br>(72-88%)          | 0.58<br>(0.34-0.92)                         | 1.3%<br>(0.83-1.9%)                  | 1.7%<br>(0.8-2.8%)                  | 2.6<br>(1.2-4.7)        | 280<br>(180-440)       |
| Lebanon  | 1990 | Female | 35 to 39 | 18%<br>(11-27%)                | 82%<br>(73-89%)          | 0.55<br>(0.32-0.88)                         | 1.2%<br>(0.76-1.9%)                  | 1.8%<br>(0.82-3%)                   | 2.8<br>(1.3-4.9)        | 230<br>(140-350)       |
| Lebanon  | 1990 | Female | 40 to 44 | 18%<br>(11-27%)                | 82%<br>(73-89%)          | 0.57<br>(0.33-0.88)                         | 1.2%<br>(0.63-2%)                    | 2%<br>(0.84-3.4%)                   | 3.5<br>(1.4-6)          | 220<br>(110-350)       |
| Lebanon  | 1990 | Female | 45 to 49 | 18%<br>(10-26%)                | 82%<br>(74-90%)          | 0.61<br>(0.33-0.99)                         | 1.2%<br>(0.54-2.2%)                  | 1.9%<br>(0.74-3.5%)                 | 5.3<br>(1.9-10)         | 270<br>(120-470)       |
| Lebanon  | 1990 | Female | 50 to 54 | 18%<br>(11-26%)                | 82%<br>(74-89%)          | 0.62<br>(0.35-1)                            | 1.2%<br>(0.36-2.2%)                  | 1.7%<br>(0.48-3.4%)                 | 6.2<br>(1.7-12)         | 260<br>(81-500)        |
| Lebanon  | 1990 | Female | 55 to 59 | 18%<br>(11-28%)                | 82%<br>(72-89%)          | 0.58<br>(0.32-0.93)                         | 0.93%<br>(0.085-1.9%)                | 1.4%<br>(0.095-2.9%)                | 6.6<br>(0.43-14)        | 230<br>(19-470)        |
| Lebanon  | 1990 | Female | 60 to 64 | 18%<br>(11-28%)                | 82%<br>(72-89%)          | 0.53<br>(0.29-0.89)                         | 0.55%<br>(-0.32-1.7%)                | 0.77%<br>(-0.45-2.3%)               | 4.9<br>(-2.8-14)        | 140<br>(-80-420)       |
| Lebanon  | 1990 | Female | 65 to 69 | 18%<br>(12-27%)                | 82%<br>(73-88%)          | 0.49<br>(0.27-0.78)                         | 0.26%<br>(-0.54-1.2%)                | 0.36%<br>(-0.75-1.6%)               | 2.7<br>(-5.4-11)        | 62<br>(-130-270)       |
| Lebanon  | 1990 | Female | 70 to 74 | 17%<br>(11-27%)                | 83%<br>(73-89%)          | 0.43<br>(0.2-0.75)                          | 0.012%<br>(-0.84-0.95%)              | 0.02%<br>(-1.1-1.2%)                | 0.1<br>(-7.6-8.3)       | 1.7<br>(-150-160)      |
| Lebanon  | 1990 | Female | 75 to 79 | 16%<br>(9.9-25%)               | 84%<br>(75-90%)          | 0.37<br>(0.17-0.68)                         | -0.14%<br>(-0.95-0.7%)               | -0.19%<br>(-1.2-0.84%)              | -1.8<br>(-12-8.3)       | -25<br>(-170-120)      |
| Lebanon  | 1990 | Female | 80 to 84 | 15%<br>(9.1-23%)               | 85%<br>(77-91%)          | 0.33<br>(0.15-0.57)                         | -0.17%<br>(-0.89-0.52%)              | -0.22%<br>(-1.1-0.63%)              | -2<br>(-9.5-5.5)        | -20<br>(-100-58)       |
| Lebanon  | 1990 | Female | 85 to 89 | 14%<br>(8.6-21%)               | 86%<br>(79-91%)          | 0.3<br>(0.14-0.55)                          | -0.24%<br>(-0.88-0.46%)              | -0.32%<br>(-1.1-0.52%)              | -2.1<br>(-7.4-3.6)      | -15<br>(-54-28)        |
| Lebanon  | 1990 | Female | 90 to 94 | 15%<br>(9.4-23%)               | 85%<br>(77-91%)          | 0.3<br>(0.14-0.58)                          | -0.31%<br>(-0.97-0.41%)              | -0.41%<br>(-1.2-0.46%)              | -1.3<br>(-3.8-1.4)      | -5.9<br>(-19-8)        |
| Lebanon  | 1990 | Female | 95 plus  | 17%<br>(9.6-29%)               | 83%<br>(71-90%)          | 0.33<br>(0.12-0.69)                         | -0.38%<br>(-1.3-0.65%)               | -0.51%<br>(-1.6-0.69%)              | -0.49<br>(-1.5-0.68)    | -1.5<br>(-4.9-2.5)     |
| Lebanon  | 1990 | Male   | All Ages | 23%<br>(19-27%)                | 77%<br>(73-81%)          | 1.3<br>(1.1-1.5)                            | 2.9%<br>(2-3.9%)                     | 3.7%<br>(2.2-5.7%)                  | 410<br>(230-640)        | 16000<br>(11000-22000) |

| Location | Year | Sex    | Age      | Prevalence of current drinkers | Prevalence of abstainers | Population average of standard drinks daily | Percent of total attributable deaths | Percent of total attributable DALYs | Attributable deaths  | Attributable DALYs  |
|----------|------|--------|----------|--------------------------------|--------------------------|---------------------------------------------|--------------------------------------|-------------------------------------|----------------------|---------------------|
| Lebanon  | 1990 | Male   | 15 to 19 | 18%<br>(11-27%)                | 82%<br>(73-89%)          | 0.67<br>(0.33-1.2)                          | 1.4%<br>(0.76-2.3%)                  | 1.6%<br>(0.79-2.9%)                 | 5.2<br>(2.5-9.3)     | 470<br>(260-800)    |
| Lebanon  | 1990 | Male   | 20 to 24 | 28%<br>(18-40%)                | 72%<br>(60-82%)          | 1.5<br>(0.83-2.5)                           | 2.9%<br>(1.7-4.6%)                   | 3.2%<br>(1.8-5.4%)                  | 15<br>(8-26)         | 1200<br>(710-2000)  |
| Lebanon  | 1990 | Male   | 25 to 29 | 34%<br>(22-46%)                | 66%<br>(54-78%)          | 2.2<br>(1.3-3.4)                            | 4%<br>(2.4-6.1%)                     | 5%<br>(2.7-8%)                      | 19<br>(10-31)        | 1400<br>(810-2100)  |
| Lebanon  | 1990 | Male   | 30 to 34 | 35%<br>(24-49%)                | 65%<br>(51-76%)          | 2.5<br>(1.5-3.8)                            | 4.4%<br>(2.6-6.6%)                   | 5.8%<br>(3.2-9.2%)                  | 19<br>(10-30)        | 1200<br>(730-1900)  |
| Lebanon  | 1990 | Male   | 35 to 39 | 37%<br>(24-50%)                | 63%<br>(50-76%)          | 2.6<br>(1.5-4)                              | 4.7%<br>(2.6-7.2%)                   | 6.5%<br>(3.3-10%)                   | 18<br>(8.9-29)       | 1100<br>(580-1700)  |
| Lebanon  | 1990 | Male   | 40 to 44 | 36%<br>(25-49%)                | 64%<br>(51-75%)          | 2.6<br>(1.5-4)                              | 4.9%<br>(2.6-7.5%)                   | 6.7%<br>(3.3-10%)                   | 18<br>(8.7-30)       | 980<br>(520-1500)   |
| Lebanon  | 1990 | Male   | 45 to 49 | 34%<br>(22-46%)                | 66%<br>(54-78%)          | 2.6<br>(1.4-4.1)                            | 5.1%<br>(2.5-8.1%)                   | 6.8%<br>(3.1-11%)                   | 27<br>(12-46)        | 1300<br>(630-2100)  |
| Lebanon  | 1990 | Male   | 50 to 54 | 32%<br>(21-44%)                | 68%<br>(56-79%)          | 2.7<br>(1.6-4.2)                            | 5.5%<br>(3-8.5%)                     | 7.1%<br>(3.8-11%)                   | 38<br>(19-61)        | 1500<br>(810-2400)  |
| Lebanon  | 1990 | Male   | 55 to 59 | 31%<br>(19-45%)                | 69%<br>(55-81%)          | 3<br>(1.7-4.8)                              | 6.2%<br>(3.4-9.6%)                   | 7.7%<br>(4-12%)                     | 55<br>(27-87)        | 1900<br>(1000-3000) |
| Lebanon  | 1990 | Male   | 60 to 64 | 29%<br>(18-44%)                | 71%<br>(56-82%)          | 2.8<br>(1.5-4.8)                            | 5.7%<br>(2.7-9.5%)                   | 6.8%<br>(3.1-11%)                   | 69<br>(31-120)       | 2000<br>(950-3400)  |
| Lebanon  | 1990 | Male   | 65 to 69 | 28%<br>(17-42%)                | 72%<br>(58-83%)          | 2.3<br>(1.2-3.7)                            | 4.6%<br>(1.8-8%)                     | 5.3%<br>(1.9-9.4%)                  | 63<br>(22-110)       | 1500<br>(570-2700)  |
| Lebanon  | 1990 | Male   | 70 to 74 | 27%<br>(17-40%)                | 73%<br>(60-83%)          | 1.7<br>(0.91-2.9)                           | 3%<br>(0.48-6.1%)                    | 3.5%<br>(0.39-7.2%)                 | 35<br>(3.8-75)       | 680<br>(110-1400)   |
| Lebanon  | 1990 | Male   | 75 to 79 | 25%<br>(16-38%)                | 75%<br>(62-84%)          | 1.3<br>(0.64-2.4)                           | 1.8%<br>(-0.44-4.7%)                 | 1.9%<br>(-0.62-5.4%)                | 21<br>(-7.1-60)      | 320<br>(-79-880)    |
| Lebanon  | 1990 | Male   | 80 to 84 | 23%<br>(14-35%)                | 77%<br>(65-86%)          | 1.1<br>(0.55-1.9)                           | 1.1%<br>(-0.52-3.4%)                 | 1.2%<br>(-0.75-3.8%)                | 9.9<br>(-6.6-33)     | 120<br>(-58-360)    |
| Lebanon  | 1990 | Male   | 85 to 89 | 21%<br>(13-32%)                | 79%<br>(68-87%)          | 0.91<br>(0.46-1.5)                          | 0.52%<br>(-0.68-2.4%)                | 0.47%<br>(-0.98-2.7%)               | 2.6<br>(-5.7-15)     | 26<br>(-35-110)     |
| Lebanon  | 1990 | Male   | 90 to 94 | 22%<br>(14-33%)                | 78%<br>(67-86%)          | 0.82<br>(0.41-1.5)                          | 0.069%<br>(-1.1-1.7%)                | -0.077%<br>(-1.5-1.9%)              | -0.17<br>(-3.3-4.1)  | 0.91<br>(-15-23)    |
| Lebanon  | 1990 | Male   | 95 plus  | 25%<br>(14-42%)                | 75%<br>(58-86%)          | 0.79<br>(0.31-1.7)                          | -0.21%<br>(-1.6-1.5%)                | -0.46%<br>(-2.1-1.6%)               | -0.26<br>(-1.2-0.91) | -0.48<br>(-3.6-3.4) |
| Lebanon  | 1995 | Female | All Ages | 14%<br>(12-16%)                | 86%<br>(84-88%)          | 0.31<br>(0.24-0.38)                         | 0.5%<br>(0.23-0.79%)                 | 0.23%<br>(-0.3-0.85%)               | 19<br>(-25-70)       | 2100<br>(920-3400)  |
| Lebanon  | 1995 | Female | 15 to 19 | 14%<br>(9.6-20%)               | 86%<br>(80-90%)          | 0.3<br>(0.16-0.49)                          | 0.6%<br>(0.37-0.9%)                  | 0.84%<br>(0.37-1.5%)                | 0.68<br>(0.29-1.2)   | 120<br>(73-190)     |
| Lebanon  | 1995 | Female | 20 to 24 | 18%<br>(13-25%)                | 82%<br>(75-87%)          | 0.46<br>(0.29-0.7)                          | 1.2%<br>(0.78-1.7%)                  | 1.4%<br>(0.67-2.3%)                 | 1.3<br>(0.62-2.4)    | 260<br>(160-390)    |
| Lebanon  | 1995 | Female | 25 to 29 | 18%<br>(12-25%)                | 82%<br>(75-88%)          | 0.49<br>(0.3-0.74)                          | 1.3%<br>(0.87-1.8%)                  | 1.6%<br>(0.8-2.6%)                  | 1.8<br>(0.83-3.1)    | 290<br>(190-430)    |
| Lebanon  | 1995 | Female | 30 to 34 | 17%<br>(11-24%)                | 83%<br>(76-89%)          | 0.46<br>(0.29-0.71)                         | 1.2%<br>(0.81-1.7%)                  | 1.6%<br>(0.84-2.8%)                 | 2.3<br>(1.1-4.1)     | 300<br>(190-450)    |

| Location | Year | Sex    | Age      | Prevalence of current drinkers | Prevalence of abstainers | Population average of standard drinks daily | Percent of total attributable deaths | Percent of total attributable DALYs | Attributable deaths  | Attributable DALYs    |
|----------|------|--------|----------|--------------------------------|--------------------------|---------------------------------------------|--------------------------------------|-------------------------------------|----------------------|-----------------------|
| Lebanon  | 1995 | Female | 35 to 39 | 17%<br>(12-24%)                | 83%<br>(76-88%)          | 0.47<br>(0.29-0.72)                         | 1.1%<br>(0.72-1.6%)                  | 1.7%<br>(0.86-2.9%)                 | 2.8<br>(1.3-4.9)     | 260<br>(160-380)      |
| Lebanon  | 1995 | Female | 40 to 44 | 17%<br>(11-23%)                | 83%<br>(77-89%)          | 0.48<br>(0.3-0.73)                          | 1.1%<br>(0.62-1.7%)                  | 1.8%<br>(0.77-3.1%)                 | 3.3<br>(1.4-5.8)     | 220<br>(120-350)      |
| Lebanon  | 1995 | Female | 45 to 49 | 16%<br>(9.9-22%)               | 84%<br>(78-90%)          | 0.5<br>(0.28-0.77)                          | 1%<br>(0.48-1.8%)                    | 1.6%<br>(0.62-3%)                   | 3.7<br>(1.4-6.8)     | 200<br>(95-340)       |
| Lebanon  | 1995 | Female | 50 to 54 | 16%<br>(11-23%)                | 84%<br>(77-89%)          | 0.5<br>(0.31-0.8)                           | 0.94%<br>(0.27-1.8%)                 | 1.4%<br>(0.33-2.8%)                 | 5.1<br>(1.2-10)      | 220<br>(68-430)       |
| Lebanon  | 1995 | Female | 55 to 59 | 17%<br>(10-25%)                | 83%<br>(75-90%)          | 0.49<br>(0.26-0.78)                         | 0.73%<br>(0.034-1.5%)                | 1.1%<br>(0.023-2.3%)                | 5<br>(0.11-11)       | 180<br>(8.5-380)      |
| Lebanon  | 1995 | Female | 60 to 64 | 17%<br>(10-26%)                | 83%<br>(74-90%)          | 0.45<br>(0.24-0.74)                         | 0.39%<br>(-0.33-1.2%)                | 0.55%<br>(-0.49-1.8%)               | 3.6<br>(-3.2-11)     | 100<br>(-94-330)      |
| Lebanon  | 1995 | Female | 65 to 69 | 17%<br>(11-25%)                | 83%<br>(75-89%)          | 0.4<br>(0.23-0.65)                          | 0.12%<br>(-0.58-0.83%)               | 0.18%<br>(-0.76-1.1%)               | 1.5<br>(-6.6-9.5)    | 34<br>(-160-230)      |
| Lebanon  | 1995 | Female | 70 to 74 | 16%<br>(11-25%)                | 84%<br>(75-89%)          | 0.35<br>(0.17-0.61)                         | -0.11%<br>(-0.84-0.65%)              | -0.13%<br>(-1.1-0.83%)              | -1.3<br>(-10-7.9)    | -26<br>(-200-150)     |
| Lebanon  | 1995 | Female | 75 to 79 | 15%<br>(9.4-23%)               | 85%<br>(77-91%)          | 0.3<br>(0.14-0.54)                          | -0.24%<br>(-0.98-0.45%)              | -0.3%<br>(-1.2-0.56%)               | -2.6<br>(-10-4.8)    | -37<br>(-150-70)      |
| Lebanon  | 1995 | Female | 80 to 84 | 14%<br>(8.5-21%)               | 86%<br>(79-91%)          | 0.27<br>(0.13-0.46)                         | -0.26%<br>(-0.86-0.33%)              | -0.32%<br>(-1.1-0.41%)              | -2.6<br>(-8.9-3.3)   | -28<br>(-94-35)       |
| Lebanon  | 1995 | Female | 85 to 89 | 13%<br>(7.9-20%)               | 87%<br>(80-92%)          | 0.25<br>(0.12-0.45)                         | -0.31%<br>(-0.85-0.21%)              | -0.39%<br>(-1.1-0.23%)              | -3<br>(-8.1-1.8)     | -21<br>(-59-15)       |
| Lebanon  | 1995 | Female | 90 to 94 | 14%<br>(8.7-21%)               | 86%<br>(79-91%)          | 0.25<br>(0.11-0.48)                         | -0.36%<br>(-0.92-0.2%)               | -0.47%<br>(-1.2-0.22%)              | -1.8<br>(-4.6-0.84)  | -8.7<br>(-23-5)       |
| Lebanon  | 1995 | Female | 95 plus  | 16%<br>(9.3-26%)               | 84%<br>(74-91%)          | 0.27<br>(0.097-0.56)                        | -0.43%<br>(-1.2-0.33%)               | -0.57%<br>(-1.5-0.35%)              | -0.69<br>(-1.8-0.41) | -2.1<br>(-5.8-1.6)    |
| Lebanon  | 1995 | Male   | All Ages | 24%<br>(21-28%)                | 76%<br>(72-79%)          | 1.3<br>(1.1-1.5)                            | 2.9%<br>(2-3.8%)                     | 3.5%<br>(1.9-5.3%)                  | 290<br>(150-440)     | 12000<br>(8300-16000) |
| Lebanon  | 1995 | Male   | 15 to 19 | 19%<br>(12-27%)                | 81%<br>(73-88%)          | 0.62<br>(0.32-1)                            | 1.7%<br>(1-2.6%)                     | 2.7%<br>(1.4-4.7%)                  | 3.9<br>(2-6.8)       | 390<br>(230-620)      |
| Lebanon  | 1995 | Male   | 20 to 24 | 30%<br>(21-40%)                | 70%<br>(60-79%)          | 1.5<br>(0.83-2.3)                           | 4.1%<br>(2.6-6.2%)                   | 6.3%<br>(3.6-10%)                   | 12<br>(6.9-20)       | 1100<br>(680-1700)    |
| Lebanon  | 1995 | Male   | 25 to 29 | 35%<br>(25-44%)                | 65%<br>(56-75%)          | 2<br>(1.2-3)                                | 4.9%<br>(3.1-7.1%)                   | 8.3%<br>(4.8-13%)                   | 16<br>(8.6-24)       | 1200<br>(740-1800)    |
| Lebanon  | 1995 | Male   | 30 to 34 | 36%<br>(26-47%)                | 64%<br>(53-74%)          | 2.2<br>(1.4-3.2)                            | 4.6%<br>(2.9-6.7%)                   | 8.1%<br>(4.6-12%)                   | 16<br>(8.7-24)       | 1100<br>(680-1600)    |
| Lebanon  | 1995 | Male   | 35 to 39 | 37%<br>(27-48%)                | 63%<br>(52-73%)          | 2.3<br>(1.5-3.5)                            | 4.5%<br>(2.6-6.7%)                   | 7.6%<br>(3.9-12%)                   | 15<br>(7.6-25)       | 990<br>(540-1500)     |
| Lebanon  | 1995 | Male   | 40 to 44 | 36%<br>(27-47%)                | 64%<br>(53-73%)          | 2.4<br>(1.4-3.6)                            | 4.3%<br>(2.2-6.7%)                   | 6.9%<br>(3.2-11%)                   | 15<br>(6.7-24)       | 850<br>(430-1300)     |
| Lebanon  | 1995 | Male   | 45 to 49 | 33%<br>(22-43%)                | 67%<br>(57-78%)          | 2.3<br>(1.3-3.5)                            | 4.3%<br>(2-6.7%)                     | 6.3%<br>(2.7-10%)                   | 16<br>(6.7-26)       | 780<br>(380-1200)     |
| Lebanon  | 1995 | Male   | 50 to 54 | 31%<br>(22-42%)                | 69%<br>(58-78%)          | 2.4<br>(1.4-3.7)                            | 4.6%<br>(2.2-7.1%)                   | 6.5%<br>(2.9-10%)                   | 25<br>(12-41)        | 1100<br>(540-1700)    |

| Location | Year | Sex    | Age      | Prevalence of current drinkers | Prevalence of abstainers | Population average of standard drinks daily | Percent of total attributable deaths | Percent of total attributable DALYs | Attributable deaths  | Attributable DALYs |
|----------|------|--------|----------|--------------------------------|--------------------------|---------------------------------------------|--------------------------------------|-------------------------------------|----------------------|--------------------|
| Lebanon  | 1995 | Male   | 55 to 59 | 31%<br>(20-46%)                | 69%<br>(54-80%)          | 2.8<br>(1.5-4.5)                            | 5.5%<br>(2.9-8.6%)                   | 7.3%<br>(3.7-12%)                   | 38<br>(19-63)        | 1400<br>(700-2200) |
| Lebanon  | 1995 | Male   | 60 to 64 | 30%<br>(18-46%)                | 70%<br>(54-82%)          | 2.7<br>(1.4-4.6)                            | 5.1%<br>(2.2-8.4%)                   | 6.5%<br>(2.6-11%)                   | 45<br>(18-77)        | 1400<br>(570-2300) |
| Lebanon  | 1995 | Male   | 65 to 69 | 29%<br>(18-43%)                | 71%<br>(57-82%)          | 2.2<br>(1.2-3.5)                            | 3.8%<br>(1.3-6.8%)                   | 4.7%<br>(1.4-8.6%)                  | 44<br>(13-80)        | 1100<br>(360-2000) |
| Lebanon  | 1995 | Male   | 70 to 74 | 28%<br>(18-41%)                | 72%<br>(59-82%)          | 1.6<br>(0.87-2.7)                           | 2.4%<br>(0.15-5.3%)                  | 2.7%<br>(-0.064-6.4%)               | 28<br>(-0.63-65)     | 580<br>(39-1300)   |
| Lebanon  | 1995 | Male   | 75 to 79 | 26%<br>(16-39%)                | 74%<br>(61-84%)          | 1.3<br>(0.6-2.2)                            | 1.2%<br>(-0.48-3.8%)                 | 1.3%<br>(-0.83-4.5%)                | 10<br>(-6.8-35)      | 180<br>(-70-540)   |
| Lebanon  | 1995 | Male   | 80 to 84 | 23%<br>(14-35%)                | 77%<br>(65-86%)          | 1<br>(0.51-1.7)                             | 0.67%<br>(-0.68-2.6%)                | 0.64%<br>(-0.98-3%)                 | 4.4<br>(-6.6-20)     | 60<br>(-59-230)    |
| Lebanon  | 1995 | Male   | 85 to 89 | 22%<br>(13-33%)                | 78%<br>(67-87%)          | 0.83<br>(0.42-1.4)                          | 0.21%<br>(-0.92-1.6%)                | 0.089%<br>(-1.3-1.8%)               | 0.48<br>(-6.9-9.5)   | 10<br>(-43-76)     |
| Lebanon  | 1995 | Male   | 90 to 94 | 23%<br>(14-35%)                | 77%<br>(65-86%)          | 0.75<br>(0.37-1.4)                          | -0.17%<br>(-1.3-1.1%)                | -0.37%<br>(-1.7-1.2%)               | -0.91<br>(-4.2-2.9)  | -2.5<br>(-19-17)   |
| Lebanon  | 1995 | Male   | 95 plus  | 26%<br>(13-43%)                | 74%<br>(57-87%)          | 0.73<br>(0.28-1.5)                          | -0.41%<br>(-1.7-1.1%)                | -0.71%<br>(-2.3-1.1%)               | -0.44<br>(-1.4-0.67) | -1<br>(-4.2-2.6)   |
| Lebanon  | 2000 | Female | All Ages | 14%<br>(12-16%)                | 86%<br>(84-88%)          | 0.27<br>(0.21-0.33)                         | 0.42%<br>(0.2-0.66%)                 | 0.085%<br>(-0.38-0.6%)              | 6.4<br>(-28-47)      | 1600<br>(770-2700) |
| Lebanon  | 2000 | Female | 15 to 19 | 14%<br>(9.4-20%)               | 86%<br>(80-91%)          | 0.25<br>(0.14-0.41)                         | 0.56%<br>(0.35-0.83%)                | 0.68%<br>(0.3-1.2%)                 | 0.45<br>(0.2-0.8)    | 110<br>(64-170)    |
| Lebanon  | 2000 | Female | 20 to 24 | 18%<br>(12-24%)                | 82%<br>(76-88%)          | 0.39<br>(0.24-0.6)                          | 1.1%<br>(0.71-1.6%)                  | 1.2%<br>(0.57-1.9%)                 | 0.89<br>(0.42-1.5)   | 230<br>(140-360)   |
| Lebanon  | 2000 | Female | 25 to 29 | 17%<br>(12-24%)                | 83%<br>(76-88%)          | 0.41<br>(0.26-0.63)                         | 1.2%<br>(0.81-1.6%)                  | 1.3%<br>(0.68-2.1%)                 | 1.1<br>(0.56-1.9)    | 260<br>(160-370)   |
| Lebanon  | 2000 | Female | 30 to 34 | 16%<br>(11-24%)                | 84%<br>(76-89%)          | 0.39<br>(0.24-0.6)                          | 1.1%<br>(0.72-1.5%)                  | 1.4%<br>(0.73-2.3%)                 | 1.5<br>(0.74-2.5)    | 250<br>(160-370)   |
| Lebanon  | 2000 | Female | 35 to 39 | 16%<br>(11-23%)                | 84%<br>(77-89%)          | 0.4<br>(0.24-0.61)                          | 0.97%<br>(0.64-1.4%)                 | 1.5%<br>(0.71-2.5%)                 | 2.1<br>(1-3.8)       | 240<br>(150-350)   |
| Lebanon  | 2000 | Female | 40 to 44 | 16%<br>(11-23%)                | 84%<br>(77-89%)          | 0.41<br>(0.25-0.62)                         | 0.89%<br>(0.52-1.4%)                 | 1.5%<br>(0.67-2.6%)                 | 2.7<br>(1.1-4.7)     | 210<br>(120-330)   |
| Lebanon  | 2000 | Female | 45 to 49 | 15%<br>(9.7-21%)               | 85%<br>(79-90%)          | 0.42<br>(0.24-0.65)                         | 0.8%<br>(0.4-1.3%)                   | 1.4%<br>(0.5-2.4%)                  | 2.9<br>(1.1-5.3)     | 170<br>(85-280)    |
| Lebanon  | 2000 | Female | 50 to 54 | 15%<br>(11-22%)                | 85%<br>(78-89%)          | 0.42<br>(0.25-0.66)                         | 0.7%<br>(0.22-1.3%)                  | 1.1%<br>(0.3-2.2%)                  | 3<br>(0.79-5.9)      | 140<br>(43-250)    |
| Lebanon  | 2000 | Female | 55 to 59 | 16%<br>(10-25%)                | 84%<br>(75-90%)          | 0.41<br>(0.23-0.65)                         | 0.51%<br>(-0.033-1.1%)               | 0.82%<br>(-0.069-1.8%)              | 3.4<br>(-0.3-7.3)    | 120<br>(-8.1-260)  |
| Lebanon  | 2000 | Female | 60 to 64 | 16%<br>(9.7-25%)               | 84%<br>(75-90%)          | 0.38<br>(0.21-0.64)                         | 0.22%<br>(-0.34-0.82%)               | 0.34%<br>(-0.47-1.3%)               | 2<br>(-2.7-7.5)      | 58<br>(-88-210)    |
| Lebanon  | 2000 | Female | 65 to 69 | 16%<br>(10-24%)                | 84%<br>(76-90%)          | 0.34<br>(0.19-0.55)                         | 0.01%<br>(-0.54-0.57%)               | 0.046%<br>(-0.73-0.84%)             | 0.36<br>(-5.8-6.8)   | 2.9<br>(-150-160)  |
| Lebanon  | 2000 | Female | 70 to 74 | 16%<br>(10-24%)                | 84%<br>(76-90%)          | 0.3<br>(0.15-0.53)                          | -0.17%<br>(-0.75-0.39%)              | -0.21%<br>(-1-0.56%)                | -2.1<br>(-9.9-5.5)   | -45<br>(-200-110)  |

| Location | Year | Sex    | Age      | Prevalence of current drinkers | Prevalence of abstainers | Population average of standard drinks daily | Percent of total attributable deaths | Percent of total attributable DALYs | Attributable deaths  | Attributable DALYs   |
|----------|------|--------|----------|--------------------------------|--------------------------|---------------------------------------------|--------------------------------------|-------------------------------------|----------------------|----------------------|
| Lebanon  | 2000 | Female | 75 to 79 | 15%<br>(9.2-23%)               | 85%<br>(77-91%)          | 0.26<br>(0.12-0.46)                         | -0.27%<br>(-0.81-0.28%)              | -0.34%<br>(-1.1-0.39%)              | -3.3<br>(-11-3.7)    | -51<br>(-160-56)     |
| Lebanon  | 2000 | Female | 80 to 84 | 13%<br>(8.6-21%)               | 87%<br>(79-91%)          | 0.23<br>(0.11-0.41)                         | -0.29%<br>(-0.79-0.18%)              | -0.36%<br>(-1-0.23%)                | -2.9<br>(-8.3-1.9)   | -32<br>(-91-20)      |
| Lebanon  | 2000 | Female | 85 to 89 | 13%<br>(8-19%)                 | 87%<br>(81-92%)          | 0.21<br>(0.1-0.39)                          | -0.34%<br>(-0.82-0.095%)             | -0.44%<br>(-1-0.1%)                 | -2.8<br>(-7-0.67)    | -21<br>(-52-5.9)     |
| Lebanon  | 2000 | Female | 90 to 94 | 14%<br>(8.7-21%)               | 86%<br>(79-91%)          | 0.22<br>(0.094-0.43)                        | -0.39%<br>(-0.93-0.063%)             | -0.51%<br>(-1.2-0.049%)             | -2.1<br>(-5-0.22)    | -10<br>(-25-1.6)     |
| Lebanon  | 2000 | Female | 95 plus  | 16%<br>(9.1-26%)               | 84%<br>(74-91%)          | 0.24<br>(0.079-0.51)                        | -0.46%<br>(-1.2-0.13%)               | -0.61%<br>(-1.5-0.11%)              | -0.88<br>(-2.2-0.17) | -2.7<br>(-7.3-0.73)  |
| Lebanon  | 2000 | Male   | All Ages | 24%<br>(21-28%)                | 76%<br>(72-79%)          | 1.1<br>(0.94-1.3)                           | 2.2%<br>(1.5-3%)                     | 2.4%<br>(1-4%)                      | 180<br>(74-300)      | 8500<br>(5600-12000) |
| Lebanon  | 2000 | Male   | 15 to 19 | 18%<br>(12-26%)                | 82%<br>(74-88%)          | 0.52<br>(0.27-0.88)                         | 1.4%<br>(0.91-2.2%)                  | 2.3%<br>(1.2-4%)                    | 2.5<br>(1.3-4.4)     | 290<br>(180-450)     |
| Lebanon  | 2000 | Male   | 20 to 24 | 29%<br>(20-39%)                | 71%<br>(61-80%)          | 1.2<br>(0.7-1.9)                            | 3.4%<br>(2.2-5%)                     | 5.4%<br>(3.1-8.5%)                  | 8.2<br>(4.6-14)      | 800<br>(510-1200)    |
| Lebanon  | 2000 | Male   | 25 to 29 | 34%<br>(24-43%)                | 66%<br>(57-76%)          | 1.7<br>(1.1-2.5)                            | 4%<br>(2.6-5.7%)                     | 6.9%<br>(4-10%)                     | 11<br>(6.1-17)       | 920<br>(590-1300)    |
| Lebanon  | 2000 | Male   | 30 to 34 | 35%<br>(25-47%)                | 65%<br>(53-75%)          | 1.9<br>(1.1-2.7)                            | 3.5%<br>(2.2-5.3%)                   | 6.5%<br>(3.8-10%)                   | 9.8<br>(5.4-16)      | 790<br>(480-1200)    |
| Lebanon  | 2000 | Male   | 35 to 39 | 36%<br>(26-48%)                | 64%<br>(52-74%)          | 2<br>(1.2-2.9)                              | 3.2%<br>(1.9-4.9%)                   | 6%<br>(3-9.5%)                      | 9.7<br>(4.8-16)      | 710<br>(400-1100)    |
| Lebanon  | 2000 | Male   | 40 to 44 | 35%<br>(26-46%)                | 65%<br>(54-74%)          | 2<br>(1.2-3)                                | 3%<br>(1.6-4.8%)                     | 5.2%<br>(2.2-8.9%)                  | 9.6<br>(4-16)        | 620<br>(320-970)     |
| Lebanon  | 2000 | Male   | 45 to 49 | 32%<br>(21-42%)                | 68%<br>(58-79%)          | 1.9<br>(1.1-3)                              | 3%<br>(1.4-5%)                       | 4.8%<br>(1.9-8.7%)                  | 11<br>(3.9-19)       | 590<br>(280-990)     |
| Lebanon  | 2000 | Male   | 50 to 54 | 30%<br>(21-40%)                | 70%<br>(60-79%)          | 2<br>(1.2-3.2)                              | 3.4%<br>(1.5-5.4%)                   | 5%<br>(1.9-8.5%)                    | 13<br>(5-23)         | 620<br>(260-1000)    |
| Lebanon  | 2000 | Male   | 55 to 59 | 31%<br>(19-44%)                | 69%<br>(56-81%)          | 2.4<br>(1.3-3.8)                            | 4.1%<br>(1.8-6.7%)                   | 5.9%<br>(2.3-9.8%)                  | 24<br>(9.5-41)       | 920<br>(420-1600)    |
| Lebanon  | 2000 | Male   | 60 to 64 | 30%<br>(18-45%)                | 70%<br>(55-82%)          | 2.3<br>(1.2-3.8)                            | 3.8%<br>(1.3-6.7%)                   | 5.1%<br>(1.5-8.8%)                  | 31<br>(9.9-57)       | 990<br>(360-1700)    |
| Lebanon  | 2000 | Male   | 65 to 69 | 28%<br>(18-42%)                | 72%<br>(58-82%)          | 1.8<br>(0.98-2.9)                           | 2.7%<br>(0.62-5.1%)                  | 3.3%<br>(0.5-6.7%)                  | 27<br>(4.1-54)       | 710<br>(170-1400)    |
| Lebanon  | 2000 | Male   | 70 to 74 | 27%<br>(17-40%)                | 73%<br>(60-83%)          | 1.4<br>(0.69-2.2)                           | 1.5%<br>(-0.16-3.6%)                 | 1.7%<br>(-0.46-4.5%)                | 17<br>(-4.7-45)      | 370<br>(-42-920)     |
| Lebanon  | 2000 | Male   | 75 to 79 | 25%<br>(15-38%)                | 75%<br>(62-85%)          | 1<br>(0.5-1.8)                              | 0.64%<br>(-0.71-2.5%)                | 0.62%<br>(-1.1-3%)                  | 6.1<br>(-11-29)      | 120<br>(-130-480)    |
| Lebanon  | 2000 | Male   | 80 to 84 | 22%<br>(13-35%)                | 78%<br>(65-87%)          | 0.84<br>(0.42-1.5)                          | 0.23%<br>(-0.82-1.7%)                | 0.12%<br>(-1.2-1.9%)                | 0.86<br>(-8.9-14)    | 22<br>(-82-170)      |
| Lebanon  | 2000 | Male   | 85 to 89 | 21%<br>(13-32%)                | 79%<br>(68-87%)          | 0.7<br>(0.34-1.2)                           | -0.09%<br>(-1-1.1%)                  | -0.26%<br>(-1.4-1.1%)               | -1.4<br>(-7.3-5.9)   | -4.4<br>(-49-52)     |
| Lebanon  | 2000 | Male   | 90 to 94 | 22%<br>(14-35%)                | 78%<br>(65-86%)          | 0.64<br>(0.31-1.2)                          | -0.36%<br>(-1.4-0.72%)               | -0.59%<br>(-1.9-0.7%)               | -1.7<br>(-5.4-2.1)   | -6.5<br>(-25-13)     |



| Location | Year | Sex    | Age      | Prevalence of current drinkers | Prevalence of abstainers | Population average of standard drinks daily | Percent of total attributable deaths | Percent of total attributable DALYs | Attributable deaths   | Attributable DALYs    |
|----------|------|--------|----------|--------------------------------|--------------------------|---------------------------------------------|--------------------------------------|-------------------------------------|-----------------------|-----------------------|
| Lebanon  | 2000 | Male   | 95 plus  | 26%<br>(13-43%)                | 74%<br>(57-87%)          | 0.62<br>(0.24-1.3)                          | -0.55%<br>(-1.8-0.62%)               | -0.88%<br>(-2.5-0.51%)              | -0.7<br>(-2-0.42)     | -1.8<br>(-5.9-2)      |
| Lebanon  | 2005 | Female | All Ages | 13%<br>(11-16%)                | 87%<br>(84-89%)          | 0.23<br>(0.18-0.29)                         | 0.37%<br>(0.17-0.59%)                | -0.0017%<br>(-0.43-0.45%)           | -0.11<br>(-33-35)     | 1500<br>(710-2500)    |
| Lebanon  | 2005 | Female | 15 to 19 | 13%<br>(9.3-19%)               | 87%<br>(81-91%)          | 0.22<br>(0.12-0.35)                         | 0.54%<br>(0.33-0.82%)                | 0.58%<br>(0.26-1%)                  | 0.44<br>(0.2-0.76)    | 130<br>(76-210)       |
| Lebanon  | 2005 | Female | 20 to 24 | 17%<br>(12-24%)                | 83%<br>(76-88%)          | 0.34<br>(0.21-0.51)                         | 1.1%<br>(0.7-1.6%)                   | 0.99%<br>(0.47-1.7%)                | 0.84<br>(0.39-1.5)    | 290<br>(170-440)      |
| Lebanon  | 2005 | Female | 25 to 29 | 17%<br>(12-24%)                | 83%<br>(76-88%)          | 0.36<br>(0.22-0.55)                         | 1.1%<br>(0.75-1.5%)                  | 1.1%<br>(0.57-1.8%)                 | 0.91<br>(0.47-1.5)    | 270<br>(170-400)      |
| Lebanon  | 2005 | Female | 30 to 34 | 16%<br>(11-23%)                | 84%<br>(77-89%)          | 0.34<br>(0.21-0.53)                         | 1%<br>(0.68-1.4%)                    | 1.2%<br>(0.63-2%)                   | 1<br>(0.52-1.7)       | 220<br>(140-320)      |
| Lebanon  | 2005 | Female | 35 to 39 | 16%<br>(11-23%)                | 84%<br>(77-89%)          | 0.34<br>(0.21-0.52)                         | 0.87%<br>(0.59-1.2%)                 | 1.3%<br>(0.68-2.2%)                 | 1.4<br>(0.72-2.5)     | 200<br>(130-290)      |
| Lebanon  | 2005 | Female | 40 to 44 | 16%<br>(11-22%)                | 84%<br>(78-89%)          | 0.35<br>(0.22-0.51)                         | 0.75%<br>(0.47-1.1%)                 | 1.3%<br>(0.62-2.2%)                 | 1.9<br>(0.94-3.3)     | 180<br>(110-270)      |
| Lebanon  | 2005 | Female | 45 to 49 | 15%<br>(9.3-21%)               | 85%<br>(79-91%)          | 0.36<br>(0.21-0.56)                         | 0.68%<br>(0.37-1.1%)                 | 1.2%<br>(0.46-2.1%)                 | 2.4<br>(1-4.4)        | 160<br>(88-260)       |
| Lebanon  | 2005 | Female | 50 to 54 | 15%<br>(10-21%)                | 85%<br>(79-90%)          | 0.36<br>(0.22-0.58)                         | 0.58%<br>(0.22-1%)                   | 1%<br>(0.29-1.9%)                   | 3<br>(0.86-5.7)       | 150<br>(59-270)       |
| Lebanon  | 2005 | Female | 55 to 59 | 16%<br>(9.8-24%)               | 84%<br>(76-90%)          | 0.36<br>(0.2-0.56)                          | 0.42%<br>(-0.012-0.86%)              | 0.72%<br>(0.03-1.5%)                | 2.8<br>(0.12-5.7)     | 100<br>(-3.4-220)     |
| Lebanon  | 2005 | Female | 60 to 64 | 16%<br>(9.4-25%)               | 84%<br>(75-91%)          | 0.33<br>(0.18-0.57)                         | 0.17%<br>(-0.3-0.66%)                | 0.28%<br>(-0.38-1%)                 | 1.5<br>(-2.1-5.8)     | 43<br>(-75-170)       |
| Lebanon  | 2005 | Female | 65 to 69 | 16%<br>(10-24%)                | 84%<br>(76-90%)          | 0.3<br>(0.16-0.49)                          | -0.022%<br>(-0.49-0.41%)             | 0.01%<br>(-0.69-0.69%)              | 0.086<br>(-5.6-5.5)   | -6.8<br>(-150-130)    |
| Lebanon  | 2005 | Female | 70 to 74 | 15%<br>(10-23%)                | 85%<br>(77-90%)          | 0.26<br>(0.13-0.45)                         | -0.18%<br>(-0.68-0.26%)              | -0.22%<br>(-0.92-0.4%)              | -2.6<br>(-10-4.5)     | -59<br>(-230-83)      |
| Lebanon  | 2005 | Female | 75 to 79 | 14%<br>(9-22%)                 | 86%<br>(78-91%)          | 0.22<br>(0.1-0.41)                          | -0.27%<br>(-0.75-0.15%)              | -0.34%<br>(-1-0.23%)                | -3.4<br>(-9.8-2.3)    | -54<br>(-150-29)      |
| Lebanon  | 2005 | Female | 80 to 84 | 13%<br>(8.4-21%)               | 87%<br>(79-92%)          | 0.2<br>(0.07-0.35)                          | -0.3%<br>(-0.76-0.068%)              | -0.38%<br>(-0.96-0.099%)            | -3.7<br>(-9.4-1)      | -41<br>(-100-9.7)     |
| Lebanon  | 2005 | Female | 85 to 89 | 13%<br>(7.8-19%)               | 87%<br>(81-92%)          | 0.18<br>(0.088-0.34)                        | -0.36%<br>(-0.8--0.0066%)            | -0.45%<br>(-1--0.01%)               | -3.5<br>(-7.8--0.079) | -26<br>(-58--0.48)    |
| Lebanon  | 2005 | Female | 90 to 94 | 13%<br>(8.5-20%)               | 87%<br>(80-91%)          | 0.18<br>(0.082-0.36)                        | -0.41%<br>(-0.94--0.036%)            | -0.53%<br>(-1.2--0.059%)            | -2.2<br>(-4.7--0.25)  | -11<br>(-24--0.95)    |
| Lebanon  | 2005 | Female | 95 plus  | 15%<br>(8.7-25%)               | 85%<br>(75-91%)          | 0.2<br>(0.07-0.43)                          | -0.48%<br>(-1.1--0.0035%)            | -0.64%<br>(-1.5--0.049%)            | -1.1<br>(-2.6--0.08)  | -3.4<br>(-8.3--0.024) |
| Lebanon  | 2005 | Male   | All Ages | 25%<br>(21-28%)                | 75%<br>(72-79%)          | 1<br>(0.87-1.2)                             | 1.8%<br>(1.2-2.6%)                   | 1.7%<br>(0.54-3.2%)                 | 150<br>(47-280)       | 8000<br>(5100-11000)  |
| Lebanon  | 2005 | Male   | 15 to 19 | 18%<br>(12-26%)                | 82%<br>(74-88%)          | 0.45<br>(0.23-0.76)                         | 1.3%<br>(0.83-1.9%)                  | 2.1%<br>(1.1-3.7%)                  | 2.2<br>(1.1-3.9)      | 280<br>(180-440)      |
| Lebanon  | 2005 | Male   | 20 to 24 | 28%<br>(19-39%)                | 72%<br>(61-81%)          | 1.1<br>(0.6-1.7)                            | 3%<br>(2-4.5%)                       | 4.8%<br>(2.6-7.9%)                  | 6.7<br>(3.6-11)       | 740<br>(470-1100)     |

| Location | Year | Sex    | Age      | Prevalence of current drinkers | Prevalence of abstainers | Population average of standard drinks daily | Percent of total attributable deaths | Percent of total attributable DALYs | Attributable deaths | Attributable DALYs |
|----------|------|--------|----------|--------------------------------|--------------------------|---------------------------------------------|--------------------------------------|-------------------------------------|---------------------|--------------------|
| Lebanon  | 2005 | Male   | 25 to 29 | 33%<br>(24-43%)                | 67%<br>(57-76%)          | 1.5<br>(0.91-2.2)                           | 3.4%<br>(2.3-4.8%)                   | 6.1%<br>(3.5-9.5%)                  | 8.1<br>(4.5-13)     | 790<br>(500-1200)  |
| Lebanon  | 2005 | Male   | 30 to 34 | 34%<br>(24-46%)                | 66%<br>(54-76%)          | 1.6<br>(1-2.4)                              | 3%<br>(2-4.3%)                       | 5.6%<br>(3.2-9%)                    | 7.3<br>(4-12)       | 660<br>(420-980)   |
| Lebanon  | 2005 | Male   | 35 to 39 | 36%<br>(26-47%)                | 64%<br>(53-74%)          | 1.7<br>(1.1-2.5)                            | 2.7%<br>(1.6-4.1%)                   | 5%<br>(2.6-8.1%)                    | 8.6<br>(4.3-15)     | 710<br>(410-1000)  |
| Lebanon  | 2005 | Male   | 40 to 44 | 34%<br>(25-45%)                | 66%<br>(55-75%)          | 1.7<br>(1.1-2.5)                            | 2.4%<br>(1.3-3.7%)                   | 4.2%<br>(1.8-7.1%)                  | 11<br>(4.3-18)      | 770<br>(420-1200)  |
| Lebanon  | 2005 | Male   | 45 to 49 | 31%<br>(21-42%)                | 69%<br>(58-79%)          | 1.6<br>(0.93-2.5)                           | 2.3%<br>(1.2-3.9%)                   | 3.8%<br>(1.5-6.9%)                  | 11<br>(3.9-20)      | 660<br>(330-1100)  |
| Lebanon  | 2005 | Male   | 50 to 54 | 29%<br>(20-40%)                | 71%<br>(60-80%)          | 1.7<br>(1-2.7)                              | 2.5%<br>(1.1-4.4%)                   | 3.9%<br>(1.3-7.1%)                  | 13<br>(4.1-24)      | 620<br>(250-1100)  |
| Lebanon  | 2005 | Male   | 55 to 59 | 30%<br>(19-44%)                | 70%<br>(56-81%)          | 2<br>(1.1-3.3)                              | 3.1%<br>(1.2-5.4%)                   | 4.6%<br>(1.6-8.2%)                  | 22<br>(7.8-40)      | 870<br>(360-1500)  |
| Lebanon  | 2005 | Male   | 60 to 64 | 29%<br>(17-44%)                | 71%<br>(56-83%)          | 1.9<br>(1-3.3)                              | 2.9%<br>(0.84-5.5%)                  | 3.9%<br>(0.84-7.6%)                 | 29<br>(6.3-57)      | 950<br>(270-1800)  |
| Lebanon  | 2005 | Male   | 65 to 69 | 28%<br>(17-41%)                | 72%<br>(59-83%)          | 1.6<br>(0.84-2.6)                           | 1.9%<br>(0.29-4%)                    | 2.3%<br>(0.089-5.2%)                | 22<br>(0.91-50)     | 620<br>(93-1300)   |
| Lebanon  | 2005 | Male   | 70 to 74 | 26%<br>(17-39%)                | 74%<br>(61-83%)          | 1.2<br>(0.62-2)                             | 0.95%<br>(-0.3-2.8%)                 | 1%<br>(-0.6-3.5%)                   | 11<br>(-6.4-39)     | 280<br>(-86-810)   |
| Lebanon  | 2005 | Male   | 75 to 79 | 24%<br>(15-37%)                | 76%<br>(63-85%)          | 0.89<br>(0.43-1.6)                          | 0.34%<br>(-0.75-1.8%)                | 0.26%<br>(-1.1-2.2%)                | 2.8<br>(-13-24)     | 72<br>(-160-400)   |
| Lebanon  | 2005 | Male   | 80 to 84 | 22%<br>(13-34%)                | 78%<br>(66-87%)          | 0.72<br>(0.35-1.2)                          | 0.0089%<br>(-0.92-1%)                | -0.13%<br>(-1.3-1.2%)               | -1.3<br>(-13-12)    | 1.2<br>(-120-140)  |
| Lebanon  | 2005 | Male   | 85 to 89 | 20%<br>(12-31%)                | 80%<br>(69-88%)          | 0.59<br>(0.3-1)                             | -0.23%<br>(-1-0.62%)                 | -0.41%<br>(-1.4-0.62%)              | -2.9<br>(-9.8-4.5)  | -15<br>(-66-41)    |
| Lebanon  | 2005 | Male   | 90 to 94 | 21%<br>(13-33%)                | 79%<br>(67-87%)          | 0.53<br>(0.26-0.98)                         | -0.45%<br>(-1.3-0.33%)               | -0.68%<br>(-1.8-0.3%)               | -2.4<br>(-6.1-1.1)  | -9.7<br>(-28-7.1)  |
| Lebanon  | 2005 | Male   | 95 plus  | 25%<br>(13-41%)                | 75%<br>(59-87%)          | 0.51<br>(0.19-1.1)                          | -0.61%<br>(-1.7-0.27%)               | -0.93%<br>(-2.3-0.13%)              | -1<br>(-2.7-0.15)   | -2.8<br>(-7.8-1.3) |
| Lebanon  | 2010 | Female | All Ages | 14%<br>(12-17%)                | 86%<br>(83-88%)          | 0.27<br>(0.21-0.34)                         | 0.4%<br>(0.21-0.64%)                 | 0.0083%<br>(-0.44-0.49%)            | 0.7<br>(-37-40)     | 1800<br>(860-2900) |
| Lebanon  | 2010 | Female | 15 to 19 | 13%<br>(8.6-20%)               | 87%<br>(80-91%)          | 0.23<br>(0.12-0.39)                         | 0.56%<br>(0.34-0.86%)                | 0.67%<br>(0.31-1.2%)                | 0.46<br>(0.22-0.81) | 140<br>(80-230)    |
| Lebanon  | 2010 | Female | 20 to 24 | 18%<br>(11-26%)                | 82%<br>(74-89%)          | 0.37<br>(0.21-0.6)                          | 1.1%<br>(0.72-1.6%)                  | 1.1%<br>(0.52-2%)                   | 0.93<br>(0.42-1.7)  | 320<br>(200-500)   |
| Lebanon  | 2010 | Female | 25 to 29 | 19%<br>(12-27%)                | 81%<br>(73-88%)          | 0.41<br>(0.24-0.63)                         | 1.2%<br>(0.8-1.6%)                   | 1.3%<br>(0.67-2.1%)                 | 1.1<br>(0.55-1.9)   | 340<br>(210-500)   |
| Lebanon  | 2010 | Female | 30 to 34 | 17%<br>(11-26%)                | 83%<br>(74-89%)          | 0.39<br>(0.22-0.62)                         | 1%<br>(0.68-1.5%)                    | 1.4%<br>(0.7-2.4%)                  | 1.2<br>(0.6-2)      | 260<br>(170-400)   |
| Lebanon  | 2010 | Female | 35 to 39 | 17%<br>(10-25%)                | 83%<br>(75-90%)          | 0.37<br>(0.21-0.58)                         | 0.88%<br>(0.6-1.2%)                  | 1.5%<br>(0.75-2.5%)                 | 1.3<br>(0.68-2.4)   | 200<br>(130-290)   |
| Lebanon  | 2010 | Female | 40 to 44 | 16%<br>(10-25%)                | 84%<br>(75-90%)          | 0.38<br>(0.22-0.58)                         | 0.75%<br>(0.45-1.1%)                 | 1.4%<br>(0.71-2.4%)                 | 1.8<br>(0.86-3.1)   | 180<br>(100-270)   |

| Location | Year | Sex    | Age      | Prevalence of current drinkers | Prevalence of abstainers | Population average of standard drinks daily | Percent of total attributable deaths | Percent of total attributable DALYs | Attributable deaths  | Attributable DALYs   |
|----------|------|--------|----------|--------------------------------|--------------------------|---------------------------------------------|--------------------------------------|-------------------------------------|----------------------|----------------------|
| Lebanon  | 2010 | Female | 45 to 49 | 16%<br>(9.6-24%)               | 84%<br>(76-90%)          | 0.41<br>(0.22-0.66)                         | 0.7%<br>(0.37-1.1%)                  | 1.4%<br>(0.56-2.5%)                 | 2.4<br>(1-4.5)       | 170<br>(90-280)      |
| Lebanon  | 2010 | Female | 50 to 54 | 16%<br>(10-24%)                | 84%<br>(76-90%)          | 0.42<br>(0.24-0.7)                          | 0.62%<br>(0.26-1.1%)                 | 1.2%<br>(0.46-2.3%)                 | 3.1<br>(1.2-5.9)     | 160<br>(67-290)      |
| Lebanon  | 2010 | Female | 55 to 59 | 17%<br>(10-25%)                | 83%<br>(75-90%)          | 0.4<br>(0.22-0.63)                          | 0.46%<br>(0.067-0.91%)               | 0.9%<br>(0.14-1.7%)                 | 3.3<br>(0.51-6.5)    | 130<br>(20-250)      |
| Lebanon  | 2010 | Female | 60 to 64 | 17%<br>(10-26%)                | 83%<br>(74-90%)          | 0.36<br>(0.2-0.63)                          | 0.22%<br>(-0.2-0.72%)                | 0.43%<br>(-0.29-1.3%)               | 2<br>(-1.3-6.2)      | 59<br>(-52-190)      |
| Lebanon  | 2010 | Female | 65 to 69 | 17%<br>(11-25%)                | 83%<br>(75-89%)          | 0.33<br>(0.18-0.55)                         | 0.037%<br>(-0.39-0.48%)              | 0.12%<br>(-0.56-0.83%)              | 0.79<br>(-3.6-5.4)   | 10<br>(-110-130)     |
| Lebanon  | 2010 | Female | 70 to 74 | 16%<br>(10-25%)                | 84%<br>(75-90%)          | 0.28<br>(0.13-0.5)                          | -0.11%<br>(-0.6-0.34%)               | -0.12%<br>(-0.83-0.51%)             | -1.4<br>(-9.2-5.7)   | -38<br>(-200-110)    |
| Lebanon  | 2010 | Female | 75 to 79 | 15%<br>(8.9-23%)               | 85%<br>(77-91%)          | 0.24<br>(0.11-0.44)                         | -0.22%<br>(-0.7-0.21%)               | -0.28%<br>(-0.95-0.3%)              | -3.9<br>(-13-4.2)    | -64<br>(-200-64)     |
| Lebanon  | 2010 | Female | 80 to 84 | 13%<br>(8.3-21%)               | 87%<br>(79-92%)          | 0.21<br>(0.1-0.37)                          | -0.25%<br>(-0.7-0.12%)               | -0.32%<br>(-0.9-0.17%)              | -4<br>(-11-2.3)      | -46<br>(-120-22)     |
| Lebanon  | 2010 | Female | 85 to 89 | 13%<br>(7.6-20%)               | 87%<br>(80-92%)          | 0.2<br>(0.091-0.37)                         | -0.32%<br>(-0.76-0.07%)              | -0.42%<br>(-0.97-0.052%)            | -4.4<br>(-11-0.57)   | -32<br>(-78-7)       |
| Lebanon  | 2010 | Female | 90 to 94 | 14%<br>(8.6-22%)               | 86%<br>(78-91%)          | 0.2<br>(0.088-0.39)                         | -0.38%<br>(-0.89-0.037%)             | -0.5%<br>(-1.2-0.0094%)             | -2.9<br>(-6.6-0.053) | -14<br>(-32-1.4)     |
| Lebanon  | 2010 | Female | 95 plus  | 16%<br>(8.6-27%)               | 84%<br>(73-91%)          | 0.22<br>(0.072-0.48)                        | -0.45%<br>(-1.2-0.064%)              | -0.62%<br>(-1.5-0.025%)             | -1.2<br>(-3-0.05)    | -3.7<br>(-9.7-0.53)  |
| Lebanon  | 2010 | Male   | All Ages | 24%<br>(20-28%)                | 76%<br>(72-80%)          | 1.1<br>(0.91-1.3)                           | 2%<br>(1.3-2.7%)                     | 1.8%<br>(0.68-3.2%)                 | 170<br>(65-310)      | 9300<br>(5900-13000) |
| Lebanon  | 2010 | Male   | 15 to 19 | 16%<br>(10-25%)                | 84%<br>(75-90%)          | 0.44<br>(0.21-0.76)                         | 1.3%<br>(0.83-2%)                    | 2.1%<br>(1-3.7%)                    | 2.2<br>(1.1-4)       | 310<br>(190-480)     |
| Lebanon  | 2010 | Male   | 20 to 24 | 26%<br>(16-37%)                | 74%<br>(63-84%)          | 1<br>(0.53-1.7)                             | 3.1%<br>(2.1-4.5%)                   | 4.9%<br>(2.6-8.1%)                  | 6.7<br>(3.6-12)      | 790<br>(510-1200)    |
| Lebanon  | 2010 | Male   | 25 to 29 | 31%<br>(21-42%)                | 69%<br>(58-79%)          | 1.4<br>(0.85-2.3)                           | 3.5%<br>(2.4-5.1%)                   | 6.4%<br>(3.4-10%)                   | 8.8<br>(4.6-14)      | 890<br>(570-1300)    |
| Lebanon  | 2010 | Male   | 30 to 34 | 33%<br>(21-45%)                | 67%<br>(55-79%)          | 1.6<br>(0.96-2.6)                           | 3.2%<br>(2.1-4.8%)                   | 6.2%<br>(3.4-10%)                   | 8.3<br>(4.4-14)      | 770<br>(480-1100)    |
| Lebanon  | 2010 | Male   | 35 to 39 | 34%<br>(22-47%)                | 66%<br>(53-78%)          | 1.7<br>(1-2.7)                              | 2.9%<br>(1.8-4.3%)                   | 5.7%<br>(2.9-9%)                    | 8.5<br>(4.2-14)      | 710<br>(420-1000)    |
| Lebanon  | 2010 | Male   | 40 to 44 | 34%<br>(23-46%)                | 66%<br>(54-77%)          | 1.8<br>(1-2.7)                              | 2.6%<br>(1.5-4.1%)                   | 4.7%<br>(2.2-7.9%)                  | 11<br>(4.9-19)       | 830<br>(460-1300)    |
| Lebanon  | 2010 | Male   | 45 to 49 | 31%<br>(19-43%)                | 69%<br>(57-81%)          | 1.7<br>(0.95-2.7)                           | 2.5%<br>(1.3-4%)                     | 4.3%<br>(1.7-7.5%)                  | 15<br>(6.1-28)       | 950<br>(460-1600)    |
| Lebanon  | 2010 | Male   | 50 to 54 | 29%<br>(19-41%)                | 71%<br>(59-81%)          | 1.8<br>(1.1-2.8)                            | 2.7%<br>(1.3-4.4%)                   | 4.4%<br>(1.8-7.5%)                  | 18<br>(7-32)         | 900<br>(430-1500)    |
| Lebanon  | 2010 | Male   | 55 to 59 | 28%<br>(18-42%)                | 72%<br>(58-82%)          | 2<br>(1.1-3.3)                              | 3.1%<br>(1.4-5.2%)                   | 4.8%<br>(1.9-8.1%)                  | 23<br>(8.8-39)       | 930<br>(430-1500)    |
| Lebanon  | 2010 | Male   | 60 to 64 | 26%<br>(15-41%)                | 74%<br>(59-85%)          | 1.9<br>(0.94-3.3)                           | 2.9%<br>(0.97-5.2%)                  | 4%<br>(1.1-7.4%)                    | 29<br>(8.1-55)       | 990<br>(330-1800)    |

| Location | Year | Sex    | Age      | Prevalence of current drinkers | Prevalence of abstainers | Population average of standard drinks daily | Percent of total attributable deaths | Percent of total attributable DALYs | Attributable deaths | Attributable DALYs  |
|----------|------|--------|----------|--------------------------------|--------------------------|---------------------------------------------|--------------------------------------|-------------------------------------|---------------------|---------------------|
| Lebanon  | 2010 | Male   | 65 to 69 | 25%<br>(16-38%)                | 75%<br>(62-84%)          | 1.5<br>(0.8-2.5)                            | 2%<br>(0.46-4%)                      | 2.6%<br>(0.36-5.4%)                 | 26<br>(3.5-55)      | 730<br>(170-1500)   |
| Lebanon  | 2010 | Male   | 70 to 74 | 24%<br>(15-36%)                | 76%<br>(64-85%)          | 1.1<br>(0.58-1.9)                           | 1.1%<br>(-0.073-2.8%)                | 1.3%<br>(-0.3-3.6%)                 | 16<br>(-3.8-44)     | 380<br>(-24-960)    |
| Lebanon  | 2010 | Male   | 75 to 79 | 22%<br>(14-34%)                | 78%<br>(66-86%)          | 0.87<br>(0.43-1.5)                          | 0.51%<br>(-0.52-1.9%)                | 0.49%<br>(-0.9-2.3%)                | 6.3<br>(-12-30)     | 130<br>(-140-510)   |
| Lebanon  | 2010 | Male   | 80 to 84 | 20%<br>(12-31%)                | 80%<br>(69-88%)          | 0.71<br>(0.36-1.2)                          | 0.17%<br>(-0.64-1.3%)                | 0.063%<br>(-1-1.4%)                 | 0.74<br>(-12-16)    | 28<br>(-100-210)    |
| Lebanon  | 2010 | Male   | 85 to 89 | 19%<br>(11-29%)                | 81%<br>(71-89%)          | 0.59<br>(0.29-1)                            | -0.087%<br>(-0.8-0.76%)              | -0.25%<br>(-1.2-0.79%)              | -2.5<br>(-12-8.5)   | -8.2<br>(-77-75)    |
| Lebanon  | 2010 | Male   | 90 to 94 | 20%<br>(12-30%)                | 80%<br>(70-88%)          | 0.53<br>(0.26-0.98)                         | -0.31%<br>(-1.1-0.49%)               | -0.52%<br>(-1.5-0.45%)              | -2.7<br>(-7.9-2.4)  | -10<br>(-35-16)     |
| Lebanon  | 2010 | Male   | 95 plus  | 23%<br>(12-39%)                | 77%<br>(61-88%)          | 0.52<br>(0.19-1.1)                          | -0.46%<br>(-1.4-0.42%)               | -0.77%<br>(-2-0.28%)                | -1.2<br>(-3.1-0.41) | -2.9<br>(-9.2-2.6)  |
| Lebanon  | 2016 | Female | All Ages | 14%<br>(12-17%)                | 86%<br>(83-88%)          | 0.3<br>(0.19-0.44)                          | 0.48%<br>(0.24-0.8%)                 | 0.047%<br>(-0.43-0.68%)             | 5.6<br>(-50-81)     | 2800<br>(1400-4900) |
| Lebanon  | 2016 | Female | 15 to 19 | 13%<br>(8.5-20%)               | 87%<br>(80-91%)          | 0.25<br>(0.11-0.45)                         | 0.56%<br>(0.34-0.86%)                | 0.57%<br>(0.24-1.1%)                | 0.51<br>(0.22-0.97) | 180<br>(100-280)    |
| Lebanon  | 2016 | Female | 20 to 24 | 18%<br>(11-26%)                | 82%<br>(74-89%)          | 0.4<br>(0.19-0.71)                          | 1.2%<br>(0.74-1.7%)                  | 1%<br>(0.43-1.9%)                   | 1.2<br>(0.5-2.3)    | 450<br>(260-690)    |
| Lebanon  | 2016 | Female | 25 to 29 | 18%<br>(12-26%)                | 82%<br>(74-88%)          | 0.44<br>(0.22-0.77)                         | 1.2%<br>(0.83-1.7%)                  | 1.2%<br>(0.53-2.2%)                 | 1.6<br>(0.69-2.8)   | 500<br>(320-750)    |
| Lebanon  | 2016 | Female | 30 to 34 | 17%<br>(11-26%)                | 83%<br>(74-89%)          | 0.42<br>(0.22-0.72)                         | 1.1%<br>(0.72-1.6%)                  | 1.4%<br>(0.66-2.5%)                 | 2<br>(0.89-3.6)     | 460<br>(280-700)    |
| Lebanon  | 2016 | Female | 35 to 39 | 17%<br>(9.8-25%)               | 83%<br>(75-90%)          | 0.4<br>(0.21-0.7)                           | 0.93%<br>(0.62-1.4%)                 | 1.5%<br>(0.67-2.7%)                 | 2.2<br>(1-4.1)      | 350<br>(220-520)    |
| Lebanon  | 2016 | Female | 40 to 44 | 16%<br>(10-24%)                | 84%<br>(76-90%)          | 0.41<br>(0.21-0.69)                         | 0.81%<br>(0.47-1.3%)                 | 1.5%<br>(0.65-2.6%)                 | 2.7<br>(1.1-4.9)    | 270<br>(160-430)    |
| Lebanon  | 2016 | Female | 45 to 49 | 16%<br>(9.4-23%)               | 84%<br>(77-91%)          | 0.44<br>(0.21-0.78)                         | 0.76%<br>(0.37-1.3%)                 | 1.5%<br>(0.52-2.8%)                 | 3.5<br>(1.2-6.9)    | 260<br>(120-440)    |
| Lebanon  | 2016 | Female | 50 to 54 | 16%<br>(10-23%)                | 84%<br>(77-90%)          | 0.45<br>(0.22-0.81)                         | 0.69%<br>(0.27-1.3%)                 | 1.3%<br>(0.41-2.7%)                 | 4.3<br>(1.4-8.8)    | 230<br>(89-460)     |
| Lebanon  | 2016 | Female | 55 to 59 | 16%<br>(10-25%)                | 84%<br>(75-90%)          | 0.42<br>(0.21-0.73)                         | 0.53%<br>(0.11-1.1%)                 | 1%<br>(0.21-2.2%)                   | 4.4<br>(0.96-9.7)   | 180<br>(36-400)     |
| Lebanon  | 2016 | Female | 60 to 64 | 16%<br>(9.9-26%)               | 84%<br>(74-90%)          | 0.39<br>(0.19-0.71)                         | 0.3%<br>(-0.16-0.95%)                | 0.56%<br>(-0.23-1.6%)               | 3.5<br>(-1.3-10)    | 110<br>(-62-350)    |
| Lebanon  | 2016 | Female | 65 to 69 | 17%<br>(11-24%)                | 83%<br>(76-89%)          | 0.35<br>(0.18-0.63)                         | 0.11%<br>(-0.33-0.7%)                | 0.22%<br>(-0.49-1.1%)               | 1.8<br>(-4.1-9.3)   | 39<br>(-130-260)    |
| Lebanon  | 2016 | Female | 70 to 74 | 16%<br>(10-24%)                | 84%<br>(76-90%)          | 0.31<br>(0.14-0.59)                         | -0.041%<br>(-0.51-0.5%)              | -0.029%<br>(-0.76-0.78%)            | -0.33<br>(-8.5-8.5) | -14<br>(-180-180)   |
| Lebanon  | 2016 | Female | 75 to 79 | 15%<br>(9-23%)                 | 85%<br>(77-91%)          | 0.26<br>(0.11-0.5)                          | -0.15%<br>(-0.63-0.37%)              | -0.2%<br>(-0.86-0.49%)              | -3.5<br>(-15-8.5)   | -58<br>(-230-140)   |
| Lebanon  | 2016 | Female | 80 to 84 | 13%<br>(8.1-21%)               | 87%<br>(79-92%)          | 0.23<br>(0.099-0.44)                        | -0.19%<br>(-0.62-0.25%)              | -0.25%<br>(-0.82-0.31%)             | -5.3<br>(-18-6.8)   | -59<br>(-200-84)    |

| Location | Year | Sex    | Age      | Prevalence of current drinkers | Prevalence of abstainers | Population average of standard drinks daily | Percent of total attributable deaths | Percent of total attributable DALYs | Attributable deaths | Attributable DALYs    |
|----------|------|--------|----------|--------------------------------|--------------------------|---------------------------------------------|--------------------------------------|-------------------------------------|---------------------|-----------------------|
| Lebanon  | 2016 | Female | 85 to 89 | 13%<br>(7.6-20%)               | 87%<br>(80-92%)          | 0.22<br>(0.09-0.43)                         | -0.27%<br>(-0.74-0.17%)              | -0.36%<br>(-0.97-0.2%)              | -6.3<br>(-17-3.5)   | -46<br>(-130-29)      |
| Lebanon  | 2016 | Female | 90 to 94 | 14%<br>(8.8-21%)               | 86%<br>(79-91%)          | 0.22<br>(0.09-0.46)                         | -0.34%<br>(-0.83-0.17%)              | -0.46%<br>(-1.1-0.15%)              | -4.4<br>(-10-1.5)   | -21<br>(-51-10)       |
| Lebanon  | 2016 | Female | 95 plus  | 16%<br>(8.7-27%)               | 84%<br>(73-91%)          | 0.24<br>(0.08-0.54)                         | -0.41%<br>(-1.1-0.22%)               | -0.57%<br>(-1.4-0.19%)              | -2.2<br>(-5.5-0.7)  | -6.6<br>(-18-3.5)     |
| Lebanon  | 2016 | Male   | All Ages | 24%<br>(20-28%)                | 76%<br>(72-80%)          | 1.2<br>(0.79-1.7)                           | 2%<br>(1.1-3.2%)                     | 1.8%<br>(0.39-3.7%)                 | 260<br>(53-510)     | 13000<br>(7000-20000) |
| Lebanon  | 2016 | Male   | 15 to 19 | 16%<br>(10-25%)                | 84%<br>(75-90%)          | 0.47<br>(0.2-0.92)                          | 1.2%<br>(0.72-1.9%)                  | 1.7%<br>(0.74-3.3%)                 | 2.6<br>(1.2-5.2)    | 380<br>(220-620)      |
| Lebanon  | 2016 | Male   | 20 to 24 | 26%<br>(16-37%)                | 74%<br>(63-84%)          | 1.1<br>(0.5-1.9)                            | 2.7%<br>(1.7-4.2%)                   | 3.6%<br>(1.7-6.5%)                  | 9.1<br>(4.3-17)     | 1100<br>(660-1700)    |
| Lebanon  | 2016 | Male   | 25 to 29 | 31%<br>(21-42%)                | 69%<br>(58-79%)          | 1.5<br>(0.8-2.6)                            | 3.2%<br>(2.1-4.8%)                   | 5%<br>(2.4-8.8%)                    | 12<br>(5.7-21)      | 1200<br>(770-1900)    |
| Lebanon  | 2016 | Male   | 30 to 34 | 33%<br>(22-46%)                | 67%<br>(54-78%)          | 1.7<br>(0.93-3)                             | 3.1%<br>(1.9-4.6%)                   | 5.2%<br>(2.5-9.2%)                  | 12<br>(5.6-20)      | 1100<br>(680-1800)    |
| Lebanon  | 2016 | Male   | 35 to 39 | 34%<br>(22-47%)                | 66%<br>(53-78%)          | 1.9<br>(0.95-3.2)                           | 2.9%<br>(1.7-4.6%)                   | 5.2%<br>(2.2-9.2%)                  | 12<br>(4.9-21)      | 1000<br>(550-1600)    |
| Lebanon  | 2016 | Male   | 40 to 44 | 34%<br>(23-46%)                | 66%<br>(54-77%)          | 1.9<br>(0.94-3.3)                           | 2.8%<br>(1.3-4.5%)                   | 4.8%<br>(1.7-8.6%)                  | 13<br>(4.3-23)      | 940<br>(450-1500)     |
| Lebanon  | 2016 | Male   | 45 to 49 | 31%<br>(19-43%)                | 69%<br>(57-81%)          | 1.9<br>(0.85-3.4)                           | 2.7%<br>(1.1-4.6%)                   | 4.5%<br>(1.3-8.2%)                  | 18<br>(5.6-35)      | 1100<br>(460-1900)    |
| Lebanon  | 2016 | Male   | 50 to 54 | 29%<br>(19-40%)                | 71%<br>(60-81%)          | 1.9<br>(0.98-3.4)                           | 2.8%<br>(1.1-4.9%)                   | 4.5%<br>(1.3-8%)                    | 30<br>(9.1-55)      | 1500<br>(580-2600)    |
| Lebanon  | 2016 | Male   | 55 to 59 | 28%<br>(17-41%)                | 72%<br>(59-83%)          | 2.2<br>(1.1-3.9)                            | 3.2%<br>(1.4-5.4%)                   | 4.8%<br>(1.8-8.4%)                  | 37<br>(14-67)       | 1500<br>(660-2700)    |
| Lebanon  | 2016 | Male   | 60 to 64 | 26%<br>(15-41%)                | 74%<br>(59-85%)          | 2<br>(0.94-3.8)                             | 3%<br>(1-5.4%)                       | 4.1%<br>(1.2-7.7%)                  | 38<br>(10-74)       | 1300<br>(420-2400)    |
| Lebanon  | 2016 | Male   | 65 to 69 | 25%<br>(15-38%)                | 75%<br>(62-85%)          | 1.6<br>(0.78-2.9)                           | 2.2%<br>(0.4-4.4%)                   | 2.8%<br>(0.29-6.1%)                 | 35<br>(3.3-75)      | 970<br>(170-2000)     |
| Lebanon  | 2016 | Male   | 70 to 74 | 24%<br>(15-36%)                | 76%<br>(64-85%)          | 1.2<br>(0.56-2.2)                           | 1.3%<br>(-0.096-3.4%)                | 1.6%<br>(-0.41-4.3%)                | 26<br>(-6.3-72)     | 610<br>(-44-1500)     |
| Lebanon  | 2016 | Male   | 75 to 79 | 22%<br>(14-34%)                | 78%<br>(66-86%)          | 0.93<br>(0.41-1.7)                          | 0.71%<br>(-0.51-2.5%)                | 0.73%<br>(-0.86-2.9%)               | 15<br>(-17-61)      | 280<br>(-210-1000)    |
| Lebanon  | 2016 | Male   | 80 to 84 | 20%<br>(12-31%)                | 80%<br>(69-88%)          | 0.75<br>(0.34-1.4)                          | 0.34%<br>(-0.64-1.8%)                | 0.27%<br>(-1-2%)                    | 4.9<br>(-18-38)     | 85<br>(-160-470)      |
| Lebanon  | 2016 | Male   | 85 to 89 | 19%<br>(11-29%)                | 81%<br>(71-89%)          | 0.62<br>(0.27-1.2)                          | 0.051%<br>(-0.77-1.2%)               | -0.078%<br>(-1.1-1.3%)              | -1.2<br>(-17-21)    | 7.2<br>(-110-180)     |
| Lebanon  | 2016 | Male   | 90 to 94 | 20%<br>(12-31%)                | 80%<br>(69-88%)          | 0.57<br>(0.25-1.1)                          | -0.21%<br>(-1-0.82%)                 | -0.4%<br>(-1.4-0.82%)               | -3.6<br>(-13-7.6)   | -12<br>(-60-45)       |
| Lebanon  | 2016 | Male   | 95 plus  | 23%<br>(12-38%)                | 77%<br>(62-88%)          | 0.57<br>(0.2-1.2)                           | -0.39%<br>(-1.4-0.73%)               | -0.68%<br>(-1.9-0.67%)              | -2<br>(-5.7-2)      | -4.7<br>(-17-8.8)     |
| Libya    | 1990 | Female | All Ages | 11%<br>(6.2-16%)               | 89%<br>(84-94%)          | 0.0087<br>(0.0047-0.014)                    | 0.19%<br>(0.13-0.25%)                | 0.13%<br>(0.0085-0.22%)             | 9.4<br>(0.59-16)    | 1000<br>(660-1400)    |

| Location | Year | Sex    | Age      | Prevalence of current drinkers | Prevalence of abstainers | Population average of standard drinks daily | Percent of total attributable deaths | Percent of total attributable DALYs | Attributable deaths   | Attributable DALYs   |
|----------|------|--------|----------|--------------------------------|--------------------------|---------------------------------------------|--------------------------------------|-------------------------------------|-----------------------|----------------------|
| Libya    | 1990 | Female | 15 to 19 | 9.4%<br>(3-20%)                | 91%<br>(80-97%)          | 0.0071<br>(0.0018-0.017)                    | 0.32%<br>(0.18-0.49%)                | 0.15%<br>(0.083-0.27%)              | 0.2<br>(0.1-0.36)     | 100<br>(55-170)      |
| Libya    | 1990 | Female | 20 to 24 | 12%<br>(3.6-26%)               | 88%<br>(74-96%)          | 0.011<br>(0.0032-0.027)                     | 0.64%<br>(0.41-0.92%)                | 0.19%<br>(0.11-0.32%)               | 0.27<br>(0.15-0.46)   | 190<br>(110-300)     |
| Libya    | 1990 | Female | 25 to 29 | 13%<br>(4-29%)                 | 87%<br>(71-96%)          | 0.014<br>(0.0038-0.032)                     | 0.69%<br>(0.48-0.95%)                | 0.31%<br>(0.17-0.55%)               | 0.39<br>(0.2-0.67)    | 170<br>(110-250)     |
| Libya    | 1990 | Female | 30 to 34 | 15%<br>(4.1-32%)               | 85%<br>(68-96%)          | 0.016<br>(0.0046-0.035)                     | 0.61%<br>(0.42-0.88%)                | 0.33%<br>(0.18-0.54%)               | 0.42<br>(0.23-0.7)    | 140<br>(85-200)      |
| Libya    | 1990 | Female | 35 to 39 | 17%<br>(4.4-33%)               | 83%<br>(67-96%)          | 0.019<br>(0.0052-0.04)                      | 0.46%<br>(0.31-0.63%)                | 0.27%<br>(0.17-0.39%)               | 0.39<br>(0.23-0.59)   | 96<br>(62-140)       |
| Libya    | 1990 | Female | 40 to 44 | 18%<br>(6-33%)                 | 82%<br>(67-94%)          | 0.021<br>(0.0067-0.046)                     | 0.35%<br>(0.22-0.5%)                 | 0.29%<br>(0.15-0.42%)               | 0.45<br>(0.24-0.7)    | 66<br>(40-97)        |
| Libya    | 1990 | Female | 45 to 49 | 18%<br>(6.3-34%)               | 82%<br>(66-94%)          | 0.023<br>(0.0066-0.052)                     | 0.27%<br>(0.14-0.4%)                 | 0.24%<br>(0.054-0.38%)              | 0.49<br>(0.11-0.81)   | 52<br>(26-80)        |
| Libya    | 1990 | Female | 50 to 54 | 19%<br>(7.3-37%)               | 81%<br>(63-93%)          | 0.023<br>(0.0066-0.053)                     | 0.23%<br>(0.06-0.36%)                | 0.26%<br>(0.032-0.43%)              | 0.69<br>(0.081-1.2)   | 46<br>(12-76)        |
| Libya    | 1990 | Female | 55 to 59 | 20%<br>(7.7-39%)               | 80%<br>(61-92%)          | 0.024<br>(0.0059-0.058)                     | 0.19%<br>(-0.025-0.35%)              | 0.25%<br>(-0.048-0.47%)             | 0.82<br>(-0.16-1.6)   | 37<br>(-5-70)        |
| Libya    | 1990 | Female | 60 to 64 | 21%<br>(8.1-40%)               | 79%<br>(60-92%)          | 0.023<br>(0.0055-0.056)                     | 0.16%<br>(-0.12-0.35%)               | 0.22%<br>(-0.13-0.49%)              | 0.96<br>(-0.55-2.1)   | 32<br>(-23-68)       |
| Libya    | 1990 | Female | 65 to 69 | 22%<br>(9.2-39%)               | 78%<br>(61-91%)          | 0.02<br>(0.0054-0.048)                      | 0.15%<br>(-0.1-0.33%)                | 0.21%<br>(-0.13-0.48%)              | 1.1<br>(-0.66-2.5)    | 28<br>(-19-63)       |
| Libya    | 1990 | Female | 70 to 74 | 21%<br>(9.2-38%)               | 79%<br>(62-91%)          | 0.016<br>(0.0041-0.043)                     | 0.16%<br>(-0.11-0.33%)               | 0.21%<br>(-0.12-0.45%)              | 1.2<br>(-0.67-2.7)    | 24<br>(-17-51)       |
| Libya    | 1990 | Female | 75 to 79 | 19%<br>(7.3-38%)               | 81%<br>(62-93%)          | 0.013<br>(0.0026-0.04)                      | 0.13%<br>(-0.15-0.28%)               | 0.17%<br>(-0.2-0.38%)               | 0.99<br>(-1.1-2.2)    | 15<br>(-17-31)       |
| Libya    | 1990 | Female | 80 to 84 | 17%<br>(5.7-38%)               | 83%<br>(62-94%)          | 0.012<br>(0.0024-0.034)                     | 0.11%<br>(-0.14-0.24%)               | 0.14%<br>(-0.16-0.3%)               | 0.56<br>(-0.68-1.2)   | 6.3<br>(-7.2-13)     |
| Libya    | 1990 | Female | 85 to 89 | 17%<br>(5.8-38%)               | 83%<br>(62-94%)          | 0.012<br>(0.0024-0.038)                     | 0.084%<br>(-0.17-0.19%)              | 0.097%<br>(-0.21-0.24%)             | 0.32<br>(-0.66-0.78)  | 2.6<br>(-5.1-6)      |
| Libya    | 1990 | Female | 90 to 94 | 20%<br>(6.4-42%)               | 80%<br>(58-94%)          | 0.013<br>(0.0025-0.04)                      | 0.064%<br>(-0.2-0.17%)               | 0.068%<br>(-0.25-0.19%)             | 0.12<br>(-0.45-0.35)  | 0.72<br>(-2.2-1.9)   |
| Libya    | 1990 | Female | 95 plus  | 24%<br>(7.1-49%)               | 76%<br>(51-93%)          | 0.016<br>(0.0026-0.05)                      | 0.048%<br>(-0.3-0.17%)               | 0.04%<br>(-0.37-0.19%)              | 0.025<br>(-0.24-0.12) | 0.12<br>(-0.77-0.45) |
| Libya    | 1990 | Male   | All Ages | 8.5%<br>(5.8-12%)              | 91%<br>(88-94%)          | 0.011<br>(0.0057-0.018)                     | 0.37%<br>(0.29-0.46%)                | 0.29%<br>(0.2-0.37%)                | 27<br>(19-35)         | 2300<br>(1700-3000)  |
| Libya    | 1990 | Male   | 15 to 19 | 6.6%<br>(2.7-13%)              | 93%<br>(87-97%)          | 0.0048<br>(0.0013-0.012)                    | 0.47%<br>(0.29-0.7%)                 | 0.13%<br>(0.072-0.24%)              | 0.28<br>(0.15-0.53)   | 170<br>(95-270)      |
| Libya    | 1990 | Male   | 20 to 24 | 10%<br>(4.2-20%)               | 90%<br>(80-96%)          | 0.011<br>(0.0035-0.025)                     | 0.96%<br>(0.6-1.4%)                  | 0.22%<br>(0.11-0.43%)               | 0.57<br>(0.28-1.1)    | 330<br>(200-520)     |
| Libya    | 1990 | Male   | 25 to 29 | 13%<br>(5-24%)                 | 87%<br>(76-95%)          | 0.017<br>(0.0057-0.038)                     | 0.99%<br>(0.69-1.4%)                 | 0.37%<br>(0.19-0.62%)               | 0.9<br>(0.47-1.5)     | 310<br>(200-460)     |
| Libya    | 1990 | Male   | 30 to 34 | 14%<br>(5.3-28%)               | 86%<br>(72-95%)          | 0.022<br>(0.008-0.046)                      | 0.91%<br>(0.65-1.2%)                 | 0.49%<br>(0.28-0.77%)               | 1.3<br>(0.74-2)       | 290<br>(190-410)     |

| Location | Year | Sex    | Age      | Prevalence of current drinkers | Prevalence of abstainers | Population average of standard drinks daily | Percent of total attributable deaths | Percent of total attributable DALYs | Attributable deaths     | Attributable DALYs  |
|----------|------|--------|----------|--------------------------------|--------------------------|---------------------------------------------|--------------------------------------|-------------------------------------|-------------------------|---------------------|
| Libya    | 1990 | Male   | 35 to 39 | 16%<br>(6.1-29%)               | 84%<br>(71-94%)          | 0.025<br>(0.0079-0.052)                     | 0.9%<br>(0.65-1.2%)                  | 0.69%<br>(0.44-1%)                  | 2<br>(1.2-3)            | 270<br>(190-370)    |
| Libya    | 1990 | Male   | 40 to 44 | 16%<br>(7.1-29%)               | 84%<br>(71-93%)          | 0.027<br>(0.0091-0.058)                     | 0.81%<br>(0.59-1.1%)                 | 0.72%<br>(0.45-1.1%)                | 2.1<br>(1.3-3.1)        | 210<br>(150-300)    |
| Libya    | 1990 | Male   | 45 to 49 | 16%<br>(6.4-29%)               | 84%<br>(71-94%)          | 0.028<br>(0.0087-0.063)                     | 0.75%<br>(0.55-0.98%)                | 0.79%<br>(0.51-1.1%)                | 2.7<br>(1.7-4.1)        | 190<br>(140-260)    |
| Libya    | 1990 | Male   | 50 to 54 | 15%<br>(6.5-29%)               | 85%<br>(71-93%)          | 0.027<br>(0.0081-0.062)                     | 0.6%<br>(0.42-0.78%)                 | 0.67%<br>(0.42-0.95%)               | 2.7<br>(1.7-4.1)        | 150<br>(100-200)    |
| Libya    | 1990 | Male   | 55 to 59 | 15%<br>(6.3-29%)               | 85%<br>(71-94%)          | 0.027<br>(0.007-0.062)                      | 0.47%<br>(0.31-0.63%)                | 0.54%<br>(0.31-0.77%)               | 2.7<br>(1.5-4)          | 120<br>(76-160)     |
| Libya    | 1990 | Male   | 60 to 64 | 14%<br>(5.9-27%)               | 86%<br>(73-94%)          | 0.024<br>(0.0057-0.059)                     | 0.36%<br>(0.21-0.52%)                | 0.42%<br>(0.19-0.65%)               | 2.6<br>(1.2-4.2)        | 89<br>(50-130)      |
| Libya    | 1990 | Male   | 65 to 69 | 14%<br>(6.2-25%)               | 86%<br>(75-94%)          | 0.02<br>(0.0059-0.045)                      | 0.32%<br>(0.17-0.48%)                | 0.39%<br>(0.19-0.6%)                | 2.8<br>(1.3-4.3)        | 72<br>(37-110)      |
| Libya    | 1990 | Male   | 70 to 74 | 12%<br>(5.7-22%)               | 88%<br>(78-94%)          | 0.015<br>(0.0042-0.036)                     | 0.28%<br>(0.15-0.41%)                | 0.34%<br>(0.18-0.52%)               | 2.3<br>(1.2-3.6)        | 47<br>(25-70)       |
| Libya    | 1990 | Male   | 75 to 79 | 11%<br>(4.7-20%)               | 89%<br>(80-95%)          | 0.011<br>(0.0026-0.03)                      | 0.22%<br>(0.1-0.32%)                 | 0.26%<br>(0.11-0.39%)               | 1.6<br>(0.69-2.4)       | 25<br>(11-36)       |
| Libya    | 1990 | Male   | 80 to 84 | 9.5%<br>(3.8-19%)              | 90%<br>(81-96%)          | 0.0093<br>(0.0023-0.025)                    | 0.2%<br>(0.1-0.29%)                  | 0.23%<br>(0.1-0.35%)                | 0.99<br>(0.44-1.5)      | 11<br>(5.3-17)      |
| Libya    | 1990 | Male   | 85 to 89 | 9.3%<br>(3.7-18%)              | 91%<br>(82-96%)          | 0.0085<br>(0.0023-0.022)                    | 0.17%<br>(0.089-0.23%)               | 0.18%<br>(0.086-0.27%)              | 0.56<br>(0.25-0.84)     | 4.6<br>(2.4-6.5)    |
| Libya    | 1990 | Male   | 90 to 94 | 10%<br>(4.2-21%)               | 90%<br>(79-96%)          | 0.0089<br>(0.0022-0.024)                    | 0.14%<br>(0.052-0.2%)                | 0.14%<br>(0.037-0.22%)              | 0.21<br>(0.052-0.33)    | 1.3<br>(0.47-1.9)   |
| Libya    | 1990 | Male   | 95 plus  | 13%<br>(4.7-27%)               | 87%<br>(73-95%)          | 0.01<br>(0.0019-0.032)                      | 0.15%<br>(0.048-0.21%)               | 0.12%<br>(-0.0061-0.21%)            | 0.066<br>(-0.0034-0.11) | 0.32<br>(0.11-0.48) |
| Libya    | 1995 | Female | All Ages | 11%<br>(6.5-17%)               | 89%<br>(83-93%)          | 0.0091<br>(0.0064-0.012)                    | 0.22%<br>(0.16-0.29%)                | 0.15%<br>(0.029-0.24%)              | 11<br>(2.3-18)          | 1200<br>(820-1700)  |
| Libya    | 1995 | Female | 15 to 19 | 9.3%<br>(3-20%)                | 91%<br>(80-97%)          | 0.0069<br>(0.0019-0.016)                    | 0.33%<br>(0.19-0.5%)                 | 0.14%<br>(0.084-0.25%)              | 0.2<br>(0.11-0.35)      | 110<br>(64-180)     |
| Libya    | 1995 | Female | 20 to 24 | 12%<br>(3.4-26%)               | 88%<br>(74-97%)          | 0.011<br>(0.0033-0.025)                     | 0.65%<br>(0.4-0.96%)                 | 0.19%<br>(0.11-0.3%)                | 0.29<br>(0.17-0.48)     | 230<br>(140-370)    |
| Libya    | 1995 | Female | 25 to 29 | 14%<br>(3.8-28%)               | 86%<br>(72-96%)          | 0.014<br>(0.004-0.028)                      | 0.7%<br>(0.48-0.96%)                 | 0.3%<br>(0.16-0.51%)                | 0.45<br>(0.25-0.78)     | 230<br>(140-340)    |
| Libya    | 1995 | Female | 30 to 34 | 15%<br>(4-32%)                 | 85%<br>(68-96%)          | 0.016<br>(0.0051-0.031)                     | 0.62%<br>(0.42-0.85%)                | 0.32%<br>(0.19-0.53%)               | 0.48<br>(0.27-0.8)      | 170<br>(110-260)    |
| Libya    | 1995 | Female | 35 to 39 | 17%<br>(4.9-32%)               | 83%<br>(68-95%)          | 0.019<br>(0.0059-0.037)                     | 0.46%<br>(0.31-0.62%)                | 0.27%<br>(0.17-0.39%)               | 0.44<br>(0.26-0.64)     | 110<br>(72-160)     |
| Libya    | 1995 | Female | 40 to 44 | 18%<br>(6.3-32%)               | 82%<br>(68-94%)          | 0.021<br>(0.0075-0.041)                     | 0.36%<br>(0.23-0.5%)                 | 0.29%<br>(0.17-0.42%)               | 0.55<br>(0.31-0.84)     | 84<br>(52-120)      |
| Libya    | 1995 | Female | 45 to 49 | 18%<br>(6.2-34%)               | 82%<br>(66-94%)          | 0.022<br>(0.0073-0.046)                     | 0.27%<br>(0.15-0.4%)                 | 0.24%<br>(0.064-0.38%)              | 0.52<br>(0.14-0.88)     | 57<br>(29-85)       |
| Libya    | 1995 | Female | 50 to 54 | 19%<br>(7.3-36%)               | 81%<br>(64-93%)          | 0.023<br>(0.0069-0.048)                     | 0.23%<br>(0.062-0.37%)               | 0.26%<br>(0.059-0.43%)              | 0.79<br>(0.18-1.3)      | 52<br>(13-85)       |

| Location | Year | Sex    | Age      | Prevalence of current drinkers | Prevalence of abstainers | Population average of standard drinks daily | Percent of total attributable deaths | Percent of total attributable DALYs | Attributable deaths   | Attributable DALYs   |
|----------|------|--------|----------|--------------------------------|--------------------------|---------------------------------------------|--------------------------------------|-------------------------------------|-----------------------|----------------------|
| Libya    | 1995 | Female | 55 to 59 | 20%<br>(8.2-40%)               | 80%<br>(60-92%)          | 0.024<br>(0.0069-0.052)                     | 0.19%<br>(-0.0098-0.36%)             | 0.25%<br>(-0.011-0.46%)             | 0.96<br>(-0.044-1.8)  | 43<br>(-2.4-81)      |
| Libya    | 1995 | Female | 60 to 64 | 21%<br>(8.7-40%)               | 79%<br>(60-91%)          | 0.023<br>(0.0063-0.05)                      | 0.16%<br>(-0.092-0.34%)              | 0.22%<br>(-0.11-0.47%)              | 1.1<br>(-0.57-2.4)    | 36<br>(-20-79)       |
| Libya    | 1995 | Female | 65 to 69 | 22%<br>(9.2-39%)               | 78%<br>(61-91%)          | 0.02<br>(0.0055-0.043)                      | 0.15%<br>(-0.078-0.33%)              | 0.22%<br>(-0.11-0.47%)              | 1.3<br>(-0.65-2.8)    | 34<br>(-17-73)       |
| Libya    | 1995 | Female | 70 to 74 | 21%<br>(9-38%)                 | 79%<br>(62-91%)          | 0.016<br>(0.0042-0.037)                     | 0.17%<br>(-0.08-0.32%)               | 0.22%<br>(-0.088-0.44%)             | 1.6<br>(-0.69-3.2)    | 32<br>(-16-62)       |
| Libya    | 1995 | Female | 75 to 79 | 18%<br>(7.1-36%)               | 82%<br>(64-93%)          | 0.013<br>(0.0027-0.035)                     | 0.14%<br>(-0.11-0.27%)               | 0.18%<br>(-0.14-0.36%)              | 1.3<br>(-0.93-2.5)    | 20<br>(-16-37)       |
| Libya    | 1995 | Female | 80 to 84 | 17%<br>(5.8-36%)               | 83%<br>(64-94%)          | 0.011<br>(0.0025-0.032)                     | 0.12%<br>(-0.1-0.23%)                | 0.15%<br>(-0.12-0.3%)               | 0.78<br>(-0.63-1.5)   | 8.8<br>(-7.2-17)     |
| Libya    | 1995 | Female | 85 to 89 | 17%<br>(6.1-39%)               | 83%<br>(61-94%)          | 0.012<br>(0.0027-0.035)                     | 0.091%<br>(-0.14-0.19%)              | 0.11%<br>(-0.17-0.24%)              | 0.44<br>(-0.67-0.98)  | 3.6<br>(-5.8-7.5)    |
| Libya    | 1995 | Female | 90 to 94 | 20%<br>(7.1-43%)               | 80%<br>(57-93%)          | 0.013<br>(0.0028-0.038)                     | 0.067%<br>(-0.19-0.16%)              | 0.072%<br>(-0.24-0.19%)             | 0.16<br>(-0.53-0.44)  | 0.96<br>(-2.6-2.3)   |
| Libya    | 1995 | Female | 95 plus  | 24%<br>(7.7-50%)               | 76%<br>(50-92%)          | 0.016<br>(0.003-0.047)                      | 0.049%<br>(-0.24-0.16%)              | 0.041%<br>(-0.32-0.18%)             | 0.033<br>(-0.25-0.15) | 0.16<br>(-0.79-0.53) |
| Libya    | 1995 | Male   | All Ages | 8.7%<br>(6-12%)                | 91%<br>(88-94%)          | 0.011<br>(0.0077-0.014)                     | 0.41%<br>(0.33-0.5%)                 | 0.32%<br>(0.23-0.4%)                | 31<br>(23-41)         | 2700<br>(2000-3500)  |
| Libya    | 1995 | Male   | 15 to 19 | 6.6%<br>(2.7-13%)              | 93%<br>(87-97%)          | 0.0047<br>(0.0014-0.01)                     | 0.48%<br>(0.29-0.72%)                | 0.13%<br>(0.072-0.24%)              | 0.31<br>(0.17-0.56)   | 190<br>(110-300)     |
| Libya    | 1995 | Male   | 20 to 24 | 10%<br>(4-20%)                 | 90%<br>(80-96%)          | 0.01<br>(0.0037-0.021)                      | 0.97%<br>(0.63-1.4%)                 | 0.21%<br>(0.11-0.41%)               | 0.65<br>(0.32-1.3)    | 400<br>(250-620)     |
| Libya    | 1995 | Male   | 25 to 29 | 13%<br>(5-24%)                 | 87%<br>(76-95%)          | 0.016<br>(0.0063-0.031)                     | 1%<br>(0.7-1.4%)                     | 0.36%<br>(0.19-0.58%)               | 1<br>(0.56-1.7)       | 370<br>(240-540)     |
| Libya    | 1995 | Male   | 30 to 34 | 14%<br>(5.3-28%)               | 86%<br>(72-95%)          | 0.021<br>(0.0084-0.038)                     | 0.92%<br>(0.64-1.2%)                 | 0.48%<br>(0.27-0.74%)               | 1.3<br>(0.78-2.1)     | 310<br>(210-440)     |
| Libya    | 1995 | Male   | 35 to 39 | 16%<br>(6.2-29%)               | 84%<br>(71-94%)          | 0.024<br>(0.0089-0.047)                     | 0.9%<br>(0.66-1.2%)                  | 0.7%<br>(0.44-1.1%)                 | 2.2<br>(1.4-3.4)      | 310<br>(210-420)     |
| Libya    | 1995 | Male   | 40 to 44 | 16%<br>(7.4-28%)               | 84%<br>(72-93%)          | 0.025<br>(0.01-0.05)                        | 0.81%<br>(0.59-1.1%)                 | 0.72%<br>(0.46-1.1%)                | 2.6<br>(1.6-3.9)      | 270<br>(190-380)     |
| Libya    | 1995 | Male   | 45 to 49 | 16%<br>(6.1-29%)               | 84%<br>(71-94%)          | 0.026<br>(0.0091-0.053)                     | 0.76%<br>(0.57-0.99%)                | 0.81%<br>(0.53-1.2%)                | 3.1<br>(1.9-4.8)      | 220<br>(160-300)     |
| Libya    | 1995 | Male   | 50 to 54 | 15%<br>(6.4-30%)               | 85%<br>(70-94%)          | 0.026<br>(0.0085-0.056)                     | 0.61%<br>(0.44-0.81%)                | 0.69%<br>(0.44-0.98%)               | 3.2<br>(2-4.7)        | 180<br>(120-240)     |
| Libya    | 1995 | Male   | 55 to 59 | 14%<br>(6.4-28%)               | 86%<br>(72-94%)          | 0.025<br>(0.0078-0.054)                     | 0.48%<br>(0.33-0.66%)                | 0.56%<br>(0.35-0.81%)               | 3.1<br>(1.8-4.6)      | 130<br>(90-190)      |
| Libya    | 1995 | Male   | 60 to 64 | 14%<br>(5.8-27%)               | 86%<br>(73-94%)          | 0.022<br>(0.0066-0.05)                      | 0.38%<br>(0.23-0.55%)                | 0.44%<br>(0.23-0.68%)               | 3.1<br>(1.5-4.7)      | 100<br>(62-150)      |
| Libya    | 1995 | Male   | 65 to 69 | 13%<br>(6-24%)                 | 87%<br>(76-94%)          | 0.018<br>(0.0058-0.039)                     | 0.34%<br>(0.2-0.51%)                 | 0.42%<br>(0.22-0.65%)               | 3.3<br>(1.8-5.1)      | 85<br>(49-130)       |
| Libya    | 1995 | Male   | 70 to 74 | 12%<br>(5.5-22%)               | 88%<br>(78-95%)          | 0.014<br>(0.0041-0.033)                     | 0.29%<br>(0.17-0.43%)                | 0.36%<br>(0.2-0.56%)                | 3.1<br>(1.7-4.9)      | 62<br>(36-93)        |



| Location | Year | Sex    | Age      | Prevalence of current drinkers | Prevalence of abstainers | Population average of standard drinks daily | Percent of total attributable deaths | Percent of total attributable DALYs | Attributable deaths    | Attributable DALYs  |
|----------|------|--------|----------|--------------------------------|--------------------------|---------------------------------------------|--------------------------------------|-------------------------------------|------------------------|---------------------|
| Libya    | 1995 | Male   | 75 to 79 | 11%<br>(4.5-20%)               | 89%<br>(80-95%)          | 0.01<br>(0.0027-0.027)                      | 0.23%<br>(0.12-0.32%)                | 0.27%<br>(0.13-0.4%)                | 2<br>(0.98-2.9)        | 31<br>(16-44)       |
| Libya    | 1995 | Male   | 80 to 84 | 9.4%<br>(3.8-19%)              | 91%<br>(81-96%)          | 0.0087<br>(0.0024-0.022)                    | 0.21%<br>(0.12-0.3%)                 | 0.24%<br>(0.13-0.37%)               | 1.2<br>(0.62-1.8)      | 13<br>(7.6-20)      |
| Libya    | 1995 | Male   | 85 to 89 | 9.2%<br>(3.7-18%)              | 91%<br>(82-96%)          | 0.008<br>(0.0023-0.02)                      | 0.17%<br>(0.095-0.24%)               | 0.19%<br>(0.095-0.28%)              | 0.72<br>(0.35-1.1)     | 5.9<br>(3.2-8.2)    |
| Libya    | 1995 | Male   | 90 to 94 | 10%<br>(4.1-21%)               | 90%<br>(79-96%)          | 0.0084<br>(0.0023-0.023)                    | 0.14%<br>(0.066-0.2%)                | 0.15%<br>(0.057-0.22%)              | 0.27<br>(0.11-0.42)    | 1.6<br>(0.76-2.3)   |
| Libya    | 1995 | Male   | 95 plus  | 13%<br>(4.6-27%)               | 87%<br>(73-95%)          | 0.0096<br>(0.002-0.028)                     | 0.15%<br>(0.052-0.22%)               | 0.13%<br>(0.012-0.21%)              | 0.074<br>(0.0071-0.12) | 0.35<br>(0.12-0.51) |
| Libya    | 2000 | Female | All Ages | 11%<br>(6.6-17%)               | 89%<br>(83-93%)          | 0.012<br>(0.0095-0.014)                     | 0.24%<br>(0.16-0.31%)                | 0.13%<br>(-0.014-0.24%)             | 12<br>(-1.2-22)        | 1400<br>(950-2000)  |
| Libya    | 2000 | Female | 15 to 19 | 9.3%<br>(2.9-20%)              | 91%<br>(80-97%)          | 0.0084<br>(0.0023-0.019)                    | 0.33%<br>(0.19-0.49%)                | 0.14%<br>(0.082-0.26%)              | 0.21<br>(0.12-0.38)    | 120<br>(65-190)     |
| Libya    | 2000 | Female | 20 to 24 | 12%<br>(3.5-27%)               | 88%<br>(73-96%)          | 0.014<br>(0.0043-0.029)                     | 0.66%<br>(0.41-0.96%)                | 0.19%<br>(0.1-0.31%)                | 0.32<br>(0.17-0.54)    | 260<br>(150-410)    |
| Libya    | 2000 | Female | 25 to 29 | 14%<br>(3.9-29%)               | 86%<br>(71-96%)          | 0.017<br>(0.0056-0.033)                     | 0.71%<br>(0.49-0.98%)                | 0.31%<br>(0.16-0.55%)               | 0.55<br>(0.28-0.98)    | 280<br>(180-420)    |
| Libya    | 2000 | Female | 30 to 34 | 15%<br>(4.4-33%)               | 85%<br>(67-96%)          | 0.02<br>(0.0068-0.036)                      | 0.62%<br>(0.4-0.88%)                 | 0.33%<br>(0.19-0.55%)               | 0.64<br>(0.35-1)       | 230<br>(140-340)    |
| Libya    | 2000 | Female | 35 to 39 | 17%<br>(4.8-32%)               | 83%<br>(68-95%)          | 0.023<br>(0.0083-0.042)                     | 0.46%<br>(0.32-0.64%)                | 0.27%<br>(0.16-0.4%)                | 0.56<br>(0.32-0.84)    | 150<br>(94-210)     |
| Libya    | 2000 | Female | 40 to 44 | 18%<br>(6.7-33%)               | 82%<br>(67-93%)          | 0.026<br>(0.01-0.047)                       | 0.35%<br>(0.21-0.5%)                 | 0.29%<br>(0.15-0.43%)               | 0.67<br>(0.34-1)       | 99<br>(57-150)      |
| Libya    | 2000 | Female | 45 to 49 | 18%<br>(6.4-34%)               | 82%<br>(66-94%)          | 0.027<br>(0.0091-0.055)                     | 0.25%<br>(0.1-0.39%)                 | 0.22%<br>(0.037-0.38%)              | 0.64<br>(0.096-1.1)    | 68<br>(27-110)      |
| Libya    | 2000 | Female | 50 to 54 | 19%<br>(7.2-36%)               | 81%<br>(64-93%)          | 0.028<br>(0.0089-0.058)                     | 0.21%<br>(0.031-0.35%)               | 0.23%<br>(0.0083-0.42%)             | 0.81<br>(0.028-1.5)    | 51<br>(6.3-90)      |
| Libya    | 2000 | Female | 55 to 59 | 20%<br>(7.8-39%)               | 80%<br>(61-92%)          | 0.029<br>(0.0086-0.062)                     | 0.15%<br>(-0.086-0.33%)              | 0.2%<br>(-0.089-0.44%)              | 0.94<br>(-0.41-2.1)    | 40<br>(-22-87)      |
| Libya    | 2000 | Female | 60 to 64 | 21%<br>(8.3-40%)               | 79%<br>(60-92%)          | 0.028<br>(0.0076-0.063)                     | 0.11%<br>(-0.18-0.33%)               | 0.17%<br>(-0.22-0.44%)              | 1<br>(-1.4-2.7)        | 31<br>(-49-88)      |
| Libya    | 2000 | Female | 65 to 69 | 21%<br>(9.2-39%)               | 79%<br>(61-91%)          | 0.024<br>(0.0067-0.052)                     | 0.11%<br>(-0.15-0.31%)               | 0.16%<br>(-0.17-0.43%)              | 1.2<br>(-1.3-3.4)      | 28<br>(-39-83)      |
| Libya    | 2000 | Female | 70 to 74 | 20%<br>(8.2-37%)               | 80%<br>(63-92%)          | 0.019<br>(0.005-0.048)                      | 0.12%<br>(-0.16-0.31%)               | 0.17%<br>(-0.18-0.43%)              | 1.5<br>(-1.7-3.9)      | 29<br>(-37-75)      |
| Libya    | 2000 | Female | 75 to 79 | 18%<br>(6.4-37%)               | 82%<br>(63-94%)          | 0.015<br>(0.0033-0.043)                     | 0.11%<br>(-0.21-0.27%)               | 0.14%<br>(-0.24-0.35%)              | 1.3<br>(-2.4-3.3)      | 20<br>(-37-49)      |
| Libya    | 2000 | Female | 80 to 84 | 16%<br>(5.5-36%)               | 84%<br>(64-94%)          | 0.014<br>(0.0029-0.039)                     | 0.091%<br>(-0.18-0.23%)              | 0.11%<br>(-0.23-0.29%)              | 0.78<br>(-1.6-2.1)     | 8.6<br>(-17-22)     |
| Libya    | 2000 | Female | 85 to 89 | 17%<br>(5.7-38%)               | 83%<br>(62-94%)          | 0.014<br>(0.003-0.041)                      | 0.058%<br>(-0.21-0.18%)              | 0.067%<br>(-0.25-0.22%)             | 0.36<br>(-1.3-1.2)     | 2.9<br>(-10-9.4)    |
| Libya    | 2000 | Female | 90 to 94 | 20%<br>(6.5-42%)               | 80%<br>(58-94%)          | 0.016<br>(0.0035-0.046)                     | 0.035%<br>(-0.23-0.16%)              | 0.033%<br>(-0.29-0.18%)             | 0.095<br>(-0.85-0.54)  | 0.64<br>(-4.3-2.9)  |

| Location | Year | Sex    | Age      | Prevalence of current drinkers | Prevalence of abstainers | Population average of standard drinks daily | Percent of total attributable deaths | Percent of total attributable DALYs | Attributable deaths    | Attributable DALYs   |
|----------|------|--------|----------|--------------------------------|--------------------------|---------------------------------------------|--------------------------------------|-------------------------------------|------------------------|----------------------|
| Libya    | 2000 | Female | 95 plus  | 24%<br>(7.8-48%)               | 76%<br>(52-92%)          | 0.019<br>(0.0036-0.054)                     | 0.02%<br>(-0.31-0.16%)               | 0.005%<br>(-0.39-0.18%)             | 0.005<br>(-0.41-0.18)  | 0.085<br>(-1.3-0.67) |
| Libya    | 2000 | Male   | All Ages | 9%<br>(6-13%)                  | 91%<br>(87-94%)          | 0.014<br>(0.012-0.016)                      | 0.44%<br>(0.35-0.54%)                | 0.32%<br>(0.23-0.42%)               | 36<br>(26-48)          | 3200<br>(2400-4100)  |
| Libya    | 2000 | Male   | 15 to 19 | 6.5%<br>(2.7-13%)              | 93%<br>(87-97%)          | 0.0056<br>(0.0018-0.012)                    | 0.47%<br>(0.28-0.71%)                | 0.14%<br>(0.072-0.27%)              | 0.37<br>(0.19-0.72)    | 200<br>(110-320)     |
| Libya    | 2000 | Male   | 20 to 24 | 10%<br>(3.9-20%)               | 90%<br>(80-96%)          | 0.013<br>(0.0045-0.024)                     | 0.94%<br>(0.6-1.4%)                  | 0.23%<br>(0.11-0.43%)               | 0.86<br>(0.4-1.6)      | 470<br>(280-730)     |
| Libya    | 2000 | Male   | 25 to 29 | 13%<br>(4.9-24%)               | 87%<br>(76-95%)          | 0.02<br>(0.0077-0.034)                      | 0.98%<br>(0.69-1.4%)                 | 0.37%<br>(0.18-0.6%)                | 1.4<br>(0.7-2.4)       | 470<br>(320-710)     |
| Libya    | 2000 | Male   | 30 to 34 | 14%<br>(5.2-28%)               | 86%<br>(72-95%)          | 0.025<br>(0.011-0.043)                      | 0.9%<br>(0.62-1.2%)                  | 0.47%<br>(0.26-0.74%)               | 1.7<br>(0.95-2.8)      | 390<br>(260-560)     |
| Libya    | 2000 | Male   | 35 to 39 | 16%<br>(6-29%)                 | 84%<br>(71-94%)          | 0.029<br>(0.012-0.053)                      | 0.89%<br>(0.66-1.2%)                 | 0.67%<br>(0.4-1%)                   | 2.5<br>(1.4-3.8)       | 340<br>(240-470)     |
| Libya    | 2000 | Male   | 40 to 44 | 16%<br>(7.2-28%)               | 84%<br>(72-93%)          | 0.031<br>(0.013-0.059)                      | 0.8%<br>(0.57-1.1%)                  | 0.71%<br>(0.45-1.1%)                | 3<br>(1.8-4.5)         | 310<br>(210-420)     |
| Libya    | 2000 | Male   | 45 to 49 | 16%<br>(6.2-29%)               | 84%<br>(71-94%)          | 0.032<br>(0.011-0.063)                      | 0.75%<br>(0.56-1%)                   | 0.79%<br>(0.5-1.2%)                 | 3.9<br>(2.5-6.1)       | 280<br>(200-380)     |
| Libya    | 2000 | Male   | 50 to 54 | 15%<br>(6.4-29%)               | 85%<br>(71-94%)          | 0.032<br>(0.011-0.066)                      | 0.6%<br>(0.42-0.81%)                 | 0.67%<br>(0.41-0.98%)               | 3.6<br>(2.2-5.2)       | 200<br>(140-270)     |
| Libya    | 2000 | Male   | 55 to 59 | 14%<br>(6.2-27%)               | 86%<br>(73-94%)          | 0.03<br>(0.01-0.065)                        | 0.47%<br>(0.3-0.65%)                 | 0.53%<br>(0.29-0.8%)                | 3.4<br>(1.9-5.3)       | 150<br>(96-210)      |
| Libya    | 2000 | Male   | 60 to 64 | 14%<br>(5.9-26%)               | 86%<br>(74-94%)          | 0.027<br>(0.008-0.062)                      | 0.36%<br>(0.2-0.51%)                 | 0.41%<br>(0.19-0.64%)               | 3.2<br>(1.5-5.1)       | 110<br>(59-160)      |
| Libya    | 2000 | Male   | 65 to 69 | 13%<br>(5.6-24%)               | 87%<br>(76-94%)          | 0.022<br>(0.0072-0.047)                     | 0.33%<br>(0.18-0.48%)                | 0.4%<br>(0.2-0.62%)                 | 3.6<br>(1.7-5.7)       | 93<br>(52-140)       |
| Libya    | 2000 | Male   | 70 to 74 | 12%<br>(5.3-21%)               | 88%<br>(79-95%)          | 0.016<br>(0.0049-0.038)                     | 0.29%<br>(0.16-0.43%)                | 0.35%<br>(0.18-0.55%)               | 3.5<br>(1.7-5.5)       | 70<br>(38-110)       |
| Libya    | 2000 | Male   | 75 to 79 | 10%<br>(4.3-20%)               | 90%<br>(80-96%)          | 0.012<br>(0.0031-0.032)                     | 0.22%<br>(0.11-0.32%)                | 0.26%<br>(0.13-0.39%)               | 2.5<br>(1.1-3.7)       | 39<br>(20-56)        |
| Libya    | 2000 | Male   | 80 to 84 | 9.1%<br>(3.6-18%)              | 91%<br>(82-96%)          | 0.01<br>(0.0028-0.025)                      | 0.2%<br>(0.11-0.3%)                  | 0.23%<br>(0.12-0.37%)               | 1.5<br>(0.74-2.3)      | 17<br>(9-25)         |
| Libya    | 2000 | Male   | 85 to 89 | 9%<br>(3.6-18%)                | 91%<br>(82-96%)          | 0.0096<br>(0.0027-0.023)                    | 0.16%<br>(0.076-0.24%)               | 0.18%<br>(0.073-0.27%)              | 0.83<br>(0.33-1.3)     | 6.8<br>(3.2-9.9)     |
| Libya    | 2000 | Male   | 90 to 94 | 10%<br>(4-21%)                 | 90%<br>(79-96%)          | 0.01<br>(0.0028-0.026)                      | 0.13%<br>(0.047-0.2%)                | 0.13%<br>(0.027-0.22%)              | 0.32<br>(0.065-0.53)   | 1.9<br>(0.68-2.9)    |
| Libya    | 2000 | Male   | 95 plus  | 13%<br>(4.7-27%)               | 87%<br>(73-95%)          | 0.012<br>(0.0024-0.033)                     | 0.14%<br>(0.03-0.22%)                | 0.12%<br>(-0.017-0.21%)             | 0.085<br>(-0.012-0.15) | 0.42<br>(0.092-0.66) |
| Libya    | 2005 | Female | All Ages | 12%<br>(6.7-18%)               | 88%<br>(82-93%)          | 0.017<br>(0.013-0.02)                       | 0.24%<br>(0.15-0.33%)                | 0.086%<br>(-0.11-0.24%)             | 8.1<br>(-11-22)        | 1500<br>(910-2200)   |
| Libya    | 2005 | Female | 15 to 19 | 9.2%<br>(3.1-20%)              | 91%<br>(80-97%)          | 0.011<br>(0.0031-0.026)                     | 0.33%<br>(0.19-0.52%)                | 0.17%<br>(0.091-0.3%)               | 0.23<br>(0.12-0.42)    | 120<br>(64-200)      |
| Libya    | 2005 | Female | 20 to 24 | 12%<br>(3.6-26%)               | 88%<br>(74-96%)          | 0.018<br>(0.0056-0.037)                     | 0.68%<br>(0.42-1%)                   | 0.21%<br>(0.11-0.38%)               | 0.34<br>(0.17-0.6)     | 280<br>(170-440)     |

| Location | Year | Sex    | Age      | Prevalence of current drinkers | Prevalence of abstainers | Population average of standard drinks daily | Percent of total attributable deaths | Percent of total attributable DALYs | Attributable deaths   | Attributable DALYs   |
|----------|------|--------|----------|--------------------------------|--------------------------|---------------------------------------------|--------------------------------------|-------------------------------------|-----------------------|----------------------|
| Libya    | 2005 | Female | 25 to 29 | 13%<br>(3.7-29%)               | 87%<br>(71-96%)          | 0.021<br>(0.007-0.041)                      | 0.73%<br>(0.5-1%)                    | 0.34%<br>(0.17-0.6%)                | 0.62<br>(0.29-1.1)    | 320<br>(200-470)     |
| Libya    | 2005 | Female | 30 to 34 | 15%<br>(3.9-31%)               | 85%<br>(69-96%)          | 0.025<br>(0.0088-0.045)                     | 0.64%<br>(0.43-0.9%)                 | 0.36%<br>(0.2-0.6%)                 | 0.77<br>(0.42-1.3)    | 280<br>(180-420)     |
| Libya    | 2005 | Female | 35 to 39 | 17%<br>(4.6-32%)               | 83%<br>(68-95%)          | 0.029<br>(0.011-0.052)                      | 0.47%<br>(0.32-0.64%)                | 0.29%<br>(0.16-0.44%)               | 0.71<br>(0.36-1.1)    | 190<br>(120-270)     |
| Libya    | 2005 | Female | 40 to 44 | 17%<br>(6.2-32%)               | 83%<br>(68-94%)          | 0.033<br>(0.014-0.061)                      | 0.35%<br>(0.19-0.52%)                | 0.29%<br>(0.12-0.44%)               | 0.78<br>(0.32-1.2)    | 120<br>(66-190)      |
| Libya    | 2005 | Female | 45 to 49 | 18%<br>(6.3-33%)               | 82%<br>(67-94%)          | 0.036<br>(0.012-0.072)                      | 0.23%<br>(0.059-0.36%)               | 0.2%<br>(-0.013-0.37%)              | 0.64<br>(-0.045-1.2)  | 73<br>(19-120)       |
| Libya    | 2005 | Female | 50 to 54 | 19%<br>(7.4-36%)               | 81%<br>(64-93%)          | 0.037<br>(0.012-0.076)                      | 0.17%<br>(-0.055-0.33%)              | 0.2%<br>(-0.079-0.42%)              | 0.81<br>(-0.27-1.7)   | 52<br>(-16-100)      |
| Libya    | 2005 | Female | 55 to 59 | 20%<br>(7.8-38%)               | 80%<br>(62-92%)          | 0.038<br>(0.011-0.081)                      | 0.097%<br>(-0.18-0.29%)              | 0.14%<br>(-0.24-0.41%)              | 0.64<br>(-1.1-1.9)    | 26<br>(-52-79)       |
| Libya    | 2005 | Female | 60 to 64 | 21%<br>(8-40%)                 | 79%<br>(60-92%)          | 0.037<br>(0.0097-0.086)                     | 0.045%<br>(-0.33-0.3%)               | 0.081%<br>(-0.38-0.4%)              | 0.51<br>(-2.6-2.6)    | 13<br>(-99-87)       |
| Libya    | 2005 | Female | 65 to 69 | 22%<br>(8.5-39%)               | 78%<br>(61-91%)          | 0.032<br>(0.0086-0.068)                     | 0.031%<br>(-0.28-0.28%)              | 0.069%<br>(-0.33-0.39%)             | 0.56<br>(-2.8-3.2)    | 8.9<br>(-84-80)      |
| Libya    | 2005 | Female | 70 to 74 | 20%<br>(7.8-37%)               | 80%<br>(63-92%)          | 0.026<br>(0.0065-0.066)                     | 0.048%<br>(-0.28-0.28%)              | 0.084%<br>(-0.33-0.38%)             | 0.82<br>(-3.2-3.7)    | 13<br>(-70-73)       |
| Libya    | 2005 | Female | 75 to 79 | 18%<br>(6.8-37%)               | 82%<br>(63-93%)          | 0.021<br>(0.0046-0.058)                     | 0.041%<br>(-0.34-0.25%)              | 0.062%<br>(-0.42-0.32%)             | 0.65<br>(-4.3-3.6)    | 8.5<br>(-70-53)      |
| Libya    | 2005 | Female | 80 to 84 | 17%<br>(5.6-36%)               | 83%<br>(64-94%)          | 0.019<br>(0.0041-0.052)                     | 0.028%<br>(-0.32-0.2%)               | 0.039%<br>(-0.37-0.25%)             | 0.33<br>(-3-2.2)      | 3.3<br>(-35-24)      |
| Libya    | 2005 | Female | 85 to 89 | 17%<br>(5.9-38%)               | 83%<br>(62-94%)          | 0.019<br>(0.004-0.057)                      | -0.0026%<br>(-0.34-0.16%)            | -0.0051%<br>(-0.41-0.2%)            | -0.035<br>(-2.8-1.4)  | -0.17<br>(-22-11)    |
| Libya    | 2005 | Female | 90 to 94 | 20%<br>(6.9-42%)               | 80%<br>(58-93%)          | 0.021<br>(0.0045-0.062)                     | -0.028%<br>(-0.38-0.14%)             | -0.043%<br>(-0.46-0.17%)            | -0.16<br>(-1.7-0.64)  | -0.65<br>(-8.9-3.5)  |
| Libya    | 2005 | Female | 95 plus  | 24%<br>(7.6-48%)               | 76%<br>(52-92%)          | 0.025<br>(0.0047-0.071)                     | -0.049%<br>(-0.47-0.15%)             | -0.08%<br>(-0.6-0.16%)              | -0.11<br>(-0.79-0.22) | -0.27<br>(-2.6-0.84) |
| Libya    | 2005 | Male   | All Ages | 9.4%<br>(6.2-13%)              | 91%<br>(87-94%)          | 0.019<br>(0.016-0.022)                      | 0.49%<br>(0.38-0.6%)                 | 0.33%<br>(0.22-0.45%)               | 40<br>(26-55)         | 3600<br>(2700-4700)  |
| Libya    | 2005 | Male   | 15 to 19 | 6.5%<br>(2.7-13%)              | 93%<br>(87-97%)          | 0.0073<br>(0.0023-0.017)                    | 0.5%<br>(0.31-0.74%)                 | 0.18%<br>(0.083-0.35%)              | 0.46<br>(0.21-0.92)   | 210<br>(120-340)     |
| Libya    | 2005 | Male   | 20 to 24 | 10%<br>(3.9-20%)               | 90%<br>(80-96%)          | 0.016<br>(0.0059-0.033)                     | 1%<br>(0.65-1.5%)                    | 0.29%<br>(0.13-0.58%)               | 1.1<br>(0.49-2.1)     | 510<br>(310-780)     |
| Libya    | 2005 | Male   | 25 to 29 | 12%<br>(4.8-24%)               | 88%<br>(76-95%)          | 0.026<br>(0.01-0.046)                       | 1%<br>(0.72-1.4%)                    | 0.43%<br>(0.21-0.75%)               | 1.8<br>(0.87-3.2)     | 560<br>(370-810)     |
| Libya    | 2005 | Male   | 30 to 34 | 14%<br>(5-28%)                 | 86%<br>(72-95%)          | 0.033<br>(0.015-0.057)                      | 0.94%<br>(0.66-1.3%)                 | 0.53%<br>(0.27-0.86%)               | 2.3<br>(1.2-3.8)      | 500<br>(330-730)     |
| Libya    | 2005 | Male   | 35 to 39 | 16%<br>(5.9-29%)               | 84%<br>(71-94%)          | 0.039<br>(0.016-0.068)                      | 0.9%<br>(0.64-1.2%)                  | 0.71%<br>(0.41-1.1%)                | 3.1<br>(1.8-5)        | 430<br>(300-590)     |
| Libya    | 2005 | Male   | 40 to 44 | 16%<br>(7.2-28%)               | 84%<br>(72-93%)          | 0.041<br>(0.017-0.078)                      | 0.81%<br>(0.59-1.1%)                 | 0.73%<br>(0.44-1.1%)                | 3.3<br>(1.9-4.9)      | 340<br>(230-460)     |

| Location | Year | Sex    | Age      | Prevalence of current drinkers | Prevalence of abstainers | Population average of standard drinks daily | Percent of total attributable deaths | Percent of total attributable DALYs | Attributable deaths    | Attributable DALYs    |
|----------|------|--------|----------|--------------------------------|--------------------------|---------------------------------------------|--------------------------------------|-------------------------------------|------------------------|-----------------------|
| Libya    | 2005 | Male   | 45 to 49 | 16%<br>(6.3-29%)               | 84%<br>(71-94%)          | 0.042<br>(0.015-0.083)                      | 0.75%<br>(0.54-1%)                   | 0.79%<br>(0.48-1.2%)                | 4<br>(2.3-6)           | 290<br>(200-390)      |
| Libya    | 2005 | Male   | 50 to 54 | 15%<br>(6.4-29%)               | 85%<br>(71-94%)          | 0.042<br>(0.015-0.088)                      | 0.59%<br>(0.39-0.81%)                | 0.65%<br>(0.36-0.98%)               | 4<br>(2.1-6)           | 220<br>(140-310)      |
| Libya    | 2005 | Male   | 55 to 59 | 14%<br>(6.1-28%)               | 86%<br>(72-94%)          | 0.04<br>(0.013-0.086)                       | 0.45%<br>(0.25-0.64%)                | 0.5%<br>(0.21-0.78%)                | 3.3<br>(1.4-5.3)       | 150<br>(82-210)       |
| Libya    | 2005 | Male   | 60 to 64 | 14%<br>(5.7-27%)               | 86%<br>(73-94%)          | 0.036<br>(0.01-0.082)                       | 0.33%<br>(0.13-0.5%)                 | 0.37%<br>(0.11-0.62%)               | 3.2<br>(0.91-5.3)      | 110<br>(43-170)       |
| Libya    | 2005 | Male   | 65 to 69 | 13%<br>(5.8-24%)               | 87%<br>(76-94%)          | 0.029<br>(0.0094-0.063)                     | 0.31%<br>(0.15-0.47%)                | 0.37%<br>(0.15-0.58%)               | 3.5<br>(1.4-5.8)       | 94<br>(45-150)        |
| Libya    | 2005 | Male   | 70 to 74 | 12%<br>(5.4-21%)               | 88%<br>(79-95%)          | 0.022<br>(0.0066-0.053)                     | 0.27%<br>(0.13-0.42%)                | 0.32%<br>(0.12-0.52%)               | 3.6<br>(1.4-5.8)       | 73<br>(34-110)        |
| Libya    | 2005 | Male   | 75 to 79 | 10%<br>(4.3-20%)               | 90%<br>(80-96%)          | 0.017<br>(0.0043-0.042)                     | 0.21%<br>(0.088-0.31%)               | 0.24%<br>(0.091-0.39%)              | 2.7<br>(0.93-4.3)      | 42<br>(19-64)         |
| Libya    | 2005 | Male   | 80 to 84 | 9.1%<br>(3.5-18%)              | 91%<br>(82-96%)          | 0.014<br>(0.0035-0.033)                     | 0.19%<br>(0.084-0.3%)                | 0.22%<br>(0.085-0.36%)              | 1.7<br>(0.67-2.8)      | 20<br>(8.7-31)        |
| Libya    | 2005 | Male   | 85 to 89 | 8.9%<br>(3.7-17%)              | 91%<br>(83-96%)          | 0.013<br>(0.0036-0.03)                      | 0.15%<br>(0.063-0.23%)               | 0.17%<br>(0.056-0.27%)              | 1<br>(0.34-1.6)        | 8.4<br>(3.5-13)       |
| Libya    | 2005 | Male   | 90 to 94 | 10%<br>(4.2-20%)               | 90%<br>(80-96%)          | 0.013<br>(0.0037-0.034)                     | 0.12%<br>(0.02-0.2%)                 | 0.11%<br>(-0.0064-0.21%)            | 0.34<br>(-0.019-0.64)  | 2.2<br>(0.37-3.6)     |
| Libya    | 2005 | Male   | 95 plus  | 13%<br>(4.7-27%)               | 87%<br>(73-95%)          | 0.016<br>(0.0032-0.044)                     | 0.12%<br>(-0.0041-0.22%)             | 0.094%<br>(-0.069-0.21%)            | 0.086<br>(-0.065-0.19) | 0.47<br>(-0.015-0.83) |
| Libya    | 2010 | Female | All Ages | 12%<br>(7.5-18%)               | 88%<br>(82-93%)          | 0.019<br>(0.015-0.023)                      | 0.26%<br>(0.16-0.35%)                | 0.088%<br>(-0.14-0.25%)             | 8.7<br>(-13-24)        | 1700<br>(980-2400)    |
| Libya    | 2010 | Female | 15 to 19 | 9.2%<br>(3-20%)                | 91%<br>(80-97%)          | 0.012<br>(0.0033-0.029)                     | 0.34%<br>(0.19-0.53%)                | 0.18%<br>(0.099-0.32%)              | 0.2<br>(0.11-0.35)     | 110<br>(57-180)       |
| Libya    | 2010 | Female | 20 to 24 | 12%<br>(3.3-26%)               | 88%<br>(74-97%)          | 0.019<br>(0.0056-0.041)                     | 0.7%<br>(0.44-1%)                    | 0.22%<br>(0.12-0.4%)                | 0.33<br>(0.17-0.61)    | 280<br>(170-460)      |
| Libya    | 2010 | Female | 25 to 29 | 13%<br>(3.7-28%)               | 87%<br>(72-96%)          | 0.023<br>(0.0072-0.046)                     | 0.74%<br>(0.5-1%)                    | 0.34%<br>(0.17-0.6%)                | 0.58<br>(0.28-1.1)     | 330<br>(200-500)      |
| Libya    | 2010 | Female | 30 to 34 | 15%<br>(4.1-31%)               | 85%<br>(69-96%)          | 0.026<br>(0.0092-0.047)                     | 0.65%<br>(0.43-0.92%)                | 0.37%<br>(0.2-0.62%)                | 0.8<br>(0.44-1.4)      | 320<br>(200-470)      |
| Libya    | 2010 | Female | 35 to 39 | 16%<br>(4.4-32%)               | 84%<br>(68-96%)          | 0.031<br>(0.011-0.055)                      | 0.48%<br>(0.33-0.66%)                | 0.31%<br>(0.17-0.47%)               | 0.82<br>(0.46-1.3)     | 240<br>(150-340)      |
| Libya    | 2010 | Female | 40 to 44 | 17%<br>(6.4-33%)               | 83%<br>(67-94%)          | 0.034<br>(0.014-0.063)                      | 0.35%<br>(0.2-0.52%)                 | 0.3%<br>(0.15-0.47%)                | 0.97<br>(0.47-1.5)     | 160<br>(87-250)       |
| Libya    | 2010 | Female | 45 to 49 | 18%<br>(6.2-33%)               | 82%<br>(67-94%)          | 0.037<br>(0.013-0.074)                      | 0.24%<br>(0.083-0.38%)               | 0.21%<br>(0.0076-0.4%)              | 0.78<br>(0.023-1.5)    | 92<br>(31-150)        |
| Libya    | 2010 | Female | 50 to 54 | 19%<br>(7.1-36%)               | 81%<br>(64-93%)          | 0.039<br>(0.012-0.08)                       | 0.17%<br>(-0.045-0.32%)              | 0.21%<br>(-0.057-0.43%)             | 0.91<br>(-0.26-1.9)    | 59<br>(-15-120)       |
| Libya    | 2010 | Female | 55 to 59 | 19%<br>(7.4-38%)               | 81%<br>(62-93%)          | 0.039<br>(0.011-0.085)                      | 0.096%<br>(-0.2-0.29%)               | 0.14%<br>(-0.22-0.43%)              | 0.76<br>(-1.3-2.3)     | 31<br>(-66-97)        |
| Libya    | 2010 | Female | 60 to 64 | 21%<br>(7.9-41%)               | 79%<br>(59-92%)          | 0.038<br>(0.0098-0.091)                     | 0.043%<br>(-0.37-0.29%)              | 0.084%<br>(-0.43-0.41%)             | 0.53<br>(-2.8-2.7)     | 13<br>(-110-86)       |

| Location | Year | Sex    | Age      | Prevalence of current drinkers | Prevalence of abstainers | Population average of standard drinks daily | Percent of total attributable deaths | Percent of total attributable DALYs | Attributable deaths  | Attributable DALYs  |
|----------|------|--------|----------|--------------------------------|--------------------------|---------------------------------------------|--------------------------------------|-------------------------------------|----------------------|---------------------|
| Libya    | 2010 | Female | 65 to 69 | 21%<br>(8.6-39%)               | 79%<br>(61-91%)          | 0.033<br>(0.0088-0.075)                     | 0.027%<br>(-0.3-0.27%)               | 0.067%<br>(-0.34-0.4%)              | 0.56<br>(-3-3.4)     | 8.3<br>(-94-85)     |
| Libya    | 2010 | Female | 70 to 74 | 20%<br>(8-37%)                 | 80%<br>(63-92%)          | 0.027<br>(0.0069-0.07)                      | 0.045%<br>(-0.29-0.26%)              | 0.083%<br>(-0.34-0.37%)             | 0.88<br>(-3.9-3.9)   | 13<br>(-85-76)      |
| Libya    | 2010 | Female | 75 to 79 | 18%<br>(6.8-34%)               | 82%<br>(66-93%)          | 0.021<br>(0.0047-0.058)                     | 0.036%<br>(-0.33-0.23%)              | 0.058%<br>(-0.41-0.31%)             | 0.67<br>(-4.7-3.6)   | 8.5<br>(-78-55)     |
| Libya    | 2010 | Female | 80 to 84 | 16%<br>(5.5-35%)               | 84%<br>(65-95%)          | 0.019<br>(0.0042-0.055)                     | 0.026%<br>(-0.3-0.2%)                | 0.036%<br>(-0.36-0.27%)             | 0.35<br>(-3.5-2.6)   | 3.5<br>(-40-28)     |
| Libya    | 2010 | Female | 85 to 89 | 17%<br>(5.3-37%)               | 83%<br>(63-95%)          | 0.019<br>(0.004-0.061)                      | -0.007%<br>(-0.35-0.16%)             | -0.011%<br>(-0.41-0.2%)             | -0.092<br>(-3.6-1.8) | -0.58<br>(-28-14)   |
| Libya    | 2010 | Female | 90 to 94 | 19%<br>(6.4-43%)               | 81%<br>(57-94%)          | 0.022<br>(0.0042-0.067)                     | -0.036%<br>(-0.39-0.14%)             | -0.054%<br>(-0.49-0.16%)            | -0.27<br>(-2.4-0.81) | -1.1<br>(-12-4.5)   |
| Libya    | 2010 | Female | 95 plus  | 23%<br>(7-49%)                 | 77%<br>(51-93%)          | 0.026<br>(0.0045-0.077)                     | -0.058%<br>(-0.52-0.15%)             | -0.092%<br>(-0.67-0.16%)            | -0.16<br>(-1.2-0.28) | -0.42<br>(-3.8-1.1) |
| Libya    | 2010 | Male   | All Ages | 9.8%<br>(6.4-14%)              | 90%<br>(86-94%)          | 0.021<br>(0.017-0.026)                      | 0.54%<br>(0.42-0.67%)                | 0.36%<br>(0.22-0.49%)               | 44<br>(28-62)        | 3900<br>(2900-5200) |
| Libya    | 2010 | Male   | 15 to 19 | 6.5%<br>(2.7-13%)              | 94%<br>(87-97%)          | 0.0077<br>(0.0024-0.017)                    | 0.51%<br>(0.31-0.77%)                | 0.2%<br>(0.086-0.39%)               | 0.45<br>(0.2-0.89)   | 190<br>(110-300)    |
| Libya    | 2010 | Male   | 20 to 24 | 10%<br>(3.9-20%)               | 90%<br>(80-96%)          | 0.018<br>(0.0056-0.035)                     | 1%<br>(0.68-1.5%)                    | 0.32%<br>(0.14-0.62%)               | 1.1<br>(0.5-2.2)     | 520<br>(320-810)    |
| Libya    | 2010 | Male   | 25 to 29 | 13%<br>(4.8-24%)               | 87%<br>(76-95%)          | 0.028<br>(0.01-0.052)                       | 1.1%<br>(0.75-1.4%)                  | 0.46%<br>(0.21-0.85%)               | 1.8<br>(0.81-3.3)    | 570<br>(380-820)    |
| Libya    | 2010 | Male   | 30 to 34 | 14%<br>(5.2-28%)               | 86%<br>(72-95%)          | 0.035<br>(0.016-0.061)                      | 0.97%<br>(0.67-1.3%)                 | 0.55%<br>(0.29-0.93%)               | 2.4<br>(1.3-4.2)     | 560<br>(370-790)    |
| Libya    | 2010 | Male   | 35 to 39 | 16%<br>(5.9-29%)               | 84%<br>(71-94%)          | 0.04<br>(0.016-0.07)                        | 0.93%<br>(0.68-1.2%)                 | 0.73%<br>(0.42-1.1%)                | 3.6<br>(2-5.9)       | 530<br>(370-720)    |
| Libya    | 2010 | Male   | 40 to 44 | 16%<br>(7.2-29%)               | 84%<br>(71-93%)          | 0.042<br>(0.018-0.077)                      | 0.83%<br>(0.58-1.1%)                 | 0.74%<br>(0.45-1.1%)                | 4<br>(2.3-6.1)       | 430<br>(290-580)    |
| Libya    | 2010 | Male   | 45 to 49 | 16%<br>(6.3-29%)               | 84%<br>(71-94%)          | 0.044<br>(0.016-0.089)                      | 0.76%<br>(0.54-1%)                   | 0.81%<br>(0.5-1.2%)                 | 4.6<br>(2.7-6.8)     | 330<br>(230-440)    |
| Libya    | 2010 | Male   | 50 to 54 | 15%<br>(6.2-29%)               | 85%<br>(71-94%)          | 0.044<br>(0.015-0.09)                       | 0.6%<br>(0.39-0.83%)                 | 0.67%<br>(0.37-1%)                  | 4.4<br>(2.2-6.6)     | 250<br>(160-340)    |
| Libya    | 2010 | Male   | 55 to 59 | 14%<br>(6.1-27%)               | 86%<br>(73-94%)          | 0.042<br>(0.014-0.087)                      | 0.45%<br>(0.26-0.65%)                | 0.5%<br>(0.22-0.79%)                | 3.9<br>(1.7-6.2)     | 170<br>(100-250)    |
| Libya    | 2010 | Male   | 60 to 64 | 14%<br>(5.7-26%)               | 86%<br>(74-94%)          | 0.037<br>(0.011-0.084)                      | 0.33%<br>(0.12-0.51%)                | 0.37%<br>(0.094-0.61%)              | 3.2<br>(0.87-5.4)    | 110<br>(41-180)     |
| Libya    | 2010 | Male   | 65 to 69 | 13%<br>(6-25%)                 | 87%<br>(75-94%)          | 0.031<br>(0.01-0.064)                       | 0.3%<br>(0.14-0.47%)                 | 0.36%<br>(0.14-0.61%)               | 3.9<br>(1.5-6.5)     | 100<br>(48-170)     |
| Libya    | 2010 | Male   | 70 to 74 | 12%<br>(5.4-22%)               | 88%<br>(78-95%)          | 0.023<br>(0.007-0.056)                      | 0.26%<br>(0.12-0.4%)                 | 0.31%<br>(0.12-0.51%)               | 3.9<br>(1.5-6.4)     | 79<br>(34-130)      |
| Libya    | 2010 | Male   | 75 to 79 | 10%<br>(4.5-20%)               | 90%<br>(80-96%)          | 0.017<br>(0.0045-0.045)                     | 0.21%<br>(0.08-0.33%)                | 0.25%<br>(0.078-0.4%)               | 3.2<br>(0.93-5.3)    | 49<br>(20-78)       |
| Libya    | 2010 | Male   | 80 to 84 | 9.3%<br>(3.6-19%)              | 91%<br>(81-96%)          | 0.015<br>(0.0038-0.036)                     | 0.19%<br>(0.082-0.3%)                | 0.22%<br>(0.085-0.37%)              | 2.1<br>(0.8-3.6)     | 24<br>(9.9-39)      |

| Location | Year | Sex    | Age      | Prevalence of current drinkers | Prevalence of abstainers | Population average of standard drinks daily | Percent of total attributable deaths | Percent of total attributable DALYs | Attributable deaths   | Attributable DALYs   |
|----------|------|--------|----------|--------------------------------|--------------------------|---------------------------------------------|--------------------------------------|-------------------------------------|-----------------------|----------------------|
| Libya    | 2010 | Male   | 85 to 89 | 9.2%<br>(3.8-18%)              | 91%<br>(82-96%)          | 0.014<br>(0.0039-0.034)                     | 0.16%<br>(0.057-0.24%)               | 0.17%<br>(0.046-0.29%)              | 1.3<br>(0.35-2.3)     | 11<br>(4-18)         |
| Libya    | 2010 | Male   | 90 to 94 | 10%<br>(4.3-21%)               | 90%<br>(79-96%)          | 0.015<br>(0.004-0.036)                      | 0.12%<br>(0.016-0.21%)               | 0.12%<br>(-0.01-0.23%)              | 0.47<br>(-0.041-0.94) | 3<br>(0.4-5.3)       |
| Libya    | 2010 | Male   | 95 plus  | 13%<br>(4.6-27%)               | 87%<br>(73-95%)          | 0.017<br>(0.0034-0.047)                     | 0.13%<br>(-0.016-0.23%)              | 0.097%<br>(-0.093-0.21%)            | 0.11<br>(-0.11-0.25)  | 0.61<br>(-0.074-1.1) |
| Libya    | 2016 | Female | All Ages | 13%<br>(7.6-19%)               | 87%<br>(81-92%)          | 0.022<br>(0.013-0.033)                      | 0.24%<br>(0.13-0.35%)                | 0.076%<br>(-0.19-0.25%)             | 8.8<br>(-21-30)       | 1700<br>(840-2500)   |
| Libya    | 2016 | Female | 15 to 19 | 9.3%<br>(3.1-20%)              | 91%<br>(80-97%)          | 0.013<br>(0.0035-0.033)                     | 0.31%<br>(0.19-0.5%)                 | 0.14%<br>(0.066-0.27%)              | 0.2<br>(0.1-0.39)     | 100<br>(57-170)      |
| Libya    | 2016 | Female | 20 to 24 | 12%<br>(3.7-25%)               | 88%<br>(75-96%)          | 0.021<br>(0.0055-0.051)                     | 0.64%<br>(0.4-0.92%)                 | 0.18%<br>(0.083-0.33%)              | 0.28<br>(0.14-0.55)   | 220<br>(130-350)     |
| Libya    | 2016 | Female | 25 to 29 | 14%<br>(3.9-29%)               | 86%<br>(71-96%)          | 0.025<br>(0.0067-0.059)                     | 0.71%<br>(0.49-0.99%)                | 0.29%<br>(0.13-0.57%)               | 0.54<br>(0.26-1.1)    | 300<br>(180-440)     |
| Libya    | 2016 | Female | 30 to 34 | 15%<br>(3.7-31%)               | 85%<br>(69-96%)          | 0.029<br>(0.0078-0.063)                     | 0.64%<br>(0.42-0.9%)                 | 0.33%<br>(0.17-0.57%)               | 0.78<br>(0.4-1.4)     | 300<br>(190-460)     |
| Libya    | 2016 | Female | 35 to 39 | 17%<br>(4.4-32%)               | 83%<br>(68-96%)          | 0.033<br>(0.01-0.065)                       | 0.47%<br>(0.31-0.65%)                | 0.29%<br>(0.15-0.45%)               | 0.92<br>(0.48-1.5)    | 250<br>(160-370)     |
| Libya    | 2016 | Female | 40 to 44 | 17%<br>(6.1-33%)               | 83%<br>(67-94%)          | 0.037<br>(0.014-0.073)                      | 0.35%<br>(0.21-0.5%)                 | 0.29%<br>(0.12-0.47%)               | 1.2<br>(0.48-2)       | 190<br>(110-290)     |
| Libya    | 2016 | Female | 45 to 49 | 18%<br>(6.2-34%)               | 82%<br>(66-94%)          | 0.04<br>(0.014-0.08)                        | 0.24%<br>(0.059-0.38%)               | 0.21%<br>(-0.014-0.39%)             | 1.1<br>(-0.073-2.2)   | 130<br>(33-210)      |
| Libya    | 2016 | Female | 50 to 54 | 19%<br>(7.3-36%)               | 81%<br>(64-93%)          | 0.041<br>(0.013-0.088)                      | 0.17%<br>(-0.051-0.34%)              | 0.2%<br>(-0.094-0.42%)              | 1.3<br>(-0.58-2.8)    | 84<br>(-26-170)      |
| Libya    | 2016 | Female | 55 to 59 | 20%<br>(7.8-38%)               | 80%<br>(62-92%)          | 0.042<br>(0.012-0.098)                      | 0.089%<br>(-0.26-0.29%)              | 0.13%<br>(-0.29-0.4%)               | 0.92<br>(-2.2-2.9)    | 38<br>(-110-120)     |
| Libya    | 2016 | Female | 60 to 64 | 21%<br>(8.4-40%)               | 79%<br>(60-92%)          | 0.041<br>(0.01-0.098)                       | 0.031%<br>(-0.39-0.29%)              | 0.07%<br>(-0.45-0.41%)              | 0.59<br>(-3.9-3.5)    | 12<br>(-160-110)     |
| Libya    | 2016 | Female | 65 to 69 | 21%<br>(9.1-39%)               | 79%<br>(61-91%)          | 0.036<br>(0.0099-0.088)                     | 0.015%<br>(-0.36-0.26%)              | 0.053%<br>(-0.42-0.37%)             | 0.49<br>(-4-3.4)      | 5<br>(-120-87)       |
| Libya    | 2016 | Female | 70 to 74 | 20%<br>(8.4-37%)               | 80%<br>(63-92%)          | 0.029<br>(0.0074-0.076)                     | 0.035%<br>(-0.35-0.27%)              | 0.071%<br>(-0.4-0.37%)              | 0.81<br>(-4.5-4.3)    | 11<br>(-110-84)      |
| Libya    | 2016 | Female | 75 to 79 | 18%<br>(6.7-37%)               | 82%<br>(63-93%)          | 0.024<br>(0.0047-0.068)                     | 0.023%<br>(-0.41-0.25%)              | 0.042%<br>(-0.47-0.33%)             | 0.56<br>(-6.2-4.4)    | 6.2<br>(-100-66)     |
| Libya    | 2016 | Female | 80 to 84 | 17%<br>(5.9-37%)               | 83%<br>(63-94%)          | 0.022<br>(0.0047-0.066)                     | 0.011%<br>(-0.39-0.2%)               | 0.018%<br>(-0.46-0.27%)             | 0.21<br>(-5.2-3.2)    | 1.8<br>(-62-34)      |
| Libya    | 2016 | Female | 85 to 89 | 17%<br>(5.9-39%)               | 83%<br>(61-94%)          | 0.022<br>(0.0049-0.07)                      | -0.022%<br>(-0.42-0.17%)             | -0.029%<br>(-0.51-0.2%)             | -0.33<br>(-5.7-2.3)   | -2.3<br>(-44-17)     |
| Libya    | 2016 | Female | 90 to 94 | 20%<br>(6.9-42%)               | 80%<br>(58-93%)          | 0.024<br>(0.0054-0.074)                     | -0.052%<br>(-0.42-0.15%)             | -0.073%<br>(-0.54-0.17%)            | -0.49<br>(-3.5-1.1)   | -2.2<br>(-19-6.3)    |
| Libya    | 2016 | Female | 95 plus  | 24%<br>(8.4-49%)               | 76%<br>(51-92%)          | 0.029<br>(0.0051-0.088)                     | -0.076%<br>(-0.58-0.15%)             | -0.12%<br>(-0.72-0.17%)             | -0.29<br>(-1.8-0.42)  | -0.79<br>(-6.2-1.6)  |
| Libya    | 2016 | Male   | All Ages | 10%<br>(7-14%)                 | 90%<br>(86-93%)          | 0.025<br>(0.015-0.036)                      | 0.5%<br>(0.38-0.62%)                 | 0.34%<br>(0.21-0.48%)               | 52<br>(32-76)         | 4000<br>(2900-5200)  |

| Location | Year | Sex    | Age      | Prevalence of current drinkers | Prevalence of abstainers | Population average of standard drinks daily | Percent of total attributable deaths | Percent of total attributable DALYs | Attributable deaths  | Attributable DALYs     |
|----------|------|--------|----------|--------------------------------|--------------------------|---------------------------------------------|--------------------------------------|-------------------------------------|----------------------|------------------------|
| Libya    | 2016 | Male   | 15 to 19 | 6.6%<br>(2.7-13%)              | 93%<br>(87-97%)          | 0.0085<br>(0.0022-0.02)                     | 0.41%<br>(0.24-0.63%)                | 0.14%<br>(0.055-0.31%)              | 0.48<br>(0.19-1.1)   | 180<br>(100-290)       |
| Libya    | 2016 | Male   | 20 to 24 | 10%<br>(3.9-20%)               | 90%<br>(80-96%)          | 0.019<br>(0.0056-0.045)                     | 0.76%<br>(0.47-1.2%)                 | 0.2%<br>(0.075-0.43%)               | 0.94<br>(0.39-2)     | 390<br>(250-620)       |
| Libya    | 2016 | Male   | 25 to 29 | 13%<br>(4.8-24%)               | 87%<br>(76-95%)          | 0.03<br>(0.0098-0.064)                      | 0.87%<br>(0.58-1.2%)                 | 0.31%<br>(0.13-0.62%)               | 1.5<br>(0.64-2.9)    | 460<br>(300-670)       |
| Libya    | 2016 | Male   | 30 to 34 | 14%<br>(5.2-29%)               | 86%<br>(71-95%)          | 0.038<br>(0.014-0.077)                      | 0.85%<br>(0.57-1.2%)                 | 0.41%<br>(0.21-0.73%)               | 2<br>(1.1-3.5)       | 460<br>(310-680)       |
| Libya    | 2016 | Male   | 35 to 39 | 16%<br>(6.2-30%)               | 84%<br>(70-94%)          | 0.043<br>(0.016-0.085)                      | 0.86%<br>(0.62-1.1%)                 | 0.61%<br>(0.33-0.97%)               | 3.6<br>(2-5.9)       | 520<br>(360-710)       |
| Libya    | 2016 | Male   | 40 to 44 | 16%<br>(7.4-29%)               | 84%<br>(71-93%)          | 0.046<br>(0.018-0.091)                      | 0.78%<br>(0.55-1.1%)                 | 0.65%<br>(0.37-1%)                  | 4.7<br>(2.6-7.6)     | 500<br>(330-690)       |
| Libya    | 2016 | Male   | 45 to 49 | 16%<br>(6.5-29%)               | 84%<br>(71-94%)          | 0.048<br>(0.017-0.095)                      | 0.72%<br>(0.5-0.97%)                 | 0.74%<br>(0.42-1.1%)                | 6.4<br>(3.7-10)      | 460<br>(310-630)       |
| Libya    | 2016 | Male   | 50 to 54 | 15%<br>(6.5-29%)               | 85%<br>(71-94%)          | 0.047<br>(0.016-0.099)                      | 0.58%<br>(0.35-0.8%)                 | 0.63%<br>(0.31-0.96%)               | 5.9<br>(2.8-9.2)     | 320<br>(200-460)       |
| Libya    | 2016 | Male   | 55 to 59 | 14%<br>(6.3-28%)               | 86%<br>(72-94%)          | 0.045<br>(0.014-0.097)                      | 0.44%<br>(0.23-0.65%)                | 0.48%<br>(0.19-0.79%)               | 5.1<br>(2-8.5)       | 220<br>(110-330)       |
| Libya    | 2016 | Male   | 60 to 64 | 14%<br>(5.8-27%)               | 86%<br>(73-94%)          | 0.04<br>(0.012-0.094)                       | 0.32%<br>(0.086-0.51%)               | 0.35%<br>(0.056-0.62%)              | 4.5<br>(0.66-7.8)    | 150<br>(42-250)        |
| Libya    | 2016 | Male   | 65 to 69 | 13%<br>(5.8-24%)               | 87%<br>(76-94%)          | 0.033<br>(0.0096-0.073)                     | 0.29%<br>(0.095-0.46%)               | 0.33%<br>(0.096-0.56%)              | 4.4<br>(1.2-7.8)     | 120<br>(39-190)        |
| Libya    | 2016 | Male   | 70 to 74 | 12%<br>(5.3-22%)               | 88%<br>(78-95%)          | 0.025<br>(0.0068-0.061)                     | 0.25%<br>(0.087-0.4%)                | 0.3%<br>(0.087-0.49%)               | 4.5<br>(1.3-7.6)     | 91<br>(30-150)         |
| Libya    | 2016 | Male   | 75 to 79 | 10%<br>(4.2-20%)               | 90%<br>(80-96%)          | 0.019<br>(0.0045-0.05)                      | 0.2%<br>(0.046-0.34%)                | 0.12%<br>(0.036-0.42%)              | 3.7<br>(0.56-6.6)    | 57<br>(13-96)          |
| Libya    | 2016 | Male   | 80 to 84 | 9.3%<br>(3.5-19%)              | 91%<br>(81-97%)          | 0.016<br>(0.004-0.04)                       | 0.19%<br>(0.058-0.31%)               | 0.21%<br>(0.054-0.37%)              | 2.5<br>(0.6-4.3)     | 28<br>(8-46)           |
| Libya    | 2016 | Male   | 85 to 89 | 9%<br>(3.6-18%)                | 91%<br>(82-96%)          | 0.014<br>(0.0039-0.038)                     | 0.15%<br>(0.052-0.26%)               | 0.16%<br>(0.034-0.3%)               | 1.6<br>(0.33-2.9)    | 13<br>(4.3-23)         |
| Libya    | 2016 | Male   | 90 to 94 | 10%<br>(4.1-21%)               | 90%<br>(79-96%)          | 0.015<br>(0.0041-0.04)                      | 0.12%<br>(-0.00044-0.22%)            | 0.12%<br>(-0.027-0.24%)             | 0.61<br>(-0.15-1.3)  | 3.9<br>(-0.014-7)      |
| Libya    | 2016 | Male   | 95 plus  | 13%<br>(4.5-27%)               | 87%<br>(73-95%)          | 0.018<br>(0.0035-0.052)                     | 0.13%<br>(-0.036-0.24%)              | 0.095%<br>(-0.11-0.23%)             | 0.16<br>(-0.18-0.39) | 0.85<br>(-0.25-1.6)    |
| Morocco  | 1990 | Female | All Ages | 1%<br>(0.73-1.3%)              | 99%<br>(99-99%)          | 0.14<br>(0.1-0.18)                          | 0.57%<br>(0.37-1%)                   | 1.1%<br>(0.62-2.1%)                 | 830<br>(470-1700)    | 29000<br>(18000-50000) |
| Morocco  | 1990 | Female | 15 to 19 | 1.1%<br>(0.49-1.8%)            | 99%<br>(98-100%)         | 0.13<br>(0.051-0.26)                        | 0.71%<br>(0.36-1.3%)                 | 1.3%<br>(0.54-2.8%)                 | 16<br>(6.7-35)       | 1500<br>(770-3000)     |
| Morocco  | 1990 | Female | 20 to 24 | 1.4%<br>(0.61-2.3%)            | 99%<br>(98-99%)          | 0.22<br>(0.089-0.4)                         | 1.2%<br>(0.61-2.1%)                  | 1.9%<br>(0.79-4.1%)                 | 31<br>(12-64)        | 2800<br>(1400-5000)    |
| Morocco  | 1990 | Female | 25 to 29 | 1.4%<br>(0.69-2.4%)            | 99%<br>(98-99%)          | 0.23<br>(0.11-0.41)                         | 1.3%<br>(0.67-2.4%)                  | 2.1%<br>(0.85-4.8%)                 | 35<br>(14-77)        | 2900<br>(1400-5600)    |
| Morocco  | 1990 | Female | 30 to 34 | 1.4%<br>(0.63-2.5%)            | 99%<br>(98-99%)          | 0.24<br>(0.11-0.42)                         | 1.2%<br>(0.63-2.4%)                  | 2.1%<br>(0.82-4.8%)                 | 35<br>(14-80)        | 2600<br>(1300-5100)    |

| Location | Year | Sex    | Age      | Prevalence of current drinkers | Prevalence of abstainers | Population average of standard drinks daily | Percent of total attributable deaths | Percent of total attributable DALYs | Attributable deaths | Attributable DALYs      |
|----------|------|--------|----------|--------------------------------|--------------------------|---------------------------------------------|--------------------------------------|-------------------------------------|---------------------|-------------------------|
| Morocco  | 1990 | Female | 35 to 39 | 1.4%<br>(0.68-2.4%)            | 99%<br>(98-99%)          | 0.25<br>(0.11-0.47)                         | 1.1%<br>(0.59-2.1%)                  | 1.9%<br>(0.85-4.1%)                 | 33<br>(14-70)       | 2100<br>(1100-3900)     |
| Morocco  | 1990 | Female | 40 to 44 | 1.4%<br>(0.7-2.5%)             | 99%<br>(98-99%)          | 0.27<br>(0.11-0.51)                         | 1.2%<br>(0.6-2.2%)                   | 2%<br>(0.91-4.2%)                   | 28<br>(13-58)       | 1500<br>(770-2900)      |
| Morocco  | 1990 | Female | 45 to 49 | 1.3%<br>(0.58-2.4%)            | 99%<br>(98-99%)          | 0.27<br>(0.11-0.52)                         | 1.2%<br>(0.59-2.5%)                  | 2%<br>(0.88-4.3%)                   | 41<br>(17-85)       | 1900<br>(880-3800)      |
| Morocco  | 1990 | Female | 50 to 54 | 1.4%<br>(0.64-2.6%)            | 99%<br>(97-99%)          | 0.28<br>(0.11-0.55)                         | 1.2%<br>(0.59-2.6%)                  | 2%<br>(0.86-4.3%)                   | 57<br>(25-120)      | 2200<br>(1100-4700)     |
| Morocco  | 1990 | Female | 55 to 59 | 1.4%<br>(0.65-2.6%)            | 99%<br>(97-99%)          | 0.27<br>(0.11-0.53)                         | 1.3%<br>(0.58-2.4%)                  | 1.9%<br>(0.82-3.8%)                 | 75<br>(33-150)      | 2500<br>(1200-4900)     |
| Morocco  | 1990 | Female | 60 to 64 | 1.4%<br>(0.63-2.7%)            | 99%<br>(97-99%)          | 0.26<br>(0.095-0.52)                        | 1.3%<br>(0.59-2.7%)                  | 1.9%<br>(0.79-4%)                   | 100<br>(44-220)     | 2900<br>(1300-5900)     |
| Morocco  | 1990 | Female | 65 to 69 | 1.4%<br>(0.67-2.5%)            | 99%<br>(98-99%)          | 0.23<br>(0.089-0.45)                        | 1.3%<br>(0.55-2.9%)                  | 1.7%<br>(0.74-4%)                   | 110<br>(44-250)     | 2500<br>(1000-5600)     |
| Morocco  | 1990 | Female | 70 to 74 | 1.4%<br>(0.66-2.4%)            | 99%<br>(98-99%)          | 0.19<br>(0.071-0.38)                        | 1.2%<br>(0.5-2.7%)                   | 1.5%<br>(0.65-3.6%)                 | 89<br>(36-220)      | 1600<br>(690-3800)      |
| Morocco  | 1990 | Female | 75 to 79 | 1.2%<br>(0.55-2.2%)            | 99%<br>(98-99%)          | 0.16<br>(0.051-0.35)                        | 1%<br>(0.38-2.4%)                    | 1.3%<br>(0.48-3.2%)                 | 65<br>(23-160)      | 910<br>(340-2200)       |
| Morocco  | 1990 | Female | 80 to 84 | 1.1%<br>(0.5-2.1%)             | 99%<br>(98-100%)         | 0.14<br>(0.046-0.29)                        | 1%<br>(0.36-2.3%)                    | 1.3%<br>(0.44-3%)                   | 50<br>(17-120)      | 510<br>(190-1200)       |
| Morocco  | 1990 | Female | 85 to 89 | 1.1%<br>(0.53-2%)              | 99%<br>(98-99%)          | 0.13<br>(0.049-0.28)                        | 0.96%<br>(0.37-2.2%)                 | 1.2%<br>(0.45-2.9%)                 | 39<br>(15-93)       | 290<br>(110-670)        |
| Morocco  | 1990 | Female | 90 to 94 | 1.2%<br>(0.58-2.3%)            | 99%<br>(98-99%)          | 0.15<br>(0.052-0.33)                        | 0.88%<br>(0.34-2.1%)                 | 1.1%<br>(0.4-2.6%)                  | 17<br>(6.3-42)      | 86<br>(32-200)          |
| Morocco  | 1990 | Female | 95 plus  | 1.6%<br>(0.62-3.3%)            | 98%<br>(97-99%)          | 0.18<br>(0.049-0.42)                        | 0.95%<br>(0.26-2.5%)                 | 1.2%<br>(0.29-3.1%)                 | 5.1<br>(1.3-14)     | 17<br>(4.6-44)          |
| Morocco  | 1990 | Male   | All Ages | 2.5%<br>(2-3.2%)               | 97%<br>(97-98%)          | 0.66<br>(0.56-0.79)                         | 1.3%<br>(0.85-2%)                    | 2.2%<br>(1.4-3.6%)                  | 1800<br>(1100-3000) | 71000<br>(47000-110000) |
| Morocco  | 1990 | Male   | 15 to 19 | 2.1%<br>(1.1-3.4%)             | 98%<br>(97-99%)          | 0.32<br>(0.14-0.62)                         | 1.3%<br>(0.74-2.1%)                  | 1.8%<br>(0.82-3.4%)                 | 30<br>(14-56)       | 2900<br>(1600-4900)     |
| Morocco  | 1990 | Male   | 20 to 24 | 3.4%<br>(1.8-5.7%)             | 97%<br>(94-98%)          | 0.81<br>(0.39-1.4)                          | 2.8%<br>(1.5-4.8%)                   | 3.8%<br>(1.8-7.3%)                  | 84<br>(38-160)      | 7200<br>(3900-12000)    |
| Morocco  | 1990 | Male   | 25 to 29 | 4.4%<br>(2.4-6.9%)             | 96%<br>(93-98%)          | 1.3<br>(0.66-2.2)                           | 3.6%<br>(1.9-6.3%)                   | 5.3%<br>(2.5-10%)                   | 120<br>(56-230)     | 8900<br>(4800-15000)    |
| Morocco  | 1990 | Male   | 30 to 34 | 4.7%<br>(2.5-7.9%)             | 95%<br>(92-97%)          | 1.5<br>(0.81-2.4)                           | 3.8%<br>(2-6.8%)                     | 5.7%<br>(2.7-11%)                   | 130<br>(60-250)     | 8200<br>(4400-15000)    |
| Morocco  | 1990 | Male   | 35 to 39 | 5%<br>(2.7-8.2%)               | 95%<br>(92-97%)          | 1.7<br>(0.78-3)                             | 3.9%<br>(2.2-6.9%)                   | 6%<br>(3-11%)                       | 130<br>(63-230)     | 7200<br>(4000-13000)    |
| Morocco  | 1990 | Male   | 40 to 44 | 5%<br>(2.9-8.3%)               | 95%<br>(92-97%)          | 1.8<br>(0.8-3.3)                            | 3.7%<br>(2.1-6.3%)                   | 5.6%<br>(3-9.8%)                    | 91<br>(48-160)      | 4700<br>(2700-7900)     |
| Morocco  | 1990 | Male   | 45 to 49 | 4.8%<br>(2.5-7.7%)             | 95%<br>(92-98%)          | 1.7<br>(0.72-3.3)                           | 3.7%<br>(2-6.4%)                     | 5.4%<br>(2.8-9.6%)                  | 110<br>(55-200)     | 4800<br>(2600-8500)     |
| Morocco  | 1990 | Male   | 50 to 54 | 4.3%<br>(2.4-7%)               | 96%<br>(93-98%)          | 1.6<br>(0.67-2.9)                           | 3.1%<br>(1.7-5.4%)                   | 4.3%<br>(2.4-7.8%)                  | 130<br>(70-240)     | 5100<br>(2900-9000)     |



| Location | Year | Sex    | Age      | Prevalence of current drinkers | Prevalence of abstainers | Population average of standard drinks daily | Percent of total attributable deaths | Percent of total attributable DALYs | Attributable deaths | Attributable DALYs     |
|----------|------|--------|----------|--------------------------------|--------------------------|---------------------------------------------|--------------------------------------|-------------------------------------|---------------------|------------------------|
| Morocco  | 1990 | Male   | 55 to 59 | 3.9%<br>(2-7%)                 | 96%<br>(93-98%)          | 1.4<br>(0.57-2.7)                           | 2.9%<br>(1.5-5.2%)                   | 3.9%<br>(2-7.1%)                    | 170<br>(85-310)     | 5500<br>(2900-9800)    |
| Morocco  | 1990 | Male   | 60 to 64 | 3.6%<br>(1.8-6.6%)             | 96%<br>(93-98%)          | 1.2<br>(0.46-2.3)                           | 2.6%<br>(1.4-5.2%)                   | 3.5%<br>(1.7-6.8%)                  | 210<br>(100-410)    | 5800<br>(3000-11000)   |
| Morocco  | 1990 | Male   | 65 to 69 | 3.4%<br>(1.7-5.7%)             | 97%<br>(94-98%)          | 0.93<br>(0.41-1.7)                          | 2.5%<br>(1.3-4.8%)                   | 3.2%<br>(1.6-6.3%)                  | 200<br>(100-410)    | 4700<br>(2400-9000)    |
| Morocco  | 1990 | Male   | 70 to 74 | 3.1%<br>(1.7-5.3%)             | 97%<br>(95-98%)          | 0.71<br>(0.3-1.4)                           | 2.4%<br>(1.3-4.6%)                   | 3%<br>(1.6-5.8%)                    | 180<br>(90-340)     | 3200<br>(1700-6100)    |
| Morocco  | 1990 | Male   | 75 to 79 | 2.8%<br>(1.5-4.8%)             | 97%<br>(95-99%)          | 0.55<br>(0.21-1.1)                          | 2.1%<br>(1-3.8%)                     | 2.5%<br>(1.3-4.7%)                  | 120<br>(61-230)     | 1700<br>(870-3200)     |
| Morocco  | 1990 | Male   | 80 to 84 | 2.5%<br>(1.3-4.4%)             | 98%<br>(96-99%)          | 0.45<br>(0.17-0.88)                         | 1.9%<br>(0.95-3.6%)                  | 2.3%<br>(1.1-4.4%)                  | 79<br>(38-150)      | 810<br>(400-1500)      |
| Morocco  | 1990 | Male   | 85 to 89 | 2.4%<br>(1.2-4.1%)             | 98%<br>(96-99%)          | 0.4<br>(0.16-0.82)                          | 1.7%<br>(0.85-3.3%)                  | 2%<br>(1-4.1%)                      | 50<br>(25-100)      | 370<br>(180-730)       |
| Morocco  | 1990 | Male   | 90 to 94 | 2.5%<br>(1.3-4.3%)             | 97%<br>(96-99%)          | 0.4<br>(0.15-0.8)                           | 1.5%<br>(0.79-3%)                    | 1.8%<br>(0.91-3.6%)                 | 20<br>(9.7-39)      | 99<br>(51-190)         |
| Morocco  | 1990 | Male   | 95 plus  | 3.1%<br>(1.4-5.9%)             | 97%<br>(94-99%)          | 0.43<br>(0.13-1)                            | 1.6%<br>(0.66-3.2%)                  | 1.8%<br>(0.74-3.8%)                 | 4.7<br>(1.9-9.9)    | 16<br>(7-33)           |
| Morocco  | 1995 | Female | All Ages | 1%<br>(0.77-1.3%)              | 99%<br>(99-99%)          | 0.14<br>(0.11-0.19)                         | 0.64%<br>(0.43-1.1%)                 | 1.1%<br>(0.68-2.1%)                 | 880<br>(510-1700)   | 30000<br>(20000-51000) |
| Morocco  | 1995 | Female | 15 to 19 | 1%<br>(0.51-1.7%)              | 99%<br>(98-99%)          | 0.13<br>(0.052-0.26)                        | 0.66%<br>(0.35-1.2%)                 | 1.2%<br>(0.53-2.6%)                 | 15<br>(6.3-31)      | 1500<br>(750-2700)     |
| Morocco  | 1995 | Female | 20 to 24 | 1.3%<br>(0.6-2.3%)             | 99%<br>(98-99%)          | 0.22<br>(0.088-0.41)                        | 1.1%<br>(0.59-2%)                    | 1.8%<br>(0.75-3.9%)                 | 27<br>(10-54)       | 2500<br>(1300-4500)    |
| Morocco  | 1995 | Female | 25 to 29 | 1.4%<br>(0.65-2.5%)            | 99%<br>(98-99%)          | 0.24<br>(0.11-0.43)                         | 1.2%<br>(0.66-2.2%)                  | 2.1%<br>(0.88-4.7%)                 | 32<br>(13-70)       | 2700<br>(1400-5000)    |
| Morocco  | 1995 | Female | 30 to 34 | 1.4%<br>(0.61-2.5%)            | 99%<br>(98-99%)          | 0.24<br>(0.11-0.42)                         | 1.2%<br>(0.65-2.2%)                  | 2.1%<br>(0.87-4.5%)                 | 36<br>(15-79)       | 2700<br>(1400-5100)    |
| Morocco  | 1995 | Female | 35 to 39 | 1.4%<br>(0.64-2.4%)            | 99%<br>(98-99%)          | 0.25<br>(0.11-0.45)                         | 1.1%<br>(0.59-2%)                    | 1.9%<br>(0.87-3.8%)                 | 38<br>(17-76)       | 2500<br>(1300-4500)    |
| Morocco  | 1995 | Female | 40 to 44 | 1.4%<br>(0.69-2.5%)            | 99%<br>(98-99%)          | 0.27<br>(0.12-0.5)                          | 1.1%<br>(0.6-2.1%)                   | 2%<br>(0.93-4%)                     | 43<br>(20-86)       | 2300<br>(1200-4300)    |
| Morocco  | 1995 | Female | 45 to 49 | 1.4%<br>(0.61-2.4%)            | 99%<br>(98-99%)          | 0.28<br>(0.11-0.55)                         | 1.2%<br>(0.58-2.2%)                  | 2%<br>(0.89-4%)                     | 37<br>(17-75)       | 1700<br>(880-3300)     |
| Morocco  | 1995 | Female | 50 to 54 | 1.4%<br>(0.66-2.6%)            | 99%<br>(97-99%)          | 0.29<br>(0.11-0.59)                         | 1.2%<br>(0.59-2.3%)                  | 1.9%<br>(0.88-3.9%)                 | 52<br>(25-110)      | 2100<br>(1100-4200)    |
| Morocco  | 1995 | Female | 55 to 59 | 1.4%<br>(0.66-2.5%)            | 99%<br>(97-99%)          | 0.28<br>(0.11-0.55)                         | 1.2%<br>(0.59-2.2%)                  | 1.8%<br>(0.83-3.4%)                 | 72<br>(33-140)      | 2400<br>(1200-4500)    |
| Morocco  | 1995 | Female | 60 to 64 | 1.4%<br>(0.64-2.7%)            | 99%<br>(97-99%)          | 0.26<br>(0.099-0.53)                        | 1.2%<br>(0.58-2.4%)                  | 1.7%<br>(0.78-3.6%)                 | 99<br>(44-200)      | 2800<br>(1300-5500)    |
| Morocco  | 1995 | Female | 65 to 69 | 1.4%<br>(0.68-2.6%)            | 99%<br>(97-99%)          | 0.23<br>(0.093-0.45)                        | 1.2%<br>(0.53-2.4%)                  | 1.6%<br>(0.72-3.5%)                 | 120<br>(53-260)     | 2800<br>(1300-6000)    |
| Morocco  | 1995 | Female | 70 to 74 | 1.3%<br>(0.67-2.5%)            | 99%<br>(98-99%)          | 0.19<br>(0.073-0.38)                        | 1.1%<br>(0.49-2.3%)                  | 1.4%<br>(0.64-3.2%)                 | 110<br>(51-270)     | 2100<br>(950-4800)     |

| Location | Year | Sex    | Age      | Prevalence of current drinkers | Prevalence of abstainers | Population average of standard drinks daily | Percent of total attributable deaths | Percent of total attributable DALYs | Attributable deaths | Attributable DALYs      |
|----------|------|--------|----------|--------------------------------|--------------------------|---------------------------------------------|--------------------------------------|-------------------------------------|---------------------|-------------------------|
| Morocco  | 1995 | Female | 75 to 79 | 1.2%<br>(0.54-2.2%)            | 99%<br>(98-99%)          | 0.15<br>(0.05-0.34)                         | 0.93%<br>(0.36-2.1%)                 | 1.2%<br>(0.47-2.7%)                 | 77<br>(29-180)      | 1100<br>(430-2500)      |
| Morocco  | 1995 | Female | 80 to 84 | 1.1%<br>(0.49-2.1%)            | 99%<br>(98-100%)         | 0.14<br>(0.043-0.29)                        | 0.93%<br>(0.35-2.1%)                 | 1.2%<br>(0.43-2.7%)                 | 53<br>(19-120)      | 550<br>(200-1200)       |
| Morocco  | 1995 | Female | 85 to 89 | 1.1%<br>(0.52-2.1%)            | 99%<br>(98-99%)          | 0.13<br>(0.048-0.28)                        | 0.89%<br>(0.35-2%)                   | 1.1%<br>(0.42-2.5%)                 | 37<br>(14-86)       | 270<br>(110-610)        |
| Morocco  | 1995 | Female | 90 to 94 | 1.2%<br>(0.57-2.3%)            | 99%<br>(98-99%)          | 0.15<br>(0.051-0.33)                        | 0.81%<br>(0.32-1.9%)                 | 1%<br>(0.37-2.3%)                   | 19<br>(6.8-44)      | 93<br>(35-220)          |
| Morocco  | 1995 | Female | 95 plus  | 1.6%<br>(0.62-3.3%)            | 98%<br>(97-99%)          | 0.18<br>(0.048-0.43)                        | 0.89%<br>(0.24-2.2%)                 | 1.1%<br>(0.27-2.7%)                 | 6.5<br>(1.6-16)     | 22<br>(6-52)            |
| Morocco  | 1995 | Male   | All Ages | 2.6%<br>(2-3.3%)               | 97%<br>(97-98%)          | 0.7<br>(0.59-0.84)                          | 1.4%<br>(0.97-2.1%)                  | 2.3%<br>(1.5-3.5%)                  | 1900<br>(1200-2900) | 72000<br>(49000-110000) |
| Morocco  | 1995 | Male   | 15 to 19 | 2%<br>(1.1-3.4%)               | 98%<br>(97-99%)          | 0.32<br>(0.14-0.63)                         | 1.2%<br>(0.7-2%)                     | 1.7%<br>(0.77-3.1%)                 | 28<br>(13-54)       | 2900<br>(1600-4800)     |
| Morocco  | 1995 | Male   | 20 to 24 | 3.4%<br>(1.7-5.6%)             | 97%<br>(94-98%)          | 0.81<br>(0.39-1.5)                          | 2.7%<br>(1.5-4.4%)                   | 3.5%<br>(1.6-6.5%)                  | 74<br>(33-140)      | 6600<br>(3600-11000)    |
| Morocco  | 1995 | Male   | 25 to 29 | 4.3%<br>(2.4-6.9%)             | 96%<br>(93-98%)          | 1.3<br>(0.64-2.2)                           | 3.4%<br>(1.9-5.7%)                   | 5%<br>(2.3-9.2%)                    | 110<br>(49-200)     | 8100<br>(4400-14000)    |
| Morocco  | 1995 | Male   | 30 to 34 | 4.7%<br>(2.5-8.2%)             | 95%<br>(92-98%)          | 1.5<br>(0.83-2.5)                           | 3.5%<br>(1.9-6.1%)                   | 5.3%<br>(2.6-10%)                   | 120<br>(60-240)     | 8300<br>(4500-15000)    |
| Morocco  | 1995 | Male   | 35 to 39 | 5%<br>(2.7-8%)                 | 95%<br>(92-97%)          | 1.7<br>(0.8-2.8)                            | 3.6%<br>(2-6.3%)                     | 5.5%<br>(2.9-10%)                   | 140<br>(71-260)     | 8100<br>(4600-14000)    |
| Morocco  | 1995 | Male   | 40 to 44 | 5.1%<br>(2.8-8.2%)             | 95%<br>(92-97%)          | 1.8<br>(0.82-3.2)                           | 3.4%<br>(2-5.6%)                     | 5.2%<br>(2.8-9%)                    | 130<br>(71-230)     | 6800<br>(4000-11000)    |
| Morocco  | 1995 | Male   | 45 to 49 | 4.8%<br>(2.4-7.5%)             | 95%<br>(92-98%)          | 1.7<br>(0.75-3.3)                           | 3.4%<br>(1.9-5.9%)                   | 5.1%<br>(2.7-8.9%)                  | 110<br>(57-190)     | 4800<br>(2700-8200)     |
| Morocco  | 1995 | Male   | 50 to 54 | 4.3%<br>(2.4-7%)               | 96%<br>(93-98%)          | 1.6<br>(0.67-2.9)                           | 2.9%<br>(1.6-4.8%)                   | 4.1%<br>(2.3-7.2%)                  | 110<br>(59-180)     | 4200<br>(2400-7000)     |
| Morocco  | 1995 | Male   | 55 to 59 | 3.9%<br>(2-6.8%)               | 96%<br>(93-98%)          | 1.4<br>(0.56-2.7)                           | 2.6%<br>(1.4-4.6%)                   | 3.6%<br>(1.9-6.4%)                  | 140<br>(78-260)     | 4800<br>(2700-8400)     |
| Morocco  | 1995 | Male   | 60 to 64 | 3.5%<br>(1.8-6.5%)             | 96%<br>(94-98%)          | 1.2<br>(0.47-2.3)                           | 2.4%<br>(1.3-4.5%)                   | 3.2%<br>(1.7-6.1%)                  | 180<br>(95-350)     | 5100<br>(2700-9500)     |
| Morocco  | 1995 | Male   | 65 to 69 | 3.3%<br>(1.8-5.6%)             | 97%<br>(94-98%)          | 0.93<br>(0.41-1.7)                          | 2.3%<br>(1.2-4.4%)                   | 3%<br>(1.6-5.8%)                    | 220<br>(120-440)    | 5200<br>(2800-9900)     |
| Morocco  | 1995 | Male   | 70 to 74 | 3.1%<br>(1.7-5.3%)             | 97%<br>(95-98%)          | 0.71<br>(0.3-1.4)                           | 2.2%<br>(1.2-4.1%)                   | 2.8%<br>(1.5-5.2%)                  | 220<br>(110-400)    | 3900<br>(2100-7200)     |
| Morocco  | 1995 | Male   | 75 to 79 | 2.7%<br>(1.4-4.7%)             | 97%<br>(95-99%)          | 0.54<br>(0.21-1.1)                          | 1.9%<br>(0.95-3.3%)                  | 2.3%<br>(1.2-4.1%)                  | 140<br>(69-250)     | 1900<br>(1000-3500)     |
| Morocco  | 1995 | Male   | 80 to 84 | 2.4%<br>(1.2-4.2%)             | 98%<br>(96-99%)          | 0.45<br>(0.16-0.86)                         | 1.8%<br>(0.85-3.2%)                  | 2.1%<br>(1-3.9%)                    | 82<br>(39-150)      | 850<br>(420-1600)       |
| Morocco  | 1995 | Male   | 85 to 89 | 2.3%<br>(1.2-3.9%)             | 98%<br>(96-99%)          | 0.39<br>(0.16-0.79)                         | 1.5%<br>(0.79-2.9%)                  | 1.8%<br>(0.92-3.5%)                 | 46<br>(23-88)       | 340<br>(170-630)        |
| Morocco  | 1995 | Male   | 90 to 94 | 2.4%<br>(1.3-4.2%)             | 98%<br>(96-99%)          | 0.39<br>(0.15-0.79)                         | 1.4%<br>(0.73-2.7%)                  | 1.6%<br>(0.83-3.2%)                 | 20<br>(10-40)       | 100<br>(53-200)         |

| Location | Year | Sex    | Age      | Prevalence of current drinkers | Prevalence of abstainers | Population average of standard drinks daily | Percent of total attributable deaths | Percent of total attributable DALYs | Attributable deaths | Attributable DALYs      |
|----------|------|--------|----------|--------------------------------|--------------------------|---------------------------------------------|--------------------------------------|-------------------------------------|---------------------|-------------------------|
| Morocco  | 1995 | Male   | 95 plus  | 2.9%<br>(1.4-5.8%)             | 97%<br>(94-99%)          | 0.42<br>(0.12-0.97)                         | 1.4%<br>(0.64-2.8%)                  | 1.6%<br>(0.7-3.3%)                  | 5.4<br>(2.4-11)     | 19<br>(8.4-37)          |
| Morocco  | 2000 | Female | All Ages | 0.93%<br>(0.69-1.2%)           | 99%<br>(99-99%)          | 0.13<br>(0.099-0.17)                        | 0.61%<br>(0.43-0.94%)                | 1.1%<br>(0.67-1.9%)                 | 810<br>(500-1400)   | 27000<br>(19000-43000)  |
| Morocco  | 2000 | Female | 15 to 19 | 0.94%<br>(0.45-1.6%)           | 99%<br>(98-100%)         | 0.12<br>(0.048-0.25)                        | 0.56%<br>(0.32-0.99%)                | 1.1%<br>(0.49-2.2%)                 | 12<br>(5.3-24)      | 1300<br>(710-2200)      |
| Morocco  | 2000 | Female | 20 to 24 | 1.1%<br>(0.52-2%)              | 99%<br>(98-99%)          | 0.19<br>(0.073-0.35)                        | 0.88%<br>(0.51-1.5%)                 | 1.5%<br>(0.66-3.1%)                 | 19<br>(8-38)        | 2100<br>(1100-3600)     |
| Morocco  | 2000 | Female | 25 to 29 | 1.2%<br>(0.57-2%)              | 99%<br>(98-99%)          | 0.2<br>(0.087-0.37)                         | 0.99%<br>(0.58-1.7%)                 | 1.7%<br>(0.76-3.6%)                 | 22<br>(10-47)       | 2200<br>(1300-3800)     |
| Morocco  | 2000 | Female | 30 to 34 | 1.1%<br>(0.51-2.1%)            | 99%<br>(98-99%)          | 0.2<br>(0.086-0.36)                         | 0.98%<br>(0.56-1.8%)                 | 1.8%<br>(0.76-3.8%)                 | 26<br>(11-57)       | 2200<br>(1200-4000)     |
| Morocco  | 2000 | Female | 35 to 39 | 1.1%<br>(0.54-2%)              | 99%<br>(98-99%)          | 0.21<br>(0.094-0.39)                        | 0.89%<br>(0.52-1.5%)                 | 1.6%<br>(0.74-2.9%)                 | 30<br>(14-58)       | 2100<br>(1200-3700)     |
| Morocco  | 2000 | Female | 40 to 44 | 1.1%<br>(0.58-2%)              | 99%<br>(98-99%)          | 0.23<br>(0.1-0.41)                          | 0.92%<br>(0.53-1.6%)                 | 1.6%<br>(0.82-3.2%)                 | 39<br>(19-75)       | 2200<br>(1300-3900)     |
| Morocco  | 2000 | Female | 45 to 49 | 1.1%<br>(0.51-2%)              | 99%<br>(98-99%)          | 0.24<br>(0.099-0.46)                        | 0.93%<br>(0.52-1.7%)                 | 1.6%<br>(0.79-3.1%)                 | 42<br>(21-79)       | 2100<br>(1100-3700)     |
| Morocco  | 2000 | Female | 50 to 54 | 1.2%<br>(0.59-2.2%)            | 99%<br>(98-99%)          | 0.25<br>(0.1-0.5)                           | 0.97%<br>(0.53-1.8%)                 | 1.6%<br>(0.81-2.9%)                 | 39<br>(21-75)       | 1600<br>(890-2900)      |
| Morocco  | 2000 | Female | 55 to 59 | 1.3%<br>(0.63-2.4%)            | 99%<br>(98-99%)          | 0.26<br>(0.1-0.51)                          | 1%<br>(0.54-1.8%)                    | 1.6%<br>(0.8-2.9%)                  | 57<br>(29-110)      | 2000<br>(1000-3600)     |
| Morocco  | 2000 | Female | 60 to 64 | 1.4%<br>(0.62-2.6%)            | 99%<br>(97-99%)          | 0.25<br>(0.095-0.51)                        | 1.1%<br>(0.52-2.1%)                  | 1.6%<br>(0.72-3.1%)                 | 84<br>(38-170)      | 2400<br>(1200-4700)     |
| Morocco  | 2000 | Female | 65 to 69 | 1.4%<br>(0.65-2.4%)            | 99%<br>(98-99%)          | 0.23<br>(0.09-0.44)                         | 1.1%<br>(0.5-2.1%)                   | 1.5%<br>(0.69-3%)                   | 110<br>(50-220)     | 2500<br>(1200-5100)     |
| Morocco  | 2000 | Female | 70 to 74 | 1.3%<br>(0.67-2.4%)            | 99%<br>(98-99%)          | 0.18<br>(0.073-0.37)                        | 0.96%<br>(0.47-2%)                   | 1.3%<br>(0.62-2.6%)                 | 120<br>(56-250)     | 2200<br>(1100-4700)     |
| Morocco  | 2000 | Female | 75 to 79 | 1.2%<br>(0.56-2.2%)            | 99%<br>(98-99%)          | 0.15<br>(0.051-0.34)                        | 0.83%<br>(0.36-1.7%)                 | 1.1%<br>(0.46-2.3%)                 | 94<br>(39-200)      | 1300<br>(570-2800)      |
| Morocco  | 2000 | Female | 80 to 84 | 1.1%<br>(0.47-2.1%)            | 99%<br>(98-100%)         | 0.14<br>(0.044-0.29)                        | 0.83%<br>(0.33-1.8%)                 | 1%<br>(0.41-2.3%)                   | 62<br>(24-140)      | 650<br>(260-1400)       |
| Morocco  | 2000 | Female | 85 to 89 | 1.1%<br>(0.5-2%)               | 99%<br>(98-99%)          | 0.13<br>(0.047-0.28)                        | 0.78%<br>(0.32-1.7%)                 | 0.97%<br>(0.39-2%)                  | 36<br>(14-78)       | 270<br>(110-560)        |
| Morocco  | 2000 | Female | 90 to 94 | 1.2%<br>(0.57-2.2%)            | 99%<br>(98-99%)          | 0.14<br>(0.051-0.32)                        | 0.71%<br>(0.29-1.5%)                 | 0.87%<br>(0.34-1.9%)                | 16<br>(6.3-35)      | 81<br>(33-170)          |
| Morocco  | 2000 | Female | 95 plus  | 1.5%<br>(0.6-3.1%)             | 98%<br>(97-99%)          | 0.17<br>(0.049-0.41)                        | 0.77%<br>(0.24-1.7%)                 | 0.92%<br>(0.27-2.2%)                | 6.3<br>(1.9-15)     | 21<br>(6.8-48)          |
| Morocco  | 2000 | Male   | All Ages | 2.8%<br>(2.3-3.5%)             | 97%<br>(96-98%)          | 0.78<br>(0.65-0.92)                         | 1.5%<br>(1.1-2.2%)                   | 2.3%<br>(1.6-3.3%)                  | 1900<br>(1200-2700) | 73000<br>(51000-100000) |
| Morocco  | 2000 | Male   | 15 to 19 | 2.2%<br>(1.2-3.5%)             | 98%<br>(96-99%)          | 0.35<br>(0.15-0.66)                         | 1.2%<br>(0.74-2.1%)                  | 1.8%<br>(0.83-3.4%)                 | 29<br>(14-54)       | 3100<br>(1800-5000)     |
| Morocco  | 2000 | Male   | 20 to 24 | 3.7%<br>(2-6.2%)               | 96%<br>(94-98%)          | 0.9<br>(0.43-1.6)                           | 2.7%<br>(1.6-4.4%)                   | 3.8%<br>(1.7-6.6%)                  | 75<br>(35-130)      | 6900<br>(4000-11000)    |

| Location | Year | Sex    | Age      | Prevalence of current drinkers | Prevalence of abstainers | Population average of standard drinks daily | Percent of total attributable deaths | Percent of total attributable DALYs | Attributable deaths | Attributable DALYs     |
|----------|------|--------|----------|--------------------------------|--------------------------|---------------------------------------------|--------------------------------------|-------------------------------------|---------------------|------------------------|
| Morocco  | 2000 | Male   | 25 to 29 | 4.8%<br>(2.7-7.4%)             | 95%<br>(93-97%)          | 1.4<br>(0.72-2.4)                           | 3.4%<br>(2-5.5%)                     | 5.2%<br>(2.6-9.1%)                  | 100<br>(48-180)     | 7800<br>(4400-13000)   |
| Morocco  | 2000 | Male   | 30 to 34 | 5.1%<br>(2.7-8.5%)             | 95%<br>(92-97%)          | 1.7<br>(0.9-2.7)                            | 3.4%<br>(2-5.9%)                     | 5.3%<br>(2.7-9.9%)                  | 110<br>(57-200)     | 7700<br>(4400-13000)   |
| Morocco  | 2000 | Male   | 35 to 39 | 5.1%<br>(2.9-8.4%)             | 95%<br>(92-97%)          | 1.7<br>(0.85-2.8)                           | 3.3%<br>(2-5.5%)                     | 5.4%<br>(3-9.4%)                    | 140<br>(75-240)     | 8200<br>(4900-13000)   |
| Morocco  | 2000 | Male   | 40 to 44 | 5%<br>(3-8.3%)                 | 95%<br>(92-97%)          | 1.7<br>(0.84-3)                             | 3.2%<br>(2-5%)                       | 4.9%<br>(2.9-8.3%)                  | 140<br>(81-240)     | 7700<br>(4700-12000)   |
| Morocco  | 2000 | Male   | 45 to 49 | 4.7%<br>(2.5-7.5%)             | 95%<br>(92-97%)          | 1.7<br>(0.78-3.2)                           | 3.1%<br>(1.8-5.1%)                   | 4.7%<br>(2.7-8.2%)                  | 150<br>(84-260)     | 6800<br>(4000-11000)   |
| Morocco  | 2000 | Male   | 50 to 54 | 4.2%<br>(2.4-6.9%)             | 96%<br>(93-98%)          | 1.5<br>(0.67-2.9)                           | 2.6%<br>(1.6-4.2%)                   | 3.8%<br>(2.3-6.3%)                  | 110<br>(62-180)     | 4200<br>(2600-6800)    |
| Morocco  | 2000 | Male   | 55 to 59 | 3.7%<br>(2-6.5%)               | 96%<br>(93-98%)          | 1.3<br>(0.53-2.6)                           | 2.4%<br>(1.3-4%)                     | 3.3%<br>(1.9-5.6%)                  | 120<br>(67-200)     | 4000<br>(2300-6700)    |
| Morocco  | 2000 | Male   | 60 to 64 | 3.4%<br>(1.7-6%)               | 97%<br>(94-98%)          | 1.1<br>(0.43-2.2)                           | 2.1%<br>(1.2-3.8%)                   | 2.8%<br>(1.5-5.1%)                  | 160<br>(84-280)     | 4400<br>(2400-7700)    |
| Morocco  | 2000 | Male   | 65 to 69 | 3.1%<br>(1.7-5.3%)             | 97%<br>(95-98%)          | 0.87<br>(0.39-1.6)                          | 2%<br>(1.1-3.6%)                     | 2.6%<br>(1.4-4.8%)                  | 190<br>(100-350)    | 4300<br>(2400-7900)    |
| Morocco  | 2000 | Male   | 70 to 74 | 2.9%<br>(1.6-5%)               | 97%<br>(95-98%)          | 0.66<br>(0.28-1.3)                          | 1.9%<br>(1-3.4%)                     | 2.4%<br>(1.3-4.3%)                  | 220<br>(120-390)    | 4100<br>(2200-7000)    |
| Morocco  | 2000 | Male   | 75 to 79 | 2.6%<br>(1.4-4.5%)             | 97%<br>(95-99%)          | 0.5<br>(0.19-1)                             | 1.6%<br>(0.87-2.9%)                  | 2%<br>(1.1-3.5%)                    | 160<br>(83-280)     | 2200<br>(1200-3900)    |
| Morocco  | 2000 | Male   | 80 to 84 | 2.3%<br>(1.2-4%)               | 98%<br>(96-99%)          | 0.42<br>(0.15-0.82)                         | 1.5%<br>(0.77-2.8%)                  | 1.8%<br>(0.91-3.3%)                 | 92<br>(46-170)      | 960<br>(480-1700)      |
| Morocco  | 2000 | Male   | 85 to 89 | 2.2%<br>(1.1-3.6%)             | 98%<br>(96-99%)          | 0.37<br>(0.15-0.74)                         | 1.3%<br>(0.69-2.4%)                  | 1.6%<br>(0.8-2.9%)                  | 46<br>(23-85)       | 340<br>(170-620)       |
| Morocco  | 2000 | Male   | 90 to 94 | 2.3%<br>(1.2-4%)               | 98%<br>(96-99%)          | 0.37<br>(0.14-0.74)                         | 1.2%<br>(0.64-2.2%)                  | 1.4%<br>(0.75-2.7%)                 | 18<br>(9.4-34)      | 92<br>(49-170)         |
| Morocco  | 2000 | Male   | 95 plus  | 2.8%<br>(1.3-5.5%)             | 97%<br>(95-99%)          | 0.4<br>(0.12-0.93)                          | 1.2%<br>(0.55-2.4%)                  | 1.4%<br>(0.61-2.8%)                 | 5.4<br>(2.3-11)     | 19<br>(8.4-36)         |
| Morocco  | 2005 | Female | All Ages | 0.95%<br>(0.73-1.3%)           | 99%<br>(99-99%)          | 0.13<br>(0.098-0.17)                        | 0.63%<br>(0.46-0.95%)                | 1%<br>(0.66-1.7%)                   | 830<br>(520-1400)   | 28000<br>(20000-42000) |
| Morocco  | 2005 | Female | 15 to 19 | 0.94%<br>(0.45-1.6%)           | 99%<br>(98-100%)         | 0.12<br>(0.044-0.23)                        | 0.52%<br>(0.29-0.9%)                 | 1%<br>(0.46-2.1%)                   | 9.5<br>(4.3-20)     | 1100<br>(600-1900)     |
| Morocco  | 2005 | Female | 20 to 24 | 1.1%<br>(0.52-2%)              | 99%<br>(98-99%)          | 0.18<br>(0.071-0.34)                        | 0.83%<br>(0.5-1.4%)                  | 1.4%<br>(0.66-2.9%)                 | 17<br>(7.4-34)      | 2000<br>(1200-3400)    |
| Morocco  | 2005 | Female | 25 to 29 | 1.1%<br>(0.54-2%)              | 99%<br>(98-99%)          | 0.18<br>(0.079-0.34)                        | 0.94%<br>(0.59-1.5%)                 | 1.7%<br>(0.76-3.4%)                 | 20<br>(9.1-41)      | 2200<br>(1300-3500)    |
| Morocco  | 2005 | Female | 30 to 34 | 1.1%<br>(0.49-2%)              | 99%<br>(98-100%)         | 0.18<br>(0.08-0.33)                         | 0.92%<br>(0.56-1.5%)                 | 1.7%<br>(0.77-3.4%)                 | 23<br>(10-47)       | 2100<br>(1300-3500)    |
| Morocco  | 2005 | Female | 35 to 39 | 1.1%<br>(0.53-1.9%)            | 99%<br>(98-99%)          | 0.2<br>(0.086-0.35)                         | 0.84%<br>(0.5-1.3%)                  | 1.5%<br>(0.75-2.8%)                 | 28<br>(14-52)       | 2100<br>(1200-3400)    |
| Morocco  | 2005 | Female | 40 to 44 | 1.1%<br>(0.59-1.9%)            | 99%<br>(98-99%)          | 0.21<br>(0.096-0.38)                        | 0.87%<br>(0.51-1.5%)                 | 1.6%<br>(0.84-2.9%)                 | 38<br>(20-70)       | 2300<br>(1300-3800)    |

| Location | Year | Sex    | Age      | Prevalence of current drinkers | Prevalence of abstainers | Population average of standard drinks daily | Percent of total attributable deaths | Percent of total attributable DALYs | Attributable deaths | Attributable DALYs      |
|----------|------|--------|----------|--------------------------------|--------------------------|---------------------------------------------|--------------------------------------|-------------------------------------|---------------------|-------------------------|
| Morocco  | 2005 | Female | 45 to 49 | 1.2%<br>(0.53-2%)              | 99%<br>(98-99%)          | 0.23<br>(0.095-0.41)                        | 0.88%<br>(0.51-1.6%)                 | 1.5%<br>(0.77-2.8%)                 | 48<br>(24-88)       | 2400<br>(1400-4100)     |
| Morocco  | 2005 | Female | 50 to 54 | 1.2%<br>(0.59-2.2%)            | 99%<br>(98-99%)          | 0.24<br>(0.097-0.46)                        | 0.92%<br>(0.51-1.6%)                 | 1.5%<br>(0.77-2.7%)                 | 55<br>(29-99)       | 2300<br>(1300-4000)     |
| Morocco  | 2005 | Female | 55 to 59 | 1.3%<br>(0.62-2.4%)            | 99%<br>(98-99%)          | 0.25<br>(0.098-0.48)                        | 0.96%<br>(0.51-1.7%)                 | 1.5%<br>(0.76-2.6%)                 | 51<br>(26-95)       | 1800<br>(980-3200)      |
| Morocco  | 2005 | Female | 60 to 64 | 1.4%<br>(0.62-2.6%)            | 99%<br>(97-99%)          | 0.24<br>(0.09-0.49)                         | 1%<br>(0.5-1.8%)                     | 1.5%<br>(0.7-2.7%)                  | 75<br>(37-140)      | 2200<br>(1100-4000)     |
| Morocco  | 2005 | Female | 65 to 69 | 1.4%<br>(0.65-2.5%)            | 99%<br>(98-99%)          | 0.21<br>(0.086-0.42)                        | 0.97%<br>(0.49-1.8%)                 | 1.4%<br>(0.67-2.6%)                 | 100<br>(50-200)     | 2400<br>(1200-4600)     |
| Morocco  | 2005 | Female | 70 to 74 | 1.3%<br>(0.66-2.4%)            | 99%<br>(98-99%)          | 0.17<br>(0.07-0.35)                         | 0.87%<br>(0.43-1.7%)                 | 1.2%<br>(0.56-2.3%)                 | 110<br>(53-220)     | 2100<br>(1000-4200)     |
| Morocco  | 2005 | Female | 75 to 79 | 1.2%<br>(0.55-2.2%)            | 99%<br>(98-99%)          | 0.14<br>(0.049-0.32)                        | 0.75%<br>(0.33-1.5%)                 | 0.97%<br>(0.41-2%)                  | 110<br>(45-220)     | 1500<br>(650-3100)      |
| Morocco  | 2005 | Female | 80 to 84 | 1.1%<br>(0.5-2%)               | 99%<br>(98-99%)          | 0.13<br>(0.043-0.28)                        | 0.75%<br>(0.31-1.6%)                 | 0.95%<br>(0.37-2%)                  | 78<br>(31-160)      | 820<br>(340-1700)       |
| Morocco  | 2005 | Female | 85 to 89 | 1.1%<br>(0.51-2%)              | 99%<br>(98-99%)          | 0.13<br>(0.047-0.27)                        | 0.71%<br>(0.31-1.5%)                 | 0.88%<br>(0.36-1.8%)                | 48<br>(20-100)      | 350<br>(150-750)        |
| Morocco  | 2005 | Female | 90 to 94 | 1.2%<br>(0.58-2.2%)            | 99%<br>(98-99%)          | 0.14<br>(0.049-0.29)                        | 0.64%<br>(0.25-1.4%)                 | 0.79%<br>(0.3-1.7%)                 | 18<br>(6.9-38)      | 91<br>(36-190)          |
| Morocco  | 2005 | Female | 95 plus  | 1.5%<br>(0.64-3.2%)            | 98%<br>(97-99%)          | 0.17<br>(0.046-0.41)                        | 0.7%<br>(0.22-1.5%)                  | 0.84%<br>(0.24-1.9%)                | 6.2<br>(1.8-14)     | 21<br>(6.6-46)          |
| Morocco  | 2005 | Male   | All Ages | 2.9%<br>(2.4-3.6%)             | 97%<br>(96-98%)          | 0.77<br>(0.63-0.92)                         | 1.6%<br>(1.2-2.3%)                   | 2.3%<br>(1.6-3.2%)                  | 1900<br>(1300-2700) | 75000<br>(54000-100000) |
| Morocco  | 2005 | Male   | 15 to 19 | 2.2%<br>(1.2-3.5%)             | 98%<br>(96-99%)          | 0.32<br>(0.13-0.6)                          | 1.2%<br>(0.71-1.9%)                  | 1.7%<br>(0.8-3.1%)                  | 25<br>(12-46)       | 2700<br>(1700-4400)     |
| Morocco  | 2005 | Male   | 20 to 24 | 3.7%<br>(2-6.1%)               | 96%<br>(94-98%)          | 0.83<br>(0.38-1.5)                          | 2.6%<br>(1.5-4.1%)                   | 3.6%<br>(1.7-6.3%)                  | 71<br>(34-130)      | 6800<br>(4000-11000)    |
| Morocco  | 2005 | Male   | 25 to 29 | 4.8%<br>(2.6-7.3%)             | 95%<br>(93-97%)          | 1.3<br>(0.64-2.3)                           | 3.2%<br>(1.9-5%)                     | 4.9%<br>(2.5-8.3%)                  | 92<br>(45-160)      | 7400<br>(4400-11000)    |
| Morocco  | 2005 | Male   | 30 to 34 | 5%<br>(2.8-8.3%)               | 95%<br>(92-97%)          | 1.5<br>(0.81-2.5)                           | 3.2%<br>(2-5.3%)                     | 5.1%<br>(2.8-9.2%)                  | 97<br>(52-170)      | 6900<br>(4100-11000)    |
| Morocco  | 2005 | Male   | 35 to 39 | 5.2%<br>(3-8.3%)               | 95%<br>(92-97%)          | 1.6<br>(0.81-2.7)                           | 3.2%<br>(2-5.1%)                     | 5.2%<br>(2.9-8.6%)                  | 120<br>(68-200)     | 7300<br>(4600-12000)    |
| Morocco  | 2005 | Male   | 40 to 44 | 5.1%<br>(3-8.2%)               | 95%<br>(92-97%)          | 1.6<br>(0.78-2.8)                           | 3%<br>(1.9-4.7%)                     | 4.7%<br>(2.7-7.7%)                  | 150<br>(83-240)     | 8000<br>(4800-12000)    |
| Morocco  | 2005 | Male   | 45 to 49 | 4.7%<br>(2.4-7.5%)             | 95%<br>(93-98%)          | 1.6<br>(0.72-2.8)                           | 2.9%<br>(1.8-4.7%)                   | 4.5%<br>(2.6-7.4%)                  | 170<br>(97-280)     | 8000<br>(4800-13000)    |
| Morocco  | 2005 | Male   | 50 to 54 | 4.2%<br>(2.4-6.7%)             | 96%<br>(93-98%)          | 1.4<br>(0.64-2.5)                           | 2.5%<br>(1.5-3.9%)                   | 3.6%<br>(2.2-5.8%)                  | 160<br>(93-260)     | 6400<br>(3900-10000)    |
| Morocco  | 2005 | Male   | 55 to 59 | 3.7%<br>(2-6.5%)               | 96%<br>(94-98%)          | 1.2<br>(0.5-2.4)                            | 2.2%<br>(1.3-3.6%)                   | 3.1%<br>(1.8-5.1%)                  | 130<br>(75-220)     | 4600<br>(2700-7400)     |
| Morocco  | 2005 | Male   | 60 to 64 | 3.3%<br>(1.7-6%)               | 97%<br>(94-98%)          | 1<br>(0.4-2)                                | 2%<br>(1.1-3.5%)                     | 2.7%<br>(1.5-4.9%)                  | 150<br>(86-270)     | 4400<br>(2500-7700)     |

| Location | Year | Sex    | Age      | Prevalence of current drinkers | Prevalence of abstainers | Population average of standard drinks daily | Percent of total attributable deaths | Percent of total attributable DALYs | Attributable deaths | Attributable DALYs     |
|----------|------|--------|----------|--------------------------------|--------------------------|---------------------------------------------|--------------------------------------|-------------------------------------|---------------------|------------------------|
| Morocco  | 2005 | Male   | 65 to 69 | 3.1%<br>(1.6-5.3%)             | 97%<br>(95-98%)          | 0.8<br>(0.36-1.5)                           | 1.9%<br>(1.1-3.2%)                   | 2.4%<br>(1.4-4.3%)                  | 180<br>(100-320)    | 4200<br>(2500-7300)    |
| Morocco  | 2005 | Male   | 70 to 74 | 2.9%<br>(1.6-4.9%)             | 97%<br>(95-98%)          | 0.61<br>(0.26-1.2)                          | 1.8%<br>(1-3%)                       | 2.3%<br>(1.3-4%)                    | 200<br>(110-340)    | 3700<br>(2100-6200)    |
| Morocco  | 2005 | Male   | 75 to 79 | 2.5%<br>(1.3-4.4%)             | 97%<br>(96-99%)          | 0.47<br>(0.18-0.94)                         | 1.5%<br>(0.78-2.6%)                  | 1.8%<br>(0.98-3.2%)                 | 170<br>(91-300)     | 2500<br>(1300-4200)    |
| Morocco  | 2005 | Male   | 80 to 84 | 2.2%<br>(1.1-4%)               | 98%<br>(96-99%)          | 0.38<br>(0.14-0.75)                         | 1.4%<br>(0.71-2.5%)                  | 1.7%<br>(0.86-3.1%)                 | 110<br>(56-210)     | 1200<br>(600-2100)     |
| Morocco  | 2005 | Male   | 85 to 89 | 2.1%<br>(1.1-3.7%)             | 98%<br>(96-99%)          | 0.34<br>(0.13-0.67)                         | 1.2%<br>(0.63-2.2%)                  | 1.4%<br>(0.73-2.7%)                 | 60<br>(30-110)      | 440<br>(230-820)       |
| Morocco  | 2005 | Male   | 90 to 94 | 2.3%<br>(1.2-3.9%)             | 98%<br>(96-99%)          | 0.34<br>(0.13-0.67)                         | 1.1%<br>(0.6-2%)                     | 1.3%<br>(0.69-2.4%)                 | 21<br>(11-39)       | 110<br>(59-200)        |
| Morocco  | 2005 | Male   | 95 plus  | 2.8%<br>(1.3-5.5%)             | 97%<br>(95-99%)          | 0.37<br>(0.11-0.89)                         | 1.1%<br>(0.51-2.2%)                  | 1.3%<br>(0.55-2.6%)                 | 5.7<br>(2.4-11)     | 20<br>(8.9-38)         |
| Morocco  | 2010 | Female | All Ages | 1.1%<br>(0.81-1.4%)            | 99%<br>(99-99%)          | 0.12<br>(0.092-0.16)                        | 0.62%<br>(0.46-0.88%)                | 0.93%<br>(0.59-1.5%)                | 780<br>(480-1300)   | 27000<br>(20000-39000) |
| Morocco  | 2010 | Female | 15 to 19 | 1%<br>(0.48-1.7%)              | 99%<br>(98-100%)         | 0.097<br>(0.038-0.2)                        | 0.46%<br>(0.26-0.76%)                | 0.89%<br>(0.41-1.8%)                | 7.1<br>(3.2-14)     | 930<br>(510-1500)      |
| Morocco  | 2010 | Female | 20 to 24 | 1.3%<br>(0.58-2.3%)            | 99%<br>(98-99%)          | 0.16<br>(0.062-0.3)                         | 0.77%<br>(0.47-1.2%)                 | 1.4%<br>(0.63-2.7%)                 | 13<br>(6-26)        | 1800<br>(1000-2900)    |
| Morocco  | 2010 | Female | 25 to 29 | 1.4%<br>(0.61-2.4%)            | 99%<br>(98-99%)          | 0.17<br>(0.073-0.31)                        | 0.89%<br>(0.57-1.4%)                 | 1.7%<br>(0.77-3.3%)                 | 19<br>(8.6-38)      | 2200<br>(1300-3400)    |
| Morocco  | 2010 | Female | 30 to 34 | 1.3%<br>(0.59-2.4%)            | 99%<br>(98-99%)          | 0.17<br>(0.074-0.31)                        | 0.9%<br>(0.54-1.4%)                  | 1.7%<br>(0.82-3.3%)                 | 22<br>(10-43)       | 2200<br>(1300-3400)    |
| Morocco  | 2010 | Female | 35 to 39 | 1.3%<br>(0.64-2.4%)            | 99%<br>(98-99%)          | 0.18<br>(0.08-0.33)                         | 0.8%<br>(0.51-1.3%)                  | 1.5%<br>(0.78-2.7%)                 | 26<br>(13-47)       | 2000<br>(1200-3100)    |
| Morocco  | 2010 | Female | 40 to 44 | 1.3%<br>(0.67-2.4%)            | 99%<br>(98-99%)          | 0.19<br>(0.085-0.35)                        | 0.83%<br>(0.49-1.4%)                 | 1.6%<br>(0.83-2.8%)                 | 36<br>(18-63)       | 2200<br>(1300-3600)    |
| Morocco  | 2010 | Female | 45 to 49 | 1.3%<br>(0.56-2.3%)            | 99%<br>(98-99%)          | 0.2<br>(0.083-0.37)                         | 0.84%<br>(0.47-1.5%)                 | 1.5%<br>(0.72-2.8%)                 | 48<br>(23-91)       | 2400<br>(1300-4300)    |
| Morocco  | 2010 | Female | 50 to 54 | 1.3%<br>(0.62-2.5%)            | 99%<br>(97-99%)          | 0.21<br>(0.083-0.4)                         | 0.86%<br>(0.47-1.5%)                 | 1.4%<br>(0.73-2.5%)                 | 61<br>(31-110)      | 2600<br>(1400-4600)    |
| Morocco  | 2010 | Female | 55 to 59 | 1.4%<br>(0.64-2.5%)            | 99%<br>(97-99%)          | 0.2<br>(0.082-0.37)                         | 0.86%<br>(0.45-1.5%)                 | 1.3%<br>(0.7-2.3%)                  | 67<br>(34-120)      | 2400<br>(1300-4300)    |
| Morocco  | 2010 | Female | 60 to 64 | 1.4%<br>(0.63-2.7%)            | 99%<br>(97-99%)          | 0.19<br>(0.074-0.39)                        | 0.86%<br>(0.45-1.5%)                 | 1.3%<br>(0.63-2.3%)                 | 61<br>(30-110)      | 1800<br>(940-3200)     |
| Morocco  | 2010 | Female | 65 to 69 | 1.4%<br>(0.66-2.5%)            | 99%<br>(97-99%)          | 0.17<br>(0.068-0.34)                        | 0.82%<br>(0.4-1.5%)                  | 1.2%<br>(0.56-2.2%)                 | 81<br>(40-150)      | 2000<br>(1000-3800)    |
| Morocco  | 2010 | Female | 70 to 74 | 1.4%<br>(0.66-2.4%)            | 99%<br>(98-99%)          | 0.14<br>(0.054-0.28)                        | 0.71%<br>(0.31-1.4%)                 | 0.96%<br>(0.42-2%)                  | 92<br>(40-190)      | 1800<br>(790-3600)     |
| Morocco  | 2010 | Female | 75 to 79 | 1.2%<br>(0.54-2.3%)            | 99%<br>(98-99%)          | 0.11<br>(0.038-0.25)                        | 0.59%<br>(0.23-1.3%)                 | 0.78%<br>(0.3-1.7%)                 | 87<br>(33-190)      | 1300<br>(500-2800)     |
| Morocco  | 2010 | Female | 80 to 84 | 1.1%<br>(0.47-2.1%)            | 99%<br>(98-100%)         | 0.1<br>(0.033-0.21)                         | 0.58%<br>(0.23-1.2%)                 | 0.74%<br>(0.28-1.6%)                | 72<br>(27-150)      | 770<br>(300-1600)      |

| Location | Year | Sex    | Age      | Prevalence of current drinkers | Prevalence of abstainers | Population average of standard drinks daily | Percent of total attributable deaths | Percent of total attributable DALYs | Attributable deaths | Attributable DALYs     |
|----------|------|--------|----------|--------------------------------|--------------------------|---------------------------------------------|--------------------------------------|-------------------------------------|---------------------|------------------------|
| Morocco  | 2010 | Female | 85 to 89 | 1.1%<br>(0.5-2%)               | 99%<br>(98-100%)         | 0.098<br>(0.036-0.21)                       | 0.54%<br>(0.21-1.1%)                 | 0.67%<br>(0.25-1.4%)                | 54<br>(20-120)      | 400<br>(160-850)       |
| Morocco  | 2010 | Female | 90 to 94 | 1.2%<br>(0.57-2.3%)            | 99%<br>(98-99%)          | 0.11<br>(0.038-0.24)                        | 0.5%<br>(0.17-1.1%)                  | 0.6%<br>(0.2-1.4%)                  | 22<br>(7.2-49)      | 110<br>(39-250)        |
| Morocco  | 2010 | Female | 95 plus  | 1.6%<br>(0.62-3.4%)            | 98%<br>(97-99%)          | 0.14<br>(0.036-0.33)                        | 0.55%<br>(0.13-1.3%)                 | 0.65%<br>(0.14-1.6%)                | 6.4<br>(1.4-15)     | 22<br>(5.6-52)         |
| Morocco  | 2010 | Male   | All Ages | 2.9%<br>(2.3-3.5%)             | 97%<br>(96-98%)          | 0.58<br>(0.47-0.7)                          | 1.6%<br>(1.2-2.2%)                   | 2.2%<br>(1.6-3%)                    | 1900<br>(1300-2600) | 72000<br>(53000-96000) |
| Morocco  | 2010 | Male   | 15 to 19 | 2%<br>(1-3.3%)                 | 98%<br>(97-99%)          | 0.22<br>(0.09-0.44)                         | 1%<br>(0.61-1.6%)                    | 1.4%<br>(0.64-2.6%)                 | 19<br>(8.7-36)      | 2300<br>(1300-3600)    |
| Morocco  | 2010 | Male   | 20 to 24 | 3.2%<br>(1.7-5.3%)             | 97%<br>(95-98%)          | 0.55<br>(0.24-1)                            | 2.3%<br>(1.4-3.4%)                   | 2.9%<br>(1.5-5.1%)                  | 55<br>(27-97)       | 5700<br>(3500-8800)    |
| Morocco  | 2010 | Male   | 25 to 29 | 4.2%<br>(2.3-6.6%)             | 96%<br>(93-98%)          | 0.87<br>(0.4-1.5)                           | 2.8%<br>(1.7-4.3%)                   | 4%<br>(2.1-6.9%)                    | 81<br>(41-140)      | 7000<br>(4200-11000)   |
| Morocco  | 2010 | Male   | 30 to 34 | 4.5%<br>(2.4-7.7%)             | 95%<br>(92-98%)          | 1<br>(0.52-1.7)                             | 2.8%<br>(1.7-4.6%)                   | 4.4%<br>(2.4-7.6%)                  | 86<br>(46-160)      | 6400<br>(3900-10000)   |
| Morocco  | 2010 | Male   | 35 to 39 | 4.8%<br>(2.6-7.9%)             | 95%<br>(92-97%)          | 1.1<br>(0.54-2)                             | 2.9%<br>(1.8-4.6%)                   | 4.6%<br>(2.6-7.7%)                  | 100<br>(57-170)     | 6400<br>(4100-10000)   |
| Morocco  | 2010 | Male   | 40 to 44 | 4.9%<br>(2.8-8%)               | 95%<br>(92-97%)          | 1.2<br>(0.54-2)                             | 2.8%<br>(1.8-4.3%)                   | 4.3%<br>(2.6-6.9%)                  | 120<br>(71-200)     | 6800<br>(4300-10000)   |
| Morocco  | 2010 | Male   | 45 to 49 | 4.6%<br>(2.3-7.4%)             | 95%<br>(93-98%)          | 1.2<br>(0.53-2.1)                           | 2.7%<br>(1.7-4.3%)                   | 4.1%<br>(2.4-6.6%)                  | 170<br>(97-280)     | 8000<br>(4800-12000)   |
| Morocco  | 2010 | Male   | 50 to 54 | 4.1%<br>(2.3-6.7%)             | 96%<br>(93-98%)          | 1.1<br>(0.48-1.9)                           | 2.3%<br>(1.4-3.5%)                   | 3.3%<br>(2-5.3%)                    | 180<br>(100-280)    | 7200<br>(4400-11000)   |
| Morocco  | 2010 | Male   | 55 to 59 | 3.7%<br>(1.9-6.5%)             | 96%<br>(93-98%)          | 0.93<br>(0.4-1.8)                           | 2.1%<br>(1.2-3.3%)                   | 2.9%<br>(1.7-4.7%)                  | 180<br>(100-290)    | 6200<br>(3700-9800)    |
| Morocco  | 2010 | Male   | 60 to 64 | 3.4%<br>(1.8-6.2%)             | 97%<br>(94-98%)          | 0.78<br>(0.32-1.6)                          | 1.9%<br>(1.1-3.2%)                   | 2.5%<br>(1.4-4.4%)                  | 150<br>(89-260)     | 4400<br>(2600-7300)    |
| Morocco  | 2010 | Male   | 65 to 69 | 3.2%<br>(1.7-5.5%)             | 97%<br>(95-98%)          | 0.63<br>(0.28-1.2)                          | 1.7%<br>(1-2.9%)                     | 2.3%<br>(1.3-3.9%)                  | 170<br>(98-290)     | 4000<br>(2300-6600)    |
| Morocco  | 2010 | Male   | 70 to 74 | 3%<br>(1.6-5.1%)               | 97%<br>(95-98%)          | 0.47<br>(0.21-0.94)                         | 1.6%<br>(0.95-2.7%)                  | 2.1%<br>(1.2-3.5%)                  | 190<br>(110-320)    | 3600<br>(2100-6000)    |
| Morocco  | 2010 | Male   | 75 to 79 | 2.6%<br>(1.4-4.7%)             | 97%<br>(95-99%)          | 0.36<br>(0.14-0.74)                         | 1.3%<br>(0.7-2.3%)                   | 1.6%<br>(0.85-2.9%)                 | 150<br>(78-260)     | 2200<br>(1200-3800)    |
| Morocco  | 2010 | Male   | 80 to 84 | 2.3%<br>(1.2-4.1%)             | 98%<br>(96-99%)          | 0.3<br>(0.11-0.6)                           | 1.2%<br>(0.61-2.1%)                  | 1.5%<br>(0.73-2.7%)                 | 120<br>(56-210)     | 1200<br>(610-2200)     |
| Morocco  | 2010 | Male   | 85 to 89 | 2.2%<br>(1.1-3.7%)             | 98%<br>(96-99%)          | 0.27<br>(0.11-0.55)                         | 1.1%<br>(0.56-1.9%)                  | 1.3%<br>(0.66-2.2%)                 | 78<br>(40-140)      | 590<br>(310-1000)      |
| Morocco  | 2010 | Male   | 90 to 94 | 2.4%<br>(1.2-4.1%)             | 98%<br>(96-99%)          | 0.27<br>(0.1-0.53)                          | 0.95%<br>(0.48-1.7%)                 | 1.1%<br>(0.56-2%)                   | 30<br>(15-53)       | 150<br>(80-270)        |
| Morocco  | 2010 | Male   | 95 plus  | 2.9%<br>(1.3-5.5%)             | 97%<br>(94-99%)          | 0.29<br>(0.083-0.68)                        | 0.95%<br>(0.39-1.9%)                 | 1.1%<br>(0.4-2.2%)                  | 6.9<br>(2.6-14)     | 24<br>(9.7-49)         |
| Morocco  | 2016 | Female | All Ages | 1.1%<br>(0.84-1.4%)            | 99%<br>(99-99%)          | 0.11<br>(0.069-0.17)                        | 0.57%<br>(0.4-0.81%)                 | 0.79%<br>(0.45-1.3%)                | 700<br>(380-1200)   | 25000<br>(17000-36000) |

| Location | Year | Sex    | Age      | Prevalence of current drinkers | Prevalence of abstainers | Population average of standard drinks daily | Percent of total attributable deaths | Percent of total attributable DALYs | Attributable deaths | Attributable DALYs     |
|----------|------|--------|----------|--------------------------------|--------------------------|---------------------------------------------|--------------------------------------|-------------------------------------|---------------------|------------------------|
| Morocco  | 2016 | Female | 15 to 19 | 1%<br>(0.48-1.7%)              | 99%<br>(98-100%)         | 0.087<br>(0.031-0.19)                       | 0.41%<br>(0.24-0.68%)                | 0.76%<br>(0.31-1.6%)                | 4.9<br>(2.1-10)     | 720<br>(410-1200)      |
| Morocco  | 2016 | Female | 20 to 24 | 1.3%<br>(0.59-2.2%)            | 99%<br>(98-99%)          | 0.14<br>(0.051-0.31)                        | 0.72%<br>(0.45-1.1%)                 | 1.2%<br>(0.53-2.2%)                 | 9.7<br>(4.2-19)     | 1500<br>(910-2400)     |
| Morocco  | 2016 | Female | 25 to 29 | 1.4%<br>(0.63-2.4%)            | 99%<br>(98-99%)          | 0.15<br>(0.057-0.3)                         | 0.81%<br>(0.52-1.2%)                 | 1.4%<br>(0.64-2.9%)                 | 14<br>(6.2-28)      | 1900<br>(1200-2900)    |
| Morocco  | 2016 | Female | 30 to 34 | 1.3%<br>(0.63-2.4%)            | 99%<br>(98-99%)          | 0.15<br>(0.059-0.3)                         | 0.8%<br>(0.52-1.2%)                  | 1.5%<br>(0.72-2.9%)                 | 19<br>(8.9-37)      | 2100<br>(1300-3300)    |
| Morocco  | 2016 | Female | 35 to 39 | 1.3%<br>(0.65-2.4%)            | 99%<br>(98-99%)          | 0.16<br>(0.067-0.33)                        | 0.72%<br>(0.45-1.1%)                 | 1.3%<br>(0.68-2.4%)                 | 22<br>(11-40)       | 1900<br>(1200-2900)    |
| Morocco  | 2016 | Female | 40 to 44 | 1.3%<br>(0.69-2.4%)            | 99%<br>(98-99%)          | 0.17<br>(0.066-0.34)                        | 0.71%<br>(0.43-1.1%)                 | 1.4%<br>(0.7-2.4%)                  | 30<br>(15-54)       | 2000<br>(1200-3200)    |
| Morocco  | 2016 | Female | 45 to 49 | 1.3%<br>(0.56-2.3%)            | 99%<br>(98-99%)          | 0.18<br>(0.065-0.35)                        | 0.71%<br>(0.41-1.2%)                 | 1.3%<br>(0.61-2.4%)                 | 40<br>(19-74)       | 2200<br>(1200-3700)    |
| Morocco  | 2016 | Female | 50 to 54 | 1.3%<br>(0.64-2.5%)            | 99%<br>(98-99%)          | 0.18<br>(0.066-0.36)                        | 0.73%<br>(0.41-1.3%)                 | 1.2%<br>(0.63-2.2%)                 | 54<br>(28-98)       | 2400<br>(1400-4200)    |
| Morocco  | 2016 | Female | 55 to 59 | 1.4%<br>(0.64-2.5%)            | 99%<br>(97-99%)          | 0.17<br>(0.067-0.35)                        | 0.74%<br>(0.4-1.3%)                  | 1.2%<br>(0.59-2.1%)                 | 70<br>(36-130)      | 2600<br>(1400-4700)    |
| Morocco  | 2016 | Female | 60 to 64 | 1.4%<br>(0.61-2.7%)            | 99%<br>(97-99%)          | 0.17<br>(0.058-0.37)                        | 0.73%<br>(0.37-1.3%)                 | 1.1%<br>(0.52-2%)                   | 80<br>(39-140)      | 2400<br>(1200-4400)    |
| Morocco  | 2016 | Female | 65 to 69 | 1.4%<br>(0.62-2.5%)            | 99%<br>(97-99%)          | 0.15<br>(0.052-0.32)                        | 0.68%<br>(0.32-1.3%)                 | 0.97%<br>(0.46-1.9%)                | 67<br>(31-130)      | 1700<br>(770-3300)     |
| Morocco  | 2016 | Female | 70 to 74 | 1.3%<br>(0.66-2.4%)            | 99%<br>(98-99%)          | 0.12<br>(0.043-0.26)                        | 0.58%<br>(0.22-1.1%)                 | 0.79%<br>(0.29-1.6%)                | 70<br>(26-150)      | 1400<br>(530-2800)     |
| Morocco  | 2016 | Female | 75 to 79 | 1.2%<br>(0.56-2.2%)            | 99%<br>(98-99%)          | 0.1<br>(0.032-0.23)                         | 0.48%<br>(0.17-0.99%)                | 0.63%<br>(0.21-1.3%)                | 71<br>(23-150)      | 1100<br>(350-2200)     |
| Morocco  | 2016 | Female | 80 to 84 | 1.1%<br>(0.48-2%)              | 99%<br>(98-100%)         | 0.089<br>(0.028-0.2)                        | 0.47%<br>(0.17-0.96%)                | 0.59%<br>(0.2-1.3%)                 | 64<br>(21-140)      | 690<br>(240-1400)      |
| Morocco  | 2016 | Female | 85 to 89 | 1.1%<br>(0.5-2%)               | 99%<br>(98-99%)          | 0.086<br>(0.03-0.2)                         | 0.43%<br>(0.14-0.92%)                | 0.53%<br>(0.16-1.2%)                | 53<br>(16-120)      | 400<br>(130-870)       |
| Morocco  | 2016 | Female | 90 to 94 | 1.2%<br>(0.57-2.2%)            | 99%<br>(98-99%)          | 0.095<br>(0.029-0.23)                       | 0.39%<br>(0.11-0.87%)                | 0.48%<br>(0.13-1.1%)                | 27<br>(7.5-63)      | 140<br>(42-320)        |
| Morocco  | 2016 | Female | 95 plus  | 1.6%<br>(0.65-3.3%)            | 98%<br>(97-99%)          | 0.12<br>(0.029-0.3)                         | 0.43%<br>(0.082-1%)                  | 0.5%<br>(0.078-1.2%)                | 9<br>(1.4-22)       | 31<br>(6.3-76)         |
| Morocco  | 2016 | Male   | All Ages | 3%<br>(2.4-3.7%)               | 97%<br>(96-98%)          | 0.53<br>(0.34-0.78)                         | 1.6%<br>(1.2-2.1%)                   | 2%<br>(1.4-2.6%)                    | 1900<br>(1400-2600) | 72000<br>(55000-94000) |
| Morocco  | 2016 | Male   | 15 to 19 | 2%<br>(1-3.1%)                 | 98%<br>(97-99%)          | 0.19<br>(0.068-0.41)                        | 0.93%<br>(0.56-1.5%)                 | 1.2%<br>(0.52-2.3%)                 | 15<br>(6.4-28)      | 1900<br>(1100-3000)    |
| Morocco  | 2016 | Male   | 20 to 24 | 3.2%<br>(1.7-5.4%)             | 97%<br>(95-98%)          | 0.48<br>(0.19-0.97)                         | 2.1%<br>(1.3-3.1%)                   | 2.6%<br>(1.3-4.5%)                  | 49<br>(24-85)       | 5300<br>(3300-8000)    |
| Morocco  | 2016 | Male   | 25 to 29 | 4.1%<br>(2.2-6.6%)             | 96%<br>(93-98%)          | 0.76<br>(0.32-1.5)                          | 2.5%<br>(1.6-3.8%)                   | 3.6%<br>(1.9-6.1%)                  | 74<br>(38-120)      | 6700<br>(4200-10000)   |
| Morocco  | 2016 | Male   | 30 to 34 | 4.5%<br>(2.4-7.8%)             | 95%<br>(92-98%)          | 0.91<br>(0.42-1.7)                          | 2.6%<br>(1.6-4%)                     | 4%<br>(2.2-6.8%)                    | 89<br>(49-150)      | 6900<br>(4300-11000)   |



| Location  | Year | Sex    | Age      | Prevalence of current drinkers | Prevalence of abstainers | Population average of standard drinks daily | Percent of total attributable deaths | Percent of total attributable DALYs | Attributable deaths    | Attributable DALYs   |
|-----------|------|--------|----------|--------------------------------|--------------------------|---------------------------------------------|--------------------------------------|-------------------------------------|------------------------|----------------------|
| Morocco   | 2016 | Male   | 35 to 39 | 4.8%<br>(2.6-7.9%)             | 95%<br>(92-97%)          | 0.99<br>(0.42-1.9)                          | 2.6%<br>(1.7-4%)                     | 4.2%<br>(2.5-6.9%)                  | 100<br>(60-170)        | 6700<br>(4300-10000) |
| Morocco   | 2016 | Male   | 40 to 44 | 4.9%<br>(2.8-8.3%)             | 95%<br>(92-97%)          | 1<br>(0.44-2)                               | 2.5%<br>(1.7-3.8%)                   | 4%<br>(2.5-6.2%)                    | 110<br>(66-180)        | 6300<br>(4100-9500)  |
| Morocco   | 2016 | Male   | 45 to 49 | 4.6%<br>(2.3-7.4%)             | 95%<br>(93-98%)          | 1<br>(0.42-1.9)                             | 2.5%<br>(1.6-3.8%)                   | 3.9%<br>(2.3-6.1%)                  | 140<br>(83-220)        | 6800<br>(4300-10000) |
| Morocco   | 2016 | Male   | 50 to 54 | 4.1%<br>(2.3-7%)               | 96%<br>(93-98%)          | 0.92<br>(0.37-1.7)                          | 2.1%<br>(1.4-3.2%)                   | 3.1%<br>(1.9-4.7%)                  | 170<br>(100-270)       | 7200<br>(4500-11000) |
| Morocco   | 2016 | Male   | 55 to 59 | 3.7%<br>(2-6.6%)               | 96%<br>(93-98%)          | 0.8<br>(0.3-1.6)                            | 1.9%<br>(1.2-3%)                     | 2.7%<br>(1.6-4.2%)                  | 200<br>(120-330)       | 7000<br>(4200-11000) |
| Morocco   | 2016 | Male   | 60 to 64 | 3.4%<br>(1.7-6.1%)             | 97%<br>(94-98%)          | 0.66<br>(0.25-1.4)                          | 1.7%<br>(0.98-2.8%)                  | 2.3%<br>(1.3-3.8%)                  | 210<br>(120-340)       | 6000<br>(3600-9900)  |
| Morocco   | 2016 | Male   | 65 to 69 | 3.1%<br>(1.7-5.3%)             | 97%<br>(95-98%)          | 0.53<br>(0.21-1.1)                          | 1.5%<br>(0.92-2.4%)                  | 2%<br>(1.2-3.3%)                    | 170<br>(100-280)       | 4100<br>(2500-6600)  |
| Morocco   | 2016 | Male   | 70 to 74 | 2.9%<br>(1.6-5%)               | 97%<br>(95-98%)          | 0.41<br>(0.16-0.89)                         | 1.4%<br>(0.81-2.3%)                  | 1.8%<br>(1-3.1%)                    | 170<br>(96-290)        | 3200<br>(1900-5400)  |
| Morocco   | 2016 | Male   | 75 to 79 | 2.6%<br>(1.4-4.7%)             | 97%<br>(95-99%)          | 0.31<br>(0.11-0.7)                          | 1.1%<br>(0.57-2%)                    | 1.4%<br>(0.7-2.5%)                  | 140<br>(72-260)        | 2100<br>(1100-3700)  |
| Morocco   | 2016 | Male   | 80 to 84 | 2.3%<br>(1.2-4.1%)             | 98%<br>(96-99%)          | 0.26<br>(0.089-0.55)                        | 1%<br>(0.51-1.8%)                    | 1.3%<br>(0.62-2.1%)                 | 110<br>(55-200)        | 1200<br>(610-2100)   |
| Morocco   | 2016 | Male   | 85 to 89 | 2.2%<br>(1.1-3.8%)             | 98%<br>(96-99%)          | 0.23<br>(0.086-0.49)                        | 0.89%<br>(0.43-1.5%)                 | 1.1%<br>(0.49-1.8%)                 | 80<br>(37-140)         | 610<br>(300-1100)    |
| Morocco   | 2016 | Male   | 90 to 94 | 2.4%<br>(1.3-4.2%)             | 98%<br>(96-99%)          | 0.23<br>(0.082-0.51)                        | 0.8%<br>(0.34-1.5%)                  | 0.93%<br>(0.37-1.7%)                | 40<br>(16-76)          | 210<br>(89-390)      |
| Morocco   | 2016 | Male   | 95 plus  | 2.9%<br>(1.3-5.8%)             | 97%<br>(94-99%)          | 0.25<br>(0.067-0.63)                        | 0.8%<br>(0.27-1.6%)                  | 0.9%<br>(0.26-1.9%)                 | 10<br>(3-22)           | 38<br>(13-75)        |
| Palestine | 1990 | Female | All Ages | 9.8%<br>(5.9-15%)              | 90%<br>(85-94%)          | 0.017<br>(0.01-0.028)                       | 0.1%<br>(0.026-0.18%)                | -0.05%<br>(-0.26-0.087%)            | -2.1<br>(-11-3.5)      | 320<br>(84-540)      |
| Palestine | 1990 | Female | 15 to 19 | 9.3%<br>(2.8-21%)              | 91%<br>(79-97%)          | 0.016<br>(0.004-0.038)                      | 0.32%<br>(0.19-0.48%)                | 0.2%<br>(0.12-0.32%)                | 0.14<br>(0.072-0.23)   | 49<br>(26-77)        |
| Palestine | 1990 | Female | 20 to 24 | 12%<br>(3.4-26%)               | 88%<br>(74-97%)          | 0.025<br>(0.007-0.057)                      | 0.63%<br>(0.4-0.93%)                 | 0.23%<br>(0.12-0.37%)               | 0.17<br>(0.08-0.28)    | 92<br>(55-140)       |
| Palestine | 1990 | Female | 25 to 29 | 14%<br>(3.8-30%)               | 86%<br>(70-96%)          | 0.031<br>(0.0081-0.069)                     | 0.64%<br>(0.44-0.89%)                | 0.23%<br>(0.096-0.37%)              | 0.16<br>(0.062-0.28)   | 85<br>(54-130)       |
| Palestine | 1990 | Female | 30 to 34 | 15%<br>(3.9-32%)               | 85%<br>(68-96%)          | 0.037<br>(0.011-0.076)                      | 0.57%<br>(0.37-0.81%)                | 0.26%<br>(0.053-0.44%)              | 0.16<br>(0.033-0.28)   | 61<br>(37-94)        |
| Palestine | 1990 | Female | 35 to 39 | 17%<br>(4.5-33%)               | 83%<br>(67-95%)          | 0.043<br>(0.012-0.092)                      | 0.43%<br>(0.27-0.59%)                | 0.25%<br>(0.034-0.45%)              | 0.18<br>(0.023-0.33)   | 43<br>(25-62)        |
| Palestine | 1990 | Female | 40 to 44 | 18%<br>(6.1-34%)               | 82%<br>(66-94%)          | 0.048<br>(0.015-0.1)                        | 0.29%<br>(0.12-0.45%)                | 0.19%<br>(-0.072-0.39%)             | 0.16<br>(-0.058-0.35)  | 28<br>(11-45)        |
| Palestine | 1990 | Female | 45 to 49 | 18%<br>(6.6-35%)               | 82%<br>(65-93%)          | 0.051<br>(0.015-0.11)                       | 0.14%<br>(-0.12-0.31%)               | 0.03%<br>(-0.39-0.27%)              | 0.032<br>(-0.38-0.3)   | 13<br>(-12-30)       |
| Palestine | 1990 | Female | 50 to 54 | 19%<br>(7.6-37%)               | 81%<br>(63-92%)          | 0.053<br>(0.015-0.12)                       | 0.033%<br>(-0.33-0.24%)              | -0.057%<br>(-0.57-0.25%)            | -0.077<br>(-0.81-0.33) | 3.1<br>(-31-23)      |

| Location  | Year | Sex    | Age      | Prevalence of current drinkers | Prevalence of abstainers | Population average of standard drinks daily | Percent of total attributable deaths | Percent of total attributable DALYs | Attributable deaths     | Attributable DALYs   |
|-----------|------|--------|----------|--------------------------------|--------------------------|---------------------------------------------|--------------------------------------|-------------------------------------|-------------------------|----------------------|
| Palestine | 1990 | Female | 55 to 59 | 20%<br>(8-40%)                 | 80%<br>(60-92%)          | 0.053<br>(0.013-0.12)                       | -0.086%<br>(-0.58-0.18%)             | -0.17%<br>(-0.86-0.21%)             | -0.28<br>(-1.4-0.34)    | -7.4<br>(-50-16)     |
| Palestine | 1990 | Female | 60 to 64 | 21%<br>(7.9-41%)               | 79%<br>(59-92%)          | 0.052<br>(0.011-0.13)                       | -0.17%<br>(-0.74-0.16%)              | -0.25%<br>(-1.1-0.19%)              | -0.51<br>(-2.2-0.41)    | -14<br>(-64-14)      |
| Palestine | 1990 | Female | 65 to 69 | 22%<br>(8.8-40%)               | 78%<br>(60-91%)          | 0.046<br>(0.011-0.12)                       | -0.18%<br>(-0.75-0.15%)              | -0.23%<br>(-0.96-0.18%)             | -0.63<br>(-2.6-0.5)     | -15<br>(-66-13)      |
| Palestine | 1990 | Female | 70 to 74 | 21%<br>(8.4-38%)               | 79%<br>(62-92%)          | 0.037<br>(0.0085-0.1)                       | -0.15%<br>(-0.7-0.17%)               | -0.18%<br>(-0.89-0.2%)              | -0.53<br>(-2.5-0.59)    | -10<br>(-48-12)      |
| Palestine | 1990 | Female | 75 to 79 | 18%<br>(6.5-38%)               | 82%<br>(62-93%)          | 0.03<br>(0.0054-0.096)                      | -0.12%<br>(-0.7-0.15%)               | -0.14%<br>(-0.85-0.17%)             | -0.4<br>(-2.4-0.49)     | -5.7<br>(-35-7.3)    |
| Palestine | 1990 | Female | 80 to 84 | 17%<br>(5.9-37%)               | 83%<br>(63-94%)          | 0.027<br>(0.0048-0.087)                     | -0.086%<br>(-0.58-0.12%)             | -0.1%<br>(-0.67-0.14%)              | -0.23<br>(-1.5-0.3)     | -2.4<br>(-16-3.3)    |
| Palestine | 1990 | Female | 85 to 89 | 17%<br>(6.1-38%)               | 83%<br>(62-94%)          | 0.027<br>(0.0048-0.084)                     | -0.1%<br>(-0.51-0.096%)              | -0.13%<br>(-0.61-0.1%)              | -0.21<br>(-1-0.17)      | -1.5<br>(-7.5-1.4)   |
| Palestine | 1990 | Female | 90 to 94 | 20%<br>(6.7-43%)               | 80%<br>(57-93%)          | 0.03<br>(0.0052-0.087)                      | -0.14%<br>(-0.6-0.067%)              | -0.18%<br>(-0.72-0.066%)            | -0.15<br>(-0.61-0.056)  | -0.73<br>(-3.1-0.35) |
| Palestine | 1990 | Female | 95 plus  | 24%<br>(7.2-49%)               | 76%<br>(51-93%)          | 0.035<br>(0.0055-0.11)                      | -0.19%<br>(-0.79-0.066%)             | -0.25%<br>(-0.98-0.056%)            | -0.081<br>(-0.32-0.018) | -0.25<br>(-1-0.09)   |
| Palestine | 1990 | Male   | All Ages | 7.4%<br>(4.9-10%)              | 93%<br>(90-95%)          | 0.019<br>(0.011-0.03)                       | 0.22%<br>(0.14-0.33%)                | 0.098%<br>(-0.024-0.2%)             | 4.4<br>(-1.2-9)         | 730<br>(470-1000)    |
| Palestine | 1990 | Male   | 15 to 19 | 6.7%<br>(2.8-14%)              | 93%<br>(86-97%)          | 0.011<br>(0.0031-0.025)                     | 0.42%<br>(0.26-0.64%)                | 0.16%<br>(0.071-0.28%)              | 0.21<br>(0.093-0.4)     | 80<br>(49-130)       |
| Palestine | 1990 | Male   | 20 to 24 | 10%<br>(4.2-20%)               | 90%<br>(80-96%)          | 0.024<br>(0.0082-0.052)                     | 0.81%<br>(0.52-1.2%)                 | 0.23%<br>(0.11-0.45%)               | 0.36<br>(0.17-0.73)     | 160<br>(99-240)      |
| Palestine | 1990 | Male   | 25 to 29 | 13%<br>(5-24%)                 | 87%<br>(76-95%)          | 0.038<br>(0.013-0.079)                      | 0.85%<br>(0.6-1.2%)                  | 0.31%<br>(0.15-0.61%)               | 0.4<br>(0.19-0.75)      | 130<br>(89-190)      |
| Palestine | 1990 | Male   | 30 to 34 | 15%<br>(5.1-28%)               | 85%<br>(72-95%)          | 0.049<br>(0.017-0.097)                      | 0.78%<br>(0.53-1.1%)                 | 0.35%<br>(0.16-0.61%)               | 0.34<br>(0.16-0.61)     | 92<br>(58-130)       |
| Palestine | 1990 | Male   | 35 to 39 | 16%<br>(6.2-29%)               | 84%<br>(71-94%)          | 0.055<br>(0.019-0.11)                       | 0.73%<br>(0.5-1%)                    | 0.43%<br>(0.16-0.74%)               | 0.39<br>(0.14-0.69)     | 72<br>(47-100)       |
| Palestine | 1990 | Male   | 40 to 44 | 16%<br>(7-29%)                 | 84%<br>(71-93%)          | 0.059<br>(0.02-0.12)                        | 0.56%<br>(0.31-0.82%)                | 0.3%<br>(-0.086-0.6%)               | 0.35<br>(-0.11-0.73)    | 61<br>(33-89)        |
| Palestine | 1990 | Male   | 45 to 49 | 16%<br>(6.3-29%)               | 84%<br>(71-94%)          | 0.061<br>(0.019-0.13)                       | 0.43%<br>(0.097-0.66%)               | 0.27%<br>(-0.24-0.61%)              | 0.37<br>(-0.34-0.91)    | 44<br>(10-70)        |
| Palestine | 1990 | Male   | 50 to 54 | 15%<br>(6.5-30%)               | 85%<br>(70-94%)          | 0.06<br>(0.019-0.13)                        | 0.29%<br>(-0.041-0.52%)              | 0.18%<br>(-0.35-0.53%)              | 0.3<br>(-0.57-0.9)      | 29<br>(-4.3-54)      |
| Palestine | 1990 | Male   | 55 to 59 | 14%<br>(6.4-27%)               | 86%<br>(73-94%)          | 0.058<br>(0.016-0.13)                       | 0.18%<br>(-0.17-0.4%)                | 0.11%<br>(-0.44-0.43%)              | 0.2<br>(-0.8-0.83)      | 16<br>(-16-38)       |
| Palestine | 1990 | Male   | 60 to 64 | 14%<br>(5.7-27%)               | 86%<br>(73-94%)          | 0.053<br>(0.013-0.14)                       | 0.14%<br>(-0.23-0.37%)               | 0.1%<br>(-0.41-0.43%)               | 0.19<br>(-0.83-0.82)    | 10<br>(-18-27)       |
| Palestine | 1990 | Male   | 65 to 69 | 13%<br>(5.8-25%)               | 87%<br>(75-94%)          | 0.043<br>(0.012-0.1)                        | 0.12%<br>(-0.19-0.31%)               | 0.1%<br>(-0.32-0.35%)               | 0.22<br>(-0.68-0.75)    | 7.6<br>(-13-19)      |
| Palestine | 1990 | Male   | 70 to 74 | 12%<br>(5.5-23%)               | 88%<br>(77-95%)          | 0.033<br>(0.0084-0.083)                     | 0.13%<br>(-0.11-0.28%)               | 0.13%<br>(-0.17-0.33%)              | 0.31<br>(-0.41-0.79)    | 7<br>(-6.2-16)       |

| Location  | Year | Sex    | Age      | Prevalence of current drinkers | Prevalence of abstainers | Population average of standard drinks daily | Percent of total attributable deaths | Percent of total attributable DALYs | Attributable deaths      | Attributable DALYs    |
|-----------|------|--------|----------|--------------------------------|--------------------------|---------------------------------------------|--------------------------------------|-------------------------------------|--------------------------|-----------------------|
| Palestine | 1990 | Male   | 75 to 79 | 11%<br>(4.6-21%)               | 89%<br>(79-95%)          | 0.025<br>(0.0056-0.071)                     | 0.11%<br>(-0.11-0.24%)               | 0.12%<br>(-0.16-0.27%)              | 0.3<br>(-0.41-0.7)       | 4.9<br>(-4.8-10)      |
| Palestine | 1990 | Male   | 80 to 84 | 9.5%<br>(3.6-19%)              | 90%<br>(81-96%)          | 0.021<br>(0.0046-0.055)                     | 0.12%<br>(-0.052-0.23%)              | 0.13%<br>(-0.078-0.26%)             | 0.27<br>(-0.16-0.56)     | 3.1<br>(-1.3-6.1)     |
| Palestine | 1990 | Male   | 85 to 89 | 9.3%<br>(3.8-18%)              | 91%<br>(82-96%)          | 0.019<br>(0.0043-0.049)                     | 0.099%<br>(-0.046-0.2%)              | 0.095%<br>(-0.077-0.22%)            | 0.15<br>(-0.12-0.35)     | 1.3<br>(-0.63-2.7)    |
| Palestine | 1990 | Male   | 90 to 94 | 10%<br>(4.4-21%)               | 90%<br>(79-96%)          | 0.02<br>(0.0045-0.056)                      | 0.072%<br>(-0.082-0.18%)             | 0.055%<br>(-0.13-0.18%)             | 0.044<br>(-0.11-0.15)    | 0.34<br>(-0.38-0.85)  |
| Palestine | 1990 | Male   | 95 plus  | 13%<br>(4.8-27%)               | 87%<br>(73-95%)          | 0.023<br>(0.0038-0.071)                     | 0.068%<br>(-0.14-0.18%)              | 0.024%<br>(-0.23-0.15%)             | 0.0065<br>(-0.063-0.042) | 0.071<br>(-0.15-0.19) |
| Palestine | 1995 | Female | All Ages | 9.9%<br>(6-16%)                | 90%<br>(84-94%)          | 0.021<br>(0.015-0.027)                      | 0.1%<br>(0.011-0.19%)                | -0.11%<br>(-0.38-0.074%)            | -4.7<br>(-17-3.1)        | 340<br>(34-600)       |
| Palestine | 1995 | Female | 15 to 19 | 9.6%<br>(3.1-22%)              | 90%<br>(78-97%)          | 0.019<br>(0.0054-0.043)                     | 0.34%<br>(0.2-0.53%)                 | 0.24%<br>(0.15-0.36%)               | 0.13<br>(0.083-0.21)     | 58<br>(33-93)         |
| Palestine | 1995 | Female | 20 to 24 | 12%<br>(3.7-27%)               | 88%<br>(73-96%)          | 0.03<br>(0.0094-0.062)                      | 0.68%<br>(0.44-1%)                   | 0.26%<br>(0.15-0.4%)                | 0.15<br>(0.085-0.23)     | 110<br>(62-170)       |
| Palestine | 1995 | Female | 25 to 29 | 14%<br>(3.9-30%)               | 86%<br>(70-96%)          | 0.036<br>(0.011-0.073)                      | 0.69%<br>(0.45-0.96%)                | 0.24%<br>(0.12-0.37%)               | 0.15<br>(0.07-0.23)      | 100<br>(62-150)       |
| Palestine | 1995 | Female | 30 to 34 | 15%<br>(4.2-33%)               | 85%<br>(67-96%)          | 0.042<br>(0.015-0.08)                       | 0.59%<br>(0.37-0.84%)                | 0.27%<br>(0.077-0.44%)              | 0.17<br>(0.048-0.29)     | 81<br>(46-120)        |
| Palestine | 1995 | Female | 35 to 39 | 17%<br>(4.9-33%)               | 83%<br>(67-95%)          | 0.05<br>(0.017-0.096)                       | 0.45%<br>(0.29-0.63%)                | 0.27%<br>(0.056-0.48%)              | 0.18<br>(0.035-0.33)     | 51<br>(30-72)         |
| Palestine | 1995 | Female | 40 to 44 | 18%<br>(6-33%)                 | 82%<br>(67-94%)          | 0.056<br>(0.019-0.11)                       | 0.3%<br>(0.12-0.47%)                 | 0.2%<br>(-0.079-0.42%)              | 0.17<br>(-0.068-0.36)    | 32<br>(13-52)         |
| Palestine | 1995 | Female | 45 to 49 | 18%<br>(6.5-34%)               | 82%<br>(66-93%)          | 0.06<br>(0.019-0.12)                        | 0.13%<br>(-0.12-0.31%)               | 0.01%<br>(-0.41-0.28%)              | 0.011<br>(-0.44-0.3)     | 14<br>(-13-33)        |
| Palestine | 1995 | Female | 50 to 54 | 19%<br>(7.5-37%)               | 81%<br>(63-92%)          | 0.062<br>(0.019-0.13)                       | -0.003%<br>(-0.4-0.24%)              | -0.11%<br>(-0.68-0.23%)             | -0.16<br>(-1.1-0.34)     | -0.29<br>(-41-26)     |
| Palestine | 1995 | Female | 55 to 59 | 20%<br>(8.4-39%)               | 80%<br>(61-92%)          | 0.062<br>(0.017-0.13)                       | -0.15%<br>(-0.7-0.16%)               | -0.26%<br>(-1-0.17%)                | -0.55<br>(-2.2-0.35)     | -17<br>(-79-17)       |
| Palestine | 1995 | Female | 60 to 64 | 21%<br>(8.6-41%)               | 79%<br>(59-91%)          | 0.06<br>(0.014-0.14)                        | -0.25%<br>(-0.94-0.12%)              | -0.34%<br>(-1.2-0.14%)              | -0.92<br>(-3.3-0.37)     | -27<br>(-97-13)       |
| Palestine | 1995 | Female | 65 to 69 | 22%<br>(9.6-39%)               | 78%<br>(61-90%)          | 0.053<br>(0.013-0.12)                       | -0.26%<br>(-0.87-0.1%)               | -0.32%<br>(-1.1-0.12%)              | -1.1<br>(-3.7-0.41)      | -26<br>(-91-11)       |
| Palestine | 1995 | Female | 70 to 74 | 21%<br>(8.7-37%)               | 79%<br>(63-91%)          | 0.042<br>(0.01-0.11)                        | -0.21%<br>(-0.85-0.11%)              | -0.25%<br>(-1-0.14%)                | -1.1<br>(-4.3-0.6)       | -21<br>(-84-11)       |
| Palestine | 1995 | Female | 75 to 79 | 19%<br>(7.2-37%)               | 81%<br>(63-93%)          | 0.034<br>(0.0068-0.095)                     | -0.17%<br>(-0.8-0.13%)               | -0.2%<br>(-0.94-0.15%)              | -0.76<br>(-3.5-0.56)     | -11<br>(-51-8.9)      |
| Palestine | 1995 | Female | 80 to 84 | 17%<br>(5.8-36%)               | 83%<br>(64-94%)          | 0.031<br>(0.0063-0.088)                     | -0.13%<br>(-0.61-0.1%)               | -0.15%<br>(-0.68-0.11%)             | -0.41<br>(-2-0.3)        | -4.4<br>(-22-3.3)     |
| Palestine | 1995 | Female | 85 to 89 | 17%<br>(5.6-37%)               | 83%<br>(63-94%)          | 0.03<br>(0.0062-0.089)                      | -0.14%<br>(-0.6-0.077%)              | -0.17%<br>(-0.68-0.083%)            | -0.34<br>(-1.5-0.16)     | -2.5<br>(-11-1.4)     |
| Palestine | 1995 | Female | 90 to 94 | 20%<br>(6.5-42%)               | 80%<br>(58-94%)          | 0.034<br>(0.0068-0.097)                     | -0.19%<br>(-0.68-0.06%)              | -0.23%<br>(-0.8-0.058%)             | -0.24<br>(-0.84-0.062)   | -1.2<br>(-4.2-0.37)   |

| Location  | Year | Sex    | Age      | Prevalence of current drinkers | Prevalence of abstainers | Population average of standard drinks daily | Percent of total attributable deaths | Percent of total attributable DALYs | Attributable deaths     | Attributable DALYs    |
|-----------|------|--------|----------|--------------------------------|--------------------------|---------------------------------------------|--------------------------------------|-------------------------------------|-------------------------|-----------------------|
| Palestine | 1995 | Female | 95 plus  | 24%<br>(7.4-48%)               | 76%<br>(52-93%)          | 0.041<br>(0.007-0.12)                       | -0.24%<br>(-0.94-0.064%)             | -0.3%<br>(-1.1-0.051%)              | -0.11<br>(-0.43-0.019)  | -0.36<br>(-1.4-0.098) |
| Palestine | 1995 | Male   | All Ages | 7.4%<br>(5-11%)                | 93%<br>(89-95%)          | 0.022<br>(0.016-0.03)                       | 0.26%<br>(0.16-0.36%)                | 0.1%<br>(-0.042-0.23%)              | 5<br>(-2-11)            | 890<br>(540-1200)     |
| Palestine | 1995 | Male   | 15 to 19 | 6.7%<br>(2.8-13%)              | 93%<br>(87-97%)          | 0.012<br>(0.0039-0.026)                     | 0.45%<br>(0.29-0.64%)                | 0.19%<br>(0.085-0.32%)              | 0.3<br>(0.14-0.54)      | 100<br>(61-150)       |
| Palestine | 1995 | Male   | 20 to 24 | 10%<br>(4.1-20%)               | 90%<br>(80-96%)          | 0.028<br>(0.01-0.054)                       | 0.91%<br>(0.6-1.3%)                  | 0.3%<br>(0.15-0.55%)                | 0.47<br>(0.23-0.87)     | 190<br>(120-280)      |
| Palestine | 1995 | Male   | 25 to 29 | 13%<br>(5.1-25%)               | 87%<br>(75-95%)          | 0.043<br>(0.017-0.084)                      | 0.95%<br>(0.67-1.3%)                 | 0.38%<br>(0.18-0.7%)                | 0.49<br>(0.23-0.9)      | 170<br>(110-240)      |
| Palestine | 1995 | Male   | 30 to 34 | 15%<br>(5.3-28%)               | 85%<br>(72-95%)          | 0.055<br>(0.022-0.1)                        | 0.87%<br>(0.61-1.2%)                 | 0.41%<br>(0.19-0.71%)               | 0.44<br>(0.2-0.76)      | 130<br>(84-180)       |
| Palestine | 1995 | Male   | 35 to 39 | 16%<br>(5.9-30%)               | 84%<br>(70-94%)          | 0.063<br>(0.023-0.12)                       | 0.78%<br>(0.54-1.1%)                 | 0.48%<br>(0.17-0.86%)               | 0.46<br>(0.16-0.81)     | 90<br>(59-130)        |
| Palestine | 1995 | Male   | 40 to 44 | 16%<br>(7.1-28%)               | 84%<br>(72-93%)          | 0.067<br>(0.025-0.13)                       | 0.58%<br>(0.32-0.84%)                | 0.31%<br>(-0.15-0.68%)              | 0.33<br>(-0.16-0.72)    | 62<br>(33-93)         |
| Palestine | 1995 | Male   | 45 to 49 | 16%<br>(6.1-29%)               | 84%<br>(71-94%)          | 0.07<br>(0.023-0.15)                        | 0.43%<br>(0.11-0.68%)                | 0.26%<br>(-0.28-0.65%)              | 0.42<br>(-0.46-1.1)     | 54<br>(12-88)         |
| Palestine | 1995 | Male   | 50 to 54 | 15%<br>(6.4-30%)               | 85%<br>(70-94%)          | 0.069<br>(0.023-0.15)                       | 0.28%<br>(-0.098-0.52%)              | 0.16%<br>(-0.44-0.54%)              | 0.3<br>(-0.86-1)        | 32<br>(-12-63)        |
| Palestine | 1995 | Male   | 55 to 59 | 14%<br>(6.2-28%)               | 86%<br>(72-94%)          | 0.066<br>(0.02-0.14)                        | 0.16%<br>(-0.25-0.41%)               | 0.076%<br>(-0.52-0.45%)             | 0.18<br>(-1.2-1.1)      | 19<br>(-29-49)        |
| Palestine | 1995 | Male   | 60 to 64 | 14%<br>(5.9-27%)               | 86%<br>(73-94%)          | 0.059<br>(0.016-0.14)                       | 0.12%<br>(-0.3-0.36%)                | 0.071%<br>(-0.51-0.41%)             | 0.19<br>(-1.4-1.1)      | 12<br>(-31-36)        |
| Palestine | 1995 | Male   | 65 to 69 | 13%<br>(5.7-25%)               | 87%<br>(75-94%)          | 0.049<br>(0.014-0.11)                       | 0.098%<br>(-0.22-0.3%)               | 0.076%<br>(-0.36-0.34%)             | 0.21<br>(-1-0.95)       | 8.3<br>(-20-25)       |
| Palestine | 1995 | Male   | 70 to 74 | 12%<br>(5.3-22%)               | 88%<br>(78-95%)          | 0.036<br>(0.011-0.086)                      | 0.11%<br>(-0.15-0.27%)               | 0.11%<br>(-0.22-0.31%)              | 0.34<br>(-0.71-1)       | 7.9<br>(-12-20)       |
| Palestine | 1995 | Male   | 75 to 79 | 11%<br>(4.5-20%)               | 89%<br>(80-96%)          | 0.027<br>(0.0068-0.073)                     | 0.1%<br>(-0.14-0.23%)                | 0.1%<br>(-0.18-0.25%)               | 0.32<br>(-0.58-0.8)     | 5.3<br>(-7.2-12)      |
| Palestine | 1995 | Male   | 80 to 84 | 9.5%<br>(3.7-19%)              | 91%<br>(81-96%)          | 0.023<br>(0.0056-0.06)                      | 0.11%<br>(-0.079-0.22%)              | 0.11%<br>(-0.11-0.24%)              | 0.3<br>(-0.28-0.63)     | 3.5<br>(-2.4-6.9)     |
| Palestine | 1995 | Male   | 85 to 89 | 9.4%<br>(3.7-18%)              | 91%<br>(82-96%)          | 0.022<br>(0.0053-0.055)                     | 0.09%<br>(-0.079-0.19%)              | 0.083%<br>(-0.11-0.2%)              | 0.16<br>(-0.21-0.4)     | 1.5<br>(-1.3-3.1)     |
| Palestine | 1995 | Male   | 90 to 94 | 11%<br>(4.2-22%)               | 89%<br>(78-96%)          | 0.023<br>(0.0053-0.063)                     | 0.06%<br>(-0.12-0.17%)               | 0.042%<br>(-0.16-0.17%)             | 0.041<br>(-0.16-0.17)   | 0.34<br>(-0.66-0.96)  |
| Palestine | 1995 | Male   | 95 plus  | 13%<br>(4.7-26%)               | 87%<br>(74-95%)          | 0.026<br>(0.0047-0.077)                     | 0.051%<br>(-0.18-0.17%)              | 0.0064%<br>(-0.27-0.15%)            | 0.002<br>(-0.084-0.047) | 0.061<br>(-0.22-0.21) |
| Palestine | 2000 | Female | All Ages | 9.8%<br>(5.6-16%)              | 90%<br>(84-94%)          | 0.035<br>(0.028-0.042)                      | 0.061%<br>(-0.08-0.17%)              | -0.26%<br>(-0.73-0.033%)            | -14<br>(-40-1.8)        | 230<br>(-300-640)     |
| Palestine | 2000 | Female | 15 to 19 | 9.3%<br>(2.8-21%)              | 91%<br>(79-97%)          | 0.031<br>(0.0091-0.071)                     | 0.35%<br>(0.21-0.54%)                | 0.21%<br>(0.13-0.33%)               | 0.15<br>(0.093-0.22)    | 69<br>(39-110)        |
| Palestine | 2000 | Female | 20 to 24 | 12%<br>(3.4-26%)               | 88%<br>(74-97%)          | 0.049<br>(0.015-0.1)                        | 0.68%<br>(0.42-1%)                   | 0.24%<br>(0.14-0.38%)               | 0.16<br>(0.096-0.25)    | 130<br>(75-200)       |

| Location  | Year | Sex    | Age      | Prevalence of current drinkers | Prevalence of abstainers | Population average of standard drinks daily | Percent of total attributable deaths | Percent of total attributable DALYs | Attributable deaths     | Attributable DALYs      |
|-----------|------|--------|----------|--------------------------------|--------------------------|---------------------------------------------|--------------------------------------|-------------------------------------|-------------------------|-------------------------|
| Palestine | 2000 | Female | 25 to 29 | 14%<br>(3.6-29%)               | 86%<br>(71-96%)          | 0.059<br>(0.017-0.12)                       | 0.69%<br>(0.46-0.95%)                | 0.23%<br>(0.099-0.4%)               | 0.16<br>(0.068-0.27)    | 120<br>(77-180)         |
| Palestine | 2000 | Female | 30 to 34 | 15%<br>(4-33%)                 | 85%<br>(67-96%)          | 0.069<br>(0.023-0.13)                       | 0.6%<br>(0.39-0.87%)                 | 0.27%<br>(0.071-0.47%)              | 0.19<br>(0.05-0.32)     | 99<br>(59-150)          |
| Palestine | 2000 | Female | 35 to 39 | 17%<br>(4.5-33%)               | 83%<br>(67-95%)          | 0.083<br>(0.028-0.15)                       | 0.45%<br>(0.27-0.65%)                | 0.3%<br>(0.047-0.56%)               | 0.23<br>(0.035-0.43)    | 68<br>(37-100)          |
| Palestine | 2000 | Female | 40 to 44 | 18%<br>(6.3-33%)               | 82%<br>(67-94%)          | 0.092<br>(0.034-0.18)                       | 0.29%<br>(0.087-0.48%)               | 0.22%<br>(-0.11-0.54%)              | 0.18<br>(-0.088-0.43)   | 36<br>(10-62)           |
| Palestine | 2000 | Female | 45 to 49 | 18%<br>(6.3-34%)               | 82%<br>(66-94%)          | 0.1<br>(0.032-0.2)                          | 0.083%<br>(-0.21-0.3%)               | -0.044%<br>(-0.56-0.32%)            | -0.048<br>(-0.62-0.34)  | 10<br>(-24-37)          |
| Palestine | 2000 | Female | 50 to 54 | 19%<br>(7.4-37%)               | 81%<br>(63-93%)          | 0.1<br>(0.033-0.22)                         | -0.1%<br>(-0.63-0.2%)                | -0.24%<br>(-1.1-0.22%)              | -0.39<br>(-1.7-0.36)    | -13<br>(-77-24)         |
| Palestine | 2000 | Female | 55 to 59 | 20%<br>(7.7-39%)               | 80%<br>(61-92%)          | 0.11<br>(0.03-0.22)                         | -0.33%<br>(-1.1-0.12%)               | -0.49%<br>(-1.6-0.13%)              | -1.2<br>(-3.8-0.29)     | -42<br>(-140-15)        |
| Palestine | 2000 | Female | 60 to 64 | 21%<br>(8.1-41%)               | 79%<br>(59-92%)          | 0.1<br>(0.025-0.25)                         | -0.5%<br>(-1.6-0.062%)               | -0.65%<br>(-2-0.063%)               | -2.4<br>(-7.4-0.23)     | -71<br>(-220-8.9)       |
| Palestine | 2000 | Female | 65 to 69 | 22%<br>(9.1-39%)               | 78%<br>(61-91%)          | 0.089<br>(0.023-0.2)                        | -0.52%<br>(-1.5-0.037%)              | -0.64%<br>(-1.8-0.044%)             | -2.9<br>(-8.3-0.2)      | -72<br>(-200-5)         |
| Palestine | 2000 | Female | 70 to 74 | 20%<br>(8.6-38%)               | 80%<br>(62-91%)          | 0.07<br>(0.017-0.18)                        | -0.44%<br>(-1.4-0.039%)              | -0.52%<br>(-1.7-0.047%)             | -3<br>(-9.7-0.27)       | -57<br>(-180-4.9)       |
| Palestine | 2000 | Female | 75 to 79 | 18%<br>(6.4-39%)               | 82%<br>(61-94%)          | 0.057<br>(0.011-0.16)                       | -0.35%<br>(-1.4-0.063%)              | -0.42%<br>(-1.7-0.076%)             | -2.2<br>(-9.1-0.42)     | -33<br>(-130-6)         |
| Palestine | 2000 | Female | 80 to 84 | 17%<br>(5.5-37%)               | 83%<br>(63-94%)          | 0.05<br>(0.01-0.14)                         | -0.28%<br>(-1.1-0.058%)              | -0.32%<br>(-1.3-0.067%)             | -1.3<br>(-5-0.26)       | -14<br>(-54-2.8)        |
| Palestine | 2000 | Female | 85 to 89 | 17%<br>(5.5-37%)               | 83%<br>(63-94%)          | 0.05<br>(0.011-0.15)                        | -0.29%<br>(-1.1-0.032%)              | -0.34%<br>(-1.2-0.032%)             | -0.82<br>(-3-0.079)     | -6.1<br>(-23-0.68)      |
| Palestine | 2000 | Female | 90 to 94 | 19%<br>(6-40%)                 | 81%<br>(60-94%)          | 0.057<br>(0.011-0.16)                       | -0.36%<br>(-1.1--0.0053%)            | -0.43%<br>(-1.4--0.016%)            | -0.54<br>(-1.7--0.02)   | -2.7<br>(-8.5--0.04)    |
| Palestine | 2000 | Female | 95 plus  | 24%<br>(7.1-47%)               | 76%<br>(53-93%)          | 0.068<br>(0.012-0.2)                        | -0.45%<br>(-1.6--0.0028%)            | -0.55%<br>(-1.9--0.024%)            | -0.26<br>(-0.87--0.011) | -0.83<br>(-2.9--0.0053) |
| Palestine | 2000 | Male   | All Ages | 7.5%<br>(5.1-11%)              | 92%<br>(89-95%)          | 0.038<br>(0.032-0.046)                      | 0.25%<br>(0.13-0.36%)                | 0.054%<br>(-0.15-0.23%)             | 3.6<br>(-9.7-15)        | 1100<br>(580-1600)      |
| Palestine | 2000 | Male   | 15 to 19 | 6.7%<br>(2.8-13%)              | 93%<br>(87-97%)          | 0.02<br>(0.0065-0.042)                      | 0.43%<br>(0.27-0.6%)                 | 0.22%<br>(0.093-0.37%)              | 0.59<br>(0.25-1)        | 140<br>(88-210)         |
| Palestine | 2000 | Male   | 20 to 24 | 10%<br>(4-20%)                 | 90%<br>(80-96%)          | 0.046<br>(0.017-0.089)                      | 0.82%<br>(0.53-1.2%)                 | 0.31%<br>(0.14-0.59%)               | 0.86<br>(0.42-1.6)      | 260<br>(170-390)        |
| Palestine | 2000 | Male   | 25 to 29 | 13%<br>(5.1-25%)               | 87%<br>(75-95%)          | 0.073<br>(0.03-0.13)                        | 0.88%<br>(0.61-1.2%)                 | 0.38%<br>(0.16-0.72%)               | 0.78<br>(0.33-1.4)      | 220<br>(140-310)        |
| Palestine | 2000 | Male   | 30 to 34 | 15%<br>(5.3-28%)               | 85%<br>(72-95%)          | 0.094<br>(0.04-0.17)                        | 0.83%<br>(0.57-1.1%)                 | 0.4%<br>(0.16-0.74%)                | 0.64<br>(0.26-1.1)      | 160<br>(110-230)        |
| Palestine | 2000 | Male   | 35 to 39 | 16%<br>(6.1-29%)               | 84%<br>(71-94%)          | 0.11<br>(0.042-0.19)                        | 0.75%<br>(0.5-1%)                    | 0.45%<br>(0.091-0.78%)              | 0.65<br>(0.13-1.1)      | 130<br>(81-180)         |
| Palestine | 2000 | Male   | 40 to 44 | 16%<br>(7.1-28%)               | 84%<br>(72-93%)          | 0.11<br>(0.044-0.21)                        | 0.54%<br>(0.21-0.81%)                | 0.23%<br>(-0.36-0.65%)              | 0.33<br>(-0.49-0.93)    | 75<br>(29-120)          |

| Location  | Year | Sex    | Age      | Prevalence of current drinkers | Prevalence of abstainers | Population average of standard drinks daily | Percent of total attributable deaths | Percent of total attributable DALYs | Attributable deaths     | Attributable DALYs    |
|-----------|------|--------|----------|--------------------------------|--------------------------|---------------------------------------------|--------------------------------------|-------------------------------------|-------------------------|-----------------------|
| Palestine | 2000 | Male   | 45 to 49 | 16%<br>(6.3-29%)               | 84%<br>(71-94%)          | 0.12<br>(0.041-0.24)                        | 0.35%<br>(-0.042-0.66%)              | 0.14%<br>(-0.54-0.61%)              | 0.26<br>(-0.99-1.1)     | 49<br>(-5.8-93)       |
| Palestine | 2000 | Male   | 50 to 54 | 15%<br>(6.5-29%)               | 85%<br>(71-94%)          | 0.12<br>(0.04-0.24)                         | 0.18%<br>(-0.32-0.48%)               | 0.011%<br>(-0.82-0.48%)             | 0.029<br>(-2.2-1.3)     | 29<br>(-52-78)        |
| Palestine | 2000 | Male   | 55 to 59 | 14%<br>(6.3-28%)               | 86%<br>(72-94%)          | 0.11<br>(0.036-0.23)                        | 0.059%<br>(-0.55-0.4%)               | -0.073%<br>(-0.93-0.42%)            | -0.22<br>(-2.9-1.3)     | 8.7<br>(-80-59)       |
| Palestine | 2000 | Male   | 60 to 64 | 14%<br>(6-27%)                 | 86%<br>(73-94%)          | 0.1<br>(0.03-0.23)                          | 0.0079%<br>(-0.53-0.34%)             | -0.076%<br>(-0.84-0.38%)            | -0.29<br>(-3.2-1.4)     | 1.2<br>(-77-49)       |
| Palestine | 2000 | Male   | 65 to 69 | 13%<br>(6.1-25%)               | 87%<br>(75-94%)          | 0.082<br>(0.026-0.17)                       | -0.02%<br>(-0.51-0.26%)              | -0.074%<br>(-0.7-0.29%)             | -0.33<br>(-3.1-1.3)     | -2.6<br>(-66-34)      |
| Palestine | 2000 | Male   | 70 to 74 | 12%<br>(5.7-22%)               | 88%<br>(78-94%)          | 0.061<br>(0.019-0.14)                       | 0.0093%<br>(-0.4-0.25%)              | -0.014%<br>(-0.5-0.27%)             | -0.073<br>(-2.6-1.4)    | 1.1<br>(-45-28)       |
| Palestine | 2000 | Male   | 75 to 79 | 11%<br>(4.6-20%)               | 89%<br>(80-95%)          | 0.047<br>(0.012-0.12)                       | 0.027%<br>(-0.32-0.22%)              | 0.012%<br>(-0.39-0.24%)             | 0.061<br>(-1.9-1.2)     | 2.1<br>(-25-17)       |
| Palestine | 2000 | Male   | 80 to 84 | 9.5%<br>(4-19%)                | 90%<br>(81-96%)          | 0.04<br>(0.01-0.1)                          | 0.064%<br>(-0.21-0.23%)              | 0.058%<br>(-0.25-0.25%)             | 0.23<br>(-0.97-0.97)    | 2.9<br>(-9.6-10)      |
| Palestine | 2000 | Male   | 85 to 89 | 9.3%<br>(3.7-18%)              | 91%<br>(82-96%)          | 0.036<br>(0.0098-0.093)                     | 0.048%<br>(-0.21-0.2%)               | 0.036%<br>(-0.25-0.21%)             | 0.093<br>(-0.65-0.53)   | 1<br>(-4.3-4.2)       |
| Palestine | 2000 | Male   | 90 to 94 | 10%<br>(4.3-21%)               | 90%<br>(79-96%)          | 0.038<br>(0.0097-0.1)                       | 0.011%<br>(-0.27-0.17%)              | -0.013%<br>(-0.34-0.16%)            | -0.017<br>(-0.42-0.2)   | 0.077<br>(-1.9-1.2)   |
| Palestine | 2000 | Male   | 95 plus  | 13%<br>(4.7-28%)               | 87%<br>(72-95%)          | 0.044<br>(0.0085-0.13)                      | -0.017%<br>(-0.41-0.16%)             | -0.069%<br>(-0.52-0.14%)            | -0.027<br>(-0.21-0.055) | -0.025<br>(-0.6-0.24) |
| Palestine | 2005 | Female | All Ages | 10%<br>(6.1-15%)               | 90%<br>(85-94%)          | 0.049<br>(0.04-0.058)                       | 0.05%<br>(-0.11-0.18%)               | -0.35%<br>(-0.91-0.011%)            | -20<br>(-51-0.54)       | 200<br>(-420-690)     |
| Palestine | 2005 | Female | 15 to 19 | 9.2%<br>(3-20%)                | 91%<br>(80-97%)          | 0.041<br>(0.012-0.094)                      | 0.37%<br>(0.22-0.59%)                | 0.27%<br>(0.17-0.43%)               | 0.17<br>(0.11-0.27)     | 81<br>(44-130)        |
| Palestine | 2005 | Female | 20 to 24 | 12%<br>(3.7-26%)               | 88%<br>(74-96%)          | 0.066<br>(0.023-0.13)                       | 0.73%<br>(0.46-1.1%)                 | 0.31%<br>(0.16-0.5%)                | 0.18<br>(0.093-0.29)    | 140<br>(84-230)       |
| Palestine | 2005 | Female | 25 to 29 | 13%<br>(3.9-28%)               | 87%<br>(72-96%)          | 0.08<br>(0.026-0.15)                        | 0.71%<br>(0.47-1%)                   | 0.26%<br>(0.093-0.45%)              | 0.16<br>(0.055-0.27)    | 140<br>(82-210)       |
| Palestine | 2005 | Female | 30 to 34 | 15%<br>(4-31%)                 | 85%<br>(69-96%)          | 0.095<br>(0.032-0.18)                       | 0.61%<br>(0.39-0.89%)                | 0.29%<br>(0.043-0.53%)              | 0.19<br>(0.027-0.34)    | 110<br>(62-170)       |
| Palestine | 2005 | Female | 35 to 39 | 17%<br>(4.6-33%)               | 83%<br>(67-95%)          | 0.11<br>(0.037-0.2)                         | 0.46%<br>(0.27-0.67%)                | 0.38%<br>(0.092-0.68%)              | 0.29<br>(0.068-0.52)    | 78<br>(43-120)        |
| Palestine | 2005 | Female | 40 to 44 | 18%<br>(6.6-34%)               | 82%<br>(66-93%)          | 0.13<br>(0.049-0.24)                        | 0.28%<br>(0.058-0.49%)               | 0.27%<br>(-0.14-0.63%)              | 0.27<br>(-0.14-0.65)    | 45<br>(8.4-83)        |
| Palestine | 2005 | Female | 45 to 49 | 18%<br>(6.1-35%)               | 82%<br>(65-94%)          | 0.14<br>(0.045-0.28)                        | 0.07%<br>(-0.29-0.31%)               | -0.02%<br>(-0.64-0.41%)             | -0.024<br>(-0.77-0.49)  | 9.6<br>(-37-43)       |
| Palestine | 2005 | Female | 50 to 54 | 19%<br>(7.3-37%)               | 81%<br>(63-93%)          | 0.14<br>(0.046-0.3)                         | -0.11%<br>(-0.65-0.21%)              | -0.21%<br>(-1-0.29%)                | -0.34<br>(-1.6-0.46)    | -15<br>(-84-28)       |
| Palestine | 2005 | Female | 55 to 59 | 20%<br>(8.4-38%)               | 80%<br>(62-92%)          | 0.14<br>(0.042-0.3)                         | -0.35%<br>(-1.1-0.097%)              | -0.49%<br>(-1.6-0.15%)              | -1.2<br>(-3.9-0.38)     | -48<br>(-160-14)      |
| Palestine | 2005 | Female | 60 to 64 | 21%<br>(8.1-39%)               | 79%<br>(61-92%)          | 0.14<br>(0.034-0.31)                        | -0.53%<br>(-1.5-0.037%)              | -0.69%<br>(-2-0.066%)               | -2.5<br>(-7.2-0.24)     | -80<br>(-230-5.5)     |

| Location  | Year | Sex    | Age      | Prevalence of current drinkers | Prevalence of abstainers | Population average of standard drinks daily | Percent of total attributable deaths | Percent of total attributable DALYs | Attributable deaths    | Attributable DALYs   |
|-----------|------|--------|----------|--------------------------------|--------------------------|---------------------------------------------|--------------------------------------|-------------------------------------|------------------------|----------------------|
| Palestine | 2005 | Female | 65 to 69 | 21%<br>(8.8-39%)               | 79%<br>(61-91%)          | 0.12<br>(0.03-0.26)                         | -0.61%<br>(-1.6--0.021%)             | -0.75%<br>(-2-0.021%)               | -3.8<br>(-10-0.1)      | -96<br>(-250-3.2)    |
| Palestine | 2005 | Female | 70 to 74 | 20%<br>(8.8-37%)               | 80%<br>(63-91%)          | 0.094<br>(0.024-0.24)                       | -0.56%<br>(-1.6--0.015%)             | -0.66%<br>(-1.9--0.017%)            | -4.1<br>(-12--0.1)     | -79<br>(-230--2.2)   |
| Palestine | 2005 | Female | 75 to 79 | 18%<br>(7-36%)                 | 82%<br>(64-93%)          | 0.076<br>(0.017-0.22)                       | -0.49%<br>(-1.7-0.0083%)             | -0.57%<br>(-2-0.014%)               | -3.5<br>(-12-0.09)     | -51<br>(-170-0.87)   |
| Palestine | 2005 | Female | 80 to 84 | 17%<br>(5.8-36%)               | 83%<br>(64-94%)          | 0.069<br>(0.015-0.2)                        | -0.44%<br>(-1.5-0.016%)              | -0.51%<br>(-1.7-0.017%)             | -2.4<br>(-8.2-0.079)   | -26<br>(-89-0.9)     |
| Palestine | 2005 | Female | 85 to 89 | 17%<br>(5.8-37%)               | 83%<br>(63-94%)          | 0.07<br>(0.015-0.21)                        | -0.45%<br>(-1.5--0.017%)             | -0.53%<br>(-1.8--0.023%)            | -1.7<br>(-5.8--0.077)  | -13<br>(-43--0.49)   |
| Palestine | 2005 | Female | 90 to 94 | 20%<br>(7.1-42%)               | 80%<br>(58-93%)          | 0.08<br>(0.018-0.23)                        | -0.52%<br>(-1.6--0.054%)             | -0.64%<br>(-1.9--0.08%)             | -0.89<br>(-2.6--0.11)  | -4.5<br>(-13--0.48)  |
| Palestine | 2005 | Female | 95 plus  | 25%<br>(7.8-49%)               | 75%<br>(51-92%)          | 0.095<br>(0.018-0.28)                       | -0.64%<br>(-2--0.057%)               | -0.79%<br>(-2.4--0.089%)            | -0.41<br>(-1.3--0.046) | -1.3<br>(-4.2--0.12) |
| Palestine | 2005 | Male   | All Ages | 7.8%<br>(5.1-11%)              | 92%<br>(89-95%)          | 0.054<br>(0.046-0.063)                      | 0.27%<br>(0.14-0.41%)                | 0.066%<br>(-0.19-0.28%)             | 5.1<br>(-14-22)        | 1300<br>(680-2000)   |
| Palestine | 2005 | Male   | 15 to 19 | 6.7%<br>(2.8-14%)              | 93%<br>(86-97%)          | 0.028<br>(0.0094-0.06)                      | 0.48%<br>(0.31-0.7%)                 | 0.31%<br>(0.12-0.56%)               | 0.99<br>(0.39-1.8)     | 190<br>(120-280)     |
| Palestine | 2005 | Male   | 20 to 24 | 10%<br>(4.1-21%)               | 90%<br>(79-96%)          | 0.064<br>(0.024-0.12)                       | 0.97%<br>(0.65-1.4%)                 | 0.52%<br>(0.22-1%)                  | 1.5<br>(0.64-3)        | 320<br>(210-480)     |
| Palestine | 2005 | Male   | 25 to 29 | 13%<br>(5-25%)                 | 87%<br>(75-95%)          | 0.1<br>(0.041-0.18)                         | 1%<br>(0.68-1.4%)                    | 0.58%<br>(0.22-1.1%)                | 1.3<br>(0.51-2.5)      | 270<br>(180-380)     |
| Palestine | 2005 | Male   | 30 to 34 | 15%<br>(5.3-29%)               | 85%<br>(71-95%)          | 0.13<br>(0.056-0.22)                        | 0.9%<br>(0.6-1.3%)                   | 0.54%<br>(0.18-1%)                  | 0.98<br>(0.31-1.9)     | 200<br>(130-290)     |
| Palestine | 2005 | Male   | 35 to 39 | 16%<br>(5.9-30%)               | 84%<br>(70-94%)          | 0.15<br>(0.059-0.26)                        | 0.79%<br>(0.5-1.1%)                  | 0.52%<br>(0.024-1%)                 | 0.88<br>(0.04-1.7)     | 160<br>(95-220)      |
| Palestine | 2005 | Male   | 40 to 44 | 16%<br>(7.1-29%)               | 84%<br>(71-93%)          | 0.16<br>(0.063-0.29)                        | 0.55%<br>(0.2-0.86%)                 | 0.27%<br>(-0.39-0.73%)              | 0.51<br>(-0.74-1.4)    | 100<br>(35-160)      |
| Palestine | 2005 | Male   | 45 to 49 | 16%<br>(6.5-29%)               | 84%<br>(71-94%)          | 0.16<br>(0.055-0.33)                        | 0.34%<br>(-0.14-0.68%)               | 0.15%<br>(-0.65-0.68%)              | 0.36<br>(-1.6-1.7)     | 59<br>(-23-120)      |
| Palestine | 2005 | Male   | 50 to 54 | 15%<br>(6.5-30%)               | 85%<br>(70-93%)          | 0.16<br>(0.054-0.33)                        | 0.16%<br>(-0.43-0.51%)               | 0.012%<br>(-0.89-0.53%)             | 0.035<br>(-2.6-1.5)    | 28<br>(-70-86)       |
| Palestine | 2005 | Male   | 55 to 59 | 14%<br>(6.2-29%)               | 86%<br>(71-94%)          | 0.15<br>(0.05-0.32)                         | 0.056%<br>(-0.55-0.43%)              | -0.06%<br>(-0.95-0.48%)             | -0.24<br>(-3.8-1.9)    | 11<br>(-100-80)      |
| Palestine | 2005 | Male   | 60 to 64 | 14%<br>(6-27%)                 | 86%<br>(73-94%)          | 0.14<br>(0.04-0.32)                         | 0.015%<br>(-0.57-0.38%)              | -0.056%<br>(-0.84-0.45%)            | -0.25<br>(-3.8-2)      | 2.5<br>(-99-63)      |
| Palestine | 2005 | Male   | 65 to 69 | 13%<br>(5.8-25%)               | 87%<br>(75-94%)          | 0.11<br>(0.035-0.24)                        | -0.045%<br>(-0.57-0.28%)             | -0.097%<br>(-0.78-0.32%)            | -0.56<br>(-4.5-1.8)    | -7.5<br>(-95-47)     |
| Palestine | 2005 | Male   | 70 to 74 | 12%<br>(5.3-21%)               | 88%<br>(79-95%)          | 0.082<br>(0.025-0.2)                        | -0.0031%<br>(-0.46-0.27%)            | -0.026%<br>(-0.58-0.3%)             | -0.17<br>(-3.9-2.1)    | -0.45<br>(-67-40)    |
| Palestine | 2005 | Male   | 75 to 79 | 10%<br>(4.3-20%)               | 90%<br>(80-96%)          | 0.062<br>(0.017-0.16)                       | -0.0045%<br>(-0.38-0.22%)            | -0.022%<br>(-0.46-0.24%)            | -0.14<br>(-3-1.5)      | -0.47<br>(-39-23)    |
| Palestine | 2005 | Male   | 80 to 84 | 9.2%<br>(3.7-18%)              | 91%<br>(82-96%)          | 0.052<br>(0.014-0.14)                       | 0.03%<br>(-0.3-0.24%)                | 0.02%<br>(-0.34-0.25%)              | 0.094<br>(-1.6-1.2)    | 1.6<br>(-16-13)      |

| Location  | Year | Sex    | Age      | Prevalence of current drinkers | Prevalence of abstainers | Population average of standard drinks daily | Percent of total attributable deaths | Percent of total attributable DALYs | Attributable deaths     | Attributable DALYs    |
|-----------|------|--------|----------|--------------------------------|--------------------------|---------------------------------------------|--------------------------------------|-------------------------------------|-------------------------|-----------------------|
| Palestine | 2005 | Male   | 85 to 89 | 9%<br>(3.6-18%)                | 91%<br>(82-96%)          | 0.048<br>(0.013-0.12)                       | 0.0013%<br>(-0.32-0.18%)             | -0.016%<br>(-0.38-0.19%)            | -0.054<br>(-1.2-0.62)   | 0.031<br>(-8.4-4.9)   |
| Palestine | 2005 | Male   | 90 to 94 | 10%<br>(4.2-21%)               | 90%<br>(79-96%)          | 0.051<br>(0.013-0.13)                       | -0.043%<br>(-0.38-0.15%)             | -0.074%<br>(-0.46-0.14%)            | -0.11<br>(-0.69-0.21)   | -0.37<br>(-3.2-1.2)   |
| Palestine | 2005 | Male   | 95 plus  | 13%<br>(4.7-27%)               | 87%<br>(73-95%)          | 0.059<br>(0.011-0.17)                       | -0.089%<br>(-0.56-0.14%)             | -0.15%<br>(-0.7-0.11%)              | -0.069<br>(-0.32-0.051) | -0.15<br>(-0.97-0.24) |
| Palestine | 2010 | Female | All Ages | 10%<br>(6-16%)                 | 90%<br>(84-94%)          | 0.042<br>(0.033-0.051)                      | 0.048%<br>(-0.11-0.17%)              | -0.35%<br>(-0.91--0.011%)           | -26<br>(-65--0.76)      | 230<br>(-510-840)     |
| Palestine | 2010 | Female | 15 to 19 | 9.2%<br>(2.9-21%)              | 91%<br>(79-97%)          | 0.035<br>(0.01-0.082)                       | 0.36%<br>(0.21-0.56%)                | 0.25%<br>(0.15-0.4%)                | 0.18<br>(0.11-0.28)     | 96<br>(52-160)        |
| Palestine | 2010 | Female | 20 to 24 | 12%<br>(3.5-26%)               | 88%<br>(74-96%)          | 0.057<br>(0.018-0.12)                       | 0.71%<br>(0.45-1%)                   | 0.28%<br>(0.15-0.45%)               | 0.19<br>(0.1-0.31)      | 170<br>(100-270)      |
| Palestine | 2010 | Female | 25 to 29 | 14%<br>(3.8-29%)               | 86%<br>(71-96%)          | 0.069<br>(0.022-0.14)                       | 0.72%<br>(0.48-1%)                   | 0.24%<br>(0.11-0.41%)               | 0.15<br>(0.068-0.26)    | 160<br>(98-240)       |
| Palestine | 2010 | Female | 30 to 34 | 15%<br>(4.1-32%)               | 85%<br>(68-96%)          | 0.082<br>(0.027-0.15)                       | 0.61%<br>(0.38-0.88%)                | 0.26%<br>(0.058-0.47%)              | 0.19<br>(0.042-0.33)    | 130<br>(74-200)       |
| Palestine | 2010 | Female | 35 to 39 | 17%<br>(4.7-33%)               | 83%<br>(67-95%)          | 0.097<br>(0.032-0.18)                       | 0.46%<br>(0.26-0.65%)                | 0.36%<br>(0.13-0.61%)               | 0.33<br>(0.11-0.56)     | 90<br>(51-140)        |
| Palestine | 2010 | Female | 40 to 44 | 18%<br>(6.7-32%)               | 82%<br>(68-93%)          | 0.11<br>(0.043-0.2)                         | 0.28%<br>(0.062-0.48%)               | 0.25%<br>(-0.11-0.55%)              | 0.31<br>(-0.14-0.69)    | 55<br>(12-98)         |
| Palestine | 2010 | Female | 45 to 49 | 18%<br>(6.3-34%)               | 82%<br>(66-94%)          | 0.12<br>(0.04-0.23)                         | 0.081%<br>(-0.2-0.31%)               | -0.013%<br>(-0.5-0.36%)             | -0.021<br>(-0.84-0.6)   | 15<br>(-37-59)        |
| Palestine | 2010 | Female | 50 to 54 | 19%<br>(7.5-36%)               | 81%<br>(64-92%)          | 0.12<br>(0.038-0.25)                        | -0.09%<br>(-0.54-0.2%)               | -0.19%<br>(-0.88-0.26%)             | -0.39<br>(-1.8-0.51)    | -15<br>(-91-34)       |
| Palestine | 2010 | Female | 55 to 59 | 20%<br>(8.2-39%)               | 80%<br>(61-92%)          | 0.12<br>(0.034-0.26)                        | -0.31%<br>(-1.1-0.11%)               | -0.45%<br>(-1.5-0.14%)              | -1.4<br>(-4.5-0.42)     | -53<br>(-180-18)      |
| Palestine | 2010 | Female | 60 to 64 | 21%<br>(8.4-41%)               | 79%<br>(59-92%)          | 0.11<br>(0.028-0.28)                        | -0.49%<br>(-1.5-0.056%)              | -0.64%<br>(-2-0.058%)               | -2.6<br>(-8.1-0.24)     | -84<br>(-250-9.5)     |
| Palestine | 2010 | Female | 65 to 69 | 21%<br>(8.9-39%)               | 79%<br>(61-91%)          | 0.1<br>(0.027-0.22)                         | -0.58%<br>(-1.6-0.011%)              | -0.72%<br>(-1.9-0.024%)             | -4.5<br>(-12-0.15)      | -110<br>(-290-2)      |
| Palestine | 2010 | Female | 70 to 74 | 20%<br>(8.5-37%)               | 80%<br>(63-92%)          | 0.079<br>(0.02-0.2)                         | -0.52%<br>(-1.5-0.0044%)             | -0.63%<br>(-1.8-0.0081%)            | -4.9<br>(-14-0.063)     | -95<br>(-270-0.78)    |
| Palestine | 2010 | Female | 75 to 79 | 18%<br>(7-36%)                 | 82%<br>(64-93%)          | 0.064<br>(0.014-0.18)                       | -0.49%<br>(-1.6-0.0067%)             | -0.57%<br>(-1.9-0.0038%)            | -4.7<br>(-15-0.031)     | -67<br>(-220-0.89)    |
| Palestine | 2010 | Female | 80 to 84 | 16%<br>(5.6-36%)               | 84%<br>(64-94%)          | 0.058<br>(0.012-0.16)                       | -0.46%<br>(-1.7-0.008%)              | -0.53%<br>(-1.9-0.0043%)            | -3.7<br>(-14-0.03)      | -39<br>(-140-0.65)    |
| Palestine | 2010 | Female | 85 to 89 | 17%<br>(5.5-38%)               | 83%<br>(62-95%)          | 0.058<br>(0.012-0.18)                       | -0.47%<br>(-1.6--0.027%)             | -0.55%<br>(-1.8--0.041%)            | -2.7<br>(-9--0.2)       | -20<br>(-67--1.1)     |
| Palestine | 2010 | Female | 90 to 94 | 19%<br>(6.7-41%)               | 81%<br>(59-93%)          | 0.066<br>(0.014-0.19)                       | -0.51%<br>(-1.5--0.05%)              | -0.62%<br>(-1.8--0.076%)            | -1.5<br>(-4.3--0.18)    | -7.3<br>(-22--0.72)   |
| Palestine | 2010 | Female | 95 plus  | 24%<br>(7.7-48%)               | 76%<br>(52-92%)          | 0.078<br>(0.015-0.22)                       | -0.61%<br>(-2--0.045%)               | -0.75%<br>(-2.3--0.072%)            | -0.57<br>(-1.8--0.055)  | -1.9<br>(-5.9--0.14)  |
| Palestine | 2010 | Male   | All Ages | 7.9%<br>(5.3-11%)              | 92%<br>(89-95%)          | 0.046<br>(0.038-0.056)                      | 0.26%<br>(0.14-0.39%)                | 0.048%<br>(-0.18-0.25%)             | 4.4<br>(-17-22)         | 1500<br>(730-2200)    |



| Location  | Year | Sex    | Age      | Prevalence of current drinkers | Prevalence of abstainers | Population average of standard drinks daily | Percent of total attributable deaths | Percent of total attributable DALYs | Attributable deaths     | Attributable DALYs  |
|-----------|------|--------|----------|--------------------------------|--------------------------|---------------------------------------------|--------------------------------------|-------------------------------------|-------------------------|---------------------|
| Palestine | 2010 | Male   | 15 to 19 | 6.8%<br>(2.9-14%)              | 93%<br>(86-97%)          | 0.024<br>(0.008-0.052)                      | 0.49%<br>(0.31-0.72%)                | 0.25%<br>(0.12-0.46%)               | 0.67<br>(0.31-1.2)      | 190<br>(120-290)    |
| Palestine | 2010 | Male   | 20 to 24 | 11%<br>(4.1-20%)               | 89%<br>(80-96%)          | 0.054<br>(0.021-0.1)                        | 1%<br>(0.7-1.5%)                     | 0.46%<br>(0.2-0.91%)                | 1.1<br>(0.48-2.2)       | 350<br>(220-540)    |
| Palestine | 2010 | Male   | 25 to 29 | 13%<br>(5.1-25%)               | 87%<br>(75-95%)          | 0.085<br>(0.034-0.16)                       | 1.1%<br>(0.75-1.5%)                  | 0.56%<br>(0.2-1.1%)                 | 1<br>(0.37-1.9)         | 290<br>(180-420)    |
| Palestine | 2010 | Male   | 30 to 34 | 15%<br>(5.3-29%)               | 85%<br>(71-95%)          | 0.11<br>(0.047-0.19)                        | 0.93%<br>(0.62-1.3%)                 | 0.53%<br>(0.16-1%)                  | 0.88<br>(0.26-1.7)      | 220<br>(140-330)    |
| Palestine | 2010 | Male   | 35 to 39 | 16%<br>(6.2-30%)               | 84%<br>(70-94%)          | 0.12<br>(0.047-0.22)                        | 0.81%<br>(0.53-1.1%)                 | 0.54%<br>(0.085-1%)                 | 0.9<br>(0.14-1.7)       | 180<br>(110-250)    |
| Palestine | 2010 | Male   | 40 to 44 | 16%<br>(7.4-29%)               | 84%<br>(71-93%)          | 0.13<br>(0.054-0.25)                        | 0.59%<br>(0.28-0.89%)                | 0.32%<br>(-0.25-0.77%)              | 0.66<br>(-0.52-1.6)     | 130<br>(58-200)     |
| Palestine | 2010 | Male   | 45 to 49 | 16%<br>(6.6-29%)               | 84%<br>(71-93%)          | 0.14<br>(0.047-0.28)                        | 0.38%<br>(-0.032-0.67%)              | 0.19%<br>(-0.48-0.67%)              | 0.6<br>(-1.5-2.1)       | 86<br>(-6.7-160)    |
| Palestine | 2010 | Male   | 50 to 54 | 15%<br>(6.5-30%)               | 85%<br>(70-93%)          | 0.14<br>(0.047-0.28)                        | 0.17%<br>(-0.35-0.5%)                | 0.027%<br>(-0.75-0.52%)             | 0.099<br>(-2.7-1.9)     | 37<br>(-71-100)     |
| Palestine | 2010 | Male   | 55 to 59 | 15%<br>(6.4-28%)               | 85%<br>(72-94%)          | 0.13<br>(0.042-0.27)                        | 0.046%<br>(-0.51-0.39%)              | -0.07%<br>(-0.86-0.43%)             | -0.31<br>(-3.8-1.9)     | 9.3<br>(-100-80)    |
| Palestine | 2010 | Male   | 60 to 64 | 14%<br>(6-27%)                 | 86%<br>(73-94%)          | 0.12<br>(0.034-0.26)                        | 0.0082%<br>(-0.57-0.36%)             | -0.065%<br>(-0.84-0.42%)            | -0.39<br>(-5.1-2.5)     | 1.9<br>(-130-80)    |
| Palestine | 2010 | Male   | 65 to 69 | 14%<br>(6.3-26%)               | 86%<br>(74-94%)          | 0.096<br>(0.031-0.21)                       | -0.024%<br>(-0.54-0.28%)             | -0.074%<br>(-0.74-0.33%)            | -0.48<br>(-4.9-2.2)     | -4.6<br>(-100-55)   |
| Palestine | 2010 | Male   | 70 to 74 | 12%<br>(5.8-22%)               | 88%<br>(78-94%)          | 0.071<br>(0.023-0.17)                       | 0.028%<br>(-0.39-0.28%)              | 0.01%<br>(-0.5-0.32%)               | 0.078<br>(-3.8-2.4)     | 4.8<br>(-65-49)     |
| Palestine | 2010 | Male   | 75 to 79 | 11%<br>(4.6-20%)               | 89%<br>(80-95%)          | 0.054<br>(0.015-0.14)                       | 0.0058%<br>(-0.37-0.22%)             | -0.012%<br>(-0.45-0.24%)            | -0.095<br>(-3.6-1.9)    | 0.75<br>(-48-29)    |
| Palestine | 2010 | Male   | 80 to 84 | 9.5%<br>(3.7-19%)              | 91%<br>(81-96%)          | 0.045<br>(0.012-0.12)                       | 0.022%<br>(-0.3-0.22%)               | 0.011%<br>(-0.34-0.24%)             | 0.071<br>(-2.2-1.5)     | 1.6<br>(-22-17)     |
| Palestine | 2010 | Male   | 85 to 89 | 9.3%<br>(3.7-18%)              | 91%<br>(82-96%)          | 0.042<br>(0.011-0.11)                       | -0.016%<br>(-0.33-0.16%)             | -0.035%<br>(-0.38-0.16%)            | -0.16<br>(-1.7-0.74)    | -0.59<br>(-12-5.8)  |
| Palestine | 2010 | Male   | 90 to 94 | 10%<br>(4.2-21%)               | 90%<br>(79-96%)          | 0.044<br>(0.011-0.11)                       | -0.055%<br>(-0.39-0.13%)             | -0.085%<br>(-0.47-0.12%)            | -0.18<br>(-0.97-0.25)   | -0.64<br>(-4.6-1.5) |
| Palestine | 2010 | Male   | 95 plus  | 13%<br>(4.7-26%)               | 87%<br>(74-95%)          | 0.05<br>(0.0097-0.13)                       | -0.09%<br>(-0.55-0.13%)              | -0.15%<br>(-0.69-0.1%)              | -0.087<br>(-0.41-0.061) | -0.2<br>(-1.2-0.28) |
| Palestine | 2016 | Female | All Ages | 10%<br>(6-16%)                 | 90%<br>(84-94%)          | 0.04<br>(0.026-0.061)                       | 0.031%<br>(-0.16-0.18%)              | -0.41%<br>(-1--0.021%)              | -39<br>(-97--2)         | 180<br>(-880-1100)  |
| Palestine | 2016 | Female | 15 to 19 | 9.4%<br>(3.2-21%)              | 91%<br>(79-97%)          | 0.033<br>(0.0093-0.081)                     | 0.36%<br>(0.21-0.54%)                | 0.26%<br>(0.15-0.4%)                | 0.24<br>(0.14-0.39)     | 110<br>(59-170)     |
| Palestine | 2016 | Female | 20 to 24 | 12%<br>(3.8-26%)               | 88%<br>(74-96%)          | 0.053<br>(0.015-0.12)                       | 0.71%<br>(0.44-1%)                   | 0.28%<br>(0.15-0.46%)               | 0.28<br>(0.15-0.45)     | 220<br>(130-360)    |
| Palestine | 2016 | Female | 25 to 29 | 14%<br>(3.7-29%)               | 86%<br>(71-96%)          | 0.064<br>(0.018-0.13)                       | 0.73%<br>(0.49-1%)                   | 0.24%<br>(0.11-0.4%)                | 0.23<br>(0.1-0.39)      | 210<br>(130-320)    |
| Palestine | 2016 | Female | 30 to 34 | 15%<br>(3.8-33%)               | 85%<br>(67-96%)          | 0.075<br>(0.021-0.15)                       | 0.62%<br>(0.38-0.87%)                | 0.27%<br>(0.05-0.48%)               | 0.28<br>(0.053-0.49)    | 160<br>(92-250)     |

| Location  | Year | Sex    | Age      | Prevalence of current drinkers | Prevalence of abstainers | Population average of standard drinks daily | Percent of total attributable deaths | Percent of total attributable DALYs | Attributable deaths   | Attributable DALYs   |
|-----------|------|--------|----------|--------------------------------|--------------------------|---------------------------------------------|--------------------------------------|-------------------------------------|-----------------------|----------------------|
| Palestine | 2016 | Female | 35 to 39 | 17%<br>(4.6-34%)               | 83%<br>(66-95%)          | 0.089<br>(0.028-0.18)                       | 0.46%<br>(0.27-0.66%)                | 0.36%<br>(0.11-0.64%)               | 0.48<br>(0.15-0.83)   | 120<br>(64-180)      |
| Palestine | 2016 | Female | 40 to 44 | 18%<br>(6.5-34%)               | 82%<br>(66-93%)          | 0.1<br>(0.034-0.21)                         | 0.28%<br>(0.039-0.48%)               | 0.23%<br>(-0.12-0.55%)              | 0.41<br>(-0.22-0.96)  | 68<br>(10-120)       |
| Palestine | 2016 | Female | 45 to 49 | 19%<br>(6.9-35%)               | 81%<br>(65-93%)          | 0.11<br>(0.034-0.22)                        | 0.066%<br>(-0.3-0.3%)                | -0.034%<br>(-0.57-0.34%)            | -0.082<br>(-1.4-0.82) | 16<br>(-71-77)       |
| Palestine | 2016 | Female | 50 to 54 | 19%<br>(7.7-37%)               | 81%<br>(63-92%)          | 0.11<br>(0.032-0.25)                        | -0.12%<br>(-0.65-0.21%)              | -0.23%<br>(-1-0.22%)                | -0.79<br>(-3.5-0.78)  | -30<br>(-170-53)     |
| Palestine | 2016 | Female | 55 to 59 | 20%<br>(8.2-39%)               | 80%<br>(61-92%)          | 0.11<br>(0.028-0.24)                        | -0.34%<br>(-1.1-0.11%)               | -0.47%<br>(-1.6-0.14%)              | -2.1<br>(-7-0.66)     | -81<br>(-270-26)     |
| Palestine | 2016 | Female | 60 to 64 | 21%<br>(8.4-40%)               | 79%<br>(60-92%)          | 0.11<br>(0.025-0.26)                        | -0.49%<br>(-1.5-0.06%)               | -0.63%<br>(-1.8-0.076%)             | -3.5<br>(-10-0.43)    | -110<br>(-320-13)    |
| Palestine | 2016 | Female | 65 to 69 | 22%<br>(9.3-39%)               | 78%<br>(61-91%)          | 0.093<br>(0.025-0.21)                       | -0.62%<br>(-1.7--0.0035%)            | -0.75%<br>(-2--0.0081%)             | -6.2<br>(-17--0.064)  | -150<br>(-420--0.81) |
| Palestine | 2016 | Female | 70 to 74 | 20%<br>(8.3-37%)               | 80%<br>(63-92%)          | 0.075<br>(0.016-0.19)                       | -0.56%<br>(-1.6-0.014%)              | -0.66%<br>(-1.9-0.014%)             | -6.9<br>(-19-0.14)    | -130<br>(-370-3.3)   |
| Palestine | 2016 | Female | 75 to 79 | 18%<br>(6.7-37%)               | 82%<br>(63-93%)          | 0.062<br>(0.012-0.18)                       | -0.54%<br>(-1.7-0.011%)              | -0.62%<br>(-2-0.011%)               | -7.5<br>(-24-0.13)    | -110<br>(-350-2.3)   |
| Palestine | 2016 | Female | 80 to 84 | 17%<br>(5.9-37%)               | 83%<br>(63-94%)          | 0.056<br>(0.01-0.17)                        | -0.51%<br>(-1.8-0.0016%)             | -0.58%<br>(-2--0.00035%)            | -6.4<br>(-22--0.0039) | -66<br>(-230-0.21)   |
| Palestine | 2016 | Female | 85 to 89 | 18%<br>(5.8-39%)               | 82%<br>(61-94%)          | 0.056<br>(0.011-0.18)                       | -0.52%<br>(-1.7--0.033%)             | -0.6%<br>(-2--0.043%)               | -4.1<br>(-13--0.28)   | -30<br>(-99--1.7)    |
| Palestine | 2016 | Female | 90 to 94 | 20%<br>(6.6-42%)               | 80%<br>(58-93%)          | 0.064<br>(0.012-0.19)                       | -0.56%<br>(-1.7--0.051%)             | -0.66%<br>(-1.9--0.07%)             | -2.1<br>(-6.3--0.23)  | -11<br>(-31--0.95)   |
| Palestine | 2016 | Female | 95 plus  | 25%<br>(7.5-50%)               | 75%<br>(50-93%)          | 0.075<br>(0.013-0.21)                       | -0.65%<br>(-2--0.039%)               | -0.78%<br>(-2.4--0.058%)            | -0.98<br>(-3--0.076)  | -3.2<br>(-10--0.19)  |
| Palestine | 2016 | Male   | All Ages | 7.9%<br>(5.5-11%)              | 92%<br>(89-95%)          | 0.043<br>(0.028-0.064)                      | 0.29%<br>(0.15-0.43%)                | 0.058%<br>(-0.19-0.26%)             | 6.6<br>(-22-29)       | 1900<br>(920-2900)   |
| Palestine | 2016 | Male   | 15 to 19 | 6.6%<br>(2.8-13%)              | 93%<br>(87-97%)          | 0.022<br>(0.0068-0.048)                     | 0.47%<br>(0.29-0.67%)                | 0.23%<br>(0.1-0.45%)                | 0.76<br>(0.34-1.5)    | 210<br>(120-320)     |
| Palestine | 2016 | Male   | 20 to 24 | 10%<br>(4-20%)                 | 90%<br>(80-96%)          | 0.048<br>(0.017-0.098)                      | 0.99%<br>(0.65-1.4%)                 | 0.42%<br>(0.17-0.9%)                | 1.5<br>(0.6-3.1)      | 450<br>(280-680)     |
| Palestine | 2016 | Male   | 25 to 29 | 13%<br>(5.2-24%)               | 87%<br>(76-95%)          | 0.076<br>(0.028-0.14)                       | 1%<br>(0.74-1.5%)                    | 0.52%<br>(0.19-1.1%)                | 1.4<br>(0.51-2.9)     | 380<br>(250-560)     |
| Palestine | 2016 | Male   | 30 to 34 | 15%<br>(5.5-28%)               | 85%<br>(72-95%)          | 0.099<br>(0.039-0.18)                       | 0.93%<br>(0.63-1.3%)                 | 0.5%<br>(0.15-1%)                   | 1.2<br>(0.37-2.3)     | 280<br>(180-420)     |
| Palestine | 2016 | Male   | 35 to 39 | 16%<br>(6.3-29%)               | 84%<br>(71-94%)          | 0.11<br>(0.041-0.22)                        | 0.81%<br>(0.54-1.1%)                 | 0.52%<br>(0.091-1%)                 | 1.3<br>(0.23-2.5)     | 230<br>(140-330)     |
| Palestine | 2016 | Male   | 40 to 44 | 16%<br>(7.5-29%)               | 84%<br>(71-92%)          | 0.12<br>(0.045-0.24)                        | 0.6%<br>(0.24-0.88%)                 | 0.33%<br>(-0.25-0.74%)              | 0.94<br>(-0.7-2.1)    | 160<br>(69-250)      |
| Palestine | 2016 | Male   | 45 to 49 | 16%<br>(6.5-30%)               | 84%<br>(70-93%)          | 0.12<br>(0.04-0.25)                         | 0.39%<br>(0.0046-0.68%)              | 0.22%<br>(-0.41-0.67%)              | 0.93<br>(-1.7-2.9)    | 120<br>(1.3-210)     |
| Palestine | 2016 | Male   | 50 to 54 | 15%<br>(6.6-30%)               | 85%<br>(70-93%)          | 0.12<br>(0.037-0.27)                        | 0.18%<br>(-0.32-0.5%)                | 0.036%<br>(-0.68-0.5%)              | 0.2<br>(-3.9-2.9)     | 56<br>(-100-160)     |

| Location  | Year | Sex    | Age      | Prevalence of current drinkers | Prevalence of abstainers | Population average of standard drinks daily | Percent of total attributable deaths | Percent of total attributable DALYs | Attributable deaths    | Attributable DALYs   |
|-----------|------|--------|----------|--------------------------------|--------------------------|---------------------------------------------|--------------------------------------|-------------------------------------|------------------------|----------------------|
| Palestine | 2016 | Male   | 55 to 59 | 15%<br>(6.3-28%)               | 85%<br>(72-94%)          | 0.12<br>(0.036-0.26)                        | 0.048%<br>(-0.5-0.39%)               | -0.059%<br>(-0.81-0.42%)            | -0.39<br>(-5.2-2.7)    | 14<br>(-150-110)     |
| Palestine | 2016 | Male   | 60 to 64 | 14%<br>(6-28%)                 | 86%<br>(72-94%)          | 0.11<br>(0.03-0.26)                         | 0.011%<br>(-0.59-0.34%)              | -0.057%<br>(-0.78-0.37%)            | -0.39<br>(-5.4-2.6)    | 2.7<br>(-140-85)     |
| Palestine | 2016 | Male   | 65 to 69 | 14%<br>(6-25%)                 | 86%<br>(75-94%)          | 0.087<br>(0.025-0.21)                       | -0.013%<br>(-0.52-0.29%)             | -0.059%<br>(-0.72-0.32%)            | -0.53<br>(-6.5-2.8)    | -3.5<br>(-140-74)    |
| Palestine | 2016 | Male   | 70 to 74 | 12%<br>(5.5-23%)               | 88%<br>(77-95%)          | 0.065<br>(0.018-0.16)                       | 0.029%<br>(-0.41-0.28%)              | 0.011%<br>(-0.52-0.32%)             | 0.11<br>(-5.6-3.2)     | 6.5<br>(-96-64)      |
| Palestine | 2016 | Male   | 75 to 79 | 11%<br>(4.5-21%)               | 89%<br>(79-95%)          | 0.05<br>(0.012-0.14)                        | 0.013%<br>(-0.38-0.23%)              | -0.0029%<br>(-0.46-0.25%)           | -0.034<br>(-5.1-2.8)   | 2.2<br>(-68-41)      |
| Palestine | 2016 | Male   | 80 to 84 | 9.7%<br>(3.6-19%)              | 90%<br>(81-96%)          | 0.042<br>(0.01-0.12)                        | 0.026%<br>(-0.31-0.22%)              | 0.015%<br>(-0.37-0.23%)             | 0.15<br>(-3.5-2.2)     | 2.8<br>(-34-24)      |
| Palestine | 2016 | Male   | 85 to 89 | 9.5%<br>(3.7-19%)              | 91%<br>(81-96%)          | 0.039<br>(0.0089-0.11)                      | -0.01%<br>(-0.36-0.17%)              | -0.029%<br>(-0.41-0.17%)            | -0.18<br>(-2.5-1)      | -0.53<br>(-18-8.3)   |
| Palestine | 2016 | Male   | 90 to 94 | 11%<br>(4.2-22%)               | 89%<br>(78-96%)          | 0.041<br>(0.0094-0.11)                      | -0.054%<br>(-0.42-0.13%)             | -0.085%<br>(-0.5-0.12%)             | -0.22<br>(-1.3-0.31)   | -0.78<br>(-6.2-1.9)  |
| Palestine | 2016 | Male   | 95 plus  | 13%<br>(4.5-28%)               | 87%<br>(72-96%)          | 0.047<br>(0.0086-0.13)                      | -0.087%<br>(-0.57-0.13%)             | -0.14%<br>(-0.68-0.19%)             | -0.11<br>(-0.51-0.078) | -0.24<br>(-1.5-0.36) |
| Oman      | 1990 | Female | All Ages | 9.1%<br>(5.9-14%)              | 91%<br>(86-94%)          | 0.11<br>(0.073-0.15)                        | -0.11%<br>(-0.046-0.27%)             | -0.11%<br>(-0.54-0.31%)             | -4.3<br>(-20-11)       | 310<br>(-130-780)    |
| Oman      | 1990 | Female | 15 to 19 | 8.8%<br>(2.9-19%)              | 91%<br>(81-97%)          | 0.1<br>(0.024-0.25)                         | 0.46%<br>(0.24-0.8%)                 | 0.56%<br>(0.11-1.5%)                | 0.28<br>(0.054-0.75)   | 47<br>(24-85)        |
| Oman      | 1990 | Female | 20 to 24 | 11%<br>(3.6-24%)               | 89%<br>(76-96%)          | 0.16<br>(0.047-0.36)                        | 0.81%<br>(0.47-1.3%)                 | 0.75%<br>(0.14-1.7%)                | 0.42<br>(0.081-1)      | 81<br>(45-130)       |
| Oman      | 1990 | Female | 25 to 29 | 13%<br>(3.6-27%)               | 87%<br>(73-96%)          | 0.19<br>(0.055-0.41)                        | 0.87%<br>(0.53-1.3%)                 | 0.9%<br>(0.19-2%)                   | 0.53<br>(0.11-1.2)     | 85<br>(49-140)       |
| Oman      | 1990 | Female | 30 to 34 | 14%<br>(3.7-30%)               | 86%<br>(70-96%)          | 0.23<br>(0.07-0.45)                         | 0.78%<br>(0.43-1.2%)                 | 0.89%<br>(0.2-2%)                   | 0.58<br>(0.13-1.3)     | 76<br>(40-120)       |
| Oman      | 1990 | Female | 35 to 39 | 16%<br>(4.5-31%)               | 84%<br>(69-95%)          | 0.27<br>(0.089-0.49)                        | 0.68%<br>(0.29-1.2%)                 | 0.93%<br>(0.16-2%)                  | 0.69<br>(0.12-1.5)     | 62<br>(27-110)       |
| Oman      | 1990 | Female | 40 to 44 | 17%<br>(6.1-31%)               | 83%<br>(69-94%)          | 0.3<br>(0.11-0.56)                          | 0.54%<br>(0.089-1.2%)                | 0.83%<br>(0.023-2%)                 | 0.72<br>(0.019-1.8)    | 47<br>(8.3-100)      |
| Oman      | 1990 | Female | 45 to 49 | 17%<br>(6.2-32%)               | 83%<br>(68-94%)          | 0.32<br>(0.1-0.65)                          | 0.32%<br>(-0.33-1.1%)                | 0.48%<br>(-0.6-1.8%)                | 0.52<br>(-0.62-1.9)    | 29<br>(-29-100)      |
| Oman      | 1990 | Female | 50 to 54 | 18%<br>(7-36%)                 | 82%<br>(64-93%)          | 0.34<br>(0.1-0.7)                           | 0.16%<br>(-0.65-1.1%)                | 0.27%<br>(-0.91-1.7%)               | 0.34<br>(-1.2-2.2)     | 14<br>(-56-90)       |
| Oman      | 1990 | Female | 55 to 59 | 19%<br>(7.5-37%)               | 81%<br>(63-92%)          | 0.34<br>(0.095-0.77)                        | -0.075%<br>(-1.1-1%)                 | -0.083%<br>(-1.7-1.5%)              | -0.11<br>(-2.3-2.3)    | -5.5<br>(-85-80)     |
| Oman      | 1990 | Female | 60 to 64 | 20%<br>(8-39%)                 | 80%<br>(61-92%)          | 0.33<br>(0.082-0.85)                        | -0.28%<br>(-1.3-0.98%)               | -0.36%<br>(-1.8-1.4%)               | -0.63<br>(-3.3-2.6)    | -20<br>(-98-76)      |
| Oman      | 1990 | Female | 65 to 69 | 21%<br>(8.5-38%)               | 79%<br>(62-92%)          | 0.29<br>(0.072-0.69)                        | -0.47%<br>(-1.6-0.51%)               | -0.61%<br>(-2.1-0.66%)              | -1.3<br>(-4.5-1.4)     | -33<br>(-110-35)     |
| Oman      | 1990 | Female | 70 to 74 | 20%<br>(8-36%)                 | 80%<br>(64-92%)          | 0.23<br>(0.054-0.62)                        | -0.53%<br>(-1.6-0.25%)               | -0.69%<br>(-2-0.33%)                | -1.6<br>(-4.9-0.86)    | -32<br>(-93-14)      |

| Location | Year | Sex    | Age      | Prevalence of current drinkers | Prevalence of abstainers | Population average of standard drinks daily | Percent of total attributable deaths | Percent of total attributable DALYs | Attributable deaths    | Attributable DALYs       |
|----------|------|--------|----------|--------------------------------|--------------------------|---------------------------------------------|--------------------------------------|-------------------------------------|------------------------|--------------------------|
| Oman     | 1990 | Female | 75 to 79 | 17%<br>(6.4-36%)               | 83%<br>(64-94%)          | 0.19<br>(0.034-0.56)                        | -0.56%<br>(-1.6-0.064%)              | -0.72%<br>(-2-0.067%)               | -1.7<br>(-5-0.15)      | -25<br>(-72-3)           |
| Oman     | 1990 | Female | 80 to 84 | 16%<br>(5.4-35%)               | 84%<br>(65-95%)          | 0.17<br>(0.03-0.54)                         | -0.53%<br>(-1.7--0.013%)             | -0.67%<br>(-2.1--0.031%)            | -1.2<br>(-3.9--0.059)  | -13<br>(-41--0.33)       |
| Oman     | 1990 | Female | 85 to 89 | 16%<br>(5.4-37%)               | 84%<br>(63-95%)          | 0.17<br>(0.032-0.53)                        | -0.61%<br>(-1.9--0.054%)             | -0.77%<br>(-2.4--0.093%)            | -1<br>(-3.2--0.13)     | -7.5<br>(-24--0.67)      |
| Oman     | 1990 | Female | 90 to 94 | 19%<br>(6.5-42%)               | 81%<br>(58-93%)          | 0.19<br>(0.036-0.59)                        | -0.69%<br>(-2--0.06%)                | -0.88%<br>(-2.5--0.12%)             | -0.54<br>(-1.5--0.071) | -2.6<br>(-7.5--0.24)     |
| Oman     | 1990 | Female | 95 plus  | 23%<br>(7.8-48%)               | 77%<br>(52-92%)          | 0.23<br>(0.039-0.71)                        | -0.76%<br>(-2.2--0.001%)             | -0.99%<br>(-2.9--0.061%)            | -0.17<br>(-0.49--0.01) | -0.54<br>(-1.6--0.00077) |
| Oman     | 1990 | Male   | All Ages | 8%<br>(5.2-12%)                | 92%<br>(88-95%)          | 0.15<br>(0.11-0.21)                         | 0.5%<br>(0.3-0.77%)                  | 0.48%<br>(0.14-0.92%)               | 22<br>(6.4-43)         | 1800<br>(1100-2700)      |
| Oman     | 1990 | Male   | 15 to 19 | 6.2%<br>(2.5-12%)              | 94%<br>(88-98%)          | 0.069<br>(0.019-0.17)                       | 0.71%<br>(0.4-1.2%)                  | 0.67%<br>(0.18-1.5%)                | 0.51<br>(0.14-1.2)     | 81<br>(44-130)           |
| Oman     | 1990 | Male   | 20 to 24 | 9.6%<br>(3.7-19%)              | 90%<br>(81-96%)          | 0.15<br>(0.047-0.32)                        | 1.5%<br>(0.87-2.4%)                  | 1.3%<br>(0.39-2.9%)                 | 1.5<br>(0.44-3.3)      | 210<br>(120-340)         |
| Oman     | 1990 | Male   | 25 to 29 | 12%<br>(4.5-23%)               | 88%<br>(77-95%)          | 0.24<br>(0.084-0.46)                        | 1.7%<br>(0.97-2.7%)                  | 1.8%<br>(0.66-3.6%)                 | 2.6<br>(0.89-5.1)      | 280<br>(160-450)         |
| Oman     | 1990 | Male   | 30 to 34 | 14%<br>(4.8-26%)               | 86%<br>(74-95%)          | 0.3<br>(0.12-0.56)                          | 1.6%<br>(0.89-2.6%)                  | 1.8%<br>(0.63-3.6%)                 | 3.2<br>(1.1-6.4)       | 300<br>(170-500)         |
| Oman     | 1990 | Male   | 35 to 39 | 15%<br>(5.6-27%)               | 85%<br>(73-94%)          | 0.34<br>(0.14-0.61)                         | 1.5%<br>(0.8-2.5%)                   | 1.8%<br>(0.65-3.6%)                 | 3.8<br>(1.3-7.6)       | 300<br>(160-510)         |
| Oman     | 1990 | Male   | 40 to 44 | 15%<br>(6.8-27%)               | 85%<br>(73-93%)          | 0.37<br>(0.14-0.68)                         | 1.3%<br>(0.64-2.2%)                  | 1.5%<br>(0.44-3.1%)                 | 3.2<br>(0.94-6.8)      | 230<br>(110-410)         |
| Oman     | 1990 | Male   | 45 to 49 | 15%<br>(6.1-28%)               | 85%<br>(72-94%)          | 0.39<br>(0.13-0.79)                         | 1.1%<br>(0.46-2.3%)                  | 1.3%<br>(0.32-3.2%)                 | 2.8<br>(0.7-7)         | 160<br>(64-350)          |
| Oman     | 1990 | Male   | 50 to 54 | 14%<br>(6.2-28%)               | 86%<br>(72-94%)          | 0.39<br>(0.13-0.84)                         | 0.85%<br>(0.15-2%)                   | 0.98%<br>(-0.037-2.7%)              | 1.9<br>(-0.064-5.4)    | 94<br>(17-230)           |
| Oman     | 1990 | Male   | 55 to 59 | 14%<br>(6-26%)                 | 86%<br>(74-94%)          | 0.37<br>(0.11-0.82)                         | 0.69%<br>(-0.017-1.9%)               | 0.78%<br>(-0.22-2.5%)               | 1.4<br>(-0.37-4.4)     | 56<br>(-1.4-160)         |
| Oman     | 1990 | Male   | 60 to 64 | 13%<br>(5.6-26%)               | 87%<br>(74-94%)          | 0.34<br>(0.09-0.82)                         | 0.56%<br>(-0.11-1.9%)                | 0.64%<br>(-0.29-2.4%)               | 1<br>(-0.46-3.9)       | 35<br>(-6.9-120)         |
| Oman     | 1990 | Male   | 65 to 69 | 13%<br>(5.6-24%)               | 87%<br>(76-94%)          | 0.27<br>(0.082-0.64)                        | 0.29%<br>(-0.28-1.3%)                | 0.29%<br>(-0.44-1.5%)               | 0.52<br>(-0.78-2.7)    | 16<br>(-14-69)           |
| Oman     | 1990 | Male   | 70 to 74 | 11%<br>(5.2-21%)               | 89%<br>(79-95%)          | 0.21<br>(0.056-0.52)                        | 0.11%<br>(-0.37-0.73%)               | 0.072%<br>(-0.55-0.85%)             | 0.16<br>(-1.2-1.8)     | 5.5<br>(-19-38)          |
| Oman     | 1990 | Male   | 75 to 79 | 9.9%<br>(4.2-19%)              | 90%<br>(81-96%)          | 0.16<br>(0.036-0.43)                        | -0.0062%<br>(-0.43-0.45%)            | -0.06%<br>(-0.6-0.49%)              | -0.13<br>(-1.3-1.1)    | -0.22<br>(-17-19)        |
| Oman     | 1990 | Male   | 80 to 84 | 8.8%<br>(3.5-17%)              | 91%<br>(83-97%)          | 0.13<br>(0.03-0.33)                         | 0.02%<br>(-0.35-0.35%)               | -0.02%<br>(-0.49-0.37%)             | -0.03<br>(-0.74-0.57)  | 0.38<br>(-6.8-7)         |
| Oman     | 1990 | Male   | 85 to 89 | 8.6%<br>(3.5-17%)              | 91%<br>(83-97%)          | 0.12<br>(0.03-0.29)                         | -0.0095%<br>(-0.34-0.26%)            | -0.059%<br>(-0.48-0.26%)            | -0.062<br>(-0.49-0.28) | -0.085<br>(-3.2-2.4)     |
| Oman     | 1990 | Male   | 90 to 94 | 9.7%<br>(3.9-20%)              | 90%<br>(80-96%)          | 0.13<br>(0.03-0.34)                         | -0.073%<br>(-0.44-0.19%)             | -0.15%<br>(-0.63-0.16%)             | -0.07<br>(-0.29-0.076) | -0.21<br>(-1.3-0.56)     |

| Location | Year | Sex    | Age      | Prevalence of current drinkers | Prevalence of abstainers | Population average of standard drinks daily | Percent of total attributable deaths | Percent of total attributable DALYs | Attributable deaths     | Attributable DALYs     |
|----------|------|--------|----------|--------------------------------|--------------------------|---------------------------------------------|--------------------------------------|-------------------------------------|-------------------------|------------------------|
| Oman     | 1990 | Male   | 95 plus  | 12%<br>(4.4-25%)               | 88%<br>(75-96%)          | 0.15<br>(0.029-0.44)                        | -0.083%<br>(-0.56-0.22%)             | -0.19%<br>(-0.79-0.17%)             | -0.025<br>(-0.1-0.022)  | -0.043<br>(-0.29-0.11) |
| Oman     | 1995 | Female | All Ages | 9.2%<br>(5.8-14%)              | 91%<br>(86-94%)          | 0.1<br>(0.068-0.14)                         | 0.11%<br>(-0.065-0.28%)              | -0.23%<br>(-0.73-0.19%)             | -7.6<br>(-24-6.3)       | 270<br>(-150-680)      |
| Oman     | 1995 | Female | 15 to 19 | 9%<br>(2.9-19%)                | 91%<br>(81-97%)          | 0.097<br>(0.024-0.23)                       | 0.46%<br>(0.26-0.77%)                | 0.55%<br>(0.12-1.4%)                | 0.29<br>(0.059-0.77)    | 57<br>(31-98)          |
| Oman     | 1995 | Female | 20 to 24 | 11%<br>(3.5-24%)               | 89%<br>(76-96%)          | 0.15<br>(0.045-0.34)                        | 0.83%<br>(0.5-1.3%)                  | 0.77%<br>(0.18-1.9%)                | 0.32<br>(0.074-0.77)    | 75<br>(44-120)         |
| Oman     | 1995 | Female | 25 to 29 | 13%<br>(3.8-27%)               | 87%<br>(73-96%)          | 0.18<br>(0.053-0.38)                        | 0.87%<br>(0.55-1.3%)                 | 0.89%<br>(0.2-2%)                   | 0.46<br>(0.1-1.1)       | 90<br>(53-140)         |
| Oman     | 1995 | Female | 30 to 34 | 15%<br>(3.5-30%)               | 85%<br>(70-96%)          | 0.21<br>(0.067-0.4)                         | 0.77%<br>(0.46-1.2%)                 | 0.87%<br>(0.22-1.9%)                | 0.57<br>(0.14-1.3)      | 88<br>(50-140)         |
| Oman     | 1995 | Female | 35 to 39 | 16%<br>(4.3-31%)               | 84%<br>(69-96%)          | 0.25<br>(0.085-0.45)                        | 0.65%<br>(0.31-1%)                   | 0.89%<br>(0.16-1.8%)                | 0.67<br>(0.13-1.4)      | 68<br>(32-110)         |
| Oman     | 1995 | Female | 40 to 44 | 17%<br>(5.8-31%)               | 83%<br>(69-94%)          | 0.28<br>(0.1-0.53)                          | 0.5%<br>(0.07-1%)                    | 0.79%<br>(0.038-1.9%)               | 0.63<br>(0.029-1.6)     | 44<br>(6.8-92)         |
| Oman     | 1995 | Female | 45 to 49 | 17%<br>(6.2-32%)               | 83%<br>(68-94%)          | 0.3<br>(0.093-0.64)                         | 0.27%<br>(-0.33-1%)                  | 0.42%<br>(-0.53-1.8%)               | 0.36<br>(-0.43-1.6)     | 20<br>(-24-74)         |
| Oman     | 1995 | Female | 50 to 54 | 18%<br>(7.2-35%)               | 82%<br>(65-93%)          | 0.31<br>(0.093-0.68)                        | 0.094%<br>(-0.71-0.98%)              | 0.18%<br>(-1-1.6%)                  | 0.22<br>(-1.3-1.9)      | 7.7<br>(-60-82)        |
| Oman     | 1995 | Female | 55 to 59 | 19%<br>(7.7-37%)               | 81%<br>(63-92%)          | 0.31<br>(0.084-0.72)                        | -0.16%<br>(-1.2-0.75%)               | -0.2%<br>(-1.7-1.1%)                | -0.28<br>(-2.4-1.7)     | -13<br>(-93-61)        |
| Oman     | 1995 | Female | 60 to 64 | 20%<br>(7.7-37%)               | 80%<br>(63-92%)          | 0.3<br>(0.072-0.75)                         | -0.37%<br>(-1.4-0.63%)               | -0.46%<br>(-1.8-1%)                 | -0.81<br>(-3.3-1.7)     | -27<br>(-100-47)       |
| Oman     | 1995 | Female | 65 to 69 | 20%<br>(8.6-37%)               | 80%<br>(63-91%)          | 0.26<br>(0.062-0.62)                        | -0.55%<br>(-1.6-0.28%)               | -0.71%<br>(-2.1-0.38%)              | -1.5<br>(-4.5-0.81)     | -37<br>(-110-18)       |
| Oman     | 1995 | Female | 70 to 74 | 19%<br>(7.9-37%)               | 81%<br>(63-92%)          | 0.21<br>(0.047-0.53)                        | -0.59%<br>(-1.6-0.089%)              | -0.75%<br>(-2-0.1%)                 | -1.8<br>(-5.1-0.25)     | -36<br>(-99-5.5)       |
| Oman     | 1995 | Female | 75 to 79 | 17%<br>(6.3-37%)               | 83%<br>(63-94%)          | 0.17<br>(0.032-0.49)                        | -0.61%<br>(-1.8-0.048%)              | -0.77%<br>(-2.3-0.053%)             | -2.3<br>(-6.5-0.16)     | -33<br>(-95-2.6)       |
| Oman     | 1995 | Female | 80 to 84 | 16%<br>(5.2-36%)               | 84%<br>(64-95%)          | 0.16<br>(0.027-0.47)                        | -0.59%<br>(-1.8-0.032%)              | -0.73%<br>(-2.2-0.056%)             | -1.8<br>(-5.5-0.14)     | -19<br>(-59-1.1)       |
| Oman     | 1995 | Female | 85 to 89 | 17%<br>(5.5-37%)               | 83%<br>(63-94%)          | 0.16<br>(0.03-0.48)                         | -0.67%<br>(-2--0.085%)               | -0.84%<br>(-2.5-0.12%)              | -1.5<br>(-4.6-0.22)     | -11<br>(-34-1.4)       |
| Oman     | 1995 | Female | 90 to 94 | 19%<br>(6-43%)                 | 81%<br>(57-94%)          | 0.18<br>(0.031-0.57)                        | -0.76%<br>(-2.1--0.08%)              | -0.96%<br>(-2.6--0.12%)             | -0.84<br>(-2.3--0.099)  | -4.2<br>(-11--0.42)    |
| Oman     | 1995 | Female | 95 plus  | 24%<br>(6.8-49%)               | 76%<br>(51-93%)          | 0.22<br>(0.034-0.68)                        | -0.84%<br>(-2.4--0.021%)             | -1.1%<br>(-3--0.081%)               | -0.29<br>(-0.81--0.021) | -0.92<br>(-2.6--0.023) |
| Oman     | 1995 | Male   | All Ages | 8.7%<br>(5.5-13%)              | 91%<br>(87-95%)          | 0.16<br>(0.12-0.21)                         | 0.66%<br>(0.42-0.96%)                | 0.58%<br>(0.18-1.1%)                | 27<br>(8.2-52)          | 2400<br>(1500-3500)    |
| Oman     | 1995 | Male   | 15 to 19 | 6.2%<br>(2.6-12%)              | 94%<br>(88-97%)          | 0.063<br>(0.018-0.15)                       | 0.72%<br>(0.41-1.2%)                 | 0.66%<br>(0.17-1.5%)                | 0.62<br>(0.16-1.4)      | 100<br>(58-170)        |
| Oman     | 1995 | Male   | 20 to 24 | 9.5%<br>(3.9-18%)              | 90%<br>(82-96%)          | 0.14<br>(0.046-0.3)                         | 1.5%<br>(0.93-2.4%)                  | 1.3%<br>(0.41-3%)                   | 1.6<br>(0.5-3.6)        | 230<br>(140-370)       |

| Location | Year | Sex    | Age      | Prevalence of current drinkers | Prevalence of abstainers | Population average of standard drinks daily | Percent of total attributable deaths | Percent of total attributable DALYs | Attributable deaths     | Attributable DALYs     |
|----------|------|--------|----------|--------------------------------|--------------------------|---------------------------------------------|--------------------------------------|-------------------------------------|-------------------------|------------------------|
| Oman     | 1995 | Male   | 25 to 29 | 12%<br>(4.5-23%)               | 88%<br>(77-95%)          | 0.21<br>(0.08-0.4)                          | 1.6%<br>(1-2.5%)                     | 1.7%<br>(0.58-3.3%)                 | 3.7<br>(1.3-7.5)        | 440<br>(260-690)       |
| Oman     | 1995 | Male   | 30 to 34 | 14%<br>(5-26%)                 | 86%<br>(74-95%)          | 0.27<br>(0.12-0.49)                         | 1.5%<br>(0.89-2.4%)                  | 1.7%<br>(0.62-3.3%)                 | 4.6<br>(1.6-9.3)        | 460<br>(270-760)       |
| Oman     | 1995 | Male   | 35 to 39 | 15%<br>(5.6-28%)               | 85%<br>(72-94%)          | 0.31<br>(0.13-0.55)                         | 1.4%<br>(0.8-2.3%)                   | 1.7%<br>(0.63-3.2%)                 | 4.5<br>(1.6-8.8)        | 380<br>(210-610)       |
| Oman     | 1995 | Male   | 40 to 44 | 15%<br>(6.6-27%)               | 85%<br>(73-93%)          | 0.33<br>(0.13-0.62)                         | 1.2%<br>(0.6-2%)                     | 1.4%<br>(0.44-2.7%)                 | 3.9<br>(1.3-8.1)        | 290<br>(150-500)       |
| Oman     | 1995 | Male   | 45 to 49 | 15%<br>(6.1-28%)               | 85%<br>(72-94%)          | 0.35<br>(0.12-0.71)                         | 1%<br>(0.45-2%)                      | 1.2%<br>(0.31-2.8%)                 | 3.1<br>(0.84-7.5)       | 190<br>(79-390)        |
| Oman     | 1995 | Male   | 50 to 54 | 14%<br>(6.2-28%)               | 86%<br>(72-94%)          | 0.35<br>(0.11-0.75)                         | 0.73%<br>(0.096-1.8%)                | 0.82%<br>(-0.12-2.3%)               | 2.2<br>(-0.32-6.2)      | 110<br>(16-280)        |
| Oman     | 1995 | Male   | 55 to 59 | 14%<br>(5.7-27%)               | 86%<br>(73-94%)          | 0.34<br>(0.099-0.76)                        | 0.57%<br>(-0.068-1.6%)               | 0.62%<br>(-0.29-2%)                 | 1.6<br>(-0.75-5.3)      | 71<br>(-8.2-200)       |
| Oman     | 1995 | Male   | 60 to 64 | 13%<br>(5.5-26%)               | 87%<br>(74-94%)          | 0.3<br>(0.083-0.74)                         | 0.46%<br>(-0.15-1.6%)                | 0.51%<br>(-0.33-2%)                 | 1.2<br>(-0.77-4.8)      | 42<br>(-14-150)        |
| Oman     | 1995 | Male   | 65 to 69 | 13%<br>(5.6-24%)               | 87%<br>(76-94%)          | 0.25<br>(0.071-0.57)                        | 0.23%<br>(-0.27-1%)                  | 0.22%<br>(-0.46-1.2%)               | 0.45<br>(-0.94-2.6)     | 15<br>(-17-65)         |
| Oman     | 1995 | Male   | 70 to 74 | 11%<br>(5.2-21%)               | 89%<br>(79-95%)          | 0.18<br>(0.051-0.45)                        | 0.083%<br>(-0.37-0.62%)              | 0.045%<br>(-0.56-0.7%)              | 0.096<br>(-1.2-1.5)     | 4.2<br>(-20-31)        |
| Oman     | 1995 | Male   | 75 to 79 | 9.9%<br>(4.3-19%)              | 90%<br>(81-96%)          | 0.14<br>(0.033-0.38)                        | -0.018%<br>(-0.41-0.31%)             | -0.077%<br>(-0.6-0.31%)             | -0.17<br>(-1.3-0.68)    | -0.69<br>(-16-12)      |
| Oman     | 1995 | Male   | 80 to 84 | 8.8%<br>(3.5-18%)              | 91%<br>(82-96%)          | 0.12<br>(0.029-0.3)                         | 0.012%<br>(-0.35-0.27%)              | -0.032%<br>(-0.5-0.28%)             | -0.054<br>(-0.84-0.47)  | 0.28<br>(-7.8-5.9)     |
| Oman     | 1995 | Male   | 85 to 89 | 8.6%<br>(3.5-17%)              | 91%<br>(83-97%)          | 0.11<br>(0.027-0.27)                        | -0.015%<br>(-0.36-0.22%)             | -0.066%<br>(-0.5-0.22%)             | -0.082<br>(-0.61-0.27)  | -0.16<br>(-4-2.5)      |
| Oman     | 1995 | Male   | 90 to 94 | 9.7%<br>(3.9-19%)              | 90%<br>(81-96%)          | 0.11<br>(0.027-0.32)                        | -0.076%<br>(-0.47-0.18%)             | -0.15%<br>(-0.64-0.15%)             | -0.091<br>(-0.38-0.087) | -0.28<br>(-1.7-0.63)   |
| Oman     | 1995 | Male   | 95 plus  | 12%<br>(4.3-26%)               | 88%<br>(74-96%)          | 0.13<br>(0.026-0.4)                         | -0.081%<br>(-0.57-0.23%)             | -0.19%<br>(-0.8-0.17%)              | -0.032<br>(-0.13-0.028) | -0.054<br>(-0.38-0.15) |
| Oman     | 2000 | Female | All Ages | 9.3%<br>(5.2-14%)              | 91%<br>(86-95%)          | 0.13<br>(0.088-0.17)                        | 0.19%<br>(-0.042-0.44%)              | -0.24%<br>(-0.88-0.4%)              | -7.3<br>(-26-12)        | 400<br>(-92-950)       |
| Oman     | 2000 | Female | 15 to 19 | 8.8%<br>(2.8-20%)              | 91%<br>(80-97%)          | 0.11<br>(0.029-0.26)                        | 0.48%<br>(0.27-0.79%)                | 0.63%<br>(0.15-1.6%)                | 0.36<br>(0.086-0.89)    | 69<br>(38-120)         |
| Oman     | 2000 | Female | 20 to 24 | 11%<br>(3.5-25%)               | 89%<br>(75-97%)          | 0.18<br>(0.053-0.39)                        | 0.88%<br>(0.53-1.3%)                 | 0.86%<br>(0.22-2.1%)                | 0.53<br>(0.14-1.3)      | 130<br>(76-200)        |
| Oman     | 2000 | Female | 25 to 29 | 13%<br>(3.5-28%)               | 87%<br>(72-96%)          | 0.22<br>(0.066-0.43)                        | 0.93%<br>(0.6-1.3%)                  | 1%<br>(0.27-2.3%)                   | 0.55<br>(0.15-1.2)      | 110<br>(66-170)        |
| Oman     | 2000 | Female | 30 to 34 | 14%<br>(3.5-30%)               | 86%<br>(70-97%)          | 0.25<br>(0.079-0.49)                        | 0.83%<br>(0.51-1.2%)                 | 1%<br>(0.31-2.1%)                   | 0.63<br>(0.18-1.3)      | 98<br>(58-150)         |
| Oman     | 2000 | Female | 35 to 39 | 16%<br>(4.1-31%)               | 84%<br>(69-96%)          | 0.29<br>(0.096-0.54)                        | 0.71%<br>(0.36-1.1%)                 | 1.1%<br>(0.3-2.2%)                  | 0.77<br>(0.21-1.5)      | 77<br>(40-130)         |
| Oman     | 2000 | Female | 40 to 44 | 16%<br>(6-31%)                 | 84%<br>(69-94%)          | 0.33<br>(0.11-0.63)                         | 0.58%<br>(0.14-1.2%)                 | 1%<br>(0.19-2.3%)                   | 0.76<br>(0.13-1.7)      | 51<br>(13-100)         |

| Location | Year | Sex    | Age      | Prevalence of current drinkers | Prevalence of abstainers | Population average of standard drinks daily | Percent of total attributable deaths | Percent of total attributable DALYs | Attributable deaths     | Attributable DALYs   |
|----------|------|--------|----------|--------------------------------|--------------------------|---------------------------------------------|--------------------------------------|-------------------------------------|-------------------------|----------------------|
| Oman     | 2000 | Female | 45 to 49 | 17%<br>(6.2-33%)               | 83%<br>(67-94%)          | 0.36<br>(0.11-0.75)                         | 0.37%<br>(-0.29-1.2%)                | 0.65%<br>(-0.36-2.3%)               | 0.52<br>(-0.29-1.8)     | 27<br>(-21-93)       |
| Oman     | 2000 | Female | 50 to 54 | 18%<br>(6.8-35%)               | 82%<br>(65-93%)          | 0.37<br>(0.11-0.84)                         | 0.21%<br>(-0.7-1.4%)                 | 0.42%<br>(-0.9-2.2%)                | 0.42<br>(-0.91-2.4)     | 15<br>(-50-100)      |
| Oman     | 2000 | Female | 55 to 59 | 19%<br>(7.3-38%)               | 81%<br>(62-93%)          | 0.38<br>(0.1-0.87)                          | -0.067%<br>(-1.2-1.2%)               | -0.026%<br>(-1.6-1.8%)              | -0.041<br>(-2.7-2.9)    | -5.8<br>(-110-100)   |
| Oman     | 2000 | Female | 60 to 64 | 20%<br>(7.5-40%)               | 80%<br>(60-92%)          | 0.36<br>(0.086-0.87)                        | -0.3%<br>(-1.5-1%)                   | -0.35%<br>(-1.9-1.5%)               | -0.69<br>(-3.8-2.9)     | -25<br>(-120-83)     |
| Oman     | 2000 | Female | 65 to 69 | 21%<br>(8.4-38%)               | 79%<br>(62-92%)          | 0.32<br>(0.077-0.72)                        | -0.54%<br>(-1.7-0.49%)               | -0.67%<br>(-2.2-0.69%)              | -1.5<br>(-5-1.6)        | -40<br>(-130-36)     |
| Oman     | 2000 | Female | 70 to 74 | 20%<br>(8.1-37%)               | 80%<br>(63-92%)          | 0.26<br>(0.059-0.66)                        | -0.61%<br>(-1.7-0.22%)               | -0.78%<br>(-2.2-0.31%)              | -1.9<br>(-5.5-0.78)     | -39<br>(-110-14)     |
| Oman     | 2000 | Female | 75 to 79 | 18%<br>(6.6-36%)               | 82%<br>(64-93%)          | 0.21<br>(0.042-0.63)                        | -0.63%<br>(-1.8-0.081%)              | -0.81%<br>(-2.3-0.081%)             | -2.2<br>(-6.3-0.22)     | -32<br>(-94-4.2)     |
| Oman     | 2000 | Female | 80 to 84 | 16%<br>(5.4-36%)               | 84%<br>(64-95%)          | 0.19<br>(0.035-0.55)                        | -0.6%<br>(-1.8--0.008%)              | -0.75%<br>(-2.2--0.023%)            | -2.1<br>(-6--0.065)     | -22<br>(-65--0.28)   |
| Oman     | 2000 | Female | 85 to 89 | 17%<br>(5.2-37%)               | 83%<br>(63-95%)          | 0.19<br>(0.035-0.58)                        | -0.67%<br>(-2--0.06%)                | -0.85%<br>(-2.5--0.099%)            | -2<br>(-5.8--0.23)      | -14<br>(-43--1.3)    |
| Oman     | 2000 | Female | 90 to 94 | 19%<br>(6.1-41%)               | 81%<br>(59-94%)          | 0.21<br>(0.038-0.65)                        | -0.76%<br>(-2.1--0.051%)             | -0.97%<br>(-2.5--0.092%)            | -1.1<br>(-3--0.11)      | -5.6<br>(-15--0.39)  |
| Oman     | 2000 | Female | 95 plus  | 24%<br>(7.3-48%)               | 76%<br>(52-93%)          | 0.26<br>(0.041-0.78)                        | -0.82%<br>(-2.3-0.05%)               | -1.1%<br>(-3--0.02%)                | -0.41<br>(-1.2--0.0076) | -1.3<br>(-3.7-0.079) |
| Oman     | 2000 | Male   | All Ages | 8.2%<br>(5.4-12%)              | 92%<br>(88-95%)          | 0.17<br>(0.13-0.22)                         | 0.78%<br>(0.51-1.1%)                 | 0.67%<br>(0.23-1.3%)                | 28<br>(9.4-54)          | 2300<br>(1500-3400)  |
| Oman     | 2000 | Male   | 15 to 19 | 6.2%<br>(2.5-12%)              | 94%<br>(88-97%)          | 0.074<br>(0.022-0.16)                       | 0.75%<br>(0.42-1.2%)                 | 0.7%<br>(0.18-1.6%)                 | 0.78<br>(0.21-1.8)      | 130<br>(69-200)      |
| Oman     | 2000 | Male   | 20 to 24 | 9.4%<br>(3.6-18%)              | 91%<br>(82-96%)          | 0.16<br>(0.055-0.32)                        | 1.6%<br>(0.95-2.4%)                  | 1.4%<br>(0.44-2.9%)                 | 2.2<br>(0.7-4.6)        | 330<br>(190-510)     |
| Oman     | 2000 | Male   | 25 to 29 | 12%<br>(4.5-22%)               | 88%<br>(78-95%)          | 0.25<br>(0.098-0.46)                        | 1.8%<br>(1.1-2.7%)                   | 1.9%<br>(0.7-3.6%)                  | 3.3<br>(1.2-6.3)        | 390<br>(230-610)     |
| Oman     | 2000 | Male   | 30 to 34 | 14%<br>(4.6-26%)               | 86%<br>(74-95%)          | 0.32<br>(0.13-0.57)                         | 1.6%<br>(0.98-2.6%)                  | 1.9%<br>(0.75-3.6%)                 | 3.8<br>(1.4-7.2)        | 390<br>(220-620)     |
| Oman     | 2000 | Male   | 35 to 39 | 15%<br>(5.6-27%)               | 85%<br>(73-94%)          | 0.37<br>(0.15-0.68)                         | 1.6%<br>(0.88-2.5%)                  | 2%<br>(0.75-3.8%)                   | 3.8<br>(1.4-7.3)        | 320<br>(180-520)     |
| Oman     | 2000 | Male   | 40 to 44 | 15%<br>(6.6-27%)               | 85%<br>(73-93%)          | 0.4<br>(0.15-0.75)                          | 1.4%<br>(0.73-2.4%)                  | 1.7%<br>(0.61-3.5%)                 | 3.3<br>(1.2-6.8)        | 240<br>(130-430)     |
| Oman     | 2000 | Male   | 45 to 49 | 15%<br>(5.8-27%)               | 85%<br>(73-94%)          | 0.42<br>(0.14-0.91)                         | 1.2%<br>(0.54-2.6%)                  | 1.5%<br>(0.47-3.6%)                 | 3.4<br>(1-8)            | 200<br>(85-420)      |
| Oman     | 2000 | Male   | 50 to 54 | 14%<br>(5.9-28%)               | 86%<br>(72-94%)          | 0.42<br>(0.13-0.9)                          | 0.95%<br>(0.26-2.3%)                 | 1.1%<br>(0.1-3.2%)                  | 2.1<br>(0.19-5.8)       | 100<br>(28-250)      |
| Oman     | 2000 | Male   | 55 to 59 | 14%<br>(5.7-26%)               | 86%<br>(74-94%)          | 0.4<br>(0.12-0.88)                          | 0.76%<br>(0.044-2.1%)                | 0.89%<br>(-0.13-2.8%)               | 2.3<br>(-0.33-7.1)      | 95<br>(5.2-260)      |
| Oman     | 2000 | Male   | 60 to 64 | 13%<br>(5.5-25%)               | 87%<br>(75-95%)          | 0.36<br>(0.1-0.85)                          | 0.62%<br>(-0.087-2.1%)               | 0.72%<br>(-0.21-2.7%)               | 2.3<br>(-0.68-8.2)      | 76<br>(-12-240)      |

| Location | Year | Sex    | Age      | Prevalence of current drinkers | Prevalence of abstainers | Population average of standard drinks daily | Percent of total attributable deaths | Percent of total attributable DALYs | Attributable deaths    | Attributable DALYs     |
|----------|------|--------|----------|--------------------------------|--------------------------|---------------------------------------------|--------------------------------------|-------------------------------------|------------------------|------------------------|
| Oman     | 2000 | Male   | 65 to 69 | 13%<br>(5.6-23%)               | 87%<br>(77-94%)          | 0.29<br>(0.085-0.66)                        | 0.31%<br>(-0.25-1.4%)                | 0.33%<br>(-0.41-1.6%)               | 0.97<br>(-1.2-4.9)     | 28<br>(-23-130)        |
| Oman     | 2000 | Male   | 70 to 74 | 11%<br>(5.2-20%)               | 89%<br>(80-95%)          | 0.22<br>(0.059-0.55)                        | 0.13%<br>(-0.36-0.78%)               | 0.099%<br>(-0.54-0.89%)             | 0.28<br>(-1.5-2.4)     | 8.2<br>(-24-50)        |
| Oman     | 2000 | Male   | 75 to 79 | 9.6%<br>(4-19%)                | 90%<br>(81-96%)          | 0.16<br>(0.037-0.44)                        | -0.00013%<br>(-0.41-0.42%)           | -0.053%<br>(-0.57-0.45%)            | -0.13<br>(-1.5-1.1)    | 0.009<br>(-18-19)      |
| Oman     | 2000 | Male   | 80 to 84 | 8.6%<br>(3.4-17%)              | 91%<br>(83-97%)          | 0.14<br>(0.034-0.34)                        | 0.018%<br>(-0.34-0.35%)              | -0.021%<br>(-0.46-0.36%)            | -0.042<br>(-0.95-0.77) | 0.48<br>(-8.8-9.3)     |
| Oman     | 2000 | Male   | 85 to 89 | 8.4%<br>(3.4-18%)              | 92%<br>(82-97%)          | 0.13<br>(0.033-0.32)                        | -0.013%<br>(-0.37-0.28%)             | -0.061%<br>(-0.49-0.27%)            | -0.098<br>(-0.78-0.45) | -0.19<br>(-5.2-4)      |
| Oman     | 2000 | Male   | 90 to 94 | 9.5%<br>(3.9-19%)              | 90%<br>(81-96%)          | 0.14<br>(0.032-0.37)                        | -0.082%<br>(-0.47-0.21%)             | -0.16%<br>(-0.65-0.18%)             | -0.12<br>(-0.5-0.14)   | -0.39<br>(-2.2-1)      |
| Oman     | 2000 | Male   | 95 plus  | 12%<br>(4.3-26%)               | 88%<br>(74-96%)          | 0.16<br>(0.031-0.46)                        | -0.094%<br>(-0.6-0.27%)              | -0.21%<br>(-0.87-0.22%)             | -0.046<br>(-0.19-0.05) | -0.084<br>(-0.53-0.25) |
| Oman     | 2005 | Female | All Ages | 9.5%<br>(5.6-15%)              | 90%<br>(85-94%)          | 0.16<br>(0.12-0.22)                         | 0.33%<br>(0.06-0.68%)                | -0.095%<br>(-0.82-0.82%)            | -2.5<br>(-22-22)       | 650<br>(120-1400)      |
| Oman     | 2005 | Female | 15 to 19 | 9%<br>(2.9-20%)                | 91%<br>(80-97%)          | 0.14<br>(0.039-0.33)                        | 0.52%<br>(0.28-0.86%)                | 0.76%<br>(0.22-1.8%)                | 0.37<br>(0.11-0.88)    | 77<br>(41-130)         |
| Oman     | 2005 | Female | 20 to 24 | 12%<br>(3.3-27%)               | 88%<br>(73-97%)          | 0.22<br>(0.065-0.51)                        | 0.94%<br>(0.57-1.5%)                 | 1%<br>(0.3-2.4%)                    | 0.65<br>(0.18-1.5)     | 150<br>(88-250)        |
| Oman     | 2005 | Female | 25 to 29 | 13%<br>(3.4-29%)               | 87%<br>(71-97%)          | 0.27<br>(0.078-0.56)                        | 0.99%<br>(0.64-1.4%)                 | 1.2%<br>(0.37-2.6%)                 | 0.79<br>(0.24-1.7)     | 160<br>(98-230)        |
| Oman     | 2005 | Female | 30 to 34 | 14%<br>(3.7-30%)               | 86%<br>(70-96%)          | 0.31<br>(0.095-0.58)                        | 0.91%<br>(0.59-1.3%)                 | 1.3%<br>(0.44-2.6%)                 | 0.71<br>(0.24-1.4)     | 110<br>(65-160)        |
| Oman     | 2005 | Female | 35 to 39 | 16%<br>(4.7-30%)               | 84%<br>(70-95%)          | 0.36<br>(0.12-0.66)                         | 0.8%<br>(0.43-1.3%)                  | 1.4%<br>(0.44-2.8%)                 | 1<br>(0.3-2)           | 96<br>(51-160)         |
| Oman     | 2005 | Female | 40 to 44 | 16%<br>(6-31%)                 | 84%<br>(69-94%)          | 0.4<br>(0.15-0.77)                          | 0.69%<br>(0.23-1.4%)                 | 1.4%<br>(0.35-2.8%)                 | 1.2<br>(0.29-2.5)      | 78<br>(25-160)         |
| Oman     | 2005 | Female | 45 to 49 | 17%<br>(6-32%)                 | 83%<br>(68-94%)          | 0.44<br>(0.14-0.9)                          | 0.52%<br>(-0.25-1.5%)                | 0.98%<br>(-0.25-3.1%)               | 0.97<br>(-0.23-3)      | 52<br>(-23-160)        |
| Oman     | 2005 | Female | 50 to 54 | 18%<br>(7.1-34%)               | 82%<br>(66-93%)          | 0.45<br>(0.14-0.96)                         | 0.41%<br>(-0.59-1.9%)                | 0.79%<br>(-0.69-3.1%)               | 0.98<br>(-0.93-4)      | 39<br>(-52-180)        |
| Oman     | 2005 | Female | 55 to 59 | 18%<br>(7.5-36%)               | 82%<br>(64-93%)          | 0.45<br>(0.13-1)                            | 0.16%<br>(-0.94-1.6%)                | 0.34%<br>(-1.3-2.6%)                | 0.45<br>(-1.7-3.5)     | 13<br>(-74-130)        |
| Oman     | 2005 | Female | 60 to 64 | 19%<br>(7.6-38%)               | 81%<br>(62-92%)          | 0.44<br>(0.11-1.1)                          | -0.083%<br>(-1.4-1.6%)               | -0.048%<br>(-1.8-2.3%)              | -0.089<br>(-3.3-4.3)   | -6.7<br>(-120-130)     |
| Oman     | 2005 | Female | 65 to 69 | 20%<br>(8.1-37%)               | 80%<br>(63-92%)          | 0.38<br>(0.096-0.85)                        | -0.38%<br>(-1.6-0.97%)               | -0.47%<br>(-2.1-1.4%)               | -0.98<br>(-4.3-2.9)    | -27<br>(-110-69)       |
| Oman     | 2005 | Female | 70 to 74 | 19%<br>(7.8-35%)               | 81%<br>(65-92%)          | 0.3<br>(0.072-0.78)                         | -0.51%<br>(-1.6-0.53%)               | -0.66%<br>(-2.1-0.7%)               | -1.4<br>(-4.6-1.6)     | -30<br>(-94-31)        |
| Oman     | 2005 | Female | 75 to 79 | 17%<br>(6.5-34%)               | 83%<br>(66-94%)          | 0.25<br>(0.05-0.68)                         | -0.53%<br>(-1.6-0.29%)               | -0.7%<br>(-2.1-0.32%)               | -1.8<br>(-5.6-0.88)    | -28<br>(-86-15)        |
| Oman     | 2005 | Female | 80 to 84 | 15%<br>(5.3-35%)               | 85%<br>(65-95%)          | 0.22<br>(0.044-0.65)                        | -0.49%<br>(-1.5-0.14%)               | -0.64%<br>(-2-0.15%)                | -1.7<br>(-5.2-0.41)    | -19<br>(-58-5.4)       |



| Location | Year | Sex    | Age      | Prevalence of current drinkers | Prevalence of abstainers | Population average of standard drinks daily | Percent of total attributable deaths | Percent of total attributable DALYs | Attributable deaths    | Attributable DALYs    |
|----------|------|--------|----------|--------------------------------|--------------------------|---------------------------------------------|--------------------------------------|-------------------------------------|------------------------|-----------------------|
| Oman     | 2005 | Female | 85 to 89 | 16%<br>(5.3-36%)               | 84%<br>(64-95%)          | 0.23<br>(0.042-0.68)                        | -0.58%<br>(-1.8-0.061%)              | -0.76%<br>(-2.3-0.043%)             | -1.8<br>(-5.5-0.1)     | -13<br>(-42-1.5)      |
| Oman     | 2005 | Female | 90 to 94 | 19%<br>(6.1-40%)               | 81%<br>(60-94%)          | 0.26<br>(0.048-0.76)                        | -0.67%<br>(-1.9-0.045%)              | -0.88%<br>(-2.4-0.0031%)            | -1.3<br>(-3.5-0.0046)  | -6.3<br>(-18-0.44)    |
| Oman     | 2005 | Female | 95 plus  | 23%<br>(6.8-48%)               | 77%<br>(52-93%)          | 0.31<br>(0.051-0.91)                        | -0.71%<br>(-2.2-0.31%)               | -0.97%<br>(-2.8-0.29%)              | -0.48<br>(-1.4-0.14)   | -1.5<br>(-4.6-0.65)   |
| Oman     | 2005 | Male   | All Ages | 8.6%<br>(5.6-12%)              | 91%<br>(88-94%)          | 0.23<br>(0.17-0.28)                         | 1%<br>(0.68-1.5%)                    | 0.96%<br>(0.38-1.8%)                | 42<br>(16-81)          | 3100<br>(1900-4500)   |
| Oman     | 2005 | Male   | 15 to 19 | 6.2%<br>(2.6-12%)              | 94%<br>(88-97%)          | 0.092<br>(0.028-0.21)                       | 0.81%<br>(0.47-1.3%)                 | 0.82%<br>(0.25-1.8%)                | 0.95<br>(0.29-2.1)     | 150<br>(84-240)       |
| Oman     | 2005 | Male   | 20 to 24 | 9.6%<br>(3.6-19%)              | 90%<br>(81-96%)          | 0.2<br>(0.071-0.42)                         | 1.7%<br>(1-2.6%)                     | 1.6%<br>(0.56-3.4%)                 | 2.8<br>(0.97-5.9)      | 370<br>(210-590)      |
| Oman     | 2005 | Male   | 25 to 29 | 12%<br>(4.7-23%)               | 88%<br>(77-95%)          | 0.32<br>(0.12-0.59)                         | 2%<br>(1.2-3.1%)                     | 2.2%<br>(0.89-4.3%)                 | 4.3<br>(1.7-8.3)       | 480<br>(270-760)      |
| Oman     | 2005 | Male   | 30 to 34 | 14%<br>(5.1-27%)               | 86%<br>(73-95%)          | 0.41<br>(0.18-0.72)                         | 1.9%<br>(1.1-2.9%)                   | 2.4%<br>(1-4.5%)                    | 4.2<br>(1.7-8.1)       | 420<br>(250-670)      |
| Oman     | 2005 | Male   | 35 to 39 | 15%<br>(5.7-29%)               | 85%<br>(71-94%)          | 0.47<br>(0.19-0.86)                         | 1.8%<br>(1-3%)                       | 2.5%<br>(0.99-4.7%)                 | 4.6<br>(1.8-9.1)       | 390<br>(230-640)      |
| Oman     | 2005 | Male   | 40 to 44 | 15%<br>(6.8-27%)               | 85%<br>(73-93%)          | 0.5<br>(0.19-0.94)                          | 1.6%<br>(0.87-2.8%)                  | 2.2%<br>(0.82-4.4%)                 | 4.7<br>(1.7-9.5)       | 340<br>(180-590)      |
| Oman     | 2005 | Male   | 45 to 49 | 15%<br>(6-28%)                 | 85%<br>(72-94%)          | 0.52<br>(0.18-1)                            | 1.5%<br>(0.65-2.9%)                  | 2%<br>(0.61-4.4%)                   | 5.5<br>(1.7-13)        | 310<br>(130-630)      |
| Oman     | 2005 | Male   | 50 to 54 | 14%<br>(6.3-29%)               | 86%<br>(71-94%)          | 0.51<br>(0.16-1.1)                          | 1.2%<br>(0.35-2.8%)                  | 1.5%<br>(0.27-3.9%)                 | 4.5<br>(0.78-12)       | 220<br>(65-510)       |
| Oman     | 2005 | Male   | 55 to 59 | 14%<br>(5.9-27%)               | 86%<br>(73-94%)          | 0.49<br>(0.15-1.1)                          | 1%<br>(0.13-2.7%)                    | 1.3%<br>(0.056-3.5%)                | 3.6<br>(0.15-10)       | 140<br>(19-370)       |
| Oman     | 2005 | Male   | 60 to 64 | 13%<br>(5.3-26%)               | 87%<br>(74-95%)          | 0.44<br>(0.12-1.1)                          | 0.86%<br>(0.0063-2.6%)               | 1%<br>(-0.08-3.2%)                  | 3.8<br>(-0.29-12)      | 120<br>(0.84-360)     |
| Oman     | 2005 | Male   | 65 to 69 | 12%<br>(5.4-24%)               | 88%<br>(76-95%)          | 0.36<br>(0.11-0.79)                         | 0.49%<br>(-0.16-1.8%)                | 0.55%<br>(-0.3-2.1%)                | 2.3<br>(-1.2-8.9)      | 62<br>(-20-220)       |
| Oman     | 2005 | Male   | 70 to 74 | 11%<br>(5.1-20%)               | 89%<br>(80-95%)          | 0.26<br>(0.076-0.64)                        | 0.23%<br>(-0.31-1.2%)                | 0.23%<br>(-0.46-1.3%)               | 0.87<br>(-1.7-5.3)     | 21<br>(-28-110)       |
| Oman     | 2005 | Male   | 75 to 79 | 9.6%<br>(4.1-18%)              | 90%<br>(82-96%)          | 0.2<br>(0.046-0.53)                         | 0.067%<br>(-0.39-0.7%)               | 0.023%<br>(-0.55-0.77%)             | 0.075<br>(-1.8-2.5)    | 3.8<br>(-22-39)       |
| Oman     | 2005 | Male   | 80 to 84 | 8.6%<br>(3.5-17%)              | 91%<br>(83-96%)          | 0.17<br>(0.043-0.42)                        | 0.075%<br>(-0.32-0.58%)              | 0.045%<br>(-0.43-0.61%)             | 0.11<br>(-1-1.5)       | 2.3<br>(-9.8-17)      |
| Oman     | 2005 | Male   | 85 to 89 | 8.5%<br>(3.4-17%)              | 92%<br>(83-97%)          | 0.16<br>(0.038-0.39)                        | 0.035%<br>(-0.33-0.43%)              | -0.0082%<br>(-0.46-0.45%)           | -0.014<br>(-0.81-0.81) | 0.56<br>(-5.3-6.9)    |
| Oman     | 2005 | Male   | 90 to 94 | 9.5%<br>(3.8-20%)              | 90%<br>(80-96%)          | 0.17<br>(0.039-0.44)                        | -0.05%<br>(-0.48-0.34%)              | -0.12%<br>(-0.65-0.32%)             | -0.12<br>(-0.62-0.3)   | -0.29<br>(-2.7-2)     |
| Oman     | 2005 | Male   | 95 plus  | 12%<br>(4.3-25%)               | 88%<br>(75-96%)          | 0.19<br>(0.037-0.57)                        | -0.063%<br>(-0.56-0.46%)             | -0.18%<br>(-0.83-0.4%)              | -0.049<br>(-0.23-0.11) | -0.07<br>(-0.61-0.52) |
| Oman     | 2010 | Female | All Ages | 10%<br>(6.1-17%)               | 90%<br>(83-94%)          | 0.2<br>(0.14-0.27)                          | 0.37%<br>(0.048-0.77%)               | -0.052%<br>(-0.86-1%)               | -1.6<br>(-27-31)       | 800<br>(100-1800)     |

| Location | Year | Sex    | Age      | Prevalence of current drinkers | Prevalence of abstainers | Population average of standard drinks daily | Percent of total attributable deaths | Percent of total attributable DALYs | Attributable deaths | Attributable DALYs  |
|----------|------|--------|----------|--------------------------------|--------------------------|---------------------------------------------|--------------------------------------|-------------------------------------|---------------------|---------------------|
| Oman     | 2010 | Female | 15 to 19 | 8.9%<br>(2.8-20%)              | 91%<br>(80-97%)          | 0.15<br>(0.042-0.36)                        | 0.52%<br>(0.3-0.84%)                 | 0.78%<br>(0.24-1.8%)                | 0.34<br>(0.11-0.79) | 75<br>(41-130)      |
| Oman     | 2010 | Female | 20 to 24 | 11%<br>(3.5-24%)               | 89%<br>(76-97%)          | 0.23<br>(0.07-0.53)                         | 0.97%<br>(0.6-1.5%)                  | 1.1%<br>(0.36-2.4%)                 | 0.62<br>(0.21-1.4)  | 160<br>(94-250)     |
| Oman     | 2010 | Female | 25 to 29 | 13%<br>(3.7-27%)               | 87%<br>(73-96%)          | 0.28<br>(0.089-0.54)                        | 1%<br>(0.66-1.4%)                    | 1.2%<br>(0.43-2.4%)                 | 0.81<br>(0.28-1.7)  | 180<br>(110-280)    |
| Oman     | 2010 | Female | 30 to 34 | 14%<br>(3.9-30%)               | 86%<br>(70-96%)          | 0.32<br>(0.11-0.59)                         | 0.91%<br>(0.58-1.3%)                 | 1.4%<br>(0.54-2.6%)                 | 0.92<br>(0.35-1.8)  | 160<br>(100-250)    |
| Oman     | 2010 | Female | 35 to 39 | 16%<br>(4.5-31%)               | 84%<br>(69-95%)          | 0.39<br>(0.14-0.72)                         | 0.82%<br>(0.44-1.3%)                 | 1.5%<br>(0.53-3%)                   | 1<br>(0.34-2)       | 110<br>(57-170)     |
| Oman     | 2010 | Female | 40 to 44 | 17%<br>(6.2-31%)               | 83%<br>(69-94%)          | 0.44<br>(0.16-0.83)                         | 0.72%<br>(0.25-1.4%)                 | 1.6%<br>(0.47-3.3%)                 | 1.2<br>(0.35-2.5)   | 86<br>(29-170)      |
| Oman     | 2010 | Female | 45 to 49 | 17%<br>(5.9-32%)               | 83%<br>(68-94%)          | 0.48<br>(0.15-0.97)                         | 0.57%<br>(-0.16-1.6%)                | 1.2%<br>(-0.032-3.4%)               | 1.1<br>(-0.028-3.2) | 65<br>(-17-190)     |
| Oman     | 2010 | Female | 50 to 54 | 18%<br>(6.8-34%)               | 82%<br>(66-93%)          | 0.49<br>(0.14-1.1)                          | 0.51%<br>(-0.48-2%)                  | 1%<br>(-0.49-3.6%)                  | 1.4<br>(-0.66-4.9)  | 56<br>(-55-230)     |
| Oman     | 2010 | Female | 55 to 59 | 19%<br>(6.9-37%)               | 81%<br>(63-93%)          | 0.49<br>(0.13-1.1)                          | 0.27%<br>(-0.89-1.9%)                | 0.53%<br>(-1.3-3%)                  | 0.94<br>(-2.2-5.6)  | 30<br>(-100-200)    |
| Oman     | 2010 | Female | 60 to 64 | 20%<br>(7.5-38%)               | 80%<br>(62-93%)          | 0.47<br>(0.11-1.1)                          | 0.019%<br>(-1.5-1.8%)                | 0.096%<br>(-1.8-2.7%)               | 0.21<br>(-3.9-5.9)  | 2<br>(-140-180)     |
| Oman     | 2010 | Female | 65 to 69 | 20%<br>(8.3-36%)               | 80%<br>(64-92%)          | 0.41<br>(0.1-0.95)                          | -0.28%<br>(-1.6-1.3%)                | -0.32%<br>(-2.1-7%)                 | -1<br>(-6.3-5.5)    | -28<br>(-160-130)   |
| Oman     | 2010 | Female | 70 to 74 | 19%<br>(7.3-35%)               | 81%<br>(65-93%)          | 0.33<br>(0.076-0.84)                        | -0.44%<br>(-1.6-0.92%)               | -0.54%<br>(-2.1-3%)                 | -1.7<br>(-6.3-6)    | -34<br>(-120-73)    |
| Oman     | 2010 | Female | 75 to 79 | 17%<br>(6.1-35%)               | 83%<br>(65-94%)          | 0.27<br>(0.051-0.81)                        | -0.47%<br>(-1.6-0.71%)               | -0.6%<br>(-2.1-0.88%)               | -1.7<br>(-5.8-2.5)  | -25<br>(-89-38)     |
| Oman     | 2010 | Female | 80 to 84 | 16%<br>(5.2-35%)               | 84%<br>(65-95%)          | 0.25<br>(0.044-0.69)                        | -0.42%<br>(-1.5-0.32%)               | -0.56%<br>(-1.9-0.37%)              | -1.6<br>(-5.3-1)    | -17<br>(-61-14)     |
| Oman     | 2010 | Female | 85 to 89 | 16%<br>(5.3-35%)               | 84%<br>(65-95%)          | 0.25<br>(0.046-0.77)                        | -0.5%<br>(-1.6-0.23%)                | -0.67%<br>(-2.1-0.22%)              | -2<br>(-6-0.64)     | -15<br>(-46-6.5)    |
| Oman     | 2010 | Female | 90 to 94 | 19%<br>(6.2-40%)               | 81%<br>(60-94%)          | 0.28<br>(0.051-0.88)                        | -0.59%<br>(-1.8-0.32%)               | -0.8%<br>(-2.3-0.28%)               | -1.6<br>(-4.7-0.57) | -7.8<br>(-23-4.3)   |
| Oman     | 2010 | Female | 95 plus  | 23%<br>(6.8-48%)               | 77%<br>(52-93%)          | 0.33<br>(0.055-1)                           | -0.61%<br>(-2.1-0.69%)               | -0.86%<br>(-2.7-0.74%)              | -0.71<br>(-2.2-0.6) | -2.2<br>(-7.1-2.4)  |
| Oman     | 2010 | Male   | All Ages | 9.5%<br>(5.9-14%)              | 90%<br>(86-94%)          | 0.28<br>(0.21-0.35)                         | 1.2%<br>(0.84-1.7%)                  | 1.1%<br>(0.51-2%)                   | 64<br>(28-120)      | 4600<br>(3100-6700) |
| Oman     | 2010 | Male   | 15 to 19 | 6.2%<br>(2.6-13%)              | 94%<br>(87-97%)          | 0.098<br>(0.029-0.23)                       | 0.84%<br>(0.49-1.4%)                 | 0.89%<br>(0.29-2%)                  | 1.1<br>(0.37-2.6)   | 160<br>(89-270)     |
| Oman     | 2010 | Male   | 20 to 24 | 9.5%<br>(3.8-19%)              | 91%<br>(81-96%)          | 0.22<br>(0.072-0.46)                        | 1.7%<br>(1.1-2.9%)                   | 1.7%<br>(0.59-3.5%)                 | 4.4<br>(1.6-9.3)    | 600<br>(350-980)    |
| Oman     | 2010 | Male   | 25 to 29 | 12%<br>(4.5-23%)               | 88%<br>(77-95%)          | 0.33<br>(0.13-0.62)                         | 2%<br>(1.3-3%)                       | 2.3%<br>(0.91-4.3%)                 | 7.2<br>(2.7-14)     | 850<br>(510-1300)   |
| Oman     | 2010 | Male   | 30 to 34 | 14%<br>(4.7-27%)               | 86%<br>(73-95%)          | 0.43<br>(0.19-0.75)                         | 1.9%<br>(1.2-2.9%)                   | 2.5%<br>(1.1-4.5%)                  | 6.4<br>(2.6-12)     | 650<br>(390-1000)   |

| Location | Year | Sex    | Age      | Prevalence of current drinkers | Prevalence of abstainers | Population average of standard drinks daily | Percent of total attributable deaths | Percent of total attributable DALYs | Attributable deaths    | Attributable DALYs    |
|----------|------|--------|----------|--------------------------------|--------------------------|---------------------------------------------|--------------------------------------|-------------------------------------|------------------------|-----------------------|
| Oman     | 2010 | Male   | 35 to 39 | 15%<br>(5.5-28%)               | 85%<br>(72-95%)          | 0.49<br>(0.19-0.92)                         | 1.9%<br>(1.1-3.1%)                   | 2.7%<br>(1.1-5.1%)                  | 6.2<br>(2.7-12)        | 540<br>(310-880)      |
| Oman     | 2010 | Male   | 40 to 44 | 15%<br>(6.6-27%)               | 85%<br>(73-93%)          | 0.52<br>(0.2-1)                             | 1.7%<br>(0.94-3%)                    | 2.5%<br>(1-4.9%)                    | 6.5<br>(2.6-13)        | 480<br>(250-820)      |
| Oman     | 2010 | Male   | 45 to 49 | 15%<br>(5.8-28%)               | 85%<br>(72-94%)          | 0.55<br>(0.18-1.1)                          | 1.7%<br>(0.75-3.2%)                  | 2.3%<br>(0.78-5%)                   | 6.8<br>(2.4-14)        | 390<br>(170-760)      |
| Oman     | 2010 | Male   | 50 to 54 | 14%<br>(5.9-28%)               | 86%<br>(72-94%)          | 0.54<br>(0.16-1.2)                          | 1.4%<br>(0.45-3.1%)                  | 1.8%<br>(0.42-4.2%)                 | 6.9<br>(1.7-16)        | 330<br>(110-740)      |
| Oman     | 2010 | Male   | 55 to 59 | 13%<br>(5.6-26%)               | 87%<br>(74-94%)          | 0.52<br>(0.16-1.2)                          | 1.2%<br>(0.33-2.8%)                  | 1.6%<br>(0.31-3.8%)                 | 6.2<br>(1.2-16)        | 250<br>(65-580)       |
| Oman     | 2010 | Male   | 60 to 64 | 13%<br>(5.4-25%)               | 87%<br>(75-95%)          | 0.46<br>(0.13-1.1)                          | 1%<br>(0.092-2.7%)                   | 1.2%<br>(0.05-3.4%)                 | 4.9<br>(0.2-14)        | 150<br>(14-420)       |
| Oman     | 2010 | Male   | 65 to 69 | 12%<br>(5.2-23%)               | 88%<br>(77-95%)          | 0.38<br>(0.11-0.84)                         | 0.66%<br>(-0.056-2.1%)               | 0.76%<br>(-0.15-2.5%)               | 3.7<br>(-0.72-12)      | 98<br>(-9.1-300)      |
| Oman     | 2010 | Male   | 70 to 74 | 11%<br>(5-21%)                 | 89%<br>(79-95%)          | 0.28<br>(0.081-0.71)                        | 0.34%<br>(-0.21-1.5%)                | 0.37%<br>(-0.32-1.8%)               | 2<br>(-1.9-10)         | 45<br>(-28-210)       |
| Oman     | 2010 | Male   | 75 to 79 | 9.6%<br>(4.1-19%)              | 90%<br>(81-96%)          | 0.22<br>(0.049-0.59)                        | 0.16%<br>(-0.35-0.99%)               | 0.14%<br>(-0.5-1.1%)                | 0.63<br>(-2.3-5.1)     | 13<br>(-28-80)        |
| Oman     | 2010 | Male   | 80 to 84 | 8.6%<br>(3.3-18%)              | 91%<br>(82-97%)          | 0.18<br>(0.043-0.48)                        | 0.16%<br>(-0.23-0.77%)               | 0.14%<br>(-0.33-0.86%)              | 0.47<br>(-1.1-2.7)     | 6.5<br>(-9.7-33)      |
| Oman     | 2010 | Male   | 85 to 89 | 8.6%<br>(3.4-17%)              | 91%<br>(83-97%)          | 0.17<br>(0.041-0.43)                        | 0.12%<br>(-0.25-0.6%)                | 0.089%<br>(-0.36-0.65%)             | 0.19<br>(-0.77-1.4)    | 2.2<br>(-4.9-12)      |
| Oman     | 2010 | Male   | 90 to 94 | 9.7%<br>(3.9-20%)              | 90%<br>(80-96%)          | 0.18<br>(0.041-0.46)                        | 0.024%<br>(-0.38-0.52%)              | -0.035%<br>(-0.55-0.5%)             | -0.038<br>(-0.59-0.57) | 0.16<br>(-2.6-3.5)    |
| Oman     | 2010 | Male   | 95 plus  | 12%<br>(4.2-27%)               | 88%<br>(73-96%)          | 0.21<br>(0.039-0.6)                         | 0.012%<br>(-0.48-0.65%)              | -0.089%<br>(-0.69-0.62%)            | -0.031<br>(-0.24-0.21) | 0.017<br>(-0.65-0.89) |
| Oman     | 2016 | Female | All Ages | 11%<br>(6.2-17%)               | 89%<br>(83-94%)          | 0.22<br>(0.12-0.36)                         | 0.42%<br>(0.096-0.94%)               | 0.023%<br>(-0.74-1.3%)              | 0.89<br>(-28-48)       | 1100<br>(240-2500)    |
| Oman     | 2016 | Female | 15 to 19 | 8.4%<br>(2.7-20%)              | 92%<br>(80-97%)          | 0.14<br>(0.032-0.39)                        | 0.52%<br>(0.29-0.88%)                | 0.81%<br>(0.25-2%)                  | 0.27<br>(0.084-0.67)   | 60<br>(33-110)        |
| Oman     | 2016 | Female | 20 to 24 | 11%<br>(3.4-24%)               | 89%<br>(76-97%)          | 0.23<br>(0.056-0.57)                        | 0.97%<br>(0.6-1.5%)                  | 1.1%<br>(0.33-2.7%)                 | 0.71<br>(0.21-1.8)     | 200<br>(120-320)      |
| Oman     | 2016 | Female | 25 to 29 | 13%<br>(3.3-27%)               | 87%<br>(73-97%)          | 0.27<br>(0.078-0.6)                         | 1%<br>(0.64-1.5%)                    | 1.2%<br>(0.38-2.6%)                 | 1.1<br>(0.33-2.3)      | 260<br>(160-400)      |
| Oman     | 2016 | Female | 30 to 34 | 14%<br>(3.9-31%)               | 86%<br>(69-96%)          | 0.32<br>(0.1-0.63)                          | 0.92%<br>(0.57-1.4%)                 | 1.4%<br>(0.5-2.7%)                  | 1.3<br>(0.49-2.7)      | 240<br>(150-380)      |
| Oman     | 2016 | Female | 35 to 39 | 16%<br>(4.6-31%)               | 84%<br>(69-95%)          | 0.38<br>(0.13-0.76)                         | 0.82%<br>(0.43-1.4%)                 | 1.5%<br>(0.49-3.1%)                 | 1.8<br>(0.59-3.7)      | 200<br>(100-340)      |
| Oman     | 2016 | Female | 40 to 44 | 16%<br>(5.8-30%)               | 84%<br>(70-94%)          | 0.43<br>(0.15-0.88)                         | 0.73%<br>(0.24-1.5%)                 | 1.6%<br>(0.44-3.6%)                 | 1.6<br>(0.45-3.7)      | 120<br>(38-260)       |
| Oman     | 2016 | Female | 45 to 49 | 17%<br>(6.3-32%)               | 83%<br>(68-94%)          | 0.47<br>(0.13-1.1)                          | 0.59%<br>(-0.11-1.8%)                | 1.2%<br>(-0.092-3.8%)               | 1.4<br>(-0.1-4.4)      | 82<br>(-17-250)       |
| Oman     | 2016 | Female | 50 to 54 | 18%<br>(6.9-35%)               | 82%<br>(65-93%)          | 0.49<br>(0.12-1.2)                          | 0.5%<br>(-0.46-2.1%)                 | 1.1%<br>(-0.42-3.9%)                | 1.6<br>(-0.63-5.9)     | 68<br>(-64-280)       |

| Location | Year | Sex    | Age      | Prevalence of current drinkers | Prevalence of abstainers | Population average of standard drinks daily | Percent of total attributable deaths | Percent of total attributable DALYs | Attributable deaths | Attributable DALYs   |
|----------|------|--------|----------|--------------------------------|--------------------------|---------------------------------------------|--------------------------------------|-------------------------------------|---------------------|----------------------|
| Oman     | 2016 | Female | 55 to 59 | 19%<br>(7.3-38%)               | 81%<br>(62-93%)          | 0.49<br>(0.12-1.2)                          | 0.3%<br>(-0.86-2%)                   | 0.63%<br>(-1.2-3.4%)                | 1.2<br>(-2.3-6.5)   | 38<br>(-110-260)     |
| Oman     | 2016 | Female | 60 to 64 | 20%<br>(7.2-39%)               | 80%<br>(61-93%)          | 0.48<br>(0.11-1.2)                          | 0.077%<br>(-1.3-2%)                  | 0.23%<br>(-1.6-3.1%)                | 0.62<br>(-4.3-8.3)  | 10<br>(-160-260)     |
| Oman     | 2016 | Female | 65 to 69 | 20%<br>(8.4-36%)               | 80%<br>(64-92%)          | 0.42<br>(0.09-1)                            | -0.19%<br>(-1.4-1.5%)                | -0.18%<br>(-1.8-2.2%)               | -0.57<br>(-5.8-7.2) | -22<br>(-160-180)    |
| Oman     | 2016 | Female | 70 to 74 | 19%<br>(8.1-34%)               | 81%<br>(66-92%)          | 0.34<br>(0.072-0.94)                        | -0.33%<br>(-1.4-1.1%)                | -0.42%<br>(-1.7-1.7%)               | -1.6<br>(-6.7-5.9)  | -36<br>(-150-120)    |
| Oman     | 2016 | Female | 75 to 79 | 17%<br>(6.6-35%)               | 83%<br>(65-93%)          | 0.28<br>(0.051-0.87)                        | -0.4%<br>(-1.5-0.92%)                | -0.52%<br>(-1.9-1.2%)               | -1.7<br>(-6.5-3.8)  | -27<br>(-100-63)     |
| Oman     | 2016 | Female | 80 to 84 | 16%<br>(5.2-36%)               | 84%<br>(64-95%)          | 0.25<br>(0.042-0.8)                         | -0.39%<br>(-1.4-0.66%)               | -0.51%<br>(-1.7-0.83%)              | -1.7<br>(-5.9-2.9)  | -19<br>(-66-34)      |
| Oman     | 2016 | Female | 85 to 89 | 16%<br>(5.4-37%)               | 84%<br>(63-95%)          | 0.25<br>(0.044-0.8)                         | -0.48%<br>(-1.6-0.42%)               | -0.63%<br>(-2-0.43%)                | -2.1<br>(-6.6-1.4)  | -15<br>(-50-14)      |
| Oman     | 2016 | Female | 90 to 94 | 19%<br>(6.2-41%)               | 81%<br>(59-94%)          | 0.29<br>(0.044-0.87)                        | -0.58%<br>(-1.8-0.46%)               | -0.77%<br>(-2.4-0.5%)               | -2.1<br>(-6.5-1.3)  | -10<br>(-32-8.1)     |
| Oman     | 2016 | Female | 95 plus  | 24%<br>(7.1-48%)               | 76%<br>(52-93%)          | 0.34<br>(0.048-1.1)                         | -0.59%<br>(-2.1-0.87%)               | -0.83%<br>(-2.7-0.93%)              | -1<br>(-3.3-1.1)    | -3.1<br>(-11-4.6)    |
| Oman     | 2016 | Male   | All Ages | 11%<br>(6.4-16%)               | 89%<br>(84-94%)          | 0.32<br>(0.19-0.5)                          | 1.4%<br>(0.87-2%)                    | 1.3%<br>(0.54-2.4%)                 | 110<br>(46-220)     | 8500<br>(5300-13000) |
| Oman     | 2016 | Male   | 15 to 19 | 6%<br>(2.5-12%)                | 94%<br>(88-97%)          | 0.095<br>(0.026-0.24)                       | 0.89%<br>(0.53-1.5%)                 | 1%<br>(0.36-2.2%)                   | 1<br>(0.39-2.3)     | 150<br>(88-260)      |
| Oman     | 2016 | Male   | 20 to 24 | 9.3%<br>(3.6-19%)              | 91%<br>(81-96%)          | 0.21<br>(0.062-0.49)                        | 1.8%<br>(1.1-2.9%)                   | 1.7%<br>(0.63-3.8%)                 | 5.2<br>(1.9-12)     | 760<br>(450-1200)    |
| Oman     | 2016 | Male   | 25 to 29 | 12%<br>(4.4-22%)               | 88%<br>(78-96%)          | 0.32<br>(0.12-0.64)                         | 2%<br>(1.2-3%)                       | 2.3%<br>(0.87-4.5%)                 | 12<br>(4.5-24)      | 1600<br>(940-2400)   |
| Oman     | 2016 | Male   | 30 to 34 | 13%<br>(4.8-26%)               | 87%<br>(74-95%)          | 0.4<br>(0.17-0.72)                          | 1.9%<br>(1.2-2.8%)                   | 2.4%<br>(0.98-4.4%)                 | 14<br>(5.7-27)      | 1600<br>(1000-2500)  |
| Oman     | 2016 | Male   | 35 to 39 | 14%<br>(5.4-27%)               | 86%<br>(73-95%)          | 0.46<br>(0.17-0.91)                         | 1.8%<br>(1.1-3%)                     | 2.6%<br>(1.1-5%)                    | 13<br>(5.3-25)      | 1100<br>(660-1900)   |
| Oman     | 2016 | Male   | 40 to 44 | 15%<br>(6.4-27%)               | 85%<br>(73-94%)          | 0.5<br>(0.17-1)                             | 1.7%<br>(0.89-3.1%)                  | 2.4%<br>(0.91-5.1%)                 | 12<br>(4.4-25)      | 880<br>(460-1600)    |
| Oman     | 2016 | Male   | 45 to 49 | 14%<br>(5.8-27%)               | 86%<br>(73-94%)          | 0.53<br>(0.15-1.2)                          | 1.6%<br>(0.71-3.1%)                  | 2.2%<br>(0.75-4.9%)                 | 14<br>(4.5-31)      | 810<br>(370-1600)    |
| Oman     | 2016 | Male   | 50 to 54 | 14%<br>(5.9-27%)               | 86%<br>(73-94%)          | 0.53<br>(0.14-1.3)                          | 1.4%<br>(0.46-3%)                    | 1.8%<br>(0.45-4.4%)                 | 11<br>(2.7-26)      | 530<br>(170-1200)    |
| Oman     | 2016 | Male   | 55 to 59 | 13%<br>(5.5-26%)               | 87%<br>(74-95%)          | 0.5<br>(0.14-1.2)                           | 1.2%<br>(0.25-2.9%)                  | 1.5%<br>(0.19-3.9%)                 | 10<br>(1.3-27)      | 410<br>(88-1000)     |
| Oman     | 2016 | Male   | 60 to 64 | 13%<br>(5.2-25%)               | 87%<br>(75-95%)          | 0.45<br>(0.12-1.1)                          | 0.98%<br>(0.099-2.7%)                | 1.2%<br>(0.045-3.6%)                | 9.6<br>(0.36-28)    | 310<br>(34-860)      |
| Oman     | 2016 | Male   | 65 to 69 | 12%<br>(5.3-22%)               | 88%<br>(78-95%)          | 0.37<br>(0.1-0.85)                          | 0.65%<br>(-0.046-2.1%)               | 0.77%<br>(-0.12-2.6%)               | 5.1<br>(-0.83-17)   | 140<br>(-9.9-430)    |
| Oman     | 2016 | Male   | 70 to 74 | 11%<br>(5-19%)                 | 89%<br>(81-95%)          | 0.27<br>(0.067-0.7)                         | 0.37%<br>(-0.17-1.5%)                | 0.41%<br>(-0.27-1.8%)               | 3.1<br>(-2-14)      | 68<br>(-31-280)      |

| Location | Year | Sex    | Age      | Prevalence of current drinkers | Prevalence of abstainers | Population average of standard drinks daily | Percent of total attributable deaths | Percent of total attributable DALYs | Attributable deaths    | Attributable DALYs   |
|----------|------|--------|----------|--------------------------------|--------------------------|---------------------------------------------|--------------------------------------|-------------------------------------|------------------------|----------------------|
| Oman     | 2016 | Male   | 75 to 79 | 9.5%<br>(4-19%)                | 90%<br>(81-96%)          | 0.21<br>(0.042-0.6)                         | 0.19%<br>(-0.25-1.1%)                | 0.18%<br>(-0.37-1.2%)               | 1.3<br>(-2.6-8.7)      | 24<br>(-32-140)      |
| Oman     | 2016 | Male   | 80 to 84 | 8.5%<br>(3.2-17%)              | 91%<br>(83-97%)          | 0.18<br>(0.035-0.51)                        | 0.18%<br>(-0.22-0.9%)                | 0.17%<br>(-0.32-1%)                 | 0.89<br>(-1.7-5.4)     | 12<br>(-15-61)       |
| Oman     | 2016 | Male   | 85 to 89 | 8.3%<br>(3.3-17%)              | 92%<br>(83-97%)          | 0.16<br>(0.037-0.45)                        | 0.14%<br>(-0.21-0.75%)               | 0.11%<br>(-0.32-0.79%)              | 0.34<br>(-0.95-2.3)    | 3.7<br>(-5.6-19)     |
| Oman     | 2016 | Male   | 90 to 94 | 9.3%<br>(3.7-19%)              | 91%<br>(81-96%)          | 0.17<br>(0.037-0.47)                        | 0.061%<br>(-0.33-0.65%)              | 0.0067%<br>(-0.47-0.67%)            | 0.0096<br>(-0.66-0.96) | 0.53<br>(-2.9-5.7)   |
| Oman     | 2016 | Male   | 95 plus  | 12%<br>(4.2-25%)               | 88%<br>(75-96%)          | 0.2<br>(0.033-0.63)                         | 0.058%<br>(-0.45-0.79%)              | -0.039%<br>(-0.66-0.77%)            | -0.015<br>(-0.25-0.3)  | 0.09<br>(-0.69-1.2)  |
| Qatar    | 1990 | Female | All Ages | 12%<br>(6.8-18%)               | 88%<br>(82-93%)          | 0.36<br>(0.24-0.49)                         | 0.9%<br>(0.48-1.5%)                  | 1.3%<br>(0.31-2.8%)                 | 5.1<br>(1.2-11)        | 300<br>(150-510)     |
| Qatar    | 1990 | Female | 15 to 19 | 10%<br>(3.6-22%)               | 90%<br>(78-96%)          | 0.28<br>(0.071-0.72)                        | 0.77%<br>(0.38-1.5%)                 | 1.4%<br>(0.42-3.6%)                 | 0.087<br>(0.025-0.22)  | 12<br>(5.4-23)       |
| Qatar    | 1990 | Female | 20 to 24 | 13%<br>(4.4-29%)               | 87%<br>(71-96%)          | 0.45<br>(0.12-1.1)                          | 1.3%<br>(0.71-2.4%)                  | 2.2%<br>(0.67-5.5%)                 | 0.18<br>(0.052-0.42)   | 25<br>(13-45)        |
| Qatar    | 1990 | Female | 25 to 29 | 15%<br>(4.6-31%)               | 85%<br>(69-95%)          | 0.54<br>(0.16-1.1)                          | 1.5%<br>(0.84-2.5%)                  | 2.9%<br>(1.5-8.8%)                  | 0.26<br>(0.088-0.54)   | 31<br>(17-52)        |
| Qatar    | 1990 | Female | 30 to 34 | 17%<br>(4.5-34%)               | 83%<br>(66-96%)          | 0.62<br>(0.21-1.2)                          | 1.6%<br>(0.87-2.6%)                  | 3.3%<br>(1.4-6.2%)                  | 0.44<br>(0.17-0.85)    | 40<br>(21-65)        |
| Qatar    | 1990 | Female | 35 to 39 | 18%<br>(5-35%)                 | 82%<br>(65-95%)          | 0.71<br>(0.27-1.3)                          | 1.7%<br>(0.85-3%)                    | 3.8%<br>(1.6-6.7%)                  | 0.78<br>(0.29-1.5)     | 54<br>(26-96)        |
| Qatar    | 1990 | Female | 40 to 44 | 19%<br>(7.3-36%)               | 81%<br>(64-93%)          | 0.8<br>(0.33-1.5)                           | 1.9%<br>(0.77-3.5%)                  | 4%<br>(1.5-7.4%)                    | 0.85<br>(0.32-1.6)     | 47<br>(18-87)        |
| Qatar    | 1990 | Female | 45 to 49 | 20%<br>(7.3-37%)               | 80%<br>(63-93%)          | 0.89<br>(0.29-1.9)                          | 1.9%<br>(0.44-4.3%)                  | 3.7%<br>(1.1-7.9%)                  | 0.66<br>(0.17-1.5)     | 31<br>(7.2-74)       |
| Qatar    | 1990 | Female | 50 to 54 | 21%<br>(8-40%)                 | 79%<br>(60-92%)          | 0.93<br>(0.26-2.1)                          | 1.9%<br>(0.11-4.8%)                  | 3.3%<br>(0.6-7.8%)                  | 0.63<br>(0.11-1.6)     | 26<br>(1.6-68)       |
| Qatar    | 1990 | Female | 55 to 59 | 22%<br>(8.6-43%)               | 78%<br>(57-91%)          | 0.95<br>(0.24-2.3)                          | 1.9%<br>(-0.07-5.4%)                 | 3.1%<br>(0.24-8.1%)                 | 0.54<br>(0.043-1.4)    | 19<br>(-0.74-53)     |
| Qatar    | 1990 | Female | 60 to 64 | 23%<br>(9.4-43%)               | 77%<br>(57-91%)          | 0.92<br>(0.21-2.3)                          | 1.4%<br>(-0.69-4.9%)                 | 2.1%<br>(-0.69-7.1%)                | 0.36<br>(-0.12-1.2)    | 10<br>(-4.9-37)      |
| Qatar    | 1990 | Female | 65 to 69 | 24%<br>(10-42%)                | 76%<br>(58-90%)          | 0.81<br>(0.2-2)                             | 0.88%<br>(-0.93-4%)                  | 1.4%<br>(-1.5-4%)                   | 0.23<br>(-0.17-0.92)   | 5.1<br>(-5.2-23)     |
| Qatar    | 1990 | Female | 70 to 74 | 23%<br>(9.4-41%)               | 77%<br>(59-91%)          | 0.66<br>(0.16-1.8)                          | 0.34%<br>(-1.3-3.6%)                 | 0.53%<br>(-1.6-4.7%)                | 0.1<br>(-0.33-0.92)    | 1.7<br>(-7-18)       |
| Qatar    | 1990 | Female | 75 to 79 | 20%<br>(7.8-42%)               | 80%<br>(58-92%)          | 0.54<br>(0.11-1.7)                          | 0.011%<br>(-1.6-3%)                  | 0.037%<br>(-2-3.7%)                 | 0.0063<br>(-0.41-0.74) | 0.032<br>(-6.5-12)   |
| Qatar    | 1990 | Female | 80 to 84 | 19%<br>(6.5-40%)               | 81%<br>(60-93%)          | 0.48<br>(0.092-1.5)                         | -0.029%<br>(-1.5-2.5%)               | -0.039%<br>(-1.8-3.1%)              | -0.012<br>(-0.49-0.8)  | -0.11<br>(-5.5-8.9)  |
| Qatar    | 1990 | Female | 85 to 89 | 19%<br>(6.5-40%)               | 81%<br>(60-94%)          | 0.47<br>(0.089-1.5)                         | -0.057%<br>(-1.5-2.2%)               | -0.087%<br>(-1.8-2.7%)              | -0.021<br>(-0.43-0.61) | -0.12<br>(-3.2-4.7)  |
| Qatar    | 1990 | Female | 90 to 94 | 21%<br>(7-44%)                 | 79%<br>(56-93%)          | 0.52<br>(0.092-1.6)                         | -0.099%<br>(-1.8-2.4%)               | -0.16%<br>(-2.1-2.7%)               | -0.02<br>(-0.25-0.32)  | -0.076<br>(-1.3-1.7) |

| Location | Year | Sex    | Age      | Prevalence of current drinkers | Prevalence of abstainers | Population average of standard drinks daily | Percent of total attributable deaths | Percent of total attributable DALYs | Attributable deaths      | Attributable DALYs     |
|----------|------|--------|----------|--------------------------------|--------------------------|---------------------------------------------|--------------------------------------|-------------------------------------|--------------------------|------------------------|
| Qatar    | 1990 | Female | 95 plus  | 26%<br>(8.2-51%)               | 74%<br>(49-92%)          | 0.6<br>(0.11-1.8)                           | -0.11%<br>(-2-2.8%)                  | -0.22%<br>(-2.5-3.3%)               | -0.0088<br>(-0.099-0.13) | -0.018<br>(-0.33-0.47) |
| Qatar    | 1990 | Male   | All Ages | 13%<br>(8.1-20%)               | 87%<br>(80-92%)          | 0.65<br>(0.49-0.85)                         | 2.2%<br>(1.6-3%)                     | 3%<br>(1.8-4.3%)                    | 25<br>(14-38)            | 1600<br>(1000-2200)    |
| Qatar    | 1990 | Male   | 15 to 19 | 7.6%<br>(3.1-14%)              | 92%<br>(86-97%)          | 0.2<br>(0.054-0.47)                         | 1.2%<br>(0.65-2%)                    | 1.6%<br>(0.61-3.6%)                 | 0.19<br>(0.07-0.44)      | 25<br>(13-43)          |
| Qatar    | 1990 | Male   | 20 to 24 | 12%<br>(4.8-23%)               | 88%<br>(77-95%)          | 0.46<br>(0.14-0.98)                         | 2.5%<br>(1.5-4.3%)                   | 3.3%<br>(1.3-6.8%)                  | 0.76<br>(0.27-1.6)       | 86<br>(48-150)         |
| Qatar    | 1990 | Male   | 25 to 29 | 15%<br>(6.1-27%)               | 85%<br>(73-94%)          | 0.7<br>(0.26-1.3)                           | 3.1%<br>(1.8-4.9%)                   | 4.7%<br>(2.1-8.5%)                  | 2<br>(0.88-3.7)          | 190<br>(110-300)       |
| Qatar    | 1990 | Male   | 30 to 34 | 17%<br>(6.4-32%)               | 83%<br>(68-94%)          | 0.88<br>(0.39-1.5)                          | 3.2%<br>(2-4.9%)                     | 5.2%<br>(2.7-8.5%)                  | 3.5<br>(1.7-6.4)         | 290<br>(170-460)       |
| Qatar    | 1990 | Male   | 35 to 39 | 18%<br>(7.2-33%)               | 82%<br>(67-93%)          | 0.98<br>(0.45-1.6)                          | 3.3%<br>(1.9-5.1%)                   | 5.5%<br>(2.7-9.1%)                  | 4.2<br>(1.9-7.5)         | 300<br>(160-480)       |
| Qatar    | 1990 | Male   | 40 to 44 | 18%<br>(8.5-32%)               | 82%<br>(68-91%)          | 1<br>(0.46-1.8)                             | 3.1%<br>(1.5-5.2%)                   | 5.1%<br>(2.2-8.7%)                  | 3.7<br>(1.5-6.8)         | 230<br>(110-390)       |
| Qatar    | 1990 | Male   | 45 to 49 | 18%<br>(7.7-33%)               | 82%<br>(67-92%)          | 1.1<br>(0.37-2.4)                           | 3.1%<br>(1.3-5.4%)                   | 4.7%<br>(1.7-9.1%)                  | 3.1<br>(1.1-5.9)         | 170<br>(74-300)        |
| Qatar    | 1990 | Male   | 50 to 54 | 17%<br>(7.6-32%)               | 83%<br>(68-92%)          | 1.1<br>(0.36-2.4)                           | 2.8%<br>(1-5.4%)                     | 4.1%<br>(1.3-7.9%)                  | 2.5<br>(0.76-5)          | 120<br>(44-230)        |
| Qatar    | 1990 | Male   | 55 to 59 | 16%<br>(7.2-31%)               | 84%<br>(69-93%)          | 1.1<br>(0.32-2.5)                           | 2.6%<br>(0.87-5.1%)                  | 3.6%<br>(1.1-7.3%)                  | 1.8<br>(0.55-3.7)        | 72<br>(24-140)         |
| Qatar    | 1990 | Male   | 60 to 64 | 16%<br>(7.1-30%)               | 84%<br>(70-93%)          | 0.96<br>(0.26-2.3)                          | 2.2%<br>(0.58-4.6%)                  | 2.8%<br>(0.71-5.9%)                 | 1.2<br>(0.29-2.7)        | 40<br>(10-86)          |
| Qatar    | 1990 | Male   | 65 to 69 | 15%<br>(7-28%)                 | 85%<br>(72-93%)          | 0.78<br>(0.22-1.8)                          | 1.7%<br>(0.31-3.9%)                  | 2.1%<br>(0.35-4.8%)                 | 0.72<br>(0.12-1.7)       | 19<br>(3.7-46)         |
| Qatar    | 1990 | Male   | 70 to 74 | 14%<br>(6.5-25%)               | 86%<br>(75-93%)          | 0.58<br>(0.17-1.5)                          | 1.2%<br>(0.098-3.1%)                 | 1.4%<br>(0.036-3.7%)                | 0.39<br>(0.01-1.1)       | 8.4<br>(0.74-23)       |
| Qatar    | 1990 | Male   | 75 to 79 | 12%<br>(5.3-23%)               | 88%<br>(77-95%)          | 0.45<br>(0.12-1.2)                          | 0.87%<br>(-0.013-2.6%)               | 0.94%<br>(-0.13-2.9%)               | 0.21<br>(-0.026-0.67)    | 3.7<br>(-0.055-11)     |
| Qatar    | 1990 | Male   | 80 to 84 | 11%<br>(4.2-21%)               | 89%<br>(79-96%)          | 0.38<br>(0.089-1)                           | 0.63%<br>(-0.08-2%)                  | 0.64%<br>(-0.23-2.2%)               | 0.2<br>(-0.074-0.72)     | 2.7<br>(-0.35-8.7)     |
| Qatar    | 1990 | Male   | 85 to 89 | 11%<br>(4.3-21%)               | 89%<br>(79-96%)          | 0.34<br>(0.088-0.88)                        | 0.47%<br>(-0.18-1.6%)                | 0.43%<br>(-0.35-1.7%)               | 0.11<br>(-0.089-0.45)    | 1.1<br>(-0.44-3.9)     |
| Qatar    | 1990 | Male   | 90 to 94 | 12%<br>(4.7-23%)               | 88%<br>(77-95%)          | 0.36<br>(0.084-0.92)                        | 0.35%<br>(-0.36-1.7%)                | 0.27%<br>(-0.58-1.8%)               | 0.028<br>(-0.059-0.18)   | 0.23<br>(-0.23-1.1)    |
| Qatar    | 1990 | Male   | 95 plus  | 14%<br>(5.5-29%)               | 86%<br>(71-94%)          | 0.41<br>(0.079-1.3)                         | 0.36%<br>(-0.5-2%)                   | 0.21%<br>(-0.81-2.1%)               | 0.0052<br>(-0.021-0.052) | 0.038<br>(-0.051-0.21) |
| Qatar    | 1995 | Female | All Ages | 13%<br>(7.3-20%)               | 87%<br>(80-93%)          | 0.29<br>(0.2-0.41)                          | 0.71%<br>(0.34-1.2%)                 | 0.82%<br>(-0.011-2%)                | 3.5<br>(-0.046-8.8)      | 260<br>(120-450)       |
| Qatar    | 1995 | Female | 15 to 19 | 11%<br>(3.4-23%)               | 89%<br>(77-97%)          | 0.22<br>(0.048-0.58)                        | 0.66%<br>(0.34-1.2%)                 | 1.1%<br>(0.34-2.8%)                 | 0.079<br>(0.024-0.2)     | 11<br>(5.7-21)         |
| Qatar    | 1995 | Female | 20 to 24 | 14%<br>(4.3-30%)               | 86%<br>(70-96%)          | 0.35<br>(0.087-0.84)                        | 1.2%<br>(0.66-2.2%)                  | 1.7%<br>(0.57-4.4%)                 | 0.11<br>(0.035-0.3)      | 17<br>(9.1-32)         |

| Location | Year | Sex    | Age      | Prevalence of current drinkers | Prevalence of abstainers | Population average of standard drinks daily | Percent of total attributable deaths | Percent of total attributable DALYs | Attributable deaths     | Attributable DALYs    |
|----------|------|--------|----------|--------------------------------|--------------------------|---------------------------------------------|--------------------------------------|-------------------------------------|-------------------------|-----------------------|
| Qatar    | 1995 | Female | 25 to 29 | 16%<br>(4.6-34%)               | 84%<br>(66-95%)          | 0.42<br>(0.12-0.89)                         | 1.3%<br>(0.79-2.3%)                  | 2.3%<br>(0.82-4.6%)                 | 0.26<br>(0.091-0.55)    | 32<br>(18-54)         |
| Qatar    | 1995 | Female | 30 to 34 | 18%<br>(4.8-36%)               | 82%<br>(64-95%)          | 0.48<br>(0.16-0.9)                          | 1.3%<br>(0.78-2.3%)                  | 2.6%<br>(1.1-4.9%)                  | 0.55<br>(0.21-1.1)      | 52<br>(28-87)         |
| Qatar    | 1995 | Female | 35 to 39 | 19%<br>(5.1-37%)               | 81%<br>(63-95%)          | 0.55<br>(0.2-1)                             | 1.4%<br>(0.66-2.4%)                  | 2.9%<br>(1.1-5.4%)                  | 0.74<br>(0.27-1.5)      | 52<br>(24-95)         |
| Qatar    | 1995 | Female | 40 to 44 | 20%<br>(7.6-37%)               | 80%<br>(63-92%)          | 0.61<br>(0.26-1.1)                          | 1.4%<br>(0.46-2.8%)                  | 3%<br>(1-5.7%)                      | 0.76<br>(0.28-1.6)      | 41<br>(13-84)         |
| Qatar    | 1995 | Female | 45 to 49 | 21%<br>(7.4-38%)               | 79%<br>(62-93%)          | 0.67<br>(0.21-1.4)                          | 1.3%<br>(0.1-3.2%)                   | 2.5%<br>(0.6-6%)                    | 0.58<br>(0.13-1.4)      | 26<br>(2.1-66)        |
| Qatar    | 1995 | Female | 50 to 54 | 22%<br>(8.9-41%)               | 78%<br>(59-91%)          | 0.71<br>(0.2-1.6)                           | 1.2%<br>(-0.23-3.5%)                 | 2.2%<br>(0.2-5.9%)                  | 0.45<br>(0.038-1.2)     | 17<br>(-3.9-50)       |
| Qatar    | 1995 | Female | 55 to 59 | 23%<br>(9.5-43%)               | 77%<br>(57-91%)          | 0.71<br>(0.19-1.7)                          | 1%<br>(-0.52-3.8%)                   | 1.9%<br>(-0.27-5.9%)                | 0.39<br>(-0.061-1.2)    | 12<br>(-6-44)         |
| Qatar    | 1995 | Female | 60 to 64 | 24%<br>(10-43%)                | 76%<br>(57-90%)          | 0.69<br>(0.16-1.7)                          | 0.52%<br>(-1.2-3.3%)                 | 1%<br>(-1.2-4.8%)                   | 0.21<br>(-0.27-1.1)     | 4.9<br>(-11-30)       |
| Qatar    | 1995 | Female | 65 to 69 | 25%<br>(11-43%)                | 75%<br>(57-89%)          | 0.6<br>(0.15-1.4)                           | 0.057%<br>(-1.5-2.4%)                | 0.32%<br>(-1.7-3.3%)                | 0.072<br>(-0.39-0.74)   | 0.44<br>(-12-18)      |
| Qatar    | 1995 | Female | 70 to 74 | 23%<br>(10-41%)                | 77%<br>(59-90%)          | 0.48<br>(0.13-1.3)                          | -0.33%<br>(-1.9-1.9%)                | -0.28%<br>(-2.2-2.4%)               | -0.06<br>(-0.48-0.55)   | -1.8<br>(-10-11)      |
| Qatar    | 1995 | Female | 75 to 79 | 21%<br>(8.3-41%)               | 79%<br>(59-92%)          | 0.39<br>(0.082-1.3)                         | -0.53%<br>(-2-1.3%)                  | -0.59%<br>(-2.3-1.7%)               | -0.15<br>(-0.61-0.39)   | -2.5<br>(-9.5-6.1)    |
| Qatar    | 1995 | Female | 80 to 84 | 20%<br>(6.7-40%)               | 80%<br>(60-93%)          | 0.36<br>(0.066-1.1)                         | -0.54%<br>(-2-0.95%)                 | -0.63%<br>(-2.3-1.2%)               | -0.19<br>(-0.74-0.34)   | -2.2<br>(-8.7-3.7)    |
| Qatar    | 1995 | Female | 85 to 89 | 20%<br>(6.8-42%)               | 80%<br>(58-93%)          | 0.35<br>(0.071-1.1)                         | -0.56%<br>(-2-0.78%)                 | -0.66%<br>(-2.4-0.98%)              | -0.15<br>(-0.54-0.2)    | -1.1<br>(-4.3-1.6)    |
| Qatar    | 1995 | Female | 90 to 94 | 23%<br>(7.7-45%)               | 77%<br>(55-92%)          | 0.39<br>(0.073-1.1)                         | -0.62%<br>(-2.2-0.94%)               | -0.76%<br>(-2.7-1.1%)               | -0.095<br>(-0.33-0.13)  | -0.48<br>(-1.7-0.75)  |
| Qatar    | 1995 | Female | 95 plus  | 27%<br>(8.9-52%)               | 73%<br>(48-91%)          | 0.46<br>(0.072-1.3)                         | -0.68%<br>(-2.5-1.4%)                | -0.88%<br>(-3.1-1.6%)               | -0.038<br>(-0.13-0.069) | -0.12<br>(-0.45-0.26) |
| Qatar    | 1995 | Male   | All Ages | 14%<br>(8.5-20%)               | 86%<br>(80-92%)          | 0.48<br>(0.36-0.64)                         | 1.8%<br>(1.2-2.4%)                   | 2.2%<br>(1.2-3.3%)                  | 20<br>(10-32)           | 1300<br>(860-1900)    |
| Qatar    | 1995 | Male   | 15 to 19 | 7.8%<br>(3.3-15%)              | 92%<br>(85-97%)          | 0.15<br>(0.039-0.37)                        | 1%<br>(0.59-1.8%)                    | 1.4%<br>(0.52-3%)                   | 0.13<br>(0.048-0.3)     | 17<br>(9.3-29)        |
| Qatar    | 1995 | Male   | 20 to 24 | 12%<br>(5-23%)                 | 88%<br>(77-95%)          | 0.33<br>(0.1-0.71)                          | 2.1%<br>(1.3-3.4%)                   | 2.4%<br>(0.95-4.8%)                 | 0.77<br>(0.28-1.7)      | 95<br>(53-160)        |
| Qatar    | 1995 | Male   | 25 to 29 | 15%<br>(6.2-27%)               | 85%<br>(73-94%)          | 0.51<br>(0.19-0.97)                         | 2.6%<br>(1.6-4%)                     | 3.6%<br>(1.7-6.5%)                  | 1.9<br>(0.81-3.5)       | 190<br>(110-300)      |
| Qatar    | 1995 | Male   | 30 to 34 | 17%<br>(6.6-32%)               | 83%<br>(68-93%)          | 0.64<br>(0.27-1.1)                          | 2.6%<br>(1.7-3.9%)                   | 3.9%<br>(2.1-6.5%)                  | 2.5<br>(1.3-4.4)        | 220<br>(130-330)      |
| Qatar    | 1995 | Male   | 35 to 39 | 19%<br>(7.5-33%)               | 81%<br>(67-93%)          | 0.72<br>(0.33-1.2)                          | 2.6%<br>(1.6-4%)                     | 4.1%<br>(2.1-6.8%)                  | 3.5<br>(1.7-6)          | 260<br>(150-400)      |
| Qatar    | 1995 | Male   | 40 to 44 | 19%<br>(8.6-33%)               | 81%<br>(67-91%)          | 0.77<br>(0.36-1.3)                          | 2.3%<br>(1.2-3.9%)                   | 3.5%<br>(1.5-6.4%)                  | 3.1<br>(1.2-5.8)        | 200<br>(98-340)       |

| Location | Year | Sex    | Age      | Prevalence of current drinkers | Prevalence of abstainers | Population average of standard drinks daily | Percent of total attributable deaths | Percent of total attributable DALYs | Attributable deaths       | Attributable DALYs     |
|----------|------|--------|----------|--------------------------------|--------------------------|---------------------------------------------|--------------------------------------|-------------------------------------|---------------------------|------------------------|
| Qatar    | 1995 | Male   | 45 to 49 | 19%<br>(7.7-34%)               | 81%<br>(66-92%)          | 0.82<br>(0.28-1.7)                          | 2.3%<br>(0.89-4.5%)                  | 3.3%<br>(0.99-6.9%)                 | 2.6<br>(0.76-5.5)         | 140<br>(56-290)        |
| Qatar    | 1995 | Male   | 50 to 54 | 18%<br>(7.9-35%)               | 82%<br>(65-92%)          | 0.82<br>(0.27-1.9)                          | 2.1%<br>(0.67-4.4%)                  | 2.9%<br>(0.8-6.5%)                  | 2<br>(0.5-4.5)            | 93<br>(30-200)         |
| Qatar    | 1995 | Male   | 55 to 59 | 17%<br>(7.3-33%)               | 83%<br>(67-93%)          | 0.78<br>(0.23-1.8)                          | 1.9%<br>(0.52-4.2%)                  | 2.5%<br>(0.57-5.7%)                 | 1.5<br>(0.35-3.6)         | 60<br>(16-130)         |
| Qatar    | 1995 | Male   | 60 to 64 | 16%<br>(7.1-31%)               | 84%<br>(69-93%)          | 0.7<br>(0.2-1.7)                            | 1.5%<br>(0.25-3.7%)                  | 1.9%<br>(0.23-4.8%)                 | 1<br>(0.13-2.6)           | 33<br>(5.6-80)         |
| Qatar    | 1995 | Male   | 65 to 69 | 16%<br>(7.3-28%)               | 84%<br>(72-93%)          | 0.57<br>(0.16-1.3)                          | 1%<br>(-0.019-2.9%)                  | 1.2%<br>(-0.11-3.6%)                | 0.5<br>(-0.042-1.5)       | 14<br>(-0.28-39)       |
| Qatar    | 1995 | Male   | 70 to 74 | 14%<br>(6.8-25%)               | 86%<br>(75-93%)          | 0.42<br>(0.12-1.1)                          | 0.64%<br>(-0.15-2.1%)                | 0.74%<br>(-0.27-2.5%)               | 0.27<br>(-0.1-0.99)       | 6<br>(-1.4-21)         |
| Qatar    | 1995 | Male   | 75 to 79 | 12%<br>(5.4-23%)               | 88%<br>(77-95%)          | 0.32<br>(0.082-0.94)                        | 0.47%<br>(-0.22-1.8%)                | 0.5%<br>(-0.37-2%)                  | 0.19<br>(-0.13-0.78)      | 3.3<br>(-1.4-13)       |
| Qatar    | 1995 | Male   | 80 to 84 | 11%<br>(4.4-22%)               | 89%<br>(78-96%)          | 0.28<br>(0.065-0.77)                        | 0.29%<br>(-0.31-1.3%)                | 0.26%<br>(-0.45-1.4%)               | 0.1<br>(-0.18-0.53)       | 1.5<br>(-1.4-6.7)      |
| Qatar    | 1995 | Male   | 85 to 89 | 11%<br>(4.4-22%)               | 89%<br>(78-96%)          | 0.25<br>(0.063-0.66)                        | 0.19%<br>(-0.34-0.95%)               | 0.13%<br>(-0.52-0.99%)              | 0.034<br>(-0.14-0.28)     | 0.47<br>(-0.85-2.4)    |
| Qatar    | 1995 | Male   | 90 to 94 | 12%<br>(5-25%)                 | 88%<br>(75-95%)          | 0.26<br>(0.06-0.65)                         | 0.09%<br>(-0.51-0.92%)               | -0.0066%<br>(-0.74-0.94%)           | -0.0011<br>(-0.11-0.14)   | 0.084<br>(-0.48-0.85)  |
| Qatar    | 1995 | Male   | 95 plus  | 15%<br>(5.5-32%)               | 85%<br>(68-95%)          | 0.3<br>(0.057-0.82)                         | 0.083%<br>(-0.64-1.2%)               | -0.077%<br>(-1-1.2%)                | -0.0027<br>(-0.034-0.042) | 0.012<br>(-0.093-0.17) |
| Qatar    | 2000 | Female | All Ages | 12%<br>(7-19%)                 | 88%<br>(81-93%)          | 0.28<br>(0.19-0.39)                         | 0.59%<br>(0.22-1.1%)                 | 0.52%<br>(-0.26-1.6%)               | 2.5<br>(-1.3-7.7)         | 240<br>(83-440)        |
| Qatar    | 2000 | Female | 15 to 19 | 10%<br>(3.1-23%)               | 90%<br>(77-97%)          | 0.2<br>(0.044-0.51)                         | 0.61%<br>(0.32-1.1%)                 | 0.98%<br>(0.29-2.5%)                | 0.096<br>(0.027-0.26)     | 15<br>(7.7-29)         |
| Qatar    | 2000 | Female | 20 to 24 | 13%<br>(3.7-28%)               | 87%<br>(72-96%)          | 0.32<br>(0.075-0.78)                        | 1.1%<br>(0.65-1.9%)                  | 1.5%<br>(0.44-3.8%)                 | 0.15<br>(0.042-0.4)       | 25<br>(14-46)          |
| Qatar    | 2000 | Female | 25 to 29 | 14%<br>(4.1-31%)               | 86%<br>(69-96%)          | 0.38<br>(0.096-0.87)                        | 1.2%<br>(0.71-2%)                    | 2%<br>(0.62-4.1%)                   | 0.19<br>(0.062-0.43)      | 27<br>(15-45)          |
| Qatar    | 2000 | Female | 30 to 34 | 16%<br>(4.3-33%)               | 84%<br>(67-96%)          | 0.43<br>(0.13-0.85)                         | 1.2%<br>(0.66-2%)                    | 2.1%<br>(0.79-4%)                   | 0.34<br>(0.12-0.77)       | 37<br>(21-64)          |
| Qatar    | 2000 | Female | 35 to 39 | 17%<br>(4.6-33%)               | 83%<br>(67-95%)          | 0.49<br>(0.16-0.88)                         | 1.1%<br>(0.56-2.1%)                  | 2.3%<br>(0.85-4.5%)                 | 0.68<br>(0.23-1.4)        | 51<br>(25-92)          |
| Qatar    | 2000 | Female | 40 to 44 | 18%<br>(6.2-34%)               | 82%<br>(66-94%)          | 0.54<br>(0.22-0.97)                         | 1.1%<br>(0.43-2.1%)                  | 2.3%<br>(0.84-4.4%)                 | 0.8<br>(0.28-1.6)         | 46<br>(16-92)          |
| Qatar    | 2000 | Female | 45 to 49 | 19%<br>(6.7-35%)               | 81%<br>(65-93%)          | 0.59<br>(0.2-1.2)                           | 0.92%<br>(-0.074-2.4%)               | 1.9%<br>(0.3-4.5%)                  | 0.61<br>(0.095-1.5)       | 29<br>(-2.1-75)        |
| Qatar    | 2000 | Female | 50 to 54 | 20%<br>(7.6-38%)               | 80%<br>(62-92%)          | 0.63<br>(0.18-1.4)                          | 0.77%<br>(-0.51-2.6%)                | 1.5%<br>(-0.25-4.3%)                | 0.42<br>(-0.069-1.2)      | 16<br>(-10-55)         |
| Qatar    | 2000 | Female | 55 to 59 | 21%<br>(8-40%)                 | 79%<br>(60-92%)          | 0.64<br>(0.17-1.5)                          | 0.57%<br>(-0.88-2.8%)                | 1.1%<br>(-0.84-4.2%)                | 0.28<br>(-0.19-1.1)       | 8.3<br>(-14-42)        |
| Qatar    | 2000 | Female | 60 to 64 | 22%<br>(8.8-42%)               | 78%<br>(58-91%)          | 0.62<br>(0.15-1.6)                          | 0.095%<br>(-1.5-2.6%)                | 0.32%<br>(-1.7-3.4%)                | 0.088<br>(-0.47-1)        | 1.2<br>(-19-33)        |



| Location | Year | Sex    | Age      | Prevalence of current drinkers | Prevalence of abstainers | Population average of standard drinks daily | Percent of total attributable deaths | Percent of total attributable DALYs | Attributable deaths     | Attributable DALYs    |
|----------|------|--------|----------|--------------------------------|--------------------------|---------------------------------------------|--------------------------------------|-------------------------------------|-------------------------|-----------------------|
| Qatar    | 2000 | Female | 65 to 69 | 22%<br>(9.8-40%)               | 78%<br>(60-90%)          | 0.54<br>(0.14-1.3)                          | -0.28%<br>(-1.8-1.7%)                | -0.21%<br>(-2.2-2.4%)               | -0.059<br>(-0.6-0.7)    | -2.8<br>(-19-16)      |
| Qatar    | 2000 | Female | 70 to 74 | 21%<br>(8.7-38%)               | 79%<br>(62-91%)          | 0.43<br>(0.11-1.1)                          | -0.59%<br>(-2.1-1.2%)                | -0.68%<br>(-2.5-1.5%)               | -0.2<br>(-0.74-0.45)    | -4.7<br>(-17-9.4)     |
| Qatar    | 2000 | Female | 75 to 79 | 19%<br>(7.1-38%)               | 81%<br>(62-93%)          | 0.35<br>(0.072-1)                           | -0.69%<br>(-2.3-0.82%)               | -0.85%<br>(-2.7-0.98%)              | -0.22<br>(-0.75-0.25)   | -3.6<br>(-12-4.1)     |
| Qatar    | 2000 | Female | 80 to 84 | 17%<br>(5.9-37%)               | 83%<br>(63-94%)          | 0.31<br>(0.061-0.96)                        | -0.66%<br>(-2.1-0.52%)               | -0.81%<br>(-2.6-0.59%)              | -0.26<br>(-0.78-0.18)   | -2.9<br>(-9.1-2.3)    |
| Qatar    | 2000 | Female | 85 to 89 | 18%<br>(6-39%)                 | 82%<br>(61-94%)          | 0.32<br>(0.062-0.98)                        | -0.73%<br>(-2.2-0.39%)               | -0.9%<br>(-2.7-0.41%)               | -0.24<br>(-0.73-0.11)   | -1.8<br>(-5.7-1)      |
| Qatar    | 2000 | Female | 90 to 94 | 21%<br>(6.7-42%)               | 79%<br>(58-93%)          | 0.36<br>(0.065-1)                           | -0.81%<br>(-2.5-0.64%)               | -1%<br>(-3-0.66%)                   | -0.13<br>(-0.38-0.088)  | -0.66<br>(-2-0.54)    |
| Qatar    | 2000 | Female | 95 plus  | 25%<br>(7.5-50%)               | 75%<br>(50-92%)          | 0.43<br>(0.065-1.3)                         | -0.91%<br>(-2.8-0.83%)               | -1.2%<br>(-3.5-0.94%)               | -0.058<br>(-0.17-0.044) | -0.18<br>(-0.56-0.17) |
| Qatar    | 2000 | Male   | All Ages | 12%<br>(7.8-18%)               | 88%<br>(82-92%)          | 0.44<br>(0.33-0.58)                         | 1.7%<br>(1.1-2.4%)                   | 2.1%<br>(1.1-3.2%)                  | 23<br>(12-39)           | 1500<br>(970-2200)    |
| Qatar    | 2000 | Male   | 15 to 19 | 7%<br>(3-13%)                  | 93%<br>(87-97%)          | 0.13<br>(0.036-0.31)                        | 0.99%<br>(0.56-1.6%)                 | 1.2%<br>(0.43-2.8%)                 | 0.24<br>(0.076-0.53)    | 32<br>(17-54)         |
| Qatar    | 2000 | Male   | 20 to 24 | 11%<br>(4.3-21%)               | 89%<br>(79-96%)          | 0.3<br>(0.09-0.66)                          | 2.2%<br>(1.3-3.5%)                   | 2.6%<br>(1-5.3%)                    | 0.64<br>(0.24-1.4)      | 76<br>(44-130)        |
| Qatar    | 2000 | Male   | 25 to 29 | 14%<br>(5.3-25%)               | 86%<br>(75-95%)          | 0.46<br>(0.15-0.93)                         | 2.5%<br>(1.5-4%)                     | 3.4%<br>(1.4-6.4%)                  | 1.6<br>(0.62-3.1)       | 160<br>(95-270)       |
| Qatar    | 2000 | Male   | 30 to 34 | 15%<br>(5.7-29%)               | 85%<br>(71-94%)          | 0.58<br>(0.23-1)                            | 2.5%<br>(1.5-3.9%)                   | 3.7%<br>(1.8-6.4%)                  | 2.5<br>(1.1-4.7)        | 220<br>(130-360)      |
| Qatar    | 2000 | Male   | 35 to 39 | 17%<br>(6.6-30%)               | 83%<br>(70-93%)          | 0.64<br>(0.29-1.1)                          | 2.4%<br>(1.4-3.8%)                   | 3.8%<br>(1.9-6.5%)                  | 3.2<br>(1.5-5.8)        | 240<br>(140-390)      |
| Qatar    | 2000 | Male   | 40 to 44 | 17%<br>(7.8-30%)               | 83%<br>(70-92%)          | 0.68<br>(0.32-1.2)                          | 2.3%<br>(1.3-3.6%)                   | 3.5%<br>(1.6-6%)                    | 4<br>(1.8-7.3)          | 260<br>(140-420)      |
| Qatar    | 2000 | Male   | 45 to 49 | 17%<br>(6.5-31%)               | 83%<br>(69-94%)          | 0.72<br>(0.26-1.5)                          | 2.1%<br>(0.96-4%)                    | 3.1%<br>(1.2-6.2%)                  | 3.8<br>(1.4-7.9)        | 210<br>(95-400)       |
| Qatar    | 2000 | Male   | 50 to 54 | 16%<br>(6.9-32%)               | 84%<br>(68-93%)          | 0.71<br>(0.24-1.5)                          | 1.9%<br>(0.68-3.9%)                  | 2.5%<br>(0.75-5.6%)                 | 2.7<br>(0.77-5.9)       | 130<br>(46-270)       |
| Qatar    | 2000 | Male   | 55 to 59 | 15%<br>(6.4-29%)               | 85%<br>(71-94%)          | 0.69<br>(0.22-1.5)                          | 1.7%<br>(0.49-3.7%)                  | 2.2%<br>(0.59-5%)                   | 1.9<br>(0.5-4.3)        | 75<br>(22-170)        |
| Qatar    | 2000 | Male   | 60 to 64 | 15%<br>(6.3-28%)               | 85%<br>(72-94%)          | 0.62<br>(0.17-1.5)                          | 1.4%<br>(0.24-3.4%)                  | 1.7%<br>(0.25-4.3%)                 | 1.2<br>(0.18-3.2)       | 41<br>(7.2-100)       |
| Qatar    | 2000 | Male   | 65 to 69 | 14%<br>(6.2-26%)               | 86%<br>(74-94%)          | 0.51<br>(0.15-1.2)                          | 0.92%<br>(0.0034-2.6%)               | 1.1%<br>(-0.029-2.3%)               | 0.74<br>(-0.029-2.3)    | 20<br>(0.076-60)      |
| Qatar    | 2000 | Male   | 70 to 74 | 13%<br>(5.8-23%)               | 87%<br>(77-94%)          | 0.38<br>(0.11-0.94)                         | 0.56%<br>(-0.16-1.9%)                | 0.62%<br>(-0.25-2.2%)               | 0.36<br>(-0.15-1.3)     | 7.9<br>(-2.3-27)      |
| Qatar    | 2000 | Male   | 75 to 79 | 11%<br>(4.7-21%)               | 89%<br>(79-95%)          | 0.29<br>(0.071-0.83)                        | 0.39%<br>(-0.21-1.5%)                | 0.39%<br>(-0.37-1.6%)               | 0.18<br>(-0.17-0.77)    | 3.4<br>(-1.8-13)      |
| Qatar    | 2000 | Male   | 80 to 84 | 9.9%<br>(4-19%)                | 90%<br>(81-96%)          | 0.24<br>(0.059-0.64)                        | 0.28%<br>(-0.23-1.1%)                | 0.24%<br>(-0.37-1.1%)               | 0.1<br>(-0.15-0.49)     | 1.6<br>(-1.3-6.1)     |

| Location | Year | Sex    | Age      | Prevalence of current drinkers | Prevalence of abstainers | Population average of standard drinks daily | Percent of total attributable deaths | Percent of total attributable DALYs | Attributable deaths       | Attributable DALYs     |
|----------|------|--------|----------|--------------------------------|--------------------------|---------------------------------------------|--------------------------------------|-------------------------------------|---------------------------|------------------------|
| Qatar    | 2000 | Male   | 85 to 89 | 9.6%<br>(3.9-19%)              | 90%<br>(81-96%)          | 0.22<br>(0.057-0.57)                        | 0.18%<br>(-0.28-0.78%)               | 0.12%<br>(-0.42-0.78%)              | 0.036<br>(-0.13-0.24)     | 0.51<br>(-0.79-2.2)    |
| Qatar    | 2000 | Male   | 90 to 94 | 11%<br>(4.5-21%)               | 89%<br>(79-95%)          | 0.23<br>(0.056-0.57)                        | 0.076%<br>(-0.46-0.72%)              | -0.025%<br>(-0.64-0.71%)            | -0.0035<br>(-0.094-0.1)   | 0.069<br>(-0.4-0.65)   |
| Qatar    | 2000 | Male   | 95 plus  | 13%<br>(4.8-28%)               | 87%<br>(72-95%)          | 0.27<br>(0.053-0.74)                        | 0.058%<br>(-0.6-0.95%)               | -0.1%<br>(-0.91-0.83%)              | -0.0049<br>(-0.044-0.043) | 0.012<br>(-0.12-0.19)  |
| Qatar    | 2005 | Female | All Ages | 12%<br>(6.9-18%)               | 88%<br>(82-93%)          | 0.38<br>(0.25-0.53)                         | 0.86%<br>(0.41-1.4%)                 | 1.1%<br>(0.16-2.5%)                 | 5.5<br>(0.78-13)          | 420<br>(210-710)       |
| Qatar    | 2005 | Female | 15 to 19 | 9.4%<br>(3-21%)                | 91%<br>(79-97%)          | 0.26<br>(0.06-0.69)                         | 0.69%<br>(0.35-1.3%)                 | 1.4%<br>(0.43-3.5%)                 | 0.1<br>(0.031-0.27)       | 15<br>(7.7-29)         |
| Qatar    | 2005 | Female | 20 to 24 | 12%<br>(3.6-26%)               | 88%<br>(74-96%)          | 0.41<br>(0.097-0.98)                        | 1.2%<br>(0.7-2.1%)                   | 2%<br>(0.59-4.8%)                   | 0.2<br>(0.06-0.51)        | 34<br>(19-59)          |
| Qatar    | 2005 | Female | 25 to 29 | 13%<br>(4-28%)                 | 87%<br>(72-96%)          | 0.48<br>(0.14-1)                            | 1.3%<br>(0.77-2.1%)                  | 2.4%<br>(0.73-4.9%)                 | 0.38<br>(0.12-0.82)       | 56<br>(31-91)          |
| Qatar    | 2005 | Female | 30 to 34 | 15%<br>(4.2-32%)               | 85%<br>(68-96%)          | 0.56<br>(0.17-1.1)                          | 1.3%<br>(0.76-2.1%)                  | 2.7%<br>(0.96-5.2%)                 | 0.6<br>(0.21-1.2)         | 68<br>(39-110)         |
| Qatar    | 2005 | Female | 35 to 39 | 17%<br>(4.8-32%)               | 83%<br>(68-95%)          | 0.65<br>(0.23-1.2)                          | 1.4%<br>(0.69-2.3%)                  | 3.3%<br>(1.3-6%)                    | 0.79<br>(0.29-1.5)        | 63<br>(31-110)         |
| Qatar    | 2005 | Female | 40 to 44 | 17%<br>(6.6-33%)               | 83%<br>(67-93%)          | 0.71<br>(0.3-1.3)                           | 1.4%<br>(0.58-2.6%)                  | 3.3%<br>(1.4-6%)                    | 0.98<br>(0.37-1.9)        | 61<br>(25-110)         |
| Qatar    | 2005 | Female | 45 to 49 | 18%<br>(6.7-34%)               | 82%<br>(66-93%)          | 0.78<br>(0.26-1.6)                          | 1.3%<br>(0.23-3.1%)                  | 2.9%<br>(0.87-6%)                   | 1<br>(0.29-2.3)           | 54<br>(10-120)         |
| Qatar    | 2005 | Female | 50 to 54 | 19%<br>(7.5-37%)               | 81%<br>(63-93%)          | 0.81<br>(0.23-1.7)                          | 1.3%<br>(-0.15-3.5%)                 | 2.5%<br>(0.33-6.1%)                 | 0.8<br>(0.1-2)            | 35<br>(-4.2-98)        |
| Qatar    | 2005 | Female | 55 to 59 | 20%<br>(7.5-38%)               | 80%<br>(62-93%)          | 0.83<br>(0.22-1.9)                          | 1.2%<br>(-0.41-4.2%)                 | 2.2%<br>(-0.12-6.3%)                | 0.63<br>(-0.038-1.9)      | 23<br>(-7.8-81)        |
| Qatar    | 2005 | Female | 60 to 64 | 21%<br>(7.9-40%)               | 79%<br>(60-92%)          | 0.81<br>(0.19-2.1)                          | 0.76%<br>(-1-3.8%)                   | 1.3%<br>(-1.1-5.3%)                 | 0.31<br>(-0.27-1.4)       | 9.2<br>(-13-48)        |
| Qatar    | 2005 | Female | 65 to 69 | 21%<br>(8.9-39%)               | 79%<br>(61-91%)          | 0.71<br>(0.18-1.7)                          | 0.34%<br>(-1.3-3%)                   | 0.62%<br>(-1.5-4.2%)                | 0.17<br>(-0.43-1.1)       | 3.6<br>(-14-32)        |
| Qatar    | 2005 | Female | 70 to 74 | 20%<br>(8.3-37%)               | 80%<br>(63-92%)          | 0.56<br>(0.15-1.5)                          | -0.087%<br>(-1.7-2.6%)               | -0.053%<br>(-2.1-3.3%)              | -0.015<br>(-0.56-0.96)    | -0.69<br>(-13-21)      |
| Qatar    | 2005 | Female | 75 to 79 | 18%<br>(6.6-36%)               | 82%<br>(64-93%)          | 0.46<br>(0.093-1.4)                         | -0.28%<br>(-1.8-2%)                  | -0.36%<br>(-2.2-2.2%)               | -0.1<br>(-0.64-0.65)      | -1.6<br>(-11-11)       |
| Qatar    | 2005 | Female | 80 to 84 | 16%<br>(5.3-36%)               | 84%<br>(64-95%)          | 0.41<br>(0.076-1.2)                         | -0.27%<br>(-1.6-1.5%)                | -0.36%<br>(-2-1.7%)                 | -0.12<br>(-0.67-0.6)      | -1.3<br>(-7.8-7.5)     |
| Qatar    | 2005 | Female | 85 to 89 | 17%<br>(5.2-39%)               | 83%<br>(61-95%)          | 0.41<br>(0.08-1.4)                          | -0.34%<br>(-1.8-1.4%)                | -0.46%<br>(-2.2-1.6%)               | -0.13<br>(-0.61-0.44)     | -0.91<br>(-4.8-3.6)    |
| Qatar    | 2005 | Female | 90 to 94 | 20%<br>(5.9-43%)               | 80%<br>(57-94%)          | 0.47<br>(0.086-1.4)                         | -0.39%<br>(-2.1-1.7%)                | -0.54%<br>(-2.6-1.8%)               | -0.087<br>(-0.41-0.29)    | -0.4<br>(-2.1-1.7)     |
| Qatar    | 2005 | Female | 95 plus  | 24%<br>(7.2-48%)               | 76%<br>(52-93%)          | 0.56<br>(0.09-1.7)                          | -0.44%<br>(-2.5-2.2%)                | -0.66%<br>(-3.1-2.5%)               | -0.034<br>(-0.16-0.13)    | -0.095<br>(-0.53-0.47) |
| Qatar    | 2005 | Male   | All Ages | 12%<br>(7.6-17%)               | 88%<br>(83-92%)          | 0.58<br>(0.43-0.75)                         | 2.2%<br>(1.5-3%)                     | 2.9%<br>(1.6-4.3%)                  | 41<br>(22-66)             | 2500<br>(1700-3600)    |

| Location | Year | Sex    | Age      | Prevalence of current drinkers | Prevalence of abstainers | Population average of standard drinks daily | Percent of total attributable deaths | Percent of total attributable DALYs | Attributable deaths      | Attributable DALYs   |
|----------|------|--------|----------|--------------------------------|--------------------------|---------------------------------------------|--------------------------------------|-------------------------------------|--------------------------|----------------------|
| Qatar    | 2005 | Male   | 15 to 19 | 6.5%<br>(2.8-13%)              | 93%<br>(87-97%)          | 0.16<br>(0.047-0.4)                         | 1.2%<br>(0.68-2%)                    | 1.7%<br>(0.7-3.6%)                  | 0.27<br>(0.11-0.59)      | 33<br>(19-57)        |
| Qatar    | 2005 | Male   | 20 to 24 | 10%<br>(4-20%)                 | 90%<br>(80-96%)          | 0.37<br>(0.11-0.83)                         | 2.3%<br>(1.4-3.9%)                   | 2.9%<br>(1.2-6%)                    | 1.3<br>(0.5-2.8)         | 150<br>(90-260)      |
| Qatar    | 2005 | Male   | 25 to 29 | 12%<br>(5.2-23%)               | 88%<br>(77-95%)          | 0.57<br>(0.2-1.1)                           | 2.7%<br>(1.6-4.3%)                   | 3.9%<br>(1.6-7.3%)                  | 2.8<br>(1.1-5.3)         | 280<br>(160-460)     |
| Qatar    | 2005 | Male   | 30 to 34 | 14%<br>(5.6-28%)               | 86%<br>(72-94%)          | 0.72<br>(0.3-1.3)                           | 2.7%<br>(1.6-4.3%)                   | 4.3%<br>(2-7.5%)                    | 3.7<br>(1.6-6.8)         | 330<br>(190-530)     |
| Qatar    | 2005 | Male   | 35 to 39 | 16%<br>(6.2-29%)               | 84%<br>(71-94%)          | 0.81<br>(0.34-1.4)                          | 2.8%<br>(1.6-4.5%)                   | 4.7%<br>(2.2-8.1%)                  | 4.6<br>(2.1-8)           | 340<br>(190-540)     |
| Qatar    | 2005 | Male   | 40 to 44 | 16%<br>(7.2-29%)               | 84%<br>(71-93%)          | 0.87<br>(0.38-1.6)                          | 2.7%<br>(1.5-4.6%)                   | 4.5%<br>(2.1-8%)                    | 5.5<br>(2.4-10)          | 350<br>(180-580)     |
| Qatar    | 2005 | Male   | 45 to 49 | 16%<br>(6-29%)                 | 84%<br>(71-94%)          | 0.9<br>(0.31-1.8)                           | 2.7%<br>(1.3-4.7%)                   | 4.1%<br>(1.7-7.5%)                  | 7<br>(2.7-13)            | 380<br>(170-670)     |
| Qatar    | 2005 | Male   | 50 to 54 | 15%<br>(6.2-29%)               | 85%<br>(71-94%)          | 0.89<br>(0.3-1.9)                           | 2.4%<br>(0.93-4.5%)                  | 3.5%<br>(1.2-6.6%)                  | 6.1<br>(2.1-12)          | 280<br>(110-540)     |
| Qatar    | 2005 | Male   | 55 to 59 | 14%<br>(6.1-27%)               | 86%<br>(73-94%)          | 0.86<br>(0.27-1.9)                          | 2.2%<br>(0.76-4.5%)                  | 3.1%<br>(1-6.4%)                    | 4.8<br>(1.5-9.8)         | 190<br>(64-380)      |
| Qatar    | 2005 | Male   | 60 to 64 | 14%<br>(5.9-26%)               | 86%<br>(74-94%)          | 0.78<br>(0.22-1.9)                          | 2.4%<br>(0.52-4.1%)                  | 2.4%<br>(0.71-5.3%)                 | 2.5<br>(0.67-5.5)        | 80<br>(23-180)       |
| Qatar    | 2005 | Male   | 65 to 69 | 13%<br>(5.9-25%)               | 87%<br>(75-94%)          | 0.64<br>(0.19-1.5)                          | 1.5%<br>(0.35-3.4%)                  | 1.9%<br>(0.43-4.3%)                 | 1.1<br>(0.25-2.6)        | 30<br>(7.2-69)       |
| Qatar    | 2005 | Male   | 70 to 74 | 12%<br>(5.3-22%)               | 88%<br>(78-95%)          | 0.48<br>(0.13-1.2)                          | 0.98%<br>(0.12-2.7%)                 | 1.2%<br>(0.12-3.2%)                 | 0.75<br>(0.075-2.2)      | 16<br>(2.1-45)       |
| Qatar    | 2005 | Male   | 75 to 79 | 10%<br>(4.4-20%)               | 90%<br>(80-96%)          | 0.36<br>(0.084-1)                           | 0.77%<br>(0.02-2.1%)                 | 0.77%<br>(-0.095-2.4%)              | 0.34<br>(-0.037-1)       | 6<br>(0.15-18)       |
| Qatar    | 2005 | Male   | 80 to 84 | 9.1%<br>(3.5-18%)              | 91%<br>(82-96%)          | 0.3<br>(0.072-0.83)                         | 0.59%<br>(-0.0049-1.7%)              | 0.58%<br>(-0.13-1.9%)               | 0.24<br>(-0.054-0.81)    | 3.3<br>(-0.024-9.6)  |
| Qatar    | 2005 | Male   | 85 to 89 | 8.9%<br>(3.5-18%)              | 91%<br>(82-96%)          | 0.28<br>(0.068-0.73)                        | 0.42%<br>(-0.12-1.3%)                | 0.36%<br>(-0.27-1.3%)               | 0.13<br>(-0.1-0.49)      | 1.4<br>(-0.44-4.4)   |
| Qatar    | 2005 | Male   | 90 to 94 | 10%<br>(4-21%)                 | 90%<br>(79-96%)          | 0.29<br>(0.07-0.76)                         | 0.29%<br>(-0.29-1.3%)                | 0.19%<br>(-0.51-1.3%)               | 0.035<br>(-0.091-0.23)   | 0.33<br>(-0.34-1.4)  |
| Qatar    | 2005 | Male   | 95 plus  | 12%<br>(4.4-26%)               | 88%<br>(74-96%)          | 0.34<br>(0.063-1)                           | 0.29%<br>(-0.44-1.5%)                | 0.12%<br>(-0.77-1.5%)               | 0.0061<br>(-0.038-0.074) | 0.06<br>(-0.093-0.3) |
| Qatar    | 2010 | Female | All Ages | 12%<br>(6.5-18%)               | 88%<br>(82-93%)          | 0.51<br>(0.33-0.75)                         | 1.1%<br>(0.64-1.7%)                  | 1.8%<br>(0.71-3.5%)                 | 11<br>(3.9-22)           | 810<br>(460-1300)    |
| Qatar    | 2010 | Female | 15 to 19 | 8.7%<br>(2.9-19%)              | 91%<br>(81-97%)          | 0.32<br>(0.073-0.86)                        | 0.75%<br>(0.38-1.4%)                 | 1.7%<br>(0.58-4.2%)                 | 0.12<br>(0.038-0.29)     | 20<br>(9.9-36)       |
| Qatar    | 2010 | Female | 20 to 24 | 11%<br>(3.3-24%)               | 89%<br>(76-97%)          | 0.51<br>(0.13-1.2)                          | 1.3%<br>(0.74-2.2%)                  | 2.5%<br>(0.72-5.8%)                 | 0.37<br>(0.097-0.91)     | 66<br>(35-110)       |
| Qatar    | 2010 | Female | 25 to 29 | 13%<br>(3.7-27%)               | 87%<br>(73-96%)          | 0.6<br>(0.16-1.3)                           | 1.4%<br>(0.82-2.2%)                  | 2.9%<br>(0.94-6%)                   | 0.78<br>(0.24-1.6)       | 120<br>(67-200)      |
| Qatar    | 2010 | Female | 30 to 34 | 14%<br>(3.4-30%)               | 86%<br>(70-97%)          | 0.68<br>(0.22-1.3)                          | 1.4%<br>(0.81-2.3%)                  | 3.3%<br>(1.2-6.3%)                  | 0.97<br>(0.35-1.9)       | 120<br>(69-190)      |

| Location | Year | Sex    | Age      | Prevalence of current drinkers | Prevalence of abstainers | Population average of standard drinks daily | Percent of total attributable deaths | Percent of total attributable DALYs | Attributable deaths   | Attributable DALYs  |
|----------|------|--------|----------|--------------------------------|--------------------------|---------------------------------------------|--------------------------------------|-------------------------------------|-----------------------|---------------------|
| Qatar    | 2010 | Female | 35 to 39 | 16%<br>(4.3-30%)               | 84%<br>(70-96%)          | 0.79<br>(0.28-1.5)                          | 1.5%<br>(0.79-2.5%)                  | 4.1%<br>(1.6-7.2%)                  | 1.3<br>(0.49-2.4)     | 110<br>(58-180)     |
| Qatar    | 2010 | Female | 40 to 44 | 16%<br>(6-30%)                 | 84%<br>(70-94%)          | 0.88<br>(0.35-1.7)                          | 1.6%<br>(0.73-2.9%)                  | 4.2%<br>(1.8-7.6%)                  | 1.4<br>(0.56-2.7)     | 100<br>(45-180)     |
| Qatar    | 2010 | Female | 45 to 49 | 17%<br>(5.9-32%)               | 83%<br>(68-94%)          | 0.99<br>(0.3-2.1)                           | 1.7%<br>(0.5-3.6%)                   | 3.9%<br>(1.3-8%)                    | 1.4<br>(0.46-2.9)     | 84<br>(25-180)      |
| Qatar    | 2010 | Female | 50 to 54 | 18%<br>(6.6-34%)               | 82%<br>(66-93%)          | 1<br>(0.27-2.3)                             | 1.7%<br>(0.26-4.1%)                  | 3.5%<br>(0.91-7.6%)                 | 1.6<br>(0.37-3.4)     | 80<br>(13-200)      |
| Qatar    | 2010 | Female | 55 to 59 | 18%<br>(7-36%)                 | 82%<br>(64-93%)          | 1.1<br>(0.26-2.6)                           | 1.8%<br>(0.033-5%)                   | 3.4%<br>(0.62-8.2%)                 | 1.3<br>(0.23-3.3)     | 56<br>(1.1-160)     |
| Qatar    | 2010 | Female | 60 to 64 | 19%<br>(7.6-38%)               | 81%<br>(62-92%)          | 1<br>(0.23-2.7)                             | 1.4%<br>(-0.4-4.7%)                  | 2.4%<br>(-0.13-7%)                  | 0.61<br>(-0.03-1.8)   | 22<br>(-5.8-75)     |
| Qatar    | 2010 | Female | 65 to 69 | 20%<br>(8.6-36%)               | 80%<br>(64-91%)          | 0.89<br>(0.23-2.2)                          | 1.1%<br>(-0.56-4.2%)                 | 1.8%<br>(-0.41-6%)                  | 0.54<br>(-0.11-1.8)   | 15<br>(-7.4-56)     |
| Qatar    | 2010 | Female | 70 to 74 | 19%<br>(8.1-35%)               | 81%<br>(65-92%)          | 0.71<br>(0.18-2)                            | 0.63%<br>(-0.91-3.9%)                | 0.94%<br>(-1.1-5%)                  | 0.41<br>(-0.46-2.3)   | 8.8<br>(-12-54)     |
| Qatar    | 2010 | Female | 75 to 79 | 17%<br>(6.4-34%)               | 83%<br>(66-94%)          | 0.58<br>(0.12-1.9)                          | 0.34%<br>(-1-3.3%)                   | 0.41%<br>(-1.3-4%)                  | 0.14<br>(-0.45-1.4)   | 2.5<br>(-7.6-24)    |
| Qatar    | 2010 | Female | 80 to 84 | 15%<br>(5.3-33%)               | 85%<br>(67-95%)          | 0.52<br>(0.1-1.6)                           | 0.34%<br>(-1-2.9%)                   | 0.37%<br>(-1.2-3.5%)                | 0.14<br>(-0.47-1.3)   | 1.9<br>(-5.4-16)    |
| Qatar    | 2010 | Female | 85 to 89 | 16%<br>(5.2-36%)               | 84%<br>(64-95%)          | 0.52<br>(0.096-1.7)                         | 0.25%<br>(-1.1-2.8%)                 | 0.23%<br>(-1.4-3.3%)                | 0.076<br>(-0.47-1.1)  | 0.82<br>(-3.6-9.5)  |
| Qatar    | 2010 | Female | 90 to 94 | 18%<br>(6.1-40%)               | 82%<br>(60-94%)          | 0.58<br>(0.11-1.8)                          | 0.25%<br>(-1.4-2.9%)                 | 0.2%<br>(-1.8-3.2%)                 | 0.037<br>(-0.32-0.61) | 0.3<br>(-1.6-3.4)   |
| Qatar    | 2010 | Female | 95 plus  | 22%<br>(7-47%)                 | 78%<br>(53-93%)          | 0.68<br>(0.11-2.1)                          | 0.27%<br>(-1.7-3.6%)                 | 0.17%<br>(-2.2-4.1%)                | 0.012<br>(-0.15-0.28) | 0.08<br>(-0.48-1.1) |
| Qatar    | 2010 | Male   | All Ages | 12%<br>(7.2-18%)               | 88%<br>(82-93%)          | 0.81<br>(0.58-1)                            | 2.6%<br>(1.9-3.4%)                   | 3.9%<br>(2.6-5.5%)                  | 86<br>(51-130)        | 6000<br>(4200-8200) |
| Qatar    | 2010 | Male   | 15 to 19 | 6.3%<br>(2.6-12%)              | 94%<br>(88-97%)          | 0.21<br>(0.057-0.52)                        | 1.4%<br>(0.81-2.3%)                  | 2.4%<br>(1-4.9%)                    | 0.47<br>(0.19-0.98)   | 57<br>(33-99)       |
| Qatar    | 2010 | Male   | 20 to 24 | 9.7%<br>(3.9-19%)              | 90%<br>(81-96%)          | 0.48<br>(0.15-1.1)                          | 2.5%<br>(1.5-4.1%)                   | 3.4%<br>(1.3-7%)                    | 3.7<br>(1.4-7.8)      | 470<br>(270-810)    |
| Qatar    | 2010 | Male   | 25 to 29 | 12%<br>(4.7-23%)               | 88%<br>(77-95%)          | 0.74<br>(0.27-1.4)                          | 2.9%<br>(1.7-4.4%)                   | 4.6%<br>(1.9-8.3%)                  | 8.6<br>(3.5-16)       | 940<br>(540-1500)   |
| Qatar    | 2010 | Male   | 30 to 34 | 14%<br>(4.9-26%)               | 86%<br>(74-95%)          | 0.93<br>(0.41-1.6)                          | 2.9%<br>(1.8-4.3%)                   | 5.2%<br>(2.5-8.7%)                  | 10<br>(4.9-18)        | 980<br>(590-1500)   |
| Qatar    | 2010 | Male   | 35 to 39 | 15%<br>(5.9-28%)               | 85%<br>(72-94%)          | 1<br>(0.45-1.8)                             | 3%<br>(1.8-4.5%)                     | 5.8%<br>(2.9-9.4%)                  | 13<br>(6.1-22)        | 1000<br>(590-1600)  |
| Qatar    | 2010 | Male   | 40 to 44 | 15%<br>(6.8-27%)               | 85%<br>(73-93%)          | 1.1<br>(0.45-2)                             | 3%<br>(1.7-4.9%)                     | 5.6%<br>(2.7-9.6%)                  | 13<br>(5.6-22)        | 870<br>(460-1400)   |
| Qatar    | 2010 | Male   | 45 to 49 | 15%<br>(5.8-28%)               | 85%<br>(72-94%)          | 1.2<br>(0.38-2.5)                           | 3%<br>(1.5-5%)                       | 5.2%<br>(2.3-9.1%)                  | 12<br>(4.8-21)        | 670<br>(320-1100)   |
| Qatar    | 2010 | Male   | 50 to 54 | 14%<br>(6.2-29%)               | 86%<br>(71-94%)          | 1.2<br>(0.37-2.6)                           | 2.8%<br>(1.2-4.9%)                   | 4.4%<br>(1.7-7.7%)                  | 9.7<br>(3.6-18)       | 470<br>(200-850)    |

| Location | Year | Sex    | Age      | Prevalence of current drinkers | Prevalence of abstainers | Population average of standard drinks daily | Percent of total attributable deaths | Percent of total attributable DALYs | Attributable deaths    | Attributable DALYs    |
|----------|------|--------|----------|--------------------------------|--------------------------|---------------------------------------------|--------------------------------------|-------------------------------------|------------------------|-----------------------|
| Qatar    | 2010 | Male   | 55 to 59 | 14%<br>(5.8-27%)               | 86%<br>(73-94%)          | 1.1<br>(0.31-2.7)                           | 2.6%<br>(1.1-4.9%)                   | 3.8%<br>(1.6-7.3%)                  | 6.5<br>(2.4-13)        | 270<br>(110-520)      |
| Qatar    | 2010 | Male   | 60 to 64 | 13%<br>(5.7-26%)               | 87%<br>(74-94%)          | 1<br>(0.27-2.6)                             | 2.4%<br>(0.92-4.6%)                  | 3.3%<br>(1.3-6.3%)                  | 3.2<br>(1.2-6.5)       | 110<br>(41-220)       |
| Qatar    | 2010 | Male   | 65 to 69 | 13%<br>(5.7-24%)               | 87%<br>(76-94%)          | 0.84<br>(0.24-2)                            | 2.1%<br>(0.76-4%)                    | 2.8%<br>(1-5.3%)                    | 1.8<br>(0.63-3.7)      | 50<br>(18-100)        |
| Qatar    | 2010 | Male   | 70 to 74 | 12%<br>(5.1-21%)               | 88%<br>(79-95%)          | 0.63<br>(0.17-1.6)                          | 1.4%<br>(0.39-3.2%)                  | 1.8%<br>(0.47-4%)                   | 2.5<br>(0.64-5.9)      | 56<br>(14-130)        |
| Qatar    | 2010 | Male   | 75 to 79 | 10%<br>(4.2-20%)               | 90%<br>(80-96%)          | 0.48<br>(0.11-1.4)                          | 1.2%<br>(0.33-2.9%)                  | 1.3%<br>(0.25-3.3%)                 | 0.65<br>(0.11-1.6)     | 12<br>(3.2-29)        |
| Qatar    | 2010 | Male   | 80 to 84 | 8.9%<br>(3.4-18%)              | 91%<br>(82-97%)          | 0.4<br>(0.094-1.2)                          | 1.2%<br>(0.36-2.6%)                  | 1.2%<br>(0.28-2.8%)                 | 0.47<br>(0.11-1.2)     | 6.6<br>(2-15)         |
| Qatar    | 2010 | Male   | 85 to 89 | 8.7%<br>(3.4-17%)              | 91%<br>(83-97%)          | 0.36<br>(0.089-0.94)                        | 0.89%<br>(0.19-2.1%)                 | 0.8%<br>(0.033-2.1%)                | 0.27<br>(0.011-0.73)   | 2.8<br>(0.61-6.8)     |
| Qatar    | 2010 | Male   | 90 to 94 | 9.9%<br>(4-20%)                | 90%<br>(80-96%)          | 0.39<br>(0.089-0.99)                        | 0.73%<br>(0.037-1.9%)                | 0.58%<br>(-0.2-2%)                  | 0.13<br>(-0.043-0.44)  | 1<br>(0.05-2.8)       |
| Qatar    | 2010 | Male   | 95 plus  | 12%<br>(4.5-26%)               | 88%<br>(74-96%)          | 0.45<br>(0.084-1.4)                         | 0.75%<br>(-0.073-2.4%)               | 0.52%<br>(-0.44-2.4%)               | 0.034<br>(-0.029-0.15) | 0.21<br>(-0.019-0.65) |
| Qatar    | 2016 | Female | All Ages | 12%<br>(6.3-19%)               | 88%<br>(81-94%)          | 0.62<br>(0.35-1)                            | 2.4%<br>(0.72-2.1%)                  | 2.4%<br>(0.91-4.4%)                 | 19<br>(6.8-38)         | 1300<br>(670-2200)    |
| Qatar    | 2016 | Female | 15 to 19 | 8.8%<br>(3.1-20%)              | 91%<br>(80-97%)          | 0.37<br>(0.082-1)                           | 0.78%<br>(0.39-1.5%)                 | 2%<br>(0.63-4.7%)                   | 0.21<br>(0.062-0.53)   | 33<br>(16-64)         |
| Qatar    | 2016 | Female | 20 to 24 | 11%<br>(3.4-24%)               | 89%<br>(76-97%)          | 0.59<br>(0.14-1.5)                          | 1.4%<br>(0.78-2.4%)                  | 2.9%<br>(0.94-6.6%)                 | 0.42<br>(0.13-1)       | 72<br>(38-120)        |
| Qatar    | 2016 | Female | 25 to 29 | 13%<br>(3.3-27%)               | 87%<br>(73-97%)          | 0.69<br>(0.18-1.5)                          | 1.5%<br>(0.83-2.4%)                  | 3.4%<br>(1.1-7.1%)                  | 0.94<br>(0.25-2.2)     | 140<br>(74-250)       |
| Qatar    | 2016 | Female | 30 to 34 | 14%<br>(3.4-31%)               | 86%<br>(69-97%)          | 0.8<br>(0.23-1.7)                           | 1.5%<br>(0.84-2.6%)                  | 3.9%<br>(1.4-7.4%)                  | 1.8<br>(0.53-3.8)      | 220<br>(110-390)      |
| Qatar    | 2016 | Female | 35 to 39 | 16%<br>(4.5-32%)               | 84%<br>(68-96%)          | 0.94<br>(0.3-2)                             | 1.6%<br>(0.8-2.9%)                   | 4.7%<br>(1.7-8.6%)                  | 2.3<br>(0.73-4.9)      | 210<br>(96-370)       |
| Qatar    | 2016 | Female | 40 to 44 | 17%<br>(6-31%)                 | 83%<br>(69-94%)          | 1.1<br>(0.39-2.1)                           | 1.8%<br>(0.71-3.4%)                  | 4.8%<br>(2-8.9%)                    | 2.6<br>(0.89-5.5)      | 180<br>(72-350)       |
| Qatar    | 2016 | Female | 45 to 49 | 17%<br>(6.2-32%)               | 83%<br>(68-94%)          | 1.2<br>(0.32-2.6)                           | 1.8%<br>(0.61-4%)                    | 4.4%<br>(1.5-8.8%)                  | 2.6<br>(0.79-6)        | 160<br>(51-350)       |
| Qatar    | 2016 | Female | 50 to 54 | 18%<br>(6.9-35%)               | 82%<br>(65-93%)          | 1.2<br>(0.3-2.9)                            | 1.9%<br>(0.39-4.7%)                  | 4%<br>(1.2-8.7%)                    | 2.1<br>(0.57-4.8)      | 110<br>(23-260)       |
| Qatar    | 2016 | Female | 55 to 59 | 19%<br>(7.4-38%)               | 81%<br>(62-93%)          | 1.3<br>(0.29-3.2)                           | 2%<br>(0.25-5.2%)                    | 3.9%<br>(0.9-9%)                    | 1.9<br>(0.4-4.7)       | 81<br>(10-210)        |
| Qatar    | 2016 | Female | 60 to 64 | 20%<br>(7.9-39%)               | 80%<br>(61-92%)          | 1.2<br>(0.27-3.2)                           | 1.7%<br>(-0.14-4.8%)                 | 3%<br>(0.2-7.6%)                    | 1.3<br>(0.093-3.8)     | 49<br>(-3.9-140)      |
| Qatar    | 2016 | Female | 65 to 69 | 21%<br>(8.8-37%)               | 79%<br>(63-91%)          | 1.1<br>(0.25-2.7)                           | 1.5%<br>(-0.32-4.5%)                 | 2.5%<br>(-0.068-6.8%)               | 0.91<br>(-0.028-2.7)   | 26<br>(-5-79)         |
| Qatar    | 2016 | Female | 70 to 74 | 20%<br>(8-36%)                 | 80%<br>(64-92%)          | 0.88<br>(0.19-2.5)                          | 1%<br>(-0.65-4.4%)                   | 1.5%<br>(-0.69-5.9%)                | 0.68<br>(-0.34-2.7)    | 15<br>(-9.7-63)       |

| Location | Year | Sex    | Age      | Prevalence of current drinkers | Prevalence of abstainers | Population average of standard drinks daily | Percent of total attributable deaths | Percent of total attributable DALYs | Attributable deaths     | Attributable DALYs   |
|----------|------|--------|----------|--------------------------------|--------------------------|---------------------------------------------|--------------------------------------|-------------------------------------|-------------------------|----------------------|
| Qatar    | 2016 | Female | 75 to 79 | 17%<br>(6.1-37%)               | 83%<br>(63-94%)          | 0.71<br>(0.13-2.3)                          | 0.65%<br>(-0.92-3.9%)                | 0.83%<br>(-1.2-4.8%)                | 0.51<br>(-0.78-3)       | 9.1<br>(-14-54)      |
| Qatar    | 2016 | Female | 80 to 84 | 16%<br>(5.2-37%)               | 84%<br>(63-95%)          | 0.63<br>(0.11-2.1)                          | 0.67%<br>(-0.8-3.8%)                 | 0.8%<br>(-0.99-4.9%)                | 0.43<br>(-0.56-2.6)     | 5.5<br>(-6.5-32)     |
| Qatar    | 2016 | Female | 85 to 89 | 16%<br>(5.3-38%)               | 84%<br>(62-95%)          | 0.62<br>(0.11-2)                            | 0.59%<br>(-0.95-4%)                  | 0.64%<br>(-1.2-4.9%)                | 0.22<br>(-0.44-1.6)     | 2<br>(-3.4-13)       |
| Qatar    | 2016 | Female | 90 to 94 | 19%<br>(5.6-43%)               | 81%<br>(57-94%)          | 0.69<br>(0.12-2.2)                          | 0.59%<br>(-1.2-3.7%)                 | 0.61%<br>(-1.5-4.4%)                | 0.13<br>(-0.32-0.92)    | 0.82<br>(-1.7-5.3)   |
| Qatar    | 2016 | Female | 95 plus  | 23%<br>(7.2-49%)               | 77%<br>(51-93%)          | 0.81<br>(0.13-2.8)                          | 0.63%<br>(-1.5-4.6%)                 | 0.61%<br>(-1.9-5.4%)                | 0.047<br>(-0.14-0.41)   | 0.21<br>(-0.45-1.5)  |
| Qatar    | 2016 | Male   | All Ages | 12%<br>(7-17%)                 | 88%<br>(83-93%)          | 0.86<br>(0.51-1.3)                          | 2.6%<br>(1.8-3.5%)                   | 3.9%<br>(2.5-5.6%)                  | 100<br>(55-180)         | 7100<br>(4600-10000) |
| Qatar    | 2016 | Male   | 15 to 19 | 6.2%<br>(2.7-12%)              | 94%<br>(88-97%)          | 0.24<br>(0.063-0.64)                        | 1.3%<br>(0.71-2.3%)                  | 2.1%<br>(0.82-4.7%)                 | 0.8<br>(0.28-2)         | 110<br>(59-200)      |
| Qatar    | 2016 | Male   | 20 to 24 | 9.6%<br>(3.8-19%)              | 90%<br>(81-96%)          | 0.54<br>(0.16-1.3)                          | 2.6%<br>(1.5-4.3%)                   | 3.7%<br>(1.4-7.5%)                  | 4.4<br>(1.6-9.8)        | 580<br>(310-1000)    |
| Qatar    | 2016 | Male   | 25 to 29 | 12%<br>(4.6-23%)               | 88%<br>(77-95%)          | 0.82<br>(0.28-1.6)                          | 2.9%<br>(1.8-4.6%)                   | 4.9%<br>(2.1-9.2%)                  | 11<br>(4.3-21)          | 1200<br>(680-1900)   |
| Qatar    | 2016 | Male   | 30 to 34 | 14%<br>(5-26%)                 | 86%<br>(74-95%)          | 1<br>(0.43-2)                               | 2.9%<br>(1.8-4.5%)                   | 5.6%<br>(2.7-9.6%)                  | 13<br>(5.8-23)          | 1200<br>(740-1900)   |
| Qatar    | 2016 | Male   | 35 to 39 | 15%<br>(5.4-28%)               | 85%<br>(72-95%)          | 1.2<br>(0.47-2.3)                           | 3.1%<br>(1.8-4.8%)                   | 6.2%<br>(3-10%)                     | 12<br>(5.1-23)          | 970<br>(540-1600)    |
| Qatar    | 2016 | Male   | 40 to 44 | 15%<br>(6.6-28%)               | 85%<br>(72-93%)          | 1.3<br>(0.46-2.6)                           | 3.1%<br>(1.7-4.9%)                   | 6%<br>(2.9-10%)                     | 13<br>(5.3-25)          | 890<br>(470-1500)    |
| Qatar    | 2016 | Male   | 45 to 49 | 15%<br>(5.9-27%)               | 85%<br>(73-94%)          | 1.3<br>(0.39-2.8)                           | 3%<br>(1.5-5.1%)                     | 5.5%<br>(2.4-9.3%)                  | 13<br>(5.1-26)          | 750<br>(360-1400)    |
| Qatar    | 2016 | Male   | 50 to 54 | 14%<br>(6-28%)                 | 86%<br>(72-94%)          | 1.3<br>(0.39-3.1)                           | 2.8%<br>(1.3-5%)                     | 4.6%<br>(2-8.2%)                    | 11<br>(4.4-23)          | 530<br>(240-1000)    |
| Qatar    | 2016 | Male   | 55 to 59 | 14%<br>(5.8-26%)               | 86%<br>(74-94%)          | 1.3<br>(0.35-3.2)                           | 2.6%<br>(1.1-4.8%)                   | 4%<br>(1.7-7.2%)                    | 9.2<br>(3.6-20)         | 380<br>(160-770)     |
| Qatar    | 2016 | Male   | 60 to 64 | 13%<br>(5.5-25%)               | 87%<br>(75-95%)          | 1.1<br>(0.3-3)                              | 2.3%<br>(0.92-4.4%)                  | 3.3%<br>(1.4-6.2%)                  | 6.3<br>(2.4-13)         | 220<br>(83-420)      |
| Qatar    | 2016 | Male   | 65 to 69 | 12%<br>(5.6-24%)               | 88%<br>(76-94%)          | 0.93<br>(0.24-2.2)                          | 2.1%<br>(0.8-4%)                     | 2.9%<br>(1.1-5.4%)                  | 3.2<br>(1.1-6.6)        | 87<br>(32-180)       |
| Qatar    | 2016 | Male   | 70 to 74 | 11%<br>(5.2-20%)               | 89%<br>(80-95%)          | 0.69<br>(0.18-1.7)                          | 1.6%<br>(0.51-3.3%)                  | 2%<br>(0.7-4.2%)                    | 2.4<br>(0.76-5.6)       | 54<br>(17-120)       |
| Qatar    | 2016 | Male   | 75 to 79 | 9.8%<br>(4.1-18%)              | 90%<br>(82-96%)          | 0.53<br>(0.12-1.5)                          | 1.1%<br>(0.23-2.6%)                  | 1.3%<br>(0.23-3.2%)                 | 2.4<br>(0.41-6.1)       | 42<br>(8.7-100)      |
| Qatar    | 2016 | Male   | 80 to 84 | 8.8%<br>(3.3-18%)              | 91%<br>(82-97%)          | 0.44<br>(0.1-1.3)                           | 1%<br>(0.23-2.5%)                    | 1.1%<br>(0.19-2.8%)                 | 1.1<br>(0.18-2.9)       | 14<br>(3.2-36)       |
| Qatar    | 2016 | Male   | 85 to 89 | 8.6%<br>(3.4-17%)              | 91%<br>(83-97%)          | 0.41<br>(0.093-1.1)                         | 0.81%<br>(0.1-2.2%)                  | 0.82%<br>(-0.0031-2.4%)             | 0.26<br>(-0.00088-0.78) | 2.4<br>(0.31-6.8)    |
| Qatar    | 2016 | Male   | 90 to 94 | 9.7%<br>(3.8-20%)              | 90%<br>(80-96%)          | 0.43<br>(0.094-1.1)                         | 0.68%<br>(-0.067-2%)                 | 0.64%<br>(-0.22-2.2%)               | 0.11<br>(-0.042-0.4)    | 0.75<br>(-0.071-2.4) |

| Location     | Year | Sex    | Age      | Prevalence of current drinkers | Prevalence of abstainers | Population average of standard drinks daily | Percent of total attributable deaths | Percent of total attributable DALYs | Attributable deaths    | Attributable DALYs    |
|--------------|------|--------|----------|--------------------------------|--------------------------|---------------------------------------------|--------------------------------------|-------------------------------------|------------------------|-----------------------|
| Qatar        | 2016 | Male   | 95 plus  | 12%<br>(4.2-26%)               | 88%<br>(74-96%)          | 0.5<br>(0.094-1.6)                          | 0.7%<br>(-0.17-2.5%)                 | 0.58%<br>(-0.43-2.6%)               | 0.041<br>(-0.032-0.19) | 0.21<br>(-0.054-0.75) |
| Saudi Arabia | 1990 | Female | All Ages | 11%<br>(8.6-13%)               | 89%<br>(87-91%)          | 0.062<br>(0.047-0.085)                      | 0.084%<br>(0.004-0.16%)              | -0.13%<br>(-0.38-0.09%)             | -39<br>(-120-28)       | 2000<br>(88-3800)     |
| Saudi Arabia | 1990 | Female | 15 to 19 | 9.8%<br>(5.4-16%)              | 90%<br>(84-95%)          | 0.052<br>(0.024-0.1)                        | 0.31%<br>(0.21-0.44%)                | 0.3%<br>(0.096-0.58%)               | 0.97<br>(0.3-1.9)      | 280<br>(170-410)      |
| Saudi Arabia | 1990 | Female | 20 to 24 | 13%<br>(6.7-21%)               | 87%<br>(79-93%)          | 0.085<br>(0.038-0.16)                       | 0.63%<br>(0.42-0.89%)                | 0.42%<br>(0.091-0.91%)              | 1.6<br>(0.35-3.5)      | 570<br>(370-860)      |
| Saudi Arabia | 1990 | Female | 25 to 29 | 15%<br>(7.8-23%)               | 85%<br>(77-92%)          | 0.11<br>(0.054-0.19)                        | 0.69%<br>(0.49-0.93%)                | 0.53%<br>(0.14-1.1%)                | 2.5<br>(0.61-5.1)      | 710<br>(460-1000)     |
| Saudi Arabia | 1990 | Female | 30 to 34 | 17%<br>(9.2-27%)               | 83%<br>(73-91%)          | 0.13<br>(0.071-0.23)                        | 0.62%<br>(0.42-0.9%)                 | 0.57%<br>(0.1-1.2%)                 | 2.8<br>(0.47-5.9)      | 610<br>(380-910)      |
| Saudi Arabia | 1990 | Female | 35 to 39 | 19%<br>(11-30%)                | 81%<br>(70-89%)          | 0.16<br>(0.08-0.28)                         | 0.49%<br>(0.3-0.71%)                 | 0.51%<br>(0.051-1.1%)               | 2.4<br>(0.24-5.1)      | 380<br>(230-560)      |
| Saudi Arabia | 1990 | Female | 40 to 44 | 20%<br>(12-31%)                | 80%<br>(69-88%)          | 0.18<br>(0.084-0.32)                        | 0.37%<br>(0.15-0.62%)                | 0.49%<br>(-0.026-1.1%)              | 2.1<br>(-0.12-5.1)     | 220<br>(89-370)       |
| Saudi Arabia | 1990 | Female | 45 to 49 | 21%<br>(11-31%)                | 79%<br>(69-89%)          | 0.19<br>(0.086-0.36)                        | 0.21%<br>(-0.025-0.47%)              | 0.26%<br>(-0.25-0.94%)              | 1.2<br>(-1.1-4.4)      | 110<br>(-12-240)      |
| Saudi Arabia | 1990 | Female | 50 to 54 | 21%<br>(13-33%)                | 79%<br>(67-87%)          | 0.19<br>(0.086-0.35)                        | 0.1%<br>(-0.2-0.38%)                 | 0.17%<br>(-0.4-0.78%)               | 0.88<br>(-2.1-4.1)     | 45<br>(-87-170)       |
| Saudi Arabia | 1990 | Female | 55 to 59 | 23%<br>(13-36%)                | 77%<br>(64-87%)          | 0.19<br>(0.088-0.34)                        | -0.055%<br>(-0.42-0.24%)             | -0.036%<br>(-0.71-0.53%)            | -0.23<br>(-4.4-3.4)    | -24<br>(-180-100)     |
| Saudi Arabia | 1990 | Female | 60 to 64 | 24%<br>(14-38%)                | 76%<br>(62-86%)          | 0.18<br>(0.082-0.35)                        | -0.26%<br>(-0.78-0.15%)              | -0.32%<br>(-1.1-0.28%)              | -4.4<br>(-15-3.9)      | -160<br>(-480-89)     |
| Saudi Arabia | 1990 | Female | 65 to 69 | 25%<br>(16-36%)                | 75%<br>(64-84%)          | 0.16<br>(0.077-0.3)                         | -0.36%<br>(-0.91-0.039%)             | -0.44%<br>(-1.2-0.12%)              | -9<br>(-24-2.6)        | -250<br>(-600-28)     |
| Saudi Arabia | 1990 | Female | 70 to 74 | 24%<br>(16-35%)                | 76%<br>(65-84%)          | 0.13<br>(0.057-0.25)                        | -0.34%<br>(-0.92-0.045%)             | -0.4%<br>(-1.1-0.11%)               | -9.9<br>(-28-2.7)      | -210<br>(-560-28)     |
| Saudi Arabia | 1990 | Female | 75 to 79 | 22%<br>(12-34%)                | 78%<br>(66-88%)          | 0.11<br>(0.041-0.22)                        | -0.33%<br>(-0.88-0.047%)             | -0.38%<br>(-1-0.072%)               | -8.7<br>(-25-1.6)      | -140<br>(-370-20)     |
| Saudi Arabia | 1990 | Female | 80 to 84 | 21%<br>(11-34%)                | 79%<br>(66-89%)          | 0.1<br>(0.039-0.2)                          | -0.32%<br>(-0.87-0.057%)             | -0.37%<br>(-1-0.089%)               | -7.1<br>(-20-1.8)      | -80<br>(-220-14)      |
| Saudi Arabia | 1990 | Female | 85 to 89 | 22%<br>(12-38%)                | 78%<br>(62-88%)          | 0.11<br>(0.04-0.22)                         | -0.39%<br>(-0.99--0.022%)            | -0.46%<br>(-1.2--0.017%)            | -6.9<br>(-18--0.26)    | -54<br>(-140--2.9)    |
| Saudi Arabia | 1990 | Female | 90 to 94 | 26%<br>(15-41%)                | 74%<br>(59-85%)          | 0.12<br>(0.048-0.26)                        | -0.5%<br>(-1.1--0.077%)              | -0.6%<br>(-1.3--0.097%)             | -5<br>(-11--0.8)       | -26<br>(-58--4.1)     |
| Saudi Arabia | 1990 | Female | 95 plus  | 31%<br>(16-49%)                | 69%<br>(51-84%)          | 0.15<br>(0.05-0.33)                         | -0.61%<br>(-1.4--0.083%)             | -0.76%<br>(-1.7--0.12%)             | -2.5<br>(-5.5--0.41)   | -8.3<br>(-19--1.1)    |
| Saudi Arabia | 1990 | Male   | All Ages | 7.3%<br>(5.7-9.2%)             | 93%<br>(91-94%)          | 0.054<br>(0.039-0.075)                      | 0.33%<br>(0.23-0.45%)                | 0.28%<br>(0.14-0.45%)               | 120<br>(57-190)        | 11000<br>(7400-15000) |
| Saudi Arabia | 1990 | Male   | 15 to 19 | 5.4%<br>(3.1-8.7%)             | 95%<br>(91-97%)          | 0.023<br>(0.01-0.045)                       | 0.44%<br>(0.28-0.63%)                | 0.24%<br>(0.069-0.52%)              | 2.1<br>(0.59-4.5)      | 520<br>(330-760)      |
| Saudi Arabia | 1990 | Male   | 20 to 24 | 8.3%<br>(4.6-13%)              | 92%<br>(87-95%)          | 0.05<br>(0.023-0.087)                       | 0.94%<br>(0.63-1.4%)                 | 0.47%<br>(0.13-1%)                  | 6.8<br>(1.9-15)        | 1600<br>(1000-2500)   |

| Location     | Year | Sex    | Age      | Prevalence of current drinkers | Prevalence of abstainers | Population average of standard drinks daily | Percent of total attributable deaths | Percent of total attributable DALYs | Attributable deaths   | Attributable DALYs  |
|--------------|------|--------|----------|--------------------------------|--------------------------|---------------------------------------------|--------------------------------------|-------------------------------------|-----------------------|---------------------|
| Saudi Arabia | 1990 | Male   | 25 to 29 | 10%<br>(5.7-16%)               | 90%<br>(84-94%)          | 0.08<br>(0.041-0.14)                        | 1.1%<br>(0.75-1.5%)                  | 0.69%<br>(0.24-1.3%)                | 11<br>(3.8-20)        | 2000<br>(1300-2900) |
| Saudi Arabia | 1990 | Male   | 30 to 34 | 12%<br>(6.6-20%)               | 88%<br>(80-93%)          | 0.11<br>(0.056-0.18)                        | 1%<br>(0.73-1.5%)                    | 0.8%<br>(0.34-1.5%)                 | 11<br>(4.7-20)        | 1700<br>(1100-2500) |
| Saudi Arabia | 1990 | Male   | 35 to 39 | 14%<br>(7.9-22%)               | 86%<br>(78-92%)          | 0.13<br>(0.064-0.22)                        | 0.99%<br>(0.7-1.4%)                  | 0.92%<br>(0.43-1.6%)                | 12<br>(5.6-22)        | 1400<br>(970-2000)  |
| Saudi Arabia | 1990 | Male   | 40 to 44 | 14%<br>(8.5-23%)               | 86%<br>(77-92%)          | 0.14<br>(0.065-0.25)                        | 0.88%<br>(0.6-1.2%)                  | 0.89%<br>(0.45-1.5%)                | 10<br>(5-17)          | 920<br>(600-1300)   |
| Saudi Arabia | 1990 | Male   | 45 to 49 | 14%<br>(7.3-21%)               | 86%<br>(79-93%)          | 0.14<br>(0.06-0.27)                         | 0.76%<br>(0.5-1.1%)                  | 0.85%<br>(0.42-1.4%)                | 8.9<br>(4.4-15)       | 620<br>(410-910)    |
| Saudi Arabia | 1990 | Male   | 50 to 54 | 13%<br>(7.4-21%)               | 87%<br>(79-93%)          | 0.13<br>(0.061-0.26)                        | 0.6%<br>(0.36-0.85%)                 | 0.69%<br>(0.31-1.1%)                | 7.5<br>(3.2-12)       | 420<br>(250-610)    |
| Saudi Arabia | 1990 | Male   | 55 to 59 | 13%<br>(7.2-20%)               | 87%<br>(80-93%)          | 0.13<br>(0.059-0.24)                        | 0.49%<br>(0.25-0.74%)                | 0.59%<br>(0.22-0.97%)               | 7.3<br>(2.6-12)       | 320<br>(160-490)    |
| Saudi Arabia | 1990 | Male   | 60 to 64 | 12%<br>(7-20%)                 | 88%<br>(80-93%)          | 0.12<br>(0.051-0.24)                        | 0.38%<br>(0.1-0.64%)                 | 0.45%<br>(0.067-0.81%)              | 9.3<br>(1.3-16)       | 300<br>(81-510)     |
| Saudi Arabia | 1990 | Male   | 65 to 69 | 12%<br>(7.2-19%)               | 88%<br>(81-93%)          | 0.1<br>(0.047-0.18)                         | 0.31%<br>(0.046-0.53%)               | 0.37%<br>(0.018-0.66%)              | 8.9<br>(0.41-16)      | 230<br>(35-400)     |
| Saudi Arabia | 1990 | Male   | 70 to 74 | 11%<br>(7.1-17%)               | 89%<br>(83-93%)          | 0.075<br>(0.033-0.15)                       | 0.31%<br>(0.08-0.51%)                | 0.38%<br>(0.069-0.64%)              | 9.2<br>(1.6-15)       | 180<br>(46-290)     |
| Saudi Arabia | 1990 | Male   | 75 to 79 | 9.6%<br>(5.6-15%)              | 90%<br>(85-94%)          | 0.056<br>(0.022-0.12)                       | 0.26%<br>(0.05-0.41%)                | 0.31%<br>(0.038-0.5%)               | 6.1<br>(0.79-9.8)     | 91<br>(18-140)      |
| Saudi Arabia | 1990 | Male   | 80 to 84 | 8.5%<br>(4.9-13%)              | 91%<br>(87-95%)          | 0.047<br>(0.02-0.089)                       | 0.28%<br>(0.1-0.41%)                 | 0.32%<br>(0.11-0.49%)               | 4.6<br>(1.6-7)        | 50<br>(18-75)       |
| Saudi Arabia | 1990 | Male   | 85 to 89 | 8.5%<br>(4.8-14%)              | 92%<br>(86-95%)          | 0.045<br>(0.019-0.088)                      | 0.18%<br>(0.022-0.31%)               | 0.2%<br>(-0.00065-0.35%)            | 2.1<br>(-0.0068-3.7)  | 18<br>(2-29)        |
| Saudi Arabia | 1990 | Male   | 90 to 94 | 9.7%<br>(5.7-16%)              | 90%<br>(84-94%)          | 0.05<br>(0.02-0.1)                          | 0.094%<br>(-0.076-0.21%)             | 0.086%<br>(-0.12-0.24%)             | 0.46<br>(-0.62-1.3)   | 3.1<br>(-2.5-7.2)   |
| Saudi Arabia | 1990 | Male   | 95 plus  | 12%<br>(6-21%)                 | 88%<br>(79-94%)          | 0.059<br>(0.018-0.13)                       | 0.059%<br>(-0.15-0.2%)               | 0.016%<br>(-0.24-0.18%)             | 0.028<br>(-0.42-0.32) | 0.44<br>(-1-1.5)    |
| Saudi Arabia | 1995 | Female | All Ages | 11%<br>(9.2-14%)               | 89%<br>(86-91%)          | 0.049<br>(0.036-0.067)                      | 0.092%<br>(-0.0025-0.17%)            | -0.15%<br>(-0.44-0.095%)            | -48<br>(-150-33)      | 2100<br>(-53-4000)  |
| Saudi Arabia | 1995 | Female | 15 to 19 | 11%<br>(5.9-17%)               | 89%<br>(83-94%)          | 0.042<br>(0.019-0.086)                      | 0.31%<br>(0.21-0.45%)                | 0.27%<br>(0.1-0.49%)                | 1<br>(0.37-2)         | 350<br>(220-510)    |
| Saudi Arabia | 1995 | Female | 20 to 24 | 14%<br>(7.3-23%)               | 86%<br>(77-93%)          | 0.069<br>(0.031-0.13)                       | 0.63%<br>(0.43-0.89%)                | 0.37%<br>(0.078-0.78%)              | 1.3<br>(0.28-2.8)     | 600<br>(370-910)    |
| Saudi Arabia | 1995 | Female | 25 to 29 | 16%<br>(8.5-25%)               | 84%<br>(75-91%)          | 0.087<br>(0.041-0.15)                       | 0.68%<br>(0.48-0.93%)                | 0.45%<br>(0.12-0.91%)               | 1.8<br>(0.46-3.7)     | 640<br>(420-940)    |
| Saudi Arabia | 1995 | Female | 30 to 34 | 18%<br>(9.7-28%)               | 82%<br>(72-90%)          | 0.1<br>(0.054-0.17)                         | 0.6%<br>(0.4-0.84%)                  | 0.46%<br>(0.086-0.92%)              | 2.4<br>(0.44-4.9)     | 660<br>(410-990)    |
| Saudi Arabia | 1995 | Female | 35 to 39 | 20%<br>(11-31%)                | 80%<br>(69-89%)          | 0.12<br>(0.062-0.21)                        | 0.46%<br>(0.31-0.64%)                | 0.4%<br>(0.043-0.83%)               | 2.4<br>(0.26-4.8)     | 480<br>(290-670)    |
| Saudi Arabia | 1995 | Female | 40 to 44 | 20%<br>(12-31%)                | 80%<br>(69-88%)          | 0.13<br>(0.065-0.23)                        | 0.34%<br>(0.17-0.52%)                | 0.38%<br>(-0.0023-0.83%)            | 2.1<br>(-0.013-4.4)   | 270<br>(130-430)    |



| Location     | Year | Sex    | Age      | Prevalence of current drinkers | Prevalence of abstainers | Population average of standard drinks daily | Percent of total attributable deaths | Percent of total attributable DALYs | Attributable deaths  | Attributable DALYs    |
|--------------|------|--------|----------|--------------------------------|--------------------------|---------------------------------------------|--------------------------------------|-------------------------------------|----------------------|-----------------------|
| Saudi Arabia | 1995 | Female | 45 to 49 | 20%<br>(11-31%)                | 80%<br>(69-89%)          | 0.14<br>(0.063-0.26)                        | 0.19%<br>(-0.0026-0.36%)             | 0.19%<br>(-0.21-0.57%)              | 0.9<br>(-0.98-2.8)   | 100<br>(-1.3-200)     |
| Saudi Arabia | 1995 | Female | 50 to 54 | 22%<br>(13-34%)                | 78%<br>(66-87%)          | 0.14<br>(0.065-0.27)                        | 0.076%<br>(-0.2-0.28%)               | 0.11%<br>(-0.38-0.51%)              | 0.7<br>(-2.4-3.3)    | 42<br>(-110-150)      |
| Saudi Arabia | 1995 | Female | 55 to 59 | 24%<br>(14-36%)                | 76%<br>(64-86%)          | 0.15<br>(0.067-0.27)                        | -0.072%<br>(-0.41-0.18%)             | -0.058%<br>(-0.64-0.37%)            | -0.41<br>(-4.5-2.7)  | -36<br>(-210-88)      |
| Saudi Arabia | 1995 | Female | 60 to 64 | 26%<br>(15-39%)                | 74%<br>(61-85%)          | 0.14<br>(0.063-0.27)                        | -0.28%<br>(-0.82-0.082%)             | -0.34%<br>(-1.1-0.18%)              | -5.7<br>(-18-2.9)    | -190<br>(-560-59)     |
| Saudi Arabia | 1995 | Female | 65 to 69 | 26%<br>(17-38%)                | 74%<br>(62-83%)          | 0.13<br>(0.056-0.22)                        | -0.35%<br>(-0.91-0.065%)             | -0.41%<br>(-1.1-0.12%)              | -10<br>(-28-3)       | -280<br>(-710-53)     |
| Saudi Arabia | 1995 | Female | 70 to 74 | 25%<br>(16-36%)                | 75%<br>(64-84%)          | 0.096<br>(0.043-0.19)                       | -0.3%<br>(-0.85-0.08%)               | -0.34%<br>(-1-0.14%)                | -12<br>(-37-4.9)     | -260<br>(-750-71)     |
| Saudi Arabia | 1995 | Female | 75 to 79 | 22%<br>(13-33%)                | 78%<br>(67-87%)          | 0.075<br>(0.03-0.15)                        | -0.25%<br>(-0.76-0.082%)             | -0.28%<br>(-0.9-0.11%)              | -9.9<br>(-31-4)      | -160<br>(-470-51)     |
| Saudi Arabia | 1995 | Female | 80 to 84 | 20%<br>(11-31%)                | 80%<br>(69-89%)          | 0.07<br>(0.028-0.14)                        | -0.24%<br>(-0.71-0.082%)             | -0.27%<br>(-0.83-0.1%)              | -8<br>(-24-3.1)      | -88<br>(-250-28)      |
| Saudi Arabia | 1995 | Female | 85 to 89 | 21%<br>(12-35%)                | 79%<br>(65-88%)          | 0.073<br>(0.029-0.15)                       | -0.3%<br>(-0.79-0.016%)              | -0.34%<br>(-0.91-0.029%)            | -6.6<br>(-17-0.53)   | -51<br>(-130-2.9)     |
| Saudi Arabia | 1995 | Female | 90 to 94 | 25%<br>(14-39%)                | 75%<br>(61-86%)          | 0.086<br>(0.035-0.18)                       | -0.38%<br>(-0.91--0.033%)            | -0.46%<br>(-1.1--0.041%)            | -5<br>(-12--0.45)    | -26<br>(-61--2.3)     |
| Saudi Arabia | 1995 | Female | 95 plus  | 30%<br>(16-48%)                | 70%<br>(52-84%)          | 0.11<br>(0.034-0.23)                        | -0.5%<br>(-1.2--0.044%)              | -0.61%<br>(-1.5--0.075%)            | -2.6<br>(-6.3--0.32) | -8.8<br>(-21--0.8)    |
| Saudi Arabia | 1995 | Male   | All Ages | 7.6%<br>(5.9-9.6%)             | 92%<br>(90-94%)          | 0.041<br>(0.03-0.057)                       | 0.39%<br>(0.28-0.5%)                 | 0.32%<br>(0.18-0.49%)               | 130<br>(74-200)      | 11000<br>(8100-15000) |
| Saudi Arabia | 1995 | Male   | 15 to 19 | 5.5%<br>(3.2-8.9%)             | 94%<br>(91-97%)          | 0.017<br>(0.0077-0.034)                     | 0.44%<br>(0.3-0.64%)                 | 0.23%<br>(0.069-0.46%)              | 2<br>(0.59-4)        | 550<br>(360-830)      |
| Saudi Arabia | 1995 | Male   | 20 to 24 | 8.4%<br>(4.7-13%)              | 92%<br>(87-95%)          | 0.037<br>(0.018-0.069)                      | 0.97%<br>(0.65-1.4%)                 | 0.46%<br>(0.11-0.99%)               | 4.7<br>(1.2-10)      | 1200<br>(790-1900)    |
| Saudi Arabia | 1995 | Male   | 25 to 29 | 11%<br>(5.7-17%)               | 89%<br>(83-94%)          | 0.058<br>(0.029-0.1)                        | 1.1%<br>(0.78-1.5%)                  | 0.64%<br>(0.21-1.3%)                | 8.7<br>(2.8-17)      | 1900<br>(1300-2800)   |
| Saudi Arabia | 1995 | Male   | 30 to 34 | 12%<br>(6.6-20%)               | 88%<br>(80-93%)          | 0.076<br>(0.039-0.13)                       | 1%<br>(0.74-1.4%)                    | 0.73%<br>(0.31-1.3%)                | 10<br>(4.3-19)       | 2000<br>(1300-2900)   |
| Saudi Arabia | 1995 | Male   | 35 to 39 | 14%<br>(7.7-22%)               | 86%<br>(78-92%)          | 0.088<br>(0.047-0.15)                       | 0.97%<br>(0.72-1.3%)                 | 0.84%<br>(0.41-1.5%)                | 12<br>(5.9-22)       | 1700<br>(1200-2400)   |
| Saudi Arabia | 1995 | Male   | 40 to 44 | 14%<br>(8.3-23%)               | 86%<br>(77-92%)          | 0.097<br>(0.047-0.17)                       | 0.84%<br>(0.58-1.1%)                 | 0.81%<br>(0.43-1.3%)                | 12<br>(6.3-21)       | 1300<br>(850-1800)    |
| Saudi Arabia | 1995 | Male   | 45 to 49 | 14%<br>(7.4-22%)               | 86%<br>(78-93%)          | 0.1<br>(0.045-0.19)                         | 0.73%<br>(0.5-0.99%)                 | 0.8%<br>(0.44-1.3%)                 | 9.5<br>(5.1-15)      | 710<br>(470-990)      |
| Saudi Arabia | 1995 | Male   | 50 to 54 | 13%<br>(7.6-21%)               | 87%<br>(79-92%)          | 0.098<br>(0.045-0.19)                       | 0.58%<br>(0.37-0.78%)                | 0.66%<br>(0.32-0.99%)               | 8.8<br>(4.4-14)      | 500<br>(310-700)      |
| Saudi Arabia | 1995 | Male   | 55 to 59 | 13%<br>(7.4-20%)               | 87%<br>(80-93%)          | 0.094<br>(0.043-0.18)                       | 0.47%<br>(0.27-0.67%)                | 0.57%<br>(0.25-0.88%)               | 8.3<br>(3.6-13)      | 370<br>(210-530)      |
| Saudi Arabia | 1995 | Male   | 60 to 64 | 13%<br>(7.1-20%)               | 87%<br>(80-93%)          | 0.086<br>(0.037-0.17)                       | 0.37%<br>(0.13-0.58%)                | 0.43%<br>(0.11-0.72%)               | 10<br>(2.7-17)       | 340<br>(120-530)      |

| Location     | Year | Sex    | Age      | Prevalence of current drinkers | Prevalence of abstainers | Population average of standard drinks daily | Percent of total attributable deaths | Percent of total attributable DALYs | Attributable deaths | Attributable DALYs  |
|--------------|------|--------|----------|--------------------------------|--------------------------|---------------------------------------------|--------------------------------------|-------------------------------------|---------------------|---------------------|
| Saudi Arabia | 1995 | Male   | 65 to 69 | 12%<br>(7.2-19%)               | 88%<br>(81-93%)          | 0.072<br>(0.033-0.13)                       | 0.32%<br>(0.092-0.51%)               | 0.38%<br>(0.078-0.63%)              | 11<br>(2.3-18)      | 280<br>(82-450)     |
| Saudi Arabia | 1995 | Male   | 70 to 74 | 11%<br>(7-17%)                 | 89%<br>(83-93%)          | 0.053<br>(0.024-0.1)                        | 0.34%<br>(0.14-0.51%)                | 0.42%<br>(0.15-0.63%)               | 13<br>(5-20)        | 250<br>(100-380)    |
| Saudi Arabia | 1995 | Male   | 75 to 79 | 9.5%<br>(5.5-15%)              | 90%<br>(85-94%)          | 0.039<br>(0.016-0.081)                      | 0.29%<br>(0.11-0.42%)                | 0.35%<br>(0.12-0.52%)               | 9.4<br>(3.2-14)     | 140<br>(54-200)     |
| Saudi Arabia | 1995 | Male   | 80 to 84 | 8.5%<br>(4.9-13%)              | 91%<br>(87-95%)          | 0.033<br>(0.014-0.062)                      | 0.3%<br>(0.15-0.42%)                 | 0.35%<br>(0.17-0.5%)                | 6.7<br>(3.2-9.5)    | 72<br>(36-100)      |
| Saudi Arabia | 1995 | Male   | 85 to 89 | 8.5%<br>(4.8-14%)              | 91%<br>(86-95%)          | 0.032<br>(0.014-0.064)                      | 0.21%<br>(0.069-0.31%)               | 0.23%<br>(0.066-0.36%)              | 2.9<br>(0.83-4.5)   | 23<br>(7.8-35)      |
| Saudi Arabia | 1995 | Male   | 90 to 94 | 9.8%<br>(5.7-16%)              | 90%<br>(84-94%)          | 0.035<br>(0.014-0.076)                      | 0.12%<br>(-0.033-0.22%)              | 0.12%<br>(-0.055-0.24%)             | 0.75<br>(-0.35-1.6) | 4.7<br>(-1.3-8.9)   |
| Saudi Arabia | 1995 | Male   | 95 plus  | 12%<br>(6-21%)                 | 88%<br>(79-94%)          | 0.042<br>(0.013-0.094)                      | 0.084%<br>(-0.098-0.2%)              | 0.05%<br>(-0.17-0.19%)              | 0.1<br>(-0.36-0.4)  | 0.73<br>(-0.85-1.8) |
| Saudi Arabia | 2000 | Female | All Ages | 12%<br>(9.8-15%)               | 88%<br>(85-90%)          | 0.046<br>(0.034-0.062)                      | 0.12%<br>(0.0092-0.22%)              | -0.14%<br>(-0.46-0.12%)             | -54<br>(-180-46)    | 2800<br>(210-5200)  |
| Saudi Arabia | 2000 | Female | 15 to 19 | 10%<br>(5.8-17%)               | 90%<br>(83-94%)          | 0.034<br>(0.015-0.066)                      | 0.31%<br>(0.21-0.44%)                | 0.25%<br>(0.11-0.44%)               | 1<br>(0.47-1.9)     | 380<br>(240-560)    |
| Saudi Arabia | 2000 | Female | 20 to 24 | 14%<br>(7.2-22%)               | 86%<br>(78-93%)          | 0.056<br>(0.026-0.11)                       | 0.64%<br>(0.43-0.91%)                | 0.33%<br>(0.098-0.66%)              | 1.5<br>(0.43-3)     | 800<br>(490-1200)   |
| Saudi Arabia | 2000 | Female | 25 to 29 | 16%<br>(8.6-25%)               | 84%<br>(75-91%)          | 0.072<br>(0.035-0.13)                       | 0.69%<br>(0.5-0.93%)                 | 0.41%<br>(0.11-0.8%)                | 2.1<br>(0.55-4.2)   | 900<br>(580-1300)   |
| Saudi Arabia | 2000 | Female | 30 to 34 | 18%<br>(10-29%)                | 82%<br>(71-90%)          | 0.088<br>(0.046-0.15)                       | 0.6%<br>(0.41-0.83%)                 | 0.43%<br>(0.091-0.82%)              | 2.5<br>(0.53-4.8)   | 760<br>(480-1100)   |
| Saudi Arabia | 2000 | Female | 35 to 39 | 20%<br>(12-31%)                | 80%<br>(69-88%)          | 0.1<br>(0.053-0.17)                         | 0.47%<br>(0.32-0.64%)                | 0.39%<br>(0.089-0.74%)              | 2.6<br>(0.57-4.9)   | 580<br>(360-820)    |
| Saudi Arabia | 2000 | Female | 40 to 44 | 21%<br>(13-32%)                | 79%<br>(68-87%)          | 0.11<br>(0.057-0.19)                        | 0.34%<br>(0.18-0.51%)                | 0.38%<br>(0.045-0.75%)              | 2.3<br>(0.26-4.6)   | 340<br>(170-520)    |
| Saudi Arabia | 2000 | Female | 45 to 49 | 21%<br>(12-32%)                | 79%<br>(68-88%)          | 0.12<br>(0.055-0.21)                        | 0.19%<br>(0.0081-0.35%)              | 0.2%<br>(-0.15-0.52%)               | 1.2<br>(-0.92-3.2)  | 150<br>(6.7-280)    |
| Saudi Arabia | 2000 | Female | 50 to 54 | 22%<br>(13-34%)                | 78%<br>(66-87%)          | 0.12<br>(0.056-0.22)                        | 0.077%<br>(-0.19-0.27%)              | 0.12%<br>(-0.33-0.44%)              | 0.92<br>(-2.5-3.5)  | 53<br>(-130-180)    |
| Saudi Arabia | 2000 | Female | 55 to 59 | 24%<br>(14-37%)                | 76%<br>(63-86%)          | 0.12<br>(0.056-0.22)                        | -0.056%<br>(-0.38-0.17%)             | -0.022%<br>(-0.57-0.36%)            | -0.17<br>(-4.5-3)   | -34<br>(-240-110)   |
| Saudi Arabia | 2000 | Female | 60 to 64 | 25%<br>(15-39%)                | 75%<br>(61-85%)          | 0.12<br>(0.051-0.22)                        | -0.24%<br>(-0.79-0.13%)              | -0.27%<br>(-0.99-0.22%)             | -6.3<br>(-23-4.8)   | -210<br>(-730-110)  |
| Saudi Arabia | 2000 | Female | 65 to 69 | 26%<br>(17-37%)                | 74%<br>(63-83%)          | 0.1<br>(0.046-0.18)                         | -0.29%<br>(-0.79-0.1%)               | -0.32%<br>(-0.95-0.16%)             | -10<br>(-30-5)      | -280<br>(-750-98)   |
| Saudi Arabia | 2000 | Female | 70 to 74 | 24%<br>(16-35%)                | 76%<br>(65-84%)          | 0.078<br>(0.034-0.15)                       | -0.24%<br>(-0.78-0.12%)              | -0.26%<br>(-0.89-0.17%)             | -13<br>(-43-8)      | -260<br>(-850-130)  |
| Saudi Arabia | 2000 | Female | 75 to 79 | 22%<br>(13-33%)                | 78%<br>(67-87%)          | 0.062<br>(0.024-0.12)                       | -0.2%<br>(-0.7-0.12%)                | -0.22%<br>(-0.78-0.15%)             | -11<br>(-40-7.9)    | -180<br>(-610-100)  |
| Saudi Arabia | 2000 | Female | 80 to 84 | 21%<br>(11-33%)                | 79%<br>(67-89%)          | 0.058<br>(0.022-0.11)                       | -0.2%<br>(-0.67-0.11%)               | -0.22%<br>(-0.73-0.13%)             | -11<br>(-36-6.7)    | -120<br>(-380-69)   |

| Location     | Year | Sex    | Age      | Prevalence of current drinkers | Prevalence of abstainers | Population average of standard drinks daily | Percent of total attributable deaths | Percent of total attributable DALYs | Attributable deaths  | Attributable DALYs    |
|--------------|------|--------|----------|--------------------------------|--------------------------|---------------------------------------------|--------------------------------------|-------------------------------------|----------------------|-----------------------|
| Saudi Arabia | 2000 | Female | 85 to 89 | 22%<br>(12-36%)                | 78%<br>(64-88%)          | 0.061<br>(0.025-0.12)                       | -0.26%<br>(-0.72-0.038%)             | -0.3%<br>(-0.81-0.043%)             | -8.3<br>(-23-1.2)    | -64<br>(-180-9.4)     |
| Saudi Arabia | 2000 | Female | 90 to 94 | 25%<br>(15-39%)                | 75%<br>(61-85%)          | 0.072<br>(0.029-0.15)                       | -0.34%<br>(-0.85--0.014%)            | -0.41%<br>(-0.99--0.023%)           | -5.5<br>(-13--0.31)  | -29<br>(-70--1.1)     |
| Saudi Arabia | 2000 | Female | 95 plus  | 31%<br>(16-48%)                | 69%<br>(52-84%)          | 0.089<br>(0.029-0.19)                       | -0.45%<br>(-1.1--0.024%)             | -0.55%<br>(-1.4--0.042%)            | -3.1<br>(-7.7--0.25) | -11<br>(-27--0.57)    |
| Saudi Arabia | 2000 | Male   | All Ages | 7.8%<br>(6.1-9.8%)             | 92%<br>(90-94%)          | 0.035<br>(0.025-0.048)                      | 0.45%<br>(0.33-0.57%)                | 0.36%<br>(0.22-0.52%)               | 150<br>(95-220)      | 13000<br>(9400-17000) |
| Saudi Arabia | 2000 | Male   | 15 to 19 | 5.4%<br>(3.1-8.7%)             | 95%<br>(91-97%)          | 0.014<br>(0.0059-0.027)                     | 0.42%<br>(0.29-0.59%)                | 0.2%<br>(0.068-0.39%)               | 2<br>(0.7-4)         | 580<br>(380-850)      |
| Saudi Arabia | 2000 | Male   | 20 to 24 | 8.2%<br>(4.5-13%)              | 92%<br>(87-95%)          | 0.029<br>(0.014-0.053)                      | 0.93%<br>(0.62-1.3%)                 | 0.38%<br>(0.1-0.81%)                | 5.1<br>(1.4-11)      | 1500<br>(960-2200)    |
| Saudi Arabia | 2000 | Male   | 25 to 29 | 10%<br>(5.6-16%)               | 90%<br>(84-94%)          | 0.046<br>(0.023-0.08)                       | 1.1%<br>(0.81-1.5%)                  | 0.57%<br>(0.2-1.1%)                 | 8.4<br>(3-17)        | 2300<br>(1500-3200)   |
| Saudi Arabia | 2000 | Male   | 30 to 34 | 12%<br>(6.5-20%)               | 88%<br>(80-94%)          | 0.061<br>(0.032-0.1)                        | 1%<br>(0.76-1.4%)                    | 0.67%<br>(0.29-1.2%)                | 9.4<br>(4.1-17)      | 2100<br>(1500-3100)   |
| Saudi Arabia | 2000 | Male   | 35 to 39 | 14%<br>(7.9-22%)               | 86%<br>(78-92%)          | 0.072<br>(0.038-0.13)                       | 0.96%<br>(0.71-1.3%)                 | 0.8%<br>(0.41-1.4%)                 | 12<br>(5.9-20)       | 1800<br>(1200-2400)   |
| Saudi Arabia | 2000 | Male   | 40 to 44 | 14%<br>(8.3-23%)               | 86%<br>(77-92%)          | 0.079<br>(0.039-0.14)                       | 0.83%<br>(0.6-1.1%)                  | 0.78%<br>(0.42-1.2%)                | 13<br>(6.8-21)       | 1400<br>(980-2000)    |
| Saudi Arabia | 2000 | Male   | 45 to 49 | 14%<br>(7.2-21%)               | 86%<br>(79-93%)          | 0.08<br>(0.036-0.15)                        | 0.72%<br>(0.52-0.94%)                | 0.79%<br>(0.46-1.2%)                | 13<br>(7.5-19)       | 1000<br>(720-1400)    |
| Saudi Arabia | 2000 | Male   | 50 to 54 | 13%<br>(7.4-21%)               | 87%<br>(79-93%)          | 0.077<br>(0.035-0.15)                       | 0.58%<br>(0.38-0.78%)                | 0.66%<br>(0.37-0.96%)               | 9.4<br>(5.1-14)      | 540<br>(350-730)      |
| Saudi Arabia | 2000 | Male   | 55 to 59 | 12%<br>(7.2-19%)               | 88%<br>(81-93%)          | 0.074<br>(0.034-0.14)                       | 0.48%<br>(0.29-0.65%)                | 0.58%<br>(0.28-0.86%)               | 7.8<br>(3.8-12)      | 350<br>(210-490)      |
| Saudi Arabia | 2000 | Male   | 60 to 64 | 12%<br>(7-20%)                 | 88%<br>(80-93%)          | 0.067<br>(0.028-0.13)                       | 0.39%<br>(0.16-0.58%)                | 0.45%<br>(0.15-0.7%)                | 13<br>(4.4-21)       | 420<br>(170-630)      |
| Saudi Arabia | 2000 | Male   | 65 to 69 | 12%<br>(7-18%)                 | 88%<br>(82-93%)          | 0.056<br>(0.025-0.1)                        | 0.35%<br>(0.14-0.52%)                | 0.41%<br>(0.15-0.63%)               | 14<br>(5-22)         | 360<br>(150-540)      |
| Saudi Arabia | 2000 | Male   | 70 to 74 | 11%<br>(6.8-16%)               | 89%<br>(84-93%)          | 0.041<br>(0.019-0.08)                       | 0.37%<br>(0.19-0.52%)                | 0.45%<br>(0.22-0.63%)               | 17<br>(8.4-24)       | 330<br>(160-460)      |
| Saudi Arabia | 2000 | Male   | 75 to 79 | 9.1%<br>(5.3-15%)              | 91%<br>(85-95%)          | 0.03<br>(0.012-0.06)                        | 0.32%<br>(0.18-0.43%)                | 0.39%<br>(0.2-0.53%)                | 14<br>(6.9-19)       | 200<br>(110-270)      |
| Saudi Arabia | 2000 | Male   | 80 to 84 | 8.1%<br>(4.7-13%)              | 92%<br>(87-95%)          | 0.025<br>(0.011-0.047)                      | 0.33%<br>(0.2-0.44%)                 | 0.39%<br>(0.23-0.51%)               | 10<br>(6.1-14)       | 110<br>(67-150)       |
| Saudi Arabia | 2000 | Male   | 85 to 89 | 8.1%<br>(4.5-13%)              | 92%<br>(87-95%)          | 0.025<br>(0.011-0.05)                       | 0.23%<br>(0.11-0.32%)                | 0.26%<br>(0.12-0.36%)               | 4.4<br>(2-6.1)       | 35<br>(17-47)         |
| Saudi Arabia | 2000 | Male   | 90 to 94 | 9.5%<br>(5.4-15%)              | 91%<br>(85-95%)          | 0.027<br>(0.011-0.057)                      | 0.14%<br>(0.012-0.23%)               | 0.15%<br>(-0.0056-0.25%)            | 1.1<br>(-0.043-1.9)  | 6.7<br>(0.56-11)      |
| Saudi Arabia | 2000 | Male   | 95 plus  | 12%<br>(5.9-21%)               | 88%<br>(79-94%)          | 0.033<br>(0.01-0.071)                       | 0.11%<br>(-0.055-0.21%)              | 0.083%<br>(-0.12-0.2%)              | 0.21<br>(-0.29-0.52) | 1.2<br>(-0.55-2.2)    |
| Saudi Arabia | 2005 | Female | All Ages | 12%<br>(10-15%)                | 88%<br>(85-90%)          | 0.049<br>(0.036-0.067)                      | 0.15%<br>(0.024-0.25%)               | -0.15%<br>(-0.48-0.13%)             | -59<br>(-190-50)     | 3400<br>(550-6200)    |

| Location     | Year | Sex    | Age      | Prevalence of current drinkers | Prevalence of abstainers | Population average of standard drinks daily | Percent of total attributable deaths | Percent of total attributable DALYs | Attributable deaths  | Attributable DALYs     |
|--------------|------|--------|----------|--------------------------------|--------------------------|---------------------------------------------|--------------------------------------|-------------------------------------|----------------------|------------------------|
| Saudi Arabia | 2005 | Female | 15 to 19 | 10%<br>(5.7-17%)               | 90%<br>(83-94%)          | 0.035<br>(0.015-0.068)                      | 0.32%<br>(0.22-0.44%)                | 0.27%<br>(0.13-0.47%)               | 1.2<br>(0.56-2.1)    | 440<br>(280-650)       |
| Saudi Arabia | 2005 | Female | 20 to 24 | 14%<br>(7.1-23%)               | 86%<br>(77-93%)          | 0.057<br>(0.026-0.11)                       | 0.65%<br>(0.44-0.9%)                 | 0.36%<br>(0.13-0.7%)                | 1.7<br>(0.62-3.4)    | 900<br>(570-1300)      |
| Saudi Arabia | 2005 | Female | 25 to 29 | 16%<br>(8.5-25%)               | 84%<br>(75-91%)          | 0.073<br>(0.035-0.13)                       | 0.7%<br>(0.51-0.94%)                 | 0.42%<br>(0.15-0.8%)                | 2.6<br>(0.94-5)      | 1100<br>(720-1600)     |
| Saudi Arabia | 2005 | Female | 30 to 34 | 18%<br>(9.9-28%)               | 82%<br>(72-90%)          | 0.088<br>(0.046-0.15)                       | 0.63%<br>(0.43-0.86%)                | 0.46%<br>(0.15-0.85%)               | 2.7<br>(0.91-5.1)    | 950<br>(610-1400)      |
| Saudi Arabia | 2005 | Female | 35 to 39 | 20%<br>(12-30%)                | 80%<br>(70-88%)          | 0.1<br>(0.053-0.17)                         | 0.48%<br>(0.33-0.66%)                | 0.42%<br>(0.13-0.76%)               | 2.6<br>(0.9-4.9)     | 600<br>(370-860)       |
| Saudi Arabia | 2005 | Female | 40 to 44 | 21%<br>(12-32%)                | 79%<br>(68-88%)          | 0.11<br>(0.058-0.19)                        | 0.35%<br>(0.2-0.52%)                 | 0.41%<br>(0.093-0.76%)              | 2.9<br>(0.67-5.4)    | 430<br>(240-660)       |
| Saudi Arabia | 2005 | Female | 45 to 49 | 21%<br>(11-32%)                | 79%<br>(68-89%)          | 0.12<br>(0.055-0.21)                        | 0.2%<br>(0.032-0.35%)                | 0.24%<br>(-0.094-0.55%)             | 1.7<br>(-0.69-3.8)   | 200<br>(29-350)        |
| Saudi Arabia | 2005 | Female | 50 to 54 | 22%<br>(13-34%)                | 78%<br>(66-87%)          | 0.12<br>(0.057-0.22)                        | 0.083%<br>(-0.18-0.27%)              | 0.15%<br>(-0.28-0.48%)              | 1.4<br>(-2.7-4.4)    | 72<br>(-140-230)       |
| Saudi Arabia | 2005 | Female | 55 to 59 | 24%<br>(14-36%)                | 76%<br>(64-86%)          | 0.12<br>(0.056-0.23)                        | -0.055%<br>(-0.37-0.17%)             | 0.0026%<br>(-0.52-0.37%)            | 0.025<br>(-4.4-3.3)  | -38<br>(-260-120)      |
| Saudi Arabia | 2005 | Female | 60 to 64 | 25%<br>(15-39%)                | 75%<br>(61-85%)          | 0.12<br>(0.05-0.23)                         | -0.23%<br>(-0.77-0.15%)              | -0.26%<br>(-0.98-0.24%)             | -7.2<br>(-27-6.7)    | -250<br>(-840-150)     |
| Saudi Arabia | 2005 | Female | 65 to 69 | 26%<br>(17-37%)                | 74%<br>(63-83%)          | 0.1<br>(0.046-0.19)                         | -0.29%<br>(-0.79-0.11%)              | -0.32%<br>(-0.93-0.17%)             | -11<br>(-32-5.7)     | -300<br>(-820-120)     |
| Saudi Arabia | 2005 | Female | 70 to 74 | 25%<br>(16-36%)                | 75%<br>(64-84%)          | 0.081<br>(0.036-0.16)                       | -0.24%<br>(-0.78-0.13%)              | -0.26%<br>(-0.92-0.17%)             | -12<br>(-42-8)       | -250<br>(-840-130)     |
| Saudi Arabia | 2005 | Female | 75 to 79 | 22%<br>(13-34%)                | 78%<br>(66-87%)          | 0.065<br>(0.025-0.13)                       | -0.2%<br>(-0.72-0.12%)               | -0.22%<br>(-0.8-0.16%)              | -11<br>(-41-8.2)     | -180<br>(-610-110)     |
| Saudi Arabia | 2005 | Female | 80 to 84 | 21%<br>(11-33%)                | 79%<br>(67-89%)          | 0.061<br>(0.024-0.11)                       | -0.21%<br>(-0.66-0.12%)              | -0.23%<br>(-0.73-0.14%)             | -13<br>(-41-7.8)     | -140<br>(-440-81)      |
| Saudi Arabia | 2005 | Female | 85 to 89 | 22%<br>(12-37%)                | 78%<br>(63-88%)          | 0.064<br>(0.026-0.13)                       | -0.27%<br>(-0.74-0.034%)             | -0.3%<br>(-0.86-0.039%)             | -11<br>(-32-1.4)     | -88<br>(-250-12)       |
| Saudi Arabia | 2005 | Female | 90 to 94 | 26%<br>(15-40%)                | 74%<br>(60-85%)          | 0.075<br>(0.03-0.16)                        | -0.35%<br>(-0.9-0.015%)              | -0.41%<br>(-1--0.021%)              | -7.4<br>(-19--0.39)  | -39<br>(-97--1.8)      |
| Saudi Arabia | 2005 | Female | 95 plus  | 31%<br>(16-48%)                | 69%<br>(52-84%)          | 0.093<br>(0.03-0.2)                         | -0.46%<br>(-1.1--0.027%)             | -0.56%<br>(-1.4--0.045%)            | -3.8<br>(-9.6--0.31) | -13<br>(-33--0.72)     |
| Saudi Arabia | 2005 | Male   | All Ages | 8%<br>(6.2-10%)                | 92%<br>(90-94%)          | 0.036<br>(0.026-0.049)                      | 0.53%<br>(0.4-0.67%)                 | 0.41%<br>(0.25-0.57%)               | 190<br>(120-270)     | 16000<br>(12000-21000) |
| Saudi Arabia | 2005 | Male   | 15 to 19 | 5.2%<br>(3-8.4%)               | 95%<br>(92-97%)          | 0.013<br>(0.0056-0.026)                     | 0.43%<br>(0.3-0.59%)                 | 0.2%<br>(0.078-0.39%)               | 2.6<br>(1-5)         | 760<br>(490-1100)      |
| Saudi Arabia | 2005 | Male   | 20 to 24 | 8%<br>(4.4-13%)                | 92%<br>(87-96%)          | 0.028<br>(0.013-0.052)                      | 0.89%<br>(0.59-1.3%)                 | 0.37%<br>(0.11-0.81%)               | 6.1<br>(1.7-13)      | 1700<br>(1100-2500)    |
| Saudi Arabia | 2005 | Male   | 25 to 29 | 10%<br>(5.4-16%)               | 90%<br>(84-95%)          | 0.044<br>(0.021-0.078)                      | 1.1%<br>(0.76-1.5%)                  | 0.56%<br>(0.2-1.1%)                 | 10<br>(3.6-20)       | 2400<br>(1600-3400)    |
| Saudi Arabia | 2005 | Male   | 30 to 34 | 12%<br>(6.3-19%)               | 88%<br>(81-94%)          | 0.058<br>(0.031-0.1)                        | 1.1%<br>(0.76-1.4%)                  | 0.66%<br>(0.3-1.2%)                 | 12<br>(5.6-22)       | 2900<br>(2000-4200)    |

| Location     | Year | Sex    | Age      | Prevalence of current drinkers | Prevalence of abstainers | Population average of standard drinks daily | Percent of total attributable deaths | Percent of total attributable DALYs | Attributable deaths | Attributable DALYs  |
|--------------|------|--------|----------|--------------------------------|--------------------------|---------------------------------------------|--------------------------------------|-------------------------------------|---------------------|---------------------|
| Saudi Arabia | 2005 | Male   | 35 to 39 | 13%<br>(7.5-21%)               | 87%<br>(79-92%)          | 0.069<br>(0.036-0.12)                       | 0.97%<br>(0.73-1.3%)                 | 0.8%<br>(0.43-1.3%)                 | 16<br>(8.6-27)      | 2500<br>(1800-3500) |
| Saudi Arabia | 2005 | Male   | 40 to 44 | 14%<br>(8.1-22%)               | 86%<br>(78-92%)          | 0.075<br>(0.038-0.13)                       | 0.84%<br>(0.61-1.1%)                 | 0.79%<br>(0.45-1.2%)                | 15<br>(8.4-24)      | 1700<br>(1200-2400) |
| Saudi Arabia | 2005 | Male   | 45 to 49 | 13%<br>(7.1-21%)               | 87%<br>(79-93%)          | 0.077<br>(0.034-0.14)                       | 0.73%<br>(0.53-0.94%)                | 0.8%<br>(0.47-1.2%)                 | 16<br>(9.4-24)      | 1200<br>(890-1700)  |
| Saudi Arabia | 2005 | Male   | 50 to 54 | 13%<br>(7.2-20%)               | 87%<br>(80-93%)          | 0.074<br>(0.034-0.14)                       | 0.58%<br>(0.39-0.76%)                | 0.67%<br>(0.36-0.96%)               | 14<br>(7.7-21)      | 850<br>(560-1100)   |
| Saudi Arabia | 2005 | Male   | 55 to 59 | 12%<br>(7-19%)                 | 88%<br>(81-93%)          | 0.071<br>(0.032-0.14)                       | 0.47%<br>(0.29-0.65%)                | 0.57%<br>(0.28-0.85%)               | 8.9<br>(4.2-13)     | 410<br>(240-570)    |
| Saudi Arabia | 2005 | Male   | 60 to 64 | 12%<br>(6.8-19%)               | 88%<br>(81-93%)          | 0.064<br>(0.026-0.12)                       | 0.4%<br>(0.16-0.59%)                 | 0.45%<br>(0.15-0.7%)                | 14<br>(4.6-21)      | 440<br>(180-650)    |
| Saudi Arabia | 2005 | Male   | 65 to 69 | 12%<br>(6.8-18%)               | 88%<br>(82-93%)          | 0.053<br>(0.024-0.097)                      | 0.36%<br>(0.15-0.53%)                | 0.43%<br>(0.17-0.65%)               | 16<br>(6.2-24)      | 400<br>(170-590)    |
| Saudi Arabia | 2005 | Male   | 70 to 74 | 10%<br>(6.6-16%)               | 90%<br>(84-93%)          | 0.039<br>(0.018-0.076)                      | 0.38%<br>(0.2-0.53%)                 | 0.47%<br>(0.24-0.64%)               | 20<br>(10-28)       | 380<br>(210-520)    |
| Saudi Arabia | 2005 | Male   | 75 to 79 | 8.9%<br>(5.2-14%)              | 91%<br>(86-95%)          | 0.029<br>(0.011-0.057)                      | 0.35%<br>(0.2-0.46%)                 | 0.42%<br>(0.24-0.56%)               | 17<br>(9.5-22)      | 240<br>(140-320)    |
| Saudi Arabia | 2005 | Male   | 80 to 84 | 7.9%<br>(4.6-13%)              | 92%<br>(87-95%)          | 0.024<br>(0.01-0.045)                       | 0.36%<br>(0.23-0.46%)                | 0.42%<br>(0.27-0.54%)               | 14<br>(9.1-19)      | 150<br>(99-200)     |
| Saudi Arabia | 2005 | Male   | 85 to 89 | 7.9%<br>(4.4-13%)              | 92%<br>(87-96%)          | 0.024<br>(0.01-0.047)                       | 0.25%<br>(0.12-0.34%)                | 0.28%<br>(0.13-0.39%)               | 6.9<br>(3.2-9.4)    | 54<br>(26-73)       |
| Saudi Arabia | 2005 | Male   | 90 to 94 | 9.1%<br>(5.2-15%)              | 91%<br>(85-95%)          | 0.026<br>(0.01-0.054)                       | 0.16%<br>(0.036-0.24%)               | 0.17%<br>(0.021-0.27%)              | 1.8<br>(0.23-2.9)   | 10<br>(2.3-16)      |
| Saudi Arabia | 2005 | Male   | 95 plus  | 11%<br>(5.6-20%)               | 89%<br>(80-94%)          | 0.031<br>(0.0098-0.07)                      | 0.13%<br>(-0.038-0.22%)              | 0.1%<br>(-0.093-0.22%)              | 0.33<br>(-0.3-0.71) | 1.7<br>(-0.5-3)     |
| Saudi Arabia | 2010 | Female | All Ages | 13%<br>(11-16%)                | 87%<br>(84-89%)          | 0.056<br>(0.04-0.075)                       | 0.19%<br>(0.066-0.3%)                | -0.13%<br>(-0.48-0.16%)             | -50<br>(-190-63)    | 4500<br>(1500-7400) |
| Saudi Arabia | 2010 | Female | 15 to 19 | 11%<br>(5.7-17%)               | 89%<br>(83-94%)          | 0.037<br>(0.016-0.074)                      | 0.34%<br>(0.23-0.47%)                | 0.32%<br>(0.17-0.55%)               | 1.2<br>(0.61-2)     | 470<br>(290-700)    |
| Saudi Arabia | 2010 | Female | 20 to 24 | 14%<br>(7-22%)                 | 86%<br>(78-93%)          | 0.06<br>(0.026-0.12)                        | 0.69%<br>(0.46-0.97%)                | 0.4%<br>(0.17-0.77%)                | 1.9<br>(0.79-3.7)   | 1000<br>(670-1600)  |
| Saudi Arabia | 2010 | Female | 25 to 29 | 15%<br>(8.3-25%)               | 85%<br>(75-92%)          | 0.075<br>(0.034-0.13)                       | 0.74%<br>(0.54-1%)                   | 0.48%<br>(0.2-0.9%)                 | 2.8<br>(1.2-5.2)    | 1200<br>(800-1700)  |
| Saudi Arabia | 2010 | Female | 30 to 34 | 18%<br>(9.5-28%)               | 82%<br>(72-90%)          | 0.091<br>(0.045-0.15)                       | 0.66%<br>(0.47-0.9%)                 | 0.52%<br>(0.24-0.91%)               | 3.2<br>(1.5-5.6)    | 1200<br>(790-1800)  |
| Saudi Arabia | 2010 | Female | 35 to 39 | 20%<br>(11-30%)                | 80%<br>(70-89%)          | 0.11<br>(0.054-0.18)                        | 0.5%<br>(0.35-0.67%)                 | 0.47%<br>(0.2-0.84%)                | 3.2<br>(1.3-5.6)    | 860<br>(540-1200)   |
| Saudi Arabia | 2010 | Female | 40 to 44 | 21%<br>(13-32%)                | 79%<br>(68-87%)          | 0.12<br>(0.06-0.2)                          | 0.36%<br>(0.2-0.52%)                 | 0.44%<br>(0.14-0.79%)               | 2.9<br>(0.87-5.1)   | 440<br>(230-670)    |
| Saudi Arabia | 2010 | Female | 45 to 49 | 21%<br>(12-32%)                | 79%<br>(68-88%)          | 0.12<br>(0.059-0.22)                        | 0.21%<br>(0.037-0.36%)               | 0.28%<br>(-0.04-0.61%)              | 2.1<br>(-0.31-4.7)  | 250<br>(43-430)     |
| Saudi Arabia | 2010 | Female | 50 to 54 | 22%<br>(13-34%)                | 78%<br>(66-87%)          | 0.13<br>(0.057-0.23)                        | 0.1%<br>(-0.14-0.28%)                | 0.2%<br>(-0.21-0.52%)               | 2<br>(-2.1-5.2)     | 100<br>(-130-290)   |

| Location     | Year | Sex    | Age      | Prevalence of current drinkers | Prevalence of abstainers | Population average of standard drinks daily | Percent of total attributable deaths | Percent of total attributable DALYs | Attributable deaths | Attributable DALYs     |
|--------------|------|--------|----------|--------------------------------|--------------------------|---------------------------------------------|--------------------------------------|-------------------------------------|---------------------|------------------------|
| Saudi Arabia | 2010 | Female | 55 to 59 | 24%<br>(14-36%)                | 76%<br>(64-86%)          | 0.13<br>(0.058-0.24)                        | -0.032%<br>(-0.34-0.18%)             | 0.051%<br>(-0.46-0.41%)             | 0.5<br>(-4.5-4.2)   | -27<br>(-280-150)      |
| Saudi Arabia | 2010 | Female | 60 to 64 | 25%<br>(15-39%)                | 75%<br>(61-85%)          | 0.12<br>(0.051-0.24)                        | -0.2%<br>(-0.72-0.15%)               | -0.22%<br>(-0.9-0.25%)              | -6.3<br>(-25-7)     | -230<br>(-820-180)     |
| Saudi Arabia | 2010 | Female | 65 to 69 | 26%<br>(16-37%)                | 74%<br>(63-84%)          | 0.11<br>(0.048-0.19)                        | -0.25%<br>(-0.74-0.13%)              | -0.27%<br>(-0.89-0.22%)             | -10<br>(-33-8)      | -290<br>(-880-160)     |
| Saudi Arabia | 2010 | Female | 70 to 74 | 24%<br>(15-35%)                | 76%<br>(65-85%)          | 0.082<br>(0.036-0.16)                       | -0.2%<br>(-0.71-0.14%)               | -0.21%<br>(-0.85-0.2%)              | -9.7<br>(-40-9.4)   | -220<br>(-810-160)     |
| Saudi Arabia | 2010 | Female | 75 to 79 | 21%<br>(12-32%)                | 79%<br>(68-88%)          | 0.064<br>(0.025-0.12)                       | -0.16%<br>(-0.62-0.14%)              | -0.17%<br>(-0.71-0.2%)              | -8<br>(-34-9.5)     | -130<br>(-520-120)     |
| Saudi Arabia | 2010 | Female | 80 to 84 | 20%<br>(11-32%)                | 80%<br>(68-89%)          | 0.06<br>(0.023-0.11)                        | -0.18%<br>(-0.62-0.14%)              | -0.19%<br>(-0.71-0.16%)             | -11<br>(-37-8.8)    | -120<br>(-410-91)      |
| Saudi Arabia | 2010 | Female | 85 to 89 | 22%<br>(12-36%)                | 78%<br>(64-88%)          | 0.065<br>(0.026-0.13)                       | -0.24%<br>(-0.71-0.047%)             | -0.27%<br>(-0.82-0.055%)            | -11<br>(-34-2.4)    | -89<br>(-270-17)       |
| Saudi Arabia | 2010 | Female | 90 to 94 | 25%<br>(14-40%)                | 75%<br>(60-86%)          | 0.076<br>(0.029-0.16)                       | -0.33%<br>(-0.85--0.0066%)           | -0.39%<br>(-1--0.014%)              | -9.2<br>(-24--0.34) | -48<br>(-120--0.95)    |
| Saudi Arabia | 2010 | Female | 95 plus  | 30%<br>(16-48%)                | 70%<br>(52-84%)          | 0.094<br>(0.031-0.21)                       | -0.43%<br>(-1.1--0.011%)             | -0.54%<br>(-1.3--0.033%)            | -4.8<br>(-12--0.3)  | -16<br>(-40--0.38)     |
| Saudi Arabia | 2010 | Male   | All Ages | 8.7%<br>(6.8-11%)              | 91%<br>(89-93%)          | 0.041<br>(0.029-0.057)                      | 0.61%<br>(0.47-0.76%)                | 0.47%<br>(0.29-0.65%)               | 230<br>(140-330)    | 20000<br>(14000-26000) |
| Saudi Arabia | 2010 | Male   | 15 to 19 | 5.4%<br>(3.1-8.7%)             | 95%<br>(91-97%)          | 0.014<br>(0.0059-0.028)                     | 0.45%<br>(0.3-0.62%)                 | 0.23%<br>(0.094-0.43%)              | 2.9<br>(1.2-5.7)    | 810<br>(520-1200)      |
| Saudi Arabia | 2010 | Male   | 20 to 24 | 8.2%<br>(4.6-13%)              | 92%<br>(87-95%)          | 0.03<br>(0.014-0.057)                       | 0.92%<br>(0.62-1.3%)                 | 0.4%<br>(0.12-0.87%)                | 7.9<br>(2.4-17)     | 2100<br>(1300-3200)    |
| Saudi Arabia | 2010 | Male   | 25 to 29 | 10%<br>(5.5-16%)               | 90%<br>(84-95%)          | 0.047<br>(0.022-0.083)                      | 1.1%<br>(0.75-1.4%)                  | 0.59%<br>(0.21-1.1%)                | 13<br>(4.7-26)      | 2700<br>(1800-3900)    |
| Saudi Arabia | 2010 | Male   | 30 to 34 | 12%<br>(6.4-20%)               | 88%<br>(80-94%)          | 0.061<br>(0.031-0.11)                       | 1.1%<br>(0.77-1.4%)                  | 0.69%<br>(0.31-1.3%)                | 14<br>(6.5-26)      | 3000<br>(2100-4400)    |
| Saudi Arabia | 2010 | Male   | 35 to 39 | 14%<br>(7.7-21%)               | 86%<br>(79-92%)          | 0.072<br>(0.037-0.12)                       | 1%<br>(0.76-1.3%)                    | 0.87%<br>(0.48-1.4%)                | 19<br>(11-31)       | 3100<br>(2200-4300)    |
| Saudi Arabia | 2010 | Male   | 40 to 44 | 14%<br>(8.3-23%)               | 86%<br>(77-92%)          | 0.078<br>(0.04-0.14)                        | 0.86%<br>(0.64-1.1%)                 | 0.84%<br>(0.48-1.3%)                | 20<br>(12-31)       | 2400<br>(1700-3300)    |
| Saudi Arabia | 2010 | Male   | 45 to 49 | 14%<br>(7.3-21%)               | 86%<br>(79-93%)          | 0.08<br>(0.037-0.15)                        | 0.75%<br>(0.56-0.96%)                | 0.84%<br>(0.5-1.2%)                 | 20<br>(12-30)       | 1700<br>(1200-2200)    |
| Saudi Arabia | 2010 | Male   | 50 to 54 | 13%<br>(7.3-20%)               | 87%<br>(80-93%)          | 0.077<br>(0.035-0.14)                       | 0.6%<br>(0.41-0.78%)                 | 0.7%<br>(0.39-0.99%)                | 19<br>(11-28)       | 1200<br>(780-1600)     |
| Saudi Arabia | 2010 | Male   | 55 to 59 | 12%<br>(7-19%)                 | 88%<br>(81-93%)          | 0.074<br>(0.033-0.14)                       | 0.48%<br>(0.3-0.65%)                 | 0.59%<br>(0.28-0.88%)               | 15<br>(7-22)        | 710<br>(430-980)       |
| Saudi Arabia | 2010 | Male   | 60 to 64 | 12%<br>(6.7-20%)               | 88%<br>(80-93%)          | 0.068<br>(0.027-0.14)                       | 0.4%<br>(0.17-0.59%)                 | 0.46%<br>(0.16-0.71%)               | 16<br>(5.3-25)      | 500<br>(220-750)       |
| Saudi Arabia | 2010 | Male   | 65 to 69 | 12%<br>(6.9-18%)               | 88%<br>(82-93%)          | 0.057<br>(0.025-0.11)                       | 0.36%<br>(0.15-0.54%)                | 0.43%<br>(0.15-0.65%)               | 15<br>(5.3-23)      | 380<br>(150-560)       |
| Saudi Arabia | 2010 | Male   | 70 to 74 | 11%<br>(6.7-16%)               | 89%<br>(84-93%)          | 0.042<br>(0.018-0.081)                      | 0.38%<br>(0.21-0.54%)                | 0.47%<br>(0.25-0.66%)               | 20<br>(11-28)       | 390<br>(210-540)       |

| Location     | Year | Sex    | Age      | Prevalence of current drinkers | Prevalence of abstainers | Population average of standard drinks daily | Percent of total attributable deaths | Percent of total attributable DALYs | Attributable deaths | Attributable DALYs  |
|--------------|------|--------|----------|--------------------------------|--------------------------|---------------------------------------------|--------------------------------------|-------------------------------------|---------------------|---------------------|
| Saudi Arabia | 2010 | Male   | 75 to 79 | 9.1%<br>(5.3-15%)              | 91%<br>(85-95%)          | 0.031<br>(0.012-0.06)                       | 0.36%<br>(0.21-0.48%)                | 0.43%<br>(0.25-0.59%)               | 18<br>(10-25)       | 270<br>(160-360)    |
| Saudi Arabia | 2010 | Male   | 80 to 84 | 8.2%<br>(4.7-13%)              | 92%<br>(87-95%)          | 0.026<br>(0.011-0.047)                      | 0.36%<br>(0.23-0.47%)                | 0.42%<br>(0.27-0.55%)               | 16<br>(10-21)       | 170<br>(110-230)    |
| Saudi Arabia | 2010 | Male   | 85 to 89 | 8.2%<br>(4.5-13%)              | 92%<br>(87-95%)          | 0.025<br>(0.011-0.052)                      | 0.26%<br>(0.13-0.35%)                | 0.29%<br>(0.14-0.4%)                | 8.7<br>(4.3-12)     | 68<br>(35-93)       |
| Saudi Arabia | 2010 | Male   | 90 to 94 | 9.5%<br>(5.5-15%)              | 91%<br>(85-95%)          | 0.028<br>(0.011-0.059)                      | 0.16%<br>(0.034-0.26%)               | 0.17%<br>(0.021-0.29%)              | 2.6<br>(0.31-4.3)   | 15<br>(3.1-24)      |
| Saudi Arabia | 2010 | Male   | 95 plus  | 12%<br>(5.9-21%)               | 88%<br>(79-94%)          | 0.034<br>(0.011-0.078)                      | 0.13%<br>(-0.044-0.24%)              | 0.11%<br>(-0.11-0.23%)              | 0.48<br>(-0.5-1)    | 2.5<br>(-0.81-4.4)  |
| Saudi Arabia | 2016 | Female | All Ages | 14%<br>(12-17%)                | 86%<br>(83-88%)          | 0.073<br>(0.052-0.099)                      | 0.22%<br>(0.089-0.35%)               | -0.12%<br>(-0.49-0.18%)             | -44<br>(-170-67)    | 5400<br>(2000-8600) |
| Saudi Arabia | 2016 | Female | 15 to 19 | 10%<br>(5.6-17%)               | 90%<br>(83-94%)          | 0.043<br>(0.018-0.09)                       | 0.36%<br>(0.23-0.48%)                | 0.36%<br>(0.19-0.62%)               | 1.1<br>(0.58-1.9)   | 470<br>(300-700)    |
| Saudi Arabia | 2016 | Female | 20 to 24 | 13%<br>(7-22%)                 | 87%<br>(78-93%)          | 0.07<br>(0.029-0.14)                        | 0.73%<br>(0.5-1%)                    | 0.47%<br>(0.21-0.88%)               | 1.8<br>(0.77-3.4)   | 1100<br>(670-1600)  |
| Saudi Arabia | 2016 | Female | 25 to 29 | 15%<br>(8.2-24%)               | 85%<br>(76-92%)          | 0.088<br>(0.038-0.16)                       | 0.77%<br>(0.56-1%)                   | 0.55%<br>(0.24-1%)                  | 2.6<br>(1.1-4.8)    | 1300<br>(850-1900)  |
| Saudi Arabia | 2016 | Female | 30 to 34 | 18%<br>(9.8-28%)               | 82%<br>(72-90%)          | 0.11<br>(0.052-0.18)                        | 0.69%<br>(0.48-0.95%)                | 0.63%<br>(0.32-1%)                  | 3.2<br>(1.6-5.3)    | 1300<br>(810-1800)  |
| Saudi Arabia | 2016 | Female | 35 to 39 | 20%<br>(12-30%)                | 80%<br>(70-88%)          | 0.13<br>(0.062-0.2)                         | 0.53%<br>(0.37-0.71%)                | 0.57%<br>(0.28-0.98%)               | 4.3<br>(2.1-7.3)    | 1100<br>(730-1600)  |
| Saudi Arabia | 2016 | Female | 40 to 44 | 21%<br>(13-32%)                | 79%<br>(68-87%)          | 0.14<br>(0.071-0.23)                        | 0.39%<br>(0.21-0.56%)                | 0.54%<br>(0.21-0.93%)               | 5.1<br>(2-9)        | 790<br>(430-1200)   |
| Saudi Arabia | 2016 | Female | 45 to 49 | 21%<br>(12-32%)                | 79%<br>(68-88%)          | 0.15<br>(0.07-0.25)                         | 0.24%<br>(0.069-0.39%)               | 0.37%<br>(0.026-0.75%)              | 3.2<br>(0.23-6.5)   | 350<br>(100-590)    |
| Saudi Arabia | 2016 | Female | 50 to 54 | 22%<br>(13-34%)                | 78%<br>(66-87%)          | 0.15<br>(0.071-0.27)                        | 0.13%<br>(-0.11-0.32%)               | 0.27%<br>(-0.14-0.62%)              | 3.3<br>(-1.8-7.6)   | 170<br>(-140-430)   |
| Saudi Arabia | 2016 | Female | 55 to 59 | 24%<br>(14-36%)                | 76%<br>(64-86%)          | 0.15<br>(0.07-0.28)                         | -0.012%<br>(-0.3-0.2%)               | 0.12%<br>(-0.37-0.51%)              | 1.4<br>(-4.2-6.3)   | -13<br>(-330-220)   |
| Saudi Arabia | 2016 | Female | 60 to 64 | 25%<br>(15-39%)                | 75%<br>(61-85%)          | 0.15<br>(0.063-0.28)                        | -0.18%<br>(-0.64-0.15%)              | -0.18%<br>(-0.83-0.29%)             | -5.4<br>(-25-8.6)   | -240<br>(-880-200)  |
| Saudi Arabia | 2016 | Female | 65 to 69 | 26%<br>(17-38%)                | 74%<br>(62-83%)          | 0.13<br>(0.058-0.23)                        | -0.24%<br>(-0.73-0.12%)              | -0.26%<br>(-0.9-0.23%)              | -8.8<br>(-31-7.9)   | -290<br>(-860-140)  |
| Saudi Arabia | 2016 | Female | 70 to 74 | 25%<br>(16-36%)                | 75%<br>(64-84%)          | 0.1<br>(0.046-0.19)                         | -0.21%<br>(-0.72-0.14%)              | -0.22%<br>(-0.86-0.22%)             | -9.7<br>(-38-10)    | -240<br>(-820-160)  |
| Saudi Arabia | 2016 | Female | 75 to 79 | 22%<br>(13-33%)                | 78%<br>(67-87%)          | 0.079<br>(0.031-0.15)                       | -0.17%<br>(-0.61-0.13%)              | -0.18%<br>(-0.74-0.19%)             | -7.9<br>(-33-8.4)   | -140<br>(-510-110)  |
| Saudi Arabia | 2016 | Female | 80 to 84 | 21%<br>(11-32%)                | 79%<br>(68-89%)          | 0.073<br>(0.029-0.14)                       | -0.19%<br>(-0.61-0.12%)              | -0.21%<br>(-0.71-0.15%)             | -9.6<br>(-33-7.1)   | -110<br>(-360-71)   |
| Saudi Arabia | 2016 | Female | 85 to 89 | 22%<br>(12-35%)                | 78%<br>(65-88%)          | 0.077<br>(0.032-0.15)                       | -0.25%<br>(-0.72-0.046%)             | -0.29%<br>(-0.84-0.059%)            | -11<br>(-31-2.2)    | -85<br>(-250-16)    |
| Saudi Arabia | 2016 | Female | 90 to 94 | 25%<br>(15-38%)                | 75%<br>(62-85%)          | 0.091<br>(0.037-0.18)                       | -0.35%<br>(-0.85--0.024%)            | -0.42%<br>(-1--0.033%)              | -11<br>(-26--0.84)  | -56<br>(-140--4)    |

| Location     | Year | Sex    | Age      | Prevalence of current drinkers | Prevalence of abstainers | Population average of standard drinks daily | Percent of total attributable deaths | Percent of total attributable DALYs | Attributable deaths | Attributable DALYs     |
|--------------|------|--------|----------|--------------------------------|--------------------------|---------------------------------------------|--------------------------------------|-------------------------------------|---------------------|------------------------|
| Saudi Arabia | 2016 | Female | 95 plus  | 30%<br>(16-48%)                | 70%<br>(52-84%)          | 0.11<br>(0.038-0.25)                        | -0.46%<br>(-1.1--0.026%)             | -0.58%<br>(-1.4--0.057%)            | -6.9<br>(-17--0.66) | -23<br>(-56--1.2)      |
| Saudi Arabia | 2016 | Male   | All Ages | 9%<br>(7.1-11%)                | 91%<br>(89-93%)          | 0.051<br>(0.036-0.072)                      | 0.69%<br>(0.53-0.86%)                | 0.55%<br>(0.34-0.78%)               | 300<br>(180-430)    | 24000<br>(18000-31000) |
| Saudi Arabia | 2016 | Male   | 15 to 19 | 5.2%<br>(3.1-8.5%)             | 95%<br>(92-97%)          | 0.016<br>(0.0063-0.032)                     | 0.49%<br>(0.34-0.69%)                | 0.26%<br>(0.11-0.51%)               | 2.7<br>(1.2-5.1)    | 820<br>(530-1200)      |
| Saudi Arabia | 2016 | Male   | 20 to 24 | 7.9%<br>(4.4-13%)              | 92%<br>(87-96%)          | 0.033<br>(0.015-0.066)                      | 1%<br>(0.69-1.5%)                    | 0.46%<br>(0.14-0.99%)               | 7<br>(2.2-15)       | 2000<br>(1300-3100)    |
| Saudi Arabia | 2016 | Male   | 25 to 29 | 9.9%<br>(5.4-16%)              | 90%<br>(84-95%)          | 0.053<br>(0.024-0.098)                      | 1.2%<br>(0.85-1.6%)                  | 0.67%<br>(0.25-1.3%)                | 13<br>(4.7-24)      | 3000<br>(2000-4200)    |
| Saudi Arabia | 2016 | Male   | 30 to 34 | 12%<br>(6.3-19%)               | 88%<br>(81-94%)          | 0.07<br>(0.034-0.12)                        | 1.2%<br>(0.85-1.5%)                  | 0.78%<br>(0.35-1.4%)                | 14<br>(6.5-25)      | 3200<br>(2100-4500)    |
| Saudi Arabia | 2016 | Male   | 35 to 39 | 13%<br>(7.5-21%)               | 87%<br>(79-92%)          | 0.082<br>(0.042-0.14)                       | 1.1%<br>(0.83-1.4%)                  | 0.98%<br>(0.56-1.6%)                | 20<br>(11-33)       | 3200<br>(2300-4300)    |
| Saudi Arabia | 2016 | Male   | 40 to 44 | 14%<br>(8.2-22%)               | 86%<br>(78-92%)          | 0.09<br>(0.046-0.16)                        | 0.93%<br>(0.68-1.2%)                 | 0.93%<br>(0.54-1.4%)                | 27<br>(15-42)       | 3200<br>(2200-4400)    |
| Saudi Arabia | 2016 | Male   | 45 to 49 | 13%<br>(7.1-21%)               | 87%<br>(79-93%)          | 0.091<br>(0.042-0.16)                       | 0.8%<br>(0.6-1%)                     | 0.92%<br>(0.56-1.3%)                | 33<br>(20-48)       | 2700<br>(1900-3600)    |
| Saudi Arabia | 2016 | Male   | 50 to 54 | 12%<br>(7.2-20%)               | 88%<br>(80-93%)          | 0.088<br>(0.04-0.16)                        | 0.64%<br>(0.44-0.83%)                | 0.76%<br>(0.42-1.1%)                | 31<br>(17-44)       | 1900<br>(1200-2500)    |
| Saudi Arabia | 2016 | Male   | 55 to 59 | 12%<br>(6.9-19%)               | 88%<br>(81-93%)          | 0.084<br>(0.038-0.17)                       | 0.51%<br>(0.31-0.7%)                 | 0.64%<br>(0.3-0.93%)                | 25<br>(12-37)       | 1200<br>(740-1700)     |
| Saudi Arabia | 2016 | Male   | 60 to 64 | 12%<br>(6.6-19%)               | 88%<br>(81-93%)          | 0.077<br>(0.032-0.15)                       | 0.44%<br>(0.21-0.64%)                | 0.51%<br>(0.2-0.8%)                 | 36<br>(13-55)       | 1200<br>(540-1700)     |
| Saudi Arabia | 2016 | Male   | 65 to 69 | 12%<br>(6.8-18%)               | 88%<br>(82-93%)          | 0.064<br>(0.029-0.12)                       | 0.4%<br>(0.17-0.59%)                 | 0.48%<br>(0.19-0.74%)               | 22<br>(8.8-34)      | 560<br>(250-830)       |
| Saudi Arabia | 2016 | Male   | 70 to 74 | 10%<br>(6.5-16%)               | 90%<br>(84-93%)          | 0.047<br>(0.021-0.089)                      | 0.41%<br>(0.24-0.58%)                | 0.51%<br>(0.28-0.73%)               | 20<br>(11-28)       | 380<br>(220-530)       |
| Saudi Arabia | 2016 | Male   | 75 to 79 | 8.9%<br>(5.2-14%)              | 91%<br>(86-95%)          | 0.034<br>(0.013-0.067)                      | 0.39%<br>(0.23-0.53%)                | 0.48%<br>(0.28-0.66%)               | 20<br>(12-27)       | 290<br>(170-400)       |
| Saudi Arabia | 2016 | Male   | 80 to 84 | 7.9%<br>(4.6-13%)              | 92%<br>(87-95%)          | 0.029<br>(0.012-0.054)                      | 0.38%<br>(0.24-0.5%)                 | 0.45%<br>(0.28-0.6%)                | 18<br>(12-25)       | 200<br>(130-270)       |
| Saudi Arabia | 2016 | Male   | 85 to 89 | 8%<br>(4.5-13%)                | 92%<br>(87-96%)          | 0.029<br>(0.012-0.056)                      | 0.28%<br>(0.14-0.39%)                | 0.32%<br>(0.15-0.46%)               | 11<br>(5-15)        | 82<br>(42-120)         |
| Saudi Arabia | 2016 | Male   | 90 to 94 | 9.4%<br>(5.4-15%)              | 91%<br>(85-95%)          | 0.032<br>(0.013-0.067)                      | 0.18%<br>(0.029-0.29%)               | 0.19%<br>(0.014-0.33%)              | 3.6<br>(0.26-6.2)   | 21<br>(3.5-33)         |
| Saudi Arabia | 2016 | Male   | 95 plus  | 12%<br>(5.9-21%)               | 88%<br>(79-94%)          | 0.039<br>(0.012-0.088)                      | 0.15%<br>(-0.043-0.28%)              | 0.12%<br>(-0.11-0.3%)               | 0.78<br>(-0.71-1.9) | 3.8<br>(-1.1-7.5)      |
| Syria        | 1990 | Female | All Ages | 1.5%<br>(1.1-1.9%)             | 99%<br>(98-99%)          | 0.034<br>(0.022-0.048)                      | 0.18%<br>(0.13-0.24%)                | 0.13%<br>(0.054-0.24%)              | 33<br>(14-59)       | 3300<br>(2300-4500)    |
| Syria        | 1990 | Female | 15 to 19 | 1.7%<br>(0.86-2.8%)            | 98%<br>(97-99%)          | 0.038<br>(0.015-0.08)                       | 0.32%<br>(0.18-0.5%)                 | 0.18%<br>(0.08-0.33%)               | 0.78<br>(0.35-1.4)  | 300<br>(160-490)       |
| Syria        | 1990 | Female | 20 to 24 | 2.2%<br>(1.2-3.7%)             | 98%<br>(96-99%)          | 0.065<br>(0.027-0.13)                       | 0.6%<br>(0.39-0.89%)                 | 0.25%<br>(0.094-0.49%)              | 1.1<br>(0.42-2.2)   | 540<br>(330-840)       |



| Location | Year | Sex    | Age      | Prevalence of current drinkers | Prevalence of abstainers | Population average of standard drinks daily | Percent of total attributable deaths | Percent of total attributable DALYs | Attributable deaths    | Attributable DALYs    |
|----------|------|--------|----------|--------------------------------|--------------------------|---------------------------------------------|--------------------------------------|-------------------------------------|------------------------|-----------------------|
| Syria    | 1990 | Female | 25 to 29 | 2.4%<br>(1.2-4%)               | 98%<br>(96-99%)          | 0.073<br>(0.034-0.14)                       | 0.66%<br>(0.46-0.92%)                | 0.33%<br>(0.14-0.61%)               | 1.5<br>(0.61-2.7)      | 540<br>(340-780)      |
| Syria    | 1990 | Female | 30 to 34 | 2.2%<br>(1.1-4%)               | 98%<br>(96-99%)          | 0.072<br>(0.033-0.13)                       | 0.62%<br>(0.42-0.85%)                | 0.39%<br>(0.19-0.69%)               | 1.9<br>(0.88-3.3)      | 460<br>(290-670)      |
| Syria    | 1990 | Female | 35 to 39 | 2.2%<br>(1.1-3.5%)             | 98%<br>(96-99%)          | 0.072<br>(0.033-0.14)                       | 0.49%<br>(0.34-0.68%)                | 0.37%<br>(0.18-0.7%)                | 2.1<br>(0.95-4)        | 350<br>(230-490)      |
| Syria    | 1990 | Female | 40 to 44 | 2.1%<br>(1.2-3.7%)             | 98%<br>(96-99%)          | 0.074<br>(0.031-0.15)                       | 0.43%<br>(0.28-0.65%)                | 0.43%<br>(0.21-0.8%)                | 2.1<br>(1-4)           | 220<br>(140-340)      |
| Syria    | 1990 | Female | 45 to 49 | 2.1%<br>(1-3.4%)               | 98%<br>(97-99%)          | 0.076<br>(0.029-0.16)                       | 0.38%<br>(0.23-0.62%)                | 0.41%<br>(0.15-0.83%)               | 2.3<br>(0.91-4.6)      | 180<br>(110-300)      |
| Syria    | 1990 | Female | 50 to 54 | 2.1%<br>(1.1-3.5%)             | 98%<br>(96-99%)          | 0.075<br>(0.03-0.15)                        | 0.35%<br>(0.18-0.61%)                | 0.41%<br>(0.15-0.82%)               | 3.1<br>(1.1-6.3)       | 180<br>(91-300)       |
| Syria    | 1990 | Female | 55 to 59 | 2.1%<br>(1.1-3.7%)             | 98%<br>(96-99%)          | 0.07<br>(0.027-0.14)                        | 0.29%<br>(0.14-0.49%)                | 0.35%<br>(0.11-0.67%)               | 3.9<br>(1.2-7.5)       | 170<br>(80-300)       |
| Syria    | 1990 | Female | 60 to 64 | 2.2%<br>(1.1-4%)               | 98%<br>(96-99%)          | 0.064<br>(0.023-0.13)                       | 0.24%<br>(0.084-0.46%)               | 0.29%<br>(0.066-0.61%)              | 4<br>(0.88-8.5)        | 140<br>(48-270)       |
| Syria    | 1990 | Female | 65 to 69 | 2.2%<br>(1.1-3.8%)             | 98%<br>(96-99%)          | 0.056<br>(0.022-0.11)                       | 0.18%<br>(0.042-0.35%)               | 0.22%<br>(0.019-0.45%)              | 3.6<br>(0.3-7.4)       | 98<br>(21-190)        |
| Syria    | 1990 | Female | 70 to 74 | 2.1%<br>(1.1-3.7%)             | 98%<br>(96-99%)          | 0.046<br>(0.016-0.097)                      | 0.13%<br>(-0.0027-0.29%)             | 0.16%<br>(-0.028-0.37%)             | 3<br>(-0.57-7)         | 63<br>(-1.2-140)      |
| Syria    | 1990 | Female | 75 to 79 | 1.9%<br>(0.95-3.4%)            | 98%<br>(97-99%)          | 0.038<br>(0.013-0.085)                      | 0.1%<br>(-0.029-0.24%)               | 0.11%<br>(-0.056-0.3%)              | 2.2<br>(-1.5-6)        | 35<br>(-10-86)        |
| Syria    | 1990 | Female | 80 to 84 | 1.7%<br>(0.86-3%)              | 98%<br>(97-99%)          | 0.033<br>(0.011-0.069)                      | 0.08%<br>(-0.017-0.2%)               | 0.087%<br>(-0.038-0.23%)            | 1.4<br>(-0.59-3.6)     | 16<br>(-3.5-40)       |
| Syria    | 1990 | Female | 85 to 89 | 1.7%<br>(0.83-2.9%)            | 98%<br>(97-99%)          | 0.031<br>(0.012-0.068)                      | 0.047%<br>(-0.049-0.15%)             | 0.044%<br>(-0.078-0.17%)            | 0.49<br>(-0.84-1.9)    | 4.7<br>(-4.9-15)      |
| Syria    | 1990 | Female | 90 to 94 | 1.8%<br>(0.94-3.1%)            | 98%<br>(97-99%)          | 0.032<br>(0.011-0.072)                      | 0.023%<br>(-0.078-0.13%)             | 0.012%<br>(-0.12-0.14%)             | 0.062<br>(-0.62-0.73)  | 0.75<br>(-2.5-4.1)    |
| Syria    | 1990 | Female | 95 plus  | 2.2%<br>(1.1-4.2%)             | 98%<br>(96-99%)          | 0.037<br>(0.01-0.092)                       | 0.0044%<br>(-0.14-0.15%)             | -0.021%<br>(-0.2-0.15%)             | -0.035<br>(-0.33-0.26) | 0.032<br>(-0.96-1)    |
| Syria    | 1990 | Male   | All Ages | 4.3%<br>(3.5-5.4%)             | 96%<br>(95-97%)          | 0.21<br>(0.15-0.29)                         | 0.63%<br>(0.4-0.89%)                 | 0.82%<br>(0.38-1.3%)                | 260<br>(120-430)       | 13000<br>(8600-19000) |
| Syria    | 1990 | Male   | 15 to 19 | 3.9%<br>(2.3-6.2%)             | 96%<br>(94-98%)          | 0.11<br>(0.047-0.2)                         | 0.55%<br>(0.33-0.84%)                | 0.45%<br>(0.19-0.94%)               | 3.4<br>(1.5-7.1)       | 610<br>(350-960)      |
| Syria    | 1990 | Male   | 20 to 24 | 6.5%<br>(3.9-10%)              | 93%<br>(90-96%)          | 0.27<br>(0.14-0.46)                         | 1.3%<br>(0.86-2.1%)                  | 1.3%<br>(0.57-2.5%)                 | 11<br>(4.9-22)         | 1400<br>(880-2200)    |
| Syria    | 1990 | Male   | 25 to 29 | 7.9%<br>(4.6-12%)              | 92%<br>(88-95%)          | 0.46<br>(0.24-0.79)                         | 1.9%<br>(1.1-2.9%)                   | 2.3%<br>(1-4.1%)                    | 19<br>(8.4-35)         | 1800<br>(1000-2800)   |
| Syria    | 1990 | Male   | 30 to 34 | 8.3%<br>(4.7-13%)              | 92%<br>(87-95%)          | 0.57<br>(0.3-0.95)                          | 2%<br>(1.2-3.2%)                     | 2.7%<br>(1.3-4.7%)                  | 22<br>(11-38)          | 1700<br>(1000-2700)   |
| Syria    | 1990 | Male   | 35 to 39 | 8.8%<br>(5.2-14%)              | 91%<br>(86-95%)          | 0.64<br>(0.33-1.1)                          | 2.1%<br>(1.3-3.3%)                   | 2.9%<br>(1.4-5.1%)                  | 25<br>(12-42)          | 1600<br>(950-2600)    |
| Syria    | 1990 | Male   | 40 to 44 | 8.8%<br>(5.3-14%)              | 91%<br>(86-95%)          | 0.65<br>(0.32-1.2)                          | 2%<br>(1-3.3%)                       | 2.7%<br>(1.2-4.9%)                  | 21<br>(9-37)           | 1200<br>(620-2000)    |

| Location | Year | Sex    | Age      | Prevalence of current drinkers | Prevalence of abstainers | Population average of standard drinks daily | Percent of total attributable deaths | Percent of total attributable DALYs | Attributable deaths    | Attributable DALYs  |
|----------|------|--------|----------|--------------------------------|--------------------------|---------------------------------------------|--------------------------------------|-------------------------------------|------------------------|---------------------|
| Syria    | 1990 | Male   | 45 to 49 | 8.2%<br>(4.5-13%)              | 92%<br>(87-95%)          | 0.56<br>(0.25-1)                            | 1.7%<br>(0.77-2.9%)                  | 2.2%<br>(0.78-4.1%)                 | 19<br>(6.7-33)         | 930<br>(420-1600)   |
| Syria    | 1990 | Male   | 50 to 54 | 7.6%<br>(4.6-12%)              | 92%<br>(88-95%)          | 0.54<br>(0.26-0.99)                         | 1.5%<br>(0.58-2.7%)                  | 1.9%<br>(0.62-3.5%)                 | 20<br>(6.4-38)         | 860<br>(330-1500)   |
| Syria    | 1990 | Male   | 55 to 59 | 7.1%<br>(4.2-12%)              | 93%<br>(88-96%)          | 0.57<br>(0.26-1)                            | 1.6%<br>(0.64-2.8%)                  | 2%<br>(0.72-3.7%)                   | 30<br>(11-56)          | 1100<br>(440-1900)  |
| Syria    | 1990 | Male   | 60 to 64 | 6.6%<br>(3.7-11%)              | 93%<br>(89-96%)          | 0.51<br>(0.22-0.95)                         | 1.4%<br>(0.47-2.5%)                  | 1.7%<br>(0.51-3.2%)                 | 33<br>(10-63)          | 980<br>(330-1800)   |
| Syria    | 1990 | Male   | 65 to 69 | 6.3%<br>(3.6-10%)              | 94%<br>(90-96%)          | 0.41<br>(0.19-0.75)                         | 1%<br>(0.25-2%)                      | 1.2%<br>(0.26-2.5%)                 | 29<br>(5.9-58)         | 700<br>(170-1400)   |
| Syria    | 1990 | Male   | 70 to 74 | 6%<br>(3.7-9.6%)               | 94%<br>(90-96%)          | 0.3<br>(0.13-0.56)                          | 0.59%<br>(0.067-1.5%)                | 0.69%<br>(0.03-1.8%)                | 15<br>(0.66-39)        | 300<br>(33-750)     |
| Syria    | 1990 | Male   | 75 to 79 | 5.4%<br>(3.1-8.9%)             | 95%<br>(91-97%)          | 0.22<br>(0.09-0.46)                         | 0.33%<br>(-0.057-1%)                 | 0.36%<br>(-0.12-1.2%)               | 7.1<br>(-2.4-24)       | 110<br>(-20-360)    |
| Syria    | 1990 | Male   | 80 to 84 | 4.9%<br>(2.8-7.9%)             | 95%<br>(92-97%)          | 0.18<br>(0.079-0.36)                        | 0.23%<br>(-0.078-0.79%)              | 0.24%<br>(-0.14-0.89%)              | 3.7<br>(-2.1-14)       | 45<br>(-15-150)     |
| Syria    | 1990 | Male   | 85 to 89 | 4.6%<br>(2.5-7.3%)             | 95%<br>(93-98%)          | 0.16<br>(0.067-0.31)                        | 0.14%<br>(-0.11-0.56%)               | 0.12%<br>(-0.18-0.61%)              | 1.3<br>(-1.9-6.4)      | 13<br>(-10-50)      |
| Syria    | 1990 | Male   | 90 to 94 | 4.8%<br>(2.8-7.8%)             | 95%<br>(92-97%)          | 0.15<br>(0.061-0.31)                        | 0.063%<br>(-0.18-0.44%)              | 0.026%<br>(-0.27-0.48%)             | 0.12<br>(-1.2-2.2)     | 1.8<br>(-5.1-13)    |
| Syria    | 1990 | Male   | 95 plus  | 5.7%<br>(3-10%)                | 94%<br>(90-97%)          | 0.16<br>(0.055-0.35)                        | 0.027%<br>(-0.29-0.46%)              | -0.041%<br>(-0.42-0.48%)            | -0.054<br>(-0.57-0.64) | 0.15<br>(-1.6-2.5)  |
| Syria    | 1995 | Female | All Ages | 1.3%<br>(1-1.8%)               | 99%<br>(98-99%)          | 0.032<br>(0.021-0.046)                      | 0.23%<br>(0.17-0.29%)                | 0.16%<br>(0.073-0.27%)              | 41<br>(19-69)          | 4000<br>(2800-5300) |
| Syria    | 1995 | Female | 15 to 19 | 1.5%<br>(0.81-2.4%)            | 99%<br>(98-99%)          | 0.035<br>(0.014-0.07)                       | 0.33%<br>(0.2-0.5%)                  | 0.18%<br>(0.086-0.31%)              | 0.82<br>(0.4-1.5)      | 350<br>(200-560)    |
| Syria    | 1995 | Female | 20 to 24 | 1.9%<br>(1.1-3.1%)             | 98%<br>(97-99%)          | 0.058<br>(0.026-0.11)                       | 0.65%<br>(0.42-0.95%)                | 0.24%<br>(0.11-0.45%)               | 1.1<br>(0.49-2.1)      | 660<br>(400-1000)   |
| Syria    | 1995 | Female | 25 to 29 | 2%<br>(1.2-3.3%)               | 98%<br>(97-99%)          | 0.066<br>(0.032-0.12)                       | 0.69%<br>(0.47-0.95%)                | 0.32%<br>(0.15-0.59%)               | 1.5<br>(0.68-2.7)      | 630<br>(400-920)    |
| Syria    | 1995 | Female | 30 to 34 | 1.9%<br>(1.1-3.2%)             | 98%<br>(97-99%)          | 0.065<br>(0.033-0.12)                       | 0.64%<br>(0.43-0.88%)                | 0.4%<br>(0.21-0.67%)                | 2<br>(1-3.4)           | 540<br>(340-790)    |
| Syria    | 1995 | Female | 35 to 39 | 1.9%<br>(1-3%)                 | 98%<br>(97-99%)          | 0.064<br>(0.031-0.12)                       | 0.51%<br>(0.36-0.69%)                | 0.38%<br>(0.2-0.66%)                | 2.2<br>(1.2-3.8)       | 410<br>(270-570)    |
| Syria    | 1995 | Female | 40 to 44 | 1.8%<br>(1.1-3.1%)             | 98%<br>(97-99%)          | 0.066<br>(0.03-0.13)                        | 0.44%<br>(0.29-0.62%)                | 0.43%<br>(0.22-0.75%)               | 3.1<br>(1.6-5.3)       | 340<br>(210-490)    |
| Syria    | 1995 | Female | 45 to 49 | 1.9%<br>(0.96-3.1%)            | 98%<br>(97-99%)          | 0.07<br>(0.028-0.14)                        | 0.39%<br>(0.24-0.59%)                | 0.41%<br>(0.17-0.8%)                | 2.8<br>(1.2-5.4)       | 220<br>(140-340)    |
| Syria    | 1995 | Female | 50 to 54 | 1.9%<br>(1.1-3.2%)             | 98%<br>(97-99%)          | 0.071<br>(0.029-0.14)                       | 0.36%<br>(0.2-0.58%)                 | 0.42%<br>(0.17-0.79%)               | 3.5<br>(1.4-6.6)       | 200<br>(100-320)    |
| Syria    | 1995 | Female | 55 to 59 | 2%<br>(1-3.5%)                 | 98%<br>(96-99%)          | 0.069<br>(0.027-0.13)                       | 0.3%<br>(0.15-0.52%)                 | 0.36%<br>(0.14-0.7%)                | 4.1<br>(1.5-7.8)       | 180<br>(85-310)     |
| Syria    | 1995 | Female | 60 to 64 | 2.1%<br>(1.1-3.8%)             | 98%<br>(96-99%)          | 0.063<br>(0.024-0.13)                       | 0.25%<br>(0.1-0.47%)                 | 0.31%<br>(0.091-0.62%)              | 5.2<br>(1.5-10)        | 180<br>(70-320)     |

| Location | Year | Sex    | Age      | Prevalence of current drinkers | Prevalence of abstainers | Population average of standard drinks daily | Percent of total attributable deaths | Percent of total attributable DALYs | Attributable deaths   | Attributable DALYs     |
|----------|------|--------|----------|--------------------------------|--------------------------|---------------------------------------------|--------------------------------------|-------------------------------------|-----------------------|------------------------|
| Syria    | 1995 | Female | 65 to 69 | 2.1%<br>(1.1-3.5%)             | 98%<br>(96-99%)          | 0.054<br>(0.022-0.1)                        | 0.19%<br>(0.048-0.35%)               | 0.23%<br>(0.032-0.46%)              | 4.7<br>(0.63-9.5)     | 130<br>(31-240)        |
| Syria    | 1995 | Female | 70 to 74 | 2%<br>(1.1-3.5%)               | 98%<br>(97-99%)          | 0.044<br>(0.017-0.095)                      | 0.14%<br>(0.02-0.29%)                | 0.17%<br>(0.0018-0.35%)             | 4<br>(0.042-8.4)      | 82<br>(12-170)         |
| Syria    | 1995 | Female | 75 to 79 | 1.8%<br>(0.93-3.2%)            | 98%<br>(97-99%)          | 0.036<br>(0.012-0.081)                      | 0.1%<br>(-0.021-0.24%)               | 0.12%<br>(-0.042-0.29%)             | 2.9<br>(-1.1-7.2)     | 47<br>(-11-110)        |
| Syria    | 1995 | Female | 80 to 84 | 1.6%<br>(0.83-2.8%)            | 98%<br>(97-99%)          | 0.032<br>(0.011-0.064)                      | 0.084%<br>(-0.014-0.19%)             | 0.093%<br>(-0.028-0.23%)            | 1.9<br>(-0.59-4.6)    | 22<br>(-3.7-51)        |
| Syria    | 1995 | Female | 85 to 89 | 1.6%<br>(0.82-2.7%)            | 98%<br>(97-99%)          | 0.03<br>(0.011-0.067)                       | 0.049%<br>(-0.046-0.14%)             | 0.047%<br>(-0.07-0.16%)             | 0.67<br>(-1-2.3)      | 6.2<br>(-5.8-18)       |
| Syria    | 1995 | Female | 90 to 94 | 1.7%<br>(0.9-3%)               | 98%<br>(97-99%)          | 0.032<br>(0.011-0.07)                       | 0.025%<br>(-0.073-0.12%)             | 0.015%<br>(-0.11-0.13%)             | 0.097<br>(-0.7-0.87)  | 1<br>(-2.9-4.9)        |
| Syria    | 1995 | Female | 95 plus  | 2.1%<br>(1-4%)                 | 98%<br>(96-99%)          | 0.036<br>(0.01-0.087)                       | 0.0064%<br>(-0.13-0.14%)             | -0.018%<br>(-0.19-0.15%)            | -0.037<br>(-0.38-0.3) | 0.054<br>(-1.1-1.2)    |
| Syria    | 1995 | Male   | All Ages | 4.6%<br>(3.9-5.6%)             | 95%<br>(94-96%)          | 0.24<br>(0.17-0.33)                         | 0.82%<br>(0.51-1.2%)                 | 1%<br>(0.49-1.6%)                   | 340<br>(160-540)      | 17000<br>(11000-24000) |
| Syria    | 1995 | Male   | 15 to 19 | 3.9%<br>(2.4-6%)               | 96%<br>(94-98%)          | 0.11<br>(0.05-0.2)                          | 0.56%<br>(0.35-0.86%)                | 0.47%<br>(0.19-0.93%)               | 4.1<br>(1.7-8.2)      | 730<br>(440-1100)      |
| Syria    | 1995 | Male   | 20 to 24 | 6.4%<br>(4.2-9.3%)             | 94%<br>(91-96%)          | 0.28<br>(0.15-0.47)                         | 1.4%<br>(0.86-2.1%)                  | 1.3%<br>(0.58-2.4%)                 | 13<br>(6.2-26)        | 1700<br>(1100-2700)    |
| Syria    | 1995 | Male   | 25 to 29 | 7.5%<br>(5-11%)                | 92%<br>(89-95%)          | 0.46<br>(0.26-0.76)                         | 1.9%<br>(1.1-2.9%)                   | 2.3%<br>(1.1-4.1%)                  | 22<br>(10-39)         | 2100<br>(1200-3200)    |
| Syria    | 1995 | Male   | 30 to 34 | 8.2%<br>(5.3-12%)              | 92%<br>(88-95%)          | 0.59<br>(0.34-0.97)                         | 2.1%<br>(1.3-3.1%)                   | 2.8%<br>(1.5-4.7%)                  | 26<br>(13-43)         | 2000<br>(1200-3100)    |
| Syria    | 1995 | Male   | 35 to 39 | 9.6%<br>(6.2-14%)              | 90%<br>(86-94%)          | 0.74<br>(0.42-1.2)                          | 2.3%<br>(1.4-3.5%)                   | 3.3%<br>(1.7-5.3%)                  | 32<br>(16-51)         | 2100<br>(1200-3100)    |
| Syria    | 1995 | Male   | 40 to 44 | 10%<br>(6.7-15%)               | 90%<br>(85-93%)          | 0.77<br>(0.43-1.3)                          | 2.3%<br>(1.2-3.5%)                   | 3.2%<br>(1.5-5.1%)                  | 34<br>(16-56)         | 1900<br>(1000-2900)    |
| Syria    | 1995 | Male   | 45 to 49 | 9%<br>(5.5-13%)                | 91%<br>(87-95%)          | 0.64<br>(0.32-1.1)                          | 1.9%<br>(0.91-3.1%)                  | 2.5%<br>(1-4.4%)                    | 27<br>(10-46)         | 1300<br>(610-2100)     |
| Syria    | 1995 | Male   | 50 to 54 | 8.1%<br>(5.2-12%)              | 92%<br>(88-95%)          | 0.6<br>(0.3-1)                              | 1.6%<br>(0.71-2.9%)                  | 2.1%<br>(0.76-3.8%)                 | 25<br>(8.8-46)        | 1100<br>(440-1800)     |
| Syria    | 1995 | Male   | 55 to 59 | 7.6%<br>(4.3-12%)              | 92%<br>(88-96%)          | 0.64<br>(0.3-1.2)                           | 1.8%<br>(0.72-3%)                    | 2.2%<br>(0.82-4%)                   | 34<br>(13-62)         | 1200<br>(480-2100)     |
| Syria    | 1995 | Male   | 60 to 64 | 7.1%<br>(3.9-12%)              | 93%<br>(88-96%)          | 0.58<br>(0.26-1.1)                          | 1.5%<br>(0.54-2.7%)                  | 1.9%<br>(0.59-3.4%)                 | 41<br>(12-77)         | 1200<br>(410-2200)     |
| Syria    | 1995 | Male   | 65 to 69 | 6.9%<br>(4-11%)                | 93%<br>(89-96%)          | 0.46<br>(0.22-0.86)                         | 1.2%<br>(0.34-2.3%)                  | 1.4%<br>(0.35-2.9%)                 | 37<br>(8.9-77)        | 910<br>(260-1800)      |
| Syria    | 1995 | Male   | 70 to 74 | 6.5%<br>(4-10%)                | 94%<br>(90-96%)          | 0.34<br>(0.15-0.62)                         | 0.69%<br>(0.088-1.7%)                | 0.81%<br>(0.047-2%)                 | 23<br>(1.4-58)        | 460<br>(59-1100)       |
| Syria    | 1995 | Male   | 75 to 79 | 5.7%<br>(3.3-9.3%)             | 94%<br>(91-97%)          | 0.25<br>(0.1-0.49)                          | 0.39%<br>(-0.043-1.2%)               | 0.43%<br>(-0.11-1.4%)               | 9.9<br>(-2.5-32)      | 160<br>(-18-470)       |
| Syria    | 1995 | Male   | 80 to 84 | 5.1%<br>(2.9-8.1%)             | 95%<br>(92-97%)          | 0.2<br>(0.084-0.39)                         | 0.27%<br>(-0.061-0.86%)              | 0.29%<br>(-0.13-0.99%)              | 4.9<br>(-2.2-17)      | 59<br>(-15-190)        |

| Location | Year | Sex    | Age      | Prevalence of current drinkers | Prevalence of abstainers | Population average of standard drinks daily | Percent of total attributable deaths | Percent of total attributable DALYs | Attributable deaths    | Attributable DALYs     |
|----------|------|--------|----------|--------------------------------|--------------------------|---------------------------------------------|--------------------------------------|-------------------------------------|------------------------|------------------------|
| Syria    | 1995 | Male   | 85 to 89 | 4.8%<br>(2.6-7.8%)             | 95%<br>(92-97%)          | 0.17<br>(0.073-0.33)                        | 0.16%<br>(-0.12-0.61%)               | 0.15%<br>(-0.2-0.68%)               | 1.8<br>(-2.3-8.1)      | 17<br>(-13-64)         |
| Syria    | 1995 | Male   | 90 to 94 | 5%<br>(2.9-8.1%)               | 95%<br>(92-97%)          | 0.17<br>(0.067-0.33)                        | 0.078%<br>(-0.19-0.47%)              | 0.04%<br>(-0.28-0.51%)              | 0.22<br>(-1.6-2.8)     | 2.6<br>(-6.2-16)       |
| Syria    | 1995 | Male   | 95 plus  | 6.1%<br>(3-11%)                | 94%<br>(89-97%)          | 0.18<br>(0.059-0.38)                        | 0.03%<br>(-0.35-0.52%)               | -0.043%<br>(-0.49-0.54%)            | -0.063<br>(-0.72-0.79) | 0.18<br>(-2-3.1)       |
| Syria    | 2000 | Female | All Ages | 1.4%<br>(1.1-1.8%)             | 99%<br>(98-99%)          | 0.038<br>(0.025-0.055)                      | 0.29%<br>(0.22-0.37%)                | 0.2%<br>(0.088-0.34%)               | 51<br>(22-87)          | 4900<br>(3600-6700)    |
| Syria    | 2000 | Female | 15 to 19 | 1.5%<br>(0.82-2.4%)            | 99%<br>(98-99%)          | 0.04<br>(0.016-0.076)                       | 0.34%<br>(0.21-0.52%)                | 0.2%<br>(0.1-0.34%)                 | 1<br>(0.51-1.7)        | 410<br>(250-650)       |
| Syria    | 2000 | Female | 20 to 24 | 1.9%<br>(1.1-3.1%)             | 98%<br>(97-99%)          | 0.065<br>(0.029-0.13)                       | 0.68%<br>(0.43-1%)                   | 0.28%<br>(0.13-0.54%)               | 1.5<br>(0.64-2.7)      | 800<br>(490-1300)      |
| Syria    | 2000 | Female | 25 to 29 | 2%<br>(1.2-3.3%)               | 98%<br>(97-99%)          | 0.074<br>(0.035-0.13)                       | 0.73%<br>(0.52-1%)                   | 0.37%<br>(0.17-0.66%)               | 1.9<br>(0.85-3.4)      | 780<br>(500-1100)      |
| Syria    | 2000 | Female | 30 to 34 | 2%<br>(1.1-3.2%)               | 98%<br>(97-99%)          | 0.073<br>(0.038-0.13)                       | 0.67%<br>(0.46-0.93%)                | 0.45%<br>(0.24-0.76%)               | 2.4<br>(1.3-4.1)       | 650<br>(420-950)       |
| Syria    | 2000 | Female | 35 to 39 | 1.9%<br>(1.1-3%)               | 98%<br>(97-99%)          | 0.072<br>(0.035-0.13)                       | 0.54%<br>(0.38-0.72%)                | 0.44%<br>(0.24-0.76%)               | 2.7<br>(1.5-4.7)       | 490<br>(320-700)       |
| Syria    | 2000 | Female | 40 to 44 | 1.8%<br>(1.1-3.1%)             | 98%<br>(97-99%)          | 0.074<br>(0.033-0.14)                       | 0.46%<br>(0.31-0.66%)                | 0.49%<br>(0.26-0.84%)               | 3.8<br>(1.9-6.4)       | 410<br>(260-580)       |
| Syria    | 2000 | Female | 45 to 49 | 1.8%<br>(0.93-3%)              | 98%<br>(97-99%)          | 0.078<br>(0.032-0.15)                       | 0.41%<br>(0.26-0.63%)                | 0.46%<br>(0.2-0.86%)                | 4.5<br>(2-8.4)         | 350<br>(210-550)       |
| Syria    | 2000 | Female | 50 to 54 | 1.9%<br>(1.1-3.2%)             | 98%<br>(97-99%)          | 0.08<br>(0.034-0.15)                        | 0.39%<br>(0.22-0.65%)                | 0.47%<br>(0.2-0.89%)                | 4.4<br>(1.9-8.3)       | 250<br>(130-410)       |
| Syria    | 2000 | Female | 55 to 59 | 2%<br>(1-3.5%)                 | 98%<br>(96-99%)          | 0.079<br>(0.032-0.16)                       | 0.34%<br>(0.17-0.59%)                | 0.42%<br>(0.16-0.8%)                | 4.8<br>(1.9-9.2)       | 210<br>(100-360)       |
| Syria    | 2000 | Female | 60 to 64 | 2.1%<br>(1.1-3.8%)             | 98%<br>(96-99%)          | 0.073<br>(0.028-0.15)                       | 0.29%<br>(0.11-0.53%)                | 0.35%<br>(0.11-0.71%)               | 5.6<br>(1.7-11)        | 190<br>(75-350)        |
| Syria    | 2000 | Female | 65 to 69 | 2.1%<br>(1.1-3.6%)             | 98%<br>(96-99%)          | 0.064<br>(0.025-0.12)                       | 0.21%<br>(0.06-0.41%)                | 0.26%<br>(0.057-0.53%)              | 5.9<br>(1.3-12)        | 160<br>(47-310)        |
| Syria    | 2000 | Female | 70 to 74 | 2.1%<br>(1.1-3.6%)             | 98%<br>(96-99%)          | 0.052<br>(0.019-0.11)                       | 0.16%<br>(0.034-0.33%)               | 0.19%<br>(0.02-0.41%)               | 5.2<br>(0.56-11)       | 110<br>(22-220)        |
| Syria    | 2000 | Female | 75 to 79 | 1.9%<br>(0.97-3.3%)            | 98%<br>(97-99%)          | 0.042<br>(0.014-0.092)                      | 0.11%<br>(-0.0095-0.26%)             | 0.13%<br>(-0.031-0.32%)             | 3.7<br>(-0.85-8.9)     | 59<br>(-4.8-130)       |
| Syria    | 2000 | Female | 80 to 84 | 1.7%<br>(0.84-3%)              | 98%<br>(97-99%)          | 0.037<br>(0.012-0.074)                      | 0.095%<br>(-0.0096-0.21%)            | 0.1%<br>(-0.027-0.25%)              | 2.5<br>(-0.65-5.9)     | 29<br>(-2.9-65)        |
| Syria    | 2000 | Female | 85 to 89 | 1.6%<br>(0.81-2.8%)            | 98%<br>(97-99%)          | 0.035<br>(0.013-0.073)                      | 0.057%<br>(-0.033-0.16%)             | 0.056%<br>(-0.059-0.18%)            | 0.93<br>(-0.96-3)      | 8.6<br>(-5.2-24)       |
| Syria    | 2000 | Female | 90 to 94 | 1.8%<br>(0.94-3.1%)            | 98%<br>(97-99%)          | 0.037<br>(0.013-0.077)                      | 0.034%<br>(-0.063-0.15%)             | 0.025%<br>(-0.097-0.16%)            | 0.19<br>(-0.74-1.2)    | 1.6<br>(-2.9-6.9)      |
| Syria    | 2000 | Female | 95 plus  | 2.1%<br>(1-4.1%)               | 98%<br>(96-99%)          | 0.042<br>(0.012-0.1)                        | 0.018%<br>(-0.13-0.18%)              | -0.0073%<br>(-0.19-0.18%)           | -0.017<br>(-0.44-0.42) | 0.17<br>(-1.2-1.7)     |
| Syria    | 2000 | Male   | All Ages | 4.8%<br>(4-5.8%)               | 95%<br>(94-96%)          | 0.28<br>(0.2-0.38)                          | 1%<br>(0.69-1.4%)                    | 1.3%<br>(0.63-2%)                   | 430<br>(210-680)       | 21000<br>(14000-29000) |

| Location | Year | Sex    | Age      | Prevalence of current drinkers | Prevalence of abstainers | Population average of standard drinks daily | Percent of total attributable deaths | Percent of total attributable DALYs | Attributable deaths   | Attributable DALYs  |
|----------|------|--------|----------|--------------------------------|--------------------------|---------------------------------------------|--------------------------------------|-------------------------------------|-----------------------|---------------------|
| Syria    | 2000 | Male   | 15 to 19 | 3.9%<br>(2.4-5.8%)             | 96%<br>(94-98%)          | 0.12<br>(0.053-0.21)                        | 0.59%<br>(0.37-0.9%)                 | 0.5%<br>(0.21-1%)                   | 5.3<br>(2.2-10)       | 890<br>(520-1400)   |
| Syria    | 2000 | Male   | 20 to 24 | 6.4%<br>(4.1-9.3%)             | 94%<br>(91-96%)          | 0.3<br>(0.16-0.51)                          | 1.5%<br>(0.93-2.2%)                  | 1.4%<br>(0.62-2.6%)                 | 17<br>(7.4-31)        | 2100<br>(1300-3200) |
| Syria    | 2000 | Male   | 25 to 29 | 7.5%<br>(4.9-11%)              | 93%<br>(89-95%)          | 0.5<br>(0.29-0.83)                          | 2%<br>(1.3-3%)                       | 2.6%<br>(1.2-4.4%)                  | 27<br>(13-45)         | 2500<br>(1500-3800) |
| Syria    | 2000 | Male   | 30 to 34 | 8.1%<br>(5.3-12%)              | 92%<br>(88-95%)          | 0.65<br>(0.39-1)                            | 2.2%<br>(1.4-3.2%)                   | 3.1%<br>(1.7-5.1%)                  | 29<br>(16-49)         | 2300<br>(1500-3400) |
| Syria    | 2000 | Male   | 35 to 39 | 9.5%<br>(6.3-14%)              | 90%<br>(86-94%)          | 0.81<br>(0.45-1.3)                          | 2.4%<br>(1.5-3.6%)                   | 3.6%<br>(2-5.7%)                    | 36<br>(19-57)         | 2400<br>(1500-3500) |
| Syria    | 2000 | Male   | 40 to 44 | 9.9%<br>(6.5-15%)              | 90%<br>(85-94%)          | 0.84<br>(0.46-1.4)                          | 2.4%<br>(1.4-3.6%)                   | 3.5%<br>(1.7-5.5%)                  | 40<br>(19-63)         | 2300<br>(1300-3300) |
| Syria    | 2000 | Male   | 45 to 49 | 8.9%<br>(5.4-13%)              | 91%<br>(87-95%)          | 0.7<br>(0.36-1.2)                           | 2%<br>(1-3.2%)                       | 2.8%<br>(1.2-4.7%)                  | 39<br>(17-68)         | 1900<br>(960-3100)  |
| Syria    | 2000 | Male   | 50 to 54 | 8.1%<br>(5.3-12%)              | 92%<br>(88-95%)          | 0.66<br>(0.34-1.1)                          | 1.8%<br>(0.84-3%)                    | 2.4%<br>(0.97-4%)                   | 35<br>(14-61)         | 1500<br>(680-2500)  |
| Syria    | 2000 | Male   | 55 to 59 | 7.6%<br>(4.2-13%)              | 92%<br>(87-96%)          | 0.71<br>(0.32-1.3)                          | 1.9%<br>(0.88-3.3%)                  | 2.4%<br>(1-4.2%)                    | 43<br>(18-77)         | 1500<br>(660-2600)  |
| Syria    | 2000 | Male   | 60 to 64 | 7%<br>(3.9-12%)                | 93%<br>(88-96%)          | 0.63<br>(0.26-1.2)                          | 1.6%<br>(0.65-3%)                    | 2%<br>(0.73-3.7%)                   | 45<br>(17-84)         | 1300<br>(520-2400)  |
| Syria    | 2000 | Male   | 65 to 69 | 6.7%<br>(3.9-11%)              | 93%<br>(89-96%)          | 0.5<br>(0.23-0.89)                          | 1.3%<br>(0.4-2.5%)                   | 1.6%<br>(0.42-3.1%)                 | 48<br>(12-94)         | 1200<br>(350-2200)  |
| Syria    | 2000 | Male   | 70 to 74 | 6.3%<br>(3.8-9.9%)             | 94%<br>(90-96%)          | 0.37<br>(0.16-0.68)                         | 0.82%<br>(0.14-1.8%)                 | 0.95%<br>(0.12-2.2%)                | 34<br>(4.2-77)        | 660<br>(110-1400)   |
| Syria    | 2000 | Male   | 75 to 79 | 5.6%<br>(3.3-9%)               | 94%<br>(91-97%)          | 0.27<br>(0.11-0.53)                         | 0.47%<br>(-0.028-1.3%)               | 0.52%<br>(-0.081-1.6%)              | 18<br>(-2.7-52)       | 280<br>(-16-780)    |
| Syria    | 2000 | Male   | 80 to 84 | 5%<br>(2.9-7.9%)               | 95%<br>(92-97%)          | 0.22<br>(0.092-0.41)                        | 0.33%<br>(-0.046-0.91%)              | 0.36%<br>(-0.094-1%)                | 8.6<br>(-2.2-25)      | 100<br>(-14-280)    |
| Syria    | 2000 | Male   | 85 to 89 | 4.7%<br>(2.5-7.9%)             | 95%<br>(92-97%)          | 0.19<br>(0.081-0.35)                        | 0.21%<br>(-0.12-0.68%)               | 0.21%<br>(-0.19-0.77%)              | 3<br>(-2.7-11)        | 27<br>(-15-88)      |
| Syria    | 2000 | Male   | 90 to 94 | 5.1%<br>(2.8-8.5%)             | 95%<br>(92-97%)          | 0.18<br>(0.077-0.36)                        | 0.11%<br>(-0.19-0.57%)               | 0.082%<br>(-0.28-0.62%)             | 0.54<br>(-1.9-4)      | 4.5<br>(-7.5-23)    |
| Syria    | 2000 | Male   | 95 plus  | 6.1%<br>(3.1-11%)              | 94%<br>(89-97%)          | 0.19<br>(0.065-0.41)                        | 0.059%<br>(-0.33-0.63%)              | -0.0082%<br>(-0.47-0.66%)           | -0.015<br>(-0.86-1.2) | 0.43<br>(-2.4-4.5)  |
| Syria    | 2005 | Female | All Ages | 1.4%<br>(1.1-1.8%)             | 99%<br>(98-99%)          | 0.042<br>(0.028-0.059)                      | 0.32%<br>(0.24-0.4%)                 | 0.21%<br>(0.11-0.35%)               | 53<br>(26-89)         | 5500<br>(4000-7300) |
| Syria    | 2005 | Female | 15 to 19 | 1.4%<br>(0.8-2.4%)             | 99%<br>(98-99%)          | 0.041<br>(0.016-0.078)                      | 0.36%<br>(0.22-0.55%)                | 0.23%<br>(0.12-0.38%)               | 1.1<br>(0.58-1.8)     | 440<br>(250-720)    |
| Syria    | 2005 | Female | 20 to 24 | 1.8%<br>(1-3%)                 | 98%<br>(97-99%)          | 0.066<br>(0.03-0.13)                        | 0.74%<br>(0.47-1.1%)                 | 0.32%<br>(0.16-0.59%)               | 1.5<br>(0.73-2.7)     | 920<br>(530-1500)   |
| Syria    | 2005 | Female | 25 to 29 | 2%<br>(1.1-3.2%)               | 98%<br>(97-99%)          | 0.076<br>(0.036-0.14)                       | 0.77%<br>(0.53-1.1%)                 | 0.41%<br>(0.21-0.74%)               | 2.1<br>(1.1-3.8)      | 900<br>(570-1300)   |
| Syria    | 2005 | Female | 30 to 34 | 1.9%<br>(1-3.1%)               | 98%<br>(97-99%)          | 0.076<br>(0.038-0.14)                       | 0.7%<br>(0.49-0.96%)                 | 0.48%<br>(0.27-0.83%)               | 2.3<br>(1.3-4)        | 710<br>(460-1000)   |

| Location | Year | Sex    | Age      | Prevalence of current drinkers | Prevalence of abstainers | Population average of standard drinks daily | Percent of total attributable deaths | Percent of total attributable DALYs | Attributable deaths   | Attributable DALYs     |
|----------|------|--------|----------|--------------------------------|--------------------------|---------------------------------------------|--------------------------------------|-------------------------------------|-----------------------|------------------------|
| Syria    | 2005 | Female | 35 to 39 | 1.8%<br>(1-2.9%)               | 98%<br>(97-99%)          | 0.076<br>(0.036-0.14)                       | 0.57%<br>(0.4-0.76%)                 | 0.48%<br>(0.28-0.81%)               | 2.5<br>(1.4-4.3)      | 540<br>(360-770)       |
| Syria    | 2005 | Female | 40 to 44 | 1.8%<br>(1.1-3%)               | 98%<br>(97-99%)          | 0.078<br>(0.035-0.14)                       | 0.48%<br>(0.33-0.69%)                | 0.53%<br>(0.3-0.9%)                 | 3.4<br>(1.9-5.8)      | 450<br>(290-650)       |
| Syria    | 2005 | Female | 45 to 49 | 1.8%<br>(0.91-2.9%)            | 98%<br>(97-99%)          | 0.082<br>(0.034-0.16)                       | 0.42%<br>(0.28-0.63%)                | 0.49%<br>(0.25-0.9%)                | 4.3<br>(2.1-7.8)      | 370<br>(230-570)       |
| Syria    | 2005 | Female | 50 to 54 | 1.9%<br>(1-3.1%)               | 98%<br>(97-99%)          | 0.083<br>(0.036-0.16)                       | 0.4%<br>(0.24-0.64%)                 | 0.5%<br>(0.24-0.91%)                | 5.4<br>(2.6-10)       | 330<br>(200-530)       |
| Syria    | 2005 | Female | 55 to 59 | 2%<br>(1-3.4%)                 | 98%<br>(97-99%)          | 0.081<br>(0.033-0.16)                       | 0.35%<br>(0.2-0.6%)                  | 0.45%<br>(0.19-0.87%)               | 5.4<br>(2.4-10)       | 240<br>(130-410)       |
| Syria    | 2005 | Female | 60 to 64 | 2.1%<br>(1-3.7%)               | 98%<br>(96-99%)          | 0.076<br>(0.028-0.15)                       | 0.3%<br>(0.13-0.56%)                 | 0.38%<br>(0.14-0.74%)               | 6.4<br>(2.2-13)       | 220<br>(95-410)        |
| Syria    | 2005 | Female | 65 to 69 | 2.1%<br>(1.1-3.6%)             | 98%<br>(96-99%)          | 0.066<br>(0.026-0.13)                       | 0.22%<br>(0.081-0.42%)               | 0.27%<br>(0.072-0.55%)              | 5.7<br>(1.5-12)       | 160<br>(58-300)        |
| Syria    | 2005 | Female | 70 to 74 | 2%<br>(1.1-3.5%)               | 98%<br>(96-99%)          | 0.053<br>(0.02-0.11)                        | 0.17%<br>(0.041-0.35%)               | 0.21%<br>(0.035-0.44%)              | 5.6<br>(0.93-12)      | 120<br>(29-240)        |
| Syria    | 2005 | Female | 75 to 79 | 1.8%<br>(0.94-3.1%)            | 98%<br>(97-99%)          | 0.043<br>(0.015-0.094)                      | 0.12%<br>(-0.0013-0.27%)             | 0.14%<br>(-0.018-0.33%)             | 3.6<br>(-0.5-8.5)     | 59<br>(-0.67-130)      |
| Syria    | 2005 | Female | 80 to 84 | 1.6%<br>(0.82-2.7%)            | 98%<br>(97-99%)          | 0.038<br>(0.013-0.075)                      | 0.097%<br>(-0.003-0.21%)             | 0.11%<br>(-0.02-0.25%)              | 2.6<br>(-0.47-6)      | 31<br>(-0.96-68)       |
| Syria    | 2005 | Female | 85 to 89 | 1.6%<br>(0.81-2.7%)            | 98%<br>(97-99%)          | 0.036<br>(0.014-0.074)                      | 0.059%<br>(-0.03-0.16%)              | 0.059%<br>(-0.051-0.18%)            | 1.2<br>(-0.99-3.6)    | 11<br>(-5.3-29)        |
| Syria    | 2005 | Female | 90 to 94 | 1.7%<br>(0.9-2.9%)             | 98%<br>(97-99%)          | 0.037<br>(0.014-0.078)                      | 0.037%<br>(-0.06-0.15%)              | 0.027%<br>(-0.094-0.17%)            | 0.25<br>(-0.86-1.6)   | 2.1<br>(-3.3-8.9)      |
| Syria    | 2005 | Female | 95 plus  | 2%<br>(0.98-3.9%)              | 98%<br>(96-99%)          | 0.042<br>(0.012-0.1)                        | 0.02%<br>(-0.12-0.17%)               | -0.0048%<br>(-0.18-0.18%)           | -0.014<br>(-0.5-0.53) | 0.24<br>(-1.4-2)       |
| Syria    | 2005 | Male   | All Ages | 4.8%<br>(4-5.8%)               | 95%<br>(94-96%)          | 0.31<br>(0.22-0.41)                         | 1.1%<br>(0.74-1.5%)                  | 1.3%<br>(0.68-2%)                   | 460<br>(240-720)      | 22000<br>(15000-31000) |
| Syria    | 2005 | Male   | 15 to 19 | 3.8%<br>(2.4-5.7%)             | 96%<br>(94-98%)          | 0.12<br>(0.054-0.22)                        | 0.62%<br>(0.39-0.91%)                | 0.55%<br>(0.24-1%)                  | 5.3<br>(2.4-10)       | 930<br>(560-1400)      |
| Syria    | 2005 | Male   | 20 to 24 | 6.2%<br>(4.1-9.3%)             | 94%<br>(91-96%)          | 0.32<br>(0.17-0.53)                         | 1.5%<br>(1-2.2%)                     | 1.6%<br>(0.73-2.9%)                 | 14<br>(6.4-26)        | 2100<br>(1300-3100)    |
| Syria    | 2005 | Male   | 25 to 29 | 7.3%<br>(4.7-11%)              | 93%<br>(89-95%)          | 0.52<br>(0.29-0.87)                         | 2%<br>(1.3-2.9%)                     | 2.8%<br>(1.3-4.5%)                  | 24<br>(12-40)         | 2500<br>(1600-3700)    |
| Syria    | 2005 | Male   | 30 to 34 | 8%<br>(5.2-12%)                | 92%<br>(88-95%)          | 0.67<br>(0.39-1.1)                          | 2.1%<br>(1.4-3%)                     | 3.3%<br>(1.8-5.1%)                  | 24<br>(13-38)         | 2100<br>(1400-3000)    |
| Syria    | 2005 | Male   | 35 to 39 | 9.3%<br>(5.9-13%)              | 91%<br>(87-94%)          | 0.83<br>(0.46-1.4)                          | 2.3%<br>(1.5-3.3%)                   | 3.8%<br>(2.1-5.8%)                  | 32<br>(18-50)         | 2300<br>(1400-3300)    |
| Syria    | 2005 | Male   | 40 to 44 | 9.6%<br>(6.3-14%)              | 90%<br>(86-94%)          | 0.86<br>(0.46-1.5)                          | 2.3%<br>(1.4-3.4%)                   | 3.6%<br>(1.9-5.7%)                  | 39<br>(20-63)         | 2300<br>(1400-3500)    |
| Syria    | 2005 | Male   | 45 to 49 | 8.7%<br>(5.3-13%)              | 91%<br>(87-95%)          | 0.72<br>(0.37-1.2)                          | 2%<br>(1.1-3.2%)                     | 2.9%<br>(1.3-4.7%)                  | 42<br>(19-69)         | 2100<br>(1100-3300)    |
| Syria    | 2005 | Male   | 50 to 54 | 7.8%<br>(5-12%)                | 92%<br>(88-95%)          | 0.67<br>(0.34-1.2)                          | 1.8%<br>(0.89-3%)                    | 2.4%<br>(1-4.1%)                    | 45<br>(20-78)         | 1900<br>(950-3200)     |

| Location | Year | Sex    | Age      | Prevalence of current drinkers | Prevalence of abstainers | Population average of standard drinks daily | Percent of total attributable deaths | Percent of total attributable DALYs | Attributable deaths  | Attributable DALYs  |
|----------|------|--------|----------|--------------------------------|--------------------------|---------------------------------------------|--------------------------------------|-------------------------------------|----------------------|---------------------|
| Syria    | 2005 | Male   | 55 to 59 | 7.4%<br>(4.1-12%)              | 93%<br>(88-96%)          | 0.72<br>(0.33-1.3)                          | 1.9%<br>(0.93-3.3%)                  | 2.4%<br>(1.1-4.3%)                  | 54<br>(24-96)        | 1900<br>(890-3200)  |
| Syria    | 2005 | Male   | 60 to 64 | 6.8%<br>(3.8-11%)              | 93%<br>(89-96%)          | 0.64<br>(0.27-1.2)                          | 1.7%<br>(0.72-3%)                    | 2%<br>(0.84-3.7%)                   | 54<br>(22-98)        | 1600<br>(680-2800)  |
| Syria    | 2005 | Male   | 65 to 69 | 6.6%<br>(3.8-11%)              | 93%<br>(89-96%)          | 0.51<br>(0.24-0.89)                         | 1.3%<br>(0.46-2.5%)                  | 1.6%<br>(0.5-3.1%)                  | 50<br>(15-97)        | 1200<br>(400-2200)  |
| Syria    | 2005 | Male   | 70 to 74 | 6.2%<br>(3.8-9.8%)             | 94%<br>(90-96%)          | 0.37<br>(0.18-0.69)                         | 0.84%<br>(0.16-1.8%)                 | 0.99%<br>(0.14-2.2%)                | 38<br>(5.2-84)       | 750<br>(150-1600)   |
| Syria    | 2005 | Male   | 75 to 79 | 5.5%<br>(3.2-9%)               | 95%<br>(91-97%)          | 0.27<br>(0.12-0.53)                         | 0.49%<br>(-0.012-1.3%)               | 0.55%<br>(-0.067-1.5%)              | 20<br>(-2.4-56)      | 320<br>(-7.4-830)   |
| Syria    | 2005 | Male   | 80 to 84 | 4.8%<br>(2.6-7.9%)             | 95%<br>(92-97%)          | 0.22<br>(0.09-0.4)                          | 0.35%<br>(-0.029-0.94%)              | 0.38%<br>(-0.084-1.1%)              | 11<br>(-2.4-31)      | 130<br>(-11-350)    |
| Syria    | 2005 | Male   | 85 to 89 | 4.5%<br>(2.4-7.5%)             | 95%<br>(93-98%)          | 0.19<br>(0.084-0.36)                        | 0.23%<br>(-0.091-0.73%)              | 0.23%<br>(-0.17-0.82%)              | 4.4<br>(-3.1-15)     | 39<br>(-16-120)     |
| Syria    | 2005 | Male   | 90 to 94 | 4.9%<br>(2.8-8%)               | 95%<br>(92-97%)          | 0.19<br>(0.076-0.36)                        | 0.14%<br>(-0.17-0.62%)               | 0.11%<br>(-0.27-0.68%)              | 0.84<br>(-2.1-5.4)   | 6.5<br>(-8.3-30)    |
| Syria    | 2005 | Male   | 95 plus  | 5.9%<br>(2.9-11%)              | 94%<br>(89-97%)          | 0.2<br>(0.064-0.44)                         | 0.087%<br>(-0.31-0.63%)              | 0.02%<br>(-0.47-0.66%)              | 0.044<br>(-0.99-1.4) | 0.75<br>(-2.6-5.4)  |
| Syria    | 2010 | Female | All Ages | 1.6%<br>(1.2-2.1%)             | 98%<br>(98-99%)          | 0.048<br>(0.03-0.071)                       | 0.34%<br>(0.27-0.43%)                | 0.23%<br>(0.12-0.39%)               | 63<br>(32-110)       | 6700<br>(4800-8800) |
| Syria    | 2010 | Female | 15 to 19 | 1.6%<br>(0.83-2.7%)            | 98%<br>(97-99%)          | 0.044<br>(0.016-0.09)                       | 0.38%<br>(0.22-0.58%)                | 0.27%<br>(0.16-0.45%)               | 1.1<br>(0.64-1.8)    | 450<br>(250-740)    |
| Syria    | 2010 | Female | 20 to 24 | 2.1%<br>(1.1-3.6%)             | 98%<br>(96-99%)          | 0.074<br>(0.03-0.15)                        | 0.76%<br>(0.48-1.1%)                 | 0.37%<br>(0.18-0.7%)                | 1.7<br>(0.82-3.2)    | 1000<br>(610-1600)  |
| Syria    | 2010 | Female | 25 to 29 | 2.3%<br>(1.2-3.9%)             | 98%<br>(96-99%)          | 0.083<br>(0.036-0.16)                       | 0.79%<br>(0.55-1.1%)                 | 0.45%<br>(0.25-0.81%)               | 2.3<br>(1.2-4)       | 1100<br>(720-1700)  |
| Syria    | 2010 | Female | 30 to 34 | 2.2%<br>(1.1-3.8%)             | 98%<br>(96-99%)          | 0.082<br>(0.038-0.15)                       | 0.73%<br>(0.5-1%)                    | 0.52%<br>(0.31-0.87%)               | 2.7<br>(1.6-4.6)     | 960<br>(610-1400)   |
| Syria    | 2010 | Female | 35 to 39 | 2.1%<br>(1.1-3.6%)             | 98%<br>(96-99%)          | 0.083<br>(0.036-0.16)                       | 0.59%<br>(0.41-0.79%)                | 0.52%<br>(0.29-0.93%)               | 3<br>(1.6-5.4)       | 680<br>(450-970)    |
| Syria    | 2010 | Female | 40 to 44 | 2.1%<br>(1.1-3.6%)             | 98%<br>(96-99%)          | 0.086<br>(0.035-0.16)                       | 0.48%<br>(0.33-0.7%)                 | 0.56%<br>(0.3-0.94%)                | 3.7<br>(2-6.4)       | 520<br>(330-750)    |
| Syria    | 2010 | Female | 45 to 49 | 2%<br>(1-3.4%)                 | 98%<br>(97-99%)          | 0.088<br>(0.035-0.18)                       | 0.43%<br>(0.28-0.65%)                | 0.52%<br>(0.26-1%)                  | 4.8<br>(2.4-9.3)     | 450<br>(280-690)    |
| Syria    | 2010 | Female | 50 to 54 | 2.1%<br>(1.1-3.4%)             | 98%<br>(97-99%)          | 0.088<br>(0.035-0.17)                       | 0.4%<br>(0.25-0.64%)                 | 0.53%<br>(0.25-0.98%)               | 6.2<br>(3-12)        | 390<br>(230-620)    |
| Syria    | 2010 | Female | 55 to 59 | 2.1%<br>(1.1-3.8%)             | 98%<br>(96-99%)          | 0.083<br>(0.031-0.17)                       | 0.36%<br>(0.2-0.6%)                  | 0.48%<br>(0.22-0.88%)               | 7<br>(3.2-13)        | 330<br>(190-550)    |
| Syria    | 2010 | Female | 60 to 64 | 2.1%<br>(1.1-3.9%)             | 98%<br>(96-99%)          | 0.075<br>(0.027-0.16)                       | 0.3%<br>(0.15-0.56%)                 | 0.4%<br>(0.15-0.77%)                | 6.8<br>(2.6-13)      | 240<br>(110-430)    |
| Syria    | 2010 | Female | 65 to 69 | 2.1%<br>(1-3.7%)               | 98%<br>(96-99%)          | 0.065<br>(0.025-0.13)                       | 0.23%<br>(0.098-0.43%)               | 0.3%<br>(0.1-0.59%)                 | 6.5<br>(2.2-13)      | 180<br>(76-340)     |
| Syria    | 2010 | Female | 70 to 74 | 2.1%<br>(1.1-3.6%)             | 98%<br>(96-99%)          | 0.053<br>(0.019-0.11)                       | 0.18%<br>(0.057-0.36%)               | 0.23%<br>(0.055-0.46%)              | 6.3<br>(1.5-13)      | 130<br>(41-260)     |

| Location | Year | Sex    | Age      | Prevalence of current drinkers | Prevalence of abstainers | Population average of standard drinks daily | Percent of total attributable deaths | Percent of total attributable DALYs | Attributable deaths    | Attributable DALYs     |
|----------|------|--------|----------|--------------------------------|--------------------------|---------------------------------------------|--------------------------------------|-------------------------------------|------------------------|------------------------|
| Syria    | 2010 | Female | 75 to 79 | 1.9%<br>(0.93-3.3%)            | 98%<br>(97-99%)          | 0.043<br>(0.014-0.093)                      | 0.13%<br>(0.024-0.29%)               | 0.16%<br>(0.013-0.37%)              | 5.3<br>(0.44-12)       | 86<br>(16-190)         |
| Syria    | 2010 | Female | 80 to 84 | 1.7%<br>(0.82-2.9%)            | 98%<br>(97-99%)          | 0.038<br>(0.013-0.078)                      | 0.11%<br>(0.0076-0.23%)              | 0.13%<br>(-0.0073-0.27%)            | 3.6<br>(-0.21-7.7)     | 42<br>(2.8-89)         |
| Syria    | 2010 | Female | 85 to 89 | 1.6%<br>(0.79-2.8%)            | 98%<br>(97-99%)          | 0.036<br>(0.012-0.076)                      | 0.068%<br>(-0.023-0.18%)             | 0.071%<br>(-0.046-0.21%)            | 1.6<br>(-1-4.7)        | 14<br>(-5-37)          |
| Syria    | 2010 | Female | 90 to 94 | 1.8%<br>(0.89-3%)              | 98%<br>(97-99%)          | 0.037<br>(0.013-0.079)                      | 0.047%<br>(-0.05-0.16%)              | 0.038%<br>(-0.085-0.18%)            | 0.42<br>(-0.95-2)      | 3.3<br>(-3.6-11)       |
| Syria    | 2010 | Female | 95 plus  | 2.1%<br>(1-4%)                 | 98%<br>(96-99%)          | 0.042<br>(0.011-0.1)                        | 0.025%<br>(-0.12-0.17%)              | -0.0035%<br>(-0.18-0.18%)           | -0.012<br>(-0.61-0.61) | 0.37<br>(-1.7-2.6)     |
| Syria    | 2010 | Male   | All Ages | 4.9%<br>(4-6.2%)               | 95%<br>(94-96%)          | 0.31<br>(0.2-0.43)                          | 1.1%<br>(0.7-1.5%)                   | 1.2%<br>(0.58-1.9%)                 | 470<br>(220-740)       | 24000<br>(16000-33000) |
| Syria    | 2010 | Male   | 15 to 19 | 3.8%<br>(2.2-6%)               | 96%<br>(94-98%)          | 0.12<br>(0.051-0.23)                        | 0.65%<br>(0.4-0.98%)                 | 0.59%<br>(0.26-1.2%)                | 5.1<br>(2.2-10)        | 950<br>(570-1500)      |
| Syria    | 2010 | Male   | 20 to 24 | 6.3%<br>(3.7-9.8%)             | 94%<br>(90-96%)          | 0.31<br>(0.15-0.55)                         | 1.6%<br>(1-2.3%)                     | 1.6%<br>(0.74-3.2%)                 | 16<br>(7.2-31)         | 2400<br>(1500-3600)    |
| Syria    | 2010 | Male   | 25 to 29 | 7.6%<br>(4.4-11%)              | 92%<br>(89-96%)          | 0.52<br>(0.26-0.9)                          | 2.1%<br>(1.3-3%)                     | 2.8%<br>(1.3-4.9%)                  | 29<br>(14-51)          | 3200<br>(1900-4600)    |
| Syria    | 2010 | Male   | 30 to 34 | 8%<br>(4.5-13%)                | 92%<br>(87-95%)          | 0.65<br>(0.34-1.1)                          | 2.1%<br>(1.3-3.1%)                   | 3.2%<br>(1.6-5.1%)                  | 30<br>(15-49)          | 2700<br>(1700-3900)    |
| Syria    | 2010 | Male   | 35 to 39 | 8.6%<br>(5-13%)                | 91%<br>(87-95%)          | 0.74<br>(0.37-1.3)                          | 2.2%<br>(1.3-3.1%)                   | 3.4%<br>(1.7-5.5%)                  | 34<br>(16-54)          | 2500<br>(1500-3600)    |
| Syria    | 2010 | Male   | 40 to 44 | 8.6%<br>(5.2-14%)              | 91%<br>(86-95%)          | 0.75<br>(0.37-1.3)                          | 2.1%<br>(1.2-3.1%)                   | 3.2%<br>(1.4-5.1%)                  | 37<br>(17-60)          | 2300<br>(1300-3500)    |
| Syria    | 2010 | Male   | 45 to 49 | 8%<br>(4.4-13%)                | 92%<br>(87-96%)          | 0.64<br>(0.28-1.2)                          | 1.8%<br>(0.91-2.8%)                  | 2.6%<br>(1.1-4.3%)                  | 40<br>(17-67)          | 2100<br>(1100-3400)    |
| Syria    | 2010 | Male   | 50 to 54 | 7.4%<br>(4.4-12%)              | 93%<br>(88-96%)          | 0.62<br>(0.28-1.1)                          | 1.7%<br>(0.76-2.7%)                  | 2.2%<br>(0.85-3.9%)                 | 45<br>(17-81)          | 2000<br>(900-3300)     |
| Syria    | 2010 | Male   | 55 to 59 | 6.9%<br>(3.9-11%)              | 93%<br>(89-96%)          | 0.65<br>(0.29-1.2)                          | 1.7%<br>(0.78-2.8%)                  | 2.2%<br>(0.93-3.8%)                 | 56<br>(24-98)          | 2000<br>(970-3400)     |
| Syria    | 2010 | Male   | 60 to 64 | 6.3%<br>(3.6-11%)              | 94%<br>(89-96%)          | 0.58<br>(0.24-1.2)                          | 1.5%<br>(0.62-2.6%)                  | 1.9%<br>(0.71-3.3%)                 | 54<br>(20-96)          | 1600<br>(650-2700)     |
| Syria    | 2010 | Male   | 65 to 69 | 6.1%<br>(3.5-9.7%)             | 94%<br>(90-96%)          | 0.46<br>(0.2-0.86)                          | 1.2%<br>(0.39-2.2%)                  | 1.5%<br>(0.44-2.7%)                 | 46<br>(14-85)          | 1100<br>(370-2100)     |
| Syria    | 2010 | Male   | 70 to 74 | 5.8%<br>(3.6-9.3%)             | 94%<br>(91-96%)          | 0.34<br>(0.15-0.65)                         | 0.77%<br>(0.15-1.6%)                 | 0.91%<br>(0.14-2%)                  | 32<br>(4.8-71)         | 640<br>(120-1400)      |
| Syria    | 2010 | Male   | 75 to 79 | 5.2%<br>(3-8.5%)               | 95%<br>(92-97%)          | 0.25<br>(0.1-0.5)                           | 0.47%<br>(0.013-1.2%)                | 0.53%<br>(-0.042-1.4%)              | 21<br>(-1.7-57)        | 340<br>(9-870)         |
| Syria    | 2010 | Male   | 80 to 84 | 4.6%<br>(2.6-7.4%)             | 95%<br>(93-97%)          | 0.2<br>(0.083-0.4)                          | 0.35%<br>(-0.023-0.9%)               | 0.38%<br>(-0.074-1%)                | 13<br>(-2.6-35)        | 150<br>(-9.2-400)      |
| Syria    | 2010 | Male   | 85 to 89 | 4.3%<br>(2.4-7.1%)             | 96%<br>(93-98%)          | 0.18<br>(0.072-0.35)                        | 0.24%<br>(-0.072-0.74%)              | 0.24%<br>(-0.14-0.86%)              | 5.9<br>(-3.4-21)       | 52<br>(-16-160)        |
| Syria    | 2010 | Male   | 90 to 94 | 4.7%<br>(2.6-7.7%)             | 95%<br>(92-97%)          | 0.17<br>(0.066-0.35)                        | 0.14%<br>(-0.16-0.65%)               | 0.11%<br>(-0.26-0.71%)              | 1.2<br>(-2.8-7.9)      | 9.3<br>(-11-43)        |



| Location | Year | Sex    | Age      | Prevalence of current drinkers | Prevalence of abstainers | Population average of standard drinks daily | Percent of total attributable deaths | Percent of total attributable DALYs | Attributable deaths | Attributable DALYs     |
|----------|------|--------|----------|--------------------------------|--------------------------|---------------------------------------------|--------------------------------------|-------------------------------------|---------------------|------------------------|
| Syria    | 2010 | Male   | 95 plus  | 5.5%<br>(2.9-10%)              | 94%<br>(90-97%)          | 0.18<br>(0.056-0.42)                        | 0.084%<br>(-0.3-0.65%)               | 0.02%<br>(-0.43-0.67%)              | 0.054<br>(-1.1-1.8) | 0.91<br>(-3.2-6.9)     |
| Syria    | 2016 | Female | All Ages | 1.6%<br>(1.2-2.1%)             | 98%<br>(98-99%)          | 0.045<br>(0.023-0.081)                      | 0.22%<br>(0.14-0.33%)                | 0.14%<br>(0.059-0.29%)              | 59<br>(26-110)      | 5700<br>(4000-7800)    |
| Syria    | 2016 | Female | 15 to 19 | 1.6%<br>(0.85-2.7%)            | 98%<br>(97-99%)          | 0.042<br>(0.015-0.095)                      | 0.18%<br>(0.088-0.32%)               | 0.045%<br>(0.018-0.11%)             | 0.93<br>(0.51-1.7)  | 440<br>(250-700)       |
| Syria    | 2016 | Female | 20 to 24 | 2.2%<br>(1.1-3.6%)             | 98%<br>(96-99%)          | 0.071<br>(0.025-0.16)                       | 0.4%<br>(0.21-0.68%)                 | 0.074%<br>(0.025-0.19%)             | 1.2<br>(0.53-2.4)   | 750<br>(440-1200)      |
| Syria    | 2016 | Female | 25 to 29 | 2.3%<br>(1.2-3.9%)             | 98%<br>(96-99%)          | 0.079<br>(0.029-0.17)                       | 0.51%<br>(0.3-0.8%)                  | 0.13%<br>(0.047-0.31%)              | 1.4<br>(0.69-2.8)   | 750<br>(470-1100)      |
| Syria    | 2016 | Female | 30 to 34 | 2.2%<br>(1.1-3.8%)             | 98%<br>(96-99%)          | 0.077<br>(0.03-0.15)                        | 0.49%<br>(0.3-0.76%)                 | 0.17%<br>(0.07-0.37%)               | 2.1<br>(1.2-3.7)    | 770<br>(490-1100)      |
| Syria    | 2016 | Female | 35 to 39 | 2.1%<br>(1.1-3.5%)             | 98%<br>(97-99%)          | 0.077<br>(0.03-0.16)                        | 0.43%<br>(0.28-0.63%)                | 0.21%<br>(0.093-0.43%)              | 2.6<br>(1.4-4.5)    | 630<br>(400-900)       |
| Syria    | 2016 | Female | 40 to 44 | 2.1%<br>(1.1-3.7%)             | 98%<br>(96-99%)          | 0.08<br>(0.029-0.17)                        | 0.39%<br>(0.24-0.58%)                | 0.28%<br>(0.14-0.56%)               | 3.3<br>(1.7-5.8)    | 480<br>(290-720)       |
| Syria    | 2016 | Female | 45 to 49 | 2%<br>(1-3.4%)                 | 98%<br>(97-99%)          | 0.083<br>(0.028-0.19)                       | 0.35%<br>(0.22-0.56%)                | 0.31%<br>(0.13-0.64%)               | 4.1<br>(1.9-8.5)    | 420<br>(250-670)       |
| Syria    | 2016 | Female | 50 to 54 | 2.1%<br>(1.1-3.5%)             | 98%<br>(96-99%)          | 0.081<br>(0.029-0.18)                       | 0.33%<br>(0.2-0.54%)                 | 0.35%<br>(0.15-0.7%)                | 5.9<br>(2.7-12)     | 400<br>(240-670)       |
| Syria    | 2016 | Female | 55 to 59 | 2.1%<br>(1.1-3.7%)             | 98%<br>(96-99%)          | 0.076<br>(0.027-0.16)                       | 0.3%<br>(0.16-0.51%)                 | 0.35%<br>(0.15-0.68%)               | 6.7<br>(2.8-13)     | 330<br>(180-570)       |
| Syria    | 2016 | Female | 60 to 64 | 2.1%<br>(1.1-3.9%)             | 98%<br>(96-99%)          | 0.069<br>(0.024-0.16)                       | 0.26%<br>(0.11-0.47%)                | 0.31%<br>(0.11-0.64%)               | 7.5<br>(2.7-15)     | 280<br>(130-510)       |
| Syria    | 2016 | Female | 65 to 69 | 2.2%<br>(1.1-3.8%)             | 98%<br>(96-99%)          | 0.062<br>(0.02-0.13)                        | 0.2%<br>(0.075-0.4%)                 | 0.25%<br>(0.07-0.52%)               | 5.9<br>(1.5-12)     | 170<br>(63-330)        |
| Syria    | 2016 | Female | 70 to 74 | 2.1%<br>(1.1-3.6%)             | 98%<br>(96-99%)          | 0.051<br>(0.017-0.12)                       | 0.17%<br>(0.046-0.34%)               | 0.21%<br>(0.042-0.45%)              | 5.9<br>(1.2-12)     | 130<br>(36-250)        |
| Syria    | 2016 | Female | 75 to 79 | 1.9%<br>(0.95-3.3%)            | 98%<br>(97-99%)          | 0.042<br>(0.012-0.1)                        | 0.13%<br>(0.02-0.29%)                | 0.15%<br>(0.0043-0.37%)             | 5.1<br>(0.14-12)    | 84<br>(14-190)         |
| Syria    | 2016 | Female | 80 to 84 | 1.7%<br>(0.83-3%)              | 98%<br>(97-99%)          | 0.037<br>(0.011-0.083)                      | 0.1%<br>(0.001-0.25%)                | 0.12%<br>(-0.014-0.29%)             | 4<br>(-0.46-10)     | 48<br>(0.5-110)        |
| Syria    | 2016 | Female | 85 to 89 | 1.7%<br>(0.81-2.9%)            | 98%<br>(97-99%)          | 0.035<br>(0.011-0.08)                       | 0.065%<br>(-0.031-0.2%)              | 0.065%<br>(-0.053-0.23%)            | 2.1<br>(-1.7-7.5)   | 20<br>(-9.2-61)        |
| Syria    | 2016 | Female | 90 to 94 | 1.8%<br>(0.93-3.1%)            | 98%<br>(97-99%)          | 0.036<br>(0.011-0.082)                      | 0.04%<br>(-0.065-0.17%)              | 0.03%<br>(-0.1-0.19%)               | 0.48<br>(-1.6-3.1)  | 4.1<br>(-6.4-17)       |
| Syria    | 2016 | Female | 95 plus  | 2.2%<br>(1-4.1%)               | 98%<br>(96-99%)          | 0.041<br>(0.01-0.11)                        | 0.018%<br>(-0.11-0.18%)              | -0.009%<br>(-0.17-0.19%)            | -0.06<br>(-1.2-1.2) | 0.5<br>(-3.1-4.8)      |
| Syria    | 2016 | Male   | All Ages | 5%<br>(4-6.2%)                 | 95%<br>(94-96%)          | 0.29<br>(0.16-0.5)                          | 0.51%<br>(0.25-0.9%)                 | 0.56%<br>(0.17-1.1%)                | 410<br>(130-720)    | 20000<br>(11000-31000) |
| Syria    | 2016 | Male   | 15 to 19 | 3.8%<br>(2.2-6.1%)             | 96%<br>(94-98%)          | 0.11<br>(0.041-0.25)                        | 0.19%<br>(0.088-0.4%)                | 0.092%<br>(0.026-0.25%)             | 5.1<br>(2.1-11)     | 930<br>(530-1500)      |
| Syria    | 2016 | Male   | 20 to 24 | 6.4%<br>(3.7-10%)              | 94%<br>(90-96%)          | 0.29<br>(0.12-0.59)                         | 0.32%<br>(0.14-0.72%)                | 0.17%<br>(0.043-0.48%)              | 13<br>(5.1-29)      | 1900<br>(1100-3100)    |

| Location | Year | Sex    | Age      | Prevalence of current drinkers | Prevalence of abstainers | Population average of standard drinks daily | Percent of total attributable deaths | Percent of total attributable DALYs | Attributable deaths | Attributable DALYs  |
|----------|------|--------|----------|--------------------------------|--------------------------|---------------------------------------------|--------------------------------------|-------------------------------------|---------------------|---------------------|
| Syria    | 2016 | Male   | 25 to 29 | 7.7%<br>(4.5-12%)              | 92%<br>(88-95%)          | 0.51<br>(0.21-0.97)                         | 0.53%<br>(0.23-1.1%)                 | 0.35%<br>(0.094-0.97%)              | 19<br>(7.1-36)      | 2200<br>(1200-3300) |
| Syria    | 2016 | Male   | 30 to 34 | 8.1%<br>(4.6-13%)              | 92%<br>(87-95%)          | 0.62<br>(0.29-1.2)                          | 0.67%<br>(0.31-1.4%)                 | 0.5%<br>(0.16-1.3%)                 | 22<br>(9.3-39)      | 2100<br>(1200-3200) |
| Syria    | 2016 | Male   | 35 to 39 | 8.6%<br>(5-14%)                | 91%<br>(86-95%)          | 0.7<br>(0.3-1.3)                            | 0.88%<br>(0.44-1.6%)                 | 0.78%<br>(0.27-1.8%)                | 26<br>(11-46)       | 2100<br>(1200-3100) |
| Syria    | 2016 | Male   | 40 to 44 | 8.7%<br>(5.3-14%)              | 91%<br>(86-95%)          | 0.71<br>(0.29-1.4)                          | 1.1%<br>(0.52-1.8%)                  | 1.1%<br>(0.38-2.2%)                 | 29<br>(11-50)       | 1900<br>(960-3000)  |
| Syria    | 2016 | Male   | 45 to 49 | 8.1%<br>(4.5-13%)              | 92%<br>(87-96%)          | 0.61<br>(0.24-1.2)                          | 1.1%<br>(0.51-1.9%)                  | 1.3%<br>(0.41-2.4%)                 | 32<br>(11-59)       | 1700<br>(790-3000)  |
| Syria    | 2016 | Male   | 50 to 54 | 7.5%<br>(4.5-12%)              | 93%<br>(88-96%)          | 0.58<br>(0.24-1.2)                          | 1.2%<br>(0.45-2%)                    | 1.4%<br>(0.4-2.6%)                  | 39<br>(12-74)       | 1800<br>(680-3100)  |
| Syria    | 2016 | Male   | 55 to 59 | 6.9%<br>(4-11%)                | 93%<br>(89-96%)          | 0.61<br>(0.24-1.3)                          | 1.3%<br>(0.46-2.2%)                  | 1.5%<br>(0.44-2.8%)                 | 51<br>(15-96)       | 1900<br>(670-3300)  |
| Syria    | 2016 | Male   | 60 to 64 | 6.4%<br>(3.5-11%)              | 94%<br>(89-96%)          | 0.55<br>(0.2-1.1)                           | 1.2%<br>(0.38-2.1%)                  | 1.4%<br>(0.4-2.6%)                  | 56<br>(17-100)      | 1700<br>(570-3000)  |
| Syria    | 2016 | Male   | 65 to 69 | 6.1%<br>(3.5-9.7%)             | 94%<br>(90-96%)          | 0.43<br>(0.17-0.88)                         | 0.96%<br>(0.24-1.9%)                 | 1.1%<br>(0.23-2.3%)                 | 45<br>(9.2-93)      | 1100<br>(270-2200)  |
| Syria    | 2016 | Male   | 70 to 74 | 5.8%<br>(3.6-9.2%)             | 94%<br>(91-96%)          | 0.32<br>(0.13-0.67)                         | 0.64%<br>(0.038-1.5%)                | 0.73%<br>(0.0045-1.8%)              | 30<br>(0.19-73)     | 590<br>(36-1400)    |
| Syria    | 2016 | Male   | 75 to 79 | 5.2%<br>(3-8.4%)               | 95%<br>(92-97%)          | 0.24<br>(0.082-0.52)                        | 0.4%<br>(-0.044-1.1%)                | 0.44%<br>(-0.11-1.3%)               | 18<br>(-4.3-55)     | 280<br>(-31-800)    |
| Syria    | 2016 | Male   | 80 to 84 | 4.6%<br>(2.5-7.5%)             | 95%<br>(92-97%)          | 0.19<br>(0.068-0.4)                         | 0.3%<br>(-0.064-0.92%)               | 0.32%<br>(-0.12-1%)                 | 10<br>(-3.7-33)     | 120<br>(-26-360)    |
| Syria    | 2016 | Male   | 85 to 89 | 4.3%<br>(2.3-7%)               | 96%<br>(93-98%)          | 0.17<br>(0.057-0.36)                        | 0.22%<br>(-0.077-0.81%)              | 0.21%<br>(-0.14-0.9%)               | 6.8<br>(-4.4-28)    | 60<br>(-21-220)     |
| Syria    | 2016 | Male   | 90 to 94 | 4.6%<br>(2.7-7.6%)             | 95%<br>(92-97%)          | 0.16<br>(0.056-0.35)                        | 0.13%<br>(-0.15-0.65%)               | 0.1%<br>(-0.23-0.72%)               | 1.6<br>(-3.7-11)    | 12<br>(-14-62)      |
| Syria    | 2016 | Male   | 95 plus  | 5.5%<br>(2.9-9.9%)             | 94%<br>(90-97%)          | 0.17<br>(0.05-0.44)                         | 0.077%<br>(-0.29-0.64%)              | 0.017%<br>(-0.41-0.67%)             | 0.076<br>(-1.9-3)   | 1.4<br>(-5-12)      |
| Tunisia  | 1990 | Female | All Ages | 2%<br>(1.5-2.6%)               | 98%<br>(97-98%)          | 0.029<br>(0.021-0.038)                      | 0.19%<br>(0.14-0.25%)                | 0.098%<br>(0.012-0.21%)             | 18<br>(2.2-39)      | 2300<br>(1600-3100) |
| Tunisia  | 1990 | Female | 15 to 19 | 2%<br>(1-3.4%)                 | 98%<br>(97-99%)          | 0.027<br>(0.011-0.052)                      | 0.34%<br>(0.2-0.52%)                 | 0.18%<br>(0.096-0.31%)              | 0.39<br>(0.2-0.67)  | 170<br>(98-280)     |
| Tunisia  | 1990 | Female | 20 to 24 | 2.7%<br>(1.3-4.6%)             | 97%<br>(95-99%)          | 0.045<br>(0.019-0.088)                      | 0.68%<br>(0.44-1%)                   | 0.26%<br>(0.13-0.45%)               | 0.66<br>(0.34-1.2)  | 380<br>(220-600)    |
| Tunisia  | 1990 | Female | 25 to 29 | 2.9%<br>(1.3-5.3%)             | 97%<br>(95-99%)          | 0.049<br>(0.021-0.092)                      | 0.7%<br>(0.5-0.95%)                  | 0.34%<br>(0.2-0.55%)                | 0.95<br>(0.54-1.6)  | 390<br>(250-570)    |
| Tunisia  | 1990 | Female | 30 to 34 | 2.8%<br>(1.2-5.2%)             | 97%<br>(95-99%)          | 0.049<br>(0.022-0.092)                      | 0.64%<br>(0.45-0.88%)                | 0.38%<br>(0.23-0.6%)                | 1.2<br>(0.7-1.9)    | 340<br>(220-510)    |
| Tunisia  | 1990 | Female | 35 to 39 | 2.7%<br>(1.2-4.8%)             | 97%<br>(95-99%)          | 0.051<br>(0.022-0.094)                      | 0.51%<br>(0.36-0.69%)                | 0.37%<br>(0.23-0.58%)               | 1.2<br>(0.75-2)     | 260<br>(160-360)    |
| Tunisia  | 1990 | Female | 40 to 44 | 2.6%<br>(1.3-4.8%)             | 97%<br>(95-99%)          | 0.052<br>(0.023-0.095)                      | 0.42%<br>(0.28-0.59%)                | 0.41%<br>(0.24-0.62%)               | 1.3<br>(0.78-2.1)   | 170<br>(100-240)    |

| Location | Year | Sex    | Age      | Prevalence of current drinkers | Prevalence of abstainers | Population average of standard drinks daily | Percent of total attributable deaths | Percent of total attributable DALYs | Attributable deaths   | Attributable DALYs    |
|----------|------|--------|----------|--------------------------------|--------------------------|---------------------------------------------|--------------------------------------|-------------------------------------|-----------------------|-----------------------|
| Tunisia  | 1990 | Female | 45 to 49 | 2.6%<br>(1.2-4.5%)             | 97%<br>(96-99%)          | 0.055<br>(0.023-0.1)                        | 0.35%<br>(0.23-0.49%)                | 0.36%<br>(0.2-0.61%)                | 1.5<br>(0.79-2.5)     | 140<br>(89-200)       |
| Tunisia  | 1990 | Female | 50 to 54 | 2.8%<br>(1.3-5%)               | 97%<br>(95-99%)          | 0.057<br>(0.025-0.12)                       | 0.3%<br>(0.18-0.43%)                 | 0.35%<br>(0.17-0.59%)               | 2.2<br>(1.1-3.8)      | 140<br>(88-220)       |
| Tunisia  | 1990 | Female | 55 to 59 | 2.9%<br>(1.4-5.5%)             | 97%<br>(95-99%)          | 0.057<br>(0.023-0.11)                       | 0.23%<br>(0.11-0.37%)                | 0.28%<br>(0.095-0.52%)              | 2.5<br>(0.81-4.7)     | 120<br>(62-200)       |
| Tunisia  | 1990 | Female | 60 to 64 | 2.9%<br>(1.4-5.4%)             | 97%<br>(95-99%)          | 0.051<br>(0.02-0.1)                         | 0.16%<br>(0.008-0.32%)               | 0.19%<br>(-0.022-0.47%)             | 2.1<br>(-0.24-5.2)    | 79<br>(3.4-160)       |
| Tunisia  | 1990 | Female | 65 to 69 | 2.9%<br>(1.4-5%)               | 97%<br>(95-99%)          | 0.044<br>(0.018-0.085)                      | 0.1%<br>(-0.044-0.26%)               | 0.12%<br>(-0.087-0.38%)             | 1.8<br>(-1.3-5.6)     | 53<br>(-23-140)       |
| Tunisia  | 1990 | Female | 70 to 74 | 2.7%<br>(1.3-4.9%)             | 97%<br>(95-99%)          | 0.036<br>(0.014-0.079)                      | 0.06%<br>(-0.081-0.22%)              | 0.07%<br>(-0.12-0.32%)              | 1.1<br>(-1.9-5.1)     | 26<br>(-34-97)        |
| Tunisia  | 1990 | Female | 75 to 79 | 2.4%<br>(1.1-4.5%)             | 98%<br>(96-99%)          | 0.03<br>(0.011-0.064)                       | 0.043%<br>(-0.12-0.19%)              | 0.047%<br>(-0.16-0.25%)             | 0.94<br>(-3.1-5)      | 16<br>(-42-73)        |
| Tunisia  | 1990 | Female | 80 to 84 | 2.2%<br>(1-3.9%)               | 98%<br>(96-99%)          | 0.026<br>(0.0093-0.053)                     | 0.029%<br>(-0.1-0.17%)               | 0.027%<br>(-0.14-0.21%)             | 0.41<br>(-2.1-3.2)    | 5.9<br>(-21-34)       |
| Tunisia  | 1990 | Female | 85 to 89 | 2.1%<br>(1-3.9%)               | 98%<br>(96-99%)          | 0.025<br>(0.0098-0.05)                      | 0.007%<br>(-0.12-0.13%)              | -0.0021%<br>(-0.17-0.15%)           | -0.022<br>(-1.6-1.5)  | 0.66<br>(-11-12)      |
| Tunisia  | 1990 | Female | 90 to 94 | 2.4%<br>(1.2-4.4%)             | 98%<br>(96-99%)          | 0.027<br>(0.01-0.057)                       | -0.018%<br>(-0.16-0.1%)              | -0.038%<br>(-0.21-0.12%)            | -0.18<br>(-0.99-0.55) | -0.52<br>(-4.5-3)     |
| Tunisia  | 1990 | Female | 95 plus  | 3.1%<br>(1.3-6.3%)             | 97%<br>(94-99%)          | 0.033<br>(0.0098-0.078)                     | -0.045%<br>(-0.24-0.091%)            | -0.08%<br>(-0.32-0.092%)            | -0.11<br>(-0.46-0.13) | -0.26<br>(-1.4-0.54)  |
| Tunisia  | 1990 | Male   | All Ages | 9.4%<br>(7.4-12%)              | 91%<br>(88-93%)          | 0.37<br>(0.33-0.42)                         | 0.98%<br>(0.7-1.3%)                  | 1.1%<br>(0.59-1.7%)                 | 280<br>(150-440)      | 14000<br>(9700-19000) |
| Tunisia  | 1990 | Male   | 15 to 19 | 7.7%<br>(4.5-12%)              | 92%<br>(88-95%)          | 0.17<br>(0.08-0.32)                         | 0.94%<br>(0.58-1.5%)                 | 1.1%<br>(0.49-2.1%)                 | 4.5<br>(2-8.7)        | 580<br>(340-920)      |
| Tunisia  | 1990 | Male   | 20 to 24 | 13%<br>(7.5-20%)               | 87%<br>(80-92%)          | 0.46<br>(0.24-0.75)                         | 2.3%<br>(1.5-3.5%)                   | 2.8%<br>(1.4-5.1%)                  | 13<br>(6.5-24)        | 1400<br>(900-2200)    |
| Tunisia  | 1990 | Male   | 25 to 29 | 16%<br>(9.5-24%)               | 84%<br>(76-90%)          | 0.73<br>(0.41-1.1)                          | 3%<br>(1.9-4.4%)                     | 4.3%<br>(2.2-6.9%)                  | 22<br>(11-35)         | 1900<br>(1100-2800)   |
| Tunisia  | 1990 | Male   | 30 to 34 | 17%<br>(9.8-26%)               | 83%<br>(74-90%)          | 0.84<br>(0.49-1.3)                          | 3%<br>(1.9-4.6%)                     | 4.5%<br>(2.5-7.3%)                  | 23<br>(13-38)         | 1800<br>(1100-2600)   |
| Tunisia  | 1990 | Male   | 35 to 39 | 18%<br>(10-26%)                | 82%<br>(74-90%)          | 0.88<br>(0.5-1.4)                           | 2.9%<br>(1.7-4.4%)                   | 4.4%<br>(2.3-7.1%)                  | 22<br>(11-37)         | 1500<br>(890-2300)    |
| Tunisia  | 1990 | Male   | 40 to 44 | 17%<br>(11-26%)                | 83%<br>(74-89%)          | 0.89<br>(0.46-1.5)                          | 2.8%<br>(1.4-4.4%)                   | 4.1%<br>(1.9-6.9%)                  | 19<br>(8.7-33)        | 1100<br>(570-1800)    |
| Tunisia  | 1990 | Male   | 45 to 49 | 15%<br>(8.5-24%)               | 85%<br>(76-92%)          | 0.84<br>(0.4-1.4)                           | 2.6%<br>(1.3-4.3%)                   | 3.8%<br>(1.7-6.3%)                  | 23<br>(10-40)         | 1100<br>(560-1900)    |
| Tunisia  | 1990 | Male   | 50 to 54 | 14%<br>(8.5-22%)               | 86%<br>(78-91%)          | 0.76<br>(0.39-1.3)                          | 2.1%<br>(0.95-3.7%)                  | 3%<br>(1.1-5.3%)                    | 28<br>(11-51)         | 1200<br>(530-2100)    |
| Tunisia  | 1990 | Male   | 55 to 59 | 13%<br>(7.3-21%)               | 87%<br>(79-93%)          | 0.67<br>(0.32-1.2)                          | 1.8%<br>(0.75-3.6%)                  | 2.4%<br>(0.94-4.8%)                 | 35<br>(13-70)         | 1300<br>(510-2400)    |
| Tunisia  | 1990 | Male   | 60 to 64 | 12%<br>(6.5-20%)               | 88%<br>(80-94%)          | 0.55<br>(0.24-1.1)                          | 1.4%<br>(0.39-3%)                    | 1.8%<br>(0.46-3.9%)                 | 30<br>(8-68)          | 910<br>(270-2000)     |

| Location | Year | Sex    | Age      | Prevalence of current drinkers | Prevalence of abstainers | Population average of standard drinks daily | Percent of total attributable deaths | Percent of total attributable DALYs | Attributable deaths    | Attributable DALYs  |
|----------|------|--------|----------|--------------------------------|--------------------------|---------------------------------------------|--------------------------------------|-------------------------------------|------------------------|---------------------|
| Tunisia  | 1990 | Male   | 65 to 69 | 11%<br>(6.4-19%)               | 89%<br>(81-94%)          | 0.45<br>(0.21-0.83)                         | 0.92%<br>(0.2-2.1%)                  | 1.1%<br>(0.19-2.6%)                 | 25<br>(4.2-58)         | 620<br>(130-1400)   |
| Tunisia  | 1990 | Male   | 70 to 74 | 11%<br>(6.4-18%)               | 89%<br>(82-94%)          | 0.35<br>(0.16-0.69)                         | 0.58%<br>(0.0063-1.6%)               | 0.67%<br>(-0.059-1.9%)              | 15<br>(-1.3-45)        | 300<br>(3.2-840)    |
| Tunisia  | 1990 | Male   | 75 to 79 | 9.6%<br>(5.5-16%)              | 90%<br>(84-95%)          | 0.27<br>(0.12-0.52)                         | 0.33%<br>(-0.18-1.1%)                | 0.36%<br>(-0.26-1.3%)               | 11<br>(-7.8-38)        | 160<br>(-95-550)    |
| Tunisia  | 1990 | Male   | 80 to 84 | 8.7%<br>(4.9-14%)              | 91%<br>(86-95%)          | 0.23<br>(0.1-0.41)                          | 0.25%<br>(-0.13-0.75%)               | 0.26%<br>(-0.2-0.85%)               | 5<br>(-4.1-16)         | 59<br>(-32-180)     |
| Tunisia  | 1990 | Male   | 85 to 89 | 8.2%<br>(4.5-13%)              | 92%<br>(87-95%)          | 0.2<br>(0.088-0.37)                         | 0.15%<br>(-0.16-0.54%)               | 0.14%<br>(-0.24-0.59%)              | 1.3<br>(-2.1-5.3)      | 12<br>(-12-42)      |
| Tunisia  | 1990 | Male   | 90 to 94 | 8.6%<br>(4.8-14%)              | 91%<br>(86-95%)          | 0.19<br>(0.08-0.37)                         | 0.068%<br>(-0.25-0.43%)              | 0.031%<br>(-0.36-0.46%)             | 0.095<br>(-1.1-1.4)    | 1.3<br>(-4.6-8.2)   |
| Tunisia  | 1990 | Male   | 95 plus  | 10%<br>(5.1-18%)               | 90%<br>(82-95%)          | 0.2<br>(0.067-0.44)                         | 0.042%<br>(-0.35-0.49%)              | -0.035%<br>(-0.51-0.48%)            | -0.027<br>(-0.39-0.37) | 0.13<br>(-1-1.5)    |
| Tunisia  | 1995 | Female | All Ages | 2%<br>(1.5-2.6%)               | 98%<br>(97-98%)          | 0.031<br>(0.024-0.041)                      | 0.24%<br>(0.18-0.3%)                 | 0.12%<br>(0.022-0.24%)              | 22<br>(4.1-45)         | 2700<br>(1900-3700) |
| Tunisia  | 1995 | Female | 15 to 19 | 1.9%<br>(0.99-3.3%)            | 98%<br>(97-99%)          | 0.027<br>(0.011-0.053)                      | 0.35%<br>(0.21-0.52%)                | 0.19%<br>(0.1-0.32%)                | 0.42<br>(0.23-0.73)    | 190<br>(110-300)    |
| Tunisia  | 1995 | Female | 20 to 24 | 2.6%<br>(1.2-4.6%)             | 97%<br>(95-99%)          | 0.046<br>(0.018-0.09)                       | 0.7%<br>(0.45-1%)                    | 0.28%<br>(0.15-0.49%)               | 0.7<br>(0.38-1.2)      | 400<br>(230-620)    |
| Tunisia  | 1995 | Female | 25 to 29 | 2.7%<br>(1.3-5.1%)             | 97%<br>(95-99%)          | 0.051<br>(0.023-0.096)                      | 0.75%<br>(0.52-1%)                   | 0.36%<br>(0.21-0.57%)               | 0.97<br>(0.56-1.5)     | 450<br>(290-680)    |
| Tunisia  | 1995 | Female | 30 to 34 | 2.6%<br>(1.2-5%)               | 97%<br>(95-99%)          | 0.051<br>(0.022-0.095)                      | 0.67%<br>(0.47-0.93%)                | 0.41%<br>(0.26-0.62%)               | 1.3<br>(0.82-2.1)      | 410<br>(260-610)    |
| Tunisia  | 1995 | Female | 35 to 39 | 2.6%<br>(1.2-4.7%)             | 97%<br>(95-99%)          | 0.054<br>(0.024-0.096)                      | 0.53%<br>(0.38-0.71%)                | 0.4%<br>(0.26-0.62%)                | 1.5<br>(0.89-2.3)      | 310<br>(200-440)    |
| Tunisia  | 1995 | Female | 40 to 44 | 2.6%<br>(1.3-4.5%)             | 97%<br>(95-99%)          | 0.055<br>(0.024-0.1)                        | 0.44%<br>(0.3-0.6%)                  | 0.43%<br>(0.26-0.66%)               | 1.9<br>(1.2-3)         | 250<br>(160-350)    |
| Tunisia  | 1995 | Female | 45 to 49 | 2.5%<br>(1.1-4.2%)             | 97%<br>(96-99%)          | 0.057<br>(0.024-0.11)                       | 0.36%<br>(0.24-0.49%)                | 0.39%<br>(0.22-0.64%)               | 1.8<br>(1-2.9)         | 160<br>(110-230)    |
| Tunisia  | 1995 | Female | 50 to 54 | 2.7%<br>(1.2-4.8%)             | 97%<br>(95-99%)          | 0.059<br>(0.024-0.12)                       | 0.31%<br>(0.2-0.44%)                 | 0.38%<br>(0.2-0.63%)                | 2<br>(1.1-3.5)         | 130<br>(86-200)     |
| Tunisia  | 1995 | Female | 55 to 59 | 2.8%<br>(1.3-5.3%)             | 97%<br>(95-99%)          | 0.058<br>(0.023-0.12)                       | 0.24%<br>(0.13-0.38%)                | 0.31%<br>(0.13-0.55%)               | 2.8<br>(1.1-4.9)       | 130<br>(69-210)     |
| Tunisia  | 1995 | Female | 60 to 64 | 2.8%<br>(1.3-5.3%)             | 97%<br>(95-99%)          | 0.053<br>(0.021-0.11)                       | 0.17%<br>(0.035-0.33%)               | 0.22%<br>(0.0075-0.5%)              | 3<br>(0.098-6.8)       | 110<br>(22-220)     |
| Tunisia  | 1995 | Female | 65 to 69 | 2.8%<br>(1.3-4.9%)             | 97%<br>(95-99%)          | 0.046<br>(0.019-0.088)                      | 0.11%<br>(-0.025-0.26%)              | 0.14%<br>(-0.054-0.37%)             | 2.4<br>(-0.89-6.2)     | 66<br>(-15-150)     |
| Tunisia  | 1995 | Female | 70 to 74 | 2.7%<br>(1.3-4.8%)             | 97%<br>(95-99%)          | 0.038<br>(0.014-0.083)                      | 0.069%<br>(-0.064-0.22%)             | 0.086%<br>(-0.11-0.32%)             | 1.8<br>(-2.4-6.8)      | 39<br>(-36-130)     |
| Tunisia  | 1995 | Female | 75 to 79 | 2.4%<br>(1.1-4.5%)             | 98%<br>(96-99%)          | 0.031<br>(0.011-0.067)                      | 0.05%<br>(-0.11-0.19%)               | 0.058%<br>(-0.14-0.26%)             | 1.3<br>(-3.2-5.8)      | 21<br>(-44-83)      |
| Tunisia  | 1995 | Female | 80 to 84 | 2.2%<br>(0.97-3.9%)            | 98%<br>(96-99%)          | 0.027<br>(0.0095-0.056)                     | 0.034%<br>(-0.093-0.16%)             | 0.035%<br>(-0.12-0.19%)             | 0.71<br>(-2.6-4)       | 9.3<br>(-25-43)     |

| Location | Year | Sex    | Age      | Prevalence of current drinkers | Prevalence of abstainers | Population average of standard drinks daily | Percent of total attributable deaths | Percent of total attributable DALYs | Attributable deaths    | Attributable DALYs     |
|----------|------|--------|----------|--------------------------------|--------------------------|---------------------------------------------|--------------------------------------|-------------------------------------|------------------------|------------------------|
| Tunisia  | 1995 | Female | 85 to 89 | 2.1%<br>(0.98-4%)              | 98%<br>(96-99%)          | 0.026<br>(0.01-0.053)                       | 0.012%<br>(-0.11-0.12%)              | 0.0058%<br>(-0.15-0.15%)            | 0.089<br>(-2.2-2.3)    | 1.8<br>(-16-17)        |
| Tunisia  | 1995 | Female | 90 to 94 | 2.4%<br>(1.2-4.5%)             | 98%<br>(95-99%)          | 0.028<br>(0.011-0.061)                      | -0.013%<br>(-0.15-0.1%)              | -0.03%<br>(-0.2-0.12%)              | -0.2<br>(-1.4-0.76)    | -0.51<br>(-6.2-4.1)    |
| Tunisia  | 1995 | Female | 95 plus  | 3.1%<br>(1.2-6.5%)             | 97%<br>(94-99%)          | 0.035<br>(0.01-0.085)                       | -0.041%<br>(-0.24-0.093%)            | -0.075%<br>(-0.32-0.091%)           | -0.15<br>(-0.64-0.18)  | -0.33<br>(-1.9-0.77)   |
| Tunisia  | 1995 | Male   | All Ages | 9.8%<br>(7.7-12%)              | 90%<br>(88-92%)          | 0.41<br>(0.36-0.46)                         | 1.2%<br>(0.87-1.6%)                  | 1.2%<br>(0.69-1.9%)                 | 330<br>(180-530)       | 17000<br>(12000-22000) |
| Tunisia  | 1995 | Male   | 15 to 19 | 7.5%<br>(4.3-12%)              | 92%<br>(88-96%)          | 0.18<br>(0.081-0.31)                        | 0.95%<br>(0.59-1.4%)                 | 1.1%<br>(0.51-2.2%)                 | 4.7<br>(2.1-9)         | 630<br>(380-960)       |
| Tunisia  | 1995 | Male   | 20 to 24 | 13%<br>(7.6-20%)               | 87%<br>(80-92%)          | 0.47<br>(0.24-0.77)                         | 2.4%<br>(1.5-3.5%)                   | 2.9%<br>(1.4-5.1%)                  | 15<br>(7.4-26)         | 1600<br>(990-2400)     |
| Tunisia  | 1995 | Male   | 25 to 29 | 16%<br>(9.5-24%)               | 84%<br>(76-90%)          | 0.74<br>(0.42-1.2)                          | 3.1%<br>(2-4.7%)                     | 4.4%<br>(2.2-7.2%)                  | 24<br>(12-40)          | 2100<br>(1300-3100)    |
| Tunisia  | 1995 | Male   | 30 to 34 | 17%<br>(9.6-26%)               | 83%<br>(74-90%)          | 0.86<br>(0.5-1.3)                           | 3.1%<br>(1.9-4.6%)                   | 4.6%<br>(2.5-7.3%)                  | 27<br>(15-44)          | 2000<br>(1200-3000)    |
| Tunisia  | 1995 | Male   | 35 to 39 | 17%<br>(10-26%)                | 83%<br>(74-90%)          | 0.89<br>(0.5-1.4)                           | 2.9%<br>(1.8-4.4%)                   | 4.5%<br>(2.4-7.2%)                  | 26<br>(14-43)          | 1800<br>(1100-2700)    |
| Tunisia  | 1995 | Male   | 40 to 44 | 17%<br>(10-26%)                | 83%<br>(74-90%)          | 0.91<br>(0.47-1.5)                          | 2.7%<br>(1.5-4.2%)                   | 4.2%<br>(2-6.8%)                    | 28<br>(13-47)          | 1600<br>(870-2600)     |
| Tunisia  | 1995 | Male   | 45 to 49 | 16%<br>(8.7-24%)               | 84%<br>(76-91%)          | 0.88<br>(0.41-1.5)                          | 2.7%<br>(1.4-4.4%)                   | 3.9%<br>(1.8-6.6%)                  | 28<br>(13-48)          | 1400<br>(680-2200)     |
| Tunisia  | 1995 | Male   | 50 to 54 | 14%<br>(8.6-21%)               | 86%<br>(79-91%)          | 0.79<br>(0.4-1.4)                           | 2.2%<br>(1-3.9%)                     | 3.1%<br>(1.3-5.5%)                  | 28<br>(11-48)          | 1200<br>(530-2000)     |
| Tunisia  | 1995 | Male   | 55 to 59 | 13%<br>(7.2-21%)               | 87%<br>(79-93%)          | 0.69<br>(0.32-1.3)                          | 1.9%<br>(0.82-3.6%)                  | 2.5%<br>(0.98-4.9%)                 | 38<br>(14-73)          | 1400<br>(570-2500)     |
| Tunisia  | 1995 | Male   | 60 to 64 | 12%<br>(6.5-20%)               | 88%<br>(80-93%)          | 0.57<br>(0.25-1.1)                          | 1.4%<br>(0.46-2.9%)                  | 1.8%<br>(0.52-3.9%)                 | 40<br>(12-85)          | 1200<br>(390-2500)     |
| Tunisia  | 1995 | Male   | 65 to 69 | 11%<br>(6.6-19%)               | 89%<br>(81-93%)          | 0.47<br>(0.22-0.84)                         | 0.97%<br>(0.26-2.2%)                 | 1.2%<br>(0.26-2.8%)                 | 32<br>(6.9-74)         | 800<br>(220-1800)      |
| Tunisia  | 1995 | Male   | 70 to 74 | 11%<br>(6.4-18%)               | 89%<br>(82-94%)          | 0.37<br>(0.17-0.69)                         | 0.6%<br>(0.04-1.6%)                  | 0.71%<br>(0.01-1.9%)                | 22<br>(0.3-60)         | 440<br>(31-1100)       |
| Tunisia  | 1995 | Male   | 75 to 79 | 9.6%<br>(5.5-16%)              | 90%<br>(84-95%)          | 0.28<br>(0.12-0.55)                         | 0.36%<br>(-0.16-1.1%)                | 0.38%<br>(-0.23-1.3%)               | 12<br>(-7.3-40)        | 180<br>(-80-590)       |
| Tunisia  | 1995 | Male   | 80 to 84 | 8.6%<br>(4.8-14%)              | 91%<br>(86-95%)          | 0.24<br>(0.11-0.43)                         | 0.26%<br>(-0.13-0.82%)               | 0.27%<br>(-0.19-0.91%)              | 7.2<br>(-5.3-25)       | 83<br>(-43-270)        |
| Tunisia  | 1995 | Male   | 85 to 89 | 8%<br>(4.4-13%)                | 92%<br>(87-96%)          | 0.2<br>(0.093-0.37)                         | 0.15%<br>(-0.15-0.53%)               | 0.14%<br>(-0.22-0.59%)              | 2.4<br>(-3.7-9.8)      | 21<br>(-22-77)         |
| Tunisia  | 1995 | Male   | 90 to 94 | 8.4%<br>(4.7-14%)              | 92%<br>(86-95%)          | 0.19<br>(0.079-0.37)                        | 0.066%<br>(-0.24-0.41%)              | 0.031%<br>(-0.33-0.43%)             | 0.16<br>(-1.7-2.3)     | 2<br>(-7.1-13)         |
| Tunisia  | 1995 | Male   | 95 plus  | 9.9%<br>(5-18%)                | 90%<br>(82-95%)          | 0.2<br>(0.068-0.43)                         | 0.033%<br>(-0.37-0.49%)              | -0.041%<br>(-0.52-0.48%)            | -0.043<br>(-0.55-0.52) | 0.14<br>(-1.5-2.1)     |
| Tunisia  | 2000 | Female | All Ages | 2%<br>(1.5-2.7%)               | 98%<br>(97-98%)          | 0.03<br>(0.022-0.039)                       | 0.27%<br>(0.2-0.34%)                 | 0.11%<br>(0.011-0.24%)              | 22<br>(2.2-47)         | 2900<br>(2100-4000)    |

| Location | Year | Sex    | Age      | Prevalence of current drinkers | Prevalence of abstainers | Population average of standard drinks daily | Percent of total attributable deaths | Percent of total attributable DALYs | Attributable deaths   | Attributable DALYs     |
|----------|------|--------|----------|--------------------------------|--------------------------|---------------------------------------------|--------------------------------------|-------------------------------------|-----------------------|------------------------|
| Tunisia  | 2000 | Female | 15 to 19 | 2%<br>(0.99-3.5%)              | 98%<br>(97-99%)          | 0.026<br>(0.011-0.052)                      | 0.36%<br>(0.22-0.55%)                | 0.19%<br>(0.11-0.31%)               | 0.39<br>(0.22-0.65)   | 210<br>(120-340)       |
| Tunisia  | 2000 | Female | 20 to 24 | 2.6%<br>(1.2-4.6%)             | 97%<br>(95-99%)          | 0.044<br>(0.018-0.087)                      | 0.73%<br>(0.46-1.1%)                 | 0.27%<br>(0.15-0.47%)               | 0.63<br>(0.34-1.1)    | 430<br>(260-670)       |
| Tunisia  | 2000 | Female | 25 to 29 | 2.7%<br>(1.3-5.1%)             | 97%<br>(95-99%)          | 0.047<br>(0.02-0.094)                       | 0.78%<br>(0.53-1.1%)                 | 0.35%<br>(0.21-0.56%)               | 0.83<br>(0.48-1.3)    | 450<br>(280-660)       |
| Tunisia  | 2000 | Female | 30 to 34 | 2.5%<br>(1-4.6%)               | 98%<br>(95-99%)          | 0.044<br>(0.018-0.084)                      | 0.69%<br>(0.47-0.97%)                | 0.4%<br>(0.25-0.59%)                | 1.2<br>(0.75-1.9)     | 440<br>(280-680)       |
| Tunisia  | 2000 | Female | 35 to 39 | 2.2%<br>(0.96-4.1%)            | 98%<br>(96-99%)          | 0.042<br>(0.017-0.079)                      | 0.55%<br>(0.38-0.75%)                | 0.37%<br>(0.25-0.55%)               | 1.3<br>(0.85-2)       | 340<br>(220-500)       |
| Tunisia  | 2000 | Female | 40 to 44 | 2.2%<br>(1.1-4%)               | 98%<br>(96-99%)          | 0.043<br>(0.019-0.079)                      | 0.44%<br>(0.29-0.6%)                 | 0.4%<br>(0.26-0.58%)                | 1.8<br>(1.1-2.7)      | 270<br>(170-390)       |
| Tunisia  | 2000 | Female | 45 to 49 | 2.4%<br>(1-4%)                 | 98%<br>(96-99%)          | 0.05<br>(0.02-0.094)                        | 0.36%<br>(0.25-0.48%)                | 0.37%<br>(0.22-0.58%)               | 2.1<br>(1.3-3.4)      | 220<br>(150-310)       |
| Tunisia  | 2000 | Female | 50 to 54 | 2.7%<br>(1.2-4.9%)             | 97%<br>(95-99%)          | 0.056<br>(0.023-0.11)                       | 0.31%<br>(0.2-0.43%)                 | 0.38%<br>(0.22-0.61%)               | 2.3<br>(1.3-3.8)      | 150<br>(97-230)        |
| Tunisia  | 2000 | Female | 55 to 59 | 2.9%<br>(1.3-5.4%)             | 97%<br>(95-99%)          | 0.057<br>(0.022-0.11)                       | 0.24%<br>(0.13-0.38%)                | 0.31%<br>(0.13-0.53%)               | 2.5<br>(0.98-4.3)     | 120<br>(62-190)        |
| Tunisia  | 2000 | Female | 60 to 64 | 2.9%<br>(1.3-5.5%)             | 97%<br>(95-99%)          | 0.052<br>(0.021-0.11)                       | 0.16%<br>(0.022-0.32%)               | 0.21%<br>(0.0053-0.47%)             | 2.8<br>(0.071-6.2)    | 100<br>(15-200)        |
| Tunisia  | 2000 | Female | 65 to 69 | 2.9%<br>(1.3-5%)               | 97%<br>(95-99%)          | 0.045<br>(0.018-0.085)                      | 0.11%<br>(-0.025-0.26%)              | 0.14%<br>(-0.051-0.38%)             | 2.7<br>(-1-7.3)       | 78<br>(-18-180)        |
| Tunisia  | 2000 | Female | 70 to 74 | 2.7%<br>(1.3-5%)               | 97%<br>(95-99%)          | 0.036<br>(0.014-0.079)                      | 0.066%<br>(-0.065-0.21%)             | 0.083%<br>(-0.095-0.3%)             | 1.7<br>(-2-6.3)       | 39<br>(-38-120)        |
| Tunisia  | 2000 | Female | 75 to 79 | 2.5%<br>(1.1-4.6%)             | 98%<br>(95-99%)          | 0.03<br>(0.011-0.065)                       | 0.05%<br>(-0.11-0.19%)               | 0.06%<br>(-0.14-0.26%)              | 1.6<br>(-3.9-6.9)     | 26<br>(-54-100)        |
| Tunisia  | 2000 | Female | 80 to 84 | 2.3%<br>(1-4.1%)               | 98%<br>(96-99%)          | 0.027<br>(0.0095-0.056)                     | 0.033%<br>(-0.1-0.15%)               | 0.035%<br>(-0.14-0.2%)              | 0.8<br>(-3.1-4.6)     | 11<br>(-32-50)         |
| Tunisia  | 2000 | Female | 85 to 89 | 2.2%<br>(1-4.1%)               | 98%<br>(96-99%)          | 0.025<br>(0.0099-0.052)                     | 0.0091%<br>(-0.12-0.12%)             | 0.0012%<br>(-0.16-0.14%)            | 0.02<br>(-2.8-2.4)    | 1.5<br>(-20-18)        |
| Tunisia  | 2000 | Female | 90 to 94 | 2.5%<br>(1.2-4.4%)             | 98%<br>(96-99%)          | 0.028<br>(0.01-0.057)                       | -0.016%<br>(-0.14-0.091%)            | -0.036%<br>(-0.2-0.1%)              | -0.33<br>(-1.8-0.93)  | -0.91<br>(-8.5-5.4)    |
| Tunisia  | 2000 | Female | 95 plus  | 3.1%<br>(1.3-6.3%)             | 97%<br>(94-99%)          | 0.034<br>(0.0099-0.08)                      | -0.042%<br>(-0.23-0.087%)            | -0.08%<br>(-0.32-0.087%)            | -0.22<br>(-0.86-0.23) | -0.47<br>(-2.5-0.98)   |
| Tunisia  | 2000 | Male   | All Ages | 11%<br>(8.7-13%)               | 89%<br>(87-91%)          | 0.43<br>(0.38-0.5)                          | 1.3%<br>(0.94-1.7%)                  | 1.2%<br>(0.7-1.8%)                  | 330<br>(190-510)      | 17000<br>(12000-23000) |
| Tunisia  | 2000 | Male   | 15 to 19 | 8.2%<br>(4.9-13%)              | 92%<br>(87-95%)          | 0.18<br>(0.084-0.32)                        | 0.97%<br>(0.6-1.5%)                  | 1.2%<br>(0.53-2.2%)                 | 5<br>(2.2-9.4)        | 670<br>(400-1000)      |
| Tunisia  | 2000 | Male   | 20 to 24 | 15%<br>(8.8-22%)               | 85%<br>(78-91%)          | 0.51<br>(0.27-0.84)                         | 2.5%<br>(1.6-3.6%)                   | 3.1%<br>(1.5-5.4%)                  | 17<br>(8.4-30)        | 1800<br>(1100-2700)    |
| Tunisia  | 2000 | Male   | 25 to 29 | 18%<br>(11-26%)                | 82%<br>(74-89%)          | 0.8<br>(0.46-1.3)                           | 3.2%<br>(2-4.7%)                     | 4.6%<br>(2.5-7.5%)                  | 25<br>(13-43)         | 2200<br>(1400-3300)    |
| Tunisia  | 2000 | Male   | 30 to 34 | 19%<br>(11-28%)                | 81%<br>(72-89%)          | 0.9<br>(0.54-1.3)                           | 3.1%<br>(2-4.5%)                     | 4.7%<br>(2.5-7.5%)                  | 28<br>(15-46)         | 2100<br>(1300-3200)    |

| Location | Year | Sex    | Age      | Prevalence of current drinkers | Prevalence of abstainers | Population average of standard drinks daily | Percent of total attributable deaths | Percent of total attributable DALYs | Attributable deaths    | Attributable DALYs  |
|----------|------|--------|----------|--------------------------------|--------------------------|---------------------------------------------|--------------------------------------|-------------------------------------|------------------------|---------------------|
| Tunisia  | 2000 | Male   | 35 to 39 | 19%<br>(11-28%)                | 81%<br>(72-89%)          | 0.91<br>(0.52-1.4)                          | 2.8%<br>(1.7-4.3%)                   | 4.4%<br>(2.3-7.1%)                  | 30<br>(16-50)          | 2100<br>(1200-3200) |
| Tunisia  | 2000 | Male   | 40 to 44 | 17%<br>(11-26%)                | 83%<br>(74-89%)          | 0.87<br>(0.47-1.4)                          | 2.6%<br>(1.5-4.1%)                   | 3.9%<br>(1.9-6.6%)                  | 33<br>(15-57)          | 1900<br>(1000-3100) |
| Tunisia  | 2000 | Male   | 45 to 49 | 15%<br>(8.5-23%)               | 85%<br>(77-91%)          | 0.8<br>(0.39-1.3)                           | 2.4%<br>(1.2-3.9%)                   | 3.5%<br>(1.6-6%)                    | 36<br>(16-63)          | 1800<br>(910-3000)  |
| Tunisia  | 2000 | Male   | 50 to 54 | 13%<br>(8.3-20%)               | 87%<br>(80-92%)          | 0.7<br>(0.35-1.2)                           | 2%<br>(0.9-3.4%)                     | 2.7%<br>(1.1-4.9%)                  | 26<br>(10-46)          | 1100<br>(510-1900)  |
| Tunisia  | 2000 | Male   | 55 to 59 | 12%<br>(7-20%)                 | 88%<br>(80-93%)          | 0.61<br>(0.29-1.2)                          | 1.7%<br>(0.74-3.2%)                  | 2.2%<br>(0.9-4.3%)                  | 29<br>(11-57)          | 1100<br>(460-2000)  |
| Tunisia  | 2000 | Male   | 60 to 64 | 11%<br>(6.1-19%)               | 89%<br>(81-94%)          | 0.5<br>(0.22-0.95)                          | 1.2%<br>(0.4-2.6%)                   | 1.6%<br>(0.46-3.3%)                 | 32<br>(8.7-69)         | 990<br>(310-2000)   |
| Tunisia  | 2000 | Male   | 65 to 69 | 11%<br>(6.2-18%)               | 89%<br>(82-94%)          | 0.41<br>(0.2-0.73)                          | 0.81%<br>(0.21-1.8%)                 | 1%<br>(0.22-2.3%)                   | 32<br>(6.9-72)         | 810<br>(210-1800)   |
| Tunisia  | 2000 | Male   | 70 to 74 | 10%<br>(6.1-17%)               | 90%<br>(83-94%)          | 0.32<br>(0.15-0.6)                          | 0.5%<br>(0.011-1.3%)                 | 0.58%<br>(-0.014-1.5%)              | 21<br>(-0.5-55)        | 420<br>(9.8-1100)   |
| Tunisia  | 2000 | Male   | 75 to 79 | 9.1%<br>(5.2-15%)              | 91%<br>(85-95%)          | 0.25<br>(0.11-0.47)                         | 0.29%<br>(-0.12-0.85%)               | 0.32%<br>(-0.18-0.99%)              | 12<br>(-7.1-38)        | 200<br>(-79-570)    |
| Tunisia  | 2000 | Male   | 80 to 84 | 8.2%<br>(4.6-13%)              | 92%<br>(87-95%)          | 0.21<br>(0.094-0.37)                        | 0.21%<br>(-0.11-0.63%)               | 0.22%<br>(-0.17-0.7%)               | 5.8<br>(-4.4-18)       | 70<br>(-35-210)     |
| Tunisia  | 2000 | Male   | 85 to 89 | 7.7%<br>(4.3-12%)              | 92%<br>(88-96%)          | 0.18<br>(0.08-0.33)                         | 0.13%<br>(-0.14-0.44%)               | 0.12%<br>(-0.22-0.47%)              | 1.7<br>(-3.2-6.8)      | 17<br>(-18-55)      |
| Tunisia  | 2000 | Male   | 90 to 94 | 8.1%<br>(4.6-13%)              | 92%<br>(87-95%)          | 0.17<br>(0.073-0.34)                        | 0.057%<br>(-0.21-0.34%)              | 0.016%<br>(-0.3-0.35%)              | 0.11<br>(-2-2.3)       | 2.3<br>(-8.3-13)    |
| Tunisia  | 2000 | Male   | 95 plus  | 9.5%<br>(4.8-17%)              | 90%<br>(83-95%)          | 0.18<br>(0.062-0.39)                        | 0.032%<br>(-0.32-0.38%)              | -0.05%<br>(-0.48-0.36%)             | -0.066<br>(-0.64-0.46) | 0.18<br>(-1.8-2)    |
| Tunisia  | 2005 | Female | All Ages | 2%<br>(1.5-2.6%)               | 98%<br>(97-98%)          | 0.033<br>(0.024-0.044)                      | 0.29%<br>(0.22-0.36%)                | 0.12%<br>(0.015-0.24%)              | 25<br>(3.1-51)         | 3200<br>(2200-4300) |
| Tunisia  | 2005 | Female | 15 to 19 | 1.9%<br>(0.93-3.3%)            | 98%<br>(97-99%)          | 0.026<br>(0.011-0.051)                      | 0.36%<br>(0.21-0.56%)                | 0.2%<br>(0.11-0.32%)                | 0.38<br>(0.21-0.63)    | 210<br>(110-350)    |
| Tunisia  | 2005 | Female | 20 to 24 | 2.5%<br>(1.1-4.3%)             | 98%<br>(96-99%)          | 0.044<br>(0.017-0.087)                      | 0.76%<br>(0.48-1.1%)                 | 0.28%<br>(0.16-0.48%)               | 0.63<br>(0.35-1.1)     | 480<br>(280-760)    |
| Tunisia  | 2005 | Female | 25 to 29 | 2.6%<br>(1.2-4.8%)             | 97%<br>(95-99%)          | 0.047<br>(0.02-0.094)                       | 0.79%<br>(0.55-1.1%)                 | 0.35%<br>(0.21-0.54%)               | 0.82<br>(0.48-1.3)     | 490<br>(300-730)    |
| Tunisia  | 2005 | Female | 30 to 34 | 2.4%<br>(0.99-4.5%)            | 98%<br>(95-99%)          | 0.045<br>(0.018-0.086)                      | 0.7%<br>(0.48-0.98%)                 | 0.41%<br>(0.26-0.62%)               | 1<br>(0.65-1.6)        | 420<br>(260-630)    |
| Tunisia  | 2005 | Female | 35 to 39 | 2.2%<br>(0.93-3.8%)            | 98%<br>(96-99%)          | 0.043<br>(0.018-0.081)                      | 0.56%<br>(0.4-0.75%)                 | 0.39%<br>(0.26-0.58%)               | 1.4<br>(0.87-2.1)      | 380<br>(250-550)    |
| Tunisia  | 2005 | Female | 40 to 44 | 2.1%<br>(1.1-3.7%)             | 98%<br>(96-99%)          | 0.044<br>(0.019-0.08)                       | 0.45%<br>(0.31-0.62%)                | 0.42%<br>(0.28-0.6%)                | 1.9<br>(1.2-3)         | 310<br>(200-450)    |
| Tunisia  | 2005 | Female | 45 to 49 | 2.3%<br>(1.1-3.8%)             | 98%<br>(96-99%)          | 0.051<br>(0.023-0.1)                        | 0.37%<br>(0.25-0.5%)                 | 0.39%<br>(0.25-0.62%)               | 2.4<br>(1.4-3.9)       | 260<br>(160-360)    |
| Tunisia  | 2005 | Female | 50 to 54 | 2.6%<br>(1.2-4.7%)             | 97%<br>(95-99%)          | 0.057<br>(0.024-0.11)                       | 0.32%<br>(0.21-0.44%)                | 0.4%<br>(0.23-0.63%)                | 3.3<br>(1.7-5.6)       | 220<br>(130-330)    |

| Location | Year | Sex    | Age      | Prevalence of current drinkers | Prevalence of abstainers | Population average of standard drinks daily | Percent of total attributable deaths | Percent of total attributable DALYs | Attributable deaths  | Attributable DALYs     |
|----------|------|--------|----------|--------------------------------|--------------------------|---------------------------------------------|--------------------------------------|-------------------------------------|----------------------|------------------------|
| Tunisia  | 2005 | Female | 55 to 59 | 2.8%<br>(1.3-5.2%)             | 97%<br>(95-99%)          | 0.058<br>(0.023-0.11)                       | 0.25%<br>(0.14-0.37%)                | 0.34%<br>(0.16-0.55%)               | 3<br>(1.4-5.3)       | 150<br>(80-230)        |
| Tunisia  | 2005 | Female | 60 to 64 | 2.9%<br>(1.4-5.4%)             | 97%<br>(95-99%)          | 0.053<br>(0.021-0.11)                       | 0.18%<br>(0.051-0.32%)               | 0.23%<br>(0.034-0.47%)              | 2.8<br>(0.42-5.8)    | 110<br>(30-200)        |
| Tunisia  | 2005 | Female | 65 to 69 | 2.8%<br>(1.3-4.8%)             | 97%<br>(95-99%)          | 0.046<br>(0.019-0.09)                       | 0.12%<br>(-0.0098-0.25%)             | 0.16%<br>(-0.027-0.37%)             | 3<br>(-0.56-7.1)     | 86<br>(-7.2-180)       |
| Tunisia  | 2005 | Female | 70 to 74 | 2.7%<br>(1.3-4.8%)             | 97%<br>(95-99%)          | 0.038<br>(0.014-0.078)                      | 0.075%<br>(-0.053-0.21%)             | 0.096%<br>(-0.085-0.31%)            | 2.6<br>(-2.4-8.4)    | 58<br>(-41-160)        |
| Tunisia  | 2005 | Female | 75 to 79 | 2.4%<br>(1.1-4.4%)             | 98%<br>(96-99%)          | 0.031<br>(0.011-0.065)                      | 0.053%<br>(-0.089-0.18%)             | 0.064%<br>(-0.13-0.25%)             | 1.8<br>(-3.6-7)      | 30<br>(-51-100)        |
| Tunisia  | 2005 | Female | 80 to 84 | 2.2%<br>(0.97-3.9%)            | 98%<br>(96-99%)          | 0.027<br>(0.0093-0.056)                     | 0.037%<br>(-0.089-0.15%)             | 0.04%<br>(-0.12-0.19%)              | 1.1<br>(-3.3-5.1)    | 15<br>(-33-58)         |
| Tunisia  | 2005 | Female | 85 to 89 | 2.1%<br>(0.99-4%)              | 98%<br>(96-99%)          | 0.026<br>(0.01-0.053)                       | 0.011%<br>(-0.12-0.11%)              | 0.0035%<br>(-0.15-0.13%)            | 0.086<br>(-3.8-3.1)  | 2.6<br>(-26-25)        |
| Tunisia  | 2005 | Female | 90 to 94 | 2.4%<br>(1.1-4.7%)             | 98%<br>(95-99%)          | 0.029<br>(0.01-0.062)                       | -0.016%<br>(-0.15-0.081%)            | -0.036%<br>(-0.21-0.088%)           | -0.45<br>(-2.6-1.1)  | -1.2<br>(-12-6.6)      |
| Tunisia  | 2005 | Female | 95 plus  | 3.2%<br>(1.3-6.5%)             | 97%<br>(93-99%)          | 0.036<br>(0.01-0.085)                       | -0.043%<br>(-0.23-0.088%)            | -0.082%<br>(-0.33-0.08%)            | -0.36<br>(-1.4-0.36) | -0.78<br>(-4.3-1.6)    |
| Tunisia  | 2005 | Male   | All Ages | 11%<br>(9.1-14%)               | 89%<br>(86-91%)          | 0.47<br>(0.4-0.55)                          | 1.4%<br>(1-1.8%)                     | 1.3%<br>(0.72-1.9%)                 | 360<br>(200-570)     | 19000<br>(13000-26000) |
| Tunisia  | 2005 | Male   | 15 to 19 | 8.3%<br>(4.9-13%)              | 92%<br>(87-95%)          | 0.19<br>(0.085-0.34)                        | 1%<br>(0.61-1.5%)                    | 1.2%<br>(0.54-2.3%)                 | 5.3<br>(2.3-9.9)     | 700<br>(420-1100)      |
| Tunisia  | 2005 | Male   | 20 to 24 | 15%<br>(8.7-22%)               | 85%<br>(78-91%)          | 0.52<br>(0.27-0.88)                         | 2.5%<br>(1.6-3.8%)                   | 3.1%<br>(1.6-5.5%)                  | 18<br>(8.9-33)       | 2000<br>(1200-3000)    |
| Tunisia  | 2005 | Male   | 25 to 29 | 18%<br>(11-26%)                | 82%<br>(74-89%)          | 0.81<br>(0.46-1.3)                          | 3.2%<br>(2.4-8%)                     | 4.7%<br>(2.4-7.9%)                  | 27<br>(13-46)        | 2300<br>(1400-3500)    |
| Tunisia  | 2005 | Male   | 30 to 34 | 18%<br>(11-27%)                | 82%<br>(73-89%)          | 0.92<br>(0.54-1.4)                          | 3.1%<br>(1.9-4.7%)                   | 4.9%<br>(2.6-8%)                    | 27<br>(14-45)        | 2100<br>(1200-3200)    |
| Tunisia  | 2005 | Male   | 35 to 39 | 18%<br>(12-27%)                | 82%<br>(73-88%)          | 0.92<br>(0.52-1.4)                          | 2.9%<br>(1.8-4.4%)                   | 4.5%<br>(2.4-7.4%)                  | 31<br>(15-52)        | 2100<br>(1200-3300)    |
| Tunisia  | 2005 | Male   | 40 to 44 | 17%<br>(11-26%)                | 83%<br>(74-89%)          | 0.89<br>(0.48-1.4)                          | 2.6%<br>(1.5-4.2%)                   | 4%<br>(2-6.7%)                      | 36<br>(17-63)        | 2100<br>(1200-3500)    |
| Tunisia  | 2005 | Male   | 45 to 49 | 15%<br>(8.4-23%)               | 85%<br>(77-92%)          | 0.81<br>(0.42-1.3)                          | 2.4%<br>(1.3-4%)                     | 3.5%<br>(1.6-6.2%)                  | 41<br>(18-74)        | 2100<br>(1000-3600)    |
| Tunisia  | 2005 | Male   | 50 to 54 | 13%<br>(8.1-20%)               | 87%<br>(80-92%)          | 0.71<br>(0.36-1.2)                          | 2%<br>(0.91-3.4%)                    | 2.8%<br>(1.1-5%)                    | 40<br>(15-73)        | 1800<br>(770-3100)     |
| Tunisia  | 2005 | Male   | 55 to 59 | 12%<br>(6.8-20%)               | 88%<br>(80-93%)          | 0.62<br>(0.3-1.2)                           | 1.7%<br>(0.74-3.2%)                  | 2.3%<br>(0.92-4.4%)                 | 32<br>(12-63)        | 1200<br>(490-2200)     |
| Tunisia  | 2005 | Male   | 60 to 64 | 11%<br>(6-19%)                 | 89%<br>(81-94%)          | 0.51<br>(0.23-0.99)                         | 1.3%<br>(0.4-2.7%)                   | 1.6%<br>(0.46-3.5%)                 | 30<br>(7.8-65)       | 930<br>(280-1900)      |
| Tunisia  | 2005 | Male   | 65 to 69 | 11%<br>(6.1-18%)               | 89%<br>(82-94%)          | 0.42<br>(0.2-0.78)                          | 0.84%<br>(0.22-1.9%)                 | 1%<br>(0.22-2.4%)                   | 29<br>(5.9-68)       | 740<br>(190-1700)      |
| Tunisia  | 2005 | Male   | 70 to 74 | 10%<br>(6-17%)                 | 90%<br>(83-94%)          | 0.33<br>(0.15-0.62)                         | 0.51%<br>(0.026-1.4%)                | 0.6%<br>(-0.00083-1.7%)             | 24<br>(-0.033-69)    | 500<br>(26-1400)       |



| Location | Year | Sex    | Age      | Prevalence of current drinkers | Prevalence of abstainers | Population average of standard drinks daily | Percent of total attributable deaths | Percent of total attributable DALYs | Attributable deaths    | Attributable DALYs  |
|----------|------|--------|----------|--------------------------------|--------------------------|---------------------------------------------|--------------------------------------|-------------------------------------|------------------------|---------------------|
| Tunisia  | 2005 | Male   | 75 to 79 | 8.9%<br>(5.1-14%)              | 91%<br>(86-95%)          | 0.25<br>(0.11-0.49)                         | 0.3%<br>(-0.1-0.89%)                 | 0.34%<br>(-0.17-1%)                 | 13<br>(-6.7-42)        | 220<br>(-72-650)    |
| Tunisia  | 2005 | Male   | 80 to 84 | 8%<br>(4.4-13%)                | 92%<br>(87-96%)          | 0.21<br>(0.091-0.37)                        | 0.22%<br>(-0.089-0.62%)              | 0.23%<br>(-0.14-0.72%)              | 7.3<br>(-4.7-23)       | 90<br>(-36-260)     |
| Tunisia  | 2005 | Male   | 85 to 89 | 7.5%<br>(4.1-12%)              | 93%<br>(88-96%)          | 0.18<br>(0.077-0.34)                        | 0.14%<br>(-0.12-0.45%)               | 0.13%<br>(-0.19-0.5%)               | 2.5<br>(-3.8-9.8)      | 24<br>(-22-79)      |
| Tunisia  | 2005 | Male   | 90 to 94 | 7.9%<br>(4.5-13%)              | 92%<br>(87-96%)          | 0.17<br>(0.075-0.34)                        | 0.064%<br>(-0.19-0.35%)              | 0.026%<br>(-0.3-0.37%)              | 0.19<br>(-2.1-2.7)     | 2.9<br>(-8.6-16)    |
| Tunisia  | 2005 | Male   | 95 plus  | 9.3%<br>(4.7-17%)              | 91%<br>(83-95%)          | 0.18<br>(0.062-0.39)                        | 0.039%<br>(-0.3-0.4%)                | -0.042%<br>(-0.46-0.39%)            | -0.087<br>(-0.95-0.83) | 0.34<br>(-2.5-3.5)  |
| Tunisia  | 2010 | Female | All Ages | 2.3%<br>(1.7-2.9%)             | 98%<br>(97-98%)          | 0.041<br>(0.03-0.054)                       | 0.3%<br>(0.23-0.37%)                 | 0.12%<br>(0.017-0.24%)              | 28<br>(4.2-60)         | 3600<br>(2500-4800) |
| Tunisia  | 2010 | Female | 15 to 19 | 2%<br>(0.99-3.5%)              | 98%<br>(97-99%)          | 0.03<br>(0.012-0.06)                        | 0.37%<br>(0.22-0.57%)                | 0.21%<br>(0.12-0.35%)               | 0.33<br>(0.18-0.55)    | 190<br>(110-300)    |
| Tunisia  | 2010 | Female | 20 to 24 | 2.7%<br>(1.3-4.7%)             | 97%<br>(95-99%)          | 0.05<br>(0.019-0.1)                         | 0.77%<br>(0.49-1.1%)                 | 0.3%<br>(0.17-0.52%)                | 0.64<br>(0.34-1.1)     | 490<br>(280-770)    |
| Tunisia  | 2010 | Female | 25 to 29 | 2.9%<br>(1.4-5.2%)             | 97%<br>(95-99%)          | 0.055<br>(0.024-0.11)                       | 0.81%<br>(0.55-1.1%)                 | 0.38%<br>(0.22-0.59%)               | 0.9<br>(0.5-1.4)       | 560<br>(340-820)    |
| Tunisia  | 2010 | Female | 30 to 34 | 2.8%<br>(1.2-5.1%)             | 97%<br>(95-99%)          | 0.056<br>(0.024-0.11)                       | 0.72%<br>(0.48-1%)                   | 0.45%<br>(0.28-0.68%)               | 1.2<br>(0.72-1.9)      | 500<br>(300-760)    |
| Tunisia  | 2010 | Female | 35 to 39 | 2.7%<br>(1.3-4.7%)             | 97%<br>(95-99%)          | 0.058<br>(0.025-0.1)                        | 0.57%<br>(0.41-0.79%)                | 0.45%<br>(0.29-0.7%)                | 1.4<br>(0.84-2.2)      | 380<br>(250-560)    |
| Tunisia  | 2010 | Female | 40 to 44 | 2.7%<br>(1.4-4.6%)             | 97%<br>(95-99%)          | 0.059<br>(0.027-0.1)                        | 0.46%<br>(0.31-0.63%)                | 0.48%<br>(0.31-0.71%)               | 2.2<br>(1.3-3.5)       | 350<br>(220-500)    |
| Tunisia  | 2010 | Female | 45 to 49 | 2.7%<br>(1.2-4.4%)             | 97%<br>(96-99%)          | 0.062<br>(0.027-0.12)                       | 0.38%<br>(0.26-0.53%)                | 0.44%<br>(0.27-0.68%)               | 2.8<br>(1.6-4.6)       | 300<br>(200-430)    |
| Tunisia  | 2010 | Female | 50 to 54 | 2.8%<br>(1.3-5%)               | 97%<br>(95-99%)          | 0.064<br>(0.027-0.13)                       | 0.32%<br>(0.21-0.46%)                | 0.43%<br>(0.25-0.69%)               | 3.7<br>(2-6.4)         | 260<br>(160-390)    |
| Tunisia  | 2010 | Female | 55 to 59 | 2.9%<br>(1.4-5.4%)             | 97%<br>(95-99%)          | 0.064<br>(0.025-0.13)                       | 0.26%<br>(0.15-0.38%)                | 0.36%<br>(0.18-0.58%)               | 4.1<br>(2-7.2)         | 210<br>(120-330)    |
| Tunisia  | 2010 | Female | 60 to 64 | 3%<br>(1.4-5.7%)               | 97%<br>(94-99%)          | 0.059<br>(0.023-0.12)                       | 0.18%<br>(0.059-0.34%)               | 0.25%<br>(0.057-0.5%)               | 3.3<br>(0.74-6.8)      | 120<br>(38-230)     |
| Tunisia  | 2010 | Female | 65 to 69 | 3%<br>(1.4-5.2%)               | 97%<br>(95-99%)          | 0.052<br>(0.021-0.097)                      | 0.12%<br>(-0.0048-0.26%)             | 0.17%<br>(-0.024-0.39%)             | 2.9<br>(-0.43-7)       | 83<br>(-3-180)      |
| Tunisia  | 2010 | Female | 70 to 74 | 2.8%<br>(1.4-5.2%)             | 97%<br>(95-99%)          | 0.042<br>(0.016-0.091)                      | 0.076%<br>(-0.055-0.21%)             | 0.099%<br>(-0.086-0.31%)            | 2.6<br>(-2.3-8.4)      | 59<br>(-42-160)     |
| Tunisia  | 2010 | Female | 75 to 79 | 2.5%<br>(1.1-4.6%)             | 98%<br>(95-99%)          | 0.034<br>(0.012-0.072)                      | 0.052%<br>(-0.086-0.18%)             | 0.062%<br>(-0.13-0.26%)             | 2.3<br>(-5-9.8)        | 39<br>(-70-140)     |
| Tunisia  | 2010 | Female | 80 to 84 | 2.2%<br>(0.99-4.1%)            | 98%<br>(96-99%)          | 0.03<br>(0.01-0.062)                        | 0.037%<br>(-0.083-0.14%)             | 0.038%<br>(-0.11-0.18%)             | 1.3<br>(-3.9-6.2)      | 18<br>(-40-69)      |
| Tunisia  | 2010 | Female | 85 to 89 | 2.2%<br>(1-4.1%)               | 98%<br>(96-99%)          | 0.028<br>(0.011-0.059)                      | 0.0091%<br>(-0.11-0.098%)            | -0.00098%<br>(-0.16-0.12%)          | -0.026<br>(-4.6-3.5)   | 2.6<br>(-32-29)     |
| Tunisia  | 2010 | Female | 90 to 94 | 2.5%<br>(1.2-4.8%)             | 97%<br>(95-99%)          | 0.031<br>(0.011-0.065)                      | -0.018%<br>(-0.15-0.075%)            | -0.04%<br>(-0.2-0.08%)              | -0.73<br>(-3.7-1.5)    | -2<br>(-17-9.1)     |

| Location | Year | Sex    | Age      | Prevalence of current drinkers | Prevalence of abstainers | Population average of standard drinks daily | Percent of total attributable deaths | Percent of total attributable DALYs | Attributable deaths  | Attributable DALYs     |
|----------|------|--------|----------|--------------------------------|--------------------------|---------------------------------------------|--------------------------------------|-------------------------------------|----------------------|------------------------|
| Tunisia  | 2010 | Female | 95 plus  | 3.2%<br>(1.3-6.7%)             | 97%<br>(93-99%)          | 0.038<br>(0.011-0.089)                      | -0.044%<br>(-0.24-0.078%)            | -0.085%<br>(-0.34-0.068%)           | -0.52<br>(-2-0.41)   | -1.1<br>(-6.1-2)       |
| Tunisia  | 2010 | Male   | All Ages | 11%<br>(8.7-13%)               | 89%<br>(87-91%)          | 0.49<br>(0.41-0.59)                         | 1.5%<br>(1.1-2%)                     | 1.3%<br>(0.73-2.1%)                 | 410<br>(220-680)     | 21000<br>(14000-30000) |
| Tunisia  | 2010 | Male   | 15 to 19 | 7.4%<br>(4.3-12%)              | 93%<br>(88-96%)          | 0.18<br>(0.077-0.34)                        | 0.97%<br>(0.59-1.5%)                 | 1.2%<br>(0.53-2.2%)                 | 4.4<br>(1.9-8.6)     | 600<br>(360-930)       |
| Tunisia  | 2010 | Male   | 20 to 24 | 13%<br>(7.3-20%)               | 87%<br>(80-93%)          | 0.47<br>(0.24-0.81)                         | 2.3%<br>(1.5-3.6%)                   | 2.8%<br>(1.4-5.1%)                  | 17<br>(7.8-31)       | 1900<br>(1200-2900)    |
| Tunisia  | 2010 | Male   | 25 to 29 | 16%<br>(9.3-23%)               | 84%<br>(77-91%)          | 0.75<br>(0.41-1.2)                          | 3%<br>(1.9-4.6%)                     | 4.3%<br>(2.2-7.3%)                  | 27<br>(13-48)        | 2400<br>(1500-3900)    |
| Tunisia  | 2010 | Male   | 30 to 34 | 17%<br>(9.5-25%)               | 83%<br>(75-90%)          | 0.88<br>(0.49-1.4)                          | 3%<br>(1.9-4.7%)                     | 4.7%<br>(2.4-7.7%)                  | 28<br>(14-49)        | 2200<br>(1300-3500)    |
| Tunisia  | 2010 | Male   | 35 to 39 | 17%<br>(9.9-26%)               | 83%<br>(74-90%)          | 0.92<br>(0.49-1.5)                          | 2.8%<br>(1.7-4.4%)                   | 4.5%<br>(2.3-7.4%)                  | 29<br>(14-52)        | 2100<br>(1200-3300)    |
| Tunisia  | 2010 | Male   | 40 to 44 | 17%<br>(10-26%)                | 83%<br>(74-90%)          | 0.92<br>(0.47-1.5)                          | 2.7%<br>(1.5-4.2%)                   | 4.1%<br>(2-6.9%)                    | 37<br>(17-64)        | 2200<br>(1200-3600)    |
| Tunisia  | 2010 | Male   | 45 to 49 | 15%<br>(8.5-24%)               | 85%<br>(76-92%)          | 0.86<br>(0.45-1.5)                          | 2.5%<br>(1.3-4.1%)                   | 3.8%<br>(1.8-6.4%)                  | 47<br>(21-85)        | 2400<br>(1300-4100)    |
| Tunisia  | 2010 | Male   | 50 to 54 | 14%<br>(8.3-21%)               | 86%<br>(79-92%)          | 0.78<br>(0.41-1.3)                          | 2.1%<br>(0.99-3.6%)                  | 3%<br>(1.2-5.3%)                    | 50<br>(20-91)        | 2200<br>(990-3800)     |
| Tunisia  | 2010 | Male   | 55 to 59 | 13%<br>(7.1-21%)               | 87%<br>(79-93%)          | 0.68<br>(0.33-1.2)                          | 1.8%<br>(0.79-3.4%)                  | 2.5%<br>(1-4.8%)                    | 52<br>(19-100)       | 1900<br>(810-3600)     |
| Tunisia  | 2010 | Male   | 60 to 64 | 11%<br>(6.3-20%)               | 89%<br>(80-94%)          | 0.56<br>(0.24-1.1)                          | 1.4%<br>(0.46-2.9%)                  | 1.8%<br>(0.53-3.9%)                 | 37<br>(10-80)        | 1100<br>(350-2400)     |
| Tunisia  | 2010 | Male   | 65 to 69 | 11%<br>(6.2-18%)               | 89%<br>(82-94%)          | 0.46<br>(0.21-0.82)                         | 0.95%<br>(0.27-2.1%)                 | 1.2%<br>(0.28-2.6%)                 | 30<br>(7.1-72)       | 770<br>(220-1800)      |
| Tunisia  | 2010 | Male   | 70 to 74 | 10%<br>(6.1-17%)               | 90%<br>(83-94%)          | 0.36<br>(0.16-0.68)                         | 0.58%<br>(0.056-1.5%)                | 0.68%<br>(0.0077-1.9%)              | 24<br>(0.34-66)      | 500<br>(44-1300)       |
| Tunisia  | 2010 | Male   | 75 to 79 | 9.3%<br>(5.4-15%)              | 91%<br>(85-95%)          | 0.28<br>(0.12-0.52)                         | 0.35%<br>(-0.084-1%)                 | 0.38%<br>(-0.15-1.2%)               | 18<br>(-7.4-59)      | 290<br>(-70-910)       |
| Tunisia  | 2010 | Male   | 80 to 84 | 8.3%<br>(4.7-13%)              | 92%<br>(87-95%)          | 0.23<br>(0.1-0.42)                          | 0.25%<br>(-0.082-0.69%)              | 0.27%<br>(-0.14-0.8%)               | 9.7<br>(-5.9-31)     | 120<br>(-40-340)       |
| Tunisia  | 2010 | Male   | 85 to 89 | 7.8%<br>(4.3-13%)              | 92%<br>(87-96%)          | 0.2<br>(0.089-0.36)                         | 0.16%<br>(-0.14-0.52%)               | 0.15%<br>(-0.22-0.58%)              | 4.2<br>(-6.1-16)     | 40<br>(-35-130)        |
| Tunisia  | 2010 | Male   | 90 to 94 | 8.2%<br>(4.7-14%)              | 92%<br>(86-95%)          | 0.19<br>(0.082-0.38)                        | 0.088%<br>(-0.2-0.45%)               | 0.05%<br>(-0.29-0.48%)              | 0.59<br>(-3.7-5.8)   | 6.5<br>(-14-34)        |
| Tunisia  | 2010 | Male   | 95 plus  | 9.8%<br>(4.9-18%)              | 90%<br>(82-95%)          | 0.2<br>(0.068-0.44)                         | 0.065%<br>(-0.29-0.52%)              | -0.019%<br>(-0.46-0.51%)            | -0.049<br>(-1.2-1.3) | 0.69<br>(-3.1-5.5)     |
| Tunisia  | 2016 | Female | All Ages | 2.3%<br>(1.7-2.9%)             | 98%<br>(97-98%)          | 0.044<br>(0.026-0.069)                      | 0.31%<br>(0.24-0.4%)                 | 0.13%<br>(0.022-0.26%)              | 34<br>(5.7-71)       | 3900<br>(2700-5200)    |
| Tunisia  | 2016 | Female | 15 to 19 | 2%<br>(1-3.5%)                 | 98%<br>(97-99%)          | 0.033<br>(0.012-0.072)                      | 0.38%<br>(0.22-0.58%)                | 0.22%<br>(0.12-0.39%)               | 0.27<br>(0.14-0.48)  | 160<br>(87-260)        |
| Tunisia  | 2016 | Female | 20 to 24 | 2.7%<br>(1.3-4.6%)             | 97%<br>(95-99%)          | 0.054<br>(0.018-0.11)                       | 0.79%<br>(0.5-1.1%)                  | 0.32%<br>(0.17-0.59%)               | 0.55<br>(0.27-1)     | 420<br>(240-660)       |

| Location | Year | Sex    | Age      | Prevalence of current drinkers | Prevalence of abstainers | Population average of standard drinks daily | Percent of total attributable deaths | Percent of total attributable DALYs | Attributable deaths  | Attributable DALYs     |
|----------|------|--------|----------|--------------------------------|--------------------------|---------------------------------------------|--------------------------------------|-------------------------------------|----------------------|------------------------|
| Tunisia  | 2016 | Female | 25 to 29 | 2.8%<br>(1.3-5.1%)             | 97%<br>(95-99%)          | 0.058<br>(0.022-0.12)                       | 0.82%<br>(0.57-1.1%)                 | 0.39%<br>(0.23-0.65%)               | 0.88<br>(0.47-1.5)   | 560<br>(350-860)       |
| Tunisia  | 2016 | Female | 30 to 34 | 2.7%<br>(1.2-5.1%)             | 97%<br>(95-99%)          | 0.059<br>(0.023-0.13)                       | 0.74%<br>(0.49-1%)                   | 0.47%<br>(0.28-0.75%)               | 1.3<br>(0.75-2.2)    | 570<br>(360-860)       |
| Tunisia  | 2016 | Female | 35 to 39 | 2.7%<br>(1.2-4.6%)             | 97%<br>(95-99%)          | 0.061<br>(0.023-0.12)                       | 0.59%<br>(0.4-0.82%)                 | 0.47%<br>(0.28-0.77%)               | 1.6<br>(0.88-2.7)    | 460<br>(280-660)       |
| Tunisia  | 2016 | Female | 40 to 44 | 2.6%<br>(1.4-4.6%)             | 97%<br>(95-99%)          | 0.062<br>(0.025-0.12)                       | 0.48%<br>(0.33-0.68%)                | 0.5%<br>(0.31-0.8%)                 | 2.2<br>(1.2-3.7)     | 360<br>(230-530)       |
| Tunisia  | 2016 | Female | 45 to 49 | 2.6%<br>(1.2-4.2%)             | 97%<br>(96-99%)          | 0.065<br>(0.027-0.13)                       | 0.4%<br>(0.27-0.55%)                 | 0.46%<br>(0.26-0.79%)               | 3.1<br>(1.7-5.6)     | 350<br>(220-510)       |
| Tunisia  | 2016 | Female | 50 to 54 | 2.7%<br>(1.3-4.9%)             | 97%<br>(95-99%)          | 0.068<br>(0.026-0.14)                       | 0.34%<br>(0.22-0.53%)                | 0.46%<br>(0.26-0.83%)               | 4.4<br>(2.2-8.2)     | 320<br>(190-510)       |
| Tunisia  | 2016 | Female | 55 to 59 | 2.9%<br>(1.4-5.3%)             | 97%<br>(95-99%)          | 0.068<br>(0.024-0.15)                       | 0.28%<br>(0.16-0.43%)                | 0.39%<br>(0.2-0.69%)                | 4.9<br>(2.3-9.1)     | 250<br>(140-400)       |
| Tunisia  | 2016 | Female | 60 to 64 | 2.9%<br>(1.4-5.6%)             | 97%<br>(94-99%)          | 0.063<br>(0.023-0.14)                       | 0.2%<br>(0.078-0.36%)                | 0.28%<br>(0.086-0.56%)              | 4.8<br>(1.4-10)      | 190<br>(68-350)        |
| Tunisia  | 2016 | Female | 65 to 69 | 2.9%<br>(1.4-4.9%)             | 97%<br>(95-99%)          | 0.054<br>(0.02-0.11)                        | 0.14%<br>(0.014-0.29%)               | 0.19%<br>(-0.0038-0.43%)            | 3.7<br>(-0.085-8.7)  | 110<br>(11-230)        |
| Tunisia  | 2016 | Female | 70 to 74 | 2.7%<br>(1.3-4.9%)             | 97%<br>(95-99%)          | 0.044<br>(0.016-0.098)                      | 0.091%<br>(-0.029-0.21%)             | 0.12%<br>(-0.056-0.31%)             | 2.8<br>(-1.3-7.9)    | 65<br>(-21-160)        |
| Tunisia  | 2016 | Female | 75 to 79 | 2.5%<br>(1.1-4.6%)             | 98%<br>(95-99%)          | 0.036<br>(0.013-0.085)                      | 0.062%<br>(-0.063-0.18%)             | 0.073%<br>(-0.1-0.25%)              | 2.6<br>(-3.9-9.1)    | 46<br>(-52-140)        |
| Tunisia  | 2016 | Female | 80 to 84 | 2.2%<br>(1-4%)                 | 98%<br>(96-99%)          | 0.032<br>(0.011-0.073)                      | 0.046%<br>(-0.069-0.15%)             | 0.048%<br>(-0.1-0.2%)               | 1.9<br>(-4-8.1)      | 26<br>(-40-89)         |
| Tunisia  | 2016 | Female | 85 to 89 | 2.2%<br>(1.1-4%)               | 98%<br>(96-99%)          | 0.03<br>(0.011-0.063)                       | 0.017%<br>(-0.098-0.11%)             | 0.0069%<br>(-0.14-0.12%)            | 0.28<br>(-5.8-5.3)   | 6.6<br>(-39-43)        |
| Tunisia  | 2016 | Female | 90 to 94 | 2.5%<br>(1.2-4.4%)             | 98%<br>(96-99%)          | 0.033<br>(0.011-0.072)                      | -0.0074%<br>(-0.12-0.088%)           | -0.029%<br>(-0.18-0.097%)           | -0.72<br>(-4.4-2.4)  | -1.2<br>(-19-14)       |
| Tunisia  | 2016 | Female | 95 plus  | 3.2%<br>(1.3-6.7%)             | 97%<br>(93-99%)          | 0.041<br>(0.011-0.11)                       | -0.034%<br>(-0.21-0.082%)            | -0.074%<br>(-0.31-0.073%)           | -0.79<br>(-3.2-0.81) | -1.5<br>(-9.5-3.7)     |
| Tunisia  | 2016 | Male   | All Ages | 11%<br>(9-13%)                 | 89%<br>(87-91%)          | 0.54<br>(0.34-0.81)                         | 1.6%<br>(0.94-2.4%)                  | 1.4%<br>(0.55-2.5%)                 | 490<br>(190-930)     | 23000<br>(13000-36000) |
| Tunisia  | 2016 | Male   | 15 to 19 | 7.3%<br>(4.3-12%)              | 93%<br>(88-96%)          | 0.19<br>(0.072-0.41)                        | 1%<br>(0.6-1.6%)                     | 1.2%<br>(0.52-2.6%)                 | 4<br>(1.6-8.4)       | 530<br>(320-870)       |
| Tunisia  | 2016 | Male   | 20 to 24 | 13%<br>(7.2-19%)               | 87%<br>(81-93%)          | 0.5<br>(0.22-0.93)                          | 2.4%<br>(1.5-4%)                     | 3%<br>(1.4-6.1%)                    | 15<br>(6.3-31)       | 1700<br>(970-2800)     |
| Tunisia  | 2016 | Male   | 25 to 29 | 16%<br>(9.3-23%)               | 84%<br>(77-91%)          | 0.79<br>(0.39-1.5)                          | 3%<br>(1.9-4.8%)                     | 4.5%<br>(2.2-8.4%)                  | 26<br>(11-49)        | 2400<br>(1400-3900)    |
| Tunisia  | 2016 | Male   | 30 to 34 | 17%<br>(9.6-25%)               | 83%<br>(75-90%)          | 0.93<br>(0.44-1.7)                          | 3%<br>(1.8-4.8%)                     | 4.8%<br>(2.4-8.5%)                  | 30<br>(14-56)        | 2400<br>(1400-4100)    |
| Tunisia  | 2016 | Male   | 35 to 39 | 17%<br>(10-26%)                | 83%<br>(74-90%)          | 0.96<br>(0.43-1.7)                          | 2.9%<br>(1.6-4.6%)                   | 4.7%<br>(2.1-8.4%)                  | 31<br>(14-60)        | 2300<br>(1300-3900)    |
| Tunisia  | 2016 | Male   | 40 to 44 | 17%<br>(10-26%)                | 83%<br>(74-90%)          | 0.97<br>(0.44-1.8)                          | 2.7%<br>(1.4-4.4%)                   | 4.3%<br>(1.8-7.4%)                  | 36<br>(15-65)        | 2200<br>(1100-3600)    |

| Location | Year | Sex    | Age      | Prevalence of current drinkers | Prevalence of abstainers | Population average of standard drinks daily | Percent of total attributable deaths | Percent of total attributable DALYs | Attributable deaths | Attributable DALYs      |
|----------|------|--------|----------|--------------------------------|--------------------------|---------------------------------------------|--------------------------------------|-------------------------------------|---------------------|-------------------------|
| Tunisia  | 2016 | Male   | 45 to 49 | 15%<br>(8.5-24%)               | 85%<br>(76-91%)          | 0.93<br>(0.42-1.7)                          | 2.6%<br>(1.3-4.4%)                   | 3.9%<br>(1.7-7%)                    | 49<br>(20-90)       | 2500<br>(1200-4500)     |
| Tunisia  | 2016 | Male   | 50 to 54 | 14%<br>(8.4-21%)               | 86%<br>(79-92%)          | 0.83<br>(0.39-1.6)                          | 2.2%<br>(0.91-3.9%)                  | 3.2%<br>(1.1-5.7%)                  | 59<br>(20-120)      | 2600<br>(1100-4800)     |
| Tunisia  | 2016 | Male   | 55 to 59 | 13%<br>(7.1-21%)               | 87%<br>(79-93%)          | 0.73<br>(0.32-1.4)                          | 1.9%<br>(0.72-3.6%)                  | 2.6%<br>(0.89-5.1%)                 | 65<br>(21-130)      | 2400<br>(880-4700)      |
| Tunisia  | 2016 | Male   | 60 to 64 | 12%<br>(6.3-20%)               | 88%<br>(80-94%)          | 0.59<br>(0.24-1.2)                          | 1.5%<br>(0.42-3%)                    | 1.9%<br>(0.51-4%)                   | 62<br>(16-140)      | 1900<br>(540-4100)      |
| Tunisia  | 2016 | Male   | 65 to 69 | 11%<br>(6-18%)                 | 89%<br>(82-94%)          | 0.48<br>(0.19-0.92)                         | 1%<br>(0.24-2.4%)                    | 1.3%<br>(0.22-3%)                   | 41<br>(6.8-100)     | 1000<br>(210-2500)      |
| Tunisia  | 2016 | Male   | 70 to 74 | 10%<br>(6-17%)                 | 90%<br>(83-94%)          | 0.37<br>(0.16-0.78)                         | 0.66%<br>(0.028-1.9%)                | 0.78%<br>(-0.014-2.3%)              | 28<br>(-0.47-84)    | 570<br>(21-1600)        |
| Tunisia  | 2016 | Male   | 75 to 79 | 9.3%<br>(5.3-15%)              | 91%<br>(85-95%)          | 0.29<br>(0.12-0.61)                         | 0.43%<br>(-0.075-1.5%)               | 0.48%<br>(-0.14-1.7%)               | 21<br>(-6.5-77)     | 340<br>(-66-1200)       |
| Tunisia  | 2016 | Male   | 80 to 84 | 8.3%<br>(4.6-13%)              | 92%<br>(87-95%)          | 0.24<br>(0.1-0.48)                          | 0.31%<br>(-0.071-1.1%)               | 0.34%<br>(-0.13-1.3%)               | 14<br>(-5.4-52)     | 170<br>(-41-570)        |
| Tunisia  | 2016 | Male   | 85 to 89 | 7.8%<br>(4.3-13%)              | 92%<br>(87-96%)          | 0.21<br>(0.083-0.41)                        | 0.21%<br>(-0.11-0.78%)               | 0.21%<br>(-0.19-0.87%)              | 8.1<br>(-7.3-35)    | 74<br>(-39-280)         |
| Tunisia  | 2016 | Male   | 90 to 94 | 8.3%<br>(4.6-14%)              | 92%<br>(86-95%)          | 0.2<br>(0.078-0.43)                         | 0.13%<br>(-0.2-0.62%)                | 0.099%<br>(-0.28-0.66%)             | 1.9<br>(-5.7-13)    | 16<br>(-23-77)          |
| Tunisia  | 2016 | Male   | 95 plus  | 9.8%<br>(5-18%)                | 90%<br>(82-95%)          | 0.22<br>(0.068-0.49)                        | 0.11%<br>(-0.28-0.71%)               | 0.032%<br>(-0.46-0.74%)             | 0.18<br>(-2.6-4.4)  | 2.5<br>(-6.7-17)        |
| Turkey   | 1990 | Female | All Ages | 21%<br>(17-24%)                | 79%<br>(76-83%)          | 0.67<br>(0.53-0.83)                         | 0.81%<br>(0.43-1.3%)                 | 0.89%<br>(0.065-1.9%)               | 1400<br>(98-3000)   | 77000<br>(40000-120000) |
| Turkey   | 1990 | Female | 15 to 19 | 22%<br>(14-32%)                | 78%<br>(68-86%)          | 0.74<br>(0.4-1.2)                           | 1.4%<br>(0.81-2.2%)                  | 2.5%<br>(1.2-4.3%)                  | 36<br>(17-64)       | 4900<br>(2800-7900)     |
| Turkey   | 1990 | Female | 20 to 24 | 29%<br>(19-40%)                | 71%<br>(60-81%)          | 1.2<br>(0.67-1.8)                           | 2.4%<br>(1.5-3.5%)                   | 3.8%<br>(1.9-6.2%)                  | 64<br>(32-110)      | 8700<br>(5200-13000)    |
| Turkey   | 1990 | Female | 25 to 29 | 29%<br>(20-41%)                | 71%<br>(59-80%)          | 1<br>(0.6-1.6)                              | 2.2%<br>(1.3-3.2%)                   | 3.4%<br>(1.5-5.9%)                  | 64<br>(28-110)      | 8100<br>(4800-12000)    |
| Turkey   | 1990 | Female | 30 to 34 | 27%<br>(17-38%)                | 73%<br>(62-83%)          | 0.97<br>(0.54-1.5)                          | 2%<br>(1.1-3.1%)                     | 3.5%<br>(1.4-6.2%)                  | 76<br>(31-130)      | 7700<br>(4300-12000)    |
| Turkey   | 1990 | Female | 35 to 39 | 25%<br>(16-36%)                | 75%<br>(64-84%)          | 1.2<br>(0.64-1.8)                           | 2.2%<br>(1.3-3.5%)                   | 4.3%<br>(2-7.4%)                    | 110<br>(49-190)     | 8600<br>(4800-14000)    |
| Turkey   | 1990 | Female | 40 to 44 | 24%<br>(16-35%)                | 76%<br>(65-84%)          | 1.2<br>(0.7-1.9)                            | 2.4%<br>(1.3-3.9%)                   | 4.7%<br>(2.3-7.7%)                  | 120<br>(58-210)     | 7700<br>(4100-13000)    |
| Turkey   | 1990 | Female | 45 to 49 | 24%<br>(15-35%)                | 76%<br>(65-85%)          | 1.2<br>(0.67-2)                             | 2.1%<br>(0.93-3.9%)                  | 3.9%<br>(1.6-7.1%)                  | 130<br>(50-230)     | 6800<br>(3000-12000)    |
| Turkey   | 1990 | Female | 50 to 54 | 25%<br>(17-35%)                | 75%<br>(65-83%)          | 1.2<br>(0.67-2)                             | 2%<br>(0.69-3.9%)                    | 3.5%<br>(1.2-6.7%)                  | 140<br>(46-260)     | 6400<br>(2200-12000)    |
| Turkey   | 1990 | Female | 55 to 59 | 25%<br>(16-36%)                | 75%<br>(64-84%)          | 1.2<br>(0.62-2)                             | 2%<br>(0.38-3.9%)                    | 3.2%<br>(0.66-6.3%)                 | 190<br>(41-380)     | 7300<br>(1400-15000)    |
| Turkey   | 1990 | Female | 60 to 64 | 24%<br>(15-36%)                | 76%<br>(64-85%)          | 1.1<br>(0.55-1.8)                           | 1.5%<br>(-0.12-3.6%)                 | 2.2%<br>(-0.13-5.6%)                | 170<br>(-9.4-430)   | 5300<br>(-420-14000)    |

| Location | Year | Sex    | Age      | Prevalence of current drinkers | Prevalence of abstainers | Population average of standard drinks daily | Percent of total attributable deaths | Percent of total attributable DALYs | Attributable deaths | Attributable DALYs        |
|----------|------|--------|----------|--------------------------------|--------------------------|---------------------------------------------|--------------------------------------|-------------------------------------|---------------------|---------------------------|
| Turkey   | 1990 | Female | 65 to 69 | 25%<br>(16-36%)                | 75%<br>(64-84%)          | 0.92<br>(0.49-1.5)                          | 0.98%<br>(-0.29-2.7%)                | 1.4%<br>(-0.45-3.8%)                | 120<br>(-38-340)    | 3100<br>(-890-8800)       |
| Turkey   | 1990 | Female | 70 to 74 | 24%<br>(16-35%)                | 76%<br>(65-84%)          | 0.76<br>(0.39-1.3)                          | 0.43%<br>(-0.82-2.1%)                | 0.55%<br>(-1.2-2.8%)                | 55<br>(-110-290)    | 1100<br>(-2200-5800)      |
| Turkey   | 1990 | Female | 75 to 79 | 22%<br>(14-33%)                | 78%<br>(67-86%)          | 0.64<br>(0.29-1.2)                          | 0.2%<br>(-0.88-1.7%)                 | 0.25%<br>(-1.2-2.2%)                | 41<br>(-200-380)    | 700<br>(-3100-6100)       |
| Turkey   | 1990 | Female | 80 to 84 | 21%<br>(13-30%)                | 79%<br>(70-87%)          | 0.57<br>(0.27-0.97)                         | 0.17%<br>(-0.78-1.3%)                | 0.2%<br>(-1-1.7%)                   | 31<br>(-160-260)    | 400<br>(-1800-3100)       |
| Turkey   | 1990 | Female | 85 to 89 | 20%<br>(12-29%)                | 80%<br>(71-88%)          | 0.52<br>(0.25-0.94)                         | 0.1%<br>(-0.74-1.1%)                 | 0.081%<br>(-1-1.4%)                 | 9.8<br>(-120-170)   | 120<br>(-890-1400)        |
| Turkey   | 1990 | Female | 90 to 94 | 21%<br>(13-30%)                | 79%<br>(70-87%)          | 0.52<br>(0.23-0.96)                         | 0.064%<br>(-0.75-1.1%)               | 0.0068%<br>(-1.1-1.4%)              | 0.38<br>(-62-77)    | 26<br>(-300-440)          |
| Turkey   | 1990 | Female | 95 plus  | 24%<br>(14-37%)                | 76%<br>(63-86%)          | 0.55<br>(0.21-1.1)                          | 0.065%<br>(-0.96-1.4%)               | -0.044%<br>(-1.4-1.6%)              | -0.88<br>(-29-33)   | 6.2<br>(-89-120)          |
| Turkey   | 1990 | Male   | All Ages | 15%<br>(12-18%)                | 85%<br>(82-88%)          | 0.63<br>(0.49-0.79)                         | 1.4%<br>(0.93-1.9%)                  | 1.5%<br>(0.82-2.4%)                 | 3000<br>(1600-4700) | 150000<br>(100000-220000) |
| Turkey   | 1990 | Male   | 15 to 19 | 12%<br>(7.5-18%)               | 88%<br>(82-92%)          | 0.3<br>(0.15-0.55)                          | 1.4%<br>(0.87-2.2%)                  | 1.6%<br>(0.79-3.1%)                 | 50<br>(24-95)       | 6100<br>(3600-9800)       |
| Turkey   | 1990 | Male   | 20 to 24 | 19%<br>(12-28%)                | 81%<br>(72-88%)          | 0.78<br>(0.42-1.2)                          | 3.5%<br>(2.3-5.1%)                   | 4%<br>(2.1-6.9%)                    | 150<br>(78-240)     | 15000<br>(9700-23000)     |
| Turkey   | 1990 | Male   | 25 to 29 | 22%<br>(14-31%)                | 78%<br>(69-86%)          | 1.2<br>(0.7-1.8)                            | 4.4%<br>(2.8-6.4%)                   | 5.9%<br>(3.2-9.4%)                  | 220<br>(120-350)    | 19000<br>(11000-28000)    |
| Turkey   | 1990 | Male   | 30 to 34 | 23%<br>(14-34%)                | 77%<br>(66-86%)          | 1.3<br>(0.75-2.1)                           | 4.1%<br>(2.5-6.2%)                   | 5.7%<br>(2.9-9.1%)                  | 220<br>(110-360)    | 17000<br>(9700-25000)     |
| Turkey   | 1990 | Male   | 35 to 39 | 24%<br>(15-35%)                | 76%<br>(65-85%)          | 1.4<br>(0.74-2.2)                           | 4%<br>(2.3-6.1%)                     | 5.1%<br>(2.5-8.3%)                  | 240<br>(120-390)    | 17000<br>(9600-25000)     |
| Turkey   | 1990 | Male   | 40 to 44 | 25%<br>(16-35%)                | 75%<br>(65-84%)          | 1.4<br>(0.8-2.2)                            | 4.8%<br>(2.7-7.1%)                   | 6.3%<br>(2.9-9.9%)                  | 310<br>(140-490)    | 18000<br>(9700-27000)     |
| Turkey   | 1990 | Male   | 45 to 49 | 23%<br>(14-33%)                | 77%<br>(67-86%)          | 1.5<br>(0.79-2.5)                           | 4.3%<br>(2.2-6.7%)                   | 5.5%<br>(2.6-8.9%)                  | 360<br>(160-600)    | 18000<br>(9300-28000)     |
| Turkey   | 1990 | Male   | 50 to 54 | 22%<br>(14-30%)                | 78%<br>(70-86%)          | 1.4<br>(0.74-2.2)                           | 3%<br>(1.3-5.2%)                     | 3.7%<br>(1.4-6.5%)                  | 340<br>(120-610)    | 15000<br>(6400-25000)     |
| Turkey   | 1990 | Male   | 55 to 59 | 20%<br>(12-31%)                | 80%<br>(69-88%)          | 1.1<br>(0.57-1.8)                           | 2%<br>(0.66-3.9%)                    | 2.4%<br>(0.63-4.9%)                 | 330<br>(87-680)     | 12000<br>(4000-24000)     |
| Turkey   | 1990 | Male   | 60 to 64 | 18%<br>(11-29%)                | 82%<br>(71-89%)          | 0.85<br>(0.42-1.5)                          | 1.5%<br>(0.36-3.3%)                  | 1.8%<br>(0.3-4%)                    | 260<br>(41-580)     | 7900<br>(1800-17000)      |
| Turkey   | 1990 | Male   | 65 to 69 | 18%<br>(11-27%)                | 82%<br>(73-89%)          | 0.76<br>(0.39-1.3)                          | 1.2%<br>(0.28-2.7%)                  | 1.4%<br>(0.22-3.2%)                 | 180<br>(28-420)     | 4600<br>(1100-10000)      |
| Turkey   | 1990 | Male   | 70 to 74 | 17%<br>(11-26%)                | 83%<br>(74-89%)          | 0.66<br>(0.33-1.1)                          | 0.94%<br>(0.029-2.3%)                | 1.1%<br>(-0.038-2.6%)               | 120<br>(-4.5-310)   | 2500<br>(74-6000)         |
| Turkey   | 1990 | Male   | 75 to 79 | 15%<br>(9.3-24%)               | 85%<br>(76-91%)          | 0.54<br>(0.26-1)                            | 0.56%<br>(-0.1-1.6%)                 | 0.61%<br>(-0.23-1.9%)               | 130<br>(-46-390)    | 2200<br>(-440-6300)       |
| Turkey   | 1990 | Male   | 80 to 84 | 14%<br>(8.2-21%)               | 86%<br>(79-92%)          | 0.45<br>(0.22-0.77)                         | 0.47%<br>(-0.042-1.2%)               | 0.5%<br>(-0.13-1.4%)                | 63<br>(-17-180)     | 800<br>(-73-2100)         |

| Location | Year | Sex    | Age      | Prevalence of current drinkers | Prevalence of abstainers | Population average of standard drinks daily | Percent of total attributable deaths | Percent of total attributable DALYs | Attributable deaths  | Attributable DALYs        |
|----------|------|--------|----------|--------------------------------|--------------------------|---------------------------------------------|--------------------------------------|-------------------------------------|----------------------|---------------------------|
| Turkey   | 1990 | Male   | 85 to 89 | 13%<br>(7.7-20%)               | 87%<br>(80-92%)          | 0.38<br>(0.19-0.67)                         | 0.3%<br>(-0.12-0.87%)                | 0.28%<br>(-0.22-0.98%)              | 20<br>(-16-70)       | 200<br>(-77-600)          |
| Turkey   | 1990 | Male   | 90 to 94 | 14%<br>(8.3-21%)               | 86%<br>(79-92%)          | 0.35<br>(0.16-0.63)                         | 0.19%<br>(-0.19-0.74%)               | 0.12%<br>(-0.37-0.79%)              | 3.1<br>(-10-21)      | 35<br>(-34-130)           |
| Turkey   | 1990 | Male   | 95 plus  | 16%<br>(8.7-27%)               | 84%<br>(73-91%)          | 0.36<br>(0.13-0.75)                         | 0.15%<br>(-0.32-0.87%)               | -0.0035%<br>(-0.63-0.88%)           | -0.018<br>(-3.3-4.6) | 3.7<br>(-7.3-21)          |
| Turkey   | 1995 | Female | All Ages | 21%<br>(17-24%)                | 79%<br>(76-83%)          | 0.83<br>(0.67-1)                            | 1.2%<br>(0.73-1.8%)                  | 1.4%<br>(0.42-2.7%)                 | 2300<br>(680-4400)   | 110000<br>(67000-170000)  |
| Turkey   | 1995 | Female | 15 to 19 | 23%<br>(15-32%)                | 77%<br>(68-85%)          | 0.95<br>(0.53-1.6)                          | 1.6%<br>(0.96-2.5%)                  | 3%<br>(1.5-5%)                      | 48<br>(24-80)        | 6100<br>(3600-9500)       |
| Turkey   | 1995 | Female | 20 to 24 | 30%<br>(20-40%)                | 70%<br>(60-80%)          | 1.5<br>(0.87-2.3)                           | 2.7%<br>(1.8-3.9%)                   | 4.6%<br>(2.5-7.4%)                  | 88<br>(47-140)       | 11000<br>(7000-16000)     |
| Turkey   | 1995 | Female | 25 to 29 | 29%<br>(20-40%)                | 71%<br>(60-80%)          | 1.2<br>(0.75-1.9)                           | 2.5%<br>(1.6-3.5%)                   | 4.2%<br>(2.2-6.7%)                  | 82<br>(42-130)       | 9800<br>(6100-14000)      |
| Turkey   | 1995 | Female | 30 to 34 | 26%<br>(17-36%)                | 74%<br>(64-83%)          | 1.1<br>(0.64-1.8)                           | 2.3%<br>(1.4-3.4%)                   | 4.1%<br>(2.1-6.7%)                  | 95<br>(48-160)       | 9400<br>(5500-14000)      |
| Turkey   | 1995 | Female | 35 to 39 | 23%<br>(15-34%)                | 77%<br>(66-85%)          | 1.3<br>(0.76-2.1)                           | 2.5%<br>(1.5-3.8%)                   | 4.9%<br>(2.5-7.7%)                  | 140<br>(69-230)      | 11000<br>(6200-16000)     |
| Turkey   | 1995 | Female | 40 to 44 | 22%<br>(15-32%)                | 78%<br>(68-85%)          | 1.4<br>(0.79-2.1)                           | 2.7%<br>(1.6-4.3%)                   | 5.3%<br>(2.9-8.3%)                  | 180<br>(97-290)      | 11000<br>(6400-17000)     |
| Turkey   | 1995 | Female | 45 to 49 | 22%<br>(14-32%)                | 78%<br>(68-86%)          | 1.3<br>(0.76-2.2)                           | 2.6%<br>(1.3-4.4%)                   | 4.7%<br>(2.2-8%)                    | 170<br>(79-290)      | 9200<br>(4600-15000)      |
| Turkey   | 1995 | Female | 50 to 54 | 23%<br>(16-32%)                | 77%<br>(68-84%)          | 1.4<br>(0.78-2.2)                           | 2.6%<br>(1.2-4.7%)                   | 4.4%<br>(1.9-8%)                    | 190<br>(86-350)      | 8900<br>(4100-16000)      |
| Turkey   | 1995 | Female | 55 to 59 | 23%<br>(15-34%)                | 77%<br>(66-85%)          | 1.4<br>(0.74-2.2)                           | 2.6%<br>(0.95-4.8%)                  | 4.3%<br>(1.5-7.9%)                  | 240<br>(89-450)      | 9300<br>(3500-17000)      |
| Turkey   | 1995 | Female | 60 to 64 | 24%<br>(15-36%)                | 76%<br>(64-85%)          | 1.3<br>(0.66-2.2)                           | 2.2%<br>(0.45-4.7%)                  | 3.3%<br>(0.65-7.2%)                 | 280<br>(58-620)      | 9100<br>(1900-20000)      |
| Turkey   | 1995 | Female | 65 to 69 | 24%<br>(16-35%)                | 76%<br>(65-84%)          | 1.1<br>(0.59-1.8)                           | 1.6%<br>(0.24-3.6%)                  | 2.3%<br>(0.3-5.1%)                  | 250<br>(31-560)      | 6500<br>(940-14000)       |
| Turkey   | 1995 | Female | 70 to 74 | 23%<br>(15-33%)                | 77%<br>(67-85%)          | 0.88<br>(0.45-1.5)                          | 0.95%<br>(-0.36-2.9%)                | 1.3%<br>(-0.57-3.9%)                | 150<br>(-69-470)     | 3200<br>(-1200-9700)      |
| Turkey   | 1995 | Female | 75 to 79 | 22%<br>(14-32%)                | 78%<br>(68-86%)          | 0.74<br>(0.34-1.4)                          | 0.63%<br>(-0.62-2.5%)                | 0.78%<br>(-0.87-3.2%)               | 140<br>(-150-580)    | 2300<br>(-2200-9000)      |
| Turkey   | 1995 | Female | 80 to 84 | 20%<br>(13-30%)                | 80%<br>(70-87%)          | 0.66<br>(0.33-1.1)                          | 0.58%<br>(-0.48-2%)                  | 0.69%<br>(-0.69-2.6%)               | 130<br>(-130-500)    | 1600<br>(-1300-5700)      |
| Turkey   | 1995 | Female | 85 to 89 | 19%<br>(12-29%)                | 81%<br>(71-88%)          | 0.61<br>(0.31-1.1)                          | 0.48%<br>(-0.47-1.8%)                | 0.54%<br>(-0.65-2.2%)               | 98<br>(-120-400)     | 840<br>(-840-3200)        |
| Turkey   | 1995 | Female | 90 to 94 | 20%<br>(13-29%)                | 80%<br>(71-87%)          | 0.61<br>(0.28-1.1)                          | 0.41%<br>(-0.55-1.7%)                | 0.44%<br>(-0.8-2.1%)                | 40<br>(-73-190)      | 250<br>(-340-1100)        |
| Turkey   | 1995 | Female | 95 plus  | 23%<br>(13-36%)                | 77%<br>(64-87%)          | 0.65<br>(0.26-1.3)                          | 0.44%<br>(-0.74-2.3%)                | 0.43%<br>(-1.1-2.7%)                | 13<br>(-33-83)       | 59<br>(-100-310)          |
| Turkey   | 1995 | Male   | All Ages | 17%<br>(14-20%)                | 83%<br>(80-86%)          | 0.87<br>(0.7-1.1)                           | 2.1%<br>(1.5-2.7%)                   | 2.3%<br>(1.3-3.3%)                  | 4800<br>(2800-7200)  | 230000<br>(160000-310000) |

| Location | Year | Sex    | Age      | Prevalence of current drinkers | Prevalence of abstainers | Population average of standard drinks daily | Percent of total attributable deaths | Percent of total attributable DALYs | Attributable deaths | Attributable DALYs       |
|----------|------|--------|----------|--------------------------------|--------------------------|---------------------------------------------|--------------------------------------|-------------------------------------|---------------------|--------------------------|
| Turkey   | 1995 | Male   | 15 to 19 | 15%<br>(9.3-21%)               | 85%<br>(79-91%)          | 0.46<br>(0.23-0.79)                         | 1.8%<br>(1-2.8%)                     | 2.2%<br>(1.1-4%)                    | 85<br>(40-160)      | 8900<br>(5200-14000)     |
| Turkey   | 1995 | Male   | 20 to 24 | 24%<br>(15-32%)                | 76%<br>(68-85%)          | 1.2<br>(0.66-1.8)                           | 4.3%<br>(2.8-6.6%)                   | 5.3%<br>(2.9-8.6%)                  | 270<br>(150-440)    | 24000<br>(15000-36000)   |
| Turkey   | 1995 | Male   | 25 to 29 | 24%<br>(17-33%)                | 76%<br>(67-83%)          | 1.6<br>(0.96-2.4)                           | 5.4%<br>(3.3-7.9%)                   | 7.3%<br>(4.1-12%)                   | 360<br>(200-560)    | 28000<br>(17000-41000)   |
| Turkey   | 1995 | Male   | 30 to 34 | 23%<br>(16-33%)                | 77%<br>(67-84%)          | 1.6<br>(0.98-2.5)                           | 4.9%<br>(3-7.3%)                     | 6.9%<br>(3.7-11%)                   | 350<br>(190-540)    | 25000<br>(15000-36000)   |
| Turkey   | 1995 | Male   | 35 to 39 | 25%<br>(18-35%)                | 75%<br>(65-82%)          | 1.7<br>(1-2.6)                              | 4.9%<br>(3-7%)                       | 6.5%<br>(3.5-9.7%)                  | 370<br>(200-570)    | 24000<br>(14000-35000)   |
| Turkey   | 1995 | Male   | 40 to 44 | 26%<br>(19-36%)                | 74%<br>(64-81%)          | 1.9<br>(1.1-2.9)                            | 5.9%<br>(3.4-8.5%)                   | 8.1%<br>(4-12%)                     | 500<br>(250-770)    | 28000<br>(16000-40000)   |
| Turkey   | 1995 | Male   | 45 to 49 | 25%<br>(16-34%)                | 75%<br>(66-84%)          | 2<br>(1.1-3.2)                              | 5.4%<br>(3.1-7.8%)                   | 7.1%<br>(3.9-11%)                   | 490<br>(260-740)    | 24000<br>(14000-35000)   |
| Turkey   | 1995 | Male   | 50 to 54 | 23%<br>(15-32%)                | 77%<br>(68-85%)          | 1.8<br>(1-2.9)                              | 4%<br>(2-6.2%)                       | 5%<br>(2.2-8%)                      | 440<br>(200-710)    | 18000<br>(9200-29000)    |
| Turkey   | 1995 | Male   | 55 to 59 | 21%<br>(13-32%)                | 79%<br>(68-87%)          | 1.4<br>(0.72-2.3)                           | 2.9%<br>(1.1-5%)                     | 3.5%<br>(1.2-6.4%)                  | 440<br>(150-810)    | 16000<br>(6200-28000)    |
| Turkey   | 1995 | Male   | 60 to 64 | 19%<br>(11-30%)                | 81%<br>(70-89%)          | 1.1<br>(0.52-1.9)                           | 2.2%<br>(0.66-4.4%)                  | 2.6%<br>(0.71-5.3%)                 | 470<br>(120-960)    | 14000<br>(4300-28000)    |
| Turkey   | 1995 | Male   | 65 to 69 | 18%<br>(11-28%)                | 82%<br>(72-89%)          | 0.95<br>(0.49-1.6)                          | 1.8%<br>(0.56-3.7%)                  | 2.1%<br>(0.6-4.3%)                  | 360<br>(100-760)    | 9100<br>(2800-19000)     |
| Turkey   | 1995 | Male   | 70 to 74 | 17%<br>(11-27%)                | 83%<br>(73-89%)          | 0.82<br>(0.41-1.5)                          | 1.4%<br>(0.27-3.2%)                  | 1.6%<br>(0.22-3.7%)                 | 260<br>(36-610)     | 5200<br>(1000-12000)     |
| Turkey   | 1995 | Male   | 75 to 79 | 16%<br>(9.6-24%)               | 84%<br>(76-90%)          | 0.67<br>(0.32-1.3)                          | 0.9%<br>(0.025-2.3%)                 | 0.99%<br>(-0.059-2.7%)              | 190<br>(-11-510)    | 3100<br>(86-8000)        |
| Turkey   | 1995 | Male   | 80 to 84 | 14%<br>(8.5-22%)               | 86%<br>(78-92%)          | 0.55<br>(0.28-0.94)                         | 0.75%<br>(0.054-1.8%)                | 0.81%<br>(-0.018-2%)                | 140<br>(-3.1-350)   | 1700<br>(130-3900)       |
| Turkey   | 1995 | Male   | 85 to 89 | 13%<br>(7.7-21%)               | 87%<br>(79-92%)          | 0.46<br>(0.23-0.83)                         | 0.52%<br>(-0.033-1.4%)               | 0.53%<br>(-0.13-1.5%)               | 72<br>(-17-200)     | 640<br>(-41-1700)        |
| Turkey   | 1995 | Male   | 90 to 94 | 14%<br>(8.4-22%)               | 86%<br>(78-92%)          | 0.44<br>(0.2-0.8)                           | 0.35%<br>(-0.16-1.2%)                | 0.31%<br>(-0.32-1.4%)               | 15<br>(-15-66)      | 110<br>(-50-370)         |
| Turkey   | 1995 | Male   | 95 plus  | 16%<br>(8.9-28%)               | 84%<br>(72-91%)          | 0.45<br>(0.16-0.91)                         | 0.29%<br>(-0.3-1.4%)                 | 0.17%<br>(-0.58-1.5%)               | 2.2<br>(-7.5-19)    | 16<br>(-17-77)           |
| Turkey   | 2000 | Female | All Ages | 20%<br>(17-23%)                | 80%<br>(77-83%)          | 1<br>(0.82-1.2)                             | 1.5%<br>(1-2.2%)                     | 2%<br>(0.85-3.7%)                   | 3100<br>(1300-5600) | 130000<br>(83000-190000) |
| Turkey   | 2000 | Female | 15 to 19 | 22%<br>(15-31%)                | 78%<br>(69-85%)          | 1.1<br>(0.62-1.8)                           | 1.7%<br>(1-2.6%)                     | 3.9%<br>(2-6.4%)                    | 46<br>(23-76)       | 6200<br>(3700-9300)      |
| Turkey   | 2000 | Female | 20 to 24 | 29%<br>(19-39%)                | 71%<br>(61-81%)          | 1.8<br>(1-2.8)                              | 2.9%<br>(1.9-4%)                     | 5.9%<br>(3.3-9%)                    | 87<br>(48-130)      | 12000<br>(7500-16000)    |
| Turkey   | 2000 | Female | 25 to 29 | 28%<br>(19-39%)                | 72%<br>(61-81%)          | 1.5<br>(0.89-2.3)                           | 2.6%<br>(1.7-3.6%)                   | 5.2%<br>(2.9-8.1%)                  | 82<br>(46-130)      | 11000<br>(6600-15000)    |
| Turkey   | 2000 | Female | 30 to 34 | 25%<br>(16-36%)                | 75%<br>(64-84%)          | 1.3<br>(0.77-2.1)                           | 2.4%<br>(1.5-3.5%)                   | 5.1%<br>(2.8-7.9%)                  | 91<br>(49-140)      | 9800<br>(6000-14000)     |

| Location | Year | Sex    | Age      | Prevalence of current drinkers | Prevalence of abstainers | Population average of standard drinks daily | Percent of total attributable deaths | Percent of total attributable DALYs | Attributable deaths | Attributable DALYs        |
|----------|------|--------|----------|--------------------------------|--------------------------|---------------------------------------------|--------------------------------------|-------------------------------------|---------------------|---------------------------|
| Turkey   | 2000 | Female | 35 to 39 | 22%<br>(14-33%)                | 78%<br>(67-86%)          | 1.5<br>(0.87-2.5)                           | 2.5%<br>(1.6-3.7%)                   | 5.7%<br>(3.2-8.9%)                  | 120<br>(67-190)     | 10000<br>(6300-15000)     |
| Turkey   | 2000 | Female | 40 to 44 | 21%<br>(14-31%)                | 79%<br>(69-86%)          | 1.6<br>(0.96-2.5)                           | 2.8%<br>(1.7-4.2%)                   | 6.2%<br>(3.7-9.4%)                  | 170<br>(99-260)     | 12000<br>(7200-17000)     |
| Turkey   | 2000 | Female | 45 to 49 | 22%<br>(14-30%)                | 78%<br>(70-86%)          | 1.6<br>(0.91-2.6)                           | 2.8%<br>(1.6-4.5%)                   | 5.7%<br>(3.1-9.4%)                  | 200<br>(110-340)    | 12000<br>(6500-19000)     |
| Turkey   | 2000 | Female | 50 to 54 | 22%<br>(15-32%)                | 78%<br>(68-85%)          | 1.6<br>(0.92-2.6)                           | 2.9%<br>(1.5-5%)                     | 5.5%<br>(2.9-9.4%)                  | 220<br>(110-380)    | 11000<br>(5600-18000)     |
| Turkey   | 2000 | Female | 55 to 59 | 23%<br>(15-33%)                | 77%<br>(67-85%)          | 1.6<br>(0.85-2.7)                           | 3.1%<br>(1.4-5.3%)                   | 5.4%<br>(2.4-9.2%)                  | 270<br>(120-470)    | 11000<br>(5100-19000)     |
| Turkey   | 2000 | Female | 60 to 64 | 23%<br>(14-34%)                | 77%<br>(66-86%)          | 1.5<br>(0.77-2.6)                           | 2.8%<br>(0.86-5.3%)                  | 4.3%<br>(1.4-8.5%)                  | 310<br>(98-610)     | 10000<br>(3300-20000)     |
| Turkey   | 2000 | Female | 65 to 69 | 23%<br>(15-34%)                | 77%<br>(66-85%)          | 1.3<br>(0.7-2.2)                            | 2.2%<br>(0.71-4.4%)                  | 3.3%<br>(1-6.7%)                    | 350<br>(110-720)    | 9500<br>(3000-19000)      |
| Turkey   | 2000 | Female | 70 to 74 | 22%<br>(15-33%)                | 78%<br>(67-85%)          | 1.1<br>(0.53-1.8)                           | 1.5%<br>(0.05-3.8%)                  | 2.1%<br>(0.0083-5.3%)               | 280<br>(1.2-710)    | 6000<br>(200-15000)       |
| Turkey   | 2000 | Female | 75 to 79 | 21%<br>(13-31%)                | 79%<br>(69-87%)          | 0.88<br>(0.4-1.7)                           | 1.1%<br>(-0.26-3.2%)                 | 1.4%<br>(-0.41-4.2%)                | 280<br>(-82-850)    | 4700<br>(-1200-14000)     |
| Turkey   | 2000 | Female | 80 to 84 | 20%<br>(12-29%)                | 80%<br>(71-88%)          | 0.79<br>(0.38-1.4)                          | 1%<br>(-0.12-2.8%)                   | 1.3%<br>(-0.19-3.6%)                | 230<br>(-34-650)    | 2800<br>(-340-7400)       |
| Turkey   | 2000 | Female | 85 to 89 | 19%<br>(12-27%)                | 81%<br>(73-88%)          | 0.73<br>(0.36-1.3)                          | 0.92%<br>(-0.13-2.6%)                | 1.1%<br>(-0.24-3.1%)                | 170<br>(-38-500)    | 1400<br>(-210-4000)       |
| Turkey   | 2000 | Female | 90 to 94 | 20%<br>(13-28%)                | 80%<br>(72-87%)          | 0.73<br>(0.32-1.4)                          | 0.83%<br>(-0.26-2.5%)                | 0.95%<br>(-0.42-3.1%)               | 98<br>(-44-310)     | 570<br>(-170-1700)        |
| Turkey   | 2000 | Female | 95 plus  | 22%<br>(13-35%)                | 78%<br>(65-87%)          | 0.78<br>(0.31-1.6)                          | 0.9%<br>(-0.47-3.3%)                 | 1%<br>(-0.71-4.1%)                  | 36<br>(-25-150)     | 140<br>(-70-520)          |
| Turkey   | 2000 | Male   | All Ages | 16%<br>(14-19%)                | 84%<br>(81-86%)          | 1.1<br>(0.87-1.3)                           | 2.5%<br>(1.9-3.2%)                   | 2.8%<br>(1.8-3.9%)                  | 5500<br>(3600-7700) | 250000<br>(190000-330000) |
| Turkey   | 2000 | Male   | 15 to 19 | 14%<br>(8.9-21%)               | 86%<br>(79-91%)          | 0.54<br>(0.26-0.91)                         | 2%<br>(1.1-3.1%)                     | 2.7%<br>(1.3-4.9%)                  | 80<br>(36-150)      | 8800<br>(5200-14000)      |
| Turkey   | 2000 | Male   | 20 to 24 | 23%<br>(14-31%)                | 77%<br>(69-86%)          | 1.4<br>(0.79-2.1)                           | 5%<br>(3.2-7.4%)                     | 6.9%<br>(3.8-11%)                   | 270<br>(150-440)    | 25000<br>(16000-37000)    |
| Turkey   | 2000 | Male   | 25 to 29 | 23%<br>(16-31%)                | 77%<br>(69-84%)          | 1.8<br>(1.1-2.7)                            | 5.9%<br>(3.9-8.4%)                   | 9%<br>(5.3-13%)                     | 370<br>(210-570)    | 29000<br>(19000-43000)    |
| Turkey   | 2000 | Male   | 30 to 34 | 22%<br>(15-31%)                | 78%<br>(69-85%)          | 1.9<br>(1.1-2.9)                            | 5.4%<br>(3.6-7.9%)                   | 8.4%<br>(5.1-13%)                   | 360<br>(210-540)    | 26000<br>(17000-38000)    |
| Turkey   | 2000 | Male   | 35 to 39 | 24%<br>(17-34%)                | 76%<br>(66-83%)          | 2<br>(1.2-3.1)                              | 5.2%<br>(3.4-7.4%)                   | 7.7%<br>(4.5-11%)                   | 380<br>(220-570)    | 25000<br>(16000-36000)    |
| Turkey   | 2000 | Male   | 40 to 44 | 25%<br>(18-34%)                | 75%<br>(66-82%)          | 2.2<br>(1.3-3.3)                            | 5.9%<br>(3.7-8.4%)                   | 8.7%<br>(4.9-12%)                   | 500<br>(280-730)    | 28000<br>(18000-40000)    |
| Turkey   | 2000 | Male   | 45 to 49 | 24%<br>(15-33%)                | 76%<br>(67-85%)          | 2.3<br>(1.3-3.7)                            | 5.5%<br>(3.5-7.6%)                   | 7.6%<br>(4.5-11%)                   | 530<br>(320-770)    | 26000<br>(17000-37000)    |
| Turkey   | 2000 | Male   | 50 to 54 | 22%<br>(15-30%)                | 78%<br>(70-85%)          | 2.1<br>(1.2-3.4)                            | 4.4%<br>(2.6-6.3%)                   | 5.8%<br>(3.2-8.5%)                  | 450<br>(250-670)    | 19000<br>(12000-28000)    |



| Location | Year | Sex    | Age      | Prevalence of current drinkers | Prevalence of abstainers | Population average of standard drinks daily | Percent of total attributable deaths | Percent of total attributable DALYs | Attributable deaths | Attributable DALYs       |
|----------|------|--------|----------|--------------------------------|--------------------------|---------------------------------------------|--------------------------------------|-------------------------------------|---------------------|--------------------------|
| Turkey   | 2000 | Male   | 55 to 59 | 20%<br>(12-30%)                | 80%<br>(70-88%)          | 1.6<br>(0.85-2.7)                           | 3.4%<br>(1.6-5.5%)                   | 4.3%<br>(2-7.2%)                    | 450<br>(200-720)    | 16000<br>(7900-26000)    |
| Turkey   | 2000 | Male   | 60 to 64 | 18%<br>(11-29%)                | 82%<br>(71-89%)          | 1.3<br>(0.61-2.2)                           | 2.6%<br>(1-4.7%)                     | 3.2%<br>(1.1-5.9%)                  | 480<br>(170-860)    | 15000<br>(5700-26000)    |
| Turkey   | 2000 | Male   | 65 to 69 | 17%<br>(11-26%)                | 83%<br>(74-89%)          | 1.1<br>(0.57-1.9)                           | 2.2%<br>(0.86-4%)                    | 2.7%<br>(0.96-4.9%)                 | 530<br>(190-970)    | 13000<br>(5200-24000)    |
| Turkey   | 2000 | Male   | 70 to 74 | 16%<br>(10-25%)                | 84%<br>(75-90%)          | 0.94<br>(0.48-1.7)                          | 1.8%<br>(0.55-3.5%)                  | 2.1%<br>(0.59-4.2%)                 | 400<br>(110-800)    | 8000<br>(2600-16000)     |
| Turkey   | 2000 | Male   | 75 to 79 | 15%<br>(8.9-23%)               | 85%<br>(77-91%)          | 0.77<br>(0.37-1.4)                          | 1.3%<br>(0.26-2.8%)                  | 1.4%<br>(0.23-3.2%)                 | 370<br>(60-830)     | 5900<br>(1200-13000)     |
| Turkey   | 2000 | Male   | 80 to 84 | 13%<br>(8.1-21%)               | 87%<br>(79-92%)          | 0.63<br>(0.31-1.1)                          | 1.1%<br>(0.24-2.2%)                  | 1.2%<br>(0.2-2.6%)                  | 190<br>(31-410)     | 2200<br>(490-4500)       |
| Turkey   | 2000 | Male   | 85 to 89 | 13%<br>(7.2-20%)               | 87%<br>(80-93%)          | 0.54<br>(0.26-0.95)                         | 0.79%<br>(0.14-2%)                   | 0.85%<br>(0.096-2.3%)               | 93<br>(10-250)      | 790<br>(130-2000)        |
| Turkey   | 2000 | Male   | 90 to 94 | 13%<br>(7.9-21%)               | 87%<br>(79-92%)          | 0.51<br>(0.23-0.92)                         | 0.58%<br>(-0.025-1.7%)               | 0.57%<br>(-0.17-1.9%)               | 33<br>(-9.7-110)    | 210<br>(-9-590)          |
| Turkey   | 2000 | Male   | 95 plus  | 16%<br>(8.4-26%)               | 84%<br>(74-92%)          | 0.52<br>(0.18-1.1)                          | 0.5%<br>(-0.21-1.8%)                 | 0.42%<br>(-0.44-2%)                 | 5.6<br>(-5.9-26)    | 28<br>(-11-100)          |
| Turkey   | 2005 | Female | All Ages | 19%<br>(16-22%)                | 81%<br>(78-84%)          | 0.97<br>(0.78-1.2)                          | 1.5%<br>(1-2.1%)                     | 1.9%<br>(0.81-3.4%)                 | 2600<br>(1100-4700) | 120000<br>(78000-170000) |
| Turkey   | 2005 | Female | 15 to 19 | 21%<br>(14-30%)                | 79%<br>(70-86%)          | 1<br>(0.58-1.7)                             | 1.5%<br>(0.95-2.3%)                  | 3.6%<br>(1.9-6.1%)                  | 35<br>(18-60)       | 5200<br>(3100-7800)      |
| Turkey   | 2005 | Female | 20 to 24 | 27%<br>(19-37%)                | 73%<br>(63-81%)          | 1.6<br>(0.93-2.6)                           | 2.6%<br>(1.8-3.7%)                   | 5.6%<br>(3.1-8.6%)                  | 67<br>(38-110)      | 10000<br>(6700-15000)    |
| Turkey   | 2005 | Female | 25 to 29 | 27%<br>(18-37%)                | 73%<br>(63-82%)          | 1.3<br>(0.81-2.1)                           | 2.3%<br>(1.6-3.2%)                   | 4.7%<br>(2.7-7.3%)                  | 63<br>(35-99)       | 9700<br>(6300-14000)     |
| Turkey   | 2005 | Female | 30 to 34 | 24%<br>(15-34%)                | 76%<br>(66-85%)          | 1.2<br>(0.7-1.9)                            | 2.1%<br>(1.3-2.9%)                   | 4.7%<br>(2.7-7.2%)                  | 72<br>(41-110)      | 9200<br>(5800-13000)     |
| Turkey   | 2005 | Female | 35 to 39 | 21%<br>(13-31%)                | 79%<br>(69-87%)          | 1.4<br>(0.79-2.3)                           | 2.2%<br>(1.4-3.2%)                   | 5.4%<br>(3-8.4%)                    | 95<br>(54-150)      | 9300<br>(5800-14000)     |
| Turkey   | 2005 | Female | 40 to 44 | 20%<br>(13-29%)                | 80%<br>(71-87%)          | 1.5<br>(0.85-2.3)                           | 2.3%<br>(1.5-3.5%)                   | 5.8%<br>(3.4-8.9%)                  | 130<br>(79-210)     | 10000<br>(6200-15000)    |
| Turkey   | 2005 | Female | 45 to 49 | 20%<br>(13-29%)                | 80%<br>(71-87%)          | 1.5<br>(0.81-2.4)                           | 2.4%<br>(1.4-4%)                     | 5.4%<br>(3-8.9%)                    | 170<br>(97-290)     | 11000<br>(6000-17000)    |
| Turkey   | 2005 | Female | 50 to 54 | 21%<br>(14-30%)                | 79%<br>(70-86%)          | 1.5<br>(0.84-2.4)                           | 2.6%<br>(1.3-4.3%)                   | 5.2%<br>(2.7-8.9%)                  | 220<br>(120-380)    | 11000<br>(6100-19000)    |
| Turkey   | 2005 | Female | 55 to 59 | 21%<br>(14-32%)                | 79%<br>(68-86%)          | 1.5<br>(0.8-2.4)                            | 2.7%<br>(1.3-4.6%)                   | 4.9%<br>(2.3-8.4%)                  | 250<br>(110-420)    | 10000<br>(4700-18000)    |
| Turkey   | 2005 | Female | 60 to 64 | 21%<br>(13-32%)                | 79%<br>(68-87%)          | 1.4<br>(0.71-2.4)                           | 2.4%<br>(0.89-4.5%)                  | 4%<br>(1.5-7.6%)                    | 270<br>(97-520)     | 9300<br>(3300-18000)     |
| Turkey   | 2005 | Female | 65 to 69 | 22%<br>(14-32%)                | 78%<br>(68-86%)          | 1.2<br>(0.64-2)                             | 1.9%<br>(0.65-3.8%)                  | 3%<br>(0.96-6%)                     | 270<br>(88-550)     | 7600<br>(2400-15000)     |
| Turkey   | 2005 | Female | 70 to 74 | 21%<br>(14-31%)                | 79%<br>(69-86%)          | 0.97<br>(0.49-1.7)                          | 1.3%<br>(0.094-3.3%)                 | 1.9%<br>(0.13-4.7%)                 | 270<br>(18-660)     | 5900<br>(390-14000)      |

| Location | Year | Sex    | Age      | Prevalence of current drinkers | Prevalence of abstainers | Population average of standard drinks daily | Percent of total attributable deaths | Percent of total attributable DALYs | Attributable deaths | Attributable DALYs        |
|----------|------|--------|----------|--------------------------------|--------------------------|---------------------------------------------|--------------------------------------|-------------------------------------|---------------------|---------------------------|
| Turkey   | 2005 | Female | 75 to 79 | 20%<br>(12-29%)                | 80%<br>(71-88%)          | 0.8<br>(0.37-1.5)                           | 0.95%<br>(-0.21-2.8%)                | 1.3%<br>(-0.33-3.8%)                | 240<br>(-61-750)    | 4100<br>(-910-12000)      |
| Turkey   | 2005 | Female | 80 to 84 | 18%<br>(12-27%)                | 82%<br>(73-88%)          | 0.72<br>(0.35-1.2)                          | 0.89%<br>(-0.1-2.4%)                 | 1.1%<br>(-0.16-3.1%)                | 190<br>(-27-530)    | 2300<br>(-280-6100)       |
| Turkey   | 2005 | Female | 85 to 89 | 18%<br>(11-26%)                | 82%<br>(74-89%)          | 0.66<br>(0.32-1.2)                          | 0.76%<br>(-0.14-2.2%)                | 0.9%<br>(-0.23-2.7%)                | 130<br>(-35-410)    | 1100<br>(-200-3300)       |
| Turkey   | 2005 | Female | 90 to 94 | 18%<br>(12-27%)                | 82%<br>(73-88%)          | 0.66<br>(0.29-1.2)                          | 0.67%<br>(-0.26-2.2%)                | 0.77%<br>(-0.43-2.7%)               | 66<br>(-36-230)     | 390<br>(-150-1300)        |
| Turkey   | 2005 | Female | 95 plus  | 21%<br>(12-33%)                | 79%<br>(67-88%)          | 0.71<br>(0.27-1.5)                          | 0.72%<br>(-0.45-2.8%)                | 0.8%<br>(-0.71-3.5%)                | 30<br>(-27-130)     | 120<br>(-77-470)          |
| Turkey   | 2005 | Male   | All Ages | 16%<br>(13-18%)                | 84%<br>(82-87%)          | 1<br>(0.81-1.2)                             | 2.3%<br>(1.8-2.9%)                   | 2.5%<br>(1.6-3.6%)                  | 4500<br>(2900-6300) | 210000<br>(160000-270000) |
| Turkey   | 2005 | Male   | 15 to 19 | 13%<br>(8.3-20%)               | 87%<br>(80-92%)          | 0.49<br>(0.24-0.83)                         | 1.8%<br>(1.1-2.7%)                   | 2.5%<br>(1.2-4.4%)                  | 59<br>(29-110)      | 7200<br>(4300-11000)      |
| Turkey   | 2005 | Male   | 20 to 24 | 21%<br>(13-29%)                | 79%<br>(71-87%)          | 1.2<br>(0.71-1.9)                           | 4.4%<br>(3-6.4%)                     | 6.3%<br>(3.6-10%)                   | 210<br>(120-340)    | 21000<br>(14000-31000)    |
| Turkey   | 2005 | Male   | 25 to 29 | 21%<br>(15-29%)                | 79%<br>(71-85%)          | 1.6<br>(1-2.5)                              | 5.2%<br>(3.5-7.4%)                   | 8.3%<br>(5-13%)                     | 300<br>(180-460)    | 25000<br>(17000-36000)    |
| Turkey   | 2005 | Male   | 30 to 34 | 20%<br>(14-28%)                | 80%<br>(72-86%)          | 1.7<br>(1-2.6)                              | 4.7%<br>(3.2-6.8%)                   | 7.8%<br>(4.7-12%)                   | 290<br>(170-430)    | 22000<br>(15000-31000)    |
| Turkey   | 2005 | Male   | 35 to 39 | 23%<br>(16-31%)                | 77%<br>(69-84%)          | 1.8<br>(1.1-2.8)                            | 4.5%<br>(2.9-6.3%)                   | 7.1%<br>(4.2-11%)                   | 300<br>(170-450)    | 21000<br>(14000-29000)    |
| Turkey   | 2005 | Male   | 40 to 44 | 23%<br>(16-32%)                | 77%<br>(68-84%)          | 1.9<br>(1.2-2.9)                            | 4.5%<br>(3-6.4%)                     | 6.9%<br>(4.1-10%)                   | 350<br>(210-520)    | 22000<br>(14000-30000)    |
| Turkey   | 2005 | Male   | 45 to 49 | 22%<br>(14-30%)                | 78%<br>(70-86%)          | 2.1<br>(1.2-3.3)                            | 4.5%<br>(2.8-6.1%)                   | 6.4%<br>(3.9-9.1%)                  | 420<br>(240-600)    | 22000<br>(14000-30000)    |
| Turkey   | 2005 | Male   | 50 to 54 | 21%<br>(14-29%)                | 79%<br>(71-86%)          | 1.9<br>(1-3)                                | 3.8%<br>(2.2-5.5%)                   | 5.2%<br>(2.9-7.6%)                  | 430<br>(240-640)    | 19000<br>(11000-28000)    |
| Turkey   | 2005 | Male   | 55 to 59 | 19%<br>(11-29%)                | 81%<br>(71-89%)          | 1.4<br>(0.75-2.4)                           | 3%<br>(1.5-4.7%)                     | 3.9%<br>(1.8-6.4%)                  | 370<br>(170-600)    | 14000<br>(7000-22000)     |
| Turkey   | 2005 | Male   | 60 to 64 | 17%<br>(10-27%)                | 83%<br>(73-90%)          | 1.1<br>(0.54-2)                             | 2.3%<br>(0.92-3.9%)                  | 2.8%<br>(1.1-5%)                    | 360<br>(140-650)    | 11000<br>(4700-20000)     |
| Turkey   | 2005 | Male   | 65 to 69 | 16%<br>(10-25%)                | 84%<br>(75-90%)          | 1<br>(0.52-1.8)                             | 1.9%<br>(0.77-3.4%)                  | 2.3%<br>(0.9-4.3%)                  | 390<br>(150-730)    | 10000<br>(4200-19000)     |
| Turkey   | 2005 | Male   | 70 to 74 | 15%<br>(9.5-24%)               | 85%<br>(76-91%)          | 0.85<br>(0.42-1.5)                          | 1.5%<br>(0.5-3%)                     | 1.8%<br>(0.56-3.6%)                 | 400<br>(120-800)    | 8200<br>(2700-16000)      |
| Turkey   | 2005 | Male   | 75 to 79 | 14%<br>(8.1-21%)               | 86%<br>(79-92%)          | 0.7<br>(0.33-1.3)                           | 1.1%<br>(0.27-2.5%)                  | 1.3%<br>(0.26-3%)                   | 330<br>(65-740)     | 5300<br>(1200-11000)      |
| Turkey   | 2005 | Male   | 80 to 84 | 12%<br>(7.4-19%)               | 88%<br>(81-93%)          | 0.57<br>(0.28-1)                            | 0.93%<br>(0.21-2%)                   | 1%<br>(0.19-2.3%)                   | 160<br>(29-370)     | 1900<br>(420-4100)        |
| Turkey   | 2005 | Male   | 85 to 89 | 12%<br>(6.7-18%)               | 88%<br>(82-93%)          | 0.49<br>(0.24-0.89)                         | 0.65%<br>(0.098-1.6%)                | 0.69%<br>(0.044-1.9%)               | 64<br>(4.1-170)     | 550<br>(81-1400)          |
| Turkey   | 2005 | Male   | 90 to 94 | 12%<br>(7.4-19%)               | 88%<br>(81-93%)          | 0.46<br>(0.2-0.84)                          | 0.45%<br>(-0.063-1.3%)               | 0.44%<br>(-0.19-1.5%)               | 18<br>(-7.8-62)     | 120<br>(-17-360)          |

| Location | Year | Sex    | Age      | Prevalence of current drinkers | Prevalence of abstainers | Population average of standard drinks daily | Percent of total attributable deaths | Percent of total attributable DALYs | Attributable deaths | Attributable DALYs        |
|----------|------|--------|----------|--------------------------------|--------------------------|---------------------------------------------|--------------------------------------|-------------------------------------|---------------------|---------------------------|
| Turkey   | 2005 | Male   | 95 plus  | 15%<br>(7.7-25%)               | 85%<br>(75-92%)          | 0.47<br>(0.17-0.97)                         | 0.37%<br>(-0.2-1.4%)                 | 0.28%<br>(-0.43-1.5%)               | 4.2<br>(-6.3-22)    | 24<br>(-13-90)            |
| Turkey   | 2010 | Female | All Ages | 19%<br>(16-22%)                | 81%<br>(78-84%)          | 0.76<br>(0.59-0.96)                         | 1.1%<br>(0.7-1.7%)                   | 1.2%<br>(0.28-2.6%)                 | 1600<br>(390-3400)  | 89000<br>(54000-140000)   |
| Turkey   | 2010 | Female | 15 to 19 | 19%<br>(12-28%)                | 81%<br>(72-88%)          | 0.74<br>(0.39-1.3)                          | 1.2%<br>(0.74-1.9%)                  | 2.9%<br>(1.4-5.1%)                  | 21<br>(10-39)       | 3900<br>(2200-6100)       |
| Turkey   | 2010 | Female | 20 to 24 | 25%<br>(16-36%)                | 75%<br>(64-84%)          | 1.2<br>(0.62-1.9)                           | 2.1%<br>(1.4-3.1%)                   | 4.3%<br>(2.1-7.1%)                  | 37<br>(19-62)       | 7900<br>(4800-12000)      |
| Turkey   | 2010 | Female | 25 to 29 | 26%<br>(16-36%)                | 74%<br>(64-84%)          | 0.98<br>(0.56-1.6)                          | 1.9%<br>(1.3-2.6%)                   | 3.5%<br>(1.8-5.8%)                  | 37<br>(19-60)       | 7900<br>(5000-11000)      |
| Turkey   | 2010 | Female | 30 to 34 | 24%<br>(15-34%)                | 76%<br>(66-85%)          | 0.94<br>(0.51-1.5)                          | 1.7%<br>(1.1-2.5%)                   | 3.6%<br>(2-5.7%)                    | 46<br>(25-75)       | 7700<br>(4800-11000)      |
| Turkey   | 2010 | Female | 35 to 39 | 22%<br>(14-32%)                | 78%<br>(68-86%)          | 1.1<br>(0.65-1.8)                           | 1.8%<br>(1.1-2.5%)                   | 4.3%<br>(2.4-6.8%)                  | 69<br>(38-110)      | 8000<br>(5100-12000)      |
| Turkey   | 2010 | Female | 40 to 44 | 21%<br>(14-31%)                | 79%<br>(69-86%)          | 1.2<br>(0.71-1.9)                           | 1.8%<br>(1.1-2.7%)                   | 4.7%<br>(2.7-7.3%)                  | 99<br>(56-160)      | 8300<br>(5100-13000)      |
| Turkey   | 2010 | Female | 45 to 49 | 21%<br>(13-30%)                | 79%<br>(70-87%)          | 1.2<br>(0.67-1.9)                           | 1.9%<br>(1-3%)                       | 4.3%<br>(2.3-7%)                    | 130<br>(71-220)     | 8700<br>(4900-14000)      |
| Turkey   | 2010 | Female | 50 to 54 | 22%<br>(14-31%)                | 78%<br>(69-86%)          | 1.2<br>(0.66-2)                             | 1.8%<br>(0.88-3.2%)                  | 3.9%<br>(1.9-6.7%)                  | 170<br>(81-300)     | 8900<br>(4400-16000)      |
| Turkey   | 2010 | Female | 55 to 59 | 22%<br>(14-32%)                | 78%<br>(68-86%)          | 1.2<br>(0.62-1.9)                           | 1.8%<br>(0.71-3.3%)                  | 3.5%<br>(1.4-6.4%)                  | 210<br>(83-380)     | 8900<br>(3500-17000)      |
| Turkey   | 2010 | Female | 60 to 64 | 21%<br>(13-32%)                | 79%<br>(68-87%)          | 1<br>(0.52-1.8)                             | 1.5%<br>(0.33-3.2%)                  | 2.6%<br>(0.64-5.4%)                 | 190<br>(46-400)     | 6700<br>(1400-14000)      |
| Turkey   | 2010 | Female | 65 to 69 | 21%<br>(14-32%)                | 79%<br>(68-86%)          | 0.91<br>(0.48-1.5)                          | 1.1%<br>(0.14-2.6%)                  | 1.8%<br>(0.28-4.1%)                 | 180<br>(28-400)     | 4900<br>(630-11000)       |
| Turkey   | 2010 | Female | 70 to 74 | 21%<br>(14-31%)                | 79%<br>(69-86%)          | 0.75<br>(0.37-1.3)                          | 0.72%<br>(-0.24-2.3%)                | 1.1%<br>(-0.32-3.2%)                | 150<br>(-43-450)    | 3200<br>(-1100-9700)      |
| Turkey   | 2010 | Female | 75 to 79 | 19%<br>(12-29%)                | 81%<br>(71-88%)          | 0.63<br>(0.29-1.2)                          | 0.42%<br>(-0.49-1.8%)                | 0.57%<br>(-0.71-2.5%)               | 110<br>(-130-500)   | 1900<br>(-2200-8400)      |
| Turkey   | 2010 | Female | 80 to 84 | 18%<br>(11-28%)                | 82%<br>(72-89%)          | 0.56<br>(0.26-0.97)                         | 0.37%<br>(-0.5-1.7%)                 | 0.45%<br>(-0.67-2.1%)               | 100<br>(-150-460)   | 1200<br>(-1600-5300)      |
| Turkey   | 2010 | Female | 85 to 89 | 17%<br>(10-25%)                | 83%<br>(75-90%)          | 0.5<br>(0.24-0.9)                           | 0.25%<br>(-0.4-1.2%)                 | 0.29%<br>(-0.58-1.5%)               | 45<br>(-94-240)     | 430<br>(-700-2000)        |
| Turkey   | 2010 | Female | 90 to 94 | 18%<br>(11-26%)                | 82%<br>(74-89%)          | 0.5<br>(0.23-0.94)                          | 0.2%<br>(-0.38-1.1%)                 | 0.19%<br>(-0.61-1.3%)               | 14<br>(-46-100)     | 120<br>(-220-640)         |
| Turkey   | 2010 | Female | 95 plus  | 21%<br>(12-33%)                | 79%<br>(67-88%)          | 0.54<br>(0.2-1.1)                           | 0.2%<br>(-0.57-1.4%)                 | 0.14%<br>(-0.92-1.8%)               | 4.3<br>(-28-53)     | 32<br>(-89-220)           |
| Turkey   | 2010 | Male   | All Ages | 14%<br>(12-17%)                | 86%<br>(83-88%)          | 0.72<br>(0.55-0.9)                          | 1.7%<br>(1.2-2.3%)                   | 1.6%<br>(0.9-2.6%)                  | 2900<br>(1500-4500) | 150000<br>(100000-200000) |
| Turkey   | 2010 | Male   | 15 to 19 | 9.9%<br>(6.1-15%)              | 90%<br>(85-94%)          | 0.28<br>(0.14-0.53)                         | 1.3%<br>(0.83-1.9%)                  | 1.5%<br>(0.76-2.8%)                 | 26<br>(13-50)       | 4600<br>(2800-7100)       |
| Turkey   | 2010 | Male   | 20 to 24 | 16%<br>(9.9-24%)               | 84%<br>(76-90%)          | 0.74<br>(0.38-1.2)                          | 3.2%<br>(2.2-4.6%)                   | 3.9%<br>(2-6.6%)                    | 85<br>(43-150)      | 13000<br>(8200-18000)     |

| Location | Year | Sex    | Age      | Prevalence of current drinkers | Prevalence of abstainers | Population average of standard drinks daily | Percent of total attributable deaths | Percent of total attributable DALYs | Attributable deaths | Attributable DALYs      |
|----------|------|--------|----------|--------------------------------|--------------------------|---------------------------------------------|--------------------------------------|-------------------------------------|---------------------|-------------------------|
| Turkey   | 2010 | Male   | 25 to 29 | 19%<br>(12-27%)                | 81%<br>(73-88%)          | 1.1<br>(0.64-1.8)                           | 3.7%<br>(2.5-5.3%)                   | 5.8%<br>(3.1-9.5%)                  | 140<br>(77-230)     | 16000<br>(10000-23000)  |
| Turkey   | 2010 | Male   | 30 to 34 | 20%<br>(12-29%)                | 80%<br>(71-88%)          | 1.3<br>(0.73-2)                             | 3.5%<br>(2.3-5%)                     | 5.9%<br>(3.3-9.5%)                  | 160<br>(88-260)     | 15000<br>(10000-22000)  |
| Turkey   | 2010 | Male   | 35 to 39 | 21%<br>(13-30%)                | 79%<br>(70-87%)          | 1.3<br>(0.72-2.1)                           | 3.2%<br>(2.1-4.7%)                   | 5.3%<br>(3-8.6%)                    | 180<br>(98-290)     | 15000<br>(9700-22000)   |
| Turkey   | 2010 | Male   | 40 to 44 | 21%<br>(14-31%)                | 79%<br>(69-86%)          | 1.4<br>(0.75-2.1)                           | 3.1%<br>(1.9-4.6%)                   | 4.9%<br>(2.6-7.6%)                  | 220<br>(110-340)    | 15000<br>(8800-22000)   |
| Turkey   | 2010 | Male   | 45 to 49 | 20%<br>(12-29%)                | 80%<br>(71-88%)          | 1.4<br>(0.78-2.4)                           | 3.2%<br>(1.8-4.8%)                   | 4.6%<br>(2.3-7.2%)                  | 300<br>(150-480)    | 16000<br>(9400-25000)   |
| Turkey   | 2010 | Male   | 50 to 54 | 19%<br>(12-27%)                | 81%<br>(73-88%)          | 1.3<br>(0.7-2.1)                            | 2.8%<br>(1.5-4.3%)                   | 3.8%<br>(1.9-6%)                    | 350<br>(170-570)    | 16000<br>(8500-25000)   |
| Turkey   | 2010 | Male   | 55 to 59 | 17%<br>(10-26%)                | 83%<br>(74-90%)          | 1<br>(0.51-1.8)                             | 2.1%<br>(0.99-3.6%)                  | 2.6%<br>(1.1-4.8%)                  | 320<br>(130-580)    | 12000<br>(5800-22000)   |
| Turkey   | 2010 | Male   | 60 to 64 | 16%<br>(9.2-25%)               | 84%<br>(75-91%)          | 0.81<br>(0.38-1.5)                          | 1.5%<br>(0.57-3%)                    | 1.9%<br>(0.61-3.8%)                 | 270<br>(89-540)     | 8600<br>(3100-17000)    |
| Turkey   | 2010 | Male   | 65 to 69 | 15%<br>(9.1-23%)               | 85%<br>(77-91%)          | 0.72<br>(0.36-1.3)                          | 1.2%<br>(0.44-2.4%)                  | 1.4%<br>(0.49-2.9%)                 | 250<br>(82-530)     | 6500<br>(2400-13000)    |
| Turkey   | 2010 | Male   | 70 to 74 | 14%<br>(8.9-22%)               | 86%<br>(78-91%)          | 0.61<br>(0.3-1.2)                           | 0.94%<br>(0.26-2.1%)                 | 1.1%<br>(0.27-2.6%)                 | 240<br>(57-560)     | 5100<br>(1300-12000)    |
| Turkey   | 2010 | Male   | 75 to 79 | 13%<br>(7.8-20%)               | 87%<br>(80-92%)          | 0.51<br>(0.24-0.97)                         | 0.69%<br>(0.11-1.7%)                 | 0.8%<br>(0.088-2.1%)                | 200<br>(21-500)     | 3300<br>(540-8100)      |
| Turkey   | 2010 | Male   | 80 to 84 | 12%<br>(6.8-19%)               | 88%<br>(81-93%)          | 0.41<br>(0.2-0.73)                          | 0.5%<br>(-0.0038-1.3%)               | 0.53%<br>(-0.052-1.5%)              | 110<br>(-11-290)    | 1200<br>(-9.1-3200)     |
| Turkey   | 2010 | Male   | 85 to 89 | 11%<br>(6.3-17%)               | 89%<br>(83-94%)          | 0.35<br>(0.17-0.63)                         | 0.31%<br>(-0.037-0.89%)              | 0.31%<br>(-0.13-0.98%)              | 31<br>(-12-100)     | 310<br>(-39-880)        |
| Turkey   | 2010 | Male   | 90 to 94 | 12%<br>(6.7-18%)               | 88%<br>(82-93%)          | 0.33<br>(0.14-0.62)                         | 0.21%<br>(-0.1-0.69%)                | 0.15%<br>(-0.28-0.76%)              | 5.1<br>(-8.9-26)    | 52<br>(-25-170)         |
| Turkey   | 2010 | Male   | 95 plus  | 14%<br>(7.1-24%)               | 86%<br>(76-93%)          | 0.34<br>(0.12-0.71)                         | 0.18%<br>(-0.21-0.8%)                | 0.04%<br>(-0.48-0.81%)              | 0.39<br>(-4.6-7.9)  | 8.7<br>(-9.9-38)        |
| Turkey   | 2016 | Female | All Ages | 19%<br>(16-23%)                | 81%<br>(77-84%)          | 0.68<br>(0.41-1)                            | 0.98%<br>(0.43-1.7%)                 | 0.74%<br>(-0.23-2.2%)               | 1200<br>(-420-3600) | 83000<br>(36000-150000) |
| Turkey   | 2016 | Female | 15 to 19 | 19%<br>(12-29%)                | 81%<br>(71-88%)          | 0.64<br>(0.31-1.2)                          | 1.1%<br>(0.66-1.7%)                  | 2.3%<br>(0.99-4.5%)                 | 20<br>(8.2-40)      | 3800<br>(2100-6000)     |
| Turkey   | 2016 | Female | 20 to 24 | 25%<br>(16-36%)                | 75%<br>(64-84%)          | 1<br>(0.46-1.8)                             | 2%<br>(1.3-3%)                       | 3.5%<br>(1.4-6.3%)                  | 33<br>(13-62)       | 7600<br>(4500-11000)    |
| Turkey   | 2016 | Female | 25 to 29 | 26%<br>(17-36%)                | 74%<br>(64-83%)          | 0.85<br>(0.42-1.5)                          | 1.8%<br>(1.3-2.6%)                   | 2.9%<br>(1.3-5.2%)                  | 31<br>(13-57)       | 7700<br>(4900-11000)    |
| Turkey   | 2016 | Female | 30 to 34 | 24%<br>(15-35%)                | 76%<br>(65-85%)          | 0.81<br>(0.39-1.5)                          | 1.7%<br>(1.1-2.4%)                   | 3%<br>(1.4-5.3%)                    | 41<br>(18-77)       | 7800<br>(4800-13000)    |
| Turkey   | 2016 | Female | 35 to 39 | 22%<br>(14-33%)                | 78%<br>(67-86%)          | 0.98<br>(0.49-1.8)                          | 1.6%<br>(1-2.5%)                     | 3.6%<br>(1.7-6.4%)                  | 64<br>(29-120)      | 8400<br>(5100-13000)    |
| Turkey   | 2016 | Female | 40 to 44 | 21%<br>(14-31%)                | 79%<br>(69-86%)          | 1.1<br>(0.54-1.7)                           | 1.6%<br>(0.94-2.6%)                  | 3.9%<br>(1.9-6.8%)                  | 95<br>(45-170)      | 8700<br>(4900-14000)    |

| Location | Year | Sex    | Age      | Prevalence of current drinkers | Prevalence of abstainers | Population average of standard drinks daily | Percent of total attributable deaths | Percent of total attributable DALYs | Attributable deaths | Attributable DALYs       |
|----------|------|--------|----------|--------------------------------|--------------------------|---------------------------------------------|--------------------------------------|-------------------------------------|---------------------|--------------------------|
| Turkey   | 2016 | Female | 45 to 49 | 21%<br>(13-31%)                | 79%<br>(69-87%)          | 1<br>(0.51-1.8)                             | 1.6%<br>(0.76-2.8%)                  | 3.5%<br>(1.5-6.5%)                  | 120<br>(49-230)     | 8300<br>(4100-15000)     |
| Turkey   | 2016 | Female | 50 to 54 | 22%<br>(14-31%)                | 78%<br>(69-86%)          | 1<br>(0.51-1.9)                             | 1.5%<br>(0.54-2.9%)                  | 3.1%<br>(1.2-6.1%)                  | 140<br>(54-300)     | 8100<br>(3100-16000)     |
| Turkey   | 2016 | Female | 55 to 59 | 22%<br>(14-32%)                | 78%<br>(68-86%)          | 1<br>(0.46-1.8)                             | 1.4%<br>(0.35-3.1%)                  | 2.7%<br>(0.73-5.9%)                 | 180<br>(47-410)     | 8100<br>(2100-18000)     |
| Turkey   | 2016 | Female | 60 to 64 | 21%<br>(13-32%)                | 79%<br>(68-87%)          | 0.91<br>(0.39-1.7)                          | 1.1%<br>(0.0045-2.8%)                | 1.9%<br>(0.062-4.8%)                | 190<br>(5.5-480)    | 6700<br>(30-17000)       |
| Turkey   | 2016 | Female | 65 to 69 | 22%<br>(14-32%)                | 78%<br>(68-86%)          | 0.79<br>(0.37-1.5)                          | 0.76%<br>(-0.25-2.3%)                | 1.3%<br>(-0.31-3.8%)                | 140<br>(-34-430)    | 4000<br>(-1300-13000)    |
| Turkey   | 2016 | Female | 70 to 74 | 21%<br>(14-31%)                | 79%<br>(69-86%)          | 0.65<br>(0.28-1.3)                          | 0.4%<br>(-0.49-1.9%)                 | 0.61%<br>(-0.68-2.8%)               | 91<br>(-100-410)    | 2000<br>(-2300-9900)     |
| Turkey   | 2016 | Female | 75 to 79 | 20%<br>(12-30%)                | 80%<br>(70-88%)          | 0.54<br>(0.22-1.1)                          | 0.16%<br>(-0.64-1.5%)                | 0.21%<br>(-0.91-2%)                 | 41<br>(-180-420)    | 750<br>(-3100-7300)      |
| Turkey   | 2016 | Female | 80 to 84 | 18%<br>(11-27%)                | 82%<br>(73-89%)          | 0.48<br>(0.2-0.93)                          | 0.12%<br>(-0.67-1.3%)                | 0.14%<br>(-0.89-1.7%)               | 32<br>(-220-430)    | 440<br>(-2400-5200)      |
| Turkey   | 2016 | Female | 85 to 89 | 18%<br>(11-26%)                | 82%<br>(74-89%)          | 0.44<br>(0.19-0.87)                         | 0.048%<br>(-0.63-1.1%)               | 0.02%<br>(-0.85-1.3%)               | 4.7<br>(-220-330)   | 130<br>(-1600-2800)      |
| Turkey   | 2016 | Female | 90 to 94 | 18%<br>(12-27%)                | 82%<br>(73-88%)          | 0.44<br>(0.18-0.88)                         | 0.0085%<br>(-0.67-1.1%)              | -0.055%<br>(-0.94-1.3%)             | -9.8<br>(-170-240)  | 11<br>(-830-1400)        |
| Turkey   | 2016 | Female | 95 plus  | 21%<br>(12-34%)                | 79%<br>(66-88%)          | 0.48<br>(0.17-1)                            | -0.011%<br>(-0.92-1.5%)              | -0.12%<br>(-1.3-1.8%)               | -10<br>(-100-140)   | -4.1<br>(-330-540)       |
| Turkey   | 2016 | Male   | All Ages | 14%<br>(12-17%)                | 86%<br>(83-88%)          | 0.63<br>(0.39-0.95)                         | 1.6%<br>(0.97-2.4%)                  | 1.3%<br>(0.49-2.4%)                 | 2700<br>(1000-5000) | 150000<br>(88000-230000) |
| Turkey   | 2016 | Male   | 15 to 19 | 10%<br>(6.2-16%)               | 90%<br>(84-94%)          | 0.24<br>(0.1-0.5)                           | 1.2%<br>(0.76-1.8%)                  | 1.3%<br>(0.56-2.6%)                 | 29<br>(12-62)       | 5000<br>(3000-7800)      |
| Turkey   | 2016 | Male   | 20 to 24 | 16%<br>(9.8-24%)               | 84%<br>(76-90%)          | 0.63<br>(0.28-1.2)                          | 2.9%<br>(1.9-4.4%)                   | 3.2%<br>(1.5-5.9%)                  | 95<br>(43-180)      | 13000<br>(8100-20000)    |
| Turkey   | 2016 | Male   | 25 to 29 | 19%<br>(12-28%)                | 81%<br>(72-88%)          | 0.94<br>(0.45-1.7)                          | 3.5%<br>(2.3-5%)                     | 4.7%<br>(2.3-8.2%)                  | 150<br>(70-270)     | 17000<br>(10000-25000)   |
| Turkey   | 2016 | Male   | 30 to 34 | 20%<br>(12-29%)                | 80%<br>(71-88%)          | 1.1<br>(0.56-1.9)                           | 3.2%<br>(2.1-4.9%)                   | 4.8%<br>(2.3-8.6%)                  | 170<br>(82-320)     | 17000<br>(10000-26000)   |
| Turkey   | 2016 | Male   | 35 to 39 | 21%<br>(13-30%)                | 79%<br>(70-87%)          | 1.1<br>(0.54-2)                             | 2.9%<br>(1.9-4.7%)                   | 4.4%<br>(2.2-8%)                    | 190<br>(93-360)     | 16000<br>(9800-26000)    |
| Turkey   | 2016 | Male   | 40 to 44 | 21%<br>(14-31%)                | 79%<br>(69-86%)          | 1.2<br>(0.58-2)                             | 2.8%<br>(1.6-4.3%)                   | 4.1%<br>(1.8-7.1%)                  | 220<br>(99-400)     | 16000<br>(8700-25000)    |
| Turkey   | 2016 | Male   | 45 to 49 | 20%<br>(12-29%)                | 80%<br>(71-88%)          | 1.2<br>(0.58-2.2)                           | 2.7%<br>(1.4-4.3%)                   | 3.8%<br>(1.6-6.6%)                  | 280<br>(110-510)    | 16000<br>(8000-27000)    |
| Turkey   | 2016 | Male   | 50 to 54 | 18%<br>(12-26%)                | 82%<br>(74-88%)          | 1.1<br>(0.52-2)                             | 2.3%<br>(1-3.9%)                     | 3%<br>(1.2-5.5%)                    | 310<br>(110-600)    | 15000<br>(6600-27000)    |
| Turkey   | 2016 | Male   | 55 to 59 | 17%<br>(10-27%)                | 83%<br>(73-90%)          | 0.86<br>(0.4-1.6)                           | 1.6%<br>(0.6-3.2%)                   | 2.1%<br>(0.62-4.2%)                 | 280<br>(90-590)     | 11000<br>(4500-23000)    |
| Turkey   | 2016 | Male   | 60 to 64 | 16%<br>(9-25%)                 | 84%<br>(75-91%)          | 0.68<br>(0.29-1.3)                          | 1.2%<br>(0.37-2.6%)                  | 1.5%<br>(0.36-3.3%)                 | 260<br>(61-590)     | 8600<br>(2600-19000)     |

| Location             | Year | Sex    | Age      | Prevalence of current drinkers | Prevalence of abstainers | Population average of standard drinks daily | Percent of total attributable deaths | Percent of total attributable DALYs | Attributable deaths | Attributable DALYs   |
|----------------------|------|--------|----------|--------------------------------|--------------------------|---------------------------------------------|--------------------------------------|-------------------------------------|---------------------|----------------------|
| Turkey               | 2016 | Male   | 65 to 69 | 15%<br>(9.1-23%)               | 85%<br>(77-91%)          | 0.6<br>(0.27-1.2)                           | 0.93%<br>(0.21-2.2%)                 | 1.1%<br>(0.2-2.8%)                  | 210<br>(38-530)     | 5700<br>(1400-14000) |
| Turkey               | 2016 | Male   | 70 to 74 | 14%<br>(8.8-22%)               | 86%<br>(78-91%)          | 0.52<br>(0.23-1)                            | 0.74%<br>(0.1-1.9%)                  | 0.88%<br>(0.1-2.2%)                 | 190<br>(21-490)     | 4100<br>(590-10000)  |
| Turkey               | 2016 | Male   | 75 to 79 | 13%<br>(7.9-20%)               | 87%<br>(80-92%)          | 0.43<br>(0.18-0.85)                         | 0.52%<br>(-0.008-1.4%)               | 0.59%<br>(-0.055-1.7%)              | 150<br>(-14-450)    | 2500<br>(-40-7200)   |
| Turkey               | 2016 | Male   | 80 to 84 | 12%<br>(6.8-18%)               | 88%<br>(82-93%)          | 0.35<br>(0.15-0.67)                         | 0.37%<br>(-0.093-1.1%)               | 0.39%<br>(-0.15-1.3%)               | 92<br>(-35-310)     | 1100<br>(-280-3500)  |
| Turkey               | 2016 | Male   | 85 to 89 | 11%<br>(6.2-17%)               | 89%<br>(83-94%)          | 0.3<br>(0.13-0.57)                          | 0.21%<br>(-0.14-0.78%)               | 0.19%<br>(-0.23-0.87%)              | 36<br>(-43-160)     | 370<br>(-250-1400)   |
| Turkey               | 2016 | Male   | 90 to 94 | 12%<br>(6.9-18%)               | 88%<br>(82-93%)          | 0.29<br>(0.12-0.56)                         | 0.11%<br>(-0.24-0.64%)               | 0.043%<br>(-0.4-0.68%)              | 3.9<br>(-36-64)     | 65<br>(-140-390)     |
| Turkey               | 2016 | Male   | 95 plus  | 14%<br>(7.1-24%)               | 86%<br>(76-93%)          | 0.3<br>(0.1-0.65)                           | 0.061%<br>(-0.4-0.75%)               | -0.071%<br>(-0.64-0.77%)            | -1.9<br>(-17-21)    | 7.3<br>(-47-90)      |
| United Arab Emirates | 1990 | Female | All Ages | 7%<br>(5.6-8.8%)               | 93%<br>(91-94%)          | 3.3<br>(2.3-4.6)                            | 1.9%<br>(1.3-2.8%)                   | 3.8%<br>(2.4-5.4%)                  | 64<br>(39-95)       | 2900<br>(1900-4200)  |
| United Arab Emirates | 1990 | Female | 15 to 19 | 7.8%<br>(4.7-12%)              | 92%<br>(88-95%)          | 3.2<br>(1.3-6.7)                            | 1.9%<br>(1.2-2.9%)                   | 4.2%<br>(2.5-6.8%)                  | 1.3<br>(0.74-2.2)   | 130<br>(79-200)      |
| United Arab Emirates | 1990 | Female | 20 to 24 | 11%<br>(6.5-16%)               | 89%<br>(84-93%)          | 5.8<br>(2.4-11)                             | 2.8%<br>(1.9-4.1%)                   | 6.3%<br>(3.8-9.4%)                  | 2.2<br>(1.3-3.6)    | 210<br>(140-310)     |
| United Arab Emirates | 1990 | Female | 25 to 29 | 11%<br>(6.8-17%)               | 89%<br>(83-93%)          | 6.7<br>(3.2-12)                             | 3.4%<br>(2.2-5%)                     | 7.5%<br>(4.6-11%)                   | 3.8<br>(2.1-6.5)    | 320<br>(200-490)     |
| United Arab Emirates | 1990 | Female | 30 to 34 | 11%<br>(6.3-17%)               | 89%<br>(83-94%)          | 6.8<br>(3.6-12)                             | 3.6%<br>(2.2-5.4%)                   | 7.9%<br>(4.7-12%)                   | 6<br>(3.2-10)       | 430<br>(260-710)     |
| United Arab Emirates | 1990 | Female | 35 to 39 | 11%<br>(6.1-16%)               | 89%<br>(84-94%)          | 6.9<br>(3.4-12)                             | 3.7%<br>(2.2-5.6%)                   | 7.5%<br>(4.4-11%)                   | 6.4<br>(3.3-11)     | 400<br>(230-670)     |
| United Arab Emirates | 1990 | Female | 40 to 44 | 10%<br>(6.1-16%)               | 90%<br>(84-94%)          | 7.1<br>(3.2-13)                             | 3.9%<br>(2.3-5.8%)                   | 7.3%<br>(4.3-11%)                   | 6.1<br>(3.2-10)     | 330<br>(190-540)     |
| United Arab Emirates | 1990 | Female | 45 to 49 | 10%<br>(5.8-16%)               | 90%<br>(84-94%)          | 7.4<br>(3-14)                               | 3.9%<br>(2.3-6.2%)                   | 6.7%<br>(3.9-10%)                   | 5.2<br>(2.7-9.2)    | 250<br>(140-420)     |
| United Arab Emirates | 1990 | Female | 50 to 54 | 10%<br>(6.4-16%)               | 90%<br>(84-94%)          | 7.3<br>(3-14)                               | 4%<br>(2.4-6.4%)                     | 6.3%<br>(3.8-9.9%)                  | 4<br>(2.1-6.8)      | 170<br>(92-270)      |
| United Arab Emirates | 1990 | Female | 55 to 59 | 11%<br>(6.2-17%)               | 89%<br>(83-94%)          | 6.9<br>(2.8-14)                             | 4.3%<br>(2.4-6.9%)                   | 6.3%<br>(3.6-10%)                   | 4.8<br>(2.5-8.2)    | 170<br>(92-290)      |
| United Arab Emirates | 1990 | Female | 60 to 64 | 11%<br>(6.1-17%)               | 89%<br>(83-94%)          | 6<br>(2.2-12)                               | 4%<br>(2.2-6.6%)                     | 5.5%<br>(3.1-9%)                    | 4<br>(2.1-7.1)      | 120<br>(64-210)      |
| United Arab Emirates | 1990 | Female | 65 to 69 | 11%<br>(6.4-17%)               | 89%<br>(83-94%)          | 5.1<br>(2.1-10)                             | 4.1%<br>(2.2-6.8%)                   | 5.5%<br>(3-9%)                      | 5.3<br>(2.6-9.2)    | 130<br>(67-220)      |
| United Arab Emirates | 1990 | Female | 70 to 74 | 10%<br>(6.2-16%)               | 90%<br>(84-94%)          | 4.1<br>(1.5-9)                              | 3.9%<br>(2-6.8%)                     | 5%<br>(2.6-8.6%)                    | 4.5<br>(2.2-8)      | 88<br>(45-150)       |
| United Arab Emirates | 1990 | Female | 75 to 79 | 9.5%<br>(5.7-15%)              | 90%<br>(85-94%)          | 3.4<br>(1.2-7.9)                            | 3.5%<br>(1.9-6.2%)                   | 4.3%<br>(2.2-7.5%)                  | 5.4<br>(2.6-9.6)    | 82<br>(41-140)       |
| United Arab Emirates | 1990 | Female | 80 to 84 | 8.7%<br>(5.1-14%)              | 91%<br>(86-95%)          | 3.1<br>(1.1-6.5)                            | 3.6%<br>(2-5.8%)                     | 4.3%<br>(2.3-6.9%)                  | 3.6<br>(1.8-5.8)    | 39<br>(20-63)        |

| Location             | Year | Sex    | Age      | Prevalence of current drinkers | Prevalence of abstainers | Population average of standard drinks daily | Percent of total attributable deaths | Percent of total attributable DALYs | Attributable deaths   | Attributable DALYs    |
|----------------------|------|--------|----------|--------------------------------|--------------------------|---------------------------------------------|--------------------------------------|-------------------------------------|-----------------------|-----------------------|
| United Arab Emirates | 1990 | Female | 85 to 89 | 8.4%<br>(4.8-13%)              | 92%<br>(87-95%)          | 2.9<br>(1.1-6.1)                            | 3.5%<br>(1.9-5.9%)                   | 4.2%<br>(2.3-7%)                    | 1.2<br>(0.65-2.1)     | 9.6<br>(5.1-16)       |
| United Arab Emirates | 1990 | Female | 90 to 94 | 9%<br>(5.3-14%)                | 91%<br>(86-95%)          | 3<br>(1.1-6.4)                              | 3.5%<br>(2-5.7%)                     | 4.1%<br>(2.3-7%)                    | 0.21<br>(0.11-0.36)   | 1.1<br>(0.62-1.9)     |
| United Arab Emirates | 1990 | Female | 95 plus  | 11%<br>(5.6-18%)               | 89%<br>(82-94%)          | 3.4<br>(1-7.8)                              | 3.7%<br>(1.9-6.4%)                   | 4.4%<br>(2.2-7.6%)                  | 0.13<br>(0.068-0.23)  | 0.47<br>(0.24-0.8)    |
| United Arab Emirates | 1990 | Male   | All Ages | 13%<br>(10-16%)                | 87%<br>(84-90%)          | 3.7<br>(2.7-5)                              | 4.2%<br>(2.8-6%)                     | 6.5%<br>(4.3-9%)                    | 240<br>(150-360)      | 13000<br>(8300-19000) |
| United Arab Emirates | 1990 | Male   | 15 to 19 | 7.9%<br>(4.8-12%)              | 92%<br>(88-95%)          | 1.2<br>(0.48-2.4)                           | 2.8%<br>(1.6-4.7%)                   | 4.7%<br>(2.4-8.5%)                  | 3.5<br>(1.6-6.8)      | 320<br>(170-560)      |
| United Arab Emirates | 1990 | Male   | 20 to 24 | 13%<br>(7.9-20%)               | 87%<br>(80-92%)          | 3<br>(1.3-5.4)                              | 5.5%<br>(3.2-8.7%)                   | 8.4%<br>(4.3-14%)                   | 12<br>(5.4-21)        | 980<br>(550-1600)     |
| United Arab Emirates | 1990 | Male   | 25 to 29 | 16%<br>(9.8-24%)               | 84%<br>(76-90%)          | 4.7<br>(2.3-7.9)                            | 6.1%<br>(3.6-9.3%)                   | 9.9%<br>(5.3-16%)                   | 20<br>(10-32)         | 1500<br>(870-2300)    |
| United Arab Emirates | 1990 | Male   | 30 to 34 | 17%<br>(10-26%)                | 83%<br>(74-90%)          | 5.5<br>(3.1-8.8)                            | 5.9%<br>(3.7-8.8%)                   | 9.7%<br>(5.7-15%)                   | 30<br>(16-51)         | 2100<br>(1300-3400)   |
| United Arab Emirates | 1990 | Male   | 35 to 39 | 19%<br>(11-28%)                | 81%<br>(72-89%)          | 6<br>(3-10)                                 | 6.2%<br>(3.9-9.4%)                   | 10%<br>(6.3-16%)                    | 38<br>(20-61)         | 2400<br>(1400-3600)   |
| United Arab Emirates | 1990 | Male   | 40 to 44 | 19%<br>(12-29%)                | 81%<br>(71-88%)          | 6.5<br>(2.9-11)                             | 6.3%<br>(4-9.5%)                     | 9.9%<br>(6-15%)                     | 34<br>(19-55)         | 1900<br>(1100-2900)   |
| United Arab Emirates | 1990 | Male   | 45 to 49 | 18%<br>(9.9-27%)               | 82%<br>(73-90%)          | 6.5<br>(2.7-13)                             | 6.2%<br>(4-9.1%)                     | 9.1%<br>(5.7-13%)                   | 31<br>(18-48)         | 1500<br>(880-2300)    |
| United Arab Emirates | 1990 | Male   | 50 to 54 | 17%<br>(10-25%)                | 83%<br>(75-90%)          | 6.2<br>(2.6-12)                             | 5.8%<br>(3.7-8.6%)                   | 8.1%<br>(5.2-12%)                   | 21<br>(12-35)         | 890<br>(520-1400)     |
| United Arab Emirates | 1990 | Male   | 55 to 59 | 16%<br>(9.1-25%)               | 84%<br>(75-91%)          | 5.8<br>(2.3-12)                             | 5.6%<br>(3.5-8.5%)                   | 7.5%<br>(4.6-11%)                   | 14<br>(7.9-24)        | 510<br>(300-830)      |
| United Arab Emirates | 1990 | Male   | 60 to 64 | 14%<br>(8.4-24%)               | 86%<br>(76-92%)          | 4.9<br>(1.8-11)                             | 5.4%<br>(3.4-8.4%)                   | 6.9%<br>(4.3-10%)                   | 8.9<br>(5-15)         | 260<br>(150-440)      |
| United Arab Emirates | 1990 | Male   | 65 to 69 | 14%<br>(8.1-22%)               | 86%<br>(78-92%)          | 4<br>(1.6-8.2)                              | 5.1%<br>(3.1-7.7%)                   | 6.3%<br>(3.9-9.6%)                  | 8.7<br>(5-14)         | 210<br>(130-340)      |
| United Arab Emirates | 1990 | Male   | 70 to 74 | 13%<br>(8-20%)                 | 87%<br>(80-92%)          | 3<br>(1.1-6.8)                              | 4.8%<br>(2.9-7.2%)                   | 5.8%<br>(3.6-8.6%)                  | 4.8<br>(2.7-7.8)      | 94<br>(54-150)        |
| United Arab Emirates | 1990 | Male   | 75 to 79 | 12%<br>(7-19%)                 | 88%<br>(81-93%)          | 2.4<br>(0.79-5.6)                           | 3.8%<br>(2.1-5.9%)                   | 4.4%<br>(2.5-6.9%)                  | 8.3<br>(4.3-14)       | 130<br>(67-210)       |
| United Arab Emirates | 1990 | Male   | 80 to 84 | 10%<br>(6.1-17%)               | 90%<br>(83-94%)          | 2<br>(0.75-4.3)                             | 3.7%<br>(2.2-5.8%)                   | 4.3%<br>(2.5-6.6%)                  | 5<br>(2.7-8.1)        | 56<br>(32-89)         |
| United Arab Emirates | 1990 | Male   | 85 to 89 | 9.8%<br>(5.6-16%)              | 90%<br>(84-94%)          | 1.8<br>(0.68-3.7)                           | 3.5%<br>(2-5.4%)                     | 3.9%<br>(2.2-6.2%)                  | 1.5<br>(0.82-2.4)     | 12<br>(6.5-19)        |
| United Arab Emirates | 1990 | Male   | 90 to 94 | 10%<br>(6-17%)                 | 90%<br>(83-94%)          | 1.8<br>(0.58-3.9)                           | 3.2%<br>(1.8-5.1%)                   | 3.6%<br>(1.9-5.7%)                  | 0.18<br>(0.096-0.3)   | 1<br>(0.54-1.6)       |
| United Arab Emirates | 1990 | Male   | 95 plus  | 12%<br>(6.4-21%)               | 88%<br>(79-94%)          | 1.9<br>(0.47-4.9)                           | 3.2%<br>(1.4-5.4%)                   | 3.5%<br>(1.4-6.1%)                  | 0.072<br>(0.029-0.13) | 0.27<br>(0.12-0.46)   |
| United Arab Emirates | 1995 | Female | All Ages | 7.5%<br>(6-9.5%)               | 92%<br>(91-94%)          | 2.4<br>(1.7-3.3)                            | 2.2%<br>(1.5-3.1%)                   | 4.1%<br>(2.8-5.8%)                  | 75<br>(48-110)        | 3600<br>(2400-5100)   |

| Location             | Year | Sex    | Age      | Prevalence of current drinkers | Prevalence of abstainers | Population average of standard drinks daily | Percent of total attributable deaths | Percent of total attributable DALYs | Attributable deaths   | Attributable DALYs     |
|----------------------|------|--------|----------|--------------------------------|--------------------------|---------------------------------------------|--------------------------------------|-------------------------------------|-----------------------|------------------------|
| United Arab Emirates | 1995 | Female | 15 to 19 | 8.1%<br>(4.8-12%)              | 92%<br>(88-95%)          | 2.2<br>(0.87-4.6)                           | 1.8%<br>(1.1-2.8%)                   | 4.2%<br>(2.4-6.8%)                  | 1.6<br>(0.88-2.6)     | 160<br>(99-250)        |
| United Arab Emirates | 1995 | Female | 20 to 24 | 11%<br>(6.6-17%)               | 89%<br>(83-93%)          | 4<br>(1.7-7.7)                              | 2.8%<br>(1.8-4%)                     | 6.1%<br>(3.6-9.3%)                  | 3.1<br>(1.7-4.9)      | 300<br>(190-440)       |
| United Arab Emirates | 1995 | Female | 25 to 29 | 11%<br>(7-17%)                 | 89%<br>(83-93%)          | 4.6<br>(2.2-8)                              | 3.3%<br>(2.1-4.8%)                   | 7.1%<br>(4.4-11%)                   | 5.4<br>(3-9.1)        | 460<br>(300-700)       |
| United Arab Emirates | 1995 | Female | 30 to 34 | 11%<br>(6.4-17%)               | 89%<br>(83-94%)          | 4.6<br>(2.5-7.7)                            | 3.5%<br>(2.1-5.2%)                   | 7.5%<br>(4.4-12%)                   | 7.3<br>(3.8-13)       | 530<br>(310-850)       |
| United Arab Emirates | 1995 | Female | 35 to 39 | 11%<br>(6.2-17%)               | 89%<br>(83-94%)          | 4.7<br>(2.3-8)                              | 3.5%<br>(2.1-5.4%)                   | 7.2%<br>(4.1-11%)                   | 8.3<br>(4.3-14)       | 520<br>(300-850)       |
| United Arab Emirates | 1995 | Female | 40 to 44 | 10%<br>(6.3-17%)               | 90%<br>(83-94%)          | 4.8<br>(2.1-8.5)                            | 3.7%<br>(2.3-5.4%)                   | 7%<br>(4.2-11%)                     | 7.7<br>(4.2-13)       | 420<br>(250-670)       |
| United Arab Emirates | 1995 | Female | 45 to 49 | 10%<br>(6-16%)                 | 90%<br>(84-94%)          | 5<br>(2.1-10)                               | 3.8%<br>(2.3-5.8%)                   | 6.5%<br>(3.9-10%)                   | 6.4<br>(3.5-11)       | 310<br>(180-500)       |
| United Arab Emirates | 1995 | Female | 50 to 54 | 11%<br>(6.4-16%)               | 89%<br>(84-94%)          | 5<br>(2-10)                                 | 3.9%<br>(2.3-6.2%)                   | 6.1%<br>(3.6-9.7%)                  | 5.3<br>(2.9-8.7)      | 220<br>(130-360)       |
| United Arab Emirates | 1995 | Female | 55 to 59 | 11%<br>(6.5-17%)               | 89%<br>(83-93%)          | 4.6<br>(1.9-9.2)                            | 4.1%<br>(2.3-6.8%)                   | 6.1%<br>(3.5-9.9%)                  | 4.1<br>(2.2-7)        | 150<br>(81-250)        |
| United Arab Emirates | 1995 | Female | 60 to 64 | 11%<br>(6.3-18%)               | 89%<br>(82-94%)          | 4<br>(1.5-8.6)                              | 3.8%<br>(2.1-6.6%)                   | 5.3%<br>(2.9-8.7%)                  | 4.3<br>(2.3-7.7)      | 130<br>(70-230)        |
| United Arab Emirates | 1995 | Female | 65 to 69 | 11%<br>(6.4-17%)               | 89%<br>(83-94%)          | 3.4<br>(1.3-6.8)                            | 3.9%<br>(2.1-6.5%)                   | 5.2%<br>(2.8-8.8%)                  | 3.9<br>(2-6.9)        | 98<br>(52-170)         |
| United Arab Emirates | 1995 | Female | 70 to 74 | 11%<br>(6.4-17%)               | 89%<br>(83-94%)          | 2.7<br>(1-6)                                | 3.7%<br>(1.9-6.4%)                   | 4.7%<br>(2.4-8.3%)                  | 5.6<br>(2.8-9.9)      | 110<br>(58-190)        |
| United Arab Emirates | 1995 | Female | 75 to 79 | 9.7%<br>(5.7-15%)              | 90%<br>(85-94%)          | 2.2<br>(0.79-5)                             | 3.3%<br>(1.7-5.8%)                   | 4%<br>(2.1-7.2%)                    | 4.1<br>(2-7.2)        | 63<br>(32-110)         |
| United Arab Emirates | 1995 | Female | 80 to 84 | 8.9%<br>(5.2-14%)              | 91%<br>(86-95%)          | 2<br>(0.75-4.2)                             | 3.3%<br>(1.8-5.4%)                   | 4%<br>(2.1-6.6%)                    | 4.1<br>(2.1-6.8)      | 46<br>(24-75)          |
| United Arab Emirates | 1995 | Female | 85 to 89 | 8.6%<br>(4.9-13%)              | 91%<br>(87-95%)          | 1.9<br>(0.72-4)                             | 3.3%<br>(1.8-5.4%)                   | 3.9%<br>(2.1-6.5%)                  | 3.3<br>(1.7-5.5)      | 25<br>(14-43)          |
| United Arab Emirates | 1995 | Female | 90 to 94 | 9.1%<br>(5.4-14%)              | 91%<br>(86-95%)          | 2<br>(0.71-4.2)                             | 3.2%<br>(1.8-5.4%)                   | 3.8%<br>(2.1-6.5%)                  | 0.77<br>(0.41-1.3)    | 4.1<br>(2.2-6.8)       |
| United Arab Emirates | 1995 | Female | 95 plus  | 11%<br>(5.8-19%)               | 89%<br>(81-94%)          | 2.3<br>(0.66-5.2)                           | 3.4%<br>(1.6-5.9%)                   | 4%<br>(1.8-7.2%)                    | 0.083<br>(0.038-0.15) | 0.29<br>(0.14-0.51)    |
| United Arab Emirates | 1995 | Male   | All Ages | 14%<br>(11-17%)                | 86%<br>(83-89%)          | 2.4<br>(1.7-3.3)                            | 4.4%<br>(3.1-6%)                     | 6.6%<br>(4.6-8.9%)                  | 300<br>(190-440)      | 17000<br>(11000-23000) |
| United Arab Emirates | 1995 | Male   | 15 to 19 | 7.8%<br>(4.8-12%)              | 92%<br>(88-95%)          | 0.75<br>(0.28-1.5)                          | 2.5%<br>(1.3-4.3%)                   | 4%<br>(1.8-7.3%)                    | 3.2<br>(1.4-6.1)      | 290<br>(150-520)       |
| United Arab Emirates | 1995 | Male   | 20 to 24 | 13%<br>(8.1-20%)               | 87%<br>(80-92%)          | 1.8<br>(0.84-3.3)                           | 5.1%<br>(3.1-7.8%)                   | 7.5%<br>(4-13%)                     | 15<br>(7.2-26)        | 1200<br>(700-2000)     |
| United Arab Emirates | 1995 | Male   | 25 to 29 | 16%<br>(10-25%)                | 84%<br>(75-90%)          | 2.9<br>(1.4-4.8)                            | 5.7%<br>(3.6-8.5%)                   | 9.1%<br>(5.2-14%)                   | 31<br>(17-51)         | 2400<br>(1500-3700)    |
| United Arab Emirates | 1995 | Male   | 30 to 34 | 18%<br>(11-26%)                | 82%<br>(74-89%)          | 3.4<br>(2-5.6)                              | 5.6%<br>(3.5-8.4%)                   | 9.3%<br>(5.7-14%)                   | 37<br>(20-59)         | 2600<br>(1600-3900)    |



| Location             | Year | Sex    | Age      | Prevalence of current drinkers | Prevalence of abstainers | Population average of standard drinks daily | Percent of total attributable deaths | Percent of total attributable DALYs | Attributable deaths   | Attributable DALYs   |
|----------------------|------|--------|----------|--------------------------------|--------------------------|---------------------------------------------|--------------------------------------|-------------------------------------|-----------------------|----------------------|
| United Arab Emirates | 1995 | Male   | 35 to 39 | 19%<br>(11-28%)                | 81%<br>(72-89%)          | 3.7<br>(1.9-6.3)                            | 5.9%<br>(3.8-8.9%)                   | 9.8%<br>(6.1-15%)                   | 45<br>(26-72)         | 2800<br>(1700-4300)  |
| United Arab Emirates | 1995 | Male   | 40 to 44 | 19%<br>(12-29%)                | 81%<br>(71-88%)          | 4<br>(1.8-7.1)                              | 5.9%<br>(3.7-8.7%)                   | 9.2%<br>(5.7-14%)                   | 46<br>(26-74)         | 2600<br>(1500-4000)  |
| United Arab Emirates | 1995 | Male   | 45 to 49 | 18%<br>(10-27%)                | 82%<br>(73-90%)          | 4<br>(1.7-8)                                | 5.8%<br>(3.7-8.4%)                   | 8.5%<br>(5.3-12%)                   | 39<br>(23-60)         | 1900<br>(1100-2800)  |
| United Arab Emirates | 1995 | Male   | 50 to 54 | 17%<br>(10-25%)                | 83%<br>(75-90%)          | 3.8<br>(1.6-7.5)                            | 5.4%<br>(3.4-7.9%)                   | 7.4%<br>(4.6-11%)                   | 29<br>(16-46)         | 1200<br>(720-1900)   |
| United Arab Emirates | 1995 | Male   | 55 to 59 | 16%<br>(9.2-25%)               | 84%<br>(75-91%)          | 3.5<br>(1.4-7.4)                            | 5.2%<br>(3.2-7.9%)                   | 6.8%<br>(4.2-10%)                   | 17<br>(9.8-28)        | 620<br>(360-990)     |
| United Arab Emirates | 1995 | Male   | 60 to 64 | 14%<br>(8.3-24%)               | 86%<br>(76-92%)          | 3<br>(1.1-6.3)                              | 4.9%<br>(3-7.6%)                     | 6.1%<br>(3.8-9.5%)                  | 12<br>(7.2-20)        | 370<br>(220-590)     |
| United Arab Emirates | 1995 | Male   | 65 to 69 | 14%<br>(8.2-22%)               | 86%<br>(78-92%)          | 2.4<br>(0.98-4.8)                           | 4.8%<br>(2.9-7.4%)                   | 5.8%<br>(3.5-8.9%)                  | 7.9<br>(4.6-13)       | 190<br>(120-300)     |
| United Arab Emirates | 1995 | Male   | 70 to 74 | 13%<br>(8.2-21%)               | 87%<br>(79-92%)          | 1.9<br>(0.68-4.2)                           | 4%<br>(2.1-6.3%)                     | 4.8%<br>(2.4-7.5%)                  | 8.7<br>(4.2-14)       | 170<br>(85-270)      |
| United Arab Emirates | 1995 | Male   | 75 to 79 | 12%<br>(7-19%)                 | 88%<br>(81-93%)          | 1.4<br>(0.45-3.3)                           | 3.4%<br>(1.4-5.6%)                   | 3.9%<br>(1.6-6.4%)                  | 3.8<br>(1.5-6.6)      | 59<br>(25-100)       |
| United Arab Emirates | 1995 | Male   | 80 to 84 | 10%<br>(6.2-17%)               | 90%<br>(83-94%)          | 1.2<br>(0.43-2.6)                           | 3.2%<br>(1.4-5.2%)                   | 3.6%<br>(1.5-5.9%)                  | 4.5<br>(1.9-7.5)      | 51<br>(23-84)        |
| United Arab Emirates | 1995 | Male   | 85 to 89 | 9.8%<br>(5.6-16%)              | 90%<br>(84-94%)          | 1.1<br>(0.39-2.4)                           | 2.9%<br>(1.3-4.8%)                   | 3.3%<br>(1.3-5.5%)                  | 4.2<br>(1.7-7.1)      | 33<br>(14-56)        |
| United Arab Emirates | 1995 | Male   | 90 to 94 | 10%<br>(6-17%)                 | 90%<br>(83-94%)          | 1.1<br>(0.35-2.4)                           | 2.7%<br>(1-4.5%)                     | 2.9%<br>(1-5.1%)                    | 0.83<br>(0.28-1.4)    | 4.6<br>(1.7-7.9)     |
| United Arab Emirates | 1995 | Male   | 95 plus  | 12%<br>(6.3-21%)               | 88%<br>(79-94%)          | 1.2<br>(0.28-3)                             | 2.6%<br>(0.71-4.8%)                  | 2.8%<br>(0.65-5.3%)                 | 0.061<br>(0.014-0.12) | 0.23<br>(0.061-0.43) |
| United Arab Emirates | 2000 | Female | All Ages | 7.2%<br>(5.7-9%)               | 93%<br>(91-94%)          | 1.5<br>(1.1-2.1)                            | 2.1%<br>(1.5-2.9%)                   | 4.1%<br>(2.8-5.7%)                  | 78<br>(52-110)        | 3800<br>(2700-5200)  |
| United Arab Emirates | 2000 | Female | 15 to 19 | 7.4%<br>(4.4-12%)              | 93%<br>(88-96%)          | 1.4<br>(0.56-2.8)                           | 1.5%<br>(0.94-2.3%)                  | 3.6%<br>(2-6%)                      | 1.6<br>(0.84-2.6)     | 170<br>(100-270)     |
| United Arab Emirates | 2000 | Female | 20 to 24 | 9.8%<br>(6-15%)                | 90%<br>(85-94%)          | 2.4<br>(1-4.6)                              | 2.4%<br>(1.6-3.5%)                   | 5.3%<br>(3-8.1%)                    | 3<br>(1.7-4.7)        | 320<br>(200-450)     |
| United Arab Emirates | 2000 | Female | 25 to 29 | 10%<br>(6.5-16%)               | 90%<br>(84-93%)          | 2.8<br>(1.3-4.9)                            | 2.8%<br>(1.9-4.1%)                   | 6.2%<br>(3.7-9.3%)                  | 5.4<br>(3.1-8.5)      | 490<br>(320-710)     |
| United Arab Emirates | 2000 | Female | 30 to 34 | 10%<br>(6.2-16%)               | 90%<br>(84-94%)          | 2.8<br>(1.6-4.7)                            | 3.1%<br>(1.9-4.5%)                   | 6.7%<br>(4-10%)                     | 7.5<br>(4.3-13)       | 580<br>(370-870)     |
| United Arab Emirates | 2000 | Female | 35 to 39 | 10%<br>(6.1-16%)               | 90%<br>(84-94%)          | 3<br>(1.5-5)                                | 3.2%<br>(2-4.9%)                     | 6.7%<br>(3.9-10%)                   | 9.1<br>(4.9-15)       | 590<br>(350-930)     |
| United Arab Emirates | 2000 | Female | 40 to 44 | 10%<br>(6.4-16%)               | 90%<br>(84-94%)          | 3.1<br>(1.4-5.3)                            | 3.4%<br>(2.2-5%)                     | 6.5%<br>(4-9.8%)                    | 8.5<br>(4.9-14)       | 480<br>(290-740)     |
| United Arab Emirates | 2000 | Female | 45 to 49 | 9.9%<br>(5.8-15%)              | 90%<br>(85-94%)          | 3.1<br>(1.3-6)                              | 3.5%<br>(2.1-5.2%)                   | 6%<br>(3.6-9.4%)                    | 6.3<br>(3.5-10)       | 310<br>(180-480)     |
| United Arab Emirates | 2000 | Female | 50 to 54 | 10%<br>(6.5-16%)               | 90%<br>(84-94%)          | 3.1<br>(1.3-6)                              | 3.6%<br>(2.1-5.5%)                   | 5.7%<br>(3.3-8.9%)                  | 5.8<br>(3.3-9.5)      | 250<br>(150-400)     |

| Location             | Year | Sex    | Age      | Prevalence of current drinkers | Prevalence of abstainers | Population average of standard drinks daily | Percent of total attributable deaths | Percent of total attributable DALYs | Attributable deaths | Attributable DALYs     |
|----------------------|------|--------|----------|--------------------------------|--------------------------|---------------------------------------------|--------------------------------------|-------------------------------------|---------------------|------------------------|
| United Arab Emirates | 2000 | Female | 55 to 59 | 11%<br>(6.2-17%)               | 89%<br>(83-94%)          | 3<br>(1.2-6.1)                              | 3.8%<br>(2.1-6.1%)                   | 5.7%<br>(3.2-9.1%)                  | 4.4<br>(2.4-7.3)    | 160<br>(89-260)        |
| United Arab Emirates | 2000 | Female | 60 to 64 | 11%<br>(6.2-18%)               | 89%<br>(82-94%)          | 2.6<br>(0.98-5.5)                           | 3.4%<br>(1.9-5.9%)                   | 4.8%<br>(2.7-8%)                    | 3.9<br>(2.2-6.6)    | 120<br>(68-210)        |
| United Arab Emirates | 2000 | Female | 65 to 69 | 11%<br>(6.4-17%)               | 89%<br>(83-94%)          | 2.2<br>(0.86-4.5)                           | 3.5%<br>(1.9-5.9%)                   | 4.8%<br>(2.6-8%)                    | 5.1<br>(2.7-8.8)    | 130<br>(69-220)        |
| United Arab Emirates | 2000 | Female | 70 to 74 | 10%<br>(6.4-17%)               | 90%<br>(83-94%)          | 1.8<br>(0.68-3.9)                           | 3.3%<br>(1.7-5.6%)                   | 4.3%<br>(2.2-7.4%)                  | 3.8<br>(1.9-6.7)    | 78<br>(41-130)         |
| United Arab Emirates | 2000 | Female | 75 to 79 | 9.7%<br>(5.7-16%)              | 90%<br>(84-94%)          | 1.5<br>(0.53-3.2)                           | 2.9%<br>(1.4-5.2%)                   | 3.6%<br>(1.7-6.5%)                  | 4.7<br>(2.3-8.6)    | 73<br>(36-130)         |
| United Arab Emirates | 2000 | Female | 80 to 84 | 8.9%<br>(5.1-14%)              | 91%<br>(86-95%)          | 1.3<br>(0.5-2.7)                            | 3%<br>(1.5-4.9%)                     | 3.6%<br>(1.8-6.1%)                  | 4.2<br>(2.7-2)      | 47<br>(24-80)          |
| United Arab Emirates | 2000 | Female | 85 to 89 | 8.6%<br>(5-13%)                | 91%<br>(87-95%)          | 1.3<br>(0.49-2.6)                           | 2.9%<br>(1.5-5%)                     | 3.5%<br>(1.7-6%)                    | 3.1<br>(1.5-5.4)    | 24<br>(12-42)          |
| United Arab Emirates | 2000 | Female | 90 to 94 | 9.1%<br>(5.3-14%)              | 91%<br>(86-95%)          | 1.3<br>(0.47-2.9)                           | 2.9%<br>(1.4-5%)                     | 3.4%<br>(1.6-6%)                    | 1.6<br>(0.82-2.9)   | 8.8<br>(4.4-15)        |
| United Arab Emirates | 2000 | Female | 95 plus  | 11%<br>(5.7-19%)               | 89%<br>(81-94%)          | 1.5<br>(0.43-3.3)                           | 3%<br>(1.3-5.4%)                     | 3.5%<br>(1.4-6.5%)                  | 0.28<br>(0.12-0.53) | 0.98<br>(0.42-1.8)     |
| United Arab Emirates | 2000 | Male   | All Ages | 14%<br>(11-17%)                | 86%<br>(83-89%)          | 1.8<br>(1.3-2.4)                            | 4.2%<br>(3.1-5.6%)                   | 6.3%<br>(4.5-8.6%)                  | 350<br>(230-480)    | 19000<br>(13000-26000) |
| United Arab Emirates | 2000 | Male   | 15 to 19 | 7.3%<br>(4.4-11%)              | 93%<br>(89-96%)          | 0.49<br>(0.19-1)                            | 1.9%<br>(1-3.3%)                     | 3%<br>(1.4-5.7%)                    | 3<br>(1.3-6)        | 290<br>(150-510)       |
| United Arab Emirates | 2000 | Male   | 20 to 24 | 12%<br>(7.5-19%)               | 88%<br>(81-92%)          | 1.2<br>(0.53-2.3)                           | 4.1%<br>(2.4-6.4%)                   | 6%<br>(3-10%)                       | 15<br>(7-27)        | 1300<br>(760-2200)     |
| United Arab Emirates | 2000 | Male   | 25 to 29 | 16%<br>(10-23%)                | 84%<br>(77-90%)          | 2<br>(0.96-3.3)                             | 4.9%<br>(3.1-7.2%)                   | 7.9%<br>(4.5-12%)                   | 32<br>(17-52)       | 2600<br>(1500-3900)    |
| United Arab Emirates | 2000 | Male   | 30 to 34 | 18%<br>(11-27%)                | 82%<br>(73-89%)          | 2.4<br>(1.4-4)                              | 5.1%<br>(3.3-7.3%)                   | 8.5%<br>(5.3-12%)                   | 40<br>(22-63)       | 2900<br>(1800-4300)    |
| United Arab Emirates | 2000 | Male   | 35 to 39 | 20%<br>(13-29%)                | 80%<br>(71-87%)          | 2.8<br>(1.4-4.5)                            | 5.5%<br>(3.5-7.9%)                   | 9.3%<br>(5.9-14%)                   | 53<br>(29-83)       | 3400<br>(2000-5100)    |
| United Arab Emirates | 2000 | Male   | 40 to 44 | 20%<br>(13-30%)                | 80%<br>(70-87%)          | 3<br>(1.4-5.2)                              | 5.6%<br>(3.5-8.2%)                   | 8.8%<br>(5.2-13%)                   | 56<br>(31-88)       | 3100<br>(1900-4800)    |
| United Arab Emirates | 2000 | Male   | 45 to 49 | 19%<br>(11-28%)                | 81%<br>(72-89%)          | 3<br>(1.3-5.9)                              | 5.6%<br>(3.5-8.1%)                   | 8.2%<br>(5.1-12%)                   | 45<br>(27-69)       | 2200<br>(1400-3300)    |
| United Arab Emirates | 2000 | Male   | 50 to 54 | 18%<br>(11-26%)                | 82%<br>(74-89%)          | 2.9<br>(1.3-5.5)                            | 5.1%<br>(3.2-7.4%)                   | 7.1%<br>(4.4-10%)                   | 34<br>(20-52)       | 1400<br>(880-2200)     |
| United Arab Emirates | 2000 | Male   | 55 to 59 | 16%<br>(9.8-26%)               | 84%<br>(74-90%)          | 2.6<br>(1-5.3)                              | 4.9%<br>(2.8-7.6%)                   | 6.5%<br>(3.8-9.9%)                  | 21<br>(12-34)       | 760<br>(420-1200)      |
| United Arab Emirates | 2000 | Male   | 60 to 64 | 15%<br>(8.6-25%)               | 85%<br>(75-91%)          | 2.2<br>(0.8-4.5)                            | 4.5%<br>(2.5-7.1%)                   | 5.7%<br>(3.2-9%)                    | 12<br>(6.5-20)      | 370<br>(200-610)       |
| United Arab Emirates | 2000 | Male   | 65 to 69 | 14%<br>(8.3-22%)               | 86%<br>(78-92%)          | 1.7<br>(0.69-3.5)                           | 4.1%<br>(2.1-6.6%)                   | 5%<br>(2.6-8%)                      | 12<br>(6.2-20)      | 300<br>(160-490)       |
| United Arab Emirates | 2000 | Male   | 70 to 74 | 13%<br>(8.3-21%)               | 87%<br>(79-92%)          | 1.3<br>(0.51-2.8)                           | 3.4%<br>(1.4-5.7%)                   | 4.1%<br>(1.6-7%)                    | 6.9<br>(2.7-12)     | 140<br>(56-240)        |

| Location             | Year | Sex    | Age      | Prevalence of current drinkers | Prevalence of abstainers | Population average of standard drinks daily | Percent of total attributable deaths | Percent of total attributable DALYs | Attributable deaths | Attributable DALYs  |
|----------------------|------|--------|----------|--------------------------------|--------------------------|---------------------------------------------|--------------------------------------|-------------------------------------|---------------------|---------------------|
| United Arab Emirates | 2000 | Male   | 75 to 79 | 12%<br>(7-19%)                 | 88%<br>(81-93%)          | 1<br>(0.34-2.3)                             | 2.6%<br>(0.71-4.8%)                  | 3%<br>(0.74-5.5%)                   | 6<br>(1.5-12)       | 94<br>(26-180)      |
| United Arab Emirates | 2000 | Male   | 80 to 84 | 11%<br>(6.3-17%)               | 89%<br>(83-94%)          | 0.88<br>(0.32-1.9)                          | 2.6%<br>(0.8-4.7%)                   | 2.9%<br>(0.83-5.2%)                 | 3.8<br>(1.2-7.2)    | 44<br>(14-81)       |
| United Arab Emirates | 2000 | Male   | 85 to 89 | 10%<br>(5.7-16%)               | 90%<br>(84-94%)          | 0.79<br>(0.3-1.7)                           | 2.3%<br>(0.73-4.3%)                  | 2.6%<br>(0.72-4.7%)                 | 2.5<br>(0.7-4.7)    | 21<br>(6.5-38)      |
| United Arab Emirates | 2000 | Male   | 90 to 94 | 11%<br>(6.1-17%)               | 89%<br>(83-94%)          | 0.79<br>(0.26-1.8)                          | 2.1%<br>(0.64-4%)                    | 2.3%<br>(0.56-4.5%)                 | 1.6<br>(0.41-3.1)   | 9.3<br>(2.8-18)     |
| United Arab Emirates | 2000 | Male   | 95 plus  | 13%<br>(6.5-21%)               | 87%<br>(79-94%)          | 0.86<br>(0.2-2.2)                           | 2.1%<br>(0.45-4.4%)                  | 2.2%<br>(0.3-4.8%)                  | 0.22<br>(0.03-0.48) | 0.86<br>(0.18-1.8)  |
| United Arab Emirates | 2005 | Female | All Ages | 7.5%<br>(6-9.4%)               | 92%<br>(91-94%)          | 1.7<br>(1.2-2.3)                            | 2.2%<br>(1.6-3%)                     | 4.4%<br>(3.1-5.9%)                  | 94<br>(65-130)      | 5000<br>(3700-6600) |
| United Arab Emirates | 2005 | Female | 15 to 19 | 7.2%<br>(4.3-11%)              | 93%<br>(89-96%)          | 1.3<br>(0.51-2.6)                           | 1.4%<br>(0.89-2.1%)                  | 3.6%<br>(2-6%)                      | 1.6<br>(0.89-2.7)   | 190<br>(120-290)    |
| United Arab Emirates | 2005 | Female | 20 to 24 | 9.5%<br>(5.8-14%)              | 91%<br>(86-94%)          | 2.3<br>(1-4.5)                              | 2.2%<br>(1.5-3.2%)                   | 5.2%<br>(3-8%)                      | 3.7<br>(2.1-5.8)    | 420<br>(280-610)    |
| United Arab Emirates | 2005 | Female | 25 to 29 | 10%<br>(6.2-15%)               | 90%<br>(85-94%)          | 2.7<br>(1.2-4.7)                            | 2.6%<br>(1.8-3.8%)                   | 6.1%<br>(3.6-9.3%)                  | 6.8<br>(4-11)       | 660<br>(430-940)    |
| United Arab Emirates | 2005 | Female | 30 to 34 | 10%<br>(6.1-16%)               | 90%<br>(84-94%)          | 2.8<br>(1.5-4.7)                            | 2.8%<br>(1.8-4.3%)                   | 6.6%<br>(3.9-10%)                   | 9.5<br>(5.5-15)     | 770<br>(500-1100)   |
| United Arab Emirates | 2005 | Female | 35 to 39 | 10%<br>(6.1-16%)               | 90%<br>(84-94%)          | 2.9<br>(1.4-5)                              | 3%<br>(1.9-4.5%)                     | 6.6%<br>(3.9-10%)                   | 10<br>(6-17)        | 710<br>(450-1100)   |
| United Arab Emirates | 2005 | Female | 40 to 44 | 10%<br>(6.2-16%)               | 90%<br>(84-94%)          | 3<br>(1.3-5.3)                              | 3.2%<br>(2-4.8%)                     | 6.3%<br>(3.9-9.6%)                  | 11<br>(6.6-17)      | 650<br>(410-970)    |
| United Arab Emirates | 2005 | Female | 45 to 49 | 9.8%<br>(5.8-15%)              | 90%<br>(85-94%)          | 3.1<br>(1.3-6)                              | 3.3%<br>(2-5.1%)                     | 5.9%<br>(3.4-9.2%)                  | 9.7<br>(5.5-16)     | 490<br>(290-750)    |
| United Arab Emirates | 2005 | Female | 50 to 54 | 10%<br>(6.4-16%)               | 90%<br>(84-94%)          | 3.1<br>(1.2-6.1)                            | 3.4%<br>(2-5.3%)                     | 5.6%<br>(3.2-8.7%)                  | 7.2<br>(4.2-12)     | 320<br>(190-510)    |
| United Arab Emirates | 2005 | Female | 55 to 59 | 11%<br>(6.2-17%)               | 89%<br>(83-94%)          | 3<br>(1.2-5.8)                              | 3.6%<br>(2-6%)                       | 5.6%<br>(3.2-9%)                    | 6.7<br>(3.9-11)     | 250<br>(140-420)    |
| United Arab Emirates | 2005 | Female | 60 to 64 | 11%<br>(6.1-18%)               | 89%<br>(82-94%)          | 2.6<br>(0.99-5.6)                           | 3.3%<br>(1.8-5.6%)                   | 4.8%<br>(2.7-7.9%)                  | 4<br>(2.3-6.6)      | 130<br>(69-220)     |
| United Arab Emirates | 2005 | Female | 65 to 69 | 11%<br>(6.4-17%)               | 89%<br>(83-94%)          | 2.2<br>(0.9-4.5)                            | 3.4%<br>(1.8-5.8%)                   | 4.8%<br>(2.6-7.9%)                  | 4.3<br>(2.3-7.1)    | 110<br>(60-190)     |
| United Arab Emirates | 2005 | Female | 70 to 74 | 10%<br>(6.3-17%)               | 90%<br>(83-94%)          | 1.8<br>(0.65-3.7)                           | 3.1%<br>(1.6-5.4%)                   | 4.1%<br>(2.1-7%)                    | 5.1<br>(2.6-9)      | 110<br>(55-180)     |
| United Arab Emirates | 2005 | Female | 75 to 79 | 9.6%<br>(5.7-16%)              | 90%<br>(84-94%)          | 1.5<br>(0.49-3.3)                           | 2.7%<br>(1.3-4.9%)                   | 3.5%<br>(1.7-6.3%)                  | 3.5<br>(1.6-6.3)    | 56<br>(26-97)       |
| United Arab Emirates | 2005 | Female | 80 to 84 | 8.8%<br>(5.1-14%)              | 91%<br>(86-95%)          | 1.3<br>(0.49-2.7)                           | 2.8%<br>(1.4-4.8%)                   | 3.5%<br>(1.7-5.9%)                  | 4<br>(1.9-6.9)      | 46<br>(23-80)       |
| United Arab Emirates | 2005 | Female | 85 to 89 | 8.5%<br>(4.9-13%)              | 92%<br>(87-95%)          | 1.3<br>(0.48-2.5)                           | 2.8%<br>(1.4-4.9%)                   | 3.4%<br>(1.7-5.8%)                  | 3.7<br>(1.8-6.5)    | 30<br>(15-50)       |
| United Arab Emirates | 2005 | Female | 90 to 94 | 8.9%<br>(5.3-14%)              | 91%<br>(86-95%)          | 1.3<br>(0.44-2.7)                           | 2.8%<br>(1.4-4.8%)                   | 3.3%<br>(1.5-5.9%)                  | 1.8<br>(0.86-3.3)   | 9.9<br>(4.7-17)     |

| Location             | Year | Sex    | Age      | Prevalence of current drinkers | Prevalence of abstainers | Population average of standard drinks daily | Percent of total attributable deaths | Percent of total attributable DALYs | Attributable deaths | Attributable DALYs     |
|----------------------|------|--------|----------|--------------------------------|--------------------------|---------------------------------------------|--------------------------------------|-------------------------------------|---------------------|------------------------|
| United Arab Emirates | 2005 | Female | 95 plus  | 11%<br>(5.6-18%)               | 89%<br>(82-94%)          | 1.5<br>(0.43-3.2)                           | 2.9%<br>(1.2-5.3%)                   | 3.4%<br>(1.4-6.5%)                  | 0.7<br>(0.29-1.3)   | 2.5<br>(1.1-4.5)       |
| United Arab Emirates | 2005 | Male   | All Ages | 14%<br>(11-18%)                | 86%<br>(82-89%)          | 1.7<br>(1.2-2.3)                            | 4.3%<br>(3.2-5.7%)                   | 6.5%<br>(4.8-8.8%)                  | 490<br>(340-700)    | 28000<br>(20000-38000) |
| United Arab Emirates | 2005 | Male   | 15 to 19 | 7.1%<br>(4.3-11%)              | 93%<br>(89-96%)          | 0.45<br>(0.16-0.93)                         | 1.8%<br>(1-3%)                       | 2.9%<br>(1.3-5.5%)                  | 3.9<br>(1.7-7.4)    | 410<br>(230-690)       |
| United Arab Emirates | 2005 | Male   | 20 to 24 | 12%<br>(7-18%)                 | 88%<br>(82-93%)          | 1.1<br>(0.47-2)                             | 3.9%<br>(2.3-6%)                     | 5.7%<br>(2.9-9.8%)                  | 22<br>(11-39)       | 2000<br>(1200-3300)    |
| United Arab Emirates | 2005 | Male   | 25 to 29 | 15%<br>(9.5-23%)               | 85%<br>(77-90%)          | 1.8<br>(0.88-3.1)                           | 4.7%<br>(2.9-6.9%)                   | 7.6%<br>(4.2-12%)                   | 50<br>(27-81)       | 4100<br>(2500-6100)    |
| United Arab Emirates | 2005 | Male   | 30 to 34 | 17%<br>(11-26%)                | 83%<br>(74-89%)          | 2.2<br>(1.3-3.6)                            | 4.8%<br>(3.2-6.9%)                   | 8.3%<br>(5.1-12%)                   | 64<br>(37-97)       | 4800<br>(3100-6800)    |
| United Arab Emirates | 2005 | Male   | 35 to 39 | 19%<br>(12-28%)                | 81%<br>(72-88%)          | 2.5<br>(1.3-4.2)                            | 5.3%<br>(3.4-7.6%)                   | 9%<br>(5.6-13%)                     | 72<br>(41-110)      | 4700<br>(3000-6800)    |
| United Arab Emirates | 2005 | Male   | 40 to 44 | 20%<br>(13-30%)                | 80%<br>(70-87%)          | 2.8<br>(1.3-4.8)                            | 5.3%<br>(3.3-7.8%)                   | 8.6%<br>(5-13%)                     | 74<br>(40-110)      | 4200<br>(2500-6400)    |
| United Arab Emirates | 2005 | Male   | 45 to 49 | 19%<br>(10-28%)                | 81%<br>(72-90%)          | 2.8<br>(1.2-5.4)                            | 5.3%<br>(3.3-7.8%)                   | 7.9%<br>(4.7-12%)                   | 63<br>(36-96)       | 3100<br>(1900-4600)    |
| United Arab Emirates | 2005 | Male   | 50 to 54 | 17%<br>(11-25%)                | 83%<br>(75-89%)          | 2.6<br>(1.1-5.1)                            | 4.9%<br>(2.9-7.2%)                   | 6.9%<br>(4.1-10%)                   | 46<br>(27-70)       | 2000<br>(1200-3000)    |
| United Arab Emirates | 2005 | Male   | 55 to 59 | 16%<br>(9.1-26%)               | 84%<br>(74-91%)          | 2.4<br>(0.91-4.9)                           | 4.6%<br>(2.6-7.2%)                   | 6.2%<br>(3.5-9.7%)                  | 35<br>(20-56)       | 1300<br>(720-2000)     |
| United Arab Emirates | 2005 | Male   | 60 to 64 | 14%<br>(8.1-24%)               | 86%<br>(76-92%)          | 2<br>(0.73-4.4)                             | 4.2%<br>(2.3-6.5%)                   | 5.4%<br>(3-8.6%)                    | 19<br>(10-30)       | 590<br>(320-920)       |
| United Arab Emirates | 2005 | Male   | 65 to 69 | 14%<br>(8.2-21%)               | 86%<br>(79-92%)          | 1.6<br>(0.64-3.3)                           | 3.9%<br>(2.1-6.2%)                   | 4.9%<br>(2.5-7.8%)                  | 12<br>(6.1-19)      | 300<br>(160-480)       |
| United Arab Emirates | 2005 | Male   | 70 to 74 | 13%<br>(7.8-20%)               | 87%<br>(80-92%)          | 1.2<br>(0.44-2.6)                           | 3.1%<br>(1.2-5.2%)                   | 3.7%<br>(1.4-6.3%)                  | 10<br>(3.8-18)      | 210<br>(80-370)        |
| United Arab Emirates | 2005 | Male   | 75 to 79 | 11%<br>(6.6-18%)               | 89%<br>(82-93%)          | 0.95<br>(0.29-2.1)                          | 2.6%<br>(0.82-4.7%)                  | 3%<br>(0.82-5.4%)                   | 5.2<br>(1.4-9.5)    | 83<br>(25-150)         |
| United Arab Emirates | 2005 | Male   | 80 to 84 | 10%<br>(6-17%)                 | 90%<br>(83-94%)          | 0.81<br>(0.28-1.7)                          | 2.5%<br>(0.88-4.5%)                  | 2.8%<br>(0.91-5.1%)                 | 4.4<br>(1.5-8)      | 51<br>(18-92)          |
| United Arab Emirates | 2005 | Male   | 85 to 89 | 9.6%<br>(5.4-16%)              | 90%<br>(84-95%)          | 0.71<br>(0.26-1.5)                          | 2.3%<br>(0.77-4.3%)                  | 2.5%<br>(0.8-4.8%)                  | 2.8<br>(0.85-5.2)   | 23<br>(7.9-42)         |
| United Arab Emirates | 2005 | Male   | 90 to 94 | 10%<br>(5.9-16%)               | 90%<br>(84-94%)          | 0.71<br>(0.24-1.6)                          | 2.1%<br>(0.68-4.2%)                  | 2.3%<br>(0.63-4.7%)                 | 1.2<br>(0.33-2.4)   | 6.9<br>(2.2-13)        |
| United Arab Emirates | 2005 | Male   | 95 plus  | 12%<br>(6.5-21%)               | 88%<br>(79-94%)          | 0.79<br>(0.19-2)                            | 2.2%<br>(0.53-4.5%)                  | 2.3%<br>(0.44-4.9%)                 | 0.55<br>(0.11-1.2)  | 2.2<br>(0.54-4.5)      |
| United Arab Emirates | 2010 | Female | All Ages | 8%<br>(6.3-10%)                | 92%<br>(90-94%)          | 1.9<br>(1.2-2.8)                            | 2.2%<br>(1.6-2.9%)                   | 4.4%<br>(3.1-6%)                    | 140<br>(95-200)     | 8100<br>(5600-11000)   |
| United Arab Emirates | 2010 | Female | 15 to 19 | 7.6%<br>(4.5-12%)              | 92%<br>(88-95%)          | 1.4<br>(0.57-2.9)                           | 1.4%<br>(0.9-2.2%)                   | 3.7%<br>(2-6.1%)                    | 2.7<br>(1.5-4.7)    | 320<br>(190-500)       |
| United Arab Emirates | 2010 | Female | 20 to 24 | 10%<br>(6.1-16%)               | 90%<br>(84-94%)          | 2.5<br>(1-5)                                | 2.2%<br>(1.5-3.3%)                   | 5.2%<br>(3-8.1%)                    | 7<br>(3.9-11)       | 810<br>(540-1200)      |

| Location             | Year | Sex    | Age      | Prevalence of current drinkers | Prevalence of abstainers | Population average of standard drinks daily | Percent of total attributable deaths | Percent of total attributable DALYs | Attributable deaths | Attributable DALYs     |
|----------------------|------|--------|----------|--------------------------------|--------------------------|---------------------------------------------|--------------------------------------|-------------------------------------|---------------------|------------------------|
| United Arab Emirates | 2010 | Female | 25 to 29 | 11%<br>(6.4-16%)               | 89%<br>(84-94%)          | 2.9<br>(1.3-5.3)                            | 2.6%<br>(1.7-3.8%)                   | 6%<br>(3.6-9.3%)                    | 11<br>(6.2-18)      | 1100<br>(730-1600)     |
| United Arab Emirates | 2010 | Female | 30 to 34 | 10%<br>(6.1-16%)               | 90%<br>(84-94%)          | 2.9<br>(1.6-5.1)                            | 2.8%<br>(1.8-4.2%)                   | 6.5%<br>(3.8-10%)                   | 14<br>(7.8-24)      | 1200<br>(760-1800)     |
| United Arab Emirates | 2010 | Female | 35 to 39 | 10%<br>(5.9-16%)               | 90%<br>(84-94%)          | 3<br>(1.4-5.2)                              | 2.9%<br>(1.8-4.5%)                   | 6.4%<br>(3.7-9.9%)                  | 18<br>(9.4-30)      | 1200<br>(750-1900)     |
| United Arab Emirates | 2010 | Female | 40 to 44 | 10%<br>(6.1-16%)               | 90%<br>(84-94%)          | 3.1<br>(1.3-5.4)                            | 3.1%<br>(1.8-4.6%)                   | 6.2%<br>(3.7-9.7%)                  | 18<br>(10-30)       | 1100<br>(630-1700)     |
| United Arab Emirates | 2010 | Female | 45 to 49 | 10%<br>(5.7-15%)               | 90%<br>(85-94%)          | 3.2<br>(1.3-6.4)                            | 3.2%<br>(1.9-5%)                     | 5.9%<br>(3.4-9.2%)                  | 16<br>(8.7-26)      | 830<br>(480-1300)      |
| United Arab Emirates | 2010 | Female | 50 to 54 | 10%<br>(6.3-16%)               | 90%<br>(84-94%)          | 3.3<br>(1.3-6.4)                            | 3.3%<br>(1.9-5.3%)                   | 5.5%<br>(3.2-8.7%)                  | 12<br>(7-21)        | 550<br>(310-900)       |
| United Arab Emirates | 2010 | Female | 55 to 59 | 10%<br>(6.1-16%)               | 90%<br>(84-94%)          | 3<br>(1.2-6.1)                              | 3.5%<br>(1.9-5.7%)                   | 5.5%<br>(3.1-8.8%)                  | 8.7<br>(4.8-14)     | 330<br>(180-550)       |
| United Arab Emirates | 2010 | Female | 60 to 64 | 11%<br>(6.1-17%)               | 89%<br>(83-94%)          | 2.7<br>(0.98-5.6)                           | 3.2%<br>(1.8-5.4%)                   | 4.7%<br>(2.6-7.6%)                  | 7<br>(3.9-12)       | 230<br>(120-380)       |
| United Arab Emirates | 2010 | Female | 65 to 69 | 11%<br>(6.3-17%)               | 89%<br>(83-94%)          | 2.3<br>(0.85-4.6)                           | 3.3%<br>(1.7-5.5%)                   | 4.6%<br>(2.6-7.6%)                  | 4.8<br>(2.6-8)      | 130<br>(68-220)        |
| United Arab Emirates | 2010 | Female | 70 to 74 | 10%<br>(6-16%)                 | 90%<br>(84-94%)          | 1.8<br>(0.63-3.9)                           | 3%<br>(1.5-5.3%)                     | 4%<br>(2-6.9%)                      | 4.9<br>(2.5-8.8)    | 100<br>(52-180)        |
| United Arab Emirates | 2010 | Female | 75 to 79 | 9.3%<br>(5.4-15%)              | 91%<br>(85-95%)          | 1.5<br>(0.46-3.4)                           | 2.7%<br>(1.3-4.8%)                   | 3.4%<br>(1.5-6.1%)                  | 5.5<br>(2.5-10)     | 88<br>(41-160)         |
| United Arab Emirates | 2010 | Female | 80 to 84 | 8.6%<br>(5.1-14%)              | 91%<br>(86-95%)          | 1.3<br>(0.46-2.9)                           | 2.7%<br>(1.4-4.7%)                   | 3.3%<br>(1.7-5.8%)                  | 4.9<br>(2.5-8.3)    | 56<br>(29-96)          |
| United Arab Emirates | 2010 | Female | 85 to 89 | 8.2%<br>(4.8-13%)              | 92%<br>(87-95%)          | 1.3<br>(0.48-2.7)                           | 2.7%<br>(1.4-4.7%)                   | 3.2%<br>(1.6-5.7%)                  | 3.8<br>(1.8-6.7)    | 30<br>(15-52)          |
| United Arab Emirates | 2010 | Female | 90 to 94 | 8.8%<br>(5.2-14%)              | 91%<br>(86-95%)          | 1.3<br>(0.44-2.8)                           | 2.7%<br>(1.3-4.8%)                   | 3.2%<br>(1.5-5.7%)                  | 2.5<br>(1.1-4.4)    | 13<br>(6.3-23)         |
| United Arab Emirates | 2010 | Female | 95 plus  | 10%<br>(5.5-18%)               | 90%<br>(82-95%)          | 1.5<br>(0.44-3.5)                           | 2.9%<br>(1.3-5.2%)                   | 3.4%<br>(1.4-6.3%)                  | 0.81<br>(0.33-1.5)  | 2.9<br>(1.2-5.2)       |
| United Arab Emirates | 2010 | Male   | All Ages | 15%<br>(12-19%)                | 85%<br>(81-88%)          | 1.9<br>(1.3-2.7)                            | 4.4%<br>(3.1-6.1%)                   | 6.7%<br>(4.8-9.3%)                  | 1000<br>(660-1500)  | 58000<br>(41000-83000) |
| United Arab Emirates | 2010 | Male   | 15 to 19 | 7.6%<br>(4.7-12%)              | 92%<br>(88-95%)          | 0.51<br>(0.19-1)                            | 2.1%<br>(1.2-3.5%)                   | 3.5%<br>(1.6-6.8%)                  | 7.3<br>(3.1-15)     | 720<br>(390-1300)      |
| United Arab Emirates | 2010 | Male   | 20 to 24 | 13%<br>(7.6-19%)               | 87%<br>(81-92%)          | 1.2<br>(0.52-2.2)                           | 4.1%<br>(2.4-6.6%)                   | 6.2%<br>(3-11%)                     | 49<br>(23-90)       | 4500<br>(2500-7400)    |
| United Arab Emirates | 2010 | Male   | 25 to 29 | 16%<br>(9.6-24%)               | 84%<br>(76-90%)          | 1.9<br>(0.92-3.3)                           | 4.9%<br>(3-7.3%)                     | 8%<br>(4.3-12%)                     | 99<br>(51-170)      | 8100<br>(4800-13000)   |
| United Arab Emirates | 2010 | Male   | 30 to 34 | 17%<br>(10-26%)                | 83%<br>(74-90%)          | 2.3<br>(1.3-3.8)                            | 4.8%<br>(3.1-7.2%)                   | 8.2%<br>(4.8-13%)                   | 130<br>(77-220)     | 10000<br>(6200-15000)  |
| United Arab Emirates | 2010 | Male   | 35 to 39 | 18%<br>(11-27%)                | 82%<br>(73-89%)          | 2.5<br>(1.2-4.3)                            | 5.1%<br>(3.2-7.7%)                   | 8.7%<br>(5.2-13%)                   | 170<br>(91-270)     | 11000<br>(6500-17000)  |
| United Arab Emirates | 2010 | Male   | 40 to 44 | 18%<br>(12-27%)                | 82%<br>(73-88%)          | 2.7<br>(1.2-4.7)                            | 5.2%<br>(3.2-7.9%)                   | 8.3%<br>(4.7-13%)                   | 150<br>(80-240)     | 8400<br>(4900-13000)   |

| Location             | Year | Sex    | Age      | Prevalence of current drinkers | Prevalence of abstainers | Population average of standard drinks daily | Percent of total attributable deaths | Percent of total attributable DALYs | Attributable deaths | Attributable DALYs    |
|----------------------|------|--------|----------|--------------------------------|--------------------------|---------------------------------------------|--------------------------------------|-------------------------------------|---------------------|-----------------------|
| United Arab Emirates | 2010 | Male   | 45 to 49 | 17%<br>(9.8-26%)               | 83%<br>(74-90%)          | 2.7<br>(1.2-5.4)                            | 5.1%<br>(3.2-7.6%)                   | 7.6%<br>(4.5-12%)                   | 140<br>(80-220)     | 6900<br>(4200-11000)  |
| United Arab Emirates | 2010 | Male   | 50 to 54 | 16%<br>(10-24%)                | 84%<br>(76-90%)          | 2.6<br>(1-5.2)                              | 4.7%<br>(2.7-7%)                     | 6.6%<br>(3.8-9.9%)                  | 98<br>(55-160)      | 4200<br>(2400-6400)   |
| United Arab Emirates | 2010 | Male   | 55 to 59 | 15%<br>(8.9-24%)               | 85%<br>(76-91%)          | 2.4<br>(0.9-5)                              | 4.6%<br>(2.6-7.2%)                   | 6.1%<br>(3.5-9.5%)                  | 61<br>(33-99)       | 2200<br>(1200-3600)   |
| United Arab Emirates | 2010 | Male   | 60 to 64 | 14%<br>(7.9-24%)               | 86%<br>(76-92%)          | 2<br>(0.71-4.3)                             | 4.1%<br>(2.3-6.5%)                   | 5.3%<br>(2.9-8.4%)                  | 41<br>(22-69)       | 1300<br>(680-2000)    |
| United Arab Emirates | 2010 | Male   | 65 to 69 | 13%<br>(7.7-21%)               | 87%<br>(79-92%)          | 1.6<br>(0.63-3.3)                           | 3.9%<br>(2-6.2%)                     | 4.9%<br>(2.5-7.8%)                  | 24<br>(12-39)       | 590<br>(310-970)      |
| United Arab Emirates | 2010 | Male   | 70 to 74 | 12%<br>(7.7-19%)               | 88%<br>(81-92%)          | 1.2<br>(0.43-2.7)                           | 3.3%<br>(1.4-5.5%)                   | 4%<br>(1.7-6.8%)                    | 13<br>(5.7-23)      | 270<br>(110-460)      |
| United Arab Emirates | 2010 | Male   | 75 to 79 | 11%<br>(6.6-18%)               | 89%<br>(82-93%)          | 0.95<br>(0.3-2.2)                           | 2.7%<br>(0.9-4.9%)                   | 3.1%<br>(0.96-5.6%)                 | 11<br>(3.3-20)      | 170<br>(58-310)       |
| United Arab Emirates | 2010 | Male   | 80 to 84 | 10%<br>(5.8-17%)               | 90%<br>(83-94%)          | 0.81<br>(0.27-1.8)                          | 2.7%<br>(1.1-4.7%)                   | 3%<br>(1.2-5.4%)                    | 7.8<br>(3-14)       | 90<br>(36-160)        |
| United Arab Emirates | 2010 | Male   | 85 to 89 | 9.5%<br>(5.4-15%)              | 91%<br>(85-95%)          | 0.72<br>(0.26-1.6)                          | 2.5%<br>(1-4.4%)                     | 2.8%<br>(1-5%)                      | 3.7<br>(1.4-6.6)    | 30<br>(12-53)         |
| United Arab Emirates | 2010 | Male   | 90 to 94 | 10%<br>(5.8-16%)               | 90%<br>(84-94%)          | 0.72<br>(0.23-1.6)                          | 2.4%<br>(0.85-4.5%)                  | 2.6%<br>(0.85-5%)                   | 1.7<br>(0.54-3.1)   | 9.4<br>(3.2-17)       |
| United Arab Emirates | 2010 | Male   | 95 plus  | 12%<br>(6.2-20%)               | 88%<br>(80-94%)          | 0.79<br>(0.18-2)                            | 2.5%<br>(0.79-4.9%)                  | 2.6%<br>(0.71-5.4%)                 | 0.43<br>(0.12-0.89) | 1.7<br>(0.55-3.3)     |
| United Arab Emirates | 2016 | Female | All Ages | 8.2%<br>(6.6-10%)              | 92%<br>(90-93%)          | 2.1<br>(1.1-3.5)                            | 2.3%<br>(1.7-3.1%)                   | 4.6%<br>(3.2-6.3%)                  | 200<br>(130-290)    | 11000<br>(7300-15000) |
| United Arab Emirates | 2016 | Female | 15 to 19 | 7.8%<br>(4.7-12%)              | 92%<br>(88-95%)          | 1.5<br>(0.53-3.2)                           | 1.4%<br>(0.88-2.1%)                  | 3.6%<br>(2-5.9%)                    | 2.2<br>(1.2-3.8)    | 260<br>(160-400)      |
| United Arab Emirates | 2016 | Female | 20 to 24 | 10%<br>(6.3-16%)               | 90%<br>(84-94%)          | 2.7<br>(0.97-5.8)                           | 2.2%<br>(1.5-3.2%)                   | 5.1%<br>(2.9-7.9%)                  | 5.5<br>(3-9.1)      | 650<br>(420-940)      |
| United Arab Emirates | 2016 | Female | 25 to 29 | 11%<br>(6.5-17%)               | 89%<br>(83-93%)          | 3.1<br>(1.2-6.2)                            | 2.5%<br>(1.7-3.6%)                   | 5.8%<br>(3.4-8.9%)                  | 11<br>(5.9-19)      | 1100<br>(740-1700)    |
| United Arab Emirates | 2016 | Female | 30 to 34 | 10%<br>(6.1-17%)               | 90%<br>(83-94%)          | 3.1<br>(1.4-6)                              | 2.7%<br>(1.8-4%)                     | 6.2%<br>(3.7-9.7%)                  | 18<br>(9.5-30)      | 1500<br>(940-2300)    |
| United Arab Emirates | 2016 | Female | 35 to 39 | 10%<br>(6-16%)                 | 90%<br>(84-94%)          | 3.1<br>(1.3-6)                              | 2.8%<br>(1.7-4.4%)                   | 6.3%<br>(3.6-9.5%)                  | 23<br>(12-39)       | 1600<br>(940-2500)    |
| United Arab Emirates | 2016 | Female | 40 to 44 | 10%<br>(6.1-16%)               | 90%<br>(84-94%)          | 3.2<br>(1.3-6.1)                            | 3%<br>(1.8-4.5%)                     | 6.1%<br>(3.7-9.3%)                  | 26<br>(14-43)       | 1500<br>(910-2400)    |
| United Arab Emirates | 2016 | Female | 45 to 49 | 10%<br>(5.9-15%)               | 90%<br>(85-94%)          | 3.4<br>(1.4-7.1)                            | 3.2%<br>(1.9-4.9%)                   | 5.8%<br>(3.4-9.1%)                  | 26<br>(14-43)       | 1300<br>(750-2100)    |
| United Arab Emirates | 2016 | Female | 50 to 54 | 10%<br>(6.3-16%)               | 90%<br>(84-94%)          | 3.4<br>(1.3-7.2)                            | 3.2%<br>(1.9-5.1%)                   | 5.4%<br>(3.1-8.6%)                  | 23<br>(13-39)       | 1000<br>(560-1700)    |
| United Arab Emirates | 2016 | Female | 55 to 59 | 11%<br>(6.3-17%)               | 89%<br>(83-94%)          | 3.2<br>(1.1-6.8)                            | 3.4%<br>(1.9-5.6%)                   | 5.3%<br>(3.1-8.6%)                  | 18<br>(9.9-30)      | 670<br>(370-1100)     |
| United Arab Emirates | 2016 | Female | 60 to 64 | 11%<br>(6-18%)                 | 89%<br>(82-94%)          | 2.7<br>(0.94-6.3)                           | 3%<br>(1.7-5.2%)                     | 4.5%<br>(2.5-7.3%)                  | 10<br>(5.6-18)      | 340<br>(180-590)      |

| Location             | Year | Sex    | Age      | Prevalence of current drinkers | Prevalence of abstainers | Population average of standard drinks daily | Percent of total attributable deaths | Percent of total attributable DALYs | Attributable deaths | Attributable DALYs     |
|----------------------|------|--------|----------|--------------------------------|--------------------------|---------------------------------------------|--------------------------------------|-------------------------------------|---------------------|------------------------|
| United Arab Emirates | 2016 | Female | 65 to 69 | 11%<br>(6.5-16%)               | 89%<br>(84-94%)          | 2.3<br>(0.83-5.2)                           | 3.1%<br>(1.7-5.3%)                   | 4.4%<br>(2.4-7.3%)                  | 9.4<br>(5-16)       | 250<br>(130-430)       |
| United Arab Emirates | 2016 | Female | 70 to 74 | 10%<br>(6.4-16%)               | 90%<br>(84-94%)          | 1.9<br>(0.62-4)                             | 2.8%<br>(1.5-4.9%)                   | 3.8%<br>(1.9-6.5%)                  | 6.2<br>(3.1-11)     | 130<br>(65-230)        |
| United Arab Emirates | 2016 | Female | 75 to 79 | 9.4%<br>(5.6-15%)              | 91%<br>(85-94%)          | 1.5<br>(0.48-3.6)                           | 2.6%<br>(1.2-4.7%)                   | 3.3%<br>(1.5-5.9%)                  | 5.3<br>(2.5-9.8)    | 85<br>(40-150)         |
| United Arab Emirates | 2016 | Female | 80 to 84 | 8.7%<br>(5-14%)                | 91%<br>(86-95%)          | 1.4<br>(0.47-3.1)                           | 2.6%<br>(1.4-4.4%)                   | 3.2%<br>(1.7-5.4%)                  | 6.2<br>(3.1-11)     | 71<br>(37-120)         |
| United Arab Emirates | 2016 | Female | 85 to 89 | 8.4%<br>(4.9-13%)              | 92%<br>(87-95%)          | 1.3<br>(0.46-2.9)                           | 2.6%<br>(1.3-4.4%)                   | 3.1%<br>(1.5-5.4%)                  | 5.4<br>(2.7-9.7)    | 43<br>(22-74)          |
| United Arab Emirates | 2016 | Female | 90 to 94 | 9%<br>(5.2-14%)                | 91%<br>(86-95%)          | 1.4<br>(0.43-3.3)                           | 2.6%<br>(1.3-4.4%)                   | 3%<br>(1.4-5.3%)                    | 2.6<br>(1.2-4.7)    | 14<br>(6.7-24)         |
| United Arab Emirates | 2016 | Female | 95 plus  | 11%<br>(5.6-18%)               | 89%<br>(82-94%)          | 1.6<br>(0.41-4)                             | 2.7%<br>(1.1-4.9%)                   | 3.2%<br>(1.2-5.9%)                  | 1.2<br>(0.48-2.2)   | 4.4<br>(1.9-7.9)       |
| United Arab Emirates | 2016 | Male   | All Ages | 15%<br>(12-18%)                | 85%<br>(82-88%)          | 1.9<br>(1.1-3.1)                            | 4.3%<br>(3-6%)                       | 6.2%<br>(4.1-8.7%)                  | 1300<br>(760-2000)  | 68000<br>(45000-98000) |
| United Arab Emirates | 2016 | Male   | 15 to 19 | 7.5%<br>(4.6-12%)              | 92%<br>(88-95%)          | 0.49<br>(0.17-1.1)                          | 2%<br>(1.1-3.4%)                     | 3.5%<br>(1.6-6.8%)                  | 6.7<br>(2.8-14)     | 670<br>(350-1200)      |
| United Arab Emirates | 2016 | Male   | 20 to 24 | 13%<br>(7.6-19%)               | 87%<br>(81-92%)          | 1.2<br>(0.44-2.6)                           | 4.1%<br>(2.4-6.5%)                   | 6.3%<br>(2.9-11%)                   | 36<br>(16-67)       | 3300<br>(1800-5300)    |
| United Arab Emirates | 2016 | Male   | 25 to 29 | 16%<br>(9.5-23%)               | 84%<br>(77-91%)          | 1.9<br>(0.75-3.8)                           | 4.7%<br>(2.8-7.1%)                   | 7.7%<br>(3.9-12%)                   | 82<br>(39-140)      | 6800<br>(3800-11000)   |
| United Arab Emirates | 2016 | Male   | 30 to 34 | 17%<br>(10-26%)                | 83%<br>(74-90%)          | 2.3<br>(1.1-4.3)                            | 4.6%<br>(2.9-7.1%)                   | 7.8%<br>(4.3-12%)                   | 110<br>(56-190)     | 8400<br>(4900-13000)   |
| United Arab Emirates | 2016 | Male   | 35 to 39 | 18%<br>(11-27%)                | 82%<br>(73-89%)          | 2.4<br>(1.1-4.6)                            | 4.9%<br>(3-7.6%)                     | 8.2%<br>(4.7-13%)                   | 160<br>(82-270)     | 10000<br>(6100-16000)  |
| United Arab Emirates | 2016 | Male   | 40 to 44 | 19%<br>(12-28%)                | 81%<br>(72-88%)          | 2.6<br>(1.1-4.9)                            | 5%<br>(3-7.5%)                       | 7.9%<br>(4.4-12%)                   | 210<br>(110-340)    | 12000<br>(6500-18000)  |
| United Arab Emirates | 2016 | Male   | 45 to 49 | 18%<br>(9.7-27%)               | 82%<br>(73-90%)          | 2.6<br>(1.1-5.5)                            | 5%<br>(3-7.6%)                       | 7.3%<br>(4.2-11%)                   | 200<br>(110-320)    | 9800<br>(5500-15000)   |
| United Arab Emirates | 2016 | Male   | 50 to 54 | 16%<br>(9.9-24%)               | 84%<br>(76-90%)          | 2.5<br>(0.95-5.4)                           | 4.5%<br>(2.6-6.9%)                   | 6.3%<br>(3.5-9.6%)                  | 180<br>(89-300)     | 7500<br>(4000-12000)   |
| United Arab Emirates | 2016 | Male   | 55 to 59 | 15%<br>(8.7-23%)               | 85%<br>(77-91%)          | 2.3<br>(0.88-5)                             | 4.3%<br>(2.4-6.9%)                   | 5.7%<br>(3.1-8.8%)                  | 130<br>(66-230)     | 4800<br>(2500-8200)    |
| United Arab Emirates | 2016 | Male   | 60 to 64 | 14%<br>(7.8-23%)               | 86%<br>(77-92%)          | 1.9<br>(0.71-4.5)                           | 3.8%<br>(1.9-6.2%)                   | 4.8%<br>(2.4-8%)                    | 77<br>(38-130)      | 2300<br>(1200-3900)    |
| United Arab Emirates | 2016 | Male   | 65 to 69 | 13%<br>(7.8-21%)               | 87%<br>(79-92%)          | 1.6<br>(0.58-3.4)                           | 3.5%<br>(1.5-5.7%)                   | 4.3%<br>(1.9-7.1%)                  | 53<br>(22-90)       | 1300<br>(580-2200)     |
| United Arab Emirates | 2016 | Male   | 70 to 74 | 12%<br>(7.6-19%)               | 88%<br>(81-92%)          | 1.2<br>(0.4-2.7)                            | 2.8%<br>(0.91-4.9%)                  | 3.3%<br>(1.1-5.8%)                  | 26<br>(8.2-49)      | 530<br>(170-960)       |
| United Arab Emirates | 2016 | Male   | 75 to 79 | 11%<br>(6.5-18%)               | 89%<br>(82-93%)          | 0.93<br>(0.29-2.2)                          | 2.5%<br>(0.76-4.6%)                  | 2.9%<br>(0.81-5.4%)                 | 13<br>(3.6-26)      | 210<br>(62-400)        |
| United Arab Emirates | 2016 | Male   | 80 to 84 | 10%<br>(5.9-16%)               | 90%<br>(84-94%)          | 0.79<br>(0.26-1.8)                          | 2.4%<br>(0.83-4.4%)                  | 2.7%<br>(0.84-5%)                   | 10<br>(3.3-20)      | 120<br>(40-230)        |

| Location             | Year | Sex    | Age      | Prevalence of current drinkers | Prevalence of abstainers | Population average of standard drinks daily | Percent of total attributable deaths | Percent of total attributable DALYs | Attributable deaths | Attributable DALYs    |
|----------------------|------|--------|----------|--------------------------------|--------------------------|---------------------------------------------|--------------------------------------|-------------------------------------|---------------------|-----------------------|
| United Arab Emirates | 2016 | Male   | 85 to 89 | 9.4%<br>(5.4-15%)              | 91%<br>(85-95%)          | 0.71<br>(0.24-1.7)                          | 2.2%<br>(0.77-4.2%)                  | 2.5%<br>(0.8-4.7%)                  | 6.5<br>(2-12)       | 53<br>(18-98)         |
| United Arab Emirates | 2016 | Male   | 90 to 94 | 10%<br>(5.8-16%)               | 90%<br>(84-94%)          | 0.71<br>(0.21-1.7)                          | 2.1%<br>(0.55-4.1%)                  | 2.3%<br>(0.55-4.6%)                 | 1.8<br>(0.43-3.7)   | 10<br>(2.7-20)        |
| United Arab Emirates | 2016 | Male   | 95 plus  | 12%<br>(6.1-20%)               | 88%<br>(80-94%)          | 0.78<br>(0.17-2.1)                          | 2.1%<br>(0.49-4.2%)                  | 2.2%<br>(0.43-4.7%)                 | 0.59<br>(0.11-1.3)  | 2.3<br>(0.55-4.7)     |
| Yemen                | 1990 | Female | All Ages | 10%<br>(6.2-16%)               | 90%<br>(84-94%)          | 0.15<br>(0.12-0.17)                         | 0.12%<br>(-0.038-0.29%)              | 0.045%<br>(-0.39-0.53%)             | 29<br>(-250-340)    | 5400<br>(-1700-14000) |
| Yemen                | 1990 | Female | 15 to 19 | 9.8%<br>(3.3-21%)              | 90%<br>(79-97%)          | 0.13<br>(0.039-0.29)                        | 0.34%<br>(0.15-0.67%)                | 0.38%<br>(0.079-0.95%)              | 4.2<br>(0.86-10)    | 520<br>(240-990)      |
| Yemen                | 1990 | Female | 20 to 24 | 13%<br>(3.8-28%)               | 87%<br>(72-96%)          | 0.21<br>(0.068-0.43)                        | 0.62%<br>(0.29-1.2%)                 | 0.62%<br>(0.098-1.5%)               | 7.7<br>(1.2-19)     | 930<br>(420-1800)     |
| Yemen                | 1990 | Female | 25 to 29 | 15%<br>(4.4-30%)               | 85%<br>(70-96%)          | 0.26<br>(0.086-0.51)                        | 0.75%<br>(0.35-1.4%)                 | 0.84%<br>(0.14-1.9%)                | 9.4<br>(1.6-22)     | 940<br>(410-1700)     |
| Yemen                | 1990 | Female | 30 to 34 | 17%<br>(4.3-34%)               | 83%<br>(66-96%)          | 0.31<br>(0.1-0.59)                          | 0.8%<br>(0.29-1.6%)                  | 1%<br>(0.14-2.4%)                   | 11<br>(1.4-27)      | 880<br>(310-1800)     |
| Yemen                | 1990 | Female | 35 to 39 | 18%<br>(5.2-35%)               | 82%<br>(65-95%)          | 0.37<br>(0.12-0.67)                         | 0.78%<br>(0.18-1.6%)                 | 1.1%<br>(0.052-2.4%)                | 12<br>(0.61-29)     | 810<br>(180-1700)     |
| Yemen                | 1990 | Female | 40 to 44 | 19%<br>(7-35%)                 | 81%<br>(65-93%)          | 0.41<br>(0.16-0.76)                         | 0.84%<br>(0.02-2%)                   | 1.2%<br>(-0.08-3.1%)                | 17<br>(-1.1-43)     | 880<br>(22-2100)      |
| Yemen                | 1990 | Female | 45 to 49 | 20%<br>(6.8-37%)               | 80%<br>(63-93%)          | 0.43<br>(0.15-0.9)                          | 0.73%<br>(-0.31-2.2%)                | 1.1%<br>(-0.54-3.4%)                | 15<br>(-7.5-48)     | 690<br>(-300-2100)    |
| Yemen                | 1990 | Female | 50 to 54 | 20%<br>(8.1-39%)               | 80%<br>(61-92%)          | 0.44<br>(0.14-0.92)                         | 0.59%<br>(-0.68-2.2%)                | 0.84%<br>(-0.96-3.2%)               | 14<br>(-17-55)      | 550<br>(-630-2100)    |
| Yemen                | 1990 | Female | 55 to 59 | 21%<br>(8.6-41%)               | 79%<br>(59-91%)          | 0.44<br>(0.13-0.93)                         | 0.32%<br>(-1-1.9%)                   | 0.44%<br>(-1.4-2.7%)                | 9<br>(-28-57)       | 290<br>(-880-1800)    |
| Yemen                | 1990 | Female | 60 to 64 | 22%<br>(9.1-42%)               | 78%<br>(58-91%)          | 0.42<br>(0.11-1)                            | -0.0063%<br>(-1.5-1.9%)              | 0.0054%<br>(-1.9-2.5%)              | 0.17<br>(-47-62)    | -2.4<br>(-1300-1700)  |
| Yemen                | 1990 | Female | 65 to 69 | 23%<br>(9.8-41%)               | 77%<br>(59-90%)          | 0.37<br>(0.1-0.81)                          | -0.34%<br>(-1.8-1.1%)                | -0.42%<br>(-2.2-1.5%)               | -12<br>(-67-45)     | -280<br>(-1500-970)   |
| Yemen                | 1990 | Female | 70 to 74 | 22%<br>(9.4-39%)               | 78%<br>(61-91%)          | 0.3<br>(0.079-0.73)                         | -0.49%<br>(-1.8-0.77%)               | -0.59%<br>(-2.2-0.96%)              | -19<br>(-70-29)     | -340<br>(-1300-540)   |
| Yemen                | 1990 | Female | 75 to 79 | 19%<br>(7.6-38%)               | 81%<br>(62-92%)          | 0.24<br>(0.055-0.66)                        | -0.51%<br>(-1.8-0.51%)               | -0.61%<br>(-2.1-0.6%)               | -18<br>(-63-18)     | -250<br>(-880-250)    |
| Yemen                | 1990 | Female | 80 to 84 | 18%<br>(5.9-37%)               | 82%<br>(63-94%)          | 0.22<br>(0.047-0.61)                        | -0.42%<br>(-1.6-0.46%)               | -0.5%<br>(-1.8-0.58%)               | -12<br>(-45-13)     | -120<br>(-460-140)    |
| Yemen                | 1990 | Female | 85 to 89 | 18%<br>(5.9-38%)               | 82%<br>(62-94%)          | 0.22<br>(0.044-0.63)                        | -0.45%<br>(-1.6-0.39%)               | -0.55%<br>(-2-0.48%)                | -7<br>(-26-6.1)     | -51<br>(-190-44)      |
| Yemen                | 1990 | Female | 90 to 94 | 21%<br>(6.5-43%)               | 79%<br>(57-93%)          | 0.25<br>(0.046-0.73)                        | -0.52%<br>(-1.8-0.36%)               | -0.66%<br>(-2.2-0.42%)              | -3.1<br>(-10-2)     | -15<br>(-51-11)       |
| Yemen                | 1990 | Female | 95 plus  | 25%<br>(7.6-51%)               | 75%<br>(49-92%)          | 0.3<br>(0.05-0.89)                          | -0.61%<br>(-2-0.64%)                 | -0.78%<br>(-2.4-0.76%)              | -1<br>(-3.1-0.97)   | -3.2<br>(-10-3.4)     |
| Yemen                | 1990 | Male   | All Ages | 7.6%<br>(5.1-11%)              | 92%<br>(89-95%)          | 0.15<br>(0.13-0.18)                         | 0.32%<br>(0.19-0.46%)                | 0.44%<br>(0.18-0.77%)               | 260<br>(110-460)    | 15000<br>(9200-21000) |



| Location | Year | Sex    | Age      | Prevalence of current drinkers | Prevalence of abstainers | Population average of standard drinks daily | Percent of total attributable deaths | Percent of total attributable DALYs | Attributable deaths    | Attributable DALYs   |
|----------|------|--------|----------|--------------------------------|--------------------------|---------------------------------------------|--------------------------------------|-------------------------------------|------------------------|----------------------|
| Yemen    | 1990 | Male   | 15 to 19 | 7.2%<br>(3.1-14%)              | 93%<br>(86-97%)          | 0.094<br>(0.03-0.2)                         | 0.63%<br>(0.33-1.1%)                 | 0.69%<br>(0.19-1.5%)                | 7.1<br>(2-16)          | 860<br>(440-1500)    |
| Yemen    | 1990 | Male   | 20 to 24 | 11%<br>(4.4-22%)               | 89%<br>(78-96%)          | 0.21<br>(0.076-0.41)                        | 1.4%<br>(0.78-2.4%)                  | 1.5%<br>(0.58-3%)                   | 20<br>(7.4-39)         | 2000<br>(1100-3400)  |
| Yemen    | 1990 | Male   | 25 to 29 | 14%<br>(5.6-26%)               | 86%<br>(74-94%)          | 0.33<br>(0.14-0.61)                         | 1.9%<br>(1-3.1%)                     | 2.3%<br>(0.96-4.2%)                 | 26<br>(11-49)          | 2200<br>(1100-3600)  |
| Yemen    | 1990 | Male   | 30 to 34 | 16%<br>(5.9-30%)               | 84%<br>(70-94%)          | 0.42<br>(0.18-0.74)                         | 2%<br>(1.1-3.3%)                     | 2.5%<br>(1.2-4.6%)                  | 28<br>(13-51)          | 2000<br>(1100-3300)  |
| Yemen    | 1990 | Male   | 35 to 39 | 17%<br>(6.5-32%)               | 83%<br>(68-93%)          | 0.48<br>(0.19-0.87)                         | 2%<br>(1-3.6%)                       | 2.6%<br>(1.1-4.9%)                  | 29<br>(12-57)          | 1800<br>(890-3200)   |
| Yemen    | 1990 | Male   | 40 to 44 | 17%<br>(7.7-30%)               | 83%<br>(70-92%)          | 0.51<br>(0.2-0.97)                          | 1.8%<br>(0.75-3.3%)                  | 2.2%<br>(0.75-4.6%)                 | 28<br>(9.5-57)         | 1500<br>(650-2900)   |
| Yemen    | 1990 | Male   | 45 to 49 | 17%<br>(6.6-31%)               | 83%<br>(69-93%)          | 0.52<br>(0.17-1)                            | 1.7%<br>(0.56-3.5%)                  | 2.1%<br>(0.49-4.7%)                 | 26<br>(6-58)           | 1200<br>(400-2600)   |
| Yemen    | 1990 | Male   | 50 to 54 | 16%<br>(6.7-31%)               | 84%<br>(69-93%)          | 0.51<br>(0.18-1.1)                          | 1.3%<br>(0.27-3%)                    | 1.6%<br>(0.14-4%)                   | 22<br>(1.8-56)         | 910<br>(190-2100)    |
| Yemen    | 1990 | Male   | 55 to 59 | 15%<br>(6.9-30%)               | 85%<br>(70-93%)          | 0.49<br>(0.16-1)                            | 1.2%<br>(0.18-2.9%)                  | 1.5%<br>(0.11-3.8%)                 | 23<br>(1.7-57)         | 780<br>(110-1900)    |
| Yemen    | 1990 | Male   | 60 to 64 | 15%<br>(6.4-29%)               | 85%<br>(71-94%)          | 0.44<br>(0.13-1)                            | 0.95%<br>(-0.035-2.8%)               | 1.1%<br>(-0.13-3.5%)                | 21<br>(-2.6-64)        | 610<br>(-21-1800)    |
| Yemen    | 1990 | Male   | 65 to 69 | 14%<br>(6.5-26%)               | 86%<br>(74-94%)          | 0.37<br>(0.12-0.77)                         | 0.56%<br>(-0.2-1.9%)                 | 0.66%<br>(-0.33-2.3%)               | 13<br>(-6.6-48)        | 330<br>(-120-1100)   |
| Yemen    | 1990 | Male   | 70 to 74 | 13%<br>(6.1-23%)               | 87%<br>(77-94%)          | 0.27<br>(0.079-0.64)                        | 0.37%<br>(-0.29-1.5%)                | 0.42%<br>(-0.38-1.8%)               | 9<br>(-8.4-38)         | 170<br>(-140-700)    |
| Yemen    | 1990 | Male   | 75 to 79 | 11%<br>(5.1-21%)               | 89%<br>(79-95%)          | 0.21<br>(0.055-0.54)                        | 0.22%<br>(-0.32-1%)                  | 0.24%<br>(-0.41-1.2%)               | 4.4<br>(-7.7-23)       | 68<br>(-100-330)     |
| Yemen    | 1990 | Male   | 80 to 84 | 10%<br>(4.2-20%)               | 90%<br>(80-96%)          | 0.18<br>(0.047-0.42)                        | 0.2%<br>(-0.22-0.83%)                | 0.22%<br>(-0.3-0.98%)               | 3.4<br>(-4.7-15)       | 39<br>(-44-160)      |
| Yemen    | 1990 | Male   | 85 to 89 | 10%<br>(4-20%)                 | 90%<br>(80-96%)          | 0.16<br>(0.043-0.4)                         | 0.12%<br>(-0.28-0.61%)               | 0.11%<br>(-0.38-0.7%)               | 0.97<br>(-3.4-6.4)     | 9.2<br>(-23-49)      |
| Yemen    | 1990 | Male   | 90 to 94 | 11%<br>(4.6-23%)               | 89%<br>(77-95%)          | 0.17<br>(0.046-0.44)                        | 0.041%<br>(-0.36-0.52%)              | 0.0046%<br>(-0.51-0.59%)            | 0.015<br>(-1.7-2)      | 0.84<br>(-7.6-11)    |
| Yemen    | 1990 | Male   | 95 plus  | 14%<br>(5.2-29%)               | 86%<br>(71-95%)          | 0.2<br>(0.041-0.55)                         | 0.028%<br>(-0.46-0.65%)              | -0.039%<br>(-0.67-0.71%)            | -0.033<br>(-0.56-0.59) | 0.097<br>(-1.6-2.2)  |
| Yemen    | 1995 | Female | All Ages | 10%<br>(6.4-16%)               | 90%<br>(84-94%)          | 0.11<br>(0.09-0.13)                         | 0.053%<br>(-0.098-0.19%)             | -0.13%<br>(-0.56-0.22%)             | -89<br>(-390-170)      | 2700<br>(-4800-9800) |
| Yemen    | 1995 | Female | 15 to 19 | 9.8%<br>(3-23%)                | 90%<br>(77-97%)          | 0.1<br>(0.031-0.24)                         | 0.29%<br>(0.15-0.53%)                | 0.29%<br>(0.054-0.72%)              | 3.6<br>(0.68-9)        | 520<br>(260-970)     |
| Yemen    | 1995 | Female | 20 to 24 | 13%<br>(4-27%)                 | 87%<br>(73-96%)          | 0.16<br>(0.05-0.35)                         | 0.52%<br>(0.26-0.94%)                | 0.43%<br>(0.051-1.1%)               | 5.2<br>(0.62-14)       | 790<br>(390-1400)    |
| Yemen    | 1995 | Female | 25 to 29 | 14%<br>(3.6-30%)               | 86%<br>(70-96%)          | 0.2<br>(0.06-0.41)                          | 0.6%<br>(0.3-1%)                     | 0.56%<br>(0.064-1.3%)               | 6.9<br>(0.81-16)       | 850<br>(420-1500)    |
| Yemen    | 1995 | Female | 30 to 34 | 16%<br>(4.2-32%)               | 84%<br>(68-96%)          | 0.24<br>(0.074-0.46)                        | 0.57%<br>(0.18-1.1%)                 | 0.61%<br>(-0.049-1.6%)              | 8.5<br>(-0.73-22)      | 850<br>(270-1700)    |

| Location | Year | Sex    | Age      | Prevalence of current drinkers | Prevalence of abstainers | Population average of standard drinks daily | Percent of total attributable deaths | Percent of total attributable DALYs | Attributable deaths  | Attributable DALYs    |
|----------|------|--------|----------|--------------------------------|--------------------------|---------------------------------------------|--------------------------------------|-------------------------------------|----------------------|-----------------------|
| Yemen    | 1995 | Female | 35 to 39 | 18%<br>(5-33%)                 | 82%<br>(67-95%)          | 0.27<br>(0.095-0.49)                        | 0.51%<br>(0.072-1%)                  | 0.6%<br>(-0.15-1.5%)                | 9.9<br>(-2.4-25)     | 760<br>(99-1600)      |
| Yemen    | 1995 | Female | 40 to 44 | 18%<br>(6.8-34%)               | 82%<br>(66-93%)          | 0.3<br>(0.12-0.56)                          | 0.48%<br>(-0.11-1.2%)                | 0.64%<br>(-0.32-1.9%)               | 12<br>(-5.8-34)      | 700<br>(-170-1700)    |
| Yemen    | 1995 | Female | 45 to 49 | 19%<br>(6.9-35%)               | 81%<br>(65-93%)          | 0.33<br>(0.12-0.64)                         | 0.32%<br>(-0.51-1.3%)                | 0.42%<br>(-0.87-1.9%)               | 8<br>(-16-38)        | 410<br>(-640-1600)    |
| Yemen    | 1995 | Female | 50 to 54 | 20%<br>(7.8-38%)               | 80%<br>(62-92%)          | 0.34<br>(0.11-0.68)                         | 0.15%<br>(-0.87-1.3%)                | 0.19%<br>(-1.3-1.8%)                | 3.9<br>(-26-38)      | 170<br>(-940-1400)    |
| Yemen    | 1995 | Female | 55 to 59 | 21%<br>(8.2-40%)               | 79%<br>(60-92%)          | 0.33<br>(0.096-0.72)                        | -0.1%<br>(-1.3-1%)                   | -0.14%<br>(-1.8-1.4%)               | -2.8<br>(-37-30)     | -90<br>(-1200-940)    |
| Yemen    | 1995 | Female | 60 to 64 | 22%<br>(8.6-41%)               | 78%<br>(59-91%)          | 0.32<br>(0.083-0.75)                        | -0.39%<br>(-1.7-0.89%)               | -0.5%<br>(-2.2-1.2%)                | -13<br>(-57-29)      | -360<br>(-1600-780)   |
| Yemen    | 1995 | Female | 65 to 69 | 22%<br>(9.7-39%)               | 78%<br>(61-90%)          | 0.27<br>(0.078-0.59)                        | -0.61%<br>(-1.9-0.4%)                | -0.76%<br>(-2.4-0.49%)              | -26<br>(-82-17)      | -600<br>(-1900-380)   |
| Yemen    | 1995 | Female | 70 to 74 | 21%<br>(8.4-38%)               | 79%<br>(62-92%)          | 0.22<br>(0.059-0.53)                        | -0.66%<br>(-1.7-0.19%)               | -0.8%<br>(-2.1-0.24%)               | -32<br>(-87-9.3)     | -590<br>(-1600-170)   |
| Yemen    | 1995 | Female | 75 to 79 | 19%<br>(6.8-38%)               | 81%<br>(62-93%)          | 0.18<br>(0.039-0.49)                        | -0.64%<br>(-1.9-0.068%)              | -0.76%<br>(-2.3-0.098%)             | -31<br>(-92-3.7)     | -430<br>(-1300-45)    |
| Yemen    | 1995 | Female | 80 to 84 | 17%<br>(6.2-38%)               | 83%<br>(62-94%)          | 0.16<br>(0.037-0.45)                        | -0.55%<br>(-1.8-0.081%)              | -0.66%<br>(-2.1-0.1%)               | -24<br>(-76-3.7)     | -250<br>(-800-38)     |
| Yemen    | 1995 | Female | 85 to 89 | 18%<br>(6.2-39%)               | 82%<br>(61-94%)          | 0.17<br>(0.036-0.49)                        | -0.58%<br>(-1.8-0.065%)              | -0.7%<br>(-2.2-0.081%)              | -12<br>(-39-1.4)     | -90<br>(-280-9.7)     |
| Yemen    | 1995 | Female | 90 to 94 | 21%<br>(7-43%)                 | 79%<br>(57-93%)          | 0.19<br>(0.041-0.54)                        | -0.65%<br>(-2--0.00073%)             | -0.81%<br>(-2.3--0.014%)            | -5.2<br>(-15--0.093) | -25<br>(-75--0.029)   |
| Yemen    | 1995 | Female | 95 plus  | 25%<br>(7.8-49%)               | 75%<br>(51-92%)          | 0.23<br>(0.041-0.67)                        | -0.76%<br>(-2.1-0.085%)              | -0.95%<br>(-2.6-0.1%)               | -1.6<br>(-4.4-0.17)  | -5.3<br>(-14-0.59)    |
| Yemen    | 1995 | Male   | All Ages | 8%<br>(5.5-11%)                | 92%<br>(89-94%)          | 0.12<br>(0.11-0.15)                         | 0.28%<br>(0.15-0.43%)                | 0.31%<br>(0.055-0.61%)              | 230<br>(37-450)      | 15000<br>(7900-21000) |
| Yemen    | 1995 | Male   | 15 to 19 | 7.2%<br>(3.1-15%)              | 93%<br>(85-97%)          | 0.072<br>(0.023-0.16)                       | 0.58%<br>(0.3-0.99%)                 | 0.58%<br>(0.15-1.3%)                | 7.6<br>(2-17)        | 1000<br>(510-1700)    |
| Yemen    | 1995 | Male   | 20 to 24 | 11%<br>(4.3-22%)               | 89%<br>(78-96%)          | 0.16<br>(0.057-0.31)                        | 1.3%<br>(0.71-2.1%)                  | 1.3%<br>(0.44-2.6%)                 | 18<br>(6.3-38)       | 2000<br>(1100-3300)   |
| Yemen    | 1995 | Male   | 25 to 29 | 14%<br>(5.6-26%)               | 86%<br>(74-94%)          | 0.25<br>(0.098-0.47)                        | 1.6%<br>(0.88-2.5%)                  | 1.8%<br>(0.68-3.3%)                 | 23<br>(8.6-43)       | 2000<br>(1100-3300)   |
| Yemen    | 1995 | Male   | 30 to 34 | 16%<br>(5.9-30%)               | 84%<br>(70-94%)          | 0.31<br>(0.13-0.54)                         | 1.6%<br>(0.89-2.6%)                  | 1.9%<br>(0.84-3.5%)                 | 25<br>(11-46)        | 1900<br>(1000-3000)   |
| Yemen    | 1995 | Male   | 35 to 39 | 17%<br>(6.8-31%)               | 83%<br>(69-93%)          | 0.36<br>(0.15-0.62)                         | 1.5%<br>(0.75-2.5%)                  | 1.8%<br>(0.71-3.3%)                 | 30<br>(12-57)        | 2000<br>(990-3400)    |
| Yemen    | 1995 | Male   | 40 to 44 | 17%<br>(8.2-31%)               | 83%<br>(69-92%)          | 0.38<br>(0.16-0.7)                          | 1.2%<br>(0.54-2.2%)                  | 1.5%<br>(0.43-2.9%)                 | 29<br>(8.4-56)       | 1700<br>(740-3000)    |
| Yemen    | 1995 | Male   | 45 to 49 | 17%<br>(7.1-31%)               | 83%<br>(69-93%)          | 0.4<br>(0.14-0.77)                          | 1.1%<br>(0.27-2.2%)                  | 1.3%<br>(0.13-2.9%)                 | 28<br>(2.6-62)       | 1400<br>(350-2800)    |
| Yemen    | 1995 | Male   | 50 to 54 | 16%<br>(7.3-31%)               | 84%<br>(69-93%)          | 0.39<br>(0.14-0.81)                         | 0.82%<br>(0.0062-2%)                 | 0.95%<br>(-0.21-2.6%)               | 21<br>(-4.8-55)      | 920<br>(6.5-2100)     |

| Location | Year | Sex    | Age      | Prevalence of current drinkers | Prevalence of abstainers | Population average of standard drinks daily | Percent of total attributable deaths | Percent of total attributable DALYs | Attributable deaths  | Attributable DALYs   |
|----------|------|--------|----------|--------------------------------|--------------------------|---------------------------------------------|--------------------------------------|-------------------------------------|----------------------|----------------------|
| Yemen    | 1995 | Male   | 55 to 59 | 16%<br>(7.1-29%)               | 84%<br>(71-93%)          | 0.38<br>(0.13-0.77)                         | 0.68%<br>(-0.053-1.8%)               | 0.8%<br>(-0.19-2.3%)                | 17<br>(-4.1-50)      | 630<br>(-52-1700)    |
| Yemen    | 1995 | Male   | 60 to 64 | 15%<br>(6.4-28%)               | 85%<br>(72-94%)          | 0.34<br>(0.1-0.77)                          | 0.49%<br>(-0.24-1.7%)                | 0.56%<br>(-0.41-2.1%)               | 16<br>(-11-60)       | 490<br>(-240-1700)   |
| Yemen    | 1995 | Male   | 65 to 69 | 14%<br>(6.3-27%)               | 86%<br>(73-94%)          | 0.27<br>(0.089-0.59)                        | 0.23%<br>(-0.37-1.1%)                | 0.24%<br>(-0.52-1.3%)               | 8.5<br>(-19-44)      | 230<br>(-370-1000)   |
| Yemen    | 1995 | Male   | 70 to 74 | 13%<br>(5.9-23%)               | 87%<br>(77-94%)          | 0.2<br>(0.064-0.46)                         | 0.12%<br>(-0.4-0.71%)                | 0.12%<br>(-0.55-0.86%)              | 5<br>(-23-36)        | 110<br>(-380-650)    |
| Yemen    | 1995 | Male   | 75 to 79 | 11%<br>(4.9-22%)               | 89%<br>(78-95%)          | 0.16<br>(0.042-0.41)                        | 0.049%<br>(-0.43-0.48%)              | 0.036%<br>(-0.56-0.54%)             | 1.5<br>(-22-21)      | 33<br>(-290-320)     |
| Yemen    | 1995 | Male   | 80 to 84 | 10%<br>(4-20%)                 | 90%<br>(80-96%)          | 0.13<br>(0.037-0.31)                        | 0.06%<br>(-0.33-0.42%)               | 0.051%<br>(-0.4-0.49%)              | 1.6<br>(-13-16)      | 24<br>(-130-170)     |
| Yemen    | 1995 | Male   | 85 to 89 | 9.9%<br>(4-19%)                | 90%<br>(81-96%)          | 0.12<br>(0.034-0.29)                        | 0.0052%<br>(-0.35-0.29%)             | -0.021%<br>(-0.45-0.32%)            | -0.28<br>(-6-4.2)    | 0.63<br>(-41-34)     |
| Yemen    | 1995 | Male   | 90 to 94 | 11%<br>(4.4-23%)               | 89%<br>(77-96%)          | 0.13<br>(0.034-0.33)                        | -0.058%<br>(-0.45-0.23%)             | -0.11%<br>(-0.59-0.25%)             | -0.57<br>(-3.1-1.3)  | -1.8<br>(-14-7.1)    |
| Yemen    | 1995 | Male   | 95 plus  | 14%<br>(5.1-30%)               | 86%<br>(70-95%)          | 0.14<br>(0.031-0.4)                         | -0.075%<br>(-0.55-0.24%)             | -0.16%<br>(-0.73-0.23%)             | -0.2<br>(-0.94-0.29) | -0.39<br>(-2.8-1.2)  |
| Yemen    | 2000 | Female | All Ages | 10%<br>(6-16%)                 | 90%<br>(84-94%)          | 0.066<br>(0.053-0.079)                      | -0.0028%<br>(-0.13-0.1%)             | -0.24%<br>(-0.63-0.04%)             | -170<br>(-440-30)    | -120<br>(-6800-5200) |
| Yemen    | 2000 | Female | 15 to 19 | 9.7%<br>(3-21%)                | 90%<br>(79-97%)          | 0.06<br>(0.019-0.14)                        | 0.25%<br>(0.13-0.41%)                | 0.19%<br>(0.021-0.47%)              | 2.6<br>(0.3-6.6)     | 530<br>(270-890)     |
| Yemen    | 2000 | Female | 20 to 24 | 12%<br>(3.6-27%)               | 88%<br>(73-96%)          | 0.096<br>(0.031-0.2)                        | 0.43%<br>(0.25-0.67%)                | 0.24%<br>(-0.012-0.61%)             | 3.5<br>(-0.17-9)     | 840<br>(470-1300)    |
| Yemen    | 2000 | Female | 25 to 29 | 14%<br>(4.1-30%)               | 86%<br>(70-96%)          | 0.12<br>(0.038-0.24)                        | 0.47%<br>(0.26-0.74%)                | 0.31%<br>(-0.007-0.76%)             | 3.7<br>(-0.085-9.1)  | 700<br>(380-1100)    |
| Yemen    | 2000 | Female | 30 to 34 | 16%<br>(4.2-33%)               | 84%<br>(67-96%)          | 0.14<br>(0.046-0.28)                        | 0.41%<br>(0.14-0.68%)                | 0.28%<br>(-0.19-0.8%)               | 3.6<br>(-2.5-10)     | 590<br>(180-1000)    |
| Yemen    | 2000 | Female | 35 to 39 | 17%<br>(4.7-34%)               | 83%<br>(66-95%)          | 0.16<br>(0.053-0.3)                         | 0.31%<br>(-0.00062-0.56%)            | 0.23%<br>(-0.28-0.7%)               | 3.6<br>(-4.5-11)     | 460<br>(-0.92-860)   |
| Yemen    | 2000 | Female | 40 to 44 | 18%<br>(6.8-35%)               | 82%<br>(65-93%)          | 0.18<br>(0.068-0.34)                        | 0.18%<br>(-0.25-0.57%)               | 0.14%<br>(-0.58-0.82%)              | 2.6<br>(-11-16)      | 290<br>(-380-900)    |
| Yemen    | 2000 | Female | 45 to 49 | 19%<br>(7-35%)                 | 81%<br>(65-93%)          | 0.19<br>(0.068-0.37)                        | -0.026%<br>(-0.67-0.43%)             | -0.13%<br>(-1.1-0.6%)               | -3<br>(-26-14)       | -39<br>(-1000-690)   |
| Yemen    | 2000 | Female | 50 to 54 | 20%<br>(8-37%)                 | 80%<br>(63-92%)          | 0.2<br>(0.068-0.39)                         | -0.21%<br>(-1-0.33%)                 | -0.34%<br>(-1.5-0.44%)              | -8.8<br>(-39-12)     | -300<br>(-1400-470)  |
| Yemen    | 2000 | Female | 55 to 59 | 21%<br>(8.6-39%)               | 79%<br>(61-91%)          | 0.2<br>(0.06-0.42)                          | -0.43%<br>(-1.5-0.21%)               | -0.59%<br>(-2.1-0.29%)              | -16<br>(-58-8.1)     | -520<br>(-1900-250)  |
| Yemen    | 2000 | Female | 60 to 64 | 22%<br>(8.4-42%)               | 78%<br>(58-92%)          | 0.19<br>(0.05-0.45)                         | -0.63%<br>(-1.9-0.063%)              | -0.82%<br>(-2.5-0.087%)             | -23<br>(-70-2.6)     | -630<br>(-2000-61)   |
| Yemen    | 2000 | Female | 65 to 69 | 23%<br>(9.2-40%)               | 77%<br>(60-91%)          | 0.17<br>(0.049-0.36)                        | -0.72%<br>(-1.9--0.0055%)            | -0.9%<br>(-2.4-0.0015%)             | -30<br>(-83-0.05)    | -700<br>(-1900--5.7) |
| Yemen    | 2000 | Female | 70 to 74 | 21%<br>(9-38%)                 | 79%<br>(62-91%)          | 0.13<br>(0.037-0.33)                        | -0.66%<br>(-1.8-0.00012%)            | -0.81%<br>(-2.1-0.01%)              | -33<br>(-88-0.4)     | -610<br>(-1600-0.11) |

| Location | Year | Sex    | Age      | Prevalence of current drinkers | Prevalence of abstainers | Population average of standard drinks daily | Percent of total attributable deaths | Percent of total attributable DALYs | Attributable deaths  | Attributable DALYs    |
|----------|------|--------|----------|--------------------------------|--------------------------|---------------------------------------------|--------------------------------------|-------------------------------------|----------------------|-----------------------|
| Yemen    | 2000 | Female | 75 to 79 | 19%<br>(7.3-39%)               | 81%<br>(61-93%)          | 0.11<br>(0.023-0.3)                         | -0.59%<br>(-1.9-0.017%)              | -0.71%<br>(-2.2-0.026%)             | -30<br>(-92-1)       | -420<br>(-1300-13)    |
| Yemen    | 2000 | Female | 80 to 84 | 17%<br>(6-39%)                 | 83%<br>(61-94%)          | 0.097<br>(0.021-0.29)                       | -0.51%<br>(-1.7-0.033%)              | -0.61%<br>(-2-0.037%)               | -24<br>(-78-1.5)     | -250<br>(-840-17)     |
| Yemen    | 2000 | Female | 85 to 89 | 18%<br>(6.1-40%)               | 82%<br>(60-94%)          | 0.098<br>(0.021-0.29)                       | -0.53%<br>(-1.7-0.0022%)             | -0.64%<br>(-2.1-0.00018%)           | -14<br>(-46-0.0036)  | -100<br>(-340-0.41)   |
| Yemen    | 2000 | Female | 90 to 94 | 20%<br>(6.5-43%)               | 80%<br>(57-93%)          | 0.11<br>(0.023-0.32)                        | -0.59%<br>(-1.8--0.031%)             | -0.73%<br>(-2.2--0.046%)            | -4.9<br>(-15--0.32)  | -24<br>(-74--1.2)     |
| Yemen    | 2000 | Female | 95 plus  | 25%<br>(8-50%)                 | 75%<br>(50-92%)          | 0.14<br>(0.024-0.39)                        | -0.7%<br>(-2.2--0.024%)              | -0.87%<br>(-2.6--0.061%)            | -1.6<br>(-4.7--0.11) | -5<br>(-15--0.17)     |
| Yemen    | 2000 | Male   | All Ages | 7.7%<br>(5.4-11%)              | 92%<br>(89-95%)          | 0.072<br>(0.06-0.085)                       | 0.21%<br>(0.098-0.36%)               | 0.16%<br>(-0.057-0.39%)             | 120<br>(-40-270)     | 11000<br>(5100-17000) |
| Yemen    | 2000 | Male   | 15 to 19 | 7.1%<br>(3-14%)                | 93%<br>(86-97%)          | 0.042<br>(0.014-0.088)                      | 0.48%<br>(0.28-0.8%)                 | 0.4%<br>(0.097-0.97%)               | 5.9<br>(1.4-14)      | 990<br>(550-1700)     |
| Yemen    | 2000 | Male   | 20 to 24 | 11%<br>(4.3-21%)               | 89%<br>(79-96%)          | 0.093<br>(0.034-0.18)                       | 1%<br>(0.6-1.7%)                     | 0.85%<br>(0.22-2%)                  | 15<br>(4-35)         | 2100<br>(1200-3500)   |
| Yemen    | 2000 | Male   | 25 to 29 | 13%<br>(5.5-26%)               | 87%<br>(74-94%)          | 0.15<br>(0.059-0.28)                        | 1.2%<br>(0.69-1.9%)                  | 1.2%<br>(0.39-2.4%)                 | 17<br>(6-35)         | 1900<br>(1100-3000)   |
| Yemen    | 2000 | Male   | 30 to 34 | 15%<br>(5.6-30%)               | 85%<br>(70-94%)          | 0.19<br>(0.078-0.33)                        | 1.2%<br>(0.64-1.9%)                  | 1.2%<br>(0.45-2.5%)                 | 16<br>(6.1-33)       | 1500<br>(800-2400)    |
| Yemen    | 2000 | Male   | 35 to 39 | 17%<br>(6.3-31%)               | 83%<br>(69-94%)          | 0.21<br>(0.079-0.38)                        | 1.1%<br>(0.56-1.8%)                  | 1.2%<br>(0.35-2.2%)                 | 17<br>(5.1-34)       | 1300<br>(660-2100)    |
| Yemen    | 2000 | Male   | 40 to 44 | 17%<br>(7.6-30%)               | 83%<br>(70-92%)          | 0.22<br>(0.092-0.42)                        | 0.82%<br>(0.34-1.4%)                 | 0.86%<br>(0.16-1.7%)                | 16<br>(2.8-32)       | 1100<br>(460-1900)    |
| Yemen    | 2000 | Male   | 45 to 49 | 16%<br>(6.9-30%)               | 84%<br>(70-93%)          | 0.23<br>(0.085-0.45)                        | 0.63%<br>(0.1-1.2%)                  | 0.66%<br>(-0.17-1.5%)               | 15<br>(-3.8-35)      | 920<br>(150-1700)     |
| Yemen    | 2000 | Male   | 50 to 54 | 16%<br>(6.7-30%)               | 84%<br>(70-93%)          | 0.22<br>(0.082-0.46)                        | 0.4%<br>(-0.18-0.92%)                | 0.38%<br>(-0.48-1.1%)               | 9.8<br>(-12-30)      | 540<br>(-260-1300)    |
| Yemen    | 2000 | Male   | 55 to 59 | 15%<br>(6.4-29%)               | 85%<br>(71-94%)          | 0.22<br>(0.071-0.45)                        | 0.27%<br>(-0.32-0.8%)                | 0.25%<br>(-0.56-0.99%)              | 6.9<br>(-15-27)      | 320<br>(-380-950)     |
| Yemen    | 2000 | Male   | 60 to 64 | 15%<br>(6.1-28%)               | 85%<br>(72-94%)          | 0.2<br>(0.059-0.45)                         | 0.14%<br>(-0.47-0.63%)               | 0.11%<br>(-0.67-0.74%)              | 3.1<br>(-19-21)      | 140<br>(-460-630)     |
| Yemen    | 2000 | Male   | 65 to 69 | 14%<br>(6.3-25%)               | 86%<br>(75-94%)          | 0.16<br>(0.053-0.34)                        | 0.017%<br>(-0.49-0.41%)              | -0.022%<br>(-0.68-0.49%)            | -0.78<br>(-24-17)    | 16<br>(-500-420)      |
| Yemen    | 2000 | Male   | 70 to 74 | 13%<br>(5.7-23%)               | 87%<br>(77-94%)          | 0.12<br>(0.037-0.27)                        | -0.0019%<br>(-0.45-0.31%)            | -0.029%<br>(-0.61-0.36%)            | -1.2<br>(-24-14)     | -1.6<br>(-410-280)    |
| Yemen    | 2000 | Male   | 75 to 79 | 11%<br>(4.6-22%)               | 89%<br>(78-95%)          | 0.092<br>(0.023-0.25)                       | -0.01%<br>(-0.41-0.27%)              | -0.034%<br>(-0.53-0.31%)            | -1.4<br>(-21-12)     | -6.9<br>(-280-180)    |
| Yemen    | 2000 | Male   | 80 to 84 | 10%<br>(3.9-20%)               | 90%<br>(80-96%)          | 0.077<br>(0.021-0.19)                       | 0.009%<br>(-0.33-0.26%)              | -0.0085%<br>(-0.42-0.3%)            | -0.31<br>(-16-11)    | 4.2<br>(-150-120)     |
| Yemen    | 2000 | Male   | 85 to 89 | 9.7%<br>(3.9-19%)              | 90%<br>(81-96%)          | 0.07<br>(0.02-0.18)                         | -0.018%<br>(-0.34-0.19%)             | -0.048%<br>(-0.44-0.21%)            | -0.85<br>(-7.9-3.8)  | -2.9<br>(-54-30)      |
| Yemen    | 2000 | Male   | 90 to 94 | 11%<br>(4.5-22%)               | 89%<br>(78-95%)          | 0.074<br>(0.02-0.19)                        | -0.064%<br>(-0.38-0.15%)             | -0.11%<br>(-0.5-0.16%)              | -0.55<br>(-2.4-0.8)  | -1.9<br>(-11-4.6)     |

| Location | Year | Sex    | Age      | Prevalence of current drinkers | Prevalence of abstainers | Population average of standard drinks daily | Percent of total attributable deaths | Percent of total attributable DALYs | Attributable deaths   | Attributable DALYs    |
|----------|------|--------|----------|--------------------------------|--------------------------|---------------------------------------------|--------------------------------------|-------------------------------------|-----------------------|-----------------------|
| Yemen    | 2000 | Male   | 95 plus  | 13%<br>(5-28%)                 | 87%<br>(72-95%)          | 0.085<br>(0.018-0.24)                       | -0.074%<br>(-0.48-0.15%)             | -0.15%<br>(-0.66-0.13%)             | -0.19<br>(-0.81-0.16) | -0.37<br>(-2.4-0.78)  |
| Yemen    | 2005 | Female | All Ages | 10%<br>(6-16%)                 | 90%<br>(84-94%)          | 0.043<br>(0.035-0.052)                      | 0.014%<br>(-0.1-0.11%)               | -0.2%<br>(-0.55-0.046%)             | -140<br>(-350-33)     | 670<br>(-4800-5200)   |
| Yemen    | 2005 | Female | 15 to 19 | 9.8%<br>(3.2-21%)              | 90%<br>(79-97%)          | 0.038<br>(0.011-0.085)                      | 0.24%<br>(0.14-0.37%)                | 0.15%<br>(0.031-0.36%)              | 2.3<br>(0.47-5.3)     | 580<br>(330-930)      |
| Yemen    | 2005 | Female | 20 to 24 | 12%<br>(3.7-27%)               | 88%<br>(73-96%)          | 0.06<br>(0.019-0.12)                        | 0.42%<br>(0.25-0.62%)                | 0.18%<br>(-0.0083-0.44%)            | 2.9<br>(-0.13-7.1)    | 990<br>(560-1500)     |
| Yemen    | 2005 | Female | 25 to 29 | 14%<br>(3.9-30%)               | 86%<br>(70-96%)          | 0.072<br>(0.023-0.14)                       | 0.46%<br>(0.28-0.68%)                | 0.23%<br>(-0.01-0.58%)              | 3.3<br>(-0.15-8.3)    | 880<br>(520-1300)     |
| Yemen    | 2005 | Female | 30 to 34 | 15%<br>(4.1-32%)               | 85%<br>(68-96%)          | 0.085<br>(0.027-0.17)                       | 0.4%<br>(0.19-0.6%)                  | 0.21%<br>(-0.13-0.57%)              | 2.6<br>(-1.5-7)       | 590<br>(270-920)      |
| Yemen    | 2005 | Female | 35 to 39 | 17%<br>(4.8-33%)               | 83%<br>(67-95%)          | 0.1<br>(0.032-0.19)                         | 0.29%<br>(0.076-0.48%)               | 0.16%<br>(-0.2-0.5%)                | 2.4<br>(-2.8-7)       | 420<br>(110-740)      |
| Yemen    | 2005 | Female | 40 to 44 | 18%<br>(7-34%)                 | 82%<br>(66-93%)          | 0.12<br>(0.044-0.22)                        | 0.16%<br>(-0.16-0.39%)               | 0.071%<br>(-0.45-0.5%)              | 1.3<br>(-8.1-9.3)     | 250<br>(-240-640)     |
| Yemen    | 2005 | Female | 45 to 49 | 19%<br>(7.4-35%)               | 81%<br>(65-93%)          | 0.12<br>(0.044-0.25)                        | -0.035%<br>(-0.51-0.27%)             | -0.17%<br>(-0.92-0.35%)             | -3.9<br>(-22-8)       | -56<br>(-830-450)     |
| Yemen    | 2005 | Female | 50 to 54 | 20%<br>(8.2-38%)               | 80%<br>(62-92%)          | 0.13<br>(0.044-0.26)                        | -0.2%<br>(-0.84-0.2%)                | -0.34%<br>(-1.3-0.25%)              | -10<br>(-38-7.5)      | -340<br>(-1400-340)   |
| Yemen    | 2005 | Female | 55 to 59 | 21%<br>(9-40%)                 | 79%<br>(60-91%)          | 0.13<br>(0.039-0.27)                        | -0.37%<br>(-1.3-0.12%)               | -0.52%<br>(-1.8-0.15%)              | -18<br>(-60-5.2)      | -570<br>(-2000-180)   |
| Yemen    | 2005 | Female | 60 to 64 | 22%<br>(9.3-42%)               | 78%<br>(58-91%)          | 0.12<br>(0.033-0.27)                        | -0.51%<br>(-1.6-0.046%)              | -0.68%<br>(-2.1-0.048%)             | -24<br>(-71-1.8)      | -670<br>(-2000-61)    |
| Yemen    | 2005 | Female | 65 to 69 | 22%<br>(9.7-40%)               | 78%<br>(60-90%)          | 0.1<br>(0.029-0.22)                         | -0.53%<br>(-1.5-0.044%)              | -0.66%<br>(-1.9-0.051%)             | -23<br>(-68-1.8)      | -540<br>(-1600-45)    |
| Yemen    | 2005 | Female | 70 to 74 | 21%<br>(8.7-38%)               | 79%<br>(62-91%)          | 0.081<br>(0.022-0.2)                        | -0.45%<br>(-1.4-0.068%)              | -0.55%<br>(-1.7-0.079%)             | -22<br>(-67-3.2)      | -400<br>(-1200-57)    |
| Yemen    | 2005 | Female | 75 to 79 | 18%<br>(6.8-37%)               | 82%<br>(63-93%)          | 0.066<br>(0.014-0.19)                       | -0.4%<br>(-1.4-0.078%)               | -0.48%<br>(-1.7-0.093%)             | -20<br>(-71-3.9)      | -280<br>(-1000-57)    |
| Yemen    | 2005 | Female | 80 to 84 | 17%<br>(5.5-37%)               | 83%<br>(63-94%)          | 0.059<br>(0.012-0.17)                       | -0.34%<br>(-1.3-0.082%)              | -0.41%<br>(-1.5-0.095%)             | -15<br>(-53-3.4)      | -150<br>(-570-37)     |
| Yemen    | 2005 | Female | 85 to 89 | 17%<br>(5.7-38%)               | 83%<br>(62-94%)          | 0.06<br>(0.012-0.17)                        | -0.36%<br>(-1.3-0.049%)              | -0.44%<br>(-1.6-0.053%)             | -9.7<br>(-35-1.2)     | -70<br>(-260-9.6)     |
| Yemen    | 2005 | Female | 90 to 94 | 20%<br>(6.9-43%)               | 80%<br>(57-93%)          | 0.07<br>(0.014-0.2)                         | -0.42%<br>(-1.4-0.024%)              | -0.53%<br>(-1.6-0.019%)             | -4.1<br>(-13-0.15)    | -20<br>(-65-1.2)      |
| Yemen    | 2005 | Female | 95 plus  | 25%<br>(7.9-49%)               | 75%<br>(51-92%)          | 0.085<br>(0.015-0.25)                       | -0.53%<br>(-1.8-0.031%)              | -0.66%<br>(-2.2-0.015%)             | -1.2<br>(-3.9-0.028)  | -3.8<br>(-13-0.22)    |
| Yemen    | 2005 | Male   | All Ages | 7.9%<br>(5.4-11%)              | 92%<br>(89-95%)          | 0.046<br>(0.038-0.056)                      | 0.22%<br>(0.11-0.35%)                | 0.15%<br>(-0.055-0.35%)             | 100<br>(-36-250)      | 11000<br>(5300-16000) |
| Yemen    | 2005 | Male   | 15 to 19 | 7%<br>(2.9-13%)                | 93%<br>(87-97%)          | 0.026<br>(0.0084-0.054)                     | 0.42%<br>(0.25-0.68%)                | 0.27%<br>(0.073-0.65%)              | 4.8<br>(1.3-11)       | 1000<br>(600-1700)    |
| Yemen    | 2005 | Male   | 20 to 24 | 11%<br>(4.3-21%)               | 89%<br>(79-96%)          | 0.057<br>(0.021-0.11)                       | 0.89%<br>(0.54-1.4%)                 | 0.57%<br>(0.14-1.3%)                | 12<br>(3.1-29)        | 2100<br>(1300-3400)   |

| Location | Year | Sex    | Age      | Prevalence of current drinkers | Prevalence of abstainers | Population average of standard drinks daily | Percent of total attributable deaths | Percent of total attributable DALYs | Attributable deaths   | Attributable DALYs   |
|----------|------|--------|----------|--------------------------------|--------------------------|---------------------------------------------|--------------------------------------|-------------------------------------|-----------------------|----------------------|
| Yemen    | 2005 | Male   | 25 to 29 | 13%<br>(5.4-25%)               | 87%<br>(75-95%)          | 0.089<br>(0.036-0.17)                       | 1%<br>(0.61-1.6%)                    | 0.82%<br>(0.24-1.7%)                | 16<br>(4.6-32)        | 2000<br>(1200-3200)  |
| Yemen    | 2005 | Male   | 30 to 34 | 15%<br>(5.8-29%)               | 85%<br>(71-94%)          | 0.12<br>(0.047-0.21)                        | 0.96%<br>(0.57-1.5%)                 | 0.89%<br>(0.29-1.9%)                | 14<br>(4.6-30)        | 1500<br>(860-2400)   |
| Yemen    | 2005 | Male   | 35 to 39 | 17%<br>(6.2-31%)               | 83%<br>(69-94%)          | 0.13<br>(0.049-0.24)                        | 0.9%<br>(0.51-1.4%)                  | 0.89%<br>(0.24-1.8%)                | 13<br>(3.6-26)        | 1200<br>(650-1800)   |
| Yemen    | 2005 | Male   | 40 to 44 | 17%<br>(7.6-30%)               | 83%<br>(70-92%)          | 0.14<br>(0.055-0.27)                        | 0.7%<br>(0.32-1.1%)                  | 0.66%<br>(0.041-1.4%)               | 11<br>(0.64-23)       | 880<br>(410-1500)    |
| Yemen    | 2005 | Male   | 45 to 49 | 17%<br>(6.8-30%)               | 83%<br>(70-93%)          | 0.14<br>(0.052-0.29)                        | 0.53%<br>(0.12-0.96%)                | 0.5%<br>(-0.13-1.2%)                | 11<br>(-2.9-27)       | 760<br>(160-1400)    |
| Yemen    | 2005 | Male   | 50 to 54 | 16%<br>(7-31%)                 | 84%<br>(69-93%)          | 0.14<br>(0.051-0.29)                        | 0.31%<br>(-0.18-0.69%)               | 0.26%<br>(-0.49-0.82%)              | 7.4<br>(-14-23)       | 480<br>(-290-1100)   |
| Yemen    | 2005 | Male   | 55 to 59 | 15%<br>(6.5-29%)               | 85%<br>(71-93%)          | 0.14<br>(0.046-0.28)                        | 0.19%<br>(-0.35-0.57%)               | 0.14%<br>(-0.59-0.7%)               | 4.7<br>(-19-22)       | 270<br>(-500-830)    |
| Yemen    | 2005 | Male   | 60 to 64 | 15%<br>(6.2-28%)               | 85%<br>(72-94%)          | 0.12<br>(0.037-0.28)                        | 0.09%<br>(-0.39-0.42%)               | 0.05%<br>(-0.59-0.5%)               | 1.7<br>(-21-18)       | 110<br>(-490-540)    |
| Yemen    | 2005 | Male   | 65 to 69 | 14%<br>(6.1-25%)               | 86%<br>(75-94%)          | 0.099<br>(0.032-0.21)                       | 0.033%<br>(-0.41-0.33%)              | -0.00076%<br>(-0.57-0.39%)          | -0.042<br>(-19-13)    | 31<br>(-400-320)     |
| Yemen    | 2005 | Male   | 70 to 74 | 12%<br>(5.6-23%)               | 88%<br>(77-94%)          | 0.073<br>(0.022-0.17)                       | 0.047%<br>(-0.32-0.32%)              | 0.031%<br>(-0.42-0.37%)             | 1.2<br>(-17-14)       | 40<br>(-270-270)     |
| Yemen    | 2005 | Male   | 75 to 79 | 11%<br>(4.4-21%)               | 89%<br>(79-96%)          | 0.056<br>(0.014-0.15)                       | 0.047%<br>(-0.29-0.27%)              | 0.036%<br>(-0.38-0.31%)             | 1.4<br>(-14-12)       | 30<br>(-190-180)     |
| Yemen    | 2005 | Male   | 80 to 84 | 9.8%<br>(4-19%)                | 90%<br>(81-96%)          | 0.047<br>(0.013-0.12)                       | 0.058%<br>(-0.21-0.28%)              | 0.052%<br>(-0.28-0.33%)             | 1.5<br>(-8.3-9.9)     | 22<br>(-77-100)      |
| Yemen    | 2005 | Male   | 85 to 89 | 9.6%<br>(4-19%)                | 90%<br>(81-96%)          | 0.044<br>(0.012-0.11)                       | 0.029%<br>(-0.21-0.2%)               | 0.011%<br>(-0.29-0.23%)             | 0.22<br>(-6.4-9)      | 5.4<br>(-40-38)      |
| Yemen    | 2005 | Male   | 90 to 94 | 11%<br>(4.4-22%)               | 89%<br>(78-96%)          | 0.046<br>(0.012-0.12)                       | -0.012%<br>(-0.29-0.16%)             | -0.049%<br>(-0.38-0.17%)            | -0.34<br>(-2.7-1.2)   | -0.51<br>(-12-7)     |
| Yemen    | 2005 | Male   | 95 plus  | 13%<br>(4.8-28%)               | 87%<br>(72-95%)          | 0.053<br>(0.011-0.14)                       | -0.024%<br>(-0.38-0.16%)             | -0.089%<br>(-0.53-0.14%)            | -0.11<br>(-0.64-0.17) | -0.12<br>(-1.9-0.79) |
| Yemen    | 2010 | Female | All Ages | 11%<br>(6.1-16%)               | 89%<br>(84-94%)          | 0.037<br>(0.027-0.047)                      | 0.039%<br>(-0.079-0.13%)             | -0.18%<br>(-0.51-0.054%)            | -120<br>(-330-39)     | 1900<br>(-3600-6200) |
| Yemen    | 2010 | Female | 15 to 19 | 9.8%<br>(3.3-21%)              | 90%<br>(79-97%)          | 0.031<br>(0.0097-0.068)                     | 0.25%<br>(0.14-0.38%)                | 0.15%<br>(0.046-0.33%)              | 2.1<br>(0.63-4.6)     | 650<br>(360-1000)    |
| Yemen    | 2010 | Female | 20 to 24 | 13%<br>(4.1-27%)               | 87%<br>(73-96%)          | 0.049<br>(0.017-0.099)                      | 0.46%<br>(0.28-0.67%)                | 0.18%<br>(0.013-0.4%)               | 2.8<br>(0.2-6.3)      | 1200<br>(710-1900)   |
| Yemen    | 2010 | Female | 25 to 29 | 14%<br>(3.8-30%)               | 86%<br>(70-96%)          | 0.06<br>(0.019-0.12)                        | 0.49%<br>(0.32-0.69%)                | 0.22%<br>(0.012-0.53%)              | 3.4<br>(0.2-7.9)      | 1100<br>(690-1700)   |
| Yemen    | 2010 | Female | 30 to 34 | 16%<br>(3.7-33%)               | 84%<br>(67-96%)          | 0.071<br>(0.021-0.14)                       | 0.42%<br>(0.24-0.63%)                | 0.21%<br>(-0.071-0.51%)             | 3.1<br>(-1-7.5)       | 820<br>(420-1300)    |
| Yemen    | 2010 | Female | 35 to 39 | 18%<br>(4.6-35%)               | 82%<br>(65-95%)          | 0.084<br>(0.024-0.16)                       | 0.3%<br>(0.11-0.47%)                 | 0.16%<br>(-0.17-0.46%)              | 2.3<br>(-2.2-6.4)     | 460<br>(170-760)     |
| Yemen    | 2010 | Female | 40 to 44 | 18%<br>(6.3-34%)               | 82%<br>(66-94%)          | 0.094<br>(0.034-0.19)                       | 0.18%<br>(-0.07-0.38%)               | 0.085%<br>(-0.36-0.41%)             | 1.4<br>(-5.8-7.1)     | 270<br>(-110-590)    |

| Location | Year | Sex    | Age      | Prevalence of current drinkers | Prevalence of abstainers | Population average of standard drinks daily | Percent of total attributable deaths | Percent of total attributable DALYs | Attributable deaths  | Attributable DALYs    |
|----------|------|--------|----------|--------------------------------|--------------------------|---------------------------------------------|--------------------------------------|-------------------------------------|----------------------|-----------------------|
| Yemen    | 2010 | Female | 45 to 49 | 19%<br>(6.8-35%)               | 81%<br>(65-93%)          | 0.1<br>(0.035-0.2)                          | 0.0085%<br>(-0.39-0.25%)             | -0.12%<br>(-0.77-0.3%)              | -2.6<br>(-17-6.6)    | 15<br>(-670-420)      |
| Yemen    | 2010 | Female | 50 to 54 | 19%<br>(7.2-37%)               | 81%<br>(63-93%)          | 0.1<br>(0.031-0.22)                         | -0.12%<br>(-0.68-0.22%)              | -0.25%<br>(-1.1-0.24%)              | -7.5<br>(-33-7.5)    | -220<br>(-1200-380)   |
| Yemen    | 2010 | Female | 55 to 59 | 20%<br>(7.8-40%)               | 80%<br>(60-92%)          | 0.1<br>(0.029-0.22)                         | -0.27%<br>(-1.1-0.13%)               | -0.4%<br>(-1.5-0.16%)               | -16<br>(-58-6.1)     | -500<br>(-1900-230)   |
| Yemen    | 2010 | Female | 60 to 64 | 21%<br>(8.4-41%)               | 79%<br>(59-92%)          | 0.096<br>(0.025-0.22)                       | -0.41%<br>(-1.4-0.078%)              | -0.55%<br>(-1.8-0.091%)             | -23<br>(-79-4)       | -660<br>(-2200-130)   |
| Yemen    | 2010 | Female | 65 to 69 | 22%<br>(9.4-40%)               | 78%<br>(60-91%)          | 0.084<br>(0.022-0.19)                       | -0.42%<br>(-1.3-0.071%)              | -0.54%<br>(-1.7-0.079%)             | -24<br>(-73-3.5)     | -560<br>(-1700-93)    |
| Yemen    | 2010 | Female | 70 to 74 | 21%<br>(8.5-38%)               | 79%<br>(62-92%)          | 0.067<br>(0.018-0.17)                       | -0.36%<br>(-1.2-0.077%)              | -0.45%<br>(-1.5-0.091%)             | -18<br>(-60-3.7)     | -340<br>(-1100-73)    |
| Yemen    | 2010 | Female | 75 to 79 | 18%<br>(7-38%)                 | 82%<br>(62-93%)          | 0.054<br>(0.012-0.15)                       | -0.32%<br>(-1.2-0.081%)              | -0.39%<br>(-1.5-0.096%)             | -16<br>(-59-3.9)     | -220<br>(-850-57)     |
| Yemen    | 2010 | Female | 80 to 84 | 17%<br>(5.9-38%)               | 83%<br>(62-94%)          | 0.049<br>(0.01-0.14)                        | -0.27%<br>(-1.1-0.091%)              | -0.33%<br>(-1.3-0.11%)              | -11<br>(-45-3.7)     | -120<br>(-470-40)     |
| Yemen    | 2010 | Female | 85 to 89 | 17%<br>(5.9-38%)               | 83%<br>(62-94%)          | 0.05<br>(0.0097-0.15)                       | -0.3%<br>(-1.1-0.052%)               | -0.37%<br>(-1.3-0.054%)             | -8.3<br>(-30-1.3)    | -60<br>(-220-10)      |
| Yemen    | 2010 | Female | 90 to 94 | 20%<br>(6.9-43%)               | 80%<br>(57-93%)          | 0.057<br>(0.011-0.16)                       | -0.35%<br>(-1.1-0.037%)              | -0.44%<br>(-1.4-0.034%)             | -3.9<br>(-13-0.31)   | -19<br>(-63-2)        |
| Yemen    | 2010 | Female | 95 plus  | 25%<br>(7.3-50%)               | 75%<br>(50-93%)          | 0.068<br>(0.011-0.2)                        | -0.43%<br>(-1.5-0.039%)              | -0.54%<br>(-1.9-0.024%)             | -1.3<br>(-4.3-0.055) | -4<br>(-14-0.36)      |
| Yemen    | 2010 | Male   | All Ages | 8.1%<br>(5.3-11%)              | 92%<br>(89-95%)          | 0.039<br>(0.029-0.05)                       | 0.25%<br>(0.13-0.38%)                | 0.16%<br>(-0.031-0.35%)             | 110<br>(-22-250)     | 12000<br>(6800-18000) |
| Yemen    | 2010 | Male   | 15 to 19 | 7%<br>(2.9-14%)                | 93%<br>(86-97%)          | 0.021<br>(0.0067-0.045)                     | 0.43%<br>(0.26-0.65%)                | 0.25%<br>(0.073-0.56%)              | 4.6<br>(1.4-10)      | 1200<br>(690-1800)    |
| Yemen    | 2010 | Male   | 20 to 24 | 11%<br>(4.2-21%)               | 89%<br>(79-96%)          | 0.046<br>(0.017-0.087)                      | 0.88%<br>(0.55-1.3%)                 | 0.51%<br>(0.14-1.2%)                | 12<br>(3.3-28)       | 2500<br>(1500-3900)   |
| Yemen    | 2010 | Male   | 25 to 29 | 13%<br>(5.3-25%)               | 87%<br>(75-95%)          | 0.07<br>(0.03-0.13)                         | 0.98%<br>(0.63-1.5%)                 | 0.73%<br>(0.23-1.5%)                | 16<br>(4.9-33)       | 2400<br>(1500-3600)   |
| Yemen    | 2010 | Male   | 30 to 34 | 15%<br>(5.7-28%)               | 85%<br>(72-94%)          | 0.091<br>(0.038-0.16)                       | 0.91%<br>(0.57-1.4%)                 | 0.79%<br>(0.25-1.6%)                | 16<br>(5.1-33)       | 1900<br>(1100-3000)   |
| Yemen    | 2010 | Male   | 35 to 39 | 17%<br>(6.5-30%)               | 83%<br>(70-94%)          | 0.11<br>(0.039-0.19)                        | 0.86%<br>(0.51-1.3%)                 | 0.82%<br>(0.26-1.6%)                | 15<br>(4.6-28)       | 1400<br>(830-2200)    |
| Yemen    | 2010 | Male   | 40 to 44 | 17%<br>(7.8-29%)               | 83%<br>(71-92%)          | 0.11<br>(0.044-0.22)                        | 0.69%<br>(0.34-1.1%)                 | 0.63%<br>(0.086-1.2%)               | 11<br>(1.5-22)       | 930<br>(450-1500)     |
| Yemen    | 2010 | Male   | 45 to 49 | 17%<br>(6.5-30%)               | 83%<br>(70-93%)          | 0.12<br>(0.038-0.25)                        | 0.54%<br>(0.16-0.89%)                | 0.5%<br>(-0.087-1.1%)               | 10<br>(-1.7-22)      | 720<br>(190-1200)     |
| Yemen    | 2010 | Male   | 50 to 54 | 16%<br>(6.7-31%)               | 84%<br>(69-93%)          | 0.11<br>(0.039-0.24)                        | 0.33%<br>(-0.085-0.68%)              | 0.28%<br>(-0.37-0.77%)              | 7.7<br>(-9.9-22)     | 510<br>(-130-1000)    |
| Yemen    | 2010 | Male   | 55 to 59 | 15%<br>(6.4-29%)               | 85%<br>(71-94%)          | 0.11<br>(0.035-0.23)                        | 0.21%<br>(-0.22-0.53%)               | 0.16%<br>(-0.48-0.63%)              | 5.6<br>(-17-22)      | 330<br>(-370-860)     |
| Yemen    | 2010 | Male   | 60 to 64 | 14%<br>(6.3-28%)               | 86%<br>(72-94%)          | 0.099<br>(0.029-0.23)                       | 0.11%<br>(-0.33-0.42%)               | 0.069%<br>(-0.54-0.49%)             | 2.7<br>(-22-20)      | 160<br>(-480-620)     |

| Location | Year | Sex    | Age      | Prevalence of current drinkers | Prevalence of abstainers | Population average of standard drinks daily | Percent of total attributable deaths | Percent of total attributable DALYs | Attributable deaths | Attributable DALYs   |
|----------|------|--------|----------|--------------------------------|--------------------------|---------------------------------------------|--------------------------------------|-------------------------------------|---------------------|----------------------|
| Yemen    | 2010 | Male   | 65 to 69 | 14%<br>(6.3-25%)               | 86%<br>(75-94%)          | 0.081<br>(0.026-0.17)                       | 0.063%<br>(-0.34-0.34%)              | 0.034%<br>(-0.49-0.4%)              | 1.3<br>(-19-16)     | 73<br>(-400-400)     |
| Yemen    | 2010 | Male   | 70 to 74 | 13%<br>(5.9-23%)               | 87%<br>(77-94%)          | 0.061<br>(0.018-0.14)                       | 0.075%<br>(-0.24-0.31%)              | 0.064%<br>(-0.35-0.38%)             | 2.2<br>(-12-13)     | 60<br>(-200-250)     |
| Yemen    | 2010 | Male   | 75 to 79 | 11%<br>(4.6-21%)               | 89%<br>(79-95%)          | 0.046<br>(0.012-0.12)                       | 0.07%<br>(-0.22-0.27%)               | 0.063%<br>(-0.29-0.33%)             | 2.2<br>(-10-11)     | 42<br>(-140-170)     |
| Yemen    | 2010 | Male   | 80 to 84 | 9.8%<br>(3.8-20%)              | 90%<br>(80-96%)          | 0.039<br>(0.0097-0.094)                     | 0.077%<br>(-0.16-0.27%)              | 0.073%<br>(-0.23-0.32%)             | 2<br>(-6.3-8.5)     | 26<br>(-55-91)       |
| Yemen    | 2010 | Male   | 85 to 89 | 9.6%<br>(3.8-19%)              | 90%<br>(81-96%)          | 0.036<br>(0.009-0.091)                      | 0.048%<br>(-0.16-0.2%)               | 0.032%<br>(-0.23-0.23%)             | 0.64<br>(-4.7-4.5)  | 8.5<br>(-29-36)      |
| Yemen    | 2010 | Male   | 90 to 94 | 11%<br>(4.2-22%)               | 89%<br>(78-96%)          | 0.038<br>(0.0091-0.1)                       | 0.012%<br>(-0.22-0.16%)              | -0.022%<br>(-0.32-0.16%)            | -0.2<br>(-3-1.5)    | 0.69<br>(-13-9.2)    |
| Yemen    | 2010 | Male   | 95 plus  | 13%<br>(4.7-28%)               | 87%<br>(72-95%)          | 0.043<br>(0.0084-0.12)                      | 0.0038%<br>(-0.3-0.16%)              | -0.058%<br>(-0.44-0.14%)            | -0.12<br>(-0.9-0.3) | 0.033<br>(-2.5-1.4)  |
| Yemen    | 2016 | Female | All Ages | 11%<br>(6.7-17%)               | 89%<br>(83-93%)          | 0.043<br>(0.026-0.067)                      | 0.04%<br>(-0.1-0.15%)                | -0.21%<br>(-0.61-0.054%)            | -160<br>(-440-43)   | 2200<br>(-5000-7800) |
| Yemen    | 2016 | Female | 15 to 19 | 9.7%<br>(3.3-22%)              | 90%<br>(78-97%)          | 0.035<br>(0.009-0.085)                      | 0.22%<br>(0.13-0.34%)                | 0.11%<br>(0.037-0.23%)              | 2.2<br>(0.74-4.6)   | 670<br>(370-1100)    |
| Yemen    | 2016 | Female | 20 to 24 | 12%<br>(3.9-28%)               | 88%<br>(72-96%)          | 0.055<br>(0.016-0.12)                       | 0.42%<br>(0.27-0.63%)                | 0.15%<br>(0.028-0.33%)              | 3.4<br>(0.6-7.5)    | 1400<br>(840-2200)   |
| Yemen    | 2016 | Female | 25 to 29 | 14%<br>(4.2-30%)               | 86%<br>(70-96%)          | 0.066<br>(0.02-0.14)                        | 0.48%<br>(0.31-0.69%)                | 0.2%<br>(0.031-0.44%)               | 4.4<br>(0.66-9.5)   | 1400<br>(910-2200)   |
| Yemen    | 2016 | Female | 30 to 34 | 16%<br>(4.7-33%)               | 84%<br>(67-95%)          | 0.078<br>(0.026-0.16)                       | 0.42%<br>(0.24-0.63%)                | 0.2%<br>(-0.041-0.48%)              | 4.4<br>(-0.88-10)   | 1100<br>(620-1800)   |
| Yemen    | 2016 | Female | 35 to 39 | 17%<br>(5.1-32%)               | 83%<br>(68-95%)          | 0.092<br>(0.03-0.19)                        | 0.31%<br>(0.12-0.48%)                | 0.17%<br>(-0.13-0.45%)              | 3.8<br>(-3-10)      | 730<br>(270-1200)    |
| Yemen    | 2016 | Female | 40 to 44 | 18%<br>(6.9-33%)               | 82%<br>(67-93%)          | 0.1<br>(0.038-0.22)                         | 0.18%<br>(-0.069-0.39%)              | 0.095%<br>(-0.31-0.44%)             | 2<br>(-6.7-9.6)     | 350<br>(-130-720)    |
| Yemen    | 2016 | Female | 45 to 49 | 19%<br>(6.8-35%)               | 81%<br>(65-93%)          | 0.11<br>(0.034-0.26)                        | 0.011%<br>(-0.38-0.27%)              | -0.11%<br>(-0.74-0.32%)             | -2.7<br>(-19-7.9)   | 21<br>(-680-500)     |
| Yemen    | 2016 | Female | 50 to 54 | 20%<br>(7.8-38%)               | 80%<br>(62-92%)          | 0.12<br>(0.032-0.27)                        | -0.13%<br>(-0.72-0.21%)              | -0.24%<br>(-1.1-0.24%)              | -8.4<br>(-37-7.9)   | -250<br>(-1400-410)  |
| Yemen    | 2016 | Female | 55 to 59 | 21%<br>(8.6-39%)               | 79%<br>(61-91%)          | 0.11<br>(0.03-0.27)                         | -0.28%<br>(-1.1-0.12%)               | -0.41%<br>(-1.6-0.14%)              | -18<br>(-70-6.4)    | -590<br>(-2300-270)  |
| Yemen    | 2016 | Female | 60 to 64 | 22%<br>(8.8-41%)               | 78%<br>(59-91%)          | 0.11<br>(0.025-0.26)                        | -0.42%<br>(-1.4-0.076%)              | -0.57%<br>(-1.8-0.076%)             | -32<br>(-110-4.2)   | -890<br>(-3000-160)  |
| Yemen    | 2016 | Female | 65 to 69 | 22%<br>(9.1-39%)               | 78%<br>(61-91%)          | 0.096<br>(0.025-0.23)                       | -0.46%<br>(-1.4-0.064%)              | -0.58%<br>(-1.7-0.066%)             | -35<br>(-110-4)     | -830<br>(-2500-110)  |
| Yemen    | 2016 | Female | 70 to 74 | 21%<br>(8.5-38%)               | 79%<br>(62-91%)          | 0.078<br>(0.019-0.2)                        | -0.41%<br>(-1.3-0.059%)              | -0.51%<br>(-1.6-0.078%)             | -29<br>(-93-4.5)    | -540<br>(-1700-77)   |
| Yemen    | 2016 | Female | 75 to 79 | 19%<br>(7.2-38%)               | 81%<br>(62-93%)          | 0.064<br>(0.012-0.19)                       | -0.37%<br>(-1.3-0.072%)              | -0.46%<br>(-1.7-0.08%)              | -21<br>(-76-3.7)    | -300<br>(-1100-58)   |
| Yemen    | 2016 | Female | 80 to 84 | 18%<br>(5.9-39%)               | 82%<br>(61-94%)          | 0.058<br>(0.01-0.17)                        | -0.33%<br>(-1.3-0.084%)              | -0.4%<br>(-1.5-0.094%)              | -14<br>(-54-3.3)    | -150<br>(-570-37)    |



| Location    | Year | Sex    | Age      | Prevalence of current drinkers | Prevalence of abstainers | Population average of standard drinks daily | Percent of total attributable deaths | Percent of total attributable DALYs | Attributable deaths  | Attributable DALYs    |
|-------------|------|--------|----------|--------------------------------|--------------------------|---------------------------------------------|--------------------------------------|-------------------------------------|----------------------|-----------------------|
| Yemen       | 2016 | Female | 85 to 89 | 18%<br>(6-40%)                 | 82%<br>(60-94%)          | 0.058<br>(0.011-0.19)                       | -0.35%<br>(-1.3-0.052%)              | -0.43%<br>(-1.6-0.054%)             | -10<br>(-37-1.3)     | -73<br>(-270-11)      |
| Yemen       | 2016 | Female | 90 to 94 | 21%<br>(6.7-43%)               | 79%<br>(57-93%)          | 0.065<br>(0.012-0.2)                        | -0.4%<br>(-1.3-0.03%)                | -0.5%<br>(-1.7-0.024%)              | -5.1<br>(-17-0.25)   | -25<br>(-84-1.9)      |
| Yemen       | 2016 | Female | 95 plus  | 25%<br>(7.8-49%)               | 75%<br>(51-92%)          | 0.078<br>(0.013-0.24)                       | -0.48%<br>(-1.6-0.031%)              | -0.61%<br>(-2-0.014%)               | -1.8<br>(-5.8-0.04)  | -5.6<br>(-19-0.38)    |
| Yemen       | 2016 | Male   | All Ages | 8.4%<br>(5.6-12%)              | 92%<br>(88-94%)          | 0.046<br>(0.028-0.07)                       | 0.26%<br>(0.15-0.4%)                 | 0.16%<br>(-0.017-0.35%)             | 140<br>(-14-310)     | 16000<br>(9100-24000) |
| Yemen       | 2016 | Male   | 15 to 19 | 7%<br>(2.9-14%)                | 93%<br>(86-97%)          | 0.023<br>(0.0065-0.055)                     | 0.29%<br>(0.17-0.45%)                | 0.13%<br>(0.037-0.3%)               | 5<br>(1.5-12)        | 1200<br>(700-1900)    |
| Yemen       | 2016 | Male   | 20 to 24 | 11%<br>(4.2-22%)               | 89%<br>(78-96%)          | 0.051<br>(0.017-0.11)                       | 0.52%<br>(0.31-0.8%)                 | 0.23%<br>(0.061-0.54%)              | 15<br>(4.1-37)       | 3100<br>(1800-4800)   |
| Yemen       | 2016 | Male   | 25 to 29 | 13%<br>(5.3-25%)               | 87%<br>(75-95%)          | 0.078<br>(0.03-0.16)                        | 0.67%<br>(0.41-1%)                   | 0.39%<br>(0.13-0.87%)               | 22<br>(7.1-48)       | 3200<br>(1900-4900)   |
| Yemen       | 2016 | Male   | 30 to 34 | 15%<br>(5.8-28%)               | 85%<br>(72-94%)          | 0.099<br>(0.04-0.19)                        | 0.7%<br>(0.44-1.1%)                  | 0.49%<br>(0.16-1%)                  | 22<br>(7.2-45)       | 2600<br>(1600-4100)   |
| Yemen       | 2016 | Male   | 35 to 39 | 16%<br>(6.6-30%)               | 84%<br>(70-93%)          | 0.11<br>(0.043-0.24)                        | 0.73%<br>(0.44-1.1%)                 | 0.6%<br>(0.19-1.2%)                 | 22<br>(7.2-44)       | 2100<br>(1200-3300)   |
| Yemen       | 2016 | Male   | 40 to 44 | 17%<br>(7.6-29%)               | 83%<br>(71-92%)          | 0.12<br>(0.044-0.26)                        | 0.62%<br>(0.32-0.96%)                | 0.52%<br>(0.09-1%)                  | 16<br>(2.8-31)       | 1300<br>(670-2100)    |
| Yemen       | 2016 | Male   | 45 to 49 | 16%<br>(6.4-30%)               | 84%<br>(70-94%)          | 0.13<br>(0.038-0.28)                        | 0.51%<br>(0.15-0.87%)                | 0.46%<br>(-0.043-0.96%)             | 13<br>(-1.3-27)      | 890<br>(270-1500)     |
| Yemen       | 2016 | Male   | 50 to 54 | 16%<br>(6.7-31%)               | 84%<br>(69-93%)          | 0.13<br>(0.037-0.3)                         | 0.33%<br>(-0.08-0.65%)               | 0.27%<br>(-0.32-0.73%)              | 8.2<br>(-10-22)      | 530<br>(-120-1000)    |
| Yemen       | 2016 | Male   | 55 to 59 | 15%<br>(6.6-29%)               | 85%<br>(71-93%)          | 0.12<br>(0.033-0.28)                        | 0.2%<br>(-0.24-0.51%)                | 0.15%<br>(-0.44-0.57%)              | 6<br>(-17-24)        | 360<br>(-400-930)     |
| Yemen       | 2016 | Male   | 60 to 64 | 15%<br>(6.2-28%)               | 85%<br>(72-94%)          | 0.11<br>(0.029-0.27)                        | 0.11%<br>(-0.36-0.42%)               | 0.067%<br>(-0.55-0.47%)             | 3.4<br>(-28-25)      | 200<br>(-650-760)     |
| Yemen       | 2016 | Male   | 65 to 69 | 14%<br>(6-26%)                 | 86%<br>(74-94%)          | 0.089<br>(0.026-0.21)                       | 0.056%<br>(-0.35-0.32%)              | 0.024%<br>(-0.5-0.37%)              | 1.3<br>(-28-21)      | 89<br>(-570-520)      |
| Yemen       | 2016 | Male   | 70 to 74 | 12%<br>(5.7-22%)               | 88%<br>(78-94%)          | 0.066<br>(0.019-0.17)                       | 0.064%<br>(-0.25-0.28%)              | 0.05%<br>(-0.35-0.33%)              | 2.5<br>(-18-16)      | 73<br>(-290-320)      |
| Yemen       | 2016 | Male   | 75 to 79 | 11%<br>(4.6-21%)               | 89%<br>(79-95%)          | 0.05<br>(0.012-0.14)                        | 0.062%<br>(-0.21-0.25%)              | 0.052%<br>(-0.3-0.28%)              | 1.9<br>(-11-10)      | 41<br>(-140-160)      |
| Yemen       | 2016 | Male   | 80 to 84 | 9.6%<br>(3.8-19%)              | 90%<br>(81-96%)          | 0.042<br>(0.0096-0.12)                      | 0.071%<br>(-0.18-0.25%)              | 0.063%<br>(-0.23-0.29%)             | 1.7<br>(-6.2-7.7)    | 24<br>(-58-84)        |
| Yemen       | 2016 | Male   | 85 to 89 | 9.5%<br>(3.9-19%)              | 91%<br>(81-96%)          | 0.039<br>(0.0097-0.11)                      | 0.04%<br>(-0.19-0.19%)               | 0.02%<br>(-0.27-0.21%)              | 0.43<br>(-5.6-4.4)   | 7.5<br>(-36-36)       |
| Yemen       | 2016 | Male   | 90 to 94 | 11%<br>(4.5-23%)               | 89%<br>(77-95%)          | 0.042<br>(0.0098-0.12)                      | 0.0035%<br>(-0.24-0.16%)             | -0.033%<br>(-0.32-0.15%)            | -0.34<br>(-3.4-1.6)  | 0.23<br>(-15-10)      |
| Yemen       | 2016 | Male   | 95 plus  | 14%<br>(5-28%)                 | 86%<br>(72-95%)          | 0.049<br>(0.0097-0.16)                      | -0.0054%<br>(-0.34-0.16%)            | -0.071%<br>(-0.48-0.13%)            | -0.22<br>(-1.5-0.41) | -0.065<br>(-4.3-2)    |
| Afghanistan | 1990 | Female | All Ages | 12%<br>(7-17%)                 | 88%<br>(83-93%)          | 0.015<br>(0.007-0.027)                      | 0.037%<br>(-0.056-0.12%)             | -0.0059%<br>(-0.21-0.14%)           | -4.7<br>(-170-110)   | 2100<br>(-3200-6400)  |

| Location    | Year | Sex    | Age      | Prevalence of current drinkers | Prevalence of abstainers | Population average of standard drinks daily | Percent of total attributable deaths | Percent of total attributable DALYs | Attributable deaths  | Attributable DALYs   |
|-------------|------|--------|----------|--------------------------------|--------------------------|---------------------------------------------|--------------------------------------|-------------------------------------|----------------------|----------------------|
| Afghanistan | 1990 | Female | 15 to 19 | 11%<br>(3.6-23%)               | 89%<br>(77-96%)          | 0.014<br>(0.0034-0.039)                     | 0.15%<br>(0.045-0.27%)               | 0.065%<br>(-0.092-0.23%)            | 0.98<br>(-1.5-3.4)   | 270<br>(80-490)      |
| Afghanistan | 1990 | Female | 20 to 24 | 14%<br>(4.4-30%)               | 86%<br>(70-96%)          | 0.021<br>(0.0054-0.055)                     | 0.27%<br>(0.039-0.51%)               | 0.072%<br>(-0.25-0.4%)              | 1.3<br>(-4.5-7.3)    | 490<br>(74-940)      |
| Afghanistan | 1990 | Female | 25 to 29 | 16%<br>(4.9-33%)               | 84%<br>(67-95%)          | 0.026<br>(0.0069-0.061)                     | 0.31%<br>(0.0027-0.62%)              | 0.14%<br>(-0.27-0.6%)               | 2.6<br>(-5.4-11)     | 540<br>(4.6-1100)    |
| Afghanistan | 1990 | Female | 30 to 34 | 18%<br>(5.2-36%)               | 82%<br>(64-95%)          | 0.031<br>(0.0086-0.073)                     | 0.29%<br>(-0.069-0.62%)              | 0.15%<br>(-0.35-0.67%)              | 3.1<br>(-7.1-13)     | 480<br>(-120-1000)   |
| Afghanistan | 1990 | Female | 35 to 39 | 20%<br>(5.8-37%)               | 80%<br>(63-94%)          | 0.036<br>(0.01-0.078)                       | 0.22%<br>(-0.085-0.51%)              | 0.14%<br>(-0.28-0.56%)              | 3.2<br>(-6.9-14)     | 370<br>(-150-880)    |
| Afghanistan | 1990 | Female | 40 to 44 | 20%<br>(7.9-37%)               | 80%<br>(63-92%)          | 0.04<br>(0.012-0.093)                       | 0.16%<br>(-0.22-0.48%)               | 0.12%<br>(-0.37-0.55%)              | 3.2<br>(-11-16)      | 280<br>(-380-830)    |
| Afghanistan | 1990 | Female | 45 to 49 | 21%<br>(7.9-39%)               | 79%<br>(61-92%)          | 0.043<br>(0.012-0.11)                       | 0.065%<br>(-0.37-0.36%)              | 0.027%<br>(-0.53-0.41%)             | 0.67<br>(-14-11)     | 91<br>(-530-500)     |
| Afghanistan | 1990 | Female | 50 to 54 | 22%<br>(8.5-41%)               | 78%<br>(59-92%)          | 0.044<br>(0.011-0.1)                        | -0.0014%<br>(-0.56-0.33%)            | -0.025%<br>(-0.74-0.38%)            | -0.74<br>(-20-11)    | -1.6<br>(-730-420)   |
| Afghanistan | 1990 | Female | 55 to 59 | 23%<br>(8.8-43%)               | 77%<br>(57-91%)          | 0.043<br>(0.011-0.11)                       | -0.066%<br>(-0.72-0.29%)             | -0.085%<br>(-0.84-0.34%)            | -2.6<br>(-26-11)     | -78<br>(-860-350)    |
| Afghanistan | 1990 | Female | 60 to 64 | 24%<br>(9.5-44%)               | 76%<br>(56-90%)          | 0.042<br>(0.009-0.11)                       | -0.12%<br>(-0.83-0.27%)              | -0.14%<br>(-0.95-0.33%)             | -4.9<br>(-34-11)     | -140<br>(-950-310)   |
| Afghanistan | 1990 | Female | 65 to 69 | 25%<br>(10-42%)                | 75%<br>(58-90%)          | 0.037<br>(0.0083-0.094)                     | -0.11%<br>(-0.7-0.26%)               | -0.12%<br>(-0.81-0.29%)             | -5<br>(-33-12)       | -120<br>(-780-280)   |
| Afghanistan | 1990 | Female | 70 to 74 | 23%<br>(9.8-41%)               | 77%<br>(59-90%)          | 0.029<br>(0.0059-0.082)                     | -0.074%<br>(-0.7-0.24%)              | -0.084%<br>(-0.79-0.27%)            | -3.3<br>(-32-11)     | -61<br>(-580-190)    |
| Afghanistan | 1990 | Female | 75 to 79 | 21%<br>(7.9-42%)               | 79%<br>(58-92%)          | 0.024<br>(0.0041-0.075)                     | -0.051%<br>(-0.69-0.22%)             | -0.058%<br>(-0.78-0.25%)            | -1.7<br>(-23-7.1)    | -23<br>(-320-99)     |
| Afghanistan | 1990 | Female | 80 to 84 | 19%<br>(6.6-42%)               | 81%<br>(58-93%)          | 0.022<br>(0.0036-0.069)                     | -0.037%<br>(-0.65-0.23%)             | -0.046%<br>(-0.74-0.26%)            | -0.6<br>(-9.7-3.4)   | -5.7<br>(-100-35)    |
| Afghanistan | 1990 | Female | 85 to 89 | 19%<br>(6.6-41%)               | 81%<br>(59-93%)          | 0.021<br>(0.0037-0.067)                     | -0.046%<br>(-0.56-0.2%)              | -0.06%<br>(-0.65-0.24%)             | -0.51<br>(-5.4-2)    | -3.3<br>(-40-15)     |
| Afghanistan | 1990 | Female | 90 to 94 | 22%<br>(7.2-44%)               | 78%<br>(56-93%)          | 0.024<br>(0.0039-0.073)                     | -0.054%<br>(-0.53-0.19%)             | -0.076%<br>(-0.65-0.23%)            | -0.26<br>(-2.2-0.8)  | -1.1<br>(-11-4.1)    |
| Afghanistan | 1990 | Female | 95 plus  | 26%<br>(8.7-50%)               | 74%<br>(50-91%)          | 0.028<br>(0.0042-0.087)                     | -0.076%<br>(-0.65-0.19%)             | -0.11%<br>(-0.77-0.22%)             | -0.1<br>(-0.76-0.21) | -0.3<br>(-2.5-0.74)  |
| Afghanistan | 1990 | Male   | All Ages | 8.7%<br>(5.9-12%)              | 91%<br>(88-94%)          | 0.017<br>(0.008-0.03)                       | 0.13%<br>(0.048-0.22%)               | 0.11%<br>(-0.036-0.27%)             | 89<br>(-27-210)      | 7300<br>(2700-12000) |
| Afghanistan | 1990 | Male   | 15 to 19 | 7.7%<br>(3.2-16%)              | 92%<br>(84-97%)          | 0.0094<br>(0.0025-0.024)                    | 0.24%<br>(0.13-0.39%)                | 0.089%<br>(0.021-0.25%)             | 1.7<br>(0.39-4.8)    | 480<br>(260-800)     |
| Afghanistan | 1990 | Male   | 20 to 24 | 12%<br>(4.9-23%)               | 88%<br>(77-95%)          | 0.021<br>(0.0062-0.049)                     | 0.48%<br>(0.28-0.76%)                | 0.21%<br>(0.041-0.57%)              | 5.3<br>(1-14)        | 1100<br>(620-1700)   |
| Afghanistan | 1990 | Male   | 25 to 29 | 15%<br>(6-27%)                 | 85%<br>(73-94%)          | 0.032<br>(0.0098-0.07)                      | 0.55%<br>(0.3-0.92%)                 | 0.34%<br>(0.052-0.8%)               | 7.7<br>(1.2-19)      | 1100<br>(600-1800)   |
| Afghanistan | 1990 | Male   | 30 to 34 | 17%<br>(6.4-31%)               | 83%<br>(69-94%)          | 0.04<br>(0.013-0.088)                       | 0.56%<br>(0.27-0.97%)                | 0.41%<br>(0.026-0.97%)              | 9.6<br>(0.66-23)     | 1000<br>(480-1800)   |

| Location    | Year | Sex    | Age      | Prevalence of current drinkers | Prevalence of abstainers | Population average of standard drinks daily | Percent of total attributable deaths | Percent of total attributable DALYs | Attributable deaths   | Attributable DALYs   |
|-------------|------|--------|----------|--------------------------------|--------------------------|---------------------------------------------|--------------------------------------|-------------------------------------|-----------------------|----------------------|
| Afghanistan | 1990 | Male   | 35 to 39 | 18%<br>(7.4-33%)               | 82%<br>(67-93%)          | 0.046<br>(0.015-0.1)                        | 0.61%<br>(0.22-1.1%)                 | 0.5%<br>(0.013-1.2%)                | 13<br>(0.35-33)       | 1100<br>(380-2100)   |
| Afghanistan | 1990 | Male   | 40 to 44 | 19%<br>(8.4-33%)               | 81%<br>(67-92%)          | 0.049<br>(0.016-0.11)                       | 0.54%<br>(0.13-1%)                   | 0.45%<br>(-0.093-1.1%)              | 13<br>(-2.4-31)       | 890<br>(220-1700)    |
| Afghanistan | 1990 | Male   | 45 to 49 | 18%<br>(7-32%)                 | 82%<br>(68-93%)          | 0.051<br>(0.015-0.12)                       | 0.45%<br>(-0.041-0.93%)              | 0.4%<br>(-0.22-1%)                  | 11<br>(-6.1-30)       | 670<br>(-61-1400)    |
| Afghanistan | 1990 | Male   | 50 to 54 | 17%<br>(7.5-33%)               | 83%<br>(67-92%)          | 0.05<br>(0.014-0.12)                        | 0.31%<br>(-0.19-0.7%)                | 0.27%<br>(-0.33-0.75%)              | 7.6<br>(-9.1-22)      | 390<br>(-240-900)    |
| Afghanistan | 1990 | Male   | 55 to 59 | 17%<br>(7.4-32%)               | 83%<br>(68-93%)          | 0.048<br>(0.013-0.12)                       | 0.21%<br>(-0.26-0.54%)               | 0.18%<br>(-0.37-0.58%)              | 5.1<br>(-11-16)       | 220<br>(-270-580)    |
| Afghanistan | 1990 | Male   | 60 to 64 | 16%<br>(7.1-30%)               | 84%<br>(70-93%)          | 0.044<br>(0.011-0.11)                       | 0.14%<br>(-0.29-0.45%)               | 0.12%<br>(-0.39-0.5%)               | 4<br>(-13-17)         | 150<br>(-300-490)    |
| Afghanistan | 1990 | Male   | 65 to 69 | 16%<br>(7-29%)                 | 84%<br>(71-93%)          | 0.037<br>(0.0092-0.09)                      | 0.11%<br>(-0.25-0.35%)               | 0.098%<br>(-0.32-0.38%)             | 3.5<br>(-11-14)       | 99<br>(-230-320)     |
| Afghanistan | 1990 | Male   | 70 to 74 | 14%<br>(6.4-25%)               | 86%<br>(75-94%)          | 0.027<br>(0.0061-0.074)                     | 0.11%<br>(-0.23-0.32%)               | 0.11%<br>(-0.29-0.36%)              | 3.5<br>(-8.7-11)      | 72<br>(-140-210)     |
| Afghanistan | 1990 | Male   | 75 to 79 | 12%<br>(5.2-23%)               | 88%<br>(77-95%)          | 0.021<br>(0.0041-0.058)                     | 0.1%<br>(-0.16-0.27%)                | 0.11%<br>(-0.21-0.3%)               | 2.3<br>(-4.8-6.6)     | 37<br>(-60-94)       |
| Afghanistan | 1990 | Male   | 80 to 84 | 11%<br>(4.3-22%)               | 89%<br>(78-96%)          | 0.017<br>(0.0038-0.052)                     | 0.11%<br>(-0.11-0.26%)               | 0.11%<br>(-0.15-0.29%)              | 1.2<br>(-1.5-3.1)     | 14<br>(-13-33)       |
| Afghanistan | 1990 | Male   | 85 to 89 | 11%<br>(4.3-22%)               | 89%<br>(78-96%)          | 0.016<br>(0.0036-0.044)                     | 0.087%<br>(-0.098-0.21%)             | 0.084%<br>(-0.14-0.23%)             | 0.62<br>(-1-1.7)      | 5.5<br>(-6.2-13)     |
| Afghanistan | 1990 | Male   | 90 to 94 | 12%<br>(4.7-24%)               | 88%<br>(76-95%)          | 0.017<br>(0.0035-0.049)                     | 0.062%<br>(-0.11-0.17%)              | 0.048%<br>(-0.16-0.19%)             | 0.16<br>(-0.53-0.61)  | 1.2<br>(-2.1-3.5)    |
| Afghanistan | 1990 | Male   | 95 plus  | 15%<br>(5.4-30%)               | 85%<br>(70-95%)          | 0.019<br>(0.003-0.065)                      | 0.062%<br>(-0.15-0.18%)              | 0.029%<br>(-0.22-0.17%)             | 0.024<br>(-0.19-0.14) | 0.21<br>(-0.49-0.61) |
| Afghanistan | 1995 | Female | All Ages | 11%<br>(6.8-17%)               | 89%<br>(83-93%)          | 0.015<br>(0.0078-0.025)                     | 0.04%<br>(-0.057-0.12%)              | -0.0051%<br>(-0.22-0.16%)           | -5.5<br>(-240-170)    | 2900<br>(-4100-9100) |
| Afghanistan | 1995 | Female | 15 to 19 | 10%<br>(3.3-22%)               | 90%<br>(78-97%)          | 0.013<br>(0.0032-0.034)                     | 0.15%<br>(0.052-0.26%)               | 0.062%<br>(-0.077-0.21%)            | 1.4<br>(-1.7-4.7)     | 380<br>(130-670)     |
| Afghanistan | 1995 | Female | 20 to 24 | 13%<br>(4-27%)                 | 87%<br>(73-96%)          | 0.02<br>(0.0055-0.049)                      | 0.26%<br>(0.032-0.46%)               | 0.071%<br>(-0.22-0.38%)             | 1.9<br>(-6-10)        | 690<br>(84-1300)     |
| Afghanistan | 1995 | Female | 25 to 29 | 15%<br>(4-31%)                 | 85%<br>(69-96%)          | 0.024<br>(0.0063-0.056)                     | 0.3%<br>(0.018-0.55%)                | 0.13%<br>(-0.24-0.53%)              | 3.7<br>(-6.8-15)      | 740<br>(47-1400)     |
| Afghanistan | 1995 | Female | 30 to 34 | 17%<br>(4.4-34%)               | 83%<br>(66-96%)          | 0.029<br>(0.0075-0.066)                     | 0.28%<br>(-0.031-0.59%)              | 0.15%<br>(-0.3-0.59%)               | 4.4<br>(-8.5-18)      | 650<br>(-68-1400)    |
| Afghanistan | 1995 | Female | 35 to 39 | 18%<br>(5-35%)                 | 82%<br>(65-95%)          | 0.034<br>(0.0095-0.073)                     | 0.22%<br>(-0.086-0.51%)              | 0.14%<br>(-0.27-0.55%)              | 4.7<br>(-9.2-19)      | 510<br>(-190-1200)   |
| Afghanistan | 1995 | Female | 40 to 44 | 19%<br>(7.6-36%)               | 81%<br>(64-92%)          | 0.038<br>(0.012-0.083)                      | 0.16%<br>(-0.19-0.47%)               | 0.12%<br>(-0.33-0.53%)              | 4.4<br>(-12-19)       | 360<br>(-420-1000)   |
| Afghanistan | 1995 | Female | 45 to 49 | 20%<br>(7.4-37%)               | 80%<br>(63-93%)          | 0.041<br>(0.012-0.088)                      | 0.069%<br>(-0.36-0.35%)              | 0.034%<br>(-0.5-0.4%)               | 1.5<br>(-21-18)       | 160<br>(-790-830)    |
| Afghanistan | 1995 | Female | 50 to 54 | 21%<br>(9-39%)                 | 79%<br>(61-91%)          | 0.043<br>(0.012-0.1)                        | 0.005%<br>(-0.53-0.32%)              | -0.017%<br>(-0.65-0.38%)            | -0.77<br>(-29-16)     | 9.8<br>(-1100-640)   |

| Location    | Year | Sex    | Age      | Prevalence of current drinkers | Prevalence of abstainers | Population average of standard drinks daily | Percent of total attributable deaths | Percent of total attributable DALYs | Attributable deaths  | Attributable DALYs    |
|-------------|------|--------|----------|--------------------------------|--------------------------|---------------------------------------------|--------------------------------------|-------------------------------------|----------------------|-----------------------|
| Afghanistan | 1995 | Female | 55 to 59 | 23%<br>(9.3-43%)               | 77%<br>(57-91%)          | 0.044<br>(0.011-0.11)                       | -0.069%<br>(-0.72-0.3%)              | -0.087%<br>(-0.84-0.35%)            | -4.3<br>(-40-17)     | -130<br>(-1300-550)   |
| Afghanistan | 1995 | Female | 60 to 64 | 24%<br>(9.4-44%)               | 76%<br>(56-91%)          | 0.042<br>(0.0095-0.1)                       | -0.13%<br>(-0.87-0.26%)              | -0.15%<br>(-0.98-0.31%)             | -7.6<br>(-52-16)     | -210<br>(-1400-440)   |
| Afghanistan | 1995 | Female | 65 to 69 | 24%<br>(10-43%)                | 76%<br>(57-90%)          | 0.036<br>(0.0086-0.092)                     | -0.1%<br>(-0.68-0.25%)               | -0.11%<br>(-0.77-0.29%)             | -6.6<br>(-44-16)     | -150<br>(-1000-370)   |
| Afghanistan | 1995 | Female | 70 to 74 | 23%<br>(9.4-41%)               | 77%<br>(59-91%)          | 0.028<br>(0.006-0.075)                      | -0.064%<br>(-0.63-0.24%)             | -0.072%<br>(-0.71-0.28%)            | -4.3<br>(-42-17)     | -79<br>(-760-300)     |
| Afghanistan | 1995 | Female | 75 to 79 | 20%<br>(7.3-39%)               | 80%<br>(61-93%)          | 0.023<br>(0.004-0.066)                      | -0.04%<br>(-0.62-0.22%)              | -0.046%<br>(-0.69-0.25%)            | -2.2<br>(-33-12)     | -30<br>(-470-170)     |
| Afghanistan | 1995 | Female | 80 to 84 | 19%<br>(6.6-40%)               | 81%<br>(60-93%)          | 0.021<br>(0.0038-0.063)                     | -0.027%<br>(-0.57-0.23%)             | -0.035%<br>(-0.64-0.27%)            | -0.83<br>(-16-6.5)   | -7.7<br>(-160-65)     |
| Afghanistan | 1995 | Female | 85 to 89 | 19%<br>(7.1-41%)               | 81%<br>(59-93%)          | 0.021<br>(0.0042-0.064)                     | -0.04%<br>(-0.53-0.21%)              | -0.052%<br>(-0.62-0.25%)            | -0.51<br>(-6.1-2.4)  | -3.3<br>(-44-17)      |
| Afghanistan | 1995 | Female | 90 to 94 | 22%<br>(8-44%)                 | 78%<br>(56-92%)          | 0.024<br>(0.0044-0.067)                     | -0.053%<br>(-0.52-0.2%)              | -0.074%<br>(-0.63-0.24%)            | -0.3<br>(-2.6-0.99)  | -1.3<br>(-13-5.1)     |
| Afghanistan | 1995 | Female | 95 plus  | 27%<br>(8.7-50%)               | 73%<br>(50-91%)          | 0.028<br>(0.0049-0.084)                     | -0.076%<br>(-0.64-0.2%)              | -0.11%<br>(-0.77-0.23%)             | -0.15<br>(-1.1-0.32) | -0.43<br>(-3.5-1.1)   |
| Afghanistan | 1995 | Male   | All Ages | 9.2%<br>(6.3-13%)              | 91%<br>(87-94%)          | 0.017<br>(0.0094-0.029)                     | 0.14%<br>(0.044-0.24%)               | 0.12%<br>(-0.052-0.29%)             | 130<br>(-61-320)     | 10000<br>(3400-18000) |
| Afghanistan | 1995 | Male   | 15 to 19 | 7.8%<br>(3.3-15%)              | 92%<br>(85-97%)          | 0.0092<br>(0.0025-0.023)                    | 0.22%<br>(0.12-0.35%)                | 0.079%<br>(0.019-0.22%)             | 2.5<br>(0.6-7)       | 690<br>(380-1100)     |
| Afghanistan | 1995 | Male   | 20 to 24 | 12%<br>(4.9-23%)               | 88%<br>(77-95%)          | 0.02<br>(0.0068-0.046)                      | 0.43%<br>(0.25-0.67%)                | 0.18%<br>(0.038-0.46%)              | 7.6<br>(1.6-19)      | 1500<br>(870-2400)    |
| Afghanistan | 1995 | Male   | 25 to 29 | 15%<br>(6.3-28%)               | 85%<br>(72-94%)          | 0.032<br>(0.011-0.07)                       | 0.51%<br>(0.27-0.83%)                | 0.3%<br>(0.036-0.71%)               | 11<br>(1.4-26)       | 1500<br>(840-2600)    |
| Afghanistan | 1995 | Male   | 30 to 34 | 17%<br>(6.7-32%)               | 83%<br>(68-93%)          | 0.041<br>(0.015-0.089)                      | 0.53%<br>(0.24-0.92%)                | 0.37%<br>(0.0056-0.88%)             | 13<br>(0.21-32)      | 1400<br>(630-2500)    |
| Afghanistan | 1995 | Male   | 35 to 39 | 19%<br>(7.4-34%)               | 81%<br>(66-93%)          | 0.046<br>(0.016-0.098)                      | 0.57%<br>(0.2-1.1%)                  | 0.47%<br>(-0.0081-1.2%)             | 18<br>(-0.29-45)     | 1400<br>(490-2800)    |
| Afghanistan | 1995 | Male   | 40 to 44 | 19%<br>(8.4-33%)               | 81%<br>(67-92%)          | 0.049<br>(0.017-0.11)                       | 0.5%<br>(0.086-0.98%)                | 0.42%<br>(-0.11-1.1%)               | 17<br>(-4.6-44)      | 1200<br>(220-2400)    |
| Afghanistan | 1995 | Male   | 45 to 49 | 19%<br>(7.6-34%)               | 81%<br>(66-92%)          | 0.051<br>(0.015-0.11)                       | 0.43%<br>(-0.1-0.93%)                | 0.38%<br>(-0.29-1%)                 | 17<br>(-13-47)       | 980<br>(-240-2200)    |
| Afghanistan | 1995 | Male   | 50 to 54 | 18%<br>(7.7-34%)               | 82%<br>(66-92%)          | 0.051<br>(0.016-0.12)                       | 0.29%<br>(-0.21-0.69%)               | 0.25%<br>(-0.35-0.75%)              | 12<br>(-18-36)       | 620<br>(-460-1500)    |
| Afghanistan | 1995 | Male   | 55 to 59 | 17%<br>(7.7-32%)               | 83%<br>(68-92%)          | 0.049<br>(0.014-0.12)                       | 0.2%<br>(-0.3-0.56%)                 | 0.17%<br>(-0.41-0.63%)              | 8.2<br>(-20-30)      | 360<br>(-510-1000)    |
| Afghanistan | 1995 | Male   | 60 to 64 | 16%<br>(7.2-31%)               | 84%<br>(69-93%)          | 0.044<br>(0.011-0.11)                       | 0.13%<br>(-0.32-0.46%)               | 0.11%<br>(-0.44-0.5%)               | 5.6<br>(-22-26)      | 200<br>(-490-740)     |
| Afghanistan | 1995 | Male   | 65 to 69 | 16%<br>(6.9-28%)               | 84%<br>(72-93%)          | 0.036<br>(0.0098-0.087)                     | 0.11%<br>(-0.22-0.35%)               | 0.098%<br>(-0.29-0.39%)             | 5.2<br>(-15-21)      | 150<br>(-320-490)     |
| Afghanistan | 1995 | Male   | 70 to 74 | 14%<br>(6.5-26%)               | 86%<br>(74-93%)          | 0.027<br>(0.0068-0.067)                     | 0.11%<br>(-0.22-0.33%)               | 0.11%<br>(-0.27-0.36%)              | 5.8<br>(-14-19)      | 120<br>(-220-350)     |

| Location    | Year | Sex    | Age      | Prevalence of current drinkers | Prevalence of abstainers | Population average of standard drinks daily | Percent of total attributable deaths | Percent of total attributable DALYs | Attributable deaths  | Attributable DALYs    |
|-------------|------|--------|----------|--------------------------------|--------------------------|---------------------------------------------|--------------------------------------|-------------------------------------|----------------------|-----------------------|
| Afghanistan | 1995 | Male   | 75 to 79 | 12%<br>(5.3-23%)               | 88%<br>(77-95%)          | 0.02<br>(0.0045-0.054)                      | 0.1%<br>(-0.15-0.26%)                | 0.11%<br>(-0.18-0.29%)              | 3.9<br>(-7.1-11)     | 60<br>(-89-150)       |
| Afghanistan | 1995 | Male   | 80 to 84 | 11%<br>(4.3-21%)               | 89%<br>(79-96%)          | 0.017<br>(0.0042-0.047)                     | 0.11%<br>(-0.1-0.26%)                | 0.11%<br>(-0.13-0.29%)              | 2<br>(-2.4-5)        | 23<br>(-21-54)        |
| Afghanistan | 1995 | Male   | 85 to 89 | 11%<br>(4.2-21%)               | 89%<br>(79-96%)          | 0.015<br>(0.0037-0.041)                     | 0.086%<br>(-0.074-0.21%)             | 0.083%<br>(-0.11-0.23%)             | 0.68<br>(-0.94-1.9)  | 6.1<br>(-5.3-15)      |
| Afghanistan | 1995 | Male   | 90 to 94 | 12%<br>(4.7-24%)               | 88%<br>(76-95%)          | 0.016<br>(0.0036-0.044)                     | 0.063%<br>(-0.098-0.17%)             | 0.049%<br>(-0.15-0.18%)             | 0.19<br>(-0.58-0.69) | 1.4<br>(-2.2-3.9)     |
| Afghanistan | 1995 | Male   | 95 plus  | 15%<br>(5.3-31%)               | 85%<br>(69-95%)          | 0.018<br>(0.0032-0.058)                     | 0.062%<br>(-0.12-0.18%)              | 0.03%<br>(-0.2-0.17%)               | 0.036<br>(-0.25-0.2) | 0.31<br>(-0.6-0.88)   |
| Afghanistan | 2000 | Female | All Ages | 11%<br>(6.7-17%)               | 89%<br>(83-93%)          | 0.018<br>(0.011-0.028)                      | 0.031%<br>(-0.088-0.14%)             | -0.033%<br>(-0.28-0.17%)            | -41<br>(-340-210)    | 2500<br>(-6800-11000) |
| Afghanistan | 2000 | Female | 15 to 19 | 11%<br>(3.4-24%)               | 89%<br>(76-97%)          | 0.016<br>(0.0044-0.04)                      | 0.16%<br>(0.039-0.28%)               | 0.066%<br>(-0.096-0.26%)            | 1.7<br>(-2.3-6.5)    | 450<br>(110-830)      |
| Afghanistan | 2000 | Female | 20 to 24 | 14%<br>(4.1-30%)               | 86%<br>(70-96%)          | 0.026<br>(0.0076-0.059)                     | 0.26%<br>(0.016-0.51%)               | 0.074%<br>(-0.28-0.43%)             | 2.3<br>(-8.9-13)     | 800<br>(47-1600)      |
| Afghanistan | 2000 | Female | 25 to 29 | 16%<br>(4.5-32%)               | 84%<br>(68-95%)          | 0.031<br>(0.0092-0.066)                     | 0.3%<br>(-0.041-0.61%)               | 0.13%<br>(-0.37-0.62%)              | 4.3<br>(-11-20)      | 860<br>(-120-1800)    |
| Afghanistan | 2000 | Female | 30 to 34 | 17%<br>(5-36%)                 | 83%<br>(64-95%)          | 0.036<br>(0.012-0.073)                      | 0.27%<br>(-0.083-0.64%)              | 0.15%<br>(-0.39-0.7%)               | 5.1<br>(-13-24)      | 740<br>(-210-1800)    |
| Afghanistan | 2000 | Female | 35 to 39 | 19%<br>(5.2-37%)               | 81%<br>(63-95%)          | 0.043<br>(0.013-0.087)                      | 0.2%<br>(-0.19-0.57%)                | 0.13%<br>(-0.36-0.63%)              | 5.2<br>(-14-25)      | 560<br>(-480-1500)    |
| Afghanistan | 2000 | Female | 40 to 44 | 20%<br>(7.3-36%)               | 80%<br>(64-93%)          | 0.047<br>(0.016-0.097)                      | 0.14%<br>(-0.29-0.49%)               | 0.099%<br>(-0.44-0.6%)              | 4.2<br>(-18-24)      | 360<br>(-710-1300)    |
| Afghanistan | 2000 | Female | 45 to 49 | 20%<br>(7.1-38%)               | 80%<br>(62-93%)          | 0.05<br>(0.016-0.1)                         | 0.029%<br>(-0.44-0.37%)              | -0.008%<br>(-0.58-0.43%)            | -0.38<br>(-28-21)    | 74<br>(-1100-930)     |
| Afghanistan | 2000 | Female | 50 to 54 | 21%<br>(8.1-39%)               | 79%<br>(61-92%)          | 0.051<br>(0.015-0.11)                       | -0.046%<br>(-0.63-0.32%)             | -0.072%<br>(-0.78-0.39%)            | -4.3<br>(-48-24)     | -120<br>(-1700-870)   |
| Afghanistan | 2000 | Female | 55 to 59 | 22%<br>(9-41%)                 | 78%<br>(59-91%)          | 0.051<br>(0.014-0.12)                       | -0.13%<br>(-0.79-0.26%)              | -0.15%<br>(-0.92-0.31%)             | -9.1<br>(-55-19)     | -290<br>(-1800-580)   |
| Afghanistan | 2000 | Female | 60 to 64 | 23%<br>(9.3-43%)               | 77%<br>(57-91%)          | 0.049<br>(0.012-0.12)                       | -0.2%<br>(-0.99-0.23%)               | -0.22%<br>(-1.1-0.28%)              | -14<br>(-71-18)      | -380<br>(-1900-460)   |
| Afghanistan | 2000 | Female | 65 to 69 | 24%<br>(10-43%)                | 76%<br>(57-90%)          | 0.043<br>(0.011-0.11)                       | -0.18%<br>(-0.81-0.21%)              | -0.2%<br>(-0.93-0.25%)              | -13<br>(-61-16)      | -300<br>(-1400-350)   |
| Afghanistan | 2000 | Female | 70 to 74 | 23%<br>(9.4-40%)               | 77%<br>(60-91%)          | 0.034<br>(0.0079-0.089)                     | -0.14%<br>(-0.76-0.22%)              | -0.15%<br>(-0.86-0.25%)             | -10<br>(-58-17)      | -190<br>(-1100-310)   |
| Afghanistan | 2000 | Female | 75 to 79 | 20%<br>(7.7-40%)               | 80%<br>(60-92%)          | 0.028<br>(0.0054-0.08)                      | -0.11%<br>(-0.76-0.22%)              | -0.12%<br>(-0.86-0.24%)             | -7<br>(-52-14)       | -98<br>(-720-200)     |
| Afghanistan | 2000 | Female | 80 to 84 | 19%<br>(6.2-39%)               | 81%<br>(61-94%)          | 0.025<br>(0.0049-0.074)                     | -0.083%<br>(-0.7-0.22%)              | -0.097%<br>(-0.78-0.25%)            | -3.5<br>(-28-9.2)    | -35<br>(-290-94)      |
| Afghanistan | 2000 | Female | 85 to 89 | 19%<br>(6.3-41%)               | 81%<br>(59-94%)          | 0.025<br>(0.005-0.076)                      | -0.094%<br>(-0.66-0.2%)              | -0.11%<br>(-0.77-0.24%)             | -1.5<br>(-10-3.2)    | -11<br>(-74-22)       |
| Afghanistan | 2000 | Female | 90 to 94 | 22%<br>(6.9-44%)               | 78%<br>(56-93%)          | 0.029<br>(0.0054-0.085)                     | -0.11%<br>(-0.63-0.19%)              | -0.14%<br>(-0.78-0.23%)             | -0.5<br>(-2.8-0.82)  | -2.4<br>(-14-4.2)     |

| Location    | Year | Sex    | Age      | Prevalence of current drinkers | Prevalence of abstainers | Population average of standard drinks daily | Percent of total attributable deaths | Percent of total attributable DALYs | Attributable deaths    | Attributable DALYs     |
|-------------|------|--------|----------|--------------------------------|--------------------------|---------------------------------------------|--------------------------------------|-------------------------------------|------------------------|------------------------|
| Afghanistan | 2000 | Female | 95 plus  | 26%<br>(8.2-51%)               | 74%<br>(49-92%)          | 0.034<br>(0.0058-0.1)                       | -0.14%<br>(-0.79-0.2%)               | -0.18%<br>(-0.96-0.23%)             | -0.22<br>(-1.2-0.29)   | -0.69<br>(-4-0.99)     |
| Afghanistan | 2000 | Male   | All Ages | 9%<br>(6.2-13%)                | 91%<br>(87-94%)          | 0.02<br>(0.013-0.03)                        | 0.15%<br>(0.032-0.27%)               | 0.12%<br>(-0.085-0.32%)             | 150<br>(-100-400)      | 12000<br>(2700-22000)  |
| Afghanistan | 2000 | Male   | 15 to 19 | 7.8%<br>(3.3-16%)              | 92%<br>(84-97%)          | 0.011<br>(0.0032-0.025)                     | 0.24%<br>(0.13-0.38%)                | 0.099%<br>(0.021-0.26%)             | 3.5<br>(0.76-9)        | 850<br>(470-1400)      |
| Afghanistan | 2000 | Male   | 20 to 24 | 12%<br>(5-24%)                 | 88%<br>(76-95%)          | 0.025<br>(0.009-0.052)                      | 0.47%<br>(0.27-0.75%)                | 0.22%<br>(0.041-0.57%)              | 10<br>(2-26)           | 1900<br>(1100-3100)    |
| Afghanistan | 2000 | Male   | 25 to 29 | 15%<br>(6.1-28%)               | 85%<br>(72-94%)          | 0.039<br>(0.014-0.077)                      | 0.56%<br>(0.28-0.96%)                | 0.35%<br>(0.022-0.82%)              | 15<br>(0.94-35)        | 1900<br>(930-3300)     |
| Afghanistan | 2000 | Male   | 30 to 34 | 17%<br>(6.4-32%)               | 83%<br>(68-94%)          | 0.049<br>(0.019-0.095)                      | 0.56%<br>(0.22-1%)                   | 0.41%<br>(-0.028-1%)                | 17<br>(-1.1-42)        | 1700<br>(650-3200)     |
| Afghanistan | 2000 | Male   | 35 to 39 | 19%<br>(7.2-34%)               | 81%<br>(66-93%)          | 0.055<br>(0.02-0.11)                        | 0.59%<br>(0.17-1.2%)                 | 0.5%<br>(-0.059-1.2%)               | 21<br>(-2.6-54)        | 1700<br>(460-3300)     |
| Afghanistan | 2000 | Male   | 40 to 44 | 19%<br>(8.7-33%)               | 81%<br>(67-91%)          | 0.059<br>(0.022-0.12)                       | 0.5%<br>(0.031-1%)                   | 0.42%<br>(-0.17-1.1%)               | 20<br>(-8.3-52)        | 1400<br>(87-2900)      |
| Afghanistan | 2000 | Male   | 45 to 49 | 18%<br>(7.5-33%)               | 82%<br>(67-92%)          | 0.061<br>(0.02-0.13)                        | 0.41%<br>(-0.17-0.96%)               | 0.36%<br>(-0.37-1.1%)               | 19<br>(-20-57)         | 1100<br>(-480-2600)    |
| Afghanistan | 2000 | Male   | 50 to 54 | 18%<br>(7.8-33%)               | 82%<br>(67-92%)          | 0.061<br>(0.02-0.13)                        | 0.27%<br>(-0.29-0.72%)               | 0.22%<br>(-0.48-0.77%)              | 13<br>(-30-45)         | 680<br>(-820-1800)     |
| Afghanistan | 2000 | Male   | 55 to 59 | 17%<br>(7.4-33%)               | 83%<br>(67-93%)          | 0.059<br>(0.017-0.14)                       | 0.17%<br>(-0.39-0.57%)               | 0.14%<br>(-0.53-0.63%)              | 8.3<br>(-32-39)        | 380<br>(-870-1300)     |
| Afghanistan | 2000 | Male   | 60 to 64 | 16%<br>(7.3-31%)               | 84%<br>(69-93%)          | 0.053<br>(0.014-0.13)                       | 0.098%<br>(-0.42-0.45%)              | 0.076%<br>(-0.53-0.5%)              | 4.6<br>(-33-30)        | 190<br>(-810-870)      |
| Afghanistan | 2000 | Male   | 65 to 69 | 16%<br>(7.2-28%)               | 84%<br>(72-93%)          | 0.043<br>(0.013-0.096)                      | 0.081%<br>(-0.3-0.37%)               | 0.068%<br>(-0.39-0.4%)              | 3.9<br>(-23-23)        | 120<br>(-460-550)      |
| Afghanistan | 2000 | Male   | 70 to 74 | 14%<br>(6.6-25%)               | 86%<br>(75-93%)          | 0.032<br>(0.0093-0.077)                     | 0.094%<br>(-0.26-0.34%)              | 0.091%<br>(-0.31-0.38%)             | 5.4<br>(-19-22)        | 110<br>(-320-430)      |
| Afghanistan | 2000 | Male   | 75 to 79 | 12%<br>(5.5-23%)               | 88%<br>(77-94%)          | 0.024<br>(0.0062-0.065)                     | 0.086%<br>(-0.2-0.26%)               | 0.085%<br>(-0.24-0.3%)              | 4<br>(-12-13)          | 64<br>(-150-190)       |
| Afghanistan | 2000 | Male   | 80 to 84 | 11%<br>(4.6-22%)               | 89%<br>(78-95%)          | 0.02<br>(0.0052-0.053)                      | 0.095%<br>(-0.14-0.27%)              | 0.095%<br>(-0.18-0.3%)              | 2.5<br>(-4.7-7.7)      | 29<br>(-45-82)         |
| Afghanistan | 2000 | Male   | 85 to 89 | 11%<br>(4.4-21%)               | 89%<br>(79-96%)          | 0.019<br>(0.0049-0.05)                      | 0.071%<br>(-0.12-0.2%)               | 0.064%<br>(-0.18-0.22%)             | 0.68<br>(-1.8-2.4)     | 6.4<br>(-11-18)        |
| Afghanistan | 2000 | Male   | 90 to 94 | 12%<br>(4.9-24%)               | 88%<br>(76-95%)          | 0.019<br>(0.0049-0.052)                     | 0.049%<br>(-0.13-0.17%)              | 0.032%<br>(-0.19-0.18%)             | 0.1<br>(-0.6-0.57)     | 0.95<br>(-2.5-3.2)     |
| Afghanistan | 2000 | Male   | 95 plus  | 15%<br>(5.5-30%)               | 85%<br>(70-94%)          | 0.022<br>(0.0046-0.065)                     | 0.046%<br>(-0.16-0.17%)              | 0.0092%<br>(-0.24-0.16%)            | 0.0099<br>(-0.26-0.17) | 0.2<br>(-0.68-0.74)    |
| Afghanistan | 2005 | Female | All Ages | 11%<br>(6.9-17%)               | 89%<br>(83-93%)          | 0.03<br>(0.022-0.041)                       | -0.0044%<br>(-0.17-0.16%)            | -0.14%<br>(-0.48-0.17%)             | -180<br>(-640-230)     | -360<br>(-14000-13000) |
| Afghanistan | 2005 | Female | 15 to 19 | 11%<br>(3.5-23%)               | 89%<br>(77-97%)          | 0.027<br>(0.0079-0.061)                     | 0.19%<br>(0.031-0.36%)               | 0.091%<br>(-0.15-0.36%)             | 2.5<br>(-4.1-9.9)      | 610<br>(97-1200)       |
| Afghanistan | 2005 | Female | 20 to 24 | 14%<br>(4.5-29%)               | 86%<br>(71-95%)          | 0.042<br>(0.013-0.091)                      | 0.28%<br>(-0.0067-0.62%)             | 0.085%<br>(-0.36-0.59%)             | 3<br>(-13-21)          | 1100<br>(-28-2300)     |

| Location    | Year | Sex    | Age      | Prevalence of current drinkers | Prevalence of abstainers | Population average of standard drinks daily | Percent of total attributable deaths | Percent of total attributable DALYs | Attributable deaths  | Attributable DALYs    |
|-------------|------|--------|----------|--------------------------------|--------------------------|---------------------------------------------|--------------------------------------|-------------------------------------|----------------------|-----------------------|
| Afghanistan | 2005 | Female | 25 to 29 | 15%<br>(4.2-32%)               | 85%<br>(68-96%)          | 0.051<br>(0.016-0.1)                        | 0.31%<br>(-0.12-0.73%)               | 0.14%<br>(-0.53-0.74%)              | 5.3<br>(-19-29)      | 1100<br>(-420-2600)   |
| Afghanistan | 2005 | Female | 30 to 34 | 17%<br>(4.7-34%)               | 83%<br>(66-95%)          | 0.06<br>(0.021-0.11)                        | 0.27%<br>(-0.2-0.75%)                | 0.14%<br>(-0.56-0.85%)              | 5.6<br>(-22-33)      | 870<br>(-630-2400)    |
| Afghanistan | 2005 | Female | 35 to 39 | 19%<br>(5.2-35%)               | 81%<br>(65-95%)          | 0.07<br>(0.023-0.13)                        | 0.19%<br>(-0.28-0.67%)               | 0.12%<br>(-0.5-0.81%)               | 5.4<br>(-23-35)      | 600<br>(-890-2100)    |
| Afghanistan | 2005 | Female | 40 to 44 | 20%<br>(7.4-35%)               | 80%<br>(65-93%)          | 0.077<br>(0.029-0.15)                       | 0.087%<br>(-0.47-0.55%)              | 0.044%<br>(-0.68-0.7%)              | 2.1<br>(-32-32)      | 260<br>(-1300-1600)   |
| Afghanistan | 2005 | Female | 45 to 49 | 20%<br>(7.1-37%)               | 80%<br>(63-93%)          | 0.082<br>(0.027-0.17)                       | -0.077%<br>(-0.64-0.37%)             | -0.12%<br>(-0.86-0.46%)             | -6.5<br>(-44-24)     | -210<br>(-1800-1100)  |
| Afghanistan | 2005 | Female | 50 to 54 | 21%<br>(8-39%)                 | 79%<br>(61-92%)          | 0.086<br>(0.026-0.18)                       | -0.22%<br>(-1-0.29%)                 | -0.26%<br>(-1.2-0.36%)              | -16<br>(-74-22)      | -620<br>(-2800-850)   |
| Afghanistan | 2005 | Female | 55 to 59 | 22%<br>(9.1-42%)               | 78%<br>(58-91%)          | 0.086<br>(0.024-0.2)                        | -0.36%<br>(-1.3-0.17%)               | -0.4%<br>(-1.5-0.25%)               | -31<br>(-120-19)     | -1100<br>(-4000-510)  |
| Afghanistan | 2005 | Female | 60 to 64 | 23%<br>(9.6-44%)               | 77%<br>(56-90%)          | 0.083<br>(0.021-0.2)                        | -0.45%<br>(-1.5-0.14%)               | -0.5%<br>(-1.7-0.17%)               | -37<br>(-130-12)     | -1100<br>(-3600-320)  |
| Afghanistan | 2005 | Female | 65 to 69 | 24%<br>(11-42%)                | 76%<br>(58-89%)          | 0.073<br>(0.02-0.16)                        | -0.43%<br>(-1.4-0.1%)                | -0.47%<br>(-1.6-0.13%)              | -38<br>(-120-10)     | -890<br>(-2800-220)   |
| Afghanistan | 2005 | Female | 70 to 74 | 23%<br>(9.7-40%)               | 77%<br>(60-90%)          | 0.058<br>(0.015-0.15)                       | -0.37%<br>(-1.3-0.14%)               | -0.4%<br>(-1.5-0.16%)               | -31<br>(-110-13)     | -580<br>(-2000-220)   |
| Afghanistan | 2005 | Female | 75 to 79 | 20%<br>(7.8-39%)               | 80%<br>(61-92%)          | 0.047<br>(0.01-0.13)                        | -0.31%<br>(-1.3-0.13%)               | -0.34%<br>(-1.4-0.15%)              | -22<br>(-92-9.8)     | -320<br>(-1300-130)   |
| Afghanistan | 2005 | Female | 80 to 84 | 19%<br>(6.4-40%)               | 81%<br>(60-94%)          | 0.042<br>(0.0088-0.12)                      | -0.25%<br>(-1.1-0.17%)               | -0.28%<br>(-1.3-0.2%)               | -12<br>(-55-8.5)     | -130<br>(-580-84)     |
| Afghanistan | 2005 | Female | 85 to 89 | 19%<br>(6.3-40%)               | 81%<br>(60-94%)          | 0.042<br>(0.0086-0.12)                      | -0.25%<br>(-1.1-0.16%)               | -0.29%<br>(-1.3-0.2%)               | -5.4<br>(-24-3.6)    | -40<br>(-170-25)      |
| Afghanistan | 2005 | Female | 90 to 94 | 22%<br>(7-44%)                 | 78%<br>(56-93%)          | 0.047<br>(0.0093-0.13)                      | -0.27%<br>(-1.1-0.13%)               | -0.33%<br>(-1.3-0.15%)              | -1.5<br>(-6.1-0.72)  | -7.6<br>(-31-3.7)     |
| Afghanistan | 2005 | Female | 95 plus  | 26%<br>(8.1-50%)               | 74%<br>(50-92%)          | 0.056<br>(0.01-0.16)                        | -0.33%<br>(-1.3-0.12%)               | -0.4%<br>(-1.5-0.14%)               | -0.42<br>(-1.6-0.14) | -1.4<br>(-5.2-0.51)   |
| Afghanistan | 2005 | Male   | All Ages | 8.9%<br>(6-13%)                | 91%<br>(87-94%)          | 0.034<br>(0.025-0.044)                      | 0.19%<br>(0.035-0.35%)               | 0.14%<br>(-0.13-0.39%)              | 190<br>(-180-540)    | 17000<br>(3100-31000) |
| Afghanistan | 2005 | Male   | 15 to 19 | 7.8%<br>(3.2-16%)              | 92%<br>(84-97%)          | 0.018<br>(0.0058-0.038)                     | 0.32%<br>(0.19-0.53%)                | 0.18%<br>(0.042-0.44%)              | 7<br>(1.6-17)        | 1200<br>(710-2100)    |
| Afghanistan | 2005 | Male   | 20 to 24 | 12%<br>(4.8-23%)               | 88%<br>(77-95%)          | 0.04<br>(0.015-0.081)                       | 0.63%<br>(0.35-1%)                   | 0.39%<br>(0.066-0.94%)              | 20<br>(3.4-47)       | 2900<br>(1600-4800)   |
| Afghanistan | 2005 | Male   | 25 to 29 | 15%<br>(6-27%)                 | 85%<br>(73-94%)          | 0.062<br>(0.024-0.12)                       | 0.74%<br>(0.36-1.3%)                 | 0.56%<br>(0.055-1.3%)               | 28<br>(2.8-64)       | 3000<br>(1500-5300)   |
| Afghanistan | 2005 | Male   | 30 to 34 | 17%<br>(6.6-32%)               | 83%<br>(68-93%)          | 0.079<br>(0.034-0.14)                       | 0.73%<br>(0.3-1.4%)                  | 0.62%<br>(0.037-1.4%)               | 29<br>(1.7-68)       | 2600<br>(1100-4800)   |
| Afghanistan | 2005 | Male   | 35 to 39 | 18%<br>(7.4-33%)               | 82%<br>(67-93%)          | 0.09<br>(0.036-0.17)                        | 0.72%<br>(0.22-1.4%)                 | 0.66%<br>(-0.034-1.6%)              | 32<br>(-1.7-78)      | 2400<br>(750-4800)    |
| Afghanistan | 2005 | Male   | 40 to 44 | 19%<br>(8.5-32%)               | 81%<br>(68-91%)          | 0.096<br>(0.038-0.19)                       | 0.57%<br>(0.031-1.1%)                | 0.51%<br>(-0.19-1.3%)               | 27<br>(-10-72)       | 1800<br>(98-3800)     |

| Location    | Year | Sex    | Age      | Prevalence of current drinkers | Prevalence of abstainers | Population average of standard drinks daily | Percent of total attributable deaths | Percent of total attributable DALYs | Attributable deaths    | Attributable DALYs      |
|-------------|------|--------|----------|--------------------------------|--------------------------|---------------------------------------------|--------------------------------------|-------------------------------------|------------------------|-------------------------|
| Afghanistan | 2005 | Male   | 45 to 49 | 18%<br>(7.2-33%)               | 82%<br>(67-93%)          | 0.1<br>(0.033-0.2)                          | 0.43%<br>(-0.19-1%)                  | 0.39%<br>(-0.46-1.1%)               | 24<br>(-28-69)         | 1400<br>(-630-3200)     |
| Afghanistan | 2005 | Male   | 50 to 54 | 17%<br>(7.6-33%)               | 83%<br>(67-92%)          | 0.098<br>(0.034-0.2)                        | 0.24%<br>(-0.42-0.73%)               | 0.19%<br>(-0.61-0.81%)              | 13<br>(-44-57)         | 730<br>(-1300-2300)     |
| Afghanistan | 2005 | Male   | 55 to 59 | 16%<br>(7.3-31%)               | 84%<br>(69-93%)          | 0.094<br>(0.03-0.2)                         | 0.13%<br>(-0.51-0.59%)               | 0.087%<br>(-0.66-0.64%)             | 6.3<br>(-49-48)        | 350<br>(-1400-1600)     |
| Afghanistan | 2005 | Male   | 60 to 64 | 16%<br>(7.1-30%)               | 84%<br>(70-93%)          | 0.084<br>(0.023-0.2)                        | 0.043%<br>(-0.58-0.45%)              | 0.012%<br>(-0.72-0.49%)             | 0.85<br>(-57-38)       | 100<br>(-1400-1100)     |
| Afghanistan | 2005 | Male   | 65 to 69 | 15%<br>(6.9-28%)               | 85%<br>(72-93%)          | 0.069<br>(0.022-0.15)                       | 0.013%<br>(-0.5-0.35%)               | -0.011%<br>(-0.59-0.39%)            | -0.77<br>(-43-29)      | 24<br>(-920-670)        |
| Afghanistan | 2005 | Male   | 70 to 74 | 14%<br>(6.2-24%)               | 86%<br>(76-94%)          | 0.051<br>(0.015-0.13)                       | 0.045%<br>(-0.37-0.34%)              | 0.035%<br>(-0.46-0.37%)             | 2.3<br>(-29-24)        | 60<br>(-500-440)        |
| Afghanistan | 2005 | Male   | 75 to 79 | 12%<br>(4.9-23%)               | 88%<br>(77-95%)          | 0.039<br>(0.01-0.1)                         | 0.046%<br>(-0.33-0.28%)              | 0.039%<br>(-0.39-0.3%)              | 2.1<br>(-21-16)        | 39<br>(-280-230)        |
| Afghanistan | 2005 | Male   | 80 to 84 | 11%<br>(4.3-21%)               | 89%<br>(79-96%)          | 0.033<br>(0.009-0.085)                      | 0.067%<br>(-0.25-0.28%)              | 0.06%<br>(-0.31-0.31%)              | 1.9<br>(-9.7-9.4)      | 25<br>(-92-100)         |
| Afghanistan | 2005 | Male   | 85 to 89 | 11%<br>(4.2-21%)               | 89%<br>(79-96%)          | 0.03<br>(0.0081-0.079)                      | 0.041%<br>(-0.21-0.21%)              | 0.026%<br>(-0.28-0.23%)             | 0.39<br>(-4.1-3.4)     | 5.2<br>(-27-27)         |
| Afghanistan | 2005 | Male   | 90 to 94 | 12%<br>(4.9-24%)               | 88%<br>(76-95%)          | 0.032<br>(0.0081-0.085)                     | 0.013%<br>(-0.23-0.17%)              | -0.015%<br>(-0.31-0.18%)            | -0.063<br>(-1.3-0.72)  | 0.33<br>(-5.6-4.2)      |
| Afghanistan | 2005 | Male   | 95 plus  | 15%<br>(5.5-31%)               | 85%<br>(69-95%)          | 0.037<br>(0.0075-0.11)                      | 0.00059%<br>(-0.3-0.17%)             | -0.052%<br>(-0.41-0.16%)            | -0.047<br>(-0.37-0.14) | 0.0025<br>(-1.1-0.61)   |
| Afghanistan | 2010 | Female | All Ages | 11%<br>(6.4-17%)               | 89%<br>(83-94%)          | 0.05<br>(0.034-0.07)                        | -0.037%<br>(-0.26-0.16%)             | -0.25%<br>(-0.7-0.13%)              | -320<br>(-930-170)     | -2900<br>(-20000-13000) |
| Afghanistan | 2010 | Female | 15 to 19 | 10%<br>(3.1-22%)               | 90%<br>(78-97%)          | 0.044<br>(0.011-0.1)                        | 0.21%<br>(0.063-0.4%)                | 0.11%<br>(-0.1-0.41%)               | 3.2<br>(-3.1-11)       | 730<br>(220-1400)       |
| Afghanistan | 2010 | Female | 20 to 24 | 13%<br>(3.8-27%)               | 87%<br>(73-96%)          | 0.069<br>(0.021-0.15)                       | 0.35%<br>(0.047-0.68%)               | 0.13%<br>(-0.32-0.66%)              | 4.7<br>(-11-22)        | 1300<br>(170-2500)      |
| Afghanistan | 2010 | Female | 25 to 29 | 15%<br>(4.2-31%)               | 85%<br>(69-96%)          | 0.084<br>(0.027-0.17)                       | 0.37%<br>(-0.045-0.79%)              | 0.21%<br>(-0.45-0.88%)              | 8.3<br>(-18-37)        | 1400<br>(-170-3000)     |
| Afghanistan | 2010 | Female | 30 to 34 | 17%<br>(4.7-35%)               | 83%<br>(65-95%)          | 0.1<br>(0.033-0.19)                         | 0.31%<br>(-0.24-0.82%)               | 0.2%<br>(-0.58-0.98%)               | 8.6<br>(-25-43)        | 1100<br>(-850-3100)     |
| Afghanistan | 2010 | Female | 35 to 39 | 19%<br>(5.1-36%)               | 81%<br>(64-95%)          | 0.12<br>(0.038-0.22)                        | 0.22%<br>(-0.32-0.77%)               | 0.17%<br>(-0.58-0.99%)              | 8.4<br>(-27-48)        | 790<br>(-1100-2800)     |
| Afghanistan | 2010 | Female | 40 to 44 | 20%<br>(6.9-37%)               | 80%<br>(63-93%)          | 0.13<br>(0.046-0.26)                        | 0.087%<br>(-0.52-0.65%)              | 0.062%<br>(-0.73-0.89%)             | 3.2<br>(-39-45)        | 280<br>(-1700-2100)     |
| Afghanistan | 2010 | Female | 45 to 49 | 20%<br>(7.1-37%)               | 80%<br>(63-93%)          | 0.14<br>(0.047-0.3)                         | -0.13%<br>(-0.9-0.4%)                | -0.17%<br>(-1.1-0.59%)              | -9.7<br>(-64-31)       | -390<br>(-2800-1200)    |
| Afghanistan | 2010 | Female | 50 to 54 | 21%<br>(8.6-39%)               | 79%<br>(61-91%)          | 0.15<br>(0.045-0.31)                        | -0.34%<br>(-1.3-0.27%)               | -0.39%<br>(-1.5-0.37%)              | -25<br>(-99-24)        | -1000<br>(-3800-810)    |
| Afghanistan | 2010 | Female | 55 to 59 | 22%<br>(9.3-40%)               | 78%<br>(60-91%)          | 0.15<br>(0.042-0.31)                        | -0.54%<br>(-1.7-0.16%)               | -0.61%<br>(-2-0.22%)                | -46<br>(-150-16)       | -1600<br>(-4900-430)    |
| Afghanistan | 2010 | Female | 60 to 64 | 23%<br>(9.2-41%)               | 77%<br>(59-91%)          | 0.14<br>(0.035-0.31)                        | -0.66%<br>(-1.8-0.048%)              | -0.74%<br>(-2.1-0.1%)               | -67<br>(-200-9.6)      | -1900<br>(-5600-150)    |



| Location    | Year | Sex    | Age      | Prevalence of current drinkers | Prevalence of abstainers | Population average of standard drinks daily | Percent of total attributable deaths | Percent of total attributable DALYs | Attributable deaths | Attributable DALYs    |
|-------------|------|--------|----------|--------------------------------|--------------------------|---------------------------------------------|--------------------------------------|-------------------------------------|---------------------|-----------------------|
| Afghanistan | 2010 | Female | 65 to 69 | 23%<br>(10-40%)                | 77%<br>(60-90%)          | 0.12<br>(0.034-0.27)                        | -0.69%<br>(-1.9--0.0019%)            | -0.77%<br>(-2.1-0.018%)             | -68<br>(-180-1.6)   | -1600<br>(-4300--4.3) |
| Afghanistan | 2010 | Female | 70 to 74 | 22%<br>(10-39%)                | 78%<br>(61-90%)          | 0.096<br>(0.026-0.24)                       | -0.61%<br>(-1.7-0.049%)              | -0.68%<br>(-1.9-0.079%)             | -59<br>(-170-6.7)   | -1100<br>(-3200-82)   |
| Afghanistan | 2010 | Female | 75 to 79 | 20%<br>(7.6-38%)               | 80%<br>(62-92%)          | 0.078<br>(0.017-0.22)                       | -0.53%<br>(-1.8-0.056%)              | -0.6%<br>(-2-0.077%)                | -44<br>(-150-5.5)   | -620<br>(-2200-65)    |
| Afghanistan | 2010 | Female | 80 to 84 | 18%<br>(6.3-38%)               | 82%<br>(62-94%)          | 0.071<br>(0.015-0.2)                        | -0.45%<br>(-1.7-0.11%)               | -0.51%<br>(-1.9-0.13%)              | -26<br>(-98-6.5)    | -270<br>(-1000-64)    |
| Afghanistan | 2010 | Female | 85 to 89 | 19%<br>(5.6-40%)               | 81%<br>(60-94%)          | 0.071<br>(0.014-0.21)                       | -0.46%<br>(-1.6-0.089%)              | -0.53%<br>(-1.8-0.097%)             | -12<br>(-41-2.2)    | -86<br>(-300-17)      |
| Afghanistan | 2010 | Female | 90 to 94 | 22%<br>(6.8-44%)               | 78%<br>(56-93%)          | 0.082<br>(0.015-0.23)                       | -0.5%<br>(-1.7-0.062%)               | -0.6%<br>(-2-0.065%)                | -3.8<br>(-13-0.41)  | -19<br>(-65-2.3)      |
| Afghanistan | 2010 | Female | 95 plus  | 26%<br>(8.2-52%)               | 74%<br>(48-92%)          | 0.097<br>(0.017-0.28)                       | -0.58%<br>(-1.9-0.051%)              | -0.7%<br>(-2.3-0.048%)              | -0.92<br>(-3-0.062) | -3<br>(-10-0.27)      |
| Afghanistan | 2010 | Male   | All Ages | 8.8%<br>(6-12%)                | 91%<br>(88-94%)          | 0.057<br>(0.041-0.077)                      | 0.27%<br>(0.082-0.46%)               | 0.21%<br>(-0.092-0.51%)             | 300<br>(-130-700)   | 24000<br>(6800-40000) |
| Afghanistan | 2010 | Male   | 15 to 19 | 7.6%<br>(3.2-14%)              | 92%<br>(86-97%)          | 0.03<br>(0.0095-0.067)                      | 0.37%<br>(0.2-0.6%)                  | 0.24%<br>(0.058-0.56%)              | 10<br>(2.5-25)      | 1600<br>(850-2700)    |
| Afghanistan | 2010 | Male   | 20 to 24 | 12%<br>(4.6-22%)               | 88%<br>(78-95%)          | 0.067<br>(0.024-0.14)                       | 0.74%<br>(0.39-1.3%)                 | 0.53%<br>(0.12-1.2%)                | 31<br>(6.8-71)      | 3700<br>(2000-6500)   |
| Afghanistan | 2010 | Male   | 25 to 29 | 14%<br>(6-27%)                 | 86%<br>(73-94%)          | 0.11<br>(0.042-0.19)                        | 0.93%<br>(0.45-1.6%)                 | 0.8%<br>(0.2-1.6%)                  | 45<br>(12-91)       | 4200<br>(2000-7200)   |
| Afghanistan | 2010 | Male   | 30 to 34 | 17%<br>(6.3-31%)               | 83%<br>(69-94%)          | 0.14<br>(0.061-0.25)                        | 0.95%<br>(0.46-1.7%)                 | 0.91%<br>(0.2-1.9%)                 | 50<br>(11-100)      | 4000<br>(1900-7100)   |
| Afghanistan | 2010 | Male   | 35 to 39 | 18%<br>(7-33%)                 | 82%<br>(67-93%)          | 0.15<br>(0.06-0.3)                          | 0.94%<br>(0.34-1.8%)                 | 0.93%<br>(0.14-2%)                  | 52<br>(7.5-110)     | 3500<br>(1300-6600)   |
| Afghanistan | 2010 | Male   | 40 to 44 | 18%<br>(8.2-32%)               | 82%<br>(68-92%)          | 0.16<br>(0.063-0.32)                        | 0.75%<br>(0.12-1.5%)                 | 0.73%<br>(-0.09-1.7%)               | 43<br>(-5.4-100)    | 2700<br>(460-5200)    |
| Afghanistan | 2010 | Male   | 45 to 49 | 18%<br>(7.1-32%)               | 82%<br>(68-93%)          | 0.17<br>(0.055-0.35)                        | 0.58%<br>(-0.079-1.3%)               | 0.57%<br>(-0.26-1.6%)               | 38<br>(-19-100)     | 2000<br>(-270-4500)   |
| Afghanistan | 2010 | Male   | 50 to 54 | 17%<br>(7.5-33%)               | 83%<br>(67-93%)          | 0.17<br>(0.055-0.35)                        | 0.32%<br>(-0.38-0.93%)               | 0.29%<br>(-0.57-1%)                 | 21<br>(-43-77)      | 1000<br>(-1200-3100)  |
| Afghanistan | 2010 | Male   | 55 to 59 | 16%<br>(7.1-31%)               | 84%<br>(69-93%)          | 0.16<br>(0.051-0.34)                        | 0.17%<br>(-0.51-0.68%)               | 0.14%<br>(-0.69-0.77%)              | 11<br>(-57-63)      | 510<br>(-1700-2100)   |
| Afghanistan | 2010 | Male   | 60 to 64 | 16%<br>(6.7-30%)               | 84%<br>(70-93%)          | 0.14<br>(0.042-0.32)                        | 0.054%<br>(-0.58-0.55%)              | 0.025%<br>(-0.74-0.6%)              | 2<br>(-63-52)       | 140<br>(-1600-1500)   |
| Afghanistan | 2010 | Male   | 65 to 69 | 15%<br>(6.5-27%)               | 85%<br>(73-93%)          | 0.12<br>(0.038-0.25)                        | -0.028%<br>(-0.58-0.37%)             | -0.058%<br>(-0.73-0.42%)            | -4.8<br>(-59-35)    | -61<br>(-1200-790)    |
| Afghanistan | 2010 | Male   | 70 to 74 | 14%<br>(6-24%)                 | 86%<br>(76-94%)          | 0.087<br>(0.026-0.2)                        | -0.00078%<br>(-0.45-0.34%)           | -0.017%<br>(-0.55-0.38%)            | -1.3<br>(-40-28)    | -0.98<br>(-690-510)   |
| Afghanistan | 2010 | Male   | 75 to 79 | 12%<br>(5.2-22%)               | 88%<br>(78-95%)          | 0.066<br>(0.017-0.17)                       | 0.0057%<br>(-0.44-0.27%)             | -0.0078%<br>(-0.52-0.3%)            | -0.46<br>(-30-17)   | 5.1<br>(-400-240)     |
| Afghanistan | 2010 | Male   | 80 to 84 | 11%<br>(4.1-21%)               | 89%<br>(79-96%)          | 0.055<br>(0.015-0.14)                       | 0.034%<br>(-0.34-0.28%)              | 0.02%<br>(-0.4-0.31%)               | 0.69<br>(-14-11)    | 14<br>(-130-120)      |

| Location    | Year | Sex    | Age      | Prevalence of current drinkers | Prevalence of abstainers | Population average of standard drinks daily | Percent of total attributable deaths | Percent of total attributable DALYs | Attributable deaths   | Attributable DALYs      |
|-------------|------|--------|----------|--------------------------------|--------------------------|---------------------------------------------|--------------------------------------|-------------------------------------|-----------------------|-------------------------|
| Afghanistan | 2010 | Male   | 85 to 89 | 10%<br>(4.2-20%)               | 90%<br>(80-96%)          | 0.051<br>(0.014-0.13)                       | 0.0054%<br>(-0.31-0.22%)             | -0.02%<br>(-0.4-0.23%)              | -0.36<br>(-7.2-4.2)   | 0.85<br>(-48-33)        |
| Afghanistan | 2010 | Male   | 90 to 94 | 12%<br>(4.9-23%)               | 88%<br>(77-95%)          | 0.054<br>(0.014-0.14)                       | -0.031%<br>(-0.35-0.17%)             | -0.074%<br>(-0.46-0.16%)            | -0.44<br>(-2.7-0.95)  | -1.1<br>(-12-5.8)       |
| Afghanistan | 2010 | Male   | 95 plus  | 14%<br>(5.4-30%)               | 86%<br>(70-95%)          | 0.062<br>(0.012-0.18)                       | -0.052%<br>(-0.44-0.17%)             | -0.12%<br>(-0.59-0.14%)             | -0.15<br>(-0.7-0.17)  | -0.25<br>(-2.1-0.84)    |
| Afghanistan | 2016 | Female | All Ages | 11%<br>(6.8-17%)               | 89%<br>(83-93%)          | 0.067<br>(0.038-0.11)                       | -0.028%<br>(-0.27-0.19%)             | -0.28%<br>(-0.77-0.13%)             | -400<br>(-1100-180)   | -2400<br>(-22000-16000) |
| Afghanistan | 2016 | Female | 15 to 19 | 10%<br>(3.3-22%)               | 90%<br>(78-97%)          | 0.057<br>(0.015-0.14)                       | 0.23%<br>(0.092-0.41%)               | 0.14%<br>(-0.053-0.44%)             | 5.4<br>(-2-17)        | 1000<br>(400-2000)      |
| Afghanistan | 2016 | Female | 20 to 24 | 13%<br>(4-27%)                 | 87%<br>(73-96%)          | 0.09<br>(0.025-0.21)                        | 0.4%<br>(0.11-0.74%)                 | 0.2%<br>(-0.22-0.72%)               | 8.3<br>(-8.8-31)      | 1800<br>(470-3500)      |
| Afghanistan | 2016 | Female | 25 to 29 | 15%<br>(4.4-31%)               | 85%<br>(69-96%)          | 0.11<br>(0.031-0.24)                        | 0.44%<br>(0.056-0.89%)               | 0.28%<br>(-0.28-0.99%)              | 12<br>(-12-45)        | 1900<br>(230-3800)      |
| Afghanistan | 2016 | Female | 30 to 34 | 17%<br>(4.3-34%)               | 83%<br>(66-96%)          | 0.13<br>(0.039-0.27)                        | 0.37%<br>(-0.082-0.88%)              | 0.27%<br>(-0.4-1%)                  | 13<br>(-21-52)        | 1600<br>(-360-3700)     |
| Afghanistan | 2016 | Female | 35 to 39 | 18%<br>(4.9-34%)               | 82%<br>(66-95%)          | 0.15<br>(0.042-0.31)                        | 0.28%<br>(-0.23-0.79%)               | 0.25%<br>(-0.42-1%)                 | 14<br>(-25-58)        | 1200<br>(-970-3300)     |
| Afghanistan | 2016 | Female | 40 to 44 | 19%<br>(7.2-35%)               | 81%<br>(65-93%)          | 0.17<br>(0.055-0.36)                        | 0.15%<br>(-0.48-0.76%)               | 0.15%<br>(-0.74-1%)                 | 8.8<br>(-41-59)       | 570<br>(-1800-2900)     |
| Afghanistan | 2016 | Female | 45 to 49 | 20%<br>(6.9-37%)               | 80%<br>(63-93%)          | 0.18<br>(0.054-0.41)                        | -0.073%<br>(-0.82-0.65%)             | -0.092%<br>(-1-0.84%)               | -6<br>(-69-54)        | -260<br>(-2900-2300)    |
| Afghanistan | 2016 | Female | 50 to 54 | 21%<br>(7.4-39%)               | 79%<br>(61-93%)          | 0.19<br>(0.051-0.44)                        | -0.29%<br>(-1.3-0.48%)               | -0.33%<br>(-1.6-0.64%)              | -24<br>(-110-47)      | -1000<br>(-4500-1600)   |
| Afghanistan | 2016 | Female | 55 to 59 | 22%<br>(8.1-41%)               | 78%<br>(59-92%)          | 0.19<br>(0.049-0.45)                        | -0.53%<br>(-1.8-0.21%)               | -0.59%<br>(-2.1-0.33%)              | -49<br>(-170-27)      | -1700<br>(-6000-720)    |
| Afghanistan | 2016 | Female | 60 to 64 | 23%<br>(8.9-43%)               | 77%<br>(57-91%)          | 0.18<br>(0.044-0.45)                        | -0.71%<br>(-2.1-0.062%)              | -0.79%<br>(-2.4-0.12%)              | -72<br>(-220-11)      | -2100<br>(-6400-200)    |
| Afghanistan | 2016 | Female | 65 to 69 | 23%<br>(9.9-41%)               | 77%<br>(59-90%)          | 0.16<br>(0.042-0.37)                        | -0.79%<br>(-2--0.014%)               | -0.87%<br>(-2.3--0.00082%)          | -98<br>(-260--0.0086) | -2300<br>(-6000--39)    |
| Afghanistan | 2016 | Female | 70 to 74 | 22%<br>(9.7-38%)               | 78%<br>(62-90%)          | 0.13<br>(0.03-0.32)                         | -0.73%<br>(-1.9--0.0092%)            | -0.81%<br>(-2.1-0.006%)             | -85<br>(-220-0.58)    | -1600<br>(-4100--19)    |
| Afghanistan | 2016 | Female | 75 to 79 | 20%<br>(8-40%)                 | 80%<br>(60-92%)          | 0.1<br>(0.022-0.3)                          | -0.66%<br>(-2.1--0.0027%)            | -0.74%<br>(-2.3-0.0078%)            | -65<br>(-200-0.71)    | -930<br>(-2900--3.7)    |
| Afghanistan | 2016 | Female | 80 to 84 | 18%<br>(6.7-40%)               | 82%<br>(60-93%)          | 0.094<br>(0.019-0.28)                       | -0.58%<br>(-1.9-0.045%)              | -0.65%<br>(-2.1-0.054%)             | -39<br>(-130-3.2)     | -410<br>(-1400-32)      |
| Afghanistan | 2016 | Female | 85 to 89 | 19%<br>(6.6-40%)               | 81%<br>(60-93%)          | 0.095<br>(0.018-0.28)                       | -0.59%<br>(-1.9-0.0066%)             | -0.68%<br>(-2.2-0.0014%)            | -18<br>(-59-0.038)    | -130<br>(-450-1.5)      |
| Afghanistan | 2016 | Female | 90 to 94 | 22%<br>(6.9-44%)               | 78%<br>(56-93%)          | 0.11<br>(0.02-0.32)                         | -0.64%<br>(-1.9--0.011%)             | -0.76%<br>(-2.2--0.024%)            | -6<br>(-17--0.19)     | -30<br>(-89--0.56)      |
| Afghanistan | 2016 | Female | 95 plus  | 27%<br>(8.3-51%)               | 73%<br>(49-92%)          | 0.13<br>(0.018-0.35)                        | -0.73%<br>(-2.1-0.0011%)             | -0.88%<br>(-2.5--0.019%)            | -1.6<br>(-4.6--0.034) | -5.2<br>(-15-0.0076)    |
| Afghanistan | 2016 | Male   | All Ages | 9%<br>(6.1-13%)                | 91%<br>(87-94%)          | 0.076<br>(0.044-0.12)                       | 0.35%<br>(0.14-0.6%)                 | 0.3%<br>(-0.015-0.67%)              | 480<br>(-23-1100)     | 35000<br>(15000-59000)  |

| Location    | Year | Sex    | Age      | Prevalence of current drinkers | Prevalence of abstainers | Population average of standard drinks daily | Percent of total attributable deaths | Percent of total attributable DALYs | Attributable deaths  | Attributable DALYs       |
|-------------|------|--------|----------|--------------------------------|--------------------------|---------------------------------------------|--------------------------------------|-------------------------------------|----------------------|--------------------------|
| Afghanistan | 2016 | Male   | 15 to 19 | 7.4%<br>(3.2-14%)              | 93%<br>(86-97%)          | 0.038<br>(0.012-0.093)                      | 0.36%<br>(0.19-0.66%)                | 0.25%<br>(0.058-0.63%)              | 16<br>(3.9-39)       | 2300<br>(1200-3900)      |
| Afghanistan | 2016 | Male   | 20 to 24 | 12%<br>(4.6-22%)               | 88%<br>(78-95%)          | 0.086<br>(0.029-0.2)                        | 0.71%<br>(0.35-1.3%)                 | 0.5%<br>(0.12-1.2%)                 | 46<br>(12-110)       | 5300<br>(2800-9400)      |
| Afghanistan | 2016 | Male   | 25 to 29 | 14%<br>(5.7-27%)               | 86%<br>(73-94%)          | 0.14<br>(0.049-0.28)                        | 0.96%<br>(0.47-1.7%)                 | 0.83%<br>(0.24-1.7%)                | 65<br>(20-130)       | 5900<br>(3000-10000)     |
| Afghanistan | 2016 | Male   | 30 to 34 | 16%<br>(5.9-31%)               | 84%<br>(69-94%)          | 0.17<br>(0.065-0.35)                        | 1%<br>(0.49-1.8%)                    | 0.99%<br>(0.31-2.1%)                | 73<br>(22-150)       | 5600<br>(2800-9900)      |
| Afghanistan | 2016 | Male   | 35 to 39 | 18%<br>(7.1-32%)               | 82%<br>(68-93%)          | 0.2<br>(0.065-0.42)                         | 1.1%<br>(0.44-2%)                    | 1.1%<br>(0.27-2.3%)                 | 80<br>(20-170)       | 5300<br>(2200-9900)      |
| Afghanistan | 2016 | Male   | 40 to 44 | 18%<br>(8.4-32%)               | 82%<br>(68-92%)          | 0.21<br>(0.074-0.44)                        | 0.89%<br>(0.26-1.8%)                 | 0.9%<br>(0.084-2%)                  | 68<br>(6.7-150)      | 4000<br>(1200-8000)      |
| Afghanistan | 2016 | Male   | 45 to 49 | 18%<br>(7.4-32%)               | 82%<br>(68-93%)          | 0.22<br>(0.07-0.47)                         | 0.73%<br>(0.047-1.6%)                | 0.75%<br>(-0.11-1.9%)               | 61<br>(-9.3-160)     | 3100<br>(200-7100)       |
| Afghanistan | 2016 | Male   | 50 to 54 | 17%<br>(7.4-32%)               | 83%<br>(68-93%)          | 0.21<br>(0.064-0.46)                        | 0.44%<br>(-0.23-1.3%)                | 0.44%<br>(-0.43-1.5%)               | 39<br>(-36-120)      | 1800<br>(-870-4900)      |
| Afghanistan | 2016 | Male   | 55 to 59 | 16%<br>(7.4-30%)               | 84%<br>(70-93%)          | 0.2<br>(0.06-0.47)                          | 0.28%<br>(-0.39-1%)                  | 0.28%<br>(-0.54-1.1%)               | 26<br>(-51-110)      | 1000<br>(-1400-3700)     |
| Afghanistan | 2016 | Male   | 60 to 64 | 16%<br>(6.8-29%)               | 84%<br>(71-93%)          | 0.18<br>(0.049-0.45)                        | 0.14%<br>(-0.49-0.8%)                | 0.13%<br>(-0.62-0.9%)               | 13<br>(-64-92)       | 460<br>(-1600-2600)      |
| Afghanistan | 2016 | Male   | 65 to 69 | 15%<br>(6.7-27%)               | 85%<br>(73-93%)          | 0.15<br>(0.046-0.34)                        | 0.014%<br>(-0.56-0.48%)              | -0.0097%<br>(-0.7-0.52%)            | -0.99<br>(-70-52)    | 38<br>(-1500-1200)       |
| Afghanistan | 2016 | Male   | 70 to 74 | 13%<br>(6-24%)                 | 87%<br>(76-94%)          | 0.11<br>(0.031-0.29)                        | 0.014%<br>(-0.45-0.38%)              | -0.00073%<br>(-0.55-0.42%)          | -0.068<br>(-50-38)   | 27<br>(-840-710)         |
| Afghanistan | 2016 | Male   | 75 to 79 | 12%<br>(4.9-22%)               | 88%<br>(78-95%)          | 0.084<br>(0.021-0.23)                       | 0.0081%<br>(-0.43-0.26%)             | -0.0058%<br>(-0.5-0.29%)            | -0.41<br>(-36-20)    | 9.4<br>(-480-290)        |
| Afghanistan | 2016 | Male   | 80 to 84 | 11%<br>(4.2-21%)               | 89%<br>(79-96%)          | 0.071<br>(0.018-0.19)                       | 0.035%<br>(-0.34-0.31%)              | 0.019%<br>(-0.42-0.34%)             | 0.79<br>(-17-14)     | 17<br>(-170-150)         |
| Afghanistan | 2016 | Male   | 85 to 89 | 10%<br>(4.2-21%)               | 90%<br>(79-96%)          | 0.066<br>(0.017-0.17)                       | -0.0019%<br>(-0.33-0.21%)            | -0.031%<br>(-0.42-0.21%)            | -0.64<br>(-8.7-4.4)  | -0.31<br>(-57-36)        |
| Afghanistan | 2016 | Male   | 90 to 94 | 12%<br>(4.8-23%)               | 88%<br>(77-95%)          | 0.07<br>(0.016-0.19)                        | -0.046%<br>(-0.39-0.16%)             | -0.096%<br>(-0.5-0.15%)             | -0.7<br>(-3.7-1.1)   | -2<br>(-17-7.1)          |
| Afghanistan | 2016 | Male   | 95 plus  | 15%<br>(5.2-30%)               | 85%<br>(70-95%)          | 0.081<br>(0.015-0.23)                       | -0.071%<br>(-0.52-0.17%)             | -0.15%<br>(-0.7-0.13%)              | -0.26<br>(-1.2-0.22) | -0.48<br>(-3.5-1.1)      |
| Bangladesh  | 1990 | Female | All Ages | 0.29%<br>(0.2-0.4%)            | 100%<br>(100-100%)       | 0.021<br>(0.018-0.024)                      | 0.35%<br>(0.29-0.41%)                | 0.5%<br>(0.39-0.61%)                | 2500<br>(1900-3100)  | 120000<br>(98000-140000) |
| Bangladesh  | 1990 | Female | 15 to 19 | 0.25%<br>(0.098-0.49%)         | 100%<br>(100-100%)       | 0.012<br>(0.004-0.025)                      | 0.31%<br>(0.2-0.46%)                 | 0.095%<br>(0.051-0.16%)             | 11<br>(5.8-18)       | 4300<br>(2500-6600)      |
| Bangladesh  | 1990 | Female | 20 to 24 | 0.26%<br>(0.087-0.52%)         | 100%<br>(99-100%)        | 0.024<br>(0.0091-0.045)                     | 0.7%<br>(0.48-0.96%)                 | 0.3%<br>(0.17-0.46%)                | 42<br>(25-67)        | 10000<br>(6800-15000)    |
| Bangladesh  | 1990 | Female | 25 to 29 | 0.27%<br>(0.087-0.56%)         | 100%<br>(99-100%)        | 0.035<br>(0.013-0.066)                      | 0.9%<br>(0.66-1.2%)                  | 0.57%<br>(0.35-0.88%)               | 73<br>(44-110)       | 11000<br>(8000-16000)    |
| Bangladesh  | 1990 | Female | 30 to 34 | 0.31%<br>(0.087-0.64%)         | 100%<br>(99-100%)        | 0.045<br>(0.016-0.082)                      | 1%<br>(0.77-1.4%)                    | 0.89%<br>(0.6-1.3%)                 | 94<br>(63-130)       | 10000<br>(7200-13000)    |

| Location   | Year | Sex    | Age      | Prevalence of current drinkers | Prevalence of abstainers | Population average of standard drinks daily | Percent of total attributable deaths | Percent of total attributable DALYs | Attributable deaths | Attributable DALYs       |
|------------|------|--------|----------|--------------------------------|--------------------------|---------------------------------------------|--------------------------------------|-------------------------------------|---------------------|--------------------------|
| Bangladesh | 1990 | Female | 35 to 39 | 0.35%<br>(0.12-0.6%)           | 100%<br>(99-100%)        | 0.051<br>(0.02-0.088)                       | 1.4%<br>(1-1.9%)                     | 1.6%<br>(1-2.3%)                    | 140<br>(95-220)     | 10000<br>(7700-14000)    |
| Bangladesh | 1990 | Female | 40 to 44 | 0.37%<br>(0.16-0.65%)          | 100%<br>(99-100%)        | 0.051<br>(0.023-0.094)                      | 1.2%<br>(0.89-1.5%)                  | 1.3%<br>(0.92-1.9%)                 | 160<br>(110-220)    | 10000<br>(7600-14000)    |
| Bangladesh | 1990 | Female | 45 to 49 | 0.38%<br>(0.16-0.67%)          | 100%<br>(99-100%)        | 0.048<br>(0.019-0.088)                      | 1.5%<br>(1.1-2.1%)                   | 1.9%<br>(1.3-2.8%)                  | 280<br>(180-410)    | 14000<br>(10000-20000)   |
| Bangladesh | 1990 | Female | 50 to 54 | 0.39%<br>(0.15-0.72%)          | 100%<br>(99-100%)        | 0.049<br>(0.018-0.093)                      | 1.6%<br>(1.1-2.2%)                   | 2%<br>(1.3-2.9%)                    | 350<br>(230-530)    | 15000<br>(10000-21000)   |
| Bangladesh | 1990 | Female | 55 to 59 | 0.41%<br>(0.17-0.77%)          | 100%<br>(99-100%)        | 0.055<br>(0.02-0.11)                        | 1.2%<br>(0.82-1.8%)                  | 1.5%<br>(0.91-2.2%)                 | 300<br>(190-460)    | 11000<br>(7300-16000)    |
| Bangladesh | 1990 | Female | 60 to 64 | 0.43%<br>(0.19-0.86%)          | 100%<br>(99-100%)        | 0.057<br>(0.02-0.12)                        | 0.88%<br>(0.58-1.3%)                 | 0.98%<br>(0.61-1.5%)                | 250<br>(150-380)    | 7800<br>(5100-11000)     |
| Bangladesh | 1990 | Female | 65 to 69 | 0.46%<br>(0.2-0.8%)            | 100%<br>(99-100%)        | 0.052<br>(0.019-0.098)                      | 0.83%<br>(0.56-1.1%)                 | 0.94%<br>(0.6-1.3%)                 | 270<br>(170-390)    | 6700<br>(4600-9200)      |
| Bangladesh | 1990 | Female | 70 to 74 | 0.47%<br>(0.22-0.83%)          | 100%<br>(99-100%)        | 0.045<br>(0.016-0.094)                      | 0.71%<br>(0.48-1%)                   | 0.8%<br>(0.52-1.2%)                 | 230<br>(150-340)    | 4400<br>(3000-6500)      |
| Bangladesh | 1990 | Female | 75 to 79 | 0.49%<br>(0.2-0.88%)           | 100%<br>(99-100%)        | 0.04<br>(0.014-0.085)                       | 0.61%<br>(0.4-0.87%)                 | 0.68%<br>(0.43-1%)                  | 150<br>(93-220)     | 2200<br>(1400-3300)      |
| Bangladesh | 1990 | Female | 80 to 84 | 0.5%<br>(0.2-0.9%)             | 100%<br>(99-100%)        | 0.037<br>(0.012-0.079)                      | 0.47%<br>(0.31-0.69%)                | 0.52%<br>(0.32-0.77%)               | 62<br>(39-93)       | 700<br>(450-1000)        |
| Bangladesh | 1990 | Female | 85 to 89 | 0.55%<br>(0.23-1.1%)           | 99%<br>(99-100%)         | 0.037<br>(0.012-0.08)                       | 0.39%<br>(0.26-0.56%)                | 0.41%<br>(0.26-0.61%)               | 28<br>(17-41)       | 230<br>(150-320)         |
| Bangladesh | 1990 | Female | 90 to 94 | 0.65%<br>(0.28-1.2%)           | 99%<br>(99-100%)         | 0.039<br>(0.015-0.088)                      | 0.34%<br>(0.22-0.5%)                 | 0.34%<br>(0.21-0.52%)               | 8.5<br>(5.2-13)     | 51<br>(33-74)            |
| Bangladesh | 1990 | Female | 95 plus  | 0.82%<br>(0.3-1.7%)            | 99%<br>(98-100%)         | 0.044<br>(0.014-0.11)                       | 0.34%<br>(0.22-0.5%)                 | 0.3%<br>(0.17-0.49%)                | 1.9<br>(1.1-3.1)    | 8.3<br>(5.4-12)          |
| Bangladesh | 1990 | Male   | All Ages | 0.75%<br>(0.58-0.99%)          | 99%<br>(99-99%)          | 0.012<br>(0.0099-0.015)                     | 0.53%<br>(0.43-0.67%)                | 0.6%<br>(0.47-0.86%)                | 3300<br>(2500-4800) | 20000<br>(160000-250000) |
| Bangladesh | 1990 | Male   | 15 to 19 | 0.48%<br>(0.22-0.86%)          | 100%<br>(99-100%)        | 0.0064<br>(0.0024-0.013)                    | 0.61%<br>(0.4-0.9%)                  | 0.16%<br>(0.11-0.25%)               | 17<br>(11-26)       | 7400<br>(4600-11000)     |
| Bangladesh | 1990 | Male   | 20 to 24 | 0.78%<br>(0.31-1.4%)           | 99%<br>(99-100%)         | 0.014<br>(0.0055-0.025)                     | 1.5%<br>(1-2%)                       | 0.58%<br>(0.34-0.94%)               | 82<br>(45-130)      | 20000<br>(13000-29000)   |
| Bangladesh | 1990 | Male   | 25 to 29 | 1.1%<br>(0.55-1.9%)            | 99%<br>(98-99%)          | 0.02<br>(0.01-0.035)                        | 1.9%<br>(1.4-2.6%)                   | 1.1%<br>(0.59-1.7%)                 | 150<br>(81-240)     | 24000<br>(17000-33000)   |
| Bangladesh | 1990 | Male   | 30 to 34 | 1.4%<br>(0.69-2.5%)            | 99%<br>(98-99%)          | 0.027<br>(0.014-0.044)                      | 2.4%<br>(1.8-3.1%)                   | 1.9%<br>(1.2-2.9%)                  | 230<br>(150-350)    | 24000<br>(17000-33000)   |
| Bangladesh | 1990 | Male   | 35 to 39 | 1.7%<br>(0.85-2.6%)            | 98%<br>(97-99%)          | 0.032<br>(0.015-0.057)                      | 2.5%<br>(1.8-3.4%)                   | 2.4%<br>(1.5-3.7%)                  | 270<br>(160-410)    | 21000<br>(15000-28000)   |
| Bangladesh | 1990 | Male   | 40 to 44 | 1.7%<br>(0.92-2.7%)            | 98%<br>(97-99%)          | 0.032<br>(0.015-0.057)                      | 2.5%<br>(1.8-3.5%)                   | 2.7%<br>(1.7-4.1%)                  | 380<br>(240-580)    | 23000<br>(17000-33000)   |
| Bangladesh | 1990 | Male   | 45 to 49 | 1.5%<br>(0.73-2.5%)            | 98%<br>(98-99%)          | 0.03<br>(0.013-0.056)                       | 2.1%<br>(1.5-3.2%)                   | 2.3%<br>(1.4-3.7%)                  | 410<br>(250-670)    | 22000<br>(15000-32000)   |
| Bangladesh | 1990 | Male   | 50 to 54 | 1.4%<br>(0.73-2.3%)            | 99%<br>(98-99%)          | 0.029<br>(0.012-0.053)                      | 1.7%<br>(1.2-2.6%)                   | 1.8%<br>(1.1-3%)                    | 380<br>(230-650)    | 17000<br>(12000-26000)   |

| Location   | Year | Sex    | Age      | Prevalence of current drinkers | Prevalence of abstainers | Population average of standard drinks daily | Percent of total attributable deaths | Percent of total attributable DALYs | Attributable deaths | Attributable DALYs        |
|------------|------|--------|----------|--------------------------------|--------------------------|---------------------------------------------|--------------------------------------|-------------------------------------|---------------------|---------------------------|
| Bangladesh | 1990 | Male   | 55 to 59 | 1.3%<br>(0.66-2.1%)            | 99%<br>(98-99%)          | 0.027<br>(0.012-0.051)                      | 1.4%<br>(0.92-2.1%)                  | 1.5%<br>(0.88-2.4%)                 | 360<br>(210-600)    | 14000<br>(8800-22000)     |
| Bangladesh | 1990 | Male   | 60 to 64 | 1.2%<br>(0.62-2%)              | 99%<br>(98-99%)          | 0.025<br>(0.01-0.048)                       | 1.1%<br>(0.69-1.6%)                  | 1.1%<br>(0.66-1.8%)                 | 320<br>(190-520)    | 10000<br>(6600-16000)     |
| Bangladesh | 1990 | Male   | 65 to 69 | 1.2%<br>(0.58-1.9%)            | 99%<br>(98-99%)          | 0.022<br>(0.009-0.041)                      | 0.86%<br>(0.57-1.3%)                 | 0.92%<br>(0.57-1.4%)                | 290<br>(170-440)    | 7400<br>(4900-11000)      |
| Bangladesh | 1990 | Male   | 70 to 74 | 1.1%<br>(0.55-1.7%)            | 99%<br>(98-99%)          | 0.018<br>(0.0065-0.036)                     | 0.65%<br>(0.43-1%)                   | 0.69%<br>(0.43-1.1%)                | 220<br>(140-360)    | 4400<br>(2900-6800)       |
| Bangladesh | 1990 | Male   | 75 to 79 | 0.95%<br>(0.44-1.7%)           | 99%<br>(98-100%)         | 0.014<br>(0.005-0.03)                       | 0.46%<br>(0.29-0.7%)                 | 0.48%<br>(0.29-0.78%)               | 120<br>(71-200)     | 1900<br>(1200-2900)       |
| Bangladesh | 1990 | Male   | 80 to 84 | 0.85%<br>(0.42-1.4%)           | 99%<br>(99-100%)         | 0.011<br>(0.0043-0.023)                     | 0.37%<br>(0.23-0.55%)                | 0.4%<br>(0.24-0.62%)                | 54<br>(33-85)       | 610<br>(390-910)          |
| Bangladesh | 1990 | Male   | 85 to 89 | 0.83%<br>(0.4-1.5%)            | 99%<br>(99-100%)         | 0.01<br>(0.004-0.02)                        | 0.28%<br>(0.18-0.4%)                 | 0.29%<br>(0.18-0.44%)               | 24<br>(15-35)       | 190<br>(130-280)          |
| Bangladesh | 1990 | Male   | 90 to 94 | 0.91%<br>(0.45-1.5%)           | 99%<br>(98-100%)         | 0.01<br>(0.004-0.022)                       | 0.22%<br>(0.14-0.32%)                | 0.21%<br>(0.13-0.33%)               | 6.2<br>(3.8-10)     | 38<br>(26-57)             |
| Bangladesh | 1990 | Male   | 95 plus  | 1.1%<br>(0.49-2%)              | 99%<br>(98-100%)         | 0.011<br>(0.0033-0.024)                     | 0.21%<br>(0.13-0.32%)                | 0.17%<br>(0.088-0.3%)               | 1.2<br>(0.6-2)      | 5.7<br>(3.5-8.7)          |
| Bangladesh | 1995 | Female | All Ages | 0.29%<br>(0.2-0.41%)           | 100%<br>(100-100%)       | 0.028<br>(0.024-0.032)                      | 0.42%<br>(0.35-0.49%)                | 0.58%<br>(0.48-0.69%)               | 2600<br>(2100-3200) | 130000<br>(100000-150000) |
| Bangladesh | 1995 | Female | 15 to 19 | 0.25%<br>(0.1-0.48%)           | 100%<br>(100-100%)       | 0.016<br>(0.0053-0.033)                     | 0.37%<br>(0.24-0.52%)                | 0.12%<br>(0.064-0.22%)              | 14<br>(6.9-24)      | 5100<br>(3100-7600)       |
| Bangladesh | 1995 | Female | 20 to 24 | 0.26%<br>(0.088-0.51%)         | 100%<br>(99-100%)        | 0.031<br>(0.011-0.058)                      | 0.79%<br>(0.55-1.1%)                 | 0.33%<br>(0.19-0.52%)               | 41<br>(23-65)       | 11000<br>(7200-16000)     |
| Bangladesh | 1995 | Female | 25 to 29 | 0.27%<br>(0.084-0.57%)         | 100%<br>(99-100%)        | 0.044<br>(0.016-0.083)                      | 0.98%<br>(0.73-1.3%)                 | 0.6%<br>(0.37-0.92%)                | 74<br>(44-120)      | 13000<br>(9000-18000)     |
| Bangladesh | 1995 | Female | 30 to 34 | 0.3%<br>(0.081-0.63%)          | 100%<br>(99-100%)        | 0.057<br>(0.019-0.1)                        | 1.1%<br>(0.82-1.4%)                  | 0.93%<br>(0.63-1.3%)                | 110<br>(73-160)     | 13000<br>(9100-17000)     |
| Bangladesh | 1995 | Female | 35 to 39 | 0.34%<br>(0.11-0.63%)          | 100%<br>(99-100%)        | 0.065<br>(0.022-0.11)                       | 1.4%<br>(1-1.9%)                     | 1.6%<br>(1.1-2.4%)                  | 170<br>(110-250)    | 13000<br>(9700-18000)     |
| Bangladesh | 1995 | Female | 40 to 44 | 0.36%<br>(0.15-0.63%)          | 100%<br>(99-100%)        | 0.065<br>(0.029-0.12)                       | 1.2%<br>(0.9-1.5%)                   | 1.4%<br>(0.97-1.9%)                 | 130<br>(89-180)     | 8700<br>(6500-11000)      |
| Bangladesh | 1995 | Female | 45 to 49 | 0.37%<br>(0.16-0.62%)          | 100%<br>(99-100%)        | 0.06<br>(0.023-0.11)                        | 1.5%<br>(1.1-2%)                     | 2%<br>(1.3-2.8%)                    | 250<br>(170-350)    | 13000<br>(9200-18000)     |
| Bangladesh | 1995 | Female | 50 to 54 | 0.38%<br>(0.15-0.71%)          | 100%<br>(99-100%)        | 0.062<br>(0.022-0.12)                       | 1.5%<br>(1.1-2.1%)                   | 2%<br>(1.3-2.9%)                    | 340<br>(220-500)    | 15000<br>(10000-20000)    |
| Bangladesh | 1995 | Female | 55 to 59 | 0.4%<br>(0.16-0.76%)           | 100%<br>(99-100%)        | 0.07<br>(0.025-0.14)                        | 1.3%<br>(0.88-1.8%)                  | 1.6%<br>(1-2.3%)                    | 330<br>(210-480)    | 12000<br>(8000-17000)     |
| Bangladesh | 1995 | Female | 60 to 64 | 0.42%<br>(0.17-0.86%)          | 100%<br>(99-100%)        | 0.073<br>(0.026-0.16)                       | 0.91%<br>(0.62-1.3%)                 | 1%<br>(0.66-1.6%)                   | 260<br>(170-390)    | 8300<br>(5600-12000)      |
| Bangladesh | 1995 | Female | 65 to 69 | 0.45%<br>(0.18-0.8%)           | 100%<br>(99-100%)        | 0.066<br>(0.023-0.13)                       | 0.85%<br>(0.61-1.2%)                 | 0.98%<br>(0.67-1.4%)                | 290<br>(200-430)    | 7300<br>(5200-10000)      |
| Bangladesh | 1995 | Female | 70 to 74 | 0.46%<br>(0.21-0.8%)           | 100%<br>(99-100%)        | 0.056<br>(0.019-0.11)                       | 0.75%<br>(0.53-1.1%)                 | 0.86%<br>(0.59-1.2%)                | 270<br>(180-390)    | 5200<br>(3600-7400)       |

| Location   | Year | Sex    | Age      | Prevalence of current drinkers | Prevalence of abstainers | Population average of standard drinks daily | Percent of total attributable deaths | Percent of total attributable DALYs | Attributable deaths | Attributable DALYs        |
|------------|------|--------|----------|--------------------------------|--------------------------|---------------------------------------------|--------------------------------------|-------------------------------------|---------------------|---------------------------|
| Bangladesh | 1995 | Female | 75 to 79 | 0.47%<br>(0.18-0.88%)          | 100%<br>(99-100%)        | 0.05<br>(0.016-0.11)                        | 0.63%<br>(0.44-0.89%)                | 0.71%<br>(0.48-1%)                  | 170<br>(120-260)    | 2600<br>(1800-3800)       |
| Bangladesh | 1995 | Female | 80 to 84 | 0.48%<br>(0.2-0.88%)           | 100%<br>(99-100%)        | 0.047<br>(0.016-0.099)                      | 0.51%<br>(0.35-0.71%)                | 0.56%<br>(0.37-0.81%)               | 82<br>(53-120)      | 930<br>(630-1300)         |
| Bangladesh | 1995 | Female | 85 to 89 | 0.53%<br>(0.22-1%)             | 99%<br>(99-100%)         | 0.046<br>(0.016-0.1)                        | 0.43%<br>(0.29-0.61%)                | 0.46%<br>(0.3-0.67%)                | 39<br>(25-58)       | 320<br>(220-460)          |
| Bangladesh | 1995 | Female | 90 to 94 | 0.63%<br>(0.26-1.2%)           | 99%<br>(99-100%)         | 0.05<br>(0.018-0.11)                        | 0.39%<br>(0.26-0.55%)                | 0.4%<br>(0.25-0.6%)                 | 12<br>(7.7-18)      | 73<br>(49-110)            |
| Bangladesh | 1995 | Female | 95 plus  | 0.8%<br>(0.31-1.6%)            | 99%<br>(98-100%)         | 0.055<br>(0.017-0.13)                       | 0.39%<br>(0.25-0.58%)                | 0.36%<br>(0.21-0.6%)                | 3<br>(1.7-5)        | 13<br>(8.2-19)            |
| Bangladesh | 1995 | Male   | All Ages | 0.77%<br>(0.59-1%)             | 99%<br>(99-99%)          | 0.017<br>(0.014-0.021)                      | 0.68%<br>(0.56-0.84%)                | 0.72%<br>(0.58-1%)                  | 3700<br>(2900-5300) | 220000<br>(180000-280000) |
| Bangladesh | 1995 | Male   | 15 to 19 | 0.48%<br>(0.22-0.83%)          | 100%<br>(99-100%)        | 0.0084<br>(0.0031-0.017)                    | 0.67%<br>(0.44-0.95%)                | 0.18%<br>(0.12-0.28%)               | 19<br>(13-28)       | 8300<br>(5300-13000)      |
| Bangladesh | 1995 | Male   | 20 to 24 | 0.78%<br>(0.31-1.4%)           | 99%<br>(99-100%)         | 0.018<br>(0.0072-0.034)                     | 1.6%<br>(1.1-2.1%)                   | 0.63%<br>(0.37-0.97%)               | 82<br>(48-130)      | 21000<br>(14000-30000)    |
| Bangladesh | 1995 | Male   | 25 to 29 | 1.1%<br>(0.52-2%)              | 99%<br>(98-99%)          | 0.027<br>(0.013-0.046)                      | 2.1%<br>(1.6-2.8%)                   | 1.2%<br>(0.69-1.9%)                 | 160<br>(94-270)     | 28000<br>(19000-37000)    |
| Bangladesh | 1995 | Male   | 30 to 34 | 1.4%<br>(0.66-2.5%)            | 99%<br>(97-99%)          | 0.036<br>(0.018-0.058)                      | 2.6%<br>(1.9-3.4%)                   | 2%<br>(1.4-3.1%)                    | 290<br>(190-430)    | 32000<br>(23000-42000)    |
| Bangladesh | 1995 | Male   | 35 to 39 | 1.6%<br>(0.81-2.6%)            | 98%<br>(97-99%)          | 0.042<br>(0.02-0.076)                       | 2.6%<br>(2-3.6%)                     | 2.5%<br>(1.6-3.9%)                  | 340<br>(210-530)    | 27000<br>(20000-37000)    |
| Bangladesh | 1995 | Male   | 40 to 44 | 1.7%<br>(0.88-2.7%)            | 98%<br>(97-99%)          | 0.043<br>(0.019-0.078)                      | 2.6%<br>(1.9-3.6%)                   | 2.8%<br>(1.9-4.3%)                  | 350<br>(230-520)    | 22000<br>(16000-30000)    |
| Bangladesh | 1995 | Male   | 45 to 49 | 1.5%<br>(0.72-2.5%)            | 98%<br>(98-99%)          | 0.041<br>(0.016-0.076)                      | 2.2%<br>(1.6-3.4%)                   | 2.4%<br>(1.5-3.9%)                  | 400<br>(240-640)    | 21000<br>(15000-31000)    |
| Bangladesh | 1995 | Male   | 50 to 54 | 1.4%<br>(0.73-2.3%)            | 99%<br>(98-99%)          | 0.038<br>(0.016-0.071)                      | 1.8%<br>(1.2-2.7%)                   | 1.9%<br>(1.2-3.3%)                  | 410<br>(250-690)    | 19000<br>(13000-29000)    |
| Bangladesh | 1995 | Male   | 55 to 59 | 1.3%<br>(0.66-2.1%)            | 99%<br>(98-99%)          | 0.036<br>(0.016-0.068)                      | 1.5%<br>(1-2.2%)                     | 1.6%<br>(0.98-2.6%)                 | 400<br>(240-660)    | 16000<br>(10000-23000)    |
| Bangladesh | 1995 | Male   | 60 to 64 | 1.2%<br>(0.6-2.1%)             | 99%<br>(98-99%)          | 0.033<br>(0.013-0.062)                      | 1.2%<br>(0.77-1.8%)                  | 1.2%<br>(0.73-2%)                   | 370<br>(220-610)    | 12000<br>(7700-18000)     |
| Bangladesh | 1995 | Male   | 65 to 69 | 1.2%<br>(0.6-1.9%)             | 99%<br>(98-99%)          | 0.029<br>(0.011-0.054)                      | 0.93%<br>(0.64-1.3%)                 | 1%<br>(0.65-1.5%)                   | 330<br>(210-500)    | 8500<br>(5700-12000)      |
| Bangladesh | 1995 | Male   | 70 to 74 | 1.1%<br>(0.56-1.7%)            | 99%<br>(98-99%)          | 0.023<br>(0.0088-0.048)                     | 0.71%<br>(0.47-1.1%)                 | 0.76%<br>(0.47-1.2%)                | 260<br>(160-410)    | 5200<br>(3500-7800)       |
| Bangladesh | 1995 | Male   | 75 to 79 | 0.94%<br>(0.44-1.7%)           | 99%<br>(98-100%)         | 0.019<br>(0.0066-0.04)                      | 0.5%<br>(0.33-0.75%)                 | 0.54%<br>(0.33-0.87%)               | 150<br>(91-240)     | 2300<br>(1500-3500)       |
| Bangladesh | 1995 | Male   | 80 to 84 | 0.84%<br>(0.41-1.4%)           | 99%<br>(99-100%)         | 0.015<br>(0.0055-0.03)                      | 0.4%<br>(0.27-0.59%)                 | 0.44%<br>(0.28-0.66%)               | 74<br>(47-110)      | 830<br>(550-1200)         |
| Bangladesh | 1995 | Male   | 85 to 89 | 0.82%<br>(0.38-1.4%)           | 99%<br>(99-100%)         | 0.013<br>(0.0053-0.027)                     | 0.31%<br>(0.21-0.44%)                | 0.33%<br>(0.21-0.49%)               | 33<br>(21-48)       | 270<br>(180-370)          |
| Bangladesh | 1995 | Male   | 90 to 94 | 0.89%<br>(0.45-1.5%)           | 99%<br>(99-100%)         | 0.013<br>(0.0051-0.028)                     | 0.24%<br>(0.16-0.35%)                | 0.24%<br>(0.15-0.37%)               | 9.5<br>(5.8-14)     | 57<br>(38-83)             |

| Location   | Year | Sex    | Age      | Prevalence of current drinkers | Prevalence of abstainers | Population average of standard drinks daily | Percent of total attributable deaths | Percent of total attributable DALYs | Attributable deaths | Attributable DALYs        |
|------------|------|--------|----------|--------------------------------|--------------------------|---------------------------------------------|--------------------------------------|-------------------------------------|---------------------|---------------------------|
| Bangladesh | 1995 | Male   | 95 plus  | 1.1%<br>(0.5-1.9%)             | 99%<br>(98-99%)          | 0.014<br>(0.0044-0.031)                     | 0.24%<br>(0.16-0.35%)                | 0.2%<br>(0.11-0.34%)                | 1.9<br>(1.1-3.2)    | 9<br>(5.8-14)             |
| Bangladesh | 2000 | Female | All Ages | 0.29%<br>(0.21-0.42%)          | 100%<br>(100-100%)       | 0.037<br>(0.031-0.042)                      | 0.49%<br>(0.42-0.57%)                | 0.64%<br>(0.53-0.75%)               | 2500<br>(2100-3100) | 130000<br>(110000-160000) |
| Bangladesh | 2000 | Female | 15 to 19 | 0.25%<br>(0.1-0.5%)            | 100%<br>(100-100%)       | 0.02<br>(0.0066-0.041)                      | 0.43%<br>(0.28-0.64%)                | 0.15%<br>(0.081-0.27%)              | 14<br>(6.9-24)      | 5600<br>(3500-8700)       |
| Bangladesh | 2000 | Female | 20 to 24 | 0.26%<br>(0.092-0.51%)         | 100%<br>(99-100%)        | 0.038<br>(0.015-0.071)                      | 0.9%<br>(0.61-1.3%)                  | 0.36%<br>(0.22-0.58%)               | 38<br>(21-62)       | 12000<br>(7900-18000)     |
| Bangladesh | 2000 | Female | 25 to 29 | 0.27%<br>(0.09-0.59%)          | 100%<br>(99-100%)        | 0.055<br>(0.022-0.11)                       | 1.1%<br>(0.8-1.4%)                   | 0.64%<br>(0.38-0.99%)               | 61<br>(37-96)       | 13000<br>(8900-18000)     |
| Bangladesh | 2000 | Female | 30 to 34 | 0.3%<br>(0.084-0.63%)          | 100%<br>(99-100%)        | 0.07<br>(0.024-0.13)                        | 1.1%<br>(0.87-1.5%)                  | 0.97%<br>(0.66-1.4%)                | 98<br>(66-140)      | 13000<br>(9700-18000)     |
| Bangladesh | 2000 | Female | 35 to 39 | 0.34%<br>(0.1-0.61%)           | 100%<br>(99-100%)        | 0.08<br>(0.03-0.13)                         | 1.4%<br>(1.1-1.8%)                   | 1.7%<br>(1.1-2.4%)                  | 180<br>(120-270)    | 16000<br>(11000-20000)    |
| Bangladesh | 2000 | Female | 40 to 44 | 0.36%<br>(0.15-0.64%)          | 100%<br>(99-100%)        | 0.081<br>(0.035-0.15)                       | 1.2%<br>(0.89-1.5%)                  | 1.4%<br>(0.98-1.9%)                 | 140<br>(97-190)     | 10000<br>(7800-14000)     |
| Bangladesh | 2000 | Female | 45 to 49 | 0.37%<br>(0.16-0.65%)          | 100%<br>(99-100%)        | 0.075<br>(0.029-0.14)                       | 1.4%<br>(1.1-1.9%)                   | 1.9%<br>(1.3-2.7%)                  | 180<br>(130-260)    | 10000<br>(7400-13000)     |
| Bangladesh | 2000 | Female | 50 to 54 | 0.39%<br>(0.15-0.73%)          | 100%<br>(99-100%)        | 0.077<br>(0.027-0.16)                       | 1.5%<br>(1.1-2%)                     | 2%<br>(1.3-2.9%)                    | 280<br>(190-400)    | 13000<br>(9000-17000)     |
| Bangladesh | 2000 | Female | 55 to 59 | 0.4%<br>(0.16-0.75%)           | 100%<br>(99-100%)        | 0.087<br>(0.031-0.17)                       | 1.3%<br>(0.91-1.8%)                  | 1.7%<br>(1.1-2.4%)                  | 320<br>(200-480)    | 12000<br>(8300-17000)     |
| Bangladesh | 2000 | Female | 60 to 64 | 0.43%<br>(0.19-0.82%)          | 100%<br>(99-100%)        | 0.09<br>(0.032-0.18)                        | 0.95%<br>(0.66-1.3%)                 | 1.1%<br>(0.74-1.7%)                 | 260<br>(170-400)    | 8700<br>(6000-12000)      |
| Bangladesh | 2000 | Female | 65 to 69 | 0.45%<br>(0.19-0.78%)          | 100%<br>(99-100%)        | 0.081<br>(0.029-0.16)                       | 0.86%<br>(0.64-1.2%)                 | 1%<br>(0.72-1.4%)                   | 290<br>(190-410)    | 7300<br>(5300-10000)      |
| Bangladesh | 2000 | Female | 70 to 74 | 0.46%<br>(0.2-0.8%)            | 100%<br>(99-100%)        | 0.069<br>(0.025-0.14)                       | 0.75%<br>(0.54-1.1%)                 | 0.89%<br>(0.61-1.3%)                | 280<br>(180-410)    | 5500<br>(3800-7900)       |
| Bangladesh | 2000 | Female | 75 to 79 | 0.47%<br>(0.2-0.86%)           | 100%<br>(99-100%)        | 0.061<br>(0.02-0.13)                        | 0.59%<br>(0.42-0.84%)                | 0.68%<br>(0.46-0.99%)               | 190<br>(130-270)    | 2900<br>(2000-4100)       |
| Bangladesh | 2000 | Female | 80 to 84 | 0.48%<br>(0.19-0.9%)           | 100%<br>(99-100%)        | 0.058<br>(0.019-0.12)                       | 0.51%<br>(0.35-0.73%)                | 0.58%<br>(0.38-0.84%)               | 110<br>(73-160)     | 1300<br>(860-1800)        |
| Bangladesh | 2000 | Female | 85 to 89 | 0.53%<br>(0.22-1%)             | 99%<br>(99-100%)         | 0.058<br>(0.02-0.13)                        | 0.46%<br>(0.32-0.68%)                | 0.5%<br>(0.32-0.76%)                | 57<br>(37-88)       | 470<br>(320-700)          |
| Bangladesh | 2000 | Female | 90 to 94 | 0.63%<br>(0.26-1.1%)           | 99%<br>(99-100%)         | 0.061<br>(0.023-0.14)                       | 0.43%<br>(0.29-0.63%)                | 0.45%<br>(0.28-0.69%)               | 20<br>(12-30)       | 120<br>(78-170)           |
| Bangladesh | 2000 | Female | 95 plus  | 0.78%<br>(0.28-1.5%)           | 99%<br>(98-100%)         | 0.068<br>(0.02-0.16)                        | 0.45%<br>(0.29-0.69%)                | 0.42%<br>(0.24-0.71%)               | 4.9<br>(2.8-8.2)    | 20<br>(13-32)             |
| Bangladesh | 2000 | Male   | All Ages | 0.86%<br>(0.66-1.1%)           | 99%<br>(99-99%)          | 0.023<br>(0.018-0.028)                      | 0.88%<br>(0.73-1%)                   | 0.9%<br>(0.73-1.2%)                 | 4300<br>(3500-5700) | 260000<br>(210000-320000) |
| Bangladesh | 2000 | Male   | 15 to 19 | 0.53%<br>(0.25-0.9%)           | 99%<br>(99-100%)         | 0.011<br>(0.0042-0.021)                     | 0.75%<br>(0.49-1.1%)                 | 0.21%<br>(0.14-0.3%)                | 20<br>(14-29)       | 9400<br>(5700-14000)      |
| Bangladesh | 2000 | Male   | 20 to 24 | 0.92%<br>(0.39-1.5%)           | 99%<br>(98-100%)         | 0.025<br>(0.011-0.046)                      | 1.8%<br>(1.3-2.4%)                   | 0.72%<br>(0.44-1.1%)                | 89<br>(53-140)      | 24000<br>(16000-35000)    |

| Location   | Year | Sex    | Age      | Prevalence of current drinkers | Prevalence of abstainers | Population average of standard drinks daily | Percent of total attributable deaths | Percent of total attributable DALYs | Attributable deaths | Attributable DALYs        |
|------------|------|--------|----------|--------------------------------|--------------------------|---------------------------------------------|--------------------------------------|-------------------------------------|---------------------|---------------------------|
| Bangladesh | 2000 | Male   | 25 to 29 | 1.3%<br>(0.64-2%)              | 99%<br>(98-99%)          | 0.037<br>(0.018-0.061)                      | 2.4%<br>(1.8-3.1%)                   | 1.4%<br>(0.83-2.2%)                 | 180<br>(100-280)    | 30000<br>(21000-41000)    |
| Bangladesh | 2000 | Male   | 30 to 34 | 1.5%<br>(0.74-2.4%)            | 99%<br>(98-99%)          | 0.044<br>(0.025-0.071)                      | 2.8%<br>(2.2-3.6%)                   | 2.3%<br>(1.6-3.4%)                  | 320<br>(220-460)    | 36000<br>(26000-48000)    |
| Bangladesh | 2000 | Male   | 35 to 39 | 1.7%<br>(0.92-2.5%)            | 98%<br>(97-99%)          | 0.051<br>(0.027-0.089)                      | 2.9%<br>(2.2-3.9%)                   | 2.9%<br>(1.9-4.3%)                  | 440<br>(280-660)    | 36000<br>(26000-48000)    |
| Bangladesh | 2000 | Male   | 40 to 44 | 1.7%<br>(1-2.7%)               | 98%<br>(97-99%)          | 0.054<br>(0.025-0.093)                      | 2.9%<br>(2.2-3.9%)                   | 3.3%<br>(2.2-4.7%)                  | 470<br>(310-670)    | 30000<br>(22000-40000)    |
| Bangladesh | 2000 | Male   | 45 to 49 | 1.5%<br>(0.78-2.4%)            | 98%<br>(98-99%)          | 0.048<br>(0.02-0.089)                       | 2.5%<br>(1.8-3.5%)                   | 2.8%<br>(1.8-4.4%)                  | 380<br>(240-600)    | 21000<br>(15000-30000)    |
| Bangladesh | 2000 | Male   | 50 to 54 | 1.3%<br>(0.72-2.2%)            | 99%<br>(98-99%)          | 0.044<br>(0.019-0.083)                      | 2%<br>(1.4-2.8%)                     | 2.2%<br>(1.5-3.4%)                  | 420<br>(270-660)    | 20000<br>(14000-28000)    |
| Bangladesh | 2000 | Male   | 55 to 59 | 1.4%<br>(0.75-2.2%)            | 99%<br>(98-99%)          | 0.048<br>(0.021-0.086)                      | 1.6%<br>(1.1-2.4%)                   | 1.8%<br>(1.1-2.9%)                  | 450<br>(280-740)    | 18000<br>(12000-26000)    |
| Bangladesh | 2000 | Male   | 60 to 64 | 1.4%<br>(0.79-2.3%)            | 99%<br>(98-99%)          | 0.047<br>(0.02-0.087)                       | 1.3%<br>(0.9-1.9%)                   | 1.5%<br>(0.9-2.3%)                  | 450<br>(270-700)    | 14000<br>(9500-21000)     |
| Bangladesh | 2000 | Male   | 65 to 69 | 1.3%<br>(0.62-2%)              | 99%<br>(98-99%)          | 0.037<br>(0.015-0.07)                       | 1.1%<br>(0.74-1.5%)                  | 1.2%<br>(0.76-1.7%)                 | 400<br>(260-600)    | 10000<br>(7300-15000)     |
| Bangladesh | 2000 | Male   | 70 to 74 | 1.1%<br>(0.56-1.7%)            | 99%<br>(98-99%)          | 0.028<br>(0.011-0.055)                      | 0.76%<br>(0.51-1.1%)                 | 0.83%<br>(0.52-1.3%)                | 310<br>(190-470)    | 6300<br>(4200-9300)       |
| Bangladesh | 2000 | Male   | 75 to 79 | 0.93%<br>(0.45-1.7%)           | 99%<br>(98-100%)         | 0.021<br>(0.0078-0.046)                     | 0.57%<br>(0.38-0.82%)                | 0.62%<br>(0.39-0.93%)               | 210<br>(130-310)    | 3200<br>(2100-4700)       |
| Bangladesh | 2000 | Male   | 80 to 84 | 0.82%<br>(0.4-1.3%)            | 99%<br>(99-100%)         | 0.017<br>(0.0066-0.035)                     | 0.47%<br>(0.32-0.67%)                | 0.52%<br>(0.34-0.77%)               | 120<br>(80-180)     | 1400<br>(930-2000)        |
| Bangladesh | 2000 | Male   | 85 to 89 | 0.79%<br>(0.36-1.4%)           | 99%<br>(99-100%)         | 0.015<br>(0.0058-0.032)                     | 0.39%<br>(0.27-0.53%)                | 0.42%<br>(0.27-0.6%)                | 57<br>(37-82)       | 460<br>(310-630)          |
| Bangladesh | 2000 | Male   | 90 to 94 | 0.87%<br>(0.43-1.4%)           | 99%<br>(99-100%)         | 0.015<br>(0.006-0.032)                      | 0.32%<br>(0.22-0.46%)                | 0.33%<br>(0.21-0.5%)                | 17<br>(11-26)       | 100<br>(70-150)           |
| Bangladesh | 2000 | Male   | 95 plus  | 1%<br>(0.49-1.9%)              | 99%<br>(98-100%)         | 0.016<br>(0.0052-0.036)                     | 0.33%<br>(0.21-0.46%)                | 0.3%<br>(0.17-0.47%)                | 4<br>(2.3-6.3)      | 17<br>(11-25)             |
| Bangladesh | 2005 | Female | All Ages | 0.3%<br>(0.21-0.41%)           | 100%<br>(100-100%)       | 0.044<br>(0.037-0.051)                      | 0.58%<br>(0.49-0.67%)                | 0.72%<br>(0.6-0.86%)                | 2700<br>(2200-3300) | 140000<br>(120000-170000) |
| Bangladesh | 2005 | Female | 15 to 19 | 0.26%<br>(0.1-0.47%)           | 100%<br>(100-100%)       | 0.022<br>(0.0074-0.045)                     | 0.51%<br>(0.33-0.73%)                | 0.22%<br>(0.13-0.35%)               | 16<br>(8.9-26)      | 6000<br>(3600-9200)       |
| Bangladesh | 2005 | Female | 20 to 24 | 0.26%<br>(0.092-0.52%)         | 100%<br>(99-100%)        | 0.042<br>(0.016-0.08)                       | 1%<br>(0.71-1.4%)                    | 0.45%<br>(0.27-0.7%)                | 40<br>(23-64)       | 13000<br>(8500-20000)     |
| Bangladesh | 2005 | Female | 25 to 29 | 0.27%<br>(0.081-0.55%)         | 100%<br>(99-100%)        | 0.061<br>(0.023-0.12)                       | 1.2%<br>(0.89-1.6%)                  | 0.78%<br>(0.48-1.2%)                | 69<br>(41-110)      | 15000<br>(10000-21000)    |
| Bangladesh | 2005 | Female | 30 to 34 | 0.31%<br>(0.07-0.64%)          | 100%<br>(99-100%)        | 0.078<br>(0.024-0.14)                       | 1.2%<br>(0.93-1.6%)                  | 1.1%<br>(0.75-1.6%)                 | 98<br>(66-150)      | 14000<br>(10000-19000)    |
| Bangladesh | 2005 | Female | 35 to 39 | 0.35%<br>(0.1-0.65%)           | 100%<br>(99-100%)        | 0.09<br>(0.033-0.15)                        | 1.4%<br>(1.1-1.9%)                   | 1.8%<br>(1.2-2.6%)                  | 200<br>(130-290)    | 17000<br>(13000-23000)    |
| Bangladesh | 2005 | Female | 40 to 44 | 0.38%<br>(0.15-0.67%)          | 100%<br>(99-100%)        | 0.091<br>(0.04-0.16)                        | 1.1%<br>(0.87-1.5%)                  | 1.4%<br>(0.96-2%)                   | 160<br>(110-240)    | 13000<br>(9700-17000)     |



| Location   | Year | Sex    | Age      | Prevalence of current drinkers | Prevalence of abstainers | Population average of standard drinks daily | Percent of total attributable deaths | Percent of total attributable DALYs | Attributable deaths | Attributable DALYs        |
|------------|------|--------|----------|--------------------------------|--------------------------|---------------------------------------------|--------------------------------------|-------------------------------------|---------------------|---------------------------|
| Bangladesh | 2005 | Female | 45 to 49 | 0.38%<br>(0.16-0.69%)          | 100%<br>(99-100%)        | 0.085<br>(0.033-0.16)                       | 1.4%<br>(1-1.9%)                     | 2%<br>(1.4-2.8%)                    | 240<br>(160-330)    | 13000<br>(9600-18000)     |
| Bangladesh | 2005 | Female | 50 to 54 | 0.4%<br>(0.16-0.73%)           | 100%<br>(99-100%)        | 0.087<br>(0.03-0.17)                        | 1.5%<br>(1.1-2%)                     | 2%<br>(1.4-2.9%)                    | 230<br>(150-330)    | 11000<br>(7800-15000)     |
| Bangladesh | 2005 | Female | 55 to 59 | 0.41%<br>(0.17-0.78%)          | 100%<br>(99-100%)        | 0.098<br>(0.035-0.2)                        | 1.3%<br>(0.91-1.7%)                  | 1.7%<br>(1.1-2.4%)                  | 290<br>(190-420)    | 11000<br>(7900-16000)     |
| Bangladesh | 2005 | Female | 60 to 64 | 0.44%<br>(0.18-0.85%)          | 100%<br>(99-100%)        | 0.1<br>(0.035-0.22)                         | 0.96%<br>(0.67-1.3%)                 | 1.2%<br>(0.75-1.7%)                 | 280<br>(180-400)    | 9300<br>(6400-13000)      |
| Bangladesh | 2005 | Female | 65 to 69 | 0.46%<br>(0.2-0.81%)           | 100%<br>(99-100%)        | 0.092<br>(0.033-0.18)                       | 0.87%<br>(0.63-1.2%)                 | 1.1%<br>(0.74-1.5%)                 | 290<br>(200-420)    | 7600<br>(5500-11000)      |
| Bangladesh | 2005 | Female | 70 to 74 | 0.47%<br>(0.21-0.84%)          | 100%<br>(99-100%)        | 0.078<br>(0.027-0.16)                       | 0.75%<br>(0.53-1.1%)                 | 0.92%<br>(0.63-1.3%)                | 280<br>(190-420)    | 5700<br>(3900-8100)       |
| Bangladesh | 2005 | Female | 75 to 79 | 0.49%<br>(0.19-0.88%)          | 100%<br>(99-100%)        | 0.069<br>(0.022-0.15)                       | 0.61%<br>(0.42-0.89%)                | 0.72%<br>(0.48-1.1%)                | 220<br>(150-340)    | 3500<br>(2400-5100)       |
| Bangladesh | 2005 | Female | 80 to 84 | 0.5%<br>(0.22-0.94%)           | 100%<br>(99-100%)        | 0.065<br>(0.022-0.14)                       | 0.54%<br>(0.37-0.8%)                 | 0.63%<br>(0.42-0.94%)               | 160<br>(110-250)    | 1900<br>(1300-2800)       |
| Bangladesh | 2005 | Female | 85 to 89 | 0.55%<br>(0.22-1%)             | 99%<br>(99-100%)         | 0.064<br>(0.023-0.14)                       | 0.5%<br>(0.35-0.73%)                 | 0.56%<br>(0.36-0.85%)               | 96<br>(63-150)      | 790<br>(530-1200)         |
| Bangladesh | 2005 | Female | 90 to 94 | 0.64%<br>(0.27-1.2%)           | 99%<br>(99-100%)         | 0.068<br>(0.025-0.15)                       | 0.48%<br>(0.32-0.7%)                 | 0.52%<br>(0.33-0.79%)               | 35<br>(22-54)       | 200<br>(140-300)          |
| Bangladesh | 2005 | Female | 95 plus  | 0.79%<br>(0.31-1.6%)           | 99%<br>(98-100%)         | 0.074<br>(0.024-0.18)                       | 0.51%<br>(0.32-0.8%)                 | 0.5%<br>(0.29-0.85%)                | 8.8<br>(5.1-15)     | 36<br>(22-57)             |
| Bangladesh | 2005 | Male   | All Ages | 0.92%<br>(0.72-1.2%)           | 99%<br>(99-99%)          | 0.027<br>(0.022-0.034)                      | 1%<br>(0.86-1.2%)                    | 0.99%<br>(0.81-1.2%)                | 4800<br>(3900-6100) | 290000<br>(240000-360000) |
| Bangladesh | 2005 | Male   | 15 to 19 | 0.55%<br>(0.26-0.92%)          | 99%<br>(99-100%)         | 0.012<br>(0.0047-0.024)                     | 0.78%<br>(0.53-1.1%)                 | 0.21%<br>(0.14-0.31%)               | 20<br>(13-29)       | 9900<br>(6200-15000)      |
| Bangladesh | 2005 | Male   | 20 to 24 | 0.95%<br>(0.42-1.6%)           | 99%<br>(98-100%)         | 0.029<br>(0.012-0.053)                      | 1.9%<br>(1.3-2.6%)                   | 0.75%<br>(0.46-1.1%)                | 93<br>(57-140)      | 27000<br>(18000-39000)    |
| Bangladesh | 2005 | Male   | 25 to 29 | 1.3%<br>(0.68-2.1%)            | 99%<br>(98-99%)          | 0.042<br>(0.021-0.072)                      | 2.5%<br>(1.9-3.3%)                   | 1.5%<br>(0.89-2.3%)                 | 190<br>(110-290)    | 34000<br>(24000-46000)    |
| Bangladesh | 2005 | Male   | 30 to 34 | 1.5%<br>(0.78-2.7%)            | 98%<br>(97-99%)          | 0.051<br>(0.029-0.08)                       | 2.9%<br>(2.2-3.7%)                   | 2.3%<br>(1.6-3.3%)                  | 300<br>(210-440)    | 36000<br>(26000-48000)    |
| Bangladesh | 2005 | Male   | 35 to 39 | 1.8%<br>(0.96-2.7%)            | 98%<br>(97-99%)          | 0.059<br>(0.032-0.1)                        | 2.9%<br>(2.2-3.9%)                   | 2.9%<br>(1.9-4.4%)                  | 450<br>(290-670)    | 39000<br>(28000-52000)    |
| Bangladesh | 2005 | Male   | 40 to 44 | 1.8%<br>(1.1-2.8%)             | 98%<br>(97-99%)          | 0.062<br>(0.03-0.1)                         | 2.8%<br>(2.2-3.8%)                   | 3.1%<br>(2.2-4.5%)                  | 540<br>(370-770)    | 37000<br>(27000-49000)    |
| Bangladesh | 2005 | Male   | 45 to 49 | 1.6%<br>(0.81-2.5%)            | 98%<br>(97-99%)          | 0.056<br>(0.023-0.1)                        | 2.4%<br>(1.8-3.4%)                   | 2.8%<br>(1.8-4.3%)                  | 480<br>(310-730)    | 27000<br>(19000-38000)    |
| Bangladesh | 2005 | Male   | 50 to 54 | 1.4%<br>(0.76-2.3%)            | 99%<br>(98-99%)          | 0.051<br>(0.022-0.095)                      | 2%<br>(1.4-2.9%)                     | 2.3%<br>(1.5-3.6%)                  | 390<br>(250-620)    | 19000<br>(13000-27000)    |
| Bangladesh | 2005 | Male   | 55 to 59 | 1.5%<br>(0.79-2.3%)            | 99%<br>(98-99%)          | 0.055<br>(0.025-0.1)                        | 1.6%<br>(1.1-2.4%)                   | 1.8%<br>(1.2-2.8%)                  | 440<br>(290-690)    | 18000<br>(12000-25000)    |
| Bangladesh | 2005 | Male   | 60 to 64 | 1.5%<br>(0.84-2.5%)            | 98%<br>(98-99%)          | 0.055<br>(0.023-0.1)                        | 1.3%<br>(0.92-1.9%)                  | 1.5%<br>(0.92-2.2%)                 | 480<br>(300-740)    | 16000<br>(11000-23000)    |

| Location   | Year | Sex    | Age      | Prevalence of current drinkers | Prevalence of abstainers | Population average of standard drinks daily | Percent of total attributable deaths | Percent of total attributable DALYs | Attributable deaths | Attributable DALYs        |
|------------|------|--------|----------|--------------------------------|--------------------------|---------------------------------------------|--------------------------------------|-------------------------------------|---------------------|---------------------------|
| Bangladesh | 2005 | Male   | 65 to 69 | 1.3%<br>(0.68-2%)              | 99%<br>(98-99%)          | 0.043<br>(0.017-0.078)                      | 1.1%<br>(0.78-1.5%)                  | 1.2%<br>(0.79-1.7%)                 | 440<br>(300-650)    | 12000<br>(8400-16000)     |
| Bangladesh | 2005 | Male   | 70 to 74 | 1.1%<br>(0.6-1.8%)             | 99%<br>(98-99%)          | 0.031<br>(0.012-0.063)                      | 0.8%<br>(0.56-1.1%)                  | 0.87%<br>(0.57-1.3%)                | 360<br>(230-530)    | 7500<br>(5100-11000)      |
| Bangladesh | 2005 | Male   | 75 to 79 | 0.95%<br>(0.47-1.7%)           | 99%<br>(98-100%)         | 0.024<br>(0.0089-0.053)                     | 0.63%<br>(0.44-0.9%)                 | 0.7%<br>(0.45-1%)                   | 280<br>(180-410)    | 4300<br>(2900-6000)       |
| Bangladesh | 2005 | Male   | 80 to 84 | 0.84%<br>(0.4-1.4%)            | 99%<br>(99-100%)         | 0.02<br>(0.0072-0.04)                       | 0.57%<br>(0.37-0.81%)                | 0.64%<br>(0.4-0.94%)                | 220<br>(130-310)    | 2400<br>(1500-3400)       |
| Bangladesh | 2005 | Male   | 85 to 89 | 0.82%<br>(0.38-1.5%)           | 99%<br>(99-100%)         | 0.017<br>(0.0067-0.036)                     | 0.49%<br>(0.33-0.67%)                | 0.54%<br>(0.34-0.75%)               | 110<br>(67-150)     | 850<br>(560-1100)         |
| Bangladesh | 2005 | Male   | 90 to 94 | 0.9%<br>(0.44-1.5%)            | 99%<br>(99-100%)         | 0.017<br>(0.0066-0.035)                     | 0.42%<br>(0.27-0.61%)                | 0.45%<br>(0.26-0.68%)               | 34<br>(19-51)       | 190<br>(120-270)          |
| Bangladesh | 2005 | Male   | 95 plus  | 1.1%<br>(0.5-2%)               | 99%<br>(98-99%)          | 0.018<br>(0.006-0.041)                      | 0.44%<br>(0.27-0.62%)                | 0.43%<br>(0.22-0.65%)               | 7.9<br>(4.1-12)     | 32<br>(19-46)             |
| Bangladesh | 2010 | Female | All Ages | 0.31%<br>(0.23-0.43%)          | 100%<br>(100-100%)       | 0.048<br>(0.041-0.056)                      | 0.64%<br>(0.54-0.74%)                | 0.72%<br>(0.6-0.86%)                | 2600<br>(2200-3100) | 140000<br>(120000-170000) |
| Bangladesh | 2010 | Female | 15 to 19 | 0.26%<br>(0.1-0.49%)           | 100%<br>(100-100%)       | 0.022<br>(0.0075-0.047)                     | 0.56%<br>(0.36-0.84%)                | 0.26%<br>(0.15-0.41%)               | 14<br>(8.1-24)      | 6000<br>(3600-9300)       |
| Bangladesh | 2010 | Female | 20 to 24 | 0.26%<br>(0.09-0.53%)          | 100%<br>(99-100%)        | 0.043<br>(0.016-0.082)                      | 1.1%<br>(0.79-1.6%)                  | 0.47%<br>(0.29-0.72%)               | 33<br>(19-51)       | 14000<br>(8700-21000)     |
| Bangladesh | 2010 | Female | 25 to 29 | 0.28%<br>(0.089-0.58%)         | 100%<br>(99-100%)        | 0.064<br>(0.025-0.13)                       | 1.3%<br>(0.94-1.7%)                  | 0.78%<br>(0.5-1.1%)                 | 60<br>(38-88)       | 15000<br>(11000-22000)    |
| Bangladesh | 2010 | Female | 30 to 34 | 0.32%<br>(0.09-0.65%)          | 100%<br>(99-100%)        | 0.083<br>(0.03-0.14)                        | 1.2%<br>(0.92-1.6%)                  | 1%<br>(0.67-1.4%)                   | 85<br>(56-120)      | 15000<br>(10000-21000)    |
| Bangladesh | 2010 | Female | 35 to 39 | 0.37%<br>(0.12-0.65%)          | 100%<br>(99-100%)        | 0.095<br>(0.038-0.16)                       | 1.3%<br>(1-1.7%)                     | 1.5%<br>(1-2.2%)                    | 150<br>(100-210)    | 15000<br>(11000-20000)    |
| Bangladesh | 2010 | Female | 40 to 44 | 0.39%<br>(0.17-0.7%)           | 100%<br>(99-100%)        | 0.096<br>(0.044-0.17)                       | 1.1%<br>(0.82-1.4%)                  | 1.2%<br>(0.82-1.7%)                 | 150<br>(98-210)     | 13000<br>(9700-17000)     |
| Bangladesh | 2010 | Female | 45 to 49 | 0.4%<br>(0.18-0.7%)            | 100%<br>(99-100%)        | 0.09<br>(0.034-0.17)                        | 1.2%<br>(0.94-1.6%)                  | 1.7%<br>(1.1-2.4%)                  | 240<br>(160-330)    | 15000<br>(11000-19000)    |
| Bangladesh | 2010 | Female | 50 to 54 | 0.42%<br>(0.17-0.77%)          | 100%<br>(99-100%)        | 0.093<br>(0.034-0.19)                       | 1.3%<br>(0.98-1.8%)                  | 1.8%<br>(1.3-2.6%)                  | 250<br>(180-370)    | 12000<br>(9000-17000)     |
| Bangladesh | 2010 | Female | 55 to 59 | 0.43%<br>(0.19-0.79%)          | 100%<br>(99-100%)        | 0.11<br>(0.038-0.21)                        | 1.2%<br>(0.84-1.5%)                  | 1.5%<br>(1-2.1%)                    | 210<br>(140-300)    | 8800<br>(6400-12000)      |
| Bangladesh | 2010 | Female | 60 to 64 | 0.46%<br>(0.2-0.9%)            | 100%<br>(99-100%)        | 0.11<br>(0.039-0.23)                        | 0.9%<br>(0.64-1.2%)                  | 1.1%<br>(0.69-1.6%)                 | 230<br>(140-330)    | 8000<br>(5600-11000)      |
| Bangladesh | 2010 | Female | 65 to 69 | 0.49%<br>(0.2-0.85%)           | 100%<br>(99-100%)        | 0.098<br>(0.034-0.19)                       | 0.82%<br>(0.6-1.1%)                  | 1%<br>(0.7-1.4%)                    | 280<br>(190-390)    | 7400<br>(5300-10000)      |
| Bangladesh | 2010 | Female | 70 to 74 | 0.5%<br>(0.22-0.89%)           | 100%<br>(99-100%)        | 0.084<br>(0.029-0.18)                       | 0.71%<br>(0.49-0.99%)                | 0.88%<br>(0.59-1.2%)                | 270<br>(180-380)    | 5500<br>(3800-7800)       |
| Bangladesh | 2010 | Female | 75 to 79 | 0.51%<br>(0.21-0.95%)          | 99%<br>(99-100%)         | 0.075<br>(0.025-0.17)                       | 0.56%<br>(0.39-0.8%)                 | 0.66%<br>(0.44-0.97%)               | 210<br>(140-320)    | 3400<br>(2400-4900)       |
| Bangladesh | 2010 | Female | 80 to 84 | 0.52%<br>(0.21-0.94%)          | 99%<br>(99-100%)         | 0.07<br>(0.024-0.15)                        | 0.54%<br>(0.37-0.79%)                | 0.62%<br>(0.41-0.93%)               | 210<br>(130-310)    | 2400<br>(1600-3400)       |

| Location   | Year | Sex    | Age      | Prevalence of current drinkers | Prevalence of abstainers | Population average of standard drinks daily | Percent of total attributable deaths | Percent of total attributable DALYs | Attributable deaths | Attributable DALYs        |
|------------|------|--------|----------|--------------------------------|--------------------------|---------------------------------------------|--------------------------------------|-------------------------------------|---------------------|---------------------------|
| Bangladesh | 2010 | Female | 85 to 89 | 0.57%<br>(0.25-1%)             | 99%<br>(99-100%)         | 0.069<br>(0.026-0.14)                       | 0.53%<br>(0.37-0.76%)                | 0.59%<br>(0.4-0.86%)                | 150<br>(97-210)     | 1200<br>(820-1700)        |
| Bangladesh | 2010 | Female | 90 to 94 | 0.68%<br>(0.3-1.3%)            | 99%<br>(99-100%)         | 0.074<br>(0.029-0.16)                       | 0.53%<br>(0.36-0.79%)                | 0.58%<br>(0.37-0.88%)               | 62<br>(40-96)       | 350<br>(240-530)          |
| Bangladesh | 2010 | Female | 95 plus  | 0.85%<br>(0.32-1.7%)           | 99%<br>(98-100%)         | 0.082<br>(0.026-0.2)                        | 0.58%<br>(0.36-0.9%)                 | 0.58%<br>(0.33-0.97%)               | 16<br>(9.3-27)      | 65<br>(41-100)            |
| Bangladesh | 2010 | Male   | All Ages | 0.95%<br>(0.73-1.2%)           | 99%<br>(99-99%)          | 0.029<br>(0.023-0.037)                      | 1.2%<br>(1-1.4%)                     | 1.1%<br>(0.92-1.3%)                 | 5400<br>(4400-6600) | 310000<br>(250000-390000) |
| Bangladesh | 2010 | Male   | 15 to 19 | 0.51%<br>(0.25-0.91%)          | 99%<br>(99-100%)         | 0.012<br>(0.0045-0.025)                     | 0.84%<br>(0.54-1.2%)                 | 0.21%<br>(0.14-0.3%)                | 18<br>(12-26)       | 10000<br>(6000-15000)     |
| Bangladesh | 2010 | Male   | 20 to 24 | 0.86%<br>(0.37-1.5%)           | 99%<br>(99-100%)         | 0.026<br>(0.011-0.051)                      | 2%<br>(1.4-2.8%)                     | 0.72%<br>(0.44-1.1%)                | 83<br>(51-130)      | 27000<br>(18000-39000)    |
| Bangladesh | 2010 | Male   | 25 to 29 | 1.2%<br>(0.61-2.1%)            | 99%<br>(98-99%)          | 0.04<br>(0.019-0.069)                       | 2.6%<br>(1.9-3.4%)                   | 1.4%<br>(0.82-2.2%)                 | 180<br>(100-280)    | 35000<br>(25000-48000)    |
| Bangladesh | 2010 | Male   | 30 to 34 | 1.6%<br>(0.81-2.9%)            | 98%<br>(97-99%)          | 0.054<br>(0.028-0.089)                      | 3%<br>(2.3-3.9%)                     | 2.3%<br>(1.6-3.2%)                  | 310<br>(210-440)    | 39000<br>(29000-53000)    |
| Bangladesh | 2010 | Male   | 35 to 39 | 1.8%<br>(0.94-2.9%)            | 98%<br>(97-99%)          | 0.062<br>(0.031-0.11)                       | 3%<br>(2.3-4%)                       | 3%<br>(1.8-4.5%)                    | 440<br>(270-660)    | 39000<br>(29000-53000)    |
| Bangladesh | 2010 | Male   | 40 to 44 | 1.8%<br>(1-3%)                 | 98%<br>(97-99%)          | 0.063<br>(0.03-0.11)                        | 2.9%<br>(2.2-3.8%)                   | 3.1%<br>(2.2-4.5%)                  | 570<br>(390-840)    | 40000<br>(30000-53000)    |
| Bangladesh | 2010 | Male   | 45 to 49 | 1.7%<br>(0.83-2.6%)            | 98%<br>(97-99%)          | 0.06<br>(0.025-0.11)                        | 2.4%<br>(1.8-3.4%)                   | 2.7%<br>(1.8-4.2%)                  | 570<br>(370-890)    | 33000<br>(24000-47000)    |
| Bangladesh | 2010 | Male   | 50 to 54 | 1.5%<br>(0.79-2.5%)            | 98%<br>(98-99%)          | 0.056<br>(0.025-0.1)                        | 2.1%<br>(1.5-2.9%)                   | 2.4%<br>(1.5-3.6%)                  | 520<br>(320-790)    | 25000<br>(18000-34000)    |
| Bangladesh | 2010 | Male   | 55 to 59 | 1.4%<br>(0.74-2.3%)            | 99%<br>(98-99%)          | 0.054<br>(0.024-0.099)                      | 1.7%<br>(1.2-2.3%)                   | 1.9%<br>(1.2-2.8%)                  | 420<br>(260-610)    | 17000<br>(12000-23000)    |
| Bangladesh | 2010 | Male   | 60 to 64 | 1.4%<br>(0.69-2.3%)            | 99%<br>(98-99%)          | 0.05<br>(0.021-0.094)                       | 1.3%<br>(0.89-1.9%)                  | 1.4%<br>(0.85-2.2%)                 | 430<br>(260-670)    | 15000<br>(9900-21000)     |
| Bangladesh | 2010 | Male   | 65 to 69 | 1.3%<br>(0.65-2%)              | 99%<br>(98-99%)          | 0.043<br>(0.018-0.08)                       | 1%<br>(0.74-1.5%)                    | 1.1%<br>(0.75-1.6%)                 | 440<br>(290-650)    | 12000<br>(8500-16000)     |
| Bangladesh | 2010 | Male   | 70 to 74 | 1.2%<br>(0.66-1.8%)            | 99%<br>(98-99%)          | 0.035<br>(0.014-0.072)                      | 0.84%<br>(0.58-1.2%)                 | 0.92%<br>(0.6-1.4%)                 | 400<br>(260-600)    | 8400<br>(5800-12000)      |
| Bangladesh | 2010 | Male   | 75 to 79 | 1%<br>(0.55-1.8%)              | 99%<br>(98-99%)          | 0.027<br>(0.011-0.059)                      | 0.71%<br>(0.47-1%)                   | 0.79%<br>(0.51-1.2%)                | 350<br>(220-510)    | 5300<br>(3500-7600)       |
| Bangladesh | 2010 | Male   | 80 to 84 | 0.92%<br>(0.45-1.5%)           | 99%<br>(99-100%)         | 0.022<br>(0.0083-0.044)                     | 0.7%<br>(0.42-1%)                    | 0.81%<br>(0.47-1.2%)                | 340<br>(200-520)    | 3700<br>(2300-5500)       |
| Bangladesh | 2010 | Male   | 85 to 89 | 0.89%<br>(0.42-1.6%)           | 99%<br>(98-100%)         | 0.019<br>(0.0075-0.039)                     | 0.65%<br>(0.35-0.89%)                | 0.74%<br>(0.37-1%)                  | 200<br>(100-290)    | 1600<br>(840-2200)        |
| Bangladesh | 2010 | Male   | 90 to 94 | 0.99%<br>(0.51-1.6%)           | 99%<br>(98-99%)          | 0.019<br>(0.0076-0.041)                     | 0.6%<br>(0.29-0.86%)                 | 0.67%<br>(0.27-0.99%)               | 73<br>(29-110)      | 400<br>(190-570)          |
| Bangladesh | 2010 | Male   | 95 plus  | 1.2%<br>(0.59-2.1%)            | 99%<br>(98-99%)          | 0.021<br>(0.0068-0.045)                     | 0.64%<br>(0.3-0.92%)                 | 0.67%<br>(0.25-1%)                  | 17<br>(6.4-26)      | 65<br>(30-94)             |
| Bangladesh | 2016 | Female | All Ages | 0.32%<br>(0.23-0.43%)          | 100%<br>(100-100%)       | 0.054<br>(0.035-0.076)                      | 0.77%<br>(0.67-0.9%)                 | 0.82%<br>(0.68-0.98%)               | 2900<br>(2300-3600) | 160000<br>(130000-190000) |

| Location   | Year | Sex    | Age      | Prevalence of current drinkers | Prevalence of abstainers | Population average of standard drinks daily | Percent of total attributable deaths | Percent of total attributable DALYs | Attributable deaths | Attributable DALYs     |
|------------|------|--------|----------|--------------------------------|--------------------------|---------------------------------------------|--------------------------------------|-------------------------------------|---------------------|------------------------|
| Bangladesh | 2016 | Female | 15 to 19 | 0.27%<br>(0.11-0.49%)          | 100%<br>(100-100%)       | 0.024<br>(0.0074-0.054)                     | 0.61%<br>(0.4-0.88%)                 | 0.29%<br>(0.17-0.46%)               | 13<br>(7.2-21)      | 6100<br>(3700-9200)    |
| Bangladesh | 2016 | Female | 20 to 24 | 0.27%<br>(0.095-0.53%)         | 100%<br>(99-100%)        | 0.047<br>(0.016-0.097)                      | 1.3%<br>(0.83-1.8%)                  | 0.51%<br>(0.31-0.77%)               | 28<br>(17-44)       | 14000<br>(8600-21000)  |
| Bangladesh | 2016 | Female | 25 to 29 | 0.29%<br>(0.087-0.59%)         | 100%<br>(99-100%)        | 0.068<br>(0.023-0.14)                       | 1.4%<br>(1-1.9%)                     | 0.8%<br>(0.52-1.2%)                 | 50<br>(32-75)       | 16000<br>(11000-22000) |
| Bangladesh | 2016 | Female | 30 to 34 | 0.32%<br>(0.087-0.67%)         | 100%<br>(99-100%)        | 0.087<br>(0.028-0.17)                       | 1.3%<br>(0.96-1.8%)                  | 0.99%<br>(0.66-1.4%)                | 75<br>(49-110)      | 16000<br>(11000-22000) |
| Bangladesh | 2016 | Female | 35 to 39 | 0.37%<br>(0.12-0.67%)          | 100%<br>(99-100%)        | 0.098<br>(0.034-0.18)                       | 1.3%<br>(1-1.7%)                     | 1.5%<br>(1-2.1%)                    | 140<br>(92-210)     | 17000<br>(12000-23000) |
| Bangladesh | 2016 | Female | 40 to 44 | 0.39%<br>(0.16-0.68%)          | 100%<br>(99-100%)        | 0.098<br>(0.04-0.18)                        | 1.1%<br>(0.84-1.5%)                  | 1.2%<br>(0.84-1.8%)                 | 140<br>(91-210)     | 14000<br>(9600-19000)  |
| Bangladesh | 2016 | Female | 45 to 49 | 0.4%<br>(0.18-0.69%)           | 100%<br>(99-100%)        | 0.09<br>(0.035-0.17)                        | 1.2%<br>(0.9-1.6%)                   | 1.6%<br>(1.1-2.3%)                  | 230<br>(150-350)    | 16000<br>(11000-21000) |
| Bangladesh | 2016 | Female | 50 to 54 | 0.41%<br>(0.19-0.76%)          | 100%<br>(99-100%)        | 0.093<br>(0.034-0.2)                        | 1.3%<br>(0.96-1.7%)                  | 1.8%<br>(1.2-2.5%)                  | 320<br>(210-480)    | 17000<br>(12000-23000) |
| Bangladesh | 2016 | Female | 55 to 59 | 0.43%<br>(0.19-0.8%)           | 100%<br>(99-100%)        | 0.11<br>(0.038-0.23)                        | 1.2%<br>(0.84-1.6%)                  | 1.5%<br>(1-2.2%)                    | 290<br>(180-430)    | 12000<br>(8700-17000)  |
| Bangladesh | 2016 | Female | 60 to 64 | 0.47%<br>(0.2-0.91%)           | 100%<br>(99-100%)        | 0.11<br>(0.038-0.25)                        | 0.92%<br>(0.66-1.2%)                 | 1.1%<br>(0.74-1.6%)                 | 210<br>(130-300)    | 7400<br>(5200-10000)   |
| Bangladesh | 2016 | Female | 65 to 69 | 0.49%<br>(0.21-0.86%)          | 100%<br>(99-100%)        | 0.1<br>(0.035-0.22)                         | 0.82%<br>(0.6-1.1%)                  | 1%<br>(0.72-1.4%)                   | 250<br>(170-360)    | 6800<br>(4900-9600)    |
| Bangladesh | 2016 | Female | 70 to 74 | 0.5%<br>(0.22-0.89%)           | 99%<br>(99-100%)         | 0.088<br>(0.027-0.2)                        | 0.74%<br>(0.51-1%)                   | 0.95%<br>(0.61-1.4%)                | 300<br>(190-460)    | 6100<br>(4200-8900)    |
| Bangladesh | 2016 | Female | 75 to 79 | 0.52%<br>(0.21-0.96%)          | 99%<br>(99-100%)         | 0.079<br>(0.022-0.19)                       | 0.55%<br>(0.38-0.78%)                | 0.67%<br>(0.45-0.97%)               | 230<br>(150-340)    | 3600<br>(2500-5200)    |
| Bangladesh | 2016 | Female | 80 to 84 | 0.53%<br>(0.22-0.94%)          | 99%<br>(99-100%)         | 0.073<br>(0.024-0.17)                       | 0.55%<br>(0.38-0.82%)                | 0.64%<br>(0.43-0.98%)               | 260<br>(170-390)    | 2900<br>(2000-4300)    |
| Bangladesh | 2016 | Female | 85 to 89 | 0.58%<br>(0.25-1.1%)           | 99%<br>(99-100%)         | 0.073<br>(0.024-0.16)                       | 0.56%<br>(0.38-0.82%)                | 0.64%<br>(0.42-0.96%)               | 210<br>(130-310)    | 1700<br>(1100-2500)    |
| Bangladesh | 2016 | Female | 90 to 94 | 0.7%<br>(0.3-1.3%)             | 99%<br>(99-100%)         | 0.078<br>(0.027-0.19)                       | 0.59%<br>(0.41-0.86%)                | 0.66%<br>(0.43-1%)                  | 110<br>(71-160)     | 610<br>(420-900)       |
| Bangladesh | 2016 | Female | 95 plus  | 0.88%<br>(0.33-1.7%)           | 99%<br>(98-100%)         | 0.088<br>(0.026-0.23)                       | 0.66%<br>(0.41-1%)                   | 0.69%<br>(0.4-1.1%)                 | 33<br>(19-53)       | 130<br>(79-200)        |
| Bangladesh | 2016 | Male   | All Ages | 1%<br>(0.78-1.3%)              | 99%<br>(99-99%)          | 0.033<br>(0.022-0.048)                      | 1.5%<br>(1.3-1.8%)                   | 1.3%<br>(1.1-1.6%)                  | 6600<br>(5200-8300) | 37000<br>(29000-46000) |
| Bangladesh | 2016 | Male   | 15 to 19 | 0.51%<br>(0.23-0.9%)           | 99%<br>(99-100%)         | 0.013<br>(0.004-0.027)                      | 0.91%<br>(0.59-1.3%)                 | 0.21%<br>(0.14-0.3%)                | 17<br>(11-26)       | 10000<br>(6500-16000)  |
| Bangladesh | 2016 | Male   | 20 to 24 | 0.87%<br>(0.36-1.5%)           | 99%<br>(99-100%)         | 0.028<br>(0.01-0.057)                       | 2.1%<br>(1.5-3%)                     | 0.67%<br>(0.42-1%)                  | 76<br>(45-120)      | 29000<br>(19000-42000) |
| Bangladesh | 2016 | Male   | 25 to 29 | 1.3%<br>(0.63-2.2%)            | 99%<br>(98-99%)          | 0.043<br>(0.019-0.078)                      | 2.8%<br>(2.1-3.5%)                   | 1.3%<br>(0.78-2%)                   | 160<br>(94-250)     | 38000<br>(26000-53000) |
| Bangladesh | 2016 | Male   | 30 to 34 | 1.6%<br>(0.8-2.9%)             | 98%<br>(97-99%)          | 0.058<br>(0.026-0.11)                       | 3.2%<br>(2.4-4.1%)                   | 2.3%<br>(1.5-3.4%)                  | 320<br>(200-490)    | 45000<br>(32000-61000) |

| Location   | Year | Sex    | Age      | Prevalence of current drinkers | Prevalence of abstainers | Population average of standard drinks daily | Percent of total attributable deaths | Percent of total attributable DALYs | Attributable deaths  | Attributable DALYs     |
|------------|------|--------|----------|--------------------------------|--------------------------|---------------------------------------------|--------------------------------------|-------------------------------------|----------------------|------------------------|
| Bangladesh | 2016 | Male   | 35 to 39 | 1.9%<br>(0.96-3%)              | 98%<br>(97-99%)          | 0.067<br>(0.031-0.12)                       | 3.2%<br>(2.4-4.2%)                   | 3%<br>(1.9-4.6%)                    | 490<br>(290-740)     | 47000<br>(34000-63000) |
| Bangladesh | 2016 | Male   | 40 to 44 | 1.9%<br>(1-3%)                 | 98%<br>(97-99%)          | 0.067<br>(0.028-0.12)                       | 3.1%<br>(2.3-4.1%)                   | 3.2%<br>(2.1-4.7%)                  | 590<br>(380-880)     | 44000<br>(32000-60000) |
| Bangladesh | 2016 | Male   | 45 to 49 | 1.7%<br>(0.83-2.7%)            | 98%<br>(97-99%)          | 0.064<br>(0.025-0.13)                       | 2.6%<br>(1.9-3.6%)                   | 2.8%<br>(1.8-4.1%)                  | 660<br>(400-1000)    | 40000<br>(28000-55000) |
| Bangladesh | 2016 | Male   | 50 to 54 | 1.6%<br>(0.82-2.6%)            | 98%<br>(97-99%)          | 0.06<br>(0.024-0.12)                        | 2.4%<br>(1.7-3.2%)                   | 2.7%<br>(1.7-4%)                    | 760<br>(480-1100)    | 37000<br>(26000-51000) |
| Bangladesh | 2016 | Male   | 55 to 59 | 1.5%<br>(0.77-2.4%)            | 99%<br>(98-99%)          | 0.057<br>(0.023-0.11)                       | 1.9%<br>(1.3-2.6%)                   | 2.1%<br>(1.3-3.1%)                  | 640<br>(400-950)     | 26000<br>(18000-36000) |
| Bangladesh | 2016 | Male   | 60 to 64 | 1.4%<br>(0.72-2.3%)            | 99%<br>(98-99%)          | 0.052<br>(0.02-0.11)                        | 1.3%<br>(0.92-2%)                    | 1.4%<br>(0.86-2.2%)                 | 430<br>(250-680)     | 15000<br>(9800-22000)  |
| Bangladesh | 2016 | Male   | 65 to 69 | 1.3%<br>(0.68-2.1%)            | 99%<br>(98-99%)          | 0.046<br>(0.017-0.091)                      | 1.1%<br>(0.77-1.5%)                  | 1.2%<br>(0.78-1.7%)                 | 440<br>(290-660)     | 12000<br>(8500-17000)  |
| Bangladesh | 2016 | Male   | 70 to 74 | 1.2%<br>(0.64-1.9%)            | 99%<br>(98-99%)          | 0.037<br>(0.013-0.084)                      | 0.93%<br>(0.64-1.3%)                 | 1%<br>(0.67-1.6%)                   | 490<br>(300-720)     | 10000<br>(6600-15000)  |
| Bangladesh | 2016 | Male   | 75 to 79 | 1.1%<br>(0.52-1.8%)            | 99%<br>(98-99%)          | 0.029<br>(0.0099-0.069)                     | 0.83%<br>(0.53-1.2%)                 | 0.95%<br>(0.57-1.4%)                | 450<br>(270-680)     | 6900<br>(4400-10000)   |
| Bangladesh | 2016 | Male   | 80 to 84 | 0.93%<br>(0.45-1.5%)           | 99%<br>(98-100%)         | 0.023<br>(0.0081-0.051)                     | 0.85%<br>(0.44-1.2%)                 | 1%<br>(0.48-1.5%)                   | 530<br>(250-790)     | 5700<br>(3000-8300)    |
| Bangladesh | 2016 | Male   | 85 to 89 | 0.9%<br>(0.43-1.6%)            | 99%<br>(98-100%)         | 0.02<br>(0.007-0.045)                       | 0.83%<br>(0.37-1.2%)                 | 0.97%<br>(0.37-1.4%)                | 360<br>(140-520)     | 2700<br>(1200-3800)    |
| Bangladesh | 2016 | Male   | 90 to 94 | 0.99%<br>(0.51-1.6%)           | 99%<br>(98-99%)          | 0.02<br>(0.0075-0.047)                      | 0.81%<br>(0.29-1.2%)                 | 0.94%<br>(0.27-1.4%)                | 150<br>(44-230)      | 790<br>(290-1200)      |
| Bangladesh | 2016 | Male   | 95 plus  | 1.2%<br>(0.55-2.1%)            | 99%<br>(98-99%)          | 0.021<br>(0.0065-0.052)                     | 0.87%<br>(0.31-1.3%)                 | 0.96%<br>(0.26-1.5%)                | 39<br>(10-61)        | 140<br>(49-210)        |
| Bhutan     | 1990 | Female | All Ages | 1.8%<br>(1.1-2.6%)             | 98%<br>(97-99%)          | 0.23<br>(0.12-0.41)                         | 0.56%<br>(0.41-0.74%)                | 0.95%<br>(0.59-1.4%)                | 25<br>(15-38)        | 1100<br>(770-1400)     |
| Bhutan     | 1990 | Female | 15 to 19 | 1.4%<br>(0.53-2.9%)            | 99%<br>(97-99%)          | 0.1<br>(0.025-0.26)                         | 0.66%<br>(0.42-1%)                   | 0.31%<br>(0.093-0.74%)              | 0.16<br>(0.046-0.38) | 42<br>(25-65)          |
| Bhutan     | 1990 | Female | 20 to 24 | 1.6%<br>(0.48-3.3%)            | 98%<br>(97-100%)         | 0.22<br>(0.052-0.58)                        | 1.3%<br>(0.86-1.9%)                  | 0.52%<br>(0.2-1.1%)                 | 0.29<br>(0.11-0.59)  | 79<br>(50-120)         |
| Bhutan     | 1990 | Female | 25 to 29 | 1.7%<br>(0.52-3.8%)            | 98%<br>(96-99%)          | 0.34<br>(0.09-0.85)                         | 1.5%<br>(1-2.1%)                     | 0.77%<br>(0.33-1.5%)                | 0.39<br>(0.16-0.81)  | 76<br>(49-110)         |
| Bhutan     | 1990 | Female | 30 to 34 | 2.1%<br>(0.58-4.7%)            | 98%<br>(95-99%)          | 0.47<br>(0.13-1.1)                          | 1.6%<br>(1.1-2.4%)                   | 1.3%<br>(0.6-2.3%)                  | 0.62<br>(0.29-1.2)   | 75<br>(49-110)         |
| Bhutan     | 1990 | Female | 35 to 39 | 2.6%<br>(0.65-5.5%)            | 97%<br>(95-99%)          | 0.56<br>(0.15-1.3)                          | 1.9%<br>(1.3-3%)                     | 2%<br>(1-3.5%)                      | 1<br>(0.5-1.8)       | 85<br>(54-130)         |
| Bhutan     | 1990 | Female | 40 to 44 | 2.9%<br>(1-6.1%)               | 97%<br>(94-99%)          | 0.58<br>(0.21-1.3)                          | 2.2%<br>(1.5-3.4%)                   | 2.6%<br>(1.5-4.5%)                  | 1.6<br>(0.87-2.8)    | 100<br>(64-160)        |
| Bhutan     | 1990 | Female | 45 to 49 | 3.2%<br>(1.2-6.9%)             | 97%<br>(93-99%)          | 0.57<br>(0.19-1.3)                          | 2.4%<br>(1.5-3.8%)                   | 3%<br>(1.6-5.1%)                    | 2.1<br>(1.1-3.7)     | 110<br>(67-170)        |
| Bhutan     | 1990 | Female | 50 to 54 | 3.5%<br>(1.3-7.9%)             | 96%<br>(92-99%)          | 0.62<br>(0.17-1.5)                          | 2.5%<br>(1.5-4%)                     | 3.1%<br>(1.7-5.3%)                  | 2.6<br>(1.3-4.5)     | 110<br>(64-180)        |

| Location | Year | Sex    | Age      | Prevalence of current drinkers | Prevalence of abstainers | Population average of standard drinks daily | Percent of total attributable deaths | Percent of total attributable DALYs | Attributable deaths    | Attributable DALYs  |
|----------|------|--------|----------|--------------------------------|--------------------------|---------------------------------------------|--------------------------------------|-------------------------------------|------------------------|---------------------|
| Bhutan   | 1990 | Female | 55 to 59 | 3.8%<br>(1.3-8.1%)             | 96%<br>(92-99%)          | 0.75<br>(0.21-1.8)                          | 2.4%<br>(1.4-4.3%)                   | 3%<br>(1.5-5.6%)                    | 2.9<br>(1.4-5.5)       | 110<br>(57-190)     |
| Bhutan   | 1990 | Female | 60 to 64 | 4.1%<br>(1.4-8.7%)             | 96%<br>(91-99%)          | 0.8<br>(0.2-2.1)                            | 2.2%<br>(1.2-4%)                     | 2.7%<br>(1.3-5.1%)                  | 3.1<br>(1.4-5.8)       | 91<br>(47-170)      |
| Bhutan   | 1990 | Female | 65 to 69 | 4.5%<br>(1.6-9.2%)             | 96%<br>(91-98%)          | 0.73<br>(0.17-1.8)                          | 2.2%<br>(1-4%)                       | 2.6%<br>(1.2-4.9%)                  | 3.2<br>(1.4-6.4)       | 77<br>(36-150)      |
| Bhutan   | 1990 | Female | 70 to 74 | 4.6%<br>(1.7-9.3%)             | 95%<br>(91-98%)          | 0.62<br>(0.15-1.7)                          | 1.9%<br>(0.86-3.7%)                  | 2.3%<br>(0.97-4.4%)                 | 2.8<br>(1.2-5.5)       | 53<br>(23-100)      |
| Bhutan   | 1990 | Female | 75 to 79 | 4.7%<br>(1.7-10%)              | 95%<br>(90-98%)          | 0.54<br>(0.12-1.6)                          | 1.6%<br>(0.6-3.2%)                   | 1.8%<br>(0.66-3.8%)                 | 1.9<br>(0.68-3.9)      | 28<br>(10-57)       |
| Bhutan   | 1990 | Female | 80 to 84 | 5.1%<br>(1.7-12%)              | 95%<br>(88-98%)          | 0.53<br>(0.12-1.6)                          | 1.5%<br>(0.49-3.5%)                  | 1.7%<br>(0.53-4%)                   | 1.3<br>(0.4-3)         | 14<br>(4.5-31)      |
| Bhutan   | 1990 | Female | 85 to 89 | 6%<br>(1.8-14%)                | 94%<br>(86-98%)          | 0.56<br>(0.12-1.6)                          | 1.4%<br>(0.41-3.5%)                  | 1.6%<br>(0.42-4.1%)                 | 0.64<br>(0.17-1.7)     | 4.9<br>(1.4-12)     |
| Bhutan   | 1990 | Female | 90 to 94 | 7.6%<br>(2.4-17%)              | 92%<br>(83-98%)          | 0.63<br>(0.13-1.6)                          | 1.4%<br>(0.34-3.4%)                  | 1.6%<br>(0.34-4%)                   | 0.22<br>(0.046-0.54)   | 1.2<br>(0.28-2.8)   |
| Bhutan   | 1990 | Female | 95 plus  | 10%<br>(3-23%)                 | 90%<br>(77-97%)          | 0.74<br>(0.15-2)                            | 1.5%<br>(0.23-3.7%)                  | 1.6%<br>(0.16-4.3%)                 | 0.054<br>(0.0056-0.15) | 0.2<br>(0.031-0.51) |
| Bhutan   | 1990 | Male   | All Ages | 19%<br>(11-28%)                | 81%<br>(72-89%)          | 0.98<br>(0.65-1.4)                          | 2.3%<br>(1.6-3%)                     | 4.1%<br>(2.6-5.8%)                  | 110<br>(66-160)        | 4400<br>(3100-5800) |
| Bhutan   | 1990 | Male   | 15 to 19 | 5.9%<br>(1.9-14%)              | 94%<br>(86-98%)          | 0.23<br>(0.046-0.68)                        | 1.4%<br>(0.81-2.6%)                  | 1.2%<br>(0.41-3%)                   | 0.49<br>(0.15-1.2)     | 70<br>(39-120)      |
| Bhutan   | 1990 | Male   | 20 to 24 | 12%<br>(3.4-28%)               | 88%<br>(72-97%)          | 0.61<br>(0.1-1.7)                           | 4%<br>(2.3-7%)                       | 3.8%<br>(1.3-8.2%)                  | 1.8<br>(0.6-3.8)       | 190<br>(100-340)    |
| Bhutan   | 1990 | Male   | 25 to 29 | 21%<br>(4.7-43%)               | 79%<br>(57-95%)          | 1.1<br>(0.2-2.8)                            | 6.4%<br>(3.2-11%)                    | 7%<br>(2.3-14%)                     | 3.2<br>(1.1-6.4)       | 290<br>(140-490)    |
| Bhutan   | 1990 | Male   | 30 to 34 | 30%<br>(6.4-55%)               | 70%<br>(45-94%)          | 1.7<br>(0.41-3.8)                           | 8.8%<br>(4.6-14%)                    | 11%<br>(4.5-18%)                    | 5.4<br>(2.2-9.3)       | 390<br>(200-620)    |
| Bhutan   | 1990 | Male   | 35 to 39 | 38%<br>(9.6-62%)               | 62%<br>(38-90%)          | 2.3<br>(0.64-4.7)                           | 10%<br>(5.3-15%)                     | 13%<br>(6-20%)                      | 7.3<br>(3.2-12)        | 460<br>(240-700)    |
| Bhutan   | 1990 | Male   | 40 to 44 | 42%<br>(13-65%)                | 58%<br>(35-87%)          | 2.6<br>(0.85-5)                             | 11%<br>(6.2-16%)                     | 14%<br>(7.4-21%)                    | 10<br>(5.4-16)         | 550<br>(310-830)    |
| Bhutan   | 1990 | Male   | 45 to 49 | 43%<br>(15-65%)                | 57%<br>(35-85%)          | 2.8<br>(0.91-5.8)                           | 11%<br>(6-16%)                       | 14%<br>(7.5-21%)                    | 12<br>(5.7-19)         | 550<br>(290-840)    |
| Bhutan   | 1990 | Male   | 50 to 54 | 43%<br>(19-65%)                | 57%<br>(35-81%)          | 3<br>(1-6.4)                                | 11%<br>(5.5-16%)                     | 14%<br>(6.7-21%)                    | 13<br>(5.8-20)         | 510<br>(250-780)    |
| Bhutan   | 1990 | Male   | 55 to 59 | 42%<br>(23-62%)                | 58%<br>(38-77%)          | 3.1<br>(0.98-6.9)                           | 10%<br>(4.7-15%)                     | 13%<br>(5.9-20%)                    | 13<br>(5.6-21)         | 440<br>(200-700)    |
| Bhutan   | 1990 | Male   | 60 to 64 | 43%<br>(22-63%)                | 57%<br>(37-78%)          | 3.1<br>(0.9-7.2)                            | 8.8%<br>(3.4-14%)                    | 11%<br>(3.9-18%)                    | 12<br>(4.5-21)         | 360<br>(140-600)    |
| Bhutan   | 1990 | Male   | 65 to 69 | 44%<br>(23-63%)                | 56%<br>(37-77%)          | 2.8<br>(0.85-6.3)                           | 7.6%<br>(2.7-13%)                    | 9.3%<br>(3.1-16%)                   | 11<br>(3.5-19)         | 260<br>(89-450)     |
| Bhutan   | 1990 | Male   | 70 to 74 | 42%<br>(23-61%)                | 58%<br>(39-77%)          | 2.4<br>(0.66-6.2)                           | 5.9%<br>(1.3-12%)                    | 7%<br>(1.4-14%)                     | 8.1<br>(1.6-17)        | 150<br>(35-310)     |

| Location | Year | Sex    | Age      | Prevalence of current drinkers | Prevalence of abstainers | Population average of standard drinks daily | Percent of total attributable deaths | Percent of total attributable DALYs | Attributable deaths  | Attributable DALYs   |
|----------|------|--------|----------|--------------------------------|--------------------------|---------------------------------------------|--------------------------------------|-------------------------------------|----------------------|----------------------|
| Bhutan   | 1990 | Male   | 75 to 79 | 39%<br>(19-60%)                | 61%<br>(40-81%)          | 2.1<br>(0.44-6)                             | 4.4%<br>(0.68-10%)                   | 5.1%<br>(0.66-12%)                  | 5<br>(0.62-11)       | 74<br>(11-170)       |
| Bhutan   | 1990 | Male   | 80 to 84 | 37%<br>(17-58%)                | 63%<br>(42-83%)          | 2<br>(0.44-5.5)                             | 4%<br>(0.5-9.2%)                     | 4.6%<br>(0.44-11%)                  | 3.1<br>(0.29-7.2)    | 34<br>(4.1-77)       |
| Bhutan   | 1990 | Male   | 85 to 89 | 37%<br>(15-57%)                | 63%<br>(43-85%)          | 2.1<br>(0.44-5.9)                           | 3.6%<br>(0.31-8%)                    | 4%<br>(0.21-9.4%)                   | 1.5<br>(0.083-3.5)   | 12<br>(1-27)         |
| Bhutan   | 1990 | Male   | 90 to 94 | 39%<br>(17-58%)                | 61%<br>(42-83%)          | 2.4<br>(0.39-7.1)                           | 3.2%<br>(0.11-7.3%)                  | 3.5%<br>(-0.069-8.4%)               | 0.5<br>(-0.0099-1.2) | 2.7<br>(0.087-6.3)   |
| Bhutan   | 1990 | Male   | 95 plus  | 42%<br>(19-64%)                | 58%<br>(36-81%)          | 2.6<br>(0.35-8.5)                           | 2.9%<br>(0.045-7%)                   | 3.1%<br>(-0.3-7.8%)                 | 0.1<br>(-0.01-0.26)  | 0.39<br>(0.006-0.93) |
| Bhutan   | 1995 | Female | All Ages | 1.7%<br>(1.2-2.6%)             | 98%<br>(97-99%)          | 0.28<br>(0.14-0.49)                         | 0.64%<br>(0.48-0.84%)                | 1.1%<br>(0.71-1.7%)                 | 24<br>(15-36)        | 980<br>(720-1300)    |
| Bhutan   | 1995 | Female | 15 to 19 | 1.4%<br>(0.53-2.8%)            | 99%<br>(97-99%)          | 0.13<br>(0.035-0.33)                        | 0.73%<br>(0.45-1.1%)                 | 0.39%<br>(0.13-0.9%)                | 0.18<br>(0.059-0.41) | 43<br>(25-66)        |
| Bhutan   | 1995 | Female | 20 to 24 | 1.6%<br>(0.47-3.5%)            | 98%<br>(97-100%)         | 0.28<br>(0.069-0.73)                        | 1.4%<br>(0.95-2.1%)                  | 0.6%<br>(0.23-1.2%)                 | 0.28<br>(0.11-0.59)  | 78<br>(49-110)       |
| Bhutan   | 1995 | Female | 25 to 29 | 1.8%<br>(0.5-4%)               | 98%<br>(96-99%)          | 0.44<br>(0.12-1.1)                          | 1.6%<br>(1.1-2.3%)                   | 0.87%<br>(0.38-1.7%)                | 0.38<br>(0.16-0.77)  | 76<br>(50-110)       |
| Bhutan   | 1995 | Female | 30 to 34 | 2.1%<br>(0.61-4.8%)            | 98%<br>(95-99%)          | 0.6<br>(0.16-1.4)                           | 1.8%<br>(1.2-2.5%)                   | 1.4%<br>(0.66-2.5%)                 | 0.55<br>(0.25-1)     | 69<br>(45-100)       |
| Bhutan   | 1995 | Female | 35 to 39 | 2.7%<br>(0.7-5.5%)             | 97%<br>(94-99%)          | 0.73<br>(0.2-1.6)                           | 2.1%<br>(1.4-3.1%)                   | 2.2%<br>(1.1-3.8%)                  | 1<br>(0.49-1.7)      | 83<br>(53-120)       |
| Bhutan   | 1995 | Female | 40 to 44 | 3%<br>(1.1-6.5%)               | 97%<br>(93-99%)          | 0.78<br>(0.28-1.7)                          | 2.3%<br>(1.5-3.6%)                   | 2.9%<br>(1.6-4.9%)                  | 1.2<br>(0.69-2.2)    | 80<br>(51-130)       |
| Bhutan   | 1995 | Female | 45 to 49 | 3.3%<br>(1.1-7.1%)             | 97%<br>(93-99%)          | 0.75<br>(0.24-1.7)                          | 2.5%<br>(1.5-3.9%)                   | 3.2%<br>(1.7-5.4%)                  | 1.6<br>(0.85-2.7)    | 83<br>(50-130)       |
| Bhutan   | 1995 | Female | 50 to 54 | 3.5%<br>(1.3-7.7%)             | 96%<br>(92-99%)          | 0.8<br>(0.23-1.9)                           | 2.6%<br>(1.6-4.1%)                   | 3.3%<br>(1.8-5.6%)                  | 2<br>(1.1-3.5)       | 89<br>(54-140)       |
| Bhutan   | 1995 | Female | 55 to 59 | 3.7%<br>(1.4-8.3%)             | 96%<br>(92-99%)          | 0.95<br>(0.29-2.3)                          | 2.5%<br>(1.4-4.4%)                   | 3.1%<br>(1.7-5.7%)                  | 2.5<br>(1.3-4.6)     | 90<br>(51-160)       |
| Bhutan   | 1995 | Female | 60 to 64 | 4.1%<br>(1.5-8.5%)             | 96%<br>(92-99%)          | 1<br>(0.27-2.7)                             | 2.4%<br>(1.3-4.2%)                   | 2.9%<br>(1.4-5.3%)                  | 3<br>(1.5-5.7)       | 90<br>(47-160)       |
| Bhutan   | 1995 | Female | 65 to 69 | 4.4%<br>(1.5-9.1%)             | 96%<br>(91-98%)          | 0.93<br>(0.24-2.3)                          | 2.3%<br>(1.1-4.3%)                   | 2.8%<br>(1.3-5.3%)                  | 3.3<br>(1.6-6.3)     | 80<br>(39-150)       |
| Bhutan   | 1995 | Female | 70 to 74 | 4.5%<br>(1.7-9.1%)             | 95%<br>(91-98%)          | 0.78<br>(0.19-2)                            | 2.1%<br>(0.98-3.9%)                  | 2.5%<br>(1.1-4.7%)                  | 3<br>(1.4-5.6)       | 57<br>(28-110)       |
| Bhutan   | 1995 | Female | 75 to 79 | 4.6%<br>(1.6-10%)              | 95%<br>(90-98%)          | 0.69<br>(0.16-2)                            | 1.8%<br>(0.71-3.6%)                  | 2.1%<br>(0.8-4.2%)                  | 2.1<br>(0.87-4.3)    | 31<br>(13-62)        |
| Bhutan   | 1995 | Female | 80 to 84 | 5.1%<br>(1.6-12%)              | 95%<br>(88-98%)          | 0.69<br>(0.15-2)                            | 1.7%<br>(0.63-3.9%)                  | 2%<br>(0.7-4.6%)                    | 1.6<br>(0.56-3.8)    | 17<br>(6.2-41)       |
| Bhutan   | 1995 | Female | 85 to 89 | 6%<br>(1.8-14%)                | 94%<br>(86-98%)          | 0.74<br>(0.17-2.1)                          | 1.7%<br>(0.62-4%)                    | 2%<br>(0.66-4.8%)                   | 0.98<br>(0.32-2.3)   | 7.5<br>(2.6-17)      |
| Bhutan   | 1995 | Female | 90 to 94 | 7.6%<br>(2.4-18%)              | 92%<br>(82-98%)          | 0.84<br>(0.19-2.3)                          | 1.8%<br>(0.53-4.1%)                  | 2.1%<br>(0.54-4.7%)                 | 0.36<br>(0.096-0.82) | 1.9<br>(0.56-4.2)    |

| Location | Year | Sex    | Age      | Prevalence of current drinkers | Prevalence of abstainers | Population average of standard drinks daily | Percent of total attributable deaths | Percent of total attributable DALYs | Attributable deaths    | Attributable DALYs   |
|----------|------|--------|----------|--------------------------------|--------------------------|---------------------------------------------|--------------------------------------|-------------------------------------|------------------------|----------------------|
| Bhutan   | 1995 | Female | 95 plus  | 10%<br>(3-24%)                 | 90%<br>(76-97%)          | 0.98<br>(0.19-2.8)                          | 1.9%<br>(0.44-4.7%)                  | 2.2%<br>(0.42-5.6%)                 | 0.092<br>(0.017-0.23)  | 0.33<br>(0.075-0.79) |
| Bhutan   | 1995 | Male   | All Ages | 18%<br>(11-26%)                | 82%<br>(74-89%)          | 1.2<br>(0.8-1.6)                            | 2.7%<br>(2-3.5%)                     | 4.9%<br>(3.1-6.8%)                  | 110<br>(69-150)        | 4200<br>(3100-5400)  |
| Bhutan   | 1995 | Male   | 15 to 19 | 5.7%<br>(1.9-14%)              | 94%<br>(86-98%)          | 0.29<br>(0.055-0.81)                        | 1.6%<br>(0.9-2.8%)                   | 1.4%<br>(0.48-3.4%)                 | 0.51<br>(0.17-1.2)     | 72<br>(40-130)       |
| Bhutan   | 1995 | Male   | 20 to 24 | 12%<br>(3.4-28%)               | 88%<br>(72-97%)          | 0.74<br>(0.14-2.1)                          | 4.3%<br>(2.5-7.2%)                   | 4.2%<br>(1.6-8.5%)                  | 1.7<br>(0.61-3.5)      | 190<br>(110-320)     |
| Bhutan   | 1995 | Male   | 25 to 29 | 20%<br>(4.9-40%)               | 80%<br>(60-95%)          | 1.4<br>(0.25-3.3)                           | 6.8%<br>(3.6-11%)                    | 7.6%<br>(2.7-14%)                   | 3.1<br>(1.1-5.8)       | 280<br>(150-450)     |
| Bhutan   | 1995 | Male   | 30 to 34 | 29%<br>(5.5-54%)               | 71%<br>(46-95%)          | 2.2<br>(0.49-4.6)                           | 9.3%<br>(5-14%)                      | 12%<br>(5.2-19%)                    | 4.7<br>(1.9-7.7)       | 340<br>(180-530)     |
| Bhutan   | 1995 | Male   | 35 to 39 | 37%<br>(9.6-62%)               | 63%<br>(38-90%)          | 2.8<br>(0.81-5.8)                           | 11%<br>(5.9-16%)                     | 14%<br>(6.9-21%)                    | 6.7<br>(3.1-10)        | 420<br>(230-620)     |
| Bhutan   | 1995 | Male   | 40 to 44 | 41%<br>(13-65%)                | 59%<br>(35-87%)          | 3.3<br>(1.1-6.5)                            | 12%<br>(7-16%)                       | 16%<br>(8.7-22%)                    | 7.7<br>(4.2-11)        | 420<br>(250-600)     |
| Bhutan   | 1995 | Male   | 45 to 49 | 43%<br>(15-65%)                | 57%<br>(35-85%)          | 3.6<br>(1.1-7.3)                            | 12%<br>(6.8-17%)                     | 16%<br>(8.6-23%)                    | 9.9<br>(5.2-15)        | 460<br>(260-660)     |
| Bhutan   | 1995 | Male   | 50 to 54 | 43%<br>(20-65%)                | 57%<br>(35-80%)          | 3.8<br>(1.3-7.9)                            | 12%<br>(6.6-16%)                     | 16%<br>(8.5-22%)                    | 12<br>(6.1-17)         | 470<br>(260-670)     |
| Bhutan   | 1995 | Male   | 55 to 59 | 42%<br>(22-63%)                | 58%<br>(37-78%)          | 3.9<br>(1.2-8.5)                            | 11%<br>(5.5-16%)                     | 15%<br>(6.8-21%)                    | 13<br>(5.7-19)         | 440<br>(210-640)     |
| Bhutan   | 1995 | Male   | 60 to 64 | 43%<br>(22-63%)                | 57%<br>(37-78%)          | 3.9<br>(1.1-9)                              | 9.8%<br>(4.2-14%)                    | 12%<br>(5.2-18%)                    | 14<br>(5.8-21)         | 390<br>(180-610)     |
| Bhutan   | 1995 | Male   | 65 to 69 | 44%<br>(23-63%)                | 56%<br>(37-77%)          | 3.6<br>(1.1-7.9)                            | 8.8%<br>(3.6-14%)                    | 11%<br>(4.3-17%)                    | 13<br>(4.9-21)         | 300<br>(120-490)     |
| Bhutan   | 1995 | Male   | 70 to 74 | 42%<br>(23-61%)                | 58%<br>(39-77%)          | 3.1<br>(0.84-7.7)                           | 6.9%<br>(1.9-12%)                    | 8.4%<br>(2.1-15%)                   | 9.9<br>(2.4-18)        | 190<br>(49-340)      |
| Bhutan   | 1995 | Male   | 75 to 79 | 39%<br>(19-60%)                | 61%<br>(40-81%)          | 2.7<br>(0.55-7.4)                           | 5.3%<br>(0.96-11%)                   | 6.3%<br>(1-12%)                     | 6.4<br>(0.98-13)       | 95<br>(17-180)       |
| Bhutan   | 1995 | Male   | 80 to 84 | 37%<br>(17-58%)                | 63%<br>(42-83%)          | 2.6<br>(0.58-7)                             | 5%<br>(0.74-10%)                     | 5.7%<br>(0.73-12%)                  | 4.5<br>(0.56-9.2)      | 49<br>(7.3-99)       |
| Bhutan   | 1995 | Male   | 85 to 89 | 37%<br>(16-56%)                | 63%<br>(44-84%)          | 2.7<br>(0.57-7.8)                           | 4.4%<br>(0.59-8.7%)                  | 5%<br>(0.57-10%)                    | 2.4<br>(0.27-5)        | 19<br>(2.5-38)       |
| Bhutan   | 1995 | Male   | 90 to 94 | 39%<br>(18-58%)                | 61%<br>(42-82%)          | 3<br>(0.53-9.1)                             | 3.9%<br>(0.38-8.1%)                  | 4.4%<br>(0.24-9.3%)                 | 0.8<br>(0.045-1.7)     | 4.4<br>(0.42-9)      |
| Bhutan   | 1995 | Male   | 95 plus  | 43%<br>(20-64%)                | 57%<br>(36-80%)          | 3.3<br>(0.48-11)                            | 3.6%<br>(0.2-7.6%)                   | 3.8%<br>(-0.026-8.6%)               | 0.17<br>(-0.0011-0.37) | 0.62<br>(0.035-1.3)  |
| Bhutan   | 2000 | Female | All Ages | 1.7%<br>(1.1-2.6%)             | 98%<br>(97-99%)          | 0.26<br>(0.13-0.45)                         | 0.68%<br>(0.52-0.87%)                | 1.1%<br>(0.71-1.7%)                 | 22<br>(14-33)          | 960<br>(720-1200)    |
| Bhutan   | 2000 | Female | 15 to 19 | 1.3%<br>(0.55-2.8%)            | 99%<br>(97-99%)          | 0.12<br>(0.032-0.31)                        | 0.73%<br>(0.46-1.1%)                 | 0.32%<br>(0.11-0.72%)               | 0.15<br>(0.049-0.34)   | 47<br>(28-70)        |
| Bhutan   | 2000 | Female | 20 to 24 | 1.5%<br>(0.5-3.3%)             | 98%<br>(97-100%)         | 0.25<br>(0.066-0.68)                        | 1.5%<br>(1-2.2%)                     | 0.53%<br>(0.22-1.1%)                | 0.26<br>(0.1-0.55)     | 93<br>(58-140)       |



| Location | Year | Sex    | Age      | Prevalence of current drinkers | Prevalence of abstainers | Population average of standard drinks daily | Percent of total attributable deaths | Percent of total attributable DALYs | Attributable deaths | Attributable DALYs  |
|----------|------|--------|----------|--------------------------------|--------------------------|---------------------------------------------|--------------------------------------|-------------------------------------|---------------------|---------------------|
| Bhutan   | 2000 | Female | 25 to 29 | 1.7%<br>(0.5-3.8%)             | 98%<br>(96-100%)         | 0.4<br>(0.11-1)                             | 1.7%<br>(1.2-2.3%)                   | 0.76%<br>(0.33-1.5%)                | 0.31<br>(0.13-0.62) | 81<br>(54-110)      |
| Bhutan   | 2000 | Female | 30 to 34 | 2.1%<br>(0.56-4.6%)            | 98%<br>(95-99%)          | 0.54<br>(0.14-1.3)                          | 1.7%<br>(1.2-2.4%)                   | 1.2%<br>(0.6-2.2%)                  | 0.51<br>(0.23-0.95) | 77<br>(51-110)      |
| Bhutan   | 2000 | Female | 35 to 39 | 2.6%<br>(0.69-5.3%)            | 97%<br>(95-99%)          | 0.64<br>(0.17-1.5)                          | 2%<br>(1.4-2.8%)                     | 2%<br>(1-3.4%)                      | 0.79<br>(0.4-1.3)   | 75<br>(50-110)      |
| Bhutan   | 2000 | Female | 40 to 44 | 2.9%<br>(1-6.4%)               | 97%<br>(94-99%)          | 0.69<br>(0.24-1.5)                          | 2.1%<br>(1.4-3.1%)                   | 2.6%<br>(1.5-4.2%)                  | 1.2<br>(0.66-2)     | 84<br>(54-130)      |
| Bhutan   | 2000 | Female | 45 to 49 | 3.2%<br>(1.1-7%)               | 97%<br>(93-99%)          | 0.68<br>(0.22-1.6)                          | 2.3%<br>(1.5-3.5%)                   | 2.9%<br>(1.6-4.9%)                  | 1.5<br>(0.82-2.5)   | 82<br>(53-130)      |
| Bhutan   | 2000 | Female | 50 to 54 | 3.5%<br>(1.2-7.6%)             | 97%<br>(92-99%)          | 0.72<br>(0.21-1.7)                          | 2.3%<br>(1.5-3.6%)                   | 3%<br>(1.6-5%)                      | 1.6<br>(0.86-2.8)   | 76<br>(46-120)      |
| Bhutan   | 2000 | Female | 55 to 59 | 3.7%<br>(1.3-8%)               | 96%<br>(92-99%)          | 0.85<br>(0.25-2.2)                          | 2.3%<br>(1.3-3.9%)                   | 2.9%<br>(1.5-5.3%)                  | 2<br>(1-3.8)        | 77<br>(44-130)      |
| Bhutan   | 2000 | Female | 60 to 64 | 4%<br>(1.4-8.6%)               | 96%<br>(91-99%)          | 0.91<br>(0.24-2.5)                          | 2.1%<br>(1.1-3.8%)                   | 2.7%<br>(1.3-5%)                    | 2.4<br>(1.2-4.5)    | 75<br>(39-130)      |
| Bhutan   | 2000 | Female | 65 to 69 | 4.4%<br>(1.5-9.1%)             | 96%<br>(91-98%)          | 0.84<br>(0.22-2.1)                          | 2.1%<br>(1-3.9%)                     | 2.6%<br>(1.2-5%)                    | 3<br>(1.4-5.7)      | 74<br>(37-140)      |
| Bhutan   | 2000 | Female | 70 to 74 | 4.5%<br>(1.7-9%)               | 95%<br>(91-98%)          | 0.71<br>(0.19-1.9)                          | 1.9%<br>(0.93-3.6%)                  | 2.4%<br>(1.1-4.5%)                  | 2.9<br>(1.3-5.4)    | 55<br>(27-100)      |
| Bhutan   | 2000 | Female | 75 to 79 | 4.6%<br>(1.7-9.9%)             | 95%<br>(90-98%)          | 0.64<br>(0.15-1.8)                          | 1.7%<br>(0.68-3.3%)                  | 2%<br>(0.78-4%)                     | 2.1<br>(0.84-4.4)   | 32<br>(13-64)       |
| Bhutan   | 2000 | Female | 80 to 84 | 5%<br>(1.6-12%)                | 95%<br>(88-98%)          | 0.63<br>(0.14-1.9)                          | 1.6%<br>(0.57-3.7%)                  | 1.9%<br>(0.66-4.4%)                 | 1.7<br>(0.56-4)     | 18<br>(6.4-43)      |
| Bhutan   | 2000 | Female | 85 to 89 | 5.9%<br>(1.8-13%)              | 94%<br>(87-98%)          | 0.66<br>(0.15-1.8)                          | 1.6%<br>(0.53-3.9%)                  | 1.9%<br>(0.57-4.8%)                 | 1.1<br>(0.34-2.8)   | 8.5<br>(2.8-21)     |
| Bhutan   | 2000 | Female | 90 to 94 | 7.3%<br>(2.3-17%)              | 93%<br>(83-98%)          | 0.74<br>(0.16-2.1)                          | 1.7%<br>(0.47-3.9%)                  | 1.9%<br>(0.5-4.7%)                  | 0.47<br>(0.12-1.1)  | 2.5<br>(0.71-5.8)   |
| Bhutan   | 2000 | Female | 95 plus  | 9.7%<br>(2.5-23%)              | 90%<br>(77-97%)          | 0.86<br>(0.16-2.4)                          | 1.8%<br>(0.37-4.4%)                  | 2%<br>(0.31-5.1%)                   | 0.12<br>(0.019-0.3) | 0.43<br>(0.086-1)   |
| Bhutan   | 2000 | Male   | All Ages | 19%<br>(11-27%)                | 81%<br>(73-89%)          | 1.1<br>(0.74-1.6)                           | 2.7%<br>(2-3.4%)                     | 4.6%<br>(2.8-6.5%)                  | 100<br>(61-150)     | 4000<br>(2900-5200) |
| Bhutan   | 2000 | Male   | 15 to 19 | 5.6%<br>(1.7-14%)              | 94%<br>(86-98%)          | 0.25<br>(0.045-0.78)                        | 1.3%<br>(0.74-2.2%)                  | 0.96%<br>(0.35-2.2%)                | 0.51<br>(0.19-1.2)  | 79<br>(45-140)      |
| Bhutan   | 2000 | Male   | 20 to 24 | 12%<br>(3.2-26%)               | 88%<br>(74-97%)          | 0.66<br>(0.13-1.9)                          | 3.5%<br>(2.1-5.7%)                   | 2.9%<br>(1.1-6.2%)                  | 1.6<br>(0.62-3.3)   | 200<br>(120-340)    |
| Bhutan   | 2000 | Male   | 25 to 29 | 20%<br>(4.5-42%)               | 80%<br>(58-96%)          | 1.3<br>(0.23-3.1)                           | 5.6%<br>(3.1-8.9%)                   | 5.5%<br>(2-11%)                     | 2.8<br>(1-5.2)      | 270<br>(150-440)    |
| Bhutan   | 2000 | Male   | 30 to 34 | 29%<br>(5.6-55%)               | 71%<br>(45-94%)          | 2<br>(0.46-4.2)                             | 7.7%<br>(4.5-11%)                    | 8.9%<br>(4.1-14%)                   | 4.6<br>(2.1-7.6)    | 360<br>(200-540)    |
| Bhutan   | 2000 | Male   | 35 to 39 | 37%<br>(9.3-62%)               | 63%<br>(38-91%)          | 2.6<br>(0.71-5.5)                           | 9.1%<br>(5.1-13%)                    | 11%<br>(5.4-17%)                    | 5.8<br>(2.7-9.2)    | 380<br>(210-550)    |
| Bhutan   | 2000 | Male   | 40 to 44 | 41%<br>(13-64%)                | 59%<br>(36-87%)          | 3<br>(0.96-6.1)                             | 9.8%<br>(5.8-14%)                    | 13%<br>(6.7-19%)                    | 7.4<br>(3.9-11)     | 420<br>(250-600)    |

| Location | Year | Sex    | Age      | Prevalence of current drinkers | Prevalence of abstainers | Population average of standard drinks daily | Percent of total attributable deaths | Percent of total attributable DALYs | Attributable deaths    | Attributable DALYs  |
|----------|------|--------|----------|--------------------------------|--------------------------|---------------------------------------------|--------------------------------------|-------------------------------------|------------------------|---------------------|
| Bhutan   | 2000 | Male   | 45 to 49 | 42%<br>(14-65%)                | 58%<br>(35-86%)          | 3.3<br>(0.98-6.8)                           | 10%<br>(5.5-15%)                     | 13%<br>(6.8-19%)                    | 8.6<br>(4.3-13)        | 410<br>(220-590)    |
| Bhutan   | 2000 | Male   | 50 to 54 | 43%<br>(19-64%)                | 57%<br>(36-81%)          | 3.5<br>(1.1-7.1)                            | 10%<br>(5.2-14%)                     | 13%<br>(6.5-19%)                    | 10<br>(5-15)           | 420<br>(220-610)    |
| Bhutan   | 2000 | Male   | 55 to 59 | 42%<br>(22-63%)                | 58%<br>(37-78%)          | 3.6<br>(1.1-8)                              | 9.6%<br>(4.6-14%)                    | 13%<br>(5.7-18%)                    | 11<br>(5.1-17)         | 400<br>(190-600)    |
| Bhutan   | 2000 | Male   | 60 to 64 | 43%<br>(22-63%)                | 57%<br>(37-78%)          | 3.6<br>(1-8.2)                              | 8.5%<br>(3.4-13%)                    | 11%<br>(4.1-17%)                    | 12<br>(4.5-19)         | 360<br>(140-560)    |
| Bhutan   | 2000 | Male   | 65 to 69 | 44%<br>(24-63%)                | 56%<br>(37-76%)          | 3.3<br>(0.98-7.2)                           | 7.7%<br>(2.7-12%)                    | 9.6%<br>(3.2-16%)                   | 12<br>(4.1-21)         | 300<br>(100-500)    |
| Bhutan   | 2000 | Male   | 70 to 74 | 42%<br>(24-61%)                | 58%<br>(39-76%)          | 2.8<br>(0.79-7.2)                           | 6%<br>(1.5-11%)                      | 7.3%<br>(1.7-14%)                   | 10<br>(2.3-19)         | 190<br>(48-360)     |
| Bhutan   | 2000 | Male   | 75 to 79 | 39%<br>(20-60%)                | 61%<br>(40-80%)          | 2.5<br>(0.51-6.8)                           | 4.7%<br>(0.73-9.6%)                  | 5.5%<br>(0.75-12%)                  | 6.7<br>(0.92-14)       | 100<br>(16-210)     |
| Bhutan   | 2000 | Male   | 80 to 84 | 37%<br>(16-58%)                | 63%<br>(42-84%)          | 2.4<br>(0.53-6.4)                           | 4.4%<br>(0.55-9.2%)                  | 5.1%<br>(0.49-11%)                  | 4.8<br>(0.43-10)       | 53<br>(6.2-110)     |
| Bhutan   | 2000 | Male   | 85 to 89 | 37%<br>(16-57%)                | 63%<br>(43-84%)          | 2.5<br>(0.52-6.7)                           | 4%<br>(0.42-8.7%)                    | 4.5%<br>(0.33-10%)                  | 2.8<br>(0.2-6.2)       | 22<br>(2.3-47)      |
| Bhutan   | 2000 | Male   | 90 to 94 | 40%<br>(17-59%)                | 60%<br>(41-83%)          | 2.7<br>(0.48-8.1)                           | 3.6%<br>(0.16-8%)                    | 4.1%<br>(-0.039-9.2%)               | 1.1<br>(-0.011-2.4)    | 5.8<br>(0.25-13)    |
| Bhutan   | 2000 | Male   | 95 plus  | 42%<br>(19-64%)                | 58%<br>(36-81%)          | 3<br>(0.41-9.5)                             | 3.4%<br>(0.096-7.7%)                 | 3.6%<br>(-0.13-8.6%)                | 0.22<br>(-0.0077-0.53) | 0.84<br>(0.024-1.9) |
| Bhutan   | 2005 | Female | All Ages | 1.8%<br>(1.2-2.7%)             | 98%<br>(97-99%)          | 0.21<br>(0.11-0.38)                         | 0.82%<br>(0.63-1%)                   | 1.1%<br>(0.66-1.8%)                 | 20<br>(11-31)          | 990<br>(740-1300)   |
| Bhutan   | 2005 | Female | 15 to 19 | 1.4%<br>(0.53-2.9%)            | 99%<br>(97-99%)          | 0.088<br>(0.021-0.23)                       | 0.91%<br>(0.59-1.3%)                 | 0.3%<br>(0.097-0.69%)               | 0.1<br>(0.032-0.24)    | 55<br>(34-81)       |
| Bhutan   | 2005 | Female | 20 to 24 | 1.6%<br>(0.5-3.5%)             | 98%<br>(97-100%)         | 0.19<br>(0.048-0.53)                        | 2.1%<br>(1.4-2.9%)                   | 0.54%<br>(0.22-1.1%)                | 0.19<br>(0.075-0.42)   | 120<br>(73-180)     |
| Bhutan   | 2005 | Female | 25 to 29 | 1.8%<br>(0.54-3.9%)            | 98%<br>(96-99%)          | 0.3<br>(0.086-0.71)                         | 2.1%<br>(1.6-2.9%)                   | 0.78%<br>(0.35-1.5%)                | 0.26<br>(0.11-0.51)    | 110<br>(70-150)     |
| Bhutan   | 2005 | Female | 30 to 34 | 2.2%<br>(0.64-4.7%)            | 98%<br>(95-99%)          | 0.4<br>(0.12-0.95)                          | 2%<br>(1.4-2.7%)                     | 1.3%<br>(0.63-2.2%)                 | 0.43<br>(0.2-0.78)     | 86<br>(58-120)      |
| Bhutan   | 2005 | Female | 35 to 39 | 2.6%<br>(0.74-5.7%)            | 97%<br>(94-99%)          | 0.48<br>(0.13-1.1)                          | 2%<br>(1.4-2.8%)                     | 2%<br>(1-3.3%)                      | 0.73<br>(0.38-1.2)     | 85<br>(57-120)      |
| Bhutan   | 2005 | Female | 40 to 44 | 3%<br>(1.1-6.2%)               | 97%<br>(94-99%)          | 0.51<br>(0.18-1.2)                          | 2%<br>(1.4-2.9%)                     | 2.5%<br>(1.4-4.1%)                  | 0.97<br>(0.54-1.6)     | 79<br>(52-110)      |
| Bhutan   | 2005 | Female | 45 to 49 | 3.2%<br>(1.2-6.6%)             | 97%<br>(93-99%)          | 0.5<br>(0.16-1.1)                           | 2.1%<br>(1.4-3.2%)                   | 2.7%<br>(1.6-4.5%)                  | 1.5<br>(0.82-2.4)      | 88<br>(58-130)      |
| Bhutan   | 2005 | Female | 50 to 54 | 3.5%<br>(1.3-7.6%)             | 96%<br>(92-99%)          | 0.54<br>(0.15-1.3)                          | 2.1%<br>(1.4-3.2%)                   | 2.8%<br>(1.5-4.8%)                  | 1.5<br>(0.76-2.4)      | 73<br>(45-110)      |
| Bhutan   | 2005 | Female | 55 to 59 | 3.8%<br>(1.4-8.4%)             | 96%<br>(92-99%)          | 0.65<br>(0.18-1.7)                          | 2.1%<br>(1.2-3.5%)                   | 2.7%<br>(1.4-5%)                    | 1.7<br>(0.84-3.2)      | 69<br>(40-120)      |
| Bhutan   | 2005 | Female | 60 to 64 | 4.1%<br>(1.4-8.8%)             | 96%<br>(91-99%)          | 0.69<br>(0.17-2)                            | 2%<br>(1.1-3.5%)                     | 2.5%<br>(1.2-4.9%)                  | 2<br>(0.96-3.9)        | 66<br>(36-120)      |

| Location | Year | Sex    | Age      | Prevalence of current drinkers | Prevalence of abstainers | Population average of standard drinks daily | Percent of total attributable deaths | Percent of total attributable DALYs | Attributable deaths   | Attributable DALYs  |
|----------|------|--------|----------|--------------------------------|--------------------------|---------------------------------------------|--------------------------------------|-------------------------------------|-----------------------|---------------------|
| Bhutan   | 2005 | Female | 65 to 69 | 4.5%<br>(1.5-9.6%)             | 95%<br>(90-98%)          | 0.64<br>(0.16-1.6)                          | 1.9%<br>(0.9-3.4%)                   | 2.4%<br>(1.1-4.6%)                  | 2.4<br>(1-4.5)        | 60<br>(29-110)      |
| Bhutan   | 2005 | Female | 70 to 74 | 4.7%<br>(1.7-9.4%)             | 95%<br>(91-98%)          | 0.54<br>(0.13-1.4)                          | 1.7%<br>(0.72-3.1%)                  | 2.1%<br>(0.87-4.2%)                 | 2.5<br>(0.99-4.9)     | 49<br>(21-93)       |
| Bhutan   | 2005 | Female | 75 to 79 | 4.8%<br>(1.6-11%)              | 95%<br>(89-98%)          | 0.48<br>(0.1-1.4)                           | 1.4%<br>(0.48-2.9%)                  | 1.7%<br>(0.56-3.6%)                 | 2<br>(0.64-4.3)       | 30<br>(11-63)       |
| Bhutan   | 2005 | Female | 80 to 84 | 5.1%<br>(1.7-12%)              | 95%<br>(88-98%)          | 0.46<br>(0.1-1.4)                           | 1.3%<br>(0.4-3.2%)                   | 1.6%<br>(0.44-3.9%)                 | 1.7<br>(0.44-4.1)     | 19<br>(5.6-44)      |
| Bhutan   | 2005 | Female | 85 to 89 | 5.9%<br>(1.9-13%)              | 94%<br>(87-98%)          | 0.48<br>(0.12-1.4)                          | 1.3%<br>(0.31-3.3%)                  | 1.5%<br>(0.32-4%)                   | 1.1<br>(0.22-2.8)     | 8.4<br>(2-21)       |
| Bhutan   | 2005 | Female | 90 to 94 | 7.4%<br>(2.5-18%)              | 93%<br>(82-98%)          | 0.55<br>(0.12-1.5)                          | 1.3%<br>(0.24-3.4%)                  | 1.5%<br>(0.2-4.1%)                  | 0.49<br>(0.066-1.3)   | 2.6<br>(0.49-6.8)   |
| Bhutan   | 2005 | Female | 95 plus  | 9.9%<br>(2.9-23%)              | 90%<br>(77-97%)          | 0.64<br>(0.12-1.9)                          | 1.4%<br>(0.13-3.8%)                  | 1.5%<br>(0.02-4.6%)                 | 0.14<br>(0.0019-0.43) | 0.52<br>(0.046-1.5) |
| Bhutan   | 2005 | Male   | All Ages | 20%<br>(12-29%)                | 80%<br>(71-88%)          | 0.86<br>(0.55-1.3)                          | 2.9%<br>(2-3.9%)                     | 4.4%<br>(2.2-6.7%)                  | 94<br>(47-150)        | 4100<br>(2800-5500) |
| Bhutan   | 2005 | Male   | 15 to 19 | 5.8%<br>(1.8-15%)              | 94%<br>(85-98%)          | 0.19<br>(0.034-0.6)                         | 1.6%<br>(0.99-2.5%)                  | 1.1%<br>(0.45-2.6%)                 | 0.46<br>(0.18-1.1)    | 89<br>(54-150)      |
| Bhutan   | 2005 | Male   | 20 to 24 | 12%<br>(3.2-28%)               | 88%<br>(72-97%)          | 0.49<br>(0.088-1.4)                         | 4.3%<br>(2.9-6.5%)                   | 3.2%<br>(1.3-6.7%)                  | 1.8<br>(0.71-3.8)     | 290<br>(180-460)    |
| Bhutan   | 2005 | Male   | 25 to 29 | 20%<br>(4.4-42%)               | 80%<br>(58-96%)          | 0.9<br>(0.17-2.2)                           | 6%<br>(3.8-9.1%)                     | 5.6%<br>(2.1-11%)                   | 3.1<br>(1.2-6.2)      | 380<br>(230-590)    |
| Bhutan   | 2005 | Male   | 30 to 34 | 29%<br>(5.6-55%)               | 71%<br>(45-94%)          | 1.4<br>(0.32-3)                             | 7.5%<br>(4.7-11%)                    | 8.6%<br>(4.1-14%)                   | 4.4<br>(2-7.5)        | 390<br>(230-580)    |
| Bhutan   | 2005 | Male   | 35 to 39 | 36%<br>(9.9-61%)               | 64%<br>(39-90%)          | 1.9<br>(0.53-3.9)                           | 8.3%<br>(4.9-12%)                    | 10%<br>(5.1-17%)                    | 6.5<br>(3.1-11)       | 460<br>(260-700)    |
| Bhutan   | 2005 | Male   | 40 to 44 | 40%<br>(15-64%)                | 60%<br>(36-85%)          | 2.2<br>(0.71-4.3)                           | 8.6%<br>(4.9-13%)                    | 11%<br>(5.4-18%)                    | 6.6<br>(3.1-11)       | 390<br>(230-590)    |
| Bhutan   | 2005 | Male   | 45 to 49 | 42%<br>(16-65%)                | 58%<br>(35-84%)          | 2.4<br>(0.73-4.9)                           | 8.7%<br>(4.6-13%)                    | 11%<br>(5.3-18%)                    | 8.9<br>(4-15)         | 450<br>(230-700)    |
| Bhutan   | 2005 | Male   | 50 to 54 | 42%<br>(20-64%)                | 58%<br>(36-80%)          | 2.5<br>(0.77-5.4)                           | 8.3%<br>(4.1-13%)                    | 11%<br>(4.5-18%)                    | 8.3<br>(3.4-14)       | 360<br>(160-560)    |
| Bhutan   | 2005 | Male   | 55 to 59 | 42%<br>(22-62%)                | 58%<br>(38-78%)          | 2.6<br>(0.78-5.8)                           | 7.8%<br>(3.1-13%)                    | 10%<br>(3.6-17%)                    | 9.8<br>(3.4-17)       | 360<br>(140-590)    |
| Bhutan   | 2005 | Male   | 60 to 64 | 43%<br>(23-63%)                | 57%<br>(37-77%)          | 2.6<br>(0.73-6)                             | 6.8%<br>(2.4-12%)                    | 8.6%<br>(2.5-15%)                   | 10<br>(2.7-18)        | 310<br>(100-530)    |
| Bhutan   | 2005 | Male   | 65 to 69 | 44%<br>(24-62%)                | 56%<br>(38-76%)          | 2.4<br>(0.72-5.6)                           | 5.9%<br>(1.6-11%)                    | 7.4%<br>(1.7-14%)                   | 10<br>(2.3-20)        | 250<br>(68-480)     |
| Bhutan   | 2005 | Male   | 70 to 74 | 42%<br>(24-61%)                | 58%<br>(39-76%)          | 2.1<br>(0.57-5.5)                           | 4.5%<br>(0.7-10%)                    | 5.5%<br>(0.59-13%)                  | 8.7<br>(0.91-20)      | 170<br>(26-380)     |
| Bhutan   | 2005 | Male   | 75 to 79 | 39%<br>(20-60%)                | 61%<br>(40-80%)          | 1.8<br>(0.36-5.1)                           | 3.5%<br>(0.29-8.4%)                  | 4.1%<br>(0.13-10%)                  | 6.2<br>(0.21-16)      | 95<br>(7.6-230)     |
| Bhutan   | 2005 | Male   | 80 to 84 | 37%<br>(17-58%)                | 63%<br>(42-83%)          | 1.8<br>(0.36-4.7)                           | 3.2%<br>(0.09-8%)                    | 3.7%<br>(-0.068-9.4%)               | 4.9<br>(-0.081-13)    | 54<br>(1.5-140)     |

| Location | Year | Sex    | Age      | Prevalence of current drinkers | Prevalence of abstainers | Population average of standard drinks daily | Percent of total attributable deaths | Percent of total attributable DALYs | Attributable deaths   | Attributable DALYs  |
|----------|------|--------|----------|--------------------------------|--------------------------|---------------------------------------------|--------------------------------------|-------------------------------------|-----------------------|---------------------|
| Bhutan   | 2005 | Male   | 85 to 89 | 37%<br>(16-57%)                | 63%<br>(43-84%)          | 1.8<br>(0.36-5.1)                           | 3%<br>(-0.078-7.6%)                  | 3.4%<br>(-0.26-8.8%)                | 2.7<br>(-0.21-7.1)    | 21<br>(-0.57-54)    |
| Bhutan   | 2005 | Male   | 90 to 94 | 39%<br>(18-59%)                | 61%<br>(41-82%)          | 2<br>(0.36-6)                               | 2.8%<br>(-0.17-7.4%)                 | 3.1%<br>(-0.42-8.6%)                | 1.1<br>(-0.15-3)      | 6<br>(-0.36-16)     |
| Bhutan   | 2005 | Male   | 95 plus  | 43%<br>(19-64%)                | 57%<br>(36-81%)          | 2.3<br>(0.32-7.6)                           | 2.7%<br>(-0.23-7.4%)                 | 2.9%<br>(-0.58-8.3%)                | 0.27<br>(-0.053-0.76) | 1<br>(-0.086-2.7)   |
| Bhutan   | 2010 | Female | All Ages | 1.8%<br>(1.2-2.7%)             | 98%<br>(97-99%)          | 0.19<br>(0.086-0.36)                        | 0.96%<br>(0.73-1.2%)                 | 1.1%<br>(0.58-1.9%)                 | 17<br>(8.5-29)        | 1000<br>(740-1300)  |
| Bhutan   | 2010 | Female | 15 to 19 | 1.3%<br>(0.51-2.7%)            | 99%<br>(97-99%)          | 0.072<br>(0.016-0.21)                       | 0.97%<br>(0.63-1.4%)                 | 0.26%<br>(0.09-0.62%)               | 0.065<br>(0.021-0.16) | 52<br>(32-79)       |
| Bhutan   | 2010 | Female | 20 to 24 | 1.5%<br>(0.48-3.4%)            | 98%<br>(97-100%)         | 0.15<br>(0.037-0.44)                        | 2.3%<br>(1.5-3.2%)                   | 0.5%<br>(0.2-1%)                    | 0.15<br>(0.058-0.32)  | 130<br>(85-200)     |
| Bhutan   | 2010 | Female | 25 to 29 | 1.7%<br>(0.5-3.8%)             | 98%<br>(96-100%)         | 0.24<br>(0.064-0.59)                        | 2.3%<br>(1.7-3%)                     | 0.73%<br>(0.34-1.4%)                | 0.22<br>(0.097-0.43)  | 120<br>(78-170)     |
| Bhutan   | 2010 | Female | 30 to 34 | 2.1%<br>(0.6-4.5%)             | 98%<br>(95-99%)          | 0.33<br>(0.091-0.77)                        | 2%<br>(1.4-2.7%)                     | 1.2%<br>(0.61-2.1%)                 | 0.39<br>(0.19-0.71)   | 100<br>(66-140)     |
| Bhutan   | 2010 | Female | 35 to 39 | 2.5%<br>(0.7-5.5%)             | 97%<br>(94-99%)          | 0.39<br>(0.1-0.91)                          | 2%<br>(1.5-2.6%)                     | 1.9%<br>(1-3.1%)                    | 0.64<br>(0.34-1.1)    | 90<br>(61-120)      |
| Bhutan   | 2010 | Female | 40 to 44 | 2.8%<br>(1-6.3%)               | 97%<br>(94-99%)          | 0.41<br>(0.13-0.97)                         | 1.9%<br>(1.4-2.7%)                   | 2.3%<br>(1.3-3.8%)                  | 0.91<br>(0.51-1.5)    | 85<br>(57-120)      |
| Bhutan   | 2010 | Female | 45 to 49 | 3.1%<br>(1.1-6.6%)             | 97%<br>(93-99%)          | 0.41<br>(0.12-0.98)                         | 1.9%<br>(1.3-2.8%)                   | 2.4%<br>(1.4-4%)                    | 1.2<br>(0.66-2.1)     | 81<br>(53-120)      |
| Bhutan   | 2010 | Female | 50 to 54 | 3.4%<br>(1.2-7.3%)             | 97%<br>(93-99%)          | 0.44<br>(0.11-1.1)                          | 1.9%<br>(1.2-2.8%)                   | 2.5%<br>(1.3-4.2%)                  | 1.4<br>(0.72-2.4)     | 77<br>(48-120)      |
| Bhutan   | 2010 | Female | 55 to 59 | 3.6%<br>(1.3-7.7%)             | 96%<br>(92-99%)          | 0.52<br>(0.13-1.4)                          | 1.8%<br>(1.1-3%)                     | 2.4%<br>(1.2-4.3%)                  | 1.5<br>(0.72-2.7)     | 65<br>(38-110)      |
| Bhutan   | 2010 | Female | 60 to 64 | 3.9%<br>(1.3-8.5%)             | 96%<br>(92-99%)          | 0.56<br>(0.13-1.6)                          | 1.7%<br>(0.93-3.1%)                  | 2.2%<br>(1-4.4%)                    | 1.7<br>(0.77-3.4)     | 58<br>(31-110)      |
| Bhutan   | 2010 | Female | 65 to 69 | 4.3%<br>(1.6-9.1%)             | 96%<br>(91-98%)          | 0.51<br>(0.12-1.4)                          | 1.6%<br>(0.77-2.9%)                  | 2.1%<br>(0.93-4%)                   | 1.9<br>(0.81-3.7)     | 52<br>(25-95)       |
| Bhutan   | 2010 | Female | 70 to 74 | 4.4%<br>(1.8-8.8%)             | 96%<br>(91-98%)          | 0.43<br>(0.1-1.1)                           | 1.4%<br>(0.59-2.6%)                  | 1.8%<br>(0.69-3.5%)                 | 1.9<br>(0.7-3.7)      | 39<br>(16-73)       |
| Bhutan   | 2010 | Female | 75 to 79 | 4.5%<br>(1.6-9.8%)             | 96%<br>(90-98%)          | 0.38<br>(0.079-1.2)                         | 1.1%<br>(0.38-2.5%)                  | 1.4%<br>(0.44-3.2%)                 | 1.8<br>(0.52-4)       | 28<br>(9.1-60)      |
| Bhutan   | 2010 | Female | 80 to 84 | 4.8%<br>(1.6-12%)              | 95%<br>(88-98%)          | 0.37<br>(0.078-1.1)                         | 1.1%<br>(0.29-2.7%)                  | 1.3%<br>(0.32-3.4%)                 | 1.6<br>(0.38-4.4)     | 19<br>(5-48)        |
| Bhutan   | 2010 | Female | 85 to 89 | 5.7%<br>(1.7-14%)              | 94%<br>(86-98%)          | 0.4<br>(0.083-1.2)                          | 1%<br>(0.18-2.8%)                    | 1.2%<br>(0.17-3.5%)                 | 1.2<br>(0.16-3.3)     | 9.3<br>(1.6-26)     |
| Bhutan   | 2010 | Female | 90 to 94 | 7.2%<br>(2.3-17%)              | 93%<br>(83-98%)          | 0.45<br>(0.088-1.3)                         | 1%<br>(0.1-2.9%)                     | 1.2%<br>(0.032-3.5%)                | 0.54<br>(0.015-1.6)   | 3<br>(0.29-8.6)     |
| Bhutan   | 2010 | Female | 95 plus  | 9.6%<br>(2.8-22%)              | 90%<br>(78-97%)          | 0.53<br>(0.094-1.6)                         | 1.1%<br>(-0.044-3.4%)                | 1.2%<br>(-0.19-4%)                  | 0.17<br>(-0.026-0.57) | 0.63<br>(-0.027-2)  |
| Bhutan   | 2010 | Male   | All Ages | 22%<br>(13-32%)                | 78%<br>(68-87%)          | 0.82<br>(0.47-1.3)                          | 3.3%<br>(2.2-4.5%)                   | 4.2%<br>(1.8-7%)                    | 91<br>(39-160)        | 4200<br>(2700-6000) |

| Location | Year | Sex    | Age      | Prevalence of current drinkers | Prevalence of abstainers | Population average of standard drinks daily | Percent of total attributable deaths | Percent of total attributable DALYs | Attributable deaths   | Attributable DALYs |
|----------|------|--------|----------|--------------------------------|--------------------------|---------------------------------------------|--------------------------------------|-------------------------------------|-----------------------|--------------------|
| Bhutan   | 2010 | Male   | 15 to 19 | 5.8%<br>(1.7-15%)              | 94%<br>(85-98%)          | 0.16<br>(0.027-0.48)                        | 1.6%<br>(1-2.4%)                     | 1%<br>(0.43-2.4%)                   | 0.39<br>(0.16-0.92)   | 85<br>(53-140)     |
| Bhutan   | 2010 | Male   | 20 to 24 | 12%<br>(3.1-28%)               | 88%<br>(72-97%)          | 0.41<br>(0.069-1.2)                         | 4.2%<br>(2.9-6%)                     | 2.9%<br>(1.2-5.9%)                  | 1.5<br>(0.63-3.1)     | 270<br>(170-420)   |
| Bhutan   | 2010 | Male   | 25 to 29 | 20%<br>(4.6-42%)               | 80%<br>(58-95%)          | 0.77<br>(0.15-1.9)                          | 5.7%<br>(3.7-8.4%)                   | 4.9%<br>(2-9.6%)                    | 3.4<br>(1.3-6.5)      | 450<br>(280-690)   |
| Bhutan   | 2010 | Male   | 30 to 34 | 29%<br>(6.2-54%)               | 71%<br>(46-94%)          | 1.2<br>(0.28-2.7)                           | 6.8%<br>(4.4-10%)                    | 7.4%<br>(3.5-13%)                   | 5.2<br>(2.4-9.2)      | 500<br>(300-760)   |
| Bhutan   | 2010 | Male   | 35 to 39 | 37%<br>(9.8-61%)               | 63%<br>(39-90%)          | 1.6<br>(0.45-3.5)                           | 7.5%<br>(4.5-11%)                    | 9%<br>(4.3-16%)                     | 5.9<br>(2.7-11)       | 450<br>(260-690)   |
| Bhutan   | 2010 | Male   | 40 to 44 | 41%<br>(14-64%)                | 59%<br>(36-86%)          | 1.9<br>(0.57-4)                             | 7.6%<br>(4.4-12%)                    | 9.6%<br>(4.3-16%)                   | 7.4<br>(3.2-13)       | 470<br>(270-730)   |
| Bhutan   | 2010 | Male   | 45 to 49 | 42%<br>(15-65%)                | 58%<br>(35-85%)          | 2.1<br>(0.57-4.4)                           | 7.6%<br>(3.9-12%)                    | 9.9%<br>(4.4-17%)                   | 7.7<br>(3.2-14)       | 410<br>(200-670)   |
| Bhutan   | 2010 | Male   | 50 to 54 | 42%<br>(19-65%)                | 58%<br>(35-81%)          | 2.2<br>(0.61-4.8)                           | 7.1%<br>(3.3-12%)                    | 9.3%<br>(3.6-16%)                   | 9.3<br>(3.4-16)       | 410<br>(190-690)   |
| Bhutan   | 2010 | Male   | 55 to 59 | 42%<br>(22-62%)                | 58%<br>(38-78%)          | 2.2<br>(0.61-5)                             | 6.6%<br>(2.5-11%)                    | 8.6%<br>(2.8-16%)                   | 8.5<br>(2.7-16)       | 320<br>(120-570)   |
| Bhutan   | 2010 | Male   | 60 to 64 | 43%<br>(22-63%)                | 57%<br>(37-78%)          | 2.2<br>(0.58-5.2)                           | 5.7%<br>(1.8-11%)                    | 7.1%<br>(1.7-14%)                   | 9.5<br>(2.3-19)       | 300<br>(90-570)    |
| Bhutan   | 2010 | Male   | 65 to 69 | 44%<br>(24-62%)                | 56%<br>(38-76%)          | 2<br>(0.53-5)                               | 4.8%<br>(1-10%)                      | 5.9%<br>(0.91-13%)                  | 9.1<br>(1.4-20)       | 230<br>(54-480)    |
| Bhutan   | 2010 | Male   | 70 to 74 | 43%<br>(24-61%)                | 57%<br>(39-76%)          | 1.8<br>(0.41-4.8)                           | 3.6%<br>(0.39-9%)                    | 4.4%<br>(0.18-11%)                  | 7.8<br>(0.34-21)      | 160<br>(17-400)    |
| Bhutan   | 2010 | Male   | 75 to 79 | 40%<br>(20-60%)                | 60%<br>(40-80%)          | 1.6<br>(0.29-4.5)                           | 2.8%<br>(0.087-7.5%)                 | 3.2%<br>(-0.14-9.1%)                | 6.1<br>(-0.26-18)     | 96<br>(3-260)      |
| Bhutan   | 2010 | Male   | 80 to 84 | 37%<br>(18-58%)                | 63%<br>(42-82%)          | 1.5<br>(0.29-4.3)                           | 2.5%<br>(-0.12-7.3%)                 | 2.8%<br>(-0.33-8.7%)                | 5.1<br>(-0.59-16)     | 59<br>(-2.8-170)   |
| Bhutan   | 2010 | Male   | 85 to 89 | 37%<br>(16-56%)                | 63%<br>(44-84%)          | 1.5<br>(0.27-4.5)                           | 2.3%<br>(-0.22-6.8%)                 | 2.5%<br>(-0.46-8%)                  | 3<br>(-0.53-9.4)      | 24<br>(-2.5-73)    |
| Bhutan   | 2010 | Male   | 90 to 94 | 39%<br>(17-59%)                | 61%<br>(41-83%)          | 1.7<br>(0.26-5.8)                           | 2.2%<br>(-0.33-6.6%)                 | 2.3%<br>(-0.63-7.7%)                | 1.1<br>(-0.31-3.7)    | 6.4<br>(-1-20)     |
| Bhutan   | 2010 | Male   | 95 plus  | 42%<br>(19-64%)                | 58%<br>(36-81%)          | 1.9<br>(0.24-6.8)                           | 2.2%<br>(-0.44-6.6%)                 | 2.2%<br>(-0.82-7.3%)                | 0.29<br>(-0.11-0.95)  | 1.2<br>(-0.23-3.4) |
| Bhutan   | 2016 | Female | All Ages | 1.9%<br>(1.3-2.8%)             | 98%<br>(97-99%)          | 0.21<br>(0.081-0.43)                        | 1.2%<br>(0.92-1.5%)                  | 1.2%<br>(0.56-2.2%)                 | 19<br>(8.3-33)        | 1100<br>(830-1500) |
| Bhutan   | 2016 | Female | 15 to 19 | 1.3%<br>(0.55-2.7%)            | 99%<br>(97-99%)          | 0.071<br>(0.016-0.22)                       | 1%<br>(0.65-1.5%)                    | 0.27%<br>(0.097-0.66%)              | 0.049<br>(0.016-0.11) | 49<br>(29-74)      |
| Bhutan   | 2016 | Female | 20 to 24 | 1.5%<br>(0.5-3.4%)             | 98%<br>(97-99%)          | 0.15<br>(0.033-0.45)                        | 2.4%<br>(1.7-3.3%)                   | 0.5%<br>(0.21-1.1%)                 | 0.12<br>(0.048-0.26)  | 130<br>(82-190)    |
| Bhutan   | 2016 | Female | 25 to 29 | 1.7%<br>(0.49-3.7%)            | 98%<br>(96-100%)         | 0.24<br>(0.06-0.64)                         | 2.4%<br>(1.8-3.3%)                   | 0.72%<br>(0.33-1.4%)                | 0.21<br>(0.088-0.41)  | 140<br>(96-210)    |
| Bhutan   | 2016 | Female | 30 to 34 | 2.1%<br>(0.59-4.7%)            | 98%<br>(95-99%)          | 0.33<br>(0.084-0.81)                        | 2.1%<br>(1.5-2.9%)                   | 1.2%<br>(0.6-2.1%)                  | 0.39<br>(0.18-0.71)   | 120<br>(78-180)    |

| Location | Year | Sex    | Age      | Prevalence of current drinkers | Prevalence of abstainers | Population average of standard drinks daily | Percent of total attributable deaths | Percent of total attributable DALYs | Attributable deaths  | Attributable DALYs  |
|----------|------|--------|----------|--------------------------------|--------------------------|---------------------------------------------|--------------------------------------|-------------------------------------|----------------------|---------------------|
| Bhutan   | 2016 | Female | 35 to 39 | 2.6%<br>(0.64-5.5%)            | 97%<br>(94-99%)          | 0.39<br>(0.094-0.96)                        | 2%<br>(1.5-2.6%)                     | 1.8%<br>(0.98-3%)                   | 0.7<br>(0.36-1.2)    | 110<br>(75-150)     |
| Bhutan   | 2016 | Female | 40 to 44 | 2.9%<br>(1-6.1%)               | 97%<br>(94-99%)          | 0.41<br>(0.11-1)                            | 1.9%<br>(1.4-2.6%)                   | 2.2%<br>(1.3-3.5%)                  | 0.92<br>(0.52-1.6)   | 98<br>(65-140)      |
| Bhutan   | 2016 | Female | 45 to 49 | 3.1%<br>(1.1-6.7%)             | 97%<br>(93-99%)          | 0.39<br>(0.1-0.96)                          | 1.8%<br>(1.3-2.6%)                   | 2.3%<br>(1.3-3.8%)                  | 1.2<br>(0.64-2.1)    | 93<br>(61-130)      |
| Bhutan   | 2016 | Female | 50 to 54 | 3.3%<br>(1.2-7.3%)             | 97%<br>(93-99%)          | 0.43<br>(0.1-1.1)                           | 1.8%<br>(1.2-2.7%)                   | 2.3%<br>(1.2-3.9%)                  | 1.4<br>(0.7-2.5)     | 82<br>(51-120)      |
| Bhutan   | 2016 | Female | 55 to 59 | 3.6%<br>(1.3-7.9%)             | 96%<br>(92-99%)          | 0.52<br>(0.11-1.5)                          | 1.7%<br>(1.1-2.8%)                   | 2.2%<br>(1.1-4.1%)                  | 1.7<br>(0.76-3.1)    | 77<br>(45-130)      |
| Bhutan   | 2016 | Female | 60 to 64 | 3.9%<br>(1.3-8.4%)             | 96%<br>(92-99%)          | 0.55<br>(0.12-1.7)                          | 1.6%<br>(0.87-2.9%)                  | 2.1%<br>(0.93-4.2%)                 | 1.8<br>(0.79-3.7)    | 65<br>(34-120)      |
| Bhutan   | 2016 | Female | 65 to 69 | 4.2%<br>(1.5-8.9%)             | 96%<br>(91-98%)          | 0.5<br>(0.1-1.4)                            | 1.5%<br>(0.7-2.7%)                   | 2%<br>(0.8-3.7%)                    | 1.9<br>(0.75-3.8)    | 54<br>(25-99)       |
| Bhutan   | 2016 | Female | 70 to 74 | 4.3%<br>(1.6-8.7%)             | 96%<br>(91-98%)          | 0.42<br>(0.085-1.2)                         | 1.3%<br>(0.52-2.4%)                  | 1.7%<br>(0.6-3.3%)                  | 2<br>(0.68-3.9)      | 42<br>(17-78)       |
| Bhutan   | 2016 | Female | 75 to 79 | 4.4%<br>(1.6-9.5%)             | 96%<br>(91-98%)          | 0.37<br>(0.072-1.2)                         | 1%<br>(0.34-2.2%)                    | 1.3%<br>(0.36-2.9%)                 | 1.8<br>(0.47-4)      | 28<br>(8.7-61)      |
| Bhutan   | 2016 | Female | 80 to 84 | 4.7%<br>(1.6-11%)              | 95%<br>(89-98%)          | 0.36<br>(0.07-1.1)                          | 0.96%<br>(0.21-2.3%)                 | 1.2%<br>(0.2-2.9%)                  | 1.9<br>(0.3-4.8)     | 22<br>(4.5-54)      |
| Bhutan   | 2016 | Female | 85 to 89 | 5.6%<br>(1.7-13%)              | 94%<br>(87-98%)          | 0.39<br>(0.072-1.2)                         | 0.95%<br>(0.12-2.6%)                 | 1.1%<br>(0.088-3.2%)                | 1.7<br>(0.12-4.8)    | 13<br>(1.7-37)      |
| Bhutan   | 2016 | Female | 90 to 94 | 7.3%<br>(2.3-17%)              | 93%<br>(83-98%)          | 0.45<br>(0.085-1.4)                         | 0.96%<br>(0.00036-2.8%)              | 1.1%<br>(-0.082-3.4%)               | 0.87<br>(-0.067-2.7) | 4.8<br>(0.0018-14)  |
| Bhutan   | 2016 | Female | 95 plus  | 9.8%<br>(2.9-23%)              | 90%<br>(77-97%)          | 0.54<br>(0.095-1.8)                         | 1.1%<br>(-0.11-3.3%)                 | 1.1%<br>(-0.29-3.9%)                | 0.28<br>(-0.072-1)   | 1.1<br>(-0.12-3.5)  |
| Bhutan   | 2016 | Male   | All Ages | 25%<br>(14-35%)                | 75%<br>(65-86%)          | 0.92<br>(0.43-1.7)                          | 3.9%<br>(2.4-5.7%)                   | 4.4%<br>(1.6-8%)                    | 100<br>(35-190)      | 4800<br>(2800-7200) |
| Bhutan   | 2016 | Male   | 15 to 19 | 5.8%<br>(1.9-14%)              | 94%<br>(86-98%)          | 0.16<br>(0.027-0.51)                        | 1.7%<br>(1.1-2.5%)                   | 1.1%<br>(0.45-2.5%)                 | 0.33<br>(0.14-0.76)  | 81<br>(49-130)      |
| Bhutan   | 2016 | Male   | 20 to 24 | 12%<br>(3.3-27%)               | 88%<br>(73-97%)          | 0.41<br>(0.068-1.2)                         | 4.4%<br>(2.9-6.5%)                   | 2.9%<br>(1.2-6.1%)                  | 1.4<br>(0.57-3)      | 270<br>(170-420)    |
| Bhutan   | 2016 | Male   | 25 to 29 | 20%<br>(4.5-42%)               | 80%<br>(58-96%)          | 0.76<br>(0.13-2)                            | 5.8%<br>(3.8-8.5%)                   | 4.8%<br>(1.9-9.5%)                  | 2.9<br>(1.1-5.9)     | 420<br>(260-640)    |
| Bhutan   | 2016 | Male   | 30 to 34 | 30%<br>(6-55%)                 | 70%<br>(45-94%)          | 1.2<br>(0.26-2.9)                           | 6.8%<br>(4.3-9.9%)                   | 7.2%<br>(3.3-13%)                   | 5.8<br>(2.6-11)      | 600<br>(350-930)    |
| Bhutan   | 2016 | Male   | 35 to 39 | 38%<br>(9.6-63%)               | 62%<br>(37-90%)          | 1.6<br>(0.38-3.8)                           | 7.2%<br>(4.4-11%)                    | 8.5%<br>(3.8-15%)                   | 7.5<br>(3.2-14)      | 610<br>(360-960)    |
| Bhutan   | 2016 | Male   | 40 to 44 | 42%<br>(13-65%)                | 58%<br>(35-87%)          | 1.8<br>(0.52-4.3)                           | 7.3%<br>(4.2-11%)                    | 9.2%<br>(4.2-16%)                   | 7.6<br>(3.1-14)      | 500<br>(280-830)    |
| Bhutan   | 2016 | Male   | 45 to 49 | 43%<br>(14-65%)                | 57%<br>(35-86%)          | 2<br>(0.45-4.7)                             | 7.2%<br>(3.8-12%)                    | 9.4%<br>(4-17%)                     | 9.4<br>(3.8-18)      | 510<br>(260-870)    |
| Bhutan   | 2016 | Male   | 50 to 54 | 42%<br>(19-64%)                | 58%<br>(36-81%)          | 2.1<br>(0.5-5.1)                            | 6.8%<br>(3-11%)                      | 8.8%<br>(3.3-15%)                   | 9.3<br>(3.3-18)      | 420<br>(180-740)    |

| Location | Year | Sex    | Age      | Prevalence of current drinkers | Prevalence of abstainers | Population average of standard drinks daily | Percent of total attributable deaths | Percent of total attributable DALYs | Attributable deaths    | Attributable DALYs          |
|----------|------|--------|----------|--------------------------------|--------------------------|---------------------------------------------|--------------------------------------|-------------------------------------|------------------------|-----------------------------|
| Bhutan   | 2016 | Male   | 55 to 59 | 42%<br>(22-62%)                | 58%<br>(38-78%)          | 2.2<br>(0.53-5.5)                           | 6.2%<br>(2.3-11%)                    | 8%<br>(2.4-15%)                     | 11<br>(3.1-21)         | 410<br>(150-760)            |
| Bhutan   | 2016 | Male   | 60 to 64 | 43%<br>(22-63%)                | 57%<br>(37-78%)          | 2.1<br>(0.49-5.8)                           | 5.3%<br>(1.5-10%)                    | 6.5%<br>(1.4-13%)                   | 9.8<br>(2.1-20)        | 310<br>(87-620)             |
| Bhutan   | 2016 | Male   | 65 to 69 | 43%<br>(23-63%)                | 57%<br>(37-77%)          | 2<br>(0.46-5)                               | 4.4%<br>(0.9-9.7%)                   | 5.4%<br>(0.68-13%)                  | 10<br>(1.3-23)         | 260<br>(50-570)             |
| Bhutan   | 2016 | Male   | 70 to 74 | 42%<br>(24-61%)                | 58%<br>(39-76%)          | 1.7<br>(0.36-5.1)                           | 3.4%<br>(0.32-8.6%)                  | 4%<br>(0.086-11%)                   | 8.8<br>(0.17-24)       | 180<br>(16-470)             |
| Bhutan   | 2016 | Male   | 75 to 79 | 39%<br>(19-60%)                | 61%<br>(40-81%)          | 1.5<br>(0.25-4.9)                           | 2.5%<br>(0.041-7.2%)                 | 2.9%<br>(-0.18-8.6%)                | 6.8<br>(-0.44-20)      | 110<br>(1.8-310)            |
| Bhutan   | 2016 | Male   | 80 to 84 | 37%<br>(17-58%)                | 63%<br>(42-83%)          | 1.4<br>(0.24-4.5)                           | 2.3%<br>(-0.23-7%)                   | 2.5%<br>(-0.43-8.4%)                | 6.4<br>(-1.1-21)       | 74<br>(-7.3-230)            |
| Bhutan   | 2016 | Male   | 85 to 89 | 37%<br>(16-57%)                | 63%<br>(43-84%)          | 1.5<br>(0.24-4.5)                           | 2.1%<br>(-0.33-6.5%)                 | 2.3%<br>(-0.58-7.7%)                | 4.2<br>(-1.14)         | 34<br>(-5.3-110)            |
| Bhutan   | 2016 | Male   | 90 to 94 | 40%<br>(18-59%)                | 60%<br>(41-82%)          | 1.7<br>(0.26-5.7)                           | 2%<br>(-0.42-6.2%)                   | 2.1%<br>(-0.75-7.1%)                | 1.7<br>(-0.6-5.9)      | 9.7<br>(-2.1-31)            |
| Bhutan   | 2016 | Male   | 95 plus  | 43%<br>(20-64%)                | 57%<br>(36-80%)          | 1.9<br>(0.24-6.7)                           | 2%<br>(-0.49-6.2%)                   | 2%<br>(-0.85-7%)                    | 0.42<br>(-0.18-1.4)    | 1.7<br>(-0.41-5.2)          |
| India    | 1990 | Female | All Ages | 4.7%<br>(3.4-6.3%)             | 95%<br>(94-97%)          | 0.12<br>(0.089-0.16)                        | 0.42%<br>(0.31-0.55%)                | 0.66%<br>(0.43-0.97%)               | 28000<br>(18000-41000) | 1100000<br>(800000-1400000) |
| India    | 1990 | Female | 15 to 19 | 3.3%<br>(1.6-6%)               | 97%<br>(94-98%)          | 0.042<br>(0.017-0.087)                      | 0.2%<br>(0.11-0.34%)                 | 0.13%<br>(0.025-0.32%)              | 140<br>(26-330)        | 23000<br>(13000-39000)      |
| India    | 1990 | Female | 20 to 24 | 3.7%<br>(1.6-6.6%)             | 96%<br>(93-98%)          | 0.088<br>(0.033-0.18)                       | 0.49%<br>(0.3-0.77%)                 | 0.37%<br>(0.15-0.75%)               | 430<br>(170-890)       | 57000<br>(34000-92000)      |
| India    | 1990 | Female | 25 to 29 | 4.2%<br>(1.9-7.9%)             | 96%<br>(92-98%)          | 0.15<br>(0.057-0.29)                        | 0.77%<br>(0.49-1.3%)                 | 0.74%<br>(0.34-1.4%)                | 780<br>(350-1500)      | 78000<br>(48000-130000)     |
| India    | 1990 | Female | 30 to 34 | 5.2%<br>(2.3-9.6%)             | 95%<br>(90-98%)          | 0.21<br>(0.086-0.4)                         | 1.1%<br>(0.68-1.7%)                  | 1.3%<br>(0.68-2.2%)                 | 1200<br>(650-2100)     | 97000<br>(61000-150000)     |
| India    | 1990 | Female | 35 to 39 | 6.1%<br>(2.6-10%)              | 94%<br>(90-97%)          | 0.25<br>(0.1-0.46)                          | 1.3%<br>(0.86-2%)                    | 1.8%<br>(1-2.9%)                    | 1700<br>(1000-2800)    | 110000<br>(73000-170000)    |
| India    | 1990 | Female | 40 to 44 | 6.8%<br>(3.4-12%)              | 93%<br>(88-97%)          | 0.27<br>(0.12-0.49)                         | 1.4%<br>(0.94-2.1%)                  | 2%<br>(1.2-3.2%)                    | 1900<br>(1200-3000)    | 110000<br>(69000-160000)    |
| India    | 1990 | Female | 45 to 49 | 7.2%<br>(3.4-12%)              | 93%<br>(88-97%)          | 0.25<br>(0.099-0.48)                        | 1.3%<br>(0.89-2%)                    | 1.8%<br>(1.1-3%)                    | 2100<br>(1300-3500)    | 100000<br>(68000-160000)    |
| India    | 1990 | Female | 50 to 54 | 7.8%<br>(3.8-13%)              | 92%<br>(87-96%)          | 0.27<br>(0.11-0.53)                         | 1.4%<br>(0.88-2.1%)                  | 1.8%<br>(1.1-2.9%)                  | 3000<br>(1800-4800)    | 120000<br>(78000-180000)    |
| India    | 1990 | Female | 55 to 59 | 8.4%<br>(4.1-16%)              | 92%<br>(84-96%)          | 0.34<br>(0.14-0.68)                         | 1.4%<br>(0.82-2.3%)                  | 1.8%<br>(0.99-3%)                   | 3700<br>(2100-6300)    | 130000<br>(75000-210000)    |
| India    | 1990 | Female | 60 to 64 | 9.4%<br>(4.6-18%)              | 91%<br>(82-95%)          | 0.38<br>(0.15-0.78)                         | 1.2%<br>(0.63-2%)                    | 1.4%<br>(0.75-2.6%)                 | 3700<br>(1900-6500)    | 100000<br>(57000-180000)    |
| India    | 1990 | Female | 65 to 69 | 9.9%<br>(4.9-18%)              | 90%<br>(82-95%)          | 0.36<br>(0.15-0.69)                         | 0.95%<br>(0.51-1.7%)                 | 1.1%<br>(0.59-2%)                   | 3400<br>(1700-6000)    | 78000<br>(42000-140000)     |

| Location | Year | Sex    | Age      | Prevalence of current drinkers | Prevalence of abstainers | Population average of standard drinks daily | Percent of total attributable deaths | Percent of total attributable DALYs | Attributable deaths       | Attributable DALYs           |
|----------|------|--------|----------|--------------------------------|--------------------------|---------------------------------------------|--------------------------------------|-------------------------------------|---------------------------|------------------------------|
| India    | 1990 | Female | 70 to 74 | 10%<br>(5.1-17%)               | 90%<br>(83-95%)          | 0.32<br>(0.13-0.62)                         | 0.72%<br>(0.34-1.4%)                 | 0.85%<br>(0.39-1.7%)                | 2600<br>(1200-5100)       | 48000<br>(23000-94000)       |
| India    | 1990 | Female | 75 to 79 | 9.7%<br>(4.5-18%)              | 90%<br>(82-95%)          | 0.28<br>(0.096-0.58)                        | 0.51%<br>(0.2-1.1%)                  | 0.59%<br>(0.22-1.3%)                | 1600<br>(570-3200)        | 22000<br>(8900-47000)        |
| India    | 1990 | Female | 80 to 84 | 10%<br>(4.6-20%)               | 90%<br>(80-95%)          | 0.28<br>(0.1-0.66)                          | 0.43%<br>(0.14-0.97%)                | 0.49%<br>(0.15-1.1%)                | 1000<br>(320-2300)        | 11000<br>(3700-25000)        |
| India    | 1990 | Female | 85 to 89 | 11%<br>(5.1-22%)               | 89%<br>(78-95%)          | 0.31<br>(0.11-0.69)                         | 0.34%<br>(0.091-0.77%)               | 0.38%<br>(0.087-0.89%)              | 410<br>(95-980)           | 3200<br>(870-7400)           |
| India    | 1990 | Female | 90 to 94 | 13%<br>(6.1-27%)               | 87%<br>(73-94%)          | 0.37<br>(0.13-0.83)                         | 0.26%<br>(-0.0062-0.68%)             | 0.28%<br>(-0.04-0.77%)              | 100<br>(-14-280)          | 570<br>(-13-1500)            |
| India    | 1990 | Female | 95 plus  | 17%<br>(6.7-33%)               | 83%<br>(67-93%)          | 0.46<br>(0.14-1.1)                          | 0.22%<br>(-0.13-0.76%)               | 0.2%<br>(-0.19-0.81%)               | 17<br>(-16-70)            | 76<br>(-42-260)              |
| India    | 1990 | Male   | All Ages | 17%<br>(15-19%)                | 83%<br>(81-85%)          | 0.68<br>(0.56-0.85)                         | 2.4%<br>(1.9-2.9%)                   | 3.2%<br>(2.3-4.1%)                  | 150000<br>(110000-190000) | 6600000<br>(5200000-8000000) |
| India    | 1990 | Male   | 15 to 19 | 7.3%<br>(5-10%)                | 93%<br>(90-95%)          | 0.23<br>(0.12-0.39)                         | 1.2%<br>(0.79-1.7%)                  | 1.1%<br>(0.61-1.8%)                 | 910<br>(520-1500)         | 110000<br>(72000-160000)     |
| India    | 1990 | Male   | 20 to 24 | 16%<br>(11-22%)                | 84%<br>(78-89%)          | 0.66<br>(0.35-1.1)                          | 3.7%<br>(2.6-5.1%)                   | 3.7%<br>(2.3-5.5%)                  | 3900<br>(2400-5800)       | 370000<br>(250000-510000)    |
| India    | 1990 | Male   | 25 to 29 | 25%<br>(18-33%)                | 75%<br>(67-82%)          | 1.1<br>(0.68-1.6)                           | 6.1%<br>(4.4-7.9%)                   | 6.5%<br>(4.3-9%)                    | 7300<br>(4800-9900)       | 610000<br>(430000-790000)    |
| India    | 1990 | Male   | 30 to 34 | 32%<br>(23-42%)                | 68%<br>(58-77%)          | 1.4<br>(0.92-2.1)                           | 7.9%<br>(5.9-10%)                    | 9%<br>(6.3-12%)                     | 12000<br>(8100-15000)     | 810000<br>(600000-1000000)   |
| India    | 1990 | Male   | 35 to 39 | 36%<br>(26-45%)                | 64%<br>(55-74%)          | 1.6<br>(1-2.3)                              | 8.1%<br>(6.1-11%)                    | 9.7%<br>(6.8-13%)                   | 14000<br>(9900-19000)     | 850000<br>(630000-1100000)   |
| India    | 1990 | Male   | 40 to 44 | 36%<br>(27-45%)                | 64%<br>(55-73%)          | 1.7<br>(1-2.4)                              | 8%<br>(5.7-11%)                      | 9.7%<br>(6.6-13%)                   | 14000<br>(9800-19000)     | 750000<br>(530000-980000)    |
| India    | 1990 | Male   | 45 to 49 | 34%<br>(24-42%)                | 66%<br>(58-76%)          | 1.6<br>(0.96-2.4)                           | 7.4%<br>(5.1-10%)                    | 8.9%<br>(6-12%)                     | 16000<br>(11000-22000)    | 730000<br>(500000-990000)    |
| India    | 1990 | Male   | 50 to 54 | 31%<br>(24-40%)                | 69%<br>(60-76%)          | 1.5<br>(0.89-2.2)                           | 6.4%<br>(4.1-9%)                     | 7.5%<br>(4.7-11%)                   | 17000<br>(11000-25000)    | 680000<br>(430000-950000)    |
| India    | 1990 | Male   | 55 to 59 | 30%<br>(22-38%)                | 70%<br>(62-78%)          | 1.4<br>(0.84-2.1)                           | 5.5%<br>(3.7-7.7%)                   | 6.5%<br>(4.2-9.1%)                  | 18000<br>(12000-25000)    | 610000<br>(410000-850000)    |
| India    | 1990 | Male   | 60 to 64 | 28%<br>(20-37%)                | 72%<br>(63-80%)          | 1.3<br>(0.76-2)                             | 4.3%<br>(2.7-6.6%)                   | 4.9%<br>(2.9-7.7%)                  | 17000<br>(9800-26000)     | 480000<br>(290000-730000)    |
| India    | 1990 | Male   | 65 to 69 | 27%<br>(20-35%)                | 73%<br>(65-80%)          | 1.2<br>(0.72-1.8)                           | 3.3%<br>(1.9-4.9%)                   | 3.7%<br>(2.1-5.6%)                  | 13000<br>(7500-20000)     | 310000<br>(180000-460000)    |
| India    | 1990 | Male   | 70 to 74 | 25%<br>(19-33%)                | 75%<br>(67-81%)          | 0.97<br>(0.58-1.5)                          | 2.3%<br>(1.2-3.7%)                   | 2.6%<br>(1.3-4.2%)                  | 8800<br>(4300-14000)      | 170000<br>(87000-270000)     |
| India    | 1990 | Male   | 75 to 79 | 22%<br>(15-30%)                | 78%<br>(70-85%)          | 0.77<br>(0.42-1.2)                          | 1.5%<br>(0.72-2.6%)                  | 1.7%<br>(0.73-2.9%)                 | 4600<br>(2000-8100)       | 69000<br>(32000-120000)      |



| Location | Year | Sex    | Age      | Prevalence of current drinkers | Prevalence of abstainers | Population average of standard drinks daily | Percent of total attributable deaths | Percent of total attributable DALYs | Attributable deaths    | Attributable DALYs         |
|----------|------|--------|----------|--------------------------------|--------------------------|---------------------------------------------|--------------------------------------|-------------------------------------|------------------------|----------------------------|
| India    | 1990 | Male   | 80 to 84 | 19%<br>(13-26%)                | 81%<br>(74-87%)          | 0.62<br>(0.36-0.96)                         | 1%<br>(0.41-1.8%)                    | 1.1%<br>(0.4-2%)                    | 1900<br>(710-3600)     | 22000<br>(8800-39000)      |
| India    | 1990 | Male   | 85 to 89 | 19%<br>(13-26%)                | 81%<br>(74-87%)          | 0.55<br>(0.31-0.87)                         | 0.67%<br>(0.22-1.3%)                 | 0.69%<br>(0.16-1.4%)                | 670<br>(150-1300)      | 5600<br>(1800-10000)       |
| India    | 1990 | Male   | 90 to 94 | 21%<br>(15-29%)                | 79%<br>(71-85%)          | 0.53<br>(0.29-0.88)                         | 0.43%<br>(0.049-0.93%)               | 0.39%<br>(-0.049-0.95%)             | 130<br>(-16-310)       | 860<br>(100-1800)          |
| India    | 1990 | Male   | 95 plus  | 24%<br>(16-34%)                | 76%<br>(66-84%)          | 0.53<br>(0.23-0.93)                         | 0.34%<br>(-0.028-0.85%)              | 0.23%<br>(-0.18-0.79%)              | 16<br>(-13-57)         | 97<br>(-7.6-240)           |
| India    | 1995 | Female | All Ages | 2.5%<br>(2.2-2.9%)             | 98%<br>(97-98%)          | 0.081<br>(0.064-0.1)                        | 0.37%<br>(0.3-0.44%)                 | 0.58%<br>(0.42-0.76%)               | 24000<br>(18000-32000) | 950000<br>(760000-1200000) |
| India    | 1995 | Female | 15 to 19 | 1.3%<br>(0.86-2%)              | 99%<br>(98-99%)          | 0.02<br>(0.0091-0.037)                      | 0.16%<br>(0.11-0.24%)                | 0.076%<br>(0.031-0.15%)             | 82<br>(34-170)         | 19000<br>(13000-29000)     |
| India    | 1995 | Female | 20 to 24 | 1.6%<br>(1-2.3%)               | 98%<br>(98-99%)          | 0.045<br>(0.023-0.078)                      | 0.37%<br>(0.26-0.52%)                | 0.21%<br>(0.12-0.36%)               | 260<br>(140-440)       | 45000<br>(30000-65000)     |
| India    | 1995 | Female | 25 to 29 | 2.2%<br>(1.4-3.2%)             | 98%<br>(97-99%)          | 0.087<br>(0.045-0.15)                       | 0.57%<br>(0.41-0.78%)                | 0.46%<br>(0.27-0.75%)               | 490<br>(290-800)       | 59000<br>(42000-83000)     |
| India    | 1995 | Female | 30 to 34 | 2.9%<br>(1.9-4.2%)             | 97%<br>(96-98%)          | 0.13<br>(0.071-0.22)                        | 0.79%<br>(0.59-1.1%)                 | 0.85%<br>(0.59-1.2%)                | 860<br>(580-1200)      | 76000<br>(55000-100000)    |
| India    | 1995 | Female | 35 to 39 | 3.5%<br>(2.3-4.7%)             | 97%<br>(95-98%)          | 0.16<br>(0.089-0.25)                        | 1%<br>(0.77-1.3%)                    | 1.3%<br>(0.92-1.8%)                 | 1300<br>(920-1800)     | 92000<br>(69000-120000)    |
| India    | 1995 | Female | 40 to 44 | 3.9%<br>(2.7-5.5%)             | 96%<br>(95-97%)          | 0.17<br>(0.096-0.28)                        | 1.1%<br>(0.84-1.5%)                  | 1.5%<br>(1.1-2%)                    | 1700<br>(1200-2300)    | 100000<br>(75000-130000)   |
| India    | 1995 | Female | 45 to 49 | 4.2%<br>(2.7-5.7%)             | 96%<br>(94-97%)          | 0.17<br>(0.087-0.29)                        | 1.1%<br>(0.86-1.5%)                  | 1.5%<br>(1.1-2%)                    | 1800<br>(1300-2500)    | 92000<br>(70000-120000)    |
| India    | 1995 | Female | 50 to 54 | 5%<br>(3.5-7%)                 | 95%<br>(93-96%)          | 0.2<br>(0.11-0.33)                          | 1.2%<br>(0.87-1.6%)                  | 1.5%<br>(1.1-2.1%)                  | 2500<br>(1800-3500)    | 100000<br>(77000-140000)   |
| India    | 1995 | Female | 55 to 59 | 5.2%<br>(3.7-7.3%)             | 95%<br>(93-96%)          | 0.24<br>(0.13-0.4)                          | 1.1%<br>(0.78-1.6%)                  | 1.4%<br>(0.93-2%)                   | 3100<br>(2100-4500)    | 110000<br>(76000-150000)   |
| India    | 1995 | Female | 60 to 64 | 5.3%<br>(3.6-7.5%)             | 95%<br>(92-96%)          | 0.25<br>(0.12-0.43)                         | 0.9%<br>(0.6-1.3%)                   | 1.1%<br>(0.7-1.7%)                  | 3000<br>(1900-4700)    | 89000<br>(59000-130000)    |
| India    | 1995 | Female | 65 to 69 | 5.4%<br>(3.6-7.7%)             | 95%<br>(92-96%)          | 0.23<br>(0.12-0.39)                         | 0.76%<br>(0.5-1.1%)                  | 0.91%<br>(0.59-1.4%)                | 2900<br>(1900-4400)    | 69000<br>(45000-100000)    |
| India    | 1995 | Female | 70 to 74 | 6.2%<br>(4.2-9.1%)             | 94%<br>(91-96%)          | 0.23<br>(0.12-0.41)                         | 0.62%<br>(0.38-0.96%)                | 0.73%<br>(0.44-1.2%)                | 2400<br>(1400-3800)    | 45000<br>(28000-71000)     |
| India    | 1995 | Female | 75 to 79 | 7.5%<br>(4.8-11%)              | 93%<br>(89-95%)          | 0.26<br>(0.12-0.5)                          | 0.51%<br>(0.27-0.9%)                 | 0.6%<br>(0.3-1.1%)                  | 1700<br>(870-3000)     | 25000<br>(13000-44000)     |
| India    | 1995 | Female | 80 to 84 | 9.4%<br>(5.7-14%)              | 91%<br>(86-94%)          | 0.32<br>(0.14-0.65)                         | 0.48%<br>(0.2-0.94%)                 | 0.56%<br>(0.23-1.1%)                | 1300<br>(530-2500)     | 14000<br>(5900-27000)      |
| India    | 1995 | Female | 85 to 89 | 11%<br>(6.6-18%)               | 89%<br>(82-93%)          | 0.4<br>(0.17-0.79)                          | 0.44%<br>(0.17-0.89%)                | 0.5%<br>(0.17-1%)                   | 670<br>(230-1400)      | 5200<br>(1900-10000)       |
| India    | 1995 | Female | 90 to 94 | 13%<br>(7.8-22%)               | 87%<br>(78-92%)          | 0.49<br>(0.21-1)                            | 0.4%<br>(0.11-0.91%)                 | 0.44%<br>(0.1-1%)                   | 210<br>(49-480)        | 1200<br>(330-2600)         |

| Location | Year | Sex    | Age      | Prevalence of current drinkers | Prevalence of abstainers | Population average of standard drinks daily | Percent of total attributable deaths | Percent of total attributable DALYs | Attributable deaths       | Attributable DALYs          |
|----------|------|--------|----------|--------------------------------|--------------------------|---------------------------------------------|--------------------------------------|-------------------------------------|---------------------------|-----------------------------|
| India    | 1995 | Female | 95 plus  | 16%<br>(8.8-28%)               | 84%<br>(72-91%)          | 0.62<br>(0.21-1.3)                          | 0.41%<br>(0.039-1.1%)                | 0.41%<br>(-0.016-1.2%)              | 46<br>(-1.8-130)          | 180<br>(17-470)             |
| India    | 1995 | Male   | All Ages | 16%<br>(15-18%)                | 84%<br>(82-85%)          | 0.89<br>(0.72-1.1)                          | 3%<br>(2.5-3.6%)                     | 4%<br>(3.1-4.9%)                    | 190000<br>(150000-240000) | 820000<br>(670000-960000)   |
| India    | 1995 | Male   | 15 to 19 | 3.9%<br>(2.9-5.3%)             | 96%<br>(95-97%)          | 0.16<br>(0.089-0.27)                        | 0.99%<br>(0.73-1.3%)                 | 0.85%<br>(0.54-1.3%)                | 730<br>(460-1100)         | 96000<br>(69000-130000)     |
| India    | 1995 | Male   | 20 to 24 | 12%<br>(8.7-15%)               | 88%<br>(85-91%)          | 0.65<br>(0.37-1)                            | 3.5%<br>(2.6-4.7%)                   | 3.5%<br>(2.3-5%)                    | 3900<br>(2600-5600)       | 380000<br>(270000-510000)   |
| India    | 1995 | Male   | 25 to 29 | 22%<br>(18-27%)                | 78%<br>(73-82%)          | 1.3<br>(0.85-1.9)                           | 6.3%<br>(4.7-7.9%)                   | 6.9%<br>(4.8-9.3%)                  | 8300<br>(5700-11000)      | 670000<br>(500000-860000)   |
| India    | 1995 | Male   | 30 to 34 | 31%<br>(25-37%)                | 69%<br>(63-75%)          | 1.9<br>(1.2-2.6)                            | 8.5%<br>(6.6-11%)                    | 10%<br>(7.3-13%)                    | 14000<br>(10000-18000)    | 960000<br>(740000-1200000)  |
| India    | 1995 | Male   | 35 to 39 | 35%<br>(29-41%)                | 65%<br>(59-71%)          | 2.2<br>(1.5-3)                              | 9.1%<br>(7.1-11%)                    | 11%<br>(8.3-14%)                    | 17000<br>(13000-22000)    | 1000000<br>(810000-1300000) |
| India    | 1995 | Male   | 40 to 44 | 36%<br>(30-42%)                | 64%<br>(58-70%)          | 2.2<br>(1.5-3.1)                            | 9.1%<br>(7-11%)                      | 11%<br>(8.4-14%)                    | 20000<br>(15000-26000)    | 1100000<br>(820000-1300000) |
| India    | 1995 | Male   | 45 to 49 | 34%<br>(28-40%)                | 66%<br>(60-72%)          | 2.1<br>(1.4-3.1)                            | 8.5%<br>(6.3-11%)                    | 10%<br>(7.5-13%)                    | 20000<br>(15000-27000)    | 930000<br>(690000-1200000)  |
| India    | 1995 | Male   | 50 to 54 | 32%<br>(27-38%)                | 68%<br>(62-73%)          | 2<br>(1.3-2.9)                              | 7.5%<br>(5.2-10%)                    | 9%<br>(6-12%)                       | 21000<br>(14000-28000)    | 840000<br>(580000-1100000)  |
| India    | 1995 | Male   | 55 to 59 | 30%<br>(25-36%)                | 70%<br>(64-75%)          | 1.9<br>(1.3-2.8)                            | 6.6%<br>(4.7-8.8%)                   | 7.8%<br>(5.3-10%)                   | 23000<br>(16000-32000)    | 790000<br>(560000-1000000)  |
| India    | 1995 | Male   | 60 to 64 | 28%<br>(23-34%)                | 72%<br>(66-77%)          | 1.7<br>(1.1-2.5)                            | 5.1%<br>(3.4-7.3%)                   | 5.9%<br>(3.8-8.4%)                  | 21000<br>(14000-31000)    | 610000<br>(410000-870000)   |
| India    | 1995 | Male   | 65 to 69 | 26%<br>(20-31%)                | 74%<br>(69-80%)          | 1.5<br>(0.93-2.1)                           | 3.9%<br>(2.6-5.5%)                   | 4.5%<br>(2.9-6.4%)                  | 17000<br>(11000-25000)    | 410000<br>(270000-580000)   |
| India    | 1995 | Male   | 70 to 74 | 24%<br>(19-29%)                | 76%<br>(71-81%)          | 1.2<br>(0.77-1.8)                           | 2.8%<br>(1.7-4.3%)                   | 3.1%<br>(1.8-4.9%)                  | 12000<br>(8000-18000)     | 230000<br>(130000-340000)   |
| India    | 1995 | Male   | 75 to 79 | 21%<br>(16-26%)                | 79%<br>(74-84%)          | 0.97<br>(0.58-1.5)                          | 1.9%<br>(1-3%)                       | 2.1%<br>(1.1-3.4%)                  | 6600<br>(3400-11000)      | 98000<br>(54000-160000)     |
| India    | 1995 | Male   | 80 to 84 | 19%<br>(14-24%)                | 81%<br>(76-86%)          | 0.8<br>(0.49-1.2)                           | 1.3%<br>(0.69-2.2%)                  | 1.5%<br>(0.72-2.4%)                 | 3000<br>(1500-4900)       | 33000<br>(17000-53000)      |
| India    | 1995 | Male   | 85 to 89 | 19%<br>(14-25%)                | 81%<br>(75-86%)          | 0.74<br>(0.45-1.1)                          | 0.96%<br>(0.44-1.7%)                 | 1%<br>(0.41-1.8%)                   | 1200<br>(470-2100)        | 9600<br>(4400-16000)        |
| India    | 1995 | Male   | 90 to 94 | 21%<br>(16-27%)                | 79%<br>(73-84%)          | 0.72<br>(0.41-1.1)                          | 0.67%<br>(0.23-1.3%)                 | 0.65%<br>(0.12-1.4%)                | 270<br>(51-570)           | 1700<br>(580-3200)          |

| Location | Year | Sex    | Age      | Prevalence of current drinkers | Prevalence of abstainers | Population average of standard drinks daily | Percent of total attributable deaths | Percent of total attributable DALYs | Attributable deaths       | Attributable DALYs            |
|----------|------|--------|----------|--------------------------------|--------------------------|---------------------------------------------|--------------------------------------|-------------------------------------|---------------------------|-------------------------------|
| India    | 1995 | Male   | 95 plus  | 24%<br>(16-31%)                | 76%<br>(69-84%)          | 0.7<br>(0.32-1.2)                           | 0.53%<br>(0.091-1.2%)                | 0.43%<br>(-0.064-1.1%)              | 40<br>(-6.1-110)          | 200<br>(34-430)               |
| India    | 2000 | Female | All Ages | 2.4%<br>(2.1-2.7%)             | 98%<br>(97-98%)          | 0.081<br>(0.064-0.1)                        | 0.4%<br>(0.33-0.48%)                 | 0.6%<br>(0.44-0.78%)                | 26000<br>(19000-34000)    | 1000000<br>(820000-1200000)   |
| India    | 2000 | Female | 15 to 19 | 1.3%<br>(0.9-1.9%)             | 99%<br>(98-99%)          | 0.02<br>(0.01-0.036)                        | 0.17%<br>(0.12-0.25%)                | 0.081%<br>(0.035-0.15%)             | 90<br>(39-170)            | 22000<br>(14000-32000)        |
| India    | 2000 | Female | 20 to 24 | 1.6%<br>(1.1-2.3%)             | 98%<br>(98-99%)          | 0.045<br>(0.025-0.076)                      | 0.4%<br>(0.28-0.56%)                 | 0.22%<br>(0.13-0.36%)               | 280<br>(160-450)          | 51000<br>(33000-73000)        |
| India    | 2000 | Female | 25 to 29 | 2.1%<br>(1.5-2.9%)             | 98%<br>(97-99%)          | 0.085<br>(0.048-0.14)                       | 0.59%<br>(0.43-0.78%)                | 0.46%<br>(0.29-0.7%)                | 510<br>(320-790)          | 65000<br>(47000-89000)        |
| India    | 2000 | Female | 30 to 34 | 2.6%<br>(1.9-3.7%)             | 97%<br>(96-98%)          | 0.13<br>(0.073-0.19)                        | 0.79%<br>(0.6-1%)                    | 0.82%<br>(0.6-1.1%)                 | 860<br>(620-1200)         | 79000<br>(59000-110000)       |
| India    | 2000 | Female | 35 to 39 | 3.2%<br>(2.3-4.1%)             | 97%<br>(96-98%)          | 0.15<br>(0.089-0.22)                        | 1%<br>(0.78-1.3%)                    | 1.3%<br>(0.92-1.7%)                 | 1300<br>(990-1800)        | 97000<br>(75000-120000)       |
| India    | 2000 | Female | 40 to 44 | 3.5%<br>(2.5-4.6%)             | 97%<br>(95-97%)          | 0.16<br>(0.094-0.25)                        | 1.1%<br>(0.84-1.4%)                  | 1.4%<br>(1.1-1.9%)                  | 1700<br>(1300-2200)       | 100000<br>(80000-130000)      |
| India    | 2000 | Female | 45 to 49 | 3.8%<br>(2.5-5%)               | 96%<br>(95-97%)          | 0.15<br>(0.085-0.25)                        | 1.1%<br>(0.84-1.4%)                  | 1.4%<br>(1.1-1.9%)                  | 2000<br>(1500-2700)       | 110000<br>(82000-130000)      |
| India    | 2000 | Female | 50 to 54 | 4.5%<br>(3.2-6.3%)             | 95%<br>(94-97%)          | 0.19<br>(0.1-0.3)                           | 1.1%<br>(0.84-1.5%)                  | 1.5%<br>(1.1-2%)                    | 2500<br>(1800-3500)       | 110000<br>(80000-140000)      |
| India    | 2000 | Female | 55 to 59 | 4.9%<br>(3.5-6.8%)             | 95%<br>(93-97%)          | 0.24<br>(0.13-0.39)                         | 1.1%<br>(0.77-1.5%)                  | 1.4%<br>(0.92-2%)                   | 3000<br>(2000-4300)       | 110000<br>(75000-150000)      |
| India    | 2000 | Female | 60 to 64 | 4.8%<br>(3.3-7%)               | 95%<br>(93-97%)          | 0.24<br>(0.12-0.42)                         | 0.88%<br>(0.59-1.3%)                 | 1.1%<br>(0.68-1.6%)                 | 3200<br>(2000-4800)       | 94000<br>(63000-140000)       |
| India    | 2000 | Female | 65 to 69 | 5%<br>(3.3-7%)                 | 95%<br>(93-97%)          | 0.23<br>(0.12-0.37)                         | 0.74%<br>(0.5-1.1%)                  | 0.89%<br>(0.59-1.3%)                | 3200<br>(2100-4800)       | 77000<br>(52000-110000)       |
| India    | 2000 | Female | 70 to 74 | 5.8%<br>(3.9-8.4%)             | 94%<br>(92-96%)          | 0.23<br>(0.12-0.4)                          | 0.6%<br>(0.37-0.92%)                 | 0.72%<br>(0.43-1.1%)                | 2700<br>(1600-4200)       | 51000<br>(31000-79000)        |
| India    | 2000 | Female | 75 to 79 | 6.9%<br>(4.4-11%)              | 93%<br>(89-96%)          | 0.26<br>(0.12-0.49)                         | 0.49%<br>(0.26-0.84%)                | 0.58%<br>(0.29-0.99%)               | 1900<br>(970-3300)        | 28000<br>(15000-47000)        |
| India    | 2000 | Female | 80 to 84 | 8.6%<br>(5.2-13%)              | 91%<br>(87-95%)          | 0.32<br>(0.14-0.64)                         | 0.45%<br>(0.2-0.88%)                 | 0.53%<br>(0.23-1%)                  | 1400<br>(620-2700)        | 15000<br>(6900-28000)         |
| India    | 2000 | Female | 85 to 89 | 10%<br>(5.8-17%)               | 90%<br>(83-94%)          | 0.38<br>(0.16-0.79)                         | 0.42%<br>(0.16-0.85%)                | 0.48%<br>(0.17-0.98%)               | 750<br>(270-1500)         | 5900<br>(2200-12000)          |
| India    | 2000 | Female | 90 to 94 | 12%<br>(6.8-21%)               | 88%<br>(79-93%)          | 0.48<br>(0.2-0.97)                          | 0.39%<br>(0.11-0.89%)                | 0.43%<br>(0.1-1%)                   | 260<br>(61-610)           | 1400<br>(420-3300)            |
| India    | 2000 | Female | 95 plus  | 15%<br>(7.7-27%)               | 85%<br>(73-92%)          | 0.61<br>(0.21-1.3)                          | 0.41%<br>(0.055-1.1%)                | 0.41%<br>(0.0064-1.2%)              | 62<br>(0.96-180)          | 250<br>(33-650)               |
| India    | 2000 | Male   | All Ages | 17%<br>(16-19%)                | 83%<br>(81-84%)          | 1.1<br>(0.86-1.3)                           | 3.4%<br>(2.9-4%)                     | 4.2%<br>(3.3-5.1%)                  | 210000<br>(160000-260000) | 9300000<br>(7800000-11000000) |
| India    | 2000 | Male   | 15 to 19 | 7.5%<br>(5.6-9.7%)             | 93%<br>(90-94%)          | 0.32<br>(0.19-0.52)                         | 1.4%<br>(1-2%)                       | 1.4%<br>(0.85-2.1%)                 | 1300<br>(810-2000)        | 150000<br>(110000-210000)     |

| Location | Year | Sex    | Age      | Prevalence of current drinkers | Prevalence of abstainers | Population average of standard drinks daily | Percent of total attributable deaths | Percent of total attributable DALYs | Attributable deaths    | Attributable DALYs          |
|----------|------|--------|----------|--------------------------------|--------------------------|---------------------------------------------|--------------------------------------|-------------------------------------|------------------------|-----------------------------|
| India    | 2000 | Male   | 20 to 24 | 19%<br>(15-24%)                | 81%<br>(76-85%)          | 1.2<br>(0.73-1.7)                           | 4.9%<br>(3.7-6.4%)                   | 5.2%<br>(3.5-7.3%)                  | 6200<br>(4200-8700)    | 580000<br>(430000-770000)   |
| India    | 2000 | Male   | 25 to 29 | 28%<br>(23-33%)                | 72%<br>(67-77%)          | 1.8<br>(1.2-2.6)                            | 7.4%<br>(5.7-9.1%)                   | 8.1%<br>(5.8-11%)                   | 11000<br>(7900-14000)  | 890000<br>(680000-1100000)  |
| India    | 2000 | Male   | 30 to 34 | 33%<br>(27-39%)                | 67%<br>(61-73%)          | 2.2<br>(1.5-3.1)                            | 8.9%<br>(7-11%)                      | 10%<br>(7.8-13%)                    | 16000<br>(12000-21000) | 1100000<br>(890000-1400000) |
| India    | 2000 | Male   | 35 to 39 | 35%<br>(30-40%)                | 65%<br>(60-70%)          | 2.4<br>(1.6-3.2)                            | 9%<br>(7.1-11%)                      | 11%<br>(8.3-13%)                    | 20000<br>(15000-24000) | 1200000<br>(930000-1400000) |
| India    | 2000 | Male   | 40 to 44 | 35%<br>(30-41%)                | 65%<br>(59-70%)          | 2.4<br>(1.6-3.3)                            | 8.9%<br>(6.9-11%)                    | 11%<br>(8.2-14%)                    | 22000<br>(17000-28000) | 1200000<br>(910000-1500000) |
| India    | 2000 | Male   | 45 to 49 | 33%<br>(27-39%)                | 67%<br>(61-73%)          | 2.3<br>(1.5-3.3)                            | 8.3%<br>(6.3-11%)                    | 10%<br>(7.5-13%)                    | 25000<br>(19000-32000) | 1200000<br>(870000-1500000) |
| India    | 2000 | Male   | 50 to 54 | 30%<br>(24-36%)                | 70%<br>(64-76%)          | 2<br>(1.3-3)                                | 7.2%<br>(5.1-9.4%)                   | 8.7%<br>(5.9-11%)                   | 22000<br>(15000-30000) | 890000<br>(630000-1200000)  |
| India    | 2000 | Male   | 55 to 59 | 26%<br>(20-32%)                | 74%<br>(68-80%)          | 1.8<br>(1.1-2.7)                            | 6.1%<br>(4.3-8%)                     | 7.2%<br>(4.9-9.7%)                  | 22000<br>(15000-30000) | 750000<br>(530000-1000000)  |
| India    | 2000 | Male   | 60 to 64 | 23%<br>(18-30%)                | 77%<br>(70-82%)          | 1.5<br>(0.92-2.4)                           | 4.6%<br>(3.1-6.6%)                   | 5.3%<br>(3.5-7.6%)                  | 20000<br>(13000-29000) | 590000<br>(400000-830000)   |
| India    | 2000 | Male   | 65 to 69 | 21%<br>(16-27%)                | 79%<br>(73-84%)          | 1.4<br>(0.81-2)                             | 3.6%<br>(2.4-5.1%)                   | 4%<br>(2.6-5.8%)                    | 17000<br>(11000-25000) | 410000<br>(280000-590000)   |
| India    | 2000 | Male   | 70 to 74 | 20%<br>(15-25%)                | 80%<br>(75-85%)          | 1.1<br>(0.67-1.7)                           | 2.5%<br>(1.6-3.9%)                   | 2.8%<br>(1.7-4.4%)                  | 12000<br>(7200-19000)  | 230000<br>(140000-350000)   |
| India    | 2000 | Male   | 75 to 79 | 16%<br>(12-22%)                | 84%<br>(78-88%)          | 0.84<br>(0.47-1.3)                          | 1.7%<br>(0.98-2.7%)                  | 1.9%<br>(1-3%)                      | 6600<br>(3600-11000)   | 99000<br>(57000-160000)     |
| India    | 2000 | Male   | 80 to 84 | 15%<br>(9.9-20%)               | 85%<br>(80-90%)          | 0.67<br>(0.39-1.1)                          | 1.2%<br>(0.64-1.8%)                  | 1.3%<br>(0.65-2.1%)                 | 3000<br>(1600-4900)    | 34000<br>(19000-54000)      |
| India    | 2000 | Male   | 85 to 89 | 15%<br>(10-21%)                | 85%<br>(79-90%)          | 0.62<br>(0.35-0.98)                         | 0.84%<br>(0.41-1.4%)                 | 0.88%<br>(0.38-1.6%)                | 1200<br>(520-2100)     | 10000<br>(4900-17000)       |
| India    | 2000 | Male   | 90 to 94 | 16%<br>(11-23%)                | 84%<br>(77-89%)          | 0.61<br>(0.33-1)                            | 0.6%<br>(0.23-1.1%)                  | 0.57%<br>(0.15-1.2%)                | 290<br>(77-620)        | 1800<br>(730-3500)          |
| India    | 2000 | Male   | 95 plus  | 19%<br>(12-27%)                | 81%<br>(73-88%)          | 0.6<br>(0.26-1.1)                           | 0.49%<br>(0.12-1.1%)                 | 1.3%<br>(-0.019-1%)                 | 47<br>(-2.3-130)       | 240<br>(59-510)             |
| India    | 2005 | Female | All Ages | 2.5%<br>(2.2-2.8%)             | 98%<br>(97-98%)          | 0.09<br>(0.072-0.11)                        | 0.4%<br>(0.33-0.49%)                 | 0.6%<br>(0.43-0.8%)                 | 26000<br>(19000-35000) | 990000<br>(800000-1200000)  |
| India    | 2005 | Female | 15 to 19 | 1.3%<br>(0.92-2%)              | 99%<br>(98-99%)          | 0.022<br>(0.011-0.04)                       | 0.17%<br>(0.11-0.24%)                | 0.089%<br>(0.041-0.17%)             | 91<br>(41-170)         | 21000<br>(13000-31000)      |

| Location | Year | Sex    | Age      | Prevalence of current drinkers | Prevalence of abstainers | Population average of standard drinks daily | Percent of total attributable deaths | Percent of total attributable DALYs | Attributable deaths       | Attributable DALYs             |
|----------|------|--------|----------|--------------------------------|--------------------------|---------------------------------------------|--------------------------------------|-------------------------------------|---------------------------|--------------------------------|
| India    | 2005 | Female | 20 to 24 | 1.7%<br>(1.1-2.3%)             | 98%<br>(98-99%)          | 0.05<br>(0.028-0.083)                       | 0.37%<br>(0.26-0.52%)                | 0.23%<br>(0.14-0.38%)               | 280<br>(170-470)          | 49000<br>(33000-70000)         |
| India    | 2005 | Female | 25 to 29 | 2.1%<br>(1.5-2.9%)             | 98%<br>(97-98%)          | 0.093<br>(0.052-0.15)                       | 0.54%<br>(0.4-0.72%)                 | 0.47%<br>(0.3-0.73%)                | 530<br>(330-820)          | 63000<br>(45000-86000)         |
| India    | 2005 | Female | 30 to 34 | 2.6%<br>(1.9-3.7%)             | 97%<br>(96-98%)          | 0.14<br>(0.079-0.21)                        | 0.71%<br>(0.54-0.92%)                | 0.79%<br>(0.56-1.1%)                | 820<br>(580-1100)         | 75000<br>(56000-100000)        |
| India    | 2005 | Female | 35 to 39 | 3.2%<br>(2.3-4.2%)             | 97%<br>(96-98%)          | 0.16<br>(0.097-0.25)                        | 0.9%<br>(0.7-1.2%)                   | 1.2%<br>(0.88-1.6%)                 | 1300<br>(940-1700)        | 92000<br>(70000-120000)        |
| India    | 2005 | Female | 40 to 44 | 3.6%<br>(2.6-4.7%)             | 96%<br>(95-97%)          | 0.17<br>(0.1-0.27)                          | 0.96%<br>(0.74-1.2%)                 | 1.4%<br>(1-1.8%)                    | 1600<br>(1200-2100)       | 98000<br>(76000-120000)        |
| India    | 2005 | Female | 45 to 49 | 3.8%<br>(2.6-5%)               | 96%<br>(95-97%)          | 0.17<br>(0.093-0.27)                        | 0.94%<br>(0.73-1.2%)                 | 1.3%<br>(0.99-1.8%)                 | 1900<br>(1400-2600)       | 99000<br>(77000-130000)        |
| India    | 2005 | Female | 50 to 54 | 4.3%<br>(3-6%)                 | 96%<br>(94-97%)          | 0.19<br>(0.11-0.32)                         | 1%<br>(0.74-1.4%)                    | 1.4%<br>(0.98-1.9%)                 | 2500<br>(1800-3500)       | 110000<br>(81000-150000)       |
| India    | 2005 | Female | 55 to 59 | 4.7%<br>(3.3-6.4%)             | 95%<br>(94-97%)          | 0.25<br>(0.13-0.41)                         | 0.99%<br>(0.68-1.4%)                 | 1.3%<br>(0.85-1.9%)                 | 2900<br>(1900-4200)       | 100000<br>(73000-150000)       |
| India    | 2005 | Female | 60 to 64 | 4.7%<br>(3.2-6.8%)             | 95%<br>(93-97%)          | 0.25<br>(0.13-0.43)                         | 0.83%<br>(0.54-1.2%)                 | 1%<br>(0.65-1.6%)                   | 3000<br>(1900-4600)       | 90000<br>(59000-140000)        |
| India    | 2005 | Female | 65 to 69 | 5%<br>(3.3-7%)                 | 95%<br>(93-97%)          | 0.24<br>(0.13-0.39)                         | 0.7%<br>(0.46-1%)                    | 0.85%<br>(0.55-1.3%)                | 3300<br>(2100-5000)       | 79000<br>(53000-120000)        |
| India    | 2005 | Female | 70 to 74 | 5.6%<br>(3.8-8.2%)             | 94%<br>(92-96%)          | 0.24<br>(0.12-0.41)                         | 0.57%<br>(0.33-0.9%)                 | 0.68%<br>(0.4-1.1%)                 | 2900<br>(1700-4700)       | 55000<br>(33000-87000)         |
| India    | 2005 | Female | 75 to 79 | 6.6%<br>(4.2-10%)              | 93%<br>(90-96%)          | 0.26<br>(0.12-0.49)                         | 0.47%<br>(0.23-0.83%)                | 0.56%<br>(0.27-0.98%)               | 2100<br>(1000-3700)       | 30000<br>(15000-53000)         |
| India    | 2005 | Female | 80 to 84 | 8.2%<br>(4.9-13%)              | 92%<br>(87-95%)          | 0.32<br>(0.14-0.61)                         | 0.43%<br>(0.19-0.83%)                | 0.51%<br>(0.21-0.99%)               | 1500<br>(640-3000)        | 17000<br>(7300-33000)          |
| India    | 2005 | Female | 85 to 89 | 9.6%<br>(5.7-16%)              | 90%<br>(84-94%)          | 0.38<br>(0.16-0.78)                         | 0.41%<br>(0.15-0.84%)                | 0.46%<br>(0.15-0.96%)               | 870<br>(290-1800)         | 6900<br>(2500-14000)           |
| India    | 2005 | Female | 90 to 94 | 11%<br>(6.5-19%)               | 89%<br>(81-93%)          | 0.47<br>(0.2-0.94)                          | 0.39%<br>(0.11-0.89%)                | 0.42%<br>(0.088-1%)                 | 310<br>(66-750)           | 1800<br>(480-4100)             |
| India    | 2005 | Female | 95 plus  | 14%<br>(7.2-25%)               | 86%<br>(75-93%)          | 0.6<br>(0.22-1.3)                           | 0.41%<br>(0.051-1.1%)                | 0.42%<br>(-0.0037-1.2%)             | 81<br>(-0.73-240)         | 320<br>(40-860)                |
| India    | 2005 | Male   | All Ages | 18%<br>(17-20%)                | 82%<br>(80-83%)          | 1.2<br>(0.94-1.4)                           | 3.8%<br>(3.2-4.4%)                   | 4.5%<br>(3.6-5.4%)                  | 230000<br>(180000-280000) | 10000000<br>(8700000-12000000) |
| India    | 2005 | Male   | 15 to 19 | 7.5%<br>(5.7-9.7%)             | 92%<br>(90-94%)          | 0.34<br>(0.19-0.54)                         | 1.5%<br>(1.1-2%)                     | 1.5%<br>(0.91-2.2%)                 | 1300<br>(810-2000)        | 160000<br>(110000-220000)      |
| India    | 2005 | Male   | 20 to 24 | 19%<br>(15-24%)                | 81%<br>(76-85%)          | 1.2<br>(0.76-1.8)                           | 5%<br>(3.8-6.6%)                     | 5.3%<br>(3.6-7.5%)                  | 6700<br>(4500-9300)       | 630000<br>(460000-820000)      |
| India    | 2005 | Male   | 25 to 29 | 28%<br>(23-33%)                | 72%<br>(67-77%)          | 1.9<br>(1.3-2.6)                            | 7.3%<br>(5.7-9.1%)                   | 8.1%<br>(5.8-11%)                   | 12000<br>(8400-15000)     | 960000<br>(730000-1200000)     |

| Location | Year | Sex    | Age      | Prevalence of current drinkers | Prevalence of abstainers | Population average of standard drinks daily | Percent of total attributable deaths | Percent of total attributable DALYs | Attributable deaths    | Attributable DALYs           |
|----------|------|--------|----------|--------------------------------|--------------------------|---------------------------------------------|--------------------------------------|-------------------------------------|------------------------|------------------------------|
| India    | 2005 | Male   | 30 to 34 | 33%<br>(28-39%)                | 67%<br>(61-72%)          | 2.3<br>(1.6-3.2)                            | 8.7%<br>(6.9-11%)                    | 10%<br>(7.7-13%)                    | 17000<br>(13000-22000) | 1200000<br>(940000-1500000)  |
| India    | 2005 | Male   | 35 to 39 | 36%<br>(31-41%)                | 64%<br>(59-69%)          | 2.5<br>(1.7-3.4)                            | 9%<br>(7.2-11%)                      | 11%<br>(8.3-13%)                    | 21000<br>(17000-27000) | 1300000<br>(1000000-1600000) |
| India    | 2005 | Male   | 40 to 44 | 36%<br>(30-41%)                | 64%<br>(59-70%)          | 2.5<br>(1.7-3.5)                            | 8.9%<br>(7-11%)                      | 11%<br>(8.4-13%)                    | 24000<br>(19000-30000) | 1300000<br>(1000000-1600000) |
| India    | 2005 | Male   | 45 to 49 | 34%<br>(28-39%)                | 66%<br>(61-72%)          | 2.4<br>(1.6-3.5)                            | 8.3%<br>(6.4-11%)                    | 10%<br>(7.6-13%)                    | 27000<br>(20000-34000) | 1200000<br>(940000-1600000)  |
| India    | 2005 | Male   | 50 to 54 | 30%<br>(25-36%)                | 70%<br>(64-75%)          | 2.1<br>(1.4-3.2)                            | 7.3%<br>(5.3-9.4%)                   | 8.8%<br>(6.2-11%)                   | 28000<br>(20000-37000) | 1100000<br>(820000-1400000)  |
| India    | 2005 | Male   | 55 to 59 | 27%<br>(21-33%)                | 73%<br>(67-79%)          | 1.9<br>(1.3-2.9)                            | 6.2%<br>(4.5-8.1%)                   | 7.4%<br>(5.3-9.8%)                  | 24000<br>(17000-32000) | 830000<br>(600000-1100000)   |
| India    | 2005 | Male   | 60 to 64 | 25%<br>(19-31%)                | 75%<br>(69-81%)          | 1.7<br>(1-2.6)                              | 4.9%<br>(3.3-6.7%)                   | 5.6%<br>(3.7-7.9%)                  | 22000<br>(14000-30000) | 630000<br>(430000-860000)    |
| India    | 2005 | Male   | 65 to 69 | 23%<br>(17-29%)                | 77%<br>(71-83%)          | 1.5<br>(0.92-2.2)                           | 3.8%<br>(2.5-5.3%)                   | 4.3%<br>(2.8-6.1%)                  | 19000<br>(13000-28000) | 460000<br>(310000-640000)    |
| India    | 2005 | Male   | 70 to 74 | 21%<br>(16-26%)                | 79%<br>(74-84%)          | 1.2<br>(0.74-1.9)                           | 2.7%<br>(1.7-4%)                     | 3%<br>(1.8-4.6%)                    | 14000<br>(8100-21000)  | 260000<br>(160000-400000)    |
| India    | 2005 | Male   | 75 to 79 | 18%<br>(13-24%)                | 82%<br>(76-87%)          | 0.94<br>(0.53-1.5)                          | 1.8%<br>(1-2.9%)                     | 2%<br>(1.1-3.3%)                    | 8000<br>(4300-13000)   | 120000<br>(68000-190000)     |
| India    | 2005 | Male   | 80 to 84 | 15%<br>(10-21%)                | 85%<br>(79-90%)          | 0.73<br>(0.42-1.1)                          | 1.2%<br>(0.68-2%)                    | 1.4%<br>(0.69-2.2%)                 | 3800<br>(1900-6200)    | 43000<br>(23000-69000)       |
| India    | 2005 | Male   | 85 to 89 | 15%<br>(10-21%)                | 85%<br>(79-90%)          | 0.66<br>(0.37-1.1)                          | 0.9%<br>(0.43-1.5%)                  | 0.94%<br>(0.41-1.7%)                | 1500<br>(670-2700)     | 13000<br>(6200-22000)        |
| India    | 2005 | Male   | 90 to 94 | 17%<br>(12-23%)                | 83%<br>(77-88%)          | 0.65<br>(0.35-1.1)                          | 0.64%<br>(0.24-1.2%)                 | 0.61%<br>(0.14-1.3%)                | 380<br>(87-800)        | 2400<br>(860-4700)           |
| India    | 2005 | Male   | 95 plus  | 19%<br>(12-27%)                | 81%<br>(73-88%)          | 0.64<br>(0.29-1.1)                          | 0.53%<br>(0.12-1.2%)                 | 0.41%<br>(-0.051-1.2%)              | 62<br>(-7.6-180)       | 320<br>(73-710)              |
| India    | 2010 | Female | All Ages | 3.5%<br>(2.9-4%)               | 97%<br>(96-97%)          | 0.11<br>(0.085-0.14)                        | 0.47%<br>(0.39-0.58%)                | 0.67%<br>(0.48-0.89%)               | 29000<br>(21000-38000) | 1100000<br>(880000-1400000)  |
| India    | 2010 | Female | 15 to 19 | 1.9%<br>(1.2-2.8%)             | 98%<br>(97-99%)          | 0.038<br>(0.018-0.071)                      | 0.21%<br>(0.14-0.31%)                | 0.13%<br>(0.054-0.27%)              | 110<br>(45-230)        | 23000<br>(15000-35000)       |
| India    | 2010 | Female | 20 to 24 | 1.9%<br>(1.2-2.8%)             | 98%<br>(97-99%)          | 0.068<br>(0.037-0.12)                       | 0.45%<br>(0.31-0.62%)                | 0.29%<br>(0.17-0.5%)                | 310<br>(170-520)       | 55000<br>(37000-80000)       |
| India    | 2010 | Female | 25 to 29 | 2.3%<br>(1.6-3.3%)             | 98%<br>(97-98%)          | 0.11<br>(0.061-0.19)                        | 0.62%<br>(0.45-0.81%)                | 0.54%<br>(0.33-0.84%)               | 560<br>(350-880)       | 72000<br>(52000-100000)      |

| Location | Year | Sex    | Age      | Prevalence of current drinkers | Prevalence of abstainers | Population average of standard drinks daily | Percent of total attributable deaths | Percent of total attributable DALYs | Attributable deaths       | Attributable DALYs             |
|----------|------|--------|----------|--------------------------------|--------------------------|---------------------------------------------|--------------------------------------|-------------------------------------|---------------------------|--------------------------------|
| India    | 2010 | Female | 30 to 34 | 2.7%<br>(1.8-3.9%)             | 97%<br>(96-98%)          | 0.15<br>(0.086-0.25)                        | 0.76%<br>(0.57-1%)                   | 0.84%<br>(0.58-1.2%)                | 830<br>(570-1200)         | 81000<br>(60000-110000)        |
| India    | 2010 | Female | 35 to 39 | 3.1%<br>(2.1-4.2%)             | 97%<br>(96-98%)          | 0.18<br>(0.099-0.29)                        | 0.92%<br>(0.7-1.2%)                  | 1.2%<br>(0.9-1.6%)                  | 1300<br>(930-1700)        | 96000<br>(73000-120000)        |
| India    | 2010 | Female | 40 to 44 | 3.4%<br>(2.4-4.7%)             | 97%<br>(95-98%)          | 0.19<br>(0.1-0.31)                          | 0.95%<br>(0.73-1.2%)                 | 1.4%<br>(1-1.8%)                    | 1600<br>(1200-2100)       | 100000<br>(77000-130000)       |
| India    | 2010 | Female | 45 to 49 | 3.7%<br>(2.4-5.1%)             | 96%<br>(95-98%)          | 0.18<br>(0.099-0.3)                         | 0.94%<br>(0.73-1.2%)                 | 1.3%<br>(0.98-1.8%)                 | 2000<br>(1400-2700)       | 100000<br>(80000-140000)       |
| India    | 2010 | Female | 50 to 54 | 4.2%<br>(2.7-6.2%)             | 96%<br>(94-97%)          | 0.22<br>(0.11-0.39)                         | 1%<br>(0.75-1.4%)                    | 1.4%<br>(1-2%)                      | 2800<br>(2000-3900)       | 120000<br>(88000-160000)       |
| India    | 2010 | Female | 55 to 59 | 4.7%<br>(3-7.1%)               | 95%<br>(93-97%)          | 0.29<br>(0.14-0.51)                         | 1%<br>(0.7-1.5%)                     | 1.4%<br>(0.89-2.1%)                 | 3500<br>(2300-5300)       | 130000<br>(86000-190000)       |
| India    | 2010 | Female | 60 to 64 | 5.1%<br>(3.2-8%)               | 95%<br>(92-97%)          | 0.32<br>(0.16-0.59)                         | 0.89%<br>(0.56-1.4%)                 | 1.1%<br>(0.68-1.8%)                 | 3600<br>(2200-5800)       | 110000<br>(67000-170000)       |
| India    | 2010 | Female | 65 to 69 | 5.3%<br>(3.3-8%)               | 95%<br>(92-97%)          | 0.3<br>(0.15-0.51)                          | 0.76%<br>(0.48-1.1%)                 | 0.95%<br>(0.58-1.5%)                | 3700<br>(2200-5700)       | 88000<br>(56000-130000)        |
| India    | 2010 | Female | 70 to 74 | 5.4%<br>(3.5-8.1%)             | 95%<br>(92-97%)          | 0.27<br>(0.13-0.49)                         | 0.61%<br>(0.36-1%)                   | 0.74%<br>(0.43-1.2%)                | 3400<br>(2000-5600)       | 64000<br>(37000-110000)        |
| India    | 2010 | Female | 75 to 79 | 5.5%<br>(3.2-8.9%)             | 95%<br>(91-97%)          | 0.24<br>(0.11-0.47)                         | 0.47%<br>(0.25-0.83%)                | 0.56%<br>(0.29-0.99%)               | 2400<br>(1200-4200)       | 35000<br>(18000-60000)         |
| India    | 2010 | Female | 80 to 84 | 6%<br>(3.3-10%)                | 94%<br>(90-97%)          | 0.26<br>(0.11-0.52)                         | 0.4%<br>(0.19-0.78%)                 | 0.47%<br>(0.21-0.92%)               | 1700<br>(780-3400)        | 19000<br>(9100-36000)          |
| India    | 2010 | Female | 85 to 89 | 6.6%<br>(3.6-12%)              | 93%<br>(88-96%)          | 0.29<br>(0.12-0.58)                         | 0.35%<br>(0.15-0.72%)                | 0.39%<br>(0.16-0.8%)                | 920<br>(370-1900)         | 7300<br>(3200-15000)           |
| India    | 2010 | Female | 90 to 94 | 7.6%<br>(4.1-14%)              | 92%<br>(86-96%)          | 0.34<br>(0.14-0.68)                         | 0.32%<br>(0.11-0.72%)                | 0.34%<br>(0.097-0.83%)              | 330<br>(93-790)           | 1900<br>(640-4300)             |
| India    | 2010 | Female | 95 plus  | 9.1%<br>(4.2-18%)              | 91%<br>(82-96%)          | 0.41<br>(0.15-0.93)                         | 0.34%<br>(0.071-0.84%)               | 0.34%<br>(0.03-0.94%)               | 86<br>(7.6-240)           | 340<br>(73-860)                |
| India    | 2010 | Male   | All Ages | 21%<br>(20-22%)                | 79%<br>(78-80%)          | 1.3<br>(1.1-1.7)                            | 4.1%<br>(3.5-4.9%)                   | 4.8%<br>(3.8-5.9%)                  | 250000<br>(200000-310000) | 11000000<br>(9200000-13000000) |
| India    | 2010 | Male   | 15 to 19 | 9.7%<br>(7.7-12%)              | 90%<br>(88-92%)          | 0.45<br>(0.28-0.69)                         | 1.6%<br>(1.2-2.2%)                   | 1.8%<br>(1.1-2.7%)                  | 1500<br>(920-2200)        | 160000<br>(120000-220000)      |
| India    | 2010 | Male   | 20 to 24 | 22%<br>(19-25%)                | 78%<br>(75-81%)          | 1.4<br>(0.94-2.1)                           | 5.3%<br>(3.9-6.9%)                   | 6%<br>(4.1-8.3%)                    | 7200<br>(4900-10000)      | 650000<br>(470000-850000)      |
| India    | 2010 | Male   | 25 to 29 | 31%<br>(27-35%)                | 69%<br>(65-73%)          | 2.2<br>(1.5-3)                              | 7.6%<br>(5.9-9.4%)                   | 8.9%<br>(6.4-11%)                   | 13000<br>(9300-17000)     | 1000000<br>(780000-1300000)    |
| India    | 2010 | Male   | 30 to 34 | 34%<br>(30-39%)                | 66%<br>(61-70%)          | 2.5<br>(1.7-3.4)                            | 8.6%<br>(7-11%)                      | 10%<br>(8-13%)                      | 17000<br>(13000-22000)    | 1200000<br>(950000-1500000)    |
| India    | 2010 | Male   | 35 to 39 | 37%<br>(33-40%)                | 63%<br>(60-67%)          | 2.7<br>(1.8-3.6)                            | 8.9%<br>(7.1-11%)                    | 11%<br>(8.3-13%)                    | 22000<br>(17000-27000)    | 1300000<br>(1000000-1600000)   |

| Location | Year | Sex    | Age      | Prevalence of current drinkers | Prevalence of abstainers | Population average of standard drinks daily | Percent of total attributable deaths | Percent of total attributable DALYs | Attributable deaths    | Attributable DALYs           |
|----------|------|--------|----------|--------------------------------|--------------------------|---------------------------------------------|--------------------------------------|-------------------------------------|------------------------|------------------------------|
| India    | 2010 | Male   | 40 to 44 | 36%<br>(32-40%)                | 64%<br>(60-68%)          | 2.6<br>(1.8-3.7)                            | 8.6%<br>(6.7-11%)                    | 11%<br>(8.1-13%)                    | 24000<br>(19000-30000) | 1300000<br>(1000000-1600000) |
| India    | 2010 | Male   | 45 to 49 | 34%<br>(30-39%)                | 66%<br>(61-70%)          | 2.6<br>(1.7-3.7)                            | 8.2%<br>(6.2-10%)                    | 10%<br>(7.5-13%)                    | 28000<br>(21000-35000) | 1300000<br>(980000-1600000)  |
| India    | 2010 | Male   | 50 to 54 | 32%<br>(27-37%)                | 68%<br>(63-73%)          | 2.4<br>(1.5-3.5)                            | 7.2%<br>(5.2-9.3%)                   | 8.7%<br>(6.3-11%)                   | 29000<br>(22000-39000) | 1200000<br>(870000-1500000)  |
| India    | 2010 | Male   | 55 to 59 | 29%<br>(24-35%)                | 71%<br>(65-76%)          | 2.2<br>(1.4-3.3)                            | 6.3%<br>(4.4-8.1%)                   | 7.5%<br>(5.3-9.9%)                  | 30000<br>(21000-40000) | 1000000<br>(750000-1400000)  |
| India    | 2010 | Male   | 60 to 64 | 28%<br>(22-35%)                | 72%<br>(65-78%)          | 2<br>(1.3-3.1)                              | 5%<br>(3.4-7%)                       | 5.9%<br>(3.9-8.2%)                  | 25000<br>(16000-34000) | 720000<br>(480000-980000)    |
| India    | 2010 | Male   | 65 to 69 | 27%<br>(21-34%)                | 73%<br>(66-79%)          | 1.8<br>(1.2-2.8)                            | 3.9%<br>(2.6-5.6%)                   | 4.5%<br>(2.9-6.5%)                  | 21000<br>(14000-30000) | 510000<br>(340000-710000)    |
| India    | 2010 | Male   | 70 to 74 | 26%<br>(20-32%)                | 74%<br>(68-80%)          | 1.6<br>(0.97-2.4)                           | 2.9%<br>(1.7-4.3%)                   | 3.3%<br>(1.9-5.1%)                  | 16000<br>(9400-25000)  | 320000<br>(190000-480000)    |
| India    | 2010 | Male   | 75 to 79 | 23%<br>(17-30%)                | 77%<br>(70-83%)          | 1.3<br>(0.74-2)                             | 2%<br>(1.1-3.3%)                     | 2.2%<br>(1.1-3.7%)                  | 10000<br>(4900-17000)  | 150000<br>(78000-240000)     |
| India    | 2010 | Male   | 80 to 84 | 20%<br>(13-27%)                | 80%<br>(73-87%)          | 0.99<br>(0.66-1.5)                          | 1.4%<br>(0.66-2.2%)                  | 1.5%<br>(0.67-2.5%)                 | 5200<br>(2300-8900)    | 59000<br>(28000-99000)       |
| India    | 2010 | Male   | 85 to 89 | 19%<br>(12-28%)                | 81%<br>(72-88%)          | 0.85<br>(0.46-1.4)                          | 0.94%<br>(0.4-1.7%)                  | 0.97%<br>(0.34-1.8%)                | 2000<br>(700-3900)     | 17000<br>(7200-31000)        |
| India    | 2010 | Male   | 90 to 94 | 21%<br>(14-30%)                | 79%<br>(70-86%)          | 0.84<br>(0.43-1.4)                          | 0.64%<br>(0.14-1.4%)                 | 0.59%<br>(0.0034-1.4%)              | 470<br>(2.7-1100)      | 3100<br>(680-6500)           |
| India    | 2010 | Male   | 95 plus  | 25%<br>(15-37%)                | 75%<br>(63-85%)          | 0.86<br>(0.39-1.6)                          | 0.49%<br>(-0.051-1.3%)               | 0.35%<br>(-0.29-1.3%)               | 67<br>(-55-250)        | 380<br>(-39-1000)            |
| India    | 2016 | Female | All Ages | 4.1%<br>(3.3-5.1%)             | 96%<br>(95-97%)          | 0.18<br>(0.14-0.25)                         | 0.71%<br>(0.57-0.89%)                | 0.95%<br>(0.68-1.3%)                | 42000<br>(30000-58000) | 1500000<br>(1200000-1900000) |
| India    | 2016 | Female | 15 to 19 | 2.6%<br>(1.5-4.4%)             | 97%<br>(96-99%)          | 0.066<br>(0.027-0.13)                       | 0.27%<br>(0.17-0.44%)                | 0.22%<br>(0.081-0.52%)              | 160<br>(58-370)        | 28000<br>(17000-46000)       |
| India    | 2016 | Female | 20 to 24 | 2.7%<br>(1.5-4.4%)             | 97%<br>(96-98%)          | 0.12<br>(0.056-0.24)                        | 0.61%<br>(0.41-0.89%)                | 0.52%<br>(0.25-1%)                  | 450<br>(220-880)       | 69000<br>(45000-100000)      |
| India    | 2016 | Female | 25 to 29 | 3.2%<br>(1.9-5.2%)             | 97%<br>(95-98%)          | 0.2<br>(0.093-0.39)                         | 0.86%<br>(0.59-1.3%)                 | 0.92%<br>(0.49-1.6%)                | 820<br>(440-1500)      | 96000<br>(63000-140000)      |
| India    | 2016 | Female | 30 to 34 | 3.6%<br>(2-6.2%)               | 96%<br>(94-98%)          | 0.27<br>(0.13-0.49)                         | 1%<br>(0.72-1.5%)                    | 1.4%<br>(0.81-2.2%)                 | 1200<br>(740-2000)     | 110000<br>(79000-170000)     |
| India    | 2016 | Female | 35 to 39 | 4.1%<br>(2.3-6.3%)             | 96%<br>(94-98%)          | 0.31<br>(0.15-0.54)                         | 1.2%<br>(0.88-1.7%)                  | 1.9%<br>(1.2-2.7%)                  | 1900<br>(1200-2700)    | 140000<br>(95000-180000)     |
| India    | 2016 | Female | 40 to 44 | 4.4%<br>(2.7-7%)               | 96%<br>(93-97%)          | 0.32<br>(0.15-0.55)                         | 1.2%<br>(0.89-1.7%)                  | 2%<br>(1.3-2.8%)                    | 2300<br>(1500-3200)    | 140000<br>(100000-190000)    |



| Location | Year | Sex    | Age      | Prevalence of current drinkers | Prevalence of abstainers | Population average of standard drinks daily | Percent of total attributable deaths | Percent of total attributable DALYs | Attributable deaths       | Attributable DALYs              |
|----------|------|--------|----------|--------------------------------|--------------------------|---------------------------------------------|--------------------------------------|-------------------------------------|---------------------------|---------------------------------|
| India    | 2016 | Female | 45 to 49 | 4.7%<br>(2.7-7.2%)             | 95%<br>(93-97%)          | 0.29<br>(0.14-0.54)                         | 1.2%<br>(0.86-1.7%)                  | 1.8%<br>(1.3-2.6%)                  | 2700<br>(1900-3900)       | 140000<br>(100000-190000)       |
| India    | 2016 | Female | 50 to 54 | 4.9%<br>(3-7.7%)               | 95%<br>(92-97%)          | 0.31<br>(0.15-0.57)                         | 1.3%<br>(0.88-1.8%)                  | 1.8%<br>(1.2-2.7%)                  | 3900<br>(2600-5800)       | 160000<br>(120000-230000)       |
| India    | 2016 | Female | 55 to 59 | 5.3%<br>(3.2-8.9%)             | 95%<br>(91-97%)          | 0.39<br>(0.18-0.74)                         | 1.3%<br>(0.83-1.9%)                  | 1.8%<br>(1.1-2.8%)                  | 4800<br>(3000-7500)       | 170000<br>(110000-260000)       |
| India    | 2016 | Female | 60 to 64 | 5.7%<br>(3.3-9.8%)             | 94%<br>(90-97%)          | 0.42<br>(0.2-0.81)                          | 1.1%<br>(0.67-1.8%)                  | 1.5%<br>(0.86-2.4%)                 | 5500<br>(3200-9000)       | 160000<br>(98000-260000)        |
| India    | 2016 | Female | 65 to 69 | 5.8%<br>(3.4-9.3%)             | 94%<br>(91-97%)          | 0.38<br>(0.18-0.71)                         | 0.95%<br>(0.57-1.5%)                 | 1.2%<br>(0.71-1.9%)                 | 5300<br>(3100-8400)       | 130000<br>(75000-200000)        |
| India    | 2016 | Female | 70 to 74 | 5.8%<br>(3.6-9.2%)             | 94%<br>(91-96%)          | 0.33<br>(0.15-0.65)                         | 0.75%<br>(0.43-1.3%)                 | 0.94%<br>(0.51-1.6%)                | 4400<br>(2400-7500)       | 84000<br>(47000-140000)         |
| India    | 2016 | Female | 75 to 79 | 5.7%<br>(3.3-9.5%)             | 94%<br>(91-97%)          | 0.3<br>(0.12-0.6)                           | 0.58%<br>(0.3-1%)                    | 0.71%<br>(0.36-1.3%)                | 3300<br>(1700-6200)       | 49000<br>(26000-90000)          |
| India    | 2016 | Female | 80 to 84 | 6%<br>(3.1-10%)                | 94%<br>(90-97%)          | 0.31<br>(0.13-0.64)                         | 0.5%<br>(0.24-0.98%)                 | 0.6%<br>(0.28-1.2%)                 | 2700<br>(1200-5200)       | 29000<br>(14000-57000)          |
| India    | 2016 | Female | 85 to 89 | 6.6%<br>(3.4-12%)              | 93%<br>(88-97%)          | 0.34<br>(0.13-0.7)                          | 0.44%<br>(0.19-0.9%)                 | 0.5%<br>(0.2-1.1%)                  | 1500<br>(630-3200)        | 12000<br>(5300-25000)           |
| India    | 2016 | Female | 90 to 94 | 7.7%<br>(3.9-14%)              | 92%<br>(86-96%)          | 0.4<br>(0.15-0.83)                          | 0.41%<br>(0.15-0.97%)                | 0.45%<br>(0.14-1.1%)                | 600<br>(190-1500)         | 3400<br>(1200-7800)             |
| India    | 2016 | Female | 95 plus  | 9.3%<br>(4-18%)                | 91%<br>(82-96%)          | 0.48<br>(0.16-1.1)                          | 0.43%<br>(0.087-1.1%)                | 0.45%<br>(0.046-1.2%)               | 170<br>(17-440)           | 650<br>(130-1600)               |
| India    | 2016 | Male   | All Ages | 20%<br>(18-22%)                | 80%<br>(78-82%)          | 1.5<br>(1.2-1.8)                            | 4.7%<br>(4-5.5%)                     | 5.4%<br>(4.3-6.5%)                  | 290000<br>(230000-350000) | 12000000<br>(10000000-14000000) |
| India    | 2016 | Male   | 15 to 19 | 6.6%<br>(4.5-9.6%)             | 93%<br>(90-95%)          | 0.36<br>(0.19-0.6)                          | 1.4%<br>(0.97-1.9%)                  | 1.5%<br>(0.93-2.4%)                 | 1100<br>(670-1800)        | 130000<br>(93000-190000)        |
| India    | 2016 | Male   | 20 to 24 | 15%<br>(11-20%)                | 85%<br>(80-89%)          | 1.1<br>(0.7-1.8)                            | 4.4%<br>(3.2-6%)                     | 5.1%<br>(3.3-7.3%)                  | 5600<br>(3700-8100)       | 520000<br>(370000-700000)       |
| India    | 2016 | Male   | 25 to 29 | 25%<br>(20-31%)                | 75%<br>(69-80%)          | 2<br>(1.3-2.9)                              | 6.9%<br>(5.2-8.7%)                   | 8.4%<br>(5.9-11%)                   | 11000<br>(8000-15000)     | 900000<br>(680000-1100000)      |
| India    | 2016 | Male   | 30 to 34 | 30%<br>(24-38%)                | 70%<br>(62-76%)          | 2.5<br>(1.6-3.5)                            | 8.3%<br>(6.6-10%)                    | 11%<br>(7.9-13%)                    | 17000<br>(13000-22000)    | 1200000<br>(930000-1500000)     |
| India    | 2016 | Male   | 35 to 39 | 34%<br>(27-41%)                | 66%<br>(59-73%)          | 2.8<br>(1.8-4)                              | 8.9%<br>(7.1-11%)                    | 11%<br>(8.7-14%)                    | 23000<br>(17000-28000)    | 1400000<br>(1100000-1700000)    |
| India    | 2016 | Male   | 40 to 44 | 34%<br>(28-41%)                | 66%<br>(59-72%)          | 2.9<br>(1.9-4.2)                            | 8.8%<br>(6.9-11%)                    | 11%<br>(8.7-14%)                    | 26000<br>(20000-32000)    | 1400000<br>(1100000-1700000)    |
| India    | 2016 | Male   | 45 to 49 | 33%<br>(26-40%)                | 67%<br>(60-74%)          | 2.8<br>(1.8-4.2)                            | 8.5%<br>(6.5-11%)                    | 11%<br>(8.1-13%)                    | 30000<br>(22000-37000)    | 1400000<br>(1100000-1700000)    |

| Location | Year | Sex    | Age      | Prevalence of current drinkers | Prevalence of abstainers | Population average of standard drinks daily | Percent of total attributable deaths | Percent of total attributable DALYs | Attributable deaths    | Attributable DALYs           |
|----------|------|--------|----------|--------------------------------|--------------------------|---------------------------------------------|--------------------------------------|-------------------------------------|------------------------|------------------------------|
| India    | 2016 | Male   | 50 to 54 | 32%<br>(25-39%)                | 68%<br>(61-75%)          | 2.7<br>(1.7-4)                              | 7.7%<br>(5.7-9.7%)                   | 9.5%<br>(7-12%)                     | 33000<br>(24000-42000) | 1300000<br>(1000000-1700000) |
| India    | 2016 | Male   | 55 to 59 | 30%<br>(24-37%)                | 70%<br>(63-76%)          | 2.6<br>(1.7-3.8)                            | 6.8%<br>(5-8.8%)                     | 8.3%<br>(6-11%)                     | 37000<br>(26000-47000) | 1300000<br>(920000-1600000)  |
| India    | 2016 | Male   | 60 to 64 | 29%<br>(23-37%)                | 71%<br>(63-77%)          | 2.4<br>(1.5-3.6)                            | 5.5%<br>(3.8-7.5%)                   | 6.5%<br>(4.4-9.1%)                  | 34000<br>(23000-47000) | 1000000<br>(670000-1400000)  |
| India    | 2016 | Male   | 65 to 69 | 28%<br>(22-35%)                | 72%<br>(65-78%)          | 2.2<br>(1.4-3.2)                            | 4.4%<br>(2.9-6.1%)                   | 5.2%<br>(3.4-7.2%)                  | 27000<br>(18000-38000) | 660000<br>(430000-910000)    |
| India    | 2016 | Male   | 70 to 74 | 26%<br>(21-33%)                | 74%<br>(67-79%)          | 1.8<br>(1.1-2.8)                            | 3.3%<br>(2-4.9%)                     | 3.8%<br>(2.2-5.7%)                  | 20000<br>(12000-30000) | 390000<br>(230000-570000)    |
| India    | 2016 | Male   | 75 to 79 | 24%<br>(18-31%)                | 76%<br>(69-82%)          | 1.5<br>(0.86-2.3)                           | 2.3%<br>(1.2-3.7%)                   | 2.6%<br>(1.3-4.3%)                  | 13000<br>(6700-21000)  | 200000<br>(110000-320000)    |
| India    | 2016 | Male   | 80 to 84 | 21%<br>(14-28%)                | 79%<br>(72-86%)          | 1.2<br>(0.68-1.8)                           | 1.6%<br>(0.8-2.6%)                   | 1.8%<br>(0.82-2.9%)                 | 7900<br>(3600-13000)   | 89000<br>(43000-140000)      |
| India    | 2016 | Male   | 85 to 89 | 20%<br>(13-28%)                | 80%<br>(72-87%)          | 1<br>(0.56-1.7)                             | 1.1%<br>(0.52-2%)                    | 1.2%<br>(0.49-2.1%)                 | 3300<br>(1300-5800)    | 27000<br>(12000-46000)       |
| India    | 2016 | Male   | 90 to 94 | 22%<br>(15-31%)                | 78%<br>(69-85%)          | 0.99<br>(0.53-1.7)                          | 0.79%<br>(0.2-1.7%)                  | 0.76%<br>(0.08-1.8%)                | 830<br>(86-1900)       | 5200<br>(1300-11000)         |
| India    | 2016 | Male   | 95 plus  | 26%<br>(16-37%)                | 74%<br>(63-84%)          | 1<br>(0.46-1.8)                             | 0.6%<br>(-0.029-1.6%)                | 0.47%<br>(-0.26-1.6%)               | 130<br>(-70-420)       | 640<br>(-30-1700)            |
| Nepal    | 1990 | Female | All Ages | 0.71%<br>(0.53-0.95%)          | 99%<br>(99-99%)          | 0.013<br>(0.0095-0.016)                     | 0.22%<br>(0.17-0.28%)                | 0.25%<br>(0.19-0.31%)               | 270<br>(210-340)       | 16000<br>(13000-19000)       |
| Nepal    | 1990 | Female | 15 to 19 | 0.52%<br>(0.24-0.91%)          | 99%<br>(99-100%)         | 0.0062<br>(0.0023-0.013)                    | 0.29%<br>(0.18-0.44%)                | 0.036%<br>(0.016-0.068%)            | 0.71<br>(0.32-1.4)     | 660<br>(380-1000)            |
| Nepal    | 1990 | Female | 20 to 24 | 0.61%<br>(0.24-1.1%)           | 99%<br>(99-100%)         | 0.014<br>(0.005-0.026)                      | 0.62%<br>(0.41-0.89%)                | 0.12%<br>(0.066-0.21%)              | 2.8<br>(1.5-4.8)       | 1400<br>(880-2200)           |
| Nepal    | 1990 | Female | 25 to 29 | 0.7%<br>(0.3-1.3%)             | 99%<br>(99-100%)         | 0.019<br>(0.0082-0.036)                     | 0.72%<br>(0.51-0.96%)                | 0.24%<br>(0.14-0.37%)               | 5.1<br>(3-8.1)         | 1500<br>(980-2000)           |
| Nepal    | 1990 | Female | 30 to 34 | 0.84%<br>(0.38-1.6%)           | 99%<br>(98-100%)         | 0.026<br>(0.011-0.047)                      | 0.8%<br>(0.59-1.1%)                  | 0.48%<br>(0.3-0.72%)                | 11<br>(6.8-16)         | 1600<br>(1100-2200)          |
| Nepal    | 1990 | Female | 35 to 39 | 1%<br>(0.48-1.7%)              | 99%<br>(98-100%)         | 0.032<br>(0.014-0.053)                      | 0.88%<br>(0.67-1.1%)                 | 0.74%<br>(0.48-1.1%)                | 18<br>(12-27)          | 1700<br>(1300-2300)          |
| Nepal    | 1990 | Female | 40 to 44 | 1.1%<br>(0.58-1.8%)            | 99%<br>(98-99%)          | 0.033<br>(0.015-0.058)                      | 0.93%<br>(0.69-1.2%)                 | 0.94%<br>(0.62-1.3%)                | 22<br>(14-32)          | 1500<br>(1100-2000)          |
| Nepal    | 1990 | Female | 45 to 49 | 1.2%<br>(0.53-1.9%)            | 99%<br>(98-99%)          | 0.03<br>(0.013-0.052)                       | 0.91%<br>(0.68-1.2%)                 | 0.97%<br>(0.65-1.4%)                | 28<br>(18-40)          | 1600<br>(1200-2100)          |
| Nepal    | 1990 | Female | 50 to 54 | 1.3%<br>(0.61-2.2%)            | 99%<br>(98-99%)          | 0.029<br>(0.012-0.054)                      | 0.85%<br>(0.6-1.2%)                  | 0.91%<br>(0.58-1.4%)                | 34<br>(21-51)          | 1600<br>(1100-2200)          |
| Nepal    | 1990 | Female | 55 to 59 | 1.4%<br>(0.67-2.3%)            | 99%<br>(98-99%)          | 0.03<br>(0.013-0.056)                       | 0.69%<br>(0.48-0.95%)                | 0.73%<br>(0.47-1.1%)                | 34<br>(21-51)          | 1300<br>(910-1900)           |

| Location | Year | Sex    | Age      | Prevalence of current drinkers | Prevalence of abstainers | Population average of standard drinks daily | Percent of total attributable deaths | Percent of total attributable DALYs | Attributable deaths    | Attributable DALYs     |
|----------|------|--------|----------|--------------------------------|--------------------------|---------------------------------------------|--------------------------------------|-------------------------------------|------------------------|------------------------|
| Nepal    | 1990 | Female | 60 to 64 | 1.4%<br>(0.69-2.5%)            | 99%<br>(98-99%)          | 0.029<br>(0.012-0.056)                      | 0.52%<br>(0.34-0.74%)                | 0.54%<br>(0.32-0.83%)               | 32<br>(19-49)          | 1100<br>(680-1500)     |
| Nepal    | 1990 | Female | 65 to 69 | 1.4%<br>(0.7-2.3%)             | 99%<br>(98-99%)          | 0.025<br>(0.011-0.045)                      | 0.42%<br>(0.28-0.6%)                 | 0.45%<br>(0.27-0.67%)               | 32<br>(19-48)          | 820<br>(530-1200)      |
| Nepal    | 1990 | Female | 70 to 74 | 1.4%<br>(0.74-2.2%)            | 99%<br>(98-99%)          | 0.021<br>(0.009-0.038)                      | 0.32%<br>(0.19-0.51%)                | 0.35%<br>(0.19-0.58%)               | 25<br>(14-42)          | 500<br>(300-800)       |
| Nepal    | 1990 | Female | 75 to 79 | 1.4%<br>(0.7-2.3%)             | 99%<br>(98-99%)          | 0.018<br>(0.0076-0.036)                     | 0.25%<br>(0.15-0.4%)                 | 0.27%<br>(0.15-0.45%)               | 17<br>(9-28)           | 260<br>(150-410)       |
| Nepal    | 1990 | Female | 80 to 84 | 1.4%<br>(0.72-2.3%)            | 99%<br>(98-99%)          | 0.017<br>(0.0071-0.032)                     | 0.17%<br>(0.091-0.26%)               | 0.17%<br>(0.084-0.29%)              | 6.9<br>(3.3-12)        | 80<br>(43-130)         |
| Nepal    | 1990 | Female | 85 to 89 | 1.6%<br>(0.77-2.7%)            | 98%<br>(97-99%)          | 0.016<br>(0.007-0.032)                      | 0.12%<br>(0.067-0.18%)               | 0.11%<br>(0.053-0.19%)              | 2.3<br>(1.1-4)         | 21<br>(12-33)          |
| Nepal    | 1990 | Female | 90 to 94 | 1.8%<br>(0.92-3.1%)            | 98%<br>(97-99%)          | 0.017<br>(0.0071-0.032)                     | 0.086%<br>(0.043-0.14%)              | 0.07%<br>(0.019-0.13%)              | 0.48<br>(0.13-0.91)    | 3.5<br>(1.7-5.7)       |
| Nepal    | 1990 | Female | 95 plus  | 2.2%<br>(0.97-4.2%)            | 98%<br>(96-99%)          | 0.018<br>(0.0058-0.037)                     | 0.078%<br>(0.026-0.13%)              | 0.043%<br>(-0.013-0.099%)           | 0.074<br>(-0.022-0.17) | 0.52<br>(0.17-0.9)     |
| Nepal    | 1990 | Male   | All Ages | 18%<br>(15-22%)                | 82%<br>(78-85%)          | 0.13<br>(0.11-0.16)                         | 0.53%<br>(0.28-0.79%)                | 0.56%<br>(0.11-0.98%)               | 560<br>(110-1000)      | 37000<br>(20000-55000) |
| Nepal    | 1990 | Male   | 15 to 19 | 8.7%<br>(5.2-14%)              | 91%<br>(86-95%)          | 0.044<br>(0.022-0.081)                      | 0.67%<br>(0.44-0.96%)                | 0.33%<br>(0.15-0.59%)               | 5.7<br>(2.6-10)        | 1300<br>(840-2000)     |
| Nepal    | 1990 | Male   | 20 to 24 | 23%<br>(14-32%)                | 77%<br>(68-86%)          | 0.15<br>(0.084-0.25)                        | 1.8%<br>(1.1-2.5%)                   | 1.2%<br>(0.44-2.1%)                 | 25<br>(9.3-46)         | 3700<br>(2300-5400)    |
| Nepal    | 1990 | Male   | 25 to 29 | 35%<br>(24-47%)                | 65%<br>(53-76%)          | 0.26<br>(0.16-0.38)                         | 2.5%<br>(1.5-3.6%)                   | 1.8%<br>(0.36-3.5%)                 | 38<br>(7.3-71)         | 4600<br>(2600-6800)    |
| Nepal    | 1990 | Male   | 30 to 34 | 43%<br>(30-56%)                | 57%<br>(44-70%)          | 0.33<br>(0.21-0.47)                         | 3%<br>(1.5-4.4%)                     | 2.6%<br>(0.56-4.7%)                 | 59<br>(13-100)         | 5500<br>(2800-8200)    |
| Nepal    | 1990 | Male   | 35 to 39 | 45%<br>(32-57%)                | 55%<br>(43-68%)          | 0.35<br>(0.22-0.52)                         | 2.9%<br>(1.4-4.3%)                   | 2.8%<br>(0.74-5%)                   | 72<br>(19-130)         | 5400<br>(2700-8300)    |
| Nepal    | 1990 | Male   | 40 to 44 | 45%<br>(32-56%)                | 55%<br>(44-68%)          | 0.35<br>(0.21-0.53)                         | 2.7%<br>(1.2-4.2%)                   | 2.7%<br>(0.66-4.9%)                 | 67<br>(16-120)         | 4200<br>(1800-6700)    |
| Nepal    | 1990 | Male   | 45 to 49 | 43%<br>(29-55%)                | 57%<br>(45-71%)          | 0.34<br>(0.19-0.53)                         | 2.4%<br>(1-3.7%)                     | 2.5%<br>(0.68-4.3%)                 | 75<br>(20-130)         | 4000<br>(1800-6500)    |
| Nepal    | 1990 | Male   | 50 to 54 | 39%<br>(28-51%)                | 61%<br>(49-72%)          | 0.32<br>(0.18-0.51)                         | 1.9%<br>(0.65-3.1%)                  | 2%<br>(0.37-3.7%)                   | 71<br>(13-130)         | 3300<br>(1100-5500)    |
| Nepal    | 1990 | Male   | 55 to 59 | 34%<br>(24-45%)                | 66%<br>(55-76%)          | 0.29<br>(0.16-0.47)                         | 1.4%<br>(0.4-2.4%)                   | 1.4%<br>(0.096-2.7%)                | 57<br>(3.6-110)        | 2300<br>(600-4000)     |
| Nepal    | 1990 | Male   | 60 to 64 | 31%<br>(20-42%)                | 69%<br>(58-80%)          | 0.26<br>(0.14-0.43)                         | 0.91%<br>(0.063-1.7%)                | 0.86%<br>(-0.19-1.9%)               | 42<br>(-9.7-93)        | 1500<br>(110-2800)     |
| Nepal    | 1990 | Male   | 65 to 69 | 28%<br>(18-39%)                | 72%<br>(61-82%)          | 0.22<br>(0.12-0.36)                         | 0.6%<br>(-0.052-1.2%)                | 0.55%<br>(-0.26-1.3%)               | 29<br>(-13-70)         | 850<br>(-72-1800)      |
| Nepal    | 1990 | Male   | 70 to 74 | 26%<br>(17-36%)                | 74%<br>(64-83%)          | 0.18<br>(0.095-0.3)                         | 0.35%<br>(-0.2-0.86%)                | 0.31%<br>(-0.37-0.89%)              | 15<br>(-19-45)         | 380<br>(-220-920)      |
| Nepal    | 1990 | Male   | 75 to 79 | 23%<br>(14-34%)                | 77%<br>(66-86%)          | 0.14<br>(0.067-0.26)                        | 0.22%<br>(-0.26-0.59%)               | 0.18%<br>(-0.4-0.62%)               | 7.2<br>(-16-25)        | 140<br>(-170-390)      |

| Location | Year | Sex    | Age      | Prevalence of current drinkers | Prevalence of abstainers | Population average of standard drinks daily | Percent of total attributable deaths | Percent of total attributable DALYs | Attributable deaths    | Attributable DALYs     |
|----------|------|--------|----------|--------------------------------|--------------------------|---------------------------------------------|--------------------------------------|-------------------------------------|------------------------|------------------------|
| Nepal    | 1990 | Male   | 80 to 84 | 21%<br>(13-32%)                | 79%<br>(68-87%)          | 0.12<br>(0.056-0.2)                         | 0.12%<br>(-0.22-0.4%)                | 0.074%<br>(-0.32-0.4%)              | 1.7<br>(-7.6-9.8)      | 33<br>(-64-120)        |
| Nepal    | 1990 | Male   | 85 to 89 | 21%<br>(13-32%)                | 79%<br>(68-87%)          | 0.1<br>(0.052-0.18)                         | 0.06%<br>(-0.21-0.29%)               | 0.009%<br>(-0.31-0.27%)             | 0.12<br>(-4-3.6)       | 6.9<br>(-24-33)        |
| Nepal    | 1990 | Male   | 90 to 94 | 24%<br>(14-36%)                | 76%<br>(64-86%)          | 0.1<br>(0.048-0.19)                         | 0.016%<br>(-0.24-0.22%)              | -0.057%<br>(-0.35-0.18%)            | -0.27<br>(-1.6-0.87)   | 0.46<br>(-6.6-6.2)     |
| Nepal    | 1990 | Male   | 95 plus  | 28%<br>(15-45%)                | 72%<br>(55-85%)          | 0.11<br>(0.04-0.22)                         | 0.027%<br>(-0.26-0.22%)              | -0.081%<br>(-0.4-0.14%)             | -0.086<br>(-0.43-0.15) | 0.11<br>(-1.1-0.93)    |
| Nepal    | 1995 | Female | All Ages | 0.71%<br>(0.54-0.94%)          | 99%<br>(99-99%)          | 0.025<br>(0.019-0.031)                      | 0.31%<br>(0.25-0.38%)                | 0.37%<br>(0.28-0.47%)               | 390<br>(290-500)       | 20000<br>(16000-25000) |
| Nepal    | 1995 | Female | 15 to 19 | 0.51%<br>(0.24-0.91%)          | 99%<br>(99-100%)         | 0.012<br>(0.0045-0.025)                     | 0.33%<br>(0.2-0.49%)                 | 0.063%<br>(0.029-0.14%)             | 1.4<br>(0.63-3)        | 810<br>(470-1300)      |
| Nepal    | 1995 | Female | 20 to 24 | 0.6%<br>(0.23-1.1%)            | 99%<br>(99-100%)         | 0.026<br>(0.0098-0.048)                     | 0.72%<br>(0.47-1%)                   | 0.2%<br>(0.11-0.33%)                | 4.6<br>(2.5-7.8)       | 1800<br>(1100-2700)    |
| Nepal    | 1995 | Female | 25 to 29 | 0.69%<br>(0.3-1.3%)            | 99%<br>(99-100%)         | 0.037<br>(0.016-0.068)                      | 0.85%<br>(0.61-1.1%)                 | 0.36%<br>(0.21-0.59%)               | 7.8<br>(4.4-13)        | 1800<br>(1200-2500)    |
| Nepal    | 1995 | Female | 30 to 34 | 0.84%<br>(0.37-1.6%)           | 99%<br>(98-100%)         | 0.05<br>(0.022-0.091)                       | 0.97%<br>(0.7-1.3%)                  | 0.67%<br>(0.42-1%)                  | 14<br>(8.7-22)         | 1900<br>(1300-2600)    |
| Nepal    | 1995 | Female | 35 to 39 | 1%<br>(0.49-1.7%)              | 99%<br>(98-100%)         | 0.062<br>(0.028-0.11)                       | 1.1%<br>(0.79-1.4%)                  | 0.99%<br>(0.65-1.4%)                | 23<br>(15-34)          | 2100<br>(1500-2800)    |
| Nepal    | 1995 | Female | 40 to 44 | 1.1%<br>(0.58-1.9%)            | 99%<br>(98-99%)          | 0.065<br>(0.03-0.12)                        | 1.2%<br>(0.84-1.5%)                  | 1.3%<br>(0.83-1.8%)                 | 33<br>(22-48)          | 2300<br>(1600-3100)    |
| Nepal    | 1995 | Female | 45 to 49 | 1.2%<br>(0.54-1.9%)            | 99%<br>(98-99%)          | 0.059<br>(0.026-0.11)                       | 1.1%<br>(0.83-1.5%)                  | 1.3%<br>(0.86-1.8%)                 | 35<br>(23-50)          | 1900<br>(1400-2600)    |
| Nepal    | 1995 | Female | 50 to 54 | 1.3%<br>(0.64-2.1%)            | 99%<br>(98-99%)          | 0.057<br>(0.024-0.1)                        | 1.1%<br>(0.76-1.5%)                  | 1.2%<br>(0.8-1.8%)                  | 46<br>(29-69)          | 2100<br>(1400-2900)    |
| Nepal    | 1995 | Female | 55 to 59 | 1.4%<br>(0.68-2.3%)            | 99%<br>(98-99%)          | 0.06<br>(0.027-0.11)                        | 0.91%<br>(0.64-1.3%)                 | 1%<br>(0.65-1.5%)                   | 49<br>(31-75)          | 1900<br>(1300-2700)    |
| Nepal    | 1995 | Female | 60 to 64 | 1.4%<br>(0.69-2.4%)            | 99%<br>(98-99%)          | 0.058<br>(0.025-0.11)                       | 0.71%<br>(0.46-1%)                   | 0.78%<br>(0.46-1.2%)                | 46<br>(28-72)          | 1500<br>(930-2100)     |
| Nepal    | 1995 | Female | 65 to 69 | 1.4%<br>(0.71-2.3%)            | 99%<br>(98-99%)          | 0.05<br>(0.023-0.09)                        | 0.56%<br>(0.38-0.83%)                | 0.62%<br>(0.38-0.96%)               | 47<br>(29-72)          | 1200<br>(770-1700)     |
| Nepal    | 1995 | Female | 70 to 74 | 1.4%<br>(0.76-2.3%)            | 99%<br>(98-99%)          | 0.041<br>(0.019-0.076)                      | 0.43%<br>(0.26-0.64%)                | 0.47%<br>(0.27-0.75%)               | 39<br>(22-62)          | 760<br>(450-1200)      |
| Nepal    | 1995 | Female | 75 to 79 | 1.4%<br>(0.71-2.4%)            | 99%<br>(98-99%)          | 0.036<br>(0.014-0.069)                      | 0.32%<br>(0.19-0.51%)                | 0.36%<br>(0.2-0.58%)                | 25<br>(14-41)          | 380<br>(220-590)       |
| Nepal    | 1995 | Female | 80 to 84 | 1.5%<br>(0.71-2.4%)            | 99%<br>(98-99%)          | 0.033<br>(0.013-0.063)                      | 0.22%<br>(0.13-0.35%)                | 0.23%<br>(0.12-0.39%)               | 11<br>(5.7-18)         | 130<br>(72-200)        |
| Nepal    | 1995 | Female | 85 to 89 | 1.6%<br>(0.79-2.7%)            | 98%<br>(97-99%)          | 0.033<br>(0.015-0.062)                      | 0.15%<br>(0.088-0.23%)               | 0.15%<br>(0.076-0.25%)              | 4<br>(2-6.6)           | 35<br>(20-53)          |
| Nepal    | 1995 | Female | 90 to 94 | 1.8%<br>(0.94-3.1%)            | 98%<br>(97-99%)          | 0.033<br>(0.014-0.064)                      | 0.11%<br>(0.061-0.18%)               | 0.097%<br>(0.038-0.18%)             | 0.88<br>(0.35-1.6)     | 6<br>(3.2-9.8)         |
| Nepal    | 1995 | Female | 95 plus  | 2.2%<br>(0.95-4%)              | 98%<br>(96-99%)          | 0.035<br>(0.012-0.075)                      | 0.097%<br>(0.038-0.18%)              | 0.061%<br>(-0.003-0.15%)            | 0.13<br>(-0.0065-0.32) | 0.83<br>(0.32-1.5)     |

| Location | Year | Sex    | Age      | Prevalence of current drinkers | Prevalence of abstainers | Population average of standard drinks daily | Percent of total attributable deaths | Percent of total attributable DALYs | Attributable deaths   | Attributable DALYs     |
|----------|------|--------|----------|--------------------------------|--------------------------|---------------------------------------------|--------------------------------------|-------------------------------------|-----------------------|------------------------|
| Nepal    | 1995 | Male   | All Ages | 19%<br>(15-23%)                | 81%<br>(77-85%)          | 0.26<br>(0.22-0.3)                          | 0.96%<br>(0.61-1.3%)                 | 1.1%<br>(0.54-1.7%)                 | 1100<br>(520-1600)    | 62000<br>(40000-83000) |
| Nepal    | 1995 | Male   | 15 to 19 | 8.7%<br>(5.1-14%)              | 91%<br>(86-95%)          | 0.085<br>(0.042-0.15)                       | 0.83%<br>(0.54-1.2%)                 | 0.54%<br>(0.24-0.96%)               | 10<br>(4.6-18)        | 1800<br>(1200-2700)    |
| Nepal    | 1995 | Male   | 20 to 24 | 23%<br>(14-33%)                | 77%<br>(67-86%)          | 0.3<br>(0.17-0.49)                          | 2.4%<br>(1.6-3.4%)                   | 2%<br>(1-3.3%)                      | 49<br>(25-82)         | 5900<br>(3900-8400)    |
| Nepal    | 1995 | Male   | 25 to 29 | 35%<br>(24-47%)                | 65%<br>(53-76%)          | 0.5<br>(0.31-0.74)                          | 3.5%<br>(2.3-4.8%)                   | 3.3%<br>(1.5-5.2%)                  | 78<br>(36-120)        | 7700<br>(4900-11000)   |
| Nepal    | 1995 | Male   | 30 to 34 | 42%<br>(30-56%)                | 58%<br>(44-70%)          | 0.64<br>(0.41-0.9)                          | 4.3%<br>(2.9-6%)                     | 4.5%<br>(2.5-6.8%)                  | 110<br>(59-160)       | 8500<br>(5500-12000)   |
| Nepal    | 1995 | Male   | 35 to 39 | 45%<br>(31-57%)                | 55%<br>(43-69%)          | 0.67<br>(0.42-0.99)                         | 4.2%<br>(2.6-5.9%)                   | 4.6%<br>(2.4-7.1%)                  | 120<br>(61-190)       | 8200<br>(5000-12000)   |
| Nepal    | 1995 | Male   | 40 to 44 | 45%<br>(32-57%)                | 55%<br>(43-68%)          | 0.67<br>(0.4-1)                             | 4%<br>(2.3-5.9%)                     | 4.5%<br>(2.2-7.2%)                  | 140<br>(65-220)       | 7900<br>(4500-12000)   |
| Nepal    | 1995 | Male   | 45 to 49 | 43%<br>(29-56%)                | 57%<br>(44-71%)          | 0.67<br>(0.37-1.1)                          | 3.6%<br>(1.9-5.5%)                   | 4.2%<br>(1.8-6.6%)                  | 130<br>(55-210)       | 6300<br>(3200-9700)    |
| Nepal    | 1995 | Male   | 50 to 54 | 39%<br>(28-51%)                | 61%<br>(49-72%)          | 0.62<br>(0.35-1)                            | 3%<br>(1.4-4.8%)                     | 3.4%<br>(1.4-5.8%)                  | 130<br>(53-230)       | 5700<br>(2600-9100)    |
| Nepal    | 1995 | Male   | 55 to 59 | 34%<br>(24-46%)                | 66%<br>(54-76%)          | 0.57<br>(0.32-0.91)                         | 2.4%<br>(1.1-4%)                     | 2.6%<br>(0.99-4.7%)                 | 120<br>(44-210)       | 4400<br>(1900-7400)    |
| Nepal    | 1995 | Male   | 60 to 64 | 31%<br>(20-43%)                | 69%<br>(57-80%)          | 0.5<br>(0.28-0.87)                          | 1.6%<br>(0.56-3%)                    | 1.7%<br>(0.36-3.5%)                 | 91<br>(19-180)        | 2900<br>(1000-5400)    |
| Nepal    | 1995 | Male   | 65 to 69 | 28%<br>(19-39%)                | 72%<br>(61-81%)          | 0.42<br>(0.23-0.68)                         | 1.1%<br>(0.23-2.1%)                  | 1.1%<br>(0.087-2.3%)                | 65<br>(5.1-140)       | 1700<br>(380-3300)     |
| Nepal    | 1995 | Male   | 70 to 74 | 26%<br>(17-36%)                | 74%<br>(64-83%)          | 0.35<br>(0.18-0.57)                         | 0.61%<br>(-0.039-1.4%)               | 0.61%<br>(-0.15-1.5%)               | 35<br>(-8.8-88)       | 780<br>(-50-1800)      |
| Nepal    | 1995 | Male   | 75 to 79 | 23%<br>(14-35%)                | 77%<br>(65-86%)          | 0.28<br>(0.14-0.5)                          | 0.34%<br>(-0.2-0.9%)                 | 0.31%<br>(-0.32-0.95%)              | 14<br>(-15-45)        | 260<br>(-160-690)      |
| Nepal    | 1995 | Male   | 80 to 84 | 22%<br>(13-32%)                | 78%<br>(68-87%)          | 0.23<br>(0.11-0.41)                         | 0.16%<br>(-0.22-0.51%)               | 0.11%<br>(-0.33-0.53%)              | 3.1<br>(-9.5-15)      | 54<br>(-78-180)        |
| Nepal    | 1995 | Male   | 85 to 89 | 22%<br>(13-33%)                | 78%<br>(67-87%)          | 0.2<br>(0.097-0.36)                         | 0.05%<br>(-0.3-0.34%)                | -0.019%<br>(-0.43-0.31%)            | -0.3<br>(-6.8-5)      | 7<br>(-42-46)          |
| Nepal    | 1995 | Male   | 90 to 94 | 24%<br>(14-36%)                | 76%<br>(64-86%)          | 0.2<br>(0.09-0.37)                          | -0.03%<br>(-0.37-0.24%)              | -0.13%<br>(-0.56-0.18%)             | -0.79<br>(-3.4-1.1)   | -1.1<br>(-13-8.6)      |
| Nepal    | 1995 | Male   | 95 plus  | 28%<br>(15-45%)                | 72%<br>(55-85%)          | 0.2<br>(0.075-0.41)                         | -0.026%<br>(-0.4-0.25%)              | -0.17%<br>(-0.6-0.13%)              | -0.23<br>(-0.83-0.18) | -0.14<br>(-2.2-1.4)    |
| Nepal    | 2000 | Female | All Ages | 1.4%<br>(1.2-1.7%)             | 99%<br>(98-99%)          | 0.083<br>(0.066-0.1)                        | 0.53%<br>(0.42-0.67%)                | 0.69%<br>(0.49-0.92%)               | 650<br>(460-880)      | 31000<br>(24000-39000) |
| Nepal    | 2000 | Female | 15 to 19 | 0.89%<br>(0.47-1.5%)           | 99%<br>(99-100%)         | 0.03<br>(0.013-0.056)                       | 0.41%<br>(0.26-0.6%)                 | 0.14%<br>(0.062-0.31%)              | 2.9<br>(1.2-6)        | 1000<br>(640-1600)     |
| Nepal    | 2000 | Female | 20 to 24 | 1.4%<br>(0.68-2.1%)            | 99%<br>(98-99%)          | 0.083<br>(0.039-0.14)                       | 0.96%<br>(0.65-1.4%)                 | 0.47%<br>(0.24-0.84%)               | 10<br>(5.4-19)        | 2400<br>(1600-3700)    |
| Nepal    | 2000 | Female | 25 to 29 | 1.7%<br>(0.94-2.7%)            | 98%<br>(97-99%)          | 0.13<br>(0.069-0.22)                        | 1.2%<br>(0.88-1.7%)                  | 0.86%<br>(0.47-1.5%)                | 17<br>(9.5-29)        | 2700<br>(1800-3800)    |

| Location | Year | Sex    | Age      | Prevalence of current drinkers | Prevalence of abstainers | Population average of standard drinks daily | Percent of total attributable deaths | Percent of total attributable DALYs | Attributable deaths     | Attributable DALYs      |
|----------|------|--------|----------|--------------------------------|--------------------------|---------------------------------------------|--------------------------------------|-------------------------------------|-------------------------|-------------------------|
| Nepal    | 2000 | Female | 30 to 34 | 2.2%<br>(1.2-3.6%)             | 98%<br>(96-99%)          | 0.18<br>(0.096-0.3)                         | 1.4%<br>(1-2%)                       | 1.4%<br>(0.86-2.3%)                 | 28<br>(17-45)           | 2900<br>(2000-4100)     |
| Nepal    | 2000 | Female | 35 to 39 | 2.6%<br>(1.5-3.9%)             | 97%<br>(96-98%)          | 0.22<br>(0.12-0.35)                         | 1.7%<br>(1.2-2.3%)                   | 2%<br>(1.2-3%)                      | 40<br>(25-61)           | 3100<br>(2200-4300)     |
| Nepal    | 2000 | Female | 40 to 44 | 2.8%<br>(1.7-4.2%)             | 97%<br>(96-98%)          | 0.23<br>(0.12-0.37)                         | 1.8%<br>(1.3-2.4%)                   | 2.3%<br>(1.5-3.5%)                  | 52<br>(33-77)           | 3200<br>(2200-4400)     |
| Nepal    | 2000 | Female | 45 to 49 | 2.9%<br>(1.6-4.4%)             | 97%<br>(96-98%)          | 0.2<br>(0.1-0.34)                           | 1.7%<br>(1.2-2.4%)                   | 2.3%<br>(1.5-3.3%)                  | 64<br>(42-93)           | 3300<br>(2300-4500)     |
| Nepal    | 2000 | Female | 50 to 54 | 3%<br>(1.9-4.6%)               | 97%<br>(95-98%)          | 0.19<br>(0.098-0.32)                        | 1.7%<br>(1.1-2.4%)                   | 2.1%<br>(1.3-3.2%)                  | 68<br>(41-100)          | 2900<br>(2000-4200)     |
| Nepal    | 2000 | Female | 55 to 59 | 3.1%<br>(1.8-5%)               | 97%<br>(95-98%)          | 0.19<br>(0.099-0.33)                        | 1.5%<br>(0.99-2.2%)                  | 1.9%<br>(1.1-2.8%)                  | 83<br>(50-130)          | 3000<br>(1900-4500)     |
| Nepal    | 2000 | Female | 60 to 64 | 3.1%<br>(1.8-5%)               | 97%<br>(95-98%)          | 0.18<br>(0.087-0.32)                        | 1.2%<br>(0.71-1.9%)                  | 1.4%<br>(0.79-2.4%)                 | 83<br>(45-140)          | 2500<br>(1500-4000)     |
| Nepal    | 2000 | Female | 65 to 69 | 2.9%<br>(1.6-4.4%)             | 97%<br>(96-98%)          | 0.14<br>(0.072-0.24)                        | 0.91%<br>(0.56-1.4%)                 | 1.1%<br>(0.64-1.6%)                 | 76<br>(44-120)          | 1800<br>(1100-2800)     |
| Nepal    | 2000 | Female | 70 to 74 | 2.6%<br>(1.5-4%)               | 97%<br>(96-98%)          | 0.11<br>(0.055-0.19)                        | 0.65%<br>(0.39-1.1%)                 | 0.76%<br>(0.43-1.3%)                | 62<br>(35-100)          | 1200<br>(710-1900)      |
| Nepal    | 2000 | Female | 75 to 79 | 2.2%<br>(1.2-3.6%)             | 98%<br>(96-99%)          | 0.079<br>(0.035-0.15)                       | 0.45%<br>(0.26-0.74%)                | 0.52%<br>(0.28-0.85%)               | 39<br>(21-66)           | 580<br>(330-950)        |
| Nepal    | 2000 | Female | 80 to 84 | 1.9%<br>(0.95-3%)              | 98%<br>(97-99%)          | 0.061<br>(0.027-0.11)                       | 0.31%<br>(0.17-0.49%)                | 0.34%<br>(0.18-0.56%)               | 17<br>(9.2-29)          | 200<br>(110-310)        |
| Nepal    | 2000 | Female | 85 to 89 | 1.9%<br>(0.92-3.2%)            | 98%<br>(97-99%)          | 0.054<br>(0.023-0.1)                        | 0.22%<br>(0.12-0.35%)                | 0.23%<br>(0.12-0.38%)               | 7<br>(3.6-12)           | 59<br>(33-94)           |
| Nepal    | 2000 | Female | 90 to 94 | 2.1%<br>(1.1-3.6%)             | 98%<br>(96-99%)          | 0.055<br>(0.024-0.1)                        | 0.16%<br>(0.081-0.27%)               | 0.15%<br>(0.059-0.29%)              | 1.7<br>(0.69-3.3)       | 11<br>(5.6-19)          |
| Nepal    | 2000 | Female | 95 plus  | 2.6%<br>(1.2-4.9%)             | 97%<br>(95-99%)          | 0.058<br>(0.021-0.12)                       | 0.14%<br>(0.048-0.28%)               | 0.099%<br>(-0.000078-0.26%)         | 0.29<br>(-0.00021-0.75) | 1.6<br>(0.54-3.2)       |
| Nepal    | 2000 | Male   | All Ages | 24%<br>(20-29%)                | 76%<br>(71-80%)          | 0.47<br>(0.4-0.54)                          | 1.6%<br>(1.2-2.1%)                   | 2%<br>(1.2-3%)                      | 1900<br>(1100-2700)     | 96000<br>(69000-130000) |
| Nepal    | 2000 | Male   | 15 to 19 | 14%<br>(8.8-20%)               | 86%<br>(80-91%)          | 0.19<br>(0.1-0.32)                          | 1.2%<br>(0.75-1.7%)                  | 1.1%<br>(0.5-1.8%)                  | 20<br>(9.5-35)          | 2700<br>(1700-4000)     |
| Nepal    | 2000 | Male   | 20 to 24 | 32%<br>(22-41%)                | 68%<br>(59-78%)          | 0.61<br>(0.35-0.96)                         | 3.5%<br>(2.3-5.1%)                   | 3.6%<br>(1.9-5.8%)                  | 84<br>(46-140)          | 8400<br>(5400-12000)    |
| Nepal    | 2000 | Male   | 25 to 29 | 44%<br>(34-53%)                | 56%<br>(47-66%)          | 0.93<br>(0.6-1.3)                           | 5.1%<br>(3.4-7%)                     | 5.6%<br>(3.1-8.5%)                  | 130<br>(71-200)         | 11000<br>(7100-15000)   |
| Nepal    | 2000 | Male   | 30 to 34 | 50%<br>(40-60%)                | 50%<br>(40-60%)          | 1.1<br>(0.75-1.5)                           | 6.1%<br>(4.2-8.2%)                   | 7.1%<br>(4.3-10%)                   | 170<br>(100-250)        | 13000<br>(8500-17000)   |
| Nepal    | 2000 | Male   | 35 to 39 | 52%<br>(41-61%)                | 48%<br>(39-59%)          | 1.1<br>(0.77-1.6)                           | 6%<br>(4-8.3%)                       | 7.2%<br>(4.3-11%)                   | 190<br>(110-290)        | 12000<br>(8000-17000)   |
| Nepal    | 2000 | Male   | 40 to 44 | 52%<br>(42-61%)                | 48%<br>(39-58%)          | 1.2<br>(0.73-1.7)                           | 5.7%<br>(3.6-8%)                     | 7.1%<br>(4.1-10%)                   | 210<br>(120-320)        | 11000<br>(7100-17000)   |
| Nepal    | 2000 | Male   | 45 to 49 | 51%<br>(40-60%)                | 49%<br>(40-60%)          | 1.2<br>(0.72-1.7)                           | 5.2%<br>(3.1-7.6%)                   | 6.4%<br>(3.6-9.7%)                  | 240<br>(130-370)        | 11000<br>(6600-17000)   |

| Location | Year | Sex    | Age      | Prevalence of current drinkers | Prevalence of abstainers | Population average of standard drinks daily | Percent of total attributable deaths | Percent of total attributable DALYs | Attributable deaths  | Attributable DALYs     |
|----------|------|--------|----------|--------------------------------|--------------------------|---------------------------------------------|--------------------------------------|-------------------------------------|----------------------|------------------------|
| Nepal    | 2000 | Male   | 50 to 54 | 46%<br>(36-55%)                | 54%<br>(45-64%)          | 1.1<br>(0.65-1.6)                           | 4.5%<br>(2.4-6.8%)                   | 5.3%<br>(2.5-8.4%)                  | 210<br>(100-330)     | 8600<br>(4500-13000)   |
| Nepal    | 2000 | Male   | 55 to 59 | 40%<br>(31-50%)                | 60%<br>(50-69%)          | 0.98<br>(0.59-1.5)                          | 3.6%<br>(1.8-6%)                     | 4.2%<br>(1.8-7.3%)                  | 210<br>(90-360)      | 7300<br>(3500-12000)   |
| Nepal    | 2000 | Male   | 60 to 64 | 36%<br>(26-47%)                | 64%<br>(53-74%)          | 0.87<br>(0.49-1.4)                          | 2.6%<br>(1.1-4.9%)                   | 3%<br>(1.1-5.8%)                    | 170<br>(63-350)      | 5300<br>(2100-9900)    |
| Nepal    | 2000 | Male   | 65 to 69 | 34%<br>(24-45%)                | 66%<br>(55-76%)          | 0.74<br>(0.44-1.2)                          | 1.8%<br>(0.54-3.5%)                  | 1.9%<br>(0.41-4%)                   | 120<br>(26-250)      | 3100<br>(920-6100)     |
| Nepal    | 2000 | Male   | 70 to 74 | 31%<br>(21-41%)                | 69%<br>(59-79%)          | 0.6<br>(0.33-0.98)                          | 1.1%<br>(0.091-2.4%)                 | 1.1%<br>(-0.045-2.7%)               | 73<br>(-2.9-180)     | 1500<br>(130-3500)     |
| Nepal    | 2000 | Male   | 75 to 79 | 26%<br>(17-38%)                | 74%<br>(62-83%)          | 0.46<br>(0.22-0.78)                         | 0.58%<br>(-0.19-1.5%)                | 0.58%<br>(-0.33-1.6%)               | 31<br>(-18-90)       | 530<br>(-170-1400)     |
| Nepal    | 2000 | Male   | 80 to 84 | 24%<br>(14-35%)                | 76%<br>(65-86%)          | 0.36<br>(0.18-0.61)                         | 0.3%<br>(-0.26-0.93%)                | 0.26%<br>(-0.43-0.99%)              | 8.8<br>(-15-33)      | 130<br>(-110-390)      |
| Nepal    | 2000 | Male   | 85 to 89 | 23%<br>(14-36%)                | 77%<br>(64-86%)          | 0.32<br>(0.16-0.55)                         | 0.11%<br>(-0.37-0.54%)               | 0.027%<br>(-0.55-0.52%)             | 0.53<br>(-11-10)     | 18<br>(-63-92)         |
| Nepal    | 2000 | Male   | 90 to 94 | 26%<br>(16-39%)                | 74%<br>(61-84%)          | 0.31<br>(0.15-0.55)                         | -0.052%<br>(-0.55-0.37%)             | -0.19%<br>(-0.78-0.28%)             | -1.4<br>(-5.8-2)     | -2.3<br>(-24-16)       |
| Nepal    | 2000 | Male   | 95 plus  | 31%<br>(17-48%)                | 69%<br>(52-83%)          | 0.31<br>(0.12-0.62)                         | -0.088%<br>(-0.61-0.36%)             | -0.27%<br>(-0.89-0.23%)             | -0.49<br>(-1.6-0.41) | -0.62<br>(-4.3-2.6)    |
| Nepal    | 2005 | Female | All Ages | 1.9%<br>(1.6-2.3%)             | 98%<br>(98-98%)          | 0.15<br>(0.12-0.18)                         | 0.79%<br>(0.63-1%)                   | 0.98%<br>(0.73-1.3%)                | 900<br>(660-1200)    | 41000<br>(33000-52000) |
| Nepal    | 2005 | Female | 15 to 19 | 1.2%<br>(0.7-1.9%)             | 99%<br>(98-99%)          | 0.051<br>(0.024-0.092)                      | 0.49%<br>(0.31-0.72%)                | 0.25%<br>(0.11-0.5%)                | 4.6<br>(2-9.2)       | 1200<br>(760-1900)     |
| Nepal    | 2005 | Female | 20 to 24 | 2.1%<br>(1.2-3.1%)             | 98%<br>(97-99%)          | 0.16<br>(0.085-0.26)                        | 1.2%<br>(0.85-1.8%)                  | 0.86%<br>(0.44-1.5%)                | 17<br>(8.8-30)       | 3000<br>(2000-4400)    |
| Nepal    | 2005 | Female | 25 to 29 | 2.7%<br>(1.7-4%)               | 97%<br>(96-98%)          | 0.25<br>(0.15-0.41)                         | 1.6%<br>(1.1-2.2%)                   | 1.5%<br>(0.8-2.4%)                  | 29<br>(16-47)        | 3600<br>(2400-5100)    |
| Nepal    | 2005 | Female | 30 to 34 | 3.5%<br>(2.1-5.3%)             | 97%<br>(95-98%)          | 0.36<br>(0.21-0.56)                         | 1.9%<br>(1.4-2.7%)                   | 2.3%<br>(1.4-3.7%)                  | 44<br>(27-72)        | 4000<br>(2700-5700)    |
| Nepal    | 2005 | Female | 35 to 39 | 4.2%<br>(2.7-6%)               | 96%<br>(94-97%)          | 0.45<br>(0.26-0.68)                         | 2.3%<br>(1.6-3.2%)                   | 3.1%<br>(1.9-4.7%)                  | 62<br>(39-94)        | 4300<br>(3000-6200)    |
| Nepal    | 2005 | Female | 40 to 44 | 4.5%<br>(3-6.4%)               | 95%<br>(94-97%)          | 0.45<br>(0.26-0.68)                         | 2.4%<br>(1.7-3.4%)                   | 3.5%<br>(2.2-5.1%)                  | 80<br>(51-120)       | 4600<br>(3200-6400)    |
| Nepal    | 2005 | Female | 45 to 49 | 4.1%<br>(2.5-5.9%)             | 96%<br>(94-98%)          | 0.36<br>(0.2-0.56)                          | 2.2%<br>(1.6-3.1%)                   | 3.2%<br>(2.1-4.5%)                  | 84<br>(54-120)       | 4200<br>(2900-5700)    |
| Nepal    | 2005 | Female | 50 to 54 | 3.5%<br>(2.1-5.2%)             | 97%<br>(95-98%)          | 0.27<br>(0.14-0.44)                         | 2%<br>(1.3-2.8%)                     | 2.6%<br>(1.7-3.8%)                  | 97<br>(61-150)       | 4100<br>(2800-5900)    |
| Nepal    | 2005 | Female | 55 to 59 | 3.2%<br>(1.9-4.9%)             | 97%<br>(95-98%)          | 0.24<br>(0.12-0.41)                         | 1.7%<br>(1.1-2.5%)                   | 2.2%<br>(1.3-3.3%)                  | 98<br>(59-150)       | 3500<br>(2200-5200)    |
| Nepal    | 2005 | Female | 60 to 64 | 3.2%<br>(1.8-5%)               | 97%<br>(95-98%)          | 0.22<br>(0.11-0.39)                         | 1.4%<br>(0.8-2.2%)                   | 1.7%<br>(0.93-2.7%)                 | 110<br>(57-170)      | 3200<br>(1800-4800)    |
| Nepal    | 2005 | Female | 65 to 69 | 2.9%<br>(1.7-4.3%)             | 97%<br>(96-98%)          | 0.18<br>(0.092-0.3)                         | 1.1%<br>(0.65-1.6%)                  | 1.3%<br>(0.74-2%)                   | 100<br>(57-160)      | 2400<br>(1500-3700)    |

| Location | Year | Sex    | Age      | Prevalence of current drinkers | Prevalence of abstainers | Population average of standard drinks daily | Percent of total attributable deaths | Percent of total attributable DALYs | Attributable deaths | Attributable DALYs       |
|----------|------|--------|----------|--------------------------------|--------------------------|---------------------------------------------|--------------------------------------|-------------------------------------|---------------------|--------------------------|
| Nepal    | 2005 | Female | 70 to 74 | 2.6%<br>(1.6-4.1%)             | 97%<br>(96-98%)          | 0.13<br>(0.067-0.24)                        | 0.79%<br>(0.48-1.2%)                 | 0.93%<br>(0.55-1.5%)                | 78<br>(45-120)      | 1500<br>(890-2400)       |
| Nepal    | 2005 | Female | 75 to 79 | 2.2%<br>(1.2-3.7%)             | 98%<br>(96-99%)          | 0.098<br>(0.046-0.18)                       | 0.55%<br>(0.32-0.9%)                 | 0.63%<br>(0.35-1.1%)                | 56<br>(31-94)       | 830<br>(480-1400)        |
| Nepal    | 2005 | Female | 80 to 84 | 1.9%<br>(0.99-3%)              | 98%<br>(97-99%)          | 0.076<br>(0.034-0.13)                       | 0.38%<br>(0.23-0.61%)                | 0.43%<br>(0.23-0.71%)               | 27<br>(14-44)       | 290<br>(170-470)         |
| Nepal    | 2005 | Female | 85 to 89 | 1.9%<br>(0.95-3.3%)            | 98%<br>(97-99%)          | 0.068<br>(0.031-0.13)                       | 0.28%<br>(0.16-0.44%)                | 0.3%<br>(0.16-0.5%)                 | 12<br>(6.5-20)      | 100<br>(56-160)          |
| Nepal    | 2005 | Female | 90 to 94 | 2.2%<br>(1.1-3.5%)             | 98%<br>(96-99%)          | 0.069<br>(0.03-0.13)                        | 0.21%<br>(0.11-0.38%)                | 0.21%<br>(0.088-0.41%)              | 3.4<br>(1.4-6.7)    | 21<br>(11-37)            |
| Nepal    | 2005 | Female | 95 plus  | 2.7%<br>(1.3-4.8%)             | 97%<br>(95-99%)          | 0.073<br>(0.027-0.15)                       | 0.18%<br>(0.064-0.39%)               | 0.15%<br>(0.017-0.39%)              | 0.65<br>(0.075-1.7) | 3.1<br>(1.1-6.6)         |
| Nepal    | 2005 | Male   | All Ages | 25%<br>(21-30%)                | 75%<br>(70-79%)          | 0.58<br>(0.49-0.68)                         | 2.1%<br>(1.5-2.8%)                   | 2.5%<br>(1.5-3.7%)                  | 2300<br>(1400-3300) | 110000<br>(80000-150000) |
| Nepal    | 2005 | Male   | 15 to 19 | 14%<br>(8.8-20%)               | 86%<br>(80-91%)          | 0.23<br>(0.12-0.4)                          | 1.3%<br>(0.84-1.9%)                  | 1.2%<br>(0.65-2.1%)                 | 22<br>(11-38)       | 2900<br>(1800-4300)      |
| Nepal    | 2005 | Male   | 20 to 24 | 32%<br>(23-42%)                | 68%<br>(58-77%)          | 0.74<br>(0.43-1.2)                          | 3.8%<br>(2.5-5.5%)                   | 3.9%<br>(2.1-6.4%)                  | 80<br>(43-130)      | 8000<br>(5100-12000)     |
| Nepal    | 2005 | Male   | 25 to 29 | 45%<br>(35-54%)                | 55%<br>(46-65%)          | 1.1<br>(0.71-1.6)                           | 5.4%<br>(3.4-7.3%)                   | 6%<br>(3-9%)                        | 130<br>(61-190)     | 11000<br>(6800-15000)    |
| Nepal    | 2005 | Male   | 30 to 34 | 51%<br>(40-61%)                | 49%<br>(39-60%)          | 1.3<br>(0.92-1.9)                           | 6.4%<br>(4.4-8.5%)                   | 7.7%<br>(4.7-11%)                   | 190<br>(110-270)    | 14000<br>(9200-19000)    |
| Nepal    | 2005 | Male   | 35 to 39 | 52%<br>(42-61%)                | 48%<br>(39-58%)          | 1.4<br>(0.93-2)                             | 6.4%<br>(4.3-8.9%)                   | 8%<br>(4.8-12%)                     | 230<br>(130-350)    | 14000<br>(9400-20000)    |
| Nepal    | 2005 | Male   | 40 to 44 | 52%<br>(42-61%)                | 48%<br>(39-58%)          | 1.4<br>(0.87-2)                             | 6.2%<br>(3.9-8.6%)                   | 7.9%<br>(4.6-11%)                   | 240<br>(140-360)    | 13000<br>(8400-19000)    |
| Nepal    | 2005 | Male   | 45 to 49 | 51%<br>(40-61%)                | 49%<br>(39-60%)          | 1.4<br>(0.88-2)                             | 5.8%<br>(3.6-8.4%)                   | 7.3%<br>(4.2-11%)                   | 250<br>(140-390)    | 12000<br>(7400-18000)    |
| Nepal    | 2005 | Male   | 50 to 54 | 47%<br>(37-56%)                | 53%<br>(44-63%)          | 1.3<br>(0.77-1.9)                           | 5%<br>(2.9-7.6%)                     | 6.1%<br>(3.3-9.6%)                  | 280<br>(150-450)    | 12000<br>(6700-18000)    |
| Nepal    | 2005 | Male   | 55 to 59 | 41%<br>(31-51%)                | 59%<br>(49-69%)          | 1.2<br>(0.69-1.8)                           | 4.1%<br>(2.1-6.9%)                   | 4.9%<br>(2.2-8.5%)                  | 250<br>(110-440)    | 8900<br>(4500-15000)     |
| Nepal    | 2005 | Male   | 60 to 64 | 37%<br>(26-48%)                | 63%<br>(52-74%)          | 1<br>(0.6-1.7)                              | 3.1%<br>(1.2-5.6%)                   | 3.5%<br>(1.2-6.7%)                  | 250<br>(84-470)     | 7500<br>(3000-14000)     |
| Nepal    | 2005 | Male   | 65 to 69 | 34%<br>(24-46%)                | 66%<br>(54-76%)          | 0.89<br>(0.52-1.4)                          | 2.1%<br>(0.69-4%)                    | 2.3%<br>(0.59-4.7%)                 | 190<br>(47-380)     | 4700<br>(1500-9000)      |
| Nepal    | 2005 | Male   | 70 to 74 | 31%<br>(22-41%)                | 69%<br>(59-78%)          | 0.72<br>(0.41-1.2)                          | 1.3%<br>(0.15-2.8%)                  | 1.4%<br>(-0.012-3.3%)               | 110<br>(-0.89-240)  | 2200<br>(240-4700)       |
| Nepal    | 2005 | Male   | 75 to 79 | 27%<br>(17-38%)                | 73%<br>(62-83%)          | 0.55<br>(0.27-0.93)                         | 0.73%<br>(-0.1-1.9%)                 | 0.75%<br>(-0.27-2.1%)               | 52<br>(-19-150)     | 870<br>(-120-2300)       |
| Nepal    | 2005 | Male   | 80 to 84 | 24%<br>(15-35%)                | 76%<br>(65-85%)          | 0.44<br>(0.22-0.73)                         | 0.42%<br>(-0.24-1.2%)                | 0.39%<br>(-0.4-1.3%)                | 17<br>(-17-54)      | 220<br>(-130-630)        |
| Nepal    | 2005 | Male   | 85 to 89 | 24%<br>(15-36%)                | 76%<br>(64-85%)          | 0.39<br>(0.19-0.69)                         | 0.18%<br>(-0.41-0.74%)               | 0.096%<br>(-0.62-0.75%)             | 2.3<br>(-15-18)     | 38<br>(-88-160)          |



| Location | Year | Sex    | Age      | Prevalence of current drinkers | Prevalence of abstainers | Population average of standard drinks daily | Percent of total attributable deaths | Percent of total attributable DALYs | Attributable deaths  | Attributable DALYs       |
|----------|------|--------|----------|--------------------------------|--------------------------|---------------------------------------------|--------------------------------------|-------------------------------------|----------------------|--------------------------|
| Nepal    | 2005 | Male   | 90 to 94 | 27%<br>(16-39%)                | 73%<br>(61-84%)          | 0.38<br>(0.18-0.68)                         | -0.033%<br>(-0.63-0.53%)             | -0.18%<br>(-0.89-0.47%)             | -1.7<br>(-8.5-4.4)   | -1.9<br>(-36-30)         |
| Nepal    | 2005 | Male   | 95 plus  | 31%<br>(17-48%)                | 69%<br>(52-83%)          | 0.39<br>(0.15-0.78)                         | -0.099%<br>(-0.79-0.51%)             | -0.31%<br>(-1.1-0.37%)              | -0.71<br>(-2.6-0.86) | -0.9<br>(-7.2-4.6)       |
| Nepal    | 2010 | Female | All Ages | 2%<br>(1.6-2.4%)               | 98%<br>(98-98%)          | 0.2<br>(0.15-0.25)                          | 0.89%<br>(0.74-1.1%)                 | 1%<br>(0.78-1.3%)                   | 890<br>(680-1200)    | 43000<br>(35000-53000)   |
| Nepal    | 2010 | Female | 15 to 19 | 1.5%<br>(0.87-2.3%)            | 99%<br>(98-99%)          | 0.077<br>(0.036-0.14)                       | 0.62%<br>(0.39-0.91%)                | 0.4%<br>(0.16-0.81%)                | 6<br>(2.4-12)        | 1500<br>(910-2200)       |
| Nepal    | 2010 | Female | 20 to 24 | 2.4%<br>(1.5-3.5%)             | 98%<br>(96-99%)          | 0.24<br>(0.13-0.38)                         | 1.5%<br>(1-2.1%)                     | 1.2%<br>(0.63-2%)                   | 20<br>(10-34)        | 3500<br>(2200-5000)      |
| Nepal    | 2010 | Female | 25 to 29 | 3%<br>(1.9-4.5%)               | 97%<br>(96-98%)          | 0.36<br>(0.2-0.58)                          | 1.8%<br>(1.3-2.4%)                   | 1.8%<br>(0.99-2.9%)                 | 29<br>(16-48)        | 3800<br>(2600-5300)      |
| Nepal    | 2010 | Female | 30 to 34 | 3.7%<br>(2.3-5.5%)             | 96%<br>(95-98%)          | 0.48<br>(0.29-0.76)                         | 2.1%<br>(1.5-3%)                     | 2.5%<br>(1.5-4%)                    | 45<br>(27-73)        | 4300<br>(3100-6100)      |
| Nepal    | 2010 | Female | 35 to 39 | 4.4%<br>(2.7-6.3%)             | 96%<br>(94-97%)          | 0.6<br>(0.32-0.94)                          | 2.4%<br>(1.7-3.2%)                   | 3.4%<br>(2.2-4.9%)                  | 68<br>(44-100)       | 4900<br>(3500-6700)      |
| Nepal    | 2010 | Female | 40 to 44 | 4.8%<br>(3.2-6.7%)             | 95%<br>(93-97%)          | 0.62<br>(0.34-0.97)                         | 2.6%<br>(1.9-3.6%)                   | 3.8%<br>(2.6-5.5%)                  | 90<br>(61-130)       | 5300<br>(3800-7500)      |
| Nepal    | 2010 | Female | 45 to 49 | 3.7%<br>(2.3-5.4%)             | 96%<br>(95-98%)          | 0.41<br>(0.23-0.68)                         | 2.3%<br>(1.6-3.1%)                   | 3.2%<br>(2.2-4.6%)                  | 95<br>(63-130)       | 4800<br>(3300-6500)      |
| Nepal    | 2010 | Female | 50 to 54 | 2.1%<br>(1.1-3.4%)             | 98%<br>(97-99%)          | 0.21<br>(0.096-0.36)                        | 1.7%<br>(1.2-2.3%)                   | 2.2%<br>(1.5-3.2%)                  | 80<br>(52-120)       | 3500<br>(2500-5000)      |
| Nepal    | 2010 | Female | 55 to 59 | 1.6%<br>(0.81-2.6%)            | 98%<br>(97-99%)          | 0.15<br>(0.069-0.28)                        | 1.3%<br>(0.92-1.9%)                  | 1.7%<br>(1.1-2.5%)                  | 86<br>(53-130)       | 3200<br>(2200-4600)      |
| Nepal    | 2010 | Female | 60 to 64 | 1.5%<br>(0.76-2.6%)            | 98%<br>(97-99%)          | 0.14<br>(0.059-0.26)                        | 1.1%<br>(0.7-1.6%)                   | 1.3%<br>(0.79-2%)                   | 83<br>(50-130)       | 2600<br>(1700-3800)      |
| Nepal    | 2010 | Female | 65 to 69 | 1.5%<br>(0.74-2.4%)            | 99%<br>(98-99%)          | 0.12<br>(0.054-0.22)                        | 0.92%<br>(0.6-1.3%)                  | 1.1%<br>(0.68-1.6%)                 | 92<br>(57-140)       | 2300<br>(1500-3400)      |
| Nepal    | 2010 | Female | 70 to 74 | 1.5%<br>(0.82-2.5%)            | 99%<br>(98-99%)          | 0.097<br>(0.041-0.18)                       | 0.73%<br>(0.46-1.1%)                 | 0.87%<br>(0.52-1.3%)                | 79<br>(47-120)       | 1500<br>(940-2300)       |
| Nepal    | 2010 | Female | 75 to 79 | 1.5%<br>(0.74-2.5%)            | 99%<br>(97-99%)          | 0.085<br>(0.034-0.16)                       | 0.57%<br>(0.34-0.88%)                | 0.66%<br>(0.38-1%)                  | 59<br>(33-94)        | 880<br>(520-1400)        |
| Nepal    | 2010 | Female | 80 to 84 | 1.5%<br>(0.73-2.5%)            | 98%<br>(98-99%)          | 0.078<br>(0.033-0.15)                       | 0.45%<br>(0.26-0.73%)                | 0.5%<br>(0.28-0.82%)                | 35<br>(19-58)        | 380<br>(220-630)         |
| Nepal    | 2010 | Female | 85 to 89 | 1.7%<br>(0.82-2.8%)            | 98%<br>(97-99%)          | 0.077<br>(0.033-0.15)                       | 0.34%<br>(0.2-0.61%)                 | 0.37%<br>(0.2-0.69%)                | 20<br>(10-35)        | 160<br>(87-280)          |
| Nepal    | 2010 | Female | 90 to 94 | 1.9%<br>(0.99-3.2%)            | 98%<br>(97-99%)          | 0.079<br>(0.033-0.16)                       | 0.27%<br>(0.14-0.52%)                | 0.28%<br>(0.13-0.58%)               | 6.5<br>(2.9-13)      | 38<br>(19-73)            |
| Nepal    | 2010 | Female | 95 plus  | 2.3%<br>(1.1-4.4%)             | 98%<br>(96-99%)          | 0.084<br>(0.029-0.18)                       | 0.25%<br>(0.1-0.54%)                 | 0.23%<br>(0.053-0.55%)              | 1.5<br>(0.35-3.6)    | 6.3<br>(2.5-14)          |
| Nepal    | 2010 | Male   | All Ages | 20%<br>(17-24%)                | 80%<br>(76-83%)          | 0.6<br>(0.48-0.74)                          | 2.5%<br>(1.8-3.4%)                   | 2.9%<br>(1.7-4.4%)                  | 2700<br>(1500-4100)  | 130000<br>(87000-170000) |
| Nepal    | 2010 | Male   | 15 to 19 | 8.9%<br>(5.3-14%)              | 91%<br>(86-95%)          | 0.19<br>(0.088-0.34)                        | 1.4%<br>(0.97-2%)                    | 1.1%<br>(0.62-2%)                   | 19<br>(10-34)        | 3100<br>(2100-4500)      |

| Location | Year | Sex    | Age      | Prevalence of current drinkers | Prevalence of abstainers | Population average of standard drinks daily | Percent of total attributable deaths | Percent of total attributable DALYs | Attributable deaths | Attributable DALYs     |
|----------|------|--------|----------|--------------------------------|--------------------------|---------------------------------------------|--------------------------------------|-------------------------------------|---------------------|------------------------|
| Nepal    | 2010 | Male   | 20 to 24 | 24%<br>(15-34%)                | 76%<br>(66-85%)          | 0.66<br>(0.35-1.1)                          | 4.2%<br>(2.9-5.9%)                   | 4%<br>(2.2-6.6%)                    | 80<br>(42-130)      | 8900<br>(6000-13000)   |
| Nepal    | 2010 | Male   | 25 to 29 | 36%<br>(25-48%)                | 64%<br>(52-75%)          | 1.1<br>(0.65-1.7)                           | 5.8%<br>(3.6-8%)                     | 6.3%<br>(2.8-9.8%)                  | 120<br>(54-190)     | 11000<br>(6600-16000)  |
| Nepal    | 2010 | Male   | 30 to 34 | 44%<br>(31-57%)                | 56%<br>(43-69%)          | 1.4<br>(0.88-2.1)                           | 6.8%<br>(3.9-9.3%)                   | 8.2%<br>(3.6-12%)                   | 170<br>(72-250)     | 13000<br>(7800-18000)  |
| Nepal    | 2010 | Male   | 35 to 39 | 46%<br>(33-58%)                | 54%<br>(42-67%)          | 1.5<br>(0.9-2.3)                            | 6.9%<br>(4.5-9.6%)                   | 8.7%<br>(4.7-13%)                   | 220<br>(120-330)    | 14000<br>(8800-20000)  |
| Nepal    | 2010 | Male   | 40 to 44 | 46%<br>(34-57%)                | 54%<br>(43-66%)          | 1.5<br>(0.87-2.3)                           | 6.8%<br>(4.4-9.4%)                   | 8.7%<br>(5.1-13%)                   | 250<br>(150-380)    | 14000<br>(9000-20000)  |
| Nepal    | 2010 | Male   | 45 to 49 | 44%<br>(29-56%)                | 56%<br>(44-71%)          | 1.4<br>(0.8-2.2)                            | 6.4%<br>(3.8-9.2%)                   | 8.1%<br>(4.5-12%)                   | 300<br>(160-450)    | 14000<br>(8700-21000)  |
| Nepal    | 2010 | Male   | 50 to 54 | 40%<br>(29-51%)                | 60%<br>(49-71%)          | 1.3<br>(0.76-2.1)                           | 5.6%<br>(3.3-8.5%)                   | 7%<br>(3.8-11%)                     | 310<br>(160-490)    | 13000<br>(7400-20000)  |
| Nepal    | 2010 | Male   | 55 to 59 | 35%<br>(24-47%)                | 65%<br>(53-76%)          | 1.2<br>(0.69-2)                             | 4.8%<br>(2.4-7.9%)                   | 5.8%<br>(2.7-9.8%)                  | 350<br>(170-610)    | 13000<br>(6500-21000)  |
| Nepal    | 2010 | Male   | 60 to 64 | 31%<br>(21-43%)                | 69%<br>(57-79%)          | 1.1<br>(0.58-1.9)                           | 3.6%<br>(1.7-6.7%)                   | 4.2%<br>(1.8-8.2%)                  | 310<br>(130-590)    | 9300<br>(4200-17000)   |
| Nepal    | 2010 | Male   | 65 to 69 | 29%<br>(19-40%)                | 71%<br>(60-81%)          | 0.94<br>(0.5-1.6)                           | 2.5%<br>(1.1-4.7%)                   | 2.9%<br>(1.1-5.6%)                  | 250<br>(94-500)     | 6300<br>(2600-12000)   |
| Nepal    | 2010 | Male   | 70 to 74 | 27%<br>(18-37%)                | 73%<br>(63-82%)          | 0.77<br>(0.4-1.3)                           | 1.7%<br>(0.42-3.4%)                  | 1.8%<br>(0.31-4%)                   | 170<br>(30-380)     | 3500<br>(830-7300)     |
| Nepal    | 2010 | Male   | 75 to 79 | 24%<br>(15-35%)                | 76%<br>(65-85%)          | 0.61<br>(0.29-1.1)                          | 1%<br>(0.016-2.4%)                   | 1.1%<br>(-0.084-2.8%)               | 84<br>(-6.4-210)    | 1400<br>(21-3200)      |
| Nepal    | 2010 | Male   | 80 to 84 | 22%<br>(13-32%)                | 78%<br>(68-87%)          | 0.5<br>(0.24-0.87)                          | 0.64%<br>(-0.096-1.6%)               | 0.64%<br>(-0.22-1.8%)               | 35<br>(-12-95)      | 430<br>(-63-1100)      |
| Nepal    | 2010 | Male   | 85 to 89 | 22%<br>(13-34%)                | 78%<br>(66-87%)          | 0.45<br>(0.21-0.79)                         | 0.35%<br>(-0.27-1.1%)                | 0.29%<br>(-0.46-1.1%)               | 9.5<br>(-15-37)     | 100<br>(-78-310)       |
| Nepal    | 2010 | Male   | 90 to 94 | 25%<br>(15-37%)                | 75%<br>(63-85%)          | 0.44<br>(0.21-0.84)                         | 0.11%<br>(-0.57-0.82%)               | -0.023%<br>(-0.84-0.8%)             | -0.29<br>(-10-10)   | 8<br>(-42-63)          |
| Nepal    | 2010 | Male   | 95 plus  | 29%<br>(16-45%)                | 71%<br>(55-84%)          | 0.45<br>(0.17-0.93)                         | 0.016%<br>(-0.71-0.84%)              | -0.19%<br>(-1-0.73%)                | -0.58<br>(-3.2-2.2) | 0.2<br>(-8.4-11)       |
| Nepal    | 2016 | Female | All Ages | 1.5%<br>(1.2-1.9%)             | 98%<br>(98-99%)          | 0.16<br>(0.095-0.25)                        | 0.93%<br>(0.76-1.1%)                 | 1%<br>(0.74-1.3%)                   | 900<br>(660-1200)   | 42000<br>(34000-52000) |
| Nepal    | 2016 | Female | 15 to 19 | 1.1%<br>(0.6-1.8%)             | 99%<br>(98-99%)          | 0.065<br>(0.024-0.13)                       | 0.65%<br>(0.42-0.97%)                | 0.36%<br>(0.13-0.76%)               | 4.3<br>(1.4-9.2)    | 1400<br>(850-2200)     |
| Nepal    | 2016 | Female | 20 to 24 | 1.7%<br>(0.9-2.6%)             | 98%<br>(97-99%)          | 0.18<br>(0.077-0.34)                        | 1.5%<br>(1-2.1%)                     | 0.92%<br>(0.47-1.6%)                | 13<br>(6.2-21)      | 3300<br>(2100-4800)    |
| Nepal    | 2016 | Female | 25 to 29 | 2.1%<br>(1.1-3.2%)             | 98%<br>(97-99%)          | 0.27<br>(0.12-0.48)                         | 1.7%<br>(1.2-2.2%)                   | 1.3%<br>(0.68-2.1%)                 | 19<br>(10-31)       | 3600<br>(2500-4900)    |
| Nepal    | 2016 | Female | 30 to 34 | 2.4%<br>(1.4-3.9%)             | 98%<br>(96-99%)          | 0.35<br>(0.16-0.64)                         | 1.7%<br>(1.3-2.4%)                   | 1.8%<br>(1.1-2.8%)                  | 30<br>(18-47)       | 3700<br>(2600-5300)    |
| Nepal    | 2016 | Female | 35 to 39 | 2.9%<br>(1.7-4.3%)             | 97%<br>(96-98%)          | 0.43<br>(0.2-0.78)                          | 1.9%<br>(1.4-2.5%)                   | 2.5%<br>(1.7-3.6%)                  | 51<br>(34-75)       | 4300<br>(3200-5700)    |

| Location | Year | Sex    | Age      | Prevalence of current drinkers | Prevalence of abstainers | Population average of standard drinks daily | Percent of total attributable deaths | Percent of total attributable DALYs | Attributable deaths | Attributable DALYs       |
|----------|------|--------|----------|--------------------------------|--------------------------|---------------------------------------------|--------------------------------------|-------------------------------------|---------------------|--------------------------|
| Nepal    | 2016 | Female | 40 to 44 | 3.1%<br>(1.9-4.6%)             | 97%<br>(95-98%)          | 0.43<br>(0.2-0.78)                          | 2%<br>(1.5-2.7%)                     | 2.9%<br>(2-4%)                      | 72<br>(49-100)      | 4700<br>(3300-6300)      |
| Nepal    | 2016 | Female | 45 to 49 | 2.6%<br>(1.4-3.9%)             | 97%<br>(96-99%)          | 0.31<br>(0.13-0.59)                         | 1.9%<br>(1.4-2.5%)                   | 2.6%<br>(1.8-3.7%)                  | 81<br>(55-120)      | 4400<br>(3100-5900)      |
| Nepal    | 2016 | Female | 50 to 54 | 1.8%<br>(0.99-3%)              | 98%<br>(97-99%)          | 0.2<br>(0.085-0.38)                         | 1.6%<br>(1.2-2.2%)                   | 2.1%<br>(1.4-3%)                    | 84<br>(55-120)      | 3900<br>(2800-5300)      |
| Nepal    | 2016 | Female | 55 to 59 | 1.6%<br>(0.75-2.5%)            | 98%<br>(97-99%)          | 0.16<br>(0.068-0.34)                        | 1.3%<br>(0.96-1.9%)                  | 1.7%<br>(1.1-2.5%)                  | 83<br>(53-120)      | 3200<br>(2200-4600)      |
| Nepal    | 2016 | Female | 60 to 64 | 1.5%<br>(0.75-2.6%)            | 98%<br>(97-99%)          | 0.15<br>(0.059-0.32)                        | 1.1%<br>(0.74-1.6%)                  | 1.3%<br>(0.81-2%)                   | 100<br>(62-150)     | 3200<br>(2100-4700)      |
| Nepal    | 2016 | Female | 65 to 69 | 1.5%<br>(0.76-2.4%)            | 98%<br>(98-99%)          | 0.13<br>(0.055-0.27)                        | 0.96%<br>(0.63-1.4%)                 | 1.2%<br>(0.71-1.8%)                 | 110<br>(69-170)     | 2800<br>(1800-4200)      |
| Nepal    | 2016 | Female | 70 to 74 | 1.5%<br>(0.81-2.5%)            | 99%<br>(98-99%)          | 0.11<br>(0.041-0.22)                        | 0.79%<br>(0.48-1.2%)                 | 0.95%<br>(0.56-1.5%)                | 97<br>(57-150)      | 1900<br>(1200-2900)      |
| Nepal    | 2016 | Female | 75 to 79 | 1.5%<br>(0.77-2.5%)            | 99%<br>(97-99%)          | 0.094<br>(0.033-0.2)                        | 0.62%<br>(0.35-0.97%)                | 0.73%<br>(0.4-1.2%)                 | 73<br>(39-120)      | 1100<br>(600-1700)       |
| Nepal    | 2016 | Female | 80 to 84 | 1.5%<br>(0.78-2.5%)            | 98%<br>(98-99%)          | 0.088<br>(0.033-0.17)                       | 0.5%<br>(0.26-0.85%)                 | 0.58%<br>(0.28-0.99%)               | 44<br>(22-76)       | 480<br>(260-810)         |
| Nepal    | 2016 | Female | 85 to 89 | 1.7%<br>(0.84-2.9%)            | 98%<br>(97-99%)          | 0.086<br>(0.033-0.18)                       | 0.4%<br>(0.2-0.74%)                  | 0.45%<br>(0.21-0.85%)               | 25<br>(12-49)       | 200<br>(100-380)         |
| Nepal    | 2016 | Female | 90 to 94 | 1.9%<br>(1.1-3.2%)             | 98%<br>(97-99%)          | 0.088<br>(0.032-0.19)                       | 0.33%<br>(0.14-0.67%)                | 0.34%<br>(0.13-0.75%)               | 10<br>(3.8-22)      | 59<br>(25-120)           |
| Nepal    | 2016 | Female | 95 plus  | 2.4%<br>(1.1-4.4%)             | 98%<br>(96-99%)          | 0.094<br>(0.03-0.21)                        | 0.3%<br>(0.11-0.68%)                 | 0.28%<br>(0.067-0.72%)              | 2.6<br>(0.62-6.7)   | 11<br>(4-25)             |
| Nepal    | 2016 | Male   | All Ages | 21%<br>(17-25%)                | 79%<br>(75-83%)          | 0.66<br>(0.41-0.99)                         | 3%<br>(1.9-4.5%)                     | 3.3%<br>(1.7-5.7%)                  | 3100<br>(1500-5300) | 140000<br>(90000-210000) |
| Nepal    | 2016 | Male   | 15 to 19 | 9.1%<br>(5.3-14%)              | 91%<br>(86-95%)          | 0.2<br>(0.084-0.39)                         | 1.5%<br>(1-2.2%)                     | 1.2%<br>(0.64-2.3%)                 | 22<br>(11-40)       | 3700<br>(2400-5400)      |
| Nepal    | 2016 | Male   | 20 to 24 | 24%<br>(15-34%)                | 76%<br>(66-85%)          | 0.69<br>(0.32-1.3)                          | 4.5%<br>(3-6.7%)                     | 4.4%<br>(2.3-8.1%)                  | 98<br>(47-180)      | 11000<br>(7200-17000)    |
| Nepal    | 2016 | Male   | 25 to 29 | 37%<br>(25-48%)                | 63%<br>(52-75%)          | 1.2<br>(0.59-2.1)                           | 6.3%<br>(4.1-9.5%)                   | 7.1%<br>(3.5-12%)                   | 140<br>(70-250)     | 13000<br>(8400-20000)    |
| Nepal    | 2016 | Male   | 30 to 34 | 44%<br>(31-58%)                | 56%<br>(42-69%)          | 1.5<br>(0.77-2.6)                           | 7.2%<br>(4.6-11%)                    | 8.9%<br>(4.2-15%)                   | 180<br>(88-290)     | 14000<br>(8400-21000)    |
| Nepal    | 2016 | Male   | 35 to 39 | 46%<br>(33-58%)                | 54%<br>(42-67%)          | 1.6<br>(0.81-2.7)                           | 7.3%<br>(4.4-11%)                    | 9.3%<br>(4.6-15%)                   | 210<br>(110-340)    | 14000<br>(8600-21000)    |
| Nepal    | 2016 | Male   | 40 to 44 | 46%<br>(33-57%)                | 54%<br>(43-67%)          | 1.6<br>(0.79-2.8)                           | 7.1%<br>(4.3-11%)                    | 9.3%<br>(4.9-15%)                   | 270<br>(140-430)    | 15000<br>(9200-23000)    |
| Nepal    | 2016 | Male   | 45 to 49 | 44%<br>(30-56%)                | 56%<br>(44-70%)          | 1.5<br>(0.76-2.7)                           | 6.8%<br>(3.9-11%)                    | 8.8%<br>(4.7-15%)                   | 330<br>(170-540)    | 16000<br>(9300-25000)    |
| Nepal    | 2016 | Male   | 50 to 54 | 40%<br>(29-52%)                | 60%<br>(48-71%)          | 1.4<br>(0.72-2.5)                           | 6%<br>(3.2-9.7%)                     | 7.6%<br>(3.7-13%)                   | 360<br>(180-620)    | 15000<br>(8200-25000)    |
| Nepal    | 2016 | Male   | 55 to 59 | 35%<br>(25-47%)                | 65%<br>(53-75%)          | 1.3<br>(0.65-2.4)                           | 5.1%<br>(2.5-8.9%)                   | 6.3%<br>(2.8-11%)                   | 370<br>(160-650)    | 13000<br>(6300-22000)    |

| Location | Year | Sex    | Age      | Prevalence of current drinkers | Prevalence of abstainers | Population average of standard drinks daily | Percent of total attributable deaths | Percent of total attributable DALYs | Attributable deaths | Attributable DALYs      |
|----------|------|--------|----------|--------------------------------|--------------------------|---------------------------------------------|--------------------------------------|-------------------------------------|---------------------|-------------------------|
| Nepal    | 2016 | Male   | 60 to 64 | 32%<br>(21-44%)                | 68%<br>(56-79%)          | 1.2<br>(0.53-2.2)                           | 4%<br>(1.6-7.6%)                     | 4.7%<br>(1.7-9.4%)                  | 380<br>(130-760)    | 11000<br>(4700-22000)   |
| Nepal    | 2016 | Male   | 65 to 69 | 30%<br>(19-41%)                | 70%<br>(59-81%)          | 1<br>(0.47-1.8)                             | 2.8%<br>(1-5.7%)                     | 3.2%<br>(1-7%)                      | 300<br>(90-620)     | 7500<br>(2600-15000)    |
| Nepal    | 2016 | Male   | 70 to 74 | 27%<br>(18-37%)                | 73%<br>(63-82%)          | 0.82<br>(0.36-1.5)                          | 1.9%<br>(0.47-4.5%)                  | 2.2%<br>(0.38-5.4%)                 | 220<br>(36-530)     | 4400<br>(1000-10000)    |
| Nepal    | 2016 | Male   | 75 to 79 | 24%<br>(15-36%)                | 76%<br>(64-85%)          | 0.65<br>(0.26-1.3)                          | 1.2%<br>(0.11-3.3%)                  | 1.3%<br>(-0.0018-3.8%)              | 130<br>(-0.19-380)  | 2000<br>(190-5600)      |
| Nepal    | 2016 | Male   | 80 to 84 | 22%<br>(13-33%)                | 78%<br>(67-87%)          | 0.53<br>(0.21-1)                            | 0.77%<br>(-0.11-2.3%)                | 0.8%<br>(-0.27-2.5%)                | 52<br>(-18-170)     | 630<br>(-96-1900)       |
| Nepal    | 2016 | Male   | 85 to 89 | 22%<br>(13-34%)                | 78%<br>(66-87%)          | 0.47<br>(0.2-0.91)                          | 0.44%<br>(-0.3-1.6%)                 | 0.4%<br>(-0.45-1.7%)                | 16<br>(-18-71)      | 160<br>(-100-570)       |
| Nepal    | 2016 | Male   | 90 to 94 | 25%<br>(15-37%)                | 75%<br>(63-85%)          | 0.47<br>(0.19-0.96)                         | 0.17%<br>(-0.57-1.2%)                | 0.048%<br>(-0.81-1.1%)              | 0.86<br>(-15-21)    | 18<br>(-60-130)         |
| Nepal    | 2016 | Male   | 95 plus  | 29%<br>(16-46%)                | 71%<br>(54-84%)          | 0.47<br>(0.16-1)                            | 0.067%<br>(-0.76-1.2%)               | -0.14%<br>(-1.1-1.1%)               | -0.56<br>(-4.4-4.8) | 1.1<br>(-12-19)         |
| Pakistan | 1990 | Female | All Ages | 1.3%<br>(0.98-1.7%)            | 99%<br>(98-99%)          | 0.031<br>(0.029-0.033)                      | 0.24%<br>(0.19-0.29%)                | 0.28%<br>(0.18-0.38%)               | 1300<br>(880-1900)  | 81000<br>(63000-100000) |
| Pakistan | 1990 | Female | 15 to 19 | 0.98%<br>(0.49-1.7%)           | 99%<br>(98-100%)         | 0.014<br>(0.0057-0.028)                     | 0.36%<br>(0.22-0.54%)                | 0.074%<br>(0.02-0.17%)              | 6<br>(1.6-14)       | 3700<br>(2200-5800)     |
| Pakistan | 1990 | Female | 20 to 24 | 1.1%<br>(0.51-1.9%)            | 99%<br>(98-99%)          | 0.031<br>(0.013-0.054)                      | 0.78%<br>(0.52-1.1%)                 | 0.26%<br>(0.14-0.46%)               | 25<br>(13-44)       | 8500<br>(5400-12000)    |
| Pakistan | 1990 | Female | 25 to 29 | 1.3%<br>(0.65-2.2%)            | 99%<br>(98-99%)          | 0.052<br>(0.025-0.088)                      | 0.93%<br>(0.66-1.3%)                 | 0.44%<br>(0.25-0.74%)               | 40<br>(23-66)       | 8800<br>(5900-12000)    |
| Pakistan | 1990 | Female | 30 to 34 | 1.5%<br>(0.73-2.6%)            | 98%<br>(97-99%)          | 0.069<br>(0.036-0.11)                       | 1%<br>(0.76-1.4%)                    | 0.79%<br>(0.49-1.2%)                | 68<br>(41-100)      | 8800<br>(6200-12000)    |
| Pakistan | 1990 | Female | 35 to 39 | 1.8%<br>(0.91-2.8%)            | 98%<br>(97-99%)          | 0.079<br>(0.041-0.13)                       | 1.1%<br>(0.77-1.4%)                  | 1%<br>(0.63-1.5%)                   | 85<br>(52-130)      | 7900<br>(5500-11000)    |
| Pakistan | 1990 | Female | 40 to 44 | 1.9%<br>(1.1-3%)               | 98%<br>(97-99%)          | 0.08<br>(0.041-0.13)                        | 1%<br>(0.73-1.4%)                    | 1.1%<br>(0.67-1.6%)                 | 98<br>(61-150)      | 7500<br>(5200-10000)    |
| Pakistan | 1990 | Female | 45 to 49 | 1.9%<br>(1-3.1%)               | 98%<br>(97-99%)          | 0.073<br>(0.034-0.13)                       | 0.98%<br>(0.7-1.4%)                  | 1.1%<br>(0.67-1.7%)                 | 130<br>(77-190)     | 7600<br>(5300-10000)    |
| Pakistan | 1990 | Female | 50 to 54 | 2%<br>(1.1-3.3%)               | 98%<br>(97-99%)          | 0.075<br>(0.036-0.13)                       | 0.96%<br>(0.66-1.3%)                 | 1.1%<br>(0.65-1.6%)                 | 150<br>(88-230)     | 7200<br>(4800-10000)    |
| Pakistan | 1990 | Female | 55 to 59 | 2.2%<br>(1.2-3.4%)             | 98%<br>(97-99%)          | 0.086<br>(0.043-0.15)                       | 0.88%<br>(0.57-1.3%)                 | 1%<br>(0.57-1.7%)                   | 170<br>(94-280)     | 6700<br>(4200-10000)    |
| Pakistan | 1990 | Female | 60 to 64 | 2.3%<br>(1.2-3.8%)             | 98%<br>(96-99%)          | 0.088<br>(0.041-0.16)                       | 0.72%<br>(0.4-1.2%)                  | 0.81%<br>(0.38-1.4%)                | 160<br>(76-290)     | 5300<br>(2900-8600)     |
| Pakistan | 1990 | Female | 65 to 69 | 2.5%<br>(1.4-4%)               | 98%<br>(96-99%)          | 0.081<br>(0.04-0.14)                        | 0.57%<br>(0.3-0.91%)                 | 0.65%<br>(0.31-1.1%)                | 160<br>(74-260)     | 4000<br>(2100-6400)     |
| Pakistan | 1990 | Female | 70 to 74 | 2.6%<br>(1.5-4.2%)             | 97%<br>(96-98%)          | 0.07<br>(0.033-0.12)                        | 0.4%<br>(0.18-0.72%)                 | 0.46%<br>(0.18-0.84%)               | 120<br>(48-230)     | 2500<br>(1100-4300)     |
| Pakistan | 1990 | Female | 75 to 79 | 2.7%<br>(1.4-4.6%)             | 97%<br>(95-99%)          | 0.062<br>(0.026-0.12)                       | 0.26%<br>(0.092-0.52%)               | 0.29%<br>(0.081-0.61%)              | 72<br>(20-150)      | 1100<br>(390-2200)      |

| Location | Year | Sex    | Age      | Prevalence of current drinkers | Prevalence of abstainers | Population average of standard drinks daily | Percent of total attributable deaths | Percent of total attributable DALYs | Attributable deaths | Attributable DALYs       |
|----------|------|--------|----------|--------------------------------|--------------------------|---------------------------------------------|--------------------------------------|-------------------------------------|---------------------|--------------------------|
| Pakistan | 1990 | Female | 80 to 84 | 2.9%<br>(1.5-4.8%)             | 97%<br>(95-99%)          | 0.06<br>(0.025-0.11)                        | 0.18%<br>(0.027-0.39%)               | 0.19%<br>(0.0071-0.45%)             | 36<br>(1.3-85)      | 420<br>(62-920)          |
| Pakistan | 1990 | Female | 85 to 89 | 3.2%<br>(1.6-5.4%)             | 97%<br>(95-98%)          | 0.06<br>(0.027-0.11)                        | 0.11%<br>(-0.026-0.28%)              | 0.1%<br>(-0.063-0.31%)              | 13<br>(-7.7-39)     | 120<br>(-29-310)         |
| Pakistan | 1990 | Female | 90 to 94 | 3.7%<br>(1.9-6.3%)             | 96%<br>(94-98%)          | 0.061<br>(0.026-0.12)                       | 0.054%<br>(-0.087-0.21%)             | 0.025%<br>(-0.14-0.2%)              | 1.3<br>(-7.5-11)    | 17<br>(-27-67)           |
| Pakistan | 1990 | Female | 95 plus  | 4.6%<br>(2-8.8%)               | 95%<br>(91-98%)          | 0.066<br>(0.023-0.14)                       | 0.02%<br>(-0.16-0.2%)                | -0.038%<br>(-0.26-0.17%)            | -0.58<br>(-3.9-2.5) | 1.2<br>(-9.8-12)         |
| Pakistan | 1990 | Male   | All Ages | 0.72%<br>(0.55-0.96%)          | 99%<br>(99-99%)          | 0.00097<br>(0.00073-0.0012)                 | 0.38%<br>(0.28-0.48%)                | 0.25%<br>(0.16-0.35%)               | 1300<br>(840-1900)  | 130000<br>(98000-170000) |
| Pakistan | 1990 | Male   | 15 to 19 | 0.5%<br>(0.21-0.9%)            | 100%<br>(99-100%)        | 0.00057<br>(0.00016-0.0012)                 | 0.71%<br>(0.47-1%)                   | 0.18%<br>(0.088-0.32%)              | 14<br>(6.7-25)      | 6700<br>(4100-10000)     |
| Pakistan | 1990 | Male   | 20 to 24 | 0.74%<br>(0.28-1.3%)           | 99%<br>(99-100%)         | 0.0011<br>(0.00034-0.0022)                  | 1.6%<br>(1.1-2.3%)                   | 0.47%<br>(0.25-0.78%)               | 47<br>(24-77)       | 17000<br>(11000-25000)   |
| Pakistan | 1990 | Male   | 25 to 29 | 1%<br>(0.46-1.7%)              | 99%<br>(98-100%)         | 0.0016<br>(0.00058-0.0031)                  | 2%<br>(1.5-2.7%)                     | 0.7%<br>(0.35-1.2%)                 | 70<br>(35-120)      | 19000<br>(13000-27000)   |
| Pakistan | 1990 | Male   | 30 to 34 | 1.3%<br>(0.56-2.3%)            | 99%<br>(98-99%)          | 0.0021<br>(0.00088-0.0039)                  | 2.2%<br>(1.6-2.9%)                   | 1.1%<br>(0.59-1.9%)                 | 110<br>(58-190)     | 19000<br>(13000-26000)   |
| Pakistan | 1990 | Male   | 35 to 39 | 1.5%<br>(0.69-2.4%)            | 99%<br>(98-99%)          | 0.0025<br>(0.001-0.0045)                    | 1.9%<br>(1.4-2.6%)                   | 1.2%<br>(0.57-2.1%)                 | 110<br>(54-200)     | 15000<br>(10000-20000)   |
| Pakistan | 1990 | Male   | 40 to 44 | 1.5%<br>(0.8-2.4%)             | 99%<br>(98-99%)          | 0.0025<br>(0.001-0.0046)                    | 1.7%<br>(1.2-2.3%)                   | 1.1%<br>(0.58-1.9%)                 | 130<br>(65-220)     | 13000<br>(8900-19000)    |
| Pakistan | 1990 | Male   | 45 to 49 | 1.4%<br>(0.66-2.2%)            | 99%<br>(98-99%)          | 0.0024<br>(0.00098-0.0047)                  | 1.4%<br>(1-2%)                       | 1.1%<br>(0.55-1.9%)                 | 160<br>(77-280)     | 12000<br>(8300-18000)    |
| Pakistan | 1990 | Male   | 50 to 54 | 1.4%<br>(0.68-2.3%)            | 99%<br>(98-99%)          | 0.0024<br>(0.001-0.0046)                    | 1.1%<br>(0.77-1.5%)                  | 0.83%<br>(0.44-1.4%)                | 140<br>(76-240)     | 9600<br>(6400-13000)     |
| Pakistan | 1990 | Male   | 55 to 59 | 1.4%<br>(0.72-2.4%)            | 99%<br>(98-99%)          | 0.0025<br>(0.001-0.0046)                    | 0.83%<br>(0.57-1.1%)                 | 0.62%<br>(0.33-1.1%)                | 130<br>(66-210)     | 7300<br>(4900-10000)     |
| Pakistan | 1990 | Male   | 60 to 64 | 1.3%<br>(0.66-2.3%)            | 99%<br>(98-99%)          | 0.0023<br>(0.00088-0.0044)                  | 0.59%<br>(0.4-0.81%)                 | 0.43%<br>(0.22-0.69%)               | 110<br>(57-180)     | 5300<br>(3500-7500)      |
| Pakistan | 1990 | Male   | 65 to 69 | 1.2%<br>(0.59-1.9%)            | 99%<br>(98-99%)          | 0.0018<br>(0.00077-0.0033)                  | 0.44%<br>(0.32-0.58%)                | 0.34%<br>(0.21-0.52%)               | 100<br>(61-150)     | 3800<br>(2700-5200)      |
| Pakistan | 1990 | Male   | 70 to 74 | 1%<br>(0.55-1.7%)              | 99%<br>(98-99%)          | 0.0014<br>(0.00051-0.0029)                  | 0.32%<br>(0.22-0.44%)                | 0.25%<br>(0.15-0.4%)                | 85<br>(50-130)      | 2400<br>(1600-3300)      |
| Pakistan | 1990 | Male   | 75 to 79 | 0.96%<br>(0.44-1.7%)           | 99%<br>(98-100%)         | 0.0012<br>(0.00039-0.0026)                  | 0.25%<br>(0.17-0.35%)                | 0.22%<br>(0.13-0.34%)               | 67<br>(39-110)      | 1300<br>(860-1900)       |
| Pakistan | 1990 | Male   | 80 to 84 | 0.88%<br>(0.41-1.5%)           | 99%<br>(98-100%)         | 0.0011<br>(0.00035-0.0022)                  | 0.17%<br>(0.12-0.23%)                | 0.14%<br>(0.088-0.23%)              | 32<br>(20-51)       | 470<br>(320-670)         |
| Pakistan | 1990 | Male   | 85 to 89 | 0.9%<br>(0.42-1.7%)            | 99%<br>(98-100%)         | 0.0011<br>(0.00035-0.0023)                  | 0.14%<br>(0.097-0.19%)               | 0.11%<br>(0.068-0.17%)              | 16<br>(9.8-25)      | 180<br>(120-240)         |
| Pakistan | 1990 | Male   | 90 to 94 | 1%<br>(0.49-1.9%)              | 99%<br>(98-100%)         | 0.0012<br>(0.00035-0.0026)                  | 0.13%<br>(0.094-0.18%)               | 0.094%<br>(0.053-0.15%)             | 5.8<br>(3.3-9.2)    | 50<br>(35-70)            |
| Pakistan | 1990 | Male   | 95 plus  | 1.3%<br>(0.54-2.6%)            | 99%<br>(97-99%)          | 0.0014<br>(0.00029-0.0037)                  | 0.16%<br>(0.11-0.22%)                | 0.093%<br>(0.049-0.15%)             | 1.6<br>(0.84-2.6)   | 11<br>(7.7-16)           |

| Location | Year | Sex    | Age      | Prevalence of current drinkers | Prevalence of abstainers | Population average of standard drinks daily | Percent of total attributable deaths | Percent of total attributable DALYs | Attributable deaths | Attributable DALYs        |
|----------|------|--------|----------|--------------------------------|--------------------------|---------------------------------------------|--------------------------------------|-------------------------------------|---------------------|---------------------------|
| Pakistan | 1995 | Female | All Ages | 1.3%<br>(1-1.7%)               | 99%<br>(98-99%)          | 0.034<br>(0.032-0.037)                      | 0.31%<br>(0.25-0.38%)                | 0.37%<br>(0.26-0.51%)               | 2000<br>(1400-2800) | 110000<br>(86000-130000)  |
| Pakistan | 1995 | Female | 15 to 19 | 0.99%<br>(0.53-1.7%)           | 99%<br>(98-99%)          | 0.015<br>(0.0062-0.03)                      | 0.35%<br>(0.21-0.52%)                | 0.089%<br>(0.029-0.19%)             | 9.8<br>(3.1-22)     | 4600<br>(2700-7200)       |
| Pakistan | 1995 | Female | 20 to 24 | 1.1%<br>(0.54-1.9%)            | 99%<br>(98-99%)          | 0.034<br>(0.015-0.058)                      | 0.78%<br>(0.52-1.1%)                 | 0.31%<br>(0.16-0.52%)               | 38<br>(19-63)       | 10000<br>(6600-15000)     |
| Pakistan | 1995 | Female | 25 to 29 | 1.3%<br>(0.67-2.3%)            | 99%<br>(98-99%)          | 0.055<br>(0.027-0.094)                      | 0.93%<br>(0.67-1.3%)                 | 0.5%<br>(0.28-0.81%)                | 58<br>(33-93)       | 11000<br>(7300-15000)     |
| Pakistan | 1995 | Female | 30 to 34 | 1.6%<br>(0.78-2.8%)            | 98%<br>(97-99%)          | 0.074<br>(0.039-0.12)                       | 1.1%<br>(0.81-1.4%)                  | 0.9%<br>(0.57-1.3%)                 | 100<br>(65-160)     | 12000<br>(8400-16000)     |
| Pakistan | 1995 | Female | 35 to 39 | 1.8%<br>(0.92-2.9%)            | 98%<br>(97-99%)          | 0.085<br>(0.044-0.13)                       | 1.1%<br>(0.83-1.5%)                  | 1.1%<br>(0.73-1.7%)                 | 140<br>(86-200)     | 11000<br>(8200-15000)     |
| Pakistan | 1995 | Female | 40 to 44 | 2%<br>(1.1-3.1%)               | 98%<br>(97-99%)          | 0.086<br>(0.044-0.14)                       | 1.1%<br>(0.77-1.4%)                  | 1.2%<br>(0.73-1.7%)                 | 130<br>(84-200)     | 9300<br>(6600-13000)      |
| Pakistan | 1995 | Female | 45 to 49 | 2%<br>(1-3.1%)                 | 98%<br>(97-99%)          | 0.079<br>(0.036-0.14)                       | 1.1%<br>(0.75-1.5%)                  | 1.2%<br>(0.75-1.8%)                 | 170<br>(100-260)    | 9400<br>(6400-13000)      |
| Pakistan | 1995 | Female | 50 to 54 | 2.1%<br>(1.2-3.4%)             | 98%<br>(97-99%)          | 0.082<br>(0.04-0.14)                        | 1%<br>(0.71-1.5%)                    | 1.2%<br>(0.75-1.8%)                 | 220<br>(140-330)    | 10000<br>(6800-14000)     |
| Pakistan | 1995 | Female | 55 to 59 | 2.2%<br>(1.3-3.6%)             | 98%<br>(96-99%)          | 0.095<br>(0.047-0.16)                       | 0.98%<br>(0.63-1.5%)                 | 1.1%<br>(0.64-1.8%)                 | 250<br>(150-410)    | 9500<br>(6000-15000)      |
| Pakistan | 1995 | Female | 60 to 64 | 2.3%<br>(1.3-4%)               | 98%<br>(96-99%)          | 0.096<br>(0.045-0.18)                       | 0.8%<br>(0.44-1.3%)                  | 0.9%<br>(0.43-1.5%)                 | 250<br>(120-430)    | 7700<br>(4300-13000)      |
| Pakistan | 1995 | Female | 65 to 69 | 2.5%<br>(1.4-4.1%)             | 97%<br>(96-99%)          | 0.087<br>(0.043-0.15)                       | 0.64%<br>(0.34-1%)                   | 0.73%<br>(0.35-1.2%)                | 240<br>(120-400)    | 5900<br>(3200-9600)       |
| Pakistan | 1995 | Female | 70 to 74 | 2.7%<br>(1.6-4.3%)             | 97%<br>(96-98%)          | 0.075<br>(0.035-0.13)                       | 0.46%<br>(0.21-0.82%)                | 0.52%<br>(0.22-0.99%)               | 190<br>(79-370)     | 3700<br>(1700-6700)       |
| Pakistan | 1995 | Female | 75 to 79 | 2.8%<br>(1.5-4.6%)             | 97%<br>(95-98%)          | 0.066<br>(0.028-0.13)                       | 0.3%<br>(0.1-0.59%)                  | 0.33%<br>(0.098-0.68%)              | 110<br>(32-230)     | 1700<br>(570-3300)        |
| Pakistan | 1995 | Female | 80 to 84 | 3%<br>(1.6-5.2%)               | 97%<br>(95-98%)          | 0.065<br>(0.027-0.12)                       | 0.21%<br>(0.03-0.45%)                | 0.22%<br>(0.012-0.5%)               | 55<br>(3-130)       | 640<br>(90-1400)          |
| Pakistan | 1995 | Female | 85 to 89 | 3.3%<br>(1.7-5.7%)             | 97%<br>(94-98%)          | 0.065<br>(0.029-0.12)                       | 0.13%<br>(-0.03-0.34%)               | 0.12%<br>(-0.062-0.37%)             | 19<br>(-9.9-59)     | 180<br>(-41-470)          |
| Pakistan | 1995 | Female | 90 to 94 | 3.8%<br>(2-6.6%)               | 96%<br>(93-98%)          | 0.067<br>(0.028-0.14)                       | 0.063%<br>(-0.1-0.25%)               | 0.035%<br>(-0.16-0.26%)             | 2.3<br>(-11-17)     | 25<br>(-38-100)           |
| Pakistan | 1995 | Female | 95 plus  | 4.6%<br>(2.2-8.6%)             | 95%<br>(91-98%)          | 0.071<br>(0.023-0.15)                       | 0.024%<br>(-0.19-0.24%)              | -0.033%<br>(-0.28-0.2%)             | -0.64<br>(-5.3-3.9) | 1.8<br>(-14-18)           |
| Pakistan | 1995 | Male   | All Ages | 0.75%<br>(0.58-0.99%)          | 99%<br>(99-99%)          | 0.001<br>(0.00079-0.0013)                   | 0.45%<br>(0.34-0.57%)                | 0.29%<br>(0.19-0.41%)               | 1700<br>(1100-2500) | 160000<br>(120000-210000) |
| Pakistan | 1995 | Male   | 15 to 19 | 0.51%<br>(0.23-0.91%)          | 99%<br>(99-100%)         | 0.00061<br>(0.00018-0.0014)                 | 0.7%<br>(0.46-1%)                    | 0.19%<br>(0.091-0.32%)              | 18<br>(8.5-31)      | 8000<br>(4900-12000)      |
| Pakistan | 1995 | Male   | 20 to 24 | 0.76%<br>(0.3-1.4%)            | 99%<br>(99-100%)         | 0.0011<br>(0.00035-0.0024)                  | 1.6%<br>(1.1-2.2%)                   | 0.49%<br>(0.25-0.82%)               | 58<br>(30-95)       | 19000<br>(12000-27000)    |
| Pakistan | 1995 | Male   | 25 to 29 | 1%<br>(0.48-1.8%)              | 99%<br>(98-100%)         | 0.0017<br>(0.00066-0.0033)                  | 2%<br>(1.5-2.7%)                     | 0.73%<br>(0.37-1.2%)                | 88<br>(44-150)      | 22000<br>(15000-31000)    |

| Location | Year | Sex    | Age      | Prevalence of current drinkers | Prevalence of abstainers | Population average of standard drinks daily | Percent of total attributable deaths | Percent of total attributable DALYs | Attributable deaths | Attributable DALYs        |
|----------|------|--------|----------|--------------------------------|--------------------------|---------------------------------------------|--------------------------------------|-------------------------------------|---------------------|---------------------------|
| Pakistan | 1995 | Male   | 30 to 34 | 1.3%<br>(0.61-2.5%)            | 99%<br>(98-99%)          | 0.0022<br>(0.00099-0.0041)                  | 2.2%<br>(1.6-2.9%)                   | 1.2%<br>(0.6-1.9%)                  | 150<br>(77-240)     | 24000<br>(16000-33000)    |
| Pakistan | 1995 | Male   | 35 to 39 | 1.5%<br>(0.73-2.5%)            | 98%<br>(98-99%)          | 0.0026<br>(0.0011-0.0048)                   | 2%<br>(1.4-2.6%)                     | 1.2%<br>(0.57-2.1%)                 | 160<br>(75-280)     | 20000<br>(14000-27000)    |
| Pakistan | 1995 | Male   | 40 to 44 | 1.5%<br>(0.82-2.5%)            | 98%<br>(98-99%)          | 0.0027<br>(0.0011-0.0049)                   | 1.7%<br>(1.2-2.3%)                   | 1.1%<br>(0.6-1.9%)                  | 150<br>(78-260)     | 15000<br>(10000-21000)    |
| Pakistan | 1995 | Male   | 45 to 49 | 1.4%<br>(0.68-2.3%)            | 99%<br>(98-99%)          | 0.0026<br>(0.001-0.005)                     | 1.4%<br>(0.99-2%)                    | 1.1%<br>(0.57-1.8%)                 | 180<br>(95-300)     | 14000<br>(9200-19000)     |
| Pakistan | 1995 | Male   | 50 to 54 | 1.4%<br>(0.7-2.3%)             | 99%<br>(98-99%)          | 0.0026<br>(0.001-0.0049)                    | 1.1%<br>(0.77-1.5%)                  | 0.83%<br>(0.46-1.4%)                | 190<br>(100-300)    | 12000<br>(8000-17000)     |
| Pakistan | 1995 | Male   | 55 to 59 | 1.4%<br>(0.72-2.4%)            | 99%<br>(98-99%)          | 0.0027<br>(0.0011-0.0049)                   | 0.82%<br>(0.57-1.1%)                 | 0.63%<br>(0.34-1%)                  | 170<br>(88-280)     | 9100<br>(6100-13000)      |
| Pakistan | 1995 | Male   | 60 to 64 | 1.4%<br>(0.66-2.4%)            | 99%<br>(98-99%)          | 0.0024<br>(0.00095-0.0047)                  | 0.58%<br>(0.39-0.8%)                 | 0.43%<br>(0.23-0.69%)               | 140<br>(75-240)     | 6500<br>(4300-9200)       |
| Pakistan | 1995 | Male   | 65 to 69 | 1.2%<br>(0.61-2%)              | 99%<br>(98-99%)          | 0.0019<br>(0.00081-0.0036)                  | 0.43%<br>(0.32-0.58%)                | 0.34%<br>(0.21-0.51%)               | 130<br>(78-200)     | 4600<br>(3300-6300)       |
| Pakistan | 1995 | Male   | 70 to 74 | 1.1%<br>(0.57-1.8%)            | 99%<br>(98-99%)          | 0.0015<br>(0.00055-0.0031)                  | 0.32%<br>(0.22-0.45%)                | 0.26%<br>(0.16-0.41%)               | 110<br>(67-170)     | 3000<br>(2000-4300)       |
| Pakistan | 1995 | Male   | 75 to 79 | 0.99%<br>(0.46-1.7%)           | 99%<br>(98-100%)         | 0.0013<br>(0.00039-0.0028)                  | 0.26%<br>(0.18-0.35%)                | 0.23%<br>(0.13-0.34%)               | 91<br>(53-140)      | 1700<br>(1100-2400)       |
| Pakistan | 1995 | Male   | 80 to 84 | 0.9%<br>(0.42-1.6%)            | 99%<br>(98-100%)         | 0.0011<br>(0.00037-0.0023)                  | 0.18%<br>(0.12-0.25%)                | 0.15%<br>(0.094-0.24%)              | 45<br>(28-71)       | 640<br>(440-900)          |
| Pakistan | 1995 | Male   | 85 to 89 | 0.91%<br>(0.43-1.6%)           | 99%<br>(98-100%)         | 0.0011<br>(0.00036-0.0024)                  | 0.15%<br>(0.11-0.2%)                 | 0.12%<br>(0.076-0.18%)              | 22<br>(14-33)       | 240<br>(170-320)          |
| Pakistan | 1995 | Male   | 90 to 94 | 1.1%<br>(0.5-1.9%)             | 99%<br>(98-99%)          | 0.0012<br>(0.00036-0.0027)                  | 0.14%<br>(0.097-0.19%)               | 0.1%<br>(0.061-0.16%)               | 7.9<br>(4.7-12)     | 65<br>(45-89)             |
| Pakistan | 1995 | Male   | 95 plus  | 1.3%<br>(0.54-2.7%)            | 99%<br>(97-99%)          | 0.0014<br>(0.00031-0.0038)                  | 0.17%<br>(0.12-0.24%)                | 0.1%<br>(0.056-0.17%)               | 2.1<br>(1.2-3.5)    | 14<br>(10-20)             |
| Pakistan | 2000 | Female | All Ages | 1.4%<br>(1.1-1.7%)             | 99%<br>(98-99%)          | 0.036<br>(0.033-0.038)                      | 0.37%<br>(0.31-0.45%)                | 0.43%<br>(0.3-0.58%)                | 2300<br>(1600-3200) | 130000<br>(100000-160000) |
| Pakistan | 2000 | Female | 15 to 19 | 1%<br>(0.53-1.7%)              | 99%<br>(98-99%)          | 0.015<br>(0.0064-0.03)                      | 0.35%<br>(0.22-0.54%)                | 0.095%<br>(0.033-0.21%)             | 12<br>(4.2-26)      | 5400<br>(3200-8600)       |
| Pakistan | 2000 | Female | 20 to 24 | 1.2%<br>(0.55-2%)              | 99%<br>(98-99%)          | 0.034<br>(0.015-0.059)                      | 0.8%<br>(0.54-1.1%)                  | 0.33%<br>(0.17-0.55%)               | 45<br>(24-76)       | 12000<br>(7800-18000)     |
| Pakistan | 2000 | Female | 25 to 29 | 1.4%<br>(0.68-2.4%)            | 99%<br>(98-99%)          | 0.056<br>(0.027-0.096)                      | 0.98%<br>(0.7-1.3%)                  | 0.54%<br>(0.31-0.86%)               | 66<br>(38-100)      | 12000<br>(8500-17000)     |
| Pakistan | 2000 | Female | 30 to 34 | 1.6%<br>(0.78-2.9%)            | 98%<br>(97-99%)          | 0.075<br>(0.04-0.12)                        | 1.1%<br>(0.85-1.5%)                  | 0.96%<br>(0.63-1.4%)                | 120<br>(75-170)     | 13000<br>(9600-18000)     |
| Pakistan | 2000 | Female | 35 to 39 | 1.9%<br>(0.93-3%)              | 98%<br>(97-99%)          | 0.086<br>(0.045-0.14)                       | 1.2%<br>(0.87-1.6%)                  | 1.2%<br>(0.8-1.7%)                  | 160<br>(100-230)    | 14000<br>(9900-18000)     |
| Pakistan | 2000 | Female | 40 to 44 | 2%<br>(1.1-3.2%)               | 98%<br>(97-99%)          | 0.086<br>(0.045-0.14)                       | 1.1%<br>(0.8-1.5%)                   | 1.2%<br>(0.78-1.8%)                 | 170<br>(110-250)    | 12000<br>(8200-16000)     |
| Pakistan | 2000 | Female | 45 to 49 | 2%<br>(1.1-3.2%)               | 98%<br>(97-99%)          | 0.079<br>(0.036-0.14)                       | 1.1%<br>(0.76-1.5%)                  | 1.2%<br>(0.77-1.9%)                 | 180<br>(110-280)    | 10000<br>(7200-15000)     |

| Location | Year | Sex    | Age      | Prevalence of current drinkers | Prevalence of abstainers | Population average of standard drinks daily | Percent of total attributable deaths | Percent of total attributable DALYs | Attributable deaths | Attributable DALYs        |
|----------|------|--------|----------|--------------------------------|--------------------------|---------------------------------------------|--------------------------------------|-------------------------------------|---------------------|---------------------------|
| Pakistan | 2000 | Female | 50 to 54 | 2.2%<br>(1.2-3.5%)             | 98%<br>(96-99%)          | 0.083<br>(0.039-0.15)                       | 1.1%<br>(0.72-1.5%)                  | 1.2%<br>(0.76-1.9%)                 | 240<br>(140-370)    | 11000<br>(7200-16000)     |
| Pakistan | 2000 | Female | 55 to 59 | 2.3%<br>(1.2-3.8%)             | 98%<br>(96-99%)          | 0.095<br>(0.045-0.17)                       | 1%<br>(0.64-1.5%)                    | 1.1%<br>(0.66-1.8%)                 | 300<br>(170-490)    | 11000<br>(7200-17000)     |
| Pakistan | 2000 | Female | 60 to 64 | 2.4%<br>(1.3-4%)               | 98%<br>(96-99%)          | 0.096<br>(0.044-0.17)                       | 0.81%<br>(0.47-1.3%)                 | 0.91%<br>(0.46-1.5%)                | 290<br>(140-490)    | 9000<br>(5000-14000)      |
| Pakistan | 2000 | Female | 65 to 69 | 2.6%<br>(1.4-4.1%)             | 97%<br>(96-99%)          | 0.087<br>(0.042-0.15)                       | 0.66%<br>(0.36-1%)                   | 0.75%<br>(0.38-1.2%)                | 290<br>(140-490)    | 7100<br>(3900-12000)      |
| Pakistan | 2000 | Female | 70 to 74 | 2.7%<br>(1.5-4.3%)             | 97%<br>(96-98%)          | 0.075<br>(0.035-0.14)                       | 0.48%<br>(0.22-0.86%)                | 0.55%<br>(0.23-1%)                  | 230<br>(100-430)    | 4500<br>(2000-8000)       |
| Pakistan | 2000 | Female | 75 to 79 | 2.9%<br>(1.6-4.7%)             | 97%<br>(95-98%)          | 0.067<br>(0.029-0.13)                       | 0.31%<br>(0.1-0.6%)                  | 0.34%<br>(0.091-0.69%)              | 130<br>(37-280)     | 2000<br>(700-4100)        |
| Pakistan | 2000 | Female | 80 to 84 | 3.1%<br>(1.6-5.1%)             | 97%<br>(95-98%)          | 0.066<br>(0.028-0.12)                       | 0.21%<br>(0.019-0.45%)               | 0.22%<br>(-0.0027-0.52%)            | 67<br>(-0.8-160)    | 770<br>(71-1700)          |
| Pakistan | 2000 | Female | 85 to 89 | 3.4%<br>(1.8-5.9%)             | 97%<br>(94-98%)          | 0.066<br>(0.03-0.13)                        | 0.13%<br>(-0.037-0.34%)              | 0.12%<br>(-0.07-0.38%)              | 22<br>(-12-68)      | 200<br>(-56-530)          |
| Pakistan | 2000 | Female | 90 to 94 | 3.9%<br>(2.1-6.8%)             | 96%<br>(93-98%)          | 0.068<br>(0.029-0.13)                       | 0.056%<br>(-0.12-0.25%)              | 0.026%<br>(-0.18-0.26%)             | 1.9<br>(-13-19)     | 24<br>(-52-110)           |
| Pakistan | 2000 | Female | 95 plus  | 4.8%<br>(2.1-9.1%)             | 95%<br>(91-98%)          | 0.072<br>(0.024-0.15)                       | 0.013%<br>(-0.2-0.22%)               | -0.049%<br>(-0.31-0.19%)            | -1<br>(-6.5-4.1)    | 1.1<br>(-17-19)           |
| Pakistan | 2000 | Male   | All Ages | 0.72%<br>(0.56-0.95%)          | 99%<br>(99-99%)          | 0.00098<br>(0.00074-0.0012)                 | 0.54%<br>(0.41-0.69%)                | 0.34%<br>(0.22-0.47%)               | 2100<br>(1400-3000) | 190000<br>(140000-250000) |
| Pakistan | 2000 | Male   | 15 to 19 | 0.49%<br>(0.22-0.87%)          | 100%<br>(99-100%)        | 0.00057<br>(0.00017-0.0012)                 | 0.72%<br>(0.46-1%)                   | 0.2%<br>(0.094-0.34%)               | 22<br>(10-39)       | 9600<br>(6000-15000)      |
| Pakistan | 2000 | Male   | 20 to 24 | 0.7%<br>(0.28-1.2%)            | 99%<br>(99-100%)         | 0.001<br>(0.00033-0.0021)                   | 1.7%<br>(1.1-2.3%)                   | 0.52%<br>(0.27-0.89%)               | 71<br>(35-120)      | 23000<br>(14000-33000)    |
| Pakistan | 2000 | Male   | 25 to 29 | 0.92%<br>(0.42-1.6%)           | 99%<br>(98-100%)         | 0.0015<br>(0.00057-0.0029)                  | 2.1%<br>(1.5-2.8%)                   | 0.79%<br>(0.4-1.3%)                 | 110<br>(51-170)     | 26000<br>(18000-36000)    |
| Pakistan | 2000 | Male   | 30 to 34 | 1.1%<br>(0.51-2%)              | 99%<br>(98-99%)          | 0.0019<br>(0.00082-0.0035)                  | 2.3%<br>(1.6-3.1%)                   | 1.2%<br>(0.66-2%)                   | 180<br>(92-300)     | 28000<br>(19000-39000)    |
| Pakistan | 2000 | Male   | 35 to 39 | 1.3%<br>(0.62-2%)              | 99%<br>(98-99%)          | 0.0022<br>(0.00098-0.004)                   | 2%<br>(1.5-2.8%)                     | 1.3%<br>(0.6-2.2%)                  | 210<br>(92-360)     | 25000<br>(17000-35000)    |
| Pakistan | 2000 | Male   | 40 to 44 | 1.4%<br>(0.75-2.2%)            | 99%<br>(98-99%)          | 0.0024<br>(0.00098-0.0043)                  | 1.7%<br>(1.2-2.4%)                   | 1.2%<br>(0.63-2%)                   | 210<br>(110-340)    | 20000<br>(14000-28000)    |
| Pakistan | 2000 | Male   | 45 to 49 | 1.4%<br>(0.67-2.1%)            | 99%<br>(98-99%)          | 0.0025<br>(0.001-0.0049)                    | 1.5%<br>(1-2.1%)                     | 1.1%<br>(0.59-1.9%)                 | 210<br>(110-350)    | 16000<br>(11000-22000)    |
| Pakistan | 2000 | Male   | 50 to 54 | 1.4%<br>(0.71-2.3%)            | 99%<br>(98-99%)          | 0.0025<br>(0.001-0.0049)                    | 1.1%<br>(0.77-1.5%)                  | 0.87%<br>(0.48-1.4%)                | 210<br>(120-340)    | 13000<br>(8900-18000)     |
| Pakistan | 2000 | Male   | 55 to 59 | 1.4%<br>(0.73-2.5%)            | 99%<br>(98-99%)          | 0.0027<br>(0.0011-0.0049)                   | 0.85%<br>(0.58-1.2%)                 | 0.66%<br>(0.36-1%)                  | 210<br>(110-340)    | 11000<br>(7500-15000)     |
| Pakistan | 2000 | Male   | 60 to 64 | 1.4%<br>(0.66-2.4%)            | 99%<br>(98-99%)          | 0.0024<br>(0.00096-0.0047)                  | 0.6%<br>(0.4-0.81%)                  | 0.45%<br>(0.24-0.69%)               | 180<br>(93-280)     | 7900<br>(5200-11000)      |
| Pakistan | 2000 | Male   | 65 to 69 | 1.2%<br>(0.62-2%)              | 99%<br>(98-99%)          | 0.002<br>(0.00082-0.0036)                   | 0.44%<br>(0.32-0.6%)                 | 0.35%<br>(0.21-0.52%)               | 160<br>(96-240)     | 5500<br>(3900-7700)       |



| Location | Year | Sex    | Age      | Prevalence of current drinkers | Prevalence of abstainers | Population average of standard drinks daily | Percent of total attributable deaths | Percent of total attributable DALYs | Attributable deaths | Attributable DALYs        |
|----------|------|--------|----------|--------------------------------|--------------------------|---------------------------------------------|--------------------------------------|-------------------------------------|---------------------|---------------------------|
| Pakistan | 2000 | Male   | 70 to 74 | 1.1%<br>(0.58-1.8%)            | 99%<br>(98-99%)          | 0.0016<br>(0.00057-0.0032)                  | 0.33%<br>(0.23-0.47%)                | 0.27%<br>(0.17-0.43%)               | 130<br>(83-210)     | 3500<br>(2500-5000)       |
| Pakistan | 2000 | Male   | 75 to 79 | 1%<br>(0.47-1.8%)              | 99%<br>(98-100%)         | 0.0013<br>(0.00042-0.0029)                  | 0.27%<br>(0.18-0.37%)                | 0.24%<br>(0.14-0.35%)               | 110<br>(66-170)     | 2100<br>(1400-2900)       |
| Pakistan | 2000 | Male   | 80 to 84 | 0.94%<br>(0.45-1.6%)           | 99%<br>(98-100%)         | 0.0012<br>(0.0004-0.0024)                   | 0.19%<br>(0.13-0.26%)                | 0.16%<br>(0.099-0.25%)              | 58<br>(35-89)       | 810<br>(560-1100)         |
| Pakistan | 2000 | Male   | 85 to 89 | 0.95%<br>(0.45-1.7%)           | 99%<br>(98-100%)         | 0.0011<br>(0.00039-0.0024)                  | 0.16%<br>(0.11-0.21%)                | 0.13%<br>(0.083-0.19%)              | 29<br>(18-43)       | 300<br>(210-400)          |
| Pakistan | 2000 | Male   | 90 to 94 | 1.1%<br>(0.52-1.9%)            | 99%<br>(98-99%)          | 0.0012<br>(0.00038-0.0028)                  | 0.15%<br>(0.11-0.2%)                 | 0.11%<br>(0.066-0.17%)              | 10<br>(6-16)        | 82<br>(58-110)            |
| Pakistan | 2000 | Male   | 95 plus  | 1.3%<br>(0.56-2.7%)            | 99%<br>(97-99%)          | 0.0015<br>(0.0003-0.0039)                   | 0.18%<br>(0.13-0.25%)                | 0.11%<br>(0.06-0.18%)               | 2.7<br>(1.5-4.5)    | 18<br>(12-24)             |
| Pakistan | 2005 | Female | All Ages | 1.4%<br>(1.1-1.8%)             | 99%<br>(98-99%)          | 0.032<br>(0.028-0.035)                      | 0.36%<br>(0.29-0.43%)                | 0.36%<br>(0.25-0.49%)               | 2100<br>(1500-2900) | 130000<br>(100000-160000) |
| Pakistan | 2005 | Female | 15 to 19 | 1%<br>(0.55-1.7%)              | 99%<br>(98-99%)          | 0.013<br>(0.0056-0.025)                     | 0.33%<br>(0.2-0.49%)                 | 0.07%<br>(0.026-0.14%)              | 11<br>(4.1-24)      | 6200<br>(3600-9900)       |
| Pakistan | 2005 | Female | 20 to 24 | 1.2%<br>(0.57-2%)              | 99%<br>(98-99%)          | 0.029<br>(0.013-0.051)                      | 0.76%<br>(0.51-1.1%)                 | 0.26%<br>(0.14-0.44%)               | 45<br>(24-73)       | 14000<br>(8900-20000)     |
| Pakistan | 2005 | Female | 25 to 29 | 1.4%<br>(0.69-2.4%)            | 99%<br>(98-99%)          | 0.048<br>(0.023-0.083)                      | 0.91%<br>(0.66-1.2%)                 | 0.43%<br>(0.25-0.69%)               | 64<br>(37-100)      | 14000<br>(9300-19000)     |
| Pakistan | 2005 | Female | 30 to 34 | 1.6%<br>(0.82-2.9%)            | 98%<br>(97-99%)          | 0.064<br>(0.034-0.1)                        | 1%<br>(0.77-1.3%)                    | 0.77%<br>(0.51-1.1%)                | 110<br>(69-160)     | 14000<br>(9700-18000)     |
| Pakistan | 2005 | Female | 35 to 39 | 1.9%<br>(0.96-3%)              | 98%<br>(97-99%)          | 0.073<br>(0.037-0.11)                       | 1.1%<br>(0.78-1.3%)                  | 0.97%<br>(0.65-1.4%)                | 150<br>(95-210)     | 14000<br>(9700-18000)     |
| Pakistan | 2005 | Female | 40 to 44 | 2%<br>(1.1-3.3%)               | 98%<br>(97-99%)          | 0.073<br>(0.037-0.12)                       | 0.96%<br>(0.71-1.3%)                 | 0.98%<br>(0.65-1.4%)                | 160<br>(110-240)    | 12000<br>(8800-17000)     |
| Pakistan | 2005 | Female | 45 to 49 | 2.1%<br>(1.1-3.2%)             | 98%<br>(97-99%)          | 0.068<br>(0.03-0.12)                        | 0.95%<br>(0.68-1.3%)                 | 1%<br>(0.68-1.5%)                   | 190<br>(120-290)    | 12000<br>(8200-16000)     |
| Pakistan | 2005 | Female | 50 to 54 | 2.2%<br>(1.2-3.5%)             | 98%<br>(97-99%)          | 0.071<br>(0.034-0.12)                       | 0.92%<br>(0.65-1.3%)                 | 1%<br>(0.65-1.6%)                   | 220<br>(130-330)    | 10000<br>(6800-15000)     |
| Pakistan | 2005 | Female | 55 to 59 | 2.3%<br>(1.3-3.8%)             | 98%<br>(96-99%)          | 0.081<br>(0.04-0.15)                        | 0.84%<br>(0.55-1.3%)                 | 0.95%<br>(0.54-1.5%)                | 260<br>(140-420)    | 10000<br>(6400-15000)     |
| Pakistan | 2005 | Female | 60 to 64 | 2.4%<br>(1.3-4.2%)             | 98%<br>(96-99%)          | 0.083<br>(0.038-0.16)                       | 0.67%<br>(0.38-1.1%)                 | 0.74%<br>(0.36-1.3%)                | 270<br>(130-470)    | 8600<br>(4800-14000)      |
| Pakistan | 2005 | Female | 65 to 69 | 2.6%<br>(1.4-4.2%)             | 97%<br>(96-99%)          | 0.075<br>(0.037-0.13)                       | 0.53%<br>(0.28-0.87%)                | 0.6%<br>(0.28-1%)                   | 260<br>(120-450)    | 6500<br>(3500-11000)      |
| Pakistan | 2005 | Female | 70 to 74 | 2.8%<br>(1.7-4.5%)             | 97%<br>(95-98%)          | 0.065<br>(0.031-0.12)                       | 0.39%<br>(0.17-0.7%)                 | 0.44%<br>(0.17-0.82%)               | 210<br>(81-400)     | 4200<br>(1800-7400)       |
| Pakistan | 2005 | Female | 75 to 79 | 3%<br>(1.6-5%)                 | 97%<br>(95-98%)          | 0.058<br>(0.025-0.11)                       | 0.23%<br>(0.04-0.47%)                | 0.25%<br>(0.019-0.54%)              | 110<br>(9-250)      | 1800<br>(310-3700)        |
| Pakistan | 2005 | Female | 80 to 84 | 3.2%<br>(1.6-5.3%)             | 97%<br>(95-98%)          | 0.057<br>(0.024-0.11)                       | 0.14%<br>(-0.041-0.34%)              | 0.14%<br>(-0.08-0.38%)              | 49<br>(-28-130)     | 590<br>(-180-1500)        |
| Pakistan | 2005 | Female | 85 to 89 | 3.5%<br>(1.9-6.1%)             | 96%<br>(94-98%)          | 0.057<br>(0.026-0.11)                       | 0.065%<br>(-0.11-0.24%)              | 0.049%<br>(-0.16-0.25%)             | 10<br>(-33-53)      | 120<br>(-190-420)         |

| Location | Year | Sex    | Age      | Prevalence of current drinkers | Prevalence of abstainers | Population average of standard drinks daily | Percent of total attributable deaths | Percent of total attributable DALYs | Attributable deaths | Attributable DALYs        |
|----------|------|--------|----------|--------------------------------|--------------------------|---------------------------------------------|--------------------------------------|-------------------------------------|---------------------|---------------------------|
| Pakistan | 2005 | Female | 90 to 94 | 4%<br>(2.1-7%)                 | 96%<br>(93-98%)          | 0.058<br>(0.024-0.12)                       | 0.0024%<br>(-0.18-0.16%)             | -0.037%<br>(-0.24-0.15%)            | -3<br>(-20-12)      | 1.3<br>(-83-77)           |
| Pakistan | 2005 | Female | 95 plus  | 4.9%<br>(2.2-9.3%)             | 95%<br>(91-98%)          | 0.062<br>(0.021-0.14)                       | -0.037%<br>(-0.26-0.15%)             | -0.1%<br>(-0.37-0.11%)              | -2.4<br>(-8.5-2.6)  | -3.3<br>(-23-13)          |
| Pakistan | 2005 | Male   | All Ages | 0.74%<br>(0.58-0.95%)          | 99%<br>(99-99%)          | 0.00088<br>(0.00066-0.0011)                 | 0.57%<br>(0.43-0.73%)                | 0.35%<br>(0.23-0.49%)               | 2500<br>(1600-3500) | 230000<br>(170000-290000) |
| Pakistan | 2005 | Male   | 15 to 19 | 0.49%<br>(0.23-0.85%)          | 100%<br>(99-100%)        | 0.00048<br>(0.00015-0.001)                  | 0.59%<br>(0.38-0.88%)                | 0.14%<br>(0.066-0.26%)              | 27<br>(12-47)       | 12000<br>(6900-17000)     |
| Pakistan | 2005 | Male   | 20 to 24 | 0.71%<br>(0.31-1.3%)           | 99%<br>(99-100%)         | 0.00088<br>(0.00029-0.0018)                 | 1.4%<br>(0.93-2%)                    | 0.4%<br>(0.2-0.69%)                 | 83<br>(41-150)      | 27000<br>(17000-40000)    |
| Pakistan | 2005 | Male   | 25 to 29 | 0.94%<br>(0.45-1.6%)           | 99%<br>(98-100%)         | 0.0013<br>(0.00052-0.0025)                  | 1.8%<br>(1.3-2.5%)                   | 0.64%<br>(0.32-1.1%)                | 120<br>(61-220)     | 31000<br>(21000-43000)    |
| Pakistan | 2005 | Male   | 30 to 34 | 1.1%<br>(0.53-2%)              | 99%<br>(98-99%)          | 0.0016<br>(0.00073-0.0031)                  | 2.1%<br>(1.5-2.9%)                   | 1.1%<br>(0.56-1.8%)                 | 210<br>(110-360)    | 32000<br>(22000-46000)    |
| Pakistan | 2005 | Male   | 35 to 39 | 1.3%<br>(0.63-2.1%)            | 99%<br>(98-99%)          | 0.0019<br>(0.00082-0.0034)                  | 1.9%<br>(1.4-2.6%)                   | 1.2%<br>(0.55-2%)                   | 250<br>(110-430)    | 29000<br>(19000-41000)    |
| Pakistan | 2005 | Male   | 40 to 44 | 1.4%<br>(0.76-2.2%)            | 99%<br>(98-99%)          | 0.0021<br>(0.00085-0.0037)                  | 1.7%<br>(1.2-2.2%)                   | 1.1%<br>(0.6-1.9%)                  | 260<br>(130-430)    | 25000<br>(17000-34000)    |
| Pakistan | 2005 | Male   | 45 to 49 | 1.4%<br>(0.68-2.2%)            | 99%<br>(98-99%)          | 0.0021<br>(0.00086-0.004)                   | 1.4%<br>(0.99-2%)                    | 1.1%<br>(0.57-1.9%)                 | 280<br>(140-490)    | 21000<br>(14000-29000)    |
| Pakistan | 2005 | Male   | 50 to 54 | 1.4%<br>(0.73-2.3%)            | 99%<br>(98-99%)          | 0.0022<br>(0.00091-0.0042)                  | 1.1%<br>(0.77-1.5%)                  | 0.86%<br>(0.48-1.3%)                | 240<br>(130-380)    | 15000<br>(9800-20000)     |
| Pakistan | 2005 | Male   | 55 to 59 | 1.5%<br>(0.76-2.5%)            | 99%<br>(98-99%)          | 0.0023<br>(0.00096-0.0042)                  | 0.85%<br>(0.58-1.2%)                 | 0.66%<br>(0.36-1%)                  | 230<br>(120-370)    | 12000<br>(8100-17000)     |
| Pakistan | 2005 | Male   | 60 to 64 | 1.4%<br>(0.7-2.4%)             | 99%<br>(98-99%)          | 0.0021<br>(0.00082-0.0042)                  | 0.6%<br>(0.41-0.81%)                 | 0.45%<br>(0.24-0.71%)               | 210<br>(110-330)    | 9300<br>(6100-13000)      |
| Pakistan | 2005 | Male   | 65 to 69 | 1.2%<br>(0.64-2%)              | 99%<br>(98-99%)          | 0.0017<br>(0.00073-0.0031)                  | 0.45%<br>(0.32-0.6%)                 | 0.35%<br>(0.22-0.53%)               | 190<br>(110-290)    | 6500<br>(4600-8900)       |
| Pakistan | 2005 | Male   | 70 to 74 | 1.1%<br>(0.58-1.8%)            | 99%<br>(98-99%)          | 0.0013<br>(0.0005-0.0027)                   | 0.33%<br>(0.24-0.46%)                | 0.27%<br>(0.17-0.43%)               | 150<br>(99-240)     | 4100<br>(2900-5800)       |
| Pakistan | 2005 | Male   | 75 to 79 | 1%<br>(0.49-1.8%)              | 99%<br>(98-100%)         | 0.0011<br>(0.00037-0.0025)                  | 0.27%<br>(0.19-0.37%)                | 0.24%<br>(0.15-0.36%)               | 130<br>(79-190)     | 2400<br>(1700-3300)       |
| Pakistan | 2005 | Male   | 80 to 84 | 0.94%<br>(0.45-1.6%)           | 99%<br>(98-100%)         | 0.00099<br>(0.00034-0.002)                  | 0.19%<br>(0.13-0.27%)                | 0.17%<br>(0.1-0.26%)                | 70<br>(42-110)      | 970<br>(670-1300)         |
| Pakistan | 2005 | Male   | 85 to 89 | 0.95%<br>(0.43-1.8%)           | 99%<br>(98-100%)         | 0.00096<br>(0.00032-0.0021)                 | 0.16%<br>(0.12-0.22%)                | 0.14%<br>(0.086-0.2%)               | 36<br>(22-52)       | 370<br>(260-490)          |
| Pakistan | 2005 | Male   | 90 to 94 | 1.1%<br>(0.5-2%)               | 99%<br>(98-100%)         | 0.001<br>(0.00032-0.0024)                   | 0.16%<br>(0.11-0.21%)                | 0.12%<br>(0.073-0.18%)              | 13<br>(7.8-19)      | 100<br>(69-140)           |
| Pakistan | 2005 | Male   | 95 plus  | 1.4%<br>(0.56-2.8%)            | 99%<br>(97-99%)          | 0.0013<br>(0.00026-0.0034)                  | 0.19%<br>(0.13-0.26%)                | 0.12%<br>(0.067-0.2%)               | 3.4<br>(1.9-5.6)    | 21<br>(15-30)             |
| Pakistan | 2010 | Female | All Ages | 1.5%<br>(1.1-1.8%)             | 99%<br>(98-99%)          | 0.026<br>(0.019-0.034)                      | 0.35%<br>(0.28-0.43%)                | 0.29%<br>(0.19-0.42%)               | 1700<br>(1100-2500) | 130000<br>(95000-160000)  |
| Pakistan | 2010 | Female | 15 to 19 | 1%<br>(0.56-1.7%)              | 99%<br>(98-99%)          | 0.01<br>(0.0041-0.022)                      | 0.38%<br>(0.23-0.59%)                | 0.069%<br>(0.027-0.13%)             | 8.8<br>(3.4-17)     | 6500<br>(3700-10000)      |

| Location | Year | Sex    | Age      | Prevalence of current drinkers | Prevalence of abstainers | Population average of standard drinks daily | Percent of total attributable deaths | Percent of total attributable DALYs | Attributable deaths | Attributable DALYs       |
|----------|------|--------|----------|--------------------------------|--------------------------|---------------------------------------------|--------------------------------------|-------------------------------------|---------------------|--------------------------|
| Pakistan | 2010 | Female | 20 to 24 | 1.2%<br>(0.57-2%)              | 99%<br>(98-99%)          | 0.023<br>(0.0095-0.041)                     | 0.84%<br>(0.56-1.2%)                 | 0.25%<br>(0.14-0.41%)               | 38<br>(20-62)       | 15000<br>(9500-22000)    |
| Pakistan | 2010 | Female | 25 to 29 | 1.4%<br>(0.72-2.5%)            | 99%<br>(98-99%)          | 0.038<br>(0.017-0.068)                      | 0.97%<br>(0.69-1.3%)                 | 0.4%<br>(0.23-0.63%)                | 54<br>(31-89)       | 15000<br>(10000-21000)   |
| Pakistan | 2010 | Female | 30 to 34 | 1.7%<br>(0.83-3%)              | 98%<br>(97-99%)          | 0.05<br>(0.024-0.087)                       | 1%<br>(0.76-1.4%)                    | 0.71%<br>(0.45-1.1%)                | 90<br>(56-140)      | 14000<br>(9900-20000)    |
| Pakistan | 2010 | Female | 35 to 39 | 1.9%<br>(0.97-3.1%)            | 98%<br>(97-99%)          | 0.057<br>(0.028-0.096)                      | 1%<br>(0.76-1.3%)                    | 0.88%<br>(0.56-1.3%)                | 120<br>(74-180)     | 13000<br>(9400-18000)    |
| Pakistan | 2010 | Female | 40 to 44 | 2%<br>(1.2-3.3%)               | 98%<br>(97-99%)          | 0.057<br>(0.026-0.097)                      | 0.92%<br>(0.67-1.2%)                 | 0.88%<br>(0.57-1.3%)                | 140<br>(87-200)     | 12000<br>(8400-16000)    |
| Pakistan | 2010 | Female | 45 to 49 | 2.1%<br>(1.1-3.2%)             | 98%<br>(97-99%)          | 0.052<br>(0.022-0.096)                      | 0.86%<br>(0.63-1.2%)                 | 0.91%<br>(0.59-1.3%)                | 170<br>(110-260)    | 12000<br>(8100-16000)    |
| Pakistan | 2010 | Female | 50 to 54 | 2.2%<br>(1.2-3.5%)             | 98%<br>(96-99%)          | 0.055<br>(0.025-0.1)                        | 0.82%<br>(0.57-1.1%)                 | 0.9%<br>(0.54-1.4%)                 | 210<br>(120-330)    | 11000<br>(7200-15000)    |
| Pakistan | 2010 | Female | 55 to 59 | 2.3%<br>(1.3-3.7%)             | 98%<br>(96-99%)          | 0.063<br>(0.029-0.12)                       | 0.71%<br>(0.46-1%)                   | 0.77%<br>(0.44-1.2%)                | 200<br>(110-340)    | 8600<br>(5400-13000)     |
| Pakistan | 2010 | Female | 60 to 64 | 2.4%<br>(1.3-4.1%)             | 98%<br>(96-99%)          | 0.063<br>(0.028-0.12)                       | 0.54%<br>(0.31-0.89%)                | 0.57%<br>(0.27-1%)                  | 200<br>(89-360)     | 6800<br>(3800-11000)     |
| Pakistan | 2010 | Female | 65 to 69 | 2.7%<br>(1.5-4.1%)             | 97%<br>(96-99%)          | 0.058<br>(0.026-0.1)                        | 0.41%<br>(0.21-0.68%)                | 0.45%<br>(0.19-0.79%)               | 210<br>(84-370)     | 5500<br>(2600-9200)      |
| Pakistan | 2010 | Female | 70 to 74 | 2.8%<br>(1.7-4.5%)             | 97%<br>(96-98%)          | 0.05<br>(0.022-0.091)                       | 0.3%<br>(0.11-0.56%)                 | 0.34%<br>(0.11-0.67%)               | 170<br>(51-350)     | 3500<br>(1300-6700)      |
| Pakistan | 2010 | Female | 75 to 79 | 3%<br>(1.6-4.9%)               | 97%<br>(95-98%)          | 0.044<br>(0.018-0.088)                      | 0.17%<br>(-0.0052-0.36%)             | 0.18%<br>(-0.036-0.42%)             | 86<br>(-18-210)     | 1400<br>(-48-3100)       |
| Pakistan | 2010 | Female | 80 to 84 | 3.2%<br>(1.7-5.4%)             | 97%<br>(95-98%)          | 0.043<br>(0.017-0.083)                      | 0.076%<br>(-0.11-0.24%)              | 0.069%<br>(-0.16-0.27%)             | 27<br>(-61-100)     | 370<br>(-530-1100)       |
| Pakistan | 2010 | Female | 85 to 89 | 3.5%<br>(1.8-6.1%)             | 97%<br>(94-98%)          | 0.044<br>(0.018-0.091)                      | 0.018%<br>(-0.15-0.16%)              | -0.0053%<br>(-0.21-0.16%)           | -1.3<br>(-51-40)    | 39<br>(-320-340)         |
| Pakistan | 2010 | Female | 90 to 94 | 4%<br>(2.1-6.9%)               | 96%<br>(93-98%)          | 0.045<br>(0.018-0.095)                      | -0.031%<br>(-0.22-0.11%)             | -0.076%<br>(-0.3-0.095%)            | -7.1<br>(-28-8.7)   | -17<br>(-120-64)         |
| Pakistan | 2010 | Female | 95 plus  | 4.9%<br>(2.2-9.4%)             | 95%<br>(91-98%)          | 0.048<br>(0.016-0.11)                       | -0.057%<br>(-0.29-0.11%)             | -0.13%<br>(-0.41-0.067%)            | -3.3<br>(-10-1.7)   | -5.6<br>(-28-11)         |
| Pakistan | 2010 | Male   | All Ages | 0.83%<br>(0.65-1.1%)           | 99%<br>(99-99%)          | 0.00075<br>(0.0005-0.0011)                  | 0.67%<br>(0.5-0.86%)                 | 0.4%<br>(0.26-0.55%)                | 2800<br>(1800-4000) | 26000<br>(190000-340000) |
| Pakistan | 2010 | Male   | 15 to 19 | 0.52%<br>(0.23-0.91%)          | 99%<br>(99-100%)         | 0.00039<br>(0.00011-0.00089)                | 0.74%<br>(0.49-1.1%)                 | 0.2%<br>(0.093-0.35%)               | 28<br>(13-48)       | 12000<br>(7700-18000)    |
| Pakistan | 2010 | Male   | 20 to 24 | 0.78%<br>(0.31-1.4%)           | 99%<br>(99-100%)         | 0.00073<br>(0.00022-0.0016)                 | 1.7%<br>(1.1-2.3%)                   | 0.5%<br>(0.24-0.89%)                | 95<br>(45-170)      | 32000<br>(20000-46000)   |
| Pakistan | 2010 | Male   | 25 to 29 | 1.1%<br>(0.5-1.9%)             | 99%<br>(98-99%)          | 0.0011<br>(0.00042-0.0022)                  | 2.1%<br>(1.5-2.9%)                   | 0.77%<br>(0.39-1.3%)                | 140<br>(67-240)     | 36000<br>(24000-51000)   |
| Pakistan | 2010 | Male   | 30 to 34 | 1.3%<br>(0.64-2.4%)            | 99%<br>(98-99%)          | 0.0015<br>(0.00063-0.0028)                  | 2.4%<br>(1.7-3.3%)                   | 1.3%<br>(0.7-2.3%)                  | 240<br>(120-430)    | 38000<br>(26000-54000)   |

| Location | Year | Sex    | Age      | Prevalence of current drinkers | Prevalence of abstainers | Population average of standard drinks daily | Percent of total attributable deaths | Percent of total attributable DALYs | Attributable deaths | Attributable DALYs        |
|----------|------|--------|----------|--------------------------------|--------------------------|---------------------------------------------|--------------------------------------|-------------------------------------|---------------------|---------------------------|
| Pakistan | 2010 | Male   | 35 to 39 | 1.6%<br>(0.79-2.5%)            | 98%<br>(98-99%)          | 0.0017<br>(0.00068-0.0032)                  | 2.2%<br>(1.5-2.9%)                   | 1.4%<br>(0.64-2.4%)                 | 270<br>(120-480)    | 33000<br>(22000-46000)    |
| Pakistan | 2010 | Male   | 40 to 44 | 1.6%<br>(0.87-2.6%)            | 98%<br>(97-99%)          | 0.0018<br>(0.00068-0.0033)                  | 1.8%<br>(1.3-2.5%)                   | 1.3%<br>(0.69-2.1%)                 | 290<br>(150-480)    | 28000<br>(19000-39000)    |
| Pakistan | 2010 | Male   | 45 to 49 | 1.5%<br>(0.71-2.4%)            | 99%<br>(98-99%)          | 0.0017<br>(0.00064-0.0035)                  | 1.6%<br>(1.1-2.2%)                   | 1.2%<br>(0.62-2.1%)                 | 330<br>(160-580)    | 25000<br>(17000-35000)    |
| Pakistan | 2010 | Male   | 50 to 54 | 1.4%<br>(0.75-2.4%)            | 99%<br>(98-99%)          | 0.0017<br>(0.00066-0.0033)                  | 1.2%<br>(0.83-1.7%)                  | 0.94%<br>(0.53-1.5%)                | 290<br>(160-490)    | 19000<br>(12000-27000)    |
| Pakistan | 2010 | Male   | 55 to 59 | 1.5%<br>(0.76-2.4%)            | 99%<br>(98-99%)          | 0.0017<br>(0.00067-0.0033)                  | 0.9%<br>(0.63-1.2%)                  | 0.7%<br>(0.38-1.1%)                 | 230<br>(120-370)    | 12000<br>(8400-18000)     |
| Pakistan | 2010 | Male   | 60 to 64 | 1.4%<br>(0.69-2.4%)            | 99%<br>(98-99%)          | 0.0016<br>(0.00058-0.0032)                  | 0.64%<br>(0.44-0.88%)                | 0.48%<br>(0.25-0.75%)               | 210<br>(110-340)    | 9500<br>(6300-13000)      |
| Pakistan | 2010 | Male   | 65 to 69 | 1.2%<br>(0.62-2%)              | 99%<br>(98-99%)          | 0.0012<br>(0.00049-0.0024)                  | 0.48%<br>(0.34-0.64%)                | 0.37%<br>(0.23-0.57%)               | 210<br>(120-310)    | 7300<br>(5100-10000)      |
| Pakistan | 2010 | Male   | 70 to 74 | 1.1%<br>(0.59-1.8%)            | 99%<br>(98-99%)          | 0.001<br>(0.00036-0.0021)                   | 0.35%<br>(0.25-0.48%)                | 0.29%<br>(0.19-0.44%)               | 170<br>(110-260)    | 4600<br>(3200-6300)       |
| Pakistan | 2010 | Male   | 75 to 79 | 1%<br>(0.49-1.8%)              | 99%<br>(98-100%)         | 0.00085<br>(0.00026-0.0018)                 | 0.28%<br>(0.2-0.38%)                 | 0.25%<br>(0.16-0.38%)               | 140<br>(88-210)     | 2700<br>(1800-3600)       |
| Pakistan | 2010 | Male   | 80 to 84 | 0.94%<br>(0.45-1.6%)           | 99%<br>(98-100%)         | 0.00074<br>(0.00023-0.0016)                 | 0.2%<br>(0.14-0.28%)                 | 0.18%<br>(0.11-0.27%)               | 79<br>(48-120)      | 1100<br>(780-1500)        |
| Pakistan | 2010 | Male   | 85 to 89 | 0.95%<br>(0.45-1.7%)           | 99%<br>(98-100%)         | 0.00071<br>(0.00024-0.0016)                 | 0.17%<br>(0.12-0.23%)                | 0.15%<br>(0.093-0.21%)              | 42<br>(26-61)       | 430<br>(300-570)          |
| Pakistan | 2010 | Male   | 90 to 94 | 1.1%<br>(0.53-2%)              | 99%<br>(98-99%)          | 0.00078<br>(0.00024-0.0018)                 | 0.16%<br>(0.12-0.22%)                | 0.12%<br>(0.075-0.19%)              | 15<br>(9.2-24)      | 120<br>(82-160)           |
| Pakistan | 2010 | Male   | 95 plus  | 1.4%<br>(0.56-2.7%)            | 99%<br>(97-99%)          | 0.00094<br>(0.0002-0.0026)                  | 0.2%<br>(0.14-0.27%)                 | 0.12%<br>(0.072-0.21%)              | 4<br>(2.3-6.7)      | 25<br>(17-35)             |
| Pakistan | 2016 | Female | All Ages | 1.5%<br>(1.2-1.9%)             | 99%<br>(98-99%)          | 0.026<br>(0.015-0.043)                      | 0.43%<br>(0.33-0.55%)                | 0.32%<br>(0.2-0.51%)                | 1900<br>(1100-3000) | 140000<br>(110000-190000) |
| Pakistan | 2016 | Female | 15 to 19 | 1%<br>(0.55-1.7%)              | 99%<br>(98-99%)          | 0.0099<br>(0.0035-0.024)                    | 0.43%<br>(0.26-0.65%)                | 0.076%<br>(0.033-0.15%)             | 8<br>(3.4-16)       | 6700<br>(3900-11000)      |
| Pakistan | 2016 | Female | 20 to 24 | 1.2%<br>(0.57-2%)              | 99%<br>(98-99%)          | 0.022<br>(0.0083-0.044)                     | 0.94%<br>(0.61-1.3%)                 | 0.26%<br>(0.15-0.43%)               | 35<br>(19-60)       | 16000<br>(9900-25000)     |
| Pakistan | 2016 | Female | 25 to 29 | 1.4%<br>(0.71-2.5%)            | 99%<br>(98-99%)          | 0.036<br>(0.015-0.072)                      | 1.1%<br>(0.76-1.5%)                  | 0.41%<br>(0.24-0.69%)               | 57<br>(32-97)       | 18000<br>(12000-25000)    |
| Pakistan | 2016 | Female | 30 to 34 | 1.7%<br>(0.81-2.9%)            | 98%<br>(97-99%)          | 0.048<br>(0.02-0.094)                       | 1.1%<br>(0.8-1.5%)                   | 0.73%<br>(0.45-1.1%)                | 96<br>(57-150)      | 17000<br>(11000-24000)    |
| Pakistan | 2016 | Female | 35 to 39 | 1.9%<br>(0.97-3%)              | 98%<br>(97-99%)          | 0.054<br>(0.022-0.1)                        | 1.1%<br>(0.77-1.4%)                  | 0.91%<br>(0.57-1.4%)                | 130<br>(79-210)     | 16000<br>(11000-21000)    |
| Pakistan | 2016 | Female | 40 to 44 | 2%<br>(1.2-3.3%)               | 98%<br>(97-99%)          | 0.054<br>(0.021-0.11)                       | 0.94%<br>(0.67-1.3%)                 | 0.9%<br>(0.57-1.4%)                 | 140<br>(86-230)     | 13000<br>(9000-19000)     |
| Pakistan | 2016 | Female | 45 to 49 | 2.1%<br>(1.1-3.2%)             | 98%<br>(97-99%)          | 0.05<br>(0.019-0.1)                         | 0.87%<br>(0.63-1.2%)                 | 0.9%<br>(0.56-1.4%)                 | 180<br>(110-280)    | 13000<br>(8800-18000)     |
| Pakistan | 2016 | Female | 50 to 54 | 2.2%<br>(1.2-3.5%)             | 98%<br>(97-99%)          | 0.052<br>(0.021-0.11)                       | 0.81%<br>(0.56-1.2%)                 | 0.88%<br>(0.54-1.4%)                | 230<br>(130-380)    | 12000<br>(8200-19000)     |

| Location | Year | Sex    | Age      | Prevalence of current drinkers | Prevalence of abstainers | Population average of standard drinks daily | Percent of total attributable deaths | Percent of total attributable DALYs | Attributable deaths | Attributable DALYs        |
|----------|------|--------|----------|--------------------------------|--------------------------|---------------------------------------------|--------------------------------------|-------------------------------------|---------------------|---------------------------|
| Pakistan | 2016 | Female | 55 to 59 | 2.3%<br>(1.3-3.8%)             | 98%<br>(96-99%)          | 0.06<br>(0.025-0.12)                        | 0.7%<br>(0.43-1.1%)                  | 0.76%<br>(0.4-1.3%)                 | 250<br>(120-450)    | 11000<br>(6300-18000)     |
| Pakistan | 2016 | Female | 60 to 64 | 2.5%<br>(1.3-4.1%)             | 98%<br>(96-99%)          | 0.061<br>(0.024-0.13)                       | 0.54%<br>(0.3-0.91%)                 | 0.57%<br>(0.25-1.1%)                | 210<br>(90-410)     | 7500<br>(3900-13000)      |
| Pakistan | 2016 | Female | 65 to 69 | 2.7%<br>(1.5-4.2%)             | 97%<br>(96-99%)          | 0.056<br>(0.022-0.11)                       | 0.41%<br>(0.2-0.71%)                 | 0.46%<br>(0.2-0.85%)                | 210<br>(87-400)     | 5600<br>(2700-9900)       |
| Pakistan | 2016 | Female | 70 to 74 | 2.8%<br>(1.6-4.6%)             | 97%<br>(95-98%)          | 0.048<br>(0.019-0.1)                        | 0.31%<br>(0.12-0.58%)                | 0.35%<br>(0.11-0.69%)               | 200<br>(64-400)     | 4000<br>(1500-7700)       |
| Pakistan | 2016 | Female | 75 to 79 | 2.9%<br>(1.6-4.9%)             | 97%<br>(95-98%)          | 0.043<br>(0.016-0.095)                      | 0.17%<br>(0.013-0.39%)               | 0.19%<br>(-0.013-0.47%)             | 100<br>(-7.2-250)   | 1700<br>(130-3700)        |
| Pakistan | 2016 | Female | 80 to 84 | 3.2%<br>(1.7-5.3%)             | 97%<br>(95-98%)          | 0.042<br>(0.016-0.091)                      | 0.083%<br>(-0.091-0.27%)             | 0.076%<br>(-0.13-0.3%)              | 33<br>(-62-130)     | 450<br>(-500-1500)        |
| Pakistan | 2016 | Female | 85 to 89 | 3.5%<br>(1.8-6%)               | 96%<br>(94-98%)          | 0.043<br>(0.015-0.096)                      | 0.024%<br>(-0.15-0.17%)              | -0.000092%<br>(-0.21-0.18%)         | 0.036<br>(-62-56)   | 62<br>(-390-470)          |
| Pakistan | 2016 | Female | 90 to 94 | 4.1%<br>(2.2-6.9%)             | 96%<br>(93-98%)          | 0.044<br>(0.016-0.11)                       | -0.025%<br>(-0.22-0.13%)             | -0.071%<br>(-0.3-0.1%)              | -8.7<br>(-37-13)    | -19<br>(-160-92)          |
| Pakistan | 2016 | Female | 95 plus  | 5%<br>(2.2-9.6%)               | 95%<br>(90-98%)          | 0.047<br>(0.015-0.11)                       | -0.05%<br>(-0.29-0.13%)              | -0.12%<br>(-0.43-0.088%)            | -4.1<br>(-14-2.9)   | -6.5<br>(-38-16)          |
| Pakistan | 2016 | Male   | All Ages | 0.86%<br>(0.66-1.1%)           | 99%<br>(99-99%)          | 0.00076<br>(0.0004-0.0013)                  | 0.84%<br>(0.63-1.1%)                 | 0.47%<br>(0.31-0.66%)               | 3400<br>(2100-4900) | 320000<br>(230000-410000) |
| Pakistan | 2016 | Male   | 15 to 19 | 0.52%<br>(0.24-0.94%)          | 99%<br>(99-100%)         | 0.00037<br>(0.000096-0.00098)               | 0.82%<br>(0.53-1.2%)                 | 0.22%<br>(0.1-0.39%)                | 28<br>(13-51)       | 13000<br>(8000-20000)     |
| Pakistan | 2016 | Male   | 20 to 24 | 0.79%<br>(0.31-1.4%)           | 99%<br>(99-100%)         | 0.00071<br>(0.00019-0.0017)                 | 1.9%<br>(1.2-2.7%)                   | 0.57%<br>(0.28-0.97%)               | 100<br>(50-180)     | 36000<br>(22000-52000)    |
| Pakistan | 2016 | Male   | 25 to 29 | 1.1%<br>(0.51-1.9%)            | 99%<br>(98-99%)          | 0.0011<br>(0.00035-0.0023)                  | 2.3%<br>(1.6-3.1%)                   | 0.85%<br>(0.42-1.5%)                | 170<br>(81-310)     | 45000<br>(30000-64000)    |
| Pakistan | 2016 | Male   | 30 to 34 | 1.4%<br>(0.65-2.5%)            | 99%<br>(98-99%)          | 0.0014<br>(0.00053-0.0031)                  | 2.6%<br>(1.9-3.6%)                   | 1.5%<br>(0.79-2.5%)                 | 300<br>(150-530)    | 47000<br>(32000-67000)    |
| Pakistan | 2016 | Male   | 35 to 39 | 1.6%<br>(0.78-2.5%)            | 98%<br>(97-99%)          | 0.0017<br>(0.0006-0.0035)                   | 2.3%<br>(1.7-3.2%)                   | 1.5%<br>(0.69-2.6%)                 | 340<br>(150-610)    | 41000<br>(27000-57000)    |
| Pakistan | 2016 | Male   | 40 to 44 | 1.6%<br>(0.89-2.5%)            | 98%<br>(97-99%)          | 0.0017<br>(0.00059-0.0036)                  | 2%<br>(1.4-2.7%)                     | 1.4%<br>(0.75-2.3%)                 | 340<br>(170-570)    | 33000<br>(22000-47000)    |
| Pakistan | 2016 | Male   | 45 to 49 | 1.5%<br>(0.7-2.3%)             | 99%<br>(98-99%)          | 0.0016<br>(0.00055-0.0037)                  | 1.7%<br>(1.2-2.4%)                   | 1.3%<br>(0.65-2.3%)                 | 390<br>(180-700)    | 29000<br>(20000-42000)    |
| Pakistan | 2016 | Male   | 50 to 54 | 1.4%<br>(0.75-2.4%)            | 99%<br>(98-99%)          | 0.0016<br>(0.00054-0.0036)                  | 1.3%<br>(0.89-1.8%)                  | 1%<br>(0.57-1.6%)                   | 370<br>(200-630)    | 23000<br>(15000-33000)    |
| Pakistan | 2016 | Male   | 55 to 59 | 1.5%<br>(0.75-2.4%)            | 99%<br>(98-99%)          | 0.0017<br>(0.00057-0.0036)                  | 0.97%<br>(0.66-1.3%)                 | 0.75%<br>(0.41-1.2%)                | 310<br>(170-530)    | 17000<br>(12000-24000)    |
| Pakistan | 2016 | Male   | 60 to 64 | 1.4%<br>(0.7-2.5%)             | 99%<br>(98-99%)          | 0.0015<br>(0.00051-0.0035)                  | 0.69%<br>(0.48-0.95%)                | 0.51%<br>(0.28-0.82%)               | 240<br>(120-380)    | 11000<br>(7200-16000)     |
| Pakistan | 2016 | Male   | 65 to 69 | 1.3%<br>(0.63-2.1%)            | 99%<br>(98-99%)          | 0.0012<br>(0.00042-0.0027)                  | 0.52%<br>(0.38-0.69%)                | 0.41%<br>(0.26-0.6%)                | 220<br>(130-340)    | 7900<br>(5600-11000)      |

| Location | Year | Sex    | Age      | Prevalence of current drinkers | Prevalence of abstainers | Population average of standard drinks daily | Percent of total attributable deaths | Percent of total attributable DALYs | Attributable deaths | Attributable DALYs     |
|----------|------|--------|----------|--------------------------------|--------------------------|---------------------------------------------|--------------------------------------|-------------------------------------|---------------------|------------------------|
| Pakistan | 2016 | Male   | 70 to 74 | 1.1%<br>(0.59-1.8%)            | 99%<br>(98-99%)          | 0.00097<br>(0.00033-0.0023)                 | 0.38%<br>(0.27-0.52%)                | 0.31%<br>(0.2-0.48%)                | 200<br>(120-320)    | 5500<br>(3800-7600)    |
| Pakistan | 2016 | Male   | 75 to 79 | 1%<br>(0.5-1.8%)               | 99%<br>(98-99%)          | 0.00082<br>(0.00024-0.002)                  | 0.31%<br>(0.22-0.41%)                | 0.27%<br>(0.17-0.4%)                | 170<br>(100-260)    | 3300<br>(2300-4500)    |
| Pakistan | 2016 | Male   | 80 to 84 | 0.95%<br>(0.46-1.6%)           | 99%<br>(98-100%)         | 0.00072<br>(0.00022-0.0017)                 | 0.22%<br>(0.15-0.3%)                 | 0.19%<br>(0.12-0.29%)               | 97<br>(62-150)      | 1400<br>(950-1900)     |
| Pakistan | 2016 | Male   | 85 to 89 | 0.96%<br>(0.46-1.8%)           | 99%<br>(98-100%)         | 0.0007<br>(0.00021-0.0017)                  | 0.18%<br>(0.13-0.24%)                | 0.16%<br>(0.1-0.22%)                | 51<br>(33-74)       | 520<br>(380-700)       |
| Pakistan | 2016 | Male   | 90 to 94 | 1.1%<br>(0.54-2%)              | 99%<br>(98-99%)          | 0.00076<br>(0.0002-0.0019)                  | 0.17%<br>(0.12-0.23%)                | 0.13%<br>(0.085-0.21%)              | 19<br>(12-30)       | 150<br>(100-200)       |
| Pakistan | 2016 | Male   | 95 plus  | 1.4%<br>(0.59-2.6%)            | 99%<br>(97-99%)          | 0.0009<br>(0.00018-0.0025)                  | 0.21%<br>(0.15-0.29%)                | 0.14%<br>(0.077-0.22%)              | 5.2<br>(2.9-8.5)    | 32<br>(22-44)          |
| Angola   | 1990 | Female | All Ages | 22%<br>(17-27%)                | 78%<br>(73-83%)          | 0.27<br>(0.21-0.34)                         | 0.54%<br>(0.19-0.96%)                | 0.8%<br>(0.066-1.6%)                | 660<br>(56-1400)    | 31000<br>(10000-56000) |
| Angola   | 1990 | Female | 15 to 19 | 22%<br>(13-35%)                | 78%<br>(65-87%)          | 0.24<br>(0.12-0.42)                         | 0.74%<br>(0.21-1.5%)                 | 0.68%<br>(-0.12-1.7%)               | 9.5<br>(-1.5-25)    | 1100<br>(310-2300)     |
| Angola   | 1990 | Female | 20 to 24 | 31%<br>(18-46%)                | 69%<br>(54-82%)          | 0.45<br>(0.23-0.75)                         | 1.7%<br>(0.61-3.3%)                  | 1.6%<br>(0.074-3.8%)                | 27<br>(1.2-62)      | 2700<br>(960-5300)     |
| Angola   | 1990 | Female | 25 to 29 | 35%<br>(20-51%)                | 65%<br>(49-80%)          | 0.6<br>(0.35-0.93)                          | 2.5%<br>(0.96-4.8%)                  | 2.8%<br>(0.58-5.9%)                 | 46<br>(9.3-100)     | 3700<br>(1400-7200)    |
| Angola   | 1990 | Female | 30 to 34 | 37%<br>(22-54%)                | 63%<br>(46-78%)          | 0.67<br>(0.39-1)                            | 3%<br>(1.1-5.4%)                     | 3.6%<br>(0.92-6.9%)                 | 61<br>(15-120)      | 4100<br>(1500-7400)    |
| Angola   | 1990 | Female | 35 to 39 | 39%<br>(24-56%)                | 61%<br>(44-76%)          | 0.66<br>(0.38-1.1)                          | 3.1%<br>(0.92-5.9%)                  | 3.7%<br>(0.81-7.6%)                 | 68<br>(14-140)      | 3900<br>(1100-7400)    |
| Angola   | 1990 | Female | 40 to 44 | 39%<br>(25-57%)                | 61%<br>(43-75%)          | 0.65<br>(0.33-1.1)                          | 3%<br>(0.88-5.9%)                    | 3.8%<br>(0.82-7.7%)                 | 63<br>(14-130)      | 3200<br>(910-6300)     |
| Angola   | 1990 | Female | 45 to 49 | 38%<br>(23-56%)                | 62%<br>(44-77%)          | 0.62<br>(0.31-1.1)                          | 2.9%<br>(0.71-6.1%)                  | 3.7%<br>(0.69-7.8%)                 | 70<br>(13-150)      | 3000<br>(690-6400)     |
| Angola   | 1990 | Female | 50 to 54 | 35%<br>(21-53%)                | 65%<br>(47-79%)          | 0.56<br>(0.29-0.96)                         | 2.9%<br>(0.44-6%)                    | 3.5%<br>(0.37-7.8%)                 | 83<br>(8.5-190)     | 3100<br>(460-6900)     |
| Angola   | 1990 | Female | 55 to 59 | 33%<br>(20-49%)                | 67%<br>(51-80%)          | 0.51<br>(0.25-0.91)                         | 2.5%<br>(0.25-5.7%)                  | 3%<br>(0.21-6.8%)                   | 82<br>(5.7-200)     | 2600<br>(270-6300)     |
| Angola   | 1990 | Female | 60 to 64 | 32%<br>(20-49%)                | 68%<br>(51-80%)          | 0.49<br>(0.24-0.89)                         | 1.8%<br>(-0.085-4.7%)                | 2.1%<br>(-0.14-5.5%)                | 68<br>(-4.5-180)    | 1800<br>(-93-4800)     |
| Angola   | 1990 | Female | 65 to 69 | 34%<br>(22-50%)                | 66%<br>(50-78%)          | 0.48<br>(0.25-0.81)                         | 1.2%<br>(-0.5-3.5%)                  | 1.4%<br>(-0.56-4.1%)                | 53<br>(-22-150)     | 1200<br>(-530-3300)    |
| Angola   | 1990 | Female | 70 to 74 | 34%<br>(22-49%)                | 66%<br>(51-78%)          | 0.43<br>(0.21-0.78)                         | 0.62%<br>(-0.96-2.6%)                | 0.73%<br>(-1.1-3.1%)                | 27<br>(-43-120)     | 470<br>(-760-2000)     |
| Angola   | 1990 | Female | 75 to 79 | 31%<br>(19-46%)                | 69%<br>(54-81%)          | 0.35<br>(0.16-0.64)                         | 0.19%<br>(-1-1.8%)                   | 0.23%<br>(-1.2-2%)                  | 6.8<br>(-37-59)     | 90<br>(-510-810)       |
| Angola   | 1990 | Female | 80 to 84 | 28%<br>(17-43%)                | 72%<br>(57-83%)          | 0.29<br>(0.13-0.52)                         | 0.029%<br>(-0.94-1.3%)               | 0.04%<br>(-1.1-1.5%)                | 0.7<br>(-20-25)     | 6.3<br>(-210-250)      |
| Angola   | 1990 | Female | 85 to 89 | 27%<br>(16-40%)                | 73%<br>(60-84%)          | 0.26<br>(0.12-0.47)                         | -0.044%<br>(-0.9-0.89%)              | -0.05%<br>(-1-1.1%)                 | -0.46<br>(-9.6-9.7) | -3.3<br>(-70-66)       |

| Location | Year | Sex    | Age      | Prevalence of current drinkers | Prevalence of abstainers | Population average of standard drinks daily | Percent of total attributable deaths | Percent of total attributable DALYs | Attributable deaths    | Attributable DALYs      |
|----------|------|--------|----------|--------------------------------|--------------------------|---------------------------------------------|--------------------------------------|-------------------------------------|------------------------|-------------------------|
| Angola   | 1990 | Female | 90 to 94 | 28%<br>(18-42%)                | 72%<br>(58-82%)          | 0.25<br>(0.12-0.47)                         | -0.053%<br>(-0.8-0.83%)              | -0.072%<br>(-0.98-0.96%)            | -0.22<br>(-3-2.9)      | -0.94<br>(-15-14)       |
| Angola   | 1990 | Female | 95 plus  | 32%<br>(18-49%)                | 68%<br>(51-82%)          | 0.25<br>(0.1-0.51)                          | 0.034%<br>(-0.69-0.86%)              | 0.0049%<br>(-0.86-0.98%)            | 0.0043<br>(-0.73-0.85) | 0.12<br>(-2.3-2.9)      |
| Angola   | 1990 | Male   | All Ages | 28%<br>(23-36%)                | 72%<br>(64-77%)          | 0.34<br>(0.27-0.42)                         | 1.1%<br>(0.45-1.7%)                  | 1.6%<br>(0.46-2.8%)                 | 1500<br>(420-2600)     | 69000<br>(29000-110000) |
| Angola   | 1990 | Male   | 15 to 19 | 24%<br>(14-39%)                | 76%<br>(61-86%)          | 0.26<br>(0.12-0.47)                         | 1.3%<br>(0.44-2.5%)                  | 1.2%<br>(0.13-2.8%)                 | 23<br>(2.3-55)         | 2400<br>(780-4400)      |
| Angola   | 1990 | Male   | 20 to 24 | 37%<br>(22-53%)                | 63%<br>(47-78%)          | 0.53<br>(0.29-0.88)                         | 3.2%<br>(1.1-5.8%)                   | 3.1%<br>(0.49-6.3%)                 | 76<br>(13-160)         | 6600<br>(2300-12000)    |
| Angola   | 1990 | Male   | 25 to 29 | 44%<br>(27-61%)                | 56%<br>(39-73%)          | 0.76<br>(0.45-1.1)                          | 4.9%<br>(1.7-8.6%)                   | 5%<br>(1.1-9.8%)                    | 120<br>(28-230)        | 8800<br>(3000-15000)    |
| Angola   | 1990 | Male   | 30 to 34 | 46%<br>(28-65%)                | 54%<br>(35-72%)          | 0.85<br>(0.51-1.3)                          | 5.7%<br>(2.1-9.6%)                   | 6.2%<br>(1.7-11%)                   | 140<br>(39-260)        | 9300<br>(3400-16000)    |
| Angola   | 1990 | Male   | 35 to 39 | 46%<br>(29-64%)                | 54%<br>(36-71%)          | 0.84<br>(0.49-1.3)                          | 5.8%<br>(2.1-10%)                    | 6.5%<br>(1.8-12%)                   | 160<br>(43-290)        | 8900<br>(3000-15000)    |
| Angola   | 1990 | Male   | 40 to 44 | 48%<br>(32-67%)                | 52%<br>(33-68%)          | 0.86<br>(0.45-1.4)                          | 6%<br>(2-11%)                        | 6.8%<br>(1.9-13%)                   | 160<br>(41-300)        | 7700<br>(2400-14000)    |
| Angola   | 1990 | Male   | 45 to 49 | 51%<br>(33-69%)                | 49%<br>(31-67%)          | 0.91<br>(0.46-1.5)                          | 6%<br>(1.7-11%)                      | 6.9%<br>(1.7-13%)                   | 180<br>(44-350)        | 7600<br>(2200-14000)    |
| Angola   | 1990 | Male   | 50 to 54 | 51%<br>(33-70%)                | 49%<br>(30-67%)          | 0.88<br>(0.47-1.5)                          | 5.5%<br>(1.1-10%)                    | 6.3%<br>(1-12%)                     | 180<br>(27-360)        | 6700<br>(1400-13000)    |
| Angola   | 1990 | Male   | 55 to 59 | 49%<br>(32-68%)                | 51%<br>(32-68%)          | 0.78<br>(0.41-1.3)                          | 4.3%<br>(0.71-8.5%)                  | 4.9%<br>(0.62-10%)                  | 150<br>(19-320)        | 4900<br>(790-10000)     |
| Angola   | 1990 | Male   | 60 to 64 | 48%<br>(30-68%)                | 52%<br>(32-70%)          | 0.68<br>(0.34-1.2)                          | 3.2%<br>(0.44-6.7%)                  | 3.6%<br>(0.33-7.7%)                 | 120<br>(13-260)        | 3300<br>(470-7000)      |
| Angola   | 1990 | Male   | 65 to 69 | 48%<br>(31-65%)                | 52%<br>(35-69%)          | 0.61<br>(0.32-1)                            | 2.2%<br>(-0.17-5.2%)                 | 2.5%<br>(-0.35-6%)                  | 82<br>(-12-200)        | 1900<br>(-140-4500)     |
| Angola   | 1990 | Male   | 70 to 74 | 49%<br>(32-66%)                | 51%<br>(34-68%)          | 0.53<br>(0.28-0.93)                         | 1.4%<br>(-0.7-3.7%)                  | 1.6%<br>(-0.87-4.2%)                | 48<br>(-27-130)        | 880<br>(-440-2400)      |
| Angola   | 1990 | Male   | 75 to 79 | 47%<br>(31-65%)                | 53%<br>(35-69%)          | 0.44<br>(0.2-0.8)                           | 0.92%<br>(-0.73-2.9%)                | 1%<br>(-0.95-3.4%)                  | 23<br>(-22-78)         | 330<br>(-280-1100)      |
| Angola   | 1990 | Male   | 80 to 84 | 42%<br>(25-60%)                | 58%<br>(40-75%)          | 0.33<br>(0.16-0.6)                          | 0.56%<br>(-0.69-1.9%)                | 0.59%<br>(-0.88-2.2%)               | 6.9<br>(-11-26)        | 77<br>(-100-270)        |
| Angola   | 1990 | Male   | 85 to 89 | 36%<br>(22-53%)                | 64%<br>(47-78%)          | 0.25<br>(0.12-0.46)                         | 0.44%<br>(-0.54-1.5%)                | 0.44%<br>(-0.72-1.7%)               | 2.4<br>(-4-9)          | 20<br>(-26-67)          |
| Angola   | 1990 | Male   | 90 to 94 | 36%<br>(22-53%)                | 64%<br>(47-78%)          | 0.22<br>(0.099-0.41)                        | 0.26%<br>(-0.47-1%)                  | 0.21%<br>(-0.67-1.1%)               | 0.37<br>(-1.2-2)       | 2.7<br>(-5-10)          |
| Angola   | 1990 | Male   | 95 plus  | 39%<br>(21-59%)                | 61%<br>(41-79%)          | 0.2<br>(0.079-0.41)                         | 0.33%<br>(-0.61-1.4%)                | 0.26%<br>(-0.88-1.5%)               | 0.11<br>(-0.39-0.66)   | 0.58<br>(-1-2.4)        |
| Angola   | 1995 | Female | All Ages | 22%<br>(17-27%)                | 78%<br>(73-83%)          | 0.29<br>(0.22-0.36)                         | 0.65%<br>(0.24-1.1%)                 | 0.96%<br>(0.16-1.9%)                | 860<br>(140-1700)      | 40000<br>(14000-67000)  |
| Angola   | 1995 | Female | 15 to 19 | 22%<br>(14-34%)                | 78%<br>(66-86%)          | 0.25<br>(0.12-0.44)                         | 0.8%<br>(0.25-1.5%)                  | 0.77%<br>(-0.061-1.9%)              | 12<br>(-0.98-29)       | 1400<br>(430-2700)      |

| Location | Year | Sex    | Age      | Prevalence of current drinkers | Prevalence of abstainers | Population average of standard drinks daily | Percent of total attributable deaths | Percent of total attributable DALYs | Attributable deaths | Attributable DALYs      |
|----------|------|--------|----------|--------------------------------|--------------------------|---------------------------------------------|--------------------------------------|-------------------------------------|---------------------|-------------------------|
| Angola   | 1995 | Female | 20 to 24 | 31%<br>(19-46%)                | 69%<br>(54-81%)          | 0.48<br>(0.25-0.77)                         | 1.8%<br>(0.74-3.3%)                  | 1.8%<br>(0.22-3.9%)                 | 34<br>(4.4-76)      | 3300<br>(1300-6200)     |
| Angola   | 1995 | Female | 25 to 29 | 35%<br>(21-52%)                | 65%<br>(48-79%)          | 0.64<br>(0.36-0.98)                         | 2.6%<br>(1.1-4.6%)                   | 2.8%<br>(0.78-5.6%)                 | 56<br>(15-120)      | 4400<br>(1800-8200)     |
| Angola   | 1995 | Female | 30 to 34 | 37%<br>(22-55%)                | 63%<br>(45-78%)          | 0.71<br>(0.4-1.1)                           | 3.1%<br>(1.3-5.4%)                   | 3.6%<br>(1.1-6.9%)                  | 75<br>(23-140)      | 5000<br>(2100-8900)     |
| Angola   | 1995 | Female | 35 to 39 | 39%<br>(24-56%)                | 61%<br>(44-76%)          | 0.71<br>(0.39-1.2)                          | 3.2%<br>(1.1-6%)                     | 3.9%<br>(0.99-7.7%)                 | 88<br>(21-180)      | 5000<br>(1700-9600)     |
| Angola   | 1995 | Female | 40 to 44 | 39%<br>(25-57%)                | 61%<br>(43-75%)          | 0.7<br>(0.36-1.1)                           | 3.3%<br>(1-6.3%)                     | 4%<br>(0.98-8%)                     | 96<br>(24-200)      | 4800<br>(1500-9200)     |
| Angola   | 1995 | Female | 45 to 49 | 38%<br>(23-56%)                | 62%<br>(44-77%)          | 0.66<br>(0.34-1.1)                          | 3.2%<br>(0.89-6.5%)                  | 4%<br>(0.93-8.2%)                   | 91<br>(20-200)      | 3900<br>(1100-8100)     |
| Angola   | 1995 | Female | 50 to 54 | 36%<br>(21-54%)                | 64%<br>(46-79%)          | 0.6<br>(0.3-1)                              | 3.1%<br>(0.65-6.5%)                  | 3.8%<br>(0.68-8%)                   | 110<br>(17-240)     | 4000<br>(710-8700)      |
| Angola   | 1995 | Female | 55 to 59 | 33%<br>(20-50%)                | 67%<br>(50-80%)          | 0.54<br>(0.27-0.96)                         | 2.7%<br>(0.31-5.9%)                  | 3.2%<br>(0.31-7.2%)                 | 110<br>(9.5-250)    | 3400<br>(390-7700)      |
| Angola   | 1995 | Female | 60 to 64 | 32%<br>(20-49%)                | 68%<br>(51-80%)          | 0.52<br>(0.24-0.93)                         | 1.9%<br>(-0.014-4.9%)                | 2.2%<br>(-0.041-5.8%)               | 86<br>(-1.8-230)    | 2300<br>(-16-6100)      |
| Angola   | 1995 | Female | 65 to 69 | 34%<br>(22-49%)                | 66%<br>(51-78%)          | 0.51<br>(0.25-0.9)                          | 1.3%<br>(-0.46-3.9%)                 | 1.5%<br>(-0.51-4.6%)                | 67<br>(-25-190)     | 1500<br>(-520-4300)     |
| Angola   | 1995 | Female | 70 to 74 | 34%<br>(22-50%)                | 66%<br>(50-78%)          | 0.46<br>(0.22-0.84)                         | 0.68%<br>(-0.97-2.9%)                | 0.8%<br>(-1.1-3.4%)                 | 35<br>(-49-140)     | 620<br>(-880-2500)      |
| Angola   | 1995 | Female | 75 to 79 | 31%<br>(20-47%)                | 69%<br>(53-80%)          | 0.37<br>(0.17-0.69)                         | 0.21%<br>(-1.1-1.7%)                 | 0.25%<br>(-1.2-2%)                  | 8.9<br>(-43-72)     | 120<br>(-590-990)       |
| Angola   | 1995 | Female | 80 to 84 | 28%<br>(17-44%)                | 72%<br>(56-83%)          | 0.31<br>(0.14-0.56)                         | 0.049%<br>(-0.94-1.3%)               | 0.062%<br>(-1.1-1.5%)               | 1.3<br>(-25-31)     | 13<br>(-250-310)        |
| Angola   | 1995 | Female | 85 to 89 | 27%<br>(16-39%)                | 73%<br>(61-84%)          | 0.27<br>(0.13-0.5)                          | -0.035%<br>(-0.91-0.85%)             | -0.041%<br>(-1.1-1%)                | -0.46<br>(-11-11)   | -3.1<br>(-80-78)        |
| Angola   | 1995 | Female | 90 to 94 | 28%<br>(17-42%)                | 72%<br>(58-83%)          | 0.26<br>(0.12-0.48)                         | -0.049%<br>(-0.79-0.8%)              | -0.069%<br>(-0.96-0.96%)            | -0.25<br>(-3.6-3.5) | -1<br>(-18-17)          |
| Angola   | 1995 | Female | 95 plus  | 32%<br>(18-49%)                | 68%<br>(51-82%)          | 0.27<br>(0.1-0.55)                          | 0.046%<br>(-0.67-0.88%)              | 0.018%<br>(-0.85-1.1%)              | 0.018<br>(-0.86-1)  | 0.19<br>(-2.7-3.6)      |
| Angola   | 1995 | Male   | All Ages | 29%<br>(23-36%)                | 71%<br>(64-77%)          | 0.36<br>(0.28-0.45)                         | 1.2%<br>(0.57-1.8%)                  | 1.8%<br>(0.67-2.9%)                 | 1700<br>(620-2900)  | 81000<br>(38000-130000) |
| Angola   | 1995 | Male   | 15 to 19 | 24%<br>(14-39%)                | 76%<br>(61-86%)          | 0.27<br>(0.13-0.49)                         | 1.5%<br>(0.53-2.7%)                  | 1.5%<br>(0.26-3.2%)                 | 28<br>(5.2-61)      | 2800<br>(1000-5300)     |
| Angola   | 1995 | Male   | 20 to 24 | 37%<br>(23-54%)                | 63%<br>(46-77%)          | 0.57<br>(0.3-0.91)                          | 3.8%<br>(1.6-6.4%)                   | 3.8%<br>(0.96-7.2%)                 | 91<br>(23-180)      | 7900<br>(3400-14000)    |
| Angola   | 1995 | Male   | 25 to 29 | 45%<br>(27-62%)                | 55%<br>(38-73%)          | 0.82<br>(0.5-1.2)                           | 5.4%<br>(2.2-8.9%)                   | 5.8%<br>(1.6-11%)                   | 140<br>(38-260)     | 10000<br>(4100-18000)   |
| Angola   | 1995 | Male   | 30 to 34 | 47%<br>(29-65%)                | 53%<br>(35-71%)          | 0.92<br>(0.55-1.4)                          | 6%<br>(2.6-9.9%)                     | 6.7%<br>(2.4-12%)                   | 170<br>(55-310)     | 11000<br>(4400-19000)   |
| Angola   | 1995 | Male   | 35 to 39 | 47%<br>(30-65%)                | 53%<br>(35-70%)          | 0.9<br>(0.52-1.4)                           | 6%<br>(2.3-10%)                      | 6.8%<br>(2.1-12%)                   | 180<br>(55-330)     | 10000<br>(3800-18000)   |



| Location | Year | Sex    | Age      | Prevalence of current drinkers | Prevalence of abstainers | Population average of standard drinks daily | Percent of total attributable deaths | Percent of total attributable DALYs | Attributable deaths  | Attributable DALYs     |
|----------|------|--------|----------|--------------------------------|--------------------------|---------------------------------------------|--------------------------------------|-------------------------------------|----------------------|------------------------|
| Angola   | 1995 | Male   | 40 to 44 | 49%<br>(32-67%)                | 51%<br>(33-68%)          | 0.92<br>(0.5-1.5)                           | 6.2%<br>(2-11%)                      | 7.2%<br>(2-13%)                     | 200<br>(57-380)      | 9900<br>(3200-18000)   |
| Angola   | 1995 | Male   | 45 to 49 | 52%<br>(32-69%)                | 48%<br>(31-68%)          | 0.97<br>(0.51-1.6)                          | 6.2%<br>(2.1-11%)                    | 7.2%<br>(2.2-13%)                   | 190<br>(55-370)      | 8300<br>(2700-15000)   |
| Angola   | 1995 | Male   | 50 to 54 | 52%<br>(34-70%)                | 48%<br>(30-66%)          | 0.94<br>(0.5-1.6)                           | 5.7%<br>(1.5-11%)                    | 6.7%<br>(1.5-13%)                   | 200<br>(42-390)      | 7400<br>(1800-14000)   |
| Angola   | 1995 | Male   | 55 to 59 | 50%<br>(32-68%)                | 50%<br>(32-68%)          | 0.83<br>(0.44-1.4)                          | 4.5%<br>(1.2-8.7%)                   | 5.2%<br>(1.2-10%)                   | 170<br>(36-350)      | 5500<br>(1400-11000)   |
| Angola   | 1995 | Male   | 60 to 64 | 48%<br>(30-68%)                | 52%<br>(32-70%)          | 0.72<br>(0.36-1.2)                          | 3.3%<br>(0.58-6.8%)                  | 3.8%<br>(0.49-7.9%)                 | 130<br>(18-280)      | 3600<br>(630-7600)     |
| Angola   | 1995 | Male   | 65 to 69 | 49%<br>(31-66%)                | 51%<br>(34-69%)          | 0.65<br>(0.33-1)                            | 2.3%<br>(-0.027-5.1%)                | 2.7%<br>(-0.13-5.9%)                | 93<br>(-4.4-210)     | 2100<br>(-22-4800)     |
| Angola   | 1995 | Male   | 70 to 74 | 49%<br>(32-66%)                | 51%<br>(34-68%)          | 0.57<br>(0.28-0.98)                         | 1.5%<br>(-0.51-3.8%)                 | 1.7%<br>(-0.66-4.4%)                | 55<br>(-21-150)      | 1000<br>(-340-2600)    |
| Angola   | 1995 | Male   | 75 to 79 | 48%<br>(32-66%)                | 52%<br>(34-68%)          | 0.47<br>(0.22-0.84)                         | 0.99%<br>(-0.71-2.9%)                | 1.1%<br>(-0.87-3.4%)                | 27<br>(-23-83)       | 390<br>(-280-1200)     |
| Angola   | 1995 | Male   | 80 to 84 | 42%<br>(25-61%)                | 58%<br>(39-75%)          | 0.36<br>(0.17-0.65)                         | 0.61%<br>(-0.64-2%)                  | 0.65%<br>(-0.82-2.2%)               | 8.6<br>(-11-30)      | 95<br>(-110-310)       |
| Angola   | 1995 | Male   | 85 to 89 | 37%<br>(22-54%)                | 63%<br>(46-78%)          | 0.27<br>(0.13-0.49)                         | 0.47%<br>(-0.45-1.5%)                | 0.48%<br>(-0.61-1.7%)               | 3.1<br>(-4-11)       | 26<br>(-25-81)         |
| Angola   | 1995 | Male   | 90 to 94 | 36%<br>(22-53%)                | 64%<br>(47-78%)          | 0.23<br>(0.11-0.43)                         | 0.27%<br>(-0.45-1%)                  | 0.23%<br>(-0.66-1.1%)               | 0.49<br>(-1.4-2.3)   | 3.4<br>(-5.7-13)       |
| Angola   | 1995 | Male   | 95 plus  | 40%<br>(22-60%)                | 60%<br>(40-78%)          | 0.22<br>(0.084-0.45)                        | 0.35%<br>(-0.6-1.4%)                 | 0.29%<br>(-0.86-1.5%)               | 0.15<br>(-0.45-0.79) | 0.73<br>(-1.2-2.8)     |
| Angola   | 2000 | Female | All Ages | 21%<br>(17-27%)                | 79%<br>(73-83%)          | 0.37<br>(0.29-0.47)                         | 0.88%<br>(0.44-1.4%)                 | 1.4%<br>(0.49-2.5%)                 | 1400<br>(470-2500)   | 59000<br>(28000-94000) |
| Angola   | 2000 | Female | 15 to 19 | 21%<br>(13-34%)                | 79%<br>(66-87%)          | 0.32<br>(0.15-0.56)                         | 0.96%<br>(0.42-1.8%)                 | 1%<br>(0.19-2.3%)                   | 17<br>(3.2-41)       | 1900<br>(790-3700)     |
| Angola   | 2000 | Female | 20 to 24 | 30%<br>(18-45%)                | 70%<br>(55-82%)          | 0.62<br>(0.32-1)                            | 2.2%<br>(1-3.7%)                     | 2.2%<br>(0.62-4.5%)                 | 49<br>(13-100)       | 4600<br>(2100-8200)    |
| Angola   | 2000 | Female | 25 to 29 | 34%<br>(20-51%)                | 66%<br>(49-80%)          | 0.83<br>(0.48-1.3)                          | 2.9%<br>(1.5-5%)                     | 3.3%<br>(1.3-6.1%)                  | 78<br>(32-150)       | 6000<br>(2900-11000)   |
| Angola   | 2000 | Female | 30 to 34 | 37%<br>(22-54%)                | 63%<br>(46-78%)          | 0.93<br>(0.52-1.4)                          | 3.6%<br>(1.8-5.9%)                   | 4.2%<br>(1.8-7.3%)                  | 100<br>(42-190)      | 6800<br>(3200-12000)   |
| Angola   | 2000 | Female | 35 to 39 | 38%<br>(24-55%)                | 62%<br>(45-76%)          | 0.92<br>(0.5-1.5)                           | 3.8%<br>(1.7-6.6%)                   | 4.6%<br>(1.9-8.3%)                  | 120<br>(46-230)      | 6900<br>(2900-12000)   |
| Angola   | 2000 | Female | 40 to 44 | 38%<br>(24-57%)                | 62%<br>(43-76%)          | 0.91<br>(0.46-1.5)                          | 4%<br>(1.7-7%)                       | 5%<br>(2-8.9%)                      | 140<br>(51-260)      | 6700<br>(2800-12000)   |
| Angola   | 2000 | Female | 45 to 49 | 37%<br>(22-55%)                | 63%<br>(45-78%)          | 0.86<br>(0.44-1.5)                          | 4.2%<br>(1.6-7.8%)                   | 5.2%<br>(1.8-9.8%)                  | 160<br>(48-310)      | 6700<br>(2200-13000)   |
| Angola   | 2000 | Female | 50 to 54 | 35%<br>(20-53%)                | 65%<br>(47-80%)          | 0.78<br>(0.39-1.3)                          | 4.2%<br>(1.4-8.3%)                   | 5.2%<br>(1.6-10%)                   | 160<br>(45-320)      | 5900<br>(1800-12000)   |
| Angola   | 2000 | Female | 55 to 59 | 32%<br>(20-49%)                | 68%<br>(51-80%)          | 0.71<br>(0.34-1.3)                          | 3.8%<br>(1.1-7.7%)                   | 4.6%<br>(1.3-9.3%)                  | 160<br>(45-350)      | 5200<br>(1500-11000)   |

| Location | Year | Sex    | Age      | Prevalence of current drinkers | Prevalence of abstainers | Population average of standard drinks daily | Percent of total attributable deaths | Percent of total attributable DALYs | Attributable deaths | Attributable DALYs       |
|----------|------|--------|----------|--------------------------------|--------------------------|---------------------------------------------|--------------------------------------|-------------------------------------|---------------------|--------------------------|
| Angola   | 2000 | Female | 60 to 64 | 31%<br>(19-48%)                | 69%<br>(52-81%)          | 0.67<br>(0.31-1.3)                          | 2.8%<br>(0.59-6.2%)                  | 3.3%<br>(0.64-7.3%)                 | 140<br>(28-310)     | 3700<br>(820-8400)       |
| Angola   | 2000 | Female | 65 to 69 | 33%<br>(22-48%)                | 67%<br>(52-78%)          | 0.66<br>(0.33-1.1)                          | 2.2%<br>(0.03-5.1%)                  | 2.5%<br>(0.019-6%)                  | 120<br>(0.86-280)   | 2600<br>(34-6200)        |
| Angola   | 2000 | Female | 70 to 74 | 33%<br>(22-48%)                | 67%<br>(52-78%)          | 0.6<br>(0.28-1.1)                           | 1.4%<br>(-0.5-4.1%)                  | 1.6%<br>(-0.56-4.8%)                | 79<br>(-28-230)     | 1400<br>(-500-4000)      |
| Angola   | 2000 | Female | 75 to 79 | 30%<br>(19-45%)                | 70%<br>(55-81%)          | 0.48<br>(0.22-0.88)                         | 0.75%<br>(-0.75-2.9%)                | 0.87%<br>(-0.86-3.4%)               | 35<br>(-35-140)     | 480<br>(-480-1900)       |
| Angola   | 2000 | Female | 80 to 84 | 27%<br>(16-42%)                | 73%<br>(58-84%)          | 0.4<br>(0.18-0.72)                          | 0.45%<br>(-0.66-2%)                  | 0.52%<br>(-0.78-2.3%)               | 14<br>(-20-61)      | 140<br>(-200-630)        |
| Angola   | 2000 | Female | 85 to 89 | 26%<br>(16-39%)                | 74%<br>(61-84%)          | 0.35<br>(0.16-0.65)                         | 0.27%<br>(-0.7-1.5%)                 | 0.31%<br>(-0.83-1.8%)               | 3.8<br>(-9.9-22)    | 28<br>(-71-160)          |
| Angola   | 2000 | Female | 90 to 94 | 28%<br>(17-41%)                | 72%<br>(59-83%)          | 0.34<br>(0.15-0.63)                         | 0.19%<br>(-0.58-1.3%)                | 0.21%<br>(-0.72-1.6%)               | 0.88<br>(-3-6.5)    | 4.7<br>(-14-33)          |
| Angola   | 2000 | Female | 95 plus  | 31%<br>(18-49%)                | 69%<br>(51-82%)          | 0.35<br>(0.13-0.71)                         | 0.24%<br>(-0.54-1.3%)                | 0.24%<br>(-0.7-1.5%)                | 0.28<br>(-0.77-1.7) | 1.1<br>(-2.4-5.9)        |
| Angola   | 2000 | Male   | All Ages | 28%<br>(22-36%)                | 72%<br>(64-78%)          | 0.48<br>(0.37-0.61)                         | 1.5%<br>(0.85-2.2%)                  | 2.3%<br>(1.2-3.6%)                  | 2300<br>(1100-3700) | 110000<br>(60000-160000) |
| Angola   | 2000 | Male   | 15 to 19 | 24%<br>(14-39%)                | 76%<br>(61-86%)          | 0.37<br>(0.17-0.66)                         | 1.7%<br>(0.78-3.1%)                  | 1.8%<br>(0.52-3.7%)                 | 35<br>(10-76)       | 3500<br>(1600-6500)      |
| Angola   | 2000 | Male   | 20 to 24 | 37%<br>(23-54%)                | 63%<br>(46-77%)          | 0.77<br>(0.41-1.2)                          | 4.4%<br>(2.2-7.4%)                   | 4.6%<br>(1.6-8.5%)                  | 120<br>(42-230)     | 10000<br>(4800-18000)    |
| Angola   | 2000 | Male   | 25 to 29 | 44%<br>(27-61%)                | 56%<br>(39-73%)          | 1.1<br>(0.66-1.7)                           | 6.3%<br>(3.3-10%)                    | 7%<br>(3-12%)                       | 190<br>(76-320)     | 13000<br>(6400-22000)    |
| Angola   | 2000 | Male   | 30 to 34 | 46%<br>(28-64%)                | 54%<br>(36-72%)          | 1.2<br>(0.72-1.8)                           | 7.1%<br>(3.8-11%)                    | 8.1%<br>(3.9-13%)                   | 220<br>(99-380)     | 14000<br>(7300-23000)    |
| Angola   | 2000 | Male   | 35 to 39 | 46%<br>(30-64%)                | 54%<br>(36-70%)          | 1.2<br>(0.68-1.9)                           | 7%<br>(3.5-11%)                      | 8.2%<br>(3.7-13%)                   | 230<br>(100-400)    | 13000<br>(6300-21000)    |
| Angola   | 2000 | Male   | 40 to 44 | 48%<br>(31-67%)                | 52%<br>(33-69%)          | 1.2<br>(0.65-2)                             | 7.3%<br>(3.3-12%)                    | 8.7%<br>(3.5-15%)                   | 260<br>(100-450)    | 12000<br>(5500-21000)    |
| Angola   | 2000 | Male   | 45 to 49 | 51%<br>(33-68%)                | 49%<br>(32-67%)          | 1.3<br>(0.71-2.2)                           | 7.6%<br>(3.4-12%)                    | 9%<br>(3.8-15%)                     | 280<br>(110-500)    | 12000<br>(5100-21000)    |
| Angola   | 2000 | Male   | 50 to 54 | 51%<br>(33-69%)                | 49%<br>(31-67%)          | 1.3<br>(0.67-2.2)                           | 7.3%<br>(3.2-13%)                    | 8.8%<br>(3.7-15%)                   | 250<br>(92-460)     | 9400<br>(3700-17000)     |
| Angola   | 2000 | Male   | 55 to 59 | 49%<br>(32-68%)                | 51%<br>(32-68%)          | 1.1<br>(0.59-1.9)                           | 6.1%<br>(2.4-11%)                    | 7.3%<br>(2.7-13%)                   | 220<br>(79-400)     | 7200<br>(2700-13000)     |
| Angola   | 2000 | Male   | 60 to 64 | 48%<br>(30-67%)                | 52%<br>(33-70%)          | 0.99<br>(0.49-1.8)                          | 4.5%<br>(1.7-8.4%)                   | 5.3%<br>(1.8-10%)                   | 180<br>(58-360)     | 5000<br>(1700-9700)      |
| Angola   | 2000 | Male   | 65 to 69 | 49%<br>(32-66%)                | 51%<br>(34-68%)          | 0.89<br>(0.45-1.5)                          | 3.4%<br>(0.89-6.7%)                  | 4%<br>(0.95-8%)                     | 140<br>(30-280)     | 3200<br>(770-6300)       |
| Angola   | 2000 | Male   | 70 to 74 | 49%<br>(32-66%)                | 51%<br>(34-68%)          | 0.78<br>(0.39-1.4)                          | 2.3%<br>(0.095-5.2%)                 | 2.6%<br>(0.021-6%)                  | 89<br>(0.68-200)    | 1600<br>(64-3600)        |
| Angola   | 2000 | Male   | 75 to 79 | 48%<br>(31-66%)                | 52%<br>(34-69%)          | 0.64<br>(0.3-1.2)                           | 1.6%<br>(-0.2-4%)                    | 1.8%<br>(-0.29-4.7%)                | 47<br>(-7.4-120)    | 670<br>(-87-1700)        |

| Location | Year | Sex    | Age      | Prevalence of current drinkers | Prevalence of abstainers | Population average of standard drinks daily | Percent of total attributable deaths | Percent of total attributable DALYs | Attributable deaths | Attributable DALYs      |
|----------|------|--------|----------|--------------------------------|--------------------------|---------------------------------------------|--------------------------------------|-------------------------------------|---------------------|-------------------------|
| Angola   | 2000 | Male   | 80 to 84 | 42%<br>(25-61%)                | 58%<br>(39-75%)          | 0.49<br>(0.23-0.87)                         | 0.99%<br>(-0.27-2.7%)                | 1.1%<br>(-0.38-3.1%)                | 16<br>(-5.5-47)     | 180<br>(-47-480)        |
| Angola   | 2000 | Male   | 85 to 89 | 37%<br>(22-54%)                | 63%<br>(46-78%)          | 0.37<br>(0.17-0.67)                         | 0.71%<br>(-0.18-1.9%)                | 0.76%<br>(-0.31-2.2%)               | 5.5<br>(-2.2-16)    | 44<br>(-11-120)         |
| Angola   | 2000 | Male   | 90 to 94 | 36%<br>(22-54%)                | 64%<br>(46-78%)          | 0.32<br>(0.15-0.58)                         | 0.42%<br>(-0.32-1.3%)                | 0.4%<br>(-0.51-1.5%)                | 1<br>(-1.2-3.7)     | 6.2<br>(-4.7-19)        |
| Angola   | 2000 | Male   | 95 plus  | 39%<br>(21-61%)                | 61%<br>(39-79%)          | 0.3<br>(0.11-0.61)                          | 0.53%<br>(-0.47-1.6%)                | 0.48%<br>(-0.72-1.8%)               | 0.3<br>(-0.45-1.1)  | 1.3<br>(-1.1-3.9)       |
| Angola   | 2005 | Female | All Ages | 21%<br>(17-26%)                | 79%<br>(74-83%)          | 0.54<br>(0.41-0.7)                          | 1.4%<br>(0.82-2.1%)                  | 2.4%<br>(1.2-3.8%)                  | 2400<br>(1100-3900) | 94000<br>(55000-140000) |
| Angola   | 2005 | Female | 15 to 19 | 21%<br>(13-33%)                | 79%<br>(67-87%)          | 0.47<br>(0.22-0.83)                         | 1.4%<br>(0.66-2.5%)                  | 1.7%<br>(0.56-3.6%)                 | 30<br>(9.8-61)      | 2900<br>(1300-5200)     |
| Angola   | 2005 | Female | 20 to 24 | 30%<br>(18-44%)                | 70%<br>(56-82%)          | 0.91<br>(0.47-1.5)                          | 3%<br>(1.6-4.9%)                     | 3.4%<br>(1.4-6.1%)                  | 77<br>(31-140)      | 6800<br>(3500-11000)    |
| Angola   | 2005 | Female | 25 to 29 | 34%<br>(20-50%)                | 66%<br>(50-80%)          | 1.2<br>(0.7-1.9)                            | 3.8%<br>(2.1-5.9%)                   | 4.4%<br>(2.1-7.5%)                  | 120<br>(57-200)     | 8800<br>(5000-14000)    |
| Angola   | 2005 | Female | 30 to 34 | 36%<br>(21-53%)                | 64%<br>(47-79%)          | 1.4<br>(0.76-2.1)                           | 4.5%<br>(2.5-7.1%)                   | 5.4%<br>(2.8-9.1%)                  | 160<br>(77-260)     | 9900<br>(5500-16000)    |
| Angola   | 2005 | Female | 35 to 39 | 38%<br>(23-56%)                | 62%<br>(44-77%)          | 1.4<br>(0.72-2.2)                           | 4.9%<br>(2.7-7.5%)                   | 6%<br>(3.1-9.4%)                    | 180<br>(85-310)     | 9900<br>(5100-17000)    |
| Angola   | 2005 | Female | 40 to 44 | 38%<br>(24-56%)                | 62%<br>(44-76%)          | 1.3<br>(0.71-2.2)                           | 5.4%<br>(2.7-8.8%)                   | 6.7%<br>(3.3-11%)                   | 210<br>(94-370)     | 10000<br>(4900-17000)   |
| Angola   | 2005 | Female | 45 to 49 | 37%<br>(22-54%)                | 63%<br>(46-78%)          | 1.3<br>(0.65-2.2)                           | 5.8%<br>(2.8-9.8%)                   | 7.4%<br>(3.5-13%)                   | 240<br>(110-450)    | 10000<br>(4700-18000)   |
| Angola   | 2005 | Female | 50 to 54 | 34%<br>(20-51%)                | 66%<br>(49-80%)          | 1.2<br>(0.58-2)                             | 6.1%<br>(2.7-11%)                    | 7.6%<br>(3.1-13%)                   | 290<br>(110-540)    | 11000<br>(4300-20000)   |
| Angola   | 2005 | Female | 55 to 59 | 32%<br>(20-49%)                | 68%<br>(51-80%)          | 1<br>(0.51-1.8)                             | 5.7%<br>(2.4-9.8%)                   | 6.9%<br>(2.9-12%)                   | 260<br>(100-480)    | 8200<br>(3400-15000)    |
| Angola   | 2005 | Female | 60 to 64 | 31%<br>(19-48%)                | 69%<br>(52-81%)          | 1<br>(0.45-1.8)                             | 4.5%<br>(1.6-8.5%)                   | 5.3%<br>(1.9-10%)                   | 230<br>(79-460)     | 6300<br>(2200-12000)    |
| Angola   | 2005 | Female | 65 to 69 | 33%<br>(21-48%)                | 67%<br>(52-79%)          | 0.98<br>(0.48-1.7)                          | 3.8%<br>(1.1-7.5%)                   | 4.5%<br>(1.3-8.9%)                  | 230<br>(62-450)     | 5000<br>(1400-10000)    |
| Angola   | 2005 | Female | 70 to 74 | 32%<br>(21-47%)                | 68%<br>(53-79%)          | 0.88<br>(0.42-1.6)                          | 2.9%<br>(0.41-6.3%)                  | 3.3%<br>(0.46-7.5%)                 | 170<br>(22-390)     | 3100<br>(390-6900)      |
| Angola   | 2005 | Female | 75 to 79 | 30%<br>(18-46%)                | 70%<br>(54-82%)          | 0.71<br>(0.33-1.3)                          | 1.9%<br>(-0.19-5%)                   | 2.2%<br>(-0.22-5.5%)                | 98<br>(-9.7-260)    | 1400<br>(-130-3600)     |
| Angola   | 2005 | Female | 80 to 84 | 27%<br>(16-43%)                | 73%<br>(57-84%)          | 0.59<br>(0.28-1)                            | 1.3%<br>(-0.23-3.4%)                 | 1.5%<br>(-0.26-3.9%)                | 47<br>(-8.1-120)    | 480<br>(-79-1200)       |
| Angola   | 2005 | Female | 85 to 89 | 26%<br>(15-39%)                | 74%<br>(61-85%)          | 0.52<br>(0.24-0.94)                         | 0.94%<br>(-0.24-2.6%)                | 1.1%<br>(-0.29-3.1%)                | 16<br>(-4.2-44)     | 110<br>(-29-320)        |
| Angola   | 2005 | Female | 90 to 94 | 27%<br>(16-40%)                | 73%<br>(60-84%)          | 0.5<br>(0.22-0.93)                          | 0.74%<br>(-0.27-2.4%)                | 0.86%<br>(-0.35-2.8%)               | 4<br>(-1.6-13)      | 21<br>(-7.4-66)         |
| Angola   | 2005 | Female | 95 plus  | 31%<br>(17-48%)                | 69%<br>(52-83%)          | 0.51<br>(0.19-1.1)                          | 0.69%<br>(-0.28-2.4%)                | 0.76%<br>(-0.39-2.8%)               | 0.97<br>(-0.48-3.5) | 3.5<br>(-1.3-12)        |

| Location | Year | Sex    | Age      | Prevalence of current drinkers | Prevalence of abstainers | Population average of standard drinks daily | Percent of total attributable deaths | Percent of total attributable DALYs | Attributable deaths | Attributable DALYs        |
|----------|------|--------|----------|--------------------------------|--------------------------|---------------------------------------------|--------------------------------------|-------------------------------------|---------------------|---------------------------|
| Angola   | 2005 | Male   | All Ages | 28%<br>(22-35%)                | 72%<br>(65-78%)          | 0.72<br>(0.54-0.91)                         | 2.2%<br>(1.4-3.1%)                   | 3.5%<br>(2.1-5.1%)                  | 3400<br>(2000-5100) | 150000<br>(100000-220000) |
| Angola   | 2005 | Male   | 15 to 19 | 24%<br>(14-39%)                | 76%<br>(61-86%)          | 0.55<br>(0.26-1)                            | 2.5%<br>(1.3-4.4%)                   | 3%<br>(1.3-5.8%)                    | 56<br>(23-110)      | 5200<br>(2700-9000)       |
| Angola   | 2005 | Male   | 20 to 24 | 37%<br>(22-54%)                | 63%<br>(46-78%)          | 1.1<br>(0.61-1.8)                           | 6.5%<br>(3.8-10%)                    | 7.5%<br>(3.8-12%)                   | 190<br>(89-320)     | 15000<br>(8400-24000)     |
| Angola   | 2005 | Male   | 25 to 29 | 44%<br>(27-62%)                | 56%<br>(38-73%)          | 1.6<br>(0.96-2.5)                           | 8.6%<br>(5.2-13%)                    | 10%<br>(5.5-15%)                    | 280<br>(140-460)    | 20000<br>(11000-31000)    |
| Angola   | 2005 | Male   | 30 to 34 | 46%<br>(29-64%)                | 54%<br>(36-71%)          | 1.8<br>(1-2.7)                              | 9.2%<br>(5.5-13%)                    | 11%<br>(6.1-16%)                    | 320<br>(160-500)    | 20000<br>(11000-30000)    |
| Angola   | 2005 | Male   | 35 to 39 | 46%<br>(30-63%)                | 54%<br>(37-70%)          | 1.8<br>(0.97-2.8)                           | 9.1%<br>(5.5-14%)                    | 11%<br>(6.2-17%)                    | 330<br>(170-520)    | 18000<br>(10000-28000)    |
| Angola   | 2005 | Male   | 40 to 44 | 48%<br>(32-66%)                | 52%<br>(34-68%)          | 1.8<br>(0.96-3)                             | 9.4%<br>(5.4-14%)                    | 12%<br>(6.4-17%)                    | 360<br>(190-590)    | 17000<br>(9600-28000)     |
| Angola   | 2005 | Male   | 45 to 49 | 51%<br>(33-69%)                | 49%<br>(31-67%)          | 2<br>(1.1-3.2)                              | 10%<br>(5.7-15%)                     | 12%<br>(6.8-19%)                    | 390<br>(200-640)    | 17000<br>(8800-27000)     |
| Angola   | 2005 | Male   | 50 to 54 | 52%<br>(33-70%)                | 48%<br>(30-67%)          | 1.9<br>(1-3.2)                              | 9.9%<br>(5.2-16%)                    | 12%<br>(6.3-19%)                    | 400<br>(200-670)    | 15000<br>(7500-25000)     |
| Angola   | 2005 | Male   | 55 to 59 | 49%<br>(32-68%)                | 51%<br>(32-68%)          | 1.7<br>(0.88-2.9)                           | 8.5%<br>(4.2-14%)                    | 10%<br>(5-17%)                      | 320<br>(150-540)    | 10000<br>(5100-17000)     |
| Angola   | 2005 | Male   | 60 to 64 | 48%<br>(30-67%)                | 52%<br>(33-70%)          | 1.5<br>(0.7-2.7)                            | 6.6%<br>(3-11%)                      | 7.9%<br>(3.6-13%)                   | 270<br>(120-490)    | 7500<br>(3400-13000)      |
| Angola   | 2005 | Male   | 65 to 69 | 48%<br>(31-66%)                | 52%<br>(34-69%)          | 1.3<br>(0.66-2.2)                           | 5.2%<br>(2-9.1%)                     | 6.2%<br>(2.3-11%)                   | 230<br>(82-400)     | 5200<br>(1900-9000)       |
| Angola   | 2005 | Male   | 70 to 74 | 49%<br>(32-66%)                | 51%<br>(34-68%)          | 1.2<br>(0.56-2.1)                           | 3.8%<br>(1.1-7.5%)                   | 4.4%<br>(1.2-8.8%)                  | 160<br>(45-310)     | 2900<br>(850-5700)        |
| Angola   | 2005 | Male   | 75 to 79 | 48%<br>(31-66%)                | 52%<br>(34-69%)          | 0.96<br>(0.45-1.7)                          | 2.8%<br>(0.62-5.9%)                  | 3.2%<br>(0.66-6.8%)                 | 94<br>(19-200)      | 1300<br>(290-2800)        |
| Angola   | 2005 | Male   | 80 to 84 | 42%<br>(25-61%)                | 58%<br>(39-75%)          | 0.75<br>(0.35-1.3)                          | 1.9%<br>(0.34-4.1%)                  | 2.1%<br>(0.31-4.8%)                 | 37<br>(5.7-81)      | 390<br>(75-850)           |
| Angola   | 2005 | Male   | 85 to 89 | 37%<br>(22-53%)                | 63%<br>(47-78%)          | 0.56<br>(0.26-1)                            | 1.3%<br>(0.21-2.8%)                  | 1.5%<br>(0.17-3.3%)                 | 13<br>(1.4-29)      | 97<br>(17-210)            |
| Angola   | 2005 | Male   | 90 to 94 | 36%<br>(22-53%)                | 64%<br>(47-78%)          | 0.48<br>(0.22-0.89)                         | 0.8%<br>(0.01-2%)                    | 0.84%<br>(-0.12-2.3%)               | 2.5<br>(-0.36-6.8)  | 14<br>(0.18-35)           |
| Angola   | 2005 | Male   | 95 plus  | 39%<br>(21-61%)                | 61%<br>(39-79%)          | 0.45<br>(0.17-0.92)                         | 0.95%<br>(-0.084-2.5%)               | 0.97%<br>(-0.3-2.8%)                | 0.7<br>(-0.22-2)    | 2.7<br>(-0.25-7.2)        |
| Angola   | 2010 | Female | All Ages | 20%<br>(16-26%)                | 80%<br>(74-84%)          | 0.73<br>(0.52-0.98)                         | 1.9%<br>(1.2-2.8%)                   | 3.3%<br>(1.9-5.3%)                  | 3200<br>(1700-5200) | 120000<br>(75000-190000)  |
| Angola   | 2010 | Female | 15 to 19 | 20%<br>(12-33%)                | 80%<br>(67-88%)          | 0.63<br>(0.3-1.1)                           | 1.8%<br>(0.91-3%)                    | 2.3%<br>(0.91-4.2%)                 | 40<br>(16-76)       | 3900<br>(1900-6600)       |
| Angola   | 2010 | Female | 20 to 24 | 29%<br>(18-44%)                | 71%<br>(56-82%)          | 1.2<br>(0.63-2)                             | 3.6%<br>(2.1-5.8%)                   | 4.4%<br>(2.1-7.8%)                  | 98<br>(47-170)      | 8600<br>(4800-14000)      |
| Angola   | 2010 | Female | 25 to 29 | 34%<br>(20-50%)                | 66%<br>(50-80%)          | 1.7<br>(0.94-2.7)                           | 4.4%<br>(2.7-6.8%)                   | 5.4%<br>(2.9-8.6%)                  | 140<br>(76-230)     | 11000<br>(6400-16000)     |

| Location | Year | Sex    | Age      | Prevalence of current drinkers | Prevalence of abstainers | Population average of standard drinks daily | Percent of total attributable deaths | Percent of total attributable DALYs | Attributable deaths | Attributable DALYs        |
|----------|------|--------|----------|--------------------------------|--------------------------|---------------------------------------------|--------------------------------------|-------------------------------------|---------------------|---------------------------|
| Angola   | 2010 | Female | 30 to 34 | 36%<br>(21-53%)                | 64%<br>(47-79%)          | 1.9<br>(1-2.9)                              | 5.1%<br>(3.1-7.8%)                   | 6.3%<br>(3.6-10%)                   | 190<br>(99-310)     | 12000<br>(7000-19000)     |
| Angola   | 2010 | Female | 35 to 39 | 37%<br>(23-56%)                | 63%<br>(44-77%)          | 1.8<br>(0.92-3.1)                           | 5.5%<br>(3.2-8.3%)                   | 7%<br>(3.9-11%)                     | 210<br>(110-360)    | 12000<br>(6500-19000)     |
| Angola   | 2010 | Female | 40 to 44 | 38%<br>(23-56%)                | 62%<br>(44-77%)          | 1.8<br>(0.87-3)                             | 6.2%<br>(3.4-9.8%)                   | 8.1%<br>(4.3-13%)                   | 240<br>(120-440)    | 12000<br>(6100-21000)     |
| Angola   | 2010 | Female | 45 to 49 | 37%<br>(21-54%)                | 63%<br>(46-79%)          | 1.7<br>(0.83-3)                             | 7%<br>(3.8-11%)                      | 9.2%<br>(4.9-15%)                   | 300<br>(140-510)    | 13000<br>(6100-22000)     |
| Angola   | 2010 | Female | 50 to 54 | 34%<br>(20-52%)                | 66%<br>(48-80%)          | 1.6<br>(0.77-2.8)                           | 7.6%<br>(3.7-12%)                    | 9.7%<br>(4.8-16%)                   | 360<br>(160-640)    | 13000<br>(6100-24000)     |
| Angola   | 2010 | Female | 55 to 59 | 31%<br>(19-49%)                | 69%<br>(51-81%)          | 1.4<br>(0.67-2.5)                           | 7.3%<br>(3.4-12%)                    | 9.1%<br>(4.3-15%)                   | 380<br>(170-690)    | 12000<br>(5500-22000)     |
| Angola   | 2010 | Female | 60 to 64 | 31%<br>(18-48%)                | 69%<br>(52-82%)          | 1.3<br>(0.6-2.4)                            | 5.9%<br>(2.4-11%)                    | 7.2%<br>(2.9-13%)                   | 310<br>(120-570)    | 8300<br>(3300-15000)      |
| Angola   | 2010 | Female | 65 to 69 | 32%<br>(21-47%)                | 68%<br>(53-79%)          | 1.3<br>(0.63-2.4)                           | 5.4%<br>(2-10%)                      | 6.5%<br>(2.4-12%)                   | 320<br>(110-630)    | 7100<br>(2500-14000)      |
| Angola   | 2010 | Female | 70 to 74 | 32%<br>(21-47%)                | 68%<br>(53-79%)          | 1.2<br>(0.54-2.2)                           | 4.3%<br>(1.2-8.5%)                   | 5.1%<br>(1.4-10%)                   | 270<br>(71-550)     | 4800<br>(1300-9900)       |
| Angola   | 2010 | Female | 75 to 79 | 29%<br>(18-44%)                | 71%<br>(56-82%)          | 0.96<br>(0.43-1.9)                          | 3.1%<br>(0.48-6.9%)                  | 3.6%<br>(0.55-8.1%)                 | 170<br>(26-400)     | 2300<br>(360-5600)        |
| Angola   | 2010 | Female | 80 to 84 | 27%<br>(16-42%)                | 73%<br>(58-84%)          | 0.78<br>(0.36-1.4)                          | 2.3%<br>(0.32-5.1%)                  | 2.6%<br>(0.37-6%)                   | 89<br>(12-210)      | 920<br>(120-2200)         |
| Angola   | 2010 | Female | 85 to 89 | 25%<br>(15-39%)                | 75%<br>(61-85%)          | 0.7<br>(0.31-1.3)                           | 1.7%<br>(0.16-4.3%)                  | 2%<br>(0.17-4.9%)                   | 33<br>(2.8-81)      | 250<br>(22-610)           |
| Angola   | 2010 | Female | 90 to 94 | 27%<br>(17-40%)                | 73%<br>(60-83%)          | 0.69<br>(0.3-1.3)                           | 1.4%<br>(0.057-3.7%)                 | 1.6%<br>(0.048-4.3%)                | 8.9<br>(0.27-23)    | 46<br>(1.8-120)           |
| Angola   | 2010 | Female | 95 plus  | 31%<br>(17-49%)                | 69%<br>(51-83%)          | 0.7<br>(0.26-1.5)                           | 1.3%<br>(-0.051-3.6%)                | 1.5%<br>(-0.13-4.2%)                | 2<br>(-0.17-5.7)    | 7.1<br>(-0.29-19)         |
| Angola   | 2010 | Male   | All Ages | 27%<br>(22-35%)                | 73%<br>(65-78%)          | 0.96<br>(0.7-1.3)                           | 2.9%<br>(2-4.1%)                     | 4.8%<br>(3.1-6.9%)                  | 4600<br>(2800-6700) | 200000<br>(130000-280000) |
| Angola   | 2010 | Male   | 15 to 19 | 23%<br>(14-38%)                | 77%<br>(62-86%)          | 0.72<br>(0.34-1.4)                          | 3.1%<br>(1.7-5.2%)                   | 3.9%<br>(1.8-7.1%)                  | 75<br>(32-140)      | 6900<br>(3600-12000)      |
| Angola   | 2010 | Male   | 20 to 24 | 36%<br>(22-53%)                | 64%<br>(47-78%)          | 1.5<br>(0.83-2.6)                           | 7.9%<br>(4.8-12%)                    | 9.6%<br>(5.4-15%)                   | 240<br>(120-400)    | 19000<br>(11000-30000)    |
| Angola   | 2010 | Male   | 25 to 29 | 43%<br>(26-60%)                | 57%<br>(40-74%)          | 2.2<br>(1.3-3.5)                            | 10%<br>(6.6-15%)                     | 13%<br>(7.5-19%)                    | 350<br>(190-560)    | 25000<br>(15000-38000)    |
| Angola   | 2010 | Male   | 30 to 34 | 45%<br>(28-64%)                | 55%<br>(36-72%)          | 2.5<br>(1.4-3.8)                            | 11%<br>(7-15%)                       | 13%<br>(8.2-19%)                    | 400<br>(220-640)    | 25000<br>(15000-38000)    |
| Angola   | 2010 | Male   | 35 to 39 | 45%<br>(29-63%)                | 55%<br>(37-71%)          | 2.4<br>(1.3-4)                              | 11%<br>(6.7-15%)                     | 13%<br>(8-19%)                      | 410<br>(230-650)    | 22000<br>(13000-35000)    |
| Angola   | 2010 | Male   | 40 to 44 | 47%<br>(31-66%)                | 53%<br>(34-69%)          | 2.4<br>(1.3-4.2)                            | 11%<br>(6.9-16%)                     | 14%<br>(8.6-20%)                    | 430<br>(240-740)    | 21000<br>(12000-35000)    |
| Angola   | 2010 | Male   | 45 to 49 | 50%<br>(33-68%)                | 50%<br>(32-67%)          | 2.6<br>(1.3-4.5)                            | 12%<br>(7.2-17%)                     | 15%<br>(9-22%)                      | 480<br>(260-770)    | 21000<br>(12000-32000)    |

| Location | Year | Sex    | Age      | Prevalence of current drinkers | Prevalence of abstainers | Population average of standard drinks daily | Percent of total attributable deaths | Percent of total attributable DALYs | Attributable deaths | Attributable DALYs       |
|----------|------|--------|----------|--------------------------------|--------------------------|---------------------------------------------|--------------------------------------|-------------------------------------|---------------------|--------------------------|
| Angola   | 2010 | Male   | 50 to 54 | 51%<br>(33-69%)                | 49%<br>(31-67%)          | 2.6<br>(1.3-4.4)                            | 12%<br>(6.9-18%)                     | 15%<br>(8.9-23%)                    | 510<br>(270-820)    | 19000<br>(10000-30000)   |
| Angola   | 2010 | Male   | 55 to 59 | 48%<br>(31-68%)                | 52%<br>(32-69%)          | 2.3<br>(1.2-3.9)                            | 11%<br>(5.8-16%)                     | 13%<br>(7.2-20%)                    | 480<br>(240-770)    | 15000<br>(7900-25000)    |
| Angola   | 2010 | Male   | 60 to 64 | 47%<br>(29-67%)                | 53%<br>(33-71%)          | 2<br>(0.88-3.5)                             | 8.6%<br>(4.3-14%)                    | 11%<br>(5.2-17%)                    | 370<br>(180-630)    | 10000<br>(5000-17000)    |
| Angola   | 2010 | Male   | 65 to 69 | 48%<br>(31-66%)                | 52%<br>(34-69%)          | 1.8<br>(0.87-3.1)                           | 7.1%<br>(3.5-12%)                    | 8.5%<br>(4.1-14%)                   | 320<br>(150-570)    | 7400<br>(3400-13000)     |
| Angola   | 2010 | Male   | 70 to 74 | 49%<br>(31-66%)                | 51%<br>(34-69%)          | 1.5<br>(0.74-2.8)                           | 5.3%<br>(2.1-10%)                    | 6.3%<br>(2.5-12%)                   | 250<br>(92-460)     | 4500<br>(1700-8400)      |
| Angola   | 2010 | Male   | 75 to 79 | 47%<br>(31-65%)                | 53%<br>(35-69%)          | 1.3<br>(0.59-2.4)                           | 4%<br>(1.3-8.1%)                     | 4.7%<br>(1.4-9.6%)                  | 150<br>(45-310)     | 2100<br>(650-4300)       |
| Angola   | 2010 | Male   | 80 to 84 | 41%<br>(24-59%)                | 59%<br>(41-76%)          | 0.98<br>(0.45-1.8)                          | 2.7%<br>(0.78-5.7%)                  | 3.2%<br>(0.86-6.6%)                 | 64<br>(17-140)      | 680<br>(180-1400)        |
| Angola   | 2010 | Male   | 85 to 89 | 36%<br>(21-53%)                | 64%<br>(47-79%)          | 0.74<br>(0.35-1.4)                          | 2%<br>(0.59-4.1%)                    | 2.2%<br>(0.61-4.7%)                 | 23<br>(6.3-49)      | 180<br>(53-360)          |
| Angola   | 2010 | Male   | 90 to 94 | 35%<br>(21-52%)                | 65%<br>(48-79%)          | 0.64<br>(0.28-1.2)                          | 1.3%<br>(0.3-3%)                     | 1.4%<br>(0.23-3.5%)                 | 5.1<br>(0.84-12)    | 28<br>(6.6-66)           |
| Angola   | 2010 | Male   | 95 plus  | 39%<br>(20-59%)                | 61%<br>(41-80%)          | 0.6<br>(0.22-1.3)                           | 1.5%<br>(0.2-3.7%)                   | 1.6%<br>(0.048-4.2%)                | 1.4<br>(0.041-3.6)  | 5.1<br>(0.67-12)         |
| Angola   | 2016 | Female | All Ages | 20%<br>(16-25%)                | 80%<br>(75-84%)          | 0.84<br>(0.48-1.4)                          | 2.4%<br>(1.3-3.7%)                   | 4.1%<br>(1.9-6.6%)                  | 3400<br>(1500-5700) | 130000<br>(68000-200000) |
| Angola   | 2016 | Female | 15 to 19 | 20%<br>(12-33%)                | 80%<br>(67-88%)          | 0.73<br>(0.31-1.4)                          | 1.7%<br>(0.88-3%)                    | 2.3%<br>(0.86-4.7%)                 | 38<br>(14-80)       | 4000<br>(2000-7200)      |
| Angola   | 2016 | Female | 20 to 24 | 29%<br>(17-44%)                | 71%<br>(56-83%)          | 1.4<br>(0.63-2.6)                           | 3.6%<br>(2-5.6%)                     | 4.5%<br>(1.9-7.9%)                  | 86<br>(35-160)      | 8400<br>(4600-14000)     |
| Angola   | 2016 | Female | 25 to 29 | 33%<br>(19-50%)                | 67%<br>(50-81%)          | 1.9<br>(0.92-3.3)                           | 4.3%<br>(2.4-6.5%)                   | 5.3%<br>(2.5-9%)                    | 130<br>(58-230)     | 10000<br>(5800-17000)    |
| Angola   | 2016 | Female | 30 to 34 | 35%<br>(21-53%)                | 65%<br>(47-79%)          | 2.1<br>(0.97-3.9)                           | 4.9%<br>(2.8-7.6%)                   | 6.3%<br>(3.2-10%)                   | 170<br>(82-310)     | 12000<br>(6300-19000)    |
| Angola   | 2016 | Female | 35 to 39 | 37%<br>(22-54%)                | 63%<br>(46-78%)          | 2.1<br>(0.93-4)                             | 5.5%<br>(3-8.7%)                     | 7.2%<br>(3.7-12%)                   | 210<br>(96-380)     | 12000<br>(6300-21000)    |
| Angola   | 2016 | Female | 40 to 44 | 37%<br>(23-55%)                | 63%<br>(45-77%)          | 2.1<br>(0.9-3.9)                            | 6.2%<br>(3.3-9.8%)                   | 8.4%<br>(4.3-13%)                   | 250<br>(120-460)    | 13000<br>(6200-22000)    |
| Angola   | 2016 | Female | 45 to 49 | 36%<br>(22-53%)                | 64%<br>(47-78%)          | 2<br>(0.86-3.7)                             | 7.2%<br>(3.6-11%)                    | 9.7%<br>(4.8-16%)                   | 310<br>(140-540)    | 13000<br>(6000-23000)    |
| Angola   | 2016 | Female | 50 to 54 | 34%<br>(20-51%)                | 66%<br>(49-80%)          | 1.8<br>(0.75-3.4)                           | 7.6%<br>(3.6-12%)                    | 10%<br>(4.7-16%)                    | 370<br>(150-650)    | 14000<br>(5900-24000)    |
| Angola   | 2016 | Female | 55 to 59 | 31%<br>(19-49%)                | 69%<br>(51-81%)          | 1.6<br>(0.66-3.3)                           | 7.3%<br>(3.1-12%)                    | 9.3%<br>(3.9-16%)                   | 390<br>(160-700)    | 13000<br>(5100-22000)    |
| Angola   | 2016 | Female | 60 to 64 | 31%<br>(18-48%)                | 69%<br>(52-82%)          | 1.5<br>(0.61-3.3)                           | 6.1%<br>(2.4-11%)                    | 7.6%<br>(2.9-14%)                   | 380<br>(140-720)    | 10000<br>(3900-20000)    |
| Angola   | 2016 | Female | 65 to 69 | 32%<br>(21-48%)                | 68%<br>(52-79%)          | 1.5<br>(0.64-3.2)                           | 5.8%<br>(1.9-11%)                    | 7%<br>(2.4-14%)                     | 350<br>(120-710)    | 7900<br>(2600-16000)     |

| Location | Year | Sex    | Age      | Prevalence of current drinkers | Prevalence of abstainers | Population average of standard drinks daily | Percent of total attributable deaths | Percent of total attributable DALYs | Attributable deaths | Attributable DALYs       |
|----------|------|--------|----------|--------------------------------|--------------------------|---------------------------------------------|--------------------------------------|-------------------------------------|---------------------|--------------------------|
| Angola   | 2016 | Female | 70 to 74 | 32%<br>(21-47%)                | 68%<br>(53-79%)          | 1.4<br>(0.55-2.7)                           | 4.8%<br>(1.1-10%)                    | 5.7%<br>(1.4-12%)                   | 300<br>(68-630)     | 5400<br>(1200-11000)     |
| Angola   | 2016 | Female | 75 to 79 | 29%<br>(18-45%)                | 71%<br>(55-82%)          | 1.1<br>(0.45-2.3)                           | 3.6%<br>(0.42-8.1%)                  | 4.2%<br>(0.5-9.7%)                  | 210<br>(25-490)     | 2900<br>(330-7000)       |
| Angola   | 2016 | Female | 80 to 84 | 27%<br>(16-41%)                | 73%<br>(59-84%)          | 0.91<br>(0.37-1.8)                          | 2.7%<br>(0.29-6.3%)                  | 3.2%<br>(0.34-7.5%)                 | 120<br>(14-280)     | 1200<br>(150-3000)       |
| Angola   | 2016 | Female | 85 to 89 | 25%<br>(15-38%)                | 75%<br>(62-85%)          | 0.81<br>(0.32-1.6)                          | 2.1%<br>(0.15-5.3%)                  | 2.4%<br>(0.16-6.3%)                 | 50<br>(3.2-130)     | 370<br>(28-940)          |
| Angola   | 2016 | Female | 90 to 94 | 27%<br>(16-40%)                | 73%<br>(60-84%)          | 0.79<br>(0.31-1.6)                          | 1.7%<br>(0.0073-4.7%)                | 2%<br>(-0.012-5.5%)                 | 14<br>(-0.076-40)   | 72<br>(0.3-200)          |
| Angola   | 2016 | Female | 95 plus  | 31%<br>(17-49%)                | 69%<br>(51-83%)          | 0.81<br>(0.28-1.8)                          | 1.6%<br>(-0.036-4.7%)                | 1.8%<br>(-0.12-5.4%)                | 3.1<br>(-0.2-9.3)   | 11<br>(-0.26-32)         |
| Angola   | 2016 | Male   | All Ages | 27%<br>(22-34%)                | 73%<br>(66-78%)          | 1.1<br>(0.63-1.7)                           | 3.9%<br>(2.3-5.8%)                   | 6.2%<br>(3.6-9.4%)                  | 5300<br>(2900-8300) | 23000<br>(140000-350000) |
| Angola   | 2016 | Male   | 15 to 19 | 23%<br>(14-38%)                | 77%<br>(62-86%)          | 0.82<br>(0.34-1.6)                          | 3.1%<br>(1.6-5.4%)                   | 4%<br>(1.6-7.6%)                    | 87<br>(34-170)      | 8200<br>(4100-15000)     |
| Angola   | 2016 | Male   | 20 to 24 | 36%<br>(22-51%)                | 64%<br>(49-78%)          | 1.7<br>(0.78-3.3)                           | 8.1%<br>(4.6-13%)                    | 9.9%<br>(4.9-17%)                   | 270<br>(120-490)    | 22000<br>(12000-37000)   |
| Angola   | 2016 | Male   | 25 to 29 | 43%<br>(26-61%)                | 57%<br>(39-74%)          | 2.5<br>(1.3-4.5)                            | 11%<br>(6.2-15%)                     | 13%<br>(7.1-20%)                    | 390<br>(190-630)    | 28000<br>(15000-43000)   |
| Angola   | 2016 | Male   | 30 to 34 | 45%<br>(27-64%)                | 55%<br>(36-73%)          | 2.8<br>(1.3-5.1)                            | 11%<br>(6.5-16%)                     | 14%<br>(7.5-20%)                    | 430<br>(220-690)    | 28000<br>(15000-43000)   |
| Angola   | 2016 | Male   | 35 to 39 | 45%<br>(29-64%)                | 55%<br>(36-71%)          | 2.8<br>(1.3-5.1)                            | 11%<br>(6.6-16%)                     | 14%<br>(7.8-21%)                    | 460<br>(240-760)    | 26000<br>(14000-41000)   |
| Angola   | 2016 | Male   | 40 to 44 | 47%<br>(31-66%)                | 53%<br>(34-69%)          | 2.8<br>(1.2-5.3)                            | 11%<br>(6.5-17%)                     | 15%<br>(8.2-22%)                    | 490<br>(260-820)    | 24000<br>(13000-40000)   |
| Angola   | 2016 | Male   | 45 to 49 | 50%<br>(32-69%)                | 50%<br>(31-68%)          | 3<br>(1.3-5.7)                              | 12%<br>(7-18%)                       | 16%<br>(8.9-23%)                    | 540<br>(270-870)    | 23000<br>(12000-37000)   |
| Angola   | 2016 | Male   | 50 to 54 | 50%<br>(32-68%)                | 50%<br>(32-68%)          | 2.9<br>(1.2-5.7)                            | 12%<br>(6.8-18%)                     | 16%<br>(8.4-24%)                    | 570<br>(280-940)    | 22000<br>(11000-35000)   |
| Angola   | 2016 | Male   | 55 to 59 | 48%<br>(31-67%)                | 52%<br>(33-69%)          | 2.6<br>(1.1-4.9)                            | 11%<br>(5.7-17%)                     | 14%<br>(7.3-22%)                    | 540<br>(260-890)    | 18000<br>(8500-29000)    |
| Angola   | 2016 | Male   | 60 to 64 | 47%<br>(29-66%)                | 53%<br>(34-71%)          | 2.2<br>(0.88-4.6)                           | 9.1%<br>(4.2-15%)                    | 11%<br>(5.3-18%)                    | 490<br>(220-840)    | 14000<br>(6300-23000)    |
| Angola   | 2016 | Male   | 65 to 69 | 48%<br>(31-65%)                | 52%<br>(35-69%)          | 2<br>(0.85-4)                               | 7.6%<br>(3.3-13%)                    | 9.3%<br>(4.1-17%)                   | 390<br>(160-700)    | 8900<br>(3800-16000)     |
| Angola   | 2016 | Male   | 70 to 74 | 48%<br>(30-65%)                | 52%<br>(35-70%)          | 1.8<br>(0.75-3.3)                           | 6%<br>(2.2-11%)                      | 7.1%<br>(2.6-14%)                   | 300<br>(100-580)    | 5400<br>(1900-11000)     |
| Angola   | 2016 | Male   | 75 to 79 | 46%<br>(30-64%)                | 54%<br>(36-70%)          | 1.5<br>(0.6-2.9)                            | 4.5%<br>(1.3-9.6%)                   | 5.3%<br>(1.5-11%)                   | 190<br>(54-420)     | 2800<br>(780-5900)       |
| Angola   | 2016 | Male   | 80 to 84 | 41%<br>(24-59%)                | 59%<br>(41-76%)          | 1.1<br>(0.44-2.3)                           | 3.2%<br>(0.83-7.2%)                  | 3.7%<br>(0.89-8.3%)                 | 87<br>(21-200)      | 930<br>(240-2000)        |
| Angola   | 2016 | Male   | 85 to 89 | 35%<br>(22-52%)                | 65%<br>(48-78%)          | 0.84<br>(0.35-1.8)                          | 2.3%<br>(0.62-5.1%)                  | 2.6%<br>(0.66-5.9%)                 | 34<br>(8.8-79)      | 260<br>(72-590)          |

| Location                 | Year | Sex    | Age      | Prevalence of current drinkers | Prevalence of abstainers | Population average of standard drinks daily | Percent of total attributable deaths | Percent of total attributable DALYs | Attributable deaths | Attributable DALYs       |
|--------------------------|------|--------|----------|--------------------------------|--------------------------|---------------------------------------------|--------------------------------------|-------------------------------------|---------------------|--------------------------|
| Angola                   | 2016 | Male   | 90 to 94 | 35%<br>(21-51%)                | 65%<br>(49-79%)          | 0.73<br>(0.28-1.5)                          | 1.5%<br>(0.29-3.9%)                  | 1.7%<br>(0.24-4.4%)                 | 8.2<br>(1.2-21)     | 45<br>(8.4-110)          |
| Angola                   | 2016 | Male   | 95 plus  | 38%<br>(20-59%)                | 62%<br>(41-80%)          | 0.68<br>(0.21-1.6)                          | 1.7%<br>(0.32-4.6%)                  | 1.9%<br>(0.2-5.2%)                  | 2.1<br>(0.21-5.9)   | 7.8<br>(1.4-21)          |
| Central African Republic | 1990 | Female | All Ages | 24%<br>(19-29%)                | 76%<br>(71-81%)          | 1.4<br>(0.96-1.8)                           | 4.3%<br>(2.9-6%)                     | 7.9%<br>(5-11%)                     | 1900<br>(1200-2700) | 59000<br>(40000-83000)   |
| Central African Republic | 1990 | Female | 15 to 19 | 23%<br>(14-35%)                | 77%<br>(65-86%)          | 1.1<br>(0.5-2)                              | 3.5%<br>(1.5-6.4%)                   | 5.2%<br>(2.1-9.6%)                  | 19<br>(7.4-36)      | 1500<br>(640-2700)       |
| Central African Republic | 1990 | Female | 20 to 24 | 32%<br>(19-47%)                | 68%<br>(53-81%)          | 2.1<br>(1-3.6)                              | 7.3%<br>(3.9-12%)                    | 9.8%<br>(4.8-16%)                   | 49<br>(24-80)       | 3500<br>(1900-5500)      |
| Central African Republic | 1990 | Female | 25 to 29 | 36%<br>(21-52%)                | 64%<br>(48-79%)          | 2.7<br>(1.4-4.5)                            | 9.1%<br>(5.3-14%)                    | 12%<br>(6.5-19%)                    | 66<br>(36-100)      | 4200<br>(2500-6600)      |
| Central African Republic | 1990 | Female | 30 to 34 | 38%<br>(23-55%)                | 62%<br>(45-77%)          | 3<br>(1.7-4.9)                              | 11%<br>(6.5-16%)                     | 14%<br>(8.4-21%)                    | 82<br>(47-120)      | 4800<br>(2900-7200)      |
| Central African Republic | 1990 | Female | 35 to 39 | 39%<br>(25-57%)                | 61%<br>(43-75%)          | 3<br>(1.6-5)                                | 12%<br>(6.8-17%)                     | 15%<br>(8.7-23%)                    | 93<br>(54-150)      | 4900<br>(2900-7400)      |
| Central African Republic | 1990 | Female | 40 to 44 | 40%<br>(25-58%)                | 60%<br>(42-75%)          | 3<br>(1.4-5)                                | 12%<br>(7.5-18%)                     | 16%<br>(9.6-23%)                    | 100<br>(60-150)     | 4700<br>(2900-7000)      |
| Central African Republic | 1990 | Female | 45 to 49 | 39%<br>(24-57%)                | 61%<br>(43-76%)          | 2.8<br>(1.5-5.1)                            | 14%<br>(8.3-21%)                     | 18%<br>(11-27%)                     | 140<br>(80-210)     | 5600<br>(3300-8400)      |
| Central African Republic | 1990 | Female | 50 to 54 | 36%<br>(22-53%)                | 64%<br>(47-78%)          | 2.6<br>(1.3-4.4)                            | 15%<br>(9-22%)                       | 18%<br>(11-28%)                     | 170<br>(100-270)    | 6200<br>(3600-9600)      |
| Central African Republic | 1990 | Female | 55 to 59 | 34%<br>(21-51%)                | 66%<br>(49-79%)          | 2.3<br>(1.1-4.2)                            | 15%<br>(8.1-23%)                     | 18%<br>(9.7-28%)                    | 210<br>(110-330)    | 6500<br>(3500-10000)     |
| Central African Republic | 1990 | Female | 60 to 64 | 33%<br>(20-50%)                | 67%<br>(50-80%)          | 2.2<br>(0.99-4)                             | 13%<br>(6.4-20%)                     | 15%<br>(7.5-24%)                    | 210<br>(100-330)    | 5600<br>(2700-8700)      |
| Central African Republic | 1990 | Female | 65 to 69 | 35%<br>(23-51%)                | 65%<br>(49-77%)          | 2.2<br>(1.1-3.8)                            | 13%<br>(6.3-20%)                     | 15%<br>(7.4-23%)                    | 230<br>(120-370)    | 5200<br>(2600-8100)      |
| Central African Republic | 1990 | Female | 70 to 74 | 35%<br>(23-50%)                | 65%<br>(50-77%)          | 2<br>(0.91-3.6)                             | 11%<br>(4.7-18%)                     | 13%<br>(5.3-21%)                    | 210<br>(88-350)     | 3700<br>(1600-6200)      |
| Central African Republic | 1990 | Female | 75 to 79 | 32%<br>(20-48%)                | 68%<br>(52-80%)          | 1.6<br>(0.71-3.1)                           | 8.6%<br>(3.1-15%)                    | 9.8%<br>(3.7-17%)                   | 150<br>(54-260)     | 2000<br>(740-3600)       |
| Central African Republic | 1990 | Female | 80 to 84 | 29%<br>(17-44%)                | 71%<br>(56-83%)          | 1.3<br>(0.6-2.5)                            | 6.7%<br>(2.4-12%)                    | 7.7%<br>(2.8-14%)                   | 82<br>(30-150)      | 840<br>(310-1600)        |
| Central African Republic | 1990 | Female | 85 to 89 | 28%<br>(17-40%)                | 72%<br>(60-83%)          | 1.2<br>(0.51-2.2)                           | 5.3%<br>(1.8-10%)                    | 6.2%<br>(2-12%)                     | 32<br>(11-62)       | 230<br>(77-450)          |
| Central African Republic | 1990 | Female | 90 to 94 | 29%<br>(18-43%)                | 71%<br>(57-82%)          | 1.1<br>(0.49-2.2)                           | 4.3%<br>(1.2-9.2%)                   | 5.2%<br>(1.5-11%)                   | 8.3<br>(2.3-18)     | 41<br>(11-86)            |
| Central African Republic | 1990 | Female | 95 plus  | 33%<br>(19-50%)                | 67%<br>(50-81%)          | 1.2<br>(0.43-2.3)                           | 3.7%<br>(0.75-8.1%)                  | 4.3%<br>(0.85-9.6%)                 | 1.7<br>(0.33-3.8)   | 5.7<br>(1.2-13)          |
| Central African Republic | 1990 | Male   | All Ages | 31%<br>(25-39%)                | 69%<br>(61-75%)          | 1.7<br>(1.2-2.3)                            | 7.2%<br>(5.3-9.3%)                   | 12%<br>(8.2-15%)                    | 3200<br>(2200-4300) | 120000<br>(86000-150000) |
| Central African Republic | 1990 | Male   | 15 to 19 | 25%<br>(15-40%)                | 75%<br>(60-85%)          | 1.2<br>(0.51-2.2)                           | 6.3%<br>(2.8-11%)                    | 8.1%<br>(3.4-14%)                   | 44<br>(18-76)       | 3300<br>(1400-5600)      |



| Location                 | Year | Sex    | Age      | Prevalence of current drinkers | Prevalence of abstainers | Population average of standard drinks daily | Percent of total attributable deaths | Percent of total attributable DALYs | Attributable deaths | Attributable DALYs     |
|--------------------------|------|--------|----------|--------------------------------|--------------------------|---------------------------------------------|--------------------------------------|-------------------------------------|---------------------|------------------------|
| Central African Republic | 1990 | Male   | 20 to 24 | 37%<br>(23-54%)                | 63%<br>(46-77%)          | 2.4<br>(1.2-4.1)                            | 14%<br>(8.1-21%)                     | 17%<br>(9.2-25%)                    | 130<br>(69-190)     | 8600<br>(4900-13000)   |
| Central African Republic | 1990 | Male   | 25 to 29 | 45%<br>(28-62%)                | 55%<br>(38-72%)          | 3.4<br>(1.9-5.6)                            | 17%<br>(11-23%)                      | 20%<br>(13-28%)                     | 170<br>(110-240)    | 11000<br>(7000-15000)  |
| Central African Republic | 1990 | Male   | 30 to 34 | 47%<br>(29-65%)                | 53%<br>(35-71%)          | 3.8<br>(2.2-6.1)                            | 19%<br>(13-25%)                      | 22%<br>(15-30%)                     | 200<br>(130-270)    | 11000<br>(7600-15000)  |
| Central African Republic | 1990 | Male   | 35 to 39 | 47%<br>(30-65%)                | 53%<br>(35-70%)          | 3.8<br>(2-6.1)                              | 20%<br>(13-27%)                      | 23%<br>(15-31%)                     | 220<br>(140-290)    | 11000<br>(7300-15000)  |
| Central African Republic | 1990 | Male   | 40 to 44 | 49%<br>(32-68%)                | 51%<br>(32-68%)          | 3.9<br>(2-6.4)                              | 21%<br>(14-29%)                      | 25%<br>(16-33%)                     | 260<br>(160-360)    | 12000<br>(7600-16000)  |
| Central African Republic | 1990 | Male   | 45 to 49 | 52%<br>(33-70%)                | 48%<br>(30-67%)          | 4.1<br>(2.3-6.8)                            | 23%<br>(15-31%)                      | 27%<br>(18-36%)                     | 320<br>(220-450)    | 13000<br>(8900-18000)  |
| Central African Republic | 1990 | Male   | 50 to 54 | 52%<br>(34-71%)                | 48%<br>(29-66%)          | 4<br>(2.1-6.7)                              | 23%<br>(15-31%)                      | 27%<br>(18-36%)                     | 370<br>(230-510)    | 13000<br>(8200-18000)  |
| Central African Republic | 1990 | Male   | 55 to 59 | 50%<br>(33-69%)                | 50%<br>(31-67%)          | 3.5<br>(1.8-6.2)                            | 21%<br>(13-29%)                      | 24%<br>(15-34%)                     | 370<br>(220-520)    | 12000<br>(6800-16000)  |
| Central African Republic | 1990 | Male   | 60 to 64 | 49%<br>(31-68%)                | 51%<br>(32-69%)          | 3.1<br>(1.4-5.6)                            | 18%<br>(9.4-25%)                     | 20%<br>(11-29%)                     | 340<br>(170-510)    | 8900<br>(4700-13000)   |
| Central African Republic | 1990 | Male   | 65 to 69 | 49%<br>(32-66%)                | 51%<br>(34-68%)          | 2.8<br>(1.4-4.8)                            | 15%<br>(8-23%)                       | 17%<br>(8.9-26%)                    | 300<br>(150-460)    | 6600<br>(3400-10000)   |
| Central African Republic | 1990 | Male   | 70 to 74 | 50%<br>(33-67%)                | 50%<br>(33-67%)          | 2.4<br>(1.2-4.3)                            | 13%<br>(5.8-21%)                     | 14%<br>(6.5-23%)                    | 230<br>(100-380)    | 4100<br>(1900-6800)    |
| Central African Republic | 1990 | Male   | 75 to 79 | 48%<br>(31-66%)                | 52%<br>(34-69%)          | 2<br>(0.9-3.7)                              | 9.9%<br>(3.6-18%)                    | 11%<br>(4.1-20%)                    | 150<br>(54-270)     | 2000<br>(760-3800)     |
| Central African Republic | 1990 | Male   | 80 to 84 | 43%<br>(25-61%)                | 57%<br>(39-75%)          | 1.5<br>(0.7-2.8)                            | 7.3%<br>(2.6-13%)                    | 8.2%<br>(2.9-15%)                   | 65<br>(23-120)      | 670<br>(240-1200)      |
| Central African Republic | 1990 | Male   | 85 to 89 | 37%<br>(23-54%)                | 63%<br>(46-77%)          | 1.1<br>(0.52-2.1)                           | 5%<br>(1.7-10%)                      | 5.8%<br>(1.9-11%)                   | 19<br>(6.5-38)      | 140<br>(49-270)        |
| Central African Republic | 1990 | Male   | 90 to 94 | 37%<br>(22-53%)                | 63%<br>(47-78%)          | 0.99<br>(0.43-1.8)                          | 3.4%<br>(0.85-7.1%)                  | 3.9%<br>(0.92-8.3%)                 | 3.6<br>(0.84-7.7)   | 18<br>(4.5-39)         |
| Central African Republic | 1990 | Male   | 95 plus  | 40%<br>(22-60%)                | 60%<br>(40-78%)          | 0.92<br>(0.34-1.9)                          | 3.4%<br>(0.55-8%)                    | 3.9%<br>(0.5-9.3%)                  | 0.81<br>(0.1-1.9)   | 2.8<br>(0.46-6.5)      |
| Central African Republic | 1995 | Female | All Ages | 24%<br>(20-29%)                | 76%<br>(71-80%)          | 1.2<br>(0.84-1.6)                           | 3.7%<br>(2.3-5.2%)                   | 6.6%<br>(3.9-9.5%)                  | 1900<br>(1100-2800) | 61000<br>(39000-88000) |
| Central African Republic | 1995 | Female | 15 to 19 | 22%<br>(14-35%)                | 78%<br>(65-86%)          | 0.93<br>(0.45-1.7)                          | 2.9%<br>(1.1-5.4%)                   | 4.1%<br>(1.4-7.9%)                  | 18<br>(5.9-36)      | 1400<br>(570-2700)     |
| Central African Republic | 1995 | Female | 20 to 24 | 32%<br>(19-47%)                | 68%<br>(53-81%)          | 1.8<br>(0.88-3)                             | 5.5%<br>(2.7-8.8%)                   | 6.8%<br>(3-12%)                     | 49<br>(22-81)       | 3500<br>(1700-5700)    |
| Central African Republic | 1995 | Female | 25 to 29 | 36%<br>(21-52%)                | 64%<br>(48-79%)          | 2.3<br>(1.3-3.8)                            | 6.1%<br>(3.1-10%)                    | 7.3%<br>(3.4-13%)                   | 69<br>(34-110)      | 4500<br>(2300-7200)    |
| Central African Republic | 1995 | Female | 30 to 34 | 38%<br>(23-56%)                | 62%<br>(44-77%)          | 2.6<br>(1.4-4.2)                            | 7.3%<br>(4-11%)                      | 8.8%<br>(4.5-14%)                   | 87<br>(47-140)      | 5100<br>(2900-8000)    |
| Central African Republic | 1995 | Female | 35 to 39 | 40%<br>(25-57%)                | 60%<br>(43-75%)          | 2.6<br>(1.4-4.4)                            | 8.4%<br>(4.6-13%)                    | 10%<br>(5.3-17%)                    | 100<br>(55-170)     | 5400<br>(3000-8800)    |

| Location                 | Year | Sex    | Age      | Prevalence of current drinkers | Prevalence of abstainers | Population average of standard drinks daily | Percent of total attributable deaths | Percent of total attributable DALYs | Attributable deaths | Attributable DALYs       |
|--------------------------|------|--------|----------|--------------------------------|--------------------------|---------------------------------------------|--------------------------------------|-------------------------------------|---------------------|--------------------------|
| Central African Republic | 1995 | Female | 40 to 44 | 40%<br>(25-58%)                | 60%<br>(42-75%)          | 2.6<br>(1.3-4.4)                            | 9.2%<br>(5.3-14%)                    | 11%<br>(6.3-18%)                    | 110<br>(59-180)     | 5100<br>(2800-8200)      |
| Central African Republic | 1995 | Female | 45 to 49 | 39%<br>(24-57%)                | 61%<br>(43-76%)          | 2.4<br>(1.2-4.3)                            | 11%<br>(6.2-17%)                     | 14%<br>(7.7-21%)                    | 130<br>(73-220)     | 5500<br>(3100-9000)      |
| Central African Republic | 1995 | Female | 50 to 54 | 36%<br>(22-54%)                | 64%<br>(46-78%)          | 2.2<br>(1.1-3.8)                            | 12%<br>(6.8-19%)                     | 15%<br>(8.3-23%)                    | 180<br>(91-290)     | 6300<br>(3300-10000)     |
| Central African Republic | 1995 | Female | 55 to 59 | 33%<br>(21-51%)                | 67%<br>(49-79%)          | 2<br>(0.99-3.6)                             | 13%<br>(6.7-20%)                     | 15%<br>(7.7-24%)                    | 210<br>(100-340)    | 6600<br>(3300-11000)     |
| Central African Republic | 1995 | Female | 60 to 64 | 33%<br>(20-50%)                | 67%<br>(50-80%)          | 1.9<br>(0.87-3.5)                           | 11%<br>(5.4-18%)                     | 13%<br>(6.1-21%)                    | 210<br>(99-340)     | 5600<br>(2600-9100)      |
| Central African Republic | 1995 | Female | 65 to 69 | 35%<br>(22-50%)                | 65%<br>(50-78%)          | 1.9<br>(0.91-3.2)                           | 11%<br>(5.2-18%)                     | 13%<br>(6-21%)                      | 240<br>(110-400)    | 5300<br>(2400-8700)      |
| Central African Republic | 1995 | Female | 70 to 74 | 35%<br>(23-50%)                | 65%<br>(50-77%)          | 1.7<br>(0.77-3.1)                           | 9.5%<br>(3.7-16%)                    | 11%<br>(4.3-18%)                    | 210<br>(81-370)     | 3800<br>(1400-6600)      |
| Central African Republic | 1995 | Female | 75 to 79 | 32%<br>(20-48%)                | 68%<br>(52-80%)          | 1.4<br>(0.61-2.7)                           | 7.2%<br>(2.2-14%)                    | 8.2%<br>(2.6-15%)                   | 140<br>(45-270)     | 1900<br>(620-3700)       |
| Central African Republic | 1995 | Female | 80 to 84 | 29%<br>(18-45%)                | 71%<br>(55-82%)          | 1.1<br>(0.51-2.1)                           | 5.6%<br>(1.7-11%)                    | 6.4%<br>(2-12%)                     | 79<br>(25-160)      | 810<br>(260-1600)        |
| Central African Republic | 1995 | Female | 85 to 89 | 27%<br>(17-41%)                | 73%<br>(59-83%)          | 1<br>(0.44-1.8)                             | 4.4%<br>(1.4-9.4%)                   | 5.1%<br>(1.6-11%)                   | 30<br>(8.9-62)      | 210<br>(65-440)          |
| Central African Republic | 1995 | Female | 90 to 94 | 29%<br>(18-43%)                | 71%<br>(57-82%)          | 0.97<br>(0.43-1.8)                          | 3.6%<br>(0.84-8%)                    | 4.3%<br>(1-9.6%)                    | 8.1<br>(1.9-18)     | 40<br>(9.5-89)           |
| Central African Republic | 1995 | Female | 95 plus  | 33%<br>(19-51%)                | 67%<br>(49-81%)          | 0.99<br>(0.37-1.9)                          | 3.1%<br>(0.45-7.4%)                  | 3.6%<br>(0.48-8.9%)                 | 1.7<br>(0.23-4.2)   | 5.9<br>(0.87-14)         |
| Central African Republic | 1995 | Male   | All Ages | 31%<br>(25-39%)                | 69%<br>(61-75%)          | 1.5<br>(1.1-2)                              | 6.4%<br>(4.5-8.5%)                   | 10%<br>(6.6-13%)                    | 3300<br>(2100-4600) | 130000<br>(86000-170000) |
| Central African Republic | 1995 | Male   | 15 to 19 | 25%<br>(15-40%)                | 75%<br>(60-85%)          | 1<br>(0.46-1.9)                             | 5.4%<br>(2.4-9.8%)                   | 6.9%<br>(2.7-13%)                   | 45<br>(18-85)       | 3400<br>(1500-6200)      |
| Central African Republic | 1995 | Male   | 20 to 24 | 38%<br>(24-54%)                | 62%<br>(46-76%)          | 2.1<br>(1.1-3.6)                            | 12%<br>(6.5-18%)                     | 14%<br>(7.3-22%)                    | 140<br>(70-210)     | 9400<br>(5100-14000)     |
| Central African Republic | 1995 | Male   | 25 to 29 | 45%<br>(28-63%)                | 55%<br>(37-72%)          | 3<br>(1.7-5)                                | 13%<br>(7.8-19%)                     | 15%<br>(8.6-23%)                    | 190<br>(110-280)    | 12000<br>(7300-17000)    |
| Central African Republic | 1995 | Male   | 30 to 34 | 47%<br>(29-66%)                | 53%<br>(34-71%)          | 3.4<br>(1.9-5.2)                            | 14%<br>(8.5-20%)                     | 16%<br>(9.3-23%)                    | 220<br>(130-310)    | 12000<br>(7900-18000)    |
| Central African Republic | 1995 | Male   | 35 to 39 | 47%<br>(31-66%)                | 53%<br>(34-69%)          | 3.3<br>(1.8-5.3)                            | 15%<br>(9-21%)                       | 17%<br>(10-25%)                     | 240<br>(150-360)    | 13000<br>(7700-18000)    |
| Central African Republic | 1995 | Male   | 40 to 44 | 49%<br>(33-68%)                | 51%<br>(32-67%)          | 3.4<br>(1.7-5.5)                            | 17%<br>(9.7-23%)                     | 19%<br>(11-26%)                     | 290<br>(160-420)    | 13000<br>(7600-19000)    |
| Central African Republic | 1995 | Male   | 45 to 49 | 52%<br>(34-69%)                | 48%<br>(31-66%)          | 3.6<br>(2-5.9)                              | 19%<br>(12-26%)                      | 21%<br>(13-30%)                     | 340<br>(200-500)    | 14000<br>(8100-20000)    |
| Central African Republic | 1995 | Male   | 50 to 54 | 53%<br>(35-71%)                | 47%<br>(29-65%)          | 3.5<br>(1.8-5.9)                            | 20%<br>(12-28%)                      | 23%<br>(14-32%)                     | 390<br>(220-580)    | 14000<br>(8000-21000)    |
| Central African Republic | 1995 | Male   | 55 to 59 | 50%<br>(33-70%)                | 50%<br>(30-67%)          | 3.1<br>(1.6-5.3)                            | 19%<br>(11-26%)                      | 21%<br>(12-30%)                     | 390<br>(210-590)    | 12000<br>(6600-18000)    |

| Location                 | Year | Sex    | Age      | Prevalence of current drinkers | Prevalence of abstainers | Population average of standard drinks daily | Percent of total attributable deaths | Percent of total attributable DALYs | Attributable deaths | Attributable DALYs     |
|--------------------------|------|--------|----------|--------------------------------|--------------------------|---------------------------------------------|--------------------------------------|-------------------------------------|---------------------|------------------------|
| Central African Republic | 1995 | Male   | 60 to 64 | 49%<br>(31-68%)                | 51%<br>(32-69%)          | 2.7<br>(1.2-4.8)                            | 15%<br>(7.7-23%)                     | 17%<br>(8.7-26%)                    | 340<br>(160-540)    | 9100<br>(4300-14000)   |
| Central African Republic | 1995 | Male   | 65 to 69 | 50%<br>(32-67%)                | 50%<br>(33-68%)          | 2.4<br>(1.2-4)                              | 13%<br>(6.5-21%)                     | 15%<br>(7.2-23%)                    | 300<br>(150-480)    | 6700<br>(3300-11000)   |
| Central African Republic | 1995 | Male   | 70 to 74 | 50%<br>(33-67%)                | 50%<br>(33-67%)          | 2.1<br>(1-3.7)                              | 11%<br>(4.3-18%)                     | 12%<br>(4.9-20%)                    | 230<br>(93-390)     | 4100<br>(1700-7000)    |
| Central African Republic | 1995 | Male   | 75 to 79 | 48%<br>(32-66%)                | 52%<br>(34-68%)          | 1.7<br>(0.78-3.2)                           | 8.4%<br>(3-16%)                      | 9.5%<br>(3.3-18%)                   | 140<br>(50-270)     | 2000<br>(700-3700)     |
| Central African Republic | 1995 | Male   | 80 to 84 | 43%<br>(26-61%)                | 57%<br>(39-74%)          | 1.3<br>(0.61-2.4)                           | 6.2%<br>(2.1-12%)                    | 7%<br>(2.3-14%)                     | 64<br>(21-130)      | 650<br>(220-1300)      |
| Central African Republic | 1995 | Male   | 85 to 89 | 37%<br>(23-55%)                | 63%<br>(45-77%)          | 1<br>(0.46-1.8)                             | 4.2%<br>(1.3-8.9%)                   | 4.9%<br>(1.4-10%)                   | 18<br>(5.4-38)      | 130<br>(40-280)        |
| Central African Republic | 1995 | Male   | 90 to 94 | 37%<br>(23-54%)                | 63%<br>(46-77%)          | 0.86<br>(0.37-1.6)                          | 2.8%<br>(0.62-6.1%)                  | 3.2%<br>(0.64-7.2%)                 | 3.6<br>(0.72-7.9)   | 18<br>(4-39)           |
| Central African Republic | 1995 | Male   | 95 plus  | 40%<br>(22-61%)                | 60%<br>(39-78%)          | 0.81<br>(0.3-1.6)                           | 2.9%<br>(0.35-7%)                    | 3.3%<br>(0.27-8%)                   | 0.84<br>(0.07-2)    | 2.9<br>(0.35-6.9)      |
| Central African Republic | 2000 | Female | All Ages | 23%<br>(19-29%)                | 77%<br>(71-81%)          | 0.99<br>(0.71-1.3)                          | 3%<br>(1.7-4.5%)                     | 5.3%<br>(2.8-8%)                    | 1800<br>(940-2900)  | 60000<br>(34000-92000) |
| Central African Republic | 2000 | Female | 15 to 19 | 22%<br>(13-34%)                | 78%<br>(66-87%)          | 0.78<br>(0.37-1.4)                          | 2.5%<br>(1-4.5%)                     | 3.4%<br>(1.2-6.5%)                  | 17<br>(6.2-34)      | 1400<br>(580-2600)     |
| Central African Republic | 2000 | Female | 20 to 24 | 31%<br>(19-46%)                | 69%<br>(54-81%)          | 1.5<br>(0.75-2.6)                           | 4.6%<br>(2.3-7.8%)                   | 5.6%<br>(2.5-9.9%)                  | 48<br>(22-85)       | 3500<br>(1800-6000)    |
| Central African Republic | 2000 | Female | 25 to 29 | 35%<br>(21-52%)                | 65%<br>(48-79%)          | 2<br>(1.1-3.3)                              | 4.5%<br>(2.2-7.9%)                   | 5.1%<br>(2.3-9.4%)                  | 70<br>(33-120)      | 4500<br>(2300-7700)    |
| Central African Republic | 2000 | Female | 30 to 34 | 37%<br>(23-55%)                | 63%<br>(45-77%)          | 2.2<br>(1.2-3.5)                            | 5%<br>(2.6-8.2%)                     | 5.7%<br>(2.8-9.5%)                  | 86<br>(43-150)      | 5000<br>(2600-8400)    |
| Central African Republic | 2000 | Female | 35 to 39 | 39%<br>(24-57%)                | 61%<br>(43-76%)          | 2.2<br>(1.2-3.8)                            | 5.8%<br>(2.9-9.8%)                   | 6.7%<br>(3.2-12%)                   | 100<br>(50-180)     | 5300<br>(2700-9300)    |
| Central African Republic | 2000 | Female | 40 to 44 | 39%<br>(25-58%)                | 61%<br>(42-75%)          | 2.2<br>(1.1-3.8)                            | 6.6%<br>(3.5-11%)                    | 7.7%<br>(4-12%)                     | 110<br>(52-200)     | 5200<br>(2500-9000)    |
| Central African Republic | 2000 | Female | 45 to 49 | 38%<br>(23-56%)                | 62%<br>(44-77%)          | 2<br>(1-3.8)                                | 8.4%<br>(4.3-13%)                    | 9.9%<br>(5.1-16%)                   | 140<br>(64-240)     | 5600<br>(2800-9800)    |
| Central African Republic | 2000 | Female | 50 to 54 | 36%<br>(21-53%)                | 64%<br>(47-79%)          | 1.8<br>(0.9-3.2)                            | 9.8%<br>(4.8-16%)                    | 12%<br>(5.6-19%)                    | 170<br>(77-290)     | 6000<br>(2800-10000)   |
| Central African Republic | 2000 | Female | 55 to 59 | 33%<br>(20-50%)                | 67%<br>(50-80%)          | 1.7<br>(0.81-3)                             | 11%<br>(5.2-18%)                     | 13%<br>(6.1-21%)                    | 200<br>(88-360)     | 6400<br>(2800-11000)   |
| Central African Republic | 2000 | Female | 60 to 64 | 32%<br>(20-49%)                | 68%<br>(51-80%)          | 1.6<br>(0.75-3)                             | 9.6%<br>(3.9-16%)                    | 11%<br>(4.6-19%)                    | 200<br>(82-360)     | 5400<br>(2200-9400)    |
| Central African Republic | 2000 | Female | 65 to 69 | 34%<br>(22-49%)                | 66%<br>(51-78%)          | 1.6<br>(0.77-2.7)                           | 9.3%<br>(4-16%)                      | 11%<br>(4.6-18%)                    | 220<br>(92-390)     | 4900<br>(2000-8600)    |
| Central African Republic | 2000 | Female | 70 to 74 | 34%<br>(22-49%)                | 66%<br>(51-78%)          | 1.4<br>(0.66-2.5)                           | 7.9%<br>(2.8-14%)                    | 9%<br>(3.3-16%)                     | 200<br>(71-370)     | 3600<br>(1300-6500)    |
| Central African Republic | 2000 | Female | 75 to 79 | 31%<br>(19-47%)                | 69%<br>(53-81%)          | 1.1<br>(0.51-2.2)                           | 5.9%<br>(1.7-12%)                    | 6.7%<br>(1.9-13%)                   | 130<br>(37-270)     | 1800<br>(510-3700)     |

| Location                 | Year | Sex    | Age      | Prevalence of current drinkers | Prevalence of abstainers | Population average of standard drinks daily | Percent of total attributable deaths | Percent of total attributable DALYs | Attributable deaths | Attributable DALYs       |
|--------------------------|------|--------|----------|--------------------------------|--------------------------|---------------------------------------------|--------------------------------------|-------------------------------------|---------------------|--------------------------|
| Central African Republic | 2000 | Female | 80 to 84 | 28%<br>(17-44%)                | 72%<br>(56-83%)          | 0.94<br>(0.43-1.7)                          | 4.6%<br>(1.3-9.2%)                   | 5.3%<br>(1.5-11%)                   | 75<br>(20-150)      | 760<br>(200-1500)        |
| Central African Republic | 2000 | Female | 85 to 89 | 27%<br>(17-40%)                | 73%<br>(60-83%)          | 0.83<br>(0.38-1.6)                          | 3.6%<br>(0.89-7.8%)                  | 4.2%<br>(1-9.1%)                    | 26<br>(6.5-57)      | 180<br>(47-410)          |
| Central African Republic | 2000 | Female | 90 to 94 | 28%<br>(18-41%)                | 72%<br>(59-82%)          | 0.81<br>(0.35-1.6)                          | 2.9%<br>(0.56-6.7%)                  | 3.5%<br>(0.68-8.2%)                 | 6.9<br>(1.3-16)     | 34<br>(6.4-79)           |
| Central African Republic | 2000 | Female | 95 plus  | 32%<br>(18-50%)                | 68%<br>(50-82%)          | 0.83<br>(0.32-1.6)                          | 2.6%<br>(0.26-6.3%)                  | 3%<br>(0.24-7.5%)                   | 1.6<br>(0.13-3.9)   | 5.3<br>(0.54-13)         |
| Central African Republic | 2000 | Male   | All Ages | 31%<br>(25-39%)                | 69%<br>(61-75%)          | 1.3<br>(0.93-1.7)                           | 5.7%<br>(3.8-7.8%)                   | 8.7%<br>(5.5-12%)                   | 3400<br>(2000-4900) | 130000<br>(83000-180000) |
| Central African Republic | 2000 | Male   | 15 to 19 | 25%<br>(14-39%)                | 75%<br>(61-86%)          | 0.89<br>(0.4-1.7)                           | 4.9%<br>(2-8.9%)                     | 6.2%<br>(2.3-11%)                   | 48<br>(17-91)       | 3600<br>(1500-6600)      |
| Central African Republic | 2000 | Male   | 20 to 24 | 37%<br>(23-54%)                | 63%<br>(46-77%)          | 1.9<br>(0.94-3.2)                           | 11%<br>(6.1-18%)                     | 13%<br>(6.8-21%)                    | 140<br>(73-230)     | 9900<br>(5400-16000)     |
| Central African Republic | 2000 | Male   | 25 to 29 | 45%<br>(27-62%)                | 55%<br>(38-73%)          | 2.6<br>(1.5-4.2)                            | 12%<br>(6.8-18%)                     | 14%<br>(7.3-21%)                    | 200<br>(120-310)    | 13000<br>(7600-19000)    |
| Central African Republic | 2000 | Male   | 30 to 34 | 47%<br>(29-65%)                | 53%<br>(35-71%)          | 3<br>(1.7-4.6)                              | 12%<br>(7.1-17%)                     | 13%<br>(7.6-19%)                    | 240<br>(140-350)    | 13000<br>(8100-20000)    |
| Central African Republic | 2000 | Male   | 35 to 39 | 47%<br>(31-65%)                | 53%<br>(35-69%)          | 2.9<br>(1.6-4.7)                            | 12%<br>(6.9-18%)                     | 13%<br>(7.6-20%)                    | 260<br>(150-400)    | 13000<br>(7700-21000)    |
| Central African Republic | 2000 | Male   | 40 to 44 | 49%<br>(32-68%)                | 51%<br>(32-68%)          | 2.9<br>(1.5-5)                              | 14%<br>(8-20%)                       | 15%<br>(8.7-22%)                    | 310<br>(170-480)    | 14000<br>(7900-22000)    |
| Central African Republic | 2000 | Male   | 45 to 49 | 52%<br>(34-69%)                | 48%<br>(31-66%)          | 3.1<br>(1.7-5.3)                            | 16%<br>(9.3-22%)                     | 18%<br>(10-25%)                     | 360<br>(190-560)    | 15000<br>(7900-23000)    |
| Central African Republic | 2000 | Male   | 50 to 54 | 52%<br>(35-71%)                | 48%<br>(29-65%)          | 3<br>(1.6-5.1)                              | 17%<br>(9.6-26%)                     | 19%<br>(11-29%)                     | 390<br>(200-620)    | 14000<br>(7100-22000)    |
| Central African Republic | 2000 | Male   | 55 to 59 | 50%<br>(33-68%)                | 50%<br>(32-67%)          | 2.7<br>(1.4-4.7)                            | 16%<br>(8.8-24%)                     | 19%<br>(9.9-27%)                    | 390<br>(200-620)    | 12000<br>(6200-19000)    |
| Central African Republic | 2000 | Male   | 60 to 64 | 49%<br>(31-68%)                | 51%<br>(32-69%)          | 2.3<br>(1.1-4.3)                            | 14%<br>(6-22%)                       | 15%<br>(6.6-24%)                    | 340<br>(150-560)    | 9000<br>(4000-15000)     |
| Central African Republic | 2000 | Male   | 65 to 69 | 50%<br>(33-67%)                | 50%<br>(33-67%)          | 2.1<br>(1.1-3.6)                            | 12%<br>(5-19%)                       | 13%<br>(5.5-21%)                    | 290<br>(120-500)    | 6500<br>(2600-11000)     |
| Central African Republic | 2000 | Male   | 70 to 74 | 50%<br>(34-66%)                | 50%<br>(34-66%)          | 1.8<br>(0.9-3.2)                            | 9.3%<br>(3.6-16%)                    | 10%<br>(4-18%)                      | 230<br>(85-400)     | 4000<br>(1500-7000)      |
| Central African Republic | 2000 | Male   | 75 to 79 | 48%<br>(32-66%)                | 52%<br>(34-68%)          | 1.5<br>(0.69-2.8)                           | 7.3%<br>(2.2-14%)                    | 8.1%<br>(2.4-15%)                   | 140<br>(41-270)     | 1900<br>(580-3700)       |
| Central African Republic | 2000 | Male   | 80 to 84 | 43%<br>(26-62%)                | 57%<br>(38-74%)          | 1.2<br>(0.54-2.1)                           | 5.3%<br>(1.5-11%)                    | 5.9%<br>(1.6-12%)                   | 62<br>(17-130)      | 630<br>(180-1300)        |
| Central African Republic | 2000 | Male   | 85 to 89 | 38%<br>(23-54%)                | 62%<br>(46-77%)          | 0.88<br>(0.41-1.6)                          | 3.6%<br>(0.9-7.6%)                   | 4.1%<br>(0.99-8.6%)                 | 17<br>(4.1-35)      | 120<br>(31-260)          |
| Central African Republic | 2000 | Male   | 90 to 94 | 37%<br>(23-53%)                | 63%<br>(47-77%)          | 0.76<br>(0.33-1.4)                          | 2.3%<br>(0.41-5.3%)                  | 2.7%<br>(0.38-6.2%)                 | 3.3<br>(0.47-7.6)   | 17<br>(2.9-38)           |
| Central African Republic | 2000 | Male   | 95 plus  | 40%<br>(21-61%)                | 60%<br>(39-79%)          | 0.71<br>(0.26-1.5)                          | 2.4%<br>(0.18-6%)                    | 2.7%<br>(0.068-7.1%)                | 0.82<br>(0.02-2.1)  | 2.8<br>(0.21-7.3)        |

| Location                 | Year | Sex    | Age      | Prevalence of current drinkers | Prevalence of abstainers | Population average of standard drinks daily | Percent of total attributable deaths | Percent of total attributable DALYs | Attributable deaths | Attributable DALYs       |
|--------------------------|------|--------|----------|--------------------------------|--------------------------|---------------------------------------------|--------------------------------------|-------------------------------------|---------------------|--------------------------|
| Central African Republic | 2005 | Female | All Ages | 23%<br>(19-29%)                | 77%<br>(71-81%)          | 0.93<br>(0.65-1.3)                          | 2.9%<br>(1.6-4.4%)                   | 4.9%<br>(2.6-7.7%)                  | 1800<br>(910-3000)  | 59000<br>(33000-98000)   |
| Central African Republic | 2005 | Female | 15 to 19 | 21%<br>(13-34%)                | 79%<br>(66-87%)          | 0.72<br>(0.34-1.3)                          | 2.2%<br>(0.97-4.1%)                  | 2.9%<br>(1.1-5.7%)                  | 17<br>(6.2-36)      | 1400<br>(620-2700)       |
| Central African Republic | 2005 | Female | 20 to 24 | 30%<br>(18-45%)                | 70%<br>(55-82%)          | 1.4<br>(0.72-2.5)                           | 4.8%<br>(2.3-8.2%)                   | 5.9%<br>(2.4-11%)                   | 50<br>(22-93)       | 3700<br>(1800-6500)      |
| Central African Republic | 2005 | Female | 25 to 29 | 34%<br>(21-51%)                | 66%<br>(49-79%)          | 1.9<br>(1-3.1)                              | 4.5%<br>(2.2-7.7%)                   | 5.2%<br>(2.3-9.4%)                  | 72<br>(33-130)      | 4700<br>(2300-8200)      |
| Central African Republic | 2005 | Female | 30 to 34 | 37%<br>(22-54%)                | 63%<br>(46-78%)          | 2.1<br>(1.1-3.5)                            | 4.5%<br>(2.3-7.5%)                   | 5%<br>(2.5-8.6%)                    | 87<br>(41-160)      | 5100<br>(2600-8900)      |
| Central African Republic | 2005 | Female | 35 to 39 | 38%<br>(24-56%)                | 62%<br>(44-76%)          | 2.1<br>(1.1-3.5)                            | 4.8%<br>(2.4-8.9%)                   | 5.5%<br>(2.6-10%)                   | 94<br>(43-180)      | 4900<br>(2400-9200)      |
| Central African Republic | 2005 | Female | 40 to 44 | 39%<br>(24-56%)                | 61%<br>(44-76%)          | 2<br>(0.99-3.6)                             | 5.6%<br>(2.7-9.1%)                   | 6.4%<br>(3-11%)                     | 110<br>(47-190)     | 5000<br>(2300-9000)      |
| Central African Republic | 2005 | Female | 45 to 49 | 38%<br>(23-55%)                | 62%<br>(45-77%)          | 2<br>(0.97-3.5)                             | 7.5%<br>(3.8-12%)                    | 8.8%<br>(4.3-15%)                   | 140<br>(63-270)     | 5900<br>(2700-11000)     |
| Central African Republic | 2005 | Female | 50 to 54 | 35%<br>(21-52%)                | 65%<br>(48-79%)          | 1.8<br>(0.85-3.1)                           | 9.1%<br>(4.3-16%)                    | 11%<br>(5.2-18%)                    | 170<br>(71-320)     | 6300<br>(2600-11000)     |
| Central African Republic | 2005 | Female | 55 to 59 | 32%<br>(20-49%)                | 68%<br>(51-80%)          | 1.6<br>(0.76-2.8)                           | 10%<br>(4.7-17%)                     | 12%<br>(5.6-20%)                    | 200<br>(79-360)     | 6200<br>(2500-11000)     |
| Central African Republic | 2005 | Female | 60 to 64 | 32%<br>(19-49%)                | 68%<br>(51-81%)          | 1.5<br>(0.71-2.8)                           | 8.9%<br>(3.8-15%)                    | 10%<br>(4.4-17%)                    | 200<br>(77-360)     | 5200<br>(2100-9500)      |
| Central African Republic | 2005 | Female | 65 to 69 | 33%<br>(22-49%)                | 67%<br>(51-78%)          | 1.5<br>(0.72-2.6)                           | 8.6%<br>(3.6-15%)                    | 9.9%<br>(4.1-17%)                   | 220<br>(84-390)     | 4800<br>(1900-8600)      |
| Central African Republic | 2005 | Female | 70 to 74 | 33%<br>(22-48%)                | 67%<br>(52-78%)          | 1.3<br>(0.61-2.4)                           | 7.3%<br>(2.4-13%)                    | 8.3%<br>(2.8-16%)                   | 200<br>(65-380)     | 3500<br>(1100-6800)      |
| Central African Republic | 2005 | Female | 75 to 79 | 30%<br>(19-46%)                | 70%<br>(54-81%)          | 1.1<br>(0.47-2.1)                           | 5.5%<br>(1.4-11%)                    | 6.2%<br>(1.5-13%)                   | 130<br>(33-290)     | 1800<br>(450-4000)       |
| Central African Republic | 2005 | Female | 80 to 84 | 28%<br>(17-43%)                | 72%<br>(57-83%)          | 0.89<br>(0.4-1.6)                           | 4.2%<br>(1.1-9.1%)                   | 4.9%<br>(1.2-10%)                   | 76<br>(20-160)      | 770<br>(200-1700)        |
| Central African Republic | 2005 | Female | 85 to 89 | 26%<br>(16-40%)                | 74%<br>(60-84%)          | 0.78<br>(0.34-1.5)                          | 3.3%<br>(0.62-7.2%)                  | 3.8%<br>(0.73-8.4%)                 | 26<br>(5.2-59)      | 190<br>(38-420)          |
| Central African Republic | 2005 | Female | 90 to 94 | 28%<br>(17-41%)                | 72%<br>(59-83%)          | 0.76<br>(0.31-1.5)                          | 2.6%<br>(0.41-6.2%)                  | 3.2%<br>(0.46-7.5%)                 | 6.5<br>(0.95-16)    | 32<br>(4.8-77)           |
| Central African Republic | 2005 | Female | 95 plus  | 31%<br>(17-49%)                | 69%<br>(51-83%)          | 0.76<br>(0.28-1.6)                          | 2.3%<br>(0.2-6.1%)                   | 2.7%<br>(0.18-7.2%)                 | 1.5<br>(0.094-4)    | 5<br>(0.42-13)           |
| Central African Republic | 2005 | Male   | All Ages | 31%<br>(25-39%)                | 69%<br>(61-75%)          | 1.2<br>(0.89-1.7)                           | 5.6%<br>(3.6-7.8%)                   | 8.4%<br>(5.2-12%)                   | 3400<br>(2000-5000) | 130000<br>(84000-190000) |
| Central African Republic | 2005 | Male   | 15 to 19 | 25%<br>(15-40%)                | 75%<br>(60-85%)          | 0.85<br>(0.37-1.6)                          | 4.6%<br>(1.9-8.5%)                   | 5.6%<br>(2.1-11%)                   | 50<br>(18-94)       | 3800<br>(1600-6900)      |
| Central African Republic | 2005 | Male   | 20 to 24 | 38%<br>(23-55%)                | 62%<br>(45-77%)          | 1.8<br>(0.9-3)                              | 12%<br>(6.3-18%)                     | 14%<br>(6.9-21%)                    | 160<br>(76-250)     | 11000<br>(5600-17000)    |
| Central African Republic | 2005 | Male   | 25 to 29 | 45%<br>(28-62%)                | 55%<br>(38-72%)          | 2.5<br>(1.4-4.1)                            | 13%<br>(7.5-19%)                     | 15%<br>(8.2-23%)                    | 220<br>(120-330)    | 14000<br>(7900-21000)    |

| Location                 | Year | Sex    | Age      | Prevalence of current drinkers | Prevalence of abstainers | Population average of standard drinks daily | Percent of total attributable deaths | Percent of total attributable DALYs | Attributable deaths   | Attributable DALYs      |
|--------------------------|------|--------|----------|--------------------------------|--------------------------|---------------------------------------------|--------------------------------------|-------------------------------------|-----------------------|-------------------------|
| Central African Republic | 2005 | Male   | 30 to 34 | 47%<br>(30-65%)                | 53%<br>(35-70%)          | 2.8<br>(1.5-4.5)                            | 12%<br>(7.3-17%)                     | 13%<br>(7.9-20%)                    | 250<br>(140-370)      | 14000<br>(8600-21000)   |
| Central African Republic | 2005 | Male   | 35 to 39 | 46%<br>(30-64%)                | 54%<br>(36-70%)          | 2.7<br>(1.4-4.6)                            | 12%<br>(6.5-17%)                     | 13%<br>(7.1-19%)                    | 260<br>(150-410)      | 14000<br>(7700-21000)   |
| Central African Republic | 2005 | Male   | 40 to 44 | 48%<br>(32-67%)                | 52%<br>(33-68%)          | 2.8<br>(1.4-4.8)                            | 13%<br>(7.1-19%)                     | 14%<br>(7.9-21%)                    | 310<br>(160-490)      | 14000<br>(7700-22000)   |
| Central African Republic | 2005 | Male   | 45 to 49 | 52%<br>(33-69%)                | 48%<br>(31-67%)          | 3<br>(1.6-5.1)                              | 15%<br>(8.1-22%)                     | 17%<br>(9.1-24%)                    | 370<br>(190-570)      | 15000<br>(7800-23000)   |
| Central African Republic | 2005 | Male   | 50 to 54 | 52%<br>(34-70%)                | 48%<br>(30-66%)          | 2.9<br>(1.5-5)                              | 16%<br>(8.8-24%)                     | 18%<br>(9.8-27%)                    | 400<br>(190-640)      | 14000<br>(6900-23000)   |
| Central African Republic | 2005 | Male   | 55 to 59 | 50%<br>(33-69%)                | 50%<br>(31-67%)          | 2.5<br>(1.3-4.4)                            | 16%<br>(8-24%)                       | 18%<br>(9-27%)                      | 370<br>(180-600)      | 12000<br>(5700-18000)   |
| Central African Republic | 2005 | Male   | 60 to 64 | 48%<br>(30-68%)                | 52%<br>(32-70%)          | 2.2<br>(1-4)                                | 13%<br>(5.6-21%)                     | 14%<br>(6.3-24%)                    | 330<br>(140-570)      | 8800<br>(3700-15000)    |
| Central African Republic | 2005 | Male   | 65 to 69 | 49%<br>(32-66%)                | 51%<br>(34-68%)          | 2<br>(0.99-3.5)                             | 11%<br>(4.7-18%)                     | 12%<br>(5.2-21%)                    | 290<br>(120-500)      | 6400<br>(2700-11000)    |
| Central African Republic | 2005 | Male   | 70 to 74 | 50%<br>(33-67%)                | 50%<br>(33-67%)          | 1.8<br>(0.85-3.1)                           | 8.7%<br>(3.1-16%)                    | 9.7%<br>(3.4-18%)                   | 220<br>(77-400)       | 4000<br>(1400-7100)     |
| Central African Republic | 2005 | Male   | 75 to 79 | 48%<br>(32-66%)                | 52%<br>(34-68%)          | 1.5<br>(0.65-2.8)                           | 6.8%<br>(1.8-13%)                    | 7.6%<br>(2.1-15%)                   | 140<br>(37-280)       | 2000<br>(520-3800)      |
| Central African Republic | 2005 | Male   | 80 to 84 | 43%<br>(26-61%)                | 57%<br>(39-74%)          | 1.1<br>(0.5-2.1)                            | 4.9%<br>(1.2-10%)                    | 5.5%<br>(1.4-12%)                   | 63<br>(15-130)        | 640<br>(160-1400)       |
| Central African Republic | 2005 | Male   | 85 to 89 | 38%<br>(23-54%)                | 62%<br>(46-77%)          | 0.85<br>(0.37-1.5)                          | 3.3%<br>(0.71-7.1%)                  | 3.8%<br>(0.79-8%)                   | 17<br>(3.6-37)        | 130<br>(27-270)         |
| Central African Republic | 2005 | Male   | 90 to 94 | 37%<br>(22-53%)                | 63%<br>(47-78%)          | 0.73<br>(0.31-1.4)                          | 2.1%<br>(0.25-5%)                    | 2.4%<br>(0.22-5.8%)                 | 3.2<br>(0.3-7.7)      | 17<br>(2-39)            |
| Central African Republic | 2005 | Male   | 95 plus  | 40%<br>(21-62%)                | 60%<br>(38-79%)          | 0.68<br>(0.24-1.4)                          | 2.2%<br>(0.14-5.7%)                  | 2.5%<br>(0.0019-6.7%)               | 0.83<br>(0.00064-2.2) | 2.9<br>(0.19-7.4)       |
| Central African Republic | 2010 | Female | All Ages | 23%<br>(18-28%)                | 77%<br>(72-82%)          | 0.96<br>(0.64-1.4)                          | 3%<br>(1.6-4.7%)                     | 5.1%<br>(2.5-8.1%)                  | 1900<br>(870-3200)    | 62000<br>(32000-100000) |
| Central African Republic | 2010 | Female | 15 to 19 | 21%<br>(13-33%)                | 79%<br>(67-87%)          | 0.74<br>(0.34-1.4)                          | 2.2%<br>(0.9-4.1%)                   | 2.8%<br>(0.97-5.6%)                 | 19<br>(6.4-39)        | 1600<br>(640-3000)      |
| Central African Republic | 2010 | Female | 20 to 24 | 30%<br>(19-45%)                | 70%<br>(55-81%)          | 1.4<br>(0.71-2.6)                           | 5.2%<br>(2.4-9.1%)                   | 6.6%<br>(2.7-12%)                   | 56<br>(24-100)        | 4100<br>(2000-7200)     |
| Central African Republic | 2010 | Female | 25 to 29 | 34%<br>(21-50%)                | 66%<br>(50-79%)          | 1.9<br>(0.99-3.2)                           | 5.4%<br>(2.7-9%)                     | 6.5%<br>(3-11%)                     | 80<br>(37-140)        | 5200<br>(2700-8900)     |
| Central African Republic | 2010 | Female | 30 to 34 | 37%<br>(22-54%)                | 63%<br>(46-78%)          | 2.1<br>(1.1-3.5)                            | 5.3%<br>(2.7-8.8%)                   | 6.1%<br>(3-10%)                     | 95<br>(43-170)        | 5600<br>(2800-9800)     |
| Central African Republic | 2010 | Female | 35 to 39 | 38%<br>(24-57%)                | 62%<br>(43-76%)          | 2.1<br>(1-3.6)                              | 5.1%<br>(2.5-9%)                     | 5.9%<br>(2.8-11%)                   | 97<br>(44-180)        | 5100<br>(2400-9500)     |
| Central African Republic | 2010 | Female | 40 to 44 | 38%<br>(24-57%)                | 62%<br>(43-76%)          | 2<br>(0.99-3.6)                             | 5.9%<br>(3-9.6%)                     | 6.8%<br>(3.4-11%)                   | 110<br>(48-190)       | 5000<br>(2300-8700)     |
| Central African Republic | 2010 | Female | 45 to 49 | 37%<br>(22-55%)                | 63%<br>(45-78%)          | 2<br>(0.95-3.6)                             | 7.9%<br>(3.8-13%)                    | 9.4%<br>(4.6-16%)                   | 140<br>(63-270)       | 5900<br>(2700-11000)    |

| Location                 | Year | Sex    | Age      | Prevalence of current drinkers | Prevalence of abstainers | Population average of standard drinks daily | Percent of total attributable deaths | Percent of total attributable DALYs | Attributable deaths | Attributable DALYs       |
|--------------------------|------|--------|----------|--------------------------------|--------------------------|---------------------------------------------|--------------------------------------|-------------------------------------|---------------------|--------------------------|
| Central African Republic | 2010 | Female | 50 to 54 | 35%<br>(20-53%)                | 65%<br>(47-80%)          | 1.8<br>(0.85-3.1)                           | 9.4%<br>(4.6-16%)                    | 11%<br>(5.4-19%)                    | 180<br>(75-330)     | 6500<br>(2800-12000)     |
| Central African Republic | 2010 | Female | 55 to 59 | 32%<br>(19-49%)                | 68%<br>(51-81%)          | 1.6<br>(0.73-3)                             | 10%<br>(4.6-17%)                     | 12%<br>(5.6-20%)                    | 210<br>(84-370)     | 6500<br>(2600-11000)     |
| Central African Republic | 2010 | Female | 60 to 64 | 32%<br>(19-48%)                | 68%<br>(52-81%)          | 1.5<br>(0.7-2.9)                            | 9%<br>(3.6-15%)                      | 11%<br>(4.3-18%)                    | 200<br>(72-360)     | 5200<br>(1900-9600)      |
| Central African Republic | 2010 | Female | 65 to 69 | 33%<br>(22-48%)                | 67%<br>(52-78%)          | 1.5<br>(0.7-2.7)                            | 8.6%<br>(3.3-15%)                    | 9.9%<br>(3.8-18%)                   | 220<br>(82-410)     | 4900<br>(1800-9100)      |
| Central African Republic | 2010 | Female | 70 to 74 | 33%<br>(21-48%)                | 67%<br>(52-79%)          | 1.3<br>(0.59-2.6)                           | 7.2%<br>(2.2-14%)                    | 8.3%<br>(2.5-16%)                   | 200<br>(63-390)     | 3600<br>(1100-7000)      |
| Central African Republic | 2010 | Female | 75 to 79 | 30%<br>(19-46%)                | 70%<br>(54-81%)          | 1.1<br>(0.48-2.2)                           | 5.4%<br>(1.2-12%)                    | 6.2%<br>(1.4-14%)                   | 140<br>(29-300)     | 1900<br>(400-4100)       |
| Central African Republic | 2010 | Female | 80 to 84 | 27%<br>(16-42%)                | 73%<br>(58-84%)          | 0.89<br>(0.39-1.7)                          | 4.2%<br>(0.88-9.1%)                  | 4.9%<br>(1-11%)                     | 83<br>(18-190)      | 840<br>(180-1900)        |
| Central African Republic | 2010 | Female | 85 to 89 | 26%<br>(16-39%)                | 74%<br>(61-84%)          | 0.79<br>(0.34-1.5)                          | 3.3%<br>(0.59-7.5%)                  | 3.8%<br>(0.68-8.7%)                 | 30<br>(5.5-69)      | 220<br>(39-500)          |
| Central African Republic | 2010 | Female | 90 to 94 | 28%<br>(17-41%)                | 72%<br>(59-83%)          | 0.77<br>(0.33-1.5)                          | 2.7%<br>(0.41-6.4%)                  | 3.2%<br>(0.48-7.7%)                 | 7.7<br>(1.2-19)     | 38<br>(5.9-91)           |
| Central African Republic | 2010 | Female | 95 plus  | 32%<br>(18-50%)                | 68%<br>(50-82%)          | 0.79<br>(0.29-1.6)                          | 2.4%<br>(0.21-6.1%)                  | 2.8%<br>(0.19-7.2%)                 | 1.7<br>(0.12-4.3)   | 5.6<br>(0.5-15)          |
| Central African Republic | 2010 | Male   | All Ages | 31%<br>(25-39%)                | 69%<br>(61-75%)          | 1.3<br>(0.86-1.8)                           | 5.9%<br>(3.7-8.4%)                   | 8.9%<br>(5.2-13%)                   | 3600<br>(2000-5400) | 140000<br>(86000-200000) |
| Central African Republic | 2010 | Male   | 15 to 19 | 24%<br>(14-39%)                | 76%<br>(61-86%)          | 0.85<br>(0.36-1.6)                          | 4.4%<br>(1.8-8%)                     | 5.3%<br>(2-10%)                     | 52<br>(19-99)       | 4000<br>(1600-7200)      |
| Central African Republic | 2010 | Male   | 20 to 24 | 37%<br>(23-54%)                | 63%<br>(46-77%)          | 1.8<br>(0.88-3.2)                           | 12%<br>(6.2-18%)                     | 14%<br>(6.8-22%)                    | 170<br>(82-280)     | 12000<br>(6000-19000)    |
| Central African Republic | 2010 | Male   | 25 to 29 | 44%<br>(27-61%)                | 56%<br>(39-73%)          | 2.5<br>(1.4-4.2)                            | 15%<br>(8.7-21%)                     | 17%<br>(9.8-25%)                    | 240<br>(140-380)    | 15000<br>(8900-23000)    |
| Central African Republic | 2010 | Male   | 30 to 34 | 46%<br>(28-65%)                | 54%<br>(35-72%)          | 2.8<br>(1.5-4.6)                            | 14%<br>(8.6-20%)                     | 16%<br>(9.5-24%)                    | 270<br>(160-410)    | 16000<br>(9200-23000)    |
| Central African Republic | 2010 | Male   | 35 to 39 | 46%<br>(30-64%)                | 54%<br>(36-70%)          | 2.7<br>(1.4-4.6)                            | 13%<br>(7.4-20%)                     | 15%<br>(8.3-22%)                    | 290<br>(150-450)    | 15000<br>(8000-23000)    |
| Central African Republic | 2010 | Male   | 40 to 44 | 48%<br>(32-67%)                | 52%<br>(33-68%)          | 2.8<br>(1.4-4.8)                            | 14%<br>(7.9-21%)                     | 16%<br>(8.8-23%)                    | 320<br>(170-520)    | 15000<br>(7800-24000)    |
| Central African Republic | 2010 | Male   | 45 to 49 | 51%<br>(34-69%)                | 49%<br>(31-66%)          | 3<br>(1.5-5)                                | 16%<br>(8.7-23%)                     | 18%<br>(9.9-26%)                    | 370<br>(190-590)    | 15000<br>(7700-24000)    |
| Central African Republic | 2010 | Male   | 50 to 54 | 52%<br>(33-70%)                | 48%<br>(30-67%)          | 2.9<br>(1.5-5.1)                            | 17%<br>(9.3-25%)                     | 19%<br>(11-28%)                     | 410<br>(200-660)    | 15000<br>(7300-23000)    |
| Central African Republic | 2010 | Male   | 55 to 59 | 49%<br>(32-68%)                | 51%<br>(32-68%)          | 2.6<br>(1.2-4.6)                            | 16%<br>(8.1-25%)                     | 18%<br>(9-28%)                      | 390<br>(180-630)    | 12000<br>(5800-20000)    |
| Central African Republic | 2010 | Male   | 60 to 64 | 48%<br>(30-68%)                | 52%<br>(32-70%)          | 2.2<br>(1-4.2)                              | 13%<br>(5.9-21%)                     | 15%<br>(6.6-24%)                    | 330<br>(140-560)    | 8800<br>(3800-15000)     |
| Central African Republic | 2010 | Male   | 65 to 69 | 49%<br>(32-67%)                | 51%<br>(33-68%)          | 2<br>(0.98-3.5)                             | 11%<br>(4.6-19%)                     | 13%<br>(5-21%)                      | 300<br>(110-540)    | 6700<br>(2500-12000)     |

| Location                 | Year | Sex    | Age      | Prevalence of current drinkers | Prevalence of abstainers | Population average of standard drinks daily | Percent of total attributable deaths | Percent of total attributable DALYs | Attributable deaths   | Attributable DALYs      |
|--------------------------|------|--------|----------|--------------------------------|--------------------------|---------------------------------------------|--------------------------------------|-------------------------------------|-----------------------|-------------------------|
| Central African Republic | 2010 | Male   | 70 to 74 | 50%<br>(32-66%)                | 50%<br>(34-68%)          | 1.8<br>(0.8-3.2)                            | 8.8%<br>(2.9-16%)                    | 9.8%<br>(3.3-18%)                   | 230<br>(76-430)       | 4100<br>(1400-7700)     |
| Central African Republic | 2010 | Male   | 75 to 79 | 48%<br>(32-65%)                | 52%<br>(35-68%)          | 1.5<br>(0.64-2.8)                           | 6.7%<br>(1.7-13%)                    | 7.5%<br>(1.8-15%)                   | 150<br>(37-300)       | 2000<br>(520-4100)      |
| Central African Republic | 2010 | Male   | 80 to 84 | 42%<br>(25-60%)                | 58%<br>(40-75%)          | 1.1<br>(0.49-2.1)                           | 4.7%<br>(1.1-9.8%)                   | 5.4%<br>(1.2-11%)                   | 67<br>(14-140)        | 680<br>(150-1400)       |
| Central African Republic | 2010 | Male   | 85 to 89 | 37%<br>(22-54%)                | 63%<br>(46-78%)          | 0.84<br>(0.36-1.6)                          | 3.2%<br>(0.64-7%)                    | 3.7%<br>(0.71-8%)                   | 19<br>(3.7-42)        | 140<br>(28-310)         |
| Central African Republic | 2010 | Male   | 90 to 94 | 36%<br>(22-54%)                | 64%<br>(46-78%)          | 0.72<br>(0.3-1.4)                           | 2.1%<br>(0.23-5%)                    | 2.4%<br>(0.18-5.9%)                 | 3.7<br>(0.28-8.8)     | 19<br>(2.1-44)          |
| Central African Republic | 2010 | Male   | 95 plus  | 40%<br>(21-60%)                | 60%<br>(40-79%)          | 0.68<br>(0.24-1.4)                          | 2.3%<br>(0.1-5.7%)                   | 2.6%<br>(-0.0031-6.7%)              | 0.95<br>(-0.0011-2.5) | 3.3<br>(0.15-8.4)       |
| Central African Republic | 2016 | Female | All Ages | 23%<br>(19-29%)                | 77%<br>(71-81%)          | 1<br>(0.54-1.7)                             | 3.4%<br>(1.7-5.7%)                   | 5.7%<br>(2.5-9.5%)                  | 2100<br>(920-3700)    | 71000<br>(34000-120000) |
| Central African Republic | 2016 | Female | 15 to 19 | 21%<br>(13-34%)                | 79%<br>(66-87%)          | 0.76<br>(0.3-1.5)                           | 2.2%<br>(0.78-4.5%)                  | 2.8%<br>(0.78-6.2%)                 | 21<br>(6.2-47)        | 1700<br>(660-3600)      |
| Central African Republic | 2016 | Female | 20 to 24 | 30%<br>(18-45%)                | 70%<br>(55-82%)          | 1.5<br>(0.6-2.8)                            | 5.4%<br>(2.2-9.7%)                   | 6.9%<br>(2.5-13%)                   | 59<br>(21-110)        | 4400<br>(1900-7900)     |
| Central African Republic | 2016 | Female | 25 to 29 | 34%<br>(20-51%)                | 66%<br>(49-80%)          | 1.9<br>(0.87-3.7)                           | 6%<br>(2.9-10%)                      | 7.4%<br>(3.2-13%)                   | 89<br>(36-160)        | 5900<br>(2700-10000)    |
| Central African Republic | 2016 | Female | 30 to 34 | 36%<br>(22-53%)                | 64%<br>(47-78%)          | 2.1<br>(0.94-3.9)                           | 6.4%<br>(3.1-11%)                    | 7.7%<br>(3.6-13%)                   | 120<br>(51-210)       | 6800<br>(3300-12000)    |
| Central African Republic | 2016 | Female | 35 to 39 | 38%<br>(24-55%)                | 62%<br>(45-76%)          | 2.1<br>(0.95-4)                             | 6.2%<br>(2.9-11%)                    | 7.4%<br>(3.3-13%)                   | 120<br>(52-230)       | 6400<br>(2800-12000)    |
| Central African Republic | 2016 | Female | 40 to 44 | 38%<br>(24-56%)                | 62%<br>(44-76%)          | 2.1<br>(0.92-4.1)                           | 6.7%<br>(3.2-11%)                    | 8%<br>(3.7-13%)                     | 130<br>(53-230)       | 5900<br>(2600-11000)    |
| Central African Republic | 2016 | Female | 45 to 49 | 37%<br>(22-54%)                | 63%<br>(46-78%)          | 2<br>(0.85-4.1)                             | 8.5%<br>(3.8-15%)                    | 10%<br>(4.6-18%)                    | 150<br>(64-290)       | 6300<br>(2700-12000)    |
| Central African Republic | 2016 | Female | 50 to 54 | 35%<br>(20-53%)                | 65%<br>(47-80%)          | 1.8<br>(0.75-3.7)                           | 9.9%<br>(4.5-17%)                    | 12%<br>(5.4-20%)                    | 190<br>(77-350)       | 6900<br>(2900-13000)    |
| Central African Republic | 2016 | Female | 55 to 59 | 32%<br>(20-50%)                | 68%<br>(50-80%)          | 1.7<br>(0.67-3.6)                           | 11%<br>(4.3-18%)                     | 13%<br>(5.1-22%)                    | 240<br>(88-450)       | 7400<br>(2800-14000)    |
| Central African Republic | 2016 | Female | 60 to 64 | 32%<br>(19-48%)                | 68%<br>(52-81%)          | 1.6<br>(0.63-3.4)                           | 9.4%<br>(3.3-17%)                    | 11%<br>(3.9-19%)                    | 230<br>(76-430)       | 6100<br>(2000-11000)    |
| Central African Republic | 2016 | Female | 65 to 69 | 33%<br>(21-49%)                | 67%<br>(51-79%)          | 1.6<br>(0.64-3.3)                           | 8.9%<br>(2.8-16%)                    | 10%<br>(3.2-19%)                    | 240<br>(73-470)       | 5300<br>(1600-10000)    |
| Central African Republic | 2016 | Female | 70 to 74 | 33%<br>(22-48%)                | 67%<br>(52-78%)          | 1.4<br>(0.53-3)                             | 7.5%<br>(1.8-15%)                    | 8.7%<br>(2.1-17%)                   | 230<br>(58-460)       | 4000<br>(1000-8200)     |
| Central African Republic | 2016 | Female | 75 to 79 | 30%<br>(19-45%)                | 70%<br>(55-81%)          | 1.1<br>(0.42-2.4)                           | 5.7%<br>(1-12%)                      | 6.5%<br>(1.2-14%)                   | 160<br>(30-360)       | 2200<br>(410-5000)      |
| Central African Republic | 2016 | Female | 80 to 84 | 28%<br>(17-43%)                | 72%<br>(57-83%)          | 0.93<br>(0.36-1.9)                          | 4.5%<br>(0.74-10%)                   | 5.2%<br>(0.86-12%)                  | 99<br>(17-230)        | 1000<br>(160-2300)      |
| Central African Republic | 2016 | Female | 85 to 89 | 26%<br>(16-40%)                | 74%<br>(60-84%)          | 0.82<br>(0.32-1.7)                          | 3.5%<br>(0.38-8%)                    | 4.1%<br>(0.46-9.4%)                 | 38<br>(4.5-90)        | 270<br>(33-640)         |



| Location                 | Year | Sex    | Age      | Prevalence of current drinkers | Prevalence of abstainers | Population average of standard drinks daily | Percent of total attributable deaths | Percent of total attributable DALYs | Attributable deaths | Attributable DALYs       |
|--------------------------|------|--------|----------|--------------------------------|--------------------------|---------------------------------------------|--------------------------------------|-------------------------------------|---------------------|--------------------------|
| Central African Republic | 2016 | Female | 90 to 94 | 28%<br>(17-41%)                | 72%<br>(59-83%)          | 0.8<br>(0.3-1.7)                            | 2.9%<br>(0.28-7.2%)                  | 3.4%<br>(0.33-8.7%)                 | 10<br>(0.97-27)     | 51<br>(5.1-130)          |
| Central African Republic | 2016 | Female | 95 plus  | 31%<br>(17-50%)                | 69%<br>(50-83%)          | 0.81<br>(0.27-1.8)                          | 2.5%<br>(0.14-6.8%)                  | 3%<br>(0.12-8%)                     | 2.3<br>(0.092-6.1)  | 7.6<br>(0.41-20)         |
| Central African Republic | 2016 | Male   | All Ages | 31%<br>(25-39%)                | 69%<br>(61-75%)          | 1.3<br>(0.72-2.2)                           | 6.8%<br>(3.9-10%)                    | 9.9%<br>(5.3-15%)                   | 4200<br>(2100-6500) | 160000<br>(92000-240000) |
| Central African Republic | 2016 | Male   | 15 to 19 | 24%<br>(14-39%)                | 76%<br>(61-86%)          | 0.87<br>(0.32-1.8)                          | 4.4%<br>(1.5-8.6%)                   | 5.3%<br>(1.6-11%)                   | 58<br>(18-120)      | 4500<br>(1600-8800)      |
| Central African Republic | 2016 | Male   | 20 to 24 | 37%<br>(22-53%)                | 63%<br>(47-78%)          | 1.8<br>(0.76-3.5)                           | 12%<br>(5.6-19%)                     | 14%<br>(6.2-23%)                    | 180<br>(79-320)     | 13000<br>(6000-21000)    |
| Central African Republic | 2016 | Male   | 25 to 29 | 44%<br>(27-62%)                | 56%<br>(38-73%)          | 2.6<br>(1.2-4.7)                            | 16%<br>(8.7-23%)                     | 18%<br>(9.7-28%)                    | 280<br>(150-430)    | 18000<br>(9600-27000)    |
| Central African Republic | 2016 | Male   | 30 to 34 | 46%<br>(28-64%)                | 54%<br>(36-72%)          | 2.9<br>(1.3-5.1)                            | 16%<br>(9-24%)                       | 19%<br>(10-28%)                     | 330<br>(180-500)    | 19000<br>(10000-28000)   |
| Central African Republic | 2016 | Male   | 35 to 39 | 46%<br>(29-64%)                | 54%<br>(36-71%)          | 2.8<br>(1.3-5.3)                            | 16%<br>(8.5-23%)                     | 18%<br>(9.7-27%)                    | 350<br>(180-550)    | 18000<br>(9700-28000)    |
| Central African Republic | 2016 | Male   | 40 to 44 | 48%<br>(32-67%)                | 52%<br>(33-68%)          | 2.9<br>(1.3-5.3)                            | 16%<br>(8.6-24%)                     | 18%<br>(9.8-27%)                    | 390<br>(190-630)    | 18000<br>(9100-29000)    |
| Central African Republic | 2016 | Male   | 45 to 49 | 51%<br>(33-70%)                | 49%<br>(30-67%)          | 3.1<br>(1.4-5.9)                            | 17%<br>(9.2-25%)                     | 20%<br>(10-29%)                     | 430<br>(210-680)    | 18000<br>(8900-28000)    |
| Central African Republic | 2016 | Male   | 50 to 54 | 52%<br>(33-69%)                | 48%<br>(31-67%)          | 3<br>(1.3-6.1)                              | 18%<br>(9-27%)                       | 20%<br>(10-30%)                     | 460<br>(210-740)    | 16000<br>(7400-26000)    |
| Central African Republic | 2016 | Male   | 55 to 59 | 49%<br>(31-68%)                | 51%<br>(32-69%)          | 2.6<br>(1.1-5.3)                            | 17%<br>(7.5-27%)                     | 19%<br>(8.5-30%)                    | 440<br>(190-730)    | 14000<br>(6000-23000)    |
| Central African Republic | 2016 | Male   | 60 to 64 | 48%<br>(30-68%)                | 52%<br>(32-70%)          | 2.3<br>(0.92-4.8)                           | 13%<br>(5.3-23%)                     | 15%<br>(5.9-26%)                    | 370<br>(140-640)    | 10000<br>(3800-17000)    |
| Central African Republic | 2016 | Male   | 65 to 69 | 49%<br>(31-66%)                | 51%<br>(34-69%)          | 2<br>(0.86-4.1)                             | 12%<br>(3.7-21%)                     | 13%<br>(4.1-23%)                    | 330<br>(110-590)    | 7200<br>(2400-13000)     |
| Central African Republic | 2016 | Male   | 70 to 74 | 49%<br>(31-66%)                | 51%<br>(34-69%)          | 1.8<br>(0.72-3.7)                           | 9.2%<br>(2.4-18%)                    | 10%<br>(2.7-20%)                    | 260<br>(65-510)     | 4700<br>(1200-9000)      |
| Central African Republic | 2016 | Male   | 75 to 79 | 47%<br>(31-65%)                | 53%<br>(35-69%)          | 1.5<br>(0.56-3)                             | 7%<br>(1.5-15%)                      | 7.9%<br>(1.6-17%)                   | 170<br>(34-370)     | 2400<br>(470-5100)       |
| Central African Republic | 2016 | Male   | 80 to 84 | 42%<br>(26-60%)                | 58%<br>(40-74%)          | 1.1<br>(0.45-2.3)                           | 5%<br>(0.84-11%)                     | 5.6%<br>(0.9-13%)                   | 79<br>(13-180)      | 810<br>(130-1800)        |
| Central African Republic | 2016 | Male   | 85 to 89 | 36%<br>(22-53%)                | 64%<br>(47-78%)          | 0.84<br>(0.34-1.8)                          | 3.5%<br>(0.54-8.1%)                  | 3.9%<br>(0.55-9.3%)                 | 24<br>(3.2-57)      | 170<br>(26-410)          |
| Central African Republic | 2016 | Male   | 90 to 94 | 36%<br>(22-52%)                | 64%<br>(48-78%)          | 0.72<br>(0.27-1.6)                          | 2.3%<br>(0.23-5.9%)                  | 2.6%<br>(0.19-6.8%)                 | 4.8<br>(0.33-12)    | 25<br>(2.5-63)           |
| Central African Republic | 2016 | Male   | 95 plus  | 39%<br>(21-60%)                | 61%<br>(40-79%)          | 0.67<br>(0.22-1.5)                          | 2.4%<br>(0.1-6.4%)                   | 2.7%<br>(0.013-7.4%)                | 1.2<br>(0.0059-3.4) | 4.3<br>(0.18-11)         |
| Congo                    | 1990 | Female | All Ages | 25%<br>(20-29%)                | 75%<br>(71-80%)          | 1<br>(0.81-1.3)                             | 3.5%<br>(2.4-4.8%)                   | 5.7%<br>(3.8-8%)                    | 850<br>(550-1200)   | 29000<br>(20000-40000)   |
| Congo                    | 1990 | Female | 15 to 19 | 22%<br>(15-32%)                | 78%<br>(68-85%)          | 0.78<br>(0.43-1.3)                          | 2%<br>(0.95-3.6%)                    | 2.7%<br>(0.96-5.2%)                 | 6.9<br>(2.4-13)     | 610<br>(290-1100)        |

| Location | Year | Sex    | Age      | Prevalence of current drinkers | Prevalence of abstainers | Population average of standard drinks daily | Percent of total attributable deaths | Percent of total attributable DALYs | Attributable deaths | Attributable DALYs     |
|----------|------|--------|----------|--------------------------------|--------------------------|---------------------------------------------|--------------------------------------|-------------------------------------|---------------------|------------------------|
| Congo    | 1990 | Female | 20 to 24 | 34%<br>(22-46%)                | 66%<br>(54-78%)          | 1.6<br>(0.91-2.4)                           | 4.3%<br>(2.2-7%)                     | 5.2%<br>(2.1-9.1%)                  | 19<br>(7.5-33)      | 1500<br>(770-2500)     |
| Congo    | 1990 | Female | 25 to 29 | 40%<br>(28-52%)                | 60%<br>(48-72%)          | 2.3<br>(1.5-3.4)                            | 6.2%<br>(3.2-9.4%)                   | 7.5%<br>(3.4-12%)                   | 32<br>(14-52)       | 2200<br>(1100-3400)    |
| Congo    | 1990 | Female | 30 to 34 | 44%<br>(30-57%)                | 56%<br>(43-70%)          | 2.7<br>(1.7-3.9)                            | 7.8%<br>(4.1-12%)                    | 9.8%<br>(4.7-15%)                   | 44<br>(20-69)       | 2700<br>(1300-4100)    |
| Congo    | 1990 | Female | 35 to 39 | 44%<br>(31-57%)                | 56%<br>(43-69%)          | 2.6<br>(1.5-3.9)                            | 8.8%<br>(4.8-13%)                    | 11%<br>(5.8-16%)                    | 55<br>(28-88)       | 2900<br>(1500-4700)    |
| Congo    | 1990 | Female | 40 to 44 | 43%<br>(31-57%)                | 57%<br>(43-69%)          | 2.4<br>(1.4-3.8)                            | 9.1%<br>(5.1-14%)                    | 11%<br>(6.1-17%)                    | 59<br>(31-91)       | 2800<br>(1500-4300)    |
| Congo    | 1990 | Female | 45 to 49 | 43%<br>(28-55%)                | 57%<br>(45-72%)          | 2.2<br>(1.3-3.4)                            | 9.4%<br>(5.2-14%)                    | 12%<br>(6.3-17%)                    | 68<br>(37-100)      | 2900<br>(1600-4400)    |
| Congo    | 1990 | Female | 50 to 54 | 39%<br>(27-52%)                | 61%<br>(48-73%)          | 1.9<br>(1.1-3.1)                            | 9.5%<br>(5.3-14%)                    | 11%<br>(6.3-17%)                    | 81<br>(43-130)      | 3000<br>(1600-4600)    |
| Congo    | 1990 | Female | 55 to 59 | 35%<br>(24-47%)                | 65%<br>(53-76%)          | 1.7<br>(0.93-2.9)                           | 8.9%<br>(4.8-14%)                    | 11%<br>(5.6-17%)                    | 88<br>(45-150)      | 2800<br>(1400-4600)    |
| Congo    | 1990 | Female | 60 to 64 | 33%<br>(22-46%)                | 67%<br>(54-78%)          | 1.7<br>(0.86-2.9)                           | 7.7%<br>(3.9-13%)                    | 9%<br>(4.5-15%)                     | 87<br>(44-150)      | 2300<br>(1200-3900)    |
| Congo    | 1990 | Female | 65 to 69 | 34%<br>(24-45%)                | 66%<br>(55-76%)          | 1.7<br>(0.96-2.7)                           | 7.5%<br>(4-12%)                      | 8.6%<br>(4.4-14%)                   | 98<br>(50-160)      | 2200<br>(1100-3600)    |
| Congo    | 1990 | Female | 70 to 74 | 34%<br>(24-45%)                | 66%<br>(55-76%)          | 1.6<br>(0.88-2.6)                           | 6.7%<br>(3.1-11%)                    | 7.6%<br>(3.5-13%)                   | 95<br>(43-160)      | 1700<br>(770-2900)     |
| Congo    | 1990 | Female | 75 to 79 | 33%<br>(22-48%)                | 67%<br>(52-78%)          | 1.4<br>(0.71-2.3)                           | 5.2%<br>(1.8-9.8%)                   | 5.9%<br>(2.1-11%)                   | 68<br>(23-130)      | 940<br>(320-1800)      |
| Congo    | 1990 | Female | 80 to 84 | 31%<br>(19-45%)                | 69%<br>(55-81%)          | 1.1<br>(0.57-1.9)                           | 3.8%<br>(1.2-7.6%)                   | 4.3%<br>(1.3-8.6%)                  | 40<br>(12-78)       | 410<br>(130-800)       |
| Congo    | 1990 | Female | 85 to 89 | 29%<br>(18-41%)                | 71%<br>(59-82%)          | 0.96<br>(0.49-1.7)                          | 2.7%<br>(0.68-5.8%)                  | 3.1%<br>(0.75-6.7%)                 | 11<br>(2.8-25)      | 84<br>(21-180)         |
| Congo    | 1990 | Female | 90 to 94 | 30%<br>(19-42%)                | 70%<br>(58-81%)          | 0.9<br>(0.45-1.6)                           | 2%<br>(0.29-4.6%)                    | 2.3%<br>(0.31-5.4%)                 | 2.3<br>(0.31-5.4)   | 12<br>(1.7-27)         |
| Congo    | 1990 | Female | 95 plus  | 33%<br>(19-49%)                | 67%<br>(51-81%)          | 0.87<br>(0.35-1.7)                          | 1.6%<br>(-0.0072-4.2%)               | 1.8%<br>(-0.072-4.8%)               | 0.4<br>(-0.017-1.1) | 1.4<br>(-0.0059-3.7)   |
| Congo    | 1990 | Male   | All Ages | 33%<br>(28-40%)                | 67%<br>(60-72%)          | 1.5<br>(1.2-1.8)                            | 6.1%<br>(4.4-7.9%)                   | 9%<br>(6.3-12%)                     | 1500<br>(1000-2100) | 57000<br>(40000-76000) |
| Congo    | 1990 | Male   | 15 to 19 | 26%<br>(17-37%)                | 74%<br>(63-83%)          | 1<br>(0.52-1.7)                             | 4%<br>(1.9-6.7%)                     | 5%<br>(2.1-8.9%)                    | 18<br>(7.2-32)      | 1400<br>(680-2500)     |
| Congo    | 1990 | Male   | 20 to 24 | 40%<br>(27-52%)                | 60%<br>(48-73%)          | 2.2<br>(1.3-3.4)                            | 9.4%<br>(5-14%)                      | 11%<br>(5.2-17%)                    | 57<br>(27-93)       | 4200<br>(2200-6500)    |
| Congo    | 1990 | Male   | 25 to 29 | 50%<br>(36-63%)                | 50%<br>(37-64%)          | 3.4<br>(2.1-4.8)                            | 12%<br>(6.3-17%)                     | 14%<br>(6.7-21%)                    | 88<br>(44-130)      | 5800<br>(3100-8300)    |
| Congo    | 1990 | Male   | 30 to 34 | 53%<br>(37-65%)                | 47%<br>(35-63%)          | 3.7<br>(2.3-5.4)                            | 13%<br>(7.5-18%)                     | 15%<br>(8-22%)                      | 100<br>(56-150)     | 6000<br>(3500-8500)    |
| Congo    | 1990 | Male   | 35 to 39 | 49%<br>(35-63%)                | 51%<br>(37-65%)          | 3.4<br>(2-5.1)                              | 13%<br>(7.8-19%)                     | 15%<br>(8.5-23%)                    | 110<br>(58-160)     | 5600<br>(3200-8200)    |

| Location | Year | Sex    | Age      | Prevalence of current drinkers | Prevalence of abstainers | Population average of standard drinks daily | Percent of total attributable deaths | Percent of total attributable DALYs | Attributable deaths | Attributable DALYs     |
|----------|------|--------|----------|--------------------------------|--------------------------|---------------------------------------------|--------------------------------------|-------------------------------------|---------------------|------------------------|
| Congo    | 1990 | Male   | 40 to 44 | 51%<br>(38-64%)                | 49%<br>(36-62%)          | 3.3<br>(1.9-5.1)                            | 15%<br>(8.8-21%)                     | 17%<br>(9.9-24%)                    | 130<br>(71-180)     | 5900<br>(3400-8600)    |
| Congo    | 1990 | Male   | 45 to 49 | 56%<br>(40-69%)                | 44%<br>(31-60%)          | 3.6<br>(2.2-5.6)                            | 17%<br>(10-23%)                      | 19%<br>(12-27%)                     | 150<br>(89-220)     | 6400<br>(3800-9100)    |
| Congo    | 1990 | Male   | 50 to 54 | 58%<br>(44-70%)                | 42%<br>(30-56%)          | 3.5<br>(2.1-5.5)                            | 17%<br>(11-24%)                      | 20%<br>(12-27%)                     | 170<br>(100-250)    | 6400<br>(3800-9100)    |
| Congo    | 1990 | Male   | 55 to 59 | 55%<br>(40-68%)                | 45%<br>(32-60%)          | 3<br>(1.7-4.8)                              | 15%<br>(8.9-21%)                     | 17%<br>(10-25%)                     | 160<br>(93-250)     | 5200<br>(3000-7800)    |
| Congo    | 1990 | Male   | 60 to 64 | 52%<br>(37-67%)                | 48%<br>(33-63%)          | 2.6<br>(1.5-4.5)                            | 12%<br>(6.9-18%)                     | 14%<br>(7.8-21%)                    | 150<br>(79-230)     | 3900<br>(2200-6300)    |
| Congo    | 1990 | Male   | 65 to 69 | 53%<br>(38-66%)                | 47%<br>(34-62%)          | 2.4<br>(1.4-3.7)                            | 11%<br>(5.9-16%)                     | 12%<br>(6.7-19%)                    | 130<br>(73-210)     | 3000<br>(1600-4700)    |
| Congo    | 1990 | Male   | 70 to 74 | 54%<br>(40-68%)                | 46%<br>(32-60%)          | 2.2<br>(1.3-3.4)                            | 8.7%<br>(4.2-14%)                    | 9.7%<br>(4.6-16%)                   | 110<br>(51-180)     | 1900<br>(920-3200)     |
| Congo    | 1990 | Male   | 75 to 79 | 54%<br>(37-70%)                | 46%<br>(30-63%)          | 1.9<br>(1-3.1)                              | 6.8%<br>(2.6-12%)                    | 7.7%<br>(2.9-13%)                   | 73<br>(28-130)      | 1000<br>(390-1800)     |
| Congo    | 1990 | Male   | 80 to 84 | 49%<br>(31-66%)                | 51%<br>(34-69%)          | 1.5<br>(0.79-2.4)                           | 4.7%<br>(1.8-8.6%)                   | 5.3%<br>(2-9.7%)                    | 33<br>(12-62)       | 340<br>(130-640)       |
| Congo    | 1990 | Male   | 85 to 89 | 42%<br>(27-59%)                | 58%<br>(41-73%)          | 1.1<br>(0.55-1.8)                           | 3%<br>(1-5.6%)                       | 3.4%<br>(1.1-6.4%)                  | 9.9<br>(3.2-19)     | 74<br>(25-140)         |
| Congo    | 1990 | Male   | 90 to 94 | 41%<br>(27-57%)                | 59%<br>(43-73%)          | 0.86<br>(0.43-1.5)                          | 1.8%<br>(0.32-3.7%)                  | 2%<br>(0.25-4.2%)                   | 1.8<br>(0.23-3.9)   | 9.7<br>(1.8-20)        |
| Congo    | 1990 | Male   | 95 plus  | 44%<br>(25-63%)                | 56%<br>(37-75%)          | 0.74<br>(0.29-1.4)                          | 1.7%<br>(0.11-4.2%)                  | 1.8%<br>(-0.065-4.8%)               | 0.4<br>(-0.015-1.1) | 1.5<br>(0.093-3.8)     |
| Congo    | 1995 | Female | All Ages | 25%<br>(21-29%)                | 75%<br>(71-79%)          | 0.86<br>(0.68-1)                            | 2.7%<br>(1.8-3.8%)                   | 4.2%<br>(2.6-6.1%)                  | 780<br>(480-1200)   | 28000<br>(19000-39000) |
| Congo    | 1995 | Female | 15 to 19 | 23%<br>(15-32%)                | 77%<br>(68-85%)          | 0.63<br>(0.36-1)                            | 1.7%<br>(0.75-3%)                    | 2.1%<br>(0.66-4.2%)                 | 6.5<br>(2.1-13)     | 600<br>(270-1100)      |
| Congo    | 1995 | Female | 20 to 24 | 34%<br>(23-45%)                | 66%<br>(55-77%)          | 1.3<br>(0.76-2)                             | 3.4%<br>(1.7-5.6%)                   | 4%<br>(1.6-7%)                      | 19<br>(7.8-34)      | 1600<br>(780-2600)     |
| Congo    | 1995 | Female | 25 to 29 | 41%<br>(28-53%)                | 59%<br>(47-72%)          | 1.9<br>(1.2-2.7)                            | 4.4%<br>(2.5-7%)                     | 5%<br>(2.4-8.5%)                    | 34<br>(17-55)       | 2300<br>(1300-3600)    |
| Congo    | 1995 | Female | 30 to 34 | 43%<br>(30-57%)                | 57%<br>(43-70%)          | 2.1<br>(1.3-3.1)                            | 5.5%<br>(3.2-8.4%)                   | 6.4%<br>(3.4-10%)                   | 46<br>(24-71)       | 2800<br>(1600-4200)    |
| Congo    | 1995 | Female | 35 to 39 | 44%<br>(30-57%)                | 56%<br>(43-70%)          | 2<br>(1.2-3.1)                              | 6.4%<br>(3.5-9.9%)                   | 7.6%<br>(3.9-12%)                   | 56<br>(28-91)       | 3000<br>(1600-4800)    |
| Congo    | 1995 | Female | 40 to 44 | 43%<br>(31-56%)                | 57%<br>(44-69%)          | 2<br>(1.1-3)                                | 6.8%<br>(3.6-11%)                    | 8.2%<br>(4.3-13%)                   | 60<br>(30-95)       | 2800<br>(1500-4400)    |
| Congo    | 1995 | Female | 45 to 49 | 42%<br>(28-55%)                | 58%<br>(45-72%)          | 1.8<br>(1.1-2.7)                            | 7.2%<br>(4.1-11%)                    | 8.6%<br>(4.8-13%)                   | 66<br>(36-100)      | 2800<br>(1600-4200)    |
| Congo    | 1995 | Female | 50 to 54 | 39%<br>(27-52%)                | 61%<br>(48-73%)          | 1.5<br>(0.87-2.4)                           | 7.4%<br>(3.9-12%)                    | 8.7%<br>(4.7-14%)                   | 77<br>(40-120)      | 2800<br>(1500-4400)    |
| Congo    | 1995 | Female | 55 to 59 | 35%<br>(24-47%)                | 65%<br>(53-76%)          | 1.4<br>(0.74-2.2)                           | 7%<br>(3.3-12%)                      | 8.2%<br>(3.9-14%)                   | 81<br>(39-140)      | 2600<br>(1200-4400)    |

| Location | Year | Sex    | Age      | Prevalence of current drinkers | Prevalence of abstainers | Population average of standard drinks daily | Percent of total attributable deaths | Percent of total attributable DALYs | Attributable deaths   | Attributable DALYs     |
|----------|------|--------|----------|--------------------------------|--------------------------|---------------------------------------------|--------------------------------------|-------------------------------------|-----------------------|------------------------|
| Congo    | 1995 | Female | 60 to 64 | 33%<br>(22-46%)                | 67%<br>(54-78%)          | 1.3<br>(0.71-2.3)                           | 5.9%<br>(2.8-10%)                    | 6.8%<br>(3.3-12%)                   | 77<br>(36-140)        | 2100<br>(970-3700)     |
| Congo    | 1995 | Female | 65 to 69 | 34%<br>(24-45%)                | 66%<br>(55-76%)          | 1.3<br>(0.77-2.1)                           | 5.5%<br>(2.5-9.5%)                   | 6.3%<br>(2.9-11%)                   | 84<br>(38-150)        | 1900<br>(850-3200)     |
| Congo    | 1995 | Female | 70 to 74 | 34%<br>(24-46%)                | 66%<br>(54-76%)          | 1.3<br>(0.72-2.1)                           | 4.9%<br>(1.7-9%)                     | 5.5%<br>(1.9-10%)                   | 80<br>(29-150)        | 1400<br>(520-2700)     |
| Congo    | 1995 | Female | 75 to 79 | 33%<br>(22-48%)                | 67%<br>(52-78%)          | 1.1<br>(0.58-1.9)                           | 3.7%<br>(0.76-7.5%)                  | 4.1%<br>(0.89-8.4%)                 | 56<br>(12-110)        | 770<br>(170-1600)      |
| Congo    | 1995 | Female | 80 to 84 | 31%<br>(19-45%)                | 69%<br>(55-81%)          | 0.9<br>(0.47-1.5)                           | 2.6%<br>(0.5-5.6%)                   | 2.9%<br>(0.57-6.4%)                 | 32<br>(6.3-69)        | 320<br>(64-710)        |
| Congo    | 1995 | Female | 85 to 89 | 29%<br>(18-41%)                | 71%<br>(59-82%)          | 0.77<br>(0.4-1.3)                           | 1.8%<br>(0.21-4%)                    | 2%<br>(0.23-4.6%)                   | 8.9<br>(0.99-20)      | 65<br>(7.9-140)        |
| Congo    | 1995 | Female | 90 to 94 | 30%<br>(19-42%)                | 70%<br>(58-81%)          | 0.72<br>(0.35-1.3)                          | 1.3%<br>(-0.087-3.4%)                | 1.5%<br>(-0.12-4%)                  | 1.7<br>(-0.15-4.8)    | 8.9<br>(-0.62-24)      |
| Congo    | 1995 | Female | 95 plus  | 33%<br>(19-49%)                | 67%<br>(51-81%)          | 0.69<br>(0.28-1.3)                          | 0.99%<br>(-0.26-3.1%)                | 1.1%<br>(-0.38-3.6%)                | 0.29<br>(-0.098-0.94) | 1<br>(-0.27-3.2)       |
| Congo    | 1995 | Male   | All Ages | 34%<br>(29-40%)                | 66%<br>(60-71%)          | 1.2<br>(0.99-1.5)                           | 4.8%<br>(3.4-6.3%)                   | 6.9%<br>(4.7-9.3%)                  | 1400<br>(900-1900)    | 54000<br>(38000-72000) |
| Congo    | 1995 | Male   | 15 to 19 | 27%<br>(18-38%)                | 73%<br>(62-82%)          | 0.83<br>(0.45-1.3)                          | 3.5%<br>(1.7-5.7%)                   | 4.3%<br>(1.8-7.5%)                  | 17<br>(7.2-31)        | 1400<br>(710-2400)     |
| Congo    | 1995 | Male   | 20 to 24 | 40%<br>(28-53%)                | 60%<br>(47-72%)          | 1.8<br>(1.1-2.7)                            | 8.4%<br>(4.6-13%)                    | 9.7%<br>(4.8-15%)                   | 58<br>(29-90)         | 4300<br>(2400-6500)    |
| Congo    | 1995 | Male   | 25 to 29 | 51%<br>(37-64%)                | 49%<br>(36-63%)          | 2.8<br>(1.7-3.9)                            | 9.8%<br>(5.2-15%)                    | 11%<br>(5.2-17%)                    | 89<br>(47-130)        | 5900<br>(3300-8500)    |
| Congo    | 1995 | Male   | 30 to 34 | 53%<br>(38-66%)                | 47%<br>(34-62%)          | 3.1<br>(1.9-4.4)                            | 9.8%<br>(5.7-14%)                    | 11%<br>(5.9-16%)                    | 100<br>(59-150)       | 6100<br>(3700-8600)    |
| Congo    | 1995 | Male   | 35 to 39 | 50%<br>(36-63%)                | 50%<br>(37-64%)          | 2.7<br>(1.6-4.1)                            | 9.7%<br>(5.7-14%)                    | 11%<br>(6.1-16%)                    | 100<br>(60-150)       | 5500<br>(3300-7900)    |
| Congo    | 1995 | Male   | 40 to 44 | 51%<br>(38-64%)                | 49%<br>(36-62%)          | 2.7<br>(1.5-4)                              | 11%<br>(6.4-16%)                     | 12%<br>(6.9-18%)                    | 120<br>(68-170)       | 5600<br>(3300-8200)    |
| Congo    | 1995 | Male   | 45 to 49 | 57%<br>(41-69%)                | 43%<br>(31-59%)          | 3<br>(1.8-4.5)                              | 13%<br>(7.8-18%)                     | 14%<br>(8.7-21%)                    | 140<br>(83-210)       | 5900<br>(3500-8600)    |
| Congo    | 1995 | Male   | 50 to 54 | 58%<br>(45-71%)                | 42%<br>(29-55%)          | 2.9<br>(1.7-4.5)                            | 14%<br>(8.1-20%)                     | 16%<br>(9.4-23%)                    | 160<br>(87-240)       | 5800<br>(3200-8600)    |
| Congo    | 1995 | Male   | 55 to 59 | 55%<br>(41-68%)                | 45%<br>(32-59%)          | 2.4<br>(1.4-3.8)                            | 12%<br>(7-18%)                       | 14%<br>(7.8-21%)                    | 140<br>(81-220)       | 4600<br>(2600-6900)    |
| Congo    | 1995 | Male   | 60 to 64 | 53%<br>(38-68%)                | 47%<br>(32-62%)          | 2.1<br>(1.2-3.6)                            | 9.5%<br>(5-15%)                      | 11%<br>(5.6-17%)                    | 130<br>(65-210)       | 3400<br>(1800-5500)    |
| Congo    | 1995 | Male   | 65 to 69 | 53%<br>(39-66%)                | 47%<br>(34-61%)          | 2<br>(1.2-3)                                | 8.2%<br>(4.3-13%)                    | 9.3%<br>(4.9-15%)                   | 110<br>(57-180)       | 2500<br>(1300-4100)    |
| Congo    | 1995 | Male   | 70 to 74 | 54%<br>(40-67%)                | 46%<br>(33-60%)          | 1.8<br>(1.1-2.7)                            | 6.6%<br>(2.8-11%)                    | 7.5%<br>(3.2-13%)                   | 92<br>(39-160)        | 1700<br>(700-2800)     |
| Congo    | 1995 | Male   | 75 to 79 | 54%<br>(38-69%)                | 46%<br>(31-62%)          | 1.5<br>(0.87-2.5)                           | 5.1%<br>(1.5-9.5%)                   | 5.8%<br>(1.7-11%)                   | 61<br>(18-120)        | 860<br>(250-1600)      |

| Location | Year | Sex    | Age      | Prevalence of current drinkers | Prevalence of abstainers | Population average of standard drinks daily | Percent of total attributable deaths | Percent of total attributable DALYs | Attributable deaths | Attributable DALYs     |
|----------|------|--------|----------|--------------------------------|--------------------------|---------------------------------------------|--------------------------------------|-------------------------------------|---------------------|------------------------|
| Congo    | 1995 | Male   | 80 to 84 | 49%<br>(32-67%)                | 51%<br>(33-68%)          | 1.2<br>(0.62-1.9)                           | 3.4%<br>(0.86-6.8%)                  | 3.9%<br>(0.91-7.8%)                 | 28<br>(6.6-55)      | 290<br>(73-570)        |
| Congo    | 1995 | Male   | 85 to 89 | 43%<br>(28-59%)                | 57%<br>(41-72%)          | 0.85<br>(0.46-1.4)                          | 2.2%<br>(0.49-4.3%)                  | 2.5%<br>(0.51-4.9%)                 | 8.2<br>(1.7-16)     | 61<br>(14-120)         |
| Congo    | 1995 | Male   | 90 to 94 | 41%<br>(27-57%)                | 59%<br>(43-73%)          | 0.68<br>(0.36-1.2)                          | 1.2%<br>(0.016-2.8%)                 | 1.3%<br>(-0.11-3.2%)                | 1.5<br>(-0.12-3.5)  | 7.9<br>(0.1-18)        |
| Congo    | 1995 | Male   | 95 plus  | 44%<br>(25-64%)                | 56%<br>(36-75%)          | 0.59<br>(0.23-1.1)                          | 1.2%<br>(-0.15-3.1%)                 | 1.2%<br>(-0.37-3.6%)                | 0.33<br>(-0.1-0.98) | 1.3<br>(-0.17-3.4)     |
| Congo    | 2000 | Female | All Ages | 24%<br>(20-27%)                | 76%<br>(73-80%)          | 0.78<br>(0.62-0.95)                         | 2.2%<br>(1.5-3.1%)                   | 3.4%<br>(2.1-4.9%)                  | 740<br>(440-1100)   | 27000<br>(18000-37000) |
| Congo    | 2000 | Female | 15 to 19 | 23%<br>(16-30%)                | 77%<br>(70-84%)          | 0.59<br>(0.36-0.91)                         | 1.5%<br>(0.77-2.5%)                  | 1.8%<br>(0.73-3.5%)                 | 6.5<br>(2.7-12)     | 610<br>(330-1100)      |
| Congo    | 2000 | Female | 20 to 24 | 33%<br>(25-42%)                | 67%<br>(58-75%)          | 1.2<br>(0.75-1.8)                           | 3.1%<br>(1.7-5%)                     | 3.5%<br>(1.7-6.1%)                  | 20<br>(9.3-33)      | 1600<br>(910-2600)     |
| Congo    | 2000 | Female | 25 to 29 | 39%<br>(30-48%)                | 61%<br>(52-70%)          | 1.7<br>(1.1-2.4)                            | 3.6%<br>(2.1-5.7%)                   | 4%<br>(2.1-6.8%)                    | 34<br>(18-54)       | 2400<br>(1500-3700)    |
| Congo    | 2000 | Female | 30 to 34 | 42%<br>(31-52%)                | 58%<br>(48-69%)          | 1.9<br>(1.3-2.7)                            | 4.2%<br>(2.4-6.3%)                   | 4.6%<br>(2.4-7.2%)                  | 45<br>(23-71)       | 2800<br>(1500-4200)    |
| Congo    | 2000 | Female | 35 to 39 | 41%<br>(31-53%)                | 59%<br>(47-69%)          | 1.8<br>(1.1-2.7)                            | 4.8%<br>(2.8-7.5%)                   | 5.5%<br>(2.9-8.9%)                  | 54<br>(30-85)       | 2900<br>(1700-4500)    |
| Congo    | 2000 | Female | 40 to 44 | 40%<br>(30-51%)                | 60%<br>(49-70%)          | 1.7<br>(1-2.6)                              | 5.2%<br>(3-8%)                       | 6%<br>(3.4-9.5%)                    | 57<br>(31-90)       | 2700<br>(1500-4200)    |
| Congo    | 2000 | Female | 45 to 49 | 40%<br>(28-51%)                | 60%<br>(49-72%)          | 1.6<br>(0.96-2.4)                           | 5.8%<br>(3.4-8.9%)                   | 6.9%<br>(3.9-11%)                   | 64<br>(36-100)      | 2700<br>(1500-4200)    |
| Congo    | 2000 | Female | 50 to 54 | 36%<br>(25-47%)                | 64%<br>(53-75%)          | 1.3<br>(0.77-2.1)                           | 6.1%<br>(3.3-9.6%)                   | 7.2%<br>(3.8-11%)                   | 72<br>(37-120)      | 2700<br>(1400-4200)    |
| Congo    | 2000 | Female | 55 to 59 | 30%<br>(21-41%)                | 70%<br>(59-79%)          | 1.1<br>(0.61-1.8)                           | 5.6%<br>(2.8-9.4%)                   | 6.6%<br>(3.3-11%)                   | 73<br>(35-130)      | 2300<br>(1100-4000)    |
| Congo    | 2000 | Female | 60 to 64 | 28%<br>(18-39%)                | 72%<br>(61-82%)          | 1<br>(0.56-1.8)                             | 4.7%<br>(2.1-8.4%)                   | 5.4%<br>(2.4-9.7%)                  | 67<br>(30-120)      | 1800<br>(810-3200)     |
| Congo    | 2000 | Female | 65 to 69 | 30%<br>(21-40%)                | 70%<br>(60-79%)          | 1.1<br>(0.66-1.8)                           | 4.5%<br>(2-7.8%)                     | 5.2%<br>(2.4-8.9%)                  | 75<br>(34-130)      | 1700<br>(760-2900)     |
| Congo    | 2000 | Female | 70 to 74 | 33%<br>(24-43%)                | 67%<br>(57-76%)          | 1.2<br>(0.66-1.8)                           | 4.1%<br>(1.4-7.9%)                   | 4.7%<br>(1.6-8.9%)                  | 74<br>(24-140)      | 1300<br>(430-2500)     |
| Congo    | 2000 | Female | 75 to 79 | 33%<br>(22-47%)                | 67%<br>(53-78%)          | 1<br>(0.57-1.7)                             | 3.2%<br>(0.54-6.5%)                  | 3.6%<br>(0.62-7.4%)                 | 53<br>(9.2-110)     | 730<br>(130-1500)      |
| Congo    | 2000 | Female | 80 to 84 | 31%<br>(19-44%)                | 69%<br>(56-81%)          | 0.84<br>(0.45-1.4)                          | 2.2%<br>(0.38-4.9%)                  | 2.5%<br>(0.46-5.6%)                 | 30<br>(5.5-66)      | 310<br>(54-680)        |
| Congo    | 2000 | Female | 85 to 89 | 28%<br>(17-41%)                | 72%<br>(59-83%)          | 0.7<br>(0.36-1.2)                           | 1.5%<br>(0.13-3.5%)                  | 1.7%<br>(0.15-4.1%)                 | 8.5<br>(0.72-20)    | 62<br>(5.6-150)        |
| Congo    | 2000 | Female | 90 to 94 | 29%<br>(19-42%)                | 71%<br>(58-81%)          | 0.65<br>(0.33-1.1)                          | 1%<br>(-0.12-2.9%)                   | 1.2%<br>(-0.17-3.4%)                | 1.7<br>(-0.24-4.7)  | 8.5<br>(-0.97-23)      |
| Congo    | 2000 | Female | 95 plus  | 32%<br>(19-48%)                | 68%<br>(52-81%)          | 0.63<br>(0.25-1.2)                          | 0.82%<br>(-0.32-2.8%)                | 0.9%<br>(-0.42-3.2%)                | 0.28<br>(-0.13-1)   | 1<br>(-0.38-3.5)       |

| Location | Year | Sex    | Age      | Prevalence of current drinkers | Prevalence of abstainers | Population average of standard drinks daily | Percent of total attributable deaths | Percent of total attributable DALYs | Attributable deaths | Attributable DALYs     |
|----------|------|--------|----------|--------------------------------|--------------------------|---------------------------------------------|--------------------------------------|-------------------------------------|---------------------|------------------------|
| Congo    | 2000 | Male   | All Ages | 36%<br>(30-42%)                | 64%<br>(58-70%)          | 1.3<br>(1-1.5)                              | 4.1%<br>(2.9-5.3%)                   | 5.9%<br>(4.1-8%)                    | 1300<br>(850-1700)  | 51000<br>(37000-68000) |
| Congo    | 2000 | Male   | 15 to 19 | 28%<br>(19-37%)                | 72%<br>(63-81%)          | 0.82<br>(0.47-1.3)                          | 3%<br>(1.6-4.9%)                     | 3.7%<br>(1.6-6.2%)                  | 16<br>(7.4-29)      | 1400<br>(740-2300)     |
| Congo    | 2000 | Male   | 20 to 24 | 43%<br>(32-54%)                | 57%<br>(46-68%)          | 1.8<br>(1.1-2.8)                            | 7.9%<br>(4.7-12%)                    | 9.1%<br>(4.9-14%)                   | 62<br>(34-95)       | 4700<br>(2700-6900)    |
| Congo    | 2000 | Male   | 25 to 29 | 56%<br>(44-65%)                | 44%<br>(35-56%)          | 2.9<br>(1.9-4)                              | 9.9%<br>(5.9-14%)                    | 11%<br>(6.2-17%)                    | 98<br>(58-140)      | 6600<br>(4100-9200)    |
| Congo    | 2000 | Male   | 30 to 34 | 55%<br>(43-66%)                | 45%<br>(34-57%)          | 3<br>(2-4.2)                                | 9.1%<br>(5.5-13%)                    | 10%<br>(5.7-15%)                    | 110<br>(64-150)     | 6500<br>(4000-8800)    |
| Congo    | 2000 | Male   | 35 to 39 | 48%<br>(38-60%)                | 52%<br>(40-62%)          | 2.5<br>(1.6-3.7)                            | 8%<br>(4.8-12%)                      | 8.9%<br>(5.1-14%)                   | 99<br>(60-150)      | 5300<br>(3400-7700)    |
| Congo    | 2000 | Male   | 40 to 44 | 50%<br>(40-62%)                | 50%<br>(38-60%)          | 2.5<br>(1.5-3.8)                            | 8.8%<br>(5.3-13%)                    | 9.9%<br>(5.9-15%)                   | 110<br>(64-160)     | 5100<br>(3100-7400)    |
| Congo    | 2000 | Male   | 45 to 49 | 60%<br>(47-70%)                | 40%<br>(30-53%)          | 3<br>(1.9-4.4)                              | 11%<br>(6.8-15%)                     | 12%<br>(7.6-18%)                    | 130<br>(77-190)     | 5400<br>(3300-7900)    |
| Congo    | 2000 | Male   | 50 to 54 | 61%<br>(49-72%)                | 39%<br>(28-51%)          | 2.9<br>(1.8-4.4)                            | 12%<br>(7.1-17%)                     | 14%<br>(8.2-19%)                    | 130<br>(76-200)     | 5000<br>(2800-7300)    |
| Congo    | 2000 | Male   | 55 to 59 | 55%<br>(41-67%)                | 45%<br>(33-59%)          | 2.3<br>(1.4-3.7)                            | 10%<br>(5.8-16%)                     | 12%<br>(6.9-18%)                    | 120<br>(65-190)     | 3800<br>(2100-5900)    |
| Congo    | 2000 | Male   | 60 to 64 | 51%<br>(37-66%)                | 49%<br>(34-63%)          | 2<br>(1.1-3.2)                              | 8.3%<br>(4.5-13%)                    | 9.7%<br>(5.1-16%)                   | 100<br>(54-180)     | 2800<br>(1500-4700)    |
| Congo    | 2000 | Male   | 65 to 69 | 53%<br>(40-66%)                | 47%<br>(34-60%)          | 1.9<br>(1.2-2.9)                            | 7.3%<br>(3.9-12%)                    | 8.4%<br>(4.5-13%)                   | 96<br>(49-160)      | 2200<br>(1100-3600)    |
| Congo    | 2000 | Male   | 70 to 74 | 57%<br>(44-69%)                | 43%<br>(31-56%)          | 1.8<br>(1.1-2.7)                            | 6.2%<br>(2.7-10%)                    | 7.1%<br>(3-12%)                     | 84<br>(36-150)      | 1500<br>(650-2600)     |
| Congo    | 2000 | Male   | 75 to 79 | 60%<br>(45-73%)                | 40%<br>(27-55%)          | 1.7<br>(0.98-2.6)                           | 4.9%<br>(1.5-9%)                     | 5.6%<br>(1.7-10%)                   | 58<br>(18-110)      | 810<br>(240-1500)      |
| Congo    | 2000 | Male   | 80 to 84 | 52%<br>(35-69%)                | 48%<br>(31-65%)          | 1.2<br>(0.68-2)                             | 3.2%<br>(0.76-6.3%)                  | 3.7%<br>(0.81-7.3%)                 | 26<br>(5.8-54)      | 280<br>(65-550)        |
| Congo    | 2000 | Male   | 85 to 89 | 42%<br>(27-59%)                | 58%<br>(41-73%)          | 0.81<br>(0.44-1.4)                          | 2%<br>(0.47-4.1%)                    | 2.2%<br>(0.48-4.7%)                 | 7.7<br>(1.7-16)     | 58<br>(15-120)         |
| Congo    | 2000 | Male   | 90 to 94 | 41%<br>(26-58%)                | 59%<br>(42-74%)          | 0.66<br>(0.34-1.1)                          | 1.1%<br>(0.021-2.6%)                 | 1.2%<br>(-0.09-3%)                  | 1.4<br>(-0.11-3.5)  | 7.8<br>(0.15-19)       |
| Congo    | 2000 | Male   | 95 plus  | 43%<br>(24-65%)                | 57%<br>(35-76%)          | 0.57<br>(0.23-1.1)                          | 1.1%<br>(-0.13-3%)                   | 1.1%<br>(-0.35-3.5%)                | 0.34<br>(-0.1-1)    | 1.3<br>(-0.16-3.7)     |
| Congo    | 2005 | Female | All Ages | 23%<br>(19-26%)                | 77%<br>(74-81%)          | 0.81<br>(0.64-0.99)                         | 2.1%<br>(1.4-2.9%)                   | 3.2%<br>(1.9-4.7%)                  | 680<br>(390-1000)   | 25000<br>(16000-34000) |
| Congo    | 2005 | Female | 15 to 19 | 22%<br>(16-29%)                | 78%<br>(71-84%)          | 0.61<br>(0.35-0.95)                         | 1.3%<br>(0.73-2.1%)                  | 1.5%<br>(0.71-2.8%)                 | 5.7<br>(2.6-10)     | 570<br>(320-920)       |
| Congo    | 2005 | Female | 20 to 24 | 32%<br>(24-41%)                | 68%<br>(59-76%)          | 1.2<br>(0.77-1.8)                           | 3%<br>(1.8-4.6%)                     | 3.4%<br>(1.8-5.7%)                  | 16<br>(8.5-27)      | 1500<br>(900-2200)     |
| Congo    | 2005 | Female | 25 to 29 | 38%<br>(29-47%)                | 62%<br>(53-71%)          | 1.8<br>(1.2-2.5)                            | 3.5%<br>(2.1-5.3%)                   | 3.9%<br>(2-6.4%)                    | 30<br>(17-47)       | 2200<br>(1400-3200)    |

| Location | Year | Sex    | Age      | Prevalence of current drinkers | Prevalence of abstainers | Population average of standard drinks daily | Percent of total attributable deaths | Percent of total attributable DALYs | Attributable deaths | Attributable DALYs     |
|----------|------|--------|----------|--------------------------------|--------------------------|---------------------------------------------|--------------------------------------|-------------------------------------|---------------------|------------------------|
| Congo    | 2005 | Female | 30 to 34 | 40%<br>(30-51%)                | 60%<br>(49-70%)          | 2<br>(1.4-2.8)                              | 3.7%<br>(2.4-5.4%)                   | 4.1%<br>(2.4-6.3%)                  | 40<br>(24-61)       | 2600<br>(1600-3700)    |
| Congo    | 2005 | Female | 35 to 39 | 40%<br>(29-52%)                | 60%<br>(48-71%)          | 1.9<br>(1.1-2.8)                            | 3.9%<br>(2.4-5.9%)                   | 4.4%<br>(2.5-7%)                    | 46<br>(26-70)       | 2500<br>(1500-3800)    |
| Congo    | 2005 | Female | 40 to 44 | 39%<br>(28-50%)                | 61%<br>(50-72%)          | 1.8<br>(1.1-2.7)                            | 4.4%<br>(2.7-6.6%)                   | 5.1%<br>(3-7.8%)                    | 50<br>(28-77)       | 2400<br>(1400-3700)    |
| Congo    | 2005 | Female | 45 to 49 | 39%<br>(27-50%)                | 61%<br>(50-73%)          | 1.6<br>(0.98-2.5)                           | 5.1%<br>(3-7.6%)                     | 6%<br>(3.6-9.2%)                    | 58<br>(33-90)       | 2500<br>(1400-3800)    |
| Congo    | 2005 | Female | 50 to 54 | 35%<br>(25-47%)                | 65%<br>(53-75%)          | 1.4<br>(0.79-2.2)                           | 5.5%<br>(3.1-8.8%)                   | 6.6%<br>(3.6-10%)                   | 67<br>(36-110)      | 2500<br>(1300-4000)    |
| Congo    | 2005 | Female | 55 to 59 | 29%<br>(20-40%)                | 71%<br>(60-80%)          | 1.2<br>(0.61-1.9)                           | 5.2%<br>(2.6-8.7%)                   | 6.2%<br>(3.1-10%)                   | 68<br>(34-120)      | 2200<br>(1100-3600)    |
| Congo    | 2005 | Female | 60 to 64 | 27%<br>(18-37%)                | 73%<br>(63-82%)          | 1.1<br>(0.56-1.9)                           | 4.4%<br>(2.1-7.7%)                   | 5.1%<br>(2.4-9%)                    | 64<br>(29-110)      | 1700<br>(780-3000)     |
| Congo    | 2005 | Female | 65 to 69 | 29%<br>(20-39%)                | 71%<br>(61-80%)          | 1.1<br>(0.67-1.8)                           | 4.3%<br>(2-7.4%)                     | 5%<br>(2.4-8.7%)                    | 72<br>(34-130)      | 1600<br>(760-2800)     |
| Congo    | 2005 | Female | 70 to 74 | 31%<br>(22-42%)                | 69%<br>(58-78%)          | 1.2<br>(0.67-1.9)                           | 4%<br>(1.3-7.5%)                     | 4.6%<br>(1.6-8.6%)                  | 72<br>(23-130)      | 1300<br>(420-2400)     |
| Congo    | 2005 | Female | 75 to 79 | 32%<br>(21-45%)                | 68%<br>(55-79%)          | 1.1<br>(0.56-1.8)                           | 3.1%<br>(0.59-6.5%)                  | 3.5%<br>(0.68-7.4%)                 | 53<br>(9.8-110)     | 730<br>(130-1500)      |
| Congo    | 2005 | Female | 80 to 84 | 29%<br>(18-43%)                | 71%<br>(57-82%)          | 0.86<br>(0.44-1.5)                          | 2.2%<br>(0.36-4.8%)                  | 2.5%<br>(0.43-5.5%)                 | 32<br>(5.4-71)      | 330<br>(56-730)        |
| Congo    | 2005 | Female | 85 to 89 | 27%<br>(16-40%)                | 73%<br>(60-84%)          | 0.71<br>(0.36-1.2)                          | 1.4%<br>(0.15-3.4%)                  | 1.6%<br>(0.18-3.8%)                 | 8.8<br>(0.99-21)    | 65<br>(7.1-150)        |
| Congo    | 2005 | Female | 90 to 94 | 28%<br>(18-40%)                | 72%<br>(60-82%)          | 0.66<br>(0.33-1.2)                          | 0.99%<br>(-0.12-2.7%)                | 1.1%<br>(-0.17-3.1%)                | 1.7<br>(-0.26-4.7)  | 8.8<br>(-1.1-24)       |
| Congo    | 2005 | Female | 95 plus  | 30%<br>(18-47%)                | 70%<br>(53-82%)          | 0.63<br>(0.26-1.2)                          | 0.8%<br>(-0.21-2.5%)                 | 0.87%<br>(-0.31-2.9%)               | 0.29<br>(-0.1-0.97) | 1<br>(-0.27-3.4)       |
| Congo    | 2005 | Male   | All Ages | 35%<br>(30-41%)                | 65%<br>(59-70%)          | 1.3<br>(1.1-1.6)                            | 3.5%<br>(2.5-4.6%)                   | 5.2%<br>(3.6-7%)                    | 960<br>(650-1300)   | 40000<br>(29000-53000) |
| Congo    | 2005 | Male   | 15 to 19 | 27%<br>(19-36%)                | 73%<br>(64-81%)          | 0.85<br>(0.46-1.4)                          | 2.7%<br>(1.6-4.3%)                   | 3.3%<br>(1.7-5.6%)                  | 13<br>(6.2-22)      | 1200<br>(660-1800)     |
| Congo    | 2005 | Male   | 20 to 24 | 42%<br>(31-53%)                | 58%<br>(47-69%)          | 1.9<br>(1.2-2.9)                            | 7.9%<br>(5-11%)                      | 9.6%<br>(5.5-15%)                   | 46<br>(26-73)       | 3600<br>(2300-5300)    |
| Congo    | 2005 | Male   | 25 to 29 | 55%<br>(44-65%)                | 45%<br>(35-56%)          | 3<br>(2-4.2)                                | 9.9%<br>(6.3-14%)                    | 12%<br>(6.8-18%)                    | 77<br>(47-110)      | 5300<br>(3500-7600)    |
| Congo    | 2005 | Male   | 30 to 34 | 54%<br>(42-65%)                | 46%<br>(35-58%)          | 3.1<br>(2.1-4.4)                            | 8.7%<br>(5.6-12%)                    | 10%<br>(6.1-15%)                    | 84<br>(51-120)      | 5200<br>(3400-7400)    |
| Congo    | 2005 | Male   | 35 to 39 | 47%<br>(36-58%)                | 53%<br>(42-64%)          | 2.6<br>(1.6-3.8)                            | 7.1%<br>(4.4-10%)                    | 8%<br>(4.8-12%)                     | 76<br>(45-110)      | 4200<br>(2600-6100)    |
| Congo    | 2005 | Male   | 40 to 44 | 49%<br>(38-61%)                | 51%<br>(39-62%)          | 2.6<br>(1.6-3.9)                            | 7.2%<br>(4.7-10%)                    | 8.2%<br>(5.2-12%)                   | 79<br>(48-120)      | 3800<br>(2400-5600)    |
| Congo    | 2005 | Male   | 45 to 49 | 59%<br>(47-69%)                | 41%<br>(31-53%)          | 3.1<br>(1.9-4.7)                            | 9%<br>(5.8-13%)                      | 11%<br>(6.7-15%)                    | 93<br>(58-140)      | 4000<br>(2600-5800)    |

| Location | Year | Sex    | Age      | Prevalence of current drinkers | Prevalence of abstainers | Population average of standard drinks daily | Percent of total attributable deaths | Percent of total attributable DALYs | Attributable deaths   | Attributable DALYs     |
|----------|------|--------|----------|--------------------------------|--------------------------|---------------------------------------------|--------------------------------------|-------------------------------------|-----------------------|------------------------|
| Congo    | 2005 | Male   | 50 to 54 | 60%<br>(48-71%)                | 40%<br>(29-52%)          | 3<br>(1.8-4.7)                              | 10%<br>(6.3-14%)                     | 12%<br>(7.6-18%)                    | 100<br>(61-150)       | 3800<br>(2300-5400)    |
| Congo    | 2005 | Male   | 55 to 59 | 54%<br>(40-67%)                | 46%<br>(33-60%)          | 2.4<br>(1.4-3.8)                            | 9.1%<br>(5.5-14%)                    | 11%<br>(6.6-17%)                    | 89<br>(52-140)        | 2900<br>(1700-4400)    |
| Congo    | 2005 | Male   | 60 to 64 | 51%<br>(37-65%)                | 49%<br>(35-63%)          | 2<br>(1.2-3.4)                              | 7.4%<br>(4.1-12%)                    | 8.9%<br>(4.8-14%)                   | 80<br>(43-130)        | 2200<br>(1200-3500)    |
| Congo    | 2005 | Male   | 65 to 69 | 52%<br>(39-65%)                | 48%<br>(35-61%)          | 2<br>(1.2-3)                                | 6.6%<br>(3.6-10%)                    | 7.8%<br>(4.2-12%)                   | 76<br>(42-120)        | 1700<br>(960-2800)     |
| Congo    | 2005 | Male   | 70 to 74 | 57%<br>(43-68%)                | 43%<br>(32-57%)          | 1.9<br>(1.2-3)                              | 5.6%<br>(2.7-9.3%)                   | 6.6%<br>(3.1-11%)                   | 67<br>(31-110)        | 1200<br>(570-2000)     |
| Congo    | 2005 | Male   | 75 to 79 | 59%<br>(44-72%)                | 41%<br>(28-56%)          | 1.8<br>(1-2.8)                              | 4.5%<br>(1.6-8.3%)                   | 5.2%<br>(1.8-9.7%)                  | 48<br>(17-89)         | 680<br>(240-1200)      |
| Congo    | 2005 | Male   | 80 to 84 | 52%<br>(34-69%)                | 48%<br>(31-66%)          | 1.3<br>(0.7-2.1)                            | 2.9%<br>(0.9-5.7%)                   | 3.4%<br>(0.97-6.6%)                 | 23<br>(6.7-47)        | 240<br>(76-480)        |
| Congo    | 2005 | Male   | 85 to 89 | 42%<br>(26-59%)                | 58%<br>(41-74%)          | 0.86<br>(0.45-1.5)                          | 1.8%<br>(0.51-3.6%)                  | 2.1%<br>(0.51-4.2%)                 | 7.3<br>(1.8-15)       | 56<br>(16-110)         |
| Congo    | 2005 | Male   | 90 to 94 | 40%<br>(26-57%)                | 60%<br>(43-74%)          | 0.69<br>(0.36-1.2)                          | 1%<br>(0.078-2.4%)                   | 1.1%<br>(-0.022-2.8%)               | 1.4<br>(-0.029-3.4)   | 7.8<br>(0.59-18)       |
| Congo    | 2005 | Male   | 95 plus  | 43%<br>(25-63%)                | 57%<br>(37-75%)          | 0.6<br>(0.24-1.2)                           | 1%<br>(-0.0042-2.9%)                 | 1.1%<br>(-0.17-3.3%)                | 0.33<br>(-0.052-0.99) | 1.3<br>(-0.0051-3.5)   |
| Congo    | 2010 | Female | All Ages | 23%<br>(19-27%)                | 77%<br>(73-81%)          | 0.88<br>(0.69-1.1)                          | 2.4%<br>(1.6-3.3%)                   | 3.6%<br>(2.2-5.2%)                  | 760<br>(420-1100)     | 27000<br>(17000-38000) |
| Congo    | 2010 | Female | 15 to 19 | 20%<br>(13-29%)                | 80%<br>(71-87%)          | 0.61<br>(0.33-1)                            | 1.3%<br>(0.72-2%)                    | 1.4%<br>(0.68-2.7%)                 | 5.6<br>(2.6-10)       | 590<br>(330-940)       |
| Congo    | 2010 | Female | 20 to 24 | 31%<br>(20-43%)                | 69%<br>(57-80%)          | 1.3<br>(0.72-2)                             | 3%<br>(1.9-4.5%)                     | 3.5%<br>(1.8-5.9%)                  | 16<br>(8.2-26)        | 1500<br>(890-2200)     |
| Congo    | 2010 | Female | 25 to 29 | 37%<br>(25-50%)                | 63%<br>(50-75%)          | 1.9<br>(1.2-2.7)                            | 3.8%<br>(2.3-5.5%)                   | 4.4%<br>(2.4-7%)                    | 30<br>(16-47)         | 2300<br>(1400-3300)    |
| Congo    | 2010 | Female | 30 to 34 | 40%<br>(28-54%)                | 60%<br>(46-72%)          | 2.1<br>(1.3-3.1)                            | 4.1%<br>(2.6-6.1%)                   | 4.8%<br>(2.8-7.5%)                  | 43<br>(24-67)         | 2800<br>(1700-4100)    |
| Congo    | 2010 | Female | 35 to 39 | 41%<br>(28-54%)                | 59%<br>(46-72%)          | 2<br>(1.2-3.2)                              | 4.4%<br>(2.6-6.6%)                   | 5.1%<br>(2.9-8%)                    | 51<br>(27-83)         | 2900<br>(1600-4400)    |
| Congo    | 2010 | Female | 40 to 44 | 40%<br>(28-53%)                | 60%<br>(47-72%)          | 2<br>(1.1-3.1)                              | 5%<br>(2.9-7.4%)                     | 5.9%<br>(3.4-8.9%)                  | 58<br>(31-89)         | 2800<br>(1600-4300)    |
| Congo    | 2010 | Female | 45 to 49 | 39%<br>(25-53%)                | 61%<br>(47-75%)          | 1.8<br>(1-2.8)                              | 5.6%<br>(3.3-8.5%)                   | 6.9%<br>(4-11%)                     | 64<br>(35-100)        | 2800<br>(1600-4400)    |
| Congo    | 2010 | Female | 50 to 54 | 36%<br>(24-49%)                | 64%<br>(51-76%)          | 1.5<br>(0.86-2.5)                           | 6%<br>(3.3-9.5%)                     | 7.3%<br>(4-11%)                     | 73<br>(39-120)        | 2700<br>(1500-4500)    |
| Congo    | 2010 | Female | 55 to 59 | 32%<br>(21-44%)                | 68%<br>(56-79%)          | 1.4<br>(0.69-2.3)                           | 5.9%<br>(2.9-9.7%)                   | 7.1%<br>(3.6-12%)                   | 78<br>(38-140)        | 2500<br>(1200-4400)    |
| Congo    | 2010 | Female | 60 to 64 | 31%<br>(20-43%)                | 69%<br>(57-80%)          | 1.3<br>(0.66-2.3)                           | 5%<br>(2.3-8.9%)                     | 6%<br>(2.8-11%)                     | 75<br>(34-130)        | 2000<br>(910-3700)     |
| Congo    | 2010 | Female | 65 to 69 | 31%<br>(21-42%)                | 69%<br>(58-79%)          | 1.3<br>(0.72-2.1)                           | 4.8%<br>(2.1-8.1%)                   | 5.6%<br>(2.6-9.6%)                  | 82<br>(36-140)        | 1800<br>(810-3200)     |



| Location | Year | Sex    | Age      | Prevalence of current drinkers | Prevalence of abstainers | Population average of standard drinks daily | Percent of total attributable deaths | Percent of total attributable DALYs | Attributable deaths | Attributable DALYs     |
|----------|------|--------|----------|--------------------------------|--------------------------|---------------------------------------------|--------------------------------------|-------------------------------------|---------------------|------------------------|
| Congo    | 2010 | Female | 70 to 74 | 31%<br>(21-42%)                | 69%<br>(58-79%)          | 1.2<br>(0.69-2)                             | 4.1%<br>(1.4-7.6%)                   | 4.8%<br>(1.6-8.8%)                  | 78<br>(25-150)      | 1400<br>(460-2700)     |
| Congo    | 2010 | Female | 75 to 79 | 30%<br>(19-44%)                | 70%<br>(56-81%)          | 1.1<br>(0.54-1.9)                           | 3.2%<br>(0.7-6.4%)                   | 3.6%<br>(0.84-7.4%)                 | 57<br>(13-120)      | 800<br>(170-1700)      |
| Congo    | 2010 | Female | 80 to 84 | 28%<br>(17-41%)                | 72%<br>(59-83%)          | 0.86<br>(0.42-1.5)                          | 2.3%<br>(0.42-4.9%)                  | 2.6%<br>(0.5-5.7%)                  | 36<br>(6.5-77)      | 370<br>(69-800)        |
| Congo    | 2010 | Female | 85 to 89 | 26%<br>(16-38%)                | 74%<br>(62-84%)          | 0.73<br>(0.38-1.3)                          | 1.5%<br>(0.23-3.6%)                  | 1.8%<br>(0.23-4.1%)                 | 11<br>(1.4-26)      | 83<br>(11-190)         |
| Congo    | 2010 | Female | 90 to 94 | 27%<br>(17-39%)                | 73%<br>(61-83%)          | 0.69<br>(0.33-1.2)                          | 1.1%<br>(-0.0058-2.7%)               | 1.3%<br>(-0.045-3.1%)               | 2.3<br>(-0.076-5.6) | 12<br>(-0.06-29)       |
| Congo    | 2010 | Female | 95 plus  | 30%<br>(17-46%)                | 70%<br>(54-83%)          | 0.67<br>(0.27-1.3)                          | 0.92%<br>(-0.17-2.6%)                | 1%<br>(-0.27-2.9%)                  | 0.38<br>(-0.11-1.2) | 1.4<br>(-0.26-4)       |
| Congo    | 2010 | Male   | All Ages | 33%<br>(27-39%)                | 67%<br>(61-73%)          | 1.3<br>(1-1.6)                              | 3.6%<br>(2.6-4.9%)                   | 5.4%<br>(3.7-7.4%)                  | 940<br>(610-1400)   | 40000<br>(28000-55000) |
| Congo    | 2010 | Male   | 15 to 19 | 25%<br>(16-35%)                | 75%<br>(65-84%)          | 0.84<br>(0.44-1.4)                          | 2.5%<br>(1.5-3.9%)                   | 3%<br>(1.5-5.1%)                    | 12<br>(5.7-21)      | 1100<br>(660-1800)     |
| Congo    | 2010 | Male   | 20 to 24 | 37%<br>(26-50%)                | 63%<br>(50-74%)          | 1.8<br>(1-2.8)                              | 7.4%<br>(4.7-11%)                    | 9%<br>(5.2-14%)                     | 40<br>(22-64)       | 3300<br>(2000-5000)    |
| Congo    | 2010 | Male   | 25 to 29 | 49%<br>(35-62%)                | 51%<br>(38-65%)          | 2.8<br>(1.8-4.1)                            | 9.6%<br>(6.5-14%)                    | 12%<br>(7.3-17%)                    | 67<br>(41-100)      | 4900<br>(3200-7000)    |
| Congo    | 2010 | Male   | 30 to 34 | 51%<br>(37-65%)                | 49%<br>(35-63%)          | 3.2<br>(2-4.6)                              | 9.3%<br>(6.1-13%)                    | 11%<br>(6.9-17%)                    | 80<br>(48-120)      | 5100<br>(3300-7500)    |
| Congo    | 2010 | Male   | 35 to 39 | 47%<br>(34-60%)                | 53%<br>(40-66%)          | 2.8<br>(1.6-4.2)                            | 8.1%<br>(5.3-11%)                    | 9.7%<br>(6-14%)                     | 78<br>(45-120)      | 4400<br>(2800-6400)    |
| Congo    | 2010 | Male   | 40 to 44 | 49%<br>(36-62%)                | 51%<br>(38-64%)          | 2.8<br>(1.6-4.2)                            | 8%<br>(5.2-11%)                      | 9.7%<br>(6.1-14%)                   | 80<br>(47-120)      | 4000<br>(2400-5900)    |
| Congo    | 2010 | Male   | 45 to 49 | 54%<br>(39-67%)                | 46%<br>(33-61%)          | 3.1<br>(1.8-4.8)                            | 9.3%<br>(5.9-13%)                    | 11%<br>(7-16%)                      | 89<br>(54-140)      | 3900<br>(2400-5900)    |
| Congo    | 2010 | Male   | 50 to 54 | 56%<br>(42-69%)                | 44%<br>(31-58%)          | 3<br>(1.7-4.8)                              | 10%<br>(6.3-15%)                     | 13%<br>(8-18%)                      | 96<br>(56-140)      | 3600<br>(2200-5400)    |
| Congo    | 2010 | Male   | 55 to 59 | 53%<br>(37-66%)                | 47%<br>(34-63%)          | 2.5<br>(1.4-4)                              | 9.4%<br>(5.7-14%)                    | 12%<br>(7.2-18%)                    | 90<br>(50-140)      | 3000<br>(1700-4500)    |
| Congo    | 2010 | Male   | 60 to 64 | 51%<br>(36-66%)                | 49%<br>(34-64%)          | 2.2<br>(1.2-3.8)                            | 7.8%<br>(4.3-12%)                    | 9.6%<br>(5.2-15%)                   | 83<br>(43-130)      | 2300<br>(1200-3700)    |
| Congo    | 2010 | Male   | 65 to 69 | 51%<br>(36-65%)                | 49%<br>(35-64%)          | 2<br>(1.2-3.2)                              | 6.8%<br>(3.8-11%)                    | 8.2%<br>(4.5-13%)                   | 79<br>(42-130)      | 1800<br>(970-2900)     |
| Congo    | 2010 | Male   | 70 to 74 | 52%<br>(38-65%)                | 48%<br>(35-62%)          | 1.9<br>(1.1-3)                              | 5.4%<br>(2.5-9.2%)                   | 6.5%<br>(3-11%)                     | 67<br>(31-120)      | 1200<br>(570-2100)     |
| Congo    | 2010 | Male   | 75 to 79 | 52%<br>(36-67%)                | 48%<br>(33-64%)          | 1.6<br>(0.87-2.6)                           | 4.2%<br>(1.6-7.7%)                   | 5%<br>(1.9-9%)                      | 47<br>(17-87)       | 670<br>(240-1200)      |
| Congo    | 2010 | Male   | 80 to 84 | 47%<br>(29-64%)                | 53%<br>(36-71%)          | 1.2<br>(0.63-2)                             | 2.8%<br>(0.9-5.3%)                   | 3.2%<br>(0.98-6.2%)                 | 24<br>(7-46)        | 250<br>(78-480)        |
| Congo    | 2010 | Male   | 85 to 89 | 40%<br>(25-57%)                | 60%<br>(43-75%)          | 0.86<br>(0.45-1.5)                          | 1.8%<br>(0.55-3.5%)                  | 2.1%<br>(0.57-4.1%)                 | 8.4<br>(2.4-17)     | 65<br>(19-130)         |

| Location | Year | Sex    | Age      | Prevalence of current drinkers | Prevalence of abstainers | Population average of standard drinks daily | Percent of total attributable deaths | Percent of total attributable DALYs | Attributable deaths  | Attributable DALYs     |
|----------|------|--------|----------|--------------------------------|--------------------------|---------------------------------------------|--------------------------------------|-------------------------------------|----------------------|------------------------|
| Congo    | 2010 | Male   | 90 to 94 | 39%<br>(24-56%)                | 61%<br>(44-76%)          | 0.7<br>(0.35-1.2)                           | 1.1%<br>(0.16-2.3%)                  | 1.2%<br>(0.07-2.6%)                 | 1.7<br>(0.1-3.9)     | 9.6<br>(1.4-21)        |
| Congo    | 2010 | Male   | 95 plus  | 42%<br>(23-62%)                | 58%<br>(38-77%)          | 0.61<br>(0.24-1.2)                          | 1.1%<br>(0.084-2.7%)                 | 1.1%<br>(-0.074-3%)                 | 0.38<br>(-0.026-1.1) | 1.5<br>(0.12-3.8)      |
| Congo    | 2016 | Female | All Ages | 23%<br>(19-27%)                | 77%<br>(73-81%)          | 0.99<br>(0.62-1.5)                          | 2.7%<br>(1.6-4.1%)                   | 4.2%<br>(2.1-6.7%)                  | 860<br>(400-1400)    | 30000<br>(16000-47000) |
| Congo    | 2016 | Female | 15 to 19 | 20%<br>(13-29%)                | 80%<br>(71-87%)          | 0.7<br>(0.33-1.2)                           | 1.3%<br>(0.76-2.2%)                  | 1.5%<br>(0.66-2.9%)                 | 6<br>(2.4-11)        | 660<br>(350-1100)      |
| Congo    | 2016 | Female | 20 to 24 | 31%<br>(20-42%)                | 69%<br>(58-80%)          | 1.4<br>(0.72-2.4)                           | 3.1%<br>(1.8-4.8%)                   | 3.5%<br>(1.7-6.2%)                  | 15<br>(6.3-26)       | 1500<br>(840-2300)     |
| Congo    | 2016 | Female | 25 to 29 | 37%<br>(25-49%)                | 63%<br>(51-75%)          | 2.1<br>(1.1-3.4)                            | 3.9%<br>(2.3-5.9%)                   | 4.6%<br>(2.3-7.6%)                  | 27<br>(13-47)        | 2200<br>(1200-3400)    |
| Congo    | 2016 | Female | 30 to 34 | 40%<br>(27-54%)                | 60%<br>(46-73%)          | 2.4<br>(1.3-3.9)                            | 4.4%<br>(2.6-6.9%)                   | 5.3%<br>(2.8-8.5%)                  | 42<br>(21-72)        | 2800<br>(1600-4600)    |
| Congo    | 2016 | Female | 35 to 39 | 41%<br>(28-53%)                | 59%<br>(47-72%)          | 2.3<br>(1.2-3.9)                            | 4.7%<br>(2.7-7.4%)                   | 5.7%<br>(3-9%)                      | 55<br>(26-95)        | 3100<br>(1600-5100)    |
| Congo    | 2016 | Female | 40 to 44 | 40%<br>(28-53%)                | 60%<br>(47-72%)          | 2.2<br>(1.2-3.8)                            | 5.2%<br>(3-8.2%)                     | 6.4%<br>(3.6-10%)                   | 65<br>(32-110)       | 3200<br>(1700-5400)    |
| Congo    | 2016 | Female | 45 to 49 | 39%<br>(25-52%)                | 61%<br>(48-75%)          | 2<br>(1-3.5)                                | 5.8%<br>(3.1-9%)                     | 7.2%<br>(3.9-11%)                   | 72<br>(36-120)       | 3100<br>(1600-5200)    |
| Congo    | 2016 | Female | 50 to 54 | 36%<br>(25-49%)                | 64%<br>(51-75%)          | 1.7<br>(0.86-3.1)                           | 6.2%<br>(3.2-10%)                    | 7.6%<br>(4-13%)                     | 79<br>(37-140)       | 3000<br>(1400-5100)    |
| Congo    | 2016 | Female | 55 to 59 | 32%<br>(21-44%)                | 68%<br>(56-79%)          | 1.6<br>(0.7-2.9)                            | 6.1%<br>(2.8-11%)                    | 7.5%<br>(3.4-13%)                   | 85<br>(36-160)       | 2700<br>(1200-5000)    |
| Congo    | 2016 | Female | 60 to 64 | 30%<br>(20-42%)                | 70%<br>(58-80%)          | 1.5<br>(0.67-2.9)                           | 5.4%<br>(2.1-9.8%)                   | 6.5%<br>(2.6-12%)                   | 83<br>(32-150)       | 2300<br>(880-4200)     |
| Congo    | 2016 | Female | 65 to 69 | 31%<br>(21-41%)                | 69%<br>(59-79%)          | 1.5<br>(0.73-2.6)                           | 5.2%<br>(2.1-9.6%)                   | 6.2%<br>(2.5-11%)                   | 94<br>(36-180)       | 2100<br>(830-4000)     |
| Congo    | 2016 | Female | 70 to 74 | 31%<br>(22-42%)                | 69%<br>(58-78%)          | 1.4<br>(0.73-2.5)                           | 4.7%<br>(1.4-9.1%)                   | 5.5%<br>(1.7-11%)                   | 94<br>(27-190)       | 1700<br>(500-3400)     |
| Congo    | 2016 | Female | 75 to 79 | 30%<br>(19-45%)                | 70%<br>(55-81%)          | 1.2<br>(0.6-2.3)                            | 3.7%<br>(0.75-8%)                    | 4.3%<br>(0.9-9.4%)                  | 73<br>(15-160)       | 1000<br>(210-2200)     |
| Congo    | 2016 | Female | 80 to 84 | 28%<br>(17-42%)                | 72%<br>(58-83%)          | 1<br>(0.45-1.9)                             | 2.7%<br>(0.45-6.2%)                  | 3.2%<br>(0.55-7.2%)                 | 49<br>(7.8-120)      | 510<br>(80-1200)       |
| Congo    | 2016 | Female | 85 to 89 | 26%<br>(16-38%)                | 74%<br>(62-84%)          | 0.84<br>(0.39-1.6)                          | 1.9%<br>(0.23-4.6%)                  | 2.2%<br>(0.28-5.2%)                 | 16<br>(1.9-40)       | 120<br>(15-300)        |
| Congo    | 2016 | Female | 90 to 94 | 27%<br>(17-39%)                | 73%<br>(61-83%)          | 0.78<br>(0.34-1.5)                          | 1.4%<br>(-0.077-3.5%)                | 1.6%<br>(-0.098-4.1%)               | 3.7<br>(-0.23-9.4)   | 19<br>(-1.1-48)        |
| Congo    | 2016 | Female | 95 plus  | 30%<br>(17-46%)                | 70%<br>(54-83%)          | 0.75<br>(0.28-1.5)                          | 1.2%<br>(-0.12-3.3%)                 | 1.3%<br>(-0.21-3.7%)                | 0.64<br>(-0.11-1.9)  | 2.3<br>(-0.24-6.4)     |
| Congo    | 2016 | Male   | All Ages | 32%<br>(27-38%)                | 68%<br>(62-73%)          | 1.5<br>(0.91-2.2)                           | 4.3%<br>(2.7-6.2%)                   | 6.2%<br>(3.7-9.1%)                  | 1100<br>(600-1700)   | 46000<br>(28000-70000) |
| Congo    | 2016 | Male   | 15 to 19 | 25%<br>(16-35%)                | 75%<br>(65-84%)          | 0.93<br>(0.45-1.7)                          | 2.7%<br>(1.5-4.3%)                   | 3.1%<br>(1.5-5.7%)                  | 14<br>(5.9-26)       | 1400<br>(720-2300)     |

| Location                         | Year | Sex    | Age      | Prevalence of current drinkers | Prevalence of abstainers | Population average of standard drinks daily | Percent of total attributable deaths | Percent of total attributable DALYs | Attributable deaths  | Attributable DALYs        |
|----------------------------------|------|--------|----------|--------------------------------|--------------------------|---------------------------------------------|--------------------------------------|-------------------------------------|----------------------|---------------------------|
| Congo                            | 2016 | Male   | 20 to 24 | 37%<br>(25-49%)                | 63%<br>(51-75%)          | 2<br>(1-3.7)                                | 7.6%<br>(4.7-12%)                    | 9.1%<br>(5-15%)                     | 44<br>(21-78)        | 3700<br>(2100-6100)       |
| Congo                            | 2016 | Male   | 25 to 29 | 48%<br>(35-61%)                | 52%<br>(39-65%)          | 3.2<br>(1.7-5.2)                            | 10%<br>(6.3-14%)                     | 12%<br>(6.9-19%)                    | 70<br>(38-120)       | 5100<br>(3100-7800)       |
| Congo                            | 2016 | Male   | 30 to 34 | 50%<br>(36-64%)                | 50%<br>(36-64%)          | 3.5<br>(1.9-5.8)                            | 9.9%<br>(6.2-14%)                    | 12%<br>(7.1-17%)                    | 84<br>(47-140)       | 5500<br>(3300-8400)       |
| Congo                            | 2016 | Male   | 35 to 39 | 47%<br>(33-60%)                | 53%<br>(40-67%)          | 3.1<br>(1.7-5.2)                            | 9%<br>(5.6-13%)                      | 11%<br>(6.3-16%)                    | 90<br>(47-150)       | 5200<br>(2900-8100)       |
| Congo                            | 2016 | Male   | 40 to 44 | 48%<br>(35-61%)                | 52%<br>(39-65%)          | 3.1<br>(1.7-5.3)                            | 8.9%<br>(5.4-13%)                    | 11%<br>(6.4-15%)                    | 97<br>(51-160)       | 4900<br>(2800-7600)       |
| Congo                            | 2016 | Male   | 45 to 49 | 54%<br>(39-67%)                | 46%<br>(33-61%)          | 3.4<br>(1.8-5.9)                            | 9.9%<br>(6.1-14%)                    | 12%<br>(7.3-18%)                    | 110<br>(58-180)      | 4800<br>(2700-7500)       |
| Congo                            | 2016 | Male   | 50 to 54 | 56%<br>(42-69%)                | 44%<br>(31-58%)          | 3.3<br>(1.7-6)                              | 11%<br>(6-15%)                       | 13%<br>(7.5-19%)                    | 110<br>(58-180)      | 4300<br>(2300-6700)       |
| Congo                            | 2016 | Male   | 55 to 59 | 52%<br>(38-66%)                | 48%<br>(34-62%)          | 2.8<br>(1.4-5.1)                            | 9.7%<br>(5.3-15%)                    | 12%<br>(6.7-18%)                    | 100<br>(50-180)      | 3500<br>(1700-5600)       |
| Congo                            | 2016 | Male   | 60 to 64 | 50%<br>(35-66%)                | 50%<br>(34-65%)          | 2.4<br>(1.2-4.5)                            | 8.1%<br>(4.2-13%)                    | 10%<br>(5.2-16%)                    | 98<br>(45-170)       | 2700<br>(1300-4700)       |
| Congo                            | 2016 | Male   | 65 to 69 | 51%<br>(36-64%)                | 49%<br>(36-64%)          | 2.3<br>(1.2-3.8)                            | 7.2%<br>(3.4-12%)                    | 8.8%<br>(4.3-15%)                   | 94<br>(40-160)       | 2200<br>(960-3700)        |
| Congo                            | 2016 | Male   | 70 to 74 | 52%<br>(38-65%)                | 48%<br>(35-62%)          | 2.1<br>(1.1-3.5)                            | 6%<br>(2.5-10%)                      | 7.1%<br>(3-12%)                     | 83<br>(33-150)       | 1500<br>(620-2800)        |
| Congo                            | 2016 | Male   | 75 to 79 | 52%<br>(36-67%)                | 48%<br>(33-64%)          | 1.8<br>(0.87-3.2)                           | 4.6%<br>(1.7-9%)                     | 5.5%<br>(1.9-11%)                   | 61<br>(20-120)       | 870<br>(300-1700)         |
| Congo                            | 2016 | Male   | 80 to 84 | 47%<br>(30-64%)                | 53%<br>(36-70%)          | 1.4<br>(0.64-2.5)                           | 3.1%<br>(0.97-6.3%)                  | 3.7%<br>(1.1-7.6%)                  | 32<br>(9-67)         | 340<br>(100-720)          |
| Congo                            | 2016 | Male   | 85 to 89 | 40%<br>(25-57%)                | 60%<br>(43-75%)          | 0.97<br>(0.47-1.7)                          | 2.1%<br>(0.62-4.3%)                  | 2.4%<br>(0.65-5%)                   | 12<br>(3.2-25)       | 91<br>(27-190)            |
| Congo                            | 2016 | Male   | 90 to 94 | 39%<br>(25-55%)                | 61%<br>(45-75%)          | 0.78<br>(0.34-1.5)                          | 1.3%<br>(0.2-2.9%)                   | 1.4%<br>(0.13-3.3%)                 | 2.6<br>(0.26-6.3)    | 15<br>(2.4-34)            |
| Congo                            | 2016 | Male   | 95 plus  | 41%<br>(24-62%)                | 59%<br>(38-76%)          | 0.68<br>(0.25-1.4)                          | 1.2%<br>(0.14-3.1%)                  | 1.3%<br>(-0.0029-3.5%)              | 0.6<br>(-0.0013-1.6) | 2.3<br>(0.26-5.8)         |
| Democratic Republic of the Congo | 1990 | Female | All Ages | 24%<br>(19-29%)                | 76%<br>(71-81%)          | 0.54<br>(0.43-0.68)                         | 1.3%<br>(0.69-2.1%)                  | 2.3%<br>(1.1-3.9%)                  | 5000<br>(2300-8200)  | 190000<br>(110000-290000) |
| Democratic Republic of the Congo | 1990 | Female | 15 to 19 | 23%<br>(14-36%)                | 77%<br>(64-86%)          | 0.45<br>(0.22-0.77)                         | 1.2%<br>(0.53-2.3%)                  | 1.6%<br>(0.45-3.4%)                 | 57<br>(16-120)       | 5500<br>(2400-10000)      |
| Democratic Republic of the Congo | 1990 | Female | 20 to 24 | 32%<br>(20-48%)                | 68%<br>(52-80%)          | 0.86<br>(0.47-1.4)                          | 3.1%<br>(1.5-5.6%)                   | 3.9%<br>(1.4-7.7%)                  | 180<br>(64-350)      | 15000<br>(7100-27000)     |
| Democratic Republic of the Congo | 1990 | Female | 25 to 29 | 36%<br>(22-52%)                | 64%<br>(48-78%)          | 1.1<br>(0.65-1.8)                           | 4.2%<br>(2.1-7%)                     | 5.4%<br>(2.3-9.7%)                  | 260<br>(110-470)     | 19000<br>(9500-31000)     |
| Democratic Republic of the Congo | 1990 | Female | 30 to 34 | 39%<br>(24-56%)                | 61%<br>(44-76%)          | 1.3<br>(0.75-2)                             | 5%<br>(2.6-8%)                       | 6.7%<br>(3.2-11%)                   | 330<br>(150-550)     | 21000<br>(11000-33000)    |
| Democratic Republic of the Congo | 1990 | Female | 35 to 39 | 40%<br>(25-57%)                | 60%<br>(43-75%)          | 1.3<br>(0.7-2)                              | 5%<br>(2.4-8.2%)                     | 6.8%<br>(2.9-11%)                   | 340<br>(150-590)     | 19000<br>(9200-31000)     |

| Location                         | Year | Sex    | Age      | Prevalence of current drinkers | Prevalence of abstainers | Population average of standard drinks daily | Percent of total attributable deaths | Percent of total attributable DALYs | Attributable deaths  | Attributable DALYs     |
|----------------------------------|------|--------|----------|--------------------------------|--------------------------|---------------------------------------------|--------------------------------------|-------------------------------------|----------------------|------------------------|
| Democratic Republic of the Congo | 1990 | Female | 40 to 44 | 40%<br>(26-59%)                | 60%<br>(41-74%)          | 1.2<br>(0.66-2)                             | 5%<br>(2.3-8.4%)                     | 6.9%<br>(3.1-12%)                   | 370<br>(170-640)     | 18000<br>(8600-31000)  |
| Democratic Republic of the Congo | 1990 | Female | 45 to 49 | 39%<br>(24-57%)                | 61%<br>(43-76%)          | 1.2<br>(0.6-2)                              | 5.5%<br>(2.6-9.5%)                   | 7.6%<br>(3.5-13%)                   | 450<br>(200-800)     | 19000<br>(9000-33000)  |
| Democratic Republic of the Congo | 1990 | Female | 50 to 54 | 37%<br>(23-54%)                | 63%<br>(46-77%)          | 1.1<br>(0.56-1.9)                           | 5.7%<br>(2.3-10%)                    | 7.6%<br>(2.9-14%)                   | 530<br>(200-970)     | 20000<br>(7800-35000)  |
| Democratic Republic of the Congo | 1990 | Female | 55 to 59 | 34%<br>(21-51%)                | 66%<br>(49-79%)          | 0.99<br>(0.5-1.7)                           | 5.6%<br>(2.1-10%)                    | 7.4%<br>(2.7-13%)                   | 600<br>(220-1100)    | 19000<br>(7100-34000)  |
| Democratic Republic of the Congo | 1990 | Female | 60 to 64 | 34%<br>(20-51%)                | 66%<br>(49-80%)          | 0.94<br>(0.45-1.7)                          | 4.5%<br>(1.5-9.2%)                   | 5.7%<br>(1.9-12%)                   | 550<br>(180-1100)    | 15000<br>(4900-30000)  |
| Democratic Republic of the Congo | 1990 | Female | 65 to 69 | 35%<br>(23-51%)                | 65%<br>(49-77%)          | 0.92<br>(0.49-1.6)                          | 3.9%<br>(0.96-7.9%)                  | 4.8%<br>(1.2-9.6%)                  | 540<br>(130-1100)    | 12000<br>(2900-24000)  |
| Democratic Republic of the Congo | 1990 | Female | 70 to 74 | 35%<br>(23-51%)                | 65%<br>(49-77%)          | 0.83<br>(0.4-1.5)                           | 2.9%<br>(0.22-6.9%)                  | 3.5%<br>(0.28-8.4%)                 | 410<br>(33-980)      | 7300<br>(540-17000)    |
| Democratic Republic of the Congo | 1990 | Female | 75 to 79 | 32%<br>(20-48%)                | 68%<br>(52-80%)          | 0.67<br>(0.3-1.2)                           | 1.8%<br>(-0.35-5%)                   | 2.2%<br>(-0.42-6%)                  | 230<br>(-42-600)     | 3100<br>(-610-8300)    |
| Democratic Republic of the Congo | 1990 | Female | 80 to 84 | 29%<br>(18-45%)                | 71%<br>(55-82%)          | 0.55<br>(0.26-0.96)                         | 1.2%<br>(-0.35-3.6%)                 | 1.5%<br>(-0.4-4.3%)                 | 98<br>(-27-290)      | 990<br>(-280-2900)     |
| Democratic Republic of the Congo | 1990 | Female | 85 to 89 | 28%<br>(17-42%)                | 72%<br>(58-83%)          | 0.49<br>(0.24-0.84)                         | 0.82%<br>(-0.37-2.7%)                | 1%<br>(-0.47-3.2%)                  | 38<br>(-18-130)      | 280<br>(-130-900)      |
| Democratic Republic of the Congo | 1990 | Female | 90 to 94 | 30%<br>(18-43%)                | 70%<br>(57-82%)          | 0.48<br>(0.22-0.87)                         | 0.6%<br>(-0.45-2.3%)                 | 0.73%<br>(-0.55-2.9%)               | 11<br>(-8-41)        | 53<br>(-40-200)        |
| Democratic Republic of the Congo | 1990 | Female | 95 plus  | 33%<br>(19-50%)                | 67%<br>(50-81%)          | 0.48<br>(0.19-0.98)                         | 0.55%<br>(-0.48-2.3%)                | 0.63%<br>(-0.61-2.8%)               | 2.5<br>(-2.4-11)     | 8.9<br>(-7.4-37)       |
| Democratic Republic of the Congo | 1990 | Male   | All Ages | 31%<br>(25-38%)                | 69%<br>(62-75%)          | 0.67<br>(0.53-0.84)                         | 1.8%<br>(1.1-2.9%)                   | 3%<br>(1.7-4.7%)                    | 6800<br>(4100-10000) | 30000<br>(20000-42000) |
| Democratic Republic of the Congo | 1990 | Male   | 15 to 19 | 25%<br>(15-40%)                | 75%<br>(60-85%)          | 0.49<br>(0.24-0.87)                         | 2%<br>(1-3.4%)                       | 2.4%<br>(0.91-4.8%)                 | 93<br>(35-180)       | 8800<br>(4500-15000)   |
| Democratic Republic of the Congo | 1990 | Male   | 20 to 24 | 38%<br>(23-54%)                | 62%<br>(46-77%)          | 1<br>(0.56-1.6)                             | 5.2%<br>(2.8-8.6%)                   | 6.1%<br>(2.7-11%)                   | 330<br>(140-570)     | 26000<br>(14000-43000) |
| Democratic Republic of the Congo | 1990 | Male   | 25 to 29 | 45%<br>(28-63%)                | 55%<br>(37-72%)          | 1.4<br>(0.84-2.2)                           | 6.9%<br>(3.8-11%)                    | 8.1%<br>(3.9-13%)                   | 510<br>(250-820)     | 36000<br>(21000-55000) |
| Democratic Republic of the Congo | 1990 | Male   | 30 to 34 | 47%<br>(29-66%)                | 53%<br>(34-71%)          | 1.6<br>(0.93-2.5)                           | 7.5%<br>(4.2-12%)                    | 8.9%<br>(4.5-14%)                   | 610<br>(310-950)     | 38000<br>(22000-58000) |
| Democratic Republic of the Congo | 1990 | Male   | 35 to 39 | 48%<br>(31-66%)                | 52%<br>(34-69%)          | 1.6<br>(0.91-2.5)                           | 7.5%<br>(4.2-12%)                    | 9%<br>(4.7-14%)                     | 640<br>(340-1000)    | 35000<br>(20000-55000) |
| Democratic Republic of the Congo | 1990 | Male   | 40 to 44 | 50%<br>(34-67%)                | 50%<br>(33-66%)          | 1.6<br>(0.89-2.6)                           | 7.9%<br>(4.2-12%)                    | 9.7%<br>(4.8-15%)                   | 730<br>(360-1200)    | 35000<br>(18000-56000) |
| Democratic Republic of the Congo | 1990 | Male   | 45 to 49 | 53%<br>(34-70%)                | 47%<br>(30-66%)          | 1.7<br>(0.96-2.7)                           | 8.4%<br>(4.6-13%)                    | 10%<br>(5.5-16%)                    | 800<br>(420-1300)    | 34000<br>(19000-53000) |
| Democratic Republic of the Congo | 1990 | Male   | 50 to 54 | 53%<br>(34-71%)                | 47%<br>(29-66%)          | 1.7<br>(0.91-2.8)                           | 8.3%<br>(4.1-14%)                    | 10%<br>(5-17%)                      | 810<br>(380-1300)    | 30000<br>(15000-49000) |
| Democratic Republic of the Congo | 1990 | Male   | 55 to 59 | 51%<br>(33-70%)                | 49%<br>(30-67%)          | 1.5<br>(0.79-2.5)                           | 7.3%<br>(3.4-12%)                    | 9%<br>(4.1-15%)                     | 720<br>(320-1200)    | 23000<br>(11000-39000) |

| Location                         | Year | Sex    | Age      | Prevalence of current drinkers | Prevalence of abstainers | Population average of standard drinks daily | Percent of total attributable deaths | Percent of total attributable DALYs | Attributable deaths | Attributable DALYs        |
|----------------------------------|------|--------|----------|--------------------------------|--------------------------|---------------------------------------------|--------------------------------------|-------------------------------------|---------------------|---------------------------|
| Democratic Republic of the Congo | 1990 | Male   | 60 to 64 | 49%<br>(31-69%)                | 51%<br>(31-69%)          | 1.3<br>(0.66-2.3)                           | 5.5%<br>(2.3-10%)                    | 6.8%<br>(2.7-12%)                   | 580<br>(240-1100)   | 16000<br>(6800-29000)     |
| Democratic Republic of the Congo | 1990 | Male   | 65 to 69 | 50%<br>(33-67%)                | 50%<br>(33-67%)          | 1.2<br>(0.61-1.9)                           | 4.3%<br>(1.5-8%)                     | 5.2%<br>(1.9-9.5%)                  | 450<br>(170-850)    | 10000<br>(3900-19000)     |
| Democratic Republic of the Congo | 1990 | Male   | 70 to 74 | 50%<br>(33-67%)                | 50%<br>(33-67%)          | 1<br>(0.5-1.7)                              | 3.1%<br>(0.67-6.4%)                  | 3.7%<br>(0.75-7.7%)                 | 310<br>(64-660)     | 5700<br>(1200-12000)      |
| Democratic Republic of the Congo | 1990 | Male   | 75 to 79 | 49%<br>(32-66%)                | 51%<br>(34-68%)          | 0.82<br>(0.39-1.4)                          | 2.1%<br>(0.1-5%)                     | 2.5%<br>(0.064-5.9%)                | 170<br>(4.4-410)    | 2400<br>(110-5700)        |
| Democratic Republic of the Congo | 1990 | Male   | 80 to 84 | 43%<br>(26-62%)                | 57%<br>(38-74%)          | 0.64<br>(0.3-1.1)                           | 1.4%<br>(-0.0082-3.3%)               | 1.6%<br>(-0.055-3.9%)               | 65<br>(-2.4-160)    | 690<br>(-4.1-1700)        |
| Democratic Republic of the Congo | 1990 | Male   | 85 to 89 | 38%<br>(24-55%)                | 62%<br>(45-76%)          | 0.48<br>(0.23-0.84)                         | 0.89%<br>(-0.11-2.3%)                | 1%<br>(-0.2-2.7%)                   | 19<br>(-3.8-53)     | 150<br>(-19-390)          |
| Democratic Republic of the Congo | 1990 | Male   | 90 to 94 | 37%<br>(23-55%)                | 63%<br>(45-77%)          | 0.41<br>(0.19-0.77)                         | 0.52%<br>(-0.27-1.6%)                | 0.53%<br>(-0.43-1.9%)               | 3.5<br>(-2.8-12)    | 20<br>(-11-63)            |
| Democratic Republic of the Congo | 1990 | Male   | 95 plus  | 41%<br>(22-61%)                | 59%<br>(39-78%)          | 0.39<br>(0.15-0.79)                         | 0.6%<br>(-0.33-1.9%)                 | 0.58%<br>(-0.56-2.3%)               | 0.95<br>(-0.92-3.7) | 4<br>(-2.2-13)            |
| Democratic Republic of the Congo | 1995 | Female | All Ages | 23%<br>(19-29%)                | 77%<br>(71-81%)          | 0.49<br>(0.39-0.61)                         | 1.1%<br>(0.6-1.9%)                   | 2%<br>(0.86-3.4%)                   | 5300<br>(2100-9100) | 200000<br>(110000-310000) |
| Democratic Republic of the Congo | 1995 | Female | 15 to 19 | 23%<br>(14-35%)                | 77%<br>(65-86%)          | 0.41<br>(0.2-0.71)                          | 1.1%<br>(0.45-2.1%)                  | 1.3%<br>(0.29-3.1%)                 | 57<br>(12-140)      | 5700<br>(2400-11000)      |
| Democratic Republic of the Congo | 1995 | Female | 20 to 24 | 32%<br>(19-47%)                | 68%<br>(53-81%)          | 0.78<br>(0.43-1.3)                          | 2.7%<br>(1.2-5.1%)                   | 3.2%<br>(0.95-6.9%)                 | 190<br>(55-400)     | 16000<br>(6800-30000)     |
| Democratic Republic of the Congo | 1995 | Female | 25 to 29 | 36%<br>(22-53%)                | 64%<br>(47-78%)          | 1<br>(0.6-1.6)                              | 3.5%<br>(1.6-5.9%)                   | 4.3%<br>(1.6-7.8%)                  | 280<br>(110-500)    | 20000<br>(9500-34000)     |
| Democratic Republic of the Congo | 1995 | Female | 30 to 34 | 39%<br>(24-57%)                | 61%<br>(43-76%)          | 1.2<br>(0.67-1.8)                           | 4%<br>(1.8-6.7%)                     | 5.1%<br>(2-9%)                      | 350<br>(130-610)    | 22000<br>(10000-36000)    |
| Democratic Republic of the Congo | 1995 | Female | 35 to 39 | 40%<br>(26-58%)                | 60%<br>(42-74%)          | 1.2<br>(0.66-1.9)                           | 4.1%<br>(1.9-7%)                     | 5.4%<br>(2.2-9.6%)                  | 370<br>(150-650)    | 21000<br>(9200-35000)     |
| Democratic Republic of the Congo | 1995 | Female | 40 to 44 | 40%<br>(26-59%)                | 60%<br>(41-74%)          | 1.1<br>(0.6-1.9)                            | 4.1%<br>(1.8-7.3%)                   | 5.5%<br>(2.2-10%)                   | 380<br>(150-690)    | 18000<br>(7900-33000)     |
| Democratic Republic of the Congo | 1995 | Female | 45 to 49 | 39%<br>(24-57%)                | 61%<br>(43-76%)          | 1.1<br>(0.55-1.8)                           | 4.7%<br>(2-8.2%)                     | 6.3%<br>(2.7-11%)                   | 470<br>(200-860)    | 20000<br>(8700-36000)     |
| Democratic Republic of the Congo | 1995 | Female | 50 to 54 | 37%<br>(22-54%)                | 63%<br>(46-78%)          | 0.97<br>(0.5-1.7)                           | 4.9%<br>(1.8-9.1%)                   | 6.5%<br>(2.3-12%)                   | 570<br>(200-1100)   | 21000<br>(7700-38000)     |
| Democratic Republic of the Congo | 1995 | Female | 55 to 59 | 34%<br>(21-51%)                | 66%<br>(49-79%)          | 0.88<br>(0.45-1.5)                          | 4.9%<br>(1.7-9%)                     | 6.3%<br>(2.2-12%)                   | 640<br>(220-1200)   | 20000<br>(7000-38000)     |
| Democratic Republic of the Congo | 1995 | Female | 60 to 64 | 33%<br>(20-50%)                | 67%<br>(50-80%)          | 0.84<br>(0.4-1.5)                           | 4%<br>(1.1-8.2%)                     | 4.9%<br>(1.4-10%)                   | 590<br>(160-1200)   | 16000<br>(4400-32000)     |
| Democratic Republic of the Congo | 1995 | Female | 65 to 69 | 35%<br>(23-50%)                | 65%<br>(50-77%)          | 0.82<br>(0.43-1.4)                          | 3.4%<br>(0.69-7.3%)                  | 4.1%<br>(0.85-8.9%)                 | 570<br>(120-1300)   | 12000<br>(2600-28000)     |
| Democratic Republic of the Congo | 1995 | Female | 70 to 74 | 35%<br>(23-51%)                | 65%<br>(49-77%)          | 0.74<br>(0.35-1.3)                          | 2.5%<br>(-0.0054-6%)                 | 3%<br>(0.027-7.3%)                  | 430<br>(3.9-1100)   | 7500<br>(-17-19000)       |
| Democratic Republic of the Congo | 1995 | Female | 75 to 79 | 32%<br>(20-49%)                | 68%<br>(51-80%)          | 0.61<br>(0.28-1.1)                          | 1.5%<br>(-0.51-4.3%)                 | 1.8%<br>(-0.57-5.1%)                | 220<br>(-71-650)    | 3000<br>(-1000-8800)      |

| Location                         | Year | Sex    | Age      | Prevalence of current drinkers | Prevalence of abstainers | Population average of standard drinks daily | Percent of total attributable deaths | Percent of total attributable DALYs | Attributable deaths  | Attributable DALYs        |
|----------------------------------|------|--------|----------|--------------------------------|--------------------------|---------------------------------------------|--------------------------------------|-------------------------------------|----------------------|---------------------------|
| Democratic Republic of the Congo | 1995 | Female | 80 to 84 | 29%<br>(18-44%)                | 71%<br>(56-82%)          | 0.5<br>(0.23-0.87)                          | 0.94%<br>(-0.55-3.1%)                | 1.1%<br>(-0.62-3.7%)                | 94<br>(-52-300)      | 940<br>(-520-3000)        |
| Democratic Republic of the Congo | 1995 | Female | 85 to 89 | 28%<br>(17-41%)                | 72%<br>(59-83%)          | 0.44<br>(0.21-0.76)                         | 0.64%<br>(-0.51-2.4%)                | 0.77%<br>(-0.61-2.8%)               | 36<br>(-28-130)      | 260<br>(-210-960)         |
| Democratic Republic of the Congo | 1995 | Female | 90 to 94 | 29%<br>(18-43%)                | 71%<br>(57-82%)          | 0.43<br>(0.2-0.79)                          | 0.46%<br>(-0.55-2.1%)                | 0.56%<br>(-0.67-2.6%)               | 9.8<br>(-12-45)      | 48<br>(-57-220)           |
| Democratic Republic of the Congo | 1995 | Female | 95 plus  | 33%<br>(19-51%)                | 67%<br>(49-81%)          | 0.44<br>(0.17-0.87)                         | 0.44%<br>(-0.49-2%)                  | 0.5%<br>(-0.64-2.4%)                | 2.5<br>(-3.2-12)     | 8.6<br>(-9.7-40)          |
| Democratic Republic of the Congo | 1995 | Male   | All Ages | 31%<br>(25-38%)                | 69%<br>(62-75%)          | 0.62<br>(0.49-0.76)                         | 1.7%<br>(1-2.7%)                     | 2.7%<br>(1.5-4.3%)                  | 7700<br>(4300-11000) | 340000<br>(220000-480000) |
| Democratic Republic of the Congo | 1995 | Male   | 15 to 19 | 25%<br>(15-40%)                | 75%<br>(60-85%)          | 0.45<br>(0.22-0.8)                          | 1.8%<br>(0.87-3.2%)                  | 2.1%<br>(0.7-4.3%)                  | 100<br>(33-200)      | 9800<br>(4700-17000)      |
| Democratic Republic of the Congo | 1995 | Male   | 20 to 24 | 38%<br>(24-54%)                | 62%<br>(46-76%)          | 0.93<br>(0.51-1.5)                          | 4.7%<br>(2.3-8.2%)                   | 5.4%<br>(1.9-10%)                   | 360<br>(130-690)     | 29000<br>(14000-50000)    |
| Democratic Republic of the Congo | 1995 | Male   | 25 to 29 | 45%<br>(28-63%)                | 55%<br>(37-72%)          | 1.3<br>(0.76-2)                             | 6.3%<br>(3.2-10%)                    | 7.4%<br>(3.2-13%)                   | 570<br>(250-960)     | 41000<br>(21000-64000)    |
| Democratic Republic of the Congo | 1995 | Male   | 30 to 34 | 48%<br>(30-66%)                | 52%<br>(34-70%)          | 1.5<br>(0.86-2.2)                           | 6.5%<br>(3.3-11%)                    | 7.6%<br>(3.4-13%)                   | 680<br>(320-1200)    | 43000<br>(22000-69000)    |
| Democratic Republic of the Congo | 1995 | Male   | 35 to 39 | 48%<br>(32-66%)                | 52%<br>(34-68%)          | 1.5<br>(0.84-2.3)                           | 6.5%<br>(3.5-10%)                    | 7.6%<br>(3.8-12%)                   | 720<br>(360-1200)    | 40000<br>(22000-63000)    |
| Democratic Republic of the Congo | 1995 | Male   | 40 to 44 | 50%<br>(33-68%)                | 50%<br>(32-67%)          | 1.5<br>(0.82-2.4)                           | 6.9%<br>(3.3-11%)                    | 8.2%<br>(3.7-13%)                   | 800<br>(360-1300)    | 39000<br>(19000-63000)    |
| Democratic Republic of the Congo | 1995 | Male   | 45 to 49 | 53%<br>(34-71%)                | 47%<br>(29-66%)          | 1.6<br>(0.88-2.5)                           | 7.4%<br>(3.8-12%)                    | 9%<br>(4.3-14%)                     | 900<br>(440-1500)    | 39000<br>(20000-62000)    |
| Democratic Republic of the Congo | 1995 | Male   | 50 to 54 | 53%<br>(35-71%)                | 47%<br>(29-65%)          | 1.5<br>(0.82-2.5)                           | 7.5%<br>(3.5-12%)                    | 9.2%<br>(4.1-15%)                   | 920<br>(410-1500)    | 34000<br>(16000-57000)    |
| Democratic Republic of the Congo | 1995 | Male   | 55 to 59 | 51%<br>(33-70%)                | 49%<br>(30-67%)          | 1.3<br>(0.7-2.2)                            | 6.6%<br>(2.7-11%)                    | 8%<br>(3.2-14%)                     | 810<br>(320-1400)    | 26000<br>(11000-45000)    |
| Democratic Republic of the Congo | 1995 | Male   | 60 to 64 | 49%<br>(31-68%)                | 51%<br>(32-69%)          | 1.2<br>(0.58-2)                             | 5%<br>(1.9-9.5%)                     | 6.1%<br>(2.2-12%)                   | 650<br>(240-1200)    | 18000<br>(6900-33000)     |
| Democratic Republic of the Congo | 1995 | Male   | 65 to 69 | 50%<br>(32-67%)                | 50%<br>(33-68%)          | 1.1<br>(0.56-1.7)                           | 3.9%<br>(1.3-7.4%)                   | 4.6%<br>(1.5-8.8%)                  | 500<br>(160-970)     | 11000<br>(3700-22000)     |
| Democratic Republic of the Congo | 1995 | Male   | 70 to 74 | 51%<br>(33-68%)                | 49%<br>(32-67%)          | 0.92<br>(0.47-1.6)                          | 2.8%<br>(0.45-6%)                    | 3.2%<br>(0.46-7.1%)                 | 340<br>(49-750)      | 6200<br>(1000-13000)      |
| Democratic Republic of the Congo | 1995 | Male   | 75 to 79 | 49%<br>(33-66%)                | 51%<br>(34-67%)          | 0.76<br>(0.36-1.3)                          | 1.9%<br>(-0.0074-4.6%)               | 2.2%<br>(-0.035-5.4%)               | 190<br>(-3-470)      | 2600<br>(-10-6500)        |
| Democratic Republic of the Congo | 1995 | Male   | 80 to 84 | 44%<br>(27-62%)                | 56%<br>(38-73%)          | 0.59<br>(0.28-1)                            | 1.2%<br>(-0.17-3%)                   | 1.3%<br>(-0.24-3.6%)                | 70<br>(-13-190)      | 740<br>(-110-1900)        |
| Democratic Republic of the Congo | 1995 | Male   | 85 to 89 | 38%<br>(23-55%)                | 62%<br>(45-77%)          | 0.44<br>(0.23-0.77)                         | 0.77%<br>(-0.22-2.1%)                | 0.86%<br>(-0.33-2.5%)               | 20<br>(-7.8-58)      | 160<br>(-43-430)          |
| Democratic Republic of the Congo | 1995 | Male   | 90 to 94 | 38%<br>(24-55%)                | 62%<br>(45-76%)          | 0.38<br>(0.18-0.71)                         | 0.45%<br>(-0.36-1.5%)                | 0.45%<br>(-0.55-1.7%)               | 3.6<br>(-4.3-13)     | 21<br>(-17-67)            |
| Democratic Republic of the Congo | 1995 | Male   | 95 plus  | 41%<br>(22-62%)                | 59%<br>(38-78%)          | 0.36<br>(0.13-0.72)                         | 0.52%<br>(-0.4-1.7%)                 | 0.5%<br>(-0.63-2%)                  | 1<br>(-1.3-3.9)      | 4.2<br>(-3.2-14)          |

| Location                         | Year | Sex    | Age      | Prevalence of current drinkers | Prevalence of abstainers | Population average of standard drinks daily | Percent of total attributable deaths | Percent of total attributable DALYs | Attributable deaths   | Attributable DALYs        |
|----------------------------------|------|--------|----------|--------------------------------|--------------------------|---------------------------------------------|--------------------------------------|-------------------------------------|-----------------------|---------------------------|
| Democratic Republic of the Congo | 2000 | Female | All Ages | 22%<br>(18-28%)                | 78%<br>(72-82%)          | 0.48<br>(0.37-0.6)                          | 1.2%<br>(0.63-2%)                    | 2.2%<br>(0.91-3.8%)                 | 6500<br>(2700-11000)  | 250000<br>(130000-380000) |
| Democratic Republic of the Congo | 2000 | Female | 15 to 19 | 22%<br>(14-35%)                | 78%<br>(65-86%)          | 0.4<br>(0.19-0.71)                          | 1.1%<br>(0.43-2.2%)                  | 1.4%<br>(0.3-3.1%)                  | 70<br>(15-160)        | 6900<br>(2600-13000)      |
| Democratic Republic of the Congo | 2000 | Female | 20 to 24 | 31%<br>(19-45%)                | 69%<br>(55-81%)          | 0.77<br>(0.41-1.3)                          | 2.8%<br>(1.2-5.2%)                   | 3.5%<br>(1-7%)                      | 220<br>(65-460)       | 19000<br>(8100-34000)     |
| Democratic Republic of the Congo | 2000 | Female | 25 to 29 | 35%<br>(21-51%)                | 65%<br>(49-79%)          | 1<br>(0.58-1.6)                             | 3.5%<br>(1.6-6%)                     | 4.3%<br>(1.6-7.9%)                  | 330<br>(130-600)      | 24000<br>(11000-41000)    |
| Democratic Republic of the Congo | 2000 | Female | 30 to 34 | 38%<br>(23-55%)                | 62%<br>(45-77%)          | 1.2<br>(0.66-1.8)                           | 4%<br>(1.9-6.7%)                     | 5%<br>(2.1-8.8%)                    | 420<br>(180-740)      | 27000<br>(13000-44000)    |
| Democratic Republic of the Congo | 2000 | Female | 35 to 39 | 39%<br>(25-57%)                | 61%<br>(43-75%)          | 1.1<br>(0.63-1.8)                           | 4.1%<br>(1.8-7%)                     | 5.2%<br>(2.1-9.2%)                  | 450<br>(190-790)      | 25000<br>(11000-42000)    |
| Democratic Republic of the Congo | 2000 | Female | 40 to 44 | 39%<br>(25-57%)                | 61%<br>(43-75%)          | 1.1<br>(0.59-1.8)                           | 4.2%<br>(1.7-7.2%)                   | 5.4%<br>(2.1-9.6%)                  | 460<br>(180-830)      | 22000<br>(9300-39000)     |
| Democratic Republic of the Congo | 2000 | Female | 45 to 49 | 38%<br>(23-55%)                | 62%<br>(45-77%)          | 1.1<br>(0.54-1.8)                           | 4.9%<br>(2-8.6%)                     | 6.5%<br>(2.5-12%)                   | 560<br>(220-1000)     | 24000<br>(9700-42000)     |
| Democratic Republic of the Congo | 2000 | Female | 50 to 54 | 36%<br>(21-54%)                | 64%<br>(46-79%)          | 0.96<br>(0.49-1.7)                          | 5.2%<br>(2-9.5%)                     | 6.8%<br>(2.4-13%)                   | 700<br>(240-1300)     | 25000<br>(9100-48000)     |
| Democratic Republic of the Congo | 2000 | Female | 55 to 59 | 33%<br>(20-50%)                | 67%<br>(50-80%)          | 0.88<br>(0.44-1.5)                          | 5.3%<br>(1.8-9.9%)                   | 6.8%<br>(2.3-13%)                   | 800<br>(260-1500)     | 25000<br>(8600-47000)     |
| Democratic Republic of the Congo | 2000 | Female | 60 to 64 | 32%<br>(20-49%)                | 68%<br>(51-80%)          | 0.83<br>(0.4-1.5)                           | 4.3%<br>(1.3-8.6%)                   | 5.4%<br>(1.5-11%)                   | 730<br>(210-1500)     | 19000<br>(5600-39000)     |
| Democratic Republic of the Congo | 2000 | Female | 65 to 69 | 34%<br>(22-49%)                | 66%<br>(51-78%)          | 0.82<br>(0.43-1.4)                          | 3.7%<br>(0.76-7.8%)                  | 4.6%<br>(0.92-9.6%)                 | 710<br>(140-1600)     | 16000<br>(3200-34000)     |
| Democratic Republic of the Congo | 2000 | Female | 70 to 74 | 34%<br>(22-50%)                | 66%<br>(50-78%)          | 0.73<br>(0.35-1.3)                          | 2.8%<br>(0.099-6.7%)                 | 3.3%<br>(0.16-7.9%)                 | 540<br>(25-1300)      | 9500<br>(360-24000)       |
| Democratic Republic of the Congo | 2000 | Female | 75 to 79 | 31%<br>(19-46%)                | 69%<br>(54-81%)          | 0.59<br>(0.27-1.1)                          | 1.7%<br>(-0.39-4.6%)                 | 2.1%<br>(-0.45-5.5%)                | 290<br>(-63-790)      | 4000<br>(-920-11000)      |
| Democratic Republic of the Congo | 2000 | Female | 80 to 84 | 28%<br>(17-44%)                | 72%<br>(56-83%)          | 0.48<br>(0.23-0.86)                         | 1.1%<br>(-0.43-3.4%)                 | 1.3%<br>(-0.5-4%)                   | 130<br>(-46-400)      | 1300<br>(-500-4000)       |
| Democratic Republic of the Congo | 2000 | Female | 85 to 89 | 27%<br>(17-41%)                | 73%<br>(59-83%)          | 0.43<br>(0.21-0.77)                         | 0.8%<br>(-0.47-2.8%)                 | 0.96%<br>(-0.55-3.4%)               | 53<br>(-30-180)       | 380<br>(-220-1300)        |
| Democratic Republic of the Congo | 2000 | Female | 90 to 94 | 29%<br>(18-42%)                | 71%<br>(58-82%)          | 0.43<br>(0.19-0.79)                         | 0.6%<br>(-0.5-2.3%)                  | 0.73%<br>(-0.63-2.8%)               | 15<br>(-13-57)        | 74<br>(-63-280)           |
| Democratic Republic of the Congo | 2000 | Female | 95 plus  | 32%<br>(18-50%)                | 68%<br>(50-82%)          | 0.43<br>(0.17-0.86)                         | 0.58%<br>(-0.49-2.4%)                | 0.66%<br>(-0.64-2.9%)               | 3.8<br>(-3.7-17)      | 13<br>(-11-56)            |
| Democratic Republic of the Congo | 2000 | Male   | All Ages | 30%<br>(24-38%)                | 70%<br>(62-76%)          | 0.63<br>(0.49-0.78)                         | 2%<br>(1.2-3%)                       | 3.2%<br>(1.7-4.9%)                  | 10000<br>(5500-15000) | 440000<br>(270000-610000) |
| Democratic Republic of the Congo | 2000 | Male   | 15 to 19 | 25%<br>(15-39%)                | 75%<br>(61-85%)          | 0.46<br>(0.22-0.84)                         | 1.9%<br>(0.87-3.5%)                  | 2.3%<br>(0.7-4.7%)                  | 140<br>(43-280)       | 13000<br>(5800-23000)     |
| Democratic Republic of the Congo | 2000 | Male   | 20 to 24 | 38%<br>(23-55%)                | 62%<br>(45-77%)          | 0.96<br>(0.53-1.6)                          | 5.2%<br>(2.6-8.7%)                   | 6%<br>(2.4-11%)                     | 480<br>(200-880)      | 38000<br>(19000-65000)    |
| Democratic Republic of the Congo | 2000 | Male   | 25 to 29 | 45%<br>(28-62%)                | 55%<br>(38-72%)          | 1.4<br>(0.8-2.1)                            | 7.1%<br>(3.7-11%)                    | 8.4%<br>(3.7-14%)                   | 760<br>(350-1200)     | 53000<br>(27000-81000)    |

| Location                         | Year | Sex    | Age      | Prevalence of current drinkers | Prevalence of abstainers | Population average of standard drinks daily | Percent of total attributable deaths | Percent of total attributable DALYs | Attributable deaths  | Attributable DALYs        |
|----------------------------------|------|--------|----------|--------------------------------|--------------------------|---------------------------------------------|--------------------------------------|-------------------------------------|----------------------|---------------------------|
| Democratic Republic of the Congo | 2000 | Male   | 30 to 34 | 47%<br>(29-65%)                | 53%<br>(35-71%)          | 1.5<br>(0.89-2.4)                           | 7.4%<br>(3.9-12%)                    | 8.7%<br>(4-14%)                     | 900<br>(410-1400)    | 55000<br>(29000-85000)    |
| Democratic Republic of the Congo | 2000 | Male   | 35 to 39 | 47%<br>(31-64%)                | 53%<br>(36-69%)          | 1.5<br>(0.86-2.4)                           | 7%<br>(3.7-11%)                      | 8.3%<br>(4.1-13%)                   | 930<br>(460-1500)    | 51000<br>(27000-79000)    |
| Democratic Republic of the Congo | 2000 | Male   | 40 to 44 | 49%<br>(32-68%)                | 51%<br>(32-68%)          | 1.5<br>(0.83-2.4)                           | 7.5%<br>(3.7-12%)                    | 8.9%<br>(4.2-14%)                   | 1000<br>(490-1700)   | 50000<br>(25000-77000)    |
| Democratic Republic of the Congo | 2000 | Male   | 45 to 49 | 52%<br>(34-69%)                | 48%<br>(31-66%)          | 1.6<br>(0.92-2.6)                           | 8.1%<br>(4.3-13%)                    | 9.8%<br>(5-16%)                     | 1100<br>(570-1800)   | 48000<br>(25000-76000)    |
| Democratic Republic of the Congo | 2000 | Male   | 50 to 54 | 52%<br>(35-70%)                | 48%<br>(30-65%)          | 1.6<br>(0.87-2.6)                           | 8.3%<br>(3.7-14%)                    | 10%<br>(4.4-17%)                    | 1200<br>(520-2000)   | 44000<br>(20000-73000)    |
| Democratic Republic of the Congo | 2000 | Male   | 55 to 59 | 50%<br>(33-68%)                | 50%<br>(32-67%)          | 1.4<br>(0.75-2.3)                           | 7.4%<br>(3.2-12%)                    | 9%<br>(3.8-15%)                     | 1100<br>(440-1800)   | 35000<br>(15000-58000)    |
| Democratic Republic of the Congo | 2000 | Male   | 60 to 64 | 49%<br>(31-68%)                | 51%<br>(32-69%)          | 1.2<br>(0.6-2.1)                            | 5.6%<br>(2.1-11%)                    | 6.8%<br>(2.5-13%)                   | 860<br>(320-1600)    | 23000<br>(9000-43000)     |
| Democratic Republic of the Congo | 2000 | Male   | 65 to 69 | 50%<br>(32-66%)                | 50%<br>(34-68%)          | 1.1<br>(0.58-1.8)                           | 4.4%<br>(1.3-8.3%)                   | 5.2%<br>(1.6-10%)                   | 670<br>(190-1300)    | 15000<br>(4700-28000)     |
| Democratic Republic of the Congo | 2000 | Male   | 70 to 74 | 50%<br>(33-67%)                | 50%<br>(33-67%)          | 0.95<br>(0.49-1.6)                          | 3.1%<br>(0.52-6.8%)                  | 3.7%<br>(0.55-8%)                   | 460<br>(70-1000)     | 8200<br>(1300-18000)      |
| Democratic Republic of the Congo | 2000 | Male   | 75 to 79 | 48%<br>(32-67%)                | 52%<br>(33-68%)          | 0.79<br>(0.37-1.4)                          | 2.2%<br>(-0.044-5.3%)                | 2.5%<br>(-0.097-6.3%)               | 250<br>(-9.6-620)    | 3500<br>(-70-8500)        |
| Democratic Republic of the Congo | 2000 | Male   | 80 to 84 | 43%<br>(25-61%)                | 57%<br>(39-75%)          | 0.61<br>(0.28-1)                            | 1.4%<br>(-0.12-3.5%)                 | 1.6%<br>(-0.22-4.1%)                | 98<br>(-13-250)      | 1000<br>(-92-2600)        |
| Democratic Republic of the Congo | 2000 | Male   | 85 to 89 | 38%<br>(23-54%)                | 62%<br>(46-77%)          | 0.46<br>(0.22-0.83)                         | 0.91%<br>(-0.19-2.4%)                | 1%<br>(-0.29-2.8%)                  | 28<br>(-8-79)        | 220<br>(-44-580)          |
| Democratic Republic of the Congo | 2000 | Male   | 90 to 94 | 37%<br>(23-54%)                | 63%<br>(46-77%)          | 0.4<br>(0.18-0.72)                          | 0.55%<br>(-0.31-1.7%)                | 0.58%<br>(-0.47-2%)                 | 5.3<br>(-4.2-18)     | 30<br>(-16-92)            |
| Democratic Republic of the Congo | 2000 | Male   | 95 plus  | 40%<br>(22-61%)                | 60%<br>(39-78%)          | 0.37<br>(0.13-0.78)                         | 0.64%<br>(-0.45-2.1%)                | 0.65%<br>(-0.7-2.4%)                | 1.5<br>(-1.6-5.4)    | 5.8<br>(-4-19)            |
| Democratic Republic of the Congo | 2005 | Female | All Ages | 22%<br>(17-27%)                | 78%<br>(73-83%)          | 0.49<br>(0.37-0.64)                         | 1.4%<br>(0.68-2.1%)                  | 2.4%<br>(1-4.1%)                    | 7600<br>(3200-13000) | 280000<br>(150000-440000) |
| Democratic Republic of the Congo | 2005 | Female | 15 to 19 | 21%<br>(13-33%)                | 79%<br>(67-87%)          | 0.41<br>(0.2-0.72)                          | 1.1%<br>(0.49-2.2%)                  | 1.4%<br>(0.35-3.1%)                 | 79<br>(21-180)       | 7900<br>(3300-15000)      |
| Democratic Republic of the Congo | 2005 | Female | 20 to 24 | 30%<br>(18-45%)                | 70%<br>(55-82%)          | 0.8<br>(0.42-1.3)                           | 2.9%<br>(1.3-5.2%)                   | 3.6%<br>(1.2-7.1%)                  | 240<br>(80-480)      | 21000<br>(9600-37000)     |
| Democratic Republic of the Congo | 2005 | Female | 25 to 29 | 34%<br>(20-51%)                | 66%<br>(49-80%)          | 1.1<br>(0.6-1.7)                            | 3.4%<br>(1.7-5.9%)                   | 4.2%<br>(1.6-8.1%)                  | 350<br>(140-630)     | 25000<br>(12000-43000)    |
| Democratic Republic of the Congo | 2005 | Female | 30 to 34 | 37%<br>(22-54%)                | 63%<br>(46-78%)          | 1.2<br>(0.68-1.9)                           | 3.8%<br>(1.8-6.5%)                   | 4.7%<br>(1.9-8.6%)                  | 440<br>(190-780)     | 28000<br>(14000-47000)    |
| Democratic Republic of the Congo | 2005 | Female | 35 to 39 | 38%<br>(24-56%)                | 62%<br>(44-76%)          | 1.2<br>(0.64-1.9)                           | 3.9%<br>(1.9-6.6%)                   | 4.9%<br>(2.1-8.6%)                  | 500<br>(220-850)     | 28000<br>(13000-45000)    |
| Democratic Republic of the Congo | 2005 | Female | 40 to 44 | 38%<br>(24-56%)                | 62%<br>(44-76%)          | 1.2<br>(0.61-2)                             | 4%<br>(1.8-7%)                       | 5.2%<br>(2.1-9.3%)                  | 530<br>(220-950)     | 25000<br>(11000-45000)    |
| Democratic Republic of the Congo | 2005 | Female | 45 to 49 | 37%<br>(23-55%)                | 63%<br>(45-77%)          | 1.1<br>(0.55-1.9)                           | 4.9%<br>(2.2-8.8%)                   | 6.5%<br>(2.8-12%)                   | 660<br>(290-1200)    | 28000<br>(13000-50000)    |



| Location                         | Year | Sex    | Age      | Prevalence of current drinkers | Prevalence of abstainers | Population average of standard drinks daily | Percent of total attributable deaths | Percent of total attributable DALYs | Attributable deaths   | Attributable DALYs        |
|----------------------------------|------|--------|----------|--------------------------------|--------------------------|---------------------------------------------|--------------------------------------|-------------------------------------|-----------------------|---------------------------|
| Democratic Republic of the Congo | 2005 | Female | 50 to 54 | 35%<br>(21-53%)                | 65%<br>(47-79%)          | 1<br>(0.5-1.8)                              | 5.4%<br>(2.1-9.7%)                   | 7%<br>(2.6-13%)                     | 790<br>(290-1500)     | 29000<br>(11000-53000)    |
| Democratic Republic of the Congo | 2005 | Female | 55 to 59 | 32%<br>(20-50%)                | 68%<br>(50-80%)          | 0.92<br>(0.46-1.6)                          | 5.7%<br>(2-11%)                      | 7.3%<br>(2.4-14%)                   | 970<br>(320-1800)     | 30000<br>(11000-58000)    |
| Democratic Republic of the Congo | 2005 | Female | 60 to 64 | 32%<br>(19-49%)                | 68%<br>(51-81%)          | 0.87<br>(0.42-1.6)                          | 4.6%<br>(1.4-9%)                     | 5.7%<br>(1.7-11%)                   | 890<br>(260-1700)     | 24000<br>(6900-47000)     |
| Democratic Republic of the Congo | 2005 | Female | 65 to 69 | 33%<br>(22-49%)                | 67%<br>(51-78%)          | 0.85<br>(0.44-1.5)                          | 4%<br>(0.96-8.4%)                    | 4.9%<br>(1.2-10%)                   | 870<br>(210-1800)     | 19000<br>(4600-40000)     |
| Democratic Republic of the Congo | 2005 | Female | 70 to 74 | 33%<br>(22-48%)                | 67%<br>(52-78%)          | 0.76<br>(0.36-1.4)                          | 3%<br>(0.26-7.2%)                    | 3.6%<br>(0.31-8.4%)                 | 670<br>(57-1600)      | 12000<br>(1000-28000)     |
| Democratic Republic of the Congo | 2005 | Female | 75 to 79 | 30%<br>(19-47%)                | 70%<br>(53-81%)          | 0.62<br>(0.28-1.1)                          | 2%<br>(-0.32-5.3%)                   | 2.3%<br>(-0.32-6.3%)                | 390<br>(-54-1000)     | 5200<br>(-830-14000)      |
| Democratic Republic of the Congo | 2005 | Female | 80 to 84 | 28%<br>(16-43%)                | 72%<br>(57-84%)          | 0.51<br>(0.24-0.91)                         | 1.3%<br>(-0.34-3.6%)                 | 1.5%<br>(-0.36-4.4%)                | 170<br>(-41-480)      | 1700<br>(-450-4900)       |
| Democratic Republic of the Congo | 2005 | Female | 85 to 89 | 26%<br>(16-39%)                | 74%<br>(61-84%)          | 0.45<br>(0.21-0.82)                         | 0.92%<br>(-0.34-2.9%)                | 1.1%<br>(-0.41-3.5%)                | 73<br>(-27-230)       | 520<br>(-200-1700)        |
| Democratic Republic of the Congo | 2005 | Female | 90 to 94 | 28%<br>(17-41%)                | 72%<br>(59-83%)          | 0.43<br>(0.19-0.83)                         | 0.7%<br>(-0.38-2.5%)                 | 0.85%<br>(-0.48-3.1%)               | 21<br>(-12-77)        | 110<br>(-56-380)          |
| Democratic Republic of the Congo | 2005 | Female | 95 plus  | 31%<br>(17-48%)                | 69%<br>(52-83%)          | 0.44<br>(0.17-0.91)                         | 0.68%<br>(-0.4-2.6%)                 | 0.78%<br>(-0.51-3.2%)               | 5.4<br>(-3.5-22)      | 19<br>(-11-73)            |
| Democratic Republic of the Congo | 2005 | Male   | All Ages | 29%<br>(24-37%)                | 71%<br>(63-76%)          | 0.66<br>(0.5-0.84)                          | 2.2%<br>(1.3-3.2%)                   | 3.5%<br>(1.9-5.3%)                  | 11000<br>(6400-16000) | 500000<br>(310000-690000) |
| Democratic Republic of the Congo | 2005 | Male   | 15 to 19 | 25%<br>(15-39%)                | 75%<br>(61-85%)          | 0.49<br>(0.23-0.89)                         | 2%<br>(0.98-3.6%)                    | 2.3%<br>(0.86-4.7%)                 | 160<br>(58-330)       | 15000<br>(7400-28000)     |
| Democratic Republic of the Congo | 2005 | Male   | 20 to 24 | 37%<br>(23-55%)                | 63%<br>(45-77%)          | 1<br>(0.55-1.7)                             | 5.4%<br>(2.8-8.8%)                   | 6.3%<br>(2.7-11%)                   | 570<br>(260-1000)     | 45000<br>(23000-74000)    |
| Democratic Republic of the Congo | 2005 | Male   | 25 to 29 | 45%<br>(27-62%)                | 55%<br>(38-73%)          | 1.4<br>(0.83-2.2)                           | 7.5%<br>(4-12%)                      | 9.1%<br>(4.3-15%)                   | 860<br>(410-1400)     | 59000<br>(32000-90000)    |
| Democratic Republic of the Congo | 2005 | Male   | 30 to 34 | 46%<br>(29-65%)                | 54%<br>(35-71%)          | 1.6<br>(0.93-2.5)                           | 7.8%<br>(4.3-12%)                    | 9.4%<br>(4.7-15%)                   | 1000<br>(520-1600)    | 62000<br>(35000-95000)    |
| Democratic Republic of the Congo | 2005 | Male   | 35 to 39 | 46%<br>(30-64%)                | 54%<br>(36-70%)          | 1.6<br>(0.89-2.5)                           | 7.5%<br>(4.1-12%)                    | 8.9%<br>(4.5-14%)                   | 1000<br>(540-1700)    | 57000<br>(32000-88000)    |
| Democratic Republic of the Congo | 2005 | Male   | 40 to 44 | 48%<br>(32-67%)                | 52%<br>(33-68%)          | 1.6<br>(0.83-2.6)                           | 7.7%<br>(4-12%)                      | 9.3%<br>(4.5-15%)                   | 1200<br>(560-1900)    | 56000<br>(29000-88000)    |
| Democratic Republic of the Congo | 2005 | Male   | 45 to 49 | 52%<br>(33-69%)                | 48%<br>(31-67%)          | 1.7<br>(0.93-2.8)                           | 8.4%<br>(4.5-13%)                    | 10%<br>(5.3-16%)                    | 1300<br>(660-2000)    | 54000<br>(29000-85000)    |
| Democratic Republic of the Congo | 2005 | Male   | 50 to 54 | 52%<br>(34-70%)                | 48%<br>(30-66%)          | 1.7<br>(0.87-2.8)                           | 8.6%<br>(4.2-14%)                    | 11%<br>(4.9-17%)                    | 1300<br>(610-2200)    | 48000<br>(23000-80000)    |
| Democratic Republic of the Congo | 2005 | Male   | 55 to 59 | 50%<br>(33-69%)                | 50%<br>(31-67%)          | 1.5<br>(0.78-2.5)                           | 7.6%<br>(3.4-13%)                    | 9.4%<br>(4-16%)                     | 1200<br>(520-2000)    | 39000<br>(17000-65000)    |
| Democratic Republic of the Congo | 2005 | Male   | 60 to 64 | 48%<br>(30-68%)                | 52%<br>(32-70%)          | 1.3<br>(0.61-2.3)                           | 5.9%<br>(2.3-11%)                    | 7.1%<br>(2.6-13%)                   | 1000<br>(370-1800)    | 27000<br>(10000-49000)    |
| Democratic Republic of the Congo | 2005 | Male   | 65 to 69 | 49%<br>(32-66%)                | 51%<br>(34-68%)          | 1.1<br>(0.61-1.9)                           | 4.6%<br>(1.6-8.7%)                   | 5.6%<br>(1.8-10%)                   | 790<br>(250-1500)     | 18000<br>(5900-33000)     |

| Location                         | Year | Sex    | Age      | Prevalence of current drinkers | Prevalence of abstainers | Population average of standard drinks daily | Percent of total attributable deaths | Percent of total attributable DALYs | Attributable deaths  | Attributable DALYs        |
|----------------------------------|------|--------|----------|--------------------------------|--------------------------|---------------------------------------------|--------------------------------------|-------------------------------------|----------------------|---------------------------|
| Democratic Republic of the Congo | 2005 | Male   | 70 to 74 | 50%<br>(33-67%)                | 50%<br>(33-67%)          | 1<br>(0.51-1.8)                             | 3.4%<br>(0.65-7.2%)                  | 4%<br>(0.72-8.5%)                   | 550<br>(98-1200)     | 9900<br>(1900-21000)      |
| Democratic Republic of the Congo | 2005 | Male   | 75 to 79 | 48%<br>(31-66%)                | 52%<br>(34-69%)          | 0.84<br>(0.41-1.5)                          | 2.4%<br>(0.07-5.7%)                  | 2.8%<br>(0.051-6.7%)                | 310<br>(5.7-760)     | 4400<br>(130-10000)       |
| Democratic Republic of the Congo | 2005 | Male   | 80 to 84 | 43%<br>(26-62%)                | 57%<br>(38-74%)          | 0.65<br>(0.31-1.2)                          | 1.5%<br>(-0.066-3.8%)                | 1.8%<br>(-0.13-4.5%)                | 130<br>(-9.5-320)    | 1300<br>(-58-3300)        |
| Democratic Republic of the Congo | 2005 | Male   | 85 to 89 | 38%<br>(23-54%)                | 62%<br>(46-77%)          | 0.49<br>(0.24-0.88)                         | 1%<br>(-0.084-2.4%)                  | 1.1%<br>(-0.16-2.9%)                | 38<br>(-5.3-96)      | 290<br>(-24-720)          |
| Democratic Republic of the Congo | 2005 | Male   | 90 to 94 | 37%<br>(23-54%)                | 63%<br>(46-77%)          | 0.42<br>(0.19-0.77)                         | 0.6%<br>(-0.26-1.8%)                 | 0.64%<br>(-0.4-2.1%)                | 6.9<br>(-4.4-22)     | 39<br>(-17-110)           |
| Democratic Republic of the Congo | 2005 | Male   | 95 plus  | 40%<br>(22-61%)                | 60%<br>(39-78%)          | 0.39<br>(0.14-0.8)                          | 0.69%<br>(-0.38-2.2%)                | 0.71%<br>(-0.62-2.6%)               | 1.8<br>(-1.6-6.6)    | 7.2<br>(-4-23)            |
| Democratic Republic of the Congo | 2010 | Female | All Ages | 22%<br>(17-27%)                | 78%<br>(73-83%)          | 0.54<br>(0.38-0.72)                         | 1.5%<br>(0.77-2.5%)                  | 2.7%<br>(1.1-4.8%)                  | 9200<br>(3900-16000) | 340000<br>(170000-530000) |
| Democratic Republic of the Congo | 2010 | Female | 15 to 19 | 21%<br>(13-34%)                | 79%<br>(66-87%)          | 0.45<br>(0.21-0.83)                         | 1.2%<br>(0.51-2.2%)                  | 1.4%<br>(0.39-3.1%)                 | 90<br>(25-200)       | 9200<br>(4000-18000)      |
| Democratic Republic of the Congo | 2010 | Female | 20 to 24 | 30%<br>(18-45%)                | 70%<br>(55-82%)          | 0.87<br>(0.45-1.5)                          | 3%<br>(1.4-5.3%)                     | 3.7%<br>(1.2-7.5%)                  | 260<br>(89-530)      | 23000<br>(11000-42000)    |
| Democratic Republic of the Congo | 2010 | Female | 25 to 29 | 35%<br>(21-51%)                | 65%<br>(49-79%)          | 1.2<br>(0.63-2)                             | 3.6%<br>(1.7-6.3%)                   | 4.6%<br>(1.8-8.6%)                  | 380<br>(150-700)     | 28000<br>(14000-48000)    |
| Democratic Republic of the Congo | 2010 | Female | 30 to 34 | 37%<br>(23-54%)                | 63%<br>(46-77%)          | 1.3<br>(0.73-2.1)                           | 4.1%<br>(2-6.9%)                     | 5.2%<br>(2.2-9.2%)                  | 500<br>(220-880)     | 32000<br>(16000-54000)    |
| Democratic Republic of the Congo | 2010 | Female | 35 to 39 | 39%<br>(24-57%)                | 61%<br>(43-76%)          | 1.3<br>(0.69-2.2)                           | 4.1%<br>(1.9-7.1%)                   | 5.2%<br>(2.2-9.3%)                  | 560<br>(240-970)     | 31000<br>(15000-52000)    |
| Democratic Republic of the Congo | 2010 | Female | 40 to 44 | 39%<br>(24-58%)                | 61%<br>(42-76%)          | 1.3<br>(0.64-2.2)                           | 4.2%<br>(1.9-7.3%)                   | 5.4%<br>(2.3-10%)                   | 600<br>(260-1100)    | 29000<br>(14000-52000)    |
| Democratic Republic of the Congo | 2010 | Female | 45 to 49 | 38%<br>(22-56%)                | 62%<br>(44-78%)          | 1.2<br>(0.58-2.2)                           | 5.3%<br>(2.3-9.5%)                   | 6.9%<br>(2.9-13%)                   | 810<br>(330-1500)    | 34000<br>(14000-62000)    |
| Democratic Republic of the Congo | 2010 | Female | 50 to 54 | 35%<br>(21-53%)                | 65%<br>(47-79%)          | 1.1<br>(0.51-1.9)                           | 5.8%<br>(2.3-11%)                    | 7.5%<br>(2.9-14%)                   | 960<br>(370-1800)    | 35000<br>(14000-65000)    |
| Democratic Republic of the Congo | 2010 | Female | 55 to 59 | 33%<br>(20-49%)                | 67%<br>(51-80%)          | 0.99<br>(0.46-1.7)                          | 6.2%<br>(2.1-12%)                    | 7.9%<br>(2.7-15%)                   | 1100<br>(380-2100)   | 36000<br>(12000-67000)    |
| Democratic Republic of the Congo | 2010 | Female | 60 to 64 | 32%<br>(20-49%)                | 68%<br>(51-80%)          | 0.95<br>(0.43-1.7)                          | 5%<br>(1.5-9.9%)                     | 6.2%<br>(1.9-12%)                   | 1100<br>(320-2100)   | 29000<br>(8800-56000)     |
| Democratic Republic of the Congo | 2010 | Female | 65 to 69 | 34%<br>(22-49%)                | 66%<br>(51-78%)          | 0.93<br>(0.46-1.6)                          | 4.5%<br>(1.1-9.1%)                   | 5.4%<br>(1.4-11%)                   | 1100<br>(270-2200)   | 24000<br>(5900-49000)     |
| Democratic Republic of the Congo | 2010 | Female | 70 to 74 | 33%<br>(22-49%)                | 67%<br>(51-78%)          | 0.83<br>(0.38-1.5)                          | 3.4%<br>(0.43-8%)                    | 4.1%<br>(0.54-9.6%)                 | 860<br>(110-2000)    | 15000<br>(1900-36000)     |
| Democratic Republic of the Congo | 2010 | Female | 75 to 79 | 30%<br>(19-46%)                | 70%<br>(54-81%)          | 0.67<br>(0.3-1.3)                           | 2.3%<br>(-0.074-5.9%)                | 2.7%<br>(-0.07-7%)                  | 520<br>(-13-1400)    | 7100<br>(-210-19000)      |
| Democratic Republic of the Congo | 2010 | Female | 80 to 84 | 28%<br>(16-43%)                | 72%<br>(57-84%)          | 0.55<br>(0.25-1)                            | 1.5%<br>(-0.2-4.3%)                  | 1.8%<br>(-0.21-5.1%)                | 250<br>(-28-690)     | 2500<br>(-330-7000)       |
| Democratic Republic of the Congo | 2010 | Female | 85 to 89 | 26%<br>(16-40%)                | 74%<br>(60-84%)          | 0.49<br>(0.23-0.92)                         | 1.1%<br>(-0.21-3.3%)                 | 1.3%<br>(-0.25-4%)                  | 100<br>(-20-310)     | 730<br>(-140-2200)        |

| Location                         | Year | Sex    | Age      | Prevalence of current drinkers | Prevalence of abstainers | Population average of standard drinks daily | Percent of total attributable deaths | Percent of total attributable DALYs | Attributable deaths   | Attributable DALYs        |
|----------------------------------|------|--------|----------|--------------------------------|--------------------------|---------------------------------------------|--------------------------------------|-------------------------------------|-----------------------|---------------------------|
| Democratic Republic of the Congo | 2010 | Female | 90 to 94 | 28%<br>(17-41%)                | 72%<br>(59-83%)          | 0.48<br>(0.22-0.91)                         | 0.86%<br>(-0.39-2.9%)                | 1%<br>(-0.49-3.4%)                  | 31<br>(-15-100)       | 150<br>(-72-510)          |
| Democratic Republic of the Congo | 2010 | Female | 95 plus  | 32%<br>(18-50%)                | 68%<br>(50-82%)          | 0.49<br>(0.19-1)                            | 0.8%<br>(-0.4-3%)                    | 0.92%<br>(-0.53-3.7%)               | 7.8<br>(-4.4-31)      | 26<br>(-13-100)           |
| Democratic Republic of the Congo | 2010 | Male   | All Ages | 29%<br>(23-38%)                | 71%<br>(62-77%)          | 0.71<br>(0.51-0.95)                         | 2.6%<br>(1.5-3.9%)                   | 4.1%<br>(2.3-6.3%)                  | 14000<br>(8000-21000) | 610000<br>(380000-860000) |
| Democratic Republic of the Congo | 2010 | Male   | 15 to 19 | 24%<br>(14-40%)                | 76%<br>(60-86%)          | 0.52<br>(0.24-0.98)                         | 2.2%<br>(1.1-3.9%)                   | 2.6%<br>(0.96-5.2%)                 | 200<br>(74-400)       | 19000<br>(8900-33000)     |
| Democratic Republic of the Congo | 2010 | Male   | 20 to 24 | 37%<br>(23-54%)                | 63%<br>(46-77%)          | 1.1<br>(0.55-1.9)                           | 6.2%<br>(3.2-10%)                    | 7.5%<br>(3.2-13%)                   | 710<br>(310-1200)     | 56000<br>(29000-93000)    |
| Democratic Republic of the Congo | 2010 | Male   | 25 to 29 | 45%<br>(28-62%)                | 55%<br>(38-72%)          | 1.6<br>(0.82-2.5)                           | 8.8%<br>(4.7-14%)                    | 11%<br>(5-18%)                      | 1100<br>(510-1700)    | 75000<br>(39000-120000)   |
| Democratic Republic of the Congo | 2010 | Male   | 30 to 34 | 47%<br>(29-65%)                | 53%<br>(35-71%)          | 1.7<br>(0.97-2.8)                           | 9.2%<br>(5.1-14%)                    | 11%<br>(5.9-18%)                    | 1200<br>(640-1900)    | 76000<br>(42000-120000)   |
| Democratic Republic of the Congo | 2010 | Male   | 35 to 39 | 47%<br>(30-65%)                | 53%<br>(35-70%)          | 1.7<br>(0.9-2.8)                            | 8.6%<br>(4.7-13%)                    | 11%<br>(5.3-17%)                    | 1300<br>(650-2000)    | 69000<br>(39000-110000)   |
| Democratic Republic of the Congo | 2010 | Male   | 40 to 44 | 48%<br>(32-67%)                | 52%<br>(33-68%)          | 1.7<br>(0.89-2.9)                           | 8.9%<br>(4.6-14%)                    | 11%<br>(5.3-17%)                    | 1400<br>(690-2200)    | 68000<br>(35000-110000)   |
| Democratic Republic of the Congo | 2010 | Male   | 45 to 49 | 52%<br>(34-69%)                | 48%<br>(31-66%)          | 1.8<br>(0.96-3.1)                           | 9.4%<br>(5.1-15%)                    | 12%<br>(6.1-19%)                    | 1500<br>(800-2600)    | 66000<br>(35000-110000)   |
| Democratic Republic of the Congo | 2010 | Male   | 50 to 54 | 52%<br>(34-70%)                | 48%<br>(30-66%)          | 1.8<br>(0.91-3.1)                           | 9.5%<br>(4.7-16%)                    | 12%<br>(5.7-20%)                    | 1600<br>(740-2700)    | 59000<br>(28000-98000)    |
| Democratic Republic of the Congo | 2010 | Male   | 55 to 59 | 50%<br>(32-69%)                | 50%<br>(31-68%)          | 1.6<br>(0.78-2.7)                           | 8.3%<br>(3.6-14%)                    | 10%<br>(4.4-17%)                    | 1400<br>(610-2400)    | 46000<br>(20000-77000)    |
| Democratic Republic of the Congo | 2010 | Male   | 60 to 64 | 48%<br>(30-68%)                | 52%<br>(32-70%)          | 1.4<br>(0.63-2.5)                           | 6.4%<br>(2.4-12%)                    | 7.8%<br>(2.9-14%)                   | 1200<br>(460-2200)    | 34000<br>(13000-60000)    |
| Democratic Republic of the Congo | 2010 | Male   | 65 to 69 | 49%<br>(32-66%)                | 51%<br>(34-68%)          | 1.2<br>(0.62-2.1)                           | 5.1%<br>(1.7-9.6%)                   | 6.1%<br>(2-12%)                     | 1000<br>(320-1900)    | 23000<br>(7600-43000)     |
| Democratic Republic of the Congo | 2010 | Male   | 70 to 74 | 50%<br>(33-66%)                | 50%<br>(34-67%)          | 1.1<br>(0.52-2)                             | 3.7%<br>(0.83-7.9%)                  | 4.4%<br>(0.92-9.4%)                 | 710<br>(150-1500)     | 13000<br>(2900-27000)     |
| Democratic Republic of the Congo | 2010 | Male   | 75 to 79 | 48%<br>(32-66%)                | 52%<br>(34-68%)          | 0.89<br>(0.41-1.7)                          | 2.6%<br>(0.21-6.3%)                  | 3.1%<br>(0.19-7.4%)                 | 410<br>(25-980)       | 5700<br>(400-14000)       |
| Democratic Republic of the Congo | 2010 | Male   | 80 to 84 | 43%<br>(26-62%)                | 57%<br>(38-74%)          | 0.68<br>(0.31-1.2)                          | 1.7%<br>(-0.026-4.1%)                | 2%<br>(-0.11-4.8%)                  | 170<br>(-9.5-420)     | 1800<br>(-29-4300)        |
| Democratic Republic of the Congo | 2010 | Male   | 85 to 89 | 37%<br>(23-54%)                | 63%<br>(46-77%)          | 0.52<br>(0.24-0.97)                         | 1.1%<br>(-0.086-2.8%)                | 1.3%<br>(-0.16-3.3%)                | 52<br>(-6.5-130)      | 400<br>(-30-980)          |
| Democratic Republic of the Congo | 2010 | Male   | 90 to 94 | 37%<br>(23-54%)                | 63%<br>(46-77%)          | 0.44<br>(0.2-0.84)                          | 0.69%<br>(-0.21-2%)                  | 0.75%<br>(-0.34-2.4%)               | 10<br>(-4.5-32)       | 56<br>(-17-170)           |
| Democratic Republic of the Congo | 2010 | Male   | 95 plus  | 40%<br>(21-61%)                | 60%<br>(39-79%)          | 0.42<br>(0.15-0.91)                         | 0.79%<br>(-0.28-2.6%)                | 0.83%<br>(-0.48-3%)                 | 2.6<br>(-1.5-9.5)     | 9.9<br>(-3.4-32)          |
| Democratic Republic of the Congo | 2016 | Female | All Ages | 21%<br>(17-27%)                | 79%<br>(73-83%)          | 0.63<br>(0.35-1.1)                          | 1.9%<br>(0.85-3.3%)                  | 3.3%<br>(1.2-6.3%)                  | 11000<br>(4000-20000) | 390000<br>(180000-660000) |
| Democratic Republic of the Congo | 2016 | Female | 15 to 19 | 21%<br>(13-34%)                | 79%<br>(66-87%)          | 0.53<br>(0.21-1.1)                          | 1.3%<br>(0.57-2.6%)                  | 1.7%<br>(0.48-3.9%)                 | 110<br>(31-250)       | 11000<br>(4900-22000)     |

| Location                         | Year | Sex    | Age      | Prevalence of current drinkers | Prevalence of abstainers | Population average of standard drinks daily | Percent of total attributable deaths | Percent of total attributable DALYs | Attributable deaths   | Attributable DALYs         |
|----------------------------------|------|--------|----------|--------------------------------|--------------------------|---------------------------------------------|--------------------------------------|-------------------------------------|-----------------------|----------------------------|
| Democratic Republic of the Congo | 2016 | Female | 20 to 24 | 30%<br>(18-45%)                | 70%<br>(55-82%)          | 1<br>(0.42-2)                               | 3.3%<br>(1.6-6%)                     | 4.3%<br>(1.4-8.9%)                  | 290<br>(94-610)       | 27000<br>(13000-48000)     |
| Democratic Republic of the Congo | 2016 | Female | 25 to 29 | 34%<br>(20-51%)                | 66%<br>(49-80%)          | 1.4<br>(0.6-2.6)                            | 4.1%<br>(1.9-7%)                     | 5.6%<br>(2.1-10%)                   | 410<br>(150-770)      | 32000<br>(15000-55000)     |
| Democratic Republic of the Congo | 2016 | Female | 30 to 34 | 37%<br>(22-53%)                | 63%<br>(47-78%)          | 1.5<br>(0.67-2.8)                           | 4.7%<br>(2.3-8.3%)                   | 6.5%<br>(2.6-12%)                   | 550<br>(220-990)      | 36000<br>(17000-61000)     |
| Democratic Republic of the Congo | 2016 | Female | 35 to 39 | 38%<br>(24-55%)                | 62%<br>(45-76%)          | 1.5<br>(0.69-2.8)                           | 4.7%<br>(2.2-8.3%)                   | 6.5%<br>(2.8-12%)                   | 600<br>(250-1100)     | 34000<br>(16000-59000)     |
| Democratic Republic of the Congo | 2016 | Female | 40 to 44 | 38%<br>(24-56%)                | 62%<br>(44-76%)          | 1.5<br>(0.64-2.8)                           | 4.9%<br>(2.1-8.8%)                   | 6.7%<br>(2.6-12%)                   | 670<br>(260-1200)     | 33000<br>(14000-61000)     |
| Democratic Republic of the Congo | 2016 | Female | 45 to 49 | 37%<br>(23-55%)                | 63%<br>(45-77%)          | 1.4<br>(0.56-2.8)                           | 6.1%<br>(2.4-11%)                    | 8.4%<br>(3.2-16%)                   | 920<br>(350-1700)     | 39000<br>(16000-72000)     |
| Democratic Republic of the Congo | 2016 | Female | 50 to 54 | 35%<br>(21-53%)                | 65%<br>(47-79%)          | 1.3<br>(0.49-2.5)                           | 6.6%<br>(2.3-13%)                    | 8.8%<br>(3-17%)                     | 1100<br>(400-2200)    | 42000<br>(15000-79000)     |
| Democratic Republic of the Congo | 2016 | Female | 55 to 59 | 32%<br>(20-50%)                | 68%<br>(50-80%)          | 1.2<br>(0.45-2.3)                           | 7%<br>(2.2-14%)                      | 9.1%<br>(2.9-18%)                   | 1300<br>(430-2600)    | 42000<br>(14000-82000)     |
| Democratic Republic of the Congo | 2016 | Female | 60 to 64 | 32%<br>(19-49%)                | 68%<br>(51-81%)          | 1.1<br>(0.45-2.2)                           | 5.6%<br>(1.6-12%)                    | 7.1%<br>(2-15%)                     | 1200<br>(350-2500)    | 32000<br>(9400-66000)      |
| Democratic Republic of the Congo | 2016 | Female | 65 to 69 | 33%<br>(21-48%)                | 67%<br>(52-79%)          | 1.1<br>(0.45-2.1)                           | 5.1%<br>(1.2-11%)                    | 6.3%<br>(1.5-13%)                   | 1300<br>(320-2700)    | 29000<br>(7300-61000)      |
| Democratic Republic of the Congo | 2016 | Female | 70 to 74 | 33%<br>(21-48%)                | 67%<br>(52-79%)          | 0.97<br>(0.38-1.9)                          | 4%<br>(0.58-9.8%)                    | 4.9%<br>(0.73-12%)                  | 1100<br>(170-2600)    | 19000<br>(2900-47000)      |
| Democratic Republic of the Congo | 2016 | Female | 75 to 79 | 30%<br>(19-46%)                | 70%<br>(54-81%)          | 0.8<br>(0.31-1.7)                           | 2.8%<br>(0.087-7.7%)                 | 3.3%<br>(0.13-9.3%)                 | 710<br>(27-1900)      | 9700<br>(330-27000)        |
| Democratic Republic of the Congo | 2016 | Female | 80 to 84 | 28%<br>(17-43%)                | 72%<br>(57-83%)          | 0.65<br>(0.26-1.3)                          | 2%<br>(-0.022-5.7%)                  | 2.4%<br>(-0.011-6.6%)               | 380<br>(-1.7-1100)    | 3800<br>(-42-11000)        |
| Democratic Republic of the Congo | 2016 | Female | 85 to 89 | 26%<br>(16-39%)                | 74%<br>(61-84%)          | 0.57<br>(0.22-1.2)                          | 1.5%<br>(-0.13-4.6%)                 | 1.7%<br>(-0.14-5.5%)                | 160<br>(-13-490)      | 1100<br>(-99-3500)         |
| Democratic Republic of the Congo | 2016 | Female | 90 to 94 | 28%<br>(17-42%)                | 72%<br>(58-83%)          | 0.56<br>(0.23-1.2)                          | 1.2%<br>(-0.3-3.8%)                  | 1.4%<br>(-0.35-4.6%)                | 48<br>(-12-160)       | 240<br>(-59-800)           |
| Democratic Republic of the Congo | 2016 | Female | 95 plus  | 32%<br>(17-50%)                | 68%<br>(50-83%)          | 0.57<br>(0.19-1.3)                          | 1.1%<br>(-0.3-3.8%)                  | 1.3%<br>(-0.41-4.5%)                | 12<br>(-4.1-44)       | 42<br>(-12-150)            |
| Democratic Republic of the Congo | 2016 | Male   | All Ages | 29%<br>(23-36%)                | 71%<br>(64-77%)          | 0.82<br>(0.45-1.4)                          | 3.2%<br>(1.6-5.1%)                   | 5%<br>(2.3-8.4%)                    | 17000<br>(8300-29000) | 740000<br>(400000-1200000) |
| Democratic Republic of the Congo | 2016 | Male   | 15 to 19 | 24%<br>(14-39%)                | 76%<br>(61-86%)          | 0.6<br>(0.23-1.3)                           | 2.4%<br>(1.1-4.5%)                   | 3%<br>(0.99-6.2%)                   | 250<br>(86-520)       | 24000<br>(11000-42000)     |
| Democratic Republic of the Congo | 2016 | Male   | 20 to 24 | 37%<br>(22-53%)                | 63%<br>(47-78%)          | 1.3<br>(0.52-2.4)                           | 6.9%<br>(3.3-12%)                    | 8.4%<br>(3.3-15%)                   | 870<br>(330-1500)     | 69000<br>(33000-120000)    |
| Democratic Republic of the Congo | 2016 | Male   | 25 to 29 | 44%<br>(27-61%)                | 56%<br>(39-73%)          | 1.8<br>(0.83-3.3)                           | 9.9%<br>(5.1-16%)                    | 13%<br>(5.7-21%)                    | 1300<br>(580-2200)    | 91000<br>(46000-150000)    |
| Democratic Republic of the Congo | 2016 | Male   | 30 to 34 | 46%<br>(28-64%)                | 54%<br>(36-72%)          | 2<br>(0.93-3.7)                             | 11%<br>(5.4-17%)                     | 14%<br>(6.3-22%)                    | 1500<br>(680-2500)    | 93000<br>(47000-150000)    |

| Location                         | Year | Sex    | Age      | Prevalence of current drinkers | Prevalence of abstainers | Population average of standard drinks daily | Percent of total attributable deaths | Percent of total attributable DALYs | Attributable deaths | Attributable DALYs      |
|----------------------------------|------|--------|----------|--------------------------------|--------------------------|---------------------------------------------|--------------------------------------|-------------------------------------|---------------------|-------------------------|
| Democratic Republic of the Congo | 2016 | Male   | 35 to 39 | 46%<br>(29-64%)                | 54%<br>(36-71%)          | 2<br>(0.9-3.6)                              | 10%<br>(5.1-16%)                     | 13%<br>(6-21%)                      | 1500<br>(700-2500)  | 83000<br>(42000-130000) |
| Democratic Republic of the Congo | 2016 | Male   | 40 to 44 | 48%<br>(32-67%)                | 52%<br>(33-68%)          | 2<br>(0.87-3.9)                             | 10%<br>(4.9-16%)                     | 13%<br>(5.8-21%)                    | 1600<br>(740-2700)  | 80000<br>(37000-130000) |
| Democratic Republic of the Congo | 2016 | Male   | 45 to 49 | 51%<br>(32-70%)                | 49%<br>(30-68%)          | 2.1<br>(0.89-4)                             | 11%<br>(5-18%)                       | 14%<br>(6.2-23%)                    | 1800<br>(810-3000)  | 78000<br>(36000-130000) |
| Democratic Republic of the Congo | 2016 | Male   | 50 to 54 | 52%<br>(34-70%)                | 48%<br>(30-66%)          | 2.1<br>(0.85-4)                             | 11%<br>(4.5-18%)                     | 13%<br>(5.4-23%)                    | 1900<br>(750-3300)  | 71000<br>(29000-120000) |
| Democratic Republic of the Congo | 2016 | Male   | 55 to 59 | 50%<br>(32-69%)                | 50%<br>(31-68%)          | 1.8<br>(0.76-3.4)                           | 9.2%<br>(3.6-16%)                    | 12%<br>(4.5-20%)                    | 1700<br>(670-3100)  | 56000<br>(22000-98000)  |
| Democratic Republic of the Congo | 2016 | Male   | 60 to 64 | 48%<br>(30-68%)                | 52%<br>(32-70%)          | 1.6<br>(0.64-3.2)                           | 7.2%<br>(2.6-14%)                    | 8.8%<br>(3.1-17%)                   | 1500<br>(540-2800)  | 40000<br>(15000-76000)  |
| Democratic Republic of the Congo | 2016 | Male   | 65 to 69 | 49%<br>(32-66%)                | 51%<br>(34-68%)          | 1.4<br>(0.63-2.8)                           | 5.8%<br>(1.9-12%)                    | 7%<br>(2.2-14%)                     | 1300<br>(400-2600)  | 29000<br>(9300-59000)   |
| Democratic Republic of the Congo | 2016 | Male   | 70 to 74 | 49%<br>(32-66%)                | 51%<br>(34-68%)          | 1.2<br>(0.52-2.5)                           | 4.3%<br>(0.96-9.7%)                  | 5.1%<br>(1.1-12%)                   | 960<br>(210-2200)   | 17000<br>(4000-40000)   |
| Democratic Republic of the Congo | 2016 | Male   | 75 to 79 | 47%<br>(31-65%)                | 53%<br>(35-69%)          | 1<br>(0.42-2.1)                             | 3.1%<br>(0.49-7.8%)                  | 3.7%<br>(0.5-9.4%)                  | 580<br>(80-1500)    | 8200<br>(1300-21000)    |
| Democratic Republic of the Congo | 2016 | Male   | 80 to 84 | 42%<br>(25-60%)                | 58%<br>(40-75%)          | 0.79<br>(0.32-1.6)                          | 2.1%<br>(0.15-5.4%)                  | 2.4%<br>(0.11-6.3%)                 | 260<br>(12-680)     | 2700<br>(200-7100)      |
| Democratic Republic of the Congo | 2016 | Male   | 85 to 89 | 37%<br>(22-54%)                | 63%<br>(46-78%)          | 0.6<br>(0.24-1.2)                           | 1.4%<br>(0.082-4%)                   | 1.6%<br>(0.027-4.8%)                | 84<br>(1.4-250)     | 640<br>(36-1800)        |
| Democratic Republic of the Congo | 2016 | Male   | 90 to 94 | 36%<br>(22-53%)                | 64%<br>(47-78%)          | 0.51<br>(0.21-1.1)                          | 0.91%<br>(-0.11-2.7%)                | 0.99%<br>(-0.23-3.1%)               | 17<br>(-4.1-55)     | 93<br>(-11-280)         |
| Democratic Republic of the Congo | 2016 | Male   | 95 plus  | 39%<br>(21-60%)                | 61%<br>(40-79%)          | 0.48<br>(0.17-1.1)                          | 1%<br>(-0.16-3.3%)                   | 1.1%<br>(-0.33-3.9%)                | 4.3<br>(-1.3-15)    | 16<br>(-2.4-52)         |
| Equatorial Guinea                | 1990 | Female | All Ages | 25%<br>(20-31%)                | 75%<br>(69-80%)          | 0.75<br>(0.56-1)                            | 2.3%<br>(1.3-3.5%)                   | 3.9%<br>(1.9-6.5%)                  | 140<br>(66-230)     | 4700<br>(2700-7200)     |
| Equatorial Guinea                | 1990 | Female | 15 to 19 | 23%<br>(14-36%)                | 77%<br>(64-86%)          | 0.56<br>(0.26-1.1)                          | 2%<br>(0.69-3.9%)                    | 2.6%<br>(0.68-5.5%)                 | 1.1<br>(0.28-2.3)   | 89<br>(31-180)          |
| Equatorial Guinea                | 1990 | Female | 20 to 24 | 32%<br>(20-47%)                | 68%<br>(53-80%)          | 1.1<br>(0.56-1.8)                           | 4.7%<br>(2.1-7.9%)                   | 5.9%<br>(2.3-10%)                   | 4.4<br>(1.7-7.9)    | 330<br>(150-580)        |
| Equatorial Guinea                | 1990 | Female | 25 to 29 | 36%<br>(21-52%)                | 64%<br>(48-79%)          | 1.4<br>(0.85-2.2)                           | 6.8%<br>(3.7-11%)                    | 8.7%<br>(4.4-14%)                   | 8.2<br>(4-14)       | 540<br>(290-900)        |
| Equatorial Guinea                | 1990 | Female | 30 to 34 | 38%<br>(23-55%)                | 62%<br>(45-77%)          | 1.6<br>(0.92-2.4)                           | 8.5%<br>(4.4-13%)                    | 11%<br>(5.4-17%)                    | 10<br>(5-17)        | 610<br>(320-990)        |
| Equatorial Guinea                | 1990 | Female | 35 to 39 | 40%<br>(25-58%)                | 60%<br>(42-75%)          | 1.6<br>(0.83-2.7)                           | 8.6%<br>(4.5-14%)                    | 11%<br>(5.6-18%)                    | 8.7<br>(4.1-15)     | 460<br>(230-770)        |
| Equatorial Guinea                | 1990 | Female | 40 to 44 | 40%<br>(25-58%)                | 60%<br>(42-75%)          | 1.5<br>(0.72-2.8)                           | 8.5%<br>(3.7-14%)                    | 11%<br>(4.5-18%)                    | 5.7<br>(2.5-10)     | 270<br>(120-470)        |
| Equatorial Guinea                | 1990 | Female | 45 to 49 | 39%<br>(24-56%)                | 61%<br>(44-76%)          | 1.5<br>(0.69-2.8)                           | 9.1%<br>(4.2-16%)                    | 11%<br>(5.1-20%)                    | 7.4<br>(3.3-13)     | 310<br>(140-530)        |
| Equatorial Guinea                | 1990 | Female | 50 to 54 | 37%<br>(22-54%)                | 63%<br>(46-78%)          | 1.4<br>(0.63-2.5)                           | 9.2%<br>(4-16%)                      | 11%<br>(4.6-20%)                    | 11<br>(4.3-19)      | 390<br>(160-680)        |

| Location          | Year | Sex    | Age      | Prevalence of current drinkers | Prevalence of abstainers | Population average of standard drinks daily | Percent of total attributable deaths | Percent of total attributable DALYs | Attributable deaths  | Attributable DALYs   |
|-------------------|------|--------|----------|--------------------------------|--------------------------|---------------------------------------------|--------------------------------------|-------------------------------------|----------------------|----------------------|
| Equatorial Guinea | 1990 | Female | 55 to 59 | 34%<br>(21-51%)                | 66%<br>(49-79%)          | 1.2<br>(0.6-2.1)                            | 9%<br>(3.4-15%)                      | 11%<br>(4.1-19%)                    | 15<br>(5.4-27)       | 460<br>(170-830)     |
| Equatorial Guinea | 1990 | Female | 60 to 64 | 34%<br>(21-51%)                | 66%<br>(49-79%)          | 1.2<br>(0.56-2.2)                           | 7.3%<br>(2.4-13%)                    | 8.5%<br>(2.9-16%)                   | 16<br>(5.1-29)       | 420<br>(140-770)     |
| Equatorial Guinea | 1990 | Female | 65 to 69 | 35%<br>(23-51%)                | 65%<br>(49-77%)          | 1.1<br>(0.55-2)                             | 6.5%<br>(2.1-12%)                    | 7.4%<br>(2.5-14%)                   | 17<br>(5.7-34)       | 380<br>(120-750)     |
| Equatorial Guinea | 1990 | Female | 70 to 74 | 35%<br>(23-50%)                | 65%<br>(50-77%)          | 1<br>(0.48-1.9)                             | 5.1%<br>(1-11%)                      | 5.8%<br>(1.2-13%)                   | 15<br>(3-32)         | 270<br>(53-560)      |
| Equatorial Guinea | 1990 | Female | 75 to 79 | 32%<br>(20-48%)                | 68%<br>(52-80%)          | 0.84<br>(0.38-1.6)                          | 3.5%<br>(0.16-8.5%)                  | 4%<br>(0.18-9.7%)                   | 9.1<br>(0.42-22)     | 130<br>(5.9-300)     |
| Equatorial Guinea | 1990 | Female | 80 to 84 | 29%<br>(18-44%)                | 71%<br>(56-82%)          | 0.69<br>(0.31-1.3)                          | 2.5%<br>(-0.073-6.2%)                | 2.9%<br>(-0.074-7.2%)               | 4.6<br>(-0.12-12)    | 47<br>(-1.4-120)     |
| Equatorial Guinea | 1990 | Female | 85 to 89 | 28%<br>(17-42%)                | 72%<br>(58-83%)          | 0.61<br>(0.29-1.1)                          | 1.9%<br>(-0.17-4.9%)                 | 2.2%<br>(-0.19-5.8%)                | 1.5<br>(-0.14-4.1)   | 11<br>(-1-30)        |
| Equatorial Guinea | 1990 | Female | 90 to 94 | 29%<br>(18-43%)                | 71%<br>(57-82%)          | 0.6<br>(0.26-1.1)                           | 1.5%<br>(-0.25-4.4%)                 | 1.7%<br>(-0.32-5.3%)                | 0.37<br>(-0.068-1.1) | 1.9<br>(-0.31-5.5)   |
| Equatorial Guinea | 1990 | Female | 95 plus  | 33%<br>(19-50%)                | 67%<br>(50-81%)          | 0.6<br>(0.24-1.2)                           | 1.2%<br>(-0.41-4%)                   | 1.4%<br>(-0.55-4.7%)                | 0.09<br>(-0.035-0.3) | 0.31<br>(-0.1-0.99)  |
| Equatorial Guinea | 1990 | Male   | All Ages | 34%<br>(27-42%)                | 66%<br>(58-73%)          | 1<br>(0.75-1.3)                             | 4%<br>(2.6-5.8%)                     | 6.2%<br>(3.6-9.2%)                  | 230<br>(130-350)     | 9500<br>(6100-13000) |
| Equatorial Guinea | 1990 | Male   | 15 to 19 | 25%<br>(15-40%)                | 75%<br>(60-85%)          | 0.6<br>(0.27-1.1)                           | 3.3%<br>(1.3-6.3%)                   | 4%<br>(1.3-8%)                      | 2.2<br>(0.71-4.6)    | 180<br>(69-340)      |
| Equatorial Guinea | 1990 | Male   | 20 to 24 | 38%<br>(23-54%)                | 62%<br>(46-77%)          | 1.2<br>(0.67-2.1)                           | 9.1%<br>(4.5-14%)                    | 11%<br>(4.8-17%)                    | 11<br>(5-19)         | 800<br>(390-1300)    |
| Equatorial Guinea | 1990 | Male   | 25 to 29 | 45%<br>(28-62%)                | 55%<br>(38-72%)          | 1.8<br>(1.1-2.7)                            | 14%<br>(7.8-20%)                     | 16%<br>(8.7-24%)                    | 21<br>(11-32)        | 1300<br>(750-2000)   |
| Equatorial Guinea | 1990 | Male   | 30 to 34 | 47%<br>(29-65%)                | 53%<br>(35-71%)          | 2<br>(1.2-3.1)                              | 15%<br>(9.4-22%)                     | 19%<br>(11-27%)                     | 25<br>(15-38)        | 1500<br>(880-2200)   |
| Equatorial Guinea | 1990 | Male   | 35 to 39 | 47%<br>(31-66%)                | 53%<br>(34-69%)          | 2<br>(1.1-3.3)                              | 15%<br>(9.2-23%)                     | 19%<br>(11-28%)                     | 22<br>(12-34)        | 1100<br>(670-1800)   |
| Equatorial Guinea | 1990 | Male   | 40 to 44 | 49%<br>(33-68%)                | 51%<br>(32-67%)          | 2<br>(1-3.6)                                | 16%<br>(8.3-24%)                     | 19%<br>(9.5-29%)                    | 17<br>(8.4-27)       | 800<br>(400-1300)    |
| Equatorial Guinea | 1990 | Male   | 45 to 49 | 52%<br>(34-69%)                | 48%<br>(31-66%)          | 2.1<br>(1-3.9)                              | 16%<br>(8.3-25%)                     | 19%<br>(9.6-30%)                    | 19<br>(9.1-30)       | 770<br>(390-1200)    |
| Equatorial Guinea | 1990 | Male   | 50 to 54 | 53%<br>(34-70%)                | 47%<br>(30-66%)          | 2.1<br>(1-3.6)                              | 15%<br>(7.3-24%)                     | 18%<br>(8.3-28%)                    | 22<br>(10-36)        | 800<br>(370-1300)    |
| Equatorial Guinea | 1990 | Male   | 55 to 59 | 50%<br>(33-69%)                | 50%<br>(31-67%)          | 1.8<br>(0.92-3.2)                           | 13%<br>(6.3-21%)                     | 15%<br>(7.3-25%)                    | 24<br>(11-40)        | 760<br>(360-1300)    |
| Equatorial Guinea | 1990 | Male   | 60 to 64 | 49%<br>(31-68%)                | 51%<br>(32-69%)          | 1.6<br>(0.8-2.9)                            | 10%<br>(4.1-17%)                     | 12%<br>(4.6-20%)                    | 22<br>(8.6-40)       | 590<br>(230-1100)    |
| Equatorial Guinea | 1990 | Male   | 65 to 69 | 49%<br>(32-67%)                | 51%<br>(33-68%)          | 1.4<br>(0.7-2.5)                            | 8.2%<br>(2.9-15%)                    | 9.3%<br>(3.3-17%)                   | 19<br>(6.4-36)       | 430<br>(150-800)     |
| Equatorial Guinea | 1990 | Male   | 70 to 74 | 50%<br>(33-67%)                | 50%<br>(33-67%)          | 1.3<br>(0.62-2.2)                           | 6.1%<br>(1.4-12%)                    | 6.9%<br>(1.5-14%)                   | 15<br>(3.3-30)       | 270<br>(61-530)      |

| Location          | Year | Sex    | Age      | Prevalence of current drinkers | Prevalence of abstainers | Population average of standard drinks daily | Percent of total attributable deaths | Percent of total attributable DALYs | Attributable deaths    | Attributable DALYs   |
|-------------------|------|--------|----------|--------------------------------|--------------------------|---------------------------------------------|--------------------------------------|-------------------------------------|------------------------|----------------------|
| Equatorial Guinea | 1990 | Male   | 75 to 79 | 48%<br>(32-66%)                | 52%<br>(34-68%)          | 1<br>(0.49-1.9)                             | 4.4%<br>(0.43-9.9%)                  | 5%<br>(0.44-11%)                    | 8.9<br>(0.76-21)       | 120<br>(11-280)      |
| Equatorial Guinea | 1990 | Male   | 80 to 84 | 43%<br>(26-61%)                | 57%<br>(39-74%)          | 0.8<br>(0.37-1.5)                           | 3%<br>(0.09-7.1%)                    | 3.4%<br>(0.016-8.2%)                | 3.7<br>(0.016-9.1)     | 38<br>(1.1-92)       |
| Equatorial Guinea | 1990 | Male   | 85 to 89 | 37%<br>(23-54%)                | 63%<br>(46-77%)          | 0.6<br>(0.28-1.1)                           | 2%<br>(-0.035-4.8%)                  | 2.2%<br>(-0.12-5.6%)                | 1<br>(-0.056-2.6)      | 7.7<br>(-0.14-19)    |
| Equatorial Guinea | 1990 | Male   | 90 to 94 | 37%<br>(23-54%)                | 63%<br>(46-77%)          | 0.52<br>(0.24-0.99)                         | 1.2%<br>(-0.31-3.3%)                 | 1.3%<br>(-0.49-3.8%)                | 0.19<br>(-0.07-0.55)   | 1<br>(-0.27-2.8)     |
| Equatorial Guinea | 1990 | Male   | 95 plus  | 40%<br>(22-60%)                | 60%<br>(40-78%)          | 0.48<br>(0.19-1)                            | 1.2%<br>(-0.45-3.8%)                 | 1.3%<br>(-0.73-4.3%)                | 0.059<br>(-0.032-0.19) | 0.22<br>(-0.08-0.65) |
| Equatorial Guinea | 1995 | Female | All Ages | 25%<br>(20-31%)                | 75%<br>(69-80%)          | 0.75<br>(0.56-1)                            | 2.2%<br>(1.3-3.5%)                   | 3.8%<br>(1.9-6.3%)                  | 140<br>(70-240)        | 5200<br>(3000-8100)  |
| Equatorial Guinea | 1995 | Female | 15 to 19 | 23%<br>(14-36%)                | 77%<br>(64-86%)          | 0.56<br>(0.25-1)                            | 1.9%<br>(0.71-3.8%)                  | 2.4%<br>(0.71-5.3%)                 | 0.9<br>(0.26-1.9)      | 76<br>(29-150)       |
| Equatorial Guinea | 1995 | Female | 20 to 24 | 32%<br>(19-47%)                | 68%<br>(53-81%)          | 1.1<br>(0.54-1.8)                           | 4.3%<br>(1.9-7.6%)                   | 5.2%<br>(2-9.6%)                    | 3.6<br>(1.3-6.7)       | 270<br>(120-480)     |
| Equatorial Guinea | 1995 | Female | 25 to 29 | 36%<br>(22-53%)                | 64%<br>(47-78%)          | 1.4<br>(0.86-2.3)                           | 6.2%<br>(3.3-9.8%)                   | 7.6%<br>(3.9-12%)                   | 8.3<br>(4-14)          | 550<br>(290-900)     |
| Equatorial Guinea | 1995 | Female | 30 to 34 | 39%<br>(24-56%)                | 61%<br>(44-76%)          | 1.6<br>(0.94-2.4)                           | 7.8%<br>(4.4-12%)                    | 9.7%<br>(5.2-15%)                   | 13<br>(6.7-21)         | 760<br>(420-1200)    |
| Equatorial Guinea | 1995 | Female | 35 to 39 | 40%<br>(26-58%)                | 60%<br>(42-74%)          | 1.6<br>(0.89-2.6)                           | 8%<br>(4.3-13%)                      | 10%<br>(5.2-16%)                    | 14<br>(6.8-23)         | 720<br>(380-1200)    |
| Equatorial Guinea | 1995 | Female | 40 to 44 | 40%<br>(26-59%)                | 60%<br>(41-74%)          | 1.5<br>(0.79-2.6)                           | 8.1%<br>(4-13%)                      | 10%<br>(4.9-16%)                    | 11<br>(4.9-18)         | 490<br>(240-820)     |
| Equatorial Guinea | 1995 | Female | 45 to 49 | 39%<br>(24-57%)                | 61%<br>(43-76%)          | 1.5<br>(0.73-2.6)                           | 8.6%<br>(4-15%)                      | 11%<br>(4.9-18%)                    | 7.8<br>(3.5-14)        | 320<br>(150-560)     |
| Equatorial Guinea | 1995 | Female | 50 to 54 | 37%<br>(22-55%)                | 63%<br>(45-78%)          | 1.4<br>(0.66-2.5)                           | 8.8%<br>(3.9-16%)                    | 11%<br>(4.7-19%)                    | 9.9<br>(4.1-18)        | 360<br>(150-660)     |
| Equatorial Guinea | 1995 | Female | 55 to 59 | 34%<br>(21-52%)                | 66%<br>(48-79%)          | 1.2<br>(0.59-2.2)                           | 8.6%<br>(3.3-15%)                    | 10%<br>(4-18%)                      | 13<br>(4.8-25)         | 410<br>(150-780)     |
| Equatorial Guinea | 1995 | Female | 60 to 64 | 33%<br>(20-50%)                | 67%<br>(50-80%)          | 1.1<br>(0.54-2.1)                           | 7%<br>(2.4-13%)                      | 8.1%<br>(2.8-15%)                   | 15<br>(4.8-29)         | 390<br>(130-770)     |
| Equatorial Guinea | 1995 | Female | 65 to 69 | 35%<br>(23-50%)                | 65%<br>(50-77%)          | 1.1<br>(0.54-2)                             | 6.2%<br>(1.9-12%)                    | 7.2%<br>(2.3-14%)                   | 17<br>(5.1-34)         | 370<br>(110-750)     |
| Equatorial Guinea | 1995 | Female | 70 to 74 | 35%<br>(23-50%)                | 65%<br>(50-77%)          | 1<br>(0.49-1.9)                             | 4.9%<br>(0.86-11%)                   | 5.6%<br>(1-12%)                     | 15<br>(2.6-34)         | 270<br>(46-590)      |
| Equatorial Guinea | 1995 | Female | 75 to 79 | 32%<br>(20-48%)                | 68%<br>(52-80%)          | 0.84<br>(0.37-1.6)                          | 3.4%<br>(0.0089-8.1%)                | 3.9%<br>(-0.0015-9.4%)              | 9.8<br>(-0.0039-23)    | 130<br>(0.39-320)    |
| Equatorial Guinea | 1995 | Female | 80 to 84 | 29%<br>(18-45%)                | 71%<br>(55-82%)          | 0.69<br>(0.32-1.3)                          | 2.5%<br>(-0.02-6.3%)                 | 2.8%<br>(-0.028-7.2%)               | 5<br>(-0.05-13)        | 51<br>(-0.42-130)    |
| Equatorial Guinea | 1995 | Female | 85 to 89 | 28%<br>(17-42%)                | 72%<br>(58-83%)          | 0.61<br>(0.28-1.1)                          | 1.8%<br>(-0.14-5%)                   | 2.1%<br>(-0.17-6%)                  | 1.7<br>(-0.14-4.8)     | 12<br>(-1-34)        |
| Equatorial Guinea | 1995 | Female | 90 to 94 | 30%<br>(19-43%)                | 70%<br>(57-81%)          | 0.6<br>(0.28-1.1)                           | 1.4%<br>(-0.29-4.1%)                 | 1.7%<br>(-0.36-5.1%)                | 0.44<br>(-0.093-1.3)   | 2.2<br>(-0.44-6.5)   |

| Location          | Year | Sex    | Age      | Prevalence of current drinkers | Prevalence of abstainers | Population average of standard drinks daily | Percent of total attributable deaths | Percent of total attributable DALYs | Attributable deaths    | Attributable DALYs    |
|-------------------|------|--------|----------|--------------------------------|--------------------------|---------------------------------------------|--------------------------------------|-------------------------------------|------------------------|-----------------------|
| Equatorial Guinea | 1995 | Female | 95 plus  | 33%<br>(19-51%)                | 67%<br>(49-81%)          | 0.61<br>(0.25-1.2)                          | 1.2%<br>(-0.43-4%)                   | 1.4%<br>(-0.57-4.7%)                | 0.097<br>(-0.039-0.32) | 0.33<br>(-0.11-1.1)   |
| Equatorial Guinea | 1995 | Male   | All Ages | 34%<br>(27-42%)                | 66%<br>(58-73%)          | 1<br>(0.76-1.4)                             | 3.8%<br>(2.4-5.4%)                   | 5.9%<br>(3.5-8.6%)                  | 240<br>(140-370)       | 10000<br>(6300-14000) |
| Equatorial Guinea | 1995 | Male   | 15 to 19 | 25%<br>(15-40%)                | 75%<br>(60-85%)          | 0.62<br>(0.28-1.2)                          | 3.3%<br>(1.4-6.1%)                   | 4.1%<br>(1.4-7.9%)                  | 1.8<br>(0.63-3.6)      | 150<br>(59-270)       |
| Equatorial Guinea | 1995 | Male   | 20 to 24 | 38%<br>(24-55%)                | 62%<br>(45-76%)          | 1.3<br>(0.67-2.1)                           | 8.7%<br>(4.3-14%)                    | 10%<br>(4.6-17%)                    | 8.5<br>(3.8-14)        | 620<br>(300-1000)     |
| Equatorial Guinea | 1995 | Male   | 25 to 29 | 46%<br>(29-62%)                | 54%<br>(38-71%)          | 1.8<br>(1.1-2.8)                            | 12%<br>(7.1-18%)                     | 15%<br>(7.9-22%)                    | 19<br>(9.9-29)         | 1200<br>(700-1800)    |
| Equatorial Guinea | 1995 | Male   | 30 to 34 | 48%<br>(30-66%)                | 52%<br>(34-70%)          | 2<br>(1.2-3)                                | 14%<br>(8.6-20%)                     | 16%<br>(9.9-23%)                    | 28<br>(16-41)          | 1600<br>(970-2400)    |
| Equatorial Guinea | 1995 | Male   | 35 to 39 | 48%<br>(32-66%)                | 52%<br>(34-68%)          | 2<br>(1.2-3.2)                              | 14%<br>(8.2-21%)                     | 17%<br>(9.4-25%)                    | 30<br>(17-46)          | 1600<br>(920-2400)    |
| Equatorial Guinea | 1995 | Male   | 40 to 44 | 50%<br>(34-68%)                | 50%<br>(32-66%)          | 2<br>(1.1-3.4)                              | 15%<br>(8-22%)                       | 17%<br>(9.2-26%)                    | 27<br>(14-43)          | 1300<br>(690-2000)    |
| Equatorial Guinea | 1995 | Male   | 45 to 49 | 53%<br>(34-70%)                | 47%<br>(30-66%)          | 2.2<br>(1.1-3.7)                            | 15%<br>(8-22%)                       | 18%<br>(9.2-27%)                    | 20<br>(9.9-33)         | 850<br>(420-1300)     |
| Equatorial Guinea | 1995 | Male   | 50 to 54 | 53%<br>(35-71%)                | 47%<br>(29-65%)          | 2.1<br>(1.1-3.8)                            | 14%<br>(7.1-23%)                     | 17%<br>(8.2-27%)                    | 20<br>(9.1-34)         | 730<br>(340-1200)     |
| Equatorial Guinea | 1995 | Male   | 55 to 59 | 51%<br>(33-70%)                | 49%<br>(30-67%)          | 1.8<br>(0.95-3.2)                           | 12%<br>(5.5-20%)                     | 15%<br>(6.6-24%)                    | 21<br>(8.9-36)         | 660<br>(290-1100)     |
| Equatorial Guinea | 1995 | Male   | 60 to 64 | 49%<br>(31-69%)                | 51%<br>(31-69%)          | 1.6<br>(0.77-2.9)                           | 9.6%<br>(3.8-17%)                    | 11%<br>(4.4-20%)                    | 20<br>(7.2-37)         | 540<br>(200-1000)     |
| Equatorial Guinea | 1995 | Male   | 65 to 69 | 50%<br>(33-67%)                | 50%<br>(33-67%)          | 1.4<br>(0.73-2.5)                           | 7.8%<br>(2.9-14%)                    | 9%<br>(3.1-16%)                     | 18<br>(6.4-34)         | 400<br>(140-740)      |
| Equatorial Guinea | 1995 | Male   | 70 to 74 | 51%<br>(33-68%)                | 49%<br>(32-67%)          | 1.3<br>(0.64-2.2)                           | 5.9%<br>(1.3-12%)                    | 6.7%<br>(1.4-13%)                   | 14<br>(3.4-29)         | 260<br>(63-520)       |
| Equatorial Guinea | 1995 | Male   | 75 to 79 | 49%<br>(33-67%)                | 51%<br>(33-67%)          | 1<br>(0.5-1.9)                              | 4.3%<br>(0.33-9.4%)                  | 4.9%<br>(0.34-11%)                  | 9.2<br>(0.65-20)       | 130<br>(11-280)       |
| Equatorial Guinea | 1995 | Male   | 80 to 84 | 44%<br>(27-61%)                | 56%<br>(39-73%)          | 0.81<br>(0.38-1.5)                          | 3%<br>(0.14-6.7%)                    | 3.4%<br>(0.13-7.8%)                 | 4<br>(0.14-9.1)        | 41<br>(1.8-93)        |
| Equatorial Guinea | 1995 | Male   | 85 to 89 | 38%<br>(23-55%)                | 62%<br>(45-77%)          | 0.62<br>(0.28-1.1)                          | 2%<br>(-0.04-5%)                     | 2.2%<br>(-0.12-5.8%)                | 1.2<br>(-0.066-3.1)    | 9.1<br>(-0.18-23)     |
| Equatorial Guinea | 1995 | Male   | 90 to 94 | 38%<br>(23-54%)                | 62%<br>(46-77%)          | 0.53<br>(0.24-0.99)                         | 1.2%<br>(-0.21-3.4%)                 | 1.4%<br>(-0.36-3.9%)                | 0.23<br>(-0.061-0.67)  | 1.2<br>(-0.21-3.4)    |
| Equatorial Guinea | 1995 | Male   | 95 plus  | 41%<br>(22-62%)                | 59%<br>(38-78%)          | 0.49<br>(0.19-0.99)                         | 1.3%<br>(-0.43-3.8%)                 | 1.4%<br>(-0.67-4.5%)                | 0.058<br>(-0.029-0.19) | 0.21<br>(-0.071-0.64) |
| Equatorial Guinea | 2000 | Female | All Ages | 24%<br>(19-30%)                | 76%<br>(70-81%)          | 0.98<br>(0.75-1.3)                          | 2.2%<br>(1.4-3.2%)                   | 3.8%<br>(2.2-5.8%)                  | 120<br>(63-190)        | 4200<br>(2500-6300)   |
| Equatorial Guinea | 2000 | Female | 15 to 19 | 22%<br>(13-34%)                | 78%<br>(66-87%)          | 0.74<br>(0.34-1.3)                          | 1.9%<br>(0.95-3.3%)                  | 2.5%<br>(1-4.6%)                    | 1.1<br>(0.41-2)        | 97<br>(46-170)        |
| Equatorial Guinea | 2000 | Female | 20 to 24 | 31%<br>(19-47%)                | 69%<br>(53-81%)          | 1.4<br>(0.71-2.4)                           | 3.4%<br>(1.8-5.6%)                   | 4%<br>(1.8-7%)                      | 2.1<br>(0.94-3.8)      | 180<br>(93-290)       |



| Location          | Year | Sex    | Age      | Prevalence of current drinkers | Prevalence of abstainers | Population average of standard drinks daily | Percent of total attributable deaths | Percent of total attributable DALYs | Attributable deaths   | Attributable DALYs   |
|-------------------|------|--------|----------|--------------------------------|--------------------------|---------------------------------------------|--------------------------------------|-------------------------------------|-----------------------|----------------------|
| Equatorial Guinea | 2000 | Female | 25 to 29 | 35%<br>(21-51%)                | 65%<br>(49-79%)          | 1.9<br>(1.1-3.1)                            | 4.2%<br>(2.4-6.5%)                   | 4.8%<br>(2.4-8%)                    | 4.4<br>(2.3-7.4)      | 320<br>(180-500)     |
| Equatorial Guinea | 2000 | Female | 30 to 34 | 38%<br>(23-55%)                | 62%<br>(45-77%)          | 2.1<br>(1.2-3.3)                            | 5.3%<br>(3.1-8.2%)                   | 6.3%<br>(3.4-10%)                   | 8.4<br>(4.6-14)       | 520<br>(310-810)     |
| Equatorial Guinea | 2000 | Female | 35 to 39 | 39%<br>(24-57%)                | 61%<br>(43-76%)          | 2.1<br>(1.2-3.2)                            | 5.6%<br>(3.3-8.8%)                   | 6.9%<br>(3.9-11%)                   | 11<br>(5.6-18)        | 590<br>(330-950)     |
| Equatorial Guinea | 2000 | Female | 40 to 44 | 39%<br>(25-58%)                | 61%<br>(42-75%)          | 2.1<br>(1.1-3.2)                            | 6.3%<br>(3.7-9.6%)                   | 7.9%<br>(4.4-12%)                   | 11<br>(5.7-18)        | 540<br>(290-860)     |
| Equatorial Guinea | 2000 | Female | 45 to 49 | 38%<br>(22-55%)                | 62%<br>(45-78%)          | 2<br>(1-3.4)                                | 7.2%<br>(4-11%)                      | 9.2%<br>(5-14%)                     | 9.7<br>(4.7-17)       | 420<br>(210-700)     |
| Equatorial Guinea | 2000 | Female | 50 to 54 | 36%<br>(21-53%)                | 64%<br>(47-79%)          | 1.8<br>(0.87-3.1)                           | 7.5%<br>(4-12%)                      | 9.5%<br>(5-15%)                     | 7.3<br>(3.4-13)       | 270<br>(130-480)     |
| Equatorial Guinea | 2000 | Female | 55 to 59 | 33%<br>(20-50%)                | 67%<br>(50-80%)          | 1.6<br>(0.8-2.9)                            | 7.9%<br>(3.7-13%)                    | 9.8%<br>(4.6-16%)                   | 8.9<br>(3.8-16)       | 280<br>(120-510)     |
| Equatorial Guinea | 2000 | Female | 60 to 64 | 32%<br>(19-49%)                | 68%<br>(51-81%)          | 1.5<br>(0.74-2.7)                           | 6.7%<br>(2.8-12%)                    | 8.1%<br>(3.3-14%)                   | 10<br>(3.7-19)        | 270<br>(99-510)      |
| Equatorial Guinea | 2000 | Female | 65 to 69 | 34%<br>(22-50%)                | 66%<br>(50-78%)          | 1.5<br>(0.77-2.6)                           | 6.4%<br>(2.5-12%)                    | 7.6%<br>(3-13%)                     | 13<br>(4.9-25)        | 300<br>(110-570)     |
| Equatorial Guinea | 2000 | Female | 70 to 74 | 34%<br>(22-50%)                | 66%<br>(50-78%)          | 1.4<br>(0.69-2.4)                           | 5.4%<br>(1.6-10%)                    | 6.3%<br>(1.8-12%)                   | 13<br>(3.9-27)        | 240<br>(70-480)      |
| Equatorial Guinea | 2000 | Female | 75 to 79 | 31%<br>(20-47%)                | 69%<br>(53-80%)          | 1.1<br>(0.51-2.1)                           | 3.9%<br>(0.59-8.5%)                  | 4.6%<br>(0.7-9.9%)                  | 9.5<br>(1.6-21)       | 130<br>(21-290)      |
| Equatorial Guinea | 2000 | Female | 80 to 84 | 28%<br>(17-43%)                | 72%<br>(57-83%)          | 0.92<br>(0.43-1.7)                          | 2.9%<br>(0.51-6.4%)                  | 3.4%<br>(0.6-7.5%)                  | 5.7<br>(0.98-13)      | 59<br>(10-130)       |
| Equatorial Guinea | 2000 | Female | 85 to 89 | 27%<br>(17-40%)                | 73%<br>(60-83%)          | 0.81<br>(0.37-1.4)                          | 2.2%<br>(0.27-4.9%)                  | 2.6%<br>(0.34-5.7%)                 | 2<br>(0.26-4.5)       | 15<br>(1.9-33)       |
| Equatorial Guinea | 2000 | Female | 90 to 94 | 28%<br>(18-42%)                | 72%<br>(58-82%)          | 0.79<br>(0.36-1.4)                          | 1.8%<br>(0.1-4.1%)                   | 2.1%<br>(0.097-4.9%)                | 0.56<br>(0.027-1.3)   | 2.8<br>(0.17-6.7)    |
| Equatorial Guinea | 2000 | Female | 95 plus  | 32%<br>(18-50%)                | 68%<br>(50-82%)          | 0.8<br>(0.31-1.6)                           | 1.6%<br>(-0.11-4.3%)                 | 1.8%<br>(-0.23-5%)                  | 0.13<br>(-0.018-0.37) | 0.46<br>(-0.032-1.3) |
| Equatorial Guinea | 2000 | Male   | All Ages | 33%<br>(26-41%)                | 67%<br>(59-74%)          | 1.4<br>(1.1-1.7)                            | 3.9%<br>(2.7-5.5%)                   | 6%<br>(4-8.5%)                      | 200<br>(120-300)      | 8500<br>(5500-12000) |
| Equatorial Guinea | 2000 | Male   | 15 to 19 | 25%<br>(14-40%)                | 75%<br>(60-86%)          | 0.84<br>(0.38-1.6)                          | 3.3%<br>(1.7-5.7%)                   | 4.3%<br>(1.9-7.9%)                  | 1.9<br>(0.77-3.7)     | 170<br>(81-290)      |
| Equatorial Guinea | 2000 | Male   | 20 to 24 | 37%<br>(23-55%)                | 63%<br>(45-77%)          | 1.8<br>(0.89-3)                             | 7.7%<br>(4.5-12%)                    | 9.2%<br>(4.7-15%)                   | 5.2<br>(2.5-9.2)      | 400<br>(220-660)     |
| Equatorial Guinea | 2000 | Male   | 25 to 29 | 45%<br>(28-62%)                | 55%<br>(38-72%)          | 2.5<br>(1.4-4)                              | 9.8%<br>(5.8-14%)                    | 11%<br>(6-17%)                      | 11<br>(6-18)          | 780<br>(440-1200)    |
| Equatorial Guinea | 2000 | Male   | 30 to 34 | 47%<br>(29-66%)                | 53%<br>(34-71%)          | 2.8<br>(1.7-4.1)                            | 11%<br>(6.6-15%)                     | 12%<br>(7.3-18%)                    | 19<br>(11-30)         | 1200<br>(710-1800)   |
| Equatorial Guinea | 2000 | Male   | 35 to 39 | 47%<br>(31-65%)                | 53%<br>(35-69%)          | 2.7<br>(1.6-4.2)                            | 11%<br>(6.8-15%)                     | 13%<br>(7.5-19%)                    | 25<br>(14-39)         | 1300<br>(800-2000)   |
| Equatorial Guinea | 2000 | Male   | 40 to 44 | 49%<br>(32-67%)                | 51%<br>(33-68%)          | 2.8<br>(1.6-4.3)                            | 12%<br>(7.1-17%)                     | 14%<br>(8.2-20%)                    | 27<br>(15-44)         | 1300<br>(750-2000)   |

| Location          | Year | Sex    | Age      | Prevalence of current drinkers | Prevalence of abstainers | Population average of standard drinks daily | Percent of total attributable deaths | Percent of total attributable DALYs | Attributable deaths     | Attributable DALYs   |
|-------------------|------|--------|----------|--------------------------------|--------------------------|---------------------------------------------|--------------------------------------|-------------------------------------|-------------------------|----------------------|
| Equatorial Guinea | 2000 | Male   | 45 to 49 | 52%<br>(34-69%)                | 48%<br>(31-66%)          | 2.9<br>(1.6-4.9)                            | 13%<br>(7.8-18%)                     | 15%<br>(9.3-22%)                    | 24<br>(13-39)           | 1000<br>(570-1600)   |
| Equatorial Guinea | 2000 | Male   | 50 to 54 | 52%<br>(34-70%)                | 48%<br>(30-66%)          | 2.9<br>(1.5-4.9)                            | 13%<br>(7.4-19%)                     | 16%<br>(9.3-24%)                    | 17<br>(8.5-28)          | 630<br>(320-1000)    |
| Equatorial Guinea | 2000 | Male   | 55 to 59 | 50%<br>(33-68%)                | 50%<br>(32-67%)          | 2.6<br>(1.3-4.4)                            | 12%<br>(6.4-18%)                     | 14%<br>(8.1-22%)                    | 15<br>(7.4-26)          | 490<br>(250-820)     |
| Equatorial Guinea | 2000 | Male   | 60 to 64 | 49%<br>(31-68%)                | 51%<br>(32-69%)          | 2.2<br>(1.1-4.1)                            | 9.6%<br>(4.9-15%)                    | 12%<br>(5.8-18%)                    | 15<br>(6.8-27)          | 410<br>(190-730)     |
| Equatorial Guinea | 2000 | Male   | 65 to 69 | 49%<br>(32-67%)                | 51%<br>(33-68%)          | 2<br>(1.1-3.4)                              | 8%<br>(3.9-13%)                      | 9.6%<br>(4.7-16%)                   | 15<br>(7.1-26)          | 340<br>(160-580)     |
| Equatorial Guinea | 2000 | Male   | 70 to 74 | 50%<br>(33-67%)                | 50%<br>(33-67%)          | 1.8<br>(0.93-3.1)                           | 6.3%<br>(2.5-11%)                    | 7.4%<br>(2.9-13%)                   | 13<br>(5-24)            | 230<br>(93-430)      |
| Equatorial Guinea | 2000 | Male   | 75 to 79 | 48%<br>(32-67%)                | 52%<br>(33-68%)          | 1.5<br>(0.72-2.5)                           | 4.8%<br>(1.2-9.2%)                   | 5.6%<br>(1.4-11%)                   | 9<br>(2.3-18)           | 130<br>(33-250)      |
| Equatorial Guinea | 2000 | Male   | 80 to 84 | 43%<br>(26-62%)                | 57%<br>(38-74%)          | 1.1<br>(0.54-2)                             | 3.4%<br>(0.79-6.7%)                  | 3.9%<br>(0.88-7.8%)                 | 4.5<br>(1-9.2)          | 48<br>(11-97)        |
| Equatorial Guinea | 2000 | Male   | 85 to 89 | 38%<br>(23-54%)                | 62%<br>(46-77%)          | 0.86<br>(0.4-1.5)                           | 2.3%<br>(0.58-4.6%)                  | 2.7%<br>(0.58-5.3%)                 | 1.5<br>(0.34-3.1)       | 11<br>(2.8-23)       |
| Equatorial Guinea | 2000 | Male   | 90 to 94 | 37%<br>(23-54%)                | 63%<br>(46-77%)          | 0.74<br>(0.34-1.4)                          | 1.5%<br>(0.14-3.4%)                  | 1.7%<br>(0.045-4%)                  | 0.34<br>(0.0087-0.79)   | 1.8<br>(0.17-4)      |
| Equatorial Guinea | 2000 | Male   | 95 plus  | 40%<br>(22-61%)                | 60%<br>(39-78%)          | 0.69<br>(0.26-1.4)                          | 1.6%<br>(0.087-4.1%)                 | 1.8%<br>(-0.065-4.6%)               | 0.083<br>(-0.0031-0.22) | 0.31<br>(0.017-0.76) |
| Equatorial Guinea | 2005 | Female | All Ages | 23%<br>(19-29%)                | 77%<br>(71-81%)          | 1.3<br>(1-1.6)                              | 2.2%<br>(1.3-3.2%)                   | 3.7%<br>(2.2-5.6%)                  | 110<br>(54-190)         | 3900<br>(2200-6400)  |
| Equatorial Guinea | 2005 | Female | 15 to 19 | 21%<br>(13-33%)                | 79%<br>(67-87%)          | 0.97<br>(0.47-1.8)                          | 1.9%<br>(1.1-3.3%)                   | 2.6%<br>(1.2-4.7%)                  | 1.3<br>(0.48-2.6)       | 130<br>(62-220)      |
| Equatorial Guinea | 2005 | Female | 20 to 24 | 30%<br>(18-45%)                | 70%<br>(55-82%)          | 1.9<br>(0.97-3.2)                           | 3.1%<br>(1.7-5%)                     | 3.4%<br>(1.5-6.2%)                  | 2.3<br>(0.89-4.4)       | 220<br>(110-350)     |
| Equatorial Guinea | 2005 | Female | 25 to 29 | 34%<br>(20-50%)                | 66%<br>(50-80%)          | 2.6<br>(1.4-4.2)                            | 2.9%<br>(1.5-4.8%)                   | 3%<br>(1.2-5.5%)                    | 2.9<br>(1.2-5)          | 220<br>(120-360)     |
| Equatorial Guinea | 2005 | Female | 30 to 34 | 36%<br>(22-53%)                | 64%<br>(47-78%)          | 2.8<br>(1.6-4.4)                            | 3.3%<br>(1.8-5.2%)                   | 3.5%<br>(1.7-6%)                    | 5<br>(2.4-8.6)          | 340<br>(190-550)     |
| Equatorial Guinea | 2005 | Female | 35 to 39 | 38%<br>(24-55%)                | 62%<br>(45-76%)          | 2.8<br>(1.6-4.3)                            | 3.8%<br>(2.1-5.9%)                   | 4.2%<br>(2.1-6.9%)                  | 7.7<br>(3.5-13)         | 450<br>(240-730)     |
| Equatorial Guinea | 2005 | Female | 40 to 44 | 38%<br>(24-56%)                | 62%<br>(44-76%)          | 2.7<br>(1.5-4.3)                            | 4.5%<br>(2.6-6.7%)                   | 5.3%<br>(2.9-8%)                    | 10<br>(4.7-18)          | 520<br>(270-870)     |
| Equatorial Guinea | 2005 | Female | 45 to 49 | 37%<br>(23-54%)                | 63%<br>(46-77%)          | 2.6<br>(1.4-4.3)                            | 5.7%<br>(3.3-8.8%)                   | 7%<br>(3.8-11%)                     | 12<br>(5.5-22)          | 520<br>(260-930)     |
| Equatorial Guinea | 2005 | Female | 50 to 54 | 34%<br>(20-51%)                | 66%<br>(49-80%)          | 2.4<br>(1.2-3.9)                            | 6.4%<br>(3.6-10%)                    | 8%<br>(4.5-13%)                     | 9.9<br>(4.2-19)         | 380<br>(180-710)     |
| Equatorial Guinea | 2005 | Female | 55 to 59 | 32%<br>(19-49%)                | 68%<br>(51-81%)          | 2.2<br>(1.1-3.9)                            | 7%<br>(3.7-11%)                      | 8.9%<br>(4.8-14%)                   | 7.4<br>(3.2-14)         | 240<br>(110-460)     |
| Equatorial Guinea | 2005 | Female | 60 to 64 | 31%<br>(19-48%)                | 69%<br>(52-81%)          | 2.1<br>(0.98-3.8)                           | 6.5%<br>(3.2-10%)                    | 8.1%<br>(4-13%)                     | 7.7<br>(3.1-16)         | 220<br>(87-420)      |

| Location          | Year | Sex    | Age      | Prevalence of current drinkers | Prevalence of abstainers | Population average of standard drinks daily | Percent of total attributable deaths | Percent of total attributable DALYs | Attributable deaths | Attributable DALYs   |
|-------------------|------|--------|----------|--------------------------------|--------------------------|---------------------------------------------|--------------------------------------|-------------------------------------|---------------------|----------------------|
| Equatorial Guinea | 2005 | Female | 65 to 69 | 33%<br>(22-48%)                | 67%<br>(52-78%)          | 2<br>(1.1-3.4)                              | 6.8%<br>(3.3-11%)                    | 8.3%<br>(4.3-13%)                   | 11<br>(4.3-21)      | 240<br>(100-460)     |
| Equatorial Guinea | 2005 | Female | 70 to 74 | 33%<br>(21-48%)                | 67%<br>(52-79%)          | 1.8<br>(0.91-3.2)                           | 6.1%<br>(2.5-11%)                    | 7.4%<br>(3-13%)                     | 12<br>(4.5-24)      | 220<br>(81-430)      |
| Equatorial Guinea | 2005 | Female | 75 to 79 | 30%<br>(19-46%)                | 70%<br>(54-81%)          | 1.5<br>(0.69-2.8)                           | 4.8%<br>(1.4-9.2%)                   | 5.8%<br>(1.7-11%)                   | 10<br>(3-21)        | 140<br>(42-300)      |
| Equatorial Guinea | 2005 | Female | 80 to 84 | 27%<br>(16-43%)                | 73%<br>(57-84%)          | 1.2<br>(0.59-2.1)                           | 3.8%<br>(1.2-7.7%)                   | 4.6%<br>(1.4-9%)                    | 6.9<br>(2-14)       | 72<br>(21-150)       |
| Equatorial Guinea | 2005 | Female | 85 to 89 | 26%<br>(15-39%)                | 74%<br>(61-85%)          | 1.1<br>(0.5-1.9)                            | 3%<br>(0.77-5.9%)                    | 3.5%<br>(0.89-7.1%)                 | 3<br>(0.77-6.1)     | 22<br>(5.9-46)       |
| Equatorial Guinea | 2005 | Female | 90 to 94 | 27%<br>(17-40%)                | 73%<br>(60-83%)          | 1.1<br>(0.48-2)                             | 2.4%<br>(0.52-5.2%)                  | 2.9%<br>(0.58-6.3%)                 | 0.82<br>(0.16-1.8)  | 4.2<br>(0.88-9.4)    |
| Equatorial Guinea | 2005 | Female | 95 plus  | 31%<br>(17-48%)                | 69%<br>(52-83%)          | 1.1<br>(0.4-2.1)                            | 2.3%<br>(0.23-5.7%)                  | 2.7%<br>(0.2-6.7%)                  | 0.19<br>(0.015-0.5) | 0.68<br>(0.065-1.7)  |
| Equatorial Guinea | 2005 | Male   | All Ages | 33%<br>(26-40%)                | 67%<br>(60-74%)          | 1.9<br>(1.5-2.3)                            | 4%<br>(2.8-5.6%)                     | 6.1%<br>(4.1-8.4%)                  | 200<br>(120-300)    | 8200<br>(5300-12000) |
| Equatorial Guinea | 2005 | Male   | 15 to 19 | 24%<br>(14-39%)                | 76%<br>(61-86%)          | 1.1<br>(0.55-2.1)                           | 3.6%<br>(2-6.1%)                     | 4.8%<br>(2.3-8.9%)                  | 2.6<br>(1.2-5.2)    | 240<br>(130-430)     |
| Equatorial Guinea | 2005 | Male   | 20 to 24 | 37%<br>(22-54%)                | 63%<br>(46-78%)          | 2.4<br>(1.2-3.9)                            | 8%<br>(4.8-12%)                      | 9.6%<br>(5.1-16%)                   | 6.7<br>(3.2-12)     | 530<br>(300-880)     |
| Equatorial Guinea | 2005 | Male   | 25 to 29 | 44%<br>(27-62%)                | 56%<br>(38-73%)          | 3.4<br>(1.9-5.4)                            | 8.2%<br>(4.7-12%)                    | 9.3%<br>(4.6-15%)                   | 8.6<br>(4.4-14)     | 610<br>(360-940)     |
| Equatorial Guinea | 2005 | Male   | 30 to 34 | 46%<br>(29-65%)                | 54%<br>(35-71%)          | 3.8<br>(2.2-5.7)                            | 7.8%<br>(4.7-11%)                    | 8.6%<br>(4.7-13%)                   | 13<br>(7.2-21)      | 810<br>(500-1300)    |
| Equatorial Guinea | 2005 | Male   | 35 to 39 | 46%<br>(29-63%)                | 54%<br>(37-71%)          | 3.7<br>(2.1-5.7)                            | 8%<br>(4.9-12%)                      | 9%<br>(5.2-14%)                     | 18<br>(10-30)       | 1000<br>(620-1600)   |
| Equatorial Guinea | 2005 | Male   | 40 to 44 | 48%<br>(32-66%)                | 52%<br>(34-68%)          | 3.7<br>(2.1-5.7)                            | 8.7%<br>(5.4-12%)                    | 10%<br>(6.1-15%)                    | 24<br>(13-40)       | 1200<br>(690-1900)   |
| Equatorial Guinea | 2005 | Male   | 45 to 49 | 51%<br>(32-69%)                | 49%<br>(31-68%)          | 4<br>(2.2-6.3)                              | 10%<br>(6.7-15%)                     | 12%<br>(7.9-17%)                    | 27<br>(15-44)       | 1200<br>(690-1900)   |
| Equatorial Guinea | 2005 | Male   | 50 to 54 | 52%<br>(33-69%)                | 48%<br>(31-67%)          | 3.9<br>(2.1-6.5)                            | 11%<br>(7.3-16%)                     | 14%<br>(8.9-20%)                    | 23<br>(12-37)       | 880<br>(490-1400)    |
| Equatorial Guinea | 2005 | Male   | 55 to 59 | 50%<br>(32-68%)                | 50%<br>(32-68%)          | 3.5<br>(1.8-5.8)                            | 11%<br>(6.9-16%)                     | 14%<br>(8.6-20%)                    | 15<br>(7.9-25)      | 500<br>(270-810)     |
| Equatorial Guinea | 2005 | Male   | 60 to 64 | 48%<br>(30-68%)                | 52%<br>(32-70%)          | 3.1<br>(1.5-5.5)                            | 9.8%<br>(5.5-15%)                    | 12%<br>(6.8-18%)                    | 13<br>(6.6-23)      | 380<br>(190-640)     |
| Equatorial Guinea | 2005 | Male   | 65 to 69 | 49%<br>(32-65%)                | 51%<br>(35-68%)          | 2.7<br>(1.5-4.6)                            | 8.7%<br>(4.9-13%)                    | 11%<br>(6-16%)                      | 14<br>(6.7-23)      | 320<br>(160-530)     |
| Equatorial Guinea | 2005 | Male   | 70 to 74 | 49%<br>(32-66%)                | 51%<br>(34-68%)          | 2.4<br>(1.3-4)                              | 7.3%<br>(3.4-12%)                    | 8.8%<br>(4-14%)                     | 13<br>(5.6-23)      | 250<br>(110-430)     |
| Equatorial Guinea | 2005 | Male   | 75 to 79 | 48%<br>(31-66%)                | 52%<br>(34-69%)          | 2<br>(0.97-3.5)                             | 5.8%<br>(2.2-10%)                    | 6.9%<br>(2.6-12%)                   | 9.9<br>(3.5-19)     | 140<br>(51-270)      |
| Equatorial Guinea | 2005 | Male   | 80 to 84 | 43%<br>(25-61%)                | 57%<br>(39-75%)          | 1.6<br>(0.74-2.6)                           | 4.3%<br>(1.6-8%)                     | 5.1%<br>(1.8-9.2%)                  | 5.6<br>(1.9-11)     | 60<br>(21-120)       |

| Location          | Year | Sex    | Age      | Prevalence of current drinkers | Prevalence of abstainers | Population average of standard drinks daily | Percent of total attributable deaths | Percent of total attributable DALYs | Attributable deaths  | Attributable DALYs   |
|-------------------|------|--------|----------|--------------------------------|--------------------------|---------------------------------------------|--------------------------------------|-------------------------------------|----------------------|----------------------|
| Equatorial Guinea | 2005 | Male   | 85 to 89 | 37%<br>(22-54%)                | 63%<br>(46-78%)          | 1.2<br>(0.56-2.1)                           | 3%<br>(1.1-5.5%)                     | 3.5%<br>(1.2-6.4%)                  | 2.1<br>(0.71-4)      | 16<br>(5.8-30)       |
| Equatorial Guinea | 2005 | Male   | 90 to 94 | 37%<br>(22-53%)                | 63%<br>(47-78%)          | 1<br>(0.45-1.9)                             | 2.1%<br>(0.59-4.4%)                  | 2.4%<br>(0.56-5.1%)                 | 0.51<br>(0.12-1.1)   | 2.8<br>(0.83-6)      |
| Equatorial Guinea | 2005 | Male   | 95 plus  | 40%<br>(21-61%)                | 60%<br>(39-79%)          | 0.96<br>(0.36-1.9)                          | 2.2%<br>(0.48-5.1%)                  | 2.4%<br>(0.35-5.9%)                 | 0.12<br>(0.018-0.31) | 0.45<br>(0.1-1.1)    |
| Equatorial Guinea | 2010 | Female | All Ages | 23%<br>(19-29%)                | 77%<br>(71-81%)          | 1.6<br>(1.1-2.1)                            | 2.3%<br>(1.4-3.5%)                   | 4%<br>(2.3-6%)                      | 120<br>(60-200)      | 4300<br>(2400-6900)  |
| Equatorial Guinea | 2010 | Female | 15 to 19 | 21%<br>(13-33%)                | 79%<br>(67-87%)          | 1.1<br>(0.56-2.1)                           | 1.9%<br>(1.1-3.2%)                   | 2.5%<br>(1.2-4.7%)                  | 1.3<br>(0.48-2.6)    | 130<br>(66-240)      |
| Equatorial Guinea | 2010 | Female | 20 to 24 | 30%<br>(18-44%)                | 70%<br>(56-82%)          | 2.2<br>(1.1-3.9)                            | 3.3%<br>(1.8-5.2%)                   | 3.6%<br>(1.5-6.5%)                  | 2.9<br>(1.2-5.4)     | 280<br>(150-460)     |
| Equatorial Guinea | 2010 | Female | 25 to 29 | 34%<br>(20-51%)                | 66%<br>(49-80%)          | 3<br>(1.6-4.9)                              | 2.8%<br>(1.4-4.7%)                   | 2.9%<br>(1.1-5.4%)                  | 3.4<br>(1.5-6.2)     | 280<br>(150-460)     |
| Equatorial Guinea | 2010 | Female | 30 to 34 | 36%<br>(22-53%)                | 64%<br>(47-78%)          | 3.4<br>(1.8-5.5)                            | 2.8%<br>(1.5-4.5%)                   | 2.8%<br>(1.3-5%)                    | 3.8<br>(1.7-6.8)     | 270<br>(150-430)     |
| Equatorial Guinea | 2010 | Female | 35 to 39 | 38%<br>(24-56%)                | 62%<br>(44-76%)          | 3.3<br>(1.8-5.6)                            | 3.1%<br>(1.7-4.9%)                   | 3.3%<br>(1.6-5.8%)                  | 5.7<br>(2.5-9.7)     | 340<br>(180-550)     |
| Equatorial Guinea | 2010 | Female | 40 to 44 | 38%<br>(23-56%)                | 62%<br>(44-77%)          | 3.2<br>(1.7-5.3)                            | 3.8%<br>(2.2-5.9%)                   | 4.3%<br>(2.4-7%)                    | 9.1<br>(4.3-17)      | 480<br>(250-820)     |
| Equatorial Guinea | 2010 | Female | 45 to 49 | 37%<br>(21-54%)                | 63%<br>(46-79%)          | 3.1<br>(1.6-5.2)                            | 5.1%<br>(3-7.8%)                     | 6.1%<br>(3.4-9.4%)                  | 13<br>(6-24)         | 590<br>(300-1000)    |
| Equatorial Guinea | 2010 | Female | 50 to 54 | 34%<br>(20-53%)                | 66%<br>(47-80%)          | 2.8<br>(1.4-4.7)                            | 6.1%<br>(3.5-9.4%)                   | 7.6%<br>(4.4-12%)                   | 14<br>(6.5-27)       | 550<br>(260-1000)    |
| Equatorial Guinea | 2010 | Female | 55 to 59 | 31%<br>(19-49%)                | 69%<br>(51-81%)          | 2.6<br>(1.3-4.5)                            | 7.1%<br>(3.9-11%)                    | 9%<br>(5-14%)                       | 12<br>(5.3-23)       | 410<br>(180-750)     |
| Equatorial Guinea | 2010 | Female | 60 to 64 | 31%<br>(19-48%)                | 69%<br>(52-81%)          | 2.5<br>(1.1-4.6)                            | 6.7%<br>(3.4-11%)                    | 8.4%<br>(4.4-13%)                   | 8.1<br>(3.4-16)      | 230<br>(100-440)     |
| Equatorial Guinea | 2010 | Female | 65 to 69 | 33%<br>(21-47%)                | 67%<br>(53-79%)          | 2.4<br>(1.2-4.1)                            | 7.2%<br>(3.6-12%)                    | 9%<br>(4.7-14%)                     | 10<br>(4.3-19)       | 230<br>(100-440)     |
| Equatorial Guinea | 2010 | Female | 70 to 74 | 32%<br>(21-48%)                | 68%<br>(52-79%)          | 2.1<br>(1-3.9)                              | 6.7%<br>(2.9-12%)                    | 8.2%<br>(3.6-14%)                   | 11<br>(4.5-22)       | 210<br>(84-400)      |
| Equatorial Guinea | 2010 | Female | 75 to 79 | 30%<br>(19-45%)                | 70%<br>(55-81%)          | 1.8<br>(0.77-3.2)                           | 5.5%<br>(1.8-10%)                    | 6.7%<br>(2.2-12%)                   | 11<br>(3.4-22)       | 150<br>(48-310)      |
| Equatorial Guinea | 2010 | Female | 80 to 84 | 27%<br>(16-42%)                | 73%<br>(58-84%)          | 1.4<br>(0.66-2.5)                           | 4.5%<br>(1.5-8.5%)                   | 5.4%<br>(1.9-10%)                   | 7.8<br>(2.6-16)      | 83<br>(28-170)       |
| Equatorial Guinea | 2010 | Female | 85 to 89 | 26%<br>(15-39%)                | 74%<br>(61-85%)          | 1.3<br>(0.59-2.3)                           | 3.6%<br>(1.1-7.4%)                   | 4.3%<br>(1.3-8.7%)                  | 4.1<br>(1.2-8.9)     | 31<br>(9.2-67)       |
| Equatorial Guinea | 2010 | Female | 90 to 94 | 27%<br>(17-40%)                | 73%<br>(60-83%)          | 1.3<br>(0.57-2.4)                           | 3.1%<br>(0.79-6.6%)                  | 3.6%<br>(0.91-7.9%)                 | 1.3<br>(0.34-3)      | 7<br>(1.8-15)        |
| Equatorial Guinea | 2010 | Female | 95 plus  | 31%<br>(17-50%)                | 69%<br>(50-83%)          | 1.3<br>(0.49-2.7)                           | 2.9%<br>(0.53-7%)                    | 3.4%<br>(0.55-8.5%)                 | 0.31<br>(0.05-0.75)  | 1.1<br>(0.19-2.6)    |
| Equatorial Guinea | 2010 | Male   | All Ages | 32%<br>(26-41%)                | 68%<br>(59-74%)          | 2.2<br>(1.6-2.9)                            | 4.2%<br>(2.9-5.9%)                   | 6.4%<br>(4.3-9.1%)                  | 210<br>(120-330)     | 8400<br>(5300-13000) |

| Location          | Year | Sex    | Age      | Prevalence of current drinkers | Prevalence of abstainers | Population average of standard drinks daily | Percent of total attributable deaths | Percent of total attributable DALYs | Attributable deaths  | Attributable DALYs  |
|-------------------|------|--------|----------|--------------------------------|--------------------------|---------------------------------------------|--------------------------------------|-------------------------------------|----------------------|---------------------|
| Equatorial Guinea | 2010 | Male   | 15 to 19 | 24%<br>(14-38%)                | 76%<br>(62-86%)          | 1.3<br>(0.64-2.5)                           | 3.4%<br>(1.9-5.5%)                   | 4.4%<br>(2.1-8%)                    | 2.4<br>(1-4.8)       | 230<br>(120-410)    |
| Equatorial Guinea | 2010 | Male   | 20 to 24 | 36%<br>(22-54%)                | 64%<br>(46-78%)          | 2.8<br>(1.4-4.8)                            | 8%<br>(4.9-12%)                      | 9.9%<br>(5.2-16%)                   | 7.3<br>(3.5-13)      | 620<br>(350-1000)   |
| Equatorial Guinea | 2010 | Male   | 25 to 29 | 44%<br>(27-61%)                | 56%<br>(39-73%)          | 4<br>(2.2-6.4)                              | 7.9%<br>(4.6-12%)                    | 9%<br>(4.5-15%)                     | 9.2<br>(5.1-16)      | 690<br>(420-1100)   |
| Equatorial Guinea | 2010 | Male   | 30 to 34 | 45%<br>(28-64%)                | 55%<br>(36-72%)          | 4.4<br>(2.5-7)                              | 6.8%<br>(4.2-10%)                    | 7.4%<br>(4-12%)                     | 9.2<br>(5-16)        | 620<br>(380-950)    |
| Equatorial Guinea | 2010 | Male   | 35 to 39 | 46%<br>(29-64%)                | 54%<br>(36-71%)          | 4.3<br>(2.4-7)                              | 6.7%<br>(4.2-10%)                    | 7.4%<br>(4.2-12%)                   | 13<br>(7.1-22)       | 750<br>(450-1200)   |
| Equatorial Guinea | 2010 | Male   | 40 to 44 | 47%<br>(31-66%)                | 53%<br>(34-69%)          | 4.4<br>(2.5-7)                              | 7.6%<br>(5-11%)                      | 8.7%<br>(5.4-13%)                   | 20<br>(11-33)        | 1000<br>(590-1600)  |
| Equatorial Guinea | 2010 | Male   | 45 to 49 | 51%<br>(33-68%)                | 49%<br>(32-67%)          | 4.7<br>(2.5-7.6)                            | 9.2%<br>(6-13%)                      | 11%<br>(7-16%)                      | 27<br>(15-44)        | 1200<br>(710-1900)  |
| Equatorial Guinea | 2010 | Male   | 50 to 54 | 51%<br>(33-69%)                | 49%<br>(31-67%)          | 4.6<br>(2.4-7.6)                            | 11%<br>(7.2-15%)                     | 14%<br>(9-19%)                      | 29<br>(16-49)        | 1100<br>(660-1800)  |
| Equatorial Guinea | 2010 | Male   | 55 to 59 | 49%<br>(31-68%)                | 51%<br>(32-69%)          | 4.1<br>(2.1-6.8)                            | 11%<br>(7.1-16%)                     | 14%<br>(9.2-20%)                    | 24<br>(13-39)        | 800<br>(440-1300)   |
| Equatorial Guinea | 2010 | Male   | 60 to 64 | 47%<br>(29-66%)                | 53%<br>(34-71%)          | 3.6<br>(1.7-6.5)                            | 10%<br>(6.1-15%)                     | 13%<br>(7.7-18%)                    | 16<br>(8.3-27)       | 460<br>(250-740)    |
| Equatorial Guinea | 2010 | Male   | 65 to 69 | 48%<br>(31-66%)                | 52%<br>(34-69%)          | 3.2<br>(1.7-5.5)                            | 9.5%<br>(5.5-14%)                    | 12%<br>(6.8-17%)                    | 15<br>(7.2-25)       | 340<br>(180-580)    |
| Equatorial Guinea | 2010 | Male   | 70 to 74 | 49%<br>(32-65%)                | 51%<br>(35-68%)          | 2.8<br>(1.4-4.9)                            | 8.1%<br>(3.9-13%)                    | 9.9%<br>(4.9-16%)                   | 14<br>(6.1-24)       | 260<br>(120-450)    |
| Equatorial Guinea | 2010 | Male   | 75 to 79 | 47%<br>(30-65%)                | 53%<br>(35-70%)          | 2.3<br>(1.1-4.2)                            | 6.5%<br>(2.6-11%)                    | 7.8%<br>(3-14%)                     | 11<br>(4-21)         | 160<br>(61-300)     |
| Equatorial Guinea | 2010 | Male   | 80 to 84 | 42%<br>(25-60%)                | 58%<br>(40-75%)          | 1.8<br>(0.86-3.2)                           | 5%<br>(1.8-9.4%)                     | 5.8%<br>(2.2-11%)                   | 6.7<br>(2.4-13)      | 72<br>(26-140)      |
| Equatorial Guinea | 2010 | Male   | 85 to 89 | 36%<br>(22-53%)                | 64%<br>(47-78%)          | 1.4<br>(0.63-2.4)                           | 3.6%<br>(1.3-6.8%)                   | 4.1%<br>(1.5-7.9%)                  | 2.9<br>(0.98-5.7)    | 22<br>(7.9-44)      |
| Equatorial Guinea | 2010 | Male   | 90 to 94 | 36%<br>(22-53%)                | 64%<br>(47-78%)          | 1.2<br>(0.51-2.3)                           | 2.6%<br>(0.79-5.7%)                  | 2.9%<br>(0.77-6.7%)                 | 0.79<br>(0.22-1.8)   | 4.3<br>(1.3-9.7)    |
| Equatorial Guinea | 2010 | Male   | 95 plus  | 39%<br>(20-60%)                | 61%<br>(40-80%)          | 1.1<br>(0.42-2.3)                           | 2.6%<br>(0.7-6.1%)                   | 2.8%<br>(0.62-6.9%)                 | 0.18<br>(0.038-0.44) | 0.66<br>(0.18-1.6)  |
| Equatorial Guinea | 2016 | Female | All Ages | 23%<br>(19-29%)                | 77%<br>(71-81%)          | 1.7<br>(1-2.8)                              | 2.6%<br>(1.5-4%)                     | 4.4%<br>(2.3-6.8%)                  | 120<br>(51-210)      | 4300<br>(2200-7100) |
| Equatorial Guinea | 2016 | Female | 15 to 19 | 21%<br>(13-32%)                | 79%<br>(68-87%)          | 1.2<br>(0.52-2.5)                           | 1.7%<br>(0.88-3%)                    | 2%<br>(0.76-4.1%)                   | 1<br>(0.34-2.3)      | 120<br>(60-220)     |
| Equatorial Guinea | 2016 | Female | 20 to 24 | 29%<br>(18-44%)                | 71%<br>(56-82%)          | 2.4<br>(1.1-4.6)                            | 3.3%<br>(1.9-5.1%)                   | 3.8%<br>(1.6-6.9%)                  | 2.3<br>(0.88-4.7)    | 260<br>(140-430)    |
| Equatorial Guinea | 2016 | Female | 25 to 29 | 33%<br>(19-50%)                | 67%<br>(50-81%)          | 3.2<br>(1.5-5.7)                            | 3.2%<br>(1.7-5.1%)                   | 3.4%<br>(1.2-6.6%)                  | 3.5<br>(1.4-6.7)     | 320<br>(170-520)    |
| Equatorial Guinea | 2016 | Female | 30 to 34 | 36%<br>(21-52%)                | 64%<br>(48-79%)          | 3.6<br>(1.7-6.6)                            | 3%<br>(1.6-4.9%)                     | 3.2%<br>(1.4-5.8%)                  | 4.1<br>(1.7-7.4)     | 310<br>(170-510)    |

| Location          | Year | Sex    | Age      | Prevalence of current drinkers | Prevalence of abstainers | Population average of standard drinks daily | Percent of total attributable deaths | Percent of total attributable DALYs | Attributable deaths | Attributable DALYs   |
|-------------------|------|--------|----------|--------------------------------|--------------------------|---------------------------------------------|--------------------------------------|-------------------------------------|---------------------|----------------------|
| Equatorial Guinea | 2016 | Female | 35 to 39 | 37%<br>(23-54%)                | 63%<br>(46-77%)          | 3.6<br>(1.6-6.9)                            | 3%<br>(1.6-4.8%)                     | 3.3%<br>(1.4-5.9%)                  | 3.9<br>(1.6-7.1)    | 250<br>(130-420)     |
| Equatorial Guinea | 2016 | Female | 40 to 44 | 37%<br>(23-55%)                | 63%<br>(45-77%)          | 3.5<br>(1.5-6.6)                            | 3.6%<br>(2-5.7%)                     | 4.2%<br>(2.1-6.9%)                  | 5.9<br>(2.3-11)     | 320<br>(150-540)     |
| Equatorial Guinea | 2016 | Female | 45 to 49 | 36%<br>(21-54%)                | 64%<br>(46-79%)          | 3.3<br>(1.5-6.4)                            | 4.9%<br>(2.7-7.7%)                   | 6.2%<br>(3.1-9.8%)                  | 10<br>(4.3-19)      | 490<br>(220-830)     |
| Equatorial Guinea | 2016 | Female | 50 to 54 | 34%<br>(20-51%)                | 66%<br>(49-80%)          | 3<br>(1.4-5.6)                              | 5.9%<br>(3.1-9.1%)                   | 7.5%<br>(4.1-12%)                   | 14<br>(6-27)        | 580<br>(260-1000)    |
| Equatorial Guinea | 2016 | Female | 55 to 59 | 31%<br>(19-48%)                | 69%<br>(52-81%)          | 2.8<br>(1.2-5.2)                            | 6.8%<br>(3.6-10%)                    | 9%<br>(5-14%)                       | 17<br>(6.6-32)      | 560<br>(240-1100)    |
| Equatorial Guinea | 2016 | Female | 60 to 64 | 31%<br>(19-49%)                | 69%<br>(51-81%)          | 2.6<br>(1.1-5.3)                            | 6.6%<br>(3.2-10%)                    | 8.5%<br>(4.3-13%)                   | 13<br>(5.1-26)      | 390<br>(160-710)     |
| Equatorial Guinea | 2016 | Female | 65 to 69 | 33%<br>(21-48%)                | 67%<br>(52-79%)          | 2.6<br>(1.2-5.1)                            | 6.8%<br>(3.3-11%)                    | 8.7%<br>(4.2-14%)                   | 10<br>(3.9-20)      | 240<br>(95-450)      |
| Equatorial Guinea | 2016 | Female | 70 to 74 | 32%<br>(21-48%)                | 68%<br>(52-79%)          | 2.3<br>(1-4.7)                              | 6.4%<br>(2.6-11%)                    | 8%<br>(3.4-13%)                     | 9.5<br>(3.4-19)     | 180<br>(64-350)      |
| Equatorial Guinea | 2016 | Female | 75 to 79 | 30%<br>(18-45%)                | 70%<br>(55-82%)          | 1.9<br>(0.74-4.1)                           | 5.4%<br>(1.6-9.8%)                   | 6.6%<br>(2.1-12%)                   | 9<br>(2.5-18)       | 130<br>(38-260)      |
| Equatorial Guinea | 2016 | Female | 80 to 84 | 27%<br>(16-42%)                | 73%<br>(58-84%)          | 1.6<br>(0.64-3.2)                           | 4.6%<br>(1.4-9.1%)                   | 5.5%<br>(1.7-11%)                   | 7.4<br>(2.1-16)     | 79<br>(23-170)       |
| Equatorial Guinea | 2016 | Female | 85 to 89 | 26%<br>(15-39%)                | 74%<br>(61-85%)          | 1.4<br>(0.58-2.9)                           | 3.8%<br>(1.1-7.9%)                   | 4.5%<br>(1.2-9.4%)                  | 4.7<br>(1.2-11)     | 36<br>(9.2-79)       |
| Equatorial Guinea | 2016 | Female | 90 to 94 | 27%<br>(17-41%)                | 73%<br>(59-83%)          | 1.4<br>(0.53-2.8)                           | 3.3%<br>(0.72-7.1%)                  | 3.9%<br>(0.84-8.4%)                 | 1.9<br>(0.42-4.3)   | 9.8<br>(2.3-22)      |
| Equatorial Guinea | 2016 | Female | 95 plus  | 31%<br>(17-49%)                | 69%<br>(51-83%)          | 1.4<br>(0.48-3)                             | 3.1%<br>(0.5-7.5%)                   | 3.7%<br>(0.54-9.1%)                 | 0.51<br>(0.075-1.2) | 1.8<br>(0.28-4.2)    |
| Equatorial Guinea | 2016 | Male   | All Ages | 32%<br>(26-40%)                | 68%<br>(60-74%)          | 2.4<br>(1.4-3.9)                            | 4.7%<br>(3-6.8%)                     | 7.1%<br>(4.5-10%)                   | 230<br>(120-380)    | 9100<br>(5600-14000) |
| Equatorial Guinea | 2016 | Male   | 15 to 19 | 24%<br>(14-38%)                | 76%<br>(62-86%)          | 1.4<br>(0.58-2.9)                           | 3%<br>(1.6-5.1%)                     | 3.5%<br>(1.5-6.8%)                  | 2.4<br>(0.89-5.1)   | 240<br>(120-440)     |
| Equatorial Guinea | 2016 | Male   | 20 to 24 | 36%<br>(22-52%)                | 64%<br>(48-78%)          | 3<br>(1.3-5.6)                              | 7.9%<br>(4.8-12%)                    | 9.7%<br>(4.9-16%)                   | 7.3<br>(3.2-14)     | 650<br>(350-1100)    |
| Equatorial Guinea | 2016 | Male   | 25 to 29 | 43%<br>(26-61%)                | 57%<br>(39-74%)          | 4.2<br>(2-7.4)                              | 8.3%<br>(4.9-12%)                    | 9.7%<br>(4.8-16%)                   | 11<br>(5.6-20)      | 860<br>(520-1400)    |
| Equatorial Guinea | 2016 | Male   | 30 to 34 | 45%<br>(27-64%)                | 55%<br>(36-73%)          | 4.7<br>(2.3-8.4)                            | 7.1%<br>(4.2-11%)                    | 7.9%<br>(4-13%)                     | 11<br>(6.1-19)      | 780<br>(480-1200)    |
| Equatorial Guinea | 2016 | Male   | 35 to 39 | 45%<br>(29-64%)                | 55%<br>(36-71%)          | 4.7<br>(2.1-8.5)                            | 6.5%<br>(3.9-9.8%)                   | 7.2%<br>(3.8-12%)                   | 10<br>(5.4-18)      | 640<br>(380-1000)    |
| Equatorial Guinea | 2016 | Male   | 40 to 44 | 47%<br>(31-66%)                | 53%<br>(34-69%)          | 4.8<br>(2.2-8.7)                            | 7.1%<br>(4.5-10%)                    | 8.1%<br>(4.9-12%)                   | 14<br>(7.5-25)      | 760<br>(430-1200)    |
| Equatorial Guinea | 2016 | Male   | 45 to 49 | 50%<br>(32-68%)                | 50%<br>(32-68%)          | 5<br>(2.3-9.4)                              | 8.8%<br>(5.7-13%)                    | 11%<br>(6.7-16%)                    | 23<br>(12-39)       | 1100<br>(600-1700)   |
| Equatorial Guinea | 2016 | Male   | 50 to 54 | 51%<br>(32-69%)                | 49%<br>(31-68%)          | 4.9<br>(2.2-9)                              | 10%<br>(6.6-14%)                     | 13%<br>(8.4-18%)                    | 31<br>(16-52)       | 1200<br>(680-2000)   |

| Location          | Year | Sex    | Age      | Prevalence of current drinkers | Prevalence of abstainers | Population average of standard drinks daily | Percent of total attributable deaths | Percent of total attributable DALYs | Attributable deaths  | Attributable DALYs    |
|-------------------|------|--------|----------|--------------------------------|--------------------------|---------------------------------------------|--------------------------------------|-------------------------------------|----------------------|-----------------------|
| Equatorial Guinea | 2016 | Male   | 55 to 59 | 49%<br>(31-67%)                | 51%<br>(33-69%)          | 4.3<br>(1.9-8.3)                            | 11%<br>(6.9-15%)                     | 14%<br>(9.1-19%)                    | 33<br>(17-55)        | 1100<br>(590-1800)    |
| Equatorial Guinea | 2016 | Male   | 60 to 64 | 47%<br>(30-67%)                | 53%<br>(33-70%)          | 3.8<br>(1.7-7.6)                            | 10%<br>(5.8-14%)                     | 13%<br>(7.6-18%)                    | 27<br>(13-47)        | 780<br>(390-1300)     |
| Equatorial Guinea | 2016 | Male   | 65 to 69 | 48%<br>(31-66%)                | 52%<br>(34-69%)          | 3.4<br>(1.6-6.4)                            | 9.3%<br>(5-14%)                      | 12%<br>(6.3-17%)                    | 19<br>(8.4-32)       | 440<br>(210-740)      |
| Equatorial Guinea | 2016 | Male   | 70 to 74 | 49%<br>(31-66%)                | 51%<br>(34-69%)          | 3<br>(1.3-5.8)                              | 8%<br>(3.6-13%)                      | 9.8%<br>(4.5-16%)                   | 14<br>(5.6-25)       | 270<br>(110-480)      |
| Equatorial Guinea | 2016 | Male   | 75 to 79 | 47%<br>(30-65%)                | 53%<br>(35-70%)          | 2.5<br>(1-5.1)                              | 6.6%<br>(2.4-12%)                    | 8%<br>(2.8-14%)                     | 11<br>(3.8-22)       | 170<br>(57-320)       |
| Equatorial Guinea | 2016 | Male   | 80 to 84 | 42%<br>(25-59%)                | 58%<br>(41-75%)          | 1.9<br>(0.8-3.8)                            | 5.1%<br>(1.7-9.8%)                   | 6.1%<br>(2-12%)                     | 7.3<br>(2.3-15)      | 79<br>(26-160)        |
| Equatorial Guinea | 2016 | Male   | 85 to 89 | 36%<br>(21-52%)                | 64%<br>(48-79%)          | 1.5<br>(0.61-2.9)                           | 3.8%<br>(1.2-7.7%)                   | 4.4%<br>(1.4-9.1%)                  | 3.6<br>(1.1-7.7)     | 28<br>(9.1-60)        |
| Equatorial Guinea | 2016 | Male   | 90 to 94 | 35%<br>(21-52%)                | 65%<br>(48-79%)          | 1.2<br>(0.51-2.5)                           | 2.7%<br>(0.71-6.1%)                  | 3.1%<br>(0.69-7.1%)                 | 1.1<br>(0.26-2.7)    | 6.1<br>(1.6-14)       |
| Equatorial Guinea | 2016 | Male   | 95 plus  | 38%<br>(20-59%)                | 62%<br>(41-80%)          | 1.2<br>(0.4-2.5)                            | 2.6%<br>(0.57-6.3%)                  | 2.9%<br>(0.47-7.2%)                 | 0.26<br>(0.043-0.67) | 0.99<br>(0.22-2.4)    |
| Gabon             | 1990 | Female | All Ages | 24%<br>(20-30%)                | 76%<br>(70-80%)          | 1.8<br>(1.5-2.2)                            | 4.7%<br>(3.5-6.1%)                   | 8.1%<br>(5.7-11%)                   | 430<br>(300-590)     | 12000<br>(9100-16000) |
| Gabon             | 1990 | Female | 15 to 19 | 22%<br>(14-35%)                | 78%<br>(65-86%)          | 1.4<br>(0.7-2.4)                            | 2.7%<br>(1.4-4.5%)                   | 3.9%<br>(1.6-7.1%)                  | 2.4<br>(0.96-4.5)    | 230<br>(120-390)      |
| Gabon             | 1990 | Female | 20 to 24 | 31%<br>(19-46%)                | 69%<br>(54-81%)          | 2.7<br>(1.5-4.3)                            | 4.7%<br>(2.8-7%)                     | 6.2%<br>(3.1-9.8%)                  | 4.8<br>(2.4-7.7)     | 430<br>(250-630)      |
| Gabon             | 1990 | Female | 25 to 29 | 35%<br>(21-52%)                | 65%<br>(48-79%)          | 3.6<br>(2-5.5)                              | 6.2%<br>(3.8-8.8%)                   | 8.4%<br>(4.4-13%)                   | 6.5<br>(3.5-9.9)     | 500<br>(310-730)      |
| Gabon             | 1990 | Female | 30 to 34 | 38%<br>(23-55%)                | 62%<br>(45-77%)          | 4<br>(2.3-6)                                | 7.7%<br>(5.1-11%)                    | 11%<br>(6.6-16%)                    | 9<br>(5.4-14)        | 590<br>(380-850)      |
| Gabon             | 1990 | Female | 35 to 39 | 39%<br>(25-57%)                | 61%<br>(43-75%)          | 3.9<br>(2.2-6.3)                            | 8.3%<br>(5.2-12%)                    | 12%<br>(6.8-16%)                    | 11<br>(6.4-17)       | 650<br>(390-940)      |
| Gabon             | 1990 | Female | 40 to 44 | 40%<br>(25-57%)                | 60%<br>(43-75%)          | 3.8<br>(2-6.2)                              | 9.2%<br>(6-13%)                      | 13%<br>(8-18%)                      | 15<br>(9-22)         | 740<br>(480-1100)     |
| Gabon             | 1990 | Female | 45 to 49 | 39%<br>(24-56%)                | 61%<br>(44-76%)          | 3.7<br>(2-6.1)                              | 11%<br>(7-15%)                       | 15%<br>(9.5-20%)                    | 23<br>(14-34)        | 990<br>(640-1400)     |
| Gabon             | 1990 | Female | 50 to 54 | 36%<br>(22-54%)                | 64%<br>(46-78%)          | 3.4<br>(1.8-5.6)                            | 11%<br>(7.5-16%)                     | 15%<br>(9.9-21%)                    | 33<br>(21-49)        | 1200<br>(790-1800)    |
| Gabon             | 1990 | Female | 55 to 59 | 34%<br>(21-51%)                | 66%<br>(49-79%)          | 3.1<br>(1.6-5.2)                            | 12%<br>(7.3-16%)                     | 15%<br>(9.2-21%)                    | 46<br>(28-67)        | 1500<br>(910-2200)    |
| Gabon             | 1990 | Female | 60 to 64 | 33%<br>(20-50%)                | 67%<br>(50-80%)          | 2.9<br>(1.4-5)                              | 11%<br>(6.4-15%)                     | 13%<br>(7.7-19%)                    | 54<br>(31-79)        | 1500<br>(860-2100)    |
| Gabon             | 1990 | Female | 65 to 69 | 35%<br>(22-50%)                | 65%<br>(50-78%)          | 2.9<br>(1.5-4.6)                            | 11%<br>(6.3-15%)                     | 13%<br>(7.6-18%)                    | 64<br>(38-93)        | 1500<br>(860-2100)    |
| Gabon             | 1990 | Female | 70 to 74 | 34%<br>(23-49%)                | 66%<br>(51-77%)          | 2.6<br>(1.3-4.4)                            | 9.5%<br>(4.9-14%)                    | 11%<br>(5.8-17%)                    | 65<br>(34-100)       | 1200<br>(610-1800)    |

| Location | Year | Sex    | Age      | Prevalence of current drinkers | Prevalence of abstainers | Population average of standard drinks daily | Percent of total attributable deaths | Percent of total attributable DALYs | Attributable deaths | Attributable DALYs     |
|----------|------|--------|----------|--------------------------------|--------------------------|---------------------------------------------|--------------------------------------|-------------------------------------|---------------------|------------------------|
| Gabon    | 1990 | Female | 75 to 79 | 32%<br>(20-47%)                | 68%<br>(53-80%)          | 2.1<br>(1-3.8)                              | 7.6%<br>(3.5-13%)                    | 8.8%<br>(4.1-15%)                   | 48<br>(22-81)       | 670<br>(310-1100)      |
| Gabon    | 1990 | Female | 80 to 84 | 29%<br>(17-44%)                | 71%<br>(56-83%)          | 1.8<br>(0.88-3)                             | 6.1%<br>(2.7-11%)                    | 7.1%<br>(3.1-12%)                   | 32<br>(14-55)       | 330<br>(140-580)       |
| Gabon    | 1990 | Female | 85 to 89 | 27%<br>(17-41%)                | 73%<br>(59-83%)          | 1.6<br>(0.79-2.7)                           | 4.8%<br>(2-8.7%)                     | 5.6%<br>(2.3-10%)                   | 15<br>(6.3-28)      | 110<br>(47-200)        |
| Gabon    | 1990 | Female | 90 to 94 | 29%<br>(18-43%)                | 71%<br>(57-82%)          | 1.5<br>(0.74-2.7)                           | 3.9%<br>(1.5-7.3%)                   | 4.6%<br>(1.7-8.6%)                  | 4.7<br>(1.7-8.7)    | 24<br>(9.3-45)         |
| Gabon    | 1990 | Female | 95 plus  | 33%<br>(18-50%)                | 67%<br>(50-82%)          | 1.5<br>(0.6-3)                              | 3.6%<br>(1-7.4%)                     | 4.1%<br>(1.1-8.8%)                  | 1.1<br>(0.31-2.4)   | 3.9<br>(1.1-8.1)       |
| Gabon    | 1990 | Male   | All Ages | 32%<br>(26-39%)                | 68%<br>(61-74%)          | 2.2<br>(1.9-2.6)                            | 8.1%<br>(6.5-10%)                    | 12%<br>(9.3-15%)                    | 770<br>(570-980)    | 26000<br>(20000-32000) |
| Gabon    | 1990 | Male   | 15 to 19 | 25%<br>(15-39%)                | 75%<br>(61-85%)          | 1.5<br>(0.76-2.7)                           | 5.2%<br>(2.7-8.7%)                   | 6.6%<br>(3.2-12%)                   | 7.1<br>(3.4-13)     | 580<br>(300-980)       |
| Gabon    | 1990 | Male   | 20 to 24 | 37%<br>(23-54%)                | 63%<br>(46-77%)          | 3.1<br>(1.7-5.1)                            | 12%<br>(7.6-17%)                     | 15%<br>(8.4-21%)                    | 21<br>(12-32)       | 1600<br>(950-2300)     |
| Gabon    | 1990 | Male   | 25 to 29 | 45%<br>(27-62%)                | 55%<br>(38-73%)          | 4.5<br>(2.6-6.7)                            | 16%<br>(10-22%)                      | 19%<br>(11-27%)                     | 28<br>(17-40)       | 1900<br>(1200-2600)    |
| Gabon    | 1990 | Male   | 30 to 34 | 47%<br>(29-64%)                | 53%<br>(36-71%)          | 5<br>(2.9-7.3)                              | 17%<br>(12-23%)                      | 21%<br>(14-28%)                     | 32<br>(21-44)       | 1900<br>(1300-2600)    |
| Gabon    | 1990 | Male   | 35 to 39 | 47%<br>(30-65%)                | 53%<br>(35-70%)          | 4.9<br>(2.8-7.7)                            | 18%<br>(12-24%)                      | 22%<br>(15-29%)                     | 38<br>(25-50)       | 2000<br>(1400-2700)    |
| Gabon    | 1990 | Male   | 40 to 44 | 49%<br>(32-67%)                | 51%<br>(33-68%)          | 5<br>(2.8-8)                                | 20%<br>(14-25%)                      | 23%<br>(17-31%)                     | 49<br>(34-67)       | 2300<br>(1600-3200)    |
| Gabon    | 1990 | Male   | 45 to 49 | 52%<br>(33-70%)                | 48%<br>(30-67%)          | 5.3<br>(3-8.2)                              | 21%<br>(15-26%)                      | 25%<br>(18-31%)                     | 63<br>(45-83)       | 2600<br>(1900-3500)    |
| Gabon    | 1990 | Male   | 50 to 54 | 52%<br>(34-70%)                | 48%<br>(30-66%)          | 5.1<br>(2.9-8.2)                            | 21%<br>(15-27%)                      | 24%<br>(17-31%)                     | 79<br>(54-110)      | 2900<br>(2000-3900)    |
| Gabon    | 1990 | Male   | 55 to 59 | 50%<br>(32-69%)                | 50%<br>(31-68%)          | 4.6<br>(2.6-7.2)                            | 19%<br>(13-25%)                      | 22%<br>(16-29%)                     | 89<br>(60-120)      | 2800<br>(1900-3800)    |
| Gabon    | 1990 | Male   | 60 to 64 | 48%<br>(31-68%)                | 52%<br>(32-69%)          | 4<br>(2.1-6.6)                              | 16%<br>(11-22%)                      | 18%<br>(12-25%)                     | 91<br>(57-130)      | 2500<br>(1600-3400)    |
| Gabon    | 1990 | Male   | 65 to 69 | 49%<br>(32-67%)                | 51%<br>(33-68%)          | 3.6<br>(2-5.5)                              | 14%<br>(9.1-20%)                     | 16%<br>(10-22%)                     | 88<br>(55-120)      | 2000<br>(1300-2800)    |
| Gabon    | 1990 | Male   | 70 to 74 | 50%<br>(32-67%)                | 50%<br>(33-68%)          | 3.1<br>(1.7-5.2)                            | 12%<br>(6.6-18%)                     | 13%<br>(7.4-20%)                    | 80<br>(44-120)      | 1400<br>(800-2200)     |
| Gabon    | 1990 | Male   | 75 to 79 | 48%<br>(31-66%)                | 52%<br>(34-69%)          | 2.6<br>(1.3-4.4)                            | 9.4%<br>(4.5-15%)                    | 11%<br>(5-17%)                      | 58<br>(27-95)       | 810<br>(390-1300)      |
| Gabon    | 1990 | Male   | 80 to 84 | 43%<br>(25-61%)                | 57%<br>(39-75%)          | 2<br>(0.99-3.4)                             | 6.8%<br>(3-11%)                      | 7.7%<br>(3.3-13%)                   | 31<br>(13-54)       | 320<br>(140-560)       |
| Gabon    | 1990 | Male   | 85 to 89 | 37%<br>(22-54%)                | 63%<br>(46-78%)          | 1.5<br>(0.8-2.7)                            | 4.8%<br>(2.1-8.6%)                   | 5.4%<br>(2.3-9.8%)                  | 10<br>(4.5-19)      | 77<br>(34-140)         |
| Gabon    | 1990 | Male   | 90 to 94 | 37%<br>(23-54%)                | 63%<br>(46-77%)          | 1.3<br>(0.66-2.4)                           | 3.3%<br>(1.2-6.2%)                   | 3.6%<br>(1.3-7.1%)                  | 2.2<br>(0.76-4.3)   | 12<br>(4.4-23)         |



| Location | Year | Sex    | Age      | Prevalence of current drinkers | Prevalence of abstainers | Population average of standard drinks daily | Percent of total attributable deaths | Percent of total attributable DALYs | Attributable deaths | Attributable DALYs     |
|----------|------|--------|----------|--------------------------------|--------------------------|---------------------------------------------|--------------------------------------|-------------------------------------|---------------------|------------------------|
| Gabon    | 1990 | Male   | 95 plus  | 40%<br>(21-60%)                | 60%<br>(40-79%)          | 1.3<br>(0.47-2.4)                           | 3.2%<br>(0.97-6.7%)                  | 3.5%<br>(0.96-7.6%)                 | 0.49<br>(0.13-1.1)  | 1.8<br>(0.54-3.8)      |
| Gabon    | 1995 | Female | All Ages | 24%<br>(20-29%)                | 76%<br>(71-80%)          | 1.4<br>(1.2-1.6)                            | 3.9%<br>(2.8-5.2%)                   | 6.3%<br>(4.2-8.8%)                  | 380<br>(250-540)    | 11000<br>(8000-14000)  |
| Gabon    | 1995 | Female | 15 to 19 | 22%<br>(14-35%)                | 78%<br>(65-86%)          | 1.1<br>(0.54-1.8)                           | 2.2%<br>(1.2-3.6%)                   | 3.1%<br>(1.5-5.5%)                  | 2.2<br>(1-3.9)      | 220<br>(120-350)       |
| Gabon    | 1995 | Female | 20 to 24 | 31%<br>(19-46%)                | 69%<br>(54-81%)          | 2<br>(1.1-3.3)                              | 3.7%<br>(2.4-5.3%)                   | 4.5%<br>(2.5-7%)                    | 4.5<br>(2.5-7.1)    | 420<br>(260-610)       |
| Gabon    | 1995 | Female | 25 to 29 | 36%<br>(22-52%)                | 64%<br>(48-78%)          | 2.7<br>(1.6-4.1)                            | 4.8%<br>(3.2-6.6%)                   | 5.9%<br>(3.6-8.7%)                  | 6.8<br>(4.2-10)     | 540<br>(360-740)       |
| Gabon    | 1995 | Female | 30 to 34 | 38%<br>(23-56%)                | 62%<br>(44-77%)          | 3.1<br>(1.8-4.7)                            | 6%<br>(4.1-8.4%)                     | 7.8%<br>(4.9-12%)                   | 9.3<br>(5.9-14)     | 620<br>(410-880)       |
| Gabon    | 1995 | Female | 35 to 39 | 39%<br>(25-57%)                | 61%<br>(43-75%)          | 3<br>(1.7-4.7)                              | 6.7%<br>(4.3-9.3%)                   | 8.8%<br>(5.5-13%)                   | 11<br>(6.9-16)      | 650<br>(410-910)       |
| Gabon    | 1995 | Female | 40 to 44 | 40%<br>(25-57%)                | 60%<br>(43-75%)          | 3<br>(1.6-4.8)                              | 7.6%<br>(4.9-11%)                    | 10%<br>(6.5-14%)                    | 14<br>(8.9-21)      | 730<br>(460-1000)      |
| Gabon    | 1995 | Female | 45 to 49 | 39%<br>(24-56%)                | 61%<br>(44-76%)          | 2.8<br>(1.5-4.7)                            | 8.8%<br>(5.6-12%)                    | 12%<br>(7.4-16%)                    | 20<br>(12-29)       | 880<br>(550-1300)      |
| Gabon    | 1995 | Female | 50 to 54 | 36%<br>(22-54%)                | 64%<br>(46-78%)          | 2.6<br>(1.4-4.2)                            | 9.4%<br>(5.9-13%)                    | 12%<br>(7.6-17%)                    | 29<br>(18-42)       | 1100<br>(690-1600)     |
| Gabon    | 1995 | Female | 55 to 59 | 33%<br>(20-51%)                | 67%<br>(49-80%)          | 2.3<br>(1.2-3.8)                            | 9.5%<br>(5.8-14%)                    | 12%<br>(7.3-18%)                    | 39<br>(23-57)       | 1200<br>(750-1800)     |
| Gabon    | 1995 | Female | 60 to 64 | 33%<br>(20-49%)                | 67%<br>(51-80%)          | 2.2<br>(1.1-3.7)                            | 8.5%<br>(4.7-13%)                    | 10%<br>(5.6-16%)                    | 46<br>(25-71)       | 1300<br>(690-1900)     |
| Gabon    | 1995 | Female | 65 to 69 | 34%<br>(22-50%)                | 66%<br>(50-78%)          | 2.2<br>(1.2-3.5)                            | 8.3%<br>(4.7-13%)                    | 10%<br>(5.6-15%)                    | 58<br>(31-90)       | 1300<br>(690-2000)     |
| Gabon    | 1995 | Female | 70 to 74 | 34%<br>(22-50%)                | 66%<br>(50-78%)          | 2<br>(1-3.4)                                | 7.2%<br>(3.2-12%)                    | 8.5%<br>(3.9-14%)                   | 54<br>(24-93)       | 990<br>(440-1700)      |
| Gabon    | 1995 | Female | 75 to 79 | 31%<br>(20-47%)                | 69%<br>(53-80%)          | 1.6<br>(0.75-2.9)                           | 5.5%<br>(2-10%)                      | 6.4%<br>(2.2-12%)                   | 42<br>(15-79)       | 590<br>(210-1100)      |
| Gabon    | 1995 | Female | 80 to 84 | 28%<br>(17-44%)                | 72%<br>(56-83%)          | 1.3<br>(0.67-2.3)                           | 4.2%<br>(1.6-8.1%)                   | 4.9%<br>(1.9-9.5%)                  | 26<br>(10-51)       | 280<br>(110-530)       |
| Gabon    | 1995 | Female | 85 to 89 | 27%<br>(17-40%)                | 73%<br>(60-83%)          | 1.2<br>(0.6-2.1)                            | 3.3%<br>(1.2-6.4%)                   | 3.8%<br>(1.4-7.4%)                  | 11<br>(4.1-22)      | 83<br>(31-170)         |
| Gabon    | 1995 | Female | 90 to 94 | 29%<br>(18-42%)                | 71%<br>(58-82%)          | 1.2<br>(0.56-2.1)                           | 2.6%<br>(0.77-5.5%)                  | 3%<br>(0.87-6.4%)                   | 3.5<br>(1-7.3)      | 18<br>(5.4-38)         |
| Gabon    | 1995 | Female | 95 plus  | 33%<br>(19-50%)                | 67%<br>(50-81%)          | 1.2<br>(0.46-2.3)                           | 2.4%<br>(0.5-5.8%)                   | 2.8%<br>(0.52-6.7%)                 | 0.87<br>(0.16-2.1)  | 3<br>(0.61-7)          |
| Gabon    | 1995 | Male   | All Ages | 32%<br>(25-39%)                | 68%<br>(61-75%)          | 1.7<br>(1.4-2)                              | 6.8%<br>(5.3-8.6%)                   | 9.7%<br>(7.1-13%)                   | 670<br>(480-890)    | 24000<br>(18000-30000) |
| Gabon    | 1995 | Male   | 15 to 19 | 25%<br>(15-40%)                | 75%<br>(60-85%)          | 1.2<br>(0.59-2.1)                           | 4.3%<br>(2.5-7.3%)                   | 5.5%<br>(2.8-9.6%)                  | 6.7<br>(3.4-12)     | 560<br>(320-950)       |
| Gabon    | 1995 | Male   | 20 to 24 | 37%<br>(23-55%)                | 63%<br>(45-77%)          | 2.4<br>(1.4-3.8)                            | 10%<br>(6.5-15%)                     | 12%<br>(7.1-18%)                    | 21<br>(13-32)       | 1600<br>(1000-2300)    |

| Location | Year | Sex    | Age      | Prevalence of current drinkers | Prevalence of abstainers | Population average of standard drinks daily | Percent of total attributable deaths | Percent of total attributable DALYs | Attributable deaths  | Attributable DALYs    |
|----------|------|--------|----------|--------------------------------|--------------------------|---------------------------------------------|--------------------------------------|-------------------------------------|----------------------|-----------------------|
| Gabon    | 1995 | Male   | 25 to 29 | 45%<br>(28-62%)                | 55%<br>(38-72%)          | 3.5<br>(2.1-5.1)                            | 13%<br>(8.7-17%)                     | 15%<br>(9.3-21%)                    | 30<br>(20-41)        | 2000<br>(1400-2700)   |
| Gabon    | 1995 | Male   | 30 to 34 | 47%<br>(29-66%)                | 53%<br>(34-71%)          | 3.9<br>(2.4-5.6)                            | 14%<br>(9.6-18%)                     | 16%<br>(11-21%)                     | 33<br>(23-45)        | 2000<br>(1500-2700)   |
| Gabon    | 1995 | Male   | 35 to 39 | 47%<br>(31-65%)                | 53%<br>(35-69%)          | 3.8<br>(2.2-5.9)                            | 14%<br>(10-19%)                      | 17%<br>(11-23%)                     | 36<br>(25-48)        | 1900<br>(1400-2600)   |
| Gabon    | 1995 | Male   | 40 to 44 | 49%<br>(32-67%)                | 51%<br>(33-68%)          | 3.9<br>(2.2-6.1)                            | 15%<br>(11-20%)                      | 18%<br>(13-24%)                     | 45<br>(30-60)        | 2100<br>(1500-2800)   |
| Gabon    | 1995 | Male   | 45 to 49 | 52%<br>(33-69%)                | 48%<br>(31-67%)          | 4.1<br>(2.3-6.6)                            | 17%<br>(12-22%)                      | 20%<br>(14-26%)                     | 58<br>(39-79)        | 2400<br>(1700-3300)   |
| Gabon    | 1995 | Male   | 50 to 54 | 52%<br>(34-70%)                | 48%<br>(30-66%)          | 4<br>(2.2-6.5)                              | 17%<br>(12-23%)                      | 20%<br>(14-27%)                     | 67<br>(45-94)        | 2500<br>(1700-3400)   |
| Gabon    | 1995 | Male   | 55 to 59 | 50%<br>(32-69%)                | 50%<br>(31-68%)          | 3.5<br>(1.9-5.7)                            | 16%<br>(10-21%)                      | 18%<br>(12-25%)                     | 74<br>(46-100)       | 2400<br>(1500-3300)   |
| Gabon    | 1995 | Male   | 60 to 64 | 49%<br>(30-68%)                | 51%<br>(32-70%)          | 3.1<br>(1.6-5.1)                            | 13%<br>(7.6-19%)                     | 15%<br>(8.7-22%)                    | 77<br>(44-120)       | 2100<br>(1200-3100)   |
| Gabon    | 1995 | Male   | 65 to 69 | 49%<br>(32-67%)                | 51%<br>(33-68%)          | 2.8<br>(1.5-4.4)                            | 11%<br>(6.5-17%)                     | 13%<br>(7.5-19%)                    | 76<br>(44-120)       | 1700<br>(990-2600)    |
| Gabon    | 1995 | Male   | 70 to 74 | 50%<br>(33-67%)                | 50%<br>(33-67%)          | 2.4<br>(1.3-4.1)                            | 9%<br>(4.6-15%)                      | 10%<br>(5.1-16%)                    | 64<br>(31-110)       | 1200<br>(560-1900)    |
| Gabon    | 1995 | Male   | 75 to 79 | 48%<br>(32-66%)                | 52%<br>(34-68%)          | 2<br>(1-3.4)                                | 7%<br>(3-12%)                        | 7.9%<br>(3.4-14%)                   | 46<br>(20-86)        | 650<br>(280-1200)     |
| Gabon    | 1995 | Male   | 80 to 84 | 43%<br>(25-61%)                | 57%<br>(39-75%)          | 1.6<br>(0.78-2.6)                           | 4.8%<br>(2-8.8%)                     | 5.5%<br>(2.2-10%)                   | 25<br>(9.7-45)       | 260<br>(100-470)      |
| Gabon    | 1995 | Male   | 85 to 89 | 37%<br>(23-55%)                | 63%<br>(45-77%)          | 1.2<br>(0.61-2.1)                           | 3.4%<br>(1.3-6.3%)                   | 3.8%<br>(1.5-7.1%)                  | 8.4<br>(3.2-16)      | 64<br>(25-120)        |
| Gabon    | 1995 | Male   | 90 to 94 | 37%<br>(23-54%)                | 63%<br>(46-77%)          | 1<br>(0.5-1.8)                              | 2.2%<br>(0.77-4.4%)                  | 2.4%<br>(0.78-4.9%)                 | 1.7<br>(0.55-3.6)    | 9.3<br>(3.3-19)       |
| Gabon    | 1995 | Male   | 95 plus  | 40%<br>(22-61%)                | 60%<br>(39-78%)          | 0.95<br>(0.37-1.8)                          | 2.2%<br>(0.61-4.8%)                  | 2.4%<br>(0.54-5.5%)                 | 0.39<br>(0.088-0.85) | 1.4<br>(0.4-3.1)      |
| Gabon    | 2000 | Female | All Ages | 23%<br>(19-29%)                | 77%<br>(71-81%)          | 1.2<br>(0.99-1.4)                           | 3.5%<br>(2.4-4.7%)                   | 5.3%<br>(3.4-7.7%)                  | 390<br>(250-580)     | 12000<br>(8100-16000) |
| Gabon    | 2000 | Female | 15 to 19 | 21%<br>(13-34%)                | 79%<br>(66-87%)          | 0.9<br>(0.46-1.6)                           | 1.8%<br>(1-3.1%)                     | 2.5%<br>(1.1-4.6%)                  | 2.2<br>(0.95-4.1)    | 220<br>(120-380)      |
| Gabon    | 2000 | Female | 20 to 24 | 30%<br>(18-44%)                | 70%<br>(56-82%)          | 1.7<br>(0.96-2.8)                           | 3.1%<br>(1.9-4.7%)                   | 3.5%<br>(1.8-5.8%)                  | 4.7<br>(2.4-7.6)     | 450<br>(270-670)      |
| Gabon    | 2000 | Female | 25 to 29 | 34%<br>(20-51%)                | 66%<br>(49-80%)          | 2.3<br>(1.3-3.5)                            | 3.6%<br>(2.2-5.3%)                   | 4%<br>(2.1-6.5%)                    | 7.7<br>(4.3-12)      | 610<br>(380-850)      |
| Gabon    | 2000 | Female | 30 to 34 | 37%<br>(22-54%)                | 63%<br>(46-78%)          | 2.6<br>(1.5-4)                              | 4.7%<br>(3-6.9%)                     | 5.4%<br>(3.1-8.3%)                  | 12<br>(7.1-18)       | 770<br>(500-1100)     |
| Gabon    | 2000 | Female | 35 to 39 | 38%<br>(24-56%)                | 62%<br>(44-76%)          | 2.6<br>(1.5-4.1)                            | 5.3%<br>(3.3-7.6%)                   | 6.3%<br>(3.7-9.5%)                  | 14<br>(8.5-21)       | 810<br>(510-1200)     |
| Gabon    | 2000 | Female | 40 to 44 | 38%<br>(24-56%)                | 62%<br>(44-76%)          | 2.5<br>(1.3-4.2)                            | 6.2%<br>(3.9-8.9%)                   | 7.7%<br>(4.7-11%)                   | 17<br>(10-25)        | 850<br>(530-1200)     |

| Location | Year | Sex    | Age      | Prevalence of current drinkers | Prevalence of abstainers | Population average of standard drinks daily | Percent of total attributable deaths | Percent of total attributable DALYs | Attributable deaths | Attributable DALYs     |
|----------|------|--------|----------|--------------------------------|--------------------------|---------------------------------------------|--------------------------------------|-------------------------------------|---------------------|------------------------|
| Gabon    | 2000 | Female | 45 to 49 | 38%<br>(22-55%)                | 62%<br>(45-78%)          | 2.4<br>(1.3-4.1)                            | 7.4%<br>(4.6-11%)                    | 9.3%<br>(5.6-13%)                   | 23<br>(14-34)       | 1000<br>(600-1500)     |
| Gabon    | 2000 | Female | 50 to 54 | 35%<br>(21-53%)                | 65%<br>(47-79%)          | 2.2<br>(1.2-3.6)                            | 8%<br>(4.8-12%)                      | 9.9%<br>(6-15%)                     | 29<br>(17-45)       | 1100<br>(660-1700)     |
| Gabon    | 2000 | Female | 55 to 59 | 32%<br>(20-49%)                | 68%<br>(51-80%)          | 2<br>(1-3.3)                                | 8.2%<br>(4.7-12%)                    | 10%<br>(5.8-15%)                    | 39<br>(22-60)       | 1300<br>(710-1900)     |
| Gabon    | 2000 | Female | 60 to 64 | 32%<br>(19-48%)                | 68%<br>(52-81%)          | 1.9<br>(0.94-3.2)                           | 7.3%<br>(3.6-12%)                    | 8.7%<br>(4.3-14%)                   | 44<br>(22-72)       | 1200<br>(610-1900)     |
| Gabon    | 2000 | Female | 65 to 69 | 33%<br>(22-49%)                | 67%<br>(51-78%)          | 1.9<br>(0.99-3)                             | 7.1%<br>(3.5-11%)                    | 8.3%<br>(4.2-13%)                   | 57<br>(29-90)       | 1300<br>(670-2100)     |
| Gabon    | 2000 | Female | 70 to 74 | 33%<br>(22-49%)                | 67%<br>(51-78%)          | 1.7<br>(0.85-2.9)                           | 6.1%<br>(2.4-11%)                    | 7.1%<br>(2.9-13%)                   | 59<br>(24-110)      | 1100<br>(430-1900)     |
| Gabon    | 2000 | Female | 75 to 79 | 31%<br>(19-46%)                | 69%<br>(54-81%)          | 1.4<br>(0.64-2.5)                           | 4.6%<br>(1.5-9%)                     | 5.3%<br>(1.7-10%)                   | 43<br>(14-83)       | 600<br>(200-1200)      |
| Gabon    | 2000 | Female | 80 to 84 | 28%<br>(16-42%)                | 72%<br>(58-84%)          | 1.1<br>(0.57-2)                             | 3.5%<br>(1.2-6.9%)                   | 4%<br>(1.3-7.9%)                    | 28<br>(9.3-56)      | 290<br>(97-590)        |
| Gabon    | 2000 | Female | 85 to 89 | 26%<br>(16-40%)                | 74%<br>(60-84%)          | 1<br>(0.51-1.7)                             | 2.6%<br>(0.83-5.2%)                  | 3%<br>(0.94-6%)                     | 11<br>(3.6-23)      | 84<br>(27-170)         |
| Gabon    | 2000 | Female | 90 to 94 | 28%<br>(17-41%)                | 72%<br>(59-83%)          | 0.98<br>(0.47-1.7)                          | 2.1%<br>(0.52-4.3%)                  | 2.4%<br>(0.55-5.1%)                 | 3.1<br>(0.73-6.7)   | 16<br>(4-34)           |
| Gabon    | 2000 | Female | 95 plus  | 31%<br>(18-49%)                | 69%<br>(51-82%)          | 0.99<br>(0.4-1.9)                           | 1.9%<br>(0.33-4.7%)                  | 2.2%<br>(0.3-5.3%)                  | 0.79<br>(0.11-1.9)  | 2.8<br>(0.45-6.6)      |
| Gabon    | 2000 | Male   | All Ages | 31%<br>(25-39%)                | 69%<br>(61-75%)          | 1.6<br>(1.3-1.8)                            | 5.3%<br>(4-6.8%)                     | 7.5%<br>(5.5-10%)                   | 540<br>(370-750)    | 20000<br>(15000-26000) |
| Gabon    | 2000 | Male   | 15 to 19 | 24%<br>(14-39%)                | 76%<br>(61-86%)          | 1<br>(0.53-1.9)                             | 3.6%<br>(2-6%)                       | 4.5%<br>(2.1-8%)                    | 5.6<br>(2.6-10)     | 500<br>(280-830)       |
| Gabon    | 2000 | Male   | 20 to 24 | 37%<br>(23-54%)                | 63%<br>(46-77%)          | 2.2<br>(1.2-3.4)                            | 8.3%<br>(5.1-12%)                    | 9.5%<br>(5.3-15%)                   | 18<br>(10-29)       | 1400<br>(880-2100)     |
| Gabon    | 2000 | Male   | 25 to 29 | 44%<br>(27-62%)                | 56%<br>(38-73%)          | 3.1<br>(1.8-4.5)                            | 9.4%<br>(6-13%)                      | 10%<br>(6.1-16%)                    | 27<br>(16-39)       | 1900<br>(1200-2600)    |
| Gabon    | 2000 | Male   | 30 to 34 | 46%<br>(28-65%)                | 54%<br>(35-72%)          | 3.5<br>(2-5.1)                              | 9.5%<br>(6.2-13%)                    | 10%<br>(6.3-15%)                    | 31<br>(19-44)       | 1900<br>(1200-2700)    |
| Gabon    | 2000 | Male   | 35 to 39 | 46%<br>(30-64%)                | 54%<br>(36-70%)          | 3.4<br>(2-5.2)                              | 9.6%<br>(6.3-14%)                    | 11%<br>(6.7-16%)                    | 33<br>(20-45)       | 1800<br>(1200-2500)    |
| Gabon    | 2000 | Male   | 40 to 44 | 48%<br>(32-67%)                | 52%<br>(33-68%)          | 3.4<br>(1.9-5.4)                            | 11%<br>(7.2-15%)                     | 12%<br>(7.9-17%)                    | 38<br>(24-53)       | 1800<br>(1200-2500)    |
| Gabon    | 2000 | Male   | 45 to 49 | 51%<br>(33-69%)                | 49%<br>(31-67%)          | 3.7<br>(2-5.9)                              | 12%<br>(8-17%)                       | 14%<br>(9.4-20%)                    | 45<br>(28-65)       | 1900<br>(1200-2800)    |
| Gabon    | 2000 | Male   | 50 to 54 | 52%<br>(34-70%)                | 48%<br>(30-66%)          | 3.6<br>(2-5.8)                              | 13%<br>(8.6-19%)                     | 16%<br>(10-22%)                     | 53<br>(32-79)       | 2000<br>(1200-2900)    |
| Gabon    | 2000 | Male   | 55 to 59 | 49%<br>(32-68%)                | 51%<br>(32-68%)          | 3.2<br>(1.7-5.2)                            | 13%<br>(7.9-18%)                     | 15%<br>(9.4-21%)                    | 55<br>(33-83)       | 1800<br>(1100-2600)    |
| Gabon    | 2000 | Male   | 60 to 64 | 48%<br>(30-68%)                | 52%<br>(32-70%)          | 2.8<br>(1.4-4.7)                            | 11%<br>(6.1-16%)                     | 13%<br>(6.9-19%)                    | 57<br>(31-91)       | 1600<br>(880-2500)     |

| Location | Year | Sex    | Age      | Prevalence of current drinkers | Prevalence of abstainers | Population average of standard drinks daily | Percent of total attributable deaths | Percent of total attributable DALYs | Attributable deaths | Attributable DALYs    |
|----------|------|--------|----------|--------------------------------|--------------------------|---------------------------------------------|--------------------------------------|-------------------------------------|---------------------|-----------------------|
| Gabon    | 2000 | Male   | 65 to 69 | 49%<br>(32-66%)                | 51%<br>(34-68%)          | 2.5<br>(1.4-3.9)                            | 9.3%<br>(5.4-14%)                    | 11%<br>(6.2-16%)                    | 59<br>(33-96)       | 1300<br>(750-2200)    |
| Gabon    | 2000 | Male   | 70 to 74 | 50%<br>(33-66%)                | 50%<br>(34-67%)          | 2.2<br>(1.2-3.6)                            | 7.4%<br>(3.7-12%)                    | 8.6%<br>(4.3-14%)                   | 52<br>(26-88)       | 950<br>(470-1600)     |
| Gabon    | 2000 | Male   | 75 to 79 | 48%<br>(31-66%)                | 52%<br>(34-69%)          | 1.8<br>(0.88-3.1)                           | 5.7%<br>(2.4-10%)                    | 6.5%<br>(2.7-12%)                   | 36<br>(14-67)       | 520<br>(210-950)      |
| Gabon    | 2000 | Male   | 80 to 84 | 42%<br>(25-61%)                | 58%<br>(39-75%)          | 1.4<br>(0.68-2.4)                           | 4%<br>(1.6-7.4%)                     | 4.6%<br>(1.8-8.4%)                  | 20<br>(7.8-38)      | 220<br>(84-410)       |
| Gabon    | 2000 | Male   | 85 to 89 | 37%<br>(22-54%)                | 63%<br>(46-78%)          | 1.1<br>(0.55-1.8)                           | 2.8%<br>(1.1-5.2%)                   | 3.2%<br>(1.3-6%)                    | 7.5<br>(2.8-14)     | 56<br>(22-100)        |
| Gabon    | 2000 | Male   | 90 to 94 | 36%<br>(22-53%)                | 64%<br>(47-78%)          | 0.92<br>(0.44-1.6)                          | 1.9%<br>(0.6-3.7%)                   | 2.1%<br>(0.59-4.3%)                 | 1.7<br>(0.46-3.4)   | 8.9<br>(2.9-18)       |
| Gabon    | 2000 | Male   | 95 plus  | 39%<br>(21-61%)                | 61%<br>(39-79%)          | 0.87<br>(0.32-1.7)                          | 2%<br>(0.55-4.2%)                    | 2.1%<br>(0.47-4.7%)                 | 0.38<br>(0.08-0.86) | 1.4<br>(0.38-3)       |
| Gabon    | 2005 | Female | All Ages | 22%<br>(18-28%)                | 78%<br>(72-82%)          | 1.2<br>(1-1.4)                              | 3.2%<br>(2.3-4.4%)                   | 5%<br>(3.1-7.4%)                    | 400<br>(250-610)    | 12000<br>(8500-16000) |
| Gabon    | 2005 | Female | 15 to 19 | 20%<br>(12-32%)                | 80%<br>(68-88%)          | 0.88<br>(0.45-1.5)                          | 1.8%<br>(1-3%)                       | 2.5%<br>(1.1-4.4%)                  | 2.4<br>(1-4.4)      | 250<br>(130-420)      |
| Gabon    | 2005 | Female | 20 to 24 | 29%<br>(18-44%)                | 71%<br>(56-82%)          | 1.7<br>(0.96-2.8)                           | 3.1%<br>(1.9-4.7%)                   | 3.6%<br>(1.6-6.1%)                  | 5.2<br>(2.6-8.8)    | 510<br>(300-770)      |
| Gabon    | 2005 | Female | 25 to 29 | 33%<br>(20-49%)                | 67%<br>(51-80%)          | 2.3<br>(1.3-3.5)                            | 3.4%<br>(2.1-5.1%)                   | 3.7%<br>(1.9-6.2%)                  | 8.4<br>(4.7-13)     | 670<br>(420-950)      |
| Gabon    | 2005 | Female | 30 to 34 | 36%<br>(21-52%)                | 64%<br>(48-79%)          | 2.6<br>(1.5-4)                              | 4%<br>(2.5-6%)                       | 4.6%<br>(2.6-7.3%)                  | 12<br>(7.3-19)      | 820<br>(530-1200)     |
| Gabon    | 2005 | Female | 35 to 39 | 37%<br>(23-55%)                | 63%<br>(45-77%)          | 2.6<br>(1.5-4)                              | 4.6%<br>(2.8-6.7%)                   | 5.4%<br>(3.1-8.3%)                  | 16<br>(9.2-23)      | 890<br>(560-1300)     |
| Gabon    | 2005 | Female | 40 to 44 | 37%<br>(23-55%)                | 63%<br>(45-77%)          | 2.5<br>(1.3-4.1)                            | 5.4%<br>(3.4-7.8%)                   | 6.5%<br>(4-9.6%)                    | 19<br>(11-27)       | 940<br>(570-1300)     |
| Gabon    | 2005 | Female | 45 to 49 | 37%<br>(22-54%)                | 63%<br>(46-78%)          | 2.4<br>(1.3-4)                              | 6.7%<br>(4.1-10%)                    | 8.3%<br>(4.9-12%)                   | 24<br>(14-37)       | 1000<br>(630-1600)    |
| Gabon    | 2005 | Female | 50 to 54 | 34%<br>(20-51%)                | 66%<br>(49-80%)          | 2.2<br>(1.1-3.6)                            | 7.5%<br>(4.4-11%)                    | 9.1%<br>(5.3-14%)                   | 30<br>(17-47)       | 1100<br>(660-1700)    |
| Gabon    | 2005 | Female | 55 to 59 | 31%<br>(18-48%)                | 69%<br>(52-82%)          | 2<br>(1-3.4)                                | 7.8%<br>(4.4-12%)                    | 9.5%<br>(5.3-14%)                   | 36<br>(20-56)       | 1200<br>(650-1800)    |
| Gabon    | 2005 | Female | 60 to 64 | 30%<br>(18-47%)                | 70%<br>(53-82%)          | 1.9<br>(0.92-3.3)                           | 7%<br>(3.6-11%)                      | 8.3%<br>(4.3-13%)                   | 42<br>(21-67)       | 1100<br>(580-1900)    |
| Gabon    | 2005 | Female | 65 to 69 | 32%<br>(21-47%)                | 68%<br>(53-79%)          | 1.8<br>(0.94-3)                             | 6.8%<br>(3.4-11%)                    | 8.1%<br>(4.1-13%)                   | 54<br>(27-87)       | 1200<br>(620-2000)    |
| Gabon    | 2005 | Female | 70 to 74 | 32%<br>(21-47%)                | 68%<br>(53-79%)          | 1.6<br>(0.84-2.9)                           | 5.9%<br>(2.4-11%)                    | 6.9%<br>(2.9-12%)                   | 58<br>(23-100)      | 1100<br>(420-1900)    |
| Gabon    | 2005 | Female | 75 to 79 | 29%<br>(18-45%)                | 71%<br>(55-82%)          | 1.4<br>(0.63-2.5)                           | 4.5%<br>(1.5-8.8%)                   | 5.2%<br>(1.8-10%)                   | 47<br>(15-94)       | 660<br>(210-1300)     |
| Gabon    | 2005 | Female | 80 to 84 | 27%<br>(16-42%)                | 73%<br>(58-84%)          | 1.1<br>(0.55-2)                             | 3.4%<br>(1.2-6.8%)                   | 4%<br>(1.4-7.8%)                    | 32<br>(11-63)       | 330<br>(110-660)      |

| Location | Year | Sex    | Age      | Prevalence of current drinkers | Prevalence of abstainers | Population average of standard drinks daily | Percent of total attributable deaths | Percent of total attributable DALYs | Attributable deaths | Attributable DALYs     |
|----------|------|--------|----------|--------------------------------|--------------------------|---------------------------------------------|--------------------------------------|-------------------------------------|---------------------|------------------------|
| Gabon    | 2005 | Female | 85 to 89 | 25%<br>(15-38%)                | 75%<br>(62-85%)          | 0.97<br>(0.48-1.7)                          | 2.6%<br>(0.84-5.2%)                  | 3%<br>(0.95-6%)                     | 12<br>(4-26)        | 93<br>(30-190)         |
| Gabon    | 2005 | Female | 90 to 94 | 27%<br>(16-40%)                | 73%<br>(60-84%)          | 0.95<br>(0.43-1.7)                          | 2%<br>(0.55-4.4%)                    | 2.3%<br>(0.59-5.1%)                 | 3.5<br>(0.89-7.5)   | 18<br>(4.7-39)         |
| Gabon    | 2005 | Female | 95 plus  | 30%<br>(16-47%)                | 70%<br>(53-84%)          | 0.96<br>(0.38-1.8)                          | 1.9%<br>(0.35-4.7%)                  | 2.2%<br>(0.34-5.5%)                 | 0.82<br>(0.13-2)    | 2.9<br>(0.52-6.9)      |
| Gabon    | 2005 | Male   | All Ages | 31%<br>(25-38%)                | 69%<br>(62-75%)          | 1.6<br>(1.4-1.8)                            | 4.7%<br>(3.5-6%)                     | 6.7%<br>(4.8-8.9%)                  | 500<br>(340-700)    | 19000<br>(14000-25000) |
| Gabon    | 2005 | Male   | 15 to 19 | 24%<br>(14-39%)                | 76%<br>(61-86%)          | 1<br>(0.51-1.9)                             | 3.4%<br>(1.9-5.6%)                   | 4.3%<br>(2-7.6%)                    | 5.4<br>(2.4-10)     | 500<br>(270-840)       |
| Gabon    | 2005 | Male   | 20 to 24 | 36%<br>(22-53%)                | 64%<br>(47-78%)          | 2.1<br>(1.2-3.4)                            | 7.9%<br>(4.8-12%)                    | 9.2%<br>(5-14%)                     | 17<br>(9.1-29)      | 1400<br>(850-2200)     |
| Gabon    | 2005 | Male   | 25 to 29 | 43%<br>(26-61%)                | 57%<br>(39-74%)          | 3.1<br>(1.8-4.4)                            | 8.4%<br>(5-12%)                      | 9.3%<br>(5.1-14%)                   | 25<br>(14-38)       | 1800<br>(1100-2600)    |
| Gabon    | 2005 | Male   | 30 to 34 | 45%<br>(28-63%)                | 55%<br>(37-72%)          | 3.4<br>(2.1-5)                              | 7.8%<br>(5.1-11%)                    | 8.4%<br>(5-13%)                     | 29<br>(17-43)       | 1800<br>(1200-2700)    |
| Gabon    | 2005 | Male   | 35 to 39 | 45%<br>(29-63%)                | 55%<br>(37-71%)          | 3.3<br>(1.9-5.1)                            | 7.8%<br>(5.1-11%)                    | 8.6%<br>(5.5-13%)                   | 32<br>(20-46)       | 1800<br>(1200-2500)    |
| Gabon    | 2005 | Male   | 40 to 44 | 47%<br>(31-66%)                | 53%<br>(34-69%)          | 3.4<br>(1.9-5.4)                            | 8.5%<br>(5.5-12%)                    | 9.6%<br>(6.1-14%)                   | 35<br>(22-51)       | 1700<br>(1100-2500)    |
| Gabon    | 2005 | Male   | 45 to 49 | 50%<br>(32-68%)                | 50%<br>(32-68%)          | 3.7<br>(2-5.8)                              | 10%<br>(6.9-14%)                     | 12%<br>(7.8-17%)                    | 41<br>(25-60)       | 1800<br>(1100-2500)    |
| Gabon    | 2005 | Male   | 50 to 54 | 51%<br>(32-69%)                | 49%<br>(31-68%)          | 3.6<br>(2-5.9)                              | 12%<br>(7.6-16%)                     | 14%<br>(9-19%)                      | 47<br>(29-68)       | 1800<br>(1100-2500)    |
| Gabon    | 2005 | Male   | 55 to 59 | 49%<br>(31-67%)                | 51%<br>(33-69%)          | 3.2<br>(1.7-5.1)                            | 12%<br>(7.2-16%)                     | 14%<br>(8.7-20%)                    | 50<br>(30-73)       | 1600<br>(1000-2400)    |
| Gabon    | 2005 | Male   | 60 to 64 | 47%<br>(29-67%)                | 53%<br>(33-71%)          | 2.8<br>(1.4-4.8)                            | 10%<br>(5.9-15%)                     | 12%<br>(7-18%)                      | 50<br>(29-77)       | 1400<br>(810-2100)     |
| Gabon    | 2005 | Male   | 65 to 69 | 48%<br>(31-65%)                | 52%<br>(35-69%)          | 2.5<br>(1.3-4)                              | 8.8%<br>(5-13%)                      | 11%<br>(5.9-16%)                    | 52<br>(29-82)       | 1200<br>(670-1900)     |
| Gabon    | 2005 | Male   | 70 to 74 | 49%<br>(31-65%)                | 51%<br>(35-69%)          | 2.2<br>(1.2-3.7)                            | 7.2%<br>(3.7-12%)                    | 8.4%<br>(4.2-14%)                   | 49<br>(24-82)       | 890<br>(440-1500)      |
| Gabon    | 2005 | Male   | 75 to 79 | 47%<br>(30-64%)                | 53%<br>(36-70%)          | 1.8<br>(0.9-3.2)                            | 5.5%<br>(2.4-10%)                    | 6.4%<br>(2.8-12%)                   | 36<br>(15-67)       | 520<br>(220-950)       |
| Gabon    | 2005 | Male   | 80 to 84 | 42%<br>(25-60%)                | 58%<br>(40-75%)          | 1.4<br>(0.7-2.4)                            | 3.9%<br>(1.6-7%)                     | 4.5%<br>(1.8-8.2%)                  | 20<br>(8.3-38)      | 220<br>(88-400)        |
| Gabon    | 2005 | Male   | 85 to 89 | 36%<br>(22-53%)                | 64%<br>(47-78%)          | 1.1<br>(0.55-1.9)                           | 2.8%<br>(1.1-5.3%)                   | 3.2%<br>(1.2-6.1%)                  | 8.2<br>(3.2-16)     | 63<br>(25-120)         |
| Gabon    | 2005 | Male   | 90 to 94 | 36%<br>(22-53%)                | 64%<br>(47-78%)          | 0.93<br>(0.43-1.7)                          | 1.9%<br>(0.6-3.9%)                   | 2.1%<br>(0.6-4.5%)                  | 1.9<br>(0.56-4.1)   | 10<br>(3.4-22)         |
| Gabon    | 2005 | Male   | 95 plus  | 39%<br>(21-60%)                | 61%<br>(40-79%)          | 0.86<br>(0.34-1.7)                          | 2%<br>(0.57-4.4%)                    | 2.1%<br>(0.5-5%)                    | 0.44<br>(0.11-1)    | 1.6<br>(0.47-3.6)      |
| Gabon    | 2010 | Female | All Ages | 22%<br>(18-27%)                | 78%<br>(73-82%)          | 1.2<br>(1-1.5)                              | 3.1%<br>(2.2-4.1%)                   | 4.8%<br>(3-7.1%)                    | 360<br>(210-530)    | 11000<br>(7300-15000)  |

| Location | Year | Sex    | Age      | Prevalence of current drinkers | Prevalence of abstainers | Population average of standard drinks daily | Percent of total attributable deaths | Percent of total attributable DALYs | Attributable deaths | Attributable DALYs     |
|----------|------|--------|----------|--------------------------------|--------------------------|---------------------------------------------|--------------------------------------|-------------------------------------|---------------------|------------------------|
| Gabon    | 2010 | Female | 15 to 19 | 20%<br>(12-32%)                | 80%<br>(68-88%)          | 0.9<br>(0.46-1.6)                           | 1.8%<br>(1-2.9%)                     | 2.5%<br>(1.1-4.5%)                  | 2.3<br>(1-4.3)      | 250<br>(140-410)       |
| Gabon    | 2010 | Female | 20 to 24 | 29%<br>(17-43%)                | 71%<br>(57-83%)          | 1.8<br>(0.98-2.8)                           | 3.3%<br>(2.1-4.8%)                   | 4%<br>(2.1-6.5%)                    | 5.2<br>(2.7-8.7)    | 530<br>(320-790)       |
| Gabon    | 2010 | Female | 25 to 29 | 33%<br>(19-50%)                | 67%<br>(50-81%)          | 2.4<br>(1.4-3.6)                            | 3.6%<br>(2.3-5.2%)                   | 4.2%<br>(2.3-6.7%)                  | 8<br>(4.4-12)       | 670<br>(440-960)       |
| Gabon    | 2010 | Female | 30 to 34 | 35%<br>(21-52%)                | 65%<br>(48-79%)          | 2.6<br>(1.5-4.1)                            | 4%<br>(2.6-5.7%)                     | 4.6%<br>(2.7-7.3%)                  | 11<br>(6.7-18)      | 780<br>(510-1100)      |
| Gabon    | 2010 | Female | 35 to 39 | 37%<br>(22-55%)                | 63%<br>(45-78%)          | 2.6<br>(1.5-4.1)                            | 4.2%<br>(2.7-6.2%)                   | 5.1%<br>(3-7.8%)                    | 13<br>(7.9-21)      | 800<br>(500-1200)      |
| Gabon    | 2010 | Female | 40 to 44 | 37%<br>(23-55%)                | 63%<br>(45-77%)          | 2.6<br>(1.3-4.2)                            | 5%<br>(3.2-7.2%)                     | 6.2%<br>(3.9-9%)                    | 17<br>(10-25)       | 870<br>(540-1300)      |
| Gabon    | 2010 | Female | 45 to 49 | 36%<br>(21-53%)                | 64%<br>(47-79%)          | 2.5<br>(1.3-4)                              | 6.1%<br>(3.7-9.3%)                   | 7.8%<br>(4.8-12%)                   | 22<br>(12-33)       | 960<br>(570-1400)      |
| Gabon    | 2010 | Female | 50 to 54 | 33%<br>(19-51%)                | 67%<br>(49-81%)          | 2.2<br>(1.1-3.7)                            | 7%<br>(4.2-10%)                      | 8.8%<br>(5.2-13%)                   | 26<br>(15-41)       | 1000<br>(580-1600)     |
| Gabon    | 2010 | Female | 55 to 59 | 31%<br>(18-48%)                | 69%<br>(52-82%)          | 2<br>(0.99-3.5)                             | 7.3%<br>(4.1-11%)                    | 9.2%<br>(5.1-14%)                   | 32<br>(17-51)       | 1000<br>(560-1600)     |
| Gabon    | 2010 | Female | 60 to 64 | 30%<br>(18-47%)                | 70%<br>(53-82%)          | 1.9<br>(0.92-3.4)                           | 6.7%<br>(3.4-10%)                    | 8.2%<br>(4.2-13%)                   | 35<br>(17-56)       | 960<br>(470-1500)      |
| Gabon    | 2010 | Female | 65 to 69 | 32%<br>(20-46%)                | 68%<br>(54-80%)          | 1.9<br>(0.95-3.1)                           | 6.6%<br>(3.3-11%)                    | 8%<br>(4.1-13%)                     | 45<br>(22-75)       | 1000<br>(500-1700)     |
| Gabon    | 2010 | Female | 70 to 74 | 31%<br>(20-46%)                | 69%<br>(54-80%)          | 1.7<br>(0.86-3)                             | 5.7%<br>(2.3-10%)                    | 6.8%<br>(2.7-12%)                   | 48<br>(19-86)       | 880<br>(340-1600)      |
| Gabon    | 2010 | Female | 75 to 79 | 29%<br>(18-44%)                | 71%<br>(56-82%)          | 1.4<br>(0.65-2.5)                           | 4.3%<br>(1.4-8.6%)                   | 5.1%<br>(1.7-10%)                   | 42<br>(13-85)       | 600<br>(190-1200)      |
| Gabon    | 2010 | Female | 80 to 84 | 26%<br>(15-41%)                | 74%<br>(59-85%)          | 1.1<br>(0.52-2)                             | 3.4%<br>(1.1-6.8%)                   | 3.9%<br>(1.3-7.9%)                  | 32<br>(10-63)       | 330<br>(110-660)       |
| Gabon    | 2010 | Female | 85 to 89 | 25%<br>(15-37%)                | 75%<br>(63-85%)          | 0.99<br>(0.47-1.7)                          | 2.5%<br>(0.78-5.1%)                  | 3%<br>(0.91-5.9%)                   | 13<br>(4-26)        | 98<br>(30-200)         |
| Gabon    | 2010 | Female | 90 to 94 | 26%<br>(16-39%)                | 74%<br>(61-84%)          | 0.97<br>(0.45-1.7)                          | 2%<br>(0.51-4.4%)                    | 2.4%<br>(0.57-5.2%)                 | 3.6<br>(0.88-8.1)   | 19<br>(4.9-41)         |
| Gabon    | 2010 | Female | 95 plus  | 30%<br>(17-48%)                | 70%<br>(52-83%)          | 1<br>(0.39-2)                               | 2%<br>(0.4-4.7%)                     | 2.3%<br>(0.39-5.4%)                 | 0.89<br>(0.15-2.2)  | 3.1<br>(0.61-7.3)      |
| Gabon    | 2010 | Male   | All Ages | 31%<br>(25-38%)                | 69%<br>(62-75%)          | 1.7<br>(1.4-2)                              | 4.7%<br>(3.5-6%)                     | 6.6%<br>(4.7-8.9%)                  | 490<br>(330-690)    | 19000<br>(14000-25000) |
| Gabon    | 2010 | Male   | 15 to 19 | 23%<br>(13-37%)                | 77%<br>(63-87%)          | 1<br>(0.51-1.8)                             | 3.2%<br>(1.8-5.2%)                   | 4%<br>(2-7%)                        | 5.3<br>(2.5-9.7)    | 500<br>(280-850)       |
| Gabon    | 2010 | Male   | 20 to 24 | 35%<br>(21-51%)                | 65%<br>(49-79%)          | 2.2<br>(1.2-3.4)                            | 7.9%<br>(5.1-11%)                    | 9.3%<br>(5.5-14%)                   | 17<br>(9.2-29)      | 1400<br>(880-2200)     |
| Gabon    | 2010 | Male   | 25 to 29 | 42%<br>(25-60%)                | 58%<br>(40-75%)          | 3.1<br>(1.9-4.6)                            | 8.8%<br>(5.8-12%)                    | 10%<br>(6-15%)                      | 26<br>(16-40)       | 1900<br>(1200-2700)    |
| Gabon    | 2010 | Male   | 30 to 34 | 44%<br>(27-63%)                | 56%<br>(37-73%)          | 3.5<br>(2.1-5.2)                            | 8%<br>(5.2-11%)                      | 8.8%<br>(5.4-13%)                   | 29<br>(17-44)       | 1900<br>(1200-2700)    |

| Location | Year | Sex    | Age      | Prevalence of current drinkers | Prevalence of abstainers | Population average of standard drinks daily | Percent of total attributable deaths | Percent of total attributable DALYs | Attributable deaths | Attributable DALYs    |
|----------|------|--------|----------|--------------------------------|--------------------------|---------------------------------------------|--------------------------------------|-------------------------------------|---------------------|-----------------------|
| Gabon    | 2010 | Male   | 35 to 39 | 45%<br>(28-63%)                | 55%<br>(37-72%)          | 3.4<br>(1.9-5.4)                            | 7.6%<br>(5.1-11%)                    | 8.5%<br>(5.5-12%)                   | 31<br>(19-47)       | 1800<br>(1200-2600)   |
| Gabon    | 2010 | Male   | 40 to 44 | 46%<br>(29-65%)                | 54%<br>(35-71%)          | 3.5<br>(1.9-5.6)                            | 8.1%<br>(5.5-11%)                    | 9.3%<br>(6-13%)                     | 36<br>(22-54)       | 1800<br>(1100-2600)   |
| Gabon    | 2010 | Male   | 45 to 49 | 50%<br>(32-68%)                | 50%<br>(32-68%)          | 3.7<br>(2-5.8)                              | 9.6%<br>(6.3-13%)                    | 11%<br>(7.1-16%)                    | 41<br>(25-60)       | 1800<br>(1100-2600)   |
| Gabon    | 2010 | Male   | 50 to 54 | 50%<br>(32-68%)                | 50%<br>(32-68%)          | 3.6<br>(2-6)                                | 11%<br>(7.4-15%)                     | 13%<br>(8.7-18%)                    | 45<br>(27-66)       | 1700<br>(1100-2500)   |
| Gabon    | 2010 | Male   | 55 to 59 | 48%<br>(31-67%)                | 52%<br>(33-69%)          | 3.2<br>(1.7-5.4)                            | 11%<br>(7-15%)                       | 14%<br>(8.6-19%)                    | 47<br>(29-70)       | 1600<br>(970-2300)    |
| Gabon    | 2010 | Male   | 60 to 64 | 46%<br>(28-66%)                | 54%<br>(34-72%)          | 2.8<br>(1.4-4.9)                            | 9.9%<br>(6-15%)                      | 12%<br>(7.2-18%)                    | 49<br>(28-75)       | 1400<br>(800-2100)    |
| Gabon    | 2010 | Male   | 65 to 69 | 47%<br>(30-64%)                | 53%<br>(36-70%)          | 2.5<br>(1.4-4.1)                            | 8.7%<br>(4.9-13%)                    | 10%<br>(5.8-16%)                    | 49<br>(26-77)       | 1100<br>(610-1800)    |
| Gabon    | 2010 | Male   | 70 to 74 | 48%<br>(30-65%)                | 52%<br>(35-70%)          | 2.2<br>(1.2-3.8)                            | 7%<br>(3.4-12%)                      | 8.3%<br>(4-14%)                     | 45<br>(22-79)       | 840<br>(400-1400)     |
| Gabon    | 2010 | Male   | 75 to 79 | 46%<br>(30-64%)                | 54%<br>(36-70%)          | 1.8<br>(0.88-3.3)                           | 5.3%<br>(2.2-9.7%)                   | 6.3%<br>(2.6-12%)                   | 36<br>(14-67)       | 510<br>(200-940)      |
| Gabon    | 2010 | Male   | 80 to 84 | 41%<br>(25-59%)                | 59%<br>(41-75%)          | 1.4<br>(0.68-2.5)                           | 3.8%<br>(1.5-7.1%)                   | 4.4%<br>(1.7-8.2%)                  | 21<br>(7.9-40)      | 220<br>(84-420)       |
| Gabon    | 2010 | Male   | 85 to 89 | 35%<br>(21-52%)                | 65%<br>(48-79%)          | 1.1<br>(0.53-1.9)                           | 2.7%<br>(1.1-5.3%)                   | 3.1%<br>(1.2-6.2%)                  | 9.3<br>(3.6-19)     | 71<br>(28-140)        |
| Gabon    | 2010 | Male   | 90 to 94 | 35%<br>(21-52%)                | 65%<br>(48-79%)          | 0.92<br>(0.42-1.7)                          | 1.8%<br>(0.57-3.8%)                  | 2%<br>(0.56-4.3%)                   | 2.4<br>(0.67-5.1)   | 13<br>(4.1-27)        |
| Gabon    | 2010 | Male   | 95 plus  | 38%<br>(20-59%)                | 62%<br>(41-80%)          | 0.87<br>(0.33-1.7)                          | 1.9%<br>(0.56-4.3%)                  | 2.1%<br>(0.48-4.9%)                 | 0.56<br>(0.13-1.3)  | 2.1<br>(0.61-4.7)     |
| Gabon    | 2016 | Female | All Ages | 22%<br>(18-28%)                | 78%<br>(72-82%)          | 1.3<br>(0.87-2)                             | 3.3%<br>(2.1-4.9%)                   | 5.3%<br>(2.9-8.4%)                  | 350<br>(180-570)    | 11000<br>(6400-15000) |
| Gabon    | 2016 | Female | 15 to 19 | 20%<br>(12-32%)                | 80%<br>(68-88%)          | 0.96<br>(0.43-1.9)                          | 1.8%<br>(1-3.1%)                     | 2.7%<br>(1.2-5.1%)                  | 2.2<br>(0.94-4.3)   | 250<br>(140-430)      |
| Gabon    | 2016 | Female | 20 to 24 | 29%<br>(17-43%)                | 71%<br>(57-83%)          | 1.9<br>(0.9-3.4)                            | 3.5%<br>(2.2-5.2%)                   | 4.5%<br>(2.2-7.6%)                  | 4.8<br>(2.2-8.2)    | 530<br>(320-790)      |
| Gabon    | 2016 | Female | 25 to 29 | 33%<br>(19-49%)                | 67%<br>(51-81%)          | 2.5<br>(1.3-4.3)                            | 4.2%<br>(2.7-5.9%)                   | 5.5%<br>(3.1-8.5%)                  | 7.5<br>(4.1-12)     | 680<br>(450-970)      |
| Gabon    | 2016 | Female | 30 to 34 | 35%<br>(21-52%)                | 65%<br>(48-79%)          | 2.8<br>(1.4-4.8)                            | 4.8%<br>(3.1-6.7%)                   | 6.5%<br>(3.7-10%)                   | 11<br>(6-17)        | 800<br>(510-1200)     |
| Gabon    | 2016 | Female | 35 to 39 | 36%<br>(22-54%)                | 64%<br>(46-78%)          | 2.8<br>(1.3-4.9)                            | 5%<br>(3.2-7%)                       | 6.9%<br>(4.1-10%)                   | 13<br>(7-21)        | 800<br>(480-1200)     |
| Gabon    | 2016 | Female | 40 to 44 | 36%<br>(23-54%)                | 64%<br>(46-77%)          | 2.7<br>(1.3-5)                              | 5.6%<br>(3.5-8.3%)                   | 7.9%<br>(4.8-12%)                   | 16<br>(9-26)        | 850<br>(490-1300)     |
| Gabon    | 2016 | Female | 45 to 49 | 36%<br>(21-53%)                | 64%<br>(47-79%)          | 2.6<br>(1.2-4.8)                            | 6.6%<br>(3.9-9.9%)                   | 9.3%<br>(5.5-14%)                   | 21<br>(12-35)       | 960<br>(540-1500)     |
| Gabon    | 2016 | Female | 50 to 54 | 33%<br>(20-51%)                | 67%<br>(49-80%)          | 2.4<br>(1-4.4)                              | 7.1%<br>(4-11%)                      | 9.6%<br>(5.5-14%)                   | 26<br>(14-42)       | 1000<br>(550-1600)    |

| Location | Year | Sex    | Age      | Prevalence of current drinkers | Prevalence of abstainers | Population average of standard drinks daily | Percent of total attributable deaths | Percent of total attributable DALYs | Attributable deaths | Attributable DALYs     |
|----------|------|--------|----------|--------------------------------|--------------------------|---------------------------------------------|--------------------------------------|-------------------------------------|---------------------|------------------------|
| Gabon    | 2016 | Female | 55 to 59 | 31%<br>(18-48%)                | 69%<br>(52-82%)          | 2.2<br>(0.96-4)                             | 7.3%<br>(3.9-11%)                    | 9.7%<br>(5.1-15%)                   | 30<br>(16-50)       | 1000<br>(520-1600)     |
| Gabon    | 2016 | Female | 60 to 64 | 30%<br>(18-47%)                | 70%<br>(53-82%)          | 2.1<br>(0.89-3.9)                           | 6.7%<br>(3.2-11%)                    | 8.5%<br>(4.1-14%)                   | 33<br>(15-54)       | 920<br>(430-1500)      |
| Gabon    | 2016 | Female | 65 to 69 | 32%<br>(20-47%)                | 68%<br>(53-80%)          | 2<br>(0.92-3.8)                             | 6.7%<br>(3.1-11%)                    | 8.3%<br>(3.9-14%)                   | 41<br>(18-69)       | 930<br>(410-1600)      |
| Gabon    | 2016 | Female | 70 to 74 | 31%<br>(20-47%)                | 69%<br>(53-80%)          | 1.8<br>(0.79-3.6)                           | 5.8%<br>(2.3-11%)                    | 7.1%<br>(2.9-13%)                   | 44<br>(17-83)       | 820<br>(320-1500)      |
| Gabon    | 2016 | Female | 75 to 79 | 29%<br>(18-45%)                | 71%<br>(55-82%)          | 1.5<br>(0.62-3.1)                           | 4.5%<br>(1.3-9.2%)                   | 5.4%<br>(1.5-11%)                   | 40<br>(11-83)       | 570<br>(160-1200)      |
| Gabon    | 2016 | Female | 80 to 84 | 26%<br>(16-41%)                | 74%<br>(59-84%)          | 1.2<br>(0.53-2.5)                           | 3.6%<br>(0.93-7.8%)                  | 4.3%<br>(1.1-9.2%)                  | 33<br>(8.7-72)      | 350<br>(90-770)        |
| Gabon    | 2016 | Female | 85 to 89 | 25%<br>(15-38%)                | 75%<br>(62-85%)          | 1.1<br>(0.48-2.2)                           | 2.8%<br>(0.66-6.5%)                  | 3.3%<br>(0.79-7.7%)                 | 18<br>(4-40)        | 130<br>(31-300)        |
| Gabon    | 2016 | Female | 90 to 94 | 26%<br>(16-39%)                | 74%<br>(61-84%)          | 1.1<br>(0.44-2.1)                           | 2.3%<br>(0.38-5.5%)                  | 2.7%<br>(0.42-6.6%)                 | 5.4<br>(0.83-13)    | 28<br>(4.3-68)         |
| Gabon    | 2016 | Female | 95 plus  | 30%<br>(16-48%)                | 70%<br>(52-84%)          | 1.1<br>(0.38-2.4)                           | 2.3%<br>(0.32-6%)                    | 2.6%<br>(0.31-7.1%)                 | 1.3<br>(0.15-3.5)   | 4.4<br>(0.63-12)       |
| Gabon    | 2016 | Male   | All Ages | 31%<br>(25-38%)                | 69%<br>(62-75%)          | 1.8<br>(1.2-2.7)                            | 5.2%<br>(3.5-7.2%)                   | 7.3%<br>(4.6-11%)                   | 520<br>(300-830)    | 20000<br>(13000-30000) |
| Gabon    | 2016 | Male   | 15 to 19 | 23%<br>(13-38%)                | 77%<br>(62-87%)          | 1.1<br>(0.48-2.1)                           | 3.2%<br>(1.8-5.5%)                   | 4.1%<br>(1.9-7.8%)                  | 5.5<br>(2.3-11)     | 530<br>(280-940)       |
| Gabon    | 2016 | Male   | 20 to 24 | 35%<br>(21-51%)                | 65%<br>(49-79%)          | 2.3<br>(1.1-4.1)                            | 8.1%<br>(5-12%)                      | 9.8%<br>(5.2-16%)                   | 18<br>(8.7-32)      | 1500<br>(880-2500)     |
| Gabon    | 2016 | Male   | 25 to 29 | 42%<br>(26-59%)                | 58%<br>(41-74%)          | 3.3<br>(1.7-5.5)                            | 9.6%<br>(6.4-14%)                    | 12%<br>(6.8-17%)                    | 27<br>(14-44)       | 2000<br>(1200-3100)    |
| Gabon    | 2016 | Male   | 30 to 34 | 44%<br>(27-63%)                | 56%<br>(37-73%)          | 3.7<br>(1.9-6.1)                            | 9.1%<br>(5.9-13%)                    | 11%<br>(6.4-16%)                    | 31<br>(17-50)       | 2100<br>(1300-3100)    |
| Gabon    | 2016 | Male   | 35 to 39 | 45%<br>(28-64%)                | 55%<br>(36-72%)          | 3.6<br>(1.8-6.3)                            | 8.8%<br>(5.7-12%)                    | 10%<br>(6.4-15%)                    | 34<br>(19-55)       | 2000<br>(1200-3100)    |
| Gabon    | 2016 | Male   | 40 to 44 | 47%<br>(30-66%)                | 53%<br>(34-70%)          | 3.7<br>(1.9-6.8)                            | 9%<br>(5.7-13%)                      | 11%<br>(6.5-15%)                    | 38<br>(21-62)       | 1900<br>(1100-3000)    |
| Gabon    | 2016 | Male   | 45 to 49 | 50%<br>(31-68%)                | 50%<br>(32-69%)          | 4<br>(1.8-7.3)                              | 10%<br>(6.2-14%)                     | 12%<br>(7.6-17%)                    | 46<br>(24-72)       | 2000<br>(1100-3100)    |
| Gabon    | 2016 | Male   | 50 to 54 | 50%<br>(32-68%)                | 50%<br>(32-68%)          | 3.9<br>(1.8-6.9)                            | 11%<br>(6.9-15%)                     | 14%<br>(8.4-18%)                    | 49<br>(27-79)       | 1900<br>(1100-3000)    |
| Gabon    | 2016 | Male   | 55 to 59 | 48%<br>(30-67%)                | 52%<br>(33-70%)          | 3.4<br>(1.6-6.2)                            | 11%<br>(6.5-16%)                     | 14%<br>(8.2-19%)                    | 49<br>(27-78)       | 1600<br>(930-2600)     |
| Gabon    | 2016 | Male   | 60 to 64 | 46%<br>(29-66%)                | 54%<br>(34-71%)          | 3<br>(1.4-5.6)                              | 9.8%<br>(5.5-14%)                    | 12%<br>(6.8-18%)                    | 49<br>(25-81)       | 1400<br>(740-2200)     |
| Gabon    | 2016 | Male   | 65 to 69 | 47%<br>(31-65%)                | 53%<br>(35-69%)          | 2.7<br>(1.2-5)                              | 8.7%<br>(4.6-14%)                    | 11%<br>(5.5-17%)                    | 51<br>(25-91)       | 1200<br>(590-2100)     |
| Gabon    | 2016 | Male   | 70 to 74 | 48%<br>(30-65%)                | 52%<br>(35-70%)          | 2.3<br>(1.1-4.5)                            | 7.2%<br>(3.2-13%)                    | 8.6%<br>(3.9-15%)                   | 46<br>(19-88)       | 860<br>(370-1600)      |



| Location | Year | Sex    | Age      | Prevalence of current drinkers | Prevalence of abstainers | Population average of standard drinks daily | Percent of total attributable deaths | Percent of total attributable DALYs | Attributable deaths | Attributable DALYs       |
|----------|------|--------|----------|--------------------------------|--------------------------|---------------------------------------------|--------------------------------------|-------------------------------------|---------------------|--------------------------|
| Gabon    | 2016 | Male   | 75 to 79 | 46%<br>(29-64%)                | 54%<br>(36-71%)          | 1.9<br>(0.85-3.9)                           | 5.5%<br>(2-11%)                      | 6.6%<br>(2.4-13%)                   | 37<br>(13-76)       | 530<br>(190-1100)        |
| Gabon    | 2016 | Male   | 80 to 84 | 41%<br>(24-59%)                | 59%<br>(41-76%)          | 1.5<br>(0.65-3)                             | 4%<br>(1.4-8.3%)                     | 4.7%<br>(1.6-9.8%)                  | 23<br>(7.9-51)      | 250<br>(84-540)          |
| Gabon    | 2016 | Male   | 85 to 89 | 35%<br>(21-52%)                | 65%<br>(48-79%)          | 1.1<br>(0.51-2.3)                           | 2.9%<br>(0.96-6.4%)                  | 3.3%<br>(1.1-7.3%)                  | 12<br>(3.8-26)      | 89<br>(30-190)           |
| Gabon    | 2016 | Male   | 90 to 94 | 34%<br>(21-51%)                | 66%<br>(49-79%)          | 0.96<br>(0.4-1.9)                           | 2%<br>(0.54-4.6%)                    | 2.2%<br>(0.53-5.2%)                 | 3.4<br>(0.82-8)     | 19<br>(5-42)             |
| Gabon    | 2016 | Male   | 95 plus  | 38%<br>(20-58%)                | 62%<br>(42-80%)          | 0.9<br>(0.3-1.9)                            | 2%<br>(0.54-5%)                      | 2.2%<br>(0.47-5.7%)                 | 0.86<br>(0.18-2.2)  | 3.2<br>(0.82-7.9)        |
| Burundi  | 1990 | Female | All Ages | 21%<br>(17-27%)                | 79%<br>(73-83%)          | 2.3<br>(1.8-2.9)                            | 3.9%<br>(2.8-5.1%)                   | 7.3%<br>(5.4-9.6%)                  | 3500<br>(2500-4800) | 110000<br>(82000-160000) |
| Burundi  | 1990 | Female | 15 to 19 | 22%<br>(13-36%)                | 78%<br>(64-87%)          | 2.7<br>(1.3-4.8)                            | 6.2%<br>(3.2-10%)                    | 8.4%<br>(4.1-14%)                   | 58<br>(28-97)       | 4400<br>(2300-7200)      |
| Burundi  | 1990 | Female | 20 to 24 | 27%<br>(15-43%)                | 73%<br>(57-85%)          | 3.8<br>(1.9-6.4)                            | 7.5%<br>(4-11%)                      | 9.1%<br>(4.6-15%)                   | 91<br>(47-150)      | 6500<br>(3600-10000)     |
| Burundi  | 1990 | Female | 25 to 29 | 29%<br>(16-46%)                | 71%<br>(54-84%)          | 4.6<br>(2.5-7.4)                            | 9.4%<br>(5.2-15%)                    | 11%<br>(6-18%)                      | 140<br>(71-230)     | 8900<br>(4800-15000)     |
| Burundi  | 1990 | Female | 30 to 34 | 32%<br>(18-50%)                | 68%<br>(50-82%)          | 5<br>(2.7-8)                                | 10%<br>(6.2-16%)                     | 13%<br>(7.2-20%)                    | 170<br>(99-290)     | 10000<br>(6000-16000)    |
| Burundi  | 1990 | Female | 35 to 39 | 36%<br>(21-54%)                | 64%<br>(46-79%)          | 5<br>(2.6-8.1)                              | 12%<br>(7.3-17%)                     | 14%<br>(8.4-21%)                    | 220<br>(130-340)    | 11000<br>(6900-18000)    |
| Burundi  | 1990 | Female | 40 to 44 | 38%<br>(23-56%)                | 62%<br>(44-77%)          | 5<br>(2.5-8.6)                              | 12%<br>(8.4-18%)                     | 15%<br>(9.6-21%)                    | 190<br>(120-280)    | 8800<br>(5600-13000)     |
| Burundi  | 1990 | Female | 45 to 49 | 38%<br>(21-55%)                | 62%<br>(45-79%)          | 5.2<br>(2.4-9)                              | 14%<br>(8.7-19%)                     | 16%<br>(10-23%)                     | 220<br>(130-330)    | 9100<br>(5600-13000)     |
| Burundi  | 1990 | Female | 50 to 54 | 36%<br>(20-56%)                | 64%<br>(44-80%)          | 5.2<br>(2.5-9.4)                            | 15%<br>(9.6-22%)                     | 18%<br>(11-25%)                     | 300<br>(180-430)    | 11000<br>(6800-16000)    |
| Burundi  | 1990 | Female | 55 to 59 | 35%<br>(20-54%)                | 65%<br>(46-80%)          | 5.2<br>(2.4-9.6)                            | 15%<br>(9.3-22%)                     | 17%<br>(10-25%)                     | 340<br>(210-510)    | 11000<br>(6500-16000)    |
| Burundi  | 1990 | Female | 60 to 64 | 35%<br>(20-54%)                | 65%<br>(46-80%)          | 5.2<br>(2.4-9.6)                            | 14%<br>(8.8-20%)                     | 16%<br>(9.8-22%)                    | 360<br>(230-520)    | 9600<br>(6100-14000)     |
| Burundi  | 1990 | Female | 65 to 69 | 36%<br>(21-54%)                | 64%<br>(46-79%)          | 4.8<br>(2.2-8.6)                            | 14%<br>(9.1-21%)                     | 16%<br>(10-23%)                     | 430<br>(270-640)    | 9700<br>(6100-14000)     |
| Burundi  | 1990 | Female | 70 to 74 | 35%<br>(21-53%)                | 65%<br>(47-79%)          | 4.1<br>(1.8-7.8)                            | 13%<br>(8-19%)                       | 14%<br>(8.7-21%)                    | 410<br>(250-610)    | 7400<br>(4500-11000)     |
| Burundi  | 1990 | Female | 75 to 79 | 32%<br>(18-50%)                | 68%<br>(50-82%)          | 3.5<br>(1.4-6.8)                            | 11%<br>(6.1-17%)                     | 12%<br>(6.7-18%)                    | 310<br>(170-460)    | 4300<br>(2300-6400)      |
| Burundi  | 1990 | Female | 80 to 84 | 31%<br>(16-49%)                | 69%<br>(51-84%)          | 3.1<br>(1.3-6.1)                            | 9.8%<br>(5.1-15%)                    | 11%<br>(5.6-16%)                    | 180<br>(93-280)     | 1900<br>(970-2900)       |
| Burundi  | 1990 | Female | 85 to 89 | 31%<br>(17-48%)                | 69%<br>(52-83%)          | 3<br>(1.2-5.7)                              | 8.3%<br>(4.2-13%)                    | 9.3%<br>(4.6-15%)                   | 65<br>(33-100)      | 480<br>(240-760)         |
| Burundi  | 1990 | Female | 90 to 94 | 33%<br>(19-50%)                | 67%<br>(50-81%)          | 3.1<br>(1.3-5.8)                            | 7.3%<br>(3.6-12%)                    | 8.4%<br>(4-14%)                     | 18<br>(8.4-29)      | 90<br>(43-140)           |

| Location | Year | Sex    | Age      | Prevalence of current drinkers | Prevalence of abstainers | Population average of standard drinks daily | Percent of total attributable deaths | Percent of total attributable DALYs | Attributable deaths | Attributable DALYs        |
|----------|------|--------|----------|--------------------------------|--------------------------|---------------------------------------------|--------------------------------------|-------------------------------------|---------------------|---------------------------|
| Burundi  | 1990 | Female | 95 plus  | 38%<br>(19-60%)                | 62%<br>(40-81%)          | 3.3<br>(1.2-6.9)                            | 7.3%<br>(3.2-12%)                    | 8.2%<br>(3.5-14%)                   | 4.3<br>(1.8-7.4)    | 15<br>(6.4-25)            |
| Burundi  | 1990 | Male   | All Ages | 30%<br>(24-38%)                | 70%<br>(62-76%)          | 3.2<br>(2.6-3.9)                            | 6.2%<br>(4.6-8.1%)                   | 10%<br>(7.8-13%)                    | 5100<br>(3600-6600) | 200000<br>(140000-260000) |
| Burundi  | 1990 | Male   | 15 to 19 | 28%<br>(17-44%)                | 72%<br>(56-83%)          | 3.4<br>(1.7-5.9)                            | 10%<br>(6.4-16%)                     | 13%<br>(7.6-20%)                    | 110<br>(65-180)     | 8600<br>(5100-13000)      |
| Burundi  | 1990 | Male   | 20 to 24 | 39%<br>(24-57%)                | 61%<br>(43-76%)          | 4.9<br>(2.6-8.2)                            | 18%<br>(11-25%)                      | 20%<br>(13-29%)                     | 250<br>(150-370)    | 18000<br>(11000-25000)    |
| Burundi  | 1990 | Male   | 25 to 29 | 45%<br>(27-62%)                | 55%<br>(38-73%)          | 6.3<br>(3.6-9.5)                            | 21%<br>(13-29%)                      | 24%<br>(15-34%)                     | 340<br>(220-490)    | 22000<br>(14000-31000)    |
| Burundi  | 1990 | Male   | 30 to 34 | 49%<br>(30-67%)                | 51%<br>(33-70%)          | 7.3<br>(4.4-11)                             | 23%<br>(15-31%)                      | 26%<br>(17-36%)                     | 410<br>(260-570)    | 24000<br>(16000-32000)    |
| Burundi  | 1990 | Male   | 35 to 39 | 51%<br>(34-69%)                | 49%<br>(31-66%)          | 8.1<br>(4.7-12)                             | 24%<br>(16-33%)                      | 28%<br>(18-38%)                     | 460<br>(300-630)    | 24000<br>(16000-32000)    |
| Burundi  | 1990 | Male   | 40 to 44 | 52%<br>(35-71%)                | 48%<br>(29-65%)          | 8.4<br>(4.5-13)                             | 25%<br>(17-32%)                      | 28%<br>(19-37%)                     | 410<br>(270-550)    | 19000<br>(13000-25000)    |
| Burundi  | 1990 | Male   | 45 to 49 | 53%<br>(34-71%)                | 47%<br>(29-66%)          | 8.4<br>(4.4-14)                             | 25%<br>(18-32%)                      | 28%<br>(20-37%)                     | 430<br>(290-610)    | 18000<br>(12000-25000)    |
| Burundi  | 1990 | Male   | 50 to 54 | 53%<br>(34-72%)                | 47%<br>(28-66%)          | 8.3<br>(4.3-14)                             | 25%<br>(18-33%)                      | 28%<br>(20-37%)                     | 490<br>(320-690)    | 18000<br>(12000-25000)    |
| Burundi  | 1990 | Male   | 55 to 59 | 53%<br>(35-71%)                | 47%<br>(29-65%)          | 8.1<br>(4.3-14)                             | 24%<br>(17-31%)                      | 26%<br>(19-34%)                     | 510<br>(340-720)    | 16000<br>(11000-23000)    |
| Burundi  | 1990 | Male   | 60 to 64 | 51%<br>(32-70%)                | 49%<br>(30-68%)          | 7.1<br>(3.5-13)                             | 20%<br>(15-26%)                      | 23%<br>(16-29%)                     | 470<br>(330-660)    | 13000<br>(8800-18000)     |
| Burundi  | 1990 | Male   | 65 to 69 | 48%<br>(31-67%)                | 52%<br>(33-69%)          | 5.7<br>(3-10)                               | 18%<br>(12-23%)                      | 19%<br>(14-26%)                     | 420<br>(280-590)    | 9400<br>(6300-13000)      |
| Burundi  | 1990 | Male   | 70 to 74 | 46%<br>(28-63%)                | 54%<br>(37-72%)          | 4.5<br>(2.2-8.2)                            | 15%<br>(9.4-20%)                     | 16%<br>(10-22%)                     | 350<br>(220-500)    | 6300<br>(3900-8900)       |
| Burundi  | 1990 | Male   | 75 to 79 | 43%<br>(27-61%)                | 57%<br>(39-73%)          | 3.7<br>(1.8-6.9)                            | 12%<br>(7-18%)                       | 14%<br>(7.7-20%)                    | 240<br>(130-350)    | 3300<br>(1800-4800)       |
| Burundi  | 1990 | Male   | 80 to 84 | 40%<br>(24-60%)                | 60%<br>(40-76%)          | 3.1<br>(1.5-5.7)                            | 10%<br>(5.5-15%)                     | 11%<br>(6.2-17%)                    | 120<br>(62-180)     | 1200<br>(650-1800)        |
| Burundi  | 1990 | Male   | 85 to 89 | 38%<br>(22-55%)                | 62%<br>(45-78%)          | 2.7<br>(1.3-4.7)                            | 7.8%<br>(4.2-12%)                    | 8.7%<br>(4.5-13%)                   | 40<br>(21-60)       | 300<br>(160-450)          |
| Burundi  | 1990 | Male   | 90 to 94 | 39%<br>(23-57%)                | 61%<br>(43-77%)          | 2.5<br>(1.1-4.6)                            | 5.9%<br>(2.7-9.6%)                   | 6.6%<br>(2.8-11%)                   | 9.7<br>(4.1-16)     | 51<br>(22-84)             |
| Burundi  | 1990 | Male   | 95 plus  | 42%<br>(22-64%)                | 58%<br>(36-78%)          | 2.4<br>(0.93-5)                             | 5.6%<br>(2.2-9.7%)                   | 6.1%<br>(2.3-11%)                   | 2.1<br>(0.79-3.7)   | 7.5<br>(3.1-13)           |
| Burundi  | 1995 | Female | All Ages | 21%<br>(17-27%)                | 79%<br>(73-83%)          | 2.4<br>(1.9-2.9)                            | 4.1%<br>(2.9-5.5%)                   | 7.7%<br>(5.6-10%)                   | 4000<br>(2900-5500) | 130000<br>(93000-180000)  |
| Burundi  | 1995 | Female | 15 to 19 | 22%<br>(13-36%)                | 78%<br>(64-87%)          | 2.8<br>(1.4-5)                              | 6.3%<br>(3.3-10%)                    | 8.4%<br>(4.1-14%)                   | 77<br>(37-130)      | 5800<br>(3000-9600)       |
| Burundi  | 1995 | Female | 20 to 24 | 27%<br>(15-43%)                | 73%<br>(57-85%)          | 4<br>(2-6.7)                                | 6.9%<br>(3.8-11%)                    | 8.3%<br>(4.2-14%)                   | 94<br>(47-160)      | 6700<br>(3600-11000)      |

| Location | Year | Sex    | Age      | Prevalence of current drinkers | Prevalence of abstainers | Population average of standard drinks daily | Percent of total attributable deaths | Percent of total attributable DALYs | Attributable deaths | Attributable DALYs     |
|----------|------|--------|----------|--------------------------------|--------------------------|---------------------------------------------|--------------------------------------|-------------------------------------|---------------------|------------------------|
| Burundi  | 1995 | Female | 25 to 29 | 30%<br>(16-47%)                | 70%<br>(53-84%)          | 4.8<br>(2.5-8.1)                            | 8.3%<br>(4.6-13%)                    | 9.8%<br>(5.1-16%)                   | 140<br>(72-220)     | 8800<br>(4800-14000)   |
| Burundi  | 1995 | Female | 30 to 34 | 33%<br>(18-51%)                | 67%<br>(49-82%)          | 5.3<br>(2.9-8.6)                            | 9.3%<br>(5.2-15%)                    | 11%<br>(5.8-18%)                    | 180<br>(97-290)     | 10000<br>(5800-17000)  |
| Burundi  | 1995 | Female | 35 to 39 | 36%<br>(21-55%)                | 64%<br>(45-79%)          | 5.3<br>(2.8-8.4)                            | 11%<br>(6.5-17%)                     | 13%<br>(7.6-20%)                    | 250<br>(150-400)    | 13000<br>(7800-21000)  |
| Burundi  | 1995 | Female | 40 to 44 | 38%<br>(22-57%)                | 62%<br>(43-78%)          | 5.3<br>(2.7-8.8)                            | 12%<br>(8-18%)                       | 14%<br>(9.2-21%)                    | 270<br>(170-410)    | 13000<br>(8000-19000)  |
| Burundi  | 1995 | Female | 45 to 49 | 38%<br>(20-56%)                | 62%<br>(44-80%)          | 5.5<br>(2.6-9.6)                            | 13%<br>(8.5-19%)                     | 15%<br>(9.7-23%)                    | 250<br>(150-380)    | 10000<br>(6500-16000)  |
| Burundi  | 1995 | Female | 50 to 54 | 36%<br>(20-56%)                | 64%<br>(44-80%)          | 5.4<br>(2.5-9.7)                            | 15%<br>(9.5-22%)                     | 18%<br>(11-25%)                     | 330<br>(200-490)    | 12000<br>(7300-18000)  |
| Burundi  | 1995 | Female | 55 to 59 | 35%<br>(20-54%)                | 65%<br>(46-80%)          | 5.4<br>(2.6-9.8)                            | 15%<br>(9.4-23%)                     | 18%<br>(11-26%)                     | 380<br>(230-580)    | 12000<br>(7200-18000)  |
| Burundi  | 1995 | Female | 60 to 64 | 35%<br>(20-54%)                | 65%<br>(46-80%)          | 5.4<br>(2.5-10)                             | 14%<br>(9.1-21%)                     | 16%<br>(10-24%)                     | 410<br>(260-600)    | 11000<br>(6900-16000)  |
| Burundi  | 1995 | Female | 65 to 69 | 37%<br>(21-55%)                | 63%<br>(45-79%)          | 5.1<br>(2.4-9)                              | 15%<br>(9.7-22%)                     | 17%<br>(11-24%)                     | 480<br>(300-700)    | 11000<br>(6800-16000)  |
| Burundi  | 1995 | Female | 70 to 74 | 35%<br>(21-53%)                | 65%<br>(47-79%)          | 4.4<br>(1.9-8.4)                            | 14%<br>(8.5-19%)                     | 15%<br>(9.3-21%)                    | 470<br>(280-690)    | 8400<br>(5100-12000)   |
| Burundi  | 1995 | Female | 75 to 79 | 32%<br>(18-51%)                | 68%<br>(49-82%)          | 3.7<br>(1.5-7.3)                            | 12%<br>(6.7-18%)                     | 13%<br>(7.3-19%)                    | 360<br>(200-530)    | 5000<br>(2700-7400)    |
| Burundi  | 1995 | Female | 80 to 84 | 31%<br>(16-49%)                | 69%<br>(51-84%)          | 3.3<br>(1.4-6.4)                            | 10%<br>(5.6-16%)                     | 12%<br>(6.2-17%)                    | 210<br>(110-310)    | 2100<br>(1100-3200)    |
| Burundi  | 1995 | Female | 85 to 89 | 31%<br>(17-49%)                | 69%<br>(51-83%)          | 3.2<br>(1.3-5.9)                            | 8.9%<br>(4.7-14%)                    | 10%<br>(5.2-15%)                    | 86<br>(45-130)      | 630<br>(330-980)       |
| Burundi  | 1995 | Female | 90 to 94 | 33%<br>(19-51%)                | 67%<br>(49-81%)          | 3.3<br>(1.3-6.2)                            | 7.8%<br>(3.9-12%)                    | 9%<br>(4.4-14%)                     | 22<br>(11-34)       | 110<br>(55-170)        |
| Burundi  | 1995 | Female | 95 plus  | 38%<br>(19-60%)                | 62%<br>(40-81%)          | 3.5<br>(1.2-7.4)                            | 7.7%<br>(3.5-13%)                    | 8.8%<br>(4-15%)                     | 5.7<br>(2.6-9.6)    | 20<br>(8.9-33)         |
| Burundi  | 1995 | Male   | All Ages | 30%<br>(24-37%)                | 70%<br>(63-76%)          | 3.2<br>(2.6-3.9)                            | 6.4%<br>(4.7-8.3%)                   | 11%<br>(7.9-14%)                    | 5700<br>(4100-7400) | 22000<br>(16000-29000) |
| Burundi  | 1995 | Male   | 15 to 19 | 28%<br>(17-43%)                | 72%<br>(57-83%)          | 3.5<br>(1.8-6)                              | 10%<br>(6.1-15%)                     | 12%<br>(7.1-18%)                    | 150<br>(87-240)     | 11000<br>(6700-18000)  |
| Burundi  | 1995 | Male   | 20 to 24 | 39%<br>(24-58%)                | 61%<br>(42-76%)          | 5.2<br>(2.7-8.6)                            | 16%<br>(9.9-22%)                     | 18%<br>(11-25%)                     | 260<br>(160-380)    | 18000<br>(11000-26000) |
| Burundi  | 1995 | Male   | 25 to 29 | 45%<br>(27-63%)                | 55%<br>(37-73%)          | 6.6<br>(3.7-10)                             | 18%<br>(11-26%)                      | 20%<br>(12-29%)                     | 330<br>(210-470)    | 21000<br>(14000-29000) |
| Burundi  | 1995 | Male   | 30 to 34 | 49%<br>(30-67%)                | 51%<br>(33-70%)          | 7.7<br>(4.6-11)                             | 19%<br>(12-26%)                      | 22%<br>(13-30%)                     | 410<br>(270-570)    | 24000<br>(16000-32000) |
| Burundi  | 1995 | Male   | 35 to 39 | 51%<br>(34-69%)                | 49%<br>(31-66%)          | 8.4<br>(4.9-13)                             | 21%<br>(14-29%)                      | 24%<br>(15-33%)                     | 520<br>(340-710)    | 27000<br>(18000-36000) |
| Burundi  | 1995 | Male   | 40 to 44 | 52%<br>(36-70%)                | 48%<br>(30-64%)          | 8.7<br>(4.8-14)                             | 23%<br>(16-30%)                      | 26%<br>(17-34%)                     | 590<br>(400-800)    | 27000<br>(19000-37000) |

| Location | Year | Sex    | Age      | Prevalence of current drinkers | Prevalence of abstainers | Population average of standard drinks daily | Percent of total attributable deaths | Percent of total attributable DALYs | Attributable deaths | Attributable DALYs       |
|----------|------|--------|----------|--------------------------------|--------------------------|---------------------------------------------|--------------------------------------|-------------------------------------|---------------------|--------------------------|
| Burundi  | 1995 | Male   | 45 to 49 | 53%<br>(35-71%)                | 47%<br>(29-65%)          | 8.8<br>(4.8-15)                             | 24%<br>(16-31%)                      | 27%<br>(18-35%)                     | 500<br>(330-700)    | 21000<br>(14000-29000)   |
| Burundi  | 1995 | Male   | 50 to 54 | 54%<br>(34-72%)                | 46%<br>(28-66%)          | 8.7<br>(4.6-15)                             | 25%<br>(18-33%)                      | 28%<br>(20-36%)                     | 540<br>(360-750)    | 20000<br>(13000-27000)   |
| Burundi  | 1995 | Male   | 55 to 59 | 53%<br>(35-72%)                | 47%<br>(28-65%)          | 8.4<br>(4.4-14)                             | 24%<br>(17-31%)                      | 27%<br>(19-35%)                     | 560<br>(380-760)    | 18000<br>(12000-24000)   |
| Burundi  | 1995 | Male   | 60 to 64 | 51%<br>(32-71%)                | 49%<br>(29-68%)          | 7.4<br>(3.7-13)                             | 21%<br>(15-27%)                      | 23%<br>(17-30%)                     | 540<br>(380-730)    | 14000<br>(10000-20000)   |
| Burundi  | 1995 | Male   | 65 to 69 | 49%<br>(31-67%)                | 51%<br>(33-69%)          | 6<br>(3.2-10)                               | 18%<br>(13-24%)                      | 20%<br>(14-26%)                     | 480<br>(320-660)    | 11000<br>(7200-15000)    |
| Burundi  | 1995 | Male   | 70 to 74 | 46%<br>(29-64%)                | 54%<br>(36-71%)          | 4.7<br>(2.4-8.6)                            | 16%<br>(10-21%)                      | 17%<br>(11-23%)                     | 400<br>(250-550)    | 7100<br>(4500-9900)      |
| Burundi  | 1995 | Male   | 75 to 79 | 43%<br>(27-62%)                | 57%<br>(38-73%)          | 3.8<br>(1.8-7.1)                            | 13%<br>(7.7-19%)                     | 14%<br>(8.5-21%)                    | 270<br>(150-390)    | 3700<br>(2100-5300)      |
| Burundi  | 1995 | Male   | 80 to 84 | 41%<br>(24-59%)                | 59%<br>(41-76%)          | 3.3<br>(1.6-6)                              | 11%<br>(6.1-16%)                     | 12%<br>(6.7-18%)                    | 130<br>(71-190)     | 1400<br>(740-2000)       |
| Burundi  | 1995 | Male   | 85 to 89 | 38%<br>(23-55%)                | 62%<br>(45-77%)          | 2.8<br>(1.4-4.8)                            | 8.5%<br>(4.7-13%)                    | 9.5%<br>(5.1-14%)                   | 52<br>(28-78)       | 390<br>(210-580)         |
| Burundi  | 1995 | Male   | 90 to 94 | 38%<br>(23-56%)                | 62%<br>(44-77%)          | 2.5<br>(1.1-4.8)                            | 6.3%<br>(2.9-10%)                    | 7.1%<br>(3.1-12%)                   | 11<br>(5.1-19)      | 59<br>(27-96)            |
| Burundi  | 1995 | Male   | 95 plus  | 42%<br>(22-64%)                | 58%<br>(36-78%)          | 2.5<br>(0.93-5.3)                           | 6.1%<br>(2.6-10%)                    | 6.6%<br>(2.8-12%)                   | 3<br>(1.3-5.1)      | 11<br>(4.6-18)           |
| Burundi  | 2000 | Female | All Ages | 21%<br>(17-27%)                | 79%<br>(73-83%)          | 2.2<br>(1.7-2.7)                            | 4.3%<br>(3-5.9%)                     | 8.2%<br>(5.8-11%)                   | 4300<br>(3000-6000) | 140000<br>(96000-190000) |
| Burundi  | 2000 | Female | 15 to 19 | 22%<br>(12-35%)                | 78%<br>(65-88%)          | 2.6<br>(1.3-4.5)                            | 6.7%<br>(3.7-11%)                    | 9.1%<br>(4.7-15%)                   | 97<br>(49-170)      | 7300<br>(3900-12000)     |
| Burundi  | 2000 | Female | 20 to 24 | 27%<br>(14-42%)                | 73%<br>(58-86%)          | 3.7<br>(1.8-6.1)                            | 7%<br>(3.8-11%)                      | 8.4%<br>(4.2-14%)                   | 110<br>(53-180)     | 7800<br>(4100-12000)     |
| Burundi  | 2000 | Female | 25 to 29 | 29%<br>(17-46%)                | 71%<br>(54-83%)          | 4.5<br>(2.3-7.5)                            | 7.7%<br>(4.1-13%)                    | 9%<br>(4.5-15%)                     | 130<br>(69-210)     | 8400<br>(4600-13000)     |
| Burundi  | 2000 | Female | 30 to 34 | 32%<br>(18-50%)                | 68%<br>(50-82%)          | 5<br>(2.6-8.1)                              | 8.2%<br>(4.7-13%)                    | 9.5%<br>(5.2-16%)                   | 160<br>(88-260)     | 9300<br>(5300-15000)     |
| Burundi  | 2000 | Female | 35 to 39 | 36%<br>(20-55%)                | 64%<br>(45-80%)          | 5<br>(2.6-8.1)                              | 10%<br>(6-16%)                       | 12%<br>(6.7-18%)                    | 230<br>(130-360)    | 12000<br>(7000-18000)    |
| Burundi  | 2000 | Female | 40 to 44 | 37%<br>(22-56%)                | 63%<br>(44-78%)          | 5<br>(2.5-8.5)                              | 12%<br>(7.3-17%)                     | 13%<br>(8.3-20%)                    | 290<br>(180-440)    | 13000<br>(8300-20000)    |
| Burundi  | 2000 | Female | 45 to 49 | 37%<br>(20-55%)                | 63%<br>(45-80%)          | 5.1<br>(2.5-8.8)                            | 13%<br>(8.4-20%)                     | 16%<br>(9.8-24%)                    | 330<br>(200-500)    | 13000<br>(8200-20000)    |
| Burundi  | 2000 | Female | 50 to 54 | 36%<br>(20-56%)                | 64%<br>(44-80%)          | 5<br>(2.4-9.2)                              | 16%<br>(9.8-24%)                     | 18%<br>(11-28%)                     | 340<br>(200-520)    | 12000<br>(7500-19000)    |
| Burundi  | 2000 | Female | 55 to 59 | 34%<br>(19-54%)                | 66%<br>(46-81%)          | 5<br>(2.3-9.4)                              | 16%<br>(9.8-25%)                     | 19%<br>(11-28%)                     | 380<br>(230-600)    | 12000<br>(7100-19000)    |
| Burundi  | 2000 | Female | 60 to 64 | 35%<br>(19-54%)                | 65%<br>(46-81%)          | 5<br>(2.2-9.4)                              | 15%<br>(9.6-22%)                     | 17%<br>(11-25%)                     | 410<br>(260-620)    | 11000<br>(6800-16000)    |

| Location | Year | Sex    | Age      | Prevalence of current drinkers | Prevalence of abstainers | Population average of standard drinks daily | Percent of total attributable deaths | Percent of total attributable DALYs | Attributable deaths | Attributable DALYs        |
|----------|------|--------|----------|--------------------------------|--------------------------|---------------------------------------------|--------------------------------------|-------------------------------------|---------------------|---------------------------|
| Burundi  | 2000 | Female | 65 to 69 | 36%<br>(21-54%)                | 64%<br>(46-79%)          | 4.7<br>(2.2-8.4)                            | 16%<br>(10-23%)                      | 18%<br>(11-26%)                     | 520<br>(320-760)    | 12000<br>(7200-17000)     |
| Burundi  | 2000 | Female | 70 to 74 | 35%<br>(21-53%)                | 65%<br>(47-79%)          | 4<br>(1.8-7.7)                              | 15%<br>(9.1-21%)                     | 16%<br>(9.9-23%)                    | 510<br>(310-750)    | 9100<br>(5600-13000)      |
| Burundi  | 2000 | Female | 75 to 79 | 32%<br>(18-51%)                | 68%<br>(49-82%)          | 3.4<br>(1.4-6.7)                            | 13%<br>(7.2-19%)                     | 14%<br>(7.9-21%)                    | 420<br>(240-640)    | 5900<br>(3300-8800)       |
| Burundi  | 2000 | Female | 80 to 84 | 31%<br>(16-50%)                | 69%<br>(50-84%)          | 3.1<br>(1.2-5.9)                            | 11%<br>(5.9-17%)                     | 12%<br>(6.5-19%)                    | 250<br>(140-390)    | 2600<br>(1400-4000)       |
| Burundi  | 2000 | Female | 85 to 89 | 31%<br>(17-48%)                | 69%<br>(52-83%)          | 2.9<br>(1.2-5.4)                            | 9.7%<br>(4.9-15%)                    | 11%<br>(5.6-17%)                    | 96<br>(50-150)      | 700<br>(370-1100)         |
| Burundi  | 2000 | Female | 90 to 94 | 33%<br>(19-51%)                | 67%<br>(49-81%)          | 3<br>(1.3-5.7)                              | 8.7%<br>(4.5-14%)                    | 10%<br>(5.1-16%)                    | 30<br>(15-48)       | 150<br>(79-240)           |
| Burundi  | 2000 | Female | 95 plus  | 38%<br>(19-60%)                | 62%<br>(40-81%)          | 3.3<br>(1.2-7)                              | 8.7%<br>(4.1-15%)                    | 9.9%<br>(4.6-17%)                   | 7.3<br>(3.3-12)     | 25<br>(11-41)             |
| Burundi  | 2000 | Male   | All Ages | 30%<br>(24-37%)                | 70%<br>(63-76%)          | 3.1<br>(2.5-3.7)                            | 6.4%<br>(4.9-8.2%)                   | 11%<br>(8.2-14%)                    | 5700<br>(4300-7400) | 220000<br>(170000-290000) |
| Burundi  | 2000 | Male   | 15 to 19 | 27%<br>(17-43%)                | 73%<br>(57-83%)          | 3.3<br>(1.8-5.6)                            | 10%<br>(6.5-15%)                     | 12%<br>(7.6-19%)                    | 180<br>(100-260)    | 13000<br>(8100-20000)     |
| Burundi  | 2000 | Male   | 20 to 24 | 39%<br>(24-55%)                | 61%<br>(45-76%)          | 4.9<br>(2.6-7.7)                            | 16%<br>(11-22%)                      | 18%<br>(11-25%)                     | 300<br>(190-420)    | 21000<br>(14000-29000)    |
| Burundi  | 2000 | Male   | 25 to 29 | 45%<br>(27-63%)                | 55%<br>(37-73%)          | 6.3<br>(3.6-9.6)                            | 17%<br>(11-24%)                      | 19%<br>(12-28%)                     | 300<br>(200-410)    | 19000<br>(13000-26000)    |
| Burundi  | 2000 | Male   | 30 to 34 | 49%<br>(30-67%)                | 51%<br>(33-70%)          | 7.3<br>(4.3-11)                             | 17%<br>(11-24%)                      | 19%<br>(13-27%)                     | 350<br>(230-470)    | 20000<br>(14000-27000)    |
| Burundi  | 2000 | Male   | 35 to 39 | 51%<br>(34-70%)                | 49%<br>(30-66%)          | 8<br>(4.5-12)                               | 19%<br>(13-25%)                      | 21%<br>(14-29%)                     | 450<br>(310-600)    | 23000<br>(16000-31000)    |
| Burundi  | 2000 | Male   | 40 to 44 | 52%<br>(36-71%)                | 48%<br>(29-64%)          | 8.3<br>(4.5-13)                             | 21%<br>(14-27%)                      | 23%<br>(16-31%)                     | 570<br>(400-770)    | 27000<br>(19000-36000)    |
| Burundi  | 2000 | Male   | 45 to 49 | 53%<br>(34-72%)                | 47%<br>(28-66%)          | 8.3<br>(4.5-14)                             | 22%<br>(15-29%)                      | 25%<br>(17-33%)                     | 600<br>(400-830)    | 25000<br>(17000-34000)    |
| Burundi  | 2000 | Male   | 50 to 54 | 53%<br>(35-71%)                | 47%<br>(29-65%)          | 8.2<br>(4.4-14)                             | 24%<br>(17-32%)                      | 27%<br>(20-36%)                     | 510<br>(350-710)    | 19000<br>(13000-26000)    |
| Burundi  | 2000 | Male   | 55 to 59 | 53%<br>(35-71%)                | 47%<br>(29-65%)          | 7.9<br>(4.2-13)                             | 24%<br>(18-31%)                      | 27%<br>(20-36%)                     | 510<br>(350-690)    | 16000<br>(11000-22000)    |
| Burundi  | 2000 | Male   | 60 to 64 | 51%<br>(32-70%)                | 49%<br>(30-68%)          | 7<br>(3.5-13)                               | 21%<br>(15-27%)                      | 24%<br>(17-31%)                     | 490<br>(340-670)    | 13000<br>(9300-18000)     |
| Burundi  | 2000 | Male   | 65 to 69 | 48%<br>(31-66%)                | 52%<br>(34-69%)          | 5.6<br>(3-9.7)                              | 19%<br>(13-25%)                      | 21%<br>(15-28%)                     | 480<br>(320-670)    | 11000<br>(7300-15000)     |
| Burundi  | 2000 | Male   | 70 to 74 | 45%<br>(28-63%)                | 55%<br>(37-72%)          | 4.3<br>(2.2-7.8)                            | 16%<br>(10-22%)                      | 18%<br>(11-24%)                     | 420<br>(260-590)    | 7600<br>(4700-11000)      |
| Burundi  | 2000 | Male   | 75 to 79 | 43%<br>(26-62%)                | 57%<br>(38-74%)          | 3.6<br>(1.7-6.6)                            | 14%<br>(7.7-19%)                     | 15%<br>(8.8-22%)                    | 290<br>(160-420)    | 4000<br>(2200-5900)       |
| Burundi  | 2000 | Male   | 80 to 84 | 40%<br>(23-59%)                | 60%<br>(41-77%)          | 3.1<br>(1.4-5.5)                            | 12%<br>(6.4-17%)                     | 13%<br>(7.2-19%)                    | 150<br>(78-220)     | 1500<br>(810-2300)        |

| Location | Year | Sex    | Age      | Prevalence of current drinkers | Prevalence of abstainers | Population average of standard drinks daily | Percent of total attributable deaths | Percent of total attributable DALYs | Attributable deaths | Attributable DALYs        |
|----------|------|--------|----------|--------------------------------|--------------------------|---------------------------------------------|--------------------------------------|-------------------------------------|---------------------|---------------------------|
| Burundi  | 2000 | Male   | 85 to 89 | 38%<br>(23-55%)                | 62%<br>(45-77%)          | 2.6<br>(1.2-4.5)                            | 9%<br>(5-14%)                        | 10%<br>(5.5-15%)                    | 51<br>(28-78)       | 380<br>(210-570)          |
| Burundi  | 2000 | Male   | 90 to 94 | 38%<br>(23-56%)                | 62%<br>(44-77%)          | 2.4<br>(1.1-4.5)                            | 7%<br>(3.3-11%)                      | 7.9%<br>(3.7-13%)                   | 15<br>(7.1-25)      | 78<br>(37-130)            |
| Burundi  | 2000 | Male   | 95 plus  | 42%<br>(21-63%)                | 58%<br>(37-79%)          | 2.4<br>(0.9-4.8)                            | 7.2%<br>(3.3-12%)                    | 8.1%<br>(3.5-14%)                   | 3.7<br>(1.6-6.3)    | 13<br>(5.7-22)            |
| Burundi  | 2005 | Female | All Ages | 22%<br>(17-28%)                | 78%<br>(72-83%)          | 2.3<br>(1.8-2.8)                            | 4.2%<br>(3-5.6%)                     | 8.1%<br>(5.8-11%)                   | 4000<br>(2800-5400) | 130000<br>(91000-170000)  |
| Burundi  | 2005 | Female | 15 to 19 | 22%<br>(12-36%)                | 78%<br>(64-88%)          | 2.6<br>(1.3-4.5)                            | 6.3%<br>(3.4-9.9%)                   | 9.1%<br>(4.7-15%)                   | 92<br>(47-150)      | 7100<br>(3700-11000)      |
| Burundi  | 2005 | Female | 20 to 24 | 27%<br>(15-43%)                | 73%<br>(57-85%)          | 3.7<br>(1.8-6.1)                            | 6.9%<br>(3.9-11%)                    | 8.8%<br>(4.6-15%)                   | 110<br>(59-180)     | 8100<br>(4600-13000)      |
| Burundi  | 2005 | Female | 25 to 29 | 29%<br>(16-46%)                | 71%<br>(54-84%)          | 4.5<br>(2.4-7.4)                            | 7.4%<br>(4.2-12%)                    | 9%<br>(4.7-15%)                     | 130<br>(70-210)     | 8700<br>(4900-14000)      |
| Burundi  | 2005 | Female | 30 to 34 | 32%<br>(17-51%)                | 68%<br>(49-83%)          | 4.9<br>(2.5-8)                              | 7.1%<br>(4.2-11%)                    | 8.3%<br>(4.7-14%)                   | 130<br>(74-210)     | 7800<br>(4700-12000)      |
| Burundi  | 2005 | Female | 35 to 39 | 36%<br>(20-54%)                | 64%<br>(46-80%)          | 4.9<br>(2.5-7.9)                            | 8.7%<br>(5.3-13%)                    | 10%<br>(6-16%)                      | 180<br>(110-280)    | 9500<br>(5700-15000)      |
| Burundi  | 2005 | Female | 40 to 44 | 37%<br>(23-57%)                | 63%<br>(43-77%)          | 4.9<br>(2.5-8.5)                            | 10%<br>(6.4-15%)                     | 12%<br>(7.4-18%)                    | 230<br>(140-340)    | 11000<br>(6700-16000)     |
| Burundi  | 2005 | Female | 45 to 49 | 37%<br>(20-56%)                | 63%<br>(44-80%)          | 5.1<br>(2.4-8.8)                            | 12%<br>(7.8-18%)                     | 15%<br>(9.4-22%)                    | 300<br>(190-460)    | 13000<br>(8000-19000)     |
| Burundi  | 2005 | Female | 50 to 54 | 36%<br>(20-56%)                | 64%<br>(44-80%)          | 5<br>(2.3-9.2)                              | 15%<br>(9.2-22%)                     | 18%<br>(11-26%)                     | 390<br>(230-570)    | 14000<br>(8400-21000)     |
| Burundi  | 2005 | Female | 55 to 59 | 34%<br>(20-54%)                | 66%<br>(46-80%)          | 5<br>(2.3-9.2)                              | 16%<br>(9.7-23%)                     | 18%<br>(11-28%)                     | 340<br>(210-520)    | 11000<br>(6600-16000)     |
| Burundi  | 2005 | Female | 60 to 64 | 35%<br>(20-53%)                | 65%<br>(47-80%)          | 5<br>(2.2-9.5)                              | 15%<br>(9.4-21%)                     | 17%<br>(11-24%)                     | 360<br>(230-520)    | 9600<br>(6200-14000)      |
| Burundi  | 2005 | Female | 65 to 69 | 36%<br>(22-54%)                | 64%<br>(46-78%)          | 4.7<br>(2.2-8.3)                            | 16%<br>(9.9-22%)                     | 18%<br>(11-25%)                     | 450<br>(280-650)    | 9900<br>(6200-14000)      |
| Burundi  | 2005 | Female | 70 to 74 | 35%<br>(21-53%)                | 65%<br>(47-79%)          | 4.1<br>(1.8-7.8)                            | 14%<br>(8.8-21%)                     | 16%<br>(9.8-23%)                    | 460<br>(280-680)    | 8300<br>(5100-12000)      |
| Burundi  | 2005 | Female | 75 to 79 | 32%<br>(18-51%)                | 68%<br>(49-82%)          | 3.4<br>(1.4-6.8)                            | 13%<br>(7.3-19%)                     | 14%<br>(8.1-21%)                    | 390<br>(220-590)    | 5400<br>(3100-8300)       |
| Burundi  | 2005 | Female | 80 to 84 | 31%<br>(16-48%)                | 69%<br>(52-84%)          | 3.1<br>(1.2-5.8)                            | 11%<br>(6.1-17%)                     | 13%<br>(6.9-19%)                    | 270<br>(150-420)    | 2800<br>(1500-4300)       |
| Burundi  | 2005 | Female | 85 to 89 | 31%<br>(17-48%)                | 69%<br>(52-83%)          | 3<br>(1.2-5.6)                              | 9.9%<br>(5.2-16%)                    | 11%<br>(5.8-18%)                    | 110<br>(59-180)     | 830<br>(430-1300)         |
| Burundi  | 2005 | Female | 90 to 94 | 34%<br>(19-51%)                | 66%<br>(49-81%)          | 3.1<br>(1.3-5.8)                            | 9%<br>(4.5-14%)                      | 10%<br>(5.2-17%)                    | 33<br>(16-52)       | 160<br>(82-260)           |
| Burundi  | 2005 | Female | 95 plus  | 38%<br>(19-60%)                | 62%<br>(40-81%)          | 3.3<br>(1.2-6.9)                            | 9.1%<br>(4.4-15%)                    | 10%<br>(5-17%)                      | 9.4<br>(4.5-16)     | 32<br>(15-52)             |
| Burundi  | 2005 | Male   | All Ages | 30%<br>(24-38%)                | 70%<br>(62-76%)          | 3.2<br>(2.6-3.9)                            | 6.6%<br>(5.1-8.4%)                   | 11%<br>(8.6-14%)                    | 5400<br>(4200-7000) | 220000<br>(170000-270000) |

| Location | Year | Sex    | Age      | Prevalence of current drinkers | Prevalence of abstainers | Population average of standard drinks daily | Percent of total attributable deaths | Percent of total attributable DALYs | Attributable deaths | Attributable DALYs       |
|----------|------|--------|----------|--------------------------------|--------------------------|---------------------------------------------|--------------------------------------|-------------------------------------|---------------------|--------------------------|
| Burundi  | 2005 | Male   | 15 to 19 | 27%<br>(17-43%)                | 73%<br>(57-83%)          | 3.2<br>(1.7-5.4)                            | 10%<br>(6.5-15%)                     | 13%<br>(8.2-19%)                    | 170<br>(100-250)    | 13000<br>(8100-19000)    |
| Burundi  | 2005 | Male   | 20 to 24 | 39%<br>(24-56%)                | 61%<br>(44-76%)          | 4.8<br>(2.6-7.6)                            | 18%<br>(12-24%)                      | 21%<br>(14-29%)                     | 340<br>(220-470)    | 24000<br>(16000-33000)   |
| Burundi  | 2005 | Male   | 25 to 29 | 45%<br>(28-62%)                | 55%<br>(38-72%)          | 6.1<br>(3.5-9.3)                            | 19%<br>(13-26%)                      | 23%<br>(15-32%)                     | 360<br>(230-490)    | 23000<br>(15000-31000)   |
| Burundi  | 2005 | Male   | 30 to 34 | 49%<br>(30-67%)                | 51%<br>(33-70%)          | 7.2<br>(4.2-11)                             | 18%<br>(12-24%)                      | 20%<br>(14-28%)                     | 330<br>(220-450)    | 19000<br>(14000-26000)   |
| Burundi  | 2005 | Male   | 35 to 39 | 51%<br>(34-69%)                | 49%<br>(31-66%)          | 7.8<br>(4.4-12)                             | 18%<br>(13-24%)                      | 21%<br>(14-28%)                     | 390<br>(280-520)    | 20000<br>(15000-27000)   |
| Burundi  | 2005 | Male   | 40 to 44 | 52%<br>(35-71%)                | 48%<br>(29-65%)          | 8.1<br>(4.4-13)                             | 19%<br>(14-25%)                      | 22%<br>(16-28%)                     | 480<br>(340-640)    | 22000<br>(16000-30000)   |
| Burundi  | 2005 | Male   | 45 to 49 | 53%<br>(34-71%)                | 47%<br>(29-66%)          | 8.1<br>(4.3-13)                             | 20%<br>(15-27%)                      | 24%<br>(17-31%)                     | 570<br>(400-790)    | 24000<br>(17000-32000)   |
| Burundi  | 2005 | Male   | 50 to 54 | 53%<br>(34-72%)                | 47%<br>(28-66%)          | 8<br>(4.2-14)                               | 22%<br>(16-29%)                      | 26%<br>(19-34%)                     | 600<br>(420-820)    | 22000<br>(16000-30000)   |
| Burundi  | 2005 | Male   | 55 to 59 | 52%<br>(34-72%)                | 48%<br>(28-66%)          | 7.7<br>(4-13)                               | 22%<br>(17-29%)                      | 26%<br>(19-34%)                     | 470<br>(340-650)    | 15000<br>(11000-20000)   |
| Burundi  | 2005 | Male   | 60 to 64 | 50%<br>(32-71%)                | 50%<br>(29-68%)          | 6.8<br>(3.3-12)                             | 20%<br>(14-26%)                      | 23%<br>(17-30%)                     | 430<br>(300-590)    | 12000<br>(8200-16000)    |
| Burundi  | 2005 | Male   | 65 to 69 | 48%<br>(31-66%)                | 52%<br>(34-69%)          | 5.4<br>(2.9-9.2)                            | 17%<br>(12-23%)                      | 20%<br>(14-27%)                     | 400<br>(270-560)    | 9000<br>(6100-12000)     |
| Burundi  | 2005 | Male   | 70 to 74 | 45%<br>(28-62%)                | 55%<br>(38-72%)          | 4.2<br>(2-7.6)                              | 15%<br>(9.3-20%)                     | 17%<br>(10-23%)                     | 380<br>(240-540)    | 6800<br>(4300-9600)      |
| Burundi  | 2005 | Male   | 75 to 79 | 42%<br>(26-61%)                | 58%<br>(39-74%)          | 3.5<br>(1.6-6.4)                            | 13%<br>(7.2-18%)                     | 14%<br>(8.1-21%)                    | 290<br>(160-420)    | 4000<br>(2300-5900)      |
| Burundi  | 2005 | Male   | 80 to 84 | 40%<br>(23-58%)                | 60%<br>(42-77%)          | 3<br>(1.4-5.4)                              | 11%<br>(6-16%)                       | 13%<br>(6.8-19%)                    | 160<br>(86-240)     | 1700<br>(890-2500)       |
| Burundi  | 2005 | Male   | 85 to 89 | 37%<br>(23-56%)                | 63%<br>(44-77%)          | 2.5<br>(1.2-4.5)                            | 8.7%<br>(4.7-13%)                    | 9.9%<br>(5.3-15%)                   | 56<br>(30-87)       | 420<br>(230-640)         |
| Burundi  | 2005 | Male   | 90 to 94 | 38%<br>(23-56%)                | 62%<br>(44-77%)          | 2.3<br>(1-4.3)                              | 6.8%<br>(3.1-11%)                    | 7.7%<br>(3.5-13%)                   | 14<br>(6.5-24)      | 74<br>(34-120)           |
| Burundi  | 2005 | Male   | 95 plus  | 42%<br>(22-63%)                | 58%<br>(37-78%)          | 2.3<br>(0.85-4.6)                           | 7.3%<br>(3.2-12%)                    | 8.2%<br>(3.5-14%)                   | 4.6<br>(2-8)        | 16<br>(7-27)             |
| Burundi  | 2010 | Female | All Ages | 22%<br>(17-28%)                | 78%<br>(72-83%)          | 2.3<br>(1.8-2.8)                            | 4.3%<br>(3.1-5.7%)                   | 8.2%<br>(6-11%)                     | 3900<br>(2700-5300) | 130000<br>(90000-170000) |
| Burundi  | 2010 | Female | 15 to 19 | 22%<br>(12-36%)                | 78%<br>(64-88%)          | 2.5<br>(1.2-4.4)                            | 5.4%<br>(3-8.6%)                     | 7.8%<br>(4.1-13%)                   | 77<br>(41-130)      | 6200<br>(3400-9900)      |
| Burundi  | 2010 | Female | 20 to 24 | 27%<br>(15-43%)                | 73%<br>(57-85%)          | 3.6<br>(1.8-5.9)                            | 7%<br>(4.1-11%)                      | 9.4%<br>(4.9-15%)                   | 110<br>(58-180)     | 8500<br>(4800-13000)     |
| Burundi  | 2010 | Female | 25 to 29 | 30%<br>(17-46%)                | 70%<br>(54-83%)          | 4.3<br>(2.3-7)                              | 8.2%<br>(4.6-13%)                    | 11%<br>(5.6-17%)                    | 140<br>(78-230)     | 9700<br>(5600-15000)     |
| Burundi  | 2010 | Female | 30 to 34 | 32%<br>(18-50%)                | 68%<br>(50-82%)          | 4.8<br>(2.6-7.7)                            | 7.9%<br>(4.8-12%)                    | 9.8%<br>(5.6-16%)                   | 140<br>(81-220)     | 8600<br>(5200-13000)     |

| Location | Year | Sex    | Age      | Prevalence of current drinkers | Prevalence of abstainers | Population average of standard drinks daily | Percent of total attributable deaths | Percent of total attributable DALYs | Attributable deaths | Attributable DALYs        |
|----------|------|--------|----------|--------------------------------|--------------------------|---------------------------------------------|--------------------------------------|-------------------------------------|---------------------|---------------------------|
| Burundi  | 2010 | Female | 35 to 39 | 36%<br>(21-54%)                | 64%<br>(46-79%)          | 4.7<br>(2.4-7.8)                            | 9.2%<br>(5.7-14%)                    | 11%<br>(6.8-17%)                    | 170<br>(100-270)    | 9100<br>(5500-14000)      |
| Burundi  | 2010 | Female | 40 to 44 | 38%<br>(23-56%)                | 62%<br>(44-77%)          | 4.8<br>(2.3-8.1)                            | 10%<br>(6.4-15%)                     | 13%<br>(8-18%)                      | 210<br>(120-320)    | 10000<br>(6100-15000)     |
| Burundi  | 2010 | Female | 45 to 49 | 38%<br>(21-56%)                | 62%<br>(44-79%)          | 4.9<br>(2.4-8.5)                            | 12%<br>(8.1-18%)                     | 15%<br>(9.8-22%)                    | 270<br>(170-420)    | 12000<br>(7200-17000)     |
| Burundi  | 2010 | Female | 50 to 54 | 36%<br>(20-56%)                | 64%<br>(44-80%)          | 4.9<br>(2.3-8.6)                            | 15%<br>(9.1-21%)                     | 18%<br>(11-26%)                     | 390<br>(240-580)    | 14000<br>(8800-21000)     |
| Burundi  | 2010 | Female | 55 to 59 | 35%<br>(20-54%)                | 65%<br>(46-80%)          | 4.9<br>(2.3-9)                              | 15%<br>(9.5-22%)                     | 18%<br>(12-27%)                     | 410<br>(250-620)    | 13000<br>(8000-19000)     |
| Burundi  | 2010 | Female | 60 to 64 | 36%<br>(20-54%)                | 64%<br>(46-80%)          | 4.9<br>(2.2-9.1)                            | 14%<br>(8.9-20%)                     | 16%<br>(10-24%)                     | 340<br>(210-500)    | 9100<br>(5700-13000)      |
| Burundi  | 2010 | Female | 65 to 69 | 36%<br>(21-55%)                | 64%<br>(45-79%)          | 4.6<br>(2.1-8.2)                            | 15%<br>(9.1-21%)                     | 17%<br>(10-24%)                     | 400<br>(250-590)    | 9000<br>(5500-13000)      |
| Burundi  | 2010 | Female | 70 to 74 | 35%<br>(20-52%)                | 65%<br>(48-80%)          | 3.9<br>(1.7-7.4)                            | 13%<br>(8.1-20%)                     | 15%<br>(9.2-22%)                    | 400<br>(240-600)    | 7200<br>(4300-11000)      |
| Burundi  | 2010 | Female | 75 to 79 | 32%<br>(18-51%)                | 68%<br>(49-82%)          | 3.3<br>(1.3-6.7)                            | 12%<br>(6.4-18%)                     | 14%<br>(7.3-21%)                    | 360<br>(200-550)    | 5000<br>(2700-7600)       |
| Burundi  | 2010 | Female | 80 to 84 | 31%<br>(17-49%)                | 69%<br>(51-83%)          | 3<br>(1.2-5.7)                              | 11%<br>(5.6-16%)                     | 12%<br>(6.4-18%)                    | 280<br>(140-420)    | 2800<br>(1500-4300)       |
| Burundi  | 2010 | Female | 85 to 89 | 31%<br>(17-48%)                | 69%<br>(52-83%)          | 2.8<br>(1.2-5.4)                            | 9.4%<br>(4.6-15%)                    | 11%<br>(5.3-17%)                    | 120<br>(58-190)     | 860<br>(430-1400)         |
| Burundi  | 2010 | Female | 90 to 94 | 34%<br>(19-51%)                | 66%<br>(49-81%)          | 2.9<br>(1.2-5.6)                            | 8.6%<br>(4.3-14%)                    | 9.9%<br>(4.9-16%)                   | 36<br>(18-57)       | 180<br>(91-280)           |
| Burundi  | 2010 | Female | 95 plus  | 38%<br>(20-60%)                | 62%<br>(40-80%)          | 3.1<br>(1.1-6.4)                            | 8.6%<br>(4-14%)                      | 9.9%<br>(4.4-17%)                   | 8.7<br>(4-15)       | 29<br>(14-49)             |
| Burundi  | 2010 | Male   | All Ages | 31%<br>(25-39%)                | 69%<br>(61-75%)          | 3.2<br>(2.5-3.9)                            | 6.9%<br>(5.2-8.6%)                   | 11%<br>(8.7-14%)                    | 5600<br>(4200-7200) | 220000<br>(170000-290000) |
| Burundi  | 2010 | Male   | 15 to 19 | 28%<br>(16-43%)                | 72%<br>(57-84%)          | 3.1<br>(1.6-5.4)                            | 9.2%<br>(6-13%)                      | 12%<br>(7.2-18%)                    | 150<br>(86-220)     | 11000<br>(7100-17000)     |
| Burundi  | 2010 | Male   | 20 to 24 | 39%<br>(24-56%)                | 61%<br>(44-76%)          | 4.6<br>(2.5-7.4)                            | 17%<br>(12-24%)                      | 21%<br>(14-29%)                     | 330<br>(210-470)    | 24000<br>(16000-33000)    |
| Burundi  | 2010 | Male   | 25 to 29 | 45%<br>(27-63%)                | 55%<br>(37-73%)          | 5.9<br>(3.5-8.8)                            | 20%<br>(14-27%)                      | 25%<br>(17-33%)                     | 400<br>(260-540)    | 26000<br>(18000-35000)    |
| Burundi  | 2010 | Male   | 30 to 34 | 49%<br>(29-67%)                | 51%<br>(33-71%)          | 6.9<br>(4.1-10)                             | 20%<br>(14-26%)                      | 23%<br>(16-32%)                     | 390<br>(270-530)    | 23000<br>(16000-31000)    |
| Burundi  | 2010 | Male   | 35 to 39 | 51%<br>(34-69%)                | 49%<br>(31-66%)          | 7.6<br>(4.2-12)                             | 19%<br>(13-25%)                      | 22%<br>(16-30%)                     | 380<br>(260-500)    | 20000<br>(14000-26000)    |
| Burundi  | 2010 | Male   | 40 to 44 | 52%<br>(36-71%)                | 48%<br>(29-64%)          | 7.9<br>(4.1-13)                             | 19%<br>(14-25%)                      | 23%<br>(17-30%)                     | 440<br>(300-600)    | 21000<br>(15000-28000)    |
| Burundi  | 2010 | Male   | 45 to 49 | 53%<br>(34-71%)                | 47%<br>(29-66%)          | 7.8<br>(4.2-13)                             | 20%<br>(15-26%)                      | 24%<br>(18-31%)                     | 520<br>(360-710)    | 22000<br>(15000-30000)    |
| Burundi  | 2010 | Male   | 50 to 54 | 53%<br>(34-72%)                | 47%<br>(28-66%)          | 7.7<br>(4.1-13)                             | 22%<br>(16-28%)                      | 26%<br>(19-34%)                     | 620<br>(430-860)    | 23000<br>(16000-32000)    |



| Location | Year | Sex    | Age      | Prevalence of current drinkers | Prevalence of abstainers | Population average of standard drinks daily | Percent of total attributable deaths | Percent of total attributable DALYs | Attributable deaths | Attributable DALYs        |
|----------|------|--------|----------|--------------------------------|--------------------------|---------------------------------------------|--------------------------------------|-------------------------------------|---------------------|---------------------------|
| Burundi  | 2010 | Male   | 55 to 59 | 52%<br>(34-71%)                | 48%<br>(29-66%)          | 7.4<br>(3.9-12)                             | 22%<br>(16-28%)                      | 26%<br>(19-33%)                     | 610<br>(430-840)    | 19000<br>(14000-27000)    |
| Burundi  | 2010 | Male   | 60 to 64 | 51%<br>(32-70%)                | 49%<br>(30-68%)          | 6.5<br>(3.3-12)                             | 19%<br>(13-24%)                      | 22%<br>(16-28%)                     | 440<br>(310-620)    | 12000<br>(8500-17000)     |
| Burundi  | 2010 | Male   | 65 to 69 | 48%<br>(30-67%)                | 52%<br>(33-70%)          | 5.3<br>(2.7-8.9)                            | 16%<br>(11-22%)                      | 19%<br>(13-25%)                     | 390<br>(260-550)    | 8700<br>(5800-12000)      |
| Burundi  | 2010 | Male   | 70 to 74 | 45%<br>(28-62%)                | 55%<br>(38-72%)          | 4.1<br>(2-7.4)                              | 14%<br>(8.2-19%)                     | 16%<br>(9.4-22%)                    | 340<br>(200-490)    | 6100<br>(3600-8700)       |
| Burundi  | 2010 | Male   | 75 to 79 | 43%<br>(26-61%)                | 57%<br>(39-74%)          | 3.4<br>(1.6-6.3)                            | 12%<br>(6.5-17%)                     | 14%<br>(7.4-20%)                    | 280<br>(160-420)    | 3900<br>(2200-5900)       |
| Burundi  | 2010 | Male   | 80 to 84 | 40%<br>(24-59%)                | 60%<br>(41-76%)          | 2.9<br>(1.3-5.3)                            | 10%<br>(5.5-15%)                     | 12%<br>(6.2-18%)                    | 180<br>(94-270)     | 1900<br>(1000-2800)       |
| Burundi  | 2010 | Male   | 85 to 89 | 38%<br>(22-55%)                | 62%<br>(45-78%)          | 2.4<br>(1.2-4.3)                            | 8.2%<br>(4.4-13%)                    | 9.3%<br>(4.8-15%)                   | 65<br>(34-100)      | 480<br>(250-760)          |
| Burundi  | 2010 | Male   | 90 to 94 | 38%<br>(23-56%)                | 62%<br>(44-77%)          | 2.2<br>(0.99-4.2)                           | 6.4%<br>(2.9-11%)                    | 7.3%<br>(3.2-12%)                   | 16<br>(7.1-27)      | 83<br>(38-140)            |
| Burundi  | 2010 | Male   | 95 plus  | 42%<br>(22-64%)                | 58%<br>(36-78%)          | 2.2<br>(0.82-4.5)                           | 6.9%<br>(3-12%)                      | 7.8%<br>(3.1-14%)                   | 4.1<br>(1.6-7.3)    | 14<br>(6-25)              |
| Burundi  | 2016 | Female | All Ages | 22%<br>(17-28%)                | 78%<br>(72-83%)          | 2.2<br>(1.4-3.2)                            | 4.7%<br>(3.2-6.5%)                   | 8.8%<br>(6.1-12%)                   | 4300<br>(3000-6000) | 140000<br>(100000-200000) |
| Burundi  | 2016 | Female | 15 to 19 | 22%<br>(13-36%)                | 78%<br>(64-87%)          | 2.5<br>(1.1-4.7)                            | 5.2%<br>(2.8-8.5%)                   | 7.7%<br>(3.7-13%)                   | 73<br>(35-130)      | 5900<br>(3000-9600)       |
| Burundi  | 2016 | Female | 20 to 24 | 27%<br>(15-43%)                | 73%<br>(57-85%)          | 3.5<br>(1.6-6.3)                            | 7.2%<br>(4.1-11%)                    | 9.9%<br>(5-16%)                     | 110<br>(55-180)     | 8600<br>(4800-13000)      |
| Burundi  | 2016 | Female | 25 to 29 | 30%<br>(16-46%)                | 70%<br>(54-84%)          | 4.3<br>(2.1-7.5)                            | 8.9%<br>(5.3-14%)                    | 12%<br>(6.8-20%)                    | 170<br>(89-270)     | 11000<br>(6800-18000)     |
| Burundi  | 2016 | Female | 30 to 34 | 32%<br>(17-50%)                | 68%<br>(50-83%)          | 4.7<br>(2.3-8.1)                            | 9.5%<br>(6-14%)                      | 13%<br>(7.7-20%)                    | 190<br>(110-310)    | 12000<br>(7100-18000)     |
| Burundi  | 2016 | Female | 35 to 39 | 36%<br>(20-53%)                | 64%<br>(47-80%)          | 4.6<br>(2.2-8.4)                            | 11%<br>(7-17%)                       | 15%<br>(9.1-22%)                    | 220<br>(130-350)    | 12000<br>(7000-18000)     |
| Burundi  | 2016 | Female | 40 to 44 | 38%<br>(23-56%)                | 62%<br>(44-77%)          | 4.7<br>(2.1-8.7)                            | 12%<br>(7.4-17%)                     | 15%<br>(9.7-22%)                    | 220<br>(130-340)    | 11000<br>(6300-16000)     |
| Burundi  | 2016 | Female | 45 to 49 | 38%<br>(20-56%)                | 62%<br>(44-80%)          | 4.9<br>(2-9.1)                              | 13%<br>(8.4-19%)                     | 17%<br>(11-25%)                     | 290<br>(170-450)    | 12000<br>(7400-19000)     |
| Burundi  | 2016 | Female | 50 to 54 | 36%<br>(20-56%)                | 64%<br>(44-80%)          | 4.8<br>(2-9.3)                              | 15%<br>(9.4-22%)                     | 19%<br>(12-27%)                     | 400<br>(240-590)    | 15000<br>(8700-22000)     |
| Burundi  | 2016 | Female | 55 to 59 | 35%<br>(20-54%)                | 65%<br>(46-80%)          | 4.8<br>(2.1-9.4)                            | 15%<br>(9.3-22%)                     | 19%<br>(11-26%)                     | 490<br>(280-730)    | 15000<br>(8900-23000)     |
| Burundi  | 2016 | Female | 60 to 64 | 35%<br>(19-55%)                | 65%<br>(45-81%)          | 4.8<br>(2-8.9)                              | 14%<br>(8.8-20%)                     | 17%<br>(10-24%)                     | 490<br>(290-720)    | 13000<br>(7800-19000)     |
| Burundi  | 2016 | Female | 65 to 69 | 37%<br>(20-54%)                | 63%<br>(46-80%)          | 4.5<br>(1.8-8.8)                            | 14%<br>(9.1-21%)                     | 17%<br>(10-24%)                     | 460<br>(280-680)    | 10000<br>(6300-15000)     |
| Burundi  | 2016 | Female | 70 to 74 | 35%<br>(21-53%)                | 65%<br>(47-79%)          | 3.9<br>(1.6-7.8)                            | 13%<br>(7.8-19%)                     | 15%<br>(8.8-22%)                    | 420<br>(240-620)    | 7500<br>(4500-11000)      |

| Location | Year | Sex    | Age      | Prevalence of current drinkers | Prevalence of abstainers | Population average of standard drinks daily | Percent of total attributable deaths | Percent of total attributable DALYs | Attributable deaths | Attributable DALYs        |
|----------|------|--------|----------|--------------------------------|--------------------------|---------------------------------------------|--------------------------------------|-------------------------------------|---------------------|---------------------------|
| Burundi  | 2016 | Female | 75 to 79 | 33%<br>(19-51%)                | 67%<br>(49-81%)          | 3.3<br>(1.2-6.9)                            | 12%<br>(6.2-18%)                     | 13%<br>(7.1-20%)                    | 370<br>(190-580)    | 5100<br>(2600-7900)       |
| Burundi  | 2016 | Female | 80 to 84 | 31%<br>(16-49%)                | 69%<br>(51-84%)          | 3<br>(1.1-5.9)                              | 10%<br>(5.3-16%)                     | 12%<br>(6-18%)                      | 290<br>(150-450)    | 2900<br>(1500-4600)       |
| Burundi  | 2016 | Female | 85 to 89 | 31%<br>(18-49%)                | 69%<br>(51-82%)          | 2.8<br>(1.1-5.7)                            | 9.1%<br>(4.5-14%)                    | 10%<br>(5.2-17%)                    | 130<br>(63-200)     | 940<br>(470-1500)         |
| Burundi  | 2016 | Female | 90 to 94 | 34%<br>(19-51%)                | 66%<br>(49-81%)          | 2.9<br>(1.1-5.9)                            | 8.3%<br>(3.9-13%)                    | 9.6%<br>(4.6-16%)                   | 39<br>(19-63)       | 200<br>(95-320)           |
| Burundi  | 2016 | Female | 95 plus  | 38%<br>(19-59%)                | 62%<br>(41-81%)          | 3.1<br>(1.1-6.9)                            | 8.5%<br>(3.8-14%)                    | 9.8%<br>(4.3-16%)                   | 10<br>(4.5-17)      | 34<br>(16-56)             |
| Burundi  | 2016 | Male   | All Ages | 31%<br>(25-39%)                | 69%<br>(61-75%)          | 3.1<br>(2-4.5)                              | 7.6%<br>(5.4-10%)                    | 12%<br>(8.9-16%)                    | 6500<br>(4700-8600) | 260000<br>(190000-340000) |
| Burundi  | 2016 | Male   | 15 to 19 | 28%<br>(16-43%)                | 72%<br>(57-84%)          | 3.1<br>(1.4-5.7)                            | 9.1%<br>(5.7-13%)                    | 12%<br>(6.9-18%)                    | 150<br>(84-230)     | 12000<br>(7300-18000)     |
| Burundi  | 2016 | Male   | 20 to 24 | 39%<br>(23-57%)                | 61%<br>(43-77%)          | 4.5<br>(2.2-7.8)                            | 17%<br>(12-23%)                      | 21%<br>(13-29%)                     | 350<br>(220-500)    | 25000<br>(16000-36000)    |
| Burundi  | 2016 | Male   | 25 to 29 | 44%<br>(27-62%)                | 56%<br>(38-73%)          | 5.8<br>(3.1-9.6)                            | 21%<br>(15-28%)                      | 26%<br>(18-35%)                     | 470<br>(300-650)    | 31000<br>(21000-42000)    |
| Burundi  | 2016 | Male   | 30 to 34 | 48%<br>(29-67%)                | 52%<br>(33-71%)          | 6.8<br>(3.6-11)                             | 22%<br>(15-28%)                      | 27%<br>(19-35%)                     | 510<br>(330-710)    | 31000<br>(21000-42000)    |
| Burundi  | 2016 | Male   | 35 to 39 | 51%<br>(34-69%)                | 49%<br>(31-66%)          | 7.4<br>(3.8-13)                             | 22%<br>(16-28%)                      | 27%<br>(19-35%)                     | 510<br>(340-690)    | 27000<br>(19000-36000)    |
| Burundi  | 2016 | Male   | 40 to 44 | 52%<br>(35-71%)                | 48%<br>(29-65%)          | 7.7<br>(3.6-13)                             | 22%<br>(16-28%)                      | 27%<br>(19-34%)                     | 480<br>(330-650)    | 23000<br>(16000-31000)    |
| Burundi  | 2016 | Male   | 45 to 49 | 53%<br>(34-71%)                | 47%<br>(29-66%)          | 7.7<br>(3.5-14)                             | 22%<br>(16-29%)                      | 27%<br>(20-35%)                     | 540<br>(360-750)    | 23000<br>(15000-31000)    |
| Burundi  | 2016 | Male   | 50 to 54 | 53%<br>(35-72%)                | 47%<br>(28-65%)          | 7.7<br>(3.5-14)                             | 23%<br>(17-30%)                      | 28%<br>(20-36%)                     | 650<br>(440-900)    | 24000<br>(16000-33000)    |
| Burundi  | 2016 | Male   | 55 to 59 | 52%<br>(35-71%)                | 48%<br>(29-65%)          | 7.3<br>(3.5-13)                             | 22%<br>(16-28%)                      | 26%<br>(19-34%)                     | 730<br>(510-1000)   | 23000<br>(16000-32000)    |
| Burundi  | 2016 | Male   | 60 to 64 | 50%<br>(32-70%)                | 50%<br>(30-68%)          | 6.4<br>(2.9-12)                             | 19%<br>(13-25%)                      | 22%<br>(15-29%)                     | 660<br>(460-930)    | 18000<br>(13000-25000)    |
| Burundi  | 2016 | Male   | 65 to 69 | 48%<br>(30-66%)                | 52%<br>(34-70%)          | 5.2<br>(2.4-9.2)                            | 16%<br>(11-22%)                      | 19%<br>(12-25%)                     | 480<br>(310-690)    | 11000<br>(7000-16000)     |
| Burundi  | 2016 | Male   | 70 to 74 | 45%<br>(28-63%)                | 55%<br>(37-72%)          | 4<br>(1.8-7.7)                              | 14%<br>(7.8-19%)                     | 16%<br>(9-22%)                      | 370<br>(210-540)    | 6700<br>(3800-9700)       |
| Burundi  | 2016 | Male   | 75 to 79 | 43%<br>(26-61%)                | 57%<br>(39-74%)          | 3.3<br>(1.4-6.5)                            | 12%<br>(5.8-18%)                     | 13%<br>(6.7-20%)                    | 280<br>(140-440)    | 4000<br>(2000-6100)       |
| Burundi  | 2016 | Male   | 80 to 84 | 40%<br>(23-59%)                | 60%<br>(41-77%)          | 2.8<br>(1.2-5.3)                            | 10%<br>(4.9-15%)                     | 11%<br>(5.6-17%)                    | 190<br>(94-300)     | 2000<br>(980-3100)        |
| Burundi  | 2016 | Male   | 85 to 89 | 37%<br>(22-55%)                | 63%<br>(45-78%)          | 2.4<br>(1-4.6)                              | 8%<br>(3.7-13%)                      | 9.1%<br>(4.2-15%)                   | 79<br>(37-130)      | 590<br>(280-950)          |
| Burundi  | 2016 | Male   | 90 to 94 | 38%<br>(23-56%)                | 62%<br>(44-77%)          | 2.2<br>(0.89-4.4)                           | 6.3%<br>(2.7-11%)                    | 7.2%<br>(3-12%)                     | 20<br>(8.3-35)      | 110<br>(44-180)           |

| Location | Year | Sex    | Age      | Prevalence of current drinkers | Prevalence of abstainers | Population average of standard drinks daily | Percent of total attributable deaths | Percent of total attributable DALYs | Attributable deaths       | Attributable DALYs      |
|----------|------|--------|----------|--------------------------------|--------------------------|---------------------------------------------|--------------------------------------|-------------------------------------|---------------------------|-------------------------|
| Burundi  | 2016 | Male   | 95 plus  | 42%<br>(21-63%)                | 58%<br>(37-79%)          | 2.1<br>(0.74-4.7)                           | 6.9%<br>(2.7-12%)                    | 7.8%<br>(2.9-14%)                   | 5<br>(1.9-8.8)            | 17<br>(6.7-30)          |
| Comoros  | 1990 | Female | All Ages | 23%<br>(17-30%)                | 77%<br>(70-83%)          | 0.12<br>(0.086-0.15)                        | 0.22%<br>(0.042-0.38%)               | 0.13%<br>(-0.21-0.46%)              | 2.7<br>(-4.2-9.2)         | 270<br>(53-490)         |
| Comoros  | 1990 | Female | 15 to 19 | 22%<br>(9.8-39%)               | 78%<br>(61-90%)          | 0.13<br>(0.054-0.24)                        | 0.48%<br>(0.15-0.91%)                | 0.26%<br>(-0.25-0.94%)              | 0.093<br>(-0.089-0.33)    | 21<br>(6.2-40)          |
| Comoros  | 1990 | Female | 20 to 24 | 27%<br>(12-47%)                | 73%<br>(53-88%)          | 0.18<br>(0.08-0.31)                         | 0.88%<br>(0.34-1.5%)                 | 0.37%<br>(-0.36-1.2%)               | 0.16<br>(-0.16-0.52)      | 40<br>(15-67)           |
| Comoros  | 1990 | Female | 25 to 29 | 28%<br>(12-47%)                | 72%<br>(53-88%)          | 0.21<br>(0.094-0.37)                        | 1%<br>(0.5-1.5%)                     | 0.56%<br>(-0.14-1.3%)               | 0.24<br>(-0.062-0.55)     | 41<br>(19-65)           |
| Comoros  | 1990 | Female | 30 to 34 | 31%<br>(12-48%)                | 69%<br>(52-88%)          | 0.24<br>(0.11-0.39)                         | 0.93%<br>(0.39-1.5%)                 | 0.62%<br>(-0.046-1.3%)              | 0.28<br>(-0.02-0.59)      | 37<br>(15-59)           |
| Comoros  | 1990 | Female | 35 to 39 | 35%<br>(16-52%)                | 65%<br>(48-84%)          | 0.24<br>(0.11-0.41)                         | 1%<br>(0.35-1.7%)                    | 0.97%<br>(-0.04-1.9%)               | 0.45<br>(-0.018-0.93)     | 37<br>(12-62)           |
| Comoros  | 1990 | Female | 40 to 44 | 36%<br>(20-53%)                | 64%<br>(47-80%)          | 0.24<br>(0.11-0.43)                         | 1.1%<br>(0.43-1.7%)                  | 1.2%<br>(0.3-2.1%)                  | 0.5<br>(0.12-0.93)        | 31<br>(13-50)           |
| Comoros  | 1990 | Female | 45 to 49 | 35%<br>(18-50%)                | 65%<br>(50-82%)          | 0.24<br>(0.11-0.43)                         | 0.92%<br>(0.27-1.6%)                 | 1%<br>(0.12-2%)                     | 0.55<br>(0.058-1.1)       | 28<br>(7.4-48)          |
| Comoros  | 1990 | Female | 50 to 54 | 34%<br>(18-49%)                | 66%<br>(51-82%)          | 0.24<br>(0.11-0.44)                         | 0.78%<br>(0.12-1.4%)                 | 0.9%<br>(0.044-1.7%)                | 0.62<br>(0.029-1.3)       | 26<br>(3.8-47)          |
| Comoros  | 1990 | Female | 55 to 59 | 34%<br>(19-50%)                | 66%<br>(50-81%)          | 0.26<br>(0.11-0.48)                         | 0.33%<br>(-0.36-0.98%)               | 0.38%<br>(-0.5-1.2%)                | 0.32<br>(-0.41-1)         | 11<br>(-12-34)          |
| Comoros  | 1990 | Female | 60 to 64 | 36%<br>(20-54%)                | 64%<br>(46-80%)          | 0.27<br>(0.11-0.48)                         | 0.2%<br>(-0.61-0.88%)                | 0.25%<br>(-0.73-1.1%)               | 0.26<br>(-0.74-1.1)       | 6.9<br>(-21-31)         |
| Comoros  | 1990 | Female | 65 to 69 | 38%<br>(20-55%)                | 62%<br>(45-80%)          | 0.26<br>(0.1-0.45)                          | 0.17%<br>(-0.69-0.86%)               | 0.18%<br>(-0.84-1%)                 | 0.23<br>(-1-1.3)          | 5.8<br>(-23-30)         |
| Comoros  | 1990 | Female | 70 to 74 | 36%<br>(20-53%)                | 64%<br>(47-80%)          | 0.22<br>(0.086-0.42)                        | -0.19%<br>(-0.99-0.49%)              | -0.27%<br>(-1.2-0.51%)              | -0.38<br>(-1.6-0.68)      | -5.5<br>(-28-14)        |
| Comoros  | 1990 | Female | 75 to 79 | 33%<br>(16-50%)                | 67%<br>(50-84%)          | 0.19<br>(0.065-0.4)                         | -0.07%<br>(-1-0.61%)                 | -0.096%<br>(-1.2-0.67%)             | -0.12<br>(-1.4-0.87)      | -1.5<br>(-20-13)        |
| Comoros  | 1990 | Female | 80 to 84 | 30%<br>(15-48%)                | 70%<br>(52-85%)          | 0.16<br>(0.058-0.35)                        | -0.27%<br>(-1.1-0.28%)               | -0.31%<br>(-1.2-0.31%)              | -0.27<br>(-1.1-0.27)      | -2.7<br>(-11-2.8)       |
| Comoros  | 1990 | Female | 85 to 89 | 30%<br>(15-46%)                | 70%<br>(54-85%)          | 0.15<br>(0.062-0.32)                        | -0.32%<br>(-1.1-0.15%)               | -0.39%<br>(-1.2-0.16%)              | -0.16<br>(-0.52-0.066)    | -1.1<br>(-3.8-0.53)     |
| Comoros  | 1990 | Female | 90 to 94 | 32%<br>(17-47%)                | 68%<br>(53-83%)          | 0.16<br>(0.064-0.32)                        | -0.4%<br>(-1.1-0.056%)               | -0.51%<br>(-1.3-0.027%)             | -0.068<br>(-0.18-0.0036)  | -0.31<br>(-0.89-0.043)  |
| Comoros  | 1990 | Female | 95 plus  | 35%<br>(17-51%)                | 65%<br>(49-83%)          | 0.16<br>(0.06-0.36)                         | -0.15%<br>(-0.88-0.4%)               | -0.26%<br>(-1.1-0.41%)              | -0.0085<br>(-0.036-0.014) | -0.019<br>(-0.11-0.053) |
| Comoros  | 1990 | Male   | All Ages | 8.2%<br>(6.9-9.9%)             | 92%<br>(90-93%)          | 0.017<br>(0.012-0.024)                      | 0.46%<br>(0.3-0.64%)                 | 0.45%<br>(0.17-0.77%)               | 9.3<br>(3.4-16)           | 650<br>(410-900)        |
| Comoros  | 1990 | Male   | 15 to 19 | 7.4%<br>(4.8-11%)              | 93%<br>(89-95%)          | 0.015<br>(0.0077-0.026)                     | 0.82%<br>(0.51-1.2%)                 | 0.13%<br>(0.038-0.24%)              | 0.052<br>(0.015-0.1)      | 38<br>(23-57)           |
| Comoros  | 1990 | Male   | 20 to 24 | 11%<br>(6.6-15%)               | 89%<br>(85-93%)          | 0.024<br>(0.012-0.042)                      | 1.6%<br>(1-2.4%)                     | 0.24%<br>(0.026-0.51%)              | 0.13<br>(0.014-0.29)      | 81<br>(49-120)          |

| Location | Year | Sex    | Age      | Prevalence of current drinkers | Prevalence of abstainers | Population average of standard drinks daily | Percent of total attributable deaths | Percent of total attributable DALYs | Attributable deaths      | Attributable DALYs     |
|----------|------|--------|----------|--------------------------------|--------------------------|---------------------------------------------|--------------------------------------|-------------------------------------|--------------------------|------------------------|
| Comoros  | 1990 | Male   | 25 to 29 | 13%<br>(8-19%)                 | 87%<br>(81-92%)          | 0.032<br>(0.017-0.052)                      | 1.9%<br>(1.3-2.6%)                   | 0.64%<br>(0.19-1.2%)                | 0.34<br>(0.1-0.66)       | 88<br>(58-130)         |
| Comoros  | 1990 | Male   | 30 to 34 | 14%<br>(8.7-22%)               | 86%<br>(78-91%)          | 0.038<br>(0.02-0.063)                       | 1.8%<br>(1.1-2.5%)                   | 0.86%<br>(0.21-1.6%)                | 0.48<br>(0.11-0.92)      | 78<br>(47-110)         |
| Comoros  | 1990 | Male   | 35 to 39 | 15%<br>(9.3-21%)               | 85%<br>(79-91%)          | 0.042<br>(0.022-0.075)                      | 1.7%<br>(1-2.5%)                     | 1.2%<br>(0.33-2.2%)                 | 0.66<br>(0.18-1.3)       | 67<br>(38-100)         |
| Comoros  | 1990 | Male   | 40 to 44 | 15%<br>(9.6-21%)               | 85%<br>(79-90%)          | 0.044<br>(0.021-0.079)                      | 1.7%<br>(0.93-2.6%)                  | 1.5%<br>(0.51-2.8%)                 | 0.77<br>(0.26-1.5)       | 55<br>(29-87)          |
| Comoros  | 1990 | Male   | 45 to 49 | 15%<br>(8.9-21%)               | 85%<br>(79-91%)          | 0.044<br>(0.021-0.077)                      | 1.7%<br>(0.88-2.8%)                  | 1.7%<br>(0.6-3.1%)                  | 1<br>(0.37-2)            | 58<br>(28-94)          |
| Comoros  | 1990 | Male   | 50 to 54 | 15%<br>(9.9-21%)               | 85%<br>(79-90%)          | 0.044<br>(0.021-0.08)                       | 1.5%<br>(0.74-2.6%)                  | 1.5%<br>(0.52-2.9%)                 | 1.1<br>(0.39-2.2)        | 52<br>(25-89)          |
| Comoros  | 1990 | Male   | 55 to 59 | 15%<br>(9.7-21%)               | 85%<br>(79-90%)          | 0.043<br>(0.021-0.079)                      | 1.3%<br>(0.63-2.2%)                  | 1.3%<br>(0.48-2.5%)                 | 1.1<br>(0.38-2)          | 43<br>(20-73)          |
| Comoros  | 1990 | Male   | 60 to 64 | 14%<br>(9-21%)                 | 86%<br>(79-91%)          | 0.037<br>(0.017-0.073)                      | 1.3%<br>(0.59-2.1%)                  | 1.3%<br>(0.49-2.4%)                 | 1.2<br>(0.44-2.2)        | 39<br>(18-66)          |
| Comoros  | 1990 | Male   | 65 to 69 | 13%<br>(8.7-19%)               | 87%<br>(81-91%)          | 0.029<br>(0.014-0.054)                      | 0.77%<br>(0.34-1.3%)                 | 0.81%<br>(0.26-1.5%)                | 0.81<br>(0.27-1.5)       | 21<br>(9.2-36)         |
| Comoros  | 1990 | Male   | 70 to 74 | 12%<br>(8.2-17%)               | 88%<br>(83-92%)          | 0.022<br>(0.01-0.042)                       | 0.58%<br>(0.25-0.98%)                | 0.63%<br>(0.22-1.1%)                | 0.65<br>(0.23-1.2)       | 13<br>(5.4-21)         |
| Comoros  | 1990 | Male   | 75 to 79 | 12%<br>(7.4-17%)               | 88%<br>(83-93%)          | 0.018<br>(0.0077-0.036)                     | 0.55%<br>(0.23-0.95%)                | 0.6%<br>(0.19-1.1%)                 | 0.52<br>(0.16-0.93)      | 7.8<br>(3.1-13)        |
| Comoros  | 1990 | Male   | 80 to 84 | 10%<br>(6.4-15%)               | 90%<br>(85-94%)          | 0.016<br>(0.0069-0.03)                      | 0.4%<br>(0.2-0.65%)                  | 0.41%<br>(0.16-0.72%)               | 0.22<br>(0.086-0.38)     | 2.6<br>(1.2-4.1)       |
| Comoros  | 1990 | Male   | 85 to 89 | 9.6%<br>(5.7-14%)              | 90%<br>(86-94%)          | 0.013<br>(0.006-0.026)                      | 0.42%<br>(0.2-0.68%)                 | 0.42%<br>(0.15-0.75%)               | 0.1<br>(0.036-0.18)      | 0.89<br>(0.42-1.5)     |
| Comoros  | 1990 | Male   | 90 to 94 | 9.6%<br>(6.1-15%)              | 90%<br>(85-94%)          | 0.013<br>(0.0051-0.026)                     | 0.32%<br>(0.17-0.5%)                 | 0.28%<br>(0.11-0.5%)                | 0.022<br>(0.0082-0.039)  | 0.15<br>(0.079-0.23)   |
| Comoros  | 1990 | Male   | 95 plus  | 11%<br>(6.2-17%)               | 89%<br>(83-94%)          | 0.013<br>(0.0044-0.028)                     | 0.43%<br>(0.21-0.68%)                | 0.39%<br>(0.12-0.7%)                | 0.0075<br>(0.0023-0.014) | 0.034<br>(0.016-0.054) |
| Comoros  | 1995 | Female | All Ages | 23%<br>(16-29%)                | 77%<br>(71-84%)          | 0.096<br>(0.076-0.12)                       | 0.24%<br>(0.06-0.41%)                | 0.17%<br>(-0.18-0.5%)               | 3.5<br>(-3.9-11)         | 310<br>(75-540)        |
| Comoros  | 1995 | Female | 15 to 19 | 22%<br>(10-38%)                | 78%<br>(62-90%)          | 0.11<br>(0.049-0.2)                         | 0.47%<br>(0.15-0.88%)                | 0.22%<br>(-0.29-0.92%)              | 0.087<br>(-0.11-0.36)    | 23<br>(7-44)           |
| Comoros  | 1995 | Female | 20 to 24 | 27%<br>(12-45%)                | 73%<br>(55-88%)          | 0.15<br>(0.068-0.25)                        | 0.88%<br>(0.3-1.5%)                  | 0.33%<br>(-0.48-1.2%)               | 0.15<br>(-0.23-0.55)     | 43<br>(14-78)          |
| Comoros  | 1995 | Female | 25 to 29 | 28%<br>(12-46%)                | 72%<br>(54-88%)          | 0.18<br>(0.082-0.3)                         | 0.99%<br>(0.51-1.5%)                 | 0.5%<br>(-0.22-1.2%)                | 0.23<br>(-0.1-0.54)      | 44<br>(23-69)          |
| Comoros  | 1995 | Female | 30 to 34 | 31%<br>(13-48%)                | 69%<br>(52-87%)          | 0.2<br>(0.088-0.33)                         | 0.92%<br>(0.42-1.4%)                 | 0.57%<br>(-0.17-1.3%)               | 0.27<br>(-0.086-0.61)    | 39<br>(17-63)          |
| Comoros  | 1995 | Female | 35 to 39 | 35%<br>(16-51%)                | 65%<br>(49-84%)          | 0.2<br>(0.092-0.34)                         | 1%<br>(0.28-1.6%)                    | 0.94%<br>(-0.14-1.9%)               | 0.5<br>(-0.074-1)        | 42<br>(11-71)          |
| Comoros  | 1995 | Female | 40 to 44 | 36%<br>(20-52%)                | 64%<br>(48-80%)          | 0.2<br>(0.095-0.35)                         | 1.1%<br>(0.43-1.7%)                  | 1.2%<br>(0.23-2.1%)                 | 0.65<br>(0.13-1.2)       | 40<br>(15-66)          |

| Location | Year | Sex    | Age      | Prevalence of current drinkers | Prevalence of abstainers | Population average of standard drinks daily | Percent of total attributable deaths | Percent of total attributable DALYs | Attributable deaths     | Attributable DALYs      |
|----------|------|--------|----------|--------------------------------|--------------------------|---------------------------------------------|--------------------------------------|-------------------------------------|-------------------------|-------------------------|
| Comoros  | 1995 | Female | 45 to 49 | 34%<br>(18-48%)                | 66%<br>(52-82%)          | 0.2<br>(0.085-0.34)                         | 0.91%<br>(0.26-1.6%)                 | 1%<br>(0.13-2%)                     | 0.56<br>(0.067-1.1)     | 29<br>(7.7-50)          |
| Comoros  | 1995 | Female | 50 to 54 | 33%<br>(18-49%)                | 67%<br>(51-82%)          | 0.2<br>(0.091-0.35)                         | 0.76%<br>(0.11-1.4%)                 | 0.88%<br>(0.035-1.7%)               | 0.64<br>(0.026-1.3)     | 27<br>(3.8-50)          |
| Comoros  | 1995 | Female | 55 to 59 | 34%<br>(19-50%)                | 66%<br>(50-81%)          | 0.21<br>(0.096-0.38)                        | 0.31%<br>(-0.36-0.94%)               | 0.35%<br>(-0.49-1.2%)               | 0.32<br>(-0.45-1)       | 11<br>(-13-34)          |
| Comoros  | 1995 | Female | 60 to 64 | 36%<br>(20-53%)                | 64%<br>(47-80%)          | 0.22<br>(0.093-0.4)                         | 0.22%<br>(-0.53-0.87%)               | 0.27%<br>(-0.61-1%)                 | 0.31<br>(-0.65-1.2)     | 8.4<br>(-19-33)         |
| Comoros  | 1995 | Female | 65 to 69 | 37%<br>(20-54%)                | 63%<br>(46-80%)          | 0.21<br>(0.087-0.37)                        | 0.24%<br>(-0.56-0.93%)               | 0.26%<br>(-0.67-1.1%)               | 0.35<br>(-0.91-1.5)     | 8.9<br>(-20-35)         |
| Comoros  | 1995 | Female | 70 to 74 | 36%<br>(19-52%)                | 64%<br>(48-81%)          | 0.18<br>(0.074-0.33)                        | -0.095%<br>(-0.88-0.53%)             | -0.17%<br>(-1.1-0.55%)              | -0.26<br>(-1.6-0.81)    | -3<br>(-27-16)          |
| Comoros  | 1995 | Female | 75 to 79 | 32%<br>(16-48%)                | 68%<br>(52-84%)          | 0.15<br>(0.054-0.32)                        | 0.059%<br>(-0.8-0.69%)               | 0.053%<br>(-0.91-0.77%)             | 0.075<br>(-1.3-1.1)     | 1.4<br>(-18-16)         |
| Comoros  | 1995 | Female | 80 to 84 | 29%<br>(15-46%)                | 71%<br>(54-85%)          | 0.13<br>(0.048-0.28)                        | -0.16%<br>(-0.9-0.34%)               | -0.19%<br>(-1-0.38%)                | -0.19<br>(-1.1-0.38)    | -2<br>(-11-4.1)         |
| Comoros  | 1995 | Female | 85 to 89 | 29%<br>(15-46%)                | 71%<br>(54-85%)          | 0.13<br>(0.054-0.26)                        | -0.22%<br>(-0.91-0.18%)              | -0.26%<br>(-1-0.2%)                 | -0.14<br>(-0.55-0.1)    | -0.96<br>(-4.1-0.81)    |
| Comoros  | 1995 | Female | 90 to 94 | 31%<br>(16-46%)                | 69%<br>(54-84%)          | 0.13<br>(0.05-0.25)                         | -0.29%<br>(-0.9-0.1%)                | -0.38%<br>(-1.1-0.085%)             | -0.063<br>(-0.18-0.015) | -0.29<br>(-0.87-0.11)   |
| Comoros  | 1995 | Female | 95 plus  | 34%<br>(18-51%)                | 66%<br>(49-82%)          | 0.13<br>(0.049-0.27)                        | -0.023%<br>(-0.65-0.48%)             | -0.1%<br>(-0.86-0.52%)              | -0.004<br>(-0.034-0.02) | -0.0034<br>(-0.1-0.076) |
| Comoros  | 1995 | Male   | All Ages | 8.3%<br>(6.9-9.9%)             | 92%<br>(90-93%)          | 0.014<br>(0.01-0.02)                        | 0.52%<br>(0.34-0.71%)                | 0.51%<br>(0.2-0.86%)                | 11<br>(4.3-18)          | 750<br>(470-1000)       |
| Comoros  | 1995 | Male   | 15 to 19 | 7.3%<br>(4.7-11%)              | 93%<br>(89-95%)          | 0.013<br>(0.0065-0.022)                     | 0.85%<br>(0.54-1.2%)                 | 0.12%<br>(0.04-0.22%)               | 0.057<br>(0.018-0.11)   | 46<br>(28-70)           |
| Comoros  | 1995 | Male   | 20 to 24 | 11%<br>(6.7-16%)               | 89%<br>(84-93%)          | 0.02<br>(0.01-0.033)                        | 1.7%<br>(1.1-2.5%)                   | 0.24%<br>(0.045-0.46%)              | 0.14<br>(0.027-0.3)     | 93<br>(57-140)          |
| Comoros  | 1995 | Male   | 25 to 29 | 13%<br>(7.9-19%)               | 87%<br>(81-92%)          | 0.026<br>(0.014-0.043)                      | 1.9%<br>(1.4-2.6%)                   | 0.64%<br>(0.22-1.2%)                | 0.38<br>(0.13-0.71)     | 99<br>(67-140)          |
| Comoros  | 1995 | Male   | 30 to 34 | 14%<br>(8.8-21%)               | 86%<br>(79-91%)          | 0.031<br>(0.017-0.051)                      | 1.8%<br>(1.2-2.5%)                   | 0.88%<br>(0.28-1.6%)                | 0.54<br>(0.17-1)        | 89<br>(57-130)          |
| Comoros  | 1995 | Male   | 35 to 39 | 15%<br>(9.2-21%)               | 85%<br>(79-91%)          | 0.035<br>(0.018-0.06)                       | 1.7%<br>(1.1-2.5%)                   | 1.2%<br>(0.41-2.3%)                 | 0.8<br>(0.26-1.5)       | 80<br>(47-120)          |
| Comoros  | 1995 | Male   | 40 to 44 | 15%<br>(9.5-21%)               | 85%<br>(79-90%)          | 0.036<br>(0.018-0.061)                      | 1.7%<br>(0.94-2.6%)                  | 1.5%<br>(0.52-2.8%)                 | 1<br>(0.32-1.9)         | 71<br>(38-110)          |
| Comoros  | 1995 | Male   | 45 to 49 | 15%<br>(9-21%)                 | 85%<br>(79-91%)          | 0.036<br>(0.017-0.064)                      | 1.8%<br>(0.91-2.8%)                  | 1.7%<br>(0.62-3.1%)                 | 1.1<br>(0.39-2.1)       | 62<br>(32-100)          |
| Comoros  | 1995 | Male   | 50 to 54 | 15%<br>(9.8-21%)               | 85%<br>(79-90%)          | 0.037<br>(0.017-0.067)                      | 1.6%<br>(0.77-2.6%)                  | 1.6%<br>(0.56-3%)                   | 1.2<br>(0.45-2.3)       | 57<br>(28-94)           |
| Comoros  | 1995 | Male   | 55 to 59 | 15%<br>(9.6-21%)               | 85%<br>(79-90%)          | 0.036<br>(0.018-0.064)                      | 1.4%<br>(0.68-2.2%)                  | 1.4%<br>(0.53-2.6%)                 | 1.3<br>(0.47-2.3)       | 49<br>(24-81)           |
| Comoros  | 1995 | Male   | 60 to 64 | 14%<br>(9.1-21%)               | 86%<br>(79-91%)          | 0.031<br>(0.014-0.059)                      | 1.3%<br>(0.62-2.1%)                  | 1.4%<br>(0.53-2.4%)                 | 1.4<br>(0.52-2.5)       | 44<br>(20-73)           |

| Location | Year | Sex    | Age      | Prevalence of current drinkers | Prevalence of abstainers | Population average of standard drinks daily | Percent of total attributable deaths | Percent of total attributable DALYs | Attributable deaths     | Attributable DALYs    |
|----------|------|--------|----------|--------------------------------|--------------------------|---------------------------------------------|--------------------------------------|-------------------------------------|-------------------------|-----------------------|
| Comoros  | 1995 | Male   | 65 to 69 | 13%<br>(8.5-19%)               | 87%<br>(81-92%)          | 0.025<br>(0.012-0.043)                      | 0.79%<br>(0.36-1.4%)                 | 0.83%<br>(0.29-1.6%)                | 0.91<br>(0.31-1.7)      | 24<br>(11-42)         |
| Comoros  | 1995 | Male   | 70 to 74 | 12%<br>(8.1-17%)               | 88%<br>(83-92%)          | 0.019<br>(0.0089-0.034)                     | 0.6%<br>(0.27-1%)                    | 0.65%<br>(0.25-1.2%)                | 0.73<br>(0.27-1.3)      | 14<br>(6.4-24)        |
| Comoros  | 1995 | Male   | 75 to 79 | 11%<br>(7.4-17%)               | 89%<br>(83-93%)          | 0.015<br>(0.0068-0.029)                     | 0.58%<br>(0.25-0.99%)                | 0.64%<br>(0.23-1.1%)                | 0.62<br>(0.22-1.1)      | 9.3<br>(4-16)         |
| Comoros  | 1995 | Male   | 80 to 84 | 11%<br>(6.6-15%)               | 89%<br>(85-93%)          | 0.013<br>(0.0058-0.024)                     | 0.42%<br>(0.21-0.68%)                | 0.43%<br>(0.18-0.75%)               | 0.27<br>(0.11-0.46)     | 3.2<br>(1.6-5.1)      |
| Comoros  | 1995 | Male   | 85 to 89 | 9.6%<br>(5.7-14%)              | 90%<br>(86-94%)          | 0.011<br>(0.0051-0.021)                     | 0.43%<br>(0.21-0.7%)                 | 0.44%<br>(0.17-0.77%)               | 0.13<br>(0.052-0.23)    | 1.1<br>(0.54-1.8)     |
| Comoros  | 1995 | Male   | 90 to 94 | 9.5%<br>(5.9-15%)              | 91%<br>(85-94%)          | 0.01<br>(0.0044-0.019)                      | 0.33%<br>(0.18-0.5%)                 | 0.3%<br>(0.13-0.5%)                 | 0.029<br>(0.013-0.049)  | 0.19<br>(0.11-0.29)   |
| Comoros  | 1995 | Male   | 95 plus  | 10%<br>(6-16%)                 | 90%<br>(84-94%)          | 0.01<br>(0.0038-0.021)                      | 0.45%<br>(0.24-0.7%)                 | 0.41%<br>(0.14-0.72%)               | 0.0087<br>(0.003-0.015) | 0.039<br>(0.02-0.061) |
| Comoros  | 2000 | Female | All Ages | 22%<br>(15-29%)                | 78%<br>(71-85%)          | 0.11<br>(0.084-0.14)                        | 0.26%<br>(0.049-0.44%)               | 0.18%<br>(-0.24-0.56%)              | 3.9<br>(-5.3-12)        | 360<br>(65-640)       |
| Comoros  | 2000 | Female | 15 to 19 | 22%<br>(10-39%)                | 78%<br>(61-90%)          | 0.12<br>(0.053-0.22)                        | 0.49%<br>(0.1-0.96%)                 | 0.24%<br>(-0.4-1.1%)                | 0.11<br>(-0.17-0.47)    | 28<br>(6.1-55)        |
| Comoros  | 2000 | Female | 20 to 24 | 26%<br>(11-46%)                | 74%<br>(54-89%)          | 0.17<br>(0.077-0.3)                         | 0.93%<br>(0.25-1.6%)                 | 0.37%<br>(-0.58-1.3%)               | 0.19<br>(-0.29-0.68)    | 53<br>(13-93)         |
| Comoros  | 2000 | Female | 25 to 29 | 28%<br>(12-45%)                | 72%<br>(55-88%)          | 0.2<br>(0.092-0.34)                         | 1.1%<br>(0.48-1.7%)                  | 0.56%<br>(-0.29-1.4%)               | 0.27<br>(-0.14-0.65)    | 52<br>(23-83)         |
| Comoros  | 2000 | Female | 30 to 34 | 30%<br>(12-47%)                | 70%<br>(53-88%)          | 0.22<br>(0.096-0.36)                        | 0.96%<br>(0.4-1.5%)                  | 0.61%<br>(-0.26-1.4%)               | 0.31<br>(-0.13-0.72)    | 45<br>(18-70)         |
| Comoros  | 2000 | Female | 35 to 39 | 34%<br>(15-51%)                | 66%<br>(49-85%)          | 0.22<br>(0.099-0.37)                        | 1.1%<br>(0.22-1.8%)                  | 1%<br>(-0.29-2.2%)                  | 0.57<br>(-0.15-1.2)     | 48<br>(9.1-82)        |
| Comoros  | 2000 | Female | 40 to 44 | 33%<br>(18-50%)                | 67%<br>(50-82%)          | 0.21<br>(0.1-0.38)                          | 1.1%<br>(0.35-1.7%)                  | 1.2%<br>(0.13-2.2%)                 | 0.73<br>(0.081-1.4)     | 46<br>(15-75)         |
| Comoros  | 2000 | Female | 45 to 49 | 29%<br>(14-44%)                | 71%<br>(56-86%)          | 0.19<br>(0.077-0.34)                        | 0.92%<br>(0.23-1.6%)                 | 1%<br>(0.04-2%)                     | 0.71<br>(0.03-1.4)      | 37<br>(9.4-65)        |
| Comoros  | 2000 | Female | 50 to 54 | 26%<br>(14-41%)                | 74%<br>(59-86%)          | 0.18<br>(0.072-0.33)                        | 0.8%<br>(0.15-1.5%)                  | 0.91%<br>(0.059-1.9%)               | 0.66<br>(0.036-1.4)     | 28<br>(5-52)          |
| Comoros  | 2000 | Female | 55 to 59 | 29%<br>(15-46%)                | 71%<br>(54-85%)          | 0.21<br>(0.087-0.41)                        | 0.38%<br>(-0.37-1%)                  | 0.43%<br>(-0.51-1.3%)               | 0.4<br>(-0.47-1.2)      | 14<br>(-13-39)        |
| Comoros  | 2000 | Female | 60 to 64 | 34%<br>(18-51%)                | 66%<br>(49-82%)          | 0.24<br>(0.095-0.44)                        | 0.26%<br>(-0.55-1%)                  | 0.32%<br>(-0.66-1.2%)               | 0.38<br>(-0.8-1.5)      | 10<br>(-22-39)        |
| Comoros  | 2000 | Female | 65 to 69 | 36%<br>(19-54%)                | 64%<br>(46-81%)          | 0.24<br>(0.093-0.42)                        | 0.24%<br>(-0.61-0.98%)               | 0.26%<br>(-0.74-1.2%)               | 0.37<br>(-1.1-1.7)      | 9<br>(-23-39)         |
| Comoros  | 2000 | Female | 70 to 74 | 35%<br>(19-52%)                | 65%<br>(48-81%)          | 0.21<br>(0.082-0.39)                        | -0.11%<br>(-0.91-0.56%)              | -0.18%<br>(-1.1-0.59%)              | -0.29<br>(-1.8-0.94)    | -3.8<br>(-31-18)      |
| Comoros  | 2000 | Female | 75 to 79 | 32%<br>(16-49%)                | 68%<br>(51-84%)          | 0.17<br>(0.062-0.36)                        | 0.028%<br>(-0.85-0.69%)              | 0.022%<br>(-0.98-0.78%)             | 0.034<br>(-1.5-1.2)     | 0.68<br>(-21-17)      |
| Comoros  | 2000 | Female | 80 to 84 | 29%<br>(14-47%)                | 71%<br>(53-86%)          | 0.15<br>(0.055-0.32)                        | -0.19%<br>(-0.95-0.35%)              | -0.22%<br>(-1.1-0.4%)               | -0.25<br>(-1.3-0.46)    | -2.6<br>(-13-4.7)     |

| Location | Year | Sex    | Age      | Prevalence of current drinkers | Prevalence of abstainers | Population average of standard drinks daily | Percent of total attributable deaths | Percent of total attributable DALYs | Attributable deaths       | Attributable DALYs      |
|----------|------|--------|----------|--------------------------------|--------------------------|---------------------------------------------|--------------------------------------|-------------------------------------|---------------------------|-------------------------|
| Comoros  | 2000 | Female | 85 to 89 | 28%<br>(15-46%)                | 72%<br>(54-85%)          | 0.14<br>(0.06-0.3)                          | -0.24%<br>(-0.98-0.2%)               | -0.29%<br>(-1.1-0.21%)              | -0.18<br>(-0.71-0.13)     | -1.3<br>(-5.2-1)        |
| Comoros  | 2000 | Female | 90 to 94 | 30%<br>(17-47%)                | 70%<br>(53-83%)          | 0.15<br>(0.06-0.3)                          | -0.32%<br>(-0.96-0.11%)              | -0.42%<br>(-1.2-0.086%)             | -0.086<br>(-0.24-0.018)   | -0.39<br>(-1.2-0.13)    |
| Comoros  | 2000 | Female | 95 plus  | 34%<br>(17-52%)                | 66%<br>(48-83%)          | 0.15<br>(0.054-0.34)                        | -0.037%<br>(-0.73-0.52%)             | -0.13%<br>(-0.98-0.54%)             | -0.0062<br>(-0.048-0.026) | -0.007<br>(-0.14-0.097) |
| Comoros  | 2000 | Male   | All Ages | 7.4%<br>(6.1-8.9%)             | 93%<br>(91-94%)          | 0.015<br>(0.01-0.02)                        | 0.55%<br>(0.36-0.73%)                | 0.5%<br>(0.18-0.83%)                | 11<br>(4.1-18)            | 820<br>(540-1100)       |
| Comoros  | 2000 | Male   | 15 to 19 | 6.9%<br>(4.5-9.9%)             | 93%<br>(90-95%)          | 0.014<br>(0.0069-0.023)                     | 0.91%<br>(0.58-1.3%)                 | 0.12%<br>(0.018-0.24%)              | 0.059<br>(0.0096-0.12)    | 55<br>(33-85)           |
| Comoros  | 2000 | Male   | 20 to 24 | 9.2%<br>(5.8-13%)              | 91%<br>(87-94%)          | 0.02<br>(0.01-0.031)                        | 1.8%<br>(1.1-2.7%)                   | 0.23%<br>(0.0073-0.48%)             | 0.14<br>(0.0042-0.29)     | 110<br>(67-170)         |
| Comoros  | 2000 | Male   | 25 to 29 | 11%<br>(6.7-16%)               | 89%<br>(84-93%)          | 0.025<br>(0.014-0.042)                      | 2.1%<br>(1.4-2.8%)                   | 0.62%<br>(0.16-1.2%)                | 0.37<br>(0.093-0.68)      | 110<br>(73-160)         |
| Comoros  | 2000 | Male   | 30 to 34 | 12%<br>(7.4-18%)               | 88%<br>(82-93%)          | 0.031<br>(0.017-0.051)                      | 1.9%<br>(1.3-2.6%)                   | 0.85%<br>(0.24-1.6%)                | 0.51<br>(0.15-0.99)       | 95<br>(62-140)          |
| Comoros  | 2000 | Male   | 35 to 39 | 13%<br>(7.6-18%)               | 87%<br>(82-92%)          | 0.034<br>(0.017-0.059)                      | 1.7%<br>(1.1-2.5%)                   | 1.2%<br>(0.38-2.2%)                 | 0.78<br>(0.24-1.5)        | 86<br>(52-130)          |
| Comoros  | 2000 | Male   | 40 to 44 | 12%<br>(7.9-18%)               | 88%<br>(82-92%)          | 0.035<br>(0.017-0.06)                       | 1.7%<br>(0.95-2.5%)                  | 1.5%<br>(0.49-2.7%)                 | 1<br>(0.33-1.9)           | 78<br>(43-120)          |
| Comoros  | 2000 | Male   | 45 to 49 | 13%<br>(7.8-18%)               | 87%<br>(82-92%)          | 0.036<br>(0.016-0.064)                      | 1.7%<br>(0.93-2.7%)                  | 1.7%<br>(0.6-3.1%)                  | 1.3<br>(0.45-2.4)         | 74<br>(39-120)          |
| Comoros  | 2000 | Male   | 50 to 54 | 13%<br>(8.9-19%)               | 87%<br>(81-91%)          | 0.037<br>(0.018-0.069)                      | 1.5%<br>(0.76-2.6%)                  | 1.6%<br>(0.55-2.9%)                 | 1.2<br>(0.4-2.1)          | 56<br>(27-90)           |
| Comoros  | 2000 | Male   | 55 to 59 | 14%<br>(9.2-20%)               | 86%<br>(80-91%)          | 0.038<br>(0.018-0.068)                      | 1.3%<br>(0.68-2.2%)                  | 1.4%<br>(0.48-2.5%)                 | 1.2<br>(0.45-2.2)         | 49<br>(24-82)           |
| Comoros  | 2000 | Male   | 60 to 64 | 13%<br>(8.5-20%)               | 87%<br>(80-92%)          | 0.034<br>(0.016-0.065)                      | 1.3%<br>(0.59-2.1%)                  | 1.4%<br>(0.5-2.4%)                  | 1.5<br>(0.52-2.6)         | 47<br>(22-77)           |
| Comoros  | 2000 | Male   | 65 to 69 | 12%<br>(8.1-17%)               | 88%<br>(83-92%)          | 0.026<br>(0.013-0.046)                      | 0.78%<br>(0.34-1.3%)                 | 0.82%<br>(0.26-1.5%)                | 0.95<br>(0.31-1.8)        | 25<br>(11-42)           |
| Comoros  | 2000 | Male   | 70 to 74 | 12%<br>(7.9-16%)               | 88%<br>(84-92%)          | 0.02<br>(0.0096-0.036)                      | 0.59%<br>(0.25-0.99%)                | 0.64%<br>(0.23-1.1%)                | 0.77<br>(0.28-1.4)        | 15<br>(6.2-25)          |
| Comoros  | 2000 | Male   | 75 to 79 | 11%<br>(7-16%)                 | 89%<br>(84-93%)          | 0.017<br>(0.0071-0.032)                     | 0.58%<br>(0.24-1%)                   | 0.63%<br>(0.22-1.2%)                | 0.66<br>(0.24-1.2)        | 9.9<br>(4.2-18)         |
| Comoros  | 2000 | Male   | 80 to 84 | 10%<br>(6.2-14%)               | 90%<br>(86-94%)          | 0.014<br>(0.0064-0.026)                     | 0.41%<br>(0.2-0.66%)                 | 0.42%<br>(0.17-0.73%)               | 0.3<br>(0.13-0.51)        | 3.6<br>(1.7-5.7)        |
| Comoros  | 2000 | Male   | 85 to 89 | 9.1%<br>(5.4-14%)              | 91%<br>(86-95%)          | 0.012<br>(0.0056-0.022)                     | 0.43%<br>(0.2-0.69%)                 | 0.43%<br>(0.15-0.74%)               | 0.15<br>(0.054-0.26)      | 1.3<br>(0.61-2.1)       |
| Comoros  | 2000 | Male   | 90 to 94 | 9.1%<br>(5.7-13%)              | 91%<br>(87-94%)          | 0.011<br>(0.0048-0.022)                     | 0.33%<br>(0.18-0.5%)                 | 0.3%<br>(0.12-0.51%)                | 0.034<br>(0.014-0.059)    | 0.23<br>(0.13-0.35)     |
| Comoros  | 2000 | Male   | 95 plus  | 9.9%<br>(5.9-15%)              | 90%<br>(85-94%)          | 0.011<br>(0.004-0.023)                      | 0.45%<br>(0.23-0.73%)                | 0.4%<br>(0.13-0.74%)                | 0.01<br>(0.0034-0.019)    | 0.046<br>(0.024-0.075)  |
| Comoros  | 2005 | Female | All Ages | 22%<br>(16-29%)                | 78%<br>(71-84%)          | 0.13<br>(0.1-0.17)                          | 0.32%<br>(0.092-0.53%)               | 0.23%<br>(-0.23-0.65%)              | 4.8<br>(-4.8-14)          | 440<br>(120-730)        |

| Location | Year | Sex    | Age      | Prevalence of current drinkers | Prevalence of abstainers | Population average of standard drinks daily | Percent of total attributable deaths | Percent of total attributable DALYs | Attributable deaths       | Attributable DALYs     |
|----------|------|--------|----------|--------------------------------|--------------------------|---------------------------------------------|--------------------------------------|-------------------------------------|---------------------------|------------------------|
| Comoros  | 2005 | Female | 15 to 19 | 22%<br>(10-38%)                | 78%<br>(62-90%)          | 0.15<br>(0.063-0.27)                        | 0.58%<br>(0.18-1.1%)                 | 0.38%<br>(-0.3-1.2%)                | 0.17<br>(-0.14-0.52)      | 35<br>(11-65)          |
| Comoros  | 2005 | Female | 20 to 24 | 26%<br>(12-45%)                | 74%<br>(55-88%)          | 0.2<br>(0.094-0.35)                         | 1.1%<br>(0.46-1.8%)                  | 0.54%<br>(-0.41-1.6%)               | 0.28<br>(-0.21-0.84)      | 67<br>(27-110)         |
| Comoros  | 2005 | Female | 25 to 29 | 27%<br>(12-45%)                | 73%<br>(55-88%)          | 0.24<br>(0.11-0.4)                          | 1.2%<br>(0.66-1.8%)                  | 0.75%<br>(-0.029-1.6%)              | 0.37<br>(-0.014-0.8)      | 65<br>(35-99)          |
| Comoros  | 2005 | Female | 30 to 34 | 30%<br>(12-47%)                | 70%<br>(53-88%)          | 0.26<br>(0.12-0.44)                         | 1.1%<br>(0.57-1.7%)                  | 0.82%<br>(-0.075-1.7%)              | 0.4<br>(-0.037-0.82)      | 54<br>(26-82)          |
| Comoros  | 2005 | Female | 35 to 39 | 34%<br>(14-50%)                | 66%<br>(50-86%)          | 0.26<br>(0.12-0.44)                         | 1.2%<br>(0.41-1.9%)                  | 1.2%<br>(-0.0036-2.4%)              | 0.63<br>(-0.0021-1.3)     | 54<br>(19-87)          |
| Comoros  | 2005 | Female | 40 to 44 | 33%<br>(18-50%)                | 67%<br>(50-82%)          | 0.25<br>(0.11-0.45)                         | 1.1%<br>(0.45-1.8%)                  | 1.3%<br>(0.2-2.3%)                  | 0.76<br>(0.12-1.4)        | 50<br>(19-78)          |
| Comoros  | 2005 | Female | 45 to 49 | 28%<br>(13-43%)                | 72%<br>(57-87%)          | 0.23<br>(0.091-0.43)                        | 0.97%<br>(0.28-1.6%)                 | 1.1%<br>(0.13-2.2%)                 | 0.78<br>(0.093-1.5)       | 42<br>(12-72)          |
| Comoros  | 2005 | Female | 50 to 54 | 25%<br>(13-41%)                | 75%<br>(59-87%)          | 0.21<br>(0.083-0.4)                         | 0.86%<br>(0.18-1.5%)                 | 1%<br>(0.11-2%)                     | 0.83<br>(0.092-1.6)       | 35<br>(6.8-64)         |
| Comoros  | 2005 | Female | 55 to 59 | 29%<br>(15-45%)                | 71%<br>(55-85%)          | 0.25<br>(0.1-0.5)                           | 0.46%<br>(-0.33-1.2%)                | 0.55%<br>(-0.49-1.5%)               | 0.45<br>(-0.41-1.3)       | 16<br>(-11-40)         |
| Comoros  | 2005 | Female | 60 to 64 | 34%<br>(18-52%)                | 66%<br>(48-82%)          | 0.29<br>(0.11-0.54)                         | 0.33%<br>(-0.45-1.1%)                | 0.42%<br>(-0.54-1.4%)               | 0.46<br>(-0.6-1.6)        | 12<br>(-17-41)         |
| Comoros  | 2005 | Female | 65 to 69 | 37%<br>(20-54%)                | 63%<br>(46-80%)          | 0.29<br>(0.11-0.51)                         | 0.29%<br>(-0.64-1.1%)                | 0.33%<br>(-0.77-1.3%)               | 0.44<br>(-1-1.8)          | 10<br>(-24-40)         |
| Comoros  | 2005 | Female | 70 to 74 | 35%<br>(19-52%)                | 65%<br>(48-81%)          | 0.25<br>(0.097-0.47)                        | -0.082%<br>(-0.95-0.63%)             | -0.15%<br>(-1.1-0.69%)              | -0.23<br>(-1.8-1.1)       | -2.7<br>(-31-21)       |
| Comoros  | 2005 | Female | 75 to 79 | 32%<br>(16-49%)                | 68%<br>(51-84%)          | 0.21<br>(0.076-0.44)                        | 0.035%<br>(-0.92-0.7%)               | 0.036%<br>(-1.1-0.81%)              | 0.052<br>(-1.6-1.2)       | 0.86<br>(-22-17)       |
| Comoros  | 2005 | Female | 80 to 84 | 29%<br>(14-47%)                | 71%<br>(53-86%)          | 0.18<br>(0.066-0.39)                        | -0.2%<br>(-1-0.35%)                  | -0.24%<br>(-1.2-0.42%)              | -0.27<br>(-1.3-0.47)      | -2.8<br>(-14-4.8)      |
| Comoros  | 2005 | Female | 85 to 89 | 29%<br>(14-46%)                | 71%<br>(54-86%)          | 0.17<br>(0.068-0.35)                        | -0.27%<br>(-1.1-0.22%)               | -0.33%<br>(-1.3-0.24%)              | -0.22<br>(-0.85-0.16)     | -1.6<br>(-6.2-1.3)     |
| Comoros  | 2005 | Female | 90 to 94 | 31%<br>(16-46%)                | 69%<br>(54-84%)          | 0.18<br>(0.069-0.35)                        | -0.37%<br>(-1.1-0.11%)               | -0.48%<br>(-1.3-0.083%)             | -0.12<br>(-0.32-0.019)    | -0.53<br>(-1.5-0.15)   |
| Comoros  | 2005 | Female | 95 plus  | 34%<br>(18-52%)                | 66%<br>(48-82%)          | 0.19<br>(0.067-0.4)                         | -0.067%<br>(-0.82-0.53%)             | -0.16%<br>(-1.1-0.55%)              | -0.0094<br>(-0.062-0.031) | -0.015<br>(-0.19-0.12) |
| Comoros  | 2005 | Male   | All Ages | 7.2%<br>(6-8.6%)               | 93%<br>(91-94%)          | 0.017<br>(0.012-0.024)                      | 0.63%<br>(0.42-0.85%)                | 0.54%<br>(0.22-0.91%)               | 12<br>(4.7-19)            | 920<br>(610-1200)      |
| Comoros  | 2005 | Male   | 15 to 19 | 6.5%<br>(4.2-9.5%)             | 93%<br>(91-96%)          | 0.016<br>(0.0079-0.027)                     | 0.99%<br>(0.64-1.4%)                 | 0.14%<br>(0.035-0.27%)              | 0.069<br>(0.017-0.14)     | 62<br>(38-93)          |
| Comoros  | 2005 | Male   | 20 to 24 | 8.7%<br>(5.5-12%)              | 91%<br>(88-95%)          | 0.022<br>(0.012-0.037)                      | 2%<br>(1.3-2.9%)                     | 0.25%<br>(0.048-0.5%)               | 0.16<br>(0.031-0.34)      | 130<br>(80-200)        |
| Comoros  | 2005 | Male   | 25 to 29 | 10%<br>(6.7-15%)               | 90%<br>(85-93%)          | 0.029<br>(0.016-0.047)                      | 2.2%<br>(1.6-3%)                     | 0.65%<br>(0.22-1.2%)                | 0.39<br>(0.13-0.73)       | 130<br>(85-190)        |
| Comoros  | 2005 | Male   | 30 to 34 | 11%<br>(7-17%)                 | 89%<br>(83-93%)          | 0.035<br>(0.02-0.057)                       | 2%<br>(1.4-2.8%)                     | 0.88%<br>(0.26-1.6%)                | 0.52<br>(0.16-0.97)       | 100<br>(68-150)        |



| Location | Year | Sex    | Age      | Prevalence of current drinkers | Prevalence of abstainers | Population average of standard drinks daily | Percent of total attributable deaths | Percent of total attributable DALYs | Attributable deaths     | Attributable DALYs     |
|----------|------|--------|----------|--------------------------------|--------------------------|---------------------------------------------|--------------------------------------|-------------------------------------|-------------------------|------------------------|
| Comoros  | 2005 | Male   | 35 to 39 | 12%<br>(7.2-17%)               | 88%<br>(83-93%)          | 0.039<br>(0.02-0.069)                       | 1.8%<br>(1.2-2.6%)                   | 1.2%<br>(0.4-2.3%)                  | 0.78<br>(0.24-1.5)      | 91<br>(56-130)         |
| Comoros  | 2005 | Male   | 40 to 44 | 12%<br>(7.5-17%)               | 88%<br>(83-92%)          | 0.04<br>(0.018-0.07)                        | 1.8%<br>(1.1-2.7%)                   | 1.5%<br>(0.56-2.9%)                 | 1.1<br>(0.36-2.1)       | 84<br>(49-130)         |
| Comoros  | 2005 | Male   | 45 to 49 | 12%<br>(7.5-17%)               | 88%<br>(83-92%)          | 0.041<br>(0.019-0.076)                      | 1.8%<br>(0.96-2.8%)                  | 1.8%<br>(0.64-3.2%)                 | 1.4<br>(0.5-2.6)        | 83<br>(45-130)         |
| Comoros  | 2005 | Male   | 50 to 54 | 13%<br>(8.7-18%)               | 87%<br>(82-91%)          | 0.043<br>(0.02-0.079)                       | 1.6%<br>(0.8-2.5%)                   | 1.6%<br>(0.61-3%)                   | 1.4<br>(0.52-2.6)       | 69<br>(34-110)         |
| Comoros  | 2005 | Male   | 55 to 59 | 13%<br>(8.5-19%)               | 87%<br>(81-91%)          | 0.044<br>(0.021-0.082)                      | 1.4%<br>(0.69-2.3%)                  | 1.4%<br>(0.5-2.6%)                  | 1.2<br>(0.43-2.2)       | 49<br>(24-81)          |
| Comoros  | 2005 | Male   | 60 to 64 | 13%<br>(8.2-19%)               | 87%<br>(81-92%)          | 0.039<br>(0.017-0.074)                      | 1.3%<br>(0.65-2.2%)                  | 1.4%<br>(0.52-2.6%)                 | 1.5<br>(0.53-2.7)       | 48<br>(24-80)          |
| Comoros  | 2005 | Male   | 65 to 69 | 12%<br>(7.7-16%)               | 88%<br>(84-92%)          | 0.03<br>(0.014-0.053)                       | 0.82%<br>(0.37-1.4%)                 | 0.87%<br>(0.28-1.6%)                | 1<br>(0.34-1.9)         | 27<br>(12-46)          |
| Comoros  | 2005 | Male   | 70 to 74 | 11%<br>(7.4-16%)               | 89%<br>(84-93%)          | 0.023<br>(0.01-0.041)                       | 0.62%<br>(0.27-1.1%)                 | 0.68%<br>(0.24-1.2%)                | 0.83<br>(0.29-1.5)      | 16<br>(7-28)           |
| Comoros  | 2005 | Male   | 75 to 79 | 11%<br>(6.7-16%)               | 89%<br>(84-93%)          | 0.019<br>(0.0081-0.036)                     | 0.6%<br>(0.26-1%)                    | 0.67%<br>(0.24-1.2%)                | 0.71<br>(0.26-1.3)      | 11<br>(4.5-19)         |
| Comoros  | 2005 | Male   | 80 to 84 | 9.5%<br>(5.9-14%)              | 90%<br>(86-94%)          | 0.016<br>(0.0073-0.029)                     | 0.43%<br>(0.22-0.69%)                | 0.45%<br>(0.18-0.77%)               | 0.34<br>(0.14-0.57)     | 4<br>(2-6.3)           |
| Comoros  | 2005 | Male   | 85 to 89 | 8.7%<br>(5.2-13%)              | 91%<br>(87-95%)          | 0.014<br>(0.0064-0.026)                     | 0.45%<br>(0.22-0.73%)                | 0.45%<br>(0.16-0.79%)               | 0.19<br>(0.067-0.33)    | 1.6<br>(0.78-2.6)      |
| Comoros  | 2005 | Male   | 90 to 94 | 8.6%<br>(5.4-13%)              | 91%<br>(87-95%)          | 0.013<br>(0.0054-0.025)                     | 0.34%<br>(0.19-0.52%)                | 0.31%<br>(0.13-0.53%)               | 0.043<br>(0.018-0.074)  | 0.28<br>(0.16-0.44)    |
| Comoros  | 2005 | Male   | 95 plus  | 9.4%<br>(5.6-15%)              | 91%<br>(85-94%)          | 0.013<br>(0.0046-0.026)                     | 0.46%<br>(0.24-0.74%)                | 0.42%<br>(0.14-0.76%)               | 0.012<br>(0.0041-0.022) | 0.055<br>(0.027-0.089) |
| Comoros  | 2010 | Female | All Ages | 23%<br>(17-29%)                | 77%<br>(71-83%)          | 0.14<br>(0.1-0.2)                           | 0.38%<br>(0.13-0.61%)                | 0.28%<br>(-0.21-0.74%)              | 5.8<br>(-4.5-16)        | 500<br>(170-830)       |
| Comoros  | 2010 | Female | 15 to 19 | 21%<br>(10-38%)                | 79%<br>(62-90%)          | 0.15<br>(0.062-0.28)                        | 0.6%<br>(0.25-1%)                    | 0.38%<br>(-0.22-1.1%)               | 0.16<br>(-0.096-0.48)   | 36<br>(15-64)          |
| Comoros  | 2010 | Female | 20 to 24 | 26%<br>(12-45%)                | 74%<br>(55-88%)          | 0.21<br>(0.096-0.36)                        | 1.1%<br>(0.57-1.8%)                  | 0.56%<br>(-0.26-1.5%)               | 0.29<br>(-0.13-0.8)     | 73<br>(34-120)         |
| Comoros  | 2010 | Female | 25 to 29 | 27%<br>(12-46%)                | 73%<br>(54-88%)          | 0.24<br>(0.11-0.43)                         | 1.3%<br>(0.78-1.9%)                  | 0.81%<br>(0.035-1.7%)               | 0.41<br>(0.018-0.86)    | 76<br>(42-110)         |
| Comoros  | 2010 | Female | 30 to 34 | 30%<br>(12-47%)                | 70%<br>(53-88%)          | 0.27<br>(0.12-0.47)                         | 1.2%<br>(0.66-1.8%)                  | 0.91%<br>(0.0067-1.8%)              | 0.46<br>(0.0035-0.92)   | 64<br>(32-96)          |
| Comoros  | 2010 | Female | 35 to 39 | 34%<br>(15-51%)                | 66%<br>(49-85%)          | 0.28<br>(0.12-0.49)                         | 1.3%<br>(0.6-2%)                     | 1.3%<br>(0.14-2.5%)                 | 0.7<br>(0.078-1.4)      | 61<br>(27-96)          |
| Comoros  | 2010 | Female | 40 to 44 | 35%<br>(19-52%)                | 65%<br>(48-81%)          | 0.27<br>(0.12-0.49)                         | 1.2%<br>(0.46-1.9%)                  | 1.4%<br>(0.2-2.5%)                  | 0.84<br>(0.13-1.5)      | 55<br>(21-88)          |
| Comoros  | 2010 | Female | 45 to 49 | 34%<br>(17-48%)                | 66%<br>(52-83%)          | 0.28<br>(0.12-0.52)                         | 1%<br>(0.27-1.8%)                    | 1.2%<br>(0.11-2.4%)                 | 0.89<br>(0.082-1.8)     | 47<br>(12-82)          |
| Comoros  | 2010 | Female | 50 to 54 | 33%<br>(18-48%)                | 67%<br>(52-82%)          | 0.28<br>(0.12-0.52)                         | 0.88%<br>(0.079-1.7%)                | 1.1%<br>(-0.0088-2.3%)              | 0.99<br>(-0.008-2)      | 41<br>(3.2-79)         |

| Location | Year | Sex    | Age      | Prevalence of current drinkers | Prevalence of abstainers | Population average of standard drinks daily | Percent of total attributable deaths | Percent of total attributable DALYs | Attributable deaths       | Attributable DALYs      |
|----------|------|--------|----------|--------------------------------|--------------------------|---------------------------------------------|--------------------------------------|-------------------------------------|---------------------------|-------------------------|
| Comoros  | 2010 | Female | 55 to 59 | 33%<br>(18-49%)                | 67%<br>(51-82%)          | 0.3<br>(0.12-0.58)                          | 0.45%<br>(-0.38-1.3%)                | 0.58%<br>(-0.54-1.7%)               | 0.6<br>(-0.58-1.8)        | 20<br>(-18-59)          |
| Comoros  | 2010 | Female | 60 to 64 | 35%<br>(19-52%)                | 65%<br>(48-81%)          | 0.31<br>(0.12-0.62)                         | 0.36%<br>(-0.43-1.2%)                | 0.48%<br>(-0.51-1.6%)               | 0.51<br>(-0.55-1.7)       | 13<br>(-15-45)          |
| Comoros  | 2010 | Female | 65 to 69 | 37%<br>(20-54%)                | 63%<br>(46-80%)          | 0.3<br>(0.11-0.57)                          | 0.35%<br>(-0.55-1.2%)                | 0.42%<br>(-0.67-1.4%)               | 0.56<br>(-0.89-2)         | 13<br>(-20-45)          |
| Comoros  | 2010 | Female | 70 to 74 | 35%<br>(19-52%)                | 65%<br>(48-81%)          | 0.26<br>(0.097-0.5)                         | -0.032%<br>(-0.83-0.69%)             | -0.089%<br>(-1-0.78%)               | -0.14<br>(-1.6-1.2)       | -1.1<br>(-29-23)        |
| Comoros  | 2010 | Female | 75 to 79 | 31%<br>(16-49%)                | 69%<br>(51-84%)          | 0.21<br>(0.076-0.47)                        | 0.086%<br>(-0.83-0.77%)              | 0.099%<br>(-0.94-0.91%)             | 0.15<br>(-1.5-1.4)        | 2.2<br>(-22-20)         |
| Comoros  | 2010 | Female | 80 to 84 | 28%<br>(14-46%)                | 72%<br>(54-86%)          | 0.18<br>(0.067-0.39)                        | -0.16%<br>(-0.98-0.39%)              | -0.18%<br>(-1.1-0.46%)              | -0.21<br>(-1.4-0.53)      | -2.3<br>(-15-5.6)       |
| Comoros  | 2010 | Female | 85 to 89 | 28%<br>(15-44%)                | 72%<br>(56-85%)          | 0.17<br>(0.071-0.37)                        | -0.23%<br>(-0.98-0.24%)              | -0.28%<br>(-1.1-0.28%)              | -0.22<br>(-0.89-0.22)     | -1.6<br>(-6.5-1.7)      |
| Comoros  | 2010 | Female | 90 to 94 | 30%<br>(16-45%)                | 70%<br>(55-84%)          | 0.18<br>(0.07-0.35)                         | -0.34%<br>(-1-0.14%)                 | -0.45%<br>(-1.3-0.11%)              | -0.13<br>(-0.4-0.034)     | -0.61<br>(-1.9-0.25)    |
| Comoros  | 2010 | Female | 95 plus  | 33%<br>(18-53%)                | 67%<br>(47-82%)          | 0.19<br>(0.066-0.39)                        | -0.0089%<br>(-0.78-0.56%)            | -0.1%<br>(-1-0.6%)                  | -0.0076<br>(-0.078-0.045) | -0.0026<br>(-0.24-0.16) |
| Comoros  | 2010 | Male   | All Ages | 8.1%<br>(6.7-9.6%)             | 92%<br>(90-93%)          | 0.02<br>(0.013-0.03)                        | 0.75%<br>(0.51-1%)                   | 0.64%<br>(0.25-1.1%)                | 14<br>(5.4-23)            | 1100<br>(720-1500)      |
| Comoros  | 2010 | Male   | 15 to 19 | 6.8%<br>(4.3-9.9%)             | 93%<br>(90-96%)          | 0.016<br>(0.0079-0.03)                      | 1%<br>(0.68-1.5%)                    | 0.15%<br>(0.041-0.29%)              | 0.073<br>(0.02-0.14)      | 67<br>(41-100)          |
| Comoros  | 2010 | Male   | 20 to 24 | 9.9%<br>(6.1-14%)              | 90%<br>(86-94%)          | 0.026<br>(0.013-0.045)                      | 2.1%<br>(1.4-3.1%)                   | 0.27%<br>(0.037-0.55%)              | 0.18<br>(0.023-0.38)      | 150<br>(92-230)         |
| Comoros  | 2010 | Male   | 25 to 29 | 12%<br>(7.3-17%)               | 88%<br>(83-93%)          | 0.034<br>(0.018-0.058)                      | 2.4%<br>(1.7-3.2%)                   | 0.7%<br>(0.2-1.3%)                  | 0.48<br>(0.13-0.89)       | 160<br>(110-220)        |
| Comoros  | 2010 | Male   | 30 to 34 | 13%<br>(7.9-20%)               | 87%<br>(80-92%)          | 0.041<br>(0.021-0.069)                      | 2.2%<br>(1.5-3%)                     | 0.94%<br>(0.31-1.8%)                | 0.62<br>(0.2-1.2)         | 130<br>(83-180)         |
| Comoros  | 2010 | Male   | 35 to 39 | 14%<br>(8.5-19%)               | 86%<br>(81-91%)          | 0.046<br>(0.022-0.083)                      | 1.9%<br>(1.3-2.7%)                   | 1.3%<br>(0.41-2.3%)                 | 0.88<br>(0.27-1.6)        | 100<br>(65-150)         |
| Comoros  | 2010 | Male   | 40 to 44 | 14%<br>(9-19%)                 | 86%<br>(81-91%)          | 0.047<br>(0.022-0.083)                      | 1.9%<br>(1.1-2.8%)                   | 1.7%<br>(0.57-3%)                   | 1.2<br>(0.42-2.2)         | 96<br>(55-150)          |
| Comoros  | 2010 | Male   | 45 to 49 | 14%<br>(8.1-19%)               | 86%<br>(81-92%)          | 0.048<br>(0.021-0.091)                      | 1.9%<br>(1.1-2.9%)                   | 1.9%<br>(0.71-3.4%)                 | 1.7<br>(0.63-3)           | 97<br>(53-150)          |
| Comoros  | 2010 | Male   | 50 to 54 | 14%<br>(9.1-20%)               | 86%<br>(80-91%)          | 0.048<br>(0.022-0.092)                      | 1.7%<br>(0.87-2.7%)                  | 1.7%<br>(0.63-3.1%)                 | 1.8<br>(0.65-3.2)         | 85<br>(43-140)          |
| Comoros  | 2010 | Male   | 55 to 59 | 14%<br>(8.9-19%)               | 86%<br>(81-91%)          | 0.046<br>(0.021-0.087)                      | 1.5%<br>(0.76-2.3%)                  | 1.5%<br>(0.56-2.7%)                 | 1.6<br>(0.59-2.9)         | 67<br>(34-110)          |
| Comoros  | 2010 | Male   | 60 to 64 | 13%<br>(8.4-19%)               | 87%<br>(81-92%)          | 0.04<br>(0.017-0.078)                       | 1.4%<br>(0.69-2.3%)                  | 1.5%<br>(0.57-2.7%)                 | 1.7<br>(0.6-3)            | 53<br>(26-90)           |
| Comoros  | 2010 | Male   | 65 to 69 | 12%<br>(7.7-17%)               | 88%<br>(83-92%)          | 0.032<br>(0.014-0.059)                      | 0.86%<br>(0.4-1.4%)                  | 0.92%<br>(0.31-1.6%)                | 1.1<br>(0.38-2.1)         | 30<br>(14-51)           |
| Comoros  | 2010 | Male   | 70 to 74 | 11%<br>(7.3-16%)               | 89%<br>(84-93%)          | 0.024<br>(0.011-0.046)                      | 0.65%<br>(0.27-1.1%)                 | 0.72%<br>(0.25-1.3%)                | 0.96<br>(0.33-1.7)        | 19<br>(7.9-32)          |

| Location | Year | Sex    | Age      | Prevalence of current drinkers | Prevalence of abstainers | Population average of standard drinks daily | Percent of total attributable deaths | Percent of total attributable DALYs | Attributable deaths     | Attributable DALYs    |
|----------|------|--------|----------|--------------------------------|--------------------------|---------------------------------------------|--------------------------------------|-------------------------------------|-------------------------|-----------------------|
| Comoros  | 2010 | Male   | 75 to 79 | 10%<br>(6.8-16%)               | 90%<br>(84-93%)          | 0.019<br>(0.0083-0.038)                     | 0.63%<br>(0.27-1.1%)                 | 0.71%<br>(0.26-1.3%)                | 0.82<br>(0.29-1.5)      | 12<br>(5-21)          |
| Comoros  | 2010 | Male   | 80 to 84 | 9.5%<br>(5.9-13%)              | 91%<br>(87-94%)          | 0.016<br>(0.0073-0.032)                     | 0.46%<br>(0.23-0.73%)                | 0.48%<br>(0.19-0.8%)                | 0.37<br>(0.16-0.63)     | 4.4<br>(2.2-7)        |
| Comoros  | 2010 | Male   | 85 to 89 | 8.6%<br>(5-13%)                | 91%<br>(87-95%)          | 0.014<br>(0.0064-0.028)                     | 0.47%<br>(0.24-0.76%)                | 0.48%<br>(0.17-0.83%)               | 0.24<br>(0.083-0.41)    | 2<br>(1-3.3)          |
| Comoros  | 2010 | Male   | 90 to 94 | 8.6%<br>(5.5-13%)              | 91%<br>(87-94%)          | 0.013<br>(0.0054-0.026)                     | 0.35%<br>(0.2-0.54%)                 | 0.32%<br>(0.13-0.55%)               | 0.059<br>(0.025-0.1)    | 0.39<br>(0.22-0.59)   |
| Comoros  | 2010 | Male   | 95 plus  | 9.5%<br>(5.5-15%)              | 90%<br>(85-95%)          | 0.013<br>(0.0046-0.027)                     | 0.48%<br>(0.25-0.76%)                | 0.43%<br>(0.15-0.79%)               | 0.017<br>(0.0056-0.031) | 0.075<br>(0.038-0.12) |
| Comoros  | 2016 | Female | All Ages | 24%<br>(17-30%)                | 76%<br>(70-83%)          | 0.17<br>(0.089-0.28)                        | 0.53%<br>(0.21-0.9%)                 | 0.43%<br>(-0.13-1.1%)               | 9<br>(-2.8-24)          | 660<br>(270-1100)     |
| Comoros  | 2016 | Female | 15 to 19 | 21%<br>(9.9-38%)               | 79%<br>(62-90%)          | 0.17<br>(0.058-0.35)                        | 0.67%<br>(0.34-1.2%)                 | 0.46%<br>(-0.13-1.3%)               | 0.18<br>(-0.052-0.5)    | 41<br>(19-71)         |
| Comoros  | 2016 | Female | 20 to 24 | 26%<br>(11-44%)                | 74%<br>(56-89%)          | 0.23<br>(0.084-0.45)                        | 1.3%<br>(0.7-2%)                     | 0.69%<br>(-0.15-1.9%)               | 0.32<br>(-0.068-0.84)   | 82<br>(42-130)        |
| Comoros  | 2016 | Female | 25 to 29 | 27%<br>(12-46%)                | 73%<br>(54-88%)          | 0.27<br>(0.11-0.53)                         | 1.5%<br>(0.89-2.2%)                  | 1%<br>(0.08-2.2%)                   | 0.51<br>(0.033-1.1)     | 91<br>(51-140)        |
| Comoros  | 2016 | Female | 30 to 34 | 30%<br>(13-47%)                | 70%<br>(53-87%)          | 0.3<br>(0.12-0.57)                          | 1.4%<br>(0.76-2.1%)                  | 1.2%<br>(0.19-2.3%)                 | 0.65<br>(0.1-1.3)       | 84<br>(43-130)        |
| Comoros  | 2016 | Female | 35 to 39 | 35%<br>(16-51%)                | 65%<br>(49-84%)          | 0.31<br>(0.13-0.59)                         | 1.4%<br>(0.68-2.3%)                  | 1.6%<br>(0.27-3.1%)                 | 0.95<br>(0.17-1.9)      | 81<br>(38-130)        |
| Comoros  | 2016 | Female | 40 to 44 | 36%<br>(20-52%)                | 64%<br>(48-80%)          | 0.31<br>(0.12-0.63)                         | 1.3%<br>(0.62-2.3%)                  | 1.6%<br>(0.48-3.1%)                 | 1.1<br>(0.31-2.1)       | 72<br>(32-120)        |
| Comoros  | 2016 | Female | 45 to 49 | 34%<br>(17-48%)                | 66%<br>(52-83%)          | 0.31<br>(0.11-0.67)                         | 1.2%<br>(0.41-2.1%)                  | 1.5%<br>(0.28-2.9%)                 | 1.2<br>(0.22-2.4)       | 62<br>(21-110)        |
| Comoros  | 2016 | Female | 50 to 54 | 33%<br>(18-48%)                | 67%<br>(52-82%)          | 0.31<br>(0.11-0.66)                         | 1.1%<br>(0.19-2.1%)                  | 1.3%<br>(0.13-2.9%)                 | 1.4<br>(0.11-3)         | 58<br>(11-110)        |
| Comoros  | 2016 | Female | 55 to 59 | 33%<br>(19-50%)                | 67%<br>(50-81%)          | 0.33<br>(0.12-0.72)                         | 0.62%<br>(-0.29-1.8%)                | 0.79%<br>(-0.39-2.4%)               | 1<br>(-0.52-3.2)        | 34<br>(-16-100)       |
| Comoros  | 2016 | Female | 60 to 64 | 35%<br>(20-53%)                | 65%<br>(47-80%)          | 0.34<br>(0.11-0.74)                         | 0.51%<br>(-0.31-1.6%)                | 0.67%<br>(-0.32-2.1%)               | 0.99<br>(-0.48-3.2)     | 27<br>(-16-87)        |
| Comoros  | 2016 | Female | 65 to 69 | 37%<br>(20-53%)                | 63%<br>(47-80%)          | 0.33<br>(0.11-0.68)                         | 0.48%<br>(-0.38-1.4%)                | 0.58%<br>(-0.51-1.8%)               | 0.86<br>(-0.7-2.7)      | 20<br>(-16-61)        |
| Comoros  | 2016 | Female | 70 to 74 | 35%<br>(19-53%)                | 65%<br>(47-81%)          | 0.28<br>(0.099-0.63)                        | 0.07%<br>(-0.72-0.89%)               | 0.025%<br>(-0.96-1%)                | 0.041<br>(-1.6-1.6)     | 2.6<br>(-27-31)       |
| Comoros  | 2016 | Female | 75 to 79 | 31%<br>(15-49%)                | 69%<br>(51-85%)          | 0.23<br>(0.075-0.55)                        | 0.16%<br>(-0.75-0.89%)               | 0.19%<br>(-0.88-1.1%)               | 0.32<br>(-1.4-1.9)      | 4.7<br>(-21-26)       |
| Comoros  | 2016 | Female | 80 to 84 | 29%<br>(13-47%)                | 71%<br>(53-87%)          | 0.21<br>(0.064-0.48)                        | -0.12%<br>(-0.93-0.47%)              | -0.14%<br>(-1.1-0.55%)              | -0.18<br>(-1.5-0.73)    | -1.9<br>(-15-7.6)     |
| Comoros  | 2016 | Female | 85 to 89 | 28%<br>(14-46%)                | 72%<br>(54-86%)          | 0.19<br>(0.068-0.43)                        | -0.21%<br>(-0.97-0.27%)              | -0.26%<br>(-1.1-0.31%)              | -0.24<br>(-1-0.28)      | -1.7<br>(-7.6-2.1)    |
| Comoros  | 2016 | Female | 90 to 94 | 30%<br>(16-47%)                | 70%<br>(53-84%)          | 0.2<br>(0.07-0.45)                          | -0.33%<br>(-1-0.19%)                 | -0.44%<br>(-1.3-0.18%)              | -0.18<br>(-0.52-0.072)  | -0.79<br>(-2.5-0.43)  |

| Location | Year | Sex    | Age      | Prevalence of current drinkers | Prevalence of abstainers | Population average of standard drinks daily | Percent of total attributable deaths | Percent of total attributable DALYs | Attributable deaths      | Attributable DALYs     |
|----------|------|--------|----------|--------------------------------|--------------------------|---------------------------------------------|--------------------------------------|-------------------------------------|--------------------------|------------------------|
| Comoros  | 2016 | Female | 95 plus  | 34%<br>(18-52%)                | 66%<br>(48-82%)          | 0.21<br>(0.069-0.48)                        | 0.003%<br>(-0.78-0.64%)              | -0.084%<br>(-1-0.68%)               | -0.0092<br>(-0.12-0.073) | 0.0014<br>(-0.35-0.27) |
| Comoros  | 2016 | Male   | All Ages | 8.3%<br>(6.9-9.9%)             | 92%<br>(90-93%)          | 0.024<br>(0.012-0.041)                      | 0.96%<br>(0.64-1.3%)                 | 0.79%<br>(0.33-1.3%)                | 17<br>(6.9-29)           | 1300<br>(890-1800)     |
| Comoros  | 2016 | Male   | 15 to 19 | 6.8%<br>(4.3-9.8%)             | 93%<br>(90-96%)          | 0.018<br>(0.0075-0.037)                     | 1.1%<br>(0.7-1.5%)                   | 0.16%<br>(0.049-0.33%)              | 0.086<br>(0.025-0.18)    | 76<br>(47-110)         |
| Comoros  | 2016 | Male   | 20 to 24 | 9.8%<br>(6.2-14%)              | 90%<br>(86-94%)          | 0.029<br>(0.012-0.057)                      | 2.2%<br>(1.4-3.2%)                   | 0.3%<br>(0.044-0.62%)               | 0.22<br>(0.034-0.49)     | 170<br>(110-260)       |
| Comoros  | 2016 | Male   | 25 to 29 | 12%<br>(7.3-17%)               | 88%<br>(83-93%)          | 0.038<br>(0.017-0.073)                      | 2.5%<br>(1.7-3.4%)                   | 0.76%<br>(0.23-1.4%)                | 0.6<br>(0.18-1.1)        | 190<br>(130-270)       |
| Comoros  | 2016 | Male   | 30 to 34 | 13%<br>(7.8-19%)               | 87%<br>(81-92%)          | 0.045<br>(0.02-0.085)                       | 2.2%<br>(1.6-3.1%)                   | 1%<br>(0.35-1.9%)                   | 0.83<br>(0.26-1.5)       | 160<br>(110-240)       |
| Comoros  | 2016 | Male   | 35 to 39 | 14%<br>(8.5-20%)               | 86%<br>(80-92%)          | 0.051<br>(0.021-0.1)                        | 2%<br>(1.3-2.9%)                     | 1.4%<br>(0.45-2.5%)                 | 1.2<br>(0.39-2.2)        | 140<br>(87-190)        |
| Comoros  | 2016 | Male   | 40 to 44 | 14%<br>(8.8-20%)               | 86%<br>(80-91%)          | 0.053<br>(0.021-0.11)                       | 2%<br>(1.2-2.9%)                     | 1.8%<br>(0.66-3.1%)                 | 1.6<br>(0.57-2.9)        | 120<br>(69-180)        |
| Comoros  | 2016 | Male   | 45 to 49 | 14%<br>(7.8-20%)               | 86%<br>(80-92%)          | 0.053<br>(0.02-0.12)                        | 2%<br>(1.1-3.1%)                     | 2%<br>(0.76-3.6%)                   | 2<br>(0.77-3.7)          | 120<br>(65-190)        |
| Comoros  | 2016 | Male   | 50 to 54 | 14%<br>(9.1-20%)               | 86%<br>(80-91%)          | 0.053<br>(0.021-0.11)                       | 1.7%<br>(0.9-2.7%)                   | 1.8%<br>(0.64-3.1%)                 | 2.2<br>(0.79-3.9)        | 100<br>(53-160)        |
| Comoros  | 2016 | Male   | 55 to 59 | 14%<br>(8.9-19%)               | 86%<br>(81-91%)          | 0.052<br>(0.02-0.11)                        | 1.5%<br>(0.8-2.4%)                   | 1.6%<br>(0.6-2.8%)                  | 2.1<br>(0.78-3.9)        | 87<br>(42-140)         |
| Comoros  | 2016 | Male   | 60 to 64 | 13%<br>(8.3-19%)               | 87%<br>(81-92%)          | 0.045<br>(0.016-0.098)                      | 1.4%<br>(0.73-2.4%)                  | 1.6%<br>(0.62-2.8%)                 | 2.4<br>(0.9-4.2)         | 75<br>(37-120)         |
| Comoros  | 2016 | Male   | 65 to 69 | 12%<br>(7.8-17%)               | 88%<br>(83-92%)          | 0.035<br>(0.014-0.074)                      | 0.89%<br>(0.41-1.5%)                 | 0.96%<br>(0.31-1.7%)                | 1.3<br>(0.45-2.5)        | 35<br>(15-60)          |
| Comoros  | 2016 | Male   | 70 to 74 | 11%<br>(7.5-16%)               | 89%<br>(84-93%)          | 0.027<br>(0.01-0.056)                       | 0.67%<br>(0.3-1.1%)                  | 0.75%<br>(0.27-1.3%)                | 1.1<br>(0.39-1.9)        | 21<br>(9.5-36)         |
| Comoros  | 2016 | Male   | 75 to 79 | 11%<br>(6.7-16%)               | 89%<br>(84-93%)          | 0.022<br>(0.0085-0.046)                     | 0.66%<br>(0.3-1.1%)                  | 0.74%<br>(0.27-1.3%)                | 0.97<br>(0.34-1.8)       | 15<br>(6.4-25)         |
| Comoros  | 2016 | Male   | 80 to 84 | 9.5%<br>(5.8-14%)              | 90%<br>(86-94%)          | 0.018<br>(0.0073-0.038)                     | 0.47%<br>(0.25-0.75%)                | 0.49%<br>(0.21-0.83%)               | 0.43<br>(0.19-0.73)      | 5.1<br>(2.6-8.1)       |
| Comoros  | 2016 | Male   | 85 to 89 | 8.7%<br>(5.1-13%)              | 91%<br>(87-95%)          | 0.016<br>(0.0063-0.033)                     | 0.49%<br>(0.23-0.79%)                | 0.5%<br>(0.18-0.88%)                | 0.28<br>(0.1-0.49)       | 2.4<br>(1.1-3.8)       |
| Comoros  | 2016 | Male   | 90 to 94 | 8.7%<br>(5.5-14%)              | 91%<br>(86-94%)          | 0.015<br>(0.0057-0.031)                     | 0.37%<br>(0.21-0.55%)                | 0.33%<br>(0.14-0.56%)               | 0.081<br>(0.033-0.14)    | 0.53<br>(0.3-0.8)      |
| Comoros  | 2016 | Male   | 95 plus  | 9.5%<br>(5.5-15%)              | 91%<br>(85-94%)          | 0.015<br>(0.0045-0.034)                     | 0.49%<br>(0.26-0.78%)                | 0.45%<br>(0.16-0.81%)               | 0.026<br>(0.009-0.048)   | 0.12<br>(0.058-0.19)   |
| Djibouti | 1990 | Female | All Ages | 32%<br>(27-39%)                | 68%<br>(61-73%)          | 0.25<br>(0.18-0.34)                         | 0.23%<br>(0.1-0.39%)                 | 0.21%<br>(-0.1-0.55%)               | 5.1<br>(-2.5-14)         | 430<br>(190-720)       |
| Djibouti | 1990 | Female | 15 to 19 | 34%<br>(21-48%)                | 66%<br>(52-79%)          | 0.3<br>(0.15-0.52)                          | 0.63%<br>(0.31-1.1%)                 | 0.4%<br>(-0.11-1.1%)                | 0.16<br>(-0.039-0.43)    | 34<br>(16-59)          |
| Djibouti | 1990 | Female | 20 to 24 | 40%<br>(25-56%)                | 60%<br>(44-75%)          | 0.41<br>(0.21-0.69)                         | 1.1%<br>(0.58-1.7%)                  | 0.49%<br>(-0.12-1.1%)               | 0.23<br>(-0.053-0.56)    | 60<br>(30-94)          |

| Location | Year | Sex    | Age      | Prevalence of current drinkers | Prevalence of abstainers | Population average of standard drinks daily | Percent of total attributable deaths | Percent of total attributable DALYs | Attributable deaths     | Attributable DALYs     |
|----------|------|--------|----------|--------------------------------|--------------------------|---------------------------------------------|--------------------------------------|-------------------------------------|-------------------------|------------------------|
| Djibouti | 1990 | Female | 25 to 29 | 43%<br>(26-59%)                | 57%<br>(41-74%)          | 0.49<br>(0.27-0.79)                         | 1.3%<br>(0.75-2%)                    | 0.86%<br>(0.12-1.8%)                | 0.39<br>(0.053-0.82)    | 65<br>(36-100)         |
| Djibouti | 1990 | Female | 30 to 34 | 45%<br>(29-61%)                | 55%<br>(39-71%)          | 0.52<br>(0.29-0.84)                         | 1.3%<br>(0.7-2%)                     | 1%<br>(0.1-2.1%)                    | 0.46<br>(0.043-0.99)    | 56<br>(29-89)          |
| Djibouti | 1990 | Female | 35 to 39 | 48%<br>(33-63%)                | 52%<br>(37-67%)          | 0.5<br>(0.27-0.8)                           | 1.2%<br>(0.61-2%)                    | 1.2%<br>(0.25-2.4%)                 | 0.57<br>(0.11-1.1)      | 48<br>(24-78)          |
| Djibouti | 1990 | Female | 40 to 44 | 49%<br>(35-65%)                | 51%<br>(35-65%)          | 0.49<br>(0.25-0.83)                         | 1.2%<br>(0.57-2%)                    | 1.5%<br>(0.46-2.6%)                 | 0.76<br>(0.24-1.4)      | 48<br>(23-77)          |
| Djibouti | 1990 | Female | 45 to 49 | 49%<br>(32-65%)                | 51%<br>(35-68%)          | 0.5<br>(0.26-0.86)                          | 1.1%<br>(0.39-2.1%)                  | 1.4%<br>(0.33-2.8%)                 | 0.82<br>(0.19-1.6)      | 41<br>(13-75)          |
| Djibouti | 1990 | Female | 50 to 54 | 47%<br>(32-64%)                | 53%<br>(36-68%)          | 0.51<br>(0.27-0.86)                         | 1.1%<br>(0.28-2.1%)                  | 1.5%<br>(0.3-2.8%)                  | 0.92<br>(0.19-1.8)      | 37<br>(8.8-70)         |
| Djibouti | 1990 | Female | 55 to 59 | 46%<br>(31-62%)                | 54%<br>(38-69%)          | 0.52<br>(0.26-0.9)                          | 0.72%<br>(-0.11-1.8%)                | 0.98%<br>(-0.16-2.5%)               | 0.72<br>(-0.12-1.9)     | 23<br>(-3.5-60)        |
| Djibouti | 1990 | Female | 60 to 64 | 46%<br>(30-64%)                | 54%<br>(36-70%)          | 0.51<br>(0.25-0.9)                          | 0.54%<br>(-0.3-1.6%)                 | 0.74%<br>(-0.34-2.1%)               | 0.65<br>(-0.32-1.9)     | 17<br>(-9.5-51)        |
| Djibouti | 1990 | Female | 65 to 69 | 48%<br>(32-64%)                | 52%<br>(36-68%)          | 0.47<br>(0.25-0.82)                         | 0.4%<br>(-0.56-1.4%)                 | 0.51%<br>(-0.66-1.7%)               | 0.52<br>(-0.67-1.7)     | 12<br>(-16-39)         |
| Djibouti | 1990 | Female | 70 to 74 | 46%<br>(32-62%)                | 54%<br>(38-68%)          | 0.42<br>(0.2-0.76)                          | -0.084%<br>(-1-0.77%)                | -0.14%<br>(-1.3-0.91%)              | -0.14<br>(-1.4-1)       | -2<br>(-25-20)         |
| Djibouti | 1990 | Female | 75 to 79 | 44%<br>(28-60%)                | 56%<br>(40-72%)          | 0.36<br>(0.16-0.66)                         | -0.14%<br>(-1.1-0.67%)               | -0.16%<br>(-1.3-0.83%)              | -0.15<br>(-1.3-0.79)    | -2.3<br>(-17-11)       |
| Djibouti | 1990 | Female | 80 to 84 | 43%<br>(27-60%)                | 57%<br>(40-73%)          | 0.33<br>(0.15-0.58)                         | -0.44%<br>(-1.3-0.23%)               | -0.51%<br>(-1.6-0.33%)              | -0.35<br>(-1.1-0.22)    | -3.8<br>(-11-2)        |
| Djibouti | 1990 | Female | 85 to 89 | 43%<br>(27-58%)                | 57%<br>(42-73%)          | 0.32<br>(0.14-0.57)                         | -0.56%<br>(-1.5-0.095%)              | -0.66%<br>(-1.7-0.13%)              | -0.27<br>(-0.71-0.053)  | -2<br>(-5.3-0.36)      |
| Djibouti | 1990 | Female | 90 to 94 | 45%<br>(29-60%)                | 55%<br>(40-71%)          | 0.31<br>(0.15-0.6)                          | -0.67%<br>(-1.5--0.03%)              | -0.83%<br>(-1.9--0.06%)             | -0.13<br>(-0.3--0.0097) | -0.65<br>(-1.4--0.03)  |
| Djibouti | 1990 | Female | 95 plus  | 47%<br>(29-64%)                | 53%<br>(36-71%)          | 0.31<br>(0.13-0.61)                         | -0.36%<br>(-1.3-0.29%)               | -0.52%<br>(-1.6-0.28%)              | -0.02<br>(-0.064-0.011) | -0.057<br>(-0.2-0.047) |
| Djibouti | 1990 | Male   | All Ages | 41%<br>(35-48%)                | 59%<br>(52-65%)          | 0.3<br>(0.22-0.41)                          | 0.64%<br>(0.27-1%)                   | 0.68%<br>(0.066-1.3%)               | 21<br>(2.3-39)          | 1400<br>(630-2300)     |
| Djibouti | 1990 | Male   | 15 to 19 | 41%<br>(28-56%)                | 59%<br>(44-72%)          | 0.36<br>(0.19-0.6)                          | 1.5%<br>(0.84-2.4%)                  | 1.1%<br>(0.2-2.4%)                  | 0.67<br>(0.12-1.4)      | 100<br>(54-160)        |
| Djibouti | 1990 | Male   | 20 to 24 | 51%<br>(37-66%)                | 49%<br>(34-63%)          | 0.48<br>(0.27-0.77)                         | 2.7%<br>(1.3-4.4%)                   | 1.6%<br>(-0.022-3.5%)               | 1.4<br>(-0.018-3)       | 210<br>(99-340)        |
| Djibouti | 1990 | Male   | 25 to 29 | 55%<br>(40-70%)                | 45%<br>(30-60%)          | 0.57<br>(0.34-0.9)                          | 3.2%<br>(1.4-5.1%)                   | 2.2%<br>(-0.13-4.7%)                | 1.9<br>(-0.12-4)        | 230<br>(96-380)        |
| Djibouti | 1990 | Male   | 30 to 34 | 58%<br>(42-72%)                | 42%<br>(28-58%)          | 0.64<br>(0.39-1)                            | 3.1%<br>(1.1-5.2%)                   | 2.5%<br>(-0.19-5.4%)                | 2<br>(-0.14-4.2)        | 190<br>(61-320)        |
| Djibouti | 1990 | Male   | 35 to 39 | 59%<br>(45-74%)                | 41%<br>(26-55%)          | 0.68<br>(0.4-1.1)                           | 3.1%<br>(0.91-5.4%)                  | 2.9%<br>(-0.035-6%)                 | 2<br>(-0.023-4.2)       | 150<br>(42-260)        |
| Djibouti | 1990 | Male   | 40 to 44 | 60%<br>(46-75%)                | 40%<br>(25-54%)          | 0.71<br>(0.4-1.1)                           | 2.9%<br>(1-4.9%)                     | 3%<br>(0.51-5.7%)                   | 2.4<br>(0.41-4.7)       | 150<br>(51-250)        |

| Location | Year | Sex    | Age      | Prevalence of current drinkers | Prevalence of abstainers | Population average of standard drinks daily | Percent of total attributable deaths | Percent of total attributable DALYs | Attributable deaths        | Attributable DALYs       |
|----------|------|--------|----------|--------------------------------|--------------------------|---------------------------------------------|--------------------------------------|-------------------------------------|----------------------------|--------------------------|
| Djibouti | 1990 | Male   | 45 to 49 | 60%<br>(44-75%)                | 40%<br>(25-56%)          | 0.7<br>(0.38-1.1)                           | 2.6%<br>(0.81-4.4%)                  | 2.8%<br>(0.39-5.1%)                 | 2.4<br>(0.33-4.5)          | 120<br>(37-210)          |
| Djibouti | 1990 | Male   | 50 to 54 | 60%<br>(45-75%)                | 40%<br>(25-55%)          | 0.69<br>(0.38-1.1)                          | 2.4%<br>(0.62-4.2%)                  | 2.6%<br>(0.34-4.8%)                 | 2.5<br>(0.33-4.8)          | 110<br>(28-190)          |
| Djibouti | 1990 | Male   | 55 to 59 | 60%<br>(45-75%)                | 40%<br>(25-55%)          | 0.67<br>(0.37-1.1)                          | 2%<br>(0.37-3.6%)                    | 2.1%<br>(0.12-4.2%)                 | 2.2<br>(0.12-4.5)          | 82<br>(16-150)           |
| Djibouti | 1990 | Male   | 60 to 64 | 59%<br>(44-75%)                | 41%<br>(25-56%)          | 0.61<br>(0.32-1)                            | 1.6%<br>(0.3-2.9%)                   | 1.7%<br>(0.12-3.3%)                 | 2<br>(0.13-4)              | 60<br>(11-120)           |
| Djibouti | 1990 | Male   | 65 to 69 | 57%<br>(42-73%)                | 43%<br>(27-58%)          | 0.51<br>(0.27-0.85)                         | 0.75%<br>(-0.29-1.8%)                | 0.77%<br>(-0.54-2%)                 | 0.93<br>(-0.64-2.5)        | 24<br>(-9.6-58)          |
| Djibouti | 1990 | Male   | 70 to 74 | 56%<br>(41-70%)                | 44%<br>(30-59%)          | 0.41<br>(0.21-0.71)                         | 0.41%<br>(-0.47-1.2%)                | 0.43%<br>(-0.57-1.4%)               | 0.51<br>(-0.71-1.7)        | 11<br>(-12-32)           |
| Djibouti | 1990 | Male   | 75 to 79 | 54%<br>(40-69%)                | 46%<br>(31-60%)          | 0.35<br>(0.16-0.62)                         | 0.28%<br>(-0.63-1%)                  | 0.27%<br>(-0.79-1.1%)               | 0.27<br>(-0.8-1.1)         | 4.5<br>(-10-16)          |
| Djibouti | 1990 | Male   | 80 to 84 | 52%<br>(35-69%)                | 48%<br>(31-65%)          | 0.31<br>(0.15-0.52)                         | 0.14%<br>(-0.58-0.74%)               | 0.087%<br>(-0.76-0.79%)             | 0.054<br>(-0.47-0.48)      | 1<br>(-4.3-5.6)          |
| Djibouti | 1990 | Male   | 85 to 89 | 50%<br>(35-64%)                | 50%<br>(36-65%)          | 0.27<br>(0.14-0.45)                         | 0.13%<br>(-0.54-0.67%)               | 0.057%<br>(-0.75-0.67%)             | 0.017<br>(-0.23-0.2)       | 0.34<br>(-1.4-1.7)       |
| Djibouti | 1990 | Male   | 90 to 94 | 51%<br>(35-65%)                | 49%<br>(35-65%)          | 0.25<br>(0.12-0.44)                         | -0.021%<br>(-0.61-0.44%)             | -0.16%<br>(-0.87-0.38%)             | -0.016<br>(-0.086-0.038)   | -0.012<br>(-0.36-0.26)   |
| Djibouti | 1990 | Male   | 95 plus  | 52%<br>(33-71%)                | 48%<br>(29-67%)          | 0.23<br>(0.098-0.44)                        | 0.078%<br>(-0.63-0.58%)              | -0.11%<br>(-0.96-0.48%)             | -0.0022<br>(-0.019-0.0095) | 0.0062<br>(-0.048-0.045) |
| Djibouti | 1995 | Female | All Ages | 32%<br>(27-39%)                | 68%<br>(61-73%)          | 0.19<br>(0.13-0.26)                         | 0.21%<br>(0.071-0.36%)               | 0.17%<br>(-0.14-0.49%)              | 4.8<br>(-4-14)             | 440<br>(150-750)         |
| Djibouti | 1995 | Female | 15 to 19 | 34%<br>(22-49%)                | 66%<br>(51-78%)          | 0.24<br>(0.12-0.4)                          | 0.55%<br>(0.21-0.96%)                | 0.29%<br>(-0.25-0.89%)              | 0.14<br>(-0.12-0.45)       | 36<br>(13-63)            |
| Djibouti | 1995 | Female | 20 to 24 | 40%<br>(25-56%)                | 60%<br>(44-75%)          | 0.32<br>(0.17-0.55)                         | 0.97%<br>(0.47-1.5%)                 | 0.34%<br>(-0.28-0.98%)              | 0.2<br>(-0.16-0.58)        | 62<br>(30-100)           |
| Djibouti | 1995 | Female | 25 to 29 | 43%<br>(27-59%)                | 57%<br>(41-73%)          | 0.39<br>(0.21-0.63)                         | 1.2%<br>(0.62-1.8%)                  | 0.62%<br>(-0.17-1.4%)               | 0.35<br>(-0.098-0.8)       | 67<br>(34-110)           |
| Djibouti | 1995 | Female | 30 to 34 | 45%<br>(29-61%)                | 55%<br>(39-71%)          | 0.4<br>(0.22-0.65)                          | 1.1%<br>(0.52-1.8%)                  | 0.78%<br>(-0.13-1.8%)               | 0.45<br>(-0.07-1)          | 61<br>(28-98)            |
| Djibouti | 1995 | Female | 35 to 39 | 48%<br>(32-63%)                | 52%<br>(37-68%)          | 0.38<br>(0.21-0.61)                         | 1.1%<br>(0.41-1.8%)                  | 0.99%<br>(0.0046-2.1%)              | 0.59<br>(0.003-1.2)        | 53<br>(21-88)            |
| Djibouti | 1995 | Female | 40 to 44 | 49%<br>(35-65%)                | 51%<br>(35-65%)          | 0.38<br>(0.2-0.64)                          | 1.1%<br>(0.47-1.8%)                  | 1.3%<br>(0.32-2.3%)                 | 0.73<br>(0.19-1.3)         | 47<br>(20-77)            |
| Djibouti | 1995 | Female | 45 to 49 | 49%<br>(32-66%)                | 51%<br>(34-68%)          | 0.39<br>(0.2-0.68)                          | 1%<br>(0.25-1.8%)                    | 1.2%<br>(0.17-2.5%)                 | 0.84<br>(0.1-1.7)          | 43<br>(11-77)            |
| Djibouti | 1995 | Female | 50 to 54 | 47%<br>(32-64%)                | 53%<br>(36-68%)          | 0.39<br>(0.19-0.67)                         | 0.94%<br>(0.21-1.8%)                 | 1.2%<br>(0.19-2.4%)                 | 0.93<br>(0.14-1.9)         | 38<br>(8.3-74)           |
| Djibouti | 1995 | Female | 55 to 59 | 46%<br>(31-63%)                | 54%<br>(37-69%)          | 0.4<br>(0.2-0.7)                            | 0.54%<br>(-0.23-1.4%)                | 0.74%<br>(-0.3-1.9%)                | 0.65<br>(-0.26-1.8)        | 21<br>(-8.4-56)          |
| Djibouti | 1995 | Female | 60 to 64 | 47%<br>(31-64%)                | 53%<br>(36-69%)          | 0.4<br>(0.2-0.7)                            | 0.4%<br>(-0.36-1.3%)                 | 0.56%<br>(-0.42-1.6%)               | 0.59<br>(-0.44-1.8)        | 15<br>(-13-47)           |

| Location | Year | Sex    | Age      | Prevalence of current drinkers | Prevalence of abstainers | Population average of standard drinks daily | Percent of total attributable deaths | Percent of total attributable DALYs | Attributable deaths     | Attributable DALYs     |
|----------|------|--------|----------|--------------------------------|--------------------------|---------------------------------------------|--------------------------------------|-------------------------------------|-------------------------|------------------------|
| Djibouti | 1995 | Female | 65 to 69 | 48%<br>(32-63%)                | 52%<br>(37-68%)          | 0.37<br>(0.19-0.65)                         | 0.33%<br>(-0.45-1.1%)                | 0.42%<br>(-0.57-1.4%)               | 0.51<br>(-0.72-1.7)     | 12<br>(-16-37)         |
| Djibouti | 1995 | Female | 70 to 74 | 46%<br>(33-61%)                | 54%<br>(39-67%)          | 0.32<br>(0.16-0.61)                         | -0.099%<br>(-0.92-0.59%)             | -0.16%<br>(-1.2-0.69%)              | -0.2<br>(-1.6-0.92)     | -2.9<br>(-28-18)       |
| Djibouti | 1995 | Female | 75 to 79 | 44%<br>(29-60%)                | 56%<br>(40-71%)          | 0.29<br>(0.12-0.53)                         | -0.094%<br>(-1-0.63%)                | -0.098%<br>(-1.2-0.77%)             | -0.11<br>(-1.4-0.93)    | -1.9<br>(-20-13)       |
| Djibouti | 1995 | Female | 80 to 84 | 43%<br>(27-60%)                | 57%<br>(40-73%)          | 0.26<br>(0.12-0.47)                         | -0.38%<br>(-1.2-0.24%)               | -0.44%<br>(-1.4-0.3%)               | -0.38<br>(-1.2-0.27)    | -4.2<br>(-13-2.5)      |
| Djibouti | 1995 | Female | 85 to 89 | 43%<br>(27-59%)                | 57%<br>(41-73%)          | 0.25<br>(0.11-0.46)                         | -0.47%<br>(-1.3-0.1%)                | -0.55%<br>(-1.5-0.14%)              | -0.3<br>(-0.83-0.074)   | -2.2<br>(-6.1-0.48)    |
| Djibouti | 1995 | Female | 90 to 94 | 45%<br>(29-60%)                | 55%<br>(40-71%)          | 0.24<br>(0.11-0.48)                         | -0.54%<br>(-1.3-0.015%)              | -0.68%<br>(-1.6-0.0017%)            | -0.15<br>(-0.35-0.0037) | -0.71<br>(-1.7-0.021)  |
| Djibouti | 1995 | Female | 95 plus  | 47%<br>(29-64%)                | 53%<br>(36-71%)          | 0.24<br>(0.099-0.48)                        | -0.22%<br>(-1-0.38%)                 | -0.34%<br>(-1.3-0.39%)              | -0.02<br>(-0.078-0.022) | -0.05<br>(-0.23-0.088) |
| Djibouti | 1995 | Male   | All Ages | 41%<br>(35-48%)                | 59%<br>(52-65%)          | 0.24<br>(0.17-0.32)                         | 0.58%<br>(0.2-0.96%)                 | 0.59%<br>(-0.028-1.2%)              | 21<br>(-1-43)           | 1500<br>(520-2400)     |
| Djibouti | 1995 | Male   | 15 to 19 | 41%<br>(28-57%)                | 59%<br>(43-72%)          | 0.28<br>(0.15-0.47)                         | 1.4%<br>(0.7-2.2%)                   | 0.9%<br>(-0.00096-2%)               | 0.63<br>(-0.00068-1.4)  | 110<br>(53-170)        |
| Djibouti | 1995 | Male   | 20 to 24 | 52%<br>(37-66%)                | 48%<br>(34-63%)          | 0.37<br>(0.21-0.6)                          | 2.5%<br>(1.1-4.1%)                   | 1.3%<br>(-0.47-3.2%)                | 1.2<br>(-0.43-2.9)      | 200<br>(87-330)        |
| Djibouti | 1995 | Male   | 25 to 29 | 56%<br>(40-70%)                | 44%<br>(30-60%)          | 0.45<br>(0.26-0.73)                         | 2.8%<br>(1-4.7%)                     | 1.7%<br>(-0.74-4.2%)                | 1.6<br>(-0.69-3.8)      | 220<br>(78-370)        |
| Djibouti | 1995 | Male   | 30 to 34 | 58%<br>(42-72%)                | 42%<br>(28-58%)          | 0.5<br>(0.3-0.79)                           | 2.7%<br>(0.62-4.8%)                  | 1.9%<br>(-0.88-4.6%)                | 1.9<br>(-0.86-4.6)      | 200<br>(46-370)        |
| Djibouti | 1995 | Male   | 35 to 39 | 59%<br>(46-74%)                | 41%<br>(26-54%)          | 0.53<br>(0.31-0.86)                         | 2.6%<br>(0.55-4.6%)                  | 2.2%<br>(-0.47-4.8%)                | 2.1<br>(-0.43-4.6)      | 170<br>(33-300)        |
| Djibouti | 1995 | Male   | 40 to 44 | 60%<br>(46-76%)                | 40%<br>(24-54%)          | 0.55<br>(0.3-0.87)                          | 2.4%<br>(0.58-4.3%)                  | 2.4%<br>(-0.073-5%)                 | 2<br>(-0.062-4.2)       | 130<br>(30-230)        |
| Djibouti | 1995 | Male   | 45 to 49 | 61%<br>(45-76%)                | 39%<br>(24-55%)          | 0.55<br>(0.29-0.89)                         | 2.3%<br>(0.51-4%)                    | 2.3%<br>(-0.012-4.5%)               | 2.4<br>(-0.011-4.7)     | 130<br>(29-220)        |
| Djibouti | 1995 | Male   | 50 to 54 | 61%<br>(45-76%)                | 39%<br>(24-55%)          | 0.54<br>(0.28-0.88)                         | 2.1%<br>(0.35-3.8%)                  | 2.2%<br>(0.038-4.4%)                | 2.5<br>(0.041-4.9)      | 110<br>(18-200)        |
| Djibouti | 1995 | Male   | 55 to 59 | 60%<br>(45-75%)                | 40%<br>(25-55%)          | 0.53<br>(0.29-0.88)                         | 1.7%<br>(0.055-3.2%)                 | 1.8%<br>(-0.26-3.7%)                | 2.2<br>(-0.32-4.6)      | 82<br>(2.7-160)        |
| Djibouti | 1995 | Male   | 60 to 64 | 59%<br>(44-75%)                | 41%<br>(25-56%)          | 0.47<br>(0.24-0.83)                         | 1.4%<br>(0.21-2.6%)                  | 1.5%<br>(-0.026-3%)                 | 2<br>(-0.035-4.1)       | 64<br>(9.4-120)        |
| Djibouti | 1995 | Male   | 65 to 69 | 58%<br>(42-74%)                | 42%<br>(26-58%)          | 0.39<br>(0.21-0.68)                         | 0.72%<br>(-0.29-1.7%)                | 0.73%<br>(-0.5-1.9%)                | 1.1<br>(-0.73-2.7)      | 28<br>(-12-64)         |
| Djibouti | 1995 | Male   | 70 to 74 | 56%<br>(41-71%)                | 44%<br>(29-59%)          | 0.32<br>(0.17-0.55)                         | 0.44%<br>(-0.46-1.2%)                | 0.46%<br>(-0.6-1.4%)                | 0.67<br>(-0.87-2)       | 14<br>(-14-36)         |
| Djibouti | 1995 | Male   | 75 to 79 | 54%<br>(40-70%)                | 46%<br>(30-60%)          | 0.27<br>(0.13-0.48)                         | 0.36%<br>(-0.44-1%)                  | 0.36%<br>(-0.63-1.1%)               | 0.45<br>(-0.77-1.4)     | 7.2<br>(-9.4-21)       |
| Djibouti | 1995 | Male   | 80 to 84 | 53%<br>(36-70%)                | 47%<br>(30-64%)          | 0.24<br>(0.12-0.43)                         | 0.21%<br>(-0.49-0.77%)               | 0.17%<br>(-0.65-0.83%)              | 0.14<br>(-0.53-0.67)    | 2<br>(-4.9-7.5)        |

| Location | Year | Sex    | Age      | Prevalence of current drinkers | Prevalence of abstainers | Population average of standard drinks daily | Percent of total attributable deaths | Percent of total attributable DALYs | Attributable deaths       | Attributable DALYs      |
|----------|------|--------|----------|--------------------------------|--------------------------|---------------------------------------------|--------------------------------------|-------------------------------------|---------------------------|-------------------------|
| Djibouti | 1995 | Male   | 85 to 89 | 51%<br>(35-65%)                | 49%<br>(35-65%)          | 0.21<br>(0.11-0.36)                         | 0.22%<br>(-0.37-0.71%)               | 0.17%<br>(-0.52-0.72%)              | 0.07<br>(-0.21-0.3)       | 0.79<br>(-1.3-2.5)      |
| Djibouti | 1995 | Male   | 90 to 94 | 51%<br>(35-65%)                | 49%<br>(35-65%)          | 0.19<br>(0.095-0.36)                        | 0.079%<br>(-0.42-0.48%)              | -0.027%<br>(-0.6-0.43%)             | -0.0037<br>(-0.081-0.059) | 0.064<br>(-0.33-0.39)   |
| Djibouti | 1995 | Male   | 95 plus  | 53%<br>(33-71%)                | 47%<br>(29-67%)          | 0.18<br>(0.075-0.35)                        | 0.19%<br>(-0.37-0.62%)               | 0.047%<br>(-0.66-0.55%)             | 0.0014<br>(-0.019-0.016)  | 0.023<br>(-0.043-0.073) |
| Djibouti | 2000 | Female | All Ages | 33%<br>(27-39%)                | 67%<br>(61-73%)          | 0.19<br>(0.13-0.25)                         | 0.22%<br>(0.013-0.43%)               | 0.16%<br>(-0.28-0.58%)              | 5.1<br>(-8.9-19)          | 490<br>(28-970)         |
| Djibouti | 2000 | Female | 15 to 19 | 34%<br>(21-49%)                | 66%<br>(51-79%)          | 0.23<br>(0.12-0.39)                         | 0.55%<br>(0.11-1%)                   | 0.3%<br>(-0.44-1.1%)                | 0.14<br>(-0.21-0.53)      | 36<br>(6.9-68)          |
| Djibouti | 2000 | Female | 20 to 24 | 40%<br>(25-57%)                | 60%<br>(43-75%)          | 0.32<br>(0.17-0.52)                         | 0.88%<br>(0.34-1.5%)                 | 0.29%<br>(-0.42-0.96%)              | 0.22<br>(-0.31-0.77)      | 72<br>(27-130)          |
| Djibouti | 2000 | Female | 25 to 29 | 43%<br>(27-60%)                | 57%<br>(40-73%)          | 0.38<br>(0.21-0.62)                         | 0.94%<br>(0.38-1.6%)                 | 0.46%<br>(-0.33-1.3%)               | 0.39<br>(-0.29-1.1)       | 74<br>(28-120)          |
| Djibouti | 2000 | Female | 30 to 34 | 45%<br>(29-61%)                | 55%<br>(39-71%)          | 0.4<br>(0.22-0.66)                          | 0.92%<br>(0.29-1.6%)                 | 0.58%<br>(-0.32-1.6%)               | 0.51<br>(-0.28-1.3)       | 67<br>(22-120)          |
| Djibouti | 2000 | Female | 35 to 39 | 48%<br>(32-63%)                | 52%<br>(37-68%)          | 0.38<br>(0.21-0.61)                         | 0.89%<br>(0.099-1.7%)                | 0.74%<br>(-0.37-1.9%)               | 0.66<br>(-0.35-1.7)       | 60<br>(6.6-120)         |
| Djibouti | 2000 | Female | 40 to 44 | 49%<br>(34-65%)                | 51%<br>(35-66%)          | 0.38<br>(0.2-0.61)                          | 0.94%<br>(0.16-1.7%)                 | 1%<br>(-0.1-2.2%)                   | 0.83<br>(-0.076-1.8)      | 54<br>(8.6-100)         |
| Djibouti | 2000 | Female | 45 to 49 | 49%<br>(32-65%)                | 51%<br>(35-68%)          | 0.38<br>(0.19-0.64)                         | 0.88%<br>(-0.081-1.9%)               | 1%<br>(-0.37-2.5%)                  | 0.84<br>(-0.3-2)          | 43<br>(-4.2-92)         |
| Djibouti | 2000 | Female | 50 to 54 | 47%<br>(32-64%)                | 53%<br>(36-68%)          | 0.39<br>(0.2-0.66)                          | 0.86%<br>(-0.13-1.9%)                | 1.1%<br>(-0.3-2.6%)                 | 1.1<br>(-0.28-2.5)        | 43<br>(-6.8-94)         |
| Djibouti | 2000 | Female | 55 to 59 | 46%<br>(30-63%)                | 54%<br>(37-70%)          | 0.4<br>(0.2-0.68)                           | 0.51%<br>(-0.55-1.6%)                | 0.68%<br>(-0.69-2.2%)               | 0.73<br>(-0.8-2.6)        | 23<br>(-24-80)          |
| Djibouti | 2000 | Female | 60 to 64 | 47%<br>(31-64%)                | 53%<br>(36-69%)          | 0.39<br>(0.2-0.7)                           | 0.39%<br>(-0.53-1.4%)                | 0.55%<br>(-0.62-1.8%)               | 0.7<br>(-0.76-2.4)        | 17<br>(-22-62)          |
| Djibouti | 2000 | Female | 65 to 69 | 48%<br>(32-64%)                | 52%<br>(36-68%)          | 0.37<br>(0.19-0.64)                         | 0.3%<br>(-0.69-1.2%)                 | 0.4%<br>(-0.83-1.6%)                | 0.57<br>(-1.2-2.2)        | 12<br>(-27-49)          |
| Djibouti | 2000 | Female | 70 to 74 | 47%<br>(33-62%)                | 53%<br>(38-67%)          | 0.32<br>(0.16-0.6)                          | -0.13%<br>(-1.1-0.67%)               | -0.19%<br>(-1.3-0.81%)              | -0.29<br>(-2.1-1.2)       | -4.5<br>(-39-23)        |
| Djibouti | 2000 | Female | 75 to 79 | 44%<br>(29-61%)                | 56%<br>(39-71%)          | 0.28<br>(0.12-0.52)                         | -0.12%<br>(-1.1-0.65%)               | -0.13%<br>(-1.3-0.83%)              | -0.18<br>(-1.8-1.2)       | -3<br>(-27-16)          |
| Djibouti | 2000 | Female | 80 to 84 | 43%<br>(27-60%)                | 57%<br>(40-73%)          | 0.26<br>(0.11-0.45)                         | -0.4%<br>(-1.3-0.28%)                | -0.45%<br>(-1.5-0.34%)              | -0.48<br>(-1.7-0.36)      | -5.3<br>(-17-3.9)       |
| Djibouti | 2000 | Female | 85 to 89 | 43%<br>(27-58%)                | 57%<br>(42-73%)          | 0.24<br>(0.11-0.45)                         | -0.47%<br>(-1.3-0.15%)               | -0.55%<br>(-1.6-0.17%)              | -0.4<br>(-1.1-0.13)       | -3<br>(-8.5-0.98)       |
| Djibouti | 2000 | Female | 90 to 94 | 45%<br>(29-59%)                | 55%<br>(41-71%)          | 0.24<br>(0.11-0.45)                         | -0.55%<br>(-1.4-0.06%)               | -0.69%<br>(-1.7-0.03%)              | -0.21<br>(-0.51-0.0093)   | -0.99<br>(-2.5-0.11)    |
| Djibouti | 2000 | Female | 95 plus  | 47%<br>(29-65%)                | 53%<br>(35-71%)          | 0.24<br>(0.095-0.46)                        | -0.18%<br>(-0.98-0.43%)              | -0.31%<br>(-1.3-0.45%)              | -0.025<br>(-0.1-0.036)    | -0.059<br>(-0.31-0.14)  |
| Djibouti | 2000 | Male   | All Ages | 41%<br>(35-49%)                | 59%<br>(51-65%)          | 0.24<br>(0.17-0.31)                         | 0.62%<br>(0.12-1.1%)                 | 0.61%<br>(-0.21-1.4%)               | 24<br>(-8.1-55)           | 1700<br>(340-3000)      |



| Location | Year | Sex    | Age      | Prevalence of current drinkers | Prevalence of abstainers | Population average of standard drinks daily | Percent of total attributable deaths | Percent of total attributable DALYs | Attributable deaths     | Attributable DALYs    |
|----------|------|--------|----------|--------------------------------|--------------------------|---------------------------------------------|--------------------------------------|-------------------------------------|-------------------------|-----------------------|
| Djibouti | 2000 | Male   | 15 to 19 | 41%<br>(28-57%)                | 59%<br>(43-72%)          | 0.27<br>(0.15-0.45)                         | 1.5%<br>(0.61-2.5%)                  | 1%<br>(-0.31-2.6%)                  | 0.64<br>(-0.21-1.6)     | 110<br>(43-180)       |
| Djibouti | 2000 | Male   | 20 to 24 | 52%<br>(38-66%)                | 48%<br>(34-62%)          | 0.37<br>(0.21-0.59)                         | 2.5%<br>(0.77-4.3%)                  | 1.3%<br>(-0.94-3.7%)                | 1.4<br>(-0.94-3.7)      | 240<br>(70-420)       |
| Djibouti | 2000 | Male   | 25 to 29 | 56%<br>(40-70%)                | 44%<br>(30-60%)          | 0.44<br>(0.25-0.71)                         | 2.5%<br>(0.41-4.6%)                  | 1.5%<br>(-1.2-4.1%)                 | 1.7<br>(-1.4-4.5)       | 230<br>(43-420)       |
| Djibouti | 2000 | Male   | 30 to 34 | 58%<br>(42-72%)                | 42%<br>(28-58%)          | 0.49<br>(0.3-0.76)                          | 2.3%<br>(0.065-4.5%)                 | 1.6%<br>(-1.2-4.4%)                 | 2<br>(-1.6-5.4)         | 210<br>(6-420)        |
| Djibouti | 2000 | Male   | 35 to 39 | 59%<br>(45-74%)                | 41%<br>(26-55%)          | 0.53<br>(0.31-0.84)                         | 2.2%<br>(0.067-4.3%)                 | 1.9%<br>(-0.86-4.7%)                | 2.6<br>(-1.3-6.4)       | 210<br>(5-400)        |
| Djibouti | 2000 | Male   | 40 to 44 | 60%<br>(45-75%)                | 40%<br>(25-55%)          | 0.54<br>(0.3-0.86)                          | 2.2%<br>(0.18-4.2%)                  | 2.1%<br>(-0.48-4.7%)                | 2.7<br>(-0.63-6)        | 170<br>(14-320)       |
| Djibouti | 2000 | Male   | 45 to 49 | 61%<br>(45-76%)                | 39%<br>(24-55%)          | 0.54<br>(0.3-0.85)                          | 2.1%<br>(0.14-4%)                    | 2.1%<br>(-0.45-4.6%)                | 2.4<br>(-0.58-5.2)      | 130<br>(9.7-250)      |
| Djibouti | 2000 | Male   | 50 to 54 | 61%<br>(45-75%)                | 39%<br>(25-55%)          | 0.53<br>(0.29-0.87)                         | 2%<br>(-0.096-3.9%)                  | 2.1%<br>(-0.58-4.6%)                | 2.8<br>(-0.73-6.4)      | 120<br>(-5.4-250)     |
| Djibouti | 2000 | Male   | 55 to 59 | 60%<br>(45-75%)                | 40%<br>(25-55%)          | 0.52<br>(0.28-0.86)                         | 1.6%<br>(-0.34-3.5%)                 | 1.7%<br>(-0.7-4.1%)                 | 2.5<br>(-1.1-6)         | 95<br>(-21-210)       |
| Djibouti | 2000 | Male   | 60 to 64 | 59%<br>(44-76%)                | 41%<br>(24-56%)          | 0.47<br>(0.25-0.81)                         | 1.4%<br>(-0.1-2.7%)                  | 1.5%<br>(-0.41-3.2%)                | 2.4<br>(-0.66-5.1)      | 74<br>(-5.8-150)      |
| Djibouti | 2000 | Male   | 65 to 69 | 58%<br>(43-73%)                | 42%<br>(27-57%)          | 0.39<br>(0.22-0.67)                         | 0.69%<br>(-0.5-1.8%)                 | 0.7%<br>(-0.73-2%)                  | 1.2<br>(-1.2-3.5)       | 32<br>(-23-83)        |
| Djibouti | 2000 | Male   | 70 to 74 | 56%<br>(41-71%)                | 44%<br>(29-59%)          | 0.31<br>(0.17-0.54)                         | 0.43%<br>(-0.71-1.4%)                | 0.45%<br>(-0.9-1.6%)                | 0.77<br>(-1.5-2.7)      | 16<br>(-26-51)        |
| Djibouti | 2000 | Male   | 75 to 79 | 54%<br>(39-70%)                | 46%<br>(30-61%)          | 0.26<br>(0.13-0.48)                         | 0.36%<br>(-0.64-1.1%)                | 0.37%<br>(-0.81-1.3%)               | 0.55<br>(-1.2-1.9)      | 8.8<br>(-16-28)       |
| Djibouti | 2000 | Male   | 80 to 84 | 52%<br>(35-69%)                | 48%<br>(31-65%)          | 0.24<br>(0.11-0.4)                          | 0.22%<br>(-0.59-0.89%)               | 0.18%<br>(-0.76-0.96%)              | 0.18<br>(-0.74-0.94)    | 2.5<br>(-7.1-11)      |
| Djibouti | 2000 | Male   | 85 to 89 | 51%<br>(34-65%)                | 49%<br>(35-66%)          | 0.21<br>(0.1-0.36)                          | 0.24%<br>(-0.42-0.83%)               | 0.2%<br>(-0.58-0.86%)               | 0.11<br>(-0.31-0.47)    | 1.1<br>(-2-3.9)       |
| Djibouti | 2000 | Male   | 90 to 94 | 51%<br>(36-66%)                | 49%<br>(34-64%)          | 0.19<br>(0.095-0.33)                        | 0.1%<br>(-0.44-0.53%)                | 0.0042%<br>(-0.63-0.51%)            | 0.0008<br>(-0.12-0.095) | 0.12<br>(-0.49-0.6)   |
| Djibouti | 2000 | Male   | 95 plus  | 53%<br>(33-71%)                | 47%<br>(29-67%)          | 0.18<br>(0.077-0.33)                        | 0.24%<br>(-0.36-0.77%)               | 0.1%<br>(-0.62-0.73%)               | 0.0043<br>(-0.026-0.03) | 0.04<br>(-0.061-0.13) |
| Djibouti | 2005 | Female | All Ages | 33%<br>(28-40%)                | 67%<br>(60-72%)          | 0.22<br>(0.16-0.29)                         | 0.26%<br>(-0.0054-0.54%)             | 0.18%<br>(-0.35-0.71%)              | 5.9<br>(-12-25)         | 570<br>(-12-1200)     |
| Djibouti | 2005 | Female | 15 to 19 | 34%<br>(21-49%)                | 66%<br>(51-79%)          | 0.26<br>(0.13-0.43)                         | 0.62%<br>(0.13-1.2%)                 | 0.37%<br>(-0.49-1.3%)               | 0.2<br>(-0.24-0.74)     | 47<br>(10-92)         |
| Djibouti | 2005 | Female | 20 to 24 | 41%<br>(25-56%)                | 59%<br>(44-75%)          | 0.35<br>(0.19-0.58)                         | 0.97%<br>(0.39-1.7%)                 | 0.36%<br>(-0.44-1.3%)               | 0.27<br>(-0.3-0.93)     | 77<br>(30-130)        |
| Djibouti | 2005 | Female | 25 to 29 | 43%<br>(27-60%)                | 57%<br>(40-73%)          | 0.42<br>(0.23-0.67)                         | 0.88%<br>(0.33-1.6%)                 | 0.44%<br>(-0.24-1.3%)               | 0.51<br>(-0.3-1.5)      | 91<br>(35-160)        |
| Djibouti | 2005 | Female | 30 to 34 | 45%<br>(29-62%)                | 55%<br>(38-71%)          | 0.44<br>(0.25-0.71)                         | 0.8%<br>(0.25-1.5%)                  | 0.49%<br>(-0.21-1.4%)               | 0.6<br>(-0.28-1.6)      | 77<br>(23-140)        |

| Location | Year | Sex    | Age      | Prevalence of current drinkers | Prevalence of abstainers | Population average of standard drinks daily | Percent of total attributable deaths | Percent of total attributable DALYs | Attributable deaths     | Attributable DALYs     |
|----------|------|--------|----------|--------------------------------|--------------------------|---------------------------------------------|--------------------------------------|-------------------------------------|-------------------------|------------------------|
| Djibouti | 2005 | Female | 35 to 39 | 48%<br>(32-63%)                | 52%<br>(37-68%)          | 0.42<br>(0.23-0.68)                         | 0.78%<br>(0.084-1.5%)                | 0.62%<br>(-0.32-1.6%)               | 0.76<br>(-0.39-2)       | 68<br>(7.1-130)        |
| Djibouti | 2005 | Female | 40 to 44 | 49%<br>(35-66%)                | 51%<br>(34-65%)          | 0.41<br>(0.21-0.68)                         | 0.82%<br>(0.17-1.6%)                 | 0.84%<br>(-0.095-1.9%)              | 1<br>(-0.11-2.2)        | 64<br>(14-120)         |
| Djibouti | 2005 | Female | 45 to 49 | 49%<br>(32-66%)                | 51%<br>(34-68%)          | 0.43<br>(0.21-0.7)                          | 0.82%<br>(-0.17-1.8%)                | 0.95%<br>(-0.44-2.4%)               | 1.1<br>(-0.53-2.7)      | 53<br>(-11-120)        |
| Djibouti | 2005 | Female | 50 to 54 | 47%<br>(32-64%)                | 53%<br>(36-68%)          | 0.43<br>(0.22-0.71)                         | 0.84%<br>(-0.25-2%)                  | 1.1%<br>(-0.4-2.7%)                 | 1.2<br>(-0.45-3)        | 46<br>(-14-110)        |
| Djibouti | 2005 | Female | 55 to 59 | 46%<br>(31-62%)                | 54%<br>(38-69%)          | 0.44<br>(0.23-0.74)                         | 0.54%<br>(-0.67-1.9%)                | 0.75%<br>(-0.9-2.6%)                | 0.98<br>(-1.1-3.3)      | 30<br>(-35-100)        |
| Djibouti | 2005 | Female | 60 to 64 | 47%<br>(31-63%)                | 53%<br>(37-69%)          | 0.43<br>(0.22-0.75)                         | 0.42%<br>(-0.65-1.5%)                | 0.61%<br>(-0.75-2.1%)               | 0.9<br>(-1.1-3.1)       | 22<br>(-34-81)         |
| Djibouti | 2005 | Female | 65 to 69 | 48%<br>(33-64%)                | 52%<br>(36-67%)          | 0.4<br>(0.21-0.67)                          | 0.3%<br>(-0.83-1.3%)                 | 0.41%<br>(-1-1.7%)                  | 0.68<br>(-1.7-2.9)      | 14<br>(-38-64)         |
| Djibouti | 2005 | Female | 70 to 74 | 47%<br>(32-62%)                | 53%<br>(38-68%)          | 0.36<br>(0.18-0.64)                         | -0.16%<br>(-1.3-0.79%)               | -0.21%<br>(-1.5-0.99%)              | -0.37<br>(-2.9-1.8)     | -6.3<br>(-52-33)       |
| Djibouti | 2005 | Female | 75 to 79 | 44%<br>(28-61%)                | 56%<br>(39-72%)          | 0.31<br>(0.14-0.56)                         | -0.18%<br>(-1.2-0.7%)                | -0.19%<br>(-1.4-0.88%)              | -0.32<br>(-2.4-1.6)     | -5.1<br>(-34-20)       |
| Djibouti | 2005 | Female | 80 to 84 | 43%<br>(26-61%)                | 57%<br>(39-74%)          | 0.29<br>(0.13-0.5)                          | -0.45%<br>(-1.4-0.3%)                | -0.51%<br>(-1.7-0.4%)               | -0.65<br>(-2.2-0.51)    | -7.2<br>(-23-4.9)      |
| Djibouti | 2005 | Female | 85 to 89 | 43%<br>(27-58%)                | 57%<br>(42-73%)          | 0.27<br>(0.13-0.5)                          | -0.53%<br>(-1.5-0.17%)               | -0.63%<br>(-1.8-0.23%)              | -0.55<br>(-1.6-0.19)    | -4.1<br>(-12-1.3)      |
| Djibouti | 2005 | Female | 90 to 94 | 45%<br>(30-59%)                | 55%<br>(41-70%)          | 0.27<br>(0.12-0.49)                         | -0.61%<br>(-1.5-0.072%)              | -0.77%<br>(-1.9-0.053%)             | -0.31<br>(-0.74-0.02)   | -1.5<br>(-3.6-0.16)    |
| Djibouti | 2005 | Female | 95 plus  | 47%<br>(29-65%)                | 53%<br>(35-71%)          | 0.26<br>(0.11-0.52)                         | -0.22%<br>(-1.1-0.46%)               | -0.34%<br>(-1.4-0.5%)               | -0.039<br>(-0.16-0.054) | -0.098<br>(-0.48-0.22) |
| Djibouti | 2005 | Male   | All Ages | 42%<br>(36-50%)                | 58%<br>(50-64%)          | 0.27<br>(0.2-0.36)                          | 0.76%<br>(0.14-1.4%)                 | 0.74%<br>(-0.23-1.7%)               | 30<br>(-9.4-69)         | 2000<br>(370-3700)     |
| Djibouti | 2005 | Male   | 15 to 19 | 41%<br>(28-57%)                | 59%<br>(43-72%)          | 0.3<br>(0.16-0.48)                          | 1.6%<br>(0.63-2.7%)                  | 1.2%<br>(-0.37-2.9%)                | 0.88<br>(-0.3-2.3)      | 140<br>(54-250)        |
| Djibouti | 2005 | Male   | 20 to 24 | 52%<br>(37-66%)                | 48%<br>(34-63%)          | 0.4<br>(0.22-0.64)                          | 2.7%<br>(0.84-4.8%)                  | 1.6%<br>(-1-4.2%)                   | 1.6<br>(-1-4.3)         | 250<br>(74-460)        |
| Djibouti | 2005 | Male   | 25 to 29 | 55%<br>(40-70%)                | 45%<br>(30-60%)          | 0.49<br>(0.28-0.74)                         | 2.5%<br>(0.35-4.6%)                  | 1.6%<br>(-1.1-4.2%)                 | 2.2<br>(-1.6-6)         | 290<br>(43-530)        |
| Djibouti | 2005 | Male   | 30 to 34 | 58%<br>(42-72%)                | 42%<br>(28-58%)          | 0.54<br>(0.32-0.83)                         | 2.2%<br>(0.14-4.4%)                  | 1.5%<br>(-1-4.1%)                   | 2.4<br>(-1.5-6.3)       | 240<br>(15-480)        |
| Djibouti | 2005 | Male   | 35 to 39 | 59%<br>(45-74%)                | 41%<br>(26-55%)          | 0.58<br>(0.34-0.92)                         | 2.2%<br>(0.24-4.2%)                  | 1.8%<br>(-0.61-4.5%)                | 3<br>(-1.1-7.3)         | 230<br>(25-450)        |
| Djibouti | 2005 | Male   | 40 to 44 | 60%<br>(45-75%)                | 40%<br>(25-55%)          | 0.59<br>(0.34-0.95)                         | 2.1%<br>(0.14-4.1%)                  | 2%<br>(-0.46-4.6%)                  | 3.6<br>(-0.81-8.2)      | 220<br>(16-440)        |
| Djibouti | 2005 | Male   | 45 to 49 | 61%<br>(45-75%)                | 39%<br>(25-55%)          | 0.59<br>(0.33-0.94)                         | 2.1%<br>(0.05-4.1%)                  | 2.1%<br>(-0.48-4.7%)                | 3.4<br>(-0.82-7.8)      | 180<br>(4-360)         |
| Djibouti | 2005 | Male   | 50 to 54 | 61%<br>(45-75%)                | 39%<br>(25-55%)          | 0.58<br>(0.32-0.93)                         | 2%<br>(-0.19-4.1%)                   | 2.1%<br>(-0.67-4.7%)                | 3.1<br>(-0.94-6.7)      | 130<br>(-13-270)       |

| Location | Year | Sex    | Age      | Prevalence of current drinkers | Prevalence of abstainers | Population average of standard drinks daily | Percent of total attributable deaths | Percent of total attributable DALYs | Attributable deaths      | Attributable DALYs    |
|----------|------|--------|----------|--------------------------------|--------------------------|---------------------------------------------|--------------------------------------|-------------------------------------|--------------------------|-----------------------|
| Djibouti | 2005 | Male   | 55 to 59 | 60%<br>(45-74%)                | 40%<br>(26-55%)          | 0.57<br>(0.31-0.91)                         | 1.7%<br>(-0.43-3.7%)                 | 1.9%<br>(-0.91-4.4%)                | 3.2<br>(-1.6-7.8)        | 120<br>(-29-260)      |
| Djibouti | 2005 | Male   | 60 to 64 | 59%<br>(44-75%)                | 41%<br>(25-56%)          | 0.52<br>(0.27-0.89)                         | 1.5%<br>(-0.16-3%)                   | 1.6%<br>(-0.5-3.4%)                 | 3<br>(-0.96-6.9)         | 92<br>(-11-200)       |
| Djibouti | 2005 | Male   | 65 to 69 | 57%<br>(42-73%)                | 43%<br>(27-58%)          | 0.43<br>(0.24-0.71)                         | 0.72%<br>(-0.67-2%)                  | 0.75%<br>(-0.99-2.4%)               | 1.5<br>(-2-4.7)          | 39<br>(-36-110)       |
| Djibouti | 2005 | Male   | 70 to 74 | 56%<br>(41-71%)                | 44%<br>(29-59%)          | 0.34<br>(0.19-0.59)                         | 0.43%<br>(-0.81-1.5%)                | 0.45%<br>(-1-1.7%)                  | 0.91<br>(-2.1-3.6)       | 19<br>(-35-66)        |
| Djibouti | 2005 | Male   | 75 to 79 | 54%<br>(40-70%)                | 46%<br>(30-60%)          | 0.29<br>(0.14-0.51)                         | 0.36%<br>(-0.77-1.3%)                | 0.38%<br>(-0.97-1.5%)               | 0.66<br>(-1.7-2.6)       | 11<br>(-22-38)        |
| Djibouti | 2005 | Male   | 80 to 84 | 52%<br>(36-69%)                | 48%<br>(31-64%)          | 0.26<br>(0.13-0.44)                         | 0.22%<br>(-0.75-1%)                  | 0.18%<br>(-0.96-1.1%)               | 0.22<br>(-1.1-1.3)       | 3.1<br>(-11-14)       |
| Djibouti | 2005 | Male   | 85 to 89 | 50%<br>(34-65%)                | 50%<br>(35-66%)          | 0.23<br>(0.12-0.39)                         | 0.24%<br>(-0.56-0.95%)               | 0.19%<br>(-0.76-1%)                 | 0.13<br>(-0.49-0.67)     | 1.4<br>(-3.1-5.3)     |
| Djibouti | 2005 | Male   | 90 to 94 | 51%<br>(35-65%)                | 49%<br>(35-65%)          | 0.21<br>(0.099-0.37)                        | 0.1%<br>(-0.51-0.62%)                | -0.0014%<br>(-0.74-0.6%)            | -0.00034<br>(-0.19-0.15) | 0.15<br>(-0.77-0.94)  |
| Djibouti | 2005 | Male   | 95 plus  | 52%<br>(33-71%)                | 48%<br>(29-67%)          | 0.19<br>(0.081-0.36)                        | 0.25%<br>(-0.51-0.89%)               | 0.11%<br>(-0.8-0.89%)               | 0.0065<br>(-0.047-0.052) | 0.058<br>(-0.12-0.21) |
| Djibouti | 2010 | Female | All Ages | 34%<br>(29-41%)                | 66%<br>(59-71%)          | 0.24<br>(0.17-0.35)                         | 0.31%<br>(0.0055-0.59%)              | 0.19%<br>(-0.39-0.76%)              | 6.4<br>(-13-26)          | 640<br>(10-1300)      |
| Djibouti | 2010 | Female | 15 to 19 | 34%<br>(22-50%)                | 66%<br>(50-78%)          | 0.27<br>(0.13-0.49)                         | 0.66%<br>(0.24-1.2%)                 | 0.42%<br>(-0.35-1.3%)               | 0.2<br>(-0.19-0.68)      | 48<br>(17-86)         |
| Djibouti | 2010 | Female | 20 to 24 | 41%<br>(25-57%)                | 59%<br>(43-75%)          | 0.37<br>(0.18-0.65)                         | 1.1%<br>(0.53-1.8%)                  | 0.47%<br>(-0.39-1.5%)               | 0.34<br>(-0.29-1.1)      | 97<br>(44-160)        |
| Djibouti | 2010 | Female | 25 to 29 | 43%<br>(28-60%)                | 57%<br>(40-72%)          | 0.44<br>(0.23-0.73)                         | 1%<br>(0.44-1.7%)                    | 0.53%<br>(-0.14-1.5%)               | 0.52<br>(-0.14-1.4)      | 93<br>(41-150)        |
| Djibouti | 2010 | Female | 30 to 34 | 45%<br>(29-61%)                | 55%<br>(39-71%)          | 0.46<br>(0.24-0.78)                         | 0.82%<br>(0.29-1.5%)                 | 0.5%<br>(-0.11-1.4%)                | 0.7<br>(-0.17-1.8)       | 92<br>(33-160)        |
| Djibouti | 2010 | Female | 35 to 39 | 48%<br>(32-63%)                | 52%<br>(37-68%)          | 0.44<br>(0.24-0.74)                         | 0.78%<br>(0.17-1.5%)                 | 0.63%<br>(-0.16-1.6%)               | 0.86<br>(-0.23-2.1)      | 77<br>(17-150)        |
| Djibouti | 2010 | Female | 40 to 44 | 49%<br>(35-65%)                | 51%<br>(35-65%)          | 0.43<br>(0.21-0.75)                         | 0.82%<br>(0.22-1.5%)                 | 0.84%<br>(-0.0019-1.8%)             | 1.1<br>(-0.0027-2.4)     | 73<br>(21-130)        |
| Djibouti | 2010 | Female | 45 to 49 | 49%<br>(32-65%)                | 51%<br>(35-68%)          | 0.44<br>(0.22-0.77)                         | 0.84%<br>(-0.056-1.8%)               | 0.99%<br>(-0.22-2.4%)               | 1.3<br>(-0.29-3)         | 65<br>(-4.4-140)      |
| Djibouti | 2010 | Female | 50 to 54 | 47%<br>(32-64%)                | 53%<br>(36-68%)          | 0.45<br>(0.23-0.78)                         | 0.87%<br>(-0.15-2%)                  | 1.1%<br>(-0.27-2.7%)                | 1.5<br>(-0.34-3.8)       | 58<br>(-9.7-140)      |
| Djibouti | 2010 | Female | 55 to 59 | 46%<br>(30-62%)                | 54%<br>(38-70%)          | 0.46<br>(0.22-0.84)                         | 0.57%<br>(-0.65-1.8%)                | 0.81%<br>(-0.83-2.5%)               | 1.1<br>(-1.1-3.4)        | 33<br>(-36-110)       |
| Djibouti | 2010 | Female | 60 to 64 | 47%<br>(31-64%)                | 53%<br>(36-69%)          | 0.45<br>(0.21-0.85)                         | 0.42%<br>(-0.66-1.6%)                | 0.63%<br>(-0.79-2.2%)               | 1.1<br>(-1.3-3.8)        | 26<br>(-39-95)        |
| Djibouti | 2010 | Female | 65 to 69 | 48%<br>(33-63%)                | 52%<br>(37-67%)          | 0.42<br>(0.21-0.74)                         | 0.29%<br>(-0.92-1.3%)                | 0.41%<br>(-1.1-1.8%)                | 0.79<br>(-2.1-3.3)       | 16<br>(-49-72)        |
| Djibouti | 2010 | Female | 70 to 74 | 47%<br>(33-62%)                | 53%<br>(38-67%)          | 0.37<br>(0.18-0.66)                         | -0.21%<br>(-1.3-0.72%)               | -0.27%<br>(-1.6-0.9%)               | -0.54<br>(-3.4-1.9)      | -9.8<br>(-60-34)      |

| Location | Year | Sex    | Age      | Prevalence of current drinkers | Prevalence of abstainers | Population average of standard drinks daily | Percent of total attributable deaths | Percent of total attributable DALYs | Attributable deaths     | Attributable DALYs   |
|----------|------|--------|----------|--------------------------------|--------------------------|---------------------------------------------|--------------------------------------|-------------------------------------|-------------------------|----------------------|
| Djibouti | 2010 | Female | 75 to 79 | 45%<br>(29-61%)                | 55%<br>(39-71%)          | 0.33<br>(0.14-0.62)                         | -0.23%<br>(-1.3-0.71%)               | -0.25%<br>(-1.5-0.88%)              | -0.49<br>(-3.3-1.8)     | -7.9<br>(-45-24)     |
| Djibouti | 2010 | Female | 80 to 84 | 43%<br>(27-60%)                | 57%<br>(40-73%)          | 0.3<br>(0.13-0.57)                          | -0.49%<br>(-1.5-0.31%)               | -0.55%<br>(-1.7-0.4%)               | -0.84<br>(-2.7-0.65)    | -9.3<br>(-29-5.9)    |
| Djibouti | 2010 | Female | 85 to 89 | 43%<br>(27-58%)                | 57%<br>(42-73%)          | 0.28<br>(0.13-0.54)                         | -0.57%<br>(-1.5-0.16%)               | -0.67%<br>(-1.8-0.21%)              | -0.72<br>(-2-0.24)      | -5.4<br>(-14-1.6)    |
| Djibouti | 2010 | Female | 90 to 94 | 45%<br>(29-59%)                | 55%<br>(41-71%)          | 0.28<br>(0.12-0.56)                         | -0.67%<br>(-1.6-0.036%)              | -0.84%<br>(-2-0.019%)               | -0.41<br>(-0.98-0.0099) | -2<br>(-4.8-0.11)    |
| Djibouti | 2010 | Female | 95 plus  | 47%<br>(29-65%)                | 53%<br>(35-71%)          | 0.27<br>(0.11-0.55)                         | -0.24%<br>(-1.2-0.5%)                | -0.38%<br>(-1.5-0.51%)              | -0.057<br>(-0.23-0.079) | -0.14<br>(-0.71-0.3) |
| Djibouti | 2010 | Male   | All Ages | 43%<br>(37-50%)                | 57%<br>(50-63%)          | 0.3<br>(0.2-0.44)                           | 0.94%<br>(0.24-1.6%)                 | 0.91%<br>(-0.15-2%)                 | 36<br>(-6.7-79)         | 2300<br>(560-4200)   |
| Djibouti | 2010 | Male   | 15 to 19 | 40%<br>(27-55%)                | 60%<br>(45-73%)          | 0.31<br>(0.16-0.54)                         | 1.7%<br>(0.71-2.8%)                  | 1.2%<br>(-0.27-2.9%)                | 0.93<br>(-0.21-2.3)     | 150<br>(60-260)      |
| Djibouti | 2010 | Male   | 20 to 24 | 51%<br>(37-65%)                | 49%<br>(35-63%)          | 0.42<br>(0.22-0.71)                         | 3%<br>(1.2-5.2%)                     | 1.8%<br>(-0.68-4.5%)                | 2.1<br>(-0.79-5.4)      | 330<br>(120-590)     |
| Djibouti | 2010 | Male   | 25 to 29 | 55%<br>(40-70%)                | 45%<br>(30-60%)          | 0.5<br>(0.28-0.79)                          | 3%<br>(0.67-5.2%)                    | 2%<br>(-1-4.8%)                     | 2.4<br>(-1.2-6)         | 310<br>(72-540)      |
| Djibouti | 2010 | Male   | 30 to 34 | 58%<br>(42-73%)                | 42%<br>(27-58%)          | 0.56<br>(0.32-0.88)                         | 2.5%<br>(0.43-4.6%)                  | 1.8%<br>(-0.72-4.5%)                | 3<br>(-1.3-7.7)         | 300<br>(51-560)      |
| Djibouti | 2010 | Male   | 35 to 39 | 59%<br>(45-74%)                | 41%<br>(26-55%)          | 0.6<br>(0.34-1)                             | 2.3%<br>(0.37-4.4%)                  | 2%<br>(-0.45-4.7%)                  | 3.5<br>(-0.77-8.1)      | 260<br>(40-500)      |
| Djibouti | 2010 | Male   | 40 to 44 | 60%<br>(46-75%)                | 40%<br>(25-54%)          | 0.62<br>(0.33-1)                            | 2.3%<br>(0.32-4.2%)                  | 2.2%<br>(-0.18-4.7%)                | 4.1<br>(-0.36-8.8)      | 250<br>(34-450)      |
| Djibouti | 2010 | Male   | 45 to 49 | 60%<br>(44-75%)                | 40%<br>(25-56%)          | 0.61<br>(0.32-1)                            | 2.2%<br>(0.29-4.1%)                  | 2.3%<br>(-0.087-4.6%)               | 4.6<br>(-0.2-9.6)       | 230<br>(32-440)      |
| Djibouti | 2010 | Male   | 50 to 54 | 60%<br>(45-74%)                | 40%<br>(26-55%)          | 0.6<br>(0.31-1)                             | 2.2%<br>(0.04-4.2%)                  | 2.3%<br>(-0.4-4.9%)                 | 4.3<br>(-0.77-9.4)      | 190<br>(3.4-370)     |
| Djibouti | 2010 | Male   | 55 to 59 | 60%<br>(45-74%)                | 40%<br>(26-55%)          | 0.59<br>(0.31-1)                            | 1.9%<br>(-0.21-4%)                   | 2.1%<br>(-0.61-4.8%)                | 3.4<br>(-0.99-8.1)      | 130<br>(-13-270)     |
| Djibouti | 2010 | Male   | 60 to 64 | 59%<br>(44-76%)                | 41%<br>(24-56%)          | 0.53<br>(0.26-0.95)                         | 1.6%<br>(-0.055-3.2%)                | 1.7%<br>(-0.31-3.7%)                | 3.7<br>(-0.66-8.2)      | 110<br>(-3.9-230)    |
| Djibouti | 2010 | Male   | 65 to 69 | 58%<br>(43-73%)                | 42%<br>(27-57%)          | 0.44<br>(0.23-0.77)                         | 0.79%<br>(-0.6-2.1%)                 | 0.83%<br>(-0.84-2.4%)               | 1.9<br>(-2.5-5.7)       | 48<br>(-37-130)      |
| Djibouti | 2010 | Male   | 70 to 74 | 56%<br>(41-70%)                | 44%<br>(30-59%)          | 0.36<br>(0.18-0.62)                         | 0.45%<br>(-0.73-1.5%)                | 0.48%<br>(-0.92-1.8%)               | 1.1<br>(-2.1-4.1)       | 22<br>(-36-75)       |
| Djibouti | 2010 | Male   | 75 to 79 | 54%<br>(40-70%)                | 46%<br>(30-60%)          | 0.3<br>(0.15-0.55)                          | 0.39%<br>(-0.77-1.3%)                | 0.41%<br>(-0.97-1.5%)               | 0.82<br>(-1.9-3.1)      | 13<br>(-25-44)       |
| Djibouti | 2010 | Male   | 80 to 84 | 52%<br>(35-69%)                | 48%<br>(31-65%)          | 0.27<br>(0.13-0.48)                         | 0.23%<br>(-0.73-1.1%)                | 0.2%<br>(-0.93-1.2%)                | 0.28<br>(-1.3-1.7)      | 4<br>(-13-18)        |
| Djibouti | 2010 | Male   | 85 to 89 | 50%<br>(33-64%)                | 50%<br>(36-67%)          | 0.23<br>(0.12-0.42)                         | 0.25%<br>(-0.57-0.96%)               | 0.2%<br>(-0.79-1%)                  | 0.16<br>(-0.62-0.83)    | 1.7<br>(-4-6.7)      |
| Djibouti | 2010 | Male   | 90 to 94 | 50%<br>(35-66%)                | 50%<br>(34-65%)          | 0.21<br>(0.097-0.4)                         | 0.1%<br>(-0.54-0.65%)                | -0.0018%<br>(-0.78-0.64%)           | -0.00052<br>(-0.24-0.2) | 0.19<br>(-1-1.2)     |

| Location | Year | Sex    | Age      | Prevalence of current drinkers | Prevalence of abstainers | Population average of standard drinks daily | Percent of total attributable deaths | Percent of total attributable DALYs | Attributable deaths    | Attributable DALYs    |
|----------|------|--------|----------|--------------------------------|--------------------------|---------------------------------------------|--------------------------------------|-------------------------------------|------------------------|-----------------------|
| Djibouti | 2010 | Male   | 95 plus  | 52%<br>(33-71%)                | 48%<br>(29-67%)          | 0.2<br>(0.078-0.4)                          | 0.27%<br>(-0.52-0.93%)               | 0.13%<br>(-0.8-0.93%)               | 0.01<br>(-0.062-0.073) | 0.082<br>(-0.16-0.29) |
| Djibouti | 2016 | Female | All Ages | 35%<br>(29-41%)                | 65%<br>(59-71%)          | 0.27<br>(0.14-0.44)                         | 0.43%<br>(0.092-0.86%)               | 0.3%<br>(-0.38-1%)                  | 9.5<br>(-12-33)        | 790<br>(170-1600)     |
| Djibouti | 2016 | Female | 15 to 19 | 34%<br>(22-50%)                | 66%<br>(50-78%)          | 0.29<br>(0.12-0.59)                         | 0.68%<br>(0.29-1.2%)                 | 0.42%<br>(-0.26-1.3%)               | 0.18<br>(-0.11-0.58)   | 44<br>(18-81)         |
| Djibouti | 2016 | Female | 20 to 24 | 40%<br>(25-57%)                | 60%<br>(43-75%)          | 0.39<br>(0.17-0.78)                         | 1.3%<br>(0.69-2.1%)                  | 0.59%<br>(-0.23-1.8%)               | 0.32<br>(-0.14-0.99)   | 96<br>(49-160)        |
| Djibouti | 2016 | Female | 25 to 29 | 43%<br>(27-59%)                | 57%<br>(41-73%)          | 0.46<br>(0.22-0.88)                         | 1.3%<br>(0.67-2.1%)                  | 0.75%<br>(-0.072-2%)                | 0.63<br>(-0.058-1.6)   | 120<br>(63-190)       |
| Djibouti | 2016 | Female | 30 to 34 | 45%<br>(29-61%)                | 55%<br>(39-71%)          | 0.49<br>(0.23-0.9)                          | 1.1%<br>(0.48-1.8%)                  | 0.72%<br>(-0.037-1.8%)              | 0.74<br>(-0.043-1.8)   | 98<br>(43-170)        |
| Djibouti | 2016 | Female | 35 to 39 | 48%<br>(33-63%)                | 52%<br>(37-67%)          | 0.47<br>(0.21-0.87)                         | 0.95%<br>(0.34-1.9%)                 | 0.82%<br>(-0.022-2.1%)              | 1.1<br>(-0.025-2.7)    | 97<br>(33-180)        |
| Djibouti | 2016 | Female | 40 to 44 | 49%<br>(35-65%)                | 51%<br>(35-65%)          | 0.46<br>(0.2-0.9)                           | 0.96%<br>(0.36-1.8%)                 | 1%<br>(0.19-2.2%)                   | 1.4<br>(0.25-3)        | 90<br>(34-170)        |
| Djibouti | 2016 | Female | 45 to 49 | 49%<br>(32-64%)                | 51%<br>(36-68%)          | 0.47<br>(0.2-0.89)                          | 0.98%<br>(0.15-2%)                   | 1.2%<br>(0.03-2.8%)                 | 1.6<br>(0.034-3.8)     | 81<br>(12-170)        |
| Djibouti | 2016 | Female | 50 to 54 | 47%<br>(32-64%)                | 53%<br>(36-68%)          | 0.47<br>(0.21-0.9)                          | 1%<br>(-0.013-2.2%)                  | 1.4%<br>(-0.12-3.1%)                | 2.1<br>(-0.17-4.9)     | 80<br>(-1-180)        |
| Djibouti | 2016 | Female | 55 to 59 | 46%<br>(31-62%)                | 54%<br>(38-69%)          | 0.48<br>(0.2-0.97)                          | 0.71%<br>(-0.5-2.2%)                 | 1%<br>(-0.66-3%)                    | 1.6<br>(-1.5-5.1)      | 50<br>(-35-160)       |
| Djibouti | 2016 | Female | 60 to 64 | 46%<br>(30-63%)                | 54%<br>(37-70%)          | 0.48<br>(0.19-1)                            | 0.56%<br>(-0.5-2%)                   | 0.82%<br>(-0.57-2.6%)               | 1.4<br>(-0.91-4.6)     | 35<br>(-30-120)       |
| Djibouti | 2016 | Female | 65 to 69 | 48%<br>(32-64%)                | 52%<br>(36-68%)          | 0.45<br>(0.19-0.88)                         | 0.43%<br>(-0.72-1.6%)                | 0.59%<br>(-0.84-2.1%)               | 1.3<br>(-1.8-4.6)      | 27<br>(-41-100)       |
| Djibouti | 2016 | Female | 70 to 74 | 47%<br>(33-62%)                | 53%<br>(38-67%)          | 0.39<br>(0.16-0.79)                         | -0.1%<br>(-1.2-0.97%)                | -0.14%<br>(-1.4-1.2%)               | -0.34<br>(-3.4-2.9)    | -5.5<br>(-63-52)      |
| Djibouti | 2016 | Female | 75 to 79 | 45%<br>(29-61%)                | 55%<br>(39-71%)          | 0.35<br>(0.13-0.73)                         | -0.13%<br>(-1.2-0.79%)               | -0.12%<br>(-1.4-1%)                 | -0.28<br>(-3.3-2.4)    | -5.1<br>(-48-32)      |
| Djibouti | 2016 | Female | 80 to 84 | 43%<br>(27-61%)                | 57%<br>(39-73%)          | 0.32<br>(0.13-0.69)                         | -0.42%<br>(-1.5-0.33%)               | -0.47%<br>(-1.7-0.47%)              | -0.87<br>(-3.1-0.87)   | -9.8<br>(-33-8.3)     |
| Djibouti | 2016 | Female | 85 to 89 | 43%<br>(27-58%)                | 57%<br>(42-73%)          | 0.3<br>(0.12-0.64)                          | -0.52%<br>(-1.5-0.18%)               | -0.61%<br>(-1.7-0.25%)              | -0.8<br>(-2.3-0.31)    | -6<br>(-17-2)         |
| Djibouti | 2016 | Female | 90 to 94 | 45%<br>(29-60%)                | 55%<br>(40-71%)          | 0.3<br>(0.11-0.62)                          | -0.63%<br>(-1.6-0.072%)              | -0.79%<br>(-1.9-0.068%)             | -0.49<br>(-1.2-0.044)  | -2.4<br>(-5.9-0.28)   |
| Djibouti | 2016 | Female | 95 plus  | 47%<br>(29-65%)                | 53%<br>(35-71%)          | 0.29<br>(0.099-0.65)                        | -0.18%<br>(-1.1-0.52%)               | -0.31%<br>(-1.5-0.55%)              | -0.06<br>(-0.27-0.11)  | -0.14<br>(-0.83-0.41) |
| Djibouti | 2016 | Male   | All Ages | 44%<br>(38-51%)                | 56%<br>(49-62%)          | 0.33<br>(0.18-0.58)                         | 1.3%<br>(0.42-2.2%)                  | 1.2%<br>(-0.043-2.5%)               | 45<br>(-1.4-93)        | 2800<br>(960-4900)    |
| Djibouti | 2016 | Male   | 15 to 19 | 40%<br>(27-56%)                | 60%<br>(44-73%)          | 0.33<br>(0.14-0.67)                         | 1.7%<br>(0.83-2.9%)                  | 1.2%<br>(-0.056-3%)                 | 0.88<br>(-0.035-2.1)   | 140<br>(64-240)       |
| Djibouti | 2016 | Male   | 20 to 24 | 51%<br>(37-66%)                | 49%<br>(34-63%)          | 0.44<br>(0.2-0.83)                          | 3.3%<br>(1.5-5.5%)                   | 2.1%<br>(-0.39-4.9%)                | 2.1<br>(-0.4-5.3)      | 330<br>(140-580)      |

| Location | Year | Sex    | Age      | Prevalence of current drinkers | Prevalence of abstainers | Population average of standard drinks daily | Percent of total attributable deaths | Percent of total attributable DALYs | Attributable deaths     | Attributable DALYs   |
|----------|------|--------|----------|--------------------------------|--------------------------|---------------------------------------------|--------------------------------------|-------------------------------------|-------------------------|----------------------|
| Djibouti | 2016 | Male   | 25 to 29 | 56%<br>(40-70%)                | 44%<br>(30-60%)          | 0.54<br>(0.27-0.99)                         | 3.5%<br>(1.2-6%)                     | 2.5%<br>(-0.6-5.8%)                 | 3.3<br>(-0.82-7.8)      | 410<br>(140-710)     |
| Djibouti | 2016 | Male   | 30 to 34 | 58%<br>(42-72%)                | 42%<br>(28-58%)          | 0.6<br>(0.3-1.1)                            | 3.1%<br>(0.99-5.7%)                  | 2.4%<br>(-0.43-5.7%)                | 3.3<br>(-0.6-7.7)       | 330<br>(100-610)     |
| Djibouti | 2016 | Male   | 35 to 39 | 59%<br>(45-74%)                | 41%<br>(26-55%)          | 0.64<br>(0.3-1.2)                           | 2.8%<br>(0.71-5.2%)                  | 2.5%<br>(-0.2-5.7%)                 | 4.3<br>(-0.35-9.9)      | 330<br>(80-620)      |
| Djibouti | 2016 | Male   | 40 to 44 | 60%<br>(45-75%)                | 40%<br>(25-55%)          | 0.66<br>(0.3-1.2)                           | 2.7%<br>(0.74-4.9%)                  | 2.7%<br>(0.22-5.5%)                 | 4.8<br>(0.37-9.8)       | 290<br>(76-530)      |
| Djibouti | 2016 | Male   | 45 to 49 | 60%<br>(45-76%)                | 40%<br>(24-55%)          | 0.65<br>(0.29-1.3)                          | 2.6%<br>(0.65-4.8%)                  | 2.7%<br>(0.25-5.6%)                 | 5.2<br>(0.46-11)        | 260<br>(69-490)      |
| Djibouti | 2016 | Male   | 50 to 54 | 61%<br>(45-75%)                | 39%<br>(25-55%)          | 0.64<br>(0.29-1.2)                          | 2.5%<br>(0.4-4.7%)                   | 2.7%<br>(0.054-5.6%)                | 5.9<br>(0.12-13)        | 250<br>(42-500)      |
| Djibouti | 2016 | Male   | 55 to 59 | 60%<br>(44-74%)                | 40%<br>(26-56%)          | 0.63<br>(0.28-1.2)                          | 2.2%<br>(0.19-4.4%)                  | 2.5%<br>(-0.096-5.3%)               | 5.3<br>(-0.2-12)        | 190<br>(17-400)      |
| Djibouti | 2016 | Male   | 60 to 64 | 59%<br>(44-75%)                | 41%<br>(25-56%)          | 0.57<br>(0.23-1.1)                          | 1.8%<br>(0.26-3.6%)                  | 2%<br>(0.073-4.2%)                  | 4.2<br>(0.16-9)         | 130<br>(18-260)      |
| Djibouti | 2016 | Male   | 65 to 69 | 58%<br>(43-73%)                | 42%<br>(27-57%)          | 0.47<br>(0.2-0.89)                          | 0.95%<br>(-0.33-2.2%)                | 1%<br>(-0.58-2.5%)                  | 2.6<br>(-1.4-6.4)       | 65<br>(-22-150)      |
| Djibouti | 2016 | Male   | 70 to 74 | 56%<br>(40-70%)                | 44%<br>(30-60%)          | 0.38<br>(0.16-0.73)                         | 0.54%<br>(-0.52-1.6%)                | 0.6%<br>(-0.7-1.8%)                 | 1.6<br>(-1.9-4.9)       | 31<br>(-30-92)       |
| Djibouti | 2016 | Male   | 75 to 79 | 54%<br>(39-70%)                | 46%<br>(30-61%)          | 0.32<br>(0.13-0.66)                         | 0.46%<br>(-0.6-1.4%)                 | 0.5%<br>(-0.82-1.6%)                | 1.2<br>(-1.9-3.8)       | 18<br>(-24-55)       |
| Djibouti | 2016 | Male   | 80 to 84 | 52%<br>(35-69%)                | 48%<br>(31-65%)          | 0.28<br>(0.12-0.59)                         | 0.27%<br>(-0.64-1%)                  | 0.25%<br>(-0.78-1.1%)               | 0.42<br>(-1.4-2)        | 5.7<br>(-14-22)      |
| Djibouti | 2016 | Male   | 85 to 89 | 50%<br>(34-65%)                | 50%<br>(35-66%)          | 0.25<br>(0.1-0.51)                          | 0.28%<br>(-0.54-0.93%)               | 0.23%<br>(-0.74-1%)                 | 0.23<br>(-0.76-1)       | 2.4<br>(-4.6-8)      |
| Djibouti | 2016 | Male   | 90 to 94 | 51%<br>(35-66%)                | 49%<br>(34-65%)          | 0.23<br>(0.095-0.45)                        | 0.11%<br>(-0.57-0.65%)               | 0.0065%<br>(-0.78-0.65%)            | 0.0024<br>(-0.31-0.26)  | 0.26<br>(-1.3-1.5)   |
| Djibouti | 2016 | Male   | 95 plus  | 53%<br>(33-71%)                | 47%<br>(29-67%)          | 0.21<br>(0.072-0.46)                        | 0.29%<br>(-0.47-0.95%)               | 0.16%<br>(-0.76-0.95%)              | 0.015<br>(-0.074-0.093) | 0.11<br>(-0.18-0.37) |
| Eritrea  | 1990 | Female | All Ages | 22%<br>(17-27%)                | 78%<br>(73-83%)          | 0.29<br>(0.19-0.44)                         | 0.6%<br>(0.31-1%)                    | 0.93%<br>(0.37-1.8%)                | 170<br>(67-330)         | 7600<br>(4000-13000) |
| Eritrea  | 1990 | Female | 15 to 19 | 22%<br>(13-36%)                | 78%<br>(64-87%)          | 0.34<br>(0.15-0.65)                         | 0.69%<br>(0.33-1.3%)                 | 0.62%<br>(0.12-1.6%)                | 2.3<br>(0.47-5.8)       | 290<br>(130-550)     |
| Eritrea  | 1990 | Female | 20 to 24 | 28%<br>(15-44%)                | 72%<br>(56-85%)          | 0.49<br>(0.22-0.89)                         | 1.4%<br>(0.67-2.6%)                  | 1.2%<br>(0.21-2.9%)                 | 5.6<br>(1-13)           | 610<br>(280-1200)    |
| Eritrea  | 1990 | Female | 25 to 29 | 30%<br>(17-46%)                | 70%<br>(54-83%)          | 0.59<br>(0.28-1.1)                          | 1.8%<br>(0.88-3.3%)                  | 1.8%<br>(0.57-3.9%)                 | 8.7<br>(2.8-19)         | 740<br>(350-1400)    |
| Eritrea  | 1990 | Female | 30 to 34 | 33%<br>(18-50%)                | 67%<br>(50-82%)          | 0.64<br>(0.3-1.2)                           | 1.9%<br>(0.9-3.6%)                   | 2.1%<br>(0.73-4.3%)                 | 11<br>(3.8-22)          | 760<br>(340-1400)    |
| Eritrea  | 1990 | Female | 35 to 39 | 36%<br>(21-55%)                | 64%<br>(45-79%)          | 0.63<br>(0.3-1.2)                           | 2.1%<br>(0.93-4.1%)                  | 2.4%<br>(0.92-4.9%)                 | 14<br>(5.2-29)          | 820<br>(360-1600)    |
| Eritrea  | 1990 | Female | 40 to 44 | 38%<br>(23-56%)                | 62%<br>(44-77%)          | 0.64<br>(0.3-1.2)                           | 2.2%<br>(1-4.1%)                     | 2.6%<br>(1.1-5%)                    | 18<br>(7-34)            | 890<br>(390-1600)    |

| Location | Year | Sex    | Age      | Prevalence of current drinkers | Prevalence of abstainers | Population average of standard drinks daily | Percent of total attributable deaths | Percent of total attributable DALYs | Attributable deaths     | Attributable DALYs    |
|----------|------|--------|----------|--------------------------------|--------------------------|---------------------------------------------|--------------------------------------|-------------------------------------|-------------------------|-----------------------|
| Eritrea  | 1990 | Female | 45 to 49 | 38%<br>(21-55%)                | 62%<br>(45-79%)          | 0.65<br>(0.28-1.3)                          | 2.4%<br>(1.1-4.7%)                   | 2.9%<br>(1.2-5.7%)                  | 20<br>(8.2-40)          | 870<br>(380-1700)     |
| Eritrea  | 1990 | Female | 50 to 54 | 36%<br>(20-56%)                | 64%<br>(44-80%)          | 0.64<br>(0.27-1.2)                          | 2.5%<br>(1-5.1%)                     | 2.9%<br>(1.1-6%)                    | 23<br>(8.8-49)          | 870<br>(340-1800)     |
| Eritrea  | 1990 | Female | 55 to 59 | 35%<br>(20-55%)                | 65%<br>(45-80%)          | 0.63<br>(0.26-1.2)                          | 2.2%<br>(0.63-4.8%)                  | 2.5%<br>(0.72-5.7%)                 | 22<br>(5.9-51)          | 690<br>(200-1600)     |
| Eritrea  | 1990 | Female | 60 to 64 | 35%<br>(19-55%)                | 65%<br>(45-81%)          | 0.62<br>(0.25-1.2)                          | 1.9%<br>(0.44-4.6%)                  | 2.2%<br>(0.51-5.3%)                 | 19<br>(4.5-47)          | 510<br>(120-1300)     |
| Eritrea  | 1990 | Female | 65 to 69 | 37%<br>(21-55%)                | 63%<br>(45-79%)          | 0.58<br>(0.24-1.1)                          | 1.6%<br>(0.28-3.9%)                  | 1.8%<br>(0.28-4.5%)                 | 16<br>(2.6-41)          | 370<br>(60-900)       |
| Eritrea  | 1990 | Female | 70 to 74 | 35%<br>(20-53%)                | 65%<br>(47-80%)          | 0.5<br>(0.2-1)                              | 0.93%<br>(-0.22-3.1%)                | 1%<br>(-0.31-3.4%)                  | 8.1<br>(-2.6-28)        | 150<br>(-37-510)      |
| Eritrea  | 1990 | Female | 75 to 79 | 33%<br>(18-51%)                | 67%<br>(49-82%)          | 0.43<br>(0.15-0.88)                         | 0.69%<br>(-0.37-2.2%)                | 0.76%<br>(-0.45-2.5%)               | 4.6<br>(-2.7-15)        | 66<br>(-35-210)       |
| Eritrea  | 1990 | Female | 80 to 84 | 31%<br>(16-49%)                | 69%<br>(51-84%)          | 0.39<br>(0.14-0.79)                         | 0.32%<br>(-0.48-1.4%)                | 0.35%<br>(-0.54-1.6%)               | 1.3<br>(-2.1-6)         | 14<br>(-21-63)        |
| Eritrea  | 1990 | Female | 85 to 89 | 31%<br>(17-48%)                | 69%<br>(52-83%)          | 0.37<br>(0.15-0.77)                         | 0.11%<br>(-0.58-0.98%)               | 0.11%<br>(-0.66-1.1%)               | 0.17<br>(-1.1-7)        | 1.5<br>(-7.6-13)      |
| Eritrea  | 1990 | Female | 90 to 94 | 34%<br>(19-51%)                | 66%<br>(49-81%)          | 0.38<br>(0.15-0.78)                         | -0.063%<br>(-0.72-0.72%)             | -0.12%<br>(-0.89-0.78%)             | -0.053<br>(-0.39-0.35)  | -0.16<br>(-1.9-1.9)   |
| Eritrea  | 1990 | Female | 95 plus  | 38%<br>(20-60%)                | 62%<br>(40-80%)          | 0.42<br>(0.15-0.88)                         | 0.13%<br>(-0.69-0.97%)               | 0.072%<br>(-0.87-1%)                | 0.0078<br>(-0.096-0.11) | 0.057<br>(-0.29-0.42) |
| Eritrea  | 1990 | Male   | All Ages | 31%<br>(25-39%)                | 69%<br>(61-75%)          | 0.42<br>(0.28-0.61)                         | 1.2%<br>(0.66-1.9%)                  | 1.8%<br>(0.79-3%)                   | 350<br>(160-600)        | 18000<br>(9700-28000) |
| Eritrea  | 1990 | Male   | 15 to 19 | 28%<br>(17-45%)                | 72%<br>(55-83%)          | 0.45<br>(0.22-0.8)                          | 1.8%<br>(0.91-3.2%)                  | 1.7%<br>(0.53-3.5%)                 | 8<br>(2.5-17)           | 860<br>(440-1500)     |
| Eritrea  | 1990 | Male   | 20 to 24 | 40%<br>(24-58%)                | 60%<br>(42-76%)          | 0.65<br>(0.32-1.1)                          | 3.6%<br>(1.6-6.4%)                   | 3.1%<br>(0.8-6.5%)                  | 19<br>(4.8-39)          | 1800<br>(820-3200)    |
| Eritrea  | 1990 | Male   | 25 to 29 | 46%<br>(28-62%)                | 54%<br>(38-72%)          | 0.82<br>(0.42-1.4)                          | 4.7%<br>(2.1-8.2%)                   | 4.6%<br>(1.4-9%)                    | 27<br>(8.2-54)          | 2200<br>(960-3800)    |
| Eritrea  | 1990 | Male   | 30 to 34 | 49%<br>(30-67%)                | 51%<br>(33-70%)          | 0.95<br>(0.48-1.6)                          | 5.3%<br>(2.4-9%)                     | 5.5%<br>(1.9-10%)                   | 34<br>(11-64)           | 2300<br>(990-4000)    |
| Eritrea  | 1990 | Male   | 35 to 39 | 52%<br>(34-69%)                | 48%<br>(31-66%)          | 1<br>(0.53-1.8)                             | 5.6%<br>(2.5-9.8%)                   | 6.1%<br>(2.3-11%)                   | 40<br>(15-74)           | 2300<br>(1000-4000)   |
| Eritrea  | 1990 | Male   | 40 to 44 | 53%<br>(36-71%)                | 47%<br>(29-64%)          | 1.1<br>(0.54-1.9)                           | 5.5%<br>(2.4-9.3%)                   | 6.1%<br>(2.4-11%)                   | 49<br>(19-90)           | 2500<br>(1000-4300)   |
| Eritrea  | 1990 | Male   | 45 to 49 | 54%<br>(34-71%)                | 46%<br>(29-66%)          | 1.1<br>(0.53-1.9)                           | 5.1%<br>(2.3-9.1%)                   | 5.7%<br>(2.4-10%)                   | 47<br>(19-86)           | 2000<br>(900-3600)    |
| Eritrea  | 1990 | Male   | 50 to 54 | 54%<br>(35-72%)                | 46%<br>(28-65%)          | 1<br>(0.51-1.9)                             | 4.9%<br>(2.2-8.8%)                   | 5.4%<br>(2.2-9.9%)                  | 45<br>(18-82)           | 1700<br>(710-3000)    |
| Eritrea  | 1990 | Male   | 55 to 59 | 53%<br>(35-72%)                | 47%<br>(28-65%)          | 1<br>(0.47-1.8)                             | 4.2%<br>(1.7-7.6%)                   | 4.7%<br>(1.7-8.8%)                  | 37<br>(13-69)           | 1200<br>(470-2200)    |
| Eritrea  | 1990 | Male   | 60 to 64 | 51%<br>(33-70%)                | 49%<br>(30-67%)          | 0.87<br>(0.39-1.6)                          | 3.2%<br>(1.2-6.2%)                   | 3.6%<br>(1.2-7%)                    | 26<br>(8.9-51)          | 720<br>(270-1400)     |

| Location | Year | Sex    | Age      | Prevalence of current drinkers | Prevalence of abstainers | Population average of standard drinks daily | Percent of total attributable deaths | Percent of total attributable DALYs | Attributable deaths     | Attributable DALYs    |
|----------|------|--------|----------|--------------------------------|--------------------------|---------------------------------------------|--------------------------------------|-------------------------------------|-------------------------|-----------------------|
| Eritrea  | 1990 | Male   | 65 to 69 | 49%<br>(31-67%)                | 51%<br>(33-69%)          | 0.7<br>(0.33-1.3)                           | 1.9%<br>(0.47-4%)                    | 2.1%<br>(0.44-4.5%)                 | 12<br>(2.6-27)          | 290<br>(72-610)       |
| Eritrea  | 1990 | Male   | 70 to 74 | 46%<br>(29-64%)                | 54%<br>(36-71%)          | 0.55<br>(0.24-1.1)                          | 1.1%<br>(0.12-2.8%)                  | 1.3%<br>(0.076-3%)                  | 5.6<br>(0.35-13)        | 100<br>(10-240)       |
| Eritrea  | 1990 | Male   | 75 to 79 | 44%<br>(27-62%)                | 56%<br>(38-73%)          | 0.45<br>(0.19-0.86)                         | 0.84%<br>(0.01-2%)                   | 0.91%<br>(-0.049-2.2%)              | 2.4<br>(-0.14-6)        | 35<br>(0.42-85)       |
| Eritrea  | 1990 | Male   | 80 to 84 | 41%<br>(25-60%)                | 59%<br>(40-75%)          | 0.38<br>(0.16-0.71)                         | 0.61%<br>(-0.023-1.4%)               | 0.62%<br>(-0.11-1.6%)               | 0.73<br>(-0.13-1.9)     | 8.5<br>(-0.32-20)     |
| Eritrea  | 1990 | Male   | 85 to 89 | 39%<br>(23-56%)                | 61%<br>(44-77%)          | 0.32<br>(0.14-0.62)                         | 0.49%<br>(-0.041-1.1%)               | 0.47%<br>(-0.15-1.1%)               | 0.23<br>(-0.069-0.55)   | 2<br>(-0.16-4.3)      |
| Eritrea  | 1990 | Male   | 90 to 94 | 39%<br>(24-58%)                | 61%<br>(42-76%)          | 0.29<br>(0.12-0.56)                         | 0.26%<br>(-0.18-0.68%)               | 0.17%<br>(-0.36-0.67%)              | 0.026<br>(-0.054-0.099) | 0.24<br>(-0.16-0.61)  |
| Eritrea  | 1990 | Male   | 95 plus  | 43%<br>(22-65%)                | 57%<br>(35-78%)          | 0.29<br>(0.099-0.6)                         | 0.33%<br>(-0.18-0.76%)               | 0.18%<br>(-0.43-0.69%)              | 0.007<br>(-0.016-0.027) | 0.05<br>(-0.028-0.12) |
| Eritrea  | 1995 | Female | All Ages | 21%<br>(16-27%)                | 79%<br>(73-84%)          | 0.39<br>(0.27-0.56)                         | 0.9%<br>(0.52-1.5%)                  | 1.5%<br>(0.73-2.7%)                 | 230<br>(110-410)        | 9100<br>(5200-14000)  |
| Eritrea  | 1995 | Female | 15 to 19 | 22%<br>(12-36%)                | 78%<br>(64-88%)          | 0.49<br>(0.22-0.9)                          | 0.91%<br>(0.47-1.6%)                 | 0.91%<br>(0.31-2%)                  | 2.9<br>(0.99-6.4)       | 350<br>(180-620)      |
| Eritrea  | 1995 | Female | 20 to 24 | 27%<br>(15-43%)                | 73%<br>(57-85%)          | 0.69<br>(0.31-1.2)                          | 1.7%<br>(0.87-2.9%)                  | 1.6%<br>(0.5-3.2%)                  | 5.6<br>(1.8-12)         | 590<br>(300-1000)     |
| Eritrea  | 1995 | Female | 25 to 29 | 30%<br>(16-47%)                | 70%<br>(53-84%)          | 0.83<br>(0.41-1.5)                          | 2.1%<br>(1.2-3.6%)                   | 2.1%<br>(0.89-4.2%)                 | 7.8<br>(3.2-15)         | 670<br>(360-1100)     |
| Eritrea  | 1995 | Female | 30 to 34 | 33%<br>(18-51%)                | 67%<br>(49-82%)          | 0.91<br>(0.44-1.7)                          | 2.3%<br>(1.2-3.9%)                   | 2.5%<br>(1.1-4.7%)                  | 9.7<br>(4.3-18)         | 700<br>(360-1100)     |
| Eritrea  | 1995 | Female | 35 to 39 | 36%<br>(21-55%)                | 64%<br>(45-79%)          | 0.9<br>(0.44-1.6)                           | 2.6%<br>(1.4-4.4%)                   | 3.1%<br>(1.5-5.4%)                  | 14<br>(6.7-24)          | 820<br>(430-1400)     |
| Eritrea  | 1995 | Female | 40 to 44 | 38%<br>(22-57%)                | 62%<br>(43-78%)          | 0.92<br>(0.44-1.6)                          | 2.9%<br>(1.5-4.9%)                   | 3.5%<br>(1.7-6.1%)                  | 18<br>(8.2-31)          | 880<br>(440-1500)     |
| Eritrea  | 1995 | Female | 45 to 49 | 38%<br>(21-56%)                | 62%<br>(44-79%)          | 0.94<br>(0.44-1.8)                          | 3.3%<br>(1.6-5.9%)                   | 4%<br>(1.9-7.3%)                    | 26<br>(12-47)           | 1100<br>(520-2000)    |
| Eritrea  | 1995 | Female | 50 to 54 | 36%<br>(20-56%)                | 64%<br>(44-80%)          | 0.91<br>(0.4-1.7)                           | 3.6%<br>(1.7-6.7%)                   | 4.3%<br>(2-8.1%)                    | 31<br>(14-58)           | 1100<br>(530-2200)    |
| Eritrea  | 1995 | Female | 55 to 59 | 35%<br>(20-55%)                | 65%<br>(45-80%)          | 0.9<br>(0.4-1.7)                            | 3.3%<br>(1.2-6.6%)                   | 3.9%<br>(1.4-8%)                    | 31<br>(11-63)           | 970<br>(350-2000)     |
| Eritrea  | 1995 | Female | 60 to 64 | 35%<br>(20-54%)                | 65%<br>(46-80%)          | 0.89<br>(0.37-1.7)                          | 3%<br>(1-6.4%)                       | 3.5%<br>(1.2-7.3%)                  | 29<br>(9.9-63)          | 780<br>(270-1700)     |
| Eritrea  | 1995 | Female | 65 to 69 | 36%<br>(21-54%)                | 64%<br>(46-79%)          | 0.83<br>(0.36-1.5)                          | 2.7%<br>(0.87-5.7%)                  | 3.1%<br>(0.96-6.5%)                 | 26<br>(8-55)            | 580<br>(190-1200)     |
| Eritrea  | 1995 | Female | 70 to 74 | 35%<br>(21-52%)                | 65%<br>(48-79%)          | 0.72<br>(0.3-1.4)                           | 1.8%<br>(0.18-4.5%)                  | 2%<br>(0.14-5.1%)                   | 16<br>(1.1-40)          | 290<br>(28-720)       |
| Eritrea  | 1995 | Female | 75 to 79 | 33%<br>(18-50%)                | 67%<br>(50-82%)          | 0.61<br>(0.24-1.2)                          | 1.4%<br>(0.0022-3.6%)                | 1.6%<br>(-0.0053-4%)                | 9.3<br>(-0.029-24)      | 130<br>(0.21-330)     |
| Eritrea  | 1995 | Female | 80 to 84 | 31%<br>(17-49%)                | 69%<br>(51-83%)          | 0.55<br>(0.22-1.1)                          | 0.9%<br>(-0.16-2.5%)                 | 1%<br>(-0.19-2.8%)                  | 3.7<br>(-0.67-10)       | 39<br>(-7.1-110)      |



| Location | Year | Sex    | Age      | Prevalence of current drinkers | Prevalence of abstainers | Population average of standard drinks daily | Percent of total attributable deaths | Percent of total attributable DALYs | Attributable deaths     | Attributable DALYs      |
|----------|------|--------|----------|--------------------------------|--------------------------|---------------------------------------------|--------------------------------------|-------------------------------------|-------------------------|-------------------------|
| Eritrea  | 1995 | Female | 85 to 89 | 31%<br>(17-48%)                | 69%<br>(52-83%)          | 0.53<br>(0.21-1.1)                          | 0.56%<br>(-0.3-1.8%)                 | 0.62%<br>(-0.36-2.1%)               | 1<br>(-0.58-3.4)        | 7.7<br>(-4.2-25)        |
| Eritrea  | 1995 | Female | 90 to 94 | 33%<br>(19-51%)                | 67%<br>(49-81%)          | 0.54<br>(0.22-1)                            | 0.32%<br>(-0.52-1.5%)                | 0.32%<br>(-0.63-1.6%)               | 0.15<br>(-0.29-0.74)    | 0.85<br>(-1.3-3.9)      |
| Eritrea  | 1995 | Female | 95 plus  | 38%<br>(19-60%)                | 62%<br>(40-81%)          | 0.59<br>(0.21-1.3)                          | 0.53%<br>(-0.36-1.8%)                | 0.53%<br>(-0.53-2%)                 | 0.055<br>(-0.055-0.2)   | 0.21<br>(-0.15-0.72)    |
| Eritrea  | 1995 | Male   | All Ages | 29%<br>(23-37%)                | 71%<br>(63-77%)          | 0.55<br>(0.38-0.78)                         | 1.7%<br>(1-2.4%)                     | 2.5%<br>(1.4-3.8%)                  | 380<br>(210-610)        | 19000<br>(12000-28000)  |
| Eritrea  | 1995 | Male   | 15 to 19 | 28%<br>(17-44%)                | 72%<br>(56-83%)          | 0.62<br>(0.31-1.1)                          | 2.4%<br>(1.4-4%)                     | 2.4%<br>(1-4.7%)                    | 9.8<br>(4.1-19)         | 1000<br>(570-1700)      |
| Eritrea  | 1995 | Male   | 20 to 24 | 40%<br>(24-58%)                | 60%<br>(42-76%)          | 0.93<br>(0.45-1.6)                          | 4.7%<br>(2.6-7.6%)                   | 4.4%<br>(1.7-8.1%)                  | 20<br>(8-37)            | 1900<br>(1000-3100)     |
| Eritrea  | 1995 | Male   | 25 to 29 | 45%<br>(27-64%)                | 55%<br>(36-73%)          | 1.2<br>(0.59-2)                             | 5.9%<br>(3.2-9.5%)                   | 6%<br>(2.5-11%)                     | 26<br>(11-47)           | 2100<br>(1100-3300)     |
| Eritrea  | 1995 | Male   | 30 to 34 | 49%<br>(29-68%)                | 51%<br>(32-71%)          | 1.3<br>(0.72-2.3)                           | 6.4%<br>(3.5-10%)                    | 6.9%<br>(3.3-12%)                   | 33<br>(15-56)           | 2200<br>(1200-3600)     |
| Eritrea  | 1995 | Male   | 35 to 39 | 51%<br>(34-69%)                | 49%<br>(31-66%)          | 1.5<br>(0.79-2.4)                           | 6.9%<br>(3.8-11%)                    | 7.7%<br>(3.8-13%)                   | 41<br>(20-68)           | 2300<br>(1300-3700)     |
| Eritrea  | 1995 | Male   | 40 to 44 | 53%<br>(36-71%)                | 47%<br>(29-64%)          | 1.5<br>(0.8-2.6)                            | 6.8%<br>(3.6-11%)                    | 7.8%<br>(3.9-13%)                   | 45<br>(22-74)           | 2200<br>(1200-3500)     |
| Eritrea  | 1995 | Male   | 45 to 49 | 53%<br>(35-71%)                | 47%<br>(29-65%)          | 1.5<br>(0.79-2.8)                           | 6.5%<br>(3.5-11%)                    | 7.4%<br>(3.8-13%)                   | 52<br>(27-91)           | 2300<br>(1200-3900)     |
| Eritrea  | 1995 | Male   | 50 to 54 | 54%<br>(34-72%)                | 46%<br>(28-66%)          | 1.5<br>(0.76-2.6)                           | 6.3%<br>(3.2-11%)                    | 7.3%<br>(3.6-13%)                   | 51<br>(24-89)           | 1900<br>(980-3400)      |
| Eritrea  | 1995 | Male   | 55 to 59 | 53%<br>(35-72%)                | 47%<br>(28-65%)          | 1.4<br>(0.69-2.5)                           | 5.7%<br>(2.7-9.7%)                   | 6.5%<br>(2.9-11%)                   | 44<br>(19-79)           | 1500<br>(670-2600)      |
| Eritrea  | 1995 | Male   | 60 to 64 | 51%<br>(33-71%)                | 49%<br>(29-67%)          | 1.2<br>(0.58-2.2)                           | 4.5%<br>(2-8.1%)                     | 5.1%<br>(2.2-9.3%)                  | 33<br>(14-60)           | 910<br>(400-1700)       |
| Eritrea  | 1995 | Male   | 65 to 69 | 49%<br>(31-67%)                | 51%<br>(33-69%)          | 1<br>(0.49-1.8)                             | 2.8%<br>(1.1-5.3%)                   | 3.2%<br>(1.2-6.2%)                  | 17<br>(6.3-33)          | 390<br>(150-750)        |
| Eritrea  | 1995 | Male   | 70 to 74 | 46%<br>(29-64%)                | 54%<br>(36-71%)          | 0.79<br>(0.37-1.4)                          | 1.8%<br>(0.47-3.9%)                  | 2%<br>(0.5-4.4%)                    | 8<br>(1.9-18)           | 150<br>(37-320)         |
| Eritrea  | 1995 | Male   | 75 to 79 | 44%<br>(27-62%)                | 56%<br>(38-73%)          | 0.64<br>(0.29-1.2)                          | 1.3%<br>(0.31-2.8%)                  | 1.5%<br>(0.31-3.2%)                 | 3.3<br>(0.67-7.2)       | 48<br>(11-100)          |
| Eritrea  | 1995 | Male   | 80 to 84 | 41%<br>(24-61%)                | 59%<br>(39-76%)          | 0.55<br>(0.24-0.98)                         | 0.98%<br>(0.23-2.1%)                 | 1%<br>(0.18-2.3%)                   | 1<br>(0.17-2.2)         | 11<br>(2.7-24)          |
| Eritrea  | 1995 | Male   | 85 to 89 | 38%<br>(23-55%)                | 62%<br>(45-77%)          | 0.46<br>(0.2-0.86)                          | 0.75%<br>(0.17-1.5%)                 | 0.76%<br>(0.09-1.6%)                | 0.35<br>(0.042-0.73)    | 3<br>(0.66-5.8)         |
| Eritrea  | 1995 | Male   | 90 to 94 | 39%<br>(24-55%)                | 61%<br>(45-76%)          | 0.41<br>(0.18-0.78)                         | 0.43%<br>(-0.096-0.99%)              | 0.35%<br>(-0.27-1%)                 | 0.049<br>(-0.037-0.14)  | 0.36<br>(-0.081-0.82)   |
| Eritrea  | 1995 | Male   | 95 plus  | 42%<br>(22-64%)                | 58%<br>(36-78%)          | 0.41<br>(0.15-0.85)                         | 0.51%<br>(-0.035-1.2%)               | 0.36%<br>(-0.32-1.1%)               | 0.012<br>(-0.011-0.035) | 0.066<br>(-0.0046-0.15) |
| Eritrea  | 2000 | Female | All Ages | 21%<br>(17-28%)                | 79%<br>(72-83%)          | 0.45<br>(0.31-0.64)                         | 1.2%<br>(0.7-1.9%)                   | 2%<br>(1-3.4%)                      | 300<br>(150-530)        | 12000<br>(6700-18000)   |

| Location | Year | Sex    | Age      | Prevalence of current drinkers | Prevalence of abstainers | Population average of standard drinks daily | Percent of total attributable deaths | Percent of total attributable DALYs | Attributable deaths  | Attributable DALYs     |
|----------|------|--------|----------|--------------------------------|--------------------------|---------------------------------------------|--------------------------------------|-------------------------------------|----------------------|------------------------|
| Eritrea  | 2000 | Female | 15 to 19 | 22%<br>(13-35%)                | 78%<br>(65-87%)          | 0.53<br>(0.25-0.94)                         | 0.97%<br>(0.51-1.7%)                 | 0.98%<br>(0.35-2%)                  | 4.2<br>(1.4-8.6)     | 480<br>(250-820)       |
| Eritrea  | 2000 | Female | 20 to 24 | 27%<br>(15-42%)                | 73%<br>(58-85%)          | 0.75<br>(0.36-1.3)                          | 1.7%<br>(0.98-2.9%)                  | 1.6%<br>(0.63-3.2%)                 | 7.4<br>(2.8-15)      | 800<br>(430-1300)      |
| Eritrea  | 2000 | Female | 25 to 29 | 29%<br>(16-45%)                | 71%<br>(55-84%)          | 0.92<br>(0.45-1.6)                          | 2.1%<br>(1.2-3.6%)                   | 2.2%<br>(0.93-4%)                   | 9.6<br>(4.1-18)      | 820<br>(450-1300)      |
| Eritrea  | 2000 | Female | 30 to 34 | 32%<br>(18-50%)                | 68%<br>(50-82%)          | 1<br>(0.48-1.8)                             | 2.4%<br>(1.3-4.1%)                   | 2.6%<br>(1.2-5%)                    | 12<br>(5.2-22)       | 820<br>(430-1400)      |
| Eritrea  | 2000 | Female | 35 to 39 | 36%<br>(20-55%)                | 64%<br>(45-80%)          | 0.99<br>(0.5-1.7)                           | 2.8%<br>(1.5-4.7%)                   | 3.3%<br>(1.6-5.8%)                  | 16<br>(7.6-28)       | 920<br>(490-1500)      |
| Eritrea  | 2000 | Female | 40 to 44 | 38%<br>(22-57%)                | 62%<br>(43-78%)          | 1<br>(0.48-1.7)                             | 3.1%<br>(1.6-5.2%)                   | 3.8%<br>(1.8-6.6%)                  | 20<br>(9.6-35)       | 1000<br>(510-1700)     |
| Eritrea  | 2000 | Female | 45 to 49 | 38%<br>(21-56%)                | 62%<br>(44-79%)          | 1<br>(0.46-1.9)                             | 3.8%<br>(1.8-6.6%)                   | 4.7%<br>(2.1-8.3%)                  | 28<br>(12-51)        | 1200<br>(550-2200)     |
| Eritrea  | 2000 | Female | 50 to 54 | 36%<br>(21-56%)                | 64%<br>(44-79%)          | 1<br>(0.45-1.8)                             | 4.3%<br>(2-7.9%)                     | 5.2%<br>(2.4-9.6%)                  | 41<br>(18-77)        | 1500<br>(680-2800)     |
| Eritrea  | 2000 | Female | 55 to 59 | 35%<br>(20-55%)                | 65%<br>(45-80%)          | 1<br>(0.43-2)                               | 4.2%<br>(1.7-8.1%)                   | 5%<br>(2-9.8%)                      | 42<br>(16-84)        | 1300<br>(520-2600)     |
| Eritrea  | 2000 | Female | 60 to 64 | 36%<br>(19-55%)                | 64%<br>(45-81%)          | 1<br>(0.42-2)                               | 3.8%<br>(1.4-7.8%)                   | 4.5%<br>(1.6-9.2%)                  | 40<br>(14-82)        | 1100<br>(380-2200)     |
| Eritrea  | 2000 | Female | 65 to 69 | 37%<br>(21-54%)                | 63%<br>(46-79%)          | 0.95<br>(0.4-1.7)                           | 3.5%<br>(1.3-7.1%)                   | 4.1%<br>(1.5-8.1%)                  | 38<br>(13-76)        | 840<br>(300-1700)      |
| Eritrea  | 2000 | Female | 70 to 74 | 35%<br>(21-54%)                | 65%<br>(46-79%)          | 0.81<br>(0.34-1.6)                          | 2.5%<br>(0.47-5.6%)                  | 2.8%<br>(0.49-6.5%)                 | 24<br>(4.2-56)       | 440<br>(82-1000)       |
| Eritrea  | 2000 | Female | 75 to 79 | 32%<br>(18-51%)                | 68%<br>(49-82%)          | 0.68<br>(0.25-1.4)                          | 2%<br>(0.39-4.7%)                    | 2.3%<br>(0.4-5.3%)                  | 15<br>(2.7-37)       | 210<br>(39-520)        |
| Eritrea  | 2000 | Female | 80 to 84 | 31%<br>(16-50%)                | 69%<br>(50-84%)          | 0.61<br>(0.24-1.2)                          | 1.3%<br>(0.053-3.3%)                 | 1.5%<br>(0.055-3.8%)                | 6.4<br>(0.25-16)     | 66<br>(2.7-160)        |
| Eritrea  | 2000 | Female | 85 to 89 | 31%<br>(17-48%)                | 69%<br>(52-83%)          | 0.59<br>(0.25-1.2)                          | 0.93%<br>(-0.11-2.4%)                | 1.1%<br>(-0.14-2.9%)                | 2.2<br>(-0.31-6)     | 17<br>(-1.9-44)        |
| Eritrea  | 2000 | Female | 90 to 94 | 33%<br>(19-50%)                | 67%<br>(50-81%)          | 0.61<br>(0.25-1.2)                          | 0.64%<br>(-0.28-2.2%)                | 0.71%<br>(-0.37-2.4%)               | 0.44<br>(-0.24-1.6)  | 2.4<br>(-1-8)          |
| Eritrea  | 2000 | Female | 95 plus  | 38%<br>(20-59%)                | 62%<br>(41-80%)          | 0.66<br>(0.24-1.4)                          | 0.91%<br>(-0.12-2.6%)                | 0.97%<br>(-0.22-2.9%)               | 0.13<br>(-0.03-0.39) | 0.47<br>(-0.061-1.3)   |
| Eritrea  | 2000 | Male   | All Ages | 30%<br>(24-38%)                | 70%<br>(62-76%)          | 0.64<br>(0.45-0.88)                         | 2.1%<br>(1.4-3.1%)                   | 3.1%<br>(1.8-4.6%)                  | 480<br>(290-750)     | 24000<br>(15000-34000) |
| Eritrea  | 2000 | Male   | 15 to 19 | 28%<br>(17-43%)                | 72%<br>(57-83%)          | 0.68<br>(0.35-1.2)                          | 2.2%<br>(1.3-3.6%)                   | 2.1%<br>(0.93-3.9%)                 | 14<br>(6.1-26)       | 1400<br>(790-2300)     |
| Eritrea  | 2000 | Male   | 20 to 24 | 39%<br>(24-56%)                | 61%<br>(44-76%)          | 1<br>(0.51-1.7)                             | 4%<br>(2.2-6.4%)                     | 3.6%<br>(1.5-6.3%)                  | 30<br>(13-53)        | 2700<br>(1500-4400)    |
| Eritrea  | 2000 | Male   | 25 to 29 | 45%<br>(28-63%)                | 55%<br>(37-72%)          | 1.3<br>(0.69-2.2)                           | 5.5%<br>(3-8.6%)                     | 5.3%<br>(2.4-9.1%)                  | 34<br>(16-59)        | 2700<br>(1500-4100)    |
| Eritrea  | 2000 | Male   | 30 to 34 | 49%<br>(30-67%)                | 51%<br>(33-70%)          | 1.5<br>(0.8-2.6)                            | 6.2%<br>(3.6-9.8%)                   | 6.5%<br>(3.3-11%)                   | 38<br>(19-63)        | 2500<br>(1400-4000)    |

| Location | Year | Sex    | Age      | Prevalence of current drinkers | Prevalence of abstainers | Population average of standard drinks daily | Percent of total attributable deaths | Percent of total attributable DALYs | Attributable deaths      | Attributable DALYs    |
|----------|------|--------|----------|--------------------------------|--------------------------|---------------------------------------------|--------------------------------------|-------------------------------------|--------------------------|-----------------------|
| Eritrea  | 2000 | Male   | 35 to 39 | 51%<br>(34-69%)                | 49%<br>(31-66%)          | 1.6<br>(0.89-2.8)                           | 6.8%<br>(3.9-11%)                    | 7.6%<br>(4-13%)                     | 45<br>(24-77)            | 2600<br>(1500-4200)   |
| Eritrea  | 2000 | Male   | 40 to 44 | 53%<br>(36-71%)                | 47%<br>(29-64%)          | 1.7<br>(0.89-2.9)                           | 7.1%<br>(4-11%)                      | 8.2%<br>(4.3-13%)                   | 52<br>(27-85)            | 2600<br>(1400-4100)   |
| Eritrea  | 2000 | Male   | 45 to 49 | 53%<br>(34-72%)                | 47%<br>(28-66%)          | 1.7<br>(0.85-3)                             | 7.2%<br>(4.1-11%)                    | 8.3%<br>(4.5-13%)                   | 55<br>(29-94)            | 2400<br>(1300-4000)   |
| Eritrea  | 2000 | Male   | 50 to 54 | 54%<br>(35-71%)                | 46%<br>(29-65%)          | 1.7<br>(0.82-2.9)                           | 7.3%<br>(3.8-12%)                    | 8.5%<br>(4.3-14%)                   | 67<br>(33-120)           | 2600<br>(1400-4300)   |
| Eritrea  | 2000 | Male   | 55 to 59 | 53%<br>(35-72%)                | 47%<br>(28-65%)          | 1.6<br>(0.77-2.8)                           | 6.7%<br>(3.3-11%)                    | 7.8%<br>(3.7-14%)                   | 59<br>(27-100)           | 2000<br>(920-3300)    |
| Eritrea  | 2000 | Male   | 60 to 64 | 51%<br>(32-70%)                | 49%<br>(30-68%)          | 1.4<br>(0.63-2.5)                           | 5.3%<br>(2.4-9.4%)                   | 6.1%<br>(2.7-11%)                   | 44<br>(19-83)            | 1200<br>(560-2300)    |
| Eritrea  | 2000 | Male   | 65 to 69 | 48%<br>(30-66%)                | 52%<br>(34-70%)          | 1.1<br>(0.54-1.9)                           | 3.4%<br>(1.5-6.4%)                   | 3.9%<br>(1.7-7.4%)                  | 24<br>(10-45)            | 560<br>(240-1000)     |
| Eritrea  | 2000 | Male   | 70 to 74 | 45%<br>(29-63%)                | 55%<br>(37-71%)          | 0.86<br>(0.41-1.6)                          | 2.2%<br>(0.73-4.5%)                  | 2.5%<br>(0.82-5.2%)                 | 12<br>(3.9-25)           | 220<br>(73-460)       |
| Eritrea  | 2000 | Male   | 75 to 79 | 43%<br>(27-62%)                | 57%<br>(38-73%)          | 0.71<br>(0.31-1.4)                          | 1.7%<br>(0.49-3.6%)                  | 1.9%<br>(0.51-4.1%)                 | 5.5<br>(1.5-12)          | 79<br>(23-170)        |
| Eritrea  | 2000 | Male   | 80 to 84 | 40%<br>(24-58%)                | 60%<br>(42-76%)          | 0.6<br>(0.26-1.1)                           | 1.3%<br>(0.33-2.5%)                  | 1.4%<br>(0.3-2.9%)                  | 1.7<br>(0.37-3.6)        | 19<br>(4.8-38)        |
| Eritrea  | 2000 | Male   | 85 to 89 | 38%<br>(23-55%)                | 62%<br>(45-77%)          | 0.5<br>(0.22-0.94)                          | 0.96%<br>(0.31-1.9%)                 | 1%<br>(0.24-2.1%)                   | 0.58<br>(0.14-1.2)       | 4.8<br>(1.5-9.2)      |
| Eritrea  | 2000 | Male   | 90 to 94 | 39%<br>(23-57%)                | 61%<br>(43-77%)          | 0.45<br>(0.2-0.85)                          | 0.6%<br>(0.049-1.3%)                 | 0.55%<br>(-0.11-1.4%)               | 0.1<br>(-0.02-0.27)      | 0.68<br>(0.054-1.5)   |
| Eritrea  | 2000 | Male   | 95 plus  | 42%<br>(21-64%)                | 58%<br>(36-79%)          | 0.45<br>(0.16-0.93)                         | 0.74%<br>(0.077-1.6%)                | 0.64%<br>(-0.15-1.6%)               | 0.027<br>(-0.0063-0.068) | 0.13<br>(0.013-0.27)  |
| Eritrea  | 2005 | Female | All Ages | 22%<br>(17-29%)                | 78%<br>(71-83%)          | 0.41<br>(0.29-0.57)                         | 1.2%<br>(0.67-1.9%)                  | 1.9%<br>(0.88-3.4%)                 | 310<br>(140-560)         | 12000<br>(7000-20000) |
| Eritrea  | 2005 | Female | 15 to 19 | 22%<br>(13-36%)                | 78%<br>(64-87%)          | 0.44<br>(0.21-0.79)                         | 1%<br>(0.52-1.8%)                    | 1.1%<br>(0.32-2.4%)                 | 4.1<br>(1.2-9.5)         | 500<br>(250-900)      |
| Eritrea  | 2005 | Female | 20 to 24 | 28%<br>(15-43%)                | 72%<br>(57-85%)          | 0.63<br>(0.31-1.1)                          | 1.8%<br>(0.99-3.1%)                  | 1.7%<br>(0.59-3.5%)                 | 8.6<br>(2.9-18)          | 980<br>(530-1600)     |
| Eritrea  | 2005 | Female | 25 to 29 | 30%<br>(17-46%)                | 70%<br>(54-83%)          | 0.76<br>(0.38-1.3)                          | 2.1%<br>(1.2-3.6%)                   | 2.2%<br>(0.8-4.4%)                  | 12<br>(4.6-24)           | 1100<br>(580-1800)    |
| Eritrea  | 2005 | Female | 30 to 34 | 33%<br>(18-51%)                | 67%<br>(49-82%)          | 0.83<br>(0.4-1.5)                           | 2.3%<br>(1.2-3.9%)                   | 2.5%<br>(1-4.7%)                    | 14<br>(5.9-27)           | 1000<br>(500-1700)    |
| Eritrea  | 2005 | Female | 35 to 39 | 36%<br>(21-54%)                | 64%<br>(46-79%)          | 0.82<br>(0.41-1.5)                          | 2.6%<br>(1.3-4.5%)                   | 3%<br>(1.3-5.6%)                    | 17<br>(7.3-31)           | 1000<br>(490-1700)    |
| Eritrea  | 2005 | Female | 40 to 44 | 38%<br>(22-56%)                | 62%<br>(44-78%)          | 0.83<br>(0.4-1.5)                           | 2.8%<br>(1.3-4.9%)                   | 3.4%<br>(1.6-6.1%)                  | 20<br>(9-38)             | 1000<br>(490-1900)    |
| Eritrea  | 2005 | Female | 45 to 49 | 38%<br>(21-56%)                | 62%<br>(44-79%)          | 0.85<br>(0.36-1.6)                          | 3.4%<br>(1.5-6.2%)                   | 4.2%<br>(1.8-7.8%)                  | 28<br>(12-53)            | 1200<br>(530-2200)    |
| Eritrea  | 2005 | Female | 50 to 54 | 36%<br>(20-56%)                | 64%<br>(44-80%)          | 0.82<br>(0.36-1.5)                          | 3.8%<br>(1.7-7.1%)                   | 4.7%<br>(2-8.8%)                    | 37<br>(15-70)            | 1400<br>(570-2500)    |

| Location | Year | Sex    | Age      | Prevalence of current drinkers | Prevalence of abstainers | Population average of standard drinks daily | Percent of total attributable deaths | Percent of total attributable DALYs | Attributable deaths   | Attributable DALYs     |
|----------|------|--------|----------|--------------------------------|--------------------------|---------------------------------------------|--------------------------------------|-------------------------------------|-----------------------|------------------------|
| Eritrea  | 2005 | Female | 55 to 59 | 35%<br>(20-54%)                | 65%<br>(46-80%)          | 0.82<br>(0.35-1.6)                          | 3.7%<br>(1.4-7.4%)                   | 4.5%<br>(1.7-9%)                    | 44<br>(16-94)         | 1400<br>(510-2900)     |
| Eritrea  | 2005 | Female | 60 to 64 | 35%<br>(20-54%)                | 65%<br>(46-80%)          | 0.81<br>(0.33-1.6)                          | 3.2%<br>(1.2-6.9%)                   | 3.9%<br>(1.4-8.2%)                  | 40<br>(14-88)         | 1100<br>(380-2300)     |
| Eritrea  | 2005 | Female | 65 to 69 | 36%<br>(21-54%)                | 64%<br>(46-79%)          | 0.76<br>(0.32-1.3)                          | 2.9%<br>(1-6.1%)                     | 3.4%<br>(1.2-7.1%)                  | 37<br>(13-79)         | 840<br>(280-1800)      |
| Eritrea  | 2005 | Female | 70 to 74 | 35%<br>(20-53%)                | 65%<br>(47-80%)          | 0.65<br>(0.27-1.3)                          | 2%<br>(0.25-4.9%)                    | 2.3%<br>(0.25-5.6%)                 | 24<br>(2.6-57)        | 430<br>(55-1000)       |
| Eritrea  | 2005 | Female | 75 to 79 | 32%<br>(18-51%)                | 68%<br>(49-82%)          | 0.55<br>(0.21-1.1)                          | 1.6%<br>(0.11-3.8%)                  | 1.8%<br>(0.088-4.4%)                | 16<br>(0.78-39)       | 220<br>(14-530)        |
| Eritrea  | 2005 | Female | 80 to 84 | 31%<br>(16-49%)                | 69%<br>(51-84%)          | 0.5<br>(0.19-0.96)                          | 1%<br>(-0.2-2.7%)                    | 1.2%<br>(-0.23-3.1%)                | 6.8<br>(-1.3-18)      | 69<br>(-13-190)        |
| Eritrea  | 2005 | Female | 85 to 89 | 31%<br>(17-49%)                | 69%<br>(51-83%)          | 0.49<br>(0.2-1)                             | 0.7%<br>(-0.29-2.2%)                 | 0.8%<br>(-0.34-2.5%)                | 2.2<br>(-0.98-7.1)    | 17<br>(-7-52)          |
| Eritrea  | 2005 | Female | 90 to 94 | 34%<br>(19-52%)                | 66%<br>(48-81%)          | 0.51<br>(0.2-1)                             | 0.44%<br>(-0.48-1.7%)                | 0.47%<br>(-0.59-2.1%)               | 0.44<br>(-0.57-1.9)   | 2.4<br>(-2.6-9.8)      |
| Eritrea  | 2005 | Female | 95 plus  | 39%<br>(20-59%)                | 61%<br>(41-80%)          | 0.55<br>(0.19-1.2)                          | 0.77%<br>(-0.24-2.4%)                | 0.82%<br>(-0.38-2.8%)               | 0.17<br>(-0.078-0.57) | 0.61<br>(-0.19-1.9)    |
| Eritrea  | 2005 | Male   | All Ages | 31%<br>(25-39%)                | 69%<br>(61-75%)          | 0.56<br>(0.39-0.76)                         | 2.2%<br>(1.4-3.2%)                   | 3.1%<br>(1.6-4.7%)                  | 510<br>(270-780)      | 26000<br>(16000-37000) |
| Eritrea  | 2005 | Male   | 15 to 19 | 28%<br>(17-44%)                | 72%<br>(56-83%)          | 0.56<br>(0.28-0.94)                         | 2.5%<br>(1.4-4.2%)                   | 2.6%<br>(1.1-4.8%)                  | 14<br>(5.6-26)        | 1500<br>(810-2400)     |
| Eritrea  | 2005 | Male   | 20 to 24 | 39%<br>(24-56%)                | 61%<br>(44-76%)          | 0.81<br>(0.43-1.4)                          | 4.9%<br>(2.7-8%)                     | 4.7%<br>(1.7-8.8%)                  | 35<br>(13-65)         | 3300<br>(1800-5500)    |
| Eritrea  | 2005 | Male   | 25 to 29 | 45%<br>(27-62%)                | 55%<br>(38-73%)          | 1<br>(0.53-1.7)                             | 6.2%<br>(3.3-10%)                    | 6.4%<br>(2.5-11%)                   | 45<br>(17-79)         | 3500<br>(1800-5600)    |
| Eritrea  | 2005 | Male   | 30 to 34 | 49%<br>(30-67%)                | 51%<br>(33-70%)          | 1.2<br>(0.66-2)                             | 6.4%<br>(3.4-10%)                    | 6.9%<br>(3-12%)                     | 43<br>(19-74)         | 3000<br>(1500-4600)    |
| Eritrea  | 2005 | Male   | 35 to 39 | 51%<br>(34-69%)                | 49%<br>(31-66%)          | 1.3<br>(0.72-2.3)                           | 6.7%<br>(3.5-11%)                    | 7.5%<br>(3.5-13%)                   | 46<br>(22-81)         | 2700<br>(1400-4500)    |
| Eritrea  | 2005 | Male   | 40 to 44 | 52%<br>(35-71%)                | 48%<br>(29-65%)          | 1.4<br>(0.71-2.4)                           | 6.6%<br>(3.5-11%)                    | 7.6%<br>(3.7-13%)                   | 50<br>(24-87)         | 2500<br>(1300-4200)    |
| Eritrea  | 2005 | Male   | 45 to 49 | 53%<br>(34-71%)                | 47%<br>(29-66%)          | 1.4<br>(0.67-2.4)                           | 6.6%<br>(3.5-11%)                    | 7.7%<br>(3.8-13%)                   | 55<br>(27-94)         | 2400<br>(1300-4100)    |
| Eritrea  | 2005 | Male   | 50 to 54 | 54%<br>(35-72%)                | 46%<br>(28-65%)          | 1.3<br>(0.65-2.3)                           | 6.6%<br>(3.2-11%)                    | 7.8%<br>(3.6-13%)                   | 59<br>(26-100)        | 2300<br>(1100-3800)    |
| Eritrea  | 2005 | Male   | 55 to 59 | 53%<br>(34-72%)                | 47%<br>(28-66%)          | 1.3<br>(0.64-2.3)                           | 6.1%<br>(2.9-10%)                    | 7.1%<br>(3.3-13%)                   | 64<br>(29-110)        | 2100<br>(1000-3700)    |
| Eritrea  | 2005 | Male   | 60 to 64 | 51%<br>(32-71%)                | 49%<br>(29-68%)          | 1.1<br>(0.51-2)                             | 4.6%<br>(2.2-8.4%)                   | 5.4%<br>(2.3-9.9%)                  | 47<br>(21-85)         | 1300<br>(610-2400)     |
| Eritrea  | 2005 | Male   | 65 to 69 | 48%<br>(30-67%)                | 52%<br>(33-70%)          | 0.88<br>(0.42-1.5)                          | 2.9%<br>(1.2-5.6%)                   | 3.4%<br>(1.3-6.5%)                  | 26<br>(9.8-50)        | 600<br>(240-1100)      |
| Eritrea  | 2005 | Male   | 70 to 74 | 45%<br>(29-63%)                | 55%<br>(37-71%)          | 0.69<br>(0.32-1.3)                          | 1.9%<br>(0.54-3.8%)                  | 2.1%<br>(0.57-4.4%)                 | 13<br>(3.5-27)        | 240<br>(70-500)        |

| Location | Year | Sex    | Age      | Prevalence of current drinkers | Prevalence of abstainers | Population average of standard drinks daily | Percent of total attributable deaths | Percent of total attributable DALYs | Attributable deaths     | Attributable DALYs    |
|----------|------|--------|----------|--------------------------------|--------------------------|---------------------------------------------|--------------------------------------|-------------------------------------|-------------------------|-----------------------|
| Eritrea  | 2005 | Male   | 75 to 79 | 43%<br>(26-61%)                | 57%<br>(39-74%)          | 0.56<br>(0.24-1)                            | 1.4%<br>(0.32-3%)                    | 1.6%<br>(0.31-3.5%)                 | 6.4<br>(1.2-14)         | 92<br>(20-200)        |
| Eritrea  | 2005 | Male   | 80 to 84 | 40%<br>(23-58%)                | 60%<br>(42-77%)          | 0.47<br>(0.2-0.86)                          | 1%<br>(0.2-2.2%)                     | 1.1%<br>(0.13-2.5%)                 | 2.2<br>(0.27-4.9)       | 25<br>(4.8-52)        |
| Eritrea  | 2005 | Male   | 85 to 89 | 38%<br>(22-55%)                | 62%<br>(45-78%)          | 0.4<br>(0.17-0.77)                          | 0.83%<br>(0.21-1.7%)                 | 0.87%<br>(0.12-1.9%)                | 0.68<br>(0.09-1.5)      | 5.6<br>(1.4-11)       |
| Eritrea  | 2005 | Male   | 90 to 94 | 38%<br>(23-56%)                | 62%<br>(44-77%)          | 0.36<br>(0.16-0.68)                         | 0.52%<br>(0.013-1.2%)                | 0.47%<br>(-0.11-1.3%)               | 0.12<br>(-0.029-0.32)   | 0.78<br>(0.019-1.8)   |
| Eritrea  | 2005 | Male   | 95 plus  | 42%<br>(22-64%)                | 58%<br>(36-78%)          | 0.36<br>(0.13-0.77)                         | 0.71%<br>(0.0083-1.6%)               | 0.63%<br>(-0.23-1.6%)               | 0.037<br>(-0.013-0.096) | 0.17<br>(0.0019-0.37) |
| Eritrea  | 2010 | Female | All Ages | 23%<br>(18-29%)                | 77%<br>(71-82%)          | 0.35<br>(0.23-0.5)                          | 1.2%<br>(0.6-2%)                     | 1.8%<br>(0.69-3.3%)                 | 310<br>(120-600)        | 12000<br>(6300-21000) |
| Eritrea  | 2010 | Female | 15 to 19 | 22%<br>(12-36%)                | 78%<br>(64-88%)          | 0.37<br>(0.17-0.7)                          | 0.91%<br>(0.46-1.7%)                 | 0.92%<br>(0.19-2.2%)                | 3.2<br>(0.67-7.8)       | 420<br>(200-770)      |
| Eritrea  | 2010 | Female | 20 to 24 | 27%<br>(15-43%)                | 73%<br>(57-85%)          | 0.53<br>(0.25-0.93)                         | 1.7%<br>(0.89-2.9%)                  | 1.6%<br>(0.37-3.5%)                 | 7.8<br>(1.9-17)         | 960<br>(480-1600)     |
| Eritrea  | 2010 | Female | 25 to 29 | 30%<br>(16-46%)                | 70%<br>(54-84%)          | 0.65<br>(0.32-1.2)                          | 2.1%<br>(1.1-3.7%)                   | 2.2%<br>(0.74-4.6%)                 | 14<br>(4.6-28)          | 1200<br>(630-2100)    |
| Eritrea  | 2010 | Female | 30 to 34 | 33%<br>(18-51%)                | 67%<br>(49-82%)          | 0.71<br>(0.35-1.3)                          | 2.3%<br>(1.1-4.1%)                   | 2.5%<br>(0.94-5.1%)                 | 16<br>(5.9-34)          | 1200<br>(580-2200)    |
| Eritrea  | 2010 | Female | 35 to 39 | 36%<br>(20-55%)                | 64%<br>(45-80%)          | 0.7<br>(0.32-1.3)                           | 2.5%<br>(1.1-4.6%)                   | 3%<br>(1.1-5.7%)                    | 19<br>(6.4-36)          | 1100<br>(470-2000)    |
| Eritrea  | 2010 | Female | 40 to 44 | 38%<br>(23-57%)                | 62%<br>(43-77%)          | 0.7<br>(0.31-1.3)                           | 2.7%<br>(1.2-4.8%)                   | 3.3%<br>(1.3-6.2%)                  | 20<br>(7.8-39)          | 1000<br>(440-1900)    |
| Eritrea  | 2010 | Female | 45 to 49 | 38%<br>(21-56%)                | 62%<br>(44-79%)          | 0.73<br>(0.3-1.4)                           | 3.1%<br>(1.3-6.1%)                   | 3.9%<br>(1.4-7.7%)                  | 27<br>(9.6-54)          | 1200<br>(440-2300)    |
| Eritrea  | 2010 | Female | 50 to 54 | 37%<br>(21-57%)                | 63%<br>(43-79%)          | 0.71<br>(0.3-1.3)                           | 3.5%<br>(1.3-6.9%)                   | 4.3%<br>(1.6-8.5%)                  | 36<br>(13-74)           | 1300<br>(500-2700)    |
| Eritrea  | 2010 | Female | 55 to 59 | 35%<br>(20-55%)                | 65%<br>(45-80%)          | 0.71<br>(0.31-1.4)                          | 3.3%<br>(1-7.2%)                     | 4%<br>(1.3-8.6%)                    | 39<br>(12-88)           | 1200<br>(390-2800)    |
| Eritrea  | 2010 | Female | 60 to 64 | 36%<br>(21-54%)                | 64%<br>(46-79%)          | 0.7<br>(0.3-1.4)                            | 2.8%<br>(0.86-6.3%)                  | 3.4%<br>(1.1-7.4%)                  | 42<br>(13-94)           | 1100<br>(340-2500)    |
| Eritrea  | 2010 | Female | 65 to 69 | 37%<br>(21-55%)                | 63%<br>(45-79%)          | 0.66<br>(0.28-1.2)                          | 2.5%<br>(0.72-5.4%)                  | 3%<br>(0.84-6.3%)                   | 38<br>(11-84)           | 840<br>(250-1900)     |
| Eritrea  | 2010 | Female | 70 to 74 | 35%<br>(21-53%)                | 65%<br>(47-79%)          | 0.57<br>(0.23-1.1)                          | 1.6%<br>(0.06-4.2%)                  | 1.8%<br>(0.016-4.9%)                | 23<br>(0.2-61)          | 420<br>(16-1100)      |
| Eritrea  | 2010 | Female | 75 to 79 | 33%<br>(19-51%)                | 67%<br>(49-81%)          | 0.48<br>(0.17-0.98)                         | 1.3%<br>(-0.095-3.2%)                | 1.5%<br>(-0.11-3.8%)                | 16<br>(-1.3-41)         | 220<br>(-16-570)      |
| Eritrea  | 2010 | Female | 80 to 84 | 31%<br>(17-49%)                | 69%<br>(51-83%)          | 0.43<br>(0.16-0.87)                         | 0.77%<br>(-0.35-2.3%)                | 0.88%<br>(-0.4-2.6%)                | 6.8<br>(-3.1-21)        | 69<br>(-30-210)       |
| Eritrea  | 2010 | Female | 85 to 89 | 31%<br>(17-49%)                | 69%<br>(51-83%)          | 0.41<br>(0.17-0.86)                         | 0.51%<br>(-0.42-1.8%)                | 0.58%<br>(-0.48-2.2%)               | 2.2<br>(-1.9-8.3)       | 16<br>(-13-60)        |
| Eritrea  | 2010 | Female | 90 to 94 | 34%<br>(20-52%)                | 66%<br>(48-80%)          | 0.43<br>(0.17-0.87)                         | 0.26%<br>(-0.57-1.5%)                | 0.27%<br>(-0.69-1.7%)               | 0.33<br>(-0.85-2.1)     | 1.9<br>(-4-11)        |

| Location | Year | Sex    | Age      | Prevalence of current drinkers | Prevalence of abstainers | Population average of standard drinks daily | Percent of total attributable deaths | Percent of total attributable DALYs | Attributable deaths   | Attributable DALYs     |
|----------|------|--------|----------|--------------------------------|--------------------------|---------------------------------------------|--------------------------------------|-------------------------------------|-----------------------|------------------------|
| Eritrea  | 2010 | Female | 95 plus  | 39%<br>(20-60%)                | 61%<br>(40-80%)          | 0.47<br>(0.16-1)                            | 0.6%<br>(-0.38-2%)                   | 0.62%<br>(-0.54-2.3%)               | 0.19<br>(-0.16-0.69)  | 0.7<br>(-0.44-2.4)     |
| Eritrea  | 2010 | Male   | All Ages | 31%<br>(25-39%)                | 69%<br>(61-75%)          | 0.48<br>(0.32-0.68)                         | 2.2%<br>(1.2-3.3%)                   | 2.9%<br>(1.4-4.7%)                  | 510<br>(240-840)      | 26000<br>(15000-39000) |
| Eritrea  | 2010 | Male   | 15 to 19 | 28%<br>(17-43%)                | 72%<br>(57-83%)          | 0.47<br>(0.23-0.84)                         | 2.3%<br>(1.2-3.8%)                   | 2.2%<br>(0.72-4.5%)                 | 11<br>(3.7-21)        | 1200<br>(650-2100)     |
| Eritrea  | 2010 | Male   | 20 to 24 | 39%<br>(23-56%)                | 61%<br>(44-77%)          | 0.69<br>(0.34-1.2)                          | 4.6%<br>(2.3-7.6%)                   | 4.2%<br>(1.2-8%)                    | 32<br>(9.6-63)        | 3200<br>(1600-5300)    |
| Eritrea  | 2010 | Male   | 25 to 29 | 45%<br>(27-63%)                | 55%<br>(37-73%)          | 0.88<br>(0.45-1.4)                          | 5.9%<br>(3-9.9%)                     | 6%<br>(2.1-11%)                     | 48<br>(17-92)         | 4000<br>(2000-6600)    |
| Eritrea  | 2010 | Male   | 30 to 34 | 49%<br>(30-67%)                | 51%<br>(33-70%)          | 1<br>(0.56-1.7)                             | 6.2%<br>(3-10%)                      | 6.7%<br>(2.6-12%)                   | 51<br>(19-92)         | 3500<br>(1700-5800)    |
| Eritrea  | 2010 | Male   | 35 to 39 | 51%<br>(34-69%)                | 49%<br>(31-66%)          | 1.1<br>(0.58-2.1)                           | 6.4%<br>(3.1-11%)                    | 7.3%<br>(3-13%)                     | 49<br>(20-87)         | 2900<br>(1400-4800)    |
| Eritrea  | 2010 | Male   | 40 to 44 | 52%<br>(36-71%)                | 48%<br>(29-64%)          | 1.2<br>(0.58-2.1)                           | 6.4%<br>(3-11%)                      | 7.4%<br>(3-13%)                     | 48<br>(19-88)         | 2500<br>(1100-4200)    |
| Eritrea  | 2010 | Male   | 45 to 49 | 53%<br>(33-72%)                | 47%<br>(28-67%)          | 1.2<br>(0.55-2.1)                           | 6.2%<br>(2.9-11%)                    | 7.3%<br>(3.1-13%)                   | 52<br>(22-93)         | 2300<br>(1000-4000)    |
| Eritrea  | 2010 | Male   | 50 to 54 | 54%<br>(35-72%)                | 46%<br>(28-65%)          | 1.1<br>(0.54-2)                             | 6.2%<br>(2.7-11%)                    | 7.3%<br>(2.9-14%)                   | 58<br>(23-110)        | 2200<br>(970-4100)     |
| Eritrea  | 2010 | Male   | 55 to 59 | 53%<br>(34-71%)                | 47%<br>(29-66%)          | 1.1<br>(0.53-2)                             | 5.5%<br>(2.5-10%)                    | 6.5%<br>(2.7-12%)                   | 56<br>(24-100)        | 1800<br>(830-3300)     |
| Eritrea  | 2010 | Male   | 60 to 64 | 51%<br>(32-71%)                | 49%<br>(29-68%)          | 0.93<br>(0.44-1.8)                          | 4.2%<br>(1.9-7.9%)                   | 4.8%<br>(2.1-9.5%)                  | 50<br>(21-98)         | 1400<br>(620-2700)     |
| Eritrea  | 2010 | Male   | 65 to 69 | 48%<br>(30-66%)                | 52%<br>(34-70%)          | 0.75<br>(0.36-1.3)                          | 2.6%<br>(0.88-5.1%)                  | 3%<br>(0.93-6%)                     | 28<br>(9-56)          | 640<br>(220-1300)      |
| Eritrea  | 2010 | Male   | 70 to 74 | 45%<br>(28-63%)                | 55%<br>(37-72%)          | 0.58<br>(0.26-1.1)                          | 1.6%<br>(0.36-3.5%)                  | 1.8%<br>(0.38-4.1%)                 | 14<br>(3-32)          | 260<br>(61-590)        |
| Eritrea  | 2010 | Male   | 75 to 79 | 43%<br>(26-62%)                | 57%<br>(38-74%)          | 0.48<br>(0.2-0.92)                          | 1.3%<br>(0.22-2.7%)                  | 1.4%<br>(0.19-3.1%)                 | 7.4<br>(1.1-17)       | 110<br>(19-240)        |
| Eritrea  | 2010 | Male   | 80 to 84 | 40%<br>(24-60%)                | 60%<br>(40-76%)          | 0.4<br>(0.17-0.76)                          | 0.87%<br>(0.087-2%)                  | 0.94%<br>(0.0021-2.3%)              | 2.6<br>(0.0056-6.5)   | 29<br>(2.8-68)         |
| Eritrea  | 2010 | Male   | 85 to 89 | 38%<br>(23-56%)                | 62%<br>(44-77%)          | 0.34<br>(0.14-0.66)                         | 0.74%<br>(0.058-1.6%)                | 0.77%<br>(-0.033-1.8%)              | 0.91<br>(-0.04-2.1)   | 7.5<br>(0.58-16)       |
| Eritrea  | 2010 | Male   | 90 to 94 | 39%<br>(24-56%)                | 61%<br>(44-76%)          | 0.31<br>(0.14-0.61)                         | 0.44%<br>(-0.066-1.1%)               | 0.39%<br>(-0.2-1.1%)                | 0.12<br>(-0.063-0.37) | 0.84<br>(-0.12-2)      |
| Eritrea  | 2010 | Male   | 95 plus  | 42%<br>(21-63%)                | 58%<br>(37-79%)          | 0.31<br>(0.11-0.66)                         | 0.63%<br>(-0.1-1.5%)                 | 0.56%<br>(-0.34-1.6%)               | 0.04<br>(-0.025-0.11) | 0.18<br>(-0.03-0.43)   |
| Eritrea  | 2016 | Female | All Ages | 23%<br>(18-29%)                | 77%<br>(71-82%)          | 0.38<br>(0.2-0.65)                          | 1.5%<br>(0.65-3%)                    | 2.3%<br>(0.65-4.8%)                 | 400<br>(120-840)      | 15000<br>(6400-29000)  |
| Eritrea  | 2016 | Female | 15 to 19 | 22%<br>(13-36%)                | 78%<br>(64-87%)          | 0.41<br>(0.15-0.85)                         | 1%<br>(0.48-2%)                      | 1.1%<br>(0.21-2.8%)                 | 3.6<br>(0.66-9.2)     | 460<br>(200-890)       |
| Eritrea  | 2016 | Female | 20 to 24 | 28%<br>(15-43%)                | 72%<br>(57-85%)          | 0.58<br>(0.23-1.2)                          | 1.9%<br>(0.94-3.5%)                  | 1.9%<br>(0.39-4.6%)                 | 7.6<br>(1.6-18)       | 920<br>(430-1700)      |

| Location | Year | Sex    | Age      | Prevalence of current drinkers | Prevalence of abstainers | Population average of standard drinks daily | Percent of total attributable deaths | Percent of total attributable DALYs | Attributable deaths | Attributable DALYs     |
|----------|------|--------|----------|--------------------------------|--------------------------|---------------------------------------------|--------------------------------------|-------------------------------------|---------------------|------------------------|
| Eritrea  | 2016 | Female | 25 to 29 | 30%<br>(17-46%)                | 70%<br>(54-83%)          | 0.7<br>(0.28-1.4)                           | 2.5%<br>(1.1-4.6%)                   | 2.7%<br>(0.74-6%)                   | 15<br>(4.4-36)      | 1400<br>(640-2600)     |
| Eritrea  | 2016 | Female | 30 to 34 | 33%<br>(18-50%)                | 67%<br>(50-82%)          | 0.76<br>(0.33-1.5)                          | 2.7%<br>(1.2-5%)                     | 3.1%<br>(1.1-6.6%)                  | 23<br>(7.5-49)      | 1700<br>(730-3200)     |
| Eritrea  | 2016 | Female | 35 to 39 | 36%<br>(21-54%)                | 64%<br>(46-79%)          | 0.75<br>(0.31-1.5)                          | 3%<br>(1.2-5.9%)                     | 3.7%<br>(1.2-7.6%)                  | 29<br>(8.5-60)      | 1700<br>(650-3300)     |
| Eritrea  | 2016 | Female | 40 to 44 | 38%<br>(23-56%)                | 62%<br>(44-77%)          | 0.76<br>(0.3-1.5)                           | 3.1%<br>(1.3-6%)                     | 3.9%<br>(1.4-8%)                    | 28<br>(9.8-59)      | 1400<br>(580-2800)     |
| Eritrea  | 2016 | Female | 45 to 49 | 38%<br>(21-57%)                | 62%<br>(43-79%)          | 0.79<br>(0.29-1.7)                          | 3.6%<br>(1.2-7.4%)                   | 4.6%<br>(1.5-9.6%)                  | 34<br>(10-74)       | 1400<br>(490-3200)     |
| Eritrea  | 2016 | Female | 50 to 54 | 36%<br>(20-57%)                | 64%<br>(43-80%)          | 0.76<br>(0.27-1.6)                          | 3.9%<br>(1.4-8.4%)                   | 4.8%<br>(1.6-10%)                   | 42<br>(14-92)       | 1500<br>(530-3400)     |
| Eritrea  | 2016 | Female | 55 to 59 | 35%<br>(20-53%)                | 65%<br>(47-80%)          | 0.75<br>(0.28-1.7)                          | 3.6%<br>(0.87-8.5%)                  | 4.4%<br>(1.1-10%)                   | 46<br>(11-110)      | 1400<br>(340-3400)     |
| Eritrea  | 2016 | Female | 60 to 64 | 36%<br>(20-54%)                | 64%<br>(46-80%)          | 0.75<br>(0.28-1.6)                          | 3.1%<br>(0.83-7.6%)                  | 3.8%<br>(1-9.2%)                    | 45<br>(12-110)      | 1200<br>(320-2900)     |
| Eritrea  | 2016 | Female | 65 to 69 | 37%<br>(21-55%)                | 63%<br>(45-79%)          | 0.71<br>(0.27-1.5)                          | 2.9%<br>(0.6-6.7%)                   | 3.4%<br>(0.71-7.7%)                 | 50<br>(10-120)      | 1100<br>(240-2600)     |
| Eritrea  | 2016 | Female | 70 to 74 | 36%<br>(21-54%)                | 64%<br>(46-79%)          | 0.61<br>(0.22-1.3)                          | 2%<br>(0.057-5.6%)                   | 2.2%<br>(0.0011-6.3%)               | 34<br>(0.016-100)   | 620<br>(18-1800)       |
| Eritrea  | 2016 | Female | 75 to 79 | 33%<br>(19-53%)                | 67%<br>(47-81%)          | 0.52<br>(0.18-1.2)                          | 1.6%<br>(0.018-4.5%)                 | 1.8%<br>(0.028-5.3%)                | 24<br>(0.36-71)     | 340<br>(3.8-1000)      |
| Eritrea  | 2016 | Female | 80 to 84 | 31%<br>(16-50%)                | 69%<br>(50-84%)          | 0.46<br>(0.16-1)                            | 0.99%<br>(-0.26-3.1%)                | 1.1%<br>(-0.3-3.6%)                 | 12<br>(-3.1-37)     | 120<br>(-32-380)       |
| Eritrea  | 2016 | Female | 85 to 89 | 31%<br>(17-49%)                | 69%<br>(51-83%)          | 0.45<br>(0.15-1)                            | 0.72%<br>(-0.38-2.6%)                | 0.82%<br>(-0.47-3%)                 | 4.3<br>(-2.3-15)    | 31<br>(-17-110)        |
| Eritrea  | 2016 | Female | 90 to 94 | 34%<br>(19-51%)                | 66%<br>(49-81%)          | 0.46<br>(0.17-1)                            | 0.46%<br>(-0.55-2.3%)                | 0.5%<br>(-0.68-2.7%)                | 0.87<br>(-1.2-4.6)  | 4.7<br>(-5.4-23)       |
| Eritrea  | 2016 | Female | 95 plus  | 38%<br>(19-60%)                | 62%<br>(40-81%)          | 0.51<br>(0.15-1.2)                          | 0.82%<br>(-0.38-3%)                  | 0.88%<br>(-0.51-3.4%)               | 0.35<br>(-0.2-1.3)  | 1.3<br>(-0.57-4.6)     |
| Eritrea  | 2016 | Male   | All Ages | 32%<br>(26-40%)                | 68%<br>(60-74%)          | 0.53<br>(0.28-0.91)                         | 2.9%<br>(1.4-5%)                     | 3.7%<br>(1.4-6.8%)                  | 640<br>(240-1200)   | 32000<br>(15000-54000) |
| Eritrea  | 2016 | Male   | 15 to 19 | 28%<br>(17-44%)                | 72%<br>(56-83%)          | 0.51<br>(0.21-1.1)                          | 2.5%<br>(1.3-4.4%)                   | 2.6%<br>(0.75-5.5%)                 | 13<br>(3.5-28)      | 1400<br>(670-2500)     |
| Eritrea  | 2016 | Male   | 20 to 24 | 39%<br>(24-56%)                | 61%<br>(44-76%)          | 0.75<br>(0.3-1.5)                           | 5.1%<br>(2.2-9.2%)                   | 4.8%<br>(1.2-10%)                   | 33<br>(7.8-71)      | 3200<br>(1400-5800)    |
| Eritrea  | 2016 | Male   | 25 to 29 | 45%<br>(27-62%)                | 55%<br>(38-73%)          | 0.95<br>(0.4-1.8)                           | 6.5%<br>(2.8-12%)                    | 6.8%<br>(1.9-14%)                   | 56<br>(15-110)      | 4500<br>(2000-7900)    |
| Eritrea  | 2016 | Male   | 30 to 34 | 49%<br>(30-68%)                | 51%<br>(32-70%)          | 1.1<br>(0.52-2.1)                           | 6.9%<br>(2.9-12%)                    | 7.7%<br>(2.3-15%)                   | 70<br>(21-140)      | 4800<br>(2100-8600)    |
| Eritrea  | 2016 | Male   | 35 to 39 | 52%<br>(34-70%)                | 48%<br>(30-66%)          | 1.2<br>(0.54-2.4)                           | 7.1%<br>(3-13%)                      | 8.3%<br>(2.8-15%)                   | 73<br>(25-140)      | 4300<br>(1700-7500)    |
| Eritrea  | 2016 | Male   | 40 to 44 | 52%<br>(35-71%)                | 48%<br>(29-65%)          | 1.3<br>(0.55-2.4)                           | 7%<br>(2.9-12%)                      | 8.4%<br>(2.9-16%)                   | 65<br>(22-120)      | 3300<br>(1300-6100)    |

| Location | Year | Sex    | Age      | Prevalence of current drinkers | Prevalence of abstainers | Population average of standard drinks daily | Percent of total attributable deaths | Percent of total attributable DALYs | Attributable deaths   | Attributable DALYs       |
|----------|------|--------|----------|--------------------------------|--------------------------|---------------------------------------------|--------------------------------------|-------------------------------------|-----------------------|--------------------------|
| Eritrea  | 2016 | Male   | 45 to 49 | 53%<br>(34-71%)                | 47%<br>(29-66%)          | 1.3<br>(0.51-2.5)                           | 6.9%<br>(2.8-13%)                    | 8.2%<br>(3-15%)                     | 61<br>(21-120)        | 2700<br>(1100-5200)      |
| Eritrea  | 2016 | Male   | 50 to 54 | 54%<br>(35-72%)                | 46%<br>(28-65%)          | 1.2<br>(0.51-2.5)                           | 6.8%<br>(2.6-13%)                    | 8.1%<br>(2.9-16%)                   | 67<br>(23-130)        | 2600<br>(990-4900)       |
| Eritrea  | 2016 | Male   | 55 to 59 | 53%<br>(35-71%)                | 47%<br>(29-65%)          | 1.2<br>(0.48-2.3)                           | 6%<br>(2.3-12%)                      | 7.2%<br>(2.6-14%)                   | 67<br>(23-140)        | 2200<br>(830-4400)       |
| Eritrea  | 2016 | Male   | 60 to 64 | 51%<br>(32-71%)                | 49%<br>(29-68%)          | 1<br>(0.4-2.1)                              | 4.6%<br>(1.7-9.2%)                   | 5.3%<br>(2-11%)                     | 55<br>(19-110)        | 1500<br>(600-3000)       |
| Eritrea  | 2016 | Male   | 65 to 69 | 49%<br>(30-67%)                | 51%<br>(33-70%)          | 0.81<br>(0.35-1.6)                          | 2.9%<br>(0.85-6.5%)                  | 3.3%<br>(0.9-7.5%)                  | 39<br>(10-87)         | 900<br>(260-2000)        |
| Eritrea  | 2016 | Male   | 70 to 74 | 46%<br>(29-64%)                | 54%<br>(36-71%)          | 0.64<br>(0.24-1.4)                          | 1.8%<br>(0.43-4.5%)                  | 2.1%<br>(0.44-5.2%)                 | 22<br>(4.4-54)        | 400<br>(93-990)          |
| Eritrea  | 2016 | Male   | 75 to 79 | 43%<br>(27-62%)                | 57%<br>(38-73%)          | 0.52<br>(0.19-1.1)                          | 1.4%<br>(0.27-3.7%)                  | 1.6%<br>(0.26-4.2%)                 | 12<br>(1.7-31)        | 170<br>(31-430)          |
| Eritrea  | 2016 | Male   | 80 to 84 | 40%<br>(24-60%)                | 60%<br>(40-76%)          | 0.43<br>(0.17-0.89)                         | 0.99%<br>(0.11-2.5%)                 | 1.1%<br>(0.03-2.8%)                 | 4.3<br>(0.12-12)      | 47<br>(5.4-120)          |
| Eritrea  | 2016 | Male   | 85 to 89 | 38%<br>(22-55%)                | 62%<br>(45-78%)          | 0.36<br>(0.14-0.78)                         | 0.82%<br>(0.1-2%)                    | 0.87%<br>(0.0094-2.2%)              | 1.5<br>(0.015-3.8)    | 12<br>(1.4-29)           |
| Eritrea  | 2016 | Male   | 90 to 94 | 38%<br>(23-57%)                | 62%<br>(43-77%)          | 0.33<br>(0.13-0.71)                         | 0.52%<br>(-0.053-1.4%)               | 0.48%<br>(-0.22-1.5%)               | 0.25<br>(-0.11-0.82)  | 1.6<br>(-0.17-4.4)       |
| Eritrea  | 2016 | Male   | 95 plus  | 42%<br>(21-64%)                | 58%<br>(36-79%)          | 0.33<br>(0.11-0.77)                         | 0.73%<br>(-0.073-1.9%)               | 0.67%<br>(-0.28-2%)                 | 0.065<br>(-0.029-0.2) | 0.28<br>(-0.028-0.74)    |
| Ethiopia | 1990 | Female | All Ages | 29%<br>(25-34%)                | 71%<br>(66-75%)          | 0.33<br>(0.29-0.37)                         | 0.68%<br>(0.083-1.3%)                | 1.1%<br>(-0.011-2.3%)               | 4200<br>(-45-8900)    | 160000<br>(20000-320000) |
| Ethiopia | 1990 | Female | 15 to 19 | 29%<br>(21-38%)                | 71%<br>(62-79%)          | 0.36<br>(0.24-0.52)                         | 0.7%<br>(0.046-1.5%)                 | 0.69%<br>(-0.18-1.8%)               | 55<br>(-15-140)       | 5400<br>(350-12000)      |
| Ethiopia | 1990 | Female | 20 to 24 | 37%<br>(26-48%)                | 63%<br>(52-74%)          | 0.49<br>(0.31-0.68)                         | 1.2%<br>(0.072-2.6%)                 | 1.2%<br>(-0.41-2.9%)                | 110<br>(-40-270)      | 10000<br>(540-21000)     |
| Ethiopia | 1990 | Female | 25 to 29 | 39%<br>(28-51%)                | 61%<br>(49-72%)          | 0.62<br>(0.43-0.86)                         | 1.9%<br>(0.46-3.6%)                  | 2%<br>(0.1-4.1%)                    | 200<br>(9.3-390)      | 14000<br>(3300-26000)    |
| Ethiopia | 1990 | Female | 30 to 34 | 42%<br>(30-54%)                | 58%<br>(46-70%)          | 0.69<br>(0.47-0.96)                         | 2.3%<br>(0.6-4.2%)                   | 2.5%<br>(0.43-5%)                   | 260<br>(44-540)       | 17000<br>(4500-32000)    |
| Ethiopia | 1990 | Female | 35 to 39 | 45%<br>(33-56%)                | 55%<br>(44-67%)          | 0.69<br>(0.46-0.95)                         | 2.3%<br>(0.36-4.6%)                  | 2.6%<br>(0.2-5.6%)                  | 310<br>(24-660)       | 17000<br>(2600-34000)    |
| Ethiopia | 1990 | Female | 40 to 44 | 47%<br>(36-57%)                | 53%<br>(43-64%)          | 0.71<br>(0.49-0.95)                         | 2.3%<br>(0.47-4.3%)                  | 2.7%<br>(0.44-5.2%)                 | 340<br>(53-660)       | 17000<br>(3200-31000)    |
| Ethiopia | 1990 | Female | 45 to 49 | 47%<br>(35-58%)                | 53%<br>(42-65%)          | 0.72<br>(0.5-0.99)                          | 2.4%<br>(0.015-5%)                   | 2.9%<br>(-0.09-6.1%)                | 390<br>(-13-820)      | 16000<br>(91-34000)      |
| Ethiopia | 1990 | Female | 50 to 54 | 45%<br>(34-56%)                | 55%<br>(44-66%)          | 0.69<br>(0.47-0.97)                         | 2.9%<br>(0.13-6.1%)                  | 3.4%<br>(0.081-7.3%)                | 520<br>(13-1100)      | 19000<br>(810-41000)     |
| Ethiopia | 1990 | Female | 55 to 59 | 43%<br>(31-56%)                | 57%<br>(44-69%)          | 0.71<br>(0.45-1)                            | 2.8%<br>(-0.059-6.3%)                | 3.3%<br>(-0.046-7.4%)               | 610<br>(-7.9-1400)    | 19000<br>(-360-42000)    |
| Ethiopia | 1990 | Female | 60 to 64 | 43%<br>(30-56%)                | 57%<br>(44-70%)          | 0.71<br>(0.46-1)                            | 2.3%<br>(0.11-5.2%)                  | 2.7%<br>(0.15-6%)                   | 520<br>(30-1100)      | 14000<br>(660-30000)     |



| Location | Year | Sex    | Age      | Prevalence of current drinkers | Prevalence of abstainers | Population average of standard drinks daily | Percent of total attributable deaths | Percent of total attributable DALYs | Attributable deaths   | Attributable DALYs        |
|----------|------|--------|----------|--------------------------------|--------------------------|---------------------------------------------|--------------------------------------|-------------------------------------|-----------------------|---------------------------|
| Ethiopia | 1990 | Female | 65 to 69 | 44%<br>(33-55%)                | 56%<br>(45-67%)          | 0.67<br>(0.45-0.93)                         | 1.8%<br>(-0.3-4.4%)                  | 2.1%<br>(-0.32-4.9%)                | 480<br>(-73-1200)     | 10000<br>(-1600-26000)    |
| Ethiopia | 1990 | Female | 70 to 74 | 42%<br>(31-54%)                | 58%<br>(46-69%)          | 0.58<br>(0.37-0.85)                         | 0.9%<br>(-1.1-3%)                    | 1%<br>(-1.2-3.4%)                   | 220<br>(-270-740)     | 3900<br>(-4700-13000)     |
| Ethiopia | 1990 | Female | 75 to 79 | 39%<br>(26-54%)                | 61%<br>(46-74%)          | 0.48<br>(0.28-0.74)                         | 0.62%<br>(-1-2.4%)                   | 0.7%<br>(-1.1-2.7%)                 | 130<br>(-210-510)     | 1800<br>(-3000-6900)      |
| Ethiopia | 1990 | Female | 80 to 84 | 38%<br>(24-52%)                | 62%<br>(48-76%)          | 0.43<br>(0.26-0.65)                         | 0.18%<br>(-1.2-1.6%)                 | 0.22%<br>(-1.4-1.8%)                | 26<br>(-160-210)      | 250<br>(-1700-2100)       |
| Ethiopia | 1990 | Female | 85 to 89 | 38%<br>(25-51%)                | 62%<br>(49-75%)          | 0.41<br>(0.24-0.63)                         | -0.0026%<br>(-1.2-1.3%)              | 0.011%<br>(-1.4-1.5%)               | 0.59<br>(-74-80)      | -0.52<br>(-530-560)       |
| Ethiopia | 1990 | Female | 90 to 94 | 39%<br>(27-53%)                | 61%<br>(47-73%)          | 0.4<br>(0.23-0.62)                          | -0.19%<br>(-1.3-0.97%)               | -0.23%<br>(-1.5-1.2%)               | -4<br>(-26-20)        | -19<br>(-130-100)         |
| Ethiopia | 1990 | Female | 95 plus  | 42%<br>(26-61%)                | 58%<br>(39-74%)          | 0.4<br>(0.19-0.68)                          | 0.1%<br>(-1.1-1.2%)                  | 0.079%<br>(-1.4-1.5%)               | 0.31<br>(-5.3-5.7)    | 1.6<br>(-17-19)           |
| Ethiopia | 1990 | Male   | All Ages | 34%<br>(28-39%)                | 66%<br>(61-72%)          | 0.63<br>(0.57-0.7)                          | 2.3%<br>(1.5-3.2%)                   | 3.5%<br>(2-5.1%)                    | 16000<br>(9300-23000) | 670000<br>(420000-940000) |
| Ethiopia | 1990 | Male   | 15 to 19 | 30%<br>(21-41%)                | 70%<br>(59-79%)          | 0.56<br>(0.35-0.84)                         | 2.1%<br>(1-3.5%)                     | 1.9%<br>(0.59-3.5%)                 | 250<br>(76-460)       | 24000<br>(11000-39000)    |
| Ethiopia | 1990 | Male   | 20 to 24 | 43%<br>(31-54%)                | 57%<br>(46-69%)          | 0.86<br>(0.58-1.2)                          | 3.8%<br>(1.8-6.2%)                   | 3.3%<br>(1-6%)                      | 560<br>(180-1000)     | 49000<br>(23000-80000)    |
| Ethiopia | 1990 | Male   | 25 to 29 | 48%<br>(35-59%)                | 52%<br>(41-65%)          | 1.2<br>(0.83-1.6)                           | 6.3%<br>(3.6-9.6%)                   | 6.1%<br>(2.9-10%)                   | 900<br>(440-1500)     | 65000<br>(37000-100000)   |
| Ethiopia | 1990 | Male   | 30 to 34 | 51%<br>(38-62%)                | 49%<br>(38-62%)          | 1.4<br>(0.98-1.9)                           | 8.2%<br>(4.8-12%)                    | 8.5%<br>(4.5-13%)                   | 1100<br>(610-1800)    | 72000<br>(42000-110000)   |
| Ethiopia | 1990 | Male   | 35 to 39 | 53%<br>(40-63%)                | 47%<br>(37-60%)          | 1.5<br>(1-2)                                | 9.4%<br>(5.6-14%)                    | 10%<br>(5.7-15%)                    | 1400<br>(770-2100)    | 77000<br>(45000-110000)   |
| Ethiopia | 1990 | Male   | 40 to 44 | 55%<br>(43-64%)                | 45%<br>(36-57%)          | 1.5<br>(1.1-2)                              | 9.8%<br>(5.8-14%)                    | 11%<br>(6.1-16%)                    | 1700<br>(920-2600)    | 81000<br>(47000-120000)   |
| Ethiopia | 1990 | Male   | 45 to 49 | 57%<br>(44-66%)                | 43%<br>(34-56%)          | 1.5<br>(1-2)                                | 8.9%<br>(4.8-14%)                    | 9.8%<br>(5.2-15%)                   | 1600<br>(850-2600)    | 70000<br>(37000-110000)   |
| Ethiopia | 1990 | Male   | 50 to 54 | 59%<br>(48-69%)                | 41%<br>(31-52%)          | 1.5<br>(1.1-2)                              | 9.3%<br>(4.7-15%)                    | 10%<br>(5.2-16%)                    | 1800<br>(900-2900)    | 68000<br>(34000-110000)   |
| Ethiopia | 1990 | Male   | 55 to 59 | 60%<br>(49-70%)                | 40%<br>(30-51%)          | 1.7<br>(1.1-2.2)                            | 9.6%<br>(5.1-14%)                    | 11%<br>(5.6-16%)                    | 2100<br>(1100-3200)   | 67000<br>(35000-100000)   |
| Ethiopia | 1990 | Male   | 60 to 64 | 56%<br>(43-67%)                | 44%<br>(33-57%)          | 1.5<br>(1-2.1)                              | 7.6%<br>(4-12%)                      | 8.4%<br>(4.4-13%)                   | 1700<br>(860-2600)    | 45000<br>(24000-70000)    |
| Ethiopia | 1990 | Male   | 65 to 69 | 49%<br>(36-61%)                | 51%<br>(39-64%)          | 1.2<br>(0.76-1.6)                           | 5.1%<br>(2.4-8.2%)                   | 5.6%<br>(2.6-9.2%)                  | 1200<br>(530-2000)    | 27000<br>(13000-45000)    |
| Ethiopia | 1990 | Male   | 70 to 74 | 45%<br>(32-57%)                | 55%<br>(43-68%)          | 0.97<br>(0.61-1.4)                          | 3.6%<br>(1.1-6.4%)                   | 4%<br>(1.2-7.2%)                    | 870<br>(250-1600)     | 16000<br>(4700-29000)     |
| Ethiopia | 1990 | Male   | 75 to 79 | 44%<br>(30-58%)                | 56%<br>(42-70%)          | 0.85<br>(0.5-1.3)                           | 2.8%<br>(0.56-5.5%)                  | 3.1%<br>(0.59-6.2%)                 | 580<br>(110-1200)     | 8100<br>(1600-16000)      |
| Ethiopia | 1990 | Male   | 80 to 84 | 42%<br>(28-56%)                | 58%<br>(44-72%)          | 0.69<br>(0.42-1)                            | 1.9%<br>(0.2-4%)                     | 2.1%<br>(0.12-4.5%)                 | 220<br>(13-470)       | 2300<br>(230-4900)        |

| Location | Year | Sex    | Age      | Prevalence of current drinkers | Prevalence of abstainers | Population average of standard drinks daily | Percent of total attributable deaths | Percent of total attributable DALYs | Attributable deaths   | Attributable DALYs        |
|----------|------|--------|----------|--------------------------------|--------------------------|---------------------------------------------|--------------------------------------|-------------------------------------|-----------------------|---------------------------|
| Ethiopia | 1990 | Male   | 85 to 89 | 40%<br>(27-54%)                | 60%<br>(46-73%)          | 0.55<br>(0.31-0.85)                         | 1.3%<br>(-0.037-2.9%)                | 1.4%<br>(-0.15-3.3%)                | 49<br>(-5.3-120)      | 380<br>(-11-880)          |
| Ethiopia | 1990 | Male   | 90 to 94 | 41%<br>(27-56%)                | 59%<br>(44-73%)          | 0.47<br>(0.27-0.74)                         | 0.73%<br>(-0.3-1.8%)                 | 0.7%<br>(-0.5-2%)                   | 6.9<br>(-4.9-20)      | 42<br>(-18-110)           |
| Ethiopia | 1990 | Male   | 95 plus  | 45%<br>(26-64%)                | 55%<br>(36-74%)          | 0.42<br>(0.18-0.75)                         | 0.81%<br>(-0.69-2.3%)                | 0.75%<br>(-1.1-2.6%)                | 1.3<br>(-1.1-4.3)     | 5.5<br>(-4.7-16)          |
| Ethiopia | 1995 | Female | All Ages | 29%<br>(24-33%)                | 71%<br>(67-76%)          | 0.34<br>(0.3-0.38)                          | 0.74%<br>(0.18-1.3%)                 | 1.1%<br>(0.11-2.2%)                 | 4700<br>(470-9400)    | 190000<br>(44000-340000)  |
| Ethiopia | 1995 | Female | 15 to 19 | 29%<br>(20-38%)                | 71%<br>(62-80%)          | 0.37<br>(0.25-0.55)                         | 0.83%<br>(0.16-1.7%)                 | 0.89%<br>(-0.093-2.1%)              | 64<br>(-6.5-150)      | 6400<br>(1300-13000)      |
| Ethiopia | 1995 | Female | 20 to 24 | 36%<br>(25-47%)                | 64%<br>(53-75%)          | 0.51<br>(0.34-0.7)                          | 1.3%<br>(0.19-2.5%)                  | 1.2%<br>(-0.22-2.9%)                | 120<br>(-22-290)      | 11000<br>(1700-22000)     |
| Ethiopia | 1995 | Female | 25 to 29 | 39%<br>(28-51%)                | 61%<br>(49-72%)          | 0.65<br>(0.44-0.89)                         | 1.8%<br>(0.56-3.2%)                  | 1.9%<br>(0.27-3.7%)                 | 220<br>(33-440)       | 17000<br>(5100-30000)     |
| Ethiopia | 1995 | Female | 30 to 34 | 42%<br>(29-54%)                | 58%<br>(46-71%)          | 0.72<br>(0.47-0.98)                         | 2.1%<br>(0.74-3.8%)                  | 2.3%<br>(0.49-4.4%)                 | 280<br>(64-570)       | 18000<br>(6300-34000)     |
| Ethiopia | 1995 | Female | 35 to 39 | 45%<br>(32-55%)                | 55%<br>(45-68%)          | 0.72<br>(0.48-1)                            | 2.2%<br>(0.59-4.1%)                  | 2.5%<br>(0.45-4.8%)                 | 350<br>(58-690)       | 19000<br>(4900-37000)     |
| Ethiopia | 1995 | Female | 40 to 44 | 47%<br>(36-57%)                | 53%<br>(43-64%)          | 0.74<br>(0.5-1)                             | 2.3%<br>(0.59-4%)                    | 2.6%<br>(0.55-4.9%)                 | 370<br>(82-690)       | 18000<br>(4800-32000)     |
| Ethiopia | 1995 | Female | 45 to 49 | 47%<br>(35-58%)                | 53%<br>(42-65%)          | 0.75<br>(0.52-1.1)                          | 2.5%<br>(0.37-4.7%)                  | 2.9%<br>(0.39-5.7%)                 | 470<br>(61-960)       | 20000<br>(3000-39000)     |
| Ethiopia | 1995 | Female | 50 to 54 | 45%<br>(34-56%)                | 55%<br>(44-66%)          | 0.72<br>(0.48-1)                            | 2.9%<br>(0.35-5.7%)                  | 3.4%<br>(0.35-6.7%)                 | 620<br>(64-1300)      | 23000<br>(2700-45000)     |
| Ethiopia | 1995 | Female | 55 to 59 | 42%<br>(30-55%)                | 58%<br>(45-70%)          | 0.73<br>(0.46-1)                            | 2.8%<br>(0.22-5.9%)                  | 3.3%<br>(0.24-6.7%)                 | 640<br>(42-1400)      | 20000<br>(1500-42000)     |
| Ethiopia | 1995 | Female | 60 to 64 | 43%<br>(30-55%)                | 57%<br>(45-70%)          | 0.74<br>(0.47-1.1)                          | 2.4%<br>(0.25-5%)                    | 2.7%<br>(0.31-5.9%)                 | 630<br>(74-1300)      | 16000<br>(1800-35000)     |
| Ethiopia | 1995 | Female | 65 to 69 | 44%<br>(32-55%)                | 56%<br>(45-68%)          | 0.7<br>(0.47-0.96)                          | 1.9%<br>(-0.08-4.1%)                 | 2.1%<br>(-0.09-4.7%)                | 510<br>(-20-1200)     | 11000<br>(-440-25000)     |
| Ethiopia | 1995 | Female | 70 to 74 | 42%<br>(31-54%)                | 58%<br>(46-69%)          | 0.6<br>(0.38-0.87)                          | 0.94%<br>(-0.92-2.9%)                | 1%<br>(-1-3.3%)                     | 270<br>(-270-870)     | 4900<br>(-4700-15000)     |
| Ethiopia | 1995 | Female | 75 to 79 | 39%<br>(26-53%)                | 61%<br>(47-74%)          | 0.5<br>(0.3-0.76)                           | 0.65%<br>(-0.83-2.3%)                | 0.73%<br>(-0.94-2.6%)               | 150<br>(-190-530)     | 2000<br>(-2600-7300)      |
| Ethiopia | 1995 | Female | 80 to 84 | 38%<br>(24-51%)                | 62%<br>(49-76%)          | 0.45<br>(0.28-0.68)                         | 0.2%<br>(-1.1-1.5%)                  | 0.24%<br>(-1.2-1.7%)                | 33<br>(-170-230)      | 320<br>(-1700-2300)       |
| Ethiopia | 1995 | Female | 85 to 89 | 37%<br>(25-50%)                | 63%<br>(50-75%)          | 0.42<br>(0.24-0.63)                         | -0.0021%<br>(-1.2-1.1%)              | 0.0082%<br>(-1.3-1.3%)              | 0.55<br>(-83-80)      | -0.33<br>(-610-570)       |
| Ethiopia | 1995 | Female | 90 to 94 | 39%<br>(26-53%)                | 61%<br>(47-74%)          | 0.41<br>(0.24-0.65)                         | -0.2%<br>(-1.2-0.81%)                | -0.25%<br>(-1.4-0.98%)              | -4.8<br>(-28-19)      | -23<br>(-130-92)          |
| Ethiopia | 1995 | Female | 95 plus  | 42%<br>(25-60%)                | 58%<br>(40-75%)          | 0.41<br>(0.21-0.72)                         | 0.1%<br>(-1.1-1.2%)                  | 0.075%<br>(-1.2-1.4%)               | 0.41<br>(-6.7-7.7)    | 2.2<br>(-22-26)           |
| Ethiopia | 1995 | Male   | All Ages | 33%<br>(28-38%)                | 67%<br>(62-72%)          | 0.64<br>(0.59-0.7)                          | 2.3%<br>(1.6-3.1%)                   | 3.5%<br>(2.2-4.9%)                  | 16000<br>(9600-22000) | 660000<br>(440000-900000) |

| Location | Year | Sex    | Age      | Prevalence of current drinkers | Prevalence of abstainers | Population average of standard drinks daily | Percent of total attributable deaths | Percent of total attributable DALYs | Attributable deaths  | Attributable DALYs        |
|----------|------|--------|----------|--------------------------------|--------------------------|---------------------------------------------|--------------------------------------|-------------------------------------|----------------------|---------------------------|
| Ethiopia | 1995 | Male   | 15 to 19 | 30%<br>(21-41%)                | 70%<br>(59-79%)          | 0.58<br>(0.37-0.85)                         | 3%<br>(1.6-4.8%)                     | 2.9%<br>(1-5.2%)                    | 250<br>(86-460)      | 25000<br>(13000-40000)    |
| Ethiopia | 1995 | Male   | 20 to 24 | 42%<br>(30-54%)                | 58%<br>(46-70%)          | 0.88<br>(0.6-1.2)                           | 5.6%<br>(3.1-8.7%)                   | 5.2%<br>(2.1-8.9%)                  | 620<br>(240-1100)    | 56000<br>(31000-86000)    |
| Ethiopia | 1995 | Male   | 25 to 29 | 47%<br>(35-59%)                | 53%<br>(41-65%)          | 1.2<br>(0.86-1.6)                           | 7.5%<br>(4.6-11%)                    | 7.6%<br>(4-12%)                     | 930<br>(500-1500)    | 69000<br>(43000-100000)   |
| Ethiopia | 1995 | Male   | 30 to 34 | 51%<br>(38-62%)                | 49%<br>(38-62%)          | 1.5<br>(1-1.9)                              | 8.5%<br>(5.3-12%)                    | 9%<br>(5-14%)                       | 1100<br>(620-1700)   | 72000<br>(44000-100000)   |
| Ethiopia | 1995 | Male   | 35 to 39 | 53%<br>(40-63%)                | 47%<br>(37-60%)          | 1.6<br>(1.1-2.2)                            | 9.1%<br>(5.6-13%)                    | 9.9%<br>(5.7-15%)                   | 1300<br>(760-2000)   | 75000<br>(46000-110000)   |
| Ethiopia | 1995 | Male   | 40 to 44 | 55%<br>(43-64%)                | 45%<br>(36-57%)          | 1.6<br>(1.1-2.1)                            | 9.1%<br>(5.4-13%)                    | 10%<br>(5.7-15%)                    | 1500<br>(860-2200)   | 74000<br>(44000-110000)   |
| Ethiopia | 1995 | Male   | 45 to 49 | 56%<br>(43-66%)                | 44%<br>(34-57%)          | 1.5<br>(1.1-2.1)                            | 8.3%<br>(4.8-12%)                    | 9.3%<br>(5.1-14%)                   | 1500<br>(830-2400)   | 65000<br>(37000-99000)    |
| Ethiopia | 1995 | Male   | 50 to 54 | 59%<br>(48-69%)                | 41%<br>(31-52%)          | 1.6<br>(1.1-2.2)                            | 8.8%<br>(4.7-14%)                    | 10%<br>(5.1-15%)                    | 1700<br>(860-2700)   | 65000<br>(34000-100000)   |
| Ethiopia | 1995 | Male   | 55 to 59 | 60%<br>(49-70%)                | 40%<br>(30-51%)          | 1.7<br>(1.2-2.3)                            | 9.2%<br>(5.2-13%)                    | 10%<br>(5.7-15%)                    | 1900<br>(1000-2800)  | 61000<br>(34000-91000)    |
| Ethiopia | 1995 | Male   | 60 to 64 | 56%<br>(43-68%)                | 44%<br>(32-57%)          | 1.6<br>(1.1-2.2)                            | 7.2%<br>(4.2-11%)                    | 8.1%<br>(4.6-12%)                   | 1800<br>(980-2800)   | 48000<br>(28000-75000)    |
| Ethiopia | 1995 | Male   | 65 to 69 | 48%<br>(36-61%)                | 52%<br>(39-64%)          | 1.2<br>(0.79-1.6)                           | 4.9%<br>(2.4-7.7%)                   | 5.5%<br>(2.6-8.7%)                  | 1100<br>(480-1700)   | 24000<br>(12000-39000)    |
| Ethiopia | 1995 | Male   | 70 to 74 | 44%<br>(32-56%)                | 56%<br>(44-68%)          | 1<br>(0.63-1.4)                             | 3.5%<br>(1.3-6.2%)                   | 3.9%<br>(1.4-7.1%)                  | 850<br>(310-1500)    | 15000<br>(5800-28000)     |
| Ethiopia | 1995 | Male   | 75 to 79 | 43%<br>(30-57%)                | 57%<br>(43-70%)          | 0.88<br>(0.53-1.3)                          | 2.8%<br>(0.75-5.2%)                  | 3.1%<br>(0.79-6%)                   | 680<br>(170-1300)    | 9500<br>(2600-18000)      |
| Ethiopia | 1995 | Male   | 80 to 84 | 42%<br>(28-56%)                | 58%<br>(44-72%)          | 0.72<br>(0.43-1.1)                          | 1.9%<br>(0.37-3.8%)                  | 2.1%<br>(0.32-4.2%)                 | 290<br>(42-590)      | 3100<br>(590-6100)        |
| Ethiopia | 1995 | Male   | 85 to 89 | 40%<br>(27-55%)                | 60%<br>(45-73%)          | 0.57<br>(0.33-0.89)                         | 1.3%<br>(0.14-2.8%)                  | 1.4%<br>(0.052-3.1%)                | 66<br>(2.4-150)      | 520<br>(54-1100)          |
| Ethiopia | 1995 | Male   | 90 to 94 | 41%<br>(27-56%)                | 59%<br>(44-73%)          | 0.48<br>(0.28-0.78)                         | 0.73%<br>(-0.2-1.8%)                 | 0.7%<br>(-0.39-2%)                  | 8.1<br>(-4.6-23)     | 49<br>(-14-120)           |
| Ethiopia | 1995 | Male   | 95 plus  | 44%<br>(25-63%)                | 56%<br>(37-75%)          | 0.42<br>(0.19-0.74)                         | 0.83%<br>(-0.55-2.3%)                | 0.77%<br>(-0.91-2.6%)               | 1.9<br>(-2.3-6.5)    | 8.3<br>(-5.5-23)          |
| Ethiopia | 2000 | Female | All Ages | 24%<br>(21-28%)                | 76%<br>(72-79%)          | 0.36<br>(0.32-0.41)                         | 0.91%<br>(0.47-1.4%)                 | 1.5%<br>(0.61-2.4%)                 | 6500<br>(2700-11000) | 240000<br>(130000-370000) |
| Ethiopia | 2000 | Female | 15 to 19 | 25%<br>(20-31%)                | 75%<br>(69-80%)          | 0.4<br>(0.28-0.56)                          | 0.84%<br>(0.33-1.5%)                 | 0.87%<br>(0.16-1.7%)                | 83<br>(16-170)       | 8100<br>(3100-14000)      |
| Ethiopia | 2000 | Female | 20 to 24 | 33%<br>(27-40%)                | 67%<br>(60-73%)          | 0.58<br>(0.42-0.77)                         | 1.4%<br>(0.51-2.4%)                  | 1.3%<br>(0.17-2.7%)                 | 160<br>(24-320)      | 14000<br>(5500-25000)     |
| Ethiopia | 2000 | Female | 25 to 29 | 35%<br>(29-41%)                | 65%<br>(59-71%)          | 0.71<br>(0.54-0.91)                         | 1.8%<br>(0.86-3%)                    | 1.8%<br>(0.67-3.3%)                 | 270<br>(100-480)     | 20000<br>(9700-33000)     |
| Ethiopia | 2000 | Female | 30 to 34 | 35%<br>(28-42%)                | 65%<br>(58-72%)          | 0.73<br>(0.54-0.96)                         | 1.9%<br>(0.97-3.2%)                  | 2%<br>(0.89-3.6%)                   | 330<br>(140-570)     | 21000<br>(11000-35000)    |

| Location | Year | Sex    | Age      | Prevalence of current drinkers | Prevalence of abstainers | Population average of standard drinks daily | Percent of total attributable deaths | Percent of total attributable DALYs | Attributable deaths    | Attributable DALYs        |
|----------|------|--------|----------|--------------------------------|--------------------------|---------------------------------------------|--------------------------------------|-------------------------------------|------------------------|---------------------------|
| Ethiopia | 2000 | Female | 35 to 39 | 36%<br>(29-43%)                | 64%<br>(57-71%)          | 0.7<br>(0.5-0.93)                           | 2.1%<br>(0.99-3.4%)                  | 2.3%<br>(0.98-3.9%)                 | 380<br>(150-650)       | 21000<br>(9600-35000)     |
| Ethiopia | 2000 | Female | 40 to 44 | 37%<br>(29-45%)                | 63%<br>(55-71%)          | 0.71<br>(0.5-0.96)                          | 2.2%<br>(1.1-3.7%)                   | 2.5%<br>(1.2-4.3%)                  | 430<br>(190-750)       | 21000<br>(9900-35000)     |
| Ethiopia | 2000 | Female | 45 to 49 | 40%<br>(32-47%)                | 60%<br>(53-68%)          | 0.78<br>(0.56-1.1)                          | 2.8%<br>(1.2-4.7%)                   | 3.2%<br>(1.3-5.6%)                  | 550<br>(220-970)       | 23000<br>(9500-40000)     |
| Ethiopia | 2000 | Female | 50 to 54 | 41%<br>(33-49%)                | 59%<br>(51-67%)          | 0.81<br>(0.58-1.1)                          | 3.5%<br>(1.4-6%)                     | 4.1%<br>(1.6-7.1%)                  | 850<br>(340-1500)      | 31000<br>(12000-52000)    |
| Ethiopia | 2000 | Female | 55 to 59 | 41%<br>(32-51%)                | 59%<br>(49-68%)          | 0.89<br>(0.62-1.2)                          | 3.6%<br>(1.5-6.3%)                   | 4.3%<br>(1.7-7.5%)                  | 940<br>(380-1600)      | 29000<br>(12000-51000)    |
| Ethiopia | 2000 | Female | 60 to 64 | 42%<br>(31-52%)                | 58%<br>(48-69%)          | 0.89<br>(0.61-1.2)                          | 3.1%<br>(1.2-5.4%)                   | 3.5%<br>(1.3-6.2%)                  | 830<br>(310-1500)      | 22000<br>(8100-39000)     |
| Ethiopia | 2000 | Female | 65 to 69 | 40%<br>(31-50%)                | 60%<br>(50-69%)          | 0.79<br>(0.56-1.1)                          | 2.5%<br>(0.82-4.6%)                  | 2.9%<br>(0.94-5.2%)                 | 790<br>(250-1500)      | 17000<br>(5600-32000)     |
| Ethiopia | 2000 | Female | 70 to 74 | 37%<br>(28-48%)                | 63%<br>(52-72%)          | 0.65<br>(0.42-0.94)                         | 1.5%<br>(-0.2-3.4%)                  | 1.6%<br>(-0.27-3.9%)                | 430<br>(-69-1000)      | 7700<br>(-1100-18000)     |
| Ethiopia | 2000 | Female | 75 to 79 | 36%<br>(23-49%)                | 64%<br>(51-77%)          | 0.55<br>(0.33-0.85)                         | 1.1%<br>(-0.31-2.7%)                 | 1.2%<br>(-0.36-3%)                  | 300<br>(-84-740)       | 4100<br>(-1200-10000)     |
| Ethiopia | 2000 | Female | 80 to 84 | 37%<br>(24-51%)                | 63%<br>(49-76%)          | 0.53<br>(0.33-0.81)                         | 0.55%<br>(-0.66-1.9%)                | 0.64%<br>(-0.74-2.2%)               | 100<br>(-120-360)      | 1000<br>(-1300-3600)      |
| Ethiopia | 2000 | Female | 85 to 89 | 37%<br>(25-51%)                | 63%<br>(49-75%)          | 0.52<br>(0.32-0.78)                         | 0.27%<br>(-0.86-1.4%)                | 0.32%<br>(-0.96-1.7%)               | 23<br>(-69-120)        | 160<br>(-510-870)         |
| Ethiopia | 2000 | Female | 90 to 94 | 39%<br>(27-53%)                | 61%<br>(47-73%)          | 0.51<br>(0.3-0.81)                          | 0.0094%<br>(-1.1-1.1%)               | -0.0044%<br>(-1.2-1.3%)             | -0.1<br>(-28-30)       | 1.4<br>(-140-150)         |
| Ethiopia | 2000 | Female | 95 plus  | 42%<br>(26-60%)                | 58%<br>(40-74%)          | 0.5<br>(0.25-0.9)                           | 0.33%<br>(-0.78-1.5%)                | 0.33%<br>(-0.99-1.8%)               | 1.9<br>(-5.9-10)       | 7.5<br>(-18-35)           |
| Ethiopia | 2000 | Male   | All Ages | 32%<br>(28-36%)                | 68%<br>(64-72%)          | 0.77<br>(0.69-0.84)                         | 2.5%<br>(1.9-3.2%)                   | 3.8%<br>(2.7-4.9%)                  | 18000<br>(12000-23000) | 750000<br>(550000-950000) |
| Ethiopia | 2000 | Male   | 15 to 19 | 26%<br>(19-33%)                | 74%<br>(67-81%)          | 0.61<br>(0.4-0.86)                          | 2.4%<br>(1.5-3.6%)                   | 2.2%<br>(1-3.7%)                    | 290<br>(140-490)       | 29000<br>(18000-44000)    |
| Ethiopia | 2000 | Male   | 20 to 24 | 40%<br>(33-48%)                | 60%<br>(52-67%)          | 1<br>(0.74-1.4)                             | 4.6%<br>(2.8-6.6%)                   | 3.9%<br>(2.1-6.3%)                  | 730<br>(390-1200)      | 66000<br>(40000-96000)    |
| Ethiopia | 2000 | Male   | 25 to 29 | 47%<br>(40-54%)                | 53%<br>(46-60%)          | 1.5<br>(1.1-1.9)                            | 6.4%<br>(4.2-8.8%)                   | 6.1%<br>(3.6-8.9%)                  | 1200<br>(690-1700)     | 87000<br>(57000-120000)   |
| Ethiopia | 2000 | Male   | 30 to 34 | 49%<br>(42-56%)                | 51%<br>(44-58%)          | 1.7<br>(1.3-2.2)                            | 7.1%<br>(4.9-9.6%)                   | 7.2%<br>(4.5-10%)                   | 1300<br>(810-1800)     | 84000<br>(57000-110000)   |
| Ethiopia | 2000 | Male   | 35 to 39 | 51%<br>(43-58%)                | 49%<br>(42-57%)          | 1.9<br>(1.4-2.4)                            | 7.8%<br>(5.2-11%)                    | 8.4%<br>(5.3-12%)                   | 1400<br>(890-2000)     | 79000<br>(53000-110000)   |
| Ethiopia | 2000 | Male   | 40 to 44 | 54%<br>(47-62%)                | 46%<br>(38-53%)          | 2<br>(1.4-2.5)                              | 8.6%<br>(5.7-11%)                    | 9.4%<br>(6-13%)                     | 1600<br>(1000-2200)    | 78000<br>(51000-110000)   |
| Ethiopia | 2000 | Male   | 45 to 49 | 57%<br>(50-63%)                | 43%<br>(37-50%)          | 1.9<br>(1.4-2.5)                            | 8.4%<br>(5.6-12%)                    | 9.4%<br>(6-13%)                     | 1600<br>(1000-2300)    | 69000<br>(45000-98000)    |
| Ethiopia | 2000 | Male   | 50 to 54 | 60%<br>(53-66%)                | 40%<br>(34-47%)          | 2<br>(1.5-2.6)                              | 9.6%<br>(6.2-13%)                    | 11%<br>(7-16%)                      | 1900<br>(1200-2800)    | 72000<br>(46000-100000)   |

| Location | Year | Sex    | Age      | Prevalence of current drinkers | Prevalence of abstainers | Population average of standard drinks daily | Percent of total attributable deaths | Percent of total attributable DALYs | Attributable deaths  | Attributable DALYs        |
|----------|------|--------|----------|--------------------------------|--------------------------|---------------------------------------------|--------------------------------------|-------------------------------------|----------------------|---------------------------|
| Ethiopia | 2000 | Male   | 55 to 59 | 63%<br>(56-70%)                | 37%<br>(30-44%)          | 2.2<br>(1.7-2.9)                            | 10%<br>(6.8-14%)                     | 12%<br>(7.7-16%)                    | 2200<br>(1400-3100)  | 71000<br>(46000-100000)   |
| Ethiopia | 2000 | Male   | 60 to 64 | 56%<br>(47-64%)                | 44%<br>(36-53%)          | 1.9<br>(1.4-2.5)                            | 8%<br>(5.3-11%)                      | 9.1%<br>(5.8-13%)                   | 1800<br>(1100-2600)  | 49000<br>(32000-70000)    |
| Ethiopia | 2000 | Male   | 65 to 69 | 46%<br>(36-56%)                | 54%<br>(44-64%)          | 1.4<br>(0.97-1.8)                           | 5.4%<br>(3.1-8.1%)                   | 6.1%<br>(3.5-9.2%)                  | 1400<br>(770-2100)   | 31000<br>(18000-47000)    |
| Ethiopia | 2000 | Male   | 70 to 74 | 45%<br>(35-55%)                | 55%<br>(45-65%)          | 1.2<br>(0.82-1.7)                           | 4.2%<br>(2-6.7%)                     | 4.8%<br>(2.2-7.7%)                  | 900<br>(430-1500)    | 16000<br>(7900-26000)     |
| Ethiopia | 2000 | Male   | 75 to 79 | 44%<br>(32-56%)                | 56%<br>(44-68%)          | 1.1<br>(0.68-1.6)                           | 3.4%<br>(1.3-5.8%)                   | 3.9%<br>(1.4-6.6%)                  | 700<br>(250-1200)    | 9900<br>(3600-17000)      |
| Ethiopia | 2000 | Male   | 80 to 84 | 41%<br>(28-56%)                | 59%<br>(44-72%)          | 0.87<br>(0.52-1.3)                          | 2.4%<br>(0.84-4.4%)                  | 2.7%<br>(0.9-5%)                    | 400<br>(130-730)     | 4200<br>(1400-7500)       |
| Ethiopia | 2000 | Male   | 85 to 89 | 39%<br>(26-53%)                | 61%<br>(47-74%)          | 0.69<br>(0.41-1.1)                          | 1.7%<br>(0.53-3.3%)                  | 1.9%<br>(0.48-3.8%)                 | 130<br>(33-260)      | 1000<br>(320-1900)        |
| Ethiopia | 2000 | Male   | 90 to 94 | 40%<br>(27-55%)                | 60%<br>(45-73%)          | 0.59<br>(0.34-0.95)                         | 1%<br>(0.12-2.1%)                    | 1%<br>(-0.02-2.4%)                  | 17<br>(-0.33-39)     | 98<br>(12-210)            |
| Ethiopia | 2000 | Male   | 95 plus  | 44%<br>(26-63%)                | 56%<br>(37-74%)          | 0.52<br>(0.24-0.9)                          | 1.1%<br>(-0.19-2.7%)                 | 1.1%<br>(-0.5-2.9%)                 | 3.1<br>(-1.4-8.4)    | 13<br>(-2-30)             |
| Ethiopia | 2005 | Female | All Ages | 27%<br>(24-31%)                | 73%<br>(69-76%)          | 0.41<br>(0.37-0.45)                         | 0.99%<br>(0.51-1.5%)                 | 1.5%<br>(0.6-2.5%)                  | 6200<br>(2500-10000) | 240000<br>(120000-360000) |
| Ethiopia | 2005 | Female | 15 to 19 | 30%<br>(25-36%)                | 70%<br>(64-75%)          | 0.5<br>(0.37-0.66)                          | 1.1%<br>(0.43-1.9%)                  | 1.3%<br>(0.25-2.6%)                 | 94<br>(18-190)       | 9300<br>(3600-16000)      |
| Ethiopia | 2005 | Female | 20 to 24 | 38%<br>(31-44%)                | 62%<br>(56-69%)          | 0.67<br>(0.49-0.88)                         | 1.7%<br>(0.68-3%)                    | 1.8%<br>(0.3-3.6%)                  | 170<br>(30-340)      | 16000<br>(6600-28000)     |
| Ethiopia | 2005 | Female | 25 to 29 | 38%<br>(31-44%)                | 62%<br>(56-69%)          | 0.79<br>(0.6-1)                             | 2%<br>(0.97-3.2%)                    | 2.1%<br>(0.79-3.8%)                 | 280<br>(100-490)     | 21000<br>(10000-34000)    |
| Ethiopia | 2005 | Female | 30 to 34 | 39%<br>(33-46%)                | 61%<br>(54-67%)          | 0.85<br>(0.64-1.1)                          | 2%<br>(1-3.1%)                       | 2.1%<br>(0.94-3.6%)                 | 330<br>(150-570)     | 22000<br>(11000-35000)    |
| Ethiopia | 2005 | Female | 35 to 39 | 41%<br>(35-47%)                | 59%<br>(53-65%)          | 0.82<br>(0.61-1.1)                          | 2.1%<br>(1-3.4%)                     | 2.3%<br>(1-4%)                      | 400<br>(160-690)     | 22000<br>(10000-37000)    |
| Ethiopia | 2005 | Female | 40 to 44 | 42%<br>(35-49%)                | 58%<br>(51-65%)          | 0.82<br>(0.59-1.1)                          | 2.2%<br>(1-3.5%)                     | 2.5%<br>(1.1-4.1%)                  | 420<br>(170-690)     | 20000<br>(9100-33000)     |
| Ethiopia | 2005 | Female | 45 to 49 | 44%<br>(36-50%)                | 56%<br>(50-64%)          | 0.86<br>(0.63-1.1)                          | 2.7%<br>(1.1-4.5%)                   | 3.2%<br>(1.3-5.4%)                  | 550<br>(220-980)     | 23000<br>(9800-41000)     |
| Ethiopia | 2005 | Female | 50 to 54 | 42%<br>(33-51%)                | 58%<br>(49-67%)          | 0.84<br>(0.6-1.2)                           | 3.2%<br>(1.3-5.4%)                   | 3.9%<br>(1.6-6.6%)                  | 720<br>(280-1200)    | 26000<br>(11000-45000)    |
| Ethiopia | 2005 | Female | 55 to 59 | 41%<br>(31-51%)                | 59%<br>(49-69%)          | 0.89<br>(0.61-1.2)                          | 3.3%<br>(1.3-5.8%)                   | 4%<br>(1.6-7%)                      | 880<br>(350-1500)    | 27000<br>(11000-48000)    |
| Ethiopia | 2005 | Female | 60 to 64 | 42%<br>(31-53%)                | 58%<br>(47-69%)          | 0.9<br>(0.6-1.3)                            | 2.8%<br>(1-5%)                       | 3.4%<br>(1.2-5.9%)                  | 810<br>(300-1400)    | 21000<br>(7800-38000)     |
| Ethiopia | 2005 | Female | 65 to 69 | 41%<br>(31-51%)                | 59%<br>(49-69%)          | 0.82<br>(0.57-1.1)                          | 2.4%<br>(0.75-4.3%)                  | 2.8%<br>(0.87-5%)                   | 720<br>(220-1300)    | 16000<br>(4800-28000)     |
| Ethiopia | 2005 | Female | 70 to 74 | 38%<br>(28-49%)                | 62%<br>(51-72%)          | 0.68<br>(0.43-0.98)                         | 1.4%<br>(-0.19-3.4%)                 | 1.6%<br>(-0.24-3.9%)                | 460<br>(-66-1100)    | 8300<br>(-1100-20000)     |

| Location | Year | Sex    | Age      | Prevalence of current drinkers | Prevalence of abstainers | Population average of standard drinks daily | Percent of total attributable deaths | Percent of total attributable DALYs | Attributable deaths    | Attributable DALYs         |
|----------|------|--------|----------|--------------------------------|--------------------------|---------------------------------------------|--------------------------------------|-------------------------------------|------------------------|----------------------------|
| Ethiopia | 2005 | Female | 75 to 79 | 36%<br>(24-50%)                | 64%<br>(50-76%)          | 0.57<br>(0.34-0.89)                         | 1%<br>(-0.28-2.7%)                   | 1.2%<br>(-0.32-3.1%)                | 280<br>(-75-730)       | 3800<br>(-1000-10000)      |
| Ethiopia | 2005 | Female | 80 to 84 | 36%<br>(24-51%)                | 64%<br>(49-76%)          | 0.54<br>(0.33-0.82)                         | 0.47%<br>(-0.7-1.7%)                 | 0.55%<br>(-0.8-2%)                  | 100<br>(-150-390)      | 1000<br>(-1500-3900)       |
| Ethiopia | 2005 | Female | 85 to 89 | 37%<br>(25-51%)                | 63%<br>(49-75%)          | 0.53<br>(0.31-0.79)                         | 0.21%<br>(-0.92-1.4%)                | 0.25%<br>(-1-1.6%)                  | 22<br>(-90-140)        | 160<br>(-670-980)          |
| Ethiopia | 2005 | Female | 90 to 94 | 39%<br>(26-52%)                | 61%<br>(48-74%)          | 0.51<br>(0.3-0.82)                          | -0.05%<br>(-1.1-0.99%)               | -0.076%<br>(-1.3-1.1%)              | -2<br>(-35-30)         | -7.7<br>(-170-150)         |
| Ethiopia | 2005 | Female | 95 plus  | 42%<br>(25-60%)                | 58%<br>(40-75%)          | 0.51<br>(0.26-0.89)                         | 0.36%<br>(-0.79-1.6%)                | 0.36%<br>(-0.97-1.8%)               | 2.5<br>(-6.6-13)       | 9.5<br>(-21-42)            |
| Ethiopia | 2005 | Male   | All Ages | 34%<br>(30-38%)                | 66%<br>(62-70%)          | 0.82<br>(0.76-0.89)                         | 3%<br>(2.3-3.8%)                     | 4.4%<br>(3.2-5.7%)                  | 18000<br>(13000-24000) | 780000<br>(590000-1000000) |
| Ethiopia | 2005 | Male   | 15 to 19 | 37%<br>(30-43%)                | 63%<br>(57-70%)          | 0.91<br>(0.66-1.2)                          | 4.3%<br>(2.8-6.1%)                   | 4.8%<br>(2.4-7.4%)                  | 400<br>(200-630)       | 39000<br>(24000-56000)     |
| Ethiopia | 2005 | Male   | 20 to 24 | 45%<br>(40-51%)                | 55%<br>(49-60%)          | 1.2<br>(0.91-1.5)                           | 7.8%<br>(5.1-11%)                    | 7.8%<br>(4.3-12%)                   | 870<br>(480-1400)      | 78000<br>(50000-110000)    |
| Ethiopia | 2005 | Male   | 25 to 29 | 47%<br>(42-53%)                | 53%<br>(47-58%)          | 1.5<br>(1.2-2)                              | 8.8%<br>(6-12%)                      | 9.2%<br>(5.5-13%)                   | 1200<br>(730-1700)     | 89000<br>(60000-120000)    |
| Ethiopia | 2005 | Male   | 30 to 34 | 49%<br>(44-55%)                | 51%<br>(45-56%)          | 1.8<br>(1.3-2.2)                            | 8.4%<br>(5.9-11%)                    | 8.9%<br>(5.7-13%)                   | 1400<br>(920-2000)     | 93000<br>(64000-130000)    |
| Ethiopia | 2005 | Male   | 35 to 39 | 50%<br>(44-56%)                | 50%<br>(44-56%)          | 1.8<br>(1.4-2.4)                            | 8.2%<br>(5.6-11%)                    | 8.9%<br>(5.7-12%)                   | 1400<br>(910-2000)     | 82000<br>(54000-110000)    |
| Ethiopia | 2005 | Male   | 40 to 44 | 54%<br>(48-60%)                | 46%<br>(40-52%)          | 2<br>(1.5-2.5)                              | 8.6%<br>(5.9-12%)                    | 9.7%<br>(6.4-13%)                   | 1500<br>(980-2100)     | 75000<br>(50000-100000)    |
| Ethiopia | 2005 | Male   | 45 to 49 | 57%<br>(52-62%)                | 43%<br>(38-48%)          | 2<br>(1.5-2.5)                              | 8.5%<br>(5.8-11%)                    | 9.7%<br>(6.4-13%)                   | 1600<br>(1000-2200)    | 68000<br>(45000-93000)     |
| Ethiopia | 2005 | Male   | 50 to 54 | 60%<br>(54-66%)                | 40%<br>(34-46%)          | 2<br>(1.5-2.7)                              | 9.5%<br>(6.2-13%)                    | 11%<br>(7.1-15%)                    | 1800<br>(1100-2500)    | 68000<br>(44000-93000)     |
| Ethiopia | 2005 | Male   | 55 to 59 | 64%<br>(57-69%)                | 36%<br>(31-43%)          | 2.3<br>(1.7-3)                              | 11%<br>(7-14%)                       | 12%<br>(8.2-17%)                    | 2200<br>(1400-3000)    | 71000<br>(46000-96000)     |
| Ethiopia | 2005 | Male   | 60 to 64 | 56%<br>(48-65%)                | 44%<br>(35-52%)          | 2<br>(1.4-2.6)                              | 8.2%<br>(5.3-11%)                    | 9.5%<br>(6-13%)                     | 1900<br>(1200-2700)    | 52000<br>(33000-73000)     |
| Ethiopia | 2005 | Male   | 65 to 69 | 46%<br>(35-56%)                | 54%<br>(44-65%)          | 1.4<br>(0.99-1.9)                           | 5.5%<br>(3.2-8.1%)                   | 6.4%<br>(3.7-9.4%)                  | 1300<br>(770-2000)     | 30000<br>(18000-44000)     |
| Ethiopia | 2005 | Male   | 70 to 74 | 44%<br>(34-54%)                | 56%<br>(46-66%)          | 1.3<br>(0.83-1.7)                           | 4.2%<br>(2-6.5%)                     | 4.8%<br>(2.3-7.5%)                  | 1100<br>(520-1800)     | 20000<br>(9900-32000)      |
| Ethiopia | 2005 | Male   | 75 to 79 | 44%<br>(33-55%)                | 56%<br>(45-67%)          | 1.1<br>(0.69-1.6)                           | 3.5%<br>(1.4-5.7%)                   | 4%<br>(1.5-6.7%)                    | 670<br>(270-1100)      | 9400<br>(3900-16000)       |
| Ethiopia | 2005 | Male   | 80 to 84 | 41%<br>(28-55%)                | 59%<br>(45-72%)          | 0.88<br>(0.53-1.3)                          | 2.4%<br>(0.88-4.2%)                  | 2.8%<br>(0.91-4.9%)                 | 370<br>(120-660)       | 3900<br>(1400-6800)        |
| Ethiopia | 2005 | Male   | 85 to 89 | 39%<br>(25-53%)                | 61%<br>(47-75%)          | 0.69<br>(0.41-1.1)                          | 1.7%<br>(0.55-3.1%)                  | 1.9%<br>(0.5-3.5%)                  | 160<br>(43-300)        | 1300<br>(400-2200)         |

| Location | Year | Sex    | Age      | Prevalence of current drinkers | Prevalence of abstainers | Population average of standard drinks daily | Percent of total attributable deaths | Percent of total attributable DALYs | Attributable deaths    | Attributable DALYs         |
|----------|------|--------|----------|--------------------------------|--------------------------|---------------------------------------------|--------------------------------------|-------------------------------------|------------------------|----------------------------|
| Ethiopia | 2005 | Male   | 90 to 94 | 40%<br>(27-54%)                | 60%<br>(46-73%)          | 0.59<br>(0.34-0.94)                         | 1%<br>(0.11-2.1%)                    | 1%<br>(-0.054-2.3%)                 | 29<br>(-1.5-65)        | 170<br>(18-350)            |
| Ethiopia | 2005 | Male   | 95 plus  | 44%<br>(25-62%)                | 56%<br>(38-75%)          | 0.53<br>(0.24-0.93)                         | 1.2%<br>(-0.14-2.7%)                 | 1.2%<br>(-0.42-3.1%)                | 5.4<br>(-1.9-14)       | 22<br>(-2.6-50)            |
| Ethiopia | 2010 | Female | All Ages | 30%<br>(27-34%)                | 70%<br>(66-73%)          | 0.42<br>(0.37-0.48)                         | 1%<br>(0.49-1.5%)                    | 1.4%<br>(0.55-2.4%)                 | 5200<br>(1900-8700)    | 210000<br>(100000-320000)  |
| Ethiopia | 2010 | Female | 15 to 19 | 35%<br>(29-39%)                | 65%<br>(61-71%)          | 0.55<br>(0.41-0.7)                          | 1%<br>(0.43-1.7%)                    | 1.2%<br>(0.25-2.3%)                 | 90<br>(18-170)         | 9500<br>(3900-16000)       |
| Ethiopia | 2010 | Female | 20 to 24 | 41%<br>(36-46%)                | 59%<br>(54-64%)          | 0.69<br>(0.52-0.9)                          | 1.7%<br>(0.78-2.7%)                  | 1.8%<br>(0.34-3.3%)                 | 140<br>(25-250)        | 14000<br>(6500-22000)      |
| Ethiopia | 2010 | Female | 25 to 29 | 41%<br>(36-45%)                | 59%<br>(55-64%)          | 0.8<br>(0.62-1)                             | 2.2%<br>(1.1-3.4%)                   | 2.5%<br>(0.97-4.4%)                 | 240<br>(93-430)        | 20000<br>(10000-32000)     |
| Ethiopia | 2010 | Female | 30 to 34 | 42%<br>(37-47%)                | 58%<br>(53-63%)          | 0.86<br>(0.67-1.1)                          | 2.1%<br>(1.1-3.4%)                   | 2.5%<br>(1.1-4.1%)                  | 280<br>(120-490)       | 20000<br>(10000-31000)     |
| Ethiopia | 2010 | Female | 35 to 39 | 43%<br>(39-48%)                | 57%<br>(52-61%)          | 0.82<br>(0.62-1.1)                          | 2.2%<br>(1.1-3.6%)                   | 2.6%<br>(1.1-4.4%)                  | 340<br>(140-610)       | 20000<br>(9400-33000)      |
| Ethiopia | 2010 | Female | 40 to 44 | 44%<br>(38-49%)                | 56%<br>(51-62%)          | 0.81<br>(0.59-1.1)                          | 2.2%<br>(1.1-3.4%)                   | 2.7%<br>(1.2-4.3%)                  | 360<br>(150-610)       | 18000<br>(8500-30000)      |
| Ethiopia | 2010 | Female | 45 to 49 | 46%<br>(40-52%)                | 54%<br>(48-60%)          | 0.87<br>(0.65-1.1)                          | 2.6%<br>(1.1-4.4%)                   | 3.3%<br>(1.3-5.5%)                  | 450<br>(160-810)       | 19000<br>(7400-34000)      |
| Ethiopia | 2010 | Female | 50 to 54 | 46%<br>(36-56%)                | 54%<br>(44-64%)          | 0.88<br>(0.6-1.2)                           | 3%<br>(1.3-5.1%)                     | 3.8%<br>(1.7-6.4%)                  | 640<br>(260-1100)      | 23000<br>(9600-41000)      |
| Ethiopia | 2010 | Female | 55 to 59 | 42%<br>(30-55%)                | 58%<br>(45-70%)          | 0.88<br>(0.56-1.3)                          | 2.9%<br>(1.1-5.1%)                   | 3.6%<br>(1.4-6.5%)                  | 670<br>(240-1200)      | 21000<br>(7700-38000)      |
| Ethiopia | 2010 | Female | 60 to 64 | 43%<br>(30-56%)                | 57%<br>(44-70%)          | 0.89<br>(0.56-1.3)                          | 2.4%<br>(0.82-4.5%)                  | 2.9%<br>(1.1-5.4%)                  | 690<br>(240-1300)      | 18000<br>(6100-34000)      |
| Ethiopia | 2010 | Female | 65 to 69 | 44%<br>(33-55%)                | 56%<br>(45-67%)          | 0.83<br>(0.55-1.2)                          | 2%<br>(0.58-3.7%)                    | 2.4%<br>(0.75-4.5%)                 | 630<br>(200-1200)      | 14000<br>(4200-26000)      |
| Ethiopia | 2010 | Female | 70 to 74 | 42%<br>(31-54%)                | 58%<br>(46-69%)          | 0.72<br>(0.46-1)                            | 1.1%<br>(-0.32-2.7%)                 | 1.3%<br>(-0.38-3.2%)                | 340<br>(-100-850)      | 6200<br>(-1900-15000)      |
| Ethiopia | 2010 | Female | 75 to 79 | 39%<br>(26-53%)                | 61%<br>(47-74%)          | 0.59<br>(0.36-0.91)                         | 0.77%<br>(-0.44-2.2%)                | 0.91%<br>(-0.49-2.6%)               | 250<br>(-130-720)      | 3300<br>(-1900-9700)       |
| Ethiopia | 2010 | Female | 80 to 84 | 38%<br>(25-52%)                | 62%<br>(48-75%)          | 0.53<br>(0.33-0.79)                         | 0.23%<br>(-0.82-1.3%)                | 0.29%<br>(-0.93-1.6%)               | 64<br>(-190-340)       | 600<br>(-2000-3400)        |
| Ethiopia | 2010 | Female | 85 to 89 | 37%<br>(25-51%)                | 63%<br>(49-75%)          | 0.5<br>(0.3-0.76)                           | 0.036%<br>(-0.97-0.98%)              | 0.053%<br>(-1.1-1.2%)               | 5.5<br>(-110-120)      | 32<br>(-830-850)           |
| Ethiopia | 2010 | Female | 90 to 94 | 39%<br>(27-52%)                | 61%<br>(48-73%)          | 0.49<br>(0.3-0.79)                          | -0.21%<br>(-1.1-0.67%)               | -0.27%<br>(-1.4-0.75%)              | -9<br>(-46-25)         | -41<br>(-230-130)          |
| Ethiopia | 2010 | Female | 95 plus  | 42%<br>(26-60%)                | 58%<br>(40-74%)          | 0.48<br>(0.24-0.86)                         | 0.23%<br>(-0.85-1.2%)                | 0.2%<br>(-1.1-1.4%)                 | 1.5<br>(-7.9-10)       | 6.7<br>(-25-37)            |
| Ethiopia | 2010 | Male   | All Ages | 35%<br>(31-39%)                | 65%<br>(61-69%)          | 0.81<br>(0.72-0.91)                         | 3.4%<br>(2.5-4.3%)                   | 4.5%<br>(3.2-6%)                    | 17000<br>(11000-23000) | 770000<br>(570000-1000000) |

| Location | Year | Sex    | Age      | Prevalence of current drinkers | Prevalence of abstainers | Population average of standard drinks daily | Percent of total attributable deaths | Percent of total attributable DALYs | Attributable deaths  | Attributable DALYs       |
|----------|------|--------|----------|--------------------------------|--------------------------|---------------------------------------------|--------------------------------------|-------------------------------------|----------------------|--------------------------|
| Ethiopia | 2010 | Male   | 15 to 19 | 39%<br>(33-45%)                | 61%<br>(55-67%)          | 0.92<br>(0.67-1.2)                          | 4.2%<br>(2.7-5.8%)                   | 4.3%<br>(2.2-6.6%)                  | 410<br>(200-630)     | 44000<br>(27000-61000)   |
| Ethiopia | 2010 | Male   | 20 to 24 | 47%<br>(42-53%)                | 53%<br>(47-58%)          | 1.2<br>(0.89-1.5)                           | 8.2%<br>(5.6-11%)                    | 7.5%<br>(4.1-11%)                   | 810<br>(430-1300)    | 83000<br>(56000-120000)  |
| Ethiopia | 2010 | Male   | 25 to 29 | 48%<br>(42-53%)                | 52%<br>(47-58%)          | 1.5<br>(1.1-1.9)                            | 9.7%<br>(6.8-13%)                    | 9.9%<br>(6-14%)                     | 1100<br>(670-1700)   | 95000<br>(64000-130000)  |
| Ethiopia | 2010 | Male   | 30 to 34 | 50%<br>(44-56%)                | 50%<br>(44-56%)          | 1.7<br>(1.3-2.2)                            | 9.3%<br>(6.7-12%)                    | 10%<br>(6.3-14%)                    | 1300<br>(770-1900)   | 88000<br>(59000-120000)  |
| Ethiopia | 2010 | Male   | 35 to 39 | 50%<br>(44-57%)                | 50%<br>(43-56%)          | 1.8<br>(1.3-2.3)                            | 8.7%<br>(6.2-11%)                    | 9.6%<br>(6.5-13%)                   | 1400<br>(880-2100)   | 84000<br>(57000-120000)  |
| Ethiopia | 2010 | Male   | 40 to 44 | 54%<br>(48-60%)                | 46%<br>(40-52%)          | 1.9<br>(1.4-2.4)                            | 8.8%<br>(6.2-12%)                    | 10%<br>(6.7-14%)                    | 1500<br>(910-2100)   | 75000<br>(50000-110000)  |
| Ethiopia | 2010 | Male   | 45 to 49 | 57%<br>(52-63%)                | 43%<br>(37-48%)          | 1.9<br>(1.4-2.4)                            | 8.6%<br>(5.9-12%)                    | 10%<br>(6.7-14%)                    | 1400<br>(890-2000)   | 63000<br>(41000-88000)   |
| Ethiopia | 2010 | Male   | 50 to 54 | 61%<br>(55-67%)                | 39%<br>(33-45%)          | 2<br>(1.4-2.5)                              | 9.3%<br>(6.1-13%)                    | 11%<br>(7-15%)                      | 1700<br>(1000-2400)  | 64000<br>(41000-92000)   |
| Ethiopia | 2010 | Male   | 55 to 59 | 64%<br>(57-70%)                | 36%<br>(30-43%)          | 2.2<br>(1.6-2.9)                            | 9.7%<br>(6.4-13%)                    | 12%<br>(7.6-16%)                    | 1900<br>(1200-2800)  | 64000<br>(42000-91000)   |
| Ethiopia | 2010 | Male   | 60 to 64 | 58%<br>(47-68%)                | 42%<br>(32-53%)          | 1.9<br>(1.3-2.6)                            | 7.5%<br>(4.8-11%)                    | 8.8%<br>(5.6-12%)                   | 1800<br>(1100-2600)  | 49000<br>(31000-71000)   |
| Ethiopia | 2010 | Male   | 65 to 69 | 48%<br>(35-60%)                | 52%<br>(40-65%)          | 1.4<br>(0.92-2)                             | 5.1%<br>(2.9-7.4%)                   | 5.9%<br>(3.3-8.7%)                  | 1300<br>(720-2000)   | 30000<br>(17000-46000)   |
| Ethiopia | 2010 | Male   | 70 to 74 | 44%<br>(32-56%)                | 56%<br>(44-68%)          | 1.2<br>(0.73-1.7)                           | 3.5%<br>(1.7-5.6%)                   | 4.1%<br>(1.9-6.5%)                  | 930<br>(420-1500)    | 17000<br>(8100-28000)    |
| Ethiopia | 2010 | Male   | 75 to 79 | 43%<br>(29-57%)                | 57%<br>(43-71%)          | 1<br>(0.61-1.6)                             | 3%<br>(1.2-5%)                       | 3.4%<br>(1.4-5.9%)                  | 750<br>(300-1300)    | 11000<br>(4300-19000)    |
| Ethiopia | 2010 | Male   | 80 to 84 | 41%<br>(28-55%)                | 59%<br>(45-72%)          | 0.84<br>(0.49-1.3)                          | 2.1%<br>(0.76-3.6%)                  | 2.4%<br>(0.77-4.3%)                 | 390<br>(130-710)     | 4100<br>(1500-7400)      |
| Ethiopia | 2010 | Male   | 85 to 89 | 39%<br>(26-54%)                | 61%<br>(46-74%)          | 0.67<br>(0.39-1)                            | 1.5%<br>(0.5-2.7%)                   | 1.6%<br>(0.45-3.1%)                 | 130<br>(35-240)      | 990<br>(330-1800)        |
| Ethiopia | 2010 | Male   | 90 to 94 | 40%<br>(26-56%)                | 60%<br>(44-74%)          | 0.57<br>(0.33-0.93)                         | 0.86%<br>(0.057-1.8%)                | 0.84%<br>(-0.13-2%)                 | 29<br>(-4.6-68)      | 170<br>(12-380)          |
| Ethiopia | 2010 | Male   | 95 plus  | 44%<br>(26-62%)                | 56%<br>(38-74%)          | 0.5<br>(0.23-0.88)                          | 1%<br>(-0.094-2.3%)                  | 0.98%<br>(-0.37-2.6%)               | 7.5<br>(-2.8-19)     | 31<br>(-2.9-73)          |
| Ethiopia | 2016 | Female | All Ages | 31%<br>(28-34%)                | 69%<br>(66-72%)          | 0.45<br>(0.3-0.66)                          | 1.2%<br>(0.5-2.1%)                   | 1.6%<br>(0.42-3.2%)                 | 5300<br>(1300-11000) | 210000<br>(89000-380000) |
| Ethiopia | 2016 | Female | 15 to 19 | 34%<br>(29-39%)                | 66%<br>(61-71%)          | 0.55<br>(0.34-0.85)                         | 1%<br>(0.48-1.7%)                    | 1.2%<br>(0.31-2.5%)                 | 85<br>(23-170)       | 9900<br>(4400-17000)     |
| Ethiopia | 2016 | Female | 20 to 24 | 41%<br>(35-46%)                | 59%<br>(54-65%)          | 0.7<br>(0.44-1.1)                           | 1.7%<br>(0.89-2.8%)                  | 1.8%<br>(0.46-3.5%)                 | 130<br>(33-270)      | 15000<br>(7800-25000)    |
| Ethiopia | 2016 | Female | 25 to 29 | 40%<br>(35-46%)                | 60%<br>(54-65%)          | 0.82<br>(0.51-1.2)                          | 2.3%<br>(1.3-3.6%)                   | 2.7%<br>(1.1-4.9%)                  | 220<br>(83-430)      | 19000<br>(10000-33000)   |
| Ethiopia | 2016 | Female | 30 to 34 | 42%<br>(36-47%)                | 58%<br>(53-64%)          | 0.87<br>(0.54-1.3)                          | 2.4%<br>(1.3-3.8%)                   | 3%<br>(1.3-5.2%)                    | 290<br>(120-530)     | 21000<br>(11000-35000)   |



| Location | Year | Sex    | Age      | Prevalence of current drinkers | Prevalence of abstainers | Population average of standard drinks daily | Percent of total attributable deaths | Percent of total attributable DALYs | Attributable deaths   | Attributable DALYs         |
|----------|------|--------|----------|--------------------------------|--------------------------|---------------------------------------------|--------------------------------------|-------------------------------------|-----------------------|----------------------------|
| Ethiopia | 2016 | Female | 35 to 39 | 43%<br>(38-48%)                | 57%<br>(52-62%)          | 0.84<br>(0.51-1.3)                          | 2.5%<br>(1.3-4.1%)                   | 3.2%<br>(1.4-5.5%)                  | 350<br>(150-660)      | 21000<br>(10000-36000)     |
| Ethiopia | 2016 | Female | 40 to 44 | 44%<br>(38-50%)                | 56%<br>(50-62%)          | 0.83<br>(0.51-1.3)                          | 2.4%<br>(1.3-4%)                     | 3.2%<br>(1.5-5.4%)                  | 390<br>(180-690)      | 20000<br>(9800-34000)      |
| Ethiopia | 2016 | Female | 45 to 49 | 46%<br>(41-52%)                | 54%<br>(48-59%)          | 0.89<br>(0.54-1.4)                          | 2.7%<br>(1.2-4.9%)                   | 3.6%<br>(1.4-6.5%)                  | 490<br>(180-910)      | 21000<br>(8300-38000)      |
| Ethiopia | 2016 | Female | 50 to 54 | 46%<br>(35-56%)                | 54%<br>(44-65%)          | 0.9<br>(0.52-1.4)                           | 2.9%<br>(1.1-5.3%)                   | 3.8%<br>(1.4-6.9%)                  | 620<br>(220-1200)     | 23000<br>(8300-42000)      |
| Ethiopia | 2016 | Female | 55 to 59 | 42%<br>(31-54%)                | 58%<br>(46-69%)          | 0.89<br>(0.48-1.5)                          | 2.7%<br>(0.72-5.3%)                  | 3.4%<br>(0.99-6.9%)                 | 660<br>(180-1400)     | 21000<br>(5800-43000)      |
| Ethiopia | 2016 | Female | 60 to 64 | 43%<br>(30-55%)                | 57%<br>(45-70%)          | 0.9<br>(0.49-1.5)                           | 2.2%<br>(0.46-4.8%)                  | 2.8%<br>(0.66-6.1%)                 | 630<br>(150-1400)     | 17000<br>(3500-36000)      |
| Ethiopia | 2016 | Female | 65 to 69 | 44%<br>(32-56%)                | 56%<br>(44-68%)          | 0.85<br>(0.49-1.4)                          | 2%<br>(0.37-4.2%)                    | 2.4%<br>(0.5-5.1%)                  | 670<br>(140-1500)     | 15000<br>(2700-33000)      |
| Ethiopia | 2016 | Female | 70 to 74 | 42%<br>(31-54%)                | 58%<br>(46-69%)          | 0.74<br>(0.4-1.2)                           | 1.1%<br>(-0.47-3.2%)                 | 1.3%<br>(-0.55-3.7%)                | 390<br>(-160-1100)    | 7000<br>(-2900-21000)      |
| Ethiopia | 2016 | Female | 75 to 79 | 39%<br>(26-54%)                | 61%<br>(46-74%)          | 0.61<br>(0.32-1)                            | 0.82%<br>(-0.52-2.7%)                | 0.98%<br>(-0.58-3.2%)               | 280<br>(-160-900)     | 3800<br>(-2300-12000)      |
| Ethiopia | 2016 | Female | 80 to 84 | 38%<br>(24-52%)                | 62%<br>(48-76%)          | 0.55<br>(0.28-0.92)                         | 0.29%<br>(-0.86-1.7%)                | 0.37%<br>(-0.95-2%)                 | 94<br>(-240-510)      | 890<br>(-2600-5100)        |
| Ethiopia | 2016 | Female | 85 to 89 | 38%<br>(25-53%)                | 62%<br>(47-75%)          | 0.52<br>(0.27-0.93)                         | 0.074%<br>(-0.95-1.4%)               | 0.1%<br>(-1.1-1.6%)                 | 14<br>(-150-220)      | 88<br>(-1100-1600)         |
| Ethiopia | 2016 | Female | 90 to 94 | 39%<br>(26-54%)                | 61%<br>(46-74%)          | 0.51<br>(0.27-0.93)                         | -0.19%<br>(-1.1-1.1%)                | -0.25%<br>(-1.3-1.2%)               | -10<br>(-58-52)       | -48<br>(-290-270)          |
| Ethiopia | 2016 | Female | 95 plus  | 42%<br>(26-60%)                | 58%<br>(40-74%)          | 0.51<br>(0.22-1)                            | 0.31%<br>(-0.69-1.6%)                | 0.3%<br>(-0.88-2%)                  | 3.1<br>(-9.2-19)      | 12<br>(-28-67)             |
| Ethiopia | 2016 | Male   | All Ages | 36%<br>(32-40%)                | 64%<br>(60-68%)          | 0.88<br>(0.59-1.3)                          | 4.2%<br>(2.8-5.8%)                   | 5%<br>(2.9-7.5%)                    | 18000<br>(9600-28000) | 850000<br>(540000-1200000) |
| Ethiopia | 2016 | Male   | 15 to 19 | 40%<br>(33-46%)                | 60%<br>(54-67%)          | 0.95<br>(0.57-1.5)                          | 4.1%<br>(2.6-5.9%)                   | 4.1%<br>(1.9-6.7%)                  | 440<br>(190-780)      | 50000<br>(30000-76000)     |
| Ethiopia | 2016 | Male   | 20 to 24 | 48%<br>(42-54%)                | 52%<br>(46-58%)          | 1.2<br>(0.77-1.9)                           | 8.1%<br>(5.4-11%)                    | 7.1%<br>(3.5-12%)                   | 930<br>(440-1600)     | 100000<br>(63000-150000)   |
| Ethiopia | 2016 | Male   | 25 to 29 | 48%<br>(42-53%)                | 52%<br>(47-58%)          | 1.5<br>(0.93-2.4)                           | 9.8%<br>(6.6-14%)                    | 9.8%<br>(5.4-15%)                   | 1200<br>(610-2000)    | 110000<br>(68000-160000)   |
| Ethiopia | 2016 | Male   | 30 to 34 | 50%<br>(44-56%)                | 50%<br>(44-56%)          | 1.8<br>(1.1-2.7)                            | 10%<br>(6.8-14%)                     | 11%<br>(6.3-16%)                    | 1300<br>(710-2100)    | 99000<br>(63000-150000)    |
| Ethiopia | 2016 | Male   | 35 to 39 | 50%<br>(44-57%)                | 50%<br>(43-56%)          | 1.8<br>(1.1-2.8)                            | 9.6%<br>(6.2-14%)                    | 11%<br>(6.5-16%)                    | 1400<br>(760-2200)    | 86000<br>(54000-130000)    |
| Ethiopia | 2016 | Male   | 40 to 44 | 54%<br>(48-60%)                | 46%<br>(40-52%)          | 1.9<br>(1.2-2.9)                            | 9.4%<br>(6-14%)                      | 11%<br>(6.7-17%)                    | 1500<br>(880-2500)    | 82000<br>(51000-130000)    |
| Ethiopia | 2016 | Male   | 45 to 49 | 58%<br>(52-63%)                | 42%<br>(37-48%)          | 1.9<br>(1.2-3)                              | 8.8%<br>(5.5-13%)                    | 11%<br>(6.3-16%)                    | 1500<br>(840-2500)    | 71000<br>(42000-110000)    |

| Location | Year | Sex    | Age      | Prevalence of current drinkers | Prevalence of abstainers | Population average of standard drinks daily | Percent of total attributable deaths | Percent of total attributable DALYs | Attributable deaths | Attributable DALYs      |
|----------|------|--------|----------|--------------------------------|--------------------------|---------------------------------------------|--------------------------------------|-------------------------------------|---------------------|-------------------------|
| Ethiopia | 2016 | Male   | 50 to 54 | 61%<br>(55-67%)                | 39%<br>(33-45%)          | 2<br>(1.2-3.2)                              | 9.1%<br>(5.5-14%)                    | 11%<br>(6.3-17%)                    | 1700<br>(890-2800)  | 66000<br>(36000-100000) |
| Ethiopia | 2016 | Male   | 55 to 59 | 64%<br>(57-70%)                | 36%<br>(30-43%)          | 2.3<br>(1.3-3.5)                            | 9.3%<br>(5.3-14%)                    | 11%<br>(6.1-17%)                    | 1900<br>(1000-3100) | 65000<br>(36000-100000) |
| Ethiopia | 2016 | Male   | 60 to 64 | 58%<br>(46-68%)                | 42%<br>(32-54%)          | 2<br>(1.2-3.3)                              | 7.2%<br>(3.9-11%)                    | 8.4%<br>(4.4-14%)                   | 1700<br>(840-2900)  | 49000<br>(25000-82000)  |
| Ethiopia | 2016 | Male   | 65 to 69 | 48%<br>(36-60%)                | 52%<br>(40-64%)          | 1.5<br>(0.83-2.3)                           | 4.7%<br>(2.3-8.2%)                   | 5.5%<br>(2.5-9.4%)                  | 1300<br>(580-2400)  | 31000<br>(14000-55000)  |
| Ethiopia | 2016 | Male   | 70 to 74 | 44%<br>(31-55%)                | 56%<br>(45-69%)          | 1.2<br>(0.64-2)                             | 3.3%<br>(1.2-6%)                     | 3.8%<br>(1.3-6.9%)                  | 1000<br>(330-1900)  | 19000<br>(6600-36000)   |
| Ethiopia | 2016 | Male   | 75 to 79 | 43%<br>(29-57%)                | 57%<br>(43-71%)          | 1.1<br>(0.53-1.8)                           | 2.8%<br>(0.95-5.4%)                  | 3.2%<br>(1.1-6.3%)                  | 790<br>(250-1600)   | 11000<br>(3700-23000)   |
| Ethiopia | 2016 | Male   | 80 to 84 | 41%<br>(27-55%)                | 59%<br>(45-73%)          | 0.86<br>(0.44-1.5)                          | 2%<br>(0.54-3.9%)                    | 2.2%<br>(0.55-4.4%)                 | 450<br>(110-930)    | 4800<br>(1300-9700)     |
| Ethiopia | 2016 | Male   | 85 to 89 | 39%<br>(26-54%)                | 61%<br>(46-74%)          | 0.68<br>(0.35-1.2)                          | 1.4%<br>(0.38-2.9%)                  | 1.5%<br>(0.31-3.3%)                 | 170<br>(32-360)     | 1300<br>(340-2700)      |
| Ethiopia | 2016 | Male   | 90 to 94 | 40%<br>(27-54%)                | 60%<br>(46-73%)          | 0.58<br>(0.29-1.1)                          | 0.85%<br>(0.054-2%)                  | 0.82%<br>(-0.11-2.2%)               | 27<br>(-3.7-73)     | 170<br>(11-410)         |
| Ethiopia | 2016 | Male   | 95 plus  | 44%<br>(26-62%)                | 56%<br>(38-74%)          | 0.52<br>(0.21-1)                            | 0.99%<br>(-0.0056-2.4%)              | 0.93%<br>(-0.24-2.6%)               | 8.7<br>(-2.2-25)    | 37<br>(-0.21-92)        |
| Kenya    | 1990 | Female | All Ages | 11%<br>(9.2-13%)               | 89%<br>(87-91%)          | 0.45<br>(0.38-0.53)                         | 0.63%<br>(0.46-0.83%)                | 1.1%<br>(0.71-1.7%)                 | 1100<br>(660-1600)  | 39000<br>(28000-53000)  |
| Kenya    | 1990 | Female | 15 to 19 | 11%<br>(7.1-17%)               | 89%<br>(83-93%)          | 0.56<br>(0.31-0.93)                         | 0.84%<br>(0.56-1.2%)                 | 0.79%<br>(0.41-1.3%)                | 15<br>(7.8-25)      | 2000<br>(1300-3000)     |
| Kenya    | 1990 | Female | 20 to 24 | 15%<br>(9-22%)                 | 85%<br>(78-91%)          | 0.77<br>(0.43-1.2)                          | 1.2%<br>(0.82-1.6%)                  | 0.79%<br>(0.41-1.3%)                | 20<br>(11-34)       | 3100<br>(2000-4400)     |
| Kenya    | 1990 | Female | 25 to 29 | 16%<br>(9.9-24%)               | 84%<br>(76-90%)          | 0.89<br>(0.51-1.4)                          | 1.3%<br>(0.95-1.8%)                  | 1%<br>(0.58-1.6%)                   | 27<br>(15-42)       | 3300<br>(2300-4500)     |
| Kenya    | 1990 | Female | 30 to 34 | 18%<br>(11-28%)                | 82%<br>(72-89%)          | 0.99<br>(0.58-1.5)                          | 1.5%<br>(1.1-2.1%)                   | 1.4%<br>(0.86-2.1%)                 | 35<br>(22-54)       | 3300<br>(2300-4500)     |
| Kenya    | 1990 | Female | 35 to 39 | 21%<br>(12-30%)                | 79%<br>(70-88%)          | 1.1<br>(0.59-1.7)                           | 1.8%<br>(1.2-2.5%)                   | 1.9%<br>(1.2-2.9%)                  | 47<br>(28-71)       | 3300<br>(2300-4600)     |
| Kenya    | 1990 | Female | 40 to 44 | 22%<br>(14-32%)                | 78%<br>(68-86%)          | 1.1<br>(0.59-1.7)                           | 2%<br>(1.3-2.8%)                     | 2.4%<br>(1.4-3.5%)                  | 52<br>(31-78)       | 3000<br>(1900-4200)     |
| Kenya    | 1990 | Female | 45 to 49 | 21%<br>(12-30%)                | 79%<br>(70-88%)          | 1.1<br>(0.58-1.8)                           | 2.3%<br>(1.4-3.4%)                   | 2.8%<br>(1.6-4.3%)                  | 56<br>(33-89)       | 2700<br>(1700-4100)     |
| Kenya    | 1990 | Female | 50 to 54 | 20%<br>(13-30%)                | 80%<br>(70-87%)          | 1.1<br>(0.57-1.8)                           | 2.6%<br>(1.5-4%)                     | 3.2%<br>(1.9-5.1%)                  | 84<br>(48-140)      | 3300<br>(2000-5200)     |
| Kenya    | 1990 | Female | 55 to 59 | 20%<br>(12-29%)                | 80%<br>(71-88%)          | 1.1<br>(0.56-1.8)                           | 2.6%<br>(1.4-4.1%)                   | 3.1%<br>(1.7-5.2%)                  | 110<br>(57-170)     | 3500<br>(2000-5700)     |
| Kenya    | 1990 | Female | 60 to 64 | 20%<br>(12-30%)                | 80%<br>(70-88%)          | 1.1<br>(0.54-1.8)                           | 2.6%<br>(1.4-4.3%)                   | 3%<br>(1.6-5.2%)                    | 120<br>(65-200)     | 3400<br>(1900-5700)     |
| Kenya    | 1990 | Female | 65 to 69 | 21%<br>(14-30%)                | 79%<br>(70-86%)          | 1<br>(0.57-1.7)                             | 2.7%<br>(1.6-4.3%)                   | 3.1%<br>(1.8-5%)                    | 140<br>(80-220)     | 3300<br>(1900-5200)     |

| Location | Year | Sex    | Age      | Prevalence of current drinkers | Prevalence of abstainers | Population average of standard drinks daily | Percent of total attributable deaths | Percent of total attributable DALYs | Attributable deaths | Attributable DALYs      |
|----------|------|--------|----------|--------------------------------|--------------------------|---------------------------------------------|--------------------------------------|-------------------------------------|---------------------|-------------------------|
| Kenya    | 1990 | Female | 70 to 74 | 20%<br>(13-28%)                | 80%<br>(72-87%)          | 0.9<br>(0.48-1.6)                           | 2.2%<br>(1.1-3.7%)                   | 2.5%<br>(1.2-4.2%)                  | 120<br>(61-210)     | 2400<br>(1200-4100)     |
| Kenya    | 1990 | Female | 75 to 79 | 18%<br>(11-27%)                | 82%<br>(73-89%)          | 0.77<br>(0.37-1.4)                          | 1.9%<br>(0.94-3.3%)                  | 2.1%<br>(1-3.8%)                    | 110<br>(51-190)     | 1500<br>(760-2700)      |
| Kenya    | 1990 | Female | 80 to 84 | 17%<br>(10-25%)                | 83%<br>(75-90%)          | 0.71<br>(0.36-1.2)                          | 1.6%<br>(0.72-2.9%)                  | 1.8%<br>(0.76-3.2%)                 | 74<br>(32-130)      | 800<br>(350-1400)       |
| Kenya    | 1990 | Female | 85 to 89 | 17%<br>(11-26%)                | 83%<br>(74-89%)          | 0.72<br>(0.37-1.2)                          | 1.4%<br>(0.56-2.5%)                  | 1.5%<br>(0.57-2.8%)                 | 41<br>(16-78)       | 320<br>(130-590)        |
| Kenya    | 1990 | Female | 90 to 94 | 19%<br>(12-29%)                | 81%<br>(71-88%)          | 0.79<br>(0.38-1.4)                          | 1.2%<br>(0.42-2.5%)                  | 1.4%<br>(0.41-2.9%)                 | 16<br>(4.8-33)      | 85<br>(29-170)          |
| Kenya    | 1990 | Female | 95 plus  | 23%<br>(12-36%)                | 77%<br>(64-88%)          | 0.9<br>(0.36-1.8)                           | 1.4%<br>(0.49-3.1%)                  | 1.6%<br>(0.46-3.5%)                 | 5.1<br>(1.5-11)     | 18<br>(6.1-40)          |
| Kenya    | 1990 | Male   | All Ages | 26%<br>(22-31%)                | 74%<br>(69-78%)          | 0.82<br>(0.7-0.96)                          | 1.2%<br>(0.89-1.6%)                  | 1.9%<br>(1.2-2.6%)                  | 2000<br>(1300-2800) | 88000<br>(63000-110000) |
| Kenya    | 1990 | Male   | 15 to 19 | 23%<br>(15-33%)                | 77%<br>(67-85%)          | 0.89<br>(0.53-1.4)                          | 2%<br>(1.3-3%)                       | 2.2%<br>(1.2-3.8%)                  | 40<br>(21-70)       | 4500<br>(2800-6700)     |
| Kenya    | 1990 | Male   | 20 to 24 | 35%<br>(23-48%)                | 65%<br>(52-77%)          | 1.3<br>(0.72-2)                             | 3.1%<br>(2.1-4.5%)                   | 2.8%<br>(1.5-4.7%)                  | 84<br>(46-140)      | 8500<br>(5500-12000)    |
| Kenya    | 1990 | Male   | 25 to 29 | 42%<br>(28-57%)                | 58%<br>(43-72%)          | 1.6<br>(0.93-2.3)                           | 3.1%<br>(2.1-4.3%)                   | 2.9%<br>(1.6-4.3%)                  | 110<br>(61-160)     | 9300<br>(6100-13000)    |
| Kenya    | 1990 | Male   | 30 to 34 | 47%<br>(31-62%)                | 53%<br>(38-69%)          | 1.9<br>(1.1-2.7)                            | 3.5%<br>(2.4-4.8%)                   | 3.5%<br>(2-5.2%)                    | 130<br>(75-190)     | 9300<br>(6200-13000)    |
| Kenya    | 1990 | Male   | 35 to 39 | 50%<br>(34-64%)                | 50%<br>(36-66%)          | 2.3<br>(1.4-3.6)                            | 4.3%<br>(2.8-6%)                     | 4.7%<br>(2.9-6.8%)                  | 160<br>(99-230)     | 9700<br>(6600-14000)    |
| Kenya    | 1990 | Male   | 40 to 44 | 50%<br>(36-65%)                | 50%<br>(35-64%)          | 2.5<br>(1.5-3.8)                            | 4.8%<br>(3.2-6.7%)                   | 5.6%<br>(3.5-8%)                    | 160<br>(100-240)    | 8600<br>(5700-12000)    |
| Kenya    | 1990 | Male   | 45 to 49 | 50%<br>(34-63%)                | 50%<br>(37-66%)          | 2.4<br>(1.3-3.8)                            | 5.3%<br>(3.4-7.4%)                   | 6.3%<br>(3.9-9%)                    | 160<br>(95-220)     | 7000<br>(4500-9900)     |
| Kenya    | 1990 | Male   | 50 to 54 | 51%<br>(37-66%)                | 49%<br>(34-63%)          | 2.3<br>(1.3-3.7)                            | 5.8%<br>(3.7-8.3%)                   | 7.1%<br>(4.2-10%)                   | 190<br>(110-280)    | 7600<br>(4500-11000)    |
| Kenya    | 1990 | Male   | 55 to 59 | 54%<br>(41-68%)                | 46%<br>(32-59%)          | 2.2<br>(1.3-3.6)                            | 5.5%<br>(3.4-8%)                     | 6.6%<br>(4-9.9%)                    | 220<br>(130-330)    | 7500<br>(4700-11000)    |
| Kenya    | 1990 | Male   | 60 to 64 | 54%<br>(39-69%)                | 46%<br>(31-61%)          | 1.9<br>(1.1-3.3)                            | 5%<br>(2.9-7.7%)                     | 5.9%<br>(3.4-9.2%)                  | 230<br>(130-360)    | 6500<br>(3900-10000)    |
| Kenya    | 1990 | Male   | 65 to 69 | 52%<br>(37-65%)                | 48%<br>(35-63%)          | 1.6<br>(0.93-2.5)                           | 3.6%<br>(2-5.7%)                     | 4.2%<br>(2.3-6.9%)                  | 180<br>(99-290)     | 4200<br>(2400-6700)     |
| Kenya    | 1990 | Male   | 70 to 74 | 47%<br>(34-60%)                | 53%<br>(40-66%)          | 1.2<br>(0.63-1.9)                           | 2.5%<br>(1.3-4.3%)                   | 2.9%<br>(1.5-5%)                    | 140<br>(69-230)     | 2500<br>(1300-4300)     |
| Kenya    | 1990 | Male   | 75 to 79 | 40%<br>(28-55%)                | 60%<br>(45-72%)          | 0.87<br>(0.43-1.5)                          | 1.8%<br>(0.84-3.2%)                  | 2.1%<br>(0.93-3.7%)                 | 92<br>(41-170)      | 1300<br>(610-2400)      |
| Kenya    | 1990 | Male   | 80 to 84 | 36%<br>(24-49%)                | 64%<br>(51-76%)          | 0.72<br>(0.39-1.2)                          | 1.3%<br>(0.58-2.3%)                  | 1.5%<br>(0.62-2.6%)                 | 48<br>(20-84)       | 520<br>(230-890)        |
| Kenya    | 1990 | Male   | 85 to 89 | 34%<br>(23-48%)                | 66%<br>(52-77%)          | 0.63<br>(0.34-1.1)                          | 1.1%<br>(0.51-1.9%)                  | 1.2%<br>(0.51-2.1%)                 | 25<br>(11-43)       | 200<br>(88-340)         |

| Location | Year | Sex    | Age      | Prevalence of current drinkers | Prevalence of abstainers | Population average of standard drinks daily | Percent of total attributable deaths | Percent of total attributable DALYs | Attributable deaths | Attributable DALYs       |
|----------|------|--------|----------|--------------------------------|--------------------------|---------------------------------------------|--------------------------------------|-------------------------------------|---------------------|--------------------------|
| Kenya    | 1990 | Male   | 90 to 94 | 35%<br>(24-48%)                | 65%<br>(52-76%)          | 0.61<br>(0.3-1)                             | 0.74%<br>(0.27-1.4%)                 | 0.74%<br>(0.2-1.5%)                 | 6.5<br>(1.8-13)     | 38<br>(14-75)            |
| Kenya    | 1990 | Male   | 95 plus  | 39%<br>(24-55%)                | 61%<br>(45-76%)          | 0.62<br>(0.26-1.2)                          | 0.88%<br>(0.33-1.7%)                 | 0.82%<br>(0.19-1.8%)                | 1.9<br>(0.44-4.1)   | 8.2<br>(3-16)            |
| Kenya    | 1995 | Female | All Ages | 11%<br>(9.4-14%)               | 89%<br>(86-91%)          | 0.48<br>(0.4-0.56)                          | 0.62%<br>(0.46-0.8%)                 | 1.1%<br>(0.7-1.5%)                  | 1400<br>(880-2000)  | 51000<br>(37000-67000)   |
| Kenya    | 1995 | Female | 15 to 19 | 11%<br>(7.1-17%)               | 89%<br>(83-93%)          | 0.57<br>(0.32-0.95)                         | 0.84%<br>(0.56-1.2%)                 | 0.8%<br>(0.42-1.3%)                 | 20<br>(10-33)       | 2600<br>(1700-3700)      |
| Kenya    | 1995 | Female | 20 to 24 | 15%<br>(9-22%)                 | 85%<br>(78-91%)          | 0.78<br>(0.44-1.2)                          | 0.89%<br>(0.61-1.2%)                 | 0.53%<br>(0.27-0.87%)               | 25<br>(13-42)       | 3900<br>(2600-5400)      |
| Kenya    | 1995 | Female | 25 to 29 | 16%<br>(10-24%)                | 84%<br>(76-90%)          | 0.91<br>(0.52-1.4)                          | 0.79%<br>(0.56-1.1%)                 | 0.51%<br>(0.3-0.8%)                 | 34<br>(20-52)       | 4000<br>(2800-5500)      |
| Kenya    | 1995 | Female | 30 to 34 | 18%<br>(11-27%)                | 82%<br>(73-89%)          | 1<br>(0.59-1.6)                             | 0.9%<br>(0.66-1.2%)                  | 0.69%<br>(0.43-1%)                  | 45<br>(28-68)       | 4100<br>(2900-5600)      |
| Kenya    | 1995 | Female | 35 to 39 | 21%<br>(13-30%)                | 79%<br>(70-87%)          | 1.1<br>(0.6-1.7)                            | 1.1%<br>(0.8-1.6%)                   | 1.1%<br>(0.67-1.6%)                 | 62<br>(38-91)       | 4300<br>(2900-5900)      |
| Kenya    | 1995 | Female | 40 to 44 | 22%<br>(14-32%)                | 78%<br>(68-86%)          | 1.1<br>(0.6-1.8)                            | 1.5%<br>(0.98-2%)                    | 1.5%<br>(0.95-2.2%)                 | 78<br>(48-110)      | 4400<br>(2900-6100)      |
| Kenya    | 1995 | Female | 45 to 49 | 21%<br>(12-30%)                | 79%<br>(70-88%)          | 1.1<br>(0.58-1.9)                           | 1.8%<br>(1.2-2.7%)                   | 2.1%<br>(1.2-3.1%)                  | 89<br>(53-130)      | 4200<br>(2600-6100)      |
| Kenya    | 1995 | Female | 50 to 54 | 20%<br>(12-29%)                | 80%<br>(71-88%)          | 1.1<br>(0.59-1.8)                           | 2.4%<br>(1.4-3.6%)                   | 2.8%<br>(1.6-4.3%)                  | 100<br>(59-160)     | 4000<br>(2400-6100)      |
| Kenya    | 1995 | Female | 55 to 59 | 20%<br>(13-29%)                | 80%<br>(71-87%)          | 1.1<br>(0.57-1.9)                           | 2.5%<br>(1.4-3.9%)                   | 2.9%<br>(1.7-4.8%)                  | 130<br>(70-200)     | 4200<br>(2400-6700)      |
| Kenya    | 1995 | Female | 60 to 64 | 20%<br>(12-30%)                | 80%<br>(70-88%)          | 1.1<br>(0.54-1.9)                           | 2.6%<br>(1.5-4.2%)                   | 3%<br>(1.7-5%)                      | 160<br>(86-270)     | 4500<br>(2500-7300)      |
| Kenya    | 1995 | Female | 65 to 69 | 21%<br>(14-30%)                | 79%<br>(70-86%)          | 1.1<br>(0.57-1.8)                           | 2.8%<br>(1.7-4.3%)                   | 3.2%<br>(1.9-5%)                    | 190<br>(110-300)    | 4400<br>(2600-6800)      |
| Kenya    | 1995 | Female | 70 to 74 | 20%<br>(13-29%)                | 80%<br>(71-87%)          | 0.92<br>(0.47-1.6)                          | 2.3%<br>(1.2-3.9%)                   | 2.6%<br>(1.3-4.4%)                  | 160<br>(79-270)     | 3000<br>(1500-5100)      |
| Kenya    | 1995 | Female | 75 to 79 | 18%<br>(11-27%)                | 82%<br>(73-89%)          | 0.79<br>(0.38-1.4)                          | 2.1%<br>(1.1-3.5%)                   | 2.3%<br>(1.2-4%)                    | 140<br>(66-230)     | 2000<br>(990-3300)       |
| Kenya    | 1995 | Female | 80 to 84 | 17%<br>(10-25%)                | 83%<br>(75-90%)          | 0.73<br>(0.37-1.2)                          | 1.7%<br>(0.79-3%)                    | 1.9%<br>(0.85-3.4%)                 | 92<br>(41-160)      | 980<br>(450-1700)        |
| Kenya    | 1995 | Female | 85 to 89 | 17%<br>(11-26%)                | 83%<br>(74-89%)          | 0.74<br>(0.38-1.3)                          | 1.4%<br>(0.61-2.5%)                  | 1.6%<br>(0.64-2.9%)                 | 47<br>(19-86)       | 360<br>(150-640)         |
| Kenya    | 1995 | Female | 90 to 94 | 19%<br>(12-28%)                | 81%<br>(72-88%)          | 0.81<br>(0.39-1.5)                          | 1.3%<br>(0.46-2.6%)                  | 1.4%<br>(0.46-3%)                   | 18<br>(5.9-38)      | 98<br>(35-190)           |
| Kenya    | 1995 | Female | 95 plus  | 23%<br>(13-36%)                | 77%<br>(64-87%)          | 0.92<br>(0.37-1.8)                          | 1.5%<br>(0.54-3.2%)                  | 1.7%<br>(0.5-3.6%)                  | 6.3<br>(1.9-13)     | 23<br>(7.7-47)           |
| Kenya    | 1995 | Male   | All Ages | 27%<br>(22-32%)                | 73%<br>(68-78%)          | 0.87<br>(0.73-1)                            | 1.3%<br>(0.94-1.6%)                  | 1.9%<br>(1.3-2.5%)                  | 2700<br>(1800-3600) | 120000<br>(88000-150000) |
| Kenya    | 1995 | Male   | 15 to 19 | 23%<br>(15-33%)                | 77%<br>(67-85%)          | 0.91<br>(0.53-1.4)                          | 2.1%<br>(1.4-3.1%)                   | 2.4%<br>(1.3-4.1%)                  | 58<br>(30-97)       | 6000<br>(3800-8900)      |

| Location | Year | Sex    | Age      | Prevalence of current drinkers | Prevalence of abstainers | Population average of standard drinks daily | Percent of total attributable deaths | Percent of total attributable DALYs | Attributable deaths | Attributable DALYs     |
|----------|------|--------|----------|--------------------------------|--------------------------|---------------------------------------------|--------------------------------------|-------------------------------------|---------------------|------------------------|
| Kenya    | 1995 | Male   | 20 to 24 | 34%<br>(22-48%)                | 66%<br>(52-78%)          | 1.3<br>(0.73-2)                             | 2.9%<br>(1.9-4.2%)                   | 2.6%<br>(1.5-4.3%)                  | 120<br>(68-200)     | 12000<br>(7700-17000)  |
| Kenya    | 1995 | Male   | 25 to 29 | 42%<br>(27-56%)                | 58%<br>(44-73%)          | 1.6<br>(0.95-2.4)                           | 2.3%<br>(1.5-3.1%)                   | 2%<br>(1.2-3%)                      | 160<br>(92-230)     | 13000<br>(8600-18000)  |
| Kenya    | 1995 | Male   | 30 to 34 | 47%<br>(31-62%)                | 53%<br>(38-69%)          | 1.9<br>(1.2-2.8)                            | 2.2%<br>(1.5-3%)                     | 2%<br>(1.2-2.9%)                    | 170<br>(110-250)    | 12000<br>(8400-17000)  |
| Kenya    | 1995 | Male   | 35 to 39 | 50%<br>(34-64%)                | 50%<br>(36-66%)          | 2.4<br>(1.4-3.6)                            | 2.9%<br>(1.9-3.9%)                   | 2.9%<br>(1.8-4.1%)                  | 220<br>(140-320)    | 13000<br>(8900-18000)  |
| Kenya    | 1995 | Male   | 40 to 44 | 50%<br>(36-65%)                | 50%<br>(35-64%)          | 2.6<br>(1.5-3.9)                            | 3.3%<br>(2.2-4.5%)                   | 3.5%<br>(2.2-4.9%)                  | 250<br>(160-350)    | 13000<br>(8600-17000)  |
| Kenya    | 1995 | Male   | 45 to 49 | 50%<br>(34-64%)                | 50%<br>(36-66%)          | 2.5<br>(1.4-3.9)                            | 4%<br>(2.7-5.5%)                     | 4.4%<br>(2.8-6.1%)                  | 250<br>(160-350)    | 11000<br>(7500-15000)  |
| Kenya    | 1995 | Male   | 50 to 54 | 51%<br>(36-66%)                | 49%<br>(34-64%)          | 2.4<br>(1.3-3.8)                            | 5.1%<br>(3.2-7%)                     | 5.8%<br>(3.6-8.2%)                  | 240<br>(150-340)    | 9400<br>(6000-13000)   |
| Kenya    | 1995 | Male   | 55 to 59 | 54%<br>(40-68%)                | 46%<br>(32-60%)          | 2.3<br>(1.3-3.6)                            | 5.3%<br>(3.3-7.5%)                   | 6.1%<br>(3.8-8.8%)                  | 270<br>(160-390)    | 9000<br>(5600-13000)   |
| Kenya    | 1995 | Male   | 60 to 64 | 54%<br>(40-69%)                | 46%<br>(31-60%)          | 2<br>(1.1-3.4)                              | 4.9%<br>(3-7.4%)                     | 5.8%<br>(3.4-8.7%)                  | 310<br>(180-470)    | 8700<br>(5200-13000)   |
| Kenya    | 1995 | Male   | 65 to 69 | 51%<br>(37-65%)                | 49%<br>(35-63%)          | 1.6<br>(0.94-2.5)                           | 3.7%<br>(2.1-5.7%)                   | 4.3%<br>(2.4-6.7%)                  | 240<br>(130-380)    | 5700<br>(3200-8800)    |
| Kenya    | 1995 | Male   | 70 to 74 | 46%<br>(33-60%)                | 54%<br>(40-67%)          | 1.2<br>(0.65-1.9)                           | 2.6%<br>(1.4-4.4%)                   | 3%<br>(1.6-5.1%)                    | 180<br>(93-300)     | 3300<br>(1700-5600)    |
| Kenya    | 1995 | Male   | 75 to 79 | 40%<br>(27-54%)                | 60%<br>(46-73%)          | 0.89<br>(0.44-1.5)                          | 1.9%<br>(0.96-3.4%)                  | 2.2%<br>(1.1-3.9%)                  | 120<br>(57-210)     | 1700<br>(840-3000)     |
| Kenya    | 1995 | Male   | 80 to 84 | 36%<br>(24-49%)                | 64%<br>(51-76%)          | 0.74<br>(0.4-1.2)                           | 1.5%<br>(0.67-2.4%)                  | 1.6%<br>(0.71-2.7%)                 | 62<br>(27-110)      | 680<br>(310-1100)      |
| Kenya    | 1995 | Male   | 85 to 89 | 34%<br>(23-48%)                | 66%<br>(52-77%)          | 0.65<br>(0.35-1.1)                          | 1.2%<br>(0.56-2%)                    | 1.3%<br>(0.57-2.2%)                 | 32<br>(14-55)       | 250<br>(120-420)       |
| Kenya    | 1995 | Male   | 90 to 94 | 35%<br>(24-48%)                | 65%<br>(52-76%)          | 0.62<br>(0.3-1.1)                           | 0.81%<br>(0.31-1.6%)                 | 0.82%<br>(0.25-1.7%)                | 8.8<br>(2.7-18)     | 51<br>(19-98)          |
| Kenya    | 1995 | Male   | 95 plus  | 39%<br>(23-54%)                | 61%<br>(46-77%)          | 0.63<br>(0.27-1.2)                          | 0.97%<br>(0.39-1.9%)                 | 0.91%<br>(0.27-1.9%)                | 2.5<br>(0.74-5.2)   | 11<br>(4.2-20)         |
| Kenya    | 2000 | Female | All Ages | 13%<br>(11-16%)                | 87%<br>(84-89%)          | 0.5<br>(0.42-0.59)                          | 0.61%<br>(0.46-0.79%)                | 0.99%<br>(0.63-1.4%)                | 1500<br>(980-2200)  | 60000<br>(44000-78000) |
| Kenya    | 2000 | Female | 15 to 19 | 14%<br>(9.1-21%)               | 86%<br>(79-91%)          | 0.64<br>(0.37-1)                            | 1%<br>(0.65-1.4%)                    | 1%<br>(0.57-1.8%)                   | 27<br>(14-45)       | 3400<br>(2200-4900)    |
| Kenya    | 2000 | Female | 20 to 24 | 17%<br>(11-25%)                | 83%<br>(75-89%)          | 0.81<br>(0.46-1.3)                          | 1%<br>(0.71-1.4%)                    | 0.67%<br>(0.35-1.1%)                | 34<br>(18-57)       | 4900<br>(3300-6900)    |
| Kenya    | 2000 | Female | 25 to 29 | 18%<br>(11-27%)                | 82%<br>(73-89%)          | 0.92<br>(0.53-1.4)                          | 0.65%<br>(0.46-0.88%)                | 0.42%<br>(0.24-0.65%)               | 43<br>(25-66)       | 4900<br>(3400-6700)    |
| Kenya    | 2000 | Female | 30 to 34 | 21%<br>(13-30%)                | 79%<br>(70-87%)          | 1<br>(0.6-1.6)                              | 0.67%<br>(0.47-0.91%)                | 0.5%<br>(0.32-0.75%)                | 55<br>(34-83)       | 4800<br>(3300-6600)    |
| Kenya    | 2000 | Female | 35 to 39 | 23%<br>(15-34%)                | 77%<br>(66-85%)          | 1.1<br>(0.62-1.7)                           | 0.84%<br>(0.57-1.2%)                 | 0.74%<br>(0.46-1.1%)                | 75<br>(46-110)      | 5000<br>(3400-7000)    |

| Location | Year | Sex    | Age      | Prevalence of current drinkers | Prevalence of abstainers | Population average of standard drinks daily | Percent of total attributable deaths | Percent of total attributable DALYs | Attributable deaths | Attributable DALYs        |
|----------|------|--------|----------|--------------------------------|--------------------------|---------------------------------------------|--------------------------------------|-------------------------------------|---------------------|---------------------------|
| Kenya    | 2000 | Female | 40 to 44 | 24%<br>(15-35%)                | 76%<br>(65-85%)          | 1.1<br>(0.59-1.8)                           | 1.1%<br>(0.72-1.5%)                  | 1.1%<br>(0.65-1.6%)                 | 96<br>(57-140)      | 5300<br>(3400-7400)       |
| Kenya    | 2000 | Female | 45 to 49 | 23%<br>(13-32%)                | 77%<br>(68-87%)          | 1.1<br>(0.54-1.8)                           | 1.5%<br>(0.91-2.2%)                  | 1.6%<br>(0.93-2.4%)                 | 120<br>(70-180)     | 5600<br>(3500-8400)       |
| Kenya    | 2000 | Female | 50 to 54 | 20%<br>(13-30%)                | 80%<br>(70-87%)          | 0.99<br>(0.52-1.7)                          | 2%<br>(1.2-3.1%)                     | 2.3%<br>(1.3-3.5%)                  | 140<br>(82-220)     | 5500<br>(3300-8400)       |
| Kenya    | 2000 | Female | 55 to 59 | 19%<br>(12-28%)                | 81%<br>(72-88%)          | 0.94<br>(0.48-1.6)                          | 2.2%<br>(1.2-3.5%)                   | 2.6%<br>(1.4-4.2%)                  | 130<br>(69-200)     | 4200<br>(2400-6700)       |
| Kenya    | 2000 | Female | 60 to 64 | 19%<br>(12-28%)                | 81%<br>(72-88%)          | 0.92<br>(0.46-1.6)                          | 2.3%<br>(1.2-3.7%)                   | 2.6%<br>(1.4-4.4%)                  | 150<br>(82-250)     | 4300<br>(2400-7000)       |
| Kenya    | 2000 | Female | 65 to 69 | 20%<br>(13-29%)                | 80%<br>(71-87%)          | 0.91<br>(0.49-1.5)                          | 2.5%<br>(1.5-3.9%)                   | 2.9%<br>(1.6-4.6%)                  | 200<br>(110-320)    | 4800<br>(2700-7400)       |
| Kenya    | 2000 | Female | 70 to 74 | 19%<br>(13-28%)                | 81%<br>(72-87%)          | 0.8<br>(0.41-1.4)                           | 2.1%<br>(1.1-3.5%)                   | 2.4%<br>(1.2-4%)                    | 170<br>(85-290)     | 3300<br>(1700-5600)       |
| Kenya    | 2000 | Female | 75 to 79 | 18%<br>(11-26%)                | 82%<br>(74-89%)          | 0.7<br>(0.33-1.2)                           | 1.9%<br>(0.96-3.2%)                  | 2.1%<br>(1.1-3.7%)                  | 140<br>(70-240)     | 2000<br>(1000-3400)       |
| Kenya    | 2000 | Female | 80 to 84 | 17%<br>(10-25%)                | 83%<br>(75-90%)          | 0.65<br>(0.33-1.1)                          | 1.5%<br>(0.69-2.7%)                  | 1.7%<br>(0.75-3%)                   | 95<br>(41-160)      | 1000<br>(460-1700)        |
| Kenya    | 2000 | Female | 85 to 89 | 17%<br>(11-26%)                | 83%<br>(74-89%)          | 0.66<br>(0.34-1.1)                          | 1.3%<br>(0.51-2.3%)                  | 1.4%<br>(0.56-2.7%)                 | 46<br>(17-86)       | 350<br>(140-640)          |
| Kenya    | 2000 | Female | 90 to 94 | 20%<br>(12-29%)                | 80%<br>(71-88%)          | 0.73<br>(0.35-1.3)                          | 1.2%<br>(0.4-2.4%)                   | 1.3%<br>(0.4-2.7%)                  | 17<br>(5.1-36)      | 89<br>(31-180)            |
| Kenya    | 2000 | Female | 95 plus  | 23%<br>(13-36%)                | 77%<br>(64-87%)          | 0.83<br>(0.33-1.6)                          | 1.4%<br>(0.51-3%)                    | 1.5%<br>(0.48-3.4%)                 | 5.9<br>(1.8-13)     | 21<br>(7.4-44)            |
| Kenya    | 2000 | Male   | All Ages | 30%<br>(25-35%)                | 70%<br>(65-75%)          | 0.86<br>(0.72-1)                            | 1.4%<br>(1.1-1.8%)                   | 2%<br>(1.4-2.6%)                    | 3400<br>(2300-4500) | 150000<br>(120000-190000) |
| Kenya    | 2000 | Male   | 15 to 19 | 28%<br>(19-39%)                | 72%<br>(61-81%)          | 0.96<br>(0.58-1.5)                          | 2.4%<br>(1.6-3.5%)                   | 2.9%<br>(1.6-4.5%)                  | 85<br>(47-140)      | 8400<br>(5400-12000)      |
| Kenya    | 2000 | Male   | 20 to 24 | 38%<br>(26-53%)                | 62%<br>(47-74%)          | 1.3<br>(0.74-2)                             | 3.7%<br>(2.4-5.2%)                   | 3.6%<br>(2.1-5.7%)                  | 180<br>(100-280)    | 16000<br>(11000-23000)    |
| Kenya    | 2000 | Male   | 25 to 29 | 45%<br>(30-59%)                | 55%<br>(41-70%)          | 1.5<br>(0.9-2.2)                            | 2.5%<br>(1.6-3.3%)                   | 2.2%<br>(1.3-3.2%)                  | 220<br>(120-310)    | 17000<br>(11000-23000)    |
| Kenya    | 2000 | Male   | 30 to 34 | 49%<br>(33-63%)                | 51%<br>(37-67%)          | 1.8<br>(1.1-2.6)                            | 2.1%<br>(1.4-2.8%)                   | 1.9%<br>(1.2-2.8%)                  | 240<br>(140-340)    | 16000<br>(11000-22000)    |
| Kenya    | 2000 | Male   | 35 to 39 | 52%<br>(37-66%)                | 48%<br>(34-63%)          | 2.2<br>(1.3-3.3)                            | 2.3%<br>(1.6-3.2%)                   | 2.3%<br>(1.5-3.3%)                  | 280<br>(180-390)    | 16000<br>(11000-22000)    |
| Kenya    | 2000 | Male   | 40 to 44 | 52%<br>(39-67%)                | 48%<br>(33-61%)          | 2.4<br>(1.4-3.5)                            | 2.9%<br>(1.9-3.9%)                   | 3%<br>(1.9-4.1%)                    | 320<br>(210-450)    | 16000<br>(11000-22000)    |
| Kenya    | 2000 | Male   | 45 to 49 | 52%<br>(36-65%)                | 48%<br>(35-64%)          | 2.3<br>(1.3-3.5)                            | 3.4%<br>(2.3-4.7%)                   | 3.7%<br>(2.4-5.1%)                  | 350<br>(230-490)    | 16000<br>(10000-21000)    |
| Kenya    | 2000 | Male   | 50 to 54 | 53%<br>(39-67%)                | 47%<br>(33-61%)          | 2.2<br>(1.2-3.5)                            | 4.6%<br>(2.9-6.4%)                   | 5.2%<br>(3.2-7.2%)                  | 370<br>(230-510)    | 14000<br>(8800-20000)     |
| Kenya    | 2000 | Male   | 55 to 59 | 55%<br>(41-69%)                | 45%<br>(31-59%)          | 2.1<br>(1.2-3.3)                            | 5.1%<br>(3.2-7.3%)                   | 5.9%<br>(3.6-8.5%)                  | 320<br>(190-460)    | 10000<br>(6600-15000)     |

| Location | Year | Sex    | Age      | Prevalence of current drinkers | Prevalence of abstainers | Population average of standard drinks daily | Percent of total attributable deaths | Percent of total attributable DALYs | Attributable deaths | Attributable DALYs     |
|----------|------|--------|----------|--------------------------------|--------------------------|---------------------------------------------|--------------------------------------|-------------------------------------|---------------------|------------------------|
| Kenya    | 2000 | Male   | 60 to 64 | 55%<br>(40-70%)                | 45%<br>(30-60%)          | 1.8<br>(0.98-3)                             | 4.7%<br>(2.9-7.2%)                   | 5.4%<br>(3.3-8.2%)                  | 330<br>(200-500)    | 9200<br>(5600-14000)   |
| Kenya    | 2000 | Male   | 65 to 69 | 52%<br>(37-66%)                | 48%<br>(34-63%)          | 1.4<br>(0.84-2.2)                           | 3.5%<br>(2-5.5%)                     | 4%<br>(2.2-6.3%)                    | 280<br>(150-450)    | 6600<br>(3700-10000)   |
| Kenya    | 2000 | Male   | 70 to 74 | 45%<br>(32-59%)                | 55%<br>(41-68%)          | 1<br>(0.55-1.6)                             | 2.4%<br>(1.2-4%)                     | 2.7%<br>(1.4-4.6%)                  | 200<br>(100-330)    | 3600<br>(1900-6000)    |
| Kenya    | 2000 | Male   | 75 to 79 | 38%<br>(26-52%)                | 62%<br>(48-74%)          | 0.73<br>(0.36-1.3)                          | 1.7%<br>(0.9-3%)                     | 2%<br>(1-3.5%)                      | 130<br>(64-220)     | 1800<br>(930-3100)     |
| Kenya    | 2000 | Male   | 80 to 84 | 34%<br>(22-47%)                | 66%<br>(53-78%)          | 0.61<br>(0.33-0.96)                         | 1.3%<br>(0.59-2.2%)                  | 1.4%<br>(0.6-2.5%)                  | 66<br>(28-120)      | 710<br>(330-1200)      |
| Kenya    | 2000 | Male   | 85 to 89 | 33%<br>(22-46%)                | 67%<br>(54-78%)          | 0.54<br>(0.29-0.9)                          | 1.1%<br>(0.52-1.8%)                  | 1.2%<br>(0.54-2%)                   | 32<br>(14-54)       | 250<br>(120-420)       |
| Kenya    | 2000 | Male   | 90 to 94 | 34%<br>(22-46%)                | 66%<br>(54-78%)          | 0.52<br>(0.26-0.91)                         | 0.74%<br>(0.3-1.4%)                  | 0.75%<br>(0.24-1.5%)                | 8.8<br>(2.8-17)     | 51<br>(21-96)          |
| Kenya    | 2000 | Male   | 95 plus  | 38%<br>(22-53%)                | 62%<br>(47-78%)          | 0.54<br>(0.22-1)                            | 0.94%<br>(0.43-1.8%)                 | 0.91%<br>(0.32-1.9%)                | 2.8<br>(0.99-5.8)   | 12<br>(5.3-22)         |
| Kenya    | 2005 | Female | All Ages | 14%<br>(11-16%)                | 86%<br>(84-89%)          | 0.53<br>(0.45-0.62)                         | 0.7%<br>(0.52-0.9%)                  | 1.1%<br>(0.71-1.6%)                 | 1800<br>(1100-2500) | 68000<br>(50000-88000) |
| Kenya    | 2005 | Female | 15 to 19 | 14%<br>(9.3-21%)               | 86%<br>(79-91%)          | 0.65<br>(0.38-1)                            | 0.93%<br>(0.61-1.3%)                 | 0.89%<br>(0.47-1.5%)                | 28<br>(15-47)       | 3700<br>(2400-5300)    |
| Kenya    | 2005 | Female | 20 to 24 | 18%<br>(11-26%)                | 82%<br>(74-89%)          | 0.85<br>(0.47-1.3)                          | 1.3%<br>(0.9-1.8%)                   | 0.92%<br>(0.48-1.5%)                | 39<br>(21-64)       | 5800<br>(3900-8100)    |
| Kenya    | 2005 | Female | 25 to 29 | 19%<br>(12-27%)                | 81%<br>(73-88%)          | 0.96<br>(0.56-1.5)                          | 0.88%<br>(0.63-1.2%)                 | 0.58%<br>(0.33-0.9%)                | 50<br>(29-75)       | 5900<br>(4100-8000)    |
| Kenya    | 2005 | Female | 30 to 34 | 21%<br>(13-31%)                | 79%<br>(69-87%)          | 1.1<br>(0.63-1.7)                           | 0.71%<br>(0.51-0.97%)                | 0.52%<br>(0.32-0.79%)               | 60<br>(37-90)       | 5400<br>(3800-7500)    |
| Kenya    | 2005 | Female | 35 to 39 | 24%<br>(15-34%)                | 76%<br>(66-85%)          | 1.1<br>(0.63-1.8)                           | 0.83%<br>(0.57-1.2%)                 | 0.72%<br>(0.45-1.1%)                | 77<br>(47-120)      | 5300<br>(3600-7400)    |
| Kenya    | 2005 | Female | 40 to 44 | 24%<br>(16-35%)                | 76%<br>(65-84%)          | 1.1<br>(0.62-1.9)                           | 1%<br>(0.67-1.4%)                    | 0.99%<br>(0.61-1.5%)                | 98<br>(59-150)      | 5500<br>(3600-7800)    |
| Kenya    | 2005 | Female | 45 to 49 | 23%<br>(14-33%)                | 77%<br>(67-86%)          | 1.1<br>(0.57-1.9)                           | 1.4%<br>(0.87-2.1%)                  | 1.5%<br>(0.88-2.3%)                 | 130<br>(77-200)     | 6200<br>(3800-9200)    |
| Kenya    | 2005 | Female | 50 to 54 | 21%<br>(13-31%)                | 79%<br>(69-87%)          | 1<br>(0.55-1.7)                             | 2%<br>(1.2-3.1%)                     | 2.3%<br>(1.3-3.7%)                  | 180<br>(100-280)    | 6900<br>(4100-11000)   |
| Kenya    | 2005 | Female | 55 to 59 | 19%<br>(12-29%)                | 81%<br>(71-88%)          | 0.98<br>(0.49-1.7)                          | 2.3%<br>(1.3-3.6%)                   | 2.7%<br>(1.5-4.3%)                  | 170<br>(91-270)     | 5600<br>(3100-8800)    |
| Kenya    | 2005 | Female | 60 to 64 | 20%<br>(12-29%)                | 80%<br>(71-88%)          | 0.96<br>(0.48-1.7)                          | 2.4%<br>(1.3-3.8%)                   | 2.8%<br>(1.5-4.5%)                  | 160<br>(83-260)     | 4400<br>(2400-7100)    |
| Kenya    | 2005 | Female | 65 to 69 | 20%<br>(13-30%)                | 80%<br>(70-87%)          | 0.94<br>(0.51-1.6)                          | 2.6%<br>(1.5-4.1%)                   | 3%<br>(1.7-4.8%)                    | 210<br>(120-320)    | 4900<br>(2800-7500)    |
| Kenya    | 2005 | Female | 70 to 74 | 20%<br>(13-29%)                | 80%<br>(71-87%)          | 0.84<br>(0.43-1.4)                          | 2.2%<br>(1.1-3.8%)                   | 2.5%<br>(1.2-4.3%)                  | 200<br>(97-350)     | 3800<br>(1900-6500)    |
| Kenya    | 2005 | Female | 75 to 79 | 18%<br>(11-27%)                | 82%<br>(73-89%)          | 0.72<br>(0.34-1.3)                          | 2%<br>(0.99-3.4%)                    | 2.3%<br>(1.1-3.9%)                  | 180<br>(86-300)     | 2500<br>(1300-4300)    |

| Location | Year | Sex    | Age      | Prevalence of current drinkers | Prevalence of abstainers | Population average of standard drinks daily | Percent of total attributable deaths | Percent of total attributable DALYs | Attributable deaths | Attributable DALYs        |
|----------|------|--------|----------|--------------------------------|--------------------------|---------------------------------------------|--------------------------------------|-------------------------------------|---------------------|---------------------------|
| Kenya    | 2005 | Female | 80 to 84 | 17%<br>(11-26%)                | 83%<br>(74-89%)          | 0.66<br>(0.33-1.1)                          | 1.6%<br>(0.74-2.8%)                  | 1.9%<br>(0.81-3.2%)                 | 110<br>(49-200)     | 1200<br>(550-2100)        |
| Kenya    | 2005 | Female | 85 to 89 | 18%<br>(11-27%)                | 82%<br>(73-89%)          | 0.68<br>(0.35-1.2)                          | 1.4%<br>(0.57-2.5%)                  | 1.5%<br>(0.61-2.9%)                 | 56<br>(22-100)      | 420<br>(170-770)          |
| Kenya    | 2005 | Female | 90 to 94 | 20%<br>(12-29%)                | 80%<br>(71-88%)          | 0.74<br>(0.35-1.3)                          | 1.3%<br>(0.46-2.5%)                  | 1.4%<br>(0.47-2.9%)                 | 20<br>(6.7-42)      | 110<br>(38-220)           |
| Kenya    | 2005 | Female | 95 plus  | 23%<br>(13-36%)                | 77%<br>(64-87%)          | 0.84<br>(0.33-1.6)                          | 1.5%<br>(0.55-3.1%)                  | 1.7%<br>(0.55-3.5%)                 | 6.6<br>(2.2-14)     | 24<br>(8.5-48)            |
| Kenya    | 2005 | Male   | All Ages | 30%<br>(25-35%)                | 70%<br>(65-75%)          | 0.88<br>(0.74-1)                            | 1.7%<br>(1.3-2.2%)                   | 2.4%<br>(1.7-3.1%)                  | 4100<br>(2900-5400) | 190000<br>(140000-240000) |
| Kenya    | 2005 | Male   | 15 to 19 | 27%<br>(19-38%)                | 73%<br>(62-81%)          | 0.93<br>(0.55-1.4)                          | 2.2%<br>(1.4-3.2%)                   | 2.5%<br>(1.4-3.9%)                  | 100<br>(56-160)     | 9800<br>(6200-14000)      |
| Kenya    | 2005 | Male   | 20 to 24 | 38%<br>(25-51%)                | 62%<br>(49-75%)          | 1.2<br>(0.71-1.9)                           | 4.3%<br>(2.8-6.1%)                   | 4.4%<br>(2.5-6.9%)                  | 230<br>(130-360)    | 20000<br>(13000-30000)    |
| Kenya    | 2005 | Male   | 25 to 29 | 44%<br>(30-58%)                | 56%<br>(42-70%)          | 1.5<br>(0.9-2.2)                            | 3.7%<br>(2.5-5%)                     | 3.6%<br>(2.2-5.2%)                  | 280<br>(170-410)    | 22000<br>(15000-30000)    |
| Kenya    | 2005 | Male   | 30 to 34 | 49%<br>(33-63%)                | 51%<br>(37-67%)          | 1.8<br>(1.1-2.6)                            | 2.7%<br>(1.9-3.7%)                   | 2.6%<br>(1.6-3.7%)                  | 300<br>(180-430)    | 21000<br>(14000-28000)    |
| Kenya    | 2005 | Male   | 35 to 39 | 52%<br>(37-66%)                | 48%<br>(34-63%)          | 2.2<br>(1.3-3.4)                            | 2.8%<br>(1.9-3.8%)                   | 2.8%<br>(1.8-4%)                    | 340<br>(220-480)    | 20000<br>(14000-27000)    |
| Kenya    | 2005 | Male   | 40 to 44 | 52%<br>(38-67%)                | 48%<br>(33-62%)          | 2.3<br>(1.3-3.6)                            | 3%<br>(2.1-4.1%)                     | 3.1%<br>(2.1-4.4%)                  | 360<br>(240-510)    | 18000<br>(12000-25000)    |
| Kenya    | 2005 | Male   | 45 to 49 | 51%<br>(35-65%)                | 49%<br>(35-65%)          | 2.2<br>(1.2-3.5)                            | 3.8%<br>(2.5-5.2%)                   | 4.1%<br>(2.7-5.6%)                  | 420<br>(280-580)    | 18000<br>(12000-25000)    |
| Kenya    | 2005 | Male   | 50 to 54 | 52%<br>(38-67%)                | 48%<br>(33-62%)          | 2.1<br>(1.2-3.4)                            | 4.9%<br>(3.1-6.7%)                   | 5.5%<br>(3.4-7.6%)                  | 490<br>(310-680)    | 19000<br>(12000-26000)    |
| Kenya    | 2005 | Male   | 55 to 59 | 55%<br>(41-69%)                | 45%<br>(31-59%)          | 2<br>(1.2-3.2)                              | 5.5%<br>(3.5-7.8%)                   | 6.4%<br>(3.9-9.2%)                  | 450<br>(280-640)    | 15000<br>(9200-21000)     |
| Kenya    | 2005 | Male   | 60 to 64 | 55%<br>(40-70%)                | 45%<br>(30-60%)          | 1.8<br>(0.96-2.9)                           | 5%<br>(3-7.6%)                       | 5.8%<br>(3.4-8.9%)                  | 350<br>(210-540)    | 9900<br>(6000-15000)      |
| Kenya    | 2005 | Male   | 65 to 69 | 52%<br>(37-65%)                | 48%<br>(35-63%)          | 1.4<br>(0.81-2.2)                           | 3.7%<br>(2.1-5.7%)                   | 4.2%<br>(2.4-6.7%)                  | 290<br>(160-460)    | 6800<br>(3900-11000)      |
| Kenya    | 2005 | Male   | 70 to 74 | 45%<br>(32-58%)                | 55%<br>(42-68%)          | 0.98<br>(0.54-1.6)                          | 2.4%<br>(1.3-4%)                     | 2.8%<br>(1.4-4.6%)                  | 220<br>(110-370)    | 4100<br>(2100-6700)       |
| Kenya    | 2005 | Male   | 75 to 79 | 38%<br>(25-52%)                | 62%<br>(48-75%)          | 0.72<br>(0.36-1.2)                          | 1.8%<br>(0.92-3.1%)                  | 2.1%<br>(1-3.6%)                    | 150<br>(74-260)     | 2100<br>(1100-3600)       |
| Kenya    | 2005 | Male   | 80 to 84 | 34%<br>(22-46%)                | 66%<br>(54-78%)          | 0.59<br>(0.3-0.94)                          | 1.3%<br>(0.64-2.2%)                  | 1.5%<br>(0.64-2.5%)                 | 78<br>(34-140)      | 850<br>(390-1400)         |
| Kenya    | 2005 | Male   | 85 to 89 | 32%<br>(21-45%)                | 68%<br>(55-79%)          | 0.52<br>(0.28-0.87)                         | 1.1%<br>(0.56-1.9%)                  | 1.2%<br>(0.58-2.1%)                 | 37<br>(17-65)       | 290<br>(140-490)          |
| Kenya    | 2005 | Male   | 90 to 94 | 33%<br>(22-46%)                | 67%<br>(54-78%)          | 0.5<br>(0.24-0.87)                          | 0.79%<br>(0.33-1.5%)                 | 0.81%<br>(0.29-1.6%)                | 9.8<br>(3.5-19)     | 57<br>(24-110)            |
| Kenya    | 2005 | Male   | 95 plus  | 37%<br>(21-52%)                | 63%<br>(48-79%)          | 0.51<br>(0.21-0.97)                         | 1%<br>(0.48-1.9%)                    | 1%<br>(0.4-2.1%)                    | 3.3<br>(1.3-6.7)    | 13<br>(6.1-25)            |



| Location | Year | Sex    | Age      | Prevalence of current drinkers | Prevalence of abstainers | Population average of standard drinks daily | Percent of total attributable deaths | Percent of total attributable DALYs | Attributable deaths | Attributable DALYs        |
|----------|------|--------|----------|--------------------------------|--------------------------|---------------------------------------------|--------------------------------------|-------------------------------------|---------------------|---------------------------|
| Kenya    | 2010 | Female | All Ages | 11%<br>(8.9-13%)               | 89%<br>(87-91%)          | 0.51<br>(0.43-0.6)                          | 0.92%<br>(0.69-1.2%)                 | 1.6%<br>(1.1-2.2%)                  | 2200<br>(1400-3100) | 79000<br>(58000-100000)   |
| Kenya    | 2010 | Female | 15 to 19 | 9.5%<br>(5.9-15%)              | 91%<br>(85-94%)          | 0.52<br>(0.28-0.86)                         | 0.72%<br>(0.48-1%)                   | 0.58%<br>(0.29-0.97%)               | 20<br>(10-34)       | 3100<br>(2000-4500)       |
| Kenya    | 2010 | Female | 20 to 24 | 13%<br>(7.4-19%)               | 87%<br>(81-93%)          | 0.73<br>(0.39-1.2)                          | 1.3%<br>(0.9-1.8%)                   | 0.87%<br>(0.44-1.4%)                | 34<br>(17-55)       | 5800<br>(3900-8100)       |
| Kenya    | 2010 | Female | 25 to 29 | 14%<br>(8.4-21%)               | 86%<br>(79-92%)          | 0.86<br>(0.48-1.3)                          | 1.1%<br>(0.83-1.5%)                  | 0.76%<br>(0.45-1.2%)                | 48<br>(28-74)       | 6400<br>(4500-8600)       |
| Kenya    | 2010 | Female | 30 to 34 | 15%<br>(9.2-23%)               | 85%<br>(77-91%)          | 0.93<br>(0.54-1.5)                          | 1%<br>(0.73-1.4%)                    | 0.77%<br>(0.47-1.2%)                | 61<br>(38-92)       | 6000<br>(4300-8300)       |
| Kenya    | 2010 | Female | 35 to 39 | 17%<br>(10-25%)                | 83%<br>(75-90%)          | 0.97<br>(0.55-1.6)                          | 1.1%<br>(0.75-1.5%)                  | 0.96%<br>(0.6-1.4%)                 | 78<br>(47-120)      | 5600<br>(3900-7700)       |
| Kenya    | 2010 | Female | 40 to 44 | 18%<br>(11-28%)                | 82%<br>(72-89%)          | 1<br>(0.55-1.7)                             | 1.3%<br>(0.89-1.8%)                  | 1.3%<br>(0.83-2%)                   | 94<br>(58-140)      | 5400<br>(3600-7600)       |
| Kenya    | 2010 | Female | 45 to 49 | 19%<br>(11-27%)                | 81%<br>(73-89%)          | 1.1<br>(0.55-1.9)                           | 1.8%<br>(1.2-2.6%)                   | 2%<br>(1.2-3%)                      | 130<br>(81-200)     | 6200<br>(4000-9200)       |
| Kenya    | 2010 | Female | 50 to 54 | 19%<br>(12-28%)                | 81%<br>(72-88%)          | 1.1<br>(0.61-1.9)                           | 2.6%<br>(1.6-4%)                     | 3.1%<br>(1.9-4.9%)                  | 200<br>(120-310)    | 7800<br>(4800-12000)      |
| Kenya    | 2010 | Female | 55 to 59 | 20%<br>(13-30%)                | 80%<br>(70-87%)          | 1.2<br>(0.65-2.1)                           | 3.1%<br>(1.7-4.7%)                   | 3.8%<br>(2.1-5.9%)                  | 240<br>(130-370)    | 8000<br>(4500-12000)      |
| Kenya    | 2010 | Female | 60 to 64 | 22%<br>(14-32%)                | 78%<br>(68-86%)          | 1.3<br>(0.68-2.2)                           | 3.2%<br>(1.8-5.1%)                   | 3.9%<br>(2.2-6.3%)                  | 250<br>(140-390)    | 7000<br>(4000-11000)      |
| Kenya    | 2010 | Female | 65 to 69 | 23%<br>(15-33%)                | 77%<br>(67-85%)          | 1.3<br>(0.71-2.1)                           | 3.5%<br>(2-5.3%)                     | 4.2%<br>(2.4-6.5%)                  | 260<br>(150-390)    | 6000<br>(3500-9000)       |
| Kenya    | 2010 | Female | 70 to 74 | 21%<br>(14-31%)                | 79%<br>(69-86%)          | 1.1<br>(0.59-1.9)                           | 2.9%<br>(1.5-4.8%)                   | 3.4%<br>(1.7-5.6%)                  | 250<br>(130-420)    | 4800<br>(2500-7900)       |
| Kenya    | 2010 | Female | 75 to 79 | 19%<br>(12-28%)                | 81%<br>(72-88%)          | 0.93<br>(0.46-1.6)                          | 2.6%<br>(1.3-4.2%)                   | 3%<br>(1.5-4.9%)                    | 250<br>(120-410)    | 3600<br>(1800-5900)       |
| Kenya    | 2010 | Female | 80 to 84 | 18%<br>(11-26%)                | 82%<br>(74-89%)          | 0.84<br>(0.43-1.4)                          | 2.1%<br>(1-3.5%)                     | 2.4%<br>(1.2-4.1%)                  | 170<br>(79-280)     | 1800<br>(870-3000)        |
| Kenya    | 2010 | Female | 85 to 89 | 19%<br>(11-28%)                | 81%<br>(72-89%)          | 0.86<br>(0.44-1.4)                          | 1.8%<br>(0.8-3.2%)                   | 2.1%<br>(0.86-3.7%)                 | 89<br>(37-160)      | 680<br>(300-1200)         |
| Kenya    | 2010 | Female | 90 to 94 | 21%<br>(13-30%)                | 79%<br>(70-87%)          | 0.94<br>(0.44-1.7)                          | 1.7%<br>(0.66-3.2%)                  | 1.9%<br>(0.69-3.8%)                 | 34<br>(12-66)       | 180<br>(68-340)           |
| Kenya    | 2010 | Female | 95 plus  | 25%<br>(13-39%)                | 75%<br>(61-87%)          | 1.1<br>(0.43-2)                             | 2%<br>(0.78-4%)                      | 2.2%<br>(0.79-4.5%)                 | 11<br>(3.9-22)      | 38<br>(15-77)             |
| Kenya    | 2010 | Male   | All Ages | 27%<br>(23-32%)                | 73%<br>(68-77%)          | 0.96<br>(0.81-1.2)                          | 2.4%<br>(1.9-3%)                     | 3.4%<br>(2.5-4.4%)                  | 5300<br>(3900-6800) | 230000<br>(180000-290000) |
| Kenya    | 2010 | Male   | 15 to 19 | 18%<br>(11-27%)                | 82%<br>(73-89%)          | 0.73<br>(0.41-1.2)                          | 1.7%<br>(1.1-2.5%)                   | 1.8%<br>(0.95-2.9%)                 | 82<br>(44-130)      | 8400<br>(5200-12000)      |
| Kenya    | 2010 | Male   | 20 to 24 | 31%<br>(20-44%)                | 69%<br>(56-80%)          | 1.2<br>(0.64-1.9)                           | 4.3%<br>(2.7-6.2%)                   | 4.5%<br>(2.6-7.2%)                  | 240<br>(140-380)    | 22000<br>(14000-32000)    |
| Kenya    | 2010 | Male   | 25 to 29 | 41%<br>(27-55%)                | 59%<br>(45-73%)          | 1.6<br>(0.98-2.4)                           | 4.8%<br>(3.3-6.4%)                   | 5.1%<br>(3.1-7.2%)                  | 360<br>(220-500)    | 28000<br>(19000-37000)    |

| Location | Year | Sex    | Age      | Prevalence of current drinkers | Prevalence of abstainers | Population average of standard drinks daily | Percent of total attributable deaths | Percent of total attributable DALYs | Attributable deaths | Attributable DALYs      |
|----------|------|--------|----------|--------------------------------|--------------------------|---------------------------------------------|--------------------------------------|-------------------------------------|---------------------|-------------------------|
| Kenya    | 2010 | Male   | 30 to 34 | 47%<br>(31-62%)                | 53%<br>(38-69%)          | 2<br>(1.2-2.9)                              | 4.6%<br>(3.2-6.1%)                   | 4.8%<br>(3.1-6.8%)                  | 410<br>(260-570)    | 27000<br>(19000-37000)  |
| Kenya    | 2010 | Male   | 35 to 39 | 50%<br>(34-64%)                | 50%<br>(36-66%)          | 2.5<br>(1.5-3.8)                            | 4.5%<br>(3.3-6.1%)                   | 4.9%<br>(3.4-6.8%)                  | 460<br>(320-640)    | 27000<br>(19000-36000)  |
| Kenya    | 2010 | Male   | 40 to 44 | 49%<br>(36-64%)                | 51%<br>(36-64%)          | 2.6<br>(1.5-4.1)                            | 4.8%<br>(3.5-6.6%)                   | 5.4%<br>(3.7-7.4%)                  | 470<br>(320-650)    | 24000<br>(17000-32000)  |
| Kenya    | 2010 | Male   | 45 to 49 | 48%<br>(32-63%)                | 52%<br>(37-68%)          | 2.5<br>(1.4-4)                              | 5.5%<br>(3.8-7.4%)                   | 6.3%<br>(4.2-8.4%)                  | 490<br>(330-660)    | 22000<br>(15000-29000)  |
| Kenya    | 2010 | Male   | 50 to 54 | 50%<br>(35-66%)                | 50%<br>(34-65%)          | 2.4<br>(1.4-3.8)                            | 6.9%<br>(4.5-9.4%)                   | 8.1%<br>(5.2-11%)                   | 590<br>(380-810)    | 23000<br>(15000-31000)  |
| Kenya    | 2010 | Male   | 55 to 59 | 55%<br>(41-69%)                | 45%<br>(31-59%)          | 2.4<br>(1.4-3.7)                            | 7.3%<br>(4.8-10%)                    | 8.8%<br>(5.7-12%)                   | 630<br>(410-880)    | 21000<br>(14000-29000)  |
| Kenya    | 2010 | Male   | 60 to 64 | 56%<br>(41-70%)                | 44%<br>(30-59%)          | 2.1<br>(1.2-3.5)                            | 6.4%<br>(4-9.5%)                     | 7.7%<br>(4.8-11%)                   | 540<br>(340-800)    | 15000<br>(9600-22000)   |
| Kenya    | 2010 | Male   | 65 to 69 | 53%<br>(38-66%)                | 47%<br>(34-62%)          | 1.7<br>(0.99-2.7)                           | 4.8%<br>(2.8-7.2%)                   | 5.6%<br>(3.3-8.6%)                  | 370<br>(220-560)    | 8500<br>(5100-13000)    |
| Kenya    | 2010 | Male   | 70 to 74 | 46%<br>(33-59%)                | 54%<br>(41-67%)          | 1.2<br>(0.67-1.9)                           | 3.2%<br>(1.6-5.1%)                   | 3.7%<br>(1.9-6%)                    | 270<br>(140-450)    | 5100<br>(2700-8200)     |
| Kenya    | 2010 | Male   | 75 to 79 | 39%<br>(26-53%)                | 61%<br>(47-74%)          | 0.88<br>(0.45-1.5)                          | 2.3%<br>(1.2-4%)                     | 2.7%<br>(1.4-4.6%)                  | 210<br>(100-350)    | 3000<br>(1500-5000)     |
| Kenya    | 2010 | Male   | 80 to 84 | 34%<br>(23-47%)                | 66%<br>(53-77%)          | 0.71<br>(0.38-1.1)                          | 1.7%<br>(0.82-2.8%)                  | 1.9%<br>(0.89-3.3%)                 | 120<br>(53-200)     | 1200<br>(600-2100)      |
| Kenya    | 2010 | Male   | 85 to 89 | 33%<br>(22-46%)                | 67%<br>(54-78%)          | 0.63<br>(0.33-1.1)                          | 1.4%<br>(0.72-2.5%)                  | 1.6%<br>(0.77-2.8%)                 | 55<br>(26-95)       | 430<br>(220-720)        |
| Kenya    | 2010 | Male   | 90 to 94 | 34%<br>(23-46%)                | 66%<br>(54-77%)          | 0.6<br>(0.29-1.1)                           | 1%<br>(0.46-2%)                      | 1.1%<br>(0.43-2.1%)                 | 15<br>(5.6-28)      | 82<br>(35-150)          |
| Kenya    | 2010 | Male   | 95 plus  | 37%<br>(22-54%)                | 63%<br>(46-78%)          | 0.62<br>(0.26-1.2)                          | 1.3%<br>(0.6-2.5%)                   | 1.4%<br>(0.54-2.7%)                 | 4.5<br>(1.8-9.1)    | 18<br>(8-33)            |
| Kenya    | 2016 | Female | All Ages | 11%<br>(9.2-13%)               | 89%<br>(87-91%)          | 0.55<br>(0.47-0.66)                         | 1.2%<br>(0.94-1.6%)                  | 2.2%<br>(1.4-3.1%)                  | 2700<br>(1700-3700) | 94000<br>(69000-120000) |
| Kenya    | 2016 | Female | 15 to 19 | 9.6%<br>(6-15%)                | 90%<br>(85-94%)          | 0.55<br>(0.29-0.92)                         | 0.82%<br>(0.55-1.1%)                 | 0.71%<br>(0.35-1.2%)                | 21<br>(10-36)       | 3400<br>(2200-4900)     |
| Kenya    | 2016 | Female | 20 to 24 | 13%<br>(7.7-19%)               | 87%<br>(81-92%)          | 0.77<br>(0.4-1.3)                           | 1.4%<br>(0.99-1.9%)                  | 0.94%<br>(0.48-1.6%)                | 31<br>(15-51)       | 5800<br>(3900-8200)     |
| Kenya    | 2016 | Female | 25 to 29 | 14%<br>(8.4-21%)               | 86%<br>(79-92%)          | 0.91<br>(0.51-1.4)                          | 1.4%<br>(1.1-1.9%)                   | 1.1%<br>(0.63-1.6%)                 | 52<br>(31-80)       | 7200<br>(5000-9800)     |
| Kenya    | 2016 | Female | 30 to 34 | 15%<br>(9.5-23%)               | 85%<br>(77-91%)          | 0.99<br>(0.58-1.5)                          | 1.5%<br>(1.1-2%)                     | 1.3%<br>(0.83-2%)                   | 77<br>(47-120)      | 7800<br>(5500-11000)    |
| Kenya    | 2016 | Female | 35 to 39 | 17%<br>(10-26%)                | 83%<br>(74-90%)          | 1<br>(0.6-1.6)                              | 1.7%<br>(1.2-2.4%)                   | 1.9%<br>(1.2-2.8%)                  | 110<br>(67-160)     | 7900<br>(5500-11000)    |
| Kenya    | 2016 | Female | 40 to 44 | 18%<br>(12-28%)                | 82%<br>(72-88%)          | 1.1<br>(0.6-1.8)                            | 2%<br>(1.3-2.8%)                     | 2.3%<br>(1.4-3.5%)                  | 120<br>(76-180)     | 7100<br>(4800-10000)    |
| Kenya    | 2016 | Female | 45 to 49 | 19%<br>(11-28%)                | 81%<br>(72-89%)          | 1.2<br>(0.58-2)                             | 2.4%<br>(1.6-3.5%)                   | 3.1%<br>(1.9-4.6%)                  | 150<br>(92-220)     | 7100<br>(4700-10000)    |

| Location | Year | Sex    | Age      | Prevalence of current drinkers | Prevalence of abstainers | Population average of standard drinks daily | Percent of total attributable deaths | Percent of total attributable DALYs | Attributable deaths | Attributable DALYs        |
|----------|------|--------|----------|--------------------------------|--------------------------|---------------------------------------------|--------------------------------------|-------------------------------------|---------------------|---------------------------|
| Kenya    | 2016 | Female | 50 to 54 | 20%<br>(12-29%)                | 80%<br>(71-88%)          | 1.2<br>(0.65-2)                             | 3%<br>(1.9-4.6%)                     | 4%<br>(2.4-6.1%)                    | 210<br>(130-320)    | 8300<br>(5200-12000)      |
| Kenya    | 2016 | Female | 55 to 59 | 21%<br>(13-30%)                | 79%<br>(70-87%)          | 1.3<br>(0.68-2.2)                           | 3.4%<br>(2-5.1%)                     | 4.4%<br>(2.5-6.8%)                  | 270<br>(150-420)    | 9000<br>(5300-14000)      |
| Kenya    | 2016 | Female | 60 to 64 | 22%<br>(14-33%)                | 78%<br>(67-86%)          | 1.4<br>(0.71-2.4)                           | 3.4%<br>(1.9-5.2%)                   | 4.3%<br>(2.4-6.8%)                  | 310<br>(170-500)    | 9000<br>(5100-14000)      |
| Kenya    | 2016 | Female | 65 to 69 | 23%<br>(15-33%)                | 77%<br>(67-85%)          | 1.4<br>(0.74-2.2)                           | 3.7%<br>(2.2-5.4%)                   | 4.5%<br>(2.6-6.8%)                  | 350<br>(210-530)    | 8400<br>(5000-12000)      |
| Kenya    | 2016 | Female | 70 to 74 | 22%<br>(15-31%)                | 78%<br>(69-85%)          | 1.2<br>(0.63-2)                             | 3%<br>(1.6-4.9%)                     | 3.6%<br>(1.8-5.9%)                  | 270<br>(140-440)    | 5200<br>(2800-8300)       |
| Kenya    | 2016 | Female | 75 to 79 | 19%<br>(12-29%)                | 81%<br>(71-88%)          | 0.99<br>(0.49-1.7)                          | 2.7%<br>(1.4-4.4%)                   | 3.2%<br>(1.7-5.2%)                  | 260<br>(130-430)    | 3800<br>(2000-6200)       |
| Kenya    | 2016 | Female | 80 to 84 | 18%<br>(11-27%)                | 82%<br>(73-89%)          | 0.89<br>(0.45-1.5)                          | 2.4%<br>(1.2-3.8%)                   | 2.8%<br>(1.4-4.5%)                  | 210<br>(110-340)    | 2200<br>(1100-3600)       |
| Kenya    | 2016 | Female | 85 to 89 | 19%<br>(11-28%)                | 81%<br>(72-89%)          | 0.91<br>(0.47-1.5)                          | 2.1%<br>(1-3.5%)                     | 2.4%<br>(1.2-4.1%)                  | 140<br>(65-230)     | 1000<br>(500-1700)        |
| Kenya    | 2016 | Female | 90 to 94 | 21%<br>(13-31%)                | 79%<br>(69-87%)          | 1<br>(0.47-1.8)                             | 2%<br>(0.85-3.6%)                    | 2.3%<br>(0.93-4.2%)                 | 57<br>(23-100)      | 300<br>(130-530)          |
| Kenya    | 2016 | Female | 95 plus  | 25%<br>(14-39%)                | 75%<br>(61-86%)          | 1.1<br>(0.46-2.2)                           | 2.4%<br>(1-4.3%)                     | 2.7%<br>(1.1-5.1%)                  | 19<br>(7.8-37)      | 67<br>(29-130)            |
| Kenya    | 2016 | Male   | All Ages | 28%<br>(23-33%)                | 72%<br>(67-77%)          | 1<br>(0.87-1.3)                             | 3%<br>(2.4-3.7%)                     | 4.2%<br>(3.1-5.4%)                  | 6200<br>(4500-8000) | 270000<br>(210000-340000) |
| Kenya    | 2016 | Male   | 15 to 19 | 18%<br>(11-27%)                | 82%<br>(73-89%)          | 0.75<br>(0.41-1.2)                          | 1.8%<br>(1.2-2.7%)                   | 2%<br>(1-3.1%)                      | 88<br>(47-140)      | 9200<br>(5900-13000)      |
| Kenya    | 2016 | Male   | 20 to 24 | 31%<br>(20-44%)                | 69%<br>(56-80%)          | 1.2<br>(0.66-2)                             | 4.3%<br>(2.8-6.3%)                   | 4.5%<br>(2.5-7.1%)                  | 230<br>(130-370)    | 22000<br>(14000-31000)    |
| Kenya    | 2016 | Male   | 25 to 29 | 41%<br>(27-55%)                | 59%<br>(45-73%)          | 1.7<br>(0.98-2.5)                           | 5.1%<br>(3.5-6.7%)                   | 5.5%<br>(3.4-7.7%)                  | 380<br>(230-530)    | 30000<br>(20000-40000)    |
| Kenya    | 2016 | Male   | 30 to 34 | 47%<br>(31-61%)                | 53%<br>(39-69%)          | 2.1<br>(1.3-3)                              | 5.2%<br>(3.6-6.9%)                   | 5.7%<br>(3.7-7.9%)                  | 470<br>(300-650)    | 33000<br>(23000-43000)    |
| Kenya    | 2016 | Male   | 35 to 39 | 49%<br>(34-64%)                | 51%<br>(36-66%)          | 2.5<br>(1.5-3.8)                            | 5.8%<br>(4.3-7.8%)                   | 6.7%<br>(4.7-9.2%)                  | 580<br>(400-780)    | 34000<br>(24000-45000)    |
| Kenya    | 2016 | Male   | 40 to 44 | 49%<br>(35-64%)                | 51%<br>(36-65%)          | 2.7<br>(1.5-4.1)                            | 6.1%<br>(4.3-8.2%)                   | 7.2%<br>(5-9.9%)                    | 600<br>(410-820)    | 31000<br>(22000-41000)    |
| Kenya    | 2016 | Male   | 45 to 49 | 48%<br>(33-63%)                | 52%<br>(37-67%)          | 2.6<br>(1.4-4.1)                            | 6.6%<br>(4.6-8.8%)                   | 7.9%<br>(5.5-11%)                   | 600<br>(400-810)    | 27000<br>(19000-35000)    |
| Kenya    | 2016 | Male   | 50 to 54 | 50%<br>(35-65%)                | 50%<br>(35-65%)          | 2.5<br>(1.4-3.9)                            | 7.3%<br>(4.8-10%)                    | 9%<br>(5.8-12%)                     | 640<br>(410-890)    | 25000<br>(16000-34000)    |
| Kenya    | 2016 | Male   | 55 to 59 | 54%<br>(40-68%)                | 46%<br>(32-60%)          | 2.5<br>(1.4-3.8)                            | 7.6%<br>(5.1-11%)                    | 9.5%<br>(6.2-13%)                   | 690<br>(460-960)    | 23000<br>(15000-32000)    |
| Kenya    | 2016 | Male   | 60 to 64 | 55%<br>(40-70%)                | 45%<br>(30-60%)          | 2.2<br>(1.2-3.6)                            | 6.6%<br>(4.1-9.6%)                   | 8%<br>(5-12%)                       | 680<br>(420-1000)   | 19000<br>(12000-28000)    |
| Kenya    | 2016 | Male   | 65 to 69 | 53%<br>(38-66%)                | 47%<br>(34-62%)          | 1.7<br>(1-2.7)                              | 4.8%<br>(2.9-7.3%)                   | 5.8%<br>(3.4-8.8%)                  | 500<br>(300-760)    | 12000<br>(6900-17000)     |

| Location   | Year | Sex    | Age      | Prevalence of current drinkers | Prevalence of abstainers | Population average of standard drinks daily | Percent of total attributable deaths | Percent of total attributable DALYs | Attributable deaths | Attributable DALYs     |
|------------|------|--------|----------|--------------------------------|--------------------------|---------------------------------------------|--------------------------------------|-------------------------------------|---------------------|------------------------|
| Kenya      | 2016 | Male   | 70 to 74 | 46%<br>(33-59%)                | 54%<br>(41-67%)          | 1.2<br>(0.7-2)                              | 3.2%<br>(1.7-5.1%)                   | 3.8%<br>(2-6.1%)                    | 300<br>(150-480)    | 5500<br>(2900-8800)    |
| Kenya      | 2016 | Male   | 75 to 79 | 39%<br>(26-53%)                | 61%<br>(47-74%)          | 0.9<br>(0.46-1.5)                           | 2.4%<br>(1.2-4%)                     | 2.8%<br>(1.4-4.7%)                  | 210<br>(100-360)    | 3000<br>(1500-5100)    |
| Kenya      | 2016 | Male   | 80 to 84 | 34%<br>(22-47%)                | 66%<br>(53-78%)          | 0.73<br>(0.38-1.2)                          | 1.8%<br>(0.88-3%)                    | 2%<br>(0.97-3.5%)                   | 130<br>(63-230)     | 1400<br>(710-2500)     |
| Kenya      | 2016 | Male   | 85 to 89 | 33%<br>(22-45%)                | 67%<br>(55-78%)          | 0.64<br>(0.34-1)                            | 1.5%<br>(0.79-2.5%)                  | 1.7%<br>(0.84-2.9%)                 | 74<br>(37-130)      | 570<br>(300-950)       |
| Kenya      | 2016 | Male   | 90 to 94 | 34%<br>(23-46%)                | 66%<br>(54-77%)          | 0.62<br>(0.29-1.1)                          | 1.1%<br>(0.51-2%)                    | 1.2%<br>(0.48-2.2%)                 | 20<br>(8.4-39)      | 110<br>(53-210)        |
| Kenya      | 2016 | Male   | 95 plus  | 37%<br>(23-54%)                | 63%<br>(46-77%)          | 0.64<br>(0.27-1.2)                          | 1.4%<br>(0.68-2.6%)                  | 1.5%<br>(0.63-2.8%)                 | 6.2<br>(2.6-12)     | 24<br>(11-44)          |
| Madagascar | 1990 | Female | All Ages | 20%<br>(16-26%)                | 80%<br>(74-84%)          | 0.64<br>(0.49-0.81)                         | 1.1%<br>(0.72-1.5%)                  | 2%<br>(1.2-3.1%)                    | 1400<br>(790-2100)  | 52000<br>(34000-71000) |
| Madagascar | 1990 | Female | 15 to 19 | 21%<br>(12-34%)                | 79%<br>(66-88%)          | 0.73<br>(0.36-1.3)                          | 1.5%<br>(0.77-2.6%)                  | 1.9%<br>(0.78-3.5%)                 | 23<br>(9.3-42)      | 2100<br>(1100-3600)    |
| Madagascar | 1990 | Female | 20 to 24 | 26%<br>(14-42%)                | 74%<br>(58-86%)          | 1<br>(0.51-1.7)                             | 2.6%<br>(1.5-4.1%)                   | 3%<br>(1.4-5.1%)                    | 42<br>(19-73)       | 3800<br>(2100-5900)    |
| Madagascar | 1990 | Female | 25 to 29 | 28%<br>(15-45%)                | 72%<br>(55-85%)          | 1.3<br>(0.67-2.2)                           | 3.7%<br>(2.2-5.7%)                   | 4.5%<br>(2.4-7.3%)                  | 63<br>(33-100)      | 4700<br>(2900-7400)    |
| Madagascar | 1990 | Female | 30 to 34 | 31%<br>(17-49%)                | 69%<br>(51-83%)          | 1.4<br>(0.7-2.3)                            | 4.3%<br>(2.5-6.6%)                   | 5.5%<br>(2.8-8.7%)                  | 78<br>(41-120)      | 5100<br>(2900-7700)    |
| Madagascar | 1990 | Female | 35 to 39 | 34%<br>(20-52%)                | 66%<br>(48-80%)          | 1.4<br>(0.73-2.3)                           | 4.3%<br>(2.5-6.6%)                   | 5.5%<br>(3-8.7%)                    | 83<br>(45-130)      | 4700<br>(2700-7200)    |
| Madagascar | 1990 | Female | 40 to 44 | 36%<br>(21-54%)                | 64%<br>(46-79%)          | 1.4<br>(0.68-2.5)                           | 4.4%<br>(2.4-7.1%)                   | 5.7%<br>(2.9-9.4%)                  | 79<br>(40-130)      | 4000<br>(2200-6500)    |
| Madagascar | 1990 | Female | 45 to 49 | 36%<br>(20-54%)                | 64%<br>(46-80%)          | 1.4<br>(0.66-2.6)                           | 4.8%<br>(2.4-8.5%)                   | 6.2%<br>(3-11%)                     | 98<br>(46-180)      | 4300<br>(2100-7300)    |
| Madagascar | 1990 | Female | 50 to 54 | 35%<br>(19-54%)                | 65%<br>(46-81%)          | 1.4<br>(0.65-2.6)                           | 5.2%<br>(2.5-8.9%)                   | 6.6%<br>(3.2-11%)                   | 140<br>(62-240)     | 5100<br>(2400-8800)    |
| Madagascar | 1990 | Female | 55 to 59 | 33%<br>(19-52%)                | 67%<br>(48-81%)          | 1.4<br>(0.62-2.6)                           | 5.1%<br>(2.3-9.3%)                   | 6.3%<br>(2.8-11%)                   | 160<br>(69-280)     | 5100<br>(2200-9000)    |
| Madagascar | 1990 | Female | 60 to 64 | 34%<br>(18-52%)                | 66%<br>(48-82%)          | 1.4<br>(0.6-2.6)                            | 4.9%<br>(2-8.8%)                     | 5.9%<br>(2.4-10%)                   | 170<br>(67-300)     | 4600<br>(1800-8300)    |
| Madagascar | 1990 | Female | 65 to 69 | 35%<br>(20-53%)                | 65%<br>(47-80%)          | 1.3<br>(0.57-2.3)                           | 4.7%<br>(2-8.2%)                     | 5.5%<br>(2.3-9.8%)                  | 170<br>(70-310)     | 3900<br>(1600-6900)    |
| Madagascar | 1990 | Female | 70 to 74 | 33%<br>(20-51%)                | 67%<br>(49-80%)          | 1.1<br>(0.47-2.1)                           | 3.7%<br>(1.1-7.5%)                   | 4.2%<br>(1.2-8.6%)                  | 120<br>(34-260)     | 2200<br>(630-4600)     |
| Madagascar | 1990 | Female | 75 to 79 | 30%<br>(16-49%)                | 70%<br>(51-84%)          | 0.91<br>(0.36-1.9)                          | 2.8%<br>(0.65-6.2%)                  | 3.2%<br>(0.73-7.1%)                 | 93<br>(21-210)      | 1300<br>(310-2900)     |
| Madagascar | 1990 | Female | 80 to 84 | 29%<br>(15-47%)                | 71%<br>(53-85%)          | 0.82<br>(0.33-1.6)                          | 2%<br>(0.47-4.8%)                    | 2.3%<br>(0.51-5.5%)                 | 57<br>(12-130)      | 590<br>(140-1400)      |
| Madagascar | 1990 | Female | 85 to 89 | 29%<br>(16-46%)                | 71%<br>(54-84%)          | 0.8<br>(0.32-1.6)                           | 1.5%<br>(0.2-3.8%)                   | 1.7%<br>(0.2-4.4%)                  | 25<br>(3.1-64)      | 190<br>(25-470)        |

| Location   | Year | Sex    | Age      | Prevalence of current drinkers | Prevalence of abstainers | Population average of standard drinks daily | Percent of total attributable deaths | Percent of total attributable DALYs | Attributable deaths | Attributable DALYs       |
|------------|------|--------|----------|--------------------------------|--------------------------|---------------------------------------------|--------------------------------------|-------------------------------------|---------------------|--------------------------|
| Madagascar | 1990 | Female | 90 to 94 | 32%<br>(18-50%)                | 68%<br>(50-82%)          | 0.83<br>(0.34-1.7)                          | 1.1%<br>(-0.094-3.4%)                | 1.3%<br>(-0.16-3.9%)                | 6.3<br>(-0.83-20)   | 34<br>(-2.6-100)         |
| Madagascar | 1990 | Female | 95 plus  | 37%<br>(18-58%)                | 63%<br>(42-82%)          | 0.92<br>(0.32-2)                            | 1.2%<br>(-0.16-4%)                   | 1.3%<br>(-0.27-4.4%)                | 1.6<br>(-0.33-5.5)  | 5.8<br>(-0.74-19)        |
| Madagascar | 1990 | Male   | All Ages | 30%<br>(24-37%)                | 70%<br>(63-76%)          | 0.94<br>(0.73-1.2)                          | 1.9%<br>(1.3-2.5%)                   | 2.9%<br>(1.9-4.1%)                  | 2300<br>(1500-3200) | 100000<br>(72000-130000) |
| Madagascar | 1990 | Male   | 15 to 19 | 27%<br>(16-42%)                | 73%<br>(58-84%)          | 0.96<br>(0.49-1.7)                          | 3%<br>(1.8-4.7%)                     | 3.3%<br>(1.7-5.7%)                  | 45<br>(22-77)       | 4400<br>(2600-6800)      |
| Madagascar | 1990 | Male   | 20 to 24 | 38%<br>(23-55%)                | 62%<br>(45-77%)          | 1.4<br>(0.75-2.3)                           | 5.9%<br>(3.6-8.7%)                   | 6.1%<br>(3.1-9.7%)                  | 110<br>(53-170)     | 9300<br>(5600-14000)     |
| Madagascar | 1990 | Male   | 25 to 29 | 43%<br>(26-61%)                | 57%<br>(39-74%)          | 1.8<br>(1-2.8)                              | 7.8%<br>(4.9-11%)                    | 8.6%<br>(4.8-13%)                   | 150<br>(81-220)     | 11000<br>(6800-16000)    |
| Madagascar | 1990 | Male   | 30 to 34 | 47%<br>(29-65%)                | 53%<br>(35-71%)          | 2.1<br>(1.2-3.2)                            | 9%<br>(5.8-13%)                      | 10%<br>(6-16%)                      | 180<br>(100-280)    | 12000<br>(7400-17000)    |
| Madagascar | 1990 | Male   | 35 to 39 | 50%<br>(32-68%)                | 50%<br>(32-68%)          | 2.3<br>(1.3-3.6)                            | 9.5%<br>(5.9-14%)                    | 11%<br>(6.7-17%)                    | 210<br>(120-310)    | 12000<br>(7200-17000)    |
| Madagascar | 1990 | Male   | 40 to 44 | 51%<br>(34-70%)                | 49%<br>(30-66%)          | 2.4<br>(1.2-3.8)                            | 9.6%<br>(5.8-14%)                    | 12%<br>(6.5-17%)                    | 190<br>(110-290)    | 9600<br>(5700-14000)     |
| Madagascar | 1990 | Male   | 45 to 49 | 52%<br>(32-70%)                | 48%<br>(30-68%)          | 2.4<br>(1.2-4)                              | 9.4%<br>(5.4-14%)                    | 11%<br>(6.2-18%)                    | 210<br>(110-330)    | 8900<br>(4900-14000)     |
| Madagascar | 1990 | Male   | 50 to 54 | 52%<br>(33-70%)                | 48%<br>(30-67%)          | 2.3<br>(1.2-3.9)                            | 9%<br>(4.9-14%)                      | 11%<br>(5.8-17%)                    | 240<br>(130-380)    | 9300<br>(4900-14000)     |
| Madagascar | 1990 | Male   | 55 to 59 | 51%<br>(33-70%)                | 49%<br>(30-67%)          | 2.2<br>(1.2-3.8)                            | 8.1%<br>(4.3-13%)                    | 9.6%<br>(4.9-15%)                   | 260<br>(130-430)    | 8700<br>(4500-14000)     |
| Madagascar | 1990 | Male   | 60 to 64 | 50%<br>(31-69%)                | 50%<br>(31-69%)          | 1.9<br>(0.93-3.4)                           | 6.8%<br>(3.3-12%)                    | 7.9%<br>(3.7-14%)                   | 260<br>(120-450)    | 7100<br>(3500-12000)     |
| Madagascar | 1990 | Male   | 65 to 69 | 47%<br>(29-65%)                | 53%<br>(35-71%)          | 1.6<br>(0.76-2.7)                           | 4.5%<br>(1.9-8.1%)                   | 5.1%<br>(2.2-9.3%)                  | 180<br>(78-340)     | 4200<br>(1900-7700)      |
| Madagascar | 1990 | Male   | 70 to 74 | 44%<br>(27-62%)                | 56%<br>(38-73%)          | 1.2<br>(0.57-2.1)                           | 2.9%<br>(0.98-6.1%)                  | 3.3%<br>(1.1-7%)                    | 120<br>(38-250)     | 2200<br>(730-4600)       |
| Madagascar | 1990 | Male   | 75 to 79 | 42%<br>(25-60%)                | 58%<br>(40-75%)          | 0.99<br>(0.45-1.9)                          | 2%<br>(0.49-4.7%)                    | 2.3%<br>(0.52-5.3%)                 | 72<br>(17-170)      | 1000<br>(250-2300)       |
| Madagascar | 1990 | Male   | 80 to 84 | 39%<br>(23-58%)                | 61%<br>(42-77%)          | 0.84<br>(0.39-1.5)                          | 1.5%<br>(0.31-3.3%)                  | 1.6%<br>(0.29-3.6%)                 | 34<br>(6-76)        | 370<br>(80-800)          |
| Madagascar | 1990 | Male   | 85 to 89 | 37%<br>(21-54%)                | 63%<br>(46-79%)          | 0.7<br>(0.32-1.3)                           | 1%<br>(0.11-2.2%)                    | 1%<br>(0.028-2.4%)                  | 13<br>(0.34-29)     | 100<br>(11-230)          |
| Madagascar | 1990 | Male   | 90 to 94 | 37%<br>(23-55%)                | 63%<br>(45-77%)          | 0.64<br>(0.27-1.2)                          | 0.48%<br>(-0.24-1.5%)                | 0.4%<br>(-0.43-1.5%)                | 1.6<br>(-1.7-6)     | 11<br>(-5.2-33)          |
| Madagascar | 1990 | Male   | 95 plus  | 41%<br>(21-62%)                | 59%<br>(38-79%)          | 0.64<br>(0.23-1.4)                          | 0.44%<br>(-0.42-1.7%)                | 0.27%<br>(-0.71-1.6%)               | 0.23<br>(-0.61-1.4) | 1.5<br>(-1.4-5.5)        |
| Madagascar | 1995 | Female | All Ages | 20%<br>(16-26%)                | 80%<br>(74-84%)          | 0.57<br>(0.43-0.72)                         | 1%<br>(0.64-1.4%)                    | 1.8%<br>(0.97-2.9%)                 | 1400<br>(710-2200)  | 51000<br>(33000-72000)   |
| Madagascar | 1995 | Female | 15 to 19 | 20%<br>(11-33%)                | 80%<br>(67-89%)          | 0.64<br>(0.31-1.1)                          | 1.3%<br>(0.64-2.2%)                  | 1.6%<br>(0.57-2.9%)                 | 21<br>(7.4-39)      | 2100<br>(1000-3500)      |

| Location   | Year | Sex    | Age      | Prevalence of current drinkers | Prevalence of abstainers | Population average of standard drinks daily | Percent of total attributable deaths | Percent of total attributable DALYs | Attributable deaths | Attributable DALYs      |
|------------|------|--------|----------|--------------------------------|--------------------------|---------------------------------------------|--------------------------------------|-------------------------------------|---------------------|-------------------------|
| Madagascar | 1995 | Female | 20 to 24 | 26%<br>(14-41%)                | 74%<br>(59-86%)          | 0.91<br>(0.44-1.5)                          | 2.2%<br>(1.3-3.4%)                   | 2.4%<br>(1-4.1%)                    | 38<br>(17-66)       | 3700<br>(2000-5700)     |
| Madagascar | 1995 | Female | 25 to 29 | 28%<br>(15-45%)                | 72%<br>(55-85%)          | 1.1<br>(0.57-1.9)                           | 3.2%<br>(1.9-4.8%)                   | 3.7%<br>(1.9-6%)                    | 58<br>(31-95)       | 4600<br>(2800-7000)     |
| Madagascar | 1995 | Female | 30 to 34 | 31%<br>(17-49%)                | 69%<br>(51-83%)          | 1.2<br>(0.64-2)                             | 3.7%<br>(2.1-5.6%)                   | 4.7%<br>(2.3-7.4%)                  | 74<br>(38-120)      | 5000<br>(2900-7500)     |
| Madagascar | 1995 | Female | 35 to 39 | 34%<br>(20-53%)                | 66%<br>(47-80%)          | 1.2<br>(0.63-2)                             | 3.7%<br>(2.1-5.7%)                   | 4.7%<br>(2.5-7.7%)                  | 81<br>(42-130)      | 4700<br>(2700-7500)     |
| Madagascar | 1995 | Female | 40 to 44 | 36%<br>(21-55%)                | 64%<br>(45-79%)          | 1.2<br>(0.59-2.2)                           | 3.8%<br>(2-6.2%)                     | 4.9%<br>(2.4-8.2%)                  | 89<br>(43-150)      | 4500<br>(2400-7400)     |
| Madagascar | 1995 | Female | 45 to 49 | 36%<br>(20-54%)                | 64%<br>(46-80%)          | 1.2<br>(0.57-2.3)                           | 4.1%<br>(2-7.2%)                     | 5.3%<br>(2.4-9.6%)                  | 94<br>(42-170)      | 4100<br>(1900-7200)     |
| Madagascar | 1995 | Female | 50 to 54 | 34%<br>(19-54%)                | 66%<br>(46-81%)          | 1.2<br>(0.55-2.3)                           | 4.5%<br>(2-8%)                       | 5.7%<br>(2.5-10%)                   | 120<br>(53-220)     | 4700<br>(2100-8200)     |
| Madagascar | 1995 | Female | 55 to 59 | 33%<br>(19-53%)                | 67%<br>(47-81%)          | 1.2<br>(0.54-2.3)                           | 4.4%<br>(1.8-8.4%)                   | 5.4%<br>(2.3-10%)                   | 150<br>(59-290)     | 4900<br>(1900-9200)     |
| Madagascar | 1995 | Female | 60 to 64 | 34%<br>(19-52%)                | 66%<br>(48-81%)          | 1.2<br>(0.52-2.3)                           | 4.2%<br>(1.5-8%)                     | 5.1%<br>(1.8-9.6%)                  | 180<br>(64-330)     | 4800<br>(1800-9000)     |
| Madagascar | 1995 | Female | 65 to 69 | 35%<br>(19-53%)                | 65%<br>(47-81%)          | 1.1<br>(0.49-2)                             | 4%<br>(1.5-7.3%)                     | 4.7%<br>(1.7-8.5%)                  | 180<br>(64-330)     | 4000<br>(1500-7400)     |
| Madagascar | 1995 | Female | 70 to 74 | 34%<br>(19-52%)                | 66%<br>(48-81%)          | 0.97<br>(0.42-1.9)                          | 3.1%<br>(0.7-6.8%)                   | 3.5%<br>(0.74-7.7%)                 | 130<br>(28-290)     | 2400<br>(550-5300)      |
| Madagascar | 1995 | Female | 75 to 79 | 31%<br>(17-49%)                | 69%<br>(51-83%)          | 0.82<br>(0.32-1.6)                          | 2.3%<br>(0.37-5.5%)                  | 2.6%<br>(0.4-6.2%)                  | 78<br>(12-180)      | 1100<br>(180-2600)      |
| Madagascar | 1995 | Female | 80 to 84 | 29%<br>(15-47%)                | 71%<br>(53-85%)          | 0.73<br>(0.29-1.4)                          | 1.6%<br>(0.14-4%)                    | 1.8%<br>(0.14-4.5%)                 | 45<br>(3.3-110)     | 470<br>(38-1100)        |
| Madagascar | 1995 | Female | 85 to 89 | 29%<br>(16-47%)                | 71%<br>(53-84%)          | 0.71<br>(0.3-1.4)                           | 1.2%<br>(-0.053-3.1%)                | 1.3%<br>(-0.11-3.6%)                | 20<br>(-1.6-56)     | 150<br>(-6.8-410)       |
| Madagascar | 1995 | Female | 90 to 94 | 32%<br>(18-49%)                | 68%<br>(51-82%)          | 0.74<br>(0.3-1.5)                           | 0.86%<br>(-0.29-3%)                  | 0.95%<br>(-0.4-3.5%)                | 6<br>(-2.5-22)      | 32<br>(-11-110)         |
| Madagascar | 1995 | Female | 95 plus  | 37%<br>(18-58%)                | 63%<br>(42-82%)          | 0.81<br>(0.29-1.8)                          | 0.99%<br>(-0.28-3.6%)                | 1%<br>(-0.45-4%)                    | 1.7<br>(-0.74-6.5)  | 6.2<br>(-1.8-22)        |
| Madagascar | 1995 | Male   | All Ages | 30%<br>(24-37%)                | 70%<br>(63-76%)          | 0.83<br>(0.64-1)                            | 1.7%<br>(1.2-2.3%)                   | 2.6%<br>(1.6-3.7%)                  | 2100<br>(1300-3100) | 97000<br>(67000-130000) |
| Madagascar | 1995 | Male   | 15 to 19 | 26%<br>(15-42%)                | 74%<br>(58-85%)          | 0.83<br>(0.42-1.4)                          | 2.7%<br>(1.6-4.2%)                   | 2.9%<br>(1.4-5.1%)                  | 42<br>(20-76)       | 4400<br>(2600-6900)     |
| Madagascar | 1995 | Male   | 20 to 24 | 38%<br>(23-55%)                | 62%<br>(45-77%)          | 1.2<br>(0.65-2)                             | 5.3%<br>(3.2-7.8%)                   | 5.3%<br>(2.7-8.6%)                  | 100<br>(50-170)     | 9600<br>(5700-14000)    |
| Madagascar | 1995 | Male   | 25 to 29 | 43%<br>(26-61%)                | 57%<br>(39-74%)          | 1.6<br>(0.87-2.4)                           | 6.8%<br>(4.4-9.9%)                   | 7.3%<br>(4-11%)                     | 140<br>(76-220)     | 11000<br>(6700-16000)   |
| Madagascar | 1995 | Male   | 30 to 34 | 47%<br>(27-66%)                | 53%<br>(34-73%)          | 1.8<br>(1-2.8)                              | 7.8%<br>(4.9-11%)                    | 8.9%<br>(5-14%)                     | 170<br>(96-270)     | 12000<br>(7100-17000)   |
| Madagascar | 1995 | Male   | 35 to 39 | 50%<br>(32-67%)                | 50%<br>(33-68%)          | 2<br>(1.1-3.2)                              | 8.3%<br>(5.1-12%)                    | 9.8%<br>(5.7-15%)                   | 200<br>(110-310)    | 12000<br>(6900-17000)   |

| Location   | Year | Sex    | Age      | Prevalence of current drinkers | Prevalence of abstainers | Population average of standard drinks daily | Percent of total attributable deaths | Percent of total attributable DALYs | Attributable deaths | Attributable DALYs     |
|------------|------|--------|----------|--------------------------------|--------------------------|---------------------------------------------|--------------------------------------|-------------------------------------|---------------------|------------------------|
| Madagascar | 1995 | Male   | 40 to 44 | 51%<br>(34-69%)                | 49%<br>(31-66%)          | 2.1<br>(1.1-3.3)                            | 8.3%<br>(4.7-12%)                    | 10%<br>(5.5-15%)                    | 220<br>(120-340)    | 11000<br>(6100-17000)  |
| Madagascar | 1995 | Male   | 45 to 49 | 52%<br>(33-70%)                | 48%<br>(30-67%)          | 2.1<br>(1-3.6)                              | 8%<br>(4.4-13%)                      | 9.7%<br>(5-16%)                     | 200<br>(100-320)    | 8600<br>(4600-14000)   |
| Madagascar | 1995 | Male   | 50 to 54 | 52%<br>(33-70%)                | 48%<br>(30-67%)          | 2<br>(1-3.4)                                | 7.8%<br>(4-13%)                      | 9.3%<br>(4.7-15%)                   | 210<br>(100-340)    | 7900<br>(4000-13000)   |
| Madagascar | 1995 | Male   | 55 to 59 | 51%<br>(34-71%)                | 49%<br>(29-66%)          | 1.9<br>(1-3.3)                              | 7%<br>(3.5-12%)                      | 8.3%<br>(4-14%)                     | 230<br>(110-390)    | 7500<br>(3800-13000)   |
| Madagascar | 1995 | Male   | 60 to 64 | 49%<br>(31-69%)                | 51%<br>(31-69%)          | 1.7<br>(0.82-3)                             | 5.7%<br>(2.7-10%)                    | 6.7%<br>(3.1-12%)                   | 230<br>(100-410)    | 6400<br>(3000-11000)   |
| Madagascar | 1995 | Male   | 65 to 69 | 47%<br>(30-65%)                | 53%<br>(35-70%)          | 1.4<br>(0.67-2.4)                           | 3.8%<br>(1.5-6.9%)                   | 4.3%<br>(1.7-8%)                    | 170<br>(62-310)     | 3800<br>(1500-7100)    |
| Madagascar | 1995 | Male   | 70 to 74 | 44%<br>(28-62%)                | 56%<br>(38-72%)          | 1.1<br>(0.5-1.9)                            | 2.5%<br>(0.78-5.2%)                  | 2.8%<br>(0.86-6%)                   | 110<br>(35-250)     | 2100<br>(690-4400)     |
| Madagascar | 1995 | Male   | 75 to 79 | 42%<br>(25-60%)                | 58%<br>(40-75%)          | 0.86<br>(0.39-1.6)                          | 1.7%<br>(0.38-3.9%)                  | 1.9%<br>(0.37-4.5%)                 | 65<br>(12-150)      | 930<br>(200-2200)      |
| Madagascar | 1995 | Male   | 80 to 84 | 39%<br>(22-58%)                | 61%<br>(42-78%)          | 0.73<br>(0.33-1.3)                          | 1.2%<br>(0.16-2.8%)                  | 1.3%<br>(0.11-3.2%)                 | 30<br>(2.4-71)      | 320<br>(44-750)        |
| Madagascar | 1995 | Male   | 85 to 89 | 36%<br>(21-53%)                | 64%<br>(47-79%)          | 0.61<br>(0.28-1.1)                          | 0.82%<br>(0.04-1.8%)                 | 0.85%<br>(-0.049-2%)                | 12<br>(-0.69-28)    | 98<br>(4.8-220)        |
| Madagascar | 1995 | Male   | 90 to 94 | 36%<br>(22-54%)                | 64%<br>(46-78%)          | 0.55<br>(0.24-1.1)                          | 0.37%<br>(-0.28-1.2%)                | 0.29%<br>(-0.48-1.2%)               | 1.6<br>(-2.6-6.5)   | 12<br>(-9.1-38)        |
| Madagascar | 1995 | Male   | 95 plus  | 40%<br>(21-62%)                | 60%<br>(38-79%)          | 0.54<br>(0.2-1.2)                           | 0.37%<br>(-0.44-1.3%)                | 0.21%<br>(-0.78-1.2%)               | 0.25<br>(-0.92-1.5) | 1.7<br>(-2.1-5.8)      |
| Madagascar | 2000 | Female | All Ages | 20%<br>(16-26%)                | 80%<br>(74-84%)          | 0.43<br>(0.32-0.55)                         | 0.78%<br>(0.47-1.2%)                 | 1.3%<br>(0.6-2.2%)                  | 1000<br>(470-1800)  | 41000<br>(24000-61000) |
| Madagascar | 2000 | Female | 15 to 19 | 20%<br>(12-33%)                | 80%<br>(67-88%)          | 0.49<br>(0.24-0.86)                         | 0.97%<br>(0.51-1.6%)                 | 1.1%<br>(0.36-2.1%)                 | 14<br>(4.5-27)      | 1500<br>(790-2600)     |
| Madagascar | 2000 | Female | 20 to 24 | 26%<br>(14-41%)                | 74%<br>(59-86%)          | 0.7<br>(0.34-1.2)                           | 1.7%<br>(0.99-2.6%)                  | 1.6%<br>(0.61-2.9%)                 | 27<br>(10-50)       | 3100<br>(1700-4700)    |
| Madagascar | 2000 | Female | 25 to 29 | 28%<br>(15-44%)                | 72%<br>(56-85%)          | 0.84<br>(0.44-1.4)                          | 2.4%<br>(1.5-3.6%)                   | 2.6%<br>(1.3-4.3%)                  | 45<br>(22-75)       | 3900<br>(2400-6000)    |
| Madagascar | 2000 | Female | 30 to 34 | 31%<br>(16-48%)                | 69%<br>(52-84%)          | 0.92<br>(0.46-1.5)                          | 2.7%<br>(1.6-4.1%)                   | 3.3%<br>(1.6-5.4%)                  | 58<br>(28-95)       | 4100<br>(2400-6400)    |
| Madagascar | 2000 | Female | 35 to 39 | 34%<br>(19-53%)                | 66%<br>(47-81%)          | 0.91<br>(0.47-1.5)                          | 2.7%<br>(1.6-4.3%)                   | 3.3%<br>(1.7-5.6%)                  | 63<br>(33-110)      | 3900<br>(2200-6200)    |
| Madagascar | 2000 | Female | 40 to 44 | 36%<br>(21-55%)                | 64%<br>(45-79%)          | 0.92<br>(0.45-1.6)                          | 2.8%<br>(1.5-4.6%)                   | 3.5%<br>(1.8-6.1%)                  | 73<br>(36-130)      | 3800<br>(2000-6400)    |
| Madagascar | 2000 | Female | 45 to 49 | 36%<br>(19-54%)                | 64%<br>(46-81%)          | 0.95<br>(0.44-1.8)                          | 2.9%<br>(1.4-5.4%)                   | 3.8%<br>(1.6-7.1%)                  | 88<br>(37-160)      | 3900<br>(1800-7100)    |
| Madagascar | 2000 | Female | 50 to 54 | 34%<br>(19-54%)                | 66%<br>(46-81%)          | 0.93<br>(0.43-1.7)                          | 3.3%<br>(1.4-6.1%)                   | 4.1%<br>(1.7-7.7%)                  | 100<br>(40-190)     | 3800<br>(1600-7100)    |
| Madagascar | 2000 | Female | 55 to 59 | 33%<br>(19-52%)                | 67%<br>(48-81%)          | 0.92<br>(0.42-1.8)                          | 3.1%<br>(1.1-6.3%)                   | 3.8%<br>(1.3-7.7%)                  | 110<br>(37-230)     | 3600<br>(1200-7300)    |

| Location   | Year | Sex    | Age      | Prevalence of current drinkers | Prevalence of abstainers | Population average of standard drinks daily | Percent of total attributable deaths | Percent of total attributable DALYs | Attributable deaths | Attributable DALYs      |
|------------|------|--------|----------|--------------------------------|--------------------------|---------------------------------------------|--------------------------------------|-------------------------------------|---------------------|-------------------------|
| Madagascar | 2000 | Female | 60 to 64 | 33%<br>(18-53%)                | 67%<br>(47-82%)          | 0.91<br>(0.41-1.7)                          | 2.9%<br>(0.82-6.1%)                  | 3.5%<br>(0.99-7.2%)                 | 130<br>(36-280)     | 3500<br>(1000-7500)     |
| Madagascar | 2000 | Female | 65 to 69 | 35%<br>(20-52%)                | 65%<br>(48-80%)          | 0.86<br>(0.38-1.5)                          | 2.6%<br>(0.74-5.4%)                  | 3.1%<br>(0.82-6.3%)                 | 140<br>(37-290)     | 3100<br>(860-6500)      |
| Madagascar | 2000 | Female | 70 to 74 | 33%<br>(19-52%)                | 67%<br>(48-81%)          | 0.74<br>(0.32-1.4)                          | 1.8%<br>(0.15-4.3%)                  | 2%<br>(0.13-4.9%)                   | 93<br>(5.7-230)     | 1700<br>(140-4100)      |
| Madagascar | 2000 | Female | 75 to 79 | 31%<br>(17-49%)                | 69%<br>(51-83%)          | 0.62<br>(0.24-1.2)                          | 1.3%<br>(-0.15-3.5%)                 | 1.5%<br>(-0.19-4%)                  | 57<br>(-7.1-150)    | 810<br>(-88-2100)       |
| Madagascar | 2000 | Female | 80 to 84 | 29%<br>(15-47%)                | 71%<br>(53-85%)          | 0.55<br>(0.22-1.1)                          | 0.81%<br>(-0.3-2.5%)                 | 0.92%<br>(-0.36-2.9%)               | 26<br>(-9.9-81)     | 270<br>(-99-840)        |
| Madagascar | 2000 | Female | 85 to 89 | 29%<br>(16-46%)                | 71%<br>(54-84%)          | 0.53<br>(0.22-1.1)                          | 0.51%<br>(-0.47-1.8%)                | 0.56%<br>(-0.55-2.1%)               | 7.9<br>(-7.7-29)    | 60<br>(-55-220)         |
| Madagascar | 2000 | Female | 90 to 94 | 32%<br>(17-50%)                | 68%<br>(50-83%)          | 0.56<br>(0.23-1.1)                          | 0.27%<br>(-0.62-1.7%)                | 0.26%<br>(-0.78-2%)                 | 1.5<br>(-4.7-11)    | 9.3<br>(-21-59)         |
| Madagascar | 2000 | Female | 95 plus  | 37%<br>(18-59%)                | 63%<br>(41-82%)          | 0.62<br>(0.21-1.4)                          | 0.41%<br>(-0.69-2%)                  | 0.37%<br>(-0.94-2.2%)               | 0.65<br>(-1.7-3.9)  | 2.8<br>(-4.7-14)        |
| Madagascar | 2000 | Male   | All Ages | 30%<br>(24-37%)                | 70%<br>(63-76%)          | 0.63<br>(0.48-0.79)                         | 1.4%<br>(0.97-1.9%)                  | 2%<br>(1.2-2.9%)                    | 1700<br>(980-2500)  | 82000<br>(56000-110000) |
| Madagascar | 2000 | Male   | 15 to 19 | 26%<br>(16-40%)                | 74%<br>(60-84%)          | 0.63<br>(0.32-1.1)                          | 2.2%<br>(1.4-3.4%)                   | 2.2%<br>(1.1-3.8%)                  | 32<br>(16-57)       | 3700<br>(2200-5700)     |
| Madagascar | 2000 | Male   | 20 to 24 | 37%<br>(23-54%)                | 63%<br>(46-77%)          | 0.94<br>(0.49-1.5)                          | 4.3%<br>(2.7-6.2%)                   | 3.9%<br>(1.8-6.4%)                  | 86<br>(39-150)      | 8800<br>(5400-13000)    |
| Madagascar | 2000 | Male   | 25 to 29 | 43%<br>(26-61%)                | 57%<br>(39-74%)          | 1.2<br>(0.68-1.9)                           | 5.3%<br>(3.4-7.6%)                   | 5.3%<br>(2.8-8.4%)                  | 120<br>(63-190)     | 10000<br>(6200-15000)   |
| Madagascar | 2000 | Male   | 30 to 34 | 47%<br>(28-66%)                | 53%<br>(34-72%)          | 1.4<br>(0.8-2.1)                            | 5.9%<br>(3.7-8.5%)                   | 6.4%<br>(3.5-10%)                   | 140<br>(77-230)     | 10000<br>(6300-15000)   |
| Madagascar | 2000 | Male   | 35 to 39 | 50%<br>(33-68%)                | 50%<br>(32-67%)          | 1.5<br>(0.85-2.5)                           | 6.1%<br>(3.7-9%)                     | 7%<br>(3.9-11%)                     | 160<br>(91-260)     | 9800<br>(5900-14000)    |
| Madagascar | 2000 | Male   | 40 to 44 | 51%<br>(35-69%)                | 49%<br>(31-65%)          | 1.6<br>(0.85-2.5)                           | 6.1%<br>(3.4-9.3%)                   | 7.1%<br>(3.7-11%)                   | 180<br>(92-280)     | 9200<br>(5100-14000)    |
| Madagascar | 2000 | Male   | 45 to 49 | 51%<br>(32-70%)                | 49%<br>(30-68%)          | 1.6<br>(0.81-2.7)                           | 5.9%<br>(3.1-9.7%)                   | 7%<br>(3.4-12%)                     | 190<br>(90-310)     | 8400<br>(4400-14000)    |
| Madagascar | 2000 | Male   | 50 to 54 | 52%<br>(33-70%)                | 48%<br>(30-67%)          | 1.5<br>(0.78-2.6)                           | 5.7%<br>(2.8-9.3%)                   | 6.7%<br>(3.2-11%)                   | 170<br>(77-290)     | 6500<br>(3300-11000)    |
| Madagascar | 2000 | Male   | 55 to 59 | 51%<br>(33-70%)                | 49%<br>(30-67%)          | 1.5<br>(0.77-2.6)                           | 5.1%<br>(2.5-8.6%)                   | 5.9%<br>(2.8-10%)                   | 160<br>(75-280)     | 5500<br>(2700-9300)     |
| Madagascar | 2000 | Male   | 60 to 64 | 49%<br>(30-68%)                | 51%<br>(32-70%)          | 1.3<br>(0.6-2.3)                            | 4.1%<br>(1.8-7.7%)                   | 4.7%<br>(2.1-9%)                    | 160<br>(70-310)     | 4600<br>(2100-8700)     |
| Madagascar | 2000 | Male   | 65 to 69 | 47%<br>(29-64%)                | 53%<br>(36-71%)          | 1<br>(0.51-1.8)                             | 2.6%<br>(0.93-4.9%)                  | 2.9%<br>(0.97-5.6%)                 | 120<br>(39-230)     | 2800<br>(980-5200)      |
| Madagascar | 2000 | Male   | 70 to 74 | 44%<br>(27-61%)                | 56%<br>(39-73%)          | 0.8<br>(0.38-1.4)                           | 1.6%<br>(0.33-3.5%)                  | 1.8%<br>(0.34-4%)                   | 78<br>(15-170)      | 1500<br>(290-3100)      |
| Madagascar | 2000 | Male   | 75 to 79 | 41%<br>(25-60%)                | 59%<br>(40-75%)          | 0.65<br>(0.29-1.2)                          | 1.1%<br>(0.098-2.6%)                 | 1.2%<br>(0.062-2.9%)                | 47<br>(2.5-110)     | 690<br>(62-1600)        |



| Location   | Year | Sex    | Age      | Prevalence of current drinkers | Prevalence of abstainers | Population average of standard drinks daily | Percent of total attributable deaths | Percent of total attributable DALYs | Attributable deaths | Attributable DALYs     |
|------------|------|--------|----------|--------------------------------|--------------------------|---------------------------------------------|--------------------------------------|-------------------------------------|---------------------|------------------------|
| Madagascar | 2000 | Male   | 80 to 84 | 39%<br>(22-57%)                | 61%<br>(43-78%)          | 0.55<br>(0.25-0.99)                         | 0.74%<br>(-0.14-1.8%)                | 0.79%<br>(-0.21-2%)                 | 21<br>(-5.6-54)     | 230<br>(-44-570)       |
| Madagascar | 2000 | Male   | 85 to 89 | 36%<br>(21-54%)                | 64%<br>(46-79%)          | 0.46<br>(0.21-0.86)                         | 0.52%<br>(-0.14-1.3%)                | 0.52%<br>(-0.26-1.4%)               | 7.6<br>(-3.8-21)    | 65<br>(-17-160)        |
| Madagascar | 2000 | Male   | 90 to 94 | 37%<br>(22-55%)                | 63%<br>(45-78%)          | 0.42<br>(0.18-0.84)                         | 0.18%<br>(-0.42-0.78%)               | 0.083%<br>(-0.64-0.79%)             | 0.5<br>(-3.9-4.8)   | 6.7<br>(-15-28)        |
| Madagascar | 2000 | Male   | 95 plus  | 40%<br>(20-62%)                | 60%<br>(38-80%)          | 0.42<br>(0.15-0.9)                          | 0.23%<br>(-0.56-0.89%)               | 0.054%<br>(-0.88-0.85%)             | 0.086<br>(-1.4-1.4) | 1.4<br>(-3.4-5.7)      |
| Madagascar | 2005 | Female | All Ages | 20%<br>(16-26%)                | 80%<br>(74-84%)          | 0.36<br>(0.26-0.45)                         | 0.66%<br>(0.36-1%)                   | 1%<br>(0.38-1.9%)                   | 830<br>(320-1500)   | 35000<br>(20000-55000) |
| Madagascar | 2005 | Female | 15 to 19 | 20%<br>(11-34%)                | 80%<br>(66-89%)          | 0.4<br>(0.19-0.72)                          | 0.79%<br>(0.43-1.3%)                 | 0.76%<br>(0.23-1.6%)                | 11<br>(3.3-24)      | 1500<br>(780-2500)     |
| Madagascar | 2005 | Female | 20 to 24 | 26%<br>(14-40%)                | 74%<br>(60-86%)          | 0.57<br>(0.28-0.98)                         | 1.4%<br>(0.84-2.2%)                  | 1.1%<br>(0.37-2.3%)                 | 19<br>(6.3-37)      | 2500<br>(1400-4000)    |
| Madagascar | 2005 | Female | 25 to 29 | 28%<br>(15-44%)                | 72%<br>(56-85%)          | 0.69<br>(0.34-1.2)                          | 2%<br>(1.2-3%)                       | 2%<br>(0.95-3.5%)                   | 37<br>(18-64)       | 3600<br>(2200-5500)    |
| Madagascar | 2005 | Female | 30 to 34 | 30%<br>(16-47%)                | 70%<br>(53-84%)          | 0.75<br>(0.38-1.2)                          | 2.2%<br>(1.3-3.2%)                   | 2.4%<br>(1.2-4%)                    | 48<br>(23-81)       | 3800<br>(2200-5700)    |
| Madagascar | 2005 | Female | 35 to 39 | 34%<br>(19-52%)                | 66%<br>(48-81%)          | 0.74<br>(0.4-1.3)                           | 2.1%<br>(1.2-3.3%)                   | 2.5%<br>(1.2-4.2%)                  | 53<br>(26-90)       | 3400<br>(1900-5300)    |
| Madagascar | 2005 | Female | 40 to 44 | 36%<br>(21-55%)                | 64%<br>(45-79%)          | 0.76<br>(0.36-1.4)                          | 2.2%<br>(1.2-3.7%)                   | 2.7%<br>(1.3-4.9%)                  | 63<br>(30-110)      | 3400<br>(1700-5600)    |
| Madagascar | 2005 | Female | 45 to 49 | 36%<br>(19-53%)                | 64%<br>(47-81%)          | 0.78<br>(0.35-1.5)                          | 2.3%<br>(1.1-4.3%)                   | 2.9%<br>(1.2-5.7%)                  | 76<br>(32-160)      | 3400<br>(1600-6600)    |
| Madagascar | 2005 | Female | 50 to 54 | 34%<br>(18-54%)                | 66%<br>(46-82%)          | 0.76<br>(0.35-1.4)                          | 2.4%<br>(0.98-4.8%)                  | 3.1%<br>(1.2-6.1%)                  | 97<br>(36-190)      | 3700<br>(1400-7200)    |
| Madagascar | 2005 | Female | 55 to 59 | 33%<br>(19-52%)                | 67%<br>(48-81%)          | 0.76<br>(0.34-1.5)                          | 2.2%<br>(0.64-4.7%)                  | 2.7%<br>(0.78-5.9%)                 | 89<br>(25-200)      | 2900<br>(800-6300)     |
| Madagascar | 2005 | Female | 60 to 64 | 34%<br>(18-53%)                | 66%<br>(47-82%)          | 0.76<br>(0.33-1.4)                          | 2.1%<br>(0.48-4.4%)                  | 2.5%<br>(0.57-5.3%)                 | 96<br>(21-220)      | 2600<br>(590-5800)     |
| Madagascar | 2005 | Female | 65 to 69 | 35%<br>(20-52%)                | 65%<br>(48-80%)          | 0.71<br>(0.32-1.3)                          | 1.9%<br>(0.36-4.1%)                  | 2.2%<br>(0.4-4.7%)                  | 100<br>(18-230)     | 2400<br>(440-5200)     |
| Madagascar | 2005 | Female | 70 to 74 | 33%<br>(20-51%)                | 67%<br>(49-80%)          | 0.61<br>(0.27-1.2)                          | 1.2%<br>(-0.15-3.2%)                 | 1.3%<br>(-0.25-3.7%)                | 69<br>(-13-200)     | 1300<br>(-150-3600)    |
| Madagascar | 2005 | Female | 75 to 79 | 31%<br>(17-49%)                | 69%<br>(51-83%)          | 0.51<br>(0.21-1.1)                          | 0.85%<br>(-0.39-2.5%)                | 0.95%<br>(-0.5-2.9%)                | 44<br>(-22-130)     | 620<br>(-300-1900)     |
| Madagascar | 2005 | Female | 80 to 84 | 29%<br>(15-48%)                | 71%<br>(52-85%)          | 0.46<br>(0.18-0.89)                         | 0.44%<br>(-0.6-1.8%)                 | 0.5%<br>(-0.69-2%)                  | 17<br>(-23-71)      | 180<br>(-240-720)      |
| Madagascar | 2005 | Female | 85 to 89 | 30%<br>(16-47%)                | 70%<br>(53-84%)          | 0.45<br>(0.18-0.91)                         | 0.2%<br>(-0.68-1.2%)                 | 0.21%<br>(-0.81-1.4%)               | 3.3<br>(-13-23)     | 27<br>(-91-170)        |
| Madagascar | 2005 | Female | 90 to 94 | 32%<br>(18-50%)                | 68%<br>(50-82%)          | 0.47<br>(0.18-0.97)                         | -0.018%<br>(-0.86-1.1%)              | -0.072%<br>(-1.1-1.2%)              | -0.38<br>(-5.6-6.3) | -0.55<br>(-27-33)      |
| Madagascar | 2005 | Female | 95 plus  | 36%<br>(18-58%)                | 64%<br>(42-82%)          | 0.51<br>(0.17-1.1)                          | 0.14%<br>(-0.9-1.3%)                 | 0.066%<br>(-1.2-1.5%)               | 0.11<br>(-1.9-2.3)  | 0.87<br>(-5.7-8.4)     |

| Location   | Year | Sex    | Age      | Prevalence of current drinkers | Prevalence of abstainers | Population average of standard drinks daily | Percent of total attributable deaths | Percent of total attributable DALYs | Attributable deaths | Attributable DALYs      |
|------------|------|--------|----------|--------------------------------|--------------------------|---------------------------------------------|--------------------------------------|-------------------------------------|---------------------|-------------------------|
| Madagascar | 2005 | Male   | All Ages | 29%<br>(23-37%)                | 71%<br>(63-77%)          | 0.52<br>(0.39-0.65)                         | 1.2%<br>(0.81-1.7%)                  | 1.6%<br>(0.85-2.4%)                 | 1400<br>(760-2300)  | 74000<br>(47000-100000) |
| Madagascar | 2005 | Male   | 15 to 19 | 26%<br>(16-41%)                | 74%<br>(59-84%)          | 0.52<br>(0.26-0.91)                         | 1.9%<br>(1.2-2.8%)                   | 1.6%<br>(0.77-3%)                   | 29<br>(13-54)       | 3700<br>(2200-5900)     |
| Madagascar | 2005 | Male   | 20 to 24 | 37%<br>(22-55%)                | 63%<br>(45-78%)          | 0.76<br>(0.4-1.2)                           | 3.5%<br>(2.3-5.1%)                   | 2.8%<br>(1.3-4.9%)                  | 63<br>(27-110)      | 7400<br>(4400-11000)    |
| Madagascar | 2005 | Male   | 25 to 29 | 43%<br>(25-60%)                | 57%<br>(40-75%)          | 0.97<br>(0.55-1.5)                          | 4.2%<br>(2.7-6.1%)                   | 3.8%<br>(1.9-6.3%)                  | 97<br>(49-160)      | 9200<br>(5800-13000)    |
| Madagascar | 2005 | Male   | 30 to 34 | 47%<br>(28-65%)                | 53%<br>(35-72%)          | 1.1<br>(0.63-1.7)                           | 4.5%<br>(2.8-6.6%)                   | 4.6%<br>(2.4-7.2%)                  | 120<br>(63-200)     | 9300<br>(5600-14000)    |
| Madagascar | 2005 | Male   | 35 to 39 | 49%<br>(32-67%)                | 51%<br>(33-68%)          | 1.2<br>(0.69-2)                             | 4.7%<br>(2.8-7%)                     | 5.1%<br>(2.6-8.2%)                  | 140<br>(69-230)     | 8800<br>(5000-13000)    |
| Madagascar | 2005 | Male   | 40 to 44 | 51%<br>(33-69%)                | 49%<br>(31-67%)          | 1.3<br>(0.67-2.1)                           | 4.7%<br>(2.6-7.1%)                   | 5.4%<br>(2.7-8.5%)                  | 150<br>(72-260)     | 8200<br>(4400-13000)    |
| Madagascar | 2005 | Male   | 45 to 49 | 51%<br>(33-71%)                | 49%<br>(29-67%)          | 1.3<br>(0.67-2.2)                           | 4.5%<br>(2.5-7.4%)                   | 5.3%<br>(2.6-8.8%)                  | 160<br>(78-280)     | 7600<br>(4000-12000)    |
| Madagascar | 2005 | Male   | 50 to 54 | 52%<br>(33-70%)                | 48%<br>(30-67%)          | 1.3<br>(0.64-2.1)                           | 4.4%<br>(2.1-7.2%)                   | 5.1%<br>(2.2-8.6%)                  | 170<br>(75-290)     | 6800<br>(3300-11000)    |
| Madagascar | 2005 | Male   | 55 to 59 | 51%<br>(33-71%)                | 49%<br>(29-67%)          | 1.2<br>(0.62-2)                             | 3.9%<br>(1.9-6.9%)                   | 4.5%<br>(2-8.1%)                    | 140<br>(60-260)     | 4800<br>(2200-8700)     |
| Madagascar | 2005 | Male   | 60 to 64 | 49%<br>(30-69%)                | 51%<br>(31-70%)          | 1<br>(0.49-1.9)                             | 3.2%<br>(1.4-6%)                     | 3.6%<br>(1.5-6.9%)                  | 130<br>(50-260)     | 3700<br>(1600-7100)     |
| Madagascar | 2005 | Male   | 65 to 69 | 46%<br>(29-64%)                | 54%<br>(36-71%)          | 0.83<br>(0.39-1.5)                          | 1.9%<br>(0.61-3.7%)                  | 2.2%<br>(0.58-4.3%)                 | 92<br>(24-180)      | 2200<br>(670-4100)      |
| Madagascar | 2005 | Male   | 70 to 74 | 43%<br>(27-61%)                | 57%<br>(39-73%)          | 0.65<br>(0.31-1.2)                          | 1.2%<br>(0.12-2.5%)                  | 1.3%<br>(0.093-2.9%)                | 62<br>(4.2-140)     | 1200<br>(120-2500)      |
| Madagascar | 2005 | Male   | 75 to 79 | 41%<br>(25-59%)                | 59%<br>(41-75%)          | 0.52<br>(0.23-1)                            | 0.82%<br>(-0.06-2%)                  | 0.91%<br>(-0.11-2.2%)               | 38<br>(-4.5-93)     | 560<br>(-39-1300)       |
| Madagascar | 2005 | Male   | 80 to 84 | 38%<br>(22-57%)                | 62%<br>(43-78%)          | 0.44<br>(0.2-0.81)                          | 0.53%<br>(-0.17-1.4%)                | 0.55%<br>(-0.25-1.5%)               | 17<br>(-7.7-46)     | 190<br>(-60-500)        |
| Madagascar | 2005 | Male   | 85 to 89 | 35%<br>(21-53%)                | 65%<br>(47-79%)          | 0.37<br>(0.17-0.69)                         | 0.4%<br>(-0.19-1%)                   | 0.38%<br>(-0.32-1.1%)               | 6.8<br>(-5.6-19)    | 61<br>(-29-150)         |
| Madagascar | 2005 | Male   | 90 to 94 | 36%<br>(22-54%)                | 64%<br>(46-78%)          | 0.34<br>(0.14-0.67)                         | 0.12%<br>(-0.42-0.59%)               | 0.013%<br>(-0.61-0.56%)             | 0.089<br>(-4.1-3.7) | 4.6<br>(-16-23)         |
| Madagascar | 2005 | Male   | 95 plus  | 40%<br>(20-61%)                | 60%<br>(39-80%)          | 0.34<br>(0.12-0.74)                         | 0.18%<br>(-0.5-0.73%)                | 0.02%<br>(-0.8-0.7%)                | 0.035<br>(-1.4-1.3) | 1.3<br>(-3.5-5.1)       |
| Madagascar | 2010 | Female | All Ages | 21%<br>(16-27%)                | 79%<br>(73-84%)          | 0.38<br>(0.28-0.51)                         | 0.73%<br>(0.4-1.2%)                  | 1.1%<br>(0.41-2.1%)                 | 1000<br>(360-1900)  | 42000<br>(23000-67000)  |
| Madagascar | 2010 | Female | 15 to 19 | 20%<br>(11-34%)                | 80%<br>(66-89%)          | 0.42<br>(0.2-0.77)                          | 0.85%<br>(0.45-1.5%)                 | 0.84%<br>(0.26-1.8%)                | 14<br>(4.4-32)      | 1900<br>(950-3200)      |
| Madagascar | 2010 | Female | 20 to 24 | 26%<br>(14-41%)                | 74%<br>(59-86%)          | 0.6<br>(0.29-1.1)                           | 1.5%<br>(0.88-2.4%)                  | 1.3%<br>(0.44-2.5%)                 | 25<br>(8.8-50)      | 3300<br>(1900-5200)     |
| Madagascar | 2010 | Female | 25 to 29 | 28%<br>(15-44%)                | 72%<br>(56-85%)          | 0.73<br>(0.37-1.3)                          | 2.1%<br>(1.3-3.2%)                   | 2.1%<br>(0.95-3.8%)                 | 40<br>(18-74)       | 3900<br>(2300-6100)     |

| Location   | Year | Sex    | Age      | Prevalence of current drinkers | Prevalence of abstainers | Population average of standard drinks daily | Percent of total attributable deaths | Percent of total attributable DALYs | Attributable deaths | Attributable DALYs      |
|------------|------|--------|----------|--------------------------------|--------------------------|---------------------------------------------|--------------------------------------|-------------------------------------|---------------------|-------------------------|
| Madagascar | 2010 | Female | 30 to 34 | 31%<br>(17-48%)                | 69%<br>(52-83%)          | 0.79<br>(0.39-1.4)                          | 2.2%<br>(1.3-3.5%)                   | 2.5%<br>(1.2-4.5%)                  | 56<br>(25-100)      | 4300<br>(2500-6700)     |
| Madagascar | 2010 | Female | 35 to 39 | 34%<br>(19-52%)                | 66%<br>(48-81%)          | 0.78<br>(0.4-1.3)                           | 2.2%<br>(1.3-3.5%)                   | 2.6%<br>(1.3-4.6%)                  | 64<br>(32-110)      | 4100<br>(2400-6700)     |
| Madagascar | 2010 | Female | 40 to 44 | 36%<br>(21-54%)                | 64%<br>(46-79%)          | 0.79<br>(0.36-1.4)                          | 2.2%<br>(1.2-3.8%)                   | 2.8%<br>(1.3-4.9%)                  | 73<br>(34-130)      | 3900<br>(2000-6600)     |
| Madagascar | 2010 | Female | 45 to 49 | 36%<br>(19-54%)                | 64%<br>(46-81%)          | 0.81<br>(0.38-1.5)                          | 2.4%<br>(1.1-4.3%)                   | 3%<br>(1.3-5.8%)                    | 90<br>(36-180)      | 4000<br>(1800-7700)     |
| Madagascar | 2010 | Female | 50 to 54 | 35%<br>(19-55%)                | 65%<br>(45-81%)          | 0.8<br>(0.36-1.5)                           | 2.6%<br>(1-4.9%)                     | 3.2%<br>(1.2-6.3%)                  | 120<br>(41-240)     | 4400<br>(1700-9000)     |
| Madagascar | 2010 | Female | 55 to 59 | 33%<br>(19-53%)                | 67%<br>(47-81%)          | 0.8<br>(0.35-1.5)                           | 2.4%<br>(0.71-5%)                    | 2.9%<br>(0.87-6.4%)                 | 120<br>(34-280)     | 4000<br>(1100-8800)     |
| Madagascar | 2010 | Female | 60 to 64 | 34%<br>(19-52%)                | 66%<br>(48-81%)          | 0.79<br>(0.34-1.6)                          | 2.2%<br>(0.54-5%)                    | 2.7%<br>(0.65-6.1%)                 | 110<br>(27-270)     | 3100<br>(730-7400)      |
| Madagascar | 2010 | Female | 65 to 69 | 35%<br>(19-53%)                | 65%<br>(47-81%)          | 0.74<br>(0.32-1.4)                          | 2%<br>(0.48-4.2%)                    | 2.3%<br>(0.53-4.9%)                 | 120<br>(26-270)     | 2700<br>(630-6000)      |
| Madagascar | 2010 | Female | 70 to 74 | 33%<br>(19-51%)                | 67%<br>(49-81%)          | 0.63<br>(0.26-1.2)                          | 1.3%<br>(-0.18-3.5%)                 | 1.4%<br>(-0.25-4.1%)                | 81<br>(-14-230)     | 1500<br>(-200-4200)     |
| Madagascar | 2010 | Female | 75 to 79 | 30%<br>(17-48%)                | 70%<br>(52-83%)          | 0.53<br>(0.2-1.1)                           | 0.91%<br>(-0.31-2.9%)                | 1%<br>(-0.38-3.3%)                  | 56<br>(-21-180)     | 800<br>(-290-2500)      |
| Madagascar | 2010 | Female | 80 to 84 | 29%<br>(16-47%)                | 71%<br>(53-84%)          | 0.48<br>(0.19-0.93)                         | 0.49%<br>(-0.51-1.9%)                | 0.56%<br>(-0.57-2.2%)               | 23<br>(-23-94)      | 250<br>(-240-980)       |
| Madagascar | 2010 | Female | 85 to 89 | 30%<br>(16-46%)                | 70%<br>(54-84%)          | 0.47<br>(0.2-0.97)                          | 0.24%<br>(-0.6-1.4%)                 | 0.26%<br>(-0.74-1.6%)               | 5.4<br>(-15-35)     | 43<br>(-110-250)        |
| Madagascar | 2010 | Female | 90 to 94 | 32%<br>(18-49%)                | 68%<br>(51-82%)          | 0.49<br>(0.19-0.99)                         | 0.027%<br>(-0.81-1.2%)               | -0.023%<br>(-1-1.4%)                | -0.15<br>(-6.9-8.9) | 1.1<br>(-33-47)         |
| Madagascar | 2010 | Female | 95 plus  | 37%<br>(18-58%)                | 63%<br>(42-82%)          | 0.53<br>(0.18-1.2)                          | 0.18%<br>(-0.87-1.5%)                | 0.11%<br>(-1.2-1.7%)                | 0.16<br>(-1.7-2.5)  | 1.1<br>(-5.1-8.9)       |
| Madagascar | 2010 | Male   | All Ages | 30%<br>(24-37%)                | 70%<br>(63-76%)          | 0.55<br>(0.41-0.72)                         | 1.3%<br>(0.88-1.9%)                  | 1.7%<br>(0.9-2.6%)                  | 1700<br>(860-2600)  | 87000<br>(55000-120000) |
| Madagascar | 2010 | Male   | 15 to 19 | 26%<br>(16-41%)                | 74%<br>(59-84%)          | 0.53<br>(0.27-0.95)                         | 1.9%<br>(1.2-2.9%)                   | 1.7%<br>(0.8-3.2%)                  | 35<br>(15-68)       | 4500<br>(2700-7100)     |
| Madagascar | 2010 | Male   | 20 to 24 | 37%<br>(21-55%)                | 63%<br>(45-79%)          | 0.79<br>(0.4-1.3)                           | 3.7%<br>(2.3-5.5%)                   | 3%<br>(1.4-5.2%)                    | 78<br>(31-150)      | 9200<br>(5400-14000)    |
| Madagascar | 2010 | Male   | 25 to 29 | 43%<br>(25-61%)                | 57%<br>(39-75%)          | 1<br>(0.55-1.6)                             | 4.4%<br>(2.8-6.3%)                   | 3.9%<br>(2-6.6%)                    | 100<br>(49-180)     | 9700<br>(5900-15000)    |
| Madagascar | 2010 | Male   | 30 to 34 | 47%<br>(28-65%)                | 53%<br>(35-72%)          | 1.2<br>(0.65-1.8)                           | 4.6%<br>(2.8-6.8%)                   | 4.6%<br>(2.4-7.4%)                  | 140<br>(68-250)     | 11000<br>(6500-17000)   |
| Madagascar | 2010 | Male   | 35 to 39 | 49%<br>(31-67%)                | 51%<br>(33-69%)          | 1.3<br>(0.71-2.1)                           | 4.7%<br>(2.9-6.9%)                   | 5.1%<br>(2.8-8%)                    | 160<br>(83-280)     | 10000<br>(6000-16000)   |
| Madagascar | 2010 | Male   | 40 to 44 | 50%<br>(33-69%)                | 50%<br>(31-67%)          | 1.3<br>(0.7-2.2)                            | 4.7%<br>(2.7-7.2%)                   | 5.4%<br>(2.8-8.5%)                  | 180<br>(86-300)     | 9500<br>(5100-15000)    |
| Madagascar | 2010 | Male   | 45 to 49 | 51%<br>(32-70%)                | 49%<br>(30-68%)          | 1.3<br>(0.7-2.3)                            | 4.6%<br>(2.5-7.7%)                   | 5.4%<br>(2.7-9.3%)                  | 190<br>(91-330)     | 8800<br>(4600-15000)    |

| Location   | Year | Sex    | Age      | Prevalence of current drinkers | Prevalence of abstainers | Population average of standard drinks daily | Percent of total attributable deaths | Percent of total attributable DALYs | Attributable deaths  | Attributable DALYs      |
|------------|------|--------|----------|--------------------------------|--------------------------|---------------------------------------------|--------------------------------------|-------------------------------------|----------------------|-------------------------|
| Madagascar | 2010 | Male   | 50 to 54 | 51%<br>(33-71%)                | 49%<br>(29-67%)          | 1.3<br>(0.65-2.2)                           | 4.5%<br>(2.3-7.4%)                   | 5.2%<br>(2.4-8.9%)                  | 200<br>(95-350)      | 8100<br>(4100-14000)    |
| Madagascar | 2010 | Male   | 55 to 59 | 51%<br>(33-70%)                | 49%<br>(30-67%)          | 1.2<br>(0.63-2.2)                           | 4%<br>(1.9-7%)                       | 4.7%<br>(2.1-8.2%)                  | 200<br>(83-370)      | 6700<br>(3000-12000)    |
| Madagascar | 2010 | Male   | 60 to 64 | 49%<br>(30-69%)                | 51%<br>(31-70%)          | 1.1<br>(0.52-2)                             | 3.2%<br>(1.4-5.9%)                   | 3.7%<br>(1.5-7%)                    | 150<br>(58-290)      | 4300<br>(1800-7900)     |
| Madagascar | 2010 | Male   | 65 to 69 | 46%<br>(29-64%)                | 54%<br>(36-71%)          | 0.86<br>(0.42-1.5)                          | 2%<br>(0.61-3.7%)                    | 2.2%<br>(0.6-4.3%)                  | 96<br>(27-190)       | 2300<br>(710-4400)      |
| Madagascar | 2010 | Male   | 70 to 74 | 43%<br>(26-61%)                | 57%<br>(39-74%)          | 0.67<br>(0.31-1.2)                          | 1.2%<br>(0.16-2.6%)                  | 1.4%<br>(0.12-3%)                   | 66<br>(6.3-150)      | 1200<br>(160-2700)      |
| Madagascar | 2010 | Male   | 75 to 79 | 41%<br>(25-60%)                | 59%<br>(40-75%)          | 0.55<br>(0.24-1.1)                          | 0.82%<br>(-0.052-2%)                 | 0.91%<br>(-0.11-2.3%)               | 42<br>(-5.1-100)     | 620<br>(-38-1500)       |
| Madagascar | 2010 | Male   | 80 to 84 | 38%<br>(21-58%)                | 62%<br>(42-79%)          | 0.46<br>(0.21-0.84)                         | 0.54%<br>(-0.15-1.4%)                | 0.56%<br>(-0.21-1.5%)               | 20<br>(-7.6-55)      | 230<br>(-61-580)        |
| Madagascar | 2010 | Male   | 85 to 89 | 36%<br>(21-53%)                | 64%<br>(47-79%)          | 0.38<br>(0.17-0.73)                         | 0.39%<br>(-0.16-1%)                  | 0.37%<br>(-0.3-1.1%)                | 7.6<br>(-6.2-23)     | 70<br>(-28-180)         |
| Madagascar | 2010 | Male   | 90 to 94 | 36%<br>(21-54%)                | 64%<br>(46-79%)          | 0.35<br>(0.14-0.69)                         | 0.11%<br>(-0.41-0.59%)               | 0.0012%<br>(-0.61-0.54%)            | 0.011<br>(-5-4.4)    | 5.4<br>(-20-28)         |
| Madagascar | 2010 | Male   | 95 plus  | 40%<br>(20-62%)                | 60%<br>(38-80%)          | 0.35<br>(0.13-0.74)                         | 0.15%<br>(-0.5-0.67%)                | -0.017%<br>(-0.8-0.61%)             | -0.034<br>(-1.6-1.2) | 1.2<br>(-3.9-5.4)       |
| Madagascar | 2016 | Female | All Ages | 21%<br>(17-27%)                | 79%<br>(73-83%)          | 0.48<br>(0.28-0.76)                         | 1%<br>(0.47-1.8%)                    | 1.6%<br>(0.5-3.2%)                  | 1500<br>(430-3300)   | 60000<br>(28000-110000) |
| Madagascar | 2016 | Female | 15 to 19 | 20%<br>(11-33%)                | 80%<br>(67-89%)          | 0.5<br>(0.2-1.1)                            | 1%<br>(0.49-1.9%)                    | 1.1%<br>(0.3-2.5%)                  | 19<br>(5.5-46)       | 2400<br>(1100-4500)     |
| Madagascar | 2016 | Female | 20 to 24 | 25%<br>(14-41%)                | 75%<br>(59-86%)          | 0.71<br>(0.31-1.4)                          | 1.8%<br>(0.99-3%)                    | 1.6%<br>(0.51-3.4%)                 | 33<br>(10-72)        | 4300<br>(2300-7100)     |
| Madagascar | 2016 | Female | 25 to 29 | 28%<br>(15-44%)                | 72%<br>(56-85%)          | 0.86<br>(0.39-1.7)                          | 2.3%<br>(1.4-3.9%)                   | 2.4%<br>(1.1-4.9%)                  | 52<br>(21-100)       | 5100<br>(2800-8400)     |
| Madagascar | 2016 | Female | 30 to 34 | 31%<br>(16-48%)                | 69%<br>(52-84%)          | 0.95<br>(0.43-1.8)                          | 2.5%<br>(1.4-4.3%)                   | 3%<br>(1.3-5.6%)                    | 63<br>(26-130)       | 5000<br>(2700-8700)     |
| Madagascar | 2016 | Female | 35 to 39 | 34%<br>(19-52%)                | 66%<br>(48-81%)          | 0.94<br>(0.41-1.8)                          | 2.5%<br>(1.4-4.4%)                   | 3.2%<br>(1.5-5.9%)                  | 82<br>(35-160)       | 5300<br>(2700-9400)     |
| Madagascar | 2016 | Female | 40 to 44 | 36%<br>(21-54%)                | 64%<br>(46-79%)          | 0.96<br>(0.4-1.8)                           | 2.6%<br>(1.2-4.8%)                   | 3.4%<br>(1.5-6.4%)                  | 100<br>(40-210)      | 5500<br>(2500-10000)    |
| Madagascar | 2016 | Female | 45 to 49 | 36%<br>(19-55%)                | 64%<br>(45-81%)          | 0.98<br>(0.41-2)                            | 2.9%<br>(1.3-5.8%)                   | 3.8%<br>(1.5-7.9%)                  | 130<br>(47-270)      | 5800<br>(2400-12000)    |
| Madagascar | 2016 | Female | 50 to 54 | 35%<br>(19-54%)                | 65%<br>(46-81%)          | 0.96<br>(0.37-1.9)                          | 3.1%<br>(1.2-6.4%)                   | 4%<br>(1.5-8.1%)                    | 170<br>(55-360)      | 6300<br>(2300-14000)    |
| Madagascar | 2016 | Female | 55 to 59 | 33%<br>(19-52%)                | 67%<br>(48-81%)          | 0.94<br>(0.38-2)                            | 3%<br>(0.78-6.6%)                    | 3.7%<br>(0.91-8.2%)                 | 180<br>(43-430)      | 5900<br>(1500-14000)    |
| Madagascar | 2016 | Female | 60 to 64 | 34%<br>(19-53%)                | 66%<br>(47-81%)          | 0.94<br>(0.36-2.1)                          | 2.8%<br>(0.62-6.6%)                  | 3.4%<br>(0.73-8%)                   | 200<br>(42-490)      | 5400<br>(1200-13000)    |
| Madagascar | 2016 | Female | 65 to 69 | 35%<br>(20-52%)                | 65%<br>(48-80%)          | 0.89<br>(0.34-1.8)                          | 2.6%<br>(0.6-6.3%)                   | 3.1%<br>(0.68-7.4%)                 | 180<br>(36-450)      | 4200<br>(880-10000)     |

| Location   | Year | Sex    | Age      | Prevalence of current drinkers | Prevalence of abstainers | Population average of standard drinks daily | Percent of total attributable deaths | Percent of total attributable DALYs | Attributable deaths | Attributable DALYs       |
|------------|------|--------|----------|--------------------------------|--------------------------|---------------------------------------------|--------------------------------------|-------------------------------------|---------------------|--------------------------|
| Madagascar | 2016 | Female | 70 to 74 | 34%<br>(19-51%)                | 66%<br>(49-81%)          | 0.77<br>(0.29-1.6)                          | 1.9%<br>(0.03-5.2%)                  | 2.1%<br>(-0.03-6%)                  | 130<br>(-1.9-380)   | 2400<br>(41-6900)        |
| Madagascar | 2016 | Female | 75 to 79 | 31%<br>(17-50%)                | 69%<br>(50-83%)          | 0.64<br>(0.22-1.4)                          | 1.4%<br>(-0.12-4.3%)                 | 1.6%<br>(-0.17-4.9%)                | 99<br>(-10-310)     | 1400<br>(-120-4400)      |
| Madagascar | 2016 | Female | 80 to 84 | 29%<br>(16-47%)                | 71%<br>(53-84%)          | 0.58<br>(0.21-1.3)                          | 0.91%<br>(-0.4-3.4%)                 | 1%<br>(-0.46-3.9%)                  | 53<br>(-24-200)     | 560<br>(-240-2000)       |
| Madagascar | 2016 | Female | 85 to 89 | 29%<br>(16-46%)                | 71%<br>(54-84%)          | 0.56<br>(0.2-1.3)                           | 0.6%<br>(-0.47-2.6%)                 | 0.66%<br>(-0.56-2.9%)               | 19<br>(-16-83)      | 150<br>(-110-620)        |
| Madagascar | 2016 | Female | 90 to 94 | 32%<br>(18-50%)                | 68%<br>(50-82%)          | 0.58<br>(0.21-1.3)                          | 0.35%<br>(-0.72-2.4%)                | 0.35%<br>(-0.89-2.7%)               | 3.4<br>(-8.6-25)    | 20<br>(-40-130)          |
| Madagascar | 2016 | Female | 95 plus  | 36%<br>(18-58%)                | 64%<br>(42-82%)          | 0.64<br>(0.21-1.6)                          | 0.48%<br>(-0.74-2.8%)                | 0.45%<br>(-0.96-3.2%)               | 0.98<br>(-2.1-7.1)  | 4.1<br>(-6.2-24)         |
| Madagascar | 2016 | Male   | All Ages | 30%<br>(24-38%)                | 70%<br>(62-76%)          | 0.68<br>(0.41-1.1)                          | 1.8%<br>(1.1-2.9%)                   | 2.3%<br>(1.1-4%)                    | 2400<br>(1100-4400) | 120000<br>(69000-200000) |
| Madagascar | 2016 | Male   | 15 to 19 | 26%<br>(15-42%)                | 74%<br>(58-85%)          | 0.64<br>(0.28-1.3)                          | 2.2%<br>(1.3-3.6%)                   | 2.1%<br>(0.82-4.1%)                 | 48<br>(19-100)      | 5900<br>(3300-10000)     |
| Madagascar | 2016 | Male   | 20 to 24 | 37%<br>(22-54%)                | 63%<br>(46-78%)          | 0.94<br>(0.43-1.7)                          | 4.3%<br>(2.5-6.5%)                   | 3.6%<br>(1.5-6.8%)                  | 110<br>(41-220)     | 13000<br>(7100-20000)    |
| Madagascar | 2016 | Male   | 25 to 29 | 43%<br>(25-60%)                | 57%<br>(40-75%)          | 1.2<br>(0.58-2.2)                           | 5.1%<br>(3.1-8%)                     | 4.8%<br>(2.2-8.6%)                  | 150<br>(64-290)     | 14000<br>(8000-23000)    |
| Madagascar | 2016 | Male   | 30 to 34 | 47%<br>(27-66%)                | 53%<br>(34-73%)          | 1.4<br>(0.66-2.6)                           | 5.4%<br>(3.1-8.6%)                   | 5.6%<br>(2.6-9.9%)                  | 170<br>(74-320)     | 13000<br>(7300-22000)    |
| Madagascar | 2016 | Male   | 35 to 39 | 49%<br>(32-68%)                | 51%<br>(32-68%)          | 1.5<br>(0.71-2.8)                           | 5.4%<br>(3.1-8.9%)                   | 6%<br>(2.9-10%)                     | 220<br>(96-410)     | 14000<br>(7400-23000)    |
| Madagascar | 2016 | Male   | 40 to 44 | 50%<br>(33-70%)                | 50%<br>(30-67%)          | 1.6<br>(0.76-2.9)                           | 5.5%<br>(2.9-9.4%)                   | 6.4%<br>(3-11%)                     | 260<br>(110-480)    | 14000<br>(6800-25000)    |
| Madagascar | 2016 | Male   | 45 to 49 | 51%<br>(32-69%)                | 49%<br>(31-68%)          | 1.6<br>(0.74-3)                             | 5.4%<br>(2.7-9.9%)                   | 6.4%<br>(2.9-12%)                   | 270<br>(110-540)    | 12000<br>(5800-23000)    |
| Madagascar | 2016 | Male   | 50 to 54 | 51%<br>(33-70%)                | 49%<br>(30-67%)          | 1.6<br>(0.7-3)                              | 5.3%<br>(2.5-9.8%)                   | 6.3%<br>(2.7-12%)                   | 290<br>(110-580)    | 11000<br>(5000-22000)    |
| Madagascar | 2016 | Male   | 55 to 59 | 50%<br>(32-69%)                | 50%<br>(31-68%)          | 1.5<br>(0.63-2.8)                           | 4.8%<br>(2.1-9.4%)                   | 5.6%<br>(2.3-11%)                   | 280<br>(110-580)    | 9600<br>(4100-19000)     |
| Madagascar | 2016 | Male   | 60 to 64 | 49%<br>(30-69%)                | 51%<br>(31-70%)          | 1.3<br>(0.57-2.6)                           | 3.9%<br>(1.5-8.5%)                   | 4.6%<br>(1.7-9.8%)                  | 260<br>(95-580)     | 7500<br>(2900-16000)     |
| Madagascar | 2016 | Male   | 65 to 69 | 46%<br>(28-64%)                | 54%<br>(36-72%)          | 1<br>(0.45-2)                               | 2.4%<br>(0.72-5.5%)                  | 2.8%<br>(0.73-6.3%)                 | 150<br>(39-340)     | 3500<br>(1000-8000)      |
| Madagascar | 2016 | Male   | 70 to 74 | 43%<br>(26-61%)                | 57%<br>(39-74%)          | 0.8<br>(0.33-1.7)                           | 1.5%<br>(0.21-3.9%)                  | 1.7%<br>(0.19-4.5%)                 | 87<br>(8.8-220)     | 1600<br>(230-4200)       |
| Madagascar | 2016 | Male   | 75 to 79 | 41%<br>(25-60%)                | 59%<br>(40-75%)          | 0.65<br>(0.25-1.4)                          | 1%<br>(0.013-2.8%)                   | 1.1%<br>(-0.038-3.1%)               | 56<br>(-2-160)      | 820<br>(10-2300)         |
| Madagascar | 2016 | Male   | 80 to 84 | 38%<br>(22-57%)                | 62%<br>(43-78%)          | 0.55<br>(0.23-1.1)                          | 0.72%<br>(-0.077-2%)                 | 0.77%<br>(-0.17-2.3%)               | 30<br>(-6.4-92)     | 340<br>(-38-980)         |
| Madagascar | 2016 | Male   | 85 to 89 | 35%<br>(21-52%)                | 65%<br>(48-79%)          | 0.46<br>(0.18-1)                            | 0.49%<br>(-0.11-1.4%)                | 0.47%<br>(-0.26-1.5%)               | 12<br>(-6-37)       | 100<br>(-23-290)         |

| Location   | Year | Sex    | Age      | Prevalence of current drinkers | Prevalence of abstainers | Population average of standard drinks daily | Percent of total attributable deaths | Percent of total attributable DALYs | Attributable deaths    | Attributable DALYs     |
|------------|------|--------|----------|--------------------------------|--------------------------|---------------------------------------------|--------------------------------------|-------------------------------------|------------------------|------------------------|
| Madagascar | 2016 | Male   | 90 to 94 | 36%<br>(21-54%)                | 64%<br>(46-79%)          | 0.41<br>(0.16-0.89)                         | 0.19%<br>(-0.35-0.86%)               | 0.084%<br>(-0.55-0.85%)             | 0.83<br>(-5.7-8.6)     | 11<br>(-21-52)         |
| Madagascar | 2016 | Male   | 95 plus  | 39%<br>(19-61%)                | 61%<br>(39-81%)          | 0.41<br>(0.13-0.99)                         | 0.21%<br>(-0.46-0.92%)               | 0.029%<br>(-0.79-0.85%)             | 0.074<br>(-2.1-2.2)    | 2.1<br>(-4.7-9.5)      |
| Malawi     | 1990 | Female | All Ages | 8.6%<br>(7-11%)                | 91%<br>(89-93%)          | 0.16<br>(0.12-0.23)                         | 0.25%<br>(0.17-0.36%)                | 0.41%<br>(0.24-0.66%)               | 320<br>(180-510)       | 14000<br>(9700-21000)  |
| Malawi     | 1990 | Female | 15 to 19 | 8.7%<br>(5.4-13%)              | 91%<br>(87-95%)          | 0.16<br>(0.08-0.29)                         | 0.5%<br>(0.28-0.84%)                 | 0.37%<br>(0.11-0.82%)               | 4.5<br>(1.3-10)        | 660<br>(360-1100)      |
| Malawi     | 1990 | Female | 20 to 24 | 11%<br>(6.8-17%)               | 89%<br>(83-93%)          | 0.25<br>(0.12-0.42)                         | 0.75%<br>(0.43-1.2%)                 | 0.45%<br>(0.16-0.96%)               | 8.6<br>(2.9-18)        | 1300<br>(720-2000)     |
| Malawi     | 1990 | Female | 25 to 29 | 12%<br>(7.3-19%)               | 88%<br>(81-93%)          | 0.33<br>(0.17-0.55)                         | 0.95%<br>(0.57-1.5%)                 | 0.72%<br>(0.33-1.4%)                | 15<br>(7.2-29)         | 1600<br>(980-2500)     |
| Malawi     | 1990 | Female | 30 to 34 | 14%<br>(8.4-22%)               | 86%<br>(78-92%)          | 0.37<br>(0.19-0.64)                         | 1.1%<br>(0.65-1.7%)                  | 0.97%<br>(0.45-1.7%)                | 20<br>(9.4-34)         | 1600<br>(970-2500)     |
| Malawi     | 1990 | Female | 35 to 39 | 17%<br>(9.8-25%)               | 83%<br>(75-90%)          | 0.35<br>(0.18-0.59)                         | 1.1%<br>(0.67-1.7%)                  | 1%<br>(0.55-1.8%)                   | 20<br>(11-34)          | 1400<br>(850-2100)     |
| Malawi     | 1990 | Female | 40 to 44 | 18%<br>(11-26%)                | 82%<br>(74-89%)          | 0.34<br>(0.17-0.59)                         | 1.2%<br>(0.74-1.8%)                  | 1.3%<br>(0.71-2.1%)                 | 25<br>(14-41)          | 1400<br>(880-2200)     |
| Malawi     | 1990 | Female | 45 to 49 | 17%<br>(9.7-26%)               | 83%<br>(74-90%)          | 0.36<br>(0.17-0.68)                         | 1.3%<br>(0.73-2.1%)                  | 1.4%<br>(0.73-2.5%)                 | 26<br>(14-47)          | 1200<br>(720-2100)     |
| Malawi     | 1990 | Female | 50 to 54 | 15%<br>(9.3-23%)               | 85%<br>(77-91%)          | 0.36<br>(0.18-0.67)                         | 1.5%<br>(0.91-2.5%)                  | 1.8%<br>(1-3%)                      | 33<br>(17-57)          | 1300<br>(720-2100)     |
| Malawi     | 1990 | Female | 55 to 59 | 13%<br>(8.1-20%)               | 87%<br>(80-92%)          | 0.35<br>(0.18-0.64)                         | 1.4%<br>(0.66-2.4%)                  | 1.6%<br>(0.75-2.8%)                 | 31<br>(14-56)          | 1000<br>(480-1800)     |
| Malawi     | 1990 | Female | 60 to 64 | 13%<br>(7.9-20%)               | 87%<br>(80-92%)          | 0.35<br>(0.17-0.65)                         | 1.4%<br>(0.68-2.5%)                  | 1.6%<br>(0.77-3%)                   | 38<br>(17-70)          | 1000<br>(480-1900)     |
| Malawi     | 1990 | Female | 65 to 69 | 14%<br>(8.8-21%)               | 86%<br>(79-91%)          | 0.34<br>(0.17-0.57)                         | 1.4%<br>(0.71-2.3%)                  | 1.6%<br>(0.78-2.7%)                 | 43<br>(20-77)          | 990<br>(480-1700)      |
| Malawi     | 1990 | Female | 70 to 74 | 14%<br>(8.6-20%)               | 86%<br>(80-91%)          | 0.29<br>(0.14-0.51)                         | 0.87%<br>(0.29-1.7%)                 | 0.92%<br>(0.27-1.9%)                | 29<br>(8.3-62)         | 570<br>(200-1200)      |
| Malawi     | 1990 | Female | 75 to 79 | 12%<br>(7.2-20%)               | 88%<br>(80-93%)          | 0.24<br>(0.11-0.46)                         | 0.82%<br>(0.33-1.5%)                 | 0.92%<br>(0.35-1.7%)                | 22<br>(8-43)           | 320<br>(120-600)       |
| Malawi     | 1990 | Female | 80 to 84 | 12%<br>(6.6-18%)               | 88%<br>(82-93%)          | 0.22<br>(0.097-0.39)                        | 0.47%<br>(0.11-0.94%)                | 0.53%<br>(0.12-1.1%)                | 6.6<br>(1.4-14)        | 70<br>(16-140)         |
| Malawi     | 1990 | Female | 85 to 89 | 12%<br>(6.6-19%)               | 88%<br>(81-93%)          | 0.21<br>(0.097-0.38)                        | 0.28%<br>(-0.051-0.66%)              | 0.3%<br>(-0.088-0.74%)              | 1.8<br>(-0.51-4.4)     | 14<br>(-2.7-33)        |
| Malawi     | 1990 | Female | 90 to 94 | 13%<br>(7.5-20%)               | 87%<br>(80-92%)          | 0.21<br>(0.099-0.4)                         | 0.15%<br>(-0.17-0.49%)               | 0.13%<br>(-0.26-0.54%)              | 0.31<br>(-0.62-1.3)    | 2.1<br>(-2.4-7.1)      |
| Malawi     | 1990 | Female | 95 plus  | 14%<br>(7.5-24%)               | 86%<br>(76-93%)          | 0.22<br>(0.09-0.45)                         | 0.44%<br>(0.058-0.89%)               | 0.44%<br>(-0.011-0.98%)             | 0.26<br>(-0.0065-0.57) | 1<br>(0.13-2.1)        |
| Malawi     | 1990 | Male   | All Ages | 29%<br>(24-35%)                | 71%<br>(65-76%)          | 0.93<br>(0.68-1.2)                          | 0.89%<br>(0.54-1.3%)                 | 1.4%<br>(0.77-2.2%)                 | 1200<br>(620-1800)     | 55000<br>(33000-82000) |
| Malawi     | 1990 | Male   | 15 to 19 | 26%<br>(17-37%)                | 74%<br>(63-83%)          | 0.93<br>(0.49-1.6)                          | 2.7%<br>(1.6-4.1%)                   | 2.9%<br>(1.4-5%)                    | 27<br>(11-51)          | 2800<br>(1600-4600)    |

| Location | Year | Sex    | Age      | Prevalence of current drinkers | Prevalence of abstainers | Population average of standard drinks daily | Percent of total attributable deaths | Percent of total attributable DALYs | Attributable deaths | Attributable DALYs    |
|----------|------|--------|----------|--------------------------------|--------------------------|---------------------------------------------|--------------------------------------|-------------------------------------|---------------------|-----------------------|
| Malawi   | 1990 | Male   | 20 to 24 | 39%<br>(26-52%)                | 61%<br>(48-74%)          | 1.5<br>(0.82-2.5)                           | 3.8%<br>(2.1-6%)                     | 3.5%<br>(1.5-6.4%)                  | 62<br>(26-120)      | 5800<br>(3200-9600)   |
| Malawi   | 1990 | Male   | 25 to 29 | 46%<br>(32-59%)                | 54%<br>(41-68%)          | 2<br>(1.2-3)                                | 3.7%<br>(1.8-6.1%)                   | 3.5%<br>(1.4-6.4%)                  | 91<br>(41-160)      | 7100<br>(3800-11000)  |
| Malawi   | 1990 | Male   | 30 to 34 | 50%<br>(35-64%)                | 50%<br>(36-65%)          | 2.2<br>(1.3-3.3)                            | 3.9%<br>(1.9-6.5%)                   | 3.8%<br>(1.6-7.1%)                  | 110<br>(47-180)     | 7100<br>(3800-11000)  |
| Malawi   | 1990 | Male   | 35 to 39 | 52%<br>(37-65%)                | 48%<br>(35-63%)          | 2.2<br>(1.3-3.4)                            | 4.1%<br>(1.9-6.9%)                   | 4.3%<br>(1.7-7.8%)                  | 110<br>(50-180)     | 6400<br>(3400-10000)  |
| Malawi   | 1990 | Male   | 40 to 44 | 52%<br>(39-65%)                | 48%<br>(35-61%)          | 2.3<br>(1.2-3.4)                            | 4.4%<br>(2.2-7.3%)                   | 4.9%<br>(2.2-8.8%)                  | 120<br>(54-210)     | 6200<br>(3100-10000)  |
| Malawi   | 1990 | Male   | 45 to 49 | 54%<br>(38-67%)                | 46%<br>(33-62%)          | 2.2<br>(1.2-3.5)                            | 4.9%<br>(2.6-8.1%)                   | 5.6%<br>(2.6-9.7%)                  | 110<br>(56-200)     | 5100<br>(2700-8500)   |
| Malawi   | 1990 | Male   | 50 to 54 | 53%<br>(39-67%)                | 47%<br>(33-61%)          | 2.1<br>(1.2-3.4)                            | 5.7%<br>(3.1-9.1%)                   | 6.8%<br>(3.5-11%)                   | 110<br>(54-190)     | 4300<br>(2200-7300)   |
| Malawi   | 1990 | Male   | 55 to 59 | 50%<br>(36-66%)                | 50%<br>(34-64%)          | 2.1<br>(1.2-3.4)                            | 6%<br>(3.4-9.4%)                     | 7.2%<br>(3.9-11%)                   | 110<br>(52-200)     | 3800<br>(1900-6400)   |
| Malawi   | 1990 | Male   | 60 to 64 | 47%<br>(31-64%)                | 53%<br>(36-69%)          | 1.9<br>(0.99-3.2)                           | 5.4%<br>(2.9-9%)                     | 6.5%<br>(3.5-11%)                   | 110<br>(51-200)     | 3100<br>(1500-5500)   |
| Malawi   | 1990 | Male   | 65 to 69 | 44%<br>(29-60%)                | 56%<br>(40-71%)          | 1.4<br>(0.77-2.4)                           | 3.7%<br>(1.9-6.4%)                   | 4.4%<br>(2.2-7.7%)                  | 77<br>(35-140)      | 1800<br>(840-3200)    |
| Malawi   | 1990 | Male   | 70 to 74 | 41%<br>(27-56%)                | 59%<br>(44-73%)          | 1.1<br>(0.58-1.8)                           | 2.6%<br>(1.1-4.6%)                   | 3%<br>(1.3-5.4%)                    | 61<br>(25-120)      | 1100<br>(460-2100)    |
| Malawi   | 1990 | Male   | 75 to 79 | 39%<br>(25-55%)                | 61%<br>(45-75%)          | 0.95<br>(0.47-1.7)                          | 2%<br>(0.73-3.9%)                    | 2.3%<br>(0.81-4.5%)                 | 36<br>(12-71)       | 510<br>(180-1000)     |
| Malawi   | 1990 | Male   | 80 to 84 | 37%<br>(23-54%)                | 63%<br>(46-77%)          | 0.81<br>(0.4-1.4)                           | 1.5%<br>(0.56-2.9%)                  | 1.7%<br>(0.58-3.3%)                 | 14<br>(4.5-27)      | 150<br>(54-290)       |
| Malawi   | 1990 | Male   | 85 to 89 | 34%<br>(21-49%)                | 66%<br>(51-79%)          | 0.67<br>(0.32-1.1)                          | 1.2%<br>(0.49-2.1%)                  | 1.3%<br>(0.48-2.4%)                 | 4.6<br>(1.7-8.7)    | 37<br>(15-67)         |
| Malawi   | 1990 | Male   | 90 to 94 | 34%<br>(22-48%)                | 66%<br>(52-78%)          | 0.63<br>(0.31-1.2)                          | 0.78%<br>(0.21-1.7%)                 | 0.79%<br>(0.081-1.8%)               | 1.1<br>(0.12-2.7)   | 6.9<br>(1.7-15)       |
| Malawi   | 1990 | Male   | 95 plus  | 36%<br>(20-55%)                | 64%<br>(45-80%)          | 0.63<br>(0.26-1.2)                          | 0.95%<br>(0.3-2%)                    | 0.92%<br>(0.14-2.1%)                | 0.3<br>(0.045-0.69) | 1.3<br>(0.4-2.7)      |
| Malawi   | 1995 | Female | All Ages | 11%<br>(8.8-13%)               | 89%<br>(87-91%)          | 0.17<br>(0.12-0.23)                         | 0.25%<br>(0.16-0.38%)                | 0.39%<br>(0.21-0.63%)               | 340<br>(180-570)    | 15000<br>(9200-22000) |
| Malawi   | 1995 | Female | 15 to 19 | 12%<br>(7.7-18%)               | 88%<br>(82-92%)          | 0.19<br>(0.098-0.32)                        | 0.48%<br>(0.25-0.85%)                | 0.36%<br>(0.065-0.85%)              | 4.8<br>(0.97-11)    | 700<br>(350-1300)     |
| Malawi   | 1995 | Female | 20 to 24 | 16%<br>(10-23%)                | 84%<br>(77-90%)          | 0.29<br>(0.16-0.5)                          | 0.61%<br>(0.32-1%)                   | 0.36%<br>(0.084-0.82%)              | 9.5<br>(2.4-22)     | 1300<br>(750-2200)    |
| Malawi   | 1995 | Female | 25 to 29 | 17%<br>(11-25%)                | 83%<br>(75-89%)          | 0.38<br>(0.21-0.63)                         | 0.6%<br>(0.32-1%)                    | 0.43%<br>(0.16-0.93%)               | 16<br>(6.6-32)      | 1600<br>(970-2500)    |
| Malawi   | 1995 | Female | 30 to 34 | 20%<br>(13-29%)                | 80%<br>(71-87%)          | 0.43<br>(0.23-0.72)                         | 0.66%<br>(0.34-1.1%)                 | 0.55%<br>(0.21-1.1%)                | 19<br>(8.2-37)      | 1500<br>(850-2500)    |
| Malawi   | 1995 | Female | 35 to 39 | 22%<br>(14-32%)                | 78%<br>(68-86%)          | 0.39<br>(0.21-0.63)                         | 0.68%<br>(0.37-1.1%)                 | 0.61%<br>(0.26-1.1%)                | 19<br>(8.5-35)      | 1300<br>(710-2100)    |

| Location | Year | Sex    | Age      | Prevalence of current drinkers | Prevalence of abstainers | Population average of standard drinks daily | Percent of total attributable deaths | Percent of total attributable DALYs | Attributable deaths   | Attributable DALYs     |
|----------|------|--------|----------|--------------------------------|--------------------------|---------------------------------------------|--------------------------------------|-------------------------------------|-----------------------|------------------------|
| Malawi   | 1995 | Female | 40 to 44 | 24%<br>(16-34%)                | 76%<br>(66-84%)          | 0.39<br>(0.2-0.66)                          | 0.79%<br>(0.44-1.3%)                 | 0.79%<br>(0.38-1.4%)                | 22<br>(11-39)         | 1200<br>(660-2000)     |
| Malawi   | 1995 | Female | 45 to 49 | 23%<br>(14-32%)                | 77%<br>(68-86%)          | 0.4<br>(0.2-0.7)                            | 0.91%<br>(0.45-1.6%)                 | 0.97%<br>(0.42-1.8%)                | 29<br>(13-56)         | 1400<br>(650-2400)     |
| Malawi   | 1995 | Female | 50 to 54 | 17%<br>(11-26%)                | 83%<br>(74-89%)          | 0.33<br>(0.16-0.6)                          | 1.2%<br>(0.65-2%)                    | 1.3%<br>(0.68-2.3%)                 | 39<br>(18-73)         | 1500<br>(760-2700)     |
| Malawi   | 1995 | Female | 55 to 59 | 13%<br>(8.2-21%)               | 87%<br>(79-92%)          | 0.3<br>(0.15-0.51)                          | 1%<br>(0.53-1.9%)                    | 1.2%<br>(0.56-2.1%)                 | 34<br>(14-65)         | 1100<br>(490-2100)     |
| Malawi   | 1995 | Female | 60 to 64 | 14%<br>(7.9-21%)               | 86%<br>(79-92%)          | 0.3<br>(0.14-0.53)                          | 1.1%<br>(0.54-2%)                    | 1.3%<br>(0.61-2.3%)                 | 38<br>(16-72)         | 1000<br>(460-2000)     |
| Malawi   | 1995 | Female | 65 to 69 | 14%<br>(8.9-22%)               | 86%<br>(78-91%)          | 0.29<br>(0.15-0.48)                         | 1.1%<br>(0.56-1.9%)                  | 1.3%<br>(0.58-2.2%)                 | 43<br>(17-80)         | 990<br>(440-1800)      |
| Malawi   | 1995 | Female | 70 to 74 | 14%<br>(8.5-21%)               | 86%<br>(79-91%)          | 0.25<br>(0.12-0.44)                         | 0.68%<br>(0.15-1.4%)                 | 0.71%<br>(0.1-1.5%)                 | 27<br>(4.2-60)        | 530<br>(120-1100)      |
| Malawi   | 1995 | Female | 75 to 79 | 13%<br>(7.4-21%)               | 87%<br>(79-93%)          | 0.2<br>(0.093-0.38)                         | 0.7%<br>(0.24-1.3%)                  | 0.78%<br>(0.25-1.4%)                | 29<br>(8.3-56)        | 410<br>(130-780)       |
| Malawi   | 1995 | Female | 80 to 84 | 12%<br>(6.9-20%)               | 88%<br>(80-93%)          | 0.19<br>(0.085-0.34)                        | 0.38%<br>(0.0014-0.77%)              | 0.42%<br>(-0.017-0.88%)             | 8.9<br>(-0.34-20)     | 94<br>(0.33-210)       |
| Malawi   | 1995 | Female | 85 to 89 | 12%<br>(6.7-19%)               | 88%<br>(81-93%)          | 0.18<br>(0.083-0.32)                        | 0.19%<br>(-0.14-0.51%)               | 0.21%<br>(-0.19-0.57%)              | 1.7<br>(-1.5-4.8)     | 14<br>(-9.9-36)        |
| Malawi   | 1995 | Female | 90 to 94 | 13%<br>(7.6-20%)               | 87%<br>(80-92%)          | 0.18<br>(0.084-0.33)                        | 0.072%<br>(-0.25-0.36%)              | 0.045%<br>(-0.34-0.38%)             | 0.11<br>(-0.86-0.97)  | 1.1<br>(-3.9-5.3)      |
| Malawi   | 1995 | Female | 95 plus  | 14%<br>(7.4-24%)               | 86%<br>(76-93%)          | 0.19<br>(0.075-0.39)                        | 0.38%<br>(-0.013-0.78%)              | 0.38%<br>(-0.1-0.84%)               | 0.29<br>(-0.077-0.66) | 1.2<br>(-0.04-2.4)     |
| Malawi   | 1995 | Male   | All Ages | 33%<br>(27-39%)                | 67%<br>(61-73%)          | 0.86<br>(0.63-1.2)                          | 1%<br>(0.63-1.5%)                    | 1.5%<br>(0.88-2.4%)                 | 1400<br>(770-2200)    | 65000<br>(39000-99000) |
| Malawi   | 1995 | Male   | 15 to 19 | 33%<br>(23-44%)                | 67%<br>(56-77%)          | 0.98<br>(0.55-1.6)                          | 2.9%<br>(1.7-4.5%)                   | 3.3%<br>(1.6-5.7%)                  | 36<br>(16-66)         | 3500<br>(2000-5700)    |
| Malawi   | 1995 | Male   | 20 to 24 | 47%<br>(34-60%)                | 53%<br>(40-66%)          | 1.5<br>(0.89-2.5)                           | 4%<br>(2.2-6.3%)                     | 3.8%<br>(1.6-6.6%)                  | 84<br>(39-150)        | 7400<br>(4200-12000)   |
| Malawi   | 1995 | Male   | 25 to 29 | 53%<br>(40-64%)                | 47%<br>(36-60%)          | 1.9<br>(1.2-2.8)                            | 3%<br>(1.6-5.1%)                     | 2.8%<br>(1.2-5.3%)                  | 110<br>(54-200)       | 8500<br>(4900-14000)   |
| Malawi   | 1995 | Male   | 30 to 34 | 56%<br>(42-68%)                | 44%<br>(32-58%)          | 2.1<br>(1.3-3)                              | 2.7%<br>(1.4-4.6%)                   | 2.6%<br>(1.2-4.8%)                  | 120<br>(58-210)       | 7900<br>(4300-13000)   |
| Malawi   | 1995 | Male   | 35 to 39 | 57%<br>(44-68%)                | 43%<br>(32-56%)          | 2<br>(1.2-3.1)                              | 2.9%<br>(1.4-5.1%)                   | 3%<br>(1.3-5.5%)                    | 120<br>(62-210)       | 7000<br>(3800-11000)   |
| Malawi   | 1995 | Male   | 40 to 44 | 58%<br>(46-69%)                | 42%<br>(31-54%)          | 2.1<br>(1.2-3.2)                            | 3.1%<br>(1.6-5.4%)                   | 3.3%<br>(1.6-5.9%)                  | 130<br>(63-220)       | 6300<br>(3400-10000)   |
| Malawi   | 1995 | Male   | 45 to 49 | 59%<br>(45-70%)                | 41%<br>(30-55%)          | 2<br>(1.2-3.1)                              | 3.6%<br>(1.9-6%)                     | 3.9%<br>(1.9-6.7%)                  | 150<br>(73-250)       | 6500<br>(3500-11000)   |
| Malawi   | 1995 | Male   | 50 to 54 | 57%<br>(44-69%)                | 43%<br>(31-56%)          | 1.9<br>(1-2.9)                              | 4.5%<br>(2.5-7.2%)                   | 5%<br>(2.7-8.1%)                    | 150<br>(73-260)       | 5800<br>(2900-9600)    |
| Malawi   | 1995 | Male   | 55 to 59 | 52%<br>(37-68%)                | 48%<br>(32-63%)          | 1.8<br>(0.98-2.9)                           | 4.9%<br>(2.8-8.1%)                   | 5.7%<br>(3-9.5%)                    | 140<br>(72-250)       | 4700<br>(2500-8100)    |



| Location | Year | Sex    | Age      | Prevalence of current drinkers | Prevalence of abstainers | Population average of standard drinks daily | Percent of total attributable deaths | Percent of total attributable DALYs | Attributable deaths  | Attributable DALYs     |
|----------|------|--------|----------|--------------------------------|--------------------------|---------------------------------------------|--------------------------------------|-------------------------------------|----------------------|------------------------|
| Malawi   | 1995 | Male   | 60 to 64 | 48%<br>(32-65%)                | 52%<br>(35-68%)          | 1.6<br>(0.84-2.6)                           | 4.5%<br>(2.5-7.3%)                   | 5.1%<br>(2.8-8.5%)                  | 130<br>(63-230)      | 3700<br>(1800-6400)    |
| Malawi   | 1995 | Male   | 65 to 69 | 44%<br>(29-60%)                | 56%<br>(40-71%)          | 1.2<br>(0.66-2)                             | 3%<br>(1.4-5.1%)                     | 3.5%<br>(1.6-5.9%)                  | 90<br>(41-170)       | 2100<br>(970-3800)     |
| Malawi   | 1995 | Male   | 70 to 74 | 42%<br>(27-57%)                | 58%<br>(43-73%)          | 0.93<br>(0.5-1.6)                           | 2.1%<br>(0.83-3.9%)                  | 2.4%<br>(0.94-4.5%)                 | 66<br>(25-130)       | 1200<br>(470-2300)     |
| Malawi   | 1995 | Male   | 75 to 79 | 40%<br>(26-56%)                | 60%<br>(44-74%)          | 0.8<br>(0.42-1.4)                           | 1.6%<br>(0.56-3.1%)                  | 1.9%<br>(0.64-3.6%)                 | 48<br>(16-94)        | 680<br>(230-1300)      |
| Malawi   | 1995 | Male   | 80 to 84 | 37%<br>(23-54%)                | 63%<br>(46-77%)          | 0.68<br>(0.35-1.2)                          | 1.2%<br>(0.35-2.3%)                  | 1.4%<br>(0.34-2.7%)                 | 19<br>(4.7-38)       | 210<br>(59-400)        |
| Malawi   | 1995 | Male   | 85 to 89 | 34%<br>(21-49%)                | 66%<br>(51-79%)          | 0.56<br>(0.27-0.96)                         | 0.94%<br>(0.34-1.7%)                 | 1%<br>(0.32-1.9%)                   | 5.4<br>(1.7-10)      | 43<br>(16-79)          |
| Malawi   | 1995 | Male   | 90 to 94 | 34%<br>(21-49%)                | 66%<br>(51-79%)          | 0.52<br>(0.25-0.95)                         | 0.6%<br>(0.095-1.3%)                 | 0.59%<br>(-0.0088-1.4%)             | 0.94<br>(-0.014-2.2) | 5.7<br>(0.91-12)       |
| Malawi   | 1995 | Male   | 95 plus  | 36%<br>(20-54%)                | 64%<br>(46-80%)          | 0.51<br>(0.21-1)                            | 0.78%<br>(0.2-1.7%)                  | 0.74%<br>(0.03-1.7%)                | 0.29<br>(0.012-0.69) | 1.3<br>(0.3-2.7)       |
| Malawi   | 2000 | Female | All Ages | 7.7%<br>(6.3-9.4%)             | 92%<br>(91-94%)          | 0.14<br>(0.098-0.19)                        | 0.28%<br>(0.16-0.45%)                | 0.44%<br>(0.22-0.78%)               | 440<br>(210-810)     | 17000<br>(10000-28000) |
| Malawi   | 2000 | Female | 15 to 19 | 7.8%<br>(5-11%)                | 92%<br>(89-95%)          | 0.14<br>(0.074-0.25)                        | 0.47%<br>(0.25-0.79%)                | 0.32%<br>(0.079-0.74%)              | 4.5<br>(1-11)        | 720<br>(380-1200)      |
| Malawi   | 2000 | Female | 20 to 24 | 9.4%<br>(6.1-14%)              | 91%<br>(86-94%)          | 0.2<br>(0.11-0.35)                          | 0.56%<br>(0.29-0.94%)                | 0.29%<br>(0.079-0.68%)              | 8.4<br>(2.4-19)      | 1400<br>(820-2200)     |
| Malawi   | 2000 | Female | 25 to 29 | 11%<br>(6.7-15%)               | 89%<br>(85-93%)          | 0.27<br>(0.15-0.44)                         | 0.43%<br>(0.21-0.75%)                | 0.27%<br>(0.093-0.62%)              | 15<br>(6.2-31)       | 1600<br>(980-2600)     |
| Malawi   | 2000 | Female | 30 to 34 | 13%<br>(8.2-19%)               | 87%<br>(81-92%)          | 0.33<br>(0.18-0.55)                         | 0.42%<br>(0.23-0.75%)                | 0.32%<br>(0.12-0.66%)               | 19<br>(8.1-36)       | 1600<br>(900-2600)     |
| Malawi   | 2000 | Female | 35 to 39 | 16%<br>(11-23%)                | 84%<br>(77-89%)          | 0.33<br>(0.18-0.56)                         | 0.46%<br>(0.22-0.85%)                | 0.39%<br>(0.16-0.83%)               | 19<br>(8.4-40)       | 1300<br>(710-2300)     |
| Malawi   | 2000 | Female | 40 to 44 | 18%<br>(13-26%)                | 82%<br>(74-87%)          | 0.35<br>(0.17-0.57)                         | 0.57%<br>(0.3-1%)                    | 0.54%<br>(0.24-1.1%)                | 23<br>(10-45)        | 1300<br>(670-2300)     |
| Malawi   | 2000 | Female | 45 to 49 | 18%<br>(12-25%)                | 82%<br>(75-88%)          | 0.37<br>(0.18-0.68)                         | 0.77%<br>(0.36-1.5%)                 | 0.79%<br>(0.32-1.6%)                | 31<br>(13-67)        | 1400<br>(640-2900)     |
| Malawi   | 2000 | Female | 50 to 54 | 15%<br>(9.3-22%)               | 85%<br>(78-91%)          | 0.34<br>(0.17-0.6)                          | 1.1%<br>(0.57-2.1%)                  | 1.3%<br>(0.58-2.4%)                 | 53<br>(22-110)       | 2000<br>(910-4000)     |
| Malawi   | 2000 | Female | 55 to 59 | 12%<br>(7.4-19%)               | 88%<br>(81-93%)          | 0.32<br>(0.16-0.56)                         | 1.2%<br>(0.55-2.1%)                  | 1.3%<br>(0.59-2.4%)                 | 51<br>(19-110)       | 1700<br>(670-3400)     |
| Malawi   | 2000 | Female | 60 to 64 | 12%<br>(7.5-19%)               | 88%<br>(81-93%)          | 0.32<br>(0.16-0.57)                         | 1.3%<br>(0.65-2.4%)                  | 1.5%<br>(0.72-2.8%)                 | 56<br>(23-120)       | 1500<br>(660-3100)     |
| Malawi   | 2000 | Female | 65 to 69 | 13%<br>(8.6-20%)               | 87%<br>(80-91%)          | 0.31<br>(0.16-0.54)                         | 1.4%<br>(0.68-2.3%)                  | 1.5%<br>(0.75-2.7%)                 | 59<br>(24-120)       | 1300<br>(570-2600)     |
| Malawi   | 2000 | Female | 70 to 74 | 13%<br>(8.3-19%)               | 87%<br>(81-92%)          | 0.27<br>(0.14-0.49)                         | 0.92%<br>(0.29-1.9%)                 | 0.99%<br>(0.26-2.1%)                | 40<br>(10-90)        | 770<br>(230-1600)      |
| Malawi   | 2000 | Female | 75 to 79 | 12%<br>(7.1-19%)               | 88%<br>(81-93%)          | 0.23<br>(0.1-0.43)                          | 0.89%<br>(0.34-1.7%)                 | 0.99%<br>(0.36-1.9%)                | 37<br>(13-76)        | 530<br>(190-1100)      |

| Location | Year | Sex    | Age      | Prevalence of current drinkers | Prevalence of abstainers | Population average of standard drinks daily | Percent of total attributable deaths | Percent of total attributable DALYs | Attributable deaths   | Attributable DALYs       |
|----------|------|--------|----------|--------------------------------|--------------------------|---------------------------------------------|--------------------------------------|-------------------------------------|-----------------------|--------------------------|
| Malawi   | 2000 | Female | 80 to 84 | 12%<br>(6.6-19%)               | 88%<br>(81-93%)          | 0.21<br>(0.099-0.4)                         | 0.54%<br>(0.12-1.1%)                 | 0.62%<br>(0.12-1.3%)                | 16<br>(3-35)          | 170<br>(35-360)          |
| Malawi   | 2000 | Female | 85 to 89 | 12%<br>(6.6-18%)               | 88%<br>(82-93%)          | 0.2<br>(0.093-0.36)                         | 0.33%<br>(-0.019-0.78%)              | 0.37%<br>(-0.05-0.89%)              | 4.6<br>(-0.56-11)     | 35<br>(-1.9-81)          |
| Malawi   | 2000 | Female | 90 to 94 | 12%<br>(7.5-19%)               | 88%<br>(81-93%)          | 0.2<br>(0.096-0.37)                         | 0.19%<br>(-0.16-0.59%)               | 0.18%<br>(-0.22-0.64%)              | 0.59<br>(-0.7-2.2)    | 3.6<br>(-2.9-11)         |
| Malawi   | 2000 | Female | 95 plus  | 14%<br>(7.5-24%)               | 86%<br>(76-92%)          | 0.21<br>(0.083-0.45)                        | 0.5%<br>(0.054-0.97%)                | 0.51%<br>(-0.03-1.1%)               | 0.39<br>(-0.022-0.82) | 1.5<br>(0.17-2.9)        |
| Malawi   | 2000 | Male   | All Ages | 28%<br>(24-34%)                | 72%<br>(66-76%)          | 0.88<br>(0.63-1.2)                          | 1.6%<br>(0.98-2.3%)                  | 2.3%<br>(1.4-3.5%)                  | 2400<br>(1400-3700)   | 110000<br>(65000-150000) |
| Malawi   | 2000 | Male   | 15 to 19 | 26%<br>(19-36%)                | 74%<br>(64-81%)          | 0.92<br>(0.51-1.5)                          | 3.3%<br>(1.9-5.2%)                   | 3.8%<br>(1.8-6.5%)                  | 54<br>(24-97)         | 4900<br>(2700-8100)      |
| Malawi   | 2000 | Male   | 20 to 24 | 39%<br>(28-50%)                | 61%<br>(50-72%)          | 1.4<br>(0.83-2.4)                           | 5.3%<br>(3-8.4%)                     | 5.5%<br>(2.6-9.4%)                  | 140<br>(65-240)       | 11000<br>(6400-18000)    |
| Malawi   | 2000 | Male   | 25 to 29 | 46%<br>(35-58%)                | 54%<br>(42-65%)          | 1.9<br>(1.2-2.9)                            | 3.9%<br>(2-6.7%)                     | 3.9%<br>(1.7-7.1%)                  | 190<br>(99-310)       | 14000<br>(7900-21000)    |
| Malawi   | 2000 | Male   | 30 to 34 | 51%<br>(38-63%)                | 49%<br>(37-62%)          | 2.2<br>(1.4-3.3)                            | 3.2%<br>(1.7-5.3%)                   | 3.2%<br>(1.5-5.5%)                  | 200<br>(100-330)      | 13000<br>(7200-20000)    |
| Malawi   | 2000 | Male   | 35 to 39 | 52%<br>(41-64%)                | 48%<br>(36-59%)          | 2.2<br>(1.3-3.3)                            | 3.2%<br>(1.6-5.4%)                   | 3.3%<br>(1.6-5.7%)                  | 200<br>(100-330)      | 11000<br>(6000-17000)    |
| Malawi   | 2000 | Male   | 40 to 44 | 53%<br>(41-64%)                | 47%<br>(36-59%)          | 2.2<br>(1.3-3.4)                            | 3.5%<br>(1.8-5.7%)                   | 3.6%<br>(1.8-6.2%)                  | 200<br>(110-330)      | 9700<br>(5200-15000)     |
| Malawi   | 2000 | Male   | 45 to 49 | 54%<br>(42-66%)                | 46%<br>(34-58%)          | 2.2<br>(1.2-3.4)                            | 4.1%<br>(2.2-6.7%)                   | 4.4%<br>(2.2-7.4%)                  | 210<br>(110-350)      | 9100<br>(4900-15000)     |
| Malawi   | 2000 | Male   | 50 to 54 | 53%<br>(41-65%)                | 47%<br>(35-59%)          | 2<br>(1.1-3.2)                              | 5.5%<br>(3.1-8.8%)                   | 6.1%<br>(3.4-9.6%)                  | 270<br>(140-450)      | 10000<br>(5500-16000)    |
| Malawi   | 2000 | Male   | 55 to 59 | 49%<br>(34-64%)                | 51%<br>(36-66%)          | 1.9<br>(1.1-3.2)                            | 6.5%<br>(3.6-10%)                    | 7.3%<br>(4-12%)                     | 280<br>(140-460)      | 8900<br>(4700-15000)     |
| Malawi   | 2000 | Male   | 60 to 64 | 45%<br>(30-61%)                | 55%<br>(39-70%)          | 1.7<br>(0.9-2.9)                            | 5.9%<br>(3.2-9.7%)                   | 6.7%<br>(3.6-11%)                   | 230<br>(120-400)      | 6300<br>(3300-11000)     |
| Malawi   | 2000 | Male   | 65 to 69 | 41%<br>(27-57%)                | 59%<br>(43-73%)          | 1.3<br>(0.7-2.1)                            | 4.2%<br>(2.1-7%)                     | 4.8%<br>(2.4-8.1%)                  | 160<br>(73-280)       | 3600<br>(1700-6200)      |
| Malawi   | 2000 | Male   | 70 to 74 | 39%<br>(26-55%)                | 61%<br>(45-74%)          | 1<br>(0.54-1.8)                             | 3%<br>(1.2-5.6%)                     | 3.5%<br>(1.4-6.4%)                  | 120<br>(48-230)       | 2100<br>(880-4100)       |
| Malawi   | 2000 | Male   | 75 to 79 | 39%<br>(26-55%)                | 61%<br>(45-74%)          | 0.93<br>(0.47-1.6)                          | 2.4%<br>(0.86-4.8%)                  | 2.8%<br>(0.97-5.4%)                 | 80<br>(27-160)        | 1100<br>(400-2200)       |
| Malawi   | 2000 | Male   | 80 to 84 | 37%<br>(23-53%)                | 63%<br>(47-77%)          | 0.79<br>(0.39-1.4)                          | 1.9%<br>(0.63-3.8%)                  | 2.2%<br>(0.68-4.3%)                 | 39<br>(12-74)         | 410<br>(130-780)         |
| Malawi   | 2000 | Male   | 85 to 89 | 33%<br>(21-49%)                | 67%<br>(51-79%)          | 0.65<br>(0.31-1.1)                          | 1.5%<br>(0.56-2.8%)                  | 1.6%<br>(0.57-3.2%)                 | 15<br>(5.2-28)        | 110<br>(43-210)          |
| Malawi   | 2000 | Male   | 90 to 94 | 33%<br>(21-49%)                | 67%<br>(51-79%)          | 0.6<br>(0.29-1.1)                           | 0.97%<br>(0.27-2%)                   | 1%<br>(0.2-2.3%)                    | 2.4<br>(0.44-5.2)     | 13<br>(3.6-28)           |
| Malawi   | 2000 | Male   | 95 plus  | 36%<br>(20-56%)                | 64%<br>(44-80%)          | 0.6<br>(0.24-1.2)                           | 1.2%<br>(0.39-2.7%)                  | 1.3%<br>(0.3-3%)                    | 0.54<br>(0.13-1.3)    | 2.1<br>(0.66-4.6)        |

| Location | Year | Sex    | Age      | Prevalence of current drinkers | Prevalence of abstainers | Population average of standard drinks daily | Percent of total attributable deaths | Percent of total attributable DALYs | Attributable deaths | Attributable DALYs       |
|----------|------|--------|----------|--------------------------------|--------------------------|---------------------------------------------|--------------------------------------|-------------------------------------|---------------------|--------------------------|
| Malawi   | 2005 | Female | All Ages | 7.4%<br>(6.1-9%)               | 93%<br>(91-94%)          | 0.14<br>(0.099-0.2)                         | 0.29%<br>(0.17-0.47%)                | 0.46%<br>(0.22-0.82%)               | 440<br>(200-800)    | 17000<br>(10000-28000)   |
| Malawi   | 2005 | Female | 15 to 19 | 7.5%<br>(4.9-11%)              | 93%<br>(89-95%)          | 0.15<br>(0.076-0.25)                        | 0.43%<br>(0.23-0.7%)                 | 0.25%<br>(0.061-0.55%)              | 4.2<br>(1-9.6)      | 790<br>(430-1300)        |
| Malawi   | 2005 | Female | 20 to 24 | 9.2%<br>(5.8-13%)              | 91%<br>(87-94%)          | 0.21<br>(0.11-0.36)                         | 0.64%<br>(0.33-1%)                   | 0.29%<br>(0.083-0.66%)              | 7.3<br>(2.4-16)     | 1400<br>(860-2200)       |
| Malawi   | 2005 | Female | 25 to 29 | 10%<br>(6.6-15%)               | 90%<br>(85-93%)          | 0.28<br>(0.15-0.45)                         | 0.43%<br>(0.22-0.78%)                | 0.24%<br>(0.081-0.57%)              | 13<br>(5.3-26)      | 1700<br>(1000-2600)      |
| Malawi   | 2005 | Female | 30 to 34 | 13%<br>(7.9-18%)               | 87%<br>(82-92%)          | 0.35<br>(0.18-0.57)                         | 0.35%<br>(0.19-0.61%)                | 0.23%<br>(0.093-0.5%)               | 16<br>(6.8-32)      | 1500<br>(910-2400)       |
| Malawi   | 2005 | Female | 35 to 39 | 16%<br>(10-22%)                | 84%<br>(78-90%)          | 0.34<br>(0.18-0.57)                         | 0.36%<br>(0.19-0.66%)                | 0.28%<br>(0.11-0.61%)               | 16<br>(7.3-33)      | 1200<br>(680-2000)       |
| Malawi   | 2005 | Female | 40 to 44 | 18%<br>(12-25%)                | 82%<br>(75-88%)          | 0.36<br>(0.18-0.63)                         | 0.43%<br>(0.23-0.78%)                | 0.39%<br>(0.18-0.78%)               | 19<br>(8.5-37)      | 1100<br>(570-1900)       |
| Malawi   | 2005 | Female | 45 to 49 | 18%<br>(11-25%)                | 82%<br>(75-89%)          | 0.39<br>(0.19-0.73)                         | 0.64%<br>(0.31-1.2%)                 | 0.64%<br>(0.26-1.3%)                | 26<br>(11-56)       | 1200<br>(600-2400)       |
| Malawi   | 2005 | Female | 50 to 54 | 14%<br>(8.8-21%)               | 86%<br>(79-91%)          | 0.35<br>(0.17-0.64)                         | 0.99%<br>(0.49-1.8%)                 | 1.1%<br>(0.49-2%)                   | 41<br>(17-86)       | 1600<br>(710-3200)       |
| Malawi   | 2005 | Female | 55 to 59 | 12%<br>(7.3-18%)               | 88%<br>(82-93%)          | 0.33<br>(0.16-0.58)                         | 1.2%<br>(0.55-2.2%)                  | 1.3%<br>(0.59-2.5%)                 | 53<br>(20-110)      | 1700<br>(720-3600)       |
| Malawi   | 2005 | Female | 60 to 64 | 12%<br>(7.2-19%)               | 88%<br>(81-93%)          | 0.34<br>(0.16-0.62)                         | 1.3%<br>(0.66-2.4%)                  | 1.5%<br>(0.76-2.8%)                 | 62<br>(24-130)      | 1700<br>(720-3500)       |
| Malawi   | 2005 | Female | 65 to 69 | 13%<br>(8.5-20%)               | 87%<br>(80-92%)          | 0.33<br>(0.17-0.57)                         | 1.5%<br>(0.76-2.5%)                  | 1.7%<br>(0.83-2.9%)                 | 67<br>(28-130)      | 1500<br>(680-3000)       |
| Malawi   | 2005 | Female | 70 to 74 | 13%<br>(8.2-19%)               | 87%<br>(81-92%)          | 0.29<br>(0.14-0.5)                          | 1%<br>(0.41-2.1%)                    | 1.2%<br>(0.41-2.3%)                 | 45<br>(14-98)       | 860<br>(310-1800)        |
| Malawi   | 2005 | Female | 75 to 79 | 12%<br>(6.8-19%)               | 88%<br>(81-93%)          | 0.24<br>(0.11-0.45)                         | 1%<br>(0.46-1.8%)                    | 1.1%<br>(0.5-2.1%)                  | 41<br>(16-81)       | 580<br>(240-1100)        |
| Malawi   | 2005 | Female | 80 to 84 | 11%<br>(6.6-18%)               | 89%<br>(82-93%)          | 0.22<br>(0.1-0.41)                          | 0.65%<br>(0.19-1.3%)                 | 0.76%<br>(0.2-1.5%)                 | 20<br>(5.2-43)      | 210<br>(59-450)          |
| Malawi   | 2005 | Female | 85 to 89 | 11%<br>(6.5-18%)               | 89%<br>(82-93%)          | 0.21<br>(0.097-0.39)                        | 0.42%<br>(0.028-0.98%)               | 0.48%<br>(0.018-1.1%)               | 6.5<br>(0.23-15)    | 49<br>(3.1-110)          |
| Malawi   | 2005 | Female | 90 to 94 | 12%<br>(7.3-20%)               | 88%<br>(80-93%)          | 0.21<br>(0.099-0.4)                         | 0.27%<br>(-0.094-0.75%)              | 0.28%<br>(-0.16-0.86%)              | 1.2<br>(-0.71-3.8)  | 7<br>(-2.5-20)           |
| Malawi   | 2005 | Female | 95 plus  | 14%<br>(7.2-24%)               | 86%<br>(76-93%)          | 0.23<br>(0.087-0.48)                        | 0.59%<br>(0.12-1.2%)                 | 0.62%<br>(0.083-1.3%)               | 0.54<br>(0.074-1.2) | 2<br>(0.42-4)            |
| Malawi   | 2005 | Male   | All Ages | 28%<br>(23-33%)                | 72%<br>(67-77%)          | 0.92<br>(0.65-1.2)                          | 1.9%<br>(1.2-2.7%)                   | 2.8%<br>(1.7-4.1%)                  | 2800<br>(1600-4200) | 120000<br>(75000-170000) |
| Malawi   | 2005 | Male   | 15 to 19 | 25%<br>(18-35%)                | 75%<br>(65-82%)          | 0.94<br>(0.52-1.5)                          | 2.9%<br>(1.7-4.7%)                   | 3.2%<br>(1.5-5.5%)                  | 64<br>(29-110)      | 5900<br>(3200-9400)      |
| Malawi   | 2005 | Male   | 20 to 24 | 38%<br>(28-49%)                | 62%<br>(51-72%)          | 1.5<br>(0.86-2.3)                           | 6%<br>(3.4-9.3%)                     | 6.2%<br>(3.1-11%)                   | 160<br>(78-280)     | 13000<br>(7400-21000)    |
| Malawi   | 2005 | Male   | 25 to 29 | 46%<br>(34-56%)                | 54%<br>(44-66%)          | 2<br>(1.2-3)                                | 4.9%<br>(2.6-8.2%)                   | 5%<br>(2.2-9.1%)                    | 230<br>(120-360)    | 16000<br>(9500-25000)    |

| Location | Year | Sex    | Age      | Prevalence of current drinkers | Prevalence of abstainers | Population average of standard drinks daily | Percent of total attributable deaths | Percent of total attributable DALYs | Attributable deaths | Attributable DALYs     |
|----------|------|--------|----------|--------------------------------|--------------------------|---------------------------------------------|--------------------------------------|-------------------------------------|---------------------|------------------------|
| Malawi   | 2005 | Male   | 30 to 34 | 50%<br>(37-63%)                | 50%<br>(37-63%)          | 2.3<br>(1.4-3.5)                            | 3.6%<br>(1.9-5.8%)                   | 3.5%<br>(1.7-6%)                    | 240<br>(120-370)    | 15000<br>(8400-22000)  |
| Malawi   | 2005 | Male   | 35 to 39 | 51%<br>(40-63%)                | 49%<br>(37-60%)          | 2.3<br>(1.4-3.6)                            | 3.3%<br>(1.8-5.3%)                   | 3.4%<br>(1.7-5.6%)                  | 230<br>(120-350)    | 12000<br>(6800-19000)  |
| Malawi   | 2005 | Male   | 40 to 44 | 52%<br>(41-64%)                | 48%<br>(36-59%)          | 2.3<br>(1.3-3.6)                            | 3.5%<br>(1.9-5.5%)                   | 3.7%<br>(1.8-5.9%)                  | 220<br>(110-350)    | 11000<br>(5700-17000)  |
| Malawi   | 2005 | Male   | 45 to 49 | 54%<br>(41-65%)                | 46%<br>(35-59%)          | 2.3<br>(1.3-3.8)                            | 4.3%<br>(2.3-6.9%)                   | 4.6%<br>(2.4-7.6%)                  | 230<br>(120-380)    | 9900<br>(5300-16000)   |
| Malawi   | 2005 | Male   | 50 to 54 | 53%<br>(41-65%)                | 47%<br>(35-59%)          | 2.1<br>(1.2-3.4)                            | 5.8%<br>(3.3-9%)                     | 6.3%<br>(3.5-10%)                   | 270<br>(140-440)    | 10000<br>(5400-16000)  |
| Malawi   | 2005 | Male   | 55 to 59 | 48%<br>(34-64%)                | 52%<br>(36-66%)          | 2<br>(1.1-3.3)                              | 7.2%<br>(4.1-11%)                    | 8.1%<br>(4.6-13%)                   | 350<br>(170-570)    | 11000<br>(5800-18000)  |
| Malawi   | 2005 | Male   | 60 to 64 | 44%<br>(29-60%)                | 56%<br>(40-71%)          | 1.8<br>(0.93-3.1)                           | 6.6%<br>(3.6-11%)                    | 7.5%<br>(4.1-12%)                   | 310<br>(150-520)    | 8400<br>(4200-14000)   |
| Malawi   | 2005 | Male   | 65 to 69 | 40%<br>(27-55%)                | 60%<br>(45-73%)          | 1.3<br>(0.72-2.2)                           | 4.7%<br>(2.5-8%)                     | 5.4%<br>(2.8-9.2%)                  | 210<br>(97-360)     | 4700<br>(2300-8100)    |
| Malawi   | 2005 | Male   | 70 to 74 | 38%<br>(25-54%)                | 62%<br>(46-75%)          | 1.1<br>(0.56-1.9)                           | 3.5%<br>(1.5-6.5%)                   | 4%<br>(1.6-7.7%)                    | 150<br>(61-290)     | 2700<br>(1100-5200)    |
| Malawi   | 2005 | Male   | 75 to 79 | 39%<br>(25-54%)                | 61%<br>(46-75%)          | 0.97<br>(0.48-1.8)                          | 2.9%<br>(1-5.5%)                     | 3.3%<br>(1.2-6.3%)                  | 100<br>(37-200)     | 1400<br>(530-2700)     |
| Malawi   | 2005 | Male   | 80 to 84 | 36%<br>(22-53%)                | 64%<br>(47-78%)          | 0.83<br>(0.4-1.5)                           | 2.2%<br>(0.8-4.3%)                   | 2.5%<br>(0.88-4.9%)                 | 49<br>(18-96)       | 510<br>(190-990)       |
| Malawi   | 2005 | Male   | 85 to 89 | 33%<br>(20-47%)                | 67%<br>(53-80%)          | 0.67<br>(0.32-1.2)                          | 1.7%<br>(0.68-3.3%)                  | 1.9%<br>(0.73-3.8%)                 | 20<br>(7.7-39)      | 150<br>(60-290)        |
| Malawi   | 2005 | Male   | 90 to 94 | 32%<br>(20-48%)                | 68%<br>(52-80%)          | 0.62<br>(0.29-1.2)                          | 1.2%<br>(0.37-2.5%)                  | 1.3%<br>(0.31-2.8%)                 | 4.6<br>(1.1-10)     | 25<br>(7.9-54)         |
| Malawi   | 2005 | Male   | 95 plus  | 35%<br>(19-54%)                | 65%<br>(46-81%)          | 0.61<br>(0.25-1.2)                          | 1.5%<br>(0.49-3.2%)                  | 1.6%<br>(0.4-3.7%)                  | 0.97<br>(0.24-2.2)  | 3.6<br>(1.2-7.8)       |
| Malawi   | 2010 | Female | All Ages | 6.6%<br>(5.4-8.1%)             | 93%<br>(92-95%)          | 0.15<br>(0.098-0.22)                        | 0.37%<br>(0.22-0.56%)                | 0.62%<br>(0.32-1.1%)                | 540<br>(260-970)    | 20000<br>(12000-31000) |
| Malawi   | 2010 | Female | 15 to 19 | 6.1%<br>(3.6-9.3%)             | 94%<br>(91-96%)          | 0.14<br>(0.067-0.25)                        | 0.39%<br>(0.22-0.63%)                | 0.2%<br>(0.059-0.47%)               | 4.4<br>(1.3-10)     | 870<br>(480-1400)      |
| Malawi   | 2010 | Female | 20 to 24 | 7.5%<br>(4.5-11%)              | 92%<br>(89-95%)          | 0.2<br>(0.1-0.36)                           | 0.73%<br>(0.41-1.1%)                 | 0.32%<br>(0.1-0.73%)                | 8.1<br>(2.6-17)     | 1700<br>(1000-2600)    |
| Malawi   | 2010 | Female | 25 to 29 | 8.6%<br>(5.1-13%)              | 91%<br>(87-95%)          | 0.28<br>(0.14-0.49)                         | 0.56%<br>(0.3-0.95%)                 | 0.31%<br>(0.1-0.67%)                | 13<br>(5.4-25)      | 1800<br>(1100-2600)    |
| Malawi   | 2010 | Female | 30 to 34 | 10%<br>(6.1-16%)               | 90%<br>(84-94%)          | 0.33<br>(0.16-0.6)                          | 0.46%<br>(0.27-0.75%)                | 0.3%<br>(0.12-0.59%)                | 16<br>(7.2-31)      | 1700<br>(1000-2500)    |
| Malawi   | 2010 | Female | 35 to 39 | 13%<br>(7.9-19%)               | 87%<br>(81-92%)          | 0.34<br>(0.16-0.6)                          | 0.46%<br>(0.26-0.75%)                | 0.36%<br>(0.16-0.69%)               | 18<br>(8.5-32)      | 1400<br>(820-2100)     |
| Malawi   | 2010 | Female | 40 to 44 | 15%<br>(9.5-21%)               | 85%<br>(79-91%)          | 0.35<br>(0.16-0.65)                         | 0.56%<br>(0.33-0.93%)                | 0.51%<br>(0.25-0.92%)               | 19<br>(9.2-35)      | 1100<br>(670-1900)     |
| Malawi   | 2010 | Female | 45 to 49 | 15%<br>(8.7-23%)               | 85%<br>(77-91%)          | 0.4<br>(0.19-0.76)                          | 0.85%<br>(0.45-1.5%)                 | 0.89%<br>(0.41-1.7%)                | 26<br>(12-50)       | 1200<br>(630-2200)     |

| Location | Year | Sex    | Age      | Prevalence of current drinkers | Prevalence of abstainers | Population average of standard drinks daily | Percent of total attributable deaths | Percent of total attributable DALYs | Attributable deaths | Attributable DALYs       |
|----------|------|--------|----------|--------------------------------|--------------------------|---------------------------------------------|--------------------------------------|-------------------------------------|---------------------|--------------------------|
| Malawi   | 2010 | Female | 50 to 54 | 14%<br>(9-22%)                 | 86%<br>(78-91%)          | 0.42<br>(0.2-0.8)                           | 1.4%<br>(0.73-2.6%)                  | 1.6%<br>(0.76-3%)                   | 43<br>(18-86)       | 1700<br>(780-3200)       |
| Malawi   | 2010 | Female | 55 to 59 | 13%<br>(7.8-20%)               | 87%<br>(80-92%)          | 0.43<br>(0.21-0.79)                         | 1.7%<br>(0.8-3.1%)                   | 2%<br>(0.93-3.9%)                   | 55<br>(22-110)      | 1800<br>(760-3600)       |
| Malawi   | 2010 | Female | 60 to 64 | 13%<br>(7.7-21%)               | 87%<br>(79-92%)          | 0.43<br>(0.21-0.78)                         | 1.8%<br>(0.9-3.3%)                   | 2.2%<br>(1.1-4%)                    | 80<br>(33-160)      | 2200<br>(960-4300)       |
| Malawi   | 2010 | Female | 65 to 69 | 14%<br>(8.5-21%)               | 86%<br>(79-91%)          | 0.42<br>(0.21-0.77)                         | 1.9%<br>(1-3.4%)                     | 2.3%<br>(1.2-4.1%)                  | 93<br>(40-180)      | 2100<br>(970-4100)       |
| Malawi   | 2010 | Female | 70 to 74 | 14%<br>(8.4-20%)               | 86%<br>(80-92%)          | 0.36<br>(0.17-0.67)                         | 1.4%<br>(0.55-2.8%)                  | 1.6%<br>(0.55-3.3%)                 | 66<br>(21-140)      | 1200<br>(440-2500)       |
| Malawi   | 2010 | Female | 75 to 79 | 12%<br>(7.2-20%)               | 88%<br>(80-93%)          | 0.3<br>(0.13-0.58)                          | 1.2%<br>(0.53-2.3%)                  | 1.4%<br>(0.61-2.7%)                 | 55<br>(21-110)      | 780<br>(300-1500)        |
| Malawi   | 2010 | Female | 80 to 84 | 12%<br>(6.7-18%)               | 88%<br>(82-93%)          | 0.27<br>(0.12-0.53)                         | 0.83%<br>(0.27-1.7%)                 | 0.97%<br>(0.3-1.9%)                 | 29<br>(8.3-60)      | 300<br>(89-610)          |
| Malawi   | 2010 | Female | 85 to 89 | 12%<br>(6.8-19%)               | 88%<br>(81-93%)          | 0.26<br>(0.11-0.52)                         | 0.58%<br>(0.11-1.3%)                 | 0.66%<br>(0.11-1.5%)                | 11<br>(1.8-25)      | 80<br>(15-190)           |
| Malawi   | 2010 | Female | 90 to 94 | 13%<br>(7.5-20%)               | 87%<br>(80-93%)          | 0.27<br>(0.12-0.52)                         | 0.4%<br>(-0.062-1.1%)                | 0.43%<br>(-0.11-1.3%)               | 2.3<br>(-0.63-6.7)  | 13<br>(-1.8-34)          |
| Malawi   | 2010 | Female | 95 plus  | 14%<br>(7.5-25%)               | 86%<br>(75-93%)          | 0.28<br>(0.1-0.61)                          | 0.78%<br>(0.19-1.5%)                 | 0.78%<br>(0.13-1.8%)                | 0.99<br>(0.17-2.2)  | 3.6<br>(0.92-7.7)        |
| Malawi   | 2010 | Male   | All Ages | 25%<br>(21-30%)                | 75%<br>(70-79%)          | 1<br>(0.67-1.4)                             | 2.4%<br>(1.6-3.4%)                   | 3.7%<br>(2.2-5.4%)                  | 3500<br>(2000-5200) | 150000<br>(93000-210000) |
| Malawi   | 2010 | Male   | 15 to 19 | 19%<br>(12-28%)                | 81%<br>(72-88%)          | 0.82<br>(0.41-1.5)                          | 2.4%<br>(1.3-4%)                     | 2.3%<br>(1-4.4%)                    | 63<br>(27-120)      | 6000<br>(3300-9700)      |
| Malawi   | 2010 | Male   | 20 to 24 | 33%<br>(24-43%)                | 67%<br>(57-76%)          | 1.5<br>(0.85-2.5)                           | 6.4%<br>(3.7-9.8%)                   | 6.7%<br>(3.3-11%)                   | 190<br>(94-330)     | 16000<br>(9000-25000)    |
| Malawi   | 2010 | Male   | 25 to 29 | 42%<br>(32-53%)                | 58%<br>(47-68%)          | 2.2<br>(1.3-3.5)                            | 6.2%<br>(3.3-9.9%)                   | 6.5%<br>(3-11%)                     | 270<br>(140-420)    | 19000<br>(11000-29000)   |
| Malawi   | 2010 | Male   | 30 to 34 | 47%<br>(36-59%)                | 53%<br>(41-64%)          | 2.5<br>(1.5-3.9)                            | 5.1%<br>(2.8-8%)                     | 5.2%<br>(2.6-8.8%)                  | 300<br>(160-460)    | 19000<br>(11000-28000)   |
| Malawi   | 2010 | Male   | 35 to 39 | 48%<br>(38-60%)                | 52%<br>(40-62%)          | 2.5<br>(1.5-4.1)                            | 4.5%<br>(2.6-6.8%)                   | 4.7%<br>(2.5-7.4%)                  | 280<br>(160-430)    | 16000<br>(9400-23000)    |
| Malawi   | 2010 | Male   | 40 to 44 | 47%<br>(36-59%)                | 53%<br>(41-64%)          | 2.4<br>(1.3-4)                              | 4.7%<br>(2.7-7.1%)                   | 5%<br>(2.8-7.7%)                    | 260<br>(140-410)    | 13000<br>(7300-20000)    |
| Malawi   | 2010 | Male   | 45 to 49 | 50%<br>(38-60%)                | 50%<br>(40-62%)          | 2.5<br>(1.4-4.2)                            | 5.7%<br>(3.2-8.8%)                   | 6.2%<br>(3.4-9.9%)                  | 260<br>(140-410)    | 11000<br>(6400-17000)    |
| Malawi   | 2010 | Male   | 50 to 54 | 52%<br>(41-63%)                | 48%<br>(37-59%)          | 2.5<br>(1.4-4.1)                            | 7.7%<br>(4.3-12%)                    | 8.7%<br>(4.8-13%)                   | 300<br>(160-480)    | 11000<br>(6200-18000)    |
| Malawi   | 2010 | Male   | 55 to 59 | 50%<br>(35-65%)                | 50%<br>(35-65%)          | 2.5<br>(1.3-4.4)                            | 9.4%<br>(5.4-14%)                    | 11%<br>(6.2-16%)                    | 360<br>(200-560)    | 12000<br>(6600-18000)    |
| Malawi   | 2010 | Male   | 60 to 64 | 47%<br>(30-64%)                | 53%<br>(36-70%)          | 2.3<br>(1.2-4)                              | 8.6%<br>(4.7-14%)                    | 10%<br>(5.4-16%)                    | 410<br>(210-660)    | 11000<br>(5900-18000)    |
| Malawi   | 2010 | Male   | 65 to 69 | 43%<br>(29-59%)                | 57%<br>(41-71%)          | 1.7<br>(0.91-3)                             | 6.3%<br>(3.1-11%)                    | 7.3%<br>(3.6-13%)                   | 310<br>(150-530)    | 7000<br>(3400-12000)     |

| Location | Year | Sex    | Age      | Prevalence of current drinkers | Prevalence of abstainers | Population average of standard drinks daily | Percent of total attributable deaths | Percent of total attributable DALYs | Attributable deaths | Attributable DALYs     |
|----------|------|--------|----------|--------------------------------|--------------------------|---------------------------------------------|--------------------------------------|-------------------------------------|---------------------|------------------------|
| Malawi   | 2010 | Male   | 70 to 74 | 40%<br>(27-56%)                | 60%<br>(44-73%)          | 1.4<br>(0.71-2.4)                           | 4.6%<br>(1.9-8.4%)                   | 5.3%<br>(2.2-9.7%)                  | 210<br>(90-420)     | 3900<br>(1600-7600)    |
| Malawi   | 2010 | Male   | 75 to 79 | 39%<br>(25-55%)                | 61%<br>(45-75%)          | 1.2<br>(0.56-2.1)                           | 3.6%<br>(1.4-6.9%)                   | 4.1%<br>(1.6-7.9%)                  | 140<br>(54-290)     | 2000<br>(750-4000)     |
| Malawi   | 2010 | Male   | 80 to 84 | 36%<br>(21-52%)                | 64%<br>(48-79%)          | 0.97<br>(0.46-1.8)                          | 2.8%<br>(0.94-5.3%)                  | 3.2%<br>(1-6.2%)                    | 69<br>(22-140)      | 720<br>(250-1400)      |
| Malawi   | 2010 | Male   | 85 to 89 | 33%<br>(20-48%)                | 67%<br>(52-80%)          | 0.81<br>(0.37-1.5)                          | 2.1%<br>(0.83-4.2%)                  | 2.4%<br>(0.88-4.8%)                 | 28<br>(10-57)       | 210<br>(82-430)        |
| Malawi   | 2010 | Male   | 90 to 94 | 33%<br>(21-48%)                | 67%<br>(52-79%)          | 0.75<br>(0.34-1.4)                          | 1.5%<br>(0.42-3.3%)                  | 1.6%<br>(0.38-3.8%)                 | 7.1<br>(1.6-16)     | 38<br>(11-85)          |
| Malawi   | 2010 | Male   | 95 plus  | 35%<br>(20-55%)                | 65%<br>(45-80%)          | 0.75<br>(0.29-1.5)                          | 1.9%<br>(0.6-4.1%)                   | 2.1%<br>(0.52-4.7%)                 | 2.1<br>(0.53-4.7)   | 7.6<br>(2.4-16)        |
| Malawi   | 2016 | Female | All Ages | 8.3%<br>(6.7-10%)              | 92%<br>(90-93%)          | 0.18<br>(0.096-0.31)                        | 0.48%<br>(0.28-0.82%)                | 0.76%<br>(0.31-1.5%)                | 570<br>(210-1100)   | 22000<br>(12000-38000) |
| Malawi   | 2016 | Female | 15 to 19 | 8.6%<br>(5.2-13%)              | 91%<br>(87-95%)          | 0.19<br>(0.078-0.35)                        | 0.46%<br>(0.26-0.77%)                | 0.26%<br>(0.058-0.66%)              | 5.3<br>(1.2-14)     | 1100<br>(600-1800)     |
| Malawi   | 2016 | Female | 20 to 24 | 11%<br>(6.6-17%)               | 89%<br>(83-93%)          | 0.28<br>(0.12-0.54)                         | 0.9%<br>(0.54-1.4%)                  | 0.41%<br>(0.1-0.97%)                | 9.5<br>(2.5-22)     | 2100<br>(1200-3200)    |
| Malawi   | 2016 | Female | 25 to 29 | 12%<br>(7.1-18%)               | 88%<br>(82-93%)          | 0.37<br>(0.16-0.73)                         | 0.85%<br>(0.49-1.4%)                 | 0.49%<br>(0.16-1.1%)                | 16<br>(6-35)        | 2300<br>(1400-3500)    |
| Malawi   | 2016 | Female | 30 to 34 | 14%<br>(8.2-22%)               | 86%<br>(78-92%)          | 0.42<br>(0.18-0.85)                         | 0.79%<br>(0.46-1.3%)                 | 0.56%<br>(0.21-1.2%)                | 19<br>(8-39)        | 2000<br>(1200-3200)    |
| Malawi   | 2016 | Female | 35 to 39 | 16%<br>(9.6-25%)               | 84%<br>(75-90%)          | 0.4<br>(0.16-0.79)                          | 0.83%<br>(0.49-1.4%)                 | 0.71%<br>(0.31-1.4%)                | 22<br>(9.6-45)      | 1700<br>(1000-2900)    |
| Malawi   | 2016 | Female | 40 to 44 | 18%<br>(11-26%)                | 82%<br>(74-89%)          | 0.4<br>(0.16-0.84)                          | 0.95%<br>(0.54-1.6%)                 | 0.76%<br>(0.44-1.9%)                | 24<br>(11-48)       | 1500<br>(820-2600)     |
| Malawi   | 2016 | Female | 45 to 49 | 17%<br>(9.6-26%)               | 83%<br>(74-90%)          | 0.42<br>(0.16-0.93)                         | 1.2%<br>(0.62-2.3%)                  | 1.4%<br>(0.6-2.9%)                  | 30<br>(12-64)       | 1400<br>(700-2800)     |
| Malawi   | 2016 | Female | 50 to 54 | 15%<br>(8.9-23%)               | 85%<br>(77-91%)          | 0.41<br>(0.16-0.87)                         | 1.6%<br>(0.75-3.2%)                  | 2%<br>(0.85-4%)                     | 41<br>(16-86)       | 1600<br>(690-3200)     |
| Malawi   | 2016 | Female | 55 to 59 | 13%<br>(7.8-20%)               | 87%<br>(80-92%)          | 0.4<br>(0.17-0.85)                          | 1.7%<br>(0.69-3.5%)                  | 2.2%<br>(0.8-4.5%)                  | 49<br>(17-110)      | 1600<br>(580-3500)     |
| Malawi   | 2016 | Female | 60 to 64 | 13%<br>(7.8-21%)               | 87%<br>(79-92%)          | 0.4<br>(0.16-0.81)                          | 1.7%<br>(0.69-3.5%)                  | 2.2%<br>(0.83-4.4%)                 | 65<br>(23-140)      | 1800<br>(670-3800)     |
| Malawi   | 2016 | Female | 65 to 69 | 14%<br>(8.9-21%)               | 86%<br>(79-91%)          | 0.39<br>(0.16-0.77)                         | 1.8%<br>(0.74-3.5%)                  | 2.2%<br>(0.82-4.3%)                 | 96<br>(34-200)      | 2200<br>(870-4500)     |
| Malawi   | 2016 | Female | 70 to 74 | 14%<br>(8.5-20%)               | 86%<br>(80-92%)          | 0.33<br>(0.14-0.69)                         | 1.2%<br>(0.33-2.9%)                  | 1.4%<br>(0.29-3.4%)                 | 74<br>(16-180)      | 1400<br>(360-3300)     |
| Malawi   | 2016 | Female | 75 to 79 | 12%<br>(7.3-20%)               | 88%<br>(80-93%)          | 0.28<br>(0.11-0.59)                         | 1.2%<br>(0.42-2.4%)                  | 1.3%<br>(0.45-2.8%)                 | 67<br>(21-140)      | 960<br>(320-2000)      |
| Malawi   | 2016 | Female | 80 to 84 | 12%<br>(6.7-19%)               | 88%<br>(81-93%)          | 0.25<br>(0.099-0.53)                        | 0.74%<br>(0.12-1.8%)                 | 0.87%<br>(0.12-2.1%)                | 32<br>(4.2-78)      | 330<br>(49-810)        |
| Malawi   | 2016 | Female | 85 to 89 | 12%<br>(6.7-19%)               | 88%<br>(81-93%)          | 0.24<br>(0.094-0.52)                        | 0.51%<br>(-0.0016-1.5%)              | 0.59%<br>(-0.022-1.7%)              | 13<br>(-0.51-38)    | 97<br>(-0.31-280)      |

| Location  | Year | Sex    | Age      | Prevalence of current drinkers | Prevalence of abstainers | Population average of standard drinks daily | Percent of total attributable deaths | Percent of total attributable DALYs | Attributable deaths | Attributable DALYs       |
|-----------|------|--------|----------|--------------------------------|--------------------------|---------------------------------------------|--------------------------------------|-------------------------------------|---------------------|--------------------------|
| Malawi    | 2016 | Female | 90 to 94 | 13%<br>(7.5-20%)               | 87%<br>(80-92%)          | 0.25<br>(0.098-0.55)                        | 0.35%<br>(-0.12-1.2%)                | 0.37%<br>(-0.19-1.4%)               | 3<br>(-1.6-11)      | 17<br>(-6.2-59)          |
| Malawi    | 2016 | Female | 95 plus  | 15%<br>(7.7-25%)               | 85%<br>(75-92%)          | 0.26<br>(0.087-0.61)                        | 0.66%<br>(0.1-1.6%)                  | 0.7%<br>(0.01-1.8%)                 | 1.4<br>(0.021-3.5)  | 5.1<br>(0.77-12)         |
| Malawi    | 2016 | Male   | All Ages | 28%<br>(23-34%)                | 72%<br>(66-77%)          | 1.1<br>(0.58-1.8)                           | 2.8%<br>(1.6-4.3%)                   | 4%<br>(2.1-6.5%)                    | 3400<br>(1700-5700) | 150000<br>(85000-230000) |
| Malawi    | 2016 | Male   | 15 to 19 | 25%<br>(16-37%)                | 75%<br>(63-84%)          | 1<br>(0.46-2)                               | 2.6%<br>(1.3-4.4%)                   | 2.5%<br>(1-5%)                      | 72<br>(29-140)      | 7000<br>(3600-12000)     |
| Malawi    | 2016 | Male   | 20 to 24 | 38%<br>(26-51%)                | 62%<br>(49-74%)          | 1.7<br>(0.76-3.1)                           | 6.3%<br>(3.4-10%)                    | 6.4%<br>(2.8-11%)                   | 190<br>(81-350)     | 17000<br>(8600-27000)    |
| Malawi    | 2016 | Male   | 25 to 29 | 45%<br>(31-59%)                | 55%<br>(41-69%)          | 2.2<br>(1.1-4)                              | 6.5%<br>(3.5-11%)                    | 6.7%<br>(3.2-12%)                   | 280<br>(130-470)    | 21000<br>(11000-33000)   |
| Malawi    | 2016 | Male   | 30 to 34 | 49%<br>(34-63%)                | 51%<br>(37-66%)          | 2.5<br>(1.2-4.5)                            | 5.6%<br>(3.1-9%)                     | 5.7%<br>(2.8-9.8%)                  | 290<br>(140-480)    | 19000<br>(10000-29000)   |
| Malawi    | 2016 | Male   | 35 to 39 | 51%<br>(37-64%)                | 49%<br>(36-63%)          | 2.5<br>(1.2-4.8)                            | 5.6%<br>(3-8.9%)                     | 6%<br>(2.9-10%)                     | 300<br>(150-500)    | 17000<br>(9200-27000)    |
| Malawi    | 2016 | Male   | 40 to 44 | 52%<br>(39-65%)                | 48%<br>(35-61%)          | 2.6<br>(1.2-4.8)                            | 6.2%<br>(3.4-9.9%)                   | 6.9%<br>(3.5-11%)                   | 300<br>(150-510)    | 15000<br>(7900-25000)    |
| Malawi    | 2016 | Male   | 45 to 49 | 53%<br>(38-66%)                | 47%<br>(34-62%)          | 2.5<br>(1.2-5.1)                            | 7.2%<br>(3.8-12%)                    | 8.3%<br>(4.1-14%)                   | 290<br>(130-480)    | 12000<br>(6100-20000)    |
| Malawi    | 2016 | Male   | 50 to 54 | 53%<br>(39-66%)                | 47%<br>(34-61%)          | 2.4<br>(1-4.7)                              | 8.4%<br>(4.3-13%)                    | 9.9%<br>(4.9-16%)                   | 290<br>(140-490)    | 11000<br>(5400-18000)    |
| Malawi    | 2016 | Male   | 55 to 59 | 50%<br>(35-65%)                | 50%<br>(35-65%)          | 2.4<br>(1.1-4.8)                            | 9.4%<br>(4.8-15%)                    | 11%<br>(5.7-18%)                    | 320<br>(150-520)    | 10000<br>(5000-17000)    |
| Malawi    | 2016 | Male   | 60 to 64 | 46%<br>(31-63%)                | 54%<br>(37-69%)          | 2.1<br>(0.93-4.2)                           | 8.1%<br>(3.9-14%)                    | 9.6%<br>(4.5-16%)                   | 310<br>(140-570)    | 8700<br>(4000-15000)     |
| Malawi    | 2016 | Male   | 65 to 69 | 43%<br>(29-59%)                | 57%<br>(41-71%)          | 1.6<br>(0.73-3.1)                           | 5.8%<br>(2.3-11%)                    | 6.8%<br>(2.7-13%)                   | 300<br>(110-580)    | 6700<br>(2700-13000)     |
| Malawi    | 2016 | Male   | 70 to 74 | 40%<br>(26-55%)                | 60%<br>(45-74%)          | 1.3<br>(0.57-2.5)                           | 4.1%<br>(1.3-8.6%)                   | 4.9%<br>(1.5-10%)                   | 230<br>(73-490)     | 4200<br>(1300-8800)      |
| Malawi    | 2016 | Male   | 75 to 79 | 39%<br>(25-55%)                | 61%<br>(45-75%)          | 1.1<br>(0.46-2.1)                           | 3.2%<br>(0.92-7.1%)                  | 3.7%<br>(1.1-8.2%)                  | 150<br>(41-350)     | 2100<br>(590-4900)       |
| Malawi    | 2016 | Male   | 80 to 84 | 36%<br>(22-53%)                | 64%<br>(47-78%)          | 0.92<br>(0.38-1.8)                          | 2.5%<br>(0.65-5.6%)                  | 2.8%<br>(0.68-6.6%)                 | 74<br>(17-170)      | 780<br>(200-1800)        |
| Malawi    | 2016 | Male   | 85 to 89 | 33%<br>(20-48%)                | 67%<br>(52-80%)          | 0.75<br>(0.3-1.6)                           | 1.9%<br>(0.53-4.2%)                  | 2.1%<br>(0.52-4.9%)                 | 30<br>(7.7-71)      | 230<br>(66-520)          |
| Malawi    | 2016 | Male   | 90 to 94 | 33%<br>(21-47%)                | 67%<br>(53-79%)          | 0.69<br>(0.27-1.5)                          | 1.3%<br>(0.24-3.5%)                  | 1.4%<br>(0.15-4%)                   | 7.7<br>(0.83-21)    | 42<br>(7.6-110)          |
| Malawi    | 2016 | Male   | 95 plus  | 35%<br>(19-54%)                | 65%<br>(46-81%)          | 0.68<br>(0.24-1.5)                          | 1.7%<br>(0.36-4.3%)                  | 1.8%<br>(0.25-4.7%)                 | 2.3<br>(0.33-6.1)   | 8.5<br>(1.9-22)          |
| Mauritius | 1990 | Female | All Ages | 26%<br>(23-31%)                | 74%<br>(69-77%)          | 0.29<br>(0.23-0.38)                         | 0.17%<br>(-0.29-0.7%)                | -0.45%<br>(-1.5-0.71%)              | -13<br>(-42-20)     | 230<br>(-390-950)        |
| Mauritius | 1990 | Female | 15 to 19 | 22%<br>(15-31%)                | 78%<br>(69-85%)          | 0.26<br>(0.15-0.43)                         | 0.81%<br>(0.42-1.3%)                 | 1.4%<br>(0.39-2.9%)                 | 0.46<br>(0.12-0.93) | 57<br>(30-93)            |

| Location  | Year | Sex    | Age      | Prevalence of current drinkers | Prevalence of abstainers | Population average of standard drinks daily | Percent of total attributable deaths | Percent of total attributable DALYs | Attributable deaths   | Attributable DALYs     |
|-----------|------|--------|----------|--------------------------------|--------------------------|---------------------------------------------|--------------------------------------|-------------------------------------|-----------------------|------------------------|
| Mauritius | 1990 | Female | 20 to 24 | 28%<br>(18-38%)                | 72%<br>(62-82%)          | 0.33<br>(0.19-0.53)                         | 1.2%<br>(0.68-1.9%)                  | 1.5%<br>(0.36-3.1%)                 | 0.65<br>(0.15-1.3)    | 97<br>(53-150)         |
| Mauritius | 1990 | Female | 25 to 29 | 32%<br>(21-43%)                | 68%<br>(57-79%)          | 0.37<br>(0.22-0.56)                         | 1.2%<br>(0.71-1.6%)                  | 1.3%<br>(0.45-2.5%)                 | 0.56<br>(0.19-1)      | 82<br>(48-120)         |
| Mauritius | 1990 | Female | 30 to 34 | 34%<br>(23-46%)                | 66%<br>(54-77%)          | 0.39<br>(0.23-0.62)                         | 1%<br>(0.64-1.5%)                    | 1.3%<br>(0.51-2.2%)                 | 0.68<br>(0.27-1.2)    | 76<br>(46-110)         |
| Mauritius | 1990 | Female | 35 to 39 | 34%<br>(23-45%)                | 66%<br>(55-77%)          | 0.42<br>(0.24-0.65)                         | 0.89%<br>(0.5-1.4%)                  | 1.2%<br>(0.41-2.2%)                 | 0.66<br>(0.23-1.2)    | 64<br>(35-98)          |
| Mauritius | 1990 | Female | 40 to 44 | 34%<br>(23-45%)                | 66%<br>(55-77%)          | 0.43<br>(0.25-0.68)                         | 0.88%<br>(0.4-1.4%)                  | 1.3%<br>(0.38-2.4%)                 | 0.94<br>(0.28-1.7)    | 65<br>(28-100)         |
| Mauritius | 1990 | Female | 45 to 49 | 36%<br>(24-46%)                | 64%<br>(54-76%)          | 0.46<br>(0.27-0.74)                         | 0.59%<br>(-0.018-1.3%)               | 0.8%<br>(-0.23-2.1%)                | 0.69<br>(-0.2-1.8)    | 42<br>(-1.2-90)        |
| Mauritius | 1990 | Female | 50 to 54 | 36%<br>(26-48%)                | 64%<br>(52-74%)          | 0.53<br>(0.32-0.83)                         | 0.11%<br>(-0.74-1.1%)                | 0.0046%<br>(-1.4-1.5%)              | 0.005<br>(-1.5-1.7)   | 8<br>(-52-72)          |
| Mauritius | 1990 | Female | 55 to 59 | 35%<br>(24-46%)                | 65%<br>(54-76%)          | 0.6<br>(0.34-0.96)                          | -0.16%<br>(-1.3-1.2%)                | -0.33%<br>(-2.1-6%)                 | -0.52<br>(-3.1-2.4)   | -12<br>(-98-88)        |
| Mauritius | 1990 | Female | 60 to 64 | 33%<br>(22-44%)                | 67%<br>(56-78%)          | 0.61<br>(0.34-1)                            | -0.59%<br>(-1.9-0.83%)               | -0.84%<br>(-2.6-1%)                 | -2<br>(-6.2-2.5)      | -52<br>(-170-75)       |
| Mauritius | 1990 | Female | 65 to 69 | 32%<br>(22-42%)                | 68%<br>(58-78%)          | 0.58<br>(0.33-0.89)                         | -0.68%<br>(-1.9-0.59%)               | -0.91%<br>(-2.5-0.71%)              | -2.9<br>(-7.9-2.3)    | -64<br>(-180-54)       |
| Mauritius | 1990 | Female | 70 to 74 | 31%<br>(22-41%)                | 69%<br>(59-78%)          | 0.56<br>(0.31-0.9)                          | -0.53%<br>(-1.8-0.8%)                | -0.69%<br>(-2.2-0.95%)              | -2.4<br>(-7.8-3.3)    | -42<br>(-140-62)       |
| Mauritius | 1990 | Female | 75 to 79 | 32%<br>(21-44%)                | 68%<br>(56-79%)          | 0.57<br>(0.31-0.95)                         | -0.69%<br>(-2-0.71%)                 | -0.88%<br>(-2.5-0.81%)              | -3.2<br>(-9.3-3.1)    | -44<br>(-130-45)       |
| Mauritius | 1990 | Female | 80 to 84 | 32%<br>(21-44%)                | 68%<br>(56-79%)          | 0.56<br>(0.31-0.85)                         | -0.78%<br>(-1.9-0.45%)               | -0.98%<br>(-2.4-0.55%)              | -3.2<br>(-7.9-1.8)    | -32<br>(-80-19)        |
| Mauritius | 1990 | Female | 85 to 89 | 33%<br>(22-44%)                | 67%<br>(56-78%)          | 0.55<br>(0.3-0.89)                          | -0.77%<br>(-1.9-0.39%)               | -0.98%<br>(-2.4-0.43%)              | -2<br>(-5-0.89)       | -14<br>(-35-7.4)       |
| Mauritius | 1990 | Female | 90 to 94 | 34%<br>(23-47%)                | 66%<br>(53-77%)          | 0.56<br>(0.3-0.97)                          | -0.77%<br>(-1.9-0.43%)               | -1%<br>(-2.3-0.46%)                 | -0.76<br>(-1.7-0.35)  | -3.6<br>(-8.5-2)       |
| Mauritius | 1990 | Female | 95 plus  | 36%<br>(22-53%)                | 64%<br>(47-78%)          | 0.58<br>(0.27-1.1)                          | -0.74%<br>(-2.1-0.78%)               | -0.97%<br>(-2.6-0.8%)               | -0.16<br>(-0.43-0.13) | -0.48<br>(-1.4-0.52)   |
| Mauritius | 1990 | Male   | All Ages | 55%<br>(48-61%)                | 45%<br>(39-52%)          | 2.1<br>(1.8-2.5)                            | 8.6%<br>(6.5-11%)                    | 10%<br>(7.1-14%)                    | 400<br>(280-530)      | 15000<br>(11000-19000) |
| Mauritius | 1990 | Male   | 15 to 19 | 45%<br>(32-59%)                | 55%<br>(41-68%)          | 1<br>(0.61-1.6)                             | 2.8%<br>(1.8-4.2%)                   | 5.2%<br>(3-8%)                      | 2<br>(1.2-3.1)        | 190<br>(130-290)       |
| Mauritius | 1990 | Male   | 20 to 24 | 65%<br>(51-76%)                | 35%<br>(24-49%)          | 2.2<br>(1.5-3.1)                            | 7.1%<br>(4.9-9.9%)                   | 12%<br>(7.3-17%)                    | 6.7<br>(4.1-9.5)      | 570<br>(390-790)       |
| Mauritius | 1990 | Male   | 25 to 29 | 69%<br>(57-79%)                | 31%<br>(21-43%)          | 2.8<br>(2-3.7)                              | 9.6%<br>(6.8-13%)                    | 14%<br>(9.1-19%)                    | 11<br>(7.6-16)        | 870<br>(620-1100)      |
| Mauritius | 1990 | Male   | 30 to 34 | 71%<br>(59-80%)                | 29%<br>(20-41%)          | 3.4<br>(2.4-4.4)                            | 12%<br>(8.9-16%)                     | 16%<br>(12-22%)                     | 18<br>(13-24)         | 1200<br>(890-1600)     |
| Mauritius | 1990 | Male   | 35 to 39 | 73%<br>(62-81%)                | 27%<br>(19-38%)          | 3.9<br>(2.7-5.1)                            | 14%<br>(11-19%)                      | 19%<br>(13-24%)                     | 28<br>(21-37)         | 1600<br>(1200-2100)    |



| Location  | Year | Sex    | Age      | Prevalence of current drinkers | Prevalence of abstainers | Population average of standard drinks daily | Percent of total attributable deaths | Percent of total attributable DALYs | Attributable deaths      | Attributable DALYs    |
|-----------|------|--------|----------|--------------------------------|--------------------------|---------------------------------------------|--------------------------------------|-------------------------------------|--------------------------|-----------------------|
| Mauritius | 1990 | Male   | 40 to 44 | 73%<br>(62-82%)                | 27%<br>(18-38%)          | 4.2<br>(3-5.4)                              | 15%<br>(11-19%)                      | 19%<br>(13-24%)                     | 35<br>(25-45)            | 1800<br>(1300-2300)   |
| Mauritius | 1990 | Male   | 45 to 49 | 72%<br>(60-82%)                | 28%<br>(18-40%)          | 4.3<br>(3-5.8)                              | 15%<br>(11-19%)                      | 19%<br>(13-24%)                     | 37<br>(26-49)            | 1700<br>(1200-2100)   |
| Mauritius | 1990 | Male   | 50 to 54 | 72%<br>(60-81%)                | 28%<br>(19-40%)          | 4.4<br>(3-5.9)                              | 14%<br>(9.3-19%)                     | 17%<br>(11-22%)                     | 45<br>(29-60)            | 1700<br>(1100-2300)   |
| Mauritius | 1990 | Male   | 55 to 59 | 73%<br>(59-83%)                | 27%<br>(17-41%)          | 4.3<br>(2.8-5.9)                            | 13%<br>(8.2-18%)                     | 15%<br>(9.4-22%)                    | 51<br>(31-72)            | 1700<br>(1100-2400)   |
| Mauritius | 1990 | Male   | 60 to 64 | 68%<br>(53-80%)                | 32%<br>(20-47%)          | 3.9<br>(2.5-5.5)                            | 12%<br>(6.9-17%)                     | 13%<br>(7.5-19%)                    | 61<br>(34-90)            | 1700<br>(970-2500)    |
| Mauritius | 1990 | Male   | 65 to 69 | 59%<br>(43-72%)                | 41%<br>(28-57%)          | 3.1<br>(2-4.4)                              | 8.8%<br>(4.6-14%)                    | 9.8%<br>(4.9-15%)                   | 51<br>(26-79)            | 1200<br>(610-1800)    |
| Mauritius | 1990 | Male   | 70 to 74 | 53%<br>(39-67%)                | 47%<br>(33-61%)          | 2.5<br>(1.5-3.6)                            | 6.2%<br>(2.4-10%)                    | 6.8%<br>(2.5-12%)                   | 30<br>(11-51)            | 560<br>(210-940)      |
| Mauritius | 1990 | Male   | 75 to 79 | 50%<br>(35-66%)                | 50%<br>(34-65%)          | 2<br>(1.2-3.2)                              | 4.2%<br>(1-8.1%)                     | 4.6%<br>(0.97-8.9%)                 | 17<br>(3.6-33)           | 250<br>(61-480)       |
| Mauritius | 1990 | Male   | 80 to 84 | 47%<br>(32-62%)                | 53%<br>(38-68%)          | 1.7<br>(1-2.5)                              | 2.7%<br>(0.49-5.6%)                  | 2.9%<br>(0.38-6.2%)                 | 6.6<br>(0.88-14)         | 73<br>(13-150)        |
| Mauritius | 1990 | Male   | 85 to 89 | 44%<br>(29-60%)                | 56%<br>(40-71%)          | 1.4<br>(0.8-2.2)                            | 1.6%<br>(-0.075-4%)                  | 1.7%<br>(-0.26-4.4%)                | 1.5<br>(-0.23-3.9)       | 12<br>(-0.57-31)      |
| Mauritius | 1990 | Male   | 90 to 94 | 45%<br>(30-60%)                | 55%<br>(40-70%)          | 1.2<br>(0.7-2.1)                            | 0.78%<br>(-0.73-3%)                  | 0.72%<br>(-1.1-3.3%)                | 0.14<br>(-0.21-0.65)     | 0.92<br>(-0.86-3.5)   |
| Mauritius | 1990 | Male   | 95 plus  | 48%<br>(29-67%)                | 52%<br>(33-71%)          | 1.1<br>(0.5-2.1)                            | 0.43%<br>(-1.2-2.9%)                 | 0.22%<br>(-1.7-3%)                  | 0.0063<br>(-0.048-0.086) | 0.048<br>(-0.13-0.32) |
| Mauritius | 1995 | Female | All Ages | 27%<br>(23-31%)                | 73%<br>(69-77%)          | 0.31<br>(0.24-0.41)                         | 0.22%<br>(-0.29-0.79%)               | -0.36%<br>(-1.4-0.89%)              | -11<br>(-44-26)          | 310<br>(-410-1100)    |
| Mauritius | 1995 | Female | 15 to 19 | 22%<br>(15-31%)                | 78%<br>(69-85%)          | 0.27<br>(0.15-0.45)                         | 0.79%<br>(0.44-1.2%)                 | 1.4%<br>(0.39-3%)                   | 0.34<br>(0.097-0.7)      | 48<br>(27-79)         |
| Mauritius | 1995 | Female | 20 to 24 | 27%<br>(18-37%)                | 73%<br>(63-82%)          | 0.34<br>(0.19-0.57)                         | 1.2%<br>(0.72-1.8%)                  | 1.5%<br>(0.36-3.2%)                 | 0.49<br>(0.12-1)         | 86<br>(50-130)        |
| Mauritius | 1995 | Female | 25 to 29 | 32%<br>(21-43%)                | 68%<br>(57-79%)          | 0.38<br>(0.23-0.58)                         | 1.2%<br>(0.77-1.6%)                  | 1.4%<br>(0.5-2.5%)                  | 0.53<br>(0.2-0.97)       | 88<br>(55-130)        |
| Mauritius | 1995 | Female | 30 to 34 | 33%<br>(22-47%)                | 67%<br>(53-78%)          | 0.4<br>(0.23-0.63)                          | 1.1%<br>(0.67-1.5%)                  | 1.4%<br>(0.59-2.3%)                 | 0.68<br>(0.29-1.1)       | 81<br>(49-120)        |
| Mauritius | 1995 | Female | 35 to 39 | 33%<br>(22-45%)                | 67%<br>(55-78%)          | 0.43<br>(0.24-0.68)                         | 1%<br>(0.62-1.6%)                    | 1.5%<br>(0.73-2.6%)                 | 0.95<br>(0.45-1.6)       | 81<br>(47-120)        |
| Mauritius | 1995 | Female | 40 to 44 | 33%<br>(23-44%)                | 67%<br>(56-77%)          | 0.44<br>(0.25-0.69)                         | 1%<br>(0.53-1.6%)                    | 1.7%<br>(0.76-2.8%)                 | 1.3<br>(0.61-2.3)        | 85<br>(43-130)        |
| Mauritius | 1995 | Female | 45 to 49 | 35%<br>(24-46%)                | 65%<br>(54-76%)          | 0.47<br>(0.27-0.76)                         | 0.68%<br>(0.043-1.4%)                | 0.99%<br>(-0.16-2.3%)               | 1.1<br>(-0.17-2.4)       | 59<br>(3.6-120)       |
| Mauritius | 1995 | Female | 50 to 54 | 36%<br>(25-48%)                | 64%<br>(52-75%)          | 0.54<br>(0.32-0.85)                         | 0.2%<br>(-0.67-1.1%)                 | 0.18%<br>(-1.2-1.7%)                | 0.25<br>(-1.6-2.3)       | 17<br>(-54-99)        |
| Mauritius | 1995 | Female | 55 to 59 | 34%<br>(24-45%)                | 66%<br>(55-76%)          | 0.61<br>(0.35-0.97)                         | -0.05%<br>(-1.2-1.3%)                | -0.14%<br>(-1.8-1.8%)               | -0.25<br>(-3.2-3.2)      | -4.5<br>(-100-110)    |

| Location  | Year | Sex    | Age      | Prevalence of current drinkers | Prevalence of abstainers | Population average of standard drinks daily | Percent of total attributable deaths | Percent of total attributable DALYs | Attributable deaths  | Attributable DALYs     |
|-----------|------|--------|----------|--------------------------------|--------------------------|---------------------------------------------|--------------------------------------|-------------------------------------|----------------------|------------------------|
| Mauritius | 1995 | Female | 60 to 64 | 32%<br>(22-44%)                | 68%<br>(56-78%)          | 0.62<br>(0.35-1)                            | -0.44%<br>(-1.7-1.1%)                | -0.63%<br>(-2.4-1.3%)               | -1.6<br>(-6.1-3.4)   | -42<br>(-170-110)      |
| Mauritius | 1995 | Female | 65 to 69 | 31%<br>(22-42%)                | 69%<br>(58-78%)          | 0.59<br>(0.34-0.94)                         | -0.55%<br>(-1.8-0.82%)               | -0.74%<br>(-2.3-1%)                 | -2.5<br>(-7.8-3.3)   | -54<br>(-180-80)       |
| Mauritius | 1995 | Female | 70 to 74 | 31%<br>(22-41%)                | 69%<br>(59-78%)          | 0.58<br>(0.32-0.97)                         | -0.43%<br>(-1.8-1%)                  | -0.56%<br>(-2.3-1.3%)               | -2.2<br>(-8.8-5)     | -39<br>(-160-96)       |
| Mauritius | 1995 | Female | 75 to 79 | 31%<br>(20-43%)                | 69%<br>(57-80%)          | 0.59<br>(0.32-1)                            | -0.62%<br>(-2-0.86%)                 | -0.82%<br>(-2.6-1%)                 | -3<br>(-9.5-3.8)     | -42<br>(-130-55)       |
| Mauritius | 1995 | Female | 80 to 84 | 31%<br>(21-44%)                | 69%<br>(56-79%)          | 0.58<br>(0.33-0.91)                         | -0.72%<br>(-1.9-0.6%)                | -0.93%<br>(-2.3-0.68%)              | -3.3<br>(-8.3-2.4)   | -33<br>(-85-26)        |
| Mauritius | 1995 | Female | 85 to 89 | 32%<br>(21-44%)                | 68%<br>(56-79%)          | 0.56<br>(0.31-0.92)                         | -0.73%<br>(-1.9-0.45%)               | -0.95%<br>(-2.4-0.48%)              | -2.3<br>(-6-1.2)     | -16<br>(-43-10)        |
| Mauritius | 1995 | Female | 90 to 94 | 33%<br>(22-46%)                | 67%<br>(54-78%)          | 0.57<br>(0.31-1)                            | -0.73%<br>(-1.8-0.47%)               | -0.97%<br>(-2.3-0.49%)              | -1<br>(-2.4-0.5)     | -4.6<br>(-12-3)        |
| Mauritius | 1995 | Female | 95 plus  | 36%<br>(22-51%)                | 64%<br>(49-78%)          | 0.59<br>(0.27-1.1)                          | -0.71%<br>(-2.1-0.86%)               | -0.95%<br>(-2.7-0.84%)              | -0.25<br>(-0.7-0.22) | -0.74<br>(-2.2-0.9)    |
| Mauritius | 1995 | Male   | All Ages | 56%<br>(49-62%)                | 44%<br>(38-51%)          | 2.3<br>(1.9-2.7)                            | 9.4%<br>(7.3-12%)                    | 11%<br>(7.7-14%)                    | 460<br>(320-600)     | 17000<br>(13000-22000) |
| Mauritius | 1995 | Male   | 15 to 19 | 45%<br>(32-59%)                | 55%<br>(41-68%)          | 1.1<br>(0.64-1.6)                           | 3.2%<br>(2-4.9%)                     | 5.5%<br>(3.2-8.6%)                  | 2.5<br>(1.4-3.8)     | 220<br>(140-330)       |
| Mauritius | 1995 | Male   | 20 to 24 | 64%<br>(50-76%)                | 36%<br>(24-50%)          | 2.3<br>(1.6-3.3)                            | 7.8%<br>(5.2-11%)                    | 12%<br>(7.5-18%)                    | 7.8<br>(4.8-12)      | 640<br>(430-900)       |
| Mauritius | 1995 | Male   | 25 to 29 | 69%<br>(56-79%)                | 31%<br>(21-44%)          | 2.9<br>(2-3.8)                              | 10%<br>(7.2-13%)                     | 15%<br>(10-20%)                     | 12<br>(8.1-17)       | 930<br>(660-1200)      |
| Mauritius | 1995 | Male   | 30 to 34 | 71%<br>(58-81%)                | 29%<br>(19-42%)          | 3.5<br>(2.5-4.6)                            | 13%<br>(9.4-16%)                     | 17%<br>(12-22%)                     | 23<br>(16-30)        | 1500<br>(1100-1900)    |
| Mauritius | 1995 | Male   | 35 to 39 | 72%<br>(60-81%)                | 28%<br>(19-40%)          | 4<br>(2.7-5.3)                              | 15%<br>(11-19%)                      | 20%<br>(14-25%)                     | 35<br>(25-44)        | 2000<br>(1500-2500)    |
| Mauritius | 1995 | Male   | 40 to 44 | 72%<br>(61-82%)                | 28%<br>(18-39%)          | 4.3<br>(3.1-5.6)                            | 16%<br>(12-20%)                      | 20%<br>(15-25%)                     | 43<br>(32-54)        | 2200<br>(1600-2700)    |
| Mauritius | 1995 | Male   | 45 to 49 | 72%<br>(58-81%)                | 28%<br>(19-42%)          | 4.4<br>(3.1-5.9)                            | 16%<br>(11-20%)                      | 19%<br>(13-25%)                     | 50<br>(35-64)        | 2200<br>(1600-2800)    |
| Mauritius | 1995 | Male   | 50 to 54 | 72%<br>(60-81%)                | 28%<br>(19-40%)          | 4.5<br>(3.1-6.1)                            | 15%<br>(10-19%)                      | 18%<br>(12-23%)                     | 50<br>(33-66)        | 1900<br>(1300-2500)    |
| Mauritius | 1995 | Male   | 55 to 59 | 72%<br>(59-82%)                | 28%<br>(18-41%)          | 4.4<br>(3-6.1)                              | 14%<br>(8.6-19%)                     | 16%<br>(9.8-22%)                    | 56<br>(35-78)        | 1900<br>(1200-2500)    |
| Mauritius | 1995 | Male   | 60 to 64 | 68%<br>(53-80%)                | 32%<br>(20-47%)          | 4<br>(2.6-5.7)                              | 12%<br>(7-17%)                       | 14%<br>(7.9-20%)                    | 57<br>(32-83)        | 1600<br>(940-2300)     |
| Mauritius | 1995 | Male   | 65 to 69 | 59%<br>(44-72%)                | 41%<br>(28-56%)          | 3.2<br>(2.1-4.6)                            | 9.3%<br>(4.9-14%)                    | 10%<br>(5.3-16%)                    | 53<br>(27-83)        | 1200<br>(640-1900)     |
| Mauritius | 1995 | Male   | 70 to 74 | 53%<br>(39-65%)                | 47%<br>(35-61%)          | 2.5<br>(1.6-3.9)                            | 6.7%<br>(2.7-11%)                    | 7.4%<br>(2.8-13%)                   | 40<br>(15-68)        | 740<br>(300-1300)      |
| Mauritius | 1995 | Male   | 75 to 79 | 50%<br>(35-65%)                | 50%<br>(35-65%)          | 2.1<br>(1.2-3.3)                            | 4.5%<br>(1.2-8.7%)                   | 4.9%<br>(1.1-9.8%)                  | 20<br>(4.5-39)       | 290<br>(75-560)        |

| Location  | Year | Sex    | Age      | Prevalence of current drinkers | Prevalence of abstainers | Population average of standard drinks daily | Percent of total attributable deaths | Percent of total attributable DALYs | Attributable deaths    | Attributable DALYs  |
|-----------|------|--------|----------|--------------------------------|--------------------------|---------------------------------------------|--------------------------------------|-------------------------------------|------------------------|---------------------|
| Mauritius | 1995 | Male   | 80 to 84 | 46%<br>(30-62%)                | 54%<br>(38-70%)          | 1.7<br>(1-2.6)                              | 3.1%<br>(0.7-6.3%)                   | 3.3%<br>(0.56-7.1%)                 | 9.1<br>(1.5-19)        | 100<br>(23-210)     |
| Mauritius | 1995 | Male   | 85 to 89 | 44%<br>(29-59%)                | 56%<br>(41-71%)          | 1.4<br>(0.81-2.3)                           | 1.8%<br>(-0.032-4.5%)                | 1.9%<br>(-0.23-5%)                  | 2.4<br>(-0.3-6.4)      | 19<br>(-0.35-49)    |
| Mauritius | 1995 | Male   | 90 to 94 | 45%<br>(31-60%)                | 55%<br>(40-69%)          | 1.3<br>(0.7-2.2)                            | 0.88%<br>(-0.76-3.3%)                | 0.82%<br>(-1.1-3.6%)                | 0.28<br>(-0.39-1.2)    | 1.8<br>(-1.6-6.7)   |
| Mauritius | 1995 | Male   | 95 plus  | 47%<br>(29-66%)                | 53%<br>(34-71%)          | 1.2<br>(0.51-2.2)                           | 0.48%<br>(-1.2-3.3%)                 | 0.26%<br>(-1.7-3.4%)                | 0.014<br>(-0.092-0.18) | 0.1<br>(-0.26-0.69) |
| Mauritius | 2000 | Female | All Ages | 22%<br>(19-26%)                | 78%<br>(74-81%)          | 0.25<br>(0.19-0.33)                         | 0.18%<br>(-0.27-0.65%)               | -0.4%<br>(-1.3-0.66%)               | -14<br>(-47-23)        | 270<br>(-390-1000)  |
| Mauritius | 2000 | Female | 15 to 19 | 18%<br>(12-26%)                | 82%<br>(74-88%)          | 0.21<br>(0.12-0.34)                         | 0.67%<br>(0.36-1.1%)                 | 1.1%<br>(0.24-2.3%)                 | 0.24<br>(0.054-0.51)   | 39<br>(21-62)       |
| Mauritius | 2000 | Female | 20 to 24 | 21%<br>(14-29%)                | 79%<br>(71-86%)          | 0.25<br>(0.14-0.41)                         | 1.1%<br>(0.67-1.6%)                  | 1.2%<br>(0.25-2.4%)                 | 0.36<br>(0.076-0.75)   | 77<br>(43-120)      |
| Mauritius | 2000 | Female | 25 to 29 | 26%<br>(18-34%)                | 74%<br>(66-82%)          | 0.29<br>(0.18-0.43)                         | 1.1%<br>(0.71-1.5%)                  | 1.1%<br>(0.4-2%)                    | 0.39<br>(0.14-0.7)     | 71<br>(45-100)      |
| Mauritius | 2000 | Female | 30 to 34 | 28%<br>(20-38%)                | 72%<br>(62-80%)          | 0.32<br>(0.2-0.48)                          | 1%<br>(0.67-1.4%)                    | 1.3%<br>(0.66-2.1%)                 | 0.57<br>(0.29-0.93)    | 78<br>(50-110)      |
| Mauritius | 2000 | Female | 35 to 39 | 27%<br>(20-37%)                | 73%<br>(63-80%)          | 0.33<br>(0.2-0.52)                          | 0.93%<br>(0.59-1.3%)                 | 1.3%<br>(0.62-2.1%)                 | 0.87<br>(0.42-1.4)     | 84<br>(51-120)      |
| Mauritius | 2000 | Female | 40 to 44 | 27%<br>(19-36%)                | 73%<br>(64-81%)          | 0.33<br>(0.2-0.51)                          | 0.92%<br>(0.51-1.4%)                 | 1.4%<br>(0.65-2.3%)                 | 1.3<br>(0.61-2.2)      | 91<br>(50-140)      |
| Mauritius | 2000 | Female | 45 to 49 | 30%<br>(20-38%)                | 70%<br>(62-80%)          | 0.37<br>(0.23-0.57)                         | 0.64%<br>(0.12-1.2%)                 | 0.9%<br>(0.02-2%)                   | 1.2<br>(0.027-2.7)     | 68<br>(14-130)      |
| Mauritius | 2000 | Female | 50 to 54 | 32%<br>(24-41%)                | 68%<br>(59-76%)          | 0.45<br>(0.28-0.7)                          | 0.17%<br>(-0.58-0.99%)               | 0.15%<br>(-1.1-1.4%)                | 0.24<br>(-1.7-2.3)     | 17<br>(-56-97)      |
| Mauritius | 2000 | Female | 55 to 59 | 29%<br>(21-39%)                | 71%<br>(61-79%)          | 0.5<br>(0.3-0.78)                           | -0.054%<br>(-0.96-1%)                | -0.13%<br>(-1.4-1.4%)               | -0.24<br>(-2.8-2.7)    | -5.1<br>(-87-96)    |
| Mauritius | 2000 | Female | 60 to 64 | 27%<br>(19-36%)                | 73%<br>(64-81%)          | 0.49<br>(0.28-0.79)                         | -0.36%<br>(-1.4-0.82%)               | -0.51%<br>(-1.8-1.1%)               | -1.4<br>(-5.1-2.9)     | -37<br>(-140-89)    |
| Mauritius | 2000 | Female | 65 to 69 | 26%<br>(18-35%)                | 74%<br>(65-82%)          | 0.46<br>(0.27-0.73)                         | -0.45%<br>(-1.4-0.55%)               | -0.61%<br>(-1.9-0.7%)               | -2<br>(-6.4-2.3)       | -45<br>(-140-56)    |
| Mauritius | 2000 | Female | 70 to 74 | 26%<br>(18-34%)                | 74%<br>(66-82%)          | 0.46<br>(0.26-0.75)                         | -0.44%<br>(-1.5-0.73%)               | -0.58%<br>(-1.9-0.91%)              | -2.6<br>(-8.6-4.1)     | -47<br>(-160-78)    |
| Mauritius | 2000 | Female | 75 to 79 | 26%<br>(18-37%)                | 74%<br>(63-82%)          | 0.47<br>(0.25-0.78)                         | -0.65%<br>(-1.8-0.48%)               | -0.85%<br>(-2.3-0.61%)              | -4.3<br>(-12-3)        | -59<br>(-160-44)    |
| Mauritius | 2000 | Female | 80 to 84 | 27%<br>(18-38%)                | 73%<br>(62-82%)          | 0.47<br>(0.27-0.73)                         | -0.71%<br>(-1.8-0.34%)               | -0.91%<br>(-2.2-0.4%)               | -4.1<br>(-9.8-1.8)     | -42<br>(-100-21)    |
| Mauritius | 2000 | Female | 85 to 89 | 28%<br>(19-39%)                | 72%<br>(61-81%)          | 0.47<br>(0.26-0.76)                         | -0.7%<br>(-1.7-0.34%)                | -0.91%<br>(-2.1-0.36%)              | -2.9<br>(-6.8-1.2)     | -20<br>(-49-9.8)    |
| Mauritius | 2000 | Female | 90 to 94 | 30%<br>(19-41%)                | 70%<br>(59-81%)          | 0.48<br>(0.26-0.83)                         | -0.67%<br>(-1.7-0.38%)               | -0.88%<br>(-2.1-0.39%)              | -1.3<br>(-3.1-0.57)    | -6<br>(-15-3.5)     |
| Mauritius | 2000 | Female | 95 plus  | 32%<br>(19-48%)                | 68%<br>(52-81%)          | 0.51<br>(0.23-0.98)                         | -0.68%<br>(-1.8-0.63%)               | -0.91%<br>(-2.3-0.59%)              | -0.37<br>(-0.95-0.24)  | -1.1<br>(-3-1.1)    |

| Location  | Year | Sex    | Age      | Prevalence of current drinkers | Prevalence of abstainers | Population average of standard drinks daily | Percent of total attributable deaths | Percent of total attributable DALYs | Attributable deaths   | Attributable DALYs     |
|-----------|------|--------|----------|--------------------------------|--------------------------|---------------------------------------------|--------------------------------------|-------------------------------------|-----------------------|------------------------|
| Mauritius | 2000 | Male   | All Ages | 59%<br>(54-64%)                | 41%<br>(36-46%)          | 2.5<br>(2.1-2.9)                            | 9%<br>(6.7-11%)                      | 10%<br>(6.9-14%)                    | 450<br>(300-610)      | 17000<br>(13000-21000) |
| Mauritius | 2000 | Male   | 15 to 19 | 48%<br>(38-59%)                | 52%<br>(41-62%)          | 1.1<br>(0.71-1.6)                           | 3%<br>(1.9-4.3%)                     | 5.6%<br>(3.1-8.4%)                  | 1.9<br>(1.1-2.9)      | 180<br>(120-260)       |
| Mauritius | 2000 | Male   | 20 to 24 | 66%<br>(55-74%)                | 34%<br>(26-45%)          | 2.3<br>(1.7-3.1)                            | 7.5%<br>(5-10%)                      | 12%<br>(7.4-17%)                    | 7.3<br>(4.6-10)       | 610<br>(400-820)       |
| Mauritius | 2000 | Male   | 25 to 29 | 71%<br>(62-78%)                | 29%<br>(22-38%)          | 2.8<br>(2.1-3.7)                            | 9.4%<br>(6.6-13%)                    | 14%<br>(9.2-19%)                    | 10<br>(6.5-14)        | 760<br>(540-1000)      |
| Mauritius | 2000 | Male   | 30 to 34 | 75%<br>(66-81%)                | 25%<br>(19-34%)          | 3.6<br>(2.7-4.6)                            | 11%<br>(8.1-14%)                     | 16%<br>(11-21%)                     | 16<br>(11-22)         | 1100<br>(800-1400)     |
| Mauritius | 2000 | Male   | 35 to 39 | 75%<br>(68-82%)                | 25%<br>(18-32%)          | 4<br>(3-5.2)                                | 13%<br>(9.7-17%)                     | 18%<br>(13-23%)                     | 31<br>(22-40)         | 1800<br>(1300-2300)    |
| Mauritius | 2000 | Male   | 40 to 44 | 76%<br>(69-82%)                | 24%<br>(18-31%)          | 4.4<br>(3.2-5.6)                            | 14%<br>(10-18%)                      | 18%<br>(13-23%)                     | 44<br>(31-57)         | 2200<br>(1600-2900)    |
| Mauritius | 2000 | Male   | 45 to 49 | 76%<br>(67-82%)                | 24%<br>(18-33%)          | 4.6<br>(3.4-5.9)                            | 14%<br>(10-18%)                      | 18%<br>(12-23%)                     | 54<br>(36-71)         | 2400<br>(1700-3200)    |
| Mauritius | 2000 | Male   | 50 to 54 | 74%<br>(66-81%)                | 26%<br>(19-34%)          | 4.5<br>(3.3-5.9)                            | 13%<br>(8.8-18%)                     | 16%<br>(10-22%)                     | 52<br>(34-71)         | 2000<br>(1400-2800)    |
| Mauritius | 2000 | Male   | 55 to 59 | 75%<br>(65-83%)                | 25%<br>(17-35%)          | 4.5<br>(3.2-5.9)                            | 13%<br>(7.5-17%)                     | 15%<br>(8.5-21%)                    | 49<br>(28-69)         | 1700<br>(990-2300)     |
| Mauritius | 2000 | Male   | 60 to 64 | 74%<br>(64-82%)                | 26%<br>(18-36%)          | 4.4<br>(3.1-6)                              | 12%<br>(6.7-17%)                     | 14%<br>(7.6-20%)                    | 59<br>(32-86)         | 1700<br>(930-2400)     |
| Mauritius | 2000 | Male   | 65 to 69 | 65%<br>(53-75%)                | 35%<br>(25-47%)          | 3.5<br>(2.5-4.8)                            | 9.4%<br>(5-14%)                      | 11%<br>(5.6-17%)                    | 52<br>(27-81)         | 1200<br>(650-1900)     |
| Mauritius | 2000 | Male   | 70 to 74 | 53%<br>(40-65%)                | 47%<br>(35-60%)          | 2.4<br>(1.6-3.6)                            | 6.1%<br>(2.4-10%)                    | 6.9%<br>(2.7-12%)                   | 40<br>(15-68)         | 750<br>(300-1300)      |
| Mauritius | 2000 | Male   | 75 to 79 | 50%<br>(37-63%)                | 50%<br>(37-63%)          | 2<br>(1.2-3)                                | 4.1%<br>(0.97-8%)                    | 4.5%<br>(0.9-9%)                    | 23<br>(4.8-47)        | 350<br>(85-690)        |
| Mauritius | 2000 | Male   | 80 to 84 | 48%<br>(31-63%)                | 52%<br>(37-69%)          | 1.7<br>(1-2.6)                              | 2.9%<br>(0.57-6%)                    | 3.1%<br>(0.47-6.7%)                 | 11<br>(1.7-24)        | 130<br>(25-260)        |
| Mauritius | 2000 | Male   | 85 to 89 | 44%<br>(29-59%)                | 56%<br>(41-71%)          | 1.4<br>(0.78-2.2)                           | 1.6%<br>(-0.13-3.9%)                 | 1.7%<br>(-0.36-4.4%)                | 2.6<br>(-0.55-6.8)    | 22<br>(-1.7-54)        |
| Mauritius | 2000 | Male   | 90 to 94 | 44%<br>(30-59%)                | 56%<br>(41-70%)          | 1.2<br>(0.66-2)                             | 0.68%<br>(-0.8-3%)                   | 0.58%<br>(-1.2-3.2%)                | 0.29<br>(-0.58-1.6)   | 2.1<br>(-2.4-8.9)      |
| Mauritius | 2000 | Male   | 95 plus  | 47%<br>(28-65%)                | 53%<br>(35-72%)          | 1.1<br>(0.48-2)                             | 0.27%<br>(-1.3-2.7%)                 | 0.011%<br>(-1.9-2.8%)               | 0.001<br>(-0.17-0.26) | 0.099<br>(-0.46-0.99)  |
| Mauritius | 2005 | Female | All Ages | 24%<br>(21-27%)                | 76%<br>(73-79%)          | 0.26<br>(0.2-0.32)                          | 0.024%<br>(-0.43-0.46%)              | -0.69%<br>(-1.6-0.27%)              | -26<br>(-58-10)       | 38<br>(-620-720)       |
| Mauritius | 2005 | Female | 15 to 19 | 19%<br>(12-27%)                | 81%<br>(73-88%)          | 0.2<br>(0.12-0.34)                          | 0.66%<br>(0.38-1%)                   | 1.1%<br>(0.35-2.2%)                 | 0.2<br>(0.067-0.42)   | 35<br>(20-55)          |
| Mauritius | 2005 | Female | 20 to 24 | 22%<br>(15-30%)                | 78%<br>(70-85%)          | 0.24<br>(0.14-0.4)                          | 1.1%<br>(0.67-1.5%)                  | 1.1%<br>(0.33-2.2%)                 | 0.28<br>(0.086-0.56)  | 64<br>(39-98)          |
| Mauritius | 2005 | Female | 25 to 29 | 27%<br>(19-35%)                | 73%<br>(65-81%)          | 0.28<br>(0.18-0.42)                         | 1.1%<br>(0.71-1.4%)                  | 1.1%<br>(0.44-1.8%)                 | 0.31<br>(0.13-0.53)   | 71<br>(46-100)         |

| Location  | Year | Sex    | Age      | Prevalence of current drinkers | Prevalence of abstainers | Population average of standard drinks daily | Percent of total attributable deaths | Percent of total attributable DALYs | Attributable deaths  | Attributable DALYs     |
|-----------|------|--------|----------|--------------------------------|--------------------------|---------------------------------------------|--------------------------------------|-------------------------------------|----------------------|------------------------|
| Mauritius | 2005 | Female | 30 to 34 | 29%<br>(22-39%)                | 71%<br>(61-78%)          | 0.31<br>(0.2-0.47)                          | 0.98%<br>(0.64-1.3%)                 | 1.3%<br>(0.69-1.9%)                 | 0.49<br>(0.26-0.74)  | 67<br>(43-96)          |
| Mauritius | 2005 | Female | 35 to 39 | 29%<br>(21-38%)                | 71%<br>(62-79%)          | 0.32<br>(0.19-0.5)                          | 0.87%<br>(0.53-1.2%)                 | 1.2%<br>(0.61-2%)                   | 0.78<br>(0.39-1.3)   | 74<br>(45-110)         |
| Mauritius | 2005 | Female | 40 to 44 | 28%<br>(21-37%)                | 72%<br>(63-79%)          | 0.32<br>(0.19-0.49)                         | 0.9%<br>(0.5-1.3%)                   | 1.5%<br>(0.82-2.3%)                 | 1.5<br>(0.79-2.3)    | 96<br>(51-140)         |
| Mauritius | 2005 | Female | 45 to 49 | 31%<br>(22-40%)                | 69%<br>(60-78%)          | 0.36<br>(0.22-0.56)                         | 0.59%<br>(0.078-1.1%)                | 0.95%<br>(0.097-1.9%)               | 1.3<br>(0.14-2.7)    | 69<br>(9.3-130)        |
| Mauritius | 2005 | Female | 50 to 54 | 33%<br>(24-42%)                | 67%<br>(58-76%)          | 0.44<br>(0.28-0.67)                         | 0.085%<br>(-0.58-0.76%)              | 0.13%<br>(-0.9-1.2%)                | 0.26<br>(-1.7-2.4)   | 11<br>(-71-97)         |
| Mauritius | 2005 | Female | 55 to 59 | 31%<br>(23-40%)                | 69%<br>(60-77%)          | 0.49<br>(0.29-0.76)                         | -0.27%<br>(-1.1-0.75%)               | -0.38%<br>(-1.6-1%)                 | -0.92<br>(-3.8-2.6)  | -34<br>(-140-95)       |
| Mauritius | 2005 | Female | 60 to 64 | 28%<br>(20-37%)                | 72%<br>(63-80%)          | 0.48<br>(0.28-0.75)                         | -0.63%<br>(-1.6-0.45%)               | -0.85%<br>(-2.1-0.63%)              | -2.4<br>(-6-1.8)     | -70<br>(-180-51)       |
| Mauritius | 2005 | Female | 65 to 69 | 27%<br>(18-36%)                | 73%<br>(64-82%)          | 0.45<br>(0.27-0.68)                         | -0.69%<br>(-1.6-0.21%)               | -0.9%<br>(-2.1-0.25%)               | -3.1<br>(-7.3-0.89)  | -74<br>(-170-23)       |
| Mauritius | 2005 | Female | 70 to 74 | 27%<br>(19-36%)                | 73%<br>(64-81%)          | 0.45<br>(0.26-0.7)                          | -0.74%<br>(-1.7-0.22%)               | -0.96%<br>(-2.2-0.29%)              | -3.8<br>(-8.8-1.1)   | -72<br>(-170-22)       |
| Mauritius | 2005 | Female | 75 to 79 | 28%<br>(19-39%)                | 72%<br>(61-81%)          | 0.46<br>(0.25-0.74)                         | -0.91%<br>(-2-0.14%)                 | -1.2%<br>(-2.6-0.16%)               | -5.9<br>(-13-0.82)   | -83<br>(-180-12)       |
| Mauritius | 2005 | Female | 80 to 84 | 29%<br>(19-39%)                | 71%<br>(61-81%)          | 0.46<br>(0.26-0.73)                         | -1%<br>(-2.1-0.011%)                 | -1.3%<br>(-2.6--0.017%)             | -7<br>(-14--0.095)   | -72<br>(-150-0.84)     |
| Mauritius | 2005 | Female | 85 to 89 | 30%<br>(19-41%)                | 70%<br>(59-81%)          | 0.46<br>(0.26-0.75)                         | -0.97%<br>(-2.1-0.032%)              | -1.2%<br>(-2.6--0.015%)             | -5.1<br>(-11--0.061) | -36<br>(-78-1.2)       |
| Mauritius | 2005 | Female | 90 to 94 | 31%<br>(21-42%)                | 69%<br>(58-79%)          | 0.46<br>(0.26-0.79)                         | -0.87%<br>(-1.8-0.12%)               | -1.1%<br>(-2.4-0.051%)              | -2.2<br>(-4.5-0.1)   | -10<br>(-22-1.5)       |
| Mauritius | 2005 | Female | 95 plus  | 33%<br>(20-49%)                | 67%<br>(51-80%)          | 0.48<br>(0.23-0.9)                          | -0.81%<br>(-2-0.48%)                 | -1.1%<br>(-2.5-0.43%)               | -0.63<br>(-1.5-0.26) | -1.9<br>(-4.6-1.2)     |
| Mauritius | 2005 | Male   | All Ages | 61%<br>(56-66%)                | 39%<br>(34-44%)          | 2.4<br>(1.9-2.8)                            | 8.2%<br>(6-10%)                      | 8.8%<br>(5.9-12%)                   | 420<br>(270-560)     | 16000<br>(12000-20000) |
| Mauritius | 2005 | Male   | 15 to 19 | 49%<br>(38-60%)                | 51%<br>(40-62%)          | 1<br>(0.66-1.5)                             | 2.8%<br>(1.8-4.1%)                   | 5.2%<br>(3-7.9%)                    | 1.6<br>(0.94-2.5)    | 160<br>(100-230)       |
| Mauritius | 2005 | Male   | 20 to 24 | 66%<br>(56-75%)                | 34%<br>(25-44%)          | 2.1<br>(1.5-2.9)                            | 7%<br>(4.7-9.5%)                     | 11%<br>(6.9-16%)                    | 5.8<br>(3.6-8.4)     | 490<br>(330-670)       |
| Mauritius | 2005 | Male   | 25 to 29 | 71%<br>(63-78%)                | 29%<br>(22-37%)          | 2.6<br>(1.9-3.5)                            | 8.6%<br>(6-11%)                      | 13%<br>(8.1-17%)                    | 10<br>(6.5-14)       | 780<br>(530-1000)      |
| Mauritius | 2005 | Male   | 30 to 34 | 75%<br>(67-81%)                | 25%<br>(19-33%)          | 3.3<br>(2.5-4.3)                            | 10%<br>(7.4-13%)                     | 14%<br>(10-19%)                     | 13<br>(8.9-18)       | 910<br>(660-1200)      |
| Mauritius | 2005 | Male   | 35 to 39 | 76%<br>(69-82%)                | 24%<br>(18-31%)          | 3.7<br>(2.7-4.8)                            | 12%<br>(8.7-15%)                     | 16%<br>(11-21%)                     | 25<br>(18-33)        | 1500<br>(1100-1900)    |
| Mauritius | 2005 | Male   | 40 to 44 | 76%<br>(69-83%)                | 24%<br>(17-31%)          | 4<br>(3-5.2)                                | 13%<br>(9.4-16%)                     | 17%<br>(12-21%)                     | 40<br>(28-52)        | 2100<br>(1500-2700)    |
| Mauritius | 2005 | Male   | 45 to 49 | 76%<br>(68-83%)                | 24%<br>(17-32%)          | 4.2<br>(3.1-5.5)                            | 13%<br>(9.3-17%)                     | 17%<br>(11-21%)                     | 52<br>(36-68)        | 2400<br>(1700-3100)    |

| Location  | Year | Sex    | Age      | Prevalence of current drinkers | Prevalence of abstainers | Population average of standard drinks daily | Percent of total attributable deaths | Percent of total attributable DALYs | Attributable deaths    | Attributable DALYs   |
|-----------|------|--------|----------|--------------------------------|--------------------------|---------------------------------------------|--------------------------------------|-------------------------------------|------------------------|----------------------|
| Mauritius | 2005 | Male   | 50 to 54 | 75%<br>(66-82%)                | 25%<br>(18-34%)          | 4.2<br>(3-5.4)                              | 12%<br>(7.7-16%)                     | 14%<br>(9.2-20%)                    | 57<br>(37-78)          | 2300<br>(1500-3100)  |
| Mauritius | 2005 | Male   | 55 to 59 | 75%<br>(65-83%)                | 25%<br>(17-35%)          | 4.1<br>(3-5.4)                              | 11%<br>(6.6-15%)                     | 13%<br>(7.6-18%)                    | 56<br>(33-79)          | 1900<br>(1100-2600)  |
| Mauritius | 2005 | Male   | 60 to 64 | 74%<br>(64-82%)                | 26%<br>(18-36%)          | 4.1<br>(2.9-5.6)                            | 10%<br>(5.8-15%)                     | 12%<br>(6.6-18%)                    | 50<br>(28-74)          | 1500<br>(820-2100)   |
| Mauritius | 2005 | Male   | 65 to 69 | 66%<br>(55-75%)                | 34%<br>(25-45%)          | 3.3<br>(2.3-4.5)                            | 7.9%<br>(4-12%)                      | 9%<br>(4.5-14%)                     | 42<br>(21-67)          | 1000<br>(520-1600)   |
| Mauritius | 2005 | Male   | 70 to 74 | 54%<br>(41-65%)                | 46%<br>(35-59%)          | 2.3<br>(1.4-3.3)                            | 5%<br>(1.9-8.7%)                     | 5.6%<br>(2-10%)                     | 29<br>(10-51)          | 550<br>(210-970)     |
| Mauritius | 2005 | Male   | 75 to 79 | 51%<br>(37-64%)                | 49%<br>(36-63%)          | 1.9<br>(1.1-2.8)                            | 3.3%<br>(0.65-6.7%)                  | 3.7%<br>(0.64-7.6%)                 | 19<br>(3.3-40)         | 290<br>(57-590)      |
| Mauritius | 2005 | Male   | 80 to 84 | 48%<br>(32-63%)                | 52%<br>(37-68%)          | 1.6<br>(0.94-2.3)                           | 2.2%<br>(0.22-4.9%)                  | 2.4%<br>(0.027-5.5%)                | 11<br>(0.13-26)        | 130<br>(12-290)      |
| Mauritius | 2005 | Male   | 85 to 89 | 44%<br>(29-59%)                | 56%<br>(41-71%)          | 1.3<br>(0.72-2.1)                           | 1.2%<br>(-0.26-3.2%)                 | 1.2%<br>(-0.51-3.5%)                | 2.9<br>(-1.2-8.5)      | 25<br>(-5.4-68)      |
| Mauritius | 2005 | Male   | 90 to 94 | 45%<br>(30-60%)                | 55%<br>(40-70%)          | 1.1<br>(0.62-1.8)                           | 0.42%<br>(-0.89-2.2%)                | 0.29%<br>(-1.3-2.3%)                | 0.2<br>(-0.9-1.6)      | 1.8<br>(-3.8-9.4)    |
| Mauritius | 2005 | Male   | 95 plus  | 47%<br>(29-67%)                | 53%<br>(33-71%)          | 1<br>(0.47-1.9)                             | 0.17%<br>(-1.2-2.1%)                 | -0.096%<br>(-1.7-2.1%)              | -0.014<br>(-0.25-0.32) | 0.099<br>(-0.69-1.3) |
| Mauritius | 2010 | Female | All Ages | 28%<br>(24-32%)                | 72%<br>(68-76%)          | 0.31<br>(0.23-0.41)                         | -0.13%<br>(-0.62-0.42%)              | -0.94%<br>(-1.9-0.13%)              | -38<br>(-75-5.2)       | -210<br>(-990-670)   |
| Mauritius | 2010 | Female | 15 to 19 | 21%<br>(14-30%)                | 79%<br>(70-86%)          | 0.24<br>(0.13-0.39)                         | 0.69%<br>(0.41-1%)                   | 1.2%<br>(0.49-2.3%)                 | 0.21<br>(0.082-0.39)   | 38<br>(22-58)        |
| Mauritius | 2010 | Female | 20 to 24 | 27%<br>(18-37%)                | 73%<br>(63-82%)          | 0.3<br>(0.17-0.5)                           | 1.1%<br>(0.71-1.6%)                  | 1.2%<br>(0.36-2.4%)                 | 0.28<br>(0.086-0.56)   | 64<br>(39-94)        |
| Mauritius | 2010 | Female | 25 to 29 | 31%<br>(21-42%)                | 69%<br>(58-79%)          | 0.32<br>(0.19-0.52)                         | 1.1%<br>(0.7-1.5%)                   | 1.1%<br>(0.4-2%)                    | 0.31<br>(0.12-0.56)    | 63<br>(39-92)        |
| Mauritius | 2010 | Female | 30 to 34 | 33%<br>(22-45%)                | 67%<br>(55-78%)          | 0.35<br>(0.2-0.55)                          | 0.97%<br>(0.59-1.4%)                 | 1.3%<br>(0.67-2%)                   | 0.55<br>(0.29-0.87)    | 74<br>(45-110)       |
| Mauritius | 2010 | Female | 35 to 39 | 33%<br>(22-44%)                | 67%<br>(56-78%)          | 0.37<br>(0.21-0.59)                         | 0.85%<br>(0.49-1.3%)                 | 1.3%<br>(0.59-2.1%)                 | 0.75<br>(0.34-1.2)     | 68<br>(38-100)       |
| Mauritius | 2010 | Female | 40 to 44 | 33%<br>(23-44%)                | 67%<br>(56-77%)          | 0.39<br>(0.21-0.61)                         | 0.86%<br>(0.41-1.4%)                 | 1.5%<br>(0.73-2.4%)                 | 1.4<br>(0.66-2.2)      | 83<br>(40-130)       |
| Mauritius | 2010 | Female | 45 to 49 | 35%<br>(23-46%)                | 65%<br>(54-77%)          | 0.41<br>(0.23-0.67)                         | 0.51%<br>(-0.067-1.1%)               | 0.92%<br>(0.013-2%)                 | 1.4<br>(0.021-3.1)     | 67<br>(-9.1-150)     |
| Mauritius | 2010 | Female | 50 to 54 | 35%<br>(24-46%)                | 65%<br>(54-76%)          | 0.47<br>(0.28-0.74)                         | -0.023%<br>(-0.73-0.7%)              | 0.037%<br>(-1-1.1%)                 | 0.073<br>(-2-2.3)      | -3.3<br>(-98-94)     |
| Mauritius | 2010 | Female | 55 to 59 | 33%<br>(23-44%)                | 67%<br>(56-77%)          | 0.53<br>(0.31-0.86)                         | -0.48%<br>(-1.4-0.55%)               | -0.63%<br>(-2-0.87%)                | -1.7<br>(-5.6-2.4)     | -69<br>(-210-82)     |
| Mauritius | 2010 | Female | 60 to 64 | 32%<br>(22-43%)                | 68%<br>(57-78%)          | 0.54<br>(0.3-0.88)                          | -0.83%<br>(-1.9-0.38%)               | -1.1%<br>(-2.6-0.46%)               | -3.8<br>(-9-1.6)       | -120<br>(-280-53)    |
| Mauritius | 2010 | Female | 65 to 69 | 31%<br>(21-41%)                | 69%<br>(59-79%)          | 0.52<br>(0.3-0.82)                          | -0.96%<br>(-2-0.12%)                 | -1.3%<br>(-2.7-0.15%)               | -4.5<br>(-9.4-0.55)    | -110<br>(-240-13)    |

| Location  | Year | Sex    | Age      | Prevalence of current drinkers | Prevalence of abstainers | Population average of standard drinks daily | Percent of total attributable deaths | Percent of total attributable DALYs | Attributable deaths  | Attributable DALYs     |
|-----------|------|--------|----------|--------------------------------|--------------------------|---------------------------------------------|--------------------------------------|-------------------------------------|----------------------|------------------------|
| Mauritius | 2010 | Female | 70 to 74 | 30%<br>(21-41%)                | 70%<br>(59-79%)          | 0.51<br>(0.28-0.82)                         | -1%<br>(-2.2-0.095%)                 | -1.4%<br>(-2.9-0.038%)              | -5.7<br>(-12-0.15)   | -110<br>(-230-9.5)     |
| Mauritius | 2010 | Female | 75 to 79 | 30%<br>(20-42%)                | 70%<br>(58-80%)          | 0.51<br>(0.27-0.86)                         | -1.1%<br>(-2.3-0.038%)               | -1.5%<br>(-3.1-0.017%)              | -7.1<br>(-15-0.079)  | -100<br>(-210-3.2)     |
| Mauritius | 2010 | Female | 80 to 84 | 31%<br>(20-42%)                | 69%<br>(58-80%)          | 0.5<br>(0.28-0.8)                           | -1.2%<br>(-2.2--0.096%)              | -1.5%<br>(-2.8--0.21%)              | -8.3<br>(-16--1.2)   | -87<br>(-170--7.3)     |
| Mauritius | 2010 | Female | 85 to 89 | 32%<br>(21-43%)                | 68%<br>(57-79%)          | 0.49<br>(0.26-0.8)                          | -1.1%<br>(-2.2--0.084%)              | -1.4%<br>(-2.8--0.17%)              | -7.3<br>(-14--0.85)  | -52<br>(-110--3.9)     |
| Mauritius | 2010 | Female | 90 to 94 | 33%<br>(23-45%)                | 67%<br>(55-77%)          | 0.5<br>(0.26-0.87)                          | -0.94%<br>(-2-0.15%)                 | -1.2%<br>(-2.5-0.14%)               | -3.3<br>(-6.8-0.37)  | -16<br>(-33-2.6)       |
| Mauritius | 2010 | Female | 95 plus  | 36%<br>(22-51%)                | 64%<br>(49-78%)          | 0.53<br>(0.23-0.97)                         | -0.81%<br>(-2-0.58%)                 | -1.1%<br>(-2.6-0.55%)               | -0.89<br>(-2.1-0.45) | -2.7<br>(-6.7-1.9)     |
| Mauritius | 2010 | Male   | All Ages | 58%<br>(51-63%)                | 42%<br>(37-49%)          | 2.2<br>(1.8-2.8)                            | 7.8%<br>(5.6-10%)                    | 8.1%<br>(5.3-11%)                   | 420<br>(270-580)     | 16000<br>(11000-21000) |
| Mauritius | 2010 | Male   | 15 to 19 | 44%<br>(31-58%)                | 56%<br>(42-69%)          | 0.9<br>(0.51-1.4)                           | 2.7%<br>(1.7-4.1%)                   | 4.7%<br>(2.6-7.5%)                  | 1.8<br>(1-2.9)       | 170<br>(110-260)       |
| Mauritius | 2010 | Male   | 20 to 24 | 64%<br>(49-76%)                | 36%<br>(24-51%)          | 2<br>(1.2-2.9)                              | 6.7%<br>(4.4-9.5%)                   | 10%<br>(6.1-15%)                    | 5.6<br>(3.3-8.1)     | 470<br>(310-670)       |
| Mauritius | 2010 | Male   | 25 to 29 | 68%<br>(55-79%)                | 32%<br>(21-45%)          | 2.5<br>(1.6-3.4)                            | 8.3%<br>(5.7-11%)                    | 12%<br>(7.3-16%)                    | 9.1<br>(5.8-13)      | 690<br>(460-940)       |
| Mauritius | 2010 | Male   | 30 to 34 | 71%<br>(58-80%)                | 29%<br>(20-42%)          | 3<br>(2.1-4)                                | 9.3%<br>(6.6-12%)                    | 13%<br>(8.5-17%)                    | 14<br>(9.8-20)       | 1000<br>(710-1300)     |
| Mauritius | 2010 | Male   | 35 to 39 | 72%<br>(59-81%)                | 28%<br>(19-41%)          | 3.4<br>(2.3-4.7)                            | 11%<br>(8-14%)                       | 14%<br>(10-19%)                     | 21<br>(15-29)        | 1300<br>(930-1700)     |
| Mauritius | 2010 | Male   | 40 to 44 | 72%<br>(61-81%)                | 28%<br>(19-39%)          | 3.7<br>(2.5-5)                              | 12%<br>(8.3-15%)                     | 15%<br>(11-20%)                     | 33<br>(23-44)        | 1800<br>(1300-2300)    |
| Mauritius | 2010 | Male   | 45 to 49 | 71%<br>(58-81%)                | 29%<br>(19-42%)          | 3.8<br>(2.6-5.2)                            | 12%<br>(8.1-15%)                     | 15%<br>(10-20%)                     | 52<br>(34-69)        | 2400<br>(1600-3100)    |
| Mauritius | 2010 | Male   | 50 to 54 | 71%<br>(59-81%)                | 29%<br>(19-41%)          | 3.8<br>(2.6-5.2)                            | 11%<br>(6.8-15%)                     | 13%<br>(8.3-18%)                    | 61<br>(37-83)        | 2400<br>(1500-3300)    |
| Mauritius | 2010 | Male   | 55 to 59 | 72%<br>(58-82%)                | 28%<br>(18-42%)          | 3.8<br>(2.5-5.2)                            | 10%<br>(5.9-14%)                     | 12%<br>(6.9-17%)                    | 62<br>(36-89)        | 2200<br>(1300-3100)    |
| Mauritius | 2010 | Male   | 60 to 64 | 67%<br>(52-79%)                | 33%<br>(21-48%)          | 3.4<br>(2.2-5)                              | 8.7%<br>(5-13%)                      | 10%<br>(5.7-15%)                    | 58<br>(32-87)        | 1700<br>(960-2500)     |
| Mauritius | 2010 | Male   | 65 to 69 | 58%<br>(43-71%)                | 42%<br>(29-57%)          | 2.8<br>(1.8-4)                              | 6.6%<br>(3.3-10%)                    | 7.7%<br>(3.7-12%)                   | 39<br>(19-62)        | 950<br>(480-1500)      |
| Mauritius | 2010 | Male   | 70 to 74 | 52%<br>(38-65%)                | 48%<br>(35-62%)          | 2.2<br>(1.3-3.3)                            | 4.6%<br>(1.8-8.3%)                   | 5.3%<br>(2-9.6%)                    | 28<br>(10-49)        | 550<br>(210-960)       |
| Mauritius | 2010 | Male   | 75 to 79 | 49%<br>(34-64%)                | 51%<br>(36-66%)          | 1.8<br>(1-2.8)                              | 3.1%<br>(0.69-6.4%)                  | 3.5%<br>(0.62-7.3%)                 | 18<br>(3.2-37)       | 270<br>(60-550)        |
| Mauritius | 2010 | Male   | 80 to 84 | 45%<br>(30-61%)                | 55%<br>(39-70%)          | 1.5<br>(0.83-2.3)                           | 2.2%<br>(0.25-4.8%)                  | 2.3%<br>(0.12-5.5%)                 | 11<br>(0.56-25)      | 120<br>(14-280)        |
| Mauritius | 2010 | Male   | 85 to 89 | 43%<br>(29-58%)                | 57%<br>(42-71%)          | 1.2<br>(0.67-2)                             | 1.2%<br>(-0.14-3.3%)                 | 1.3%<br>(-0.35-3.7%)                | 4.1<br>(-1.1-12)     | 35<br>(-4-92)          |

| Location  | Year | Sex    | Age      | Prevalence of current drinkers | Prevalence of abstainers | Population average of standard drinks daily | Percent of total attributable deaths | Percent of total attributable DALYs | Attributable deaths    | Attributable DALYs    |
|-----------|------|--------|----------|--------------------------------|--------------------------|---------------------------------------------|--------------------------------------|-------------------------------------|------------------------|-----------------------|
| Mauritius | 2010 | Male   | 90 to 94 | 43%<br>(29-59%)                | 57%<br>(41-71%)          | 1.1<br>(0.57-1.8)                           | 0.47%<br>(-0.77-2.2%)                | 0.36%<br>(-1.1-2.4%)                | 0.43<br>(-1.3-2.9)     | 3.4<br>(-5.5-16)      |
| Mauritius | 2010 | Male   | 95 plus  | 46%<br>(27-65%)                | 54%<br>(35-73%)          | 0.95<br>(0.42-1.8)                          | 0.26%<br>(-0.97-2.1%)                | 0.017%<br>(-1.5-2%)                 | 0.0038<br>(-0.33-0.44) | 0.23<br>(-0.86-1.8)   |
| Mauritius | 2016 | Female | All Ages | 28%<br>(24-32%)                | 72%<br>(68-76%)          | 0.33<br>(0.2-0.49)                          | -0.24%<br>(-0.8-0.49%)               | -1%<br>(-2.1-0.3%)                  | -48<br>(-96-15)        | -410<br>(-1400-790)   |
| Mauritius | 2016 | Female | 15 to 19 | 21%<br>(14-30%)                | 79%<br>(70-86%)          | 0.23<br>(0.12-0.42)                         | 0.69%<br>(0.4-1%)                    | 1.2%<br>(0.4-2.3%)                  | 0.19<br>(0.064-0.38)   | 35<br>(19-54)         |
| Mauritius | 2016 | Female | 20 to 24 | 26%<br>(17-36%)                | 74%<br>(64-83%)          | 0.29<br>(0.15-0.52)                         | 1.1%<br>(0.71-1.6%)                  | 1.1%<br>(0.35-2.4%)                 | 0.27<br>(0.077-0.56)   | 68<br>(40-100)        |
| Mauritius | 2016 | Female | 25 to 29 | 31%<br>(21-41%)                | 69%<br>(59-79%)          | 0.32<br>(0.17-0.55)                         | 1%<br>(0.66-1.5%)                    | 0.93%<br>(0.28-1.8%)                | 0.24<br>(0.074-0.48)   | 62<br>(37-92)         |
| Mauritius | 2016 | Female | 30 to 34 | 32%<br>(22-44%)                | 68%<br>(56-78%)          | 0.34<br>(0.18-0.59)                         | 0.93%<br>(0.56-1.4%)                 | 1.1%<br>(0.47-1.9%)                 | 0.36<br>(0.15-0.65)    | 60<br>(34-91)         |
| Mauritius | 2016 | Female | 35 to 39 | 32%<br>(21-43%)                | 68%<br>(57-79%)          | 0.37<br>(0.19-0.63)                         | 0.8%<br>(0.43-1.3%)                  | 1.1%<br>(0.38-2.1%)                 | 0.63<br>(0.23-1.2)     | 69<br>(34-110)        |
| Mauritius | 2016 | Female | 40 to 44 | 32%<br>(22-43%)                | 68%<br>(57-78%)          | 0.38<br>(0.19-0.65)                         | 0.75%<br>(0.29-1.3%)                 | 1.2%<br>(0.43-2.3%)                 | 0.98<br>(0.32-1.8)     | 69<br>(27-120)        |
| Mauritius | 2016 | Female | 45 to 49 | 34%<br>(23-45%)                | 66%<br>(55-77%)          | 0.41<br>(0.21-0.71)                         | 0.48%<br>(-0.091-1.1%)               | 0.81%<br>(-0.14-1.9%)               | 0.97<br>(-0.17-2.3)    | 51<br>(-11-120)       |
| Mauritius | 2016 | Female | 50 to 54 | 34%<br>(24-46%)                | 66%<br>(54-76%)          | 0.47<br>(0.25-0.8)                          | -0.043%<br>(-0.79-0.81%)             | -0.052%<br>(-1.2-1.3%)              | -0.11<br>(-2.6-2.8)    | -6.6<br>(-110-120)    |
| Mauritius | 2016 | Female | 55 to 59 | 33%<br>(23-45%)                | 67%<br>(55-77%)          | 0.53<br>(0.28-0.94)                         | -0.52%<br>(-1.6-0.69%)               | -0.73%<br>(-2.2-1%)                 | -2.2<br>(-6.7-2.9)     | -84<br>(-250-100)     |
| Mauritius | 2016 | Female | 60 to 64 | 31%<br>(21-43%)                | 69%<br>(57-79%)          | 0.54<br>(0.27-0.93)                         | -0.85%<br>(-2.1-0.52%)               | -1.2%<br>(-2.8-0.74%)               | -4.6<br>(-11-2.7)      | -140<br>(-350-85)     |
| Mauritius | 2016 | Female | 65 to 69 | 30%<br>(20-40%)                | 70%<br>(60-80%)          | 0.51<br>(0.26-0.84)                         | -0.97%<br>(-2.1-0.3%)                | -1.3%<br>(-2.9-0.39%)               | -6.4<br>(-14-1.9)      | -160<br>(-360-49)     |
| Mauritius | 2016 | Female | 70 to 74 | 30%<br>(20-40%)                | 70%<br>(60-80%)          | 0.5<br>(0.25-0.85)                          | -1%<br>(-2.2-0.37%)                  | -1.3%<br>(-2.9-0.39%)               | -6.6<br>(-15-2)        | -130<br>(-290-43)     |
| Mauritius | 2016 | Female | 75 to 79 | 30%<br>(19-42%)                | 70%<br>(58-81%)          | 0.51<br>(0.24-0.9)                          | -1.1%<br>(-2.3-0.29%)                | -1.5%<br>(-3.1-0.33%)               | -7.6<br>(-16-1.5)      | -110<br>(-240-28)     |
| Mauritius | 2016 | Female | 80 to 84 | 30%<br>(20-42%)                | 70%<br>(58-80%)          | 0.5<br>(0.25-0.84)                          | -1.1%<br>(-2.2-0.096%)               | -1.5%<br>(-2.9-0.036%)              | -9.5<br>(-19-0.24)     | -100<br>(-200-8)      |
| Mauritius | 2016 | Female | 85 to 89 | 31%<br>(21-42%)                | 69%<br>(58-79%)          | 0.49<br>(0.24-0.84)                         | -1.1%<br>(-2.1-0.11%)                | -1.4%<br>(-2.8-0.062%)              | -8.3<br>(-16-0.37)     | -59<br>(-120-6.2)     |
| Mauritius | 2016 | Female | 90 to 94 | 33%<br>(22-45%)                | 67%<br>(55-78%)          | 0.51<br>(0.24-0.93)                         | -0.93%<br>(-1.9-0.31%)               | -1.2%<br>(-2.5-0.27%)               | -4.5<br>(-9-0.91)      | -21<br>(-44-6.6)      |
| Mauritius | 2016 | Female | 95 plus  | 36%<br>(21-53%)                | 64%<br>(47-79%)          | 0.54<br>(0.22-1)                            | -0.79%<br>(-2-0.67%)                 | -1.1%<br>(-2.6-0.68%)               | -1.4<br>(-3.4-0.83)    | -4.2<br>(-11-3.3)     |
| Mauritius | 2016 | Male   | All Ages | 58%<br>(52-64%)                | 42%<br>(36-48%)          | 2.3<br>(1.6-3.3)                            | 7.3%<br>(4.4-11%)                    | 7.5%<br>(3.9-12%)                   | 420<br>(210-660)       | 15000<br>(9100-22000) |
| Mauritius | 2016 | Male   | 15 to 19 | 43%<br>(30-57%)                | 57%<br>(43-70%)          | 0.88<br>(0.46-1.5)                          | 2.6%<br>(1.5-4%)                     | 4.6%<br>(2.5-7.6%)                  | 1.5<br>(0.76-2.5)      | 150<br>(87-230)       |



| Location   | Year | Sex    | Age      | Prevalence of current drinkers | Prevalence of abstainers | Population average of standard drinks daily | Percent of total attributable deaths | Percent of total attributable DALYs | Attributable deaths  | Attributable DALYs     |
|------------|------|--------|----------|--------------------------------|--------------------------|---------------------------------------------|--------------------------------------|-------------------------------------|----------------------|------------------------|
| Mauritius  | 2016 | Male   | 20 to 24 | 63%<br>(49-75%)                | 37%<br>(25-51%)          | 2<br>(1.1-3.1)                              | 6.5%<br>(4-9.4%)                     | 10%<br>(5.4-16%)                    | 5.4<br>(2.8-8.7)     | 470<br>(280-710)       |
| Mauritius  | 2016 | Male   | 25 to 29 | 68%<br>(55-78%)                | 32%<br>(22-45%)          | 2.4<br>(1.4-3.7)                            | 8%<br>(5.1-11%)                      | 12%<br>(6.8-17%)                    | 8<br>(4.4-13)        | 630<br>(400-930)       |
| Mauritius  | 2016 | Male   | 30 to 34 | 70%<br>(56-80%)                | 30%<br>(20-44%)          | 3<br>(1.8-4.6)                              | 9%<br>(5.9-13%)                      | 13%<br>(8-18%)                      | 11<br>(6.4-17)       | 770<br>(490-1100)      |
| Mauritius  | 2016 | Male   | 35 to 39 | 72%<br>(59-80%)                | 28%<br>(20-41%)          | 3.4<br>(2-5.2)                              | 10%<br>(6.9-14%)                     | 14%<br>(9-20%)                      | 20<br>(12-29)        | 1200<br>(810-1800)     |
| Mauritius  | 2016 | Male   | 40 to 44 | 72%<br>(61-81%)                | 28%<br>(19-39%)          | 3.7<br>(2.2-5.6)                            | 11%<br>(7.3-15%)                     | 15%<br>(9.4-21%)                    | 27<br>(16-38)        | 1500<br>(950-2100)     |
| Mauritius  | 2016 | Male   | 45 to 49 | 71%<br>(57-81%)                | 29%<br>(19-43%)          | 3.8<br>(2.2-5.7)                            | 11%<br>(7-16%)                       | 15%<br>(9.1-21%)                    | 38<br>(22-54)        | 1800<br>(1100-2500)    |
| Mauritius  | 2016 | Male   | 50 to 54 | 71%<br>(59-80%)                | 29%<br>(20-41%)          | 3.8<br>(2.3-5.8)                            | 11%<br>(5.9-15%)                     | 13%<br>(7.3-19%)                    | 55<br>(30-85)        | 2300<br>(1200-3400)    |
| Mauritius  | 2016 | Male   | 55 to 59 | 71%<br>(57-82%)                | 29%<br>(18-43%)          | 3.7<br>(2.3-5.8)                            | 9.5%<br>(5-14%)                      | 12%<br>(6-17%)                      | 62<br>(32-94)        | 2200<br>(1200-3300)    |
| Mauritius  | 2016 | Male   | 60 to 64 | 66%<br>(50-79%)                | 34%<br>(21-50%)          | 3.4<br>(2-5.3)                              | 8.4%<br>(4-13%)                      | 10%<br>(4.7-16%)                    | 64<br>(30-100)       | 1900<br>(930-3000)     |
| Mauritius  | 2016 | Male   | 65 to 69 | 57%<br>(42-71%)                | 43%<br>(29-58%)          | 2.7<br>(1.6-4.3)                            | 6.4%<br>(2.7-11%)                    | 7.5%<br>(3.1-13%)                   | 54<br>(22-94)        | 1300<br>(560-2300)     |
| Mauritius  | 2016 | Male   | 70 to 74 | 51%<br>(38-64%)                | 49%<br>(36-62%)          | 2.1<br>(1.2-3.5)                            | 4.6%<br>(1.4-8.6%)                   | 5.3%<br>(1.5-10%)                   | 33<br>(9.4-63)       | 650<br>(200-1200)      |
| Mauritius  | 2016 | Male   | 75 to 79 | 48%<br>(33-64%)                | 52%<br>(36-67%)          | 1.8<br>(0.88-3)                             | 3.1%<br>(0.49-7%)                    | 3.5%<br>(0.4-8%)                    | 20<br>(2.1-46)       | 310<br>(41-700)        |
| Mauritius  | 2016 | Male   | 80 to 84 | 45%<br>(30-61%)                | 55%<br>(39-70%)          | 1.4<br>(0.72-2.4)                           | 2.1%<br>(0.078-5.3%)                 | 2.3%<br>(-0.057-6.1%)               | 12<br>(-0.3-32)      | 140<br>(5.3-350)       |
| Mauritius  | 2016 | Male   | 85 to 89 | 42%<br>(28-57%)                | 58%<br>(43-72%)          | 1.2<br>(0.6-2)                              | 1.2%<br>(-0.32-3.7%)                 | 1.3%<br>(-0.53-4.1%)                | 4.7<br>(-1.9-15)     | 41<br>(-10-120)        |
| Mauritius  | 2016 | Male   | 90 to 94 | 42%<br>(28-58%)                | 58%<br>(42-72%)          | 1<br>(0.54-1.9)                             | 0.53%<br>(-0.81-2.6%)                | 0.42%<br>(-1.2-2.8%)                | 0.71<br>(-2-4.7)     | 5.4<br>(-8.3-26)       |
| Mauritius  | 2016 | Male   | 95 plus  | 45%<br>(28-64%)                | 55%<br>(36-72%)          | 0.95<br>(0.38-1.9)                          | 0.35%<br>(-0.91-2.3%)                | 0.12%<br>(-1.4-2.3%)                | 0.052<br>(-0.6-0.99) | 0.61<br>(-1.6-4)       |
| Mozambique | 1990 | Female | All Ages | 35%<br>(30-42%)                | 65%<br>(58-70%)          | 0.25<br>(0.19-0.33)                         | 0.19%<br>(-0.024-0.4%)               | 0.18%<br>(-0.23-0.61%)              | 180<br>(-220-580)    | 13000<br>(-1600-27000) |
| Mozambique | 1990 | Female | 15 to 19 | 38%<br>(26-52%)                | 62%<br>(48-74%)          | 0.32<br>(0.18-0.52)                         | 0.63%<br>(-0.057-1.4%)               | 0.56%<br>(-0.5-1.7%)                | 9.4<br>(-8.9-29)     | 1200<br>(-100-2600)    |
| Mozambique | 1990 | Female | 20 to 24 | 46%<br>(32-60%)                | 54%<br>(40-68%)          | 0.44<br>(0.25-0.71)                         | 0.97%<br>(0.1-1.9%)                  | 0.68%<br>(-0.52-1.9%)               | 13<br>(-9.7-37)      | 1800<br>(180-3500)     |
| Mozambique | 1990 | Female | 25 to 29 | 46%<br>(33-59%)                | 54%<br>(41-67%)          | 0.5<br>(0.29-0.81)                          | 1.4%<br>(0.22-2.6%)                  | 1.2%<br>(-0.43-3%)                  | 22<br>(-7.5-53)      | 2100<br>(290-4100)     |
| Mozambique | 1990 | Female | 30 to 34 | 49%<br>(35-61%)                | 51%<br>(39-65%)          | 0.53<br>(0.29-0.88)                         | 1.4%<br>(0.11-2.8%)                  | 1.4%<br>(-0.47-3.5%)                | 24<br>(-8.3-61)      | 1900<br>(140-4000)     |
| Mozambique | 1990 | Female | 35 to 39 | 54%<br>(40-65%)                | 46%<br>(35-60%)          | 0.53<br>(0.29-0.87)                         | 1.3%<br>(-0.23-2.6%)                 | 1.4%<br>(-0.84-3.4%)                | 25<br>(-15-64)       | 1700<br>(-320-3700)    |

| Location   | Year | Sex    | Age      | Prevalence of current drinkers | Prevalence of abstainers | Population average of standard drinks daily | Percent of total attributable deaths | Percent of total attributable DALYs | Attributable deaths  | Attributable DALYs    |
|------------|------|--------|----------|--------------------------------|--------------------------|---------------------------------------------|--------------------------------------|-------------------------------------|----------------------|-----------------------|
| Mozambique | 1990 | Female | 40 to 44 | 56%<br>(43-67%)                | 44%<br>(33-57%)          | 0.53<br>(0.29-0.84)                         | 0.99%<br>(-0.11-2.2%)                | 1.1%<br>(-0.46-2.9%)                | 22<br>(-9.1-56)      | 1300<br>(-140-2900)   |
| Mozambique | 1990 | Female | 45 to 49 | 54%<br>(40-66%)                | 46%<br>(34-60%)          | 0.52<br>(0.27-0.86)                         | 0.87%<br>(-0.17-2%)                  | 1.1%<br>(-0.45-2.8%)                | 23<br>(-9.7-58)      | 1100<br>(-210-2500)   |
| Mozambique | 1990 | Female | 50 to 54 | 50%<br>(38-62%)                | 50%<br>(38-62%)          | 0.49<br>(0.25-0.81)                         | 0.88%<br>(-0.24-2.1%)                | 1.1%<br>(-0.41-2.8%)                | 28<br>(-10-71)       | 1100<br>(-290-2600)   |
| Mozambique | 1990 | Female | 55 to 59 | 46%<br>(33-58%)                | 54%<br>(42-67%)          | 0.47<br>(0.24-0.8)                          | 0.57%<br>(-0.56-1.8%)                | 0.72%<br>(-0.73-2.2%)               | 22<br>(-22-68)       | 700<br>(-700-2100)    |
| Mozambique | 1990 | Female | 60 to 64 | 46%<br>(32-60%)                | 54%<br>(40-68%)          | 0.46<br>(0.23-0.8)                          | 0.39%<br>(-0.59-1.5%)                | 0.51%<br>(-0.74-1.9%)               | 19<br>(-27-70)       | 490<br>(-730-1900)    |
| Mozambique | 1990 | Female | 65 to 69 | 48%<br>(34-63%)                | 52%<br>(37-66%)          | 0.44<br>(0.24-0.74)                         | 0.27%<br>(-0.78-1.4%)                | 0.32%<br>(-0.92-1.6%)               | 14<br>(-39-69)       | 310<br>(-880-1500)    |
| Mozambique | 1990 | Female | 70 to 74 | 47%<br>(33-64%)                | 53%<br>(36-67%)          | 0.38<br>(0.2-0.65)                          | -0.15%<br>(-1.2-0.84%)               | -0.2%<br>(-1.4-0.99%)               | -9.2<br>(-67-44)     | -140<br>(-1200-810)   |
| Mozambique | 1990 | Female | 75 to 79 | 45%<br>(30-62%)                | 55%<br>(38-70%)          | 0.32<br>(0.15-0.57)                         | -0.18%<br>(-1.2-0.6%)                | -0.21%<br>(-1.4-0.75%)              | -7.8<br>(-54-28)     | -110<br>(-750-380)    |
| Mozambique | 1990 | Female | 80 to 84 | 43%<br>(27-61%)                | 57%<br>(39-73%)          | 0.3<br>(0.15-0.51)                          | -0.4%<br>(-1.3-0.25%)                | -0.46%<br>(-1.5-0.31%)              | -10<br>(-35-7.1)     | -110<br>(-370-68)     |
| Mozambique | 1990 | Female | 85 to 89 | 43%<br>(29-58%)                | 57%<br>(42-71%)          | 0.28<br>(0.14-0.5)                          | -0.54%<br>(-1.4-0.07%)               | -0.64%<br>(-1.7-0.077%)             | -9.1<br>(-24-1.1)    | -66<br>(-170-8.5)     |
| Mozambique | 1990 | Female | 90 to 94 | 45%<br>(31-60%)                | 55%<br>(40-69%)          | 0.28<br>(0.14-0.51)                         | -0.63%<br>(-1.5--0.027%)             | -0.79%<br>(-1.8--0.064%)            | -4.5<br>(-10--0.37)  | -22<br>(-52--0.94)    |
| Mozambique | 1990 | Female | 95 plus  | 47%<br>(30-66%)                | 53%<br>(34-70%)          | 0.28<br>(0.13-0.55)                         | -0.32%<br>(-1.2-0.34%)               | -0.46%<br>(-1.5-0.33%)              | -0.72<br>(-2.3-0.52) | -2<br>(-7.4-2.1)      |
| Mozambique | 1990 | Male   | All Ages | 45%<br>(37-52%)                | 55%<br>(48-63%)          | 0.29<br>(0.22-0.39)                         | 0.49%<br>(0.12-0.83%)                | 0.65%<br>(0.017-1.2%)               | 680<br>(18-1300)     | 38000<br>(9400-64000) |
| Mozambique | 1990 | Male   | 15 to 19 | 46%<br>(32-61%)                | 54%<br>(39-68%)          | 0.38<br>(0.22-0.6)                          | 1.5%<br>(0.5-2.7%)                   | 1.4%<br>(-0.11-3%)                  | 26<br>(-2.1-57)      | 3000<br>(930-5300)    |
| Mozambique | 1990 | Male   | 20 to 24 | 61%<br>(46-73%)                | 39%<br>(27-54%)          | 0.53<br>(0.31-0.83)                         | 2.6%<br>(0.62-4.6%)                  | 2%<br>(-0.46-4.6%)                  | 44<br>(-11-100)      | 5100<br>(1200-8900)   |
| Mozambique | 1990 | Male   | 25 to 29 | 62%<br>(49-72%)                | 38%<br>(28-51%)          | 0.61<br>(0.36-0.93)                         | 2.8%<br>(0.66-5.2%)                  | 2.3%<br>(-0.55-5.4%)                | 48<br>(-11-110)      | 4600<br>(1000-8300)   |
| Mozambique | 1990 | Male   | 30 to 34 | 63%<br>(50-73%)                | 37%<br>(27-50%)          | 0.67<br>(0.39-1)                            | 2.9%<br>(0.26-5.4%)                  | 2.6%<br>(-0.67-5.9%)                | 51<br>(-13-110)      | 4000<br>(380-7600)    |
| Mozambique | 1990 | Male   | 35 to 39 | 66%<br>(54-75%)                | 34%<br>(25-46%)          | 0.72<br>(0.42-1.1)                          | 2.9%<br>(0.25-5.9%)                  | 2.9%<br>(-0.54-6.7%)                | 60<br>(-10-140)      | 3900<br>(340-7700)    |
| Mozambique | 1990 | Male   | 40 to 44 | 68%<br>(57-77%)                | 32%<br>(23-43%)          | 0.75<br>(0.43-1.2)                          | 2.9%<br>(0.24-5.5%)                  | 3.1%<br>(-0.3-6.4%)                 | 71<br>(-7.6-150)     | 3900<br>(350-7300)    |
| Mozambique | 1990 | Male   | 45 to 49 | 70%<br>(59-79%)                | 30%<br>(21-41%)          | 0.76<br>(0.42-1.2)                          | 2.8%<br>(0.5-5.3%)                   | 3.1%<br>(0.13-6.2%)                 | 79<br>(3-160)        | 3700<br>(600-7100)    |
| Mozambique | 1990 | Male   | 50 to 54 | 70%<br>(60-79%)                | 30%<br>(21-40%)          | 0.73<br>(0.4-1.2)                           | 2.6%<br>(0.36-4.9%)                  | 2.9%<br>(0.098-5.8%)                | 82<br>(2.9-160)      | 3300<br>(470-6200)    |
| Mozambique | 1990 | Male   | 55 to 59 | 67%<br>(56-76%)                | 33%<br>(24-44%)          | 0.69<br>(0.38-1.1)                          | 2.2%<br>(0.17-4.2%)                  | 2.4%<br>(-0.027-4.9%)               | 76<br>(-0.9-160)     | 2600<br>(200-5200)    |

| Location   | Year | Sex    | Age      | Prevalence of current drinkers | Prevalence of abstainers | Population average of standard drinks daily | Percent of total attributable deaths | Percent of total attributable DALYs | Attributable deaths  | Attributable DALYs    |
|------------|------|--------|----------|--------------------------------|--------------------------|---------------------------------------------|--------------------------------------|-------------------------------------|----------------------|-----------------------|
| Mozambique | 1990 | Male   | 60 to 64 | 65%<br>(52-76%)                | 35%<br>(24-48%)          | 0.6<br>(0.32-0.99)                          | 1.5%<br>(-0.051-3.1%)                | 1.6%<br>(-0.18-3.6%)                | 58<br>(-6.6-130)     | 1700<br>(-56-3500)    |
| Mozambique | 1990 | Male   | 65 to 69 | 64%<br>(48-77%)                | 36%<br>(23-52%)          | 0.49<br>(0.27-0.8)                          | 0.78%<br>(-0.53-2%)                  | 0.84%<br>(-0.73-2.3%)               | 32<br>(-27-87)       | 780<br>(-520-2000)    |
| Mozambique | 1990 | Male   | 70 to 74 | 61%<br>(43-75%)                | 39%<br>(25-57%)          | 0.39<br>(0.21-0.66)                         | 0.59%<br>(-0.42-1.5%)                | 0.67%<br>(-0.53-1.8%)               | 25<br>(-20-66)       | 470<br>(-340-1200)    |
| Mozambique | 1990 | Male   | 75 to 79 | 57%<br>(40-74%)                | 43%<br>(26-60%)          | 0.32<br>(0.16-0.54)                         | 0.52%<br>(-0.41-1.3%)                | 0.57%<br>(-0.49-1.5%)               | 17<br>(-15-44)       | 250<br>(-190-630)     |
| Mozambique | 1990 | Male   | 80 to 84 | 54%<br>(36-72%)                | 46%<br>(28-64%)          | 0.27<br>(0.14-0.44)                         | 0.5%<br>(-0.24-1.1%)                 | 0.52%<br>(-0.35-1.2%)               | 8<br>(-5.3-19)       | 91<br>(-44-210)       |
| Mozambique | 1990 | Male   | 85 to 89 | 51%<br>(34-67%)                | 49%<br>(33-66%)          | 0.23<br>(0.11-0.39)                         | 0.43%<br>(-0.13-0.89%)               | 0.43%<br>(-0.23-0.97%)              | 3.8<br>(-2-8.7)      | 33<br>(-10-68)        |
| Mozambique | 1990 | Male   | 90 to 94 | 51%<br>(35-68%)                | 49%<br>(32-65%)          | 0.2<br>(0.098-0.38)                         | 0.24%<br>(-0.24-0.62%)               | 0.18%<br>(-0.4-0.62%)               | 0.63<br>(-1.4-2.1)   | 5.1<br>(-4.9-13)      |
| Mozambique | 1990 | Male   | 95 plus  | 54%<br>(32-74%)                | 46%<br>(26-68%)          | 0.2<br>(0.087-0.38)                         | 0.38%<br>(-0.14-0.77%)               | 0.29%<br>(-0.34-0.77%)              | 0.25<br>(-0.28-0.65) | 1.3<br>(-0.46-2.6)    |
| Mozambique | 1995 | Female | All Ages | 36%<br>(31-42%)                | 64%<br>(58-69%)          | 0.34<br>(0.25-0.45)                         | 0.32%<br>(0.058-0.57%)               | 0.39%<br>(-0.11-0.9%)               | 430<br>(-130-1000)   | 25000<br>(4700-45000) |
| Mozambique | 1995 | Female | 15 to 19 | 38%<br>(26-51%)                | 62%<br>(49-74%)          | 0.42<br>(0.22-0.69)                         | 0.86%<br>(0.08-1.8%)                 | 0.93%<br>(-0.3-2.5%)                | 17<br>(-4.9-46)      | 1800<br>(170-3900)    |
| Mozambique | 1995 | Female | 20 to 24 | 46%<br>(32-60%)                | 54%<br>(40-68%)          | 0.58<br>(0.32-0.93)                         | 1.2%<br>(0.31-2.2%)                  | 0.99%<br>(-0.19-2.5%)               | 27<br>(-5.8-66)      | 3000<br>(870-5600)    |
| Mozambique | 1995 | Female | 25 to 29 | 46%<br>(32-59%)                | 54%<br>(41-68%)          | 0.66<br>(0.37-1)                            | 1.5%<br>(0.44-2.9%)                  | 1.4%<br>(0.061-3.3%)                | 46<br>(1.9-100)      | 3900<br>(1200-7300)   |
| Mozambique | 1995 | Female | 30 to 34 | 49%<br>(34-61%)                | 51%<br>(39-66%)          | 0.69<br>(0.37-1.1)                          | 1.5%<br>(0.39-3%)                    | 1.5%<br>(0.073-3.6%)                | 48<br>(2.5-110)      | 3500<br>(940-6900)    |
| Mozambique | 1995 | Female | 35 to 39 | 54%<br>(40-65%)                | 46%<br>(35-60%)          | 0.67<br>(0.38-1.1)                          | 1.5%<br>(0.096-3.1%)                 | 1.6%<br>(-0.18-3.8%)                | 48<br>(-5.4-110)     | 3000<br>(200-6200)    |
| Mozambique | 1995 | Female | 40 to 44 | 56%<br>(44-67%)                | 44%<br>(33-56%)          | 0.67<br>(0.36-1.1)                          | 1.2%<br>(0.11-2.5%)                  | 1.4%<br>(-0.079-3.2%)               | 39<br>(-2.2-91)      | 2100<br>(190-4400)    |
| Mozambique | 1995 | Female | 45 to 49 | 54%<br>(40-66%)                | 46%<br>(34-60%)          | 0.67<br>(0.35-1.1)                          | 1.2%<br>(0.047-2.6%)                 | 1.5%<br>(-0.086-3.5%)               | 42<br>(-2.4-100)     | 1900<br>(76-4400)     |
| Mozambique | 1995 | Female | 50 to 54 | 50%<br>(37-62%)                | 50%<br>(38-63%)          | 0.64<br>(0.33-1.1)                          | 1.3%<br>(0.013-3.1%)                 | 1.6%<br>(-0.083-4%)                 | 52<br>(-2.3-130)     | 2000<br>(19-4600)     |
| Mozambique | 1995 | Female | 55 to 59 | 46%<br>(33-59%)                | 54%<br>(41-67%)          | 0.6<br>(0.32-1)                             | 1%<br>(-0.33-2.6%)                   | 1.3%<br>(-0.37-3.4%)                | 48<br>(-14-120)      | 1500<br>(-490-3900)   |
| Mozambique | 1995 | Female | 60 to 64 | 46%<br>(32-59%)                | 54%<br>(41-68%)          | 0.59<br>(0.3-1)                             | 0.81%<br>(-0.45-2.3%)                | 1%<br>(-0.55-3%)                    | 44<br>(-23-130)      | 1100<br>(-640-3300)   |
| Mozambique | 1995 | Female | 65 to 69 | 48%<br>(35-63%)                | 52%<br>(37-65%)          | 0.56<br>(0.31-0.95)                         | 0.64%<br>(-0.54-2%)                  | 0.78%<br>(-0.65-2.4%)               | 37<br>(-30-120)      | 820<br>(-670-2600)    |
| Mozambique | 1995 | Female | 70 to 74 | 47%<br>(33-63%)                | 53%<br>(37-67%)          | 0.49<br>(0.26-0.84)                         | 0.14%<br>(-1.1-1.4%)                 | 0.14%<br>(-1.3-1.7%)                | 7<br>(-64-83)        | 140<br>(-1100-1500)   |
| Mozambique | 1995 | Female | 75 to 79 | 45%<br>(30-61%)                | 55%<br>(39-70%)          | 0.42<br>(0.2-0.74)                          | -0.0052%<br>(-1.1-0.96%)             | 0.0048%<br>(-1.3-1.2%)              | 0.14<br>(-53-49)     | -3.4<br>(-750-670)    |

| Location   | Year | Sex    | Age      | Prevalence of current drinkers | Prevalence of abstainers | Population average of standard drinks daily | Percent of total attributable deaths | Percent of total attributable DALYs | Attributable deaths | Attributable DALYs     |
|------------|------|--------|----------|--------------------------------|--------------------------|---------------------------------------------|--------------------------------------|-------------------------------------|---------------------|------------------------|
| Mozambique | 1995 | Female | 80 to 84 | 44%<br>(28-60%)                | 56%<br>(40-72%)          | 0.39<br>(0.19-0.65)                         | -0.29%<br>(-1.2-0.5%)                | -0.32%<br>(-1.4-0.6%)               | -8.4<br>(-38-16)    | -91<br>(-390-160)      |
| Mozambique | 1995 | Female | 85 to 89 | 43%<br>(29-59%)                | 57%<br>(41-71%)          | 0.37<br>(0.19-0.64)                         | -0.47%<br>(-1.4-0.25%)               | -0.56%<br>(-1.7-0.3%)               | -9.2<br>(-27-4.9)   | -67<br>(-200-35)       |
| Mozambique | 1995 | Female | 90 to 94 | 44%<br>(31-60%)                | 56%<br>(40-69%)          | 0.36<br>(0.17-0.65)                         | -0.59%<br>(-1.5-0.079%)              | -0.74%<br>(-1.8-0.06%)              | -5.1<br>(-12-0.42)  | -24<br>(-60-3.3)       |
| Mozambique | 1995 | Female | 95 plus  | 47%<br>(30-66%)                | 53%<br>(34-70%)          | 0.37<br>(0.16-0.72)                         | -0.3%<br>(-1.2-0.42%)                | -0.43%<br>(-1.5-0.42%)              | -0.87<br>(-3-0.87)  | -2.4<br>(-9.1-3.4)     |
| Mozambique | 1995 | Male   | All Ages | 46%<br>(39-54%)                | 54%<br>(46-61%)          | 0.41<br>(0.3-0.53)                          | 0.71%<br>(0.25-1.1%)                 | 0.96%<br>(0.18-1.7%)                | 1200<br>(210-2000)  | 61000<br>(21000-98000) |
| Mozambique | 1995 | Male   | 15 to 19 | 46%<br>(32-60%)                | 54%<br>(40-68%)          | 0.49<br>(0.28-0.79)                         | 2%<br>(0.86-3.4%)                    | 2%<br>(0.3-4.1%)                    | 36<br>(5.8-74)      | 3900<br>(1600-6700)    |
| Mozambique | 1995 | Male   | 20 to 24 | 60%<br>(46-72%)                | 40%<br>(28-54%)          | 0.68<br>(0.39-1.1)                          | 3.2%<br>(1.1-5.4%)                   | 2.8%<br>(0.0073-5.7%)               | 70<br>(0.18-140)    | 7100<br>(2400-12000)   |
| Mozambique | 1995 | Male   | 25 to 29 | 62%<br>(48-72%)                | 38%<br>(28-52%)          | 0.78<br>(0.46-1.2)                          | 3.1%<br>(0.96-5.4%)                  | 2.7%<br>(0.17-5.7%)                 | 85<br>(5-170)       | 7400<br>(2300-13000)   |
| Mozambique | 1995 | Male   | 30 to 34 | 63%<br>(51-73%)                | 37%<br>(27-49%)          | 0.85<br>(0.52-1.3)                          | 3%<br>(0.69-5.6%)                    | 2.8%<br>(0.12-6%)                   | 100<br>(4.6-210)    | 7400<br>(1800-13000)   |
| Mozambique | 1995 | Male   | 35 to 39 | 66%<br>(54-75%)                | 34%<br>(25-46%)          | 0.92<br>(0.55-1.5)                          | 3.1%<br>(0.68-5.9%)                  | 3.2%<br>(0.24-6.7%)                 | 120<br>(8.4-240)    | 7200<br>(1600-13000)   |
| Mozambique | 1995 | Male   | 40 to 44 | 68%<br>(57-77%)                | 32%<br>(23-43%)          | 0.97<br>(0.55-1.6)                          | 3.2%<br>(0.94-5.8%)                  | 3.4%<br>(0.65-6.7%)                 | 130<br>(24-260)     | 6700<br>(2000-13000)   |
| Mozambique | 1995 | Male   | 45 to 49 | 70%<br>(58-79%)                | 30%<br>(21-42%)          | 0.98<br>(0.55-1.6)                          | 3.2%<br>(0.79-5.9%)                  | 3.6%<br>(0.56-6.9%)                 | 130<br>(20-250)     | 6000<br>(1500-11000)   |
| Mozambique | 1995 | Male   | 50 to 54 | 70%<br>(59-78%)                | 30%<br>(22-41%)          | 0.95<br>(0.52-1.5)                          | 3.2%<br>(0.72-6%)                    | 3.7%<br>(0.55-7.2%)                 | 140<br>(19-260)     | 5300<br>(1100-10000)   |
| Mozambique | 1995 | Male   | 55 to 59 | 67%<br>(56-77%)                | 33%<br>(23-44%)          | 0.89<br>(0.51-1.4)                          | 2.8%<br>(0.62-5.4%)                  | 3.3%<br>(0.54-6.3%)                 | 120<br>(19-240)     | 4100<br>(880-8000)     |
| Mozambique | 1995 | Male   | 60 to 64 | 65%<br>(52-75%)                | 35%<br>(25-48%)          | 0.77<br>(0.42-1.3)                          | 2%<br>(0.33-4%)                      | 2.2%<br>(0.22-4.6%)                 | 93<br>(9.4-200)     | 2700<br>(440-5400)     |
| Mozambique | 1995 | Male   | 65 to 69 | 63%<br>(48-77%)                | 37%<br>(23-52%)          | 0.63<br>(0.35-1)                            | 1.1%<br>(-0.21-2.6%)                 | 1.2%<br>(-0.34-3%)                  | 53<br>(-14-130)     | 1300<br>(-240-2900)    |
| Mozambique | 1995 | Male   | 70 to 74 | 60%<br>(44-75%)                | 40%<br>(25-56%)          | 0.5<br>(0.27-0.87)                          | 0.78%<br>(-0.38-1.9%)                | 0.89%<br>(-0.48-2.3%)               | 37<br>(-21-95)      | 690<br>(-340-1700)     |
| Mozambique | 1995 | Male   | 75 to 79 | 57%<br>(40-73%)                | 43%<br>(27-60%)          | 0.41<br>(0.2-0.7)                           | 0.64%<br>(-0.31-1.5%)                | 0.72%<br>(-0.39-1.8%)               | 24<br>(-14-59)      | 350<br>(-180-830)      |
| Mozambique | 1995 | Male   | 80 to 84 | 54%<br>(35-71%)                | 46%<br>(29-65%)          | 0.35<br>(0.18-0.58)                         | 0.57%<br>(-0.21-1.2%)                | 0.61%<br>(-0.31-1.4%)               | 11<br>(-5.8-25)     | 120<br>(-46-270)       |
| Mozambique | 1995 | Male   | 85 to 89 | 51%<br>(33-67%)                | 49%<br>(33-67%)          | 0.29<br>(0.14-0.5)                          | 0.46%<br>(-0.15-0.98%)               | 0.46%<br>(-0.25-1.1%)               | 4.6<br>(-2.5-11)    | 39<br>(-12-84)         |
| Mozambique | 1995 | Male   | 90 to 94 | 50%<br>(34-67%)                | 50%<br>(33-66%)          | 0.26<br>(0.13-0.48)                         | 0.24%<br>(-0.3-0.66%)                | 0.18%<br>(-0.46-0.67%)              | 0.69<br>(-1.8-2.6)  | 5.7<br>(-6.9-16)       |
| Mozambique | 1995 | Male   | 95 plus  | 53%<br>(32-73%)                | 47%<br>(27-68%)          | 0.25<br>(0.11-0.49)                         | 0.39%<br>(-0.17-0.85%)               | 0.29%<br>(-0.38-0.86%)              | 0.31<br>(-0.4-0.88) | 1.6<br>(-0.7-3.6)      |

| Location   | Year | Sex    | Age      | Prevalence of current drinkers | Prevalence of abstainers | Population average of standard drinks daily | Percent of total attributable deaths | Percent of total attributable DALYs | Attributable deaths  | Attributable DALYs       |
|------------|------|--------|----------|--------------------------------|--------------------------|---------------------------------------------|--------------------------------------|-------------------------------------|----------------------|--------------------------|
| Mozambique | 2000 | Female | All Ages | 35%<br>(30-41%)                | 65%<br>(59-70%)          | 0.48<br>(0.35-0.63)                         | 0.57%<br>(0.22-0.98%)                | 0.88%<br>(0.18-1.7%)                | 1100<br>(210-2200)   | 48000<br>(19000-84000)   |
| Mozambique | 2000 | Female | 15 to 19 | 41%<br>(29-55%)                | 59%<br>(45-71%)          | 0.65<br>(0.37-1.1)                          | 1.4%<br>(0.39-2.8%)                  | 1.8%<br>(0.14-4.1%)                 | 34<br>(2.8-79)       | 3200<br>(860-6500)       |
| Mozambique | 2000 | Female | 20 to 24 | 48%<br>(35-60%)                | 52%<br>(40-65%)          | 0.86<br>(0.49-1.4)                          | 1.6%<br>(0.59-3%)                    | 1.5%<br>(0.23-3.6%)                 | 53<br>(7.6-120)      | 5000<br>(1800-9700)      |
| Mozambique | 2000 | Female | 25 to 29 | 44%<br>(33-55%)                | 56%<br>(45-67%)          | 0.89<br>(0.52-1.4)                          | 1.5%<br>(0.6-2.9%)                   | 1.5%<br>(0.4-3.3%)                  | 78<br>(22-160)       | 6000<br>(2500-11000)     |
| Mozambique | 2000 | Female | 30 to 34 | 46%<br>(35-57%)                | 54%<br>(43-65%)          | 0.92<br>(0.51-1.5)                          | 1.5%<br>(0.61-3.1%)                  | 1.6%<br>(0.47-3.5%)                 | 86<br>(27-180)       | 5800<br>(2500-11000)     |
| Mozambique | 2000 | Female | 35 to 39 | 51%<br>(41-62%)                | 49%<br>(38-59%)          | 0.92<br>(0.51-1.5)                          | 1.6%<br>(0.51-3.2%)                  | 1.8%<br>(0.39-3.9%)                 | 88<br>(20-180)       | 5100<br>(1500-9900)      |
| Mozambique | 2000 | Female | 40 to 44 | 54%<br>(43-64%)                | 46%<br>(36-57%)          | 0.93<br>(0.49-1.5)                          | 1.5%<br>(0.41-3.1%)                  | 1.7%<br>(0.34-3.7%)                 | 75<br>(15-160)       | 3800<br>(1100-7600)      |
| Mozambique | 2000 | Female | 45 to 49 | 52%<br>(40-63%)                | 48%<br>(37-60%)          | 0.92<br>(0.5-1.5)                           | 1.7%<br>(0.43-3.7%)                  | 2.1%<br>(0.42-4.6%)                 | 86<br>(17-190)       | 3800<br>(910-8000)       |
| Mozambique | 2000 | Female | 50 to 54 | 47%<br>(36-58%)                | 53%<br>(42-64%)          | 0.86<br>(0.46-1.5)                          | 2.1%<br>(0.53-4.5%)                  | 2.7%<br>(0.6-5.8%)                  | 110<br>(24-240)      | 4000<br>(930-8900)       |
| Mozambique | 2000 | Female | 55 to 59 | 43%<br>(32-55%)                | 57%<br>(45-68%)          | 0.82<br>(0.43-1.4)                          | 2.3%<br>(0.38-5.1%)                  | 2.9%<br>(0.44-6.4%)                 | 120<br>(18-280)      | 3900<br>(630-8700)       |
| Mozambique | 2000 | Female | 60 to 64 | 44%<br>(31-58%)                | 56%<br>(42-69%)          | 0.82<br>(0.41-1.4)                          | 2%<br>(0.21-4.6%)                    | 2.5%<br>(0.27-5.8%)                 | 120<br>(13-290)      | 3200<br>(340-7800)       |
| Mozambique | 2000 | Female | 65 to 69 | 48%<br>(34-63%)                | 52%<br>(37-66%)          | 0.8<br>(0.43-1.3)                           | 1.8%<br>(0.079-4.2%)                 | 2.2%<br>(0.11-5.1%)                 | 120<br>(6-280)       | 2600<br>(130-6200)       |
| Mozambique | 2000 | Female | 70 to 74 | 48%<br>(33-64%)                | 52%<br>(36-67%)          | 0.71<br>(0.37-1.2)                          | 1.1%<br>(-0.64-3.5%)                 | 1.4%<br>(-0.79-4.2%)                | 74<br>(-45-230)      | 1300<br>(-760-4200)      |
| Mozambique | 2000 | Female | 75 to 79 | 45%<br>(31-63%)                | 55%<br>(37-69%)          | 0.61<br>(0.29-1.1)                          | 0.77%<br>(-0.71-2.7%)                | 0.94%<br>(-0.84-3.2%)               | 44<br>(-39-150)      | 590<br>(-540-2000)       |
| Mozambique | 2000 | Female | 80 to 84 | 44%<br>(29-61%)                | 56%<br>(39-71%)          | 0.56<br>(0.28-0.95)                         | 0.31%<br>(-0.94-1.8%)                | 0.4%<br>(-1.1-2.2%)                 | 12<br>(-33-67)       | 120<br>(-350-680)        |
| Mozambique | 2000 | Female | 85 to 89 | 43%<br>(29-59%)                | 57%<br>(41-71%)          | 0.53<br>(0.27-0.95)                         | 0.013%<br>(-1.1-1.2%)                | 0.018%<br>(-1.4-1.4%)               | 0.34<br>(-25-26)     | 2.3<br>(-180-180)        |
| Mozambique | 2000 | Female | 90 to 94 | 45%<br>(31-60%)                | 55%<br>(40-69%)          | 0.53<br>(0.25-0.96)                         | -0.2%<br>(-1.2-0.92%)                | -0.28%<br>(-1.5-1.1%)               | -2.2<br>(-12-8.6)    | -9.6<br>(-58-44)         |
| Mozambique | 2000 | Female | 95 plus  | 48%<br>(31-66%)                | 52%<br>(34-69%)          | 0.54<br>(0.23-1)                            | 0.053%<br>(-1-1.3%)                  | -0.023%<br>(-1.3-1.4%)              | -0.052<br>(-3.1-3.3) | 0.52<br>(-9.3-12)        |
| Mozambique | 2000 | Male   | All Ages | 48%<br>(41-56%)                | 52%<br>(44-59%)          | 0.62<br>(0.46-0.81)                         | 1.3%<br>(0.62-2%)                    | 1.8%<br>(0.72-3%)                   | 2400<br>(960-4100)   | 120000<br>(57000-180000) |
| Mozambique | 2000 | Male   | 15 to 19 | 54%<br>(40-66%)                | 46%<br>(34-60%)          | 0.85<br>(0.5-1.3)                           | 3.2%<br>(1.4-5.4%)                   | 3.7%<br>(1.1-6.8%)                  | 82<br>(23-160)       | 7500<br>(3200-13000)     |
| Mozambique | 2000 | Male   | 20 to 24 | 66%<br>(54-75%)                | 34%<br>(25-46%)          | 1.1<br>(0.68-1.6)                           | 4.8%<br>(2-8.1%)                     | 4.7%<br>(1.1-9.3%)                  | 170<br>(37-320)      | 14000<br>(5700-25000)    |
| Mozambique | 2000 | Male   | 25 to 29 | 63%<br>(54-71%)                | 37%<br>(29-46%)          | 1.2<br>(0.72-1.8)                           | 4%<br>(1.8-7.1%)                     | 3.9%<br>(1.2-7.7%)                  | 180<br>(55-340)      | 14000<br>(6200-23000)    |

| Location   | Year | Sex    | Age      | Prevalence of current drinkers | Prevalence of abstainers | Population average of standard drinks daily | Percent of total attributable deaths | Percent of total attributable DALYs | Attributable deaths | Attributable DALYs      |
|------------|------|--------|----------|--------------------------------|--------------------------|---------------------------------------------|--------------------------------------|-------------------------------------|---------------------|-------------------------|
| Mozambique | 2000 | Male   | 30 to 34 | 64%<br>(54-72%)                | 36%<br>(28-46%)          | 1.3<br>(0.77-1.9)                           | 3.8%<br>(1.6-7%)                     | 3.8%<br>(1.3-7.6%)                  | 200<br>(72-370)     | 13000<br>(5700-23000)   |
| Mozambique | 2000 | Male   | 35 to 39 | 66%<br>(57-74%)                | 34%<br>(26-43%)          | 1.3<br>(0.79-2.1)                           | 4%<br>(1.5-7.1%)                     | 4.2%<br>(1.3-8.1%)                  | 230<br>(70-440)     | 13000<br>(4800-23000)   |
| Mozambique | 2000 | Male   | 40 to 44 | 68%<br>(60-76%)                | 32%<br>(24-40%)          | 1.4<br>(0.8-2.2)                            | 4.2%<br>(1.6-7.4%)                   | 4.6%<br>(1.5-8.3%)                  | 260<br>(88-460)     | 13000<br>(5000-22000)   |
| Mozambique | 2000 | Male   | 45 to 49 | 72%<br>(63-79%)                | 28%<br>(21-37%)          | 1.5<br>(0.87-2.3)                           | 4.5%<br>(1.8-8%)                     | 5%<br>(1.9-9.4%)                    | 270<br>(97-500)     | 12000<br>(4700-21000)   |
| Mozambique | 2000 | Male   | 50 to 54 | 71%<br>(63-78%)                | 29%<br>(22-37%)          | 1.4<br>(0.79-2.3)                           | 5%<br>(1.9-8.8%)                     | 5.7%<br>(2.1-10%)                   | 280<br>(95-530)     | 11000<br>(3800-20000)   |
| Mozambique | 2000 | Male   | 55 to 59 | 68%<br>(59-76%)                | 32%<br>(24-41%)          | 1.3<br>(0.75-2.1)                           | 4.7%<br>(1.7-8.6%)                   | 5.5%<br>(1.8-10%)                   | 270<br>(77-510)     | 8700<br>(2800-16000)    |
| Mozambique | 2000 | Male   | 60 to 64 | 66%<br>(56-75%)                | 34%<br>(25-44%)          | 1.1<br>(0.64-1.8)                           | 3.5%<br>(1-6.9%)                     | 4%<br>(1-8.1%)                      | 200<br>(49-410)     | 5600<br>(1600-11000)    |
| Mozambique | 2000 | Male   | 65 to 69 | 64%<br>(49-77%)                | 36%<br>(23-51%)          | 0.93<br>(0.54-1.5)                          | 2.2%<br>(0.3-4.6%)                   | 2.5%<br>(0.23-5.4%)                 | 130<br>(13-280)     | 2900<br>(400-6300)      |
| Mozambique | 2000 | Male   | 70 to 74 | 61%<br>(43-75%)                | 39%<br>(25-57%)          | 0.73<br>(0.39-1.2)                          | 1.4%<br>(-0.16-3.3%)                 | 1.6%<br>(-0.23-4%)                  | 83<br>(-12-190)     | 1500<br>(-170-3500)     |
| Mozambique | 2000 | Male   | 75 to 79 | 58%<br>(40-74%)                | 42%<br>(26-60%)          | 0.6<br>(0.3-1)                              | 1.1%<br>(-0.24-2.7%)                 | 1.3%<br>(-0.32-3.2%)                | 51<br>(-13-130)     | 710<br>(-160-1800)      |
| Mozambique | 2000 | Male   | 80 to 84 | 54%<br>(35-72%)                | 46%<br>(28-65%)          | 0.51<br>(0.26-0.84)                         | 0.9%<br>(-0.15-2.2%)                 | 1%<br>(-0.24-2.5%)                  | 23<br>(-5.5-58)     | 250<br>(-42-610)        |
| Mozambique | 2000 | Male   | 85 to 89 | 51%<br>(33-67%)                | 49%<br>(33-67%)          | 0.43<br>(0.21-0.74)                         | 0.65%<br>(-0.19-1.5%)                | 0.69%<br>(-0.32-1.7%)               | 8.3<br>(-3.8-21)    | 67<br>(-19-160)         |
| Mozambique | 2000 | Male   | 90 to 94 | 51%<br>(34-67%)                | 49%<br>(33-66%)          | 0.38<br>(0.19-0.71)                         | 0.35%<br>(-0.28-1.1%)                | 0.29%<br>(-0.48-1.2%)               | 1.3<br>(-2.2-5.2)   | 9.3<br>(-7.6-29)        |
| Mozambique | 2000 | Male   | 95 plus  | 53%<br>(32-73%)                | 47%<br>(27-68%)          | 0.37<br>(0.15-0.71)                         | 0.52%<br>(-0.27-1.3%)                | 0.44%<br>(-0.49-1.4%)               | 0.5<br>(-0.57-1.6)  | 2.4<br>(-1.2-6.2)       |
| Mozambique | 2005 | Female | All Ages | 35%<br>(29-40%)                | 65%<br>(60-71%)          | 0.56<br>(0.41-0.74)                         | 0.63%<br>(0.3-1.1%)                  | 1%<br>(0.36-2%)                     | 1400<br>(460-2800)  | 56000<br>(26000-100000) |
| Mozambique | 2005 | Female | 15 to 19 | 41%<br>(29-54%)                | 59%<br>(46-71%)          | 0.77<br>(0.43-1.2)                          | 1.5%<br>(0.6-2.7%)                   | 1.9%<br>(0.44-4%)                   | 33<br>(7.3-76)      | 3300<br>(1200-6500)     |
| Mozambique | 2005 | Female | 20 to 24 | 47%<br>(34-60%)                | 53%<br>(40-66%)          | 1<br>(0.6-1.6)                              | 1.6%<br>(0.69-3%)                    | 1.5%<br>(0.39-3.5%)                 | 55<br>(13-120)      | 5300<br>(2400-10000)    |
| Mozambique | 2005 | Female | 25 to 29 | 44%<br>(33-54%)                | 56%<br>(46-67%)          | 1.1<br>(0.6-1.7)                            | 1.2%<br>(0.47-2.4%)                  | 1.1%<br>(0.28-2.6%)                 | 75<br>(24-160)      | 6100<br>(2800-11000)    |
| Mozambique | 2005 | Female | 30 to 34 | 45%<br>(34-57%)                | 55%<br>(43-66%)          | 1.1<br>(0.61-1.8)                           | 1.1%<br>(0.45-2.2%)                  | 1%<br>(0.31-2.3%)                   | 82<br>(28-180)      | 5700<br>(2600-11000)    |
| Mozambique | 2005 | Female | 35 to 39 | 51%<br>(40-61%)                | 49%<br>(39-60%)          | 1.1<br>(0.6-1.7)                            | 1.1%<br>(0.42-2.4%)                  | 1.2%<br>(0.31-2.7%)                 | 90<br>(25-200)      | 5300<br>(2000-11000)    |
| Mozambique | 2005 | Female | 40 to 44 | 53%<br>(43-64%)                | 47%<br>(36-57%)          | 1.1<br>(0.6-1.8)                            | 1.2%<br>(0.4-2.4%)                   | 1.2%<br>(0.35-2.7%)                 | 83<br>(23-180)      | 4300<br>(1500-8700)     |
| Mozambique | 2005 | Female | 45 to 49 | 52%<br>(40-62%)                | 48%<br>(38-60%)          | 1.1<br>(0.62-1.8)                           | 1.6%<br>(0.56-3.4%)                  | 1.9%<br>(0.57-4.2%)                 | 110<br>(33-230)     | 4600<br>(1600-9600)     |

| Location   | Year | Sex    | Age      | Prevalence of current drinkers | Prevalence of abstainers | Population average of standard drinks daily | Percent of total attributable deaths | Percent of total attributable DALYs | Attributable deaths | Attributable DALYs       |
|------------|------|--------|----------|--------------------------------|--------------------------|---------------------------------------------|--------------------------------------|-------------------------------------|---------------------|--------------------------|
| Mozambique | 2005 | Female | 50 to 54 | 47%<br>(35-58%)                | 53%<br>(42-65%)          | 1<br>(0.54-1.7)                             | 2.2%<br>(0.73-4.3%)                  | 2.6%<br>(0.84-5.4%)                 | 130<br>(38-270)     | 4800<br>(1500-10000)     |
| Mozambique | 2005 | Female | 55 to 59 | 43%<br>(31-55%)                | 57%<br>(45-69%)          | 0.97<br>(0.51-1.7)                          | 2.6%<br>(0.74-5.4%)                  | 3.3%<br>(0.93-7%)                   | 150<br>(40-340)     | 4800<br>(1300-11000)     |
| Mozambique | 2005 | Female | 60 to 64 | 44%<br>(31-57%)                | 56%<br>(43-69%)          | 0.97<br>(0.5-1.7)                           | 2.5%<br>(0.66-5.4%)                  | 3.3%<br>(0.84-6.8%)                 | 160<br>(38-370)     | 4300<br>(1000-9800)      |
| Mozambique | 2005 | Female | 65 to 69 | 47%<br>(34-63%)                | 53%<br>(37-66%)          | 0.96<br>(0.52-1.6)                          | 2.5%<br>(0.71-5.1%)                  | 3.2%<br>(0.85-6.4%)                 | 170<br>(43-370)     | 3700<br>(930-8200)       |
| Mozambique | 2005 | Female | 70 to 74 | 47%<br>(33-63%)                | 53%<br>(37-67%)          | 0.85<br>(0.42-1.5)                          | 1.9%<br>(-0.12-4.7%)                 | 2.4%<br>(-0.16-5.8%)                | 130<br>(-7.5-350)   | 2300<br>(-130-6200)      |
| Mozambique | 2005 | Female | 75 to 79 | 45%<br>(30-62%)                | 55%<br>(38-70%)          | 0.72<br>(0.35-1.3)                          | 1.4%<br>(-0.28-3.9%)                 | 1.8%<br>(-0.34-4.8%)                | 88<br>(-16-240)     | 1200<br>(-240-3200)      |
| Mozambique | 2005 | Female | 80 to 84 | 43%<br>(27-61%)                | 57%<br>(39-73%)          | 0.67<br>(0.34-1.1)                          | 0.87%<br>(-0.57-2.7%)                | 1.1%<br>(-0.65-3.3%)                | 39<br>(-21-120)     | 390<br>(-240-1200)       |
| Mozambique | 2005 | Female | 85 to 89 | 43%<br>(28-59%)                | 57%<br>(41-72%)          | 0.64<br>(0.32-1.1)                          | 0.49%<br>(-0.78-2%)                  | 0.6%<br>(-0.92-2.5%)                | 13<br>(-19-53)      | 90<br>(-140-380)         |
| Mozambique | 2005 | Female | 90 to 94 | 45%<br>(31-61%)                | 55%<br>(39-69%)          | 0.63<br>(0.31-1.2)                          | 0.19%<br>(-0.96-1.7%)                | 0.21%<br>(-1.2-2%)                  | 1.8<br>(-10-17)     | 10<br>(-49-87)           |
| Mozambique | 2005 | Female | 95 plus  | 48%<br>(30-66%)                | 52%<br>(34-70%)          | 0.64<br>(0.28-1.3)                          | 0.46%<br>(-0.75-2.1%)                | 0.47%<br>(-1-2.5%)                  | 1.2<br>(-2.5-6.3)   | 4.6<br>(-7.5-21)         |
| Mozambique | 2005 | Male   | All Ages | 48%<br>(41-55%)                | 52%<br>(45-59%)          | 0.72<br>(0.53-0.95)                         | 1.6%<br>(0.89-2.5%)                  | 2.3%<br>(1.1-3.7%)                  | 3400<br>(1500-5500) | 160000<br>(84000-240000) |
| Mozambique | 2005 | Male   | 15 to 19 | 53%<br>(40-66%)                | 47%<br>(34-60%)          | 1<br>(0.6-1.6)                              | 3.7%<br>(1.8-6.1%)                   | 4.5%<br>(1.7-8%)                    | 110<br>(38-200)     | 9700<br>(4500-17000)     |
| Mozambique | 2005 | Male   | 20 to 24 | 66%<br>(54-76%)                | 34%<br>(24-46%)          | 1.3<br>(0.77-2)                             | 5.6%<br>(2.6-9.6%)                   | 5.9%<br>(2-11%)                     | 230<br>(77-440)     | 19000<br>(8500-33000)    |
| Mozambique | 2005 | Male   | 25 to 29 | 63%<br>(54-72%)                | 37%<br>(28-46%)          | 1.4<br>(0.84-2.1)                           | 4.4%<br>(2-7.8%)                     | 4.3%<br>(1.6-8.4%)                  | 270<br>(100-490)    | 20000<br>(9500-33000)    |
| Mozambique | 2005 | Male   | 30 to 34 | 64%<br>(55-72%)                | 36%<br>(28-45%)          | 1.5<br>(0.9-2.3)                            | 3.8%<br>(1.8-6.9%)                   | 3.8%<br>(1.5-7.6%)                  | 280<br>(110-490)    | 18000<br>(8400-29000)    |
| Mozambique | 2005 | Male   | 35 to 39 | 66%<br>(57-74%)                | 34%<br>(26-43%)          | 1.6<br>(0.94-2.5)                           | 3.9%<br>(1.7-7%)                     | 4.1%<br>(1.6-7.8%)                  | 290<br>(110-510)    | 16000<br>(7200-27000)    |
| Mozambique | 2005 | Male   | 40 to 44 | 68%<br>(60-77%)                | 32%<br>(23-40%)          | 1.7<br>(1-2.6)                              | 4.2%<br>(1.9-7.4%)                   | 4.5%<br>(1.8-8.2%)                  | 320<br>(130-570)    | 16000<br>(7000-27000)    |
| Mozambique | 2005 | Male   | 45 to 49 | 72%<br>(63-79%)                | 28%<br>(21-37%)          | 1.7<br>(1-2.8)                              | 4.7%<br>(2.1-8.1%)                   | 5.2%<br>(2.2-9.2%)                  | 350<br>(150-620)    | 15000<br>(6800-26000)    |
| Mozambique | 2005 | Male   | 50 to 54 | 71%<br>(63-78%)                | 29%<br>(22-37%)          | 1.7<br>(0.93-2.7)                           | 5.5%<br>(2.4-9.5%)                   | 6.3%<br>(2.6-11%)                   | 380<br>(150-690)    | 14000<br>(6200-25000)    |
| Mozambique | 2005 | Male   | 55 to 59 | 68%<br>(59-76%)                | 32%<br>(24-41%)          | 1.5<br>(0.91-2.4)                           | 5.6%<br>(2.4-9.8%)                   | 6.6%<br>(2.6-12%)                   | 370<br>(130-700)    | 12000<br>(4500-22000)    |
| Mozambique | 2005 | Male   | 60 to 64 | 66%<br>(56-75%)                | 34%<br>(25-44%)          | 1.4<br>(0.76-2.2)                           | 4.3%<br>(1.6-8.2%)                   | 5%<br>(1.8-9.5%)                    | 290<br>(94-570)     | 8100<br>(2700-16000)     |
| Mozambique | 2005 | Male   | 65 to 69 | 64%<br>(48-77%)                | 36%<br>(23-52%)          | 1.1<br>(0.63-1.8)                           | 2.9%<br>(0.67-5.9%)                  | 3.4%<br>(0.73-6.9%)                 | 200<br>(39-410)     | 4500<br>(950-9000)       |

| Location   | Year | Sex    | Age      | Prevalence of current drinkers | Prevalence of abstainers | Population average of standard drinks daily | Percent of total attributable deaths | Percent of total attributable DALYs | Attributable deaths | Attributable DALYs      |
|------------|------|--------|----------|--------------------------------|--------------------------|---------------------------------------------|--------------------------------------|-------------------------------------|---------------------|-------------------------|
| Mozambique | 2005 | Male   | 70 to 74 | 60%<br>(43-75%)                | 40%<br>(25-57%)          | 0.86<br>(0.45-1.5)                          | 1.9%<br>(0.15-4.4%)                  | 2.3%<br>(0.089-5.1%)                | 130<br>(5-290)      | 2400<br>(190-5200)      |
| Mozambique | 2005 | Male   | 75 to 79 | 57%<br>(40-73%)                | 43%<br>(27-60%)          | 0.7<br>(0.35-1.2)                           | 1.5%<br>(-0.033-3.6%)                | 1.8%<br>(-0.073-4.3%)               | 84<br>(-3.6-200)    | 1200<br>(-22-2800)      |
| Mozambique | 2005 | Male   | 80 to 84 | 53%<br>(34-70%)                | 47%<br>(30-66%)          | 0.6<br>(0.3-0.98)                           | 1.2%<br>(-0.0079-2.9%)               | 1.4%<br>(-0.073-3.3%)               | 41<br>(-2-99)       | 430<br>(-2.7-1000)      |
| Mozambique | 2005 | Male   | 85 to 89 | 50%<br>(33-66%)                | 50%<br>(34-67%)          | 0.5<br>(0.25-0.87)                          | 0.89%<br>(-0.058-2%)                 | 0.97%<br>(-0.18-2.3%)               | 14<br>(-2.7-35)     | 110<br>(-7.9-260)       |
| Mozambique | 2005 | Male   | 90 to 94 | 50%<br>(34-67%)                | 50%<br>(33-66%)          | 0.45<br>(0.22-0.81)                         | 0.5%<br>(-0.23-1.4%)                 | 0.47%<br>(-0.43-1.5%)               | 2.4<br>(-2.2-7.8)   | 15<br>(-7.3-42)         |
| Mozambique | 2005 | Male   | 95 plus  | 53%<br>(32-72%)                | 47%<br>(28-68%)          | 0.43<br>(0.18-0.82)                         | 0.71%<br>(-0.23-1.9%)                | 0.66%<br>(-0.47-2%)                 | 0.83<br>(-0.6-2.5)  | 3.6<br>(-1.1-9.3)       |
| Mozambique | 2010 | Female | All Ages | 36%<br>(30-42%)                | 64%<br>(58-70%)          | 0.57<br>(0.4-0.77)                          | 0.66%<br>(0.29-1.1%)                 | 1.1%<br>(0.3-2.1%)                  | 1500<br>(390-3000)  | 59000<br>(25000-100000) |
| Mozambique | 2010 | Female | 15 to 19 | 38%<br>(26-52%)                | 62%<br>(48-74%)          | 0.71<br>(0.39-1.2)                          | 1.2%<br>(0.51-2.3%)                  | 1.5%<br>(0.29-3.3%)                 | 32<br>(6.6-76)      | 3400<br>(1300-6800)     |
| Mozambique | 2010 | Female | 20 to 24 | 46%<br>(32-60%)                | 54%<br>(40-68%)          | 0.99<br>(0.54-1.6)                          | 1.5%<br>(0.66-2.8%)                  | 1.4%<br>(0.32-3.3%)                 | 49<br>(12-110)      | 5100<br>(2400-9600)     |
| Mozambique | 2010 | Female | 25 to 29 | 47%<br>(33-59%)                | 53%<br>(41-67%)          | 1.1<br>(0.61-1.8)                           | 1.1%<br>(0.49-2.3%)                  | 1%<br>(0.29-2.5%)                   | 72<br>(24-160)      | 6100<br>(2800-11000)    |
| Mozambique | 2010 | Female | 30 to 34 | 49%<br>(36-61%)                | 51%<br>(39-64%)          | 1.2<br>(0.65-2)                             | 0.99%<br>(0.42-2%)                   | 0.92%<br>(0.29-2.1%)                | 82<br>(27-170)      | 5900<br>(2600-11000)    |
| Mozambique | 2010 | Female | 35 to 39 | 54%<br>(41-65%)                | 46%<br>(35-59%)          | 1.2<br>(0.65-1.9)                           | 1%<br>(0.39-2.1%)                    | 1%<br>(0.29-2.3%)                   | 87<br>(25-190)      | 5200<br>(2100-10000)    |
| Mozambique | 2010 | Female | 40 to 44 | 56%<br>(44-67%)                | 44%<br>(33-56%)          | 1.2<br>(0.63-1.9)                           | 1.1%<br>(0.38-2.1%)                  | 1.1%<br>(0.3-2.4%)                  | 85<br>(22-180)      | 4400<br>(1500-8900)     |
| Mozambique | 2010 | Female | 45 to 49 | 54%<br>(40-65%)                | 46%<br>(35-60%)          | 1.2<br>(0.61-2)                             | 1.6%<br>(0.49-3.2%)                  | 1.9%<br>(0.51-3.9%)                 | 110<br>(32-240)     | 5000<br>(1600-10000)    |
| Mozambique | 2010 | Female | 50 to 54 | 50%<br>(37-62%)                | 50%<br>(38-63%)          | 1.1<br>(0.58-1.9)                           | 2.3%<br>(0.65-4.5%)                  | 2.8%<br>(0.78-5.7%)                 | 150<br>(37-310)     | 5400<br>(1500-12000)    |
| Mozambique | 2010 | Female | 55 to 59 | 46%<br>(34-59%)                | 54%<br>(41-66%)          | 1.1<br>(0.55-1.8)                           | 2.7%<br>(0.63-5.4%)                  | 3.6%<br>(0.83-7.1%)                 | 170<br>(35-360)     | 5300<br>(1200-11000)    |
| Mozambique | 2010 | Female | 60 to 64 | 47%<br>(32-60%)                | 53%<br>(40-68%)          | 1<br>(0.51-1.8)                             | 2.6%<br>(0.5-5.6%)                   | 3.4%<br>(0.72-7.3%)                 | 170<br>(30-390)     | 4600<br>(770-11000)     |
| Mozambique | 2010 | Female | 65 to 69 | 49%<br>(35-64%)                | 51%<br>(36-65%)          | 0.98<br>(0.51-1.7)                          | 2.5%<br>(0.43-5.3%)                  | 3.3%<br>(0.56-6.7%)                 | 180<br>(30-410)     | 4100<br>(640-9000)      |
| Mozambique | 2010 | Female | 70 to 74 | 48%<br>(33-64%)                | 52%<br>(36-67%)          | 0.85<br>(0.43-1.5)                          | 1.9%<br>(-0.16-4.9%)                 | 2.4%<br>(-0.21-6.1%)                | 140<br>(-10-400)    | 2600<br>(-190-7300)     |
| Mozambique | 2010 | Female | 75 to 79 | 45%<br>(31-63%)                | 55%<br>(37-69%)          | 0.73<br>(0.35-1.3)                          | 1.4%<br>(-0.36-3.9%)                 | 1.8%<br>(-0.43-4.8%)                | 100<br>(-23-280)    | 1400<br>(-320-3900)     |
| Mozambique | 2010 | Female | 80 to 84 | 44%<br>(29-62%)                | 56%<br>(38-71%)          | 0.67<br>(0.33-1.1)                          | 0.87%<br>(-0.56-2.7%)                | 1.1%<br>(-0.66-3.4%)                | 47<br>(-29-140)     | 470<br>(-300-1500)      |
| Mozambique | 2010 | Female | 85 to 89 | 44%<br>(29-59%)                | 56%<br>(41-71%)          | 0.64<br>(0.32-1.1)                          | 0.5%<br>(-0.85-2%)                   | 0.62%<br>(-1-2.4%)                  | 16<br>(-26-64)      | 120<br>(-200-460)       |



| Location   | Year | Sex    | Age      | Prevalence of current drinkers | Prevalence of abstainers | Population average of standard drinks daily | Percent of total attributable deaths | Percent of total attributable DALYs | Attributable deaths | Attributable DALYs       |
|------------|------|--------|----------|--------------------------------|--------------------------|---------------------------------------------|--------------------------------------|-------------------------------------|---------------------|--------------------------|
| Mozambique | 2010 | Female | 90 to 94 | 45%<br>(31-61%)                | 55%<br>(39-69%)          | 0.63<br>(0.3-1.2)                           | 0.2%<br>(-1-1.8%)                    | 0.21%<br>(-1.2-2.3%)                | 2.2<br>(-13-23)     | 12<br>(-62-110)          |
| Mozambique | 2010 | Female | 95 plus  | 48%<br>(31-67%)                | 52%<br>(33-69%)          | 0.64<br>(0.27-1.3)                          | 0.49%<br>(-0.73-2.4%)                | 0.51%<br>(-1-2.8%)                  | 1.4<br>(-2.8-8)     | 5.6<br>(-8.2-27)         |
| Mozambique | 2010 | Male   | All Ages | 45%<br>(38-53%)                | 55%<br>(47-62%)          | 0.67<br>(0.48-0.92)                         | 1.7%<br>(0.92-2.7%)                  | 2.4%<br>(1.1-3.9%)                  | 3700<br>(1600-6000) | 170000<br>(89000-260000) |
| Mozambique | 2010 | Male   | 15 to 19 | 46%<br>(32-61%)                | 54%<br>(39-68%)          | 0.84<br>(0.47-1.3)                          | 3.1%<br>(1.5-5.1%)                   | 3.5%<br>(1.3-6.4%)                  | 110<br>(35-210)     | 10000<br>(4600-17000)    |
| Mozambique | 2010 | Male   | 20 to 24 | 61%<br>(46-73%)                | 39%<br>(27-54%)          | 1.2<br>(0.66-1.9)                           | 5.5%<br>(2.6-9.1%)                   | 5.6%<br>(2-10%)                     | 240<br>(84-440)     | 20000<br>(9500-34000)    |
| Mozambique | 2010 | Male   | 25 to 29 | 62%<br>(49-72%)                | 38%<br>(28-51%)          | 1.3<br>(0.78-2.1)                           | 4.6%<br>(2.1-7.9%)                   | 4.5%<br>(1.6-8.8%)                  | 310<br>(110-550)    | 23000<br>(11000-37000)   |
| Mozambique | 2010 | Male   | 30 to 34 | 64%<br>(52-74%)                | 36%<br>(26-48%)          | 1.5<br>(0.87-2.3)                           | 3.9%<br>(1.9-7.1%)                   | 3.9%<br>(1.6-7.7%)                  | 340<br>(130-590)    | 22000<br>(10000-36000)   |
| Mozambique | 2010 | Male   | 35 to 39 | 66%<br>(55-75%)                | 34%<br>(25-45%)          | 1.6<br>(0.92-2.6)                           | 3.8%<br>(1.6-6.8%)                   | 4%<br>(1.5-7.6%)                    | 320<br>(120-580)    | 18000<br>(8100-31000)    |
| Mozambique | 2010 | Male   | 40 to 44 | 68%<br>(57-77%)                | 32%<br>(23-43%)          | 1.7<br>(0.9-2.6)                            | 4.1%<br>(1.8-7.1%)                   | 4.4%<br>(1.7-7.8%)                  | 320<br>(130-570)    | 16000<br>(6800-27000)    |
| Mozambique | 2010 | Male   | 45 to 49 | 70%<br>(57-79%)                | 30%<br>(21-43%)          | 1.7<br>(0.93-2.7)                           | 4.6%<br>(2.1-7.9%)                   | 5.1%<br>(2.1-9%)                    | 360<br>(140-620)    | 15000<br>(6800-26000)    |
| Mozambique | 2010 | Male   | 50 to 54 | 70%<br>(60-78%)                | 30%<br>(22-40%)          | 1.6<br>(0.88-2.7)                           | 5.5%<br>(2.3-9.6%)                   | 6.3%<br>(2.5-11%)                   | 400<br>(150-740)    | 15000<br>(6000-27000)    |
| Mozambique | 2010 | Male   | 55 to 59 | 68%<br>(56-77%)                | 32%<br>(23-44%)          | 1.5<br>(0.83-2.4)                           | 5.7%<br>(2.4-9.9%)                   | 6.7%<br>(2.7-12%)                   | 410<br>(160-780)    | 13000<br>(5200-25000)    |
| Mozambique | 2010 | Male   | 60 to 64 | 65%<br>(53-76%)                | 35%<br>(24-47%)          | 1.3<br>(0.72-2.2)                           | 4.3%<br>(1.5-8.3%)                   | 5%<br>(1.7-9.7%)                    | 320<br>(99-660)     | 8900<br>(2900-18000)     |
| Mozambique | 2010 | Male   | 65 to 69 | 64%<br>(48-77%)                | 36%<br>(23-52%)          | 1.1<br>(0.6-1.8)                            | 2.9%<br>(0.61-6%)                    | 3.4%<br>(0.66-6.9%)                 | 220<br>(44-460)     | 5100<br>(1100-10000)     |
| Mozambique | 2010 | Male   | 70 to 74 | 61%<br>(43-75%)                | 39%<br>(25-57%)          | 0.86<br>(0.46-1.5)                          | 2%<br>(0.14-4.4%)                    | 2.3%<br>(0.12-5.2%)                 | 150<br>(9.4-340)    | 2700<br>(200-6000)       |
| Mozambique | 2010 | Male   | 75 to 79 | 57%<br>(40-73%)                | 43%<br>(27-60%)          | 0.7<br>(0.35-1.2)                           | 1.5%<br>(-0.083-3.7%)                | 1.8%<br>(-0.16-4.3%)                | 100<br>(-8.4-240)   | 1400<br>(-76-3400)       |
| Mozambique | 2010 | Male   | 80 to 84 | 54%<br>(35-72%)                | 46%<br>(28-65%)          | 0.6<br>(0.3-1)                              | 1.2%<br>(-0.026-2.8%)                | 1.4%<br>(-0.086-3.3%)               | 52<br>(-3-120)      | 550<br>(-11-1300)        |
| Mozambique | 2010 | Male   | 85 to 89 | 51%<br>(33-67%)                | 49%<br>(33-67%)          | 0.5<br>(0.25-0.87)                          | 0.92%<br>(-0.1-2.2%)                 | 1%<br>(-0.2-2.5%)                   | 18<br>(-3.9-46)     | 150<br>(-16-340)         |
| Mozambique | 2010 | Male   | 90 to 94 | 50%<br>(34-67%)                | 50%<br>(33-66%)          | 0.45<br>(0.21-0.85)                         | 0.52%<br>(-0.26-1.4%)                | 0.5%<br>(-0.43-1.6%)                | 3.1<br>(-2.7-10)    | 20<br>(-9.4-55)          |
| Mozambique | 2010 | Male   | 95 plus  | 53%<br>(33-73%)                | 47%<br>(27-67%)          | 0.43<br>(0.17-0.89)                         | 0.76%<br>(-0.24-2.1%)                | 0.72%<br>(-0.5-2.3%)                | 1<br>(-0.74-3.4)    | 4.4<br>(-1.4-12)         |
| Mozambique | 2016 | Female | All Ages | 36%<br>(30-42%)                | 64%<br>(58-70%)          | 0.6<br>(0.35-0.96)                          | 0.95%<br>(0.33-1.7%)                 | 1.6%<br>(0.32-3.3%)                 | 1900<br>(380-4100)  | 74000<br>(25000-140000)  |
| Mozambique | 2016 | Female | 15 to 19 | 39%<br>(27-52%)                | 61%<br>(48-73%)          | 0.76<br>(0.37-1.4)                          | 1.3%<br>(0.5-2.5%)                   | 1.5%<br>(0.28-3.3%)                 | 43<br>(8.2-97)      | 4500<br>(1700-8600)      |

| Location   | Year | Sex    | Age      | Prevalence of current drinkers | Prevalence of abstainers | Population average of standard drinks daily | Percent of total attributable deaths | Percent of total attributable DALYs | Attributable deaths | Attributable DALYs       |
|------------|------|--------|----------|--------------------------------|--------------------------|---------------------------------------------|--------------------------------------|-------------------------------------|---------------------|--------------------------|
| Mozambique | 2016 | Female | 20 to 24 | 47%<br>(33-60%)                | 53%<br>(40-67%)          | 1<br>(0.5-1.9)                              | 1.8%<br>(0.8-3.4%)                   | 1.8%<br>(0.37-3.9%)                 | 63<br>(14-140)      | 6700<br>(3000-12000)     |
| Mozambique | 2016 | Female | 25 to 29 | 47%<br>(33-59%)                | 53%<br>(41-67%)          | 1.2<br>(0.58-2.2)                           | 1.6%<br>(0.72-3%)                    | 1.6%<br>(0.43-3.4%)                 | 82<br>(26-170)      | 7100<br>(3300-12000)     |
| Mozambique | 2016 | Female | 30 to 34 | 49%<br>(36-62%)                | 51%<br>(38-64%)          | 1.3<br>(0.58-2.3)                           | 1.6%<br>(0.69-3.1%)                  | 1.7%<br>(0.47-3.6%)                 | 96<br>(31-200)      | 6900<br>(3000-13000)     |
| Mozambique | 2016 | Female | 35 to 39 | 54%<br>(41-66%)                | 46%<br>(34-59%)          | 1.2<br>(0.58-2.3)                           | 1.8%<br>(0.63-3.4%)                  | 2%<br>(0.52-4.2%)                   | 110<br>(27-220)     | 6400<br>(2300-12000)     |
| Mozambique | 2016 | Female | 40 to 44 | 56%<br>(45-67%)                | 44%<br>(33-55%)          | 1.2<br>(0.56-2.3)                           | 1.9%<br>(0.58-3.8%)                  | 2.3%<br>(0.53-4.8%)                 | 100<br>(24-220)     | 5300<br>(1700-11000)     |
| Mozambique | 2016 | Female | 45 to 49 | 55%<br>(40-66%)                | 45%<br>(34-60%)          | 1.2<br>(0.54-2.4)                           | 2.5%<br>(0.67-5.5%)                  | 3.3%<br>(0.79-7.5%)                 | 140<br>(32-320)     | 6000<br>(1600-14000)     |
| Mozambique | 2016 | Female | 50 to 54 | 51%<br>(38-62%)                | 49%<br>(38-62%)          | 1.2<br>(0.51-2.3)                           | 3.2%<br>(0.84-6.6%)                  | 4.3%<br>(1-9.2%)                    | 180<br>(45-410)     | 6900<br>(1800-15000)     |
| Mozambique | 2016 | Female | 55 to 59 | 47%<br>(34-59%)                | 53%<br>(41-66%)          | 1.1<br>(0.5-2.2)                            | 3.5%<br>(0.61-7.4%)                  | 4.9%<br>(0.8-10%)                   | 210<br>(35-470)     | 6700<br>(1100-15000)     |
| Mozambique | 2016 | Female | 60 to 64 | 47%<br>(33-60%)                | 53%<br>(40-67%)          | 1.1<br>(0.49-2)                             | 3.1%<br>(0.44-7.2%)                  | 4.2%<br>(0.59-9.4%)                 | 220<br>(32-510)     | 5900<br>(840-14000)      |
| Mozambique | 2016 | Female | 65 to 69 | 49%<br>(35-65%)                | 51%<br>(35-65%)          | 1<br>(0.48-1.9)                             | 2.9%<br>(0.45-7.1%)                  | 3.8%<br>(0.58-9%)                   | 240<br>(35-590)     | 5300<br>(790-13000)      |
| Mozambique | 2016 | Female | 70 to 74 | 48%<br>(34-64%)                | 52%<br>(36-66%)          | 0.9<br>(0.38-1.8)                           | 2.1%<br>(-0.22-6.1%)                 | 2.7%<br>(-0.25-7.6%)                | 190<br>(-18-570)    | 3500<br>(-330-10000)     |
| Mozambique | 2016 | Female | 75 to 79 | 45%<br>(31-62%)                | 55%<br>(38-69%)          | 0.78<br>(0.33-1.5)                          | 1.6%<br>(-0.35-4.9%)                 | 2.1%<br>(-0.42-6.1%)                | 150<br>(-27-430)    | 2000<br>(-410-6000)      |
| Mozambique | 2016 | Female | 80 to 84 | 44%<br>(29-62%)                | 56%<br>(38-71%)          | 0.71<br>(0.33-1.4)                          | 0.97%<br>(-0.61-3.4%)                | 1.2%<br>(-0.7-4%)                   | 70<br>(-40-230)     | 700<br>(-430-2400)       |
| Mozambique | 2016 | Female | 85 to 89 | 44%<br>(29-59%)                | 56%<br>(41-71%)          | 0.68<br>(0.3-1.3)                           | 0.59%<br>(-0.77-2.7%)                | 0.72%<br>(-0.93-3.2%)               | 26<br>(-33-110)     | 180<br>(-240-810)        |
| Mozambique | 2016 | Female | 90 to 94 | 46%<br>(32-62%)                | 54%<br>(38-68%)          | 0.68<br>(0.29-1.4)                          | 0.29%<br>(-1-2.3%)                   | 0.33%<br>(-1.3-2.9%)                | 4.7<br>(-19-41)     | 26<br>(-93-210)          |
| Mozambique | 2016 | Female | 95 plus  | 49%<br>(32-68%)                | 51%<br>(32-68%)          | 0.69<br>(0.26-1.6)                          | 0.58%<br>(-0.76-3%)                  | 0.62%<br>(-1-3.5%)                  | 2.3<br>(-4-13)      | 8.8<br>(-12-45)          |
| Mozambique | 2016 | Male   | All Ages | 46%<br>(39-54%)                | 54%<br>(46-61%)          | 0.72<br>(0.41-1.1)                          | 2.1%<br>(0.98-3.5%)                  | 2.8%<br>(1.1-5%)                    | 4000<br>(1500-7200) | 190000<br>(87000-320000) |
| Mozambique | 2016 | Male   | 15 to 19 | 46%<br>(32-61%)                | 54%<br>(39-68%)          | 0.89<br>(0.43-1.6)                          | 2.8%<br>(1.3-4.9%)                   | 3%<br>(0.96-5.8%)                   | 120<br>(37-250)     | 12000<br>(5100-21000)    |
| Mozambique | 2016 | Male   | 20 to 24 | 61%<br>(46-73%)                | 39%<br>(27-54%)          | 1.2<br>(0.61-2.2)                           | 5.7%<br>(2.6-9.8%)                   | 5.7%<br>(1.8-11%)                   | 260<br>(77-530)     | 23000<br>(9800-41000)    |
| Mozambique | 2016 | Male   | 25 to 29 | 62%<br>(48-73%)                | 38%<br>(27-52%)          | 1.4<br>(0.71-2.5)                           | 5%<br>(2.2-8.9%)                     | 5%<br>(1.6-9.9%)                    | 320<br>(100-610)    | 25000<br>(11000-42000)   |
| Mozambique | 2016 | Male   | 30 to 34 | 64%<br>(51-74%)                | 36%<br>(26-49%)          | 1.5<br>(0.77-2.7)                           | 4.5%<br>(1.9-8%)                     | 4.5%<br>(1.5-8.6%)                  | 360<br>(120-680)    | 24000<br>(10000-42000)   |
| Mozambique | 2016 | Male   | 35 to 39 | 66%<br>(54-75%)                | 34%<br>(25-46%)          | 1.7<br>(0.79-3)                             | 4.5%<br>(1.8-8.2%)                   | 4.7%<br>(1.5-9.2%)                  | 380<br>(120-730)    | 22000<br>(8500-40000)    |

| Location   | Year | Sex    | Age      | Prevalence of current drinkers | Prevalence of abstainers | Population average of standard drinks daily | Percent of total attributable deaths | Percent of total attributable DALYs | Attributable deaths | Attributable DALYs       |
|------------|------|--------|----------|--------------------------------|--------------------------|---------------------------------------------|--------------------------------------|-------------------------------------|---------------------|--------------------------|
| Mozambique | 2016 | Male   | 40 to 44 | 68%<br>(57-77%)                | 32%<br>(23-43%)          | 1.8<br>(0.82-3.3)                           | 4.9%<br>(2-8.8%)                     | 5.3%<br>(1.9-9.9%)                  | 350<br>(120-670)    | 18000<br>(6900-33000)    |
| Mozambique | 2016 | Male   | 45 to 49 | 70%<br>(58-79%)                | 30%<br>(21-42%)          | 1.8<br>(0.82-3.4)                           | 5.6%<br>(2.2-10%)                    | 6.4%<br>(2.3-12%)                   | 340<br>(120-660)    | 15000<br>(5900-28000)    |
| Mozambique | 2016 | Male   | 50 to 54 | 70%<br>(60-78%)                | 30%<br>(22-40%)          | 1.7<br>(0.77-3.2)                           | 6.4%<br>(2.3-12%)                    | 7.6%<br>(2.6-14%)                   | 400<br>(130-760)    | 15000<br>(5200-28000)    |
| Mozambique | 2016 | Male   | 55 to 59 | 68%<br>(56-77%)                | 32%<br>(23-44%)          | 1.6<br>(0.76-2.8)                           | 6.4%<br>(2.4-12%)                    | 7.8%<br>(2.7-14%)                   | 420<br>(140-790)    | 14000<br>(4800-25000)    |
| Mozambique | 2016 | Male   | 60 to 64 | 65%<br>(53-76%)                | 35%<br>(24-47%)          | 1.4<br>(0.64-2.6)                           | 4.8%<br>(1.4-10%)                    | 5.7%<br>(1.5-12%)                   | 360<br>(97-750)     | 9900<br>(2900-21000)     |
| Mozambique | 2016 | Male   | 65 to 69 | 63%<br>(48-76%)                | 37%<br>(24-52%)          | 1.1<br>(0.52-2.1)                           | 3.1%<br>(0.59-7.1%)                  | 3.8%<br>(0.63-8.6%)                 | 250<br>(41-580)     | 5800<br>(1100-13000)     |
| Mozambique | 2016 | Male   | 70 to 74 | 60%<br>(43-74%)                | 40%<br>(26-57%)          | 0.89<br>(0.39-1.8)                          | 2.1%<br>(0.21-5.5%)                  | 2.6%<br>(0.22-6.6%)                 | 180<br>(16-450)     | 3300<br>(340-8100)       |
| Mozambique | 2016 | Male   | 75 to 79 | 57%<br>(39-73%)                | 43%<br>(27-61%)          | 0.73<br>(0.32-1.4)                          | 1.6%<br>(0.0000038-4.2%)             | 1.9%<br>(-0.044-5.1%)               | 120<br>(-2.6-320)   | 1700<br>(0.004-4500)     |
| Mozambique | 2016 | Male   | 80 to 84 | 54%<br>(34-71%)                | 46%<br>(29-66%)          | 0.62<br>(0.29-1.2)                          | 1.3%<br>(0.021-3.1%)                 | 1.5%<br>(-0.039-3.6%)               | 68<br>(-1.8-170)    | 720<br>(12-1700)         |
| Mozambique | 2016 | Male   | 85 to 89 | 51%<br>(33-68%)                | 49%<br>(32-67%)          | 0.52<br>(0.23-1.1)                          | 0.96%<br>(-0.052-2.5%)               | 1.1%<br>(-0.17-2.8%)                | 24<br>(-3.5-65)     | 190<br>(-10-490)         |
| Mozambique | 2016 | Male   | 90 to 94 | 51%<br>(35-68%)                | 49%<br>(32-65%)          | 0.47<br>(0.2-0.98)                          | 0.57%<br>(-0.25-1.8%)                | 0.55%<br>(-0.42-2%)                 | 4.3<br>(-3.2-16)    | 27<br>(-12-83)           |
| Mozambique | 2016 | Male   | 95 plus  | 54%<br>(33-73%)                | 46%<br>(27-67%)          | 0.45<br>(0.17-1)                            | 0.78%<br>(-0.25-2.3%)                | 0.74%<br>(-0.52-2.5%)               | 1.3<br>(-0.93-4.6)  | 5.7<br>(-1.8-17)         |
| Rwanda     | 1990 | Female | All Ages | 39%<br>(34-44%)                | 61%<br>(56-66%)          | 1.6<br>(1.2-2.2)                            | 3.6%<br>(2.5-5%)                     | 6.7%<br>(4.4-9.5%)                  | 3600<br>(2300-5100) | 130000<br>(89000-180000) |
| Rwanda     | 1990 | Female | 15 to 19 | 41%<br>(31-50%)                | 59%<br>(50-69%)          | 2.1<br>(1.2-3.4)                            | 7.5%<br>(3.8-13%)                    | 10%<br>(5-17%)                      | 100<br>(50-180)     | 7800<br>(3900-13000)     |
| Rwanda     | 1990 | Female | 20 to 24 | 52%<br>(41-62%)                | 48%<br>(38-59%)          | 3<br>(1.8-4.8)                              | 9.1%<br>(5-14%)                      | 11%<br>(5.9-18%)                    | 150<br>(77-240)     | 10000<br>(5600-16000)    |
| Rwanda     | 1990 | Female | 25 to 29 | 56%<br>(45-66%)                | 44%<br>(34-55%)          | 3.7<br>(2.3-5.8)                            | 11%<br>(6-16%)                       | 13%<br>(7-20%)                      | 190<br>(100-290)    | 12000<br>(6900-18000)    |
| Rwanda     | 1990 | Female | 30 to 34 | 59%<br>(48-68%)                | 41%<br>(32-52%)          | 3.9<br>(2.4-5.9)                            | 11%<br>(6.9-17%)                     | 14%<br>(8.3-22%)                    | 230<br>(130-360)    | 13000<br>(7700-20000)    |
| Rwanda     | 1990 | Female | 35 to 39 | 62%<br>(51-69%)                | 38%<br>(31-49%)          | 3.6<br>(2.2-5.4)                            | 12%<br>(7.5-18%)                     | 15%<br>(8.9-23%)                    | 250<br>(150-380)    | 13000<br>(7800-19000)    |
| Rwanda     | 1990 | Female | 40 to 44 | 62%<br>(53-69%)                | 38%<br>(31-47%)          | 3.5<br>(2.1-5.5)                            | 12%<br>(7.1-18%)                     | 15%<br>(8.7-22%)                    | 220<br>(130-340)    | 10000<br>(5900-16000)    |
| Rwanda     | 1990 | Female | 45 to 49 | 61%<br>(51-68%)                | 39%<br>(32-49%)          | 3.6<br>(2-5.7)                              | 14%<br>(8.2-21%)                     | 17%<br>(9.9-26%)                    | 220<br>(130-330)    | 9100<br>(5300-14000)     |
| Rwanda     | 1990 | Female | 50 to 54 | 58%<br>(47-67%)                | 42%<br>(33-53%)          | 3.5<br>(1.9-5.6)                            | 17%<br>(9.4-24%)                     | 20%<br>(11-29%)                     | 300<br>(170-450)    | 11000<br>(6100-16000)    |
| Rwanda     | 1990 | Female | 55 to 59 | 55%<br>(39-71%)                | 45%<br>(29-61%)          | 3.5<br>(1.8-5.9)                            | 17%<br>(9.5-24%)                     | 19%<br>(11-29%)                     | 400<br>(230-610)    | 13000<br>(7200-19000)    |

| Location | Year | Sex    | Age      | Prevalence of current drinkers | Prevalence of abstainers | Population average of standard drinks daily | Percent of total attributable deaths | Percent of total attributable DALYs | Attributable deaths | Attributable DALYs        |
|----------|------|--------|----------|--------------------------------|--------------------------|---------------------------------------------|--------------------------------------|-------------------------------------|---------------------|---------------------------|
| Rwanda   | 1990 | Female | 60 to 64 | 56%<br>(38-73%)                | 44%<br>(27-62%)          | 3.4<br>(1.8-6)                              | 15%<br>(8.4-22%)                     | 17%<br>(9.7-26%)                    | 430<br>(240-650)    | 12000<br>(6300-17000)     |
| Rwanda   | 1990 | Female | 65 to 69 | 57%<br>(40-73%)                | 43%<br>(27-60%)          | 3.1<br>(1.8-5.2)                            | 14%<br>(8.1-21%)                     | 16%<br>(9.1-24%)                    | 410<br>(230-620)    | 9000<br>(5000-14000)      |
| Rwanda   | 1990 | Female | 70 to 74 | 55%<br>(39-71%)                | 45%<br>(29-61%)          | 2.7<br>(1.5-4.6)                            | 12%<br>(5.9-20%)                     | 14%<br>(6.5-22%)                    | 300<br>(140-480)    | 5300<br>(2500-8600)       |
| Rwanda   | 1990 | Female | 75 to 79 | 53%<br>(38-70%)                | 47%<br>(30-62%)          | 2.4<br>(1.2-4.3)                            | 10%<br>(4.3-18%)                     | 11%<br>(4.9-20%)                    | 240<br>(100-420)    | 3300<br>(1400-5800)       |
| Rwanda   | 1990 | Female | 80 to 84 | 52%<br>(35-69%)                | 48%<br>(31-65%)          | 2.2<br>(1.2-4)                              | 8.2%<br>(3.4-15%)                    | 9.3%<br>(3.9-17%)                   | 120<br>(48-210)     | 1200<br>(490-2200)        |
| Rwanda   | 1990 | Female | 85 to 89 | 51%<br>(36-66%)                | 49%<br>(34-64%)          | 2.1<br>(1.1-3.7)                            | 6.6%<br>(2.4-12%)                    | 7.5%<br>(2.8-14%)                   | 48<br>(18-90)       | 350<br>(130-660)          |
| Rwanda   | 1990 | Female | 90 to 94 | 53%<br>(37-68%)                | 47%<br>(32-63%)          | 2<br>(1-3.7)                                | 5.1%<br>(1.5-11%)                    | 6%<br>(1.7-12%)                     | 14<br>(3.8-28)      | 69<br>(20-140)            |
| Rwanda   | 1990 | Female | 95 plus  | 55%<br>(36-73%)                | 45%<br>(27-64%)          | 2<br>(0.88-3.7)                             | 4.9%<br>(0.95-11%)                   | 5.6%<br>(0.99-12%)                  | 3.7<br>(0.65-8.1)   | 13<br>(2.5-27)            |
| Rwanda   | 1990 | Male   | All Ages | 59%<br>(53-65%)                | 41%<br>(35-47%)          | 2.1<br>(1.6-2.8)                            | 5.2%<br>(3.8-6.7%)                   | 8.5%<br>(6.1-11%)                   | 4900<br>(3400-6400) | 210000<br>(150000-270000) |
| Rwanda   | 1990 | Male   | 15 to 19 | 59%<br>(48-68%)                | 41%<br>(32-52%)          | 2.9<br>(1.8-4.5)                            | 11%<br>(6.7-16%)                     | 14%<br>(7.6-20%)                    | 180<br>(96-260)     | 14000<br>(8000-20000)     |
| Rwanda   | 1990 | Male   | 20 to 24 | 68%<br>(58-76%)                | 32%<br>(24-42%)          | 3.6<br>(2.2-5.5)                            | 15%<br>(9.5-22%)                     | 16%<br>(9.6-24%)                    | 300<br>(190-440)    | 22000<br>(14000-32000)    |
| Rwanda   | 1990 | Male   | 25 to 29 | 75%<br>(66-81%)                | 25%<br>(19-34%)          | 4.4<br>(2.7-6.5)                            | 16%<br>(10-23%)                      | 17%<br>(11-26%)                     | 370<br>(240-510)    | 24000<br>(16000-33000)    |
| Rwanda   | 1990 | Male   | 30 to 34 | 78%<br>(70-83%)                | 22%<br>(17-30%)          | 4.9<br>(3.1-7.2)                            | 17%<br>(12-24%)                      | 19%<br>(13-27%)                     | 420<br>(290-570)    | 25000<br>(17000-33000)    |
| Rwanda   | 1990 | Male   | 35 to 39 | 78%<br>(71-83%)                | 22%<br>(17-29%)          | 5.1<br>(3.1-7.8)                            | 19%<br>(13-26%)                      | 21%<br>(14-30%)                     | 450<br>(310-610)    | 24000<br>(17000-32000)    |
| Rwanda   | 1990 | Male   | 40 to 44 | 79%<br>(72-84%)                | 21%<br>(16-28%)          | 5.2<br>(3.1-8.1)                            | 21%<br>(14-28%)                      | 23%<br>(16-32%)                     | 460<br>(310-630)    | 21000<br>(14000-29000)    |
| Rwanda   | 1990 | Male   | 45 to 49 | 81%<br>(74-86%)                | 19%<br>(14-26%)          | 5.3<br>(3-8.2)                              | 22%<br>(14-29%)                      | 25%<br>(16-33%)                     | 390<br>(250-550)    | 16000<br>(11000-23000)    |
| Rwanda   | 1990 | Male   | 50 to 54 | 82%<br>(77-86%)                | 18%<br>(14-23%)          | 5.2<br>(3-8.2)                              | 24%<br>(15-32%)                      | 27%<br>(17-36%)                     | 450<br>(280-640)    | 17000<br>(10000-23000)    |
| Rwanda   | 1990 | Male   | 55 to 59 | 81%<br>(74-86%)                | 19%<br>(14-26%)          | 5<br>(3-8)                                  | 23%<br>(15-31%)                      | 26%<br>(18-35%)                     | 550<br>(350-780)    | 18000<br>(11000-25000)    |
| Rwanda   | 1990 | Male   | 60 to 64 | 79%<br>(69-86%)                | 21%<br>(14-31%)          | 4.4<br>(2.6-7.3)                            | 19%<br>(12-27%)                      | 22%<br>(14-30%)                     | 520<br>(310-760)    | 14000<br>(8300-20000)     |
| Rwanda   | 1990 | Male   | 65 to 69 | 75%<br>(59-87%)                | 25%<br>(13-41%)          | 3.6<br>(2.2-6)                              | 16%<br>(9.2-23%)                     | 18%<br>(10-26%)                     | 360<br>(200-540)    | 7900<br>(4500-12000)      |
| Rwanda   | 1990 | Male   | 70 to 74 | 73%<br>(57-84%)                | 27%<br>(16-43%)          | 2.9<br>(1.7-4.8)                            | 12%<br>(5.9-19%)                     | 13%<br>(6.8-21%)                    | 200<br>(94-330)     | 3500<br>(1700-5800)       |
| Rwanda   | 1990 | Male   | 75 to 79 | 71%<br>(56-84%)                | 29%<br>(16-44%)          | 2.5<br>(1.3-4.3)                            | 9.4%<br>(3.6-17%)                    | 11%<br>(4.2-19%)                    | 120<br>(47-210)     | 1700<br>(650-3000)        |

| Location | Year | Sex    | Age      | Prevalence of current drinkers | Prevalence of abstainers | Population average of standard drinks daily | Percent of total attributable deaths | Percent of total attributable DALYs | Attributable deaths | Attributable DALYs       |
|----------|------|--------|----------|--------------------------------|--------------------------|---------------------------------------------|--------------------------------------|-------------------------------------|---------------------|--------------------------|
| Rwanda   | 1990 | Male   | 80 to 84 | 70%<br>(52-83%)                | 30%<br>(17-48%)          | 2.2<br>(1.2-3.7)                            | 7.8%<br>(3.4-13%)                    | 8.8%<br>(3.7-15%)                   | 57<br>(24-100)      | 590<br>(250-1000)        |
| Rwanda   | 1990 | Male   | 85 to 89 | 67%<br>(50-80%)                | 33%<br>(20-50%)          | 1.9<br>(1.1-3.2)                            | 5.9%<br>(2.4-10%)                    | 6.7%<br>(2.7-12%)                   | 24<br>(9.6-44)      | 180<br>(74-320)          |
| Rwanda   | 1990 | Male   | 90 to 94 | 67%<br>(52-81%)                | 33%<br>(19-48%)          | 1.7<br>(0.93-2.9)                           | 3.9%<br>(1.3-7.1%)                   | 4.4%<br>(1.3-8.2%)                  | 5.9<br>(1.7-11)     | 31<br>(10-57)            |
| Rwanda   | 1990 | Male   | 95 plus  | 68%<br>(49-84%)                | 32%<br>(16-51%)          | 1.6<br>(0.72-3)                             | 4.1%<br>(0.93-8.7%)                  | 4.5%<br>(0.76-9.9%)                 | 1.6<br>(0.26-3.4)   | 5.7<br>(1.3-12)          |
| Rwanda   | 1995 | Female | All Ages | 41%<br>(37-45%)                | 59%<br>(55-63%)          | 1.6<br>(1.2-2.2)                            | 3.7%<br>(2.2-5.3%)                   | 6.6%<br>(3.9-9.7%)                  | 3500<br>(2000-5200) | 130000<br>(80000-190000) |
| Rwanda   | 1995 | Female | 15 to 19 | 44%<br>(39-48%)                | 56%<br>(52-61%)          | 2.1<br>(1.4-3.3)                            | 7.3%<br>(3.4-13%)                    | 9.8%<br>(4.3-18%)                   | 120<br>(51-200)     | 8600<br>(4000-15000)     |
| Rwanda   | 1995 | Female | 20 to 24 | 55%<br>(51-59%)                | 45%<br>(41-49%)          | 3.1<br>(1.9-4.5)                            | 8.7%<br>(4.6-14%)                    | 11%<br>(5.2-18%)                    | 170<br>(82-280)     | 12000<br>(6000-19000)    |
| Rwanda   | 1995 | Female | 25 to 29 | 58%<br>(54-62%)                | 42%<br>(38-46%)          | 3.6<br>(2.3-5.5)                            | 9.1%<br>(4.6-14%)                    | 11%<br>(5.1-17%)                    | 210<br>(110-330)    | 13000<br>(6900-20000)    |
| Rwanda   | 1995 | Female | 30 to 34 | 60%<br>(56-64%)                | 40%<br>(36-44%)          | 3.7<br>(2.4-5.6)                            | 9.5%<br>(5.2-15%)                    | 11%<br>(5.7-18%)                    | 230<br>(120-390)    | 13000<br>(7400-22000)    |
| Rwanda   | 1995 | Female | 35 to 39 | 60%<br>(57-65%)                | 40%<br>(35-43%)          | 3.3<br>(2.1-5)                              | 10%<br>(5.5-16%)                     | 12%<br>(6.3-20%)                    | 260<br>(140-420)    | 13000<br>(7400-21000)    |
| Rwanda   | 1995 | Female | 40 to 44 | 60%<br>(56-65%)                | 40%<br>(35-44%)          | 3.2<br>(1.9-5)                              | 10%<br>(5.5-17%)                     | 12%<br>(6.4-20%)                    | 230<br>(120-370)    | 11000<br>(5700-17000)    |
| Rwanda   | 1995 | Female | 45 to 49 | 59%<br>(54-63%)                | 41%<br>(37-46%)          | 3.2<br>(1.8-5.1)                            | 13%<br>(6.6-20%)                     | 15%<br>(7.9-24%)                    | 270<br>(140-430)    | 11000<br>(5900-18000)    |
| Rwanda   | 1995 | Female | 50 to 54 | 57%<br>(47-66%)                | 43%<br>(34-53%)          | 3.2<br>(1.8-5.3)                            | 15%<br>(8-24%)                       | 18%<br>(9.4-28%)                    | 320<br>(160-500)    | 11000<br>(5700-18000)    |
| Rwanda   | 1995 | Female | 55 to 59 | 57%<br>(41-73%)                | 43%<br>(27-59%)          | 3.4<br>(1.8-5.8)                            | 17%<br>(8.5-26%)                     | 19%<br>(10-30%)                     | 310<br>(160-500)    | 9700<br>(5000-16000)     |
| Rwanda   | 1995 | Female | 60 to 64 | 57%<br>(41-75%)                | 43%<br>(25-59%)          | 3.3<br>(1.7-5.7)                            | 15%<br>(7.7-24%)                     | 18%<br>(8.9-28%)                    | 410<br>(200-630)    | 11000<br>(5400-17000)    |
| Rwanda   | 1995 | Female | 65 to 69 | 58%<br>(41-74%)                | 42%<br>(26-59%)          | 3<br>(1.7-5.1)                              | 15%<br>(7.5-23%)                     | 16%<br>(8.5-25%)                    | 380<br>(190-590)    | 8400<br>(4300-13000)     |
| Rwanda   | 1995 | Female | 70 to 74 | 56%<br>(39-72%)                | 44%<br>(28-61%)          | 2.6<br>(1.4-4.5)                            | 13%<br>(5.5-21%)                     | 14%<br>(6.2-23%)                    | 260<br>(110-440)    | 4700<br>(2000-7800)      |
| Rwanda   | 1995 | Female | 75 to 79 | 54%<br>(38-70%)                | 46%<br>(30-62%)          | 2.3<br>(1.2-4.2)                            | 11%<br>(3.9-19%)                     | 12%<br>(4.4-21%)                    | 170<br>(64-300)     | 2300<br>(880-4200)       |
| Rwanda   | 1995 | Female | 80 to 84 | 54%<br>(37-70%)                | 46%<br>(30-63%)          | 2.2<br>(1.1-3.8)                            | 8.7%<br>(3.4-16%)                    | 9.8%<br>(3.8-18%)                   | 97<br>(38-180)      | 1000<br>(390-1800)       |
| Rwanda   | 1995 | Female | 85 to 89 | 53%<br>(37-67%)                | 47%<br>(33-63%)          | 2.1<br>(1-3.6)                              | 7.1%<br>(2.4-13%)                    | 8.1%<br>(2.8-15%)                   | 47<br>(16-89)       | 340<br>(120-650)         |
| Rwanda   | 1995 | Female | 90 to 94 | 54%<br>(39-69%)                | 46%<br>(31-61%)          | 2<br>(1-3.5)                                | 5.5%<br>(1.4-11%)                    | 6.5%<br>(1.5-14%)                   | 14<br>(3.4-30)      | 71<br>(18-150)           |
| Rwanda   | 1995 | Female | 95 plus  | 56%<br>(37-74%)                | 44%<br>(26-63%)          | 1.9<br>(0.85-3.6)                           | 5.2%<br>(0.95-11%)                   | 6%<br>(0.96-13%)                    | 3.7<br>(0.61-8.2)   | 13<br>(2.3-28)           |

| Location | Year | Sex    | Age      | Prevalence of current drinkers | Prevalence of abstainers | Population average of standard drinks daily | Percent of total attributable deaths | Percent of total attributable DALYs | Attributable deaths | Attributable DALYs        |
|----------|------|--------|----------|--------------------------------|--------------------------|---------------------------------------------|--------------------------------------|-------------------------------------|---------------------|---------------------------|
| Rwanda   | 1995 | Male   | All Ages | 64%<br>(59-69%)                | 36%<br>(31-41%)          | 2.1<br>(1.6-2.9)                            | 5.8%<br>(4.1-7.6%)                   | 9.2%<br>(6.3-12%)                   | 5500<br>(3700-7300) | 240000<br>(170000-310000) |
| Rwanda   | 1995 | Male   | 15 to 19 | 69%<br>(63-74%)                | 31%<br>(26-37%)          | 3.2<br>(2.1-4.8)                            | 11%<br>(6.2-17%)                     | 13%<br>(6.7-20%)                    | 240<br>(130-350)    | 18000<br>(10000-26000)    |
| Rwanda   | 1995 | Male   | 20 to 24 | 72%<br>(68-77%)                | 28%<br>(23-32%)          | 3.6<br>(2.2-5.5)                            | 14%<br>(7.9-19%)                     | 14%<br>(7.8-21%)                    | 370<br>(220-520)    | 26000<br>(16000-36000)    |
| Rwanda   | 1995 | Male   | 25 to 29 | 77%<br>(73-80%)                | 23%<br>(20-27%)          | 4.3<br>(2.7-6.4)                            | 14%<br>(8.6-20%)                     | 15%<br>(8.7-22%)                    | 430<br>(270-600)    | 28000<br>(18000-38000)    |
| Rwanda   | 1995 | Male   | 30 to 34 | 80%<br>(76-83%)                | 20%<br>(17-24%)          | 4.8<br>(3-7.2)                              | 15%<br>(9.9-20%)                     | 16%<br>(10-22%)                     | 480<br>(310-650)    | 28000<br>(19000-37000)    |
| Rwanda   | 1995 | Male   | 35 to 39 | 79%<br>(76-82%)                | 21%<br>(18-24%)          | 4.9<br>(3-7.3)                              | 17%<br>(11-23%)                      | 18%<br>(12-25%)                     | 520<br>(350-710)    | 27000<br>(18000-36000)    |
| Rwanda   | 1995 | Male   | 40 to 44 | 81%<br>(78-84%)                | 19%<br>(16-22%)          | 5.1<br>(3.2-7.8)                            | 19%<br>(13-26%)                      | 21%<br>(14-28%)                     | 520<br>(340-700)    | 24000<br>(16000-33000)    |
| Rwanda   | 1995 | Male   | 45 to 49 | 84%<br>(80-86%)                | 16%<br>(14-20%)          | 5.2<br>(3.1-7.9)                            | 21%<br>(14-28%)                      | 23%<br>(15-32%)                     | 540<br>(340-740)    | 22000<br>(14000-30000)    |
| Rwanda   | 1995 | Male   | 50 to 54 | 84%<br>(80-87%)                | 16%<br>(13-20%)          | 5.1<br>(2.9-8)                              | 24%<br>(15-32%)                      | 27%<br>(17-36%)                     | 510<br>(310-690)    | 18000<br>(11000-25000)    |
| Rwanda   | 1995 | Male   | 55 to 59 | 82%<br>(77-87%)                | 18%<br>(13-23%)          | 4.9<br>(2.8-8)                              | 24%<br>(15-32%)                      | 27%<br>(17-36%)                     | 490<br>(290-680)    | 15000<br>(9200-21000)     |
| Rwanda   | 1995 | Male   | 60 to 64 | 79%<br>(71-86%)                | 21%<br>(14-29%)          | 4.3<br>(2.4-7.2)                            | 21%<br>(12-29%)                      | 23%<br>(13-32%)                     | 530<br>(300-750)    | 14000<br>(8000-20000)     |
| Rwanda   | 1995 | Male   | 65 to 69 | 76%<br>(61-87%)                | 24%<br>(13-39%)          | 3.5<br>(2.1-5.7)                            | 17%<br>(8.7-25%)                     | 19%<br>(9.7-28%)                    | 450<br>(230-670)    | 9900<br>(5100-15000)      |
| Rwanda   | 1995 | Male   | 70 to 74 | 73%<br>(58-84%)                | 27%<br>(16-42%)          | 2.8<br>(1.6-4.6)                            | 13%<br>(5.6-21%)                     | 14%<br>(6.3-23%)                    | 240<br>(110-400)    | 4300<br>(1900-7100)       |
| Rwanda   | 1995 | Male   | 75 to 79 | 72%<br>(58-84%)                | 28%<br>(16-42%)          | 2.4<br>(1.2-4)                              | 10%<br>(3.6-18%)                     | 12%<br>(4-20%)                      | 130<br>(46-230)     | 1800<br>(640-3200)        |
| Rwanda   | 1995 | Male   | 80 to 84 | 70%<br>(54-83%)                | 30%<br>(17-46%)          | 2.1<br>(1.2-3.5)                            | 8.6%<br>(3.4-15%)                    | 9.7%<br>(3.7-17%)                   | 57<br>(22-100)      | 590<br>(230-1000)         |
| Rwanda   | 1995 | Male   | 85 to 89 | 68%<br>(51-80%)                | 32%<br>(20-49%)          | 1.8<br>(1-3)                                | 6.5%<br>(2.4-12%)                    | 7.4%<br>(2.6-13%)                   | 24<br>(8.3-44)      | 180<br>(65-320)           |
| Rwanda   | 1995 | Male   | 90 to 94 | 67%<br>(52-81%)                | 33%<br>(19-48%)          | 1.6<br>(0.88-2.8)                           | 4.3%<br>(1.3-8%)                     | 4.9%<br>(1.2-9.3%)                  | 6.5<br>(1.7-12)     | 34<br>(10-64)             |
| Rwanda   | 1995 | Male   | 95 plus  | 69%<br>(48-85%)                | 31%<br>(15-52%)          | 1.5<br>(0.67-2.8)                           | 4.6%<br>(0.81-9.5%)                  | 5.1%<br>(0.66-11%)                  | 1.8<br>(0.23-3.8)   | 6.3<br>(1.1-13)           |
| Rwanda   | 2000 | Female | All Ages | 41%<br>(37-45%)                | 59%<br>(55-63%)          | 1.6<br>(1.2-2.1)                            | 3.2%<br>(2-4.6%)                     | 5.9%<br>(3.4-8.5%)                  | 3400<br>(2000-5100) | 120000<br>(74000-170000)  |
| Rwanda   | 2000 | Female | 15 to 19 | 43%<br>(39-47%)                | 57%<br>(53-61%)          | 2<br>(1.3-2.9)                              | 6.7%<br>(3.3-11%)                    | 10%<br>(4.6-18%)                    | 110<br>(52-200)     | 8600<br>(4300-15000)      |
| Rwanda   | 2000 | Female | 20 to 24 | 54%<br>(50-58%)                | 46%<br>(42-50%)          | 2.8<br>(1.8-4.2)                            | 7.5%<br>(4.1-12%)                    | 9.7%<br>(4.9-17%)                   | 130<br>(69-220)     | 9700<br>(5300-15000)      |
| Rwanda   | 2000 | Female | 25 to 29 | 58%<br>(54-61%)                | 42%<br>(39-46%)          | 3.4<br>(2.1-5.1)                            | 6.3%<br>(3.2-10%)                    | 7.4%<br>(3.5-13%)                   | 150<br>(81-250)     | 9900<br>(5500-16000)      |

| Location | Year | Sex    | Age      | Prevalence of current drinkers | Prevalence of abstainers | Population average of standard drinks daily | Percent of total attributable deaths | Percent of total attributable DALYs | Attributable deaths | Attributable DALYs        |
|----------|------|--------|----------|--------------------------------|--------------------------|---------------------------------------------|--------------------------------------|-------------------------------------|---------------------|---------------------------|
| Rwanda   | 2000 | Female | 30 to 34 | 59%<br>(56-63%)                | 41%<br>(37-44%)          | 3.5<br>(2.1-5.3)                            | 5.9%<br>(3.2-9.4%)                   | 6.8%<br>(3.4-11%)                   | 150<br>(82-250)     | 8900<br>(5000-14000)      |
| Rwanda   | 2000 | Female | 35 to 39 | 60%<br>(56-63%)                | 40%<br>(37-44%)          | 3.1<br>(2-4.8)                              | 6.3%<br>(3.5-11%)                    | 7.4%<br>(3.8-13%)                   | 210<br>(110-350)    | 11000<br>(6200-18000)     |
| Rwanda   | 2000 | Female | 40 to 44 | 60%<br>(56-63%)                | 40%<br>(37-44%)          | 3<br>(1.8-4.7)                              | 6.5%<br>(3.5-11%)                    | 7.7%<br>(4.1-13%)                   | 190<br>(99-310)     | 8800<br>(4800-14000)      |
| Rwanda   | 2000 | Female | 45 to 49 | 58%<br>(53-62%)                | 42%<br>(38-47%)          | 3<br>(1.8-4.9)                              | 8.9%<br>(4.8-14%)                    | 11%<br>(5.7-17%)                    | 240<br>(120-400)    | 10000<br>(5300-16000)     |
| Rwanda   | 2000 | Female | 50 to 54 | 56%<br>(46-66%)                | 44%<br>(34-54%)          | 3<br>(1.7-5.1)                              | 12%<br>(6.3-18%)                     | 14%<br>(7.6-22%)                    | 290<br>(150-450)    | 11000<br>(5400-16000)     |
| Rwanda   | 2000 | Female | 55 to 59 | 55%<br>(39-72%)                | 45%<br>(28-61%)          | 3.1<br>(1.6-5.3)                            | 13%<br>(7-21%)                       | 16%<br>(8.3-24%)                    | 330<br>(170-530)    | 10000<br>(5300-16000)     |
| Rwanda   | 2000 | Female | 60 to 64 | 56%<br>(39-73%)                | 44%<br>(27-61%)          | 3.1<br>(1.6-5.3)                            | 13%<br>(6.5-19%)                     | 15%<br>(7.6-23%)                    | 260<br>(130-410)    | 6900<br>(3600-11000)      |
| Rwanda   | 2000 | Female | 65 to 69 | 57%<br>(40-74%)                | 43%<br>(26-60%)          | 2.8<br>(1.6-4.7)                            | 12%<br>(6-19%)                       | 14%<br>(7.1-21%)                    | 460<br>(230-720)    | 10000<br>(5100-16000)     |
| Rwanda   | 2000 | Female | 70 to 74 | 56%<br>(39-71%)                | 44%<br>(29-61%)          | 2.5<br>(1.3-4.2)                            | 10%<br>(4.2-17%)                     | 12%<br>(4.8-20%)                    | 230<br>(95-390)     | 4100<br>(1700-6900)       |
| Rwanda   | 2000 | Female | 75 to 79 | 53%<br>(37-71%)                | 47%<br>(29-63%)          | 2.2<br>(1.1-3.8)                            | 8.7%<br>(3.1-16%)                    | 9.9%<br>(3.5-18%)                   | 430<br>(150-780)    | 6000<br>(2100-11000)      |
| Rwanda   | 2000 | Female | 80 to 84 | 52%<br>(35-69%)                | 48%<br>(31-65%)          | 2<br>(1-3.4)                                | 7%<br>(2.4-13%)                      | 8.1%<br>(2.8-15%)                   | 180<br>(63-330)     | 1900<br>(650-3400)        |
| Rwanda   | 2000 | Female | 85 to 89 | 52%<br>(36-66%)                | 48%<br>(34-64%)          | 1.9<br>(0.95-3.2)                           | 5.7%<br>(1.9-11%)                    | 6.5%<br>(2.2-12%)                   | 39<br>(13-74)       | 290<br>(93-540)           |
| Rwanda   | 2000 | Female | 90 to 94 | 53%<br>(37-68%)                | 47%<br>(32-63%)          | 1.8<br>(0.93-3.3)                           | 4.4%<br>(1-9.1%)                     | 5.2%<br>(1.2-11%)                   | 13<br>(2.9-27)      | 66<br>(15-140)            |
| Rwanda   | 2000 | Female | 95 plus  | 55%<br>(36-74%)                | 45%<br>(26-64%)          | 1.8<br>(0.78-3.5)                           | 4.3%<br>(0.76-9.7%)                  | 5%<br>(0.78-11%)                    | 4.1<br>(0.64-9.3)   | 14<br>(2.4-32)            |
| Rwanda   | 2000 | Male   | All Ages | 65%<br>(60-69%)                | 35%<br>(31-40%)          | 2.1<br>(1.6-2.8)                            | 5.5%<br>(4.1-7.2%)                   | 8.5%<br>(5.9-11%)                   | 5200<br>(3600-6900) | 220000<br>(160000-280000) |
| Rwanda   | 2000 | Male   | 15 to 19 | 70%<br>(65-74%)                | 30%<br>(26-35%)          | 3.1<br>(2.1-4.6)                            | 13%<br>(8.1-19%)                     | 17%<br>(10-24%)                     | 230<br>(130-330)    | 18000<br>(11000-25000)    |
| Rwanda   | 2000 | Male   | 20 to 24 | 73%<br>(69-77%)                | 27%<br>(23-31%)          | 3.5<br>(2.2-5.1)                            | 18%<br>(12-25%)                      | 21%<br>(13-30%)                     | 340<br>(210-480)    | 25000<br>(16000-34000)    |
| Rwanda   | 2000 | Male   | 25 to 29 | 77%<br>(73-80%)                | 23%<br>(20-27%)          | 4.1<br>(2.5-6.3)                            | 16%<br>(11-23%)                      | 18%<br>(11-27%)                     | 360<br>(230-510)    | 24000<br>(16000-33000)    |
| Rwanda   | 2000 | Male   | 30 to 34 | 80%<br>(77-83%)                | 20%<br>(17-23%)          | 4.6<br>(2.8-7.1)                            | 14%<br>(9.6-20%)                     | 16%<br>(10-22%)                     | 390<br>(250-520)    | 23000<br>(15000-31000)    |
| Rwanda   | 2000 | Male   | 35 to 39 | 79%<br>(76-82%)                | 21%<br>(18-24%)          | 4.7<br>(3-7)                                | 14%<br>(9.3-19%)                     | 15%<br>(9.9-22%)                    | 530<br>(360-720)    | 28000<br>(19000-38000)    |
| Rwanda   | 2000 | Male   | 40 to 44 | 81%<br>(78-84%)                | 19%<br>(16-22%)          | 4.9<br>(3-7.5)                              | 15%<br>(10-20%)                      | 17%<br>(11-22%)                     | 470<br>(310-650)    | 22000<br>(15000-30000)    |
| Rwanda   | 2000 | Male   | 45 to 49 | 84%<br>(81-86%)                | 16%<br>(14-19%)          | 5<br>(3-7.6)                                | 17%<br>(11-23%)                      | 19%<br>(12-26%)                     | 470<br>(310-670)    | 20000<br>(13000-28000)    |

| Location | Year | Sex    | Age      | Prevalence of current drinkers | Prevalence of abstainers | Population average of standard drinks daily | Percent of total attributable deaths | Percent of total attributable DALYs | Attributable deaths | Attributable DALYs     |
|----------|------|--------|----------|--------------------------------|--------------------------|---------------------------------------------|--------------------------------------|-------------------------------------|---------------------|------------------------|
| Rwanda   | 2000 | Male   | 50 to 54 | 84%<br>(81-87%)                | 16%<br>(13-19%)          | 4.9<br>(2.8-7.7)                            | 19%<br>(13-27%)                      | 22%<br>(15-30%)                     | 430<br>(270-600)    | 16000<br>(10000-22000) |
| Rwanda   | 2000 | Male   | 55 to 59 | 82%<br>(77-87%)                | 18%<br>(13-23%)          | 4.7<br>(2.8-7.5)                            | 20%<br>(13-28%)                      | 24%<br>(15-32%)                     | 440<br>(270-610)    | 14000<br>(8700-19000)  |
| Rwanda   | 2000 | Male   | 60 to 64 | 79%<br>(70-86%)                | 21%<br>(14-30%)          | 4.1<br>(2.3-6.5)                            | 17%<br>(9.7-24%)                     | 20%<br>(11-28%)                     | 310<br>(170-450)    | 8300<br>(4600-12000)   |
| Rwanda   | 2000 | Male   | 65 to 69 | 75%<br>(60-87%)                | 25%<br>(13-40%)          | 3.3<br>(1.9-5.1)                            | 14%<br>(7.4-20%)                     | 16%<br>(8.4-23%)                    | 460<br>(240-700)    | 10000<br>(5300-15000)  |
| Rwanda   | 2000 | Male   | 70 to 74 | 73%<br>(57-84%)                | 27%<br>(16-43%)          | 2.6<br>(1.5-4.3)                            | 10%<br>(4.4-17%)                     | 12%<br>(5-19%)                      | 190<br>(77-310)     | 3300<br>(1400-5500)    |
| Rwanda   | 2000 | Male   | 75 to 79 | 71%<br>(55-83%)                | 29%<br>(17-45%)          | 2.2<br>(1.2-3.8)                            | 8.2%<br>(2.8-15%)                    | 9.3%<br>(3.2-16%)                   | 380<br>(130-680)    | 5300<br>(1800-9500)    |
| Rwanda   | 2000 | Male   | 80 to 84 | 69%<br>(51-82%)                | 31%<br>(18-49%)          | 2<br>(1.1-3.1)                              | 6.8%<br>(2.5-12%)                    | 7.8%<br>(2.9-14%)                   | 130<br>(50-240)     | 1400<br>(530-2400)     |
| Rwanda   | 2000 | Male   | 85 to 89 | 67%<br>(50-80%)                | 33%<br>(20-50%)          | 1.7<br>(0.91-2.8)                           | 5.2%<br>(1.8-9.3%)                   | 6%<br>(2-11%)                       | 23<br>(7.5-41)      | 170<br>(59-300)        |
| Rwanda   | 2000 | Male   | 90 to 94 | 67%<br>(52-81%)                | 33%<br>(19-48%)          | 1.5<br>(0.8-2.6)                            | 3.5%<br>(1-6.9%)                     | 4%<br>(1-7.9%)                      | 6.3<br>(1.6-13)     | 33<br>(10-65)          |
| Rwanda   | 2000 | Male   | 95 plus  | 68%<br>(48-84%)                | 32%<br>(16-52%)          | 1.4<br>(0.63-2.7)                           | 3.9%<br>(0.83-8.4%)                  | 4.4%<br>(0.66-9.7%)                 | 2.4<br>(0.35-5.3)   | 8.5<br>(1.8-18)        |
| Rwanda   | 2005 | Female | All Ages | 40%<br>(36-44%)                | 60%<br>(56-64%)          | 1.6<br>(1.2-2.2)                            | 2.3%<br>(1.6-3.2%)                   | 4.3%<br>(2.7-6.1%)                  | 2000<br>(1200-2900) | 72000<br>(49000-98000) |
| Rwanda   | 2005 | Female | 15 to 19 | 41%<br>(37-45%)                | 59%<br>(55-63%)          | 1.9<br>(1.2-2.8)                            | 4.6%<br>(2.5-6.9%)                   | 6.7%<br>(3.4-11%)                   | 72<br>(37-110)      | 5800<br>(3200-8800)    |
| Rwanda   | 2005 | Female | 20 to 24 | 52%<br>(48-56%)                | 48%<br>(44-52%)          | 2.8<br>(1.7-4.1)                            | 5.7%<br>(3.4-8.6%)                   | 7.7%<br>(4.2-12%)                   | 95<br>(52-150)      | 7400<br>(4400-11000)   |
| Rwanda   | 2005 | Female | 25 to 29 | 56%<br>(52-60%)                | 44%<br>(40-48%)          | 3.3<br>(2-4.9)                              | 5%<br>(2.9-7.7%)                     | 6.1%<br>(3.1-10%)                   | 92<br>(52-140)      | 6400<br>(3900-9500)    |
| Rwanda   | 2005 | Female | 30 to 34 | 58%<br>(54-62%)                | 42%<br>(38-46%)          | 3.4<br>(2.1-5.2)                            | 4.1%<br>(2.4-6.2%)                   | 4.7%<br>(2.6-7.6%)                  | 90<br>(53-140)      | 5700<br>(3400-8400)    |
| Rwanda   | 2005 | Female | 35 to 39 | 58%<br>(54-63%)                | 42%<br>(37-46%)          | 3.1<br>(1.9-4.8)                            | 4.1%<br>(2.4-6.3%)                   | 4.7%<br>(2.6-7.5%)                  | 89<br>(51-140)      | 4900<br>(2900-7500)    |
| Rwanda   | 2005 | Female | 40 to 44 | 58%<br>(54-63%)                | 42%<br>(37-46%)          | 2.9<br>(1.7-4.7)                            | 4%<br>(2.2-6%)                       | 4.7%<br>(2.5-7.3%)                  | 110<br>(59-170)     | 5300<br>(3000-8100)    |
| Rwanda   | 2005 | Female | 45 to 49 | 56%<br>(51-61%)                | 44%<br>(39-49%)          | 2.9<br>(1.6-4.8)                            | 5.9%<br>(3.3-9.1%)                   | 7.4%<br>(4.1-11%)                   | 140<br>(79-220)     | 5900<br>(3400-9300)    |
| Rwanda   | 2005 | Female | 50 to 54 | 55%<br>(44-65%)                | 45%<br>(35-56%)          | 2.9<br>(1.6-4.9)                            | 8.2%<br>(4.5-12%)                    | 10%<br>(5.7-16%)                    | 180<br>(100-280)    | 6700<br>(3700-10000)   |
| Rwanda   | 2005 | Female | 55 to 59 | 54%<br>(38-71%)                | 46%<br>(29-62%)          | 3<br>(1.6-5.2)                              | 9.6%<br>(5.2-15%)                    | 12%<br>(6.6-19%)                    | 190<br>(100-300)    | 6100<br>(3300-9600)    |
| Rwanda   | 2005 | Female | 60 to 64 | 54%<br>(37-73%)                | 46%<br>(27-63%)          | 3<br>(1.5-5.2)                              | 9.4%<br>(4.7-15%)                    | 12%<br>(6-19%)                      | 200<br>(100-320)    | 5400<br>(2800-8800)    |
| Rwanda   | 2005 | Female | 65 to 69 | 55%<br>(39-72%)                | 45%<br>(28-61%)          | 2.8<br>(1.5-4.5)                            | 9.3%<br>(4.7-14%)                    | 11%<br>(5.8-17%)                    | 170<br>(83-270)     | 3800<br>(1900-5900)    |



| Location | Year | Sex    | Age      | Prevalence of current drinkers | Prevalence of abstainers | Population average of standard drinks daily | Percent of total attributable deaths | Percent of total attributable DALYs | Attributable deaths | Attributable DALYs        |
|----------|------|--------|----------|--------------------------------|--------------------------|---------------------------------------------|--------------------------------------|-------------------------------------|---------------------|---------------------------|
| Rwanda   | 2005 | Female | 70 to 74 | 54%<br>(37-70%)                | 46%<br>(30-63%)          | 2.4<br>(1.2-4.2)                            | 8%<br>(3.2-13%)                      | 9.5%<br>(3.9-16%)                   | 250<br>(110-430)    | 4600<br>(2000-7800)       |
| Rwanda   | 2005 | Female | 75 to 79 | 52%<br>(36-68%)                | 48%<br>(32-64%)          | 2.1<br>(1-3.7)                              | 6.7%<br>(2.4-12%)                    | 8%<br>(2.8-15%)                     | 110<br>(37-210)     | 1500<br>(520-2900)        |
| Rwanda   | 2005 | Female | 80 to 84 | 51%<br>(33-68%)                | 49%<br>(32-67%)          | 2<br>(1-3.3)                                | 5.4%<br>(1.9-10%)                    | 6.4%<br>(2.2-12%)                   | 140<br>(49-270)     | 1500<br>(500-2800)        |
| Rwanda   | 2005 | Female | 85 to 89 | 50%<br>(34-66%)                | 50%<br>(34-66%)          | 1.8<br>(0.93-3.2)                           | 4.3%<br>(1.4-8.4%)                   | 5.1%<br>(1.6-9.7%)                  | 57<br>(18-110)      | 410<br>(130-790)          |
| Rwanda   | 2005 | Female | 90 to 94 | 52%<br>(36-67%)                | 48%<br>(33-64%)          | 1.8<br>(0.88-3.3)                           | 3.5%<br>(0.73-7.8%)                  | 4.1%<br>(0.8-9.1%)                  | 8.1<br>(1.6-18)     | 41<br>(8.7-90)            |
| Rwanda   | 2005 | Female | 95 plus  | 54%<br>(35-74%)                | 46%<br>(26-65%)          | 1.7<br>(0.76-3.5)                           | 3.5%<br>(0.59-8%)                    | 4%<br>(0.58-9.5%)                   | 2.5<br>(0.36-6.1)   | 8.6<br>(1.5-20)           |
| Rwanda   | 2005 | Male   | All Ages | 63%<br>(58-68%)                | 37%<br>(32-42%)          | 2.1<br>(1.5-2.8)                            | 4.4%<br>(3.3-5.7%)                   | 6.6%<br>(4.7-8.8%)                  | 3100<br>(2200-4100) | 140000<br>(100000-180000) |
| Rwanda   | 2005 | Male   | 15 to 19 | 68%<br>(63-72%)                | 32%<br>(28-37%)          | 3.1<br>(2-4.5)                              | 9.3%<br>(6.3-13%)                    | 12%<br>(7.3-17%)                    | 140<br>(88-200)     | 12000<br>(8000-17000)     |
| Rwanda   | 2005 | Male   | 20 to 24 | 72%<br>(67-76%)                | 28%<br>(24-33%)          | 3.4<br>(2.1-5)                              | 16%<br>(11-21%)                      | 18%<br>(11-26%)                     | 230<br>(140-330)    | 19000<br>(13000-26000)    |
| Rwanda   | 2005 | Male   | 25 to 29 | 76%<br>(72-79%)                | 24%<br>(21-28%)          | 4<br>(2.5-6.1)                              | 16%<br>(10-22%)                      | 18%<br>(11-26%)                     | 240<br>(150-360)    | 18000<br>(12000-24000)    |
| Rwanda   | 2005 | Male   | 30 to 34 | 79%<br>(75-82%)                | 21%<br>(18-25%)          | 4.5<br>(2.8-6.9)                            | 13%<br>(8.7-18%)                     | 14%<br>(9.1-20%)                    | 230<br>(150-320)    | 15000<br>(10000-20000)    |
| Rwanda   | 2005 | Male   | 35 to 39 | 78%<br>(74-81%)                | 22%<br>(19-26%)          | 4.6<br>(2.9-7.1)                            | 11%<br>(7.9-16%)                     | 13%<br>(8.4-18%)                    | 230<br>(150-320)    | 13000<br>(8700-17000)     |
| Rwanda   | 2005 | Male   | 40 to 44 | 80%<br>(76-83%)                | 20%<br>(17-24%)          | 4.8<br>(2.9-7.5)                            | 11%<br>(7.6-15%)                     | 13%<br>(8.2-18%)                    | 300<br>(190-420)    | 15000<br>(9700-20000)     |
| Rwanda   | 2005 | Male   | 45 to 49 | 83%<br>(79-86%)                | 17%<br>(14-21%)          | 4.9<br>(2.8-7.6)                            | 13%<br>(8.3-18%)                     | 15%<br>(9.2-20%)                    | 270<br>(180-370)    | 12000<br>(7700-16000)     |
| Rwanda   | 2005 | Male   | 50 to 54 | 83%<br>(80-86%)                | 17%<br>(14-20%)          | 4.8<br>(2.8-7.6)                            | 15%<br>(9.8-21%)                     | 18%<br>(11-25%)                     | 300<br>(190-410)    | 11000<br>(7300-15000)     |
| Rwanda   | 2005 | Male   | 55 to 59 | 82%<br>(76-86%)                | 18%<br>(14-24%)          | 4.6<br>(2.7-7.1)                            | 16%<br>(10-22%)                      | 20%<br>(13-27%)                     | 260<br>(170-370)    | 8600<br>(5500-12000)      |
| Rwanda   | 2005 | Male   | 60 to 64 | 78%<br>(68-86%)                | 22%<br>(14-32%)          | 4<br>(2.3-6.6)                              | 14%<br>(8-20%)                       | 16%<br>(9.4-23%)                    | 240<br>(140-350)    | 6600<br>(3900-9500)       |
| Rwanda   | 2005 | Male   | 65 to 69 | 74%<br>(58-86%)                | 26%<br>(14-42%)          | 3.2<br>(1.9-5.2)                            | 11%<br>(5.9-16%)                     | 13%<br>(6.9-19%)                    | 160<br>(86-240)     | 3600<br>(2000-5600)       |
| Rwanda   | 2005 | Male   | 70 to 74 | 72%<br>(55-84%)                | 28%<br>(16-45%)          | 2.5<br>(1.4-4.2)                            | 7.8%<br>(3.6-13%)                    | 9.1%<br>(4.1-15%)                   | 210<br>(98-360)     | 3900<br>(1800-6500)       |
| Rwanda   | 2005 | Male   | 75 to 79 | 70%<br>(54-83%)                | 30%<br>(17-46%)          | 2.1<br>(1.1-3.6)                            | 6.3%<br>(2.3-12%)                    | 7.3%<br>(2.7-14%)                   | 83<br>(31-160)      | 1200<br>(440-2200)        |
| Rwanda   | 2005 | Male   | 80 to 84 | 68%<br>(50-81%)                | 32%<br>(19-50%)          | 1.9<br>(1-3.1)                              | 5.1%<br>(1.9-9.3%)                   | 5.9%<br>(2.1-11%)                   | 110<br>(42-210)     | 1200<br>(450-2200)        |
| Rwanda   | 2005 | Male   | 85 to 89 | 65%<br>(48-79%)                | 35%<br>(21-52%)          | 1.6<br>(0.87-2.6)                           | 3.9%<br>(1.3-7.1%)                   | 4.4%<br>(1.4-8.2%)                  | 41<br>(13-75)       | 310<br>(110-560)          |

| Location | Year | Sex    | Age      | Prevalence of current drinkers | Prevalence of abstainers | Population average of standard drinks daily | Percent of total attributable deaths | Percent of total attributable DALYs | Attributable deaths | Attributable DALYs       |
|----------|------|--------|----------|--------------------------------|--------------------------|---------------------------------------------|--------------------------------------|-------------------------------------|---------------------|--------------------------|
| Rwanda   | 2005 | Male   | 90 to 94 | 65%<br>(47-79%)                | 35%<br>(21-53%)          | 1.5<br>(0.76-2.5)                           | 2.7%<br>(0.69-5.1%)                  | 2.9%<br>(0.59-5.9%)                 | 4<br>(0.82-8.1)     | 22<br>(5.5-43)           |
| Rwanda   | 2005 | Male   | 95 plus  | 66%<br>(45-83%)                | 34%<br>(17-55%)          | 1.4<br>(0.61-2.6)                           | 3%<br>(0.74-6.5%)                    | 3.2%<br>(0.57-7.2%)                 | 1.3<br>(0.22-2.8)   | 4.7<br>(1.1-9.9)         |
| Rwanda   | 2010 | Female | All Ages | 41%<br>(36-47%)                | 59%<br>(53-64%)          | 1.6<br>(1.1-2.3)                            | 2.7%<br>(1.7-3.9%)                   | 5%<br>(2.7-7.6%)                    | 1800<br>(960-2800)  | 63000<br>(39000-91000)   |
| Rwanda   | 2010 | Female | 15 to 19 | 39%<br>(30-50%)                | 61%<br>(50-70%)          | 1.8<br>(0.98-2.9)                           | 3.4%<br>(1.7-5.5%)                   | 4.9%<br>(2.1-8.3%)                  | 41<br>(19-68)       | 3500<br>(1800-5600)      |
| Rwanda   | 2010 | Female | 20 to 24 | 51%<br>(40-62%)                | 49%<br>(38-60%)          | 2.6<br>(1.5-4.2)                            | 4.8%<br>(2.6-7.4%)                   | 6.5%<br>(3.2-11%)                   | 67<br>(33-110)      | 5700<br>(3100-9000)      |
| Rwanda   | 2010 | Female | 25 to 29 | 55%<br>(43-66%)                | 45%<br>(34-57%)          | 3.2<br>(1.8-5.1)                            | 4.9%<br>(2.8-7.5%)                   | 6.5%<br>(3.2-11%)                   | 82<br>(44-130)      | 6200<br>(3700-9300)      |
| Rwanda   | 2010 | Female | 30 to 34 | 58%<br>(47-67%)                | 42%<br>(33-53%)          | 3.3<br>(1.9-5.4)                            | 4.7%<br>(2.7-7.2%)                   | 6%<br>(3.2-9.8%)                    | 75<br>(41-120)      | 5000<br>(2900-7400)      |
| Rwanda   | 2010 | Female | 35 to 39 | 61%<br>(50-69%)                | 39%<br>(31-50%)          | 3.1<br>(1.7-5.3)                            | 4.9%<br>(2.8-7.7%)                   | 6.4%<br>(3.4-10%)                   | 80<br>(44-130)      | 4600<br>(2600-7200)      |
| Rwanda   | 2010 | Female | 40 to 44 | 62%<br>(51-69%)                | 38%<br>(31-49%)          | 3<br>(1.6-5)                                | 5.1%<br>(2.7-8%)                     | 6.8%<br>(3.5-11%)                   | 75<br>(39-120)      | 3800<br>(2000-6000)      |
| Rwanda   | 2010 | Female | 45 to 49 | 60%<br>(49-68%)                | 40%<br>(32-51%)          | 3.1<br>(1.6-5.2)                            | 6.8%<br>(3.6-11%)                    | 9.5%<br>(4.9-15%)                   | 130<br>(71-210)     | 5800<br>(3100-9300)      |
| Rwanda   | 2010 | Female | 50 to 54 | 57%<br>(46-67%)                | 43%<br>(33-54%)          | 3<br>(1.6-5.3)                              | 8.3%<br>(4.2-13%)                    | 12%<br>(6.1-17%)                    | 160<br>(83-250)     | 6100<br>(3100-9600)      |
| Rwanda   | 2010 | Female | 55 to 59 | 54%<br>(38-71%)                | 46%<br>(29-62%)          | 3<br>(1.5-5.5)                              | 9%<br>(4.4-14%)                      | 12%<br>(6.1-19%)                    | 190<br>(90-310)     | 6100<br>(2900-10000)     |
| Rwanda   | 2010 | Female | 60 to 64 | 55%<br>(38-73%)                | 45%<br>(27-62%)          | 2.9<br>(1.4-5.3)                            | 8.6%<br>(4-14%)                      | 11%<br>(5.3-18%)                    | 180<br>(84-310)     | 5100<br>(2300-8500)      |
| Rwanda   | 2010 | Female | 65 to 69 | 56%<br>(39-72%)                | 44%<br>(28-61%)          | 2.7<br>(1.4-4.7)                            | 8.4%<br>(3.9-14%)                    | 11%<br>(4.9-17%)                    | 200<br>(93-340)     | 4500<br>(2100-7800)      |
| Rwanda   | 2010 | Female | 70 to 74 | 55%<br>(38-70%)                | 45%<br>(30-62%)          | 2.4<br>(1.2-4.3)                            | 7.1%<br>(2.4-13%)                    | 8.5%<br>(3-16%)                     | 140<br>(47-260)     | 2500<br>(850-4700)       |
| Rwanda   | 2010 | Female | 75 to 79 | 52%<br>(36-69%)                | 48%<br>(31-64%)          | 2.1<br>(0.96-3.8)                           | 5.9%<br>(1.6-12%)                    | 7.1%<br>(1.9-14%)                   | 190<br>(49-370)     | 2600<br>(690-5200)       |
| Rwanda   | 2010 | Female | 80 to 84 | 51%<br>(34-68%)                | 49%<br>(32-66%)          | 1.9<br>(0.97-3.4)                           | 4.8%<br>(1.1-9.5%)                   | 5.7%<br>(1.3-11%)                   | 110<br>(25-220)     | 1100<br>(260-2300)       |
| Rwanda   | 2010 | Female | 85 to 89 | 51%<br>(35-65%)                | 49%<br>(35-65%)          | 1.8<br>(0.89-3.3)                           | 3.8%<br>(0.91-8%)                    | 4.5%<br>(1.1-9.6%)                  | 60<br>(15-130)      | 440<br>(110-960)         |
| Rwanda   | 2010 | Female | 90 to 94 | 52%<br>(36-68%)                | 48%<br>(32-64%)          | 1.7<br>(0.85-3.3)                           | 3%<br>(0.32-7.2%)                    | 3.5%<br>(0.27-8.4%)                 | 17<br>(1.3-41)      | 86<br>(8.8-210)          |
| Rwanda   | 2010 | Female | 95 plus  | 54%<br>(35-74%)                | 46%<br>(26-65%)          | 1.7<br>(0.73-3.4)                           | 3%<br>(0.28-7.8%)                    | 3.5%<br>(0.18-9.4%)                 | 2<br>(0.1-5.1)      | 6.7<br>(0.6-17)          |
| Rwanda   | 2010 | Male   | All Ages | 65%<br>(60-69%)                | 35%<br>(31-40%)          | 2.1<br>(1.4-3)                              | 5.1%<br>(3.7-6.7%)                   | 7.3%<br>(4.8-10%)                   | 2700<br>(1800-3700) | 130000<br>(90000-160000) |
| Rwanda   | 2010 | Male   | 15 to 19 | 69%<br>(62-74%)                | 31%<br>(26-38%)          | 3<br>(1.7-4.7)                              | 7.8%<br>(5-11%)                      | 9.3%<br>(5.2-14%)                   | 91<br>(51-140)      | 8400<br>(5300-12000)     |

| Location | Year | Sex    | Age      | Prevalence of current drinkers | Prevalence of abstainers | Population average of standard drinks daily | Percent of total attributable deaths | Percent of total attributable DALYs | Attributable deaths | Attributable DALYs      |
|----------|------|--------|----------|--------------------------------|--------------------------|---------------------------------------------|--------------------------------------|-------------------------------------|---------------------|-------------------------|
| Rwanda   | 2010 | Male   | 20 to 24 | 73%<br>(68-77%)                | 27%<br>(23-32%)          | 3.4<br>(1.9-5.4)                            | 14%<br>(9.2-19%)                     | 15%<br>(8.9-22%)                    | 200<br>(110-300)    | 18000<br>(12000-25000)  |
| Rwanda   | 2010 | Male   | 25 to 29 | 77%<br>(72-80%)                | 23%<br>(20-28%)          | 3.9<br>(2.3-6.2)                            | 15%<br>(10-20%)                      | 17%<br>(10-25%)                     | 230<br>(140-340)    | 18000<br>(12000-25000)  |
| Rwanda   | 2010 | Male   | 30 to 34 | 80%<br>(75-83%)                | 20%<br>(17-25%)          | 4.4<br>(2.6-6.9)                            | 14%<br>(9.5-19%)                     | 16%<br>(10-24%)                     | 210<br>(130-300)    | 14000<br>(9600-19000)   |
| Rwanda   | 2010 | Male   | 35 to 39 | 79%<br>(76-82%)                | 21%<br>(18-24%)          | 4.6<br>(2.6-7.7)                            | 13%<br>(8.7-18%)                     | 16%<br>(9.7-22%)                    | 190<br>(120-280)    | 11000<br>(7300-15000)   |
| Rwanda   | 2010 | Male   | 40 to 44 | 81%<br>(77-84%)                | 19%<br>(16-23%)          | 4.7<br>(2.7-7.6)                            | 13%<br>(8.6-18%)                     | 16%<br>(10-22%)                     | 190<br>(120-270)    | 9500<br>(6000-13000)    |
| Rwanda   | 2010 | Male   | 45 to 49 | 83%<br>(80-86%)                | 17%<br>(14-20%)          | 4.8<br>(2.6-7.9)                            | 14%<br>(9.1-20%)                     | 18%<br>(11-25%)                     | 270<br>(160-390)    | 12000<br>(7400-17000)   |
| Rwanda   | 2010 | Male   | 50 to 54 | 84%<br>(80-87%)                | 16%<br>(13-20%)          | 4.7<br>(2.6-7.9)                            | 16%<br>(9.9-22%)                     | 20%<br>(12-28%)                     | 260<br>(160-370)    | 10000<br>(6200-14000)   |
| Rwanda   | 2010 | Male   | 55 to 59 | 82%<br>(77-87%)                | 18%<br>(13-23%)          | 4.5<br>(2.5-7.4)                            | 16%<br>(9.8-22%)                     | 20%<br>(12-28%)                     | 280<br>(170-390)    | 9100<br>(5600-13000)    |
| Rwanda   | 2010 | Male   | 60 to 64 | 79%<br>(70-86%)                | 21%<br>(14-30%)          | 3.9<br>(2-6.8)                              | 13%<br>(7.1-19%)                     | 16%<br>(8.5-23%)                    | 220<br>(120-330)    | 6100<br>(3300-9100)     |
| Rwanda   | 2010 | Male   | 65 to 69 | 74%<br>(57-87%)                | 26%<br>(13-43%)          | 3.1<br>(1.7-5.3)                            | 9.6%<br>(4.9-15%)                    | 12%<br>(5.8-19%)                    | 180<br>(87-290)     | 4100<br>(2000-6700)     |
| Rwanda   | 2010 | Male   | 70 to 74 | 71%<br>(55-84%)                | 29%<br>(16-45%)          | 2.5<br>(1.3-4.2)                            | 6.9%<br>(2.9-12%)                    | 8.2%<br>(3.5-15%)                   | 110<br>(45-190)     | 1900<br>(840-3500)      |
| Rwanda   | 2010 | Male   | 75 to 79 | 70%<br>(54-82%)                | 30%<br>(18-46%)          | 2.1<br>(1.1-3.7)                            | 5.5%<br>(1.6-11%)                    | 6.4%<br>(1.9-13%)                   | 140<br>(41-280)     | 2000<br>(610-4000)      |
| Rwanda   | 2010 | Male   | 80 to 84 | 68%<br>(50-82%)                | 32%<br>(18-50%)          | 1.9<br>(0.98-3.2)                           | 4.5%<br>(1.4-8.5%)                   | 5.2%<br>(1.6-10%)                   | 77<br>(23-150)      | 810<br>(250-1600)       |
| Rwanda   | 2010 | Male   | 85 to 89 | 65%<br>(49-79%)                | 35%<br>(21-51%)          | 1.6<br>(0.84-2.8)                           | 3.4%<br>(1.1-6.6%)                   | 3.9%<br>(1.1-7.6%)                  | 44<br>(12-87)       | 330<br>(100-650)        |
| Rwanda   | 2010 | Male   | 90 to 94 | 65%<br>(49-79%)                | 35%<br>(21-51%)          | 1.4<br>(0.73-2.6)                           | 2.3%<br>(0.53-5%)                    | 2.5%<br>(0.38-5.7%)                 | 10<br>(1.5-23)      | 56<br>(13-120)          |
| Rwanda   | 2010 | Male   | 95 plus  | 67%<br>(46-83%)                | 33%<br>(17-54%)          | 1.3<br>(0.6-2.6)                            | 2.6%<br>(0.6-5.9%)                   | 2.8%<br>(0.29-6.7%)                 | 1<br>(0.11-2.4)     | 3.9<br>(0.88-8.6)       |
| Rwanda   | 2016 | Female | All Ages | 42%<br>(37-47%)                | 58%<br>(53-63%)          | 1.7<br>(0.93-2.9)                           | 3.3%<br>(1.7-5.1%)                   | 5.8%<br>(2.6-9.7%)                  | 2000<br>(850-3400)  | 69000<br>(36000-110000) |
| Rwanda   | 2016 | Female | 15 to 19 | 40%<br>(30-49%)                | 60%<br>(51-70%)          | 1.8<br>(0.79-3.4)                           | 3.4%<br>(1.5-5.9%)                   | 5.5%<br>(2.1-10%)                   | 39<br>(14-72)       | 3500<br>(1500-6000)     |
| Rwanda   | 2016 | Female | 20 to 24 | 51%<br>(39-61%)                | 49%<br>(39-61%)          | 2.6<br>(1.2-4.9)                            | 5%<br>(2.6-8%)                       | 7.5%<br>(3.2-13%)                   | 50<br>(21-88)       | 4500<br>(2300-7200)     |
| Rwanda   | 2016 | Female | 25 to 29 | 55%<br>(43-65%)                | 45%<br>(35-57%)          | 3.2<br>(1.5-5.7)                            | 5.7%<br>(3.2-8.9%)                   | 8.8%<br>(4.3-15%)                   | 77<br>(38-130)      | 6000<br>(3300-9400)     |
| Rwanda   | 2016 | Female | 30 to 34 | 58%<br>(47-67%)                | 42%<br>(33-53%)          | 3.4<br>(1.7-6.2)                            | 5.8%<br>(3.2-9%)                     | 8.9%<br>(4.4-15%)                   | 95<br>(47-160)      | 6500<br>(3400-10000)    |
| Rwanda   | 2016 | Female | 35 to 39 | 61%<br>(50-68%)                | 39%<br>(32-50%)          | 3.2<br>(1.5-6)                              | 6%<br>(3.1-9.7%)                     | 9.2%<br>(4.5-15%)                   | 97<br>(46-160)      | 5700<br>(2900-9100)     |

| Location | Year | Sex    | Age      | Prevalence of current drinkers | Prevalence of abstainers | Population average of standard drinks daily | Percent of total attributable deaths | Percent of total attributable DALYs | Attributable deaths | Attributable DALYs       |
|----------|------|--------|----------|--------------------------------|--------------------------|---------------------------------------------|--------------------------------------|-------------------------------------|---------------------|--------------------------|
| Rwanda   | 2016 | Female | 40 to 44 | 62%<br>(52-69%)                | 38%<br>(31-48%)          | 3.1<br>(1.4-5.7)                            | 5.7%<br>(2.7-9.1%)                   | 8.4%<br>(4-13%)                     | 95<br>(44-160)      | 4900<br>(2300-7900)      |
| Rwanda   | 2016 | Female | 45 to 49 | 60%<br>(48-68%)                | 40%<br>(32-52%)          | 3.1<br>(1.4-6)                              | 6.8%<br>(3.1-11%)                    | 9.9%<br>(4.7-16%)                   | 120<br>(53-190)     | 5100<br>(2300-8200)      |
| Rwanda   | 2016 | Female | 50 to 54 | 57%<br>(45-66%)                | 43%<br>(34-55%)          | 3<br>(1.3-5.8)                              | 7.8%<br>(3.6-12%)                    | 11%<br>(5.1-17%)                    | 190<br>(86-310)     | 7000<br>(3200-12000)     |
| Rwanda   | 2016 | Female | 55 to 59 | 54%<br>(39-71%)                | 46%<br>(29-61%)          | 2.9<br>(1.3-5.8)                            | 8.3%<br>(3.4-14%)                    | 11%<br>(4.8-19%)                    | 210<br>(90-370)     | 6900<br>(2900-12000)     |
| Rwanda   | 2016 | Female | 60 to 64 | 55%<br>(38-72%)                | 45%<br>(28-62%)          | 2.9<br>(1.2-5.5)                            | 8%<br>(3.3-13%)                      | 10%<br>(4.3-18%)                    | 230<br>(92-400)     | 6300<br>(2400-11000)     |
| Rwanda   | 2016 | Female | 65 to 69 | 56%<br>(39-72%)                | 44%<br>(28-61%)          | 2.7<br>(1.2-5.2)                            | 7.9%<br>(2.9-14%)                    | 9.9%<br>(3.8-17%)                   | 230<br>(90-410)     | 5200<br>(2000-9400)      |
| Rwanda   | 2016 | Female | 70 to 74 | 55%<br>(38-71%)                | 45%<br>(29-62%)          | 2.4<br>(1.1-5)                              | 6.6%<br>(1.7-13%)                    | 8%<br>(2.1-16%)                     | 200<br>(53-410)     | 3700<br>(950-7600)       |
| Rwanda   | 2016 | Female | 75 to 79 | 53%<br>(36-70%)                | 47%<br>(30-64%)          | 2.1<br>(0.86-4.4)                           | 5.6%<br>(1.1-12%)                    | 6.8%<br>(1.4-14%)                   | 130<br>(28-290)     | 1900<br>(370-4100)       |
| Rwanda   | 2016 | Female | 80 to 84 | 51%<br>(34-69%)                | 49%<br>(31-66%)          | 1.9<br>(0.81-3.9)                           | 4.6%<br>(0.83-10%)                   | 5.5%<br>(0.99-12%)                  | 110<br>(21-250)     | 1200<br>(210-2700)       |
| Rwanda   | 2016 | Female | 85 to 89 | 51%<br>(35-66%)                | 49%<br>(34-65%)          | 1.8<br>(0.79-3.8)                           | 3.8%<br>(0.48-9.5%)                  | 4.5%<br>(0.56-11%)                  | 82<br>(11-210)      | 610<br>(76-1500)         |
| Rwanda   | 2016 | Female | 90 to 94 | 52%<br>(36-68%)                | 48%<br>(32-64%)          | 1.8<br>(0.74-3.7)                           | 3.1%<br>(0.0068-8.4%)                | 3.6%<br>(-0.025-10%)                | 23<br>(-0.16-65)    | 120<br>(0.26-330)        |
| Rwanda   | 2016 | Female | 95 plus  | 54%<br>(35-74%)                | 46%<br>(26-65%)          | 1.7<br>(0.63-4.2)                           | 3.2%<br>(0.14-8.9%)                  | 3.6%<br>(0.055-11%)                 | 9.5<br>(0.14-27)    | 33<br>(1.4-92)           |
| Rwanda   | 2016 | Male   | All Ages | 61%<br>(55-66%)                | 39%<br>(34-45%)          | 2.1<br>(1.1-3.5)                            | 6.3%<br>(3.9-8.8%)                   | 8.6%<br>(4.8-13%)                   | 3000<br>(1600-4600) | 140000<br>(89000-200000) |
| Rwanda   | 2016 | Male   | 15 to 19 | 57%<br>(45-67%)                | 43%<br>(33-55%)          | 2.5<br>(1.1-4.7)                            | 7.6%<br>(4.4-12%)                    | 9%<br>(4.2-15%)                     | 91<br>(41-160)      | 8900<br>(4900-14000)     |
| Rwanda   | 2016 | Male   | 20 to 24 | 67%<br>(56-75%)                | 33%<br>(25-44%)          | 3.1<br>(1.5-5.9)                            | 14%<br>(8.5-20%)                     | 15%<br>(7.4-24%)                    | 160<br>(77-260)     | 15000<br>(8900-22000)    |
| Rwanda   | 2016 | Male   | 25 to 29 | 74%<br>(65-80%)                | 26%<br>(20-35%)          | 3.8<br>(1.9-7)                              | 16%<br>(10-22%)                      | 19%<br>(10-27%)                     | 260<br>(140-410)    | 21000<br>(13000-30000)   |
| Rwanda   | 2016 | Male   | 30 to 34 | 77%<br>(69-83%)                | 23%<br>(17-31%)          | 4.2<br>(2.1-7.5)                            | 16%<br>(9.9-22%)                     | 19%<br>(11-28%)                     | 280<br>(150-420)    | 19000<br>(12000-28000)   |
| Rwanda   | 2016 | Male   | 35 to 39 | 77%<br>(69-82%)                | 23%<br>(18-31%)          | 4.4<br>(2.1-7.8)                            | 15%<br>(9.2-21%)                     | 19%<br>(11-28%)                     | 260<br>(140-390)    | 15000<br>(8800-22000)    |
| Rwanda   | 2016 | Male   | 40 to 44 | 78%<br>(72-83%)                | 22%<br>(17-28%)          | 4.5<br>(2-8)                                | 15%<br>(8.7-21%)                     | 19%<br>(11-27%)                     | 220<br>(120-330)    | 12000<br>(6600-16000)    |
| Rwanda   | 2016 | Male   | 45 to 49 | 81%<br>(73-85%)                | 19%<br>(15-27%)          | 4.6<br>(2.1-8.6)                            | 15%<br>(8.5-21%)                     | 19%<br>(10-28%)                     | 220<br>(120-330)    | 9800<br>(5400-14000)     |
| Rwanda   | 2016 | Male   | 50 to 54 | 82%<br>(75-86%)                | 18%<br>(14-25%)          | 4.5<br>(2.1-8.5)                            | 15%<br>(8.2-21%)                     | 19%<br>(10-27%)                     | 310<br>(160-480)    | 12000<br>(6700-18000)    |
| Rwanda   | 2016 | Male   | 55 to 59 | 80%<br>(73-86%)                | 20%<br>(14-27%)          | 4.3<br>(2.1-7.9)                            | 15%<br>(8.2-21%)                     | 19%<br>(10-27%)                     | 300<br>(160-450)    | 10000<br>(5500-15000)    |

| Location   | Year | Sex    | Age      | Prevalence of current drinkers | Prevalence of abstainers | Population average of standard drinks daily | Percent of total attributable deaths | Percent of total attributable DALYs | Attributable deaths    | Attributable DALYs   |
|------------|------|--------|----------|--------------------------------|--------------------------|---------------------------------------------|--------------------------------------|-------------------------------------|------------------------|----------------------|
| Rwanda     | 2016 | Male   | 60 to 64 | 78%<br>(67-86%)                | 22%<br>(14-33%)          | 3.9<br>(1.7-7.3)                            | 12%<br>(5.9-19%)                     | 15%<br>(7.2-23%)                    | 270<br>(120-430)       | 7600<br>(3600-12000) |
| Rwanda     | 2016 | Male   | 65 to 69 | 75%<br>(59-86%)                | 25%<br>(14-41%)          | 3.1<br>(1.5-5.8)                            | 9.2%<br>(3.8-16%)                    | 11%<br>(4.5-20%)                    | 200<br>(80-350)        | 4500<br>(1900-8100)  |
| Rwanda     | 2016 | Male   | 70 to 74 | 72%<br>(56-84%)                | 28%<br>(16-44%)          | 2.5<br>(1.2-5.1)                            | 6.6%<br>(2.2-13%)                    | 7.9%<br>(2.6-16%)                   | 150<br>(47-300)        | 2700<br>(890-5400)   |
| Rwanda     | 2016 | Male   | 75 to 79 | 70%<br>(55-83%)                | 30%<br>(17-45%)          | 2.1<br>(0.94-4.4)                           | 5.3%<br>(1.2-12%)                    | 6.4%<br>(1.4-14%)                   | 88<br>(19-200)         | 1300<br>(290-2800)   |
| Rwanda     | 2016 | Male   | 80 to 84 | 68%<br>(49-81%)                | 32%<br>(19-51%)          | 1.9<br>(0.84-3.7)                           | 4.4%<br>(0.94-10%)                   | 5.1%<br>(1-12%)                     | 74<br>(15-170)         | 790<br>(170-1800)    |
| Rwanda     | 2016 | Male   | 85 to 89 | 65%<br>(48-79%)                | 35%<br>(21-52%)          | 1.6<br>(0.74-3.3)                           | 3.4%<br>(0.72-7.9%)                  | 3.8%<br>(0.72-9.1%)                 | 50<br>(9.4-120)        | 390<br>(85-900)      |
| Rwanda     | 2016 | Male   | 90 to 94 | 65%<br>(49-79%)                | 35%<br>(21-51%)          | 1.4<br>(0.65-2.9)                           | 2.4%<br>(0.36-6.2%)                  | 2.6%<br>(0.17-6.9%)                 | 12<br>(0.78-32)        | 67<br>(10-170)       |
| Rwanda     | 2016 | Male   | 95 plus  | 67%<br>(47-83%)                | 33%<br>(17-53%)          | 1.3<br>(0.5-2.9)                            | 2.6%<br>(0.47-7%)                    | 2.7%<br>(0.22-7.8%)                 | 5.3<br>(0.45-15)       | 20<br>(3.8-54)       |
| Seychelles | 1990 | Female | All Ages | 8.2%<br>(6-11%)                | 92%<br>(89-94%)          | 0.41<br>(0.3-0.54)                          | 2.3%<br>(1.6-3.2%)                   | 4%<br>(2.3-6.3%)                    | 9.8<br>(5.4-15)        | 200<br>(130-290)     |
| Seychelles | 1990 | Female | 15 to 19 | 7.7%<br>(3.5-14%)              | 92%<br>(86-96%)          | 0.33<br>(0.12-0.71)                         | 1%<br>(0.57-1.7%)                    | 1.5%<br>(0.72-3.1%)                 | 0.033<br>(0.015-0.067) | 4.2<br>(2.4-7.1)     |
| Seychelles | 1990 | Female | 20 to 24 | 9.2%<br>(3.8-18%)              | 91%<br>(82-96%)          | 0.45<br>(0.16-0.92)                         | 1.5%<br>(0.92-2.4%)                  | 1.9%<br>(0.84-3.6%)                 | 0.046<br>(0.02-0.091)  | 6.6<br>(3.8-10)      |
| Seychelles | 1990 | Female | 25 to 29 | 9.8%<br>(4.2-19%)              | 90%<br>(81-96%)          | 0.5<br>(0.19-1)                             | 1.7%<br>(1.1-2.6%)                   | 2.2%<br>(1.1-4.1%)                  | 0.068<br>(0.033-0.13)  | 7.9<br>(4.8-12)      |
| Seychelles | 1990 | Female | 30 to 34 | 11%<br>(4.5-20%)               | 89%<br>(80-96%)          | 0.57<br>(0.21-1.1)                          | 1.9%<br>(1.2-3%)                     | 2.8%<br>(1.5-4.9%)                  | 0.097<br>(0.048-0.18)  | 8.5<br>(5.1-14)      |
| Seychelles | 1990 | Female | 35 to 39 | 12%<br>(4.8-22%)               | 88%<br>(78-95%)          | 0.64<br>(0.24-1.3)                          | 2.2%<br>(1.3-3.6%)                   | 3.4%<br>(1.7-5.9%)                  | 0.13<br>(0.062-0.23)   | 8.7<br>(4.9-14)      |
| Seychelles | 1990 | Female | 40 to 44 | 12%<br>(5.4-21%)               | 88%<br>(79-95%)          | 0.72<br>(0.26-1.5)                          | 2.6%<br>(1.4-4.4%)                   | 4%<br>(2-7.1%)                      | 0.1<br>(0.05-0.18)     | 5.6<br>(3-9.5)       |
| Seychelles | 1990 | Female | 45 to 49 | 12%<br>(5.2-23%)               | 88%<br>(77-95%)          | 0.83<br>(0.27-1.9)                          | 3%<br>(1.5-5.2%)                     | 4.4%<br>(2.2-7.8%)                  | 0.19<br>(0.095-0.35)   | 9.2<br>(4.7-16)      |
| Seychelles | 1990 | Female | 50 to 54 | 13%<br>(5.6-24%)               | 87%<br>(76-94%)          | 0.93<br>(0.32-2)                            | 3.5%<br>(1.7-6.1%)                   | 4.9%<br>(2.3-8.8%)                  | 0.39<br>(0.19-0.7)     | 16<br>(7.8-28)       |
| Seychelles | 1990 | Female | 55 to 59 | 13%<br>(5.7-24%)               | 87%<br>(76-94%)          | 1<br>(0.33-2.1)                             | 3.7%<br>(1.7-6.6%)                   | 5.1%<br>(2.3-8.9%)                  | 0.53<br>(0.24-0.94)    | 18<br>(8.2-31)       |
| Seychelles | 1990 | Female | 60 to 64 | 13%<br>(5.4-24%)               | 87%<br>(76-95%)          | 1<br>(0.32-2.2)                             | 3.7%<br>(1.7-6.9%)                   | 4.9%<br>(2.2-8.9%)                  | 0.75<br>(0.35-1.4)     | 21<br>(9.9-39)       |
| Seychelles | 1990 | Female | 65 to 69 | 12%<br>(5.5-23%)               | 88%<br>(77-95%)          | 0.94<br>(0.33-2)                            | 3.9%<br>(1.8-7.2%)                   | 5.1%<br>(2.3-9.1%)                  | 1<br>(0.47-1.8)        | 24<br>(11-42)        |
| Seychelles | 1990 | Female | 70 to 74 | 12%<br>(5.4-22%)               | 88%<br>(78-95%)          | 0.85<br>(0.28-1.9)                          | 3.7%<br>(1.5-7.2%)                   | 4.7%<br>(1.9-9.2%)                  | 1.1<br>(0.45-2.1)      | 20<br>(8.3-39)       |
| Seychelles | 1990 | Female | 75 to 79 | 11%<br>(4.8-22%)               | 89%<br>(78-95%)          | 0.79<br>(0.23-1.8)                          | 3.4%<br>(1.2-6.6%)                   | 4.1%<br>(1.5-8.1%)                  | 1.4<br>(0.51-2.8)      | 20<br>(7.2-39)       |

| Location   | Year | Sex    | Age      | Prevalence of current drinkers | Prevalence of abstainers | Population average of standard drinks daily | Percent of total attributable deaths | Percent of total attributable DALYs | Attributable deaths    | Attributable DALYs   |
|------------|------|--------|----------|--------------------------------|--------------------------|---------------------------------------------|--------------------------------------|-------------------------------------|------------------------|----------------------|
| Seychelles | 1990 | Female | 80 to 84 | 11%<br>(5-22%)                 | 89%<br>(78-95%)          | 0.79<br>(0.25-1.8)                          | 3.4%<br>(1.3-6.6%)                   | 4.2%<br>(1.5-8%)                    | 1.7<br>(0.63-3.4)      | 18<br>(6.5-35)       |
| Seychelles | 1990 | Female | 85 to 89 | 12%<br>(5.3-22%)               | 88%<br>(78-95%)          | 0.83<br>(0.25-1.9)                          | 3.3%<br>(1.2-6.8%)                   | 4%<br>(1.4-8.3%)                    | 1.3<br>(0.45-2.7)      | 9.8<br>(3.3-20)      |
| Seychelles | 1990 | Female | 90 to 94 | 14%<br>(5.7-26%)               | 86%<br>(74-94%)          | 0.95<br>(0.25-2.3)                          | 3.4%<br>(1.1-7%)                     | 4%<br>(1.2-8.4%)                    | 0.64<br>(0.19-1.3)     | 3.3<br>(1-6.8)       |
| Seychelles | 1990 | Female | 95 plus  | 17%<br>(6.6-34%)               | 83%<br>(66-93%)          | 1.1<br>(0.24-3.2)                           | 3.8%<br>(1.1-8.5%)                   | 4.5%<br>(1.3-10%)                   | 0.23<br>(0.064-0.51)   | 0.76<br>(0.22-1.7)   |
| Seychelles | 1990 | Male   | All Ages | 25%<br>(19-32%)                | 75%<br>(68-81%)          | 1.2<br>(1-1.4)                              | 6.9%<br>(5.2-8.5%)                   | 7.9%<br>(5.4-10%)                   | 25<br>(17-34)          | 870<br>(660-1100)    |
| Seychelles | 1990 | Male   | 15 to 19 | 21%<br>(12-36%)                | 79%<br>(64-88%)          | 0.6<br>(0.27-1.1)                           | 2.5%<br>(1.5-4%)                     | 3.3%<br>(1.7-5.6%)                  | 0.19<br>(0.1-0.33)     | 17<br>(9.7-27)       |
| Seychelles | 1990 | Male   | 20 to 24 | 33%<br>(18-51%)                | 67%<br>(49-82%)          | 1.4<br>(0.73-2.3)                           | 6.2%<br>(3.7-9.5%)                   | 7.5%<br>(4.1-12%)                   | 0.63<br>(0.35-1)       | 48<br>(29-73)        |
| Seychelles | 1990 | Male   | 25 to 29 | 38%<br>(20-56%)                | 62%<br>(44-80%)          | 2<br>(1.1-3.1)                              | 8.4%<br>(5.4-12%)                    | 10%<br>(6.1-15%)                    | 1<br>(0.63-1.6)        | 72<br>(46-110)       |
| Seychelles | 1990 | Male   | 30 to 34 | 41%<br>(22-60%)                | 59%<br>(40-78%)          | 2.5<br>(1.4-3.7)                            | 10%<br>(6.8-14%)                     | 12%<br>(7.9-17%)                    | 1.5<br>(0.92-2.1)      | 90<br>(59-130)       |
| Seychelles | 1990 | Male   | 35 to 39 | 44%<br>(26-63%)                | 56%<br>(37-74%)          | 2.8<br>(1.5-4.5)                            | 12%<br>(7.6-17%)                     | 14%<br>(8.9-20%)                    | 1.8<br>(1.1-2.6)       | 96<br>(60-140)       |
| Seychelles | 1990 | Male   | 40 to 44 | 43%<br>(26-64%)                | 57%<br>(36-74%)          | 3<br>(1.6-4.9)                              | 13%<br>(7.9-18%)                     | 15%<br>(9.2-21%)                    | 1.2<br>(0.76-1.8)      | 60<br>(37-85)        |
| Seychelles | 1990 | Male   | 45 to 49 | 42%<br>(23-61%)                | 58%<br>(39-77%)          | 2.9<br>(1.5-4.9)                            | 13%<br>(7.8-18%)                     | 15%<br>(9.2-21%)                    | 1.8<br>(1.1-2.6)       | 78<br>(48-110)       |
| Seychelles | 1990 | Male   | 50 to 54 | 40%<br>(22-59%)                | 60%<br>(41-78%)          | 2.8<br>(1.4-4.6)                            | 12%<br>(7-17%)                       | 14%<br>(8-20%)                      | 2.3<br>(1.3-3.3)       | 86<br>(49-120)       |
| Seychelles | 1990 | Male   | 55 to 59 | 37%<br>(21-58%)                | 63%<br>(42-79%)          | 2.5<br>(1.2-4.1)                            | 11%<br>(6.1-16%)                     | 12%<br>(7-18%)                      | 2.9<br>(1.7-4.4)       | 95<br>(54-140)       |
| Seychelles | 1990 | Male   | 60 to 64 | 34%<br>(19-54%)                | 66%<br>(46-81%)          | 2.1<br>(0.99-3.8)                           | 8.9%<br>(4.6-14%)                    | 10%<br>(5.2-16%)                    | 3<br>(1.5-4.8)         | 82<br>(42-130)       |
| Seychelles | 1990 | Male   | 65 to 69 | 31%<br>(17-49%)                | 69%<br>(51-83%)          | 1.8<br>(0.84-3.1)                           | 7.4%<br>(3.8-12%)                    | 8.4%<br>(4.3-13%)                   | 2.7<br>(1.4-4.4)       | 62<br>(31-99)        |
| Seychelles | 1990 | Male   | 70 to 74 | 28%<br>(15-44%)                | 72%<br>(56-85%)          | 1.5<br>(0.67-2.7)                           | 5.8%<br>(2.7-10%)                    | 6.6%<br>(3-12%)                     | 2<br>(0.92-3.7)        | 38<br>(17-68)        |
| Seychelles | 1990 | Male   | 75 to 79 | 25%<br>(14-42%)                | 75%<br>(58-86%)          | 1.2<br>(0.52-2.3)                           | 4.4%<br>(1.8-8.3%)                   | 4.9%<br>(1.9-9.4%)                  | 1.5<br>(0.59-2.9)      | 22<br>(8.7-41)       |
| Seychelles | 1990 | Male   | 80 to 84 | 23%<br>(11-40%)                | 77%<br>(60-89%)          | 1.1<br>(0.45-2)                             | 3.6%<br>(1.5-6.9%)                   | 4.1%<br>(1.6-7.9%)                  | 1.3<br>(0.5-2.5)       | 14<br>(5.5-26)       |
| Seychelles | 1990 | Male   | 85 to 89 | 22%<br>(11-36%)                | 78%<br>(64-89%)          | 0.94<br>(0.4-1.8)                           | 2.8%<br>(1-5.6%)                     | 3.1%<br>(1.1-6.4%)                  | 0.62<br>(0.22-1.3)     | 4.8<br>(1.8-9.6)     |
| Seychelles | 1990 | Male   | 90 to 94 | 23%<br>(12-38%)                | 77%<br>(62-88%)          | 0.91<br>(0.4-1.8)                           | 2.3%<br>(0.79-5.2%)                  | 2.6%<br>(0.83-5.9%)                 | 0.19<br>(0.061-0.43)   | 1<br>(0.34-2.3)      |
| Seychelles | 1990 | Male   | 95 plus  | 26%<br>(12-45%)                | 74%<br>(55-88%)          | 0.94<br>(0.32-2)                            | 2.1%<br>(0.5-5.6%)                   | 2.3%<br>(0.42-6%)                   | 0.041<br>(0.0075-0.11) | 0.15<br>(0.036-0.38) |

| Location   | Year | Sex    | Age      | Prevalence of current drinkers | Prevalence of abstainers | Population average of standard drinks daily | Percent of total attributable deaths | Percent of total attributable DALYs | Attributable deaths    | Attributable DALYs |
|------------|------|--------|----------|--------------------------------|--------------------------|---------------------------------------------|--------------------------------------|-------------------------------------|------------------------|--------------------|
| Seychelles | 1995 | Female | All Ages | 8.3%<br>(6-11%)                | 92%<br>(89-94%)          | 0.52<br>(0.39-0.69)                         | 2.6%<br>(1.8-3.6%)                   | 4.5%<br>(2.7-6.9%)                  | 11<br>(6.4-17)         | 230<br>(160-320)   |
| Seychelles | 1995 | Female | 15 to 19 | 7.4%<br>(3.3-14%)              | 93%<br>(86-97%)          | 0.4<br>(0.13-0.9)                           | 1.1%<br>(0.61-1.9%)                  | 1.8%<br>(0.83-3.7%)                 | 0.035<br>(0.016-0.072) | 4.5<br>(2.5-8)     |
| Seychelles | 1995 | Female | 20 to 24 | 9%<br>(3.8-17%)                | 91%<br>(83-96%)          | 0.53<br>(0.18-1.1)                          | 1.7%<br>(1-2.6%)                     | 2.2%<br>(0.95-4.2%)                 | 0.049<br>(0.021-0.092) | 7.3<br>(4.3-12)    |
| Seychelles | 1995 | Female | 25 to 29 | 9.7%<br>(4.2-18%)              | 90%<br>(82-96%)          | 0.6<br>(0.22-1.3)                           | 1.9%<br>(1.2-2.8%)                   | 2.6%<br>(1.2-4.7%)                  | 0.063<br>(0.028-0.12)  | 7.9<br>(4.8-12)    |
| Seychelles | 1995 | Female | 30 to 34 | 11%<br>(4.2-21%)               | 89%<br>(79-96%)          | 0.68<br>(0.26-1.4)                          | 2.1%<br>(1.3-3.1%)                   | 3.2%<br>(1.7-5.5%)                  | 0.1<br>(0.051-0.18)    | 9.7<br>(5.9-15)    |
| Seychelles | 1995 | Female | 35 to 39 | 12%<br>(4.5-22%)               | 88%<br>(78-95%)          | 0.77<br>(0.3-1.5)                           | 2.3%<br>(1.4-3.6%)                   | 3.9%<br>(2.1-6.6%)                  | 0.15<br>(0.079-0.27)   | 11<br>(6.5-18)     |
| Seychelles | 1995 | Female | 40 to 44 | 12%<br>(5.2-22%)               | 88%<br>(78-95%)          | 0.87<br>(0.33-1.7)                          | 2.7%<br>(1.5-4.6%)                   | 4.6%<br>(2.4-7.7%)                  | 0.2<br>(0.1-0.36)      | 12<br>(6.6-20)     |
| Seychelles | 1995 | Female | 45 to 49 | 12%<br>(4.9-22%)               | 88%<br>(78-95%)          | 1<br>(0.33-2.2)                             | 3.2%<br>(1.7-5.4%)                   | 5%<br>(2.6-8.5%)                    | 0.17<br>(0.085-0.3)    | 8.2<br>(4.4-14)    |
| Seychelles | 1995 | Female | 50 to 54 | 12%<br>(5.2-24%)               | 88%<br>(76-95%)          | 1.1<br>(0.39-2.5)                           | 3.7%<br>(2-6.4%)                     | 5.5%<br>(2.8-9.6%)                  | 0.31<br>(0.16-0.56)    | 13<br>(6.8-22)     |
| Seychelles | 1995 | Female | 55 to 59 | 12%<br>(5.5-23%)               | 88%<br>(77-95%)          | 1.2<br>(0.4-2.6)                            | 4%<br>(2-6.9%)                       | 5.7%<br>(2.8-9.8%)                  | 0.58<br>(0.29-1)       | 20<br>(10-34)      |
| Seychelles | 1995 | Female | 60 to 64 | 12%<br>(5.3-23%)               | 88%<br>(77-95%)          | 1.2<br>(0.39-2.7)                           | 4.1%<br>(2-7.4%)                     | 5.5%<br>(2.7-10%)                   | 0.8<br>(0.4-1.5)       | 23<br>(11-42)      |
| Seychelles | 1995 | Female | 65 to 69 | 12%<br>(5.3-22%)               | 88%<br>(78-95%)          | 1.1<br>(0.38-2.3)                           | 4.2%<br>(2-7.4%)                     | 5.6%<br>(2.7-9.8%)                  | 1.2<br>(0.55-2)        | 27<br>(13-48)      |
| Seychelles | 1995 | Female | 70 to 74 | 11%<br>(5-21%)                 | 89%<br>(79-95%)          | 1<br>(0.31-2.3)                             | 4%<br>(1.8-7.4%)                     | 5.1%<br>(2.3-9.7%)                  | 1.4<br>(0.62-2.6)      | 26<br>(12-49)      |
| Seychelles | 1995 | Female | 75 to 79 | 11%<br>(4.6-22%)               | 89%<br>(78-95%)          | 0.94<br>(0.27-2.2)                          | 3.6%<br>(1.5-7%)                     | 4.6%<br>(1.8-8.8%)                  | 1.3<br>(0.54-2.7)      | 19<br>(7.7-38)     |
| Seychelles | 1995 | Female | 80 to 84 | 11%<br>(4.7-21%)               | 89%<br>(79-95%)          | 0.93<br>(0.28-2.2)                          | 3.7%<br>(1.5-7.2%)                   | 4.6%<br>(1.8-9%)                    | 1.8<br>(0.71-3.5)      | 19<br>(7.4-37)     |
| Seychelles | 1995 | Female | 85 to 89 | 12%<br>(5.3-22%)               | 88%<br>(78-95%)          | 0.99<br>(0.31-2.3)                          | 3.7%<br>(1.4-7.3%)                   | 4.5%<br>(1.7-8.8%)                  | 1.7<br>(0.6-3.2)       | 12<br>(4.6-24)     |
| Seychelles | 1995 | Female | 90 to 94 | 14%<br>(5.9-26%)               | 86%<br>(74-94%)          | 1.1<br>(0.3-2.7)                            | 3.8%<br>(1.3-7.5%)                   | 4.5%<br>(1.6-9.1%)                  | 0.89<br>(0.3-1.8)      | 4.6<br>(1.6-9)     |
| Seychelles | 1995 | Female | 95 plus  | 17%<br>(6.6-35%)               | 83%<br>(65-93%)          | 1.4<br>(0.28-3.8)                           | 4.3%<br>(1.3-9.2%)                   | 5.1%<br>(1.5-11%)                   | 0.32<br>(0.099-0.7)    | 1.1<br>(0.34-2.3)  |
| Seychelles | 1995 | Male   | All Ages | 26%<br>(21-34%)                | 74%<br>(66-79%)          | 1.6<br>(1.4-1.9)                            | 8.8%<br>(7-11%)                      | 9.8%<br>(7.1-13%)                   | 35<br>(25-45)          | 1200<br>(970-1500) |
| Seychelles | 1995 | Male   | 15 to 19 | 21%<br>(12-35%)                | 79%<br>(65-88%)          | 0.7<br>(0.3-1.4)                            | 2.8%<br>(1.7-4.6%)                   | 3.8%<br>(2-6.7%)                    | 0.21<br>(0.11-0.37)    | 18<br>(11-31)      |
| Seychelles | 1995 | Male   | 20 to 24 | 32%<br>(18-50%)                | 68%<br>(50-82%)          | 1.7<br>(0.82-2.8)                           | 7.2%<br>(4.2-11%)                    | 8.8%<br>(4.8-14%)                   | 0.8<br>(0.43-1.3)      | 61<br>(36-93)      |
| Seychelles | 1995 | Male   | 25 to 29 | 38%<br>(20-56%)                | 62%<br>(44-80%)          | 2.4<br>(1.3-3.9)                            | 9.8%<br>(6.2-14%)                    | 12%<br>(7.1-18%)                    | 1.3<br>(0.73-1.9)      | 86<br>(53-120)     |

| Location   | Year | Sex    | Age      | Prevalence of current drinkers | Prevalence of abstainers | Population average of standard drinks daily | Percent of total attributable deaths | Percent of total attributable DALYs | Attributable deaths    | Attributable DALYs   |
|------------|------|--------|----------|--------------------------------|--------------------------|---------------------------------------------|--------------------------------------|-------------------------------------|------------------------|----------------------|
| Seychelles | 1995 | Male   | 30 to 34 | 41%<br>(22-61%)                | 59%<br>(39-78%)          | 3<br>(1.7-4.5)                              | 12%<br>(8.1-16%)                     | 14%<br>(9.5-19%)                    | 2<br>(1.3-2.7)         | 120<br>(83-160)      |
| Seychelles | 1995 | Male   | 35 to 39 | 43%<br>(26-63%)                | 57%<br>(37-74%)          | 3.4<br>(2-5.3)                              | 13%<br>(9.2-18%)                     | 16%<br>(11-22%)                     | 2.8<br>(1.8-3.8)       | 150<br>(100-200)     |
| Seychelles | 1995 | Male   | 40 to 44 | 43%<br>(26-63%)                | 57%<br>(37-74%)          | 3.6<br>(2-5.5)                              | 14%<br>(9.6-19%)                     | 17%<br>(11-23%)                     | 3.3<br>(2.2-4.5)       | 160<br>(110-220)     |
| Seychelles | 1995 | Male   | 45 to 49 | 42%<br>(24-62%)                | 58%<br>(38-76%)          | 3.5<br>(1.8-5.9)                            | 15%<br>(9.7-20%)                     | 17%<br>(11-23%)                     | 2.5<br>(1.6-3.4)       | 110<br>(69-150)      |
| Seychelles | 1995 | Male   | 50 to 54 | 40%<br>(22-58%)                | 60%<br>(42-78%)          | 3.3<br>(1.7-5.6)                            | 14%<br>(8.5-19%)                     | 16%<br>(9.9-21%)                    | 3.1<br>(1.9-4.2)       | 110<br>(73-160)      |
| Seychelles | 1995 | Male   | 55 to 59 | 37%<br>(22-57%)                | 63%<br>(43-78%)          | 3<br>(1.4-5)                                | 12%<br>(7.5-17%)                     | 14%<br>(8.7-20%)                    | 3.2<br>(1.9-4.5)       | 100<br>(63-140)      |
| Seychelles | 1995 | Male   | 60 to 64 | 34%<br>(19-54%)                | 66%<br>(46-81%)          | 2.6<br>(1.2-4.6)                            | 10%<br>(5.8-16%)                     | 12%<br>(6.6-18%)                    | 3.7<br>(2-5.7)         | 100<br>(56-160)      |
| Seychelles | 1995 | Male   | 65 to 69 | 31%<br>(17-49%)                | 69%<br>(51-83%)          | 2.2<br>(1-3.8)                              | 8.9%<br>(4.7-14%)                    | 10%<br>(5.3-16%)                    | 3.7<br>(2-5.8)         | 86<br>(46-130)       |
| Seychelles | 1995 | Male   | 70 to 74 | 28%<br>(15-44%)                | 72%<br>(56-85%)          | 1.8<br>(0.79-3.3)                           | 7.1%<br>(3.4-12%)                    | 8.1%<br>(3.8-13%)                   | 3.1<br>(1.5-5.1)       | 58<br>(27-94)        |
| Seychelles | 1995 | Male   | 75 to 79 | 25%<br>(14-41%)                | 75%<br>(59-86%)          | 1.5<br>(0.63-2.8)                           | 5.4%<br>(2.3-9.6%)                   | 6.1%<br>(2.6-11%)                   | 2.1<br>(0.91-3.7)      | 30<br>(13-53)        |
| Seychelles | 1995 | Male   | 80 to 84 | 23%<br>(12-39%)                | 77%<br>(61-88%)          | 1.3<br>(0.53-2.4)                           | 4.6%<br>(2-8.3%)                     | 5.2%<br>(2.2-9.4%)                  | 1.6<br>(0.65-2.8)      | 17<br>(7.1-30)       |
| Seychelles | 1995 | Male   | 85 to 89 | 22%<br>(11-36%)                | 78%<br>(64-89%)          | 1.1<br>(0.48-2.2)                           | 3.7%<br>(1.5-7%)                     | 4.1%<br>(1.7-8%)                    | 0.89<br>(0.36-1.7)     | 6.9<br>(2.8-13)      |
| Seychelles | 1995 | Male   | 90 to 94 | 23%<br>(12-38%)                | 77%<br>(62-88%)          | 1.1<br>(0.48-2.1)                           | 3.2%<br>(1.2-6.6%)                   | 3.6%<br>(1.3-7.6%)                  | 0.33<br>(0.12-0.7)     | 1.8<br>(0.67-3.7)    |
| Seychelles | 1995 | Male   | 95 plus  | 27%<br>(12-46%)                | 73%<br>(54-88%)          | 1.2<br>(0.38-2.6)                           | 3.2%<br>(0.95-7.3%)                  | 3.4%<br>(0.93-8.2%)                 | 0.08<br>(0.022-0.19)   | 0.29<br>(0.086-0.68) |
| Seychelles | 2000 | Female | All Ages | 8.7%<br>(6.4-12%)              | 91%<br>(88-94%)          | 0.72<br>(0.52-0.96)                         | 3.2%<br>(2.3-4.3%)                   | 5.3%<br>(3.4-7.9%)                  | 15<br>(9.5-22)         | 310<br>(220-420)     |
| Seychelles | 2000 | Female | 15 to 19 | 7.5%<br>(3.4-14%)              | 93%<br>(86-97%)          | 0.52<br>(0.18-1.2)                          | 1.3%<br>(0.71-2.3%)                  | 2.3%<br>(1-4.6%)                    | 0.048<br>(0.021-0.096) | 5.7<br>(3.1-10)      |
| Seychelles | 2000 | Female | 20 to 24 | 9.1%<br>(3.6-18%)              | 91%<br>(82-96%)          | 0.7<br>(0.24-1.4)                           | 1.9%<br>(1.2-3%)                     | 2.7%<br>(1.2-4.9%)                  | 0.067<br>(0.03-0.12)   | 8.8<br>(5.2-14)      |
| Seychelles | 2000 | Female | 25 to 29 | 9.9%<br>(4.1-19%)              | 90%<br>(81-96%)          | 0.8<br>(0.28-1.7)                           | 2.2%<br>(1.4-3.4%)                   | 3.1%<br>(1.5-5.4%)                  | 0.094<br>(0.044-0.18)  | 10<br>(6.1-16)       |
| Seychelles | 2000 | Female | 30 to 34 | 11%<br>(4.3-21%)               | 89%<br>(79-96%)          | 0.9<br>(0.34-1.9)                           | 2.5%<br>(1.5-3.8%)                   | 3.9%<br>(2.1-6.4%)                  | 0.15<br>(0.071-0.26)   | 12<br>(7.2-20)       |
| Seychelles | 2000 | Female | 35 to 39 | 12%<br>(4.8-21%)               | 88%<br>(79-95%)          | 1<br>(0.4-1.9)                              | 2.9%<br>(1.7-4.5%)                   | 4.7%<br>(2.6-7.8%)                  | 0.25<br>(0.12-0.42)    | 17<br>(9.2-27)       |
| Seychelles | 2000 | Female | 40 to 44 | 12%<br>(5.4-22%)               | 88%<br>(78-95%)          | 1.1<br>(0.41-2.2)                           | 3.3%<br>(1.9-5.3%)                   | 5.4%<br>(2.9-8.6%)                  | 0.37<br>(0.19-0.63)    | 21<br>(12-35)        |
| Seychelles | 2000 | Female | 45 to 49 | 12%<br>(5-22%)                 | 88%<br>(78-95%)          | 1.3<br>(0.43-2.7)                           | 3.7%<br>(2-6.3%)                     | 5.7%<br>(3-9.6%)                    | 0.46<br>(0.24-0.8)     | 22<br>(12-37)        |



| Location   | Year | Sex    | Age      | Prevalence of current drinkers | Prevalence of abstainers | Population average of standard drinks daily | Percent of total attributable deaths | Percent of total attributable DALYs | Attributable deaths | Attributable DALYs  |
|------------|------|--------|----------|--------------------------------|--------------------------|---------------------------------------------|--------------------------------------|-------------------------------------|---------------------|---------------------|
| Seychelles | 2000 | Female | 50 to 54 | 12%<br>(5.2-24%)               | 88%<br>(76-95%)          | 1.4<br>(0.5-3.1)                            | 4.3%<br>(2.3-7.2%)                   | 6.2%<br>(3.3-11%)                   | 0.35<br>(0.18-0.6)  | 14<br>(7.6-24)      |
| Seychelles | 2000 | Female | 55 to 59 | 12%<br>(5.6-23%)               | 88%<br>(77-94%)          | 1.6<br>(0.52-3.4)                           | 4.5%<br>(2.4-7.5%)                   | 6.4%<br>(3.4-11%)                   | 0.54<br>(0.29-0.92) | 19<br>(10-31)       |
| Seychelles | 2000 | Female | 60 to 64 | 12%<br>(5.4-23%)               | 88%<br>(77-95%)          | 1.6<br>(0.5-3.6)                            | 4.6%<br>(2.4-8.1%)                   | 6.2%<br>(3.2-11%)                   | 0.98<br>(0.51-1.7)  | 28<br>(15-50)       |
| Seychelles | 2000 | Female | 65 to 69 | 12%<br>(5.4-22%)               | 88%<br>(78-95%)          | 1.5<br>(0.51-3.1)                           | 4.9%<br>(2.5-8.3%)                   | 6.4%<br>(3.4-11%)                   | 1.4<br>(0.75-2.5)   | 34<br>(18-59)       |
| Seychelles | 2000 | Female | 70 to 74 | 12%<br>(5.2-22%)               | 88%<br>(78-95%)          | 1.3<br>(0.43-3)                             | 4.6%<br>(2.2-8.1%)                   | 5.9%<br>(2.9-10%)                   | 1.8<br>(0.9-3.2)    | 35<br>(17-61)       |
| Seychelles | 2000 | Female | 75 to 79 | 11%<br>(4.8-21%)               | 89%<br>(79-95%)          | 1.2<br>(0.37-2.8)                           | 4.2%<br>(1.8-7.6%)                   | 5.3%<br>(2.3-9.7%)                  | 2<br>(0.86-3.6)     | 28<br>(12-51)       |
| Seychelles | 2000 | Female | 80 to 84 | 11%<br>(5.2-22%)               | 89%<br>(78-95%)          | 1.2<br>(0.4-2.8)                            | 4.3%<br>(2-8%)                       | 5.3%<br>(2.4-9.9%)                  | 2.5<br>(1.1-4.6)    | 26<br>(12-49)       |
| Seychelles | 2000 | Female | 85 to 89 | 12%<br>(5.6-23%)               | 88%<br>(77-94%)          | 1.3<br>(0.41-3)                             | 4.4%<br>(1.9-8.5%)                   | 5.3%<br>(2.3-10%)                   | 2.1<br>(0.89-4.1)   | 15<br>(6.8-31)      |
| Seychelles | 2000 | Female | 90 to 94 | 14%<br>(6.2-27%)               | 86%<br>(73-94%)          | 1.5<br>(0.41-3.6)                           | 4.5%<br>(1.8-8.5%)                   | 5.3%<br>(2.2-10%)                   | 1.3<br>(0.52-2.4)   | 6.6<br>(2.7-12)     |
| Seychelles | 2000 | Female | 95 plus  | 18%<br>(6.7-34%)               | 82%<br>(66-93%)          | 1.8<br>(0.39-5.2)                           | 5%<br>(1.9-10%)                      | 5.9%<br>(2.2-12%)                   | 0.5<br>(0.18-1)     | 1.7<br>(0.61-3.4)   |
| Seychelles | 2000 | Male   | All Ages | 27%<br>(22-35%)                | 73%<br>(65-78%)          | 2.2<br>(1.9-2.6)                            | 10%<br>(8.6-12%)                     | 12%<br>(9.2-14%)                    | 41<br>(32-50)       | 1400<br>(1200-1700) |
| Seychelles | 2000 | Male   | 15 to 19 | 21%<br>(12-35%)                | 79%<br>(65-88%)          | 0.92<br>(0.4-1.8)                           | 3.4%<br>(1.9-5.7%)                   | 4.7%<br>(2.5-8.4%)                  | 0.27<br>(0.14-0.49) | 23<br>(13-39)       |
| Seychelles | 2000 | Male   | 20 to 24 | 33%<br>(18-51%)                | 67%<br>(49-82%)          | 2.2<br>(1.1-3.8)                            | 8.7%<br>(5.1-13%)                    | 11%<br>(6.1-17%)                    | 0.94<br>(0.51-1.4)  | 71<br>(42-100)      |
| Seychelles | 2000 | Male   | 25 to 29 | 38%<br>(21-56%)                | 62%<br>(44-79%)          | 3.1<br>(1.6-5)                              | 11%<br>(7.4-16%)                     | 14%<br>(9.1-20%)                    | 1.4<br>(0.89-2)     | 98<br>(63-140)      |
| Seychelles | 2000 | Male   | 30 to 34 | 41%<br>(23-61%)                | 59%<br>(39-77%)          | 3.8<br>(2.1-5.8)                            | 13%<br>(9.5-17%)                     | 17%<br>(12-22%)                     | 2<br>(1.4-2.6)      | 120<br>(86-160)     |
| Seychelles | 2000 | Male   | 35 to 39 | 43%<br>(26-63%)                | 57%<br>(37-74%)          | 4.3<br>(2.5-6.5)                            | 15%<br>(11-19%)                      | 18%<br>(14-24%)                     | 2.8<br>(2-3.7)      | 150<br>(110-200)    |
| Seychelles | 2000 | Male   | 40 to 44 | 43%<br>(26-63%)                | 57%<br>(37-74%)          | 4.5<br>(2.6-6.9)                            | 16%<br>(12-20%)                      | 19%<br>(14-25%)                     | 3.7<br>(2.7-4.9)    | 180<br>(130-230)    |
| Seychelles | 2000 | Male   | 45 to 49 | 41%<br>(23-62%)                | 59%<br>(38-77%)          | 4.5<br>(2.3-7.3)                            | 16%<br>(11-21%)                      | 19%<br>(14-25%)                     | 4.3<br>(3-5.6)      | 180<br>(130-240)    |
| Seychelles | 2000 | Male   | 50 to 54 | 39%<br>(22-59%)                | 61%<br>(41-78%)          | 4.2<br>(2.2-7.1)                            | 15%<br>(11-20%)                      | 18%<br>(13-24%)                     | 2.9<br>(2-3.9)      | 110<br>(78-150)     |
| Seychelles | 2000 | Male   | 55 to 59 | 37%<br>(21-58%)                | 63%<br>(42-79%)          | 3.8<br>(1.9-6.5)                            | 14%<br>(9.5-19%)                     | 17%<br>(11-22%)                     | 3.3<br>(2.3-4.5)    | 110<br>(73-150)     |
| Seychelles | 2000 | Male   | 60 to 64 | 34%<br>(19-54%)                | 66%<br>(46-81%)          | 3.3<br>(1.5-6.1)                            | 12%<br>(7.5-17%)                     | 14%<br>(8.8-20%)                    | 3.5<br>(2.2-5)      | 98<br>(60-140)      |
| Seychelles | 2000 | Male   | 65 to 69 | 31%<br>(17-49%)                | 69%<br>(51-83%)          | 2.8<br>(1.3-4.9)                            | 11%<br>(6.4-15%)                     | 12%<br>(7.4-17%)                    | 4.4<br>(2.7-6.3)    | 100<br>(61-150)     |

| Location   | Year | Sex    | Age      | Prevalence of current drinkers | Prevalence of abstainers | Population average of standard drinks daily | Percent of total attributable deaths | Percent of total attributable DALYs | Attributable deaths    | Attributable DALYs |
|------------|------|--------|----------|--------------------------------|--------------------------|---------------------------------------------|--------------------------------------|-------------------------------------|------------------------|--------------------|
| Seychelles | 2000 | Male   | 70 to 74 | 27%<br>(15-44%)                | 73%<br>(56-85%)          | 2.2<br>(1-4.2)                              | 8.7%<br>(4.8-13%)                    | 10%<br>(5.5-15%)                    | 4.1<br>(2.2-6)         | 76<br>(42-110)     |
| Seychelles | 2000 | Male   | 75 to 79 | 25%<br>(14-41%)                | 75%<br>(59-86%)          | 1.9<br>(0.79-3.6)                           | 6.9%<br>(3.4-11%)                    | 7.9%<br>(3.8-13%)                   | 3.1<br>(1.5-5)         | 45<br>(22-72)      |
| Seychelles | 2000 | Male   | 80 to 84 | 23%<br>(11-38%)                | 77%<br>(62-89%)          | 1.6<br>(0.69-3.1)                           | 6%<br>(2.8-10%)                      | 6.9%<br>(3.2-12%)                   | 2.5<br>(1.2-4.2)       | 27<br>(13-45)      |
| Seychelles | 2000 | Male   | 85 to 89 | 22%<br>(11-36%)                | 78%<br>(64-89%)          | 1.4<br>(0.64-2.8)                           | 5%<br>(2.2-8.6%)                     | 5.7%<br>(2.5-9.8%)                  | 1.1<br>(0.5-1.9)       | 8.6<br>(3.8-15)    |
| Seychelles | 2000 | Male   | 90 to 94 | 23%<br>(12-38%)                | 77%<br>(62-88%)          | 1.4<br>(0.61-2.8)                           | 4.4%<br>(1.9-8.1%)                   | 5.1%<br>(2.1-9.4%)                  | 0.49<br>(0.2-0.9)      | 2.6<br>(1.1-4.7)   |
| Seychelles | 2000 | Male   | 95 plus  | 26%<br>(12-45%)                | 74%<br>(55-88%)          | 1.5<br>(0.5-3.2)                            | 4.4%<br>(1.5-9%)                     | 4.9%<br>(1.6-10%)                   | 0.14<br>(0.045-0.29)   | 0.5<br>(0.17-1)    |
| Seychelles | 2005 | Female | All Ages | 8.9%<br>(6.3-12%)              | 91%<br>(88-94%)          | 0.81<br>(0.6-1.1)                           | 3.2%<br>(2.3-4.3%)                   | 5.3%<br>(3.4-8%)                    | 16<br>(10-24)          | 340<br>(250-470)   |
| Seychelles | 2005 | Female | 15 to 19 | 7.3%<br>(3.3-14%)              | 93%<br>(86-97%)          | 0.54<br>(0.18-1.2)                          | 1.3%<br>(0.71-2.2%)                  | 2.3%<br>(0.99-4.7%)                 | 0.043<br>(0.018-0.087) | 5.1<br>(2.8-8.8)   |
| Seychelles | 2005 | Female | 20 to 24 | 8.9%<br>(3.8-17%)              | 91%<br>(83-96%)          | 0.73<br>(0.25-1.5)                          | 1.9%<br>(1.1-2.9%)                   | 2.7%<br>(1.2-5%)                    | 0.068<br>(0.029-0.13)  | 9.2<br>(5.3-15)    |
| Seychelles | 2005 | Female | 25 to 29 | 9.7%<br>(4.1-18%)              | 90%<br>(82-96%)          | 0.83<br>(0.28-1.8)                          | 2.1%<br>(1.3-3.2%)                   | 3%<br>(1.4-5.3%)                    | 0.097<br>(0.043-0.17)  | 11<br>(6.8-18)     |
| Seychelles | 2005 | Female | 30 to 34 | 11%<br>(4.3-21%)               | 89%<br>(79-96%)          | 0.93<br>(0.34-1.9)                          | 2.4%<br>(1.5-3.6%)                   | 3.8%<br>(2-6.1%)                    | 0.16<br>(0.08-0.27)    | 14<br>(8.2-22)     |
| Seychelles | 2005 | Female | 35 to 39 | 11%<br>(4.6-22%)               | 89%<br>(78-95%)          | 1<br>(0.39-2)                               | 2.8%<br>(1.6-4.3%)                   | 4.6%<br>(2.5-7.6%)                  | 0.26<br>(0.13-0.45)    | 18<br>(11-29)      |
| Seychelles | 2005 | Female | 40 to 44 | 12%<br>(5.2-21%)               | 88%<br>(79-95%)          | 1.2<br>(0.45-2.3)                           | 3.2%<br>(1.9-5.2%)                   | 5.3%<br>(3-8.6%)                    | 0.42<br>(0.22-0.71)    | 24<br>(14-39)      |
| Seychelles | 2005 | Female | 45 to 49 | 12%<br>(5.1-22%)               | 88%<br>(78-95%)          | 1.3<br>(0.48-2.8)                           | 3.7%<br>(2-6.3%)                     | 5.8%<br>(3.1-9.7%)                  | 0.59<br>(0.31-1)       | 28<br>(15-46)      |
| Seychelles | 2005 | Female | 50 to 54 | 12%<br>(5.2-24%)               | 88%<br>(76-95%)          | 1.5<br>(0.55-3.2)                           | 4.3%<br>(2.3-7.4%)                   | 6.3%<br>(3.4-11%)                   | 0.73<br>(0.39-1.3)     | 30<br>(16-50)      |
| Seychelles | 2005 | Female | 55 to 59 | 13%<br>(5.6-24%)               | 87%<br>(76-94%)          | 1.7<br>(0.55-3.7)                           | 4.6%<br>(2.4-7.8%)                   | 6.5%<br>(3.4-11%)                   | 0.52<br>(0.27-0.92)    | 18<br>(9.4-31)     |
| Seychelles | 2005 | Female | 60 to 64 | 13%<br>(5.5-24%)               | 87%<br>(76-95%)          | 1.7<br>(0.54-3.9)                           | 4.7%<br>(2.5-8.3%)                   | 6.3%<br>(3.3-11%)                   | 0.78<br>(0.41-1.4)     | 23<br>(12-40)      |
| Seychelles | 2005 | Female | 65 to 69 | 12%<br>(5.4-23%)               | 88%<br>(77-95%)          | 1.6<br>(0.55-3.2)                           | 4.9%<br>(2.5-8.3%)                   | 6.5%<br>(3.3-11%)                   | 1.5<br>(0.75-2.5)      | 35<br>(18-59)      |
| Seychelles | 2005 | Female | 70 to 74 | 12%<br>(5.4-22%)               | 88%<br>(78-95%)          | 1.4<br>(0.47-3.3)                           | 4.6%<br>(2.3-8%)                     | 6%<br>(3-10%)                       | 1.9<br>(0.95-3.3)      | 36<br>(18-62)      |
| Seychelles | 2005 | Female | 75 to 79 | 11%<br>(5-21%)                 | 89%<br>(79-95%)          | 1.3<br>(0.4-3.1)                            | 4.2%<br>(1.9-7.6%)                   | 5.3%<br>(2.4-9.6%)                  | 2.2<br>(1-4)           | 32<br>(15-57)      |
| Seychelles | 2005 | Female | 80 to 84 | 11%<br>(5.1-22%)               | 89%<br>(78-95%)          | 1.3<br>(0.42-3)                             | 4.4%<br>(2-7.9%)                     | 5.4%<br>(2.5-9.8%)                  | 2.8<br>(1.3-5.1)       | 29<br>(14-53)      |
| Seychelles | 2005 | Female | 85 to 89 | 12%<br>(5.4-23%)               | 88%<br>(77-95%)          | 1.4<br>(0.44-3.2)                           | 4.4%<br>(1.9-8.4%)                   | 5.3%<br>(2.2-10%)                   | 2.3<br>(0.96-4.4)      | 17<br>(7.2-33)     |

| Location   | Year | Sex    | Age      | Prevalence of current drinkers | Prevalence of abstainers | Population average of standard drinks daily | Percent of total attributable deaths | Percent of total attributable DALYs | Attributable deaths   | Attributable DALYs  |
|------------|------|--------|----------|--------------------------------|--------------------------|---------------------------------------------|--------------------------------------|-------------------------------------|-----------------------|---------------------|
| Seychelles | 2005 | Female | 90 to 94 | 14%<br>(6.1-26%)               | 86%<br>(74-94%)          | 1.6<br>(0.45-3.8)                           | 4.5%<br>(1.9-8.2%)                   | 5.4%<br>(2.2-10%)                   | 1.2<br>(0.51-2.3)     | 6.4<br>(2.6-12)     |
| Seychelles | 2005 | Female | 95 plus  | 17%<br>(6.9-34%)               | 83%<br>(66-93%)          | 1.9<br>(0.41-5.4)                           | 5%<br>(1.8-9.8%)                     | 5.8%<br>(2.1-12%)                   | 0.55<br>(0.2-1.1)     | 1.9<br>(0.7-3.7)    |
| Seychelles | 2005 | Male   | All Ages | 29%<br>(23-37%)                | 71%<br>(63-77%)          | 2.5<br>(2.1-3)                              | 10%<br>(8.8-12%)                     | 12%<br>(9.7-14%)                    | 42<br>(34-51)         | 1500<br>(1200-1800) |
| Seychelles | 2005 | Male   | 15 to 19 | 21%<br>(12-35%)                | 79%<br>(65-88%)          | 0.95<br>(0.4-1.9)                           | 3.5%<br>(1.9-5.9%)                   | 4.9%<br>(2.5-8.6%)                  | 0.27<br>(0.14-0.48)   | 22<br>(12-39)       |
| Seychelles | 2005 | Male   | 20 to 24 | 32%<br>(17-50%)                | 68%<br>(50-83%)          | 2.3<br>(1.1-4)                              | 8.8%<br>(5.1-13%)                    | 11%<br>(6.1-17%)                    | 1<br>(0.55-1.6)       | 77<br>(44-120)      |
| Seychelles | 2005 | Male   | 25 to 29 | 37%<br>(20-56%)                | 63%<br>(44-80%)          | 3.2<br>(1.6-5.2)                            | 11%<br>(7.3-15%)                     | 14%<br>(9-20%)                      | 1.5<br>(0.9-2.2)      | 100<br>(67-150)     |
| Seychelles | 2005 | Male   | 30 to 34 | 41%<br>(22-60%)                | 59%<br>(40-78%)          | 4<br>(2.2-6.1)                              | 13%<br>(9.4-17%)                     | 17%<br>(12-22%)                     | 2.1<br>(1.4-2.8)      | 130<br>(92-170)     |
| Seychelles | 2005 | Male   | 35 to 39 | 43%<br>(25-63%)                | 57%<br>(37-75%)          | 4.5<br>(2.6-7)                              | 14%<br>(11-19%)                      | 19%<br>(14-24%)                     | 2.8<br>(2-3.7)        | 160<br>(110-200)    |
| Seychelles | 2005 | Male   | 40 to 44 | 43%<br>(26-63%)                | 57%<br>(37-74%)          | 4.8<br>(2.7-7.2)                            | 15%<br>(11-20%)                      | 20%<br>(15-25%)                     | 3.7<br>(2.7-4.9)      | 180<br>(140-240)    |
| Seychelles | 2005 | Male   | 45 to 49 | 41%<br>(23-60%)                | 59%<br>(40-77%)          | 4.7<br>(2.5-7.5)                            | 16%<br>(12-20%)                      | 20%<br>(15-25%)                     | 4.5<br>(3.2-5.9)      | 200<br>(140-250)    |
| Seychelles | 2005 | Male   | 50 to 54 | 39%<br>(22-58%)                | 61%<br>(42-78%)          | 4.4<br>(2.3-7.3)                            | 15%<br>(11-20%)                      | 19%<br>(14-24%)                     | 4.8<br>(3.5-6.3)      | 180<br>(130-240)    |
| Seychelles | 2005 | Male   | 55 to 59 | 37%<br>(21-56%)                | 63%<br>(44-79%)          | 4<br>(1.9-6.7)                              | 14%<br>(9.6-18%)                     | 17%<br>(12-22%)                     | 3.2<br>(2.2-4.4)      | 110<br>(73-140)     |
| Seychelles | 2005 | Male   | 60 to 64 | 34%<br>(19-53%)                | 66%<br>(47-81%)          | 3.5<br>(1.5-6.3)                            | 12%<br>(7.7-17%)                     | 14%<br>(9.1-20%)                    | 3.3<br>(2.1-4.5)      | 91<br>(58-130)      |
| Seychelles | 2005 | Male   | 65 to 69 | 31%<br>(17-48%)                | 69%<br>(52-83%)          | 2.9<br>(1.3-5)                              | 11%<br>(6.5-15%)                     | 12%<br>(7.7-17%)                    | 3.2<br>(1.9-4.4)      | 73<br>(46-100)      |
| Seychelles | 2005 | Male   | 70 to 74 | 27%<br>(15-43%)                | 73%<br>(57-85%)          | 2.4<br>(1.1-4.3)                            | 8.8%<br>(5-13%)                      | 10%<br>(5.8-15%)                    | 3.9<br>(2.2-5.6)      | 72<br>(41-110)      |
| Seychelles | 2005 | Male   | 75 to 79 | 25%<br>(14-41%)                | 75%<br>(59-86%)          | 2<br>(0.81-3.8)                             | 7%<br>(3.4-11%)                      | 8.1%<br>(4-13%)                     | 3.3<br>(1.6-5.2)      | 48<br>(24-75)       |
| Seychelles | 2005 | Male   | 80 to 84 | 23%<br>(11-38%)                | 77%<br>(62-89%)          | 1.7<br>(0.71-3.2)                           | 6.2%<br>(2.9-10%)                    | 7.1%<br>(3.3-12%)                   | 2.6<br>(1.2-4.3)      | 28<br>(13-46)       |
| Seychelles | 2005 | Male   | 85 to 89 | 21%<br>(11-35%)                | 79%<br>(65-89%)          | 1.5<br>(0.66-2.9)                           | 5.2%<br>(2.5-8.9%)                   | 5.9%<br>(2.7-10%)                   | 1.4<br>(0.65-2.5)     | 11<br>(5-19)        |
| Seychelles | 2005 | Male   | 90 to 94 | 23%<br>(12-37%)                | 77%<br>(63-88%)          | 1.5<br>(0.63-2.8)                           | 4.6%<br>(2-8.2%)                     | 5.3%<br>(2.2-9.6%)                  | 0.46<br>(0.19-0.82)   | 2.4<br>(1-4.3)      |
| Seychelles | 2005 | Male   | 95 plus  | 26%<br>(12-45%)                | 74%<br>(55-88%)          | 1.5<br>(0.51-3.3)                           | 4.6%<br>(1.7-9.5%)                   | 5.1%<br>(1.7-11%)                   | 0.14<br>(0.047-0.29)  | 0.5<br>(0.18-1)     |
| Seychelles | 2010 | Female | All Ages | 8.9%<br>(6.4-12%)              | 91%<br>(88-94%)          | 0.74<br>(0.52-1)                            | 2.9%<br>(2-3.9%)                     | 4.8%<br>(3-7.1%)                    | 14<br>(8.8-22)        | 310<br>(220-420)    |
| Seychelles | 2010 | Female | 15 to 19 | 7.3%<br>(3.2-14%)              | 93%<br>(86-97%)          | 0.48<br>(0.15-1.1)                          | 1.1%<br>(0.64-1.9%)                  | 1.9%<br>(0.78-4%)                   | 0.033<br>(0.013-0.07) | 4.4<br>(2.4-7.4)    |

| Location   | Year | Sex    | Age      | Prevalence of current drinkers | Prevalence of abstainers | Population average of standard drinks daily | Percent of total attributable deaths | Percent of total attributable DALYs | Attributable deaths    | Attributable DALYs  |
|------------|------|--------|----------|--------------------------------|--------------------------|---------------------------------------------|--------------------------------------|-------------------------------------|------------------------|---------------------|
| Seychelles | 2010 | Female | 20 to 24 | 8.8%<br>(3.7-17%)              | 91%<br>(83-96%)          | 0.64<br>(0.2-1.4)                           | 1.7%<br>(1.1-2.7%)                   | 2.2%<br>(0.92-4.3%)                 | 0.045<br>(0.019-0.088) | 7.3<br>(4.3-12)     |
| Seychelles | 2010 | Female | 25 to 29 | 9.6%<br>(4.2-19%)              | 90%<br>(81-96%)          | 0.73<br>(0.24-1.6)                          | 1.9%<br>(1.2-2.9%)                   | 2.5%<br>(1.1-4.4%)                  | 0.061<br>(0.026-0.11)  | 8.7<br>(5.4-14)     |
| Seychelles | 2010 | Female | 30 to 34 | 11%<br>(4.2-20%)               | 89%<br>(80-96%)          | 0.83<br>(0.29-1.7)                          | 2%<br>(1.3-3.1%)                     | 3.2%<br>(1.6-5.4%)                  | 0.1<br>(0.05-0.18)     | 11<br>(6.3-17)      |
| Seychelles | 2010 | Female | 35 to 39 | 11%<br>(4.6-22%)               | 89%<br>(78-95%)          | 0.92<br>(0.36-1.8)                          | 2.3%<br>(1.4-3.6%)                   | 4%<br>(2.1-6.7%)                    | 0.18<br>(0.093-0.31)   | 14<br>(8.1-22)      |
| Seychelles | 2010 | Female | 40 to 44 | 12%<br>(5.3-21%)               | 88%<br>(79-95%)          | 1<br>(0.38-2.1)                             | 2.8%<br>(1.6-4.5%)                   | 4.7%<br>(2.6-7.9%)                  | 0.31<br>(0.16-0.52)    | 19<br>(11-31)       |
| Seychelles | 2010 | Female | 45 to 49 | 12%<br>(4.8-23%)               | 88%<br>(77-95%)          | 1.2<br>(0.4-2.5)                            | 3.3%<br>(1.8-5.5%)                   | 5.3%<br>(2.7-9%)                    | 0.52<br>(0.26-0.9)     | 26<br>(14-44)       |
| Seychelles | 2010 | Female | 50 to 54 | 12%<br>(5.2-24%)               | 88%<br>(76-95%)          | 1.3<br>(0.47-2.8)                           | 3.8%<br>(2.1-6.6%)                   | 5.8%<br>(3-10%)                     | 0.76<br>(0.39-1.3)     | 32<br>(17-54)       |
| Seychelles | 2010 | Female | 55 to 59 | 12%<br>(5.4-23%)               | 88%<br>(77-95%)          | 1.4<br>(0.48-3)                             | 4.1%<br>(2.2-7%)                     | 5.9%<br>(3.1-10%)                   | 0.91<br>(0.47-1.6)     | 32<br>(17-55)       |
| Seychelles | 2010 | Female | 60 to 64 | 12%<br>(5.2-23%)               | 88%<br>(77-95%)          | 1.5<br>(0.45-3.2)                           | 4.2%<br>(2.2-7.6%)                   | 5.8%<br>(3-10%)                     | 0.69<br>(0.36-1.3)     | 20<br>(11-37)       |
| Seychelles | 2010 | Female | 65 to 69 | 12%<br>(5.3-23%)               | 88%<br>(77-95%)          | 1.4<br>(0.45-2.8)                           | 4.4%<br>(2.2-7.6%)                   | 5.9%<br>(3-10%)                     | 1.1<br>(0.53-1.9)      | 26<br>(13-45)       |
| Seychelles | 2010 | Female | 70 to 74 | 11%<br>(5.2-21%)               | 89%<br>(79-95%)          | 1.2<br>(0.38-2.9)                           | 4.1%<br>(1.9-7.3%)                   | 5.4%<br>(2.5-9.7%)                  | 1.6<br>(0.73-2.8)      | 30<br>(14-53)       |
| Seychelles | 2010 | Female | 75 to 79 | 11%<br>(4.9-21%)               | 89%<br>(79-95%)          | 1.1<br>(0.33-2.6)                           | 3.7%<br>(1.5-7%)                     | 4.7%<br>(1.9-8.9%)                  | 1.8<br>(0.73-3.4)      | 26<br>(11-49)       |
| Seychelles | 2010 | Female | 80 to 84 | 11%<br>(4.9-21%)               | 89%<br>(79-95%)          | 1.1<br>(0.36-2.7)                           | 3.8%<br>(1.6-7.1%)                   | 4.7%<br>(2-8.8%)                    | 2.4<br>(1-4.5)         | 26<br>(11-48)       |
| Seychelles | 2010 | Female | 85 to 89 | 12%<br>(5.5-22%)               | 88%<br>(78-95%)          | 1.2<br>(0.38-2.8)                           | 3.9%<br>(1.6-7.3%)                   | 4.7%<br>(1.9-9%)                    | 2.2<br>(0.88-4.1)      | 16<br>(6.7-31)      |
| Seychelles | 2010 | Female | 90 to 94 | 14%<br>(6.3-26%)               | 86%<br>(74-94%)          | 1.4<br>(0.41-3.4)                           | 4%<br>(1.5-7.6%)                     | 4.8%<br>(1.8-9.3%)                  | 1.2<br>(0.47-2.4)      | 6.4<br>(2.5-12)     |
| Seychelles | 2010 | Female | 95 plus  | 17%<br>(6.4-34%)               | 83%<br>(66-94%)          | 1.7<br>(0.35-5.1)                           | 4.5%<br>(1.4-9.2%)                   | 5.3%<br>(1.7-11%)                   | 0.49<br>(0.16-0.99)    | 1.7<br>(0.55-3.4)   |
| Seychelles | 2010 | Male   | All Ages | 29%<br>(23-36%)                | 71%<br>(64-77%)          | 2.3<br>(1.8-2.8)                            | 9.4%<br>(7.7-11%)                    | 11%<br>(8.5-14%)                    | 40<br>(31-50)          | 1400<br>(1200-1700) |
| Seychelles | 2010 | Male   | 15 to 19 | 21%<br>(11-34%)                | 79%<br>(66-89%)          | 0.81<br>(0.34-1.6)                          | 3%<br>(1.7-5.1%)                     | 4.2%<br>(2.2-7.4%)                  | 0.21<br>(0.11-0.38)    | 18<br>(10-31)       |
| Seychelles | 2010 | Male   | 20 to 24 | 32%<br>(17-49%)                | 68%<br>(51-83%)          | 2<br>(0.92-3.5)                             | 7.5%<br>(4.3-11%)                    | 9.8%<br>(5.1-16%)                   | 0.76<br>(0.4-1.2)      | 60<br>(34-91)       |
| Seychelles | 2010 | Male   | 25 to 29 | 37%<br>(20-55%)                | 63%<br>(45-80%)          | 2.8<br>(1.4-4.7)                            | 9.5%<br>(6-13%)                      | 13%<br>(7.6-18%)                    | 1.1<br>(0.68-1.7)      | 82<br>(52-120)      |
| Seychelles | 2010 | Male   | 30 to 34 | 40%<br>(22-60%)                | 60%<br>(40-78%)          | 3.4<br>(1.8-5.6)                            | 11%<br>(7.6-15%)                     | 15%<br>(9.9-20%)                    | 1.6<br>(1-2.2)         | 100<br>(70-140)     |
| Seychelles | 2010 | Male   | 35 to 39 | 42%<br>(25-62%)                | 58%<br>(38-75%)          | 3.9<br>(2.2-6.3)                            | 12%<br>(8.8-16%)                     | 17%<br>(12-22%)                     | 2.3<br>(1.5-3)         | 130<br>(91-170)     |

| Location   | Year | Sex    | Age      | Prevalence of current drinkers | Prevalence of abstainers | Population average of standard drinks daily | Percent of total attributable deaths | Percent of total attributable DALYs | Attributable deaths    | Attributable DALYs  |
|------------|------|--------|----------|--------------------------------|--------------------------|---------------------------------------------|--------------------------------------|-------------------------------------|------------------------|---------------------|
| Seychelles | 2010 | Male   | 40 to 44 | 42%<br>(25-62%)                | 58%<br>(38-75%)          | 4.1<br>(2.2-6.3)                            | 14%<br>(9.7-17%)                     | 18%<br>(13-23%)                     | 3.1<br>(2.2-4)         | 160<br>(110-200)    |
| Seychelles | 2010 | Male   | 45 to 49 | 41%<br>(23-61%)                | 59%<br>(39-77%)          | 4.1<br>(2.1-6.5)                            | 14%<br>(10-18%)                      | 18%<br>(13-24%)                     | 4.2<br>(2.9-5.4)       | 180<br>(130-240)    |
| Seychelles | 2010 | Male   | 50 to 54 | 39%<br>(21-58%)                | 61%<br>(42-79%)          | 3.8<br>(2-6.3)                              | 14%<br>(9.8-18%)                     | 17%<br>(12-22%)                     | 5.1<br>(3.6-6.8)       | 200<br>(140-260)    |
| Seychelles | 2010 | Male   | 55 to 59 | 37%<br>(21-57%)                | 63%<br>(43-79%)          | 3.4<br>(1.7-5.8)                            | 13%<br>(8.5-17%)                     | 16%<br>(10-21%)                     | 5.2<br>(3.5-7.1)       | 170<br>(120-230)    |
| Seychelles | 2010 | Male   | 60 to 64 | 34%<br>(18-54%)                | 66%<br>(46-82%)          | 3<br>(1.3-5.6)                              | 11%<br>(6.7-16%)                     | 13%<br>(8-19%)                      | 3.2<br>(2-4.6)         | 91<br>(56-130)      |
| Seychelles | 2010 | Male   | 65 to 69 | 30%<br>(17-47%)                | 70%<br>(53-83%)          | 2.5<br>(1.2-4.5)                            | 9.6%<br>(5.5-14%)                    | 11%<br>(6.5-16%)                    | 3.6<br>(2.1-5.3)       | 84<br>(49-120)      |
| Seychelles | 2010 | Male   | 70 to 74 | 27%<br>(15-43%)                | 73%<br>(57-85%)          | 2<br>(0.9-3.8)                              | 7.7%<br>(4.1-12%)                    | 9.1%<br>(4.8-14%)                   | 3.1<br>(1.7-4.8)       | 59<br>(31-89)       |
| Seychelles | 2010 | Male   | 75 to 79 | 24%<br>(13-41%)                | 76%<br>(59-87%)          | 1.7<br>(0.69-3.3)                           | 6.1%<br>(2.9-10%)                    | 7.1%<br>(3.3-12%)                   | 2.7<br>(1.2-4.5)       | 40<br>(18-66)       |
| Seychelles | 2010 | Male   | 80 to 84 | 22%<br>(11-37%)                | 78%<br>(63-89%)          | 1.5<br>(0.61-2.7)                           | 5.3%<br>(2.3-9.1%)                   | 6.1%<br>(2.6-10%)                   | 2.3<br>(0.95-3.9)      | 24<br>(11-42)       |
| Seychelles | 2010 | Male   | 85 to 89 | 21%<br>(11-34%)                | 79%<br>(66-89%)          | 1.3<br>(0.57-2.5)                           | 4.3%<br>(1.9-7.8%)                   | 4.9%<br>(2.1-9.1%)                  | 1.3<br>(0.54-2.3)      | 9.7<br>(4.3-18)     |
| Seychelles | 2010 | Male   | 90 to 94 | 22%<br>(12-38%)                | 78%<br>(62-88%)          | 1.2<br>(0.52-2.4)                           | 3.8%<br>(1.5-7.3%)                   | 4.3%<br>(1.7-8.5%)                  | 0.48<br>(0.19-0.95)    | 2.6<br>(1-5)        |
| Seychelles | 2010 | Male   | 95 plus  | 26%<br>(11-46%)                | 74%<br>(54-89%)          | 1.3<br>(0.43-2.8)                           | 3.8%<br>(1.2-8.3%)                   | 4.1%<br>(1.3-9.5%)                  | 0.11<br>(0.032-0.24)   | 0.38<br>(0.13-0.85) |
| Seychelles | 2016 | Female | All Ages | 9.3%<br>(6.8-12%)              | 91%<br>(88-93%)          | 0.71<br>(0.41-1.1)                          | 2.8%<br>(1.9-3.9%)                   | 4.5%<br>(2.7-6.8%)                  | 15<br>(8.5-22)         | 320<br>(210-460)    |
| Seychelles | 2016 | Female | 15 to 19 | 7.6%<br>(3.5-14%)              | 92%<br>(86-97%)          | 0.44<br>(0.13-1.1)                          | 1.1%<br>(0.58-1.9%)                  | 1.8%<br>(0.73-3.8%)                 | 0.026<br>(0.01-0.056)  | 3.6<br>(1.9-6.5)    |
| Seychelles | 2016 | Female | 20 to 24 | 9.1%<br>(3.8-17%)              | 91%<br>(83-96%)          | 0.59<br>(0.17-1.4)                          | 1.7%<br>(1-2.5%)                     | 2%<br>(0.81-3.8%)                   | 0.038<br>(0.015-0.077) | 6.5<br>(3.8-10)     |
| Seychelles | 2016 | Female | 25 to 29 | 9.8%<br>(4.1-19%)              | 90%<br>(81-96%)          | 0.67<br>(0.2-1.5)                           | 1.7%<br>(1.1-2.7%)                   | 2.1%<br>(0.97-3.9%)                 | 0.051<br>(0.022-0.1)   | 7.7<br>(4.6-12)     |
| Seychelles | 2016 | Female | 30 to 34 | 11%<br>(4.3-20%)               | 89%<br>(80-96%)          | 0.76<br>(0.25-1.7)                          | 1.9%<br>(1.2-3%)                     | 2.8%<br>(1.4-5%)                    | 0.094<br>(0.043-0.19)  | 10<br>(5.8-16)      |
| Seychelles | 2016 | Female | 35 to 39 | 12%<br>(4.7-22%)               | 88%<br>(78-95%)          | 0.84<br>(0.3-1.8)                           | 2.2%<br>(1.3-3.4%)                   | 3.6%<br>(1.9-6.2%)                  | 0.17<br>(0.084-0.32)   | 13<br>(7.6-22)      |
| Seychelles | 2016 | Female | 40 to 44 | 12%<br>(5.3-22%)               | 88%<br>(78-95%)          | 0.93<br>(0.31-2)                            | 2.6%<br>(1.5-4.2%)                   | 4.3%<br>(2.3-7.2%)                  | 0.3<br>(0.15-0.55)     | 19<br>(9.7-31)      |
| Seychelles | 2016 | Female | 45 to 49 | 12%<br>(5.2-23%)               | 88%<br>(77-95%)          | 1.1<br>(0.35-2.3)                           | 3%<br>(1.6-5.2%)                     | 4.9%<br>(2.5-8.4%)                  | 0.51<br>(0.24-0.89)    | 26<br>(13-44)       |
| Seychelles | 2016 | Female | 50 to 54 | 13%<br>(5.5-24%)               | 87%<br>(76-94%)          | 1.2<br>(0.4-2.5)                            | 3.6%<br>(1.9-6.2%)                   | 5.4%<br>(2.7-9.4%)                  | 0.83<br>(0.41-1.4)     | 35<br>(17-60)       |
| Seychelles | 2016 | Female | 55 to 59 | 13%<br>(5.7-24%)               | 87%<br>(76-94%)          | 1.3<br>(0.42-2.8)                           | 3.8%<br>(2-6.4%)                     | 5.5%<br>(2.9-9.4%)                  | 1.1<br>(0.55-2)        | 40<br>(20-69)       |

| Location   | Year | Sex    | Age      | Prevalence of current drinkers | Prevalence of abstainers | Population average of standard drinks daily | Percent of total attributable deaths | Percent of total attributable DALYs | Attributable deaths  | Attributable DALYs |
|------------|------|--------|----------|--------------------------------|--------------------------|---------------------------------------------|--------------------------------------|-------------------------------------|----------------------|--------------------|
| Seychelles | 2016 | Female | 60 to 64 | 13%<br>(5.6-25%)               | 87%<br>(75-94%)          | 1.3<br>(0.41-3.1)                           | 3.9%<br>(1.9-6.8%)                   | 5.4%<br>(2.7-9.4%)                  | 1.3<br>(0.63-2.3)    | 38<br>(19-69)      |
| Seychelles | 2016 | Female | 65 to 69 | 12%<br>(5.7-23%)               | 88%<br>(77-94%)          | 1.3<br>(0.39-2.7)                           | 4%<br>(1.9-7%)                       | 5.4%<br>(2.7-9.3%)                  | 1<br>(0.47-1.8)      | 25<br>(12-44)      |
| Seychelles | 2016 | Female | 70 to 74 | 12%<br>(5.4-21%)               | 88%<br>(79-95%)          | 1.1<br>(0.33-2.7)                           | 3.8%<br>(1.6-6.7%)                   | 5%<br>(2.2-9%)                      | 1.2<br>(0.52-2.2)    | 23<br>(10-42)      |
| Seychelles | 2016 | Female | 75 to 79 | 11%<br>(4.8-22%)               | 89%<br>(78-95%)          | 1.1<br>(0.29-2.8)                           | 3.4%<br>(1.3-6.5%)                   | 4.4%<br>(1.7-8.5%)                  | 1.7<br>(0.64-3.3)    | 24<br>(9.4-47)     |
| Seychelles | 2016 | Female | 80 to 84 | 11%<br>(4.9-21%)               | 89%<br>(79-95%)          | 1.1<br>(0.3-2.7)                            | 3.5%<br>(1.3-6.6%)                   | 4.4%<br>(1.6-8.3%)                  | 2.2<br>(0.82-4.3)    | 24<br>(8.9-46)     |
| Seychelles | 2016 | Female | 85 to 89 | 12%<br>(5.4-23%)               | 88%<br>(77-95%)          | 1.1<br>(0.33-2.8)                           | 3.5%<br>(1.3-6.7%)                   | 4.3%<br>(1.6-8.3%)                  | 2.2<br>(0.8-4.3)     | 17<br>(6.2-33)     |
| Seychelles | 2016 | Female | 90 to 94 | 14%<br>(6-27%)                 | 86%<br>(73-94%)          | 1.3<br>(0.33-3.3)                           | 3.6%<br>(1.3-7.1%)                   | 4.3%<br>(1.5-8.5%)                  | 1.4<br>(0.5-2.7)     | 7.1<br>(2.6-14)    |
| Seychelles | 2016 | Female | 95 plus  | 18%<br>(6.5-34%)               | 82%<br>(66-93%)          | 1.6<br>(0.29-4.7)                           | 4.1%<br>(1.1-8.6%)                   | 4.8%<br>(1.3-10%)                   | 0.56<br>(0.15-1.2)   | 1.9<br>(0.52-4.1)  |
| Seychelles | 2016 | Male   | All Ages | 29%<br>(23-37%)                | 71%<br>(63-77%)          | 2.1<br>(1.3-3.1)                            | 8.8%<br>(6.2-11%)                    | 10%<br>(6.7-13%)                    | 41<br>(26-56)        | 1400<br>(950-1900) |
| Seychelles | 2016 | Male   | 15 to 19 | 21%<br>(11-34%)                | 79%<br>(66-89%)          | 0.74<br>(0.27-1.6)                          | 2.8%<br>(1.6-5%)                     | 4%<br>(2-7.4%)                      | 0.16<br>(0.082-0.31) | 14<br>(8-26)       |
| Seychelles | 2016 | Male   | 20 to 24 | 32%<br>(17-51%)                | 68%<br>(49-83%)          | 1.8<br>(0.73-3.6)                           | 6.8%<br>(3.7-11%)                    | 8.8%<br>(4.4-15%)                   | 0.6<br>(0.3-1)       | 48<br>(26-79)      |
| Seychelles | 2016 | Male   | 25 to 29 | 38%<br>(20-56%)                | 62%<br>(44-80%)          | 2.5<br>(1.1-4.7)                            | 8.5%<br>(5-13%)                      | 11%<br>(6.1-17%)                    | 0.88<br>(0.46-1.4)   | 64<br>(37-99)      |
| Seychelles | 2016 | Male   | 30 to 34 | 41%<br>(22-60%)                | 59%<br>(40-78%)          | 3.1<br>(1.5-5.7)                            | 9.9%<br>(6.1-14%)                    | 13%<br>(7.8-19%)                    | 1.3<br>(0.75-2)      | 87<br>(52-130)     |
| Seychelles | 2016 | Male   | 35 to 39 | 43%<br>(26-62%)                | 57%<br>(38-74%)          | 3.5<br>(1.7-6.3)                            | 11%<br>(7.1-15%)                     | 15%<br>(9.3-21%)                    | 1.9<br>(1.1-2.8)     | 110<br>(68-160)    |
| Seychelles | 2016 | Male   | 40 to 44 | 43%<br>(26-63%)                | 57%<br>(37-74%)          | 3.7<br>(1.8-6.3)                            | 12%<br>(8.1-16%)                     | 16%<br>(11-22%)                     | 2.9<br>(1.7-4.1)     | 150<br>(92-200)    |
| Seychelles | 2016 | Male   | 45 to 49 | 41%<br>(23-61%)                | 59%<br>(39-77%)          | 3.7<br>(1.7-6.4)                            | 13%<br>(8.6-18%)                     | 17%<br>(11-23%)                     | 4<br>(2.4-5.8)       | 180<br>(110-250)   |
| Seychelles | 2016 | Male   | 50 to 54 | 39%<br>(22-59%)                | 61%<br>(41-78%)          | 3.4<br>(1.6-5.9)                            | 13%<br>(7.9-17%)                     | 16%<br>(10-22%)                     | 5<br>(2.9-7.4)       | 190<br>(120-280)   |
| Seychelles | 2016 | Male   | 55 to 59 | 37%<br>(21-57%)                | 63%<br>(43-79%)          | 3.1<br>(1.4-5.5)                            | 12%<br>(7.1-16%)                     | 15%<br>(8.8-20%)                    | 5.8<br>(3.4-8.5)     | 190<br>(110-280)   |
| Seychelles | 2016 | Male   | 60 to 64 | 34%<br>(19-54%)                | 66%<br>(46-81%)          | 2.7<br>(1.1-5.1)                            | 10%<br>(5.4-15%)                     | 12%<br>(6.5-18%)                    | 5.4<br>(2.9-8.2)     | 150<br>(83-230)    |
| Seychelles | 2016 | Male   | 65 to 69 | 31%<br>(17-49%)                | 69%<br>(51-83%)          | 2.2<br>(0.94-4.2)                           | 8.6%<br>(4.5-13%)                    | 10%<br>(5.4-15%)                    | 3.3<br>(1.7-5.2)     | 78<br>(39-120)     |
| Seychelles | 2016 | Male   | 70 to 74 | 27%<br>(15-44%)                | 73%<br>(56-85%)          | 1.8<br>(0.72-3.6)                           | 7%<br>(3.3-11%)                      | 8.2%<br>(3.9-13%)                   | 2.9<br>(1.4-4.7)     | 54<br>(26-87)      |
| Seychelles | 2016 | Male   | 75 to 79 | 25%<br>(13-41%)                | 75%<br>(59-87%)          | 1.5<br>(0.58-3.2)                           | 5.4%<br>(2.3-9.6%)                   | 6.3%<br>(2.6-11%)                   | 2.3<br>(0.94-4.2)    | 34<br>(14-61)      |

| Location   | Year | Sex    | Age      | Prevalence of current drinkers | Prevalence of abstainers | Population average of standard drinks daily | Percent of total attributable deaths | Percent of total attributable DALYs | Attributable deaths   | Attributable DALYs   |
|------------|------|--------|----------|--------------------------------|--------------------------|---------------------------------------------|--------------------------------------|-------------------------------------|-----------------------|----------------------|
| Seychelles | 2016 | Male   | 80 to 84 | 23%<br>(11-38%)                | 77%<br>(62-89%)          | 1.3<br>(0.49-2.6)                           | 4.7%<br>(1.8-8.4%)                   | 5.4%<br>(2.1-9.6%)                  | 2.1<br>(0.8-3.8)      | 23<br>(9-42)         |
| Seychelles | 2016 | Male   | 85 to 89 | 21%<br>(11-35%)                | 79%<br>(65-89%)          | 1.2<br>(0.45-2.4)                           | 3.8%<br>(1.4-7.3%)                   | 4.3%<br>(1.6-8.4%)                  | 1.3<br>(0.48-2.7)     | 10<br>(3.8-20)       |
| Seychelles | 2016 | Male   | 90 to 94 | 22%<br>(12-37%)                | 78%<br>(63-88%)          | 1.1<br>(0.43-2.3)                           | 3.3%<br>(1.1-6.7%)                   | 3.8%<br>(1.3-7.8%)                  | 0.56<br>(0.18-1.2)    | 3<br>(1-6.1)         |
| Seychelles | 2016 | Male   | 95 plus  | 26%<br>(12-44%)                | 74%<br>(56-88%)          | 1.2<br>(0.36-2.8)                           | 3.3%<br>(0.98-7.7%)                  | 3.6%<br>(1-8.6%)                    | 0.15<br>(0.042-0.35)  | 0.55<br>(0.16-1.3)   |
| Somalia    | 1990 | Female | All Ages | 35%<br>(29-41%)                | 65%<br>(59-71%)          | 0.073<br>(0.067-0.078)                      | 0.23%<br>(0.084-0.4%)                | 0.26%<br>(-0.013-0.56%)             | 120<br>(-5.6-260)     | 6200<br>(2200-11000) |
| Somalia    | 1990 | Female | 15 to 19 | 36%<br>(23-51%)                | 64%<br>(49-77%)          | 0.087<br>(0.05-0.13)                        | 0.3%<br>(0.052-0.57%)                | 0.091%<br>(-0.26-0.46%)             | 0.76<br>(-2.1-3.7)    | 260<br>(46-490)      |
| Somalia    | 1990 | Female | 20 to 24 | 42%<br>(27-58%)                | 58%<br>(42-73%)          | 0.12<br>(0.071-0.18)                        | 0.56%<br>(0.19-0.98%)                | 0.13%<br>(-0.33-0.63%)              | 1.3<br>(-3.4-6.6)     | 520<br>(170-950)     |
| Somalia    | 1990 | Female | 25 to 29 | 44%<br>(29-61%)                | 56%<br>(39-71%)          | 0.14<br>(0.084-0.2)                         | 0.69%<br>(0.19-1.2%)                 | 0.33%<br>(-0.33-1%)                 | 3.5<br>(-3.8-11)      | 610<br>(160-1100)    |
| Somalia    | 1990 | Female | 30 to 34 | 46%<br>(31-61%)                | 54%<br>(39-69%)          | 0.14<br>(0.088-0.21)                        | 0.75%<br>(0.2-1.3%)                  | 0.51%<br>(-0.18-1.3%)               | 5.8<br>(-2.1-14)      | 640<br>(160-1100)    |
| Somalia    | 1990 | Female | 35 to 39 | 49%<br>(34-64%)                | 51%<br>(36-66%)          | 0.14<br>(0.085-0.2)                         | 0.83%<br>(0.31-1.5%)                 | 0.74%<br>(0.064-1.6%)               | 9.5<br>(0.84-21)      | 710<br>(270-1300)    |
| Somalia    | 1990 | Female | 40 to 44 | 50%<br>(36-66%)                | 50%<br>(34-64%)          | 0.14<br>(0.079-0.2)                         | 1%<br>(0.48-1.6%)                    | 1%<br>(0.41-1.8%)                   | 14<br>(5.4-27)        | 790<br>(370-1300)    |
| Somalia    | 1990 | Female | 45 to 49 | 50%<br>(33-67%)                | 50%<br>(33-67%)          | 0.14<br>(0.078-0.22)                        | 0.9%<br>(0.34-1.5%)                  | 0.96%<br>(0.27-1.7%)                | 14<br>(3.8-26)        | 670<br>(250-1200)    |
| Somalia    | 1990 | Female | 50 to 54 | 48%<br>(33-65%)                | 52%<br>(35-67%)          | 0.14<br>(0.082-0.21)                        | 0.89%<br>(0.29-1.6%)                 | 0.99%<br>(0.26-1.9%)                | 18<br>(4.7-36)        | 720<br>(230-1400)    |
| Somalia    | 1990 | Female | 55 to 59 | 47%<br>(32-63%)                | 53%<br>(37-68%)          | 0.14<br>(0.079-0.23)                        | 0.46%<br>(-0.11-1.1%)                | 0.51%<br>(-0.16-1.2%)               | 10<br>(-3.2-26)       | 350<br>(-85-820)     |
| Somalia    | 1990 | Female | 60 to 64 | 48%<br>(31-64%)                | 52%<br>(36-69%)          | 0.14<br>(0.077-0.23)                        | 0.45%<br>(-0.2-1.1%)                 | 0.52%<br>(-0.23-1.2%)               | 12<br>(-5.6-30)       | 330<br>(-150-790)    |
| Somalia    | 1990 | Female | 65 to 69 | 49%<br>(34-65%)                | 51%<br>(35-66%)          | 0.13<br>(0.078-0.2)                         | 0.5%<br>(-0.14-1.2%)                 | 0.54%<br>(-0.18-1.3%)               | 15<br>(-4.9-36)       | 350<br>(-100-830)    |
| Somalia    | 1990 | Female | 70 to 74 | 48%<br>(33-63%)                | 52%<br>(37-67%)          | 0.12<br>(0.062-0.2)                         | 0.17%<br>(-0.45-0.71%)               | 0.14%<br>(-0.54-0.74%)              | 4.2<br>(-16-22)       | 100<br>(-260-410)    |
| Somalia    | 1990 | Female | 75 to 79 | 45%<br>(29-61%)                | 55%<br>(39-71%)          | 0.1<br>(0.049-0.17)                         | 0.23%<br>(-0.38-0.71%)               | 0.24%<br>(-0.45-0.78%)              | 6.1<br>(-11-20)       | 92<br>(-150-290)     |
| Somalia    | 1990 | Female | 80 to 84 | 44%<br>(28-61%)                | 56%<br>(39-72%)          | 0.095<br>(0.048-0.15)                       | 0.016%<br>(-0.51-0.41%)              | 0.011%<br>(-0.57-0.45%)             | 0.18<br>(-9.2-7.2)    | 3.1<br>(-94-74)      |
| Somalia    | 1990 | Female | 85 to 89 | 44%<br>(29-59%)                | 56%<br>(41-71%)          | 0.091<br>(0.047-0.14)                       | -0.051%<br>(-0.5-0.27%)              | -0.072%<br>(-0.6-0.31%)             | -0.59<br>(-4.9-2.5)   | -3.5<br>(-35-19)     |
| Somalia    | 1990 | Female | 90 to 94 | 46%<br>(30-60%)                | 54%<br>(40-70%)          | 0.089<br>(0.045-0.15)                       | -0.11%<br>(-0.53-0.18%)              | -0.17%<br>(-0.66-0.19%)             | -0.38<br>(-1.5-0.44)  | -1.5<br>(-7.4-2.5)   |
| Somalia    | 1990 | Female | 95 plus  | 48%<br>(30-65%)                | 52%<br>(35-70%)          | 0.086<br>(0.039-0.16)                       | 0.22%<br>(-0.24-0.63%)               | 0.19%<br>(-0.34-0.68%)              | 0.091<br>(-0.17-0.33) | 0.41<br>(-0.45-1.2)  |

| Location | Year | Sex    | Age      | Prevalence of current drinkers | Prevalence of abstainers | Population average of standard drinks daily | Percent of total attributable deaths | Percent of total attributable DALYs | Attributable deaths  | Attributable DALYs    |
|----------|------|--------|----------|--------------------------------|--------------------------|---------------------------------------------|--------------------------------------|-------------------------------------|----------------------|-----------------------|
| Somalia  | 1990 | Male   | All Ages | 43%<br>(37-51%)                | 57%<br>(49-63%)          | 0.087<br>(0.081-0.093)                      | 0.42%<br>(0.083-0.77%)               | 0.49%<br>(-0.059-1%)                | 220<br>(-28-480)     | 13000<br>(2700-23000) |
| Somalia  | 1990 | Male   | 15 to 19 | 42%<br>(30-57%)                | 58%<br>(43-70%)          | 0.1<br>(0.062-0.15)                         | 0.7%<br>(0.28-1.1%)                  | 0.24%<br>(-0.21-0.76%)              | 2.4<br>(-2.2-7.6)    | 680<br>(260-1100)     |
| Somalia  | 1990 | Male   | 20 to 24 | 53%<br>(39-67%)                | 47%<br>(33-61%)          | 0.13<br>(0.086-0.19)                        | 1.2%<br>(0.28-2.1%)                  | 0.33%<br>(-0.6-1.3%)                | 4.7<br>(-9-19)       | 1400<br>(310-2500)    |
| Somalia  | 1990 | Male   | 25 to 29 | 56%<br>(41-71%)                | 44%<br>(29-59%)          | 0.16<br>(0.1-0.21)                          | 1.5%<br>(0.12-2.9%)                  | 0.61%<br>(-1-2.3%)                  | 8<br>(-14-29)        | 1500<br>(120-2800)    |
| Somalia  | 1990 | Male   | 30 to 34 | 58%<br>(43-73%)                | 42%<br>(27-57%)          | 0.18<br>(0.12-0.24)                         | 1.5%<br>(-0.14-3.1%)                 | 0.81%<br>(-1.2-2.9%)                | 10<br>(-15-35)       | 1300<br>(-130-2800)   |
| Somalia  | 1990 | Male   | 35 to 39 | 60%<br>(47-75%)                | 40%<br>(25-53%)          | 0.19<br>(0.12-0.27)                         | 1.6%<br>(-0.15-3.4%)                 | 1.2%<br>(-1-3.4%)                   | 16<br>(-13-45)       | 1300<br>(-130-2800)   |
| Somalia  | 1990 | Male   | 40 to 44 | 61%<br>(47-76%)                | 39%<br>(24-53%)          | 0.19<br>(0.12-0.29)                         | 1.8%<br>(0.079-3.4%)                 | 1.6%<br>(-0.46-3.7%)                | 22<br>(-6.9-51)      | 1400<br>(56-2700)     |
| Somalia  | 1990 | Male   | 45 to 49 | 61%<br>(45-76%)                | 39%<br>(24-55%)          | 0.19<br>(0.12-0.28)                         | 1.8%<br>(0.26-3.4%)                  | 1.8%<br>(-0.17-3.7%)                | 25<br>(-2.2-54)      | 1300<br>(170-2400)    |
| Somalia  | 1990 | Male   | 50 to 54 | 61%<br>(45-76%)                | 39%<br>(24-55%)          | 0.19<br>(0.11-0.28)                         | 1.7%<br>(0.12-3.3%)                  | 1.7%<br>(-0.18-3.7%)                | 27<br>(-2.6-59)      | 1200<br>(81-2300)     |
| Somalia  | 1990 | Male   | 55 to 59 | 61%<br>(46-76%)                | 39%<br>(24-54%)          | 0.18<br>(0.11-0.28)                         | 1.4%<br>(0.055-2.7%)                 | 1.4%<br>(-0.22-3%)                  | 24<br>(-3.6-53)      | 900<br>(32-1800)      |
| Somalia  | 1990 | Male   | 60 to 64 | 60%<br>(44-76%)                | 40%<br>(24-56%)          | 0.17<br>(0.098-0.27)                        | 1.5%<br>(0.43-2.5%)                  | 1.5%<br>(0.34-2.8%)                 | 29<br>(6-56)         | 870<br>(260-1600)     |
| Somalia  | 1990 | Male   | 65 to 69 | 58%<br>(44-74%)                | 42%<br>(26-56%)          | 0.14<br>(0.086-0.21)                        | 0.93%<br>(0.22-1.7%)                 | 0.99%<br>(0.15-1.9%)                | 20<br>(3-39)         | 490<br>(110-910)      |
| Somalia  | 1990 | Male   | 70 to 74 | 57%<br>(42-71%)                | 43%<br>(29-58%)          | 0.11<br>(0.067-0.18)                        | 0.69%<br>(0.13-1.2%)                 | 0.76%<br>(0.1-1.4%)                 | 15<br>(2.1-29)       | 290<br>(55-540)       |
| Somalia  | 1990 | Male   | 75 to 79 | 55%<br>(41-70%)                | 45%<br>(30-59%)          | 0.096<br>(0.053-0.15)                       | 0.65%<br>(0.18-1.1%)                 | 0.7%<br>(0.16-1.3%)                 | 12<br>(2.6-21)       | 170<br>(45-300)       |
| Somalia  | 1990 | Male   | 80 to 84 | 54%<br>(37-70%)                | 46%<br>(30-63%)          | 0.086<br>(0.049-0.13)                       | 0.42%<br>(0.084-0.75%)               | 0.43%<br>(0.048-0.83%)              | 4<br>(0.43-7.7)      | 46<br>(9.3-83)        |
| Somalia  | 1990 | Male   | 85 to 89 | 52%<br>(36-66%)                | 48%<br>(34-64%)          | 0.076<br>(0.044-0.12)                       | 0.45%<br>(0.16-0.75%)                | 0.45%<br>(0.13-0.8%)                | 2.4<br>(0.69-4.3)    | 20<br>(7.3-33)        |
| Somalia  | 1990 | Male   | 90 to 94 | 52%<br>(37-66%)                | 48%<br>(34-63%)          | 0.07<br>(0.039-0.11)                        | 0.29%<br>(0.062-0.51%)               | 0.25%<br>(-0.011-0.51%)             | 0.4<br>(-0.018-0.82) | 2.8<br>(0.59-4.8)     |
| Somalia  | 1990 | Male   | 95 plus  | 54%<br>(35-72%)                | 46%<br>(28-65%)          | 0.065<br>(0.03-0.11)                        | 0.44%<br>(0.16-0.71%)                | 0.39%<br>(0.033-0.73%)              | 0.12<br>(0.01-0.23)  | 0.55<br>(0.19-0.9)    |
| Somalia  | 1995 | Female | All Ages | 35%<br>(29-41%)                | 65%<br>(59-71%)          | 0.072<br>(0.063-0.081)                      | 0.24%<br>(0.065-0.45%)               | 0.27%<br>(-0.061-0.62%)             | 120<br>(-25-270)     | 6200<br>(1700-12000)  |
| Somalia  | 1995 | Female | 15 to 19 | 36%<br>(23-51%)                | 64%<br>(49-77%)          | 0.087<br>(0.05-0.13)                        | 0.31%<br>(0.00096-0.65%)             | 0.097%<br>(-0.35-0.56%)             | 0.73<br>(-2.4-4.1)   | 260<br>(0.78-530)     |
| Somalia  | 1995 | Female | 20 to 24 | 42%<br>(27-57%)                | 58%<br>(43-73%)          | 0.12<br>(0.072-0.18)                        | 0.57%<br>(0.12-1.1%)                 | 0.14%<br>(-0.45-0.77%)              | 1.3<br>(-4.5-7.5)    | 510<br>(100-950)      |
| Somalia  | 1995 | Female | 25 to 29 | 44%<br>(29-60%)                | 56%<br>(40-71%)          | 0.14<br>(0.086-0.2)                         | 0.7%<br>(0.11-1.3%)                  | 0.33%<br>(-0.44-1.1%)               | 3.5<br>(-5-12)       | 610<br>(99-1200)      |



| Location | Year | Sex    | Age      | Prevalence of current drinkers | Prevalence of abstainers | Population average of standard drinks daily | Percent of total attributable deaths | Percent of total attributable DALYs | Attributable deaths  | Attributable DALYs    |
|----------|------|--------|----------|--------------------------------|--------------------------|---------------------------------------------|--------------------------------------|-------------------------------------|----------------------|-----------------------|
| Somalia  | 1995 | Female | 30 to 34 | 46%<br>(31-62%)                | 54%<br>(38-69%)          | 0.15<br>(0.087-0.21)                        | 0.75%<br>(0.13-1.5%)                 | 0.52%<br>(-0.29-1.5%)               | 5.9<br>(-3.5-16)     | 640<br>(100-1200)     |
| Somalia  | 1995 | Female | 35 to 39 | 49%<br>(33-64%)                | 51%<br>(36-67%)          | 0.14<br>(0.082-0.21)                        | 0.84%<br>(0.24-1.6%)                 | 0.75%<br>(-0.0048-1.7%)             | 9.7<br>(-0.05-23)    | 710<br>(200-1400)     |
| Somalia  | 1995 | Female | 40 to 44 | 50%<br>(36-65%)                | 50%<br>(35-64%)          | 0.13<br>(0.075-0.2)                         | 1%<br>(0.42-1.8%)                    | 1.1%<br>(0.36-2%)                   | 15<br>(4.9-29)       | 830<br>(350-1500)     |
| Somalia  | 1995 | Female | 45 to 49 | 50%<br>(34-66%)                | 50%<br>(34-66%)          | 0.14<br>(0.078-0.21)                        | 0.91%<br>(0.27-1.6%)                 | 0.98%<br>(0.2-1.9%)                 | 15<br>(3-29)         | 700<br>(200-1300)     |
| Somalia  | 1995 | Female | 50 to 54 | 48%<br>(33-64%)                | 52%<br>(36-67%)          | 0.14<br>(0.079-0.22)                        | 0.91%<br>(0.21-1.7%)                 | 1%<br>(0.13-2%)                     | 18<br>(2.2-36)       | 690<br>(150-1300)     |
| Somalia  | 1995 | Female | 55 to 59 | 47%<br>(32-64%)                | 53%<br>(36-68%)          | 0.14<br>(0.078-0.23)                        | 0.46%<br>(-0.26-1.1%)                | 0.51%<br>(-0.33-1.3%)               | 11<br>(-7.3-29)      | 360<br>(-200-930)     |
| Somalia  | 1995 | Female | 60 to 64 | 48%<br>(32-65%)                | 52%<br>(35-68%)          | 0.14<br>(0.078-0.23)                        | 0.46%<br>(-0.28-1.1%)                | 0.52%<br>(-0.3-1.3%)                | 12<br>(-7.3-31)      | 330<br>(-190-810)     |
| Somalia  | 1995 | Female | 65 to 69 | 49%<br>(34-64%)                | 51%<br>(36-66%)          | 0.13<br>(0.077-0.21)                        | 0.52%<br>(-0.13-1.2%)                | 0.55%<br>(-0.14-1.3%)               | 15<br>(-4-36)        | 350<br>(-87-790)      |
| Somalia  | 1995 | Female | 70 to 74 | 48%<br>(34-63%)                | 52%<br>(37-66%)          | 0.12<br>(0.062-0.2)                         | 0.18%<br>(-0.46-0.76%)               | 0.15%<br>(-0.56-0.8%)               | 4.3<br>(-16-23)      | 100<br>(-270-450)     |
| Somalia  | 1995 | Female | 75 to 79 | 46%<br>(30-61%)                | 54%<br>(39-70%)          | 0.1<br>(0.05-0.17)                          | 0.25%<br>(-0.42-0.75%)               | 0.26%<br>(-0.47-0.81%)              | 6.4<br>(-12-20)      | 95<br>(-160-290)      |
| Somalia  | 1995 | Female | 80 to 84 | 44%<br>(28-61%)                | 56%<br>(39-72%)          | 0.095<br>(0.049-0.15)                       | 0.024%<br>(-0.51-0.42%)              | 0.021%<br>(-0.58-0.46%)             | 0.35<br>(-9.6-7.7)   | 4.7<br>(-99-79)       |
| Somalia  | 1995 | Female | 85 to 89 | 44%<br>(28-59%)                | 56%<br>(41-72%)          | 0.09<br>(0.046-0.15)                        | -0.043%<br>(-0.5-0.3%)               | -0.062%<br>(-0.59-0.32%)            | -0.52<br>(-4.9-2.7)  | -3<br>(-35-20)        |
| Somalia  | 1995 | Female | 90 to 94 | 46%<br>(30-61%)                | 54%<br>(39-70%)          | 0.089<br>(0.044-0.15)                       | -0.1%<br>(-0.52-0.21%)               | -0.16%<br>(-0.65-0.21%)             | -0.47<br>(-1.9-0.63) | -1.8<br>(-9.1-3.6)    |
| Somalia  | 1995 | Female | 95 plus  | 48%<br>(30-65%)                | 52%<br>(35-70%)          | 0.086<br>(0.037-0.16)                       | 0.24%<br>(-0.2-0.66%)                | 0.21%<br>(-0.32-0.72%)              | 0.16<br>(-0.24-0.53) | 0.68<br>(-0.61-1.9)   |
| Somalia  | 1995 | Male   | All Ages | 43%<br>(37-50%)                | 57%<br>(50-63%)          | 0.086<br>(0.076-0.097)                      | 0.45%<br>(0.059-0.85%)               | 0.52%<br>(-0.1-1.2%)                | 220<br>(-44-500)     | 13000<br>(1800-24000) |
| Somalia  | 1995 | Male   | 15 to 19 | 42%<br>(29-58%)                | 58%<br>(42-71%)          | 0.099<br>(0.061-0.15)                       | 0.79%<br>(0.29-1.3%)                 | 0.29%<br>(-0.34-0.98%)              | 2.5<br>(-3.1-8.6)    | 680<br>(250-1200)     |
| Somalia  | 1995 | Male   | 20 to 24 | 53%<br>(39-67%)                | 47%<br>(33-61%)          | 0.13<br>(0.083-0.19)                        | 1.4%<br>(0.26-2.5%)                  | 0.41%<br>(-0.94-1.7%)               | 4.8<br>(-11-20)      | 1400<br>(260-2500)    |
| Somalia  | 1995 | Male   | 25 to 29 | 56%<br>(42-70%)                | 44%<br>(30-58%)          | 0.16<br>(0.1-0.22)                          | 1.6%<br>(-0.011-3.3%)                | 0.7%<br>(-1.3-2.7%)                 | 8<br>(-15-32)        | 1500<br>(-8.6-3000)   |
| Somalia  | 1995 | Male   | 30 to 34 | 59%<br>(43-73%)                | 41%<br>(27-57%)          | 0.18<br>(0.12-0.24)                         | 1.6%<br>(-0.27-3.3%)                 | 0.87%<br>(-1.5-3.1%)                | 10<br>(-17-37)       | 1300<br>(-220-2800)   |
| Somalia  | 1995 | Male   | 35 to 39 | 60%<br>(46-74%)                | 40%<br>(26-54%)          | 0.19<br>(0.12-0.28)                         | 1.7%<br>(-0.34-3.6%)                 | 1.3%<br>(-1.2-3.7%)                 | 16<br>(-15-47)       | 1300<br>(-260-2900)   |
| Somalia  | 1995 | Male   | 40 to 44 | 61%<br>(46-76%)                | 39%<br>(24-54%)          | 0.19<br>(0.12-0.29)                         | 1.8%<br>(-0.036-3.5%)                | 1.6%<br>(-0.65-3.8%)                | 22<br>(-9.6-53)      | 1300<br>(-28-2700)    |
| Somalia  | 1995 | Male   | 45 to 49 | 61%<br>(46-77%)                | 39%<br>(23-54%)          | 0.19<br>(0.11-0.29)                         | 1.8%<br>(0.073-3.6%)                 | 1.8%<br>(-0.35-3.9%)                | 26<br>(-5-58)        | 1300<br>(48-2600)     |

| Location | Year | Sex    | Age      | Prevalence of current drinkers | Prevalence of abstainers | Population average of standard drinks daily | Percent of total attributable deaths | Percent of total attributable DALYs | Attributable deaths | Attributable DALYs    |
|----------|------|--------|----------|--------------------------------|--------------------------|---------------------------------------------|--------------------------------------|-------------------------------------|---------------------|-----------------------|
| Somalia  | 1995 | Male   | 50 to 54 | 61%<br>(46-76%)                | 39%<br>(24-54%)          | 0.19<br>(0.11-0.28)                         | 1.7%<br>(-0.089-3.3%)                | 1.7%<br>(-0.45-3.6%)                | 25<br>(-6.9-58)     | 1100<br>(-56-2300)    |
| Somalia  | 1995 | Male   | 55 to 59 | 61%<br>(46-75%)                | 39%<br>(25-54%)          | 0.19<br>(0.11-0.29)                         | 1.4%<br>(-0.069-2.9%)                | 1.4%<br>(-0.38-3.2%)                | 24<br>(-6.4-56)     | 890<br>(-42-1900)     |
| Somalia  | 1995 | Male   | 60 to 64 | 60%<br>(44-76%)                | 40%<br>(24-56%)          | 0.17<br>(0.098-0.27)                        | 1.4%<br>(0.34-2.7%)                  | 1.5%<br>(0.2-2.9%)                  | 28<br>(3.7-56)      | 830<br>(190-1600)     |
| Somalia  | 1995 | Male   | 65 to 69 | 58%<br>(44-75%)                | 42%<br>(25-56%)          | 0.14<br>(0.085-0.21)                        | 0.94%<br>(0.15-1.7%)                 | 1%<br>(0.059-1.9%)                  | 19<br>(1.2-39)      | 470<br>(73-910)       |
| Somalia  | 1995 | Male   | 70 to 74 | 57%<br>(42-71%)                | 43%<br>(29-58%)          | 0.11<br>(0.067-0.18)                        | 0.7%<br>(0.095-1.3%)                 | 0.76%<br>(0.061-1.5%)               | 15<br>(1.2-29)      | 280<br>(39-530)       |
| Somalia  | 1995 | Male   | 75 to 79 | 55%<br>(41-71%)                | 45%<br>(29-59%)          | 0.095<br>(0.052-0.15)                       | 0.66%<br>(0.15-1.2%)                 | 0.71%<br>(0.13-1.3%)                | 11<br>(2.1-21)      | 170<br>(38-300)       |
| Somalia  | 1995 | Male   | 80 to 84 | 54%<br>(38-70%)                | 46%<br>(30-62%)          | 0.086<br>(0.047-0.13)                       | 0.42%<br>(0.069-0.77%)               | 0.44%<br>(0.03-0.84%)               | 4.2<br>(0.28-8.2)   | 48<br>(7.8-88)        |
| Somalia  | 1995 | Male   | 85 to 89 | 52%<br>(37-67%)                | 48%<br>(33-63%)          | 0.076<br>(0.042-0.12)                       | 0.46%<br>(0.15-0.75%)                | 0.47%<br>(0.098-0.82%)              | 2.6<br>(0.54-4.5)   | 21<br>(6.5-35)        |
| Somalia  | 1995 | Male   | 90 to 94 | 52%<br>(37-66%)                | 48%<br>(34-63%)          | 0.07<br>(0.037-0.11)                        | 0.29%<br>(0.05-0.51%)                | 0.26%<br>(-0.028-0.53%)             | 0.55<br>(-0.06-1.1) | 3.7<br>(0.64-6.6)     |
| Somalia  | 1995 | Male   | 95 plus  | 54%<br>(35-72%)                | 46%<br>(28-65%)          | 0.065<br>(0.029-0.12)                       | 0.45%<br>(0.15-0.74%)                | 0.4%<br>(0.052-0.76%)               | 0.2<br>(0.025-0.37) | 0.87<br>(0.28-1.4)    |
| Somalia  | 2000 | Female | All Ages | 35%<br>(29-41%)                | 65%<br>(59-71%)          | 0.075<br>(0.05-0.11)                        | 0.25%<br>(-0.043-0.54%)              | 0.27%<br>(-0.24-0.77%)              | 120<br>(-110-370)   | 6700<br>(-1200-15000) |
| Somalia  | 2000 | Female | 15 to 19 | 36%<br>(23-51%)                | 64%<br>(49-77%)          | 0.089<br>(0.043-0.15)                       | 0.31%<br>(-0.11-0.74%)               | 0.093%<br>(-0.54-0.78%)             | 0.79<br>(-4.6-6.5)  | 290<br>(-97-700)      |
| Somalia  | 2000 | Female | 20 to 24 | 42%<br>(27-57%)                | 58%<br>(43-73%)          | 0.12<br>(0.062-0.21)                        | 0.56%<br>(-0.052-1.2%)               | 0.13%<br>(-0.71-0.98%)              | 1.4<br>(-7.6-11)    | 570<br>(-51-1200)     |
| Somalia  | 2000 | Female | 25 to 29 | 44%<br>(29-60%)                | 56%<br>(40-71%)          | 0.14<br>(0.078-0.25)                        | 0.67%<br>(-0.055-1.4%)               | 0.3%<br>(-0.64-1.3%)                | 3.7<br>(-8.1-16)    | 660<br>(-50-1500)     |
| Somalia  | 2000 | Female | 30 to 34 | 46%<br>(31-62%)                | 54%<br>(38-69%)          | 0.15<br>(0.079-0.25)                        | 0.71%<br>(-0.13-1.6%)                | 0.47%<br>(-0.66-1.6%)               | 6.3<br>(-8.4-22)    | 700<br>(-120-1500)    |
| Somalia  | 2000 | Female | 35 to 39 | 49%<br>(34-64%)                | 51%<br>(36-66%)          | 0.14<br>(0.075-0.24)                        | 0.77%<br>(-0.078-1.7%)               | 0.68%<br>(-0.43-1.9%)               | 10<br>(-6-30)       | 760<br>(-85-1700)     |
| Somalia  | 2000 | Female | 40 to 44 | 50%<br>(35-65%)                | 50%<br>(35-65%)          | 0.14<br>(0.069-0.25)                        | 0.95%<br>(0.15-1.8%)                 | 0.99%<br>(-0.031-2.1%)              | 16<br>(-0.47-35)    | 890<br>(130-1700)     |
| Somalia  | 2000 | Female | 45 to 49 | 50%<br>(32-66%)                | 50%<br>(34-68%)          | 0.15<br>(0.071-0.25)                        | 0.85%<br>(-0.068-1.8%)               | 0.91%<br>(-0.22-2.1%)               | 16<br>(-3.9-38)     | 770<br>(-62-1600)     |
| Somalia  | 2000 | Female | 50 to 54 | 48%<br>(33-65%)                | 52%<br>(35-67%)          | 0.15<br>(0.073-0.25)                        | 0.84%<br>(-0.24-2%)                  | 0.93%<br>(-0.34-2.3%)               | 20<br>(-7.5-48)     | 760<br>(-220-1700)    |
| Somalia  | 2000 | Female | 55 to 59 | 47%<br>(33-64%)                | 53%<br>(36-67%)          | 0.15<br>(0.074-0.27)                        | 0.4%<br>(-0.61-1.4%)                 | 0.44%<br>(-0.74-1.6%)               | 10<br>(-17-38)      | 340<br>(-520-1200)    |
| Somalia  | 2000 | Female | 60 to 64 | 48%<br>(31-65%)                | 52%<br>(35-69%)          | 0.15<br>(0.071-0.27)                        | 0.42%<br>(-0.56-1.2%)                | 0.48%<br>(-0.61-1.5%)               | 14<br>(-17-41)      | 360<br>(-470-1100)    |
| Somalia  | 2000 | Female | 65 to 69 | 49%<br>(34-65%)                | 51%<br>(35-66%)          | 0.14<br>(0.07-0.24)                         | 0.48%<br>(-0.36-1.3%)                | 0.52%<br>(-0.45-1.4%)               | 15<br>(-13-42)      | 360<br>(-270-940)     |

| Location | Year | Sex    | Age      | Prevalence of current drinkers | Prevalence of abstainers | Population average of standard drinks daily | Percent of total attributable deaths | Percent of total attributable DALYs | Attributable deaths  | Attributable DALYs     |
|----------|------|--------|----------|--------------------------------|--------------------------|---------------------------------------------|--------------------------------------|-------------------------------------|----------------------|------------------------|
| Somalia  | 2000 | Female | 70 to 74 | 48%<br>(34-62%)                | 52%<br>(38-66%)          | 0.12<br>(0.059-0.21)                        | 0.15%<br>(-0.66-0.83%)               | 0.12%<br>(-0.77-0.89%)              | 3.9<br>(-25-28)      | 94<br>(-430-520)       |
| Somalia  | 2000 | Female | 75 to 79 | 46%<br>(29-62%)                | 54%<br>(38-71%)          | 0.11<br>(0.049-0.2)                         | 0.22%<br>(-0.65-0.84%)               | 0.23%<br>(-0.72-0.93%)              | 6.4<br>(-20-26)      | 95<br>(-280-360)       |
| Somalia  | 2000 | Female | 80 to 84 | 44%<br>(28-62%)                | 56%<br>(38-72%)          | 0.099<br>(0.045-0.18)                       | 0.0067%<br>(-0.65-0.47%)             | 0.0027%<br>(-0.73-0.54%)            | 0.05<br>(-14-9.9)    | 1.5<br>(-150-100)      |
| Somalia  | 2000 | Female | 85 to 89 | 44%<br>(29-59%)                | 56%<br>(41-71%)          | 0.093<br>(0.044-0.17)                       | -0.051%<br>(-0.61-0.32%)             | -0.071%<br>(-0.73-0.35%)            | -0.65<br>(-6.5-3.2)  | -3.9<br>(-46-24)       |
| Somalia  | 2000 | Female | 90 to 94 | 46%<br>(30-60%)                | 54%<br>(40-70%)          | 0.091<br>(0.042-0.17)                       | -0.1%<br>(-0.63-0.22%)               | -0.16%<br>(-0.76-0.24%)             | -0.51<br>(-2.5-0.76) | -2<br>(-12-4.3)        |
| Somalia  | 2000 | Female | 95 plus  | 48%<br>(30-65%)                | 52%<br>(35-70%)          | 0.088<br>(0.035-0.18)                       | 0.25%<br>(-0.24-0.68%)               | 0.22%<br>(-0.35-0.73%)              | 0.22<br>(-0.36-0.74) | 0.98<br>(-0.94-2.7)    |
| Somalia  | 2000 | Male   | All Ages | 43%<br>(37-50%)                | 57%<br>(50-63%)          | 0.09<br>(0.06-0.13)                         | 0.47%<br>(-0.058-1%)                 | 0.51%<br>(-0.36-1.4%)               | 230<br>(-170-620)    | 14000<br>(-1800-29000) |
| Somalia  | 2000 | Male   | 15 to 19 | 42%<br>(29-57%)                | 58%<br>(43-71%)          | 0.1<br>(0.055-0.17)                         | 0.8%<br>(0.12-1.6%)                  | 0.28%<br>(-0.62-1.2%)               | 2.8<br>(-6.2-13)     | 790<br>(120-1600)      |
| Somalia  | 2000 | Male   | 20 to 24 | 53%<br>(39-67%)                | 47%<br>(33-61%)          | 0.14<br>(0.074-0.23)                        | 1.4%<br>(0.038-2.8%)                 | 0.39%<br>(-1.3-2.1%)                | 5.1<br>(-17-27)      | 1600<br>(45-3200)      |
| Somalia  | 2000 | Male   | 25 to 29 | 56%<br>(41-71%)                | 44%<br>(29-59%)          | 0.16<br>(0.093-0.26)                        | 1.6%<br>(-0.29-3.6%)                 | 0.63%<br>(-1.7-3.1%)                | 8.2<br>(-23-38)      | 1600<br>(-280-3500)    |
| Somalia  | 2000 | Male   | 30 to 34 | 58%<br>(43-73%)                | 42%<br>(27-57%)          | 0.18<br>(0.1-0.3)                           | 1.5%<br>(-0.62-3.7%)                 | 0.77%<br>(-1.8-3.4%)                | 11<br>(-25-47)       | 1400<br>(-580-3500)    |
| Somalia  | 2000 | Male   | 35 to 39 | 60%<br>(45-74%)                | 40%<br>(26-55%)          | 0.2<br>(0.11-0.33)                          | 1.5%<br>(-0.7-3.7%)                  | 1.1%<br>(-1.6-3.9%)                 | 16<br>(-24-56)       | 1400<br>(-630-3500)    |
| Somalia  | 2000 | Male   | 40 to 44 | 61%<br>(46-76%)                | 39%<br>(24-54%)          | 0.2<br>(0.11-0.35)                          | 1.6%<br>(-0.54-3.8%)                 | 1.4%<br>(-1.2-4.2%)                 | 22<br>(-20-68)       | 1400<br>(-470-3400)    |
| Somalia  | 2000 | Male   | 45 to 49 | 61%<br>(46-76%)                | 39%<br>(24-54%)          | 0.2<br>(0.11-0.34)                          | 1.7%<br>(-0.57-3.6%)                 | 1.6%<br>(-1-4%)                     | 27<br>(-18-70)       | 1400<br>(-480-3100)    |
| Somalia  | 2000 | Male   | 50 to 54 | 61%<br>(46-76%)                | 39%<br>(24-54%)          | 0.2<br>(0.11-0.34)                          | 1.5%<br>(-0.66-3.5%)                 | 1.5%<br>(-1.1-4%)                   | 27<br>(-21-73)       | 1200<br>(-530-2800)    |
| Somalia  | 2000 | Male   | 55 to 59 | 61%<br>(46-75%)                | 39%<br>(25-54%)          | 0.19<br>(0.1-0.33)                          | 1.3%<br>(-0.74-3.1%)                 | 1.3%<br>(-1.1-3.5%)                 | 23<br>(-21-67)       | 880<br>(-490-2200)     |
| Somalia  | 2000 | Male   | 60 to 64 | 60%<br>(44-75%)                | 40%<br>(25-56%)          | 0.18<br>(0.091-0.31)                        | 1.3%<br>(-0.033-2.7%)                | 1.4%<br>(-0.22-3.1%)                | 30<br>(-4.7-68)      | 890<br>(-23-1900)      |
| Somalia  | 2000 | Male   | 65 to 69 | 58%<br>(44-73%)                | 42%<br>(27-56%)          | 0.15<br>(0.077-0.24)                        | 0.86%<br>(-0.25-1.9%)                | 0.91%<br>(-0.4-2.2%)                | 20<br>(-8.3-49)      | 480<br>(-140-1100)     |
| Somalia  | 2000 | Male   | 70 to 74 | 57%<br>(42-71%)                | 43%<br>(29-58%)          | 0.12<br>(0.061-0.2)                         | 0.65%<br>(-0.16-1.4%)                | 0.71%<br>(-0.25-1.6%)               | 16<br>(-5.1-37)      | 300<br>(-72-670)       |
| Somalia  | 2000 | Male   | 75 to 79 | 55%<br>(40-71%)                | 45%<br>(29-60%)          | 0.099<br>(0.05-0.17)                        | 0.61%<br>(-0.092-1.2%)               | 0.66%<br>(-0.14-1.4%)               | 12<br>(-2.7-26)      | 180<br>(-27-360)       |
| Somalia  | 2000 | Male   | 80 to 84 | 54%<br>(37-70%)                | 46%<br>(30-63%)          | 0.089<br>(0.045-0.15)                       | 0.4%<br>(-0.11-0.87%)                | 0.41%<br>(-0.2-0.97%)               | 4.5<br>(-2.2-11)     | 52<br>(-14-110)        |
| Somalia  | 2000 | Male   | 85 to 89 | 52%<br>(36-66%)                | 48%<br>(34-64%)          | 0.079<br>(0.039-0.14)                       | 0.44%<br>(0.022-0.82%)               | 0.44%<br>(-0.051-0.89%)             | 2.7<br>(-0.31-5.5)   | 23<br>(1.1-42)         |

| Location | Year | Sex    | Age      | Prevalence of current drinkers | Prevalence of abstainers | Population average of standard drinks daily | Percent of total attributable deaths | Percent of total attributable DALYs | Attributable deaths   | Attributable DALYs     |
|----------|------|--------|----------|--------------------------------|--------------------------|---------------------------------------------|--------------------------------------|-------------------------------------|-----------------------|------------------------|
| Somalia  | 2000 | Male   | 90 to 94 | 52%<br>(37-67%)                | 48%<br>(33-63%)          | 0.073<br>(0.035-0.13)                       | 0.28%<br>(-0.028-0.55%)              | 0.24%<br>(-0.12-0.57%)              | 0.59<br>(-0.28-1.4)   | 4<br>(-0.4-8)          |
| Somalia  | 2000 | Male   | 95 plus  | 54%<br>(34-71%)                | 46%<br>(29-66%)          | 0.068<br>(0.027-0.14)                       | 0.44%<br>(0.073-0.77%)               | 0.39%<br>(-0.059-0.79%)             | 0.27<br>(-0.042-0.56) | 1.2<br>(0.2-2.2)       |
| Somalia  | 2005 | Female | All Ages | 34%<br>(29-41%)                | 66%<br>(59-71%)          | 0.081<br>(0.042-0.14)                       | 0.26%<br>(-0.11-0.62%)               | 0.26%<br>(-0.39-0.89%)              | 130<br>(-180-430)     | 7200<br>(-2900-18000)  |
| Somalia  | 2005 | Female | 15 to 19 | 36%<br>(23-51%)                | 64%<br>(49-77%)          | 0.099<br>(0.043-0.19)                       | 0.34%<br>(-0.13-0.87%)               | 0.11%<br>(-0.65-0.93%)              | 1<br>(-5.8-8.9)       | 350<br>(-130-910)      |
| Somalia  | 2005 | Female | 20 to 24 | 42%<br>(27-57%)                | 58%<br>(43-73%)          | 0.13<br>(0.059-0.25)                        | 0.62%<br>(-0.063-1.4%)               | 0.15%<br>(-0.8-1.2%)                | 1.7<br>(-9.2-14)      | 660<br>(-67-1500)      |
| Somalia  | 2005 | Female | 25 to 29 | 44%<br>(28-61%)                | 56%<br>(39-72%)          | 0.16<br>(0.074-0.31)                        | 0.7%<br>(-0.1-1.6%)                  | 0.33%<br>(-0.73-1.5%)               | 4.2<br>(-9.2-18)      | 750<br>(-100-1700)     |
| Somalia  | 2005 | Female | 30 to 34 | 46%<br>(30-62%)                | 54%<br>(38-70%)          | 0.17<br>(0.072-0.32)                        | 0.74%<br>(-0.23-1.7%)                | 0.5%<br>(-0.78-1.8%)                | 7.1<br>(-10-24)       | 780<br>(-230-1800)     |
| Somalia  | 2005 | Female | 35 to 39 | 48%<br>(33-64%)                | 52%<br>(36-67%)          | 0.16<br>(0.067-0.31)                        | 0.78%<br>(-0.19-1.7%)                | 0.68%<br>(-0.61-1.9%)               | 11<br>(-9.2-32)       | 840<br>(-190-1900)     |
| Somalia  | 2005 | Female | 40 to 44 | 50%<br>(36-65%)                | 50%<br>(35-64%)          | 0.16<br>(0.066-0.32)                        | 0.95%<br>(0.031-1.9%)                | 1%<br>(-0.18-2.2%)                  | 17<br>(-3.1-40)       | 960<br>(30-2000)       |
| Somalia  | 2005 | Female | 45 to 49 | 50%<br>(33-67%)                | 50%<br>(33-67%)          | 0.16<br>(0.067-0.33)                        | 0.83%<br>(-0.3-1.9%)                 | 0.89%<br>(-0.49-2.3%)               | 17<br>(-9.7-45)       | 810<br>(-300-1900)     |
| Somalia  | 2005 | Female | 50 to 54 | 48%<br>(33-64%)                | 52%<br>(36-67%)          | 0.16<br>(0.068-0.32)                        | 0.81%<br>(-0.49-2.1%)                | 0.9%<br>(-0.66-2.5%)                | 21<br>(-15-56)        | 810<br>(-480-2100)     |
| Somalia  | 2005 | Female | 55 to 59 | 47%<br>(31-63%)                | 53%<br>(37-69%)          | 0.17<br>(0.069-0.34)                        | 0.37%<br>(-0.85-1.5%)                | 0.41%<br>(-1-1.8%)                  | 11<br>(-26-46)        | 350<br>(-800-1400)     |
| Somalia  | 2005 | Female | 60 to 64 | 48%<br>(32-65%)                | 52%<br>(35-68%)          | 0.16<br>(0.067-0.32)                        | 0.38%<br>(-0.69-1.3%)                | 0.44%<br>(-0.76-1.6%)               | 13<br>(-23-43)        | 330<br>(-600-1100)     |
| Somalia  | 2005 | Female | 65 to 69 | 49%<br>(34-64%)                | 51%<br>(36-66%)          | 0.15<br>(0.064-0.29)                        | 0.44%<br>(-0.6-1.4%)                 | 0.48%<br>(-0.71-1.6%)               | 16<br>(-24-53)        | 380<br>(-520-1200)     |
| Somalia  | 2005 | Female | 70 to 74 | 48%<br>(33-63%)                | 52%<br>(37-67%)          | 0.13<br>(0.056-0.26)                        | 0.11%<br>(-0.85-0.94%)               | 0.075%<br>(-0.97-1%)                | 2.5<br>(-32-33)       | 71<br>(-560-610)       |
| Somalia  | 2005 | Female | 75 to 79 | 45%<br>(30-62%)                | 55%<br>(38-70%)          | 0.12<br>(0.048-0.24)                        | 0.17%<br>(-0.88-0.88%)               | 0.17%<br>(-0.98-0.97%)              | 5.2<br>(-29-29)       | 79<br>(-400-410)       |
| Somalia  | 2005 | Female | 80 to 84 | 44%<br>(28-62%)                | 56%<br>(38-72%)          | 0.11<br>(0.043-0.22)                        | -0.031%<br>(-0.91-0.55%)             | -0.039%<br>(-1-0.6%)                | -0.87<br>(-23-13)     | -7.9<br>(-230-130)     |
| Somalia  | 2005 | Female | 85 to 89 | 44%<br>(29-58%)                | 56%<br>(42-71%)          | 0.1<br>(0.042-0.21)                         | -0.093%<br>(-0.88-0.4%)              | -0.12%<br>(-1-0.44%)                | -1.1<br>(-10-4.3)     | -7.4<br>(-72-33)       |
| Somalia  | 2005 | Female | 90 to 94 | 46%<br>(31-60%)                | 54%<br>(40-69%)          | 0.1<br>(0.039-0.2)                          | -0.15%<br>(-0.84-0.27%)              | -0.21%<br>(-1-0.29%)                | -0.7<br>(-3.4-0.96)   | -3<br>(-17-5.4)        |
| Somalia  | 2005 | Female | 95 plus  | 48%<br>(31-66%)                | 52%<br>(34-69%)          | 0.098<br>(0.034-0.22)                       | 0.22%<br>(-0.46-0.71%)               | 0.2%<br>(-0.61-0.77%)               | 0.2<br>(-0.63-0.78)   | 0.89<br>(-1.8-2.8)     |
| Somalia  | 2005 | Male   | All Ages | 42%<br>(36-50%)                | 58%<br>(50-64%)          | 0.097<br>(0.052-0.17)                       | 0.53%<br>(-0.13-1.2%)                | 0.56%<br>(-0.53-1.6%)               | 260<br>(-250-770)     | 15000<br>(-3800-35000) |
| Somalia  | 2005 | Male   | 15 to 19 | 42%<br>(29-58%)                | 58%<br>(42-71%)          | 0.11<br>(0.052-0.22)                        | 0.85%<br>(0.053-1.8%)                | 0.33%<br>(-0.8-1.5%)                | 3.7<br>(-8.8-17)      | 950<br>(57-2000)       |

| Location | Year | Sex    | Age      | Prevalence of current drinkers | Prevalence of abstainers | Population average of standard drinks daily | Percent of total attributable deaths | Percent of total attributable DALYs | Attributable deaths  | Attributable DALYs    |
|----------|------|--------|----------|--------------------------------|--------------------------|---------------------------------------------|--------------------------------------|-------------------------------------|----------------------|-----------------------|
| Somalia  | 2005 | Male   | 20 to 24 | 53%<br>(39-66%)                | 47%<br>(34-61%)          | 0.15<br>(0.069-0.29)                        | 1.5%<br>(-0.05-3.2%)                 | 0.47%<br>(-1.5-2.7%)                | 6.8<br>(-22-37)      | 1800<br>(-61-3900)    |
| Somalia  | 2005 | Male   | 25 to 29 | 56%<br>(41-70%)                | 44%<br>(30-59%)          | 0.18<br>(0.085-0.34)                        | 1.7%<br>(-0.39-3.8%)                 | 0.71%<br>(-1.9-3.3%)                | 10<br>(-27-48)       | 1800<br>(-450-4300)   |
| Somalia  | 2005 | Male   | 30 to 34 | 58%<br>(42-72%)                | 42%<br>(28-58%)          | 0.2<br>(0.093-0.39)                         | 1.5%<br>(-0.75-3.9%)                 | 0.85%<br>(-2-3.7%)                  | 13<br>(-30-55)       | 1600<br>(-750-4000)   |
| Somalia  | 2005 | Male   | 35 to 39 | 60%<br>(46-74%)                | 40%<br>(26-54%)          | 0.22<br>(0.097-0.42)                        | 1.6%<br>(-0.73-3.9%)                 | 1.2%<br>(-1.6-4.1%)                 | 19<br>(-27-67)       | 1600<br>(-750-4100)   |
| Somalia  | 2005 | Male   | 40 to 44 | 60%<br>(46-75%)                | 40%<br>(25-54%)          | 0.22<br>(0.096-0.44)                        | 1.6%<br>(-0.72-3.9%)                 | 1.5%<br>(-1.5-4.4%)                 | 25<br>(-23-76)       | 1600<br>(-650-3900)   |
| Somalia  | 2005 | Male   | 45 to 49 | 61%<br>(45-76%)                | 39%<br>(24-55%)          | 0.22<br>(0.095-0.46)                        | 1.7%<br>(-0.71-3.9%)                 | 1.6%<br>(-1.4-4.4%)                 | 29<br>(-25-80)       | 1500<br>(-720-3600)   |
| Somalia  | 2005 | Male   | 50 to 54 | 61%<br>(46-76%)                | 39%<br>(24-54%)          | 0.22<br>(0.096-0.44)                        | 1.5%<br>(-0.98-3.9%)                 | 1.5%<br>(-1.5-4.3%)                 | 30<br>(-31-87)       | 1300<br>(-880-3300)   |
| Somalia  | 2005 | Male   | 55 to 59 | 61%<br>(46-75%)                | 39%<br>(25-54%)          | 0.21<br>(0.094-0.41)                        | 1.3%<br>(-0.99-3.3%)                 | 1.3%<br>(-1.4-3.7%)                 | 27<br>(-32-84)       | 1000<br>(-810-2800)   |
| Somalia  | 2005 | Male   | 60 to 64 | 60%<br>(45-75%)                | 40%<br>(25-55%)          | 0.19<br>(0.081-0.37)                        | 1.4%<br>(-0.33-3%)                   | 1.4%<br>(-0.57-3.3%)                | 32<br>(-12-76)       | 950<br>(-220-2100)    |
| Somalia  | 2005 | Male   | 65 to 69 | 58%<br>(44-73%)                | 42%<br>(27-56%)          | 0.16<br>(0.07-0.3)                          | 0.88%<br>(-0.49-2.2%)                | 0.93%<br>(-0.66-2.4%)               | 22<br>(-17-60)       | 550<br>(-300-1400)    |
| Somalia  | 2005 | Male   | 70 to 74 | 57%<br>(41-71%)                | 43%<br>(29-59%)          | 0.13<br>(0.056-0.25)                        | 0.66%<br>(-0.34-1.7%)                | 0.72%<br>(-0.44-1.9%)               | 17<br>(-11-46)       | 320<br>(-170-830)     |
| Somalia  | 2005 | Male   | 75 to 79 | 55%<br>(40-70%)                | 45%<br>(30-60%)          | 0.11<br>(0.045-0.21)                        | 0.62%<br>(-0.28-1.5%)                | 0.67%<br>(-0.38-1.7%)               | 14<br>(-7.4-33)      | 200<br>(-93-460)      |
| Somalia  | 2005 | Male   | 80 to 84 | 53%<br>(36-69%)                | 47%<br>(31-64%)          | 0.096<br>(0.04-0.19)                        | 0.41%<br>(-0.3-1%)                   | 0.42%<br>(-0.41-1.2%)               | 5.4<br>(-5.2-15)     | 63<br>(-45-160)       |
| Somalia  | 2005 | Male   | 85 to 89 | 51%<br>(36-65%)                | 49%<br>(35-64%)          | 0.085<br>(0.037-0.17)                       | 0.45%<br>(-0.12-0.97%)               | 0.46%<br>(-0.23-1.1%)               | 3<br>(-1.5-7)        | 25<br>(-6.8-54)       |
| Somalia  | 2005 | Male   | 90 to 94 | 52%<br>(37-67%)                | 48%<br>(33-63%)          | 0.079<br>(0.031-0.16)                       | 0.29%<br>(-0.13-0.68%)               | 0.26%<br>(-0.26-0.72%)              | 0.65<br>(-0.64-1.8)  | 4.4<br>(-1.8-10)      |
| Somalia  | 2005 | Male   | 95 plus  | 53%<br>(34-71%)                | 47%<br>(29-66%)          | 0.073<br>(0.026-0.15)                       | 0.45%<br>(-0.06-0.92%)               | 0.4%<br>(-0.21-1%)                  | 0.29<br>(-0.15-0.74) | 1.3<br>(-0.17-2.7)    |
| Somalia  | 2010 | Female | All Ages | 35%<br>(29-41%)                | 65%<br>(59-71%)          | 0.09<br>(0.042-0.17)                        | 0.25%<br>(-0.091-0.57%)              | 0.24%<br>(-0.37-0.82%)              | 130<br>(-200-440)    | 7900<br>(-2800-18000) |
| Somalia  | 2010 | Female | 15 to 19 | 36%<br>(23-52%)                | 64%<br>(48-77%)          | 0.11<br>(0.043-0.23)                        | 0.35%<br>(-0.11-0.87%)               | 0.12%<br>(-0.6-0.95%)               | 1.3<br>(-6.4-10)     | 420<br>(-130-1100)    |
| Somalia  | 2010 | Female | 20 to 24 | 42%<br>(26-58%)                | 58%<br>(42-74%)          | 0.15<br>(0.058-0.31)                        | 0.64%<br>(0.005-1.3%)                | 0.17%<br>(-0.73-1.2%)               | 2.1<br>(-9-15)       | 780<br>(6-1600)       |
| Somalia  | 2010 | Female | 25 to 29 | 44%<br>(29-60%)                | 56%<br>(40-71%)          | 0.18<br>(0.072-0.35)                        | 0.75%<br>(-0.045-1.6%)               | 0.37%<br>(-0.68-1.5%)               | 5.1<br>(-9.2-21)     | 870<br>(-48-1900)     |
| Somalia  | 2010 | Female | 30 to 34 | 46%<br>(30-62%)                | 54%<br>(38-70%)          | 0.18<br>(0.071-0.38)                        | 0.77%<br>(-0.17-1.7%)                | 0.54%<br>(-0.7-1.8%)                | 8.1<br>(-9.7-27)     | 880<br>(-200-2000)    |
| Somalia  | 2010 | Female | 35 to 39 | 48%<br>(34-64%)                | 52%<br>(36-66%)          | 0.17<br>(0.067-0.37)                        | 0.82%<br>(-0.18-1.8%)                | 0.72%<br>(-0.56-2%)                 | 12<br>(-9.4-35)      | 930<br>(-200-2100)    |

| Location | Year | Sex    | Age      | Prevalence of current drinkers | Prevalence of abstainers | Population average of standard drinks daily | Percent of total attributable deaths | Percent of total attributable DALYs | Attributable deaths  | Attributable DALYs     |
|----------|------|--------|----------|--------------------------------|--------------------------|---------------------------------------------|--------------------------------------|-------------------------------------|----------------------|------------------------|
| Somalia  | 2010 | Female | 40 to 44 | 50%<br>(36-66%)                | 50%<br>(34-64%)          | 0.17<br>(0.063-0.37)                        | 0.97%<br>(0.095-1.9%)                | 1%<br>(-0.12-2.2%)                  | 19<br>(-2.1-41)      | 1100<br>(99-2100)      |
| Somalia  | 2010 | Female | 45 to 49 | 50%<br>(33-66%)                | 50%<br>(34-67%)          | 0.18<br>(0.065-0.39)                        | 0.85%<br>(-0.28-1.9%)                | 0.91%<br>(-0.51-2.2%)               | 19<br>(-11-45)       | 880<br>(-310-2000)     |
| Somalia  | 2010 | Female | 50 to 54 | 48%<br>(33-65%)                | 52%<br>(35-67%)          | 0.18<br>(0.066-0.38)                        | 0.82%<br>(-0.48-2.1%)                | 0.92%<br>(-0.67-2.5%)               | 22<br>(-16-60)       | 870<br>(-490-2200)     |
| Somalia  | 2010 | Female | 55 to 59 | 47%<br>(32-63%)                | 53%<br>(37-68%)          | 0.18<br>(0.069-0.41)                        | 0.37%<br>(-0.84-1.5%)                | 0.42%<br>(-0.94-1.8%)               | 12<br>(-28-48)       | 390<br>(-840-1500)     |
| Somalia  | 2010 | Female | 60 to 64 | 48%<br>(31-65%)                | 52%<br>(35-69%)          | 0.18<br>(0.066-0.38)                        | 0.38%<br>(-0.68-1.3%)                | 0.44%<br>(-0.79-1.5%)               | 14<br>(-24-50)       | 360<br>(-670-1300)     |
| Somalia  | 2010 | Female | 65 to 69 | 49%<br>(34-65%)                | 51%<br>(35-66%)          | 0.17<br>(0.065-0.35)                        | 0.41%<br>(-0.68-1.3%)                | 0.45%<br>(-0.8-1.5%)                | 16<br>(-28-52)       | 360<br>(-580-1100)     |
| Somalia  | 2010 | Female | 70 to 74 | 48%<br>(34-62%)                | 52%<br>(38-66%)          | 0.15<br>(0.053-0.32)                        | 0.071%<br>(-1-0.87%)                 | 0.042%<br>(-1.1-0.96%)              | 1.6<br>(-43-36)      | 55<br>(-740-650)       |
| Somalia  | 2010 | Female | 75 to 79 | 46%<br>(30-62%)                | 54%<br>(38-70%)          | 0.13<br>(0.046-0.28)                        | 0.13%<br>(-0.95-0.9%)                | 0.14%<br>(-1.1-1%)                  | 4.4<br>(-35-32)      | 66<br>(-470-440)       |
| Somalia  | 2010 | Female | 80 to 84 | 45%<br>(28-61%)                | 55%<br>(39-72%)          | 0.12<br>(0.043-0.27)                        | -0.077%<br>(-1-0.52%)                | -0.088%<br>(-1.2-0.57%)             | -2.2<br>(-29-14)     | -22<br>(-290-150)      |
| Somalia  | 2010 | Female | 85 to 89 | 44%<br>(28-59%)                | 56%<br>(41-72%)          | 0.11<br>(0.043-0.25)                        | -0.13%<br>(-0.96-0.37%)              | -0.16%<br>(-1.1-0.41%)              | -1.9<br>(-13-4.7)    | -13<br>(-91-35)        |
| Somalia  | 2010 | Female | 90 to 94 | 46%<br>(30-60%)                | 54%<br>(40-70%)          | 0.11<br>(0.039-0.24)                        | -0.17%<br>(-0.9-0.26%)               | -0.23%<br>(-1.1-0.26%)              | -0.86<br>(-4-0.97)   | -3.7<br>(-20-5.4)      |
| Somalia  | 2010 | Female | 95 plus  | 48%<br>(30-65%)                | 52%<br>(35-70%)          | 0.11<br>(0.034-0.25)                        | 0.17%<br>(-0.52-0.66%)               | 0.14%<br>(-0.65-0.69%)              | 0.16<br>(-0.75-0.77) | 0.76<br>(-2.2-2.9)     |
| Somalia  | 2010 | Male   | All Ages | 42%<br>(36-50%)                | 58%<br>(50-64%)          | 0.11<br>(0.049-0.21)                        | 0.51%<br>(-0.073-1.1%)               | 0.55%<br>(-0.44-1.5%)               | 290<br>(-240-830)    | 18000<br>(-2500-39000) |
| Somalia  | 2010 | Male   | 15 to 19 | 42%<br>(29-57%)                | 58%<br>(43-71%)          | 0.12<br>(0.049-0.25)                        | 0.79%<br>(0.04-1.6%)                 | 0.3%<br>(-0.67-1.4%)                | 4.3<br>(-9.5-20)     | 1100<br>(58-2400)      |
| Somalia  | 2010 | Male   | 20 to 24 | 52%<br>(38-66%)                | 48%<br>(34-62%)          | 0.16<br>(0.068-0.33)                        | 1.4%<br>(-0.13-2.9%)                 | 0.42%<br>(-1.4-2.3%)                | 7.9<br>(-26-43)      | 2100<br>(-220-4500)    |
| Somalia  | 2010 | Male   | 25 to 29 | 56%<br>(41-71%)                | 44%<br>(29-59%)          | 0.2<br>(0.084-0.39)                         | 1.6%<br>(-0.38-3.5%)                 | 0.69%<br>(-1.8-3%)                  | 12<br>(-31-53)       | 2100<br>(-480-4700)    |
| Somalia  | 2010 | Male   | 30 to 34 | 58%<br>(43-73%)                | 42%<br>(27-57%)          | 0.22<br>(0.091-0.45)                        | 1.5%<br>(-0.61-3.7%)                 | 0.83%<br>(-1.9-3.5%)                | 14<br>(-33-60)       | 1800<br>(-740-4500)    |
| Somalia  | 2010 | Male   | 35 to 39 | 60%<br>(46-74%)                | 40%<br>(26-54%)          | 0.24<br>(0.096-0.51)                        | 1.6%<br>(-0.59-3.9%)                 | 1.2%<br>(-1.5-4.1%)                 | 22<br>(-26-73)       | 1800<br>(-680-4300)    |
| Somalia  | 2010 | Male   | 40 to 44 | 60%<br>(46-75%)                | 40%<br>(25-54%)          | 0.24<br>(0.092-0.52)                        | 1.6%<br>(-0.54-4%)                   | 1.5%<br>(-1.2-4.4%)                 | 29<br>(-23-83)       | 1800<br>(-590-4200)    |
| Somalia  | 2010 | Male   | 45 to 49 | 61%<br>(45-76%)                | 39%<br>(24-55%)          | 0.24<br>(0.092-0.52)                        | 1.7%<br>(-0.51-3.7%)                 | 1.7%<br>(-1-4.2%)                   | 33<br>(-20-85)       | 1700<br>(-520-3800)    |
| Somalia  | 2010 | Male   | 50 to 54 | 61%<br>(45-75%)                | 39%<br>(25-55%)          | 0.24<br>(0.091-0.5)                         | 1.6%<br>(-0.76-3.7%)                 | 1.6%<br>(-1.2-4.3%)                 | 34<br>(-28-91)       | 1500<br>(-680-3500)    |
| Somalia  | 2010 | Male   | 55 to 59 | 61%<br>(46-75%)                | 39%<br>(25-54%)          | 0.23<br>(0.088-0.49)                        | 1.3%<br>(-0.79-3.3%)                 | 1.4%<br>(-1.2-3.7%)                 | 31<br>(-28-91)       | 1200<br>(-670-3000)    |

| Location | Year | Sex    | Age      | Prevalence of current drinkers | Prevalence of abstainers | Population average of standard drinks daily | Percent of total attributable deaths | Percent of total attributable DALYs | Attributable deaths  | Attributable DALYs    |
|----------|------|--------|----------|--------------------------------|--------------------------|---------------------------------------------|--------------------------------------|-------------------------------------|----------------------|-----------------------|
| Somalia  | 2010 | Male   | 60 to 64 | 60%<br>(44-76%)                | 40%<br>(24-56%)          | 0.21<br>(0.077-0.45)                        | 1.4%<br>(-0.19-2.9%)                 | 1.5%<br>(-0.46-3.3%)                | 38<br>(-11-89)       | 1100<br>(-170-2500)   |
| Somalia  | 2010 | Male   | 65 to 69 | 58%<br>(43-73%)                | 42%<br>(27-57%)          | 0.17<br>(0.069-0.37)                        | 0.89%<br>(-0.42-2.1%)                | 0.95%<br>(-0.63-2.4%)               | 24<br>(-16-61)       | 590<br>(-290-1400)    |
| Somalia  | 2010 | Male   | 70 to 74 | 56%<br>(42-70%)                | 44%<br>(30-58%)          | 0.14<br>(0.054-0.29)                        | 0.64%<br>(-0.37-1.6%)                | 0.7%<br>(-0.47-1.8%)                | 19<br>(-13-50)       | 360<br>(-210-890)     |
| Somalia  | 2010 | Male   | 75 to 79 | 55%<br>(41-70%)                | 45%<br>(30-59%)          | 0.12<br>(0.043-0.25)                        | 0.6%<br>(-0.29-1.4%)                 | 0.66%<br>(-0.4-1.6%)                | 15<br>(-8.6-36)      | 210<br>(-100-510)     |
| Somalia  | 2010 | Male   | 80 to 84 | 53%<br>(36-70%)                | 47%<br>(30-64%)          | 0.11<br>(0.04-0.23)                         | 0.38%<br>(-0.3-1%)                   | 0.39%<br>(-0.41-1.1%)               | 5.9<br>(-5.9-17)     | 69<br>(-52-180)       |
| Somalia  | 2010 | Male   | 85 to 89 | 51%<br>(34-66%)                | 49%<br>(34-66%)          | 0.093<br>(0.035-0.2)                        | 0.41%<br>(-0.19-0.91%)               | 0.41%<br>(-0.29-1%)                 | 3.4<br>(-2.5-8.3)    | 29<br>(-14-64)        |
| Somalia  | 2010 | Male   | 90 to 94 | 52%<br>(36-66%)                | 48%<br>(34-64%)          | 0.087<br>(0.032-0.19)                       | 0.25%<br>(-0.17-0.6%)                | 0.21%<br>(-0.27-0.61%)              | 0.65<br>(-0.83-1.8)  | 4.4<br>(-2.9-11)      |
| Somalia  | 2010 | Male   | 95 plus  | 53%<br>(33-72%)                | 47%<br>(28-67%)          | 0.081<br>(0.027-0.19)                       | 0.35%<br>(-0.11-0.77%)               | 0.3%<br>(-0.24-0.79%)               | 0.28<br>(-0.22-0.74) | 1.3<br>(-0.38-2.8)    |
| Somalia  | 2016 | Female | All Ages | 34%<br>(29-41%)                | 66%<br>(59-71%)          | 0.098<br>(0.041-0.19)                       | 0.32%<br>(-0.1-0.75%)                | 0.29%<br>(-0.43-0.96%)              | 150<br>(-230-500)    | 9400<br>(-2800-21000) |
| Somalia  | 2016 | Female | 15 to 19 | 35%<br>(22-51%)                | 65%<br>(49-78%)          | 0.12<br>(0.043-0.26)                        | 0.37%<br>(-0.11-0.91%)               | 0.14%<br>(-0.61-1%)                 | 1.7<br>(-7.4-12)     | 520<br>(-150-1300)    |
| Somalia  | 2016 | Female | 20 to 24 | 42%<br>(26-58%)                | 58%<br>(42-74%)          | 0.16<br>(0.059-0.34)                        | 0.72%<br>(0.037-1.5%)                | 0.21%<br>(-0.81-1.3%)               | 2.7<br>(-11-17)      | 970<br>(49-2000)      |
| Somalia  | 2016 | Female | 25 to 29 | 44%<br>(28-60%)                | 56%<br>(40-72%)          | 0.19<br>(0.076-0.4)                         | 0.85%<br>(0.024-1.8%)                | 0.45%<br>(-0.74-1.7%)               | 6.5<br>(-11-25)      | 1100<br>(30-2300)     |
| Somalia  | 2016 | Female | 30 to 34 | 46%<br>(30-61%)                | 54%<br>(39-70%)          | 0.2<br>(0.073-0.42)                         | 0.88%<br>(-0.069-1.9%)               | 0.64%<br>(-0.68-2%)                 | 10<br>(-11-32)       | 1100<br>(-84-2300)    |
| Somalia  | 2016 | Female | 35 to 39 | 48%<br>(33-63%)                | 52%<br>(37-67%)          | 0.19<br>(0.066-0.42)                        | 0.91%<br>(-0.21-2%)                  | 0.83%<br>(-0.63-2.3%)               | 15<br>(-10-42)       | 1100<br>(-250-2400)   |
| Somalia  | 2016 | Female | 40 to 44 | 50%<br>(36-65%)                | 50%<br>(35-64%)          | 0.19<br>(0.062-0.43)                        | 1.1%<br>(0.099-2.1%)                 | 1.1%<br>(-0.12-2.5%)                | 22<br>(-2.1-50)      | 1200<br>(100-2500)    |
| Somalia  | 2016 | Female | 45 to 49 | 50%<br>(33-65%)                | 50%<br>(35-67%)          | 0.19<br>(0.065-0.42)                        | 0.92%<br>(-0.24-2%)                  | 1%<br>(-0.44-2.4%)                  | 22<br>(-9.6-53)      | 1000<br>(-250-2300)   |
| Somalia  | 2016 | Female | 50 to 54 | 48%<br>(33-64%)                | 52%<br>(36-67%)          | 0.19<br>(0.064-0.42)                        | 0.89%<br>(-0.45-2.2%)                | 1%<br>(-0.64-2.7%)                  | 26<br>(-16-66)       | 1000<br>(-530-2400)   |
| Somalia  | 2016 | Female | 55 to 59 | 47%<br>(32-62%)                | 53%<br>(38-68%)          | 0.2<br>(0.067-0.44)                         | 0.41%<br>(-0.9-1.7%)                 | 0.47%<br>(-1.1-2%)                  | 14<br>(-31-58)       | 450<br>(-970-1800)    |
| Somalia  | 2016 | Female | 60 to 64 | 47%<br>(31-64%)                | 53%<br>(36-69%)          | 0.2<br>(0.066-0.46)                         | 0.4%<br>(-0.72-1.4%)                 | 0.47%<br>(-0.84-1.7%)               | 16<br>(-28-56)       | 420<br>(-760-1500)    |
| Somalia  | 2016 | Female | 65 to 69 | 49%<br>(33-65%)                | 51%<br>(35-67%)          | 0.18<br>(0.063-0.41)                        | 0.41%<br>(-0.67-1.3%)                | 0.45%<br>(-0.77-1.5%)               | 17<br>(-29-57)       | 400<br>(-650-1300)    |
| Somalia  | 2016 | Female | 70 to 74 | 48%<br>(33-63%)                | 52%<br>(37-67%)          | 0.16<br>(0.055-0.36)                        | 0.053%<br>(-1.1-0.9%)                | 0.019%<br>(-1.3-0.97%)              | 0.68<br>(-51-37)     | 41<br>(-870-700)      |
| Somalia  | 2016 | Female | 75 to 79 | 46%<br>(29-62%)                | 54%<br>(38-71%)          | 0.14<br>(0.045-0.32)                        | 0.11%<br>(-1.1-0.9%)                 | 0.11%<br>(-1.2-1%)                  | 4<br>(-47-38)        | 62<br>(-640-510)      |

| Location | Year | Sex    | Age      | Prevalence of current drinkers | Prevalence of abstainers | Population average of standard drinks daily | Percent of total attributable deaths | Percent of total attributable DALYs | Attributable deaths  | Attributable DALYs     |
|----------|------|--------|----------|--------------------------------|--------------------------|---------------------------------------------|--------------------------------------|-------------------------------------|----------------------|------------------------|
| Somalia  | 2016 | Female | 80 to 84 | 44%<br>(28-61%)                | 56%<br>(39-72%)          | 0.13<br>(0.042-0.29)                        | -0.11%<br>(-1.1-0.54%)               | -0.13%<br>(-1.3-0.6%)               | -3.5<br>(-34-17)     | -36<br>(-360-170)      |
| Somalia  | 2016 | Female | 85 to 89 | 44%<br>(29-59%)                | 56%<br>(41-71%)          | 0.12<br>(0.042-0.3)                         | -0.17%<br>(-1-0.39%)                 | -0.2%<br>(-1.2-0.45%)               | -2.4<br>(-14-5.2)    | -17<br>(-110-39)       |
| Somalia  | 2016 | Female | 90 to 94 | 46%<br>(30-60%)                | 54%<br>(40-70%)          | 0.12<br>(0.037-0.29)                        | -0.24%<br>(-1.1-0.27%)               | -0.31%<br>(-1.3-0.28%)              | -1.2<br>(-4.9-1.1)   | -5.3<br>(-24-6.3)      |
| Somalia  | 2016 | Female | 95 plus  | 48%<br>(30-65%)                | 52%<br>(35-70%)          | 0.12<br>(0.035-0.3)                         | 0.16%<br>(-0.66-0.76%)               | 0.12%<br>(-0.84-0.81%)              | 0.12<br>(-0.79-0.77) | 0.61<br>(-2.4-2.8)     |
| Somalia  | 2016 | Male   | All Ages | 42%<br>(36-50%)                | 58%<br>(50-64%)          | 0.12<br>(0.049-0.23)                        | 0.7%<br>(-0.051-1.5%)                | 0.72%<br>(-0.47-1.9%)               | 360<br>(-220-990)    | 22000<br>(-1600-45000) |
| Somalia  | 2016 | Male   | 15 to 19 | 42%<br>(29-56%)                | 58%<br>(44-71%)          | 0.14<br>(0.048-0.29)                        | 0.88%<br>(0.066-1.7%)                | 0.35%<br>(-0.68-1.5%)               | 5.7<br>(-11-24)      | 1400<br>(110-2900)     |
| Somalia  | 2016 | Male   | 20 to 24 | 52%<br>(38-66%)                | 48%<br>(34-62%)          | 0.18<br>(0.069-0.37)                        | 1.5%<br>(0.032-3.1%)                 | 0.51%<br>(-1.4-2.4%)                | 11<br>(-30-52)       | 2700<br>(55-5600)      |
| Somalia  | 2016 | Male   | 25 to 29 | 56%<br>(41-70%)                | 44%<br>(30-59%)          | 0.22<br>(0.086-0.44)                        | 1.8%<br>(-0.27-3.8%)                 | 0.83%<br>(-1.8-3.5%)                | 16<br>(-35-68)       | 2700<br>(-430-5800)    |
| Somalia  | 2016 | Male   | 30 to 34 | 58%<br>(43-72%)                | 42%<br>(28-57%)          | 0.24<br>(0.094-0.5)                         | 1.7%<br>(-0.5-4%)                    | 1%<br>(-1.9-4%)                     | 19<br>(-36-75)       | 2300<br>(-640-5400)    |
| Somalia  | 2016 | Male   | 35 to 39 | 60%<br>(46-74%)                | 40%<br>(26-54%)          | 0.26<br>(0.094-0.55)                        | 1.8%<br>(-0.52-4.2%)                 | 1.4%<br>(-1.5-4.6%)                 | 27<br>(-27-85)       | 2200<br>(-580-5100)    |
| Somalia  | 2016 | Male   | 40 to 44 | 60%<br>(46-75%)                | 40%<br>(25-54%)          | 0.27<br>(0.088-0.58)                        | 1.9%<br>(-0.36-4.2%)                 | 1.8%<br>(-1.1-4.7%)                 | 35<br>(-21-94)       | 2100<br>(-390-4800)    |
| Somalia  | 2016 | Male   | 45 to 49 | 61%<br>(45-76%)                | 39%<br>(24-55%)          | 0.27<br>(0.087-0.58)                        | 1.9%<br>(-0.33-4.2%)                 | 1.9%<br>(-0.96-4.8%)                | 41<br>(-20-100)      | 2100<br>(-330-4500)    |
| Somalia  | 2016 | Male   | 50 to 54 | 61%<br>(46-75%)                | 39%<br>(25-54%)          | 0.26<br>(0.086-0.56)                        | 1.8%<br>(-0.6-4.2%)                  | 1.8%<br>(-1.1-4.8%)                 | 41<br>(-26-110)      | 1800<br>(-600-4200)    |
| Somalia  | 2016 | Male   | 55 to 59 | 60%<br>(46-75%)                | 40%<br>(25-54%)          | 0.25<br>(0.088-0.55)                        | 1.5%<br>(-0.64-3.7%)                 | 1.6%<br>(-1.1-4.3%)                 | 38<br>(-27-110)      | 1400<br>(-620-3500)    |
| Somalia  | 2016 | Male   | 60 to 64 | 60%<br>(44-76%)                | 40%<br>(24-56%)          | 0.23<br>(0.079-0.5)                         | 1.5%<br>(-0.037-3.2%)                | 1.6%<br>(-0.25-3.6%)                | 45<br>(-6.9-100)     | 1300<br>(-31-2800)     |
| Somalia  | 2016 | Male   | 65 to 69 | 58%<br>(44-74%)                | 42%<br>(26-56%)          | 0.19<br>(0.067-0.42)                        | 0.96%<br>(-0.44-2.3%)                | 1%<br>(-0.65-2.6%)                  | 30<br>(-18-75)       | 730<br>(-330-1700)     |
| Somalia  | 2016 | Male   | 70 to 74 | 57%<br>(42-71%)                | 43%<br>(29-58%)          | 0.15<br>(0.054-0.32)                        | 0.69%<br>(-0.44-1.7%)                | 0.75%<br>(-0.59-1.9%)               | 21<br>(-17-56)       | 400<br>(-270-1000)     |
| Somalia  | 2016 | Male   | 75 to 79 | 55%<br>(41-70%)                | 45%<br>(30-59%)          | 0.13<br>(0.044-0.28)                        | 0.65%<br>(-0.34-1.5%)                | 0.71%<br>(-0.43-1.7%)               | 17<br>(-11-43)       | 260<br>(-130-600)      |
| Somalia  | 2016 | Male   | 80 to 84 | 53%<br>(36-69%)                | 47%<br>(31-64%)          | 0.12<br>(0.039-0.25)                        | 0.41%<br>(-0.4-1.1%)                 | 0.43%<br>(-0.5-1.2%)                | 7<br>(-8.5-21)       | 81<br>(-80-220)        |
| Somalia  | 2016 | Male   | 85 to 89 | 51%<br>(35-66%)                | 49%<br>(34-65%)          | 0.1<br>(0.035-0.23)                         | 0.45%<br>(-0.22-1%)                  | 0.46%<br>(-0.34-1.1%)               | 3.9<br>(-2.8-9.5)    | 32<br>(-15-72)         |
| Somalia  | 2016 | Male   | 90 to 94 | 52%<br>(36-67%)                | 48%<br>(33-64%)          | 0.094<br>(0.031-0.22)                       | 0.3%<br>(-0.2-0.73%)                 | 0.26%<br>(-0.34-0.78%)              | 0.8<br>(-1.1-2.4)    | 5.4<br>(-3.6-14)       |
| Somalia  | 2016 | Male   | 95 plus  | 53%<br>(33-72%)                | 47%<br>(28-67%)          | 0.087<br>(0.027-0.21)                       | 0.45%<br>(-0.18-1%)                  | 0.4%<br>(-0.34-1.1%)                | 0.31<br>(-0.26-0.83) | 1.4<br>(-0.53-3.1)     |



| Location | Year | Sex    | Age      | Prevalence of current drinkers | Prevalence of abstainers | Population average of standard drinks daily | Percent of total attributable deaths | Percent of total attributable DALYs | Attributable deaths | Attributable DALYs        |
|----------|------|--------|----------|--------------------------------|--------------------------|---------------------------------------------|--------------------------------------|-------------------------------------|---------------------|---------------------------|
| Tanzania | 1990 | Female | All Ages | 20%<br>(16-26%)                | 80%<br>(74-84%)          | 1.4<br>(1-1.9)                              | 1.5%<br>(1.1-2%)                     | 3.2%<br>(2.2-4.5%)                  | 5200<br>(3500-7300) | 170000<br>(130000-220000) |
| Tanzania | 1990 | Female | 15 to 19 | 21%<br>(12-34%)                | 79%<br>(66-88%)          | 1.6<br>(0.75-2.9)                           | 2.7%<br>(1.4-4.4%)                   | 3.6%<br>(1.7-6.1%)                  | 100<br>(48-170)     | 8700<br>(4600-14000)      |
| Tanzania | 1990 | Female | 20 to 24 | 26%<br>(14-42%)                | 74%<br>(58-86%)          | 2.3<br>(1.1-4.1)                            | 3.1%<br>(1.8-4.9%)                   | 3.5%<br>(1.8-5.9%)                  | 130<br>(66-220)     | 11000<br>(6500-17000)     |
| Tanzania | 1990 | Female | 25 to 29 | 28%<br>(16-45%)                | 72%<br>(55-84%)          | 2.8<br>(1.5-4.8)                            | 3.7%<br>(2.5-5.4%)                   | 4.3%<br>(2.6-6.6%)                  | 170<br>(100-250)    | 13000<br>(8300-18000)     |
| Tanzania | 1990 | Female | 30 to 34 | 31%<br>(17-48%)                | 69%<br>(52-83%)          | 3.1<br>(1.6-5.4)                            | 4.5%<br>(3-6.4%)                     | 5.4%<br>(3.3-8%)                    | 200<br>(120-300)    | 13000<br>(8900-19000)     |
| Tanzania | 1990 | Female | 35 to 39 | 34%<br>(19-52%)                | 66%<br>(48-81%)          | 3.1<br>(1.5-5.2)                            | 5.1%<br>(3.2-7.3%)                   | 6.4%<br>(3.9-9.5%)                  | 240<br>(140-340)    | 13000<br>(8500-19000)     |
| Tanzania | 1990 | Female | 40 to 44 | 36%<br>(22-54%)                | 64%<br>(46-78%)          | 3.1<br>(1.5-5.4)                            | 5.5%<br>(3.4-7.8%)                   | 7.1%<br>(4.2-10%)                   | 270<br>(160-370)    | 13000<br>(8200-18000)     |
| Tanzania | 1990 | Female | 45 to 49 | 36%<br>(20-53%)                | 64%<br>(47-80%)          | 3.2<br>(1.5-5.8)                            | 6.6%<br>(4.1-9.6%)                   | 8.6%<br>(5.2-13%)                   | 330<br>(200-490)    | 14000<br>(8900-21000)     |
| Tanzania | 1990 | Female | 50 to 54 | 35%<br>(19-55%)                | 65%<br>(45-81%)          | 3.2<br>(1.4-5.8)                            | 7.8%<br>(4.7-11%)                    | 9.9%<br>(6-14%)                     | 430<br>(260-630)    | 16000<br>(10000-24000)    |
| Tanzania | 1990 | Female | 55 to 59 | 33%<br>(19-52%)                | 67%<br>(48-81%)          | 3.1<br>(1.4-5.8)                            | 8%<br>(4.6-12%)                      | 9.9%<br>(5.7-15%)                   | 500<br>(290-760)    | 16000<br>(9300-24000)     |
| Tanzania | 1990 | Female | 60 to 64 | 34%<br>(19-53%)                | 66%<br>(47-81%)          | 3.1<br>(1.3-6)                              | 8.2%<br>(4.6-12%)                    | 9.8%<br>(5.6-15%)                   | 580<br>(320-900)    | 16000<br>(9000-24000)     |
| Tanzania | 1990 | Female | 65 to 69 | 35%<br>(20-53%)                | 65%<br>(47-80%)          | 2.9<br>(1.3-5.4)                            | 8.8%<br>(4.9-13%)                    | 10%<br>(5.6-16%)                    | 700<br>(390-1100)   | 16000<br>(8900-25000)     |
| Tanzania | 1990 | Female | 70 to 74 | 34%<br>(20-52%)                | 66%<br>(48-80%)          | 2.5<br>(1.1-5)                              | 7.7%<br>(3.6-13%)                    | 8.8%<br>(4.1-15%)                   | 630<br>(280-1100)   | 12000<br>(5300-19000)     |
| Tanzania | 1990 | Female | 75 to 79 | 31%<br>(18-50%)                | 69%<br>(50-82%)          | 2.1<br>(0.79-4.2)                           | 6.5%<br>(2.7-11%)                    | 7.4%<br>(3-13%)                     | 460<br>(180-820)    | 6500<br>(2600-12000)      |
| Tanzania | 1990 | Female | 80 to 84 | 29%<br>(15-48%)                | 71%<br>(52-85%)          | 1.9<br>(0.73-3.7)                           | 5.5%<br>(2.2-10%)                    | 6.3%<br>(2.6-11%)                   | 260<br>(100-480)    | 2700<br>(1100-5000)       |
| Tanzania | 1990 | Female | 85 to 89 | 29%<br>(16-46%)                | 71%<br>(54-84%)          | 1.8<br>(0.73-3.6)                           | 4.6%<br>(1.6-9%)                     | 5.2%<br>(1.8-10%)                   | 130<br>(45-260)     | 970<br>(340-1900)         |
| Tanzania | 1990 | Female | 90 to 94 | 32%<br>(18-50%)                | 68%<br>(50-82%)          | 1.9<br>(0.75-4)                             | 4%<br>(1.3-8%)                       | 4.7%<br>(1.4-9.3%)                  | 46<br>(14-91)       | 230<br>(73-460)           |
| Tanzania | 1990 | Female | 95 plus  | 36%<br>(18-59%)                | 64%<br>(41-82%)          | 2<br>(0.66-4.5)                             | 4.3%<br>(1.3-9%)                     | 4.9%<br>(1.4-10%)                   | 13<br>(3.7-28)      | 45<br>(13-95)             |
| Tanzania | 1990 | Male   | All Ages | 29%<br>(23-37%)                | 71%<br>(63-77%)          | 2<br>(1.5-2.7)                              | 2.6%<br>(2-3.2%)                     | 4.4%<br>(3.2-5.6%)                  | 7500<br>(5500-9600) | 320000<br>(240000-390000) |
| Tanzania | 1990 | Male   | 15 to 19 | 27%<br>(16-43%)                | 73%<br>(57-84%)          | 2.1<br>(1.1-3.6)                            | 5.6%<br>(3.3-8.5%)                   | 7.3%<br>(3.9-12%)                   | 190<br>(100-310)    | 16000<br>(10000-26000)    |
| Tanzania | 1990 | Male   | 20 to 24 | 38%<br>(23-55%)                | 62%<br>(45-77%)          | 3.1<br>(1.6-5.2)                            | 8.7%<br>(5.4-12%)                    | 9.7%<br>(5.5-15%)                   | 390<br>(230-590)    | 31000<br>(20000-45000)    |
| Tanzania | 1990 | Male   | 25 to 29 | 44%<br>(26-61%)                | 56%<br>(39-74%)          | 3.9<br>(2.2-6.3)                            | 9%<br>(6-13%)                        | 9.9%<br>(6.1-15%)                   | 510<br>(330-710)    | 36000<br>(25000-48000)    |

| Location | Year | Sex    | Age      | Prevalence of current drinkers | Prevalence of abstainers | Population average of standard drinks daily | Percent of total attributable deaths | Percent of total attributable DALYs | Attributable deaths | Attributable DALYs        |
|----------|------|--------|----------|--------------------------------|--------------------------|---------------------------------------------|--------------------------------------|-------------------------------------|---------------------|---------------------------|
| Tanzania | 1990 | Male   | 30 to 34 | 48%<br>(28-66%)                | 52%<br>(34-72%)          | 4.6<br>(2.6-7.3)                            | 9.6%<br>(6.6-13%)                    | 11%<br>(6.8-15%)                    | 550<br>(370-760)    | 35000<br>(24000-47000)    |
| Tanzania | 1990 | Male   | 35 to 39 | 50%<br>(32-68%)                | 50%<br>(32-68%)          | 5.1<br>(2.8-8.3)                            | 11%<br>(7.1-15%)                     | 12%<br>(7.8-18%)                    | 610<br>(410-820)    | 34000<br>(23000-44000)    |
| Tanzania | 1990 | Male   | 40 to 44 | 51%<br>(34-70%)                | 49%<br>(30-66%)          | 5.3<br>(2.6-8.8)                            | 11%<br>(7.8-15%)                     | 13%<br>(8.9-18%)                    | 650<br>(440-880)    | 32000<br>(22000-43000)    |
| Tanzania | 1990 | Male   | 45 to 49 | 52%<br>(33-70%)                | 48%<br>(30-67%)          | 5.3<br>(2.7-8.9)                            | 12%<br>(8.3-16%)                     | 14%<br>(9.8-19%)                    | 690<br>(470-920)    | 30000<br>(21000-40000)    |
| Tanzania | 1990 | Male   | 50 to 54 | 52%<br>(33-70%)                | 48%<br>(30-67%)          | 5.2<br>(2.7-9)                              | 13%<br>(8.8-17%)                     | 16%<br>(11-21%)                     | 750<br>(490-1000)   | 28000<br>(19000-38000)    |
| Tanzania | 1990 | Male   | 55 to 59 | 52%<br>(34-70%)                | 48%<br>(30-66%)          | 5<br>(2.5-8.6)                              | 13%<br>(8.3-17%)                     | 15%<br>(10-20%)                     | 750<br>(470-1000)   | 25000<br>(16000-33000)    |
| Tanzania | 1990 | Male   | 60 to 64 | 50%<br>(31-69%)                | 50%<br>(31-69%)          | 4.4<br>(2-8)                                | 11%<br>(7-16%)                       | 13%<br>(8.1-18%)                    | 720<br>(430-1000)   | 20000<br>(12000-28000)    |
| Tanzania | 1990 | Male   | 65 to 69 | 47%<br>(29-66%)                | 53%<br>(34-71%)          | 3.5<br>(1.7-6.2)                            | 9.3%<br>(5.1-13%)                    | 11%<br>(6-16%)                      | 610<br>(320-880)    | 14000<br>(7600-20000)     |
| Tanzania | 1990 | Male   | 70 to 74 | 44%<br>(27-62%)                | 56%<br>(38-73%)          | 2.8<br>(1.3-5)                              | 7.4%<br>(3.5-12%)                    | 8.5%<br>(4-14%)                     | 480<br>(220-800)    | 8700<br>(4100-15000)      |
| Tanzania | 1990 | Male   | 75 to 79 | 42%<br>(26-60%)                | 58%<br>(40-74%)          | 2.3<br>(1-4.3)                              | 5.9%<br>(2.4-11%)                    | 6.8%<br>(2.8-12%)                   | 320<br>(130-570)    | 4500<br>(1800-8100)       |
| Tanzania | 1990 | Male   | 80 to 84 | 39%<br>(23-58%)                | 61%<br>(42-77%)          | 1.9<br>(0.86-3.6)                           | 4.9%<br>(1.9-9.2%)                   | 5.6%<br>(2.1-11%)                   | 160<br>(59-300)     | 1700<br>(640-3100)        |
| Tanzania | 1990 | Male   | 85 to 89 | 37%<br>(22-54%)                | 63%<br>(46-78%)          | 1.6<br>(0.74-3)                             | 3.7%<br>(1.5-7.3%)                   | 4.2%<br>(1.6-8.2%)                  | 68<br>(26-130)      | 520<br>(210-1000)         |
| Tanzania | 1990 | Male   | 90 to 94 | 38%<br>(23-56%)                | 62%<br>(44-77%)          | 1.5<br>(0.66-2.9)                           | 2.8%<br>(0.88-5.9%)                  | 3.1%<br>(0.86-6.7%)                 | 19<br>(5.3-41)      | 100<br>(32-210)           |
| Tanzania | 1990 | Male   | 95 plus  | 41%<br>(21-63%)                | 59%<br>(37-79%)          | 1.5<br>(0.52-3)                             | 2.8%<br>(0.89-6.2%)                  | 3%<br>(0.78-6.8%)                   | 4.3<br>(1.1-9.9)    | 16<br>(5.2-36)            |
| Tanzania | 1995 | Female | All Ages | 21%<br>(16-27%)                | 79%<br>(73-84%)          | 1.3<br>(0.94-1.8)                           | 1.5%<br>(1-2%)                       | 3.1%<br>(1.9-4.3%)                  | 6100<br>(3700-8600) | 200000<br>(140000-270000) |
| Tanzania | 1995 | Female | 15 to 19 | 21%<br>(12-35%)                | 79%<br>(65-88%)          | 1.5<br>(0.67-2.7)                           | 2.4%<br>(1.2-4%)                     | 3.2%<br>(1.4-5.6%)                  | 100<br>(45-180)     | 9200<br>(4600-15000)      |
| Tanzania | 1995 | Female | 20 to 24 | 27%<br>(14-42%)                | 73%<br>(58-86%)          | 2.1<br>(1-3.7)                              | 2.5%<br>(1.4-3.9%)                   | 2.6%<br>(1.2-4.5%)                  | 140<br>(67-240)     | 12000<br>(7100-19000)     |
| Tanzania | 1995 | Female | 25 to 29 | 29%<br>(16-46%)                | 71%<br>(54-84%)          | 2.6<br>(1.3-4.3)                            | 2.6%<br>(1.6-4%)                     | 2.6%<br>(1.5-4.5%)                  | 190<br>(110-290)    | 14000<br>(9300-21000)     |
| Tanzania | 1995 | Female | 30 to 34 | 32%<br>(17-50%)                | 68%<br>(50-83%)          | 2.8<br>(1.5-4.9)                            | 2.9%<br>(1.8-4.3%)                   | 3.1%<br>(1.8-4.9%)                  | 230<br>(140-350)    | 15000<br>(9700-22000)     |
| Tanzania | 1995 | Female | 35 to 39 | 35%<br>(20-54%)                | 65%<br>(46-80%)          | 2.8<br>(1.4-4.8)                            | 3.5%<br>(2-5.3%)                     | 3.9%<br>(2.1-6.3%)                  | 260<br>(150-400)    | 15000<br>(9400-22000)     |
| Tanzania | 1995 | Female | 40 to 44 | 37%<br>(22-55%)                | 63%<br>(45-78%)          | 2.8<br>(1.3-4.9)                            | 4%<br>(2.4-6%)                       | 4.7%<br>(2.7-7.3%)                  | 290<br>(170-430)    | 15000<br>(8700-21000)     |
| Tanzania | 1995 | Female | 45 to 49 | 37%<br>(20-55%)                | 63%<br>(45-80%)          | 2.9<br>(1.3-5.1)                            | 5.3%<br>(3.1-7.9%)                   | 6.4%<br>(3.6-9.6%)                  | 400<br>(230-620)    | 17000<br>(10000-26000)    |

| Location | Year | Sex    | Age      | Prevalence of current drinkers | Prevalence of abstainers | Population average of standard drinks daily | Percent of total attributable deaths | Percent of total attributable DALYs | Attributable deaths  | Attributable DALYs        |
|----------|------|--------|----------|--------------------------------|--------------------------|---------------------------------------------|--------------------------------------|-------------------------------------|----------------------|---------------------------|
| Tanzania | 1995 | Female | 50 to 54 | 35%<br>(19-55%)                | 65%<br>(45-81%)          | 2.8<br>(1.3-5)                              | 6.6%<br>(3.8-9.9%)                   | 8%<br>(4.6-12%)                     | 510<br>(280-790)     | 19000<br>(11000-30000)    |
| Tanzania | 1995 | Female | 55 to 59 | 34%<br>(19-54%)                | 66%<br>(46-81%)          | 2.8<br>(1.3-5.4)                            | 7.2%<br>(4.1-11%)                    | 8.7%<br>(4.8-13%)                   | 600<br>(330-920)     | 19000<br>(11000-29000)    |
| Tanzania | 1995 | Female | 60 to 64 | 35%<br>(19-53%)                | 65%<br>(47-81%)          | 2.8<br>(1.2-5.4)                            | 7.6%<br>(4-12%)                      | 8.9%<br>(4.8-14%)                   | 700<br>(370-1100)    | 19000<br>(10000-30000)    |
| Tanzania | 1995 | Female | 65 to 69 | 36%<br>(20-54%)                | 64%<br>(46-80%)          | 2.7<br>(1.2-4.9)                            | 8.2%<br>(4.3-13%)                    | 9.5%<br>(5-15%)                     | 830<br>(420-1300)    | 19000<br>(9700-30000)     |
| Tanzania | 1995 | Female | 70 to 74 | 35%<br>(20-52%)                | 65%<br>(48-80%)          | 2.3<br>(0.96-4.4)                           | 7.2%<br>(3.1-12%)                    | 8.1%<br>(3.5-14%)                   | 730<br>(300-1300)    | 13000<br>(5700-23000)     |
| Tanzania | 1995 | Female | 75 to 79 | 32%<br>(18-49%)                | 68%<br>(51-82%)          | 1.9<br>(0.74-3.8)                           | 6.1%<br>(2.3-11%)                    | 6.9%<br>(2.5-13%)                   | 550<br>(190-1000)    | 7700<br>(2800-14000)      |
| Tanzania | 1995 | Female | 80 to 84 | 30%<br>(16-48%)                | 70%<br>(52-84%)          | 1.7<br>(0.66-3.4)                           | 5.1%<br>(1.8-9.6%)                   | 5.8%<br>(2.1-11%)                   | 320<br>(110-600)     | 3300<br>(1200-6200)       |
| Tanzania | 1995 | Female | 85 to 89 | 30%<br>(16-48%)                | 70%<br>(52-84%)          | 1.7<br>(0.67-3.3)                           | 4.1%<br>(1.3-8.5%)                   | 4.7%<br>(1.5-9.8%)                  | 140<br>(43-300)      | 1000<br>(330-2200)        |
| Tanzania | 1995 | Female | 90 to 94 | 33%<br>(18-50%)                | 67%<br>(50-82%)          | 1.7<br>(0.68-3.4)                           | 3.6%<br>(0.95-7.6%)                  | 4.1%<br>(1.1-9%)                    | 48<br>(12-100)       | 250<br>(65-530)           |
| Tanzania | 1995 | Female | 95 plus  | 37%<br>(18-59%)                | 63%<br>(41-82%)          | 1.8<br>(0.59-4.2)                           | 3.8%<br>(1.1-8.5%)                   | 4.3%<br>(1.2-9.7%)                  | 14<br>(3.9-32)       | 49<br>(14-110)            |
| Tanzania | 1995 | Male   | All Ages | 30%<br>(24-38%)                | 70%<br>(62-76%)          | 1.8<br>(1.3-2.4)                            | 2.5%<br>(1.8-3.2%)                   | 4%<br>(2.8-5.4%)                    | 8300<br>(5800-11000) | 350000<br>(260000-460000) |
| Tanzania | 1995 | Male   | 15 to 19 | 27%<br>(16-43%)                | 73%<br>(57-84%)          | 1.9<br>(0.92-3.3)                           | 5.1%<br>(3-7.9%)                     | 6.6%<br>(3.4-11%)                   | 200<br>(100-340)     | 18000<br>(10000-28000)    |
| Tanzania | 1995 | Male   | 20 to 24 | 39%<br>(23-56%)                | 61%<br>(44-77%)          | 2.8<br>(1.5-4.7)                            | 7.7%<br>(4.5-11%)                    | 8.4%<br>(4.4-13%)                   | 440<br>(240-680)     | 35000<br>(22000-52000)    |
| Tanzania | 1995 | Male   | 25 to 29 | 44%<br>(26-62%)                | 56%<br>(38-74%)          | 3.5<br>(2-5.6)                              | 6.7%<br>(4.1-9.9%)                   | 7%<br>(3.8-11%)                     | 570<br>(340-830)     | 40000<br>(26000-56000)    |
| Tanzania | 1995 | Male   | 30 to 34 | 48%<br>(29-67%)                | 52%<br>(33-71%)          | 4.1<br>(2.4-6.6)                            | 6.3%<br>(3.9-9.1%)                   | 6.5%<br>(3.8-10%)                   | 630<br>(390-900)     | 39000<br>(26000-54000)    |
| Tanzania | 1995 | Male   | 35 to 39 | 51%<br>(33-68%)                | 49%<br>(32-67%)          | 4.6<br>(2.5-7.5)                            | 7.1%<br>(4.4-11%)                    | 7.7%<br>(4.5-12%)                   | 690<br>(430-980)     | 38000<br>(25000-53000)    |
| Tanzania | 1995 | Male   | 40 to 44 | 52%<br>(35-70%)                | 48%<br>(30-65%)          | 4.7<br>(2.4-7.8)                            | 7.7%<br>(5-11%)                      | 8.5%<br>(5.3-12%)                   | 720<br>(460-1000)    | 35000<br>(23000-50000)    |
| Tanzania | 1995 | Male   | 45 to 49 | 52%<br>(33-70%)                | 48%<br>(30-67%)          | 4.7<br>(2.3-7.9)                            | 8.8%<br>(5.6-12%)                    | 9.9%<br>(6.2-14%)                   | 780<br>(490-1100)    | 34000<br>(22000-47000)    |
| Tanzania | 1995 | Male   | 50 to 54 | 53%<br>(33-71%)                | 47%<br>(29-67%)          | 4.6<br>(2.3-7.9)                            | 11%<br>(6.6-14%)                     | 12%<br>(7.7-17%)                    | 840<br>(510-1200)    | 32000<br>(20000-45000)    |
| Tanzania | 1995 | Male   | 55 to 59 | 52%<br>(34-72%)                | 48%<br>(28-66%)          | 4.5<br>(2.2-7.5)                            | 11%<br>(7-15%)                       | 13%<br>(8.2-18%)                    | 850<br>(510-1200)    | 28000<br>(17000-39000)    |
| Tanzania | 1995 | Male   | 60 to 64 | 50%<br>(32-70%)                | 50%<br>(30-68%)          | 3.9<br>(1.9-7.2)                            | 10%<br>(5.7-14%)                     | 12%<br>(6.7-16%)                    | 810<br>(460-1200)    | 22000<br>(13000-33000)    |
| Tanzania | 1995 | Male   | 65 to 69 | 48%<br>(30-66%)                | 52%<br>(34-70%)          | 3.2<br>(1.5-5.5)                            | 8.2%<br>(4.3-12%)                    | 9.5%<br>(4.9-14%)                   | 670<br>(340-1000)    | 15000<br>(8000-24000)     |

| Location | Year | Sex    | Age      | Prevalence of current drinkers | Prevalence of abstainers | Population average of standard drinks daily | Percent of total attributable deaths | Percent of total attributable DALYs | Attributable deaths | Attributable DALYs        |
|----------|------|--------|----------|--------------------------------|--------------------------|---------------------------------------------|--------------------------------------|-------------------------------------|---------------------|---------------------------|
| Tanzania | 1995 | Male   | 70 to 74 | 45%<br>(28-62%)                | 55%<br>(38-72%)          | 2.5<br>(1.2-4.6)                            | 6.4%<br>(2.8-11%)                    | 7.3%<br>(3.2-13%)                   | 510<br>(220-890)    | 9300<br>(4000-16000)      |
| Tanzania | 1995 | Male   | 75 to 79 | 42%<br>(26-61%)                | 58%<br>(39-74%)          | 2<br>(0.87-3.8)                             | 5.1%<br>(1.9-9.6%)                   | 5.8%<br>(2.2-11%)                   | 340<br>(130-650)    | 4800<br>(1800-9100)       |
| Tanzania | 1995 | Male   | 80 to 84 | 40%<br>(23-59%)                | 60%<br>(41-77%)          | 1.7<br>(0.75-3.2)                           | 4.2%<br>(1.5-8.2%)                   | 4.8%<br>(1.7-9.2%)                  | 170<br>(60-330)     | 1800<br>(650-3400)        |
| Tanzania | 1995 | Male   | 85 to 89 | 37%<br>(22-54%)                | 63%<br>(46-78%)          | 1.4<br>(0.65-2.7)                           | 3.1%<br>(1.2-6.5%)                   | 3.5%<br>(1.3-7.3%)                  | 69<br>(25-140)      | 530<br>(200-1100)         |
| Tanzania | 1995 | Male   | 90 to 94 | 38%<br>(23-55%)                | 62%<br>(45-77%)          | 1.3<br>(0.57-2.5)                           | 2.3%<br>(0.67-5.2%)                  | 2.5%<br>(0.62-5.9%)                 | 19<br>(4.7-45)      | 100<br>(31-240)           |
| Tanzania | 1995 | Male   | 95 plus  | 41%<br>(21-63%)                | 59%<br>(37-79%)          | 1.3<br>(0.44-2.7)                           | 2.3%<br>(0.69-5.6%)                  | 2.5%<br>(0.53-6.3%)                 | 4.5<br>(0.98-11)    | 17<br>(5-41)              |
| Tanzania | 2000 | Female | All Ages | 21%<br>(17-27%)                | 79%<br>(73-83%)          | 1.2<br>(0.88-1.7)                           | 1.6%<br>(1-2.2%)                     | 3.1%<br>(1.8-4.5%)                  | 6700<br>(3900-9800) | 220000<br>(150000-310000) |
| Tanzania | 2000 | Female | 15 to 19 | 21%<br>(12-35%)                | 79%<br>(65-88%)          | 1.4<br>(0.65-2.6)                           | 2.4%<br>(1.3-4.1%)                   | 3.3%<br>(1.4-5.9%)                  | 110<br>(50-200)     | 10000<br>(5300-17000)     |
| Tanzania | 2000 | Female | 20 to 24 | 27%<br>(14-42%)                | 73%<br>(58-86%)          | 2<br>(0.96-3.6)                             | 2.6%<br>(1.4-4.1%)                   | 2.8%<br>(1.2-4.7%)                  | 160<br>(78-260)     | 14000<br>(8100-21000)     |
| Tanzania | 2000 | Female | 25 to 29 | 29%<br>(17-45%)                | 71%<br>(55-83%)          | 2.5<br>(1.2-4.1)                            | 2.2%<br>(1.3-3.6%)                   | 2.2%<br>(1.1-4%)                    | 220<br>(120-340)    | 16000<br>(10000-24000)    |
| Tanzania | 2000 | Female | 30 to 34 | 32%<br>(18-50%)                | 68%<br>(50-82%)          | 2.7<br>(1.3-4.7)                            | 2.3%<br>(1.3-3.5%)                   | 2.3%<br>(1.3-3.8%)                  | 260<br>(150-400)    | 17000<br>(11000-25000)    |
| Tanzania | 2000 | Female | 35 to 39 | 35%<br>(20-54%)                | 65%<br>(46-80%)          | 2.7<br>(1.3-4.5)                            | 2.6%<br>(1.4-4.2%)                   | 2.8%<br>(1.4-4.7%)                  | 290<br>(160-450)    | 16000<br>(9700-25000)     |
| Tanzania | 2000 | Female | 40 to 44 | 37%<br>(22-56%)                | 63%<br>(44-78%)          | 2.7<br>(1.2-4.6)                            | 3.2%<br>(1.7-4.8%)                   | 3.5%<br>(1.8-5.5%)                  | 320<br>(170-500)    | 16000<br>(8800-25000)     |
| Tanzania | 2000 | Female | 45 to 49 | 37%<br>(21-55%)                | 63%<br>(45-79%)          | 2.8<br>(1.2-5)                              | 4.5%<br>(2.5-7%)                     | 5.2%<br>(2.8-8.2%)                  | 420<br>(230-680)    | 18000<br>(10000-29000)    |
| Tanzania | 2000 | Female | 50 to 54 | 36%<br>(20-56%)                | 64%<br>(44-80%)          | 2.7<br>(1.2-4.9)                            | 6%<br>(3.4-9.2%)                     | 7.1%<br>(3.9-11%)                   | 580<br>(300-950)    | 22000<br>(11000-35000)    |
| Tanzania | 2000 | Female | 55 to 59 | 34%<br>(20-54%)                | 66%<br>(46-80%)          | 2.7<br>(1.2-5)                              | 7%<br>(3.7-11%)                      | 8.3%<br>(4.4-13%)                   | 680<br>(340-1100)   | 22000<br>(11000-35000)    |
| Tanzania | 2000 | Female | 60 to 64 | 35%<br>(19-54%)                | 65%<br>(46-81%)          | 2.7<br>(1.2-5.4)                            | 7.3%<br>(3.9-11%)                    | 8.6%<br>(4.6-14%)                   | 760<br>(380-1300)   | 21000<br>(11000-34000)    |
| Tanzania | 2000 | Female | 65 to 69 | 36%<br>(21-54%)                | 64%<br>(46-79%)          | 2.5<br>(1.1-4.7)                            | 7.9%<br>(4.2-13%)                    | 9.2%<br>(4.8-15%)                   | 910<br>(450-1500)   | 21000<br>(10000-33000)    |
| Tanzania | 2000 | Female | 70 to 74 | 34%<br>(20-53%)                | 66%<br>(47-80%)          | 2.2<br>(0.91-4.2)                           | 6.9%<br>(3-12%)                      | 7.8%<br>(3.3-13%)                   | 800<br>(340-1400)   | 15000<br>(6300-26000)     |
| Tanzania | 2000 | Female | 75 to 79 | 32%<br>(18-51%)                | 68%<br>(49-82%)          | 1.8<br>(0.71-3.6)                           | 5.9%<br>(2.2-11%)                    | 6.7%<br>(2.5-12%)                   | 610<br>(220-1100)   | 8600<br>(3200-16000)      |
| Tanzania | 2000 | Female | 80 to 84 | 30%<br>(16-49%)                | 70%<br>(51-84%)          | 1.6<br>(0.61-3.2)                           | 4.9%<br>(1.7-9.3%)                   | 5.6%<br>(2-11%)                     | 380<br>(130-730)    | 4000<br>(1300-7600)       |
| Tanzania | 2000 | Female | 85 to 89 | 31%<br>(17-47%)                | 69%<br>(53-83%)          | 1.6<br>(0.64-3.1)                           | 4%<br>(1.3-7.9%)                     | 4.6%<br>(1.4-9.2%)                  | 160<br>(49-320)     | 1200<br>(370-2400)        |

| Location | Year | Sex    | Age      | Prevalence of current drinkers | Prevalence of abstainers | Population average of standard drinks daily | Percent of total attributable deaths | Percent of total attributable DALYs | Attributable deaths  | Attributable DALYs        |
|----------|------|--------|----------|--------------------------------|--------------------------|---------------------------------------------|--------------------------------------|-------------------------------------|----------------------|---------------------------|
| Tanzania | 2000 | Female | 90 to 94 | 33%<br>(19-51%)                | 67%<br>(49-81%)          | 1.6<br>(0.63-3.2)                           | 3.5%<br>(0.9-7.4%)                   | 4%<br>(0.96-8.7%)                   | 50<br>(12-110)       | 260<br>(65-550)           |
| Tanzania | 2000 | Female | 95 plus  | 38%<br>(19-59%)                | 62%<br>(41-81%)          | 1.7<br>(0.59-3.9)                           | 3.7%<br>(1-8.6%)                     | 4.2%<br>(1.1-9.8%)                  | 15<br>(3.7-35)       | 52<br>(14-120)            |
| Tanzania | 2000 | Male   | All Ages | 30%<br>(24-38%)                | 70%<br>(62-76%)          | 1.8<br>(1.3-2.4)                            | 2.8%<br>(2.1-3.6%)                   | 4.4%<br>(3.1-5.8%)                  | 9700<br>(6800-13000) | 410000<br>(300000-540000) |
| Tanzania | 2000 | Male   | 15 to 19 | 27%<br>(16-42%)                | 73%<br>(58-84%)          | 1.8<br>(0.9-3.1)                            | 5.2%<br>(3.1-8.1%)                   | 6.7%<br>(3.5-11%)                   | 230<br>(120-380)     | 20000<br>(12000-32000)    |
| Tanzania | 2000 | Male   | 20 to 24 | 39%<br>(24-55%)                | 61%<br>(45-76%)          | 2.6<br>(1.4-4.4)                            | 8.6%<br>(5.4-12%)                    | 9.6%<br>(5.3-15%)                   | 520<br>(300-820)     | 42000<br>(26000-62000)    |
| Tanzania | 2000 | Male   | 25 to 29 | 45%<br>(27-63%)                | 55%<br>(37-73%)          | 3.4<br>(1.8-5.2)                            | 7.1%<br>(4.3-11%)                    | 7.4%<br>(4-12%)                     | 680<br>(430-1000)    | 48000<br>(32000-68000)    |
| Tanzania | 2000 | Male   | 30 to 34 | 48%<br>(29-67%)                | 52%<br>(33-71%)          | 3.9<br>(2.2-6.2)                            | 6%<br>(3.9-8.8%)                     | 6.2%<br>(3.7-9.5%)                  | 750<br>(480-1100)    | 47000<br>(32000-65000)    |
| Tanzania | 2000 | Male   | 35 to 39 | 51%<br>(34-70%)                | 49%<br>(30-66%)          | 4.3<br>(2.3-7.2)                            | 6.1%<br>(3.8-9.1%)                   | 6.5%<br>(3.8-10%)                   | 800<br>(510-1200)    | 44000<br>(29000-62000)    |
| Tanzania | 2000 | Male   | 40 to 44 | 52%<br>(36-71%)                | 48%<br>(29-64%)          | 4.5<br>(2.2-7.4)                            | 6.7%<br>(4.4-9.8%)                   | 7.2%<br>(4.6-11%)                   | 840<br>(540-1200)    | 41000<br>(26000-58000)    |
| Tanzania | 2000 | Male   | 45 to 49 | 53%<br>(34-71%)                | 47%<br>(29-66%)          | 4.5<br>(2.1-7.6)                            | 7.7%<br>(4.9-11%)                    | 8.6%<br>(5.2-12%)                   | 870<br>(550-1300)    | 37000<br>(24000-54000)    |
| Tanzania | 2000 | Male   | 50 to 54 | 53%<br>(35-71%)                | 47%<br>(29-65%)          | 4.4<br>(2.2-7.6)                            | 9.9%<br>(6.4-13%)                    | 11%<br>(7.2-15%)                    | 980<br>(620-1400)    | 37000<br>(24000-52000)    |
| Tanzania | 2000 | Male   | 55 to 59 | 52%<br>(35-71%)                | 48%<br>(29-65%)          | 4.3<br>(2.1-7.4)                            | 11%<br>(6.8-15%)                     | 13%<br>(7.9-18%)                    | 1000<br>(600-1400)   | 32000<br>(20000-46000)    |
| Tanzania | 2000 | Male   | 60 to 64 | 50%<br>(32-69%)                | 50%<br>(31-68%)          | 3.7<br>(1.7-6.9)                            | 9.9%<br>(5.6-14%)                    | 11%<br>(6.4-17%)                    | 930<br>(500-1400)    | 26000<br>(14000-38000)    |
| Tanzania | 2000 | Male   | 65 to 69 | 48%<br>(30-66%)                | 52%<br>(34-70%)          | 3<br>(1.5-5.3)                              | 8.2%<br>(4.3-12%)                    | 9.5%<br>(5-15%)                     | 780<br>(400-1200)    | 18000<br>(9300-28000)     |
| Tanzania | 2000 | Male   | 70 to 74 | 45%<br>(28-62%)                | 55%<br>(38-72%)          | 2.4<br>(1.2-4.2)                            | 6.3%<br>(2.8-11%)                    | 7.3%<br>(3.2-13%)                   | 590<br>(260-1100)    | 11000<br>(4800-19000)     |
| Tanzania | 2000 | Male   | 75 to 79 | 43%<br>(26-61%)                | 57%<br>(39-74%)          | 1.9<br>(0.84-3.5)                           | 5.1%<br>(1.9-9.9%)                   | 5.9%<br>(2.1-11%)                   | 400<br>(150-790)     | 5700<br>(2200-11000)      |
| Tanzania | 2000 | Male   | 80 to 84 | 40%<br>(23-58%)                | 60%<br>(42-77%)          | 1.6<br>(0.72-3)                             | 4.3%<br>(1.5-8.3%)                   | 4.9%<br>(1.7-9.4%)                  | 210<br>(73-410)      | 2200<br>(790-4300)        |
| Tanzania | 2000 | Male   | 85 to 89 | 38%<br>(23-54%)                | 62%<br>(46-77%)          | 1.4<br>(0.64-2.6)                           | 3.3%<br>(1.2-6.6%)                   | 3.7%<br>(1.3-7.5%)                  | 84<br>(30-170)       | 640<br>(240-1300)         |
| Tanzania | 2000 | Male   | 90 to 94 | 38%<br>(23-57%)                | 62%<br>(43-77%)          | 1.3<br>(0.54-2.4)                           | 2.4%<br>(0.73-5.3%)                  | 2.7%<br>(0.72-6%)                   | 23<br>(6.2-52)       | 120<br>(38-270)           |
| Tanzania | 2000 | Male   | 95 plus  | 42%<br>(21-64%)                | 58%<br>(36-79%)          | 1.3<br>(0.43-2.7)                           | 2.6%<br>(0.83-5.8%)                  | 2.8%<br>(0.73-6.7%)                 | 6<br>(1.6-14)        | 22<br>(7.3-51)            |
| Tanzania | 2005 | Female | All Ages | 21%<br>(16-27%)                | 79%<br>(73-84%)          | 1.3<br>(0.88-1.7)                           | 1.6%<br>(1-2.2%)                     | 3.1%<br>(1.8-4.4%)                  | 6600<br>(3700-9700)  | 220000<br>(140000-300000) |
| Tanzania | 2005 | Female | 15 to 19 | 21%<br>(12-35%)                | 79%<br>(65-88%)          | 1.4<br>(0.64-2.7)                           | 2.2%<br>(1.2-3.7%)                   | 2.9%<br>(1.3-5%)                    | 110<br>(50-200)      | 10000<br>(5300-17000)     |

| Location | Year | Sex    | Age      | Prevalence of current drinkers | Prevalence of abstainers | Population average of standard drinks daily | Percent of total attributable deaths | Percent of total attributable DALYs | Attributable deaths   | Attributable DALYs        |
|----------|------|--------|----------|--------------------------------|--------------------------|---------------------------------------------|--------------------------------------|-------------------------------------|-----------------------|---------------------------|
| Tanzania | 2005 | Female | 20 to 24 | 27%<br>(14-42%)                | 73%<br>(58-86%)          | 2<br>(0.97-3.6)                             | 2.6%<br>(1.5-4.1%)                   | 2.8%<br>(1.3-5%)                    | 150<br>(74-260)       | 14000<br>(8300-22000)     |
| Tanzania | 2005 | Female | 25 to 29 | 29%<br>(16-45%)                | 71%<br>(55-84%)          | 2.4<br>(1.2-4.2)                            | 2.1%<br>(1.2-3.4%)                   | 2.1%<br>(1-3.8%)                    | 200<br>(110-320)      | 16000<br>(10000-23000)    |
| Tanzania | 2005 | Female | 30 to 34 | 31%<br>(17-49%)                | 69%<br>(51-83%)          | 2.7<br>(1.3-4.9)                            | 1.9%<br>(1.2-3%)                     | 1.9%<br>(1.1-3.2%)                  | 240<br>(140-370)      | 16000<br>(10000-24000)    |
| Tanzania | 2005 | Female | 35 to 39 | 35%<br>(20-53%)                | 65%<br>(47-80%)          | 2.7<br>(1.3-4.7)                            | 2.1%<br>(1.2-3.3%)                   | 2.2%<br>(1.2-3.7%)                  | 270<br>(150-410)      | 15000<br>(9300-23000)     |
| Tanzania | 2005 | Female | 40 to 44 | 36%<br>(22-55%)                | 64%<br>(45-78%)          | 2.7<br>(1.2-4.7)                            | 2.5%<br>(1.4-3.9%)                   | 2.7%<br>(1.5-4.3%)                  | 290<br>(160-460)      | 15000<br>(8400-23000)     |
| Tanzania | 2005 | Female | 45 to 49 | 36%<br>(20-54%)                | 64%<br>(46-80%)          | 2.8<br>(1.2-5)                              | 3.7%<br>(1.9-5.8%)                   | 4.2%<br>(2.2-6.8%)                  | 390<br>(200-640)      | 17000<br>(9300-27000)     |
| Tanzania | 2005 | Female | 50 to 54 | 35%<br>(19-54%)                | 65%<br>(46-81%)          | 2.7<br>(1.2-5)                              | 5.4%<br>(2.9-8.4%)                   | 6.4%<br>(3.5-9.9%)                  | 550<br>(280-900)      | 21000<br>(11000-33000)    |
| Tanzania | 2005 | Female | 55 to 59 | 33%<br>(19-53%)                | 67%<br>(47-81%)          | 2.7<br>(1.2-5.1)                            | 6.7%<br>(3.6-10%)                    | 8%<br>(4.4-12%)                     | 680<br>(340-1100)     | 22000<br>(11000-36000)    |
| Tanzania | 2005 | Female | 60 to 64 | 34%<br>(19-53%)                | 66%<br>(47-81%)          | 2.7<br>(1.2-5.4)                            | 7.1%<br>(3.8-11%)                    | 8.5%<br>(4.6-13%)                   | 790<br>(390-1300)     | 22000<br>(11000-36000)    |
| Tanzania | 2005 | Female | 65 to 69 | 35%<br>(20-53%)                | 65%<br>(47-80%)          | 2.5<br>(1.1-4.7)                            | 7.8%<br>(4-12%)                      | 9.2%<br>(4.8-14%)                   | 910<br>(430-1500)     | 21000<br>(10000-34000)    |
| Tanzania | 2005 | Female | 70 to 74 | 34%<br>(20-52%)                | 66%<br>(48-80%)          | 2.2<br>(0.9-4.3)                            | 6.9%<br>(3-11%)                      | 7.9%<br>(3.4-13%)                   | 820<br>(330-1400)     | 15000<br>(6200-27000)     |
| Tanzania | 2005 | Female | 75 to 79 | 32%<br>(17-50%)                | 68%<br>(50-83%)          | 1.8<br>(0.68-3.8)                           | 6%<br>(2.4-10%)                      | 6.9%<br>(2.8-12%)                   | 520<br>(190-980)      | 7300<br>(2700-14000)      |
| Tanzania | 2005 | Female | 80 to 84 | 30%<br>(16-49%)                | 70%<br>(51-84%)          | 1.7<br>(0.6-3.3)                            | 5%<br>(1.8-9.4%)                     | 5.8%<br>(2.1-11%)                   | 420<br>(150-810)      | 4400<br>(1600-8300)       |
| Tanzania | 2005 | Female | 85 to 89 | 30%<br>(16-49%)                | 70%<br>(51-84%)          | 1.6<br>(0.64-3.2)                           | 4.2%<br>(1.4-8.4%)                   | 4.8%<br>(1.6-9.9%)                  | 200<br>(68-420)       | 1500<br>(520-3100)        |
| Tanzania | 2005 | Female | 90 to 94 | 33%<br>(18-50%)                | 67%<br>(50-82%)          | 1.7<br>(0.65-3.3)                           | 3.7%<br>(1-7.9%)                     | 4.3%<br>(1.2-9.3%)                  | 62<br>(17-140)        | 320<br>(91-690)           |
| Tanzania | 2005 | Female | 95 plus  | 38%<br>(19-60%)                | 62%<br>(40-81%)          | 1.8<br>(0.61-4.1)                           | 4%<br>(1.1-8.9%)                     | 4.6%<br>(1.2-10%)                   | 17<br>(4.3-38)        | 58<br>(16-130)            |
| Tanzania | 2005 | Male   | All Ages | 30%<br>(24-38%)                | 70%<br>(62-76%)          | 1.8<br>(1.3-2.4)                            | 3.2%<br>(2.4-4.1%)                   | 4.9%<br>(3.5-6.4%)                  | 11000<br>(7800-15000) | 470000<br>(350000-600000) |
| Tanzania | 2005 | Male   | 15 to 19 | 27%<br>(16-42%)                | 73%<br>(58-84%)          | 1.8<br>(0.86-3.2)                           | 4.9%<br>(2.9-7.7%)                   | 6.2%<br>(3.2-10%)                   | 250<br>(120-420)      | 22000<br>(13000-35000)    |
| Tanzania | 2005 | Male   | 20 to 24 | 38%<br>(23-56%)                | 62%<br>(44-77%)          | 2.6<br>(1.4-4.4)                            | 9.2%<br>(5.7-13%)                    | 11%<br>(5.8-16%)                    | 550<br>(320-870)      | 45000<br>(29000-66000)    |
| Tanzania | 2005 | Male   | 25 to 29 | 44%<br>(26-61%)                | 56%<br>(39-74%)          | 3.4<br>(1.8-5.3)                            | 8.4%<br>(5.1-12%)                    | 9.2%<br>(5-15%)                     | 750<br>(450-1100)     | 53000<br>(35000-75000)    |
| Tanzania | 2005 | Male   | 30 to 34 | 48%<br>(29-66%)                | 52%<br>(34-71%)          | 3.9<br>(2.2-6.3)                            | 6.7%<br>(4.4-9.9%)                   | 7%<br>(4.3-11%)                     | 840<br>(530-1200)     | 53000<br>(35000-73000)    |
| Tanzania | 2005 | Male   | 35 to 39 | 50%<br>(33-69%)                | 50%<br>(31-67%)          | 4.3<br>(2.3-7.3)                            | 6.4%<br>(4.1-9.4%)                   | 6.8%<br>(4-10%)                     | 900<br>(580-1300)     | 50000<br>(33000-69000)    |

| Location | Year | Sex    | Age      | Prevalence of current drinkers | Prevalence of abstainers | Population average of standard drinks daily | Percent of total attributable deaths | Percent of total attributable DALYs | Attributable deaths  | Attributable DALYs        |
|----------|------|--------|----------|--------------------------------|--------------------------|---------------------------------------------|--------------------------------------|-------------------------------------|----------------------|---------------------------|
| Tanzania | 2005 | Male   | 40 to 44 | 51%<br>(35-70%)                | 49%<br>(30-65%)          | 4.5<br>(2.2-7.5)                            | 6.6%<br>(4.4-9.1%)                   | 7%<br>(4.6-10%)                     | 920<br>(600-1300)    | 45000<br>(30000-62000)    |
| Tanzania | 2005 | Male   | 45 to 49 | 52%<br>(34-70%)                | 48%<br>(30-66%)          | 4.5<br>(2.2-7.8)                            | 7.8%<br>(4.9-11%)                    | 8.7%<br>(5.2-12%)                   | 980<br>(610-1400)    | 42000<br>(27000-60000)    |
| Tanzania | 2005 | Male   | 50 to 54 | 52%<br>(33-71%)                | 48%<br>(29-67%)          | 4.4<br>(2.2-7.8)                            | 9.9%<br>(6.4-14%)                    | 11%<br>(7.3-16%)                    | 1000<br>(650-1500)   | 39000<br>(25000-55000)    |
| Tanzania | 2005 | Male   | 55 to 59 | 51%<br>(33-71%)                | 49%<br>(29-67%)          | 4.2<br>(2-7.5)                              | 11%<br>(7-16%)                       | 13%<br>(8.2-18%)                    | 1100<br>(680-1600)   | 37000<br>(22000-52000)    |
| Tanzania | 2005 | Male   | 60 to 64 | 50%<br>(31-70%)                | 50%<br>(30-69%)          | 3.7<br>(1.7-6.7)                            | 10%<br>(5.7-15%)                     | 12%<br>(6.6-17%)                    | 1000<br>(560-1500)   | 29000<br>(16000-42000)    |
| Tanzania | 2005 | Male   | 65 to 69 | 47%<br>(30-66%)                | 53%<br>(34-70%)          | 3<br>(1.5-5.3)                              | 8.4%<br>(4.3-13%)                    | 9.8%<br>(5-15%)                     | 950<br>(490-1500)    | 22000<br>(11000-34000)    |
| Tanzania | 2005 | Male   | 70 to 74 | 44%<br>(27-62%)                | 56%<br>(38-73%)          | 2.3<br>(1.1-4.4)                            | 6.5%<br>(2.9-11%)                    | 7.5%<br>(3.3-13%)                   | 760<br>(330-1400)    | 14000<br>(6100-25000)     |
| Tanzania | 2005 | Male   | 75 to 79 | 42%<br>(26-60%)                | 58%<br>(40-74%)          | 1.9<br>(0.82-3.8)                           | 5.3%<br>(1.9-10%)                    | 6.1%<br>(2.3-12%)                   | 640<br>(230-1200)    | 9100<br>(3300-18000)      |
| Tanzania | 2005 | Male   | 80 to 84 | 39%<br>(23-58%)                | 61%<br>(42-77%)          | 1.6<br>(0.72-3)                             | 4.4%<br>(1.8-8.5%)                   | 5%<br>(1.9-9.9%)                    | 310<br>(120-630)     | 3300<br>(1300-6500)       |
| Tanzania | 2005 | Male   | 85 to 89 | 36%<br>(22-53%)                | 64%<br>(47-78%)          | 1.4<br>(0.62-2.6)                           | 3.4%<br>(1.3-6.8%)                   | 3.8%<br>(1.5-7.6%)                  | 110<br>(41-210)      | 810<br>(320-1600)         |
| Tanzania | 2005 | Male   | 90 to 94 | 37%<br>(22-55%)                | 63%<br>(45-78%)          | 1.2<br>(0.53-2.4)                           | 2.5%<br>(0.78-5.4%)                  | 2.8%<br>(0.78-6.3%)                 | 27<br>(7.9-62)       | 150<br>(46-320)           |
| Tanzania | 2005 | Male   | 95 plus  | 41%<br>(21-63%)                | 59%<br>(37-79%)          | 1.2<br>(0.43-2.6)                           | 2.8%<br>(0.88-6.4%)                  | 3.1%<br>(0.82-7.2%)                 | 7.3<br>(1.9-17)      | 27<br>(8.4-61)            |
| Tanzania | 2010 | Female | All Ages | 21%<br>(16-27%)                | 79%<br>(73-84%)          | 1.3<br>(0.8-1.9)                            | 1.8%<br>(1.1-2.4%)                   | 3.5%<br>(1.9-5.1%)                  | 7200<br>(3700-11000) | 230000<br>(140000-320000) |
| Tanzania | 2010 | Female | 15 to 19 | 21%<br>(12-35%)                | 79%<br>(65-88%)          | 1.4<br>(0.6-2.7)                            | 1.9%<br>(1-3.2%)                     | 2.4%<br>(1-4.3%)                    | 110<br>(46-190)      | 10000<br>(5300-17000)     |
| Tanzania | 2010 | Female | 20 to 24 | 26%<br>(14-41%)                | 74%<br>(59-86%)          | 2<br>(0.91-3.6)                             | 2.5%<br>(1.5-3.9%)                   | 2.6%<br>(1.2-4.7%)                  | 140<br>(64-220)      | 14000<br>(8000-21000)     |
| Tanzania | 2010 | Female | 25 to 29 | 29%<br>(16-45%)                | 71%<br>(55-84%)          | 2.4<br>(1.2-4.3)                            | 2.3%<br>(1.3-3.6%)                   | 2.3%<br>(1.1-4.3%)                  | 180<br>(98-290)      | 15000<br>(9600-22000)     |
| Tanzania | 2010 | Female | 30 to 34 | 31%<br>(17-49%)                | 69%<br>(51-83%)          | 2.7<br>(1.3-5.1)                            | 2.1%<br>(1.3-3.3%)                   | 2.2%<br>(1.2-3.7%)                  | 230<br>(130-360)     | 16000<br>(10000-24000)    |
| Tanzania | 2010 | Female | 35 to 39 | 35%<br>(20-53%)                | 65%<br>(47-80%)          | 2.7<br>(1.3-4.8)                            | 2.2%<br>(1.2-3.5%)                   | 2.4%<br>(1.2-4%)                    | 260<br>(140-410)     | 16000<br>(9100-23000)     |
| Tanzania | 2010 | Female | 40 to 44 | 36%<br>(21-55%)                | 64%<br>(45-79%)          | 2.7<br>(1.2-4.8)                            | 2.6%<br>(1.5-4%)                     | 2.9%<br>(1.6-4.6%)                  | 290<br>(150-450)     | 15000<br>(8500-23000)     |
| Tanzania | 2010 | Female | 45 to 49 | 37%<br>(20-54%)                | 63%<br>(46-80%)          | 2.8<br>(1.2-5.2)                            | 3.8%<br>(2-5.8%)                     | 4.4%<br>(2.2-7%)                    | 370<br>(190-600)     | 17000<br>(8800-26000)     |
| Tanzania | 2010 | Female | 50 to 54 | 35%<br>(19-55%)                | 65%<br>(45-81%)          | 2.8<br>(1.2-5.3)                            | 5.7%<br>(3-8.9%)                     | 7%<br>(3.6-11%)                     | 550<br>(260-910)     | 21000<br>(10000-34000)    |
| Tanzania | 2010 | Female | 55 to 59 | 34%<br>(19-53%)                | 66%<br>(47-81%)          | 2.8<br>(1.2-5.4)                            | 6.9%<br>(3.6-11%)                    | 8.5%<br>(4.4-13%)                   | 670<br>(320-1100)    | 22000<br>(10000-36000)    |

| Location | Year | Sex    | Age      | Prevalence of current drinkers | Prevalence of abstainers | Population average of standard drinks daily | Percent of total attributable deaths | Percent of total attributable DALYs | Attributable deaths   | Attributable DALYs        |
|----------|------|--------|----------|--------------------------------|--------------------------|---------------------------------------------|--------------------------------------|-------------------------------------|-----------------------|---------------------------|
| Tanzania | 2010 | Female | 60 to 64 | 35%<br>(19-53%)                | 65%<br>(47-81%)          | 2.8<br>(1.1-5.6)                            | 7.3%<br>(3.5-12%)                    | 8.9%<br>(4.5-14%)                   | 820<br>(370-1400)     | 23000<br>(11000-38000)    |
| Tanzania | 2010 | Female | 65 to 69 | 36%<br>(20-54%)                | 64%<br>(46-80%)          | 2.6<br>(1.1-5.2)                            | 7.9%<br>(3.8-13%)                    | 9.5%<br>(4.5-15%)                   | 1000<br>(450-1700)    | 23000<br>(10000-38000)    |
| Tanzania | 2010 | Female | 70 to 74 | 34%<br>(20-52%)                | 66%<br>(48-80%)          | 2.2<br>(0.87-4.4)                           | 6.9%<br>(2.7-12%)                    | 8%<br>(3-14%)                       | 910<br>(330-1600)     | 17000<br>(6200-29000)     |
| Tanzania | 2010 | Female | 75 to 79 | 31%<br>(17-50%)                | 69%<br>(50-83%)          | 1.9<br>(0.67-3.8)                           | 6%<br>(2.1-10%)                      | 6.9%<br>(2.5-12%)                   | 770<br>(270-1400)     | 11000<br>(3900-20000)     |
| Tanzania | 2010 | Female | 80 to 84 | 30%<br>(16-48%)                | 70%<br>(52-84%)          | 1.7<br>(0.59-3.4)                           | 5%<br>(1.7-9.2%)                     | 5.8%<br>(2-11%)                     | 490<br>(160-970)      | 5100<br>(1600-10000)      |
| Tanzania | 2010 | Female | 85 to 89 | 30%<br>(17-47%)                | 70%<br>(53-83%)          | 1.6<br>(0.62-3.4)                           | 4.2%<br>(1.3-8.5%)                   | 4.9%<br>(1.5-9.9%)                  | 250<br>(77-500)       | 1800<br>(580-3700)        |
| Tanzania | 2010 | Female | 90 to 94 | 33%<br>(18-51%)                | 67%<br>(49-82%)          | 1.7<br>(0.6-3.5)                            | 3.7%<br>(0.96-8.3%)                  | 4.3%<br>(1.1-9.7%)                  | 84<br>(21-190)        | 430<br>(110-950)          |
| Tanzania | 2010 | Female | 95 plus  | 37%<br>(18-60%)                | 63%<br>(40-82%)          | 1.8<br>(0.56-4.1)                           | 4%<br>(1.1-9.4%)                     | 4.6%<br>(1.1-11%)                   | 21<br>(5.2-51)        | 74<br>(19-170)            |
| Tanzania | 2010 | Male   | All Ages | 30%<br>(24-38%)                | 70%<br>(62-76%)          | 1.8<br>(1.2-2.6)                            | 3.8%<br>(2.7-4.9%)                   | 5.7%<br>(3.9-7.9%)                  | 13000<br>(8200-17000) | 520000<br>(370000-680000) |
| Tanzania | 2010 | Male   | 15 to 19 | 27%<br>(16-42%)                | 73%<br>(58-84%)          | 1.7<br>(0.79-3.2)                           | 4.5%<br>(2.6-7.1%)                   | 5.4%<br>(2.7-8.9%)                  | 280<br>(130-470)      | 25000<br>(13000-39000)    |
| Tanzania | 2010 | Male   | 20 to 24 | 38%<br>(23-55%)                | 62%<br>(45-77%)          | 2.6<br>(1.3-4.4)                            | 9.3%<br>(5.7-13%)                    | 11%<br>(5.9-16%)                    | 600<br>(330-960)      | 49000<br>(30000-73000)    |
| Tanzania | 2010 | Male   | 25 to 29 | 43%<br>(26-62%)                | 57%<br>(38-74%)          | 3.3<br>(1.7-5.5)                            | 9.5%<br>(5.9-14%)                    | 11%<br>(5.9-17%)                    | 810<br>(460-1200)     | 58000<br>(37000-83000)    |
| Tanzania | 2010 | Male   | 30 to 34 | 47%<br>(28-66%)                | 53%<br>(34-72%)          | 3.9<br>(2.1-6.7)                            | 8.3%<br>(5.3-12%)                    | 9.1%<br>(5.4-14%)                   | 920<br>(560-1300)     | 59000<br>(38000-83000)    |
| Tanzania | 2010 | Male   | 35 to 39 | 50%<br>(32-68%)                | 50%<br>(32-68%)          | 4.3<br>(2.1-7.6)                            | 7.8%<br>(5-11%)                      | 8.6%<br>(5.1-13%)                   | 1000<br>(630-1500)    | 57000<br>(37000-79000)    |
| Tanzania | 2010 | Male   | 40 to 44 | 51%<br>(34-70%)                | 49%<br>(30-66%)          | 4.4<br>(2.2-7.9)                            | 8%<br>(5.3-11%)                      | 8.8%<br>(5.8-12%)                   | 1100<br>(670-1500)    | 52000<br>(34000-72000)    |
| Tanzania | 2010 | Male   | 45 to 49 | 52%<br>(32-71%)                | 48%<br>(29-68%)          | 4.5<br>(2-8)                                | 9%<br>(5.6-13%)                      | 10%<br>(6.1-15%)                    | 1100<br>(670-1600)    | 48000<br>(30000-68000)    |
| Tanzania | 2010 | Male   | 50 to 54 | 52%<br>(33-71%)                | 48%<br>(29-67%)          | 4.4<br>(2.1-8.2)                            | 11%<br>(6.8-15%)                     | 13%<br>(8-18%)                      | 1200<br>(760-1700)    | 47000<br>(29000-66000)    |
| Tanzania | 2010 | Male   | 55 to 59 | 52%<br>(33-70%)                | 48%<br>(30-67%)          | 4.2<br>(2-7.7)                              | 12%<br>(7.1-17%)                     | 14%<br>(8.4-20%)                    | 1200<br>(720-1700)    | 40000<br>(24000-55000)    |
| Tanzania | 2010 | Male   | 60 to 64 | 50%<br>(31-70%)                | 50%<br>(30-69%)          | 3.7<br>(1.7-7.4)                            | 10%<br>(5.6-15%)                     | 12%<br>(6.5-18%)                    | 1200<br>(640-1800)    | 34000<br>(18000-49000)    |
| Tanzania | 2010 | Male   | 65 to 69 | 47%<br>(29-66%)                | 53%<br>(34-71%)          | 3<br>(1.4-5.7)                              | 8.5%<br>(4.1-13%)                    | 10%<br>(4.8-16%)                    | 1000<br>(470-1600)    | 23000<br>(11000-36000)    |
| Tanzania | 2010 | Male   | 70 to 74 | 44%<br>(27-61%)                | 56%<br>(39-73%)          | 2.3<br>(1-4.5)                              | 6.5%<br>(2.7-12%)                    | 7.6%<br>(3.1-13%)                   | 860<br>(350-1500)     | 16000<br>(6500-28000)     |
| Tanzania | 2010 | Male   | 75 to 79 | 42%<br>(25-60%)                | 58%<br>(40-75%)          | 1.9<br>(0.77-3.7)                           | 5.4%<br>(1.8-11%)                    | 6.2%<br>(2-12%)                     | 660<br>(210-1300)     | 9300<br>(3100-19000)      |



| Location | Year | Sex    | Age      | Prevalence of current drinkers | Prevalence of abstainers | Population average of standard drinks daily | Percent of total attributable deaths | Percent of total attributable DALYs | Attributable deaths  | Attributable DALYs        |
|----------|------|--------|----------|--------------------------------|--------------------------|---------------------------------------------|--------------------------------------|-------------------------------------|----------------------|---------------------------|
| Tanzania | 2010 | Male   | 80 to 84 | 39%<br>(23-59%)                | 61%<br>(41-77%)          | 1.6<br>(0.66-3.1)                           | 4.4%<br>(1.5-8.8%)                   | 5%<br>(1.7-10%)                     | 440<br>(150-890)     | 4700<br>(1600-9400)       |
| Tanzania | 2010 | Male   | 85 to 89 | 36%<br>(22-55%)                | 64%<br>(45-78%)          | 1.4<br>(0.58-2.7)                           | 3.4%<br>(1.2-7.1%)                   | 3.9%<br>(1.3-8.2%)                  | 160<br>(56-340)      | 1200<br>(440-2600)        |
| Tanzania | 2010 | Male   | 90 to 94 | 37%<br>(22-55%)                | 63%<br>(45-78%)          | 1.2<br>(0.47-2.5)                           | 2.5%<br>(0.76-5.7%)                  | 2.8%<br>(0.74-6.5%)                 | 35<br>(9.3-81)       | 190<br>(58-430)           |
| Tanzania | 2010 | Male   | 95 plus  | 41%<br>(20-62%)                | 59%<br>(38-80%)          | 1.2<br>(0.4-2.7)                            | 2.8%<br>(0.82-6.6%)                  | 3.1%<br>(0.76-7.5%)                 | 8.7<br>(2.2-21)      | 32<br>(9.4-74)            |
| Tanzania | 2016 | Female | All Ages | 21%<br>(17-27%)                | 79%<br>(73-83%)          | 1.2<br>(0.64-2.1)                           | 2.2%<br>(1.2-3.2%)                   | 4.3%<br>(2-6.6%)                    | 7700<br>(3500-12000) | 240000<br>(140000-350000) |
| Tanzania | 2016 | Female | 15 to 19 | 21%<br>(12-35%)                | 79%<br>(65-88%)          | 1.4<br>(0.52-3)                             | 2%<br>(0.9-3.3%)                     | 2.5%<br>(0.9-4.8%)                  | 100<br>(38-190)      | 11000<br>(4800-18000)     |
| Tanzania | 2016 | Female | 20 to 24 | 27%<br>(15-42%)                | 73%<br>(58-85%)          | 2<br>(0.76-4.1)                             | 2.8%<br>(1.5-4.1%)                   | 3%<br>(1.3-5.1%)                    | 130<br>(60-230)      | 14000<br>(8100-21000)     |
| Tanzania | 2016 | Female | 25 to 29 | 29%<br>(16-44%)                | 71%<br>(56-84%)          | 2.4<br>(0.96-4.9)                           | 2.8%<br>(1.7-4.2%)                   | 3%<br>(1.5-5.1%)                    | 180<br>(90-290)      | 16000<br>(9800-24000)     |
| Tanzania | 2016 | Female | 30 to 34 | 32%<br>(17-49%)                | 68%<br>(51-83%)          | 2.6<br>(1.1-5.3)                            | 3%<br>(1.8-4.6%)                     | 3.5%<br>(1.8-5.7%)                  | 230<br>(120-380)     | 17000<br>(10000-26000)    |
| Tanzania | 2016 | Female | 35 to 39 | 35%<br>(20-53%)                | 65%<br>(47-80%)          | 2.6<br>(1-5.2)                              | 3.5%<br>(2-5.2%)                     | 4.3%<br>(2.3-6.6%)                  | 290<br>(150-470)     | 18000<br>(10000-28000)    |
| Tanzania | 2016 | Female | 40 to 44 | 37%<br>(22-55%)                | 63%<br>(45-78%)          | 2.6<br>(1-5.2)                              | 4%<br>(2.1-6.1%)                     | 5.1%<br>(2.5-7.9%)                  | 330<br>(160-530)     | 17000<br>(8800-27000)     |
| Tanzania | 2016 | Female | 45 to 49 | 37%<br>(20-54%)                | 63%<br>(46-80%)          | 2.7<br>(0.99-5.7)                           | 5.1%<br>(2.4-8%)                     | 6.7%<br>(3.2-11%)                   | 420<br>(180-690)     | 19000<br>(8700-30000)     |
| Tanzania | 2016 | Female | 50 to 54 | 35%<br>(20-56%)                | 65%<br>(44-80%)          | 2.7<br>(0.94-6)                             | 6.4%<br>(3-10%)                      | 8.4%<br>(4-13%)                     | 570<br>(260-960)     | 22000<br>(10000-36000)    |
| Tanzania | 2016 | Female | 55 to 59 | 34%<br>(20-52%)                | 66%<br>(48-80%)          | 2.7<br>(0.89-5.5)                           | 7%<br>(3.2-11%)                      | 9%<br>(4.2-15%)                     | 680<br>(300-1100)    | 22000<br>(9800-37000)     |
| Tanzania | 2016 | Female | 60 to 64 | 35%<br>(19-53%)                | 65%<br>(47-81%)          | 2.7<br>(0.9-5.9)                            | 7.1%<br>(3.1-12%)                    | 8.8%<br>(3.9-15%)                   | 820<br>(350-1400)    | 23000<br>(9700-39000)     |
| Tanzania | 2016 | Female | 65 to 69 | 36%<br>(20-53%)                | 64%<br>(47-80%)          | 2.5<br>(0.9-5.6)                            | 7.5%<br>(3.1-12%)                    | 9.1%<br>(3.7-15%)                   | 1100<br>(410-1800)   | 24000<br>(9500-41000)     |
| Tanzania | 2016 | Female | 70 to 74 | 35%<br>(20-52%)                | 65%<br>(48-80%)          | 2.2<br>(0.71-4.9)                           | 6.4%<br>(1.9-12%)                    | 7.5%<br>(2.2-14%)                   | 990<br>(300-1800)    | 18000<br>(5800-33000)     |
| Tanzania | 2016 | Female | 75 to 79 | 32%<br>(18-50%)                | 68%<br>(50-82%)          | 1.8<br>(0.58-4.1)                           | 5.6%<br>(1.6-10%)                    | 6.6%<br>(1.9-12%)                   | 870<br>(250-1600)    | 12000<br>(3600-23000)     |
| Tanzania | 2016 | Female | 80 to 84 | 30%<br>(16-48%)                | 70%<br>(52-84%)          | 1.7<br>(0.55-3.8)                           | 4.7%<br>(1.2-9.3%)                   | 5.4%<br>(1.4-11%)                   | 610<br>(150-1200)    | 6400<br>(1600-13000)      |
| Tanzania | 2016 | Female | 85 to 89 | 30%<br>(17-48%)                | 70%<br>(52-83%)          | 1.6<br>(0.52-3.7)                           | 3.9%<br>(0.91-8.2%)                  | 4.6%<br>(1-9.5%)                    | 300<br>(67-640)      | 2200<br>(520-4800)        |
| Tanzania | 2016 | Female | 90 to 94 | 33%<br>(18-50%)                | 67%<br>(50-82%)          | 1.6<br>(0.49-3.9)                           | 3.5%<br>(0.59-8.1%)                  | 4.1%<br>(0.64-9.5%)                 | 95<br>(16-230)       | 490<br>(80-1100)          |
| Tanzania | 2016 | Female | 95 plus  | 37%<br>(19-59%)                | 63%<br>(41-81%)          | 1.7<br>(0.48-4.3)                           | 3.8%<br>(0.73-8.6%)                  | 4.4%<br>(0.76-10%)                  | 30<br>(5.2-69)       | 100<br>(19-230)           |

| Location | Year | Sex    | Age      | Prevalence of current drinkers | Prevalence of abstainers | Population average of standard drinks daily | Percent of total attributable deaths | Percent of total attributable DALYs | Attributable deaths   | Attributable DALYs        |
|----------|------|--------|----------|--------------------------------|--------------------------|---------------------------------------------|--------------------------------------|-------------------------------------|-----------------------|---------------------------|
| Tanzania | 2016 | Male   | All Ages | 30%<br>(24-38%)                | 70%<br>(62-76%)          | 1.7<br>(0.9-3)                              | 4.6%<br>(2.9-6.3%)                   | 6.6%<br>(3.7-9.4%)                  | 14000<br>(7500-20000) | 580000<br>(360000-800000) |
| Tanzania | 2016 | Male   | 15 to 19 | 27%<br>(16-43%)                | 73%<br>(57-84%)          | 1.7<br>(0.68-3.4)                           | 4.6%<br>(2.4-7.5%)                   | 5.5%<br>(2.4-9.9%)                  | 310<br>(130-570)      | 28000<br>(15000-48000)    |
| Tanzania | 2016 | Male   | 20 to 24 | 38%<br>(23-56%)                | 62%<br>(44-77%)          | 2.5<br>(1.1-4.9)                            | 9.4%<br>(5.5-14%)                    | 11%<br>(5.4-17%)                    | 680<br>(330-1100)     | 56000<br>(31000-87000)    |
| Tanzania | 2016 | Male   | 25 to 29 | 44%<br>(26-62%)                | 56%<br>(38-74%)          | 3.3<br>(1.4-6.6)                            | 10%<br>(6.2-15%)                     | 12%<br>(6.2-18%)                    | 880<br>(440-1400)     | 64000<br>(37000-96000)    |
| Tanzania | 2016 | Male   | 30 to 34 | 48%<br>(28-67%)                | 52%<br>(33-72%)          | 3.8<br>(1.7-7.4)                            | 9.8%<br>(6.1-14%)                    | 11%<br>(6.3-16%)                    | 970<br>(540-1500)     | 63000<br>(38000-91000)    |
| Tanzania | 2016 | Male   | 35 to 39 | 50%<br>(32-68%)                | 50%<br>(32-68%)          | 4.1<br>(1.7-8.2)                            | 9.8%<br>(6.1-14%)                    | 11%<br>(6.5-16%)                    | 1100<br>(630-1700)    | 64000<br>(38000-91000)    |
| Tanzania | 2016 | Male   | 40 to 44 | 51%<br>(34-70%)                | 49%<br>(30-66%)          | 4.3<br>(1.8-8.2)                            | 10%<br>(6.1-14%)                     | 12%<br>(6.9-16%)                    | 1200<br>(670-1700)    | 60000<br>(35000-84000)    |
| Tanzania | 2016 | Male   | 45 to 49 | 52%<br>(33-71%)                | 48%<br>(29-67%)          | 4.3<br>(1.7-9)                              | 11%<br>(6.1-15%)                     | 13%<br>(7.2-18%)                    | 1300<br>(670-1800)    | 55000<br>(31000-79000)    |
| Tanzania | 2016 | Male   | 50 to 54 | 52%<br>(34-71%)                | 48%<br>(29-66%)          | 4.3<br>(1.7-8.9)                            | 12%<br>(6.6-17%)                     | 14%<br>(7.8-21%)                    | 1300<br>(710-2000)    | 51000<br>(28000-75000)    |
| Tanzania | 2016 | Male   | 55 to 59 | 51%<br>(34-70%)                | 49%<br>(30-66%)          | 4.1<br>(1.6-8.4)                            | 12%<br>(6.2-17%)                     | 15%<br>(7.5-21%)                    | 1400<br>(690-2000)    | 45000<br>(23000-64000)    |
| Tanzania | 2016 | Male   | 60 to 64 | 50%<br>(31-70%)                | 50%<br>(30-69%)          | 3.6<br>(1.4-7.6)                            | 10%<br>(4.7-15%)                     | 12%<br>(5.5-18%)                    | 1200<br>(530-1800)    | 33000<br>(16000-50000)    |
| Tanzania | 2016 | Male   | 65 to 69 | 47%<br>(29-65%)                | 53%<br>(35-71%)          | 2.9<br>(1.1-6.1)                            | 8%<br>(3.2-13%)                      | 9.4%<br>(3.7-16%)                   | 1100<br>(420-1800)    | 25000<br>(9900-41000)     |
| Tanzania | 2016 | Male   | 70 to 74 | 44%<br>(27-62%)                | 56%<br>(38-73%)          | 2.2<br>(0.8-4.7)                            | 6.1%<br>(1.9-11%)                    | 7.1%<br>(2.2-13%)                   | 850<br>(260-1600)     | 16000<br>(4900-30000)     |
| Tanzania | 2016 | Male   | 75 to 79 | 42%<br>(26-60%)                | 58%<br>(40-74%)          | 1.8<br>(0.66-4.2)                           | 5%<br>(1.4-10%)                      | 5.9%<br>(1.6-12%)                   | 690<br>(180-1500)     | 9900<br>(2600-21000)      |
| Tanzania | 2016 | Male   | 80 to 84 | 39%<br>(23-59%)                | 61%<br>(41-77%)          | 1.6<br>(0.56-3.3)                           | 4.2%<br>(1.1-9%)                     | 4.8%<br>(1.2-10%)                   | 480<br>(120-1100)     | 5100<br>(1300-11000)      |
| Tanzania | 2016 | Male   | 85 to 89 | 37%<br>(22-54%)                | 63%<br>(46-78%)          | 1.3<br>(0.48-3)                             | 3.2%<br>(0.84-7.7%)                  | 3.7%<br>(0.88-8.9%)                 | 230<br>(53-540)       | 1800<br>(440-4100)        |
| Tanzania | 2016 | Male   | 90 to 94 | 37%<br>(22-55%)                | 63%<br>(45-78%)          | 1.2<br>(0.39-2.8)                           | 2.4%<br>(0.47-6.2%)                  | 2.7%<br>(0.42-7%)                   | 63<br>(9.7-170)       | 340<br>(64-870)           |
| Tanzania | 2016 | Male   | 95 plus  | 41%<br>(20-63%)                | 59%<br>(37-80%)          | 1.2<br>(0.33-2.9)                           | 2.7%<br>(0.6-6.7%)                   | 3%<br>(0.5-7.6%)                    | 12<br>(2-32)          | 45<br>(9.8-110)           |
| Uganda   | 1990 | Female | All Ages | 40%<br>(33-47%)                | 60%<br>(53-67%)          | 1.4<br>(1.1-1.9)                            | 2%<br>(1.4-2.6%)                     | 3.9%<br>(2.5-5.4%)                  | 5100<br>(3200-7000)   | 180000<br>(120000-230000) |
| Uganda   | 1990 | Female | 15 to 19 | 40%<br>(28-53%)                | 60%<br>(47-72%)          | 1.9<br>(1.1-3)                              | 3.4%<br>(1.6-5.6%)                   | 4.6%<br>(1.7-8.3%)                  | 96<br>(34-170)        | 8200<br>(3900-14000)      |
| Uganda   | 1990 | Female | 20 to 24 | 49%<br>(35-61%)                | 51%<br>(39-65%)          | 2.5<br>(1.4-4)                              | 4%<br>(2-6.7%)                       | 4.6%<br>(1.8-8.4%)                  | 150<br>(62-270)       | 12000<br>(6300-20000)     |
| Uganda   | 1990 | Female | 25 to 29 | 53%<br>(39-65%)                | 47%<br>(35-61%)          | 3.1<br>(1.8-4.9)                            | 4.5%<br>(2.4-7.5%)                   | 5.2%<br>(2.3-9.1%)                  | 200<br>(94-330)       | 14000<br>(7500-22000)     |

| Location | Year | Sex    | Age      | Prevalence of current drinkers | Prevalence of abstainers | Population average of standard drinks daily | Percent of total attributable deaths | Percent of total attributable DALYs | Attributable deaths | Attributable DALYs        |
|----------|------|--------|----------|--------------------------------|--------------------------|---------------------------------------------|--------------------------------------|-------------------------------------|---------------------|---------------------------|
| Uganda   | 1990 | Female | 30 to 34 | 57%<br>(44-69%)                | 43%<br>(31-56%)          | 3.4<br>(2-5.1)                              | 5.4%<br>(2.9-8.4%)                   | 6.4%<br>(3-11%)                     | 240<br>(120-370)    | 15000<br>(8300-22000)     |
| Uganda   | 1990 | Female | 35 to 39 | 62%<br>(49-73%)                | 38%<br>(27-51%)          | 3.2<br>(1.9-5.1)                            | 6.2%<br>(3.2-9.7%)                   | 7.5%<br>(3.5-12%)                   | 280<br>(140-440)    | 15000<br>(8200-23000)     |
| Uganda   | 1990 | Female | 40 to 44 | 65%<br>(53-76%)                | 35%<br>(24-47%)          | 3.3<br>(1.9-5.2)                            | 6.9%<br>(3.6-11%)                    | 8.5%<br>(4.3-13%)                   | 290<br>(150-450)    | 14000<br>(7500-21000)     |
| Uganda   | 1990 | Female | 45 to 49 | 64%<br>(50-75%)                | 36%<br>(25-50%)          | 3.3<br>(1.8-5.3)                            | 7.9%<br>(4.6-12%)                    | 9.8%<br>(5.6-15%)                   | 340<br>(190-520)    | 15000<br>(8300-22000)     |
| Uganda   | 1990 | Female | 50 to 54 | 63%<br>(48-74%)                | 37%<br>(26-52%)          | 3.2<br>(1.7-5.2)                            | 9.6%<br>(5.5-14%)                    | 12%<br>(6.6-17%)                    | 420<br>(230-620)    | 16000<br>(8600-23000)     |
| Uganda   | 1990 | Female | 55 to 59 | 62%<br>(46-76%)                | 38%<br>(24-54%)          | 3.1<br>(1.6-5.1)                            | 10%<br>(5.6-15%)                     | 12%<br>(6.9-18%)                    | 590<br>(330-880)    | 19000<br>(10000-28000)    |
| Uganda   | 1990 | Female | 60 to 64 | 60%<br>(43-75%)                | 40%<br>(25-57%)          | 2.9<br>(1.6-5.1)                            | 9.9%<br>(5.1-15%)                    | 12%<br>(6.2-18%)                    | 620<br>(330-960)    | 17000<br>(8900-26000)     |
| Uganda   | 1990 | Female | 65 to 69 | 57%<br>(41-72%)                | 43%<br>(28-59%)          | 2.6<br>(1.4-4.2)                            | 9.6%<br>(5-15%)                      | 11%<br>(5.9-17%)                    | 660<br>(350-1000)   | 15000<br>(7900-23000)     |
| Uganda   | 1990 | Female | 70 to 74 | 54%<br>(38-69%)                | 46%<br>(31-62%)          | 2.2<br>(1.1-3.7)                            | 7.8%<br>(3.5-13%)                    | 8.8%<br>(3.9-15%)                   | 520<br>(230-870)    | 9400<br>(4200-16000)      |
| Uganda   | 1990 | Female | 75 to 79 | 52%<br>(35-69%)                | 48%<br>(31-65%)          | 1.8<br>(0.9-3.1)                            | 6.1%<br>(2.3-11%)                    | 6.9%<br>(2.6-13%)                   | 340<br>(130-630)    | 4800<br>(1800-8800)       |
| Uganda   | 1990 | Female | 80 to 84 | 51%<br>(33-69%)                | 49%<br>(31-67%)          | 1.7<br>(0.9-2.8)                            | 5%<br>(1.9-9.3%)                     | 5.6%<br>(2.1-10%)                   | 190<br>(73-360)     | 2000<br>(770-3700)        |
| Uganda   | 1990 | Female | 85 to 89 | 51%<br>(33-67%)                | 49%<br>(33-67%)          | 1.7<br>(0.85-2.8)                           | 3.9%<br>(1.3-7.7%)                   | 4.4%<br>(1.5-8.8%)                  | 70<br>(23-140)      | 520<br>(170-1000)         |
| Uganda   | 1990 | Female | 90 to 94 | 52%<br>(36-68%)                | 48%<br>(32-64%)          | 1.7<br>(0.83-2.9)                           | 3.2%<br>(0.72-6.9%)                  | 3.6%<br>(0.75-8.1%)                 | 17<br>(3.5-37)      | 87<br>(20-190)            |
| Uganda   | 1990 | Female | 95 plus  | 55%<br>(34-75%)                | 45%<br>(25-66%)          | 1.7<br>(0.74-3.2)                           | 3%<br>(0.54-7.1%)                    | 3.4%<br>(0.51-8.3%)                 | 3.5<br>(0.52-8.4)   | 12<br>(2.2-29)            |
| Uganda   | 1990 | Male   | All Ages | 46%<br>(38-53%)                | 54%<br>(47-62%)          | 1.6<br>(1.2-2.1)                            | 2.3%<br>(1.7-3.2%)                   | 4%<br>(2.8-5.4%)                    | 6200<br>(4300-8500) | 260000<br>(180000-350000) |
| Uganda   | 1990 | Male   | 15 to 19 | 40%<br>(27-54%)                | 60%<br>(46-73%)          | 1.8<br>(1-3)                                | 4.5%<br>(2.1-7.6%)                   | 5.9%<br>(2.3-10%)                   | 140<br>(60-260)     | 11000<br>(5400-19000)     |
| Uganda   | 1990 | Male   | 20 to 24 | 52%<br>(38-64%)                | 48%<br>(36-62%)          | 2.5<br>(1.4-3.8)                            | 6.1%<br>(2.9-10%)                    | 7%<br>(2.9-12%)                     | 310<br>(130-520)    | 22000<br>(11000-37000)    |
| Uganda   | 1990 | Male   | 25 to 29 | 62%<br>(50-72%)                | 38%<br>(28-50%)          | 3.3<br>(2-5.1)                              | 6.2%<br>(3-10%)                      | 6.9%<br>(2.9-12%)                   | 430<br>(200-700)    | 28000<br>(15000-44000)    |
| Uganda   | 1990 | Male   | 30 to 34 | 69%<br>(56-79%)                | 31%<br>(21-44%)          | 4<br>(2.4-5.9)                              | 7.2%<br>(3.7-11%)                    | 7.9%<br>(3.8-13%)                   | 510<br>(260-770)    | 30000<br>(16000-44000)    |
| Uganda   | 1990 | Male   | 35 to 39 | 72%<br>(61-81%)                | 28%<br>(19-39%)          | 4.4<br>(2.6-7)                              | 8.3%<br>(4.3-13%)                    | 9.4%<br>(4.5-15%)                   | 570<br>(300-850)    | 30000<br>(17000-44000)    |
| Uganda   | 1990 | Male   | 40 to 44 | 75%<br>(64-83%)                | 25%<br>(17-36%)          | 4.6<br>(2.7-7)                              | 9.2%<br>(5.4-14%)                    | 10%<br>(5.9-16%)                    | 590<br>(330-870)    | 28000<br>(16000-40000)    |
| Uganda   | 1990 | Male   | 45 to 49 | 76%<br>(63-85%)                | 24%<br>(15-37%)          | 4.4<br>(2.5-6.9)                            | 10%<br>(6.3-15%)                     | 12%<br>(6.9-18%)                    | 620<br>(360-910)    | 26000<br>(16000-38000)    |

| Location | Year | Sex    | Age      | Prevalence of current drinkers | Prevalence of abstainers | Population average of standard drinks daily | Percent of total attributable deaths | Percent of total attributable DALYs | Attributable deaths | Attributable DALYs        |
|----------|------|--------|----------|--------------------------------|--------------------------|---------------------------------------------|--------------------------------------|-------------------------------------|---------------------|---------------------------|
| Uganda   | 1990 | Male   | 50 to 54 | 76%<br>(63-85%)                | 24%<br>(15-37%)          | 4.2<br>(2.3-6.8)                            | 12%<br>(7.1-17%)                     | 14%<br>(8.2-20%)                    | 600<br>(360-870)    | 22000<br>(13000-32000)    |
| Uganda   | 1990 | Male   | 55 to 59 | 75%<br>(62-85%)                | 25%<br>(15-38%)          | 4<br>(2.3-6.4)                              | 12%<br>(7.4-17%)                     | 14%<br>(8.6-20%)                    | 710<br>(420-1100)   | 23000<br>(14000-34000)    |
| Uganda   | 1990 | Male   | 60 to 64 | 72%<br>(59-84%)                | 28%<br>(16-41%)          | 3.4<br>(1.9-5.8)                            | 11%<br>(6-16%)                       | 12%<br>(7-18%)                      | 630<br>(360-980)    | 17000<br>(9800-26000)     |
| Uganda   | 1990 | Male   | 65 to 69 | 69%<br>(54-81%)                | 31%<br>(19-46%)          | 2.8<br>(1.6-4.4)                            | 8%<br>(4.3-13%)                      | 9.3%<br>(5.1-15%)                   | 470<br>(260-750)    | 11000<br>(5900-17000)     |
| Uganda   | 1990 | Male   | 70 to 74 | 66%<br>(50-78%)                | 34%<br>(22-50%)          | 2.2<br>(1.2-3.6)                            | 5.8%<br>(2.6-10%)                    | 6.7%<br>(3.1-12%)                   | 320<br>(150-570)    | 5800<br>(2700-10000)      |
| Uganda   | 1990 | Male   | 75 to 79 | 62%<br>(46-78%)                | 38%<br>(22-54%)          | 1.8<br>(0.91-3)                             | 4.4%<br>(1.7-8.2%)                   | 5.1%<br>(2-9.4%)                    | 190<br>(74-360)     | 2700<br>(1000-5000)       |
| Uganda   | 1990 | Male   | 80 to 84 | 59%<br>(40-75%)                | 41%<br>(25-60%)          | 1.5<br>(0.8-2.5)                            | 3.6%<br>(1.5-6.6%)                   | 4.1%<br>(1.6-7.5%)                  | 91<br>(36-160)      | 950<br>(380-1700)         |
| Uganda   | 1990 | Male   | 85 to 89 | 55%<br>(37-71%)                | 45%<br>(29-63%)          | 1.2<br>(0.63-2.1)                           | 2.5%<br>(1.1-4.6%)                   | 2.8%<br>(1.1-5.2%)                  | 31<br>(13-58)       | 230<br>(100-430)          |
| Uganda   | 1990 | Male   | 90 to 94 | 54%<br>(38-71%)                | 46%<br>(29-62%)          | 1.1<br>(0.54-2)                             | 1.6%<br>(0.47-3.6%)                  | 1.7%<br>(0.39-4.2%)                 | 6.4<br>(1.4-15)     | 35<br>(10-79)             |
| Uganda   | 1990 | Male   | 95 plus  | 56%<br>(35-76%)                | 44%<br>(24-65%)          | 1.1<br>(0.45-2.1)                           | 1.6%<br>(0.34-3.9%)                  | 1.6%<br>(0.18-4.2%)                 | 1.3<br>(0.14-3.3)   | 5<br>(1.1-12)             |
| Uganda   | 1995 | Female | All Ages | 40%<br>(34-46%)                | 60%<br>(54-66%)          | 1.4<br>(1-1.9)                              | 2%<br>(1.4-2.8%)                     | 3.8%<br>(2.4-5.5%)                  | 6000<br>(3700-8600) | 210000<br>(140000-290000) |
| Uganda   | 1995 | Female | 15 to 19 | 45%<br>(35-55%)                | 55%<br>(45-65%)          | 2.1<br>(1.3-3.2)                            | 4.3%<br>(2.3-6.9%)                   | 6.1%<br>(3-9.8%)                    | 140<br>(68-230)     | 12000<br>(6400-18000)     |
| Uganda   | 1995 | Female | 20 to 24 | 51%<br>(42-59%)                | 49%<br>(41-58%)          | 2.7<br>(1.6-4.1)                            | 4.1%<br>(2.3-6.6%)                   | 4.7%<br>(2.2-8.1%)                  | 200<br>(100-330)    | 16000<br>(8900-25000)     |
| Uganda   | 1995 | Female | 25 to 29 | 54%<br>(46-61%)                | 46%<br>(39-54%)          | 3.2<br>(2-4.6)                              | 3.5%<br>(1.9-5.9%)                   | 3.7%<br>(1.8-7%)                    | 260<br>(140-400)    | 18000<br>(11000-27000)    |
| Uganda   | 1995 | Female | 30 to 34 | 56%<br>(48-63%)                | 44%<br>(37-52%)          | 3.3<br>(2.1-4.9)                            | 3.6%<br>(2-5.7%)                     | 3.9%<br>(2-6.4%)                    | 280<br>(160-430)    | 17000<br>(10000-26000)    |
| Uganda   | 1995 | Female | 35 to 39 | 59%<br>(50-67%)                | 41%<br>(33-50%)          | 3<br>(1.8-4.6)                              | 4.2%<br>(2.4-6.7%)                   | 4.7%<br>(2.5-7.9%)                  | 310<br>(170-470)    | 17000<br>(9700-25000)     |
| Uganda   | 1995 | Female | 40 to 44 | 60%<br>(51-70%)                | 40%<br>(30-49%)          | 3<br>(1.7-4.7)                              | 4.9%<br>(2.8-7.6%)                   | 5.6%<br>(3.1-8.7%)                  | 340<br>(190-520)    | 16000<br>(9300-25000)     |
| Uganda   | 1995 | Female | 45 to 49 | 61%<br>(51-71%)                | 39%<br>(29-49%)          | 3.1<br>(1.7-5)                              | 6.1%<br>(3.5-9.4%)                   | 7.2%<br>(4-11%)                     | 390<br>(220-600)    | 17000<br>(9500-25000)     |
| Uganda   | 1995 | Female | 50 to 54 | 62%<br>(48-74%)                | 38%<br>(26-52%)          | 3.1<br>(1.7-5.2)                            | 8.5%<br>(4.8-12%)                    | 10%<br>(5.7-15%)                    | 540<br>(290-810)    | 20000<br>(11000-30000)    |
| Uganda   | 1995 | Female | 55 to 59 | 61%<br>(45-76%)                | 39%<br>(24-55%)          | 3.1<br>(1.6-5.3)                            | 9.7%<br>(5.3-14%)                    | 11%<br>(6.2-17%)                    | 580<br>(310-880)    | 18000<br>(9900-28000)     |
| Uganda   | 1995 | Female | 60 to 64 | 60%<br>(44-75%)                | 40%<br>(25-56%)          | 2.9<br>(1.6-5.1)                            | 9.7%<br>(5.2-14%)                    | 11%<br>(6.1-17%)                    | 730<br>(390-1100)   | 20000<br>(10000-30000)    |
| Uganda   | 1995 | Female | 65 to 69 | 57%<br>(41-71%)                | 43%<br>(29-59%)          | 2.7<br>(1.4-4.3)                            | 9.6%<br>(5.1-15%)                    | 11%<br>(5.8-17%)                    | 780<br>(400-1200)   | 17000<br>(9000-27000)     |

| Location | Year | Sex    | Age      | Prevalence of current drinkers | Prevalence of abstainers | Population average of standard drinks daily | Percent of total attributable deaths | Percent of total attributable DALYs | Attributable deaths  | Attributable DALYs        |
|----------|------|--------|----------|--------------------------------|--------------------------|---------------------------------------------|--------------------------------------|-------------------------------------|----------------------|---------------------------|
| Uganda   | 1995 | Female | 70 to 74 | 54%<br>(38-68%)                | 46%<br>(32-62%)          | 2.2<br>(1.1-3.7)                            | 8%<br>(3.6-13%)                      | 9%<br>(4.1-15%)                     | 640<br>(270-1100)    | 12000<br>(4900-20000)     |
| Uganda   | 1995 | Female | 75 to 79 | 52%<br>(36-69%)                | 48%<br>(31-64%)          | 1.8<br>(0.92-3.1)                           | 6.4%<br>(2.4-12%)                    | 7.2%<br>(2.8-13%)                   | 430<br>(160-800)     | 6000<br>(2200-11000)      |
| Uganda   | 1995 | Female | 80 to 84 | 51%<br>(33-69%)                | 49%<br>(31-67%)          | 1.7<br>(0.88-2.9)                           | 5.2%<br>(2.1-9.7%)                   | 5.9%<br>(2.5-11%)                   | 240<br>(94-450)      | 2500<br>(990-4600)        |
| Uganda   | 1995 | Female | 85 to 89 | 50%<br>(33-66%)                | 50%<br>(34-67%)          | 1.7<br>(0.87-2.9)                           | 4.1%<br>(1.5-8.1%)                   | 4.6%<br>(1.7-9.4%)                  | 86<br>(30-170)       | 640<br>(230-1300)         |
| Uganda   | 1995 | Female | 90 to 94 | 52%<br>(36-68%)                | 48%<br>(32-64%)          | 1.7<br>(0.84-2.9)                           | 3.3%<br>(0.81-7.2%)                  | 3.8%<br>(0.87-8.4%)                 | 22<br>(5-49)         | 110<br>(28-250)           |
| Uganda   | 1995 | Female | 95 plus  | 54%<br>(34-75%)                | 46%<br>(25-66%)          | 1.7<br>(0.72-3.1)                           | 3.2%<br>(0.66-7.5%)                  | 3.6%<br>(0.6-8.6%)                  | 4.8<br>(0.82-12)     | 17<br>(3.5-39)            |
| Uganda   | 1995 | Male   | All Ages | 50%<br>(43-57%)                | 50%<br>(43-57%)          | 1.8<br>(1.3-2.4)                            | 2.6%<br>(1.8-3.5%)                   | 4.2%<br>(2.9-5.7%)                  | 7900<br>(5300-11000) | 330000<br>(230000-440000) |
| Uganda   | 1995 | Male   | 15 to 19 | 50%<br>(40-60%)                | 50%<br>(40-60%)          | 2.4<br>(1.5-3.5)                            | 6.4%<br>(3.7-9.7%)                   | 8.6%<br>(4.7-13%)                   | 240<br>(130-380)     | 19000<br>(11000-29000)    |
| Uganda   | 1995 | Male   | 20 to 24 | 59%<br>(51-67%)                | 41%<br>(33-49%)          | 2.9<br>(1.8-4.4)                            | 8.4%<br>(4.8-13%)                    | 9.8%<br>(5.2-16%)                   | 470<br>(250-760)     | 33000<br>(19000-52000)    |
| Uganda   | 1995 | Male   | 25 to 29 | 67%<br>(60-73%)                | 33%<br>(27-40%)          | 3.7<br>(2.3-5.4)                            | 6.5%<br>(3.4-11%)                    | 7.1%<br>(3.4-12%)                   | 620<br>(350-930)     | 40000<br>(24000-58000)    |
| Uganda   | 1995 | Male   | 30 to 34 | 74%<br>(66-80%)                | 26%<br>(20-34%)          | 4.4<br>(2.8-6.4)                            | 5.8%<br>(3.3-9.1%)                   | 6.1%<br>(3.3-9.9%)                  | 680<br>(410-980)     | 39000<br>(25000-56000)    |
| Uganda   | 1995 | Male   | 35 to 39 | 76%<br>(69-82%)                | 24%<br>(18-31%)          | 4.7<br>(2.8-7.3)                            | 6.5%<br>(3.7-10%)                    | 7.1%<br>(3.9-11%)                   | 690<br>(430-970)     | 36000<br>(23000-50000)    |
| Uganda   | 1995 | Male   | 40 to 44 | 78%<br>(71-84%)                | 22%<br>(16-29%)          | 4.9<br>(2.8-7.6)                            | 7.2%<br>(4.4-10%)                    | 7.9%<br>(4.7-11%)                   | 730<br>(460-1000)    | 34000<br>(22000-47000)    |
| Uganda   | 1995 | Male   | 45 to 49 | 79%<br>(69-86%)                | 21%<br>(14-31%)          | 4.7<br>(2.7-7.4)                            | 8.4%<br>(4.9-12%)                    | 9.3%<br>(5.4-14%)                   | 760<br>(450-1100)    | 31000<br>(19000-45000)    |
| Uganda   | 1995 | Male   | 50 to 54 | 78%<br>(68-85%)                | 22%<br>(15-32%)          | 4.4<br>(2.5-7)                              | 11%<br>(6.4-15%)                     | 12%<br>(7.2-17%)                    | 830<br>(480-1200)    | 30000<br>(18000-43000)    |
| Uganda   | 1995 | Male   | 55 to 59 | 76%<br>(63-86%)                | 24%<br>(14-37%)          | 4.1<br>(2.3-6.6)                            | 12%<br>(7.2-17%)                     | 14%<br>(8.4-19%)                    | 750<br>(450-1100)    | 24000<br>(15000-35000)    |
| Uganda   | 1995 | Male   | 60 to 64 | 72%<br>(58-84%)                | 28%<br>(16-42%)          | 3.4<br>(1.9-5.7)                            | 10%<br>(6.1-15%)                     | 12%<br>(6.8-17%)                    | 760<br>(430-1200)    | 21000<br>(12000-32000)    |
| Uganda   | 1995 | Male   | 65 to 69 | 69%<br>(53-82%)                | 31%<br>(18-47%)          | 2.8<br>(1.6-4.4)                            | 7.9%<br>(4.3-12%)                    | 9.1%<br>(4.9-14%)                   | 570<br>(310-930)     | 13000<br>(7100-21000)     |
| Uganda   | 1995 | Male   | 70 to 74 | 66%<br>(50-78%)                | 34%<br>(22-50%)          | 2.2<br>(1.2-3.5)                            | 5.9%<br>(2.7-10%)                    | 6.7%<br>(3.1-11%)                   | 400<br>(190-690)     | 7300<br>(3400-12000)      |
| Uganda   | 1995 | Male   | 75 to 79 | 62%<br>(46-77%)                | 38%<br>(23-54%)          | 1.8<br>(0.92-3)                             | 4.6%<br>(1.7-8.3%)                   | 5.2%<br>(1.9-9.5%)                  | 250<br>(89-450)      | 3500<br>(1300-6300)       |
| Uganda   | 1995 | Male   | 80 to 84 | 59%<br>(40-75%)                | 41%<br>(25-60%)          | 1.5<br>(0.81-2.5)                           | 3.8%<br>(1.5-6.7%)                   | 4.3%<br>(1.7-7.7%)                  | 120<br>(46-210)      | 1200<br>(490-2200)        |
| Uganda   | 1995 | Male   | 85 to 89 | 55%<br>(37-71%)                | 45%<br>(29-63%)          | 1.3<br>(0.66-2.2)                           | 2.6%<br>(1.1-4.8%)                   | 3%<br>(1.2-5.4%)                    | 39<br>(16-71)        | 300<br>(130-550)          |

| Location | Year | Sex    | Age      | Prevalence of current drinkers | Prevalence of abstainers | Population average of standard drinks daily | Percent of total attributable deaths | Percent of total attributable DALYs | Attributable deaths   | Attributable DALYs        |
|----------|------|--------|----------|--------------------------------|--------------------------|---------------------------------------------|--------------------------------------|-------------------------------------|-----------------------|---------------------------|
| Uganda   | 1995 | Male   | 90 to 94 | 54%<br>(38-71%)                | 46%<br>(29-62%)          | 1.1<br>(0.57-2)                             | 1.7%<br>(0.56-3.6%)                  | 1.9%<br>(0.54-4%)                   | 8.3<br>(2.4-18)       | 45<br>(15-95)             |
| Uganda   | 1995 | Male   | 95 plus  | 56%<br>(35-76%)                | 44%<br>(24-65%)          | 1.1<br>(0.44-2.1)                           | 1.7%<br>(0.44-3.8%)                  | 1.8%<br>(0.3-4.2%)                  | 1.7<br>(0.29-4.1)     | 6.7<br>(1.7-15)           |
| Uganda   | 2000 | Female | All Ages | 39%<br>(33-45%)                | 61%<br>(55-67%)          | 1.5<br>(1.1-1.9)                            | 2.4%<br>(1.7-3.3%)                   | 4.6%<br>(3-6.5%)                    | 7600<br>(4900-11000)  | 260000<br>(180000-360000) |
| Uganda   | 2000 | Female | 15 to 19 | 45%<br>(36-54%)                | 55%<br>(46-64%)          | 2.3<br>(1.4-3.4)                            | 4.8%<br>(2.6-7.5%)                   | 6.9%<br>(3.6-12%)                   | 180<br>(95-300)       | 15000<br>(8600-24000)     |
| Uganda   | 2000 | Female | 20 to 24 | 50%<br>(41-57%)                | 50%<br>(43-59%)          | 2.8<br>(1.7-4.3)                            | 5.5%<br>(3.1-8.5%)                   | 6.9%<br>(3.5-11%)                   | 250<br>(130-420)      | 19000<br>(11000-30000)    |
| Uganda   | 2000 | Female | 25 to 29 | 52%<br>(46-59%)                | 48%<br>(41-54%)          | 3.3<br>(2.1-4.8)                            | 4.2%<br>(2.3-7%)                     | 4.7%<br>(2.3-8.3%)                  | 320<br>(180-490)      | 22000<br>(13000-32000)    |
| Uganda   | 2000 | Female | 30 to 34 | 55%<br>(48-62%)                | 45%<br>(38-52%)          | 3.4<br>(2.2-5.1)                            | 3.7%<br>(2.1-5.8%)                   | 3.9%<br>(2.1-6.5%)                  | 340<br>(190-530)      | 21000<br>(13000-31000)    |
| Uganda   | 2000 | Female | 35 to 39 | 58%<br>(50-66%)                | 42%<br>(34-50%)          | 3.1<br>(1.9-4.7)                            | 4%<br>(2.4-6.6%)                     | 4.4%<br>(2.4-7.4%)                  | 340<br>(200-530)      | 18000<br>(11000-28000)    |
| Uganda   | 2000 | Female | 40 to 44 | 59%<br>(51-68%)                | 41%<br>(32-49%)          | 3.1<br>(1.8-4.8)                            | 4.7%<br>(2.8-7.2%)                   | 5.3%<br>(3.1-8.1%)                  | 380<br>(220-570)      | 18000<br>(11000-27000)    |
| Uganda   | 2000 | Female | 45 to 49 | 60%<br>(51-69%)                | 40%<br>(31-49%)          | 3.2<br>(1.8-5.2)                            | 6.5%<br>(3.8-9.7%)                   | 7.5%<br>(4.3-11%)                   | 500<br>(290-770)      | 21000<br>(13000-32000)    |
| Uganda   | 2000 | Female | 50 to 54 | 61%<br>(50-71%)                | 39%<br>(29-50%)          | 3.3<br>(1.9-5.2)                            | 9.5%<br>(5.9-14%)                    | 11%<br>(6.9-16%)                    | 710<br>(410-1000)     | 26000<br>(15000-37000)    |
| Uganda   | 2000 | Female | 55 to 59 | 60%<br>(46-74%)                | 40%<br>(26-54%)          | 3.1<br>(1.7-5.3)                            | 11%<br>(6.7-17%)                     | 14%<br>(8-20%)                      | 830<br>(470-1200)     | 26000<br>(15000-39000)    |
| Uganda   | 2000 | Female | 60 to 64 | 58%<br>(41-73%)                | 42%<br>(27-59%)          | 2.9<br>(1.5-5)                              | 11%<br>(6.2-16%)                     | 13%<br>(7.3-19%)                    | 760<br>(410-1200)     | 20000<br>(11000-31000)    |
| Uganda   | 2000 | Female | 65 to 69 | 55%<br>(40-69%)                | 45%<br>(31-60%)          | 2.7<br>(1.5-4.4)                            | 11%<br>(6.2-16%)                     | 13%<br>(7.2-19%)                    | 980<br>(550-1500)     | 22000<br>(12000-34000)    |
| Uganda   | 2000 | Female | 70 to 74 | 53%<br>(37-67%)                | 47%<br>(33-63%)          | 2.3<br>(1.2-3.8)                            | 9.3%<br>(4.6-15%)                    | 11%<br>(5.4-17%)                    | 840<br>(400-1400)     | 15000<br>(7400-25000)     |
| Uganda   | 2000 | Female | 75 to 79 | 51%<br>(35-68%)                | 49%<br>(32-65%)          | 1.9<br>(0.96-3.3)                           | 7.7%<br>(3.4-14%)                    | 8.8%<br>(3.9-15%)                   | 620<br>(260-1100)     | 8600<br>(3800-15000)      |
| Uganda   | 2000 | Female | 80 to 84 | 51%<br>(33-69%)                | 49%<br>(31-67%)          | 1.8<br>(0.97-3)                             | 6.4%<br>(2.8-11%)                    | 7.4%<br>(3.2-13%)                   | 370<br>(160-660)      | 3800<br>(1600-6800)       |
| Uganda   | 2000 | Female | 85 to 89 | 51%<br>(34-66%)                | 49%<br>(34-66%)          | 1.8<br>(0.93-3.1)                           | 5.3%<br>(2.1-10%)                    | 6.1%<br>(2.5-11%)                   | 130<br>(55-250)       | 980<br>(410-1800)         |
| Uganda   | 2000 | Female | 90 to 94 | 52%<br>(36-68%)                | 48%<br>(32-64%)          | 1.8<br>(0.88-3.1)                           | 4.4%<br>(1.5-8.9%)                   | 5.1%<br>(1.8-10%)                   | 34<br>(12-69)         | 170<br>(61-350)           |
| Uganda   | 2000 | Female | 95 plus  | 55%<br>(35-73%)                | 45%<br>(27-65%)          | 1.8<br>(0.76-3.3)                           | 4.3%<br>(1.3-9.1%)                   | 4.9%<br>(1.3-11%)                   | 7.9<br>(2.2-17)       | 27<br>(7.9-57)            |
| Uganda   | 2000 | Male   | All Ages | 47%<br>(39-54%)                | 53%<br>(46-61%)          | 1.8<br>(1.3-2.3)                            | 3.3%<br>(2.5-4.2%)                   | 5.3%<br>(3.8-6.8%)                  | 10000<br>(7400-13000) | 420000<br>(320000-540000) |
| Uganda   | 2000 | Male   | 15 to 19 | 45%<br>(35-56%)                | 55%<br>(44-65%)          | 2.2<br>(1.4-3.4)                            | 6.8%<br>(4-10%)                      | 9%<br>(5-14%)                       | 320<br>(180-490)      | 25000<br>(14000-37000)    |

| Location | Year | Sex    | Age      | Prevalence of current drinkers | Prevalence of abstainers | Population average of standard drinks daily | Percent of total attributable deaths | Percent of total attributable DALYs | Attributable deaths  | Attributable DALYs        |
|----------|------|--------|----------|--------------------------------|--------------------------|---------------------------------------------|--------------------------------------|-------------------------------------|----------------------|---------------------------|
| Uganda   | 2000 | Male   | 20 to 24 | 53%<br>(44-63%)                | 47%<br>(37-56%)          | 2.7<br>(1.6-4.2)                            | 11%<br>(6.4-16%)                     | 13%<br>(7.5-19%)                    | 610<br>(350-920)     | 43000<br>(26000-63000)    |
| Uganda   | 2000 | Male   | 25 to 29 | 63%<br>(55-71%)                | 37%<br>(29-45%)          | 3.6<br>(2.2-5.3)                            | 10%<br>(5.8-16%)                     | 11%<br>(6.1-18%)                    | 800<br>(500-1200)    | 51000<br>(34000-73000)    |
| Uganda   | 2000 | Male   | 30 to 34 | 72%<br>(64-78%)                | 28%<br>(22-36%)          | 4.5<br>(2.9-6.5)                            | 7.8%<br>(5-11%)                      | 8.5%<br>(5.2-13%)                   | 900<br>(600-1200)    | 52000<br>(36000-69000)    |
| Uganda   | 2000 | Male   | 35 to 39 | 75%<br>(67-81%)                | 25%<br>(19-33%)          | 4.9<br>(3-7.4)                              | 7.3%<br>(4.6-11%)                    | 7.9%<br>(4.8-12%)                   | 880<br>(590-1200)    | 46000<br>(31000-61000)    |
| Uganda   | 2000 | Male   | 40 to 44 | 76%<br>(69-83%)                | 24%<br>(17-31%)          | 5<br>(2.9-7.5)                              | 8%<br>(5.4-11%)                      | 8.7%<br>(5.8-12%)                   | 860<br>(570-1200)    | 40000<br>(27000-54000)    |
| Uganda   | 2000 | Male   | 45 to 49 | 78%<br>(68-85%)                | 22%<br>(15-32%)          | 4.9<br>(2.8-7.8)                            | 9.4%<br>(5.7-13%)                    | 10%<br>(6.3-15%)                    | 910<br>(590-1200)    | 38000<br>(25000-51000)    |
| Uganda   | 2000 | Male   | 50 to 54 | 78%<br>(68-86%)                | 22%<br>(14-32%)          | 4.7<br>(2.8-7.6)                            | 12%<br>(7.8-17%)                     | 14%<br>(8.7-19%)                    | 1000<br>(650-1400)   | 37000<br>(24000-51000)    |
| Uganda   | 2000 | Male   | 55 to 59 | 76%<br>(63-85%)                | 24%<br>(15-37%)          | 4.3<br>(2.5-6.8)                            | 14%<br>(9.3-19%)                     | 16%<br>(11-22%)                     | 1100<br>(690-1500)   | 34000<br>(22000-46000)    |
| Uganda   | 2000 | Male   | 60 to 64 | 71%<br>(56-83%)                | 29%<br>(17-44%)          | 3.5<br>(1.9-5.9)                            | 12%<br>(7-17%)                       | 14%<br>(8.1-20%)                    | 820<br>(480-1200)    | 22000<br>(13000-32000)    |
| Uganda   | 2000 | Male   | 65 to 69 | 68%<br>(52-80%)                | 32%<br>(20-48%)          | 2.8<br>(1.6-4.5)                            | 9.5%<br>(5.2-15%)                    | 11%<br>(6-17%)                      | 750<br>(420-1200)    | 17000<br>(9400-27000)     |
| Uganda   | 2000 | Male   | 70 to 74 | 65%<br>(49-77%)                | 35%<br>(23-51%)          | 2.2<br>(1.3-3.6)                            | 7.2%<br>(3.5-12%)                    | 8.2%<br>(4-14%)                     | 550<br>(270-930)     | 9900<br>(4900-17000)      |
| Uganda   | 2000 | Male   | 75 to 79 | 62%<br>(45-77%)                | 38%<br>(23-55%)          | 1.9<br>(0.98-3.2)                           | 5.8%<br>(2.3-10%)                    | 6.6%<br>(2.7-12%)                   | 360<br>(150-660)     | 5000<br>(2100-9200)       |
| Uganda   | 2000 | Male   | 80 to 84 | 59%<br>(41-75%)                | 41%<br>(25-59%)          | 1.6<br>(0.9-2.7)                            | 4.7%<br>(2-8.5%)                     | 5.4%<br>(2.3-9.8%)                  | 180<br>(76-330)      | 1900<br>(820-3400)        |
| Uganda   | 2000 | Male   | 85 to 89 | 55%<br>(38-71%)                | 45%<br>(29-62%)          | 1.3<br>(0.69-2.3)                           | 3.4%<br>(1.5-6.1%)                   | 3.9%<br>(1.6-7%)                    | 63<br>(27-110)       | 470<br>(200-840)          |
| Uganda   | 2000 | Male   | 90 to 94 | 55%<br>(39-70%)                | 45%<br>(30-61%)          | 1.2<br>(0.6-2.1)                            | 2.4%<br>(0.79-4.9%)                  | 2.7%<br>(0.85-5.6%)                 | 14<br>(4.5-30)       | 75<br>(25-150)            |
| Uganda   | 2000 | Male   | 95 plus  | 57%<br>(36-76%)                | 43%<br>(24-64%)          | 1.2<br>(0.49-2.2)                           | 2.6%<br>(0.77-5.5%)                  | 2.8%<br>(0.75-6%)                   | 3.3<br>(0.87-7.1)    | 12<br>(3.5-25)            |
| Uganda   | 2005 | Female | All Ages | 38%<br>(33-45%)                | 62%<br>(55-67%)          | 1.4<br>(1-1.9)                              | 2.6%<br>(1.8-3.5%)                   | 5%<br>(3.3-7%)                      | 8200<br>(5200-12000) | 280000<br>(190000-370000) |
| Uganda   | 2005 | Female | 15 to 19 | 44%<br>(35-53%)                | 56%<br>(47-65%)          | 2.2<br>(1.3-3.3)                            | 3.9%<br>(2.2-6.4%)                   | 5.1%<br>(2.5-9%)                    | 190<br>(98-330)      | 16000<br>(9000-26000)     |
| Uganda   | 2005 | Female | 20 to 24 | 49%<br>(40-56%)                | 51%<br>(44-60%)          | 2.7<br>(1.6-4.1)                            | 5.3%<br>(3-8.5%)                     | 6.8%<br>(3.3-12%)                   | 260<br>(130-440)     | 21000<br>(12000-33000)    |
| Uganda   | 2005 | Female | 25 to 29 | 52%<br>(46-58%)                | 48%<br>(42-54%)          | 3.2<br>(2-4.8)                              | 5.4%<br>(3-8.5%)                     | 6.5%<br>(3.1-11%)                   | 340<br>(200-510)     | 24000<br>(15000-34000)    |
| Uganda   | 2005 | Female | 30 to 34 | 55%<br>(47-62%)                | 45%<br>(38-53%)          | 3.3<br>(2.1-5)                              | 4.5%<br>(2.7-7.1%)                   | 5.2%<br>(2.8-8.6%)                  | 370<br>(210-570)     | 23000<br>(14000-33000)    |
| Uganda   | 2005 | Female | 35 to 39 | 57%<br>(50-66%)                | 43%<br>(34-50%)          | 3<br>(1.9-4.6)                              | 4.4%<br>(2.6-6.9%)                   | 4.9%<br>(2.8-7.9%)                  | 360<br>(210-550)     | 20000<br>(12000-29000)    |

| Location | Year | Sex    | Age      | Prevalence of current drinkers | Prevalence of abstainers | Population average of standard drinks daily | Percent of total attributable deaths | Percent of total attributable DALYs | Attributable deaths   | Attributable DALYs        |
|----------|------|--------|----------|--------------------------------|--------------------------|---------------------------------------------|--------------------------------------|-------------------------------------|-----------------------|---------------------------|
| Uganda   | 2005 | Female | 40 to 44 | 59%<br>(51-67%)                | 41%<br>(33-49%)          | 3<br>(1.8-4.8)                              | 4.9%<br>(3-7.4%)                     | 5.6%<br>(3.4-8.6%)                  | 360<br>(220-550)      | 18000<br>(11000-26000)    |
| Uganda   | 2005 | Female | 45 to 49 | 60%<br>(50-69%)                | 40%<br>(31-50%)          | 3.1<br>(1.7-5)                              | 6.9%<br>(4.1-10%)                    | 8.2%<br>(4.7-12%)                   | 480<br>(280-730)      | 20000<br>(12000-30000)    |
| Uganda   | 2005 | Female | 50 to 54 | 61%<br>(49-72%)                | 39%<br>(28-51%)          | 3.1<br>(1.8-5)                              | 10%<br>(6-15%)                       | 13%<br>(7.2-18%)                    | 770<br>(440-1100)     | 28000<br>(16000-42000)    |
| Uganda   | 2005 | Female | 55 to 59 | 60%<br>(44-74%)                | 40%<br>(26-56%)          | 3<br>(1.7-5.2)                              | 12%<br>(7.1-18%)                     | 15%<br>(8.6-21%)                    | 900<br>(520-1400)     | 28000<br>(16000-43000)    |
| Uganda   | 2005 | Female | 60 to 64 | 57%<br>(42-72%)                | 43%<br>(28-58%)          | 2.8<br>(1.5-5)                              | 11%<br>(6.5-17%)                     | 14%<br>(7.8-20%)                    | 910<br>(490-1400)     | 24000<br>(13000-38000)    |
| Uganda   | 2005 | Female | 65 to 69 | 55%<br>(39-69%)                | 45%<br>(31-61%)          | 2.6<br>(1.4-4.3)                            | 11%<br>(6.4-17%)                     | 13%<br>(7.6-20%)                    | 900<br>(510-1400)     | 20000<br>(11000-31000)    |
| Uganda   | 2005 | Female | 70 to 74 | 52%<br>(37-67%)                | 48%<br>(33-63%)          | 2.2<br>(1.1-3.7)                            | 9.8%<br>(4.6-16%)                    | 11%<br>(5.4-18%)                    | 950<br>(430-1500)     | 17000<br>(7800-28000)     |
| Uganda   | 2005 | Female | 75 to 79 | 51%<br>(35-68%)                | 49%<br>(32-65%)          | 1.9<br>(0.93-3.3)                           | 8.2%<br>(3.4-14%)                    | 9.4%<br>(3.9-16%)                   | 730<br>(300-1200)     | 10000<br>(4100-17000)     |
| Uganda   | 2005 | Female | 80 to 84 | 51%<br>(33-68%)                | 49%<br>(32-67%)          | 1.8<br>(0.91-3)                             | 6.8%<br>(2.9-12%)                    | 7.9%<br>(3.3-14%)                   | 470<br>(200-810)      | 4800<br>(2000-8300)       |
| Uganda   | 2005 | Female | 85 to 89 | 50%<br>(33-67%)                | 50%<br>(33-67%)          | 1.7<br>(0.87-3)                             | 5.7%<br>(2.3-10%)                    | 6.6%<br>(2.6-12%)                   | 180<br>(71-330)       | 1300<br>(520-2400)        |
| Uganda   | 2005 | Female | 90 to 94 | 52%<br>(36-69%)                | 48%<br>(31-64%)          | 1.7<br>(0.84-3)                             | 4.9%<br>(1.8-9.3%)                   | 5.7%<br>(2-11%)                     | 46<br>(16-89)         | 230<br>(82-440)           |
| Uganda   | 2005 | Female | 95 plus  | 55%<br>(35-74%)                | 45%<br>(26-65%)          | 1.8<br>(0.78-3.2)                           | 4.8%<br>(1.4-9.7%)                   | 5.5%<br>(1.5-11%)                   | 10<br>(2.7-21)        | 34<br>(10-70)             |
| Uganda   | 2005 | Male   | All Ages | 47%<br>(40-54%)                | 53%<br>(46-60%)          | 1.7<br>(1.2-2.3)                            | 3.8%<br>(2.8-4.9%)                   | 6.1%<br>(4.4-8%)                    | 11000<br>(8000-15000) | 480000<br>(350000-610000) |
| Uganda   | 2005 | Male   | 15 to 19 | 45%<br>(35-56%)                | 55%<br>(44-65%)          | 2.2<br>(1.3-3.3)                            | 6%<br>(3.5-9.5%)                     | 7.6%<br>(4.1-12%)                   | 360<br>(200-570)      | 28000<br>(16000-44000)    |
| Uganda   | 2005 | Male   | 20 to 24 | 53%<br>(44-63%)                | 47%<br>(37-56%)          | 2.7<br>(1.5-4.1)                            | 11%<br>(6.3-16%)                     | 13%<br>(7.3-20%)                    | 690<br>(390-1100)     | 49000<br>(29000-73000)    |
| Uganda   | 2005 | Male   | 25 to 29 | 63%<br>(55-70%)                | 37%<br>(30-45%)          | 3.4<br>(2.1-5.1)                            | 13%<br>(7.6-19%)                     | 15%<br>(8.3-23%)                    | 920<br>(560-1300)     | 59000<br>(38000-82000)    |
| Uganda   | 2005 | Male   | 30 to 34 | 72%<br>(64-78%)                | 28%<br>(22-36%)          | 4.3<br>(2.8-6.4)                            | 12%<br>(7.3-16%)                     | 13%<br>(7.9-20%)                    | 1100<br>(670-1400)    | 61000<br>(40000-82000)    |
| Uganda   | 2005 | Male   | 35 to 39 | 75%<br>(68-81%)                | 25%<br>(19-32%)          | 4.8<br>(2.9-7.3)                            | 10%<br>(6.5-14%)                     | 11%<br>(7-16%)                      | 1000<br>(690-1400)    | 55000<br>(37000-74000)    |
| Uganda   | 2005 | Male   | 40 to 44 | 76%<br>(69-83%)                | 24%<br>(17-31%)          | 4.9<br>(2.9-7.6)                            | 9.7%<br>(6.6-13%)                    | 11%<br>(7.3-15%)                    | 980<br>(650-1400)     | 46000<br>(31000-63000)    |
| Uganda   | 2005 | Male   | 45 to 49 | 78%<br>(68-85%)                | 22%<br>(15-32%)          | 4.8<br>(2.6-7.4)                            | 11%<br>(7.1-16%)                     | 13%<br>(7.9-18%)                    | 950<br>(600-1300)     | 39000<br>(25000-53000)    |
| Uganda   | 2005 | Male   | 50 to 54 | 78%<br>(69-86%)                | 22%<br>(14-31%)          | 4.6<br>(2.5-7.1)                            | 14%<br>(8.4-19%)                     | 16%<br>(9.7-23%)                    | 1100<br>(660-1500)    | 39000<br>(24000-53000)    |
| Uganda   | 2005 | Male   | 55 to 59 | 76%<br>(65-85%)                | 24%<br>(15-35%)          | 4.2<br>(2.4-6.9)                            | 15%<br>(9.6-21%)                     | 18%<br>(11-25%)                     | 1100<br>(710-1600)    | 36000<br>(23000-49000)    |



| Location | Year | Sex    | Age      | Prevalence of current drinkers | Prevalence of abstainers | Population average of standard drinks daily | Percent of total attributable deaths | Percent of total attributable DALYs | Attributable deaths  | Attributable DALYs        |
|----------|------|--------|----------|--------------------------------|--------------------------|---------------------------------------------|--------------------------------------|-------------------------------------|----------------------|---------------------------|
| Uganda   | 2005 | Male   | 60 to 64 | 71%<br>(57-83%)                | 29%<br>(17-43%)          | 3.4<br>(1.9-5.8)                            | 13%<br>(7.8-19%)                     | 15%<br>(9.1-22%)                    | 1000<br>(590-1500)   | 27000<br>(16000-40000)    |
| Uganda   | 2005 | Male   | 65 to 69 | 68%<br>(52-80%)                | 32%<br>(20-48%)          | 2.7<br>(1.5-4.5)                            | 10%<br>(5.6-16%)                     | 12%<br>(6.5-18%)                    | 740<br>(390-1200)    | 17000<br>(8900-26000)     |
| Uganda   | 2005 | Male   | 70 to 74 | 64%<br>(49-77%)                | 36%<br>(23-51%)          | 2.2<br>(1.2-3.6)                            | 7.7%<br>(3.7-13%)                    | 8.9%<br>(4.4-15%)                   | 650<br>(310-1100)    | 12000<br>(5700-20000)     |
| Uganda   | 2005 | Male   | 75 to 79 | 62%<br>(45-76%)                | 38%<br>(24-55%)          | 1.8<br>(0.95-3.1)                           | 6.2%<br>(2.4-11%)                    | 7.1%<br>(2.9-13%)                   | 430<br>(180-760)     | 6100<br>(2500-11000)      |
| Uganda   | 2005 | Male   | 80 to 84 | 59%<br>(40-75%)                | 41%<br>(25-60%)          | 1.6<br>(0.83-2.6)                           | 5%<br>(2.1-8.9%)                     | 5.8%<br>(2.4-10%)                   | 230<br>(94-410)      | 2400<br>(990-4300)        |
| Uganda   | 2005 | Male   | 85 to 89 | 55%<br>(38-70%)                | 45%<br>(30-62%)          | 1.3<br>(0.64-2.2)                           | 3.7%<br>(1.6-6.5%)                   | 4.2%<br>(1.8-7.5%)                  | 84<br>(35-150)       | 630<br>(270-1100)         |
| Uganda   | 2005 | Male   | 90 to 94 | 54%<br>(38-70%)                | 46%<br>(30-62%)          | 1.1<br>(0.56-2)                             | 2.6%<br>(0.88-5.1%)                  | 3%<br>(0.95-5.9%)                   | 19<br>(6.3-39)       | 100<br>(35-200)           |
| Uganda   | 2005 | Male   | 95 plus  | 57%<br>(35-76%)                | 43%<br>(24-65%)          | 1.1<br>(0.48-2.1)                           | 2.9%<br>(0.84-6.3%)                  | 3.3%<br>(0.84-7.1%)                 | 4.7<br>(1.2-10)      | 17<br>(4.9-36)            |
| Uganda   | 2010 | Female | All Ages | 39%<br>(32-46%)                | 61%<br>(54-68%)          | 1.4<br>(0.92-2)                             | 2.5%<br>(1.6-3.5%)                   | 4.9%<br>(2.8-7.1%)                  | 7700<br>(4300-11000) | 260000<br>(160000-370000) |
| Uganda   | 2010 | Female | 15 to 19 | 40%<br>(28-52%)                | 60%<br>(48-72%)          | 1.8<br>(0.94-3.2)                           | 3.2%<br>(1.7-5.3%)                   | 4%<br>(1.9-7.1%)                    | 170<br>(81-300)      | 15000<br>(7900-25000)     |
| Uganda   | 2010 | Female | 20 to 24 | 48%<br>(35-61%)                | 52%<br>(39-65%)          | 2.5<br>(1.3-4.3)                            | 4.5%<br>(2.5-7%)                     | 5.4%<br>(2.4-9.4%)                  | 240<br>(120-420)     | 20000<br>(11000-32000)    |
| Uganda   | 2010 | Female | 25 to 29 | 52%<br>(39-64%)                | 48%<br>(36-61%)          | 3<br>(1.7-4.9)                              | 4.4%<br>(2.4-7%)                     | 5%<br>(2.3-8.9%)                    | 310<br>(170-480)     | 22000<br>(14000-33000)    |
| Uganda   | 2010 | Female | 30 to 34 | 57%<br>(43-68%)                | 43%<br>(32-57%)          | 3.2<br>(1.8-5.3)                            | 4.5%<br>(2.5-7.2%)                   | 5.2%<br>(2.6-9.1%)                  | 350<br>(200-560)     | 22000<br>(14000-35000)    |
| Uganda   | 2010 | Female | 35 to 39 | 62%<br>(48-73%)                | 38%<br>(27-52%)          | 3.1<br>(1.7-5.3)                            | 4.7%<br>(2.6-7.5%)                   | 5.5%<br>(2.9-9.1%)                  | 380<br>(210-590)     | 21000<br>(12000-32000)    |
| Uganda   | 2010 | Female | 40 to 44 | 64%<br>(52-75%)                | 36%<br>(25-48%)          | 3.2<br>(1.7-5.3)                            | 5.2%<br>(3-8%)                       | 6.1%<br>(3.4-9.4%)                  | 370<br>(210-580)     | 18000<br>(10000-28000)    |
| Uganda   | 2010 | Female | 45 to 49 | 64%<br>(49-75%)                | 36%<br>(25-51%)          | 3.2<br>(1.7-5.6)                            | 6.9%<br>(3.7-10%)                    | 8.4%<br>(4.6-13%)                   | 440<br>(240-680)     | 19000<br>(10000-28000)    |
| Uganda   | 2010 | Female | 50 to 54 | 62%<br>(48-75%)                | 38%<br>(25-52%)          | 3.1<br>(1.5-5.4)                            | 9.7%<br>(5.3-14%)                    | 12%<br>(6.5-18%)                    | 620<br>(330-960)     | 23000<br>(12000-36000)    |
| Uganda   | 2010 | Female | 55 to 59 | 62%<br>(46-77%)                | 38%<br>(23-54%)          | 3<br>(1.5-5.5)                              | 11%<br>(6.1-17%)                     | 14%<br>(7.7-21%)                    | 830<br>(430-1300)    | 26000<br>(14000-41000)    |
| Uganda   | 2010 | Female | 60 to 64 | 60%<br>(44-75%)                | 40%<br>(25-56%)          | 2.9<br>(1.4-5.1)                            | 11%<br>(5.7-17%)                     | 13%<br>(7.1-20%)                    | 860<br>(430-1400)    | 23000<br>(12000-37000)    |
| Uganda   | 2010 | Female | 65 to 69 | 57%<br>(40-71%)                | 43%<br>(29-60%)          | 2.6<br>(1.3-4.5)                            | 11%<br>(5.4-17%)                     | 13%<br>(6.6-20%)                    | 940<br>(470-1500)    | 21000<br>(10000-33000)    |
| Uganda   | 2010 | Female | 70 to 74 | 53%<br>(38-69%)                | 47%<br>(31-62%)          | 2.1<br>(1.1-3.7)                            | 8.9%<br>(3.8-15%)                    | 10%<br>(4.5-17%)                    | 750<br>(320-1200)    | 14000<br>(5900-22000)     |
| Uganda   | 2010 | Female | 75 to 79 | 52%<br>(35-68%)                | 48%<br>(32-65%)          | 1.8<br>(0.82-3.2)                           | 7.4%<br>(2.6-13%)                    | 8.7%<br>(3.1-15%)                   | 700<br>(250-1200)    | 9800<br>(3600-17000)      |

| Location | Year | Sex    | Age      | Prevalence of current drinkers | Prevalence of abstainers | Population average of standard drinks daily | Percent of total attributable deaths | Percent of total attributable DALYs | Attributable deaths   | Attributable DALYs        |
|----------|------|--------|----------|--------------------------------|--------------------------|---------------------------------------------|--------------------------------------|-------------------------------------|-----------------------|---------------------------|
| Uganda   | 2010 | Female | 80 to 84 | 51%<br>(32-68%)                | 49%<br>(32-68%)          | 1.7<br>(0.8-2.9)                            | 6.1%<br>(2.3-11%)                    | 7.1%<br>(2.6-13%)                   | 480<br>(180-870)      | 5000<br>(1900-9000)       |
| Uganda   | 2010 | Female | 85 to 89 | 50%<br>(33-66%)                | 50%<br>(34-67%)          | 1.6<br>(0.77-2.9)                           | 5.1%<br>(1.8-10%)                    | 6%<br>(2.1-12%)                     | 190<br>(67-380)       | 1400<br>(500-2800)        |
| Uganda   | 2010 | Female | 90 to 94 | 52%<br>(35-68%)                | 48%<br>(32-65%)          | 1.6<br>(0.74-2.9)                           | 4.3%<br>(1.2-9%)                     | 5.1%<br>(1.4-11%)                   | 51<br>(14-100)        | 260<br>(73-530)           |
| Uganda   | 2010 | Female | 95 plus  | 54%<br>(34-73%)                | 46%<br>(27-66%)          | 1.6<br>(0.68-3)                             | 4.4%<br>(1.1-9.2%)                   | 5.1%<br>(1.2-11%)                   | 11<br>(2.5-23)        | 37<br>(9.3-78)            |
| Uganda   | 2010 | Male   | All Ages | 44%<br>(37-52%)                | 56%<br>(48-63%)          | 1.5<br>(1-2.2)                              | 4.1%<br>(2.8-5.5%)                   | 6.5%<br>(4.4-9%)                    | 12000<br>(7700-16000) | 490000<br>(340000-660000) |
| Uganda   | 2010 | Male   | 15 to 19 | 39%<br>(27-52%)                | 61%<br>(48-73%)          | 1.7<br>(0.91-3)                             | 5.1%<br>(2.7-8.3%)                   | 6.3%<br>(3.1-11%)                   | 340<br>(170-580)      | 27000<br>(14000-45000)    |
| Uganda   | 2010 | Male   | 20 to 24 | 51%<br>(38-63%)                | 49%<br>(37-62%)          | 2.4<br>(1.3-4)                              | 9.9%<br>(5.6-15%)                    | 12%<br>(6.4-19%)                    | 700<br>(380-1100)     | 50000<br>(29000-77000)    |
| Uganda   | 2010 | Male   | 25 to 29 | 62%<br>(49-72%)                | 38%<br>(28-51%)          | 3.1<br>(1.8-5.1)                            | 12%<br>(6.4-17%)                     | 14%<br>(7.3-21%)                    | 950<br>(550-1400)     | 62000<br>(37000-90000)    |
| Uganda   | 2010 | Male   | 30 to 34 | 69%<br>(56-79%)                | 31%<br>(21-44%)          | 3.8<br>(2.3-6.1)                            | 12%<br>(7.4-18%)                     | 14%<br>(8.2-22%)                    | 1100<br>(710-1600)    | 65000<br>(41000-90000)    |
| Uganda   | 2010 | Male   | 35 to 39 | 72%<br>(61-81%)                | 28%<br>(19-39%)          | 4.2<br>(2.5-7)                              | 12%<br>(7.6-17%)                     | 14%<br>(8.4-20%)                    | 1100<br>(740-1600)    | 60000<br>(40000-82000)    |
| Uganda   | 2010 | Male   | 40 to 44 | 74%<br>(63-83%)                | 26%<br>(17-37%)          | 4.4<br>(2.5-7.2)                            | 12%<br>(7.6-16%)                     | 13%<br>(8.8-19%)                    | 1100<br>(700-1600)    | 52000<br>(34000-72000)    |
| Uganda   | 2010 | Male   | 45 to 49 | 76%<br>(63-85%)                | 24%<br>(15-37%)          | 4.2<br>(2.1-7)                              | 12%<br>(7.6-17%)                     | 14%<br>(8.7-20%)                    | 1000<br>(610-1400)    | 42000<br>(26000-58000)    |
| Uganda   | 2010 | Male   | 50 to 54 | 76%<br>(64-85%)                | 24%<br>(15-36%)          | 4.1<br>(2.1-7)                              | 14%<br>(8.7-20%)                     | 17%<br>(10-24%)                     | 1000<br>(600-1400)    | 37000<br>(22000-50000)    |
| Uganda   | 2010 | Male   | 55 to 59 | 75%<br>(61-84%)                | 25%<br>(16-39%)          | 3.9<br>(2.1-6.7)                            | 15%<br>(9.1-21%)                     | 18%<br>(11-26%)                     | 1100<br>(640-1500)    | 34000<br>(21000-47000)    |
| Uganda   | 2010 | Male   | 60 to 64 | 72%<br>(58-84%)                | 28%<br>(16-42%)          | 3.3<br>(1.7-5.9)                            | 13%<br>(7-19%)                       | 15%<br>(8.4-23%)                    | 970<br>(520-1500)     | 26000<br>(14000-39000)    |
| Uganda   | 2010 | Male   | 65 to 69 | 68%<br>(53-81%)                | 32%<br>(19-47%)          | 2.6<br>(1.4-4.7)                            | 9.9%<br>(5.1-16%)                    | 12%<br>(6.2-19%)                    | 820<br>(420-1400)     | 18000<br>(9500-30000)     |
| Uganda   | 2010 | Male   | 70 to 74 | 65%<br>(49-77%)                | 35%<br>(23-51%)          | 2.1<br>(1.1-3.6)                            | 7.2%<br>(3.1-13%)                    | 8.4%<br>(3.7-15%)                   | 560<br>(250-980)      | 10000<br>(4400-18000)     |
| Uganda   | 2010 | Male   | 75 to 79 | 61%<br>(44-77%)                | 39%<br>(23-56%)          | 1.7<br>(0.81-3.1)                           | 5.7%<br>(2.1-11%)                    | 6.6%<br>(2.4-13%)                   | 440<br>(160-840)      | 6200<br>(2300-12000)      |
| Uganda   | 2010 | Male   | 80 to 84 | 57%<br>(38-74%)                | 43%<br>(26-62%)          | 1.4<br>(0.7-2.5)                            | 4.5%<br>(1.7-8.5%)                   | 5.2%<br>(1.9-9.7%)                  | 250<br>(89-480)       | 2600<br>(950-5000)        |
| Uganda   | 2010 | Male   | 85 to 89 | 54%<br>(37-70%)                | 46%<br>(30-63%)          | 1.2<br>(0.56-2.1)                           | 3.4%<br>(1.2-6.5%)                   | 3.9%<br>(1.3-7.5%)                  | 92<br>(30-180)        | 690<br>(230-1300)         |
| Uganda   | 2010 | Male   | 90 to 94 | 53%<br>(37-70%)                | 47%<br>(30-63%)          | 1<br>(0.49-1.9)                             | 2.4%<br>(0.62-5%)                    | 2.7%<br>(0.63-5.7%)                 | 22<br>(5-46)          | 110<br>(30-240)           |
| Uganda   | 2010 | Male   | 95 plus  | 55%<br>(35-75%)                | 45%<br>(25-65%)          | 1<br>(0.42-1.9)                             | 2.7%<br>(0.7-5.7%)                   | 3%<br>(0.64-6.6%)                   | 5.3<br>(1.2-12)       | 19<br>(5-41)              |

| Location | Year | Sex    | Age      | Prevalence of current drinkers | Prevalence of abstainers | Population average of standard drinks daily | Percent of total attributable deaths | Percent of total attributable DALYs | Attributable deaths   | Attributable DALYs        |
|----------|------|--------|----------|--------------------------------|--------------------------|---------------------------------------------|--------------------------------------|-------------------------------------|-----------------------|---------------------------|
| Uganda   | 2016 | Female | All Ages | 39%<br>(32-47%)                | 61%<br>(53-68%)          | 1.2<br>(0.64-2.1)                           | 2.9%<br>(1.5-4.3%)                   | 5.3%<br>(2.4-8.5%)                  | 7200<br>(3200-12000)  | 250000<br>(130000-380000) |
| Uganda   | 2016 | Female | 15 to 19 | 40%<br>(27-52%)                | 60%<br>(48-73%)          | 1.6<br>(0.71-3.1)                           | 3.3%<br>(1.5-5.7%)                   | 4.6%<br>(1.6-8.8%)                  | 160<br>(58-290)       | 14000<br>(6600-25000)     |
| Uganda   | 2016 | Female | 20 to 24 | 48%<br>(35-61%)                | 52%<br>(39-65%)          | 2.2<br>(0.97-4.2)                           | 4.5%<br>(2.2-7.5%)                   | 5.5%<br>(2.1-10%)                   | 220<br>(88-410)       | 20000<br>(10000-34000)    |
| Uganda   | 2016 | Female | 25 to 29 | 52%<br>(39-64%)                | 48%<br>(36-61%)          | 2.7<br>(1.2-4.9)                            | 4.7%<br>(2.5-7.7%)                   | 5.8%<br>(2.4-11%)                   | 280<br>(130-490)      | 22000<br>(12000-34000)    |
| Uganda   | 2016 | Female | 30 to 34 | 57%<br>(43-68%)                | 43%<br>(32-57%)          | 2.9<br>(1.4-5.2)                            | 5.4%<br>(2.8-8.9%)                   | 7%<br>(3.1-13%)                     | 340<br>(160-590)      | 23000<br>(12000-37000)    |
| Uganda   | 2016 | Female | 35 to 39 | 62%<br>(48-73%)                | 38%<br>(27-52%)          | 2.8<br>(1.3-5.1)                            | 6.4%<br>(3.3-10%)                    | 8.7%<br>(4.3-14%)                   | 400<br>(200-670)      | 23000<br>(12000-37000)    |
| Uganda   | 2016 | Female | 40 to 44 | 64%<br>(52-75%)                | 36%<br>(25-48%)          | 2.8<br>(1.3-5.5)                            | 7%<br>(3.6-11%)                      | 9.7%<br>(4.9-16%)                   | 420<br>(200-700)      | 21000<br>(10000-34000)    |
| Uganda   | 2016 | Female | 45 to 49 | 64%<br>(49-75%)                | 36%<br>(25-51%)          | 2.9<br>(1.2-5.7)                            | 8.4%<br>(4-14%)                      | 12%<br>(5.4-18%)                    | 470<br>(210-800)      | 20000<br>(9200-34000)     |
| Uganda   | 2016 | Female | 50 to 54 | 62%<br>(48-75%)                | 38%<br>(25-52%)          | 2.7<br>(1.1-5.4)                            | 9.7%<br>(4.5-15%)                    | 13%<br>(6.1-20%)                    | 560<br>(250-920)      | 21000<br>(9200-34000)     |
| Uganda   | 2016 | Female | 55 to 59 | 61%<br>(46-76%)                | 39%<br>(24-54%)          | 2.6<br>(1.1-5.2)                            | 11%<br>(4.8-17%)                     | 14%<br>(6.4-22%)                    | 670<br>(290-1100)     | 21000<br>(9200-36000)     |
| Uganda   | 2016 | Female | 60 to 64 | 60%<br>(43-74%)                | 40%<br>(26-57%)          | 2.5<br>(1-5)                                | 9.6%<br>(3.9-16%)                    | 12%<br>(5.1-20%)                    | 780<br>(310-1300)     | 21000<br>(8200-35000)     |
| Uganda   | 2016 | Female | 65 to 69 | 57%<br>(40-71%)                | 43%<br>(29-60%)          | 2.3<br>(0.97-4.5)                           | 9.2%<br>(3.6-16%)                    | 11%<br>(4.5-19%)                    | 870<br>(330-1500)     | 20000<br>(7400-34000)     |
| Uganda   | 2016 | Female | 70 to 74 | 53%<br>(38-68%)                | 47%<br>(32-62%)          | 1.9<br>(0.77-3.8)                           | 7.5%<br>(2.2-14%)                    | 8.8%<br>(2.7-17%)                   | 750<br>(220-1400)     | 14000<br>(4100-26000)     |
| Uganda   | 2016 | Female | 75 to 79 | 52%<br>(35-69%)                | 48%<br>(31-65%)          | 1.6<br>(0.63-3.2)                           | 6.2%<br>(1.5-13%)                    | 7.3%<br>(1.8-15%)                   | 560<br>(140-1200)     | 7800<br>(2000-16000)      |
| Uganda   | 2016 | Female | 80 to 84 | 51%<br>(33-68%)                | 49%<br>(32-67%)          | 1.5<br>(0.6-2.8)                            | 5.1%<br>(1.1-11%)                    | 5.9%<br>(1.2-13%)                   | 400<br>(81-830)       | 4100<br>(830-8600)        |
| Uganda   | 2016 | Female | 85 to 89 | 50%<br>(34-67%)                | 50%<br>(33-66%)          | 1.5<br>(0.57-2.8)                           | 4.3%<br>(0.78-9.4%)                  | 5.1%<br>(0.92-11%)                  | 250<br>(46-540)       | 1800<br>(330-4000)        |
| Uganda   | 2016 | Female | 90 to 94 | 51%<br>(35-68%)                | 49%<br>(32-65%)          | 1.4<br>(0.56-3)                             | 3.6%<br>(0.46-8.6%)                  | 4.2%<br>(0.48-10%)                  | 71<br>(8-170)         | 360<br>(45-870)           |
| Uganda   | 2016 | Female | 95 plus  | 54%<br>(34-74%)                | 46%<br>(26-66%)          | 1.5<br>(0.51-3.1)                           | 3.8%<br>(0.48-9.1%)                  | 4.4%<br>(0.46-11%)                  | 16<br>(1.7-39)        | 55<br>(6.8-130)           |
| Uganda   | 2016 | Male   | All Ages | 45%<br>(37-53%)                | 55%<br>(47-63%)          | 1.4<br>(0.71-2.4)                           | 4.6%<br>(2.6-6.8%)                   | 7%<br>(3.8-11%)                     | 12000<br>(6200-18000) | 500000<br>(280000-740000) |
| Uganda   | 2016 | Male   | 15 to 19 | 39%<br>(27-52%)                | 61%<br>(48-73%)          | 1.5<br>(0.69-2.9)                           | 4.9%<br>(2.3-8.5%)                   | 6.3%<br>(2.6-11%)                   | 330<br>(140-610)      | 27000<br>(12000-47000)    |
| Uganda   | 2016 | Male   | 20 to 24 | 51%<br>(37-63%)                | 49%<br>(37-63%)          | 2.1<br>(0.92-4)                             | 9.1%<br>(4.3-15%)                    | 11%<br>(4.8-18%)                    | 700<br>(300-1200)     | 51000<br>(24000-84000)    |
| Uganda   | 2016 | Male   | 25 to 29 | 62%<br>(49-72%)                | 38%<br>(28-51%)          | 2.8<br>(1.2-5)                              | 11%<br>(5.3-17%)                     | 13%<br>(5.8-21%)                    | 950<br>(440-1500)     | 63000<br>(31000-96000)    |

| Location | Year | Sex    | Age      | Prevalence of current drinkers | Prevalence of abstainers | Population average of standard drinks daily | Percent of total attributable deaths | Percent of total attributable DALYs | Attributable deaths | Attributable DALYs     |
|----------|------|--------|----------|--------------------------------|--------------------------|---------------------------------------------|--------------------------------------|-------------------------------------|---------------------|------------------------|
| Uganda   | 2016 | Male   | 30 to 34 | 69%<br>(56-78%)                | 31%<br>(22-44%)          | 3.4<br>(1.6-6.1)                            | 11%<br>(5.9-17%)                     | 13%<br>(6.6-21%)                    | 1100<br>(590-1600)  | 65000<br>(36000-97000) |
| Uganda   | 2016 | Male   | 35 to 39 | 72%<br>(60-81%)                | 28%<br>(19-40%)          | 3.7<br>(1.8-7)                              | 12%<br>(7.1-18%)                     | 15%<br>(8.1-22%)                    | 1200<br>(680-1700)  | 63000<br>(36000-90000) |
| Uganda   | 2016 | Male   | 40 to 44 | 74%<br>(63-83%)                | 26%<br>(17-37%)          | 3.9<br>(1.9-7.2)                            | 14%<br>(7.6-20%)                     | 17%<br>(9.3-24%)                    | 1200<br>(670-1800)  | 57000<br>(32000-83000) |
| Uganda   | 2016 | Male   | 45 to 49 | 76%<br>(63-85%)                | 24%<br>(15-37%)          | 3.8<br>(1.7-7.1)                            | 14%<br>(7.5-20%)                     | 17%<br>(9.2-25%)                    | 1100<br>(590-1700)  | 48000<br>(25000-70000) |
| Uganda   | 2016 | Male   | 50 to 54 | 76%<br>(63-85%)                | 24%<br>(15-37%)          | 3.6<br>(1.6-6.9)                            | 15%<br>(7.6-21%)                     | 18%<br>(9.5-26%)                    | 1100<br>(550-1600)  | 39000<br>(21000-58000) |
| Uganda   | 2016 | Male   | 55 to 59 | 75%<br>(61-85%)                | 25%<br>(15-39%)          | 3.4<br>(1.5-6.4)                            | 14%<br>(7.2-21%)                     | 18%<br>(8.8-26%)                    | 980<br>(500-1500)   | 31000<br>(16000-47000) |
| Uganda   | 2016 | Male   | 60 to 64 | 72%<br>(57-83%)                | 28%<br>(17-43%)          | 2.9<br>(1.2-5.8)                            | 11%<br>(5.2-18%)                     | 14%<br>(6.4-22%)                    | 860<br>(400-1400)   | 23000<br>(11000-38000) |
| Uganda   | 2016 | Male   | 65 to 69 | 69%<br>(53-81%)                | 31%<br>(19-47%)          | 2.3<br>(0.98-4.5)                           | 8.5%<br>(3.3-15%)                    | 10%<br>(3.9-18%)                    | 720<br>(280-1300)   | 16000<br>(6300-30000)  |
| Uganda   | 2016 | Male   | 70 to 74 | 65%<br>(49-77%)                | 35%<br>(23-51%)          | 1.8<br>(0.78-3.6)                           | 6.1%<br>(2-12%)                      | 7.2%<br>(2.3-15%)                   | 570<br>(190-1200)   | 10000<br>(3400-21000)  |
| Uganda   | 2016 | Male   | 75 to 79 | 62%<br>(44-76%)                | 38%<br>(24-56%)          | 1.5<br>(0.62-3)                             | 4.8%<br>(1.2-10%)                    | 5.6%<br>(1.4-12%)                   | 380<br>(90-820)     | 5300<br>(1300-11000)   |
| Uganda   | 2016 | Male   | 80 to 84 | 58%<br>(39-74%)                | 42%<br>(26-61%)          | 1.3<br>(0.53-2.5)                           | 3.8%<br>(0.84-8.5%)                  | 4.4%<br>(0.93-9.9%)                 | 230<br>(49-520)     | 2400<br>(530-5400)     |
| Uganda   | 2016 | Male   | 85 to 89 | 54%<br>(36-70%)                | 46%<br>(30-64%)          | 1<br>(0.41-2.1)                             | 2.9%<br>(0.75-6.6%)                  | 3.3%<br>(0.79-7.7%)                 | 110<br>(25-240)     | 820<br>(210-1800)      |
| Uganda   | 2016 | Male   | 90 to 94 | 53%<br>(37-69%)                | 47%<br>(31-63%)          | 0.92<br>(0.35-1.9)                          | 2%<br>(0.39-4.9%)                    | 2.2%<br>(0.34-5.8%)                 | 25<br>(4.1-65)      | 140<br>(27-340)        |
| Uganda   | 2016 | Male   | 95 plus  | 56%<br>(35-75%)                | 44%<br>(25-65%)          | 0.89<br>(0.3-1.8)                           | 2.3%<br>(0.4-5.7%)                   | 2.5%<br>(0.29-6.5%)                 | 6.5<br>(0.73-16)    | 24<br>(3.9-57)         |
| Zambia   | 1990 | Female | All Ages | 11%<br>(9.6-14%)               | 89%<br>(86-90%)          | 0.57<br>(0.41-0.77)                         | 0.94%<br>(0.63-1.3%)                 | 1.7%<br>(1.1-2.6%)                  | 1000<br>(600-1600)  | 38000<br>(25000-54000) |
| Zambia   | 1990 | Female | 15 to 19 | 11%<br>(7.5-16%)               | 89%<br>(84-93%)          | 0.64<br>(0.33-1.1)                          | 1.7%<br>(0.86-3%)                    | 2%<br>(0.83-3.9%)                   | 21<br>(9.1-41)      | 1900<br>(980-3300)     |
| Zambia   | 1990 | Female | 20 to 24 | 15%<br>(9.4-21%)               | 85%<br>(79-91%)          | 0.95<br>(0.51-1.6)                          | 2.1%<br>(1.1-3.4%)                   | 2%<br>(0.9-3.7%)                    | 35<br>(15-62)       | 3000<br>(1600-4900)    |
| Zambia   | 1990 | Female | 25 to 29 | 16%<br>(10-23%)                | 84%<br>(77-90%)          | 1.2<br>(0.67-2)                             | 2.5%<br>(1.4-4%)                     | 2.6%<br>(1.3-4.6%)                  | 47<br>(25-78)       | 3500<br>(2100-5500)    |
| Zambia   | 1990 | Female | 30 to 34 | 18%<br>(12-27%)                | 82%<br>(73-88%)          | 1.4<br>(0.72-2.3)                           | 3%<br>(1.7-4.8%)                     | 3.2%<br>(1.6-5.5%)                  | 54<br>(28-91)       | 3500<br>(2000-5600)    |
| Zambia   | 1990 | Female | 35 to 39 | 21%<br>(14-29%)                | 79%<br>(71-86%)          | 1.3<br>(0.67-2.2)                           | 3.4%<br>(1.9-5.4%)                   | 3.8%<br>(2-6.5%)                    | 61<br>(32-98)       | 3500<br>(2000-5400)    |
| Zambia   | 1990 | Female | 40 to 44 | 22%<br>(15-31%)                | 78%<br>(69-85%)          | 1.3<br>(0.68-2.1)                           | 3.6%<br>(2.1-5.7%)                   | 4.2%<br>(2.2-6.9%)                  | 62<br>(33-110)      | 3100<br>(1700-5200)    |
| Zambia   | 1990 | Female | 45 to 49 | 22%<br>(13-31%)                | 78%<br>(69-87%)          | 1.3<br>(0.69-2.2)                           | 3.9%<br>(2.3-6.2%)                   | 4.7%<br>(2.6-7.5%)                  | 72<br>(39-120)      | 3100<br>(1800-5100)    |

| Location | Year | Sex    | Age      | Prevalence of current drinkers | Prevalence of abstainers | Population average of standard drinks daily | Percent of total attributable deaths | Percent of total attributable DALYs | Attributable deaths | Attributable DALYs     |
|----------|------|--------|----------|--------------------------------|--------------------------|---------------------------------------------|--------------------------------------|-------------------------------------|---------------------|------------------------|
| Zambia   | 1990 | Female | 50 to 54 | 20%<br>(13-29%)                | 80%<br>(71-87%)          | 1.2<br>(0.68-2)                             | 4.5%<br>(2.6-7.3%)                   | 5.4%<br>(3.1-8.7%)                  | 91<br>(49-150)      | 3400<br>(1900-5700)    |
| Zambia   | 1990 | Female | 55 to 59 | 19%<br>(12-27%)                | 81%<br>(73-88%)          | 1.2<br>(0.63-2.1)                           | 4.4%<br>(2.3-7.1%)                   | 5.1%<br>(2.7-8.3%)                  | 97<br>(47-170)      | 3100<br>(1600-5400)    |
| Zambia   | 1990 | Female | 60 to 64 | 20%<br>(12-29%)                | 80%<br>(71-88%)          | 1.2<br>(0.59-2.2)                           | 4.4%<br>(2.3-7.4%)                   | 5.1%<br>(2.7-8.5%)                  | 110<br>(53-190)     | 3000<br>(1500-5200)    |
| Zambia   | 1990 | Female | 65 to 69 | 20%<br>(13-28%)                | 80%<br>(72-87%)          | 1.1<br>(0.59-1.9)                           | 4.5%<br>(2.5-7.5%)                   | 5.1%<br>(2.8-8.4%)                  | 130<br>(63-210)     | 2900<br>(1500-4800)    |
| Zambia   | 1990 | Female | 70 to 74 | 19%<br>(13-27%)                | 81%<br>(73-87%)          | 1<br>(0.52-1.8)                             | 3.6%<br>(1.5-6.6%)                   | 4%<br>(1.7-7.3%)                    | 100<br>(40-190)     | 1900<br>(760-3500)     |
| Zambia   | 1990 | Female | 75 to 79 | 17%<br>(10-26%)                | 83%<br>(74-90%)          | 0.85<br>(0.43-1.6)                          | 3.1%<br>(1.3-5.8%)                   | 3.5%<br>(1.4-6.5%)                  | 76<br>(31-150)      | 1100<br>(450-2100)     |
| Zambia   | 1990 | Female | 80 to 84 | 16%<br>(9.9-24%)               | 84%<br>(76-90%)          | 0.79<br>(0.42-1.3)                          | 2.5%<br>(1.1-4.7%)                   | 2.8%<br>(1.2-5.2%)                  | 41<br>(17-76)       | 430<br>(190-800)       |
| Zambia   | 1990 | Female | 85 to 89 | 17%<br>(10-25%)                | 83%<br>(75-90%)          | 0.8<br>(0.39-1.4)                           | 2%<br>(0.77-3.9%)                    | 2.2%<br>(0.85-4.4%)                 | 19<br>(7.1-38)      | 140<br>(55-280)        |
| Zambia   | 1990 | Female | 90 to 94 | 18%<br>(12-27%)                | 82%<br>(73-88%)          | 0.86<br>(0.42-1.6)                          | 1.8%<br>(0.55-3.9%)                  | 2%<br>(0.58-4.4%)                   | 6.3<br>(1.9-14)     | 33<br>(10-72)          |
| Zambia   | 1990 | Female | 95 plus  | 21%<br>(12-35%)                | 79%<br>(65-88%)          | 0.97<br>(0.4-2)                             | 2.2%<br>(0.7-4.8%)                   | 2.4%<br>(0.71-5.6%)                 | 2<br>(0.6-4.6)      | 7<br>(2.3-16)          |
| Zambia   | 1990 | Male   | All Ages | 29%<br>(23-34%)                | 71%<br>(66-77%)          | 1.5<br>(1.1-1.9)                            | 1.3%<br>(0.92-1.8%)                  | 2.1%<br>(1.4-2.9%)                  | 1200<br>(770-1700)  | 56000<br>(39000-77000) |
| Zambia   | 1990 | Male   | 15 to 19 | 25%<br>(17-35%)                | 75%<br>(65-83%)          | 1.4<br>(0.78-2.1)                           | 3.6%<br>(2.3-5.5%)                   | 4.2%<br>(2.2-6.9%)                  | 30<br>(16-50)       | 3100<br>(1900-4600)    |
| Zambia   | 1990 | Male   | 20 to 24 | 40%<br>(28-52%)                | 60%<br>(48-72%)          | 2.3<br>(1.4-3.4)                            | 4.6%<br>(2.9-7%)                     | 4.3%<br>(2.3-7.2%)                  | 67<br>(37-110)      | 6200<br>(3900-9100)    |
| Zambia   | 1990 | Male   | 25 to 29 | 47%<br>(34-59%)                | 53%<br>(41-66%)          | 3.3<br>(2.1-4.7)                            | 4.3%<br>(2.6-6.7%)                   | 4%<br>(2.1-6.7%)                    | 93<br>(55-140)      | 7200<br>(4700-10000)   |
| Zambia   | 1990 | Male   | 30 to 34 | 52%<br>(39-64%)                | 48%<br>(36-61%)          | 3.9<br>(2.5-5.8)                            | 4.6%<br>(2.8-6.9%)                   | 4.4%<br>(2.4-7.2%)                  | 97<br>(59-150)      | 6600<br>(4300-9400)    |
| Zambia   | 1990 | Male   | 35 to 39 | 55%<br>(41-66%)                | 45%<br>(34-59%)          | 4<br>(2.4-5.9)                              | 5%<br>(3-7.6%)                       | 5.1%<br>(2.8-8.5%)                  | 99<br>(61-150)      | 5800<br>(3700-8600)    |
| Zambia   | 1990 | Male   | 40 to 44 | 54%<br>(42-65%)                | 46%<br>(35-58%)          | 3.9<br>(2.4-5.7)                            | 5.4%<br>(3.3-8.1%)                   | 5.7%<br>(3.3-9%)                    | 100<br>(63-150)     | 5300<br>(3400-7700)    |
| Zambia   | 1990 | Male   | 45 to 49 | 52%<br>(38-63%)                | 48%<br>(37-62%)          | 3.8<br>(2.2-5.7)                            | 6.4%<br>(3.9-9.3%)                   | 7.1%<br>(4.1-11%)                   | 110<br>(67-160)     | 5000<br>(3300-7000)    |
| Zambia   | 1990 | Male   | 50 to 54 | 51%<br>(40-63%)                | 49%<br>(37-60%)          | 3.7<br>(2.2-5.7)                            | 7.9%<br>(5-11%)                      | 9.2%<br>(5.5-14%)                   | 120<br>(75-180)     | 4900<br>(3100-7100)    |
| Zambia   | 1990 | Male   | 55 to 59 | 50%<br>(39-62%)                | 50%<br>(38-61%)          | 3.4<br>(2.1-5.2)                            | 7.7%<br>(4.7-11%)                    | 9.1%<br>(5.4-13%)                   | 120<br>(68-180)     | 4000<br>(2500-5800)    |
| Zambia   | 1990 | Male   | 60 to 64 | 48%<br>(34-62%)                | 52%<br>(38-66%)          | 2.7<br>(1.6-4.3)                            | 6.8%<br>(4-10%)                      | 8.1%<br>(4.6-12%)                   | 110<br>(61-170)     | 3200<br>(1900-4900)    |
| Zambia   | 1990 | Male   | 65 to 69 | 46%<br>(32-61%)                | 54%<br>(39-68%)          | 2.2<br>(1.2-3.5)                            | 5.2%<br>(2.8-8.2%)                   | 6.1%<br>(3.3-9.9%)                  | 84<br>(44-140)      | 2000<br>(1100-3200)    |

| Location | Year | Sex    | Age      | Prevalence of current drinkers | Prevalence of abstainers | Population average of standard drinks daily | Percent of total attributable deaths | Percent of total attributable DALYs | Attributable deaths | Attributable DALYs     |
|----------|------|--------|----------|--------------------------------|--------------------------|---------------------------------------------|--------------------------------------|-------------------------------------|---------------------|------------------------|
| Zambia   | 1990 | Male   | 70 to 74 | 44%<br>(31-58%)                | 56%<br>(42-69%)          | 1.8<br>(1-2.9)                              | 4.1%<br>(2-6.8%)                     | 4.8%<br>(2.3-8.2%)                  | 68<br>(33-120)      | 1300<br>(630-2200)     |
| Zambia   | 1990 | Male   | 75 to 79 | 41%<br>(27-57%)                | 59%<br>(43-73%)          | 1.5<br>(0.79-2.6)                           | 3.4%<br>(1.5-6.1%)                   | 3.9%<br>(1.7-7.2%)                  | 48<br>(21-88)       | 700<br>(310-1300)      |
| Zambia   | 1990 | Male   | 80 to 84 | 38%<br>(23-54%)                | 62%<br>(46-77%)          | 1.3<br>(0.67-2.1)                           | 2.8%<br>(1.3-5%)                     | 3.2%<br>(1.4-5.8%)                  | 25<br>(11-47)       | 270<br>(120-510)       |
| Zambia   | 1990 | Male   | 85 to 89 | 36%<br>(23-50%)                | 64%<br>(50-77%)          | 1.1<br>(0.56-1.8)                           | 2.1%<br>(0.97-3.8%)                  | 2.4%<br>(1-4.3%)                    | 10<br>(4.7-19)      | 83<br>(39-150)         |
| Zambia   | 1990 | Male   | 90 to 94 | 36%<br>(23-52%)                | 64%<br>(48-77%)          | 1<br>(0.51-1.8)                             | 1.6%<br>(0.6-3.2%)                   | 1.7%<br>(0.53-3.7%)                 | 2.9<br>(0.91-6.1)   | 16<br>(6.1-33)         |
| Zambia   | 1990 | Male   | 95 plus  | 39%<br>(21-59%)                | 61%<br>(41-79%)          | 1<br>(0.42-1.9)                             | 1.8%<br>(0.67-3.8%)                  | 1.8%<br>(0.56-4.1%)                 | 0.72<br>(0.21-1.6)  | 2.9<br>(1.1-6.1)       |
| Zambia   | 1995 | Female | All Ages | 12%<br>(10-14%)                | 88%<br>(86-90%)          | 0.55<br>(0.4-0.74)                          | 1.2%<br>(0.77-1.7%)                  | 2%<br>(1.3-3%)                      | 1600<br>(960-2400)  | 57000<br>(37000-84000) |
| Zambia   | 1995 | Female | 15 to 19 | 12%<br>(7.9-17%)               | 88%<br>(83-92%)          | 0.62<br>(0.33-1)                            | 1.8%<br>(0.88-3.1%)                  | 2.1%<br>(0.88-3.9%)                 | 29<br>(13-54)       | 2500<br>(1300-4400)    |
| Zambia   | 1995 | Female | 20 to 24 | 15%<br>(9.9-22%)               | 85%<br>(78-90%)          | 0.93<br>(0.49-1.5)                          | 1.8%<br>(0.95-3.3%)                  | 1.8%<br>(0.75-3.6%)                 | 51<br>(22-95)       | 4100<br>(2200-6900)    |
| Zambia   | 1995 | Female | 25 to 29 | 17%<br>(11-24%)                | 83%<br>(76-89%)          | 1.2<br>(0.65-1.9)                           | 2%<br>(0.97-3.5%)                    | 2%<br>(0.83-3.8%)                   | 76<br>(38-140)      | 5300<br>(3000-8900)    |
| Zambia   | 1995 | Female | 30 to 34 | 19%<br>(12-28%)                | 81%<br>(72-88%)          | 1.3<br>(0.71-2.2)                           | 2.3%<br>(1.2-3.8%)                   | 2.3%<br>(1.1-4.1%)                  | 86<br>(43-150)      | 5300<br>(2900-8700)    |
| Zambia   | 1995 | Female | 35 to 39 | 22%<br>(14-29%)                | 78%<br>(71-86%)          | 1.2<br>(0.66-2.1)                           | 2.8%<br>(1.4-4.8%)                   | 3%<br>(1.4-5.4%)                    | 100<br>(52-170)     | 5400<br>(2900-9000)    |
| Zambia   | 1995 | Female | 40 to 44 | 23%<br>(15-32%)                | 77%<br>(68-85%)          | 1.2<br>(0.63-2.1)                           | 3.1%<br>(1.7-5.1%)                   | 3.3%<br>(1.7-5.7%)                  | 100<br>(53-170)     | 4900<br>(2700-8000)    |
| Zambia   | 1995 | Female | 45 to 49 | 23%<br>(14-32%)                | 77%<br>(68-86%)          | 1.3<br>(0.67-2.1)                           | 3.6%<br>(1.9-5.8%)                   | 4%<br>(2.2-6.6%)                    | 120<br>(64-200)     | 5200<br>(2800-8500)    |
| Zambia   | 1995 | Female | 50 to 54 | 21%<br>(14-30%)                | 79%<br>(70-86%)          | 1.2<br>(0.66-2)                             | 4.4%<br>(2.5-6.9%)                   | 5%<br>(2.7-7.8%)                    | 150<br>(82-250)     | 5700<br>(3100-9200)    |
| Zambia   | 1995 | Female | 55 to 59 | 20%<br>(13-29%)                | 80%<br>(71-87%)          | 1.2<br>(0.61-2)                             | 4.4%<br>(2.4-7.2%)                   | 4.9%<br>(2.6-8%)                    | 160<br>(79-260)     | 5000<br>(2600-8100)    |
| Zambia   | 1995 | Female | 60 to 64 | 20%<br>(13-30%)                | 80%<br>(70-87%)          | 1.1<br>(0.57-2.1)                           | 4.4%<br>(2.3-7.6%)                   | 4.9%<br>(2.5-8.5%)                  | 170<br>(84-290)     | 4500<br>(2300-7800)    |
| Zambia   | 1995 | Female | 65 to 69 | 21%<br>(14-29%)                | 79%<br>(71-86%)          | 1.1<br>(0.59-1.8)                           | 4.5%<br>(2.4-7.5%)                   | 5%<br>(2.7-8.4%)                    | 190<br>(96-320)     | 4200<br>(2200-7200)    |
| Zambia   | 1995 | Female | 70 to 74 | 20%<br>(13-27%)                | 80%<br>(73-87%)          | 0.97<br>(0.5-1.7)                           | 3.6%<br>(1.5-6.8%)                   | 4%<br>(1.6-7.5%)                    | 150<br>(62-280)     | 2800<br>(1200-5100)    |
| Zambia   | 1995 | Female | 75 to 79 | 18%<br>(12-26%)                | 82%<br>(74-88%)          | 0.83<br>(0.41-1.5)                          | 3.1%<br>(1.3-5.9%)                   | 3.4%<br>(1.4-6.4%)                  | 110<br>(45-210)     | 1500<br>(640-3000)     |
| Zambia   | 1995 | Female | 80 to 84 | 17%<br>(11-25%)                | 83%<br>(75-89%)          | 0.77<br>(0.41-1.3)                          | 2.5%<br>(1-4.6%)                     | 2.7%<br>(1.1-5.1%)                  | 58<br>(24-110)      | 610<br>(250-1100)      |
| Zambia   | 1995 | Female | 85 to 89 | 17%<br>(10-26%)                | 83%<br>(74-90%)          | 0.78<br>(0.4-1.3)                           | 2%<br>(0.76-3.8%)                    | 2.2%<br>(0.82-4.3%)                 | 23<br>(8.3-44)      | 170<br>(63-330)        |

| Location | Year | Sex    | Age      | Prevalence of current drinkers | Prevalence of abstainers | Population average of standard drinks daily | Percent of total attributable deaths | Percent of total attributable DALYs | Attributable deaths | Attributable DALYs       |
|----------|------|--------|----------|--------------------------------|--------------------------|---------------------------------------------|--------------------------------------|-------------------------------------|---------------------|--------------------------|
| Zambia   | 1995 | Female | 90 to 94 | 19%<br>(12-28%)                | 81%<br>(72-88%)          | 0.83<br>(0.41-1.5)                          | 1.7%<br>(0.52-3.7%)                  | 1.9%<br>(0.52-4.1%)                 | 7.1<br>(2-16)       | 37<br>(11-81)            |
| Zambia   | 1995 | Female | 95 plus  | 22%<br>(12-35%)                | 78%<br>(65-88%)          | 0.93<br>(0.37-1.8)                          | 2.1%<br>(0.69-4.7%)                  | 2.3%<br>(0.7-5.2%)                  | 2.5<br>(0.75-5.8)   | 8.7<br>(2.8-20)          |
| Zambia   | 1995 | Male   | All Ages | 29%<br>(24-35%)                | 71%<br>(65-76%)          | 1.4<br>(1.1-1.8)                            | 2%<br>(1.4-2.8%)                     | 3%<br>(2-4.3%)                      | 2300<br>(1500-3400) | 100000<br>(72000-150000) |
| Zambia   | 1995 | Male   | 15 to 19 | 26%<br>(18-37%)                | 74%<br>(63-82%)          | 1.3<br>(0.76-2)                             | 4.4%<br>(2.7-6.6%)                   | 5.3%<br>(2.8-8.3%)                  | 57<br>(29-93)       | 5200<br>(3100-7900)      |
| Zambia   | 1995 | Male   | 20 to 24 | 41%<br>(28-53%)                | 59%<br>(47-72%)          | 2.2<br>(1.4-3.3)                            | 6%<br>(3.6-9.2%)                     | 6.2%<br>(3.2-10%)                   | 140<br>(80-230)     | 11000<br>(7300-17000)    |
| Zambia   | 1995 | Male   | 25 to 29 | 49%<br>(35-60%)                | 51%<br>(40-65%)          | 3.2<br>(2.1-4.6)                            | 4.9%<br>(2.8-7.7%)                   | 4.8%<br>(2.5-8.1%)                  | 200<br>(120-310)    | 14000<br>(9300-20000)    |
| Zambia   | 1995 | Male   | 30 to 34 | 53%<br>(40-65%)                | 47%<br>(35-60%)          | 3.7<br>(2.4-5.5)                            | 4.5%<br>(2.6-7.2%)                   | 4.5%<br>(2.4-7.7%)                  | 210<br>(130-320)    | 13000<br>(8600-19000)    |
| Zambia   | 1995 | Male   | 35 to 39 | 56%<br>(43-67%)                | 44%<br>(33-57%)          | 3.8<br>(2.4-5.7)                            | 5.1%<br>(2.9-8.2%)                   | 5.3%<br>(2.9-8.9%)                  | 210<br>(130-310)    | 11000<br>(7400-16000)    |
| Zambia   | 1995 | Male   | 40 to 44 | 55%<br>(43-66%)                | 45%<br>(34-57%)          | 3.7<br>(2.3-5.5)                            | 5.3%<br>(3.2-8.2%)                   | 5.6%<br>(3.2-9%)                    | 200<br>(120-290)    | 9500<br>(6100-14000)     |
| Zambia   | 1995 | Male   | 45 to 49 | 53%<br>(39-64%)                | 47%<br>(36-61%)          | 3.7<br>(2.2-5.5)                            | 6.4%<br>(4-9.4%)                     | 6.8%<br>(4.1-10%)                   | 220<br>(140-330)    | 9400<br>(6100-14000)     |
| Zambia   | 1995 | Male   | 50 to 54 | 52%<br>(41-64%)                | 48%<br>(36-59%)          | 3.6<br>(2.2-5.5)                            | 8.3%<br>(5.3-12%)                    | 9.2%<br>(5.7-13%)                   | 250<br>(150-360)    | 9300<br>(5900-14000)     |
| Zambia   | 1995 | Male   | 55 to 59 | 51%<br>(39-63%)                | 49%<br>(37-61%)          | 3.2<br>(2-5)                                | 8.6%<br>(5.4-12%)                    | 9.7%<br>(6-14%)                     | 240<br>(140-360)    | 7800<br>(4800-12000)     |
| Zambia   | 1995 | Male   | 60 to 64 | 50%<br>(36-63%)                | 50%<br>(37-64%)          | 2.6<br>(1.5-4.2)                            | 7.4%<br>(4.3-11%)                    | 8.3%<br>(4.7-13%)                   | 200<br>(110-320)    | 5700<br>(3200-8900)      |
| Zambia   | 1995 | Male   | 65 to 69 | 48%<br>(33-62%)                | 52%<br>(38-67%)          | 2.1<br>(1.2-3.4)                            | 5.7%<br>(3.1-9.2%)                   | 6.5%<br>(3.5-10%)                   | 150<br>(80-260)     | 3500<br>(1900-5800)      |
| Zambia   | 1995 | Male   | 70 to 74 | 45%<br>(31-59%)                | 55%<br>(41-69%)          | 1.8<br>(0.98-2.8)                           | 4.5%<br>(2.2-7.4%)                   | 5.1%<br>(2.4-8.4%)                  | 120<br>(52-200)     | 2100<br>(1000-3600)      |
| Zambia   | 1995 | Male   | 75 to 79 | 43%<br>(28-59%)                | 57%<br>(41-72%)          | 1.5<br>(0.79-2.5)                           | 3.6%<br>(1.6-6.4%)                   | 4.1%<br>(1.8-7.3%)                  | 80<br>(35-140)      | 1100<br>(500-2000)       |
| Zambia   | 1995 | Male   | 80 to 84 | 40%<br>(25-55%)                | 60%<br>(45-75%)          | 1.2<br>(0.67-2.1)                           | 2.9%<br>(1.3-5.1%)                   | 3.3%<br>(1.4-5.8%)                  | 40<br>(17-71)       | 430<br>(190-760)         |
| Zambia   | 1995 | Male   | 85 to 89 | 37%<br>(24-52%)                | 63%<br>(48-76%)          | 1.1<br>(0.57-1.7)                           | 2.2%<br>(1-4%)                       | 2.4%<br>(1-4.4%)                    | 15<br>(6-27)        | 120<br>(51-210)          |
| Zambia   | 1995 | Male   | 90 to 94 | 37%<br>(23-52%)                | 63%<br>(48-77%)          | 0.97<br>(0.49-1.7)                          | 1.6%<br>(0.56-3.2%)                  | 1.7%<br>(0.48-3.5%)                 | 3.7<br>(1.1-7.6)    | 21<br>(7.5-41)           |
| Zambia   | 1995 | Male   | 95 plus  | 39%<br>(22-59%)                | 61%<br>(41-78%)          | 0.95<br>(0.4-1.8)                           | 1.8%<br>(0.67-3.8%)                  | 1.9%<br>(0.55-4.1%)                 | 0.94<br>(0.28-2.1)  | 3.7<br>(1.3-7.7)         |
| Zambia   | 2000 | Female | All Ages | 12%<br>(11-15%)                | 88%<br>(85-89%)          | 0.49<br>(0.35-0.67)                         | 1.3%<br>(0.78-1.9%)                  | 2%<br>(1.2-3.1%)                    | 1900<br>(1100-2900) | 72000<br>(42000-110000)  |
| Zambia   | 2000 | Female | 15 to 19 | 13%<br>(9-18%)                 | 87%<br>(82-91%)          | 0.57<br>(0.3-0.93)                          | 1.9%<br>(0.92-3.3%)                  | 2.4%<br>(0.94-4.5%)                 | 36<br>(14-69)       | 3100<br>(1400-5400)      |

| Location | Year | Sex    | Age      | Prevalence of current drinkers | Prevalence of abstainers | Population average of standard drinks daily | Percent of total attributable deaths | Percent of total attributable DALYs | Attributable deaths | Attributable DALYs        |
|----------|------|--------|----------|--------------------------------|--------------------------|---------------------------------------------|--------------------------------------|-------------------------------------|---------------------|---------------------------|
| Zambia   | 2000 | Female | 20 to 24 | 17%<br>(12-23%)                | 83%<br>(77-88%)          | 0.84<br>(0.46-1.4)                          | 2.1%<br>(1-3.9%)                     | 2.2%<br>(0.85-4.6%)                 | 68<br>(27-130)      | 5400<br>(2700-9600)       |
| Zambia   | 2000 | Female | 25 to 29 | 18%<br>(13-25%)                | 82%<br>(75-87%)          | 1<br>(0.61-1.7)                             | 1.8%<br>(0.88-3.4%)                  | 1.9%<br>(0.79-3.7%)                 | 110<br>(51-200)     | 7500<br>(3900-13000)      |
| Zambia   | 2000 | Female | 30 to 34 | 20%<br>(14-28%)                | 80%<br>(72-86%)          | 1.1<br>(0.62-1.9)                           | 1.9%<br>(0.95-3.3%)                  | 2%<br>(0.88-3.5%)                   | 120<br>(57-220)     | 7400<br>(3800-13000)      |
| Zambia   | 2000 | Female | 35 to 39 | 22%<br>(15-29%)                | 78%<br>(71-85%)          | 1.1<br>(0.59-1.8)                           | 2.4%<br>(1.1-4.3%)                   | 2.5%<br>(1.1-4.6%)                  | 130<br>(60-230)     | 7000<br>(3400-12000)      |
| Zambia   | 2000 | Female | 40 to 44 | 24%<br>(18-32%)                | 76%<br>(68-82%)          | 1.1<br>(0.58-1.8)                           | 2.5%<br>(1.3-4.4%)                   | 2.7%<br>(1.3-4.7%)                  | 130<br>(60-220)     | 6000<br>(3000-10000)      |
| Zambia   | 2000 | Female | 45 to 49 | 25%<br>(17-32%)                | 75%<br>(68-83%)          | 1.2<br>(0.64-1.9)                           | 3.4%<br>(1.7-5.7%)                   | 3.7%<br>(1.9-6.2%)                  | 160<br>(82-280)     | 6800<br>(3500-11000)      |
| Zambia   | 2000 | Female | 50 to 54 | 22%<br>(15-29%)                | 78%<br>(71-85%)          | 1<br>(0.58-1.7)                             | 4%<br>(2.1-6.5%)                     | 4.4%<br>(2.3-7.2%)                  | 190<br>(96-330)     | 7100<br>(3600-12000)      |
| Zambia   | 2000 | Female | 55 to 59 | 19%<br>(12-27%)                | 81%<br>(73-88%)          | 0.91<br>(0.48-1.6)                          | 3.9%<br>(1.9-6.8%)                   | 4.4%<br>(2.1-7.6%)                  | 190<br>(89-340)     | 5900<br>(2800-11000)      |
| Zambia   | 2000 | Female | 60 to 64 | 19%<br>(12-28%)                | 81%<br>(72-88%)          | 0.89<br>(0.47-1.6)                          | 3.8%<br>(1.9-6.7%)                   | 4.3%<br>(2.1-7.4%)                  | 190<br>(90-330)     | 5000<br>(2500-8800)       |
| Zambia   | 2000 | Female | 65 to 69 | 20%<br>(14-27%)                | 80%<br>(73-86%)          | 0.88<br>(0.48-1.4)                          | 3.9%<br>(2.1-6.6%)                   | 4.3%<br>(2.3-7.3%)                  | 200<br>(110-360)    | 4600<br>(2400-7900)       |
| Zambia   | 2000 | Female | 70 to 74 | 19%<br>(13-27%)                | 81%<br>(73-87%)          | 0.78<br>(0.41-1.3)                          | 3.2%<br>(1.3-5.9%)                   | 3.4%<br>(1.4-6.5%)                  | 160<br>(61-320)     | 3000<br>(1100-5700)       |
| Zambia   | 2000 | Female | 75 to 79 | 18%<br>(11-26%)                | 82%<br>(74-89%)          | 0.69<br>(0.33-1.2)                          | 2.8%<br>(1.1-5.3%)                   | 3.1%<br>(1.2-5.8%)                  | 130<br>(49-240)     | 1800<br>(700-3400)        |
| Zambia   | 2000 | Female | 80 to 84 | 17%<br>(11-25%)                | 83%<br>(75-89%)          | 0.66<br>(0.35-1.1)                          | 2.2%<br>(0.9-4.1%)                   | 2.4%<br>(0.99-4.6%)                 | 69<br>(28-130)      | 720<br>(290-1400)         |
| Zambia   | 2000 | Female | 85 to 89 | 18%<br>(11-26%)                | 82%<br>(74-89%)          | 0.66<br>(0.33-1.1)                          | 1.7%<br>(0.63-3.3%)                  | 1.9%<br>(0.67-3.7%)                 | 22<br>(7.9-42)      | 160<br>(60-310)           |
| Zambia   | 2000 | Female | 90 to 94 | 19%<br>(12-29%)                | 81%<br>(71-88%)          | 0.71<br>(0.34-1.3)                          | 1.5%<br>(0.37-3.2%)                  | 1.6%<br>(0.38-3.6%)                 | 6.2<br>(1.4-14)     | 32<br>(8.1-71)            |
| Zambia   | 2000 | Female | 95 plus  | 23%<br>(13-36%)                | 77%<br>(64-87%)          | 0.79<br>(0.32-1.5)                          | 1.8%<br>(0.55-4.1%)                  | 2%<br>(0.55-4.5%)                   | 2.2<br>(0.6-4.9)    | 7.7<br>(2.4-17)           |
| Zambia   | 2000 | Male   | All Ages | 32%<br>(28-38%)                | 68%<br>(62-72%)          | 1.3<br>(0.97-1.7)                           | 3%<br>(2-4.1%)                       | 4.2%<br>(2.7-5.9%)                  | 4000<br>(2500-5700) | 180000<br>(120000-240000) |
| Zambia   | 2000 | Male   | 15 to 19 | 31%<br>(23-39%)                | 69%<br>(61-77%)          | 1.3<br>(0.78-2)                             | 5.5%<br>(3.3-8.4%)                   | 6.5%<br>(3.5-10%)                   | 110<br>(57-180)     | 8900<br>(5200-14000)      |
| Zambia   | 2000 | Male   | 20 to 24 | 46%<br>(36-56%)                | 54%<br>(44-64%)          | 2.1<br>(1.4-3.1)                            | 8.9%<br>(5.3-13%)                    | 9.7%<br>(5.4-15%)                   | 280<br>(160-420)    | 21000<br>(13000-30000)    |
| Zambia   | 2000 | Male   | 25 to 29 | 53%<br>(43-62%)                | 47%<br>(38-57%)          | 2.9<br>(2-4.1)                              | 6.9%<br>(3.9-11%)                    | 7.2%<br>(3.7-12%)                   | 380<br>(230-560)    | 25000<br>(17000-36000)    |
| Zambia   | 2000 | Male   | 30 to 34 | 57%<br>(46-66%)                | 43%<br>(34-54%)          | 3.4<br>(2.3-4.7)                            | 5.7%<br>(3.3-8.8%)                   | 5.9%<br>(3.2-9.4%)                  | 400<br>(250-560)    | 24000<br>(15000-32000)    |
| Zambia   | 2000 | Male   | 35 to 39 | 58%<br>(49-67%)                | 42%<br>(33-51%)          | 3.4<br>(2.2-5)                              | 5.8%<br>(3.4-9%)                     | 6.1%<br>(3.4-9.8%)                  | 370<br>(240-530)    | 20000<br>(13000-28000)    |



| Location | Year | Sex    | Age      | Prevalence of current drinkers | Prevalence of abstainers | Population average of standard drinks daily | Percent of total attributable deaths | Percent of total attributable DALYs | Attributable deaths | Attributable DALYs      |
|----------|------|--------|----------|--------------------------------|--------------------------|---------------------------------------------|--------------------------------------|-------------------------------------|---------------------|-------------------------|
| Zambia   | 2000 | Male   | 40 to 44 | 58%<br>(48-66%)                | 42%<br>(34-52%)          | 3.3<br>(2.1-4.8)                            | 6.3%<br>(3.9-9.2%)                   | 6.6%<br>(4-9.8%)                    | 350<br>(210-510)    | 16000<br>(10000-24000)  |
| Zambia   | 2000 | Male   | 45 to 49 | 54%<br>(43-64%)                | 46%<br>(36-57%)          | 3.1<br>(1.9-4.6)                            | 7.2%<br>(4.4-11%)                    | 7.7%<br>(4.5-12%)                   | 350<br>(200-510)    | 15000<br>(8900-21000)   |
| Zambia   | 2000 | Male   | 50 to 54 | 53%<br>(44-63%)                | 47%<br>(37-56%)          | 3.1<br>(1.9-4.6)                            | 9.5%<br>(5.8-14%)                    | 10%<br>(6.3-15%)                    | 430<br>(240-640)    | 16000<br>(9200-23000)   |
| Zambia   | 2000 | Male   | 55 to 59 | 52%<br>(42-62%)                | 48%<br>(38-58%)          | 2.7<br>(1.8-4.1)                            | 10%<br>(6.1-15%)                     | 11%<br>(6.7-16%)                    | 420<br>(230-640)    | 13000<br>(7600-20000)   |
| Zambia   | 2000 | Male   | 60 to 64 | 48%<br>(36-61%)                | 52%<br>(39-64%)          | 2.1<br>(1.3-3.4)                            | 7.9%<br>(4.6-12%)                    | 8.8%<br>(5-14%)                     | 340<br>(180-550)    | 9100<br>(5100-15000)    |
| Zambia   | 2000 | Male   | 65 to 69 | 46%<br>(32-60%)                | 54%<br>(40-68%)          | 1.7<br>(0.97-2.7)                           | 6%<br>(3.2-9.7%)                     | 6.7%<br>(3.6-11%)                   | 240<br>(120-420)    | 5500<br>(2800-9300)     |
| Zambia   | 2000 | Male   | 70 to 74 | 44%<br>(30-58%)                | 56%<br>(42-70%)          | 1.4<br>(0.78-2.3)                           | 4.5%<br>(2-7.7%)                     | 5%<br>(2.2-8.6%)                    | 170<br>(76-310)     | 3100<br>(1400-5500)     |
| Zambia   | 2000 | Male   | 75 to 79 | 42%<br>(28-56%)                | 58%<br>(44-72%)          | 1.2<br>(0.66-2)                             | 3.6%<br>(1.5-6.6%)                   | 4%<br>(1.6-7.3%)                    | 110<br>(44-200)     | 1500<br>(630-2800)      |
| Zambia   | 2000 | Male   | 80 to 84 | 39%<br>(24-55%)                | 61%<br>(45-76%)          | 1<br>(0.56-1.7)                             | 2.8%<br>(1.2-5.2%)                   | 3.2%<br>(1.3-5.9%)                  | 56<br>(22-110)      | 590<br>(250-1100)       |
| Zambia   | 2000 | Male   | 85 to 89 | 37%<br>(23-51%)                | 63%<br>(49-77%)          | 0.87<br>(0.48-1.4)                          | 2.2%<br>(0.9-3.9%)                   | 2.4%<br>(0.93-4.4%)                 | 18<br>(7-34)        | 140<br>(58-260)         |
| Zambia   | 2000 | Male   | 90 to 94 | 37%<br>(23-51%)                | 63%<br>(49-77%)          | 0.81<br>(0.4-1.4)                           | 1.5%<br>(0.52-3.2%)                  | 1.6%<br>(0.48-3.5%)                 | 4.1<br>(1.2-8.8)    | 23<br>(7.9-47)          |
| Zambia   | 2000 | Male   | 95 plus  | 40%<br>(22-59%)                | 60%<br>(41-78%)          | 0.8<br>(0.34-1.6)                           | 1.9%<br>(0.65-4.2%)                  | 2%<br>(0.52-4.6%)                   | 1.2<br>(0.31-2.7)   | 4.5<br>(1.5-9.7)        |
| Zambia   | 2005 | Female | All Ages | 12%<br>(10-13%)                | 88%<br>(87-90%)          | 0.42<br>(0.29-0.57)                         | 1.2%<br>(0.72-1.8%)                  | 1.9%<br>(1.1-3%)                    | 1800<br>(970-2900)  | 66000<br>(38000-100000) |
| Zambia   | 2005 | Female | 15 to 19 | 11%<br>(7.9-15%)               | 89%<br>(85-92%)          | 0.44<br>(0.23-0.73)                         | 1.4%<br>(0.68-2.5%)                  | 1.6%<br>(0.6-3.2%)                  | 29<br>(11-61)       | 2700<br>(1300-5100)     |
| Zambia   | 2005 | Female | 20 to 24 | 15%<br>(11-20%)                | 85%<br>(80-89%)          | 0.68<br>(0.37-1.1)                          | 2%<br>(0.97-3.6%)                    | 2.1%<br>(0.74-4.2%)                 | 57<br>(23-110)      | 4700<br>(2400-8400)     |
| Zambia   | 2005 | Female | 25 to 29 | 17%<br>(12-22%)                | 83%<br>(78-88%)          | 0.88<br>(0.51-1.4)                          | 1.8%<br>(0.84-3.4%)                  | 1.8%<br>(0.7-3.9%)                  | 99<br>(43-180)      | 7000<br>(3600-12000)    |
| Zambia   | 2005 | Female | 30 to 34 | 18%<br>(13-26%)                | 82%<br>(74-87%)          | 0.97<br>(0.53-1.6)                          | 1.6%<br>(0.76-2.9%)                  | 1.6%<br>(0.68-3.1%)                 | 110<br>(51-220)     | 7000<br>(3500-13000)    |
| Zambia   | 2005 | Female | 35 to 39 | 21%<br>(15-27%)                | 79%<br>(73-85%)          | 0.92<br>(0.51-1.6)                          | 1.8%<br>(0.86-3.4%)                  | 1.9%<br>(0.82-3.7%)                 | 120<br>(52-210)     | 6300<br>(3100-11000)    |
| Zambia   | 2005 | Female | 40 to 44 | 24%<br>(17-30%)                | 76%<br>(70-83%)          | 0.96<br>(0.52-1.5)                          | 2%<br>(0.97-3.5%)                    | 2.1%<br>(0.98-3.7%)                 | 110<br>(48-190)     | 5100<br>(2500-8800)     |
| Zambia   | 2005 | Female | 45 to 49 | 24%<br>(17-31%)                | 76%<br>(69-83%)          | 1<br>(0.56-1.7)                             | 2.8%<br>(1.4-4.8%)                   | 3.1%<br>(1.4-5.3%)                  | 140<br>(61-230)     | 5700<br>(2700-9700)     |
| Zambia   | 2005 | Female | 50 to 54 | 22%<br>(15-29%)                | 78%<br>(71-85%)          | 0.95<br>(0.53-1.6)                          | 3.6%<br>(1.8-6.1%)                   | 4%<br>(2-6.8%)                      | 170<br>(76-310)     | 6300<br>(2900-11000)    |
| Zambia   | 2005 | Female | 55 to 59 | 19%<br>(12-26%)                | 81%<br>(74-88%)          | 0.83<br>(0.44-1.4)                          | 3.7%<br>(1.7-6.4%)                   | 4.2%<br>(1.9-7.3%)                  | 180<br>(78-330)     | 5800<br>(2500-10000)    |

| Location | Year | Sex    | Age      | Prevalence of current drinkers | Prevalence of abstainers | Population average of standard drinks daily | Percent of total attributable deaths | Percent of total attributable DALYs | Attributable deaths | Attributable DALYs        |
|----------|------|--------|----------|--------------------------------|--------------------------|---------------------------------------------|--------------------------------------|-------------------------------------|---------------------|---------------------------|
| Zambia   | 2005 | Female | 60 to 64 | 19%<br>(12-27%)                | 81%<br>(73-88%)          | 0.81<br>(0.41-1.4)                          | 3.6%<br>(1.7-6.4%)                   | 4.1%<br>(1.9-7.4%)                  | 180<br>(85-330)     | 4900<br>(2300-8900)       |
| Zambia   | 2005 | Female | 65 to 69 | 20%<br>(14-27%)                | 80%<br>(73-86%)          | 0.81<br>(0.45-1.3)                          | 3.8%<br>(2-6.4%)                     | 4.2%<br>(2.2-7.1%)                  | 200<br>(100-360)    | 4500<br>(2300-8000)       |
| Zambia   | 2005 | Female | 70 to 74 | 19%<br>(13-27%)                | 81%<br>(73-87%)          | 0.72<br>(0.37-1.2)                          | 3%<br>(1.2-5.8%)                     | 3.3%<br>(1.2-6.5%)                  | 170<br>(65-330)     | 3000<br>(1200-6100)       |
| Zambia   | 2005 | Female | 75 to 79 | 18%<br>(12-26%)                | 82%<br>(74-88%)          | 0.64<br>(0.31-1.1)                          | 2.8%<br>(1.1-5.2%)                   | 3.1%<br>(1.2-5.9%)                  | 140<br>(53-270)     | 1900<br>(750-3700)        |
| Zambia   | 2005 | Female | 80 to 84 | 17%<br>(11-26%)                | 83%<br>(74-89%)          | 0.61<br>(0.32-1)                            | 2.2%<br>(0.86-4.1%)                  | 2.4%<br>(0.94-4.6%)                 | 83<br>(32-160)      | 860<br>(340-1700)         |
| Zambia   | 2005 | Female | 85 to 89 | 18%<br>(11-27%)                | 82%<br>(73-89%)          | 0.61<br>(0.31-1)                            | 1.8%<br>(0.65-3.5%)                  | 2%<br>(0.71-4%)                     | 26<br>(9.2-53)      | 190<br>(70-390)           |
| Zambia   | 2005 | Female | 90 to 94 | 20%<br>(12-29%)                | 80%<br>(71-88%)          | 0.65<br>(0.32-1.2)                          | 1.5%<br>(0.42-3.3%)                  | 1.7%<br>(0.43-3.8%)                 | 6.3<br>(1.5-14)     | 32<br>(8.6-70)            |
| Zambia   | 2005 | Female | 95 plus  | 22%<br>(12-36%)                | 78%<br>(64-88%)          | 0.73<br>(0.31-1.4)                          | 1.9%<br>(0.55-4.3%)                  | 2.1%<br>(0.56-4.9%)                 | 2<br>(0.54-4.7)     | 7.1<br>(2-16)             |
| Zambia   | 2005 | Male   | All Ages | 32%<br>(28-38%)                | 68%<br>(62-72%)          | 1.2<br>(0.88-1.6)                           | 3.9%<br>(2.7-5.4%)                   | 5.4%<br>(3.6-7.4%)                  | 5500<br>(3500-7700) | 240000<br>(160000-330000) |
| Zambia   | 2005 | Male   | 15 to 19 | 31%<br>(23-39%)                | 69%<br>(61-77%)          | 1.2<br>(0.7-1.9)                            | 5.1%<br>(2.9-7.9%)                   | 5.8%<br>(3-9.4%)                    | 140<br>(73-230)     | 11000<br>(6400-18000)     |
| Zambia   | 2005 | Male   | 20 to 24 | 47%<br>(36-56%)                | 53%<br>(44-64%)          | 2<br>(1.3-2.9)                              | 10%<br>(6.1-15%)                     | 11%<br>(6.2-17%)                    | 350<br>(190-520)    | 26000<br>(15000-37000)    |
| Zambia   | 2005 | Male   | 25 to 29 | 53%<br>(44-62%)                | 47%<br>(38-56%)          | 2.7<br>(1.9-3.8)                            | 9.6%<br>(5.5-15%)                    | 10%<br>(5.4-17%)                    | 510<br>(320-730)    | 34000<br>(22000-47000)    |
| Zambia   | 2005 | Male   | 30 to 34 | 57%<br>(47-66%)                | 43%<br>(34-53%)          | 3.1<br>(2.1-4.4)                            | 7.7%<br>(4.6-11%)                    | 8%<br>(4.5-12%)                     | 550<br>(360-780)    | 33000<br>(21000-45000)    |
| Zambia   | 2005 | Male   | 35 to 39 | 59%<br>(49-68%)                | 41%<br>(32-51%)          | 3.1<br>(2-4.6)                              | 7.2%<br>(4.5-11%)                    | 7.6%<br>(4.5-12%)                   | 530<br>(340-770)    | 28000<br>(18000-40000)    |
| Zambia   | 2005 | Male   | 40 to 44 | 58%<br>(48-67%)                | 42%<br>(33-52%)          | 3<br>(1.9-4.4)                              | 7.4%<br>(4.8-11%)                    | 7.8%<br>(5-11%)                     | 490<br>(310-720)    | 23000<br>(15000-33000)    |
| Zambia   | 2005 | Male   | 45 to 49 | 54%<br>(43-64%)                | 46%<br>(36-57%)          | 2.9<br>(1.8-4.3)                            | 8.8%<br>(5.3-13%)                    | 9.5%<br>(5.5-14%)                   | 480<br>(290-720)    | 20000<br>(12000-30000)    |
| Zambia   | 2005 | Male   | 50 to 54 | 53%<br>(44-63%)                | 47%<br>(37-56%)          | 2.8<br>(1.8-4.2)                            | 11%<br>(6.8-16%)                     | 12%<br>(7.4-17%)                    | 550<br>(320-800)    | 20000<br>(12000-29000)    |
| Zambia   | 2005 | Male   | 55 to 59 | 53%<br>(43-63%)                | 47%<br>(37-57%)          | 2.5<br>(1.6-3.7)                            | 12%<br>(6.9-17%)                     | 13%<br>(7.6-19%)                    | 570<br>(330-870)    | 18000<br>(10000-27000)    |
| Zambia   | 2005 | Male   | 60 to 64 | 49%<br>(36-62%)                | 51%<br>(38-64%)          | 2<br>(1.1-3)                                | 8.9%<br>(4.9-14%)                    | 9.7%<br>(5.4-15%)                   | 460<br>(250-740)    | 13000<br>(7000-20000)     |
| Zambia   | 2005 | Male   | 65 to 69 | 46%<br>(32-60%)                | 54%<br>(40-68%)          | 1.6<br>(0.9-2.4)                            | 6.6%<br>(3.4-11%)                    | 7.3%<br>(3.8-12%)                   | 350<br>(180-580)    | 7900<br>(4100-13000)      |
| Zambia   | 2005 | Male   | 70 to 74 | 44%<br>(30-58%)                | 56%<br>(42-70%)          | 1.3<br>(0.7-2.1)                            | 4.8%<br>(2.1-8.3%)                   | 5.3%<br>(2.3-9.1%)                  | 240<br>(100-420)    | 4300<br>(1800-7500)       |
| Zambia   | 2005 | Male   | 75 to 79 | 42%<br>(27-57%)                | 58%<br>(43-73%)          | 1.1<br>(0.57-1.8)                           | 3.8%<br>(1.4-7%)                     | 4.2%<br>(1.5-7.8%)                  | 150<br>(51-290)     | 2200<br>(740-4000)        |

| Location | Year | Sex    | Age      | Prevalence of current drinkers | Prevalence of abstainers | Population average of standard drinks daily | Percent of total attributable deaths | Percent of total attributable DALYs | Attributable deaths | Attributable DALYs     |
|----------|------|--------|----------|--------------------------------|--------------------------|---------------------------------------------|--------------------------------------|-------------------------------------|---------------------|------------------------|
| Zambia   | 2005 | Male   | 80 to 84 | 39%<br>(24-55%)                | 61%<br>(45-76%)          | 0.93<br>(0.49-1.5)                          | 2.9%<br>(1.1-5.4%)                   | 3.2%<br>(1.1-6.1%)                  | 79<br>(28-150)      | 830<br>(310-1600)      |
| Zambia   | 2005 | Male   | 85 to 89 | 36%<br>(23-52%)                | 64%<br>(48-77%)          | 0.79<br>(0.41-1.4)                          | 2.3%<br>(0.85-4.3%)                  | 2.5%<br>(0.86-4.8%)                 | 24<br>(8-45)        | 180<br>(66-340)        |
| Zambia   | 2005 | Male   | 90 to 94 | 37%<br>(23-52%)                | 63%<br>(48-77%)          | 0.73<br>(0.37-1.3)                          | 1.6%<br>(0.48-3.3%)                  | 1.7%<br>(0.42-3.7%)                 | 4.6<br>(1.1-10)     | 25<br>(7.7-53)         |
| Zambia   | 2005 | Male   | 95 plus  | 40%<br>(22-59%)                | 60%<br>(41-78%)          | 0.72<br>(0.31-1.4)                          | 2.1%<br>(0.59-4.5%)                  | 2.2%<br>(0.47-5%)                   | 1.4<br>(0.29-3.2)   | 5.2<br>(1.5-11)        |
| Zambia   | 2010 | Female | All Ages | 9%<br>(7.9-10%)                | 91%<br>(90-92%)          | 0.37<br>(0.25-0.55)                         | 1.3%<br>(0.77-2.1%)                  | 2.3%<br>(1.3-3.7%)                  | 1900<br>(970-3100)  | 63000<br>(35000-99000) |
| Zambia   | 2010 | Female | 15 to 19 | 5.3%<br>(3.9-8.4%)             | 95%<br>(92-96%)          | 0.25<br>(0.12-0.44)                         | 0.79%<br>(0.4-1.4%)                  | 0.74%<br>(0.27-1.6%)                | 16<br>(5.4-34)      | 1700<br>(850-3100)     |
| Zambia   | 2010 | Female | 20 to 24 | 9.6%<br>(7.6-13%)              | 90%<br>(87-92%)          | 0.51<br>(0.27-0.87)                         | 1.6%<br>(0.81-2.9%)                  | 1.6%<br>(0.55-3.2%)                 | 41<br>(16-82)       | 3800<br>(2000-6700)    |
| Zambia   | 2010 | Female | 25 to 29 | 13%<br>(10-15%)                | 87%<br>(85-90%)          | 0.76<br>(0.44-1.2)                          | 1.7%<br>(0.83-3.2%)                  | 1.7%<br>(0.66-3.5%)                 | 76<br>(33-140)      | 5700<br>(3100-9700)    |
| Zambia   | 2010 | Female | 30 to 34 | 14%<br>(12-17%)                | 86%<br>(83-88%)          | 0.83<br>(0.47-1.3)                          | 1.7%<br>(0.86-3%)                    | 1.7%<br>(0.74-3.4%)                 | 97<br>(46-190)      | 6200<br>(3400-11000)   |
| Zambia   | 2010 | Female | 35 to 39 | 17%<br>(14-20%)                | 83%<br>(80-86%)          | 0.84<br>(0.49-1.4)                          | 1.9%<br>(0.91-3.4%)                  | 2%<br>(0.85-3.7%)                   | 110<br>(50-200)     | 6000<br>(3000-11000)   |
| Zambia   | 2010 | Female | 40 to 44 | 19%<br>(16-22%)                | 81%<br>(78-84%)          | 0.88<br>(0.5-1.5)                           | 2.2%<br>(1.1-3.7%)                   | 2.3%<br>(1.1-4.1%)                  | 97<br>(44-180)      | 4800<br>(2300-8500)    |
| Zambia   | 2010 | Female | 45 to 49 | 20%<br>(16-24%)                | 80%<br>(76-84%)          | 1<br>(0.55-1.6)                             | 3.2%<br>(1.6-5.3%)                   | 3.6%<br>(1.7-6.2%)                  | 120<br>(51-200)     | 4900<br>(2300-8500)    |
| Zambia   | 2010 | Female | 50 to 54 | 21%<br>(15-28%)                | 79%<br>(72-85%)          | 1<br>(0.55-1.8)                             | 4.4%<br>(2.2-7.7%)                   | 5.2%<br>(2.6-9.1%)                  | 150<br>(67-280)     | 5700<br>(2600-10000)   |
| Zambia   | 2010 | Female | 55 to 59 | 20%<br>(13-29%)                | 80%<br>(71-87%)          | 1<br>(0.52-1.8)                             | 4.9%<br>(2.4-8.5%)                   | 5.8%<br>(2.8-10%)                   | 190<br>(82-350)     | 6000<br>(2700-11000)   |
| Zambia   | 2010 | Female | 60 to 64 | 21%<br>(13-30%)                | 79%<br>(70-87%)          | 1<br>(0.51-1.8)                             | 4.8%<br>(2.3-8.4%)                   | 5.6%<br>(2.7-10%)                   | 210<br>(94-380)     | 5600<br>(2600-10000)   |
| Zambia   | 2010 | Female | 65 to 69 | 21%<br>(14-29%)                | 79%<br>(71-86%)          | 1<br>(0.52-1.7)                             | 4.8%<br>(2.5-8.5%)                   | 5.5%<br>(2.9-9.9%)                  | 240<br>(120-430)    | 5300<br>(2700-9500)    |
| Zambia   | 2010 | Female | 70 to 74 | 20%<br>(14-28%)                | 80%<br>(72-86%)          | 0.87<br>(0.45-1.5)                          | 3.8%<br>(1.7-7.3%)                   | 4.3%<br>(1.8-8.4%)                  | 200<br>(82-400)     | 3700<br>(1500-7200)    |
| Zambia   | 2010 | Female | 75 to 79 | 18%<br>(11-27%)                | 82%<br>(73-89%)          | 0.75<br>(0.36-1.4)                          | 3.4%<br>(1.4-6.6%)                   | 3.8%<br>(1.6-7.5%)                  | 170<br>(71-350)     | 2400<br>(1000-4800)    |
| Zambia   | 2010 | Female | 80 to 84 | 17%<br>(11-25%)                | 83%<br>(75-89%)          | 0.7<br>(0.34-1.2)                           | 2.7%<br>(1-5.1%)                     | 3%<br>(1.2-5.7%)                    | 110<br>(42-220)     | 1200<br>(450-2300)     |
| Zambia   | 2010 | Female | 85 to 89 | 18%<br>(11-27%)                | 82%<br>(73-89%)          | 0.71<br>(0.33-1.3)                          | 2.2%<br>(0.79-4.6%)                  | 2.5%<br>(0.88-5.2%)                 | 40<br>(14-85)       | 290<br>(100-630)       |
| Zambia   | 2010 | Female | 90 to 94 | 20%<br>(12-29%)                | 80%<br>(71-88%)          | 0.75<br>(0.35-1.4)                          | 2%<br>(0.51-4.5%)                    | 2.3%<br>(0.55-5.3%)                 | 9.4<br>(2.3-22)     | 49<br>(12-110)         |
| Zambia   | 2010 | Female | 95 plus  | 22%<br>(12-35%)                | 78%<br>(65-88%)          | 0.83<br>(0.32-1.7)                          | 2.4%<br>(0.71-5.5%)                  | 2.7%<br>(0.76-6.2%)                 | 2.4<br>(0.68-5.4)   | 8.3<br>(2.5-18)        |

| Location | Year | Sex    | Age      | Prevalence of current drinkers | Prevalence of abstainers | Population average of standard drinks daily | Percent of total attributable deaths | Percent of total attributable DALYs | Attributable deaths | Attributable DALYs        |
|----------|------|--------|----------|--------------------------------|--------------------------|---------------------------------------------|--------------------------------------|-------------------------------------|---------------------|---------------------------|
| Zambia   | 2010 | Male   | All Ages | 28%<br>(24-33%)                | 72%<br>(67-76%)          | 1.3<br>(0.86-1.8)                           | 5.1%<br>(3.4-6.9%)                   | 7.1%<br>(4.6-9.9%)                  | 6600<br>(4100-9400) | 280000<br>(190000-390000) |
| Zambia   | 2010 | Male   | 15 to 19 | 17%<br>(11-27%)                | 83%<br>(73-89%)          | 0.76<br>(0.38-1.4)                          | 3.4%<br>(1.8-5.9%)                   | 3.6%<br>(1.6-6.6%)                  | 100<br>(45-190)     | 8800<br>(4400-15000)      |
| Zambia   | 2010 | Male   | 20 to 24 | 37%<br>(29-46%)                | 63%<br>(54-71%)          | 1.8<br>(1.1-2.8)                            | 9.8%<br>(5.7-15%)                    | 11%<br>(5.6-16%)                    | 360<br>(180-550)    | 27000<br>(15000-39000)    |
| Zambia   | 2010 | Male   | 25 to 29 | 50%<br>(41-57%)                | 50%<br>(43-59%)          | 2.9<br>(1.9-4.3)                            | 12%<br>(6.7-17%)                     | 13%<br>(6.8-20%)                    | 570<br>(340-830)    | 38000<br>(24000-53000)    |
| Zambia   | 2010 | Male   | 30 to 34 | 54%<br>(45-63%)                | 46%<br>(37-55%)          | 3.4<br>(2.2-4.9)                            | 11%<br>(6.5-16%)                     | 12%<br>(6.7-18%)                    | 670<br>(430-950)    | 40000<br>(26000-55000)    |
| Zambia   | 2010 | Male   | 35 to 39 | 56%<br>(49-64%)                | 44%<br>(36-51%)          | 3.5<br>(2.2-5.1)                            | 10%<br>(6.7-15%)                     | 11%<br>(7.1-16%)                    | 680<br>(430-1000)   | 36000<br>(23000-51000)    |
| Zambia   | 2010 | Male   | 40 to 44 | 56%<br>(47-64%)                | 44%<br>(36-53%)          | 3.3<br>(2.1-5.1)                            | 11%<br>(6.9-16%)                     | 12%<br>(7.4-17%)                    | 650<br>(390-930)    | 30000<br>(18000-44000)    |
| Zambia   | 2010 | Male   | 45 to 49 | 53%<br>(44-61%)                | 47%<br>(39-56%)          | 3.3<br>(1.9-4.9)                            | 13%<br>(7.9-18%)                     | 14%<br>(8.7-20%)                    | 600<br>(350-900)    | 25000<br>(15000-37000)    |
| Zambia   | 2010 | Male   | 50 to 54 | 51%<br>(42-60%)                | 49%<br>(40-58%)          | 3.1<br>(1.8-4.8)                            | 15%<br>(9.2-21%)                     | 17%<br>(10-24%)                     | 620<br>(360-920)    | 22000<br>(13000-33000)    |
| Zambia   | 2010 | Male   | 55 to 59 | 51%<br>(42-59%)                | 49%<br>(41-58%)          | 2.8<br>(1.7-4.3)                            | 15%<br>(8.9-21%)                     | 17%<br>(9.8-24%)                    | 600<br>(330-890)    | 19000<br>(11000-28000)    |
| Zambia   | 2010 | Male   | 60 to 64 | 50%<br>(37-62%)                | 50%<br>(38-63%)          | 2.3<br>(1.3-3.8)                            | 11%<br>(6.2-17%)                     | 13%<br>(6.9-19%)                    | 550<br>(290-870)    | 15000<br>(8100-23000)     |
| Zambia   | 2010 | Male   | 65 to 69 | 48%<br>(33-62%)                | 52%<br>(38-67%)          | 1.9<br>(1-3.1)                              | 8.6%<br>(4.4-14%)                    | 9.6%<br>(4.8-15%)                   | 460<br>(220-750)    | 10000<br>(5100-17000)     |
| Zambia   | 2010 | Male   | 70 to 74 | 45%<br>(31-59%)                | 55%<br>(41-69%)          | 1.6<br>(0.84-2.6)                           | 6.2%<br>(2.8-11%)                    | 6.9%<br>(3.1-12%)                   | 330<br>(150-600)    | 6000<br>(2600-11000)      |
| Zambia   | 2010 | Male   | 75 to 79 | 42%<br>(28-59%)                | 58%<br>(41-72%)          | 1.3<br>(0.66-2.2)                           | 4.9%<br>(2-9%)                       | 5.4%<br>(2.2-10%)                   | 220<br>(90-410)     | 3100<br>(1200-5700)       |
| Zambia   | 2010 | Male   | 80 to 84 | 40%<br>(25-56%)                | 60%<br>(44-75%)          | 1.1<br>(0.54-1.8)                           | 3.7%<br>(1.3-7%)                     | 4.1%<br>(1.4-7.7%)                  | 120<br>(42-230)     | 1300<br>(460-2400)        |
| Zambia   | 2010 | Male   | 85 to 89 | 37%<br>(23-52%)                | 63%<br>(48-77%)          | 0.92<br>(0.46-1.6)                          | 2.9%<br>(1.1-5.5%)                   | 3.2%<br>(1.2-6.1%)                  | 36<br>(13-69)       | 270<br>(100-510)          |
| Zambia   | 2010 | Male   | 90 to 94 | 37%<br>(23-52%)                | 63%<br>(48-77%)          | 0.84<br>(0.4-1.5)                           | 2%<br>(0.62-4.3%)                    | 2.2%<br>(0.6-4.8%)                  | 6.7<br>(1.8-15)     | 36<br>(11-76)             |
| Zambia   | 2010 | Male   | 95 plus  | 39%<br>(23-59%)                | 61%<br>(41-77%)          | 0.83<br>(0.33-1.7)                          | 2.6%<br>(0.78-5.7%)                  | 2.8%<br>(0.72-6.3%)                 | 1.9<br>(0.49-4.4)   | 7.1<br>(2.1-15)           |
| Zambia   | 2016 | Female | All Ages | 10%<br>(8.5-12%)               | 90%<br>(88-91%)          | 0.43<br>(0.22-0.73)                         | 1.5%<br>(0.77-2.6%)                  | 2.6%<br>(1.1-4.5%)                  | 1700<br>(700-3300)  | 60000<br>(29000-100000)   |
| Zambia   | 2016 | Female | 15 to 19 | 8.6%<br>(5.1-13%)              | 91%<br>(87-95%)          | 0.4<br>(0.15-0.82)                          | 1%<br>(0.48-2%)                      | 1%<br>(0.28-2.5%)                   | 20<br>(5.4-47)      | 2200<br>(1000-4300)       |
| Zambia   | 2016 | Female | 20 to 24 | 12%<br>(8-17%)                 | 88%<br>(83-92%)          | 0.63<br>(0.26-1.3)                          | 1.8%<br>(0.92-3.3%)                  | 1.7%<br>(0.52-3.8%)                 | 37<br>(12-80)       | 3900<br>(2000-7000)       |
| Zambia   | 2016 | Female | 25 to 29 | 14%<br>(10-20%)                | 86%<br>(80-90%)          | 0.85<br>(0.39-1.6)                          | 2.1%<br>(1-3.7%)                     | 2.1%<br>(0.73-4.4%)                 | 66<br>(25-130)      | 5300<br>(2700-9600)       |

| Location | Year | Sex    | Age      | Prevalence of current drinkers | Prevalence of abstainers | Population average of standard drinks daily | Percent of total attributable deaths | Percent of total attributable DALYs | Attributable deaths  | Attributable DALYs        |
|----------|------|--------|----------|--------------------------------|--------------------------|---------------------------------------------|--------------------------------------|-------------------------------------|----------------------|---------------------------|
| Zambia   | 2016 | Female | 30 to 34 | 16%<br>(12-23%)                | 84%<br>(77-88%)          | 0.97<br>(0.43-1.9)                          | 2.4%<br>(1.2-4.3%)                   | 2.7%<br>(1-5.3%)                    | 89<br>(34-190)       | 6000<br>(2800-11000)      |
| Zambia   | 2016 | Female | 35 to 39 | 18%<br>(13-25%)                | 82%<br>(75-87%)          | 0.94<br>(0.41-1.8)                          | 2.8%<br>(1.4-5.2%)                   | 3.3%<br>(1.4-6.3%)                  | 110<br>(41-240)      | 6200<br>(2800-12000)      |
| Zambia   | 2016 | Female | 40 to 44 | 20%<br>(14-26%)                | 80%<br>(74-86%)          | 0.93<br>(0.39-1.8)                          | 2.9%<br>(1.4-5%)                     | 3.5%<br>(1.6-6.1%)                  | 100<br>(40-210)      | 5200<br>(2300-10000)      |
| Zambia   | 2016 | Female | 45 to 49 | 21%<br>(14-27%)                | 79%<br>(73-86%)          | 1<br>(0.44-2)                               | 3.6%<br>(1.7-6.6%)                   | 4.5%<br>(1.9-8.2%)                  | 110<br>(43-240)      | 4900<br>(2000-9900)       |
| Zambia   | 2016 | Female | 50 to 54 | 20%<br>(14-29%)                | 80%<br>(71-86%)          | 1<br>(0.43-2.1)                             | 4.3%<br>(2-7.6%)                     | 5.3%<br>(2.4-9.4%)                  | 130<br>(48-260)      | 4800<br>(1900-9300)       |
| Zambia   | 2016 | Female | 55 to 59 | 20%<br>(13-29%)                | 80%<br>(71-87%)          | 1<br>(0.42-2.1)                             | 4.5%<br>(1.8-8.4%)                   | 5.7%<br>(2.3-10%)                   | 140<br>(49-290)      | 4500<br>(1600-9000)       |
| Zambia   | 2016 | Female | 60 to 64 | 20%<br>(13-30%)                | 80%<br>(70-87%)          | 1<br>(0.41-2)                               | 4.4%<br>(1.7-8.1%)                   | 5.4%<br>(2.1-10%)                   | 170<br>(61-330)      | 4600<br>(1700-9000)       |
| Zambia   | 2016 | Female | 65 to 69 | 21%<br>(14-29%)                | 79%<br>(71-86%)          | 0.99<br>(0.44-2)                            | 4.5%<br>(1.9-8.2%)                   | 5.3%<br>(2.3-9.8%)                  | 210<br>(81-410)      | 4800<br>(1900-9200)       |
| Zambia   | 2016 | Female | 70 to 74 | 20%<br>(14-28%)                | 80%<br>(72-86%)          | 0.88<br>(0.39-1.8)                          | 3.6%<br>(1.3-7.3%)                   | 4.1%<br>(1.4-8.6%)                  | 190<br>(59-410)      | 3400<br>(1100-7500)       |
| Zambia   | 2016 | Female | 75 to 79 | 18%<br>(12-28%)                | 82%<br>(72-88%)          | 0.76<br>(0.32-1.6)                          | 3.3%<br>(1.2-6.8%)                   | 3.8%<br>(1.3-7.7%)                  | 170<br>(57-360)      | 2400<br>(810-5100)        |
| Zambia   | 2016 | Female | 80 to 84 | 17%<br>(11-26%)                | 83%<br>(74-89%)          | 0.71<br>(0.29-1.4)                          | 2.6%<br>(0.75-5.7%)                  | 3%<br>(0.88-6.6%)                   | 120<br>(35-270)      | 1200<br>(360-2800)        |
| Zambia   | 2016 | Female | 85 to 89 | 18%<br>(11-26%)                | 82%<br>(74-89%)          | 0.71<br>(0.27-1.4)                          | 2.2%<br>(0.58-5%)                    | 2.5%<br>(0.65-5.8%)                 | 50<br>(13-120)       | 370<br>(98-900)           |
| Zambia   | 2016 | Female | 90 to 94 | 19%<br>(12-29%)                | 81%<br>(71-88%)          | 0.76<br>(0.3-1.6)                           | 1.9%<br>(0.29-5%)                    | 2.2%<br>(0.28-5.8%)                 | 13<br>(1.7-35)       | 68<br>(10-180)            |
| Zambia   | 2016 | Female | 95 plus  | 22%<br>(13-36%)                | 78%<br>(64-87%)          | 0.85<br>(0.29-1.9)                          | 2.4%<br>(0.63-6%)                    | 2.7%<br>(0.65-6.8%)                 | 3.2<br>(0.75-7.9)    | 11<br>(2.8-27)            |
| Zambia   | 2016 | Male   | All Ages | 29%<br>(25-33%)                | 71%<br>(67-75%)          | 1.3<br>(0.68-2.2)                           | 5.4%<br>(3.1-7.9%)                   | 7.3%<br>(4-11%)                     | 6200<br>(3100-10000) | 270000<br>(150000-410000) |
| Zambia   | 2016 | Male   | 15 to 19 | 17%<br>(11-26%)                | 83%<br>(74-89%)          | 0.76<br>(0.32-1.5)                          | 3.1%<br>(1.5-5.4%)                   | 3.2%<br>(1.2-6.1%)                  | 93<br>(32-180)       | 8400<br>(4000-15000)      |
| Zambia   | 2016 | Male   | 20 to 24 | 37%<br>(29-45%)                | 63%<br>(55-71%)          | 1.8<br>(0.87-3.4)                           | 9%<br>(4.7-14%)                      | 9.7%<br>(4.5-16%)                   | 320<br>(140-540)     | 25000<br>(13000-40000)    |
| Zambia   | 2016 | Male   | 25 to 29 | 50%<br>(41-57%)                | 50%<br>(43-59%)          | 2.9<br>(1.5-5.2)                            | 11%<br>(6.1-17%)                     | 13%<br>(6.1-20%)                    | 530<br>(270-820)     | 36000<br>(20000-54000)    |
| Zambia   | 2016 | Male   | 30 to 34 | 54%<br>(45-62%)                | 46%<br>(38-55%)          | 3.4<br>(1.7-5.8)                            | 12%<br>(6.6-17%)                     | 13%<br>(6.7-19%)                    | 610<br>(320-920)     | 37000<br>(21000-55000)    |
| Zambia   | 2016 | Male   | 35 to 39 | 56%<br>(48-65%)                | 44%<br>(35-52%)          | 3.5<br>(1.8-5.9)                            | 12%<br>(6.8-17%)                     | 13%<br>(7.4-20%)                    | 660<br>(350-1000)    | 36000<br>(19000-55000)    |
| Zambia   | 2016 | Male   | 40 to 44 | 56%<br>(47-64%)                | 44%<br>(36-53%)          | 3.3<br>(1.7-5.8)                            | 12%<br>(7-18%)                       | 14%<br>(7.7-21%)                    | 670<br>(340-1100)    | 32000<br>(17000-51000)    |
| Zambia   | 2016 | Male   | 45 to 49 | 53%<br>(44-61%)                | 47%<br>(39-56%)          | 3.3<br>(1.6-5.8)                            | 13%<br>(7.3-19%)                     | 15%<br>(8.2-22%)                    | 640<br>(310-1100)    | 27000<br>(14000-44000)    |

| Location | Year | Sex    | Age      | Prevalence of current drinkers | Prevalence of abstainers | Population average of standard drinks daily | Percent of total attributable deaths | Percent of total attributable DALYs | Attributable deaths | Attributable DALYs     |
|----------|------|--------|----------|--------------------------------|--------------------------|---------------------------------------------|--------------------------------------|-------------------------------------|---------------------|------------------------|
| Zambia   | 2016 | Male   | 50 to 54 | 51%<br>(42-60%)                | 49%<br>(40-58%)          | 3.1<br>(1.4-5.7)                            | 14%<br>(7.3-20%)                     | 16%<br>(8.4-23%)                    | 610<br>(290-1000)   | 23000<br>(11000-37000) |
| Zambia   | 2016 | Male   | 55 to 59 | 51%<br>(42-60%)                | 49%<br>(40-58%)          | 2.9<br>(1.3-5.3)                            | 13%<br>(6.8-20%)                     | 15%<br>(8-23%)                      | 530<br>(230-870)    | 17000<br>(7700-27000)  |
| Zambia   | 2016 | Male   | 60 to 64 | 49%<br>(37-62%)                | 51%<br>(38-63%)          | 2.4<br>(1.1-4.4)                            | 10%<br>(4.9-17%)                     | 12%<br>(5.5-19%)                    | 440<br>(190-740)    | 12000<br>(5300-20000)  |
| Zambia   | 2016 | Male   | 65 to 69 | 47%<br>(34-62%)                | 53%<br>(38-66%)          | 1.9<br>(0.85-3.5)                           | 7.7%<br>(3.3-14%)                    | 8.8%<br>(3.7-16%)                   | 390<br>(150-750)    | 8800<br>(3500-17000)   |
| Zambia   | 2016 | Male   | 70 to 74 | 45%<br>(31-59%)                | 55%<br>(41-69%)          | 1.6<br>(0.69-3)                             | 5.7%<br>(2.1-11%)                    | 6.4%<br>(2.5-13%)                   | 310<br>(110-650)    | 5700<br>(2100-12000)   |
| Zambia   | 2016 | Male   | 75 to 79 | 42%<br>(28-58%)                | 58%<br>(42-72%)          | 1.3<br>(0.55-2.6)                           | 4.5%<br>(1.4-9.6%)                   | 5.1%<br>(1.6-11%)                   | 230<br>(69-500)     | 3300<br>(980-7000)     |
| Zambia   | 2016 | Male   | 80 to 84 | 39%<br>(25-55%)                | 61%<br>(45-75%)          | 1.1<br>(0.44-2.2)                           | 3.5%<br>(0.99-7.7%)                  | 3.9%<br>(1.1-8.6%)                  | 130<br>(35-300)     | 1400<br>(380-3200)     |
| Zambia   | 2016 | Male   | 85 to 89 | 36%<br>(23-51%)                | 64%<br>(49-77%)          | 0.92<br>(0.37-1.9)                          | 2.7%<br>(0.81-6.1%)                  | 3%<br>(0.85-7%)                     | 42<br>(11-96)       | 320<br>(93-710)        |
| Zambia   | 2016 | Male   | 90 to 94 | 36%<br>(23-51%)                | 64%<br>(49-77%)          | 0.84<br>(0.34-1.8)                          | 2%<br>(0.49-4.8%)                    | 2.1%<br>(0.44-5.4%)                 | 8.1<br>(1.7-21)     | 44<br>(11-110)         |
| Zambia   | 2016 | Male   | 95 plus  | 39%<br>(22-59%)                | 61%<br>(41-78%)          | 0.83<br>(0.29-1.8)                          | 2.5%<br>(0.72-5.9%)                  | 2.7%<br>(0.61-6.7%)                 | 2.1<br>(0.49-5.4)   | 7.8<br>(2.2-19)        |
| Botswana | 1990 | Female | All Ages | 16%<br>(12-20%)                | 84%<br>(80-88%)          | 0.83<br>(0.63-1.1)                          | 2.6%<br>(1.6-3.8%)                   | 4.1%<br>(2-6.6%)                    | 160<br>(78-250)     | 6000<br>(3800-8700)    |
| Botswana | 1990 | Female | 15 to 19 | 14%<br>(7.7-24%)               | 86%<br>(76-92%)          | 0.65<br>(0.27-1.2)                          | 2%<br>(0.98-3.3%)                    | 2.8%<br>(1.1-5.5%)                  | 2.1<br>(0.75-4)     | 230<br>(110-380)       |
| Botswana | 1990 | Female | 20 to 24 | 19%<br>(9.6-30%)               | 81%<br>(70-90%)          | 1.2<br>(0.56-2.1)                           | 3.1%<br>(1.7-5.3%)                   | 3.5%<br>(1.3-7.2%)                  | 4.1<br>(1.6-8.1)    | 430<br>(240-700)       |
| Botswana | 1990 | Female | 25 to 29 | 21%<br>(11-35%)                | 79%<br>(65-89%)          | 1.5<br>(0.74-2.6)                           | 3.6%<br>(2-5.8%)                     | 4.2%<br>(1.7-7.8%)                  | 5.5<br>(2.5-9.8)    | 470<br>(270-760)       |
| Botswana | 1990 | Female | 30 to 34 | 24%<br>(12-40%)                | 76%<br>(60-88%)          | 1.8<br>(0.91-3)                             | 4%<br>(2.2-6.5%)                     | 5.2%<br>(2.3-9.5%)                  | 7.2<br>(3.3-12)     | 520<br>(300-840)       |
| Botswana | 1990 | Female | 35 to 39 | 27%<br>(15-43%)                | 73%<br>(57-85%)          | 1.9<br>(0.92-3.2)                           | 4.9%<br>(2.7-7.8%)                   | 6.7%<br>(3.2-11%)                   | 9.6<br>(4.8-17)     | 580<br>(320-950)       |
| Botswana | 1990 | Female | 40 to 44 | 29%<br>(16-45%)                | 71%<br>(55-84%)          | 1.9<br>(0.86-3.4)                           | 5.8%<br>(3-9.7%)                     | 8.2%<br>(3.9-14%)                   | 10<br>(4.7-18)      | 520<br>(260-890)       |
| Botswana | 1990 | Female | 45 to 49 | 29%<br>(14-45%)                | 71%<br>(55-86%)          | 1.9<br>(0.8-3.7)                            | 6.4%<br>(3.2-11%)                    | 8.9%<br>(4.1-15%)                   | 13<br>(6-23)        | 570<br>(280-990)       |
| Botswana | 1990 | Female | 50 to 54 | 29%<br>(15-46%)                | 71%<br>(54-85%)          | 1.9<br>(0.8-3.7)                            | 6.6%<br>(3-11%)                      | 8.7%<br>(3.9-15%)                   | 16<br>(6.9-29)      | 620<br>(280-1100)      |
| Botswana | 1990 | Female | 55 to 59 | 28%<br>(16-45%)                | 72%<br>(55-84%)          | 1.8<br>(0.8-3.4)                            | 6.5%<br>(2.8-11%)                    | 8.3%<br>(3.5-15%)                   | 18<br>(7.3-32)      | 590<br>(250-1100)      |
| Botswana | 1990 | Female | 60 to 64 | 29%<br>(16-46%)                | 71%<br>(54-84%)          | 1.8<br>(0.73-3.5)                           | 6%<br>(2-11%)                        | 7.6%<br>(2.5-14%)                   | 18<br>(5.7-35)      | 500<br>(160-960)       |
| Botswana | 1990 | Female | 65 to 69 | 30%<br>(17-45%)                | 70%<br>(55-83%)          | 1.7<br>(0.78-3)                             | 5.5%<br>(1.7-11%)                    | 6.7%<br>(2.1-13%)                   | 21<br>(6.4-41)      | 480<br>(150-930)       |

| Location | Year | Sex    | Age      | Prevalence of current drinkers | Prevalence of abstainers | Population average of standard drinks daily | Percent of total attributable deaths | Percent of total attributable DALYs | Attributable deaths | Attributable DALYs     |
|----------|------|--------|----------|--------------------------------|--------------------------|---------------------------------------------|--------------------------------------|-------------------------------------|---------------------|------------------------|
| Botswana | 1990 | Female | 70 to 74 | 28%<br>(16-43%)                | 72%<br>(57-84%)          | 1.4<br>(0.59-2.5)                           | 4%<br>(0.69-8.5%)                    | 4.8%<br>(0.85-10%)                  | 14<br>(2.5-30)      | 260<br>(46-560)        |
| Botswana | 1990 | Female | 75 to 79 | 25%<br>(14-41%)                | 75%<br>(59-86%)          | 1.1<br>(0.43-2.3)                           | 2.8%<br>(-0.077-7.2%)                | 3.3%<br>(-0.093-8.4%)               | 8.2<br>(-0.21-20)   | 120<br>(-2.9-290)      |
| Botswana | 1990 | Female | 80 to 84 | 24%<br>(13-39%)                | 76%<br>(61-87%)          | 1<br>(0.41-2)                               | 2.3%<br>(-0.11-5.9%)                 | 2.6%<br>(-0.15-6.9%)                | 5.5<br>(-0.31-15)   | 58<br>(-2.7-160)       |
| Botswana | 1990 | Female | 85 to 89 | 25%<br>(13-40%)                | 75%<br>(60-87%)          | 1<br>(0.4-1.9)                              | 1.9%<br>(-0.21-5.2%)                 | 2.1%<br>(-0.3-6%)                   | 3.1<br>(-0.44-9)    | 24<br>(-2.7-67)        |
| Botswana | 1990 | Female | 90 to 94 | 27%<br>(15-43%)                | 73%<br>(57-85%)          | 1<br>(0.42-2)                               | 1.5%<br>(-0.57-4.9%)                 | 1.7%<br>(-0.75-5.7%)                | 1.1<br>(-0.47-3.5)  | 5.6<br>(-2.1-18)       |
| Botswana | 1990 | Female | 95 plus  | 32%<br>(16-51%)                | 68%<br>(49-84%)          | 1.1<br>(0.38-2.5)                           | 1.5%<br>(-1.5-8%)                    | 1.6%<br>(-1.3-6.6%)                 | 0.25<br>(-0.2-1)    | 0.89<br>(-0.6-3.4)     |
| Botswana | 1990 | Male   | All Ages | 30%<br>(24-38%)                | 70%<br>(62-76%)          | 1.8<br>(1.4-2.3)                            | 6.2%<br>(4.6-8.3%)                   | 8.6%<br>(6-12%)                     | 400<br>(270-560)    | 18000<br>(13000-24000) |
| Botswana | 1990 | Male   | 15 to 19 | 26%<br>(16-40%)                | 74%<br>(60-84%)          | 1.3<br>(0.66-2.3)                           | 5.5%<br>(3-8.9%)                     | 7.1%<br>(3.5-12%)                   | 9.4<br>(4.4-17)     | 820<br>(450-1400)      |
| Botswana | 1990 | Male   | 20 to 24 | 39%<br>(25-56%)                | 61%<br>(44-75%)          | 2.8<br>(1.5-4.5)                            | 10%<br>(6.3-15%)                     | 12%<br>(6.5-18%)                    | 26<br>(14-42)       | 2100<br>(1200-3100)    |
| Botswana | 1990 | Male   | 25 to 29 | 46%<br>(29-63%)                | 54%<br>(37-71%)          | 3.9<br>(2.3-5.9)                            | 11%<br>(6.5-16%)                     | 12%<br>(6.5-19%)                    | 33<br>(20-48)       | 2300<br>(1500-3200)    |
| Botswana | 1990 | Male   | 30 to 34 | 49%<br>(31-66%)                | 51%<br>(34-69%)          | 4.3<br>(2.6-6.7)                            | 11%<br>(6.7-15%)                     | 12%<br>(7.1-19%)                    | 34<br>(21-50)       | 2200<br>(1400-3100)    |
| Botswana | 1990 | Male   | 35 to 39 | 51%<br>(34-68%)                | 49%<br>(32-66%)          | 4.3<br>(2.5-6.7)                            | 12%<br>(7.2-17%)                     | 14%<br>(8-20%)                      | 38<br>(23-56)       | 2100<br>(1400-3000)    |
| Botswana | 1990 | Male   | 40 to 44 | 51%<br>(35-69%)                | 49%<br>(31-65%)          | 4.2<br>(2.2-6.7)                            | 13%<br>(7.9-18%)                     | 15%<br>(9.1-22%)                    | 35<br>(20-52)       | 1700<br>(1000-2500)    |
| Botswana | 1990 | Male   | 45 to 49 | 51%<br>(33-68%)                | 49%<br>(32-67%)          | 4.2<br>(2.2-7.3)                            | 15%<br>(9.6-21%)                     | 18%<br>(12-25%)                     | 41<br>(25-61)       | 1800<br>(1100-2600)    |
| Botswana | 1990 | Male   | 50 to 54 | 51%<br>(32-69%)                | 49%<br>(31-68%)          | 4.1<br>(2-7)                                | 15%<br>(9.5-21%)                     | 18%<br>(11-26%)                     | 44<br>(26-66)       | 1700<br>(1000-2500)    |
| Botswana | 1990 | Male   | 55 to 59 | 50%<br>(33-69%)                | 50%<br>(31-67%)          | 3.8<br>(1.9-6.4)                            | 14%<br>(8.7-20%)                     | 17%<br>(10-24%)                     | 42<br>(23-65)       | 1400<br>(780-2100)     |
| Botswana | 1990 | Male   | 60 to 64 | 48%<br>(32-67%)                | 52%<br>(33-68%)          | 3.2<br>(1.5-5.7)                            | 12%<br>(6.1-17%)                     | 14%<br>(7-21%)                      | 34<br>(17-55)       | 940<br>(470-1500)      |
| Botswana | 1990 | Male   | 65 to 69 | 45%<br>(30-62%)                | 55%<br>(38-70%)          | 2.5<br>(1.2-4.2)                            | 9%<br>(4.4-15%)                      | 11%<br>(5.2-17%)                    | 31<br>(14-52)       | 710<br>(330-1200)      |
| Botswana | 1990 | Male   | 70 to 74 | 42%<br>(27-58%)                | 58%<br>(42-73%)          | 1.8<br>(0.87-3)                             | 5.5%<br>(2.1-9.5%)                   | 6.2%<br>(2.5-11%)                   | 16<br>(5.9-30)      | 300<br>(120-550)       |
| Botswana | 1990 | Male   | 75 to 79 | 41%<br>(27-58%)                | 59%<br>(42-73%)          | 1.4<br>(0.63-2.6)                           | 3.7%<br>(1-7.7%)                     | 4.2%<br>(1.1-8.6%)                  | 8<br>(2.2-17)       | 120<br>(33-240)        |
| Botswana | 1990 | Male   | 80 to 84 | 39%<br>(25-57%)                | 61%<br>(43-75%)          | 1.2<br>(0.58-2.3)                           | 2.8%<br>(0.71-6.1%)                  | 3.1%<br>(0.71-6.9%)                 | 4.2<br>(0.93-9)     | 45<br>(11-97)          |
| Botswana | 1990 | Male   | 85 to 89 | 36%<br>(23-51%)                | 64%<br>(49-77%)          | 1<br>(0.47-1.9)                             | 2%<br>(0.37-4.3%)                    | 2.1%<br>(0.32-4.8%)                 | 1.7<br>(0.25-3.9)   | 14<br>(2.6-30)         |

| Location | Year | Sex    | Age      | Prevalence of current drinkers | Prevalence of abstainers | Population average of standard drinks daily | Percent of total attributable deaths | Percent of total attributable DALYs | Attributable deaths    | Attributable DALYs     |
|----------|------|--------|----------|--------------------------------|--------------------------|---------------------------------------------|--------------------------------------|-------------------------------------|------------------------|------------------------|
| Botswana | 1990 | Male   | 90 to 94 | 35%<br>(22-51%)                | 65%<br>(49-78%)          | 0.91<br>(0.39-1.7)                          | 1.3%<br>(0.11-3.2%)                  | 1.4%<br>(-0.013-3.6%)               | 0.43<br>(-0.0039-1.1)  | 2.4<br>(0.21-5.6)      |
| Botswana | 1990 | Male   | 95 plus  | 37%<br>(21-56%)                | 63%<br>(44-79%)          | 0.85<br>(0.29-1.7)                          | 1.2%<br>(-0.034-3.4%)                | 1.1%<br>(-0.28-3.6%)                | 0.076<br>(-0.018-0.24) | 0.31<br>(-0.009-0.9)   |
| Botswana | 1995 | Female | All Ages | 17%<br>(13-21%)                | 83%<br>(79-87%)          | 0.9<br>(0.7-1.1)                            | 1.8%<br>(0.73-3.3%)                  | 2.6%<br>(0.91-5.1%)                 | 180<br>(48-430)        | 7200<br>(2700-15000)   |
| Botswana | 1995 | Female | 15 to 19 | 14%<br>(7.8-23%)               | 86%<br>(77-92%)          | 0.68<br>(0.3-1.3)                           | 1.5%<br>(0.7-2.9%)                   | 1.8%<br>(0.48-4%)                   | 2.4<br>(0.56-6.2)      | 270<br>(120-550)       |
| Botswana | 1995 | Female | 20 to 24 | 19%<br>(10-31%)                | 81%<br>(69-90%)          | 1.2<br>(0.6-2.1)                            | 1.6%<br>(0.65-3.2%)                  | 1.3%<br>(0.3-3.3%)                  | 4.8<br>(1.1-12)        | 500<br>(220-1000)      |
| Botswana | 1995 | Female | 25 to 29 | 22%<br>(12-36%)                | 78%<br>(64-88%)          | 1.6<br>(0.79-2.8)                           | 1.3%<br>(0.47-2.9%)                  | 1.2%<br>(0.23-3.1%)                 | 6.6<br>(1.5-18)        | 560<br>(230-1300)      |
| Botswana | 1995 | Female | 30 to 34 | 25%<br>(13-40%)                | 75%<br>(60-87%)          | 1.9<br>(0.97-3.1)                           | 1.6%<br>(0.55-3.4%)                  | 1.5%<br>(0.35-3.8%)                 | 8.6<br>(1.9-24)        | 610<br>(220-1500)      |
| Botswana | 1995 | Female | 35 to 39 | 28%<br>(16-44%)                | 72%<br>(56-84%)          | 1.9<br>(0.98-3.3)                           | 2.2%<br>(0.67-4.9%)                  | 2.3%<br>(0.47-5.6%)                 | 12<br>(2.5-34)         | 720<br>(230-1800)      |
| Botswana | 1995 | Female | 40 to 44 | 29%<br>(17-47%)                | 71%<br>(53-83%)          | 2<br>(0.93-3.4)                             | 3%<br>(0.98-6.5%)                    | 3.3%<br>(0.82-7.5%)                 | 15<br>(3.4-42)         | 790<br>(230-2000)      |
| Botswana | 1995 | Female | 45 to 49 | 30%<br>(15-47%)                | 70%<br>(53-85%)          | 2<br>(0.89-3.8)                             | 3.7%<br>(1.2-7.7%)                   | 4.2%<br>(1.1-9.2%)                  | 15<br>(3.1-38)         | 680<br>(180-1600)      |
| Botswana | 1995 | Female | 50 to 54 | 29%<br>(16-48%)                | 71%<br>(52-84%)          | 1.9<br>(0.87-3.9)                           | 4.5%<br>(1.5-8.8%)                   | 5.2%<br>(1.6-11%)                   | 18<br>(3.8-44)         | 690<br>(180-1600)      |
| Botswana | 1995 | Female | 55 to 59 | 29%<br>(17-46%)                | 71%<br>(54-83%)          | 1.9<br>(0.85-3.6)                           | 4.9%<br>(1.8-9.5%)                   | 5.9%<br>(2-11%)                     | 20<br>(4.4-50)         | 680<br>(180-1600)      |
| Botswana | 1995 | Female | 60 to 64 | 30%<br>(16-48%)                | 70%<br>(52-84%)          | 1.9<br>(0.77-3.6)                           | 5%<br>(1.5-10%)                      | 6.1%<br>(1.8-12%)                   | 21<br>(4.3-55)         | 600<br>(140-1500)      |
| Botswana | 1995 | Female | 65 to 69 | 30%<br>(17-47%)                | 70%<br>(53-83%)          | 1.7<br>(0.79-3.1)                           | 4.8%<br>(1.4-10%)                    | 5.9%<br>(1.8-12%)                   | 21<br>(4.3-53)         | 480<br>(110-1200)      |
| Botswana | 1995 | Female | 70 to 74 | 28%<br>(17-44%)                | 72%<br>(56-83%)          | 1.4<br>(0.64-2.6)                           | 3.8%<br>(0.68-8.4%)                  | 4.6%<br>(0.87-10%)                  | 18<br>(2.4-51)         | 340<br>(49-920)        |
| Botswana | 1995 | Female | 75 to 79 | 25%<br>(14-41%)                | 75%<br>(59-86%)          | 1.2<br>(0.46-2.3)                           | 2.8%<br>(0.0081-7%)                  | 3.3%<br>(-0.025-8.4%)               | 11<br>(-0.077-33)      | 150<br>(0.035-470)     |
| Botswana | 1995 | Female | 80 to 84 | 24%<br>(13-39%)                | 76%<br>(61-87%)          | 1.1<br>(0.43-2.1)                           | 2.3%<br>(-0.0067-6.1%)               | 2.7%<br>(-0.023-7.4%)               | 6.1<br>(-0.059-19)     | 65<br>(-0.25-200)      |
| Botswana | 1995 | Female | 85 to 89 | 25%<br>(14-40%)                | 75%<br>(60-86%)          | 1<br>(0.43-2)                               | 1.9%<br>(-0.15-5.2%)                 | 2.2%<br>(-0.26-6.1%)                | 3<br>(-0.31-9.4)       | 23<br>(-2-69)          |
| Botswana | 1995 | Female | 90 to 94 | 28%<br>(16-44%)                | 72%<br>(56-84%)          | 1.1<br>(0.44-2.1)                           | 1.6%<br>(-0.54-5.1%)                 | 1.9%<br>(-0.71-6.1%)                | 1.2<br>(-0.45-4.4)     | 6.4<br>(-2-22)         |
| Botswana | 1995 | Female | 95 plus  | 33%<br>(17-54%)                | 67%<br>(46-83%)          | 1.2<br>(0.4-2.6)                            | 1.6%<br>(-0.98-6.3%)                 | 1.8%<br>(-1.3-7.1%)                 | 0.33<br>(-0.25-1.5)    | 1.2<br>(-0.76-4.9)     |
| Botswana | 1995 | Male   | All Ages | 32%<br>(26-39%)                | 68%<br>(61-74%)          | 1.9<br>(1.5-2.4)                            | 5%<br>(2.5-8%)                       | 6.4%<br>(3-10%)                     | 570<br>(210-1100)      | 26000<br>(11000-46000) |
| Botswana | 1995 | Male   | 15 to 19 | 26%<br>(17-40%)                | 74%<br>(60-83%)          | 1.4<br>(0.68-2.4)                           | 5.4%<br>(2.9-8.8%)                   | 6.7%<br>(3.3-12%)                   | 12<br>(4.3-25)         | 1100<br>(480-2000)     |



| Location | Year | Sex    | Age      | Prevalence of current drinkers | Prevalence of abstainers | Population average of standard drinks daily | Percent of total attributable deaths | Percent of total attributable DALYs | Attributable deaths   | Attributable DALYs    |
|----------|------|--------|----------|--------------------------------|--------------------------|---------------------------------------------|--------------------------------------|-------------------------------------|-----------------------|-----------------------|
| Botswana | 1995 | Male   | 20 to 24 | 40%<br>(26-56%)                | 60%<br>(44-74%)          | 2.9<br>(1.6-4.6)                            | 7.4%<br>(3.6-12%)                    | 7.8%<br>(3.1-14%)                   | 35<br>(12-65)         | 2700<br>(1200-4600)   |
| Botswana | 1995 | Male   | 25 to 29 | 46%<br>(29-64%)                | 54%<br>(36-71%)          | 4<br>(2.4-6.1)                              | 5.7%<br>(2.4-10%)                    | 5.8%<br>(2-11%)                     | 43<br>(15-80)         | 3000<br>(1300-5100)   |
| Botswana | 1995 | Male   | 30 to 34 | 49%<br>(31-67%)                | 51%<br>(33-69%)          | 4.4<br>(2.7-6.6)                            | 5.5%<br>(2.3-9.8%)                   | 5.6%<br>(1.9-11%)                   | 47<br>(16-90)         | 2900<br>(1200-5200)   |
| Botswana | 1995 | Male   | 35 to 39 | 51%<br>(35-69%)                | 49%<br>(31-65%)          | 4.3<br>(2.5-6.7)                            | 6.2%<br>(2.4-11%)                    | 6.5%<br>(2.2-12%)                   | 54<br>(17-110)        | 3000<br>(1100-5700)   |
| Botswana | 1995 | Male   | 40 to 44 | 51%<br>(35-69%)                | 49%<br>(31-65%)          | 4.3<br>(2.3-6.8)                            | 7.3%<br>(2.9-13%)                    | 7.8%<br>(2.8-15%)                   | 63<br>(19-140)        | 3000<br>(1100-6300)   |
| Botswana | 1995 | Male   | 45 to 49 | 51%<br>(33-68%)                | 49%<br>(32-67%)          | 4.2<br>(2.3-7)                              | 9.5%<br>(4.2-16%)                    | 10%<br>(4.2-18%)                    | 61<br>(19-130)        | 2600<br>(940-5400)    |
| Botswana | 1995 | Male   | 50 to 54 | 51%<br>(33-69%)                | 49%<br>(31-67%)          | 4.1<br>(2.2-7)                              | 12%<br>(6-18%)                       | 13%<br>(6.5-20%)                    | 65<br>(20-130)        | 2500<br>(890-4900)    |
| Botswana | 1995 | Male   | 55 to 59 | 51%<br>(34-69%)                | 49%<br>(31-66%)          | 3.9<br>(2-6.5)                              | 12%<br>(6.5-18%)                     | 13%<br>(7.2-20%)                    | 63<br>(21-130)        | 2100<br>(780-4000)    |
| Botswana | 1995 | Male   | 60 to 64 | 49%<br>(32-68%)                | 51%<br>(32-68%)          | 3.3<br>(1.6-5.9)                            | 10%<br>(5.2-16%)                     | 12%<br>(5.9-18%)                    | 51<br>(17-100)        | 1400<br>(520-2800)    |
| Botswana | 1995 | Male   | 65 to 69 | 45%<br>(31-62%)                | 55%<br>(38-69%)          | 2.5<br>(1.3-4.3)                            | 8.2%<br>(4-14%)                      | 9.4%<br>(4.7-15%)                   | 36<br>(12-71)         | 820<br>(300-1600)     |
| Botswana | 1995 | Male   | 70 to 74 | 42%<br>(27-59%)                | 58%<br>(41-73%)          | 1.8<br>(0.88-3.1)                           | 5.2%<br>(2-9.4%)                     | 5.9%<br>(2.3-11%)                   | 24<br>(7.6-49)        | 440<br>(150-890)      |
| Botswana | 1995 | Male   | 75 to 79 | 41%<br>(27-58%)                | 59%<br>(42-73%)          | 1.5<br>(0.65-2.8)                           | 3.6%<br>(1-7.5%)                     | 4%<br>(1-8.5%)                      | 12<br>(2.8-26)        | 170<br>(45-370)       |
| Botswana | 1995 | Male   | 80 to 84 | 40%<br>(24-57%)                | 60%<br>(43-76%)          | 1.3<br>(0.58-2.3)                           | 2.9%<br>(0.73-6.2%)                  | 3.2%<br>(0.75-7%)                   | 5.3<br>(1.2-12)       | 58<br>(14-130)        |
| Botswana | 1995 | Male   | 85 to 89 | 37%<br>(24-53%)                | 63%<br>(47-76%)          | 1.1<br>(0.49-1.9)                           | 2.1%<br>(0.39-4.6%)                  | 2.2%<br>(0.31-5.1%)                 | 1.9<br>(0.26-4.6)     | 15<br>(2.9-35)        |
| Botswana | 1995 | Male   | 90 to 94 | 36%<br>(23-51%)                | 64%<br>(49-77%)          | 0.94<br>(0.4-1.8)                           | 1.4%<br>(0.18-3.6%)                  | 1.5%<br>(0.081-4%)                  | 0.54<br>(0.03-1.4)    | 3<br>(0.36-7.6)       |
| Botswana | 1995 | Male   | 95 plus  | 38%<br>(21-57%)                | 62%<br>(43-79%)          | 0.87<br>(0.3-1.8)                           | 1.3%<br>(0.038-3.7%)                 | 1.3%<br>(-0.17-4%)                  | 0.11<br>(-0.014-0.36) | 0.46<br>(0.013-1.3)   |
| Botswana | 2000 | Female | All Ages | 17%<br>(13-22%)                | 83%<br>(78-87%)          | 1.1<br>(0.87-1.4)                           | 1.8%<br>(0.83-3.8%)                  | 2.6%<br>(1-5.4%)                    | 360<br>(120-950)      | 13000<br>(5500-33000) |
| Botswana | 2000 | Female | 15 to 19 | 14%<br>(8.1-24%)               | 86%<br>(76-92%)          | 0.81<br>(0.35-1.5)                          | 2.1%<br>(0.92-4.2%)                  | 2.6%<br>(0.78-5.9%)                 | 4.8<br>(1.4-12)       | 470<br>(190-990)      |
| Botswana | 2000 | Female | 20 to 24 | 19%<br>(10-32%)                | 81%<br>(68-90%)          | 1.4<br>(0.69-2.6)                           | 1.6%<br>(0.63-3.5%)                  | 1.4%<br>(0.4-3.7%)                  | 10<br>(2.8-29)        | 900<br>(370-2100)     |
| Botswana | 2000 | Female | 25 to 29 | 22%<br>(12-35%)                | 78%<br>(65-88%)          | 1.9<br>(0.93-3.2)                           | 1.1%<br>(0.36-2.8%)                  | 0.95%<br>(0.23-2.9%)                | 14<br>(3.6-44)        | 1000<br>(390-2800)    |
| Botswana | 2000 | Female | 30 to 34 | 25%<br>(13-40%)                | 75%<br>(60-87%)          | 2.2<br>(1.1-3.7)                            | 1.1%<br>(0.38-2.9%)                  | 1.1%<br>(0.28-3.1%)                 | 17<br>(4.5-53)        | 1100<br>(390-3000)    |
| Botswana | 2000 | Female | 35 to 39 | 28%<br>(15-44%)                | 72%<br>(56-85%)          | 2.3<br>(1.2-4)                              | 1.7%<br>(0.52-4.5%)                  | 1.7%<br>(0.43-4.9%)                 | 24<br>(6.1-77)        | 1300<br>(420-4000)    |

| Location | Year | Sex    | Age      | Prevalence of current drinkers | Prevalence of abstainers | Population average of standard drinks daily | Percent of total attributable deaths | Percent of total attributable DALYs | Attributable deaths | Attributable DALYs     |
|----------|------|--------|----------|--------------------------------|--------------------------|---------------------------------------------|--------------------------------------|-------------------------------------|---------------------|------------------------|
| Botswana | 2000 | Female | 40 to 44 | 29%<br>(17-46%)                | 71%<br>(54-83%)          | 2.4<br>(1.1-4.2)                            | 2.2%<br>(0.77-5.6%)                  | 2.3%<br>(0.68-6.1%)                 | 30<br>(7.9-88)      | 1500<br>(440-4000)     |
| Botswana | 2000 | Female | 45 to 49 | 30%<br>(16-46%)                | 70%<br>(54-84%)          | 2.4<br>(1-4.5)                              | 3%<br>(1.1-7%)                       | 3.2%<br>(1-7.6%)                    | 35<br>(10-100)      | 1500<br>(490-4200)     |
| Botswana | 2000 | Female | 50 to 54 | 30%<br>(16-49%)                | 70%<br>(51-84%)          | 2.3<br>(1-4.7)                              | 3.9%<br>(1.5-8.2%)                   | 4.2%<br>(1.5-9%)                    | 31<br>(9.5-89)      | 1200<br>(390-3200)     |
| Botswana | 2000 | Female | 55 to 59 | 30%<br>(17-46%)                | 70%<br>(54-83%)          | 2.3<br>(0.99-4.3)                           | 5%<br>(1.9-10%)                      | 5.6%<br>(2-11%)                     | 36<br>(9.8-99)      | 1200<br>(350-3200)     |
| Botswana | 2000 | Female | 60 to 64 | 30%<br>(17-48%)                | 70%<br>(52-83%)          | 2.2<br>(0.89-4.4)                           | 5.5%<br>(1.8-11%)                    | 6.3%<br>(2.1-12%)                   | 40<br>(10-110)      | 1100<br>(290-3000)     |
| Botswana | 2000 | Female | 65 to 69 | 31%<br>(17-47%)                | 69%<br>(53-83%)          | 2<br>(0.94-3.8)                             | 5.8%<br>(2-11%)                      | 6.7%<br>(2.3-13%)                   | 42<br>(10-110)      | 960<br>(230-2400)      |
| Botswana | 2000 | Female | 70 to 74 | 29%<br>(17-45%)                | 71%<br>(55-83%)          | 1.7<br>(0.71-3.2)                           | 4.9%<br>(1.2-10%)                    | 5.7%<br>(1.5-12%)                   | 32<br>(6.1-88)      | 590<br>(120-1600)      |
| Botswana | 2000 | Female | 75 to 79 | 26%<br>(14-41%)                | 74%<br>(59-86%)          | 1.4<br>(0.52-2.8)                           | 3.9%<br>(0.39-9.1%)                  | 4.5%<br>(0.46-10%)                  | 25<br>(2.1-72)      | 350<br>(31-1000)       |
| Botswana | 2000 | Female | 80 to 84 | 25%<br>(13-40%)                | 75%<br>(60-87%)          | 1.3<br>(0.52-2.5)                           | 3.5%<br>(0.36-8.5%)                  | 4%<br>(0.41-9.9%)                   | 14<br>(1.3-41)      | 150<br>(15-430)        |
| Botswana | 2000 | Female | 85 to 89 | 25%<br>(14-41%)                | 75%<br>(59-86%)          | 1.2<br>(0.51-2.4)                           | 3%<br>(0.27-7.4%)                    | 3.5%<br>(0.26-8.6%)                 | 6.4<br>(0.41-17)    | 48<br>(3.4-130)        |
| Botswana | 2000 | Female | 90 to 94 | 28%<br>(16-44%)                | 72%<br>(56-84%)          | 1.3<br>(0.5-2.6)                            | 2.7%<br>(-0.14-7.4%)                 | 3.1%<br>(-0.24-8.7%)                | 2.3<br>(-0.14-6.4)  | 12<br>(-0.55-32)       |
| Botswana | 2000 | Female | 95 plus  | 33%<br>(17-52%)                | 67%<br>(48-83%)          | 1.4<br>(0.47-3.1)                           | 2.8%<br>(-0.55-8.7%)                 | 3.1%<br>(-0.75-9.9%)                | 0.74<br>(-0.19-2.4) | 2.6<br>(-0.54-8)       |
| Botswana | 2000 | Male   | All Ages | 33%<br>(27-40%)                | 67%<br>(60-73%)          | 2.3<br>(1.8-2.9)                            | 5.2%<br>(2.8-8.8%)                   | 6.4%<br>(3.3-11%)                   | 1000<br>(430-2100)  | 44000<br>(21000-86000) |
| Botswana | 2000 | Male   | 15 to 19 | 27%<br>(17-41%)                | 73%<br>(59-83%)          | 1.6<br>(0.78-2.7)                           | 7%<br>(3.8-12%)                      | 8.9%<br>(4.3-15%)                   | 21<br>(8.2-42)      | 1800<br>(820-3300)     |
| Botswana | 2000 | Male   | 20 to 24 | 40%<br>(26-56%)                | 60%<br>(44-74%)          | 3.3<br>(1.8-5.3)                            | 8.9%<br>(4.6-14%)                    | 9.6%<br>(4.3-16%)                   | 62<br>(26-120)      | 4600<br>(2200-8200)    |
| Botswana | 2000 | Male   | 25 to 29 | 47%<br>(29-64%)                | 53%<br>(36-71%)          | 4.5<br>(2.7-6.6)                            | 5.3%<br>(2.3-9.9%)                   | 5.3%<br>(2.1-11%)                   | 75<br>(32-140)      | 5000<br>(2400-9100)    |
| Botswana | 2000 | Male   | 30 to 34 | 50%<br>(31-68%)                | 50%<br>(32-69%)          | 5<br>(3.1-7.5)                              | 4.4%<br>(2-8.2%)                     | 4.5%<br>(1.8-8.7%)                  | 80<br>(32-160)      | 4800<br>(2100-9200)    |
| Botswana | 2000 | Male   | 35 to 39 | 51%<br>(35-69%)                | 49%<br>(31-65%)          | 5<br>(2.9-7.5)                              | 5.1%<br>(2.1-10%)                    | 5.3%<br>(2-11%)                     | 91<br>(33-190)      | 4800<br>(1900-10000)   |
| Botswana | 2000 | Male   | 40 to 44 | 51%<br>(35-70%)                | 49%<br>(30-65%)          | 4.9<br>(2.6-7.8)                            | 6%<br>(2.5-12%)                      | 6.2%<br>(2.4-12%)                   | 110<br>(38-240)     | 5100<br>(1900-11000)   |
| Botswana | 2000 | Male   | 45 to 49 | 51%<br>(33-69%)                | 49%<br>(31-67%)          | 4.8<br>(2.5-7.9)                            | 8%<br>(3.5-15%)                      | 8.4%<br>(3.4-16%)                   | 130<br>(45-300)     | 5400<br>(2000-12000)   |
| Botswana | 2000 | Male   | 50 to 54 | 51%<br>(33-69%)                | 49%<br>(31-67%)          | 4.7<br>(2.4-7.6)                            | 10%<br>(5.4-17%)                     | 11%<br>(5.5-19%)                    | 110<br>(42-250)     | 4200<br>(1700-8900)    |
| Botswana | 2000 | Male   | 55 to 59 | 51%<br>(34-69%)                | 49%<br>(31-66%)          | 4.4<br>(2.3-7.4)                            | 12%<br>(6.7-19%)                     | 13%<br>(7.3-20%)                    | 110<br>(43-230)     | 3500<br>(1500-7300)    |

| Location | Year | Sex    | Age      | Prevalence of current drinkers | Prevalence of abstainers | Population average of standard drinks daily | Percent of total attributable deaths | Percent of total attributable DALYs | Attributable deaths    | Attributable DALYs    |
|----------|------|--------|----------|--------------------------------|--------------------------|---------------------------------------------|--------------------------------------|-------------------------------------|------------------------|-----------------------|
| Botswana | 2000 | Male   | 60 to 64 | 49%<br>(33-68%)                | 51%<br>(32-67%)          | 3.8<br>(1.8-6.6)                            | 11%<br>(5.6-17%)                     | 12%<br>(6.2-18%)                    | 91<br>(35-190)         | 2500<br>(1000-5100)   |
| Botswana | 2000 | Male   | 65 to 69 | 46%<br>(31-63%)                | 54%<br>(37-69%)          | 2.9<br>(1.5-4.9)                            | 9.3%<br>(4.6-15%)                    | 10%<br>(5.1-17%)                    | 66<br>(27-140)         | 1500<br>(630-3000)    |
| Botswana | 2000 | Male   | 70 to 74 | 43%<br>(28-60%)                | 57%<br>(40-72%)          | 2.1<br>(1-3.6)                              | 6.2%<br>(2.6-11%)                    | 6.9%<br>(2.9-12%)                   | 35<br>(12-72)          | 640<br>(230-1300)     |
| Botswana | 2000 | Male   | 75 to 79 | 42%<br>(28-59%)                | 58%<br>(41-72%)          | 1.7<br>(0.76-3.1)                           | 4.5%<br>(1.4-8.9%)                   | 5%<br>(1.5-10%)                     | 23<br>(6.3-49)         | 320<br>(92-690)       |
| Botswana | 2000 | Male   | 80 to 84 | 40%<br>(25-57%)                | 60%<br>(43-75%)          | 1.5<br>(0.68-2.6)                           | 3.8%<br>(1.1-7.5%)                   | 4.2%<br>(1.1-8.4%)                  | 10<br>(2.8-22)         | 110<br>(32-230)       |
| Botswana | 2000 | Male   | 85 to 89 | 37%<br>(24-53%)                | 63%<br>(47-76%)          | 1.2<br>(0.58-2.1)                           | 2.7%<br>(0.68-5.6%)                  | 3%<br>(0.68-6.3%)                   | 3.1<br>(0.71-6.8)      | 24<br>(6.2-51)        |
| Botswana | 2000 | Male   | 90 to 94 | 36%<br>(23-52%)                | 64%<br>(48-77%)          | 1.1<br>(0.47-2)                             | 1.9%<br>(0.39-4.5%)                  | 2.1%<br>(0.34-4.9%)                 | 0.78<br>(0.12-1.8)     | 4.3<br>(0.83-9.8)     |
| Botswana | 2000 | Male   | 95 plus  | 38%<br>(21-57%)                | 62%<br>(43-79%)          | 0.99<br>(0.36-2)                            | 1.8%<br>(0.16-4.4%)                  | 1.8%<br>(-0.019-5%)                 | 0.19<br>(-0.0019-0.51) | 0.72<br>(0.066-1.8)   |
| Botswana | 2005 | Female | All Ages | 17%<br>(14-22%)                | 83%<br>(78-86%)          | 1.3<br>(0.99-1.7)                           | 1.9%<br>(0.99-3.8%)                  | 2.8%<br>(1.3-5.4%)                  | 420<br>(170-1000)      | 15000<br>(7200-34000) |
| Botswana | 2005 | Female | 15 to 19 | 14%<br>(7.9-23%)               | 86%<br>(77-92%)          | 0.9<br>(0.39-1.7)                           | 2.6%<br>(1.2-4.9%)                   | 3.6%<br>(1.3-7.7%)                  | 5.2<br>(1.8-13)        | 520<br>(220-1100)     |
| Botswana | 2005 | Female | 20 to 24 | 19%<br>(10-31%)                | 81%<br>(69-90%)          | 1.6<br>(0.78-2.9)                           | 2.3%<br>(0.88-4.6%)                  | 2.1%<br>(0.6-5.1%)                  | 11<br>(3.7-31)         | 1000<br>(480-2300)    |
| Botswana | 2005 | Female | 25 to 29 | 22%<br>(12-36%)                | 78%<br>(64-88%)          | 2.1<br>(1-3.8)                              | 1.2%<br>(0.43-3%)                    | 1.1%<br>(0.3-3.2%)                  | 16<br>(5.1-47)         | 1200<br>(510-3000)    |
| Botswana | 2005 | Female | 30 to 34 | 24%<br>(13-40%)                | 76%<br>(60-87%)          | 2.4<br>(1.2-4.2)                            | 1%<br>(0.4-2.5%)                     | 0.95%<br>(0.3-2.5%)                 | 19<br>(6.1-52)         | 1200<br>(490-3100)    |
| Botswana | 2005 | Female | 35 to 39 | 27%<br>(15-43%)                | 73%<br>(57-85%)          | 2.6<br>(1.3-4.5)                            | 1.4%<br>(0.53-3.5%)                  | 1.4%<br>(0.45-3.8%)                 | 24<br>(7.8-72)         | 1400<br>(500-3700)    |
| Botswana | 2005 | Female | 40 to 44 | 29%<br>(17-46%)                | 71%<br>(54-83%)          | 2.7<br>(1.1-4.9)                            | 1.9%<br>(0.76-4.4%)                  | 1.9%<br>(0.69-4.7%)                 | 29<br>(9.4-81)         | 1400<br>(520-3800)    |
| Botswana | 2005 | Female | 45 to 49 | 30%<br>(15-46%)                | 70%<br>(54-85%)          | 2.7<br>(1.2-5)                              | 2.7%<br>(1.1-5.9%)                   | 2.8%<br>(1.1-6.3%)                  | 36<br>(12-94)          | 1500<br>(580-3900)    |
| Botswana | 2005 | Female | 50 to 54 | 30%<br>(16-48%)                | 70%<br>(52-84%)          | 2.6<br>(1.2-5.1)                            | 3.8%<br>(1.6-7.5%)                   | 4%<br>(1.6-8.1%)                    | 41<br>(14-110)         | 1600<br>(580-3900)    |
| Botswana | 2005 | Female | 55 to 59 | 29%<br>(17-47%)                | 71%<br>(53-83%)          | 2.6<br>(1.1-4.8)                            | 5.2%<br>(2.2-9.8%)                   | 5.8%<br>(2.4-11%)                   | 38<br>(13-99)          | 1200<br>(450-3200)    |
| Botswana | 2005 | Female | 60 to 64 | 30%<br>(16-47%)                | 70%<br>(53-84%)          | 2.5<br>(1-4.9)                              | 6%<br>(2.3-11%)                      | 7%<br>(2.7-13%)                     | 42<br>(13-110)         | 1200<br>(380-3000)    |
| Botswana | 2005 | Female | 65 to 69 | 30%<br>(17-47%)                | 70%<br>(53-83%)          | 2.3<br>(1-4.2)                              | 6.6%<br>(2.6-12%)                    | 7.7%<br>(3.1-14%)                   | 50<br>(16-120)         | 1100<br>(370-2800)    |
| Botswana | 2005 | Female | 70 to 74 | 28%<br>(16-43%)                | 72%<br>(57-84%)          | 1.9<br>(0.79-3.5)                           | 5.6%<br>(1.7-11%)                    | 6.6%<br>(2-13%)                     | 42<br>(11-110)         | 780<br>(200-2000)     |
| Botswana | 2005 | Female | 75 to 79 | 25%<br>(14-41%)                | 75%<br>(59-86%)          | 1.5<br>(0.57-3.1)                           | 4.6%<br>(0.81-10%)                   | 5.4%<br>(0.98-12%)                  | 29<br>(4.3-78)         | 420<br>(64-1100)      |

| Location | Year | Sex    | Age      | Prevalence of current drinkers | Prevalence of abstainers | Population average of standard drinks daily | Percent of total attributable deaths | Percent of total attributable DALYs | Attributable deaths  | Attributable DALYs     |
|----------|------|--------|----------|--------------------------------|--------------------------|---------------------------------------------|--------------------------------------|-------------------------------------|----------------------|------------------------|
| Botswana | 2005 | Female | 80 to 84 | 24%<br>(13-39%)                | 76%<br>(61-87%)          | 1.4<br>(0.57-2.7)                           | 4.3%<br>(0.8-9.6%)                   | 5%<br>(0.9-11%)                     | 21<br>(3.2-54)       | 220<br>(36-560)        |
| Botswana | 2005 | Female | 85 to 89 | 25%<br>(14-40%)                | 75%<br>(60-86%)          | 1.4<br>(0.59-2.6)                           | 3.9%<br>(0.56-8.9%)                  | 4.5%<br>(0.64-10%)                  | 11<br>(1.4-27)       | 83<br>(11-200)         |
| Botswana | 2005 | Female | 90 to 94 | 28%<br>(15-44%)                | 72%<br>(56-85%)          | 1.5<br>(0.58-2.9)                           | 3.6%<br>(0.18-8.5%)                  | 4.1%<br>(0.14-10%)                  | 3.6<br>(0.11-9.4)    | 19<br>(1-47)           |
| Botswana | 2005 | Female | 95 plus  | 32%<br>(17-54%)                | 68%<br>(46-83%)          | 1.6<br>(0.49-3.6)                           | 3.7%<br>(-0.28-9.8%)                 | 4.2%<br>(-0.42-11%)                 | 1<br>(-0.093-2.9)    | 3.6<br>(-0.25-9.9)     |
| Botswana | 2005 | Male   | All Ages | 33%<br>(27-41%)                | 67%<br>(59-73%)          | 2.8<br>(2.3-3.5)                            | 6.2%<br>(3.6-9.2%)                   | 7.5%<br>(4.4-11%)                   | 1200<br>(610-2100)   | 53000<br>(28000-85000) |
| Botswana | 2005 | Male   | 15 to 19 | 27%<br>(17-41%)                | 73%<br>(59-83%)          | 1.8<br>(0.92-3.3)                           | 8.2%<br>(4.5-13%)                    | 11%<br>(5.5-18%)                    | 25<br>(12-44)        | 2000<br>(1100-3400)    |
| Botswana | 2005 | Male   | 20 to 24 | 40%<br>(25-56%)                | 60%<br>(44-75%)          | 3.9<br>(2.1-6.1)                            | 12%<br>(7.2-18%)                     | 14%<br>(7.2-22%)                    | 76<br>(39-120)       | 5600<br>(3200-8800)    |
| Botswana | 2005 | Male   | 25 to 29 | 46%<br>(30-62%)                | 54%<br>(38-70%)          | 5.3<br>(3.1-7.9)                            | 7.1%<br>(3.6-12%)                    | 7.4%<br>(3.4-13%)                   | 95<br>(48-160)       | 6300<br>(3400-9900)    |
| Botswana | 2005 | Male   | 30 to 34 | 49%<br>(32-67%)                | 51%<br>(33-68%)          | 5.9<br>(3.5-8.6)                            | 4.9%<br>(2.5-8%)                     | 5%<br>(2.3-8.4%)                    | 96<br>(44-160)       | 5700<br>(2900-9400)    |
| Botswana | 2005 | Male   | 35 to 39 | 51%<br>(34-68%)                | 49%<br>(32-66%)          | 5.8<br>(3.3-9)                              | 5.2%<br>(2.4-8.8%)                   | 5.4%<br>(2.3-9.3%)                  | 100<br>(43-180)      | 5400<br>(2400-9500)    |
| Botswana | 2005 | Male   | 40 to 44 | 52%<br>(35-69%)                | 48%<br>(31-65%)          | 5.7<br>(2.9-9.3)                            | 6.1%<br>(2.9-10%)                    | 6.3%<br>(2.8-11%)                   | 110<br>(45-210)      | 5400<br>(2300-9700)    |
| Botswana | 2005 | Male   | 45 to 49 | 51%<br>(33-69%)                | 49%<br>(31-67%)          | 5.7<br>(3-9.6)                              | 8%<br>(3.9-13%)                      | 8.4%<br>(3.9-14%)                   | 140<br>(56-260)      | 5800<br>(2500-11000)   |
| Botswana | 2005 | Male   | 50 to 54 | 51%<br>(33-69%)                | 49%<br>(31-67%)          | 5.5<br>(2.9-9.2)                            | 11%<br>(6.1-17%)                     | 12%<br>(6.3-18%)                    | 150<br>(64-270)      | 5600<br>(2500-10000)   |
| Botswana | 2005 | Male   | 55 to 59 | 51%<br>(34-69%)                | 49%<br>(31-66%)          | 5.1<br>(2.6-8.8)                            | 13%<br>(7.8-19%)                     | 15%<br>(8.6-21%)                    | 130<br>(59-230)      | 4100<br>(2000-7200)    |
| Botswana | 2005 | Male   | 60 to 64 | 49%<br>(33-67%)                | 51%<br>(33-67%)          | 4.4<br>(2.1-7.6)                            | 13%<br>(7-19%)                       | 14%<br>(7.6-20%)                    | 110<br>(50-200)      | 3100<br>(1400-5300)    |
| Botswana | 2005 | Male   | 65 to 69 | 46%<br>(30-63%)                | 54%<br>(37-70%)          | 3.3<br>(1.7-5.6)                            | 11%<br>(6-17%)                       | 13%<br>(6.6-19%)                    | 91<br>(42-160)       | 2100<br>(980-3500)     |
| Botswana | 2005 | Male   | 70 to 74 | 42%<br>(27-59%)                | 58%<br>(41-73%)          | 2.4<br>(1.2-4.2)                            | 7.8%<br>(3.2-13%)                    | 8.7%<br>(3.6-14%)                   | 52<br>(20-96)        | 960<br>(390-1700)      |
| Botswana | 2005 | Male   | 75 to 79 | 41%<br>(27-58%)                | 59%<br>(42-73%)          | 2<br>(0.84-3.7)                             | 5.7%<br>(1.8-10%)                    | 6.4%<br>(1.9-12%)                   | 28<br>(7.9-54)       | 400<br>(120-770)       |
| Botswana | 2005 | Male   | 80 to 84 | 40%<br>(24-57%)                | 60%<br>(43-76%)          | 1.7<br>(0.75-3.1)                           | 4.8%<br>(1.5-9.5%)                   | 5.4%<br>(1.6-11%)                   | 16<br>(4.6-33)       | 170<br>(52-340)        |
| Botswana | 2005 | Male   | 85 to 89 | 37%<br>(24-53%)                | 63%<br>(47-76%)          | 1.4<br>(0.64-2.6)                           | 3.7%<br>(1-7.3%)                     | 4.1%<br>(1.1-8.3%)                  | 6<br>(1.6-12)        | 46<br>(13-94)          |
| Botswana | 2005 | Male   | 90 to 94 | 36%<br>(23-52%)                | 64%<br>(48-77%)          | 1.3<br>(0.54-2.5)                           | 2.8%<br>(0.63-6.2%)                  | 3.1%<br>(0.63-7%)                   | 1.4<br>(0.26-3.1)    | 7.3<br>(1.7-16)        |
| Botswana | 2005 | Male   | 95 plus  | 38%<br>(21-58%)                | 62%<br>(42-79%)          | 1.2<br>(0.42-2.5)                           | 2.7%<br>(0.44-6.8%)                  | 2.9%<br>(0.32-7.5%)                 | 0.31<br>(0.033-0.82) | 1.2<br>(0.19-2.9)      |

| Location | Year | Sex    | Age      | Prevalence of current drinkers | Prevalence of abstainers | Population average of standard drinks daily | Percent of total attributable deaths | Percent of total attributable DALYs | Attributable deaths | Attributable DALYs     |
|----------|------|--------|----------|--------------------------------|--------------------------|---------------------------------------------|--------------------------------------|-------------------------------------|---------------------|------------------------|
| Botswana | 2010 | Female | All Ages | 17%<br>(14-22%)                | 83%<br>(78-86%)          | 1.4<br>(0.99-1.9)                           | 2.3%<br>(1.1-4%)                     | 3.3%<br>(1.4-5.9%)                  | 340<br>(110-750)    | 12000<br>(5500-26000)  |
| Botswana | 2010 | Female | 15 to 19 | 14%<br>(7.6-23%)               | 86%<br>(77-92%)          | 0.91<br>(0.38-1.8)                          | 2.2%<br>(1.1-4.1%)                   | 2.9%<br>(1-5.8%)                    | 3.6<br>(1-8.6)      | 400<br>(180-790)       |
| Botswana | 2010 | Female | 20 to 24 | 19%<br>(9.8-31%)               | 81%<br>(69-90%)          | 1.6<br>(0.75-3.1)                           | 2.7%<br>(1.3-5.1%)                   | 2.6%<br>(0.72-6.5%)                 | 7.7<br>(2.3-19)     | 840<br>(400-1700)      |
| Botswana | 2010 | Female | 25 to 29 | 21%<br>(11-35%)                | 79%<br>(65-89%)          | 2.1<br>(0.97-3.8)                           | 1.8%<br>(0.67-3.9%)                  | 1.6%<br>(0.38-4.4%)                 | 12<br>(3.4-33)      | 1000<br>(460-2300)     |
| Botswana | 2010 | Female | 30 to 34 | 24%<br>(13-38%)                | 76%<br>(62-87%)          | 2.4<br>(1.2-4.3)                            | 1.4%<br>(0.55-2.9%)                  | 1.2%<br>(0.34-3.1%)                 | 15<br>(4.3-41)      | 1100<br>(430-2500)     |
| Botswana | 2010 | Female | 35 to 39 | 27%<br>(15-42%)                | 73%<br>(58-85%)          | 2.6<br>(1.3-5)                              | 1.6%<br>(0.59-3.8%)                  | 1.6%<br>(0.43-4.1%)                 | 19<br>(4.9-53)      | 1100<br>(400-2800)     |
| Botswana | 2010 | Female | 40 to 44 | 28%<br>(16-45%)                | 72%<br>(55-84%)          | 2.7<br>(1.1-5)                              | 2.1%<br>(0.8-4.7%)                   | 2.1%<br>(0.69-5.1%)                 | 22<br>(6.2-58)      | 1100<br>(390-2800)     |
| Botswana | 2010 | Female | 45 to 49 | 29%<br>(15-46%)                | 71%<br>(54-85%)          | 2.7<br>(1.1-5.5)                            | 2.9%<br>(1.1-6.5%)                   | 3.2%<br>(1-7.2%)                    | 26<br>(7.5-65)      | 1200<br>(400-2800)     |
| Botswana | 2010 | Female | 50 to 54 | 29%<br>(16-46%)                | 71%<br>(54-84%)          | 2.7<br>(1.1-5.5)                            | 4%<br>(1.6-8.1%)                     | 4.5%<br>(1.6-9.4%)                  | 31<br>(8.6-77)      | 1200<br>(410-2900)     |
| Botswana | 2010 | Female | 55 to 59 | 28%<br>(16-45%)                | 72%<br>(55-84%)          | 2.6<br>(1.1-4.9)                            | 5.5%<br>(2.2-10%)                    | 6.6%<br>(2.5-12%)                   | 36<br>(9.4-89)      | 1200<br>(370-2900)     |
| Botswana | 2010 | Female | 60 to 64 | 29%<br>(16-46%)                | 71%<br>(54-84%)          | 2.5<br>(1-5)                                | 6.1%<br>(2.3-11%)                    | 7.6%<br>(2.9-14%)                   | 32<br>(9.2-76)      | 910<br>(280-2100)      |
| Botswana | 2010 | Female | 65 to 69 | 29%<br>(16-45%)                | 71%<br>(55-84%)          | 2.3<br>(0.97-4.5)                           | 6.6%<br>(2.4-12%)                    | 8.2%<br>(3.2-15%)                   | 37<br>(10-88)       | 880<br>(260-2000)      |
| Botswana | 2010 | Female | 70 to 74 | 27%<br>(16-42%)                | 73%<br>(58-84%)          | 1.9<br>(0.73-3.8)                           | 5.4%<br>(1.4-11%)                    | 6.7%<br>(1.7-13%)                   | 34<br>(6.9-84)      | 650<br>(140-1500)      |
| Botswana | 2010 | Female | 75 to 79 | 25%<br>(13-40%)                | 75%<br>(60-87%)          | 1.6<br>(0.55-3.2)                           | 4.3%<br>(0.46-9.5%)                  | 5.3%<br>(0.59-12%)                  | 26<br>(2.4-69)      | 380<br>(37-980)        |
| Botswana | 2010 | Female | 80 to 84 | 24%<br>(13-39%)                | 76%<br>(61-87%)          | 1.4<br>(0.54-2.8)                           | 4.1%<br>(0.51-9.1%)                  | 4.9%<br>(0.56-11%)                  | 20<br>(2.3-52)      | 210<br>(26-550)        |
| Botswana | 2010 | Female | 85 to 89 | 25%<br>(13-40%)                | 75%<br>(60-87%)          | 1.4<br>(0.53-2.9)                           | 3.8%<br>(0.43-8.9%)                  | 4.5%<br>(0.47-10%)                  | 11<br>(0.95-27)     | 82<br>(8.2-210)        |
| Botswana | 2010 | Female | 90 to 94 | 27%<br>(15-43%)                | 73%<br>(57-85%)          | 1.5<br>(0.56-3)                             | 3.5%<br>(0.11-8.7%)                  | 4.2%<br>(0.058-10%)                 | 4.3<br>(0.06-12)    | 22<br>(0.73-59)        |
| Botswana | 2010 | Female | 95 plus  | 32%<br>(16-52%)                | 68%<br>(48-84%)          | 1.6<br>(0.5-3.8)                            | 3.6%<br>(-0.36-9.7%)                 | 4.2%<br>(-0.59-11%)                 | 1.1<br>(-0.16-3.3)  | 3.8<br>(-0.41-11)      |
| Botswana | 2010 | Male   | All Ages | 34%<br>(28-42%)                | 66%<br>(58-72%)          | 3<br>(2.2-4.1)                              | 7.5%<br>(4.7-10%)                    | 8.9%<br>(5.6-12%)                   | 1200<br>(640-1700)  | 50000<br>(28000-73000) |
| Botswana | 2010 | Male   | 15 to 19 | 26%<br>(16-41%)                | 74%<br>(59-84%)          | 1.9<br>(0.89-3.4)                           | 7.2%<br>(4-11%)                      | 9.2%<br>(4.7-15%)                   | 21<br>(9.7-36)      | 1700<br>(930-2900)     |
| Botswana | 2010 | Male   | 20 to 24 | 39%<br>(25-56%)                | 61%<br>(44-75%)          | 3.9<br>(2-6.6)                              | 13%<br>(8.3-19%)                     | 15%<br>(8.7-23%)                    | 64<br>(34-95)       | 4900<br>(2900-7000)    |
| Botswana | 2010 | Male   | 25 to 29 | 46%<br>(29-63%)                | 54%<br>(37-71%)          | 5.3<br>(3-8.2)                              | 10%<br>(5.7-15%)                     | 11%<br>(5.5-18%)                    | 87<br>(46-130)      | 6000<br>(3400-8500)    |

| Location | Year | Sex    | Age      | Prevalence of current drinkers | Prevalence of abstainers | Population average of standard drinks daily | Percent of total attributable deaths | Percent of total attributable DALYs | Attributable deaths  | Attributable DALYs    |
|----------|------|--------|----------|--------------------------------|--------------------------|---------------------------------------------|--------------------------------------|-------------------------------------|----------------------|-----------------------|
| Botswana | 2010 | Male   | 30 to 34 | 49%<br>(32-66%)                | 51%<br>(34-68%)          | 6<br>(3.5-9.3)                              | 6.9%<br>(3.7-11%)                    | 7.2%<br>(3.5-12%)                   | 94<br>(45-150)       | 5800<br>(3200-8700)   |
| Botswana | 2010 | Male   | 35 to 39 | 51%<br>(34-68%)                | 49%<br>(32-66%)          | 5.9<br>(3.3-9.5)                            | 6.3%<br>(3.2-9.7%)                   | 6.6%<br>(3-11%)                     | 97<br>(44-160)       | 5300<br>(2600-8400)   |
| Botswana | 2010 | Male   | 40 to 44 | 51%<br>(34-69%)                | 49%<br>(31-66%)          | 5.8<br>(2.9-9.6)                            | 6.9%<br>(3.6-11%)                    | 7.3%<br>(3.6-12%)                   | 100<br>(46-180)      | 5000<br>(2400-8300)   |
| Botswana | 2010 | Male   | 45 to 49 | 50%<br>(32-68%)                | 50%<br>(32-68%)          | 5.7<br>(2.8-9.8)                            | 9%<br>(4.7-14%)                      | 9.7%<br>(4.8-15%)                   | 120<br>(53-200)      | 5000<br>(2400-8300)   |
| Botswana | 2010 | Male   | 50 to 54 | 50%<br>(31-68%)                | 50%<br>(32-69%)          | 5.5<br>(2.7-9.4)                            | 11%<br>(6.5-17%)                     | 12%<br>(6.8-18%)                    | 130<br>(62-220)      | 5000<br>(2500-8100)   |
| Botswana | 2010 | Male   | 55 to 59 | 50%<br>(33-68%)                | 50%<br>(32-67%)          | 5.2<br>(2.5-8.9)                            | 14%<br>(8.5-19%)                     | 16%<br>(9.6-22%)                    | 140<br>(67-230)      | 4500<br>(2300-7200)   |
| Botswana | 2010 | Male   | 60 to 64 | 48%<br>(32-67%)                | 52%<br>(33-68%)          | 4.4<br>(2-8)                                | 13%<br>(7.6-19%)                     | 15%<br>(8.6-21%)                    | 100<br>(50-170)      | 2900<br>(1400-4700)   |
| Botswana | 2010 | Male   | 65 to 69 | 45%<br>(30-62%)                | 55%<br>(38-70%)          | 3.4<br>(1.6-5.8)                            | 11%<br>(5.8-17%)                     | 13%<br>(6.8-19%)                    | 88<br>(39-140)       | 2000<br>(920-3300)    |
| Botswana | 2010 | Male   | 70 to 74 | 42%<br>(27-58%)                | 58%<br>(42-73%)          | 2.4<br>(1.1-4.4)                            | 7.8%<br>(3.1-13%)                    | 8.8%<br>(3.5-15%)                   | 55<br>(21-97)        | 1000<br>(400-1800)    |
| Botswana | 2010 | Male   | 75 to 79 | 40%<br>(26-57%)                | 60%<br>(43-74%)          | 1.9<br>(0.81-3.7)                           | 5.6%<br>(1.7-11%)                    | 6.3%<br>(1.8-12%)                   | 31<br>(8.6-59)       | 440<br>(130-840)      |
| Botswana | 2010 | Male   | 80 to 84 | 39%<br>(24-57%)                | 61%<br>(43-76%)          | 1.7<br>(0.72-3.1)                           | 4.6%<br>(1.3-9.1%)                   | 5.2%<br>(1.4-10%)                   | 17<br>(4.4-33)       | 180<br>(51-350)       |
| Botswana | 2010 | Male   | 85 to 89 | 36%<br>(23-52%)                | 64%<br>(48-77%)          | 1.4<br>(0.62-2.7)                           | 3.5%<br>(0.92-7.4%)                  | 4%<br>(0.97-8.4%)                   | 6.1<br>(1.5-13)      | 47<br>(12-98)         |
| Botswana | 2010 | Male   | 90 to 94 | 35%<br>(22-51%)                | 65%<br>(49-78%)          | 1.3<br>(0.53-2.4)                           | 2.7%<br>(0.5-6.1%)                   | 3.1%<br>(0.46-7%)                   | 1.7<br>(0.26-3.9)    | 9<br>(1.6-20)         |
| Botswana | 2010 | Male   | 95 plus  | 37%<br>(21-57%)                | 63%<br>(43-79%)          | 1.2<br>(0.41-2.5)                           | 2.6%<br>(0.41-6.5%)                  | 2.8%<br>(0.26-7.3%)                 | 0.34<br>(0.031-0.86) | 1.2<br>(0.19-3)       |
| Botswana | 2016 | Female | All Ages | 18%<br>(14-22%)                | 82%<br>(78-86%)          | 1.4<br>(0.81-2.3)                           | 3.6%<br>(1.5-5.9%)                   | 5.2%<br>(1.8-9%)                    | 380<br>(89-760)      | 14000<br>(4900-26000) |
| Botswana | 2016 | Female | 15 to 19 | 14%<br>(7.6-23%)               | 86%<br>(77-92%)          | 0.92<br>(0.34-2)                            | 2.3%<br>(1.1-4.2%)                   | 3.3%<br>(1.1-6.7%)                  | 3.3<br>(0.82-7.3)    | 380<br>(160-700)      |
| Botswana | 2016 | Female | 20 to 24 | 18%<br>(9.8-30%)               | 82%<br>(70-90%)          | 1.7<br>(0.64-3.4)                           | 3.3%<br>(1.7-5.6%)                   | 3.5%<br>(1.1-7%)                    | 6.9<br>(1.8-15)      | 780<br>(380-1300)     |
| Botswana | 2016 | Female | 25 to 29 | 21%<br>(11-34%)                | 79%<br>(66-89%)          | 2.1<br>(0.89-4.1)                           | 3.1%<br>(1.4-5.5%)                   | 3.4%<br>(0.77-7.1%)                 | 12<br>(2.7-26)       | 1000<br>(460-1900)    |
| Botswana | 2016 | Female | 30 to 34 | 24%<br>(12-39%)                | 76%<br>(61-88%)          | 2.4<br>(1.1-4.8)                            | 3%<br>(1.3-5.6%)                     | 3.4%<br>(0.82-7%)                   | 17<br>(3.3-36)       | 1200<br>(460-2400)    |
| Botswana | 2016 | Female | 35 to 39 | 27%<br>(14-42%)                | 73%<br>(58-86%)          | 2.6<br>(1.2-5.2)                            | 3.4%<br>(1.2-6.4%)                   | 4%<br>(0.89-8.1%)                   | 24<br>(3.9-53)       | 1400<br>(430-2900)    |
| Botswana | 2016 | Female | 40 to 44 | 28%<br>(16-44%)                | 72%<br>(56-84%)          | 2.6<br>(1-5.3)                              | 3.8%<br>(1.2-7.3%)                   | 4.6%<br>(1.1-9.1%)                  | 26<br>(4.7-58)       | 1400<br>(380-2800)    |
| Botswana | 2016 | Female | 45 to 49 | 28%<br>(15-45%)                | 72%<br>(55-85%)          | 2.6<br>(1-5.7)                              | 4.6%<br>(1.5-8.9%)                   | 5.7%<br>(1.5-11%)                   | 30<br>(5.4-63)       | 1300<br>(340-2700)    |

| Location | Year | Sex    | Age      | Prevalence of current drinkers | Prevalence of abstainers | Population average of standard drinks daily | Percent of total attributable deaths | Percent of total attributable DALYs | Attributable deaths | Attributable DALYs     |
|----------|------|--------|----------|--------------------------------|--------------------------|---------------------------------------------|--------------------------------------|-------------------------------------|---------------------|------------------------|
| Botswana | 2016 | Female | 50 to 54 | 28%<br>(15-47%)                | 72%<br>(53-85%)          | 2.6<br>(1-5.6)                              | 5.4%<br>(1.9-10%)                    | 6.7%<br>(2-13%)                     | 33<br>(6.3-73)      | 1300<br>(330-2700)     |
| Botswana | 2016 | Female | 55 to 59 | 28%<br>(16-45%)                | 72%<br>(55-84%)          | 2.6<br>(1-5.4)                              | 6.7%<br>(2.4-12%)                    | 8.9%<br>(3.3-15%)                   | 38<br>(7.3-86)      | 1300<br>(330-2800)     |
| Botswana | 2016 | Female | 60 to 64 | 29%<br>(16-46%)                | 71%<br>(54-84%)          | 2.5<br>(0.91-5.3)                           | 6.8%<br>(2.1-13%)                    | 9%<br>(3-16%)                       | 42<br>(8-92)        | 1200<br>(280-2600)     |
| Botswana | 2016 | Female | 65 to 69 | 29%<br>(17-46%)                | 71%<br>(54-83%)          | 2.3<br>(0.87-4.6)                           | 6.8%<br>(2-13%)                      | 8.9%<br>(2.8-16%)                   | 40<br>(7.3-90)      | 930<br>(200-2100)      |
| Botswana | 2016 | Female | 70 to 74 | 27%<br>(16-43%)                | 73%<br>(57-84%)          | 1.9<br>(0.69-3.9)                           | 5.5%<br>(1-11%)                      | 7%<br>(1.3-14%)                     | 35<br>(4.5-82)      | 670<br>(94-1500)       |
| Botswana | 2016 | Female | 75 to 79 | 25%<br>(14-41%)                | 75%<br>(59-86%)          | 1.6<br>(0.51-3.5)                           | 4.3%<br>(0.36-9.4%)                  | 5.3%<br>(0.44-12%)                  | 30<br>(2.1-74)      | 440<br>(30-1100)       |
| Botswana | 2016 | Female | 80 to 84 | 24%<br>(12-39%)                | 76%<br>(61-88%)          | 1.4<br>(0.47-3)                             | 3.9%<br>(0.11-9%)                    | 4.7%<br>(0.076-11%)                 | 23<br>(0.42-57)     | 240<br>(7.5-600)       |
| Botswana | 2016 | Female | 85 to 89 | 25%<br>(13-39%)                | 75%<br>(61-87%)          | 1.4<br>(0.47-3.1)                           | 3.6%<br>(-0.098-8.8%)                | 4.3%<br>(-0.18-10%)                 | 14<br>(-0.56-36)    | 100<br>(-2.8-270)      |
| Botswana | 2016 | Female | 90 to 94 | 27%<br>(15-43%)                | 73%<br>(57-85%)          | 1.5<br>(0.47-3.3)                           | 3.3%<br>(-0.31-8.9%)                 | 3.9%<br>(-0.47-10%)                 | 5<br>(-0.56-14)     | 26<br>(-2.3-71)        |
| Botswana | 2016 | Female | 95 plus  | 32%<br>(16-51%)                | 68%<br>(49-84%)          | 1.6<br>(0.43-3.8)                           | 3.4%<br>(-0.62-9.6%)                 | 3.9%<br>(-0.87-11%)                 | 1.5<br>(-0.31-4.6)  | 5.1<br>(-0.89-15)      |
| Botswana | 2016 | Male   | All Ages | 35%<br>(29-43%)                | 65%<br>(57-71%)          | 3.2<br>(1.9-5.2)                            | 9.3%<br>(5.4-13%)                    | 11%<br>(6.5-15%)                    | 1100<br>(520-1800)  | 48000<br>(24000-71000) |
| Botswana | 2016 | Male   | 15 to 19 | 26%<br>(16-40%)                | 74%<br>(60-84%)          | 1.9<br>(0.75-3.8)                           | 6.8%<br>(3.5-11%)                    | 9.1%<br>(4.1-16%)                   | 16<br>(6.9-29)      | 1400<br>(710-2400)     |
| Botswana | 2016 | Male   | 20 to 24 | 39%<br>(25-55%)                | 61%<br>(45-75%)          | 4<br>(1.8-7.8)                              | 13%<br>(7.5-18%)                     | 15%<br>(8-22%)                      | 49<br>(23-77)       | 3900<br>(2100-5700)    |
| Botswana | 2016 | Male   | 25 to 29 | 45%<br>(29-63%)                | 55%<br>(37-71%)          | 5.4<br>(2.6-10)                             | 12%<br>(6.6-17%)                     | 13%<br>(6.8-20%)                    | 69<br>(31-110)      | 4900<br>(2500-7300)    |
| Botswana | 2016 | Male   | 30 to 34 | 48%<br>(31-66%)                | 52%<br>(34-69%)          | 6<br>(3-11)                                 | 10%<br>(5.5-15%)                     | 11%<br>(5.4-17%)                    | 85<br>(35-140)      | 5400<br>(2700-8300)    |
| Botswana | 2016 | Male   | 35 to 39 | 50%<br>(34-68%)                | 50%<br>(32-66%)          | 5.9<br>(2.9-12)                             | 9.3%<br>(4.7-15%)                    | 10%<br>(4.6-17%)                    | 98<br>(36-170)      | 5500<br>(2300-8900)    |
| Botswana | 2016 | Male   | 40 to 44 | 51%<br>(34-69%)                | 49%<br>(31-66%)          | 5.9<br>(2.5-12)                             | 9.6%<br>(4.6-15%)                    | 11%<br>(4.6-17%)                    | 110<br>(39-180)     | 5200<br>(2200-8700)    |
| Botswana | 2016 | Male   | 45 to 49 | 50%<br>(32-68%)                | 50%<br>(32-68%)          | 5.8<br>(2.5-11)                             | 11%<br>(5.6-17%)                     | 13%<br>(5.8-20%)                    | 120<br>(42-200)     | 5100<br>(2000-8400)    |
| Botswana | 2016 | Male   | 50 to 54 | 50%<br>(32-68%)                | 50%<br>(32-68%)          | 5.6<br>(2.3-11)                             | 13%<br>(6.8-19%)                     | 15%<br>(7.4-22%)                    | 120<br>(46-200)     | 4700<br>(2000-7600)    |
| Botswana | 2016 | Male   | 55 to 59 | 50%<br>(33-67%)                | 50%<br>(33-67%)          | 5.3<br>(2.3-10)                             | 15%<br>(8.3-21%)                     | 17%<br>(9.4-24%)                    | 130<br>(56-210)     | 4300<br>(2000-6900)    |
| Botswana | 2016 | Male   | 60 to 64 | 48%<br>(32-67%)                | 52%<br>(33-68%)          | 4.5<br>(1.8-8.9)                            | 13%<br>(6.9-19%)                     | 16%<br>(8.3-23%)                    | 120<br>(53-200)     | 3400<br>(1500-5500)    |
| Botswana | 2016 | Male   | 65 to 69 | 45%<br>(30-62%)                | 55%<br>(38-70%)          | 3.4<br>(1.4-6.5)                            | 11%<br>(5.3-17%)                     | 13%<br>(6.2-20%)                    | 90<br>(35-150)      | 2100<br>(830-3500)     |

| Location | Year | Sex    | Age      | Prevalence of current drinkers | Prevalence of abstainers | Population average of standard drinks daily | Percent of total attributable deaths | Percent of total attributable DALYs | Attributable deaths | Attributable DALYs    |
|----------|------|--------|----------|--------------------------------|--------------------------|---------------------------------------------|--------------------------------------|-------------------------------------|---------------------|-----------------------|
| Botswana | 2016 | Male   | 70 to 74 | 42%<br>(27-58%)                | 58%<br>(42-73%)          | 2.5<br>(0.96-4.8)                           | 7.8%<br>(2.8-13%)                    | 9%<br>(3.2-15%)                     | 57<br>(18-100)      | 1100<br>(350-1900)    |
| Botswana | 2016 | Male   | 75 to 79 | 40%<br>(26-58%)                | 60%<br>(42-74%)          | 2<br>(0.71-4.2)                             | 5.7%<br>(1.3-11%)                    | 6.5%<br>(1.5-13%)                   | 36<br>(7.8-73)      | 520<br>(120-1100)     |
| Botswana | 2016 | Male   | 80 to 84 | 38%<br>(24-55%)                | 62%<br>(45-76%)          | 1.7<br>(0.66-3.7)                           | 4.7%<br>(1.9-7.7%)                   | 5.3%<br>(1.1-11%)                   | 19<br>(3.8-42)      | 210<br>(45-450)       |
| Botswana | 2016 | Male   | 85 to 89 | 35%<br>(23-51%)                | 65%<br>(49-77%)          | 1.5<br>(0.53-3)                             | 3.6%<br>(0.72-8.3%)                  | 4.1%<br>(0.75-9.5%)                 | 7.6<br>(1.5-17)     | 59<br>(12-130)        |
| Botswana | 2016 | Male   | 90 to 94 | 35%<br>(22-50%)                | 65%<br>(50-78%)          | 1.3<br>(0.45-2.8)                           | 2.9%<br>(0.41-6.9%)                  | 3.2%<br>(0.37-8%)                   | 2<br>(0.22-4.9)     | 11<br>(1.5-25)        |
| Botswana | 2016 | Male   | 95 plus  | 37%<br>(20-56%)                | 63%<br>(44-80%)          | 1.2<br>(0.35-3)                             | 2.8%<br>(0.31-7.4%)                  | 3%<br>(0.18-8.3%)                   | 0.47<br>(0.028-1.3) | 1.7<br>(0.19-4.6)     |
| Lesotho  | 1990 | Female | All Ages | 16%<br>(13-19%)                | 84%<br>(81-87%)          | 1.1<br>(0.77-1.5)                           | 3.5%<br>(2.2-5%)                     | 6%<br>(3.4-9%)                      | 400<br>(220-620)    | 13000<br>(8400-19000) |
| Lesotho  | 1990 | Female | 15 to 19 | 14%<br>(8.2-22%)               | 86%<br>(78-92%)          | 0.84<br>(0.37-1.7)                          | 3.5%<br>(1.6-6.3%)                   | 5.8%<br>(2.3-11%)                   | 6.7<br>(2.5-13)     | 560<br>(260-1000)     |
| Lesotho  | 1990 | Female | 20 to 24 | 18%<br>(11-29%)                | 82%<br>(71-89%)          | 1.5<br>(0.75-2.8)                           | 5.7%<br>(2.9-9.9%)                   | 8.3%<br>(3.5-15%)                   | 12<br>(5-21)        | 940<br>(480-1600)     |
| Lesotho  | 1990 | Female | 25 to 29 | 21%<br>(12-33%)                | 79%<br>(67-88%)          | 2<br>(0.96-3.4)                             | 6.3%<br>(3.4-10%)                    | 9.4%<br>(4.4-16%)                   | 13<br>(6-21)        | 910<br>(490-1400)     |
| Lesotho  | 1990 | Female | 30 to 34 | 24%<br>(14-37%)                | 76%<br>(63-86%)          | 2.3<br>(1.1-3.9)                            | 6.9%<br>(3.8-11%)                    | 10%<br>(5.3-18%)                    | 15<br>(7.6-24)      | 940<br>(530-1500)     |
| Lesotho  | 1990 | Female | 35 to 39 | 26%<br>(15-40%)                | 74%<br>(60-85%)          | 2.4<br>(1.1-4.2)                            | 7.6%<br>(4.4-12%)                    | 12%<br>(6.4-18%)                    | 18<br>(10-29)       | 1000<br>(600-1600)    |
| Lesotho  | 1990 | Female | 40 to 44 | 28%<br>(17-43%)                | 72%<br>(57-83%)          | 2.4<br>(1.1-4.3)                            | 8.4%<br>(4.5-13%)                    | 13%<br>(6.6-19%)                    | 21<br>(11-34)       | 1000<br>(550-1600)    |
| Lesotho  | 1990 | Female | 45 to 49 | 28%<br>(16-42%)                | 72%<br>(58-84%)          | 2.4<br>(1.1-4.6)                            | 9%<br>(4.7-14%)                      | 13%<br>(6.8-20%)                    | 20<br>(11-33)       | 880<br>(470-1400)     |
| Lesotho  | 1990 | Female | 50 to 54 | 27%<br>(16-43%)                | 73%<br>(57-84%)          | 2.3<br>(1.1-4.3)                            | 9.3%<br>(4.9-15%)                    | 13%<br>(6.6-20%)                    | 33<br>(16-55)       | 1200<br>(610-2000)    |
| Lesotho  | 1990 | Female | 55 to 59 | 27%<br>(16-42%)                | 73%<br>(58-84%)          | 2.3<br>(1-4.2)                              | 9.2%<br>(4.5-15%)                    | 12%<br>(6-20%)                      | 46<br>(21-79)       | 1500<br>(710-2500)    |
| Lesotho  | 1990 | Female | 60 to 64 | 28%<br>(16-43%)                | 72%<br>(57-84%)          | 2.2<br>(0.98-4.2)                           | 8.7%<br>(3.9-15%)                    | 11%<br>(4.9-19%)                    | 47<br>(20-82)       | 1300<br>(570-2200)    |
| Lesotho  | 1990 | Female | 65 to 69 | 28%<br>(18-42%)                | 72%<br>(58-82%)          | 2<br>(0.95-3.6)                             | 8.4%<br>(3.5-14%)                    | 10%<br>(4.4-17%)                    | 59<br>(23-100)      | 1300<br>(530-2200)    |
| Lesotho  | 1990 | Female | 70 to 74 | 26%<br>(17-39%)                | 74%<br>(61-83%)          | 1.6<br>(0.77-3)                             | 6.3%<br>(2.3-11%)                    | 7.7%<br>(2.7-13%)                   | 48<br>(16-86)       | 860<br>(300-1600)     |
| Lesotho  | 1990 | Female | 75 to 79 | 23%<br>(14-36%)                | 77%<br>(64-86%)          | 1.3<br>(0.55-2.5)                           | 4.7%<br>(1.3-9.1%)                   | 5.6%<br>(1.5-11%)                   | 32<br>(8.4-64)      | 450<br>(120-880)      |
| Lesotho  | 1990 | Female | 80 to 84 | 22%<br>(13-34%)                | 78%<br>(66-87%)          | 1.2<br>(0.55-2.2)                           | 3.9%<br>(1-7.8%)                     | 4.7%<br>(1.2-9.2%)                  | 20<br>(5.3-42)      | 210<br>(55-430)       |
| Lesotho  | 1990 | Female | 85 to 89 | 23%<br>(13-34%)                | 77%<br>(66-87%)          | 1.2<br>(0.5-2.2)                            | 3.4%<br>(0.72-7.3%)                  | 4%<br>(0.83-8.6%)                   | 11<br>(2.2-23)      | 79<br>(16-170)        |



| Location | Year | Sex    | Age      | Prevalence of current drinkers | Prevalence of abstainers | Population average of standard drinks daily | Percent of total attributable deaths | Percent of total attributable DALYs | Attributable deaths   | Attributable DALYs     |
|----------|------|--------|----------|--------------------------------|--------------------------|---------------------------------------------|--------------------------------------|-------------------------------------|-----------------------|------------------------|
| Lesotho  | 1990 | Female | 90 to 94 | 24%<br>(15-36%)                | 76%<br>(64-85%)          | 1.2<br>(0.53-2.3)                           | 2.9%<br>(0.49-6.7%)                  | 3.5%<br>(0.55-7.9%)                 | 3.6<br>(0.55-8.1)     | 18<br>(3-40)           |
| Lesotho  | 1990 | Female | 95 plus  | 28%<br>(16-43%)                | 72%<br>(57-84%)          | 1.3<br>(0.47-2.7)                           | 2.8%<br>(0.078-7.2%)                 | 3.2%<br>(0.002-8.5%)                | 0.92<br>(0.00059-2.4) | 3.1<br>(0.087-8)       |
| Lesotho  | 1990 | Male   | All Ages | 36%<br>(31-40%)                | 64%<br>(60-69%)          | 2.8<br>(2-3.6)                              | 8.8%<br>(6.7-12%)                    | 13%<br>(9.4-17%)                    | 1100<br>(750-1400)    | 41000<br>(30000-53000) |
| Lesotho  | 1990 | Male   | 15 to 19 | 30%<br>(22-39%)                | 70%<br>(61-78%)          | 2<br>(1-3.3)                                | 8.9%<br>(5.2-14%)                    | 12%<br>(6.6-19%)                    | 25<br>(13-41)         | 2000<br>(1100-3000)    |
| Lesotho  | 1990 | Male   | 20 to 24 | 48%<br>(37-59%)                | 52%<br>(41-63%)          | 4.6<br>(2.6-7.3)                            | 18%<br>(12-25%)                      | 22%<br>(15-32%)                     | 65<br>(42-92)         | 4600<br>(3100-6400)    |
| Lesotho  | 1990 | Male   | 25 to 29 | 56%<br>(45-66%)                | 44%<br>(34-55%)          | 6.3<br>(3.6-9.7)                            | 20%<br>(15-27%)                      | 25%<br>(18-33%)                     | 64<br>(46-87)         | 4100<br>(3000-5500)    |
| Lesotho  | 1990 | Male   | 30 to 34 | 61%<br>(49-69%)                | 39%<br>(31-51%)          | 7<br>(4.3-10)                               | 21%<br>(15-27%)                      | 25%<br>(18-34%)                     | 57<br>(41-77)         | 3300<br>(2400-4400)    |
| Lesotho  | 1990 | Male   | 35 to 39 | 62%<br>(50-71%)                | 38%<br>(29-50%)          | 6.9<br>(4-11)                               | 21%<br>(15-28%)                      | 26%<br>(19-35%)                     | 63<br>(44-85)         | 3300<br>(2300-4400)    |
| Lesotho  | 1990 | Male   | 40 to 44 | 64%<br>(53-72%)                | 36%<br>(28-47%)          | 6.9<br>(3.8-11)                             | 23%<br>(17-29%)                      | 28%<br>(21-36%)                     | 73<br>(51-97)         | 3400<br>(2400-4500)    |
| Lesotho  | 1990 | Male   | 45 to 49 | 66%<br>(54-74%)                | 34%<br>(26-46%)          | 7.1<br>(3.9-12)                             | 24%<br>(18-30%)                      | 29%<br>(22-37%)                     | 81<br>(57-110)        | 3400<br>(2400-4500)    |
| Lesotho  | 1990 | Male   | 50 to 54 | 66%<br>(56-74%)                | 34%<br>(26-44%)          | 6.9<br>(3.7-11)                             | 24%<br>(17-30%)                      | 28%<br>(20-37%)                     | 110<br>(76-150)       | 4100<br>(2800-5600)    |
| Lesotho  | 1990 | Male   | 55 to 59 | 64%<br>(52-72%)                | 36%<br>(28-48%)          | 6.3<br>(3.5-9.9)                            | 22%<br>(16-29%)                      | 26%<br>(18-34%)                     | 130<br>(88-180)       | 4200<br>(2800-5800)    |
| Lesotho  | 1990 | Male   | 60 to 64 | 60%<br>(47-70%)                | 40%<br>(30-53%)          | 5.2<br>(2.7-8.7)                            | 19%<br>(12-25%)                      | 19%<br>(13-29%)                     | 130<br>(75-180)       | 3400<br>(2000-4900)    |
| Lesotho  | 1990 | Male   | 65 to 69 | 54%<br>(37-70%)                | 46%<br>(30-63%)          | 3.8<br>(1.9-6.4)                            | 15%<br>(8.4-22%)                     | 17%<br>(9.7-25%)                    | 110<br>(61-170)       | 2600<br>(1400-3800)    |
| Lesotho  | 1990 | Male   | 70 to 74 | 50%<br>(33-67%)                | 50%<br>(33-67%)          | 2.8<br>(1.4-4.9)                            | 9.9%<br>(4.7-16%)                    | 11%<br>(5.3-18%)                    | 71<br>(32-120)        | 1300<br>(580-2100)     |
| Lesotho  | 1990 | Male   | 75 to 79 | 49%<br>(32-66%)                | 51%<br>(34-68%)          | 2.2<br>(1-4.1)                              | 7.1%<br>(2.7-13%)                    | 8%<br>(3-14%)                       | 44<br>(16-83)         | 620<br>(230-1100)      |
| Lesotho  | 1990 | Male   | 80 to 84 | 47%<br>(30-64%)                | 53%<br>(36-70%)          | 1.9<br>(0.92-3.4)                           | 5.5%<br>(2-10%)                      | 6.1%<br>(2.2-12%)                   | 23<br>(8.1-43)        | 240<br>(86-450)        |
| Lesotho  | 1990 | Male   | 85 to 89 | 44%<br>(29-60%)                | 56%<br>(40-71%)          | 1.6<br>(0.76-2.9)                           | 4%<br>(1.3-7.8%)                     | 4.5%<br>(1.5-8.9%)                  | 8.7<br>(2.8-18)       | 65<br>(22-130)         |
| Lesotho  | 1990 | Male   | 90 to 94 | 43%<br>(28-60%)                | 57%<br>(40-72%)          | 1.4<br>(0.67-2.6)                           | 2.9%<br>(0.85-6.2%)                  | 3.3%<br>(0.89-7.2%)                 | 1.9<br>(0.53-4.3)     | 10<br>(3-22)           |
| Lesotho  | 1990 | Male   | 95 plus  | 45%<br>(26-67%)                | 55%<br>(33-74%)          | 1.3<br>(0.49-2.6)                           | 2.5%<br>(0.5-5.9%)                   | 2.7%<br>(0.43-6.7%)                 | 0.34<br>(0.054-0.85)  | 1.2<br>(0.25-2.9)      |
| Lesotho  | 1995 | Female | All Ages | 16%<br>(13-20%)                | 84%<br>(80-87%)          | 1.1<br>(0.79-1.5)                           | 3%<br>(1.8-4.5%)                     | 5.2%<br>(2.8-8%)                    | 430<br>(220-680)      | 14000<br>(8300-21000)  |
| Lesotho  | 1995 | Female | 15 to 19 | 14%<br>(8.2-22%)               | 86%<br>(78-92%)          | 0.85<br>(0.37-1.7)                          | 3%<br>(1.4-5.7%)                     | 4.8%<br>(1.8-9.3%)                  | 6.6<br>(2.5-13)       | 560<br>(250-1000)      |

| Location | Year | Sex    | Age      | Prevalence of current drinkers | Prevalence of abstainers | Population average of standard drinks daily | Percent of total attributable deaths | Percent of total attributable DALYs | Attributable deaths | Attributable DALYs     |
|----------|------|--------|----------|--------------------------------|--------------------------|---------------------------------------------|--------------------------------------|-------------------------------------|---------------------|------------------------|
| Lesotho  | 1995 | Female | 20 to 24 | 18%<br>(11-29%)                | 82%<br>(71-89%)          | 1.5<br>(0.77-2.8)                           | 3.7%<br>(1.9-6.5%)                   | 4.5%<br>(1.9-8.6%)                  | 12<br>(4.9-22)      | 960<br>(480-1600)      |
| Lesotho  | 1995 | Female | 25 to 29 | 21%<br>(12-34%)                | 79%<br>(66-88%)          | 2<br>(0.98-3.5)                             | 3.5%<br>(1.7-6%)                     | 4.1%<br>(1.6-7.7%)                  | 13<br>(5.8-23)      | 980<br>(510-1600)      |
| Lesotho  | 1995 | Female | 30 to 34 | 24%<br>(14-37%)                | 76%<br>(63-86%)          | 2.3<br>(1.1-3.9)                            | 4%<br>(2.1-7%)                       | 4.9%<br>(2.2-9.2%)                  | 14<br>(7-25)        | 930<br>(490-1600)      |
| Lesotho  | 1995 | Female | 35 to 39 | 26%<br>(15-41%)                | 74%<br>(59-85%)          | 2.4<br>(1.2-4.2)                            | 4.9%<br>(2.5-8%)                     | 6.2%<br>(2.9-11%)                   | 18<br>(8.9-30)      | 980<br>(550-1600)      |
| Lesotho  | 1995 | Female | 40 to 44 | 28%<br>(17-43%)                | 72%<br>(57-83%)          | 2.4<br>(1.1-4.4)                            | 6%<br>(3.3-9.7%)                     | 7.9%<br>(3.9-13%)                   | 23<br>(12-39)       | 1100<br>(610-1900)     |
| Lesotho  | 1995 | Female | 45 to 49 | 28%<br>(15-44%)                | 72%<br>(56-85%)          | 2.4<br>(1.1-4.5)                            | 7%<br>(3.8-11%)                      | 9.3%<br>(4.8-15%)                   | 27<br>(13-46)       | 1200<br>(600-1900)     |
| Lesotho  | 1995 | Female | 50 to 54 | 27%<br>(16-43%)                | 73%<br>(57-84%)          | 2.3<br>(1.1-4.4)                            | 7.9%<br>(4.1-13%)                    | 10%<br>(5.4-17%)                    | 27<br>(13-48)       | 1000<br>(500-1800)     |
| Lesotho  | 1995 | Female | 55 to 59 | 27%<br>(16-41%)                | 73%<br>(59-84%)          | 2.3<br>(1.1-4.2)                            | 8.2%<br>(4.1-14%)                    | 11%<br>(5.2-17%)                    | 41<br>(19-73)       | 1300<br>(640-2400)     |
| Lesotho  | 1995 | Female | 60 to 64 | 28%<br>(16-43%)                | 72%<br>(57-84%)          | 2.2<br>(0.99-4.3)                           | 8.1%<br>(3.8-14%)                    | 10%<br>(4.8-18%)                    | 57<br>(24-100)      | 1500<br>(670-2700)     |
| Lesotho  | 1995 | Female | 65 to 69 | 28%<br>(18-42%)                | 72%<br>(58-82%)          | 2<br>(0.98-3.6)                             | 8%<br>(3.4-13%)                      | 9.9%<br>(4.2-16%)                   | 59<br>(23-100)      | 1300<br>(520-2300)     |
| Lesotho  | 1995 | Female | 70 to 74 | 26%<br>(16-39%)                | 74%<br>(61-84%)          | 1.7<br>(0.77-3)                             | 6.2%<br>(2.1-11%)                    | 7.5%<br>(2.5-13%)                   | 52<br>(18-93)       | 940<br>(320-1700)      |
| Lesotho  | 1995 | Female | 75 to 79 | 23%<br>(14-36%)                | 77%<br>(64-86%)          | 1.3<br>(0.55-2.6)                           | 4.6%<br>(1.2-9%)                     | 5.5%<br>(1.4-10%)                   | 37<br>(8.6-74)      | 520<br>(120-1100)      |
| Lesotho  | 1995 | Female | 80 to 84 | 22%<br>(13-34%)                | 78%<br>(66-87%)          | 1.2<br>(0.55-2.2)                           | 3.9%<br>(0.98-7.9%)                  | 4.6%<br>(1.2-9.3%)                  | 23<br>(5.1-48)      | 240<br>(54-490)        |
| Lesotho  | 1995 | Female | 85 to 89 | 23%<br>(14-34%)                | 77%<br>(66-86%)          | 1.2<br>(0.53-2.2)                           | 3.4%<br>(0.76-7.1%)                  | 4%<br>(0.87-8.4%)                   | 13<br>(2.6-26)      | 92<br>(19-190)         |
| Lesotho  | 1995 | Female | 90 to 94 | 24%<br>(15-37%)                | 76%<br>(63-85%)          | 1.2<br>(0.54-2.3)                           | 2.9%<br>(0.52-6.8%)                  | 3.5%<br>(0.57-8%)                   | 4.4<br>(0.7-10)     | 22<br>(3.9-51)         |
| Lesotho  | 1995 | Female | 95 plus  | 28%<br>(15-44%)                | 72%<br>(56-85%)          | 1.3<br>(0.45-2.7)                           | 2.8%<br>(0.085-7.2%)                 | 3.3%<br>(0.028-8.5%)                | 1.1<br>(0.0098-2.9) | 3.7<br>(0.096-9.6)     |
| Lesotho  | 1995 | Male   | All Ages | 37%<br>(32-41%)                | 63%<br>(59-68%)          | 2.9<br>(2.1-3.7)                            | 8.4%<br>(6.4-11%)                    | 12%<br>(8.7-15%)                    | 1200<br>(860-1600)  | 48000<br>(36000-62000) |
| Lesotho  | 1995 | Male   | 15 to 19 | 30%<br>(21-39%)                | 70%<br>(61-79%)          | 2<br>(1-3.4)                                | 8.8%<br>(5.2-13%)                    | 12%<br>(6.4-19%)                    | 30<br>(16-48)       | 2300<br>(1300-3600)    |
| Lesotho  | 1995 | Male   | 20 to 24 | 48%<br>(37-59%)                | 52%<br>(41-63%)          | 4.6<br>(2.5-7.3)                            | 15%<br>(9.7-21%)                     | 18%<br>(11-26%)                     | 78<br>(49-110)      | 5500<br>(3600-7700)    |
| Lesotho  | 1995 | Male   | 25 to 29 | 56%<br>(45-66%)                | 44%<br>(34-55%)          | 6.3<br>(3.6-9.4)                            | 15%<br>(9.4-21%)                     | 17%<br>(10-24%)                     | 85<br>(59-110)      | 5400<br>(3900-7200)    |
| Lesotho  | 1995 | Male   | 30 to 34 | 60%<br>(49-69%)                | 40%<br>(31-51%)          | 7<br>(4.3-10)                               | 14%<br>(9.6-20%)                     | 16%<br>(10-24%)                     | 73<br>(51-99)       | 4300<br>(3000-5700)    |
| Lesotho  | 1995 | Male   | 35 to 39 | 62%<br>(51-70%)                | 38%<br>(30-49%)          | 6.9<br>(4-11)                               | 16%<br>(10-22%)                      | 18%<br>(11-26%)                     | 75<br>(52-100)      | 3900<br>(2800-5300)    |

| Location | Year | Sex    | Age      | Prevalence of current drinkers | Prevalence of abstainers | Population average of standard drinks daily | Percent of total attributable deaths | Percent of total attributable DALYs | Attributable deaths | Attributable DALYs     |
|----------|------|--------|----------|--------------------------------|--------------------------|---------------------------------------------|--------------------------------------|-------------------------------------|---------------------|------------------------|
| Lesotho  | 1995 | Male   | 40 to 44 | 64%<br>(53-72%)                | 36%<br>(28-47%)          | 6.9<br>(3.8-11)                             | 18%<br>(12-23%)                      | 20%<br>(14-27%)                     | 86<br>(60-120)      | 4000<br>(2800-5400)    |
| Lesotho  | 1995 | Male   | 45 to 49 | 66%<br>(54-74%)                | 34%<br>(26-46%)          | 7<br>(3.8-12)                               | 20%<br>(15-26%)                      | 24%<br>(17-30%)                     | 100<br>(70-140)     | 4200<br>(3000-5600)    |
| Lesotho  | 1995 | Male   | 50 to 54 | 66%<br>(56-74%)                | 34%<br>(26-44%)          | 6.8<br>(3.6-11)                             | 22%<br>(15-28%)                      | 25%<br>(18-32%)                     | 110<br>(73-150)     | 4100<br>(2700-5500)    |
| Lesotho  | 1995 | Male   | 55 to 59 | 64%<br>(53-72%)                | 36%<br>(28-47%)          | 6.2<br>(3.4-10)                             | 21%<br>(14-27%)                      | 24%<br>(16-31%)                     | 140<br>(88-190)     | 4400<br>(2900-5900)    |
| Lesotho  | 1995 | Male   | 60 to 64 | 60%<br>(47-70%)                | 40%<br>(30-53%)          | 5.2<br>(2.6-8.7)                            | 18%<br>(11-24%)                      | 21%<br>(12-27%)                     | 150<br>(86-210)     | 4100<br>(2300-5600)    |
| Lesotho  | 1995 | Male   | 65 to 69 | 54%<br>(37-71%)                | 46%<br>(29-63%)          | 3.8<br>(1.9-6.2)                            | 15%<br>(8-21%)                       | 17%<br>(9.1-24%)                    | 130<br>(66-190)     | 2800<br>(1500-4200)    |
| Lesotho  | 1995 | Male   | 70 to 74 | 50%<br>(33-67%)                | 50%<br>(33-67%)          | 2.7<br>(1.3-4.9)                            | 9.6%<br>(4.3-16%)                    | 11%<br>(4.8-18%)                    | 87<br>(37-150)      | 1600<br>(670-2600)     |
| Lesotho  | 1995 | Male   | 75 to 79 | 48%<br>(33-66%)                | 52%<br>(34-67%)          | 2.2<br>(0.97-4.1)                           | 6.9%<br>(2.4-13%)                    | 7.7%<br>(2.7-14%)                   | 50<br>(17-94)       | 700<br>(240-1300)      |
| Lesotho  | 1995 | Male   | 80 to 84 | 47%<br>(30-65%)                | 53%<br>(35-70%)          | 1.9<br>(0.88-3.4)                           | 5.4%<br>(1.8-10%)                    | 6.1%<br>(2-11%)                     | 26<br>(8.7-50)      | 280<br>(94-520)        |
| Lesotho  | 1995 | Male   | 85 to 89 | 44%<br>(29-60%)                | 56%<br>(40-71%)          | 1.6<br>(0.76-2.9)                           | 4%<br>(1.3-8.1%)                     | 4.6%<br>(1.5-9.2%)                  | 10<br>(3.3-21)      | 77<br>(26-160)         |
| Lesotho  | 1995 | Male   | 90 to 94 | 43%<br>(28-60%)                | 57%<br>(40-72%)          | 1.4<br>(0.67-2.7)                           | 3%<br>(0.92-6.4%)                    | 3.3%<br>(0.99-7.4%)                 | 2.6<br>(0.75-5.8)   | 14<br>(4.2-29)         |
| Lesotho  | 1995 | Male   | 95 plus  | 45%<br>(26-67%)                | 55%<br>(33-74%)          | 1.3<br>(0.49-2.7)                           | 2.6%<br>(0.53-6.1%)                  | 2.8%<br>(0.45-7%)                   | 0.48<br>(0.076-1.2) | 1.7<br>(0.35-4.2)      |
| Lesotho  | 2000 | Female | All Ages | 16%<br>(13-20%)                | 84%<br>(80-87%)          | 1.2<br>(0.86-1.7)                           | 3%<br>(1.6-4.6%)                     | 4.9%<br>(2.6-7.6%)                  | 690<br>(340-1100)   | 22000<br>(12000-33000) |
| Lesotho  | 2000 | Female | 15 to 19 | 14%<br>(8.2-22%)               | 86%<br>(78-92%)          | 0.92<br>(0.41-1.8)                          | 3.4%<br>(1.5-6.3%)                   | 5%<br>(1.8-9.8%)                    | 10<br>(4-20)        | 840<br>(370-1500)      |
| Lesotho  | 2000 | Female | 20 to 24 | 18%<br>(11-29%)                | 82%<br>(71-89%)          | 1.7<br>(0.79-3.1)                           | 3%<br>(1.3-5.5%)                     | 3.3%<br>(1.2-6.9%)                  | 18<br>(8-33)        | 1400<br>(690-2400)     |
| Lesotho  | 2000 | Female | 25 to 29 | 21%<br>(12-33%)                | 79%<br>(67-88%)          | 2.2<br>(1-3.9)                              | 2.2%<br>(0.97-4.3%)                  | 2.2%<br>(0.83-4.8%)                 | 20<br>(8.7-37)      | 1400<br>(670-2400)     |
| Lesotho  | 2000 | Female | 30 to 34 | 24%<br>(14-37%)                | 76%<br>(63-86%)          | 2.5<br>(1.2-4.4)                            | 2.5%<br>(1.1-4.4%)                   | 2.6%<br>(1.1-4.8%)                  | 24<br>(10-43)       | 1500<br>(690-2500)     |
| Lesotho  | 2000 | Female | 35 to 39 | 26%<br>(16-40%)                | 74%<br>(60-84%)          | 2.6<br>(1.3-4.6)                            | 3.2%<br>(1.4-5.8%)                   | 3.5%<br>(1.4-6.7%)                  | 30<br>(14-53)       | 1600<br>(780-2800)     |
| Lesotho  | 2000 | Female | 40 to 44 | 28%<br>(17-43%)                | 72%<br>(57-83%)          | 2.7<br>(1.2-4.8)                            | 4.2%<br>(2-7.4%)                     | 4.8%<br>(2.1-8.5%)                  | 38<br>(17-67)       | 1800<br>(840-3100)     |
| Lesotho  | 2000 | Female | 45 to 49 | 28%<br>(16-43%)                | 72%<br>(57-84%)          | 2.6<br>(1.2-5.1)                            | 5.5%<br>(2.5-9.3%)                   | 6.4%<br>(2.9-11%)                   | 49<br>(21-87)       | 2100<br>(910-3600)     |
| Lesotho  | 2000 | Female | 50 to 54 | 27%<br>(16-42%)                | 73%<br>(58-84%)          | 2.5<br>(1.1-4.8)                            | 7.1%<br>(3.4-12%)                    | 8.3%<br>(3.9-14%)                   | 57<br>(24-100)      | 2100<br>(930-3700)     |
| Lesotho  | 2000 | Female | 55 to 59 | 27%<br>(17-42%)                | 73%<br>(58-83%)          | 2.5<br>(1.1-4.7)                            | 8.2%<br>(4.1-13%)                    | 9.7%<br>(4.9-16%)                   | 54<br>(23-96)       | 1700<br>(760-3000)     |

| Location | Year | Sex    | Age      | Prevalence of current drinkers | Prevalence of abstainers | Population average of standard drinks daily | Percent of total attributable deaths | Percent of total attributable DALYs | Attributable deaths | Attributable DALYs     |
|----------|------|--------|----------|--------------------------------|--------------------------|---------------------------------------------|--------------------------------------|-------------------------------------|---------------------|------------------------|
| Lesotho  | 2000 | Female | 60 to 64 | 28%<br>(17-44%)                | 72%<br>(56-83%)          | 2.4<br>(1.1-4.8)                            | 8.6%<br>(4-15%)                      | 10%<br>(4.8-17%)                    | 76<br>(32-130)      | 2000<br>(860-3500)     |
| Lesotho  | 2000 | Female | 65 to 69 | 28%<br>(18-42%)                | 72%<br>(58-82%)          | 2.2<br>(1.1-3.9)                            | 8.9%<br>(4-15%)                      | 11%<br>(4.8-17%)                    | 100<br>(42-180)     | 2300<br>(920-4000)     |
| Lesotho  | 2000 | Female | 70 to 74 | 26%<br>(16-39%)                | 74%<br>(61-84%)          | 1.8<br>(0.82-3.3)                           | 7.1%<br>(2.6-12%)                    | 8.3%<br>(3.1-14%)                   | 79<br>(26-140)      | 1400<br>(480-2500)     |
| Lesotho  | 2000 | Female | 75 to 79 | 23%<br>(14-35%)                | 77%<br>(65-86%)          | 1.4<br>(0.6-2.8)                            | 5.4%<br>(1.4-10%)                    | 6.3%<br>(1.7-12%)                   | 59<br>(15-120)      | 820<br>(210-1600)      |
| Lesotho  | 2000 | Female | 80 to 84 | 22%<br>(13-35%)                | 78%<br>(65-87%)          | 1.3<br>(0.6-2.4)                            | 4.8%<br>(1.4-9.1%)                   | 5.6%<br>(1.6-11%)                   | 40<br>(10-78)       | 410<br>(110-810)       |
| Lesotho  | 2000 | Female | 85 to 89 | 23%<br>(14-35%)                | 77%<br>(65-86%)          | 1.3<br>(0.59-2.5)                           | 4.3%<br>(1.1-8.5%)                   | 5%<br>(1.3-9.9%)                    | 21<br>(5.1-42)      | 150<br>(37-310)        |
| Lesotho  | 2000 | Female | 90 to 94 | 25%<br>(15-37%)                | 75%<br>(63-85%)          | 1.4<br>(0.6-2.5)                            | 3.8%<br>(0.86-8%)                    | 4.4%<br>(0.97-9.4%)                 | 7.2<br>(1.5-16)     | 36<br>(8-78)           |
| Lesotho  | 2000 | Female | 95 plus  | 28%<br>(15-43%)                | 72%<br>(57-85%)          | 1.4<br>(0.49-2.9)                           | 3.6%<br>(0.29-8.5%)                  | 4.2%<br>(0.27-10%)                  | 1.9<br>(0.12-4.5)   | 6.4<br>(0.5-15)        |
| Lesotho  | 2000 | Male   | All Ages | 38%<br>(34-41%)                | 62%<br>(59-66%)          | 3.1<br>(2.2-4.1)                            | 8.7%<br>(6.3-11%)                    | 12%<br>(8.4-15%)                    | 1800<br>(1300-2300) | 70000<br>(50000-89000) |
| Lesotho  | 2000 | Male   | 15 to 19 | 29%<br>(25-33%)                | 71%<br>(67-75%)          | 2<br>(1.1-3.2)                              | 10%<br>(6.1-15%)                     | 13%<br>(7.5-19%)                    | 43<br>(24-65)       | 3200<br>(1900-4900)    |
| Lesotho  | 2000 | Male   | 20 to 24 | 47%<br>(42-52%)                | 53%<br>(48-58%)          | 4.6<br>(2.7-7)                              | 15%<br>(9.4-21%)                     | 17%<br>(10-24%)                     | 110<br>(71-150)     | 7400<br>(5000-10000)   |
| Lesotho  | 2000 | Male   | 25 to 29 | 58%<br>(53-62%)                | 42%<br>(38-47%)          | 6.7<br>(4.1-10)                             | 12%<br>(7.1-17%)                     | 12%<br>(7.3-20%)                    | 120<br>(84-160)     | 7600<br>(5400-10000)   |
| Lesotho  | 2000 | Male   | 30 to 34 | 62%<br>(57-66%)                | 38%<br>(34-43%)          | 7.6<br>(4.8-11)                             | 11%<br>(6.7-15%)                     | 11%<br>(6.8-17%)                    | 110<br>(78-150)     | 6500<br>(4600-8700)    |
| Lesotho  | 2000 | Male   | 35 to 39 | 63%<br>(58-68%)                | 37%<br>(32-42%)          | 7.3<br>(4.5-11)                             | 12%<br>(7.3-17%)                     | 13%<br>(7.7-19%)                    | 120<br>(79-160)     | 6100<br>(4100-8200)    |
| Lesotho  | 2000 | Male   | 40 to 44 | 67%<br>(62-71%)                | 33%<br>(29-38%)          | 7.6<br>(4.3-12)                             | 14%<br>(9.6-20%)                     | 16%<br>(10-22%)                     | 140<br>(90-190)     | 6300<br>(4200-8600)    |
| Lesotho  | 2000 | Male   | 45 to 49 | 70%<br>(66-74%)                | 30%<br>(26-34%)          | 8<br>(4.5-13)                               | 18%<br>(13-24%)                      | 20%<br>(14-26%)                     | 170<br>(110-230)    | 6900<br>(4700-9300)    |
| Lesotho  | 2000 | Male   | 50 to 54 | 71%<br>(66-74%)                | 29%<br>(26-34%)          | 7.8<br>(4.4-12)                             | 22%<br>(16-28%)                      | 24%<br>(17-31%)                     | 200<br>(130-270)    | 7200<br>(4800-9700)    |
| Lesotho  | 2000 | Male   | 55 to 59 | 67%<br>(62-71%)                | 33%<br>(29-38%)          | 7<br>(3.9-11)                               | 22%<br>(15-28%)                      | 24%<br>(17-31%)                     | 180<br>(120-240)    | 5600<br>(3700-7500)    |
| Lesotho  | 2000 | Male   | 60 to 64 | 60%<br>(48-70%)                | 40%<br>(30-52%)          | 5.5<br>(2.8-9.2)                            | 19%<br>(12-25%)                      | 21%<br>(14-28%)                     | 190<br>(110-250)    | 5000<br>(3000-6700)    |
| Lesotho  | 2000 | Male   | 65 to 69 | 55%<br>(37-71%)                | 45%<br>(29-63%)          | 4.1<br>(2.1-6.8)                            | 16%<br>(9.3-23%)                     | 18%<br>(10-25%)                     | 180<br>(100-260)    | 4000<br>(2300-5700)    |
| Lesotho  | 2000 | Male   | 70 to 74 | 50%<br>(33-68%)                | 50%<br>(32-67%)          | 2.9<br>(1.5-5.1)                            | 11%<br>(5.1-17%)                     | 12%<br>(5.7-19%)                    | 120<br>(54-190)     | 2100<br>(1000-3400)    |
| Lesotho  | 2000 | Male   | 75 to 79 | 49%<br>(32-66%)                | 51%<br>(34-68%)          | 2.4<br>(1.1-4.3)                            | 8%<br>(3.1-14%)                      | 8.9%<br>(3.4-16%)                   | 81<br>(31-150)      | 1100<br>(430-2000)     |

| Location | Year | Sex    | Age      | Prevalence of current drinkers | Prevalence of abstainers | Population average of standard drinks daily | Percent of total attributable deaths | Percent of total attributable DALYs | Attributable deaths | Attributable DALYs     |
|----------|------|--------|----------|--------------------------------|--------------------------|---------------------------------------------|--------------------------------------|-------------------------------------|---------------------|------------------------|
| Lesotho  | 2000 | Male   | 80 to 84 | 47%<br>(30-64%)                | 53%<br>(36-70%)          | 2.1<br>(0.98-3.5)                           | 6.5%<br>(2.3-11%)                    | 7.3%<br>(2.6-13%)                   | 44<br>(15-80)       | 450<br>(160-820)       |
| Lesotho  | 2000 | Male   | 85 to 89 | 44%<br>(29-61%)                | 56%<br>(39-71%)          | 1.7<br>(0.85-3)                             | 4.8%<br>(1.9-9.1%)                   | 5.4%<br>(2.1-10%)                   | 14<br>(5.3-27)      | 100<br>(40-200)        |
| Lesotho  | 2000 | Male   | 90 to 94 | 43%<br>(28-60%)                | 57%<br>(40-72%)          | 1.5<br>(0.71-2.7)                           | 3.5%<br>(1.2-7%)                     | 3.9%<br>(1.3-8.1%)                  | 3.5<br>(1.1-7.1)    | 18<br>(6.1-36)         |
| Lesotho  | 2000 | Male   | 95 plus  | 46%<br>(26-67%)                | 54%<br>(33-74%)          | 1.4<br>(0.54-2.6)                           | 3%<br>(0.79-6.6%)                    | 3.4%<br>(0.76-7.6%)                 | 0.74<br>(0.17-1.7)  | 2.6<br>(0.69-5.7)      |
| Lesotho  | 2005 | Female | All Ages | 16%<br>(13-20%)                | 84%<br>(80-87%)          | 1.3<br>(0.89-1.8)                           | 3%<br>(1.7-4.6%)                     | 4.8%<br>(2.6-7.3%)                  | 920<br>(480-1400)   | 29000<br>(16000-43000) |
| Lesotho  | 2005 | Female | 15 to 19 | 14%<br>(8-22%)                 | 86%<br>(78-92%)          | 0.93<br>(0.41-1.8)                          | 4.1%<br>(1.8-7.8%)                   | 5.8%<br>(2.2-12%)                   | 14<br>(5.6-29)      | 1100<br>(520-2200)     |
| Lesotho  | 2005 | Female | 20 to 24 | 19%<br>(11-29%)                | 81%<br>(71-89%)          | 1.7<br>(0.83-3.2)                           | 3.5%<br>(1.6-6.6%)                   | 3.9%<br>(1.4-8%)                    | 27<br>(12-50)       | 2000<br>(1000-3500)    |
| Lesotho  | 2005 | Female | 25 to 29 | 21%<br>(12-34%)                | 79%<br>(66-88%)          | 2.3<br>(1.1-4)                              | 2%<br>(0.88-4.1%)                    | 2.1%<br>(0.79-4.4%)                 | 29<br>(13-54)       | 1900<br>(960-3400)     |
| Lesotho  | 2005 | Female | 30 to 34 | 24%<br>(14-37%)                | 76%<br>(63-86%)          | 2.6<br>(1.2-4.6)                            | 2%<br>(0.97-3.8%)                    | 2%<br>(0.9-4.1%)                    | 31<br>(14-56)       | 1800<br>(910-3200)     |
| Lesotho  | 2005 | Female | 35 to 39 | 27%<br>(15-40%)                | 73%<br>(60-85%)          | 2.7<br>(1.3-5)                              | 2.7%<br>(1.2-5.1%)                   | 2.9%<br>(1.2-5.6%)                  | 39<br>(18-71)       | 2000<br>(980-3700)     |
| Lesotho  | 2005 | Female | 40 to 44 | 28%<br>(17-43%)                | 72%<br>(57-83%)          | 2.8<br>(1.2-5.2)                            | 3.4%<br>(1.5-5.9%)                   | 3.6%<br>(1.6-6.5%)                  | 46<br>(21-83)       | 2200<br>(1000-3900)    |
| Lesotho  | 2005 | Female | 45 to 49 | 28%<br>(16-43%)                | 72%<br>(57-84%)          | 2.7<br>(1.2-5.4)                            | 4.7%<br>(2.2-8.2%)                   | 5.2%<br>(2.4-9.1%)                  | 64<br>(29-110)      | 2700<br>(1200-4600)    |
| Lesotho  | 2005 | Female | 50 to 54 | 28%<br>(16-43%)                | 72%<br>(57-84%)          | 2.6<br>(1.2-5)                              | 6.6%<br>(3.2-11%)                    | 7.4%<br>(3.6-12%)                   | 85<br>(38-150)      | 3100<br>(1400-5300)    |
| Lesotho  | 2005 | Female | 55 to 59 | 27%<br>(17-42%)                | 73%<br>(58-83%)          | 2.6<br>(1.1-4.9)                            | 8.2%<br>(4.2-13%)                    | 9.4%<br>(4.8-15%)                   | 91<br>(43-160)      | 2900<br>(1400-5000)    |
| Lesotho  | 2005 | Female | 60 to 64 | 28%<br>(17-43%)                | 72%<br>(57-83%)          | 2.5<br>(1.1-4.8)                            | 8.8%<br>(4.1-14%)                    | 10%<br>(4.7-17%)                    | 79<br>(34-140)      | 2100<br>(920-3600)     |
| Lesotho  | 2005 | Female | 65 to 69 | 28%<br>(18-42%)                | 72%<br>(58-82%)          | 2.2<br>(1.1-4.1)                            | 9.4%<br>(4.3-15%)                    | 11%<br>(5.2-17%)                    | 120<br>(51-200)     | 2600<br>(1100-4500)    |
| Lesotho  | 2005 | Female | 70 to 74 | 26%<br>(17-39%)                | 74%<br>(61-83%)          | 1.8<br>(0.81-3.4)                           | 7.6%<br>(2.9-13%)                    | 8.8%<br>(3.4-15%)                   | 120<br>(44-210)     | 2100<br>(790-3800)     |
| Lesotho  | 2005 | Female | 75 to 79 | 23%<br>(14-36%)                | 77%<br>(64-86%)          | 1.5<br>(0.57-2.8)                           | 6.1%<br>(1.7-11%)                    | 7%<br>(2-13%)                       | 80<br>(21-160)      | 1100<br>(300-2200)     |
| Lesotho  | 2005 | Female | 80 to 84 | 22%<br>(13-35%)                | 78%<br>(65-87%)          | 1.4<br>(0.6-2.4)                            | 5.5%<br>(1.8-10%)                    | 6.4%<br>(2-12%)                     | 57<br>(17-110)      | 580<br>(180-1100)      |
| Lesotho  | 2005 | Female | 85 to 89 | 23%<br>(14-35%)                | 77%<br>(65-86%)          | 1.4<br>(0.6-2.6)                            | 4.9%<br>(1.4-9.5%)                   | 5.7%<br>(1.7-11%)                   | 28<br>(7.7-58)      | 210<br>(56-420)        |
| Lesotho  | 2005 | Female | 90 to 94 | 25%<br>(15-37%)                | 75%<br>(63-85%)          | 1.4<br>(0.59-2.6)                           | 4.3%<br>(1-8.8%)                     | 5%<br>(1.2-10%)                     | 9.5<br>(2.2-20)     | 48<br>(11-100)         |
| Lesotho  | 2005 | Female | 95 plus  | 27%<br>(15-43%)                | 73%<br>(57-85%)          | 1.5<br>(0.47-3.1)                           | 4.2%<br>(0.37-9.6%)                  | 4.9%<br>(0.37-11%)                  | 2.5<br>(0.19-6)     | 8.6<br>(0.77-20)       |

| Location | Year | Sex    | Age      | Prevalence of current drinkers | Prevalence of abstainers | Population average of standard drinks daily | Percent of total attributable deaths | Percent of total attributable DALYs | Attributable deaths | Attributable DALYs      |
|----------|------|--------|----------|--------------------------------|--------------------------|---------------------------------------------|--------------------------------------|-------------------------------------|---------------------|-------------------------|
| Lesotho  | 2005 | Male   | All Ages | 38%<br>(35-41%)                | 62%<br>(59-65%)          | 3.4<br>(2.5-4.4)                            | 9.6%<br>(7.1-12%)                    | 13%<br>(9.3-16%)                    | 2600<br>(1800-3400) | 99000<br>(73000-130000) |
| Lesotho  | 2005 | Male   | 15 to 19 | 30%<br>(27-33%)                | 70%<br>(67-73%)          | 2.2<br>(1.3-3.6)                            | 12%<br>(7.8-17%)                     | 15%<br>(9.4-22%)                    | 65<br>(38-95)       | 4800<br>(3000-7000)     |
| Lesotho  | 2005 | Male   | 20 to 24 | 49%<br>(46-52%)                | 51%<br>(48-54%)          | 5.2<br>(3.1-7.7)                            | 18%<br>(12-26%)                      | 21%<br>(13-30%)                     | 170<br>(110-230)    | 11000<br>(7800-15000)   |
| Lesotho  | 2005 | Male   | 25 to 29 | 58%<br>(55-61%)                | 42%<br>(39-45%)          | 7.2<br>(4.4-11)                             | 13%<br>(7.7-19%)                     | 14%<br>(7.9-21%)                    | 180<br>(130-250)    | 11000<br>(8000-15000)   |
| Lesotho  | 2005 | Male   | 30 to 34 | 62%<br>(59-65%)                | 38%<br>(35-41%)          | 7.9<br>(5-12)                               | 10%<br>(6.6-15%)                     | 11%<br>(6.7-17%)                    | 170<br>(120-230)    | 9600<br>(6600-13000)    |
| Lesotho  | 2005 | Male   | 35 to 39 | 63%<br>(60-66%)                | 37%<br>(34-40%)          | 7.6<br>(4.5-12)                             | 12%<br>(7.1-17%)                     | 12%<br>(7.4-18%)                    | 170<br>(110-230)    | 8800<br>(6000-12000)    |
| Lesotho  | 2005 | Male   | 40 to 44 | 66%<br>(62-69%)                | 34%<br>(31-38%)          | 7.8<br>(4.3-13)                             | 14%<br>(9-19%)                       | 14%<br>(9.5-20%)                    | 180<br>(120-240)    | 8300<br>(5500-11000)    |
| Lesotho  | 2005 | Male   | 45 to 49 | 69%<br>(65-72%)                | 31%<br>(28-35%)          | 8.1<br>(4.5-13)                             | 17%<br>(12-23%)                      | 19%<br>(13-25%)                     | 220<br>(140-300)    | 9000<br>(6000-12000)    |
| Lesotho  | 2005 | Male   | 50 to 54 | 70%<br>(66-73%)                | 30%<br>(27-34%)          | 8.1<br>(4.3-13)                             | 22%<br>(16-28%)                      | 24%<br>(17-30%)                     | 280<br>(190-380)    | 10000<br>(6900-14000)   |
| Lesotho  | 2005 | Male   | 55 to 59 | 66%<br>(62-70%)                | 34%<br>(30-38%)          | 7.2<br>(4-11)                               | 23%<br>(17-29%)                      | 25%<br>(18-32%)                     | 290<br>(200-390)    | 9100<br>(6200-12000)    |
| Lesotho  | 2005 | Male   | 60 to 64 | 59%<br>(48-70%)                | 41%<br>(30-52%)          | 5.7<br>(2.8-9.5)                            | 20%<br>(13-27%)                      | 23%<br>(15-30%)                     | 250<br>(150-330)    | 6600<br>(4100-8800)     |
| Lesotho  | 2005 | Male   | 65 to 69 | 55%<br>(37-70%)                | 45%<br>(30-63%)          | 4.3<br>(2.1-7)                              | 18%<br>(11-25%)                      | 20%<br>(12-28%)                     | 240<br>(140-340)    | 5400<br>(3200-7600)     |
| Lesotho  | 2005 | Male   | 70 to 74 | 50%<br>(33-68%)                | 50%<br>(32-67%)          | 3.1<br>(1.5-5.3)                            | 13%<br>(6.3-19%)                     | 14%<br>(6.9-21%)                    | 150<br>(77-240)     | 2800<br>(1400-4300)     |
| Lesotho  | 2005 | Male   | 75 to 79 | 49%<br>(33-66%)                | 51%<br>(34-67%)          | 2.5<br>(1.1-4.6)                            | 9.4%<br>(3.6-16%)                    | 10%<br>(4-18%)                      | 99<br>(38-170)      | 1400<br>(540-2300)      |
| Lesotho  | 2005 | Male   | 80 to 84 | 47%<br>(30-64%)                | 53%<br>(36-70%)          | 2.2<br>(1-3.8)                              | 7.9%<br>(3-14%)                      | 8.8%<br>(3.4-15%)                   | 68<br>(27-120)      | 710<br>(270-1200)       |
| Lesotho  | 2005 | Male   | 85 to 89 | 44%<br>(29-61%)                | 56%<br>(39-71%)          | 1.8<br>(0.87-3.3)                           | 6%<br>(2.3-11%)                      | 6.8%<br>(2.6-13%)                   | 22<br>(8.7-41)      | 170<br>(64-300)         |
| Lesotho  | 2005 | Male   | 90 to 94 | 44%<br>(28-60%)                | 56%<br>(40-72%)          | 1.6<br>(0.75-2.9)                           | 4.4%<br>(1.5-8.9%)                   | 5.1%<br>(1.7-10%)                   | 5<br>(1.6-9.9)      | 25<br>(8.5-51)          |
| Lesotho  | 2005 | Male   | 95 plus  | 46%<br>(27-67%)                | 54%<br>(33-73%)          | 1.5<br>(0.53-3)                             | 4.1%<br>(0.97-8.8%)                  | 4.7%<br>(0.98-10%)                  | 1.2<br>(0.25-2.5)   | 4.1<br>(0.97-8.8)       |
| Lesotho  | 2010 | Female | All Ages | 16%<br>(13-20%)                | 84%<br>(80-87%)          | 1.3<br>(0.91-1.9)                           | 3.5%<br>(2.1-5.2%)                   | 5.6%<br>(3.2-8.4%)                  | 970<br>(520-1500)   | 30000<br>(18000-45000)  |
| Lesotho  | 2010 | Female | 15 to 19 | 14%<br>(8.2-23%)               | 86%<br>(77-92%)          | 0.97<br>(0.41-1.9)                          | 3.8%<br>(1.6-7%)                     | 5%<br>(1.9-9.8%)                    | 15<br>(5.7-29)      | 1200<br>(530-2300)      |
| Lesotho  | 2010 | Female | 20 to 24 | 19%<br>(11-29%)                | 81%<br>(71-89%)          | 1.8<br>(0.84-3.3)                           | 4.2%<br>(1.9-7.9%)                   | 4.9%<br>(1.8-9.7%)                  | 29<br>(13-53)       | 2200<br>(1100-3800)     |
| Lesotho  | 2010 | Female | 25 to 29 | 22%<br>(12-34%)                | 78%<br>(66-88%)          | 2.3<br>(1.1-4)                              | 2.6%<br>(1.2-5%)                     | 2.8%<br>(1.1-5.7%)                  | 36<br>(16-67)       | 2400<br>(1200-4300)     |

| Location | Year | Sex    | Age      | Prevalence of current drinkers | Prevalence of abstainers | Population average of standard drinks daily | Percent of total attributable deaths | Percent of total attributable DALYs | Attributable deaths | Attributable DALYs       |
|----------|------|--------|----------|--------------------------------|--------------------------|---------------------------------------------|--------------------------------------|-------------------------------------|---------------------|--------------------------|
| Lesotho  | 2010 | Female | 30 to 34 | 24%<br>(14-37%)                | 76%<br>(63-86%)          | 2.6<br>(1.3-4.5)                            | 2.4%<br>(1.2-4.4%)                   | 2.5%<br>(1.1-4.7%)                  | 37<br>(16-67)       | 2200<br>(1100-3900)      |
| Lesotho  | 2010 | Female | 35 to 39 | 27%<br>(15-41%)                | 73%<br>(59-85%)          | 2.8<br>(1.3-5.2)                            | 3.2%<br>(1.5-5.7%)                   | 3.5%<br>(1.5-6.3%)                  | 38<br>(17-68)       | 2000<br>(930-3500)       |
| Lesotho  | 2010 | Female | 40 to 44 | 28%<br>(17-45%)                | 72%<br>(55-83%)          | 2.9<br>(1.2-5.4)                            | 4.2%<br>(2.1-7%)                     | 4.6%<br>(2.2-7.8%)                  | 42<br>(19-72)       | 2000<br>(950-3300)       |
| Lesotho  | 2010 | Female | 45 to 49 | 29%<br>(16-44%)                | 71%<br>(56-84%)          | 2.9<br>(1.2-5.7)                            | 6.1%<br>(3-10%)                      | 6.9%<br>(3.3-11%)                   | 60<br>(27-100)      | 2500<br>(1200-4200)      |
| Lesotho  | 2010 | Female | 50 to 54 | 28%<br>(16-43%)                | 72%<br>(57-84%)          | 2.8<br>(1.2-5.5)                            | 8.3%<br>(4.2-13%)                    | 9.6%<br>(5-16%)                     | 86<br>(42-140)      | 3200<br>(1600-5200)      |
| Lesotho  | 2010 | Female | 55 to 59 | 27%<br>(16-42%)                | 73%<br>(58-84%)          | 2.7<br>(1.2-5.2)                            | 10%<br>(5.1-16%)                     | 12%<br>(6.1-19%)                    | 110<br>(49-180)     | 3300<br>(1600-5600)      |
| Lesotho  | 2010 | Female | 60 to 64 | 28%<br>(17-43%)                | 72%<br>(57-83%)          | 2.6<br>(1.1-5)                              | 10%<br>(4.7-16%)                     | 12%<br>(5.6-19%)                    | 110<br>(45-170)     | 2800<br>(1200-4700)      |
| Lesotho  | 2010 | Female | 65 to 69 | 28%<br>(18-42%)                | 72%<br>(58-82%)          | 2.4<br>(1-4.3)                              | 10%<br>(4.7-17%)                     | 12%<br>(5.8-19%)                    | 100<br>(43-170)     | 2200<br>(960-3800)       |
| Lesotho  | 2010 | Female | 70 to 74 | 26%<br>(17-39%)                | 74%<br>(61-83%)          | 1.9<br>(0.83-3.6)                           | 8.2%<br>(3-14%)                      | 9.5%<br>(3.6-16%)                   | 110<br>(38-190)     | 2000<br>(670-3500)       |
| Lesotho  | 2010 | Female | 75 to 79 | 23%<br>(14-36%)                | 77%<br>(64-86%)          | 1.5<br>(0.6-3.1)                            | 6.3%<br>(1.6-12%)                    | 7.3%<br>(1.9-14%)                   | 98<br>(24-190)      | 1400<br>(330-2700)       |
| Lesotho  | 2010 | Female | 80 to 84 | 22%<br>(14-35%)                | 78%<br>(65-86%)          | 1.4<br>(0.61-2.6)                           | 5.7%<br>(1.5-11%)                    | 6.5%<br>(1.9-12%)                   | 72<br>(19-140)      | 740<br>(200-1400)        |
| Lesotho  | 2010 | Female | 85 to 89 | 23%<br>(14-34%)                | 77%<br>(66-86%)          | 1.4<br>(0.6-2.7)                            | 5.1%<br>(1.3-10%)                    | 5.9%<br>(1.5-12%)                   | 28<br>(7-56)        | 200<br>(51-410)          |
| Lesotho  | 2010 | Female | 90 to 94 | 25%<br>(15-37%)                | 75%<br>(63-85%)          | 1.4<br>(0.58-2.8)                           | 4.4%<br>(0.82-9.2%)                  | 5.2%<br>(0.91-11%)                  | 9.1<br>(1.6-19)     | 46<br>(8.5-95)           |
| Lesotho  | 2010 | Female | 95 plus  | 27%<br>(15-44%)                | 73%<br>(56-85%)          | 1.5<br>(0.48-3.4)                           | 4.4%<br>(0.3-10%)                    | 5.1%<br>(0.29-12%)                  | 2.5<br>(0.15-5.8)   | 8.4<br>(0.59-19)         |
| Lesotho  | 2010 | Male   | All Ages | 39%<br>(36-42%)                | 61%<br>(58-64%)          | 3.6<br>(2.5-4.9)                            | 11%<br>(8.4-14%)                     | 14%<br>(11-18%)                     | 2600<br>(1900-3400) | 110000<br>(80000-140000) |
| Lesotho  | 2010 | Male   | 15 to 19 | 31%<br>(27-34%)                | 69%<br>(66-73%)          | 2.3<br>(1.3-3.7)                            | 11%<br>(7-16%)                       | 14%<br>(8.1-20%)                    | 67<br>(40-99)       | 5000<br>(3000-7300)      |
| Lesotho  | 2010 | Male   | 20 to 24 | 50%<br>(46-53%)                | 50%<br>(47-54%)          | 5.3<br>(3.1-8.1)                            | 20%<br>(14-27%)                      | 23%<br>(16-32%)                     | 180<br>(130-250)    | 13000<br>(9000-17000)    |
| Lesotho  | 2010 | Male   | 25 to 29 | 58%<br>(55-62%)                | 42%<br>(38-45%)          | 7.3<br>(4.4-11)                             | 16%<br>(9.9-22%)                     | 17%<br>(10-26%)                     | 230<br>(160-300)    | 14000<br>(10000-19000)   |
| Lesotho  | 2010 | Male   | 30 to 34 | 62%<br>(59-65%)                | 38%<br>(35-41%)          | 8.1<br>(5.2-12)                             | 12%<br>(8.3-17%)                     | 13%<br>(8.7-19%)                    | 220<br>(150-290)    | 12000<br>(8900-16000)    |
| Lesotho  | 2010 | Male   | 35 to 39 | 63%<br>(60-67%)                | 37%<br>(33-40%)          | 7.9<br>(4.6-13)                             | 13%<br>(8.7-18%)                     | 14%<br>(9.3-20%)                    | 200<br>(140-270)    | 10000<br>(7400-14000)    |
| Lesotho  | 2010 | Male   | 40 to 44 | 66%<br>(63-70%)                | 34%<br>(30-37%)          | 8.1<br>(4.4-13)                             | 16%<br>(11-21%)                      | 17%<br>(12-22%)                     | 190<br>(130-250)    | 8700<br>(6000-12000)     |
| Lesotho  | 2010 | Male   | 45 to 49 | 69%<br>(66-72%)                | 31%<br>(28-34%)          | 8.4<br>(4.5-14)                             | 20%<br>(15-26%)                      | 22%<br>(16-28%)                     | 200<br>(140-270)    | 8300<br>(5700-11000)     |

| Location | Year | Sex    | Age      | Prevalence of current drinkers | Prevalence of abstainers | Population average of standard drinks daily | Percent of total attributable deaths | Percent of total attributable DALYs | Attributable deaths | Attributable DALYs     |
|----------|------|--------|----------|--------------------------------|--------------------------|---------------------------------------------|--------------------------------------|-------------------------------------|---------------------|------------------------|
| Lesotho  | 2010 | Male   | 50 to 54 | 70%<br>(67-73%)                | 30%<br>(27-33%)          | 8.3<br>(4.2-13)                             | 25%<br>(18-30%)                      | 27%<br>(20-33%)                     | 250<br>(170-330)    | 9100<br>(6300-12000)   |
| Lesotho  | 2010 | Male   | 55 to 59 | 66%<br>(62-70%)                | 34%<br>(30-38%)          | 7.4<br>(3.9-12)                             | 26%<br>(19-32%)                      | 29%<br>(21-35%)                     | 280<br>(200-370)    | 8900<br>(6200-12000)   |
| Lesotho  | 2010 | Male   | 60 to 64 | 59%<br>(48-70%)                | 41%<br>(30-52%)          | 5.8<br>(2.8-10)                             | 22%<br>(15-29%)                      | 25%<br>(16-32%)                     | 260<br>(160-350)    | 6900<br>(4300-9200)    |
| Lesotho  | 2010 | Male   | 65 to 69 | 54%<br>(37-71%)                | 46%<br>(29-63%)          | 4.3<br>(2.1-7.3)                            | 19%<br>(11-26%)                      | 21%<br>(13-30%)                     | 210<br>(120-290)    | 4600<br>(2600-6500)    |
| Lesotho  | 2010 | Male   | 70 to 74 | 50%<br>(33-67%)                | 50%<br>(33-67%)          | 3.1<br>(1.4-5.4)                            | 13%<br>(6.2-20%)                     | 15%<br>(7-22%)                      | 150<br>(71-240)     | 2700<br>(1300-4200)    |
| Lesotho  | 2010 | Male   | 75 to 79 | 48%<br>(33-65%)                | 52%<br>(35-67%)          | 2.5<br>(1.1-4.7)                            | 9.7%<br>(3.3-16%)                    | 11%<br>(3.7-18%)                    | 97<br>(34-170)      | 1300<br>(470-2300)     |
| Lesotho  | 2010 | Male   | 80 to 84 | 47%<br>(30-64%)                | 53%<br>(36-70%)          | 2.2<br>(1-4)                                | 7.9%<br>(3-14%)                      | 8.9%<br>(3.4-16%)                   | 70<br>(26-130)      | 730<br>(270-1300)      |
| Lesotho  | 2010 | Male   | 85 to 89 | 44%<br>(28-60%)                | 56%<br>(40-72%)          | 1.8<br>(0.82-3.4)                           | 6%<br>(2.1-11%)                      | 6.9%<br>(2.4-13%)                   | 24<br>(8.6-45)      | 180<br>(64-330)        |
| Lesotho  | 2010 | Male   | 90 to 94 | 43%<br>(28-60%)                | 57%<br>(40-72%)          | 1.6<br>(0.7-3)                              | 4.5%<br>(1.4-9%)                     | 5.2%<br>(1.7-11%)                   | 5.5<br>(1.7-11)     | 28<br>(9.5-57)         |
| Lesotho  | 2010 | Male   | 95 plus  | 45%<br>(26-66%)                | 55%<br>(34-74%)          | 1.5<br>(0.53-3.1)                           | 4.3%<br>(1-9.1%)                     | 4.9%<br>(1.1-11%)                   | 1.3<br>(0.29-2.8)   | 4.5<br>(1.1-9.6)       |
| Lesotho  | 2016 | Female | All Ages | 17%<br>(13-21%)                | 83%<br>(79-87%)          | 1.5<br>(0.83-2.4)                           | 3.7%<br>(2-5.9%)                     | 5.8%<br>(2.9-9.2%)                  | 880<br>(380-1500)   | 28000<br>(14000-47000) |
| Lesotho  | 2016 | Female | 15 to 19 | 14%<br>(8.2-23%)               | 86%<br>(77-92%)          | 1<br>(0.41-2.1)                             | 2.9%<br>(1.2-5.6%)                   | 3.4%<br>(1.2-6.8%)                  | 13<br>(4.8-27)      | 1100<br>(460-2200)     |
| Lesotho  | 2016 | Female | 20 to 24 | 19%<br>(11-29%)                | 81%<br>(71-89%)          | 1.9<br>(0.81-3.7)                           | 4.1%<br>(1.9-7.7%)                   | 4.6%<br>(1.7-9.4%)                  | 26<br>(10-50)       | 2000<br>(980-3600)     |
| Lesotho  | 2016 | Female | 25 to 29 | 22%<br>(13-34%)                | 78%<br>(66-87%)          | 2.4<br>(1.1-4.5)                            | 3%<br>(1.3-6.2%)                     | 3.2%<br>(1.2-7.2%)                  | 35<br>(14-73)       | 2400<br>(1100-4700)    |
| Lesotho  | 2016 | Female | 30 to 34 | 24%<br>(14-38%)                | 76%<br>(62-86%)          | 2.8<br>(1.3-5.3)                            | 2.7%<br>(1.2-5.3%)                   | 2.8%<br>(1.1-5.8%)                  | 43<br>(17-85)       | 2600<br>(1100-4900)    |
| Lesotho  | 2016 | Female | 35 to 39 | 27%<br>(16-41%)                | 73%<br>(59-84%)          | 2.9<br>(1.3-5.6)                            | 3.4%<br>(1.5-6.2%)                   | 3.7%<br>(1.5-6.8%)                  | 45<br>(17-90)       | 2400<br>(1000-4700)    |
| Lesotho  | 2016 | Female | 40 to 44 | 28%<br>(17-43%)                | 72%<br>(57-83%)          | 2.9<br>(1.1-5.8)                            | 4.5%<br>(2.1-7.8%)                   | 5%<br>(2.2-8.9%)                    | 39<br>(16-76)       | 1800<br>(790-3500)     |
| Lesotho  | 2016 | Female | 45 to 49 | 28%<br>(16-44%)                | 72%<br>(56-84%)          | 2.9<br>(1.1-6.1)                            | 6.4%<br>(2.9-11%)                    | 7.4%<br>(3.3-13%)                   | 43<br>(17-78)       | 1800<br>(750-3200)     |
| Lesotho  | 2016 | Female | 50 to 54 | 28%<br>(16-44%)                | 72%<br>(56-84%)          | 2.8<br>(1-5.7)                              | 8.2%<br>(3.9-13%)                    | 9.8%<br>(4.6-16%)                   | 58<br>(23-110)      | 2200<br>(890-3900)     |
| Lesotho  | 2016 | Female | 55 to 59 | 27%<br>(16-42%)                | 73%<br>(58-84%)          | 2.7<br>(1.1-5.8)                            | 10%<br>(4.8-16%)                     | 12%<br>(6-20%)                      | 83<br>(33-150)      | 2600<br>(1100-4800)    |
| Lesotho  | 2016 | Female | 60 to 64 | 28%<br>(17-43%)                | 72%<br>(57-83%)          | 2.7<br>(1-5.4)                              | 10%<br>(4.2-16%)                     | 12%<br>(5.3-19%)                    | 100<br>(38-180)     | 2800<br>(1100-5000)    |
| Lesotho  | 2016 | Female | 65 to 69 | 28%<br>(18-43%)                | 72%<br>(57-82%)          | 2.4<br>(0.99-4.9)                           | 10%<br>(4.3-17%)                     | 12%<br>(5.3-20%)                    | 120<br>(43-210)     | 2600<br>(970-4700)     |



| Location | Year | Sex    | Age      | Prevalence of current drinkers | Prevalence of abstainers | Population average of standard drinks daily | Percent of total attributable deaths | Percent of total attributable DALYs | Attributable deaths | Attributable DALYs       |
|----------|------|--------|----------|--------------------------------|--------------------------|---------------------------------------------|--------------------------------------|-------------------------------------|---------------------|--------------------------|
| Lesotho  | 2016 | Female | 70 to 74 | 26%<br>(17-40%)                | 74%<br>(60-83%)          | 2<br>(0.77-4.1)                             | 8%<br>(2.5-14%)                      | 9.5%<br>(3.2-16%)                   | 83<br>(24-150)      | 1500<br>(430-2700)       |
| Lesotho  | 2016 | Female | 75 to 79 | 23%<br>(14-36%)                | 77%<br>(64-86%)          | 1.6<br>(0.63-3.5)                           | 6.3%<br>(1.6-12%)                    | 7.4%<br>(1.9-13%)                   | 75<br>(16-150)      | 1000<br>(220-2100)       |
| Lesotho  | 2016 | Female | 80 to 84 | 22%<br>(13-35%)                | 78%<br>(65-87%)          | 1.5<br>(0.6-3.1)                            | 5.6%<br>(1.4-11%)                    | 6.5%<br>(1.6-13%)                   | 70<br>(17-140)      | 720<br>(170-1400)        |
| Lesotho  | 2016 | Female | 85 to 89 | 23%<br>(14-35%)                | 77%<br>(65-86%)          | 1.5<br>(0.58-3.1)                           | 5.1%<br>(1.1-10%)                    | 5.9%<br>(1.3-12%)                   | 36<br>(8.4-75)      | 270<br>(61-540)          |
| Lesotho  | 2016 | Female | 90 to 94 | 25%<br>(16-37%)                | 75%<br>(63-84%)          | 1.5<br>(0.58-3.3)                           | 4.5%<br>(0.78-9.5%)                  | 5.3%<br>(0.92-11%)                  | 9.2<br>(1.6-20)     | 46<br>(7.9-98)           |
| Lesotho  | 2016 | Female | 95 plus  | 28%<br>(16-44%)                | 72%<br>(56-84%)          | 1.6<br>(0.52-3.5)                           | 4.4%<br>(0.37-10%)                   | 5.2%<br>(0.43-12%)                  | 2.4<br>(0.19-5.6)   | 7.9<br>(0.71-19)         |
| Lesotho  | 2016 | Male   | All Ages | 40%<br>(35-46%)                | 60%<br>(54-65%)          | 4.1<br>(2.4-6.7)                            | 12%<br>(8.5-15%)                     | 15%<br>(11-19%)                     | 2600<br>(1800-3500) | 110000<br>(76000-140000) |
| Lesotho  | 2016 | Male   | 15 to 19 | 30%<br>(21-39%)                | 70%<br>(61-79%)          | 2.4<br>(1.1-4.6)                            | 9%<br>(4.9-14%)                      | 10%<br>(5.4-16%)                    | 61<br>(32-97)       | 4600<br>(2500-7200)      |
| Lesotho  | 2016 | Male   | 20 to 24 | 49%<br>(37-59%)                | 51%<br>(41-63%)          | 5.6<br>(2.8-9.9)                            | 19%<br>(13-26%)                      | 22%<br>(14-30%)                     | 170<br>(110-240)    | 12000<br>(8100-17000)    |
| Lesotho  | 2016 | Male   | 25 to 29 | 57%<br>(45-67%)                | 43%<br>(33-55%)          | 7.6<br>(3.6-13)                             | 16%<br>(10-23%)                      | 18%<br>(11-26%)                     | 230<br>(150-310)    | 14000<br>(9700-19000)    |
| Lesotho  | 2016 | Male   | 30 to 34 | 61%<br>(49-70%)                | 39%<br>(30-51%)          | 8.4<br>(4.3-15)                             | 14%<br>(9-19%)                       | 15%<br>(9.4-21%)                    | 260<br>(170-350)    | 15000<br>(10000-20000)   |
| Lesotho  | 2016 | Male   | 35 to 39 | 63%<br>(51-71%)                | 37%<br>(29-49%)          | 8.2<br>(4.2-15)                             | 14%<br>(8.9-19%)                     | 15%<br>(9.5-21%)                    | 260<br>(170-360)    | 13000<br>(8600-19000)    |
| Lesotho  | 2016 | Male   | 40 to 44 | 64%<br>(53-73%)                | 36%<br>(27-47%)          | 8.3<br>(3.8-16)                             | 17%<br>(11-22%)                      | 18%<br>(12-24%)                     | 240<br>(150-340)    | 11000<br>(6800-15000)    |
| Lesotho  | 2016 | Male   | 45 to 49 | 66%<br>(53-74%)                | 34%<br>(26-47%)          | 8.5<br>(3.7-17)                             | 21%<br>(15-27%)                      | 23%<br>(16-30%)                     | 220<br>(130-300)    | 8800<br>(5600-12000)     |
| Lesotho  | 2016 | Male   | 50 to 54 | 66%<br>(56-74%)                | 34%<br>(26-44%)          | 8.2<br>(3.6-16)                             | 24%<br>(17-30%)                      | 26%<br>(18-33%)                     | 200<br>(120-270)    | 7200<br>(4500-9700)      |
| Lesotho  | 2016 | Male   | 55 to 59 | 64%<br>(53-72%)                | 36%<br>(28-47%)          | 7.4<br>(3.4-14)                             | 25%<br>(17-31%)                      | 28%<br>(19-34%)                     | 220<br>(140-300)    | 6800<br>(4400-9300)      |
| Lesotho  | 2016 | Male   | 60 to 64 | 60%<br>(48-70%)                | 40%<br>(30-52%)          | 6.1<br>(2.6-12)                             | 22%<br>(14-29%)                      | 25%<br>(15-32%)                     | 240<br>(140-330)    | 6300<br>(3700-8700)      |
| Lesotho  | 2016 | Male   | 65 to 69 | 55%<br>(38-71%)                | 45%<br>(29-62%)          | 4.6<br>(1.9-9)                              | 19%<br>(10-26%)                      | 21%<br>(11-29%)                     | 220<br>(120-310)    | 4800<br>(2600-6900)      |
| Lesotho  | 2016 | Male   | 70 to 74 | 50%<br>(34-67%)                | 50%<br>(33-66%)          | 3.3<br>(1.4-6.5)                            | 13%<br>(5.7-21%)                     | 15%<br>(6.4-23%)                    | 140<br>(59-220)     | 2500<br>(1100-4000)      |
| Lesotho  | 2016 | Male   | 75 to 79 | 49%<br>(33-66%)                | 51%<br>(34-67%)          | 2.7<br>(1-5.6)                              | 10%<br>(3.3-17%)                     | 11%<br>(3.7-19%)                    | 96<br>(32-170)      | 1300<br>(460-2300)       |
| Lesotho  | 2016 | Male   | 80 to 84 | 47%<br>(30-65%)                | 53%<br>(35-70%)          | 2.3<br>(0.97-4.8)                           | 8.3%<br>(2.8-15%)                    | 9.3%<br>(3.1-17%)                   | 64<br>(21-120)      | 660<br>(220-1200)        |
| Lesotho  | 2016 | Male   | 85 to 89 | 44%<br>(29-60%)                | 56%<br>(40-71%)          | 2<br>(0.81-4.3)                             | 6.4%<br>(2-13%)                      | 7.3%<br>(2.3-14%)                   | 23<br>(7-44)        | 170<br>(53-330)          |

| Location | Year | Sex    | Age      | Prevalence of current drinkers | Prevalence of abstainers | Population average of standard drinks daily | Percent of total attributable deaths | Percent of total attributable DALYs | Attributable deaths      | Attributable DALYs     |
|----------|------|--------|----------|--------------------------------|--------------------------|---------------------------------------------|--------------------------------------|-------------------------------------|--------------------------|------------------------|
| Lesotho  | 2016 | Male   | 90 to 94 | 43%<br>(27-61%)                | 57%<br>(39-73%)          | 1.8<br>(0.68-3.8)                           | 4.9%<br>(1.3-10%)                    | 5.7%<br>(1.5-12%)                   | 5.5<br>(1.4-11)          | 28<br>(7.6-58)         |
| Lesotho  | 2016 | Male   | 95 plus  | 45%<br>(26-66%)                | 55%<br>(34-74%)          | 1.6<br>(0.55-3.7)                           | 4.7%<br>(0.95-10%)                   | 5.4%<br>(0.97-12%)                  | 1.4<br>(0.25-3)          | 4.8<br>(0.96-10)       |
| Namibia  | 1990 | Female | All Ages | 27%<br>(23-31%)                | 73%<br>(69-77%)          | 0.14<br>(0.079-0.23)                        | 0.19%<br>(-0.16-0.53%)               | -0.16%<br>(-0.8-0.45%)              | -8.8<br>(-44-24)         | 610<br>(-510-1700)     |
| Namibia  | 1990 | Female | 15 to 19 | 23%<br>(16-31%)                | 77%<br>(69-84%)          | 0.12<br>(0.06-0.23)                         | 0.63%<br>(0.18-1.2%)                 | 0.42%<br>(-0.38-1.4%)               | 0.4<br>(-0.4-1.3)        | 86<br>(22-170)         |
| Namibia  | 1990 | Female | 20 to 24 | 33%<br>(23-44%)                | 67%<br>(56-77%)          | 0.24<br>(0.12-0.44)                         | 1.2%<br>(0.33-2.3%)                  | 0.69%<br>(-0.72-2.2%)               | 0.87<br>(-0.94-2.8)      | 180<br>(43-330)        |
| Namibia  | 1990 | Female | 25 to 29 | 37%<br>(27-49%)                | 63%<br>(51-73%)          | 0.27<br>(0.13-0.46)                         | 1.2%<br>(0.29-2.1%)                  | 0.7%<br>(-0.62-2.3%)                | 0.92<br>(-0.8-3)         | 160<br>(40-300)        |
| Namibia  | 1990 | Female | 30 to 34 | 41%<br>(29-53%)                | 59%<br>(47-71%)          | 0.3<br>(0.14-0.51)                          | 1.1%<br>(0.16-2.1%)                  | 0.77%<br>(-0.76-2.4%)               | 1<br>(-0.99-3.3)         | 130<br>(20-260)        |
| Namibia  | 1990 | Female | 35 to 39 | 44%<br>(32-54%)                | 56%<br>(46-68%)          | 0.33<br>(0.16-0.56)                         | 1%<br>(-0.11-2.2%)                   | 0.92%<br>(-0.88-2.7%)               | 1.3<br>(-1.2-3.7)        | 110<br>(-13-250)       |
| Namibia  | 1990 | Female | 40 to 44 | 46%<br>(35-56%)                | 54%<br>(44-65%)          | 0.34<br>(0.17-0.6)                          | 0.9%<br>(-0.27-2.1%)                 | 0.93%<br>(-0.84-2.8%)               | 1.3<br>(-1.2-4)          | 92<br>(-27-210)        |
| Namibia  | 1990 | Female | 45 to 49 | 46%<br>(33-56%)                | 54%<br>(44-67%)          | 0.31<br>(0.15-0.54)                         | 0.71%<br>(-0.42-1.9%)                | 0.73%<br>(-0.9-2.4%)                | 1.2<br>(-1.5-3.8)        | 71<br>(-41-180)        |
| Namibia  | 1990 | Female | 50 to 54 | 44%<br>(33-56%)                | 56%<br>(44-67%)          | 0.27<br>(0.13-0.48)                         | 0.33%<br>(-0.85-1.4%)                | 0.24%<br>(-1.4-1.7%)                | 0.49<br>(-2.7-3.4)       | 33<br>(-84-140)        |
| Namibia  | 1990 | Female | 55 to 59 | 43%<br>(31-54%)                | 57%<br>(46-69%)          | 0.23<br>(0.11-0.42)                         | -0.065%<br>(-1.2-0.91%)              | -0.18%<br>(-1.6-1.1%)               | -0.47<br>(-4.3-2.7)      | -6.8<br>(-120-93)      |
| Namibia  | 1990 | Female | 60 to 64 | 42%<br>(30-55%)                | 58%<br>(45-70%)          | 0.21<br>(0.095-0.39)                        | -0.48%<br>(-1.6-0.48%)               | -0.65%<br>(-2-0.55%)                | -2.2<br>(-6.8-1.9)       | -55<br>(-180-55)       |
| Namibia  | 1990 | Female | 65 to 69 | 41%<br>(30-52%)                | 59%<br>(48-70%)          | 0.19<br>(0.095-0.35)                        | -0.64%<br>(-1.8-0.31%)               | -0.79%<br>(-2.2-0.38%)              | -3.2<br>(-8.6-1.5)       | -70<br>(-190-33)       |
| Namibia  | 1990 | Female | 70 to 74 | 38%<br>(28-48%)                | 62%<br>(52-72%)          | 0.16<br>(0.076-0.3)                         | -0.6%<br>(-1.7-0.13%)                | -0.71%<br>(-2-0.15%)                | -3.3<br>(-9.1-0.66)      | -59<br>(-160-12)       |
| Namibia  | 1990 | Female | 75 to 79 | 33%<br>(23-46%)                | 67%<br>(54-77%)          | 0.13<br>(0.059-0.24)                        | -0.64%<br>(-1.5-0.029%)              | -0.75%<br>(-1.8-0.023%)             | -3.3<br>(-7.9-0.1)       | -45<br>(-110-2.1)      |
| Namibia  | 1990 | Female | 80 to 84 | 33%<br>(22-44%)                | 67%<br>(56-78%)          | 0.12<br>(0.056-0.22)                        | -0.58%<br>(-1.4-0.026%)              | -0.68%<br>(-1.7-0.023%)             | -2.2<br>(-5.4-0.072)     | -23<br>(-56--1)        |
| Namibia  | 1990 | Female | 85 to 89 | 35%<br>(24-47%)                | 65%<br>(53-76%)          | 0.12<br>(0.056-0.21)                        | -0.58%<br>(-1.3-0.023%)              | -0.68%<br>(-1.6-0.032%)             | -1.3<br>(-3-0.061)       | -9.2<br>(-22--0.37)    |
| Namibia  | 1990 | Female | 90 to 94 | 38%<br>(27-51%)                | 62%<br>(49-73%)          | 0.12<br>(0.054-0.22)                        | -0.57%<br>(-1.4-0.034%)              | -0.69%<br>(-1.7-0.054%)             | -0.47<br>(-1.1-0.037)    | -2.3<br>(-5.7--0.14)   |
| Namibia  | 1990 | Female | 95 plus  | 44%<br>(28-62%)                | 56%<br>(38-72%)          | 0.13<br>(0.05-0.25)                         | -0.54%<br>(-1.5-0.027%)              | -0.68%<br>(-1.8-0.0099%)            | -0.11<br>(-0.28--0.0016) | -0.33<br>(-0.91-0.017) |
| Namibia  | 1990 | Male   | All Ages | 39%<br>(34-44%)                | 61%<br>(56-66%)          | 0.27<br>(0.16-0.43)                         | 1.1%<br>(0.34-1.9%)                  | 1%<br>(-0.065-2.1%)                 | 68<br>(-4.3-140)         | 4400<br>(1300-7500)    |
| Namibia  | 1990 | Male   | 15 to 19 | 34%<br>(24-44%)                | 66%<br>(56-76%)          | 0.21<br>(0.11-0.36)                         | 1.7%<br>(0.79-2.8%)                  | 1.4%<br>(0.25-3.1%)                 | 2.3<br>(0.41-5.1)        | 290<br>(130-510)       |

| Location | Year | Sex    | Age      | Prevalence of current drinkers | Prevalence of abstainers | Population average of standard drinks daily | Percent of total attributable deaths | Percent of total attributable DALYs | Attributable deaths    | Attributable DALYs    |
|----------|------|--------|----------|--------------------------------|--------------------------|---------------------------------------------|--------------------------------------|-------------------------------------|------------------------|-----------------------|
| Namibia  | 1990 | Male   | 20 to 24 | 56%<br>(44-67%)                | 44%<br>(33-56%)          | 0.53<br>(0.3-0.88)                          | 3.7%<br>(1.7-6.3%)                   | 3.3%<br>(0.64-6.5%)                 | 7.7<br>(1.4-15)        | 780<br>(340-1300)     |
| Namibia  | 1990 | Male   | 25 to 29 | 62%<br>(51-72%)                | 38%<br>(28-49%)          | 0.63<br>(0.35-1.1)                          | 3.7%<br>(1.6-6.2%)                   | 3.3%<br>(0.61-6.5%)                 | 8.2<br>(1.5-16)        | 740<br>(300-1200)     |
| Namibia  | 1990 | Male   | 30 to 34 | 65%<br>(53-74%)                | 35%<br>(26-47%)          | 0.65<br>(0.37-1.1)                          | 3.2%<br>(1.2-5.5%)                   | 3%<br>(0.28-5.9%)                   | 6.9<br>(0.7-13)        | 550<br>(200-930)      |
| Namibia  | 1990 | Male   | 35 to 39 | 66%<br>(55-74%)                | 34%<br>(26-45%)          | 0.62<br>(0.34-1)                            | 2.8%<br>(0.75-5.2%)                  | 2.7%<br>(0.14-5.9%)                 | 6.2<br>(0.34-13)       | 410<br>(110-770)      |
| Namibia  | 1990 | Male   | 40 to 44 | 65%<br>(54-73%)                | 35%<br>(27-46%)          | 0.59<br>(0.32-0.97)                         | 2.5%<br>(0.29-4.9%)                  | 2.5%<br>(-0.28-5.5%)                | 6.2<br>(-0.69-14)      | 350<br>(40-680)       |
| Namibia  | 1990 | Male   | 45 to 49 | 62%<br>(48-70%)                | 38%<br>(30-52%)          | 0.57<br>(0.32-0.94)                         | 3%<br>(0.51-5.8%)                    | 3.1%<br>(-0.03-6.5%)                | 8.4<br>(-0.087-18)     | 410<br>(73-790)       |
| Namibia  | 1990 | Male   | 50 to 54 | 62%<br>(51-70%)                | 38%<br>(30-49%)          | 0.56<br>(0.29-0.93)                         | 2.6%<br>(0.28-5.1%)                  | 2.6%<br>(-0.23-5.8%)                | 7.7<br>(-0.73-17)      | 350<br>(38-670)       |
| Namibia  | 1990 | Male   | 55 to 59 | 65%<br>(54-73%)                | 35%<br>(27-46%)          | 0.56<br>(0.29-0.92)                         | 1.8%<br>(-0.4-4.1%)                  | 1.8%<br>(-0.88-4.6%)                | 6.3<br>(-3.2-16)       | 250<br>(-53-550)      |
| Namibia  | 1990 | Male   | 60 to 64 | 62%<br>(50-71%)                | 38%<br>(29-50%)          | 0.45<br>(0.25-0.78)                         | 0.8%<br>(-1.2-4%)                    | 0.69%<br>(-1.5-2.6%)                | 3<br>(-6.7-11)         | 110<br>(-150-340)     |
| Namibia  | 1990 | Male   | 65 to 69 | 52%<br>(40-63%)                | 48%<br>(37-60%)          | 0.29<br>(0.16-0.51)                         | 0.51%<br>(-0.92-1.8%)                | 0.44%<br>(-1.2-1.9%)                | 2<br>(-5.9-8.9)        | 62<br>(-110-210)      |
| Namibia  | 1990 | Male   | 70 to 74 | 48%<br>(37-60%)                | 52%<br>(40-63%)          | 0.18<br>(0.096-0.33)                        | 0.38%<br>(-0.58-1.2%)                | 0.34%<br>(-0.78-1.2%)               | 1.5<br>(-3.5-5.8)      | 35<br>(-54-110)       |
| Namibia  | 1990 | Male   | 75 to 79 | 50%<br>(35-64%)                | 50%<br>(36-65%)          | 0.14<br>(0.065-0.25)                        | 0.21%<br>(-0.59-0.81%)               | 0.16%<br>(-0.74-0.85%)              | 0.58<br>(-2.7-3.2)     | 12<br>(-34-48)        |
| Namibia  | 1990 | Male   | 80 to 84 | 50%<br>(34-65%)                | 50%<br>(35-66%)          | 0.12<br>(0.058-0.22)                        | 0.17%<br>(-0.45-0.65%)               | 0.13%<br>(-0.6-0.68%)               | 0.3<br>(-1.4-1.6)      | 4.7<br>(-12-18)       |
| Namibia  | 1990 | Male   | 85 to 89 | 47%<br>(33-61%)                | 53%<br>(39-67%)          | 0.1<br>(0.049-0.18)                         | 0.15%<br>(-0.36-0.52%)               | 0.11%<br>(-0.46-0.54%)              | 0.12<br>(-0.52-0.61)   | 1.4<br>(-3.3-4.9)     |
| Namibia  | 1990 | Male   | 90 to 94 | 46%<br>(32-61%)                | 54%<br>(39-68%)          | 0.089<br>(0.042-0.17)                       | 0.15%<br>(-0.25-0.45%)               | 0.11%<br>(-0.35-0.46%)              | 0.045<br>(-0.14-0.19)  | 0.35<br>(-0.61-1.1)   |
| Namibia  | 1990 | Male   | 95 plus  | 48%<br>(30-68%)                | 52%<br>(32-70%)          | 0.082<br>(0.032-0.17)                       | 0.2%<br>(-0.16-0.45%)                | 0.12%<br>(-0.31-0.42%)              | 0.012<br>(-0.03-0.041) | 0.076<br>(-0.06-0.18) |
| Namibia  | 1995 | Female | All Ages | 23%<br>(21-27%)                | 77%<br>(73-79%)          | 0.27<br>(0.17-0.41)                         | 0.36%<br>(-0.083-0.88%)              | -0.12%<br>(-0.89-0.7%)              | -8<br>(-61-45)         | 1400<br>(-320-3400)   |
| Namibia  | 1995 | Female | 15 to 19 | 18%<br>(14-24%)                | 82%<br>(76-86%)          | 0.21<br>(0.11-0.37)                         | 0.85%<br>(0.38-1.5%)                 | 0.81%<br>(0.0072-1.9%)              | 0.91<br>(0.0096-2.2)   | 130<br>(58-240)       |
| Namibia  | 1995 | Female | 20 to 24 | 27%<br>(21-35%)                | 73%<br>(65-79%)          | 0.43<br>(0.22-0.72)                         | 1.4%<br>(0.58-2.5%)                  | 1.1%<br>(0.067-2.6%)                | 2.5<br>(0.16-5.8)      | 320<br>(140-550)      |
| Namibia  | 1995 | Female | 25 to 29 | 32%<br>(26-39%)                | 68%<br>(61-74%)          | 0.51<br>(0.29-0.82)                         | 1.2%<br>(0.49-2.3%)                  | 0.95%<br>(0.07-2.4%)                | 2.9<br>(0.21-6.5)      | 310<br>(130-550)      |
| Namibia  | 1995 | Female | 30 to 34 | 36%<br>(30-44%)                | 64%<br>(56-70%)          | 0.57<br>(0.31-0.93)                         | 1.2%<br>(0.46-2.4%)                  | 1.1%<br>(0.1-2.8%)                  | 3.5<br>(0.3-7.7)       | 300<br>(110-550)      |
| Namibia  | 1995 | Female | 35 to 39 | 38%<br>(32-47%)                | 62%<br>(53-68%)          | 0.63<br>(0.35-1)                            | 1.4%<br>(0.41-2.9%)                  | 1.5%<br>(0.16-3.5%)                 | 4.4<br>(0.58-9.8)      | 290<br>(87-570)       |

| Location | Year | Sex    | Age      | Prevalence of current drinkers | Prevalence of abstainers | Population average of standard drinks daily | Percent of total attributable deaths | Percent of total attributable DALYs | Attributable deaths     | Attributable DALYs    |
|----------|------|--------|----------|--------------------------------|--------------------------|---------------------------------------------|--------------------------------------|-------------------------------------|-------------------------|-----------------------|
| Namibia  | 1995 | Female | 40 to 44 | 39%<br>(32-49%)                | 61%<br>(51-68%)          | 0.63<br>(0.34-1.1)                          | 1.5%<br>(0.34-3.1%)                  | 1.7%<br>(0.19-4%)                   | 4.7<br>(0.52-11)        | 260<br>(56-540)       |
| Namibia  | 1995 | Female | 45 to 49 | 41%<br>(33-49%)                | 59%<br>(51-67%)          | 0.59<br>(0.33-1)                            | 1.3%<br>(0.053-3%)                   | 1.5%<br>(-0.14-3.7%)                | 4<br>(-0.36-10)         | 190<br>(8.3-440)      |
| Namibia  | 1995 | Female | 50 to 54 | 42%<br>(33-53%)                | 58%<br>(47-67%)          | 0.56<br>(0.29-0.97)                         | 0.8%<br>(-0.64-2.7%)                 | 0.9%<br>(-0.96-3.4%)                | 2.6<br>(-2.7-9.4)       | 110<br>(-81-360)      |
| Namibia  | 1995 | Female | 55 to 59 | 43%<br>(31-54%)                | 57%<br>(46-69%)          | 0.52<br>(0.26-0.9)                          | 0.094%<br>(-1.3-1.7%)                | 0.073%<br>(-1.7-2.1%)               | 0.2<br>(-5.6-6.5)       | 11<br>(-170-210)      |
| Namibia  | 1995 | Female | 60 to 64 | 43%<br>(30-55%)                | 57%<br>(45-70%)          | 0.47<br>(0.23-0.86)                         | -0.64%<br>(-2.1-0.87%)               | -0.79%<br>(-2.5-1.1%)               | -3<br>(-10-4.2)         | -81<br>(-270-110)     |
| Namibia  | 1995 | Female | 65 to 69 | 42%<br>(31-52%)                | 58%<br>(48-69%)          | 0.42<br>(0.23-0.75)                         | -1.1%<br>(-2.4-0.18%)                | -1.2%<br>(-2.9-0.31%)               | -6<br>(-15-1.5)         | -140<br>(-330-25)     |
| Namibia  | 1995 | Female | 70 to 74 | 38%<br>(28-49%)                | 62%<br>(51-72%)          | 0.35<br>(0.18-0.62)                         | -1.1%<br>(-2.4--0.12%)               | -1.3%<br>(-2.8--0.084%)             | -6.8<br>(-15--0.42)     | -130<br>(-270--12)    |
| Namibia  | 1995 | Female | 75 to 79 | 34%<br>(23-46%)                | 66%<br>(54-77%)          | 0.29<br>(0.14-0.51)                         | -1.3%<br>(-2.4--0.3%)                | -1.5%<br>(-2.8--0.35%)              | -7.4<br>(-14--1.8)      | -100<br>(-200--25)    |
| Namibia  | 1995 | Female | 80 to 84 | 33%<br>(23-44%)                | 67%<br>(56-77%)          | 0.26<br>(0.14-0.44)                         | -1.2%<br>(-2.4--0.35%)               | -1.4%<br>(-2.7--0.39%)              | -5.5<br>(-11--1.5)      | -58<br>(-110--17)     |
| Namibia  | 1995 | Female | 85 to 89 | 35%<br>(24-47%)                | 65%<br>(53-76%)          | 0.27<br>(0.13-0.45)                         | -1.3%<br>(-2.5--0.38%)               | -1.5%<br>(-2.8--0.45%)              | -3.3<br>(-6.4--0.96)    | -24<br>(-48--7.3)     |
| Namibia  | 1995 | Female | 90 to 94 | 39%<br>(27-52%)                | 61%<br>(48-73%)          | 0.27<br>(0.13-0.48)                         | -1.3%<br>(-2.6--0.37%)               | -1.6%<br>(-3--0.45%)                | -1.3<br>(-2.6--0.36)    | -6.4<br>(-13--1.8)    |
| Namibia  | 1995 | Female | 95 plus  | 44%<br>(28-61%)                | 56%<br>(39-72%)          | 0.29<br>(0.12-0.55)                         | -1.3%<br>(-2.6--0.27%)               | -1.6%<br>(-3.1--0.38%)              | -0.33<br>(-0.66--0.076) | -1.1<br>(-2.1--0.22)  |
| Namibia  | 1995 | Male   | All Ages | 38%<br>(34-41%)                | 62%<br>(59-66%)          | 0.59<br>(0.38-0.88)                         | 2.2%<br>(1.1-3.5%)                   | 2.3%<br>(0.84-4.1%)                 | 190<br>(68-330)         | 10000<br>(5200-17000) |
| Namibia  | 1995 | Male   | 15 to 19 | 32%<br>(27-37%)                | 68%<br>(63-73%)          | 0.44<br>(0.27-0.69)                         | 2.6%<br>(1.4-4%)                     | 2.9%<br>(1.1-4.9%)                  | 5.4<br>(2.1-9.3)        | 540<br>(290-830)      |
| Namibia  | 1995 | Male   | 20 to 24 | 53%<br>(47-58%)                | 47%<br>(42-53%)          | 1.1<br>(0.7-1.7)                            | 5.5%<br>(3.1-8.8%)                   | 5.6%<br>(2.7-9.9%)                  | 20<br>(9.7-32)          | 1600<br>(950-2500)    |
| Namibia  | 1995 | Male   | 25 to 29 | 60%<br>(55-64%)                | 40%<br>(36-45%)          | 1.3<br>(0.83-2)                             | 5%<br>(2.7-8.1%)                     | 5%<br>(2.3-8.9%)                    | 22<br>(11-36)           | 1700<br>(960-2500)    |
| Namibia  | 1995 | Male   | 30 to 34 | 62%<br>(57-67%)                | 38%<br>(33-43%)          | 1.4<br>(0.87-2.1)                           | 4.4%<br>(2.3-7.2%)                   | 4.4%<br>(2-8%)                      | 21<br>(9.6-35)          | 1400<br>(730-2200)    |
| Namibia  | 1995 | Male   | 35 to 39 | 63%<br>(58-68%)                | 37%<br>(32-42%)          | 1.3<br>(0.8-2)                              | 4.2%<br>(2.1-7.2%)                   | 4.5%<br>(2-8.1%)                    | 19<br>(8.1-33)          | 1100<br>(530-1800)    |
| Namibia  | 1995 | Male   | 40 to 44 | 62%<br>(57-67%)                | 38%<br>(33-43%)          | 1.2<br>(0.76-1.9)                           | 4.3%<br>(1.9-7.5%)                   | 4.6%<br>(1.8-8.5%)                  | 19<br>(7.1-34)          | 950<br>(400-1600)     |
| Namibia  | 1995 | Male   | 45 to 49 | 59%<br>(54-65%)                | 41%<br>(35-46%)          | 1.2<br>(0.73-1.9)                           | 5%<br>(2.3-8.6%)                     | 5.5%<br>(2.2-9.7%)                  | 22<br>(8.9-39)          | 990<br>(450-1700)     |
| Namibia  | 1995 | Male   | 50 to 54 | 59%<br>(53-65%)                | 41%<br>(35-47%)          | 1.2<br>(0.7-1.8)                            | 4.9%<br>(2-8.7%)                     | 5.4%<br>(1.8-9.7%)                  | 22<br>(6.6-41)          | 870<br>(330-1500)     |
| Namibia  | 1995 | Male   | 55 to 59 | 62%<br>(55-69%)                | 38%<br>(31-45%)          | 1.2<br>(0.71-1.7)                           | 4.1%<br>(1.2-7.6%)                   | 4.5%<br>(1.1-8.6%)                  | 19<br>(4.4-38)          | 660<br>(190-1300)     |

| Location | Year | Sex    | Age      | Prevalence of current drinkers | Prevalence of abstainers | Population average of standard drinks daily | Percent of total attributable deaths | Percent of total attributable DALYs | Attributable deaths       | Attributable DALYs    |
|----------|------|--------|----------|--------------------------------|--------------------------|---------------------------------------------|--------------------------------------|-------------------------------------|---------------------------|-----------------------|
| Namibia  | 1995 | Male   | 60 to 64 | 61%<br>(49-70%)                | 39%<br>(30-51%)          | 0.99<br>(0.58-1.5)                          | 2.3%<br>(-0.095-5.2%)                | 2.4%<br>(-0.36-5.8%)                | 12<br>(-1.8-29)           | 350<br>(-14-810)      |
| Namibia  | 1995 | Male   | 65 to 69 | 53%<br>(41-64%)                | 47%<br>(36-59%)          | 0.66<br>(0.39-1.1)                          | 1.1%<br>(-0.65-3.1%)                 | 1.1%<br>(-0.95-3.4%)                | 6.2<br>(-5.4-18)          | 160<br>(-98-420)      |
| Namibia  | 1995 | Male   | 70 to 74 | 49%<br>(37-60%)                | 51%<br>(40-63%)          | 0.42<br>(0.23-0.7)                          | 0.35%<br>(-0.84-1.5%)                | 0.31%<br>(-1.1-1.6%)                | 1.7<br>(-5.7-8.9)         | 39<br>(-92-170)       |
| Namibia  | 1995 | Male   | 75 to 79 | 50%<br>(36-65%)                | 50%<br>(35-64%)          | 0.32<br>(0.16-0.56)                         | 0.0076%<br>(-1.1-0.91%)              | -0.069%<br>(-1.4-0.96%)             | -0.31<br>(-6-4.2)         | 0.56<br>(-78-65)      |
| Namibia  | 1995 | Male   | 80 to 84 | 50%<br>(34-65%)                | 50%<br>(35-66%)          | 0.28<br>(0.14-0.47)                         | -0.055%<br>(-0.99-0.72%)             | -0.13%<br>(-1.2-0.76%)              | -0.38<br>(-3.5-2.2)       | -1.9<br>(-34-25)      |
| Namibia  | 1995 | Male   | 85 to 89 | 47%<br>(33-62%)                | 53%<br>(38-67%)          | 0.23<br>(0.12-0.39)                         | -0.062%<br>(-0.82-0.58%)             | -0.14%<br>(-1-0.61%)                | -0.18<br>(-1.4-0.8)       | -0.69<br>(-9.2-6.3)   |
| Namibia  | 1995 | Male   | 90 to 94 | 46%<br>(32-61%)                | 54%<br>(39-68%)          | 0.2<br>(0.1-0.36)                           | -0.037%<br>(-0.69-0.5%)              | -0.12%<br>(-0.86-0.5%)              | -0.051<br>(-0.37-0.22)    | -0.092<br>(-1.7-1.3)  |
| Namibia  | 1995 | Male   | 95 plus  | 49%<br>(30-67%)                | 51%<br>(33-70%)          | 0.19<br>(0.076-0.37)                        | 0.068%<br>(-0.49-0.54%)              | -0.047%<br>(-0.71-0.48%)            | -0.0051<br>(-0.078-0.053) | 0.029<br>(-0.21-0.23) |
| Namibia  | 2000 | Female | All Ages | 24%<br>(22-27%)                | 76%<br>(73-78%)          | 0.78<br>(0.52-1.1)                          | 1.6%<br>(0.66-3%)                    | 1.9%<br>(0.47-3.9%)                 | 200<br>(47-450)           | 9700<br>(3500-18000)  |
| Namibia  | 2000 | Female | 15 to 19 | 20%<br>(16-25%)                | 80%<br>(75-84%)          | 0.61<br>(0.35-0.96)                         | 2.1%<br>(1-3.7%)                     | 2.8%<br>(1-5.6%)                    | 4.3<br>(1.5-8.8)          | 410<br>(190-730)      |
| Namibia  | 2000 | Female | 20 to 24 | 29%<br>(24-35%)                | 71%<br>(65-76%)          | 1.3<br>(0.73-2)                             | 2.7%<br>(1.1-5%)                     | 2.8%<br>(0.81-6%)                   | 12<br>(4.1-24)            | 1000<br>(460-1900)    |
| Namibia  | 2000 | Female | 25 to 29 | 34%<br>(30-40%)                | 66%<br>(60-70%)          | 1.5<br>(0.9-2.2)                            | 1.8%<br>(0.65-3.6%)                  | 1.8%<br>(0.47-4%)                   | 15<br>(4.8-30)            | 1100<br>(470-2000)    |
| Namibia  | 2000 | Female | 30 to 34 | 37%<br>(31-42%)                | 63%<br>(58-69%)          | 1.6<br>(0.96-2.4)                           | 1.9%<br>(0.71-3.9%)                  | 2%<br>(0.53-4.4%)                   | 17<br>(5.3-37)            | 1100<br>(430-2200)    |
| Namibia  | 2000 | Female | 35 to 39 | 39%<br>(34-44%)                | 61%<br>(56-66%)          | 1.7<br>(1.1-2.6)                            | 2.5%<br>(0.86-5%)                    | 2.7%<br>(0.77-5.7%)                 | 23<br>(6.9-46)            | 1300<br>(450-2400)    |
| Namibia  | 2000 | Female | 40 to 44 | 41%<br>(36-47%)                | 59%<br>(53-64%)          | 1.8<br>(1-2.7)                              | 3.2%<br>(1.2-6%)                     | 3.5%<br>(1.2-6.9%)                  | 25<br>(8-49)              | 1200<br>(440-2300)    |
| Namibia  | 2000 | Female | 45 to 49 | 41%<br>(35-48%)                | 59%<br>(52-65%)          | 1.6<br>(0.96-2.6)                           | 3.6%<br>(1.3-7.1%)                   | 4.2%<br>(1.4-8.3%)                  | 26<br>(7.3-54)            | 1100<br>(350-2200)    |
| Namibia  | 2000 | Female | 50 to 54 | 41%<br>(33-49%)                | 59%<br>(51-67%)          | 1.4<br>(0.82-2.3)                           | 3.9%<br>(1.3-7.8%)                   | 4.5%<br>(1.4-9.2%)                  | 24<br>(6.6-52)            | 910<br>(260-1900)     |
| Namibia  | 2000 | Female | 55 to 59 | 43%<br>(34-53%)                | 57%<br>(47-66%)          | 1.4<br>(0.77-2.3)                           | 3.5%<br>(0.61-7.6%)                  | 4.2%<br>(0.71-9%)                   | 21<br>(3.2-51)            | 680<br>(110-1600)     |
| Namibia  | 2000 | Female | 60 to 64 | 41%<br>(32-50%)                | 59%<br>(50-68%)          | 1.2<br>(0.63-2.1)                           | 2.7%<br>(-0.15-7.1%)                 | 3.2%<br>(-0.22-8.3%)                | 16<br>(-0.93-47)          | 440<br>(-25-1300)     |
| Namibia  | 2000 | Female | 65 to 69 | 35%<br>(26-44%)                | 65%<br>(56-74%)          | 0.93<br>(0.5-1.6)                           | 1.8%<br>(-0.63-5%)                   | 2.2%<br>(-0.75-6.1%)                | 13<br>(-3.8-39)           | 280<br>(-93-850)      |
| Namibia  | 2000 | Female | 70 to 74 | 31%<br>(23-41%)                | 69%<br>(59-77%)          | 0.77<br>(0.42-1.3)                          | 0.96%<br>(-1.1-3.9%)                 | 1.2%<br>(-1.3-4.7%)                 | 7.7<br>(-9-35)            | 140<br>(-160-630)     |
| Namibia  | 2000 | Female | 75 to 79 | 30%<br>(21-40%)                | 70%<br>(60-79%)          | 0.68<br>(0.35-1.2)                          | 0.23%<br>(-1.5-2.7%)                 | 0.29%<br>(-1.8-3.2%)                | 1.8<br>(-12-21)           | 23<br>(-170-290)      |

| Location | Year | Sex    | Age      | Prevalence of current drinkers | Prevalence of abstainers | Population average of standard drinks daily | Percent of total attributable deaths | Percent of total attributable DALYs | Attributable deaths    | Attributable DALYs     |
|----------|------|--------|----------|--------------------------------|--------------------------|---------------------------------------------|--------------------------------------|-------------------------------------|------------------------|------------------------|
| Namibia  | 2000 | Female | 80 to 84 | 32%<br>(22-42%)                | 68%<br>(58-78%)          | 0.67<br>(0.36-1.1)                          | -0.087%<br>(-1.8-2.1%)               | -0.087%<br>(-2.1-2.5%)              | -0.45<br>(-11-12)      | -5.2<br>(-110-120)     |
| Namibia  | 2000 | Female | 85 to 89 | 35%<br>(24-47%)                | 65%<br>(53-76%)          | 0.7<br>(0.36-1.2)                           | -0.45%<br>(-2.1-1.5%)                | -0.53%<br>(-2.4-1.7%)               | -1.4<br>(-6.9-4.8)     | -10<br>(-49-35)        |
| Namibia  | 2000 | Female | 90 to 94 | 38%<br>(27-50%)                | 62%<br>(50-73%)          | 0.72<br>(0.37-1.3)                          | -0.73%<br>(-2.3-1.2%)                | -0.9%<br>(-2.8-1.4%)                | -0.88<br>(-2.7-1.4)    | -4.2<br>(-13-7.1)      |
| Namibia  | 2000 | Female | 95 plus  | 44%<br>(27-62%)                | 56%<br>(38-73%)          | 0.75<br>(0.33-1.4)                          | -0.84%<br>(-2.6-1.4%)                | -1.1%<br>(-3.1-1.5%)                | -0.27<br>(-0.8-0.41)   | -0.82<br>(-2.6-1.4)    |
| Namibia  | 2000 | Male   | All Ages | 41%<br>(37-45%)                | 59%<br>(55-63%)          | 1.3<br>(0.94-1.9)                           | 4.7%<br>(2.9-6.7%)                   | 5.5%<br>(3.3-8.3%)                  | 680<br>(390-1000)      | 32000<br>(20000-47000) |
| Namibia  | 2000 | Male   | 15 to 19 | 36%<br>(30-43%)                | 64%<br>(57-70%)          | 1<br>(0.57-1.6)                             | 5.2%<br>(3.7-9.9%)                   | 6.4%<br>(3.3-10%)                   | 15<br>(7.5-25)         | 1300<br>(700-2000)     |
| Namibia  | 2000 | Male   | 20 to 24 | 57%<br>(50-63%)                | 43%<br>(37-50%)          | 2.3<br>(1.4-3.6)                            | 9.1%<br>(5.3-14%)                    | 10%<br>(5.2-16%)                    | 51<br>(29-77)          | 3800<br>(2300-5600)    |
| Namibia  | 2000 | Male   | 25 to 29 | 63%<br>(57-68%)                | 37%<br>(32-43%)          | 2.9<br>(1.7-4.3)                            | 6.9%<br>(3.7-11%)                    | 7.2%<br>(3.6-13%)                   | 64<br>(36-97)          | 4300<br>(2600-6200)    |
| Namibia  | 2000 | Male   | 30 to 34 | 66%<br>(61-72%)                | 34%<br>(28-39%)          | 3.1<br>(1.9-4.6)                            | 6.3%<br>(3.3-9.7%)                   | 6.5%<br>(3.2-10%)                   | 67<br>(38-100)         | 4000<br>(2400-6000)    |
| Namibia  | 2000 | Male   | 35 to 39 | 66%<br>(61-71%)                | 34%<br>(29-39%)          | 2.9<br>(1.7-4.4)                            | 6.6%<br>(3.5-11%)                    | 7%<br>(3.5-12%)                     | 70<br>(38-110)         | 3700<br>(2100-5800)    |
| Namibia  | 2000 | Male   | 40 to 44 | 65%<br>(59-70%)                | 35%<br>(30-41%)          | 2.8<br>(1.6-4.3)                            | 7.3%<br>(3.9-12%)                    | 7.9%<br>(4.1-13%)                   | 71<br>(38-120)         | 3400<br>(1900-5400)    |
| Namibia  | 2000 | Male   | 45 to 49 | 61%<br>(54-67%)                | 39%<br>(33-46%)          | 2.6<br>(1.5-4.1)                            | 8.8%<br>(4.7-14%)                    | 9.6%<br>(4.9-16%)                   | 74<br>(38-120)         | 3100<br>(1700-5100)    |
| Namibia  | 2000 | Male   | 50 to 54 | 60%<br>(53-67%)                | 40%<br>(33-47%)          | 2.5<br>(1.4-4)                              | 10%<br>(5.1-16%)                     | 11%<br>(5.5-18%)                    | 76<br>(36-130)         | 2900<br>(1400-4700)    |
| Namibia  | 2000 | Male   | 55 to 59 | 65%<br>(59-72%)                | 35%<br>(28-41%)          | 2.6<br>(1.6-4.2)                            | 10%<br>(5.5-16%)                     | 12%<br>(5.9-19%)                    | 77<br>(38-130)         | 2500<br>(1300-4100)    |
| Namibia  | 2000 | Male   | 60 to 64 | 63%<br>(55-71%)                | 37%<br>(29-45%)          | 2.2<br>(1.3-3.6)                            | 7.8%<br>(3.5-14%)                    | 8.6%<br>(3.7-15%)                   | 58<br>(24-110)         | 1600<br>(690-2900)     |
| Namibia  | 2000 | Male   | 65 to 69 | 52%<br>(42-62%)                | 48%<br>(38-58%)          | 1.4<br>(0.84-2.3)                           | 4.7%<br>(1.5-9.1%)                   | 5.3%<br>(1.5-10%)                   | 37<br>(11-73)          | 830<br>(260-1600)      |
| Namibia  | 2000 | Male   | 70 to 74 | 48%<br>(37-58%)                | 52%<br>(42-63%)          | 0.91<br>(0.53-1.5)                          | 2%<br>(-0.037-4.7%)                  | 2.2%<br>(-0.11-5.2%)                | 16<br>(-0.82-39)       | 290<br>(-5.1-720)      |
| Namibia  | 2000 | Male   | 75 to 79 | 51%<br>(38-64%)                | 49%<br>(36-62%)          | 0.74<br>(0.39-1.2)                          | 0.74%<br>(-0.93-2.9%)                | 0.78%<br>(-1.1-3.2%)                | 4.6<br>(-6.7-18)       | 69<br>(-86-260)        |
| Namibia  | 2000 | Male   | 80 to 84 | 51%<br>(35-65%)                | 49%<br>(35-65%)          | 0.65<br>(0.34-1.1)                          | 0.36%<br>(-1-2%)                     | 0.35%<br>(-1.3-2.2%)                | 1.3<br>(-4.8-8.2)      | 16<br>(-46-87)         |
| Namibia  | 2000 | Male   | 85 to 89 | 47%<br>(32-62%)                | 53%<br>(38-68%)          | 0.53<br>(0.27-0.88)                         | 0.12%<br>(-0.95-1.2%)                | 0.065%<br>(-1.2-1.3%)               | 0.11<br>(-1.9-2.1)     | 1.7<br>(-13-17)        |
| Namibia  | 2000 | Male   | 90 to 94 | 47%<br>(33-61%)                | 53%<br>(39-67%)          | 0.46<br>(0.23-0.81)                         | 0.0097%<br>(-0.88-0.9%)              | -0.09%<br>(-1.1-0.95%)              | -0.044<br>(-0.56-0.47) | 0.03<br>(-2.6-2.6)     |
| Namibia  | 2000 | Male   | 95 plus  | 49%<br>(30-68%)                | 51%<br>(32-70%)          | 0.42<br>(0.19-0.79)                         | 0.15%<br>(-0.7-1%)                   | 0.013%<br>(-0.98-1%)                | 0.0015<br>(-0.11-0.12) | 0.07<br>(-0.32-0.46)   |

| Location | Year | Sex    | Age      | Prevalence of current drinkers | Prevalence of abstainers | Population average of standard drinks daily | Percent of total attributable deaths | Percent of total attributable DALYs | Attributable deaths | Attributable DALYs     |
|----------|------|--------|----------|--------------------------------|--------------------------|---------------------------------------------|--------------------------------------|-------------------------------------|---------------------|------------------------|
| Namibia  | 2005 | Female | All Ages | 25%<br>(22-27%)                | 75%<br>(73-78%)          | 1.2<br>(0.81-1.6)                           | 1.8%<br>(0.9-3.2%)                   | 2.4%<br>(0.98-4.4%)                 | 310<br>(120-620)    | 13000<br>(6200-23000)  |
| Namibia  | 2005 | Female | 15 to 19 | 21%<br>(17-24%)                | 79%<br>(76-83%)          | 0.96<br>(0.58-1.4)                          | 2.9%<br>(1.6-4.8%)                   | 4.2%<br>(1.8-7.4%)                  | 6.3<br>(2.7-12)     | 600<br>(310-1000)      |
| Namibia  | 2005 | Female | 20 to 24 | 31%<br>(28-36%)                | 69%<br>(64-72%)          | 2<br>(1.2-2.9)                              | 3.4%<br>(1.5-6.2%)                   | 3.6%<br>(1.2-7.7%)                  | 15<br>(6.4-28)      | 1200<br>(660-2100)     |
| Namibia  | 2005 | Female | 25 to 29 | 35%<br>(31-39%)                | 65%<br>(61-69%)          | 2.2<br>(1.4-3.2)                            | 1.6%<br>(0.69-3.2%)                  | 1.5%<br>(0.53-3.4%)                 | 16<br>(6.9-33)      | 1200<br>(610-2200)     |
| Namibia  | 2005 | Female | 30 to 34 | 36%<br>(32-40%)                | 64%<br>(60-68%)          | 2.2<br>(1.5-3.2)                            | 1.4%<br>(0.62-2.8%)                  | 1.3%<br>(0.51-3%)                   | 18<br>(7.5-37)      | 1200<br>(580-2200)     |
| Namibia  | 2005 | Female | 35 to 39 | 38%<br>(34-43%)                | 62%<br>(57-66%)          | 2.5<br>(1.6-3.7)                            | 1.8%<br>(0.81-3.6%)                  | 1.9%<br>(0.73-3.9%)                 | 23<br>(10-46)       | 1300<br>(640-2500)     |
| Namibia  | 2005 | Female | 40 to 44 | 41%<br>(36-45%)                | 59%<br>(55-64%)          | 2.6<br>(1.6-3.8)                            | 2.5%<br>(1.2-4.6%)                   | 2.6%<br>(1.1-5.1%)                  | 29<br>(13-56)       | 1400<br>(670-2700)     |
| Namibia  | 2005 | Female | 45 to 49 | 40%<br>(35-45%)                | 60%<br>(55-65%)          | 2.3<br>(1.4-3.5)                            | 3.3%<br>(1.5-6.2%)                   | 3.6%<br>(1.5-6.9%)                  | 31<br>(13-62)       | 1400<br>(620-2600)     |
| Namibia  | 2005 | Female | 50 to 54 | 40%<br>(33-48%)                | 60%<br>(52-67%)          | 2.1<br>(1.2-3.3)                            | 4.3%<br>(1.9-7.8%)                   | 4.9%<br>(2.1-9%)                    | 34<br>(14-70)       | 1300<br>(540-2600)     |
| Namibia  | 2005 | Female | 55 to 59 | 43%<br>(34-52%)                | 57%<br>(48-66%)          | 2<br>(1.1-3.3)                              | 4.8%<br>(1.9-8.9%)                   | 5.7%<br>(2.1-10%)                   | 32<br>(11-67)       | 1000<br>(370-2100)     |
| Namibia  | 2005 | Female | 60 to 64 | 40%<br>(31-50%)                | 60%<br>(50-69%)          | 1.7<br>(0.91-2.9)                           | 4.6%<br>(1.1-9.6%)                   | 5.6%<br>(1.3-11%)                   | 30<br>(6.6-69)      | 830<br>(180-1900)      |
| Namibia  | 2005 | Female | 65 to 69 | 34%<br>(25-43%)                | 66%<br>(57-75%)          | 1.3<br>(0.74-2.2)                           | 3.7%<br>(0.79-7.9%)                  | 4.5%<br>(0.99-9.6%)                 | 25<br>(4.9-59)      | 570<br>(100-1300)      |
| Namibia  | 2005 | Female | 70 to 74 | 31%<br>(23-40%)                | 69%<br>(60-77%)          | 1.1<br>(0.63-1.9)                           | 2.7%<br>(0.078-6.4%)                 | 3.3%<br>(0.095-7.5%)                | 20<br>(0.59-51)     | 360<br>(8.8-920)       |
| Namibia  | 2005 | Female | 75 to 79 | 29%<br>(21-40%)                | 71%<br>(60-79%)          | 0.97<br>(0.51-1.6)                          | 1.8%<br>(-0.62-5.1%)                 | 2.1%<br>(-0.7-6%)                   | 13<br>(-4.2-41)     | 190<br>(-60-570)       |
| Namibia  | 2005 | Female | 80 to 84 | 31%<br>(22-41%)                | 69%<br>(59-78%)          | 0.96<br>(0.53-1.6)                          | 1.4%<br>(-0.76-4.5%)                 | 1.7%<br>(-0.93-5.2%)                | 8.9<br>(-4.6-30)    | 92<br>(-48-320)        |
| Namibia  | 2005 | Female | 85 to 89 | 34%<br>(23-46%)                | 66%<br>(54-77%)          | 1<br>(0.54-1.7)                             | 0.97%<br>(-1.1-4%)                   | 1.1%<br>(-1.3-4.7%)                 | 2.9<br>(-3.4-12)    | 22<br>(-25-91)         |
| Namibia  | 2005 | Female | 90 to 94 | 38%<br>(26-51%)                | 62%<br>(49-74%)          | 1<br>(0.55-1.8)                             | 0.55%<br>(-1.5-3.7%)                 | 0.6%<br>(-1.8-4.3%)                 | 0.57<br>(-1.8-4.2)  | 3.1<br>(-8.4-21)       |
| Namibia  | 2005 | Female | 95 plus  | 43%<br>(27-60%)                | 57%<br>(40-73%)          | 1.1<br>(0.49-2)                             | 0.45%<br>(-1.9-4.5%)                 | 0.44%<br>(-2.4-5.1%)                | 0.11<br>(-0.56-1.2) | 0.42<br>(-1.8-4)       |
| Namibia  | 2005 | Male   | All Ages | 42%<br>(39-46%)                | 58%<br>(54-61%)          | 2.5<br>(1.8-3.5)                            | 6.8%<br>(4.5-9.3%)                   | 8.2%<br>(5.2-12%)                   | 1200<br>(730-1700)  | 52000<br>(34000-71000) |
| Namibia  | 2005 | Male   | 15 to 19 | 38%<br>(33-44%)                | 62%<br>(56-67%)          | 2.1<br>(1.4-3)                              | 9.2%<br>(6.1-13%)                    | 12%<br>(7.5-17%)                    | 31<br>(19-45)       | 2400<br>(1600-3500)    |
| Namibia  | 2005 | Male   | 20 to 24 | 60%<br>(54-65%)                | 40%<br>(35-46%)          | 4.7<br>(3.2-6.5)                            | 16%<br>(10-22%)                      | 19%<br>(11-27%)                     | 85<br>(56-120)      | 6100<br>(4200-8300)    |
| Namibia  | 2005 | Male   | 25 to 29 | 64%<br>(59-69%)                | 36%<br>(31-41%)          | 5.4<br>(3.7-7.5)                            | 10%<br>(6-16%)                       | 11%<br>(5.9-18%)                    | 100<br>(66-130)     | 6500<br>(4500-8600)    |

| Location | Year | Sex    | Age      | Prevalence of current drinkers | Prevalence of abstainers | Population average of standard drinks daily | Percent of total attributable deaths | Percent of total attributable DALYs | Attributable deaths  | Attributable DALYs    |
|----------|------|--------|----------|--------------------------------|--------------------------|---------------------------------------------|--------------------------------------|-------------------------------------|----------------------|-----------------------|
| Namibia  | 2005 | Male   | 30 to 34 | 67%<br>(62-72%)                | 33%<br>(28-38%)          | 5.6<br>(3.8-8)                              | 7.6%<br>(4.6-12%)                    | 7.9%<br>(4.6-12%)                   | 100<br>(68-140)      | 6100<br>(4100-8200)   |
| Namibia  | 2005 | Male   | 35 to 39 | 67%<br>(62-71%)                | 33%<br>(29-38%)          | 5.2<br>(3.5-7.5)                            | 7.7%<br>(4.6-12%)                    | 8.2%<br>(4.6-13%)                   | 110<br>(66-150)      | 5700<br>(3600-7800)   |
| Namibia  | 2005 | Male   | 40 to 44 | 66%<br>(60-70%)                | 34%<br>(30-40%)          | 5<br>(3.3-7.2)                              | 8.7%<br>(5.4-13%)                    | 9.2%<br>(5.6-14%)                   | 120<br>(72-170)      | 5500<br>(3500-7800)   |
| Namibia  | 2005 | Male   | 45 to 49 | 62%<br>(56-67%)                | 38%<br>(33-44%)          | 4.8<br>(3.2-6.9)                            | 11%<br>(6.8-16%)                     | 12%<br>(7.2-17%)                    | 120<br>(75-180)      | 5200<br>(3200-7500)   |
| Namibia  | 2005 | Male   | 50 to 54 | 60%<br>(52-66%)                | 40%<br>(34-48%)          | 4.4<br>(2.9-6.4)                            | 14%<br>(9-19%)                       | 15%<br>(9.9-21%)                    | 120<br>(73-180)      | 4600<br>(2800-6600)   |
| Namibia  | 2005 | Male   | 55 to 59 | 64%<br>(57-71%)                | 36%<br>(29-43%)          | 4.5<br>(3.1-6.6)                            | 16%<br>(11-22%)                      | 18%<br>(12-24%)                     | 130<br>(75-180)      | 4100<br>(2500-5900)   |
| Namibia  | 2005 | Male   | 60 to 64 | 63%<br>(54-70%)                | 37%<br>(30-46%)          | 3.8<br>(2.6-5.5)                            | 14%<br>(8.4-19%)                     | 15%<br>(9.3-22%)                    | 110<br>(61-170)      | 3000<br>(1700-4600)   |
| Namibia  | 2005 | Male   | 65 to 69 | 52%<br>(42-62%)                | 48%<br>(38-58%)          | 2.4<br>(1.6-3.7)                            | 9.3%<br>(5-15%)                      | 10%<br>(5.6-17%)                    | 74<br>(37-120)       | 1700<br>(840-2800)    |
| Namibia  | 2005 | Male   | 70 to 74 | 47%<br>(37-58%)                | 53%<br>(42-63%)          | 1.6<br>(0.93-2.5)                           | 4.9%<br>(1.8-9.1%)                   | 5.4%<br>(2-10%)                     | 38<br>(14-73)        | 700<br>(260-1300)     |
| Namibia  | 2005 | Male   | 75 to 79 | 50%<br>(37-64%)                | 50%<br>(36-63%)          | 1.3<br>(0.67-2.1)                           | 2.8%<br>(0.34-6.2%)                  | 3.1%<br>(0.29-6.8%)                 | 20<br>(1.9-46)       | 280<br>(34-640)       |
| Namibia  | 2005 | Male   | 80 to 84 | 50%<br>(35-65%)                | 50%<br>(35-65%)          | 1.1<br>(0.62-1.9)                           | 2.1%<br>(0.0054-5%)                  | 2.3%<br>(-0.086-5.5%)               | 9.8<br>(-0.38-24)    | 110<br>(0.28-250)     |
| Namibia  | 2005 | Male   | 85 to 89 | 46%<br>(31-61%)                | 54%<br>(39-69%)          | 0.94<br>(0.5-1.6)                           | 1.3%<br>(-0.21-3.4%)                 | 1.4%<br>(-0.36-3.9%)                | 2.7<br>(-0.63-7.1)   | 21<br>(-3.3-54)       |
| Namibia  | 2005 | Male   | 90 to 94 | 46%<br>(32-60%)                | 54%<br>(40-68%)          | 0.83<br>(0.44-1.4)                          | 0.9%<br>(-0.35-2.6%)                 | 0.93%<br>(-0.54-2.9%)               | 0.52<br>(-0.28-1.6)  | 3<br>(-1.1-8.5)       |
| Namibia  | 2005 | Male   | 95 plus  | 48%<br>(30-67%)                | 52%<br>(33-70%)          | 0.77<br>(0.33-1.4)                          | 0.98%<br>(-0.27-3%)                  | 0.95%<br>(-0.5-3.3%)                | 0.12<br>(-0.06-0.41) | 0.48<br>(-0.13-1.5)   |
| Namibia  | 2010 | Female | All Ages | 27%<br>(24-30%)                | 73%<br>(70-76%)          | 1.6<br>(0.99-2.3)                           | 2.1%<br>(1-3.6%)                     | 3%<br>(1.2-5.5%)                    | 300<br>(110-610)     | 12000<br>(5700-21000) |
| Namibia  | 2010 | Female | 15 to 19 | 20%<br>(17-24%)                | 80%<br>(76-83%)          | 1.2<br>(0.67-1.7)                           | 2.7%<br>(1.4-4.5%)                   | 3.7%<br>(1.6-6.6%)                  | 5.8<br>(2.3-12)      | 590<br>(300-1000)     |
| Namibia  | 2010 | Female | 20 to 24 | 35%<br>(31-39%)                | 65%<br>(61-69%)          | 2.7<br>(1.6-4.3)                            | 4.2%<br>(2-7.1%)                     | 4.7%<br>(1.6-9.4%)                  | 13<br>(5.3-25)       | 1200<br>(660-2000)    |
| Namibia  | 2010 | Female | 25 to 29 | 39%<br>(35-44%)                | 61%<br>(56-65%)          | 3<br>(1.8-4.5)                              | 2.2%<br>(0.94-4%)                    | 2.1%<br>(0.65-4.5%)                 | 13<br>(5.1-24)       | 1100<br>(540-1800)    |
| Namibia  | 2010 | Female | 30 to 34 | 39%<br>(34-44%)                | 61%<br>(56-66%)          | 2.9<br>(1.8-4.4)                            | 1.6%<br>(0.74-2.9%)                  | 1.5%<br>(0.54-3.1%)                 | 14<br>(5.6-26)       | 990<br>(500-1700)     |
| Namibia  | 2010 | Female | 35 to 39 | 40%<br>(35-45%)                | 60%<br>(55-65%)          | 3.2<br>(1.9-4.9)                            | 1.9%<br>(0.91-3.3%)                  | 1.9%<br>(0.76-3.6%)                 | 18<br>(7.4-32)       | 1100<br>(530-1800)    |
| Namibia  | 2010 | Female | 40 to 44 | 41%<br>(36-46%)                | 59%<br>(54-64%)          | 3.2<br>(1.9-5)                              | 2.7%<br>(1.3-4.6%)                   | 2.9%<br>(1.2-5.1%)                  | 23<br>(9.7-40)       | 1200<br>(560-2000)    |
| Namibia  | 2010 | Female | 45 to 49 | 41%<br>(36-47%)                | 59%<br>(53-64%)          | 2.9<br>(1.6-4.7)                            | 3.7%<br>(1.7-6.5%)                   | 4.2%<br>(1.7-7.8%)                  | 27<br>(11-50)        | 1200<br>(550-2200)    |



| Location | Year | Sex    | Age      | Prevalence of current drinkers | Prevalence of abstainers | Population average of standard drinks daily | Percent of total attributable deaths | Percent of total attributable DALYs | Attributable deaths | Attributable DALYs     |
|----------|------|--------|----------|--------------------------------|--------------------------|---------------------------------------------|--------------------------------------|-------------------------------------|---------------------|------------------------|
| Namibia  | 2010 | Female | 50 to 54 | 42%<br>(32-52%)                | 58%<br>(48-68%)          | 2.7<br>(1.4-4.4)                            | 5%<br>(2.2-8.8%)                     | 6%<br>(2.6-11%)                     | 31<br>(12-62)       | 1200<br>(500-2300)     |
| Namibia  | 2010 | Female | 55 to 59 | 43%<br>(31-55%)                | 57%<br>(45-69%)          | 2.4<br>(1.2-4.2)                            | 5.8%<br>(2.2-11%)                    | 7.4%<br>(2.8-13%)                   | 32<br>(9.9-67)      | 1100<br>(350-2100)     |
| Namibia  | 2010 | Female | 60 to 64 | 42%<br>(30-54%)                | 58%<br>(46-70%)          | 2.2<br>(1-3.8)                              | 5.8%<br>(1.5-11%)                    | 7.5%<br>(2-14%)                     | 31<br>(6.9-68)      | 870<br>(210-1900)      |
| Namibia  | 2010 | Female | 65 to 69 | 41%<br>(30-51%)                | 59%<br>(49-70%)          | 1.9<br>(1-3.3)                              | 5.4%<br>(1.3-11%)                    | 7%<br>(1.7-14%)                     | 31<br>(7.1-72)      | 720<br>(160-1600)      |
| Namibia  | 2010 | Female | 70 to 74 | 37%<br>(27-47%)                | 63%<br>(53-73%)          | 1.6<br>(0.83-2.8)                           | 4.1%<br>(0.55-9.1%)                  | 5.2%<br>(0.78-11%)                  | 25<br>(3.4-63)      | 460<br>(58-1200)       |
| Namibia  | 2010 | Female | 75 to 79 | 33%<br>(22-44%)                | 67%<br>(56-78%)          | 1.3<br>(0.64-2.3)                           | 2.8%<br>(-0.27-7%)                   | 3.5%<br>(-0.33-8.9%)                | 18<br>(-1.8-50)     | 250<br>(-24-720)       |
| Namibia  | 2010 | Female | 80 to 84 | 32%<br>(22-43%)                | 68%<br>(57-78%)          | 1.2<br>(0.62-2.1)                           | 2.3%<br>(-0.39-6.1%)                 | 2.8%<br>(-0.51-7.5%)                | 13<br>(-2.4-38)     | 140<br>(-25-410)       |
| Namibia  | 2010 | Female | 85 to 89 | 34%<br>(23-46%)                | 66%<br>(54-77%)          | 1.2<br>(0.62-2.2)                           | 1.8%<br>(-0.78-5.8%)                 | 2.1%<br>(-0.97-6.9%)                | 6<br>(-2.8-21)      | 45<br>(-20-150)        |
| Namibia  | 2010 | Female | 90 to 94 | 38%<br>(26-50%)                | 62%<br>(50-74%)          | 1.2<br>(0.62-2.3)                           | 1.4%<br>(-1.2-5.3%)                  | 1.6%<br>(-1.6-6.4%)                 | 1.5<br>(-1.5-5.9)   | 7.8<br>(-7.3-31)       |
| Namibia  | 2010 | Female | 95 plus  | 43%<br>(27-61%)                | 57%<br>(39-73%)          | 1.3<br>(0.55-2.6)                           | 1.3%<br>(-1.6-6.4%)                  | 1.4%<br>(-2-7.5%)                   | 0.34<br>(-0.47-1.7) | 1.2<br>(-1.4-5.9)      |
| Namibia  | 2010 | Male   | All Ages | 46%<br>(42-49%)                | 54%<br>(51-58%)          | 3.2<br>(2-4.8)                              | 7.8%<br>(5.3-10%)                    | 9.8%<br>(6.4-13%)                   | 1100<br>(710-1500)  | 50000<br>(34000-66000) |
| Namibia  | 2010 | Male   | 15 to 19 | 40%<br>(35-44%)                | 60%<br>(56-65%)          | 2.5<br>(1.5-3.8)                            | 9.2%<br>(5.9-13%)                    | 12%<br>(7-18%)                      | 34<br>(20-51)       | 2700<br>(1700-4000)    |
| Namibia  | 2010 | Male   | 20 to 24 | 64%<br>(61-68%)                | 36%<br>(32-39%)          | 6<br>(3.7-9)                                | 19%<br>(13-25%)                      | 22%<br>(14-31%)                     | 91<br>(60-120)      | 6600<br>(4500-8700)    |
| Namibia  | 2010 | Male   | 25 to 29 | 68%<br>(65-72%)                | 32%<br>(28-35%)          | 6.8<br>(4.2-10)                             | 13%<br>(8.1-19%)                     | 15%<br>(8.5-23%)                    | 93<br>(63-120)      | 6200<br>(4300-8100)    |
| Namibia  | 2010 | Male   | 30 to 34 | 69%<br>(65-72%)                | 31%<br>(28-35%)          | 6.8<br>(4.2-10)                             | 9.4%<br>(6.1-14%)                    | 10%<br>(6.3-15%)                    | 91<br>(62-120)      | 5500<br>(3900-7100)    |
| Namibia  | 2010 | Male   | 35 to 39 | 69%<br>(65-72%)                | 31%<br>(28-35%)          | 6.3<br>(3.9-9.8)                            | 9.1%<br>(5.9-13%)                    | 9.9%<br>(6.2-15%)                   | 96<br>(65-130)      | 5200<br>(3600-6700)    |
| Namibia  | 2010 | Male   | 40 to 44 | 67%<br>(63-71%)                | 33%<br>(29-37%)          | 6<br>(3.8-9.3)                              | 10%<br>(7.1-14%)                     | 12%<br>(7.7-16%)                    | 100<br>(68-140)     | 4900<br>(3300-6500)    |
| Namibia  | 2010 | Male   | 45 to 49 | 63%<br>(59-68%)                | 37%<br>(32-41%)          | 5.7<br>(3.6-9)                              | 13%<br>(9.2-18%)                     | 15%<br>(10-21%)                     | 110<br>(75-160)     | 4800<br>(3300-6500)    |
| Namibia  | 2010 | Male   | 50 to 54 | 61%<br>(54-67%)                | 39%<br>(33-46%)          | 5.4<br>(3.3-8.5)                            | 16%<br>(11-22%)                      | 19%<br>(13-25%)                     | 110<br>(72-160)     | 4300<br>(2800-5900)    |
| Namibia  | 2010 | Male   | 55 to 59 | 67%<br>(61-73%)                | 33%<br>(27-39%)          | 5.6<br>(3.4-8.6)                            | 19%<br>(13-24%)                      | 22%<br>(15-29%)                     | 110<br>(71-160)     | 3700<br>(2400-5200)    |
| Namibia  | 2010 | Male   | 60 to 64 | 67%<br>(60-72%)                | 33%<br>(28-40%)          | 4.8<br>(3-7.4)                              | 16%<br>(9.9-23%)                     | 19%<br>(11-27%)                     | 110<br>(59-160)     | 2900<br>(1600-4400)    |
| Namibia  | 2010 | Male   | 65 to 69 | 55%<br>(45-65%)                | 45%<br>(35-55%)          | 3.1<br>(1.8-4.8)                            | 11%<br>(5.8-18%)                     | 13%<br>(6.6-20%)                    | 77<br>(37-130)      | 1800<br>(860-2900)     |

| Location | Year | Sex    | Age      | Prevalence of current drinkers | Prevalence of abstainers | Population average of standard drinks daily | Percent of total attributable deaths | Percent of total attributable DALYs | Attributable deaths   | Attributable DALYs    |
|----------|------|--------|----------|--------------------------------|--------------------------|---------------------------------------------|--------------------------------------|-------------------------------------|-----------------------|-----------------------|
| Namibia  | 2010 | Male   | 70 to 74 | 48%<br>(37-59%)                | 52%<br>(41-63%)          | 1.9<br>(1-3.2)                              | 5.8%<br>(2.2-11%)                    | 6.6%<br>(2.4-12%)                   | 39<br>(14-75)         | 730<br>(260-1400)     |
| Namibia  | 2010 | Male   | 75 to 79 | 49%<br>(35-63%)                | 51%<br>(37-65%)          | 1.5<br>(0.72-2.6)                           | 3.4%<br>(0.58-7.6%)                  | 3.8%<br>(0.61-8.6%)                 | 21<br>(3.3-47)        | 300<br>(48-670)       |
| Namibia  | 2010 | Male   | 80 to 84 | 49%<br>(33-64%)                | 51%<br>(36-67%)          | 1.3<br>(0.64-2.2)                           | 2.5%<br>(0.25-5.9%)                  | 2.8%<br>(0.17-6.7%)                 | 12<br>(0.75-28)       | 130<br>(12-300)       |
| Namibia  | 2010 | Male   | 85 to 89 | 46%<br>(32-61%)                | 54%<br>(39-68%)          | 1.1<br>(0.57-1.9)                           | 1.7%<br>(-0.01-4.3%)                 | 1.9%<br>(-0.12-4.9%)                | 3.9<br>(-0.27-9.9)    | 31<br>(-0.19-75)      |
| Namibia  | 2010 | Male   | 90 to 94 | 45%<br>(31-60%)                | 55%<br>(40-69%)          | 0.96<br>(0.48-1.8)                          | 1.2%<br>(-0.15-3.6%)                 | 1.3%<br>(-0.29-4%)                  | 0.81<br>(-0.18-2.5)   | 4.5<br>(-0.54-13)     |
| Namibia  | 2010 | Male   | 95 plus  | 48%<br>(29-67%)                | 52%<br>(33-71%)          | 0.9<br>(0.37-1.8)                           | 1.3%<br>(-0.12-3.9%)                 | 1.3%<br>(-0.35-4.4%)                | 0.17<br>(-0.045-0.58) | 0.69<br>(-0.063-2.1)  |
| Namibia  | 2016 | Female | All Ages | 28%<br>(25-31%)                | 72%<br>(69-75%)          | 1.6<br>(0.81-2.9)                           | 2.6%<br>(1-4.7%)                     | 3.7%<br>(1-7.5%)                    | 290<br>(68-630)       | 12000<br>(4400-22000) |
| Namibia  | 2016 | Female | 15 to 19 | 19%<br>(15-25%)                | 81%<br>(75-85%)          | 1<br>(0.47-2)                               | 2.4%<br>(1.2-4.1%)                   | 3.3%<br>(1.1-6.6%)                  | 4.2<br>(1.3-8.7)      | 470<br>(210-850)      |
| Namibia  | 2016 | Female | 20 to 24 | 35%<br>(28-41%)                | 65%<br>(59-72%)          | 2.7<br>(1.2-4.8)                            | 4.2%<br>(2.1-7%)                     | 4.9%<br>(1.5-9.6%)                  | 11<br>(3.6-21)        | 1100<br>(550-1900)    |
| Namibia  | 2016 | Female | 25 to 29 | 42%<br>(34-47%)                | 58%<br>(53-66%)          | 3.1<br>(1.5-5.6)                            | 3.1%<br>(1.3-5.4%)                   | 3.2%<br>(0.82-6.7%)                 | 12<br>(3.7-23)        | 1100<br>(510-1800)    |
| Namibia  | 2016 | Female | 30 to 34 | 41%<br>(34-47%)                | 59%<br>(53-66%)          | 3.1<br>(1.5-5.6)                            | 2.4%<br>(1-4.4%)                     | 2.5%<br>(0.66-5.3%)                 | 12<br>(3.8-25)        | 940<br>(430-1700)     |
| Namibia  | 2016 | Female | 35 to 39 | 42%<br>(35-49%)                | 58%<br>(51-65%)          | 3.2<br>(1.6-6)                              | 2.7%<br>(1.1-4.7%)                   | 3%<br>(0.86-5.9%)                   | 16<br>(4.8-31)        | 1000<br>(410-1800)    |
| Namibia  | 2016 | Female | 40 to 44 | 42%<br>(36-50%)                | 58%<br>(50-64%)          | 3.2<br>(1.5-5.8)                            | 3.5%<br>(1.3-6.4%)                   | 4.2%<br>(1.3-8.2%)                  | 21<br>(6.2-42)        | 1100<br>(420-2100)    |
| Namibia  | 2016 | Female | 45 to 49 | 43%<br>(35-49%)                | 57%<br>(51-65%)          | 2.9<br>(1.3-5.4)                            | 4.6%<br>(1.8-8.5%)                   | 5.9%<br>(2-11%)                     | 26<br>(7.5-51)        | 1200<br>(410-2300)    |
| Namibia  | 2016 | Female | 50 to 54 | 42%<br>(33-52%)                | 58%<br>(48-67%)          | 2.6<br>(1.1-4.9)                            | 5.5%<br>(1.8-10%)                    | 7.3%<br>(2.5-14%)                   | 30<br>(8.1-63)        | 1200<br>(360-2400)    |
| Namibia  | 2016 | Female | 55 to 59 | 42%<br>(30-54%)                | 58%<br>(46-70%)          | 2.3<br>(0.95-4.5)                           | 6%<br>(1.8-12%)                      | 8.6%<br>(2.4-16%)                   | 31<br>(6.6-70)        | 1000<br>(250-2300)    |
| Namibia  | 2016 | Female | 60 to 64 | 41%<br>(29-54%)                | 59%<br>(46-71%)          | 2.1<br>(0.84-4)                             | 5.6%<br>(0.91-12%)                   | 7.9%<br>(1.3-16%)                   | 31<br>(4.3-74)        | 870<br>(130-2100)     |
| Namibia  | 2016 | Female | 65 to 69 | 40%<br>(29-51%)                | 60%<br>(49-71%)          | 1.9<br>(0.83-3.5)                           | 5.1%<br>(0.41-11%)                   | 7%<br>(0.59-15%)                    | 30<br>(2.2-80)        | 700<br>(56-1800)      |
| Namibia  | 2016 | Female | 70 to 74 | 37%<br>(27-47%)                | 63%<br>(53-73%)          | 1.6<br>(0.7-3.1)                            | 3.8%<br>(-0.26-9.7%)                 | 5.1%<br>(-0.3-13%)                  | 24<br>(-1.4-68)       | 450<br>(-26-1300)     |
| Namibia  | 2016 | Female | 75 to 79 | 33%<br>(23-45%)                | 67%<br>(55-77%)          | 1.3<br>(0.54-2.5)                           | 2.7%<br>(-0.74-7.8%)                 | 3.4%<br>(-0.96-9.8%)                | 17<br>(-4.4-53)       | 240<br>(-65-780)      |
| Namibia  | 2016 | Female | 80 to 84 | 32%<br>(22-43%)                | 68%<br>(57-78%)          | 1.2<br>(0.5-2.2)                            | 2.1%<br>(-0.83-6.9%)                 | 2.7%<br>(-1-8.7%)                   | 12<br>(-4.6-41)       | 130<br>(-49-420)      |
| Namibia  | 2016 | Female | 85 to 89 | 34%<br>(23-46%)                | 66%<br>(54-77%)          | 1.2<br>(0.5-2.4)                            | 1.7%<br>(-1.1-6.5%)                  | 2.1%<br>(-1.4-7.7%)                 | 6.9<br>(-4.9-27)      | 52<br>(-34-200)       |

| Location     | Year | Sex    | Age      | Prevalence of current drinkers | Prevalence of abstainers | Population average of standard drinks daily | Percent of total attributable deaths | Percent of total attributable DALYs | Attributable deaths   | Attributable DALYs        |
|--------------|------|--------|----------|--------------------------------|--------------------------|---------------------------------------------|--------------------------------------|-------------------------------------|-----------------------|---------------------------|
| Namibia      | 2016 | Female | 90 to 94 | 38%<br>(26-50%)                | 62%<br>(50-74%)          | 1.2<br>(0.52-2.5)                           | 1.3%<br>(-1.4-6.1%)                  | 1.6%<br>(-1.8-7.1%)                 | 2.2<br>(-2.8-10)      | 12<br>(-13-53)            |
| Namibia      | 2016 | Female | 95 plus  | 43%<br>(27-60%)                | 57%<br>(40-73%)          | 1.3<br>(0.47-2.8)                           | 1.3%<br>(-1.7-7.3%)                  | 1.4%<br>(-2.2-8.6%)                 | 0.44<br>(-0.73-2.7)   | 1.6<br>(-2.3-9)           |
| Namibia      | 2016 | Male   | All Ages | 46%<br>(43-50%)                | 54%<br>(50-57%)          | 3.6<br>(1.8-6.2)                            | 8.9%<br>(5.5-12%)                    | 11%<br>(6.5-15%)                    | 1100<br>(640-1600)    | 51000<br>(31000-71000)    |
| Namibia      | 2016 | Male   | 15 to 19 | 35%<br>(30-40%)                | 65%<br>(60-70%)          | 2.4<br>(1.1-4.2)                            | 8.4%<br>(4.9-13%)                    | 11%<br>(5.9-17%)                    | 30<br>(15-48)         | 2400<br>(1400-3700)       |
| Namibia      | 2016 | Male   | 20 to 24 | 64%<br>(58-68%)                | 36%<br>(32-42%)          | 6.4<br>(3.1-11)                             | 18%<br>(12-25%)                      | 22%<br>(14-31%)                     | 95<br>(55-130)        | 7000<br>(4400-9500)       |
| Namibia      | 2016 | Male   | 25 to 29 | 70%<br>(65-73%)                | 30%<br>(27-35%)          | 7.5<br>(3.7-13)                             | 16%<br>(10-21%)                      | 18%<br>(11-26%)                     | 100<br>(59-140)       | 6800<br>(4200-9000)       |
| Namibia      | 2016 | Male   | 30 to 34 | 69%<br>(64-73%)                | 31%<br>(27-36%)          | 7.3<br>(3.7-13)                             | 11%<br>(7.2-16%)                     | 13%<br>(7.5-19%)                    | 88<br>(53-120)        | 5400<br>(3400-7300)       |
| Namibia      | 2016 | Male   | 35 to 39 | 69%<br>(65-73%)                | 31%<br>(27-35%)          | 6.8<br>(3.4-12)                             | 10%<br>(6.3-14%)                     | 11%<br>(6.8-17%)                    | 91<br>(54-130)        | 5000<br>(3100-6900)       |
| Namibia      | 2016 | Male   | 40 to 44 | 67%<br>(62-71%)                | 33%<br>(29-38%)          | 6.5<br>(3.2-11)                             | 11%<br>(6.7-15%)                     | 12%<br>(7.4-17%)                    | 99<br>(58-140)        | 4800<br>(2900-6800)       |
| Namibia      | 2016 | Male   | 45 to 49 | 63%<br>(57-68%)                | 37%<br>(32-43%)          | 6.1<br>(3-11)                               | 13%<br>(8.4-18%)                     | 15%<br>(9.5-21%)                    | 110<br>(67-160)       | 4800<br>(3000-6700)       |
| Namibia      | 2016 | Male   | 50 to 54 | 60%<br>(54-66%)                | 40%<br>(34-46%)          | 5.7<br>(2.8-10)                             | 15%<br>(9.5-20%)                     | 18%<br>(11-24%)                     | 120<br>(68-170)       | 4500<br>(2700-6400)       |
| Namibia      | 2016 | Male   | 55 to 59 | 67%<br>(60-73%)                | 33%<br>(27-40%)          | 6<br>(3-10)                                 | 18%<br>(11-24%)                      | 21%<br>(13-28%)                     | 120<br>(70-180)       | 4100<br>(2400-5700)       |
| Namibia      | 2016 | Male   | 60 to 64 | 67%<br>(60-72%)                | 33%<br>(28-40%)          | 5.2<br>(2.6-9)                              | 16%<br>(8.2-23%)                     | 19%<br>(9.6-27%)                    | 110<br>(55-170)       | 3000<br>(1600-4600)       |
| Namibia      | 2016 | Male   | 65 to 69 | 55%<br>(44-65%)                | 45%<br>(35-56%)          | 3.3<br>(1.6-6.2)                            | 11%<br>(4.9-18%)                     | 13%<br>(5.7-22%)                    | 82<br>(34-140)        | 1900<br>(800-3100)        |
| Namibia      | 2016 | Male   | 70 to 74 | 48%<br>(36-60%)                | 52%<br>(40-64%)          | 2<br>(0.91-3.8)                             | 6.2%<br>(1.7-12%)                    | 7.1%<br>(1.9-14%)                   | 46<br>(12-92)         | 850<br>(230-1700)         |
| Namibia      | 2016 | Male   | 75 to 79 | 49%<br>(34-63%)                | 51%<br>(37-66%)          | 1.6<br>(0.67-3)                             | 3.8%<br>(0.47-9.2%)                  | 4.2%<br>(0.45-11%)                  | 24<br>(2.6-60)        | 350<br>(44-860)           |
| Namibia      | 2016 | Male   | 80 to 84 | 49%<br>(33-63%)                | 51%<br>(37-67%)          | 1.4<br>(0.59-2.6)                           | 2.9%<br>(0.2-7.3%)                   | 3.2%<br>(0.11-8.2%)                 | 14<br>(0.52-36)       | 150<br>(11-380)           |
| Namibia      | 2016 | Male   | 85 to 89 | 46%<br>(31-61%)                | 54%<br>(39-69%)          | 1.2<br>(0.5-2.3)                            | 2%<br>(-0.036-5.6%)                  | 2.2%<br>(-0.17-6.4%)                | 5.4<br>(-0.42-15)     | 42<br>(-0.78-120)         |
| Namibia      | 2016 | Male   | 90 to 94 | 45%<br>(31-60%)                | 55%<br>(40-69%)          | 1<br>(0.42-2.1)                             | 1.5%<br>(-0.18-4.7%)                 | 1.6%<br>(-0.33-5.4%)                | 1.4<br>(-0.28-4.5)    | 7.6<br>(-0.91-24)         |
| Namibia      | 2016 | Male   | 95 plus  | 47%<br>(29-66%)                | 53%<br>(34-71%)          | 0.96<br>(0.34-2.1)                          | 1.6%<br>(-0.066-5%)                  | 1.6%<br>(-0.27-5.6%)                | 0.28<br>(-0.046-0.94) | 1.1<br>(-0.046-3.3)       |
| South Africa | 1990 | Female | All Ages | 21%<br>(18-25%)                | 79%<br>(75-82%)          | 1.7<br>(1.2-2.3)                            | 4.7%<br>(3.7-5.9%)                   | 7.3%<br>(5.5-9.2%)                  | 9300<br>(7000-12000)  | 380000<br>(300000-470000) |
| South Africa | 1990 | Female | 15 to 19 | 17%<br>(11-24%)                | 83%<br>(76-89%)          | 1.2<br>(0.6-2.2)                            | 4.2%<br>(2.4-6.3%)                   | 7.1%<br>(3.9-11%)                   | 150<br>(83-230)       | 13000<br>(7700-19000)     |

| Location     | Year | Sex    | Age      | Prevalence of current drinkers | Prevalence of abstainers | Population average of standard drinks daily | Percent of total attributable deaths | Percent of total attributable DALYs | Attributable deaths    | Attributable DALYs        |
|--------------|------|--------|----------|--------------------------------|--------------------------|---------------------------------------------|--------------------------------------|-------------------------------------|------------------------|---------------------------|
| South Africa | 1990 | Female | 20 to 24 | 22%<br>(15-32%)                | 78%<br>(68-85%)          | 2.2<br>(1.1-3.7)                            | 7.7%<br>(4.9-11%)                    | 10%<br>(6.3-14%)                    | 540<br>(330-780)       | 41000<br>(26000-58000)    |
| South Africa | 1990 | Female | 25 to 29 | 26%<br>(17-36%)                | 74%<br>(64-83%)          | 2.7<br>(1.5-4.4)                            | 9.4%<br>(6.3-13%)                    | 12%<br>(7.7-16%)                    | 850<br>(550-1200)      | 57000<br>(38000-76000)    |
| South Africa | 1990 | Female | 30 to 34 | 29%<br>(19-41%)                | 71%<br>(59-81%)          | 3.1<br>(1.7-4.9)                            | 9.6%<br>(6.7-13%)                    | 12%<br>(8.6-17%)                    | 940<br>(640-1300)      | 57000<br>(40000-77000)    |
| South Africa | 1990 | Female | 35 to 39 | 32%<br>(22-45%)                | 68%<br>(55-78%)          | 3.1<br>(1.8-5)                              | 9.5%<br>(6.8-13%)                    | 13%<br>(9.3-18%)                    | 730<br>(510-980)       | 41000<br>(29000-54000)    |
| South Africa | 1990 | Female | 40 to 44 | 34%<br>(24-47%)                | 66%<br>(53-76%)          | 3.1<br>(1.6-5.1)                            | 9.4%<br>(6.4-13%)                    | 14%<br>(9.3-18%)                    | 620<br>(420-830)       | 31000<br>(22000-42000)    |
| South Africa | 1990 | Female | 45 to 49 | 34%<br>(22-46%)                | 66%<br>(54-78%)          | 3.2<br>(1.6-5.8)                            | 9.5%<br>(6.4-13%)                    | 14%<br>(9.3-18%)                    | 560<br>(380-760)       | 25000<br>(17000-34000)    |
| South Africa | 1990 | Female | 50 to 54 | 33%<br>(23-45%)                | 67%<br>(55-77%)          | 3.3<br>(1.7-5.7)                            | 9.2%<br>(6.1-13%)                    | 13%<br>(8.8-18%)                    | 500<br>(330-690)       | 20000<br>(13000-27000)    |
| South Africa | 1990 | Female | 55 to 59 | 33%<br>(23-45%)                | 67%<br>(55-77%)          | 3.4<br>(1.7-5.8)                            | 9.1%<br>(5.9-13%)                    | 13%<br>(8.3-18%)                    | 630<br>(400-880)       | 21000<br>(14000-30000)    |
| South Africa | 1990 | Female | 60 to 64 | 34%<br>(23-46%)                | 66%<br>(54-77%)          | 3.4<br>(1.7-6)                              | 8.5%<br>(5.2-12%)                    | 12%<br>(7.1-17%)                    | 720<br>(440-1000)      | 21000<br>(13000-29000)    |
| South Africa | 1990 | Female | 65 to 69 | 35%<br>(25-46%)                | 65%<br>(54-75%)          | 3.1<br>(1.7-5.4)                            | 8.3%<br>(5.2-12%)                    | 11%<br>(7.2-16%)                    | 900<br>(570-1300)      | 22000<br>(14000-31000)    |
| South Africa | 1990 | Female | 70 to 74 | 33%<br>(24-44%)                | 67%<br>(56-76%)          | 2.7<br>(1.4-4.5)                            | 6.7%<br>(3.8-10%)                    | 9%<br>(5-13%)                       | 550<br>(310-820)       | 11000<br>(6100-16000)     |
| South Africa | 1990 | Female | 75 to 79 | 29%<br>(20-40%)                | 71%<br>(60-80%)          | 2.2<br>(1.1-3.8)                            | 5.2%<br>(2.5-8.2%)                   | 6.8%<br>(3.3-11%)                   | 570<br>(280-920)       | 8800<br>(4200-14000)      |
| South Africa | 1990 | Female | 80 to 84 | 28%<br>(19-39%)                | 72%<br>(61-81%)          | 2<br>(0.97-3.4)                             | 4.8%<br>(2.3-7.8%)                   | 6.1%<br>(2.9-9.8%)                  | 610<br>(290-1000)      | 6800<br>(3200-11000)      |
| South Africa | 1990 | Female | 85 to 89 | 28%<br>(19-39%)                | 72%<br>(61-81%)          | 1.9<br>(0.96-3.4)                           | 4.5%<br>(2-7.5%)                     | 5.5%<br>(2.4-9.2%)                  | 320<br>(140-530)       | 2400<br>(1100-4000)       |
| South Africa | 1990 | Female | 90 to 94 | 30%<br>(20-42%)                | 70%<br>(58-80%)          | 1.9<br>(0.91-3.6)                           | 4.2%<br>(1.7-7.3%)                   | 5.1%<br>(2-9%)                      | 110<br>(41-190)        | 560<br>(230-980)          |
| South Africa | 1990 | Female | 95 plus  | 34%<br>(21-48%)                | 66%<br>(52-79%)          | 2<br>(0.8-4.2)                              | 4.1%<br>(1.2-8.2%)                   | 4.9%<br>(1.2-10%)                   | 23<br>(6-48)           | 80<br>(23-160)            |
| South Africa | 1990 | Male   | All Ages | 31%<br>(27-36%)                | 69%<br>(64-73%)          | 2.4<br>(1.7-3.3)                            | 8.4%<br>(6.8-10%)                    | 11%<br>(8.8-13%)                    | 18000<br>(14000-21000) | 810000<br>(650000-960000) |
| South Africa | 1990 | Male   | 15 to 19 | 25%<br>(17-37%)                | 75%<br>(63-83%)          | 1.4<br>(0.68-2.5)                           | 5.7%<br>(3.5-8.9%)                   | 8%<br>(4.4-13%)                     | 240<br>(130-380)       | 21000<br>(12000-31000)    |
| South Africa | 1990 | Male   | 20 to 24 | 37%<br>(25-50%)                | 63%<br>(50-75%)          | 3.1<br>(1.7-5.1)                            | 13%<br>(8.5-17%)                     | 15%<br>(9.9-22%)                    | 950<br>(600-1300)      | 70000<br>(47000-96000)    |
| South Africa | 1990 | Male   | 25 to 29 | 43%<br>(30-57%)                | 57%<br>(43-70%)          | 4.9<br>(2.7-7.5)                            | 17%<br>(13-22%)                      | 21%<br>(15-27%)                     | 1800<br>(1300-2300)    | 120000<br>(85000-150000)  |
| South Africa | 1990 | Male   | 30 to 34 | 46%<br>(32-60%)                | 54%<br>(40-68%)          | 5.6<br>(3.3-8.6)                            | 19%<br>(14-24%)                      | 22%<br>(16-28%)                     | 2300<br>(1700-3000)    | 140000<br>(100000-170000) |
| South Africa | 1990 | Male   | 35 to 39 | 48%<br>(33-61%)                | 52%<br>(39-67%)          | 5.5<br>(3.2-8.7)                            | 19%<br>(14-23%)                      | 22%<br>(17-28%)                     | 2200<br>(1700-2800)    | 120000<br>(92000-150000)  |

| Location     | Year | Sex    | Age      | Prevalence of current drinkers | Prevalence of abstainers | Population average of standard drinks daily | Percent of total attributable deaths | Percent of total attributable DALYs | Attributable deaths  | Attributable DALYs        |
|--------------|------|--------|----------|--------------------------------|--------------------------|---------------------------------------------|--------------------------------------|-------------------------------------|----------------------|---------------------------|
| South Africa | 1990 | Male   | 40 to 44 | 47%<br>(34-61%)                | 53%<br>(39-66%)          | 5<br>(2.6-8)                                | 18%<br>(13-23%)                      | 21%<br>(16-27%)                     | 1900<br>(1400-2400)  | 91000<br>(68000-110000)   |
| South Africa | 1990 | Male   | 45 to 49 | 46%<br>(31-60%)                | 54%<br>(40-69%)          | 4.2<br>(2.2-7.3)                            | 17%<br>(13-22%)                      | 21%<br>(15-26%)                     | 1800<br>(1300-2300)  | 77000<br>(55000-97000)    |
| South Africa | 1990 | Male   | 50 to 54 | 45%<br>(32-59%)                | 55%<br>(41-68%)          | 3.9<br>(2-6.7)                              | 16%<br>(11-20%)                      | 19%<br>(13-25%)                     | 1400<br>(940-1800)   | 53000<br>(37000-67000)    |
| South Africa | 1990 | Male   | 55 to 59 | 46%<br>(34-59%)                | 54%<br>(41-66%)          | 3.9<br>(2.1-6.5)                            | 15%<br>(11-19%)                      | 18%<br>(13-23%)                     | 1400<br>(990-1800)   | 47000<br>(34000-61000)    |
| South Africa | 1990 | Male   | 60 to 64 | 45%<br>(32-59%)                | 55%<br>(41-68%)          | 3.5<br>(1.8-6.1)                            | 12%<br>(7.9-16%)                     | 15%<br>(9.5-20%)                    | 1000<br>(670-1400)   | 29000<br>(19000-39000)    |
| South Africa | 1990 | Male   | 65 to 69 | 43%<br>(32-56%)                | 57%<br>(44-68%)          | 2.8<br>(1.6-4.8)                            | 9.8%<br>(6.4-14%)                    | 12%<br>(7.8-17%)                    | 1100<br>(690-1500)   | 25000<br>(16000-35000)    |
| South Africa | 1990 | Male   | 70 to 74 | 41%<br>(29-53%)                | 59%<br>(47-71%)          | 2.1<br>(1.1-3.4)                            | 6.7%<br>(3.9-9.9%)                   | 8.1%<br>(4.7-12%)                   | 610<br>(350-890)     | 12000<br>(6700-17000)     |
| South Africa | 1990 | Male   | 75 to 79 | 37%<br>(26-50%)                | 63%<br>(50-74%)          | 1.6<br>(0.82-2.8)                           | 4.7%<br>(2.3-7.5%)                   | 5.6%<br>(2.7-9.1%)                  | 470<br>(230-760)     | 7100<br>(3500-11000)      |
| South Africa | 1990 | Male   | 80 to 84 | 35%<br>(24-47%)                | 65%<br>(53-76%)          | 1.4<br>(0.68-2.3)                           | 3.7%<br>(1.8-6.1%)                   | 4.3%<br>(2-7.1%)                    | 290<br>(130-490)     | 3300<br>(1500-5400)       |
| South Africa | 1990 | Male   | 85 to 89 | 33%<br>(23-46%)                | 67%<br>(54-77%)          | 1.2<br>(0.58-2)                             | 2.9%<br>(1.3-5.1%)                   | 3.3%<br>(1.5-5.9%)                  | 150<br>(63-260)      | 1200<br>(530-2000)        |
| South Africa | 1990 | Male   | 90 to 94 | 33%<br>(23-45%)                | 67%<br>(55-77%)          | 1<br>(0.47-1.9)                             | 2.3%<br>(0.88-4.4%)                  | 2.6%<br>(0.91-5.2%)                 | 53<br>(18-100)       | 290<br>(110-550)          |
| South Africa | 1990 | Male   | 95 plus  | 36%<br>(22-52%)                | 64%<br>(48-78%)          | 0.93<br>(0.36-2)                            | 2.1%<br>(0.74-4.4%)                  | 2.3%<br>(0.65-5%)                   | 13<br>(3.6-27)       | 48<br>(17-100)            |
| South Africa | 1995 | Female | All Ages | 23%<br>(19-26%)                | 77%<br>(74-81%)          | 1.8<br>(1.3-2.5)                            | 4.2%<br>(3.3-5.2%)                   | 6.7%<br>(4.9-8.6%)                  | 9400<br>(6900-12000) | 360000<br>(280000-440000) |
| South Africa | 1995 | Female | 15 to 19 | 17%<br>(11-25%)                | 83%<br>(75-89%)          | 1.3<br>(0.63-2.3)                           | 3.6%<br>(2.1-5.5%)                   | 6.2%<br>(3.4-9.6%)                  | 140<br>(78-220)      | 13000<br>(7500-19000)     |
| South Africa | 1995 | Female | 20 to 24 | 23%<br>(15-33%)                | 77%<br>(67-85%)          | 2.2<br>(1.2-3.8)                            | 5.6%<br>(3.6-8%)                     | 7.2%<br>(4.4-11%)                   | 410<br>(250-610)     | 33000<br>(21000-47000)    |
| South Africa | 1995 | Female | 25 to 29 | 26%<br>(17-37%)                | 74%<br>(63-83%)          | 2.9<br>(1.6-4.7)                            | 6.8%<br>(4.5-9.5%)                   | 8.5%<br>(5.4-12%)                   | 680<br>(430-960)     | 47000<br>(31000-64000)    |
| South Africa | 1995 | Female | 30 to 34 | 30%<br>(20-43%)                | 70%<br>(57-80%)          | 3.3<br>(1.8-5.2)                            | 7.3%<br>(5.1-9.9%)                   | 9.4%<br>(6.3-13%)                   | 740<br>(500-1000)    | 47000<br>(32000-62000)    |
| South Africa | 1995 | Female | 35 to 39 | 34%<br>(23-46%)                | 66%<br>(54-77%)          | 3.2<br>(1.8-5.3)                            | 7%<br>(5-9.5%)                       | 9.5%<br>(6.6-13%)                   | 590<br>(410-810)     | 34000<br>(24000-46000)    |
| South Africa | 1995 | Female | 40 to 44 | 35%<br>(24-49%)                | 65%<br>(51-76%)          | 3.2<br>(1.7-5.4)                            | 7.5%<br>(5.1-10%)                    | 11%<br>(7.1-14%)                    | 570<br>(390-770)     | 29000<br>(21000-39000)    |
| South Africa | 1995 | Female | 45 to 49 | 35%<br>(23-47%)                | 65%<br>(53-77%)          | 3.4<br>(1.7-6)                              | 8%<br>(5.4-11%)                      | 11%<br>(7.6-15%)                    | 580<br>(390-780)     | 26000<br>(18000-35000)    |
| South Africa | 1995 | Female | 50 to 54 | 34%<br>(24-47%)                | 66%<br>(53-76%)          | 3.4<br>(1.8-6.1)                            | 8.3%<br>(5.5-11%)                    | 12%<br>(8-16%)                      | 570<br>(380-770)     | 23000<br>(16000-31000)    |
| South Africa | 1995 | Female | 55 to 59 | 34%<br>(23-46%)                | 66%<br>(54-77%)          | 3.5<br>(1.8-6)                              | 8.5%<br>(5.5-12%)                    | 12%<br>(7.6-16%)                    | 710<br>(460-980)     | 24000<br>(16000-33000)    |

| Location     | Year | Sex    | Age      | Prevalence of current drinkers | Prevalence of abstainers | Population average of standard drinks daily | Percent of total attributable deaths | Percent of total attributable DALYs | Attributable deaths    | Attributable DALYs         |
|--------------|------|--------|----------|--------------------------------|--------------------------|---------------------------------------------|--------------------------------------|-------------------------------------|------------------------|----------------------------|
| South Africa | 1995 | Female | 60 to 64 | 35%<br>(23-47%)                | 65%<br>(53-77%)          | 3.4<br>(1.7-6.1)                            | 8.1%<br>(5.1-11%)                    | 11%<br>(7-16%)                      | 800<br>(500-1100)      | 23000<br>(15000-33000)     |
| South Africa | 1995 | Female | 65 to 69 | 35%<br>(25-47%)                | 65%<br>(53-75%)          | 3.2<br>(1.7-5.4)                            | 8.1%<br>(5.1-11%)                    | 11%<br>(6.9-16%)                    | 970<br>(620-1400)      | 23000<br>(15000-33000)     |
| South Africa | 1995 | Female | 70 to 74 | 33%<br>(24-45%)                | 67%<br>(55-76%)          | 2.7<br>(1.4-4.6)                            | 6.6%<br>(3.8-9.9%)                   | 8.9%<br>(5.1-13%)                   | 670<br>(390-990)       | 13000<br>(7500-20000)      |
| South Africa | 1995 | Female | 75 to 79 | 30%<br>(20-42%)                | 70%<br>(58-80%)          | 2.3<br>(1.1-4)                              | 5.2%<br>(2.5-8.2%)                   | 6.9%<br>(3.4-11%)                   | 650<br>(320-1000)      | 9900<br>(4800-16000)       |
| South Africa | 1995 | Female | 80 to 84 | 28%<br>(19-39%)                | 72%<br>(61-81%)          | 2<br>(1-3.5)                                | 4.8%<br>(2.3-7.8%)                   | 6.1%<br>(2.9-9.9%)                  | 740<br>(360-1200)      | 8100<br>(4000-13000)       |
| South Africa | 1995 | Female | 85 to 89 | 29%<br>(19-40%)                | 71%<br>(60-81%)          | 2<br>(1-3.4)                                | 4.6%<br>(2.1-7.5%)                   | 5.6%<br>(2.6-9.2%)                  | 420<br>(190-700)       | 3300<br>(1500-5300)        |
| South Africa | 1995 | Female | 90 to 94 | 31%<br>(21-43%)                | 69%<br>(57-79%)          | 2<br>(0.98-3.8)                             | 4.3%<br>(1.7-7.5%)                   | 5.2%<br>(2-9.2%)                    | 150<br>(57-260)        | 780<br>(310-1300)          |
| South Africa | 1995 | Female | 95 plus  | 35%<br>(22-49%)                | 65%<br>(51-78%)          | 2.1<br>(0.83-4.3)                           | 4.2%<br>(1.3-8.2%)                   | 5%<br>(1.4-10%)                     | 33<br>(9.1-66)         | 110<br>(33-220)            |
| South Africa | 1995 | Male   | All Ages | 33%<br>(28-38%)                | 67%<br>(62-72%)          | 2.4<br>(1.7-3.3)                            | 8.2%<br>(6.7-9.7%)                   | 10%<br>(8.3-12%)                    | 20000<br>(16000-24000) | 880000<br>(720000-1100000) |
| South Africa | 1995 | Male   | 15 to 19 | 26%<br>(17-36%)                | 74%<br>(64-83%)          | 1.3<br>(0.65-2.3)                           | 5.7%<br>(3.4-8.8%)                   | 8%<br>(4.2-13%)                     | 290<br>(150-460)       | 24000<br>(14000-37000)     |
| South Africa | 1995 | Male   | 20 to 24 | 38%<br>(25-51%)                | 62%<br>(49-75%)          | 3<br>(1.6-4.9)                              | 11%<br>(7.5-15%)                     | 13%<br>(8.6-19%)                    | 1000<br>(660-1400)     | 75000<br>(52000-100000)    |
| South Africa | 1995 | Male   | 25 to 29 | 44%<br>(31-57%)                | 56%<br>(43-69%)          | 4.7<br>(2.6-7.5)                            | 14%<br>(10-18%)                      | 16%<br>(11-21%)                     | 1800<br>(1300-2400)    | 120000<br>(85000-150000)   |
| South Africa | 1995 | Male   | 30 to 34 | 47%<br>(33-61%)                | 53%<br>(39-67%)          | 5.5<br>(3.2-8.4)                            | 15%<br>(12-19%)                      | 18%<br>(13-23%)                     | 2300<br>(1600-2900)    | 140000<br>(100000-170000)  |
| South Africa | 1995 | Male   | 35 to 39 | 49%<br>(35-62%)                | 51%<br>(38-65%)          | 5.3<br>(3.2-8.4)                            | 15%<br>(12-19%)                      | 18%<br>(14-23%)                     | 2200<br>(1700-2800)    | 120000<br>(91000-150000)   |
| South Africa | 1995 | Male   | 40 to 44 | 48%<br>(35-61%)                | 52%<br>(39-65%)          | 4.8<br>(2.6-7.8)                            | 15%<br>(11-19%)                      | 18%<br>(13-22%)                     | 2000<br>(1500-2500)    | 96000<br>(72000-120000)    |
| South Africa | 1995 | Male   | 45 to 49 | 46%<br>(32-60%)                | 54%<br>(40-68%)          | 4.1<br>(2.2-6.9)                            | 16%<br>(12-20%)                      | 19%<br>(14-23%)                     | 2100<br>(1500-2600)    | 90000<br>(67000-110000)    |
| South Africa | 1995 | Male   | 50 to 54 | 46%<br>(33-60%)                | 54%<br>(40-67%)          | 3.7<br>(1.9-6.6)                            | 15%<br>(11-19%)                      | 18%<br>(12-23%)                     | 1700<br>(1200-2200)    | 67000<br>(47000-85000)     |
| South Africa | 1995 | Male   | 55 to 59 | 47%<br>(35-59%)                | 53%<br>(41-65%)          | 3.7<br>(2.1-6.2)                            | 14%<br>(10-18%)                      | 17%<br>(12-21%)                     | 1800<br>(1300-2300)    | 60000<br>(44000-77000)     |
| South Africa | 1995 | Male   | 60 to 64 | 46%<br>(33-60%)                | 54%<br>(40-67%)          | 3.4<br>(1.8-5.8)                            | 12%<br>(7.8-16%)                     | 14%<br>(9.2-19%)                    | 1300<br>(890-1800)     | 38000<br>(25000-51000)     |
| South Africa | 1995 | Male   | 65 to 69 | 44%<br>(33-57%)                | 56%<br>(43-67%)          | 2.7<br>(1.5-4.5)                            | 9.5%<br>(6.2-13%)                    | 11%<br>(7.3-16%)                    | 1300<br>(820-1800)     | 30000<br>(20000-41000)     |
| South Africa | 1995 | Male   | 70 to 74 | 42%<br>(30-53%)                | 58%<br>(47-70%)          | 2<br>(1.1-3.3)                              | 6.5%<br>(3.8-9.6%)                   | 7.7%<br>(4.4-12%)                   | 770<br>(440-1200)      | 15000<br>(8500-22000)      |

| Location     | Year | Sex    | Age      | Prevalence of current drinkers | Prevalence of abstainers | Population average of standard drinks daily | Percent of total attributable deaths | Percent of total attributable DALYs | Attributable deaths    | Attributable DALYs        |
|--------------|------|--------|----------|--------------------------------|--------------------------|---------------------------------------------|--------------------------------------|-------------------------------------|------------------------|---------------------------|
| South Africa | 1995 | Male   | 75 to 79 | 38%<br>(27-52%)                | 62%<br>(48-73%)          | 1.6<br>(0.79-2.7)                           | 4.5%<br>(2.2-7.3%)                   | 5.3%<br>(2.6-8.6%)                  | 540<br>(260-870)       | 8100<br>(3900-13000)      |
| South Africa | 1995 | Male   | 80 to 84 | 36%<br>(25-48%)                | 64%<br>(52-75%)          | 1.3<br>(0.69-2.2)                           | 3.5%<br>(1.7-5.7%)                   | 4.1%<br>(1.9-6.7%)                  | 350<br>(160-580)       | 3900<br>(1800-6300)       |
| South Africa | 1995 | Male   | 85 to 89 | 34%<br>(23-46%)                | 66%<br>(54-77%)          | 1.1<br>(0.55-1.9)                           | 2.7%<br>(1.2-4.8%)                   | 3.1%<br>(1.3-5.5%)                  | 180<br>(74-320)        | 1400<br>(620-2500)        |
| South Africa | 1995 | Male   | 90 to 94 | 34%<br>(23-47%)                | 66%<br>(53-77%)          | 0.96<br>(0.45-1.8)                          | 2.1%<br>(0.83-4.1%)                  | 2.4%<br>(0.86-4.8%)                 | 61<br>(22-120)         | 330<br>(130-650)          |
| South Africa | 1995 | Male   | 95 plus  | 37%<br>(23-52%)                | 63%<br>(48-77%)          | 0.88<br>(0.35-1.8)                          | 1.9%<br>(0.65-4.2%)                  | 2.1%<br>(0.57-4.6%)                 | 15<br>(4.2-34)         | 58<br>(19-130)            |
| South Africa | 2000 | Female | All Ages | 21%<br>(18-25%)                | 79%<br>(75-82%)          | 1.6<br>(1.1-2.2)                            | 3.6%<br>(2.7-4.6%)                   | 5.4%<br>(3.8-7.1%)                  | 14000<br>(10000-19000) | 510000<br>(390000-650000) |
| South Africa | 2000 | Female | 15 to 19 | 15%<br>(10-23%)                | 85%<br>(77-90%)          | 1.1<br>(0.52-1.8)                           | 3.8%<br>(2.2-5.8%)                   | 5.4%<br>(2.8-8.5%)                  | 260<br>(140-400)       | 21000<br>(12000-32000)    |
| South Africa | 2000 | Female | 20 to 24 | 19%<br>(12-29%)                | 81%<br>(71-88%)          | 1.8<br>(0.91-3)                             | 4.2%<br>(2.4-6.4%)                   | 4.6%<br>(2.5-7.4%)                  | 650<br>(370-980)       | 48000<br>(29000-71000)    |
| South Africa | 2000 | Female | 25 to 29 | 22%<br>(14-32%)                | 78%<br>(68-86%)          | 2.3<br>(1.2-3.8)                            | 4.2%<br>(2.5-6.3%)                   | 4.5%<br>(2.5-6.9%)                  | 1100<br>(600-1600)     | 69000<br>(41000-100000)   |
| South Africa | 2000 | Female | 30 to 34 | 26%<br>(17-37%)                | 74%<br>(63-83%)          | 2.6<br>(1.4-4.3)                            | 4.2%<br>(2.6-6.4%)                   | 4.6%<br>(2.7-7.1%)                  | 1000<br>(640-1500)     | 63000<br>(40000-91000)    |
| South Africa | 2000 | Female | 35 to 39 | 30%<br>(19-43%)                | 70%<br>(57-81%)          | 2.7<br>(1.5-4.5)                            | 4.1%<br>(2.4-6.1%)                   | 4.5%<br>(2.5-7%)                    | 870<br>(500-1300)      | 48000<br>(29000-71000)    |
| South Africa | 2000 | Female | 40 to 44 | 32%<br>(22-45%)                | 68%<br>(55-78%)          | 2.8<br>(1.4-4.6)                            | 4%<br>(2.5-6%)                       | 4.6%<br>(2.7-7%)                    | 710<br>(430-1100)      | 36000<br>(23000-53000)    |
| South Africa | 2000 | Female | 45 to 49 | 32%<br>(20-43%)                | 68%<br>(57-80%)          | 2.9<br>(1.5-5)                              | 4.9%<br>(3.2-7.1%)                   | 5.8%<br>(3.6-8.5%)                  | 750<br>(470-1100)      | 34000<br>(22000-48000)    |
| South Africa | 2000 | Female | 50 to 54 | 32%<br>(22-45%)                | 68%<br>(55-78%)          | 3<br>(1.6-5)                                | 6%<br>(3.9-8.4%)                     | 7.2%<br>(4.6-10%)                   | 830<br>(530-1200)      | 32000<br>(21000-46000)    |
| South Africa | 2000 | Female | 55 to 59 | 34%<br>(24-46%)                | 66%<br>(54-76%)          | 3.2<br>(1.7-5.6)                            | 7.2%<br>(4.6-10%)                    | 8.9%<br>(5.7-13%)                   | 970<br>(620-1400)      | 32000<br>(21000-45000)    |
| South Africa | 2000 | Female | 60 to 64 | 36%<br>(24-48%)                | 64%<br>(52-76%)          | 3.3<br>(1.7-5.8)                            | 7.8%<br>(4.7-11%)                    | 9.7%<br>(5.8-14%)                   | 1300<br>(780-1900)     | 37000<br>(22000-53000)    |
| South Africa | 2000 | Female | 65 to 69 | 36%<br>(26-47%)                | 64%<br>(53-74%)          | 3.1<br>(1.7-5.2)                            | 8.1%<br>(4.9-11%)                    | 10%<br>(6.2-14%)                    | 1500<br>(890-2100)     | 34000<br>(21000-48000)    |
| South Africa | 2000 | Female | 70 to 74 | 34%<br>(24-45%)                | 66%<br>(55-76%)          | 2.6<br>(1.3-4.3)                            | 7.1%<br>(3.9-11%)                    | 8.7%<br>(4.9-13%)                   | 1400<br>(790-2100)     | 27000<br>(15000-40000)    |
| South Africa | 2000 | Female | 75 to 79 | 31%<br>(21-43%)                | 69%<br>(57-79%)          | 2.2<br>(1.1-3.8)                            | 5.6%<br>(2.6-9%)                     | 6.9%<br>(3.2-11%)                   | 940<br>(440-1500)      | 14000<br>(6500-23000)     |
| South Africa | 2000 | Female | 80 to 84 | 30%<br>(20-41%)                | 70%<br>(59-80%)          | 2<br>(1-3.5)                                | 5.2%<br>(2.4-8.7%)                   | 6.3%<br>(3-11%)                     | 1200<br>(550-1900)     | 12000<br>(5900-21000)     |
| South Africa | 2000 | Female | 85 to 89 | 31%<br>(21-42%)                | 69%<br>(58-79%)          | 2<br>(1-3.5)                                | 4.9%<br>(2.1-8.2%)                   | 5.9%<br>(2.5-9.9%)                  | 680<br>(290-1100)      | 5100<br>(2200-8600)       |
| South Africa | 2000 | Female | 90 to 94 | 33%<br>(23-45%)                | 67%<br>(55-77%)          | 2<br>(1-3.7)                                | 4.5%<br>(1.8-7.9%)                   | 5.4%<br>(2.1-9.5%)                  | 230<br>(88-410)        | 1200<br>(460-2100)        |

| Location     | Year | Sex    | Age      | Prevalence of current drinkers | Prevalence of abstainers | Population average of standard drinks daily | Percent of total attributable deaths | Percent of total attributable DALYs | Attributable deaths    | Attributable DALYs          |
|--------------|------|--------|----------|--------------------------------|--------------------------|---------------------------------------------|--------------------------------------|-------------------------------------|------------------------|-----------------------------|
| South Africa | 2000 | Female | 95 plus  | 37%<br>(24-51%)                | 63%<br>(49-76%)          | 2.1<br>(0.85-4.1)                           | 4.4%<br>(1.2-8.3%)                   | 5.1%<br>(1.3-9.9%)                  | 52<br>(13-100)         | 180<br>(48-340)             |
| South Africa | 2000 | Male   | All Ages | 34%<br>(29-39%)                | 66%<br>(61-71%)          | 2.4<br>(1.7-3.2)                            | 7.3%<br>(5.8-8.9%)                   | 9%<br>(7-11%)                       | 27000<br>(21000-33000) | 1200000<br>(930000-1400000) |
| South Africa | 2000 | Male   | 15 to 19 | 27%<br>(18-38%)                | 73%<br>(62-82%)          | 1.3<br>(0.65-2.3)                           | 6.5%<br>(3.7-9.9%)                   | 8.3%<br>(4.3-13%)                   | 500<br>(260-790)       | 40000<br>(22000-61000)      |
| South Africa | 2000 | Male   | 20 to 24 | 39%<br>(27-52%)                | 61%<br>(48-73%)          | 3<br>(1.6-4.9)                              | 9.6%<br>(6.4-14%)                    | 11%<br>(6.9-16%)                    | 1300<br>(830-1900)     | 95000<br>(64000-130000)     |
| South Africa | 2000 | Male   | 25 to 29 | 46%<br>(32-59%)                | 54%<br>(41-68%)          | 4.7<br>(2.7-7.5)                            | 9.4%<br>(6-13%)                      | 10%<br>(6.1-15%)                    | 2100<br>(1300-3000)    | 140000<br>(90000-190000)    |
| South Africa | 2000 | Male   | 30 to 34 | 48%<br>(34-62%)                | 52%<br>(38-66%)          | 5.4<br>(3.2-8.2)                            | 10%<br>(7.3-14%)                     | 11%<br>(7.7-15%)                    | 2700<br>(1900-3700)    | 160000<br>(120000-210000)   |
| South Africa | 2000 | Male   | 35 to 39 | 49%<br>(36-63%)                | 51%<br>(37-64%)          | 5.1<br>(3-8)                                | 11%<br>(7.7-14%)                     | 12%<br>(8.2-16%)                    | 2900<br>(2100-3900)    | 150000<br>(110000-200000)   |
| South Africa | 2000 | Male   | 40 to 44 | 48%<br>(35-61%)                | 52%<br>(39-65%)          | 4.6<br>(2.4-7.6)                            | 10%<br>(7.2-13%)                     | 11%<br>(7.8-15%)                    | 2600<br>(1800-3500)    | 120000<br>(88000-160000)    |
| South Africa | 2000 | Male   | 45 to 49 | 46%<br>(32-59%)                | 54%<br>(41-68%)          | 3.8<br>(2-6.4)                              | 12%<br>(8.6-15%)                     | 13%<br>(9.6-17%)                    | 2900<br>(2100-3700)    | 120000<br>(88000-160000)    |
| South Africa | 2000 | Male   | 50 to 54 | 45%<br>(31-58%)                | 55%<br>(42-69%)          | 3.5<br>(1.8-5.8)                            | 13%<br>(9.1-17%)                     | 14%<br>(10-19%)                     | 2800<br>(2000-3600)    | 110000<br>(75000-140000)    |
| South Africa | 2000 | Male   | 55 to 59 | 46%<br>(34-59%)                | 54%<br>(41-66%)          | 3.5<br>(2-5.9)                              | 13%<br>(9-16%)                       | 14%<br>(10-19%)                     | 2500<br>(1800-3300)    | 83000<br>(59000-110000)     |
| South Africa | 2000 | Male   | 60 to 64 | 47%<br>(35-61%)                | 53%<br>(39-65%)          | 3.3<br>(1.7-5.6)                            | 11%<br>(7.4-15%)                     | 13%<br>(8.4-17%)                    | 2200<br>(1400-3000)    | 61000<br>(40000-82000)      |
| South Africa | 2000 | Male   | 65 to 69 | 47%<br>(36-59%)                | 53%<br>(41-64%)          | 2.7<br>(1.5-4.5)                            | 9.5%<br>(6.1-13%)                    | 11%<br>(7-15%)                      | 1700<br>(1100-2300)    | 39000<br>(25000-53000)      |
| South Africa | 2000 | Male   | 70 to 74 | 45%<br>(33-56%)                | 55%<br>(44-67%)          | 2.1<br>(1.1-3.4)                            | 6.8%<br>(3.8-10%)                    | 7.8%<br>(4.3-12%)                   | 1200<br>(670-1800)     | 23000<br>(12000-34000)      |
| South Africa | 2000 | Male   | 75 to 79 | 42%<br>(29-54%)                | 58%<br>(46-71%)          | 1.6<br>(0.83-2.7)                           | 4.6%<br>(2.2-7.6%)                   | 5.3%<br>(2.5-8.7%)                  | 660<br>(310-1100)      | 9700<br>(4500-16000)        |
| South Africa | 2000 | Male   | 80 to 84 | 40%<br>(28-52%)                | 60%<br>(48-72%)          | 1.4<br>(0.75-2.3)                           | 3.8%<br>(1.8-6.3%)                   | 4.3%<br>(1.9-7.1%)                  | 500<br>(230-820)       | 5400<br>(2500-8900)         |
| South Africa | 2000 | Male   | 85 to 89 | 38%<br>(27-50%)                | 62%<br>(50-73%)          | 1.2<br>(0.6-2.1)                            | 2.9%<br>(1.3-5.1%)                   | 3.2%<br>(1.3-5.8%)                  | 230<br>(95-410)        | 1700<br>(750-3100)          |
| South Africa | 2000 | Male   | 90 to 94 | 37%<br>(26-49%)                | 63%<br>(51-74%)          | 0.99<br>(0.5-1.8)                           | 2.1%<br>(0.82-4.1%)                  | 2.4%<br>(0.86-4.7%)                 | 69<br>(25-140)         | 380<br>(150-730)            |
| South Africa | 2000 | Male   | 95 plus  | 38%<br>(23-53%)                | 62%<br>(47-77%)          | 0.87<br>(0.35-1.8)                          | 2%<br>(0.66-4.2%)                    | 2.1%<br>(0.59-4.7%)                 | 18<br>(5.1-41)         | 67<br>(23-150)              |
| South Africa | 2005 | Female | All Ages | 21%<br>(18-24%)                | 79%<br>(76-82%)          | 1.7<br>(1.2-2.3)                            | 3%<br>(2.2-4%)                       | 4.2%<br>(2.9-5.6%)                  | 16000<br>(12000-21000) | 600000<br>(440000-780000)   |
| South Africa | 2005 | Female | 15 to 19 | 16%<br>(11-24%)                | 84%<br>(76-89%)          | 1.2<br>(0.59-2.1)                           | 4.7%<br>(2.7-7.1%)                   | 6.5%<br>(3.5-10%)                   | 340<br>(190-550)       | 28000<br>(16000-42000)      |



| Location     | Year | Sex    | Age      | Prevalence of current drinkers | Prevalence of abstainers | Population average of standard drinks daily | Percent of total attributable deaths | Percent of total attributable DALYs | Attributable deaths    | Attributable DALYs           |
|--------------|------|--------|----------|--------------------------------|--------------------------|---------------------------------------------|--------------------------------------|-------------------------------------|------------------------|------------------------------|
| South Africa | 2005 | Female | 20 to 24 | 20%<br>(14-29%)                | 80%<br>(71-86%)          | 2<br>(1-3.3)                                | 5%<br>(3-7.4%)                       | 5.5%<br>(3.1-8.4%)                  | 1000<br>(610-1500)     | 75000<br>(46000-110000)      |
| South Africa | 2005 | Female | 25 to 29 | 22%<br>(14-31%)                | 78%<br>(69-86%)          | 2.4<br>(1.3-3.9)                            | 3.3%<br>(1.8-5.1%)                   | 3.4%<br>(1.8-5.4%)                  | 1300<br>(720-2000)     | 84000<br>(48000-130000)      |
| South Africa | 2005 | Female | 30 to 34 | 25%<br>(16-36%)                | 75%<br>(64-84%)          | 2.7<br>(1.5-4.4)                            | 3.5%<br>(2.1-5.3%)                   | 3.6%<br>(2.2-5.6%)                  | 1500<br>(950-2300)     | 90000<br>(56000-130000)      |
| South Africa | 2005 | Female | 35 to 39 | 28%<br>(19-39%)                | 72%<br>(61-81%)          | 2.7<br>(1.4-4.4)                            | 2.5%<br>(1.2-4.3%)                   | 2.6%<br>(1.1-4.6%)                  | 960<br>(430-1600)      | 52000<br>(26000-87000)       |
| South Africa | 2005 | Female | 40 to 44 | 30%<br>(21-42%)                | 70%<br>(58-79%)          | 2.7<br>(1.4-4.6)                            | 2.7%<br>(1.6-4.2%)                   | 2.9%<br>(1.6-4.6%)                  | 850<br>(480-1300)      | 42000<br>(25000-66000)       |
| South Africa | 2005 | Female | 45 to 49 | 30%<br>(20-41%)                | 70%<br>(59-80%)          | 2.9<br>(1.5-4.8)                            | 2.7%<br>(1.6-4.2%)                   | 2.9%<br>(1.5-4.7%)                  | 680<br>(370-1100)      | 31000<br>(18000-48000)       |
| South Africa | 2005 | Female | 50 to 54 | 30%<br>(21-41%)                | 70%<br>(59-79%)          | 2.9<br>(1.6-5.1)                            | 4.1%<br>(2.6-6.1%)                   | 4.7%<br>(2.9-6.9%)                  | 900<br>(560-1300)      | 35000<br>(22000-52000)       |
| South Africa | 2005 | Female | 55 to 59 | 31%<br>(22-41%)                | 69%<br>(59-78%)          | 3.1<br>(1.6-5.5)                            | 5.4%<br>(3.5-7.6%)                   | 6.3%<br>(4-9%)                      | 1000<br>(650-1400)     | 34000<br>(22000-49000)       |
| South Africa | 2005 | Female | 60 to 64 | 32%<br>(22-43%)                | 68%<br>(57-78%)          | 3.1<br>(1.6-5.5)                            | 6%<br>(3.7-8.8%)                     | 7.2%<br>(4.4-11%)                   | 1100<br>(690-1700)     | 32000<br>(20000-48000)       |
| South Africa | 2005 | Female | 65 to 69 | 32%<br>(23-43%)                | 68%<br>(57-77%)          | 2.9<br>(1.5-4.8)                            | 6.8%<br>(4.2-9.8%)                   | 8.3%<br>(5-12%)                     | 1400<br>(860-2000)     | 33000<br>(20000-48000)       |
| South Africa | 2005 | Female | 70 to 74 | 30%<br>(21-41%)                | 70%<br>(59-79%)          | 2.4<br>(1.2-4)                              | 5.9%<br>(3.3-9%)                     | 7.3%<br>(4.1-11%)                   | 1300<br>(710-1900)     | 24000<br>(13000-36000)       |
| South Africa | 2005 | Female | 75 to 79 | 28%<br>(19-38%)                | 72%<br>(62-81%)          | 2.1<br>(1-3.6)                              | 5.4%<br>(2.6-8.7%)                   | 6.5%<br>(3.2-10%)                   | 1100<br>(530-1800)     | 16000<br>(7700-26000)        |
| South Africa | 2005 | Female | 80 to 84 | 28%<br>(20-38%)                | 72%<br>(62-80%)          | 2<br>(1-3.4)                                | 5.3%<br>(2.6-8.7%)                   | 6.3%<br>(3.1-10%)                   | 1500<br>(710-2400)     | 16000<br>(7600-26000)        |
| South Africa | 2005 | Female | 85 to 89 | 29%<br>(20-40%)                | 71%<br>(60-80%)          | 2<br>(1-3.5)                                | 5.1%<br>(2.3-8.4%)                   | 6.1%<br>(2.7-10%)                   | 830<br>(370-1400)      | 6200<br>(2800-10000)         |
| South Africa | 2005 | Female | 90 to 94 | 31%<br>(22-42%)                | 69%<br>(58-78%)          | 2<br>(1-3.7)                                | 4.8%<br>(2-8.1%)                     | 5.7%<br>(2.3-9.7%)                  | 310<br>(120-530)       | 1600<br>(640-2700)           |
| South Africa | 2005 | Female | 95 plus  | 34%<br>(22-48%)                | 66%<br>(52-78%)          | 2.1<br>(0.87-4.1)                           | 4.7%<br>(1.4-8.8%)                   | 5.5%<br>(1.6-10%)                   | 75<br>(22-140)         | 250<br>(79-470)              |
| South Africa | 2005 | Male   | All Ages | 32%<br>(28-37%)                | 68%<br>(63-72%)          | 2.6<br>(1.8-3.6)                            | 6.3%<br>(5-8%)                       | 7.6%<br>(6-9.5%)                    | 29000<br>(23000-36000) | 1300000<br>(1000000-1600000) |
| South Africa | 2005 | Male   | 15 to 19 | 27%<br>(18-38%)                | 73%<br>(62-82%)          | 1.5<br>(0.73-2.6)                           | 7%<br>(4-10%)                        | 9.2%<br>(5-14%)                     | 530<br>(290-810)       | 42000<br>(24000-63000)       |
| South Africa | 2005 | Male   | 20 to 24 | 38%<br>(26-51%)                | 62%<br>(49-74%)          | 3.3<br>(1.8-5.3)                            | 11%<br>(6.9-15%)                     | 12%<br>(7.6-17%)                    | 1600<br>(1000-2200)    | 110000<br>(75000-160000)     |
| South Africa | 2005 | Male   | 25 to 29 | 43%<br>(30-57%)                | 57%<br>(43-70%)          | 5<br>(2.7-8)                                | 6.9%<br>(3.8-11%)                    | 7.1%<br>(3.7-12%)                   | 1900<br>(1000-2900)    | 130000<br>(73000-190000)     |
| South Africa | 2005 | Male   | 30 to 34 | 46%<br>(32-59%)                | 54%<br>(41-68%)          | 5.8<br>(3.3-9)                              | 8.1%<br>(5.5-11%)                    | 8.5%<br>(5.7-12%)                   | 3200<br>(2200-4500)    | 190000<br>(130000-260000)    |

| Location     | Year | Sex    | Age      | Prevalence of current drinkers | Prevalence of abstainers | Population average of standard drinks daily | Percent of total attributable deaths | Percent of total attributable DALYs | Attributable deaths    | Attributable DALYs        |
|--------------|------|--------|----------|--------------------------------|--------------------------|---------------------------------------------|--------------------------------------|-------------------------------------|------------------------|---------------------------|
| South Africa | 2005 | Male   | 35 to 39 | 47%<br>(33-60%)                | 53%<br>(40-67%)          | 5.4<br>(3.1-8.6)                            | 7.5%<br>(4.9-11%)                    | 8%<br>(5.1-12%)                     | 3100<br>(2000-4400)    | 160000<br>(110000-230000) |
| South Africa | 2005 | Male   | 40 to 44 | 45%<br>(32-59%)                | 55%<br>(41-68%)          | 4.8<br>(2.5-8.1)                            | 7.8%<br>(5.5-11%)                    | 8.4%<br>(5.8-12%)                   | 3000<br>(2100-4100)    | 140000<br>(100000-190000) |
| South Africa | 2005 | Male   | 45 to 49 | 42%<br>(28-56%)                | 58%<br>(44-72%)          | 4<br>(2.1-6.5)                              | 8.4%<br>(6-11%)                      | 9.1%<br>(6.3-12%)                   | 2900<br>(2000-3900)    | 120000<br>(86000-160000)  |
| South Africa | 2005 | Male   | 50 to 54 | 41%<br>(28-55%)                | 59%<br>(45-72%)          | 3.6<br>(1.9-6)                              | 11%<br>(7.6-14%)                     | 12%<br>(8.2-15%)                    | 3100<br>(2200-4100)    | 120000<br>(83000-150000)  |
| South Africa | 2005 | Male   | 55 to 59 | 42%<br>(30-56%)                | 58%<br>(44-70%)          | 3.6<br>(1.9-6.1)                            | 12%<br>(8.3-15%)                     | 13%<br>(9.2-17%)                    | 3000<br>(2100-3900)    | 96000<br>(68000-120000)   |
| South Africa | 2005 | Male   | 60 to 64 | 42%<br>(30-56%)                | 58%<br>(44-70%)          | 3.3<br>(1.7-5.5)                            | 9.9%<br>(6.5-13%)                    | 11%<br>(7.4-15%)                    | 2200<br>(1400-3000)    | 62000<br>(41000-83000)    |
| South Africa | 2005 | Male   | 65 to 69 | 41%<br>(30-54%)                | 59%<br>(46-70%)          | 2.6<br>(1.4-4.3)                            | 9.1%<br>(5.8-12%)                    | 10%<br>(6.5-14%)                    | 1900<br>(1200-2600)    | 44000<br>(28000-60000)    |
| South Africa | 2005 | Male   | 70 to 74 | 38%<br>(28-51%)                | 62%<br>(49-72%)          | 2<br>(1-3.3)                                | 5.9%<br>(3.4-8.8%)                   | 6.9%<br>(3.8-10%)                   | 1000<br>(580-1600)     | 20000<br>(11000-29000)    |
| South Africa | 2005 | Male   | 75 to 79 | 36%<br>(25-49%)                | 64%<br>(51-75%)          | 1.5<br>(0.75-2.6)                           | 4.5%<br>(2.1-7.2%)                   | 5.1%<br>(2.4-8.2%)                  | 690<br>(330-1100)      | 10000<br>(4800-16000)     |
| South Africa | 2005 | Male   | 80 to 84 | 34%<br>(24-47%)                | 66%<br>(53-76%)          | 1.3<br>(0.67-2.1)                           | 3.7%<br>(1.7-6%)                     | 4.2%<br>(1.9-6.8%)                  | 590<br>(260-970)       | 6400<br>(3000-10000)      |
| South Africa | 2005 | Male   | 85 to 89 | 33%<br>(23-45%)                | 67%<br>(55-77%)          | 1.1<br>(0.56-1.9)                           | 2.8%<br>(1.2-4.9%)                   | 3.2%<br>(1.3-5.6%)                  | 230<br>(96-400)        | 1800<br>(760-3100)        |
| South Africa | 2005 | Male   | 90 to 94 | 32%<br>(22-44%)                | 68%<br>(56-78%)          | 0.93<br>(0.45-1.7)                          | 2.1%<br>(0.86-4.1%)                  | 2.4%<br>(0.9-4.7%)                  | 69<br>(26-130)         | 370<br>(150-710)          |
| South Africa | 2005 | Male   | 95 plus  | 34%<br>(20-48%)                | 66%<br>(52-80%)          | 0.83<br>(0.34-1.6)                          | 2.1%<br>(0.7-4.3%)                   | 2.2%<br>(0.7-4.8%)                  | 17<br>(5.5-38)         | 64<br>(23-130)            |
| South Africa | 2010 | Female | All Ages | 22%<br>(19-25%)                | 78%<br>(75-81%)          | 1.9<br>(1.3-2.6)                            | 2.8%<br>(2.1-3.6%)                   | 4.1%<br>(2.9-5.4%)                  | 15000<br>(10000-19000) | 510000<br>(390000-650000) |
| South Africa | 2010 | Female | 15 to 19 | 18%<br>(12-25%)                | 82%<br>(75-88%)          | 1.4<br>(0.67-2.4)                           | 4.1%<br>(2.4-6.1%)                   | 5.5%<br>(3.1-8.6%)                  | 270<br>(160-430)       | 23000<br>(14000-35000)    |
| South Africa | 2010 | Female | 20 to 24 | 23%<br>(15-32%)                | 77%<br>(68-85%)          | 2.3<br>(1.2-3.9)                            | 6%<br>(3.8-8.5%)                     | 6.9%<br>(4.1-10%)                   | 950<br>(590-1400)      | 70000<br>(45000-98000)    |
| South Africa | 2010 | Female | 25 to 29 | 25%<br>(17-35%)                | 75%<br>(65-83%)          | 2.8<br>(1.6-4.7)                            | 3.6%<br>(2.1-5.5%)                   | 3.8%<br>(2-6%)                      | 1100<br>(640-1600)     | 74000<br>(45000-110000)   |
| South Africa | 2010 | Female | 30 to 34 | 27%<br>(18-39%)                | 73%<br>(61-82%)          | 3.1<br>(1.8-5)                              | 2.3%<br>(1.3-3.5%)                   | 2.3%<br>(1.3-3.7%)                  | 790<br>(450-1200)      | 49000<br>(30000-73000)    |
| South Africa | 2010 | Female | 35 to 39 | 30%<br>(20-42%)                | 70%<br>(58-80%)          | 3<br>(1.6-4.9)                              | 1.9%<br>(0.96-3.1%)                  | 1.9%<br>(0.86-3.3%)                 | 610<br>(290-1000)      | 35000<br>(19000-57000)    |
| South Africa | 2010 | Female | 40 to 44 | 32%<br>(22-43%)                | 68%<br>(57-78%)          | 3<br>(1.5-5.2)                              | 1.4%<br>(0.79-2.3%)                  | 1.3%<br>(0.62-2.3%)                 | 360<br>(180-640)       | 20000<br>(12000-34000)    |
| South Africa | 2010 | Female | 45 to 49 | 31%<br>(21-43%)                | 69%<br>(57-79%)          | 3.1<br>(1.6-5.2)                            | 2.5%<br>(1.5-3.8%)                   | 2.7%<br>(1.6-4.2%)                  | 660<br>(380-1000)      | 31000<br>(18000-45000)    |
| South Africa | 2010 | Female | 50 to 54 | 30%<br>(21-42%)                | 70%<br>(58-79%)          | 3.1<br>(1.6-5.3)                            | 3.8%<br>(2.4-5.5%)                   | 4.2%<br>(2.6-6.1%)                  | 890<br>(570-1300)      | 35000<br>(23000-51000)    |

| Location     | Year | Sex    | Age      | Prevalence of current drinkers | Prevalence of abstainers | Population average of standard drinks daily | Percent of total attributable deaths | Percent of total attributable DALYs | Attributable deaths    | Attributable DALYs          |
|--------------|------|--------|----------|--------------------------------|--------------------------|---------------------------------------------|--------------------------------------|-------------------------------------|------------------------|-----------------------------|
| South Africa | 2010 | Female | 55 to 59 | 29%<br>(20-39%)                | 71%<br>(61-80%)          | 3.1<br>(1.6-5.5)                            | 5.6%<br>(3.6-8%)                     | 6.6%<br>(4.3-9.4%)                  | 1200<br>(790-1700)     | 40000<br>(26000-57000)      |
| South Africa | 2010 | Female | 60 to 64 | 29%<br>(20-41%)                | 71%<br>(59-80%)          | 3<br>(1.5-5.2)                              | 6.1%<br>(3.6-8.9%)                   | 7.3%<br>(4.4-11%)                   | 1300<br>(770-1900)     | 36000<br>(22000-53000)      |
| South Africa | 2010 | Female | 65 to 69 | 30%<br>(21-40%)                | 70%<br>(60-79%)          | 2.7<br>(1.5-4.4)                            | 6.6%<br>(4-9.7%)                     | 8.1%<br>(4.9-12%)                   | 1400<br>(830-2000)     | 32000<br>(19000-47000)      |
| South Africa | 2010 | Female | 70 to 74 | 28%<br>(20-38%)                | 72%<br>(62-80%)          | 2.4<br>(1.2-4)                              | 5.9%<br>(3.1-8.8%)                   | 7.2%<br>(3.9-11%)                   | 1300<br>(720-2000)     | 25000<br>(13000-38000)      |
| South Africa | 2010 | Female | 75 to 79 | 26%<br>(18-36%)                | 74%<br>(64-82%)          | 2<br>(0.99-3.5)                             | 5.1%<br>(2.4-8.3%)                   | 6.3%<br>(3-10%)                     | 1100<br>(550-1800)     | 17000<br>(8000-27000)       |
| South Africa | 2010 | Female | 80 to 84 | 26%<br>(18-36%)                | 74%<br>(64-82%)          | 1.9<br>(0.98-3.2)                           | 5%<br>(2.5-8.2%)                     | 6.1%<br>(3-9.8%)                    | 1600<br>(770-2500)     | 17000<br>(8200-27000)       |
| South Africa | 2010 | Female | 85 to 89 | 27%<br>(19-37%)                | 73%<br>(63-81%)          | 1.9<br>(0.95-3.4)                           | 4.8%<br>(2.2-8%)                     | 5.7%<br>(2.6-9.6%)                  | 850<br>(380-1400)      | 6400<br>(2900-11000)        |
| South Africa | 2010 | Female | 90 to 94 | 29%<br>(20-39%)                | 71%<br>(61-80%)          | 1.9<br>(0.94-3.5)                           | 4.5%<br>(1.7-7.7%)                   | 5.3%<br>(1.9-9.1%)                  | 300<br>(110-520)       | 1600<br>(590-2700)          |
| South Africa | 2010 | Female | 95 plus  | 32%<br>(20-45%)                | 68%<br>(55-80%)          | 2<br>(0.82-3.9)                             | 4.5%<br>(1.3-8.3%)                   | 5.3%<br>(1.4-10%)                   | 80<br>(21-150)         | 270<br>(77-500)             |
| South Africa | 2010 | Male   | All Ages | 32%<br>(27-36%)                | 68%<br>(64-73%)          | 2.8<br>(2-3.9)                              | 5.8%<br>(4.6-7.2%)                   | 6.9%<br>(5.3-8.5%)                  | 25000<br>(19000-31000) | 1100000<br>(830000-1300000) |
| South Africa | 2010 | Male   | 15 to 19 | 25%<br>(17-35%)                | 75%<br>(65-83%)          | 1.4<br>(0.71-2.5)                           | 5.6%<br>(3.3-8.3%)                   | 7%<br>(3.8-11%)                     | 390<br>(210-590)       | 33000<br>(19000-49000)      |
| South Africa | 2010 | Male   | 20 to 24 | 36%<br>(24-48%)                | 64%<br>(52-76%)          | 3.2<br>(1.8-5.2)                            | 12%<br>(8-16%)                       | 13%<br>(8.7-19%)                    | 1500<br>(990-2100)     | 110000<br>(76000-150000)    |
| South Africa | 2010 | Male   | 25 to 29 | 41%<br>(28-55%)                | 59%<br>(45-72%)          | 5<br>(2.8-8)                                | 8.2%<br>(4.9-12%)                    | 8.7%<br>(4.7-13%)                   | 1900<br>(1100-2800)    | 130000<br>(80000-180000)    |
| South Africa | 2010 | Male   | 30 to 34 | 45%<br>(30-58%)                | 55%<br>(42-70%)          | 5.9<br>(3.4-9.3)                            | 6.2%<br>(4-9.1%)                     | 6.5%<br>(3.9-9.7%)                  | 2000<br>(1200-2900)    | 120000<br>(79000-170000)    |
| South Africa | 2010 | Male   | 35 to 39 | 45%<br>(32-58%)                | 55%<br>(42-68%)          | 5.6<br>(3-9.2)                              | 5.9%<br>(3.8-8.7%)                   | 6.2%<br>(3.8-9.3%)                  | 2100<br>(1300-3100)    | 110000<br>(76000-160000)    |
| South Africa | 2010 | Male   | 40 to 44 | 43%<br>(31-57%)                | 57%<br>(43-69%)          | 4.9<br>(2.5-8.2)                            | 5.3%<br>(3.6-7.5%)                   | 5.6%<br>(3.7-7.9%)                  | 1800<br>(1200-2500)    | 88000<br>(59000-120000)     |
| South Africa | 2010 | Male   | 45 to 49 | 41%<br>(27-55%)                | 59%<br>(45-73%)          | 4.1<br>(2.2-6.7)                            | 7.2%<br>(5.1-9.7%)                   | 7.8%<br>(5.5-11%)                   | 2300<br>(1600-3100)    | 100000<br>(71000-130000)    |
| South Africa | 2010 | Male   | 50 to 54 | 41%<br>(29-54%)                | 59%<br>(46-71%)          | 3.7<br>(1.9-6.4)                            | 9.2%<br>(6.6-12%)                    | 10%<br>(7.2-13%)                    | 2700<br>(2000-3600)    | 100000<br>(75000-140000)    |
| South Africa | 2010 | Male   | 55 to 59 | 41%<br>(29-55%)                | 59%<br>(45-71%)          | 3.7<br>(2-6.3)                              | 11%<br>(8-14%)                       | 13%<br>(9-16%)                      | 3100<br>(2200-4000)    | 100000<br>(72000-130000)    |
| South Africa | 2010 | Male   | 60 to 64 | 40%<br>(28-54%)                | 60%<br>(46-72%)          | 3.2<br>(1.6-5.6)                            | 9.9%<br>(6.5-13%)                    | 11%<br>(7.4-15%)                    | 2500<br>(1600-3400)    | 70000<br>(46000-94000)      |
| South Africa | 2010 | Male   | 65 to 69 | 38%<br>(27-50%)                | 62%<br>(50-73%)          | 2.5<br>(1.3-4.1)                            | 8.5%<br>(5.4-12%)                    | 9.8%<br>(6.2-14%)                   | 1900<br>(1200-2600)    | 43000<br>(28000-60000)      |

| Location     | Year | Sex    | Age      | Prevalence of current drinkers | Prevalence of abstainers | Population average of standard drinks daily | Percent of total attributable deaths | Percent of total attributable DALYs | Attributable deaths   | Attributable DALYs        |
|--------------|------|--------|----------|--------------------------------|--------------------------|---------------------------------------------|--------------------------------------|-------------------------------------|-----------------------|---------------------------|
| South Africa | 2010 | Male   | 70 to 74 | 35%<br>(25-47%)                | 65%<br>(53-75%)          | 1.9<br>(0.95-3.2)                           | 5.8%<br>(3.3-8.9%)                   | 6.8%<br>(3.8-10%)                   | 1200<br>(660-1800)    | 22000<br>(12000-33000)    |
| South Africa | 2010 | Male   | 75 to 79 | 33%<br>(23-45%)                | 67%<br>(55-77%)          | 1.5<br>(0.7-2.5)                            | 4.2%<br>(2.1-6.7%)                   | 4.8%<br>(2.4-7.7%)                  | 630<br>(300-1000)     | 9200<br>(4600-15000)      |
| South Africa | 2010 | Male   | 80 to 84 | 32%<br>(22-43%)                | 68%<br>(57-78%)          | 1.2<br>(0.63-2.1)                           | 3.4%<br>(1.6-5.5%)                   | 3.9%<br>(1.7-6.3%)                  | 540<br>(250-880)      | 5900<br>(2700-9500)       |
| South Africa | 2010 | Male   | 85 to 89 | 30%<br>(20-42%)                | 70%<br>(58-80%)          | 1<br>(0.52-1.8)                             | 2.6%<br>(1.1-4.5%)                   | 2.9%<br>(1.2-5.1%)                  | 250<br>(100-430)      | 1900<br>(820-3400)        |
| South Africa | 2010 | Male   | 90 to 94 | 30%<br>(20-41%)                | 70%<br>(59-80%)          | 0.91<br>(0.43-1.7)                          | 2%<br>(0.78-3.9%)                    | 2.3%<br>(0.82-4.5%)                 | 70<br>(25-140)        | 380<br>(140-720)          |
| South Africa | 2010 | Male   | 95 plus  | 33%<br>(20-47%)                | 67%<br>(53-80%)          | 0.84<br>(0.34-1.7)                          | 2%<br>(0.72-4.2%)                    | 2.2%<br>(0.67-4.8%)                 | 17<br>(5.3-37)        | 63<br>(23-130)            |
| South Africa | 2016 | Female | All Ages | 23%<br>(20-27%)                | 77%<br>(73-80%)          | 2<br>(1.4-2.8)                              | 3.7%<br>(2.7-4.6%)                   | 5.4%<br>(3.8-7.2%)                  | 14000<br>(9600-18000) | 470000<br>(360000-600000) |
| South Africa | 2016 | Female | 15 to 19 | 16%<br>(11-24%)                | 84%<br>(76-89%)          | 1.2<br>(0.6-2.2)                            | 2.1%<br>(1.3-3.3%)                   | 2.4%<br>(1.3-4.1%)                  | 99<br>(53-160)        | 11000<br>(6600-17000)     |
| South Africa | 2016 | Female | 20 to 24 | 22%<br>(14-31%)                | 78%<br>(69-86%)          | 2.2<br>(1.1-3.7)                            | 4.6%<br>(3-6.5%)                     | 5.5%<br>(3.3-8.2%)                  | 430<br>(270-640)      | 37000<br>(24000-53000)    |
| South Africa | 2016 | Female | 25 to 29 | 25%<br>(16-35%)                | 75%<br>(65-84%)          | 2.8<br>(1.6-4.6)                            | 4.7%<br>(3-6.7%)                     | 5.5%<br>(3.3-8.2%)                  | 790<br>(510-1100)     | 56000<br>(38000-78000)    |
| South Africa | 2016 | Female | 30 to 34 | 28%<br>(19-40%)                | 72%<br>(60-81%)          | 3.1<br>(1.8-5.1)                            | 4.3%<br>(2.9-6.2%)                   | 4.9%<br>(3.1-7.2%)                  | 840<br>(560-1200)     | 52000<br>(36000-73000)    |
| South Africa | 2016 | Female | 35 to 39 | 31%<br>(21-44%)                | 69%<br>(56-79%)          | 3.1<br>(1.6-4.9)                            | 3.6%<br>(2.2-5.4%)                   | 4.2%<br>(2.4-6.2%)                  | 700<br>(420-1000)     | 40000<br>(25000-56000)    |
| South Africa | 2016 | Female | 40 to 44 | 33%<br>(23-46%)                | 67%<br>(54-77%)          | 3.1<br>(1.5-5.2)                            | 3.7%<br>(2.3-5.4%)                   | 4.4%<br>(2.6-6.3%)                  | 700<br>(440-990)      | 36000<br>(23000-50000)    |
| South Africa | 2016 | Female | 45 to 49 | 33%<br>(21-44%)                | 67%<br>(56-79%)          | 3.2<br>(1.7-5.4)                            | 4.1%<br>(2.7-5.9%)                   | 5%<br>(3.2-7.2%)                    | 790<br>(520-1100)     | 37000<br>(24000-51000)    |
| South Africa | 2016 | Female | 50 to 54 | 32%<br>(23-44%)                | 68%<br>(56-77%)          | 3.2<br>(1.8-5.7)                            | 5.4%<br>(3.5-7.7%)                   | 6.9%<br>(4.5-9.6%)                  | 1000<br>(670-1400)    | 41000<br>(27000-57000)    |
| South Africa | 2016 | Female | 55 to 59 | 33%<br>(23-44%)                | 67%<br>(56-77%)          | 3.4<br>(1.8-5.8)                            | 6.5%<br>(4.1-9.3%)                   | 8.6%<br>(5.4-12%)                   | 1200<br>(740-1700)    | 40000<br>(25000-58000)    |
| South Africa | 2016 | Female | 60 to 64 | 33%<br>(23-46%)                | 67%<br>(54-77%)          | 3.4<br>(1.7-5.8)                            | 7.1%<br>(4.3-10%)                    | 9.4%<br>(5.7-14%)                   | 1300<br>(760-1900)    | 36000<br>(22000-54000)    |
| South Africa | 2016 | Female | 65 to 69 | 34%<br>(25-45%)                | 66%<br>(55-75%)          | 3.1<br>(1.7-5.1)                            | 7.1%<br>(4.2-11%)                    | 9.4%<br>(5.6-14%)                   | 1200<br>(690-1700)    | 28000<br>(16000-42000)    |
| South Africa | 2016 | Female | 70 to 74 | 32%<br>(23-43%)                | 68%<br>(57-77%)          | 2.6<br>(1.3-4.4)                            | 6%<br>(3.2-9.3%)                     | 7.9%<br>(4.2-12%)                   | 1100<br>(600-1700)    | 22000<br>(11000-34000)    |
| South Africa | 2016 | Female | 75 to 79 | 28%<br>(20-39%)                | 72%<br>(61-80%)          | 2.2<br>(1.1-3.8)                            | 4.9%<br>(2.3-7.9%)                   | 6.4%<br>(3.1-10%)                   | 900<br>(430-1400)     | 14000<br>(6400-22000)     |
| South Africa | 2016 | Female | 80 to 84 | 27%<br>(18-37%)                | 73%<br>(63-82%)          | 2<br>(1-3.3)                                | 4.7%<br>(2.2-7.6%)                   | 5.9%<br>(2.8-9.6%)                  | 1200<br>(580-2000)    | 13000<br>(6500-22000)     |
| South Africa | 2016 | Female | 85 to 89 | 28%<br>(19-38%)                | 72%<br>(62-81%)          | 1.9<br>(0.97-3.3)                           | 4.5%<br>(2.1-7.6%)                   | 5.5%<br>(2.5-9.2%)                  | 890<br>(400-1500)     | 6800<br>(3100-11000)      |

| Location     | Year | Sex    | Age      | Prevalence of current drinkers | Prevalence of abstainers | Population average of standard drinks daily | Percent of total attributable deaths | Percent of total attributable DALYs | Attributable deaths    | Attributable DALYs         |
|--------------|------|--------|----------|--------------------------------|--------------------------|---------------------------------------------|--------------------------------------|-------------------------------------|------------------------|----------------------------|
| South Africa | 2016 | Female | 90 to 94 | 31%<br>(22-41%)                | 69%<br>(59-78%)          | 2<br>(0.98-3.5)                             | 4.3%<br>(1.7-7.6%)                   | 5.2%<br>(2.1-9.1%)                  | 360<br>(140-630)       | 1900<br>(740-3300)         |
| South Africa | 2016 | Female | 95 plus  | 34%<br>(22-47%)                | 66%<br>(53-78%)          | 2.1<br>(0.86-3.9)                           | 4.4%<br>(1.3-8.3%)                   | 5.3%<br>(1.4-10%)                   | 94<br>(25-180)         | 320<br>(92-600)            |
| South Africa | 2016 | Male   | All Ages | 33%<br>(28-38%)                | 67%<br>(62-72%)          | 2.7<br>(1.9-3.8)                            | 6.8%<br>(5.5-8.2%)                   | 8.1%<br>(6.3-9.8%)                  | 23000<br>(18000-28000) | 990000<br>(800000-1200000) |
| South Africa | 2016 | Male   | 15 to 19 | 24%<br>(16-35%)                | 76%<br>(65-84%)          | 1.3<br>(0.61-2.2)                           | 3.2%<br>(1.9-4.7%)                   | 3.3%<br>(1.7-5.4%)                  | 170<br>(89-280)        | 17000<br>(11000-26000)     |
| South Africa | 2016 | Male   | 20 to 24 | 35%<br>(23-48%)                | 65%<br>(52-77%)          | 2.9<br>(1.5-4.8)                            | 10%<br>(6.9-14%)                     | 12%<br>(7.5-17%)                    | 1000<br>(660-1500)     | 83000<br>(57000-110000)    |
| South Africa | 2016 | Male   | 25 to 29 | 41%<br>(28-55%)                | 59%<br>(45-72%)          | 4.6<br>(2.6-7.4)                            | 11%<br>(7.3-14%)                     | 12%<br>(7.8-16%)                    | 1900<br>(1300-2500)    | 130000<br>(92000-170000)   |
| South Africa | 2016 | Male   | 30 to 34 | 44%<br>(30-58%)                | 56%<br>(42-70%)          | 5.4<br>(3.1-8.3)                            | 9.6%<br>(6.8-13%)                    | 11%<br>(7.2-14%)                    | 2200<br>(1500-3000)    | 130000<br>(96000-180000)   |
| South Africa | 2016 | Male   | 35 to 39 | 46%<br>(32-59%)                | 54%<br>(41-68%)          | 5.2<br>(2.8-8.1)                            | 8.5%<br>(5.9-12%)                    | 9.5%<br>(6.4-13%)                   | 2100<br>(1500-2900)    | 120000<br>(84000-150000)   |
| South Africa | 2016 | Male   | 40 to 44 | 45%<br>(33-59%)                | 55%<br>(41-67%)          | 4.7<br>(2.4-7.8)                            | 8%<br>(5.6-10%)                      | 8.9%<br>(6.2-12%)                   | 2000<br>(1400-2600)    | 96000<br>(68000-120000)    |
| South Africa | 2016 | Male   | 45 to 49 | 44%<br>(29-58%)                | 56%<br>(42-71%)          | 4<br>(2.1-6.7)                              | 8.3%<br>(5.8-11%)                    | 9.4%<br>(6.6-12%)                   | 2000<br>(1400-2600)    | 88000<br>(62000-110000)    |
| South Africa | 2016 | Male   | 50 to 54 | 43%<br>(30-57%)                | 57%<br>(43-70%)          | 3.7<br>(2-6.4)                              | 9.8%<br>(6.9-13%)                    | 11%<br>(7.9-15%)                    | 2400<br>(1700-3100)    | 93000<br>(66000-120000)    |
| South Africa | 2016 | Male   | 55 to 59 | 44%<br>(31-57%)                | 56%<br>(43-69%)          | 3.7<br>(2-6.2)                              | 11%<br>(7.7-14%)                     | 13%<br>(9.1-16%)                    | 2600<br>(1900-3400)    | 86000<br>(62000-110000)    |
| South Africa | 2016 | Male   | 60 to 64 | 43%<br>(31-58%)                | 57%<br>(42-69%)          | 3.3<br>(1.6-5.6)                            | 10%<br>(6.5-14%)                     | 12%<br>(7.6-16%)                    | 2400<br>(1500-3300)    | 68000<br>(43000-93000)     |
| South Africa | 2016 | Male   | 65 to 69 | 42%<br>(30-54%)                | 58%<br>(46-70%)          | 2.6<br>(1.4-4.4)                            | 8.4%<br>(5.2-12%)                    | 10%<br>(6.2-14%)                    | 1700<br>(1000-2300)    | 38000<br>(23000-54000)     |
| South Africa | 2016 | Male   | 70 to 74 | 39%<br>(28-51%)                | 61%<br>(49-72%)          | 1.9<br>(0.98-3.3)                           | 5.7%<br>(3-8.6%)                     | 6.8%<br>(3.6-10%)                   | 1000<br>(560-1600)     | 20000<br>(11000-30000)     |
| South Africa | 2016 | Male   | 75 to 79 | 36%<br>(25-49%)                | 64%<br>(51-75%)          | 1.5<br>(0.73-2.5)                           | 4%<br>(1.8-6.4%)                     | 4.7%<br>(2.2-7.6%)                  | 530<br>(250-870)       | 7900<br>(3800-13000)       |
| South Africa | 2016 | Male   | 80 to 84 | 33%<br>(23-46%)                | 67%<br>(54-77%)          | 1.2<br>(0.61-2)                             | 3.1%<br>(1.4-5.1%)                   | 3.6%<br>(1.6-6%)                    | 460<br>(200-770)       | 5000<br>(2300-8400)        |
| South Africa | 2016 | Male   | 85 to 89 | 32%<br>(22-43%)                | 68%<br>(57-78%)          | 1<br>(0.53-1.7)                             | 2.4%<br>(0.99-4.2%)                  | 2.7%<br>(1.1-4.9%)                  | 250<br>(100-450)       | 1900<br>(820-3500)         |
| South Africa | 2016 | Male   | 90 to 94 | 32%<br>(22-43%)                | 68%<br>(57-78%)          | 0.89<br>(0.43-1.6)                          | 1.8%<br>(0.67-3.6%)                  | 2%<br>(0.68-4.1%)                   | 86<br>(29-170)         | 470<br>(180-910)           |
| South Africa | 2016 | Male   | 95 plus  | 34%<br>(21-49%)                | 66%<br>(51-79%)          | 0.83<br>(0.33-1.6)                          | 1.8%<br>(0.59-3.9%)                  | 1.9%<br>(0.53-4.3%)                 | 19<br>(5.4-44)         | 74<br>(24-160)             |
| Swaziland    | 1990 | Female | All Ages | 9.3%<br>(7.6-11%)              | 91%<br>(89-92%)          | 0.71<br>(0.52-0.95)                         | 2.7%<br>(1.9-3.8%)                   | 4.6%<br>(3-6.6%)                    | 130<br>(83-200)        | 4900<br>(3400-6800)        |

| Location  | Year | Sex    | Age      | Prevalence of current drinkers | Prevalence of abstainers | Population average of standard drinks daily | Percent of total attributable deaths | Percent of total attributable DALYs | Attributable deaths   | Attributable DALYs     |
|-----------|------|--------|----------|--------------------------------|--------------------------|---------------------------------------------|--------------------------------------|-------------------------------------|-----------------------|------------------------|
| Swaziland | 1990 | Female | 15 to 19 | 8.2%<br>(5.1-12%)              | 92%<br>(88-95%)          | 0.54<br>(0.27-0.95)                         | 2.5%<br>(1.3-4.2%)                   | 3.8%<br>(1.7-7%)                    | 2.2<br>(0.98-4.1)     | 210<br>(110-350)       |
| Swaziland | 1990 | Female | 20 to 24 | 12%<br>(7.3-18%)               | 88%<br>(82-93%)          | 1.1<br>(0.55-1.8)                           | 4.5%<br>(2.6-7.1%)                   | 6.1%<br>(2.9-11%)                   | 4.3<br>(2.1-7.5)      | 380<br>(220-610)       |
| Swaziland | 1990 | Female | 25 to 29 | 13%<br>(8.1-19%)               | 87%<br>(81-92%)          | 1.3<br>(0.72-2.1)                           | 5.1%<br>(3-7.8%)                     | 7.2%<br>(3.7-12%)                   | 5<br>(2.6-8.5)        | 390<br>(230-600)       |
| Swaziland | 1990 | Female | 30 to 34 | 14%<br>(8.9-23%)               | 86%<br>(77-91%)          | 1.5<br>(0.8-2.4)                            | 5.3%<br>(3.2-8%)                     | 7.7%<br>(4.1-12%)                   | 5.5<br>(2.8-9.1)      | 370<br>(210-570)       |
| Swaziland | 1990 | Female | 35 to 39 | 17%<br>(10-24%)                | 83%<br>(76-90%)          | 1.6<br>(0.89-2.7)                           | 6%<br>(3.8-8.8%)                     | 8.7%<br>(5.2-13%)                   | 7<br>(4-11)           | 410<br>(240-630)       |
| Swaziland | 1990 | Female | 40 to 44 | 18%<br>(12-26%)                | 82%<br>(74-88%)          | 1.7<br>(0.86-2.8)                           | 7.1%<br>(4.4-10%)                    | 10%<br>(6.1-15%)                    | 9.1<br>(5.1-15)       | 460<br>(270-710)       |
| Swaziland | 1990 | Female | 45 to 49 | 19%<br>(11-27%)                | 81%<br>(73-89%)          | 1.6<br>(0.86-2.7)                           | 7.7%<br>(4.8-12%)                    | 11%<br>(6.5-16%)                    | 11<br>(6.1-17)        | 470<br>(280-740)       |
| Swaziland | 1990 | Female | 50 to 54 | 19%<br>(12-27%)                | 81%<br>(73-88%)          | 1.6<br>(0.82-2.8)                           | 7.7%<br>(4.6-12%)                    | 10%<br>(6-15%)                      | 12<br>(6.7-20)        | 470<br>(260-750)       |
| Swaziland | 1990 | Female | 55 to 59 | 19%<br>(12-28%)                | 81%<br>(72-88%)          | 1.7<br>(0.83-3)                             | 7.8%<br>(4.3-12%)                    | 9.8%<br>(5.5-15%)                   | 14<br>(7.4-23)        | 470<br>(240-750)       |
| Swaziland | 1990 | Female | 60 to 64 | 19%<br>(12-29%)                | 81%<br>(71-88%)          | 1.7<br>(0.83-3)                             | 7.4%<br>(3.8-12%)                    | 9.1%<br>(4.7-14%)                   | 16<br>(7.9-26)        | 440<br>(220-730)       |
| Swaziland | 1990 | Female | 65 to 69 | 19%<br>(13-27%)                | 81%<br>(73-87%)          | 1.5<br>(0.79-2.5)                           | 6.8%<br>(3.4-11%)                    | 8.2%<br>(4.1-13%)                   | 17<br>(8.2-28)        | 390<br>(190-630)       |
| Swaziland | 1990 | Female | 70 to 74 | 17%<br>(11-25%)                | 83%<br>(75-89%)          | 1.2<br>(0.59-2.2)                           | 5%<br>(2.3-9%)                       | 5.9%<br>(2.6-11%)                   | 13<br>(5.9-24)        | 240<br>(110-440)       |
| Swaziland | 1990 | Female | 75 to 79 | 14%<br>(8.7-22%)               | 86%<br>(78-91%)          | 0.89<br>(0.4-1.7)                           | 3.6%<br>(1.3-7.1%)                   | 4.2%<br>(1.5-8.2%)                  | 8.5<br>(3-17)         | 120<br>(43-240)        |
| Swaziland | 1990 | Female | 80 to 84 | 13%<br>(7.9-20%)               | 87%<br>(80-92%)          | 0.76<br>(0.36-1.4)                          | 2.8%<br>(1-5.8%)                     | 3.2%<br>(1.2-6.8%)                  | 4.9<br>(1.7-10)       | 52<br>(18-110)         |
| Swaziland | 1990 | Female | 85 to 89 | 13%<br>(7.9-20%)               | 87%<br>(80-92%)          | 0.71<br>(0.37-1.3)                          | 2.3%<br>(0.7-4.9%)                   | 2.6%<br>(0.8-5.7%)                  | 2<br>(0.61-4.4)       | 15<br>(4.7-33)         |
| Swaziland | 1990 | Female | 90 to 94 | 14%<br>(8.8-21%)               | 86%<br>(79-91%)          | 0.68<br>(0.33-1.3)                          | 1.8%<br>(0.42-4.4%)                  | 2.1%<br>(0.43-5.1%)                 | 0.54<br>(0.11-1.3)    | 2.8<br>(0.63-6.7)      |
| Swaziland | 1990 | Female | 95 plus  | 15%<br>(8.5-24%)               | 85%<br>(76-92%)          | 0.67<br>(0.27-1.3)                          | 1.6%<br>(0.15-4.3%)                  | 1.8%<br>(0.12-4.9%)                 | 0.11<br>(0.0071-0.29) | 0.38<br>(0.036-1)      |
| Swaziland | 1990 | Male   | All Ages | 17%<br>(14-20%)                | 83%<br>(80-86%)          | 1.7<br>(1.3-2.3)                            | 6.6%<br>(5.1-8.2%)                   | 10%<br>(7.9-13%)                    | 350<br>(260-450)      | 14000<br>(11000-18000) |
| Swaziland | 1990 | Male   | 15 to 19 | 15%<br>(9.4-21%)               | 85%<br>(79-91%)          | 1.2<br>(0.6-2.1)                            | 5.8%<br>(3.4-9.1%)                   | 7.3%<br>(3.9-12%)                   | 7.3<br>(4-12)         | 610<br>(360-950)       |
| Swaziland | 1990 | Male   | 20 to 24 | 25%<br>(16-34%)                | 75%<br>(66-84%)          | 2.8<br>(1.5-4.6)                            | 13%<br>(8.6-18%)                     | 16%<br>(9.7-23%)                    | 18<br>(11-27)         | 1400<br>(890-2000)     |
| Swaziland | 1990 | Male   | 25 to 29 | 30%<br>(20-41%)                | 70%<br>(59-80%)          | 4<br>(2.3-6.4)                              | 16%<br>(11-21%)                      | 19%<br>(13-27%)                     | 20<br>(13-27)         | 1300<br>(910-1800)     |
| Swaziland | 1990 | Male   | 30 to 34 | 34%<br>(22-47%)                | 66%<br>(53-78%)          | 4.7<br>(2.6-7.5)                            | 17%<br>(11-22%)                      | 21%<br>(14-27%)                     | 19<br>(13-26)         | 1200<br>(810-1500)     |

| Location  | Year | Sex    | Age      | Prevalence of current drinkers | Prevalence of abstainers | Population average of standard drinks daily | Percent of total attributable deaths | Percent of total attributable DALYs | Attributable deaths   | Attributable DALYs  |
|-----------|------|--------|----------|--------------------------------|--------------------------|---------------------------------------------|--------------------------------------|-------------------------------------|-----------------------|---------------------|
| Swaziland | 1990 | Male   | 35 to 39 | 37%<br>(25-50%)                | 63%<br>(50-75%)          | 4.9<br>(2.7-7.9)                            | 18%<br>(13-23%)                      | 22%<br>(16-29%)                     | 22<br>(15-29)         | 1200<br>(830-1600)  |
| Swaziland | 1990 | Male   | 40 to 44 | 37%<br>(26-50%)                | 63%<br>(50-74%)          | 4.9<br>(2.5-7.8)                            | 19%<br>(14-25%)                      | 23%<br>(17-30%)                     | 27<br>(19-37)         | 1300<br>(900-1700)  |
| Swaziland | 1990 | Male   | 45 to 49 | 36%<br>(22-48%)                | 64%<br>(52-78%)          | 4.7<br>(2.5-7.7)                            | 20%<br>(15-25%)                      | 24%<br>(18-31%)                     | 35<br>(24-48)         | 1500<br>(1000-2000) |
| Swaziland | 1990 | Male   | 50 to 54 | 36%<br>(24-49%)                | 64%<br>(51-76%)          | 4.7<br>(2.5-7.7)                            | 20%<br>(14-25%)                      | 23%<br>(17-30%)                     | 45<br>(31-63)         | 1700<br>(1200-2400) |
| Swaziland | 1990 | Male   | 55 to 59 | 39%<br>(27-53%)                | 61%<br>(47-73%)          | 4.9<br>(2.5-8.4)                            | 19%<br>(14-24%)                      | 23%<br>(16-29%)                     | 46<br>(32-64)         | 1500<br>(1000-2000) |
| Swaziland | 1990 | Male   | 60 to 64 | 36%<br>(24-50%)                | 64%<br>(50-76%)          | 4.1<br>(2-7.2)                              | 16%<br>(11-21%)                      | 19%<br>(13-25%)                     | 39<br>(25-55)         | 1100<br>(690-1500)  |
| Swaziland | 1990 | Male   | 65 to 69 | 28%<br>(19-38%)                | 72%<br>(62-81%)          | 2.7<br>(1.4-4.4)                            | 12%<br>(7.9-17%)                     | 14%<br>(9-19%)                      | 31<br>(19-45)         | 710<br>(430-1000)   |
| Swaziland | 1990 | Male   | 70 to 74 | 24%<br>(17-34%)                | 76%<br>(66-83%)          | 1.8<br>(0.94-3.1)                           | 8%<br>(4.6-12%)                      | 9.1%<br>(5.2-14%)                   | 20<br>(11-32)         | 370<br>(200-590)    |
| Swaziland | 1990 | Male   | 75 to 79 | 24%<br>(15-35%)                | 76%<br>(65-85%)          | 1.4<br>(0.69-2.6)                           | 5.8%<br>(2.8-10%)                    | 6.6%<br>(3.1-11%)                   | 11<br>(4.9-19)        | 160<br>(71-270)     |
| Swaziland | 1990 | Male   | 80 to 84 | 23%<br>(14-35%)                | 77%<br>(65-86%)          | 1.3<br>(0.62-2.2)                           | 4.6%<br>(2.1-8.2%)                   | 5.2%<br>(2.4-9.2%)                  | 5.2<br>(2.3-9.4)      | 55<br>(25-99)       |
| Swaziland | 1990 | Male   | 85 to 89 | 22%<br>(13-32%)                | 78%<br>(68-87%)          | 1<br>(0.53-1.9)                             | 3.4%<br>(1.5-6.4%)                   | 3.8%<br>(1.7-7.3%)                  | 1.7<br>(0.75-3.3)     | 13<br>(5.8-25)      |
| Swaziland | 1990 | Male   | 90 to 94 | 22%<br>(14-32%)                | 78%<br>(68-86%)          | 0.92<br>(0.44-1.7)                          | 2.6%<br>(1.1-5.3%)                   | 2.9%<br>(1.2-6.1%)                  | 0.41<br>(0.16-0.89)   | 2.2<br>(0.92-4.7)   |
| Swaziland | 1990 | Male   | 95 plus  | 24%<br>(13-38%)                | 76%<br>(62-87%)          | 0.88<br>(0.33-1.9)                          | 2.3%<br>(0.8-4.9%)                   | 2.4%<br>(0.77-5.5%)                 | 0.083<br>(0.026-0.19) | 0.31<br>(0.11-0.66) |
| Swaziland | 1995 | Female | All Ages | 9%<br>(7.4-11%)                | 91%<br>(89-93%)          | 0.69<br>(0.5-0.92)                          | 1.9%<br>(1.1-2.9%)                   | 3.2%<br>(1.7-5.1%)                  | 120<br>(57-190)       | 4300<br>(2400-6800) |
| Swaziland | 1995 | Female | 15 to 19 | 8.1%<br>(5-12%)                | 92%<br>(88-95%)          | 0.54<br>(0.26-0.95)                         | 1.8%<br>(0.89-3.1%)                  | 2.3%<br>(0.85-4.6%)                 | 1.9<br>(0.66-3.8)     | 190<br>(94-330)     |
| Swaziland | 1995 | Female | 20 to 24 | 12%<br>(7.2-18%)               | 88%<br>(82-93%)          | 1.1<br>(0.55-1.8)                           | 2%<br>(1-3.5%)                       | 2%<br>(0.67-4.2%)                   | 3.4<br>(1.3-6.6)      | 320<br>(180-530)    |
| Swaziland | 1995 | Female | 25 to 29 | 13%<br>(7.9-19%)               | 87%<br>(81-92%)          | 1.3<br>(0.68-2.2)                           | 2%<br>(0.97-3.8%)                    | 2%<br>(0.72-4.5%)                   | 4.1<br>(1.7-7.8)      | 340<br>(180-570)    |
| Swaziland | 1995 | Female | 30 to 34 | 14%<br>(8.9-22%)               | 86%<br>(78-91%)          | 1.5<br>(0.79-2.4)                           | 2.3%<br>(1.1-4.1%)                   | 2.4%<br>(0.88-5%)                   | 4.4<br>(1.9-8.3)      | 320<br>(170-530)    |
| Swaziland | 1995 | Female | 35 to 39 | 16%<br>(9.9-24%)               | 84%<br>(76-90%)          | 1.6<br>(0.83-2.6)                           | 3%<br>(1.4-5.4%)                     | 3.4%<br>(1.3-6.9%)                  | 5.6<br>(2.5-11)       | 340<br>(180-590)    |
| Swaziland | 1995 | Female | 40 to 44 | 18%<br>(12-26%)                | 82%<br>(74-88%)          | 1.7<br>(0.82-2.7)                           | 4.1%<br>(2.1-6.7%)                   | 5.1%<br>(2.4-9.2%)                  | 7.5<br>(3.3-14)       | 390<br>(190-660)    |
| Swaziland | 1995 | Female | 45 to 49 | 19%<br>(11-26%)                | 81%<br>(74-89%)          | 1.7<br>(0.82-2.8)                           | 5.1%<br>(2.7-8.5%)                   | 6.4%<br>(3.3-11%)                   | 9.3<br>(4.2-17)       | 420<br>(210-740)    |
| Swaziland | 1995 | Female | 50 to 54 | 19%<br>(12-26%)                | 81%<br>(74-88%)          | 1.6<br>(0.84-2.9)                           | 5.7%<br>(3-9.4%)                     | 7.2%<br>(3.7-12%)                   | 10<br>(4.3-20)        | 400<br>(190-740)    |

| Location  | Year | Sex    | Age      | Prevalence of current drinkers | Prevalence of abstainers | Population average of standard drinks daily | Percent of total attributable deaths | Percent of total attributable DALYs | Attributable deaths   | Attributable DALYs     |
|-----------|------|--------|----------|--------------------------------|--------------------------|---------------------------------------------|--------------------------------------|-------------------------------------|-----------------------|------------------------|
| Swaziland | 1995 | Female | 55 to 59 | 18%<br>(12-27%)                | 82%<br>(73-88%)          | 1.7<br>(0.84-2.9)                           | 6.1%<br>(3.3-10%)                    | 7.7%<br>(4.1-12%)                   | 12<br>(4.9-23)        | 400<br>(180-760)       |
| Swaziland | 1995 | Female | 60 to 64 | 19%<br>(11-29%)                | 81%<br>(71-89%)          | 1.7<br>(0.82-3.1)                           | 6.2%<br>(3-11%)                      | 7.8%<br>(3.9-13%)                   | 14<br>(5.5-26)        | 380<br>(160-710)       |
| Swaziland | 1995 | Female | 65 to 69 | 19%<br>(12-27%)                | 81%<br>(73-88%)          | 1.5<br>(0.78-2.6)                           | 6%<br>(3.1-9.9%)                     | 7.5%<br>(3.8-12%)                   | 15<br>(6-28)          | 350<br>(140-630)       |
| Swaziland | 1995 | Female | 70 to 74 | 17%<br>(11-25%)                | 83%<br>(75-89%)          | 1.2<br>(0.61-2.2)                           | 4.5%<br>(1.9-8%)                     | 5.5%<br>(2.4-9.6%)                  | 12<br>(4.3-24)        | 220<br>(83-440)        |
| Swaziland | 1995 | Female | 75 to 79 | 14%<br>(8.6-22%)               | 86%<br>(78-91%)          | 0.89<br>(0.41-1.7)                          | 3.3%<br>(1.1-6.5%)                   | 4%<br>(1.4-7.8%)                    | 8.2<br>(2.5-17)       | 120<br>(38-240)        |
| Swaziland | 1995 | Female | 80 to 84 | 13%<br>(7.8-19%)               | 87%<br>(81-92%)          | 0.75<br>(0.37-1.4)                          | 2.6%<br>(0.85-5.6%)                  | 3.1%<br>(1-6.5%)                    | 4.9<br>(1.6-11)       | 52<br>(17-120)         |
| Swaziland | 1995 | Female | 85 to 89 | 13%<br>(7.9-19%)               | 87%<br>(81-92%)          | 0.71<br>(0.35-1.3)                          | 2.2%<br>(0.72-4.7%)                  | 2.6%<br>(0.83-5.5%)                 | 2.3<br>(0.68-4.8)     | 17<br>(5.2-36)         |
| Swaziland | 1995 | Female | 90 to 94 | 14%<br>(8.7-20%)               | 86%<br>(80-91%)          | 0.68<br>(0.33-1.3)                          | 1.8%<br>(0.44-4.2%)                  | 2.1%<br>(0.49-5%)                   | 0.62<br>(0.14-1.5)    | 3.2<br>(0.73-7.5)      |
| Swaziland | 1995 | Female | 95 plus  | 15%<br>(8.8-23%)               | 85%<br>(77-91%)          | 0.68<br>(0.27-1.3)                          | 1.6%<br>(0.15-4.2%)                  | 1.9%<br>(0.09-4.9%)                 | 0.13<br>(0.0056-0.34) | 0.44<br>(0.037-1.1)    |
| Swaziland | 1995 | Male   | All Ages | 17%<br>(13-20%)                | 83%<br>(80-87%)          | 1.7<br>(1.3-2.3)                            | 5.7%<br>(4.3-7.4%)                   | 8.5%<br>(6.3-11%)                   | 380<br>(270-520)      | 15000<br>(11000-20000) |
| Swaziland | 1995 | Male   | 15 to 19 | 14%<br>(9.3-21%)               | 86%<br>(79-91%)          | 1.2<br>(0.6-2.1)                            | 5.4%<br>(3.2-8.5%)                   | 6.9%<br>(3.6-11%)                   | 7.8<br>(4.1-13)       | 660<br>(380-1000)      |
| Swaziland | 1995 | Male   | 20 to 24 | 24%<br>(16-34%)                | 76%<br>(66-84%)          | 2.8<br>(1.5-4.5)                            | 8.7%<br>(5.3-13%)                    | 9.6%<br>(5.4-15%)                   | 19<br>(12-29)         | 1400<br>(930-2100)     |
| Swaziland | 1995 | Male   | 25 to 29 | 30%<br>(19-41%)                | 70%<br>(59-81%)          | 4<br>(2.2-6.5)                              | 8.7%<br>(5.2-13%)                    | 9.5%<br>(5.2-16%)                   | 21<br>(13-29)         | 1400<br>(930-1900)     |
| Swaziland | 1995 | Male   | 30 to 34 | 34%<br>(22-47%)                | 66%<br>(53-78%)          | 4.6<br>(2.5-7.2)                            | 9.2%<br>(5.6-14%)                    | 10%<br>(5.8-16%)                    | 21<br>(14-30)         | 1300<br>(860-1800)     |
| Swaziland | 1995 | Male   | 35 to 39 | 37%<br>(24-49%)                | 63%<br>(51-76%)          | 4.8<br>(2.6-7.5)                            | 11%<br>(6.3-16%)                     | 12%<br>(6.7-18%)                    | 26<br>(17-37)         | 1400<br>(930-1900)     |
| Swaziland | 1995 | Male   | 40 to 44 | 37%<br>(26-51%)                | 63%<br>(49-74%)          | 4.8<br>(2.5-8)                              | 12%<br>(7.8-17%)                     | 14%<br>(8.7-20%)                    | 31<br>(20-45)         | 1500<br>(1000-2100)    |
| Swaziland | 1995 | Male   | 45 to 49 | 35%<br>(22-48%)                | 65%<br>(52-78%)          | 4.6<br>(2.4-7.8)                            | 15%<br>(10-21%)                      | 17%<br>(12-24%)                     | 40<br>(26-59)         | 1700<br>(1100-2500)    |
| Swaziland | 1995 | Male   | 50 to 54 | 36%<br>(25-48%)                | 64%<br>(52-75%)          | 4.6<br>(2.5-7.6)                            | 16%<br>(12-21%)                      | 19%<br>(13-24%)                     | 45<br>(29-67)         | 1700<br>(1100-2500)    |
| Swaziland | 1995 | Male   | 55 to 59 | 39%<br>(27-52%)                | 61%<br>(48-73%)          | 4.8<br>(2.5-8.2)                            | 17%<br>(12-22%)                      | 19%<br>(14-25%)                     | 52<br>(34-76)         | 1700<br>(1100-2400)    |
| Swaziland | 1995 | Male   | 60 to 64 | 36%<br>(23-49%)                | 64%<br>(51-77%)          | 4<br>(2-7.2)                                | 14%<br>(9.8-19%)                     | 17%<br>(11-22%)                     | 45<br>(28-66)         | 1200<br>(780-1800)     |
| Swaziland | 1995 | Male   | 65 to 69 | 28%<br>(19-38%)                | 72%<br>(62-81%)          | 2.6<br>(1.4-4.5)                            | 11%<br>(7-15%)                       | 13%<br>(8-18%)                      | 32<br>(18-48)         | 720<br>(420-1100)      |
| Swaziland | 1995 | Male   | 70 to 74 | 24%<br>(16-33%)                | 76%<br>(67-84%)          | 1.8<br>(0.93-3.1)                           | 7.4%<br>(4.1-11%)                    | 8.5%<br>(4.7-13%)                   | 21<br>(11-34)         | 390<br>(200-620)       |



| Location  | Year | Sex    | Age      | Prevalence of current drinkers | Prevalence of abstainers | Population average of standard drinks daily | Percent of total attributable deaths | Percent of total attributable DALYs | Attributable deaths | Attributable DALYs   |
|-----------|------|--------|----------|--------------------------------|--------------------------|---------------------------------------------|--------------------------------------|-------------------------------------|---------------------|----------------------|
| Swaziland | 1995 | Male   | 75 to 79 | 23%<br>(15-34%)                | 77%<br>(66-85%)          | 1.4<br>(0.67-2.7)                           | 5.5%<br>(2.6-9.6%)                   | 6.2%<br>(2.9-11%)                   | 13<br>(5.8-23)      | 190<br>(82-330)      |
| Swaziland | 1995 | Male   | 80 to 84 | 23%<br>(14-33%)                | 77%<br>(67-86%)          | 1.2<br>(0.61-2.2)                           | 4.5%<br>(2.1-7.8%)                   | 5.1%<br>(2.4-8.8%)                  | 6.3<br>(2.8-12)     | 67<br>(31-120)       |
| Swaziland | 1995 | Male   | 85 to 89 | 21%<br>(13-31%)                | 79%<br>(69-87%)          | 1<br>(0.51-1.9)                             | 3.3%<br>(1.5-6.4%)                   | 3.8%<br>(1.6-7.2%)                  | 2.1<br>(0.89-3.9)   | 16<br>(6.9-30)       |
| Swaziland | 1995 | Male   | 90 to 94 | 21%<br>(13-31%)                | 79%<br>(69-87%)          | 0.91<br>(0.43-1.7)                          | 2.5%<br>(1.1-5.2%)                   | 2.9%<br>(1.1-5.8%)                  | 0.48<br>(0.19-0.98) | 2.5<br>(1.1-5.1)     |
| Swaziland | 1995 | Male   | 95 plus  | 23%<br>(13-38%)                | 77%<br>(62-87%)          | 0.86<br>(0.33-1.8)                          | 2.3%<br>(0.83-4.9%)                  | 2.4%<br>(0.8-5.5%)                  | 0.09<br>(0.028-0.2) | 0.33<br>(0.12-0.71)  |
| Swaziland | 2000 | Female | All Ages | 8.6%<br>(7.1-10%)              | 91%<br>(90-93%)          | 0.68<br>(0.51-0.89)                         | 1.5%<br>(0.89-2.8%)                  | 2.5%<br>(1.3-4.4%)                  | 180<br>(94-370)     | 6500<br>(3800-13000) |
| Swaziland | 2000 | Female | 15 to 19 | 7.7%<br>(4.9-11%)              | 92%<br>(89-95%)          | 0.55<br>(0.27-0.92)                         | 2%<br>(0.97-3.6%)                    | 2.7%<br>(0.96-5.3%)                 | 3.5<br>(1.3-7.2)    | 310<br>(160-580)     |
| Swaziland | 2000 | Female | 20 to 24 | 10%<br>(6-16%)                 | 90%<br>(84-94%)          | 0.96<br>(0.48-1.7)                          | 1.5%<br>(0.71-3%)                    | 1.5%<br>(0.51-3.3%)                 | 5.5<br>(2.4-11)     | 470<br>(250-870)     |
| Swaziland | 2000 | Female | 25 to 29 | 11%<br>(6.3-16%)               | 89%<br>(84-94%)          | 1.1<br>(0.59-1.8)                           | 1%<br>(0.43-2.3%)                    | 0.92%<br>(0.32-2.4%)                | 6<br>(2.6-14)       | 450<br>(230-930)     |
| Swaziland | 2000 | Female | 30 to 34 | 12%<br>(7.3-19%)               | 88%<br>(81-93%)          | 1.3<br>(0.7-2.2)                            | 1.1%<br>(0.49-2.5%)                  | 1.1%<br>(0.39-2.6%)                 | 7<br>(3-16)         | 460<br>(230-970)     |
| Swaziland | 2000 | Female | 35 to 39 | 15%<br>(9.2-22%)               | 85%<br>(78-91%)          | 1.5<br>(0.8-2.5)                            | 1.6%<br>(0.66-3.6%)                  | 1.6%<br>(0.58-3.9%)                 | 9.4<br>(4.2-23)     | 540<br>(270-1200)    |
| Swaziland | 2000 | Female | 40 to 44 | 16%<br>(11-23%)                | 84%<br>(77-89%)          | 1.6<br>(0.8-2.6)                            | 2.2%<br>(1-4.7%)                     | 2.3%<br>(1-5.3%)                    | 12<br>(5.4-28)      | 600<br>(290-1300)    |
| Swaziland | 2000 | Female | 45 to 49 | 17%<br>(11-25%)                | 83%<br>(75-89%)          | 1.6<br>(0.81-2.7)                           | 3%<br>(1.4-6.2%)                     | 3.3%<br>(1.5-7.2%)                  | 15<br>(6.8-35)      | 660<br>(310-1500)    |
| Swaziland | 2000 | Female | 50 to 54 | 19%<br>(12-26%)                | 81%<br>(74-88%)          | 1.7<br>(0.91-2.8)                           | 4%<br>(1.9-7.7%)                     | 4.4%<br>(2.1-8.6%)                  | 17<br>(7.4-40)      | 650<br>(300-1500)    |
| Swaziland | 2000 | Female | 55 to 59 | 19%<br>(12-27%)                | 81%<br>(73-88%)          | 1.7<br>(0.91-3)                             | 5%<br>(2.6-8.9%)                     | 5.7%<br>(2.9-10%)                   | 18<br>(8.1-41)      | 600<br>(280-1300)    |
| Swaziland | 2000 | Female | 60 to 64 | 20%<br>(13-28%)                | 80%<br>(72-87%)          | 1.8<br>(0.91-3.1)                           | 5.8%<br>(2.9-9.9%)                   | 6.9%<br>(3.4-11%)                   | 21<br>(9-45)        | 580<br>(260-1200)    |
| Swaziland | 2000 | Female | 65 to 69 | 21%<br>(14-29%)                | 79%<br>(71-86%)          | 1.7<br>(0.95-2.9)                           | 6.3%<br>(3.2-10%)                    | 7.4%<br>(3.8-12%)                   | 24<br>(10-50)       | 540<br>(230-1100)    |
| Swaziland | 2000 | Female | 70 to 74 | 19%<br>(13-26%)                | 81%<br>(74-87%)          | 1.4<br>(0.73-2.4)                           | 5.1%<br>(2.3-8.9%)                   | 6%<br>(2.7-10%)                     | 19<br>(7-41)        | 350<br>(130-730)     |
| Swaziland | 2000 | Female | 75 to 79 | 15%<br>(9.1-22%)               | 85%<br>(78-91%)          | 0.98<br>(0.49-1.8)                          | 3.8%<br>(1.3-7%)                     | 4.4%<br>(1.6-8.4%)                  | 13<br>(3.9-29)      | 180<br>(56-400)      |
| Swaziland | 2000 | Female | 80 to 84 | 13%<br>(8.1-19%)               | 87%<br>(81-92%)          | 0.8<br>(0.39-1.4)                           | 3%<br>(1.1-5.7%)                     | 3.5%<br>(1.3-6.7%)                  | 7.1<br>(2.4-15)     | 75<br>(25-160)       |
| Swaziland | 2000 | Female | 85 to 89 | 13%<br>(7.7-19%)               | 87%<br>(81-92%)          | 0.74<br>(0.36-1.4)                          | 2.5%<br>(0.82-5%)                    | 2.9%<br>(0.96-5.9%)                 | 3.5<br>(1.1-7.1)    | 26<br>(8.4-53)       |
| Swaziland | 2000 | Female | 90 to 94 | 14%<br>(8.7-20%)               | 86%<br>(80-91%)          | 0.71<br>(0.35-1.3)                          | 2%<br>(0.52-4.5%)                    | 2.3%<br>(0.59-5.3%)                 | 1<br>(0.24-2.2)     | 5.1<br>(1.3-11)      |

| Location  | Year | Sex    | Age      | Prevalence of current drinkers | Prevalence of abstainers | Population average of standard drinks daily | Percent of total attributable deaths | Percent of total attributable DALYs | Attributable deaths  | Attributable DALYs     |
|-----------|------|--------|----------|--------------------------------|--------------------------|---------------------------------------------|--------------------------------------|-------------------------------------|----------------------|------------------------|
| Swaziland | 2000 | Female | 95 plus  | 15%<br>(8.5-24%)               | 85%<br>(76-92%)          | 0.7<br>(0.27-1.4)                           | 1.9%<br>(0.17-4.4%)                  | 2.1%<br>(0.1-5.2%)                  | 0.2<br>(0.01-0.5)    | 0.7<br>(0.061-1.7)     |
| Swaziland | 2000 | Male   | All Ages | 17%<br>(14-20%)                | 83%<br>(80-86%)          | 1.8<br>(1.4-2.4)                            | 5.4%<br>(3.5-7.9%)                   | 7.7%<br>(5.1-11%)                   | 650<br>(380-990)     | 25000<br>(16000-38000) |
| Swaziland | 2000 | Male   | 15 to 19 | 13%<br>(8.1-18%)               | 87%<br>(82-92%)          | 1.1<br>(0.55-1.8)                           | 5.9%<br>(3.4-9.1%)                   | 7.3%<br>(3.8-12%)                   | 13<br>(5.9-22)       | 1000<br>(550-1700)     |
| Swaziland | 2000 | Male   | 20 to 24 | 21%<br>(13-29%)                | 79%<br>(71-87%)          | 2.5<br>(1.3-3.9)                            | 7.9%<br>(4.4-12%)                    | 8.5%<br>(4.4-14%)                   | 30<br>(16-49)        | 2200<br>(1300-3400)    |
| Swaziland | 2000 | Male   | 25 to 29 | 27%<br>(18-36%)                | 73%<br>(64-82%)          | 3.7<br>(2.2-5.7)                            | 5.6%<br>(3.1-9.7%)                   | 5.7%<br>(2.9-10%)                   | 33<br>(19-52)        | 2200<br>(1300-3300)    |
| Swaziland | 2000 | Male   | 30 to 34 | 31%<br>(21-42%)                | 69%<br>(58-79%)          | 4.4<br>(2.6-6.7)                            | 5.6%<br>(3.1-9.6%)                   | 5.8%<br>(3-10%)                     | 34<br>(20-54)        | 2000<br>(1200-3100)    |
| Swaziland | 2000 | Male   | 35 to 39 | 38%<br>(28-50%)                | 62%<br>(50-72%)          | 5.3<br>(3.1-8.2)                            | 7.2%<br>(3.8-12%)                    | 7.6%<br>(3.8-14%)                   | 44<br>(24-73)        | 2300<br>(1300-3700)    |
| Swaziland | 2000 | Male   | 40 to 44 | 42%<br>(31-53%)                | 58%<br>(47-69%)          | 5.7<br>(3.2-9.1)                            | 8.7%<br>(4.8-14%)                    | 9.3%<br>(5-16%)                     | 57<br>(31-96)        | 2700<br>(1500-4400)    |
| Swaziland | 2000 | Male   | 45 to 49 | 37%<br>(25-50%)                | 63%<br>(50-75%)          | 5.2<br>(2.8-8.3)                            | 11%<br>(6.4-17%)                     | 12%<br>(6.6-19%)                    | 66<br>(35-120)       | 2800<br>(1500-4800)    |
| Swaziland | 2000 | Male   | 50 to 54 | 37%<br>(26-48%)                | 63%<br>(52-74%)          | 5<br>(2.9-7.9)                              | 14%<br>(8.9-20%)                     | 15%<br>(9.5-22%)                    | 77<br>(39-130)       | 2800<br>(1500-4600)    |
| Swaziland | 2000 | Male   | 55 to 59 | 43%<br>(31-54%)                | 57%<br>(46-69%)          | 5.7<br>(3.1-9)                              | 16%<br>(11-22%)                      | 18%<br>(12-25%)                     | 88<br>(48-140)       | 2800<br>(1500-4400)    |
| Swaziland | 2000 | Male   | 60 to 64 | 40%<br>(28-51%)                | 60%<br>(49-72%)          | 4.8<br>(2.5-8.1)                            | 15%<br>(10-20%)                      | 17%<br>(12-23%)                     | 86<br>(48-130)       | 2300<br>(1300-3500)    |
| Swaziland | 2000 | Male   | 65 to 69 | 29%<br>(20-39%)                | 71%<br>(61-80%)          | 2.8<br>(1.5-4.7)                            | 12%<br>(7.5-16%)                     | 13%<br>(8.4-18%)                    | 57<br>(32-90)        | 1300<br>(720-2000)     |
| Swaziland | 2000 | Male   | 70 to 74 | 24%<br>(16-33%)                | 76%<br>(67-84%)          | 1.9<br>(1-3.1)                              | 7.9%<br>(4.5-12%)                    | 8.8%<br>(5.1-13%)                   | 31<br>(16-50)        | 570<br>(300-900)       |
| Swaziland | 2000 | Male   | 75 to 79 | 24%<br>(15-34%)                | 76%<br>(66-85%)          | 1.5<br>(0.76-2.7)                           | 6.1%<br>(2.9-9.9%)                   | 6.8%<br>(3.3-11%)                   | 20<br>(8.8-33)       | 280<br>(120-460)       |
| Swaziland | 2000 | Male   | 80 to 84 | 23%<br>(15-34%)                | 77%<br>(66-85%)          | 1.4<br>(0.68-2.3)                           | 5.3%<br>(2.5-8.9%)                   | 6%<br>(2.8-10%)                     | 10<br>(4.6-17)       | 110<br>(50-180)        |
| Swaziland | 2000 | Male   | 85 to 89 | 22%<br>(14-32%)                | 78%<br>(68-86%)          | 1.2<br>(0.58-2)                             | 4%<br>(1.9-7%)                       | 4.6%<br>(2-8%)                      | 3.6<br>(1.6-6.5)     | 27<br>(12-48)          |
| Swaziland | 2000 | Male   | 90 to 94 | 22%<br>(14-33%)                | 78%<br>(67-86%)          | 1<br>(0.5-1.9)                              | 3%<br>(1.3-5.9%)                     | 3.5%<br>(1.4-6.9%)                  | 0.8<br>(0.32-1.6)    | 4.2<br>(1.8-8.1)       |
| Swaziland | 2000 | Male   | 95 plus  | 24%<br>(13-39%)                | 76%<br>(61-87%)          | 0.96<br>(0.38-2)                            | 2.8%<br>(1-5.9%)                     | 3.1%<br>(1-6.5%)                    | 0.15<br>(0.048-0.31) | 0.53<br>(0.19-1.1)     |
| Swaziland | 2005 | Female | All Ages | 8.8%<br>(7.3-11%)              | 91%<br>(89-93%)          | 0.62<br>(0.48-0.79)                         | 1.5%<br>(0.91-2.7%)                  | 2.3%<br>(1.3-4%)                    | 240<br>(140-460)     | 8600<br>(5200-16000)   |
| Swaziland | 2005 | Female | 15 to 19 | 7.8%<br>(5-12%)                | 92%<br>(88-95%)          | 0.49<br>(0.24-0.84)                         | 2.5%<br>(1.2-4.4%)                   | 3.3%<br>(1.3-6.4%)                  | 4.8<br>(1.9-9.8)     | 410<br>(210-780)       |
| Swaziland | 2005 | Female | 20 to 24 | 10%<br>(6.2-16%)               | 90%<br>(84-94%)          | 0.86<br>(0.46-1.4)                          | 2%<br>(0.87-3.9%)                    | 2%<br>(0.7-4.5%)                    | 8.2<br>(3.8-18)      | 670<br>(360-1300)      |

| Location  | Year | Sex    | Age      | Prevalence of current drinkers | Prevalence of abstainers | Population average of standard drinks daily | Percent of total attributable deaths | Percent of total attributable DALYs | Attributable deaths    | Attributable DALYs     |
|-----------|------|--------|----------|--------------------------------|--------------------------|---------------------------------------------|--------------------------------------|-------------------------------------|------------------------|------------------------|
| Swaziland | 2005 | Female | 25 to 29 | 11%<br>(6.5-16%)               | 89%<br>(84-94%)          | 0.98<br>(0.56-1.6)                          | 1%<br>(0.46-2.4%)                    | 0.97%<br>(0.36-2.5%)                | 8.6<br>(3.9-19)        | 620<br>(330-1300)      |
| Swaziland | 2005 | Female | 30 to 34 | 13%<br>(7.8-20%)               | 87%<br>(80-92%)          | 1.2<br>(0.64-1.9)                           | 0.91%<br>(0.42-2%)                   | 0.86%<br>(0.35-2%)                  | 9.1<br>(4-20)          | 570<br>(290-1200)      |
| Swaziland | 2005 | Female | 35 to 39 | 15%<br>(9.6-23%)               | 85%<br>(77-90%)          | 1.4<br>(0.76-2.2)                           | 1.3%<br>(0.59-3%)                    | 1.3%<br>(0.53-3.2%)                 | 12<br>(5.6-29)         | 670<br>(340-1500)      |
| Swaziland | 2005 | Female | 40 to 44 | 16%<br>(11-23%)                | 84%<br>(77-89%)          | 1.4<br>(0.74-2.3)                           | 1.7%<br>(0.83-3.6%)                  | 1.8%<br>(0.81-3.9%)                 | 16<br>(7-36)           | 760<br>(360-1700)      |
| Swaziland | 2005 | Female | 45 to 49 | 18%<br>(11-25%)                | 82%<br>(75-89%)          | 1.4<br>(0.72-2.4)                           | 2.5%<br>(1.2-5.1%)                   | 2.7%<br>(1.2-5.6%)                  | 20<br>(9.1-45)         | 850<br>(400-1900)      |
| Swaziland | 2005 | Female | 50 to 54 | 19%<br>(13-26%)                | 81%<br>(74-87%)          | 1.5<br>(0.82-2.5)                           | 3.5%<br>(1.8-6.8%)                   | 3.8%<br>(2-7.4%)                    | 24<br>(11-53)          | 900<br>(440-1900)      |
| Swaziland | 2005 | Female | 55 to 59 | 19%<br>(12-27%)                | 81%<br>(73-88%)          | 1.6<br>(0.86-2.7)                           | 4.8%<br>(2.5-8.3%)                   | 5.4%<br>(2.7-9.4%)                  | 27<br>(12-55)          | 860<br>(400-1700)      |
| Swaziland | 2005 | Female | 60 to 64 | 20%<br>(13-30%)                | 80%<br>(70-87%)          | 1.6<br>(0.82-2.9)                           | 5.6%<br>(2.7-9.7%)                   | 6.4%<br>(3-11%)                     | 29<br>(12-57)          | 780<br>(340-1600)      |
| Swaziland | 2005 | Female | 65 to 69 | 22%<br>(15-29%)                | 78%<br>(71-85%)          | 1.6<br>(0.83-2.6)                           | 6.1%<br>(3-10%)                      | 7%<br>(3.4-11%)                     | 32<br>(15-63)          | 730<br>(330-1400)      |
| Swaziland | 2005 | Female | 70 to 74 | 19%<br>(13-26%)                | 81%<br>(74-87%)          | 1.2<br>(0.65-2)                             | 4.7%<br>(2-8.5%)                     | 5.4%<br>(2.3-9.6%)                  | 24<br>(9.2-50)         | 440<br>(170-890)       |
| Swaziland | 2005 | Female | 75 to 79 | 15%<br>(9.4-22%)               | 85%<br>(78-91%)          | 0.87<br>(0.42-1.6)                          | 3.5%<br>(1.1-6.9%)                   | 4%<br>(1.2-7.9%)                    | 16<br>(4.5-33)         | 220<br>(63-470)        |
| Swaziland | 2005 | Female | 80 to 84 | 13%<br>(8.2-19%)               | 87%<br>(81-92%)          | 0.71<br>(0.35-1.2)                          | 2.7%<br>(0.86-5.4%)                  | 3.1%<br>(0.99-6.3%)                 | 8.7<br>(2.7-18)        | 91<br>(29-180)         |
| Swaziland | 2005 | Female | 85 to 89 | 13%<br>(8-19%)                 | 87%<br>(81-92%)          | 0.65<br>(0.32-1.1)                          | 2.1%<br>(0.63-4.5%)                  | 2.5%<br>(0.73-5.2%)                 | 3.7<br>(1.1-7.8)       | 27<br>(8-57)           |
| Swaziland | 2005 | Female | 90 to 94 | 14%<br>(8.8-20%)               | 86%<br>(80-91%)          | 0.62<br>(0.3-1.1)                           | 1.7%<br>(0.33-4%)                    | 1.9%<br>(0.34-4.6%)                 | 1.1<br>(0.21-2.7)      | 5.8<br>(1.2-14)        |
| Swaziland | 2005 | Female | 95 plus  | 15%<br>(8.5-23%)               | 85%<br>(77-91%)          | 0.61<br>(0.24-1.2)                          | 1.6%<br>(0.0034-4.1%)                | 1.8%<br>(-0.068-4.7%)               | 0.25<br>(-0.0092-0.64) | 0.86<br>(0.002-2.2)    |
| Swaziland | 2005 | Male   | All Ages | 17%<br>(14-20%)                | 83%<br>(80-86%)          | 1.6<br>(1.3-2)                              | 5.3%<br>(3.6-7.6%)                   | 7.3%<br>(5-10%)                     | 800<br>(520-1200)      | 32000<br>(22000-47000) |
| Swaziland | 2005 | Male   | 15 to 19 | 13%<br>(8.3-19%)               | 87%<br>(81-92%)          | 0.95<br>(0.5-1.6)                           | 6.2%<br>(3.5-9.6%)                   | 7.5%<br>(3.9-12%)                   | 16<br>(7.9-28)         | 1300<br>(700-2200)     |
| Swaziland | 2005 | Male   | 20 to 24 | 21%<br>(14-29%)                | 79%<br>(71-86%)          | 2.2<br>(1.2-3.5)                            | 9.8%<br>(5.7-15%)                    | 11%<br>(5.8-17%)                    | 42<br>(24-68)          | 3000<br>(1800-4700)    |
| Swaziland | 2005 | Male   | 25 to 29 | 27%<br>(19-36%)                | 73%<br>(64-81%)          | 3.3<br>(2-4.9)                              | 6.4%<br>(3.5-11%)                    | 6.6%<br>(3.5-12%)                   | 46<br>(27-72)          | 3000<br>(1800-4500)    |
| Swaziland | 2005 | Male   | 30 to 34 | 31%<br>(21-43%)                | 69%<br>(57-79%)          | 3.9<br>(2.3-5.8)                            | 5.1%<br>(3-8.3%)                     | 5.2%<br>(2.9-8.8%)                  | 48<br>(29-75)          | 2800<br>(1700-4300)    |
| Swaziland | 2005 | Male   | 35 to 39 | 38%<br>(28-50%)                | 62%<br>(50-72%)          | 4.5<br>(2.8-6.8)                            | 6.4%<br>(3.6-11%)                    | 6.7%<br>(3.6-11%)                   | 61<br>(36-97)          | 3200<br>(1900-5000)    |
| Swaziland | 2005 | Male   | 40 to 44 | 42%<br>(31-53%)                | 58%<br>(47-69%)          | 4.9<br>(2.7-7.6)                            | 7.7%<br>(4.6-12%)                    | 8.1%<br>(4.7-13%)                   | 72<br>(42-120)         | 3400<br>(2000-5400)    |

| Location  | Year | Sex    | Age      | Prevalence of current drinkers | Prevalence of abstainers | Population average of standard drinks daily | Percent of total attributable deaths | Percent of total attributable DALYs | Attributable deaths  | Attributable DALYs   |
|-----------|------|--------|----------|--------------------------------|--------------------------|---------------------------------------------|--------------------------------------|-------------------------------------|----------------------|----------------------|
| Swaziland | 2005 | Male   | 45 to 49 | 37%<br>(25-50%)                | 63%<br>(50-75%)          | 4.4<br>(2.4-7)                              | 9.4%<br>(5.6-15%)                    | 9.9%<br>(5.7-16%)                   | 82<br>(46-140)       | 3400<br>(2000-5700)  |
| Swaziland | 2005 | Male   | 50 to 54 | 37%<br>(26-49%)                | 63%<br>(51-74%)          | 4.3<br>(2.4-6.7)                            | 13%<br>(8.3-18%)                     | 14%<br>(8.8-19%)                    | 93<br>(53-150)       | 3400<br>(2000-5500)  |
| Swaziland | 2005 | Male   | 55 to 59 | 43%<br>(32-54%)                | 57%<br>(46-68%)          | 4.8<br>(2.8-7.5)                            | 16%<br>(11-22%)                      | 18%<br>(12-24%)                     | 110<br>(64-170)      | 3300<br>(2100-5200)  |
| Swaziland | 2005 | Male   | 60 to 64 | 40%<br>(29-51%)                | 60%<br>(49-71%)          | 4.1<br>(2.2-6.8)                            | 15%<br>(10-20%)                      | 17%<br>(11-23%)                     | 92<br>(57-140)       | 2500<br>(1600-3700)  |
| Swaziland | 2005 | Male   | 65 to 69 | 29%<br>(20-39%)                | 71%<br>(61-80%)          | 2.4<br>(1.3-4)                              | 11%<br>(7-16%)                       | 13%<br>(7.7-18%)                    | 68<br>(38-100)       | 1500<br>(870-2300)   |
| Swaziland | 2005 | Male   | 70 to 74 | 24%<br>(17-33%)                | 76%<br>(67-83%)          | 1.6<br>(0.85-2.5)                           | 7.5%<br>(4-12%)                      | 8.3%<br>(4.5-13%)                   | 37<br>(19-60)        | 670<br>(350-1100)    |
| Swaziland | 2005 | Male   | 75 to 79 | 24%<br>(16-35%)                | 76%<br>(65-84%)          | 1.3<br>(0.65-2.3)                           | 5.6%<br>(2.6-9.4%)                   | 6.2%<br>(2.9-11%)                   | 21<br>(9.5-36)       | 290<br>(130-500)     |
| Swaziland | 2005 | Male   | 80 to 84 | 24%<br>(15-35%)                | 76%<br>(65-85%)          | 1.2<br>(0.59-2)                             | 4.7%<br>(2.2-8.2%)                   | 5.3%<br>(2.4-9.2%)                  | 11<br>(5.3-20)       | 120<br>(56-200)      |
| Swaziland | 2005 | Male   | 85 to 89 | 23%<br>(14-33%)                | 77%<br>(67-86%)          | 0.99<br>(0.51-1.7)                          | 3.6%<br>(1.6-6.3%)                   | 4%<br>(1.8-7.1%)                    | 3.7<br>(1.6-6.7)     | 28<br>(13-50)        |
| Swaziland | 2005 | Male   | 90 to 94 | 22%<br>(14-33%)                | 78%<br>(67-86%)          | 0.87<br>(0.42-1.6)                          | 2.6%<br>(1.1-5%)                     | 3%<br>(1.2-5.8%)                    | 0.91<br>(0.37-1.8)   | 4.8<br>(2-9.2)       |
| Swaziland | 2005 | Male   | 95 plus  | 25%<br>(14-40%)                | 75%<br>(60-86%)          | 0.82<br>(0.32-1.7)                          | 2.5%<br>(0.89-5.2%)                  | 2.8%<br>(0.87-6%)                   | 0.18<br>(0.055-0.38) | 0.63<br>(0.22-1.3)   |
| Swaziland | 2010 | Female | All Ages | 9.5%<br>(7.7-11%)              | 90%<br>(89-92%)          | 0.57<br>(0.42-0.76)                         | 1.2%<br>(0.68-2.1%)                  | 1.8%<br>(0.85-3.2%)                 | 170<br>(72-330)      | 6400<br>(3400-12000) |
| Swaziland | 2010 | Female | 15 to 19 | 8.1%<br>(5-12%)                | 92%<br>(88-95%)          | 0.42<br>(0.21-0.73)                         | 1.6%<br>(0.78-2.8%)                  | 1.8%<br>(0.73-3.6%)                 | 3.3<br>(1.3-6.6)     | 310<br>(150-570)     |
| Swaziland | 2010 | Female | 20 to 24 | 12%<br>(7-18%)                 | 88%<br>(82-93%)          | 0.82<br>(0.43-1.3)                          | 1.9%<br>(0.86-3.7%)                  | 1.9%<br>(0.65-4.2%)                 | 7<br>(3-15)          | 630<br>(330-1200)    |
| Swaziland | 2010 | Female | 25 to 29 | 13%<br>(7.9-19%)               | 87%<br>(81-92%)          | 0.99<br>(0.54-1.6)                          | 1.1%<br>(0.49-2.5%)                  | 1.1%<br>(0.37-2.6%)                 | 7.7<br>(3.4-17)      | 590<br>(310-1100)    |
| Swaziland | 2010 | Female | 30 to 34 | 14%<br>(8.8-22%)               | 86%<br>(78-91%)          | 1.1<br>(0.6-1.9)                            | 0.89%<br>(0.4-1.9%)                  | 0.82%<br>(0.3-2%)                   | 7.2<br>(3-17)        | 480<br>(230-1000)    |
| Swaziland | 2010 | Female | 35 to 39 | 16%<br>(9.9-24%)               | 84%<br>(76-90%)          | 1.2<br>(0.64-2.1)                           | 1.1%<br>(0.46-2.3%)                  | 1%<br>(0.39-2.4%)                   | 8.1<br>(3.3-19)      | 460<br>(210-1000)    |
| Swaziland | 2010 | Female | 40 to 44 | 18%<br>(11-26%)                | 82%<br>(74-89%)          | 1.3<br>(0.63-2.2)                           | 1.5%<br>(0.67-3%)                    | 1.5%<br>(0.63-3.3%)                 | 11<br>(4.2-24)       | 530<br>(240-1100)    |
| Swaziland | 2010 | Female | 45 to 49 | 19%<br>(11-26%)                | 81%<br>(74-89%)          | 1.3<br>(0.61-2.2)                           | 2.1%<br>(0.94-4.2%)                  | 2.2%<br>(0.94-4.6%)                 | 14<br>(5.7-30)       | 600<br>(270-1300)    |
| Swaziland | 2010 | Female | 50 to 54 | 18%<br>(12-26%)                | 82%<br>(74-88%)          | 1.2<br>(0.62-2.1)                           | 2.8%<br>(1.2-5.4%)                   | 3%<br>(1.3-6%)                      | 16<br>(6.3-37)       | 630<br>(250-1300)    |
| Swaziland | 2010 | Female | 55 to 59 | 19%<br>(12-27%)                | 81%<br>(73-88%)          | 1.3<br>(0.63-2.3)                           | 3.8%<br>(1.6-7%)                     | 4.4%<br>(1.8-8%)                    | 19<br>(7-41)         | 640<br>(240-1300)    |
| Swaziland | 2010 | Female | 60 to 64 | 19%<br>(11-28%)                | 81%<br>(72-89%)          | 1.3<br>(0.61-2.3)                           | 4.2%<br>(1.6-8%)                     | 5%<br>(1.9-9.4%)                    | 20<br>(6.8-42)       | 560<br>(190-1200)    |

| Location  | Year | Sex    | Age      | Prevalence of current drinkers | Prevalence of abstainers | Population average of standard drinks daily | Percent of total attributable deaths | Percent of total attributable DALYs | Attributable deaths  | Attributable DALYs     |
|-----------|------|--------|----------|--------------------------------|--------------------------|---------------------------------------------|--------------------------------------|-------------------------------------|----------------------|------------------------|
| Swaziland | 2010 | Female | 65 to 69 | 19%<br>(13-27%)                | 81%<br>(73-87%)          | 1.1<br>(0.57-1.9)                           | 4.2%<br>(1.5-7.7%)                   | 5%<br>(1.9-9.2%)                    | 20<br>(6.3-41)       | 450<br>(140-930)       |
| Swaziland | 2010 | Female | 70 to 74 | 17%<br>(11-24%)                | 83%<br>(76-89%)          | 0.9<br>(0.46-1.6)                           | 3.1%<br>(0.81-6.2%)                  | 3.7%<br>(0.97-7.3%)                 | 15<br>(3.5-35)       | 280<br>(64-630)        |
| Swaziland | 2010 | Female | 75 to 79 | 14%<br>(8.8-21%)               | 86%<br>(79-91%)          | 0.67<br>(0.3-1.3)                           | 2.2%<br>(0.32-5.2%)                  | 2.6%<br>(0.38-6.1%)                 | 9.8<br>(1.2-24)      | 140<br>(18-340)        |
| Swaziland | 2010 | Female | 80 to 84 | 13%<br>(8-19%)                 | 87%<br>(81-92%)          | 0.57<br>(0.27-1)                            | 1.7%<br>(0.23-4%)                    | 2%<br>(0.27-4.6%)                   | 6<br>(0.74-15)       | 63<br>(7.5-150)        |
| Swaziland | 2010 | Female | 85 to 89 | 13%<br>(8-19%)                 | 87%<br>(81-92%)          | 0.53<br>(0.26-0.95)                         | 1.3%<br>(0.034-3.2%)                 | 1.5%<br>(0.023-3.7%)                | 2.1<br>(0.031-5.1)   | 16<br>(0.38-38)        |
| Swaziland | 2010 | Female | 90 to 94 | 14%<br>(8.8-20%)               | 86%<br>(80-91%)          | 0.51<br>(0.25-0.97)                         | 0.99%<br>(-0.17-2.9%)                | 1.1%<br>(-0.23-3.4%)                | 0.58<br>(-0.12-1.7)  | 3<br>(-0.52-8.7)       |
| Swaziland | 2010 | Female | 95 plus  | 15%<br>(8.6-24%)               | 85%<br>(76-91%)          | 0.5<br>(0.2-1)                              | 0.9%<br>(-0.35-2.9%)                 | 0.99%<br>(-0.51-3.3%)               | 0.14<br>(-0.07-0.49) | 0.51<br>(-0.21-1.7)    |
| Swaziland | 2010 | Male   | All Ages | 18%<br>(15-22%)                | 82%<br>(78-85%)          | 1.5<br>(1.1-2)                              | 5.1%<br>(3.5-6.9%)                   | 6.8%<br>(4.4-9.1%)                  | 700<br>(440-970)     | 29000<br>(19000-40000) |
| Swaziland | 2010 | Male   | 15 to 19 | 15%<br>(9.2-22%)               | 85%<br>(78-91%)          | 0.89<br>(0.46-1.5)                          | 4.7%<br>(2.6-7.6%)                   | 5.4%<br>(2.7-9.1%)                  | 14<br>(6.8-24)       | 1200<br>(630-1900)     |
| Swaziland | 2010 | Male   | 20 to 24 | 25%<br>(16-34%)                | 75%<br>(66-84%)          | 2.1<br>(1.2-3.4)                            | 9.5%<br>(5.5-14%)                    | 11%<br>(5.6-17%)                    | 46<br>(26-71)        | 3400<br>(2100-5100)    |
| Swaziland | 2010 | Male   | 25 to 29 | 31%<br>(20-41%)                | 69%<br>(59-80%)          | 3<br>(1.7-4.7)                              | 7.3%<br>(3.9-12%)                    | 7.7%<br>(3.8-14%)                   | 54<br>(32-81)        | 3600<br>(2200-5100)    |
| Swaziland | 2010 | Male   | 30 to 34 | 34%<br>(22-47%)                | 66%<br>(53-78%)          | 3.5<br>(2-5.6)                              | 5.6%<br>(3.1-8.9%)                   | 5.8%<br>(3.1-9.6%)                  | 49<br>(28-72)        | 2900<br>(1700-4200)    |
| Swaziland | 2010 | Male   | 35 to 39 | 37%<br>(25-50%)                | 63%<br>(50-75%)          | 3.6<br>(2-5.9)                              | 5.8%<br>(3.1-8.9%)                   | 6.1%<br>(3.1-9.5%)                  | 51<br>(28-76)        | 2700<br>(1600-3900)    |
| Swaziland | 2010 | Male   | 40 to 44 | 37%<br>(26-50%)                | 63%<br>(50-74%)          | 3.6<br>(1.9-6)                              | 6.8%<br>(3.8-9.9%)                   | 7.2%<br>(4-11%)                     | 58<br>(31-89)        | 2700<br>(1500-4100)    |
| Swaziland | 2010 | Male   | 45 to 49 | 36%<br>(23-48%)                | 64%<br>(52-77%)          | 3.5<br>(1.7-5.9)                            | 8.5%<br>(4.9-13%)                    | 9.1%<br>(5.1-14%)                   | 66<br>(35-110)       | 2800<br>(1500-4400)    |
| Swaziland | 2010 | Male   | 50 to 54 | 36%<br>(25-48%)                | 64%<br>(52-75%)          | 3.5<br>(1.8-5.8)                            | 11%<br>(6.7-16%)                     | 12%<br>(7.2-17%)                    | 77<br>(41-120)       | 2800<br>(1600-4400)    |
| Swaziland | 2010 | Male   | 55 to 59 | 39%<br>(27-53%)                | 61%<br>(47-73%)          | 3.7<br>(1.8-6.1)                            | 14%<br>(8.7-19%)                     | 15%<br>(9.6-21%)                    | 86<br>(48-130)       | 2800<br>(1600-4100)    |
| Swaziland | 2010 | Male   | 60 to 64 | 36%<br>(25-50%)                | 64%<br>(50-75%)          | 3.1<br>(1.5-5.3)                            | 13%<br>(7.2-18%)                     | 14%<br>(7.9-20%)                    | 78<br>(40-120)       | 2100<br>(1100-3200)    |
| Swaziland | 2010 | Male   | 65 to 69 | 29%<br>(19-39%)                | 71%<br>(61-81%)          | 2<br>(0.99-3.3)                             | 9.6%<br>(5-14%)                      | 11%<br>(5.6-16%)                    | 57<br>(28-88)        | 1300<br>(650-2000)     |
| Swaziland | 2010 | Male   | 70 to 74 | 24%<br>(17-33%)                | 76%<br>(67-83%)          | 1.3<br>(0.65-2.2)                           | 6%<br>(2.8-9.8%)                     | 6.7%<br>(3.1-11%)                   | 34<br>(15-56)        | 610<br>(270-1000)      |
| Swaziland | 2010 | Male   | 75 to 79 | 24%<br>(15-34%)                | 76%<br>(66-85%)          | 1.1<br>(0.48-1.9)                           | 4.2%<br>(1.7-7.8%)                   | 4.7%<br>(1.9-8.7%)                  | 17<br>(6.7-33)       | 240<br>(97-460)        |
| Swaziland | 2010 | Male   | 80 to 84 | 23%<br>(14-33%)                | 77%<br>(67-86%)          | 0.91<br>(0.43-1.6)                          | 3.3%<br>(1.3-6.3%)                   | 3.7%<br>(1.4-7.1%)                  | 8.8<br>(3.5-17)      | 94<br>(37-180)         |

| Location  | Year | Sex    | Age      | Prevalence of current drinkers | Prevalence of abstainers | Population average of standard drinks daily | Percent of total attributable deaths | Percent of total attributable DALYs | Attributable deaths   | Attributable DALYs     |
|-----------|------|--------|----------|--------------------------------|--------------------------|---------------------------------------------|--------------------------------------|-------------------------------------|-----------------------|------------------------|
| Swaziland | 2010 | Male   | 85 to 89 | 21%<br>(13-31%)                | 79%<br>(69-87%)          | 0.76<br>(0.36-1.3)                          | 2.4%<br>(0.99-4.7%)                  | 2.7%<br>(1.1-5.3%)                  | 2.5<br>(1-5)          | 19<br>(7.9-37)         |
| Swaziland | 2010 | Male   | 90 to 94 | 21%<br>(13-32%)                | 79%<br>(68-87%)          | 0.67<br>(0.31-1.3)                          | 1.8%<br>(0.67-3.9%)                  | 2%<br>(0.69-4.5%)                   | 0.59<br>(0.2-1.3)     | 3.2<br>(1.2-6.8)       |
| Swaziland | 2010 | Male   | 95 plus  | 24%<br>(13-38%)                | 76%<br>(62-87%)          | 0.64<br>(0.25-1.3)                          | 1.8%<br>(0.54-4%)                    | 1.9%<br>(0.47-4.5%)                 | 0.14<br>(0.033-0.33)  | 0.52<br>(0.15-1.2)     |
| Swaziland | 2016 | Female | All Ages | 9.5%<br>(7.8-11%)              | 90%<br>(89-92%)          | 0.6<br>(0.34-0.95)                          | 1.6%<br>(0.68-2.9%)                  | 2.4%<br>(0.82-4.6%)                 | 140<br>(38-300)       | 5400<br>(2000-11000)   |
| Swaziland | 2016 | Female | 15 to 19 | 8%<br>(5-12%)                  | 92%<br>(88-95%)          | 0.43<br>(0.19-0.86)                         | 1.4%<br>(0.64-2.6%)                  | 1.5%<br>(0.44-3.3%)                 | 2.1<br>(0.54-4.8)     | 220<br>(97-430)        |
| Swaziland | 2016 | Female | 20 to 24 | 12%<br>(7-18%)                 | 88%<br>(82-93%)          | 0.83<br>(0.38-1.5)                          | 1.9%<br>(0.9-3.6%)                   | 1.7%<br>(0.48-4%)                   | 4.8<br>(1.4-11)       | 500<br>(230-940)       |
| Swaziland | 2016 | Female | 25 to 29 | 13%<br>(7.8-19%)               | 87%<br>(81-92%)          | 1<br>(0.46-1.8)                             | 1.5%<br>(0.64-3%)                    | 1.4%<br>(0.38-3.3%)                 | 6.3<br>(1.8-15)       | 550<br>(250-1100)      |
| Swaziland | 2016 | Female | 30 to 34 | 14%<br>(8.7-22%)               | 86%<br>(78-91%)          | 1.1<br>(0.53-2)                             | 1.5%<br>(0.64-3%)                    | 1.5%<br>(0.43-3.5%)                 | 6.6<br>(1.7-16)       | 480<br>(200-1000)      |
| Swaziland | 2016 | Female | 35 to 39 | 16%<br>(9.8-23%)               | 84%<br>(77-90%)          | 1.2<br>(0.56-2.4)                           | 1.8%<br>(0.73-3.8%)                  | 2%<br>(0.57-4.4%)                   | 6.7<br>(1.7-16)       | 410<br>(140-890)       |
| Swaziland | 2016 | Female | 40 to 44 | 18%<br>(11-25%)                | 82%<br>(75-89%)          | 1.3<br>(0.55-2.5)                           | 2.3%<br>(0.83-4.7%)                  | 2.6%<br>(0.8-5.6%)                  | 7.2<br>(1.8-17)       | 370<br>(120-810)       |
| Swaziland | 2016 | Female | 45 to 49 | 18%<br>(11-26%)                | 82%<br>(74-89%)          | 1.3<br>(0.54-2.6)                           | 3.1%<br>(1.2-6.3%)                   | 3.7%<br>(1.3-7.7%)                  | 9.3<br>(2.4-22)       | 420<br>(130-950)       |
| Swaziland | 2016 | Female | 50 to 54 | 18%<br>(12-26%)                | 82%<br>(74-88%)          | 1.3<br>(0.53-2.4)                           | 3.5%<br>(1.3-7%)                     | 4.3%<br>(1.5-8.6%)                  | 12<br>(3.1-28)        | 470<br>(140-1100)      |
| Swaziland | 2016 | Female | 55 to 59 | 18%<br>(12-27%)                | 82%<br>(73-88%)          | 1.3<br>(0.53-2.5)                           | 4.5%<br>(1.7-8.5%)                   | 5.9%<br>(2.1-11%)                   | 15<br>(4-36)          | 520<br>(150-1200)      |
| Swaziland | 2016 | Female | 60 to 64 | 19%<br>(11-28%)                | 81%<br>(72-89%)          | 1.3<br>(0.52-2.6)                           | 4.5%<br>(1.4-9.2%)                   | 5.9%<br>(1.9-12%)                   | 18<br>(4.3-41)        | 500<br>(130-1100)      |
| Swaziland | 2016 | Female | 65 to 69 | 19%<br>(12-27%)                | 81%<br>(73-88%)          | 1.2<br>(0.49-2.3)                           | 4.3%<br>(1.1-8.6%)                   | 5.6%<br>(1.5-11%)                   | 18<br>(3.6-43)        | 430<br>(84-1000)       |
| Swaziland | 2016 | Female | 70 to 74 | 17%<br>(11-25%)                | 83%<br>(75-89%)          | 0.94<br>(0.39-1.9)                          | 3.2%<br>(0.47-7.1%)                  | 4%<br>(0.63-8.7%)                   | 14<br>(1.8-33)        | 260<br>(30-600)        |
| Swaziland | 2016 | Female | 75 to 79 | 14%<br>(8.4-21%)               | 86%<br>(79-92%)          | 0.7<br>(0.27-1.5)                           | 2.3%<br>(0.12-5.8%)                  | 2.8%<br>(0.16-7%)                   | 9.6<br>(0.5-26)       | 140<br>(6.5-370)       |
| Swaziland | 2016 | Female | 80 to 84 | 13%<br>(7.9-19%)               | 87%<br>(81-92%)          | 0.6<br>(0.23-1.2)                           | 1.8%<br>(-0.029-4.8%)                | 2.1%<br>(-0.048-5.7%)               | 6.3<br>(-0.14-19)     | 67<br>(-0.95-200)      |
| Swaziland | 2016 | Female | 85 to 89 | 13%<br>(7.8-19%)               | 87%<br>(81-92%)          | 0.56<br>(0.23-1.1)                          | 1.4%<br>(-0.085-4%)                  | 1.7%<br>(-0.11-4.7%)                | 2.6<br>(-0.12-7.9)    | 20<br>(-0.9-59)        |
| Swaziland | 2016 | Female | 90 to 94 | 13%<br>(8.7-20%)               | 87%<br>(80-91%)          | 0.54<br>(0.2-1.1)                           | 1.1%<br>(-0.21-3.8%)                 | 1.3%<br>(-0.28-4.5%)                | 0.64<br>(-0.13-2.3)   | 3.4<br>(-0.58-11)      |
| Swaziland | 2016 | Female | 95 plus  | 15%<br>(8.2-23%)               | 85%<br>(77-92%)          | 0.53<br>(0.18-1.2)                          | 1%<br>(-0.4-3.8%)                    | 1.2%<br>(-0.55-4.4%)                | 0.14<br>(-0.067-0.54) | 0.5<br>(-0.19-1.8)     |
| Swaziland | 2016 | Male   | All Ages | 19%<br>(15-23%)                | 81%<br>(77-85%)          | 1.6<br>(0.87-2.6)                           | 5.7%<br>(3.5-7.9%)                   | 7.4%<br>(4.4-10%)                   | 590<br>(320-890)      | 25000<br>(15000-37000) |

| Location  | Year | Sex    | Age      | Prevalence of current drinkers | Prevalence of abstainers | Population average of standard drinks daily | Percent of total attributable deaths | Percent of total attributable DALYs | Attributable deaths  | Attributable DALYs     |
|-----------|------|--------|----------|--------------------------------|--------------------------|---------------------------------------------|--------------------------------------|-------------------------------------|----------------------|------------------------|
| Swaziland | 2016 | Male   | 15 to 19 | 15%<br>(9.3-21%)               | 85%<br>(79-91%)          | 0.88<br>(0.39-1.7)                          | 4%<br>(2-6.7%)                       | 4.4%<br>(1.9-8%)                    | 10<br>(4.3-19)       | 870<br>(440-1500)      |
| Swaziland | 2016 | Male   | 20 to 24 | 24%<br>(15-34%)                | 76%<br>(66-85%)          | 2.1<br>(0.99-3.8)                           | 8.7%<br>(5.1-13%)                    | 9.5%<br>(5-15%)                     | 37<br>(19-59)        | 2800<br>(1600-4300)    |
| Swaziland | 2016 | Male   | 25 to 29 | 30%<br>(19-42%)                | 70%<br>(58-81%)          | 3<br>(1.4-5.5)                              | 7.5%<br>(4.1-12%)                    | 8%<br>(3.9-13%)                     | 53<br>(29-82)        | 3600<br>(2100-5300)    |
| Swaziland | 2016 | Male   | 30 to 34 | 34%<br>(22-47%)                | 66%<br>(53-78%)          | 3.5<br>(1.7-6.4)                            | 6.7%<br>(3.7-10%)                    | 7.1%<br>(3.7-11%)                   | 52<br>(28-80)        | 3200<br>(1800-4700)    |
| Swaziland | 2016 | Male   | 35 to 39 | 37%<br>(24-49%)                | 63%<br>(51-76%)          | 3.6<br>(1.7-6.7)                            | 7.3%<br>(3.9-11%)                    | 8%<br>(4.1-12%)                     | 47<br>(23-74)        | 2500<br>(1300-3900)    |
| Swaziland | 2016 | Male   | 40 to 44 | 37%<br>(26-50%)                | 63%<br>(50-74%)          | 3.6<br>(1.6-6.9)                            | 8.9%<br>(4.9-13%)                    | 9.8%<br>(5.3-15%)                   | 45<br>(23-75)        | 2200<br>(1100-3500)    |
| Swaziland | 2016 | Male   | 45 to 49 | 35%<br>(22-48%)                | 65%<br>(52-78%)          | 3.5<br>(1.5-6.8)                            | 11%<br>(6.5-16%)                     | 12%<br>(7.1-18%)                    | 51<br>(26-83)        | 2100<br>(1100-3400)    |
| Swaziland | 2016 | Male   | 50 to 54 | 36%<br>(24-48%)                | 64%<br>(52-76%)          | 3.4<br>(1.5-6.4)                            | 12%<br>(7.4-18%)                     | 14%<br>(8.2-20%)                    | 56<br>(28-92)        | 2100<br>(1100-3400)    |
| Swaziland | 2016 | Male   | 55 to 59 | 39%<br>(27-52%)                | 61%<br>(48-73%)          | 3.6<br>(1.6-6.6)                            | 14%<br>(8-20%)                       | 17%<br>(9.1-23%)                    | 63<br>(31-100)       | 2000<br>(1100-3300)    |
| Swaziland | 2016 | Male   | 60 to 64 | 36%<br>(24-49%)                | 64%<br>(51-76%)          | 3<br>(1.2-5.9)                              | 12%<br>(6-18%)                       | 14%<br>(7-21%)                      | 62<br>(27-100)       | 1700<br>(770-2700)     |
| Swaziland | 2016 | Male   | 65 to 69 | 28%<br>(19-39%)                | 72%<br>(61-81%)          | 1.9<br>(0.81-3.7)                           | 9.2%<br>(4.1-15%)                    | 11%<br>(4.8-17%)                    | 50<br>(21-82)        | 1100<br>(470-1900)     |
| Swaziland | 2016 | Male   | 70 to 74 | 24%<br>(16-34%)                | 76%<br>(66-84%)          | 1.3<br>(0.53-2.5)                           | 5.8%<br>(2.2-10%)                    | 6.6%<br>(2.5-12%)                   | 30<br>(11-55)        | 550<br>(200-1000)      |
| Swaziland | 2016 | Male   | 75 to 79 | 24%<br>(15-34%)                | 76%<br>(66-85%)          | 1<br>(0.42-2.2)                             | 4.1%<br>(1.2-8.3%)                   | 4.6%<br>(1.4-9.4%)                  | 18<br>(5.1-39)       | 260<br>(74-550)        |
| Swaziland | 2016 | Male   | 80 to 84 | 23%<br>(14-33%)                | 77%<br>(67-86%)          | 0.91<br>(0.36-1.8)                          | 3.2%<br>(0.88-6.5%)                  | 3.6%<br>(0.96-7.4%)                 | 9.4<br>(2.5-20)      | 100<br>(27-210)        |
| Swaziland | 2016 | Male   | 85 to 89 | 21%<br>(13-31%)                | 79%<br>(69-87%)          | 0.75<br>(0.29-1.5)                          | 2.4%<br>(0.64-5.2%)                  | 2.6%<br>(0.68-5.9%)                 | 2.7<br>(0.71-6.1)    | 21<br>(5.7-46)         |
| Swaziland | 2016 | Male   | 90 to 94 | 21%<br>(13-31%)                | 79%<br>(69-87%)          | 0.67<br>(0.24-1.4)                          | 1.8%<br>(0.45-4.4%)                  | 2%<br>(0.44-5%)                     | 0.58<br>(0.13-1.4)   | 3.1<br>(0.78-7.4)      |
| Swaziland | 2016 | Male   | 95 plus  | 23%<br>(13-37%)                | 77%<br>(63-87%)          | 0.64<br>(0.2-1.4)                           | 1.8%<br>(0.4-4.7%)                   | 1.9%<br>(0.35-5.3%)                 | 0.13<br>(0.024-0.36) | 0.49<br>(0.11-1.3)     |
| Zimbabwe  | 1990 | Female | All Ages | 8.3%<br>(7-9.7%)               | 92%<br>(90-93%)          | 0.31<br>(0.24-0.39)                         | 0.99%<br>(0.7-1.3%)                  | 1.6%<br>(1-2.3%)                    | 580<br>(340-850)     | 22000<br>(15000-30000) |
| Zimbabwe  | 1990 | Female | 15 to 19 | 7.2%<br>(4.6-11%)              | 93%<br>(89-95%)          | 0.26<br>(0.14-0.43)                         | 0.91%<br>(0.56-1.4%)                 | 0.87%<br>(0.38-1.6%)                | 6.3<br>(2.9-12)      | 900<br>(550-1400)      |
| Zimbabwe  | 1990 | Female | 20 to 24 | 9.8%<br>(6.2-14%)              | 90%<br>(86-94%)          | 0.47<br>(0.26-0.77)                         | 1.3%<br>(0.78-2%)                    | 0.92%<br>(0.41-1.7%)                | 13<br>(6.4-22)       | 1800<br>(1200-2600)    |
| Zimbabwe  | 1990 | Female | 25 to 29 | 12%<br>(7.2-17%)               | 88%<br>(83-93%)          | 0.6<br>(0.34-0.96)                          | 1.3%<br>(0.76-2%)                    | 1%<br>(0.44-2%)                     | 17<br>(8.8-29)       | 1900<br>(1200-2800)    |
| Zimbabwe  | 1990 | Female | 30 to 34 | 13%<br>(8.1-20%)               | 87%<br>(80-92%)          | 0.68<br>(0.37-1.1)                          | 1.5%<br>(0.87-2.3%)                  | 1.4%<br>(0.65-2.5%)                 | 22<br>(12-37)        | 1900<br>(1200-2700)    |

| Location | Year | Sex    | Age      | Prevalence of current drinkers | Prevalence of abstainers | Population average of standard drinks daily | Percent of total attributable deaths | Percent of total attributable DALYs | Attributable deaths | Attributable DALYs      |
|----------|------|--------|----------|--------------------------------|--------------------------|---------------------------------------------|--------------------------------------|-------------------------------------|---------------------|-------------------------|
| Zimbabwe | 1990 | Female | 35 to 39 | 15%<br>(9.3-21%)               | 85%<br>(79-91%)          | 0.71<br>(0.38-1.1)                          | 1.8%<br>(1.1-2.8%)                   | 1.9%<br>(0.94-3.3%)                 | 29<br>(16-48)       | 1900<br>(1200-2900)     |
| Zimbabwe | 1990 | Female | 40 to 44 | 16%<br>(10-23%)                | 84%<br>(77-90%)          | 0.73<br>(0.4-1.2)                           | 2.2%<br>(1.3-3.3%)                   | 2.6%<br>(1.4-4.2%)                  | 31<br>(18-50)       | 1700<br>(1000-2500)     |
| Zimbabwe | 1990 | Female | 45 to 49 | 17%<br>(9.8-23%)               | 83%<br>(77-90%)          | 0.74<br>(0.39-1.2)                          | 2.7%<br>(1.6-4%)                     | 3.3%<br>(1.9-5.2%)                  | 43<br>(23-67)       | 1900<br>(1100-2900)     |
| Zimbabwe | 1990 | Female | 50 to 54 | 16%<br>(11-23%)                | 84%<br>(77-89%)          | 0.73<br>(0.39-1.2)                          | 3.1%<br>(1.8-4.8%)                   | 3.9%<br>(2.2-6.1%)                  | 52<br>(27-87)       | 2000<br>(1100-3300)     |
| Zimbabwe | 1990 | Female | 55 to 59 | 15%<br>(9.8-22%)               | 85%<br>(78-90%)          | 0.72<br>(0.38-1.2)                          | 3.3%<br>(2-5%)                       | 4.1%<br>(2.5-6.3%)                  | 62<br>(31-100)      | 2100<br>(1100-3400)     |
| Zimbabwe | 1990 | Female | 60 to 64 | 16%<br>(10-23%)                | 84%<br>(77-90%)          | 0.73<br>(0.39-1.2)                          | 3.2%<br>(1.8-5.2%)                   | 3.9%<br>(2.2-6.4%)                  | 72<br>(36-120)      | 2000<br>(1000-3300)     |
| Zimbabwe | 1990 | Female | 65 to 69 | 17%<br>(11-24%)                | 83%<br>(76-89%)          | 0.72<br>(0.41-1.2)                          | 3.2%<br>(1.9-5.2%)                   | 4%<br>(2.4-6.3%)                    | 81<br>(41-140)      | 1800<br>(940-3000)      |
| Zimbabwe | 1990 | Female | 70 to 74 | 17%<br>(11-24%)                | 83%<br>(76-89%)          | 0.61<br>(0.33-1)                            | 2.4%<br>(1.2-4%)                     | 2.9%<br>(1.4-4.8%)                  | 72<br>(34-120)      | 1300<br>(630-2200)      |
| Zimbabwe | 1990 | Female | 75 to 79 | 15%<br>(9.1-23%)               | 85%<br>(77-91%)          | 0.49<br>(0.24-0.87)                         | 1.4%<br>(0.46-2.9%)                  | 1.7%<br>(0.54-3.4%)                 | 38<br>(12-80)       | 540<br>(170-1100)       |
| Zimbabwe | 1990 | Female | 80 to 84 | 14%<br>(8.8-22%)               | 86%<br>(78-91%)          | 0.44<br>(0.24-0.76)                         | 1%<br>(0.24-2.1%)                    | 1.2%<br>(0.27-2.5%)                 | 23<br>(5.2-50)      | 240<br>(57-510)         |
| Zimbabwe | 1990 | Female | 85 to 89 | 15%<br>(9-23%)                 | 85%<br>(77-91%)          | 0.44<br>(0.22-0.75)                         | 0.75%<br>(0.039-1.8%)                | 0.86%<br>(0.018-2.1%)               | 9.9<br>(0.21-24)    | 75<br>(3.8-180)         |
| Zimbabwe | 1990 | Female | 90 to 94 | 16%<br>(10-25%)                | 84%<br>(75-90%)          | 0.45<br>(0.22-0.82)                         | 0.52%<br>(-0.2-1.6%)                 | 0.57%<br>(-0.31-1.8%)               | 2.5<br>(-1.3-8.2)   | 14<br>(-5.5-42)         |
| Zimbabwe | 1990 | Female | 95 plus  | 19%<br>(11-31%)                | 81%<br>(69-89%)          | 0.47<br>(0.19-0.95)                         | 0.42%<br>(-0.52-1.8%)                | 0.42%<br>(-0.71-2%)                 | 0.46<br>(-0.79-2.2) | 1.8<br>(-2.3-7.6)       |
| Zimbabwe | 1990 | Male   | All Ages | 31%<br>(26-36%)                | 69%<br>(64-74%)          | 1.6<br>(1.4-2)                              | 3.4%<br>(1.8-4.8%)                   | 5%<br>(2.5-7.1%)                    | 2200<br>(980-3300)  | 96000<br>(49000-140000) |
| Zimbabwe | 1990 | Male   | 15 to 19 | 27%<br>(19-36%)                | 73%<br>(64-81%)          | 1.3<br>(0.8-2)                              | 4.4%<br>(2.8-6.4%)                   | 5.7%<br>(3.2-8.9%)                  | 45<br>(19-76)       | 4300<br>(2300-6700)     |
| Zimbabwe | 1990 | Male   | 20 to 24 | 41%<br>(29-52%)                | 59%<br>(48-71%)          | 2.9<br>(1.9-4.2)                            | 7%<br>(3.7-11%)                      | 7.5%<br>(3.2-13%)                   | 140<br>(61-230)     | 12000<br>(6300-17000)   |
| Zimbabwe | 1990 | Male   | 25 to 29 | 47%<br>(34-59%)                | 53%<br>(41-66%)          | 3.5<br>(2.4-4.8)                            | 5.7%<br>(2.7-9.5%)                   | 5.8%<br>(2.2-11%)                   | 170<br>(75-270)     | 12000<br>(6600-18000)   |
| Zimbabwe | 1990 | Male   | 30 to 34 | 50%<br>(37-61%)                | 50%<br>(39-63%)          | 3.8<br>(2.6-5.3)                            | 5.4%<br>(2.5-9%)                     | 5.7%<br>(2.2-10%)                   | 170<br>(72-260)     | 11000<br>(5500-16000)   |
| Zimbabwe | 1990 | Male   | 35 to 39 | 53%<br>(39-65%)                | 47%<br>(35-61%)          | 3.9<br>(2.6-5.6)                            | 6%<br>(2.7-9.9%)                     | 6.6%<br>(2.5-12%)                   | 170<br>(70-280)     | 9700<br>(4600-15000)    |
| Zimbabwe | 1990 | Male   | 40 to 44 | 56%<br>(43-67%)                | 44%<br>(33-57%)          | 4.1<br>(2.6-5.8)                            | 6.5%<br>(3-11%)                      | 7.3%<br>(2.9-13%)                   | 160<br>(65-250)     | 7900<br>(3600-12000)    |
| Zimbabwe | 1990 | Male   | 45 to 49 | 59%<br>(44-70%)                | 41%<br>(30-56%)          | 4.5<br>(2.8-6.4)                            | 9%<br>(4.1-14%)                      | 10%<br>(4.2-17%)                    | 210<br>(84-330)     | 9400<br>(4100-14000)    |
| Zimbabwe | 1990 | Male   | 50 to 54 | 59%<br>(46-70%)                | 41%<br>(30-54%)          | 4.2<br>(2.6-6.1)                            | 10%<br>(5.6-15%)                     | 12%<br>(6.2-18%)                    | 220<br>(88-340)     | 8500<br>(3900-13000)    |



| Location | Year | Sex    | Age      | Prevalence of current drinkers | Prevalence of abstainers | Population average of standard drinks daily | Percent of total attributable deaths | Percent of total attributable DALYs | Attributable deaths | Attributable DALYs     |
|----------|------|--------|----------|--------------------------------|--------------------------|---------------------------------------------|--------------------------------------|-------------------------------------|---------------------|------------------------|
| Zimbabwe | 1990 | Male   | 55 to 59 | 56%<br>(43-67%)                | 44%<br>(33-57%)          | 3.2<br>(2-4.6)                              | 9.5%<br>(5.3-14%)                    | 12%<br>(6.3-17%)                    | 200<br>(79-320)     | 6700<br>(3000-10000)   |
| Zimbabwe | 1990 | Male   | 60 to 64 | 54%<br>(40-65%)                | 46%<br>(35-60%)          | 2.5<br>(1.5-3.8)                            | 8.2%<br>(4.5-12%)                    | 10%<br>(5.6-15%)                    | 190<br>(78-310)     | 5300<br>(2300-8300)    |
| Zimbabwe | 1990 | Male   | 65 to 69 | 53%<br>(39-64%)                | 47%<br>(36-61%)          | 2.1<br>(1.3-3)                              | 7.9%<br>(4.7-11%)                    | 9.6%<br>(5.9-14%)                   | 190<br>(77-290)     | 4300<br>(1900-6700)    |
| Zimbabwe | 1990 | Male   | 70 to 74 | 49%<br>(36-62%)                | 51%<br>(38-64%)          | 1.7<br>(1.1-2.6)                            | 6.5%<br>(3.8-9.6%)                   | 7.9%<br>(4.7-12%)                   | 170<br>(73-280)     | 3200<br>(1400-5000)    |
| Zimbabwe | 1990 | Male   | 75 to 79 | 47%<br>(32-63%)                | 53%<br>(37-68%)          | 1.5<br>(0.85-2.3)                           | 4.9%<br>(2.4-7.7%)                   | 5.8%<br>(2.9-9.2%)                  | 110<br>(43-180)     | 1500<br>(620-2500)     |
| Zimbabwe | 1990 | Male   | 80 to 84 | 43%<br>(29-58%)                | 57%<br>(42-71%)          | 1.2<br>(0.7-1.8)                            | 3.5%<br>(1.6-5.6%)                   | 4.1%<br>(2-6.6%)                    | 55<br>(24-96)       | 570<br>(260-990)       |
| Zimbabwe | 1990 | Male   | 85 to 89 | 39%<br>(26-52%)                | 61%<br>(48-74%)          | 0.91<br>(0.5-1.4)                           | 2.1%<br>(0.81-3.6%)                  | 2.4%<br>(0.88-4.4%)                 | 19<br>(7-35)        | 140<br>(55-260)        |
| Zimbabwe | 1990 | Male   | 90 to 94 | 36%<br>(25-49%)                | 64%<br>(51-75%)          | 0.71<br>(0.38-1.2)                          | 1.1%<br>(0.27-2.3%)                  | 1.2%<br>(0.21-2.6%)                 | 4<br>(0.62-8.7)     | 22<br>(5.3-46)         |
| Zimbabwe | 1990 | Male   | 95 plus  | 37%<br>(23-53%)                | 63%<br>(47-77%)          | 0.58<br>(0.25-1.1)                          | 0.76%<br>(-0.053-2%)                 | 0.73%<br>(-0.24-2.2%)               | 0.58<br>(-0.2-1.7)  | 2.5<br>(-0.17-6.4)     |
| Zimbabwe | 1995 | Female | All Ages | 8.8%<br>(7.8-10%)              | 91%<br>(90-92%)          | 0.27<br>(0.21-0.33)                         | 0.53%<br>(0.31-0.84%)                | 0.72%<br>(0.34-1.3%)                | 420<br>(190-780)    | 18000<br>(11000-29000) |
| Zimbabwe | 1995 | Female | 15 to 19 | 6.2%<br>(4.6-8.4%)             | 94%<br>(92-95%)          | 0.18<br>(0.1-0.28)                          | 0.68%<br>(0.4-1%)                    | 0.48%<br>(0.17-1%)                  | 4.5<br>(1.7-9.7)    | 850<br>(500-1300)      |
| Zimbabwe | 1995 | Female | 20 to 24 | 9.7%<br>(7.4-12%)              | 90%<br>(88-93%)          | 0.37<br>(0.23-0.56)                         | 0.69%<br>(0.34-1.1%)                 | 0.35%<br>(0.11-0.83%)               | 10<br>(3.9-20)      | 1700<br>(1000-2500)    |
| Zimbabwe | 1995 | Female | 25 to 29 | 12%<br>(9.2-15%)               | 88%<br>(85-91%)          | 0.5<br>(0.32-0.76)                          | 0.48%<br>(0.24-0.87%)                | 0.28%<br>(0.089-0.67%)              | 14<br>(5.4-28)      | 1700<br>(1000-2600)    |
| Zimbabwe | 1995 | Female | 30 to 34 | 15%<br>(11-19%)                | 85%<br>(81-89%)          | 0.62<br>(0.38-0.93)                         | 0.54%<br>(0.27-0.95%)                | 0.39%<br>(0.13-0.86%)               | 19<br>(7.3-38)      | 1700<br>(920-2900)     |
| Zimbabwe | 1995 | Female | 35 to 39 | 18%<br>(14-22%)                | 82%<br>(78-86%)          | 0.68<br>(0.41-1)                            | 0.71%<br>(0.32-1.4%)                 | 0.62%<br>(0.22-1.4%)                | 26<br>(11-54)       | 1800<br>(950-3200)     |
| Zimbabwe | 1995 | Female | 40 to 44 | 19%<br>(15-23%)                | 81%<br>(77-85%)          | 0.69<br>(0.42-1)                            | 0.9%<br>(0.43-1.6%)                  | 0.88%<br>(0.34-1.8%)                | 32<br>(13-66)       | 1800<br>(890-3300)     |
| Zimbabwe | 1995 | Female | 45 to 49 | 20%<br>(15-25%)                | 80%<br>(75-85%)          | 0.72<br>(0.43-1.1)                          | 1.1%<br>(0.51-2.1%)                  | 1.2%<br>(0.47-2.3%)                 | 32<br>(13-65)       | 1500<br>(700-2800)     |
| Zimbabwe | 1995 | Female | 50 to 54 | 18%<br>(12-25%)                | 82%<br>(75-88%)          | 0.66<br>(0.36-1.1)                          | 1.5%<br>(0.7-2.7%)                   | 1.6%<br>(0.71-3.1%)                 | 41<br>(16-84)       | 1600<br>(710-3200)     |
| Zimbabwe | 1995 | Female | 55 to 59 | 15%<br>(9.7-22%)               | 85%<br>(78-90%)          | 0.58<br>(0.31-0.95)                         | 1.7%<br>(0.85-3%)                    | 2%<br>(0.91-3.5%)                   | 44<br>(18-86)       | 1500<br>(670-2800)     |
| Zimbabwe | 1995 | Female | 60 to 64 | 16%<br>(9.9-24%)               | 84%<br>(76-90%)          | 0.59<br>(0.31-1)                            | 1.8%<br>(0.84-3.2%)                  | 2.1%<br>(1-3.8%)                    | 48<br>(18-99)       | 1400<br>(570-2800)     |
| Zimbabwe | 1995 | Female | 65 to 69 | 18%<br>(12-24%)                | 82%<br>(76-88%)          | 0.58<br>(0.34-0.92)                         | 1.9%<br>(0.91-3.2%)                  | 2.3%<br>(1.2-3.8%)                  | 58<br>(22-120)      | 1300<br>(530-2600)     |
| Zimbabwe | 1995 | Female | 70 to 74 | 17%<br>(11-24%)                | 83%<br>(76-89%)          | 0.49<br>(0.27-0.79)                         | 1.4%<br>(0.63-2.5%)                  | 1.7%<br>(0.77-3%)                   | 43<br>(16-89)       | 790<br>(290-1600)      |

| Location | Year | Sex    | Age      | Prevalence of current drinkers | Prevalence of abstainers | Population average of standard drinks daily | Percent of total attributable deaths | Percent of total attributable DALYs | Attributable deaths  | Attributable DALYs      |
|----------|------|--------|----------|--------------------------------|--------------------------|---------------------------------------------|--------------------------------------|-------------------------------------|----------------------|-------------------------|
| Zimbabwe | 1995 | Female | 75 to 79 | 15%<br>(9.2-23%)               | 85%<br>(77-91%)          | 0.39<br>(0.2-0.69)                          | 0.84%<br>(0.14-1.8%)                 | 1%<br>(0.17-2.1%)                   | 28<br>(4-65)         | 390<br>(55-910)         |
| Zimbabwe | 1995 | Female | 80 to 84 | 15%<br>(8.4-22%)               | 85%<br>(78-92%)          | 0.35<br>(0.18-0.6)                          | 0.56%<br>(-0.05-1.3%)                | 0.67%<br>(-0.063-1.5%)              | 15<br>(-1.2-37)      | 160<br>(-12-380)        |
| Zimbabwe | 1995 | Female | 85 to 89 | 15%<br>(9.1-23%)               | 85%<br>(77-91%)          | 0.35<br>(0.18-0.61)                         | 0.32%<br>(-0.23-0.95%)               | 0.36%<br>(-0.29-1.1%)               | 4.7<br>(-3.7-15)     | 36<br>(-27-120)         |
| Zimbabwe | 1995 | Female | 90 to 94 | 16%<br>(10-24%)                | 84%<br>(76-90%)          | 0.35<br>(0.18-0.64)                         | 0.13%<br>(-0.44-0.8%)                | 0.1%<br>(-0.58-0.92%)               | 0.52<br>(-3.1-4.8)   | 3.9<br>(-14-25)         |
| Zimbabwe | 1995 | Female | 95 plus  | 19%<br>(10-31%)                | 81%<br>(69-90%)          | 0.37<br>(0.16-0.72)                         | 0.038%<br>(-0.74-0.84%)              | -0.041%<br>(-0.95-0.89%)            | -0.058<br>(-1.3-1.2) | 0.19<br>(-3.9-4.4)      |
| Zimbabwe | 1995 | Male   | All Ages | 36%<br>(32-40%)                | 64%<br>(60-68%)          | 1.5<br>(1.2-1.8)                            | 2.3%<br>(1.3-3.8%)                   | 3%<br>(1.6-4.9%)                    | 2200<br>(1100-3700)  | 99000<br>(55000-160000) |
| Zimbabwe | 1995 | Male   | 15 to 19 | 35%<br>(28-42%)                | 65%<br>(58-72%)          | 1.4<br>(0.9-1.9)                            | 4.5%<br>(2.9-6.3%)                   | 5.7%<br>(3.4-8.6%)                  | 57<br>(25-100)       | 5400<br>(3000-8600)     |
| Zimbabwe | 1995 | Male   | 20 to 24 | 49%<br>(41-56%)                | 51%<br>(44-59%)          | 2.8<br>(1.9-3.8)                            | 5.8%<br>(2.9-9.9%)                   | 6%<br>(2.5-11%)                     | 170<br>(79-300)      | 14000<br>(7600-23000)   |
| Zimbabwe | 1995 | Male   | 25 to 29 | 54%<br>(47-61%)                | 46%<br>(39-53%)          | 3.2<br>(2.4-4.4)                            | 3.2%<br>(1.5-6.1%)                   | 3.1%<br>(1.2-6.4%)                  | 180<br>(85-320)      | 13000<br>(7100-22000)   |
| Zimbabwe | 1995 | Male   | 30 to 34 | 56%<br>(49-62%)                | 44%<br>(38-51%)          | 3.4<br>(2.5-4.6)                            | 2.7%<br>(1.3-5%)                     | 2.6%<br>(1.1-5.2%)                  | 180<br>(85-340)      | 12000<br>(6200-20000)   |
| Zimbabwe | 1995 | Male   | 35 to 39 | 56%<br>(49-64%)                | 44%<br>(36-51%)          | 3.3<br>(2.3-4.5)                            | 2.9%<br>(1.3-5.7%)                   | 2.9%<br>(1.1-6.2%)                  | 180<br>(81-340)      | 10000<br>(5100-18000)   |
| Zimbabwe | 1995 | Male   | 40 to 44 | 58%<br>(50-67%)                | 42%<br>(33-50%)          | 3.4<br>(2.3-4.7)                            | 3.3%<br>(1.5-6.2%)                   | 3.4%<br>(1.4-6.9%)                  | 200<br>(86-360)      | 9600<br>(4500-17000)    |
| Zimbabwe | 1995 | Male   | 45 to 49 | 62%<br>(53-70%)                | 38%<br>(30-47%)          | 3.8<br>(2.5-5.2)                            | 4.3%<br>(2-7.7%)                     | 4.5%<br>(1.9-8.3%)                  | 200<br>(86-350)      | 8500<br>(4100-15000)    |
| Zimbabwe | 1995 | Male   | 50 to 54 | 61%<br>(52-69%)                | 39%<br>(31-48%)          | 3.5<br>(2.3-5)                              | 5.6%<br>(3-9.2%)                     | 6%<br>(3-10%)                       | 220<br>(96-390)      | 8300<br>(4100-15000)    |
| Zimbabwe | 1995 | Male   | 55 to 59 | 56%<br>(44-67%)                | 44%<br>(33-56%)          | 2.5<br>(1.6-3.7)                            | 5.3%<br>(2.7-8.6%)                   | 5.9%<br>(2.9-9.8%)                  | 180<br>(79-310)      | 5900<br>(2900-10000)    |
| Zimbabwe | 1995 | Male   | 60 to 64 | 54%<br>(39-65%)                | 46%<br>(35-61%)          | 1.9<br>(1.2-3)                              | 4.9%<br>(2.5-8%)                     | 5.6%<br>(2.7-9.3%)                  | 160<br>(65-280)      | 4400<br>(2000-7700)     |
| Zimbabwe | 1995 | Male   | 65 to 69 | 53%<br>(39-64%)                | 47%<br>(36-61%)          | 1.6<br>(1-2.4)                              | 4.9%<br>(2.7-7.5%)                   | 5.7%<br>(3.1-8.8%)                  | 160<br>(72-280)      | 3700<br>(1700-6400)     |
| Zimbabwe | 1995 | Male   | 70 to 74 | 49%<br>(37-62%)                | 51%<br>(38-63%)          | 1.4<br>(0.83-2)                             | 4.2%<br>(2.2-6.4%)                   | 4.9%<br>(2.6-7.5%)                  | 130<br>(58-230)      | 2400<br>(1100-4200)     |
| Zimbabwe | 1995 | Male   | 75 to 79 | 46%<br>(32-62%)                | 54%<br>(38-68%)          | 1.2<br>(0.65-1.8)                           | 3.2%<br>(1.5-5.2%)                   | 3.8%<br>(1.7-6.2%)                  | 100<br>(40-180)      | 1400<br>(580-2500)      |
| Zimbabwe | 1995 | Male   | 80 to 84 | 43%<br>(29-58%)                | 57%<br>(42-71%)          | 0.93<br>(0.54-1.4)                          | 2.4%<br>(1-4.2%)                     | 2.9%<br>(1.2-4.9%)                  | 51<br>(20-93)        | 530<br>(210-960)        |
| Zimbabwe | 1995 | Male   | 85 to 89 | 39%<br>(26-52%)                | 61%<br>(48-74%)          | 0.71<br>(0.4-1.1)                           | 1.4%<br>(0.44-2.6%)                  | 1.6%<br>(0.45-3%)                   | 16<br>(4.4-30)       | 120<br>(37-220)         |
| Zimbabwe | 1995 | Male   | 90 to 94 | 36%<br>(25-50%)                | 64%<br>(50-75%)          | 0.56<br>(0.3-0.95)                          | 0.72%<br>(0.028-1.6%)                | 0.77%<br>(-0.067-1.8%)              | 3<br>(-0.27-7.2)     | 17<br>(0.58-38)         |

| Location | Year | Sex    | Age      | Prevalence of current drinkers | Prevalence of abstainers | Population average of standard drinks daily | Percent of total attributable deaths | Percent of total attributable DALYs | Attributable deaths | Attributable DALYs        |
|----------|------|--------|----------|--------------------------------|--------------------------|---------------------------------------------|--------------------------------------|-------------------------------------|---------------------|---------------------------|
| Zimbabwe | 1995 | Male   | 95 plus  | 37%<br>(23-54%)                | 63%<br>(46-77%)          | 0.46<br>(0.21-0.89)                         | 0.52%<br>(-0.15-1.2%)                | 0.45%<br>(-0.35-1.3%)               | 0.43<br>(-0.35-1.3) | 2<br>(-0.59-5)            |
| Zimbabwe | 2000 | Female | All Ages | 8.2%<br>(7.1-9.6%)             | 92%<br>(90-93%)          | 0.25<br>(0.2-0.32)                          | 0.55%<br>(0.32-0.91%)                | 0.74%<br>(0.36-1.3%)                | 670<br>(300-1200)   | 27000<br>(15000-45000)    |
| Zimbabwe | 2000 | Female | 15 to 19 | 6.8%<br>(4.6-9.7%)             | 93%<br>(90-95%)          | 0.2<br>(0.11-0.33)                          | 0.83%<br>(0.46-1.4%)                 | 0.74%<br>(0.27-1.6%)                | 9.8<br>(3.7-22)     | 1300<br>(750-2300)        |
| Zimbabwe | 2000 | Female | 20 to 24 | 8.9%<br>(5.9-12%)              | 91%<br>(88-94%)          | 0.36<br>(0.2-0.56)                          | 0.81%<br>(0.39-1.4%)                 | 0.52%<br>(0.17-1.2%)                | 19<br>(7.8-39)      | 2500<br>(1500-4000)       |
| Zimbabwe | 2000 | Female | 25 to 29 | 11%<br>(7.5-15%)               | 89%<br>(85-93%)          | 0.47<br>(0.27-0.73)                         | 0.43%<br>(0.21-0.88%)                | 0.29%<br>(0.092-0.71%)              | 24<br>(9.5-51)      | 2400<br>(1300-4200)       |
| Zimbabwe | 2000 | Female | 30 to 34 | 13%<br>(9-18%)                 | 87%<br>(82-91%)          | 0.56<br>(0.32-0.89)                         | 0.41%<br>(0.2-0.79%)                 | 0.32%<br>(0.11-0.73%)               | 29<br>(11-63)       | 2300<br>(1200-4100)       |
| Zimbabwe | 2000 | Female | 35 to 39 | 15%<br>(10-20%)                | 85%<br>(80-90%)          | 0.59<br>(0.34-0.92)                         | 0.57%<br>(0.25-1.2%)                 | 0.51%<br>(0.18-1.2%)                | 40<br>(16-91)       | 2500<br>(1200-4900)       |
| Zimbabwe | 2000 | Female | 40 to 44 | 17%<br>(12-21%)                | 83%<br>(79-88%)          | 0.62<br>(0.35-0.97)                         | 0.75%<br>(0.34-1.4%)                 | 0.73%<br>(0.29-1.5%)                | 50<br>(21-110)      | 2600<br>(1200-5100)       |
| Zimbabwe | 2000 | Female | 45 to 49 | 17%<br>(12-23%)                | 83%<br>(77-88%)          | 0.64<br>(0.36-1)                            | 1%<br>(0.48-2%)                      | 1.1%<br>(0.43-2.2%)                 | 60<br>(25-120)      | 2700<br>(1200-5300)       |
| Zimbabwe | 2000 | Female | 50 to 54 | 16%<br>(11-22%)                | 84%<br>(78-89%)          | 0.61<br>(0.34-1)                            | 1.3%<br>(0.63-2.4%)                  | 1.4%<br>(0.62-2.6%)                 | 56<br>(23-110)      | 2200<br>(990-4200)        |
| Zimbabwe | 2000 | Female | 55 to 59 | 14%<br>(9.2-20%)               | 86%<br>(80-91%)          | 0.56<br>(0.3-0.91)                          | 1.7%<br>(0.89-3%)                    | 1.9%<br>(0.92-3.3%)                 | 70<br>(30-140)      | 2300<br>(1000-4400)       |
| Zimbabwe | 2000 | Female | 60 to 64 | 15%<br>(9.7-22%)               | 85%<br>(78-90%)          | 0.58<br>(0.31-0.97)                         | 1.8%<br>(0.87-3.2%)                  | 2%<br>(0.95-3.7%)                   | 73<br>(29-140)      | 2000<br>(860-3900)        |
| Zimbabwe | 2000 | Female | 65 to 69 | 18%<br>(12-25%)                | 82%<br>(75-88%)          | 0.61<br>(0.35-0.97)                         | 2.1%<br>(0.95-3.6%)                  | 2.4%<br>(1.1-4.2%)                  | 92<br>(37-180)      | 2100<br>(870-4100)        |
| Zimbabwe | 2000 | Female | 70 to 74 | 17%<br>(12-24%)                | 83%<br>(76-88%)          | 0.52<br>(0.29-0.87)                         | 1.5%<br>(0.58-2.9%)                  | 1.7%<br>(0.66-3.3%)                 | 73<br>(24-160)      | 1300<br>(440-2800)        |
| Zimbabwe | 2000 | Female | 75 to 79 | 15%<br>(9.3-23%)               | 85%<br>(77-91%)          | 0.41<br>(0.2-0.72)                          | 0.88%<br>(0.057-2%)                  | 1%<br>(0.074-2.3%)                  | 39<br>(2.7-95)      | 550<br>(36-1300)          |
| Zimbabwe | 2000 | Female | 80 to 84 | 15%<br>(9-22%)                 | 85%<br>(78-91%)          | 0.38<br>(0.2-0.65)                          | 0.58%<br>(-0.072-1.5%)               | 0.67%<br>(-0.092-1.7%)              | 22<br>(-3.2-60)     | 230<br>(-33-620)          |
| Zimbabwe | 2000 | Female | 85 to 89 | 16%<br>(9.4-23%)               | 84%<br>(77-91%)          | 0.38<br>(0.19-0.65)                         | 0.33%<br>(-0.31-1.1%)                | 0.37%<br>(-0.38-1.3%)               | 7.4<br>(-7.1-26)    | 57<br>(-49-190)           |
| Zimbabwe | 2000 | Female | 90 to 94 | 17%<br>(11-25%)                | 83%<br>(75-89%)          | 0.38<br>(0.19-0.67)                         | 0.14%<br>(-0.5-0.96%)                | 0.12%<br>(-0.64-1.1%)               | 0.84<br>(-4.5-7.7)  | 5.9<br>(-21-40)           |
| Zimbabwe | 2000 | Female | 95 plus  | 20%<br>(11-32%)                | 80%<br>(68-89%)          | 0.4<br>(0.17-0.79)                          | 0.056%<br>(-0.78-1%)                 | -0.015%<br>(-1-1.1%)                | -0.03<br>(-1.9-2.1) | 0.41<br>(-5.6-7.6)        |
| Zimbabwe | 2000 | Male   | All Ages | 34%<br>(30-39%)                | 66%<br>(61-70%)          | 1.5<br>(1.2-1.8)                            | 3.6%<br>(2.4-5%)                     | 4.5%<br>(2.9-6.3%)                  | 4600<br>(2900-6600) | 200000<br>(130000-270000) |
| Zimbabwe | 2000 | Male   | 15 to 19 | 30%<br>(23-37%)                | 70%<br>(63-77%)          | 1.2<br>(0.82-1.8)                           | 5.2%<br>(3.4-7.4%)                   | 6.4%<br>(4-9.5%)                    | 110<br>(61-170)     | 9500<br>(5900-14000)      |
| Zimbabwe | 2000 | Male   | 20 to 24 | 45%<br>(36-54%)                | 55%<br>(46-64%)          | 2.6<br>(1.8-3.5)                            | 9.4%<br>(5.5-14%)                    | 10%<br>(5.5-16%)                    | 370<br>(230-540)    | 27000<br>(18000-38000)    |

| Location | Year | Sex    | Age      | Prevalence of current drinkers | Prevalence of abstainers | Population average of standard drinks daily | Percent of total attributable deaths | Percent of total attributable DALYs | Attributable deaths | Attributable DALYs     |
|----------|------|--------|----------|--------------------------------|--------------------------|---------------------------------------------|--------------------------------------|-------------------------------------|---------------------|------------------------|
| Zimbabwe | 2000 | Male   | 25 to 29 | 51%<br>(42-59%)                | 49%<br>(41-58%)          | 3.2<br>(2.2-4.2)                            | 5%<br>(2.7-8.9%)                     | 5.1%<br>(2.5-9.6%)                  | 390<br>(240-570)    | 26000<br>(17000-37000) |
| Zimbabwe | 2000 | Male   | 30 to 34 | 53%<br>(44-61%)                | 47%<br>(39-56%)          | 3.4<br>(2.3-4.5)                            | 3.6%<br>(2-6%)                       | 3.6%<br>(1.9-6.2%)                  | 370<br>(220-550)    | 22000<br>(14000-32000) |
| Zimbabwe | 2000 | Male   | 35 to 39 | 55%<br>(47-65%)                | 45%<br>(35-53%)          | 3.4<br>(2.4-4.7)                            | 3.9%<br>(2.2-6.7%)                   | 4%<br>(2.1-7.2%)                    | 390<br>(240-590)    | 21000<br>(13000-31000) |
| Zimbabwe | 2000 | Male   | 40 to 44 | 58%<br>(48-68%)                | 42%<br>(32-52%)          | 3.6<br>(2.4-5)                              | 4.6%<br>(2.6-7.2%)                   | 4.8%<br>(2.7-7.7%)                  | 430<br>(240-660)    | 20000<br>(12000-31000) |
| Zimbabwe | 2000 | Male   | 45 to 49 | 62%<br>(52-71%)                | 38%<br>(29-48%)          | 4<br>(2.6-5.6)                              | 6.3%<br>(3.6-10%)                    | 6.7%<br>(3.7-11%)                   | 500<br>(280-770)    | 21000<br>(12000-32000) |
| Zimbabwe | 2000 | Male   | 50 to 54 | 63%<br>(54-72%)                | 37%<br>(28-46%)          | 3.8<br>(2.4-5.5)                            | 7.5%<br>(4.5-11%)                    | 8%<br>(4.7-12%)                     | 420<br>(230-660)    | 16000<br>(9000-24000)  |
| Zimbabwe | 2000 | Male   | 55 to 59 | 58%<br>(47-67%)                | 42%<br>(33-53%)          | 2.8<br>(1.8-4)                              | 7.7%<br>(4.7-12%)                    | 8.5%<br>(5.1-13%)                   | 400<br>(210-630)    | 13000<br>(7100-20000)  |
| Zimbabwe | 2000 | Male   | 60 to 64 | 53%<br>(41-64%)                | 47%<br>(36-59%)          | 2<br>(1.2-3.1)                              | 6.4%<br>(3.6-10%)                    | 7.1%<br>(3.9-11%)                   | 330<br>(160-560)    | 8900<br>(4500-15000)   |
| Zimbabwe | 2000 | Male   | 65 to 69 | 51%<br>(38-62%)                | 49%<br>(38-62%)          | 1.7<br>(1.1-2.5)                            | 6.3%<br>(3.5-9.5%)                   | 7%<br>(4-11%)                       | 320<br>(160-510)    | 7100<br>(3700-11000)   |
| Zimbabwe | 2000 | Male   | 70 to 74 | 50%<br>(38-62%)                | 50%<br>(38-62%)          | 1.4<br>(0.89-2.2)                           | 5.3%<br>(2.7-8.2%)                   | 6%<br>(3-9.4%)                      | 270<br>(130-450)    | 4800<br>(2300-8000)    |
| Zimbabwe | 2000 | Male   | 75 to 79 | 49%<br>(35-63%)                | 51%<br>(37-65%)          | 1.3<br>(0.72-1.9)                           | 4%<br>(1.7-6.7%)                     | 4.6%<br>(1.9-7.8%)                  | 180<br>(65-310)     | 2400<br>(940-4200)     |
| Zimbabwe | 2000 | Male   | 80 to 84 | 44%<br>(30-60%)                | 56%<br>(40-70%)          | 1<br>(0.57-1.6)                             | 3%<br>(0.99-5.2%)                    | 3.4%<br>(1.1-5.9%)                  | 95<br>(30-170)      | 980<br>(330-1800)      |
| Zimbabwe | 2000 | Male   | 85 to 89 | 39%<br>(26-52%)                | 61%<br>(48-74%)          | 0.76<br>(0.42-1.2)                          | 1.7%<br>(0.48-3.3%)                  | 1.9%<br>(0.48-3.7%)                 | 30<br>(7.7-60)      | 230<br>(64-440)        |
| Zimbabwe | 2000 | Male   | 90 to 94 | 37%<br>(25-50%)                | 63%<br>(50-75%)          | 0.6<br>(0.31-0.99)                          | 0.9%<br>(0.078-1.9%)                 | 0.97%<br>(0.0033-2.1%)              | 5.3<br>(0.017-12)   | 29<br>(2.6-62)         |
| Zimbabwe | 2000 | Male   | 95 plus  | 37%<br>(23-53%)                | 63%<br>(47-77%)          | 0.49<br>(0.21-0.94)                         | 0.69%<br>(-0.057-1.6%)               | 0.66%<br>(-0.24-1.8%)               | 0.84<br>(-0.3-2.3)  | 3.5<br>(-0.29-8.5)     |
| Zimbabwe | 2005 | Female | All Ages | 8%<br>(6.7-9.4%)               | 92%<br>(91-93%)          | 0.28<br>(0.22-0.35)                         | 0.68%<br>(0.38-1.1%)                 | 0.97%<br>(0.5-1.6%)                 | 1000<br>(480-1700)  | 38000<br>(21000-60000) |
| Zimbabwe | 2005 | Female | 15 to 19 | 7.1%<br>(4.5-10%)              | 93%<br>(90-95%)          | 0.24<br>(0.13-0.39)                         | 0.86%<br>(0.47-1.5%)                 | 0.79%<br>(0.31-1.6%)                | 16<br>(5.9-33)      | 1800<br>(960-3100)     |
| Zimbabwe | 2005 | Female | 20 to 24 | 8.8%<br>(5.6-13%)              | 91%<br>(87-94%)          | 0.4<br>(0.22-0.64)                          | 1.2%<br>(0.57-2.1%)                  | 0.92%<br>(0.31-2.1%)                | 33<br>(13-68)       | 3600<br>(2000-6100)    |
| Zimbabwe | 2005 | Female | 25 to 29 | 10%<br>(6.7-15%)               | 90%<br>(85-93%)          | 0.5<br>(0.29-0.81)                          | 0.62%<br>(0.28-1.2%)                 | 0.48%<br>(0.15-1.1%)                | 40<br>(15-85)       | 3600<br>(1800-6200)    |
| Zimbabwe | 2005 | Female | 30 to 34 | 12%<br>(7.7-18%)               | 88%<br>(82-92%)          | 0.58<br>(0.32-0.94)                         | 0.47%<br>(0.21-0.94%)                | 0.39%<br>(0.13-0.89%)               | 41<br>(14-87)       | 3000<br>(1400-5600)    |
| Zimbabwe | 2005 | Female | 35 to 39 | 14%<br>(8.4-19%)               | 86%<br>(81-92%)          | 0.61<br>(0.33-0.95)                         | 0.6%<br>(0.24-1.2%)                  | 0.56%<br>(0.18-1.2%)                | 50<br>(18-110)      | 3000<br>(1300-6000)    |
| Zimbabwe | 2005 | Female | 40 to 44 | 15%<br>(10-21%)                | 85%<br>(79-90%)          | 0.63<br>(0.35-1)                            | 0.79%<br>(0.34-1.5%)                 | 0.78%<br>(0.28-1.6%)                | 60<br>(22-120)      | 3000<br>(1300-5700)    |

| Location | Year | Sex    | Age      | Prevalence of current drinkers | Prevalence of abstainers | Population average of standard drinks daily | Percent of total attributable deaths | Percent of total attributable DALYs | Attributable deaths | Attributable DALYs        |
|----------|------|--------|----------|--------------------------------|--------------------------|---------------------------------------------|--------------------------------------|-------------------------------------|---------------------|---------------------------|
| Zimbabwe | 2005 | Female | 45 to 49 | 16%<br>(11-22%)                | 84%<br>(78-89%)          | 0.67<br>(0.36-1.1)                          | 1.2%<br>(0.5-2.3%)                   | 1.2%<br>(0.47-2.4%)                 | 76<br>(30-150)      | 3300<br>(1500-6200)       |
| Zimbabwe | 2005 | Female | 50 to 54 | 16%<br>(11-22%)                | 84%<br>(78-89%)          | 0.67<br>(0.37-1.1)                          | 1.7%<br>(0.79-3%)                    | 1.8%<br>(0.79-3.2%)                 | 91<br>(37-170)      | 3500<br>(1500-6400)       |
| Zimbabwe | 2005 | Female | 55 to 59 | 14%<br>(9.3-20%)               | 86%<br>(80-91%)          | 0.64<br>(0.35-1.1)                          | 2.2%<br>(1.1-3.7%)                   | 2.4%<br>(1.2-4.1%)                  | 89<br>(38-170)      | 2900<br>(1300-5400)       |
| Zimbabwe | 2005 | Female | 60 to 64 | 15%<br>(9.8-22%)               | 85%<br>(78-90%)          | 0.67<br>(0.36-1.1)                          | 2.5%<br>(1.2-4.2%)                   | 2.8%<br>(1.4-4.8%)                  | 110<br>(46-220)     | 3100<br>(1300-5900)       |
| Zimbabwe | 2005 | Female | 65 to 69 | 18%<br>(12-25%)                | 82%<br>(75-88%)          | 0.7<br>(0.4-1.1)                            | 2.8%<br>(1.4-4.8%)                   | 3.2%<br>(1.6-5.5%)                  | 140<br>(62-260)     | 3200<br>(1400-5700)       |
| Zimbabwe | 2005 | Female | 70 to 74 | 18%<br>(12-25%)                | 82%<br>(75-88%)          | 0.6<br>(0.33-1)                             | 2.1%<br>(0.91-4%)                    | 2.4%<br>(1.1-4.6%)                  | 120<br>(44-240)     | 2100<br>(790-4200)        |
| Zimbabwe | 2005 | Female | 75 to 79 | 16%<br>(9.2-24%)               | 84%<br>(76-91%)          | 0.48<br>(0.24-0.85)                         | 1.3%<br>(0.28-2.8%)                  | 1.5%<br>(0.32-3.2%)                 | 74<br>(14-170)      | 1000<br>(200-2400)        |
| Zimbabwe | 2005 | Female | 80 to 84 | 15%<br>(9.3-23%)               | 85%<br>(77-91%)          | 0.44<br>(0.23-0.77)                         | 0.91%<br>(0.16-2%)                   | 1%<br>(0.19-2.2%)                   | 45<br>(7.8-100)     | 460<br>(79-1000)          |
| Zimbabwe | 2005 | Female | 85 to 89 | 16%<br>(9.7-24%)               | 84%<br>(76-90%)          | 0.43<br>(0.22-0.73)                         | 0.63%<br>(-0.038-1.6%)               | 0.71%<br>(-0.053-1.8%)              | 16<br>(-1.3-41)     | 120<br>(-6.5-300)         |
| Zimbabwe | 2005 | Female | 90 to 94 | 17%<br>(11-26%)                | 83%<br>(74-89%)          | 0.44<br>(0.22-0.75)                         | 0.39%<br>(-0.24-1.3%)                | 0.42%<br>(-0.33-1.5%)               | 3.6<br>(-2.9-13)    | 20<br>(-12-65)            |
| Zimbabwe | 2005 | Female | 95 plus  | 20%<br>(11-32%)                | 80%<br>(68-89%)          | 0.45<br>(0.2-0.89)                          | 0.29%<br>(-0.48-1.4%)                | 0.27%<br>(-0.66-1.5%)               | 0.56<br>(-1.4-3.3)  | 2.4<br>(-4-12)            |
| Zimbabwe | 2005 | Male   | All Ages | 31%<br>(27-35%)                | 69%<br>(65-73%)          | 1.6<br>(1.3-1.8)                            | 5%<br>(3.7-6.4%)                     | 6.5%<br>(4.8-8.5%)                  | 7300<br>(5300-9600) | 300000<br>(230000-390000) |
| Zimbabwe | 2005 | Male   | 15 to 19 | 24%<br>(17-32%)                | 76%<br>(68-83%)          | 1.1<br>(0.69-1.6)                           | 4.9%<br>(3.1-7.3%)                   | 5.6%<br>(3.2-8.6%)                  | 150<br>(83-220)     | 12000<br>(7500-18000)     |
| Zimbabwe | 2005 | Male   | 20 to 24 | 38%<br>(29-48%)                | 62%<br>(52-71%)          | 2.6<br>(1.8-3.5)                            | 13%<br>(8.2-18%)                     | 15%<br>(8.7-21%)                    | 540<br>(360-750)    | 39000<br>(26000-53000)    |
| Zimbabwe | 2005 | Male   | 25 to 29 | 46%<br>(37-54%)                | 54%<br>(46-63%)          | 3.3<br>(2.3-4.3)                            | 8.6%<br>(5-14%)                      | 9.1%<br>(4.9-16%)                   | 610<br>(420-820)    | 40000<br>(28000-53000)    |
| Zimbabwe | 2005 | Male   | 30 to 34 | 48%<br>(38-58%)                | 52%<br>(42-62%)          | 3.4<br>(2.4-4.7)                            | 5.6%<br>(3.4-8.9%)                   | 5.7%<br>(3.4-9.4%)                  | 560<br>(380-770)    | 33000<br>(23000-44000)    |
| Zimbabwe | 2005 | Male   | 35 to 39 | 52%<br>(44-62%)                | 48%<br>(38-56%)          | 3.6<br>(2.5-5)                              | 5.4%<br>(3.2-8.6%)                   | 5.7%<br>(3.2-9.3%)                  | 560<br>(360-800)    | 29000<br>(19000-41000)    |
| Zimbabwe | 2005 | Male   | 40 to 44 | 56%<br>(46-66%)                | 44%<br>(34-54%)          | 3.9<br>(2.6-5.4)                            | 6.4%<br>(4.2-9.2%)                   | 6.8%<br>(4.3-9.8%)                  | 620<br>(410-870)    | 29000<br>(19000-40000)    |
| Zimbabwe | 2005 | Male   | 45 to 49 | 62%<br>(51-71%)                | 38%<br>(29-49%)          | 4.5<br>(3-6.4)                              | 9%<br>(5.9-13%)                      | 9.6%<br>(6.2-14%)                   | 750<br>(510-1100)   | 31000<br>(21000-43000)    |
| Zimbabwe | 2005 | Male   | 50 to 54 | 65%<br>(55-73%)                | 35%<br>(27-45%)          | 4.4<br>(2.8-6.3)                            | 12%<br>(7.9-16%)                     | 13%<br>(8.5-17%)                    | 790<br>(510-1100)   | 29000<br>(19000-40000)    |
| Zimbabwe | 2005 | Male   | 55 to 59 | 59%<br>(49-68%)                | 41%<br>(32-51%)          | 3.2<br>(2.1-4.6)                            | 11%<br>(7.5-16%)                     | 13%<br>(8.3-18%)                    | 580<br>(370-840)    | 18000<br>(12000-26000)    |
| Zimbabwe | 2005 | Male   | 60 to 64 | 53%<br>(42-64%)                | 47%<br>(36-58%)          | 2.3<br>(1.4-3.5)                            | 9.9%<br>(5.9-15%)                    | 11%<br>(6.4-17%)                    | 560<br>(330-870)    | 15000<br>(9000-23000)     |

| Location | Year | Sex    | Age      | Prevalence of current drinkers | Prevalence of abstainers | Population average of standard drinks daily | Percent of total attributable deaths | Percent of total attributable DALYs | Attributable deaths | Attributable DALYs     |
|----------|------|--------|----------|--------------------------------|--------------------------|---------------------------------------------|--------------------------------------|-------------------------------------|---------------------|------------------------|
| Zimbabwe | 2005 | Male   | 65 to 69 | 51%<br>(40-63%)                | 49%<br>(37-60%)          | 1.9<br>(1.2-2.8)                            | 9.3%<br>(5.6-14%)                    | 10%<br>(6.1-15%)                    | 540<br>(320-820)    | 12000<br>(7200-18000)  |
| Zimbabwe | 2005 | Male   | 70 to 74 | 50%<br>(38-61%)                | 50%<br>(39-62%)          | 1.6<br>(1-2.4)                              | 7.7%<br>(4.1-12%)                    | 8.7%<br>(4.7-13%)                   | 460<br>(240-700)    | 8100<br>(4300-13000)   |
| Zimbabwe | 2005 | Male   | 75 to 79 | 49%<br>(36-63%)                | 51%<br>(37-64%)          | 1.4<br>(0.82-2.3)                           | 6%<br>(2.5-9.9%)                     | 6.7%<br>(2.8-11%)                   | 320<br>(140-530)    | 4400<br>(1900-7400)    |
| Zimbabwe | 2005 | Male   | 80 to 84 | 45%<br>(31-60%)                | 55%<br>(40-69%)          | 1.1<br>(0.66-1.8)                           | 4.3%<br>(1.7-7.4%)                   | 4.9%<br>(1.9-8.4%)                  | 170<br>(69-300)     | 1800<br>(720-3000)     |
| Zimbabwe | 2005 | Male   | 85 to 89 | 39%<br>(26-52%)                | 61%<br>(48-74%)          | 0.85<br>(0.47-1.3)                          | 2.5%<br>(0.88-4.6%)                  | 2.9%<br>(0.98-5.3%)                 | 51<br>(17-92)       | 370<br>(130-670)       |
| Zimbabwe | 2005 | Male   | 90 to 94 | 37%<br>(25-49%)                | 63%<br>(51-75%)          | 0.66<br>(0.36-1.1)                          | 1.4%<br>(0.34-2.7%)                  | 1.5%<br>(0.32-3.1%)                 | 10<br>(2.1-20)      | 53<br>(13-100)         |
| Zimbabwe | 2005 | Male   | 95 plus  | 37%<br>(23-53%)                | 63%<br>(47-77%)          | 0.54<br>(0.23-1)                            | 1%<br>(0.2-2.4%)                     | 1.1%<br>(0.072-2.6%)                | 1.6<br>(0.1-3.8)    | 6<br>(1.1-13)          |
| Zimbabwe | 2010 | Female | All Ages | 9.1%<br>(7.6-11%)              | 91%<br>(89-92%)          | 0.3<br>(0.22-0.39)                          | 0.73%<br>(0.4-1.2%)                  | 1%<br>(0.51-1.7%)                   | 950<br>(410-1700)   | 38000<br>(20000-62000) |
| Zimbabwe | 2010 | Female | 15 to 19 | 7.7%<br>(5.1-11%)              | 92%<br>(89-95%)          | 0.24<br>(0.12-0.39)                         | 0.71%<br>(0.36-1.3%)                 | 0.59%<br>(0.2-1.3%)                 | 15<br>(5-32)        | 1800<br>(890-3100)     |
| Zimbabwe | 2010 | Female | 20 to 24 | 11%<br>(6.5-15%)               | 89%<br>(85-94%)          | 0.43<br>(0.23-0.68)                         | 1.4%<br>(0.67-2.4%)                  | 1.1%<br>(0.39-2.4%)                 | 36<br>(13-73)       | 4000<br>(2200-6700)    |
| Zimbabwe | 2010 | Female | 25 to 29 | 13%<br>(7.7-18%)               | 87%<br>(82-92%)          | 0.54<br>(0.31-0.89)                         | 0.9%<br>(0.4-1.7%)                   | 0.74%<br>(0.23-1.7%)                | 49<br>(18-100)      | 4300<br>(2300-7600)    |
| Zimbabwe | 2010 | Female | 30 to 34 | 14%<br>(8.7-22%)               | 86%<br>(78-91%)          | 0.62<br>(0.35-1)                            | 0.69%<br>(0.3-1.3%)                  | 0.59%<br>(0.19-1.3%)                | 51<br>(17-110)      | 3700<br>(1700-6800)    |
| Zimbabwe | 2010 | Female | 35 to 39 | 16%<br>(9.8-23%)               | 84%<br>(77-90%)          | 0.65<br>(0.35-1.1)                          | 0.76%<br>(0.32-1.6%)                 | 0.72%<br>(0.24-1.6%)                | 55<br>(19-120)      | 3300<br>(1500-6600)    |
| Zimbabwe | 2010 | Female | 40 to 44 | 17%<br>(11-24%)                | 83%<br>(76-89%)          | 0.67<br>(0.35-1.1)                          | 0.98%<br>(0.42-1.9%)                 | 0.98%<br>(0.36-2%)                  | 57<br>(20-120)      | 2900<br>(1200-5600)    |
| Zimbabwe | 2010 | Female | 45 to 49 | 18%<br>(11-25%)                | 82%<br>(75-89%)          | 0.67<br>(0.35-1.1)                          | 1.4%<br>(0.6-2.8%)                   | 1.5%<br>(0.56-3%)                   | 68<br>(24-140)      | 3000<br>(1200-5900)    |
| Zimbabwe | 2010 | Female | 50 to 54 | 17%<br>(11-24%)                | 83%<br>(76-89%)          | 0.65<br>(0.35-1.1)                          | 2%<br>(0.9-3.6%)                     | 2.1%<br>(0.93-4%)                   | 83<br>(31-170)      | 3200<br>(1300-6200)    |
| Zimbabwe | 2010 | Female | 55 to 59 | 16%<br>(11-22%)                | 84%<br>(78-89%)          | 0.65<br>(0.35-1.1)                          | 2.5%<br>(1.3-4.4%)                   | 2.9%<br>(1.4-5%)                    | 100<br>(37-200)     | 3300<br>(1300-6300)    |
| Zimbabwe | 2010 | Female | 60 to 64 | 17%<br>(11-24%)                | 83%<br>(76-89%)          | 0.66<br>(0.35-1.1)                          | 2.6%<br>(1.3-4.7%)                   | 3%<br>(1.4-5.5%)                    | 94<br>(34-180)      | 2600<br>(1000-5000)    |
| Zimbabwe | 2010 | Female | 65 to 69 | 19%<br>(12-26%)                | 81%<br>(74-88%)          | 0.65<br>(0.34-1.1)                          | 2.8%<br>(1.3-4.9%)                   | 3.2%<br>(1.6-5.7%)                  | 130<br>(49-260)     | 2900<br>(1200-5700)    |
| Zimbabwe | 2010 | Female | 70 to 74 | 18%<br>(12-25%)                | 82%<br>(75-88%)          | 0.55<br>(0.28-0.93)                         | 1.9%<br>(0.76-3.7%)                  | 2.2%<br>(0.88-4.2%)                 | 100<br>(32-210)     | 1800<br>(590-3800)     |
| Zimbabwe | 2010 | Female | 75 to 79 | 16%<br>(9.7-24%)               | 84%<br>(76-90%)          | 0.44<br>(0.21-0.77)                         | 1.1%<br>(0.17-2.5%)                  | 1.3%<br>(0.19-2.9%)                 | 62<br>(8-150)       | 860<br>(120-2100)      |
| Zimbabwe | 2010 | Female | 80 to 84 | 15%<br>(9.3-23%)               | 85%<br>(77-91%)          | 0.39<br>(0.2-0.69)                          | 0.72%<br>(0.0076-1.7%)               | 0.84%<br>(0.018-2%)                 | 39<br>(0.81-94)     | 400<br>(3.5-970)       |

| Location | Year | Sex    | Age      | Prevalence of current drinkers | Prevalence of abstainers | Population average of standard drinks daily | Percent of total attributable deaths | Percent of total attributable DALYs | Attributable deaths | Attributable DALYs        |
|----------|------|--------|----------|--------------------------------|--------------------------|---------------------------------------------|--------------------------------------|-------------------------------------|---------------------|---------------------------|
| Zimbabwe | 2010 | Female | 85 to 89 | 16%<br>(9.6-24%)               | 84%<br>(76-90%)          | 0.39<br>(0.2-0.67)                          | 0.46%<br>(-0.17-1.3%)                | 0.53%<br>(-0.23-1.5%)               | 12<br>(-5.3-36)     | 91<br>(-35-270)           |
| Zimbabwe | 2010 | Female | 90 to 94 | 17%<br>(11-26%)                | 83%<br>(74-89%)          | 0.39<br>(0.19-0.67)                         | 0.24%<br>(-0.38-1%)                  | 0.24%<br>(-0.49-1.2%)               | 1.9<br>(-4-9.3)     | 11<br>(-19-49)            |
| Zimbabwe | 2010 | Female | 95 plus  | 20%<br>(11-32%)                | 80%<br>(68-89%)          | 0.4<br>(0.17-0.81)                          | 0.15%<br>(-0.57-1.2%)                | 0.11%<br>(-0.74-1.3%)               | 0.24<br>(-1.6-2.9)  | 1.3<br>(-4.8-10)          |
| Zimbabwe | 2010 | Male   | All Ages | 33%<br>(28-38%)                | 67%<br>(62-72%)          | 1.5<br>(1.2-1.9)                            | 5.4%<br>(3.9-7%)                     | 7.1%<br>(5-9.3%)                    | 7200<br>(5000-9700) | 310000<br>(220000-400000) |
| Zimbabwe | 2010 | Male   | 15 to 19 | 28%<br>(20-38%)                | 72%<br>(62-80%)          | 1.2<br>(0.7-1.8)                            | 4.4%<br>(2.6-6.6%)                   | 4.8%<br>(2.6-7.6%)                  | 160<br>(85-240)     | 13000<br>(7700-19000)     |
| Zimbabwe | 2010 | Male   | 20 to 24 | 42%<br>(30-53%)                | 58%<br>(47-70%)          | 2.6<br>(1.7-3.7)                            | 13%<br>(8.4-19%)                     | 15%<br>(9.5-22%)                    | 570<br>(360-800)    | 41000<br>(27000-57000)    |
| Zimbabwe | 2010 | Male   | 25 to 29 | 49%<br>(36-59%)                | 51%<br>(41-64%)          | 3.2<br>(2.2-4.3)                            | 11%<br>(6.6-17%)                     | 12%<br>(6.6-20%)                    | 690<br>(470-950)    | 45000<br>(31000-60000)    |
| Zimbabwe | 2010 | Male   | 30 to 34 | 52%<br>(39-63%)                | 48%<br>(37-61%)          | 3.4<br>(2.3-4.7)                            | 8.1%<br>(5.1-12%)                    | 8.6%<br>(5.1-14%)                   | 660<br>(430-910)    | 38000<br>(26000-53000)    |
| Zimbabwe | 2010 | Male   | 35 to 39 | 54%<br>(42-65%)                | 46%<br>(35-58%)          | 3.4<br>(2.2-5)                              | 7.1%<br>(4.4-11%)                    | 7.5%<br>(4.5-12%)                   | 600<br>(380-870)    | 31000<br>(20000-45000)    |
| Zimbabwe | 2010 | Male   | 40 to 44 | 57%<br>(45-68%)                | 43%<br>(32-55%)          | 3.6<br>(2.3-5.3)                            | 7.7%<br>(5-11%)                      | 8.3%<br>(5.3-12%)                   | 590<br>(370-870)    | 27000<br>(18000-40000)    |
| Zimbabwe | 2010 | Male   | 45 to 49 | 60%<br>(46-71%)                | 40%<br>(29-54%)          | 4<br>(2.4-5.7)                              | 11%<br>(6.7-16%)                     | 12%<br>(7-17%)                      | 670<br>(420-960)    | 28000<br>(18000-39000)    |
| Zimbabwe | 2010 | Male   | 50 to 54 | 60%<br>(48-71%)                | 40%<br>(29-52%)          | 3.7<br>(2.3-5.4)                            | 13%<br>(8-18%)                       | 14%<br>(8.6-20%)                    | 680<br>(420-990)    | 25000<br>(15000-36000)    |
| Zimbabwe | 2010 | Male   | 55 to 59 | 57%<br>(45-68%)                | 43%<br>(32-55%)          | 2.8<br>(1.8-4.1)                            | 12%<br>(7.8-18%)                     | 14%<br>(8.5-20%)                    | 610<br>(370-930)    | 19000<br>(12000-29000)    |
| Zimbabwe | 2010 | Male   | 60 to 64 | 56%<br>(42-67%)                | 44%<br>(33-58%)          | 2.2<br>(1.3-3.5)                            | 10%<br>(6.1-17%)                     | 12%<br>(6.7-18%)                    | 470<br>(260-750)    | 13000<br>(7100-20000)     |
| Zimbabwe | 2010 | Male   | 65 to 69 | 54%<br>(42-65%)                | 46%<br>(35-58%)          | 1.8<br>(1.1-2.8)                            | 9.8%<br>(5.7-15%)                    | 11%<br>(6.4-17%)                    | 540<br>(300-840)    | 12000<br>(6800-19000)     |
| Zimbabwe | 2010 | Male   | 70 to 74 | 51%<br>(38-63%)                | 49%<br>(37-62%)          | 1.5<br>(0.91-2.3)                           | 7.6%<br>(3.7-12%)                    | 8.6%<br>(4.1-13%)                   | 440<br>(210-710)    | 7900<br>(3800-13000)      |
| Zimbabwe | 2010 | Male   | 75 to 79 | 48%<br>(34-63%)                | 52%<br>(37-66%)          | 1.3<br>(0.72-2)                             | 5.5%<br>(1.9-9.3%)                   | 6.2%<br>(2.1-11%)                   | 300<br>(100-500)    | 4100<br>(1400-7000)       |
| Zimbabwe | 2010 | Male   | 80 to 84 | 45%<br>(30-59%)                | 55%<br>(41-70%)          | 1<br>(0.57-1.6)                             | 3.9%<br>(1.3-7%)                     | 4.4%<br>(1.4-7.9%)                  | 160<br>(53-310)     | 1700<br>(550-3100)        |
| Zimbabwe | 2010 | Male   | 85 to 89 | 40%<br>(28-54%)                | 60%<br>(46-72%)          | 0.79<br>(0.44-1.3)                          | 2.3%<br>(0.72-4.5%)                  | 2.6%<br>(0.76-5.1%)                 | 48<br>(14-95)       | 350<br>(110-690)          |
| Zimbabwe | 2010 | Male   | 90 to 94 | 38%<br>(26-51%)                | 62%<br>(49-74%)          | 0.62<br>(0.32-1)                            | 1.2%<br>(0.14-2.6%)                  | 1.4%<br>(0.079-3%)                  | 8.4<br>(0.5-19)     | 44<br>(5.3-94)            |
| Zimbabwe | 2010 | Male   | 95 plus  | 38%<br>(24-55%)                | 62%<br>(45-76%)          | 0.51<br>(0.21-0.97)                         | 0.94%<br>(0.078-2.1%)                | 0.96%<br>(-0.065-2.4%)              | 1.6<br>(-0.11-3.9)  | 6<br>(0.5-14)             |
| Zimbabwe | 2016 | Female | All Ages | 9.1%<br>(7.6-11%)              | 91%<br>(89-92%)          | 0.32<br>(0.19-0.52)                         | 0.97%<br>(0.55-1.6%)                 | 1.3%<br>(0.61-2.6%)                 | 890<br>(380-1800)   | 37000<br>(20000-63000)    |

| Location | Year | Sex    | Age      | Prevalence of current drinkers | Prevalence of abstainers | Population average of standard drinks daily | Percent of total attributable deaths | Percent of total attributable DALYs | Attributable deaths | Attributable DALYs        |
|----------|------|--------|----------|--------------------------------|--------------------------|---------------------------------------------|--------------------------------------|-------------------------------------|---------------------|---------------------------|
| Zimbabwe | 2016 | Female | 15 to 19 | 7.5%<br>(4.9-11%)              | 93%<br>(89-95%)          | 0.24<br>(0.11-0.47)                         | 0.78%<br>(0.4-1.4%)                  | 0.65%<br>(0.21-1.5%)                | 12<br>(3.6-25)      | 1500<br>(800-2700)        |
| Zimbabwe | 2016 | Female | 20 to 24 | 10%<br>(6.5-15%)               | 90%<br>(85-93%)          | 0.44<br>(0.2-0.84)                          | 1.5%<br>(0.82-2.5%)                  | 1.1%<br>(0.37-2.4%)                 | 26<br>(9.2-52)      | 3400<br>(1900-5600)       |
| Zimbabwe | 2016 | Female | 25 to 29 | 12%<br>(7.6-18%)               | 88%<br>(82-92%)          | 0.57<br>(0.27-1.1)                          | 1.3%<br>(0.69-2.3%)                  | 1.1%<br>(0.37-2.3%)                 | 39<br>(15-77)       | 3900<br>(2200-6500)       |
| Zimbabwe | 2016 | Female | 30 to 34 | 14%<br>(8.7-21%)               | 86%<br>(79-91%)          | 0.65<br>(0.31-1.3)                          | 1.3%<br>(0.67-2.2%)                  | 1.1%<br>(0.44-2.3%)                 | 50<br>(19-100)      | 4000<br>(2200-7000)       |
| Zimbabwe | 2016 | Female | 35 to 39 | 16%<br>(9.6-22%)               | 84%<br>(78-90%)          | 0.68<br>(0.32-1.3)                          | 1.5%<br>(0.77-2.7%)                  | 1.5%<br>(0.63-3%)                   | 61<br>(25-130)      | 3900<br>(2000-7300)       |
| Zimbabwe | 2016 | Female | 40 to 44 | 17%<br>(11-24%)                | 83%<br>(76-89%)          | 0.7<br>(0.32-1.4)                           | 1.8%<br>(0.87-3.3%)                  | 2%<br>(0.82-3.9%)                   | 61<br>(25-130)      | 3200<br>(1500-6000)       |
| Zimbabwe | 2016 | Female | 45 to 49 | 17%<br>(10-25%)                | 83%<br>(75-90%)          | 0.7<br>(0.31-1.4)                           | 2.2%<br>(1-3.9%)                     | 2.5%<br>(1.1-4.8%)                  | 61<br>(25-120)      | 2700<br>(1200-5200)       |
| Zimbabwe | 2016 | Female | 50 to 54 | 17%<br>(11-24%)                | 83%<br>(76-89%)          | 0.68<br>(0.32-1.3)                          | 2.5%<br>(1.2-4.5%)                   | 2.9%<br>(1.3-5.4%)                  | 70<br>(27-140)      | 2700<br>(1200-5400)       |
| Zimbabwe | 2016 | Female | 55 to 59 | 16%<br>(10-22%)                | 84%<br>(78-90%)          | 0.68<br>(0.32-1.3)                          | 2.9%<br>(1.4-5.4%)                   | 3.5%<br>(1.7-6.6%)                  | 87<br>(37-170)      | 2900<br>(1300-5600)       |
| Zimbabwe | 2016 | Female | 60 to 64 | 16%<br>(11-24%)                | 84%<br>(76-89%)          | 0.69<br>(0.32-1.4)                          | 2.8%<br>(1.2-5.5%)                   | 3.4%<br>(1.4-6.8%)                  | 100<br>(39-220)     | 2900<br>(1200-5900)       |
| Zimbabwe | 2016 | Female | 65 to 69 | 18%<br>(12-25%)                | 82%<br>(75-88%)          | 0.68<br>(0.32-1.3)                          | 2.8%<br>(1.1-5.6%)                   | 3.3%<br>(1.3-6.7%)                  | 110<br>(38-220)     | 2400<br>(860-5000)        |
| Zimbabwe | 2016 | Female | 70 to 74 | 17%<br>(12-25%)                | 83%<br>(75-88%)          | 0.57<br>(0.27-1.1)                          | 1.9%<br>(0.6-4.3%)                   | 2.3%<br>(0.71-5%)                   | 91<br>(27-210)      | 1600<br>(490-3800)        |
| Zimbabwe | 2016 | Female | 75 to 79 | 15%<br>(9.7-23%)               | 85%<br>(77-90%)          | 0.46<br>(0.2-0.89)                          | 1.2%<br>(0.1-3%)                     | 1.4%<br>(0.12-3.4%)                 | 60<br>(5.2-160)     | 840<br>(72-2300)          |
| Zimbabwe | 2016 | Female | 80 to 84 | 15%<br>(9.2-23%)               | 85%<br>(77-91%)          | 0.42<br>(0.19-0.79)                         | 0.78%<br>(-0.056-2.2%)               | 0.91%<br>(-0.069-2.6%)              | 40<br>(-2.8-110)    | 410<br>(-28-1200)         |
| Zimbabwe | 2016 | Female | 85 to 89 | 16%<br>(9.3-24%)               | 84%<br>(76-91%)          | 0.41<br>(0.18-0.81)                         | 0.54%<br>(-0.24-1.8%)                | 0.62%<br>(-0.31-2.1%)               | 17<br>(-8-60)       | 130<br>(-55-450)          |
| Zimbabwe | 2016 | Female | 90 to 94 | 17%<br>(11-25%)                | 83%<br>(75-89%)          | 0.42<br>(0.19-0.84)                         | 0.33%<br>(-0.39-1.6%)                | 0.35%<br>(-0.5-1.8%)                | 3.4<br>(-4.9-17)    | 19<br>(-22-87)            |
| Zimbabwe | 2016 | Female | 95 plus  | 19%<br>(11-31%)                | 81%<br>(69-89%)          | 0.43<br>(0.16-0.94)                         | 0.27%<br>(-0.55-1.7%)                | 0.24%<br>(-0.74-1.9%)               | 0.54<br>(-1.6-4.2)  | 2.3<br>(-4.7-15)          |
| Zimbabwe | 2016 | Male   | All Ages | 33%<br>(28-39%)                | 67%<br>(61-72%)          | 1.7<br>(1-2.6)                              | 6%<br>(4-8.3%)                       | 7.8%<br>(4.9-11%)                   | 6100<br>(3700-9200) | 270000<br>(170000-380000) |
| Zimbabwe | 2016 | Male   | 15 to 19 | 27%<br>(19-37%)                | 73%<br>(63-81%)          | 1.2<br>(0.61-2.3)                           | 4.3%<br>(2.3-7.1%)                   | 4.7%<br>(2.3-8.3%)                  | 120<br>(57-220)     | 10000<br>(5500-17000)     |
| Zimbabwe | 2016 | Male   | 20 to 24 | 42%<br>(30-54%)                | 58%<br>(46-70%)          | 2.7<br>(1.3-4.6)                            | 12%<br>(7.1-18%)                     | 14%<br>(7.5-21%)                    | 440<br>(240-660)    | 33000<br>(19000-48000)    |
| Zimbabwe | 2016 | Male   | 25 to 29 | 48%<br>(35-59%)                | 52%<br>(41-65%)          | 3.3<br>(1.8-5.6)                            | 11%<br>(7-17%)                       | 13%<br>(7.2-20%)                    | 570<br>(340-820)    | 38000<br>(24000-53000)    |
| Zimbabwe | 2016 | Male   | 30 to 34 | 51%<br>(38-62%)                | 49%<br>(38-62%)          | 3.6<br>(2-6.2)                              | 10%<br>(6.3-15%)                     | 12%<br>(6.7-18%)                    | 620<br>(370-910)    | 37000<br>(23000-53000)    |



| Location | Year | Sex    | Age      | Prevalence of current drinkers | Prevalence of abstainers | Population average of standard drinks daily | Percent of total attributable deaths | Percent of total attributable DALYs | Attributable deaths | Attributable DALYs     |
|----------|------|--------|----------|--------------------------------|--------------------------|---------------------------------------------|--------------------------------------|-------------------------------------|---------------------|------------------------|
| Zimbabwe | 2016 | Male   | 35 to 39 | 54%<br>(41-65%)                | 46%<br>(35-59%)          | 3.6<br>(2-6.2)                              | 10%<br>(6.5-15%)                     | 12%<br>(7.1-18%)                    | 610<br>(370-900)    | 32000<br>(20000-47000) |
| Zimbabwe | 2016 | Male   | 40 to 44 | 57%<br>(44-68%)                | 43%<br>(32-56%)          | 3.8<br>(2.1-6.7)                            | 11%<br>(6.9-16%)                     | 13%<br>(7.8-19%)                    | 570<br>(330-860)    | 27000<br>(16000-40000) |
| Zimbabwe | 2016 | Male   | 45 to 49 | 60%<br>(45-71%)                | 40%<br>(29-55%)          | 4.2<br>(2.1-7.3)                            | 14%<br>(8.4-20%)                     | 16%<br>(9.4-23%)                    | 570<br>(330-870)    | 24000<br>(14000-36000) |
| Zimbabwe | 2016 | Male   | 50 to 54 | 60%<br>(47-70%)                | 40%<br>(30-53%)          | 3.9<br>(2-6.9)                              | 14%<br>(8.3-21%)                     | 16%<br>(9.2-24%)                    | 530<br>(300-840)    | 20000<br>(11000-31000) |
| Zimbabwe | 2016 | Male   | 55 to 59 | 57%<br>(44-68%)                | 43%<br>(32-56%)          | 2.9<br>(1.5-5.2)                            | 13%<br>(7.1-19%)                     | 15%<br>(8.2-22%)                    | 460<br>(240-760)    | 15000<br>(7800-24000)  |
| Zimbabwe | 2016 | Male   | 60 to 64 | 55%<br>(41-66%)                | 45%<br>(34-59%)          | 2.3<br>(1.2-4.4)                            | 10%<br>(5-17%)                       | 12%<br>(5.8-20%)                    | 420<br>(200-780)    | 12000<br>(5500-21000)  |
| Zimbabwe | 2016 | Male   | 65 to 69 | 54%<br>(41-64%)                | 46%<br>(36-59%)          | 1.9<br>(0.98-3.6)                           | 9%<br>(4.4-16%)                      | 10%<br>(5.1-18%)                    | 370<br>(180-680)    | 8400<br>(4000-15000)   |
| Zimbabwe | 2016 | Male   | 70 to 74 | 51%<br>(38-63%)                | 49%<br>(37-62%)          | 1.6<br>(0.8-2.8)                            | 6.8%<br>(2.9-12%)                    | 7.8%<br>(3.3-14%)                   | 350<br>(150-650)    | 6300<br>(2600-12000)   |
| Zimbabwe | 2016 | Male   | 75 to 79 | 48%<br>(33-62%)                | 52%<br>(38-67%)          | 1.3<br>(0.64-2.4)                           | 4.8%<br>(1.5-9.3%)                   | 5.5%<br>(1.7-11%)                   | 250<br>(76-500)     | 3400<br>(1100-7000)    |
| Zimbabwe | 2016 | Male   | 80 to 84 | 44%<br>(30-59%)                | 56%<br>(41-70%)          | 1.1<br>(0.51-2)                             | 3.3%<br>(0.97-6.6%)                  | 3.8%<br>(1.1-7.5%)                  | 140<br>(39-290)     | 1400<br>(420-3000)     |
| Zimbabwe | 2016 | Male   | 85 to 89 | 39%<br>(27-53%)                | 61%<br>(47-73%)          | 0.82<br>(0.38-1.5)                          | 2%<br>(0.48-4.6%)                    | 2.3%<br>(0.49-5.2%)                 | 47<br>(10-110)      | 350<br>(81-790)        |
| Zimbabwe | 2016 | Male   | 90 to 94 | 37%<br>(26-50%)                | 63%<br>(50-74%)          | 0.64<br>(0.29-1.2)                          | 1.1%<br>(0.15-2.8%)                  | 1.3%<br>(0.1-3.1%)                  | 9<br>(0.74-23)      | 48<br>(6.4-120)        |
| Zimbabwe | 2016 | Male   | 95 plus  | 38%<br>(24-55%)                | 62%<br>(45-76%)          | 0.53<br>(0.2-1.1)                           | 0.92%<br>(0.092-2.4%)                | 0.94%<br>(-0.015-2.7%)              | 1.5<br>(-0.024-4.4) | 5.9<br>(0.55-16)       |
| Benin    | 1990 | Female | All Ages | 58%<br>(51-65%)                | 42%<br>(35-49%)          | 0.72<br>(0.57-0.91)                         | 0.59%<br>(0.3-0.93%)                 | 0.95%<br>(0.2-1.9%)                 | 290<br>(61-560)     | 13000<br>(6500-20000)  |
| Benin    | 1990 | Female | 15 to 19 | 60%<br>(46-73%)                | 40%<br>(27-54%)          | 0.82<br>(0.41-1.4)                          | 1.1%<br>(0.51-1.9%)                  | 1.2%<br>(0.2-2.4%)                  | 5<br>(0.88-10)      | 640<br>(280-1100)      |
| Benin    | 1990 | Female | 20 to 24 | 67%<br>(54-79%)                | 33%<br>(21-46%)          | 1.2<br>(0.64-1.9)                           | 2%<br>(1-3.3%)                       | 1.9%<br>(0.47-3.9%)                 | 10<br>(2.4-20)      | 1200<br>(610-2000)     |
| Benin    | 1990 | Female | 25 to 29 | 69%<br>(55-79%)                | 31%<br>(21-45%)          | 1.4<br>(0.74-2.2)                           | 2.4%<br>(1.2-3.7%)                   | 2.6%<br>(0.83-4.6%)                 | 13<br>(4-23)        | 1200<br>(620-1900)     |
| Benin    | 1990 | Female | 30 to 34 | 71%<br>(57-80%)                | 29%<br>(20-43%)          | 1.4<br>(0.81-2.3)                           | 2.4%<br>(1.3-3.8%)                   | 2.9%<br>(1.2-5%)                    | 14<br>(5.6-25)      | 1100<br>(610-1800)     |
| Benin    | 1990 | Female | 35 to 39 | 74%<br>(63-83%)                | 26%<br>(17-37%)          | 1.5<br>(0.8-2.4)                            | 2.7%<br>(1.3-4.5%)                   | 3.7%<br>(1.5-6.4%)                  | 19<br>(7.5-33)      | 1200<br>(580-1900)     |
| Benin    | 1990 | Female | 40 to 44 | 75%<br>(65-84%)                | 25%<br>(16-35%)          | 1.5<br>(0.75-2.5)                           | 3%<br>(1.4-5.1%)                     | 4.3%<br>(1.8-7.6%)                  | 24<br>(10-43)       | 1300<br>(580-2200)     |
| Benin    | 1990 | Female | 45 to 49 | 74%<br>(62-84%)                | 26%<br>(16-38%)          | 1.5<br>(0.76-2.6)                           | 3.2%<br>(1.2-5.9%)                   | 4.6%<br>(1.6-8.6%)                  | 31<br>(11-58)       | 1400<br>(510-2500)     |
| Benin    | 1990 | Female | 50 to 54 | 73%<br>(60-83%)                | 27%<br>(17-40%)          | 1.5<br>(0.74-2.6)                           | 3.4%<br>(1.2-6.5%)                   | 4.9%<br>(1.7-9.3%)                  | 36<br>(12-69)       | 1400<br>(480-2600)     |

| Location | Year | Sex    | Age      | Prevalence of current drinkers | Prevalence of abstainers | Population average of standard drinks daily | Percent of total attributable deaths | Percent of total attributable DALYs | Attributable deaths | Attributable DALYs     |
|----------|------|--------|----------|--------------------------------|--------------------------|---------------------------------------------|--------------------------------------|-------------------------------------|---------------------|------------------------|
| Benin    | 1990 | Female | 55 to 59 | 71%<br>(54-84%)                | 29%<br>(16-46%)          | 1.6<br>(0.72-2.8)                           | 3.5%<br>(1-6.7%)                     | 4.9%<br>(1.5-9.4%)                  | 43<br>(13-81)       | 1400<br>(390-2600)     |
| Benin    | 1990 | Female | 60 to 64 | 71%<br>(53-84%)                | 29%<br>(16-47%)          | 1.6<br>(0.73-2.7)                           | 2.8%<br>(0.34-6.2%)                  | 3.7%<br>(0.5-8.2%)                  | 40<br>(5.4-85)      | 1100<br>(130-2300)     |
| Benin    | 1990 | Female | 65 to 69 | 72%<br>(57-85%)                | 28%<br>(15-43%)          | 1.4<br>(0.74-2.3)                           | 1.9%<br>(-0.37-5%)                   | 2.4%<br>(-0.51-6.5%)                | 32<br>(-6.6-85)     | 710<br>(-140-1900)     |
| Benin    | 1990 | Female | 70 to 74 | 71%<br>(55-83%)                | 29%<br>(17-45%)          | 1.2<br>(0.55-2)                             | 1.2%<br>(-1.4-4%)                    | 1.5%<br>(-1.2-5.4%)                 | 24<br>(-19-86)      | 430<br>(-360-1600)     |
| Benin    | 1990 | Female | 75 to 79 | 68%<br>(53-81%)                | 32%<br>(19-47%)          | 1<br>(0.43-1.9)                             | 0.34%<br>(-1.7-3.3%)                 | 0.42%<br>(-2-4%)                    | 5.9<br>(-29-56)     | 82<br>(-400-780)       |
| Benin    | 1990 | Female | 80 to 84 | 66%<br>(48-81%)                | 34%<br>(19-52%)          | 0.93<br>(0.41-1.6)                          | -0.065%<br>(-1.9-2%)                 | -0.086%<br>(-2.3-2.4%)              | -0.75<br>(-20-21)   | -7<br>(-200-220)       |
| Benin    | 1990 | Female | 85 to 89 | 66%<br>(49-79%)                | 34%<br>(21-51%)          | 0.91<br>(0.39-1.6)                          | -0.39%<br>(-2-1.6%)                  | -0.51%<br>(-2.5-1.8%)               | -2.8<br>(-14-9.8)   | -19<br>(-100-75)       |
| Benin    | 1990 | Female | 90 to 94 | 68%<br>(54-80%)                | 32%<br>(20-46%)          | 0.92<br>(0.37-1.7)                          | -0.62%<br>(-2.3-1.4%)                | -0.85%<br>(-2.8-1.6%)               | -1.8<br>(-6.1-3.6)  | -8.1<br>(-29-19)       |
| Benin    | 1990 | Female | 95 plus  | 69%<br>(50-84%)                | 31%<br>(16-50%)          | 0.91<br>(0.3-1.9)                           | -0.58%<br>(-2.2-1.7%)                | -0.86%<br>(-2.8-1.8%)               | -0.5<br>(-1.6-1.1)  | -1.4<br>(-5-3.9)       |
| Benin    | 1990 | Male   | All Ages | 9.5%<br>(7.4-12%)              | 91%<br>(88-93%)          | 0.21<br>(0.15-0.28)                         | 0.66%<br>(0.49-0.9%)                 | 1.1%<br>(0.78-1.6%)                 | 370<br>(260-540)    | 16000<br>(12000-22000) |
| Benin    | 1990 | Male   | 15 to 19 | 7.5%<br>(4-13%)                | 92%<br>(87-96%)          | 0.12<br>(0.049-0.23)                        | 0.68%<br>(0.44-0.99%)                | 0.48%<br>(0.23-0.86%)               | 2.4<br>(1.2-4.4)    | 400<br>(250-590)       |
| Benin    | 1990 | Male   | 20 to 24 | 13%<br>(6.6-21%)               | 87%<br>(79-93%)          | 0.27<br>(0.12-0.51)                         | 1.8%<br>(1.1-2.6%)                   | 1.4%<br>(0.67-2.5%)                 | 9.2<br>(4.4-16)     | 1100<br>(670-1600)     |
| Benin    | 1990 | Male   | 25 to 29 | 16%<br>(8.6-27%)               | 84%<br>(73-91%)          | 0.42<br>(0.18-0.79)                         | 2.8%<br>(1.7-4.3%)                   | 2.7%<br>(1.4-4.8%)                  | 17<br>(8.7-31)      | 1600<br>(970-2400)     |
| Benin    | 1990 | Male   | 30 to 34 | 18%<br>(9.9-31%)               | 82%<br>(69-90%)          | 0.51<br>(0.23-0.94)                         | 3.5%<br>(2.3-5.4%)                   | 3.9%<br>(2.2-6.6%)                  | 25<br>(14-41)       | 1800<br>(1100-2700)    |
| Benin    | 1990 | Male   | 35 to 39 | 20%<br>(11-33%)                | 80%<br>(67-89%)          | 0.56<br>(0.23-1)                            | 4.1%<br>(2.7-6.2%)                   | 5%<br>(3-7.9%)                      | 32<br>(20-51)       | 1900<br>(1200-2900)    |
| Benin    | 1990 | Male   | 40 to 44 | 21%<br>(11-35%)                | 79%<br>(65-89%)          | 0.6<br>(0.24-1.2)                           | 4.5%<br>(2.8-7.3%)                   | 5.7%<br>(3.3-9.3%)                  | 36<br>(21-58)       | 1800<br>(1100-2800)    |
| Benin    | 1990 | Male   | 45 to 49 | 21%<br>(11-35%)                | 79%<br>(65-89%)          | 0.62<br>(0.24-1.3)                          | 4.9%<br>(3.1-7.9%)                   | 6.2%<br>(3.8-10%)                   | 47<br>(28-77)       | 2000<br>(1300-3300)    |
| Benin    | 1990 | Male   | 50 to 54 | 21%<br>(12-35%)                | 79%<br>(65-88%)          | 0.62<br>(0.25-1.2)                          | 4.3%<br>(2.5-7.2%)                   | 5.4%<br>(3-9.1%)                    | 43<br>(23-74)       | 1600<br>(950-2700)     |
| Benin    | 1990 | Male   | 55 to 59 | 21%<br>(12-35%)                | 79%<br>(65-88%)          | 0.59<br>(0.23-1.1)                          | 3.9%<br>(2.3-6.4%)                   | 4.8%<br>(2.8-8.1%)                  | 41<br>(23-67)       | 1300<br>(780-2200)     |
| Benin    | 1990 | Male   | 60 to 64 | 21%<br>(11-35%)                | 79%<br>(65-89%)          | 0.51<br>(0.19-1)                            | 3.1%<br>(1.8-5.5%)                   | 3.8%<br>(2.1-6.7%)                  | 38<br>(21-67)       | 1100<br>(610-1800)     |
| Benin    | 1990 | Male   | 65 to 69 | 21%<br>(11-34%)                | 79%<br>(66-89%)          | 0.42<br>(0.17-0.84)                         | 2.3%<br>(1.3-3.9%)                   | 2.7%<br>(1.5-4.7%)                  | 31<br>(17-55)       | 720<br>(420-1200)      |
| Benin    | 1990 | Male   | 70 to 74 | 19%<br>(11-32%)                | 81%<br>(68-89%)          | 0.32<br>(0.14-0.63)                         | 1.6%<br>(0.84-3%)                    | 1.9%<br>(0.97-3.6%)                 | 24<br>(12-45)       | 440<br>(230-810)       |

| Location | Year | Sex    | Age      | Prevalence of current drinkers | Prevalence of abstainers | Population average of standard drinks daily | Percent of total attributable deaths | Percent of total attributable DALYs | Attributable deaths   | Attributable DALYs    |
|----------|------|--------|----------|--------------------------------|--------------------------|---------------------------------------------|--------------------------------------|-------------------------------------|-----------------------|-----------------------|
| Benin    | 1990 | Male   | 75 to 79 | 17%<br>(9.8-29%)               | 83%<br>(71-90%)          | 0.24<br>(0.086-0.49)                        | 1.1%<br>(0.56-2.1%)                  | 1.3%<br>(0.62-2.5%)                 | 14<br>(7-28)          | 210<br>(100-390)      |
| Benin    | 1990 | Male   | 80 to 84 | 15%<br>(8.1-26%)               | 85%<br>(74-92%)          | 0.19<br>(0.071-0.38)                        | 0.89%<br>(0.46-1.7%)                 | 1%<br>(0.49-2%)                     | 6.2<br>(3-12)         | 66<br>(34-130)        |
| Benin    | 1990 | Male   | 85 to 89 | 14%<br>(7.7-22%)               | 86%<br>(78-92%)          | 0.15<br>(0.055-0.33)                        | 0.67%<br>(0.34-1.2%)                 | 0.75%<br>(0.35-1.4%)                | 2.8<br>(1.3-5.2)      | 21<br>(11-38)         |
| Benin    | 1990 | Male   | 90 to 94 | 14%<br>(7.9-23%)               | 86%<br>(77-92%)          | 0.14<br>(0.047-0.3)                         | 0.38%<br>(0.13-0.77%)                | 0.39%<br>(0.076-0.86%)              | 0.55<br>(0.11-1.2)    | 3.3<br>(1.1-6.8)      |
| Benin    | 1990 | Male   | 95 plus  | 16%<br>(7.7-29%)               | 84%<br>(71-92%)          | 0.14<br>(0.034-0.36)                        | 0.35%<br>(0.027-0.83%)               | 0.3%<br>(-0.095-0.92%)              | 0.11<br>(-0.035-0.33) | 0.52<br>(0.04-1.3)    |
| Benin    | 1995 | Female | All Ages | 59%<br>(52-66%)                | 41%<br>(34-48%)          | 0.71<br>(0.56-0.9)                          | 0.65%<br>(0.33-1%)                   | 0.99%<br>(0.18-2%)                  | 330<br>(56-660)       | 15000<br>(7800-24000) |
| Benin    | 1995 | Female | 15 to 19 | 61%<br>(47-72%)                | 39%<br>(28-53%)          | 0.81<br>(0.41-1.3)                          | 1.2%<br>(0.49-2%)                    | 1.2%<br>(0.17-2.5%)                 | 6.3<br>(0.88-13)      | 780<br>(320-1400)     |
| Benin    | 1995 | Female | 20 to 24 | 68%<br>(54-79%)                | 32%<br>(21-46%)          | 1.2<br>(0.62-1.8)                           | 2.1%<br>(1-3.5%)                     | 2%<br>(0.44-3.9%)                   | 13<br>(2.7-25)        | 1500<br>(720-2400)    |
| Benin    | 1995 | Female | 25 to 29 | 70%<br>(56-79%)                | 30%<br>(21-44%)          | 1.3<br>(0.72-2.1)                           | 2.4%<br>(1.2-3.8%)                   | 2.5%<br>(0.79-4.7%)                 | 17<br>(5.2-31)        | 1600<br>(820-2500)    |
| Benin    | 1995 | Female | 30 to 34 | 72%<br>(58-81%)                | 28%<br>(19-42%)          | 1.4<br>(0.81-2.2)                           | 2.4%<br>(1.3-3.9%)                   | 2.8%<br>(1.2-5%)                    | 19<br>(7.6-33)        | 1500<br>(780-2300)    |
| Benin    | 1995 | Female | 35 to 39 | 75%<br>(65-83%)                | 25%<br>(17-35%)          | 1.4<br>(0.77-2.3)                           | 2.8%<br>(1.2-4.6%)                   | 3.6%<br>(1.3-6.5%)                  | 24<br>(8.4-43)        | 1500<br>(670-2500)    |
| Benin    | 1995 | Female | 40 to 44 | 76%<br>(66-84%)                | 24%<br>(16-34%)          | 1.5<br>(0.74-2.5)                           | 3.1%<br>(1.4-5.2%)                   | 4.3%<br>(1.7-7.4%)                  | 28<br>(11-50)         | 1500<br>(660-2500)    |
| Benin    | 1995 | Female | 45 to 49 | 75%<br>(62-84%)                | 25%<br>(16-38%)          | 1.5<br>(0.74-2.6)                           | 3.2%<br>(1.1-6%)                     | 4.5%<br>(1.4-8.8%)                  | 33<br>(10-64)         | 1500<br>(500-2800)    |
| Benin    | 1995 | Female | 50 to 54 | 73%<br>(61-84%)                | 27%<br>(16-39%)          | 1.5<br>(0.73-2.6)                           | 3.4%<br>(1.1-6.4%)                   | 4.8%<br>(1.4-9%)                    | 43<br>(12-83)         | 1600<br>(510-3100)    |
| Benin    | 1995 | Female | 55 to 59 | 72%<br>(55-84%)                | 28%<br>(16-45%)          | 1.5<br>(0.7-2.7)                            | 3.4%<br>(0.92-6.7%)                  | 4.7%<br>(1.3-9.2%)                  | 48<br>(13-94)         | 1500<br>(420-3000)    |
| Benin    | 1995 | Female | 60 to 64 | 72%<br>(54-85%)                | 28%<br>(15-46%)          | 1.5<br>(0.71-2.6)                           | 2.7%<br>(0.35-5.9%)                  | 3.5%<br>(0.46-7.9%)                 | 43<br>(5.7-97)        | 1200<br>(150-2600)    |
| Benin    | 1995 | Female | 65 to 69 | 72%<br>(56-85%)                | 28%<br>(15-44%)          | 1.4<br>(0.69-2.3)                           | 1.7%<br>(-0.46-5.1%)                 | 2.2%<br>(-0.6-6.3%)                 | 33<br>(-8.3-91)       | 730<br>(-200-2100)    |
| Benin    | 1995 | Female | 70 to 74 | 71%<br>(56-84%)                | 29%<br>(16-44%)          | 1.1<br>(0.53-2)                             | 1.1%<br>(-1.1-4.5%)                  | 1.4%<br>(-1.4-5.4%)                 | 24<br>(-23-90)        | 420<br>(-430-1600)    |
| Benin    | 1995 | Female | 75 to 79 | 68%<br>(53-82%)                | 32%<br>(18-47%)          | 0.97<br>(0.41-1.8)                          | 0.31%<br>(-1.7-3.2%)                 | 0.38%<br>(-2.1-3.9%)                | 6<br>(-34-62)         | 84<br>(-460-870)      |
| Benin    | 1995 | Female | 80 to 84 | 67%<br>(49-80%)                | 33%<br>(20-51%)          | 0.91<br>(0.41-1.6)                          | -0.088%<br>(-2-2.1%)                 | -0.12%<br>(-2.4-2.6%)               | -1.2<br>(-23-25)      | -11<br>(-240-260)     |
| Benin    | 1995 | Female | 85 to 89 | 67%<br>(50-79%)                | 33%<br>(21-50%)          | 0.89<br>(0.36-1.6)                          | -0.4%<br>(-2.2-1.6%)                 | -0.53%<br>(-2.7-1.9%)               | -3.4<br>(-18-12)      | -23<br>(-120-94)      |
| Benin    | 1995 | Female | 90 to 94 | 68%<br>(54-80%)                | 32%<br>(20-46%)          | 0.89<br>(0.36-1.7)                          | -0.61%<br>(-2.3-1.5%)                | -0.84%<br>(-2.9-1.6%)               | -2.3<br>(-7.8-4.5)    | -10<br>(-37-24)       |

| Location | Year | Sex    | Age      | Prevalence of current drinkers | Prevalence of abstainers | Population average of standard drinks daily | Percent of total attributable deaths | Percent of total attributable DALYs | Attributable deaths  | Attributable DALYs     |
|----------|------|--------|----------|--------------------------------|--------------------------|---------------------------------------------|--------------------------------------|-------------------------------------|----------------------|------------------------|
| Benin    | 1995 | Female | 95 plus  | 69%<br>(51-84%)                | 31%<br>(16-49%)          | 0.88<br>(0.3-1.9)                           | -0.56%<br>(-2.1-1.7%)                | -0.84%<br>(-2.7-1.8%)               | -0.62<br>(-2-1.3)    | -1.7<br>(-6.2-5)       |
| Benin    | 1995 | Male   | All Ages | 10%<br>(7.7-13%)               | 90%<br>(87-92%)          | 0.22<br>(0.16-0.3)                          | 0.76%<br>(0.56-1.1%)                 | 1.2%<br>(0.86-1.8%)                 | 450<br>(310-670)     | 20000<br>(15000-27000) |
| Benin    | 1995 | Male   | 15 to 19 | 7.8%<br>(4.3-14%)              | 92%<br>(86-96%)          | 0.13<br>(0.051-0.25)                        | 0.7%<br>(0.45-1%)                    | 0.5%<br>(0.23-0.92%)                | 3<br>(1.4-5.5)       | 490<br>(310-740)       |
| Benin    | 1995 | Male   | 20 to 24 | 13%<br>(7-21%)                 | 87%<br>(79-93%)          | 0.28<br>(0.12-0.51)                         | 1.8%<br>(1.1-2.6%)                   | 1.4%<br>(0.66-2.5%)                 | 12<br>(5.3-21)       | 1300<br>(830-2000)     |
| Benin    | 1995 | Male   | 25 to 29 | 17%<br>(8.9-28%)               | 83%<br>(72-91%)          | 0.43<br>(0.19-0.81)                         | 2.7%<br>(1.7-4.2%)                   | 2.6%<br>(1.3-4.7%)                  | 23<br>(11-41)        | 2000<br>(1200-3200)    |
| Benin    | 1995 | Male   | 30 to 34 | 19%<br>(10-33%)                | 81%<br>(67-90%)          | 0.53<br>(0.24-0.96)                         | 3.4%<br>(2.1-5.3%)                   | 3.7%<br>(1.9-6.3%)                  | 33<br>(18-56)        | 2400<br>(1500-3700)    |
| Benin    | 1995 | Male   | 35 to 39 | 21%<br>(11-34%)                | 79%<br>(66-89%)          | 0.57<br>(0.25-1.1)                          | 4%<br>(2.5-6.1%)                     | 4.7%<br>(2.7-7.6%)                  | 42<br>(25-70)        | 2500<br>(1600-3900)    |
| Benin    | 1995 | Male   | 40 to 44 | 21%<br>(12-36%)                | 79%<br>(64-88%)          | 0.61<br>(0.25-1.2)                          | 4.3%<br>(2.6-6.9%)                   | 5.3%<br>(3-8.9%)                    | 48<br>(27-82)        | 2400<br>(1500-3900)    |
| Benin    | 1995 | Male   | 45 to 49 | 22%<br>(11-36%)                | 78%<br>(64-89%)          | 0.63<br>(0.25-1.3)                          | 4.7%<br>(2.9-7.7%)                   | 5.8%<br>(3.5-9.8%)                  | 52<br>(31-89)        | 2300<br>(1400-3800)    |
| Benin    | 1995 | Male   | 50 to 54 | 22%<br>(12-37%)                | 78%<br>(63-88%)          | 0.63<br>(0.26-1.3)                          | 4.3%<br>(2.5-7.2%)                   | 5.3%<br>(3-9%)                      | 55<br>(31-97)        | 2100<br>(1200-3700)    |
| Benin    | 1995 | Male   | 55 to 59 | 22%<br>(13-37%)                | 78%<br>(63-87%)          | 0.61<br>(0.23-1.2)                          | 3.9%<br>(2.3-6.6%)                   | 4.8%<br>(2.7-8.1%)                  | 51<br>(28-87)        | 1700<br>(960-2800)     |
| Benin    | 1995 | Male   | 60 to 64 | 22%<br>(12-37%)                | 78%<br>(63-88%)          | 0.53<br>(0.19-1.1)                          | 3.1%<br>(1.7-5.6%)                   | 3.7%<br>(2-6.8%)                    | 44<br>(24-80)        | 1200<br>(700-2200)     |
| Benin    | 1995 | Male   | 65 to 69 | 21%<br>(12-35%)                | 79%<br>(65-88%)          | 0.43<br>(0.17-0.84)                         | 2.3%<br>(1.3-4%)                     | 2.7%<br>(1.5-4.8%)                  | 35<br>(20-62)        | 800<br>(460-1400)      |
| Benin    | 1995 | Male   | 70 to 74 | 20%<br>(12-33%)                | 80%<br>(67-88%)          | 0.33<br>(0.13-0.67)                         | 1.6%<br>(0.85-3%)                    | 1.9%<br>(0.98-3.5%)                 | 27<br>(14-50)        | 490<br>(260-910)       |
| Benin    | 1995 | Male   | 75 to 79 | 18%<br>(10-30%)                | 82%<br>(70-90%)          | 0.24<br>(0.083-0.5)                         | 1.1%<br>(0.53-2.2%)                  | 1.3%<br>(0.6-2.5%)                  | 16<br>(7.5-32)       | 230<br>(110-450)       |
| Benin    | 1995 | Male   | 80 to 84 | 16%<br>(8.5-27%)               | 84%<br>(73-92%)          | 0.19<br>(0.069-0.4)                         | 0.89%<br>(0.46-1.7%)                 | 1%<br>(0.49-2%)                     | 7.1<br>(3.4-14)      | 76<br>(38-150)         |
| Benin    | 1995 | Male   | 85 to 89 | 15%<br>(8-24%)                 | 85%<br>(76-92%)          | 0.16<br>(0.053-0.33)                        | 0.68%<br>(0.34-1.3%)                 | 0.75%<br>(0.33-1.5%)                | 3.2<br>(1.4-6.3)     | 25<br>(12-47)          |
| Benin    | 1995 | Male   | 90 to 94 | 15%<br>(8.3-24%)               | 85%<br>(76-92%)          | 0.14<br>(0.046-0.32)                        | 0.41%<br>(0.13-0.87%)                | 0.41%<br>(0.084-0.97%)              | 0.72<br>(0.15-1.7)   | 4.3<br>(1.3-8.9)       |
| Benin    | 1995 | Male   | 95 plus  | 17%<br>(8-30%)                 | 83%<br>(70-92%)          | 0.15<br>(0.035-0.37)                        | 0.41%<br>(0.043-1%)                  | 0.37%<br>(-0.051-1.1%)              | 0.17<br>(-0.023-0.5) | 0.73<br>(0.078-1.8)    |
| Benin    | 2000 | Female | All Ages | 64%<br>(56-72%)                | 36%<br>(28-44%)          | 0.78<br>(0.61-0.98)                         | 0.74%<br>(0.37-1.2%)                 | 1.1%<br>(0.19-2.1%)                 | 390<br>(69-750)      | 19000<br>(9100-29000)  |
| Benin    | 2000 | Female | 15 to 19 | 70%<br>(57-82%)                | 30%<br>(18-43%)          | 0.99<br>(0.53-1.6)                          | 1.4%<br>(0.52-2.3%)                  | 1.6%<br>(0.15-3.3%)                 | 8.9<br>(0.74-19)     | 1000<br>(390-1800)     |
| Benin    | 2000 | Female | 20 to 24 | 76%<br>(66-83%)                | 24%<br>(17-34%)          | 1.4<br>(0.75-2.1)                           | 2.3%<br>(1-3.7%)                     | 2.2%<br>(0.45-4.4%)                 | 17<br>(3.2-33)       | 1900<br>(840-3000)     |

| Location | Year | Sex    | Age      | Prevalence of current drinkers | Prevalence of abstainers | Population average of standard drinks daily | Percent of total attributable deaths | Percent of total attributable DALYs | Attributable deaths | Attributable DALYs     |
|----------|------|--------|----------|--------------------------------|--------------------------|---------------------------------------------|--------------------------------------|-------------------------------------|---------------------|------------------------|
| Benin    | 2000 | Female | 25 to 29 | 75%<br>(65-83%)                | 25%<br>(17-35%)          | 1.5<br>(0.84-2.3)                           | 2.5%<br>(1.2-4.1%)                   | 2.6%<br>(0.82-5%)                   | 23<br>(6.8-43)      | 2100<br>(1000-3400)    |
| Benin    | 2000 | Female | 30 to 34 | 76%<br>(66-83%)                | 24%<br>(17-34%)          | 1.5<br>(0.9-2.4)                            | 2.4%<br>(1.3-3.9%)                   | 2.7%<br>(1.1-4.8%)                  | 24<br>(9.1-44)      | 1800<br>(970-3000)     |
| Benin    | 2000 | Female | 35 to 39 | 78%<br>(69-85%)                | 22%<br>(15-31%)          | 1.5<br>(0.87-2.4)                           | 2.7%<br>(1.3-4.6%)                   | 3.4%<br>(1.3-6%)                    | 31<br>(11-54)       | 1900<br>(870-3200)     |
| Benin    | 2000 | Female | 40 to 44 | 78%<br>(70-85%)                | 22%<br>(15-30%)          | 1.6<br>(0.8-2.6)                            | 3%<br>(1.3-5.1%)                     | 4%<br>(1.6-7%)                      | 34<br>(14-59)       | 1800<br>(780-3000)     |
| Benin    | 2000 | Female | 45 to 49 | 78%<br>(68-85%)                | 22%<br>(15-32%)          | 1.6<br>(0.82-2.8)                           | 3.3%<br>(1-6.1%)                     | 4.6%<br>(1.3-8.6%)                  | 39<br>(12-74)       | 1700<br>(570-3200)     |
| Benin    | 2000 | Female | 50 to 54 | 75%<br>(63-84%)                | 25%<br>(16-37%)          | 1.5<br>(0.76-2.6)                           | 3.5%<br>(1-6.6%)                     | 4.8%<br>(1.3-9.2%)                  | 48<br>(13-94)       | 1800<br>(520-3500)     |
| Benin    | 2000 | Female | 55 to 59 | 72%<br>(56-84%)                | 28%<br>(16-44%)          | 1.6<br>(0.7-2.6)                            | 3.5%<br>(0.94-6.9%)                  | 4.8%<br>(1.3-9.3%)                  | 59<br>(16-120)      | 1900<br>(510-3800)     |
| Benin    | 2000 | Female | 60 to 64 | 72%<br>(55-85%)                | 28%<br>(15-45%)          | 1.5<br>(0.7-2.7)                            | 2.7%<br>(0.22-6.3%)                  | 3.5%<br>(0.28-8.2%)                 | 50<br>(4-120)       | 1300<br>(100-3200)     |
| Benin    | 2000 | Female | 65 to 69 | 73%<br>(58-85%)                | 27%<br>(15-42%)          | 1.4<br>(0.7-2.3)                            | 1.7%<br>(-0.64-5%)                   | 2.2%<br>(-0.81-6.5%)                | 36<br>(-13-110)     | 810<br>(-290-2400)     |
| Benin    | 2000 | Female | 70 to 74 | 71%<br>(56-83%)                | 29%<br>(17-44%)          | 1.1<br>(0.53-2)                             | 1%<br>(-1.3-4.4%)                    | 1.3%<br>(-1.6-5.4%)                 | 24<br>(-28-97)      | 420<br>(-510-1700)     |
| Benin    | 2000 | Female | 75 to 79 | 68%<br>(52-81%)                | 32%<br>(19-48%)          | 0.98<br>(0.42-1.8)                          | 0.27%<br>(-1.8-3.1%)                 | 0.33%<br>(-2.1-3.8%)                | 5.5<br>(-36-62)     | 76<br>(-520-880)       |
| Benin    | 2000 | Female | 80 to 84 | 67%<br>(48-81%)                | 33%<br>(19-52%)          | 0.91<br>(0.4-1.6)                           | -0.091%<br>(-1.9-2.3%)               | -0.12%<br>(-2.3-2.8%)               | -1.3<br>(-25-29)    | -12<br>(-260-310)      |
| Benin    | 2000 | Female | 85 to 89 | 67%<br>(49-79%)                | 33%<br>(21-51%)          | 0.89<br>(0.37-1.6)                          | -0.38%<br>(-2.1-1.8%)                | -0.5%<br>(-2.7-2.1%)                | -3.7<br>(-20-16)    | -24<br>(-140-120)      |
| Benin    | 2000 | Female | 90 to 94 | 68%<br>(54-80%)                | 32%<br>(20-46%)          | 0.89<br>(0.35-1.7)                          | -0.55%<br>(-2.3-1.7%)                | -0.77%<br>(-2.9-2%)                 | -2.4<br>(-9.2-6.3)  | -11<br>(-44-33)        |
| Benin    | 2000 | Female | 95 plus  | 69%<br>(50-84%)                | 31%<br>(16-50%)          | 0.88<br>(0.29-1.9)                          | -0.45%<br>(-2.1-2.1%)                | -0.73%<br>(-2.7-2.4%)               | -0.67<br>(-2.5-2.2) | -1.7<br>(-7.7-7.8)     |
| Benin    | 2000 | Male   | All Ages | 10%<br>(8.1-14%)               | 90%<br>(86-92%)          | 0.24<br>(0.17-0.32)                         | 0.87%<br>(0.64-1.2%)                 | 1.4%<br>(0.95-2.1%)                 | 540<br>(370-820)    | 24000<br>(18000-33000) |
| Benin    | 2000 | Male   | 15 to 19 | 8.2%<br>(4.6-14%)              | 92%<br>(86-95%)          | 0.13<br>(0.054-0.26)                        | 0.74%<br>(0.45-1.1%)                 | 0.54%<br>(0.23-1%)                  | 3.7<br>(1.6-7)      | 580<br>(350-890)       |
| Benin    | 2000 | Male   | 20 to 24 | 14%<br>(7.3-22%)               | 86%<br>(78-93%)          | 0.3<br>(0.13-0.54)                          | 1.8%<br>(1.2-2.8%)                   | 1.5%<br>(0.71-2.8%)                 | 14<br>(6.7-25)      | 1600<br>(980-2400)     |
| Benin    | 2000 | Male   | 25 to 29 | 18%<br>(9.7-30%)               | 82%<br>(70-90%)          | 0.46<br>(0.2-0.85)                          | 2.6%<br>(1.6-4.2%)                   | 2.5%<br>(1.2-4.7%)                  | 27<br>(13-49)       | 2300<br>(1400-3800)    |
| Benin    | 2000 | Male   | 30 to 34 | 20%<br>(11-33%)                | 80%<br>(67-89%)          | 0.56<br>(0.25-1)                            | 3.3%<br>(2-5.1%)                     | 3.5%<br>(1.9-5.9%)                  | 41<br>(21-68)       | 2900<br>(1800-4500)    |
| Benin    | 2000 | Male   | 35 to 39 | 21%<br>(12-35%)                | 79%<br>(65-88%)          | 0.6<br>(0.27-1.1)                           | 3.8%<br>(2.4-5.9%)                   | 4.3%<br>(2.5-6.8%)                  | 52<br>(30-87)       | 3100<br>(1900-4800)    |
| Benin    | 2000 | Male   | 40 to 44 | 22%<br>(12-37%)                | 78%<br>(63-88%)          | 0.63<br>(0.26-1.2)                          | 4.1%<br>(2.6-6.6%)                   | 4.9%<br>(2.9-8%)                    | 60<br>(34-99)       | 3000<br>(1800-4800)    |

| Location | Year | Sex    | Age      | Prevalence of current drinkers | Prevalence of abstainers | Population average of standard drinks daily | Percent of total attributable deaths | Percent of total attributable DALYs | Attributable deaths   | Attributable DALYs     |
|----------|------|--------|----------|--------------------------------|--------------------------|---------------------------------------------|--------------------------------------|-------------------------------------|-----------------------|------------------------|
| Benin    | 2000 | Male   | 45 to 49 | 23%<br>(12-37%)                | 77%<br>(63-88%)          | 0.67<br>(0.27-1.3)                          | 4.6%<br>(2.8-8%)                     | 5.6%<br>(3.2-9.8%)                  | 68<br>(39-120)        | 3000<br>(1800-5100)    |
| Benin    | 2000 | Male   | 50 to 54 | 23%<br>(12-38%)                | 77%<br>(62-88%)          | 0.67<br>(0.27-1.3)                          | 4.3%<br>(2.4-7.5%)                   | 5.2%<br>(2.8-9.2%)                  | 62<br>(33-110)        | 2300<br>(1300-4000)    |
| Benin    | 2000 | Male   | 55 to 59 | 23%<br>(13-38%)                | 77%<br>(62-87%)          | 0.64<br>(0.24-1.2)                          | 4%<br>(2.2-6.9%)                     | 4.8%<br>(2.5-8.5%)                  | 66<br>(34-110)        | 2200<br>(1200-3700)    |
| Benin    | 2000 | Male   | 60 to 64 | 23%<br>(12-38%)                | 77%<br>(62-88%)          | 0.56<br>(0.21-1.1)                          | 3.1%<br>(1.7-5.8%)                   | 3.7%<br>(1.9-7.1%)                  | 54<br>(28-100)        | 1500<br>(810-2700)     |
| Benin    | 2000 | Male   | 65 to 69 | 22%<br>(13-36%)                | 78%<br>(64-87%)          | 0.46<br>(0.19-0.87)                         | 2.3%<br>(1.2-4%)                     | 2.7%<br>(1.4-4.9%)                  | 39<br>(21-71)         | 900<br>(490-1600)      |
| Benin    | 2000 | Male   | 70 to 74 | 21%<br>(12-34%)                | 79%<br>(66-88%)          | 0.35<br>(0.14-0.73)                         | 1.6%<br>(0.8-3.2%)                   | 1.9%<br>(0.91-3.8%)                 | 29<br>(14-57)         | 520<br>(260-1000)      |
| Benin    | 2000 | Male   | 75 to 79 | 19%<br>(11-31%)                | 81%<br>(69-89%)          | 0.26<br>(0.091-0.54)                        | 1.1%<br>(0.51-2.2%)                  | 1.3%<br>(0.55-2.6%)                 | 17<br>(7.4-35)        | 240<br>(110-500)       |
| Benin    | 2000 | Male   | 80 to 84 | 17%<br>(9.2-28%)               | 83%<br>(72-91%)          | 0.21<br>(0.076-0.42)                        | 0.9%<br>(0.42-1.7%)                  | 1%<br>(0.46-2%)                     | 8<br>(3.6-16)         | 85<br>(40-170)         |
| Benin    | 2000 | Male   | 85 to 89 | 15%<br>(8.6-25%)               | 85%<br>(75-91%)          | 0.17<br>(0.058-0.35)                        | 0.69%<br>(0.29-1.4%)                 | 0.77%<br>(0.29-1.6%)                | 3.6<br>(1.4-7.6)      | 28<br>(12-56)          |
| Benin    | 2000 | Male   | 90 to 94 | 16%<br>(8.9-26%)               | 84%<br>(74-91%)          | 0.16<br>(0.051-0.35)                        | 0.43%<br>(0.12-0.94%)                | 0.44%<br>(0.057-1.1%)               | 0.84<br>(0.11-2)      | 5<br>(1.3-11)          |
| Benin    | 2000 | Male   | 95 plus  | 18%<br>(8.8-32%)               | 82%<br>(68-91%)          | 0.16<br>(0.039-0.4)                         | 0.46%<br>(0.056-1.2%)                | 0.44%<br>(-0.062-1.3%)              | 0.22<br>(-0.032-0.66) | 0.95<br>(0.12-2.5)     |
| Benin    | 2005 | Female | All Ages | 59%<br>(52-66%)                | 41%<br>(34-48%)          | 0.79<br>(0.62-0.99)                         | 0.83%<br>(0.44-1.3%)                 | 1.2%<br>(0.3-2.3%)                  | 460<br>(110-860)      | 21000<br>(11000-33000) |
| Benin    | 2005 | Female | 15 to 19 | 62%<br>(51-74%)                | 38%<br>(26-49%)          | 0.93<br>(0.47-1.5)                          | 1.3%<br>(0.58-2.2%)                  | 1.5%<br>(0.25-3%)                   | 9.2<br>(1.5-19)       | 1100<br>(470-1900)     |
| Benin    | 2005 | Female | 20 to 24 | 69%<br>(58-78%)                | 31%<br>(22-42%)          | 1.3<br>(0.69-2.1)                           | 2.3%<br>(1.2-3.7%)                   | 2.2%<br>(0.56-4.4%)                 | 17<br>(4.3-36)        | 2000<br>(1000-3300)    |
| Benin    | 2005 | Female | 25 to 29 | 69%<br>(57-78%)                | 31%<br>(22-43%)          | 1.5<br>(0.81-2.3)                           | 2.4%<br>(1.3-3.8%)                   | 2.4%<br>(0.88-4.4%)                 | 24<br>(8.6-44)        | 2200<br>(1200-3600)    |
| Benin    | 2005 | Female | 30 to 34 | 71%<br>(59-80%)                | 29%<br>(20-41%)          | 1.5<br>(0.89-2.4)                           | 2.2%<br>(1.2-3.4%)                   | 2.3%<br>(1-4%)                      | 25<br>(10-44)         | 2000<br>(1100-3200)    |
| Benin    | 2005 | Female | 35 to 39 | 74%<br>(64-82%)                | 26%<br>(18-36%)          | 1.6<br>(0.87-2.5)                           | 2.5%<br>(1.3-4.1%)                   | 3.1%<br>(1.3-5.3%)                  | 35<br>(15-60)         | 2200<br>(1100-3500)    |
| Benin    | 2005 | Female | 40 to 44 | 75%<br>(66-83%)                | 25%<br>(17-34%)          | 1.6<br>(0.82-2.6)                           | 2.8%<br>(1.4-4.6%)                   | 3.6%<br>(1.6-6%)                    | 40<br>(18-67)         | 2100<br>(1000-3400)    |
| Benin    | 2005 | Female | 45 to 49 | 75%<br>(64-83%)                | 25%<br>(17-36%)          | 1.6<br>(0.85-2.9)                           | 3.3%<br>(1.3-6.2%)                   | 4.5%<br>(1.6-8.6%)                  | 47<br>(17-89)         | 2100<br>(840-3900)     |
| Benin    | 2005 | Female | 50 to 54 | 74%<br>(62-83%)                | 26%<br>(17-38%)          | 1.7<br>(0.82-2.9)                           | 3.6%<br>(1.2-7%)                     | 4.9%<br>(1.6-9.4%)                  | 53<br>(17-100)        | 2000<br>(690-3900)     |
| Benin    | 2005 | Female | 55 to 59 | 72%<br>(56-84%)                | 28%<br>(16-44%)          | 1.7<br>(0.8-2.9)                            | 3.7%<br>(1-7.5%)                     | 5.1%<br>(1.4-9.8%)                  | 66<br>(18-130)        | 2100<br>(580-4200)     |
| Benin    | 2005 | Female | 60 to 64 | 72%<br>(55-85%)                | 28%<br>(15-45%)          | 1.7<br>(0.78-2.9)                           | 2.9%<br>(0.21-6.6%)                  | 3.8%<br>(0.35-8.5%)                 | 62<br>(5.8-140)       | 1700<br>(130-3900)     |

| Location | Year | Sex    | Age      | Prevalence of current drinkers | Prevalence of abstainers | Population average of standard drinks daily | Percent of total attributable deaths | Percent of total attributable DALYs | Attributable deaths | Attributable DALYs     |
|----------|------|--------|----------|--------------------------------|--------------------------|---------------------------------------------|--------------------------------------|-------------------------------------|---------------------|------------------------|
| Benin    | 2005 | Female | 65 to 69 | 72%<br>(57-85%)                | 28%<br>(15-43%)          | 1.5<br>(0.77-2.5)                           | 1.9%<br>(-0.57-5.4%)                 | 2.5%<br>(-0.74-6.8%)                | 46<br>(-13-120)     | 1000<br>(-290-2900)    |
| Benin    | 2005 | Female | 70 to 74 | 71%<br>(55-83%)                | 29%<br>(17-45%)          | 1.3<br>(0.59-2.2)                           | 1.2%<br>(-1.2-4.9%)                  | 1.5%<br>(-1.5-6.1%)                 | 30<br>(-29-110)     | 530<br>(-530-2100)     |
| Benin    | 2005 | Female | 75 to 79 | 69%<br>(52-82%)                | 31%<br>(18-48%)          | 1.1<br>(0.46-2)                             | 0.41%<br>(-1.8-3.7%)                 | 0.5%<br>(-2.2-4.4%)                 | 8.5<br>(-38-76)     | 120<br>(-520-1100)     |
| Benin    | 2005 | Female | 80 to 84 | 67%<br>(49-81%)                | 33%<br>(19-51%)          | 1<br>(0.45-1.8)                             | 0.084%<br>(-1.9-2.7%)                | 0.08%<br>(-2.2-3.2%)                | 0.84<br>(-26-35)    | 11<br>(-260-370)       |
| Benin    | 2005 | Female | 85 to 89 | 67%<br>(50-79%)                | 33%<br>(21-50%)          | 0.98<br>(0.4-1.8)                           | -0.19%<br>(-2-2.2%)                  | -0.29%<br>(-2.6-2.5%)               | -2.3<br>(-20-20)    | -13<br>(-140-150)      |
| Benin    | 2005 | Female | 90 to 94 | 69%<br>(54-81%)                | 31%<br>(19-46%)          | 0.99<br>(0.39-2)                            | -0.39%<br>(-2.3-2.1%)                | -0.59%<br>(-2.9-2.4%)               | -2.1<br>(-10-8.7)   | -8.5<br>(-49-46)       |
| Benin    | 2005 | Female | 95 plus  | 70%<br>(52-84%)                | 30%<br>(16-48%)          | 0.98<br>(0.33-2.1)                          | -0.3%<br>(-2.1-2.7%)                 | -0.55%<br>(-2.7-3.1%)               | -0.59<br>(-2.9-3.4) | -1.3<br>(-8.9-12)      |
| Benin    | 2005 | Male   | All Ages | 11%<br>(8.2-14%)               | 89%<br>(86-92%)          | 0.27<br>(0.19-0.35)                         | 1%<br>(0.75-1.4%)                    | 1.6%<br>(1.1-2.4%)                  | 670<br>(450-1000)   | 30000<br>(22000-41000) |
| Benin    | 2005 | Male   | 15 to 19 | 8.3%<br>(4.6-15%)              | 92%<br>(85-95%)          | 0.15<br>(0.062-0.3)                         | 0.79%<br>(0.5-1.2%)                  | 0.58%<br>(0.26-1.1%)                | 4.5<br>(2.1-8.8)    | 710<br>(440-1100)      |
| Benin    | 2005 | Male   | 20 to 24 | 14%<br>(7.3-23%)               | 86%<br>(77-93%)          | 0.33<br>(0.14-0.62)                         | 2%<br>(1.3-2.9%)                     | 1.6%<br>(0.78-2.9%)                 | 17<br>(8.1-31)      | 1900<br>(1200-3000)    |
| Benin    | 2005 | Male   | 25 to 29 | 18%<br>(9.4-29%)               | 82%<br>(71-91%)          | 0.5<br>(0.22-0.94)                          | 2.8%<br>(1.8-4.3%)                   | 2.7%<br>(1.4-4.7%)                  | 32<br>(16-57)       | 2800<br>(1800-4300)    |
| Benin    | 2005 | Male   | 30 to 34 | 20%<br>(11-33%)                | 80%<br>(67-89%)          | 0.61<br>(0.28-1.1)                          | 3.3%<br>(2.1-5.2%)                   | 3.5%<br>(1.9-5.9%)                  | 48<br>(27-82)       | 3400<br>(2100-5300)    |
| Benin    | 2005 | Male   | 35 to 39 | 21%<br>(12-34%)                | 79%<br>(66-88%)          | 0.65<br>(0.29-1.2)                          | 3.8%<br>(2.4-5.8%)                   | 4.3%<br>(2.5-6.9%)                  | 64<br>(36-100)      | 3700<br>(2300-5800)    |
| Benin    | 2005 | Male   | 40 to 44 | 22%<br>(13-37%)                | 78%<br>(63-87%)          | 0.7<br>(0.29-1.3)                           | 4.1%<br>(2.6-6.6%)                   | 4.9%<br>(2.9-7.8%)                  | 75<br>(43-120)      | 3800<br>(2300-6000)    |
| Benin    | 2005 | Male   | 45 to 49 | 23%<br>(12-38%)                | 77%<br>(62-88%)          | 0.73<br>(0.3-1.5)                           | 4.7%<br>(2.9-7.9%)                   | 5.7%<br>(3.3-9.7%)                  | 86<br>(49-150)      | 3800<br>(2300-6200)    |
| Benin    | 2005 | Male   | 50 to 54 | 23%<br>(13-38%)                | 77%<br>(62-87%)          | 0.74<br>(0.31-1.5)                          | 4.5%<br>(2.5-7.7%)                   | 5.5%<br>(2.8-9.5%)                  | 82<br>(42-140)      | 3100<br>(1700-5300)    |
| Benin    | 2005 | Male   | 55 to 59 | 23%<br>(13-38%)                | 77%<br>(62-87%)          | 0.71<br>(0.27-1.4)                          | 4.3%<br>(2.3-7.2%)                   | 5.1%<br>(2.7-8.9%)                  | 75<br>(39-130)      | 2500<br>(1300-4200)    |
| Benin    | 2005 | Male   | 60 to 64 | 23%<br>(12-37%)                | 77%<br>(63-88%)          | 0.62<br>(0.23-1.2)                          | 3.4%<br>(1.8-6.1%)                   | 4%<br>(2-7.4%)                      | 70<br>(35-130)      | 2000<br>(1000-3500)    |
| Benin    | 2005 | Male   | 65 to 69 | 22%<br>(13-36%)                | 78%<br>(64-87%)          | 0.51<br>(0.22-0.94)                         | 2.4%<br>(1.3-4.3%)                   | 2.8%<br>(1.5-5%)                    | 48<br>(25-88)       | 1100<br>(600-2000)     |
| Benin    | 2005 | Male   | 70 to 74 | 21%<br>(12-34%)                | 79%<br>(66-88%)          | 0.38<br>(0.16-0.79)                         | 1.7%<br>(0.82-3.3%)                  | 2%<br>(0.94-3.9%)                   | 33<br>(16-64)       | 610<br>(300-1200)      |
| Benin    | 2005 | Male   | 75 to 79 | 19%<br>(11-31%)                | 81%<br>(69-89%)          | 0.29<br>(0.1-0.56)                          | 1.2%<br>(0.54-2.3%)                  | 1.3%<br>(0.59-2.7%)                 | 19<br>(8.4-39)      | 270<br>(120-550)       |
| Benin    | 2005 | Male   | 80 to 84 | 17%<br>(9.2-28%)               | 83%<br>(72-91%)          | 0.23<br>(0.085-0.46)                        | 0.95%<br>(0.47-1.8%)                 | 1.1%<br>(0.5-2.1%)                  | 8.9<br>(4.1-17)     | 95<br>(46-180)         |

| Location | Year | Sex    | Age      | Prevalence of current drinkers | Prevalence of abstainers | Population average of standard drinks daily | Percent of total attributable deaths | Percent of total attributable DALYs | Attributable deaths   | Attributable DALYs     |
|----------|------|--------|----------|--------------------------------|--------------------------|---------------------------------------------|--------------------------------------|-------------------------------------|-----------------------|------------------------|
| Benin    | 2005 | Male   | 85 to 89 | 15%<br>(8.7-25%)               | 85%<br>(75-91%)          | 0.19<br>(0.067-0.4)                         | 0.73%<br>(0.33-1.4%)                 | 0.81%<br>(0.33-1.6%)                | 4<br>(1.6-8.2)        | 32<br>(14-61)          |
| Benin    | 2005 | Male   | 90 to 94 | 16%<br>(9.1-25%)               | 84%<br>(75-91%)          | 0.17<br>(0.058-0.38)                        | 0.47%<br>(0.13-1.1%)                 | 0.48%<br>(0.064-1.2%)               | 0.98<br>(0.13-2.5)    | 5.8<br>(1.6-13)        |
| Benin    | 2005 | Male   | 95 plus  | 18%<br>(8.8-32%)               | 82%<br>(68-91%)          | 0.18<br>(0.043-0.47)                        | 0.5%<br>(0.082-1.3%)                 | 0.47%<br>(-0.052-1.4%)              | 0.26<br>(-0.029-0.77) | 1.1<br>(0.18-2.8)      |
| Benin    | 2010 | Female | All Ages | 56%<br>(48-63%)                | 44%<br>(37-52%)          | 0.78<br>(0.59-1)                            | 0.97%<br>(0.52-1.5%)                 | 1.5%<br>(0.32-2.9%)                 | 560<br>(120-1100)     | 25000<br>(13000-40000) |
| Benin    | 2010 | Female | 15 to 19 | 57%<br>(44-70%)                | 43%<br>(30-56%)          | 0.86<br>(0.41-1.5)                          | 1.3%<br>(0.56-2.2%)                  | 1.4%<br>(0.3-2.8%)                  | 10<br>(2.1-21)        | 1300<br>(550-2200)     |
| Benin    | 2010 | Female | 20 to 24 | 64%<br>(51-75%)                | 36%<br>(25-49%)          | 1.2<br>(0.64-2.1)                           | 2.3%<br>(1.2-3.8%)                   | 2.2%<br>(0.65-4.3%)                 | 19<br>(5.4-38)        | 2300<br>(1200-3800)    |
| Benin    | 2010 | Female | 25 to 29 | 65%<br>(52-76%)                | 35%<br>(24-48%)          | 1.4<br>(0.75-2.3)                           | 2.5%<br>(1.5-3.9%)                   | 2.6%<br>(0.98-4.7%)                 | 25<br>(9.3-45)        | 2400<br>(1400-3800)    |
| Benin    | 2010 | Female | 30 to 34 | 67%<br>(53-78%)                | 33%<br>(22-47%)          | 1.5<br>(0.84-2.4)                           | 2.4%<br>(1.4-3.7%)                   | 2.6%<br>(1.2-4.5%)                  | 28<br>(13-47)         | 2300<br>(1300-3600)    |
| Benin    | 2010 | Female | 35 to 39 | 71%<br>(59-80%)                | 29%<br>(20-41%)          | 1.6<br>(0.81-2.5)                           | 2.7%<br>(1.4-4.3%)                   | 3.4%<br>(1.6-5.7%)                  | 38<br>(16-63)         | 2400<br>(1300-3800)    |
| Benin    | 2010 | Female | 40 to 44 | 72%<br>(62-82%)                | 28%<br>(18-38%)          | 1.6<br>(0.8-2.7)                            | 3.2%<br>(1.6-5.1%)                   | 4.3%<br>(1.9-7.3%)                  | 47<br>(21-80)         | 2500<br>(1200-4100)    |
| Benin    | 2010 | Female | 45 to 49 | 73%<br>(60-83%)                | 27%<br>(17-40%)          | 1.7<br>(0.83-2.9)                           | 3.6%<br>(1.5-6.9%)                   | 5.2%<br>(1.9-9.8%)                  | 57<br>(21-110)        | 2600<br>(1000-4800)    |
| Benin    | 2010 | Female | 50 to 54 | 73%<br>(61-83%)                | 27%<br>(17-39%)          | 1.7<br>(0.83-3.1)                           | 4%<br>(1.4-7.9%)                     | 5.7%<br>(2-11%)                     | 68<br>(24-130)        | 2600<br>(940-5000)     |
| Benin    | 2010 | Female | 55 to 59 | 72%<br>(56-84%)                | 28%<br>(16-44%)          | 1.8<br>(0.84-3.2)                           | 4.2%<br>(1.2-8.2%)                   | 5.7%<br>(1.6-11%)                   | 79<br>(22-160)        | 2500<br>(730-5200)     |
| Benin    | 2010 | Female | 60 to 64 | 72%<br>(55-85%)                | 28%<br>(15-45%)          | 1.8<br>(0.82-3.2)                           | 3.2%<br>(0.28-7.3%)                  | 4.2%<br>(0.44-9.4%)                 | 74<br>(7.3-170)       | 2000<br>(180-4600)     |
| Benin    | 2010 | Female | 65 to 69 | 73%<br>(57-85%)                | 27%<br>(15-43%)          | 1.6<br>(0.8-2.7)                            | 2.2%<br>(-0.57-6%)                   | 2.8%<br>(-0.68-7.5%)                | 62<br>(-15-170)       | 1400<br>(-340-3900)    |
| Benin    | 2010 | Female | 70 to 74 | 71%<br>(56-83%)                | 29%<br>(17-44%)          | 1.4<br>(0.61-2.5)                           | 1.3%<br>(-1.2-5.2%)                  | 1.7%<br>(-1.5-6.5%)                 | 39<br>(-35-150)       | 700<br>(-630-2700)     |
| Benin    | 2010 | Female | 75 to 79 | 69%<br>(53-81%)                | 31%<br>(19-47%)          | 1.2<br>(0.47-2.2)                           | 0.54%<br>(-1.8-4.1%)                 | 0.65%<br>(-2.1-5%)                  | 13<br>(-44-96)        | 180<br>(-630-1400)     |
| Benin    | 2010 | Female | 80 to 84 | 67%<br>(50-81%)                | 33%<br>(19-50%)          | 1.1<br>(0.46-1.9)                           | 0.2%<br>(-1.8-3%)                    | 0.22%<br>(-2.2-3.6%)                | 2.7<br>(-28-44)       | 32<br>(-290-470)       |
| Benin    | 2010 | Female | 85 to 89 | 67%<br>(50-80%)                | 33%<br>(20-50%)          | 1<br>(0.42-1.9)                             | -0.057%<br>(-2.1-2.5%)               | -0.13%<br>(-2.6-2.9%)               | -1.1<br>(-22-24)      | -4.2<br>(-160-180)     |
| Benin    | 2010 | Female | 90 to 94 | 68%<br>(54-80%)                | 32%<br>(20-46%)          | 1<br>(0.4-2.1)                              | -0.24%<br>(-2.1-2.7%)                | -0.42%<br>(-2.7-3.1%)               | -1.6<br>(-11-12)      | -5.8<br>(-50-63)       |
| Benin    | 2010 | Female | 95 plus  | 69%<br>(52-84%)                | 31%<br>(16-48%)          | 1<br>(0.34-2.2)                             | -0.17%<br>(-2-3.1%)                  | -0.4%<br>(-2.7-3.6%)                | -0.49<br>(-3.2-4.4)   | -0.81<br>(-10-15)      |
| Benin    | 2010 | Male   | All Ages | 11%<br>(8.4-14%)               | 89%<br>(86-92%)          | 0.29<br>(0.2-0.39)                          | 1.2%<br>(0.88-1.7%)                  | 1.9%<br>(1.3-2.8%)                  | 810<br>(540-1200)     | 36000<br>(26000-50000) |



| Location | Year | Sex    | Age      | Prevalence of current drinkers | Prevalence of abstainers | Population average of standard drinks daily | Percent of total attributable deaths | Percent of total attributable DALYs | Attributable deaths   | Attributable DALYs     |
|----------|------|--------|----------|--------------------------------|--------------------------|---------------------------------------------|--------------------------------------|-------------------------------------|-----------------------|------------------------|
| Benin    | 2010 | Male   | 15 to 19 | 8.4%<br>(4.7-15%)              | 92%<br>(85-95%)          | 0.16<br>(0.067-0.31)                        | 0.81%<br>(0.52-1.2%)                 | 0.6%<br>(0.27-1.1%)                 | 5.5<br>(2.4-10)       | 850<br>(520-1300)      |
| Benin    | 2010 | Male   | 20 to 24 | 14%<br>(7.5-23%)               | 86%<br>(77-93%)          | 0.35<br>(0.15-0.66)                         | 2.1%<br>(1.3-3.2%)                   | 1.7%<br>(0.83-3%)                   | 20<br>(9.5-36)        | 2300<br>(1400-3600)    |
| Benin    | 2010 | Male   | 25 to 29 | 18%<br>(9.7-29%)               | 82%<br>(71-90%)          | 0.54<br>(0.24-1)                            | 3.1%<br>(1.9-4.8%)                   | 3.1%<br>(1.5-5.4%)                  | 38<br>(19-69)         | 3400<br>(2100-5400)    |
| Benin    | 2010 | Male   | 30 to 34 | 20%<br>(11-34%)                | 80%<br>(66-89%)          | 0.65<br>(0.3-1.2)                           | 3.7%<br>(2.4-5.7%)                   | 4.1%<br>(2.3-6.7%)                  | 56<br>(30-94)         | 4000<br>(2500-6200)    |
| Benin    | 2010 | Male   | 35 to 39 | 22%<br>(12-36%)                | 78%<br>(64-88%)          | 0.69<br>(0.3-1.3)                           | 4.2%<br>(2.6-6.3%)                   | 4.9%<br>(2.8-7.7%)                  | 73<br>(41-120)        | 4300<br>(2600-6500)    |
| Benin    | 2010 | Male   | 40 to 44 | 22%<br>(13-37%)                | 78%<br>(63-87%)          | 0.74<br>(0.31-1.4)                          | 4.7%<br>(2.8-7.4%)                   | 5.7%<br>(3.2-9.2%)                  | 89<br>(50-140)        | 4500<br>(2700-7100)    |
| Benin    | 2010 | Male   | 45 to 49 | 23%<br>(12-37%)                | 77%<br>(63-88%)          | 0.78<br>(0.3-1.6)                           | 5.3%<br>(3.1-8.8%)                   | 6.6%<br>(3.8-11%)                   | 110<br>(61-180)       | 4700<br>(2800-7900)    |
| Benin    | 2010 | Male   | 50 to 54 | 23%<br>(12-38%)                | 77%<br>(62-88%)          | 0.78<br>(0.31-1.6)                          | 5%<br>(2.7-8.3%)                     | 6.1%<br>(3.2-10%)                   | 100<br>(53-180)       | 3900<br>(2100-6600)    |
| Benin    | 2010 | Male   | 55 to 59 | 23%<br>(13-38%)                | 77%<br>(62-87%)          | 0.75<br>(0.28-1.5)                          | 4.6%<br>(2.5-7.9%)                   | 5.6%<br>(2.9-9.8%)                  | 100<br>(52-170)       | 3300<br>(1800-5500)    |
| Benin    | 2010 | Male   | 60 to 64 | 23%<br>(12-38%)                | 77%<br>(62-88%)          | 0.65<br>(0.25-1.4)                          | 3.5%<br>(1.9-6.3%)                   | 4.2%<br>(2.1-7.6%)                  | 77<br>(39-140)        | 2200<br>(1100-3800)    |
| Benin    | 2010 | Male   | 65 to 69 | 22%<br>(13-37%)                | 78%<br>(63-87%)          | 0.54<br>(0.22-1)                            | 2.5%<br>(1.3-4.5%)                   | 2.9%<br>(1.5-5.3%)                  | 62<br>(32-110)        | 1400<br>(770-2500)     |
| Benin    | 2010 | Male   | 70 to 74 | 21%<br>(12-34%)                | 79%<br>(66-88%)          | 0.41<br>(0.16-0.88)                         | 1.8%<br>(0.88-3.6%)                  | 2.1%<br>(1-4.2%)                    | 41<br>(20-85)         | 750<br>(370-1500)      |
| Benin    | 2010 | Male   | 75 to 79 | 19%<br>(11-31%)                | 81%<br>(69-89%)          | 0.31<br>(0.1-0.64)                          | 1.2%<br>(0.56-2.4%)                  | 1.4%<br>(0.6-2.9%)                  | 22<br>(9.5-45)        | 310<br>(140-630)       |
| Benin    | 2010 | Male   | 80 to 84 | 17%<br>(9.1-28%)               | 83%<br>(72-91%)          | 0.25<br>(0.087-0.51)                        | 0.99%<br>(0.47-1.8%)                 | 1.1%<br>(0.51-2.2%)                 | 10<br>(4.5-19)        | 110<br>(50-200)        |
| Benin    | 2010 | Male   | 85 to 89 | 16%<br>(8.3-25%)               | 84%<br>(75-92%)          | 0.2<br>(0.07-0.44)                          | 0.75%<br>(0.35-1.4%)                 | 0.83%<br>(0.36-1.6%)                | 4.3<br>(1.9-8.6)      | 34<br>(16-65)          |
| Benin    | 2010 | Male   | 90 to 94 | 16%<br>(9-26%)                 | 84%<br>(74-91%)          | 0.19<br>(0.058-0.42)                        | 0.49%<br>(0.13-1.1%)                 | 0.5%<br>(0.071-1.2%)                | 1.1<br>(0.15-2.6)     | 6.4<br>(1.8-14)        |
| Benin    | 2010 | Male   | 95 plus  | 18%<br>(8.9-33%)               | 82%<br>(67-91%)          | 0.19<br>(0.045-0.51)                        | 0.51%<br>(0.091-1.3%)                | 0.48%<br>(-0.04-1.4%)               | 0.28<br>(-0.023-0.83) | 1.2<br>(0.21-3)        |
| Benin    | 2016 | Female | All Ages | 60%<br>(53-67%)                | 40%<br>(33-47%)          | 0.86<br>(0.5-1.3)                           | 1.1%<br>(0.45-2.1%)                  | 1.7%<br>(0.13-3.9%)                 | 640<br>(51-1500)      | 29000<br>(12000-52000) |
| Benin    | 2016 | Female | 15 to 19 | 61%<br>(48-74%)                | 39%<br>(26-52%)          | 0.95<br>(0.42-1.8)                          | 1.3%<br>(0.58-2.4%)                  | 1.4%<br>(0.26-3.1%)                 | 11<br>(2-24)          | 1400<br>(600-2600)     |
| Benin    | 2016 | Female | 20 to 24 | 69%<br>(55-79%)                | 31%<br>(21-45%)          | 1.4<br>(0.64-2.6)                           | 2.4%<br>(1.3-4.2%)                   | 2.3%<br>(0.58-5.1%)                 | 20<br>(4.9-44)        | 2600<br>(1300-4500)    |
| Benin    | 2016 | Female | 25 to 29 | 70%<br>(57-79%)                | 30%<br>(21-43%)          | 1.6<br>(0.72-2.9)                           | 2.7%<br>(1.5-4.4%)                   | 2.8%<br>(0.99-5.5%)                 | 26<br>(9.2-53)        | 2700<br>(1500-4400)    |
| Benin    | 2016 | Female | 30 to 34 | 72%<br>(60-81%)                | 28%<br>(19-40%)          | 1.7<br>(0.79-2.9)                           | 2.7%<br>(1.4-4.4%)                   | 3.1%<br>(1.2-5.8%)                  | 30<br>(12-57)         | 2600<br>(1400-4200)    |

| Location | Year | Sex    | Age      | Prevalence of current drinkers | Prevalence of abstainers | Population average of standard drinks daily | Percent of total attributable deaths | Percent of total attributable DALYs | Attributable deaths | Attributable DALYs     |
|----------|------|--------|----------|--------------------------------|--------------------------|---------------------------------------------|--------------------------------------|-------------------------------------|---------------------|------------------------|
| Benin    | 2016 | Female | 35 to 39 | 75%<br>(65-82%)                | 25%<br>(18-35%)          | 1.7<br>(0.78-3.1)                           | 3%<br>(1.5-5.1%)                     | 3.9%<br>(1.5-7.1%)                  | 41<br>(16-75)       | 2700<br>(1300-4600)    |
| Benin    | 2016 | Female | 40 to 44 | 76%<br>(66-84%)                | 24%<br>(16-34%)          | 1.7<br>(0.73-3.3)                           | 3.3%<br>(1.5-6%)                     | 4.8%<br>(1.9-8.7%)                  | 54<br>(21-98)       | 2900<br>(1300-5100)    |
| Benin    | 2016 | Female | 45 to 49 | 75%<br>(63-84%)                | 25%<br>(16-37%)          | 1.7<br>(0.75-3.4)                           | 3.8%<br>(1.3-7.4%)                   | 5.5%<br>(1.8-11%)                   | 68<br>(22-140)      | 3000<br>(1100-6000)    |
| Benin    | 2016 | Female | 50 to 54 | 74%<br>(62-84%)                | 26%<br>(16-38%)          | 1.8<br>(0.74-3.4)                           | 4.1%<br>(1.2-8.4%)                   | 5.8%<br>(1.7-12%)                   | 83<br>(24-180)      | 3200<br>(920-6700)     |
| Benin    | 2016 | Female | 55 to 59 | 72%<br>(57-85%)                | 28%<br>(15-43%)          | 1.8<br>(0.76-3.7)                           | 4.2%<br>(0.82-9.1%)                  | 5.8%<br>(1.2-12%)                   | 96<br>(20-210)      | 3100<br>(620-6700)     |
| Benin    | 2016 | Female | 60 to 64 | 72%<br>(56-85%)                | 28%<br>(15-44%)          | 1.8<br>(0.73-3.6)                           | 3.2%<br>(-0.023-8.3%)                | 4.2%<br>(0.011-11%)                 | 81<br>(0.19-200)    | 2200<br>(-16-5700)     |
| Benin    | 2016 | Female | 65 to 69 | 72%<br>(55-85%)                | 28%<br>(15-45%)          | 1.6<br>(0.69-3.1)                           | 2.2%<br>(-0.82-7%)                   | 2.7%<br>(-1-8.7%)                   | 65<br>(-23-210)     | 1500<br>(-550-4900)    |
| Benin    | 2016 | Female | 70 to 74 | 71%<br>(55-83%)                | 29%<br>(17-45%)          | 1.3<br>(0.52-2.6)                           | 1.3%<br>(-1.4-6.1%)                  | 1.6%<br>(-1.7-7.5%)                 | 45<br>(-48-210)     | 820<br>(-890-3800)     |
| Benin    | 2016 | Female | 75 to 79 | 68%<br>(53-82%)                | 32%<br>(18-47%)          | 1.2<br>(0.42-2.4)                           | 0.54%<br>(-1.8-5%)                   | 0.63%<br>(-2.3-5.9%)                | 16<br>(-54-140)     | 230<br>(-740-2000)     |
| Benin    | 2016 | Female | 80 to 84 | 67%<br>(48-81%)                | 33%<br>(19-52%)          | 1.1<br>(0.39-2.1)                           | 0.21%<br>(-2-3.9%)                   | 0.22%<br>(-2.5-4.6%)                | 3.2<br>(-37-68)     | 39<br>(-370-730)       |
| Benin    | 2016 | Female | 85 to 89 | 67%<br>(49-80%)                | 33%<br>(20-51%)          | 1.1<br>(0.39-2.2)                           | -0.019%<br>(-2.2-3.4%)               | -0.091%<br>(-2.7-3.9%)              | -0.87<br>(-26-38)   | -1.6<br>(-180-290)     |
| Benin    | 2016 | Female | 90 to 94 | 69%<br>(55-81%)                | 31%<br>(19-45%)          | 1.1<br>(0.35-2.3)                           | -0.19%<br>(-2.2-3.4%)                | -0.36%<br>(-2.9-3.8%)               | -1.5<br>(-12-16)    | -4.9<br>(-57-86)       |
| Benin    | 2016 | Female | 95 plus  | 70%<br>(52-85%)                | 30%<br>(15-48%)          | 1.1<br>(0.3-2.4)                            | -0.11%<br>(-2.2-3.9%)                | -0.34%<br>(-2.9-4.4%)               | -0.46<br>(-3.8-5.9) | -0.59<br>(-12-20)      |
| Benin    | 2016 | Male   | All Ages | 11%<br>(8.4-14%)               | 89%<br>(86-92%)          | 0.29<br>(0.16-0.49)                         | 1.4%<br>(0.91-2%)                    | 2.1%<br>(1.3-3.2%)                  | 900<br>(550-1400)   | 41000<br>(27000-61000) |
| Benin    | 2016 | Male   | 15 to 19 | 8.4%<br>(4.7-15%)              | 92%<br>(85-95%)          | 0.16<br>(0.06-0.34)                         | 0.84%<br>(0.51-1.3%)                 | 0.6%<br>(0.24-1.2%)                 | 6.1<br>(2.5-12)     | 990<br>(590-1600)      |
| Benin    | 2016 | Male   | 20 to 24 | 14%<br>(7.7-23%)               | 86%<br>(77-92%)          | 0.36<br>(0.13-0.74)                         | 2.1%<br>(1.3-3.4%)                   | 1.7%<br>(0.76-3.3%)                 | 22<br>(9.7-44)      | 2600<br>(1600-4300)    |
| Benin    | 2016 | Male   | 25 to 29 | 18%<br>(9.7-29%)               | 82%<br>(71-90%)          | 0.54<br>(0.21-1.1)                          | 3.1%<br>(1.9-5.2%)                   | 3.1%<br>(1.5-5.9%)                  | 42<br>(19-82)       | 3800<br>(2200-6300)    |
| Benin    | 2016 | Male   | 30 to 34 | 20%<br>(11-33%)                | 80%<br>(67-89%)          | 0.65<br>(0.26-1.3)                          | 3.8%<br>(2.4-6.1%)                   | 4.2%<br>(2.2-7.4%)                  | 60<br>(30-110)      | 4400<br>(2600-7100)    |
| Benin    | 2016 | Male   | 35 to 39 | 21%<br>(12-35%)                | 79%<br>(65-88%)          | 0.69<br>(0.26-1.5)                          | 4.3%<br>(2.6-6.7%)                   | 5.1%<br>(2.8-8.4%)                  | 78<br>(42-130)      | 4700<br>(2800-7500)    |
| Benin    | 2016 | Male   | 40 to 44 | 22%<br>(13-37%)                | 78%<br>(63-87%)          | 0.74<br>(0.26-1.6)                          | 4.7%<br>(2.7-7.9%)                   | 5.8%<br>(3.1-10%)                   | 95<br>(50-160)      | 4900<br>(2700-8100)    |
| Benin    | 2016 | Male   | 45 to 49 | 23%<br>(12-36%)                | 77%<br>(64-88%)          | 0.78<br>(0.28-1.7)                          | 5.3%<br>(2.9-9.2%)                   | 6.6%<br>(3.5-12%)                   | 120<br>(62-220)     | 5300<br>(2900-9400)    |
| Benin    | 2016 | Male   | 50 to 54 | 23%<br>(12-37%)                | 77%<br>(63-88%)          | 0.78<br>(0.28-1.8)                          | 4.8%<br>(2.5-8.5%)                   | 5.8%<br>(2.9-10%)                   | 120<br>(59-210)     | 4500<br>(2400-8100)    |

| Location     | Year | Sex    | Age      | Prevalence of current drinkers | Prevalence of abstainers | Population average of standard drinks daily | Percent of total attributable deaths | Percent of total attributable DALYs | Attributable deaths   | Attributable DALYs     |
|--------------|------|--------|----------|--------------------------------|--------------------------|---------------------------------------------|--------------------------------------|-------------------------------------|-----------------------|------------------------|
| Benin        | 2016 | Male   | 55 to 59 | 23%<br>(13-37%)                | 77%<br>(63-87%)          | 0.75<br>(0.25-1.7)                          | 4.4%<br>(2.3-8%)                     | 5.4%<br>(2.7-9.7%)                  | 110<br>(57-210)       | 3800<br>(2000-6700)    |
| Benin        | 2016 | Male   | 60 to 64 | 23%<br>(12-38%)                | 77%<br>(62-88%)          | 0.67<br>(0.22-1.5)                          | 3.4%<br>(1.7-6.4%)                   | 4%<br>(1.9-7.7%)                    | 94<br>(45-180)        | 2600<br>(1300-4800)    |
| Benin        | 2016 | Male   | 65 to 69 | 22%<br>(13-36%)                | 78%<br>(64-87%)          | 0.55<br>(0.19-1.2)                          | 2.4%<br>(1.1-4.7%)                   | 2.8%<br>(1.3-5.5%)                  | 62<br>(28-120)        | 1500<br>(690-2900)     |
| Benin        | 2016 | Male   | 70 to 74 | 21%<br>(12-34%)                | 79%<br>(66-88%)          | 0.41<br>(0.14-0.97)                         | 1.7%<br>(0.76-3.5%)                  | 2%<br>(0.87-4.1%)                   | 46<br>(20-95)         | 850<br>(390-1800)      |
| Benin        | 2016 | Male   | 75 to 79 | 19%<br>(11-31%)                | 81%<br>(69-89%)          | 0.31<br>(0.088-0.68)                        | 1.1%<br>(0.51-2.4%)                  | 1.3%<br>(0.56-2.7%)                 | 24<br>(10-51)         | 350<br>(160-740)       |
| Benin        | 2016 | Male   | 80 to 84 | 17%<br>(9.3-29%)               | 83%<br>(71-91%)          | 0.25<br>(0.073-0.54)                        | 0.92%<br>(0.41-1.8%)                 | 1%<br>(0.43-2.1%)                   | 10<br>(4.3-21)        | 110<br>(50-220)        |
| Benin        | 2016 | Male   | 85 to 89 | 16%<br>(8.9-25%)               | 84%<br>(75-91%)          | 0.2<br>(0.062-0.49)                         | 0.69%<br>(0.3-1.4%)                  | 0.76%<br>(0.29-1.6%)                | 4.3<br>(1.6-9)        | 34<br>(15-69)          |
| Benin        | 2016 | Male   | 90 to 94 | 16%<br>(8.9-26%)               | 84%<br>(74-91%)          | 0.18<br>(0.051-0.46)                        | 0.46%<br>(0.12-1%)                   | 0.46%<br>(0.048-1.2%)               | 1<br>(0.11-2.6)       | 6.3<br>(1.6-14)        |
| Benin        | 2016 | Male   | 95 plus  | 18%<br>(9-32%)                 | 82%<br>(68-91%)          | 0.19<br>(0.039-0.5)                         | 0.48%<br>(0.096-1.3%)                | 0.43%<br>(-0.05-1.4%)               | 0.27<br>(-0.031-0.86) | 1.2<br>(0.23-3.2)      |
| Burkina Faso | 1990 | Female | All Ages | 33%<br>(29-38%)                | 67%<br>(62-71%)          | 1.2<br>(0.9-1.6)                            | 1.3%<br>(0.84-1.8%)                  | 2.7%<br>(1.6-4%)                    | 1900<br>(1200-2800)   | 63000<br>(43000-88000) |
| Burkina Faso | 1990 | Female | 15 to 19 | 32%<br>(23-42%)                | 68%<br>(58-77%)          | 1.3<br>(0.7-2)                              | 1.8%<br>(0.98-2.9%)                  | 2.3%<br>(1-4.1%)                    | 25<br>(11-43)         | 2200<br>(1200-3500)    |
| Burkina Faso | 1990 | Female | 20 to 24 | 38%<br>(27-49%)                | 62%<br>(51-73%)          | 1.8<br>(1.1-2.8)                            | 3.1%<br>(1.9-4.6%)                   | 3.5%<br>(1.8-5.6%)                  | 48<br>(25-79)         | 4200<br>(2500-6300)    |
| Burkina Faso | 1990 | Female | 25 to 29 | 41%<br>(30-52%)                | 59%<br>(48-70%)          | 2.1<br>(1.3-3.2)                            | 4%<br>(2.4-6.1%)                     | 4.8%<br>(2.5-7.8%)                  | 68<br>(36-110)        | 4900<br>(3000-7500)    |
| Burkina Faso | 1990 | Female | 30 to 34 | 44%<br>(33-55%)                | 56%<br>(45-67%)          | 2.3<br>(1.4-3.5)                            | 4.3%<br>(2.7-6.4%)                   | 5.5%<br>(3.2-8.4%)                  | 73<br>(43-110)        | 4700<br>(2900-7000)    |
| Burkina Faso | 1990 | Female | 35 to 39 | 48%<br>(36-57%)                | 52%<br>(43-64%)          | 2.5<br>(1.5-3.7)                            | 4.7%<br>(2.9-6.8%)                   | 6.1%<br>(3.6-9.1%)                  | 81<br>(49-120)        | 4500<br>(2900-6600)    |
| Burkina Faso | 1990 | Female | 40 to 44 | 50%<br>(39-60%)                | 50%<br>(40-61%)          | 2.7<br>(1.6-4.1)                            | 5.5%<br>(3.4-8%)                     | 7.5%<br>(4.5-11%)                   | 97<br>(58-140)        | 4700<br>(2900-6900)    |
| Burkina Faso | 1990 | Female | 45 to 49 | 52%<br>(39-62%)                | 48%<br>(38-61%)          | 3<br>(1.8-4.5)                              | 7%<br>(4.2-10%)                      | 9.6%<br>(5.7-14%)                   | 140<br>(83-200)       | 5800<br>(3600-8600)    |
| Burkina Faso | 1990 | Female | 50 to 54 | 53%<br>(42-63%)                | 47%<br>(37-58%)          | 3.2<br>(1.9-4.9)                            | 8%<br>(4.5-12%)                      | 11%<br>(6.1-16%)                    | 170<br>(97-260)       | 6500<br>(3700-9700)    |
| Burkina Faso | 1990 | Female | 55 to 59 | 55%<br>(44-66%)                | 45%<br>(34-56%)          | 3.2<br>(2-5)                                | 8.1%<br>(4.6-12%)                    | 11%<br>(6.1-16%)                    | 210<br>(120-310)      | 6600<br>(3800-9900)    |
| Burkina Faso | 1990 | Female | 60 to 64 | 56%<br>(44-66%)                | 44%<br>(34-56%)          | 3.1<br>(1.8-4.8)                            | 7%<br>(3.8-11%)                      | 8.7%<br>(4.7-14%)                   | 220<br>(110-340)      | 5900<br>(3100-9300)    |
| Burkina Faso | 1990 | Female | 65 to 69 | 55%<br>(45-65%)                | 45%<br>(35-55%)          | 2.7<br>(1.7-4)                              | 6.7%<br>(3.3-11%)                    | 8.1%<br>(4.1-13%)                   | 250<br>(130-410)      | 5600<br>(2800-9100)    |
| Burkina Faso | 1990 | Female | 70 to 74 | 53%<br>(43-63%)                | 47%<br>(37-57%)          | 2.2<br>(1.3-3.5)                            | 6.2%<br>(2.7-11%)                    | 7.4%<br>(3.2-13%)                   | 250<br>(110-440)      | 4400<br>(1900-7900)    |

| Location     | Year | Sex    | Age      | Prevalence of current drinkers | Prevalence of abstainers | Population average of standard drinks daily | Percent of total attributable deaths | Percent of total attributable DALYs | Attributable deaths | Attributable DALYs      |
|--------------|------|--------|----------|--------------------------------|--------------------------|---------------------------------------------|--------------------------------------|-------------------------------------|---------------------|-------------------------|
| Burkina Faso | 1990 | Female | 75 to 79 | 51%<br>(37-64%)                | 49%<br>(36-63%)          | 1.9<br>(1.1-3.2)                            | 4.8%<br>(1.5-9.2%)                   | 5.6%<br>(1.8-11%)                   | 150<br>(49-300)     | 2100<br>(690-4200)      |
| Burkina Faso | 1990 | Female | 80 to 84 | 50%<br>(34-65%)                | 50%<br>(35-66%)          | 1.8<br>(0.99-2.9)                           | 4%<br>(1.2-7.9%)                     | 4.7%<br>(1.5-9.4%)                  | 65<br>(21-130)      | 670<br>(220-1300)       |
| Burkina Faso | 1990 | Female | 85 to 89 | 51%<br>(36-65%)                | 49%<br>(35-64%)          | 1.8<br>(1.1-2.9)                            | 3.5%<br>(1-7.2%)                     | 4.2%<br>(1.1-8.5%)                  | 30<br>(8.3-62)      | 220<br>(63-450)         |
| Burkina Faso | 1990 | Female | 90 to 94 | 53%<br>(39-67%)                | 47%<br>(33-61%)          | 1.9<br>(1.1-3.1)                            | 3.1%<br>(0.57-6.7%)                  | 3.7%<br>(0.58-8%)                   | 8.9<br>(1.4-20)     | 46<br>(8.2-99)          |
| Burkina Faso | 1990 | Female | 95 plus  | 56%<br>(37-73%)                | 44%<br>(27-63%)          | 1.9<br>(0.94-3.2)                           | 2.7%<br>(0.15-6.9%)                  | 3.1%<br>(0.021-8.3%)                | 1.9<br>(0.013-5)    | 6.6<br>(0.37-17)        |
| Burkina Faso | 1990 | Male   | All Ages | 25%<br>(21-29%)                | 75%<br>(71-79%)          | 1.4<br>(1-1.8)                              | 1.8%<br>(1.3-2.3%)                   | 3.6%<br>(2.5-4.8%)                  | 2600<br>(1800-3400) | 97000<br>(71000-120000) |
| Burkina Faso | 1990 | Male   | 15 to 19 | 20%<br>(13-29%)                | 80%<br>(71-87%)          | 1.1<br>(0.6-1.8)                            | 2.6%<br>(1.5-4.2%)                   | 3.5%<br>(1.8-5.7%)                  | 36<br>(18-62)       | 3100<br>(1700-5000)     |
| Burkina Faso | 1990 | Male   | 20 to 24 | 31%<br>(20-41%)                | 69%<br>(59-80%)          | 2.2<br>(1.2-3.5)                            | 6.2%<br>(3.8-9.3%)                   | 7.6%<br>(4.2-12%)                   | 110<br>(63-170)     | 8200<br>(5000-12000)    |
| Burkina Faso | 1990 | Male   | 25 to 29 | 37%<br>(27-49%)                | 63%<br>(51-73%)          | 2.7<br>(1.6-4.1)                            | 6.9%<br>(4.2-10%)                    | 8.3%<br>(4.5-13%)                   | 140<br>(84-200)     | 9300<br>(6000-13000)    |
| Burkina Faso | 1990 | Male   | 30 to 34 | 41%<br>(30-53%)                | 59%<br>(47-70%)          | 3.1<br>(1.9-4.6)                            | 7.8%<br>(4.9-11%)                    | 9.4%<br>(5.6-14%)                   | 150<br>(95-220)     | 9300<br>(5900-13000)    |
| Burkina Faso | 1990 | Male   | 35 to 39 | 44%<br>(31-55%)                | 56%<br>(45-69%)          | 3.6<br>(2.1-5.5)                            | 9.2%<br>(6.1-13%)                    | 11%<br>(7.2-16%)                    | 170<br>(110-240)    | 9200<br>(6200-12000)    |
| Burkina Faso | 1990 | Male   | 40 to 44 | 45%<br>(33-55%)                | 55%<br>(45-67%)          | 3.8<br>(2.4-5.7)                            | 10%<br>(7-14%)                       | 13%<br>(8.6-18%)                    | 190<br>(130-260)    | 9100<br>(6200-12000)    |
| Burkina Faso | 1990 | Male   | 45 to 49 | 46%<br>(33-56%)                | 54%<br>(44-67%)          | 3.9<br>(2.3-5.8)                            | 12%<br>(7.9-16%)                     | 15%<br>(9.9-20%)                    | 230<br>(150-310)    | 9500<br>(6400-13000)    |
| Burkina Faso | 1990 | Male   | 50 to 54 | 48%<br>(37-59%)                | 52%<br>(41-63%)          | 4.1<br>(2.4-6.4)                            | 13%<br>(8.5-17%)                     | 16%<br>(11-22%)                     | 250<br>(160-340)    | 9100<br>(5900-12000)    |
| Burkina Faso | 1990 | Male   | 55 to 59 | 50%<br>(38-61%)                | 50%<br>(39-62%)          | 4.4<br>(2.6-6.8)                            | 13%<br>(8.7-17%)                     | 16%<br>(11-21%)                     | 260<br>(170-360)    | 8400<br>(5600-11000)    |
| Burkina Faso | 1990 | Male   | 60 to 64 | 51%<br>(37-63%)                | 49%<br>(37-63%)          | 4.2<br>(2.4-6.4)                            | 11%<br>(6.7-15%)                     | 13%<br>(8.1-18%)                    | 260<br>(160-360)    | 7200<br>(4400-9900)     |
| Burkina Faso | 1990 | Male   | 65 to 69 | 50%<br>(38-60%)                | 50%<br>(40-62%)          | 3.6<br>(2.1-5.5)                            | 9.7%<br>(5.8-14%)                    | 12%<br>(7-17%)                      | 270<br>(160-400)    | 6200<br>(3700-8900)     |
| Burkina Faso | 1990 | Male   | 70 to 74 | 49%<br>(38-60%)                | 51%<br>(40-62%)          | 3<br>(1.7-4.6)                              | 8.6%<br>(4.7-13%)                    | 10%<br>(5.5-16%)                    | 260<br>(140-410)    | 4700<br>(2500-7300)     |
| Burkina Faso | 1990 | Male   | 75 to 79 | 49%<br>(35-63%)                | 51%<br>(37-65%)          | 2.5<br>(1.4-4.1)                            | 6.7%<br>(3-12%)                      | 7.9%<br>(3.5-14%)                   | 160<br>(72-290)     | 2300<br>(1000-4000)     |
| Burkina Faso | 1990 | Male   | 80 to 84 | 46%<br>(32-60%)                | 54%<br>(40-68%)          | 2<br>(1.1-3.2)                              | 5.3%<br>(2.3-9.1%)                   | 6.2%<br>(2.7-11%)                   | 61<br>(26-110)      | 630<br>(270-1100)       |
| Burkina Faso | 1990 | Male   | 85 to 89 | 41%<br>(28-55%)                | 59%<br>(45-72%)          | 1.5<br>(0.83-2.4)                           | 3.8%<br>(1.6-6.5%)                   | 4.4%<br>(1.8-7.8%)                  | 23<br>(9.3-41)      | 170<br>(72-300)         |
| Burkina Faso | 1990 | Male   | 90 to 94 | 40%<br>(28-54%)                | 60%<br>(46-72%)          | 1.2<br>(0.63-1.9)                           | 2.3%<br>(0.71-4.4%)                  | 2.7%<br>(0.72-5.2%)                 | 4.8<br>(1.3-9.4)    | 25<br>(7.6-48)          |

| Location     | Year | Sex    | Age      | Prevalence of current drinkers | Prevalence of abstainers | Population average of standard drinks daily | Percent of total attributable deaths | Percent of total attributable DALYs | Attributable deaths  | Attributable DALYs       |
|--------------|------|--------|----------|--------------------------------|--------------------------|---------------------------------------------|--------------------------------------|-------------------------------------|----------------------|--------------------------|
| Burkina Faso | 1990 | Male   | 95 plus  | 42%<br>(27-60%)                | 58%<br>(40-73%)          | 0.94<br>(0.43-1.8)                          | 2%<br>(0.069-4.6%)                   | 2.2%<br>(-0.11-5.5%)                | 0.91<br>(-0.047-2.3) | 3.3<br>(0.12-7.9)        |
| Burkina Faso | 1995 | Female | All Ages | 33%<br>(29-38%)                | 67%<br>(62-71%)          | 1.3<br>(0.97-1.7)                           | 1.3%<br>(0.88-1.9%)                  | 2.8%<br>(1.7-4.1%)                  | 2100<br>(1300-3100)  | 70000<br>(47000-97000)   |
| Burkina Faso | 1995 | Female | 15 to 19 | 32%<br>(23-42%)                | 68%<br>(58-77%)          | 1.3<br>(0.77-2.1)                           | 1.8%<br>(1-2.9%)                     | 2.4%<br>(1.1-4.1%)                  | 28<br>(13-49)        | 2600<br>(1500-4200)      |
| Burkina Faso | 1995 | Female | 20 to 24 | 38%<br>(27-49%)                | 62%<br>(51-73%)          | 2<br>(1.2-3)                                | 2.9%<br>(1.8-4.3%)                   | 3.2%<br>(1.7-5.1%)                  | 50<br>(27-83)        | 4400<br>(2800-6700)      |
| Burkina Faso | 1995 | Female | 25 to 29 | 41%<br>(30-53%)                | 59%<br>(47-70%)          | 2.2<br>(1.4-3.4)                            | 3.2%<br>(1.9-5%)                     | 3.6%<br>(1.9-6%)                    | 70<br>(40-110)       | 5200<br>(3200-8000)      |
| Burkina Faso | 1995 | Female | 30 to 34 | 45%<br>(33-55%)                | 55%<br>(45-67%)          | 2.5<br>(1.5-3.8)                            | 3.4%<br>(2.1-5.2%)                   | 3.9%<br>(2.2-6.4%)                  | 77<br>(45-120)       | 5000<br>(3100-7600)      |
| Burkina Faso | 1995 | Female | 35 to 39 | 48%<br>(36-58%)                | 52%<br>(42-64%)          | 2.6<br>(1.6-3.9)                            | 3.8%<br>(2.4-5.5%)                   | 4.6%<br>(2.8-6.9%)                  | 86<br>(52-130)       | 4900<br>(3100-7000)      |
| Burkina Faso | 1995 | Female | 40 to 44 | 51%<br>(40-60%)                | 49%<br>(40-60%)          | 2.9<br>(1.8-4.3)                            | 4.8%<br>(3-7%)                       | 6.2%<br>(3.8-9.1%)                  | 110<br>(67-150)      | 5300<br>(3300-7500)      |
| Burkina Faso | 1995 | Female | 45 to 49 | 52%<br>(39-62%)                | 48%<br>(38-61%)          | 3.2<br>(1.9-4.9)                            | 6.4%<br>(4-9.3%)                     | 8.4%<br>(5.1-12%)                   | 140<br>(88-220)      | 6200<br>(3800-9100)      |
| Burkina Faso | 1995 | Female | 50 to 54 | 54%<br>(43-63%)                | 46%<br>(37-57%)          | 3.4<br>(2-5.2)                              | 7.8%<br>(4.5-12%)                    | 10%<br>(5.9-15%)                    | 200<br>(110-300)     | 7300<br>(4100-11000)     |
| Burkina Faso | 1995 | Female | 55 to 59 | 55%<br>(43-65%)                | 45%<br>(35-57%)          | 3.4<br>(2.1-5.4)                            | 8.2%<br>(4.9-12%)                    | 10%<br>(6.3-16%)                    | 230<br>(130-350)     | 7400<br>(4200-11000)     |
| Burkina Faso | 1995 | Female | 60 to 64 | 56%<br>(44-66%)                | 44%<br>(34-56%)          | 3.3<br>(2-5.1)                              | 7.2%<br>(3.9-11%)                    | 9%<br>(4.9-14%)                     | 240<br>(130-370)     | 6400<br>(3500-10000)     |
| Burkina Faso | 1995 | Female | 65 to 69 | 55%<br>(44-65%)                | 45%<br>(35-56%)          | 2.9<br>(1.8-4.4)                            | 7.1%<br>(3.6-11%)                    | 8.6%<br>(4.4-14%)                   | 270<br>(140-440)     | 6200<br>(3100-9900)      |
| Burkina Faso | 1995 | Female | 70 to 74 | 53%<br>(43-64%)                | 47%<br>(36-57%)          | 2.4<br>(1.3-3.6)                            | 6.6%<br>(2.8-11%)                    | 7.8%<br>(3.4-13%)                   | 280<br>(120-490)     | 5000<br>(2100-8700)      |
| Burkina Faso | 1995 | Female | 75 to 79 | 51%<br>(37-64%)                | 49%<br>(36-63%)          | 2<br>(1.1-3.2)                              | 5.1%<br>(1.9-9.6%)                   | 6.1%<br>(2.1-11%)                   | 180<br>(66-340)      | 2500<br>(920-4800)       |
| Burkina Faso | 1995 | Female | 80 to 84 | 50%<br>(34-65%)                | 50%<br>(35-66%)          | 1.9<br>(1.1-3.1)                            | 4.3%<br>(1.5-8.2%)                   | 5.1%<br>(1.7-9.5%)                  | 84<br>(28-160)       | 870<br>(300-1600)        |
| Burkina Faso | 1995 | Female | 85 to 89 | 50%<br>(36-65%)                | 50%<br>(35-64%)          | 1.9<br>(1.1-3.1)                            | 3.8%<br>(1.2-7.8%)                   | 4.5%<br>(1.4-9.1%)                  | 42<br>(13-83)        | 310<br>(95-610)          |
| Burkina Faso | 1995 | Female | 90 to 94 | 53%<br>(39-67%)                | 47%<br>(33-61%)          | 1.9<br>(1.1-3.2)                            | 3.4%<br>(0.81-7.4%)                  | 4.1%<br>(0.9-8.8%)                  | 13<br>(2.9-28)       | 66<br>(15-140)           |
| Burkina Faso | 1995 | Female | 95 plus  | 56%<br>(37-73%)                | 44%<br>(27-63%)          | 2<br>(0.98-3.5)                             | 3.1%<br>(0.21-7.5%)                  | 3.6%<br>(0.12-8.8%)                 | 2.8<br>(0.095-7.1)   | 9.8<br>(0.67-24)         |
| Burkina Faso | 1995 | Male   | All Ages | 25%<br>(21-29%)                | 75%<br>(71-79%)          | 1.5<br>(1.1-2)                              | 1.9%<br>(1.4-2.5%)                   | 3.8%<br>(2.7-5%)                    | 3000<br>(2200-3900)  | 110000<br>(85000-140000) |
| Burkina Faso | 1995 | Male   | 15 to 19 | 20%<br>(14-29%)                | 80%<br>(71-86%)          | 1.2<br>(0.67-1.9)                           | 2.9%<br>(1.7-4.6%)                   | 3.9%<br>(2.1-6.4%)                  | 47<br>(25-78)        | 4000<br>(2300-6200)      |
| Burkina Faso | 1995 | Male   | 20 to 24 | 31%<br>(21-41%)                | 69%<br>(59-79%)          | 2.4<br>(1.3-3.7)                            | 6.7%<br>(4.2-9.8%)                   | 8.3%<br>(4.9-12%)                   | 130<br>(77-200)      | 9900<br>(6200-14000)     |

| Location     | Year | Sex    | Age      | Prevalence of current drinkers | Prevalence of abstainers | Population average of standard drinks daily | Percent of total attributable deaths | Percent of total attributable DALYs | Attributable deaths | Attributable DALYs      |
|--------------|------|--------|----------|--------------------------------|--------------------------|---------------------------------------------|--------------------------------------|-------------------------------------|---------------------|-------------------------|
| Burkina Faso | 1995 | Male   | 25 to 29 | 38%<br>(27-49%)                | 62%<br>(51-73%)          | 2.9<br>(1.8-4.4)                            | 6.9%<br>(4.3-10%)                    | 8.1%<br>(4.7-12%)                   | 170<br>(110-250)    | 11000<br>(7400-16000)   |
| Burkina Faso | 1995 | Male   | 30 to 34 | 42%<br>(30-53%)                | 58%<br>(47-70%)          | 3.4<br>(2-5.1)                              | 6.9%<br>(4.5-9.8%)                   | 8%<br>(5-12%)                       | 190<br>(120-270)    | 11000<br>(7600-16000)   |
| Burkina Faso | 1995 | Male   | 35 to 39 | 44%<br>(31-55%)                | 56%<br>(45-69%)          | 3.9<br>(2.4-5.9)                            | 8.1%<br>(5.4-11%)                    | 9.6%<br>(6.2-14%)                   | 210<br>(150-300)    | 11000<br>(8000-15000)   |
| Burkina Faso | 1995 | Male   | 40 to 44 | 45%<br>(34-56%)                | 55%<br>(44-66%)          | 4.2<br>(2.5-6.2)                            | 9.1%<br>(6.3-12%)                    | 11%<br>(7.5-15%)                    | 220<br>(150-290)    | 11000<br>(7400-14000)   |
| Burkina Faso | 1995 | Male   | 45 to 49 | 46%<br>(33-56%)                | 54%<br>(44-67%)          | 4.3<br>(2.4-6.4)                            | 11%<br>(7.4-14%)                     | 13%<br>(8.8-18%)                    | 250<br>(170-340)    | 11000<br>(7300-14000)   |
| Burkina Faso | 1995 | Male   | 50 to 54 | 48%<br>(37-59%)                | 52%<br>(41-63%)          | 4.5<br>(2.5-6.9)                            | 12%<br>(8.6-16%)                     | 15%<br>(11-20%)                     | 290<br>(190-390)    | 11000<br>(7100-14000)   |
| Burkina Faso | 1995 | Male   | 55 to 59 | 51%<br>(39-61%)                | 49%<br>(39-61%)          | 4.8<br>(2.9-7.3)                            | 13%<br>(9.1-17%)                     | 16%<br>(11-21%)                     | 300<br>(200-400)    | 9500<br>(6500-13000)    |
| Burkina Faso | 1995 | Male   | 60 to 64 | 51%<br>(37-63%)                | 49%<br>(37-63%)          | 4.5<br>(2.7-7)                              | 11%<br>(7.2-15%)                     | 13%<br>(8.7-18%)                    | 280<br>(170-380)    | 7600<br>(4700-10000)    |
| Burkina Faso | 1995 | Male   | 65 to 69 | 50%<br>(38-61%)                | 50%<br>(39-62%)          | 3.9<br>(2.3-5.9)                            | 10%<br>(6.3-14%)                     | 12%<br>(7.6-17%)                    | 290<br>(170-410)    | 6500<br>(4000-9300)     |
| Burkina Faso | 1995 | Male   | 70 to 74 | 50%<br>(39-61%)                | 50%<br>(39-61%)          | 3.3<br>(1.8-5)                              | 9.4%<br>(5.1-14%)                    | 11%<br>(6.1-17%)                    | 290<br>(160-450)    | 5300<br>(2900-8000)     |
| Burkina Faso | 1995 | Male   | 75 to 79 | 49%<br>(35-63%)                | 51%<br>(37-65%)          | 2.7<br>(1.5-4.5)                            | 7.4%<br>(3.5-13%)                    | 8.7%<br>(4-15%)                     | 190<br>(91-330)     | 2700<br>(1300-4600)     |
| Burkina Faso | 1995 | Male   | 80 to 84 | 46%<br>(32-61%)                | 54%<br>(39-68%)          | 2.2<br>(1.2-3.6)                            | 5.9%<br>(2.7-10%)                    | 6.9%<br>(3.2-12%)                   | 78<br>(36-140)      | 810<br>(370-1400)       |
| Burkina Faso | 1995 | Male   | 85 to 89 | 42%<br>(29-56%)                | 58%<br>(44-71%)          | 1.6<br>(0.89-2.7)                           | 4.3%<br>(2-7.7%)                     | 5%<br>(2.3-9%)                      | 32<br>(15-58)       | 240<br>(110-430)        |
| Burkina Faso | 1995 | Male   | 90 to 94 | 41%<br>(28-54%)                | 59%<br>(46-72%)          | 1.3<br>(0.69-2.2)                           | 2.6%<br>(0.9-5.2%)                   | 3%<br>(0.98-5.9%)                   | 6.9<br>(2.2-14)     | 36<br>(12-71)           |
| Burkina Faso | 1995 | Male   | 95 plus  | 43%<br>(26-61%)                | 57%<br>(39-74%)          | 1<br>(0.44-2)                               | 2.2%<br>(0.25-5.4%)                  | 2.5%<br>(0.079-6.3%)                | 1.3<br>(0.042-3.3)  | 4.7<br>(0.52-11)        |
| Burkina Faso | 2000 | Female | All Ages | 31%<br>(27-35%)                | 69%<br>(65-73%)          | 1.3<br>(0.93-1.6)                           | 1.4%<br>(0.97-2%)                    | 3%<br>(1.9-4.4%)                    | 2400<br>(1500-3500) | 81000<br>(56000-110000) |
| Burkina Faso | 2000 | Female | 15 to 19 | 30%<br>(23-37%)                | 70%<br>(63-77%)          | 1.3<br>(0.79-2)                             | 1.9%<br>(1.1-3%)                     | 2.4%<br>(1.3-4.2%)                  | 33<br>(17-56)       | 3000<br>(1800-4800)     |
| Burkina Faso | 2000 | Female | 20 to 24 | 33%<br>(26-42%)                | 67%<br>(58-74%)          | 1.8<br>(1.1-2.8)                            | 3.2%<br>(2.1-4.7%)                   | 3.6%<br>(1.9-5.9%)                  | 60<br>(32-99)       | 5300<br>(3300-7800)     |
| Burkina Faso | 2000 | Female | 25 to 29 | 36%<br>(28-44%)                | 64%<br>(56-72%)          | 2.1<br>(1.3-3.1)                            | 3.3%<br>(2.1-4.9%)                   | 3.7%<br>(2.1-6%)                    | 78<br>(46-120)      | 5800<br>(3700-8500)     |
| Burkina Faso | 2000 | Female | 30 to 34 | 37%<br>(30-47%)                | 63%<br>(53-70%)          | 2.2<br>(1.4-3.3)                            | 3.2%<br>(2-4.8%)                     | 3.6%<br>(2.1-5.8%)                  | 86<br>(52-140)      | 5600<br>(3600-8600)     |
| Burkina Faso | 2000 | Female | 35 to 39 | 43%<br>(36-51%)                | 57%<br>(49-64%)          | 2.5<br>(1.6-3.7)                            | 3.5%<br>(2.2-5.2%)                   | 4.2%<br>(2.4-6.4%)                  | 99<br>(61-140)      | 5600<br>(3600-7900)     |
| Burkina Faso | 2000 | Female | 40 to 44 | 47%<br>(39-55%)                | 53%<br>(45-61%)          | 2.9<br>(1.8-4.2)                            | 4.9%<br>(3.1-6.8%)                   | 6.1%<br>(3.8-8.7%)                  | 130<br>(83-190)     | 6500<br>(4200-9100)     |

| Location     | Year | Sex    | Age      | Prevalence of current drinkers | Prevalence of abstainers | Population average of standard drinks daily | Percent of total attributable deaths | Percent of total attributable DALYs | Attributable deaths | Attributable DALYs        |
|--------------|------|--------|----------|--------------------------------|--------------------------|---------------------------------------------|--------------------------------------|-------------------------------------|---------------------|---------------------------|
| Burkina Faso | 2000 | Female | 45 to 49 | 50%<br>(40-58%)                | 50%<br>(42-60%)          | 3.3<br>(2-5)                                | 6.7%<br>(4.2-9.6%)                   | 8.7%<br>(5.4-12%)                   | 180<br>(110-250)    | 7600<br>(4700-11000)      |
| Burkina Faso | 2000 | Female | 50 to 54 | 54%<br>(45-62%)                | 46%<br>(38-55%)          | 3.7<br>(2.2-5.5)                            | 8.4%<br>(5.1-12%)                    | 11%<br>(6.6-15%)                    | 230<br>(130-330)    | 8500<br>(5100-12000)      |
| Burkina Faso | 2000 | Female | 55 to 59 | 56%<br>(47-65%)                | 44%<br>(35-53%)          | 3.7<br>(2.3-5.7)                            | 9.1%<br>(5.6-13%)                    | 12%<br>(7.2-17%)                    | 280<br>(170-410)    | 8900<br>(5300-13000)      |
| Burkina Faso | 2000 | Female | 60 to 64 | 57%<br>(47-65%)                | 43%<br>(35-53%)          | 3.5<br>(2.2-5.4)                            | 8%<br>(4.5-12%)                      | 9.9%<br>(5.7-15%)                   | 280<br>(160-430)    | 7700<br>(4200-12000)      |
| Burkina Faso | 2000 | Female | 65 to 69 | 55%<br>(45-64%)                | 45%<br>(36-55%)          | 3.1<br>(1.9-4.6)                            | 7.6%<br>(4.1-12%)                    | 9.2%<br>(5-15%)                     | 300<br>(160-500)    | 6800<br>(3600-11000)      |
| Burkina Faso | 2000 | Female | 70 to 74 | 52%<br>(42-61%)                | 48%<br>(39-58%)          | 2.5<br>(1.4-3.8)                            | 6.5%<br>(2.7-11%)                    | 7.7%<br>(3.2-13%)                   | 280<br>(110-500)    | 5100<br>(2000-9100)       |
| Burkina Faso | 2000 | Female | 75 to 79 | 49%<br>(36-62%)                | 51%<br>(38-64%)          | 2.1<br>(1.1-3.5)                            | 5%<br>(1.5-9.6%)                     | 5.9%<br>(1.8-11%)                   | 190<br>(57-350)     | 2600<br>(790-5000)        |
| Burkina Faso | 2000 | Female | 80 to 84 | 50%<br>(34-65%)                | 50%<br>(35-66%)          | 2.1<br>(1.1-3.3)                            | 4.4%<br>(1.4-8.4%)                   | 5.2%<br>(1.6-9.8%)                  | 95<br>(29-180)      | 990<br>(300-1800)         |
| Burkina Faso | 2000 | Female | 85 to 89 | 52%<br>(37-66%)                | 48%<br>(34-63%)          | 2.1<br>(1.2-3.3)                            | 4.1%<br>(1.3-7.9%)                   | 4.8%<br>(1.4-9.3%)                  | 53<br>(16-100)      | 390<br>(120-750)          |
| Burkina Faso | 2000 | Female | 90 to 94 | 55%<br>(41-68%)                | 45%<br>(32-59%)          | 2.2<br>(1.2-3.5)                            | 3.7%<br>(0.86-7.7%)                  | 4.4%<br>(0.97-9.3%)                 | 18<br>(3.9-37)      | 89<br>(21-190)            |
| Burkina Faso | 2000 | Female | 95 plus  | 57%<br>(39-73%)                | 43%<br>(27-61%)          | 2.2<br>(1.1-3.7)                            | 3.4%<br>(0.36-8.2%)                  | 3.9%<br>(0.23-9.6%)                 | 4<br>(0.23-9.9)     | 14<br>(1.5-33)            |
| Burkina Faso | 2000 | Male   | All Ages | 24%<br>(21-28%)                | 76%<br>(72-79%)          | 1.5<br>(1.2-2)                              | 2.1%<br>(1.6-2.7%)                   | 4.2%<br>(3.1-5.5%)                  | 3400<br>(2600-4300) | 130000<br>(100000-160000) |
| Burkina Faso | 2000 | Male   | 15 to 19 | 21%<br>(16-27%)                | 79%<br>(73-84%)          | 1.3<br>(0.76-2)                             | 3.2%<br>(1.9-4.8%)                   | 4.3%<br>(2.4-6.7%)                  | 59<br>(32-94)       | 5000<br>(3000-7300)       |
| Burkina Faso | 2000 | Male   | 20 to 24 | 29%<br>(23-36%)                | 71%<br>(64-77%)          | 2.4<br>(1.4-3.5)                            | 7.1%<br>(4.6-9.8%)                   | 8.9%<br>(5.6-13%)                   | 150<br>(95-220)     | 11000<br>(7500-16000)     |
| Burkina Faso | 2000 | Male   | 25 to 29 | 32%<br>(26-39%)                | 68%<br>(61-74%)          | 2.6<br>(1.7-3.9)                            | 7.4%<br>(5-10%)                      | 8.8%<br>(5.5-13%)                   | 180<br>(120-250)    | 12000<br>(8300-16000)     |
| Burkina Faso | 2000 | Male   | 30 to 34 | 38%<br>(31-46%)                | 62%<br>(54-69%)          | 3.3<br>(2.1-4.9)                            | 7.4%<br>(5.2-10%)                    | 8.7%<br>(5.9-12%)                   | 220<br>(150-290)    | 13000<br>(9400-17000)     |
| Burkina Faso | 2000 | Male   | 35 to 39 | 43%<br>(37-50%)                | 57%<br>(50-63%)          | 4.1<br>(2.7-5.9)                            | 8.1%<br>(5.8-11%)                    | 9.5%<br>(6.6-13%)                   | 250<br>(180-330)    | 13000<br>(9900-17000)     |
| Burkina Faso | 2000 | Male   | 40 to 44 | 43%<br>(36-50%)                | 57%<br>(50-64%)          | 4.2<br>(2.7-6.1)                            | 8.9%<br>(6.5-11%)                    | 11%<br>(7.6-14%)                    | 260<br>(190-340)    | 12000<br>(9200-16000)     |
| Burkina Faso | 2000 | Male   | 45 to 49 | 45%<br>(36-52%)                | 55%<br>(48-64%)          | 4.4<br>(2.7-6.5)                            | 11%<br>(7.6-14%)                     | 13%<br>(9.2-17%)                    | 280<br>(210-360)    | 12000<br>(8800-15000)     |
| Burkina Faso | 2000 | Male   | 50 to 54 | 49%<br>(41-56%)                | 51%<br>(44-59%)          | 4.9<br>(3-7.3)                              | 13%<br>(9.3-16%)                     | 16%<br>(11-20%)                     | 320<br>(230-400)    | 12000<br>(8500-15000)     |
| Burkina Faso | 2000 | Male   | 55 to 59 | 53%<br>(45-61%)                | 47%<br>(39-55%)          | 5.3<br>(3.4-8)                              | 14%<br>(10-18%)                      | 17%<br>(13-22%)                     | 350<br>(250-450)    | 11000<br>(8200-14000)     |
| Burkina Faso | 2000 | Male   | 60 to 64 | 54%<br>(44-63%)                | 46%<br>(37-56%)          | 5.1<br>(3.2-7.6)                            | 13%<br>(8.6-16%)                     | 15%<br>(10-19%)                     | 330<br>(230-430)    | 9100<br>(6300-12000)      |

| Location     | Year | Sex    | Age      | Prevalence of current drinkers | Prevalence of abstainers | Population average of standard drinks daily | Percent of total attributable deaths | Percent of total attributable DALYs | Attributable deaths | Attributable DALYs      |
|--------------|------|--------|----------|--------------------------------|--------------------------|---------------------------------------------|--------------------------------------|-------------------------------------|---------------------|-------------------------|
| Burkina Faso | 2000 | Male   | 65 to 69 | 53%<br>(45-61%)                | 47%<br>(39-55%)          | 4.4<br>(2.8-6.4)                            | 12%<br>(7.6-15%)                     | 14%<br>(9-18%)                      | 320<br>(200-430)    | 7200<br>(4600-9500)     |
| Burkina Faso | 2000 | Male   | 70 to 74 | 55%<br>(46-63%)                | 45%<br>(37-54%)          | 3.9<br>(2.3-5.7)                            | 11%<br>(5.8-15%)                     | 13%<br>(6.8-18%)                    | 320<br>(170-460)    | 5700<br>(3100-8400)     |
| Burkina Faso | 2000 | Male   | 75 to 79 | 57%<br>(46-68%)                | 43%<br>(32-54%)          | 3.4<br>(1.9-5.4)                            | 8.5%<br>(3.9-14%)                    | 10%<br>(4.6-16%)                    | 220<br>(100-360)    | 3100<br>(1500-5100)     |
| Burkina Faso | 2000 | Male   | 80 to 84 | 54%<br>(39-67%)                | 46%<br>(33-61%)          | 2.7<br>(1.5-4.4)                            | 6.8%<br>(3.1-11%)                    | 7.9%<br>(3.5-13%)                   | 95<br>(43-160)      | 1000<br>(450-1700)      |
| Burkina Faso | 2000 | Male   | 85 to 89 | 47%<br>(33-61%)                | 53%<br>(39-67%)          | 2<br>(1.1-3.1)                              | 4.9%<br>(2.1-8.2%)                   | 5.7%<br>(2.3-9.6%)                  | 41<br>(17-71)       | 310<br>(130-530)        |
| Burkina Faso | 2000 | Male   | 90 to 94 | 46%<br>(33-59%)                | 54%<br>(41-67%)          | 1.6<br>(0.86-2.6)                           | 3%<br>(0.95-5.9%)                    | 3.5%<br>(0.94-6.9%)                 | 9.7<br>(2.6-19)     | 51<br>(16-98)           |
| Burkina Faso | 2000 | Male   | 95 plus  | 47%<br>(31-64%)                | 53%<br>(36-69%)          | 1.2<br>(0.56-2.3)                           | 2.7%<br>(0.37-6%)                    | 3%<br>(0.23-7.2%)                   | 1.9<br>(0.15-4.6)   | 6.9<br>(0.98-16)        |
| Burkina Faso | 2005 | Female | All Ages | 30%<br>(27-34%)                | 70%<br>(66-73%)          | 1.2<br>(0.9-1.6)                            | 1.5%<br>(1-2.2%)                     | 3.1%<br>(1.9-4.6%)                  | 2500<br>(1500-3700) | 87000<br>(61000-120000) |
| Burkina Faso | 2005 | Female | 15 to 19 | 30%<br>(23-37%)                | 70%<br>(63-77%)          | 1.3<br>(0.78-2)                             | 1.8%<br>(1-2.8%)                     | 2.2%<br>(1-3.8%)                    | 34<br>(16-59)       | 3200<br>(1800-5000)     |
| Burkina Faso | 2005 | Female | 20 to 24 | 33%<br>(25-41%)                | 67%<br>(59-75%)          | 1.8<br>(1.1-2.7)                            | 3.3%<br>(2.1-4.9%)                   | 3.9%<br>(2.1-6.1%)                  | 66<br>(35-100)      | 5900<br>(3700-8600)     |
| Burkina Faso | 2005 | Female | 25 to 29 | 35%<br>(28-43%)                | 65%<br>(57-72%)          | 2<br>(1.3-3)                                | 3.9%<br>(2.5-5.8%)                   | 4.7%<br>(2.6-7.4%)                  | 88<br>(52-140)      | 6700<br>(4400-9900)     |
| Burkina Faso | 2005 | Female | 30 to 34 | 37%<br>(29-46%)                | 63%<br>(54-71%)          | 2.1<br>(1.3-3.3)                            | 3.7%<br>(2.4-5.3%)                   | 4.4%<br>(2.7-6.7%)                  | 96<br>(59-150)      | 6300<br>(4200-9200)     |
| Burkina Faso | 2005 | Female | 35 to 39 | 43%<br>(36-51%)                | 57%<br>(49-64%)          | 2.5<br>(1.6-3.7)                            | 4.1%<br>(2.6-5.9%)                   | 5%<br>(3-7.6%)                      | 120<br>(72-170)     | 6700<br>(4400-9600)     |
| Burkina Faso | 2005 | Female | 40 to 44 | 47%<br>(38-55%)                | 53%<br>(45-62%)          | 2.8<br>(1.7-4.1)                            | 5.3%<br>(3.4-7.4%)                   | 6.8%<br>(4.3-9.7%)                  | 150<br>(99-220)     | 7600<br>(4900-11000)    |
| Burkina Faso | 2005 | Female | 45 to 49 | 49%<br>(40-58%)                | 51%<br>(42-60%)          | 3.2<br>(1.9-4.9)                            | 7.3%<br>(4.5-10%)                    | 9.6%<br>(5.9-14%)                   | 210<br>(130-300)    | 8900<br>(5500-13000)    |
| Burkina Faso | 2005 | Female | 50 to 54 | 53%<br>(44-62%)                | 47%<br>(38-56%)          | 3.6<br>(2.1-5.5)                            | 8.6%<br>(5-12%)                      | 11%<br>(6.5-16%)                    | 250<br>(140-360)    | 9200<br>(5400-13000)    |
| Burkina Faso | 2005 | Female | 55 to 59 | 56%<br>(47-64%)                | 44%<br>(36-53%)          | 3.6<br>(2.3-5.6)                            | 9.1%<br>(5.4-13%)                    | 12%<br>(7.1-17%)                    | 290<br>(170-420)    | 9200<br>(5500-14000)    |
| Burkina Faso | 2005 | Female | 60 to 64 | 56%<br>(47-65%)                | 44%<br>(35-53%)          | 3.4<br>(2.1-5.4)                            | 7.9%<br>(4.4-12%)                    | 9.8%<br>(5.6-15%)                   | 300<br>(160-450)    | 8000<br>(4400-12000)    |
| Burkina Faso | 2005 | Female | 65 to 69 | 55%<br>(46-64%)                | 45%<br>(36-54%)          | 3<br>(1.8-4.6)                              | 7.5%<br>(3.7-12%)                    | 9%<br>(4.4-15%)                     | 310<br>(150-510)    | 7100<br>(3400-11000)    |
| Burkina Faso | 2005 | Female | 70 to 74 | 52%<br>(42-61%)                | 48%<br>(39-58%)          | 2.4<br>(1.4-3.8)                            | 5.9%<br>(2-11%)                      | 7%<br>(2.4-13%)                     | 260<br>(90-480)     | 4800<br>(1600-8700)     |
| Burkina Faso | 2005 | Female | 75 to 79 | 49%<br>(36-62%)                | 51%<br>(38-64%)          | 2<br>(1.1-3.4)                              | 4.5%<br>(0.98-8.7%)                  | 5.3%<br>(1.2-10%)                   | 170<br>(38-340)     | 2400<br>(530-4700)      |
| Burkina Faso | 2005 | Female | 80 to 84 | 50%<br>(34-65%)                | 50%<br>(35-66%)          | 2<br>(1.1-3.2)                              | 3.9%<br>(0.95-7.7%)                  | 4.6%<br>(1.1-9.1%)                  | 89<br>(20-170)      | 930<br>(220-1800)       |



| Location     | Year | Sex    | Age      | Prevalence of current drinkers | Prevalence of abstainers | Population average of standard drinks daily | Percent of total attributable deaths | Percent of total attributable DALYs | Attributable deaths | Attributable DALYs        |
|--------------|------|--------|----------|--------------------------------|--------------------------|---------------------------------------------|--------------------------------------|-------------------------------------|---------------------|---------------------------|
| Burkina Faso | 2005 | Female | 85 to 89 | 52%<br>(37-66%)                | 48%<br>(34-63%)          | 2.1<br>(1.1-3.2)                            | 3.6%<br>(0.69-7.3%)                  | 4.2%<br>(0.73-8.6%)                 | 51<br>(9-100)       | 380<br>(75-770)           |
| Burkina Faso | 2005 | Female | 90 to 94 | 55%<br>(41-68%)                | 45%<br>(32-59%)          | 2.1<br>(1.2-3.4)                            | 3.3%<br>(0.31-7.3%)                  | 3.8%<br>(0.27-8.8%)                 | 18<br>(1.3-42)      | 94<br>(9-210)             |
| Burkina Faso | 2005 | Female | 95 plus  | 57%<br>(39-73%)                | 43%<br>(27-61%)          | 2.1<br>(1.1-3.6)                            | 3%<br>(-0.022-7.8%)                  | 3.5%<br>(-0.19-9%)                  | 4.4<br>(-0.25-11)   | 15<br>(-0.11-39)          |
| Burkina Faso | 2005 | Male   | All Ages | 24%<br>(21-27%)                | 76%<br>(73-79%)          | 1.5<br>(1.1-2)                              | 2.1%<br>(1.6-2.8%)                   | 4.2%<br>(3-5.6%)                    | 3400<br>(2500-4400) | 130000<br>(100000-160000) |
| Burkina Faso | 2005 | Male   | 15 to 19 | 21%<br>(15-27%)                | 79%<br>(73-85%)          | 1.3<br>(0.75-2.1)                           | 2.7%<br>(1.6-4.2%)                   | 3.5%<br>(1.9-5.7%)                  | 55<br>(30-89)       | 4800<br>(2900-7100)       |
| Burkina Faso | 2005 | Male   | 20 to 24 | 29%<br>(23-36%)                | 71%<br>(64-77%)          | 2.3<br>(1.4-3.5)                            | 6.6%<br>(4.4-9.3%)                   | 8.1%<br>(5.1-12%)                   | 150<br>(92-220)     | 11000<br>(7500-16000)     |
| Burkina Faso | 2005 | Male   | 25 to 29 | 32%<br>(25-39%)                | 68%<br>(61-75%)          | 2.6<br>(1.6-3.8)                            | 7.9%<br>(5.4-11%)                    | 9.8%<br>(6.3-14%)                   | 190<br>(120-260)    | 13000<br>(8900-17000)     |
| Burkina Faso | 2005 | Male   | 30 to 34 | 38%<br>(31-46%)                | 62%<br>(54-69%)          | 3.2<br>(2.1-4.8)                            | 8.5%<br>(5.9-11%)                    | 10%<br>(7-14%)                      | 220<br>(150-300)    | 14000<br>(9400-18000)     |
| Burkina Faso | 2005 | Male   | 35 to 39 | 43%<br>(36-49%)                | 57%<br>(51-64%)          | 4<br>(2.6-5.8)                              | 9%<br>(6.7-12%)                      | 11%<br>(7.8-15%)                    | 270<br>(190-340)    | 15000<br>(11000-18000)    |
| Burkina Faso | 2005 | Male   | 40 to 44 | 43%<br>(36-50%)                | 57%<br>(50-64%)          | 4.1<br>(2.6-6)                              | 9.5%<br>(7-12%)                      | 12%<br>(8.4-15%)                    | 290<br>(210-370)    | 14000<br>(10000-17000)    |
| Burkina Faso | 2005 | Male   | 45 to 49 | 44%<br>(37-52%)                | 56%<br>(48-63%)          | 4.3<br>(2.7-6.3)                            | 11%<br>(8.1-14%)                     | 14%<br>(9.9-18%)                    | 320<br>(230-400)    | 13000<br>(9700-17000)     |
| Burkina Faso | 2005 | Male   | 50 to 54 | 49%<br>(41-57%)                | 51%<br>(43-59%)          | 4.8<br>(2.9-7)                              | 13%<br>(9.2-16%)                     | 16%<br>(11-20%)                     | 320<br>(230-410)    | 12000<br>(8600-15000)     |
| Burkina Faso | 2005 | Male   | 55 to 59 | 53%<br>(45-61%)                | 47%<br>(39-55%)          | 5.3<br>(3.3-7.9)                            | 14%<br>(10-18%)                      | 17%<br>(12-22%)                     | 350<br>(250-440)    | 11000<br>(8200-14000)     |
| Burkina Faso | 2005 | Male   | 60 to 64 | 53%<br>(44-63%)                | 47%<br>(37-56%)          | 5<br>(3.1-7.6)                              | 13%<br>(8.7-16%)                     | 15%<br>(10-19%)                     | 350<br>(230-440)    | 9500<br>(6400-12000)      |
| Burkina Faso | 2005 | Male   | 65 to 69 | 53%<br>(44-61%)                | 47%<br>(39-56%)          | 4.3<br>(2.6-6.3)                            | 11%<br>(7.2-15%)                     | 14%<br>(8.6-18%)                    | 320<br>(200-430)    | 7200<br>(4600-9700)       |
| Burkina Faso | 2005 | Male   | 70 to 74 | 54%<br>(45-63%)                | 46%<br>(37-55%)          | 3.8<br>(2.3-5.7)                            | 10%<br>(5.3-15%)                     | 12%<br>(6.3-18%)                    | 290<br>(150-430)    | 5200<br>(2800-7700)       |
| Burkina Faso | 2005 | Male   | 75 to 79 | 57%<br>(46-69%)                | 43%<br>(31-54%)          | 3.4<br>(1.8-5.4)                            | 8.1%<br>(3.4-14%)                    | 9.4%<br>(4.1-16%)                   | 200<br>(88-330)     | 2800<br>(1200-4700)       |
| Burkina Faso | 2005 | Male   | 80 to 84 | 53%<br>(38-67%)                | 47%<br>(33-62%)          | 2.7<br>(1.4-4.3)                            | 6.3%<br>(2.7-11%)                    | 7.3%<br>(3.1-13%)                   | 88<br>(37-160)      | 920<br>(400-1600)         |
| Burkina Faso | 2005 | Male   | 85 to 89 | 46%<br>(33-60%)                | 54%<br>(40-67%)          | 1.9<br>(1.1-3.2)                            | 4.4%<br>(1.8-7.8%)                   | 5.1%<br>(2-9.1%)                    | 40<br>(16-72)       | 300<br>(120-540)          |
| Burkina Faso | 2005 | Male   | 90 to 94 | 45%<br>(32-58%)                | 55%<br>(42-68%)          | 1.5<br>(0.85-2.5)                           | 2.7%<br>(0.74-5.4%)                  | 3.1%<br>(0.71-6.3%)                 | 10<br>(2.3-20)      | 53<br>(14-100)            |
| Burkina Faso | 2005 | Male   | 95 plus  | 47%<br>(31-64%)                | 53%<br>(36-69%)          | 1.2<br>(0.54-2.2)                           | 2.3%<br>(0.32-5.5%)                  | 2.6%<br>(0.14-6.3%)                 | 2.1<br>(0.11-5)     | 7.5<br>(1-17)             |
| Burkina Faso | 2010 | Female | All Ages | 33%<br>(28-38%)                | 67%<br>(62-72%)          | 1.2<br>(0.83-1.7)                           | 1.6%<br>(0.92-2.3%)                  | 3.1%<br>(1.5-4.8%)                  | 2500<br>(1300-3800) | 89000<br>(54000-130000)   |

| Location     | Year | Sex    | Age      | Prevalence of current drinkers | Prevalence of abstainers | Population average of standard drinks daily | Percent of total attributable deaths | Percent of total attributable DALYs | Attributable deaths | Attributable DALYs        |
|--------------|------|--------|----------|--------------------------------|--------------------------|---------------------------------------------|--------------------------------------|-------------------------------------|---------------------|---------------------------|
| Burkina Faso | 2010 | Female | 15 to 19 | 32%<br>(23-42%)                | 68%<br>(58-77%)          | 1.2<br>(0.67-2)                             | 1.7%<br>(0.93-2.8%)                  | 2%<br>(0.87-3.6%)                   | 35<br>(15-62)       | 3400<br>(1800-5600)       |
| Burkina Faso | 2010 | Female | 20 to 24 | 38%<br>(27-49%)                | 62%<br>(51-73%)          | 1.8<br>(1-3.1)                              | 3.3%<br>(2-5.1%)                     | 3.8%<br>(1.9-6.4%)                  | 68<br>(34-120)      | 6300<br>(3700-9500)       |
| Burkina Faso | 2010 | Female | 25 to 29 | 41%<br>(30-53%)                | 59%<br>(47-70%)          | 2.1<br>(1.2-3.4)                            | 4.1%<br>(2.5-6.1%)                   | 5%<br>(2.7-8.1%)                    | 92<br>(50-150)      | 7200<br>(4300-11000)      |
| Burkina Faso | 2010 | Female | 30 to 34 | 44%<br>(32-55%)                | 56%<br>(45-68%)          | 2.3<br>(1.3-3.7)                            | 4.2%<br>(2.6-6.4%)                   | 5.4%<br>(3-8.5%)                    | 100<br>(57-160)     | 7000<br>(4200-10000)      |
| Burkina Faso | 2010 | Female | 35 to 39 | 48%<br>(36-58%)                | 52%<br>(42-64%)          | 2.5<br>(1.4-4)                              | 4.5%<br>(2.7-6.8%)                   | 5.9%<br>(3.3-9.2%)                  | 120<br>(67-190)     | 7000<br>(4200-10000)      |
| Burkina Faso | 2010 | Female | 40 to 44 | 50%<br>(40-60%)                | 50%<br>(40-60%)          | 2.7<br>(1.5-4.4)                            | 5.5%<br>(3.3-8.1%)                   | 7.5%<br>(4.3-11%)                   | 160<br>(91-230)     | 7800<br>(4500-11000)      |
| Burkina Faso | 2010 | Female | 45 to 49 | 52%<br>(40-62%)                | 48%<br>(38-60%)          | 3<br>(1.6-4.9)                              | 7.4%<br>(4.1-11%)                    | 10%<br>(5.6-15%)                    | 210<br>(120-320)    | 9100<br>(5100-14000)      |
| Burkina Faso | 2010 | Female | 50 to 54 | 53%<br>(43-63%)                | 47%<br>(37-57%)          | 3.2<br>(1.8-5.1)                            | 8.4%<br>(4.7-13%)                    | 11%<br>(6.3-17%)                    | 260<br>(140-390)    | 9700<br>(5400-15000)      |
| Burkina Faso | 2010 | Female | 55 to 59 | 55%<br>(44-65%)                | 45%<br>(35-56%)          | 3.2<br>(1.9-5.3)                            | 8.7%<br>(4.6-14%)                    | 11%<br>(6-17%)                      | 300<br>(160-460)    | 9500<br>(5100-15000)      |
| Burkina Faso | 2010 | Female | 60 to 64 | 56%<br>(44-66%)                | 44%<br>(34-56%)          | 3.1<br>(1.7-5.1)                            | 7.3%<br>(3.1-12%)                    | 9%<br>(4-15%)                       | 280<br>(130-470)    | 7800<br>(3500-13000)      |
| Burkina Faso | 2010 | Female | 65 to 69 | 55%<br>(45-64%)                | 45%<br>(36-55%)          | 2.7<br>(1.6-4.3)                            | 6.6%<br>(2.6-11%)                    | 8%<br>(3.3-14%)                     | 310<br>(120-530)    | 6900<br>(2700-12000)      |
| Burkina Faso | 2010 | Female | 70 to 74 | 53%<br>(43-62%)                | 47%<br>(38-57%)          | 2.2<br>(1.2-3.5)                            | 5%<br>(0.98-9.9%)                    | 6%<br>(1.2-12%)                     | 240<br>(46-470)     | 4400<br>(850-8500)        |
| Burkina Faso | 2010 | Female | 75 to 79 | 51%<br>(37-64%)                | 49%<br>(36-63%)          | 1.9<br>(0.94-3.2)                           | 3.7%<br>(0.17-8.4%)                  | 4.4%<br>(0.16-9.9%)                 | 150<br>(5.6-340)    | 2200<br>(95-4800)         |
| Burkina Faso | 2010 | Female | 80 to 84 | 49%<br>(34-64%)                | 51%<br>(36-66%)          | 1.8<br>(0.88-2.9)                           | 3.2%<br>(0.13-6.9%)                  | 3.7%<br>(0.099-8.2%)                | 76<br>(2-170)       | 800<br>(34-1800)          |
| Burkina Faso | 2010 | Female | 85 to 89 | 50%<br>(35-64%)                | 50%<br>(36-65%)          | 1.7<br>(0.91-2.9)                           | 2.7%<br>(-0.037-6.4%)                | 3.2%<br>(-0.083-7.6%)               | 43<br>(-1.2-100)    | 320<br>(-4.5-760)         |
| Burkina Faso | 2010 | Female | 90 to 94 | 53%<br>(38-67%)                | 47%<br>(33-62%)          | 1.8<br>(0.91-3)                             | 2.4%<br>(-0.39-6.2%)                 | 2.8%<br>(-0.62-7.3%)                | 16<br>(-3.6-41)     | 82<br>(-13-210)           |
| Burkina Faso | 2010 | Female | 95 plus  | 55%<br>(36-73%)                | 45%<br>(27-64%)          | 1.8<br>(0.86-3.3)                           | 2.2%<br>(-0.52-6.7%)                 | 2.5%<br>(-0.8-7.8%)                 | 3.9<br>(-1.3-12)    | 14<br>(-3.3-42)           |
| Burkina Faso | 2010 | Male   | All Ages | 25%<br>(21-30%)                | 75%<br>(70-79%)          | 1.4<br>(0.98-2)                             | 2.3%<br>(1.5-3.1%)                   | 4.3%<br>(2.8-5.8%)                  | 3600<br>(2400-4700) | 140000<br>(100000-180000) |
| Burkina Faso | 2010 | Male   | 15 to 19 | 20%<br>(14-28%)                | 80%<br>(72-86%)          | 1.1<br>(0.58-1.8)                           | 2.5%<br>(1.4-3.9%)                   | 3.1%<br>(1.5-5.2%)                  | 53<br>(27-91)       | 4800<br>(2600-7500)       |
| Burkina Faso | 2010 | Male   | 20 to 24 | 31%<br>(21-42%)                | 69%<br>(58-79%)          | 2.2<br>(1.2-3.6)                            | 6.5%<br>(4-9.5%)                     | 7.8%<br>(4.3-12%)                   | 150<br>(86-240)     | 12000<br>(7400-18000)     |
| Burkina Faso | 2010 | Male   | 25 to 29 | 38%<br>(27-49%)                | 62%<br>(51-73%)          | 2.7<br>(1.5-4.2)                            | 8.7%<br>(5.6-12%)                    | 11%<br>(6.6-16%)                    | 220<br>(130-320)    | 15000<br>(9900-21000)     |
| Burkina Faso | 2010 | Male   | 30 to 34 | 41%<br>(30-52%)                | 59%<br>(48-70%)          | 3.1<br>(1.8-5)                              | 9.6%<br>(6.4-13%)                    | 12%<br>(7.7-17%)                    | 260<br>(160-350)    | 16000<br>(11000-21000)    |

| Location     | Year | Sex    | Age      | Prevalence of current drinkers | Prevalence of abstainers | Population average of standard drinks daily | Percent of total attributable deaths | Percent of total attributable DALYs | Attributable deaths | Attributable DALYs      |
|--------------|------|--------|----------|--------------------------------|--------------------------|---------------------------------------------|--------------------------------------|-------------------------------------|---------------------|-------------------------|
| Burkina Faso | 2010 | Male   | 35 to 39 | 44%<br>(31-54%)                | 56%<br>(46-69%)          | 3.6<br>(2-5.8)                              | 10%<br>(6.8-14%)                     | 13%<br>(8.4-18%)                    | 290<br>(190-390)    | 16000<br>(11000-21000)  |
| Burkina Faso | 2010 | Male   | 40 to 44 | 45%<br>(34-55%)                | 55%<br>(45-66%)          | 3.9<br>(2.2-6.3)                            | 11%<br>(7.4-15%)                     | 14%<br>(9.2-19%)                    | 330<br>(220-430)    | 16000<br>(11000-21000)  |
| Burkina Faso | 2010 | Male   | 45 to 49 | 46%<br>(32-56%)                | 54%<br>(44-68%)          | 3.9<br>(2.2-6.3)                            | 13%<br>(8.1-16%)                     | 16%<br>(10-21%)                     | 360<br>(230-470)    | 15000<br>(9800-20000)   |
| Burkina Faso | 2010 | Male   | 50 to 54 | 48%<br>(36-59%)                | 52%<br>(41-64%)          | 4.2<br>(2.2-6.7)                            | 13%<br>(8.3-17%)                     | 16%<br>(10-22%)                     | 360<br>(230-480)    | 13000<br>(8600-18000)   |
| Burkina Faso | 2010 | Male   | 55 to 59 | 50%<br>(39-61%)                | 50%<br>(39-61%)          | 4.4<br>(2.5-7.4)                            | 13%<br>(8.5-18%)                     | 17%<br>(11-22%)                     | 360<br>(230-480)    | 11000<br>(7500-15000)   |
| Burkina Faso | 2010 | Male   | 60 to 64 | 51%<br>(37-63%)                | 49%<br>(37-63%)          | 4.2<br>(2.3-7)                              | 12%<br>(6.7-16%)                     | 14%<br>(8.1-19%)                    | 330<br>(190-470)    | 9200<br>(5300-13000)    |
| Burkina Faso | 2010 | Male   | 65 to 69 | 50%<br>(38-61%)                | 50%<br>(39-62%)          | 3.6<br>(2-5.8)                              | 10%<br>(5.5-14%)                     | 12%<br>(6.5-17%)                    | 310<br>(170-460)    | 7100<br>(3800-10000)    |
| Burkina Faso | 2010 | Male   | 70 to 74 | 50%<br>(39-60%)                | 50%<br>(40-61%)          | 3<br>(1.7-4.9)                              | 8.4%<br>(3.7-14%)                    | 9.9%<br>(4.4-16%)                   | 260<br>(120-420)    | 4700<br>(2100-7700)     |
| Burkina Faso | 2010 | Male   | 75 to 79 | 49%<br>(35-63%)                | 51%<br>(37-65%)          | 2.6<br>(1.3-4.4)                            | 6.4%<br>(2.3-12%)                    | 7.4%<br>(2.7-14%)                   | 160<br>(57-300)     | 2300<br>(820-4200)      |
| Burkina Faso | 2010 | Male   | 80 to 84 | 47%<br>(32-60%)                | 53%<br>(40-68%)          | 2.1<br>(1-3.6)                              | 4.9%<br>(1.7-9.7%)                   | 5.7%<br>(1.9-11%)                   | 70<br>(23-140)      | 740<br>(250-1400)       |
| Burkina Faso | 2010 | Male   | 85 to 89 | 42%<br>(29-56%)                | 58%<br>(44-71%)          | 1.6<br>(0.8-2.6)                            | 3.5%<br>(1.1-6.8%)                   | 4%<br>(1.1-8%)                      | 33<br>(9.5-66)      | 250<br>(77-490)         |
| Burkina Faso | 2010 | Male   | 90 to 94 | 41%<br>(28-55%)                | 59%<br>(45-72%)          | 1.2<br>(0.61-2.1)                           | 2.1%<br>(0.39-4.6%)                  | 2.3%<br>(0.32-5.3%)                 | 8.4<br>(1.1-19)     | 45<br>(8.2-100)         |
| Burkina Faso | 2010 | Male   | 95 plus  | 43%<br>(27-60%)                | 57%<br>(40-73%)          | 0.97<br>(0.41-1.8)                          | 1.8%<br>(-0.051-4.6%)                | 1.9%<br>(-0.31-5.3%)                | 1.8<br>(-0.3-5.1)   | 6.8<br>(-0.2-18)        |
| Burkina Faso | 2016 | Female | All Ages | 33%<br>(29-38%)                | 67%<br>(62-71%)          | 1.1<br>(0.63-2)                             | 1.7%<br>(0.79-2.9%)                  | 3.3%<br>(1.2-5.9%)                  | 2600<br>(890-4700)  | 94000<br>(45000-150000) |
| Burkina Faso | 2016 | Female | 15 to 19 | 32%<br>(23-41%)                | 68%<br>(59-77%)          | 1.2<br>(0.56-2.2)                           | 1.7%<br>(0.84-3%)                    | 2%<br>(0.74-4.1%)                   | 35<br>(12-69)       | 3500<br>(1800-6100)     |
| Burkina Faso | 2016 | Female | 20 to 24 | 38%<br>(27-49%)                | 62%<br>(51-73%)          | 1.7<br>(0.81-3.3)                           | 3.3%<br>(1.8-5.3%)                   | 3.7%<br>(1.6-6.8%)                  | 68<br>(29-130)      | 6600<br>(3700-11000)    |
| Burkina Faso | 2016 | Female | 25 to 29 | 41%<br>(30-53%)                | 59%<br>(47-70%)          | 2<br>(0.95-3.7)                             | 4%<br>(2.2-6.5%)                     | 5%<br>(2.2-8.8%)                    | 89<br>(42-160)      | 7300<br>(4000-12000)    |
| Burkina Faso | 2016 | Female | 30 to 34 | 45%<br>(33-55%)                | 55%<br>(45-67%)          | 2.2<br>(1-3.9)                              | 4.3%<br>(2.3-7%)                     | 5.8%<br>(2.7-9.7%)                  | 110<br>(50-180)     | 7300<br>(3900-12000)    |
| Burkina Faso | 2016 | Female | 35 to 39 | 48%<br>(36-58%)                | 52%<br>(42-64%)          | 2.3<br>(1.1-4.3)                            | 4.9%<br>(2.6-8%)                     | 6.9%<br>(3.3-12%)                   | 130<br>(63-230)     | 7800<br>(4100-13000)    |
| Burkina Faso | 2016 | Female | 40 to 44 | 51%<br>(39-60%)                | 49%<br>(40-61%)          | 2.5<br>(1.2-4.7)                            | 5.8%<br>(3-9.3%)                     | 8.4%<br>(4-13%)                     | 160<br>(79-260)     | 8200<br>(4200-13000)    |
| Burkina Faso | 2016 | Female | 45 to 49 | 52%<br>(40-62%)                | 48%<br>(38-60%)          | 2.8<br>(1.3-5.4)                            | 7.2%<br>(3.3-12%)                    | 10%<br>(4.7-17%)                    | 220<br>(100-370)    | 9700<br>(4500-16000)    |
| Burkina Faso | 2016 | Female | 50 to 54 | 53%<br>(42-63%)                | 47%<br>(37-58%)          | 3<br>(1.4-5.6)                              | 8%<br>(3.4-13%)                      | 11%<br>(4.8-18%)                    | 280<br>(120-450)    | 10000<br>(4500-17000)   |

| Location     | Year | Sex    | Age      | Prevalence of current drinkers | Prevalence of abstainers | Population average of standard drinks daily | Percent of total attributable deaths | Percent of total attributable DALYs | Attributable deaths | Attributable DALYs       |
|--------------|------|--------|----------|--------------------------------|--------------------------|---------------------------------------------|--------------------------------------|-------------------------------------|---------------------|--------------------------|
| Burkina Faso | 2016 | Female | 55 to 59 | 55%<br>(44-65%)                | 45%<br>(35-56%)          | 3.1<br>(1.4-5.9)                            | 8%<br>(3.2-14%)                      | 11%<br>(4.3-18%)                    | 320<br>(130-540)    | 10000<br>(4100-17000)    |
| Burkina Faso | 2016 | Female | 60 to 64 | 56%<br>(44-66%)                | 44%<br>(34-56%)          | 2.9<br>(1.4-5.8)                            | 6.6%<br>(2.1-12%)                    | 8.3%<br>(2.7-15%)                   | 300<br>(96-540)     | 8100<br>(2500-15000)     |
| Burkina Faso | 2016 | Female | 65 to 69 | 55%<br>(45-65%)                | 45%<br>(35-55%)          | 2.5<br>(1.2-4.6)                            | 6.1%<br>(1.3-12%)                    | 7.4%<br>(1.7-15%)                   | 300<br>(69-600)     | 6900<br>(1500-14000)     |
| Burkina Faso | 2016 | Female | 70 to 74 | 53%<br>(43-64%)                | 47%<br>(36-57%)          | 2.1<br>(0.97-3.8)                           | 4.6%<br>(0.28-11%)                   | 5.4%<br>(0.32-13%)                  | 250<br>(15-600)     | 4500<br>(260-11000)      |
| Burkina Faso | 2016 | Female | 75 to 79 | 51%<br>(36-64%)                | 49%<br>(36-64%)          | 1.8<br>(0.73-3.4)                           | 3.3%<br>(-0.45-9.3%)                 | 3.9%<br>(-0.58-11%)                 | 160<br>(-23-440)    | 2200<br>(-290-6200)      |
| Burkina Faso | 2016 | Female | 80 to 84 | 49%<br>(33-64%)                | 51%<br>(36-67%)          | 1.7<br>(0.74-3.1)                           | 2.8%<br>(-0.37-7.9%)                 | 3.3%<br>(-0.44-9.3%)                | 76<br>(-10-220)     | 800<br>(-100-2200)       |
| Burkina Faso | 2016 | Female | 85 to 89 | 50%<br>(35-65%)                | 50%<br>(35-65%)          | 1.7<br>(0.74-3.2)                           | 2.4%<br>(-0.58-7.2%)                 | 2.8%<br>(-0.73-8.4%)                | 41<br>(-11-120)     | 310<br>(-72-910)         |
| Burkina Faso | 2016 | Female | 90 to 94 | 53%<br>(38-66%)                | 47%<br>(34-62%)          | 1.7<br>(0.75-3.2)                           | 2.1%<br>(-0.86-7.1%)                 | 2.4%<br>(-1.1-8.3%)                 | 15<br>(-7.3-53)     | 80<br>(-32-270)          |
| Burkina Faso | 2016 | Female | 95 plus  | 55%<br>(37-72%)                | 45%<br>(28-63%)          | 1.7<br>(0.72-3.6)                           | 2%<br>(-0.91-7%)                     | 2.2%<br>(-1.3-8.2%)                 | 4.1<br>(-2.5-16)    | 15<br>(-6.9-53)          |
| Burkina Faso | 2016 | Male   | All Ages | 26%<br>(22-30%)                | 74%<br>(70-78%)          | 1.4<br>(0.77-2.4)                           | 2.6%<br>(1.6-3.8%)                   | 4.7%<br>(2.7-6.9%)                  | 3800<br>(2200-5500) | 160000<br>(95000-220000) |
| Burkina Faso | 2016 | Male   | 15 to 19 | 21%<br>(14-29%)                | 79%<br>(71-86%)          | 1.1<br>(0.49-2.1)                           | 2.5%<br>(1.3-4.3%)                   | 3.1%<br>(1.4-5.9%)                  | 56<br>(25-110)      | 5200<br>(2600-8900)      |
| Burkina Faso | 2016 | Male   | 20 to 24 | 31%<br>(21-41%)                | 69%<br>(59-79%)          | 2.1<br>(0.99-4)                             | 6.2%<br>(3.5-9.5%)                   | 7.3%<br>(3.6-12%)                   | 160<br>(80-260)     | 13000<br>(7200-20000)    |
| Burkina Faso | 2016 | Male   | 25 to 29 | 38%<br>(27-49%)                | 62%<br>(51-73%)          | 2.6<br>(1.2-4.7)                            | 8.3%<br>(4.8-12%)                    | 10%<br>(5.5-16%)                    | 230<br>(120-350)    | 16000<br>(9400-24000)    |
| Burkina Faso | 2016 | Male   | 30 to 34 | 42%<br>(30-53%)                | 58%<br>(47-70%)          | 3<br>(1.5-5.3)                              | 9.4%<br>(5.7-13%)                    | 12%<br>(6.6-17%)                    | 280<br>(150-400)    | 17000<br>(10000-24000)   |
| Burkina Faso | 2016 | Male   | 35 to 39 | 44%<br>(32-55%)                | 56%<br>(45-68%)          | 3.4<br>(1.7-6.1)                            | 11%<br>(6.4-15%)                     | 13%<br>(7.8-19%)                    | 330<br>(190-460)    | 18000<br>(11000-25000)   |
| Burkina Faso | 2016 | Male   | 40 to 44 | 45%<br>(34-56%)                | 55%<br>(44-66%)          | 3.7<br>(1.7-6.8)                            | 11%<br>(7.2-16%)                     | 15%<br>(8.8-20%)                    | 360<br>(210-490)    | 17000<br>(11000-24000)   |
| Burkina Faso | 2016 | Male   | 45 to 49 | 46%<br>(33-56%)                | 54%<br>(44-67%)          | 3.8<br>(1.8-7)                              | 13%<br>(7.1-17%)                     | 16%<br>(8.9-22%)                    | 410<br>(220-570)    | 17000<br>(9700-24000)    |
| Burkina Faso | 2016 | Male   | 50 to 54 | 48%<br>(37-58%)                | 52%<br>(42-63%)          | 4<br>(1.7-7.1)                              | 12%<br>(6.8-17%)                     | 16%<br>(8.4-22%)                    | 410<br>(220-570)    | 15000<br>(8400-21000)    |
| Burkina Faso | 2016 | Male   | 55 to 59 | 51%<br>(39-61%)                | 49%<br>(39-61%)          | 4.2<br>(2-8)                                | 13%<br>(6.8-17%)                     | 16%<br>(8.6-21%)                    | 410<br>(230-570)    | 13000<br>(7400-18000)    |
| Burkina Faso | 2016 | Male   | 60 to 64 | 51%<br>(37-63%)                | 49%<br>(37-63%)          | 4<br>(1.9-7.7)                              | 11%<br>(5.1-16%)                     | 13%<br>(6.1-19%)                    | 360<br>(170-520)    | 9800<br>(4800-14000)     |
| Burkina Faso | 2016 | Male   | 65 to 69 | 50%<br>(39-61%)                | 50%<br>(39-61%)          | 3.4<br>(1.6-6.4)                            | 9.1%<br>(4-14%)                      | 11%<br>(4.8-17%)                    | 310<br>(140-500)    | 7200<br>(3200-11000)     |
| Burkina Faso | 2016 | Male   | 70 to 74 | 50%<br>(39-60%)                | 50%<br>(40-61%)          | 2.9<br>(1.4-5.1)                            | 7.6%<br>(2.7-13%)                    | 9%<br>(3.1-16%)                     | 270<br>(94-490)     | 4900<br>(1700-8800)      |

| Location     | Year | Sex    | Age      | Prevalence of current drinkers | Prevalence of abstainers | Population average of standard drinks daily | Percent of total attributable deaths | Percent of total attributable DALYs | Attributable deaths | Attributable DALYs     |
|--------------|------|--------|----------|--------------------------------|--------------------------|---------------------------------------------|--------------------------------------|-------------------------------------|---------------------|------------------------|
| Burkina Faso | 2016 | Male   | 75 to 79 | 50%<br>(36-63%)                | 50%<br>(37-64%)          | 2.4<br>(1.1-4.8)                            | 5.9%<br>(1.7-12%)                    | 6.9%<br>(2-14%)                     | 170<br>(50-350)     | 2400<br>(730-4900)     |
| Burkina Faso | 2016 | Male   | 80 to 84 | 47%<br>(32-61%)                | 53%<br>(39-68%)          | 2<br>(0.84-3.6)                             | 4.6%<br>(1.2-10%)                    | 5.3%<br>(1.3-12%)                   | 70<br>(17-150)      | 730<br>(190-1600)      |
| Burkina Faso | 2016 | Male   | 85 to 89 | 43%<br>(30-56%)                | 57%<br>(44-70%)          | 1.5<br>(0.66-2.9)                           | 3.2%<br>(0.73-7.4%)                  | 3.7%<br>(0.75-8.6%)                 | 31<br>(6.3-72)      | 230<br>(53-540)        |
| Burkina Faso | 2016 | Male   | 90 to 94 | 41%<br>(29-55%)                | 59%<br>(45-71%)          | 1.2<br>(0.49-2.2)                           | 1.9%<br>(0.16-4.9%)                  | 2.1%<br>(-0.022-5.7%)               | 8.1<br>(-0.082-22)  | 44<br>(3.6-110)        |
| Burkina Faso | 2016 | Male   | 95 plus  | 43%<br>(27-61%)                | 57%<br>(39-73%)          | 0.92<br>(0.34-2)                            | 1.6%<br>(-0.14-4.9%)                 | 1.7%<br>(-0.44-5.6%)                | 1.9<br>(-0.48-6.2)  | 7.1<br>(-0.58-21)      |
| Cameroon     | 1990 | Female | All Ages | 14%<br>(11-19%)                | 86%<br>(81-89%)          | 1.3<br>(0.94-1.6)                           | 1.7%<br>(1.4-2.2%)                   | 3.8%<br>(2.7-5.1%)                  | 2400<br>(1700-3300) | 74000<br>(57000-94000) |
| Cameroon     | 1990 | Female | 15 to 19 | 13%<br>(6.4-24%)               | 87%<br>(76-94%)          | 1.1<br>(0.4-2.2)                            | 1.7%<br>(0.89-2.8%)                  | 2.1%<br>(0.87-3.9%)                 | 22<br>(9.2-42)      | 2300<br>(1200-3900)    |
| Cameroon     | 1990 | Female | 20 to 24 | 17%<br>(7.6-30%)               | 83%<br>(70-92%)          | 1.7<br>(0.67-3.3)                           | 2.6%<br>(1.6-4%)                     | 2.7%<br>(1.3-4.8%)                  | 35<br>(16-63)       | 3600<br>(2200-5800)    |
| Cameroon     | 1990 | Female | 25 to 29 | 19%<br>(8.3-33%)               | 81%<br>(67-92%)          | 2.2<br>(0.89-4)                             | 3.2%<br>(2-4.9%)                     | 3.8%<br>(2-6.2%)                    | 48<br>(25-78)       | 4000<br>(2500-5900)    |
| Cameroon     | 1990 | Female | 30 to 34 | 21%<br>(9.4-38%)               | 79%<br>(62-91%)          | 2.5<br>(1.1-4.6)                            | 3.7%<br>(2.4-5.3%)                   | 4.7%<br>(2.7-7.4%)                  | 57<br>(33-89)       | 4100<br>(2600-6000)    |
| Cameroon     | 1990 | Female | 35 to 39 | 24%<br>(11-41%)                | 76%<br>(59-89%)          | 2.7<br>(1.1-4.9)                            | 4.7%<br>(3-6.9%)                     | 6.5%<br>(3.9-9.7%)                  | 84<br>(51-130)      | 4900<br>(3100-7100)    |
| Cameroon     | 1990 | Female | 40 to 44 | 25%<br>(13-43%)                | 75%<br>(57-87%)          | 2.9<br>(1.2-5.3)                            | 5.6%<br>(3.7-8.1%)                   | 8%<br>(5.2-12%)                     | 110<br>(70-160)     | 5500<br>(3600-7900)    |
| Cameroon     | 1990 | Female | 45 to 49 | 26%<br>(12-43%)                | 74%<br>(57-88%)          | 3<br>(1.1-5.7)                              | 6.7%<br>(4.2-9.3%)                   | 9.5%<br>(6-13%)                     | 140<br>(90-210)     | 6300<br>(4000-9000)    |
| Cameroon     | 1990 | Female | 50 to 54 | 27%<br>(13-46%)                | 73%<br>(54-87%)          | 3.2<br>(1.3-6.1)                            | 7.7%<br>(4.9-11%)                    | 11%<br>(6.7-15%)                    | 190<br>(120-280)    | 7300<br>(4600-11000)   |
| Cameroon     | 1990 | Female | 55 to 59 | 27%<br>(14-46%)                | 73%<br>(54-86%)          | 3.4<br>(1.4-6.9)                            | 8%<br>(5-12%)                        | 11%<br>(6.6-15%)                    | 240<br>(150-350)    | 7700<br>(4800-11000)   |
| Cameroon     | 1990 | Female | 60 to 64 | 28%<br>(14-48%)                | 72%<br>(52-86%)          | 3.6<br>(1.3-7.2)                            | 7.6%<br>(4.9-11%)                    | 9.7%<br>(6.2-14%)                   | 270<br>(170-410)    | 7500<br>(4600-11000)   |
| Cameroon     | 1990 | Female | 65 to 69 | 29%<br>(16-48%)                | 71%<br>(52-84%)          | 3.3<br>(1.2-6.6)                            | 8.3%<br>(5-12%)                      | 10%<br>(6.1-15%)                    | 350<br>(200-520)    | 7800<br>(4500-12000)   |
| Cameroon     | 1990 | Female | 70 to 74 | 27%<br>(14-44%)                | 73%<br>(56-86%)          | 2.6<br>(0.92-5.9)                           | 7.7%<br>(4.1-12%)                    | 9.3%<br>(4.8-15%)                   | 350<br>(190-560)    | 6400<br>(3400-10000)   |
| Cameroon     | 1990 | Female | 75 to 79 | 24%<br>(12-41%)                | 76%<br>(59-88%)          | 2.1<br>(0.64-4.8)                           | 6.1%<br>(2.6-10%)                    | 7.2%<br>(3.1-12%)                   | 250<br>(110-420)    | 3500<br>(1500-5900)    |
| Cameroon     | 1990 | Female | 80 to 84 | 22%<br>(9.8-39%)               | 78%<br>(61-90%)          | 1.9<br>(0.55-4)                             | 5.3%<br>(2-9.2%)                     | 6.3%<br>(2.4-11%)                   | 160<br>(61-280)     | 1700<br>(650-2900)     |
| Cameroon     | 1990 | Female | 85 to 89 | 23%<br>(11-39%)                | 77%<br>(61-89%)          | 1.9<br>(0.57-4.4)                           | 4.7%<br>(1.7-8.6%)                   | 5.6%<br>(2-10%)                     | 88<br>(32-160)      | 650<br>(240-1200)      |
| Cameroon     | 1990 | Female | 90 to 94 | 25%<br>(12-43%)                | 75%<br>(57-88%)          | 2<br>(0.55-4.9)                             | 4.4%<br>(1.3-8.4%)                   | 5.2%<br>(1.5-10%)                   | 31<br>(8.9-60)      | 160<br>(47-310)        |

| Location | Year | Sex    | Age      | Prevalence of current drinkers | Prevalence of abstainers | Population average of standard drinks daily | Percent of total attributable deaths | Percent of total attributable DALYs | Attributable deaths | Attributable DALYs       |
|----------|------|--------|----------|--------------------------------|--------------------------|---------------------------------------------|--------------------------------------|-------------------------------------|---------------------|--------------------------|
| Cameroon | 1990 | Female | 95 plus  | 30%<br>(13-53%)                | 70%<br>(47-87%)          | 2.3<br>(0.54-6.1)                           | 4.3%<br>(0.94-8.6%)                  | 5%<br>(0.97-10%)                    | 7.8<br>(1.5-16)     | 27<br>(5.7-54)           |
| Cameroon | 1990 | Male   | All Ages | 11%<br>(8.3-15%)               | 89%<br>(85-92%)          | 1.4<br>(1.1-1.9)                            | 2.1%<br>(1.7-2.6%)                   | 4.1%<br>(3.2-5.1%)                  | 2800<br>(2100-3500) | 100000<br>(80000-120000) |
| Cameroon | 1990 | Male   | 15 to 19 | 8.5%<br>(4-16%)                | 91%<br>(84-96%)          | 0.82<br>(0.29-1.8)                          | 1.9%<br>(1-3.2%)                     | 2.4%<br>(1.1-4.4%)                  | 25<br>(11-46)       | 2400<br>(1300-4100)      |
| Cameroon | 1990 | Male   | 20 to 24 | 13%<br>(6-24%)                 | 87%<br>(76-94%)          | 1.7<br>(0.61-3.3)                           | 4.2%<br>(2.5-6.3%)                   | 4.8%<br>(2.6-7.8%)                  | 70<br>(36-110)      | 5900<br>(3500-8900)      |
| Cameroon | 1990 | Male   | 25 to 29 | 17%<br>(8-30%)                 | 83%<br>(70-92%)          | 2.6<br>(1-4.8)                              | 5.8%<br>(3.6-8.9%)                   | 7%<br>(4-11%)                       | 110<br>(62-170)     | 7900<br>(5000-12000)     |
| Cameroon | 1990 | Male   | 30 to 34 | 20%<br>(8.5-36%)               | 80%<br>(64-91%)          | 3.2<br>(1.4-5.9)                            | 7.1%<br>(4.6-10%)                    | 8.9%<br>(5.2-14%)                   | 130<br>(81-210)     | 8600<br>(5600-13000)     |
| Cameroon | 1990 | Male   | 35 to 39 | 22%<br>(10-40%)                | 78%<br>(60-90%)          | 3.7<br>(1.5-6.9)                            | 8.5%<br>(5.6-12%)                    | 11%<br>(7-16%)                      | 170<br>(120-250)    | 9600<br>(6600-13000)     |
| Cameroon | 1990 | Male   | 40 to 44 | 23%<br>(12-40%)                | 77%<br>(60-88%)          | 3.9<br>(1.6-7.6)                            | 9.6%<br>(6.6-13%)                    | 13%<br>(8.6-17%)                    | 210<br>(150-290)    | 10000<br>(7200-14000)    |
| Cameroon | 1990 | Male   | 45 to 49 | 24%<br>(11-39%)                | 76%<br>(61-89%)          | 4.2<br>(1.5-8.5)                            | 11%<br>(7.6-15%)                     | 14%<br>(9.9-20%)                    | 260<br>(180-370)    | 11000<br>(7700-16000)    |
| Cameroon | 1990 | Male   | 50 to 54 | 24%<br>(11-42%)                | 76%<br>(58-89%)          | 4.2<br>(1.6-8.7)                            | 10%<br>(6.9-14%)                     | 13%<br>(9-18%)                      | 270<br>(180-380)    | 10000<br>(6800-14000)    |
| Cameroon | 1990 | Male   | 55 to 59 | 24%<br>(12-42%)                | 76%<br>(58-88%)          | 4.1<br>(1.5-8.3)                            | 10%<br>(6.9-14%)                     | 13%<br>(8.8-17%)                    | 290<br>(200-410)    | 9600<br>(6500-13000)     |
| Cameroon | 1990 | Male   | 60 to 64 | 24%<br>(12-41%)                | 76%<br>(59-88%)          | 3.7<br>(1.3-7.8)                            | 8.7%<br>(5.9-12%)                    | 11%<br>(7.4-15%)                    | 300<br>(200-410)    | 8100<br>(5400-11000)     |
| Cameroon | 1990 | Male   | 65 to 69 | 24%<br>(12-40%)                | 76%<br>(60-88%)          | 3.1<br>(1.1-6.4)                            | 8%<br>(5.1-11%)                      | 9.8%<br>(6.3-14%)                   | 290<br>(180-420)    | 6700<br>(4200-9600)      |
| Cameroon | 1990 | Male   | 70 to 74 | 22%<br>(12-38%)                | 78%<br>(62-88%)          | 2.3<br>(0.79-5.3)                           | 7.1%<br>(4-11%)                      | 8.5%<br>(4.9-13%)                   | 270<br>(150-420)    | 5000<br>(2800-7700)      |
| Cameroon | 1990 | Male   | 75 to 79 | 20%<br>(9.7-35%)               | 80%<br>(65-90%)          | 1.7<br>(0.51-4)                             | 5.4%<br>(2.5-9.1%)                   | 6.4%<br>(3-11%)                     | 180<br>(85-300)     | 2600<br>(1200-4200)      |
| Cameroon | 1990 | Male   | 80 to 84 | 18%<br>(8.2-33%)               | 82%<br>(67-92%)          | 1.4<br>(0.41-3.2)                           | 4.7%<br>(2.1-8%)                     | 5.6%<br>(2.5-9.4%)                  | 100<br>(46-170)     | 1100<br>(490-1800)       |
| Cameroon | 1990 | Male   | 85 to 89 | 17%<br>(8.1-32%)               | 83%<br>(68-92%)          | 1.2<br>(0.37-2.9)                           | 4%<br>(1.6-7%)                       | 4.7%<br>(1.8-8.3%)                  | 53<br>(21-93)       | 390<br>(160-690)         |
| Cameroon | 1990 | Male   | 90 to 94 | 18%<br>(8.4-34%)               | 82%<br>(66-92%)          | 1.1<br>(0.3-2.9)                            | 3.1%<br>(1-6.1%)                     | 3.6%<br>(1.1-7.2%)                  | 16<br>(5-32)        | 83<br>(28-160)           |
| Cameroon | 1990 | Male   | 95 plus  | 22%<br>(8.6-42%)               | 78%<br>(58-91%)          | 1.2<br>(0.23-3.5)                           | 2.8%<br>(0.69-6.2%)                  | 3.1%<br>(0.67-7.3%)                 | 3.6<br>(0.76-8)     | 13<br>(3.1-28)           |
| Cameroon | 1995 | Female | All Ages | 15%<br>(11-19%)                | 85%<br>(81-89%)          | 1.1<br>(0.8-1.4)                            | 1.6%<br>(1.2-2.1%)                   | 3.5%<br>(2.3-4.9%)                  | 2700<br>(1700-3800) | 83000<br>(61000-110000)  |
| Cameroon | 1995 | Female | 15 to 19 | 14%<br>(6.6-24%)               | 86%<br>(76-93%)          | 0.92<br>(0.32-1.9)                          | 1.6%<br>(0.82-2.8%)                  | 2%<br>(0.74-3.8%)                   | 26<br>(9.7-50)      | 2700<br>(1400-4700)      |
| Cameroon | 1995 | Female | 20 to 24 | 17%<br>(7.9-31%)               | 83%<br>(69-92%)          | 1.5<br>(0.56-2.8)                           | 2.3%<br>(1.3-3.6%)                   | 2.3%<br>(0.99-4%)                   | 42<br>(18-73)       | 4400<br>(2500-6700)      |

| Location | Year | Sex    | Age      | Prevalence of current drinkers | Prevalence of abstainers | Population average of standard drinks daily | Percent of total attributable deaths | Percent of total attributable DALYs | Attributable deaths | Attributable DALYs       |
|----------|------|--------|----------|--------------------------------|--------------------------|---------------------------------------------|--------------------------------------|-------------------------------------|---------------------|--------------------------|
| Cameroon | 1995 | Female | 25 to 29 | 20%<br>(8.4-34%)               | 80%<br>(66-92%)          | 1.8<br>(0.74-3.4)                           | 2.7%<br>(1.6-4.1%)                   | 2.8%<br>(1.3-5%)                    | 58<br>(30-97)       | 4900<br>(3000-7400)      |
| Cameroon | 1995 | Female | 30 to 34 | 22%<br>(9.7-39%)               | 78%<br>(61-90%)          | 2.1<br>(0.93-3.9)                           | 3%<br>(1.9-4.4%)                     | 3.4%<br>(1.8-5.4%)                  | 68<br>(37-110)      | 4900<br>(3000-7000)      |
| Cameroon | 1995 | Female | 35 to 39 | 25%<br>(12-42%)                | 75%<br>(58-88%)          | 2.3<br>(0.95-4.2)                           | 4%<br>(2.5-6.1%)                     | 5%<br>(2.9-8%)                      | 96<br>(57-150)      | 5700<br>(3600-8200)      |
| Cameroon | 1995 | Female | 40 to 44 | 26%<br>(14-43%)                | 74%<br>(57-86%)          | 2.5<br>(1-4.5)                              | 4.9%<br>(3.1-7.1%)                   | 6.5%<br>(3.9-9.8%)                  | 120<br>(75-180)     | 6200<br>(3900-8900)      |
| Cameroon | 1995 | Female | 45 to 49 | 27%<br>(12-44%)                | 73%<br>(56-88%)          | 2.5<br>(0.92-4.9)                           | 6%<br>(3.7-8.7%)                     | 8%<br>(4.7-12%)                     | 160<br>(94-240)     | 7000<br>(4300-10000)     |
| Cameroon | 1995 | Female | 50 to 54 | 27%<br>(13-47%)                | 73%<br>(53-87%)          | 2.6<br>(1-5.2)                              | 7%<br>(4.3-10%)                      | 9.3%<br>(5.6-14%)                   | 210<br>(130-320)    | 8100<br>(4800-12000)     |
| Cameroon | 1995 | Female | 55 to 59 | 28%<br>(14-48%)                | 72%<br>(52-86%)          | 2.9<br>(1.1-5.8)                            | 7.6%<br>(4.5-11%)                    | 9.8%<br>(5.7-15%)                   | 260<br>(150-410)    | 8500<br>(4900-13000)     |
| Cameroon | 1995 | Female | 60 to 64 | 30%<br>(15-49%)                | 70%<br>(51-85%)          | 3<br>(1.1-6.4)                              | 7.3%<br>(4.2-11%)                    | 9.1%<br>(5.3-14%)                   | 300<br>(170-460)    | 8200<br>(4700-13000)     |
| Cameroon | 1995 | Female | 65 to 69 | 30%<br>(16-49%)                | 70%<br>(51-84%)          | 2.8<br>(1-5.7)                              | 7.9%<br>(4.4-12%)                    | 9.7%<br>(5.3-15%)                   | 380<br>(210-600)    | 8600<br>(4700-13000)     |
| Cameroon | 1995 | Female | 70 to 74 | 28%<br>(15-45%)                | 72%<br>(55-85%)          | 2.2<br>(0.78-5)                             | 7.2%<br>(3.3-12%)                    | 8.6%<br>(3.9-14%)                   | 380<br>(170-650)    | 6900<br>(3100-12000)     |
| Cameroon | 1995 | Female | 75 to 79 | 24%<br>(12-42%)                | 76%<br>(58-88%)          | 1.7<br>(0.5-4)                              | 5.6%<br>(2.1-9.7%)                   | 6.6%<br>(2.5-12%)                   | 270<br>(98-480)     | 3800<br>(1400-6700)      |
| Cameroon | 1995 | Female | 80 to 84 | 22%<br>(11-39%)                | 78%<br>(61-89%)          | 1.5<br>(0.46-3.3)                           | 4.9%<br>(1.7-9.2%)                   | 5.7%<br>(1.9-11%)                   | 170<br>(59-330)     | 1800<br>(620-3400)       |
| Cameroon | 1995 | Female | 85 to 89 | 23%<br>(11-39%)                | 77%<br>(61-89%)          | 1.5<br>(0.47-3.5)                           | 4.3%<br>(1.3-8.3%)                   | 5.1%<br>(1.5-9.9%)                  | 96<br>(29-190)      | 710<br>(220-1400)        |
| Cameroon | 1995 | Female | 90 to 94 | 26%<br>(12-44%)                | 74%<br>(56-88%)          | 1.7<br>(0.46-3.9)                           | 4%<br>(1-8.2%)                       | 4.8%<br>(1.2-10%)                   | 36<br>(8.8-76)      | 180<br>(46-390)          |
| Cameroon | 1995 | Female | 95 plus  | 31%<br>(13-54%)                | 69%<br>(46-87%)          | 1.9<br>(0.44-4.8)                           | 4%<br>(0.58-8.6%)                    | 4.6%<br>(0.58-10%)                  | 9.3<br>(1.2-20)     | 32<br>(4.6-69)           |
| Cameroon | 1995 | Male   | All Ages | 12%<br>(8.8-16%)               | 88%<br>(84-91%)          | 1.3<br>(0.95-1.6)                           | 2.2%<br>(1.7-2.7%)                   | 4.1%<br>(3.1-5.2%)                  | 3400<br>(2600-4400) | 120000<br>(98000-150000) |
| Cameroon | 1995 | Male   | 15 to 19 | 9.2%<br>(4.4-17%)              | 91%<br>(83-96%)          | 0.73<br>(0.25-1.5)                          | 2%<br>(1-3.4%)                       | 2.5%<br>(1.1-4.6%)                  | 34<br>(14-64)       | 3200<br>(1600-5500)      |
| Cameroon | 1995 | Male   | 20 to 24 | 14%<br>(6.3-25%)               | 86%<br>(75-94%)          | 1.5<br>(0.56-3)                             | 4.2%<br>(2.4-6.4%)                   | 4.8%<br>(2.4-7.8%)                  | 97<br>(48-160)      | 7900<br>(4500-12000)     |
| Cameroon | 1995 | Male   | 25 to 29 | 18%<br>(8.4-32%)               | 82%<br>(68-92%)          | 2.3<br>(0.91-4.3)                           | 5.4%<br>(3.1-8.4%)                   | 6.1%<br>(3.2-10%)                   | 150<br>(84-240)     | 11000<br>(6500-16000)    |
| Cameroon | 1995 | Male   | 30 to 34 | 21%<br>(9.6-37%)               | 79%<br>(63-90%)          | 2.9<br>(1.3-5.3)                            | 6.2%<br>(3.8-9.1%)                   | 7.2%<br>(4.1-11%)                   | 190<br>(110-280)    | 12000<br>(7300-17000)    |
| Cameroon | 1995 | Male   | 35 to 39 | 24%<br>(11-41%)                | 76%<br>(59-89%)          | 3.2<br>(1.4-6)                              | 7.3%<br>(4.7-11%)                    | 8.9%<br>(5.4-13%)                   | 220<br>(140-320)    | 12000<br>(8000-17000)    |
| Cameroon | 1995 | Male   | 40 to 44 | 24%<br>(12-41%)                | 76%<br>(59-88%)          | 3.5<br>(1.4-6.4)                            | 8.5%<br>(5.7-12%)                    | 10%<br>(6.8-15%)                    | 260<br>(170-370)    | 13000<br>(8500-17000)    |

| Location | Year | Sex    | Age      | Prevalence of current drinkers | Prevalence of abstainers | Population average of standard drinks daily | Percent of total attributable deaths | Percent of total attributable DALYs | Attributable deaths | Attributable DALYs       |
|----------|------|--------|----------|--------------------------------|--------------------------|---------------------------------------------|--------------------------------------|-------------------------------------|---------------------|--------------------------|
| Cameroon | 1995 | Male   | 45 to 49 | 25%<br>(11-41%)                | 75%<br>(59-89%)          | 3.6<br>(1.3-7.1)                            | 10%<br>(6.6-14%)                     | 12%<br>(8.2-18%)                    | 320<br>(210-460)    | 14000<br>(9100-19000)    |
| Cameroon | 1995 | Male   | 50 to 54 | 25%<br>(12-45%)                | 75%<br>(55-88%)          | 3.7<br>(1.4-7.6)                            | 9.9%<br>(6.5-14%)                    | 12%<br>(8.1-17%)                    | 330<br>(220-480)    | 12000<br>(8200-18000)    |
| Cameroon | 1995 | Male   | 55 to 59 | 25%<br>(13-45%)                | 75%<br>(55-87%)          | 3.6<br>(1.3-7.2)                            | 9.9%<br>(6.6-14%)                    | 12%<br>(8.3-17%)                    | 360<br>(230-510)    | 12000<br>(7600-16000)    |
| Cameroon | 1995 | Male   | 60 to 64 | 25%<br>(13-44%)                | 75%<br>(56-87%)          | 3.2<br>(1.1-7.1)                            | 8.5%<br>(5.6-12%)                    | 10%<br>(6.8-15%)                    | 350<br>(220-510)    | 9600<br>(6100-14000)     |
| Cameroon | 1995 | Male   | 65 to 69 | 25%<br>(13-42%)                | 75%<br>(58-87%)          | 2.7<br>(1-5.6)                              | 7.8%<br>(4.8-11%)                    | 9.4%<br>(5.7-14%)                   | 350<br>(210-520)    | 7900<br>(4700-12000)     |
| Cameroon | 1995 | Male   | 70 to 74 | 24%<br>(12-39%)                | 76%<br>(61-88%)          | 2<br>(0.68-4.6)                             | 6.8%<br>(3.6-11%)                    | 8.1%<br>(4.3-13%)                   | 320<br>(160-510)    | 5800<br>(3000-9200)      |
| Cameroon | 1995 | Male   | 75 to 79 | 21%<br>(10-38%)                | 79%<br>(62-90%)          | 1.5<br>(0.46-3.5)                           | 5.2%<br>(2.2-9%)                     | 6.1%<br>(2.6-11%)                   | 210<br>(89-370)     | 3000<br>(1200-5200)      |
| Cameroon | 1995 | Male   | 80 to 84 | 20%<br>(8.6-35%)               | 80%<br>(65-91%)          | 1.3<br>(0.37-2.9)                           | 4.6%<br>(1.8-8.1%)                   | 5.3%<br>(2.1-9.4%)                  | 120<br>(48-210)     | 1300<br>(510-2200)       |
| Cameroon | 1995 | Male   | 85 to 89 | 19%<br>(8.4-34%)               | 81%<br>(66-92%)          | 1.1<br>(0.31-2.5)                           | 3.8%<br>(1.4-7.1%)                   | 4.5%<br>(1.5-8.3%)                  | 60<br>(20-110)      | 450<br>(160-820)         |
| Cameroon | 1995 | Male   | 90 to 94 | 20%<br>(8.8-36%)               | 80%<br>(64-91%)          | 1<br>(0.27-2.6)                             | 3%<br>(0.88-6.3%)                    | 3.4%<br>(0.97-7.4%)                 | 19<br>(5.2-40)      | 96<br>(29-210)           |
| Cameroon | 1995 | Male   | 95 plus  | 23%<br>(9.6-45%)               | 77%<br>(55-90%)          | 1<br>(0.2-3)                                | 2.8%<br>(0.63-6.7%)                  | 3.2%<br>(0.59-7.8%)                 | 4.4<br>(0.82-11)    | 16<br>(3.5-37)           |
| Cameroon | 2000 | Female | All Ages | 15%<br>(11-20%)                | 85%<br>(80-89%)          | 1.1<br>(0.82-1.4)                           | 1.8%<br>(1.3-2.4%)                   | 3.7%<br>(2.4-5.3%)                  | 3500<br>(2100-5100) | 110000<br>(74000-140000) |
| Cameroon | 2000 | Female | 15 to 19 | 14%<br>(7-25%)                 | 86%<br>(75-93%)          | 0.95<br>(0.35-2)                            | 1.7%<br>(0.86-3%)                    | 2.1%<br>(0.78-4.1%)                 | 34<br>(13-64)       | 3400<br>(1700-5900)      |
| Cameroon | 2000 | Female | 20 to 24 | 18%<br>(8.3-32%)               | 82%<br>(68-92%)          | 1.5<br>(0.59-2.9)                           | 2.3%<br>(1.3-3.6%)                   | 2.2%<br>(0.94-4.1%)                 | 54<br>(23-98)       | 5500<br>(3000-8500)      |
| Cameroon | 2000 | Female | 25 to 29 | 20%<br>(9.6-36%)               | 80%<br>(64-90%)          | 1.9<br>(0.79-3.5)                           | 2.3%<br>(1.2-3.6%)                   | 2.3%<br>(1-4%)                      | 76<br>(38-120)      | 6300<br>(3800-9400)      |
| Cameroon | 2000 | Female | 30 to 34 | 23%<br>(10-41%)                | 77%<br>(59-90%)          | 2.2<br>(0.96-4)                             | 2.5%<br>(1.4-3.8%)                   | 2.6%<br>(1.3-4.2%)                  | 89<br>(48-140)      | 6300<br>(3800-9400)      |
| Cameroon | 2000 | Female | 35 to 39 | 26%<br>(12-44%)                | 74%<br>(56-88%)          | 2.4<br>(1-4.4)                              | 3.4%<br>(2-5.3%)                     | 3.9%<br>(2-6.4%)                    | 130<br>(72-200)     | 7500<br>(4500-11000)     |
| Cameroon | 2000 | Female | 40 to 44 | 27%<br>(14-46%)                | 73%<br>(54-86%)          | 2.6<br>(1-4.9)                              | 4.3%<br>(2.7-6.5%)                   | 5.2%<br>(3.2-8.2%)                  | 150<br>(92-240)     | 7800<br>(4900-12000)     |
| Cameroon | 2000 | Female | 45 to 49 | 28%<br>(13-46%)                | 72%<br>(54-87%)          | 2.7<br>(0.94-5.2)                           | 5.6%<br>(3.3-8.4%)                   | 7.1%<br>(4-11%)                     | 200<br>(120-320)    | 8900<br>(5200-14000)     |
| Cameroon | 2000 | Female | 50 to 54 | 28%<br>(13-49%)                | 72%<br>(51-87%)          | 2.8<br>(1.1-5.4)                            | 7%<br>(4.1-10%)                      | 8.8%<br>(5.3-13%)                   | 270<br>(150-430)    | 10000<br>(5700-16000)    |
| Cameroon | 2000 | Female | 55 to 59 | 29%<br>(14-49%)                | 71%<br>(51-86%)          | 3<br>(1.2-6.2)                              | 7.9%<br>(4.5-12%)                    | 9.8%<br>(5.6-15%)                   | 340<br>(180-540)    | 11000<br>(5900-17000)    |
| Cameroon | 2000 | Female | 60 to 64 | 30%<br>(15-50%)                | 70%<br>(50-85%)          | 3.1<br>(1.1-6.4)                            | 7.6%<br>(4.5-12%)                    | 9.2%<br>(5.4-14%)                   | 380<br>(210-600)    | 10000<br>(5600-16000)    |



| Location | Year | Sex    | Age      | Prevalence of current drinkers | Prevalence of abstainers | Population average of standard drinks daily | Percent of total attributable deaths | Percent of total attributable DALYs | Attributable deaths | Attributable DALYs        |
|----------|------|--------|----------|--------------------------------|--------------------------|---------------------------------------------|--------------------------------------|-------------------------------------|---------------------|---------------------------|
| Cameroon | 2000 | Female | 65 to 69 | 31%<br>(16-49%)                | 69%<br>(51-84%)          | 2.9<br>(1.1-5.7)                            | 8.4%<br>(4.6-13%)                    | 10%<br>(5.5-15%)                    | 490<br>(250-780)    | 11000<br>(5800-18000)     |
| Cameroon | 2000 | Female | 70 to 74 | 29%<br>(16-47%)                | 71%<br>(53-84%)          | 2.3<br>(0.82-5.2)                           | 7.6%<br>(3.4-13%)                    | 9%<br>(3.9-15%)                     | 480<br>(200-840)    | 8600<br>(3700-15000)      |
| Cameroon | 2000 | Female | 75 to 79 | 25%<br>(12-43%)                | 75%<br>(57-88%)          | 1.8<br>(0.53-4.1)                           | 6%<br>(2.3-11%)                      | 7.1%<br>(2.6-13%)                   | 350<br>(130-650)    | 4900<br>(1800-9000)       |
| Cameroon | 2000 | Female | 80 to 84 | 23%<br>(11-40%)                | 77%<br>(60-89%)          | 1.6<br>(0.45-3.4)                           | 5.4%<br>(1.9-10%)                    | 6.3%<br>(2.2-12%)                   | 230<br>(76-450)     | 2400<br>(790-4600)        |
| Cameroon | 2000 | Female | 85 to 89 | 23%<br>(11-40%)                | 77%<br>(60-89%)          | 1.6<br>(0.48-3.6)                           | 4.8%<br>(1.4-9.3%)                   | 5.6%<br>(1.6-11%)                   | 130<br>(36-250)     | 920<br>(280-1800)         |
| Cameroon | 2000 | Female | 90 to 94 | 26%<br>(12-45%)                | 74%<br>(55-88%)          | 1.7<br>(0.46-4.1)                           | 4.5%<br>(1.1-9%)                     | 5.4%<br>(1.2-11%)                   | 49<br>(11-100)      | 250<br>(60-510)           |
| Cameroon | 2000 | Female | 95 plus  | 31%<br>(13-55%)                | 69%<br>(45-87%)          | 1.9<br>(0.45-5.1)                           | 4.5%<br>(0.73-9.6%)                  | 5.2%<br>(0.72-12%)                  | 14<br>(1.8-30)      | 46<br>(7.5-100)           |
| Cameroon | 2000 | Male   | All Ages | 12%<br>(9.3-17%)               | 88%<br>(83-91%)          | 1.3<br>(1-1.7)                              | 2.5%<br>(1.9-3.1%)                   | 4.5%<br>(3.4-5.7%)                  | 4400<br>(3300-5700) | 160000<br>(130000-200000) |
| Cameroon | 2000 | Male   | 15 to 19 | 9.7%<br>(4.7-18%)              | 90%<br>(82-95%)          | 0.79<br>(0.29-1.7)                          | 2.2%<br>(1.1-3.7%)                   | 2.7%<br>(1.1-4.9%)                  | 48<br>(20-87)       | 4400<br>(2200-7300)       |
| Cameroon | 2000 | Male   | 20 to 24 | 15%<br>(6.7-26%)               | 85%<br>(74-93%)          | 1.6<br>(0.6-3.1)                            | 4.5%<br>(2.6-7%)                     | 5.1%<br>(2.5-8.2%)                  | 130<br>(66-220)     | 10000<br>(5800-16000)     |
| Cameroon | 2000 | Male   | 25 to 29 | 19%<br>(8.9-33%)               | 81%<br>(67-91%)          | 2.4<br>(1-4.5)                              | 5.2%<br>(2.9-8.1%)                   | 5.8%<br>(2.9-9.4%)                  | 200<br>(120-330)    | 14000<br>(8700-22000)     |
| Cameroon | 2000 | Male   | 30 to 34 | 22%<br>(10-39%)                | 78%<br>(61-90%)          | 3<br>(1.3-5.6)                              | 5.8%<br>(3.5-8.7%)                   | 6.5%<br>(3.7-10%)                   | 260<br>(150-400)    | 16000<br>(9900-24000)     |
| Cameroon | 2000 | Male   | 35 to 39 | 25%<br>(12-42%)                | 75%<br>(58-88%)          | 3.4<br>(1.4-6.4)                            | 6.7%<br>(4.3-9.8%)                   | 7.7%<br>(4.7-12%)                   | 300<br>(190-440)    | 16000<br>(11000-23000)    |
| Cameroon | 2000 | Male   | 40 to 44 | 25%<br>(13-44%)                | 75%<br>(56-87%)          | 3.7<br>(1.5-6.9)                            | 7.8%<br>(5.2-11%)                    | 9.1%<br>(5.9-13%)                   | 340<br>(220-490)    | 16000<br>(11000-23000)    |
| Cameroon | 2000 | Male   | 45 to 49 | 26%<br>(12-43%)                | 74%<br>(57-88%)          | 3.9<br>(1.4-7.6)                            | 9.5%<br>(6.3-13%)                    | 11%<br>(7.5-16%)                    | 420<br>(270-590)    | 18000<br>(11000-25000)    |
| Cameroon | 2000 | Male   | 50 to 54 | 27%<br>(13-46%)                | 73%<br>(54-87%)          | 3.9<br>(1.5-7.9)                            | 9.9%<br>(6.4-14%)                    | 12%<br>(7.7-16%)                    | 430<br>(280-610)    | 16000<br>(10000-23000)    |
| Cameroon | 2000 | Male   | 55 to 59 | 27%<br>(14-45%)                | 73%<br>(55-86%)          | 3.8<br>(1.4-7.7)                            | 10%<br>(6.8-14%)                     | 12%<br>(8.2-17%)                    | 470<br>(310-670)    | 15000<br>(10000-21000)    |
| Cameroon | 2000 | Male   | 60 to 64 | 27%<br>(13-45%)                | 73%<br>(55-87%)          | 3.5<br>(1.2-7.4)                            | 8.9%<br>(5.8-13%)                    | 11%<br>(6.9-15%)                    | 450<br>(290-660)    | 12000<br>(7900-18000)     |
| Cameroon | 2000 | Male   | 65 to 69 | 26%<br>(13-43%)                | 74%<br>(57-87%)          | 2.9<br>(1-6)                                | 8.3%<br>(4.9-12%)                    | 9.8%<br>(5.8-15%)                   | 440<br>(260-670)    | 10000<br>(5900-15000)     |
| Cameroon | 2000 | Male   | 70 to 74 | 25%<br>(13-41%)                | 75%<br>(59-87%)          | 2.2<br>(0.74-4.8)                           | 7.3%<br>(3.6-12%)                    | 8.5%<br>(4.4-14%)                   | 400<br>(200-660)    | 7300<br>(3700-12000)      |
| Cameroon | 2000 | Male   | 75 to 79 | 23%<br>(11-39%)                | 77%<br>(61-89%)          | 1.7<br>(0.51-3.8)                           | 5.6%<br>(2.2-9.7%)                   | 6.5%<br>(2.5-11%)                   | 270<br>(110-480)    | 3800<br>(1500-6700)       |
| Cameroon | 2000 | Male   | 80 to 84 | 21%<br>(9.9-36%)               | 79%<br>(64-90%)          | 1.4<br>(0.4-3)                              | 5%<br>(1.9-8.9%)                     | 5.8%<br>(2.2-10%)                   | 160<br>(61-280)     | 1600<br>(640-2900)        |

| Location | Year | Sex    | Age      | Prevalence of current drinkers | Prevalence of abstainers | Population average of standard drinks daily | Percent of total attributable deaths | Percent of total attributable DALYs | Attributable deaths | Attributable DALYs        |
|----------|------|--------|----------|--------------------------------|--------------------------|---------------------------------------------|--------------------------------------|-------------------------------------|---------------------|---------------------------|
| Cameroon | 2000 | Male   | 85 to 89 | 20%<br>(9.2-35%)               | 80%<br>(65-91%)          | 1.2<br>(0.33-2.7)                           | 4.2%<br>(1.5-7.8%)                   | 4.9%<br>(1.7-9.2%)                  | 78<br>(26-150)      | 580<br>(200-1100)         |
| Cameroon | 2000 | Male   | 90 to 94 | 21%<br>(9.9-37%)               | 79%<br>(63-90%)          | 1.1<br>(0.29-2.8)                           | 3.4%<br>(0.94-7.1%)                  | 3.9%<br>(1-8.3%)                    | 24<br>(6.4-52)      | 130<br>(35-260)           |
| Cameroon | 2000 | Male   | 95 plus  | 25%<br>(10-47%)                | 75%<br>(53-90%)          | 1.2<br>(0.23-3.2)                           | 3.3%<br>(0.78-7.6%)                  | 3.8%<br>(0.75-9%)                   | 6.2<br>(1.2-15)     | 22<br>(4.9-50)            |
| Cameroon | 2005 | Female | All Ages | 15%<br>(11-20%)                | 85%<br>(80-89%)          | 1.3<br>(0.96-1.7)                           | 1.8%<br>(1.3-2.4%)                   | 3.8%<br>(2.5-5.3%)                  | 3900<br>(2400-5600) | 120000<br>(83000-160000)  |
| Cameroon | 2005 | Female | 15 to 19 | 14%<br>(7-25%)                 | 86%<br>(75-93%)          | 1.1<br>(0.42-2.3)                           | 1.8%<br>(0.92-3%)                    | 2.2%<br>(0.89-4.1%)                 | 39<br>(16-77)       | 4000<br>(2100-6600)       |
| Cameroon | 2005 | Female | 20 to 24 | 18%<br>(8.7-32%)               | 82%<br>(68-91%)          | 1.8<br>(0.7-3.4)                            | 2.4%<br>(1.4-3.6%)                   | 2.3%<br>(1.1-4%)                    | 63<br>(29-110)      | 6300<br>(3800-9700)       |
| Cameroon | 2005 | Female | 25 to 29 | 21%<br>(9.7-36%)               | 79%<br>(64-90%)          | 2.2<br>(0.93-4.1)                           | 2.2%<br>(1.2-3.4%)                   | 2.1%<br>(0.93-3.8%)                 | 83<br>(44-130)      | 7000<br>(4300-10000)      |
| Cameroon | 2005 | Female | 30 to 34 | 23%<br>(10-42%)                | 77%<br>(58-90%)          | 2.5<br>(1.1-4.6)                            | 2.2%<br>(1.3-3.3%)                   | 2.2%<br>(1.1-3.6%)                  | 100<br>(53-150)     | 7100<br>(4300-10000)      |
| Cameroon | 2005 | Female | 35 to 39 | 26%<br>(12-44%)                | 74%<br>(56-88%)          | 2.8<br>(1.2-5)                              | 3%<br>(1.8-4.5%)                     | 3.3%<br>(1.8-5.3%)                  | 140<br>(80-220)     | 8400<br>(5200-12000)      |
| Cameroon | 2005 | Female | 40 to 44 | 27%<br>(14-45%)                | 73%<br>(55-86%)          | 3<br>(1.2-5.7)                              | 3.8%<br>(2.4-5.7%)                   | 4.4%<br>(2.6-6.7%)                  | 170<br>(100-270)    | 8700<br>(5500-13000)      |
| Cameroon | 2005 | Female | 45 to 49 | 28%<br>(13-45%)                | 72%<br>(55-87%)          | 3.1<br>(1.1-6)                              | 5.2%<br>(3.1-7.7%)                   | 6.4%<br>(3.7-9.7%)                  | 220<br>(120-340)    | 9700<br>(5600-15000)      |
| Cameroon | 2005 | Female | 50 to 54 | 29%<br>(13-48%)                | 71%<br>(52-87%)          | 3.3<br>(1.2-6.5)                            | 6.8%<br>(4.1-10%)                    | 8.5%<br>(5.1-13%)                   | 300<br>(160-470)    | 11000<br>(6300-17000)     |
| Cameroon | 2005 | Female | 55 to 59 | 29%<br>(15-48%)                | 71%<br>(52-85%)          | 3.6<br>(1.3-7.2)                            | 7.9%<br>(4.7-12%)                    | 9.8%<br>(6-15%)                     | 370<br>(200-590)    | 12000<br>(6600-19000)     |
| Cameroon | 2005 | Female | 60 to 64 | 30%<br>(15-51%)                | 70%<br>(49-85%)          | 3.6<br>(1.3-7.7)                            | 7.7%<br>(4.7-12%)                    | 9.4%<br>(5.8-14%)                   | 410<br>(230-660)    | 11000<br>(6400-18000)     |
| Cameroon | 2005 | Female | 65 to 69 | 31%<br>(16-50%)                | 69%<br>(50-84%)          | 3.3<br>(1.3-6.5)                            | 8.8%<br>(5.1-13%)                    | 11%<br>(6.1-16%)                    | 540<br>(290-860)    | 12000<br>(6600-19000)     |
| Cameroon | 2005 | Female | 70 to 74 | 29%<br>(16-47%)                | 71%<br>(53-84%)          | 2.6<br>(0.97-5.8)                           | 8%<br>(3.9-13%)                      | 9.5%<br>(4.6-15%)                   | 540<br>(250-930)    | 9800<br>(4600-17000)      |
| Cameroon | 2005 | Female | 75 to 79 | 25%<br>(12-44%)                | 75%<br>(56-88%)          | 2.1<br>(0.59-4.8)                           | 6.5%<br>(2.6-11%)                    | 7.6%<br>(3-13%)                     | 410<br>(160-730)    | 5700<br>(2300-10000)      |
| Cameroon | 2005 | Female | 80 to 84 | 23%<br>(11-40%)                | 77%<br>(60-89%)          | 1.8<br>(0.53-4)                             | 5.8%<br>(2.1-11%)                    | 6.9%<br>(2.5-12%)                   | 280<br>(100-520)    | 2900<br>(1100-5300)       |
| Cameroon | 2005 | Female | 85 to 89 | 24%<br>(12-41%)                | 76%<br>(59-88%)          | 1.8<br>(0.56-4.3)                           | 5.3%<br>(1.8-10%)                    | 6.2%<br>(2-12%)                     | 150<br>(50-290)     | 1100<br>(370-2100)        |
| Cameroon | 2005 | Female | 90 to 94 | 27%<br>(13-46%)                | 73%<br>(54-87%)          | 2<br>(0.53-4.9)                             | 5%<br>(1.4-9.7%)                     | 6%<br>(1.5-12%)                     | 58<br>(15-110)      | 300<br>(82-580)           |
| Cameroon | 2005 | Female | 95 plus  | 32%<br>(14-54%)                | 68%<br>(46-86%)          | 2.3<br>(0.55-6.1)                           | 5%<br>(0.91-10%)                     | 5.9%<br>(0.95-12%)                  | 17<br>(2.8-36)      | 57<br>(10-120)            |
| Cameroon | 2005 | Male   | All Ages | 13%<br>(9.3-17%)               | 87%<br>(83-91%)          | 1.6<br>(1.2-2.1)                            | 2.6%<br>(2.1-3.3%)                   | 4.7%<br>(3.7-5.9%)                  | 5100<br>(4000-6500) | 190000<br>(150000-240000) |

| Location | Year | Sex    | Age      | Prevalence of current drinkers | Prevalence of abstainers | Population average of standard drinks daily | Percent of total attributable deaths | Percent of total attributable DALYs | Attributable deaths | Attributable DALYs       |
|----------|------|--------|----------|--------------------------------|--------------------------|---------------------------------------------|--------------------------------------|-------------------------------------|---------------------|--------------------------|
| Cameroon | 2005 | Male   | 15 to 19 | 9.8%<br>(4.8-18%)              | 90%<br>(82-95%)          | 0.91<br>(0.34-1.9)                          | 2.3%<br>(1.2-3.8%)                   | 2.8%<br>(1.3-5%)                    | 59<br>(26-100)      | 5300<br>(2800-8700)      |
| Cameroon | 2005 | Male   | 20 to 24 | 15%<br>(7-27%)                 | 85%<br>(73-93%)          | 1.9<br>(0.71-3.6)                           | 4.8%<br>(2.8-7.3%)                   | 5.5%<br>(2.8-8.8%)                  | 160<br>(83-270)     | 13000<br>(7400-20000)    |
| Cameroon | 2005 | Male   | 25 to 29 | 19%<br>(9-34%)                 | 81%<br>(66-91%)          | 2.8<br>(1.2-5.3)                            | 5.6%<br>(3.3-8.5%)                   | 6.2%<br>(3.3-10%)                   | 240<br>(140-390)    | 17000<br>(11000-26000)   |
| Cameroon | 2005 | Male   | 30 to 34 | 22%<br>(10-39%)                | 78%<br>(61-90%)          | 3.5<br>(1.5-6.5)                            | 5.7%<br>(3.5-8.6%)                   | 6.3%<br>(3.7-9.6%)                  | 300<br>(180-460)    | 19000<br>(12000-28000)   |
| Cameroon | 2005 | Male   | 35 to 39 | 24%<br>(12-41%)                | 76%<br>(59-88%)          | 3.9<br>(1.6-7.6)                            | 6.4%<br>(4.3-9.3%)                   | 7.3%<br>(4.6-11%)                   | 350<br>(230-510)    | 19000<br>(13000-27000)   |
| Cameroon | 2005 | Male   | 40 to 44 | 25%<br>(13-44%)                | 75%<br>(56-87%)          | 4.3<br>(1.7-8.4)                            | 7.3%<br>(5.1-10%)                    | 8.4%<br>(5.7-12%)                   | 400<br>(270-560)    | 19000<br>(13000-26000)   |
| Cameroon | 2005 | Male   | 45 to 49 | 26%<br>(12-43%)                | 74%<br>(57-88%)          | 4.6<br>(1.7-9)                              | 9.2%<br>(6.2-13%)                    | 11%<br>(7.2-15%)                    | 470<br>(320-660)    | 20000<br>(13000-28000)   |
| Cameroon | 2005 | Male   | 50 to 54 | 27%<br>(13-46%)                | 73%<br>(54-87%)          | 4.7<br>(1.7-9.4)                            | 9.9%<br>(6.4-13%)                    | 12%<br>(7.8-16%)                    | 480<br>(310-660)    | 18000<br>(12000-24000)   |
| Cameroon | 2005 | Male   | 55 to 59 | 27%<br>(13-46%)                | 73%<br>(54-87%)          | 4.5<br>(1.6-9.1)                            | 11%<br>(7.3-14%)                     | 13%<br>(8.8-17%)                    | 530<br>(350-740)    | 17000<br>(11000-23000)   |
| Cameroon | 2005 | Male   | 60 to 64 | 27%<br>(13-45%)                | 73%<br>(55-87%)          | 4<br>(1.4-8.9)                              | 9.2%<br>(6-13%)                      | 11%<br>(7.2-16%)                    | 510<br>(320-740)    | 14000<br>(9000-20000)    |
| Cameroon | 2005 | Male   | 65 to 69 | 26%<br>(13-44%)                | 74%<br>(56-87%)          | 3.3<br>(1.2-7.1)                            | 8.5%<br>(5.2-12%)                    | 10%<br>(6.2-15%)                    | 500<br>(300-730)    | 11000<br>(6900-17000)    |
| Cameroon | 2005 | Male   | 70 to 74 | 25%<br>(13-41%)                | 75%<br>(59-87%)          | 2.5<br>(0.9-5.5)                            | 7.6%<br>(4.2-12%)                    | 8.9%<br>(5-13%)                     | 470<br>(260-710)    | 8500<br>(4700-13000)     |
| Cameroon | 2005 | Male   | 75 to 79 | 22%<br>(11-40%)                | 78%<br>(60-89%)          | 1.9<br>(0.56-4.3)                           | 5.9%<br>(2.5-10%)                    | 6.9%<br>(2.9-12%)                   | 320<br>(130-540)    | 4500<br>(1900-7600)      |
| Cameroon | 2005 | Male   | 80 to 84 | 20%<br>(9.4-36%)               | 80%<br>(64-91%)          | 1.5<br>(0.45-3.5)                           | 5.3%<br>(2.1-9.1%)                   | 6.1%<br>(2.5-11%)                   | 190<br>(77-330)     | 2000<br>(810-3400)       |
| Cameroon | 2005 | Male   | 85 to 89 | 19%<br>(9.4-34%)               | 81%<br>(66-91%)          | 1.3<br>(0.4-3)                              | 4.5%<br>(1.7-8.1%)                   | 5.3%<br>(1.9-9.4%)                  | 94<br>(34-170)      | 700<br>(250-1200)        |
| Cameroon | 2005 | Male   | 90 to 94 | 21%<br>(10-36%)                | 79%<br>(64-90%)          | 1.3<br>(0.35-3.2)                           | 3.7%<br>(1.1-7.2%)                   | 4.3%<br>(1.2-8.5%)                  | 30<br>(8.5-59)      | 150<br>(45-300)          |
| Cameroon | 2005 | Male   | 95 plus  | 25%<br>(10-46%)                | 75%<br>(54-90%)          | 1.3<br>(0.27-3.9)                           | 3.6%<br>(0.84-7.9%)                  | 4.1%<br>(0.82-9.4%)                 | 7.4<br>(1.5-17)     | 26<br>(5.9-57)           |
| Cameroon | 2010 | Female | All Ages | 16%<br>(11-21%)                | 84%<br>(79-89%)          | 1.4<br>(0.96-2)                             | 1.8%<br>(1.3-2.5%)                   | 3.8%<br>(2.4-5.3%)                  | 4000<br>(2400-5900) | 120000<br>(85000-170000) |
| Cameroon | 2010 | Female | 15 to 19 | 14%<br>(6.9-25%)               | 86%<br>(75-93%)          | 1.2<br>(0.45-2.6)                           | 1.7%<br>(0.91-2.9%)                  | 2%<br>(0.81-3.7%)                   | 40<br>(16-77)       | 4200<br>(2200-7400)      |
| Cameroon | 2010 | Female | 20 to 24 | 18%<br>(8.6-33%)               | 82%<br>(67-91%)          | 1.9<br>(0.71-3.6)                           | 2.6%<br>(1.5-3.8%)                   | 2.5%<br>(1.1-4.4%)                  | 66<br>(29-110)      | 7000<br>(4100-11000)     |
| Cameroon | 2010 | Female | 25 to 29 | 21%<br>(9.1-37%)               | 79%<br>(63-91%)          | 2.3<br>(0.94-4.4)                           | 2.4%<br>(1.4-3.7%)                   | 2.3%<br>(1.1-4.1%)                  | 89<br>(46-150)      | 7800<br>(4800-12000)     |
| Cameroon | 2010 | Female | 30 to 34 | 23%<br>(11-41%)                | 77%<br>(59-89%)          | 2.7<br>(1.1-5.1)                            | 2.3%<br>(1.3-3.5%)                   | 2.2%<br>(1.1-3.8%)                  | 100<br>(55-170)     | 7700<br>(4700-11000)     |

| Location | Year | Sex    | Age      | Prevalence of current drinkers | Prevalence of abstainers | Population average of standard drinks daily | Percent of total attributable deaths | Percent of total attributable DALYs | Attributable deaths | Attributable DALYs        |
|----------|------|--------|----------|--------------------------------|--------------------------|---------------------------------------------|--------------------------------------|-------------------------------------|---------------------|---------------------------|
| Cameroon | 2010 | Female | 35 to 39 | 26%<br>(12-44%)                | 74%<br>(56-88%)          | 3<br>(1.2-5.7)                              | 3%<br>(1.8-4.5%)                     | 3.2%<br>(1.7-5.1%)                  | 150<br>(82-230)     | 8900<br>(5500-13000)      |
| Cameroon | 2010 | Female | 40 to 44 | 27%<br>(14-46%)                | 73%<br>(54-86%)          | 3.2<br>(1.2-6.1)                            | 3.8%<br>(2.4-5.6%)                   | 4.4%<br>(2.6-6.8%)                  | 180<br>(110-280)    | 9300<br>(5800-14000)      |
| Cameroon | 2010 | Female | 45 to 49 | 28%<br>(13-45%)                | 72%<br>(55-87%)          | 3.3<br>(1.1-6.4)                            | 5.2%<br>(3.1-7.6%)                   | 6.4%<br>(3.6-9.7%)                  | 230<br>(130-370)    | 10000<br>(6100-16000)     |
| Cameroon | 2010 | Female | 50 to 54 | 28%<br>(14-48%)                | 72%<br>(52-86%)          | 3.4<br>(1.3-6.8)                            | 6.8%<br>(4.1-10%)                    | 8.6%<br>(5.1-13%)                   | 300<br>(160-490)    | 11000<br>(6300-18000)     |
| Cameroon | 2010 | Female | 55 to 59 | 29%<br>(15-49%)                | 71%<br>(51-85%)          | 3.7<br>(1.3-7.5)                            | 8%<br>(4.6-12%)                      | 10%<br>(6-15%)                      | 370<br>(190-600)    | 12000<br>(6400-19000)     |
| Cameroon | 2010 | Female | 60 to 64 | 30%<br>(16-50%)                | 70%<br>(50-84%)          | 3.8<br>(1.3-8.1)                            | 7.9%<br>(4.6-12%)                    | 9.8%<br>(5.8-15%)                   | 420<br>(230-690)    | 12000<br>(6300-19000)     |
| Cameroon | 2010 | Female | 65 to 69 | 31%<br>(16-50%)                | 69%<br>(50-84%)          | 3.5<br>(1.2-7)                              | 8.9%<br>(5.1-13%)                    | 11%<br>(6.1-16%)                    | 550<br>(280-890)    | 13000<br>(6500-20000)     |
| Cameroon | 2010 | Female | 70 to 74 | 29%<br>(15-46%)                | 71%<br>(54-85%)          | 2.8<br>(0.95-6.3)                           | 8.1%<br>(3.9-13%)                    | 9.7%<br>(4.6-16%)                   | 550<br>(240-930)    | 10000<br>(4500-17000)     |
| Cameroon | 2010 | Female | 75 to 79 | 25%<br>(13-43%)                | 75%<br>(57-87%)          | 2.2<br>(0.63-5.1)                           | 6.5%<br>(2.6-11%)                    | 7.7%<br>(3-13%)                     | 420<br>(170-770)    | 6000<br>(2400-11000)      |
| Cameroon | 2010 | Female | 80 to 84 | 23%<br>(11-39%)                | 77%<br>(61-89%)          | 1.9<br>(0.54-4.4)                           | 5.9%<br>(2.2-11%)                    | 6.9%<br>(2.5-13%)                   | 300<br>(110-560)    | 3200<br>(1200-5800)       |
| Cameroon | 2010 | Female | 85 to 89 | 23%<br>(11-40%)                | 77%<br>(60-89%)          | 1.9<br>(0.59-4.3)                           | 5.3%<br>(1.8-10%)                    | 6.3%<br>(2-12%)                     | 170<br>(55-330)     | 1200<br>(410-2400)        |
| Cameroon | 2010 | Female | 90 to 94 | 26%<br>(12-45%)                | 74%<br>(55-88%)          | 2<br>(0.55-5)                               | 5.1%<br>(1.4-9.8%)                   | 6%<br>(1.6-12%)                     | 63<br>(17-120)      | 320<br>(91-630)           |
| Cameroon | 2010 | Female | 95 plus  | 31%<br>(13-55%)                | 69%<br>(45-87%)          | 2.3<br>(0.55-6.4)                           | 5%<br>(0.83-10%)                     | 5.9%<br>(0.88-12%)                  | 18<br>(2.6-37)      | 60<br>(9.7-120)           |
| Cameroon | 2010 | Male   | All Ages | 13%<br>(9.5-17%)               | 87%<br>(83-91%)          | 1.7<br>(1.2-2.4)                            | 2.8%<br>(2.2-3.5%)                   | 5%<br>(3.9-6.3%)                    | 5600<br>(4300-7100) | 210000<br>(160000-260000) |
| Cameroon | 2010 | Male   | 15 to 19 | 9.8%<br>(4.7-18%)              | 90%<br>(82-95%)          | 0.95<br>(0.34-2.1)                          | 2.3%<br>(1.2-3.8%)                   | 2.7%<br>(1.2-4.8%)                  | 64<br>(28-110)      | 5800<br>(3100-9900)       |
| Cameroon | 2010 | Male   | 20 to 24 | 15%<br>(7-27%)                 | 85%<br>(73-93%)          | 1.9<br>(0.74-3.9)                           | 5%<br>(3.1-7.6%)                     | 5.8%<br>(3.1-9.3%)                  | 180<br>(92-300)     | 15000<br>(8300-22000)     |
| Cameroon | 2010 | Male   | 25 to 29 | 19%<br>(9.2-34%)               | 81%<br>(66-91%)          | 2.9<br>(1.2-5.6)                            | 6.2%<br>(3.7-9.1%)                   | 7.1%<br>(3.9-11%)                   | 280<br>(160-440)    | 20000<br>(12000-30000)    |
| Cameroon | 2010 | Male   | 30 to 34 | 22%<br>(10-39%)                | 78%<br>(61-90%)          | 3.7<br>(1.6-6.9)                            | 6.5%<br>(3.9-9.5%)                   | 7.3%<br>(4.2-11%)                   | 340<br>(210-520)    | 21000<br>(14000-32000)    |
| Cameroon | 2010 | Male   | 35 to 39 | 25%<br>(11-43%)                | 75%<br>(57-89%)          | 4.2<br>(1.6-8.4)                            | 7%<br>(4.7-10%)                      | 8.1%<br>(5.2-12%)                   | 400<br>(260-580)    | 22000<br>(15000-31000)    |
| Cameroon | 2010 | Male   | 40 to 44 | 26%<br>(13-44%)                | 74%<br>(56-87%)          | 4.5<br>(1.6-8.9)                            | 7.9%<br>(5.6-11%)                    | 9.3%<br>(6.5-13%)                   | 450<br>(300-630)    | 22000<br>(15000-30000)    |
| Cameroon | 2010 | Male   | 45 to 49 | 26%<br>(13-43%)                | 74%<br>(57-87%)          | 4.8<br>(1.6-9.7)                            | 9.7%<br>(6.5-13%)                    | 12%<br>(7.7-16%)                    | 520<br>(340-730)    | 22000<br>(15000-31000)    |
| Cameroon | 2010 | Male   | 50 to 54 | 27%<br>(13-47%)                | 73%<br>(53-87%)          | 4.8<br>(1.7-10)                             | 10%<br>(6.6-14%)                     | 12%<br>(8.1-17%)                    | 510<br>(330-710)    | 19000<br>(12000-26000)    |

| Location | Year | Sex    | Age      | Prevalence of current drinkers | Prevalence of abstainers | Population average of standard drinks daily | Percent of total attributable deaths | Percent of total attributable DALYs | Attributable deaths | Attributable DALYs       |
|----------|------|--------|----------|--------------------------------|--------------------------|---------------------------------------------|--------------------------------------|-------------------------------------|---------------------|--------------------------|
| Cameroon | 2010 | Male   | 55 to 59 | 27%<br>(14-45%)                | 73%<br>(55-86%)          | 4.7<br>(1.6-9.2)                            | 11%<br>(7.4-15%)                     | 13%<br>(9.1-18%)                    | 560<br>(370-780)    | 18000<br>(12000-25000)   |
| Cameroon | 2010 | Male   | 60 to 64 | 27%<br>(13-46%)                | 73%<br>(54-87%)          | 4.2<br>(1.3-8.9)                            | 9.6%<br>(6.4-14%)                    | 11%<br>(7.6-16%)                    | 550<br>(350-790)    | 15000<br>(9600-21000)    |
| Cameroon | 2010 | Male   | 65 to 69 | 27%<br>(13-44%)                | 73%<br>(56-87%)          | 3.5<br>(1.2-7.2)                            | 8.8%<br>(5.4-13%)                    | 10%<br>(6.5-15%)                    | 550<br>(330-790)    | 12000<br>(7600-18000)    |
| Cameroon | 2010 | Male   | 70 to 74 | 25%<br>(13-41%)                | 75%<br>(59-87%)          | 2.6<br>(0.92-5.7)                           | 7.8%<br>(4.4-12%)                    | 9.2%<br>(5.1-14%)                   | 510<br>(280-780)    | 9200<br>(5100-14000)     |
| Cameroon | 2010 | Male   | 75 to 79 | 23%<br>(11-39%)                | 77%<br>(61-89%)          | 2<br>(0.56-4.7)                             | 6%<br>(2.6-10%)                      | 7%<br>(3-12%)                       | 350<br>(140-590)    | 4900<br>(2000-8300)      |
| Cameroon | 2010 | Male   | 80 to 84 | 21%<br>(9.4-36%)               | 79%<br>(64-91%)          | 1.6<br>(0.47-3.7)                           | 5.3%<br>(2.2-9.1%)                   | 6.2%<br>(2.5-11%)                   | 220<br>(89-360)     | 2200<br>(940-3800)       |
| Cameroon | 2010 | Male   | 85 to 89 | 20%<br>(9.3-34%)               | 80%<br>(66-91%)          | 1.4<br>(0.4-3.3)                            | 4.6%<br>(1.7-8.1%)                   | 5.4%<br>(2-9.5%)                    | 110<br>(40-190)     | 810<br>(300-1400)        |
| Cameroon | 2010 | Male   | 90 to 94 | 21%<br>(10-37%)                | 79%<br>(63-90%)          | 1.3<br>(0.34-3.3)                           | 3.8%<br>(1.1-7.4%)                   | 4.4%<br>(1.2-8.7%)                  | 34<br>(9.1-67)      | 180<br>(50-340)          |
| Cameroon | 2010 | Male   | 95 plus  | 25%<br>(11-47%)                | 75%<br>(53-89%)          | 1.4<br>(0.26-3.9)                           | 3.7%<br>(0.81-8.1%)                  | 4.3%<br>(0.83-9.6%)                 | 8.4<br>(1.6-19)     | 29<br>(6.5-64)           |
| Cameroon | 2016 | Female | All Ages | 16%<br>(11-21%)                | 84%<br>(79-89%)          | 1.4<br>(0.79-2.4)                           | 1.9%<br>(1.3-2.8%)                   | 4%<br>(2.4-5.7%)                    | 4100<br>(2300-6200) | 130000<br>(82000-180000) |
| Cameroon | 2016 | Female | 15 to 19 | 14%<br>(6.9-25%)               | 86%<br>(75-93%)          | 1.2<br>(0.38-2.8)                           | 1.6%<br>(0.8-2.7%)                   | 1.7%<br>(0.61-3.3%)                 | 37<br>(13-75)       | 4200<br>(2000-7300)      |
| Cameroon | 2016 | Female | 20 to 24 | 18%<br>(8.4-32%)               | 82%<br>(68-92%)          | 1.9<br>(0.65-4.2)                           | 2.5%<br>(1.6-3.8%)                   | 2.3%<br>(1.1-4.2%)                  | 61<br>(24-110)      | 7100<br>(4100-11000)     |
| Cameroon | 2016 | Female | 25 to 29 | 21%<br>(9.5-36%)               | 79%<br>(64-91%)          | 2.4<br>(0.87-5.1)                           | 2.5%<br>(1.5-3.8%)                   | 2.4%<br>(1.1-4.3%)                  | 86<br>(44-150)      | 8100<br>(5000-12000)     |
| Cameroon | 2016 | Female | 30 to 34 | 23%<br>(10-41%)                | 77%<br>(59-90%)          | 2.7<br>(1-5.6)                              | 2.5%<br>(1.5-3.8%)                   | 2.5%<br>(1.2-4.2%)                  | 110<br>(55-180)     | 8400<br>(5200-13000)     |
| Cameroon | 2016 | Female | 35 to 39 | 26%<br>(12-44%)                | 74%<br>(56-88%)          | 3<br>(1.1-6.4)                              | 3.1%<br>(1.9-4.9%)                   | 3.5%<br>(1.9-5.7%)                  | 160<br>(84-250)     | 9600<br>(5700-14000)     |
| Cameroon | 2016 | Female | 40 to 44 | 27%<br>(14-45%)                | 73%<br>(55-86%)          | 3.2<br>(1.1-6.9)                            | 3.9%<br>(2.4-5.9%)                   | 4.7%<br>(2.7-7.4%)                  | 190<br>(110-320)    | 10000<br>(5900-15000)    |
| Cameroon | 2016 | Female | 45 to 49 | 28%<br>(13-46%)                | 72%<br>(54-87%)          | 3.3<br>(1-7.3)                              | 5.3%<br>(3.1-8%)                     | 6.7%<br>(3.9-10%)                   | 250<br>(140-400)    | 11000<br>(6300-17000)    |
| Cameroon | 2016 | Female | 50 to 54 | 29%<br>(13-48%)                | 71%<br>(52-87%)          | 3.5<br>(1.1-7.3)                            | 6.8%<br>(4-10%)                      | 8.9%<br>(5.2-13%)                   | 310<br>(160-530)    | 12000<br>(6500-20000)    |
| Cameroon | 2016 | Female | 55 to 59 | 29%<br>(14-49%)                | 71%<br>(51-86%)          | 3.8<br>(1.3-8.5)                            | 7.8%<br>(4.6-12%)                    | 10%<br>(6.1-15%)                    | 370<br>(190-620)    | 12000<br>(6200-20000)    |
| Cameroon | 2016 | Female | 60 to 64 | 30%<br>(15-50%)                | 70%<br>(50-85%)          | 3.9<br>(1.2-8.7)                            | 7.6%<br>(4.2-12%)                    | 9.6%<br>(5.4-15%)                   | 410<br>(210-700)    | 11000<br>(6000-19000)    |
| Cameroon | 2016 | Female | 65 to 69 | 31%<br>(16-49%)                | 69%<br>(51-84%)          | 3.5<br>(1.1-7.6)                            | 8.4%<br>(4.5-13%)                    | 10%<br>(5.5-16%)                    | 540<br>(250-900)    | 12000<br>(5800-20000)    |
| Cameroon | 2016 | Female | 70 to 74 | 29%<br>(15-46%)                | 71%<br>(54-85%)          | 2.8<br>(0.86-6.8)                           | 7.5%<br>(3.3-12%)                    | 9%<br>(4-15%)                       | 530<br>(230-930)    | 9800<br>(4200-17000)     |

| Location | Year | Sex    | Age      | Prevalence of current drinkers | Prevalence of abstainers | Population average of standard drinks daily | Percent of total attributable deaths | Percent of total attributable DALYs | Attributable deaths | Attributable DALYs        |
|----------|------|--------|----------|--------------------------------|--------------------------|---------------------------------------------|--------------------------------------|-------------------------------------|---------------------|---------------------------|
| Cameroon | 2016 | Female | 75 to 79 | 25%<br>(12-43%)                | 75%<br>(57-88%)          | 2.2<br>(0.57-5.3)                           | 6%<br>(2.3-10%)                      | 7.2%<br>(2.7-12%)                   | 420<br>(150-770)    | 6000<br>(2200-11000)      |
| Cameroon | 2016 | Female | 80 to 84 | 23%<br>(11-40%)                | 77%<br>(60-89%)          | 1.9<br>(0.52-4.7)                           | 5.4%<br>(1.9-9.8%)                   | 6.4%<br>(2.2-12%)                   | 300<br>(99-580)     | 3200<br>(1000-6000)       |
| Cameroon | 2016 | Female | 85 to 89 | 23%<br>(11-40%)                | 77%<br>(60-89%)          | 1.9<br>(0.53-4.7)                           | 5%<br>(1.6-9.3%)                     | 5.9%<br>(1.8-11%)                   | 180<br>(56-370)     | 1400<br>(410-2700)        |
| Cameroon | 2016 | Female | 90 to 94 | 27%<br>(12-46%)                | 73%<br>(54-88%)          | 2.2<br>(0.52-5.6)                           | 4.9%<br>(1.2-9.5%)                   | 5.8%<br>(1.3-12%)                   | 74<br>(17-150)      | 380<br>(90-740)           |
| Cameroon | 2016 | Female | 95 plus  | 32%<br>(14-56%)                | 68%<br>(44-86%)          | 2.5<br>(0.46-7)                             | 5%<br>(0.66-10%)                     | 5.9%<br>(0.64-12%)                  | 21<br>(2.3-43)      | 70<br>(9.6-140)           |
| Cameroon | 2016 | Male   | All Ages | 13%<br>(9.6-18%)               | 87%<br>(82-90%)          | 1.7<br>(0.94-2.9)                           | 3%<br>(2.3-3.9%)                     | 5.1%<br>(3.8-6.6%)                  | 5900<br>(4200-7700) | 220000<br>(170000-290000) |
| Cameroon | 2016 | Male   | 15 to 19 | 9.8%<br>(4.7-18%)              | 90%<br>(82-95%)          | 0.98<br>(0.28-2.4)                          | 2.1%<br>(1.1-3.4%)                   | 2.4%<br>(0.94-4.3%)                 | 64<br>(26-120)      | 6000<br>(3000-10000)      |
| Cameroon | 2016 | Male   | 20 to 24 | 15%<br>(7-27%)                 | 85%<br>(73-93%)          | 2<br>(0.65-4.3)                             | 4.7%<br>(2.8-7%)                     | 5.2%<br>(2.6-8.4%)                  | 180<br>(90-290)     | 15000<br>(8400-22000)     |
| Cameroon | 2016 | Male   | 25 to 29 | 19%<br>(9.3-33%)               | 81%<br>(67-91%)          | 3<br>(1-6.6)                                | 6%<br>(3.8-8.7%)                     | 6.8%<br>(3.9-10%)                   | 290<br>(160-470)    | 21000<br>(13000-32000)    |
| Cameroon | 2016 | Male   | 30 to 34 | 22%<br>(10-38%)                | 78%<br>(62-90%)          | 3.8<br>(1.4-8.1)                            | 6.6%<br>(4.1-9.8%)                   | 7.4%<br>(4.3-11%)                   | 380<br>(220-590)    | 24000<br>(15000-36000)    |
| Cameroon | 2016 | Male   | 35 to 39 | 25%<br>(12-41%)                | 75%<br>(59-88%)          | 4.2<br>(1.5-8.9)                            | 7.1%<br>(4.7-10%)                    | 8.2%<br>(5.2-12%)                   | 440<br>(280-650)    | 25000<br>(16000-35000)    |
| Cameroon | 2016 | Male   | 40 to 44 | 26%<br>(13-44%)                | 74%<br>(56-87%)          | 4.5<br>(1.6-9.9)                            | 7.7%<br>(5.3-11%)                    | 9%<br>(6.1-13%)                     | 490<br>(310-710)    | 24000<br>(16000-34000)    |
| Cameroon | 2016 | Male   | 45 to 49 | 26%<br>(12-43%)                | 74%<br>(57-88%)          | 4.7<br>(1.5-10)                             | 9.3%<br>(6.1-13%)                    | 11%<br>(7.3-15%)                    | 570<br>(360-810)    | 24000<br>(16000-34000)    |
| Cameroon | 2016 | Male   | 50 to 54 | 26%<br>(12-46%)                | 74%<br>(54-88%)          | 4.7<br>(1.4-10)                             | 9.3%<br>(6.2-13%)                    | 11%<br>(7.3-15%)                    | 550<br>(340-780)    | 20000<br>(13000-29000)    |
| Cameroon | 2016 | Male   | 55 to 59 | 27%<br>(14-45%)                | 73%<br>(55-86%)          | 4.6<br>(1.5-10)                             | 10%<br>(6.8-14%)                     | 12%<br>(8.3-17%)                    | 580<br>(360-810)    | 19000<br>(12000-26000)    |
| Cameroon | 2016 | Male   | 60 to 64 | 27%<br>(13-44%)                | 73%<br>(56-87%)          | 4.2<br>(1.1-9.6)                            | 9%<br>(5.7-13%)                      | 11%<br>(6.7-15%)                    | 550<br>(340-810)    | 15000<br>(9400-22000)     |
| Cameroon | 2016 | Male   | 65 to 69 | 26%<br>(13-43%)                | 74%<br>(57-87%)          | 3.5<br>(1.1-8.2)                            | 8.1%<br>(4.7-12%)                    | 9.7%<br>(5.7-14%)                   | 550<br>(320-810)    | 12000<br>(7200-18000)     |
| Cameroon | 2016 | Male   | 70 to 74 | 25%<br>(13-42%)                | 75%<br>(58-87%)          | 2.7<br>(0.79-6.4)                           | 7.2%<br>(3.7-11%)                    | 8.5%<br>(4.5-13%)                   | 510<br>(270-810)    | 9300<br>(4900-15000)      |
| Cameroon | 2016 | Male   | 75 to 79 | 23%<br>(11-39%)                | 77%<br>(61-89%)          | 2.1<br>(0.51-5.1)                           | 5.6%<br>(2.3-9.3%)                   | 6.5%<br>(2.7-11%)                   | 360<br>(150-600)    | 5100<br>(2100-8400)       |
| Cameroon | 2016 | Male   | 80 to 84 | 21%<br>(9.5-37%)               | 79%<br>(63-91%)          | 1.7<br>(0.45-4.2)                           | 5%<br>(2-8.4%)                       | 5.8%<br>(2.3-9.9%)                  | 220<br>(91-380)     | 2300<br>(960-3900)        |
| Cameroon | 2016 | Male   | 85 to 89 | 20%<br>(8.8-35%)               | 80%<br>(65-91%)          | 1.4<br>(0.35-3.6)                           | 4.3%<br>(1.5-8%)                     | 5%<br>(1.8-9.3%)                    | 120<br>(40-220)     | 880<br>(310-1600)         |
| Cameroon | 2016 | Male   | 90 to 94 | 21%<br>(9.7-38%)               | 79%<br>(62-90%)          | 1.4<br>(0.32-3.6)                           | 3.6%<br>(0.99-7.1%)                  | 4.1%<br>(1.1-8.4%)                  | 38<br>(9.9-78)      | 200<br>(54-400)           |

| Location   | Year | Sex    | Age      | Prevalence of current drinkers | Prevalence of abstainers | Population average of standard drinks daily | Percent of total attributable deaths | Percent of total attributable DALYs | Attributable deaths | Attributable DALYs  |
|------------|------|--------|----------|--------------------------------|--------------------------|---------------------------------------------|--------------------------------------|-------------------------------------|---------------------|---------------------|
| Cameroon   | 2016 | Male   | 95 plus  | 25%<br>(10-46%)                | 75%<br>(54-90%)          | 1.4<br>(0.24-4.3)                           | 3.5%<br>(0.7-7.8%)                   | 4%<br>(0.68-9%)                     | 9.2<br>(1.6-21)     | 32<br>(6.4-72)      |
| Cape Verde | 1990 | Female | All Ages | 13%<br>(9.5-17%)               | 87%<br>(83-90%)          | 0.89<br>(0.78-1)                            | 2.1%<br>(1.6-2.6%)                   | 4.4%<br>(2.7-6.2%)                  | 47<br>(28-65)       | 1400<br>(1100-1700) |
| Cape Verde | 1990 | Female | 15 to 19 | 12%<br>(5.8-22%)               | 88%<br>(78-94%)          | 0.75<br>(0.3-1.5)                           | 1.8%<br>(1-3%)                       | 2.9%<br>(1.1-5.5%)                  | 0.35<br>(0.13-0.68) | 45<br>(25-74)       |
| Cape Verde | 1990 | Female | 20 to 24 | 15%<br>(6.8-28%)               | 85%<br>(72-93%)          | 1.2<br>(0.5-2.1)                            | 3.5%<br>(2.2-5.3%)                   | 4.7%<br>(2.2-8.3%)                  | 0.74<br>(0.33-1.3)  | 92<br>(56-140)      |
| Cape Verde | 1990 | Female | 25 to 29 | 17%<br>(7.7-31%)               | 83%<br>(69-92%)          | 1.4<br>(0.65-2.5)                           | 4%<br>(2.6-5.7%)                     | 5.9%<br>(2.9-9.4%)                  | 1.1<br>(0.53-1.8)   | 110<br>(68-160)     |
| Cape Verde | 1990 | Female | 30 to 34 | 20%<br>(8.4-35%)               | 80%<br>(65-92%)          | 1.7<br>(0.74-3)                             | 4.4%<br>(2.8-6.5%)                   | 7.1%<br>(3.9-11%)                   | 1.1<br>(0.61-1.8)   | 91<br>(57-140)      |
| Cape Verde | 1990 | Female | 35 to 39 | 22%<br>(10-38%)                | 78%<br>(62-90%)          | 1.9<br>(0.77-3.4)                           | 5.1%<br>(3.2-7.5%)                   | 8.8%<br>(5-13%)                     | 1.5<br>(0.83-2.3)   | 95<br>(59-140)      |
| Cape Verde | 1990 | Female | 40 to 44 | 23%<br>(12-40%)                | 77%<br>(60-88%)          | 2<br>(0.83-3.9)                             | 5.5%<br>(3.3-8.3%)                   | 9.9%<br>(5.4-15%)                   | 1.1<br>(0.61-1.7)   | 60<br>(35-89)       |
| Cape Verde | 1990 | Female | 45 to 49 | 24%<br>(11-40%)                | 76%<br>(60-89%)          | 2<br>(0.72-4.2)                             | 6.2%<br>(3.4-9.5%)                   | 11%<br>(5.5-16%)                    | 1.8<br>(0.9-2.8)    | 81<br>(45-120)      |
| Cape Verde | 1990 | Female | 50 to 54 | 24%<br>(11-43%)                | 76%<br>(57-89%)          | 2.1<br>(0.82-4.2)                           | 6.4%<br>(3.6-9.6%)                   | 10%<br>(5.7-15%)                    | 3.2<br>(1.8-5)      | 130<br>(71-190)     |
| Cape Verde | 1990 | Female | 55 to 59 | 25%<br>(12-43%)                | 75%<br>(57-88%)          | 2.3<br>(0.96-4.4)                           | 6.7%<br>(3.8-10%)                    | 10%<br>(5.6-16%)                    | 4.2<br>(2.3-6.6)    | 140<br>(80-220)     |
| Cape Verde | 1990 | Female | 60 to 64 | 26%<br>(13-45%)                | 74%<br>(55-87%)          | 2.4<br>(0.91-4.6)                           | 6.4%<br>(3.4-10%)                    | 9.1%<br>(4.8-15%)                   | 5.1<br>(2.7-8.3)    | 150<br>(77-240)     |
| Cape Verde | 1990 | Female | 65 to 69 | 27%<br>(14-44%)                | 73%<br>(56-86%)          | 2.2<br>(0.88-4.1)                           | 6.9%<br>(3.5-11%)                    | 9.5%<br>(4.8-15%)                   | 4.6<br>(2.3-7.3)    | 110<br>(54-170)     |
| Cape Verde | 1990 | Female | 70 to 74 | 25%<br>(13-42%)                | 75%<br>(58-87%)          | 1.8<br>(0.66-3.8)                           | 6.2%<br>(2.7-11%)                    | 8.1%<br>(3.4-14%)                   | 6<br>(2.6-10)       | 110<br>(47-190)     |
| Cape Verde | 1990 | Female | 75 to 79 | 22%<br>(11-39%)                | 78%<br>(61-89%)          | 1.4<br>(0.43-3.2)                           | 4.7%<br>(1.5-8.7%)                   | 6%<br>(1.9-11%)                     | 6<br>(1.9-11)       | 86<br>(28-160)      |
| Cape Verde | 1990 | Female | 80 to 84 | 20%<br>(9.1-35%)               | 80%<br>(65-91%)          | 1.2<br>(0.39-2.6)                           | 4.3%<br>(1.3-8.2%)                   | 5.3%<br>(1.6-10%)                   | 4.7<br>(1.3-9)      | 49<br>(15-95)       |
| Cape Verde | 1990 | Female | 85 to 89 | 21%<br>(9.7-36%)               | 79%<br>(64-90%)          | 1.2<br>(0.41-2.8)                           | 4%<br>(1.1-8.5%)                     | 4.9%<br>(1.3-10%)                   | 3.4<br>(0.92-7.3)   | 26<br>(7-54)        |
| Cape Verde | 1990 | Female | 90 to 94 | 24%<br>(11-42%)                | 76%<br>(58-89%)          | 1.4<br>(0.39-3.3)                           | 3.8%<br>(0.82-8.3%)                  | 4.6%<br>(0.91-10%)                  | 1.3<br>(0.25-2.9)   | 6.7<br>(1.4-15)     |
| Cape Verde | 1990 | Female | 95 plus  | 28%<br>(12-50%)                | 72%<br>(50-88%)          | 1.6<br>(0.38-4.1)                           | 3.7%<br>(0.32-8.8%)                  | 4.4%<br>(0.26-11%)                  | 0.42<br>(0.025-1)   | 1.5<br>(0.13-3.5)   |
| Cape Verde | 1990 | Male   | All Ages | 9.3%<br>(6.9-13%)              | 91%<br>(87-93%)          | 0.86<br>(0.75-0.98)                         | 2.4%<br>(2-3%)                       | 4.2%<br>(3.1-5.3%)                  | 54<br>(40-71)       | 1900<br>(1500-2300) |
| Cape Verde | 1990 | Male   | 15 to 19 | 7.7%<br>(3.5-14%)              | 92%<br>(86-96%)          | 0.54<br>(0.2-1.1)                           | 1.9%<br>(1-3.3%)                     | 2.3%<br>(0.94-4.5%)                 | 0.66<br>(0.27-1.2)  | 67<br>(35-110)      |
| Cape Verde | 1990 | Male   | 20 to 24 | 12%<br>(5.4-21%)               | 88%<br>(79-95%)          | 1.1<br>(0.46-2.1)                           | 4.4%<br>(2.6-7%)                     | 5%<br>(2.5-8.7%)                    | 1.8<br>(0.85-3.1)   | 160<br>(89-250)     |

| Location   | Year | Sex    | Age      | Prevalence of current drinkers | Prevalence of abstainers | Population average of standard drinks daily | Percent of total attributable deaths | Percent of total attributable DALYs | Attributable deaths   | Attributable DALYs     |
|------------|------|--------|----------|--------------------------------|--------------------------|---------------------------------------------|--------------------------------------|-------------------------------------|-----------------------|------------------------|
| Cape Verde | 1990 | Male   | 25 to 29 | 15%<br>(7.4-27%)               | 85%<br>(73-93%)          | 1.7<br>(0.74-3.1)                           | 6%<br>(3.8-8.8%)                     | 7.3%<br>(4.2-11%)                   | 2.4<br>(1.4-3.9)      | 190<br>(110-280)       |
| Cape Verde | 1990 | Male   | 30 to 34 | 18%<br>(7.8-33%)               | 82%<br>(67-92%)          | 2.2<br>(0.97-3.9)                           | 7.1%<br>(4.6-10%)                    | 8.9%<br>(5.2-13%)                   | 2.1<br>(1.2-3.2)      | 140<br>(90-210)        |
| Cape Verde | 1990 | Male   | 35 to 39 | 20%<br>(9.3-36%)               | 80%<br>(64-91%)          | 2.5<br>(0.97-4.6)                           | 8.2%<br>(5.4-12%)                    | 11%<br>(6.7-16%)                    | 2.8<br>(1.7-4.2)      | 160<br>(100-230)       |
| Cape Verde | 1990 | Male   | 40 to 44 | 21%<br>(11-38%)                | 79%<br>(62-89%)          | 2.7<br>(1.1-5.4)                            | 8.7%<br>(5.9-12%)                    | 11%<br>(7.5-16%)                    | 2<br>(1.3-3)          | 100<br>(66-150)        |
| Cape Verde | 1990 | Male   | 45 to 49 | 22%<br>(9.9-37%)               | 78%<br>(63-90%)          | 2.9<br>(1.1-6.1)                            | 10%<br>(6.3-14%)                     | 13%<br>(8.1-18%)                    | 2.5<br>(1.5-3.6)      | 110<br>(69-150)        |
| Cape Verde | 1990 | Male   | 50 to 54 | 22%<br>(10-40%)                | 78%<br>(60-90%)          | 2.9<br>(1.1-5.9)                            | 9.1%<br>(5.9-13%)                    | 11%<br>(7.4-16%)                    | 5.1<br>(3.2-7.3)      | 190<br>(120-270)       |
| Cape Verde | 1990 | Male   | 55 to 59 | 22%<br>(11-40%)                | 78%<br>(60-89%)          | 2.8<br>(1.1-5.3)                            | 8.7%<br>(5.6-12%)                    | 11%<br>(6.9-15%)                    | 6.8<br>(4.4-9.7)      | 220<br>(150-320)       |
| Cape Verde | 1990 | Male   | 60 to 64 | 22%<br>(11-39%)                | 78%<br>(61-89%)          | 2.5<br>(0.89-4.9)                           | 7.1%<br>(4.3-11%)                    | 8.6%<br>(5.1-13%)                   | 7.5<br>(4.4-11)       | 210<br>(120-310)       |
| Cape Verde | 1990 | Male   | 65 to 69 | 22%<br>(11-37%)                | 78%<br>(63-89%)          | 2.1<br>(0.79-4.2)                           | 6.2%<br>(3.4-9.3%)                   | 7.3%<br>(4.1-11%)                   | 5.5<br>(3-8.6)        | 130<br>(71-200)        |
| Cape Verde | 1990 | Male   | 70 to 74 | 21%<br>(10-35%)                | 79%<br>(65-90%)          | 1.6<br>(0.56-3.3)                           | 5%<br>(2.3-8.3%)                     | 5.9%<br>(2.7-9.9%)                  | 6.1<br>(2.8-10)       | 110<br>(51-190)        |
| Cape Verde | 1990 | Male   | 75 to 79 | 19%<br>(8.9-34%)               | 81%<br>(66-91%)          | 1.2<br>(0.35-2.7)                           | 3.5%<br>(1.2-6.5%)                   | 4%<br>(1.4-7.5%)                    | 4.4<br>(1.4-8.1)      | 63<br>(21-120)         |
| Cape Verde | 1990 | Male   | 80 to 84 | 17%<br>(7.6-31%)               | 83%<br>(69-92%)          | 0.97<br>(0.29-2.1)                          | 2.9%<br>(1-5.4%)                     | 3.3%<br>(1.1-6.2%)                  | 2.7<br>(0.9-5.1)      | 29<br>(10-54)          |
| Cape Verde | 1990 | Male   | 85 to 89 | 16%<br>(7.2-28%)               | 84%<br>(72-93%)          | 0.82<br>(0.25-1.9)                          | 2.4%<br>(0.71-4.9%)                  | 2.7%<br>(0.76-5.6%)                 | 1.4<br>(0.38-2.9)     | 10<br>(3.2-22)         |
| Cape Verde | 1990 | Male   | 90 to 94 | 17%<br>(7.7-31%)               | 83%<br>(69-92%)          | 0.77<br>(0.2-2)                             | 1.7%<br>(0.31-4.4%)                  | 1.9%<br>(0.25-5%)                   | 0.31<br>(0.04-0.8)    | 1.7<br>(0.29-4.3)      |
| Cape Verde | 1990 | Male   | 95 plus  | 20%<br>(7.7-40%)               | 80%<br>(60-92%)          | 0.8<br>(0.16-2.3)                           | 1.4%<br>(-0.036-4.1%)                | 1.4%<br>(-0.27-4.7%)                | 0.062<br>(-0.011-0.2) | 0.24<br>(-0.0059-0.72) |
| Cape Verde | 1995 | Female | All Ages | 14%<br>(10-18%)                | 86%<br>(82-90%)          | 0.99<br>(0.87-1.1)                          | 2.1%<br>(1.5-2.8%)                   | 4.6%<br>(2.8-6.5%)                  | 55<br>(33-79)         | 1600<br>(1200-2100)    |
| Cape Verde | 1995 | Female | 15 to 19 | 12%<br>(6-22%)                 | 88%<br>(78-94%)          | 0.82<br>(0.32-1.7)                          | 1.9%<br>(1-3.2%)                     | 3%<br>(1.2-5.6%)                    | 0.41<br>(0.16-0.82)   | 52<br>(27-86)          |
| Cape Verde | 1995 | Female | 20 to 24 | 16%<br>(7-28%)                 | 84%<br>(72-93%)          | 1.3<br>(0.53-2.5)                           | 3.6%<br>(2.2-5.4%)                   | 4.8%<br>(2.2-8.2%)                  | 0.76<br>(0.34-1.4)    | 94<br>(56-140)         |
| Cape Verde | 1995 | Female | 25 to 29 | 18%<br>(7.5-31%)               | 82%<br>(69-92%)          | 1.6<br>(0.68-2.8)                           | 4%<br>(2.6-5.7%)                     | 5.6%<br>(2.8-9%)                    | 1.1<br>(0.55-1.9)     | 110<br>(69-160)        |
| Cape Verde | 1995 | Female | 30 to 34 | 20%<br>(8.8-35%)               | 80%<br>(65-91%)          | 1.9<br>(0.85-3.2)                           | 4.4%<br>(2.8-6.3%)                   | 6.8%<br>(3.8-10%)                   | 1.6<br>(0.89-2.7)     | 130<br>(81-200)        |
| Cape Verde | 1995 | Female | 35 to 39 | 23%<br>(11-39%)                | 77%<br>(61-89%)          | 2.1<br>(0.95-3.6)                           | 5.1%<br>(3.2-7.3%)                   | 8.7%<br>(5.1-13%)                   | 1.9<br>(1-3)          | 120<br>(75-180)        |
| Cape Verde | 1995 | Female | 40 to 44 | 24%<br>(12-41%)                | 76%<br>(59-88%)          | 2.2<br>(0.94-4.2)                           | 5.7%<br>(3.6-8.5%)                   | 10%<br>(5.7-15%)                    | 2.2<br>(1.2-3.5)      | 120<br>(72-180)        |



| Location   | Year | Sex    | Age      | Prevalence of current drinkers | Prevalence of abstainers | Population average of standard drinks daily | Percent of total attributable deaths | Percent of total attributable DALYs | Attributable deaths | Attributable DALYs  |
|------------|------|--------|----------|--------------------------------|--------------------------|---------------------------------------------|--------------------------------------|-------------------------------------|---------------------|---------------------|
| Cape Verde | 1995 | Female | 45 to 49 | 25%<br>(11-41%)                | 75%<br>(59-89%)          | 2.3<br>(0.83-4.8)                           | 6.4%<br>(3.6-9.6%)                   | 11%<br>(5.8-16%)                    | 1.7<br>(0.87-2.6)   | 76<br>(42-120)      |
| Cape Verde | 1995 | Female | 50 to 54 | 25%<br>(12-44%)                | 75%<br>(56-88%)          | 2.4<br>(0.95-4.9)                           | 6.7%<br>(3.8-10%)                    | 11%<br>(6.2-16%)                    | 2.4<br>(1.3-3.9)    | 96<br>(53-150)      |
| Cape Verde | 1995 | Female | 55 to 59 | 26%<br>(13-45%)                | 74%<br>(55-87%)          | 2.6<br>(1-5)                                | 7.1%<br>(3.9-11%)                    | 11%<br>(5.9-17%)                    | 4.6<br>(2.4-7.5)    | 160<br>(86-250)     |
| Cape Verde | 1995 | Female | 60 to 64 | 27%<br>(13-46%)                | 73%<br>(54-87%)          | 2.7<br>(1-5.2)                              | 6.9%<br>(3.7-11%)                    | 9.9%<br>(5.2-16%)                   | 5.9<br>(3.2-9.7)    | 170<br>(91-270)     |
| Cape Verde | 1995 | Female | 65 to 69 | 28%<br>(14-46%)                | 72%<br>(54-86%)          | 2.5<br>(0.99-4.6)                           | 7.5%<br>(3.9-12%)                    | 10%<br>(5.4-16%)                    | 8.2<br>(4.1-13)     | 190<br>(98-300)     |
| Cape Verde | 1995 | Female | 70 to 74 | 26%<br>(13-42%)                | 74%<br>(58-87%)          | 2<br>(0.72-4.1)                             | 6.6%<br>(2.8-11%)                    | 8.7%<br>(3.7-15%)                   | 6<br>(2.5-11)       | 110<br>(48-200)     |
| Cape Verde | 1995 | Female | 75 to 79 | 22%<br>(11-39%)                | 78%<br>(61-89%)          | 1.5<br>(0.45-3.6)                           | 5.1%<br>(1.6-9.4%)                   | 6.5%<br>(2-12%)                     | 5.7<br>(1.7-11)     | 83<br>(25-160)      |
| Cape Verde | 1995 | Female | 80 to 84 | 20%<br>(9.2-37%)               | 80%<br>(63-91%)          | 1.4<br>(0.41-2.9)                           | 4.6%<br>(1.4-9%)                     | 5.7%<br>(1.7-11%)                   | 4.7<br>(1.4-9.3)    | 50<br>(15-97)       |
| Cape Verde | 1995 | Female | 85 to 89 | 21%<br>(9.5-37%)               | 79%<br>(63-90%)          | 1.3<br>(0.44-3)                             | 4.4%<br>(1.2-9.2%)                   | 5.4%<br>(1.4-11%)                   | 4.6<br>(1.2-9.8)    | 35<br>(9.6-72)      |
| Cape Verde | 1995 | Female | 90 to 94 | 23%<br>(11-41%)                | 77%<br>(59-89%)          | 1.5<br>(0.41-3.6)                           | 4.2%<br>(0.91-8.8%)                  | 5.1%<br>(1-11%)                     | 2.4<br>(0.48-5)     | 12<br>(2.6-25)      |
| Cape Verde | 1995 | Female | 95 plus  | 28%<br>(12-51%)                | 72%<br>(49-88%)          | 1.7<br>(0.38-4.5)                           | 4.1%<br>(0.43-9.7%)                  | 4.9%<br>(0.42-12%)                  | 0.6<br>(0.052-1.4)  | 2.1<br>(0.22-4.8)   |
| Cape Verde | 1995 | Male   | All Ages | 10%<br>(7.5-14%)               | 90%<br>(86-93%)          | 1<br>(0.89-1.2)                             | 2.8%<br>(2.1-3.5%)                   | 4.7%<br>(3.4-6%)                    | 72<br>(52-94)       | 2600<br>(2000-3300) |
| Cape Verde | 1995 | Male   | 15 to 19 | 8.1%<br>(3.8-15%)              | 92%<br>(85-96%)          | 0.63<br>(0.22-1.3)                          | 2.1%<br>(1.1-3.7%)                   | 2.6%<br>(1.1-5%)                    | 0.87<br>(0.35-1.7)  | 84<br>(43-150)      |
| Cape Verde | 1995 | Male   | 20 to 24 | 13%<br>(5.6-23%)               | 87%<br>(77-94%)          | 1.3<br>(0.52-2.5)                           | 4.9%<br>(2.8-7.7%)                   | 5.6%<br>(2.7-9.6%)                  | 2.4<br>(1.2-4.2)    | 210<br>(110-330)    |
| Cape Verde | 1995 | Male   | 25 to 29 | 16%<br>(7.3-30%)               | 84%<br>(70-93%)          | 2<br>(0.89-3.5)                             | 6.5%<br>(4.1-9.6%)                   | 7.9%<br>(4.5-12%)                   | 3.6<br>(1.9-5.8)    | 260<br>(160-400)    |
| Cape Verde | 1995 | Male   | 30 to 34 | 19%<br>(8.3-35%)               | 81%<br>(65-92%)          | 2.5<br>(1.2-4.3)                            | 7.7%<br>(5-11%)                      | 9.7%<br>(5.7-14%)                   | 4.3<br>(2.4-6.7)    | 280<br>(170-420)    |
| Cape Verde | 1995 | Male   | 35 to 39 | 21%<br>(9.9-37%)               | 79%<br>(63-90%)          | 2.8<br>(1.2-5.2)                            | 8.8%<br>(5.8-13%)                    | 11%<br>(7.1-16%)                    | 3.7<br>(2.2-5.6)    | 210<br>(130-300)    |
| Cape Verde | 1995 | Male   | 40 to 44 | 22%<br>(11-39%)                | 78%<br>(61-89%)          | 3.1<br>(1.3-5.8)                            | 9.7%<br>(6.5-13%)                    | 13%<br>(8.4-17%)                    | 4.8<br>(3-7.3)      | 240<br>(150-360)    |
| Cape Verde | 1995 | Male   | 45 to 49 | 23%<br>(10-38%)                | 77%<br>(62-90%)          | 3.3<br>(1.2-7.1)                            | 11%<br>(6.9-15%)                     | 14%<br>(8.9-19%)                    | 3.7<br>(2.2-5.5)    | 160<br>(98-230)     |
| Cape Verde | 1995 | Male   | 50 to 54 | 23%<br>(11-41%)                | 77%<br>(59-89%)          | 3.3<br>(1.2-6.9)                            | 10%<br>(6.5-14%)                     | 13%<br>(8.2-18%)                    | 3.5<br>(2.2-5.1)    | 130<br>(84-190)     |
| Cape Verde | 1995 | Male   | 55 to 59 | 23%<br>(12-40%)                | 77%<br>(60-88%)          | 3.2<br>(1.2-6.1)                            | 9.9%<br>(6.5-14%)                    | 12%<br>(7.9-17%)                    | 7.8<br>(4.9-11)     | 250<br>(160-370)    |
| Cape Verde | 1995 | Male   | 60 to 64 | 23%<br>(12-40%)                | 77%<br>(60-88%)          | 2.8<br>(1-5.6)                              | 8%<br>(5-12%)                        | 9.6%<br>(5.9-14%)                   | 9.1<br>(5.5-14)     | 250<br>(150-380)    |

| Location   | Year | Sex    | Age      | Prevalence of current drinkers | Prevalence of abstainers | Population average of standard drinks daily | Percent of total attributable deaths | Percent of total attributable DALYs | Attributable deaths    | Attributable DALYs  |
|------------|------|--------|----------|--------------------------------|--------------------------|---------------------------------------------|--------------------------------------|-------------------------------------|------------------------|---------------------|
| Cape Verde | 1995 | Male   | 65 to 69 | 23%<br>(11-39%)                | 77%<br>(61-89%)          | 2.4<br>(0.91-4.6)                           | 7%<br>(3.9-10%)                      | 8.3%<br>(4.8-13%)                   | 10<br>(5.6-16)         | 230<br>(130-360)    |
| Cape Verde | 1995 | Male   | 70 to 74 | 21%<br>(11-37%)                | 79%<br>(63-89%)          | 1.8<br>(0.63-3.8)                           | 5.7%<br>(2.7-9.3%)                   | 6.8%<br>(3.1-11%)                   | 6.9<br>(3.1-11)        | 130<br>(59-210)     |
| Cape Verde | 1995 | Male   | 75 to 79 | 19%<br>(9.2-35%)               | 81%<br>(65-91%)          | 1.3<br>(0.38-3.1)                           | 4%<br>(1.3-7.4%)                     | 4.6%<br>(1.5-8.5%)                  | 5.1<br>(1.6-9.4)       | 74<br>(24-130)      |
| Cape Verde | 1995 | Male   | 80 to 84 | 18%<br>(7.8-32%)               | 82%<br>(68-92%)          | 1.1<br>(0.33-2.5)                           | 3.4%<br>(1.2-6.4%)                   | 3.9%<br>(1.3-7.4%)                  | 3.3<br>(1.1-6.4)       | 36<br>(12-67)       |
| Cape Verde | 1995 | Male   | 85 to 89 | 16%<br>(7.6-30%)               | 84%<br>(70-92%)          | 0.93<br>(0.28-2.1)                          | 2.8%<br>(0.85-5.7%)                  | 3.2%<br>(0.92-6.6%)                 | 2.1<br>(0.59-4.2)      | 16<br>(4.8-32)      |
| Cape Verde | 1995 | Male   | 90 to 94 | 18%<br>(8.2-32%)               | 82%<br>(68-92%)          | 0.88<br>(0.23-2.2)                          | 2.2%<br>(0.45-5.1%)                  | 2.5%<br>(0.42-5.9%)                 | 0.69<br>(0.11-1.7)     | 3.7<br>(0.74-8.7)   |
| Cape Verde | 1995 | Male   | 95 plus  | 21%<br>(8.4-41%)               | 79%<br>(59-92%)          | 0.93<br>(0.18-2.7)                          | 2%<br>(0.17-5.4%)                    | 2.1%<br>(0.017-6.1%)                | 0.11<br>(0.00088-0.33) | 0.42<br>(0.037-1.2) |
| Cape Verde | 2000 | Female | All Ages | 14%<br>(10-19%)                | 86%<br>(81-90%)          | 1.1<br>(0.94-1.2)                           | 2.6%<br>(1.9-3.5%)                   | 5.6%<br>(3.4-7.9%)                  | 60<br>(34-89)          | 1700<br>(1200-2400) |
| Cape Verde | 2000 | Female | 15 to 19 | 13%<br>(6.1-23%)               | 87%<br>(77-94%)          | 0.85<br>(0.33-1.7)                          | 2%<br>(1.1-3.2%)                     | 3.5%<br>(1.4-6.8%)                  | 0.46<br>(0.16-0.89)    | 62<br>(35-100)      |
| Cape Verde | 2000 | Female | 20 to 24 | 16%<br>(7.3-29%)               | 84%<br>(71-93%)          | 1.4<br>(0.57-2.6)                           | 3.7%<br>(2.3-5.4%)                   | 5.2%<br>(2.4-8.9%)                  | 0.74<br>(0.33-1.4)     | 98<br>(60-150)      |
| Cape Verde | 2000 | Female | 25 to 29 | 18%<br>(8.3-33%)               | 82%<br>(67-92%)          | 1.7<br>(0.73-3)                             | 3.8%<br>(2.4-5.4%)                   | 5.3%<br>(2.6-8.9%)                  | 0.91<br>(0.44-1.5)     | 98<br>(61-150)      |
| Cape Verde | 2000 | Female | 30 to 34 | 21%<br>(9.1-37%)               | 79%<br>(63-91%)          | 2<br>(0.89-3.4)                             | 4%<br>(2.6-5.7%)                     | 5.9%<br>(3.1-9.3%)                  | 1.3<br>(0.71-2.1)      | 110<br>(72-170)     |
| Cape Verde | 2000 | Female | 35 to 39 | 23%<br>(11-39%)                | 77%<br>(61-89%)          | 2.2<br>(0.98-3.6)                           | 4.6%<br>(2.9-6.7%)                   | 7.7%<br>(4.3-12%)                   | 2.3<br>(1.2-3.5)       | 150<br>(92-220)     |
| Cape Verde | 2000 | Female | 40 to 44 | 25%<br>(12-43%)                | 75%<br>(57-88%)          | 2.3<br>(1-4.1)                              | 5.2%<br>(3.2-7.7%)                   | 9%<br>(5.2-14%)                     | 2.4<br>(1.3-3.9)       | 130<br>(80-200)     |
| Cape Verde | 2000 | Female | 45 to 49 | 25%<br>(11-42%)                | 75%<br>(58-89%)          | 2.4<br>(0.91-4.9)                           | 6%<br>(3.5-9.2%)                     | 10%<br>(5.8-16%)                    | 2.8<br>(1.5-4.5)       | 130<br>(72-200)     |
| Cape Verde | 2000 | Female | 50 to 54 | 26%<br>(12-45%)                | 74%<br>(55-88%)          | 2.6<br>(1-5.2)                              | 6.5%<br>(3.7-9.8%)                   | 11%<br>(6-16%)                      | 2<br>(1.1-3.3)         | 79<br>(43-130)      |
| Cape Verde | 2000 | Female | 55 to 59 | 26%<br>(13-45%)                | 74%<br>(55-87%)          | 2.8<br>(1.1-5.4)                            | 7.1%<br>(3.9-11%)                    | 11%<br>(6.1-17%)                    | 3.4<br>(1.8-5.6)       | 120<br>(63-190)     |
| Cape Verde | 2000 | Female | 60 to 64 | 27%<br>(14-46%)                | 73%<br>(54-86%)          | 2.8<br>(1.1-5.6)                            | 6.9%<br>(3.6-11%)                    | 10%<br>(5.3-16%)                    | 6.4<br>(3.3-11)        | 180<br>(95-310)     |
| Cape Verde | 2000 | Female | 65 to 69 | 28%<br>(14-46%)                | 72%<br>(54-86%)          | 2.6<br>(1-4.8)                              | 7.5%<br>(3.8-12%)                    | 11%<br>(5.4-17%)                    | 9<br>(4.3-15)          | 210<br>(110-350)    |
| Cape Verde | 2000 | Female | 70 to 74 | 26%<br>(13-42%)                | 74%<br>(58-87%)          | 2<br>(0.75-4.2)                             | 6.6%<br>(2.7-11%)                    | 8.8%<br>(3.5-15%)                   | 9.5<br>(3.7-17)        | 180<br>(72-330)     |
| Cape Verde | 2000 | Female | 75 to 79 | 22%<br>(11-40%)                | 78%<br>(60-89%)          | 1.6<br>(0.46-3.7)                           | 5.1%<br>(1.5-9.7%)                   | 6.6%<br>(1.9-13%)                   | 5.5<br>(1.6-11)        | 80<br>(24-160)      |
| Cape Verde | 2000 | Female | 80 to 84 | 21%<br>(9.2-37%)               | 79%<br>(63-91%)          | 1.4<br>(0.41-3)                             | 4.8%<br>(1.3-9.4%)                   | 6%<br>(1.6-12%)                     | 4.3<br>(1.1-8.5)       | 46<br>(13-90)       |

| Location   | Year | Sex    | Age      | Prevalence of current drinkers | Prevalence of abstainers | Population average of standard drinks daily | Percent of total attributable deaths | Percent of total attributable DALYs | Attributable deaths  | Attributable DALYs  |
|------------|------|--------|----------|--------------------------------|--------------------------|---------------------------------------------|--------------------------------------|-------------------------------------|----------------------|---------------------|
| Cape Verde | 2000 | Female | 85 to 89 | 21%<br>(10-37%)                | 79%<br>(63-90%)          | 1.4<br>(0.46-3.2)                           | 4.6%<br>(1.2-9.6%)                   | 5.7%<br>(1.4-12%)                   | 4.4<br>(1.1-9.3)     | 33<br>(8.3-68)      |
| Cape Verde | 2000 | Female | 90 to 94 | 24%<br>(11-42%)                | 76%<br>(58-89%)          | 1.6<br>(0.44-3.7)                           | 4.6%<br>(1-9.7%)                     | 5.6%<br>(1.1-12%)                   | 3<br>(0.61-6.7)      | 16<br>(3.4-34)      |
| Cape Verde | 2000 | Female | 95 plus  | 29%<br>(12-51%)                | 71%<br>(49-88%)          | 1.8<br>(0.42-4.8)                           | 4.6%<br>(0.44-11%)                   | 5.5%<br>(0.35-13%)                  | 1.1<br>(0.071-2.6)   | 3.8<br>(0.33-8.5)   |
| Cape Verde | 2000 | Male   | All Ages | 11%<br>(7.9-15%)               | 89%<br>(85-92%)          | 1.1<br>(0.99-1.3)                           | 3.8%<br>(3-4.8%)                     | 6%<br>(4.5-7.5%)                    | 90<br>(61-120)       | 3200<br>(2400-4200) |
| Cape Verde | 2000 | Male   | 15 to 19 | 8.6%<br>(4.1-16%)              | 91%<br>(84-96%)          | 0.69<br>(0.26-1.4)                          | 2.6%<br>(1.3-4.4%)                   | 3.4%<br>(1.4-6.2%)                  | 1.2<br>(0.47-2.4)    | 120<br>(59-210)     |
| Cape Verde | 2000 | Male   | 20 to 24 | 13%<br>(6-24%)                 | 87%<br>(76-94%)          | 1.4<br>(0.57-2.7)                           | 5.4%<br>(3.2-8.6%)                   | 6.6%<br>(3.3-11%)                   | 2.7<br>(1.3-4.8)     | 230<br>(130-370)    |
| Cape Verde | 2000 | Male   | 25 to 29 | 17%<br>(7.5-31%)               | 83%<br>(69-93%)          | 2.1<br>(0.9-3.9)                            | 7%<br>(4.3-10%)                      | 8.7%<br>(4.9-14%)                   | 3.9<br>(2-6.4)       | 290<br>(170-450)    |
| Cape Verde | 2000 | Male   | 30 to 34 | 20%<br>(8.5-36%)               | 80%<br>(64-91%)          | 2.7<br>(1.2-4.7)                            | 7.9%<br>(4.9-11%)                    | 9.8%<br>(5.7-15%)                   | 5<br>(2.8-8.1)       | 320<br>(200-500)    |
| Cape Verde | 2000 | Male   | 35 to 39 | 22%<br>(10-38%)                | 78%<br>(62-90%)          | 3<br>(1.3-5.3)                              | 9%<br>(5.8-13%)                      | 11%<br>(7.2-16%)                    | 6.4<br>(3.7-9.8)     | 360<br>(220-540)    |
| Cape Verde | 2000 | Male   | 40 to 44 | 23%<br>(12-40%)                | 77%<br>(60-88%)          | 3.3<br>(1.4-6.1)                            | 9.8%<br>(6.7-14%)                    | 12%<br>(8.6-17%)                    | 5.4<br>(3.4-8.3)     | 270<br>(170-400)    |
| Cape Verde | 2000 | Male   | 45 to 49 | 24%<br>(11-39%)                | 76%<br>(61-89%)          | 3.5<br>(1.3-7.5)                            | 12%<br>(7.7-16%)                     | 15%<br>(9.9-21%)                    | 7.4<br>(4.4-11)      | 320<br>(200-470)    |
| Cape Verde | 2000 | Male   | 50 to 54 | 24%<br>(11-43%)                | 76%<br>(57-89%)          | 3.6<br>(1.4-7.6)                            | 11%<br>(7-15%)                       | 14%<br>(8.9-19%)                    | 4.9<br>(3-7.5)       | 190<br>(120-280)    |
| Cape Verde | 2000 | Male   | 55 to 59 | 24%<br>(12-42%)                | 76%<br>(58-88%)          | 3.4<br>(1.3-6.9)                            | 11%<br>(7.2-15%)                     | 13%<br>(8.8-19%)                    | 5.3<br>(3.2-7.7)     | 170<br>(110-250)    |
| Cape Verde | 2000 | Male   | 60 to 64 | 24%<br>(12-41%)                | 76%<br>(59-88%)          | 3.1<br>(1.1-6.3)                            | 8.7%<br>(5.4-13%)                    | 11%<br>(6.5-15%)                    | 9.8<br>(5.7-15)      | 270<br>(160-420)    |
| Cape Verde | 2000 | Male   | 65 to 69 | 24%<br>(12-40%)                | 76%<br>(60-88%)          | 2.5<br>(1-4.9)                              | 7.6%<br>(4.4-11%)                    | 9.1%<br>(5.2-14%)                   | 12<br>(6.8-19)       | 280<br>(160-440)    |
| Cape Verde | 2000 | Male   | 70 to 74 | 22%<br>(12-38%)                | 78%<br>(62-88%)          | 1.9<br>(0.7-4)                              | 6.3%<br>(3-10%)                      | 7.4%<br>(3.5-12%)                   | 12<br>(5.2-20)       | 220<br>(97-370)     |
| Cape Verde | 2000 | Male   | 75 to 79 | 20%<br>(9.9-36%)               | 80%<br>(64-90%)          | 1.4<br>(0.4-3.3)                            | 4.3%<br>(1.3-8.1%)                   | 5%<br>(1.5-9.4%)                    | 6.1<br>(1.7-12)      | 88<br>(26-170)      |
| Cape Verde | 2000 | Male   | 80 to 84 | 18%<br>(8.4-33%)               | 82%<br>(67-92%)          | 1.2<br>(0.35-2.7)                           | 3.7%<br>(1.1-7.1%)                   | 4.3%<br>(1.3-8.3%)                  | 3.9<br>(1.1-7.7)     | 42<br>(12-81)       |
| Cape Verde | 2000 | Male   | 85 to 89 | 17%<br>(8-31%)                 | 83%<br>(69-92%)          | 1<br>(0.31-2.4)                             | 3.2%<br>(0.88-6.4%)                  | 3.7%<br>(0.94-7.4%)                 | 2.4<br>(0.63-4.8)    | 18<br>(5.1-37)      |
| Cape Verde | 2000 | Male   | 90 to 94 | 19%<br>(8.8-34%)               | 81%<br>(66-91%)          | 0.97<br>(0.26-2.4)                          | 2.7%<br>(0.57-6%)                    | 3%<br>(0.55-7.2%)                   | 0.96<br>(0.17-2.3)   | 5.1<br>(1.1-12)     |
| Cape Verde | 2000 | Male   | 95 plus  | 23%<br>(9.1-44%)               | 77%<br>(56-91%)          | 1<br>(0.2-2.9)                              | 2.5%<br>(0.39-6.7%)                  | 2.8%<br>(0.29-7.7%)                 | 0.25<br>(0.026-0.68) | 0.9<br>(0.14-2.4)   |
| Cape Verde | 2005 | Female | All Ages | 15%<br>(11-19%)                | 85%<br>(81-89%)          | 1.2<br>(1.1-1.4)                            | 2.9%<br>(2.2-3.9%)                   | 6.1%<br>(3.8-8.8%)                  | 65<br>(40-97)        | 1900<br>(1400-2500) |

| Location   | Year | Sex    | Age      | Prevalence of current drinkers | Prevalence of abstainers | Population average of standard drinks daily | Percent of total attributable deaths | Percent of total attributable DALYs | Attributable deaths | Attributable DALYs  |
|------------|------|--------|----------|--------------------------------|--------------------------|---------------------------------------------|--------------------------------------|-------------------------------------|---------------------|---------------------|
| Cape Verde | 2005 | Female | 15 to 19 | 13%<br>(5.9-22%)               | 87%<br>(78-94%)          | 0.95<br>(0.37-1.9)                          | 1.9%<br>(1.1-3.1%)                   | 3.4%<br>(1.4-6.4%)                  | 0.49<br>(0.19-0.9)  | 71<br>(40-110)      |
| Cape Verde | 2005 | Female | 20 to 24 | 16%<br>(7.5-29%)               | 84%<br>(71-92%)          | 1.5<br>(0.65-2.9)                           | 3.6%<br>(2.4-5.2%)                   | 5.2%<br>(2.4-8.9%)                  | 0.8<br>(0.38-1.4)   | 120<br>(73-170)     |
| Cape Verde | 2005 | Female | 25 to 29 | 18%<br>(8.2-33%)               | 82%<br>(67-92%)          | 1.9<br>(0.81-3.4)                           | 3.7%<br>(2.4-5.3%)                   | 5%<br>(2.4-8.5%)                    | 0.86<br>(0.43-1.4)  | 100<br>(64-150)     |
| Cape Verde | 2005 | Female | 30 to 34 | 21%<br>(8.8-38%)               | 79%<br>(62-91%)          | 2.2<br>(0.97-3.9)                           | 3.7%<br>(2.4-5.3%)                   | 5.4%<br>(2.8-8.4%)                  | 1.1<br>(0.58-1.7)   | 96<br>(63-140)      |
| Cape Verde | 2005 | Female | 35 to 39 | 23%<br>(10-40%)                | 77%<br>(60-90%)          | 2.4<br>(1-4.1)                              | 4.2%<br>(2.7-6%)                     | 6.9%<br>(3.8-11%)                   | 1.7<br>(0.96-2.6)   | 120<br>(76-170)     |
| Cape Verde | 2005 | Female | 40 to 44 | 24%<br>(12-42%)                | 76%<br>(58-88%)          | 2.6<br>(1.1-4.6)                            | 4.8%<br>(3.1-7.1%)                   | 8.3%<br>(5-13%)                     | 2.8<br>(1.6-4.4)    | 160<br>(99-240)     |
| Cape Verde | 2005 | Female | 45 to 49 | 25%<br>(11-42%)                | 75%<br>(58-89%)          | 2.7<br>(1-5.2)                              | 5.6%<br>(3.4-8.4%)                   | 9.7%<br>(5.7-15%)                   | 3.1<br>(1.8-4.9)    | 150<br>(89-230)     |
| Cape Verde | 2005 | Female | 50 to 54 | 26%<br>(12-45%)                | 74%<br>(55-88%)          | 2.8<br>(1.2-5.5)                            | 6.3%<br>(3.7-9.6%)                   | 11%<br>(6.2-16%)                    | 3.5<br>(1.9-5.7)    | 140<br>(79-230)     |
| Cape Verde | 2005 | Female | 55 to 59 | 26%<br>(13-46%)                | 74%<br>(54-87%)          | 3.1<br>(1.2-6.2)                            | 6.9%<br>(3.9-11%)                    | 11%<br>(6.1-17%)                    | 2.5<br>(1.4-4.2)    | 88<br>(48-140)      |
| Cape Verde | 2005 | Female | 60 to 64 | 28%<br>(13-47%)                | 72%<br>(53-87%)          | 3.2<br>(1.2-6.6)                            | 6.9%<br>(3.8-11%)                    | 10%<br>(5.8-16%)                    | 4.5<br>(2.4-7.6)    | 130<br>(71-220)     |
| Cape Verde | 2005 | Female | 65 to 69 | 28%<br>(14-47%)                | 72%<br>(53-86%)          | 2.9<br>(1.1-5.5)                            | 7.6%<br>(4-12%)                      | 11%<br>(5.8-17%)                    | 9.5<br>(4.7-16)     | 230<br>(110-380)    |
| Cape Verde | 2005 | Female | 70 to 74 | 26%<br>(14-43%)                | 74%<br>(57-86%)          | 2.3<br>(0.8-4.9)                            | 6.8%<br>(2.9-11%)                    | 9.3%<br>(3.9-16%)                   | 11<br>(4.7-20)      | 210<br>(91-380)     |
| Cape Verde | 2005 | Female | 75 to 79 | 22%<br>(11-40%)                | 78%<br>(60-89%)          | 1.8<br>(0.51-4.1)                           | 5.3%<br>(1.7-9.7%)                   | 7%<br>(2.3-13%)                     | 9.3<br>(3-17)       | 140<br>(45-250)     |
| Cape Verde | 2005 | Female | 80 to 84 | 20%<br>(9.2-37%)               | 80%<br>(63-91%)          | 1.5<br>(0.44-3.4)                           | 5%<br>(1.5-9.3%)                     | 6.3%<br>(1.9-12%)                   | 5.8<br>(1.7-11)     | 62<br>(19-120)      |
| Cape Verde | 2005 | Female | 85 to 89 | 21%<br>(9.8-37%)               | 79%<br>(63-90%)          | 1.5<br>(0.5-3.5)                            | 4.9%<br>(1.4-9.8%)                   | 6.1%<br>(1.8-12%)                   | 4<br>(1.2-8)        | 30<br>(9-60)        |
| Cape Verde | 2005 | Female | 90 to 94 | 24%<br>(11-42%)                | 76%<br>(58-89%)          | 1.7<br>(0.49-4.1)                           | 4.8%<br>(1.2-9.9%)                   | 5.9%<br>(1.3-12%)                   | 2.9<br>(0.63-6)     | 15<br>(3.5-30)      |
| Cape Verde | 2005 | Female | 95 plus  | 29%<br>(12-52%)                | 71%<br>(48-88%)          | 2<br>(0.47-5.2)                             | 4.9%<br>(0.66-11%)                   | 5.9%<br>(0.63-13%)                  | 1.3<br>(0.14-2.9)   | 4.5<br>(0.61-9.8)   |
| Cape Verde | 2005 | Male   | All Ages | 11%<br>(8.3-15%)               | 89%<br>(85-92%)          | 1.4<br>(1.2-1.5)                            | 4.6%<br>(3.7-5.7%)                   | 6.7%<br>(5.1-8.5%)                  | 110<br>(78-150)     | 4000<br>(3000-5200) |
| Cape Verde | 2005 | Male   | 15 to 19 | 8.5%<br>(3.9-16%)              | 92%<br>(84-96%)          | 0.76<br>(0.28-1.5)                          | 2.7%<br>(1.4-4.7%)                   | 3.5%<br>(1.5-6.6%)                  | 1.6<br>(0.63-3.2)   | 150<br>(75-270)     |
| Cape Verde | 2005 | Male   | 20 to 24 | 13%<br>(5.9-24%)               | 87%<br>(76-94%)          | 1.6<br>(0.64-3)                             | 5.7%<br>(3.3-9%)                     | 6.9%<br>(3.5-12%)                   | 3.9<br>(1.8-6.9)    | 320<br>(170-530)    |
| Cape Verde | 2005 | Male   | 25 to 29 | 17%<br>(8.1-30%)               | 83%<br>(70-92%)          | 2.4<br>(1-4.4)                              | 7.3%<br>(4.5-11%)                    | 9.2%<br>(5.2-14%)                   | 4.5<br>(2.4-7.6)    | 330<br>(200-530)    |
| Cape Verde | 2005 | Male   | 30 to 34 | 20%<br>(9-36%)                 | 80%<br>(64-91%)          | 3.1<br>(1.4-5.2)                            | 8.2%<br>(5.2-12%)                    | 10%<br>(6.2-16%)                    | 5.5<br>(3-8.7)      | 360<br>(210-550)    |

| Location   | Year | Sex    | Age      | Prevalence of current drinkers | Prevalence of abstainers | Population average of standard drinks daily | Percent of total attributable deaths | Percent of total attributable DALYs | Attributable deaths  | Attributable DALYs  |
|------------|------|--------|----------|--------------------------------|--------------------------|---------------------------------------------|--------------------------------------|-------------------------------------|----------------------|---------------------|
| Cape Verde | 2005 | Male   | 35 to 39 | 22%<br>(10-38%)                | 78%<br>(62-90%)          | 3.4<br>(1.4-6)                              | 9.1%<br>(6-13%)                      | 12%<br>(7.4-17%)                    | 7<br>(4.1-11)        | 400<br>(250-600)    |
| Cape Verde | 2005 | Male   | 40 to 44 | 23%<br>(12-40%)                | 77%<br>(60-88%)          | 3.6<br>(1.6-6.5)                            | 10%<br>(6.8-14%)                     | 13%<br>(9-18%)                      | 8.5<br>(5.4-13)      | 420<br>(280-630)    |
| Cape Verde | 2005 | Male   | 45 to 49 | 24%<br>(11-39%)                | 76%<br>(61-89%)          | 3.9<br>(1.5-7.6)                            | 12%<br>(7.8-16%)                     | 15%<br>(9.7-20%)                    | 7.9<br>(5-12)        | 340<br>(220-500)    |
| Cape Verde | 2005 | Male   | 50 to 54 | 24%<br>(11-43%)                | 76%<br>(57-89%)          | 3.9<br>(1.6-8.1)                            | 11%<br>(7.5-16%)                     | 14%<br>(9.4-19%)                    | 9.1<br>(5.7-13)      | 350<br>(220-500)    |
| Cape Verde | 2005 | Male   | 55 to 59 | 24%<br>(12-42%)                | 76%<br>(58-88%)          | 3.8<br>(1.4-7.6)                            | 11%<br>(7.4-15%)                     | 13%<br>(9.1-19%)                    | 6.5<br>(4.1-9.4)     | 210<br>(140-310)    |
| Cape Verde | 2005 | Male   | 60 to 64 | 24%<br>(11-41%)                | 76%<br>(59-89%)          | 3.4<br>(1.2-7.2)                            | 8.9%<br>(5.7-13%)                    | 11%<br>(6.8-16%)                    | 6.6<br>(4-10)        | 190<br>(110-280)    |
| Cape Verde | 2005 | Male   | 65 to 69 | 24%<br>(12-40%)                | 76%<br>(60-88%)          | 2.8<br>(1.1-5.7)                            | 7.9%<br>(4.7-12%)                    | 9.4%<br>(5.7-14%)                   | 14<br>(7.9-21)       | 320<br>(190-480)    |
| Cape Verde | 2005 | Male   | 70 to 74 | 22%<br>(11-37%)                | 78%<br>(63-89%)          | 2.1<br>(0.74-4.4)                           | 6.7%<br>(3.3-10%)                    | 7.9%<br>(3.8-12%)                   | 16<br>(7.7-26)       | 300<br>(140-490)    |
| Cape Verde | 2005 | Male   | 75 to 79 | 20%<br>(9.7-36%)               | 80%<br>(64-90%)          | 1.6<br>(0.46-3.7)                           | 4.8%<br>(1.7-8.5%)                   | 5.5%<br>(1.9-9.6%)                  | 11<br>(3.6-20)       | 160<br>(52-290)     |
| Cape Verde | 2005 | Male   | 80 to 84 | 18%<br>(8.2-33%)               | 82%<br>(67-92%)          | 1.3<br>(0.38-2.9)                           | 4.1%<br>(1.3-7.5%)                   | 4.8%<br>(1.5-8.6%)                  | 6.1<br>(2-11)        | 65<br>(21-120)      |
| Cape Verde | 2005 | Male   | 85 to 89 | 17%<br>(8.1-32%)               | 83%<br>(68-92%)          | 1.1<br>(0.34-2.7)                           | 3.6%<br>(1.1-7%)                     | 4.2%<br>(1.1-8.2%)                  | 2.5<br>(0.69-4.9)    | 19<br>(5.5-37)      |
| Cape Verde | 2005 | Male   | 90 to 94 | 19%<br>(8.8-33%)               | 81%<br>(67-91%)          | 1.1<br>(0.29-2.6)                           | 3%<br>(0.73-6.4%)                    | 3.4%<br>(0.76-7.4%)                 | 0.96<br>(0.22-2.1)   | 5.1<br>(1.3-11)     |
| Cape Verde | 2005 | Male   | 95 plus  | 23%<br>(9.1-43%)               | 77%<br>(57-91%)          | 1.2<br>(0.24-3.2)                           | 2.8%<br>(0.5-6.9%)                   | 3.1%<br>(0.39-7.8%)                 | 0.28<br>(0.035-0.71) | 1<br>(0.17-2.5)     |
| Cape Verde | 2010 | Female | All Ages | 15%<br>(11-20%)                | 85%<br>(80-89%)          | 1.3<br>(1.1-1.5)                            | 3.1%<br>(2.3-4.1%)                   | 6.1%<br>(3.5-9%)                    | 65<br>(37-94)        | 1800<br>(1300-2400) |
| Cape Verde | 2010 | Female | 15 to 19 | 12%<br>(5.8-22%)               | 88%<br>(78-94%)          | 0.94<br>(0.35-2)                            | 1.8%<br>(1.1-2.9%)                   | 3.1%<br>(1.2-5.8%)                  | 0.41<br>(0.16-0.78)  | 65<br>(38-100)      |
| Cape Verde | 2010 | Female | 20 to 24 | 16%<br>(6.9-29%)               | 84%<br>(71-93%)          | 1.5<br>(0.6-2.9)                            | 3.5%<br>(2.3-4.9%)                   | 4.8%<br>(2.2-8.3%)                  | 0.72<br>(0.33-1.2)   | 120<br>(76-180)     |
| Cape Verde | 2010 | Female | 25 to 29 | 18%<br>(8-33%)                 | 82%<br>(67-92%)          | 1.9<br>(0.78-3.4)                           | 3.5%<br>(2.4-4.9%)                   | 4.6%<br>(2.3-7.8%)                  | 0.84<br>(0.46-1.3)   | 110<br>(76-160)     |
| Cape Verde | 2010 | Female | 30 to 34 | 20%<br>(8.9-37%)               | 80%<br>(63-91%)          | 2.2<br>(0.94-3.8)                           | 3.4%<br>(2.3-4.8%)                   | 5%<br>(2.6-7.9%)                    | 0.97<br>(0.57-1.5)   | 99<br>(66-140)      |
| Cape Verde | 2010 | Female | 35 to 39 | 23%<br>(11-39%)                | 77%<br>(61-89%)          | 2.4<br>(1-4.1)                              | 3.9%<br>(2.6-5.4%)                   | 6.6%<br>(3.6-10%)                   | 1.4<br>(0.8-2)       | 100<br>(67-140)     |
| Cape Verde | 2010 | Female | 40 to 44 | 24%<br>(12-41%)                | 76%<br>(59-88%)          | 2.5<br>(1-4.6)                              | 4.4%<br>(2.9-6.4%)                   | 8.1%<br>(4.9-12%)                   | 2.2<br>(1.3-3.3)     | 130<br>(86-190)     |
| Cape Verde | 2010 | Female | 45 to 49 | 25%<br>(11-41%)                | 75%<br>(59-89%)          | 2.6<br>(1-5.1)                              | 5.3%<br>(3.2-7.8%)                   | 9.5%<br>(5.4-14%)                   | 3.6<br>(2-5.5)       | 180<br>(100-260)    |
| Cape Verde | 2010 | Female | 50 to 54 | 25%<br>(12-44%)                | 75%<br>(56-88%)          | 2.8<br>(1.1-5.5)                            | 5.9%<br>(3.4-8.8%)                   | 10%<br>(5.8-15%)                    | 3.9<br>(2.2-6.1)     | 170<br>(95-250)     |

| Location   | Year | Sex    | Age      | Prevalence of current drinkers | Prevalence of abstainers | Population average of standard drinks daily | Percent of total attributable deaths | Percent of total attributable DALYs | Attributable deaths | Attributable DALYs  |
|------------|------|--------|----------|--------------------------------|--------------------------|---------------------------------------------|--------------------------------------|-------------------------------------|---------------------|---------------------|
| Cape Verde | 2010 | Female | 55 to 59 | 26%<br>(13-44%)                | 74%<br>(56-87%)          | 3<br>(1.2-6.1)                              | 6.5%<br>(3.7-10%)                    | 11%<br>(5.9-16%)                    | 4.1<br>(2.2-6.7)    | 150<br>(79-230)     |
| Cape Verde | 2010 | Female | 60 to 64 | 27%<br>(14-46%)                | 73%<br>(54-86%)          | 3.1<br>(1.1-6.5)                            | 6.5%<br>(3.6-11%)                    | 9.7%<br>(5.3-15%)                   | 3<br>(1.6-4.8)      | 88<br>(47-140)      |
| Cape Verde | 2010 | Female | 65 to 69 | 28%<br>(15-46%)                | 72%<br>(54-85%)          | 2.8<br>(1.1-5.5)                            | 7.2%<br>(3.7-12%)                    | 10%<br>(5.5-17%)                    | 6.3<br>(3.2-10)     | 150<br>(77-250)     |
| Cape Verde | 2010 | Female | 70 to 74 | 26%<br>(14-43%)                | 74%<br>(57-86%)          | 2.3<br>(0.76-4.9)                           | 6.3%<br>(2.8-11%)                    | 8.7%<br>(3.6-15%)                   | 10<br>(4.1-17)      | 190<br>(79-330)     |
| Cape Verde | 2010 | Female | 75 to 79 | 22%<br>(11-39%)                | 78%<br>(61-89%)          | 1.7<br>(0.47-4.3)                           | 4.9%<br>(1.5-9.1%)                   | 6.6%<br>(2-12%)                     | 9.9<br>(3-18)       | 150<br>(46-280)     |
| Cape Verde | 2010 | Female | 80 to 84 | 20%<br>(9-36%)                 | 80%<br>(64-91%)          | 1.5<br>(0.44-3.3)                           | 4.7%<br>(1.3-8.8%)                   | 6%<br>(1.7-11%)                     | 7.7<br>(2.1-14)     | 84<br>(24-150)      |
| Cape Verde | 2010 | Female | 85 to 89 | 21%<br>(10-36%)                | 79%<br>(64-90%)          | 1.5<br>(0.51-3.4)                           | 4.7%<br>(1.4-9.4%)                   | 5.8%<br>(1.6-12%)                   | 5.6<br>(1.6-12)     | 42<br>(13-86)       |
| Cape Verde | 2010 | Female | 90 to 94 | 24%<br>(11-41%)                | 76%<br>(59-89%)          | 1.7<br>(0.45-4)                             | 4.6%<br>(1-9.5%)                     | 5.7%<br>(1.1-12%)                   | 2.7<br>(0.52-5.7)   | 14<br>(2.9-29)      |
| Cape Verde | 2010 | Female | 95 plus  | 28%<br>(12-51%)                | 72%<br>(49-88%)          | 1.9<br>(0.44-5.1)                           | 4.7%<br>(0.66-10%)                   | 5.6%<br>(0.62-13%)                  | 1.2<br>(0.14-2.8)   | 4.3<br>(0.59-9.6)   |
| Cape Verde | 2010 | Male   | All Ages | 12%<br>(9-16%)                 | 88%<br>(84-91%)          | 1.5<br>(1.3-1.8)                            | 5.2%<br>(4.3-6.4%)                   | 7.1%<br>(5.5-9%)                    | 120<br>(92-160)     | 4400<br>(3500-5500) |
| Cape Verde | 2010 | Male   | 15 to 19 | 8.6%<br>(4.1-16%)              | 91%<br>(84-96%)          | 0.78<br>(0.29-1.6)                          | 2.7%<br>(1.4-4.7%)                   | 3.6%<br>(1.5-6.7%)                  | 1.6<br>(0.64-3.1)   | 150<br>(74-260)     |
| Cape Verde | 2010 | Male   | 20 to 24 | 13%<br>(6.1-24%)               | 87%<br>(76-94%)          | 1.6<br>(0.63-3.1)                           | 5.7%<br>(3.3-9%)                     | 6.9%<br>(3.4-12%)                   | 4.5<br>(2.1-8)      | 370<br>(200-620)    |
| Cape Verde | 2010 | Male   | 25 to 29 | 17%<br>(7.8-30%)               | 83%<br>(70-92%)          | 2.4<br>(1-4.2)                              | 7.2%<br>(4.5-11%)                    | 9.1%<br>(5.2-14%)                   | 5.9<br>(3.1-9.7)    | 440<br>(260-680)    |
| Cape Verde | 2010 | Male   | 30 to 34 | 20%<br>(8.8-35%)               | 80%<br>(65-91%)          | 3<br>(1.4-5.3)                              | 8.1%<br>(5.1-12%)                    | 10%<br>(6.2-16%)                    | 6.1<br>(3.3-9.6)    | 400<br>(240-600)    |
| Cape Verde | 2010 | Male   | 35 to 39 | 22%<br>(10-38%)                | 78%<br>(62-90%)          | 3.4<br>(1.4-6)                              | 9.1%<br>(6-13%)                      | 12%<br>(7.6-17%)                    | 7<br>(4.1-10)       | 400<br>(250-590)    |
| Cape Verde | 2010 | Male   | 40 to 44 | 23%<br>(11-40%)                | 77%<br>(60-89%)          | 3.6<br>(1.5-6.7)                            | 9.9%<br>(6.9-14%)                    | 13%<br>(9.1-18%)                    | 8.4<br>(5.5-12)     | 420<br>(280-610)    |
| Cape Verde | 2010 | Male   | 45 to 49 | 23%<br>(11-39%)                | 77%<br>(61-89%)          | 3.9<br>(1.5-7.7)                            | 12%<br>(7.9-16%)                     | 15%<br>(10-21%)                     | 12<br>(7.5-16)      | 510<br>(330-710)    |
| Cape Verde | 2010 | Male   | 50 to 54 | 24%<br>(11-42%)                | 76%<br>(58-89%)          | 3.9<br>(1.5-8.1)                            | 11%<br>(7.5-15%)                     | 14%<br>(9.4-19%)                    | 9.7<br>(6.3-14)     | 370<br>(240-510)    |
| Cape Verde | 2010 | Male   | 55 to 59 | 24%<br>(12-42%)                | 76%<br>(58-88%)          | 3.9<br>(1.4-7.9)                            | 11%<br>(7.5-15%)                     | 14%<br>(9.2-19%)                    | 11<br>(7.2-15)      | 360<br>(240-500)    |
| Cape Verde | 2010 | Male   | 60 to 64 | 24%<br>(11-42%)                | 76%<br>(58-89%)          | 3.5<br>(1.2-7.4)                            | 8.8%<br>(5.7-13%)                    | 11%<br>(6.7-16%)                    | 6.4<br>(4.1-9.5)    | 180<br>(110-270)    |
| Cape Verde | 2010 | Male   | 65 to 69 | 24%<br>(12-40%)                | 76%<br>(60-88%)          | 2.8<br>(1-5.8)                              | 7.9%<br>(4.7-12%)                    | 9.3%<br>(5.6-14%)                   | 8.8<br>(5.2-14)     | 200<br>(120-310)    |
| Cape Verde | 2010 | Male   | 70 to 74 | 22%<br>(11-37%)                | 78%<br>(63-89%)          | 2.1<br>(0.72-4.6)                           | 6.6%<br>(3.1-10%)                    | 7.7%<br>(3.6-12%)                   | 16<br>(7.9-27)      | 300<br>(150-490)    |

| Location   | Year | Sex    | Age      | Prevalence of current drinkers | Prevalence of abstainers | Population average of standard drinks daily | Percent of total attributable deaths | Percent of total attributable DALYs | Attributable deaths | Attributable DALYs  |
|------------|------|--------|----------|--------------------------------|--------------------------|---------------------------------------------|--------------------------------------|-------------------------------------|---------------------|---------------------|
| Cape Verde | 2010 | Male   | 75 to 79 | 20%<br>(9.4-36%)               | 80%<br>(64-91%)          | 1.6<br>(0.44-3.8)                           | 4.6%<br>(1.6-8.4%)                   | 5.3%<br>(1.8-9.7%)                  | 14<br>(4.6-26)      | 200<br>(69-370)     |
| Cape Verde | 2010 | Male   | 80 to 84 | 18%<br>(8.3-33%)               | 82%<br>(67-92%)          | 1.3<br>(0.37-2.9)                           | 4%<br>(1.3-7.2%)                     | 4.6%<br>(1.4-8.3%)                  | 8.4<br>(2.7-15)     | 90<br>(29-160)      |
| Cape Verde | 2010 | Male   | 85 to 89 | 17%<br>(8.1-31%)               | 83%<br>(69-92%)          | 1.1<br>(0.34-2.5)                           | 3.5%<br>(1-6.7%)                     | 4%<br>(1-7.8%)                      | 3.4<br>(0.9-6.7)    | 26<br>(7.3-50)      |
| Cape Verde | 2010 | Male   | 90 to 94 | 19%<br>(8.7-33%)               | 81%<br>(67-91%)          | 1.1<br>(0.28-2.7)                           | 2.9%<br>(0.64-6.4%)                  | 3.3%<br>(0.65-7.4%)                 | 0.86<br>(0.17-1.9)  | 4.6<br>(1-10)       |
| Cape Verde | 2010 | Male   | 95 plus  | 22%<br>(9.1-43%)               | 78%<br>(57-91%)          | 1.1<br>(0.23-3.3)                           | 2.7%<br>(0.43-6.7%)                  | 2.9%<br>(0.32-7.7%)                 | 0.23<br>(0.025-0.6) | 0.83<br>(0.13-2.1)  |
| Cape Verde | 2016 | Female | All Ages | 15%<br>(11-20%)                | 85%<br>(80-89%)          | 1.4<br>(0.86-2.1)                           | 3.2%<br>(2.3-4.2%)                   | 5.8%<br>(2.9-8.9%)                  | 65<br>(32-100)      | 1900<br>(1300-2500) |
| Cape Verde | 2016 | Female | 15 to 19 | 12%<br>(5.8-22%)               | 88%<br>(78-94%)          | 0.92<br>(0.3-2.1)                           | 1.7%<br>(0.99-2.8%)                  | 2.9%<br>(1-5.8%)                    | 0.3<br>(0.1-0.61)   | 51<br>(29-87)       |
| Cape Verde | 2016 | Female | 20 to 24 | 16%<br>(6.8-29%)               | 84%<br>(71-93%)          | 1.5<br>(0.5-3.1)                            | 3.3%<br>(2.1-4.8%)                   | 4.2%<br>(1.8-7.5%)                  | 0.64<br>(0.27-1.2)  | 120<br>(72-180)     |
| Cape Verde | 2016 | Female | 25 to 29 | 18%<br>(7.9-32%)               | 82%<br>(68-92%)          | 1.8<br>(0.73-3.7)                           | 3.4%<br>(2.3-4.6%)                   | 4.3%<br>(2.1-7.2%)                  | 0.87<br>(0.46-1.4)  | 130<br>(87-190)     |
| Cape Verde | 2016 | Female | 30 to 34 | 20%<br>(9-37%)                 | 80%<br>(63-91%)          | 2.1<br>(0.9-4.2)                            | 3.3%<br>(2.3-4.6%)                   | 4.8%<br>(2.7-7.7%)                  | 1.1<br>(0.63-1.7)   | 120<br>(80-170)     |
| Cape Verde | 2016 | Female | 35 to 39 | 23%<br>(11-40%)                | 77%<br>(60-89%)          | 2.4<br>(0.9-4.6)                            | 3.7%<br>(2.4-5.3%)                   | 6.4%<br>(3.6-10%)                   | 1.4<br>(0.81-2.2)   | 110<br>(72-160)     |
| Cape Verde | 2016 | Female | 40 to 44 | 24%<br>(12-42%)                | 76%<br>(58-88%)          | 2.5<br>(0.94-5.2)                           | 4.1%<br>(2.6-6%)                     | 7.7%<br>(4.6-12%)                   | 1.9<br>(1.1-2.8)    | 120<br>(74-170)     |
| Cape Verde | 2016 | Female | 45 to 49 | 25%<br>(11-41%)                | 75%<br>(59-89%)          | 2.5<br>(0.95-5.5)                           | 4.8%<br>(2.9-7.2%)                   | 8.9%<br>(5-13%)                     | 2.9<br>(1.6-4.6)    | 150<br>(84-220)     |
| Cape Verde | 2016 | Female | 50 to 54 | 25%<br>(12-44%)                | 75%<br>(56-88%)          | 2.7<br>(1-5.5)                              | 5.4%<br>(3.2-8.1%)                   | 9.4%<br>(5.4-14%)                   | 4.6<br>(2.4-7.4)    | 190<br>(110-310)    |
| Cape Verde | 2016 | Female | 55 to 59 | 25%<br>(13-44%)                | 75%<br>(56-87%)          | 2.9<br>(1-6.1)                              | 5.9%<br>(3.2-9.1%)                   | 9.6%<br>(5.2-15%)                   | 5.3<br>(2.8-8.7)    | 190<br>(100-300)    |
| Cape Verde | 2016 | Female | 60 to 64 | 27%<br>(13-45%)                | 73%<br>(55-87%)          | 3<br>(1-6.8)                                | 5.9%<br>(3.1-9.5%)                   | 8.8%<br>(4.4-14%)                   | 5.4<br>(2.6-9)      | 160<br>(80-270)     |
| Cape Verde | 2016 | Female | 65 to 69 | 27%<br>(14-45%)                | 73%<br>(55-86%)          | 2.7<br>(0.95-5.9)                           | 6.5%<br>(3.1-11%)                    | 9.3%<br>(4.3-15%)                   | 4.2<br>(1.9-7.1)    | 100<br>(48-170)     |
| Cape Verde | 2016 | Female | 70 to 74 | 25%<br>(13-42%)                | 75%<br>(58-87%)          | 2.2<br>(0.69-5.2)                           | 5.6%<br>(2-9.9%)                     | 7.7%<br>(2.7-14%)                   | 5.8<br>(1.9-10)     | 110<br>(39-200)     |
| Cape Verde | 2016 | Female | 75 to 79 | 22%<br>(10-39%)                | 78%<br>(61-90%)          | 1.7<br>(0.42-4.5)                           | 4.5%<br>(1.3-8.6%)                   | 5.9%<br>(1.6-11%)                   | 8.3<br>(2.2-16)     | 120<br>(34-240)     |
| Cape Verde | 2016 | Female | 80 to 84 | 20%<br>(9.2-36%)               | 80%<br>(64-91%)          | 1.5<br>(0.41-3.6)                           | 4.3%<br>(1.1-8.4%)                   | 5.4%<br>(1.4-11%)                   | 8.5<br>(2.1-17)     | 92<br>(24-180)      |
| Cape Verde | 2016 | Female | 85 to 89 | 21%<br>(9.6-37%)               | 79%<br>(63-90%)          | 1.5<br>(0.42-3.7)                           | 4.2%<br>(1.1-8.7%)                   | 5.2%<br>(1.2-11%)                   | 8.5<br>(1.9-18)     | 64<br>(16-130)      |
| Cape Verde | 2016 | Female | 90 to 94 | 23%<br>(11-40%)                | 77%<br>(60-89%)          | 1.6<br>(0.43-4.3)                           | 4.1%<br>(0.72-9%)                    | 5%<br>(0.78-11%)                    | 4.6<br>(0.72-10)    | 24<br>(4.1-52)      |

| Location   | Year | Sex    | Age      | Prevalence of current drinkers | Prevalence of abstainers | Population average of standard drinks daily | Percent of total attributable deaths | Percent of total attributable DALYs | Attributable deaths  | Attributable DALYs    |
|------------|------|--------|----------|--------------------------------|--------------------------|---------------------------------------------|--------------------------------------|-------------------------------------|----------------------|-----------------------|
| Cape Verde | 2016 | Female | 95 plus  | 28%<br>(11-51%)                | 72%<br>(49-89%)          | 1.9<br>(0.41-5.3)                           | 4.3%<br>(0.46-10%)                   | 5.1%<br>(0.33-12%)                  | 1.3<br>(0.082-3.1)   | 4.5<br>(0.47-10)      |
| Cape Verde | 2016 | Male   | All Ages | 13%<br>(9.3-17%)               | 87%<br>(83-91%)          | 1.6<br>(1-2.5)                              | 5.5%<br>(4.4-6.9%)                   | 7%<br>(5.3-8.9%)                    | 120<br>(86-160)      | 4500<br>(3500-5900)   |
| Cape Verde | 2016 | Male   | 15 to 19 | 8.3%<br>(4-16%)                | 92%<br>(84-96%)          | 0.75<br>(0.24-1.7)                          | 2.5%<br>(1.3-4.5%)                   | 3.3%<br>(1.3-6.2%)                  | 1.3<br>(0.49-2.5)    | 120<br>(57-220)       |
| Cape Verde | 2016 | Male   | 20 to 24 | 13%<br>(5.7-23%)               | 87%<br>(77-94%)          | 1.5<br>(0.51-3.3)                           | 5.2%<br>(2.9-8.4%)                   | 6.2%<br>(2.7-11%)                   | 3.7<br>(1.6-6.8)     | 320<br>(170-530)      |
| Cape Verde | 2016 | Male   | 25 to 29 | 16%<br>(7.7-29%)               | 84%<br>(71-92%)          | 2.3<br>(0.88-4.6)                           | 6.5%<br>(4.1-9.6%)                   | 8.2%<br>(4.4-13%)                   | 5.4<br>(2.9-8.8)     | 420<br>(260-650)      |
| Cape Verde | 2016 | Male   | 30 to 34 | 19%<br>(8.7-34%)               | 81%<br>(66-91%)          | 2.9<br>(1.2-5.5)                            | 7.4%<br>(4.8-11%)                    | 9.6%<br>(5.8-14%)                   | 6.9<br>(3.9-11)      | 470<br>(290-700)      |
| Cape Verde | 2016 | Male   | 35 to 39 | 22%<br>(10-37%)                | 78%<br>(63-90%)          | 3.3<br>(1.3-6.4)                            | 8.4%<br>(5.6-12%)                    | 11%<br>(7.1-16%)                    | 7.6<br>(4.3-12)      | 440<br>(270-660)      |
| Cape Verde | 2016 | Male   | 40 to 44 | 23%<br>(11-39%)                | 77%<br>(61-89%)          | 3.5<br>(1.3-7.6)                            | 9.4%<br>(6.4-13%)                    | 13%<br>(8.6-17%)                    | 8.6<br>(5.3-13)      | 440<br>(280-640)      |
| Cape Verde | 2016 | Male   | 45 to 49 | 23%<br>(11-38%)                | 77%<br>(62-89%)          | 3.7<br>(1.3-8.3)                            | 11%<br>(7.4-15%)                     | 15%<br>(9.8-20%)                    | 12<br>(7.2-17)       | 510<br>(320-730)      |
| Cape Verde | 2016 | Male   | 50 to 54 | 23%<br>(11-42%)                | 77%<br>(58-89%)          | 3.7<br>(1.3-8.2)                            | 11%<br>(7.1-15%)                     | 14%<br>(9.1-19%)                    | 13<br>(8.5-20)       | 510<br>(330-740)      |
| Cape Verde | 2016 | Male   | 55 to 59 | 23%<br>(12-41%)                | 77%<br>(59-88%)          | 3.6<br>(1.2-7.5)                            | 10%<br>(6.8-14%)                     | 13%<br>(8.5-18%)                    | 12<br>(7.9-18)       | 400<br>(260-580)      |
| Cape Verde | 2016 | Male   | 60 to 64 | 23%<br>(11-40%)                | 77%<br>(60-89%)          | 3.3<br>(1-7.4)                              | 8.4%<br>(5.2-12%)                    | 10%<br>(6.2-15%)                    | 11<br>(6.5-17)       | 310<br>(190-460)      |
| Cape Verde | 2016 | Male   | 65 to 69 | 23%<br>(11-39%)                | 77%<br>(61-89%)          | 2.7<br>(0.88-5.9)                           | 7.1%<br>(4-11%)                      | 8.5%<br>(4.8-13%)                   | 7.1<br>(3.9-11)      | 160<br>(91-260)       |
| Cape Verde | 2016 | Male   | 70 to 74 | 22%<br>(11-38%)                | 78%<br>(62-89%)          | 2.1<br>(0.66-5)                             | 5.8%<br>(2.6-9.3%)                   | 6.9%<br>(3-11%)                     | 6.7<br>(2.9-11)      | 130<br>(55-210)       |
| Cape Verde | 2016 | Male   | 75 to 79 | 20%<br>(9.5-34%)               | 80%<br>(66-90%)          | 1.6<br>(0.39-3.9)                           | 4.2%<br>(1.3-7.8%)                   | 4.9%<br>(1.5-9%)                    | 9.5<br>(3-18)        | 140<br>(44-260)       |
| Cape Verde | 2016 | Male   | 80 to 84 | 18%<br>(7.7-32%)               | 82%<br>(68-92%)          | 1.3<br>(0.31-3.1)                           | 3.6%<br>(1.1-6.9%)                   | 4.1%<br>(1.2-8%)                    | 8.6<br>(2.5-17)      | 92<br>(28-180)        |
| Cape Verde | 2016 | Male   | 85 to 89 | 17%<br>(7.9-30%)               | 83%<br>(70-92%)          | 1.1<br>(0.3-2.7)                            | 3.1%<br>(0.84-6.4%)                  | 3.5%<br>(0.88-7.3%)                 | 5<br>(1.3-10)        | 38<br>(10-77)         |
| Cape Verde | 2016 | Male   | 90 to 94 | 18%<br>(8.3-34%)               | 82%<br>(66-92%)          | 1<br>(0.27-2.7)                             | 2.6%<br>(0.51-6%)                    | 2.9%<br>(0.49-7%)                   | 1.4<br>(0.23-3.2)    | 7.3<br>(1.4-17)       |
| Cape Verde | 2016 | Male   | 95 plus  | 22%<br>(8.9-41%)               | 78%<br>(59-91%)          | 1.1<br>(0.2-3.2)                            | 2.4%<br>(0.32-6.1%)                  | 2.6%<br>(0.21-7%)                   | 0.22<br>(0.018-0.59) | 0.82<br>(0.11-2.1)    |
| Chad       | 1990 | Female | All Ages | 15%<br>(13-18%)                | 85%<br>(82-87%)          | 0.33<br>(0.29-0.37)                         | 0.46%<br>(0.32-0.63%)                | 0.85%<br>(0.48-1.3%)                | 350<br>(200-530)     | 14000<br>(9500-19000) |
| Chad       | 1990 | Female | 15 to 19 | 14%<br>(9.4-20%)               | 86%<br>(80-91%)          | 0.26<br>(0.15-0.43)                         | 0.59%<br>(0.35-0.93%)                | 0.37%<br>(0.085-0.82%)              | 2.3<br>(0.49-5.1)    | 430<br>(250-690)      |
| Chad       | 1990 | Female | 20 to 24 | 18%<br>(12-26%)                | 82%<br>(74-88%)          | 0.42<br>(0.25-0.67)                         | 1.4%<br>(0.81-2.2%)                  | 0.96%<br>(0.27-2%)                  | 6.9<br>(2-15)        | 990<br>(570-1600)     |



| Location | Year | Sex    | Age      | Prevalence of current drinkers | Prevalence of abstainers | Population average of standard drinks daily | Percent of total attributable deaths | Percent of total attributable DALYs | Attributable deaths | Attributable DALYs     |
|----------|------|--------|----------|--------------------------------|--------------------------|---------------------------------------------|--------------------------------------|-------------------------------------|---------------------|------------------------|
| Chad     | 1990 | Female | 25 to 29 | 21%<br>(14-30%)                | 79%<br>(70-86%)          | 0.58<br>(0.36-0.86)                         | 1.8%<br>(1.1-2.7%)                   | 1.6%<br>(0.73-2.9%)                 | 11<br>(5-21)        | 1200<br>(690-1800)     |
| Chad     | 1990 | Female | 30 to 34 | 23%<br>(15-33%)                | 77%<br>(67-85%)          | 0.71<br>(0.47-1)                            | 2.1%<br>(1.3-3.1%)                   | 2.3%<br>(1.2-3.8%)                  | 17<br>(8.9-28)      | 1300<br>(830-1900)     |
| Chad     | 1990 | Female | 35 to 39 | 26%<br>(17-35%)                | 74%<br>(65-83%)          | 0.8<br>(0.5-1.1)                            | 2.5%<br>(1.5-3.8%)                   | 3.1%<br>(1.6-5%)                    | 24<br>(13-39)       | 1500<br>(900-2300)     |
| Chad     | 1990 | Female | 40 to 44 | 26%<br>(18-35%)                | 74%<br>(65-82%)          | 0.8<br>(0.5-1.1)                            | 2.6%<br>(1.6-3.9%)                   | 3.4%<br>(1.9-5.4%)                  | 23<br>(13-38)       | 1200<br>(740-1800)     |
| Chad     | 1990 | Female | 45 to 49 | 27%<br>(17-35%)                | 73%<br>(65-83%)          | 0.72<br>(0.45-1)                            | 2.6%<br>(1.6-4%)                     | 3.5%<br>(1.9-5.5%)                  | 26<br>(15-42)       | 1200<br>(690-1800)     |
| Chad     | 1990 | Female | 50 to 54 | 26%<br>(18-36%)                | 74%<br>(64-82%)          | 0.74<br>(0.47-1.1)                          | 2.7%<br>(1.6-4.4%)                   | 3.7%<br>(2-5.7%)                    | 33<br>(19-52)       | 1300<br>(730-1900)     |
| Chad     | 1990 | Female | 55 to 59 | 26%<br>(18-34%)                | 74%<br>(66-82%)          | 0.86<br>(0.53-1.3)                          | 3%<br>(1.7-4.6%)                     | 4%<br>(2.2-6.1%)                    | 44<br>(24-69)       | 1400<br>(790-2200)     |
| Chad     | 1990 | Female | 60 to 64 | 27%<br>(19-37%)                | 73%<br>(63-81%)          | 0.93<br>(0.56-1.4)                          | 2.8%<br>(1.5-4.6%)                   | 3.6%<br>(1.9-5.8%)                  | 49<br>(26-82)       | 1300<br>(710-2200)     |
| Chad     | 1990 | Female | 65 to 69 | 29%<br>(21-38%)                | 71%<br>(62-79%)          | 0.89<br>(0.55-1.3)                          | 2.3%<br>(1-4%)                       | 2.8%<br>(1.2-4.9%)                  | 47<br>(20-83)       | 1100<br>(450-1800)     |
| Chad     | 1990 | Female | 70 to 74 | 27%<br>(20-36%)                | 73%<br>(64-80%)          | 0.72<br>(0.43-1.1)                          | 1.8%<br>(0.44-3.8%)                  | 2.2%<br>(0.49-4.6%)                 | 40<br>(9.1-83)      | 720<br>(170-1500)      |
| Chad     | 1990 | Female | 75 to 79 | 22%<br>(15-32%)                | 78%<br>(68-85%)          | 0.53<br>(0.29-0.88)                         | 0.97%<br>(-0.072-2.4%)               | 1.1%<br>(-0.11-2.9%)                | 18<br>(-1.7-46)     | 260<br>(-20-640)       |
| Chad     | 1990 | Female | 80 to 84 | 19%<br>(13-27%)                | 81%<br>(73-87%)          | 0.45<br>(0.26-0.71)                         | 0.56%<br>(-0.21-1.5%)                | 0.65%<br>(-0.27-1.8%)               | 6.9<br>(-2.9-20)    | 73<br>(-27-200)        |
| Chad     | 1990 | Female | 85 to 89 | 20%<br>(13-28%)                | 80%<br>(72-87%)          | 0.45<br>(0.26-0.69)                         | 0.28%<br>(-0.42-1.2%)                | 0.31%<br>(-0.55-1.4%)               | 2.1<br>(-3.8-9.3)   | 17<br>(-25-69)         |
| Chad     | 1990 | Female | 90 to 94 | 21%<br>(14-30%)                | 79%<br>(70-86%)          | 0.46<br>(0.25-0.75)                         | 0.037%<br>(-0.64-0.81%)              | -0.01%<br>(-0.85-0.94%)             | -0.03<br>(-2.5-2.8) | 0.67<br>(-11-15)       |
| Chad     | 1990 | Female | 95 plus  | 23%<br>(15-33%)                | 77%<br>(67-85%)          | 0.48<br>(0.22-0.82)                         | -0.076%<br>(-0.89-0.86%)             | -0.19%<br>(-1.2-0.93%)              | -0.16<br>(-1-0.82)  | -0.27<br>(-3.2-3)      |
| Chad     | 1990 | Male   | All Ages | 15%<br>(12-17%)                | 85%<br>(83-88%)          | 0.65<br>(0.6-0.7)                           | 1.1%<br>(0.9-1.3%)                   | 1.9%<br>(1.5-2.4%)                  | 840<br>(650-1000)   | 36000<br>(29000-43000) |
| Chad     | 1990 | Male   | 15 to 19 | 11%<br>(7.2-16%)               | 89%<br>(84-93%)          | 0.33<br>(0.19-0.53)                         | 0.98%<br>(0.61-1.5%)                 | 0.92%<br>(0.47-1.6%)                | 6.2<br>(3.2-11)     | 720<br>(450-1100)      |
| Chad     | 1990 | Male   | 20 to 24 | 19%<br>(12-27%)                | 81%<br>(73-88%)          | 0.85<br>(0.54-1.3)                          | 3%<br>(2-4.2%)                       | 3%<br>(1.7-4.7%)                    | 26<br>(16-41)       | 2300<br>(1500-3200)    |
| Chad     | 1990 | Male   | 25 to 29 | 26%<br>(17-35%)                | 74%<br>(65-83%)          | 1.5<br>(0.97-2.1)                           | 5.3%<br>(3.5-7.3%)                   | 6%<br>(3.7-8.9%)                    | 52<br>(33-75)       | 3700<br>(2500-5100)    |
| Chad     | 1990 | Male   | 30 to 34 | 29%<br>(20-41%)                | 71%<br>(59-80%)          | 1.8<br>(1.2-2.5)                            | 6.7%<br>(4.5-9%)                     | 8.2%<br>(5.2-11%)                   | 69<br>(45-96)       | 4400<br>(3000-5900)    |
| Chad     | 1990 | Male   | 35 to 39 | 31%<br>(20-41%)                | 69%<br>(59-80%)          | 1.8<br>(1.1-2.5)                            | 7.2%<br>(4.9-9.8%)                   | 9%<br>(6-13%)                       | 79<br>(54-110)      | 4400<br>(3100-5800)    |
| Chad     | 1990 | Male   | 40 to 44 | 30%<br>(21-40%)                | 70%<br>(60-79%)          | 1.8<br>(1.1-2.5)                            | 7.7%<br>(5.3-10%)                    | 9.9%<br>(6.6-14%)                   | 82<br>(55-110)      | 4000<br>(2800-5400)    |

| Location | Year | Sex    | Age      | Prevalence of current drinkers | Prevalence of abstainers | Population average of standard drinks daily | Percent of total attributable deaths | Percent of total attributable DALYs | Attributable deaths     | Attributable DALYs     |
|----------|------|--------|----------|--------------------------------|--------------------------|---------------------------------------------|--------------------------------------|-------------------------------------|-------------------------|------------------------|
| Chad     | 1990 | Male   | 45 to 49 | 30%<br>(19-39%)                | 70%<br>(61-81%)          | 1.7<br>(1.1-2.4)                            | 8.2%<br>(5.5-11%)                    | 10%<br>(7-14%)                      | 97<br>(65-130)          | 4100<br>(2800-5500)    |
| Chad     | 1990 | Male   | 50 to 54 | 29%<br>(21-39%)                | 71%<br>(61-79%)          | 1.6<br>(1.1-2.5)                            | 7.7%<br>(5-11%)                      | 9.8%<br>(6.3-14%)                   | 100<br>(65-140)         | 3700<br>(2500-5300)    |
| Chad     | 1990 | Male   | 55 to 59 | 29%<br>(20-38%)                | 71%<br>(62-80%)          | 1.5<br>(0.95-2.3)                           | 6.6%<br>(4.1-9.5%)                   | 8.2%<br>(5.1-12%)                   | 93<br>(57-140)          | 3000<br>(1900-4300)    |
| Chad     | 1990 | Male   | 60 to 64 | 28%<br>(19-39%)                | 72%<br>(61-81%)          | 1.3<br>(0.78-2.2)                           | 5%<br>(3-7.9%)                       | 6.1%<br>(3.6-9.7%)                  | 81<br>(48-130)          | 2200<br>(1400-3500)    |
| Chad     | 1990 | Male   | 65 to 69 | 28%<br>(20-36%)                | 72%<br>(64-80%)          | 1.1<br>(0.68-1.7)                           | 3.8%<br>(2.3-5.8%)                   | 4.6%<br>(2.7-7.1%)                  | 67<br>(40-100)          | 1500<br>(930-2300)     |
| Chad     | 1990 | Male   | 70 to 74 | 26%<br>(19-35%)                | 74%<br>(65-81%)          | 0.83<br>(0.51-1.3)                          | 2.6%<br>(1.3-4.2%)                   | 3.1%<br>(1.6-5.1%)                  | 49<br>(24-81)           | 890<br>(450-1500)      |
| Chad     | 1990 | Male   | 75 to 79 | 23%<br>(16-32%)                | 77%<br>(68-84%)          | 0.61<br>(0.35-0.99)                         | 1.7%<br>(0.6-3%)                     | 1.9%<br>(0.66-3.6%)                 | 25<br>(8.8-48)          | 360<br>(130-670)       |
| Chad     | 1990 | Male   | 80 to 84 | 20%<br>(13-27%)                | 80%<br>(73-87%)          | 0.47<br>(0.27-0.74)                         | 1.2%<br>(0.4-2.2%)                   | 1.3%<br>(0.43-2.5%)                 | 10<br>(3.4-20)          | 110<br>(39-210)        |
| Chad     | 1990 | Male   | 85 to 89 | 19%<br>(12-27%)                | 81%<br>(73-88%)          | 0.38<br>(0.22-0.6)                          | 0.74%<br>(0.13-1.4%)                 | 0.83%<br>(0.079-1.7%)               | 3.8<br>(0.37-7.9)       | 30<br>(5.5-59)         |
| Chad     | 1990 | Male   | 90 to 94 | 19%<br>(13-28%)                | 81%<br>(72-87%)          | 0.33<br>(0.18-0.55)                         | 0.28%<br>(-0.26-0.81%)               | 0.24%<br>(-0.42-0.91%)              | 0.46<br>(-0.8-1.7)      | 3.2<br>(-2.9-9.3)      |
| Chad     | 1990 | Male   | 95 plus  | 22%<br>(13-32%)                | 78%<br>(68-87%)          | 0.31<br>(0.14-0.55)                         | 0.11%<br>(-0.53-0.71%)               | -0.017%<br>(-0.8-0.75%)             | -0.0081<br>(-0.38-0.36) | 0.2<br>(-0.99-1.4)     |
| Chad     | 1995 | Female | All Ages | 15%<br>(13-18%)                | 85%<br>(82-87%)          | 0.35<br>(0.31-0.39)                         | 0.5%<br>(0.35-0.68%)                 | 0.92%<br>(0.52-1.4%)                | 430<br>(250-630)        | 17000<br>(12000-23000) |
| Chad     | 1995 | Female | 15 to 19 | 14%<br>(9.6-20%)               | 86%<br>(80-90%)          | 0.29<br>(0.17-0.46)                         | 0.62%<br>(0.37-0.97%)                | 0.42%<br>(0.11-0.91%)               | 2.9<br>(0.73-6.3)       | 530<br>(310-840)       |
| Chad     | 1995 | Female | 20 to 24 | 19%<br>(12-26%)                | 81%<br>(74-88%)          | 0.46<br>(0.27-0.73)                         | 1.4%<br>(0.82-2.2%)                  | 1%<br>(0.32-2.1%)                   | 9.2<br>(2.9-20)         | 1300<br>(730-2000)     |
| Chad     | 1995 | Female | 25 to 29 | 21%<br>(14-30%)                | 79%<br>(70-86%)          | 0.64<br>(0.4-0.94)                          | 1.7%<br>(0.99-2.5%)                  | 1.4%<br>(0.64-2.7%)                 | 14<br>(5.9-25)          | 1400<br>(830-2100)     |
| Chad     | 1995 | Female | 30 to 34 | 24%<br>(16-34%)                | 76%<br>(66-84%)          | 0.79<br>(0.52-1.1)                          | 1.9%<br>(1.2-2.9%)                   | 2%<br>(1-3.5%)                      | 19<br>(9.7-33)          | 1500<br>(920-2300)     |
| Chad     | 1995 | Female | 35 to 39 | 26%<br>(17-35%)                | 74%<br>(65-83%)          | 0.89<br>(0.56-1.3)                          | 2.4%<br>(1.4-3.7%)                   | 2.8%<br>(1.5-4.8%)                  | 28<br>(15-46)           | 1700<br>(1000-2600)    |
| Chad     | 1995 | Female | 40 to 44 | 27%<br>(19-37%)                | 73%<br>(63-81%)          | 0.89<br>(0.56-1.3)                          | 2.5%<br>(1.5-3.8%)                   | 3.2%<br>(1.7-5.1%)                  | 32<br>(17-51)           | 1700<br>(960-2500)     |
| Chad     | 1995 | Female | 45 to 49 | 27%<br>(17-36%)                | 73%<br>(64-83%)          | 0.8<br>(0.5-1.2)                            | 2.6%<br>(1.5-4%)                     | 3.4%<br>(1.9-5.5%)                  | 30<br>(17-49)           | 1300<br>(800-2100)     |
| Chad     | 1995 | Female | 50 to 54 | 27%<br>(19-36%)                | 73%<br>(64-81%)          | 0.82<br>(0.52-1.2)                          | 2.9%<br>(1.6-4.5%)                   | 3.8%<br>(2-5.9%)                    | 39<br>(21-62)           | 1500<br>(820-2300)     |
| Chad     | 1995 | Female | 55 to 59 | 27%<br>(18-35%)                | 73%<br>(65-82%)          | 0.96<br>(0.58-1.4)                          | 3.2%<br>(1.8-5.1%)                   | 4.2%<br>(2.3-6.7%)                  | 52<br>(28-83)           | 1700<br>(940-2600)     |
| Chad     | 1995 | Female | 60 to 64 | 28%<br>(19-38%)                | 72%<br>(62-81%)          | 1<br>(0.62-1.6)                             | 3.1%<br>(1.6-5%)                     | 3.9%<br>(2-6.2%)                    | 59<br>(30-97)           | 1600<br>(840-2600)     |

| Location | Year | Sex    | Age      | Prevalence of current drinkers | Prevalence of abstainers | Population average of standard drinks daily | Percent of total attributable deaths | Percent of total attributable DALYs | Attributable deaths  | Attributable DALYs     |
|----------|------|--------|----------|--------------------------------|--------------------------|---------------------------------------------|--------------------------------------|-------------------------------------|----------------------|------------------------|
| Chad     | 1995 | Female | 65 to 69 | 30%<br>(22-39%)                | 70%<br>(61-78%)          | 0.97<br>(0.6-1.4)                           | 2.6%<br>(1.1-4.3%)                   | 3.1%<br>(1.3-5.3%)                  | 57<br>(23-98)        | 1300<br>(530-2200)     |
| Chad     | 1995 | Female | 70 to 74 | 28%<br>(20-36%)                | 72%<br>(64-80%)          | 0.77<br>(0.46-1.2)                          | 2%<br>(0.48-3.8%)                    | 2.4%<br>(0.55-4.7%)                 | 48<br>(11-95)        | 880<br>(210-1700)      |
| Chad     | 1995 | Female | 75 to 79 | 22%<br>(15-32%)                | 78%<br>(68-85%)          | 0.57<br>(0.31-0.92)                         | 1.1%<br>(-0.026-2.6%)                | 1.3%<br>(-0.061-3.2%)               | 23<br>(-1.1-56)      | 330<br>(-8-790)        |
| Chad     | 1995 | Female | 80 to 84 | 20%<br>(13-27%)                | 80%<br>(73-87%)          | 0.48<br>(0.28-0.75)                         | 0.67%<br>(-0.16-1.7%)                | 0.78%<br>(-0.2-2%)                  | 9.5<br>(-2.4-24)     | 100<br>(-23-250)       |
| Chad     | 1995 | Female | 85 to 89 | 20%<br>(13-28%)                | 80%<br>(72-87%)          | 0.47<br>(0.27-0.75)                         | 0.4%<br>(-0.32-1.4%)                 | 0.44%<br>(-0.43-1.6%)               | 3.5<br>(-3.4-13)     | 27<br>(-22-93)         |
| Chad     | 1995 | Female | 90 to 94 | 22%<br>(14-30%)                | 78%<br>(70-86%)          | 0.49<br>(0.26-0.81)                         | 0.15%<br>(-0.57-1.1%)                | 0.13%<br>(-0.77-1.3%)               | 0.43<br>(-2.5-4.2)   | 3.1<br>(-12-22)        |
| Chad     | 1995 | Female | 95 plus  | 24%<br>(15-33%)                | 76%<br>(67-85%)          | 0.51<br>(0.25-0.87)                         | 0.042%<br>(-0.84-1.1%)               | -0.053%<br>(-1.1-1.3%)              | -0.054<br>(-1.2-1.3) | 0.17<br>(-3.5-4.8)     |
| Chad     | 1995 | Male   | All Ages | 15%<br>(13-18%)                | 85%<br>(82-87%)          | 0.69<br>(0.64-0.74)                         | 1.2%<br>(0.97-1.5%)                  | 2.1%<br>(1.6-2.6%)                  | 1000<br>(790-1300)   | 43000<br>(35000-53000) |
| Chad     | 1995 | Male   | 15 to 19 | 11%<br>(7.4-16%)               | 89%<br>(84-93%)          | 0.36<br>(0.21-0.57)                         | 1.1%<br>(0.69-1.7%)                  | 1.1%<br>(0.52-2%)                   | 8<br>(3.7-15)        | 910<br>(560-1400)      |
| Chad     | 1995 | Male   | 20 to 24 | 20%<br>(13-27%)                | 80%<br>(73-87%)          | 0.93<br>(0.6-1.3)                           | 3.3%<br>(2.1-4.9%)                   | 3.5%<br>(1.9-5.6%)                  | 34<br>(18-55)        | 2900<br>(1900-4400)    |
| Chad     | 1995 | Male   | 25 to 29 | 27%<br>(18-36%)                | 73%<br>(64-82%)          | 1.6<br>(1.1-2.2)                            | 5.3%<br>(3.2-7.8%)                   | 6%<br>(3.2-9.3%)                    | 64<br>(36-97)        | 4600<br>(2800-6500)    |
| Chad     | 1995 | Male   | 30 to 34 | 30%<br>(21-42%)                | 70%<br>(58-79%)          | 2<br>(1.3-2.7)                              | 6.3%<br>(4-8.8%)                     | 7.4%<br>(4.2-11%)                   | 83<br>(49-120)       | 5200<br>(3300-7300)    |
| Chad     | 1995 | Male   | 35 to 39 | 31%<br>(21-41%)                | 69%<br>(59-79%)          | 1.9<br>(1.3-2.7)                            | 6.7%<br>(4.1-9.4%)                   | 8.1%<br>(4.6-12%)                   | 94<br>(57-130)       | 5200<br>(3300-7200)    |
| Chad     | 1995 | Male   | 40 to 44 | 31%<br>(22-42%)                | 69%<br>(58-78%)          | 1.9<br>(1.2-2.6)                            | 7.3%<br>(4.8-10%)                    | 9%<br>(5.7-13%)                     | 110<br>(68-150)      | 5200<br>(3400-7200)    |
| Chad     | 1995 | Male   | 45 to 49 | 30%<br>(20-40%)                | 70%<br>(60-80%)          | 1.9<br>(1.2-2.6)                            | 8%<br>(5.2-11%)                      | 9.9%<br>(6.3-14%)                   | 110<br>(72-160)      | 4800<br>(3200-6600)    |
| Chad     | 1995 | Male   | 50 to 54 | 30%<br>(21-40%)                | 70%<br>(60-79%)          | 1.8<br>(1.2-2.7)                            | 7.8%<br>(5.1-11%)                    | 9.7%<br>(6.2-14%)                   | 120<br>(78-180)      | 4500<br>(3000-6500)    |
| Chad     | 1995 | Male   | 55 to 59 | 30%<br>(21-40%)                | 70%<br>(60-79%)          | 1.7<br>(1-2.5)                              | 6.9%<br>(4.3-10%)                    | 8.5%<br>(5.2-12%)                   | 120<br>(70-170)      | 3700<br>(2300-5500)    |
| Chad     | 1995 | Male   | 60 to 64 | 29%<br>(20-40%)                | 71%<br>(60-80%)          | 1.4<br>(0.85-2.3)                           | 5.3%<br>(3.2-8.3%)                   | 6.3%<br>(3.8-10%)                   | 98<br>(57-160)       | 2700<br>(1600-4300)    |
| Chad     | 1995 | Male   | 65 to 69 | 29%<br>(21-38%)                | 71%<br>(62-79%)          | 1.2<br>(0.74-1.8)                           | 4%<br>(2.4-6.1%)                     | 4.8%<br>(2.8-7.4%)                  | 80<br>(47-130)       | 1800<br>(1100-2800)    |
| Chad     | 1995 | Male   | 70 to 74 | 27%<br>(19-36%)                | 73%<br>(64-81%)          | 0.91<br>(0.56-1.4)                          | 2.8%<br>(1.4-4.7%)                   | 3.4%<br>(1.7-5.5%)                  | 60<br>(30-100)       | 1100<br>(550-1800)     |
| Chad     | 1995 | Male   | 75 to 79 | 24%<br>(16-34%)                | 76%<br>(66-84%)          | 0.67<br>(0.39-1.1)                          | 1.8%<br>(0.64-3.3%)                  | 2.1%<br>(0.72-3.9%)                 | 33<br>(11-61)        | 460<br>(170-860)       |
| Chad     | 1995 | Male   | 80 to 84 | 21%<br>(14-28%)                | 79%<br>(72-86%)          | 0.52<br>(0.3-0.81)                          | 1.3%<br>(0.45-2.5%)                  | 1.5%<br>(0.47-2.9%)                 | 14<br>(4.4-28)       | 150<br>(51-290)        |

| Location | Year | Sex    | Age      | Prevalence of current drinkers | Prevalence of abstainers | Population average of standard drinks daily | Percent of total attributable deaths | Percent of total attributable DALYs | Attributable deaths   | Attributable DALYs     |
|----------|------|--------|----------|--------------------------------|--------------------------|---------------------------------------------|--------------------------------------|-------------------------------------|-----------------------|------------------------|
| Chad     | 1995 | Male   | 85 to 89 | 19%<br>(12-28%)                | 81%<br>(72-88%)          | 0.42<br>(0.24-0.65)                         | 0.86%<br>(0.18-1.6%)                 | 0.96%<br>(0.12-1.9%)                | 5.2<br>(0.66-10)      | 40<br>(8.7-77)         |
| Chad     | 1995 | Male   | 90 to 94 | 20%<br>(13-29%)                | 80%<br>(71-87%)          | 0.36<br>(0.2-0.6)                           | 0.38%<br>(-0.19-1%)                  | 0.36%<br>(-0.33-1.1%)               | 0.75<br>(-0.7-2.4)    | 4.7<br>(-2.4-13)       |
| Chad     | 1995 | Male   | 95 plus  | 23%<br>(14-33%)                | 77%<br>(67-86%)          | 0.34<br>(0.15-0.61)                         | 0.23%<br>(-0.51-1%)                  | 0.14%<br>(-0.77-1.1%)               | 0.075<br>(-0.43-0.63) | 0.52<br>(-1.1-2.3)     |
| Chad     | 2000 | Female | All Ages | 15%<br>(14-17%)                | 85%<br>(83-86%)          | 0.34<br>(0.3-0.38)                          | 0.5%<br>(0.34-0.69%)                 | 0.88%<br>(0.48-1.3%)                | 490<br>(270-740)      | 20000<br>(13000-27000) |
| Chad     | 2000 | Female | 15 to 19 | 15%<br>(11-19%)                | 85%<br>(81-89%)          | 0.28<br>(0.18-0.42)                         | 0.63%<br>(0.36-0.99%)                | 0.44%<br>(0.09-0.96%)               | 3.9<br>(0.81-8.7)     | 660<br>(370-1100)      |
| Chad     | 2000 | Female | 20 to 24 | 19%<br>(15-24%)                | 81%<br>(76-85%)          | 0.46<br>(0.3-0.68)                          | 1.4%<br>(0.79-2.3%)                  | 1.1%<br>(0.33-2.3%)                 | 13<br>(3.8-28)        | 1600<br>(930-2700)     |
| Chad     | 2000 | Female | 25 to 29 | 22%<br>(17-28%)                | 78%<br>(72-83%)          | 0.64<br>(0.46-0.87)                         | 1.5%<br>(0.89-2.3%)                  | 1.3%<br>(0.58-2.4%)                 | 19<br>(8.4-35)        | 1800<br>(1100-2800)    |
| Chad     | 2000 | Female | 30 to 34 | 25%<br>(19-32%)                | 75%<br>(68-81%)          | 0.8<br>(0.58-1.1)                           | 1.7%<br>(1-2.7%)                     | 1.7%<br>(0.88-3%)                   | 24<br>(13-42)         | 1800<br>(1100-2800)    |
| Chad     | 2000 | Female | 35 to 39 | 27%<br>(21-33%)                | 73%<br>(67-79%)          | 0.88<br>(0.63-1.2)                          | 2.1%<br>(1.2-3.2%)                   | 2.4%<br>(1.2-4%)                    | 33<br>(17-53)         | 2000<br>(1200-3100)    |
| Chad     | 2000 | Female | 40 to 44 | 29%<br>(23-35%)                | 71%<br>(65-77%)          | 0.9<br>(0.61-1.2)                           | 2.3%<br>(1.3-3.5%)                   | 2.8%<br>(1.5-4.4%)                  | 37<br>(20-58)         | 1900<br>(1100-2900)    |
| Chad     | 2000 | Female | 45 to 49 | 31%<br>(24-37%)                | 69%<br>(63-76%)          | 0.86<br>(0.6-1.2)                           | 2.6%<br>(1.5-4%)                     | 3.3%<br>(1.8-5.5%)                  | 45<br>(25-71)         | 2000<br>(1100-3100)    |
| Chad     | 2000 | Female | 50 to 54 | 27%<br>(21-34%)                | 73%<br>(66-79%)          | 0.8<br>(0.53-1.1)                           | 2.8%<br>(1.5-4.2%)                   | 3.6%<br>(1.9-5.6%)                  | 45<br>(24-69)         | 1700<br>(940-2600)     |
| Chad     | 2000 | Female | 55 to 59 | 23%<br>(17-30%)                | 77%<br>(70-83%)          | 0.78<br>(0.5-1.1)                           | 2.9%<br>(1.7-4.6%)                   | 3.8%<br>(2-6%)                      | 54<br>(29-87)         | 1700<br>(970-2800)     |
| Chad     | 2000 | Female | 60 to 64 | 25%<br>(19-32%)                | 75%<br>(68-81%)          | 0.86<br>(0.56-1.3)                          | 2.9%<br>(1.5-4.6%)                   | 3.6%<br>(1.9-5.7%)                  | 62<br>(33-100)        | 1700<br>(910-2700)     |
| Chad     | 2000 | Female | 65 to 69 | 28%<br>(22-35%)                | 72%<br>(65-78%)          | 0.86<br>(0.58-1.2)                          | 2.4%<br>(1-4.1%)                     | 2.9%<br>(1.2-5.1%)                  | 60<br>(26-110)        | 1400<br>(580-2400)     |
| Chad     | 2000 | Female | 70 to 74 | 25%<br>(19-33%)                | 75%<br>(67-81%)          | 0.68<br>(0.42-1)                            | 1.8%<br>(0.42-3.7%)                  | 2.2%<br>(0.48-4.6%)                 | 50<br>(10-100)        | 900<br>(200-1900)      |
| Chad     | 2000 | Female | 75 to 79 | 20%<br>(14-29%)                | 80%<br>(71-86%)          | 0.49<br>(0.28-0.79)                         | 1%<br>(0.023-2.5%)                   | 1.2%<br>(-0.012-3%)                 | 25<br>(-0.24-62)      | 360<br>(8.4-860)       |
| Chad     | 2000 | Female | 80 to 84 | 19%<br>(12-25%)                | 81%<br>(75-88%)          | 0.43<br>(0.26-0.66)                         | 0.66%<br>(-0.16-1.8%)                | 0.77%<br>(-0.25-2.1%)               | 11<br>(-3.4-30)       | 120<br>(-27-310)       |
| Chad     | 2000 | Female | 85 to 89 | 19%<br>(12-26%)                | 81%<br>(74-88%)          | 0.42<br>(0.25-0.66)                         | 0.41%<br>(-0.35-1.4%)                | 0.47%<br>(-0.46-1.7%)               | 4.2<br>(-4.1-15)      | 32<br>(-27-110)        |
| Chad     | 2000 | Female | 90 to 94 | 20%<br>(14-28%)                | 80%<br>(72-86%)          | 0.43<br>(0.24-0.7)                          | 0.21%<br>(-0.57-1.3%)                | 0.2%<br>(-0.77-1.5%)                | 0.73<br>(-2.9-5.7)    | 4.7<br>(-13-29)        |
| Chad     | 2000 | Female | 95 plus  | 22%<br>(14-31%)                | 78%<br>(69-86%)          | 0.45<br>(0.22-0.77)                         | 0.12%<br>(-0.75-1.2%)                | 0.034%<br>(-1-1.4%)                 | 0.039<br>(-1.2-1.5)   | 0.53<br>(-3.3-5.5)     |
| Chad     | 2000 | Male   | All Ages | 19%<br>(16-22%)                | 81%<br>(78-84%)          | 0.79<br>(0.74-0.84)                         | 1.5%<br>(1.2-1.8%)                   | 2.4%<br>(1.9-3%)                    | 1400<br>(1100-1800)   | 63000<br>(50000-77000) |

| Location | Year | Sex    | Age      | Prevalence of current drinkers | Prevalence of abstainers | Population average of standard drinks daily | Percent of total attributable deaths | Percent of total attributable DALYs | Attributable deaths | Attributable DALYs     |
|----------|------|--------|----------|--------------------------------|--------------------------|---------------------------------------------|--------------------------------------|-------------------------------------|---------------------|------------------------|
| Chad     | 2000 | Male   | 15 to 19 | 15%<br>(10-20%)                | 85%<br>(80-90%)          | 0.45<br>(0.28-0.66)                         | 1.4%<br>(0.85-2.1%)                  | 1.5%<br>(0.78-2.5%)                 | 15<br>(7.9-26)      | 1500<br>(910-2300)     |
| Chad     | 2000 | Male   | 20 to 24 | 28%<br>(20-36%)                | 72%<br>(64-80%)          | 1.2<br>(0.86-1.7)                           | 4.2%<br>(2.9-6%)                     | 4.6%<br>(2.9-6.9%)                  | 66<br>(41-98)       | 5200<br>(3500-7400)    |
| Chad     | 2000 | Male   | 25 to 29 | 36%<br>(27-43%)                | 64%<br>(57-73%)          | 2<br>(1.4-2.6)                              | 6.3%<br>(4.3-8.8%)                   | 7.2%<br>(4.5-11%)                   | 120<br>(76-160)     | 7900<br>(5500-11000)   |
| Chad     | 2000 | Male   | 30 to 34 | 38%<br>(28-45%)                | 62%<br>(55-72%)          | 2.3<br>(1.6-2.9)                            | 7%<br>(4.8-9.5%)                     | 8.1%<br>(5.3-11%)                   | 130<br>(93-190)     | 8100<br>(5800-11000)   |
| Chad     | 2000 | Male   | 35 to 39 | 37%<br>(28-44%)                | 63%<br>(56-72%)          | 2.2<br>(1.5-2.9)                            | 7%<br>(4.9-9.7%)                     | 8.3%<br>(5.5-12%)                   | 140<br>(97-190)     | 7500<br>(5400-10000)   |
| Chad     | 2000 | Male   | 40 to 44 | 37%<br>(30-44%)                | 63%<br>(56-70%)          | 2.1<br>(1.5-2.8)                            | 7.7%<br>(5.2-10%)                    | 9.2%<br>(6.1-13%)                   | 160<br>(110-210)    | 7500<br>(5200-10000)   |
| Chad     | 2000 | Male   | 45 to 49 | 37%<br>(29-44%)                | 63%<br>(56-71%)          | 2.1<br>(1.5-2.8)                            | 8.6%<br>(5.9-12%)                    | 10%<br>(7.1-14%)                    | 180<br>(120-240)    | 7500<br>(5100-10000)   |
| Chad     | 2000 | Male   | 50 to 54 | 35%<br>(27-43%)                | 65%<br>(57-73%)          | 1.9<br>(1.3-2.7)                            | 8.4%<br>(5.6-12%)                    | 10%<br>(6.7-14%)                    | 160<br>(100-230)    | 6000<br>(3900-8400)    |
| Chad     | 2000 | Male   | 55 to 59 | 30%<br>(23-37%)                | 70%<br>(63-77%)          | 1.5<br>(1-2.2)                              | 6.8%<br>(4.4-10%)                    | 8.3%<br>(5.3-12%)                   | 140<br>(90-210)     | 4600<br>(3000-6800)    |
| Chad     | 2000 | Male   | 60 to 64 | 26%<br>(18-34%)                | 74%<br>(66-82%)          | 1.2<br>(0.72-1.9)                           | 4.8%<br>(2.8-7.5%)                   | 5.7%<br>(3.3-9%)                    | 110<br>(63-180)     | 3000<br>(1800-4900)    |
| Chad     | 2000 | Male   | 65 to 69 | 28%<br>(21-36%)                | 72%<br>(64-79%)          | 1.1<br>(0.72-1.6)                           | 3.9%<br>(2.2-5.9%)                   | 4.6%<br>(2.6-7.1%)                  | 93<br>(53-150)      | 2100<br>(1200-3300)    |
| Chad     | 2000 | Male   | 70 to 74 | 28%<br>(22-36%)                | 72%<br>(64-78%)          | 0.88<br>(0.57-1.3)                          | 2.8%<br>(1.3-4.8%)                   | 3.3%<br>(1.5-5.6%)                  | 70<br>(31-120)      | 1300<br>(580-2100)     |
| Chad     | 2000 | Male   | 75 to 79 | 23%<br>(16-32%)                | 77%<br>(68-84%)          | 0.61<br>(0.36-0.98)                         | 1.7%<br>(0.55-3.3%)                  | 2%<br>(0.59-3.9%)                   | 37<br>(11-72)       | 520<br>(170-1000)      |
| Chad     | 2000 | Male   | 80 to 84 | 21%<br>(14-28%)                | 79%<br>(72-86%)          | 0.48<br>(0.29-0.74)                         | 1.3%<br>(0.33-2.4%)                  | 1.4%<br>(0.33-2.8%)                 | 17<br>(3.8-32)      | 180<br>(46-330)        |
| Chad     | 2000 | Male   | 85 to 89 | 20%<br>(13-28%)                | 80%<br>(72-87%)          | 0.4<br>(0.24-0.62)                          | 0.86%<br>(0.13-1.7%)                 | 0.96%<br>(0.07-2%)                  | 6.2<br>(0.47-13)    | 48<br>(7.1-96)         |
| Chad     | 2000 | Male   | 90 to 94 | 21%<br>(14-29%)                | 79%<br>(71-86%)          | 0.35<br>(0.2-0.56)                          | 0.4%<br>(-0.24-1.1%)                 | 0.39%<br>(-0.39-1.3%)               | 0.95<br>(-0.96-3)   | 5.9<br>(-3.5-16)       |
| Chad     | 2000 | Male   | 95 plus  | 23%<br>(15-33%)                | 77%<br>(67-85%)          | 0.33<br>(0.15-0.57)                         | 0.31%<br>(-0.51-1.2%)                | 0.24%<br>(-0.78-1.3%)               | 0.15<br>(-0.5-0.83) | 0.8<br>(-1.3-3)        |
| Chad     | 2005 | Female | All Ages | 15%<br>(14-17%)                | 85%<br>(83-86%)          | 0.37<br>(0.33-0.41)                         | 0.53%<br>(0.37-0.72%)                | 0.93%<br>(0.55-1.4%)                | 570<br>(330-870)    | 23000<br>(16000-31000) |
| Chad     | 2005 | Female | 15 to 19 | 15%<br>(11-19%)                | 85%<br>(81-89%)          | 0.31<br>(0.2-0.45)                          | 0.68%<br>(0.4-1%)                    | 0.49%<br>(0.13-1%)                  | 4.8<br>(1.2-11)     | 820<br>(480-1300)      |
| Chad     | 2005 | Female | 20 to 24 | 19%<br>(15-24%)                | 81%<br>(76-85%)          | 0.5<br>(0.34-0.74)                          | 1.5%<br>(0.87-2.3%)                  | 1.1%<br>(0.43-2.3%)                 | 15<br>(5.4-31)      | 1900<br>(1100-3000)    |
| Chad     | 2005 | Female | 25 to 29 | 22%<br>(17-28%)                | 78%<br>(72-83%)          | 0.71<br>(0.5-0.94)                          | 1.5%<br>(0.89-2.3%)                  | 1.2%<br>(0.56-2.3%)                 | 21<br>(10-38)       | 2100<br>(1300-3200)    |
| Chad     | 2005 | Female | 30 to 34 | 25%<br>(19-31%)                | 75%<br>(69-81%)          | 0.89<br>(0.65-1.2)                          | 1.5%<br>(0.96-2.3%)                  | 1.4%<br>(0.75-2.5%)                 | 27<br>(14-45)       | 2100<br>(1300-3100)    |

| Location | Year | Sex    | Age      | Prevalence of current drinkers | Prevalence of abstainers | Population average of standard drinks daily | Percent of total attributable deaths | Percent of total attributable DALYs | Attributable deaths | Attributable DALYs     |
|----------|------|--------|----------|--------------------------------|--------------------------|---------------------------------------------|--------------------------------------|-------------------------------------|---------------------|------------------------|
| Chad     | 2005 | Female | 35 to 39 | 27%<br>(21-33%)                | 73%<br>(67-79%)          | 0.99<br>(0.69-1.3)                          | 1.8%<br>(1.1-2.8%)                   | 2%<br>(1.1-3.3%)                    | 35<br>(20-56)       | 2200<br>(1400-3200)    |
| Chad     | 2005 | Female | 40 to 44 | 29%<br>(22-35%)                | 71%<br>(65-78%)          | 1<br>(0.68-1.4)                             | 2%<br>(1.3-3.1%)                     | 2.4%<br>(1.4-3.8%)                  | 40<br>(23-61)       | 2100<br>(1300-3100)    |
| Chad     | 2005 | Female | 45 to 49 | 31%<br>(23-36%)                | 69%<br>(64-77%)          | 0.96<br>(0.68-1.3)                          | 2.5%<br>(1.5-3.7%)                   | 3.1%<br>(1.8-4.8%)                  | 49<br>(29-76)       | 2200<br>(1300-3200)    |
| Chad     | 2005 | Female | 50 to 54 | 27%<br>(21-34%)                | 73%<br>(66-79%)          | 0.88<br>(0.6-1.2)                           | 2.8%<br>(1.6-4.2%)                   | 3.6%<br>(2.1-5.4%)                  | 60<br>(33-91)       | 2300<br>(1300-3400)    |
| Chad     | 2005 | Female | 55 to 59 | 23%<br>(17-30%)                | 77%<br>(70-83%)          | 0.86<br>(0.56-1.3)                          | 3.1%<br>(1.7-4.8%)                   | 4%<br>(2.2-6.1%)                    | 61<br>(33-100)      | 2000<br>(1100-3200)    |
| Chad     | 2005 | Female | 60 to 64 | 25%<br>(18-32%)                | 75%<br>(68-82%)          | 0.96<br>(0.63-1.4)                          | 3%<br>(1.7-4.8%)                     | 3.8%<br>(2.1-6.1%)                  | 71<br>(38-120)      | 1900<br>(1100-3200)    |
| Chad     | 2005 | Female | 65 to 69 | 28%<br>(21-35%)                | 72%<br>(65-79%)          | 0.96<br>(0.64-1.4)                          | 2.6%<br>(1.2-4.4%)                   | 3.3%<br>(1.5-5.4%)                  | 71<br>(31-120)      | 1600<br>(710-2800)     |
| Chad     | 2005 | Female | 70 to 74 | 25%<br>(19-33%)                | 75%<br>(67-81%)          | 0.75<br>(0.46-1.1)                          | 2%<br>(0.55-3.9%)                    | 2.4%<br>(0.65-4.9%)                 | 59<br>(15-120)      | 1100<br>(280-2100)     |
| Chad     | 2005 | Female | 75 to 79 | 20%<br>(14-29%)                | 80%<br>(71-86%)          | 0.54<br>(0.31-0.87)                         | 1.2%<br>(0.13-2.8%)                  | 1.4%<br>(0.13-3.4%)                 | 31<br>(2.8-74)      | 450<br>(47-1000)       |
| Chad     | 2005 | Female | 80 to 84 | 18%<br>(12-25%)                | 82%<br>(75-88%)          | 0.47<br>(0.28-0.73)                         | 0.8%<br>(-0.055-2%)                  | 0.94%<br>(-0.1-2.4%)                | 15<br>(-1.6-38)     | 160<br>(-11-400)       |
| Chad     | 2005 | Female | 85 to 89 | 19%<br>(13-26%)                | 81%<br>(74-87%)          | 0.47<br>(0.28-0.74)                         | 0.55%<br>(-0.22-1.6%)                | 0.62%<br>(-0.31-1.9%)               | 6.2<br>(-3-19)      | 48<br>(-19-140)        |
| Chad     | 2005 | Female | 90 to 94 | 20%<br>(13-28%)                | 80%<br>(72-87%)          | 0.48<br>(0.26-0.76)                         | 0.33%<br>(-0.5-1.4%)                 | 0.34%<br>(-0.67-1.7%)               | 1.4<br>(-2.7-6.8)   | 8.1<br>(-12-35)        |
| Chad     | 2005 | Female | 95 plus  | 22%<br>(14-31%)                | 78%<br>(69-86%)          | 0.49<br>(0.24-0.83)                         | 0.23%<br>(-0.65-1.4%)                | 0.17%<br>(-0.88-1.6%)               | 0.2<br>(-1.1-1.9)   | 1.1<br>(-3-6.7)        |
| Chad     | 2005 | Male   | All Ages | 18%<br>(15-21%)                | 82%<br>(79-85%)          | 0.85<br>(0.79-0.9)                          | 1.5%<br>(1.2-1.9%)                   | 2.5%<br>(2-3.2%)                    | 1700<br>(1300-2100) | 73000<br>(58000-89000) |
| Chad     | 2005 | Male   | 15 to 19 | 15%<br>(11-20%)                | 85%<br>(80-89%)          | 0.48<br>(0.31-0.71)                         | 1.5%<br>(0.95-2.2%)                  | 1.7%<br>(0.92-2.7%)                 | 18<br>(10-30)       | 1800<br>(1100-2700)    |
| Chad     | 2005 | Male   | 20 to 24 | 28%<br>(20-35%)                | 72%<br>(65-80%)          | 1.3<br>(0.94-1.8)                           | 4.7%<br>(3.2-6.4%)                   | 5.4%<br>(3.5-7.9%)                  | 77<br>(49-110)      | 6100<br>(4200-8500)    |
| Chad     | 2005 | Male   | 25 to 29 | 36%<br>(27-43%)                | 64%<br>(57-73%)          | 2.2<br>(1.6-2.8)                            | 6.7%<br>(4.6-9.3%)                   | 7.9%<br>(5.1-12%)                   | 140<br>(90-190)     | 9300<br>(6400-13000)   |
| Chad     | 2005 | Male   | 30 to 34 | 37%<br>(28-44%)                | 63%<br>(56-72%)          | 2.5<br>(1.8-3.1)                            | 7%<br>(5-9.4%)                       | 8.1%<br>(5.4-11%)                   | 160<br>(110-220)    | 9700<br>(6900-13000)   |
| Chad     | 2005 | Male   | 35 to 39 | 37%<br>(30-43%)                | 63%<br>(57-70%)          | 2.3<br>(1.6-3.1)                            | 6.9%<br>(4.9-9.4%)                   | 8.1%<br>(5.5-11%)                   | 160<br>(110-210)    | 8500<br>(6100-11000)   |
| Chad     | 2005 | Male   | 40 to 44 | 37%<br>(29-44%)                | 63%<br>(56-71%)          | 2.3<br>(1.6-3)                              | 7.3%<br>(5.2-9.9%)                   | 8.7%<br>(6-12%)                     | 170<br>(120-230)    | 8200<br>(5800-11000)   |
| Chad     | 2005 | Male   | 45 to 49 | 37%<br>(28-44%)                | 63%<br>(56-72%)          | 2.3<br>(1.6-3)                              | 8.5%<br>(6-11%)                      | 10%<br>(7.2-14%)                    | 200<br>(140-270)    | 8400<br>(5900-11000)   |
| Chad     | 2005 | Male   | 50 to 54 | 35%<br>(27-42%)                | 65%<br>(58-73%)          | 2.1<br>(1.5-2.9)                            | 8.6%<br>(5.9-12%)                    | 10%<br>(7.2-14%)                    | 200<br>(130-280)    | 7400<br>(5000-10000)   |

| Location | Year | Sex    | Age      | Prevalence of current drinkers | Prevalence of abstainers | Population average of standard drinks daily | Percent of total attributable deaths | Percent of total attributable DALYs | Attributable deaths | Attributable DALYs     |
|----------|------|--------|----------|--------------------------------|--------------------------|---------------------------------------------|--------------------------------------|-------------------------------------|---------------------|------------------------|
| Chad     | 2005 | Male   | 55 to 59 | 29%<br>(22-37%)                | 71%<br>(63-78%)          | 1.7<br>(1.1-2.4)                            | 7.2%<br>(4.8-10%)                    | 8.8%<br>(5.9-13%)                   | 160<br>(100-230)    | 5100<br>(3400-7400)    |
| Chad     | 2005 | Male   | 60 to 64 | 25%<br>(18-34%)                | 75%<br>(66-82%)          | 1.3<br>(0.77-2)                             | 5.1%<br>(3.2-7.9%)                   | 6.1%<br>(3.7-9.5%)                  | 130<br>(78-200)     | 3500<br>(2200-5600)    |
| Chad     | 2005 | Male   | 65 to 69 | 28%<br>(21-35%)                | 72%<br>(65-79%)          | 1.2<br>(0.76-1.8)                           | 4.1%<br>(2.5-6.2%)                   | 4.9%<br>(2.9-7.5%)                  | 110<br>(64-170)     | 2500<br>(1500-3900)    |
| Chad     | 2005 | Male   | 70 to 74 | 28%<br>(21-35%)                | 72%<br>(65-79%)          | 0.96<br>(0.63-1.4)                          | 3%<br>(1.4-4.9%)                     | 3.5%<br>(1.7-5.8%)                  | 81<br>(38-130)      | 1500<br>(710-2400)     |
| Chad     | 2005 | Male   | 75 to 79 | 23%<br>(16-32%)                | 77%<br>(68-84%)          | 0.66<br>(0.4-1.1)                           | 1.8%<br>(0.66-3.4%)                  | 2.1%<br>(0.73-4%)                   | 43<br>(15-80)       | 610<br>(220-1100)      |
| Chad     | 2005 | Male   | 80 to 84 | 20%<br>(14-27%)                | 80%<br>(73-86%)          | 0.52<br>(0.31-0.79)                         | 1.4%<br>(0.47-2.5%)                  | 1.6%<br>(0.49-3%)                   | 21<br>(6.5-39)      | 220<br>(77-410)        |
| Chad     | 2005 | Male   | 85 to 89 | 20%<br>(13-27%)                | 80%<br>(73-87%)          | 0.43<br>(0.25-0.67)                         | 0.96%<br>(0.23-1.8%)                 | 1.1%<br>(0.2-2.2%)                  | 7.9<br>(1.5-16)     | 61<br>(15-120)         |
| Chad     | 2005 | Male   | 90 to 94 | 20%<br>(14-28%)                | 80%<br>(72-86%)          | 0.38<br>(0.22-0.61)                         | 0.48%<br>(-0.14-1.2%)                | 0.48%<br>(-0.29-1.3%)               | 1.3<br>(-0.81-3.8)  | 8<br>(-2.4-20)         |
| Chad     | 2005 | Male   | 95 plus  | 23%<br>(15-33%)                | 77%<br>(67-85%)          | 0.36<br>(0.17-0.63)                         | 0.41%<br>(-0.39-1.3%)                | 0.35%<br>(-0.65-1.5%)               | 0.24<br>(-0.45-1)   | 1.1<br>(-1.1-3.7)      |
| Chad     | 2010 | Female | All Ages | 12%<br>(11-14%)                | 88%<br>(86-89%)          | 0.36<br>(0.32-0.4)                          | 0.59%<br>(0.44-0.78%)                | 1.1%<br>(0.71-1.5%)                 | 690<br>(440-1000)   | 27000<br>(20000-35000) |
| Chad     | 2010 | Female | 15 to 19 | 11%<br>(8.7-14%)               | 89%<br>(86-91%)          | 0.27<br>(0.18-0.4)                          | 0.67%<br>(0.42-0.97%)                | 0.44%<br>(0.17-0.89%)               | 5.2<br>(1.8-11)     | 950<br>(600-1400)      |
| Chad     | 2010 | Female | 20 to 24 | 15%<br>(12-19%)                | 85%<br>(81-88%)          | 0.46<br>(0.32-0.69)                         | 1.5%<br>(0.99-2.2%)                  | 1.1%<br>(0.5-2.1%)                  | 16<br>(6.7-30)      | 2200<br>(1400-3400)    |
| Chad     | 2010 | Female | 25 to 29 | 18%<br>(15-22%)                | 82%<br>(78-85%)          | 0.7<br>(0.53-0.91)                          | 1.6%<br>(1-2.3%)                     | 1.3%<br>(0.65-2.2%)                 | 22<br>(12-37)       | 2400<br>(1600-3300)    |
| Chad     | 2010 | Female | 30 to 34 | 22%<br>(18-25%)                | 78%<br>(75-82%)          | 0.92<br>(0.71-1.2)                          | 1.6%<br>(1.1-2.3%)                   | 1.5%<br>(0.89-2.5%)                 | 29<br>(18-46)       | 2300<br>(1600-3400)    |
| Chad     | 2010 | Female | 35 to 39 | 24%<br>(20-28%)                | 76%<br>(72-80%)          | 1<br>(0.76-1.4)                             | 1.9%<br>(1.2-2.6%)                   | 2%<br>(1.3-3.1%)                    | 38<br>(24-56)       | 2400<br>(1700-3300)    |
| Chad     | 2010 | Female | 40 to 44 | 23%<br>(19-28%)                | 77%<br>(72-81%)          | 0.96<br>(0.68-1.3)                          | 2.1%<br>(1.4-2.9%)                   | 2.4%<br>(1.6-3.6%)                  | 40<br>(26-59)       | 2200<br>(1500-3000)    |
| Chad     | 2010 | Female | 45 to 49 | 22%<br>(18-28%)                | 78%<br>(72-82%)          | 0.84<br>(0.6-1.2)                           | 2.5%<br>(1.6-3.6%)                   | 3.1%<br>(2-4.7%)                    | 49<br>(32-73)       | 2200<br>(1500-3200)    |
| Chad     | 2010 | Female | 50 to 54 | 23%<br>(19-28%)                | 77%<br>(72-81%)          | 0.92<br>(0.65-1.3)                          | 3.2%<br>(2-4.6%)                     | 4.2%<br>(2.6-6.3%)                  | 70<br>(43-100)      | 2600<br>(1700-3900)    |
| Chad     | 2010 | Female | 55 to 59 | 22%<br>(18-27%)                | 78%<br>(73-82%)          | 1<br>(0.71-1.4)                             | 3.7%<br>(2.3-5.7%)                   | 4.9%<br>(3-7.5%)                    | 92<br>(54-140)      | 3000<br>(1800-4600)    |
| Chad     | 2010 | Female | 60 to 64 | 20%<br>(16-26%)                | 80%<br>(74-84%)          | 0.95<br>(0.64-1.4)                          | 3.4%<br>(2.1-5.2%)                   | 4.3%<br>(2.6-6.5%)                  | 82<br>(48-130)      | 2200<br>(1300-3500)    |
| Chad     | 2010 | Female | 65 to 69 | 23%<br>(19-29%)                | 77%<br>(71-81%)          | 0.97<br>(0.67-1.4)                          | 3.1%<br>(1.7-4.7%)                   | 3.8%<br>(2.1-5.9%)                  | 87<br>(48-140)      | 2000<br>(1100-3200)    |
| Chad     | 2010 | Female | 70 to 74 | 23%<br>(18-29%)                | 77%<br>(71-82%)          | 0.81<br>(0.52-1.2)                          | 2.4%<br>(0.98-4.4%)                  | 3%<br>(1.1-5.3%)                    | 76<br>(30-140)      | 1400<br>(540-2500)     |

| Location | Year | Sex    | Age      | Prevalence of current drinkers | Prevalence of abstainers | Population average of standard drinks daily | Percent of total attributable deaths | Percent of total attributable DALYs | Attributable deaths | Attributable DALYs      |
|----------|------|--------|----------|--------------------------------|--------------------------|---------------------------------------------|--------------------------------------|-------------------------------------|---------------------|-------------------------|
| Chad     | 2010 | Female | 75 to 79 | 19%<br>(14-25%)                | 81%<br>(75-86%)          | 0.6<br>(0.36-0.92)                          | 1.6%<br>(0.37-3.2%)                  | 1.9%<br>(0.43-3.9%)                 | 44<br>(9.8-90)      | 620<br>(150-1300)       |
| Chad     | 2010 | Female | 80 to 84 | 18%<br>(12-24%)                | 82%<br>(76-88%)          | 0.55<br>(0.33-0.84)                         | 1.1%<br>(0.17-2.4%)                  | 1.3%<br>(0.18-2.9%)                 | 23<br>(3.1-52)      | 240<br>(38-540)         |
| Chad     | 2010 | Female | 85 to 89 | 19%<br>(12-26%)                | 81%<br>(74-88%)          | 0.56<br>(0.32-0.85)                         | 0.85%<br>(-0.0008-2%)                | 0.99%<br>(-0.057-2.4%)              | 11<br>(-0.65-28)    | 85<br>(-0.079-200)      |
| Chad     | 2010 | Female | 90 to 94 | 20%<br>(14-28%)                | 80%<br>(72-86%)          | 0.57<br>(0.31-0.91)                         | 0.62%<br>(-0.27-1.9%)                | 0.68%<br>(-0.4-2.2%)                | 3.2<br>(-1.9-10)    | 17<br>(-7.8-54)         |
| Chad     | 2010 | Female | 95 plus  | 22%<br>(14-31%)                | 78%<br>(69-86%)          | 0.59<br>(0.29-1)                            | 0.5%<br>(-0.52-1.9%)                 | 0.49%<br>(-0.75-2.2%)               | 0.65<br>(-1-2.9)    | 2.7<br>(-2.8-10)        |
| Chad     | 2010 | Male   | All Ages | 15%<br>(14-17%)                | 85%<br>(83-86%)          | 0.88<br>(0.82-0.94)                         | 1.8%<br>(1.4-2.2%)                   | 2.9%<br>(2.3-3.6%)                  | 2000<br>(1600-2500) | 88000<br>(72000-110000) |
| Chad     | 2010 | Male   | 15 to 19 | 11%<br>(8.3-13%)               | 89%<br>(87-92%)          | 0.42<br>(0.27-0.6)                          | 1.4%<br>(0.89-1.9%)                  | 1.4%<br>(0.84-2.3%)                 | 19<br>(11-30)       | 2000<br>(1300-2800)     |
| Chad     | 2010 | Male   | 20 to 24 | 22%<br>(18-26%)                | 78%<br>(74-82%)          | 1.3<br>(0.93-1.7)                           | 4.6%<br>(3.2-6.5%)                   | 5.3%<br>(3.6-7.6%)                  | 84<br>(55-120)      | 6800<br>(4800-9400)     |
| Chad     | 2010 | Male   | 25 to 29 | 31%<br>(26-35%)                | 69%<br>(65-74%)          | 2.3<br>(1.7-2.8)                            | 7.4%<br>(5.2-9.8%)                   | 8.9%<br>(5.9-12%)                   | 160<br>(110-210)    | 11000<br>(7800-14000)   |
| Chad     | 2010 | Male   | 30 to 34 | 34%<br>(28-39%)                | 66%<br>(61-72%)          | 2.7<br>(2.1-3.4)                            | 8.1%<br>(5.8-10%)                    | 9.6%<br>(6.7-13%)                   | 190<br>(140-260)    | 12000<br>(8700-15000)   |
| Chad     | 2010 | Male   | 35 to 39 | 33%<br>(29-38%)                | 67%<br>(62-71%)          | 2.6<br>(1.9-3.3)                            | 7.9%<br>(5.8-11%)                    | 9.5%<br>(6.7-13%)                   | 200<br>(140-260)    | 11000<br>(8000-14000)   |
| Chad     | 2010 | Male   | 40 to 44 | 33%<br>(28-38%)                | 67%<br>(62-72%)          | 2.5<br>(1.8-3.2)                            | 8.5%<br>(6.1-11%)                    | 10%<br>(7.4-14%)                    | 200<br>(150-270)    | 9800<br>(7100-13000)    |
| Chad     | 2010 | Male   | 45 to 49 | 30%<br>(26-35%)                | 70%<br>(65-74%)          | 2.3<br>(1.7-3)                              | 9.4%<br>(6.9-12%)                    | 12%<br>(8.4-15%)                    | 220<br>(160-310)    | 9500<br>(6900-13000)    |
| Chad     | 2010 | Male   | 50 to 54 | 27%<br>(22-32%)                | 73%<br>(68-78%)          | 2<br>(1.4-2.8)                              | 8.8%<br>(6.2-12%)                    | 11%<br>(7.7-15%)                    | 220<br>(150-290)    | 8000<br>(5600-11000)    |
| Chad     | 2010 | Male   | 55 to 59 | 28%<br>(24-33%)                | 72%<br>(67-76%)          | 1.9<br>(1.4-2.7)                            | 8.5%<br>(5.8-12%)                    | 11%<br>(7.3-15%)                    | 220<br>(150-300)    | 7000<br>(4800-9800)     |
| Chad     | 2010 | Male   | 60 to 64 | 27%<br>(22-32%)                | 73%<br>(68-78%)          | 1.6<br>(1.1-2.4)                            | 6.6%<br>(4.3-9.7%)                   | 8%<br>(5.1-12%)                     | 170<br>(110-260)    | 4700<br>(3000-7000)     |
| Chad     | 2010 | Male   | 65 to 69 | 26%<br>(21-31%)                | 74%<br>(69-79%)          | 1.3<br>(0.93-1.9)                           | 4.9%<br>(3.1-7.2%)                   | 5.8%<br>(3.8-8.7%)                  | 140<br>(88-210)     | 3200<br>(2000-4700)     |
| Chad     | 2010 | Male   | 70 to 74 | 23%<br>(19-29%)                | 77%<br>(71-81%)          | 0.96<br>(0.65-1.4)                          | 3.3%<br>(1.8-5.1%)                   | 3.9%<br>(2.2-6.1%)                  | 99<br>(52-150)      | 1800<br>(990-2800)      |
| Chad     | 2010 | Male   | 75 to 79 | 20%<br>(15-26%)                | 80%<br>(74-85%)          | 0.68<br>(0.42-1.1)                          | 2.1%<br>(0.95-3.7%)                  | 2.4%<br>(1.1-4.3%)                  | 54<br>(23-95)       | 760<br>(340-1400)       |
| Chad     | 2010 | Male   | 80 to 84 | 19%<br>(13-25%)                | 81%<br>(75-87%)          | 0.59<br>(0.36-0.9)                          | 1.7%<br>(0.7-2.8%)                   | 1.9%<br>(0.76-3.3%)                 | 28<br>(11-48)       | 290<br>(120-500)        |
| Chad     | 2010 | Male   | 85 to 89 | 19%<br>(12-25%)                | 81%<br>(75-88%)          | 0.5<br>(0.29-0.76)                          | 1.2%<br>(0.47-2.1%)                  | 1.4%<br>(0.46-2.5%)                 | 11<br>(3.8-21)      | 88<br>(34-160)          |
| Chad     | 2010 | Male   | 90 to 94 | 19%<br>(13-27%)                | 81%<br>(73-87%)          | 0.44<br>(0.25-0.69)                         | 0.66%<br>(0.059-1.4%)                | 0.69%<br>(-0.058-1.7%)              | 2.2<br>(-0.18-5.2)  | 13<br>(1.1-28)          |



| Location | Year | Sex    | Age      | Prevalence of current drinkers | Prevalence of abstainers | Population average of standard drinks daily | Percent of total attributable deaths | Percent of total attributable DALYs | Attributable deaths | Attributable DALYs      |
|----------|------|--------|----------|--------------------------------|--------------------------|---------------------------------------------|--------------------------------------|-------------------------------------|---------------------|-------------------------|
| Chad     | 2010 | Male   | 95 plus  | 22%<br>(14-31%)                | 78%<br>(69-86%)          | 0.42<br>(0.2-0.72)                          | 0.58%<br>(-0.17-1.6%)                | 0.55%<br>(-0.39-1.8%)               | 0.43<br>(-0.3-1.4)  | 1.9<br>(-0.54-5.1)      |
| Chad     | 2016 | Female | All Ages | 12%<br>(11-14%)                | 88%<br>(86-89%)          | 0.35<br>(0.24-0.47)                         | 0.6%<br>(0.39-0.87%)                 | 1.1%<br>(0.57-1.8%)                 | 690<br>(370-1100)   | 28000<br>(19000-41000)  |
| Chad     | 2016 | Female | 15 to 19 | 11%<br>(8.6-14%)               | 89%<br>(86-91%)          | 0.26<br>(0.15-0.43)                         | 0.65%<br>(0.4-0.99%)                 | 0.39%<br>(0.13-0.83%)               | 5.3<br>(1.6-12)     | 1100<br>(650-1700)      |
| Chad     | 2016 | Female | 20 to 24 | 15%<br>(12-18%)                | 85%<br>(82-88%)          | 0.45<br>(0.27-0.73)                         | 1.5%<br>(0.95-2.3%)                  | 0.99%<br>(0.37-2.1%)                | 15<br>(5.4-32)      | 2500<br>(1600-4000)     |
| Chad     | 2016 | Female | 25 to 29 | 18%<br>(15-22%)                | 82%<br>(78-85%)          | 0.68<br>(0.42-1)                            | 1.6%<br>(1-2.3%)                     | 1.3%<br>(0.61-2.3%)                 | 22<br>(11-39)       | 2700<br>(1700-3800)     |
| Chad     | 2016 | Female | 30 to 34 | 21%<br>(18-25%)                | 79%<br>(75-82%)          | 0.89<br>(0.57-1.3)                          | 1.7%<br>(1.1-2.4%)                   | 1.5%<br>(0.81-2.6%)                 | 29<br>(16-49)       | 2600<br>(1700-3900)     |
| Chad     | 2016 | Female | 35 to 39 | 23%<br>(20-27%)                | 77%<br>(73-80%)          | 0.99<br>(0.64-1.4)                          | 1.9%<br>(1.2-2.8%)                   | 2%<br>(1.2-3.2%)                    | 40<br>(23-63)       | 2600<br>(1700-3900)     |
| Chad     | 2016 | Female | 40 to 44 | 23%<br>(19-27%)                | 77%<br>(73-81%)          | 0.92<br>(0.56-1.4)                          | 2%<br>(1.3-3%)                       | 2.5%<br>(1.5-3.8%)                  | 43<br>(26-67)       | 2400<br>(1500-3500)     |
| Chad     | 2016 | Female | 45 to 49 | 22%<br>(18-27%)                | 78%<br>(73-82%)          | 0.8<br>(0.49-1.2)                           | 2.4%<br>(1.5-3.7%)                   | 3.1%<br>(1.8-5%)                    | 49<br>(28-79)       | 2300<br>(1400-3500)     |
| Chad     | 2016 | Female | 50 to 54 | 23%<br>(19-28%)                | 77%<br>(72-81%)          | 0.88<br>(0.53-1.3)                          | 3.1%<br>(1.7-4.9%)                   | 4.1%<br>(2.3-6.7%)                  | 67<br>(37-110)      | 2600<br>(1500-4100)     |
| Chad     | 2016 | Female | 55 to 59 | 22%<br>(18-26%)                | 78%<br>(74-82%)          | 0.96<br>(0.6-1.4)                           | 3.5%<br>(1.9-5.9%)                   | 4.8%<br>(2.6-8.2%)                  | 88<br>(47-150)      | 2900<br>(1600-4900)     |
| Chad     | 2016 | Female | 60 to 64 | 20%<br>(16-25%)                | 80%<br>(75-84%)          | 0.9<br>(0.54-1.4)                           | 3.1%<br>(1.7-5.2%)                   | 4%<br>(2.1-6.7%)                    | 94<br>(49-160)      | 2600<br>(1400-4400)     |
| Chad     | 2016 | Female | 65 to 69 | 23%<br>(19-28%)                | 77%<br>(72-81%)          | 0.92<br>(0.57-1.4)                          | 2.8%<br>(1.2-5.2%)                   | 3.5%<br>(1.5-6.5%)                  | 85<br>(35-160)      | 2000<br>(840-3600)      |
| Chad     | 2016 | Female | 70 to 74 | 22%<br>(18-28%)                | 78%<br>(72-82%)          | 0.77<br>(0.45-1.3)                          | 2.2%<br>(0.62-4.5%)                  | 2.7%<br>(0.75-5.4%)                 | 71<br>(20-150)      | 1300<br>(360-2700)      |
| Chad     | 2016 | Female | 75 to 79 | 18%<br>(14-24%)                | 82%<br>(76-86%)          | 0.57<br>(0.31-0.98)                         | 1.4%<br>(0.16-3.2%)                  | 1.7%<br>(0.19-3.9%)                 | 42<br>(4.5-98)      | 610<br>(78-1400)        |
| Chad     | 2016 | Female | 80 to 84 | 18%<br>(12-24%)                | 82%<br>(76-88%)          | 0.53<br>(0.29-0.92)                         | 0.99%<br>(0.0095-2.5%)               | 1.2%<br>(-0.023-3%)                 | 22<br>(-0.41-57)    | 240<br>(2.2-600)        |
| Chad     | 2016 | Female | 85 to 89 | 19%<br>(12-27%)                | 81%<br>(73-88%)          | 0.54<br>(0.29-0.92)                         | 0.72%<br>(-0.19-2.1%)                | 0.83%<br>(-0.28-2.5%)               | 11<br>(-3.5-31)     | 82<br>(-21-230)         |
| Chad     | 2016 | Female | 90 to 94 | 20%<br>(13-28%)                | 80%<br>(72-87%)          | 0.55<br>(0.29-0.94)                         | 0.5%<br>(-0.4-1.9%)                  | 0.54%<br>(-0.57-2.2%)               | 3<br>(-3-12)        | 17<br>(-13-62)          |
| Chad     | 2016 | Female | 95 plus  | 22%<br>(14-31%)                | 78%<br>(69-86%)          | 0.57<br>(0.25-1)                            | 0.4%<br>(-0.58-1.8%)                 | 0.36%<br>(-0.83-2.1%)               | 0.58<br>(-1.4-3.3)  | 2.6<br>(-3.8-12)        |
| Chad     | 2016 | Male   | All Ages | 15%<br>(14-17%)                | 85%<br>(83-86%)          | 0.86<br>(0.6-1.2)                           | 1.8%<br>(1.3-2.5%)                   | 3%<br>(2-4.2%)                      | 2200<br>(1500-3000) | 96000<br>(68000-130000) |
| Chad     | 2016 | Male   | 15 to 19 | 10%<br>(8.5-13%)               | 90%<br>(87-92%)          | 0.41<br>(0.23-0.65)                         | 1.3%<br>(0.82-1.9%)                  | 1.3%<br>(0.68-2.3%)                 | 20<br>(10-35)       | 2200<br>(1400-3400)     |
| Chad     | 2016 | Male   | 20 to 24 | 22%<br>(18-26%)                | 78%<br>(74-82%)          | 1.2<br>(0.78-1.9)                           | 4.5%<br>(3-6.5%)                     | 5.1%<br>(3.1-7.9%)                  | 91<br>(53-140)      | 7700<br>(5000-11000)    |

| Location      | Year | Sex    | Age      | Prevalence of current drinkers | Prevalence of abstainers | Population average of standard drinks daily | Percent of total attributable deaths | Percent of total attributable DALYs | Attributable deaths | Attributable DALYs     |
|---------------|------|--------|----------|--------------------------------|--------------------------|---------------------------------------------|--------------------------------------|-------------------------------------|---------------------|------------------------|
| Chad          | 2016 | Male   | 25 to 29 | 30%<br>(25-35%)                | 70%<br>(65-75%)          | 2.2<br>(1.4-3.2)                            | 7.3%<br>(4.8-10%)                    | 8.9%<br>(5.5-13%)                   | 170<br>(100-250)    | 12000<br>(7900-17000)  |
| Chad          | 2016 | Male   | 30 to 34 | 34%<br>(28-38%)                | 66%<br>(62-72%)          | 2.6<br>(1.7-3.8)                            | 8.1%<br>(5.6-11%)                    | 9.9%<br>(6.4-14%)                   | 210<br>(140-290)    | 13000<br>(8800-17000)  |
| Chad          | 2016 | Male   | 35 to 39 | 33%<br>(29-37%)                | 67%<br>(63-71%)          | 2.5<br>(1.6-3.6)                            | 8%<br>(5.5-11%)                      | 9.7%<br>(6.5-14%)                   | 220<br>(150-300)    | 12000<br>(8400-16000)  |
| Chad          | 2016 | Male   | 40 to 44 | 33%<br>(28-38%)                | 67%<br>(62-72%)          | 2.4<br>(1.5-3.6)                            | 8.3%<br>(5.5-12%)                    | 10%<br>(6.8-14%)                    | 230<br>(150-320)    | 11000<br>(7500-15000)  |
| Chad          | 2016 | Male   | 45 to 49 | 30%<br>(26-35%)                | 70%<br>(65-74%)          | 2.2<br>(1.4-3.3)                            | 9.1%<br>(5.9-13%)                    | 11%<br>(7.3-16%)                    | 240<br>(150-350)    | 10000<br>(6300-15000)  |
| Chad          | 2016 | Male   | 50 to 54 | 27%<br>(22-33%)                | 73%<br>(67-78%)          | 1.9<br>(1.2-3)                              | 8.4%<br>(5.5-12%)                    | 11%<br>(6.7-15%)                    | 220<br>(140-310)    | 8200<br>(5200-12000)   |
| Chad          | 2016 | Male   | 55 to 59 | 28%<br>(23-33%)                | 72%<br>(67-77%)          | 1.9<br>(1.1-2.9)                            | 8.2%<br>(5.1-12%)                    | 10%<br>(6.3-15%)                    | 220<br>(140-340)    | 7200<br>(4400-11000)   |
| Chad          | 2016 | Male   | 60 to 64 | 27%<br>(22-33%)                | 73%<br>(67-78%)          | 1.6<br>(0.92-2.6)                           | 6.3%<br>(3.7-9.9%)                   | 7.7%<br>(4.4-12%)                   | 200<br>(110-320)    | 5400<br>(3100-8700)    |
| Chad          | 2016 | Male   | 65 to 69 | 26%<br>(21-31%)                | 74%<br>(69-79%)          | 1.3<br>(0.8-2)                              | 4.7%<br>(2.6-7.7%)                   | 5.6%<br>(3.2-9.3%)                  | 140<br>(79-240)     | 3300<br>(1800-5500)    |
| Chad          | 2016 | Male   | 70 to 74 | 23%<br>(18-29%)                | 77%<br>(71-82%)          | 0.93<br>(0.56-1.5)                          | 3.1%<br>(1.6-5.5%)                   | 3.8%<br>(1.9-6.7%)                  | 100<br>(50-190)     | 1900<br>(940-3400)     |
| Chad          | 2016 | Male   | 75 to 79 | 20%<br>(15-26%)                | 80%<br>(74-85%)          | 0.66<br>(0.38-1.1)                          | 2%<br>(0.8-3.7%)                     | 2.3%<br>(0.9-4.4%)                  | 58<br>(22-110)      | 820<br>(320-1600)      |
| Chad          | 2016 | Male   | 80 to 84 | 19%<br>(13-26%)                | 81%<br>(74-87%)          | 0.57<br>(0.31-0.95)                         | 1.6%<br>(0.64-2.8%)                  | 1.8%<br>(0.69-3.3%)                 | 29<br>(11-53)       | 310<br>(120-560)       |
| Chad          | 2016 | Male   | 85 to 89 | 19%<br>(12-26%)                | 81%<br>(74-88%)          | 0.48<br>(0.27-0.81)                         | 1.1%<br>(0.37-2.2%)                  | 1.3%<br>(0.35-2.6%)                 | 12<br>(3.4-25)      | 94<br>(31-190)         |
| Chad          | 2016 | Male   | 90 to 94 | 19%<br>(13-27%)                | 81%<br>(73-87%)          | 0.42<br>(0.22-0.72)                         | 0.61%<br>(-0.013-1.5%)               | 0.62%<br>(-0.15-1.7%)               | 2.4<br>(-0.56-6.3)  | 14<br>(-0.3-34)        |
| Chad          | 2016 | Male   | 95 plus  | 22%<br>(14-31%)                | 78%<br>(69-86%)          | 0.4<br>(0.17-0.74)                          | 0.51%<br>(-0.22-1.5%)                | 0.46%<br>(-0.44-1.7%)               | 0.44<br>(-0.42-1.6) | 2<br>(-0.84-5.9)       |
| Cote d'Ivoire | 1990 | Female | All Ages | 16%<br>(14-19%)                | 84%<br>(81-86%)          | 0.45<br>(0.31-0.62)                         | 0.82%<br>(0.51-1.2%)                 | 1.5%<br>(0.77-2.5%)                 | 930<br>(470-1500)   | 36000<br>(23000-53000) |
| Cote d'Ivoire | 1990 | Female | 15 to 19 | 16%<br>(11-22%)                | 84%<br>(78-89%)          | 0.46<br>(0.24-0.77)                         | 0.94%<br>(0.51-1.6%)                 | 0.94%<br>(0.33-1.9%)                | 11<br>(3.7-22)      | 1300<br>(740-2200)     |
| Cote d'Ivoire | 1990 | Female | 20 to 24 | 22%<br>(14-30%)                | 78%<br>(70-86%)          | 0.72<br>(0.37-1.2)                          | 1.8%<br>(1.1-2.9%)                   | 1.6%<br>(0.64-3.1%)                 | 23<br>(9.4-44)      | 2700<br>(1600-4200)    |
| Cote d'Ivoire | 1990 | Female | 25 to 29 | 23%<br>(15-32%)                | 77%<br>(68-85%)          | 0.75<br>(0.4-1.2)                           | 1.9%<br>(1.1-3%)                     | 1.8%<br>(0.81-3.4%)                 | 26<br>(12-50)       | 2600<br>(1600-4200)    |
| Cote d'Ivoire | 1990 | Female | 30 to 34 | 25%<br>(16-37%)                | 75%<br>(63-84%)          | 0.82<br>(0.43-1.4)                          | 2%<br>(1.3-3.2%)                     | 2.2%<br>(1.1-3.9%)                  | 32<br>(16-57)       | 2500<br>(1600-4000)    |
| Cote d'Ivoire | 1990 | Female | 35 to 39 | 29%<br>(19-39%)                | 71%<br>(61-81%)          | 0.93<br>(0.5-1.5)                           | 2.4%<br>(1.4-4%)                     | 3%<br>(1.6-5.3%)                    | 46<br>(24-80)       | 2800<br>(1700-4500)    |
| Cote d'Ivoire | 1990 | Female | 40 to 44 | 30%<br>(20-40%)                | 70%<br>(60-80%)          | 1<br>(0.55-1.6)                             | 3.1%<br>(1.8-4.7%)                   | 4.2%<br>(2.4-6.4%)                  | 65<br>(37-100)      | 3300<br>(2000-5100)    |

| Location      | Year | Sex    | Age      | Prevalence of current drinkers | Prevalence of abstainers | Population average of standard drinks daily | Percent of total attributable deaths | Percent of total attributable DALYs | Attributable deaths | Attributable DALYs        |
|---------------|------|--------|----------|--------------------------------|--------------------------|---------------------------------------------|--------------------------------------|-------------------------------------|---------------------|---------------------------|
| Cote d'Ivoire | 1990 | Female | 45 to 49 | 29%<br>(18-39%)                | 71%<br>(61-82%)          | 1.1<br>(0.57-1.8)                           | 3.5%<br>(1.9-5.8%)                   | 4.7%<br>(2.4-8.1%)                  | 83<br>(43-140)      | 3600<br>(2000-6200)       |
| Cote d'Ivoire | 1990 | Female | 50 to 54 | 28%<br>(20-39%)                | 72%<br>(61-80%)          | 1.1<br>(0.62-1.9)                           | 4%<br>(2.1-6.9%)                     | 5.3%<br>(2.8-9%)                    | 110<br>(56-180)     | 4100<br>(2200-7000)       |
| Cote d'Ivoire | 1990 | Female | 55 to 59 | 29%<br>(20-39%)                | 71%<br>(61-80%)          | 1.2<br>(0.65-2.1)                           | 4.2%<br>(2-7.4%)                     | 5.4%<br>(2.6-9.5%)                  | 120<br>(57-220)     | 4000<br>(1900-7000)       |
| Cote d'Ivoire | 1990 | Female | 60 to 64 | 30%<br>(20-42%)                | 70%<br>(58-80%)          | 1.2<br>(0.63-2.1)                           | 3.7%<br>(1.6-6.9%)                   | 4.6%<br>(2-8.6%)                    | 120<br>(51-230)     | 3300<br>(1400-6200)       |
| Cote d'Ivoire | 1990 | Female | 65 to 69 | 32%<br>(22-42%)                | 68%<br>(58-78%)          | 1.2<br>(0.66-2)                             | 3.3%<br>(1.1-6.3%)                   | 4%<br>(1.3-7.6%)                    | 110<br>(38-220)     | 2600<br>(850-5000)        |
| Cote d'Ivoire | 1990 | Female | 70 to 74 | 29%<br>(20-39%)                | 71%<br>(61-80%)          | 0.95<br>(0.5-1.6)                           | 2.8%<br>(0.64-6%)                    | 3.3%<br>(0.73-7%)                   | 95<br>(21-200)      | 1700<br>(380-3600)        |
| Cote d'Ivoire | 1990 | Female | 75 to 79 | 24%<br>(16-34%)                | 76%<br>(66-84%)          | 0.71<br>(0.35-1.3)                          | 1.7%<br>(-0.02-4.2%)                 | 2%<br>(-0.045-5%)                   | 49<br>(-1.1-130)    | 700<br>(-7.7-1800)        |
| Cote d'Ivoire | 1990 | Female | 80 to 84 | 22%<br>(14-31%)                | 78%<br>(69-86%)          | 0.62<br>(0.32-1)                            | 1.1%<br>(-0.1-2.8%)                  | 1.3%<br>(-0.15-3.3%)                | 21<br>(-2.5-57)     | 230<br>(-22-600)          |
| Cote d'Ivoire | 1990 | Female | 85 to 89 | 24%<br>(15-35%)                | 76%<br>(65-85%)          | 0.64<br>(0.31-1.1)                          | 0.74%<br>(-0.34-2.3%)                | 0.84%<br>(-0.46-2.8%)               | 7.7<br>(-4.1-26)    | 59<br>(-27-190)           |
| Cote d'Ivoire | 1990 | Female | 90 to 94 | 27%<br>(18-39%)                | 73%<br>(61-82%)          | 0.69<br>(0.33-1.2)                          | 0.43%<br>(-0.7-2.2%)                 | 0.45%<br>(-0.94-2.5%)               | 1.4<br>(-3-7.9)     | 8.4<br>(-13-42)           |
| Cote d'Ivoire | 1990 | Female | 95 plus  | 32%<br>(18-48%)                | 68%<br>(52-82%)          | 0.77<br>(0.3-1.5)                           | 0.27%<br>(-1-2.4%)                   | 0.19%<br>(-1.4-2.7%)                | 0.15<br>(-1.1-2.1)  | 0.85<br>(-3.2-7.5)        |
| Cote d'Ivoire | 1990 | Male   | All Ages | 29%<br>(24-34%)                | 71%<br>(66-76%)          | 1.3<br>(0.93-1.8)                           | 2.6%<br>(1.8-3.5%)                   | 4.2%<br>(2.8-6%)                    | 3600<br>(2400-5000) | 150000<br>(100000-200000) |
| Cote d'Ivoire | 1990 | Male   | 15 to 19 | 22%<br>(14-31%)                | 78%<br>(69-86%)          | 0.78<br>(0.39-1.3)                          | 2%<br>(1.1-4.2%)                     | 2.4%<br>(1.1-4.2%)                  | 32<br>(15-57)       | 2900<br>(1700-4800)       |
| Cote d'Ivoire | 1990 | Male   | 20 to 24 | 35%<br>(24-47%)                | 65%<br>(53-76%)          | 1.8<br>(0.94-2.9)                           | 5.2%<br>(3.2-7.9%)                   | 5.9%<br>(3.3-9.4%)                  | 120<br>(64-190)     | 9200<br>(5500-14000)      |
| Cote d'Ivoire | 1990 | Male   | 25 to 29 | 43%<br>(31-55%)                | 57%<br>(45-69%)          | 2.4<br>(1.4-3.8)                            | 6.8%<br>(4.3-10%)                    | 7.8%<br>(4.5-12%)                   | 200<br>(120-300)    | 14000<br>(8500-20000)     |
| Cote d'Ivoire | 1990 | Male   | 30 to 34 | 47%<br>(34-59%)                | 53%<br>(41-66%)          | 2.9<br>(1.7-4.3)                            | 8%<br>(5.1-11%)                      | 9.3%<br>(5.6-14%)                   | 270<br>(160-390)    | 16000<br>(10000-23000)    |
| Cote d'Ivoire | 1990 | Male   | 35 to 39 | 48%<br>(35-60%)                | 52%<br>(40-65%)          | 3.2<br>(1.8-5)                              | 9.4%<br>(5.9-13%)                    | 11%<br>(6.8-17%)                    | 340<br>(210-490)    | 18000<br>(12000-26000)    |
| Cote d'Ivoire | 1990 | Male   | 40 to 44 | 47%<br>(35-58%)                | 53%<br>(42-65%)          | 3.2<br>(1.8-5.1)                            | 10%<br>(6.6-15%)                     | 13%<br>(7.8-18%)                    | 420<br>(260-610)    | 20000<br>(13000-29000)    |
| Cote d'Ivoire | 1990 | Male   | 45 to 49 | 45%<br>(31-57%)                | 55%<br>(43-69%)          | 2.9<br>(1.7-4.5)                            | 11%<br>(6.7-16%)                     | 13%<br>(8.1-19%)                    | 470<br>(280-680)    | 20000<br>(12000-28000)    |
| Cote d'Ivoire | 1990 | Male   | 50 to 54 | 45%<br>(33-57%)                | 55%<br>(43-67%)          | 2.6<br>(1.6-4.2)                            | 9.7%<br>(5.5-15%)                    | 12%<br>(6.7-18%)                    | 430<br>(250-660)    | 16000<br>(9400-24000)     |
| Cote d'Ivoire | 1990 | Male   | 55 to 59 | 47%<br>(34-59%)                | 53%<br>(41-66%)          | 2.5<br>(1.5-4.2)                            | 8.8%<br>(5-14%)                      | 11%<br>(5.9-17%)                    | 400<br>(220-620)    | 13000<br>(7300-20000)     |
| Cote d'Ivoire | 1990 | Male   | 60 to 64 | 46%<br>(33-60%)                | 54%<br>(40-67%)          | 2.3<br>(1.2-3.9)                            | 7.1%<br>(3.5-12%)                    | 8.4%<br>(4.1-14%)                   | 320<br>(160-540)    | 8900<br>(4400-15000)      |

| Location      | Year | Sex    | Age      | Prevalence of current drinkers | Prevalence of abstainers | Population average of standard drinks daily | Percent of total attributable deaths | Percent of total attributable DALYs | Attributable deaths     | Attributable DALYs     |
|---------------|------|--------|----------|--------------------------------|--------------------------|---------------------------------------------|--------------------------------------|-------------------------------------|-------------------------|------------------------|
| Cote d'Ivoire | 1990 | Male   | 65 to 69 | 45%<br>(33-56%)                | 55%<br>(44-67%)          | 2<br>(1.2-3.3)                              | 5.7%<br>(2.8-9.5%)                   | 6.7%<br>(3.3-11%)                   | 250<br>(120-410)        | 5600<br>(2800-9400)    |
| Cote d'Ivoire | 1990 | Male   | 70 to 74 | 43%<br>(32-55%)                | 57%<br>(45-68%)          | 1.7<br>(0.94-2.8)                           | 4.6%<br>(1.9-8.4%)                   | 5.4%<br>(2.1-9.8%)                  | 180<br>(76-340)         | 3400<br>(1400-6200)    |
| Cote d'Ivoire | 1990 | Male   | 75 to 79 | 40%<br>(28-55%)                | 60%<br>(45-72%)          | 1.4<br>(0.69-2.3)                           | 3.3%<br>(1.1-6.5%)                   | 3.8%<br>(1.3-7.5%)                  | 100<br>(34-210)         | 1500<br>(500-2900)     |
| Cote d'Ivoire | 1990 | Male   | 80 to 84 | 37%<br>(25-50%)                | 63%<br>(50-75%)          | 1.1<br>(0.55-1.8)                           | 2.4%<br>(0.7-4.7%)                   | 2.7%<br>(0.73-5.5%)                 | 45<br>(12-91)           | 480<br>(140-960)       |
| Cote d'Ivoire | 1990 | Male   | 85 to 89 | 34%<br>(22-48%)                | 66%<br>(52-78%)          | 0.82<br>(0.41-1.4)                          | 1.5%<br>(0.31-3.2%)                  | 1.6%<br>(0.26-3.7%)                 | 14<br>(2.3-32)          | 110<br>(24-240)        |
| Cote d'Ivoire | 1990 | Male   | 90 to 94 | 34%<br>(23-48%)                | 66%<br>(52-77%)          | 0.67<br>(0.33-1.2)                          | 0.56%<br>(-0.34-1.8%)                | 0.52%<br>(-0.54-2%)                 | 1.5<br>(-1.6-5.7)       | 9.8<br>(-5.8-31)       |
| Cote d'Ivoire | 1990 | Male   | 95 plus  | 38%<br>(22-56%)                | 62%<br>(44-78%)          | 0.57<br>(0.22-1.2)                          | 0.17%<br>(-0.8-1.4%)                 | -0.013%<br>(-1.2-1.5%)              | -0.0082<br>(-0.74-0.89) | 0.44<br>(-2-3.5)       |
| Cote d'Ivoire | 1995 | Female | All Ages | 17%<br>(15-21%)                | 83%<br>(79-85%)          | 0.54<br>(0.37-0.77)                         | 1.1%<br>(0.63-1.6%)                  | 1.9%<br>(0.97-3.2%)                 | 1500<br>(730-2500)      | 54000<br>(33000-82000) |
| Cote d'Ivoire | 1995 | Female | 15 to 19 | 17%<br>(11-23%)                | 83%<br>(77-89%)          | 0.55<br>(0.28-0.95)                         | 1.2%<br>(0.63-2%)                    | 1.3%<br>(0.45-2.7%)                 | 18<br>(6.4-38)          | 2000<br>(1100-3500)    |
| Cote d'Ivoire | 1995 | Female | 20 to 24 | 22%<br>(15-31%)                | 78%<br>(69-85%)          | 0.86<br>(0.44-1.5)                          | 2%<br>(1.1-3.3%)                     | 1.9%<br>(0.76-3.6%)                 | 39<br>(16-78)           | 4000<br>(2300-6600)    |
| Cote d'Ivoire | 1995 | Female | 25 to 29 | 24%<br>(16-33%)                | 76%<br>(67-84%)          | 0.9<br>(0.49-1.5)                           | 1.8%<br>(1-3.1%)                     | 1.7%<br>(0.73-3.3%)                 | 43<br>(20-81)           | 3800<br>(2300-6100)    |
| Cote d'Ivoire | 1995 | Female | 30 to 34 | 26%<br>(17-37%)                | 74%<br>(63-83%)          | 0.98<br>(0.5-1.7)                           | 1.9%<br>(1.1-3.2%)                   | 2%<br>(0.95-3.7%)                   | 50<br>(25-91)           | 3700<br>(2200-6000)    |
| Cote d'Ivoire | 1995 | Female | 35 to 39 | 30%<br>(20-40%)                | 70%<br>(60-80%)          | 1.1<br>(0.59-1.8)                           | 2.4%<br>(1.3-3.9%)                   | 2.8%<br>(1.4-4.8%)                  | 69<br>(35-120)          | 4100<br>(2400-6600)    |
| Cote d'Ivoire | 1995 | Female | 40 to 44 | 31%<br>(21-41%)                | 69%<br>(59-79%)          | 1.2<br>(0.66-2)                             | 3.1%<br>(1.8-4.8%)                   | 3.8%<br>(2.1-6.1%)                  | 91<br>(53-140)          | 4600<br>(2700-7000)    |
| Cote d'Ivoire | 1995 | Female | 45 to 49 | 30%<br>(19-40%)                | 70%<br>(60-81%)          | 1.3<br>(0.68-2.2)                           | 3.8%<br>(2-6.4%)                     | 4.9%<br>(2.4-8.3%)                  | 120<br>(59-210)         | 5200<br>(2700-8900)    |
| Cote d'Ivoire | 1995 | Female | 50 to 54 | 29%<br>(20-40%)                | 71%<br>(60-80%)          | 1.3<br>(0.73-2.2)                           | 4.6%<br>(2.4-7.6%)                   | 5.9%<br>(3-9.8%)                    | 170<br>(84-280)         | 6200<br>(3200-10000)   |
| Cote d'Ivoire | 1995 | Female | 55 to 59 | 30%<br>(21-40%)                | 70%<br>(60-79%)          | 1.4<br>(0.76-2.4)                           | 5%<br>(2.4-8.5%)                     | 6.3%<br>(3.1-11%)                   | 200<br>(93-340)         | 6300<br>(3100-11000)   |
| Cote d'Ivoire | 1995 | Female | 60 to 64 | 31%<br>(21-43%)                | 69%<br>(57-79%)          | 1.4<br>(0.74-2.5)                           | 4.6%<br>(2-8.1%)                     | 5.6%<br>(2.4-9.8%)                  | 190<br>(82-350)         | 5300<br>(2300-9700)    |
| Cote d'Ivoire | 1995 | Female | 65 to 69 | 33%<br>(23-43%)                | 67%<br>(57-77%)          | 1.4<br>(0.74-2.2)                           | 4.2%<br>(1.5-7.6%)                   | 5%<br>(1.8-9.1%)                    | 190<br>(69-350)         | 4200<br>(1600-7700)    |
| Cote d'Ivoire | 1995 | Female | 70 to 74 | 30%<br>(21-40%)                | 70%<br>(60-79%)          | 1.1<br>(0.57-1.9)                           | 3.5%<br>(1-7.2%)                     | 4.2%<br>(1.2-8.5%)                  | 150<br>(43-310)         | 2800<br>(790-5700)     |
| Cote d'Ivoire | 1995 | Female | 75 to 79 | 24%<br>(16-36%)                | 76%<br>(64-84%)          | 0.82<br>(0.4-1.4)                           | 2.3%<br>(0.26-5.3%)                  | 2.7%<br>(0.29-6.2%)                 | 83<br>(9.3-200)         | 1200<br>(140-2800)     |
| Cote d'Ivoire | 1995 | Female | 80 to 84 | 22%<br>(14-32%)                | 78%<br>(68-86%)          | 0.71<br>(0.37-1.2)                          | 1.5%<br>(0.032-3.7%)                 | 1.8%<br>(-0.0017-4.3%)              | 37<br>(-0.037-92)       | 390<br>(7.9-970)       |

| Location      | Year | Sex    | Age      | Prevalence of current drinkers | Prevalence of abstainers | Population average of standard drinks daily | Percent of total attributable deaths | Percent of total attributable DALYs | Attributable deaths | Attributable DALYs        |
|---------------|------|--------|----------|--------------------------------|--------------------------|---------------------------------------------|--------------------------------------|-------------------------------------|---------------------|---------------------------|
| Cote d'Ivoire | 1995 | Female | 85 to 89 | 24%<br>(15-35%)                | 76%<br>(65-85%)          | 0.73<br>(0.37-1.3)                          | 1.2%<br>(-0.2-3.2%)                  | 1.3%<br>(-0.3-3.7%)                 | 15<br>(-3.2-42)     | 110<br>(-20-310)          |
| Cote d'Ivoire | 1995 | Female | 90 to 94 | 28%<br>(18-40%)                | 72%<br>(60-82%)          | 0.8<br>(0.38-1.4)                           | 0.86%<br>(-0.53-3%)                  | 0.94%<br>(-0.74-3.6%)               | 3.7<br>(-2.8-14)    | 20<br>(-12-71)            |
| Cote d'Ivoire | 1995 | Female | 95 plus  | 33%<br>(19-50%)                | 67%<br>(50-81%)          | 0.87<br>(0.34-1.7)                          | 0.68%<br>(-0.9-3.4%)                 | 0.67%<br>(-1.2-3.9%)                | 0.65<br>(-1.2-3.9)  | 2.7<br>(-3.5-14)          |
| Cote d'Ivoire | 1995 | Male   | All Ages | 30%<br>(25-35%)                | 70%<br>(65-75%)          | 1.6<br>(1.1-2.1)                            | 3.5%<br>(2.4-4.6%)                   | 5.4%<br>(3.6-7.5%)                  | 5900<br>(3900-8100) | 240000<br>(170000-320000) |
| Cote d'Ivoire | 1995 | Male   | 15 to 19 | 23%<br>(15-32%)                | 77%<br>(68-85%)          | 0.93<br>(0.47-1.6)                          | 2.7%<br>(1.4-4.3%)                   | 3.3%<br>(1.5-5.6%)                  | 62<br>(30-110)      | 5200<br>(2800-8600)       |
| Cote d'Ivoire | 1995 | Male   | 20 to 24 | 37%<br>(25-48%)                | 63%<br>(52-75%)          | 2.1<br>(1.1-3.4)                            | 6.5%<br>(3.7-10%)                    | 7.5%<br>(3.9-12%)                   | 220<br>(110-350)    | 16000<br>(9100-25000)     |
| Cote d'Ivoire | 1995 | Male   | 25 to 29 | 45%<br>(32-57%)                | 55%<br>(43-68%)          | 2.9<br>(1.6-4.4)                            | 7.7%<br>(4.5-12%)                    | 8.6%<br>(4.8-13%)                   | 340<br>(200-500)    | 22000<br>(14000-32000)    |
| Cote d'Ivoire | 1995 | Male   | 30 to 34 | 48%<br>(35-60%)                | 52%<br>(40-65%)          | 3.4<br>(1.9-5.1)                            | 8.3%<br>(5.2-12%)                    | 9.3%<br>(5.6-14%)                   | 440<br>(280-620)    | 26000<br>(17000-36000)    |
| Cote d'Ivoire | 1995 | Male   | 35 to 39 | 49%<br>(36-62%)                | 51%<br>(38-64%)          | 3.8<br>(2.1-5.9)                            | 9.5%<br>(5.9-14%)                    | 11%<br>(6.5-16%)                    | 540<br>(340-740)    | 29000<br>(18000-39000)    |
| Cote d'Ivoire | 1995 | Male   | 40 to 44 | 49%<br>(36-60%)                | 51%<br>(40-64%)          | 3.8<br>(2.1-6.1)                            | 11%<br>(6.6-15%)                     | 12%<br>(7.5-17%)                    | 640<br>(410-890)    | 30000<br>(19000-42000)    |
| Cote d'Ivoire | 1995 | Male   | 45 to 49 | 46%<br>(32-58%)                | 54%<br>(42-68%)          | 3.3<br>(1.9-5.4)                            | 11%<br>(7.1-16%)                     | 13%<br>(8.2-19%)                    | 720<br>(450-1000)   | 30000<br>(19000-43000)    |
| Cote d'Ivoire | 1995 | Male   | 50 to 54 | 46%<br>(35-58%)                | 54%<br>(42-65%)          | 3.1<br>(1.8-4.9)                            | 11%<br>(6.3-16%)                     | 13%<br>(7.5-19%)                    | 700<br>(400-1100)   | 26000<br>(15000-38000)    |
| Cote d'Ivoire | 1995 | Male   | 55 to 59 | 48%<br>(36-60%)                | 52%<br>(40-64%)          | 3<br>(1.7-4.8)                              | 11%<br>(5.9-16%)                     | 12%<br>(6.8-18%)                    | 670<br>(370-1000)   | 21000<br>(12000-32000)    |
| Cote d'Ivoire | 1995 | Male   | 60 to 64 | 48%<br>(34-60%)                | 52%<br>(40-66%)          | 2.7<br>(1.5-4.4)                            | 8.5%<br>(4.3-14%)                    | 9.9%<br>(4.9-16%)                   | 540<br>(270-880)    | 15000<br>(7500-24000)     |
| Cote d'Ivoire | 1995 | Male   | 65 to 69 | 46%<br>(35-58%)                | 54%<br>(42-65%)          | 2.4<br>(1.4-3.8)                            | 7%<br>(3.4-11%)                      | 8.1%<br>(4-13%)                     | 420<br>(200-700)    | 9600<br>(4700-16000)      |
| Cote d'Ivoire | 1995 | Male   | 70 to 74 | 45%<br>(34-56%)                | 55%<br>(44-66%)          | 2<br>(1.1-3.2)                              | 5.8%<br>(2.4-10%)                    | 6.7%<br>(2.8-12%)                   | 320<br>(130-570)    | 5800<br>(2500-10000)      |
| Cote d'Ivoire | 1995 | Male   | 75 to 79 | 42%<br>(29-55%)                | 58%<br>(45-71%)          | 1.6<br>(0.81-2.7)                           | 4.3%<br>(1.5-8.3%)                   | 4.9%<br>(1.6-9.5%)                  | 180<br>(60-340)     | 2500<br>(880-4800)        |
| Cote d'Ivoire | 1995 | Male   | 80 to 84 | 38%<br>(26-52%)                | 62%<br>(48-74%)          | 1.2<br>(0.64-2)                             | 3.2%<br>(1-6.1%)                     | 3.6%<br>(1.1-7.2%)                  | 75<br>(23-150)      | 790<br>(250-1600)         |
| Cote d'Ivoire | 1995 | Male   | 85 to 89 | 35%<br>(24-49%)                | 65%<br>(51-76%)          | 0.97<br>(0.5-1.7)                           | 2.1%<br>(0.52-4.3%)                  | 2.3%<br>(0.52-4.9%)                 | 24<br>(5.5-52)      | 180<br>(47-380)           |
| Cote d'Ivoire | 1995 | Male   | 90 to 94 | 36%<br>(24-49%)                | 64%<br>(51-76%)          | 0.81<br>(0.4-1.4)                           | 1%<br>(-0.17-2.8%)                   | 1%<br>(-0.37-3.1%)                  | 3.7<br>(-1.3-11)    | 22<br>(-3.6-59)           |
| Cote d'Ivoire | 1995 | Male   | 95 plus  | 39%<br>(24-56%)                | 61%<br>(44-76%)          | 0.69<br>(0.28-1.4)                          | 0.62%<br>(-0.62-2.5%)                | 0.51%<br>(-1-2.8%)                  | 0.41<br>(-0.82-2.3) | 2<br>(-2-8.3)             |
| Cote d'Ivoire | 2000 | Female | All Ages | 15%<br>(13-18%)                | 85%<br>(82-87%)          | 0.49<br>(0.35-0.69)                         | 1.1%<br>(0.63-1.6%)                  | 1.9%<br>(0.96-3.2%)                 | 1700<br>(830-2800)  | 62000<br>(36000-94000)    |

| Location      | Year | Sex    | Age      | Prevalence of current drinkers | Prevalence of abstainers | Population average of standard drinks daily | Percent of total attributable deaths | Percent of total attributable DALYs | Attributable deaths | Attributable DALYs     |
|---------------|------|--------|----------|--------------------------------|--------------------------|---------------------------------------------|--------------------------------------|-------------------------------------|---------------------|------------------------|
| Cote d'Ivoire | 2000 | Female | 15 to 19 | 14%<br>(9.9-19%)               | 86%<br>(81-90%)          | 0.46<br>(0.25-0.76)                         | 1.1%<br>(0.63-1.8%)                  | 1.1%<br>(0.44-2.3%)                 | 18<br>(6.8-37)      | 2100<br>(1200-3600)    |
| Cote d'Ivoire | 2000 | Female | 20 to 24 | 18%<br>(13-24%)                | 82%<br>(76-87%)          | 0.7<br>(0.39-1.1)                           | 1.8%<br>(1.1-2.9%)                   | 1.6%<br>(0.66-3%)                   | 39<br>(17-73)       | 4300<br>(2600-6700)    |
| Cote d'Ivoire | 2000 | Female | 25 to 29 | 19%<br>(14-25%)                | 81%<br>(75-86%)          | 0.74<br>(0.42-1.2)                          | 1.5%<br>(0.85-2.5%)                  | 1.2%<br>(0.55-2.5%)                 | 45<br>(21-83)       | 4200<br>(2600-6800)    |
| Cote d'Ivoire | 2000 | Female | 30 to 34 | 22%<br>(16-29%)                | 78%<br>(71-84%)          | 0.85<br>(0.48-1.4)                          | 1.5%<br>(0.85-2.4%)                  | 1.4%<br>(0.67-2.6%)                 | 55<br>(28-98)       | 4200<br>(2500-6800)    |
| Cote d'Ivoire | 2000 | Female | 35 to 39 | 27%<br>(20-33%)                | 73%<br>(67-80%)          | 1<br>(0.59-1.7)                             | 1.9%<br>(1.1-3.1%)                   | 2.1%<br>(1-3.6%)                    | 79<br>(41-140)      | 4700<br>(2800-7600)    |
| Cote d'Ivoire | 2000 | Female | 40 to 44 | 29%<br>(23-36%)                | 71%<br>(64-77%)          | 1.2<br>(0.69-1.9)                           | 2.6%<br>(1.5-4.1%)                   | 3%<br>(1.7-4.9%)                    | 110<br>(61-180)     | 5500<br>(3200-8700)    |
| Cote d'Ivoire | 2000 | Female | 45 to 49 | 28%<br>(20-36%)                | 72%<br>(64-80%)          | 1.2<br>(0.7-2.1)                            | 3.3%<br>(1.8-5.6%)                   | 4%<br>(2-6.9%)                      | 130<br>(66-230)     | 5800<br>(3000-9900)    |
| Cote d'Ivoire | 2000 | Female | 50 to 54 | 27%<br>(20-35%)                | 73%<br>(65-80%)          | 1.3<br>(0.7-2.1)                            | 4.3%<br>(2.2-7.2%)                   | 5.3%<br>(2.7-8.8%)                  | 190<br>(89-320)     | 6900<br>(3400-12000)   |
| Cote d'Ivoire | 2000 | Female | 55 to 59 | 27%<br>(20-36%)                | 73%<br>(64-80%)          | 1.3<br>(0.74-2.2)                           | 4.8%<br>(2.4-8.3%)                   | 5.9%<br>(2.9-10%)                   | 230<br>(100-410)    | 7300<br>(3400-13000)   |
| Cote d'Ivoire | 2000 | Female | 60 to 64 | 29%<br>(21-39%)                | 71%<br>(61-79%)          | 1.4<br>(0.74-2.4)                           | 4.6%<br>(1.9-8.4%)                   | 5.6%<br>(2.3-10%)                   | 230<br>(91-440)     | 6400<br>(2500-12000)   |
| Cote d'Ivoire | 2000 | Female | 65 to 69 | 31%<br>(23-40%)                | 69%<br>(60-77%)          | 1.3<br>(0.76-2.2)                           | 4.3%<br>(1.6-8%)                     | 5.1%<br>(1.9-9.4%)                  | 230<br>(78-430)     | 5100<br>(1800-9800)    |
| Cote d'Ivoire | 2000 | Female | 70 to 74 | 28%<br>(21-37%)                | 72%<br>(63-79%)          | 1.1<br>(0.58-1.9)                           | 3.5%<br>(0.99-7.1%)                  | 4.1%<br>(1.2-8.3%)                  | 170<br>(48-360)     | 3100<br>(900-6500)     |
| Cote d'Ivoire | 2000 | Female | 75 to 79 | 24%<br>(15-34%)                | 76%<br>(66-85%)          | 0.8<br>(0.4-1.5)                            | 2.3%<br>(0.31-5.5%)                  | 2.7%<br>(0.34-6.3%)                 | 91<br>(11-220)      | 1300<br>(170-3100)     |
| Cote d'Ivoire | 2000 | Female | 80 to 84 | 22%<br>(14-31%)                | 78%<br>(69-86%)          | 0.71<br>(0.37-1.2)                          | 1.6%<br>(0.15-3.8%)                  | 1.8%<br>(0.12-4.3%)                 | 41<br>(2.7-100)     | 430<br>(38-1000)       |
| Cote d'Ivoire | 2000 | Female | 85 to 89 | 24%<br>(16-34%)                | 76%<br>(66-84%)          | 0.73<br>(0.37-1.2)                          | 1.3%<br>(-0.14-3.3%)                 | 1.4%<br>(-0.2-3.9%)                 | 17<br>(-2.4-48)     | 130<br>(-14-360)       |
| Cote d'Ivoire | 2000 | Female | 90 to 94 | 27%<br>(18-39%)                | 73%<br>(61-82%)          | 0.79<br>(0.39-1.4)                          | 0.98%<br>(-0.44-3.4%)                | 1.1%<br>(-0.62-3.9%)                | 4.6<br>(-2.5-17)    | 25<br>(-11-84)         |
| Cote d'Ivoire | 2000 | Female | 95 plus  | 32%<br>(18-48%)                | 68%<br>(52-82%)          | 0.86<br>(0.34-1.7)                          | 0.84%<br>(-0.79-3.6%)                | 0.85%<br>(-1.1-4.2%)                | 0.92<br>(-1.2-4.6)  | 3.6<br>(-3.4-16)       |
| Cote d'Ivoire | 2000 | Male   | All Ages | 33%<br>(29-38%)                | 67%<br>(62-71%)          | 1.7<br>(1.2-2.4)                            | 3.6%<br>(2.5-4.9%)                   | 5.6%<br>(3.7-7.8%)                  | 6700<br>(4500-9600) | 28000<br>(19000-37000) |
| Cote d'Ivoire | 2000 | Male   | 15 to 19 | 29%<br>(22-37%)                | 71%<br>(63-78%)          | 1.2<br>(0.67-2)                             | 3.3%<br>(1.8-5.3%)                   | 4.2%<br>(2.1-6.9%)                  | 87<br>(43-150)      | 7200<br>(4000-12000)   |
| Cote d'Ivoire | 2000 | Male   | 20 to 24 | 46%<br>(38-54%)                | 54%<br>(46-62%)          | 2.7<br>(1.6-4.2)                            | 7.9%<br>(4.7-12%)                    | 9.2%<br>(5.2-14%)                   | 290<br>(160-460)    | 21000<br>(13000-32000) |
| Cote d'Ivoire | 2000 | Male   | 25 to 29 | 50%<br>(42-58%)                | 50%<br>(42-58%)          | 3.3<br>(2-5.1)                              | 8.3%<br>(5.1-12%)                    | 9.3%<br>(5.4-14%)                   | 410<br>(250-600)    | 27000<br>(17000-39000) |
| Cote d'Ivoire | 2000 | Male   | 30 to 34 | 52%<br>(44-59%)                | 48%<br>(41-56%)          | 3.7<br>(2.3-5.6)                            | 8.1%<br>(5.3-12%)                    | 9%<br>(5.6-13%)                     | 500<br>(330-710)    | 30000<br>(20000-41000) |

| Location      | Year | Sex    | Age      | Prevalence of current drinkers | Prevalence of abstainers | Population average of standard drinks daily | Percent of total attributable deaths | Percent of total attributable DALYs | Attributable deaths | Attributable DALYs     |
|---------------|------|--------|----------|--------------------------------|--------------------------|---------------------------------------------|--------------------------------------|-------------------------------------|---------------------|------------------------|
| Cote d'Ivoire | 2000 | Male   | 35 to 39 | 52%<br>(45-60%)                | 48%<br>(40-55%)          | 4<br>(2.4-6.1)                              | 8.7%<br>(5.6-12%)                    | 9.8%<br>(5.9-14%)                   | 600<br>(390-820)    | 32000<br>(21000-43000) |
| Cote d'Ivoire | 2000 | Male   | 40 to 44 | 50%<br>(43-58%)                | 50%<br>(42-57%)          | 3.9<br>(2.3-5.9)                            | 9.5%<br>(6.1-13%)                    | 11%<br>(6.8-15%)                    | 700<br>(440-960)    | 33000<br>(21000-44000) |
| Cote d'Ivoire | 2000 | Male   | 45 to 49 | 48%<br>(39-56%)                | 52%<br>(44-61%)          | 3.5<br>(2.1-5.4)                            | 11%<br>(6.8-15%)                     | 12%<br>(7.6-17%)                    | 770<br>(490-1100)   | 32000<br>(20000-46000) |
| Cote d'Ivoire | 2000 | Male   | 50 to 54 | 45%<br>(37-54%)                | 55%<br>(46-63%)          | 3.1<br>(1.8-4.8)                            | 10%<br>(6-15%)                       | 12%<br>(6.9-18%)                    | 740<br>(430-1100)   | 27000<br>(16000-41000) |
| Cote d'Ivoire | 2000 | Male   | 55 to 59 | 48%<br>(38-58%)                | 52%<br>(42-62%)          | 3<br>(1.7-4.9)                              | 10%<br>(6-15%)                       | 12%<br>(6.8-18%)                    | 750<br>(410-1100)   | 24000<br>(13000-36000) |
| Cote d'Ivoire | 2000 | Male   | 60 to 64 | 50%<br>(39-60%)                | 50%<br>(40-61%)          | 2.9<br>(1.7-4.8)                            | 8.9%<br>(4.3-14%)                    | 10%<br>(5-16%)                      | 660<br>(310-1000)   | 18000<br>(8600-29000)  |
| Cote d'Ivoire | 2000 | Male   | 65 to 69 | 49%<br>(40-58%)                | 51%<br>(42-60%)          | 2.6<br>(1.6-4)                              | 7.3%<br>(3.5-12%)                    | 8.5%<br>(4-14%)                     | 520<br>(250-880)    | 12000<br>(5700-20000)  |
| Cote d'Ivoire | 2000 | Male   | 70 to 74 | 47%<br>(38-56%)                | 53%<br>(44-62%)          | 2.2<br>(1.2-3.4)                            | 6.1%<br>(2.6-11%)                    | 7%<br>(2.9-13%)                     | 380<br>(160-700)    | 7000<br>(3000-13000)   |
| Cote d'Ivoire | 2000 | Male   | 75 to 79 | 43%<br>(31-56%)                | 57%<br>(44-69%)          | 1.7<br>(0.87-2.9)                           | 4.4%<br>(1.5-8.7%)                   | 5%<br>(1.7-10%)                     | 200<br>(68-400)     | 2900<br>(970-5700)     |
| Cote d'Ivoire | 2000 | Male   | 80 to 84 | 39%<br>(27-53%)                | 61%<br>(47-73%)          | 1.3<br>(0.7-2.2)                            | 3.3%<br>(1.1-6.5%)                   | 3.8%<br>(1.2-7.4%)                  | 87<br>(27-170)      | 920<br>(310-1800)      |
| Cote d'Ivoire | 2000 | Male   | 85 to 89 | 38%<br>(25-52%)                | 62%<br>(48-75%)          | 1.1<br>(0.53-1.8)                           | 2.3%<br>(0.58-4.6%)                  | 2.5%<br>(0.56-5.3%)                 | 28<br>(6.3-57)      | 220<br>(52-440)        |
| Cote d'Ivoire | 2000 | Male   | 90 to 94 | 38%<br>(26-52%)                | 62%<br>(48-74%)          | 0.89<br>(0.46-1.6)                          | 1.2%<br>(-0.096-3%)                  | 1.3%<br>(-0.28-3.4%)                | 4.7<br>(-1.1-13)    | 27<br>(-2.2-69)        |
| Cote d'Ivoire | 2000 | Male   | 95 plus  | 42%<br>(26-59%)                | 58%<br>(41-74%)          | 0.77<br>(0.32-1.5)                          | 0.89%<br>(-0.52-3.2%)                | 0.83%<br>(-0.88-3.6%)               | 0.73<br>(-0.78-3.2) | 3.2<br>(-1.8-11)       |
| Cote d'Ivoire | 2005 | Female | All Ages | 15%<br>(13-17%)                | 85%<br>(83-87%)          | 0.48<br>(0.32-0.69)                         | 1%<br>(0.58-1.6%)                    | 1.8%<br>(0.85-3%)                   | 1700<br>(790-2900)  | 62000<br>(36000-96000) |
| Cote d'Ivoire | 2005 | Female | 15 to 19 | 14%<br>(9.7-19%)               | 86%<br>(81-90%)          | 0.45<br>(0.25-0.75)                         | 0.98%<br>(0.58-1.6%)                 | 0.95%<br>(0.37-1.8%)                | 17<br>(6.4-33)      | 2100<br>(1200-3500)    |
| Cote d'Ivoire | 2005 | Female | 20 to 24 | 18%<br>(13-24%)                | 82%<br>(76-87%)          | 0.7<br>(0.39-1.1)                           | 1.7%<br>(1-2.7%)                     | 1.5%<br>(0.6-2.7%)                  | 35<br>(15-67)       | 4100<br>(2500-6500)    |
| Cote d'Ivoire | 2005 | Female | 25 to 29 | 19%<br>(14-25%)                | 81%<br>(75-86%)          | 0.72<br>(0.4-1.2)                           | 1.4%<br>(0.79-2.2%)                  | 1.1%<br>(0.5-2.2%)                  | 42<br>(20-78)       | 4200<br>(2600-6500)    |
| Cote d'Ivoire | 2005 | Female | 30 to 34 | 22%<br>(16-28%)                | 78%<br>(72-84%)          | 0.83<br>(0.45-1.4)                          | 1.3%<br>(0.74-2.1%)                  | 1.1%<br>(0.55-2.1%)                 | 53<br>(27-92)       | 4200<br>(2600-6300)    |
| Cote d'Ivoire | 2005 | Female | 35 to 39 | 27%<br>(20-33%)                | 73%<br>(67-80%)          | 1<br>(0.57-1.6)                             | 1.6%<br>(0.93-2.7%)                  | 1.7%<br>(0.84-3%)                   | 78<br>(41-130)      | 4800<br>(2800-7500)    |
| Cote d'Ivoire | 2005 | Female | 40 to 44 | 29%<br>(22-36%)                | 71%<br>(64-78%)          | 1.1<br>(0.66-1.9)                           | 2.3%<br>(1.3-3.4%)                   | 2.6%<br>(1.4-4%)                    | 110<br>(61-170)     | 5600<br>(3300-8700)    |
| Cote d'Ivoire | 2005 | Female | 45 to 49 | 28%<br>(20-36%)                | 72%<br>(64-80%)          | 1.2<br>(0.66-2)                             | 2.9%<br>(1.6-4.9%)                   | 3.4%<br>(1.8-5.9%)                  | 130<br>(68-230)     | 5900<br>(3100-10000)   |
| Cote d'Ivoire | 2005 | Female | 50 to 54 | 27%<br>(20-35%)                | 73%<br>(65-80%)          | 1.2<br>(0.66-2.1)                           | 3.9%<br>(1.9-6.8%)                   | 4.8%<br>(2.3-8.2%)                  | 180<br>(84-330)     | 6900<br>(3200-12000)   |

| Location      | Year | Sex    | Age      | Prevalence of current drinkers | Prevalence of abstainers | Population average of standard drinks daily | Percent of total attributable deaths | Percent of total attributable DALYs | Attributable deaths | Attributable DALYs        |
|---------------|------|--------|----------|--------------------------------|--------------------------|---------------------------------------------|--------------------------------------|-------------------------------------|---------------------|---------------------------|
| Cote d'Ivoire | 2005 | Female | 55 to 59 | 27%<br>(20-36%)                | 73%<br>(64-80%)          | 1.3<br>(0.7-2.2)                            | 4.6%<br>(2.2-7.9%)                   | 5.6%<br>(2.6-9.6%)                  | 230<br>(100-400)    | 7300<br>(3300-13000)      |
| Cote d'Ivoire | 2005 | Female | 60 to 64 | 29%<br>(21-38%)                | 71%<br>(62-79%)          | 1.4<br>(0.73-2.3)                           | 4.4%<br>(1.8-8.1%)                   | 5.2%<br>(2.2-9.5%)                  | 240<br>(92-450)     | 6500<br>(2500-12000)      |
| Cote d'Ivoire | 2005 | Female | 65 to 69 | 31%<br>(23-40%)                | 69%<br>(60-77%)          | 1.3<br>(0.74-2.2)                           | 4.1%<br>(1.4-7.8%)                   | 4.8%<br>(1.6-9.1%)                  | 230<br>(80-460)     | 5300<br>(1800-10000)      |
| Cote d'Ivoire | 2005 | Female | 70 to 74 | 28%<br>(20-37%)                | 72%<br>(63-80%)          | 1.1<br>(0.54-1.9)                           | 3.2%<br>(0.82-6.6%)                  | 3.7%<br>(0.98-7.7%)                 | 170<br>(43-360)     | 3100<br>(800-6500)        |
| Cote d'Ivoire | 2005 | Female | 75 to 79 | 24%<br>(16-34%)                | 76%<br>(66-84%)          | 0.8<br>(0.38-1.5)                           | 2.1%<br>(0.21-5.1%)                  | 2.4%<br>(0.2-5.9%)                  | 88<br>(7.5-210)     | 1200<br>(120-2900)        |
| Cote d'Ivoire | 2005 | Female | 80 to 84 | 22%<br>(14-31%)                | 78%<br>(69-86%)          | 0.7<br>(0.37-1.2)                           | 1.5%<br>(0.0065-3.8%)                | 1.7%<br>(-0.069-4.4%)               | 38<br>(-1.5-98)     | 400<br>(1.7-1000)         |
| Cote d'Ivoire | 2005 | Female | 85 to 89 | 24%<br>(15-34%)                | 76%<br>(66-85%)          | 0.71<br>(0.36-1.3)                          | 1.2%<br>(-0.21-3.2%)                 | 1.3%<br>(-0.28-3.7%)                | 16<br>(-3.6-45)     | 120<br>(-21-340)          |
| Cote d'Ivoire | 2005 | Female | 90 to 94 | 27%<br>(18-39%)                | 73%<br>(61-82%)          | 0.77<br>(0.37-1.4)                          | 0.9%<br>(-0.55-3.1%)                 | 0.98%<br>(-0.76-3.6%)               | 4.3<br>(-3.2-16)    | 24<br>(-14-81)            |
| Cote d'Ivoire | 2005 | Female | 95 plus  | 32%<br>(18-49%)                | 68%<br>(51-82%)          | 0.86<br>(0.35-1.7)                          | 0.77%<br>(-0.85-3.5%)                | 0.76%<br>(-1.2-4%)                  | 0.86<br>(-1.3-4.7)  | 3.5<br>(-3.9-16)          |
| Cote d'Ivoire | 2005 | Male   | All Ages | 32%<br>(28-37%)                | 68%<br>(63-72%)          | 1.7<br>(1.1-2.3)                            | 3.5%<br>(2.3-4.8%)                   | 5.4%<br>(3.4-7.6%)                  | 6700<br>(4300-9500) | 270000<br>(180000-360000) |
| Cote d'Ivoire | 2005 | Male   | 15 to 19 | 28%<br>(21-37%)                | 72%<br>(63-79%)          | 1.2<br>(0.67-1.9)                           | 3%<br>(1.7-4.8%)                     | 3.6%<br>(1.9-6%)                    | 84<br>(44-140)      | 7000<br>(4000-12000)      |
| Cote d'Ivoire | 2005 | Male   | 20 to 24 | 45%<br>(37-53%)                | 55%<br>(47-63%)          | 2.6<br>(1.5-4)                              | 7.5%<br>(4.5-11%)                    | 8.7%<br>(5.1-13%)                   | 270<br>(150-410)    | 20000<br>(12000-30000)    |
| Cote d'Ivoire | 2005 | Male   | 25 to 29 | 50%<br>(41-57%)                | 50%<br>(43-59%)          | 3.2<br>(1.9-5)                              | 8.3%<br>(5-12%)                      | 9.4%<br>(5.4-14%)                   | 390<br>(240-570)    | 26000<br>(17000-37000)    |
| Cote d'Ivoire | 2005 | Male   | 30 to 34 | 52%<br>(44-59%)                | 48%<br>(41-56%)          | 3.6<br>(2.2-5.6)                            | 8.1%<br>(5.2-11%)                    | 9%<br>(5.5-13%)                     | 480<br>(320-670)    | 29000<br>(19000-39000)    |
| Cote d'Ivoire | 2005 | Male   | 35 to 39 | 52%<br>(44-59%)                | 48%<br>(41-56%)          | 4<br>(2.4-6.1)                              | 8.4%<br>(5.6-12%)                    | 9.4%<br>(6.1-13%)                   | 580<br>(390-790)    | 31000<br>(21000-41000)    |
| Cote d'Ivoire | 2005 | Male   | 40 to 44 | 50%<br>(42-57%)                | 50%<br>(43-58%)          | 3.8<br>(2.3-5.9)                            | 9%<br>(5.9-12%)                      | 10%<br>(6.6-14%)                    | 680<br>(430-930)    | 32000<br>(21000-43000)    |
| Cote d'Ivoire | 2005 | Male   | 45 to 49 | 48%<br>(39-56%)                | 52%<br>(44-61%)          | 3.5<br>(2.1-5.4)                            | 10%<br>(6.4-14%)                     | 12%<br>(7.2-16%)                    | 760<br>(460-1100)   | 32000<br>(20000-45000)    |
| Cote d'Ivoire | 2005 | Male   | 50 to 54 | 45%<br>(36-54%)                | 55%<br>(46-64%)          | 3<br>(1.7-4.9)                              | 9.9%<br>(5.9-14%)                    | 11%<br>(6.5-17%)                    | 710<br>(410-1100)   | 26000<br>(15000-39000)    |
| Cote d'Ivoire | 2005 | Male   | 55 to 59 | 48%<br>(38-57%)                | 52%<br>(43-62%)          | 3<br>(1.7-4.7)                              | 10%<br>(5.6-15%)                     | 12%<br>(6.6-17%)                    | 750<br>(420-1200)   | 24000<br>(14000-37000)    |
| Cote d'Ivoire | 2005 | Male   | 60 to 64 | 50%<br>(40-60%)                | 50%<br>(40-60%)          | 2.8<br>(1.6-4.5)                            | 8.7%<br>(4.4-14%)                    | 10%<br>(5-16%)                      | 680<br>(340-1100)   | 19000<br>(9400-29000)     |
| Cote d'Ivoire | 2005 | Male   | 65 to 69 | 48%<br>(39-57%)                | 52%<br>(43-61%)          | 2.5<br>(1.5-3.9)                            | 7.1%<br>(3.5-12%)                    | 8.2%<br>(3.9-14%)                   | 540<br>(260-930)    | 12000<br>(6000-21000)     |
| Cote d'Ivoire | 2005 | Male   | 70 to 74 | 46%<br>(37-55%)                | 54%<br>(45-63%)          | 2.1<br>(1.2-3.4)                            | 5.9%<br>(2.4-11%)                    | 6.7%<br>(2.7-12%)                   | 410<br>(170-740)    | 7400<br>(3000-14000)      |



| Location      | Year | Sex    | Age      | Prevalence of current drinkers | Prevalence of abstainers | Population average of standard drinks daily | Percent of total attributable deaths | Percent of total attributable DALYs | Attributable deaths | Attributable DALYs      |
|---------------|------|--------|----------|--------------------------------|--------------------------|---------------------------------------------|--------------------------------------|-------------------------------------|---------------------|-------------------------|
| Cote d'Ivoire | 2005 | Male   | 75 to 79 | 42%<br>(30-55%)                | 58%<br>(45-70%)          | 1.7<br>(0.83-2.9)                           | 4.2%<br>(1.3-8.4%)                   | 4.8%<br>(1.4-9.7%)                  | 210<br>(59-420)     | 2900<br>(880-5900)      |
| Cote d'Ivoire | 2005 | Male   | 80 to 84 | 39%<br>(26-52%)                | 61%<br>(48-74%)          | 1.3<br>(0.66-2.2)                           | 3.1%<br>(0.94-6.5%)                  | 3.6%<br>(1-7.4%)                    | 83<br>(23-170)      | 890<br>(270-1800)       |
| Cote d'Ivoire | 2005 | Male   | 85 to 89 | 37%<br>(25-51%)                | 63%<br>(49-75%)          | 1<br>(0.53-1.8)                             | 2.1%<br>(0.51-4.5%)                  | 2.4%<br>(0.46-5.2%)                 | 29<br>(5.5-62)      | 220<br>(54-470)         |
| Cote d'Ivoire | 2005 | Male   | 90 to 94 | 38%<br>(26-52%)                | 62%<br>(48-74%)          | 0.88<br>(0.43-1.5)                          | 1.1%<br>(-0.12-3%)                   | 1.1%<br>(-0.3-3.3%)                 | 4.5<br>(-1.2-14)    | 26<br>(-2.9-71)         |
| Cote d'Ivoire | 2005 | Male   | 95 plus  | 42%<br>(26-59%)                | 58%<br>(41-74%)          | 0.75<br>(0.31-1.5)                          | 0.79%<br>(-0.56-2.8%)                | 0.71%<br>(-0.94-3.1%)               | 0.64<br>(-0.86-2.8) | 2.9<br>(-2-10)          |
| Cote d'Ivoire | 2010 | Female | All Ages | 17%<br>(14-20%)                | 83%<br>(80-86%)          | 0.53<br>(0.33-0.8)                          | 1.1%<br>(0.58-1.7%)                  | 1.9%<br>(0.82-3.3%)                 | 1700<br>(740-3100)  | 65000<br>(36000-100000) |
| Cote d'Ivoire | 2010 | Female | 15 to 19 | 16%<br>(11-23%)                | 84%<br>(77-89%)          | 0.53<br>(0.27-0.9)                          | 1%<br>(0.54-1.6%)                    | 0.96%<br>(0.36-2%)                  | 19<br>(7.1-39)      | 2400<br>(1300-3900)     |
| Cote d'Ivoire | 2010 | Female | 20 to 24 | 22%<br>(14-31%)                | 78%<br>(69-86%)          | 0.84<br>(0.43-1.5)                          | 1.9%<br>(1.1-3%)                     | 1.6%<br>(0.63-3.2%)                 | 39<br>(15-77)       | 4600<br>(2700-7500)     |
| Cote d'Ivoire | 2010 | Female | 25 to 29 | 23%<br>(15-32%)                | 77%<br>(68-85%)          | 0.87<br>(0.45-1.5)                          | 1.6%<br>(0.9-2.6%)                   | 1.4%<br>(0.55-2.6%)                 | 45<br>(21-83)       | 4500<br>(2800-7000)     |
| Cote d'Ivoire | 2010 | Female | 30 to 34 | 25%<br>(17-36%)                | 75%<br>(64-83%)          | 0.95<br>(0.47-1.7)                          | 1.5%<br>(0.86-2.4%)                  | 1.4%<br>(0.63-2.6%)                 | 57<br>(28-100)      | 4600<br>(2800-7200)     |
| Cote d'Ivoire | 2010 | Female | 35 to 39 | 29%<br>(19-40%)                | 71%<br>(60-81%)          | 1.1<br>(0.53-2)                             | 1.8%<br>(0.98-2.9%)                  | 1.9%<br>(0.89-3.3%)                 | 82<br>(39-140)      | 5100<br>(2800-8200)     |
| Cote d'Ivoire | 2010 | Female | 40 to 44 | 30%<br>(21-41%)                | 70%<br>(59-79%)          | 1.2<br>(0.6-2.1)                            | 2.4%<br>(1.3-3.9%)                   | 2.8%<br>(1.4-4.7%)                  | 120<br>(60-190)     | 6000<br>(3200-9700)     |
| Cote d'Ivoire | 2010 | Female | 45 to 49 | 29%<br>(18-39%)                | 71%<br>(61-82%)          | 1.2<br>(0.61-2.2)                           | 3%<br>(1.5-5.1%)                     | 3.6%<br>(1.7-6.4%)                  | 140<br>(65-260)     | 6200<br>(3100-11000)    |
| Cote d'Ivoire | 2010 | Female | 50 to 54 | 29%<br>(20-39%)                | 71%<br>(61-80%)          | 1.3<br>(0.64-2.3)                           | 4%<br>(1.9-6.9%)                     | 5%<br>(2.3-8.7%)                    | 190<br>(83-340)     | 7300<br>(3300-13000)    |
| Cote d'Ivoire | 2010 | Female | 55 to 59 | 29%<br>(20-40%)                | 71%<br>(60-80%)          | 1.4<br>(0.68-2.4)                           | 4.6%<br>(2-8.1%)                     | 5.7%<br>(2.6-10%)                   | 230<br>(96-420)     | 7400<br>(3100-13000)    |
| Cote d'Ivoire | 2010 | Female | 60 to 64 | 30%<br>(20-42%)                | 70%<br>(58-80%)          | 1.4<br>(0.69-2.4)                           | 4.2%<br>(1.5-8%)                     | 5.1%<br>(1.9-9.4%)                  | 230<br>(81-450)     | 6300<br>(2300-12000)    |
| Cote d'Ivoire | 2010 | Female | 65 to 69 | 32%<br>(23-42%)                | 68%<br>(58-77%)          | 1.3<br>(0.68-2.2)                           | 3.8%<br>(1.2-7.7%)                   | 4.6%<br>(1.4-9.1%)                  | 230<br>(67-480)     | 5300<br>(1500-11000)    |
| Cote d'Ivoire | 2010 | Female | 70 to 74 | 29%<br>(21-39%)                | 71%<br>(61-79%)          | 1.1<br>(0.54-2)                             | 3%<br>(0.53-7.1%)                    | 3.5%<br>(0.6-8.4%)                  | 170<br>(29-410)     | 3200<br>(580-7500)      |
| Cote d'Ivoire | 2010 | Female | 75 to 79 | 24%<br>(16-35%)                | 76%<br>(65-84%)          | 0.78<br>(0.37-1.5)                          | 1.9%<br>(0.021-5.2%)                 | 2.3%<br>(-0.0033-6%)                | 90<br>(-0.13-250)   | 1300<br>(14-3500)       |
| Cote d'Ivoire | 2010 | Female | 80 to 84 | 22%<br>(14-31%)                | 78%<br>(69-86%)          | 0.67<br>(0.33-1.2)                          | 1.3%<br>(-0.17-3.9%)                 | 1.5%<br>(-0.23-4.4%)                | 36<br>(-5.8-110)    | 390<br>(-49-1100)       |
| Cote d'Ivoire | 2010 | Female | 85 to 89 | 23%<br>(15-34%)                | 77%<br>(66-85%)          | 0.69<br>(0.32-1.2)                          | 1%<br>(-0.32-3.3%)                   | 1.1%<br>(-0.43-3.7%)                | 15<br>(-5.8-50)     | 120<br>(-37-370)        |
| Cote d'Ivoire | 2010 | Female | 90 to 94 | 27%<br>(17-39%)                | 73%<br>(61-83%)          | 0.75<br>(0.34-1.4)                          | 0.76%<br>(-0.63-3.1%)                | 0.81%<br>(-0.86-3.6%)               | 3.9<br>(-4.2-17)    | 22<br>(-18-90)          |

| Location      | Year | Sex    | Age      | Prevalence of current drinkers | Prevalence of abstainers | Population average of standard drinks daily | Percent of total attributable deaths | Percent of total attributable DALYs | Attributable deaths | Attributable DALYs        |
|---------------|------|--------|----------|--------------------------------|--------------------------|---------------------------------------------|--------------------------------------|-------------------------------------|---------------------|---------------------------|
| Cote d'Ivoire | 2010 | Female | 95 plus  | 32%<br>(17-48%)                | 68%<br>(52-83%)          | 0.82<br>(0.3-1.6)                           | 0.62%<br>(-0.95-3.2%)                | 0.58%<br>(-1.3-3.6%)                | 0.72<br>(-1.6-4.6)  | 3.1<br>(-4.8-16)          |
| Cote d'Ivoire | 2010 | Male   | All Ages | 30%<br>(24-35%)                | 70%<br>(65-76%)          | 1.5<br>(0.9-2.2)                            | 3.3%<br>(2.2-4.7%)                   | 5.2%<br>(3.2-7.5%)                  | 6400<br>(3800-9200) | 260000<br>(170000-350000) |
| Cote d'Ivoire | 2010 | Male   | 15 to 19 | 23%<br>(15-32%)                | 77%<br>(68-85%)          | 0.93<br>(0.45-1.6)                          | 2.3%<br>(1.2-3.9%)                   | 2.7%<br>(1.2-4.7%)                  | 71<br>(32-130)      | 6200<br>(3300-11000)      |
| Cote d'Ivoire | 2010 | Male   | 20 to 24 | 37%<br>(25-48%)                | 63%<br>(52-75%)          | 2<br>(1.1-3.4)                              | 6.1%<br>(3.5-9.4%)                   | 7%<br>(3.6-11%)                     | 230<br>(120-370)    | 17000<br>(9800-26000)     |
| Cote d'Ivoire | 2010 | Male   | 25 to 29 | 44%<br>(32-57%)                | 56%<br>(43-68%)          | 2.8<br>(1.5-4.6)                            | 7.6%<br>(4.5-11%)                    | 8.7%<br>(4.8-13%)                   | 340<br>(190-500)    | 23000<br>(14000-34000)    |
| Cote d'Ivoire | 2010 | Male   | 30 to 34 | 48%<br>(35-61%)                | 52%<br>(39-65%)          | 3.3<br>(1.8-5.5)                            | 8%<br>(4.9-12%)                      | 9.1%<br>(5.4-14%)                   | 450<br>(270-640)    | 27000<br>(17000-38000)    |
| Cote d'Ivoire | 2010 | Male   | 35 to 39 | 49%<br>(36-61%)                | 51%<br>(39-64%)          | 3.7<br>(1.9-6.4)                            | 8.5%<br>(5.4-12%)                    | 9.7%<br>(5.9-14%)                   | 540<br>(340-750)    | 29000<br>(19000-40000)    |
| Cote d'Ivoire | 2010 | Male   | 40 to 44 | 48%<br>(36-60%)                | 52%<br>(40-64%)          | 3.6<br>(2-6)                                | 9.2%<br>(5.8-13%)                    | 11%<br>(6.6-15%)                    | 640<br>(400-910)    | 30000<br>(19000-43000)    |
| Cote d'Ivoire | 2010 | Male   | 45 to 49 | 46%<br>(32-57%)                | 54%<br>(43-68%)          | 3.3<br>(1.8-5.4)                            | 10%<br>(6.3-14%)                     | 12%<br>(7.3-17%)                    | 720<br>(430-1000)   | 30000<br>(19000-44000)    |
| Cote d'Ivoire | 2010 | Male   | 50 to 54 | 46%<br>(35-58%)                | 54%<br>(42-65%)          | 3<br>(1.6-5.1)                              | 10%<br>(5.7-15%)                     | 12%<br>(6.6-17%)                    | 700<br>(390-1100)   | 26000<br>(15000-39000)    |
| Cote d'Ivoire | 2010 | Male   | 55 to 59 | 48%<br>(36-60%)                | 52%<br>(40-64%)          | 2.9<br>(1.5-5)                              | 9.9%<br>(5.4-15%)                    | 12%<br>(6.4-18%)                    | 710<br>(370-1100)   | 23000<br>(12000-35000)    |
| Cote d'Ivoire | 2010 | Male   | 60 to 64 | 48%<br>(35-60%)                | 52%<br>(40-65%)          | 2.6<br>(1.4-4.7)                            | 8.3%<br>(3.9-13%)                    | 9.6%<br>(4.5-16%)                   | 660<br>(300-1100)   | 18000<br>(8600-29000)     |
| Cote d'Ivoire | 2010 | Male   | 65 to 69 | 46%<br>(35-58%)                | 54%<br>(42-65%)          | 2.3<br>(1.2-3.8)                            | 6.6%<br>(2.9-12%)                    | 7.7%<br>(3.3-14%)                   | 540<br>(240-960)    | 12000<br>(5500-22000)     |
| Cote d'Ivoire | 2010 | Male   | 70 to 74 | 45%<br>(34-56%)                | 55%<br>(44-66%)          | 2<br>(1-3.4)                                | 5.4%<br>(2-10%)                      | 6.3%<br>(2.3-12%)                   | 420<br>(150-810)    | 7600<br>(2800-14000)      |
| Cote d'Ivoire | 2010 | Male   | 75 to 79 | 42%<br>(28-55%)                | 58%<br>(45-72%)          | 1.6<br>(0.79-3)                             | 3.9%<br>(1.1-8.1%)                   | 4.5%<br>(1.2-9.4%)                  | 220<br>(58-470)     | 3100<br>(860-6600)        |
| Cote d'Ivoire | 2010 | Male   | 80 to 84 | 38%<br>(26-52%)                | 62%<br>(48-74%)          | 1.3<br>(0.62-2.3)                           | 2.9%<br>(0.79-6.1%)                  | 3.3%<br>(0.82-7%)                   | 84<br>(20-180)      | 900<br>(240-1900)         |
| Cote d'Ivoire | 2010 | Male   | 85 to 89 | 36%<br>(24-50%)                | 64%<br>(50-76%)          | 0.99<br>(0.48-1.8)                          | 1.9%<br>(0.39-4.3%)                  | 2.1%<br>(0.35-5%)                   | 29<br>(4.8-68)      | 230<br>(48-520)           |
| Cote d'Ivoire | 2010 | Male   | 90 to 94 | 37%<br>(25-50%)                | 63%<br>(50-75%)          | 0.82<br>(0.39-1.5)                          | 0.98%<br>(-0.18-2.9%)                | 1%<br>(-0.39-3.3%)                  | 4.8<br>(-1.8-16)    | 28<br>(-5.1-85)           |
| Cote d'Ivoire | 2010 | Male   | 95 plus  | 40%<br>(25-58%)                | 60%<br>(42-75%)          | 0.7<br>(0.27-1.4)                           | 0.67%<br>(-0.59-2.6%)                | 0.57%<br>(-0.96-3%)                 | 0.61<br>(-1-3.1)    | 2.9<br>(-2.6-11)          |
| Cote d'Ivoire | 2016 | Female | All Ages | 18%<br>(15-21%)                | 82%<br>(79-85%)          | 0.52<br>(0.27-0.9)                          | 1.2%<br>(0.53-2.1%)                  | 2%<br>(0.61-4.2%)                   | 1800<br>(550-3700)  | 69000<br>(32000-130000)   |
| Cote d'Ivoire | 2016 | Female | 15 to 19 | 17%<br>(11-23%)                | 83%<br>(77-89%)          | 0.51<br>(0.21-0.98)                         | 1%<br>(0.54-1.8%)                    | 0.97%<br>(0.28-2.2%)                | 20<br>(5.6-44)      | 2600<br>(1400-4800)       |
| Cote d'Ivoire | 2016 | Female | 20 to 24 | 22%<br>(14-31%)                | 78%<br>(69-86%)          | 0.81<br>(0.34-1.5)                          | 2%<br>(1.1-3.2%)                     | 1.7%<br>(0.55-3.6%)                 | 39<br>(13-84)       | 5100<br>(2900-8400)       |

| Location      | Year | Sex    | Age      | Prevalence of current drinkers | Prevalence of abstainers | Population average of standard drinks daily | Percent of total attributable deaths | Percent of total attributable DALYs | Attributable deaths  | Attributable DALYs        |
|---------------|------|--------|----------|--------------------------------|--------------------------|---------------------------------------------|--------------------------------------|-------------------------------------|----------------------|---------------------------|
| Cote d'Ivoire | 2016 | Female | 25 to 29 | 23%<br>(15-33%)                | 77%<br>(67-85%)          | 0.83<br>(0.37-1.6)                          | 1.9%<br>(1.1-3%)                     | 1.6%<br>(0.58-3.2%)                 | 45<br>(18-89)        | 4900<br>(2900-7800)       |
| Cote d'Ivoire | 2016 | Female | 30 to 34 | 26%<br>(17-37%)                | 74%<br>(63-83%)          | 0.91<br>(0.39-1.8)                          | 1.8%<br>(1-2.9%)                     | 1.8%<br>(0.74-3.3%)                 | 57<br>(24-100)       | 4800<br>(2800-7700)       |
| Cote d'Ivoire | 2016 | Female | 35 to 39 | 29%<br>(19-40%)                | 71%<br>(60-81%)          | 1<br>(0.43-2)                               | 2.2%<br>(1.1-3.7%)                   | 2.5%<br>(1-4.7%)                    | 86<br>(34-160)       | 5500<br>(2700-9700)       |
| Cote d'Ivoire | 2016 | Female | 40 to 44 | 31%<br>(21-41%)                | 69%<br>(59-79%)          | 1.1<br>(0.48-2.2)                           | 2.9%<br>(1.4-4.8%)                   | 3.6%<br>(1.6-6.3%)                  | 130<br>(56-230)      | 6600<br>(3200-12000)      |
| Cote d'Ivoire | 2016 | Female | 45 to 49 | 30%<br>(19-40%)                | 70%<br>(60-81%)          | 1.2<br>(0.46-2.4)                           | 3.4%<br>(1.4-6.3%)                   | 4.4%<br>(1.8-8.4%)                  | 160<br>(60-310)      | 7000<br>(2800-13000)      |
| Cote d'Ivoire | 2016 | Female | 50 to 54 | 29%<br>(20-39%)                | 71%<br>(61-80%)          | 1.3<br>(0.51-2.4)                           | 4.2%<br>(1.6-7.9%)                   | 5.4%<br>(2-10%)                     | 210<br>(75-410)      | 8000<br>(3000-15000)      |
| Cote d'Ivoire | 2016 | Female | 55 to 59 | 29%<br>(20-40%)                | 71%<br>(60-80%)          | 1.3<br>(0.58-2.7)                           | 4.6%<br>(1.5-8.9%)                   | 5.8%<br>(2-11%)                     | 250<br>(78-490)      | 7900<br>(2600-16000)      |
| Cote d'Ivoire | 2016 | Female | 60 to 64 | 31%<br>(20-43%)                | 69%<br>(57-80%)          | 1.3<br>(0.57-2.7)                           | 4.1%<br>(1.1-8.3%)                   | 5%<br>(1.4-10%)                     | 240<br>(65-490)      | 6500<br>(1800-13000)      |
| Cote d'Ivoire | 2016 | Female | 65 to 69 | 32%<br>(23-43%)                | 68%<br>(57-77%)          | 1.3<br>(0.56-2.5)                           | 3.6%<br>(0.62-8.3%)                  | 4.3%<br>(0.74-9.9%)                 | 230<br>(39-530)      | 5200<br>(900-12000)       |
| Cote d'Ivoire | 2016 | Female | 70 to 74 | 30%<br>(21-40%)                | 70%<br>(60-79%)          | 1<br>(0.44-2.1)                             | 2.7%<br>(0.078-7.6%)                 | 3.2%<br>(0.076-8.9%)                | 180<br>(4.4-480)     | 3200<br>(92-8800)         |
| Cote d'Ivoire | 2016 | Female | 75 to 79 | 24%<br>(16-35%)                | 76%<br>(65-84%)          | 0.76<br>(0.29-1.6)                          | 1.8%<br>(-0.26-5.6%)                 | 2%<br>(-0.31-6.7%)                  | 96<br>(-15-310)      | 1400<br>(-200-4500)       |
| Cote d'Ivoire | 2016 | Female | 80 to 84 | 22%<br>(14-32%)                | 78%<br>(68-86%)          | 0.65<br>(0.26-1.3)                          | 1.2%<br>(-0.4-4.3%)                  | 1.4%<br>(-0.53-4.9%)                | 39<br>(-14-140)      | 410<br>(-130-1500)        |
| Cote d'Ivoire | 2016 | Female | 85 to 89 | 24%<br>(15-35%)                | 76%<br>(65-85%)          | 0.67<br>(0.27-1.4)                          | 0.92%<br>(-0.59-3.8%)                | 1%<br>(-0.73-4.4%)                  | 17<br>(-12-71)       | 130<br>(-82-540)          |
| Cote d'Ivoire | 2016 | Female | 90 to 94 | 27%<br>(18-39%)                | 73%<br>(61-82%)          | 0.74<br>(0.28-1.5)                          | 0.69%<br>(-0.92-3.6%)                | 0.73%<br>(-1.2-4.3%)                | 4.3<br>(-7-25)       | 24<br>(-32-130)           |
| Cote d'Ivoire | 2016 | Female | 95 plus  | 32%<br>(18-49%)                | 68%<br>(51-82%)          | 0.81<br>(0.26-1.8)                          | 0.58%<br>(-1.2-4%)                   | 0.53%<br>(-1.6-4.7%)                | 0.82<br>(-2.4-7.2)   | 3.6<br>(-7.3-25)          |
| Cote d'Ivoire | 2016 | Male   | All Ages | 30%<br>(25-35%)                | 70%<br>(65-75%)          | 1.4<br>(0.72-2.4)                           | 3.4%<br>(1.9-5.2%)                   | 5.2%<br>(2.6-8.4%)                  | 6200<br>(3100-10000) | 250000<br>(140000-380000) |
| Cote d'Ivoire | 2016 | Male   | 15 to 19 | 23%<br>(15-32%)                | 77%<br>(68-85%)          | 0.88<br>(0.37-1.7)                          | 2.2%<br>(1.1-4%)                     | 2.6%<br>(1-5.1%)                    | 75<br>(29-150)       | 6700<br>(3200-12000)      |
| Cote d'Ivoire | 2016 | Male   | 20 to 24 | 37%<br>(25-48%)                | 63%<br>(52-75%)          | 1.9<br>(0.87-3.5)                           | 5.9%<br>(3-9.7%)                     | 6.7%<br>(3-12%)                     | 240<br>(110-420)     | 19000<br>(9500-31000)     |
| Cote d'Ivoire | 2016 | Male   | 25 to 29 | 44%<br>(32-56%)                | 56%<br>(44-68%)          | 2.6<br>(1.2-4.9)                            | 7.6%<br>(4.1-12%)                    | 8.8%<br>(4.4-14%)                   | 350<br>(180-560)     | 24000<br>(13000-37000)    |
| Cote d'Ivoire | 2016 | Male   | 30 to 34 | 48%<br>(35-60%)                | 52%<br>(40-65%)          | 3.1<br>(1.5-5.9)                            | 8.2%<br>(4.7-12%)                    | 9.5%<br>(5.1-14%)                   | 440<br>(240-660)     | 27000<br>(15000-40000)    |
| Cote d'Ivoire | 2016 | Male   | 35 to 39 | 49%<br>(37-61%)                | 51%<br>(39-63%)          | 3.5<br>(1.5-6.9)                            | 8.8%<br>(5.1-13%)                    | 10%<br>(5.8-16%)                    | 540<br>(290-790)     | 29000<br>(16000-42000)    |
| Cote d'Ivoire | 2016 | Male   | 40 to 44 | 48%<br>(37-60%)                | 52%<br>(40-63%)          | 3.5<br>(1.5-6.5)                            | 9.4%<br>(5.2-13%)                    | 11%<br>(5.9-16%)                    | 620<br>(320-940)     | 30000<br>(16000-45000)    |

| Location      | Year | Sex    | Age      | Prevalence of current drinkers | Prevalence of abstainers | Population average of standard drinks daily | Percent of total attributable deaths | Percent of total attributable DALYs | Attributable deaths | Attributable DALYs     |
|---------------|------|--------|----------|--------------------------------|--------------------------|---------------------------------------------|--------------------------------------|-------------------------------------|---------------------|------------------------|
| Cote d'Ivoire | 2016 | Male   | 45 to 49 | 47%<br>(32-58%)                | 53%<br>(42-68%)          | 3.1<br>(1.4-6)                              | 10%<br>(5.2-15%)                     | 12%<br>(6-18%)                      | 690<br>(350-1100)   | 30000<br>(15000-45000) |
| Cote d'Ivoire | 2016 | Male   | 50 to 54 | 47%<br>(35-59%)                | 53%<br>(41-65%)          | 2.9<br>(1.3-5.5)                            | 9.4%<br>(4.4-15%)                    | 11%<br>(5.2-18%)                    | 670<br>(300-1100)   | 25000<br>(12000-39000) |
| Cote d'Ivoire | 2016 | Male   | 55 to 59 | 48%<br>(36-61%)                | 52%<br>(39-64%)          | 2.8<br>(1.2-5.2)                            | 9.3%<br>(4.1-15%)                    | 11%<br>(4.7-18%)                    | 690<br>(290-1100)   | 22000<br>(9700-36000)  |
| Cote d'Ivoire | 2016 | Male   | 60 to 64 | 48%<br>(34-61%)                | 52%<br>(39-66%)          | 2.5<br>(1.1-4.9)                            | 7.7%<br>(2.9-13%)                    | 9%<br>(3.3-16%)                     | 610<br>(220-1100)   | 17000<br>(6300-29000)  |
| Cote d'Ivoire | 2016 | Male   | 65 to 69 | 47%<br>(36-58%)                | 53%<br>(42-64%)          | 2.2<br>(0.99-4.1)                           | 6.1%<br>(2-12%)                      | 7.1%<br>(2.3-14%)                   | 530<br>(160-1000)   | 12000<br>(3900-23000)  |
| Cote d'Ivoire | 2016 | Male   | 70 to 74 | 45%<br>(34-56%)                | 55%<br>(44-66%)          | 1.9<br>(0.85-3.7)                           | 4.9%<br>(1.3-10%)                    | 5.7%<br>(1.4-12%)                   | 420<br>(100-890)    | 7700<br>(2000-16000)   |
| Cote d'Ivoire | 2016 | Male   | 75 to 79 | 42%<br>(29-56%)                | 58%<br>(44-71%)          | 1.5<br>(0.63-3.1)                           | 3.5%<br>(0.58-8.6%)                  | 4%<br>(0.61-10%)                    | 240<br>(36-590)     | 3400<br>(560-8300)     |
| Cote d'Ivoire | 2016 | Male   | 80 to 84 | 38%<br>(26-52%)                | 62%<br>(48-74%)          | 1.2<br>(0.5-2.4)                            | 2.6%<br>(0.39-6.4%)                  | 2.9%<br>(0.38-7.5%)                 | 90<br>(11-230)      | 970<br>(150-2400)      |
| Cote d'Ivoire | 2016 | Male   | 85 to 89 | 36%<br>(24-50%)                | 64%<br>(50-76%)          | 0.93<br>(0.39-1.9)                          | 1.7%<br>(0.12-4.7%)                  | 1.9%<br>(0.046-5.4%)                | 31<br>(0.77-92)     | 250<br>(17-680)        |
| Cote d'Ivoire | 2016 | Male   | 90 to 94 | 36%<br>(24-51%)                | 64%<br>(49-76%)          | 0.77<br>(0.3-1.5)                           | 0.86%<br>(-0.33-3.1%)                | 0.85%<br>(-0.57-3.4%)               | 5.2<br>(-3.4-21)    | 32<br>(-12-110)        |
| Cote d'Ivoire | 2016 | Male   | 95 plus  | 40%<br>(25-58%)                | 60%<br>(42-75%)          | 0.66<br>(0.22-1.5)                          | 0.58%<br>(-0.58-2.8%)                | 0.45%<br>(-0.94-3%)                 | 0.67<br>(-1.4-4.4)  | 3.4<br>(-3.5-16)       |
| The Gambia    | 1990 | Female | All Ages | 22%<br>(16-28%)                | 78%<br>(72-84%)          | 0.39<br>(0.27-0.53)                         | 0.67%<br>(0.38-1%)                   | 1.1%<br>(0.43-2.2%)                 | 44<br>(17-86)       | 2000<br>(1100-3100)    |
| The Gambia    | 1990 | Female | 15 to 19 | 22%<br>(12-36%)                | 78%<br>(64-88%)          | 0.38<br>(0.15-0.71)                         | 0.89%<br>(0.44-1.6%)                 | 0.85%<br>(0.1-2.1%)                 | 0.59<br>(0.073-1.5) | 84<br>(39-150)         |
| The Gambia    | 1990 | Female | 20 to 24 | 27%<br>(13-43%)                | 73%<br>(57-87%)          | 0.59<br>(0.24-1.1)                          | 1.9%<br>(0.99-3.3%)                  | 1.7%<br>(0.38-3.9%)                 | 1.7<br>(0.38-4.1)   | 220<br>(110-400)       |
| The Gambia    | 1990 | Female | 25 to 29 | 30%<br>(15-47%)                | 70%<br>(53-85%)          | 0.73<br>(0.32-1.3)                          | 2.3%<br>(1.2-3.9%)                   | 2.5%<br>(0.78-5%)                   | 2.5<br>(0.77-5)     | 250<br>(120-400)       |
| The Gambia    | 1990 | Female | 30 to 34 | 32%<br>(16-51%)                | 68%<br>(49-84%)          | 0.82<br>(0.39-1.4)                          | 2.5%<br>(1.3-4%)                     | 3.1%<br>(1.2-5.7%)                  | 2.9<br>(1.2-5.5)    | 230<br>(120-370)       |
| The Gambia    | 1990 | Female | 35 to 39 | 36%<br>(19-54%)                | 64%<br>(46-81%)          | 0.88<br>(0.4-1.5)                           | 2.8%<br>(1.4-4.8%)                   | 3.9%<br>(1.6-7.4%)                  | 3.3<br>(1.3-6.1)    | 200<br>(98-350)        |
| The Gambia    | 1990 | Female | 40 to 44 | 37%<br>(22-56%)                | 63%<br>(44-78%)          | 0.93<br>(0.37-1.7)                          | 3.1%<br>(1.6-5.4%)                   | 4.6%<br>(2-8.2%)                    | 2.9<br>(1.2-5.2)    | 150<br>(73-260)        |
| The Gambia    | 1990 | Female | 45 to 49 | 38%<br>(20-58%)                | 62%<br>(42-80%)          | 0.97<br>(0.37-1.8)                          | 3.3%<br>(1.4-6.4%)                   | 4.7%<br>(1.8-9.5%)                  | 3.9<br>(1.5-7.9)    | 170<br>(72-340)        |
| The Gambia    | 1990 | Female | 50 to 54 | 39%<br>(21-59%)                | 61%<br>(41-79%)          | 1<br>(0.41-1.9)                             | 3.5%<br>(1.4-6.3%)                   | 4.8%<br>(1.9-8.8%)                  | 3.9<br>(1.5-7.4)    | 150<br>(61-280)        |
| The Gambia    | 1990 | Female | 55 to 59 | 39%<br>(23-58%)                | 61%<br>(42-77%)          | 1.1<br>(0.44-2.2)                           | 3.6%<br>(1.1-7.1%)                   | 4.8%<br>(1.4-9.6%)                  | 5<br>(1.4-11)       | 160<br>(47-340)        |
| The Gambia    | 1990 | Female | 60 to 64 | 40%<br>(22-59%)                | 60%<br>(41-78%)          | 1.1<br>(0.41-2.2)                           | 3%<br>(0.61-6.6%)                    | 3.8%<br>(0.78-8.5%)                 | 5.2<br>(0.99-12)    | 140<br>(28-320)        |

| Location   | Year | Sex    | Age      | Prevalence of current drinkers | Prevalence of abstainers | Population average of standard drinks daily | Percent of total attributable deaths | Percent of total attributable DALYs | Attributable deaths       | Attributable DALYs      |
|------------|------|--------|----------|--------------------------------|--------------------------|---------------------------------------------|--------------------------------------|-------------------------------------|---------------------------|-------------------------|
| The Gambia | 1990 | Female | 65 to 69 | 41%<br>(24-59%)                | 59%<br>(41-76%)          | 1<br>(0.41-2)                               | 2.2%<br>(0.078-5.7%)                 | 2.8%<br>(0.074-7.1%)                | 4.6<br>(0.11-12)          | 100<br>(3.1-280)        |
| The Gambia | 1990 | Female | 70 to 74 | 39%<br>(24-57%)                | 61%<br>(43-76%)          | 0.83<br>(0.32-1.7)                          | 1.7%<br>(-0.33-5.4%)                 | 2.1%<br>(-0.43-6.7%)                | 4.7<br>(-1-15)            | 84<br>(-17-260)         |
| The Gambia | 1990 | Female | 75 to 79 | 35%<br>(19-54%)                | 65%<br>(46-81%)          | 0.68<br>(0.22-1.5)                          | 0.91%<br>(-0.77-3.9%)                | 1.1%<br>(-0.96-4.6%)                | 1.9<br>(-1.7-8.1)         | 27<br>(-23-110)         |
| The Gambia | 1990 | Female | 80 to 84 | 33%<br>(17-52%)                | 67%<br>(48-83%)          | 0.62<br>(0.2-1.3)                           | 0.54%<br>(-0.88-2.6%)                | 0.63%<br>(-1.1-3.1%)                | 0.56<br>(-0.95-3)         | 6<br>(-9.6-31)          |
| The Gambia | 1990 | Female | 85 to 89 | 33%<br>(18-52%)                | 67%<br>(48-82%)          | 0.61<br>(0.2-1.3)                           | 0.25%<br>(-1.2-2.2%)                 | 0.26%<br>(-1.4-2.6%)                | 0.12<br>(-0.64-1.2)       | 1<br>(-4.6-8.9)         |
| The Gambia | 1990 | Female | 90 to 94 | 37%<br>(21-55%)                | 63%<br>(45-79%)          | 0.65<br>(0.2-1.4)                           | 0.0086%<br>(-1.4-1.9%)               | -0.059%<br>(-1.7-2.3%)              | -0.0084<br>(-0.25-0.33)   | 0.0099<br>(-1.2-1.7)    |
| The Gambia | 1990 | Female | 95 plus  | 41%<br>(22-61%)                | 59%<br>(39-78%)          | 0.7<br>(0.18-1.6)                           | -0.067%<br>(-1.5-2.2%)               | -0.2%<br>(-1.9-2.5%)                | -0.0075<br>(-0.072-0.092) | -0.0097<br>(-0.22-0.33) |
| The Gambia | 1990 | Male   | All Ages | 18%<br>(14-24%)                | 82%<br>(76-86%)          | 0.47<br>(0.34-0.63)                         | 1.1%<br>(0.73-1.5%)                  | 1.8%<br>(1.1-2.8%)                  | 84<br>(53-130)            | 3600<br>(2500-5100)     |
| The Gambia | 1990 | Male   | 15 to 19 | 14%<br>(7.6-24%)               | 86%<br>(76-92%)          | 0.29<br>(0.11-0.58)                         | 1%<br>(0.59-1.7%)                    | 0.94%<br>(0.33-1.9%)                | 0.63<br>(0.22-1.3)        | 87<br>(48-150)          |
| The Gambia | 1990 | Male   | 20 to 24 | 22%<br>(11-35%)                | 78%<br>(65-89%)          | 0.59<br>(0.23-1.1)                          | 2.7%<br>(1.5-4.4%)                   | 2.7%<br>(1-5.2%)                    | 2.7<br>(1.1-5.2)          | 280<br>(150-460)        |
| The Gambia | 1990 | Male   | 25 to 29 | 27%<br>(14-43%)                | 73%<br>(57-86%)          | 0.87<br>(0.37-1.5)                          | 4.2%<br>(2.4-6.5%)                   | 4.8%<br>(2.1-8.4%)                  | 4.6<br>(2-8.1)            | 370<br>(210-590)        |
| The Gambia | 1990 | Male   | 30 to 34 | 31%<br>(16-49%)                | 69%<br>(51-84%)          | 1.1<br>(0.52-1.8)                           | 5.2%<br>(3.1-7.9%)                   | 6.5%<br>(3.5-10%)                   | 6.1<br>(3.2-10)           | 420<br>(250-650)        |
| The Gambia | 1990 | Male   | 35 to 39 | 34%<br>(18-52%)                | 66%<br>(48-82%)          | 1.2<br>(0.52-2.2)                           | 5.9%<br>(3.6-9.1%)                   | 7.8%<br>(4.5-12%)                   | 7.2<br>(4-12)             | 420<br>(250-650)        |
| The Gambia | 1990 | Male   | 40 to 44 | 35%<br>(20-54%)                | 65%<br>(46-80%)          | 1.3<br>(0.5-2.5)                            | 6.4%<br>(3.8-10%)                    | 8.8%<br>(5-14%)                     | 7.6<br>(4.2-13)           | 380<br>(220-620)        |
| The Gambia | 1990 | Male   | 45 to 49 | 36%<br>(19-54%)                | 64%<br>(46-81%)          | 1.4<br>(0.52-2.8)                           | 6.9%<br>(3.9-11%)                    | 9.3%<br>(5.2-15%)                   | 9.8<br>(5.4-16)           | 430<br>(240-700)        |
| The Gambia | 1990 | Male   | 50 to 54 | 36%<br>(20-57%)                | 64%<br>(43-80%)          | 1.4<br>(0.52-2.8)                           | 6.4%<br>(3.2-11%)                    | 8.5%<br>(4.1-15%)                   | 8.9<br>(4.3-16)           | 340<br>(170-590)        |
| The Gambia | 1990 | Male   | 55 to 59 | 36%<br>(21-56%)                | 64%<br>(44-79%)          | 1.4<br>(0.52-2.7)                           | 5.8%<br>(2.9-10%)                    | 7.5%<br>(3.7-13%)                   | 9.2<br>(4.5-16)           | 300<br>(150-530)        |
| The Gambia | 1990 | Male   | 60 to 64 | 36%<br>(20-55%)                | 64%<br>(45-80%)          | 1.2<br>(0.43-2.5)                           | 4.5%<br>(2.1-8.5%)                   | 5.6%<br>(2.5-11%)                   | 8.5<br>(3.8-16)           | 240<br>(110-440)        |
| The Gambia | 1990 | Male   | 65 to 69 | 36%<br>(21-54%)                | 64%<br>(46-79%)          | 1<br>(0.39-2.1)                             | 3.4%<br>(1.4-7.3%)                   | 4.2%<br>(1.7-8.9%)                  | 8.2<br>(3.3-17)           | 190<br>(79-390)         |
| The Gambia | 1990 | Male   | 70 to 74 | 34%<br>(20-52%)                | 66%<br>(48-80%)          | 0.78<br>(0.29-1.8)                          | 2.4%<br>(0.67-5.5%)                  | 2.9%<br>(0.78-6.8%)                 | 5.8<br>(1.6-14)           | 110<br>(32-250)         |
| The Gambia | 1990 | Male   | 75 to 79 | 31%<br>(17-50%)                | 69%<br>(50-83%)          | 0.6<br>(0.18-1.3)                           | 1.5%<br>(0.28-3.8%)                  | 1.8%<br>(0.29-4.5%)                 | 3<br>(0.51-7.6)           | 43<br>(8.1-110)         |
| The Gambia | 1990 | Male   | 80 to 84 | 28%<br>(15-46%)                | 72%<br>(54-85%)          | 0.49<br>(0.16-1)                            | 1.2%<br>(0.2-2.8%)                   | 1.4%<br>(0.16-3.4%)                 | 1.2<br>(0.14-2.9)         | 13<br>(2.1-30)          |

| Location   | Year | Sex    | Age      | Prevalence of current drinkers | Prevalence of abstainers | Population average of standard drinks daily | Percent of total attributable deaths | Percent of total attributable DALYs | Attributable deaths      | Attributable DALYs     |
|------------|------|--------|----------|--------------------------------|--------------------------|---------------------------------------------|--------------------------------------|-------------------------------------|--------------------------|------------------------|
| The Gambia | 1990 | Male   | 85 to 89 | 27%<br>(14-43%)                | 73%<br>(57-86%)          | 0.42<br>(0.13-0.92)                         | 0.81%<br>(-0.032-2.1%)               | 0.91%<br>(-0.12-2.4%)               | 0.45<br>(-0.06-1.2)      | 3.5<br>(-0.13-8.9)     |
| The Gambia | 1990 | Male   | 90 to 94 | 28%<br>(15-46%)                | 72%<br>(54-85%)          | 0.4<br>(0.11-0.97)                          | 0.36%<br>(-0.34-1.4%)                | 0.34%<br>(-0.53-1.6%)               | 0.05<br>(-0.082-0.24)    | 0.33<br>(-0.31-1.3)    |
| The Gambia | 1990 | Male   | 95 plus  | 33%<br>(15-55%)                | 67%<br>(45-85%)          | 0.4<br>(0.086-1.1)                          | 0.27%<br>(-0.65-1.8%)                | 0.16%<br>(-0.99-2%)                 | 0.0048<br>(-0.03-0.06)   | 0.033<br>(-0.079-0.22) |
| The Gambia | 1995 | Female | All Ages | 22%<br>(16-28%)                | 78%<br>(72-84%)          | 0.38<br>(0.28-0.51)                         | 0.71%<br>(0.41-1.1%)                 | 1.2%<br>(0.44-2.2%)                 | 51<br>(19-96)            | 2300<br>(1300-3600)    |
| The Gambia | 1995 | Female | 15 to 19 | 22%<br>(12-36%)                | 78%<br>(64-88%)          | 0.38<br>(0.15-0.73)                         | 0.92%<br>(0.43-1.8%)                 | 0.9%<br>(0.079-2.3%)                | 0.75<br>(0.065-1.9)      | 110<br>(48-200)        |
| The Gambia | 1995 | Female | 20 to 24 | 27%<br>(14-44%)                | 73%<br>(56-86%)          | 0.59<br>(0.24-1.1)                          | 1.9%<br>(0.96-3.3%)                  | 1.7%<br>(0.34-4%)                   | 1.6<br>(0.32-3.9)        | 210<br>(100-380)       |
| The Gambia | 1995 | Female | 25 to 29 | 30%<br>(15-47%)                | 70%<br>(53-85%)          | 0.72<br>(0.32-1.3)                          | 2.3%<br>(1.2-3.8%)                   | 2.5%<br>(0.72-5.1%)                 | 2.7<br>(0.77-5.5)        | 270<br>(140-450)       |
| The Gambia | 1995 | Female | 30 to 34 | 33%<br>(17-53%)                | 67%<br>(47-83%)          | 0.82<br>(0.39-1.4)                          | 2.5%<br>(1.3-4%)                     | 3%<br>(1.2-5.6%)                    | 3.2<br>(1.3-6)           | 260<br>(130-410)       |
| The Gambia | 1995 | Female | 35 to 39 | 36%<br>(20-55%)                | 64%<br>(45-80%)          | 0.88<br>(0.41-1.5)                          | 2.8%<br>(1.4-4.9%)                   | 3.8%<br>(1.6-7.2%)                  | 4<br>(1.6-7.6)           | 250<br>(130-430)       |
| The Gambia | 1995 | Female | 40 to 44 | 38%<br>(22-57%)                | 62%<br>(43-78%)          | 0.93<br>(0.38-1.7)                          | 3.1%<br>(1.5-5.4%)                   | 4.5%<br>(2-8.3%)                    | 4.3<br>(1.9-7.9)         | 220<br>(110-390)       |
| The Gambia | 1995 | Female | 45 to 49 | 39%<br>(20-58%)                | 61%<br>(42-80%)          | 0.96<br>(0.38-1.8)                          | 3.2%<br>(1.4-5.9%)                   | 4.6%<br>(1.8-9.1%)                  | 3.6<br>(1.4-7)           | 160<br>(68-300)        |
| The Gambia | 1995 | Female | 50 to 54 | 39%<br>(21-59%)                | 61%<br>(41-79%)          | 1<br>(0.39-1.9)                             | 3.5%<br>(1.5-6.6%)                   | 4.8%<br>(1.9-9.2%)                  | 5.5<br>(2.1-11)          | 210<br>(83-390)        |
| The Gambia | 1995 | Female | 55 to 59 | 39%<br>(22-58%)                | 61%<br>(42-78%)          | 1.1<br>(0.43-2.1)                           | 3.5%<br>(1.1-7.1%)                   | 4.7%<br>(1.4-9.8%)                  | 5.4<br>(1.6-11)          | 170<br>(55-360)        |
| The Gambia | 1995 | Female | 60 to 64 | 40%<br>(22-60%)                | 60%<br>(40-78%)          | 1.1<br>(0.41-2.2)                           | 2.9%<br>(0.61-6.5%)                  | 3.8%<br>(0.76-8.3%)                 | 5.8<br>(1.3-13)          | 160<br>(35-350)        |
| The Gambia | 1995 | Female | 65 to 69 | 42%<br>(25-59%)                | 58%<br>(41-75%)          | 1<br>(0.42-2)                               | 2.2%<br>(0.028-5.7%)                 | 2.8%<br>(0.025-7%)                  | 5.5<br>(0.054-14)        | 120<br>(1.8-320)       |
| The Gambia | 1995 | Female | 70 to 74 | 40%<br>(24-57%)                | 60%<br>(43-76%)          | 0.84<br>(0.32-1.8)                          | 1.7%<br>(-0.45-5.1%)                 | 2.1%<br>(-0.56-6.3%)                | 4.9<br>(-1.3-15)         | 89<br>(-24-270)        |
| The Gambia | 1995 | Female | 75 to 79 | 35%<br>(19-55%)                | 65%<br>(45-81%)          | 0.67<br>(0.21-1.5)                          | 0.91%<br>(-0.91-3.8%)                | 1.1%<br>(-1.1-4.4%)                 | 2.5<br>(-2.6-11)         | 35<br>(-35-150)        |
| The Gambia | 1995 | Female | 80 to 84 | 33%<br>(17-51%)                | 67%<br>(49-83%)          | 0.6<br>(0.2-1.2)                            | 0.53%<br>(-0.91-2.7%)                | 0.62%<br>(-1.1-3.1%)                | 0.75<br>(-1.4-3.9)       | 8<br>(-14-41)          |
| The Gambia | 1995 | Female | 85 to 89 | 33%<br>(18-51%)                | 67%<br>(49-82%)          | 0.6<br>(0.19-1.3)                           | 0.25%<br>(-1.1-2.2%)                 | 0.27%<br>(-1.4-2.5%)                | 0.17<br>(-0.83-1.6)      | 1.4<br>(-5.8-12)       |
| The Gambia | 1995 | Female | 90 to 94 | 36%<br>(20-54%)                | 64%<br>(46-80%)          | 0.63<br>(0.19-1.4)                          | 0.02%<br>(-1.4-2%)                   | -0.043%<br>(-1.7-2.5%)              | -0.0089<br>(-0.36-0.53)  | 0.028<br>(-1.7-2.7)    |
| The Gambia | 1995 | Female | 95 plus  | 41%<br>(22-62%)                | 59%<br>(38-78%)          | 0.67<br>(0.18-1.6)                          | -0.044%<br>(-1.5-2.3%)               | -0.17%<br>(-1.9-2.6%)               | -0.0083<br>(-0.092-0.13) | -0.008<br>(-0.29-0.44) |
| The Gambia | 1995 | Male   | All Ages | 18%<br>(14-24%)                | 82%<br>(76-86%)          | 0.47<br>(0.35-0.63)                         | 1.1%<br>(0.78-1.6%)                  | 1.9%<br>(1.2-3%)                    | 95<br>(59-140)           | 4100<br>(2900-5600)    |

| Location   | Year | Sex    | Age      | Prevalence of current drinkers | Prevalence of abstainers | Population average of standard drinks daily | Percent of total attributable deaths | Percent of total attributable DALYs | Attributable deaths    | Attributable DALYs    |
|------------|------|--------|----------|--------------------------------|--------------------------|---------------------------------------------|--------------------------------------|-------------------------------------|------------------------|-----------------------|
| The Gambia | 1995 | Male   | 15 to 19 | 15%<br>(7.6-25%)               | 85%<br>(75-92%)          | 0.3<br>(0.11-0.62)                          | 1.1%<br>(0.62-1.8%)                  | 1%<br>(0.31-2.2%)                   | 0.78<br>(0.24-1.7)     | 110<br>(59-180)       |
| The Gambia | 1995 | Male   | 20 to 24 | 23%<br>(12-37%)                | 77%<br>(63-88%)          | 0.61<br>(0.24-1.1)                          | 2.7%<br>(1.5-4.4%)                   | 2.6%<br>(0.99-5.1%)                 | 2.6<br>(0.95-5.1)      | 270<br>(150-450)      |
| The Gambia | 1995 | Male   | 25 to 29 | 28%<br>(15-44%)                | 72%<br>(56-85%)          | 0.91<br>(0.37-1.6)                          | 4%<br>(2.2-6.3%)                     | 4.5%<br>(2-7.9%)                    | 5.1<br>(2.2-9.1)       | 420<br>(230-670)      |
| The Gambia | 1995 | Male   | 30 to 34 | 32%<br>(16-50%)                | 68%<br>(50-84%)          | 1.1<br>(0.54-1.9)                           | 4.8%<br>(3-7.3%)                     | 6%<br>(3.2-9.6%)                    | 6.6<br>(3.5-11)        | 460<br>(260-710)      |
| The Gambia | 1995 | Male   | 35 to 39 | 34%<br>(19-53%)                | 66%<br>(47-81%)          | 1.2<br>(0.56-2.2)                           | 5.6%<br>(3.6-8.7%)                   | 7.3%<br>(4.3-12%)                   | 8.4<br>(4.8-13)        | 480<br>(300-740)      |
| The Gambia | 1995 | Male   | 40 to 44 | 36%<br>(21-54%)                | 64%<br>(46-79%)          | 1.3<br>(0.53-2.5)                           | 6.1%<br>(3.7-9.6%)                   | 8.4%<br>(4.9-13%)                   | 9.3<br>(5.3-15)        | 470<br>(270-730)      |
| The Gambia | 1995 | Male   | 45 to 49 | 36%<br>(19-55%)                | 64%<br>(45-81%)          | 1.4<br>(0.54-2.8)                           | 6.6%<br>(3.8-11%)                    | 9%<br>(5-15%)                       | 9.7<br>(5.2-16)        | 420<br>(230-690)      |
| The Gambia | 1995 | Male   | 50 to 54 | 37%<br>(20-57%)                | 63%<br>(43-80%)          | 1.4<br>(0.55-2.7)                           | 6.3%<br>(3.2-11%)                    | 8.3%<br>(4.1-14%)                   | 11<br>(5.5-19)         | 420<br>(220-720)      |
| The Gambia | 1995 | Male   | 55 to 59 | 37%<br>(21-57%)                | 63%<br>(43-79%)          | 1.4<br>(0.55-2.7)                           | 5.8%<br>(2.9-9.9%)                   | 7.5%<br>(3.7-13%)                   | 10<br>(5-18)           | 340<br>(170-580)      |
| The Gambia | 1995 | Male   | 60 to 64 | 37%<br>(20-57%)                | 63%<br>(43-80%)          | 1.3<br>(0.44-2.6)                           | 4.6%<br>(2-8.7%)                     | 5.7%<br>(2.5-11%)                   | 9.7<br>(4.2-19)        | 270<br>(120-510)      |
| The Gambia | 1995 | Male   | 65 to 69 | 37%<br>(21-55%)                | 63%<br>(45-79%)          | 1<br>(0.4-2.1)                              | 3.4%<br>(1.4-6.9%)                   | 4.2%<br>(1.7-8.6%)                  | 8.4<br>(3.4-17)        | 190<br>(83-400)       |
| The Gambia | 1995 | Male   | 70 to 74 | 35%<br>(20-53%)                | 65%<br>(47-80%)          | 0.8<br>(0.3-1.7)                            | 2.4%<br>(0.67-5.3%)                  | 2.9%<br>(0.78-6.5%)                 | 7.5<br>(1.9-18)        | 140<br>(38-320)       |
| The Gambia | 1995 | Male   | 75 to 79 | 32%<br>(18-51%)                | 68%<br>(49-82%)          | 0.61<br>(0.18-1.4)                          | 1.5%<br>(0.25-3.9%)                  | 1.8%<br>(0.24-4.7%)                 | 3.7<br>(0.47-9.6)      | 53<br>(8.1-130)       |
| The Gambia | 1995 | Male   | 80 to 84 | 29%<br>(15-49%)                | 71%<br>(51-85%)          | 0.51<br>(0.16-1.1)                          | 1.2%<br>(0.2-3%)                     | 1.4%<br>(0.18-3.5%)                 | 1.5<br>(0.18-3.6)      | 16<br>(2.6-38)        |
| The Gambia | 1995 | Male   | 85 to 89 | 28%<br>(15-45%)                | 72%<br>(55-85%)          | 0.44<br>(0.14-0.98)                         | 0.85%<br>(-0.075-2.3%)               | 0.95%<br>(-0.16-2.7%)               | 0.6<br>(-0.1-1.7)      | 4.7<br>(-0.42-13)     |
| The Gambia | 1995 | Male   | 90 to 94 | 30%<br>(16-48%)                | 70%<br>(52-84%)          | 0.42<br>(0.12-1)                            | 0.41%<br>(-0.36-1.5%)                | 0.39%<br>(-0.57-1.7%)               | 0.096<br>(-0.14-0.42)  | 0.61<br>(-0.54-2.2)   |
| The Gambia | 1995 | Male   | 95 plus  | 34%<br>(16-57%)                | 66%<br>(43-84%)          | 0.42<br>(0.093-1.1)                         | 0.38%<br>(-0.6-2.1%)                 | 0.29%<br>(-0.9-2.4%)                | 0.014<br>(-0.044-0.11) | 0.073<br>(-0.12-0.39) |
| The Gambia | 2000 | Female | All Ages | 22%<br>(17-29%)                | 78%<br>(71-83%)          | 0.43<br>(0.32-0.57)                         | 0.85%<br>(0.49-1.3%)                 | 1.4%<br>(0.54-2.7%)                 | 66<br>(26-130)         | 2900<br>(1700-4500)   |
| The Gambia | 2000 | Female | 15 to 19 | 22%<br>(12-36%)                | 78%<br>(64-88%)          | 0.42<br>(0.17-0.81)                         | 1%<br>(0.48-2%)                      | 1.1%<br>(0.15-2.7%)                 | 1<br>(0.14-2.6)        | 140<br>(63-260)       |
| The Gambia | 2000 | Female | 20 to 24 | 28%<br>(14-45%)                | 72%<br>(55-86%)          | 0.67<br>(0.29-1.2)                          | 2.1%<br>(1.1-3.6%)                   | 2%<br>(0.44-4.5%)                   | 2.4<br>(0.54-5.6)      | 300<br>(150-530)      |
| The Gambia | 2000 | Female | 25 to 29 | 30%<br>(15-48%)                | 70%<br>(52-85%)          | 0.82<br>(0.36-1.4)                          | 2.4%<br>(1.3-3.9%)                   | 2.6%<br>(0.85-5.1%)                 | 3.1<br>(1-6.2)         | 310<br>(160-510)      |
| The Gambia | 2000 | Female | 30 to 34 | 33%<br>(17-52%)                | 67%<br>(48-83%)          | 0.93<br>(0.44-1.6)                          | 2.5%<br>(1.4-4.2%)                   | 3%<br>(1.3-5.7%)                    | 3.9<br>(1.7-7.4)       | 310<br>(170-500)      |

| Location   | Year | Sex    | Age      | Prevalence of current drinkers | Prevalence of abstainers | Population average of standard drinks daily | Percent of total attributable deaths | Percent of total attributable DALYs | Attributable deaths   | Attributable DALYs    |
|------------|------|--------|----------|--------------------------------|--------------------------|---------------------------------------------|--------------------------------------|-------------------------------------|-----------------------|-----------------------|
| The Gambia | 2000 | Female | 35 to 39 | 36%<br>(19-55%)                | 64%<br>(45-81%)          | 1<br>(0.45-1.8)                             | 2.9%<br>(1.5-5%)                     | 4%<br>(1.8-7.4%)                    | 4.9<br>(2.1-9.2)      | 300<br>(150-530)      |
| The Gambia | 2000 | Female | 40 to 44 | 38%<br>(22-57%)                | 62%<br>(43-78%)          | 1.1<br>(0.43-1.9)                           | 3.3%<br>(1.7-5.6%)                   | 4.8%<br>(2.2-8.5%)                  | 5.4<br>(2.4-9.8)      | 280<br>(140-480)      |
| The Gambia | 2000 | Female | 45 to 49 | 39%<br>(20-57%)                | 61%<br>(43-80%)          | 1.1<br>(0.44-2.1)                           | 3.5%<br>(1.5-6.3%)                   | 5.1%<br>(2.1-9.5%)                  | 5.6<br>(2.2-10)       | 250<br>(100-450)      |
| The Gambia | 2000 | Female | 50 to 54 | 39%<br>(21-60%)                | 61%<br>(40-79%)          | 1.1<br>(0.46-2.1)                           | 3.9%<br>(1.6-7.3%)                   | 5.4%<br>(2.2-10%)                   | 5.4<br>(2.1-10)       | 200<br>(82-390)       |
| The Gambia | 2000 | Female | 55 to 59 | 39%<br>(23-58%)                | 61%<br>(42-77%)          | 1.2<br>(0.47-2.3)                           | 4%<br>(1.4-8.1%)                     | 5.5%<br>(1.8-11%)                   | 8.1<br>(2.6-17)       | 260<br>(86-530)       |
| The Gambia | 2000 | Female | 60 to 64 | 40%<br>(23-59%)                | 60%<br>(41-77%)          | 1.2<br>(0.47-2.4)                           | 3.4%<br>(0.83-7.5%)                  | 4.4%<br>(1.1-9.5%)                  | 7.1<br>(1.7-16)       | 190<br>(45-430)       |
| The Gambia | 2000 | Female | 65 to 69 | 41%<br>(25-59%)                | 59%<br>(41-75%)          | 1.1<br>(0.47-2.2)                           | 2.7%<br>(0.16-6.6%)                  | 3.4%<br>(0.14-8.3%)                 | 7<br>(0.3-18)         | 160<br>(10-400)       |
| The Gambia | 2000 | Female | 70 to 74 | 39%<br>(24-57%)                | 61%<br>(43-76%)          | 0.93<br>(0.36-1.9)                          | 2%<br>(-0.46-5.9%)                   | 2.5%<br>(-0.62-7.3%)                | 6.6<br>(-1.7-19)      | 120<br>(-27-350)      |
| The Gambia | 2000 | Female | 75 to 79 | 35%<br>(19-54%)                | 65%<br>(46-81%)          | 0.75<br>(0.24-1.7)                          | 1.2%<br>(-0.85-4.7%)                 | 1.4%<br>(-1.1-5.6%)                 | 3.4<br>(-2.5-14)      | 49<br>(-35-200)       |
| The Gambia | 2000 | Female | 80 to 84 | 33%<br>(17-53%)                | 67%<br>(47-83%)          | 0.68<br>(0.23-1.4)                          | 0.78%<br>(-0.84-3.4%)                | 0.92%<br>(-1.1-4.1%)                | 1.3<br>(-1.5-6)       | 14<br>(-15-62)        |
| The Gambia | 2000 | Female | 85 to 89 | 33%<br>(18-51%)                | 67%<br>(49-82%)          | 0.68<br>(0.22-1.5)                          | 0.51%<br>(-1-3.1%)                   | 0.58%<br>(-1.3-3.6%)                | 0.5<br>(-1.1-3)       | 3.9<br>(-7.9-22)      |
| The Gambia | 2000 | Female | 90 to 94 | 36%<br>(19-54%)                | 64%<br>(46-81%)          | 0.71<br>(0.22-1.5)                          | 0.3%<br>(-1.4-3.2%)                  | 0.29%<br>(-1.8-3.8%)                | 0.084<br>(-0.5-1.1)   | 0.53<br>(-2.4-5.5)    |
| The Gambia | 2000 | Female | 95 plus  | 40%<br>(21-61%)                | 60%<br>(39-79%)          | 0.74<br>(0.2-1.7)                           | 0.24%<br>(-1.5-3.4%)                 | 0.16%<br>(-1.9-4%)                  | 0.011<br>(-0.13-0.28) | 0.068<br>(-0.39-0.96) |
| The Gambia | 2000 | Male   | All Ages | 19%<br>(14-25%)                | 81%<br>(75-86%)          | 0.53<br>(0.4-0.72)                          | 1.3%<br>(0.93-1.9%)                  | 2.3%<br>(1.4-3.6%)                  | 120<br>(74-200)       | 5200<br>(3600-7100)   |
| The Gambia | 2000 | Male   | 15 to 19 | 16%<br>(8.1-26%)               | 84%<br>(74-92%)          | 0.35<br>(0.13-0.7)                          | 1.2%<br>(0.64-2%)                    | 1.2%<br>(0.4-2.6%)                  | 1.1<br>(0.36-2.4)     | 140<br>(77-250)       |
| The Gambia | 2000 | Male   | 20 to 24 | 23%<br>(12-39%)                | 77%<br>(61-88%)          | 0.71<br>(0.29-1.3)                          | 2.8%<br>(1.6-4.7%)                   | 2.8%<br>(1.1-5.3%)                  | 3.7<br>(1.4-7.1)      | 380<br>(200-620)      |
| The Gambia | 2000 | Male   | 25 to 29 | 29%<br>(15-46%)                | 71%<br>(54-85%)          | 1<br>(0.45-1.9)                             | 3.9%<br>(2.1-6.3%)                   | 4.3%<br>(1.9-7.8%)                  | 5.9<br>(2.5-10)       | 470<br>(250-750)      |
| The Gambia | 2000 | Male   | 30 to 34 | 33%<br>(17-52%)                | 67%<br>(48-83%)          | 1.3<br>(0.62-2.2)                           | 4.7%<br>(2.7-7.3%)                   | 5.6%<br>(2.9-9.3%)                  | 8.3<br>(4.4-14)       | 560<br>(340-880)      |
| The Gambia | 2000 | Male   | 35 to 39 | 35%<br>(20-54%)                | 65%<br>(46-80%)          | 1.4<br>(0.63-2.6)                           | 5.4%<br>(3.3-8.3%)                   | 6.8%<br>(3.9-11%)                   | 9.8<br>(5.6-15)       | 560<br>(340-870)      |
| The Gambia | 2000 | Male   | 40 to 44 | 36%<br>(21-56%)                | 64%<br>(44-79%)          | 1.5<br>(0.6-2.8)                            | 6.1%<br>(3.5-9.4%)                   | 8%<br>(4.4-12%)                     | 12<br>(6.3-18)        | 570<br>(330-890)      |
| The Gambia | 2000 | Male   | 45 to 49 | 37%<br>(19-55%)                | 63%<br>(45-81%)          | 1.6<br>(0.64-3.1)                           | 7%<br>(3.8-11%)                      | 9.2%<br>(4.7-15%)                   | 14<br>(7.1-22)        | 590<br>(320-960)      |
| The Gambia | 2000 | Male   | 50 to 54 | 38%<br>(21-58%)                | 62%<br>(42-79%)          | 1.6<br>(0.64-3.2)                           | 6.9%<br>(3.4-11%)                    | 8.9%<br>(4.4-15%)                   | 13<br>(6.4-22)        | 490<br>(250-830)      |



| Location   | Year | Sex    | Age      | Prevalence of current drinkers | Prevalence of abstainers | Population average of standard drinks daily | Percent of total attributable deaths | Percent of total attributable DALYs | Attributable deaths   | Attributable DALYs   |
|------------|------|--------|----------|--------------------------------|--------------------------|---------------------------------------------|--------------------------------------|-------------------------------------|-----------------------|----------------------|
| The Gambia | 2000 | Male   | 55 to 59 | 38%<br>(22-57%)                | 62%<br>(43-78%)          | 1.6<br>(0.61-3.1)                           | 6.5%<br>(3.1-11%)                    | 8.2%<br>(3.9-14%)                   | 15<br>(7.1-26)        | 490<br>(240-840)     |
| The Gambia | 2000 | Male   | 60 to 64 | 37%<br>(21-57%)                | 63%<br>(43-79%)          | 1.4<br>(0.51-3)                             | 5.1%<br>(2.2-9.5%)                   | 6.3%<br>(2.7-12%)                   | 13<br>(5.4-24)        | 350<br>(150-660)     |
| The Gambia | 2000 | Male   | 65 to 69 | 37%<br>(21-55%)                | 63%<br>(45-79%)          | 1.2<br>(0.46-2.3)                           | 3.9%<br>(1.5-8%)                     | 4.7%<br>(1.8-9.6%)                  | 11<br>(4.3-23)        | 260<br>(100-520)     |
| The Gambia | 2000 | Male   | 70 to 74 | 36%<br>(21-53%)                | 64%<br>(47-79%)          | 0.92<br>(0.35-1.9)                          | 2.8%<br>(0.73-6.6%)                  | 3.3%<br>(0.85-7.9%)                 | 9.4<br>(2.4-23)       | 170<br>(45-410)      |
| The Gambia | 2000 | Male   | 75 to 79 | 32%<br>(18-51%)                | 68%<br>(49-82%)          | 0.7<br>(0.22-1.7)                           | 1.8%<br>(0.24-4.8%)                  | 2.1%<br>(0.21-5.8%)                 | 5.6<br>(0.59-16)      | 80<br>(11-220)       |
| The Gambia | 2000 | Male   | 80 to 84 | 30%<br>(16-49%)                | 70%<br>(51-84%)          | 0.59<br>(0.18-1.2)                          | 1.5%<br>(0.22-3.8%)                  | 1.7%<br>(0.21-4.5%)                 | 2.3<br>(0.28-6.2)     | 25<br>(3.7-63)       |
| The Gambia | 2000 | Male   | 85 to 89 | 29%<br>(15-47%)                | 71%<br>(53-85%)          | 0.52<br>(0.16-1.1)                          | 1.1%<br>(0.0087-3.1%)                | 1.2%<br>(-0.081-3.7%)               | 0.9<br>(-0.063-2.7)   | 6.9<br>(0.057-20)    |
| The Gambia | 2000 | Male   | 90 to 94 | 31%<br>(16-49%)                | 69%<br>(51-84%)          | 0.49<br>(0.15-1.2)                          | 0.61%<br>(-0.37-2.3%)                | 0.63%<br>(-0.55-2.7%)               | 0.19<br>(-0.17-0.82)  | 1.1<br>(-0.67-4.3)   |
| The Gambia | 2000 | Male   | 95 plus  | 35%<br>(17-58%)                | 65%<br>(42-83%)          | 0.5<br>(0.11-1.3)                           | 0.67%<br>(-0.58-3%)                  | 0.65%<br>(-0.92-3.5%)               | 0.049<br>(-0.07-0.27) | 0.21<br>(-0.18-0.91) |
| The Gambia | 2005 | Female | All Ages | 22%<br>(17-29%)                | 78%<br>(71-83%)          | 0.48<br>(0.36-0.65)                         | 0.93%<br>(0.54-1.4%)                 | 1.6%<br>(0.59-3.1%)                 | 75<br>(28-140)        | 3200<br>(1900-5100)  |
| The Gambia | 2005 | Female | 15 to 19 | 22%<br>(12-36%)                | 78%<br>(64-88%)          | 0.46<br>(0.19-0.87)                         | 1%<br>(0.52-1.8%)                    | 1.1%<br>(0.19-2.8%)                 | 1<br>(0.17-2.5)       | 140<br>(70-250)      |
| The Gambia | 2005 | Female | 20 to 24 | 27%<br>(14-44%)                | 73%<br>(56-86%)          | 0.73<br>(0.32-1.3)                          | 2%<br>(1.1-3.3%)                     | 1.8%<br>(0.44-3.9%)                 | 2.2<br>(0.57-4.9)     | 310<br>(170-510)     |
| The Gambia | 2005 | Female | 25 to 29 | 30%<br>(15-47%)                | 70%<br>(53-85%)          | 0.89<br>(0.4-1.6)                           | 2.1%<br>(1.2-3.3%)                   | 2.1%<br>(0.71-4.2%)                 | 3.2<br>(1.1-6.3)      | 350<br>(200-550)     |
| The Gambia | 2005 | Female | 30 to 34 | 33%<br>(17-52%)                | 67%<br>(48-83%)          | 1<br>(0.49-1.8)                             | 2.1%<br>(1.2-3.4%)                   | 2.3%<br>(1-4.3%)                    | 3.4<br>(1.5-6.4)      | 290<br>(160-470)     |
| The Gambia | 2005 | Female | 35 to 39 | 36%<br>(20-56%)                | 64%<br>(44-80%)          | 1.1<br>(0.5-1.9)                            | 2.6%<br>(1.4-4.4%)                   | 3.4%<br>(1.5-6.2%)                  | 5.1<br>(2.3-9.4)      | 330<br>(180-550)     |
| The Gambia | 2005 | Female | 40 to 44 | 38%<br>(22-57%)                | 62%<br>(43-78%)          | 1.2<br>(0.49-2.1)                           | 3%<br>(1.6-5%)                       | 4.3%<br>(2-7.5%)                    | 6.1<br>(2.8-11)       | 320<br>(160-550)     |
| The Gambia | 2005 | Female | 45 to 49 | 39%<br>(21-58%)                | 61%<br>(42-79%)          | 1.2<br>(0.48-2.3)                           | 3.3%<br>(1.5-6.2%)                   | 4.9%<br>(2-9.1%)                    | 6.5<br>(2.6-12)       | 290<br>(130-540)     |
| The Gambia | 2005 | Female | 50 to 54 | 39%<br>(21-60%)                | 61%<br>(40-79%)          | 1.3<br>(0.52-2.5)                           | 4.1%<br>(1.8-7.4%)                   | 5.8%<br>(2.4-11%)                   | 8.1<br>(3.3-15)       | 310<br>(130-570)     |
| The Gambia | 2005 | Female | 55 to 59 | 39%<br>(23-58%)                | 61%<br>(42-77%)          | 1.4<br>(0.54-2.6)                           | 4.3%<br>(1.5-8.3%)                   | 5.9%<br>(2-12%)                     | 7.4<br>(2.5-15)       | 240<br>(80-470)      |
| The Gambia | 2005 | Female | 60 to 64 | 40%<br>(23-59%)                | 60%<br>(41-77%)          | 1.4<br>(0.52-2.7)                           | 3.7%<br>(0.85-8.2%)                  | 5%<br>(1.2-11%)                     | 9.5<br>(2.3-21)       | 260<br>(61-570)      |
| The Gambia | 2005 | Female | 65 to 69 | 41%<br>(24-59%)                | 59%<br>(41-76%)          | 1.2<br>(0.51-2.3)                           | 3%<br>(0.27-7.1%)                    | 3.8%<br>(0.35-9.1%)                 | 7.9<br>(0.71-19)      | 180<br>(15-440)      |
| The Gambia | 2005 | Female | 70 to 74 | 39%<br>(24-57%)                | 61%<br>(43-76%)          | 1<br>(0.39-2.2)                             | 2.3%<br>(-0.36-6.5%)                 | 2.9%<br>(-0.43-8.1%)                | 7.1<br>(-1.2-21)      | 130<br>(-20-370)     |

| Location   | Year | Sex    | Age      | Prevalence of current drinkers | Prevalence of abstainers | Population average of standard drinks daily | Percent of total attributable deaths | Percent of total attributable DALYs | Attributable deaths   | Attributable DALYs  |
|------------|------|--------|----------|--------------------------------|--------------------------|---------------------------------------------|--------------------------------------|-------------------------------------|-----------------------|---------------------|
| The Gambia | 2005 | Female | 75 to 79 | 35%<br>(19-54%)                | 65%<br>(46-81%)          | 0.84<br>(0.27-1.8)                          | 1.4%<br>(-0.85-5.4%)                 | 1.7%<br>(-1.1-6.3%)                 | 4.3<br>(-2.8-16)      | 62<br>(-38-230)     |
| The Gambia | 2005 | Female | 80 to 84 | 33%<br>(18-53%)                | 67%<br>(47-82%)          | 0.75<br>(0.26-1.6)                          | 0.95%<br>(-0.85-4%)                  | 1.1%<br>(-1.1-4.8%)                 | 1.7<br>(-1.7-7.6)     | 19<br>(-16-79)      |
| The Gambia | 2005 | Female | 85 to 89 | 33%<br>(18-52%)                | 67%<br>(48-82%)          | 0.74<br>(0.24-1.6)                          | 0.68%<br>(-1-3.6%)                   | 0.78%<br>(-1.3-4.3%)                | 0.77<br>(-1.3-4.4)    | 6<br>(-9.1-32)      |
| The Gambia | 2005 | Female | 90 to 94 | 36%<br>(20-55%)                | 64%<br>(45-80%)          | 0.78<br>(0.24-1.8)                          | 0.47%<br>(-1.4-3.5%)                 | 0.49%<br>(-1.8-4.3%)                | 0.19<br>(-0.68-1.6)   | 1.1<br>(-3.2-8.3)   |
| The Gambia | 2005 | Female | 95 plus  | 40%<br>(20-61%)                | 60%<br>(39-80%)          | 0.82<br>(0.21-1.9)                          | 0.43%<br>(-1.5-3.9%)                 | 0.38%<br>(-1.9-4.6%)                | 0.035<br>(-0.18-0.42) | 0.16<br>(-0.53-1.4) |
| The Gambia | 2005 | Male   | All Ages | 19%<br>(14-24%)                | 81%<br>(76-86%)          | 0.59<br>(0.43-0.79)                         | 1.6%<br>(1.1-2.3%)                   | 2.7%<br>(1.7-4.2%)                  | 160<br>(95-240)       | 6500<br>(4500-9000) |
| The Gambia | 2005 | Male   | 15 to 19 | 15%<br>(7.9-26%)               | 85%<br>(74-92%)          | 0.38<br>(0.14-0.75)                         | 1.3%<br>(0.72-2.2%)                  | 1.3%<br>(0.45-2.8%)                 | 1.4<br>(0.47-3)       | 170<br>(93-290)     |
| The Gambia | 2005 | Male   | 20 to 24 | 23%<br>(12-39%)                | 77%<br>(61-88%)          | 0.78<br>(0.32-1.4)                          | 3%<br>(1.6-4.9%)                     | 3%<br>(1.2-5.6%)                    | 4.7<br>(1.9-9)        | 460<br>(250-770)    |
| The Gambia | 2005 | Male   | 25 to 29 | 29%<br>(15-46%)                | 71%<br>(54-85%)          | 1.2<br>(0.5-2.1)                            | 3.8%<br>(2-6.4%)                     | 4.2%<br>(1.8-7.8%)                  | 7.9<br>(3.5-14)       | 630<br>(350-1000)   |
| The Gambia | 2005 | Male   | 30 to 34 | 32%<br>(17-52%)                | 68%<br>(48-83%)          | 1.4<br>(0.69-2.5)                           | 4.3%<br>(2.5-6.8%)                   | 4.9%<br>(2.6-8.3%)                  | 9.5<br>(5.3-15)       | 640<br>(380-960)    |
| The Gambia | 2005 | Male   | 35 to 39 | 35%<br>(19-55%)                | 65%<br>(45-81%)          | 1.6<br>(0.68-2.8)                           | 5.1%<br>(3.1-7.9%)                   | 6.2%<br>(3.6-10%)                   | 12<br>(7.2-20)        | 710<br>(430-1100)   |
| The Gambia | 2005 | Male   | 40 to 44 | 36%<br>(21-55%)                | 64%<br>(45-79%)          | 1.7<br>(0.66-3)                             | 5.7%<br>(3.3-8.8%)                   | 7.2%<br>(4-11%)                     | 14<br>(7.8-22)        | 690<br>(400-1100)   |
| The Gambia | 2005 | Male   | 45 to 49 | 37%<br>(19-57%)                | 63%<br>(43-81%)          | 1.8<br>(0.67-3.5)                           | 6.9%<br>(3.8-11%)                    | 8.8%<br>(4.7-14%)                   | 17<br>(9.3-27)        | 740<br>(410-1200)   |
| The Gambia | 2005 | Male   | 50 to 54 | 37%<br>(21-59%)                | 63%<br>(41-79%)          | 1.8<br>(0.72-3.6)                           | 7.1%<br>(3.6-12%)                    | 9.2%<br>(4.6-15%)                   | 18<br>(9-30)          | 680<br>(350-1100)   |
| The Gambia | 2005 | Male   | 55 to 59 | 37%<br>(21-57%)                | 63%<br>(43-79%)          | 1.7<br>(0.65-3.3)                           | 7%<br>(3.4-11%)                      | 8.8%<br>(4.2-15%)                   | 17<br>(7.8-29)        | 560<br>(260-930)    |
| The Gambia | 2005 | Male   | 60 to 64 | 37%<br>(21-56%)                | 63%<br>(44-79%)          | 1.6<br>(0.53-3.4)                           | 5.7%<br>(2.5-11%)                    | 6.9%<br>(3-13%)                     | 18<br>(7.7-34)        | 490<br>(220-940)    |
| The Gambia | 2005 | Male   | 65 to 69 | 37%<br>(21-55%)                | 63%<br>(45-79%)          | 1.3<br>(0.52-2.7)                           | 4.4%<br>(1.7-9%)                     | 5.3%<br>(2.1-11%)                   | 14<br>(5.5-30)        | 320<br>(130-670)    |
| The Gambia | 2005 | Male   | 70 to 74 | 35%<br>(21-53%)                | 65%<br>(47-79%)          | 1<br>(0.39-2.2)                             | 3.1%<br>(0.87-7.4%)                  | 3.8%<br>(1-9%)                      | 11<br>(3.1-28)        | 210<br>(59-500)     |
| The Gambia | 2005 | Male   | 75 to 79 | 32%<br>(18-51%)                | 68%<br>(49-82%)          | 0.79<br>(0.24-1.8)                          | 2%<br>(0.32-5.7%)                    | 2.4%<br>(0.34-6.8%)                 | 6.7<br>(0.92-18)      | 95<br>(15-260)      |
| The Gambia | 2005 | Male   | 80 to 84 | 30%<br>(16-49%)                | 70%<br>(51-84%)          | 0.66<br>(0.22-1.4)                          | 1.7%<br>(0.25-4.4%)                  | 1.9%<br>(0.24-5.2%)                 | 3.1<br>(0.36-8.1)     | 33<br>(5.1-86)      |
| The Gambia | 2005 | Male   | 85 to 89 | 28%<br>(15-47%)                | 72%<br>(53-85%)          | 0.56<br>(0.18-1.3)                          | 1.2%<br>(0.043-3.4%)                 | 1.4%<br>(-0.032-4%)                 | 1.4<br>(-0.031-4)     | 11<br>(0.37-30)     |
| The Gambia | 2005 | Male   | 90 to 94 | 30%<br>(15-49%)                | 70%<br>(51-85%)          | 0.53<br>(0.16-1.2)                          | 0.71%<br>(-0.33-2.7%)                | 0.75%<br>(-0.51-3.1%)               | 0.27<br>(-0.18-1.2)   | 1.6<br>(-0.72-6)    |

| Location   | Year | Sex    | Age      | Prevalence of current drinkers | Prevalence of abstainers | Population average of standard drinks daily | Percent of total attributable deaths | Percent of total attributable DALYs | Attributable deaths   | Attributable DALYs   |
|------------|------|--------|----------|--------------------------------|--------------------------|---------------------------------------------|--------------------------------------|-------------------------------------|-----------------------|----------------------|
| The Gambia | 2005 | Male   | 95 plus  | 35%<br>(16-56%)                | 65%<br>(44-84%)          | 0.53<br>(0.11-1.4)                          | 0.77%<br>(-0.53-3.3%)                | 0.76%<br>(-0.85-3.9%)               | 0.072<br>(-0.08-0.36) | 0.29<br>(-0.2-1.3)   |
| The Gambia | 2010 | Female | All Ages | 22%<br>(17-29%)                | 78%<br>(71-83%)          | 0.49<br>(0.32-0.73)                         | 0.99%<br>(0.55-1.6%)                 | 1.6%<br>(0.52-3.3%)                 | 80<br>(25-160)        | 3500<br>(1900-5700)  |
| The Gambia | 2010 | Female | 15 to 19 | 22%<br>(11-36%)                | 78%<br>(64-89%)          | 0.46<br>(0.17-0.94)                         | 1%<br>(0.52-1.8%)                    | 1.1%<br>(0.17-2.7%)                 | 0.98<br>(0.16-2.4)    | 150<br>(78-280)      |
| The Gambia | 2010 | Female | 20 to 24 | 27%<br>(14-44%)                | 73%<br>(56-86%)          | 0.73<br>(0.3-1.4)                           | 2%<br>(1.1-3.2%)                     | 1.7%<br>(0.39-3.8%)                 | 2<br>(0.46-4.6)       | 320<br>(180-510)     |
| The Gambia | 2010 | Female | 25 to 29 | 30%<br>(16-47%)                | 70%<br>(53-84%)          | 0.89<br>(0.39-1.7)                          | 2%<br>(1.2-3.2%)                     | 1.8%<br>(0.61-3.8%)                 | 3<br>(1-6.1)          | 350<br>(200-560)     |
| The Gambia | 2010 | Female | 30 to 34 | 33%<br>(17-52%)                | 67%<br>(48-83%)          | 1<br>(0.48-1.9)                             | 1.9%<br>(1.1-3%)                     | 1.9%<br>(0.88-3.6%)                 | 3.6<br>(1.6-6.8)      | 330<br>(190-530)     |
| The Gambia | 2010 | Female | 35 to 39 | 36%<br>(20-55%)                | 64%<br>(45-80%)          | 1.1<br>(0.46-2.1)                           | 2.3%<br>(1.2-3.9%)                   | 2.9%<br>(1.2-5.4%)                  | 4.8<br>(2.1-8.8)      | 320<br>(170-540)     |
| The Gambia | 2010 | Female | 40 to 44 | 38%<br>(22-57%)                | 62%<br>(43-78%)          | 1.2<br>(0.49-2.2)                           | 2.7%<br>(1.4-4.8%)                   | 3.9%<br>(1.7-7%)                    | 6.7<br>(3.1-12)       | 360<br>(180-620)     |
| The Gambia | 2010 | Female | 45 to 49 | 39%<br>(20-57%)                | 61%<br>(43-80%)          | 1.2<br>(0.44-2.4)                           | 3%<br>(1.4-5.7%)                     | 4.4%<br>(1.8-8.3%)                  | 7.3<br>(3.1-14)       | 330<br>(150-620)     |
| The Gambia | 2010 | Female | 50 to 54 | 39%<br>(21-60%)                | 61%<br>(40-79%)          | 1.3<br>(0.48-2.5)                           | 3.9%<br>(1.6-7.4%)                   | 5.6%<br>(2.3-11%)                   | 9.6<br>(3.9-19)       | 370<br>(150-700)     |
| The Gambia | 2010 | Female | 55 to 59 | 39%<br>(22-58%)                | 61%<br>(42-78%)          | 1.4<br>(0.49-2.6)                           | 4.2%<br>(1.3-8.4%)                   | 5.8%<br>(1.8-11%)                   | 10<br>(3.3-21)        | 340<br>(110-690)     |
| The Gambia | 2010 | Female | 60 to 64 | 40%<br>(23-59%)                | 60%<br>(41-77%)          | 1.4<br>(0.49-2.8)                           | 3.6%<br>(0.68-8%)                    | 4.8%<br>(0.9-11%)                   | 8.1<br>(1.7-19)       | 220<br>(43-520)      |
| The Gambia | 2010 | Female | 65 to 69 | 41%<br>(24-60%)                | 59%<br>(40-76%)          | 1.3<br>(0.5-2.5)                            | 2.9%<br>(0.016-7.2%)                 | 3.7%<br>(0.01-9.2%)                 | 9.5<br>(0.027-25)     | 220<br>(1.3-560)     |
| The Gambia | 2010 | Female | 70 to 74 | 39%<br>(24-57%)                | 61%<br>(43-76%)          | 1<br>(0.38-2.2)                             | 2.1%<br>(-0.49-6.5%)                 | 2.6%<br>(-0.62-8.3%)                | 7<br>(-1.8-22)        | 130<br>(-30-400)     |
| The Gambia | 2010 | Female | 75 to 79 | 35%<br>(19-53%)                | 65%<br>(47-81%)          | 0.82<br>(0.26-1.8)                          | 1.3%<br>(-0.96-5%)                   | 1.5%<br>(-1.2-6.2%)                 | 4<br>(-3.2-16)        | 57<br>(-44-230)      |
| The Gambia | 2010 | Female | 80 to 84 | 32%<br>(17-51%)                | 68%<br>(49-83%)          | 0.73<br>(0.24-1.6)                          | 0.83%<br>(-0.98-3.9%)                | 0.97%<br>(-1.2-4.7%)                | 1.6<br>(-2.2-8)       | 18<br>(-22-84)       |
| The Gambia | 2010 | Female | 85 to 89 | 33%<br>(18-50%)                | 67%<br>(50-82%)          | 0.72<br>(0.22-1.5)                          | 0.57%<br>(-1.1-3.4%)                 | 0.64%<br>(-1.4-4.1%)                | 0.76<br>(-1.7-4.8)    | 6<br>(-12-36)        |
| The Gambia | 2010 | Female | 90 to 94 | 36%<br>(20-54%)                | 64%<br>(46-80%)          | 0.77<br>(0.23-1.7)                          | 0.38%<br>(-1.4-3.8%)                 | 0.38%<br>(-1.8-4.5%)                | 0.19<br>(-0.88-2.3)   | 1.2<br>(-4.1-12)     |
| The Gambia | 2010 | Female | 95 plus  | 41%<br>(21-62%)                | 59%<br>(38-79%)          | 0.82<br>(0.2-2.1)                           | 0.35%<br>(-1.6-4.5%)                 | 0.27%<br>(-2.1-5.4%)                | 0.036<br>(-0.29-0.71) | 0.19<br>(-0.86-2.5)  |
| The Gambia | 2010 | Male   | All Ages | 19%<br>(14-24%)                | 81%<br>(76-86%)          | 0.59<br>(0.39-0.87)                         | 1.7%<br>(1.1-2.5%)                   | 2.9%<br>(1.7-4.6%)                  | 170<br>(99-280)       | 7100<br>(4700-10000) |
| The Gambia | 2010 | Male   | 15 to 19 | 15%<br>(7.9-27%)               | 85%<br>(73-92%)          | 0.38<br>(0.14-0.78)                         | 1.3%<br>(0.7-2.3%)                   | 1.4%<br>(0.44-2.9%)                 | 1.6<br>(0.51-3.4)     | 200<br>(110-350)     |
| The Gambia | 2010 | Male   | 20 to 24 | 23%<br>(12-38%)                | 77%<br>(62-88%)          | 0.77<br>(0.3-1.5)                           | 3.1%<br>(1.7-5.1%)                   | 3.1%<br>(1.2-6.2%)                  | 5<br>(1.9-9.8)        | 510<br>(280-850)     |

| Location   | Year | Sex    | Age      | Prevalence of current drinkers | Prevalence of abstainers | Population average of standard drinks daily | Percent of total attributable deaths | Percent of total attributable DALYs | Attributable deaths    | Attributable DALYs  |
|------------|------|--------|----------|--------------------------------|--------------------------|---------------------------------------------|--------------------------------------|-------------------------------------|------------------------|---------------------|
| The Gambia | 2010 | Male   | 25 to 29 | 28%<br>(15-45%)                | 72%<br>(55-85%)          | 1.1<br>(0.47-2.2)                           | 3.8%<br>(2-6.3%)                     | 4.1%<br>(1.7-7.5%)                  | 8.5<br>(3.8-16)        | 700<br>(380-1200)   |
| The Gambia | 2010 | Male   | 30 to 34 | 32%<br>(17-51%)                | 68%<br>(49-83%)          | 1.4<br>(0.65-2.6)                           | 4.1%<br>(2.4-6.4%)                   | 4.6%<br>(2.4-7.9%)                  | 11<br>(6-18)           | 770<br>(450-1200)   |
| The Gambia | 2010 | Male   | 35 to 39 | 35%<br>(19-53%)                | 65%<br>(47-81%)          | 1.5<br>(0.64-2.9)                           | 4.6%<br>(2.8-7.3%)                   | 5.5%<br>(3-9.2%)                    | 13<br>(7.2-20)         | 730<br>(440-1100)   |
| The Gambia | 2010 | Male   | 40 to 44 | 36%<br>(21-54%)                | 64%<br>(46-79%)          | 1.6<br>(0.68-3.1)                           | 5.3%<br>(3.2-8.2%)                   | 6.6%<br>(3.8-10%)                   | 16<br>(9-25)           | 800<br>(470-1200)   |
| The Gambia | 2010 | Male   | 45 to 49 | 37%<br>(19-56%)                | 63%<br>(44-81%)          | 1.8<br>(0.66-3.7)                           | 6.3%<br>(3.6-10%)                    | 8%<br>(4.4-13%)                     | 19<br>(10-31)          | 810<br>(450-1300)   |
| The Gambia | 2010 | Male   | 50 to 54 | 37%<br>(21-58%)                | 63%<br>(42-79%)          | 1.8<br>(0.67-3.8)                           | 6.8%<br>(3.5-11%)                    | 8.6%<br>(4.5-14%)                   | 20<br>(10-34)          | 750<br>(390-1300)   |
| The Gambia | 2010 | Male   | 55 to 59 | 38%<br>(22-58%)                | 62%<br>(42-78%)          | 1.7<br>(0.61-3.5)                           | 6.7%<br>(3.1-11%)                    | 8.5%<br>(3.9-14%)                   | 21<br>(9.3-35)         | 670<br>(310-1100)   |
| The Gambia | 2010 | Male   | 60 to 64 | 37%<br>(21-57%)                | 63%<br>(43-79%)          | 1.6<br>(0.55-3.4)                           | 5.5%<br>(2.5-10%)                    | 6.8%<br>(3-13%)                     | 17<br>(7.5-32)         | 470<br>(210-880)    |
| The Gambia | 2010 | Male   | 65 to 69 | 37%<br>(21-56%)                | 63%<br>(44-79%)          | 1.3<br>(0.53-2.7)                           | 4.2%<br>(1.6-8.8%)                   | 5.2%<br>(2-11%)                     | 16<br>(6.3-35)         | 380<br>(150-800)    |
| The Gambia | 2010 | Male   | 70 to 74 | 35%<br>(21-54%)                | 65%<br>(46-79%)          | 1<br>(0.39-2.3)                             | 3%<br>(0.84-7.3%)                    | 3.7%<br>(0.99-8.8%)                 | 12<br>(3.2-28)         | 210<br>(59-510)     |
| The Gambia | 2010 | Male   | 75 to 79 | 32%<br>(17-51%)                | 68%<br>(49-83%)          | 0.78<br>(0.24-1.9)                          | 2%<br>(0.28-5.3%)                    | 2.3%<br>(0.27-6.2%)                 | 6.6<br>(0.74-18)       | 94<br>(14-250)      |
| The Gambia | 2010 | Male   | 80 to 84 | 30%<br>(15-48%)                | 70%<br>(52-85%)          | 0.65<br>(0.21-1.4)                          | 1.6%<br>(0.29-4.2%)                  | 1.9%<br>(0.32-5%)                   | 3.2<br>(0.53-8.4)      | 34<br>(6-88)        |
| The Gambia | 2010 | Male   | 85 to 89 | 28%<br>(15-45%)                | 72%<br>(55-85%)          | 0.56<br>(0.17-1.2)                          | 1.2%<br>(0.0087-3.2%)                | 1.3%<br>(-0.081-3.7%)               | 1.5<br>(-0.092-4.4)    | 12<br>(0.088-33)    |
| The Gambia | 2010 | Male   | 90 to 94 | 30%<br>(15-48%)                | 70%<br>(52-85%)          | 0.53<br>(0.16-1.3)                          | 0.7%<br>(-0.32-2.8%)                 | 0.72%<br>(-0.53-3.2%)               | 0.35<br>(-0.26-1.6)    | 2.1<br>(-0.96-8.1)  |
| The Gambia | 2010 | Male   | 95 plus  | 35%<br>(17-56%)                | 65%<br>(44-83%)          | 0.53<br>(0.11-1.4)                          | 0.75%<br>(-0.47-3.3%)                | 0.74%<br>(-0.77-3.8%)               | 0.083<br>(-0.085-0.43) | 0.34<br>(-0.21-1.5) |
| The Gambia | 2016 | Female | All Ages | 23%<br>(17-29%)                | 77%<br>(71-83%)          | 0.45<br>(0.23-0.78)                         | 1.1%<br>(0.51-1.9%)                  | 1.7%<br>(0.34-4%)                   | 83<br>(18-200)         | 3800<br>(1800-6900) |
| The Gambia | 2016 | Female | 15 to 19 | 21%<br>(12-36%)                | 79%<br>(64-88%)          | 0.42<br>(0.14-0.94)                         | 0.96%<br>(0.49-1.7%)                 | 0.91%<br>(0.093-2.5%)               | 0.93<br>(0.097-2.6)    | 170<br>(81-310)     |
| The Gambia | 2016 | Female | 20 to 24 | 27%<br>(14-43%)                | 73%<br>(57-86%)          | 0.66<br>(0.24-1.4)                          | 2%<br>(1.1-3.3%)                     | 1.5%<br>(0.26-3.9%)                 | 1.9<br>(0.31-4.8)      | 340<br>(190-570)    |
| The Gambia | 2016 | Female | 25 to 29 | 30%<br>(15-47%)                | 70%<br>(53-85%)          | 0.81<br>(0.3-1.7)                           | 2%<br>(1.2-3.3%)                     | 1.8%<br>(0.52-4%)                   | 2.7<br>(0.78-5.9)      | 360<br>(200-580)    |
| The Gambia | 2016 | Female | 30 to 34 | 33%<br>(16-53%)                | 67%<br>(47-84%)          | 0.91<br>(0.37-1.8)                          | 2%<br>(1.2-3.3%)                     | 2.1%<br>(0.79-4.3%)                 | 3.6<br>(1.4-7.3)       | 350<br>(200-600)    |
| The Gambia | 2016 | Female | 35 to 39 | 36%<br>(20-55%)                | 64%<br>(45-80%)          | 0.99<br>(0.38-2.1)                          | 2.3%<br>(1.3-4.2%)                   | 3.1%<br>(1.2-6.2%)                  | 5.5<br>(2.3-11)        | 380<br>(200-700)    |
| The Gambia | 2016 | Female | 40 to 44 | 38%<br>(22-57%)                | 62%<br>(43-78%)          | 1<br>(0.37-2.4)                             | 2.7%<br>(1.3-5%)                     | 4%<br>(1.7-7.9%)                    | 6.7<br>(2.8-13)        | 370<br>(180-690)    |

| Location   | Year | Sex    | Age      | Prevalence of current drinkers | Prevalence of abstainers | Population average of standard drinks daily | Percent of total attributable deaths | Percent of total attributable DALYs | Attributable deaths | Attributable DALYs   |
|------------|------|--------|----------|--------------------------------|--------------------------|---------------------------------------------|--------------------------------------|-------------------------------------|---------------------|----------------------|
| The Gambia | 2016 | Female | 45 to 49 | 39%<br>(20-58%)                | 61%<br>(42-80%)          | 1.1<br>(0.36-2.5)                           | 3%<br>(1.3-6.2%)                     | 4.6%<br>(1.7-9.6%)                  | 8.4<br>(3.1-17)     | 380<br>(170-760)     |
| The Gambia | 2016 | Female | 50 to 54 | 39%<br>(22-60%)                | 61%<br>(40-78%)          | 1.1<br>(0.38-2.6)                           | 3.6%<br>(1.4-7.4%)                   | 5.3%<br>(1.9-11%)                   | 11<br>(4-23)        | 420<br>(160-860)     |
| The Gambia | 2016 | Female | 55 to 59 | 39%<br>(23-58%)                | 61%<br>(42-77%)          | 1.2<br>(0.4-2.7)                            | 3.7%<br>(0.99-8.3%)                  | 5.3%<br>(1.3-12%)                   | 12<br>(3-27)        | 390<br>(100-870)     |
| The Gambia | 2016 | Female | 60 to 64 | 41%<br>(23-60%)                | 59%<br>(40-77%)          | 1.3<br>(0.38-2.9)                           | 3.1%<br>(0.34-7.7%)                  | 4.2%<br>(0.5-10%)                   | 11<br>(1.3-26)      | 290<br>(34-720)      |
| The Gambia | 2016 | Female | 65 to 69 | 41%<br>(24-59%)                | 59%<br>(41-76%)          | 1.1<br>(0.39-2.5)                           | 2.4%<br>(-0.39-7.6%)                 | 3.1%<br>(-0.53-9.6%)                | 7.3<br>(-1.2-24)    | 170<br>(-27-540)     |
| The Gambia | 2016 | Female | 70 to 74 | 39%<br>(23-58%)                | 61%<br>(42-77%)          | 0.93<br>(0.3-2.2)                           | 1.7%<br>(-0.71-6.4%)                 | 2.1%<br>(-0.91-7.8%)                | 6.7<br>(-2.9-26)    | 120<br>(-53-460)     |
| The Gambia | 2016 | Female | 75 to 79 | 35%<br>(19-54%)                | 65%<br>(46-81%)          | 0.75<br>(0.22-1.8)                          | 0.98%<br>(-1.1-5%)                   | 1.2%<br>(-1.4-6%)                   | 3.4<br>(-4.3-18)    | 50<br>(-58-260)      |
| The Gambia | 2016 | Female | 80 to 84 | 32%<br>(17-52%)                | 68%<br>(48-83%)          | 0.68<br>(0.19-1.6)                          | 0.63%<br>(-1.2-4.2%)                 | 0.72%<br>(-1.4-4.9%)                | 1.3<br>(-2.7-9.1)   | 14<br>(-27-95)       |
| The Gambia | 2016 | Female | 85 to 89 | 33%<br>(18-51%)                | 67%<br>(49-82%)          | 0.68<br>(0.19-1.7)                          | 0.41%<br>(-1.2-3.7%)                 | 0.44%<br>(-1.6-4.4%)                | 0.58<br>(-2.1-5.7)  | 4.9<br>(-15-42)      |
| The Gambia | 2016 | Female | 90 to 94 | 36%<br>(20-54%)                | 64%<br>(46-80%)          | 0.71<br>(0.19-1.8)                          | 0.24%<br>(-1.4-3.8%)                 | 0.19%<br>(-1.8-4.4%)                | 0.12<br>(-1.2-2.9)  | 0.93<br>(-5.5-14)    |
| The Gambia | 2016 | Female | 95 plus  | 40%<br>(20-62%)                | 60%<br>(38-80%)          | 0.76<br>(0.16-2)                            | 0.23%<br>(-1.7-4.2%)                 | 0.12%<br>(-2.1-4.8%)                | 0.022<br>(-0.4-0.9) | 0.17<br>(-1.2-3.1)   |
| The Gambia | 2016 | Male   | All Ages | 19%<br>(14-25%)                | 81%<br>(75-86%)          | 0.54<br>(0.28-0.93)                         | 1.8%<br>(1.1-2.8%)                   | 2.9%<br>(1.5-4.8%)                  | 180<br>(94-300)     | 7700<br>(4600-12000) |
| The Gambia | 2016 | Male   | 15 to 19 | 15%<br>(8.1-26%)               | 85%<br>(74-92%)          | 0.35<br>(0.11-0.79)                         | 1.2%<br>(0.65-2.3%)                  | 1.2%<br>(0.33-2.8%)                 | 1.7<br>(0.47-4)     | 230<br>(120-430)     |
| The Gambia | 2016 | Male   | 20 to 24 | 23%<br>(12-38%)                | 77%<br>(62-88%)          | 0.7<br>(0.24-1.5)                           | 2.9%<br>(1.6-5.3%)                   | 2.9%<br>(1-6.4%)                    | 5.3<br>(1.9-12)     | 560<br>(310-1000)    |
| The Gambia | 2016 | Male   | 25 to 29 | 28%<br>(15-45%)                | 72%<br>(55-85%)          | 1<br>(0.37-2.2)                             | 3.7%<br>(2-6.6%)                     | 4%<br>(1.6-8%)                      | 8.8<br>(3.6-17)     | 740<br>(390-1300)    |
| The Gambia | 2016 | Male   | 30 to 34 | 32%<br>(17-51%)                | 68%<br>(49-83%)          | 1.3<br>(0.51-2.5)                           | 4%<br>(2.3-6.4%)                     | 4.5%<br>(2.2-7.8%)                  | 12<br>(6-21)        | 840<br>(480-1300)    |
| The Gambia | 2016 | Male   | 35 to 39 | 35%<br>(19-53%)                | 65%<br>(47-81%)          | 1.4<br>(0.51-2.9)                           | 4.5%<br>(2.7-7%)                     | 5.3%<br>(2.9-8.9%)                  | 15<br>(8.5-25)      | 890<br>(530-1400)    |
| The Gambia | 2016 | Male   | 40 to 44 | 36%<br>(21-55%)                | 64%<br>(45-79%)          | 1.5<br>(0.53-3.3)                           | 5%<br>(2.9-7.9%)                     | 6.1%<br>(3.4-9.7%)                  | 16<br>(9-26)        | 820<br>(470-1300)    |
| The Gambia | 2016 | Male   | 45 to 49 | 37%<br>(19-56%)                | 63%<br>(44-81%)          | 1.6<br>(0.5-3.7)                            | 6%<br>(3.2-9.8%)                     | 7.5%<br>(4-13%)                     | 20<br>(11-35)       | 900<br>(480-1500)    |
| The Gambia | 2016 | Male   | 50 to 54 | 37%<br>(20-58%)                | 63%<br>(42-80%)          | 1.6<br>(0.54-3.6)                           | 6%<br>(2.9-10%)                      | 7.6%<br>(3.7-13%)                   | 21<br>(9.7-36)      | 780<br>(380-1400)    |
| The Gambia | 2016 | Male   | 55 to 59 | 37%<br>(21-57%)                | 63%<br>(43-79%)          | 1.6<br>(0.49-3.6)                           | 6%<br>(2.8-11%)                      | 7.7%<br>(3.5-13%)                   | 21<br>(9.4-38)      | 700<br>(320-1200)    |
| The Gambia | 2016 | Male   | 60 to 64 | 37%<br>(20-57%)                | 63%<br>(43-80%)          | 1.4<br>(0.42-3.4)                           | 5%<br>(2-9.7%)                       | 6.2%<br>(2.5-12%)                   | 19<br>(7.6-37)      | 540<br>(220-1000)    |

| Location   | Year | Sex    | Age      | Prevalence of current drinkers | Prevalence of abstainers | Population average of standard drinks daily | Percent of total attributable deaths | Percent of total attributable DALYs | Attributable deaths  | Attributable DALYs       |
|------------|------|--------|----------|--------------------------------|--------------------------|---------------------------------------------|--------------------------------------|-------------------------------------|----------------------|--------------------------|
| The Gambia | 2016 | Male   | 65 to 69 | 37%<br>(21-55%)                | 63%<br>(45-79%)          | 1.2<br>(0.39-2.9)                           | 3.8%<br>(1.3-8.2%)                   | 4.7%<br>(1.6-10%)                   | 15<br>(5.1-33)       | 340<br>(120-750)         |
| The Gambia | 2016 | Male   | 70 to 74 | 36%<br>(21-53%)                | 64%<br>(47-79%)          | 0.92<br>(0.28-2.3)                          | 2.7%<br>(0.73-6.9%)                  | 3.3%<br>(0.87-8.4%)                 | 12<br>(3.2-32)       | 220<br>(60-580)          |
| The Gambia | 2016 | Male   | 75 to 79 | 33%<br>(18-52%)                | 67%<br>(48-82%)          | 0.71<br>(0.2-1.8)                           | 1.7%<br>(0.26-5%)                    | 2.1%<br>(0.25-6%)                   | 6.4<br>(0.79-18)     | 92<br>(14-260)           |
| The Gambia | 2016 | Male   | 80 to 84 | 30%<br>(16-48%)                | 70%<br>(52-84%)          | 0.59<br>(0.17-1.4)                          | 1.5%<br>(0.23-3.9%)                  | 1.7%<br>(0.2-4.6%)                  | 2.9<br>(0.33-8.2)    | 32<br>(4.9-86)           |
| The Gambia | 2016 | Male   | 85 to 89 | 29%<br>(15-46%)                | 71%<br>(54-85%)          | 0.51<br>(0.14-1.3)                          | 1.1%<br>(0.013-3.2%)                 | 1.2%<br>(-0.087-3.7%)               | 1.5<br>(-0.11-4.5)   | 12<br>(0.14-34)          |
| The Gambia | 2016 | Male   | 90 to 94 | 30%<br>(15-49%)                | 70%<br>(51-85%)          | 0.49<br>(0.12-1.3)                          | 0.62%<br>(-0.34-2.7%)                | 0.63%<br>(-0.55-3.1%)               | 0.36<br>(-0.31-1.8)  | 2.1<br>(-1.2-9.2)        |
| The Gambia | 2016 | Male   | 95 plus  | 35%<br>(17-58%)                | 65%<br>(42-83%)          | 0.49<br>(0.092-1.5)                         | 0.66%<br>(-0.46-3.3%)                | 0.62%<br>(-0.74-3.8%)               | 0.098<br>(-0.12-0.6) | 0.42<br>(-0.3-2.1)       |
| Ghana      | 1990 | Female | All Ages | 18%<br>(15-21%)                | 82%<br>(79-85%)          | 0.93<br>(0.64-1.3)                          | 2.3%<br>(1.5-3.2%)                   | 4.6%<br>(2.8-6.5%)                  | 3100<br>(1900-4400)  | 110000<br>(72000-150000) |
| Ghana      | 1990 | Female | 15 to 19 | 16%<br>(11-22%)                | 84%<br>(78-89%)          | 0.74<br>(0.38-1.3)                          | 1.7%<br>(0.97-2.9%)                  | 2.1%<br>(0.9-3.9%)                  | 28<br>(12-52)        | 2900<br>(1600-4800)      |
| Ghana      | 1990 | Female | 20 to 24 | 21%<br>(14-29%)                | 79%<br>(71-86%)          | 1.2<br>(0.63-2.1)                           | 3.7%<br>(2.1-5.9%)                   | 4.3%<br>(2-7.7%)                    | 72<br>(34-130)       | 6500<br>(3700-10000)     |
| Ghana      | 1990 | Female | 25 to 29 | 24%<br>(16-33%)                | 76%<br>(67-84%)          | 1.5<br>(0.79-2.5)                           | 5.1%<br>(3-7.8%)                     | 6.4%<br>(3.3-11%)                   | 110<br>(57-180)      | 8000<br>(4700-12000)     |
| Ghana      | 1990 | Female | 30 to 34 | 27%<br>(17-38%)                | 73%<br>(62-83%)          | 1.9<br>(0.99-3.1)                           | 5.8%<br>(3.6-8.4%)                   | 7.8%<br>(4.3-12%)                   | 130<br>(72-190)      | 8200<br>(5100-12000)     |
| Ghana      | 1990 | Female | 35 to 39 | 29%<br>(20-39%)                | 71%<br>(61-80%)          | 2<br>(1-3.4)                                | 7.3%<br>(4.4-11%)                    | 10%<br>(5.8-16%)                    | 160<br>(95-260)      | 9200<br>(5500-14000)     |
| Ghana      | 1990 | Female | 40 to 44 | 31%<br>(21-41%)                | 69%<br>(59-79%)          | 2.2<br>(1.1-3.5)                            | 7.9%<br>(4.6-12%)                    | 11%<br>(6.4-17%)                    | 210<br>(120-310)     | 10000<br>(5900-15000)    |
| Ghana      | 1990 | Female | 45 to 49 | 32%<br>(21-43%)                | 68%<br>(57-79%)          | 2.3<br>(1.2-3.8)                            | 8.9%<br>(5.2-13%)                    | 12%<br>(7-18%)                      | 250<br>(140-370)     | 11000<br>(6000-16000)    |
| Ghana      | 1990 | Female | 50 to 54 | 34%<br>(24-45%)                | 66%<br>(55-76%)          | 2.5<br>(1.3-4.1)                            | 9.5%<br>(5.3-14%)                    | 13%<br>(7.1-18%)                    | 300<br>(160-450)     | 11000<br>(6200-17000)    |
| Ghana      | 1990 | Female | 55 to 59 | 37%<br>(26-48%)                | 63%<br>(52-74%)          | 2.6<br>(1.4-4.4)                            | 9.9%<br>(5.6-14%)                    | 13%<br>(7.2-18%)                    | 350<br>(190-530)     | 11000<br>(6300-17000)    |
| Ghana      | 1990 | Female | 60 to 64 | 39%<br>(27-51%)                | 61%<br>(49-73%)          | 2.6<br>(1.3-4.5)                            | 8.9%<br>(4.7-14%)                    | 11%<br>(5.6-17%)                    | 370<br>(180-570)     | 10000<br>(5000-15000)    |
| Ghana      | 1990 | Female | 65 to 69 | 40%<br>(29-50%)                | 60%<br>(50-71%)          | 2.4<br>(1.3-4)                              | 8.7%<br>(4.3-14%)                    | 10%<br>(5-16%)                      | 400<br>(190-650)     | 9100<br>(4300-15000)     |
| Ghana      | 1990 | Female | 70 to 74 | 36%<br>(26-47%)                | 64%<br>(53-74%)          | 1.9<br>(1-3.3)                              | 7.7%<br>(3-14%)                      | 9.1%<br>(3.6-16%)                   | 360<br>(140-640)     | 6500<br>(2600-11000)     |
| Ghana      | 1990 | Female | 75 to 79 | 30%<br>(20-42%)                | 70%<br>(58-80%)          | 1.5<br>(0.71-2.6)                           | 5.7%<br>(1.8-11%)                    | 6.6%<br>(2.1-12%)                   | 220<br>(71-410)      | 3000<br>(1000-5700)      |
| Ghana      | 1990 | Female | 80 to 84 | 27%<br>(18-37%)                | 73%<br>(63-82%)          | 1.3<br>(0.66-2.2)                           | 4.8%<br>(1.6-9.1%)                   | 5.5%<br>(1.8-11%)                   | 100<br>(32-190)      | 1000<br>(330-2000)       |

| Location | Year | Sex    | Age      | Prevalence of current drinkers | Prevalence of abstainers | Population average of standard drinks daily | Percent of total attributable deaths | Percent of total attributable DALYs | Attributable deaths | Attributable DALYs        |
|----------|------|--------|----------|--------------------------------|--------------------------|---------------------------------------------|--------------------------------------|-------------------------------------|---------------------|---------------------------|
| Ghana    | 1990 | Female | 85 to 89 | 27%<br>(18-38%)                | 73%<br>(62-82%)          | 1.3<br>(0.65-2.3)                           | 4.3%<br>(1.3-8.5%)                   | 5%<br>(1.4-9.9%)                    | 51<br>(15-100)      | 380<br>(110-750)          |
| Ghana    | 1990 | Female | 90 to 94 | 29%<br>(20-41%)                | 71%<br>(59-80%)          | 1.4<br>(0.65-2.5)                           | 4%<br>(0.83-8.5%)                    | 4.6%<br>(0.89-10%)                  | 18<br>(3.4-38)      | 91<br>(19-190)            |
| Ghana    | 1990 | Female | 95 plus  | 32%<br>(19-48%)                | 68%<br>(52-81%)          | 1.5<br>(0.61-2.9)                           | 3.7%<br>(0.27-9%)                    | 4.2%<br>(0.14-11%)                  | 4.5<br>(0.14-11)    | 16<br>(1.1-38)            |
| Ghana    | 1990 | Male   | All Ages | 27%<br>(23-31%)                | 73%<br>(69-77%)          | 2.1<br>(1.5-2.8)                            | 4%<br>(3.1-5.1%)                     | 7.9%<br>(5.9-10%)                   | 6000<br>(4400-7800) | 220000<br>(160000-270000) |
| Ghana    | 1990 | Male   | 15 to 19 | 18%<br>(12-25%)                | 82%<br>(75-88%)          | 1.1<br>(0.55-1.8)                           | 2.7%<br>(1.5-4.3%)                   | 3.4%<br>(1.6-6%)                    | 47<br>(22-83)       | 4300<br>(2400-7000)       |
| Ghana    | 1990 | Male   | 20 to 24 | 31%<br>(21-41%)                | 69%<br>(59-79%)          | 2.4<br>(1.3-4)                              | 7.4%<br>(4.8-11%)                    | 9%<br>(5.4-14%)                     | 180<br>(100-270)    | 14000<br>(8700-20000)     |
| Ghana    | 1990 | Male   | 25 to 29 | 42%<br>(30-53%)                | 58%<br>(47-70%)          | 3.9<br>(2.3-6.1)                            | 11%<br>(7.2-15%)                     | 13%<br>(8.5-18%)                    | 290<br>(190-390)    | 19000<br>(13000-26000)    |
| Ghana    | 1990 | Male   | 30 to 34 | 48%<br>(36-60%)                | 52%<br>(40-64%)          | 5<br>(3-7.9)                                | 12%<br>(8.3-16%)                     | 15%<br>(9.8-20%)                    | 320<br>(220-430)    | 19000<br>(14000-25000)    |
| Ghana    | 1990 | Male   | 35 to 39 | 51%<br>(38-61%)                | 49%<br>(39-62%)          | 5.4<br>(3.1-8.7)                            | 12%<br>(8.7-17%)                     | 16%<br>(11-21%)                     | 330<br>(230-450)    | 18000<br>(13000-24000)    |
| Ghana    | 1990 | Male   | 40 to 44 | 52%<br>(40-62%)                | 48%<br>(38-60%)          | 5.3<br>(2.9-8.2)                            | 14%<br>(10-19%)                      | 19%<br>(13-25%)                     | 450<br>(310-610)    | 22000<br>(15000-29000)    |
| Ghana    | 1990 | Male   | 45 to 49 | 52%<br>(39-62%)                | 48%<br>(38-61%)          | 5<br>(2.8-7.9)                              | 17%<br>(12-22%)                      | 22%<br>(16-29%)                     | 540<br>(380-720)    | 23000<br>(16000-30000)    |
| Ghana    | 1990 | Male   | 50 to 54 | 54%<br>(44-65%)                | 46%<br>(35-56%)          | 5.2<br>(2.9-8.2)                            | 18%<br>(13-24%)                      | 23%<br>(16-30%)                     | 610<br>(420-820)    | 22000<br>(16000-30000)    |
| Ghana    | 1990 | Male   | 55 to 59 | 60%<br>(49-69%)                | 40%<br>(31-51%)          | 5.7<br>(3.3-9)                              | 19%<br>(14-24%)                      | 24%<br>(17-31%)                     | 680<br>(480-900)    | 22000<br>(15000-29000)    |
| Ghana    | 1990 | Male   | 60 to 64 | 61%<br>(49-72%)                | 39%<br>(28-51%)          | 5.4<br>(3-8.7)                              | 17%<br>(12-23%)                      | 21%<br>(14-28%)                     | 680<br>(460-920)    | 19000<br>(13000-25000)    |
| Ghana    | 1990 | Male   | 65 to 69 | 58%<br>(46-67%)                | 42%<br>(33-54%)          | 4.7<br>(2.6-7.4)                            | 16%<br>(10-22%)                      | 19%<br>(13-26%)                     | 650<br>(410-900)    | 15000<br>(9500-20000)     |
| Ghana    | 1990 | Male   | 70 to 74 | 54%<br>(43-64%)                | 46%<br>(36-57%)          | 3.9<br>(2.2-6.3)                            | 15%<br>(9-21%)                       | 18%<br>(11-26%)                     | 590<br>(340-840)    | 11000<br>(6100-15000)     |
| Ghana    | 1990 | Male   | 75 to 79 | 50%<br>(37-63%)                | 50%<br>(37-63%)          | 3.1<br>(1.5-5.4)                            | 13%<br>(5.9-19%)                     | 15%<br>(6.9-23%)                    | 390<br>(180-600)    | 5400<br>(2500-8400)       |
| Ghana    | 1990 | Male   | 80 to 84 | 46%<br>(34-58%)                | 54%<br>(42-66%)          | 2.5<br>(1.3-4.1)                            | 10%<br>(4.9-16%)                     | 12%<br>(5.7-19%)                    | 170<br>(81-270)     | 1800<br>(840-2800)        |
| Ghana    | 1990 | Male   | 85 to 89 | 44%<br>(32-57%)                | 56%<br>(43-68%)          | 2<br>(1.1-3.6)                              | 7.9%<br>(3.7-13%)                    | 9.3%<br>(4.3-15%)                   | 71<br>(33-120)      | 520<br>(250-870)          |
| Ghana    | 1990 | Male   | 90 to 94 | 46%<br>(33-59%)                | 54%<br>(41-67%)          | 1.8<br>(0.86-3.2)                           | 5.5%<br>(2-11%)                      | 6.4%<br>(2.2-13%)                   | 19<br>(6.4-37)      | 96<br>(33-180)            |
| Ghana    | 1990 | Male   | 95 plus  | 50%<br>(33-68%)                | 50%<br>(32-67%)          | 1.6<br>(0.66-3.2)                           | 5.2%<br>(1.1-12%)                    | 6%<br>(1.1-14%)                     | 4.4<br>(0.83-9.9)   | 15<br>(3.4-34)            |
| Ghana    | 1995 | Female | All Ages | 18%<br>(16-21%)                | 82%<br>(79-84%)          | 0.91<br>(0.62-1.3)                          | 2.3%<br>(1.5-3.2%)                   | 4.3%<br>(2.5-6.3%)                  | 3200<br>(1800-4700) | 110000<br>(72000-150000)  |

| Location | Year | Sex    | Age      | Prevalence of current drinkers | Prevalence of abstainers | Population average of standard drinks daily | Percent of total attributable deaths | Percent of total attributable DALYs | Attributable deaths | Attributable DALYs     |
|----------|------|--------|----------|--------------------------------|--------------------------|---------------------------------------------|--------------------------------------|-------------------------------------|---------------------|------------------------|
| Ghana    | 1995 | Female | 15 to 19 | 16%<br>(10-22%)                | 84%<br>(78-90%)          | 0.7<br>(0.37-1.2)                           | 1.6%<br>(0.95-2.6%)                  | 1.9%<br>(0.79-3.4%)                 | 27<br>(11-50)       | 2900<br>(1700-4700)    |
| Ghana    | 1995 | Female | 20 to 24 | 21%<br>(14-29%)                | 79%<br>(71-86%)          | 1.1<br>(0.6-2)                              | 3.2%<br>(1.9-5.2%)                   | 3.5%<br>(1.7-6.5%)                  | 70<br>(34-130)      | 6700<br>(3900-11000)   |
| Ghana    | 1995 | Female | 25 to 29 | 24%<br>(16-33%)                | 76%<br>(67-84%)          | 1.5<br>(0.74-2.4)                           | 4.1%<br>(2.4-6.3%)                   | 4.7%<br>(2.3-8.1%)                  | 110<br>(56-180)     | 8500<br>(5100-13000)   |
| Ghana    | 1995 | Female | 30 to 34 | 27%<br>(18-38%)                | 73%<br>(62-82%)          | 1.8<br>(0.96-3)                             | 4.6%<br>(2.8-7.1%)                   | 5.7%<br>(3.1-9.1%)                  | 130<br>(72-210)     | 8900<br>(5300-13000)   |
| Ghana    | 1995 | Female | 35 to 39 | 29%<br>(20-39%)                | 71%<br>(61-80%)          | 1.9<br>(0.98-3.2)                           | 5.9%<br>(3.4-9.1%)                   | 7.7%<br>(4.2-12%)                   | 170<br>(98-270)     | 9800<br>(5800-15000)   |
| Ghana    | 1995 | Female | 40 to 44 | 31%<br>(22-41%)                | 69%<br>(59-78%)          | 2.1<br>(1.1-3.4)                            | 6.6%<br>(3.8-9.6%)                   | 8.9%<br>(5.1-13%)                   | 190<br>(110-290)    | 9400<br>(5600-14000)   |
| Ghana    | 1995 | Female | 45 to 49 | 32%<br>(21-43%)                | 68%<br>(57-79%)          | 2.3<br>(1.1-3.6)                            | 7.7%<br>(4.5-11%)                    | 10%<br>(5.9-16%)                    | 260<br>(140-390)    | 11000<br>(6400-16000)  |
| Ghana    | 1995 | Female | 50 to 54 | 34%<br>(24-45%)                | 66%<br>(55-76%)          | 2.4<br>(1.2-4)                              | 8.5%<br>(4.6-12%)                    | 11%<br>(6.1-16%)                    | 310<br>(160-470)    | 12000<br>(6200-17000)  |
| Ghana    | 1995 | Female | 55 to 59 | 37%<br>(26-48%)                | 63%<br>(52-74%)          | 2.5<br>(1.3-4.2)                            | 8.9%<br>(4.9-13%)                    | 11%<br>(6.2-17%)                    | 360<br>(190-550)    | 12000<br>(6100-18000)  |
| Ghana    | 1995 | Female | 60 to 64 | 39%<br>(27-52%)                | 61%<br>(48-73%)          | 2.4<br>(1.3-4.2)                            | 8%<br>(3.9-13%)                      | 9.8%<br>(4.8-15%)                   | 370<br>(170-590)    | 10000<br>(4800-16000)  |
| Ghana    | 1995 | Female | 65 to 69 | 40%<br>(29-50%)                | 60%<br>(50-71%)          | 2.3<br>(1.2-3.8)                            | 7.9%<br>(3.5-13%)                    | 9.4%<br>(4.2-15%)                   | 410<br>(180-680)    | 9200<br>(4100-15000)   |
| Ghana    | 1995 | Female | 70 to 74 | 36%<br>(27-47%)                | 64%<br>(53-73%)          | 1.8<br>(0.98-3.1)                           | 6.8%<br>(2.6-12%)                    | 8%<br>(3-14%)                       | 360<br>(140-660)    | 6600<br>(2500-12000)   |
| Ghana    | 1995 | Female | 75 to 79 | 30%<br>(20-42%)                | 70%<br>(58-80%)          | 1.4<br>(0.67-2.4)                           | 5%<br>(1.4-9.8%)                     | 5.8%<br>(1.6-11%)                   | 220<br>(62-450)     | 3100<br>(890-6200)     |
| Ghana    | 1995 | Female | 80 to 84 | 27%<br>(18-37%)                | 73%<br>(63-82%)          | 1.2<br>(0.59-2.1)                           | 4.1%<br>(1.2-8.2%)                   | 4.8%<br>(1.3-9.5%)                  | 100<br>(28-210)     | 1100<br>(300-2100)     |
| Ghana    | 1995 | Female | 85 to 89 | 27%<br>(17-38%)                | 73%<br>(62-83%)          | 1.2<br>(0.61-2.2)                           | 3.7%<br>(0.86-8%)                    | 4.3%<br>(0.97-9.3%)                 | 54<br>(12-120)      | 400<br>(94-860)        |
| Ghana    | 1995 | Female | 90 to 94 | 29%<br>(19-40%)                | 71%<br>(60-81%)          | 1.3<br>(0.61-2.3)                           | 3.3%<br>(0.36-7.7%)                  | 3.9%<br>(0.35-9.1%)                 | 18<br>(1.7-42)      | 92<br>(9.9-210)        |
| Ghana    | 1995 | Female | 95 plus  | 32%<br>(19-46%)                | 68%<br>(54-81%)          | 1.3<br>(0.53-2.6)                           | 3.1%<br>(-0.0043-7.8%)               | 3.5%<br>(-0.17-9.2%)                | 4.4<br>(-0.22-12)   | 15<br>(-0.022-40)      |
| Ghana    | 1995 | Male   | All Ages | 28%<br>(24-32%)                | 72%<br>(68-76%)          | 2<br>(1.4-2.8)                              | 4.1%<br>(3-5.1%)                     | 7.8%<br>(5.6-10%)                   | 6400<br>(4600-8300) | 23000<br>(17000-29000) |
| Ghana    | 1995 | Male   | 15 to 19 | 18%<br>(12-25%)                | 82%<br>(75-88%)          | 1<br>(0.53-1.7)                             | 2.5%<br>(1.4-3.9%)                   | 3.1%<br>(1.5-5.3%)                  | 47<br>(23-80)       | 4400<br>(2500-7000)    |
| Ghana    | 1995 | Male   | 20 to 24 | 31%<br>(21-41%)                | 69%<br>(59-79%)          | 2.3<br>(1.3-3.8)                            | 6.6%<br>(4.2-9.7%)                   | 7.8%<br>(4.5-12%)                   | 170<br>(97-260)     | 14000<br>(8400-20000)  |
| Ghana    | 1995 | Male   | 25 to 29 | 42%<br>(30-53%)                | 58%<br>(47-70%)          | 3.8<br>(2.1-5.9)                            | 9.2%<br>(6.1-13%)                    | 11%<br>(6.9-16%)                    | 300<br>(190-410)    | 20000<br>(14000-27000) |
| Ghana    | 1995 | Male   | 30 to 34 | 48%<br>(36-60%)                | 52%<br>(40-64%)          | 4.8<br>(2.8-7.4)                            | 9.6%<br>(6.7-13%)                    | 11%<br>(7.4-16%)                    | 340<br>(230-450)    | 21000<br>(15000-28000) |



| Location | Year | Sex    | Age      | Prevalence of current drinkers | Prevalence of abstainers | Population average of standard drinks daily | Percent of total attributable deaths | Percent of total attributable DALYs | Attributable deaths | Attributable DALYs       |
|----------|------|--------|----------|--------------------------------|--------------------------|---------------------------------------------|--------------------------------------|-------------------------------------|---------------------|--------------------------|
| Ghana    | 1995 | Male   | 35 to 39 | 51%<br>(40-62%)                | 49%<br>(38-60%)          | 5.1<br>(2.9-8.1)                            | 10%<br>(6.9-14%)                     | 12%<br>(8.2-17%)                    | 360<br>(250-480)    | 20000<br>(14000-26000)   |
| Ghana    | 1995 | Male   | 40 to 44 | 52%<br>(40-62%)                | 48%<br>(38-60%)          | 5<br>(2.8-7.8)                              | 12%<br>(8.3-16%)                     | 15%<br>(10-20%)                     | 410<br>(280-550)    | 20000<br>(14000-26000)   |
| Ghana    | 1995 | Male   | 45 to 49 | 52%<br>(38-62%)                | 48%<br>(38-62%)          | 4.7<br>(2.6-7.4)                            | 15%<br>(10-20%)                      | 19%<br>(13-25%)                     | 580<br>(390-770)    | 25000<br>(17000-32000)   |
| Ghana    | 1995 | Male   | 50 to 54 | 54%<br>(43-65%)                | 46%<br>(35-57%)          | 5<br>(2.8-7.9)                              | 16%<br>(11-21%)                      | 20%<br>(14-26%)                     | 630<br>(440-850)    | 24000<br>(17000-31000)   |
| Ghana    | 1995 | Male   | 55 to 59 | 60%<br>(49-69%)                | 40%<br>(31-51%)          | 5.5<br>(3.1-8.7)                            | 17%<br>(12-22%)                      | 22%<br>(15-28%)                     | 700<br>(480-920)    | 22000<br>(16000-29000)   |
| Ghana    | 1995 | Male   | 60 to 64 | 61%<br>(48-72%)                | 39%<br>(28-52%)          | 5.2<br>(2.9-8.5)                            | 16%<br>(11-21%)                      | 20%<br>(13-26%)                     | 700<br>(460-940)    | 19000<br>(13000-25000)   |
| Ghana    | 1995 | Male   | 65 to 69 | 58%<br>(46-68%)                | 42%<br>(32-54%)          | 4.5<br>(2.5-7.2)                            | 15%<br>(9.3-20%)                     | 18%<br>(11-24%)                     | 690<br>(420-970)    | 16000<br>(9700-22000)    |
| Ghana    | 1995 | Male   | 70 to 74 | 55%<br>(43-65%)                | 45%<br>(35-57%)          | 3.7<br>(2.1-6)                              | 14%<br>(7.8-20%)                     | 16%<br>(9.4-23%)                    | 670<br>(380-980)    | 12000<br>(6900-18000)    |
| Ghana    | 1995 | Male   | 75 to 79 | 51%<br>(37-63%)                | 49%<br>(37-63%)          | 3<br>(1.5-5.1)                              | 11%<br>(5.3-18%)                     | 14%<br>(6.2-21%)                    | 480<br>(220-750)    | 6700<br>(3000-10000)     |
| Ghana    | 1995 | Male   | 80 to 84 | 47%<br>(34-59%)                | 53%<br>(41-66%)          | 2.4<br>(1.3-4.1)                            | 9.2%<br>(4.2-15%)                    | 11%<br>(5.1-18%)                    | 220<br>(99-360)     | 2200<br>(1000-3700)      |
| Ghana    | 1995 | Male   | 85 to 89 | 45%<br>(32-58%)                | 55%<br>(42-68%)          | 2<br>(1-3.5)                                | 7%<br>(3-12%)                        | 8.1%<br>(3.5-15%)                   | 85<br>(36-150)      | 630<br>(280-1100)        |
| Ghana    | 1995 | Male   | 90 to 94 | 46%<br>(33-59%)                | 54%<br>(41-67%)          | 1.7<br>(0.81-3)                             | 4.8%<br>(1.6-9.7%)                   | 5.5%<br>(1.7-11%)                   | 21<br>(6.7-43)      | 110<br>(36-220)          |
| Ghana    | 1995 | Male   | 95 plus  | 50%<br>(33-67%)                | 50%<br>(33-67%)          | 1.5<br>(0.59-3.1)                           | 4.5%<br>(0.9-10%)                    | 5.1%<br>(0.8-12%)                   | 4.7<br>(0.73-11)    | 16<br>(3.1-38)           |
| Ghana    | 2000 | Female | All Ages | 16%<br>(14-18%)                | 84%<br>(82-86%)          | 0.75<br>(0.51-1)                            | 2%<br>(1.3-2.8%)                     | 3.6%<br>(2-5.5%)                    | 2900<br>(1600-4500) | 100000<br>(65000-150000) |
| Ghana    | 2000 | Female | 15 to 19 | 13%<br>(9.3-18%)               | 87%<br>(82-91%)          | 0.56<br>(0.3-0.94)                          | 1.3%<br>(0.78-2.1%)                  | 1.4%<br>(0.62-2.6%)                 | 22<br>(9.3-39)      | 2600<br>(1500-4200)      |
| Ghana    | 2000 | Female | 20 to 24 | 17%<br>(12-23%)                | 83%<br>(77-88%)          | 0.87<br>(0.49-1.5)                          | 2.4%<br>(1.5-3.7%)                   | 2.3%<br>(1.1-4.1%)                  | 49<br>(25-87)       | 5500<br>(3400-8300)      |
| Ghana    | 2000 | Female | 25 to 29 | 19%<br>(14-25%)                | 81%<br>(75-86%)          | 1.1<br>(0.6-1.8)                            | 2.7%<br>(1.7-4.2%)                   | 2.8%<br>(1.4-4.6%)                  | 84<br>(46-140)      | 7200<br>(4500-11000)     |
| Ghana    | 2000 | Female | 30 to 34 | 21%<br>(16-28%)                | 79%<br>(72-84%)          | 1.3<br>(0.74-2.1)                           | 3.1%<br>(1.8-4.6%)                   | 3.3%<br>(1.8-5.4%)                  | 110<br>(64-180)     | 7900<br>(4900-12000)     |
| Ghana    | 2000 | Female | 35 to 39 | 25%<br>(20-31%)                | 75%<br>(69-80%)          | 1.6<br>(0.88-2.5)                           | 4%<br>(2.4-6%)                       | 4.8%<br>(2.7-7.7%)                  | 160<br>(92-250)     | 9200<br>(5700-14000)     |
| Ghana    | 2000 | Female | 40 to 44 | 28%<br>(23-34%)                | 72%<br>(66-77%)          | 1.8<br>(0.99-2.7)                           | 4.8%<br>(2.9-7%)                     | 6.1%<br>(3.6-9.1%)                  | 190<br>(110-280)    | 9400<br>(5800-14000)     |
| Ghana    | 2000 | Female | 45 to 49 | 28%<br>(21-35%)                | 72%<br>(65-79%)          | 1.8<br>(0.99-2.9)                           | 5.7%<br>(3.3-8.8%)                   | 7.3%<br>(4.1-11%)                   | 210<br>(120-340)    | 9400<br>(5300-14000)     |
| Ghana    | 2000 | Female | 50 to 54 | 29%<br>(22-36%)                | 71%<br>(64-78%)          | 1.9<br>(1-3.1)                              | 6.6%<br>(3.6-10%)                    | 8.4%<br>(4.6-13%)                   | 290<br>(150-470)    | 11000<br>(5800-17000)    |

| Location | Year | Sex    | Age      | Prevalence of current drinkers | Prevalence of abstainers | Population average of standard drinks daily | Percent of total attributable deaths | Percent of total attributable DALYs | Attributable deaths | Attributable DALYs        |
|----------|------|--------|----------|--------------------------------|--------------------------|---------------------------------------------|--------------------------------------|-------------------------------------|---------------------|---------------------------|
| Ghana    | 2000 | Female | 55 to 59 | 33%<br>(26-40%)                | 67%<br>(60-74%)          | 2<br>(1.1-3.4)                              | 7.3%<br>(3.8-11%)                    | 9.1%<br>(4.8-14%)                   | 340<br>(170-550)    | 11000<br>(5500-18000)     |
| Ghana    | 2000 | Female | 60 to 64 | 34%<br>(25-43%)                | 66%<br>(57-75%)          | 2<br>(1.1-3.4)                              | 6.6%<br>(3.1-11%)                    | 8%<br>(3.8-13%)                     | 350<br>(160-580)    | 9600<br>(4600-16000)      |
| Ghana    | 2000 | Female | 65 to 69 | 35%<br>(26-44%)                | 65%<br>(56-74%)          | 1.8<br>(1-3.1)                              | 6.5%<br>(2.9-11%)                    | 7.7%<br>(3.5-13%)                   | 380<br>(170-670)    | 8600<br>(3800-15000)      |
| Ghana    | 2000 | Female | 70 to 74 | 33%<br>(25-41%)                | 67%<br>(59-75%)          | 1.6<br>(0.84-2.6)                           | 5.6%<br>(2-10%)                      | 6.6%<br>(2.3-12%)                   | 330<br>(110-620)    | 6100<br>(2200-11000)      |
| Ghana    | 2000 | Female | 75 to 79 | 28%<br>(20-37%)                | 72%<br>(63-80%)          | 1.2<br>(0.6-2.1)                            | 4.2%<br>(1.1-8.2%)                   | 4.9%<br>(1.2-9.7%)                  | 210<br>(54-430)     | 3000<br>(800-6100)        |
| Ghana    | 2000 | Female | 80 to 84 | 25%<br>(17-34%)                | 75%<br>(66-83%)          | 1.1<br>(0.55-1.8)                           | 3.5%<br>(0.95-7.2%)                  | 4%<br>(1-8.4%)                      | 110<br>(28-230)     | 1100<br>(300-2400)        |
| Ghana    | 2000 | Female | 85 to 89 | 25%<br>(17-35%)                | 75%<br>(65-83%)          | 1.1<br>(0.52-1.9)                           | 3.1%<br>(0.61-7.1%)                  | 3.6%<br>(0.66-8.2%)                 | 58<br>(11-130)      | 430<br>(87-960)           |
| Ghana    | 2000 | Female | 90 to 94 | 27%<br>(18-37%)                | 73%<br>(63-82%)          | 1.1<br>(0.55-2)                             | 2.8%<br>(0.27-6.6%)                  | 3.2%<br>(0.23-7.7%)                 | 20<br>(1.4-48)      | 100<br>(9.9-240)          |
| Ghana    | 2000 | Female | 95 plus  | 29%<br>(17-43%)                | 71%<br>(57-83%)          | 1.2<br>(0.48-2.2)                           | 2.6%<br>(-0.12-7%)                   | 2.9%<br>(-0.29-8%)                  | 4.7<br>(-0.47-13)   | 17<br>(-0.73-45)          |
| Ghana    | 2000 | Male   | All Ages | 28%<br>(25-31%)                | 72%<br>(69-75%)          | 2<br>(1.4-2.7)                              | 4.4%<br>(3.3-5.6%)                   | 8%<br>(5.7-10%)                     | 7300<br>(5200-9500) | 260000<br>(190000-330000) |
| Ghana    | 2000 | Male   | 15 to 19 | 14%<br>(9.9-19%)               | 86%<br>(81-90%)          | 0.75<br>(0.41-1.2)                          | 2.1%<br>(1.3-3.3%)                   | 2.4%<br>(1.2-4.3%)                  | 42<br>(21-75)       | 4200<br>(2500-6600)       |
| Ghana    | 2000 | Male   | 20 to 24 | 25%<br>(19-32%)                | 75%<br>(68-81%)          | 1.7<br>(0.99-2.8)                           | 5.6%<br>(3.5-8.2%)                   | 6.4%<br>(3.7-9.8%)                  | 160<br>(89-250)     | 13000<br>(7900-19000)     |
| Ghana    | 2000 | Male   | 25 to 29 | 40%<br>(33-46%)                | 60%<br>(54-67%)          | 3.4<br>(2-5.2)                              | 8.5%<br>(5.8-12%)                    | 10%<br>(6.3-14%)                    | 320<br>(210-460)    | 22000<br>(15000-30000)    |
| Ghana    | 2000 | Male   | 30 to 34 | 50%<br>(43-56%)                | 50%<br>(44-57%)          | 4.7<br>(3-7)                                | 9.3%<br>(6.6-12%)                    | 11%<br>(7.3-15%)                    | 410<br>(280-560)    | 25000<br>(18000-34000)    |
| Ghana    | 2000 | Male   | 35 to 39 | 56%<br>(50-61%)                | 44%<br>(39-50%)          | 5.4<br>(3.3-8.1)                            | 9.9%<br>(6.9-13%)                    | 12%<br>(7.8-16%)                    | 460<br>(320-600)    | 25000<br>(18000-32000)    |
| Ghana    | 2000 | Male   | 40 to 44 | 57%<br>(51-62%)                | 43%<br>(38-49%)          | 5.3<br>(3.2-8.1)                            | 11%<br>(8.3-15%)                     | 14%<br>(9.7-17%)                    | 530<br>(370-690)    | 25000<br>(18000-33000)    |
| Ghana    | 2000 | Male   | 45 to 49 | 54%<br>(47-60%)                | 46%<br>(40-53%)          | 4.7<br>(2.8-7.3)                            | 14%<br>(9.5-18%)                     | 17%<br>(12-22%)                     | 620<br>(430-810)    | 26000<br>(18000-34000)    |
| Ghana    | 2000 | Male   | 50 to 54 | 57%<br>(50-63%)                | 43%<br>(37-50%)          | 5<br>(2.9-7.8)                              | 15%<br>(11-20%)                      | 19%<br>(13-24%)                     | 770<br>(520-1000)   | 29000<br>(20000-38000)    |
| Ghana    | 2000 | Male   | 55 to 59 | 63%<br>(57-69%)                | 37%<br>(31-43%)          | 5.6<br>(3.3-8.9)                            | 17%<br>(12-22%)                      | 21%<br>(14-26%)                     | 860<br>(580-1100)   | 28000<br>(19000-36000)    |
| Ghana    | 2000 | Male   | 60 to 64 | 63%<br>(55-70%)                | 37%<br>(30-45%)          | 5.1<br>(3-8.1)                              | 16%<br>(9.8-21%)                     | 19%<br>(12-25%)                     | 830<br>(510-1100)   | 23000<br>(14000-30000)    |
| Ghana    | 2000 | Male   | 65 to 69 | 56%<br>(47-65%)                | 44%<br>(35-53%)          | 4.1<br>(2.5-6.5)                            | 14%<br>(8.4-18%)                     | 16%<br>(9.9-22%)                    | 740<br>(450-1000)   | 17000<br>(10000-23000)    |
| Ghana    | 2000 | Male   | 70 to 74 | 51%<br>(41-60%)                | 49%<br>(40-59%)          | 3.2<br>(1.8-5.2)                            | 12%<br>(6.4-18%)                     | 14%<br>(7.5-21%)                    | 680<br>(350-1000)   | 12000<br>(6500-18000)     |

| Location | Year | Sex    | Age      | Prevalence of current drinkers | Prevalence of abstainers | Population average of standard drinks daily | Percent of total attributable deaths | Percent of total attributable DALYs | Attributable deaths | Attributable DALYs       |
|----------|------|--------|----------|--------------------------------|--------------------------|---------------------------------------------|--------------------------------------|-------------------------------------|---------------------|--------------------------|
| Ghana    | 2000 | Male   | 75 to 79 | 48%<br>(37-60%)                | 52%<br>(40-63%)          | 2.7<br>(1.4-4.4)                            | 10%<br>(4.5-16%)                     | 12%<br>(5.3-19%)                    | 500<br>(220-800)    | 7000<br>(3200-11000)     |
| Ghana    | 2000 | Male   | 80 to 84 | 47%<br>(35-59%)                | 53%<br>(41-65%)          | 2.3<br>(1.2-3.8)                            | 8.3%<br>(3.8-14%)                    | 9.7%<br>(4.4-17%)                   | 260<br>(120-440)    | 2600<br>(1200-4500)      |
| Ghana    | 2000 | Male   | 85 to 89 | 46%<br>(33-59%)                | 54%<br>(41-67%)          | 1.9<br>(1-3.4)                              | 6.4%<br>(2.5-12%)                    | 7.4%<br>(2.8-14%)                   | 110<br>(40-200)     | 780<br>(310-1400)        |
| Ghana    | 2000 | Male   | 90 to 94 | 47%<br>(34-60%)                | 53%<br>(40-66%)          | 1.7<br>(0.84-3)                             | 4.4%<br>(1.3-9.3%)                   | 5.1%<br>(1.4-11%)                   | 25<br>(6.8-54)      | 130<br>(38-270)          |
| Ghana    | 2000 | Male   | 95 plus  | 51%<br>(34-68%)                | 49%<br>(32-66%)          | 1.5<br>(0.63-2.9)                           | 4.1%<br>(0.82-9.6%)                  | 4.6%<br>(0.69-11%)                  | 5.3<br>(0.79-13)    | 19<br>(3.6-44)           |
| Ghana    | 2005 | Female | All Ages | 16%<br>(15-18%)                | 84%<br>(82-85%)          | 0.81<br>(0.55-1.1)                          | 2%<br>(1.3-2.8%)                     | 3.6%<br>(1.9-5.5%)                  | 3300<br>(1700-5200) | 110000<br>(70000-160000) |
| Ghana    | 2005 | Female | 15 to 19 | 12%<br>(8.9-17%)               | 88%<br>(83-91%)          | 0.52<br>(0.27-0.88)                         | 1.2%<br>(0.73-1.9%)                  | 1.2%<br>(0.53-2.2%)                 | 20<br>(8.8-35)      | 2600<br>(1600-4100)      |
| Ghana    | 2005 | Female | 20 to 24 | 17%<br>(14-22%)                | 83%<br>(78-86%)          | 0.91<br>(0.51-1.5)                          | 2.3%<br>(1.5-3.6%)                   | 2.1%<br>(1-3.8%)                    | 48<br>(25-82)       | 5800<br>(3700-8500)      |
| Ghana    | 2005 | Female | 25 to 29 | 20%<br>(16-24%)                | 80%<br>(76-84%)          | 1.1<br>(0.65-1.9)                           | 2.5%<br>(1.6-3.6%)                   | 2.4%<br>(1.2-4.1%)                  | 79<br>(44-120)      | 7200<br>(4800-10000)     |
| Ghana    | 2005 | Female | 30 to 34 | 23%<br>(19-28%)                | 77%<br>(72-81%)          | 1.5<br>(0.86-2.2)                           | 2.7%<br>(1.7-3.9%)                   | 2.8%<br>(1.5-4.4%)                  | 120<br>(65-170)     | 8400<br>(5500-12000)     |
| Ghana    | 2005 | Female | 35 to 39 | 27%<br>(22-31%)                | 73%<br>(69-78%)          | 1.7<br>(1-2.7)                              | 3.4%<br>(2.2-5.1%)                   | 4%<br>(2.3-6.1%)                    | 170<br>(100-260)    | 10000<br>(6300-14000)    |
| Ghana    | 2005 | Female | 40 to 44 | 28%<br>(23-33%)                | 72%<br>(67-77%)          | 1.8<br>(0.99-2.8)                           | 4.1%<br>(2.5-5.9%)                   | 4.9%<br>(3-7.4%)                    | 200<br>(120-300)    | 10000<br>(6400-15000)    |
| Ghana    | 2005 | Female | 45 to 49 | 29%<br>(24-35%)                | 71%<br>(65-76%)          | 1.9<br>(1.1-3)                              | 5.2%<br>(3-7.7%)                     | 6.5%<br>(3.6-9.8%)                  | 250<br>(130-390)    | 11000<br>(6300-17000)    |
| Ghana    | 2005 | Female | 50 to 54 | 32%<br>(26-39%)                | 68%<br>(61-74%)          | 2.1<br>(1.2-3.4)                            | 6.5%<br>(3.5-9.8%)                   | 8.2%<br>(4.4-13%)                   | 300<br>(150-480)    | 12000<br>(6000-18000)    |
| Ghana    | 2005 | Female | 55 to 59 | 37%<br>(30-44%)                | 63%<br>(56-70%)          | 2.4<br>(1.4-3.9)                            | 7.5%<br>(4.1-11%)                    | 9.5%<br>(5.1-14%)                   | 400<br>(200-640)    | 13000<br>(6500-21000)    |
| Ghana    | 2005 | Female | 60 to 64 | 36%<br>(29-43%)                | 64%<br>(57-71%)          | 2.2<br>(1.2-3.7)                            | 6.5%<br>(3.1-10%)                    | 8%<br>(3.7-12%)                     | 380<br>(170-630)    | 10000<br>(4700-17000)    |
| Ghana    | 2005 | Female | 65 to 69 | 35%<br>(28-43%)                | 65%<br>(57-72%)          | 1.9<br>(1.1-3.1)                            | 6.2%<br>(2.6-10%)                    | 7.5%<br>(3.1-13%)                   | 430<br>(170-730)    | 9800<br>(3900-17000)     |
| Ghana    | 2005 | Female | 70 to 74 | 32%<br>(26-40%)                | 68%<br>(60-74%)          | 1.5<br>(0.84-2.5)                           | 5.3%<br>(1.7-10%)                    | 6.2%<br>(2-12%)                     | 410<br>(130-760)    | 7500<br>(2300-14000)     |
| Ghana    | 2005 | Female | 75 to 79 | 25%<br>(19-33%)                | 75%<br>(67-81%)          | 1.1<br>(0.55-1.9)                           | 3.7%<br>(0.88-7.3%)                  | 4.3%<br>(1-8.5%)                    | 270<br>(57-540)     | 3800<br>(860-7600)       |
| Ghana    | 2005 | Female | 80 to 84 | 24%<br>(16-32%)                | 76%<br>(68-84%)          | 1<br>(0.52-1.7)                             | 3.1%<br>(0.74-6.6%)                  | 3.6%<br>(0.84-7.7%)                 | 150<br>(33-310)     | 1600<br>(370-3200)       |
| Ghana    | 2005 | Female | 85 to 89 | 25%<br>(17-34%)                | 75%<br>(66-83%)          | 1.1<br>(0.54-1.9)                           | 2.9%<br>(0.58-6.4%)                  | 3.3%<br>(0.63-7.5%)                 | 78<br>(15-170)      | 580<br>(120-1300)        |
| Ghana    | 2005 | Female | 90 to 94 | 27%<br>(18-36%)                | 73%<br>(64-82%)          | 1.1<br>(0.56-2)                             | 2.6%<br>(0.21-6.5%)                  | 3%<br>(0.18-7.7%)                   | 28<br>(1.6-73)      | 150<br>(12-370)          |

| Location | Year | Sex    | Age      | Prevalence of current drinkers | Prevalence of abstainers | Population average of standard drinks daily | Percent of total attributable deaths | Percent of total attributable DALYs | Attributable deaths  | Attributable DALYs        |
|----------|------|--------|----------|--------------------------------|--------------------------|---------------------------------------------|--------------------------------------|-------------------------------------|----------------------|---------------------------|
| Ghana    | 2005 | Female | 95 plus  | 29%<br>(18-42%)                | 71%<br>(58-82%)          | 1.2<br>(0.5-2.3)                            | 2.5%<br>(-0.16-6.8%)                 | 2.7%<br>(-0.34-7.9%)                | 6.9<br>(-0.84-20)    | 24<br>(-1.4-69)           |
| Ghana    | 2005 | Male   | All Ages | 29%<br>(26-31%)                | 71%<br>(69-74%)          | 2.1<br>(1.4-2.8)                            | 4.6%<br>(3.4-5.8%)                   | 8.3%<br>(5.8-11%)                   | 8400<br>(5900-11000) | 300000<br>(220000-370000) |
| Ghana    | 2005 | Male   | 15 to 19 | 11%<br>(8.4-15%)               | 89%<br>(85-92%)          | 0.61<br>(0.34-1)                            | 1.8%<br>(1.1-2.7%)                   | 1.9%<br>(1-3.3%)                    | 39<br>(19-70)        | 4100<br>(2400-6400)       |
| Ghana    | 2005 | Male   | 20 to 24 | 27%<br>(22-32%)                | 73%<br>(68-78%)          | 1.9<br>(1.1-3.1)                            | 5.8%<br>(3.8-8.1%)                   | 6.6%<br>(3.9-9.8%)                  | 180<br>(100-280)     | 15000<br>(9300-21000)     |
| Ghana    | 2005 | Male   | 25 to 29 | 44%<br>(39-49%)                | 56%<br>(51-61%)          | 3.9<br>(2.4-5.9)                            | 9.1%<br>(6.2-12%)                    | 11%<br>(6.9-15%)                    | 370<br>(240-500)     | 25000<br>(17000-34000)    |
| Ghana    | 2005 | Male   | 30 to 34 | 50%<br>(45-56%)                | 50%<br>(44-55%)          | 4.9<br>(3.1-7.1)                            | 9.1%<br>(6.5-12%)                    | 11%<br>(7.3-14%)                    | 440<br>(310-590)     | 27000<br>(20000-36000)    |
| Ghana    | 2005 | Male   | 35 to 39 | 53%<br>(48-58%)                | 47%<br>(42-52%)          | 5.1<br>(3.1-7.7)                            | 9.5%<br>(6.9-12%)                    | 11%<br>(7.9-15%)                    | 510<br>(370-670)     | 28000<br>(21000-36000)    |
| Ghana    | 2005 | Male   | 40 to 44 | 55%<br>(50-60%)                | 45%<br>(40-50%)          | 5.1<br>(3-7.8)                              | 11%<br>(7.8-14%)                     | 13%<br>(9.2-16%)                    | 600<br>(420-790)     | 29000<br>(21000-38000)    |
| Ghana    | 2005 | Male   | 45 to 49 | 53%<br>(49-58%)                | 47%<br>(42-51%)          | 4.7<br>(2.9-7.1)                            | 13%<br>(9.3-17%)                     | 16%<br>(11-21%)                     | 730<br>(500-960)     | 31000<br>(22000-40000)    |
| Ghana    | 2005 | Male   | 50 to 54 | 57%<br>(53-62%)                | 43%<br>(38-47%)          | 5.2<br>(3-7.7)                              | 15%<br>(10-19%)                      | 18%<br>(12-23%)                     | 770<br>(520-1000)    | 29000<br>(20000-37000)    |
| Ghana    | 2005 | Male   | 55 to 59 | 65%<br>(61-70%)                | 35%<br>(30-39%)          | 5.9<br>(3.5-9.1)                            | 17%<br>(12-21%)                      | 20%<br>(14-26%)                     | 1000<br>(690-1300)   | 32000<br>(22000-42000)    |
| Ghana    | 2005 | Male   | 60 to 64 | 65%<br>(58-71%)                | 35%<br>(29-42%)          | 5.4<br>(3.2-8.7)                            | 16%<br>(10-20%)                      | 18%<br>(12-24%)                     | 960<br>(620-1200)    | 26000<br>(17000-34000)    |
| Ghana    | 2005 | Male   | 65 to 69 | 60%<br>(53-66%)                | 40%<br>(34-47%)          | 4.5<br>(2.7-6.9)                            | 14%<br>(8.5-19%)                     | 16%<br>(10-22%)                     | 890<br>(540-1200)    | 20000<br>(12000-28000)    |
| Ghana    | 2005 | Male   | 70 to 74 | 55%<br>(47-62%)                | 45%<br>(38-53%)          | 3.6<br>(2.1-5.7)                            | 12%<br>(6.8-18%)                     | 15%<br>(8-21%)                      | 830<br>(440-1200)    | 15000<br>(8400-22000)     |
| Ghana    | 2005 | Male   | 75 to 79 | 52%<br>(43-61%)                | 48%<br>(39-57%)          | 3<br>(1.6-4.8)                              | 10%<br>(4.5-16%)                     | 12%<br>(5.3-19%)                    | 610<br>(270-960)     | 8500<br>(3800-13000)      |
| Ghana    | 2005 | Male   | 80 to 84 | 50%<br>(38-61%)                | 50%<br>(39-62%)          | 2.6<br>(1.4-4.1)                            | 8.5%<br>(3.8-14%)                    | 9.9%<br>(4.5-17%)                   | 310<br>(140-530)     | 3300<br>(1500-5400)       |
| Ghana    | 2005 | Male   | 85 to 89 | 48%<br>(36-60%)                | 52%<br>(40-64%)          | 2.1<br>(1.1-3.6)                            | 6.4%<br>(2.5-12%)                    | 7.4%<br>(2.9-14%)                   | 140<br>(54-260)      | 1000<br>(420-1900)        |
| Ghana    | 2005 | Male   | 90 to 94 | 50%<br>(37-62%)                | 50%<br>(38-63%)          | 1.8<br>(0.94-3.2)                           | 4.4%<br>(1.3-9.8%)                   | 5.1%<br>(1.5-11%)                   | 35<br>(10-79)        | 180<br>(54-400)           |
| Ghana    | 2005 | Male   | 95 plus  | 54%<br>(37-70%)                | 46%<br>(30-63%)          | 1.6<br>(0.69-3.1)                           | 4%<br>(0.68-9.5%)                    | 4.5%<br>(0.85-11%)                  | 6.8<br>(0.85-17)     | 24<br>(4.1-57)            |
| Ghana    | 2010 | Female | All Ages | 18%<br>(16-21%)                | 82%<br>(79-84%)          | 1<br>(0.67-1.4)                             | 2.4%<br>(1.6-3.4%)                   | 4.4%<br>(2.3-6.6%)                  | 4500<br>(2400-7000)  | 150000<br>(93000-210000)  |
| Ghana    | 2010 | Female | 15 to 19 | 14%<br>(9.8-19%)               | 86%<br>(81-90%)          | 0.67<br>(0.35-1.2)                          | 1.3%<br>(0.8-2%)                     | 1.3%<br>(0.61-2.3%)                 | 23<br>(11-41)        | 3000<br>(1800-4800)       |
| Ghana    | 2010 | Female | 20 to 24 | 19%<br>(14-25%)                | 81%<br>(75-86%)          | 1.1<br>(0.6-2)                              | 2.6%<br>(1.7-3.7%)                   | 2.4%<br>(1.2-4.1%)                  | 52<br>(27-87)        | 6500<br>(4100-9400)       |

| Location | Year | Sex    | Age      | Prevalence of current drinkers | Prevalence of abstainers | Population average of standard drinks daily | Percent of total attributable deaths | Percent of total attributable DALYs | Attributable deaths  | Attributable DALYs        |
|----------|------|--------|----------|--------------------------------|--------------------------|---------------------------------------------|--------------------------------------|-------------------------------------|----------------------|---------------------------|
| Ghana    | 2010 | Female | 25 to 29 | 21%<br>(16-28%)                | 79%<br>(72-84%)          | 1.4<br>(0.76-2.3)                           | 2.9%<br>(1.8-4.1%)                   | 2.9%<br>(1.5-4.8%)                  | 89<br>(50-140)       | 8400<br>(5500-12000)      |
| Ghana    | 2010 | Female | 30 to 34 | 25%<br>(19-32%)                | 75%<br>(68-81%)          | 1.8<br>(0.99-2.8)                           | 3.1%<br>(2-4.5%)                     | 3.4%<br>(1.9-5.2%)                  | 140<br>(80-210)      | 10000<br>(6500-14000)     |
| Ghana    | 2010 | Female | 35 to 39 | 28%<br>(22-34%)                | 72%<br>(66-78%)          | 2<br>(1.1-3.3)                              | 3.8%<br>(2.4-5.4%)                   | 4.4%<br>(2.6-6.7%)                  | 200<br>(120-290)     | 12000<br>(7700-17000)     |
| Ghana    | 2010 | Female | 40 to 44 | 29%<br>(23-36%)                | 71%<br>(64-77%)          | 2.1<br>(1.1-3.3)                            | 4.5%<br>(2.8-6.4%)                   | 5.6%<br>(3.4-8.1%)                  | 250<br>(150-360)     | 13000<br>(8000-18000)     |
| Ghana    | 2010 | Female | 45 to 49 | 31%<br>(24-38%)                | 69%<br>(62-76%)          | 2.3<br>(1.2-3.7)                            | 5.8%<br>(3.3-8.4%)                   | 7.5%<br>(4.2-11%)                   | 320<br>(180-470)     | 14000<br>(8000-21000)     |
| Ghana    | 2010 | Female | 50 to 54 | 34%<br>(26-42%)                | 66%<br>(58-74%)          | 2.6<br>(1.4-4.3)                            | 7.5%<br>(4.2-11%)                    | 9.6%<br>(5.4-14%)                   | 430<br>(220-660)     | 16000<br>(8900-25000)     |
| Ghana    | 2010 | Female | 55 to 59 | 38%<br>(30-47%)                | 62%<br>(53-70%)          | 2.8<br>(1.6-4.8)                            | 8.5%<br>(4.7-13%)                    | 11%<br>(6-16%)                      | 490<br>(260-760)     | 16000<br>(8700-24000)     |
| Ghana    | 2010 | Female | 60 to 64 | 39%<br>(30-48%)                | 61%<br>(52-70%)          | 2.7<br>(1.4-4.8)                            | 7.7%<br>(3.7-12%)                    | 9.3%<br>(4.5-15%)                   | 500<br>(240-800)     | 14000<br>(6700-22000)     |
| Ghana    | 2010 | Female | 65 to 69 | 38%<br>(29-47%)                | 62%<br>(53-71%)          | 2.3<br>(1.3-4)                              | 7.4%<br>(3.2-12%)                    | 8.9%<br>(3.8-14%)                   | 520<br>(220-880)     | 12000<br>(5100-20000)     |
| Ghana    | 2010 | Female | 70 to 74 | 34%<br>(26-42%)                | 66%<br>(58-74%)          | 1.8<br>(0.96-3)                             | 6.2%<br>(2.2-11%)                    | 7.3%<br>(2.5-13%)                   | 560<br>(190-1000)    | 10000<br>(3600-18000)     |
| Ghana    | 2010 | Female | 75 to 79 | 27%<br>(19-37%)                | 73%<br>(63-81%)          | 1.3<br>(0.63-2.4)                           | 4.5%<br>(1.2-8.6%)                   | 5.2%<br>(1.4-9.9%)                  | 450<br>(120-870)     | 6500<br>(1700-12000)      |
| Ghana    | 2010 | Female | 80 to 84 | 25%<br>(17-34%)                | 75%<br>(66-83%)          | 1.2<br>(0.61-2.1)                           | 3.9%<br>(0.91-7.8%)                  | 4.5%<br>(1-9%)                      | 290<br>(65-610)      | 3100<br>(720-6300)        |
| Ghana    | 2010 | Female | 85 to 89 | 26%<br>(17-36%)                | 74%<br>(64-83%)          | 1.3<br>(0.62-2.3)                           | 3.6%<br>(0.71-7.6%)                  | 4.2%<br>(0.76-8.9%)                 | 140<br>(25-300)      | 1000<br>(200-2200)        |
| Ghana    | 2010 | Female | 90 to 94 | 28%<br>(19-38%)                | 72%<br>(62-81%)          | 1.3<br>(0.64-2.5)                           | 3.3%<br>(0.36-7.7%)                  | 3.9%<br>(0.33-9.2%)                 | 47<br>(3.9-110)      | 240<br>(26-570)           |
| Ghana    | 2010 | Female | 95 plus  | 31%<br>(19-45%)                | 69%<br>(55-81%)          | 1.4<br>(0.59-2.8)                           | 3.2%<br>(0.03-8%)                    | 3.6%<br>(-0.12-9.4%)                | 12<br>(-0.39-33)     | 43<br>(0.39-110)          |
| Ghana    | 2010 | Male   | All Ages | 29%<br>(26-32%)                | 71%<br>(68-74%)          | 2.4<br>(1.6-3.3)                            | 5%<br>(3.8-6.2%)                     | 8.9%<br>(6.5-11%)                   | 9500<br>(6900-12000) | 330000<br>(250000-410000) |
| Ghana    | 2010 | Male   | 15 to 19 | 13%<br>(9.2-18%)               | 87%<br>(82-91%)          | 0.79<br>(0.42-1.4)                          | 2%<br>(1.2-3.2%)                     | 2.2%<br>(1.1-4%)                    | 51<br>(24-95)        | 5200<br>(3000-8400)       |
| Ghana    | 2010 | Male   | 20 to 24 | 29%<br>(24-36%)                | 71%<br>(64-76%)          | 2.4<br>(1.3-4)                              | 6.4%<br>(4.2-8.9%)                   | 7.4%<br>(4.2-11%)                   | 220<br>(120-330)     | 18000<br>(11000-25000)    |
| Ghana    | 2010 | Male   | 25 to 29 | 45%<br>(39-52%)                | 55%<br>(48-61%)          | 4.5<br>(2.7-6.9)                            | 9.8%<br>(7-13%)                      | 12%<br>(8-16%)                      | 400<br>(260-550)     | 28000<br>(19000-37000)    |
| Ghana    | 2010 | Male   | 30 to 34 | 50%<br>(44-57%)                | 50%<br>(43-56%)          | 5.5<br>(3.4-8.2)                            | 10%<br>(7.6-13%)                     | 12%<br>(8.7-15%)                    | 470<br>(340-630)     | 29000<br>(21000-39000)    |
| Ghana    | 2010 | Male   | 35 to 39 | 52%<br>(46-58%)                | 48%<br>(42-54%)          | 5.6<br>(3.3-8.7)                            | 10%<br>(7.6-13%)                     | 12%<br>(8.8-16%)                    | 540<br>(400-720)     | 30000<br>(22000-39000)    |
| Ghana    | 2010 | Male   | 40 to 44 | 54%<br>(47-59%)                | 46%<br>(41-53%)          | 5.6<br>(3.2-8.7)                            | 12%<br>(8.6-14%)                     | 14%<br>(10-17%)                     | 670<br>(480-870)     | 33000<br>(24000-42000)    |

| Location | Year | Sex    | Age      | Prevalence of current drinkers | Prevalence of abstainers | Population average of standard drinks daily | Percent of total attributable deaths | Percent of total attributable DALYs | Attributable deaths | Attributable DALYs       |
|----------|------|--------|----------|--------------------------------|--------------------------|---------------------------------------------|--------------------------------------|-------------------------------------|---------------------|--------------------------|
| Ghana    | 2010 | Male   | 45 to 49 | 53%<br>(47-59%)                | 47%<br>(41-53%)          | 5.3<br>(3.1-8.2)                            | 14%<br>(11-18%)                      | 17%<br>(13-22%)                     | 840<br>(610-1100)   | 36000<br>(26000-46000)   |
| Ghana    | 2010 | Male   | 50 to 54 | 57%<br>(51-63%)                | 43%<br>(37-49%)          | 5.8<br>(3.4-9.2)                            | 15%<br>(11-19%)                      | 19%<br>(14-23%)                     | 910<br>(640-1200)   | 34000<br>(24000-43000)   |
| Ghana    | 2010 | Male   | 55 to 59 | 65%<br>(59-70%)                | 35%<br>(30-41%)          | 6.6<br>(3.9-10)                             | 17%<br>(13-21%)                      | 21%<br>(15-25%)                     | 1000<br>(710-1300)  | 32000<br>(24000-41000)   |
| Ghana    | 2010 | Male   | 60 to 64 | 65%<br>(57-72%)                | 35%<br>(28-43%)          | 6.1<br>(3.5-10)                             | 16%<br>(11-20%)                      | 19%<br>(13-24%)                     | 1100<br>(780-1400)  | 31000<br>(22000-39000)   |
| Ghana    | 2010 | Male   | 65 to 69 | 61%<br>(53-68%)                | 39%<br>(32-47%)          | 5.2<br>(3-8.1)                              | 15%<br>(9.6-19%)                     | 17%<br>(11-23%)                     | 1000<br>(660-1300)  | 23000<br>(15000-30000)   |
| Ghana    | 2010 | Male   | 70 to 74 | 57%<br>(48-65%)                | 43%<br>(35-52%)          | 4.3<br>(2.4-6.9)                            | 13%<br>(7.4-19%)                     | 16%<br>(8.8-22%)                    | 950<br>(520-1400)   | 17000<br>(9600-25000)    |
| Ghana    | 2010 | Male   | 75 to 79 | 54%<br>(44-63%)                | 46%<br>(37-56%)          | 3.5<br>(1.8-5.9)                            | 11%<br>(5-16%)                       | 13%<br>(5.7-19%)                    | 720<br>(330-1100)   | 10000<br>(4700-15000)    |
| Ghana    | 2010 | Male   | 80 to 84 | 51%<br>(39-61%)                | 49%<br>(39-61%)          | 2.9<br>(1.5-4.8)                            | 9.1%<br>(4-15%)                      | 11%<br>(4.6-17%)                    | 390<br>(170-640)    | 4100<br>(1700-6700)      |
| Ghana    | 2010 | Male   | 85 to 89 | 48%<br>(36-60%)                | 52%<br>(40-64%)          | 2.3<br>(1.2-3.9)                            | 6.9%<br>(2.7-13%)                    | 8%<br>(3.1-15%)                     | 170<br>(66-310)     | 1300<br>(500-2300)       |
| Ghana    | 2010 | Male   | 90 to 94 | 49%<br>(36-62%)                | 51%<br>(38-64%)          | 2<br>(0.97-3.6)                             | 4.9%<br>(1.4-10%)                    | 5.6%<br>(1.5-12%)                   | 48<br>(13-100)      | 250<br>(74-530)          |
| Ghana    | 2010 | Male   | 95 plus  | 54%<br>(36-69%)                | 46%<br>(31-64%)          | 1.8<br>(0.73-3.6)                           | 4.3%<br>(0.73-10%)                   | 4.8%<br>(0.6-12%)                   | 9.8<br>(1.2-24)     | 35<br>(5.8-82)           |
| Ghana    | 2016 | Female | All Ages | 20%<br>(17-23%)                | 80%<br>(77-83%)          | 1.3<br>(0.68-2.1)                           | 3.1%<br>(1.8-4.4%)                   | 5.5%<br>(2.7-8.4%)                  | 5000<br>(2400-7700) | 160000<br>(95000-230000) |
| Ghana    | 2016 | Female | 15 to 19 | 16%<br>(11-22%)                | 84%<br>(78-89%)          | 0.88<br>(0.38-1.7)                          | 1.5%<br>(0.82-2.3%)                  | 1.5%<br>(0.61-2.9%)                 | 24<br>(9.2-45)      | 3300<br>(1800-5300)      |
| Ghana    | 2016 | Female | 20 to 24 | 21%<br>(14-30%)                | 79%<br>(70-86%)          | 1.4<br>(0.62-2.8)                           | 3%<br>(1.9-4.3%)                     | 2.8%<br>(1.3-4.8%)                  | 50<br>(21-86)       | 6800<br>(4100-9800)      |
| Ghana    | 2016 | Female | 25 to 29 | 24%<br>(16-33%)                | 76%<br>(67-84%)          | 1.8<br>(0.8-3.5)                            | 3.4%<br>(2.1-4.9%)                   | 3.6%<br>(1.8-5.9%)                  | 84<br>(42-130)      | 8500<br>(5400-12000)     |
| Ghana    | 2016 | Female | 30 to 34 | 27%<br>(18-39%)                | 73%<br>(61-82%)          | 2.2<br>(1-4.1)                              | 3.7%<br>(2.4-5.2%)                   | 4.3%<br>(2.4-6.6%)                  | 130<br>(74-200)     | 10000<br>(6700-15000)    |
| Ghana    | 2016 | Female | 35 to 39 | 30%<br>(20-40%)                | 70%<br>(60-80%)          | 2.4<br>(1-4.5)                              | 4.4%<br>(2.8-6.3%)                   | 5.7%<br>(3.2-8.4%)                  | 210<br>(120-310)    | 13000<br>(8000-18000)    |
| Ghana    | 2016 | Female | 40 to 44 | 31%<br>(22-41%)                | 69%<br>(59-78%)          | 2.6<br>(1.2-4.7)                            | 5.2%<br>(3.1-7.4%)                   | 7%<br>(3.9-10%)                     | 280<br>(150-410)    | 14000<br>(8400-21000)    |
| Ghana    | 2016 | Female | 45 to 49 | 33%<br>(22-43%)                | 67%<br>(57-78%)          | 2.8<br>(1.2-5.3)                            | 6.6%<br>(3.8-9.5%)                   | 8.9%<br>(5.1-13%)                   | 370<br>(200-550)    | 16000<br>(9400-24000)    |
| Ghana    | 2016 | Female | 50 to 54 | 35%<br>(25-46%)                | 65%<br>(54-75%)          | 3<br>(1.3-5.8)                              | 7.8%<br>(4.3-11%)                    | 10%<br>(5.8-15%)                    | 470<br>(250-710)    | 18000<br>(9900-27000)    |
| Ghana    | 2016 | Female | 55 to 59 | 37%<br>(27-49%)                | 63%<br>(51-73%)          | 3.1<br>(1.4-6)                              | 8.5%<br>(4.3-13%)                    | 11%<br>(5.6-16%)                    | 560<br>(270-880)    | 18000<br>(9100-29000)    |
| Ghana    | 2016 | Female | 60 to 64 | 39%<br>(28-52%)                | 61%<br>(48-72%)          | 3.1<br>(1.4-6.2)                            | 8%<br>(3.3-12%)                      | 9.9%<br>(4.2-15%)                   | 550<br>(230-890)    | 15000<br>(6500-25000)    |

| Location | Year | Sex    | Age      | Prevalence of current drinkers | Prevalence of abstainers | Population average of standard drinks daily | Percent of total attributable deaths | Percent of total attributable DALYs | Attributable deaths  | Attributable DALYs        |
|----------|------|--------|----------|--------------------------------|--------------------------|---------------------------------------------|--------------------------------------|-------------------------------------|----------------------|---------------------------|
| Ghana    | 2016 | Female | 65 to 69 | 40%<br>(29-51%)                | 60%<br>(49-71%)          | 2.9<br>(1.3-5.4)                            | 8.2%<br>(3.2-13%)                    | 10%<br>(3.9-16%)                    | 640<br>(250-1100)    | 15000<br>(5800-25000)     |
| Ghana    | 2016 | Female | 70 to 74 | 36%<br>(27-47%)                | 64%<br>(53-73%)          | 2.3<br>(1-4.4)                              | 7.1%<br>(2.2-12%)                    | 8.4%<br>(2.6-15%)                   | 540<br>(160-980)     | 10000<br>(2900-18000)     |
| Ghana    | 2016 | Female | 75 to 79 | 30%<br>(20-41%)                | 70%<br>(59-80%)          | 1.7<br>(0.68-3.4)                           | 5.4%<br>(1.2-10%)                    | 6.3%<br>(1.3-12%)                   | 440<br>(87-850)      | 6300<br>(1300-12000)      |
| Ghana    | 2016 | Female | 80 to 84 | 27%<br>(18-37%)                | 73%<br>(63-82%)          | 1.5<br>(0.65-2.9)                           | 4.7%<br>(0.95-9%)                    | 5.5%<br>(1.1-11%)                   | 320<br>(59-630)      | 3400<br>(640-6600)        |
| Ghana    | 2016 | Female | 85 to 89 | 27%<br>(18-38%)                | 73%<br>(62-82%)          | 1.5<br>(0.62-2.9)                           | 4.3%<br>(0.76-9%)                    | 5.1%<br>(0.81-10%)                  | 220<br>(35-470)      | 1600<br>(290-3400)        |
| Ghana    | 2016 | Female | 90 to 94 | 29%<br>(19-41%)                | 71%<br>(59-81%)          | 1.6<br>(0.66-3.3)                           | 4.1%<br>(0.31-8.9%)                  | 4.7%<br>(0.23-11%)                  | 71<br>(3.5-160)      | 370<br>(28-810)           |
| Ghana    | 2016 | Female | 95 plus  | 32%<br>(20-47%)                | 68%<br>(53-80%)          | 1.7<br>(0.61-3.8)                           | 4%<br>(0.011-9.5%)                   | 4.5%<br>(-0.17-11%)                 | 17<br>(-0.66-42)     | 58<br>(0.17-140)          |
| Ghana    | 2016 | Male   | All Ages | 30%<br>(26-34%)                | 70%<br>(66-74%)          | 2.8<br>(1.5-4.7)                            | 5.7%<br>(4.2-7.2%)                   | 9.9%<br>(6.7-13%)                   | 9700<br>(6600-13000) | 350000<br>(250000-440000) |
| Ghana    | 2016 | Male   | 15 to 19 | 19%<br>(12-26%)                | 81%<br>(74-88%)          | 1.3<br>(0.56-2.6)                           | 2.7%<br>(1.4-4.5%)                   | 3.2%<br>(1.4-5.9%)                  | 75<br>(30-140)       | 7300<br>(3700-12000)      |
| Ghana    | 2016 | Male   | 20 to 24 | 31%<br>(21-42%)                | 69%<br>(58-79%)          | 2.9<br>(1.3-5.5)                            | 6.9%<br>(4.3-9.8%)                   | 8.1%<br>(4.4-12%)                   | 240<br>(130-380)     | 20000<br>(12000-29000)    |
| Ghana    | 2016 | Male   | 25 to 29 | 42%<br>(31-53%)                | 58%<br>(47-69%)          | 4.7<br>(2.3-8.5)                            | 9.7%<br>(6.6-13%)                    | 12%<br>(7.8-16%)                    | 400<br>(260-560)     | 28000<br>(19000-39000)    |
| Ghana    | 2016 | Male   | 30 to 34 | 49%<br>(37-60%)                | 51%<br>(40-63%)          | 6.1<br>(3.1-11)                             | 10%<br>(7.6-13%)                     | 13%<br>(9.1-17%)                    | 470<br>(330-640)     | 30000<br>(22000-39000)    |
| Ghana    | 2016 | Male   | 35 to 39 | 52%<br>(39-62%)                | 48%<br>(38-61%)          | 6.5<br>(3.1-11)                             | 11%<br>(8-14%)                       | 14%<br>(9.7-18%)                    | 570<br>(390-760)     | 32000<br>(23000-42000)    |
| Ghana    | 2016 | Male   | 40 to 44 | 53%<br>(41-63%)                | 47%<br>(37-59%)          | 6.4<br>(2.9-12)                             | 12%<br>(8.6-15%)                     | 15%<br>(10-18%)                     | 670<br>(460-900)     | 33000<br>(23000-44000)    |
| Ghana    | 2016 | Male   | 45 to 49 | 52%<br>(39-62%)                | 48%<br>(38-61%)          | 6<br>(2.8-11)                               | 14%<br>(10-18%)                      | 18%<br>(13-22%)                     | 900<br>(620-1200)    | 39000<br>(27000-51000)    |
| Ghana    | 2016 | Male   | 50 to 54 | 55%<br>(44-65%)                | 45%<br>(35-56%)          | 6.4<br>(3.1-12)                             | 15%<br>(11-19%)                      | 18%<br>(13-23%)                     | 950<br>(660-1200)    | 36000<br>(25000-46000)    |
| Ghana    | 2016 | Male   | 55 to 59 | 61%<br>(50-70%)                | 39%<br>(30-50%)          | 7<br>(3.3-13)                               | 16%<br>(11-20%)                      | 20%<br>(14-24%)                     | 1100<br>(740-1400)   | 35000<br>(24000-45000)    |
| Ghana    | 2016 | Male   | 60 to 64 | 62%<br>(49-72%)                | 38%<br>(28-51%)          | 6.6<br>(3-12)                               | 15%<br>(9.9-19%)                     | 18%<br>(12-23%)                     | 1000<br>(650-1300)   | 29000<br>(18000-37000)    |
| Ghana    | 2016 | Male   | 65 to 69 | 58%<br>(46-68%)                | 42%<br>(32-54%)          | 5.7<br>(2.7-10)                             | 14%<br>(8.3-18%)                     | 16%<br>(9.9-22%)                    | 1100<br>(640-1500)   | 25000<br>(15000-33000)    |
| Ghana    | 2016 | Male   | 70 to 74 | 55%<br>(44-65%)                | 45%<br>(35-56%)          | 4.7<br>(2.2-8.8)                            | 13%<br>(6.7-18%)                     | 15%<br>(7.9-21%)                    | 970<br>(500-1400)    | 18000<br>(9200-26000)     |
| Ghana    | 2016 | Male   | 75 to 79 | 52%<br>(39-65%)                | 48%<br>(35-61%)          | 3.9<br>(1.6-7.5)                            | 11%<br>(4.5-16%)                     | 12%<br>(5.1-19%)                    | 660<br>(280-1000)    | 9400<br>(3900-14000)      |
| Ghana    | 2016 | Male   | 80 to 84 | 48%<br>(35-61%)                | 52%<br>(39-65%)          | 3.1<br>(1.3-5.8)                            | 9%<br>(3.6-14%)                      | 11%<br>(4.2-17%)                    | 370<br>(150-590)     | 3900<br>(1600-6200)       |

| Location | Year | Sex    | Age      | Prevalence of current drinkers | Prevalence of abstainers | Population average of standard drinks daily | Percent of total attributable deaths | Percent of total attributable DALYs | Attributable deaths   | Attributable DALYs    |
|----------|------|--------|----------|--------------------------------|--------------------------|---------------------------------------------|--------------------------------------|-------------------------------------|-----------------------|-----------------------|
| Ghana    | 2016 | Male   | 85 to 89 | 46%<br>(33-59%)                | 54%<br>(41-67%)          | 2.5<br>(1.1-4.8)                            | 7.3%<br>(2.4-13%)                    | 8.5%<br>(2.8-15%)                   | 190<br>(64-350)       | 1500<br>(500-2600)    |
| Ghana    | 2016 | Male   | 90 to 94 | 47%<br>(34-61%)                | 53%<br>(39-66%)          | 2.2<br>(0.94-4.5)                           | 5.4%<br>(1.3-11%)                    | 6.2%<br>(1.3-13%)                   | 57<br>(12-120)        | 300<br>(70-620)       |
| Ghana    | 2016 | Male   | 95 plus  | 52%<br>(34-68%)                | 48%<br>(32-66%)          | 2<br>(0.69-4.4)                             | 4.6%<br>(0.61-11%)                   | 5.2%<br>(0.45-13%)                  | 12<br>(1-30)          | 43<br>(5.6-100)       |
| Guinea   | 1990 | Female | All Ages | 24%<br>(19-30%)                | 76%<br>(70-81%)          | 0.11<br>(0.094-0.12)                        | 0.18%<br>(0.048-0.32%)               | 0.19%<br>(-0.12-0.49%)              | 86<br>(-52-220)       | 5800<br>(1600-10000)  |
| Guinea   | 1990 | Female | 15 to 19 | 22%<br>(12-35%)                | 78%<br>(65-88%)          | 0.094<br>(0.039-0.18)                       | 0.38%<br>(0.16-0.65%)                | 0.082%<br>(-0.17-0.38%)             | 0.53<br>(-1.1-2.4)    | 290<br>(120-500)      |
| Guinea   | 1990 | Female | 20 to 24 | 27%<br>(14-44%)                | 73%<br>(56-86%)          | 0.15<br>(0.064-0.26)                        | 0.8%<br>(0.39-1.3%)                  | 0.17%<br>(-0.25-0.65%)              | 1.3<br>(-2.1-5)       | 620<br>(300-1000)     |
| Guinea   | 1990 | Female | 25 to 29 | 30%<br>(16-47%)                | 70%<br>(53-84%)          | 0.18<br>(0.081-0.31)                        | 0.89%<br>(0.38-1.5%)                 | 0.35%<br>(-0.33-1.1%)               | 2.7<br>(-2.6-8.6)     | 660<br>(280-1100)     |
| Guinea   | 1990 | Female | 30 to 34 | 33%<br>(17-51%)                | 67%<br>(49-83%)          | 0.2<br>(0.1-0.33)                           | 0.94%<br>(0.38-1.5%)                 | 0.62%<br>(-0.21-1.5%)               | 5.1<br>(-1.7-12)      | 670<br>(250-1100)     |
| Guinea   | 1990 | Female | 35 to 39 | 36%<br>(20-56%)                | 64%<br>(44-80%)          | 0.22<br>(0.11-0.36)                         | 0.95%<br>(0.36-1.6%)                 | 0.84%<br>(-0.069-1.8%)              | 7.7<br>(-0.63-16)     | 660<br>(240-1100)     |
| Guinea   | 1990 | Female | 40 to 44 | 38%<br>(22-57%)                | 62%<br>(43-78%)          | 0.23<br>(0.1-0.38)                          | 1.2%<br>(0.45-1.9%)                  | 1.4%<br>(0.31-2.5%)                 | 11<br>(2.5-20)        | 670<br>(250-1100)     |
| Guinea   | 1990 | Female | 45 to 49 | 38%<br>(20-58%)                | 62%<br>(42-80%)          | 0.23<br>(0.1-0.42)                          | 1%<br>(0.2-1.8%)                     | 1.2%<br>(-0.028-2.4%)               | 12<br>(-0.27-23)      | 580<br>(110-1000)     |
| Guinea   | 1990 | Female | 50 to 54 | 39%<br>(21-60%)                | 61%<br>(40-79%)          | 0.24<br>(0.11-0.44)                         | 1.2%<br>(0.3-2.1%)                   | 1.5%<br>(0.26-2.7%)                 | 17<br>(3.1-31)        | 680<br>(170-1200)     |
| Guinea   | 1990 | Female | 55 to 59 | 39%<br>(23-58%)                | 61%<br>(42-77%)          | 0.27<br>(0.12-0.47)                         | 0.82%<br>(-0.14-1.7%)                | 1%<br>(-0.21-2.2%)                  | 14<br>(-3-32)         | 480<br>(-78-1000)     |
| Guinea   | 1990 | Female | 60 to 64 | 41%<br>(22-60%)                | 59%<br>(40-78%)          | 0.27<br>(0.11-0.49)                         | 0.6%<br>(-0.37-1.4%)                 | 0.74%<br>(-0.48-1.8%)               | 13<br>(-8.1-33)       | 370<br>(-220-890)     |
| Guinea   | 1990 | Female | 65 to 69 | 41%<br>(24-59%)                | 59%<br>(41-76%)          | 0.24<br>(0.11-0.43)                         | 0.17%<br>(-0.88-1%)                  | 0.19%<br>(-1.1-1.2%)                | 4.1<br>(-24-27)       | 99<br>(-510-610)      |
| Guinea   | 1990 | Female | 70 to 74 | 39%<br>(24-57%)                | 61%<br>(43-76%)          | 0.2<br>(0.081-0.4)                          | 0.12%<br>(-0.96-0.95%)               | 0.13%<br>(-1.2-1.1%)                | 2.9<br>(-26-26)       | 57<br>(-460-460)      |
| Guinea   | 1990 | Female | 75 to 79 | 35%<br>(20-55%)                | 65%<br>(45-80%)          | 0.16<br>(0.054-0.35)                        | -0.079%<br>(-1.2-0.64%)              | -0.11%<br>(-1.3-0.75%)              | -1.9<br>(-24-13)      | -23<br>(-320-190)     |
| Guinea   | 1990 | Female | 80 to 84 | 33%<br>(17-52%)                | 67%<br>(48-83%)          | 0.15<br>(0.048-0.3)                         | -0.18%<br>(-1-0.41%)                 | -0.22%<br>(-1.2-0.47%)              | -2<br>(-11-4.3)       | -19<br>(-110-45)      |
| Guinea   | 1990 | Female | 85 to 89 | 33%<br>(18-51%)                | 67%<br>(49-82%)          | 0.14<br>(0.052-0.31)                        | -0.28%<br>(-1.1-0.24%)               | -0.35%<br>(-1.3-0.27%)              | -1.6<br>(-5.8-1.2)    | -11<br>(-41-9.2)      |
| Guinea   | 1990 | Female | 90 to 94 | 36%<br>(20-54%)                | 64%<br>(46-80%)          | 0.15<br>(0.05-0.32)                         | -0.38%<br>(-1.2-0.13%)               | -0.5%<br>(-1.5-0.13%)               | -0.79<br>(-2.3-0.2)   | -3.6<br>(-11-1.3)     |
| Guinea   | 1990 | Female | 95 plus  | 40%<br>(21-61%)                | 60%<br>(39-79%)          | 0.16<br>(0.045-0.36)                        | -0.38%<br>(-1.3-0.17%)               | -0.53%<br>(-1.6-0.15%)              | -0.24<br>(-0.72-0.07) | -0.69<br>(-2.3-0.31)  |
| Guinea   | 1990 | Male   | All Ages | 20%<br>(15-25%)                | 80%<br>(75-85%)          | 0.13<br>(0.11-0.14)                         | 0.37%<br>(0.24-0.54%)                | 0.59%<br>(0.32-0.93%)               | 260<br>(130-410)      | 12000<br>(7800-17000) |



| Location | Year | Sex    | Age      | Prevalence of current drinkers | Prevalence of abstainers | Population average of standard drinks daily | Percent of total attributable deaths | Percent of total attributable DALYs | Attributable deaths  | Attributable DALYs   |
|----------|------|--------|----------|--------------------------------|--------------------------|---------------------------------------------|--------------------------------------|-------------------------------------|----------------------|----------------------|
| Guinea   | 1990 | Male   | 15 to 19 | 15%<br>(7.8-25%)               | 85%<br>(75-92%)          | 0.072<br>(0.028-0.14)                       | 0.58%<br>(0.36-0.88%)                | 0.27%<br>(0.066-0.57%)              | 1.4<br>(0.33-2.9)    | 350<br>(210-550)     |
| Guinea   | 1990 | Male   | 20 to 24 | 22%<br>(11-36%)                | 78%<br>(64-89%)          | 0.15<br>(0.059-0.27)                        | 1.3%<br>(0.78-2%)                    | 0.7%<br>(0.1-1.4%)                  | 4.4<br>(0.67-8.9)    | 830<br>(490-1300)    |
| Guinea   | 1990 | Male   | 25 to 29 | 27%<br>(15-44%)                | 73%<br>(56-85%)          | 0.22<br>(0.098-0.37)                        | 1.8%<br>(1-2.7%)                     | 1.3%<br>(0.23-2.5%)                 | 8.3<br>(1.4-17)      | 1100<br>(600-1600)   |
| Guinea   | 1990 | Male   | 30 to 34 | 31%<br>(16-49%)                | 69%<br>(51-84%)          | 0.26<br>(0.13-0.43)                         | 2.2%<br>(1.2-3.3%)                   | 2%<br>(0.69-3.6%)                   | 14<br>(4.7-24)       | 1300<br>(700-1900)   |
| Guinea   | 1990 | Male   | 35 to 39 | 34%<br>(18-53%)                | 66%<br>(47-82%)          | 0.29<br>(0.14-0.49)                         | 2.7%<br>(1.6-4%)                     | 3%<br>(1.5-4.9%)                    | 23<br>(11-37)        | 1500<br>(940-2300)   |
| Guinea   | 1990 | Male   | 40 to 44 | 35%<br>(20-54%)                | 65%<br>(46-80%)          | 0.31<br>(0.14-0.55)                         | 3%<br>(1.8-4.4%)                     | 3.7%<br>(2-5.7%)                    | 27<br>(14-43)        | 1400<br>(850-2100)   |
| Guinea   | 1990 | Male   | 45 to 49 | 36%<br>(19-55%)                | 64%<br>(45-81%)          | 0.33<br>(0.14-0.63)                         | 3%<br>(1.8-4.6%)                     | 3.8%<br>(2.2-6.1%)                  | 32<br>(18-53)        | 1500<br>(880-2300)   |
| Guinea   | 1990 | Male   | 50 to 54 | 36%<br>(19-57%)                | 64%<br>(43-81%)          | 0.33<br>(0.14-0.63)                         | 2.6%<br>(1.4-4.1%)                   | 3.3%<br>(1.6-5.3%)                  | 32<br>(15-52)        | 1300<br>(670-2000)   |
| Guinea   | 1990 | Male   | 55 to 59 | 36%<br>(21-55%)                | 64%<br>(45-79%)          | 0.32<br>(0.13-0.59)                         | 2.4%<br>(1.2-3.7%)                   | 2.9%<br>(1.4-4.7%)                  | 31<br>(15-51)        | 1100<br>(550-1700)   |
| Guinea   | 1990 | Male   | 60 to 64 | 36%<br>(20-56%)                | 64%<br>(44-80%)          | 0.29<br>(0.11-0.57)                         | 1.9%<br>(0.92-3.1%)                  | 2.3%<br>(1-4%)                      | 31<br>(14-54)        | 890<br>(440-1500)    |
| Guinea   | 1990 | Male   | 65 to 69 | 36%<br>(21-54%)                | 64%<br>(46-79%)          | 0.24<br>(0.1-0.46)                          | 1.3%<br>(0.5-2.2%)                   | 1.6%<br>(0.5-2.8%)                  | 24<br>(7.3-41)       | 550<br>(210-940)     |
| Guinea   | 1990 | Male   | 70 to 74 | 34%<br>(21-52%)                | 66%<br>(48-79%)          | 0.19<br>(0.074-0.39)                        | 0.91%<br>(0.16-1.8%)                 | 1.1%<br>(0.14-2.2%)                 | 17<br>(2.1-34)       | 310<br>(52-610)      |
| Guinea   | 1990 | Male   | 75 to 79 | 31%<br>(17-50%)                | 69%<br>(50-83%)          | 0.14<br>(0.046-0.32)                        | 0.64%<br>(-0.015-1.3%)               | 0.74%<br>(-0.071-1.6%)              | 8.9<br>(-0.88-19)    | 130<br>(-3-270)      |
| Guinea   | 1990 | Male   | 80 to 84 | 28%<br>(15-47%)                | 72%<br>(53-85%)          | 0.12<br>(0.038-0.25)                        | 0.5%<br>(-0.095-1.1%)                | 0.56%<br>(-0.15-1.3%)               | 3.3<br>(-0.91-7.6)   | 36<br>(-7-79)        |
| Guinea   | 1990 | Male   | 85 to 89 | 27%<br>(14-44%)                | 73%<br>(56-86%)          | 0.1<br>(0.032-0.22)                         | 0.37%<br>(-0.092-0.86%)              | 0.4%<br>(-0.17-0.99%)               | 1.3<br>(-0.56-3.3)   | 11<br>(-2.6-25)      |
| Guinea   | 1990 | Male   | 90 to 94 | 29%<br>(15-46%)                | 71%<br>(54-85%)          | 0.096<br>(0.028-0.23)                       | 0.18%<br>(-0.23-0.5%)                | 0.14%<br>(-0.38-0.56%)              | 0.2<br>(-0.5-0.76)   | 1.5<br>(-1.9-4.2)    |
| Guinea   | 1990 | Male   | 95 plus  | 33%<br>(15-55%)                | 67%<br>(45-85%)          | 0.098<br>(0.022-0.26)                       | 0.15%<br>(-0.38-0.53%)               | 0.069%<br>(-0.63-0.54%)             | 0.026<br>(-0.24-0.2) | 0.24<br>(-0.6-0.81)  |
| Guinea   | 1995 | Female | All Ages | 24%<br>(19-31%)                | 76%<br>(69-81%)          | 0.12<br>(0.11-0.14)                         | 0.2%<br>(0.044-0.36%)                | 0.19%<br>(-0.16-0.54%)              | 100<br>(-84-290)     | 7300<br>(1700-13000) |
| Guinea   | 1995 | Female | 15 to 19 | 22%<br>(12-37%)                | 78%<br>(63-88%)          | 0.11<br>(0.044-0.2)                         | 0.4%<br>(0.17-0.68%)                 | 0.11%<br>(-0.19-0.46%)              | 0.9<br>(-1.5-3.9)    | 390<br>(170-680)     |
| Guinea   | 1995 | Female | 20 to 24 | 28%<br>(14-44%)                | 72%<br>(56-86%)          | 0.17<br>(0.073-0.31)                        | 0.82%<br>(0.38-1.3%)                 | 0.19%<br>(-0.32-0.72%)              | 2<br>(-3.1-7.4)      | 820<br>(360-1400)    |
| Guinea   | 1995 | Female | 25 to 29 | 30%<br>(16-48%)                | 70%<br>(52-84%)          | 0.2<br>(0.095-0.35)                         | 0.92%<br>(0.4-1.5%)                  | 0.38%<br>(-0.34-1.2%)               | 3.8<br>(-3.4-12)     | 840<br>(360-1400)    |
| Guinea   | 1995 | Female | 30 to 34 | 33%<br>(17-52%)                | 67%<br>(48-83%)          | 0.23<br>(0.12-0.38)                         | 0.96%<br>(0.36-1.6%)                 | 0.63%<br>(-0.26-1.6%)               | 6.5<br>(-2.7-16)     | 840<br>(320-1400)    |

| Location | Year | Sex    | Age      | Prevalence of current drinkers | Prevalence of abstainers | Population average of standard drinks daily | Percent of total attributable deaths | Percent of total attributable DALYs | Attributable deaths    | Attributable DALYs     |
|----------|------|--------|----------|--------------------------------|--------------------------|---------------------------------------------|--------------------------------------|-------------------------------------|------------------------|------------------------|
| Guinea   | 1995 | Female | 35 to 39 | 37%<br>(20-56%)                | 63%<br>(44-80%)          | 0.25<br>(0.12-0.4)                          | 0.97%<br>(0.33-1.7%)                 | 0.84%<br>(-0.086-1.8%)              | 9.6<br>(-0.98-21)      | 830<br>(280-1500)      |
| Guinea   | 1995 | Female | 40 to 44 | 38%<br>(22-57%)                | 62%<br>(43-78%)          | 0.26<br>(0.12-0.43)                         | 1.2%<br>(0.46-2%)                    | 1.4%<br>(0.27-2.7%)                 | 16<br>(3.2-32)         | 990<br>(360-1700)      |
| Guinea   | 1995 | Female | 45 to 49 | 39%<br>(20-58%)                | 61%<br>(42-80%)          | 0.26<br>(0.12-0.48)                         | 1.1%<br>(0.19-1.9%)                  | 1.2%<br>(0.03-2.5%)                 | 14<br>(0.36-28)        | 720<br>(130-1300)      |
| Guinea   | 1995 | Female | 50 to 54 | 39%<br>(21-59%)                | 61%<br>(41-79%)          | 0.28<br>(0.12-0.5)                          | 1.2%<br>(0.21-2.1%)                  | 1.5%<br>(0.14-2.7%)                 | 21<br>(2-39)           | 820<br>(140-1400)      |
| Guinea   | 1995 | Female | 55 to 59 | 39%<br>(22-58%)                | 61%<br>(42-78%)          | 0.3<br>(0.13-0.53)                          | 0.81%<br>(-0.22-1.8%)                | 1%<br>(-0.33-2.3%)                  | 18<br>(-5.7-41)        | 580<br>(-170-1300)     |
| Guinea   | 1995 | Female | 60 to 64 | 41%<br>(23-60%)                | 59%<br>(40-77%)          | 0.3<br>(0.13-0.56)                          | 0.58%<br>(-0.38-1.5%)                | 0.71%<br>(-0.5-1.9%)                | 16<br>(-11-41)         | 430<br>(-290-1100)     |
| Guinea   | 1995 | Female | 65 to 69 | 42%<br>(25-59%)                | 58%<br>(41-75%)          | 0.28<br>(0.12-0.5)                          | 0.12%<br>(-0.99-1%)                  | 0.13%<br>(-1.2-1.2%)                | 3.6<br>(-32-34)        | 89<br>(-710-760)       |
| Guinea   | 1995 | Female | 70 to 74 | 40%<br>(25-58%)                | 60%<br>(42-75%)          | 0.23<br>(0.093-0.46)                        | 0.063%<br>(-0.99-0.93%)              | 0.06%<br>(-1.2-1.1%)                | 1.8<br>(-37-33)        | 40<br>(-640-590)       |
| Guinea   | 1995 | Female | 75 to 79 | 36%<br>(19-55%)                | 64%<br>(45-81%)          | 0.18<br>(0.061-0.4)                         | -0.11%<br>(-1.1-0.62%)               | -0.14%<br>(-1.4-0.71%)              | -3.4<br>(-33-17)       | -42<br>(-450-240)      |
| Guinea   | 1995 | Female | 80 to 84 | 33%<br>(17-53%)                | 67%<br>(47-83%)          | 0.17<br>(0.055-0.34)                        | -0.23%<br>(-1.2-0.38%)               | -0.29%<br>(-1.4-0.46%)              | -3.7<br>(-18-5.9)      | -36<br>(-190-62)       |
| Guinea   | 1995 | Female | 85 to 89 | 33%<br>(18-52%)                | 67%<br>(48-82%)          | 0.16<br>(0.055-0.34)                        | -0.35%<br>(-1.3-0.23%)               | -0.44%<br>(-1.5-0.26%)              | -2.7<br>(-9.5-1.6)     | -18<br>(-67-12)        |
| Guinea   | 1995 | Female | 90 to 94 | 36%<br>(19-54%)                | 64%<br>(46-81%)          | 0.17<br>(0.056-0.36)                        | -0.44%<br>(-1.3-0.11%)               | -0.58%<br>(-1.6-0.1%)               | -1.2<br>(-3.2-0.21)    | -5.3<br>(-15-1.4)      |
| Guinea   | 1995 | Female | 95 plus  | 41%<br>(21-61%)                | 59%<br>(39-79%)          | 0.18<br>(0.05-0.42)                         | -0.43%<br>(-1.4-0.16%)               | -0.6%<br>(-1.8-0.11%)               | -0.32<br>(-0.94-0.059) | -0.92<br>(-2.9-0.34)   |
| Guinea   | 1995 | Male   | All Ages | 20%<br>(16-26%)                | 80%<br>(74-84%)          | 0.15<br>(0.13-0.17)                         | 0.44%<br>(0.27-0.64%)                | 0.68%<br>(0.34-1.1%)                | 360<br>(180-570)       | 17000<br>(10000-24000) |
| Guinea   | 1995 | Male   | 15 to 19 | 15%<br>(7.9-26%)               | 85%<br>(74-92%)          | 0.085<br>(0.033-0.16)                       | 0.61%<br>(0.36-0.92%)                | 0.32%<br>(0.062-0.69%)              | 2.3<br>(0.46-5)        | 510<br>(290-810)       |
| Guinea   | 1995 | Male   | 20 to 24 | 23%<br>(12-39%)                | 77%<br>(61-88%)          | 0.17<br>(0.069-0.33)                        | 1.4%<br>(0.81-2.1%)                  | 0.8%<br>(0.15-1.6%)                 | 7.1<br>(1.4-14)        | 1200<br>(650-1800)     |
| Guinea   | 1995 | Male   | 25 to 29 | 28%<br>(14-45%)                | 72%<br>(55-86%)          | 0.25<br>(0.11-0.44)                         | 1.8%<br>(0.95-2.8%)                  | 1.4%<br>(0.2-2.7%)                  | 13<br>(1.8-25)         | 1500<br>(790-2300)     |
| Guinea   | 1995 | Male   | 30 to 34 | 32%<br>(17-51%)                | 68%<br>(49-83%)          | 0.31<br>(0.15-0.52)                         | 2.2%<br>(1.1-3.3%)                   | 2%<br>(0.62-3.7%)                   | 20<br>(6.2-37)         | 1700<br>(870-2700)     |
| Guinea   | 1995 | Male   | 35 to 39 | 35%<br>(20-54%)                | 65%<br>(46-80%)          | 0.34<br>(0.16-0.57)                         | 2.7%<br>(1.6-4%)                     | 3%<br>(1.5-4.9%)                    | 33<br>(16-53)          | 2100<br>(1200-3100)    |
| Guinea   | 1995 | Male   | 40 to 44 | 36%<br>(21-56%)                | 64%<br>(44-79%)          | 0.37<br>(0.17-0.63)                         | 2.9%<br>(1.8-4.5%)                   | 3.6%<br>(1.9-5.7%)                  | 43<br>(23-67)          | 2200<br>(1300-3400)    |
| Guinea   | 1995 | Male   | 45 to 49 | 37%<br>(20-55%)                | 63%<br>(45-80%)          | 0.39<br>(0.17-0.73)                         | 3%<br>(1.8-4.8%)                     | 3.7%<br>(2-6%)                      | 43<br>(24-71)          | 2000<br>(1100-3000)    |
| Guinea   | 1995 | Male   | 50 to 54 | 38%<br>(21-59%)                | 62%<br>(41-79%)          | 0.39<br>(0.17-0.75)                         | 2.7%<br>(1.4-4.3%)                   | 3.3%<br>(1.6-5.4%)                  | 43<br>(21-76)          | 1700<br>(920-2900)     |

| Location | Year | Sex    | Age      | Prevalence of current drinkers | Prevalence of abstainers | Population average of standard drinks daily | Percent of total attributable deaths | Percent of total attributable DALYs | Attributable deaths | Attributable DALYs  |
|----------|------|--------|----------|--------------------------------|--------------------------|---------------------------------------------|--------------------------------------|-------------------------------------|---------------------|---------------------|
| Guinea   | 1995 | Male   | 55 to 59 | 38%<br>(22-58%)                | 62%<br>(42-78%)          | 0.38<br>(0.16-0.72)                         | 2.4%<br>(1.2-3.9%)                   | 2.9%<br>(1.4-4.9%)                  | 43<br>(20-75)       | 1500<br>(740-2500)  |
| Guinea   | 1995 | Male   | 60 to 64 | 38%<br>(20-57%)                | 62%<br>(43-80%)          | 0.34<br>(0.13-0.69)                         | 1.9%<br>(0.91-3.2%)                  | 2.3%<br>(0.96-4%)                   | 40<br>(17-73)       | 1200<br>(560-2000)  |
| Guinea   | 1995 | Male   | 65 to 69 | 37%<br>(21-55%)                | 63%<br>(45-79%)          | 0.29<br>(0.12-0.53)                         | 1.3%<br>(0.4-2.3%)                   | 1.5%<br>(0.42-2.8%)                 | 30<br>(8.4-56)      | 720<br>(230-1300)   |
| Guinea   | 1995 | Male   | 70 to 74 | 35%<br>(21-53%)                | 65%<br>(47-79%)          | 0.22<br>(0.086-0.46)                        | 0.88%<br>(0.09-1.8%)                 | 1%<br>(0.061-2.2%)                  | 22<br>(1.3-47)      | 410<br>(42-850)     |
| Guinea   | 1995 | Male   | 75 to 79 | 33%<br>(18-52%)                | 67%<br>(48-82%)          | 0.17<br>(0.054-0.37)                        | 0.6%<br>(-0.15-1.3%)                 | 0.68%<br>(-0.25-1.6%)               | 12<br>(-4.3-28)     | 180<br>(-45-400)    |
| Guinea   | 1995 | Male   | 80 to 84 | 30%<br>(15-48%)                | 70%<br>(52-85%)          | 0.14<br>(0.046-0.29)                        | 0.47%<br>(-0.15-1.1%)                | 0.52%<br>(-0.26-1.3%)               | 4.7<br>(-2.4-12)    | 53<br>(-17-130)     |
| Guinea   | 1995 | Male   | 85 to 89 | 29%<br>(14-46%)                | 71%<br>(54-86%)          | 0.12<br>(0.038-0.26)                        | 0.35%<br>(-0.19-0.91%)               | 0.36%<br>(-0.29-1%)                 | 1.7<br>(-1.4-4.7)   | 14<br>(-7.7-37)     |
| Guinea   | 1995 | Male   | 90 to 94 | 30%<br>(16-49%)                | 70%<br>(51-84%)          | 0.11<br>(0.034-0.27)                        | 0.16%<br>(-0.35-0.53%)               | 0.12%<br>(-0.51-0.57%)              | 0.2<br>(-0.89-0.98) | 1.6<br>(-3.6-5.5)   |
| Guinea   | 1995 | Male   | 95 plus  | 35%<br>(17-57%)                | 65%<br>(43-83%)          | 0.11<br>(0.027-0.29)                        | 0.15%<br>(-0.44-0.63%)               | 0.065%<br>(-0.71-0.66%)             | 0.03<br>(-0.31-0.3) | 0.28<br>(-0.78-1.2) |
| Guinea   | 2000 | Female | All Ages | 24%<br>(19-30%)                | 76%<br>(70-81%)          | 0.11<br>(0.092-0.12)                        | 0.2%<br>(0.025-0.37%)                | 0.16%<br>(-0.23-0.54%)              | 88<br>(-130-300)    | 7300<br>(920-14000) |
| Guinea   | 2000 | Female | 15 to 19 | 23%<br>(12-38%)                | 77%<br>(62-88%)          | 0.095<br>(0.04-0.18)                        | 0.4%<br>(0.16-0.65%)                 | 0.078%<br>(-0.23-0.43%)             | 0.73<br>(-2.2-3.9)  | 430<br>(170-750)    |
| Guinea   | 2000 | Female | 20 to 24 | 28%<br>(14-45%)                | 72%<br>(55-86%)          | 0.15<br>(0.065-0.26)                        | 0.8%<br>(0.35-1.3%)                  | 0.14%<br>(-0.37-0.69%)              | 1.6<br>(-4.5-7.8)   | 910<br>(380-1500)   |
| Guinea   | 2000 | Female | 25 to 29 | 31%<br>(15-48%)                | 69%<br>(52-85%)          | 0.18<br>(0.081-0.31)                        | 0.85%<br>(0.35-1.4%)                 | 0.3%<br>(-0.36-1%)                  | 3.5<br>(-4.1-12)    | 900<br>(360-1500)   |
| Guinea   | 2000 | Female | 30 to 34 | 34%<br>(17-53%)                | 66%<br>(47-83%)          | 0.2<br>(0.099-0.34)                         | 0.86%<br>(0.24-1.5%)                 | 0.5%<br>(-0.36-1.3%)                | 5.9<br>(-4.2-15)    | 850<br>(240-1500)   |
| Guinea   | 2000 | Female | 35 to 39 | 37%<br>(20-56%)                | 63%<br>(44-80%)          | 0.22<br>(0.11-0.36)                         | 0.87%<br>(0.25-1.5%)                 | 0.7%<br>(-0.16-1.6%)                | 8.9<br>(-2-21)      | 830<br>(250-1500)   |
| Guinea   | 2000 | Female | 40 to 44 | 39%<br>(23-57%)                | 61%<br>(43-77%)          | 0.23<br>(0.11-0.39)                         | 1.1%<br>(0.33-1.8%)                  | 1.2%<br>(0.066-2.3%)                | 16<br>(0.84-31)     | 970<br>(290-1700)   |
| Guinea   | 2000 | Female | 45 to 49 | 39%<br>(21-58%)                | 61%<br>(42-79%)          | 0.24<br>(0.11-0.44)                         | 0.94%<br>(0.016-1.8%)                | 1.1%<br>(-0.22-2.3%)                | 16<br>(-3.4-34)     | 810<br>(14-1500)    |
| Guinea   | 2000 | Female | 50 to 54 | 39%<br>(22-60%)                | 61%<br>(40-78%)          | 0.25<br>(0.11-0.44)                         | 1%<br>(0.036-2%)                     | 1.3%<br>(-0.063-2.6%)               | 19<br>(-0.92-38)    | 780<br>(27-1400)    |
| Guinea   | 2000 | Female | 55 to 59 | 40%<br>(23-58%)                | 60%<br>(42-77%)          | 0.27<br>(0.12-0.48)                         | 0.67%<br>(-0.43-1.7%)                | 0.81%<br>(-0.62-2.2%)               | 15<br>(-12-40)      | 520<br>(-330-1300)  |
| Guinea   | 2000 | Female | 60 to 64 | 41%<br>(24-60%)                | 59%<br>(40-76%)          | 0.27<br>(0.11-0.51)                         | 0.45%<br>(-0.52-1.3%)                | 0.54%<br>(-0.65-1.7%)               | 13<br>(-16-40)      | 360<br>(-410-1100)  |
| Guinea   | 2000 | Female | 65 to 69 | 42%<br>(25-60%)                | 58%<br>(40-75%)          | 0.25<br>(0.11-0.44)                         | 0.046%<br>(-1-0.94%)                 | 0.038%<br>(-1.3-1.1%)               | 1.1<br>(-36-33)     | 37<br>(-810-720)    |
| Guinea   | 2000 | Female | 70 to 74 | 40%<br>(24-58%)                | 60%<br>(42-76%)          | 0.2<br>(0.082-0.4)                          | 0.013%<br>(-1.1-0.9%)                | -0.0046%<br>(-1.3-1.1%)             | -0.089<br>(-41-34)  | 10<br>(-720-600)    |

| Location | Year | Sex    | Age      | Prevalence of current drinkers | Prevalence of abstainers | Population average of standard drinks daily | Percent of total attributable deaths | Percent of total attributable DALYs | Attributable deaths | Attributable DALYs     |
|----------|------|--------|----------|--------------------------------|--------------------------|---------------------------------------------|--------------------------------------|-------------------------------------|---------------------|------------------------|
| Guinea   | 2000 | Female | 75 to 79 | 36%<br>(20-54%)                | 64%<br>(46-80%)          | 0.16<br>(0.055-0.35)                        | -0.089%<br>(-1.2-0.6%)               | -0.12%<br>(-1.4-0.69%)              | -3.3<br>(-36-19)    | -38<br>(-500-270)      |
| Guinea   | 2000 | Female | 80 to 84 | 33%<br>(18-52%)                | 67%<br>(48-82%)          | 0.15<br>(0.051-0.3)                         | -0.22%<br>(-1.2-0.37%)               | -0.28%<br>(-1.4-0.43%)              | -4.3<br>(-21-6.7)   | -41<br>(-220-71)       |
| Guinea   | 2000 | Female | 85 to 89 | 34%<br>(18-51%)                | 66%<br>(49-82%)          | 0.14<br>(0.05-0.29)                         | -0.34%<br>(-1.2-0.26%)               | -0.43%<br>(-1.5-0.28%)              | -3.5<br>(-12-2.4)   | -24<br>(-85-19)        |
| Guinea   | 2000 | Female | 90 to 94 | 37%<br>(20-54%)                | 63%<br>(46-80%)          | 0.15<br>(0.049-0.32)                        | -0.42%<br>(-1.3-0.15%)               | -0.56%<br>(-1.6-0.15%)              | -1.4<br>(-4.1-0.37) | -6.4<br>(-19-2.4)      |
| Guinea   | 2000 | Female | 95 plus  | 41%<br>(22-62%)                | 59%<br>(38-78%)          | 0.16<br>(0.045-0.37)                        | -0.4%<br>(-1.3-0.17%)                | -0.57%<br>(-1.7-0.12%)              | -0.35<br>(-1-0.074) | -0.96<br>(-3.2-0.4)    |
| Guinea   | 2000 | Male   | All Ages | 21%<br>(16-27%)                | 79%<br>(73-84%)          | 0.13<br>(0.12-0.15)                         | 0.45%<br>(0.26-0.69%)                | 0.68%<br>(0.28-1.2%)                | 380<br>(160-660)    | 18000<br>(10000-27000) |
| Guinea   | 2000 | Male   | 15 to 19 | 16%<br>(8.1-27%)               | 84%<br>(73-92%)          | 0.08<br>(0.031-0.15)                        | 0.56%<br>(0.34-0.87%)                | 0.26%<br>(0.02-0.62%)               | 2.3<br>(0.18-5.4)   | 560<br>(330-880)       |
| Guinea   | 2000 | Male   | 20 to 24 | 24%<br>(12-39%)                | 76%<br>(61-88%)          | 0.16<br>(0.066-0.29)                        | 1.2%<br>(0.68-1.9%)                  | 0.64%<br>(0.043-1.3%)               | 7.3<br>(0.48-16)    | 1300<br>(700-2000)     |
| Guinea   | 2000 | Male   | 25 to 29 | 29%<br>(16-45%)                | 71%<br>(55-84%)          | 0.23<br>(0.1-0.4)                           | 1.6%<br>(0.82-2.5%)                  | 1.1%<br>(0.079-2.1%)                | 13<br>(0.94-26)     | 1600<br>(800-2400)     |
| Guinea   | 2000 | Male   | 30 to 34 | 33%<br>(17-51%)                | 67%<br>(49-83%)          | 0.29<br>(0.14-0.47)                         | 1.9%<br>(0.91-2.9%)                  | 1.6%<br>(0.45-3%)                   | 20<br>(5.7-38)      | 1800<br>(860-2800)     |
| Guinea   | 2000 | Male   | 35 to 39 | 36%<br>(20-55%)                | 64%<br>(45-80%)          | 0.31<br>(0.15-0.53)                         | 2.3%<br>(1.3-3.6%)                   | 2.5%<br>(1.1-4.3%)                  | 34<br>(16-58)       | 2200<br>(1200-3300)    |
| Guinea   | 2000 | Male   | 40 to 44 | 37%<br>(22-56%)                | 63%<br>(44-78%)          | 0.34<br>(0.16-0.58)                         | 2.6%<br>(1.4-4.1%)                   | 3%<br>(1.4-4.9%)                    | 45<br>(21-74)       | 2400<br>(1300-3700)    |
| Guinea   | 2000 | Male   | 45 to 49 | 38%<br>(20-56%)                | 62%<br>(44-80%)          | 0.35<br>(0.16-0.66)                         | 2.7%<br>(1.5-4.4%)                   | 3.2%<br>(1.6-5.4%)                  | 53<br>(26-90)       | 2400<br>(1300-3900)    |
| Guinea   | 2000 | Male   | 50 to 54 | 38%<br>(21-59%)                | 62%<br>(41-79%)          | 0.36<br>(0.15-0.66)                         | 2.4%<br>(1.1-3.9%)                   | 2.8%<br>(1.1-4.8%)                  | 45<br>(18-79)       | 1800<br>(810-3000)     |
| Guinea   | 2000 | Male   | 55 to 59 | 38%<br>(23-58%)                | 62%<br>(42-77%)          | 0.35<br>(0.15-0.64)                         | 2.1%<br>(0.93-3.6%)                  | 2.5%<br>(0.95-4.5%)                 | 46<br>(17-83)       | 1500<br>(670-2700)     |
| Guinea   | 2000 | Male   | 60 to 64 | 38%<br>(21-58%)                | 62%<br>(42-79%)          | 0.31<br>(0.12-0.62)                         | 1.7%<br>(0.68-3.1%)                  | 2%<br>(0.7-3.7%)                    | 42<br>(15-80)       | 1200<br>(490-2200)     |
| Guinea   | 2000 | Male   | 65 to 69 | 38%<br>(22-56%)                | 62%<br>(44-78%)          | 0.26<br>(0.11-0.49)                         | 1.2%<br>(0.26-2.2%)                  | 1.3%<br>(0.22-2.7%)                 | 31<br>(5.3-63)      | 730<br>(170-1400)      |
| Guinea   | 2000 | Male   | 70 to 74 | 37%<br>(22-54%)                | 63%<br>(46-78%)          | 0.2<br>(0.078-0.41)                         | 0.79%<br>(-0.065-1.8%)               | 0.92%<br>(-0.11-2.1%)               | 23<br>(-2.7-52)     | 430<br>(-33-940)       |
| Guinea   | 2000 | Male   | 75 to 79 | 33%<br>(19-52%)                | 67%<br>(48-81%)          | 0.16<br>(0.051-0.34)                        | 0.54%<br>(-0.21-1.3%)                | 0.6%<br>(-0.28-1.5%)                | 13<br>(-6.1-32)     | 190<br>(-73-450)       |
| Guinea   | 2000 | Male   | 80 to 84 | 31%<br>(16-49%)                | 69%<br>(51-84%)          | 0.13<br>(0.043-0.26)                        | 0.43%<br>(-0.22-1.1%)                | 0.47%<br>(-0.31-1.2%)               | 5.5<br>(-3.7-15)    | 62<br>(-31-150)        |
| Guinea   | 2000 | Male   | 85 to 89 | 30%<br>(15-47%)                | 70%<br>(53-85%)          | 0.11<br>(0.036-0.25)                        | 0.32%<br>(-0.25-0.88%)               | 0.32%<br>(-0.34-0.99%)              | 2<br>(-2.1-6.1)     | 17<br>(-13-46)         |
| Guinea   | 2000 | Male   | 90 to 94 | 32%<br>(16-50%)                | 68%<br>(50-84%)          | 0.11<br>(0.033-0.25)                        | 0.16%<br>(-0.36-0.56%)               | 0.11%<br>(-0.53-0.59%)              | 0.24<br>(-1.1-1.2)  | 1.9<br>(-4.5-6.8)      |

| Location | Year | Sex    | Age      | Prevalence of current drinkers | Prevalence of abstainers | Population average of standard drinks daily | Percent of total attributable deaths | Percent of total attributable DALYs | Attributable deaths   | Attributable DALYs     |
|----------|------|--------|----------|--------------------------------|--------------------------|---------------------------------------------|--------------------------------------|-------------------------------------|-----------------------|------------------------|
| Guinea   | 2000 | Male   | 95 plus  | 36%<br>(17-58%)                | 64%<br>(42-83%)          | 0.11<br>(0.026-0.28)                        | 0.16%<br>(-0.5-0.67%)                | 0.078%<br>(-0.73-0.68%)             | 0.038<br>(-0.36-0.33) | 0.32<br>(-0.98-1.3)    |
| Guinea   | 2005 | Female | All Ages | 24%<br>(19-31%)                | 76%<br>(69-81%)          | 0.094<br>(0.083-0.11)                       | 0.2%<br>(0.04-0.37%)                 | 0.15%<br>(-0.23-0.52%)              | 82<br>(-120-280)      | 7600<br>(1500-14000)   |
| Guinea   | 2005 | Female | 15 to 19 | 22%<br>(12-36%)                | 78%<br>(64-88%)          | 0.083<br>(0.035-0.16)                       | 0.4%<br>(0.17-0.66%)                 | 0.066%<br>(-0.21-0.37%)             | 0.64<br>(-2-3.7)      | 470<br>(200-790)       |
| Guinea   | 2005 | Female | 20 to 24 | 28%<br>(14-45%)                | 72%<br>(55-86%)          | 0.13<br>(0.057-0.23)                        | 0.81%<br>(0.38-1.4%)                 | 0.12%<br>(-0.39-0.68%)              | 1.4<br>(-4.7-7.9)     | 1000<br>(460-1700)     |
| Guinea   | 2005 | Female | 25 to 29 | 31%<br>(16-49%)                | 69%<br>(51-84%)          | 0.16<br>(0.074-0.28)                        | 0.81%<br>(0.36-1.3%)                 | 0.25%<br>(-0.33-0.86%)              | 3.4<br>(-4.5-12)      | 990<br>(420-1600)      |
| Guinea   | 2005 | Female | 30 to 34 | 34%<br>(17-53%)                | 66%<br>(47-83%)          | 0.18<br>(0.09-0.3)                          | 0.79%<br>(0.28-1.3%)                 | 0.42%<br>(-0.27-1.1%)               | 5.9<br>(-3.6-15)      | 900<br>(330-1500)      |
| Guinea   | 2005 | Female | 35 to 39 | 37%<br>(20-57%)                | 63%<br>(43-80%)          | 0.2<br>(0.096-0.33)                         | 0.81%<br>(0.28-1.3%)                 | 0.61%<br>(-0.058-1.4%)              | 8.8<br>(-0.87-20)     | 840<br>(290-1400)      |
| Guinea   | 2005 | Female | 40 to 44 | 39%<br>(22-58%)                | 61%<br>(42-78%)          | 0.21<br>(0.098-0.35)                        | 1%<br>(0.39-1.6%)                    | 1.1%<br>(0.21-1.9%)                 | 16<br>(3.2-29)        | 970<br>(370-1600)      |
| Guinea   | 2005 | Female | 45 to 49 | 40%<br>(21-59%)                | 60%<br>(41-79%)          | 0.21<br>(0.093-0.39)                        | 0.88%<br>(0.12-1.6%)                 | 0.98%<br>(-0.084-2%)                | 16<br>(-1.4-32)       | 820<br>(110-1500)      |
| Guinea   | 2005 | Female | 50 to 54 | 40%<br>(22-60%)                | 60%<br>(40-78%)          | 0.22<br>(0.098-0.41)                        | 0.98%<br>(0.1-1.8%)                  | 1.2%<br>(0.018-2.4%)                | 22<br>(0.35-45)       | 900<br>(95-1700)       |
| Guinea   | 2005 | Female | 55 to 59 | 40%<br>(23-58%)                | 60%<br>(42-77%)          | 0.24<br>(0.1-0.43)                          | 0.59%<br>(-0.39-1.5%)                | 0.7%<br>(-0.57-1.8%)                | 13<br>(-11-37)        | 470<br>(-300-1200)     |
| Guinea   | 2005 | Female | 60 to 64 | 41%<br>(23-60%)                | 59%<br>(40-77%)          | 0.24<br>(0.099-0.45)                        | 0.37%<br>(-0.56-1.2%)                | 0.43%<br>(-0.67-1.5%)               | 10<br>(-17-36)        | 290<br>(-450-980)      |
| Guinea   | 2005 | Female | 65 to 69 | 42%<br>(25-60%)                | 58%<br>(40-75%)          | 0.22<br>(0.095-0.39)                        | 0.0095%<br>(-1-0.87%)                | -0.013%<br>(-1.3-1%)                | -0.35<br>(-37-30)     | 8.7<br>(-810-670)      |
| Guinea   | 2005 | Female | 70 to 74 | 40%<br>(24-58%)                | 60%<br>(42-76%)          | 0.18<br>(0.073-0.35)                        | -0.019%<br>(-1-0.8%)                 | -0.049%<br>(-1.3-0.94%)             | -1.4<br>(-39-30)      | -11<br>(-700-550)      |
| Guinea   | 2005 | Female | 75 to 79 | 36%<br>(20-55%)                | 64%<br>(45-80%)          | 0.14<br>(0.047-0.31)                        | -0.088%<br>(-1.2-0.59%)              | -0.13%<br>(-1.4-0.68%)              | -3.4<br>(-36-19)      | -38<br>(-500-270)      |
| Guinea   | 2005 | Female | 80 to 84 | 33%<br>(18-52%)                | 67%<br>(48-82%)          | 0.13<br>(0.045-0.26)                        | -0.21%<br>(-1.1-0.36%)               | -0.27%<br>(-1.3-0.41%)              | -4.2<br>(-21-6)       | -39<br>(-210-65)       |
| Guinea   | 2005 | Female | 85 to 89 | 34%<br>(19-52%)                | 66%<br>(48-81%)          | 0.13<br>(0.045-0.26)                        | -0.31%<br>(-1.2-0.24%)               | -0.4%<br>(-1.4-0.26%)               | -3.9<br>(-14-2.4)     | -26<br>(-97-20)        |
| Guinea   | 2005 | Female | 90 to 94 | 37%<br>(20-55%)                | 63%<br>(45-80%)          | 0.14<br>(0.044-0.28)                        | -0.41%<br>(-1.2-0.15%)               | -0.54%<br>(-1.6-0.13%)              | -1.8<br>(-5.3-0.46)   | -8.3<br>(-25-2.9)      |
| Guinea   | 2005 | Female | 95 plus  | 41%<br>(21-62%)                | 59%<br>(38-79%)          | 0.14<br>(0.039-0.32)                        | -0.38%<br>(-1.3-0.18%)               | -0.54%<br>(-1.6-0.14%)              | -0.42<br>(-1.3-0.11)  | -1.2<br>(-3.9-0.58)    |
| Guinea   | 2005 | Male   | All Ages | 21%<br>(16-26%)                | 79%<br>(74-84%)          | 0.12<br>(0.1-0.13)                          | 0.49%<br>(0.28-0.75%)                | 0.71%<br>(0.31-1.2%)                | 410<br>(180-710)      | 20000<br>(12000-30000) |
| Guinea   | 2005 | Male   | 15 to 19 | 16%<br>(8.3-27%)               | 84%<br>(73-92%)          | 0.071<br>(0.028-0.13)                       | 0.58%<br>(0.36-0.88%)                | 0.26%<br>(0.044-0.58%)              | 2.4<br>(0.41-5.5)     | 620<br>(360-980)       |
| Guinea   | 2005 | Male   | 20 to 24 | 24%<br>(12-40%)                | 76%<br>(60-88%)          | 0.14<br>(0.059-0.26)                        | 1.2%<br>(0.73-1.9%)                  | 0.64%<br>(0.094-1.3%)               | 7.9<br>(1.1-17)       | 1400<br>(820-2300)     |

| Location | Year | Sex    | Age      | Prevalence of current drinkers | Prevalence of abstainers | Population average of standard drinks daily | Percent of total attributable deaths | Percent of total attributable DALYs | Attributable deaths   | Attributable DALYs   |
|----------|------|--------|----------|--------------------------------|--------------------------|---------------------------------------------|--------------------------------------|-------------------------------------|-----------------------|----------------------|
| Guinea   | 2005 | Male   | 25 to 29 | 29%<br>(15-47%)                | 71%<br>(53-85%)          | 0.21<br>(0.095-0.35)                        | 1.5%<br>(0.83-2.3%)                  | 1%<br>(0.15-2%)                     | 14<br>(2-27)          | 1700<br>(920-2700)   |
| Guinea   | 2005 | Male   | 30 to 34 | 33%<br>(17-51%)                | 67%<br>(49-83%)          | 0.26<br>(0.12-0.42)                         | 1.8%<br>(0.91-2.7%)                  | 1.5%<br>(0.48-2.8%)                 | 22<br>(7-41)          | 1900<br>(980-3000)   |
| Guinea   | 2005 | Male   | 35 to 39 | 36%<br>(19-55%)                | 64%<br>(45-81%)          | 0.28<br>(0.13-0.47)                         | 2.2%<br>(1.3-3.4%)                   | 2.3%<br>(1.1-3.8%)                  | 36<br>(17-62)         | 2300<br>(1300-3600)  |
| Guinea   | 2005 | Male   | 40 to 44 | 37%<br>(22-56%)                | 63%<br>(44-78%)          | 0.3<br>(0.14-0.51)                          | 2.4%<br>(1.4-3.7%)                   | 2.8%<br>(1.3-4.5%)                  | 47<br>(22-76)         | 2500<br>(1300-3800)  |
| Guinea   | 2005 | Male   | 45 to 49 | 38%<br>(20-58%)                | 62%<br>(42-80%)          | 0.31<br>(0.14-0.6)                          | 2.5%<br>(1.5-4.1%)                   | 3%<br>(1.5-5%)                      | 55<br>(28-93)         | 2500<br>(1400-4000)  |
| Guinea   | 2005 | Male   | 50 to 54 | 39%<br>(21-59%)                | 61%<br>(41-79%)          | 0.32<br>(0.14-0.58)                         | 2.3%<br>(1.2-3.7%)                   | 2.7%<br>(1.2-4.6%)                  | 55<br>(24-96)         | 2200<br>(1100-3600)  |
| Guinea   | 2005 | Male   | 55 to 59 | 38%<br>(22-58%)                | 62%<br>(42-78%)          | 0.31<br>(0.13-0.58)                         | 2.1%<br>(0.95-3.5%)                  | 2.4%<br>(0.99-4.3%)                 | 47<br>(19-85)         | 1600<br>(730-2800)   |
| Guinea   | 2005 | Male   | 60 to 64 | 38%<br>(21-58%)                | 62%<br>(42-79%)          | 0.28<br>(0.11-0.56)                         | 1.7%<br>(0.7-2.9%)                   | 2%<br>(0.72-3.5%)                   | 45<br>(17-81)         | 1300<br>(540-2200)   |
| Guinea   | 2005 | Male   | 65 to 69 | 38%<br>(21-56%)                | 62%<br>(44-79%)          | 0.23<br>(0.1-0.44)                          | 1.1%<br>(0.26-2.2%)                  | 1.3%<br>(0.22-2.6%)                 | 32<br>(5.3-65)        | 760<br>(170-1500)    |
| Guinea   | 2005 | Male   | 70 to 74 | 36%<br>(22-54%)                | 64%<br>(46-78%)          | 0.18<br>(0.07-0.37)                         | 0.78%<br>(0.037-1.7%)                | 0.9%<br>(-0.01-1.9%)                | 23<br>(-0.26-50)      | 430<br>(21-910)      |
| Guinea   | 2005 | Male   | 75 to 79 | 33%<br>(18-53%)                | 67%<br>(47-82%)          | 0.14<br>(0.044-0.3)                         | 0.54%<br>(-0.12-1.3%)                | 0.6%<br>(-0.17-1.5%)                | 13<br>(-3.9-34)       | 200<br>(-45-470)     |
| Guinea   | 2005 | Male   | 80 to 84 | 31%<br>(16-49%)                | 69%<br>(51-84%)          | 0.11<br>(0.037-0.23)                        | 0.45%<br>(-0.14-1%)                  | 0.48%<br>(-0.22-1.2%)               | 6<br>(-2.7-15)        | 66<br>(-21-150)      |
| Guinea   | 2005 | Male   | 85 to 89 | 29%<br>(16-47%)                | 71%<br>(53-84%)          | 0.099<br>(0.033-0.21)                       | 0.33%<br>(-0.2-0.85%)                | 0.34%<br>(-0.28-0.99%)              | 2.5<br>(-2.2-7.5)     | 21<br>(-12-57)       |
| Guinea   | 2005 | Male   | 90 to 94 | 31%<br>(17-49%)                | 69%<br>(51-83%)          | 0.093<br>(0.029-0.22)                       | 0.17%<br>(-0.29-0.57%)               | 0.14%<br>(-0.45-0.62%)              | 0.36<br>(-1.2-1.6)    | 2.7<br>(-4.6-9)      |
| Guinea   | 2005 | Male   | 95 plus  | 36%<br>(18-57%)                | 64%<br>(43-82%)          | 0.094<br>(0.023-0.24)                       | 0.18%<br>(-0.41-0.64%)               | 0.097%<br>(-0.65-0.66%)             | 0.056<br>(-0.37-0.38) | 0.41<br>(-0.95-1.5)  |
| Guinea   | 2010 | Female | All Ages | 24%<br>(19-31%)                | 76%<br>(69-81%)          | 0.093<br>(0.078-0.11)                       | 0.23%<br>(0.045-0.42%)               | 0.15%<br>(-0.24-0.55%)              | 85<br>(-140-310)      | 8500<br>(1700-16000) |
| Guinea   | 2010 | Female | 15 to 19 | 23%<br>(12-36%)                | 77%<br>(64-88%)          | 0.082<br>(0.034-0.16)                       | 0.43%<br>(0.19-0.69%)                | 0.066%<br>(-0.2-0.36%)              | 0.69<br>(-2.1-3.7)    | 550<br>(250-910)     |
| Guinea   | 2010 | Female | 20 to 24 | 28%<br>(14-45%)                | 72%<br>(55-86%)          | 0.13<br>(0.058-0.23)                        | 0.87%<br>(0.41-1.4%)                 | 0.12%<br>(-0.38-0.64%)              | 1.6<br>(-5-8.6)       | 1200<br>(530-2000)   |
| Guinea   | 2010 | Female | 25 to 29 | 31%<br>(16-48%)                | 69%<br>(52-84%)          | 0.16<br>(0.072-0.27)                        | 0.86%<br>(0.4-1.4%)                  | 0.26%<br>(-0.35-0.87%)              | 3.8<br>(-5.1-12)      | 1100<br>(520-1900)   |
| Guinea   | 2010 | Female | 30 to 34 | 34%<br>(17-52%)                | 66%<br>(48-83%)          | 0.18<br>(0.09-0.3)                          | 0.82%<br>(0.3-1.3%)                  | 0.43%<br>(-0.23-1.1%)               | 6.7<br>(-3.4-17)      | 1000<br>(380-1700)   |
| Guinea   | 2010 | Female | 35 to 39 | 37%<br>(20-56%)                | 63%<br>(44-80%)          | 0.19<br>(0.092-0.32)                        | 0.82%<br>(0.34-1.4%)                 | 0.63%<br>(-0.044-1.4%)              | 9.9<br>(-0.69-22)     | 950<br>(390-1600)    |
| Guinea   | 2010 | Female | 40 to 44 | 39%<br>(23-58%)                | 61%<br>(42-77%)          | 0.2<br>(0.096-0.35)                         | 1%<br>(0.44-1.6%)                    | 1.1%<br>(0.27-2%)                   | 17<br>(4-31)          | 1100<br>(450-1800)   |

| Location | Year | Sex    | Age      | Prevalence of current drinkers | Prevalence of abstainers | Population average of standard drinks daily | Percent of total attributable deaths | Percent of total attributable DALYs | Attributable deaths  | Attributable DALYs     |
|----------|------|--------|----------|--------------------------------|--------------------------|---------------------------------------------|--------------------------------------|-------------------------------------|----------------------|------------------------|
| Guinea   | 2010 | Female | 45 to 49 | 40%<br>(21-58%)                | 60%<br>(42-79%)          | 0.21<br>(0.093-0.38)                        | 0.9%<br>(0.2-1.6%)                   | 1%<br>(0.0059-1.9%)                 | 17<br>(0.11-35)      | 890<br>(200-1600)      |
| Guinea   | 2010 | Female | 50 to 54 | 40%<br>(22-60%)                | 60%<br>(40-78%)          | 0.22<br>(0.097-0.38)                        | 0.96%<br>(0.16-1.8%)                 | 1.2%<br>(0.028-2.3%)                | 24<br>(0.59-49)      | 960<br>(150-1900)      |
| Guinea   | 2010 | Female | 55 to 59 | 40%<br>(23-59%)                | 60%<br>(41-77%)          | 0.24<br>(0.1-0.42)                          | 0.58%<br>(-0.35-1.4%)                | 0.69%<br>(-0.52-1.8%)               | 17<br>(-12-44)       | 580<br>(-350-1400)     |
| Guinea   | 2010 | Female | 60 to 64 | 41%<br>(23-60%)                | 59%<br>(40-77%)          | 0.24<br>(0.097-0.44)                        | 0.32%<br>(-0.65-1.2%)                | 0.37%<br>(-0.84-1.4%)               | 9.5<br>(-22-39)      | 270<br>(-590-1000)     |
| Guinea   | 2010 | Female | 65 to 69 | 42%<br>(25-60%)                | 58%<br>(40-75%)          | 0.21<br>(0.093-0.39)                        | -0.039%<br>(-1.1-0.83%)              | -0.071%<br>(-1.4-0.99%)             | -2.2<br>(-43-32)     | -32<br>(-940-720)      |
| Guinea   | 2010 | Female | 70 to 74 | 40%<br>(24-57%)                | 60%<br>(43-76%)          | 0.17<br>(0.068-0.34)                        | -0.05%<br>(-1.1-0.79%)               | -0.085%<br>(-1.3-0.93%)             | -2.8<br>(-48-33)     | -35<br>(-840-590)      |
| Guinea   | 2010 | Female | 75 to 79 | 35%<br>(20-54%)                | 65%<br>(46-80%)          | 0.14<br>(0.044-0.3)                         | -0.1%<br>(-1.3-0.57%)                | -0.15%<br>(-1.5-0.67%)              | -4.3<br>(-44-20)     | -50<br>(-600-280)      |
| Guinea   | 2010 | Female | 80 to 84 | 33%<br>(17-52%)                | 67%<br>(48-83%)          | 0.13<br>(0.041-0.25)                        | -0.23%<br>(-1.2-0.37%)               | -0.29%<br>(-1.4-0.42%)              | -4.8<br>(-23-7.1)    | -45<br>(-230-76)       |
| Guinea   | 2010 | Female | 85 to 89 | 34%<br>(18-52%)                | 66%<br>(48-82%)          | 0.12<br>(0.043-0.26)                        | -0.32%<br>(-1.2-0.24%)               | -0.41%<br>(-1.4-0.25%)              | -4.4<br>(-16-2.7)    | -29<br>(-110-22)       |
| Guinea   | 2010 | Female | 90 to 94 | 37%<br>(20-54%)                | 63%<br>(46-80%)          | 0.13<br>(0.042-0.27)                        | -0.41%<br>(-1.3-0.14%)               | -0.55%<br>(-1.6-0.13%)              | -2.4<br>(-7.1-0.53)  | -11<br>(-34-3.8)       |
| Guinea   | 2010 | Female | 95 plus  | 41%<br>(22-62%)                | 59%<br>(38-78%)          | 0.14<br>(0.038-0.32)                        | -0.4%<br>(-1.3-0.18%)                | -0.57%<br>(-1.7-0.13%)              | -0.64<br>(-1.9-0.15) | -1.8<br>(-5.9-0.82)    |
| Guinea   | 2010 | Male   | All Ages | 21%<br>(16-27%)                | 79%<br>(73-84%)          | 0.11<br>(0.098-0.13)                        | 0.58%<br>(0.34-0.88%)                | 0.83%<br>(0.37-1.4%)                | 490<br>(210-850)     | 23000<br>(13000-35000) |
| Guinea   | 2010 | Male   | 15 to 19 | 16%<br>(8.4-27%)               | 84%<br>(73-92%)          | 0.067<br>(0.028-0.13)                       | 0.59%<br>(0.37-0.89%)                | 0.27%<br>(0.055-0.58%)              | 2.9<br>(0.56-6.4)    | 730<br>(440-1100)      |
| Guinea   | 2010 | Male   | 20 to 24 | 24%<br>(12-39%)                | 76%<br>(61-88%)          | 0.14<br>(0.058-0.25)                        | 1.3%<br>(0.77-1.9%)                  | 0.68%<br>(0.13-1.4%)                | 9.8<br>(1.8-20)      | 1700<br>(990-2700)     |
| Guinea   | 2010 | Male   | 25 to 29 | 29%<br>(15-46%)                | 71%<br>(54-85%)          | 0.2<br>(0.09-0.34)                          | 1.6%<br>(0.89-2.4%)                  | 1.1%<br>(0.2-2.1%)                  | 17<br>(2.9-34)       | 2100<br>(1100-3300)    |
| Guinea   | 2010 | Male   | 30 to 34 | 33%<br>(17-51%)                | 67%<br>(49-83%)          | 0.25<br>(0.12-0.41)                         | 1.9%<br>(1-2.9%)                     | 1.6%<br>(0.56-3%)                   | 28<br>(9.5-51)       | 2400<br>(1300-3800)    |
| Guinea   | 2010 | Male   | 35 to 39 | 36%<br>(20-56%)                | 64%<br>(44-80%)          | 0.27<br>(0.13-0.46)                         | 2.3%<br>(1.4-3.6%)                   | 2.5%<br>(1.2-4.1%)                  | 44<br>(22-74)        | 2800<br>(1600-4300)    |
| Guinea   | 2010 | Male   | 40 to 44 | 37%<br>(22-57%)                | 63%<br>(43-78%)          | 0.29<br>(0.13-0.51)                         | 2.6%<br>(1.6-4%)                     | 3%<br>(1.6-4.8%)                    | 55<br>(29-90)        | 2900<br>(1700-4500)    |
| Guinea   | 2010 | Male   | 45 to 49 | 38%<br>(20-57%)                | 62%<br>(43-80%)          | 0.31<br>(0.13-0.58)                         | 2.7%<br>(1.5-4.3%)                   | 3.1%<br>(1.6-5.2%)                  | 63<br>(31-110)       | 2800<br>(1500-4700)    |
| Guinea   | 2010 | Male   | 50 to 54 | 39%<br>(21-60%)                | 61%<br>(40-79%)          | 0.31<br>(0.13-0.59)                         | 2.4%<br>(1.1-3.9%)                   | 2.8%<br>(1.1-4.7%)                  | 63<br>(25-110)       | 2500<br>(1100-4100)    |
| Guinea   | 2010 | Male   | 55 to 59 | 39%<br>(22-59%)                | 61%<br>(41-78%)          | 0.3<br>(0.13-0.55)                          | 2.2%<br>(0.99-3.7%)                  | 2.6%<br>(1-4.5%)                    | 64<br>(24-120)       | 2200<br>(930-3700)     |
| Guinea   | 2010 | Male   | 60 to 64 | 39%<br>(22-58%)                | 61%<br>(42-78%)          | 0.27<br>(0.11-0.55)                         | 1.8%<br>(0.71-3%)                    | 2%<br>(0.74-3.7%)                   | 52<br>(19-98)        | 1500<br>(590-2700)     |

| Location | Year | Sex    | Age      | Prevalence of current drinkers | Prevalence of abstainers | Population average of standard drinks daily | Percent of total attributable deaths | Percent of total attributable DALYs | Attributable deaths   | Attributable DALYs    |
|----------|------|--------|----------|--------------------------------|--------------------------|---------------------------------------------|--------------------------------------|-------------------------------------|-----------------------|-----------------------|
| Guinea   | 2010 | Male   | 65 to 69 | 39%<br>(22-57%)                | 61%<br>(43-78%)          | 0.23<br>(0.097-0.43)                        | 1.2%<br>(0.27-2.2%)                  | 1.3%<br>(0.21-2.7%)                 | 38<br>(5.7-76)        | 880<br>(190-1700)     |
| Guinea   | 2010 | Male   | 70 to 74 | 37%<br>(22-55%)                | 63%<br>(45-78%)          | 0.18<br>(0.065-0.36)                        | 0.8%<br>(0.024-1.7%)                 | 0.93%<br>(-0.0016-2%)               | 27<br>(-0.043-60)     | 490<br>(14-1100)      |
| Guinea   | 2010 | Male   | 75 to 79 | 34%<br>(18-53%)                | 66%<br>(47-82%)          | 0.13<br>(0.042-0.29)                        | 0.55%<br>(-0.11-1.2%)                | 0.62%<br>(-0.2-1.5%)                | 15<br>(-4.5-36)       | 220<br>(-43-500)      |
| Guinea   | 2010 | Male   | 80 to 84 | 31%<br>(16-50%)                | 69%<br>(50-84%)          | 0.11<br>(0.034-0.23)                        | 0.47%<br>(-0.13-1%)                  | 0.51%<br>(-0.22-1.2%)               | 6.7<br>(-2.8-16)      | 75<br>(-22-170)       |
| Guinea   | 2010 | Male   | 85 to 89 | 30%<br>(16-47%)                | 70%<br>(53-84%)          | 0.096<br>(0.031-0.2)                        | 0.35%<br>(-0.17-0.87%)               | 0.36%<br>(-0.27-0.98%)              | 3<br>(-2.2-8.2)       | 25<br>(-12-62)        |
| Guinea   | 2010 | Male   | 90 to 94 | 31%<br>(17-49%)                | 69%<br>(51-83%)          | 0.091<br>(0.027-0.21)                       | 0.19%<br>(-0.29-0.6%)                | 0.15%<br>(-0.45-0.64%)              | 0.51<br>(-1.5-2.2)    | 3.8<br>(-6-12)        |
| Guinea   | 2010 | Male   | 95 plus  | 36%<br>(18-57%)                | 64%<br>(43-82%)          | 0.092<br>(0.022-0.23)                       | 0.19%<br>(-0.43-0.67%)               | 0.11%<br>(-0.66-0.7%)               | 0.087<br>(-0.52-0.56) | 0.59<br>(-1.3-2.1)    |
| Guinea   | 2016 | Female | All Ages | 25%<br>(19-31%)                | 75%<br>(69-81%)          | 0.1<br>(0.065-0.15)                         | 0.28%<br>(0.075-0.48%)               | 0.16%<br>(-0.3-0.57%)               | 90<br>(-170-320)      | 10000<br>(2800-18000) |
| Guinea   | 2016 | Female | 15 to 19 | 23%<br>(12-38%)                | 77%<br>(62-88%)          | 0.088<br>(0.033-0.19)                       | 0.46%<br>(0.22-0.73%)                | 0.078%<br>(-0.19-0.37%)             | 0.84<br>(-2.1-4.1)    | 640<br>(300-1000)     |
| Guinea   | 2016 | Female | 20 to 24 | 28%<br>(15-46%)                | 72%<br>(54-85%)          | 0.14<br>(0.055-0.27)                        | 0.99%<br>(0.52-1.6%)                 | 0.15%<br>(-0.32-0.7%)               | 1.9<br>(-3.9-9.2)     | 1400<br>(710-2300)    |
| Guinea   | 2016 | Female | 25 to 29 | 31%<br>(16-49%)                | 69%<br>(51-84%)          | 0.17<br>(0.065-0.32)                        | 1%<br>(0.54-1.5%)                    | 0.31%<br>(-0.29-0.94%)              | 4.5<br>(-4.4-13)      | 1400<br>(720-2300)    |
| Guinea   | 2016 | Female | 30 to 34 | 34%<br>(17-53%)                | 66%<br>(47-83%)          | 0.19<br>(0.083-0.34)                        | 0.91%<br>(0.45-1.4%)                 | 0.48%<br>(-0.16-1.1%)               | 7.9<br>(-2.7-18)      | 1300<br>(620-2000)    |
| Guinea   | 2016 | Female | 35 to 39 | 38%<br>(20-56%)                | 62%<br>(44-80%)          | 0.21<br>(0.088-0.38)                        | 0.89%<br>(0.41-1.4%)                 | 0.68%<br>(-0.011-1.5%)              | 12<br>(-0.18-25)      | 1200<br>(530-1900)    |
| Guinea   | 2016 | Female | 40 to 44 | 39%<br>(23-59%)                | 61%<br>(41-77%)          | 0.22<br>(0.088-0.43)                        | 1.1%<br>(0.51-1.7%)                  | 1.1%<br>(0.32-2%)                   | 20<br>(5.7-37)        | 1300<br>(580-2000)    |
| Guinea   | 2016 | Female | 45 to 49 | 40%<br>(22-59%)                | 60%<br>(41-78%)          | 0.22<br>(0.086-0.43)                        | 0.96%<br>(0.26-1.7%)                 | 1.1%<br>(0.088-2.1%)                | 20<br>(1.4-40)        | 1000<br>(270-1800)    |
| Guinea   | 2016 | Female | 50 to 54 | 40%<br>(22-61%)                | 60%<br>(39-78%)          | 0.23<br>(0.086-0.45)                        | 1%<br>(0.16-1.7%)                    | 1.2%<br>(0.079-2.2%)                | 27<br>(1.8-53)        | 1100<br>(180-2000)    |
| Guinea   | 2016 | Female | 55 to 59 | 40%<br>(24-59%)                | 60%<br>(41-76%)          | 0.25<br>(0.097-0.49)                        | 0.61%<br>(-0.31-1.4%)                | 0.73%<br>(-0.45-1.8%)               | 20<br>(-13-50)        | 670<br>(-350-1600)    |
| Guinea   | 2016 | Female | 60 to 64 | 41%<br>(24-61%)                | 59%<br>(39-76%)          | 0.25<br>(0.093-0.49)                        | 0.3%<br>(-0.66-1.1%)                 | 0.35%<br>(-0.85-1.4%)               | 12<br>(-28-48)        | 340<br>(-750-1300)    |
| Guinea   | 2016 | Female | 65 to 69 | 42%<br>(25-60%)                | 58%<br>(40-75%)          | 0.23<br>(0.087-0.45)                        | -0.093%<br>(-1.2-0.75%)              | -0.14%<br>(-1.5-0.89%)              | -4.9<br>(-51-32)      | -88<br>(-1100-730)    |
| Guinea   | 2016 | Female | 70 to 74 | 40%<br>(24-58%)                | 60%<br>(42-76%)          | 0.19<br>(0.065-0.39)                        | -0.11%<br>(-1.2-0.71%)               | -0.16%<br>(-1.4-0.84%)              | -5.8<br>(-53-30)      | -85<br>(-940-550)     |
| Guinea   | 2016 | Female | 75 to 79 | 36%<br>(20-54%)                | 64%<br>(46-80%)          | 0.15<br>(0.044-0.35)                        | -0.17%<br>(-1.4-0.54%)               | -0.22%<br>(-1.6-0.61%)              | -7.4<br>(-57-21)      | -92<br>(-760-300)     |
| Guinea   | 2016 | Female | 80 to 84 | 34%<br>(18-53%)                | 66%<br>(47-82%)          | 0.14<br>(0.041-0.3)                         | -0.3%<br>(-1.3-0.33%)                | -0.38%<br>(-1.5-0.35%)              | -7.4<br>(-30-7)       | -70<br>(-310-77)      |



| Location      | Year | Sex    | Age      | Prevalence of current drinkers | Prevalence of abstainers | Population average of standard drinks daily | Percent of total attributable deaths | Percent of total attributable DALYs | Attributable deaths   | Attributable DALYs     |
|---------------|------|--------|----------|--------------------------------|--------------------------|---------------------------------------------|--------------------------------------|-------------------------------------|-----------------------|------------------------|
| Guinea        | 2016 | Female | 85 to 89 | 34%<br>(19-52%)                | 66%<br>(48-81%)          | 0.14<br>(0.042-0.3)                         | -0.38%<br>(-1.4-0.22%)               | -0.49%<br>(-1.7-0.23%)              | -5.8<br>(-20-2.6)     | -39<br>(-140-22)       |
| Guinea        | 2016 | Female | 90 to 94 | 37%<br>(20-55%)                | 63%<br>(45-80%)          | 0.14<br>(0.042-0.32)                        | -0.48%<br>(-1.4-0.12%)               | -0.63%<br>(-1.8-0.091%)             | -3.1<br>(-8.7-0.44)   | -14<br>(-42-3.6)       |
| Guinea        | 2016 | Female | 95 plus  | 41%<br>(22-62%)                | 59%<br>(38-78%)          | 0.15<br>(0.039-0.39)                        | -0.45%<br>(-1.5-0.14%)               | -0.64%<br>(-1.9-0.081%)             | -0.94<br>(-2.8-0.12)  | -2.6<br>(-8.7-0.85)    |
| Guinea        | 2016 | Male   | All Ages | 21%<br>(16-27%)                | 79%<br>(73-84%)          | 0.12<br>(0.082-0.18)                        | 0.7%<br>(0.44-0.99%)                 | 0.94%<br>(0.47-1.5%)                | 560<br>(280-890)      | 27000<br>(18000-39000) |
| Guinea        | 2016 | Male   | 15 to 19 | 16%<br>(8.2-28%)               | 84%<br>(72-92%)          | 0.074<br>(0.026-0.16)                       | 0.62%<br>(0.4-0.92%)                 | 0.28%<br>(0.072-0.62%)              | 3.4<br>(0.86-7.4)     | 860<br>(520-1300)      |
| Guinea        | 2016 | Male   | 20 to 24 | 24%<br>(13-40%)                | 76%<br>(60-87%)          | 0.15<br>(0.058-0.29)                        | 1.4%<br>(0.86-2%)                    | 0.74%<br>(0.17-1.5%)                | 12<br>(2.6-25)        | 2100<br>(1200-3200)    |
| Guinea        | 2016 | Male   | 25 to 29 | 30%<br>(16-47%)                | 70%<br>(53-84%)          | 0.22<br>(0.087-0.4)                         | 1.7%<br>(1-2.6%)                     | 1.2%<br>(0.33-2.3%)                 | 21<br>(5.3-41)        | 2600<br>(1500-3900)    |
| Guinea        | 2016 | Male   | 30 to 34 | 33%<br>(18-52%)                | 67%<br>(48-82%)          | 0.26<br>(0.12-0.47)                         | 2%<br>(1.2-2.9%)                     | 1.8%<br>(0.71-2.9%)                 | 34<br>(13-57)         | 2900<br>(1700-4400)    |
| Guinea        | 2016 | Male   | 35 to 39 | 36%<br>(20-54%)                | 64%<br>(46-80%)          | 0.29<br>(0.12-0.55)                         | 2.4%<br>(1.5-3.5%)                   | 2.6%<br>(1.4-3.9%)                  | 52<br>(28-85)         | 3400<br>(2100-5000)    |
| Guinea        | 2016 | Male   | 40 to 44 | 38%<br>(22-57%)                | 62%<br>(43-78%)          | 0.31<br>(0.12-0.6)                          | 2.6%<br>(1.7-3.8%)                   | 3%<br>(1.8-4.5%)                    | 64<br>(35-100)        | 3400<br>(2100-5100)    |
| Guinea        | 2016 | Male   | 45 to 49 | 38%<br>(20-57%)                | 62%<br>(43-80%)          | 0.33<br>(0.12-0.67)                         | 2.7%<br>(1.6-4%)                     | 3.2%<br>(1.8-5%)                    | 71<br>(37-110)        | 3200<br>(1900-4900)    |
| Guinea        | 2016 | Male   | 50 to 54 | 39%<br>(21-59%)                | 61%<br>(41-79%)          | 0.33<br>(0.12-0.66)                         | 2.4%<br>(1.2-3.8%)                   | 2.9%<br>(1.3-4.5%)                  | 70<br>(32-110)        | 2800<br>(1300-4300)    |
| Guinea        | 2016 | Male   | 55 to 59 | 39%<br>(23-58%)                | 61%<br>(42-77%)          | 0.32<br>(0.12-0.64)                         | 2.2%<br>(1.1-3.6%)                   | 2.6%<br>(1.2-4.4%)                  | 72<br>(33-120)        | 2400<br>(1200-4000)    |
| Guinea        | 2016 | Male   | 60 to 64 | 39%<br>(22-58%)                | 61%<br>(42-78%)          | 0.29<br>(0.1-0.6)                           | 1.8%<br>(0.84-2.8%)                  | 2.1%<br>(0.9-3.4%)                  | 67<br>(29-110)        | 1900<br>(910-3100)     |
| Guinea        | 2016 | Male   | 65 to 69 | 39%<br>(23-57%)                | 61%<br>(43-77%)          | 0.25<br>(0.092-0.49)                        | 1.1%<br>(0.32-2%)                    | 1.3%<br>(0.3-2.4%)                  | 41<br>(8.9-77)        | 970<br>(270-1800)      |
| Guinea        | 2016 | Male   | 70 to 74 | 37%<br>(22-55%)                | 63%<br>(45-78%)          | 0.19<br>(0.063-0.42)                        | 0.79%<br>(0.063-1.6%)                | 0.91%<br>(0.019-1.9%)               | 29<br>(0.62-58)       | 540<br>(43-1100)       |
| Guinea        | 2016 | Male   | 75 to 79 | 34%<br>(19-52%)                | 66%<br>(48-81%)          | 0.15<br>(0.043-0.34)                        | 0.52%<br>(-0.13-1.1%)                | 0.58%<br>(-0.21-1.2%)               | 16<br>(-5.7-34)       | 230<br>(-57-480)       |
| Guinea        | 2016 | Male   | 80 to 84 | 31%<br>(16-50%)                | 69%<br>(50-84%)          | 0.12<br>(0.034-0.26)                        | 0.43%<br>(-0.15-0.94%)               | 0.47%<br>(-0.25-1.1%)               | 6.9<br>(-3.6-16)      | 78<br>(-28-170)        |
| Guinea        | 2016 | Male   | 85 to 89 | 29%<br>(15-47%)                | 71%<br>(53-85%)          | 0.1<br>(0.031-0.24)                         | 0.31%<br>(-0.17-0.73%)               | 0.32%<br>(-0.27-0.82%)              | 2.8<br>(-2.4-7.3)     | 24<br>(-13-57)         |
| Guinea        | 2016 | Male   | 90 to 94 | 31%<br>(16-49%)                | 69%<br>(51-84%)          | 0.097<br>(0.026-0.23)                       | 0.16%<br>(-0.31-0.5%)                | 0.12%<br>(-0.46-0.53%)              | 0.44<br>(-1.7-2)      | 3.7<br>(-7-11)         |
| Guinea        | 2016 | Male   | 95 plus  | 36%<br>(17-58%)                | 64%<br>(42-83%)          | 0.098<br>(0.022-0.27)                       | 0.17%<br>(-0.43-0.58%)               | 0.08%<br>(-0.64-0.58%)              | 0.082<br>(-0.67-0.62) | 0.69<br>(-1.8-2.4)     |
| Guinea-Bissau | 1990 | Female | All Ages | 25%<br>(20-32%)                | 75%<br>(68-80%)          | 0.77<br>(0.57-1)                            | 1.5%<br>(0.86-2.2%)                  | 2.8%<br>(1.3-4.7%)                  | 230<br>(110-390)      | 7700<br>(4500-12000)   |

| Location      | Year | Sex    | Age      | Prevalence of current drinkers | Prevalence of abstainers | Population average of standard drinks daily | Percent of total attributable deaths | Percent of total attributable DALYs | Attributable deaths | Attributable DALYs     |
|---------------|------|--------|----------|--------------------------------|--------------------------|---------------------------------------------|--------------------------------------|-------------------------------------|---------------------|------------------------|
| Guinea-Bissau | 1990 | Female | 15 to 19 | 24%<br>(13-39%)                | 76%<br>(61-87%)          | 0.7<br>(0.28-1.3)                           | 1.6%<br>(0.63-2.9%)                  | 1.9%<br>(0.5-3.9%)                  | 2.2<br>(0.59-4.6)   | 210<br>(80-380)        |
| Guinea-Bissau | 1990 | Female | 20 to 24 | 29%<br>(15-46%)                | 71%<br>(54-85%)          | 1.1<br>(0.46-2)                             | 3%<br>(1.4-5.2%)                     | 3.3%<br>(1.1-6.4%)                  | 4.7<br>(1.6-9.3)    | 410<br>(200-720)       |
| Guinea-Bissau | 1990 | Female | 25 to 29 | 32%<br>(16-51%)                | 68%<br>(49-84%)          | 1.3<br>(0.56-2.4)                           | 3.9%<br>(2-6.5%)                     | 4.7%<br>(2-8.4%)                    | 6.9<br>(2.9-12)     | 510<br>(260-830)       |
| Guinea-Bissau | 1990 | Female | 30 to 34 | 34%<br>(18-53%)                | 66%<br>(47-82%)          | 1.5<br>(0.69-2.5)                           | 4.5%<br>(2.5-7.5%)                   | 5.7%<br>(2.8-10%)                   | 9<br>(4.4-16)       | 570<br>(310-960)       |
| Guinea-Bissau | 1990 | Female | 35 to 39 | 38%<br>(21-57%)                | 62%<br>(43-79%)          | 1.6<br>(0.74-2.7)                           | 5.3%<br>(2.8-8.6%)                   | 6.9%<br>(3.5-11%)                   | 13<br>(6.4-21)      | 700<br>(380-1100)      |
| Guinea-Bissau | 1990 | Female | 40 to 44 | 40%<br>(23-59%)                | 60%<br>(41-77%)          | 1.6<br>(0.78-3)                             | 6%<br>(3.1-9.8%)                     | 8.1%<br>(4-13%)                     | 14<br>(6.9-24)      | 690<br>(340-1100)      |
| Guinea-Bissau | 1990 | Female | 45 to 49 | 40%<br>(21-60%)                | 60%<br>(40-79%)          | 1.7<br>(0.71-3)                             | 6.6%<br>(3.1-11%)                    | 8.7%<br>(4.1-15%)                   | 18<br>(7.8-31)      | 740<br>(340-1300)      |
| Guinea-Bissau | 1990 | Female | 50 to 54 | 40%<br>(23-61%)                | 60%<br>(39-77%)          | 1.8<br>(0.75-3.3)                           | 6.6%<br>(2.9-11%)                    | 8.4%<br>(3.6-14%)                   | 20<br>(8.1-34)      | 720<br>(300-1300)      |
| Guinea-Bissau | 1990 | Female | 55 to 59 | 41%<br>(24-60%)                | 59%<br>(40-76%)          | 1.9<br>(0.82-3.6)                           | 7.1%<br>(2.6-13%)                    | 8.7%<br>(3.1-15%)                   | 26<br>(9-47)        | 810<br>(280-1500)      |
| Guinea-Bissau | 1990 | Female | 60 to 64 | 42%<br>(24-61%)                | 58%<br>(39-76%)          | 1.9<br>(0.77-3.7)                           | 6.3%<br>(1.9-11%)                    | 7.5%<br>(2.3-14%)                   | 29<br>(8.8-58)      | 780<br>(240-1500)      |
| Guinea-Bissau | 1990 | Female | 65 to 69 | 43%<br>(26-61%)                | 57%<br>(39-74%)          | 1.8<br>(0.78-3.2)                           | 5.4%<br>(1.3-11%)                    | 6.3%<br>(1.4-13%)                   | 32<br>(7.8-65)      | 720<br>(170-1500)      |
| Guinea-Bissau | 1990 | Female | 70 to 74 | 41%<br>(25-59%)                | 59%<br>(41-75%)          | 1.5<br>(0.6-2.9)                            | 4.5%<br>(0.41-11%)                   | 5.2%<br>(0.48-12%)                  | 29<br>(2.7-71)      | 510<br>(49-1300)       |
| Guinea-Bissau | 1990 | Female | 75 to 79 | 37%<br>(20-56%)                | 63%<br>(44-80%)          | 1.2<br>(0.38-2.6)                           | 3%<br>(-0.35-8.6%)                   | 3.4%<br>(-0.43-10%)                 | 16<br>(-1.9-47)     | 220<br>(-25-650)       |
| Guinea-Bissau | 1990 | Female | 80 to 84 | 35%<br>(19-53%)                | 65%<br>(47-81%)          | 1.1<br>(0.36-2.2)                           | 2.1%<br>(-0.44-6.4%)                 | 2.4%<br>(-0.51-7.3%)                | 5.6<br>(-1.2-17)    | 59<br>(-12-180)        |
| Guinea-Bissau | 1990 | Female | 85 to 89 | 35%<br>(20-53%)                | 65%<br>(47-80%)          | 1.1<br>(0.38-2.2)                           | 1.7%<br>(-0.64-5.4%)                 | 1.9%<br>(-0.79-6.2%)                | 1.9<br>(-0.78-6)    | 14<br>(-5.2-44)        |
| Guinea-Bissau | 1990 | Female | 90 to 94 | 38%<br>(21-56%)                | 62%<br>(44-79%)          | 1.1<br>(0.37-2.4)                           | 1.3%<br>(-0.92-5.1%)                 | 1.5%<br>(-1.2-6.1%)                 | 0.43<br>(-0.34-1.8) | 2.3<br>(-1.5-9.1)      |
| Guinea-Bissau | 1990 | Female | 95 plus  | 42%<br>(23-62%)                | 58%<br>(38-77%)          | 1.2<br>(0.32-2.8)                           | 1.2%<br>(-1.3-5.6%)                  | 1.3%<br>(-1.7-6.4%)                 | 0.1<br>(-0.14-0.53) | 0.39<br>(-0.42-1.8)    |
| Guinea-Bissau | 1990 | Male   | All Ages | 21%<br>(16-27%)                | 79%<br>(73-84%)          | 0.91<br>(0.68-1.2)                          | 2.3%<br>(1.6-3%)                     | 4%<br>(2.6-5.5%)                    | 370<br>(240-520)    | 14000<br>(10000-19000) |
| Guinea-Bissau | 1990 | Male   | 15 to 19 | 16%<br>(8.3-27%)               | 84%<br>(73-92%)          | 0.53<br>(0.19-1.1)                          | 1.8%<br>(0.83-3.5%)                  | 2%<br>(0.74-4.3%)                   | 3.3<br>(1.1-6.7)    | 280<br>(120-540)       |
| Guinea-Bissau | 1990 | Male   | 20 to 24 | 24%<br>(13-39%)                | 76%<br>(61-87%)          | 1.1<br>(0.44-2)                             | 4.9%<br>(2.4-8.5%)                   | 5.4%<br>(2.3-9.9%)                  | 11<br>(4.4-20)      | 810<br>(390-1400)      |
| Guinea-Bissau | 1990 | Male   | 25 to 29 | 29%<br>(15-46%)                | 71%<br>(54-85%)          | 1.6<br>(0.67-2.8)                           | 7.9%<br>(4-13%)                      | 9.2%<br>(4.1-15%)                   | 18<br>(8.3-30)      | 1200<br>(600-1900)     |
| Guinea-Bissau | 1990 | Male   | 30 to 34 | 33%<br>(17-52%)                | 67%<br>(48-83%)          | 2<br>(0.93-3.4)                             | 9.9%<br>(5.7-15%)                    | 12%<br>(6.3-18%)                    | 25<br>(14-39)       | 1500<br>(850-2300)     |

| Location      | Year | Sex    | Age      | Prevalence of current drinkers | Prevalence of abstainers | Population average of standard drinks daily | Percent of total attributable deaths | Percent of total attributable DALYs | Attributable deaths   | Attributable DALYs   |
|---------------|------|--------|----------|--------------------------------|--------------------------|---------------------------------------------|--------------------------------------|-------------------------------------|-----------------------|----------------------|
| Guinea-Bissau | 1990 | Male   | 35 to 39 | 36%<br>(20-55%)                | 64%<br>(45-80%)          | 2.2<br>(0.96-3.8)                           | 11%<br>(6.2-17%)                     | 13%<br>(7.2-20%)                    | 33<br>(18-50)         | 1700<br>(970-2600)   |
| Guinea-Bissau | 1990 | Male   | 40 to 44 | 37%<br>(21-57%)                | 63%<br>(43-79%)          | 2.3<br>(1-4.2)                              | 12%<br>(6.7-17%)                     | 14%<br>(7.8-21%)                    | 37<br>(19-56)         | 1700<br>(930-2600)   |
| Guinea-Bissau | 1990 | Male   | 45 to 49 | 38%<br>(20-56%)                | 62%<br>(44-80%)          | 2.4<br>(0.98-4.5)                           | 12%<br>(6.7-19%)                     | 15%<br>(7.8-22%)                    | 43<br>(22-67)         | 1800<br>(950-2800)   |
| Guinea-Bissau | 1990 | Male   | 50 to 54 | 38%<br>(21-59%)                | 62%<br>(41-79%)          | 2.4<br>(1-4.7)                              | 12%<br>(5.8-18%)                     | 14%<br>(6.7-21%)                    | 41<br>(19-64)         | 1500<br>(720-2300)   |
| Guinea-Bissau | 1990 | Male   | 55 to 59 | 38%<br>(22-58%)                | 62%<br>(42-78%)          | 2.4<br>(0.91-4.5)                           | 11%<br>(5.1-17%)                     | 12%<br>(5.8-19%)                    | 42<br>(19-69)         | 1300<br>(620-2200)   |
| Guinea-Bissau | 1990 | Male   | 60 to 64 | 38%<br>(21-58%)                | 62%<br>(42-79%)          | 2.1<br>(0.8-4.2)                            | 8.1%<br>(3.3-14%)                    | 9.4%<br>(3.8-16%)                   | 38<br>(15-66)         | 1000<br>(420-1800)   |
| Guinea-Bissau | 1990 | Male   | 65 to 69 | 38%<br>(22-56%)                | 62%<br>(44-78%)          | 1.8<br>(0.74-3.4)                           | 6.5%<br>(2.5-12%)                    | 7.4%<br>(2.8-13%)                   | 34<br>(13-64)         | 770<br>(300-1400)    |
| Guinea-Bissau | 1990 | Male   | 70 to 74 | 36%<br>(22-54%)                | 64%<br>(46-78%)          | 1.4<br>(0.52-2.8)                           | 4.8%<br>(1.4-10%)                    | 5.5%<br>(1.5-12%)                   | 26<br>(6.9-56)        | 460<br>(130-1000)    |
| Guinea-Bissau | 1990 | Male   | 75 to 79 | 33%<br>(19-52%)                | 67%<br>(48-81%)          | 1.1<br>(0.33-2.3)                           | 3.3%<br>(0.62-7.7%)                  | 3.7%<br>(0.66-8.8%)                 | 13<br>(2.3-30)        | 180<br>(33-430)      |
| Guinea-Bissau | 1990 | Male   | 80 to 84 | 31%<br>(16-49%)                | 69%<br>(51-84%)          | 0.89<br>(0.27-1.8)                          | 2.5%<br>(0.46-6.1%)                  | 2.9%<br>(0.48-7.1%)                 | 4.5<br>(0.73-11)      | 47<br>(8.6-110)      |
| Guinea-Bissau | 1990 | Male   | 85 to 89 | 29%<br>(15-47%)                | 71%<br>(53-85%)          | 0.77<br>(0.25-1.6)                          | 1.9%<br>(0.22-4.8%)                  | 2.1%<br>(0.17-5.5%)                 | 1.4<br>(0.11-3.6)     | 10<br>(1.2-26)       |
| Guinea-Bissau | 1990 | Male   | 90 to 94 | 31%<br>(16-49%)                | 69%<br>(51-84%)          | 0.72<br>(0.22-1.6)                          | 1.1%<br>(-0.15-3.6%)                 | 1.2%<br>(-0.32-4.2%)                | 0.23<br>(-0.061-0.8)  | 1.3<br>(-0.17-4.2)   |
| Guinea-Bissau | 1990 | Male   | 95 plus  | 35%<br>(18-56%)                | 65%<br>(44-82%)          | 0.72<br>(0.16-1.8)                          | 1%<br>(-0.45-4%)                     | 1%<br>(-0.75-4.6%)                  | 0.05<br>(-0.037-0.23) | 0.2<br>(-0.091-0.79) |
| Guinea-Bissau | 1995 | Female | All Ages | 25%<br>(20-32%)                | 75%<br>(68-80%)          | 0.73<br>(0.54-0.96)                         | 1.5%<br>(0.84-2.2%)                  | 2.7%<br>(1.3-4.6%)                  | 220<br>(100-390)      | 7700<br>(4400-12000) |
| Guinea-Bissau | 1995 | Female | 15 to 19 | 24%<br>(13-38%)                | 76%<br>(62-87%)          | 0.66<br>(0.26-1.3)                          | 1.5%<br>(0.62-2.9%)                  | 1.8%<br>(0.45-3.9%)                 | 2.3<br>(0.58-5.1)     | 220<br>(86-420)      |
| Guinea-Bissau | 1995 | Female | 20 to 24 | 29%<br>(16-46%)                | 71%<br>(54-84%)          | 1<br>(0.44-1.9)                             | 2.9%<br>(1.3-4.9%)                   | 3.1%<br>(1-6%)                      | 5<br>(1.6-9.8)        | 440<br>(210-760)     |
| Guinea-Bissau | 1995 | Female | 25 to 29 | 32%<br>(16-50%)                | 68%<br>(50-84%)          | 1.3<br>(0.54-2.3)                           | 3.7%<br>(1.8-6.1%)                   | 4.3%<br>(1.7-7.7%)                  | 7.1<br>(2.8-13)       | 530<br>(260-880)     |
| Guinea-Bissau | 1995 | Female | 30 to 34 | 35%<br>(18-54%)                | 65%<br>(46-82%)          | 1.4<br>(0.68-2.5)                           | 4.2%<br>(2.2-6.9%)                   | 5.2%<br>(2.5-9%)                    | 8.8<br>(4.2-16)       | 570<br>(300-950)     |
| Guinea-Bissau | 1995 | Female | 35 to 39 | 38%<br>(21-58%)                | 62%<br>(42-79%)          | 1.5<br>(0.72-2.6)                           | 4.9%<br>(2.5-8%)                     | 6.3%<br>(3-11%)                     | 12<br>(5.7-21)        | 670<br>(340-1100)    |
| Guinea-Bissau | 1995 | Female | 40 to 44 | 40%<br>(23-59%)                | 60%<br>(41-77%)          | 1.6<br>(0.75-2.7)                           | 5.6%<br>(2.9-9.2%)                   | 7.5%<br>(3.6-12%)                   | 17<br>(7.9-28)        | 800<br>(390-1300)    |
| Guinea-Bissau | 1995 | Female | 45 to 49 | 41%<br>(21-59%)                | 59%<br>(41-79%)          | 1.6<br>(0.69-3)                             | 6.2%<br>(2.9-10%)                    | 8.1%<br>(3.7-14%)                   | 18<br>(8-32)          | 760<br>(350-1300)    |
| Guinea-Bissau | 1995 | Female | 50 to 54 | 41%<br>(23-61%)                | 59%<br>(39-77%)          | 1.7<br>(0.74-3.2)                           | 6.3%<br>(2.5-11%)                    | 7.9%<br>(3.2-14%)                   | 22<br>(8.5-39)        | 810<br>(310-1400)    |

| Location      | Year | Sex    | Age      | Prevalence of current drinkers | Prevalence of abstainers | Population average of standard drinks daily | Percent of total attributable deaths | Percent of total attributable DALYs | Attributable deaths  | Attributable DALYs     |
|---------------|------|--------|----------|--------------------------------|--------------------------|---------------------------------------------|--------------------------------------|-------------------------------------|----------------------|------------------------|
| Guinea-Bissau | 1995 | Female | 55 to 59 | 41%<br>(24-59%)                | 59%<br>(41-76%)          | 1.9<br>(0.77-3.4)                           | 6.7%<br>(2.4-12%)                    | 8.2%<br>(2.8-15%)                   | 25<br>(8.2-47)       | 800<br>(260-1500)      |
| Guinea-Bissau | 1995 | Female | 60 to 64 | 42%<br>(24-61%)                | 58%<br>(39-76%)          | 1.9<br>(0.74-3.6)                           | 5.8%<br>(1.7-11%)                    | 6.9%<br>(2-13%)                     | 27<br>(7.7-52)       | 720<br>(210-1400)      |
| Guinea-Bissau | 1995 | Female | 65 to 69 | 43%<br>(26-61%)                | 57%<br>(39-74%)          | 1.7<br>(0.77-3.1)                           | 5%<br>(0.97-10%)                     | 5.8%<br>(1.1-12%)                   | 29<br>(5.4-60)       | 640<br>(120-1400)      |
| Guinea-Bissau | 1995 | Female | 70 to 74 | 41%<br>(26-59%)                | 59%<br>(41-74%)          | 1.4<br>(0.56-2.8)                           | 4%<br>(0.3-9.8%)                     | 4.6%<br>(0.35-11%)                  | 27<br>(2-69)         | 480<br>(36-1200)       |
| Guinea-Bissau | 1995 | Female | 75 to 79 | 37%<br>(21-57%)                | 63%<br>(43-79%)          | 1.1<br>(0.38-2.5)                           | 2.6%<br>(-0.55-8.1%)                 | 3%<br>(-0.64-9.2%)                  | 15<br>(-3.4-49)      | 210<br>(-44-680)       |
| Guinea-Bissau | 1995 | Female | 80 to 84 | 35%<br>(19-53%)                | 65%<br>(47-81%)          | 1<br>(0.35-2.1)                             | 1.9%<br>(-0.55-6.1%)                 | 2.2%<br>(-0.67-7%)                  | 6.2<br>(-2-21)       | 65<br>(-19-210)        |
| Guinea-Bissau | 1995 | Female | 85 to 89 | 35%<br>(20-53%)                | 65%<br>(47-80%)          | 1<br>(0.37-2.1)                             | 1.5%<br>(-0.69-5.5%)                 | 1.7%<br>(-0.84-6.2%)                | 2.3<br>(-1.1-8.2)    | 17<br>(-7.7-60)        |
| Guinea-Bissau | 1995 | Female | 90 to 94 | 38%<br>(22-55%)                | 62%<br>(45-78%)          | 1.1<br>(0.35-2.2)                           | 1.2%<br>(-1-5.1%)                    | 1.4%<br>(-1.3-6%)                   | 0.52<br>(-0.49-2.3)  | 2.8<br>(-2.2-12)       |
| Guinea-Bissau | 1995 | Female | 95 plus  | 42%<br>(23-62%)                | 58%<br>(38-77%)          | 1.1<br>(0.29-2.6)                           | 1.1%<br>(-1.3-5.6%)                  | 1.2%<br>(-1.7-6.5%)                 | 0.11<br>(-0.16-0.59) | 0.41<br>(-0.47-2)      |
| Guinea-Bissau | 1995 | Male   | All Ages | 21%<br>(16-27%)                | 79%<br>(73-84%)          | 0.88<br>(0.65-1.1)                          | 4.1%<br>(1.7-3.2%)                   | 4.1%<br>(2.7-5.7%)                  | 390<br>(250-550)     | 15000<br>(11000-20000) |
| Guinea-Bissau | 1995 | Male   | 15 to 19 | 16%<br>(8.5-27%)               | 84%<br>(73-91%)          | 0.53<br>(0.19-1.1)                          | 1.8%<br>(0.81-3.5%)                  | 2.1%<br>(0.74-4.3%)                 | 3.7<br>(1.3-7.8)     | 320<br>(140-610)       |
| Guinea-Bissau | 1995 | Male   | 20 to 24 | 24%<br>(13-40%)                | 76%<br>(60-87%)          | 1.1<br>(0.45-2)                             | 4.8%<br>(2.4-8.4%)                   | 5.3%<br>(2.2-9.8%)                  | 12<br>(5-22)         | 910<br>(440-1600)      |
| Guinea-Bissau | 1995 | Male   | 25 to 29 | 30%<br>(16-47%)                | 70%<br>(53-84%)          | 1.6<br>(0.64-2.8)                           | 7.5%<br>(3.7-12%)                    | 8.7%<br>(4-15%)                     | 20<br>(8.8-33)       | 1300<br>(640-2100)     |
| Guinea-Bissau | 1995 | Male   | 30 to 34 | 34%<br>(18-52%)                | 66%<br>(48-82%)          | 1.9<br>(0.95-3.3)                           | 9.2%<br>(5.2-14%)                    | 11%<br>(5.7-17%)                    | 26<br>(14-40)        | 1500<br>(860-2300)     |
| Guinea-Bissau | 1995 | Male   | 35 to 39 | 37%<br>(20-56%)                | 63%<br>(44-80%)          | 2.1<br>(0.94-3.9)                           | 10%<br>(5.5-15%)                     | 12%<br>(6.6-19%)                    | 32<br>(17-49)        | 1700<br>(940-2600)     |
| Guinea-Bissau | 1995 | Male   | 40 to 44 | 38%<br>(22-57%)                | 62%<br>(43-78%)          | 2.2<br>(0.98-4.1)                           | 11%<br>(6-17%)                       | 13%<br>(7.1-20%)                    | 42<br>(22-65)        | 2000<br>(1000-3000)    |
| Guinea-Bissau | 1995 | Male   | 45 to 49 | 39%<br>(21-57%)                | 61%<br>(43-79%)          | 2.4<br>(0.99-4.4)                           | 12%<br>(6.6-18%)                     | 14%<br>(7.6-21%)                    | 45<br>(24-70)        | 1900<br>(1000-2900)    |
| Guinea-Bissau | 1995 | Male   | 50 to 54 | 39%<br>(22-60%)                | 61%<br>(40-78%)          | 2.4<br>(1-4.6)                              | 11%<br>(5.4-17%)                     | 13%<br>(6.4-20%)                    | 47<br>(22-74)        | 1700<br>(840-2700)     |
| Guinea-Bissau | 1995 | Male   | 55 to 59 | 39%<br>(23-59%)                | 61%<br>(41-77%)          | 2.4<br>(0.94-4.5)                           | 10%<br>(4.9-16%)                     | 12%<br>(5.6-19%)                    | 43<br>(20-72)        | 1400<br>(630-2300)     |
| Guinea-Bissau | 1995 | Male   | 60 to 64 | 39%<br>(22-59%)                | 61%<br>(41-78%)          | 2.1<br>(0.79-4.4)                           | 7.9%<br>(3.1-14%)                    | 9.1%<br>(3.6-16%)                   | 37<br>(15-67)        | 1000<br>(410-1800)     |
| Guinea-Bissau | 1995 | Male   | 65 to 69 | 39%<br>(22-57%)                | 61%<br>(43-78%)          | 1.8<br>(0.74-3.5)                           | 6.2%<br>(2.4-12%)                    | 7.1%<br>(2.8-14%)                   | 33<br>(12-63)        | 740<br>(280-1400)      |
| Guinea-Bissau | 1995 | Male   | 70 to 74 | 37%<br>(22-55%)                | 63%<br>(45-78%)          | 1.4<br>(0.53-2.8)                           | 4.6%<br>(1.3-10%)                    | 5.2%<br>(1.4-12%)                   | 26<br>(6.7-58)       | 470<br>(130-1000)      |

| Location      | Year | Sex    | Age      | Prevalence of current drinkers | Prevalence of abstainers | Population average of standard drinks daily | Percent of total attributable deaths | Percent of total attributable DALYs | Attributable deaths    | Attributable DALYs   |
|---------------|------|--------|----------|--------------------------------|--------------------------|---------------------------------------------|--------------------------------------|-------------------------------------|------------------------|----------------------|
| Guinea-Bissau | 1995 | Male   | 75 to 79 | 34%<br>(20-54%)                | 66%<br>(46-80%)          | 1.1<br>(0.35-2.3)                           | 3.1%<br>(0.5-8%)                     | 3.5%<br>(0.54-9.1%)                 | 13<br>(2-35)           | 190<br>(30-480)      |
| Guinea-Bissau | 1995 | Male   | 80 to 84 | 32%<br>(16-51%)                | 68%<br>(49-84%)          | 0.89<br>(0.29-1.9)                          | 2.4%<br>(0.4-5.7%)                   | 2.7%<br>(0.39-6.5%)                 | 5.1<br>(0.78-12)       | 54<br>(9.4-130)      |
| Guinea-Bissau | 1995 | Male   | 85 to 89 | 30%<br>(15-48%)                | 70%<br>(52-85%)          | 0.76<br>(0.25-1.6)                          | 1.8%<br>(0.21-4.8%)                  | 2%<br>(0.19-5.5%)                   | 1.7<br>(0.16-4.8)      | 13<br>(1.6-35)       |
| Guinea-Bissau | 1995 | Male   | 90 to 94 | 32%<br>(16-50%)                | 68%<br>(50-84%)          | 0.73<br>(0.22-1.7)                          | 1.2%<br>(-0.2-3.9%)                  | 1.3%<br>(-0.36-4.5%)                | 0.31<br>(-0.089-1.1)   | 1.7<br>(-0.29-5.8)   |
| Guinea-Bissau | 1995 | Male   | 95 plus  | 37%<br>(18-58%)                | 63%<br>(42-82%)          | 0.73<br>(0.16-1.9)                          | 1.2%<br>(-0.44-4.8%)                 | 1.2%<br>(-0.71-5.6%)                | 0.068<br>(-0.039-0.31) | 0.26<br>(-0.094-1.1) |
| Guinea-Bissau | 2000 | Female | All Ages | 25%<br>(20-32%)                | 75%<br>(68-80%)          | 0.71<br>(0.52-0.92)                         | 1.5%<br>(0.87-2.4%)                  | 2.7%<br>(1.2-4.8%)                  | 230<br>(100-410)       | 8200<br>(4600-13000) |
| Guinea-Bissau | 2000 | Female | 15 to 19 | 24%<br>(13-39%)                | 76%<br>(61-87%)          | 0.64<br>(0.26-1.2)                          | 1.5%<br>(0.63-3%)                    | 1.8%<br>(0.43-4.2%)                 | 2.7<br>(0.64-6.2)      | 260<br>(100-500)     |
| Guinea-Bissau | 2000 | Female | 20 to 24 | 29%<br>(15-46%)                | 71%<br>(54-85%)          | 1<br>(0.44-1.9)                             | 2.7%<br>(1.3-4.7%)                   | 2.9%<br>(0.93-5.7%)                 | 5.4<br>(1.9-11)        | 490<br>(230-860)     |
| Guinea-Bissau | 2000 | Female | 25 to 29 | 32%<br>(17-50%)                | 68%<br>(50-83%)          | 1.2<br>(0.54-2.1)                           | 3.2%<br>(1.6-5.4%)                   | 3.6%<br>(1.3-6.7%)                  | 7.6<br>(3-14)          | 570<br>(280-970)     |
| Guinea-Bissau | 2000 | Female | 30 to 34 | 35%<br>(19-53%)                | 65%<br>(47-81%)          | 1.4<br>(0.66-2.4)                           | 3.7%<br>(1.9-6.1%)                   | 4.4%<br>(2-7.7%)                    | 9.3<br>(4.3-16)        | 600<br>(320-990)     |
| Guinea-Bissau | 2000 | Female | 35 to 39 | 39%<br>(22-57%)                | 61%<br>(43-78%)          | 1.5<br>(0.68-2.5)                           | 4.3%<br>(2.2-7.2%)                   | 5.4%<br>(2.5-9.3%)                  | 12<br>(5.6-22)         | 690<br>(330-1200)    |
| Guinea-Bissau | 2000 | Female | 40 to 44 | 40%<br>(24-59%)                | 60%<br>(41-76%)          | 1.5<br>(0.7-2.7)                            | 5.1%<br>(2.5-8.6%)                   | 6.7%<br>(3.2-11%)                   | 16<br>(7.2-28)         | 790<br>(380-1400)    |
| Guinea-Bissau | 2000 | Female | 45 to 49 | 41%<br>(22-59%)                | 59%<br>(41-78%)          | 1.6<br>(0.68-2.8)                           | 5.8%<br>(2.6-10%)                    | 7.5%<br>(3.2-13%)                   | 22<br>(9.4-40)         | 930<br>(400-1700)    |
| Guinea-Bissau | 2000 | Female | 50 to 54 | 41%<br>(23-61%)                | 59%<br>(39-77%)          | 1.6<br>(0.73-3)                             | 6%<br>(2.4-11%)                      | 7.5%<br>(3-14%)                     | 24<br>(9-44)           | 860<br>(340-1600)    |
| Guinea-Bissau | 2000 | Female | 55 to 59 | 41%<br>(25-60%)                | 59%<br>(40-75%)          | 1.8<br>(0.75-3.3)                           | 6.5%<br>(2.2-12%)                    | 8%<br>(2.6-15%)                     | 30<br>(9.6-57)         | 930<br>(310-1800)    |
| Guinea-Bissau | 2000 | Female | 60 to 64 | 42%<br>(24-61%)                | 58%<br>(39-76%)          | 1.8<br>(0.7-3.6)                            | 5.5%<br>(1.5-11%)                    | 6.6%<br>(1.8-13%)                   | 27<br>(7.1-55)         | 720<br>(190-1500)    |
| Guinea-Bissau | 2000 | Female | 65 to 69 | 44%<br>(26-60%)                | 56%<br>(40-74%)          | 1.6<br>(0.73-3)                             | 4.7%<br>(0.8-10%)                    | 5.4%<br>(0.92-12%)                  | 27<br>(4.7-59)         | 600<br>(100-1300)    |
| Guinea-Bissau | 2000 | Female | 70 to 74 | 41%<br>(25-59%)                | 59%<br>(41-75%)          | 1.4<br>(0.55-2.7)                           | 3.6%<br>(-0.071-9.6%)                | 4.2%<br>(-0.057-11%)                | 24<br>(-0.3-64)        | 420<br>(-8.3-1100)   |
| Guinea-Bissau | 2000 | Female | 75 to 79 | 37%<br>(20-55%)                | 63%<br>(45-80%)          | 1.1<br>(0.36-2.4)                           | 2.4%<br>(-0.63-7.6%)                 | 2.7%<br>(-0.75-8.7%)                | 14<br>(-4.1-46)        | 200<br>(-55-640)     |
| Guinea-Bissau | 2000 | Female | 80 to 84 | 35%<br>(18-53%)                | 65%<br>(47-82%)          | 1<br>(0.33-2)                               | 1.8%<br>(-0.71-6.2%)                 | 2.1%<br>(-0.83-7.2%)                | 6.6<br>(-2.7-23)       | 69<br>(-27-240)      |
| Guinea-Bissau | 2000 | Female | 85 to 89 | 35%<br>(20-52%)                | 65%<br>(48-80%)          | 0.98<br>(0.36-2.1)                          | 1.5%<br>(-0.79-5.4%)                 | 1.7%<br>(-0.98-6.3%)                | 2.6<br>(-1.5-9.7)      | 19<br>(-10-71)       |
| Guinea-Bissau | 2000 | Female | 90 to 94 | 38%<br>(22-54%)                | 62%<br>(46-78%)          | 1<br>(0.35-2.2)                             | 1.2%<br>(-1.1-5.5%)                  | 1.4%<br>(-1.3-6.6%)                 | 0.67<br>(-0.63-3.2)    | 3.6<br>(-3-16)       |

| Location      | Year | Sex    | Age      | Prevalence of current drinkers | Prevalence of abstainers | Population average of standard drinks daily | Percent of total attributable deaths | Percent of total attributable DALYs | Attributable deaths  | Attributable DALYs     |
|---------------|------|--------|----------|--------------------------------|--------------------------|---------------------------------------------|--------------------------------------|-------------------------------------|----------------------|------------------------|
| Guinea-Bissau | 2000 | Female | 95 plus  | 42%<br>(22-62%)                | 58%<br>(38-78%)          | 1.1<br>(0.3-2.5)                            | 1.2%<br>(-1.4-5.9%)                  | 1.2%<br>(-1.8-6.8%)                 | 0.14<br>(-0.21-0.75) | 0.51<br>(-0.63-2.5)    |
| Guinea-Bissau | 2000 | Male   | All Ages | 22%<br>(17-28%)                | 78%<br>(72-83%)          | 0.87<br>(0.64-1.1)                          | 2.6%<br>(1.8-3.4%)                   | 4.3%<br>(2.7-6%)                    | 420<br>(270-600)     | 17000<br>(11000-22000) |
| Guinea-Bissau | 2000 | Male   | 15 to 19 | 17%<br>(8.6-29%)               | 83%<br>(71-91%)          | 0.54<br>(0.2-1.1)                           | 2%<br>(0.85-3.7%)                    | 2.2%<br>(0.8-4.7%)                  | 4.6<br>(1.5-9.5)     | 390<br>(170-750)       |
| Guinea-Bissau | 2000 | Male   | 20 to 24 | 25%<br>(13-41%)                | 75%<br>(59-87%)          | 1.1<br>(0.44-2)                             | 4.8%<br>(2.3-8.6%)                   | 5.4%<br>(2.2-10%)                   | 14<br>(5.6-26)       | 1000<br>(480-1900)     |
| Guinea-Bissau | 2000 | Male   | 25 to 29 | 31%<br>(17-48%)                | 69%<br>(52-83%)          | 1.6<br>(0.65-2.8)                           | 7.1%<br>(3.5-12%)                    | 8.1%<br>(3.6-14%)                   | 22<br>(10-38)        | 1500<br>(740-2500)     |
| Guinea-Bissau | 2000 | Male   | 30 to 34 | 35%<br>(18-53%)                | 65%<br>(47-82%)          | 1.9<br>(0.92-3.3)                           | 8.5%<br>(4.6-13%)                    | 9.9%<br>(5.2-16%)                   | 28<br>(14-45)        | 1700<br>(920-2600)     |
| Guinea-Bissau | 2000 | Male   | 35 to 39 | 38%<br>(21-57%)                | 62%<br>(43-79%)          | 2.1<br>(0.91-3.7)                           | 9.3%<br>(5.1-14%)                    | 11%<br>(5.8-17%)                    | 34<br>(18-52)        | 1800<br>(960-2700)     |
| Guinea-Bissau | 2000 | Male   | 40 to 44 | 39%<br>(23-58%)                | 61%<br>(42-77%)          | 2.2<br>(0.96-3.9)                           | 10%<br>(5.6-16%)                     | 12%<br>(6.3-19%)                    | 42<br>(21-66)        | 2000<br>(1000-3100)    |
| Guinea-Bissau | 2000 | Male   | 45 to 49 | 39%<br>(21-57%)                | 61%<br>(43-79%)          | 2.3<br>(0.97-4.4)                           | 11%<br>(5.9-17%)                     | 13%<br>(6.9-20%)                    | 54<br>(27-84)        | 2200<br>(1100-3500)    |
| Guinea-Bissau | 2000 | Male   | 50 to 54 | 39%<br>(22-60%)                | 61%<br>(40-78%)          | 2.3<br>(0.96-4.6)                           | 11%<br>(5.2-17%)                     | 13%<br>(6-20%)                      | 51<br>(23-83)        | 1900<br>(870-3000)     |
| Guinea-Bissau | 2000 | Male   | 55 to 59 | 39%<br>(23-58%)                | 61%<br>(42-77%)          | 2.3<br>(0.9-4.5)                            | 10%<br>(4.5-16%)                     | 12%<br>(5.1-19%)                    | 51<br>(23-84)        | 1600<br>(750-2600)     |
| Guinea-Bissau | 2000 | Male   | 60 to 64 | 40%<br>(22-59%)                | 60%<br>(41-78%)          | 2.1<br>(0.78-4.4)                           | 7.7%<br>(3-14%)                      | 8.9%<br>(3.4-16%)                   | 39<br>(14-71)        | 1000<br>(390-1900)     |
| Guinea-Bissau | 2000 | Male   | 65 to 69 | 40%<br>(23-58%)                | 60%<br>(42-77%)          | 1.8<br>(0.73-3.5)                           | 6.1%<br>(2.3-12%)                    | 7%<br>(2.5-14%)                     | 33<br>(11-63)        | 740<br>(260-1400)      |
| Guinea-Bissau | 2000 | Male   | 70 to 74 | 38%<br>(23-56%)                | 62%<br>(44-77%)          | 1.4<br>(0.53-2.7)                           | 4.5%<br>(1.1-10%)                    | 5.1%<br>(1.2-11%)                   | 25<br>(5.7-58)       | 450<br>(110-1000)      |
| Guinea-Bissau | 2000 | Male   | 75 to 79 | 35%<br>(20-54%)                | 65%<br>(46-80%)          | 1<br>(0.34-2.3)                             | 3%<br>(0.38-7.9%)                    | 3.4%<br>(0.4-8.9%)                  | 14<br>(1.7-38)       | 200<br>(26-530)        |
| Guinea-Bissau | 2000 | Male   | 80 to 84 | 32%<br>(17-51%)                | 68%<br>(49-83%)          | 0.88<br>(0.28-1.9)                          | 2.4%<br>(0.31-5.8%)                  | 2.7%<br>(0.31-6.7%)                 | 5.9<br>(0.65-15)     | 62<br>(8.2-150)        |
| Guinea-Bissau | 2000 | Male   | 85 to 89 | 31%<br>(16-50%)                | 69%<br>(50-84%)          | 0.76<br>(0.26-1.6)                          | 1.8%<br>(0.13-4.8%)                  | 2.1%<br>(0.062-5.5%)                | 2.1<br>(0.062-5.7)   | 16<br>(1.1-42)         |
| Guinea-Bissau | 2000 | Male   | 90 to 94 | 33%<br>(17-51%)                | 67%<br>(49-83%)          | 0.72<br>(0.22-1.6)                          | 1.2%<br>(-0.19-3.9%)                 | 1.3%<br>(-0.36-4.5%)                | 0.43<br>(-0.12-1.5)  | 2.4<br>(-0.36-7.6)     |
| Guinea-Bissau | 2000 | Male   | 95 plus  | 37%<br>(18-59%)                | 63%<br>(41-82%)          | 0.72<br>(0.17-1.8)                          | 1.4%<br>(-0.43-5.1%)                 | 1.5%<br>(-0.67-6%)                  | 0.1<br>(-0.047-0.42) | 0.38<br>(-0.12-1.5)    |
| Guinea-Bissau | 2005 | Female | All Ages | 25%<br>(20-32%)                | 75%<br>(68-80%)          | 0.72<br>(0.53-0.96)                         | 1.6%<br>(0.88-2.5%)                  | 2.8%<br>(1.2-4.9%)                  | 250<br>(110-450)     | 8800<br>(4900-14000)   |
| Guinea-Bissau | 2005 | Female | 15 to 19 | 23%<br>(13-38%)                | 77%<br>(62-87%)          | 0.63<br>(0.25-1.2)                          | 1.5%<br>(0.62-2.9%)                  | 1.8%<br>(0.47-4.2%)                 | 2.7<br>(0.71-6.3)    | 270<br>(110-530)       |
| Guinea-Bissau | 2005 | Female | 20 to 24 | 29%<br>(15-47%)                | 71%<br>(53-85%)          | 1<br>(0.44-1.8)                             | 2.7%<br>(1.2-4.8%)                   | 2.8%<br>(0.84-5.9%)                 | 6.2<br>(1.9-13)      | 560<br>(270-1000)      |

| Location      | Year | Sex    | Age      | Prevalence of current drinkers | Prevalence of abstainers | Population average of standard drinks daily | Percent of total attributable deaths | Percent of total attributable DALYs | Attributable deaths | Attributable DALYs     |
|---------------|------|--------|----------|--------------------------------|--------------------------|---------------------------------------------|--------------------------------------|-------------------------------------|---------------------|------------------------|
| Guinea-Bissau | 2005 | Female | 25 to 29 | 32%<br>(16-50%)                | 68%<br>(50-84%)          | 1.2<br>(0.55-2.2)                           | 2.8%<br>(1.3-4.8%)                   | 3%<br>(1.1-6%)                      | 8.3<br>(3.3-16)     | 640<br>(320-1100)      |
| Guinea-Bissau | 2005 | Female | 30 to 34 | 35%<br>(18-53%)                | 65%<br>(47-82%)          | 1.4<br>(0.68-2.5)                           | 3%<br>(1.6-5.2%)                     | 3.4%<br>(1.5-6.2%)                  | 10<br>(4.5-18)      | 660<br>(340-1100)      |
| Guinea-Bissau | 2005 | Female | 35 to 39 | 38%<br>(21-57%)                | 62%<br>(43-79%)          | 1.5<br>(0.72-2.5)                           | 3.7%<br>(1.8-6.3%)                   | 4.5%<br>(2-7.8%)                    | 13<br>(6-23)        | 730<br>(360-1200)      |
| Guinea-Bissau | 2005 | Female | 40 to 44 | 40%<br>(24-58%)                | 60%<br>(42-76%)          | 1.6<br>(0.73-2.7)                           | 4.5%<br>(2.2-7.7%)                   | 5.7%<br>(2.5-9.9%)                  | 17<br>(7.3-30)      | 810<br>(360-1400)      |
| Guinea-Bissau | 2005 | Female | 45 to 49 | 41%<br>(22-59%)                | 59%<br>(41-78%)          | 1.6<br>(0.68-2.9)                           | 5.4%<br>(2.2-9.3%)                   | 6.8%<br>(2.8-12%)                   | 22<br>(8.6-40)      | 920<br>(380-1700)      |
| Guinea-Bissau | 2005 | Female | 50 to 54 | 41%<br>(23-61%)                | 59%<br>(39-77%)          | 1.7<br>(0.73-3.1)                           | 5.8%<br>(2.2-11%)                    | 7.3%<br>(2.7-13%)                   | 29<br>(10-55)       | 1100<br>(400-2000)     |
| Guinea-Bissau | 2005 | Female | 55 to 59 | 41%<br>(24-59%)                | 59%<br>(41-76%)          | 1.8<br>(0.75-3.3)                           | 6.5%<br>(2.1-12%)                    | 8%<br>(2.6-15%)                     | 31<br>(10-62)       | 990<br>(320-1900)      |
| Guinea-Bissau | 2005 | Female | 60 to 64 | 42%<br>(25-61%)                | 58%<br>(39-75%)          | 1.8<br>(0.73-3.5)                           | 5.6%<br>(1.2-11%)                    | 6.7%<br>(1.4-13%)                   | 31<br>(6.3-65)      | 830<br>(170-1800)      |
| Guinea-Bissau | 2005 | Female | 65 to 69 | 43%<br>(26-60%)                | 57%<br>(40-74%)          | 1.7<br>(0.72-3)                             | 4.7%<br>(0.69-10%)                   | 5.5%<br>(0.83-13%)                  | 27<br>(4.1-62)      | 600<br>(83-1400)       |
| Guinea-Bissau | 2005 | Female | 70 to 74 | 41%<br>(26-58%)                | 59%<br>(42-74%)          | 1.4<br>(0.54-2.8)                           | 3.8%<br>(-0.083-9.9%)                | 4.4%<br>(-0.075-11%)                | 23<br>(-0.41-62)    | 410<br>(-9.5-1100)     |
| Guinea-Bissau | 2005 | Female | 75 to 79 | 37%<br>(21-56%)                | 63%<br>(44-79%)          | 1.1<br>(0.37-2.5)                           | 2.5%<br>(-0.66-8.2%)                 | 2.8%<br>(-0.77-9.3%)                | 14<br>(-3.7-46)     | 190<br>(-50-630)       |
| Guinea-Bissau | 2005 | Female | 80 to 84 | 35%<br>(19-54%)                | 65%<br>(46-81%)          | 1<br>(0.34-2.1)                             | 2%<br>(-0.64-6.7%)                   | 2.3%<br>(-0.75-7.8%)                | 7.2<br>(-2.4-25)    | 75<br>(-23-260)        |
| Guinea-Bissau | 2005 | Female | 85 to 89 | 35%<br>(19-54%)                | 65%<br>(46-81%)          | 1<br>(0.36-2.1)                             | 1.7%<br>(-0.8-6.2%)                  | 1.9%<br>(-0.97-7.2%)                | 3.3<br>(-1.6-12)    | 24<br>(-11-91)         |
| Guinea-Bissau | 2005 | Female | 90 to 94 | 38%<br>(21-55%)                | 62%<br>(45-79%)          | 1<br>(0.35-2.3)                             | 1.5%<br>(-1-6.1%)                    | 1.7%<br>(-1.3-7.3%)                 | 0.91<br>(-0.73-4)   | 4.7<br>(-3.4-20)       |
| Guinea-Bissau | 2005 | Female | 95 plus  | 42%<br>(22-63%)                | 58%<br>(37-78%)          | 1.1<br>(0.29-2.6)                           | 1.4%<br>(-1.4-6.3%)                  | 1.5%<br>(-1.8-7.2%)                 | 0.2<br>(-0.24-0.95) | 0.72<br>(-0.7-3.2)     |
| Guinea-Bissau | 2005 | Male   | All Ages | 21%<br>(16-27%)                | 79%<br>(73-84%)          | 0.89<br>(0.67-1.2)                          | 2.9%<br>(2-3.9%)                     | 4.7%<br>(3-6.6%)                    | 490<br>(310-700)    | 19000<br>(13000-26000) |
| Guinea-Bissau | 2005 | Male   | 15 to 19 | 17%<br>(8.6-28%)               | 83%<br>(72-91%)          | 0.53<br>(0.2-1.1)                           | 2%<br>(0.89-3.8%)                    | 2.3%<br>(0.8-4.8%)                  | 5.1<br>(1.7-11)     | 430<br>(190-820)       |
| Guinea-Bissau | 2005 | Male   | 20 to 24 | 25%<br>(13-41%)                | 75%<br>(59-87%)          | 1.1<br>(0.44-2)                             | 5%<br>(2.4-8.6%)                     | 5.5%<br>(2.3-9.9%)                  | 17<br>(7.3-30)      | 1300<br>(620-2200)     |
| Guinea-Bissau | 2005 | Male   | 25 to 29 | 30%<br>(16-48%)                | 70%<br>(52-84%)          | 1.6<br>(0.68-2.9)                           | 6.9%<br>(3.3-11%)                    | 7.9%<br>(3.5-13%)                   | 26<br>(12-44)       | 1700<br>(870-2800)     |
| Guinea-Bissau | 2005 | Male   | 30 to 34 | 34%<br>(18-52%)                | 66%<br>(48-82%)          | 1.9<br>(0.93-3.3)                           | 8%<br>(4.6-12%)                      | 9.2%<br>(5-14%)                     | 33<br>(18-51)       | 2000<br>(1100-3000)    |
| Guinea-Bissau | 2005 | Male   | 35 to 39 | 37%<br>(21-56%)                | 63%<br>(44-79%)          | 2.1<br>(0.95-3.7)                           | 8.9%<br>(4.9-14%)                    | 10%<br>(5.5-16%)                    | 39<br>(21-60)       | 2100<br>(1100-3100)    |
| Guinea-Bissau | 2005 | Male   | 40 to 44 | 38%<br>(22-57%)                | 62%<br>(43-78%)          | 2.2<br>(0.96-4.1)                           | 9.8%<br>(5-15%)                      | 11%<br>(5.8-18%)                    | 47<br>(24-73)       | 2200<br>(1100-3400)    |

| Location      | Year | Sex    | Age      | Prevalence of current drinkers | Prevalence of abstainers | Population average of standard drinks daily | Percent of total attributable deaths | Percent of total attributable DALYs | Attributable deaths   | Attributable DALYs   |
|---------------|------|--------|----------|--------------------------------|--------------------------|---------------------------------------------|--------------------------------------|-------------------------------------|-----------------------|----------------------|
| Guinea-Bissau | 2005 | Male   | 45 to 49 | 39%<br>(21-58%)                | 61%<br>(42-79%)          | 2.3<br>(0.99-4.5)                           | 11%<br>(5.8-17%)                     | 13%<br>(6.6-20%)                    | 58<br>(29-91)         | 2400<br>(1200-3700)  |
| Guinea-Bissau | 2005 | Male   | 50 to 54 | 39%<br>(22-60%)                | 61%<br>(40-78%)          | 2.4<br>(0.97-4.6)                           | 11%<br>(5.5-18%)                     | 13%<br>(6.4-20%)                    | 65<br>(31-110)        | 2400<br>(1200-3900)  |
| Guinea-Bissau | 2005 | Male   | 55 to 59 | 39%<br>(24-58%)                | 61%<br>(42-76%)          | 2.3<br>(0.94-4.4)                           | 10%<br>(4.7-17%)                     | 12%<br>(5.3-19%)                    | 59<br>(25-97)         | 1900<br>(800-3000)   |
| Guinea-Bissau | 2005 | Male   | 60 to 64 | 39%<br>(23-58%)                | 61%<br>(42-77%)          | 2.1<br>(0.77-4.2)                           | 8.1%<br>(3.1-14%)                    | 9.3%<br>(3.5-16%)                   | 50<br>(18-90)         | 1300<br>(500-2400)   |
| Guinea-Bissau | 2005 | Male   | 65 to 69 | 39%<br>(22-57%)                | 61%<br>(43-78%)          | 1.8<br>(0.73-3.5)                           | 6.4%<br>(2.3-12%)                    | 7.3%<br>(2.6-14%)                   | 37<br>(12-72)         | 830<br>(280-1600)    |
| Guinea-Bissau | 2005 | Male   | 70 to 74 | 38%<br>(22-55%)                | 62%<br>(45-78%)          | 1.4<br>(0.53-2.9)                           | 4.8%<br>(1.1-11%)                    | 5.4%<br>(1.2-12%)                   | 28<br>(6.2-65)        | 500<br>(110-1200)    |
| Guinea-Bissau | 2005 | Male   | 75 to 79 | 34%<br>(19-54%)                | 66%<br>(46-81%)          | 1.1<br>(0.33-2.4)                           | 3.2%<br>(0.37-8.5%)                  | 3.6%<br>(0.38-9.6%)                 | 16<br>(1.6-42)        | 220<br>(24-580)      |
| Guinea-Bissau | 2005 | Male   | 80 to 84 | 32%<br>(16-50%)                | 68%<br>(50-84%)          | 0.89<br>(0.28-1.9)                          | 2.6%<br>(0.36-6.4%)                  | 2.9%<br>(0.36-7.3%)                 | 7.1<br>(0.9-18)       | 74<br>(11-190)       |
| Guinea-Bissau | 2005 | Male   | 85 to 89 | 30%<br>(16-48%)                | 70%<br>(52-84%)          | 0.77<br>(0.25-1.7)                          | 2%<br>(0.17-5.3%)                    | 2.3%<br>(0.1-6.1%)                  | 2.7<br>(0.12-7.4)     | 20<br>(1.7-55)       |
| Guinea-Bissau | 2005 | Male   | 90 to 94 | 32%<br>(17-50%)                | 68%<br>(50-83%)          | 0.73<br>(0.22-1.7)                          | 1.4%<br>(-0.16-4.4%)                 | 1.5%<br>(-0.31-5.2%)                | 0.58<br>(-0.12-2)     | 3.1<br>(-0.36-10)    |
| Guinea-Bissau | 2005 | Male   | 95 plus  | 37%<br>(18-58%)                | 63%<br>(42-82%)          | 0.73<br>(0.17-1.8)                          | 1.5%<br>(-0.37-5.6%)                 | 1.7%<br>(-0.64-6.6%)                | 0.15<br>(-0.056-0.58) | 0.54<br>(-0.13-2)    |
| Guinea-Bissau | 2010 | Female | All Ages | 25%<br>(20-32%)                | 75%<br>(68-80%)          | 0.73<br>(0.52-1)                            | 1.7%<br>(0.92-2.8%)                  | 2.9%<br>(1.2-5.3%)                  | 250<br>(100-480)      | 9200<br>(4800-15000) |
| Guinea-Bissau | 2010 | Female | 15 to 19 | 24%<br>(13-37%)                | 76%<br>(63-87%)          | 0.64<br>(0.25-1.3)                          | 1.5%<br>(0.61-2.9%)                  | 1.8%<br>(0.41-4%)                   | 2.7<br>(0.63-6.2)     | 280<br>(110-540)     |
| Guinea-Bissau | 2010 | Female | 20 to 24 | 29%<br>(15-47%)                | 71%<br>(53-85%)          | 1<br>(0.4-1.9)                              | 2.6%<br>(1.3-4.8%)                   | 2.8%<br>(0.82-5.9%)                 | 5.9<br>(1.8-12)       | 570<br>(270-1000)    |
| Guinea-Bissau | 2010 | Female | 25 to 29 | 32%<br>(16-51%)                | 68%<br>(49-84%)          | 1.2<br>(0.53-2.2)                           | 2.6%<br>(1.3-4.5%)                   | 2.7%<br>(1-5.4%)                    | 8.7<br>(3.5-16)       | 690<br>(360-1200)    |
| Guinea-Bissau | 2010 | Female | 30 to 34 | 35%<br>(17-53%)                | 65%<br>(47-83%)          | 1.4<br>(0.64-2.5)                           | 2.7%<br>(1.4-4.6%)                   | 2.9%<br>(1.3-5.5%)                  | 11<br>(4.9-19)        | 700<br>(370-1200)    |
| Guinea-Bissau | 2010 | Female | 35 to 39 | 38%<br>(21-57%)                | 62%<br>(43-79%)          | 1.5<br>(0.7-2.7)                            | 3.2%<br>(1.5-5.7%)                   | 3.8%<br>(1.7-6.8%)                  | 14<br>(6.1-25)        | 780<br>(380-1300)    |
| Guinea-Bissau | 2010 | Female | 40 to 44 | 40%<br>(23-59%)                | 60%<br>(41-77%)          | 1.6<br>(0.69-2.8)                           | 4.2%<br>(1.9-7.3%)                   | 5.1%<br>(2.3-8.9%)                  | 18<br>(7.8-32)        | 870<br>(400-1500)    |
| Guinea-Bissau | 2010 | Female | 45 to 49 | 41%<br>(22-59%)                | 59%<br>(41-78%)          | 1.6<br>(0.67-3)                             | 4.9%<br>(2-8.9%)                     | 6.2%<br>(2.5-11%)                   | 22<br>(8.8-41)        | 940<br>(390-1700)    |
| Guinea-Bissau | 2010 | Female | 50 to 54 | 41%<br>(23-62%)                | 59%<br>(38-77%)          | 1.7<br>(0.7-3.3)                            | 5.5%<br>(2-11%)                      | 6.9%<br>(2.5-13%)                   | 28<br>(9.9-56)        | 1000<br>(370-2000)   |
| Guinea-Bissau | 2010 | Female | 55 to 59 | 41%<br>(24-60%)                | 59%<br>(40-76%)          | 1.8<br>(0.71-3.5)                           | 6.2%<br>(1.9-12%)                    | 7.6%<br>(2.3-15%)                   | 37<br>(11-76)         | 1200<br>(340-2400)   |
| Guinea-Bissau | 2010 | Female | 60 to 64 | 42%<br>(24-61%)                | 58%<br>(39-76%)          | 1.8<br>(0.69-3.7)                           | 5.3%<br>(0.95-11%)                   | 6.3%<br>(1.1-14%)                   | 31<br>(5.6-67)        | 840<br>(150-1800)    |



| Location      | Year | Sex    | Age      | Prevalence of current drinkers | Prevalence of abstainers | Population average of standard drinks daily | Percent of total attributable deaths | Percent of total attributable DALYs | Attributable deaths | Attributable DALYs     |
|---------------|------|--------|----------|--------------------------------|--------------------------|---------------------------------------------|--------------------------------------|-------------------------------------|---------------------|------------------------|
| Guinea-Bissau | 2010 | Female | 65 to 69 | 43%<br>(26-61%)                | 57%<br>(39-74%)          | 1.6<br>(0.69-3.2)                           | 4.4%<br>(0.43-11%)                   | 5.2%<br>(0.48-12%)                  | 30<br>(2.8-72)      | 660<br>(61-1600)       |
| Guinea-Bissau | 2010 | Female | 70 to 74 | 41%<br>(25-58%)                | 59%<br>(42-75%)          | 1.4<br>(0.51-2.8)                           | 3.5%<br>(-0.33-9.3%)                 | 4.1%<br>(-0.44-11%)                 | 22<br>(-2.3-60)     | 390<br>(-40-1100)      |
| Guinea-Bissau | 2010 | Female | 75 to 79 | 37%<br>(21-56%)                | 63%<br>(44-79%)          | 1.1<br>(0.36-2.4)                           | 2.3%<br>(-0.78-7.8%)                 | 2.7%<br>(-0.95-9.1%)                | 13<br>(-4.4-44)     | 180<br>(-61-630)       |
| Guinea-Bissau | 2010 | Female | 80 to 84 | 35%<br>(18-53%)                | 65%<br>(47-82%)          | 1<br>(0.36-2.1)                             | 1.8%<br>(-0.87-6.5%)                 | 2.1%<br>(-1-7.5%)                   | 6.5<br>(-3.1-23)    | 68<br>(-31-240)        |
| Guinea-Bissau | 2010 | Female | 85 to 89 | 35%<br>(19-53%)                | 65%<br>(47-81%)          | 0.99<br>(0.35-2.1)                          | 1.5%<br>(-0.96-6.1%)                 | 1.8%<br>(-1.2-7.2%)                 | 3.2<br>(-2.1-13)    | 24<br>(-14-95)         |
| Guinea-Bissau | 2010 | Female | 90 to 94 | 38%<br>(21-55%)                | 62%<br>(45-79%)          | 1<br>(0.33-2.2)                             | 1.3%<br>(-1.2-5.8%)                  | 1.5%<br>(-1.5-6.9%)                 | 0.95<br>(-0.98-4.5) | 5<br>(-4.7-23)         |
| Guinea-Bissau | 2010 | Female | 95 plus  | 42%<br>(22-63%)                | 58%<br>(37-78%)          | 1.1<br>(0.27-2.5)                           | 1.2%<br>(-1.4-6.4%)                  | 1.3%<br>(-1.8-7.4%)                 | 0.2<br>(-0.28-1.1)  | 0.76<br>(-0.87-3.9)    |
| Guinea-Bissau | 2010 | Male   | All Ages | 22%<br>(17-28%)                | 78%<br>(72-83%)          | 0.9<br>(0.63-1.2)                           | 3.3%<br>(2.2-4.4%)                   | 5.1%<br>(3.1-7.3%)                  | 530<br>(310-770)    | 21000<br>(14000-28000) |
| Guinea-Bissau | 2010 | Male   | 15 to 19 | 17%<br>(8.9-28%)               | 83%<br>(72-91%)          | 0.53<br>(0.19-1.1)                          | 2%<br>(0.88-3.8%)                    | 2.3%<br>(0.78-4.8%)                 | 5.2<br>(1.9-11)     | 450<br>(200-860)       |
| Guinea-Bissau | 2010 | Male   | 20 to 24 | 25%<br>(13-40%)                | 75%<br>(60-87%)          | 1.1<br>(0.42-2)                             | 4.9%<br>(2.3-8.4%)                   | 5.4%<br>(2.1-10%)                   | 17<br>(6.6-31)      | 1300<br>(600-2200)     |
| Guinea-Bissau | 2010 | Male   | 25 to 29 | 30%<br>(16-47%)                | 70%<br>(53-84%)          | 1.5<br>(0.68-2.8)                           | 6.6%<br>(3.2-11%)                    | 7.5%<br>(3.3-13%)                   | 29<br>(13-49)       | 1900<br>(940-3200)     |
| Guinea-Bissau | 2010 | Male   | 30 to 34 | 34%<br>(18-53%)                | 66%<br>(47-82%)          | 1.9<br>(0.9-3.4)                            | 7.5%<br>(4-12%)                      | 8.6%<br>(4.3-14%)                   | 36<br>(19-56)       | 2100<br>(1200-3300)    |
| Guinea-Bissau | 2010 | Male   | 35 to 39 | 37%<br>(20-57%)                | 63%<br>(43-80%)          | 2.1<br>(0.93-3.9)                           | 8.2%<br>(4.4-13%)                    | 9.5%<br>(5-15%)                     | 42<br>(22-66)       | 2200<br>(1200-3400)    |
| Guinea-Bissau | 2010 | Male   | 40 to 44 | 38%<br>(22-58%)                | 62%<br>(42-78%)          | 2.2<br>(0.93-4.2)                           | 9.4%<br>(4.7-15%)                    | 11%<br>(5.3-17%)                    | 50<br>(23-79)       | 2300<br>(1100-3600)    |
| Guinea-Bissau | 2010 | Male   | 45 to 49 | 39%<br>(21-57%)                | 61%<br>(43-79%)          | 2.3<br>(0.91-4.6)                           | 11%<br>(5.4-16%)                     | 12%<br>(6.2-19%)                    | 60<br>(29-97)       | 2500<br>(1200-4000)    |
| Guinea-Bissau | 2010 | Male   | 50 to 54 | 40%<br>(22-60%)                | 60%<br>(40-78%)          | 2.4<br>(0.98-4.7)                           | 11%<br>(5.2-17%)                     | 13%<br>(6-20%)                      | 65<br>(30-110)      | 2400<br>(1100-3900)    |
| Guinea-Bissau | 2010 | Male   | 55 to 59 | 40%<br>(24-60%)                | 60%<br>(40-76%)          | 2.3<br>(0.91-4.6)                           | 10%<br>(4.5-17%)                     | 12%<br>(5.2-20%)                    | 71<br>(30-120)      | 2300<br>(950-3700)     |
| Guinea-Bissau | 2010 | Male   | 60 to 64 | 40%<br>(23-59%)                | 60%<br>(41-77%)          | 2.1<br>(0.76-4.4)                           | 8.1%<br>(3-14%)                      | 9.3%<br>(3.4-17%)                   | 55<br>(19-100)      | 1500<br>(520-2700)     |
| Guinea-Bissau | 2010 | Male   | 65 to 69 | 40%<br>(24-57%)                | 60%<br>(43-76%)          | 1.8<br>(0.68-3.6)                           | 6.4%<br>(2.2-12%)                    | 7.3%<br>(2.4-14%)                   | 44<br>(14-86)       | 990<br>(330-1900)      |
| Guinea-Bissau | 2010 | Male   | 70 to 74 | 38%<br>(23-56%)                | 62%<br>(44-77%)          | 1.4<br>(0.52-2.9)                           | 4.6%<br>(1.1-10%)                    | 5.3%<br>(1.2-12%)                   | 29<br>(6.3-66)      | 520<br>(120-1200)      |
| Guinea-Bissau | 2010 | Male   | 75 to 79 | 35%<br>(19-53%)                | 65%<br>(47-81%)          | 1.1<br>(0.32-2.3)                           | 3.1%<br>(0.44-8.1%)                  | 3.5%<br>(0.45-9.3%)                 | 16<br>(2-41)        | 220<br>(29-570)        |
| Guinea-Bissau | 2010 | Male   | 80 to 84 | 32%<br>(16-51%)                | 68%<br>(49-84%)          | 0.89<br>(0.28-1.9)                          | 2.5%<br>(0.38-6.2%)                  | 2.8%<br>(0.38-7.1%)                 | 7.3<br>(0.95-19)    | 76<br>(12-190)         |

| Location      | Year | Sex    | Age      | Prevalence of current drinkers | Prevalence of abstainers | Population average of standard drinks daily | Percent of total attributable deaths | Percent of total attributable DALYs | Attributable deaths   | Attributable DALYs     |
|---------------|------|--------|----------|--------------------------------|--------------------------|---------------------------------------------|--------------------------------------|-------------------------------------|-----------------------|------------------------|
| Guinea-Bissau | 2010 | Male   | 85 to 89 | 31%<br>(16-49%)                | 69%<br>(51-84%)          | 0.76<br>(0.25-1.7)                          | 2%<br>(0.11-5.5%)                    | 2.2%<br>(0.019-6.2%)                | 2.9<br>(0.024-8.5)    | 22<br>(1.3-62)         |
| Guinea-Bissau | 2010 | Male   | 90 to 94 | 32%<br>(17-50%)                | 68%<br>(50-83%)          | 0.71<br>(0.21-1.7)                          | 1.3%<br>(-0.17-4.5%)                 | 1.5%<br>(-0.33-5.3%)                | 0.65<br>(-0.14-2.4)   | 3.5<br>(-0.45-12)      |
| Guinea-Bissau | 2010 | Male   | 95 plus  | 36%<br>(18-58%)                | 64%<br>(42-82%)          | 0.71<br>(0.16-1.9)                          | 1.5%<br>(-0.4-5.3%)                  | 1.6%<br>(-0.66-6.3%)                | 0.16<br>(-0.067-0.64) | 0.6<br>(-0.16-2.2)     |
| Guinea-Bissau | 2016 | Female | All Ages | 26%<br>(20-32%)                | 74%<br>(68-80%)          | 0.74<br>(0.41-1.2)                          | 2%<br>(0.83-3.5%)                    | 3.2%<br>(0.89-6.7%)                 | 270<br>(74-560)       | 9800<br>(4100-18000)   |
| Guinea-Bissau | 2016 | Female | 15 to 19 | 23%<br>(13-39%)                | 77%<br>(61-87%)          | 0.64<br>(0.22-1.4)                          | 1.4%<br>(0.58-2.7%)                  | 1.6%<br>(0.29-3.8%)                 | 2.5<br>(0.46-6.1)     | 270<br>(110-550)       |
| Guinea-Bissau | 2016 | Female | 20 to 24 | 29%<br>(15-46%)                | 71%<br>(54-85%)          | 0.99<br>(0.35-2.1)                          | 2.7%<br>(1.3-4.8%)                   | 2.8%<br>(0.75-6.1%)                 | 5.5<br>(1.5-12)       | 570<br>(280-1000)      |
| Guinea-Bissau | 2016 | Female | 25 to 29 | 32%<br>(16-51%)                | 68%<br>(49-84%)          | 1.2<br>(0.47-2.4)                           | 2.7%<br>(1.3-4.7%)                   | 2.9%<br>(0.91-5.9%)                 | 8.4<br>(2.9-17)       | 700<br>(330-1200)      |
| Guinea-Bissau | 2016 | Female | 30 to 34 | 35%<br>(18-53%)                | 65%<br>(47-82%)          | 1.4<br>(0.57-2.7)                           | 2.8%<br>(1.3-4.9%)                   | 3.1%<br>(1.2-6.2%)                  | 12<br>(4.7-22)        | 790<br>(390-1400)      |
| Guinea-Bissau | 2016 | Female | 35 to 39 | 38%<br>(21-57%)                | 62%<br>(43-79%)          | 1.5<br>(0.6-2.9)                            | 3.3%<br>(1.4-5.9%)                   | 4%<br>(1.5-7.4%)                    | 15<br>(5.4-29)        | 870<br>(360-1600)      |
| Guinea-Bissau | 2016 | Female | 40 to 44 | 40%<br>(24-58%)                | 60%<br>(42-76%)          | 1.5<br>(0.59-3.1)                           | 4.2%<br>(1.7-7.6%)                   | 5.4%<br>(2-9.8%)                    | 19<br>(7.4-36)        | 950<br>(380-1700)      |
| Guinea-Bissau | 2016 | Female | 45 to 49 | 41%<br>(21-60%)                | 59%<br>(40-79%)          | 1.6<br>(0.58-3.4)                           | 5.1%<br>(1.8-9.8%)                   | 6.6%<br>(2.2-13%)                   | 24<br>(7.7-46)        | 1000<br>(340-1900)     |
| Guinea-Bissau | 2016 | Female | 50 to 54 | 41%<br>(23-62%)                | 59%<br>(38-77%)          | 1.7<br>(0.62-3.6)                           | 5.6%<br>(1.7-11%)                    | 7.1%<br>(2.2-15%)                   | 29<br>(8.5-58)        | 1100<br>(320-2100)     |
| Guinea-Bissau | 2016 | Female | 55 to 59 | 41%<br>(24-60%)                | 59%<br>(40-76%)          | 1.8<br>(0.62-4.2)                           | 6.2%<br>(1.4-13%)                    | 7.8%<br>(1.8-16%)                   | 36<br>(8.5-76)        | 1100<br>(270-2400)     |
| Guinea-Bissau | 2016 | Female | 60 to 64 | 42%<br>(24-61%)                | 58%<br>(39-76%)          | 1.8<br>(0.63-4.2)                           | 5.2%<br>(0.68-11%)                   | 6.3%<br>(0.84-14%)                  | 37<br>(5-83)          | 990<br>(140-2200)      |
| Guinea-Bissau | 2016 | Female | 65 to 69 | 43%<br>(25-61%)                | 57%<br>(39-75%)          | 1.7<br>(0.59-3.7)                           | 4.4%<br>(-0.042-11%)                 | 5.2%<br>(-0.041-13%)                | 31<br>(-0.25-81)      | 700<br>(-7-1800)       |
| Guinea-Bissau | 2016 | Female | 70 to 74 | 41%<br>(25-59%)                | 59%<br>(41-75%)          | 1.4<br>(0.45-3.1)                           | 3.4%<br>(-0.57-10%)                  | 4%<br>(-0.68-12%)                   | 24<br>(-4-76)         | 440<br>(-74-1400)      |
| Guinea-Bissau | 2016 | Female | 75 to 79 | 37%<br>(21-55%)                | 63%<br>(45-79%)          | 1.1<br>(0.32-2.6)                           | 2.3%<br>(-1-8.6%)                    | 2.6%<br>(-1.2-9.9%)                 | 13<br>(-6.3-52)       | 190<br>(-86-720)       |
| Guinea-Bissau | 2016 | Female | 80 to 84 | 34%<br>(18-54%)                | 66%<br>(46-82%)          | 1<br>(0.32-2.3)                             | 1.8%<br>(-1-7%)                      | 2.1%<br>(-1.2-8.1%)                 | 6.5<br>(-3.8-26)      | 68<br>(-39-270)        |
| Guinea-Bissau | 2016 | Female | 85 to 89 | 35%<br>(19-53%)                | 65%<br>(47-81%)          | 0.98<br>(0.3-2.3)                           | 1.5%<br>(-1.2-6.4%)                  | 1.7%<br>(-1.4-7.5%)                 | 3.2<br>(-2.5-13)      | 24<br>(-18-100)        |
| Guinea-Bissau | 2016 | Female | 90 to 94 | 38%<br>(21-55%)                | 62%<br>(45-79%)          | 1<br>(0.29-2.3)                             | 1.3%<br>(-1.3-6.1%)                  | 1.5%<br>(-1.7-7.3%)                 | 1<br>(-1.2-5.1)       | 5.3<br>(-5.5-26)       |
| Guinea-Bissau | 2016 | Female | 95 plus  | 42%<br>(22-63%)                | 58%<br>(37-78%)          | 1.1<br>(0.26-2.7)                           | 1.2%<br>(-1.5-6.2%)                  | 1.3%<br>(-2-7.2%)                   | 0.24<br>(-0.38-1.3)   | 0.9<br>(-1.1-4.6)      |
| Guinea-Bissau | 2016 | Male   | All Ages | 22%<br>(17-29%)                | 78%<br>(71-83%)          | 0.91<br>(0.5-1.5)                           | 3.7%<br>(2.1-5.4%)                   | 5.5%<br>(2.8-8.6%)                  | 570<br>(280-910)      | 22000<br>(13000-34000) |

| Location      | Year | Sex    | Age      | Prevalence of current drinkers | Prevalence of abstainers | Population average of standard drinks daily | Percent of total attributable deaths | Percent of total attributable DALYs | Attributable deaths   | Attributable DALYs     |
|---------------|------|--------|----------|--------------------------------|--------------------------|---------------------------------------------|--------------------------------------|-------------------------------------|-----------------------|------------------------|
| Guinea-Bissau | 2016 | Male   | 15 to 19 | 17%<br>(8.8-29%)               | 83%<br>(71-91%)          | 0.53<br>(0.17-1.2)                          | 1.8%<br>(0.75-3.6%)                  | 2%<br>(0.63-4.4%)                   | 5.1<br>(1.5-11)       | 460<br>(190-910)       |
| Guinea-Bissau | 2016 | Male   | 20 to 24 | 25%<br>(13-40%)                | 75%<br>(60-87%)          | 1.1<br>(0.37-2.3)                           | 4.7%<br>(2-8.3%)                     | 5.2%<br>(1.8-10%)                   | 17<br>(5.8-33)        | 1300<br>(580-2400)     |
| Guinea-Bissau | 2016 | Male   | 25 to 29 | 30%<br>(17-47%)                | 70%<br>(53-83%)          | 1.5<br>(0.57-3.1)                           | 6.5%<br>(3-11%)                      | 7.4%<br>(3-13%)                     | 29<br>(12-51)         | 2000<br>(920-3300)     |
| Guinea-Bissau | 2016 | Male   | 30 to 34 | 34%<br>(18-52%)                | 66%<br>(48-82%)          | 1.9<br>(0.78-3.7)                           | 7.2%<br>(3.8-12%)                    | 8.3%<br>(4-14%)                     | 40<br>(19-64)         | 2400<br>(1200-3800)    |
| Guinea-Bissau | 2016 | Male   | 35 to 39 | 37%<br>(21-56%)                | 63%<br>(44-79%)          | 2.1<br>(0.83-4.2)                           | 7.8%<br>(3.9-12%)                    | 9%<br>(4.3-14%)                     | 46<br>(21-72)         | 2400<br>(1200-3800)    |
| Guinea-Bissau | 2016 | Male   | 40 to 44 | 38%<br>(22-58%)                | 62%<br>(42-78%)          | 2.2<br>(0.8-4.5)                            | 8.7%<br>(3.9-14%)                    | 10%<br>(4.5-16%)                    | 54<br>(23-87)         | 2500<br>(1100-4100)    |
| Guinea-Bissau | 2016 | Male   | 45 to 49 | 39%<br>(21-58%)                | 61%<br>(42-79%)          | 2.3<br>(0.8-5)                              | 10%<br>(4.7-16%)                     | 12%<br>(5.4-19%)                    | 64<br>(28-110)        | 2700<br>(1200-4400)    |
| Guinea-Bissau | 2016 | Male   | 50 to 54 | 39%<br>(22-59%)                | 61%<br>(41-78%)          | 2.4<br>(0.84-5.3)                           | 10%<br>(4.4-17%)                     | 12%<br>(5-20%)                      | 67<br>(27-120)        | 2400<br>(1000-4200)    |
| Guinea-Bissau | 2016 | Male   | 55 to 59 | 39%<br>(23-59%)                | 61%<br>(41-77%)          | 2.3<br>(0.76-5.1)                           | 10%<br>(3.9-17%)                     | 12%<br>(4.6-20%)                    | 70<br>(26-120)        | 2200<br>(850-3800)     |
| Guinea-Bissau | 2016 | Male   | 60 to 64 | 39%<br>(22-58%)                | 61%<br>(42-78%)          | 2.1<br>(0.67-4.8)                           | 7.9%<br>(2.6-14%)                    | 9%<br>(2.9-17%)                     | 64<br>(20-120)        | 1700<br>(540-3200)     |
| Guinea-Bissau | 2016 | Male   | 65 to 69 | 39%<br>(23-57%)                | 61%<br>(43-77%)          | 1.8<br>(0.6-4)                              | 6.1%<br>(1.8-13%)                    | 7%<br>(2-15%)                       | 48<br>(13-100)        | 1100<br>(320-2200)     |
| Guinea-Bissau | 2016 | Male   | 70 to 74 | 38%<br>(23-56%)                | 62%<br>(44-77%)          | 1.4<br>(0.44-3.1)                           | 4.5%<br>(0.97-11%)                   | 5.2%<br>(1.1-13%)                   | 34<br>(6.8-86)        | 610<br>(130-1500)      |
| Guinea-Bissau | 2016 | Male   | 75 to 79 | 35%<br>(20-53%)                | 65%<br>(47-80%)          | 1.1<br>(0.29-2.7)                           | 3.1%<br>(0.4-8.6%)                   | 3.5%<br>(0.42-9.8%)                 | 17<br>(2.1-50)        | 240<br>(30-690)        |
| Guinea-Bissau | 2016 | Male   | 80 to 84 | 32%<br>(17-51%)                | 68%<br>(49-83%)          | 0.89<br>(0.26-2.1)                          | 2.5%<br>(0.29-7%)                    | 2.8%<br>(0.25-8%)                   | 7.7<br>(0.67-22)      | 80<br>(9.1-230)        |
| Guinea-Bissau | 2016 | Male   | 85 to 89 | 31%<br>(16-49%)                | 69%<br>(51-84%)          | 0.76<br>(0.23-1.8)                          | 2%<br>(0.084-5.9%)                   | 2.2%<br>(0.026-6.8%)                | 3.1<br>(0.036-9.4)    | 23<br>(1-69)           |
| Guinea-Bissau | 2016 | Male   | 90 to 94 | 33%<br>(17-51%)                | 67%<br>(49-83%)          | 0.72<br>(0.19-1.7)                          | 1.3%<br>(-0.15-4.7%)                 | 1.5%<br>(-0.31-5.4%)                | 0.72<br>(-0.15-2.6)   | 3.9<br>(-0.44-14)      |
| Guinea-Bissau | 2016 | Male   | 95 plus  | 37%<br>(19-60%)                | 63%<br>(40-81%)          | 0.73<br>(0.15-2)                            | 1.5%<br>(-0.43-5.8%)                 | 1.6%<br>(-0.68-6.8%)                | 0.19<br>(-0.083-0.82) | 0.72<br>(-0.21-2.8)    |
| Liberia       | 1990 | Female | All Ages | 20%<br>(17-23%)                | 80%<br>(77-83%)          | 1.3<br>(1-1.5)                              | 1.5%<br>(1.2-1.8%)                   | 3.5%<br>(2.6-4.4%)                  | 560<br>(420-710)      | 18000<br>(14000-23000) |
| Liberia       | 1990 | Female | 15 to 19 | 18%<br>(12-25%)                | 82%<br>(75-88%)          | 1.3<br>(0.79-1.9)                           | 1.9%<br>(1.2-2.9%)                   | 2.2%<br>(1.2-3.6%)                  | 7.6<br>(4.1-13)       | 690<br>(420-1000)      |
| Liberia       | 1990 | Female | 20 to 24 | 23%<br>(15-32%)                | 77%<br>(68-85%)          | 1.9<br>(1.1-2.8)                            | 3.4%<br>(2.3-5%)                     | 3.9%<br>(2.3-6%)                    | 14<br>(8.2-22)        | 1200<br>(770-1700)     |
| Liberia       | 1990 | Female | 25 to 29 | 27%<br>(17-38%)                | 73%<br>(62-83%)          | 2.2<br>(1.4-3.2)                            | 4.2%<br>(2.8-5.9%)                   | 5.1%<br>(3.2-7.6%)                  | 16<br>(10-24)         | 1200<br>(820-1700)     |
| Liberia       | 1990 | Female | 30 to 34 | 30%<br>(19-43%)                | 70%<br>(57-81%)          | 2.4<br>(1.5-3.6)                            | 4.3%<br>(3-6.1%)                     | 5.6%<br>(3.7-8.2%)                  | 17<br>(11-25)         | 1100<br>(790-1600)     |

| Location | Year | Sex    | Age      | Prevalence of current drinkers | Prevalence of abstainers | Population average of standard drinks daily | Percent of total attributable deaths | Percent of total attributable DALYs | Attributable deaths | Attributable DALYs     |
|----------|------|--------|----------|--------------------------------|--------------------------|---------------------------------------------|--------------------------------------|-------------------------------------|---------------------|------------------------|
| Liberia  | 1990 | Female | 35 to 39 | 33%<br>(21-47%)                | 67%<br>(53-79%)          | 2.6<br>(1.6-3.9)                            | 5.4%<br>(3.8-7.5%)                   | 7.3%<br>(5-10%)                     | 23<br>(15-32)       | 1300<br>(890-1800)     |
| Liberia  | 1990 | Female | 40 to 44 | 35%<br>(23-50%)                | 65%<br>(50-77%)          | 2.6<br>(1.6-3.8)                            | 6%<br>(4.1-8.1%)                     | 8.4%<br>(5.8-12%)                   | 24<br>(16-33)       | 1200<br>(840-1600)     |
| Liberia  | 1990 | Female | 45 to 49 | 35%<br>(21-51%)                | 65%<br>(49-79%)          | 2.3<br>(1.3-3.6)                            | 6.7%<br>(4.5-9.4%)                   | 9.3%<br>(6.2-13%)                   | 31<br>(20-45)       | 1400<br>(900-1900)     |
| Liberia  | 1990 | Female | 50 to 54 | 36%<br>(23-51%)                | 64%<br>(49-77%)          | 2.7<br>(1.6-4.2)                            | 8.9%<br>(6-12%)                      | 12%<br>(8.4-17%)                    | 47<br>(32-65)       | 1800<br>(1200-2400)    |
| Liberia  | 1990 | Female | 55 to 59 | 36%<br>(24-51%)                | 64%<br>(49-76%)          | 3.7<br>(2-6.2)                              | 11%<br>(7.4-15%)                     | 15%<br>(9.8-20%)                    | 65<br>(43-89)       | 2100<br>(1400-2800)    |
| Liberia  | 1990 | Female | 60 to 64 | 37%<br>(24-53%)                | 63%<br>(47-76%)          | 4<br>(2.2-6.9)                              | 11%<br>(7.6-15%)                     | 14%<br>(9.8-19%)                    | 75<br>(51-100)      | 2000<br>(1400-2800)    |
| Liberia  | 1990 | Female | 65 to 69 | 39%<br>(27-53%)                | 61%<br>(47-73%)          | 3.7<br>(2.1-5.8)                            | 12%<br>(7.9-16%)                     | 15%<br>(9.8-20%)                    | 88<br>(58-120)      | 2000<br>(1300-2700)    |
| Liberia  | 1990 | Female | 70 to 74 | 36%<br>(25-51%)                | 64%<br>(49-75%)          | 2.9<br>(1.6-4.9)                            | 11%<br>(6.4-16%)                     | 13%<br>(7.7-19%)                    | 78<br>(45-110)      | 1400<br>(830-2000)     |
| Liberia  | 1990 | Female | 75 to 79 | 31%<br>(20-45%)                | 69%<br>(55-80%)          | 2.2<br>(1-3.9)                              | 8.2%<br>(4.1-13%)                    | 9.9%<br>(5-15%)                     | 44<br>(23-69)       | 620<br>(320-970)       |
| Liberia  | 1990 | Female | 80 to 84 | 29%<br>(18-42%)                | 71%<br>(58-82%)          | 1.9<br>(0.95-3.3)                           | 6.9%<br>(3.6-11%)                    | 8.2%<br>(4.1-13%)                   | 19<br>(9.5-30)      | 200<br>(99-310)        |
| Liberia  | 1990 | Female | 85 to 89 | 29%<br>(19-42%)                | 71%<br>(58-81%)          | 1.9<br>(0.94-3.2)                           | 6.1%<br>(2.8-10%)                    | 7.2%<br>(3.3-12%)                   | 9<br>(4.2-15)       | 66<br>(31-110)         |
| Liberia  | 1990 | Female | 90 to 94 | 32%<br>(21-45%)                | 68%<br>(55-79%)          | 1.9<br>(0.93-3.5)                           | 5.4%<br>(2.2-10%)                    | 6.4%<br>(2.5-12%)                   | 2.7<br>(1.1-5.3)    | 14<br>(5.6-26)         |
| Liberia  | 1990 | Female | 95 plus  | 35%<br>(21-52%)                | 65%<br>(48-79%)          | 2<br>(0.84-4)                               | 4.8%<br>(1.4-9.9%)                   | 5.6%<br>(1.6-12%)                   | 0.66<br>(0.18-1.4)  | 2.3<br>(0.69-4.7)      |
| Liberia  | 1990 | Male   | All Ages | 27%<br>(23-31%)                | 73%<br>(69-77%)          | 1.7<br>(1.4-2.1)                            | 1.9%<br>(1.5-2.3%)                   | 3.6%<br>(2.8-4.5%)                  | 670<br>(520-840)    | 27000<br>(22000-32000) |
| Liberia  | 1990 | Male   | 15 to 19 | 20%<br>(13-27%)                | 80%<br>(73-87%)          | 1.1<br>(0.67-1.7)                           | 1.7%<br>(1-2.6%)                     | 1.8%<br>(1-2.9%)                    | 9.7<br>(5.5-15)     | 830<br>(510-1200)      |
| Liberia  | 1990 | Male   | 20 to 24 | 34%<br>(24-45%)                | 66%<br>(55-76%)          | 2.7<br>(1.7-3.8)                            | 3.7%<br>(2.6-5.1%)                   | 3.8%<br>(2.5-5.4%)                  | 30<br>(20-42)       | 2200<br>(1500-3000)    |
| Liberia  | 1990 | Male   | 25 to 29 | 48%<br>(34-61%)                | 52%<br>(39-66%)          | 4.1<br>(2.8-5.6)                            | 6.6%<br>(4.8-8.5%)                   | 7.3%<br>(5.2-9.7%)                  | 44<br>(32-58)       | 2900<br>(2200-3800)    |
| Liberia  | 1990 | Male   | 30 to 34 | 52%<br>(36-67%)                | 48%<br>(33-64%)          | 4.6<br>(3.1-6.3)                            | 8.5%<br>(6.4-11%)                    | 10%<br>(7.5-13%)                    | 48<br>(36-62)       | 2900<br>(2200-3700)    |
| Liberia  | 1990 | Male   | 35 to 39 | 48%<br>(32-65%)                | 52%<br>(35-68%)          | 4.2<br>(2.7-5.8)                            | 9.9%<br>(7.5-13%)                    | 13%<br>(9.4-16%)                    | 50<br>(37-65)       | 2700<br>(2000-3400)    |
| Liberia  | 1990 | Male   | 40 to 44 | 47%<br>(32-65%)                | 53%<br>(35-68%)          | 4<br>(2.6-5.7)                              | 12%<br>(9.1-15%)                     | 16%<br>(12-19%)                     | 54<br>(41-68)       | 2600<br>(2000-3200)    |
| Liberia  | 1990 | Male   | 45 to 49 | 48%<br>(31-65%)                | 52%<br>(35-69%)          | 4.1<br>(2.5-6)                              | 14%<br>(10-17%)                      | 18%<br>(14-23%)                     | 70<br>(53-90)       | 3000<br>(2300-3800)    |
| Liberia  | 1990 | Male   | 50 to 54 | 48%<br>(33-66%)                | 52%<br>(34-67%)          | 3.9<br>(2.5-5.9)                            | 14%<br>(10-18%)                      | 18%<br>(14-24%)                     | 73<br>(53-95)       | 2700<br>(2000-3500)    |

| Location | Year | Sex    | Age      | Prevalence of current drinkers | Prevalence of abstainers | Population average of standard drinks daily | Percent of total attributable deaths | Percent of total attributable DALYs | Attributable deaths   | Attributable DALYs     |
|----------|------|--------|----------|--------------------------------|--------------------------|---------------------------------------------|--------------------------------------|-------------------------------------|-----------------------|------------------------|
| Liberia  | 1990 | Male   | 55 to 59 | 48%<br>(33-65%)                | 52%<br>(35-67%)          | 3.6<br>(2.1-5.6)                            | 13%<br>(9-17%)                       | 17%<br>(12-22%)                     | 70<br>(48-94)         | 2300<br>(1600-3000)    |
| Liberia  | 1990 | Male   | 60 to 64 | 47%<br>(31-65%)                | 53%<br>(35-69%)          | 3.2<br>(1.8-5.1)                            | 11%<br>(7.2-15%)                     | 14%<br>(9.3-19%)                    | 66<br>(42-92)         | 1800<br>(1100-2500)    |
| Liberia  | 1990 | Male   | 65 to 69 | 47%<br>(32-64%)                | 53%<br>(36-68%)          | 2.7<br>(1.6-4.3)                            | 9.8%<br>(6.1-14%)                    | 12%<br>(7.8-18%)                    | 62<br>(39-91)         | 1400<br>(890-2100)     |
| Liberia  | 1990 | Male   | 70 to 74 | 45%<br>(32-62%)                | 55%<br>(38-68%)          | 2.2<br>(1.2-3.5)                            | 8.1%<br>(4.5-13%)                    | 10%<br>(5.5-16%)                    | 50<br>(28-80)         | 910<br>(500-1400)      |
| Liberia  | 1990 | Male   | 75 to 79 | 42%<br>(29-59%)                | 58%<br>(41-71%)          | 1.7<br>(0.86-3)                             | 6.1%<br>(2.9-10%)                    | 7.4%<br>(3.5-13%)                   | 28<br>(13-49)         | 400<br>(190-680)       |
| Liberia  | 1990 | Male   | 80 to 84 | 39%<br>(25-56%)                | 61%<br>(44-75%)          | 1.4<br>(0.7-2.3)                            | 4.7%<br>(2.1-8.1%)                   | 5.7%<br>(2.5-9.9%)                  | 10<br>(4.6-18)        | 110<br>(48-190)        |
| Liberia  | 1990 | Male   | 85 to 89 | 36%<br>(24-52%)                | 64%<br>(48-76%)          | 1.1<br>(0.55-1.8)                           | 3.3%<br>(1.4-5.7%)                   | 3.9%<br>(1.6-6.9%)                  | 4.2<br>(1.7-7.6)      | 31<br>(13-56)          |
| Liberia  | 1990 | Male   | 90 to 94 | 37%<br>(24-53%)                | 63%<br>(47-76%)          | 0.88<br>(0.43-1.5)                          | 1.8%<br>(0.46-3.7%)                  | 2.1%<br>(0.43-4.4%)                 | 0.8<br>(0.16-1.7)     | 4.2<br>(1.1-8.9)       |
| Liberia  | 1990 | Male   | 95 plus  | 41%<br>(24-60%)                | 59%<br>(40-76%)          | 0.76<br>(0.32-1.6)                          | 1.2%<br>(-0.19-3.5%)                 | 1.3%<br>(-0.48-4.2%)                | 0.12<br>(-0.045-0.39) | 0.47<br>(-0.076-1.4)   |
| Liberia  | 1995 | Female | All Ages | 20%<br>(17-24%)                | 80%<br>(76-83%)          | 1.3<br>(1-1.5)                              | 1.7%<br>(1.3-2.1%)                   | 3.8%<br>(2.8-4.9%)                  | 610<br>(440-780)      | 20000<br>(15000-24000) |
| Liberia  | 1995 | Female | 15 to 19 | 18%<br>(12-25%)                | 82%<br>(75-88%)          | 1.2<br>(0.79-1.8)                           | 2.1%<br>(1.3-3.3%)                   | 2.7%<br>(1.4-4.6%)                  | 8.6<br>(4.4-14)       | 750<br>(450-1200)      |
| Liberia  | 1995 | Female | 20 to 24 | 23%<br>(16-32%)                | 77%<br>(68-84%)          | 1.9<br>(1.2-2.7)                            | 3.8%<br>(2.4-5.7%)                   | 4.5%<br>(2.6-7%)                    | 17<br>(9.6-26)        | 1400<br>(850-2000)     |
| Liberia  | 1995 | Female | 25 to 29 | 27%<br>(17-39%)                | 73%<br>(61-83%)          | 2.2<br>(1.3-3.1)                            | 4.3%<br>(2.9-6.3%)                   | 5.3%<br>(3.2-8.2%)                  | 19<br>(11-29)         | 1400<br>(880-2000)     |
| Liberia  | 1995 | Female | 30 to 34 | 30%<br>(19-45%)                | 70%<br>(55-81%)          | 2.4<br>(1.5-3.5)                            | 4.4%<br>(2.9-6.3%)                   | 5.6%<br>(3.4-8.3%)                  | 19<br>(12-29)         | 1200<br>(820-1800)     |
| Liberia  | 1995 | Female | 35 to 39 | 34%<br>(21-50%)                | 66%<br>(50-79%)          | 2.6<br>(1.6-3.9)                            | 5.4%<br>(3.7-7.8%)                   | 7.3%<br>(4.7-11%)                   | 25<br>(16-36)         | 1400<br>(950-2000)     |
| Liberia  | 1995 | Female | 40 to 44 | 36%<br>(23-52%)                | 64%<br>(48-77%)          | 2.6<br>(1.6-3.9)                            | 6%<br>(4-8.5%)                       | 8.4%<br>(5.6-12%)                   | 28<br>(18-39)         | 1400<br>(910-1900)     |
| Liberia  | 1995 | Female | 45 to 49 | 36%<br>(21-52%)                | 64%<br>(48-79%)          | 2.4<br>(1.3-3.6)                            | 6.8%<br>(4.4-9.7%)                   | 9.4%<br>(6-14%)                     | 30<br>(19-43)         | 1300<br>(820-1800)     |
| Liberia  | 1995 | Female | 50 to 54 | 36%<br>(23-52%)                | 64%<br>(48-77%)          | 2.6<br>(1.6-4.1)                            | 9%<br>(6-12%)                        | 12%<br>(8.2-17%)                    | 50<br>(33-70)         | 1800<br>(1200-2600)    |
| Liberia  | 1995 | Female | 55 to 59 | 36%<br>(24-52%)                | 64%<br>(48-76%)          | 3.5<br>(1.9-6)                              | 11%<br>(7.3-16%)                     | 15%<br>(9.6-20%)                    | 70<br>(45-97)         | 2200<br>(1400-3100)    |
| Liberia  | 1995 | Female | 60 to 64 | 38%<br>(24-54%)                | 62%<br>(46-76%)          | 3.9<br>(2.1-6.7)                            | 11%<br>(7.4-15%)                     | 14%<br>(9.5-20%)                    | 79<br>(52-110)        | 2100<br>(1400-3000)    |
| Liberia  | 1995 | Female | 65 to 69 | 39%<br>(27-55%)                | 61%<br>(45-73%)          | 3.6<br>(2-5.5)                              | 12%<br>(7.6-17%)                     | 15%<br>(9.5-20%)                    | 94<br>(61-130)        | 2100<br>(1400-2900)    |
| Liberia  | 1995 | Female | 70 to 74 | 37%<br>(25-52%)                | 63%<br>(48-75%)          | 2.8<br>(1.5-4.7)                            | 11%<br>(6.2-16%)                     | 13%<br>(7.3-19%)                    | 89<br>(49-130)        | 1600<br>(890-2300)     |

| Location | Year | Sex    | Age      | Prevalence of current drinkers | Prevalence of abstainers | Population average of standard drinks daily | Percent of total attributable deaths | Percent of total attributable DALYs | Attributable deaths | Attributable DALYs     |
|----------|------|--------|----------|--------------------------------|--------------------------|---------------------------------------------|--------------------------------------|-------------------------------------|---------------------|------------------------|
| Liberia  | 1995 | Female | 75 to 79 | 31%<br>(20-46%)                | 69%<br>(54-80%)          | 2.1<br>(1-3.6)                              | 8.1%<br>(4.1-13%)                    | 9.6%<br>(4.9-15%)                   | 48<br>(24-78)       | 670<br>(340-1100)      |
| Liberia  | 1995 | Female | 80 to 84 | 29%<br>(18-42%)                | 71%<br>(58-82%)          | 1.8<br>(0.93-3)                             | 6.7%<br>(3.3-11%)                    | 7.9%<br>(3.8-13%)                   | 21<br>(10-34)       | 220<br>(110-350)       |
| Liberia  | 1995 | Female | 85 to 89 | 29%<br>(19-42%)                | 71%<br>(58-81%)          | 1.8<br>(0.9-3)                              | 5.8%<br>(2.7-10%)                    | 6.9%<br>(3.1-12%)                   | 12<br>(5.4-20)      | 85<br>(40-140)         |
| Liberia  | 1995 | Female | 90 to 94 | 32%<br>(21-46%)                | 68%<br>(54-79%)          | 1.8<br>(0.88-3.3)                           | 5.1%<br>(1.9-9.9%)                   | 6.1%<br>(2.2-12%)                   | 3.6<br>(1.3-7)      | 18<br>(6.8-35)         |
| Liberia  | 1995 | Female | 95 plus  | 35%<br>(21-53%)                | 65%<br>(47-79%)          | 1.9<br>(0.81-3.8)                           | 4.6%<br>(1.3-9.9%)                   | 5.3%<br>(1.4-12%)                   | 0.8<br>(0.21-1.7)   | 2.7<br>(0.77-6)        |
| Liberia  | 1995 | Male   | All Ages | 27%<br>(23-32%)                | 73%<br>(68-77%)          | 1.7<br>(1.4-2)                              | 2%<br>(1.6-2.5%)                     | 3.8%<br>(2.9-4.8%)                  | 670<br>(510-850)    | 26000<br>(21000-33000) |
| Liberia  | 1995 | Male   | 15 to 19 | 20%<br>(13-27%)                | 80%<br>(73-87%)          | 1.1<br>(0.66-1.6)                           | 1.9%<br>(1.1-3%)                     | 2.1%<br>(1.1-3.6%)                  | 8.8<br>(4.4-14)     | 760<br>(450-1200)      |
| Liberia  | 1995 | Male   | 20 to 24 | 35%<br>(24-45%)                | 65%<br>(55-76%)          | 2.6<br>(1.7-3.7)                            | 4.4%<br>(2.8-6.3%)                   | 4.8%<br>(2.8-7.1%)                  | 29<br>(17-43)       | 2200<br>(1400-3100)    |
| Liberia  | 1995 | Male   | 25 to 29 | 48%<br>(34-62%)                | 52%<br>(38-66%)          | 4<br>(2.8-5.4)                              | 7.2%<br>(4.8-9.8%)                   | 8.4%<br>(5.4-12%)                   | 43<br>(28-59)       | 2900<br>(1900-3800)    |
| Liberia  | 1995 | Male   | 30 to 34 | 52%<br>(37-67%)                | 48%<br>(33-63%)          | 4.5<br>(3.1-6)                              | 8.8%<br>(6.4-12%)                    | 11%<br>(7.5-14%)                    | 48<br>(33-64)       | 2900<br>(2100-3700)    |
| Liberia  | 1995 | Male   | 35 to 39 | 49%<br>(33-66%)                | 51%<br>(34-67%)          | 4<br>(2.6-5.7)                              | 9.8%<br>(7.1-13%)                    | 13%<br>(9-17%)                      | 50<br>(36-66)       | 2700<br>(1900-3500)    |
| Liberia  | 1995 | Male   | 40 to 44 | 47%<br>(33-64%)                | 53%<br>(36-67%)          | 3.8<br>(2.5-5.5)                            | 11%<br>(8.4-15%)                     | 15%<br>(11-19%)                     | 55<br>(39-71)       | 2600<br>(1900-3300)    |
| Liberia  | 1995 | Male   | 45 to 49 | 48%<br>(31-65%)                | 52%<br>(35-69%)          | 3.9<br>(2.4-5.7)                            | 13%<br>(9.6-17%)                     | 18%<br>(13-23%)                     | 60<br>(44-78)       | 2500<br>(1900-3300)    |
| Liberia  | 1995 | Male   | 50 to 54 | 49%<br>(33-67%)                | 51%<br>(33-67%)          | 3.8<br>(2.4-5.6)                            | 14%<br>(9.9-18%)                     | 18%<br>(13-24%)                     | 75<br>(53-99)       | 2800<br>(2000-3600)    |
| Liberia  | 1995 | Male   | 55 to 59 | 49%<br>(33-65%)                | 51%<br>(35-67%)          | 3.6<br>(2-5.5)                              | 13%<br>(8.8-17%)                     | 17%<br>(12-23%)                     | 72<br>(48-99)       | 2300<br>(1600-3200)    |
| Liberia  | 1995 | Male   | 60 to 64 | 48%<br>(33-65%)                | 52%<br>(35-67%)          | 3.1<br>(1.8-5)                              | 11%<br>(6.8-16%)                     | 14%<br>(8.9-20%)                    | 66<br>(41-93)       | 1800<br>(1100-2500)    |
| Liberia  | 1995 | Male   | 65 to 69 | 48%<br>(33-65%)                | 52%<br>(35-67%)          | 2.7<br>(1.6-4.1)                            | 9.8%<br>(6-14%)                      | 12%<br>(7.6-18%)                    | 60<br>(37-89)       | 1400<br>(830-2000)     |
| Liberia  | 1995 | Male   | 70 to 74 | 46%<br>(33-63%)                | 54%<br>(37-67%)          | 2.2<br>(1.2-3.5)                            | 8.2%<br>(4.6-13%)                    | 10%<br>(5.6-16%)                    | 52<br>(29-82)       | 940<br>(530-1500)      |
| Liberia  | 1995 | Male   | 75 to 79 | 43%<br>(29-59%)                | 57%<br>(41-71%)          | 1.7<br>(0.89-2.8)                           | 6.1%<br>(2.8-11%)                    | 7.4%<br>(3.3-13%)                   | 30<br>(13-53)       | 420<br>(190-740)       |
| Liberia  | 1995 | Male   | 80 to 84 | 40%<br>(25-56%)                | 60%<br>(44-75%)          | 1.3<br>(0.72-2.2)                           | 4.7%<br>(2.1-8.4%)                   | 5.7%<br>(2.5-10%)                   | 11<br>(5-21)        | 120<br>(52-210)        |
| Liberia  | 1995 | Male   | 85 to 89 | 37%<br>(25-52%)                | 63%<br>(48-75%)          | 1.1<br>(0.55-1.8)                           | 3.3%<br>(1.4-6.1%)                   | 4%<br>(1.6-7.2%)                    | 5.6<br>(2.2-10)     | 41<br>(17-75)          |
| Liberia  | 1995 | Male   | 90 to 94 | 38%<br>(24-53%)                | 62%<br>(47-76%)          | 0.88<br>(0.45-1.5)                          | 1.9%<br>(0.48-3.9%)                  | 2.2%<br>(0.43-4.7%)                 | 1.2<br>(0.24-2.6)   | 6.4<br>(1.6-13)        |

| Location | Year | Sex    | Age      | Prevalence of current drinkers | Prevalence of abstainers | Population average of standard drinks daily | Percent of total attributable deaths | Percent of total attributable DALYs | Attributable deaths  | Attributable DALYs     |
|----------|------|--------|----------|--------------------------------|--------------------------|---------------------------------------------|--------------------------------------|-------------------------------------|----------------------|------------------------|
| Liberia  | 1995 | Male   | 95 plus  | 41%<br>(25-60%)                | 59%<br>(40-75%)          | 0.76<br>(0.32-1.6)                          | 1.4%<br>(-0.074-3.9%)                | 1.6%<br>(-0.3-4.8%)                 | 0.21<br>(-0.039-0.6) | 0.76<br>(-0.039-2.1)   |
| Liberia  | 2000 | Female | All Ages | 21%<br>(18-24%)                | 79%<br>(76-82%)          | 1.1<br>(0.91-1.3)                           | 1.8%<br>(1.3-2.3%)                   | 3.9%<br>(2.7-5.2%)                  | 700<br>(490-960)     | 23000<br>(17000-29000) |
| Liberia  | 2000 | Female | 15 to 19 | 18%<br>(12-25%)                | 82%<br>(75-88%)          | 1.1<br>(0.68-1.6)                           | 2.1%<br>(1.3-3.5%)                   | 2.9%<br>(1.5-5.1%)                  | 9.2<br>(4.6-17)      | 840<br>(480-1400)      |
| Liberia  | 2000 | Female | 20 to 24 | 23%<br>(15-32%)                | 77%<br>(68-85%)          | 1.7<br>(1-2.4)                              | 3.7%<br>(2.4-5.5%)                   | 4.4%<br>(2.4-7.1%)                  | 18<br>(10-30)        | 1600<br>(1000-2400)    |
| Liberia  | 2000 | Female | 25 to 29 | 27%<br>(17-38%)                | 73%<br>(62-83%)          | 1.9<br>(1.2-2.7)                            | 3.6%<br>(2.3-5.3%)                   | 4.2%<br>(2.4-6.6%)                  | 21<br>(12-32)        | 1600<br>(1000-2200)    |
| Liberia  | 2000 | Female | 30 to 34 | 30%<br>(20-44%)                | 70%<br>(56-80%)          | 2.1<br>(1.3-3)                              | 3.5%<br>(2.3-5.1%)                   | 4.2%<br>(2.5-6.4%)                  | 21<br>(13-32)        | 1400<br>(930-2000)     |
| Liberia  | 2000 | Female | 35 to 39 | 34%<br>(21-49%)                | 66%<br>(51-79%)          | 2.3<br>(1.4-3.3)                            | 4.3%<br>(2.8-6.3%)                   | 5.5%<br>(3.4-8.5%)                  | 28<br>(17-41)        | 1600<br>(1000-2300)    |
| Liberia  | 2000 | Female | 40 to 44 | 35%<br>(23-51%)                | 65%<br>(49-77%)          | 2.2<br>(1.4-3.3)                            | 4.8%<br>(3.2-7.1%)                   | 6.4%<br>(4.1-9.7%)                  | 31<br>(20-47)        | 1500<br>(1000-2200)    |
| Liberia  | 2000 | Female | 45 to 49 | 36%<br>(22-51%)                | 64%<br>(49-78%)          | 2<br>(1.2-3)                                | 5.5%<br>(3.4-8.2%)                   | 7.5%<br>(4.6-11%)                   | 36<br>(22-55)        | 1600<br>(970-2300)     |
| Liberia  | 2000 | Female | 50 to 54 | 36%<br>(23-51%)                | 64%<br>(49-77%)          | 2.2<br>(1.3-3.5)                            | 7.6%<br>(4.9-11%)                    | 10%<br>(6.5-14%)                    | 51<br>(31-75)        | 1900<br>(1200-2800)    |
| Liberia  | 2000 | Female | 55 to 59 | 36%<br>(24-51%)                | 64%<br>(49-76%)          | 3<br>(1.6-5)                                | 10%<br>(6.2-14%)                     | 13%<br>(8-19%)                      | 83<br>(50-120)       | 2700<br>(1600-3900)    |
| Liberia  | 2000 | Female | 60 to 64 | 37%<br>(24-53%)                | 63%<br>(47-76%)          | 3.3<br>(1.8-5.4)                            | 10%<br>(6.5-14%)                     | 13%<br>(8.2-18%)                    | 96<br>(60-140)       | 2600<br>(1600-3800)    |
| Liberia  | 2000 | Female | 65 to 69 | 39%<br>(27-53%)                | 61%<br>(47-73%)          | 3<br>(1.8-4.6)                              | 10%<br>(6.3-15%)                     | 13%<br>(7.9-19%)                    | 110<br>(67-160)      | 2500<br>(1500-3700)    |
| Liberia  | 2000 | Female | 70 to 74 | 36%<br>(25-51%)                | 64%<br>(49-75%)          | 2.4<br>(1.3-3.9)                            | 9.2%<br>(4.6-14%)                    | 11%<br>(5.6-17%)                    | 100<br>(51-160)      | 1800<br>(920-2900)     |
| Liberia  | 2000 | Female | 75 to 79 | 31%<br>(20-45%)                | 69%<br>(55-80%)          | 1.8<br>(0.86-3.1)                           | 6.6%<br>(3-11%)                      | 7.9%<br>(3.5-14%)                   | 60<br>(27-100)       | 830<br>(380-1400)      |
| Liberia  | 2000 | Female | 80 to 84 | 28%<br>(18-42%)                | 72%<br>(58-82%)          | 1.5<br>(0.78-2.6)                           | 5.3%<br>(2.3-9.3%)                   | 6.3%<br>(2.7-11%)                   | 24<br>(10-43)        | 250<br>(110-440)       |
| Liberia  | 2000 | Female | 85 to 89 | 29%<br>(18-41%)                | 71%<br>(59-82%)          | 1.5<br>(0.78-2.5)                           | 4.5%<br>(1.8-8.1%)                   | 5.3%<br>(2.2-9.6%)                  | 10<br>(4.3-19)       | 77<br>(32-140)         |
| Liberia  | 2000 | Female | 90 to 94 | 31%<br>(20-45%)                | 69%<br>(55-80%)          | 1.5<br>(0.75-2.7)                           | 3.9%<br>(1.4-8.3%)                   | 4.7%<br>(1.6-10%)                   | 3.8<br>(1.3-8.3)     | 19<br>(6.8-41)         |
| Liberia  | 2000 | Female | 95 plus  | 35%<br>(20-52%)                | 65%<br>(48-80%)          | 1.6<br>(0.67-3.1)                           | 3.5%<br>(0.85-8.3%)                  | 4.1%<br>(0.84-10%)                  | 0.87<br>(0.18-2.1)   | 3<br>(0.7-7)           |
| Liberia  | 2000 | Male   | All Ages | 28%<br>(24-33%)                | 72%<br>(67-76%)          | 1.5<br>(1.2-1.8)                            | 2.3%<br>(1.8-2.9%)                   | 4.2%<br>(3.1-5.5%)                  | 800<br>(580-1100)    | 32000<br>(25000-40000) |
| Liberia  | 2000 | Male   | 15 to 19 | 20%<br>(14-28%)                | 80%<br>(72-86%)          | 0.93<br>(0.57-1.4)                          | 2.6%<br>(1.6-3.9%)                   | 3.8%<br>(2-6.1%)                    | 11<br>(5.8-17)       | 950<br>(560-1400)      |
| Liberia  | 2000 | Male   | 20 to 24 | 35%<br>(24-46%)                | 65%<br>(54-76%)          | 2.2<br>(1.4-3.1)                            | 7%<br>(4.7-9.9%)                     | 9.3%<br>(5.8-13%)                   | 36<br>(23-53)        | 2700<br>(1800-3800)    |

| Location | Year | Sex    | Age      | Prevalence of current drinkers | Prevalence of abstainers | Population average of standard drinks daily | Percent of total attributable deaths | Percent of total attributable DALYs | Attributable deaths  | Attributable DALYs     |
|----------|------|--------|----------|--------------------------------|--------------------------|---------------------------------------------|--------------------------------------|-------------------------------------|----------------------|------------------------|
| Liberia  | 2000 | Male   | 25 to 29 | 48%<br>(33-62%)                | 52%<br>(38-67%)          | 3.3<br>(2.3-4.6)                            | 9.4%<br>(6.4-13%)                    | 12%<br>(7.9-17%)                    | 56<br>(37-76)        | 3700<br>(2600-4900)    |
| Liberia  | 2000 | Male   | 30 to 34 | 53%<br>(37-68%)                | 47%<br>(32-63%)          | 3.8<br>(2.6-5.1)                            | 9.8%<br>(7-13%)                      | 13%<br>(8.8-18%)                    | 62<br>(44-84)        | 3700<br>(2700-5000)    |
| Liberia  | 2000 | Male   | 35 to 39 | 49%<br>(33-66%)                | 51%<br>(34-67%)          | 3.4<br>(2.3-4.8)                            | 9.7%<br>(6.9-13%)                    | 13%<br>(8.8-18%)                    | 64<br>(45-85)        | 3400<br>(2500-4500)    |
| Liberia  | 2000 | Male   | 40 to 44 | 47%<br>(32-63%)                | 53%<br>(37-68%)          | 3.3<br>(2.1-4.7)                            | 10%<br>(7.6-14%)                     | 14%<br>(10-18%)                     | 69<br>(50-92)        | 3300<br>(2400-4400)    |
| Liberia  | 2000 | Male   | 45 to 49 | 48%<br>(32-66%)                | 52%<br>(34-68%)          | 3.3<br>(2-4.8)                              | 12%<br>(8.4-16%)                     | 16%<br>(11-21%)                     | 77<br>(55-100)       | 3300<br>(2300-4400)    |
| Liberia  | 2000 | Male   | 50 to 54 | 49%<br>(34-66%)                | 51%<br>(34-66%)          | 3.2<br>(2-4.8)                              | 12%<br>(8.5-16%)                     | 16%<br>(11-22%)                     | 78<br>(54-110)       | 2900<br>(2000-3900)    |
| Liberia  | 2000 | Male   | 55 to 59 | 49%<br>(33-66%)                | 51%<br>(34-67%)          | 3<br>(1.8-4.7)                              | 12%<br>(7.6-17%)                     | 15%<br>(9.9-21%)                    | 88<br>(56-130)       | 2800<br>(1800-4000)    |
| Liberia  | 2000 | Male   | 60 to 64 | 48%<br>(33-66%)                | 52%<br>(34-67%)          | 2.7<br>(1.5-4.2)                            | 9.6%<br>(5.7-14%)                    | 12%<br>(7.1-18%)                    | 80<br>(46-120)       | 2200<br>(1300-3300)    |
| Liberia  | 2000 | Male   | 65 to 69 | 48%<br>(33-64%)                | 52%<br>(36-67%)          | 2.3<br>(1.4-3.5)                            | 8.1%<br>(4.7-13%)                    | 10%<br>(5.9-16%)                    | 69<br>(40-110)       | 1600<br>(920-2500)     |
| Liberia  | 2000 | Male   | 70 to 74 | 46%<br>(33-62%)                | 54%<br>(38-67%)          | 1.9<br>(1.1-3)                              | 6.6%<br>(3.4-11%)                    | 8.1%<br>(4.2-14%)                   | 57<br>(29-97)        | 1000<br>(530-1700)     |
| Liberia  | 2000 | Male   | 75 to 79 | 44%<br>(30-60%)                | 56%<br>(40-70%)          | 1.5<br>(0.77-2.5)                           | 4.9%<br>(1.9-9%)                     | 5.9%<br>(2.3-11%)                   | 35<br>(13-65)        | 490<br>(190-910)       |
| Liberia  | 2000 | Male   | 80 to 84 | 41%<br>(26-57%)                | 59%<br>(43-74%)          | 1.2<br>(0.62-2)                             | 3.7%<br>(1.5-7%)                     | 4.4%<br>(1.6-8.5%)                  | 13<br>(4.7-25)       | 130<br>(51-260)        |
| Liberia  | 2000 | Male   | 85 to 89 | 38%<br>(25-53%)                | 62%<br>(47-75%)          | 0.93<br>(0.49-1.6)                          | 2.5%<br>(0.86-5.1%)                  | 3%<br>(0.91-6%)                     | 4.8<br>(1.5-9.8)     | 36<br>(12-71)          |
| Liberia  | 2000 | Male   | 90 to 94 | 39%<br>(25-54%)                | 61%<br>(46-75%)          | 0.77<br>(0.39-1.3)                          | 1.4%<br>(0.12-3.2%)                  | 1.6%<br>(-0.0035-3.7%)              | 1.2<br>(-0.0026-2.8) | 6.2<br>(0.54-14)       |
| Liberia  | 2000 | Male   | 95 plus  | 42%<br>(26-60%)                | 58%<br>(40-74%)          | 0.67<br>(0.28-1.4)                          | 1%<br>(-0.27-3.2%)                   | 1.1%<br>(-0.57-3.8%)                | 0.21<br>(-0.11-0.7)  | 0.81<br>(-0.22-2.5)    |
| Liberia  | 2005 | Female | All Ages | 19%<br>(16-22%)                | 81%<br>(78-84%)          | 0.93<br>(0.76-1.1)                          | 1.7%<br>(1.3-2.3%)                   | 3.7%<br>(2.5-5.1%)                  | 630<br>(420-880)     | 20000<br>(15000-27000) |
| Liberia  | 2005 | Female | 15 to 19 | 15%<br>(10-21%)                | 85%<br>(79-90%)          | 0.77<br>(0.48-1.2)                          | 1.5%<br>(0.93-2.3%)                  | 1.9%<br>(0.98-3.3%)                 | 5.8<br>(2.9-10)      | 600<br>(370-950)       |
| Liberia  | 2005 | Female | 20 to 24 | 19%<br>(13-26%)                | 81%<br>(74-87%)          | 1.2<br>(0.75-1.8)                           | 2.7%<br>(1.8-4%)                     | 3.1%<br>(1.7-5.1%)                  | 12<br>(7-20)         | 1200<br>(780-1700)     |
| Liberia  | 2005 | Female | 25 to 29 | 25%<br>(16-35%)                | 75%<br>(65-84%)          | 1.5<br>(0.96-2.2)                           | 2.8%<br>(1.8-4%)                     | 3.1%<br>(1.7-4.9%)                  | 16<br>(9.5-25)       | 1300<br>(870-1900)     |
| Liberia  | 2005 | Female | 30 to 34 | 30%<br>(18-43%)                | 70%<br>(57-82%)          | 1.8<br>(1.1-2.7)                            | 2.6%<br>(1.8-3.8%)                   | 2.9%<br>(1.8-4.6%)                  | 17<br>(11-26)        | 1200<br>(850-1700)     |
| Liberia  | 2005 | Female | 35 to 39 | 33%<br>(21-48%)                | 67%<br>(52-79%)          | 2<br>(1.2-2.9)                              | 3.3%<br>(2.1-4.8%)                   | 4%<br>(2.4-6.2%)                    | 23<br>(15-35)        | 1400<br>(930-2000)     |
| Liberia  | 2005 | Female | 40 to 44 | 35%<br>(23-51%)                | 65%<br>(49-77%)          | 2<br>(1.3-2.9)                              | 3.7%<br>(2.5-5.5%)                   | 4.7%<br>(3.1-7.2%)                  | 27<br>(18-41)        | 1400<br>(930-2000)     |



| Location | Year | Sex    | Age      | Prevalence of current drinkers | Prevalence of abstainers | Population average of standard drinks daily | Percent of total attributable deaths | Percent of total attributable DALYs | Attributable deaths | Attributable DALYs     |
|----------|------|--------|----------|--------------------------------|--------------------------|---------------------------------------------|--------------------------------------|-------------------------------------|---------------------|------------------------|
| Liberia  | 2005 | Female | 45 to 49 | 35%<br>(21-51%)                | 65%<br>(49-79%)          | 1.8<br>(1-2.8)                              | 4.3%<br>(2.8-6.4%)                   | 5.8%<br>(3.6-8.6%)                  | 33<br>(20-50)       | 1400<br>(910-2100)     |
| Liberia  | 2005 | Female | 50 to 54 | 35%<br>(23-51%)                | 65%<br>(49-77%)          | 2<br>(1.2-3.2)                              | 6.3%<br>(4-9.2%)                     | 8.4%<br>(5.4-12%)                   | 51<br>(31-80)       | 1900<br>(1200-3000)    |
| Liberia  | 2005 | Female | 55 to 59 | 36%<br>(23-51%)                | 64%<br>(49-77%)          | 2.7<br>(1.4-4.5)                            | 8.8%<br>(5.3-13%)                    | 11%<br>(6.9-16%)                    | 73<br>(42-110)      | 2300<br>(1400-3500)    |
| Liberia  | 2005 | Female | 60 to 64 | 37%<br>(24-53%)                | 63%<br>(47-76%)          | 3<br>(1.6-5)                                | 8.9%<br>(5.4-13%)                    | 11%<br>(6.9-16%)                    | 91<br>(53-140)      | 2500<br>(1500-3700)    |
| Liberia  | 2005 | Female | 65 to 69 | 38%<br>(26-53%)                | 62%<br>(47-74%)          | 2.7<br>(1.5-4.2)                            | 9.1%<br>(5.3-14%)                    | 11%<br>(6.6-17%)                    | 100<br>(59-160)     | 2300<br>(1300-3500)    |
| Liberia  | 2005 | Female | 70 to 74 | 36%<br>(25-50%)                | 64%<br>(50-75%)          | 2.1<br>(1.1-3.4)                            | 7.7%<br>(3.7-13%)                    | 9.3%<br>(4.5-15%)                   | 88<br>(42-150)      | 1600<br>(760-2700)     |
| Liberia  | 2005 | Female | 75 to 79 | 31%<br>(20-46%)                | 69%<br>(54-80%)          | 1.6<br>(0.74-2.7)                           | 5.5%<br>(2.4-9.8%)                   | 6.6%<br>(2.8-12%)                   | 53<br>(22-95)       | 740<br>(320-1300)      |
| Liberia  | 2005 | Female | 80 to 84 | 28%<br>(18-42%)                | 72%<br>(58-82%)          | 1.4<br>(0.69-2.3)                           | 4.3%<br>(1.8-7.8%)                   | 5.2%<br>(2.2-9.4%)                  | 24<br>(9.9-44)      | 250<br>(110-460)       |
| Liberia  | 2005 | Female | 85 to 89 | 29%<br>(18-42%)                | 71%<br>(58-82%)          | 1.3<br>(0.69-2.2)                           | 3.6%<br>(1.5-6.5%)                   | 4.2%<br>(1.7-7.9%)                  | 11<br>(4.2-20)      | 79<br>(32-150)         |
| Liberia  | 2005 | Female | 90 to 94 | 31%<br>(20-45%)                | 69%<br>(55-80%)          | 1.3<br>(0.66-2.4)                           | 3.1%<br>(0.93-6.8%)                  | 3.7%<br>(1-8.2%)                    | 3.1<br>(0.87-6.9)   | 16<br>(4.8-35)         |
| Liberia  | 2005 | Female | 95 plus  | 34%<br>(20-51%)                | 66%<br>(49-80%)          | 1.4<br>(0.6-2.7)                            | 2.8%<br>(0.49-6.7%)                  | 3.2%<br>(0.45-8.2%)                 | 0.82<br>(0.11-2.1)  | 2.8<br>(0.5-7)         |
| Liberia  | 2005 | Male   | All Ages | 28%<br>(24-32%)                | 72%<br>(68-76%)          | 1.3<br>(1.1-1.6)                            | 2.4%<br>(1.9-3.1%)                   | 4.2%<br>(3.1-5.5%)                  | 720<br>(530-960)    | 30000<br>(23000-38000) |
| Liberia  | 2005 | Male   | 15 to 19 | 18%<br>(14-24%)                | 82%<br>(76-86%)          | 0.74<br>(0.49-1.1)                          | 2%<br>(1.3-2.9%)                     | 2.8%<br>(1.6-4.3%)                  | 7.6<br>(4.3-12)     | 730<br>(480-1100)      |
| Liberia  | 2005 | Male   | 20 to 24 | 35%<br>(27-43%)                | 65%<br>(57-73%)          | 2<br>(1.4-2.6)                              | 6.1%<br>(4.2-8.4%)                   | 8.2%<br>(5.3-12%)                   | 31<br>(20-46)       | 2500<br>(1700-3400)    |
| Liberia  | 2005 | Male   | 25 to 29 | 50%<br>(38-62%)                | 50%<br>(38-62%)          | 3.2<br>(2.3-4.1)                            | 8.4%<br>(5.8-12%)                    | 11%<br>(7.4-16%)                    | 52<br>(36-72)       | 3600<br>(2600-4800)    |
| Liberia  | 2005 | Male   | 30 to 34 | 54%<br>(39-68%)                | 46%<br>(32-61%)          | 3.5<br>(2.4-4.6)                            | 8.3%<br>(6.1-11%)                    | 11%<br>(7.5-15%)                    | 59<br>(42-78)       | 3600<br>(2700-4700)    |
| Liberia  | 2005 | Male   | 35 to 39 | 49%<br>(33-66%)                | 51%<br>(34-67%)          | 3.1<br>(2-4.2)                              | 8%<br>(5.6-11%)                      | 10%<br>(7.1-14%)                    | 59<br>(41-79)       | 3200<br>(2300-4200)    |
| Liberia  | 2005 | Male   | 40 to 44 | 47%<br>(32-64%)                | 53%<br>(36-68%)          | 2.9<br>(2-4.1)                              | 8.4%<br>(6.1-11%)                    | 11%<br>(7.8-15%)                    | 64<br>(45-85)       | 3100<br>(2200-4100)    |
| Liberia  | 2005 | Male   | 45 to 49 | 48%<br>(32-65%)                | 52%<br>(35-68%)          | 3<br>(1.8-4.3)                              | 9.8%<br>(7-13%)                      | 13%<br>(9.1-18%)                    | 74<br>(52-100)      | 3100<br>(2200-4200)    |
| Liberia  | 2005 | Male   | 50 to 54 | 49%<br>(33-66%)                | 51%<br>(34-67%)          | 2.9<br>(1.8-4.3)                            | 10%<br>(6.9-14%)                     | 14%<br>(9.2-18%)                    | 75<br>(50-100)      | 2800<br>(1900-3800)    |
| Liberia  | 2005 | Male   | 55 to 59 | 49%<br>(34-66%)                | 51%<br>(34-66%)          | 2.7<br>(1.6-4.2)                            | 9.7%<br>(6.1-14%)                    | 13%<br>(7.9-18%)                    | 70<br>(43-100)      | 2300<br>(1400-3300)    |
| Liberia  | 2005 | Male   | 60 to 64 | 48%<br>(32-66%)                | 52%<br>(34-68%)          | 2.4<br>(1.3-3.8)                            | 8.1%<br>(4.6-12%)                    | 10%<br>(5.8-16%)                    | 73<br>(40-110)      | 2000<br>(1100-3100)    |

| Location | Year | Sex    | Age      | Prevalence of current drinkers | Prevalence of abstainers | Population average of standard drinks daily | Percent of total attributable deaths | Percent of total attributable DALYs | Attributable deaths  | Attributable DALYs     |
|----------|------|--------|----------|--------------------------------|--------------------------|---------------------------------------------|--------------------------------------|-------------------------------------|----------------------|------------------------|
| Liberia  | 2005 | Male   | 65 to 69 | 47%<br>(33-63%)                | 53%<br>(37-67%)          | 2<br>(1.2-3.2)                              | 6.5%<br>(3.9-10%)                    | 8.2%<br>(4.8-13%)                   | 61<br>(36-96)        | 1400<br>(810-2200)     |
| Liberia  | 2005 | Male   | 70 to 74 | 46%<br>(32-62%)                | 54%<br>(38-68%)          | 1.7<br>(0.94-2.6)                           | 5.2%<br>(2.7-8.8%)                   | 6.4%<br>(3.2-11%)                   | 47<br>(24-81)        | 860<br>(450-1500)      |
| Liberia  | 2005 | Male   | 75 to 79 | 43%<br>(30-60%)                | 57%<br>(40-70%)          | 1.3<br>(0.69-2.2)                           | 3.7%<br>(1.4-7%)                     | 4.4%<br>(1.6-8.5%)                  | 27<br>(9.7-51)       | 380<br>(140-710)       |
| Liberia  | 2005 | Male   | 80 to 84 | 40%<br>(26-57%)                | 60%<br>(43-74%)          | 1<br>(0.56-1.7)                             | 2.8%<br>(0.99-5.5%)                  | 3.3%<br>(1.1-6.7%)                  | 12<br>(3.9-24)       | 120<br>(45-250)        |
| Liberia  | 2005 | Male   | 85 to 89 | 38%<br>(24-53%)                | 62%<br>(47-76%)          | 0.82<br>(0.43-1.3)                          | 1.8%<br>(0.51-3.8%)                  | 2.2%<br>(0.52-4.5%)                 | 4.1<br>(1-8.5)       | 31<br>(8.8-63)         |
| Liberia  | 2005 | Male   | 90 to 94 | 38%<br>(25-54%)                | 62%<br>(46-75%)          | 0.68<br>(0.34-1.2)                          | 0.93%<br>(-0.12-2.4%)                | 1%<br>(-0.3-2.8%)                   | 0.7<br>(-0.2-2)      | 3.9<br>(-0.5-10)       |
| Liberia  | 2005 | Male   | 95 plus  | 42%<br>(26-61%)                | 58%<br>(39-74%)          | 0.6<br>(0.25-1.2)                           | 0.68%<br>(-0.4-2.2%)                 | 0.65%<br>(-0.7-2.6%)                | 0.13<br>(-0.14-0.56) | 0.57<br>(-0.34-1.9)    |
| Liberia  | 2010 | Female | All Ages | 19%<br>(17-22%)                | 81%<br>(78-83%)          | 0.83<br>(0.66-1)                            | 1.8%<br>(1.3-2.4%)                   | 3.7%<br>(2.4-5.3%)                  | 640<br>(410-930)     | 21000<br>(15000-28000) |
| Liberia  | 2010 | Female | 15 to 19 | 17%<br>(13-21%)                | 83%<br>(79-87%)          | 0.77<br>(0.52-1.1)                          | 1.4%<br>(0.88-2%)                    | 1.7%<br>(0.92-2.8%)                 | 5.4<br>(2.9-8.9)     | 600<br>(370-900)       |
| Liberia  | 2010 | Female | 20 to 24 | 21%<br>(16-27%)                | 79%<br>(73-84%)          | 1.2<br>(0.8-1.7)                            | 2.7%<br>(1.8-3.7%)                   | 3%<br>(1.7-4.8%)                    | 11<br>(6.6-18)       | 1200<br>(800-1700)     |
| Liberia  | 2010 | Female | 25 to 29 | 26%<br>(18-35%)                | 74%<br>(65-82%)          | 1.4<br>(0.95-2.1)                           | 2.7%<br>(1.9-3.9%)                   | 3%<br>(1.8-5%)                      | 15<br>(9-23)         | 1300<br>(920-1900)     |
| Liberia  | 2010 | Female | 30 to 34 | 29%<br>(20-40%)                | 71%<br>(60-80%)          | 1.6<br>(1-2.2)                              | 2.4%<br>(1.7-3.4%)                   | 2.7%<br>(1.7-4.2%)                  | 16<br>(10-24)        | 1200<br>(850-1700)     |
| Liberia  | 2010 | Female | 35 to 39 | 30%<br>(21-44%)                | 70%<br>(56-79%)          | 1.6<br>(1-2.3)                              | 2.8%<br>(1.9-4.1%)                   | 3.4%<br>(2.1-5.1%)                  | 22<br>(14-32)        | 1300<br>(930-1900)     |
| Liberia  | 2010 | Female | 40 to 44 | 32%<br>(22-46%)                | 68%<br>(54-78%)          | 1.6<br>(1-2.3)                              | 3.2%<br>(2.1-4.5%)                   | 4%<br>(2.6-6%)                      | 26<br>(17-39)        | 1400<br>(900-2000)     |
| Liberia  | 2010 | Female | 45 to 49 | 34%<br>(22-50%)                | 66%<br>(50-78%)          | 1.5<br>(0.94-2.3)                           | 3.8%<br>(2.3-5.7%)                   | 5%<br>(3.1-7.7%)                    | 33<br>(19-50)        | 1400<br>(910-2200)     |
| Liberia  | 2010 | Female | 50 to 54 | 35%<br>(23-51%)                | 65%<br>(49-77%)          | 1.7<br>(1-2.8)                              | 5.6%<br>(3.5-8.3%)                   | 7.5%<br>(4.7-11%)                   | 54<br>(32-83)        | 2000<br>(1200-3100)    |
| Liberia  | 2010 | Female | 55 to 59 | 36%<br>(23-51%)                | 64%<br>(49-77%)          | 2.4<br>(1.3-4)                              | 8%<br>(4.6-12%)                      | 10%<br>(6-16%)                      | 84<br>(47-130)       | 2700<br>(1500-4100)    |
| Liberia  | 2010 | Female | 60 to 64 | 37%<br>(24-54%)                | 63%<br>(46-76%)          | 2.6<br>(1.4-4.3)                            | 8%<br>(4.4-12%)                      | 10%<br>(5.7-15%)                    | 89<br>(50-140)       | 2400<br>(1400-3700)    |
| Liberia  | 2010 | Female | 65 to 69 | 38%<br>(26-54%)                | 62%<br>(46-74%)          | 2.4<br>(1.3-3.8)                            | 7.9%<br>(4.3-12%)                    | 9.7%<br>(5.3-15%)                   | 110<br>(59-170)      | 2400<br>(1300-3800)    |
| Liberia  | 2010 | Female | 70 to 74 | 36%<br>(25-51%)                | 64%<br>(49-75%)          | 1.9<br>(0.98-3.1)                           | 6.4%<br>(2.9-11%)                    | 7.7%<br>(3.4-13%)                   | 90<br>(39-160)       | 1600<br>(700-2900)     |
| Liberia  | 2010 | Female | 75 to 79 | 31%<br>(20-46%)                | 69%<br>(54-80%)          | 1.4<br>(0.67-2.5)                           | 4.6%<br>(1.6-8.8%)                   | 5.4%<br>(1.8-10%)                   | 53<br>(18-100)       | 750<br>(260-1500)      |
| Liberia  | 2010 | Female | 80 to 84 | 28%<br>(18-42%)                | 72%<br>(58-82%)          | 1.2<br>(0.61-2.1)                           | 3.5%<br>(1.3-6.6%)                   | 4.1%<br>(1.5-8%)                    | 23<br>(8.1-44)       | 240<br>(87-450)        |

| Location | Year | Sex    | Age      | Prevalence of current drinkers | Prevalence of abstainers | Population average of standard drinks daily | Percent of total attributable deaths | Percent of total attributable DALYs | Attributable deaths   | Attributable DALYs     |
|----------|------|--------|----------|--------------------------------|--------------------------|---------------------------------------------|--------------------------------------|-------------------------------------|-----------------------|------------------------|
| Liberia  | 2010 | Female | 85 to 89 | 29%<br>(18-41%)                | 71%<br>(59-82%)          | 1.2<br>(0.6-2)                              | 2.9%<br>(0.96-5.6%)                  | 3.4%<br>(1.1-6.6%)                  | 12<br>(3.5-23)        | 86<br>(28-170)         |
| Liberia  | 2010 | Female | 90 to 94 | 31%<br>(20-45%)                | 69%<br>(55-80%)          | 1.2<br>(0.57-2.1)                           | 2.4%<br>(0.46-5.6%)                  | 2.8%<br>(0.43-6.5%)                 | 3.4<br>(0.52-8.1)     | 18<br>(3.2-40)         |
| Liberia  | 2010 | Female | 95 plus  | 35%<br>(20-52%)                | 65%<br>(48-80%)          | 1.2<br>(0.52-2.5)                           | 2.2%<br>(0.059-5.8%)                 | 2.5%<br>(-0.094-7%)                 | 0.7<br>(-0.027-2)     | 2.5<br>(0.069-6.8)     |
| Liberia  | 2010 | Male   | All Ages | 30%<br>(26-33%)                | 70%<br>(67-74%)          | 1.3<br>(1-1.5)                              | 2.7%<br>(2.1-3.5%)                   | 4.5%<br>(3.2-6.1%)                  | 780<br>(560-1100)     | 33000<br>(25000-42000) |
| Liberia  | 2010 | Male   | 15 to 19 | 21%<br>(17-26%)                | 79%<br>(74-83%)          | 0.75<br>(0.51-1.1)                          | 2%<br>(1.3-2.8%)                     | 2.6%<br>(1.6-4%)                    | 8.4<br>(5-13)         | 820<br>(540-1200)      |
| Liberia  | 2010 | Male   | 20 to 24 | 39%<br>(32-45%)                | 61%<br>(55-68%)          | 1.9<br>(1.4-2.6)                            | 6%<br>(4.3-8%)                       | 8%<br>(5.4-11%)                     | 34<br>(22-47)         | 2700<br>(1900-3600)    |
| Liberia  | 2010 | Male   | 25 to 29 | 53%<br>(42-63%)                | 47%<br>(37-58%)          | 3<br>(2.2-3.9)                              | 8.4%<br>(6-11%)                      | 11%<br>(7.9-16%)                    | 56<br>(39-78)         | 3900<br>(2900-5300)    |
| Liberia  | 2010 | Male   | 30 to 34 | 55%<br>(42-67%)                | 45%<br>(33-58%)          | 3.2<br>(2.3-4.1)                            | 8.4%<br>(6.2-11%)                    | 11%<br>(7.9-15%)                    | 64<br>(46-86)         | 4000<br>(3000-5300)    |
| Liberia  | 2010 | Male   | 35 to 39 | 50%<br>(38-66%)                | 50%<br>(34-62%)          | 2.7<br>(1.9-3.7)                            | 7.8%<br>(5.5-10%)                    | 10%<br>(6.9-14%)                    | 65<br>(47-87)         | 3600<br>(2600-4700)    |
| Liberia  | 2010 | Male   | 40 to 44 | 48%<br>(36-64%)                | 52%<br>(36-64%)          | 2.6<br>(1.8-3.6)                            | 8.2%<br>(6-11%)                      | 11%<br>(7.7-14%)                    | 71<br>(51-96)         | 3400<br>(2500-4600)    |
| Liberia  | 2010 | Male   | 45 to 49 | 50%<br>(36-66%)                | 50%<br>(34-64%)          | 2.7<br>(1.8-3.9)                            | 9.4%<br>(6.7-13%)                    | 12%<br>(8.7-17%)                    | 83<br>(57-120)        | 3600<br>(2500-4900)    |
| Liberia  | 2010 | Male   | 50 to 54 | 49%<br>(34-67%)                | 51%<br>(33-66%)          | 2.6<br>(1.6-3.8)                            | 9.5%<br>(6.4-13%)                    | 13%<br>(8.5-18%)                    | 85<br>(57-120)        | 3200<br>(2200-4500)    |
| Liberia  | 2010 | Male   | 55 to 59 | 49%<br>(33-66%)                | 51%<br>(34-67%)          | 2.4<br>(1.4-3.7)                            | 8.9%<br>(5.6-13%)                    | 12%<br>(7.3-17%)                    | 81<br>(50-120)        | 2600<br>(1600-3900)    |
| Liberia  | 2010 | Male   | 60 to 64 | 48%<br>(33-66%)                | 52%<br>(34-67%)          | 2.1<br>(1.2-3.4)                            | 7.3%<br>(4.1-12%)                    | 9.1%<br>(5-15%)                     | 70<br>(39-120)        | 1900<br>(1100-3100)    |
| Liberia  | 2010 | Male   | 65 to 69 | 48%<br>(33-64%)                | 52%<br>(36-67%)          | 1.8<br>(1.1-2.9)                            | 5.7%<br>(3.2-9.4%)                   | 7%<br>(3.9-11%)                     | 66<br>(36-110)        | 1500<br>(830-2500)     |
| Liberia  | 2010 | Male   | 70 to 74 | 46%<br>(32-63%)                | 54%<br>(37-68%)          | 1.5<br>(0.84-2.3)                           | 4.4%<br>(2-8%)                       | 5.3%<br>(2.4-9.6%)                  | 50<br>(23-92)         | 910<br>(420-1600)      |
| Liberia  | 2010 | Male   | 75 to 79 | 43%<br>(30-59%)                | 57%<br>(41-70%)          | 1.2<br>(0.6-2)                              | 3%<br>(0.95-5.9%)                    | 3.6%<br>(1.1-7.1%)                  | 27<br>(8.5-53)        | 380<br>(120-750)       |
| Liberia  | 2010 | Male   | 80 to 84 | 40%<br>(26-57%)                | 60%<br>(43-74%)          | 0.92<br>(0.47-1.5)                          | 2.2%<br>(0.63-4.6%)                  | 2.6%<br>(0.68-5.6%)                 | 11<br>(2.7-23)        | 110<br>(31-240)        |
| Liberia  | 2010 | Male   | 85 to 89 | 38%<br>(24-53%)                | 62%<br>(47-76%)          | 0.72<br>(0.38-1.2)                          | 1.4%<br>(0.27-3.1%)                  | 1.7%<br>(0.22-3.8%)                 | 4.2<br>(0.55-9.4)     | 32<br>(5.8-70)         |
| Liberia  | 2010 | Male   | 90 to 94 | 38%<br>(25-53%)                | 62%<br>(47-75%)          | 0.6<br>(0.3-1)                              | 0.65%<br>(-0.32-1.9%)                | 0.67%<br>(-0.51-2.2%)               | 0.6<br>(-0.46-2)      | 3.5<br>(-1.7-11)       |
| Liberia  | 2010 | Male   | 95 plus  | 41%<br>(25-60%)                | 59%<br>(40-75%)          | 0.52<br>(0.22-1)                            | 0.43%<br>(-0.54-1.8%)                | 0.35%<br>(-0.85-2.1%)               | 0.071<br>(-0.17-0.43) | 0.36<br>(-0.44-1.5)    |
| Liberia  | 2016 | Female | All Ages | 20%<br>(18-22%)                | 80%<br>(78-82%)          | 0.87<br>(0.52-1.3)                          | 2.2%<br>(1.3-3.2%)                   | 4.2%<br>(2.2-6.8%)                  | 680<br>(350-1100)     | 22000<br>(13000-32000) |

| Location | Year | Sex    | Age      | Prevalence of current drinkers | Prevalence of abstainers | Population average of standard drinks daily | Percent of total attributable deaths | Percent of total attributable DALYs | Attributable deaths | Attributable DALYs     |
|----------|------|--------|----------|--------------------------------|--------------------------|---------------------------------------------|--------------------------------------|-------------------------------------|---------------------|------------------------|
| Liberia  | 2016 | Female | 15 to 19 | 20%<br>(16-23%)                | 80%<br>(77-84%)          | 0.93<br>(0.54-1.5)                          | 1.5%<br>(0.87-2.4%)                  | 1.8%<br>(0.85-3.4%)                 | 5.9<br>(2.7-11)     | 700<br>(400-1100)      |
| Liberia  | 2016 | Female | 20 to 24 | 25%<br>(21-29%)                | 75%<br>(71-79%)          | 1.4<br>(0.8-2.2)                            | 2.8%<br>(1.8-4.1%)                   | 3.2%<br>(1.6-5.4%)                  | 11<br>(5.1-18)      | 1200<br>(760-1800)     |
| Liberia  | 2016 | Female | 25 to 29 | 26%<br>(21-33%)                | 74%<br>(67-79%)          | 1.5<br>(0.83-2.3)                           | 2.8%<br>(1.8-4.1%)                   | 3.2%<br>(1.7-5.5%)                  | 13<br>(6.4-22)      | 1300<br>(800-1900)     |
| Liberia  | 2016 | Female | 30 to 34 | 27%<br>(21-36%)                | 73%<br>(64-79%)          | 1.5<br>(0.81-2.3)                           | 2.6%<br>(1.6-3.7%)                   | 3%<br>(1.6-4.7%)                    | 15<br>(8.3-24)      | 1200<br>(800-1800)     |
| Liberia  | 2016 | Female | 35 to 39 | 28%<br>(21-39%)                | 72%<br>(61-79%)          | 1.5<br>(0.8-2.4)                            | 2.9%<br>(1.8-4.3%)                   | 3.6%<br>(2-5.8%)                    | 21<br>(12-33)       | 1300<br>(840-2000)     |
| Liberia  | 2016 | Female | 40 to 44 | 30%<br>(22-43%)                | 70%<br>(57-78%)          | 1.5<br>(0.8-2.4)                            | 3.2%<br>(1.9-4.8%)                   | 4.3%<br>(2.4-6.5%)                  | 27<br>(15-41)       | 1400<br>(860-2100)     |
| Liberia  | 2016 | Female | 45 to 49 | 33%<br>(24-46%)                | 67%<br>(54-76%)          | 1.5<br>(0.77-2.4)                           | 3.9%<br>(2.1-6.2%)                   | 5.3%<br>(2.8-8.6%)                  | 36<br>(18-58)       | 1600<br>(860-2500)     |
| Liberia  | 2016 | Female | 50 to 54 | 35%<br>(23-50%)                | 65%<br>(50-77%)          | 1.8<br>(0.89-3)                             | 5.6%<br>(2.9-9%)                     | 7.7%<br>(4-12%)                     | 59<br>(30-96)       | 2200<br>(1200-3600)    |
| Liberia  | 2016 | Female | 55 to 59 | 36%<br>(23-51%)                | 64%<br>(49-77%)          | 2.4<br>(1.1-4.3)                            | 7.7%<br>(3.9-12%)                    | 10%<br>(5.1-16%)                    | 90<br>(45-140)      | 2900<br>(1500-4600)    |
| Liberia  | 2016 | Female | 60 to 64 | 37%<br>(24-53%)                | 63%<br>(47-76%)          | 2.6<br>(1.3-4.6)                            | 9.7%<br>(3.7-12%)                    | 9.7%<br>(4.7-15%)                   | 100<br>(49-160)     | 2800<br>(1400-4300)    |
| Liberia  | 2016 | Female | 65 to 69 | 39%<br>(26-53%)                | 61%<br>(47-74%)          | 2.4<br>(1.2-4.2)                            | 7.6%<br>(3.3-13%)                    | 9.4%<br>(4.1-15%)                   | 100<br>(45-180)     | 2400<br>(1000-4000)    |
| Liberia  | 2016 | Female | 70 to 74 | 36%<br>(24-50%)                | 64%<br>(50-76%)          | 1.9<br>(0.87-3.5)                           | 6.2%<br>(2.1-12%)                    | 7.4%<br>(2.5-14%)                   | 92<br>(31-180)      | 1700<br>(570-3300)     |
| Liberia  | 2016 | Female | 75 to 79 | 31%<br>(20-45%)                | 69%<br>(55-80%)          | 1.4<br>(0.6-2.8)                            | 4.4%<br>(1.1-9.6%)                   | 5.2%<br>(1.2-11%)                   | 60<br>(14-130)      | 840<br>(200-1800)      |
| Liberia  | 2016 | Female | 80 to 84 | 28%<br>(18-42%)                | 72%<br>(58-82%)          | 1.2<br>(0.53-2.3)                           | 3.5%<br>(0.72-7.5%)                  | 4.1%<br>(0.83-8.8%)                 | 28<br>(5.5-60)      | 290<br>(60-620)        |
| Liberia  | 2016 | Female | 85 to 89 | 29%<br>(18-41%)                | 71%<br>(59-82%)          | 1.2<br>(0.52-2.3)                           | 2.9%<br>(0.45-6.7%)                  | 3.4%<br>(0.45-7.9%)                 | 13<br>(1.7-31)      | 98<br>(15-220)         |
| Liberia  | 2016 | Female | 90 to 94 | 31%<br>(20-45%)                | 69%<br>(55-80%)          | 1.2<br>(0.5-2.4)                            | 2.5%<br>(0.021-6.9%)                 | 2.9%<br>(-0.09-8.1%)                | 4.4<br>(-0.14-12)   | 23<br>(0.19-62)        |
| Liberia  | 2016 | Female | 95 plus  | 35%<br>(20-52%)                | 65%<br>(48-80%)          | 1.3<br>(0.49-2.7)                           | 2.3%<br>(-0.22-6.8%)                 | 2.6%<br>(-0.44-8%)                  | 1.1<br>(-0.19-3.4)  | 3.8<br>(-0.38-11)      |
| Liberia  | 2016 | Male   | All Ages | 31%<br>(28-35%)                | 69%<br>(65-72%)          | 1.3<br>(0.82-2)                             | 3.2%<br>(2.1-4.6%)                   | 5.1%<br>(3.1-7.5%)                  | 830<br>(490-1200)   | 35000<br>(23000-50000) |
| Liberia  | 2016 | Male   | 15 to 19 | 24%<br>(19-29%)                | 76%<br>(71-81%)          | 0.89<br>(0.51-1.4)                          | 2.2%<br>(1.3-3.5%)                   | 2.8%<br>(1.4-4.8%)                  | 11<br>(5.6-19)      | 1100<br>(630-1700)     |
| Liberia  | 2016 | Male   | 20 to 24 | 43%<br>(36-49%)                | 57%<br>(51-64%)          | 2.2<br>(1.2-3.3)                            | 6.2%<br>(4-9%)                       | 8.2%<br>(4.9-12%)                   | 36<br>(21-56)       | 2900<br>(1900-4300)    |
| Liberia  | 2016 | Male   | 25 to 29 | 54%<br>(44-64%)                | 46%<br>(36-56%)          | 3<br>(1.7-4.8)                              | 8.4%<br>(5.5-12%)                    | 12%<br>(7.1-17%)                    | 55<br>(34-81)       | 4000<br>(2600-5600)    |
| Liberia  | 2016 | Male   | 30 to 34 | 56%<br>(44-68%)                | 44%<br>(32-56%)          | 3.2<br>(1.9-5)                              | 8.6%<br>(5.8-12%)                    | 12%<br>(7.7-17%)                    | 66<br>(42-93)       | 4200<br>(2800-5700)    |

| Location | Year | Sex    | Age      | Prevalence of current drinkers | Prevalence of abstainers | Population average of standard drinks daily | Percent of total attributable deaths | Percent of total attributable DALYs | Attributable deaths  | Attributable DALYs     |
|----------|------|--------|----------|--------------------------------|--------------------------|---------------------------------------------|--------------------------------------|-------------------------------------|----------------------|------------------------|
| Liberia  | 2016 | Male   | 35 to 39 | 50%<br>(38-64%)                | 50%<br>(36-62%)          | 2.8<br>(1.5-4.4)                            | 8.2%<br>(5.4-11%)                    | 11%<br>(6.9-16%)                    | 70<br>(44-99)        | 3900<br>(2600-5400)    |
| Liberia  | 2016 | Male   | 40 to 44 | 48%<br>(37-63%)                | 52%<br>(37-63%)          | 2.7<br>(1.5-4.3)                            | 8.5%<br>(5.4-12%)                    | 11%<br>(7.2-17%)                    | 77<br>(47-110)       | 3800<br>(2400-5600)    |
| Liberia  | 2016 | Male   | 45 to 49 | 51%<br>(38-65%)                | 49%<br>(35-62%)          | 2.8<br>(1.5-4.6)                            | 9.7%<br>(6-14%)                      | 13%<br>(7.9-19%)                    | 93<br>(56-140)       | 4000<br>(2500-5800)    |
| Liberia  | 2016 | Male   | 50 to 54 | 50%<br>(35-66%)                | 50%<br>(34-65%)          | 2.7<br>(1.4-4.5)                            | 9.3%<br>(5.6-14%)                    | 12%<br>(7.5-18%)                    | 93<br>(54-140)       | 3500<br>(2100-5200)    |
| Liberia  | 2016 | Male   | 55 to 59 | 49%<br>(33-66%)                | 51%<br>(34-67%)          | 2.5<br>(1.2-4.4)                            | 8.6%<br>(4.7-14%)                    | 11%<br>(6.1-17%)                    | 91<br>(49-140)       | 3000<br>(1600-4600)    |
| Liberia  | 2016 | Male   | 60 to 64 | 48%<br>(32-67%)                | 52%<br>(33-68%)          | 2.2<br>(1-3.8)                              | 7%<br>(3.4-12%)                      | 8.8%<br>(4.2-15%)                   | 79<br>(38-130)       | 2200<br>(1100-3700)    |
| Liberia  | 2016 | Male   | 65 to 69 | 48%<br>(34-65%)                | 52%<br>(35-66%)          | 1.9<br>(0.94-3.1)                           | 5.4%<br>(2.5-9.6%)                   | 6.7%<br>(3-12%)                     | 62<br>(27-110)       | 1400<br>(640-2400)     |
| Liberia  | 2016 | Male   | 70 to 74 | 46%<br>(32-62%)                | 54%<br>(38-68%)          | 1.5<br>(0.73-2.7)                           | 4.1%<br>(1.6-8.2%)                   | 5%<br>(1.9-10%)                     | 51<br>(20-100)       | 940<br>(370-1900)      |
| Liberia  | 2016 | Male   | 75 to 79 | 43%<br>(29-60%)                | 57%<br>(40-71%)          | 1.2<br>(0.54-2.3)                           | 2.7%<br>(0.71-6.1%)                  | 3.3%<br>(0.82-7.3%)                 | 28<br>(6.9-66)       | 410<br>(100-940)       |
| Liberia  | 2016 | Male   | 80 to 84 | 40%<br>(26-57%)                | 60%<br>(43-74%)          | 0.94<br>(0.42-1.8)                          | 2%<br>(0.42-4.6%)                    | 2.4%<br>(0.41-5.5%)                 | 11<br>(2-27)         | 120<br>(25-280)        |
| Liberia  | 2016 | Male   | 85 to 89 | 38%<br>(24-53%)                | 62%<br>(47-76%)          | 0.74<br>(0.33-1.4)                          | 1.3%<br>(0.13-3%)                    | 1.4%<br>(0.044-3.6%)                | 4<br>(0.12-10)       | 32<br>(3.2-76)         |
| Liberia  | 2016 | Male   | 90 to 94 | 38%<br>(25-55%)                | 62%<br>(45-75%)          | 0.61<br>(0.25-1.2)                          | 0.55%<br>(-0.43-1.9%)                | 0.53%<br>(-0.68-2.1%)               | 0.6<br>(-0.77-2.4)   | 3.8<br>(-2.9-13)       |
| Liberia  | 2016 | Male   | 95 plus  | 42%<br>(25-61%)                | 58%<br>(39-75%)          | 0.53<br>(0.2-1.2)                           | 0.33%<br>(-0.67-1.6%)                | 0.19%<br>(-1.1-1.7%)                | 0.055<br>(-0.3-0.49) | 0.38<br>(-0.78-1.8)    |
| Mali     | 1990 | Female | All Ages | 5.3%<br>(4.4-6.2%)             | 95%<br>(94-96%)          | 0.35<br>(0.26-0.46)                         | 0.7%<br>(0.5-0.93%)                  | 1.6%<br>(1-2.2%)                    | 1200<br>(780-1700)   | 37000<br>(26000-50000) |
| Mali     | 1990 | Female | 15 to 19 | 5%<br>(3.2-7.3%)               | 95%<br>(93-97%)          | 0.32<br>(0.15-0.55)                         | 0.72%<br>(0.45-1.1%)                 | 0.62%<br>(0.25-1.2%)                | 7.1<br>(2.9-13)      | 910<br>(540-1400)      |
| Mali     | 1990 | Female | 20 to 24 | 6.3%<br>(3.8-9.4%)             | 94%<br>(91-96%)          | 0.51<br>(0.26-0.88)                         | 1.5%<br>(0.96-2.1%)                  | 1.2%<br>(0.59-2.1%)                 | 15<br>(7.7-27)       | 1800<br>(1100-2700)    |
| Mali     | 1990 | Female | 25 to 29 | 7%<br>(4.2-10%)                | 93%<br>(90-96%)          | 0.62<br>(0.32-1)                            | 1.9%<br>(1.2-2.8%)                   | 1.8%<br>(1-3%)                      | 22<br>(12-36)        | 2000<br>(1300-2900)    |
| Mali     | 1990 | Female | 30 to 34 | 7.7%<br>(4.7-12%)              | 92%<br>(88-95%)          | 0.71<br>(0.38-1.2)                          | 2.2%<br>(1.5-3.2%)                   | 2.5%<br>(1.5-3.8%)                  | 29<br>(17-45)        | 2100<br>(1400-3100)    |
| Mali     | 1990 | Female | 35 to 39 | 8.9%<br>(5.1-13%)              | 91%<br>(87-95%)          | 0.8<br>(0.42-1.4)                           | 2.8%<br>(1.8-4%)                     | 3.4%<br>(2.1-5.1%)                  | 44<br>(27-67)        | 2600<br>(1700-3700)    |
| Mali     | 1990 | Female | 40 to 44 | 9.4%<br>(5.8-14%)              | 91%<br>(86-94%)          | 0.82<br>(0.41-1.4)                          | 3.1%<br>(2-4.4%)                     | 3.9%<br>(2.5-5.8%)                  | 50<br>(32-75)        | 2500<br>(1700-3700)    |
| Mali     | 1990 | Female | 45 to 49 | 9.2%<br>(5.6-13%)              | 91%<br>(87-94%)          | 0.76<br>(0.38-1.3)                          | 3.6%<br>(2.2-5.5%)                   | 4.7%<br>(2.7-7.2%)                  | 73<br>(43-110)       | 3200<br>(1900-4800)    |
| Mali     | 1990 | Female | 50 to 54 | 9.2%<br>(5.9-13%)              | 91%<br>(87-94%)          | 0.79<br>(0.4-1.4)                           | 3.9%<br>(2.3-5.8%)                   | 4.8%<br>(2.9-7.2%)                  | 88<br>(52-130)       | 3300<br>(2000-5000)    |

| Location | Year | Sex    | Age      | Prevalence of current drinkers | Prevalence of abstainers | Population average of standard drinks daily | Percent of total attributable deaths | Percent of total attributable DALYs | Attributable deaths | Attributable DALYs     |
|----------|------|--------|----------|--------------------------------|--------------------------|---------------------------------------------|--------------------------------------|-------------------------------------|---------------------|------------------------|
| Mali     | 1990 | Female | 55 to 59 | 9.6%<br>(6.1-14%)              | 90%<br>(86-94%)          | 0.91<br>(0.46-1.6)                          | 4.3%<br>(2.6-6.3%)                   | 5.3%<br>(3.1-7.8%)                  | 120<br>(70-180)     | 3800<br>(2300-5600)    |
| Mali     | 1990 | Female | 60 to 64 | 11%<br>(6.4-16%)               | 89%<br>(84-94%)          | 0.99<br>(0.48-1.8)                          | 4.3%<br>(2.5-6.5%)                   | 5.2%<br>(3-7.8%)                    | 150<br>(86-230)     | 4200<br>(2400-6300)    |
| Mali     | 1990 | Female | 65 to 69 | 12%<br>(7.6-17%)               | 88%<br>(83-92%)          | 1<br>(0.48-1.7)                             | 4.6%<br>(2.5-7.3%)                   | 5.4%<br>(2.9-8.6%)                  | 200<br>(110-320)    | 4600<br>(2400-7200)    |
| Mali     | 1990 | Female | 70 to 74 | 11%<br>(7.1-16%)               | 89%<br>(84-93%)          | 0.81<br>(0.39-1.4)                          | 4.4%<br>(2.1-7.4%)                   | 5.1%<br>(2.4-8.5%)                  | 210<br>(100-360)    | 3800<br>(1800-6500)    |
| Mali     | 1990 | Female | 75 to 79 | 8.5%<br>(5.1-13%)              | 91%<br>(87-95%)          | 0.59<br>(0.26-1.1)                          | 3%<br>(1.2-5.3%)                     | 3.5%<br>(1.4-6.1%)                  | 110<br>(48-200)     | 1600<br>(670-2800)     |
| Mali     | 1990 | Female | 80 to 84 | 7.6%<br>(4.5-11%)              | 92%<br>(89-95%)          | 0.51<br>(0.23-0.89)                         | 2.2%<br>(0.96-3.8%)                  | 2.5%<br>(1.1-4.4%)                  | 37<br>(16-67)       | 390<br>(170-680)       |
| Mali     | 1990 | Female | 85 to 89 | 7.9%<br>(4.6-12%)              | 92%<br>(88-95%)          | 0.51<br>(0.25-0.94)                         | 1.7%<br>(0.7-3.2%)                   | 1.9%<br>(0.78-3.7%)                 | 13<br>(5.3-25)      | 97<br>(41-180)         |
| Mali     | 1990 | Female | 90 to 94 | 8.7%<br>(5.5-13%)              | 91%<br>(87-95%)          | 0.55<br>(0.25-1)                            | 1.3%<br>(0.48-2.8%)                  | 1.5%<br>(0.53-3.3%)                 | 2.8<br>(0.97-6.1)   | 15<br>(5.2-31)         |
| Mali     | 1990 | Female | 95 plus  | 10%<br>(5.8-16%)               | 90%<br>(84-94%)          | 0.59<br>(0.23-1.2)                          | 1.2%<br>(0.26-2.9%)                  | 1.3%<br>(0.23-3.4%)                 | 0.52<br>(0.089-1.3) | 1.9<br>(0.4-4.5)       |
| Mali     | 1990 | Male   | All Ages | 2.4%<br>(2-2.9%)               | 98%<br>(97-98%)          | 0.16<br>(0.12-0.21)                         | 0.52%<br>(0.4-0.69%)                 | 1%<br>(0.74-1.5%)                   | 770<br>(550-1100)   | 29000<br>(22000-39000) |
| Mali     | 1990 | Male   | 15 to 19 | 1.9%<br>(1.1-3%)               | 98%<br>(97-99%)          | 0.1<br>(0.045-0.18)                         | 0.58%<br>(0.38-0.81%)                | 0.35%<br>(0.19-0.63%)               | 3.5<br>(1.9-6.4)    | 650<br>(420-940)       |
| Mali     | 1990 | Male   | 20 to 24 | 3%<br>(1.7-4.5%)               | 97%<br>(95-98%)          | 0.21<br>(0.11-0.38)                         | 1.5%<br>(1-2.1%)                     | 1.1%<br>(0.64-1.9%)                 | 13<br>(7.5-23)      | 1600<br>(1100-2400)    |
| Mali     | 1990 | Male   | 25 to 29 | 4%<br>(2.3-6.2%)               | 96%<br>(94-98%)          | 0.34<br>(0.17-0.56)                         | 2.5%<br>(1.7-3.5%)                   | 2.4%<br>(1.4-3.8%)                  | 25<br>(14-40)       | 2200<br>(1500-3200)    |
| Mali     | 1990 | Male   | 30 to 34 | 4.5%<br>(2.5-7.2%)             | 96%<br>(93-97%)          | 0.41<br>(0.21-0.68)                         | 3.2%<br>(2.2-4.6%)                   | 3.5%<br>(2.2-5.5%)                  | 36<br>(22-55)       | 2500<br>(1700-3600)    |
| Mali     | 1990 | Male   | 35 to 39 | 4.7%<br>(2.6-7.1%)             | 95%<br>(93-97%)          | 0.44<br>(0.22-0.77)                         | 3.9%<br>(2.6-5.6%)                   | 4.7%<br>(3-7.1%)                    | 52<br>(33-79)       | 3000<br>(2100-4400)    |
| Mali     | 1990 | Male   | 40 to 44 | 4.9%<br>(2.9-7.5%)             | 95%<br>(93-97%)          | 0.45<br>(0.22-0.79)                         | 4.3%<br>(2.9-6.5%)                   | 5.5%<br>(3.5-8.4%)                  | 59<br>(38-88)       | 2900<br>(2000-4300)    |
| Mali     | 1990 | Male   | 45 to 49 | 5.1%<br>(2.8-7.8%)             | 95%<br>(92-97%)          | 0.46<br>(0.21-0.81)                         | 4.7%<br>(3.1-6.7%)                   | 6%<br>(3.9-8.8%)                    | 77<br>(50-120)      | 3300<br>(2200-4900)    |
| Mali     | 1990 | Male   | 50 to 54 | 5.2%<br>(3.1-7.9%)             | 95%<br>(92-97%)          | 0.47<br>(0.22-0.85)                         | 4.3%<br>(2.8-6.5%)                   | 5.4%<br>(3.5-8.3%)                  | 74<br>(47-110)      | 2800<br>(1900-4200)    |
| Mali     | 1990 | Male   | 55 to 59 | 5.1%<br>(3-7.6%)               | 95%<br>(92-97%)          | 0.44<br>(0.22-0.79)                         | 4%<br>(2.6-6%)                       | 5%<br>(3.2-7.4%)                    | 82<br>(51-120)      | 2700<br>(1800-4000)    |
| Mali     | 1990 | Male   | 60 to 64 | 4.9%<br>(2.9-7.8%)             | 95%<br>(92-97%)          | 0.4<br>(0.18-0.75)                          | 3.5%<br>(2.2-5.3%)                   | 4.2%<br>(2.7-6.5%)                  | 91<br>(56-140)      | 2500<br>(1600-3900)    |
| Mali     | 1990 | Male   | 65 to 69 | 4.9%<br>(2.9-7.4%)             | 95%<br>(93-97%)          | 0.36<br>(0.17-0.62)                         | 2.9%<br>(1.8-4.5%)                   | 3.5%<br>(2.2-5.5%)                  | 94<br>(58-150)      | 2100<br>(1300-3300)    |
| Mali     | 1990 | Male   | 70 to 74 | 4.8%<br>(2.9-7.1%)             | 95%<br>(93-97%)          | 0.3<br>(0.14-0.54)                          | 2.5%<br>(1.4-4%)                     | 2.9%<br>(1.7-4.8%)                  | 89<br>(51-150)      | 1600<br>(930-2600)     |

| Location | Year | Sex    | Age      | Prevalence of current drinkers | Prevalence of abstainers | Population average of standard drinks daily | Percent of total attributable deaths | Percent of total attributable DALYs | Attributable deaths  | Attributable DALYs     |
|----------|------|--------|----------|--------------------------------|--------------------------|---------------------------------------------|--------------------------------------|-------------------------------------|----------------------|------------------------|
| Mali     | 1990 | Male   | 75 to 79 | 4.3%<br>(2.5-6.9%)             | 96%<br>(93-98%)          | 0.24<br>(0.1-0.46)                          | 1.9%<br>(1-3.2%)                     | 2.2%<br>(1.2-3.8%)                  | 53<br>(29-93)        | 740<br>(410-1300)      |
| Mali     | 1990 | Male   | 80 to 84 | 3.8%<br>(2.1-5.6%)             | 96%<br>(94-98%)          | 0.18<br>(0.083-0.33)                        | 1.5%<br>(0.82-2.5%)                  | 1.7%<br>(0.95-2.9%)                 | 18<br>(10-31)        | 190<br>(110-320)       |
| Mali     | 1990 | Male   | 85 to 89 | 3.4%<br>(1.9-5.5%)             | 97%<br>(94-98%)          | 0.14<br>(0.068-0.28)                        | 1%<br>(0.59-1.9%)                    | 1.2%<br>(0.65-2.2%)                 | 5.8<br>(3.1-11)      | 43<br>(24-78)          |
| Mali     | 1990 | Male   | 90 to 94 | 3.5%<br>(2-5.7%)               | 97%<br>(94-98%)          | 0.13<br>(0.054-0.26)                        | 0.59%<br>(0.31-1.1%)                 | 0.65%<br>(0.31-1.3%)                | 0.93<br>(0.44-1.9)   | 5.1<br>(2.6-9.7)       |
| Mali     | 1990 | Male   | 95 plus  | 4%<br>(2.2-6.6%)               | 96%<br>(93-98%)          | 0.12<br>(0.043-0.25)                        | 0.45%<br>(0.19-1%)                   | 0.45%<br>(0.14-1.1%)                | 0.12<br>(0.038-0.31) | 0.51<br>(0.21-1.1)     |
| Mali     | 1995 | Female | All Ages | 5.2%<br>(4.3-6.1%)             | 95%<br>(94-96%)          | 0.34<br>(0.25-0.46)                         | 0.67%<br>(0.47-0.89%)                | 1.5%<br>(0.9-2.1%)                  | 1100<br>(710-1600)   | 36000<br>(25000-49000) |
| Mali     | 1995 | Female | 15 to 19 | 4.9%<br>(3.1-7.1%)             | 95%<br>(93-97%)          | 0.31<br>(0.15-0.52)                         | 0.72%<br>(0.44-1.1%)                 | 0.6%<br>(0.26-1.1%)                 | 7.4<br>(3.2-14)      | 1000<br>(600-1500)     |
| Mali     | 1995 | Female | 20 to 24 | 6.3%<br>(3.7-9.4%)             | 94%<br>(91-96%)          | 0.5<br>(0.26-0.85)                          | 1.4%<br>(0.94-2.1%)                  | 1.1%<br>(0.56-1.9%)                 | 17<br>(8.3-28)       | 2100<br>(1300-3000)    |
| Mali     | 1995 | Female | 25 to 29 | 6.9%<br>(4.2-11%)              | 93%<br>(89-96%)          | 0.6<br>(0.31-1)                             | 1.8%<br>(1.2-2.5%)                   | 1.6%<br>(0.91-2.7%)                 | 22<br>(13-37)        | 2100<br>(1400-3100)    |
| Mali     | 1995 | Female | 30 to 34 | 7.7%<br>(4.5-12%)              | 92%<br>(88-96%)          | 0.7<br>(0.37-1.1)                           | 2.1%<br>(1.4-3%)                     | 2.2%<br>(1.3-3.4%)                  | 29<br>(17-45)        | 2100<br>(1400-3100)    |
| Mali     | 1995 | Female | 35 to 39 | 8.9%<br>(5.3-13%)              | 91%<br>(87-95%)          | 0.79<br>(0.41-1.3)                          | 2.6%<br>(1.7-3.8%)                   | 3.1%<br>(1.9-4.7%)                  | 41<br>(25-64)        | 2500<br>(1600-3600)    |
| Mali     | 1995 | Female | 40 to 44 | 9.3%<br>(5.8-13%)              | 91%<br>(87-94%)          | 0.81<br>(0.41-1.4)                          | 2.8%<br>(1.9-4.1%)                   | 3.6%<br>(2.3-5.2%)                  | 52<br>(32-77)        | 2600<br>(1700-3800)    |
| Mali     | 1995 | Female | 45 to 49 | 9.1%<br>(5.3-13%)              | 91%<br>(87-95%)          | 0.76<br>(0.36-1.3)                          | 3.3%<br>(2-5.1%)                     | 4.3%<br>(2.4-6.6%)                  | 65<br>(36-100)       | 2800<br>(1600-4400)    |
| Mali     | 1995 | Female | 50 to 54 | 9.1%<br>(5.7-14%)              | 91%<br>(86-94%)          | 0.78<br>(0.38-1.4)                          | 3.6%<br>(2.2-5.5%)                   | 4.5%<br>(2.7-6.9%)                  | 91<br>(50-140)       | 3400<br>(1900-5300)    |
| Mali     | 1995 | Female | 55 to 59 | 9.5%<br>(5.9-14%)              | 90%<br>(86-94%)          | 0.89<br>(0.44-1.6)                          | 4%<br>(2.4-5.9%)                     | 4.9%<br>(2.9-7.3%)                  | 110<br>(64-170)      | 3600<br>(2100-5500)    |
| Mali     | 1995 | Female | 60 to 64 | 10%<br>(6.5-16%)               | 90%<br>(84-94%)          | 0.98<br>(0.45-1.8)                          | 4%<br>(2.3-6.1%)                     | 4.8%<br>(2.7-7.2%)                  | 140<br>(77-210)      | 3800<br>(2100-5800)    |
| Mali     | 1995 | Female | 65 to 69 | 12%<br>(7.6-17%)               | 88%<br>(83-92%)          | 0.98<br>(0.48-1.7)                          | 4.4%<br>(2.2-7%)                     | 5.1%<br>(2.6-8.1%)                  | 190<br>(93-310)      | 4300<br>(2100-6900)    |
| Mali     | 1995 | Female | 70 to 74 | 11%<br>(6.9-16%)               | 89%<br>(84-93%)          | 0.8<br>(0.38-1.4)                           | 4.1%<br>(1.9-7%)                     | 4.7%<br>(2.2-8%)                    | 200<br>(91-340)      | 3600<br>(1700-6100)    |
| Mali     | 1995 | Female | 75 to 79 | 8.4%<br>(5-13%)                | 92%<br>(87-95%)          | 0.57<br>(0.26-1)                            | 2.7%<br>(1.2-4.9%)                   | 3.2%<br>(1.3-5.5%)                  | 110<br>(49-210)      | 1600<br>(690-2800)     |
| Mali     | 1995 | Female | 80 to 84 | 7.4%<br>(4.5-11%)              | 93%<br>(89-96%)          | 0.49<br>(0.23-0.86)                         | 2%<br>(0.85-3.6%)                    | 2.3%<br>(0.96-4.1%)                 | 41<br>(17-75)        | 430<br>(190-780)       |
| Mali     | 1995 | Female | 85 to 89 | 7.6%<br>(4.5-12%)              | 92%<br>(88-95%)          | 0.48<br>(0.23-0.92)                         | 1.5%<br>(0.6-2.9%)                   | 1.8%<br>(0.67-3.4%)                 | 17<br>(6.3-32)       | 130<br>(49-240)        |
| Mali     | 1995 | Female | 90 to 94 | 8.5%<br>(5.4-13%)              | 92%<br>(87-95%)          | 0.52<br>(0.24-1)                            | 1.2%<br>(0.38-2.7%)                  | 1.4%<br>(0.41-3.2%)                 | 4.1<br>(1.2-9.1)     | 22<br>(6.6-47)         |

| Location | Year | Sex    | Age      | Prevalence of current drinkers | Prevalence of abstainers | Population average of standard drinks daily | Percent of total attributable deaths | Percent of total attributable DALYs | Attributable deaths  | Attributable DALYs     |
|----------|------|--------|----------|--------------------------------|--------------------------|---------------------------------------------|--------------------------------------|-------------------------------------|----------------------|------------------------|
| Mali     | 1995 | Female | 95 plus  | 9.7%<br>(5.6-15%)              | 90%<br>(85-94%)          | 0.56<br>(0.21-1.1)                          | 1.1%<br>(0.24-2.8%)                  | 1.2%<br>(0.18-3.2%)                 | 0.76<br>(0.11-2)     | 2.7<br>(0.58-6.8)      |
| Mali     | 1995 | Male   | All Ages | 2.5%<br>(2-3%)                 | 98%<br>(97-98%)          | 0.17<br>(0.12-0.23)                         | 0.5%<br>(0.38-0.67%)                 | 0.97%<br>(0.69-1.4%)                | 750<br>(530-1100)    | 29000<br>(22000-39000) |
| Mali     | 1995 | Male   | 15 to 19 | 2%<br>(1.1-3.1%)               | 98%<br>(97-99%)          | 0.1<br>(0.048-0.19)                         | 0.61%<br>(0.4-0.86%)                 | 0.36%<br>(0.19-0.64%)               | 3.7<br>(1.9-6.6)     | 740<br>(480-1100)      |
| Mali     | 1995 | Male   | 20 to 24 | 3.1%<br>(1.7-4.9%)             | 97%<br>(95-98%)          | 0.23<br>(0.11-0.38)                         | 1.5%<br>(1.1-2.2%)                   | 1.1%<br>(0.63-1.9%)                 | 15<br>(8.1-26)       | 1900<br>(1300-2800)    |
| Mali     | 1995 | Male   | 25 to 29 | 4.1%<br>(2.3-6.4%)             | 96%<br>(94-98%)          | 0.35<br>(0.18-0.61)                         | 2.3%<br>(1.5-3.3%)                   | 2.1%<br>(1.2-3.5%)                  | 28<br>(16-45)        | 2500<br>(1700-3600)    |
| Mali     | 1995 | Male   | 30 to 34 | 4.7%<br>(2.6-7.7%)             | 95%<br>(92-97%)          | 0.43<br>(0.22-0.75)                         | 2.8%<br>(1.9-4.1%)                   | 3%<br>(1.8-4.8%)                    | 36<br>(22-58)        | 2600<br>(1800-3800)    |
| Mali     | 1995 | Male   | 35 to 39 | 4.9%<br>(2.7-7.5%)             | 95%<br>(92-97%)          | 0.46<br>(0.23-0.81)                         | 3.4%<br>(2.3-4.9%)                   | 4%<br>(2.5-6.3%)                    | 48<br>(30-72)        | 2800<br>(1900-4100)    |
| Mali     | 1995 | Male   | 40 to 44 | 5.1%<br>(3-7.7%)               | 95%<br>(92-97%)          | 0.47<br>(0.24-0.85)                         | 3.8%<br>(2.6-5.8%)                   | 4.8%<br>(3.1-7.5%)                  | 62<br>(39-96)        | 3100<br>(2000-4700)    |
| Mali     | 1995 | Male   | 45 to 49 | 5.3%<br>(2.9-8.2%)             | 95%<br>(92-97%)          | 0.49<br>(0.22-0.89)                         | 4.2%<br>(2.8-6.2%)                   | 5.3%<br>(3.4-8.1%)                  | 67<br>(42-100)       | 2900<br>(1900-4300)    |
| Mali     | 1995 | Male   | 50 to 54 | 5.4%<br>(3.3-8.1%)             | 95%<br>(92-97%)          | 0.49<br>(0.23-0.91)                         | 4%<br>(2.6-6.1%)                     | 5%<br>(3.1-7.9%)                    | 75<br>(47-120)       | 2900<br>(1900-4500)    |
| Mali     | 1995 | Male   | 55 to 59 | 5.3%<br>(3.2-7.9%)             | 95%<br>(92-97%)          | 0.47<br>(0.23-0.85)                         | 3.8%<br>(2.5-5.6%)                   | 4.7%<br>(3.1-7.2%)                  | 75<br>(48-120)       | 2500<br>(1600-3700)    |
| Mali     | 1995 | Male   | 60 to 64 | 5.1%<br>(3-8.2%)               | 95%<br>(92-97%)          | 0.43<br>(0.19-0.82)                         | 3.3%<br>(2.1-5%)                     | 4%<br>(2.5-6.2%)                    | 82<br>(50-130)       | 2300<br>(1400-3500)    |
| Mali     | 1995 | Male   | 65 to 69 | 5.1%<br>(3.1-7.6%)             | 95%<br>(92-97%)          | 0.38<br>(0.17-0.65)                         | 2.8%<br>(1.7-4.4%)                   | 3.4%<br>(2-5.5%)                    | 84<br>(52-140)       | 1900<br>(1200-3100)    |
| Mali     | 1995 | Male   | 70 to 74 | 4.9%<br>(3.1-7.3%)             | 95%<br>(93-97%)          | 0.31<br>(0.15-0.55)                         | 2.3%<br>(1.4-3.7%)                   | 2.8%<br>(1.6-4.6%)                  | 82<br>(48-140)       | 1500<br>(890-2400)     |
| Mali     | 1995 | Male   | 75 to 79 | 4.5%<br>(2.6-7.2%)             | 96%<br>(93-97%)          | 0.25<br>(0.11-0.46)                         | 1.8%<br>(1-3.1%)                     | 2.1%<br>(1.2-3.7%)                  | 58<br>(32-100)       | 820<br>(460-1400)      |
| Mali     | 1995 | Male   | 80 to 84 | 3.9%<br>(2.2-5.9%)             | 96%<br>(94-98%)          | 0.19<br>(0.086-0.35)                        | 1.4%<br>(0.81-2.5%)                  | 1.7%<br>(0.92-3%)                   | 24<br>(13-43)        | 250<br>(140-440)       |
| Mali     | 1995 | Male   | 85 to 89 | 3.6%<br>(1.9-5.6%)             | 96%<br>(94-98%)          | 0.15<br>(0.072-0.3)                         | 1%<br>(0.6-1.9%)                     | 1.2%<br>(0.67-2.3%)                 | 8.3<br>(4.6-16)      | 62<br>(36-120)         |
| Mali     | 1995 | Male   | 90 to 94 | 3.7%<br>(2.2-5.8%)             | 96%<br>(94-98%)          | 0.13<br>(0.06-0.27)                         | 0.6%<br>(0.31-1.2%)                  | 0.65%<br>(0.31-1.4%)                | 1.4<br>(0.66-3)      | 7.7<br>(3.9-16)        |
| Mali     | 1995 | Male   | 95 plus  | 4.2%<br>(2.3-6.9%)             | 96%<br>(93-98%)          | 0.13<br>(0.045-0.27)                        | 0.47%<br>(0.2-1%)                    | 0.46%<br>(0.14-1.2%)                | 0.19<br>(0.057-0.49) | 0.79<br>(0.34-1.8)     |
| Mali     | 2000 | Female | All Ages | 4.7%<br>(3.9-5.6%)             | 95%<br>(94-96%)          | 0.33<br>(0.24-0.44)                         | 0.62%<br>(0.45-0.81%)                | 1.3%<br>(0.85-1.9%)                 | 1100<br>(670-1500)   | 35000<br>(25000-46000) |
| Mali     | 2000 | Female | 15 to 19 | 4.6%<br>(2.9-6.9%)             | 95%<br>(93-97%)          | 0.31<br>(0.15-0.51)                         | 0.7%<br>(0.44-1%)                    | 0.55%<br>(0.25-0.96%)               | 7.6<br>(3.3-13)      | 1100<br>(660-1600)     |
| Mali     | 2000 | Female | 20 to 24 | 5.5%<br>(3.3-8.2%)             | 94%<br>(92-97%)          | 0.47<br>(0.25-0.8)                          | 1.3%<br>(0.9-1.9%)                   | 0.92%<br>(0.49-1.5%)                | 15<br>(8.1-25)       | 2100<br>(1400-3100)    |



| Location | Year | Sex    | Age      | Prevalence of current drinkers | Prevalence of abstainers | Population average of standard drinks daily | Percent of total attributable deaths | Percent of total attributable DALYs | Attributable deaths | Attributable DALYs     |
|----------|------|--------|----------|--------------------------------|--------------------------|---------------------------------------------|--------------------------------------|-------------------------------------|---------------------|------------------------|
| Mali     | 2000 | Female | 25 to 29 | 5.9%<br>(3.7-8.8%)             | 94%<br>(91-96%)          | 0.56<br>(0.31-0.91)                         | 1.6%<br>(1.1-2.2%)                   | 1.3%<br>(0.76-2.1%)                 | 22<br>(13-35)       | 2300<br>(1600-3200)    |
| Mali     | 2000 | Female | 30 to 34 | 6.7%<br>(4-10%)                | 93%<br>(90-96%)          | 0.65<br>(0.35-1)                            | 1.8%<br>(1.2-2.5%)                   | 1.8%<br>(1.1-2.7%)                  | 28<br>(17-42)       | 2200<br>(1500-3100)    |
| Mali     | 2000 | Female | 35 to 39 | 7.8%<br>(4.8-12%)              | 92%<br>(88-95%)          | 0.75<br>(0.39-1.2)                          | 2.2%<br>(1.5-3.2%)                   | 2.6%<br>(1.6-3.8%)                  | 38<br>(23-57)       | 2400<br>(1600-3400)    |
| Mali     | 2000 | Female | 40 to 44 | 8.1%<br>(5.2-12%)              | 92%<br>(88-95%)          | 0.76<br>(0.37-1.3)                          | 2.5%<br>(1.7-3.5%)                   | 3.1%<br>(2-4.5%)                    | 46<br>(29-67)       | 2400<br>(1600-3400)    |
| Mali     | 2000 | Female | 45 to 49 | 7.9%<br>(4.7-11%)              | 92%<br>(89-95%)          | 0.7<br>(0.34-1.2)                           | 2.8%<br>(1.8-4.2%)                   | 3.6%<br>(2.2-5.5%)                  | 59<br>(36-93)       | 2600<br>(1700-4000)    |
| Mali     | 2000 | Female | 50 to 54 | 8%<br>(5.3-12%)                | 92%<br>(88-95%)          | 0.73<br>(0.38-1.3)                          | 3.2%<br>(2-4.7%)                     | 4%<br>(2.4-6%)                      | 74<br>(44-110)      | 2800<br>(1700-4300)    |
| Mali     | 2000 | Female | 55 to 59 | 8.8%<br>(5.6-12%)              | 91%<br>(88-94%)          | 0.88<br>(0.46-1.5)                          | 3.6%<br>(2.3-5.4%)                   | 4.5%<br>(2.8-6.7%)                  | 110<br>(64-160)     | 3500<br>(2100-5300)    |
| Mali     | 2000 | Female | 60 to 64 | 11%<br>(6.9-15%)               | 89%<br>(85-93%)          | 1.1<br>(0.54-1.9)                           | 3.9%<br>(2.3-5.9%)                   | 4.7%<br>(2.8-7.1%)                  | 130<br>(78-210)     | 3600<br>(2100-5600)    |
| Mali     | 2000 | Female | 65 to 69 | 12%<br>(8.4-17%)               | 88%<br>(83-92%)          | 1.1<br>(0.58-1.9)                           | 4.5%<br>(2.4-6.9%)                   | 5.4%<br>(2.8-8.3%)                  | 180<br>(95-280)     | 4100<br>(2200-6300)    |
| Mali     | 2000 | Female | 70 to 74 | 11%<br>(7.5-16%)               | 89%<br>(84-93%)          | 0.89<br>(0.45-1.5)                          | 4%<br>(1.9-6.9%)                     | 4.7%<br>(2.2-8%)                    | 180<br>(87-310)     | 3300<br>(1600-5600)    |
| Mali     | 2000 | Female | 75 to 79 | 8.4%<br>(5.1-13%)              | 92%<br>(87-95%)          | 0.61<br>(0.28-1.1)                          | 2.7%<br>(1.2-4.7%)                   | 3.1%<br>(1.4-5.4%)                  | 110<br>(46-190)     | 1500<br>(660-2700)     |
| Mali     | 2000 | Female | 80 to 84 | 7.3%<br>(4.3-11%)              | 93%<br>(89-96%)          | 0.51<br>(0.24-0.91)                         | 2%<br>(0.87-3.7%)                    | 2.3%<br>(0.97-4.2%)                 | 43<br>(18-81)       | 450<br>(200-830)       |
| Mali     | 2000 | Female | 85 to 89 | 7.6%<br>(4.3-12%)              | 92%<br>(88-96%)          | 0.51<br>(0.25-0.97)                         | 1.6%<br>(0.66-3%)                    | 1.8%<br>(0.72-3.5%)                 | 21<br>(8.5-42)      | 160<br>(66-310)        |
| Mali     | 2000 | Female | 90 to 94 | 8.4%<br>(5.2-13%)              | 92%<br>(87-95%)          | 0.55<br>(0.26-1)                            | 1.3%<br>(0.42-2.9%)                  | 1.5%<br>(0.45-3.3%)                 | 6.3<br>(1.9-14)     | 33<br>(11-72)          |
| Mali     | 2000 | Female | 95 plus  | 9.6%<br>(5.3-15%)              | 90%<br>(85-95%)          | 0.6<br>(0.23-1.2)                           | 1.2%<br>(0.29-3%)                    | 1.4%<br>(0.25-3.4%)                 | 1.3<br>(0.24-3.4)   | 4.8<br>(1.1-12)        |
| Mali     | 2000 | Male   | All Ages | 2.4%<br>(1.9-2.9%)             | 98%<br>(97-98%)          | 0.17<br>(0.12-0.23)                         | 0.46%<br>(0.35-0.63%)                | 0.89%<br>(0.63-1.3%)                | 720<br>(510-1000)   | 28000<br>(22000-38000) |
| Mali     | 2000 | Male   | 15 to 19 | 2%<br>(1.2-3%)                 | 98%<br>(97-99%)          | 0.11<br>(0.054-0.2)                         | 0.58%<br>(0.38-0.81%)                | 0.31%<br>(0.17-0.54%)               | 3.7<br>(2-6.5)      | 810<br>(510-1100)      |
| Mali     | 2000 | Male   | 20 to 24 | 3%<br>(1.7-4.5%)               | 97%<br>(95-98%)          | 0.23<br>(0.12-0.39)                         | 1.3%<br>(0.9-1.9%)                   | 0.85%<br>(0.47-1.4%)                | 14<br>(8.1-23)      | 2000<br>(1400-2900)    |
| Mali     | 2000 | Male   | 25 to 29 | 3.6%<br>(2.2-5.4%)             | 96%<br>(95-98%)          | 0.33<br>(0.18-0.54)                         | 1.8%<br>(1.3-2.5%)                   | 1.6%<br>(0.91-2.5%)                 | 27<br>(16-42)       | 2600<br>(1900-3700)    |
| Mali     | 2000 | Male   | 30 to 34 | 3.9%<br>(2.3-6.3%)             | 96%<br>(94-98%)          | 0.39<br>(0.2-0.67)                          | 2.1%<br>(1.5-3.1%)                   | 2.1%<br>(1.3-3.4%)                  | 34<br>(21-54)       | 2700<br>(1900-3700)    |
| Mali     | 2000 | Male   | 35 to 39 | 4%<br>(2.3-6.2%)               | 96%<br>(94-98%)          | 0.41<br>(0.2-0.69)                          | 2.6%<br>(1.8-3.8%)                   | 2.9%<br>(1.8-4.5%)                  | 43<br>(27-67)       | 2600<br>(1800-3800)    |
| Mali     | 2000 | Male   | 40 to 44 | 4.4%<br>(2.7-6.6%)             | 96%<br>(93-97%)          | 0.45<br>(0.23-0.78)                         | 3.1%<br>(2.1-4.6%)                   | 3.8%<br>(2.5-5.8%)                  | 53<br>(35-81)       | 2700<br>(1900-4000)    |

| Location | Year | Sex    | Age      | Prevalence of current drinkers | Prevalence of abstainers | Population average of standard drinks daily | Percent of total attributable deaths | Percent of total attributable DALYs | Attributable deaths | Attributable DALYs     |
|----------|------|--------|----------|--------------------------------|--------------------------|---------------------------------------------|--------------------------------------|-------------------------------------|---------------------|------------------------|
| Mali     | 2000 | Male   | 45 to 49 | 5.3%<br>(3.1-7.7%)             | 95%<br>(92-97%)          | 0.53<br>(0.26-0.94)                         | 3.7%<br>(2.5-5.5%)                   | 4.7%<br>(3-7%)                      | 69<br>(45-100)      | 3100<br>(2100-4500)    |
| Mali     | 2000 | Male   | 50 to 54 | 5.6%<br>(3.6-8.1%)             | 94%<br>(92-96%)          | 0.56<br>(0.27-0.97)                         | 3.7%<br>(2.5-5.5%)                   | 4.7%<br>(3.1-7.1%)                  | 64<br>(42-98)       | 2500<br>(1700-3700)    |
| Mali     | 2000 | Male   | 55 to 59 | 5.7%<br>(3.5-8.1%)             | 94%<br>(92-96%)          | 0.55<br>(0.28-0.97)                         | 3.7%<br>(2.5-5.4%)                   | 4.7%<br>(3.1-7%)                    | 76<br>(50-110)      | 2500<br>(1700-3700)    |
| Mali     | 2000 | Male   | 60 to 64 | 5.7%<br>(3.7-8.3%)             | 94%<br>(92-96%)          | 0.52<br>(0.26-0.96)                         | 3.3%<br>(2.2-4.9%)                   | 4.1%<br>(2.7-6.3%)                  | 75<br>(48-120)      | 2100<br>(1400-3200)    |
| Mali     | 2000 | Male   | 65 to 69 | 5.9%<br>(3.7-8.4%)             | 94%<br>(92-96%)          | 0.47<br>(0.24-0.79)                         | 2.8%<br>(1.8-4.4%)                   | 3.5%<br>(2.2-5.5%)                  | 77<br>(47-120)      | 1800<br>(1100-2800)    |
| Mali     | 2000 | Male   | 70 to 74 | 6.1%<br>(4-8.8%)               | 94%<br>(91-96%)          | 0.42<br>(0.21-0.72)                         | 2.5%<br>(1.5-4%)                     | 3%<br>(1.8-5%)                      | 80<br>(47-130)      | 1500<br>(860-2400)     |
| Mali     | 2000 | Male   | 75 to 79 | 5.6%<br>(3.4-8.8%)             | 94%<br>(91-97%)          | 0.34<br>(0.16-0.61)                         | 2%<br>(1.1-3.4%)                     | 2.3%<br>(1.3-4.1%)                  | 59<br>(32-110)      | 840<br>(450-1500)      |
| Mali     | 2000 | Male   | 80 to 84 | 4.4%<br>(2.5-6.8%)             | 96%<br>(93-97%)          | 0.24<br>(0.11-0.43)                         | 1.5%<br>(0.86-2.5%)                  | 1.8%<br>(1-3.1%)                    | 27<br>(15-46)       | 280<br>(160-480)       |
| Mali     | 2000 | Male   | 85 to 89 | 3.8%<br>(2.1-5.9%)             | 96%<br>(94-98%)          | 0.18<br>(0.084-0.34)                        | 1.1%<br>(0.62-2%)                    | 1.2%<br>(0.69-2.4%)                 | 11<br>(6.4-22)      | 86<br>(50-160)         |
| Mali     | 2000 | Male   | 90 to 94 | 3.8%<br>(2.3-6.1%)             | 96%<br>(94-98%)          | 0.15<br>(0.072-0.3)                         | 0.64%<br>(0.34-1.3%)                 | 0.7%<br>(0.34-1.5%)                 | 2.2<br>(1-4.6)      | 12<br>(6.3-24)         |
| Mali     | 2000 | Male   | 95 plus  | 4.4%<br>(2.4-7.3%)             | 96%<br>(93-98%)          | 0.15<br>(0.054-0.31)                        | 0.51%<br>(0.22-1.1%)                 | 0.51%<br>(0.15-1.3%)                | 0.32<br>(0.093-0.8) | 1.3<br>(0.56-2.9)      |
| Mali     | 2005 | Female | All Ages | 4.6%<br>(3.8-5.5%)             | 95%<br>(95-96%)          | 0.33<br>(0.24-0.43)                         | 0.58%<br>(0.42-0.75%)                | 1.2%<br>(0.78-1.7%)                 | 940<br>(580-1300)   | 32000<br>(23000-42000) |
| Mali     | 2005 | Female | 15 to 19 | 4.5%<br>(2.8-6.7%)             | 95%<br>(93-97%)          | 0.31<br>(0.15-0.52)                         | 0.71%<br>(0.45-1%)                   | 0.54%<br>(0.25-0.95%)               | 6.5<br>(2.9-12)     | 1100<br>(650-1600)     |
| Mali     | 2005 | Female | 20 to 24 | 5.4%<br>(3.3-8.1%)             | 95%<br>(92-97%)          | 0.47<br>(0.24-0.81)                         | 1.4%<br>(0.96-1.9%)                  | 0.86%<br>(0.46-1.4%)                | 13<br>(6.9-22)      | 2100<br>(1500-3000)    |
| Mali     | 2005 | Female | 25 to 29 | 5.8%<br>(3.6-8.7%)             | 94%<br>(91-96%)          | 0.56<br>(0.3-0.89)                          | 1.5%<br>(1.1-2.1%)                   | 1.2%<br>(0.71-1.9%)                 | 20<br>(11-31)       | 2300<br>(1600-3200)    |
| Mali     | 2005 | Female | 30 to 34 | 6.6%<br>(4.1-10%)              | 93%<br>(90-96%)          | 0.65<br>(0.36-1)                            | 1.7%<br>(1.2-2.3%)                   | 1.6%<br>(1-2.5%)                    | 27<br>(16-41)       | 2400<br>(1600-3200)    |
| Mali     | 2005 | Female | 35 to 39 | 7.7%<br>(4.7-11%)              | 92%<br>(89-95%)          | 0.75<br>(0.4-1.2)                           | 2%<br>(1.4-2.8%)                     | 2.3%<br>(1.4-3.4%)                  | 37<br>(23-55)       | 2400<br>(1700-3300)    |
| Mali     | 2005 | Female | 40 to 44 | 8%<br>(5.1-11%)                | 92%<br>(89-95%)          | 0.76<br>(0.39-1.2)                          | 2.3%<br>(1.6-3.1%)                   | 2.9%<br>(1.8-4.1%)                  | 43<br>(27-62)       | 2300<br>(1600-3200)    |
| Mali     | 2005 | Female | 45 to 49 | 7.8%<br>(4.5-11%)              | 92%<br>(89-95%)          | 0.7<br>(0.34-1.2)                           | 2.6%<br>(1.6-3.7%)                   | 3.3%<br>(2-5%)                      | 51<br>(30-79)       | 2300<br>(1500-3500)    |
| Mali     | 2005 | Female | 50 to 54 | 7.9%<br>(5.2-12%)              | 92%<br>(88-95%)          | 0.73<br>(0.37-1.3)                          | 2.9%<br>(1.9-4.3%)                   | 3.8%<br>(2.4-5.7%)                  | 69<br>(42-100)      | 2700<br>(1700-4000)    |
| Mali     | 2005 | Female | 55 to 59 | 8.6%<br>(5.4-13%)              | 91%<br>(87-95%)          | 0.89<br>(0.46-1.6)                          | 3.3%<br>(2.1-4.9%)                   | 4.3%<br>(2.6-6.4%)                  | 87<br>(51-130)      | 2900<br>(1800-4300)    |
| Mali     | 2005 | Female | 60 to 64 | 10%<br>(6.7-15%)               | 90%<br>(85-93%)          | 1.1<br>(0.55-1.9)                           | 3.6%<br>(2.1-5.4%)                   | 4.5%<br>(2.6-6.7%)                  | 120<br>(72-190)     | 3400<br>(2000-5100)    |

| Location | Year | Sex    | Age      | Prevalence of current drinkers | Prevalence of abstainers | Population average of standard drinks daily | Percent of total attributable deaths | Percent of total attributable DALYs | Attributable deaths | Attributable DALYs     |
|----------|------|--------|----------|--------------------------------|--------------------------|---------------------------------------------|--------------------------------------|-------------------------------------|---------------------|------------------------|
| Mali     | 2005 | Female | 65 to 69 | 12%<br>(8.2-17%)               | 88%<br>(83-92%)          | 1.1<br>(0.59-1.9)                           | 4.2%<br>(2.3-6.3%)                   | 5%<br>(2.8-7.6%)                    | 150<br>(80-240)     | 3500<br>(1900-5400)    |
| Mali     | 2005 | Female | 70 to 74 | 11%<br>(7.4-16%)               | 89%<br>(84-93%)          | 0.9<br>(0.45-1.6)                           | 3.7%<br>(1.7-6.2%)                   | 4.4%<br>(2-7.4%)                    | 150<br>(67-260)     | 2700<br>(1300-4700)    |
| Mali     | 2005 | Female | 75 to 79 | 8.4%<br>(5-13%)                | 92%<br>(87-95%)          | 0.62<br>(0.28-1.1)                          | 2.5%<br>(1.1-4.4%)                   | 2.9%<br>(1.2-5.2%)                  | 90<br>(38-160)      | 1300<br>(540-2300)     |
| Mali     | 2005 | Female | 80 to 84 | 7.3%<br>(4.3-11%)              | 93%<br>(89-96%)          | 0.52<br>(0.24-0.94)                         | 1.9%<br>(0.81-3.3%)                  | 2.2%<br>(0.91-3.9%)                 | 39<br>(17-71)       | 410<br>(180-740)       |
| Mali     | 2005 | Female | 85 to 89 | 7.6%<br>(4.5-12%)              | 92%<br>(88-96%)          | 0.52<br>(0.26-1)                            | 1.5%<br>(0.61-2.8%)                  | 1.8%<br>(0.67-3.3%)                 | 22<br>(8.4-40)      | 160<br>(66-300)        |
| Mali     | 2005 | Female | 90 to 94 | 8.3%<br>(5.2-13%)              | 92%<br>(87-95%)          | 0.55<br>(0.26-1)                            | 1.3%<br>(0.39-2.6%)                  | 1.5%<br>(0.41-3%)                   | 7.6<br>(2.1-16)     | 40<br>(12-82)          |
| Mali     | 2005 | Female | 95 plus  | 9.5%<br>(5.5-15%)              | 91%<br>(85-95%)          | 0.59<br>(0.23-1.2)                          | 1.2%<br>(0.29-2.8%)                  | 1.4%<br>(0.25-3.3%)                 | 1.9<br>(0.34-4.5)   | 6.7<br>(1.6-15)        |
| Mali     | 2005 | Male   | All Ages | 2.3%<br>(1.9-2.9%)             | 98%<br>(97-98%)          | 0.17<br>(0.13-0.23)                         | 0.5%<br>(0.38-0.67%)                 | 0.92%<br>(0.65-1.3%)                | 750<br>(520-1100)   | 31000<br>(23000-42000) |
| Mali     | 2005 | Male   | 15 to 19 | 2%<br>(1.2-2.9%)               | 98%<br>(97-99%)          | 0.11<br>(0.056-0.19)                        | 0.66%<br>(0.45-0.93%)                | 0.37%<br>(0.2-0.68%)                | 4<br>(2.1-7.3)      | 900<br>(610-1300)      |
| Mali     | 2005 | Male   | 20 to 24 | 2.9%<br>(1.7-4.4%)             | 97%<br>(96-98%)          | 0.23<br>(0.12-0.41)                         | 1.6%<br>(1.1-2.2%)                   | 1%<br>(0.59-1.7%)                   | 15<br>(8.3-25)      | 2300<br>(1500-3200)    |
| Mali     | 2005 | Male   | 25 to 29 | 3.6%<br>(2.1-5.4%)             | 96%<br>(95-98%)          | 0.34<br>(0.18-0.55)                         | 2%<br>(1.4-2.8%)                     | 1.7%<br>(1-2.8%)                    | 29<br>(18-48)       | 3000<br>(2100-4100)    |
| Mali     | 2005 | Male   | 30 to 34 | 3.9%<br>(2.3-6.2%)             | 96%<br>(94-98%)          | 0.4<br>(0.2-0.66)                           | 2.2%<br>(1.6-3.3%)                   | 2.2%<br>(1.3-3.5%)                  | 41<br>(25-65)       | 3300<br>(2300-4600)    |
| Mali     | 2005 | Male   | 35 to 39 | 4%<br>(2.2-6.1%)               | 96%<br>(94-98%)          | 0.42<br>(0.21-0.71)                         | 2.6%<br>(1.8-3.8%)                   | 2.9%<br>(1.9-4.7%)                  | 52<br>(33-82)       | 3200<br>(2200-4800)    |
| Mali     | 2005 | Male   | 40 to 44 | 4.4%<br>(2.6-6.5%)             | 96%<br>(93-97%)          | 0.46<br>(0.23-0.78)                         | 3%<br>(2.1-4.4%)                     | 3.6%<br>(2.5-5.6%)                  | 59<br>(39-94)       | 3100<br>(2100-4600)    |
| Mali     | 2005 | Male   | 45 to 49 | 5.2%<br>(3-7.3%)               | 95%<br>(93-97%)          | 0.53<br>(0.26-0.92)                         | 3.6%<br>(2.5-5.3%)                   | 4.5%<br>(3-7%)                      | 71<br>(46-110)      | 3200<br>(2200-4600)    |
| Mali     | 2005 | Male   | 50 to 54 | 5.6%<br>(3.6-8.2%)             | 94%<br>(92-96%)          | 0.56<br>(0.28-0.97)                         | 3.6%<br>(2.5-5.2%)                   | 4.6%<br>(3-6.9%)                    | 75<br>(49-110)      | 2900<br>(2000-4300)    |
| Mali     | 2005 | Male   | 55 to 59 | 5.6%<br>(3.5-8%)               | 94%<br>(92-96%)          | 0.55<br>(0.29-0.98)                         | 3.6%<br>(2.4-5.4%)                   | 4.6%<br>(3-6.9%)                    | 72<br>(47-110)      | 2400<br>(1600-3500)    |
| Mali     | 2005 | Male   | 60 to 64 | 5.6%<br>(3.7-8.2%)             | 94%<br>(92-96%)          | 0.52<br>(0.25-0.95)                         | 3.3%<br>(2.2-4.8%)                   | 4.1%<br>(2.7-6.2%)                  | 83<br>(52-130)      | 2300<br>(1500-3500)    |
| Mali     | 2005 | Male   | 65 to 69 | 5.8%<br>(3.7-8.3%)             | 94%<br>(92-96%)          | 0.47<br>(0.24-0.81)                         | 2.7%<br>(1.8-4.2%)                   | 3.4%<br>(2.2-5.3%)                  | 73<br>(46-110)      | 1700<br>(1100-2600)    |
| Mali     | 2005 | Male   | 70 to 74 | 6.1%<br>(4-8.8%)               | 94%<br>(91-96%)          | 0.43<br>(0.22-0.74)                         | 2.4%<br>(1.5-3.9%)                   | 3%<br>(1.8-4.8%)                    | 75<br>(44-120)      | 1400<br>(820-2200)     |
| Mali     | 2005 | Male   | 75 to 79 | 5.6%<br>(3.4-8.7%)             | 94%<br>(91-97%)          | 0.35<br>(0.15-0.64)                         | 1.9%<br>(1.1-3.3%)                   | 2.3%<br>(1.2-4.1%)                  | 56<br>(30-100)      | 790<br>(430-1400)      |
| Mali     | 2005 | Male   | 80 to 84 | 4.4%<br>(2.6-6.8%)             | 96%<br>(93-97%)          | 0.24<br>(0.11-0.44)                         | 1.5%<br>(0.87-2.6%)                  | 1.7%<br>(1-3.1%)                    | 27<br>(15-48)       | 280<br>(160-500)       |

| Location | Year | Sex    | Age      | Prevalence of current drinkers | Prevalence of abstainers | Population average of standard drinks daily | Percent of total attributable deaths | Percent of total attributable DALYs | Attributable deaths | Attributable DALYs     |
|----------|------|--------|----------|--------------------------------|--------------------------|---------------------------------------------|--------------------------------------|-------------------------------------|---------------------|------------------------|
| Mali     | 2005 | Male   | 85 to 89 | 3.8%<br>(2-5.9%)               | 96%<br>(94-98%)          | 0.18<br>(0.084-0.34)                        | 1%<br>(0.62-1.9%)                    | 1.2%<br>(0.68-2.2%)                 | 13<br>(7.3-24)      | 97<br>(58-180)         |
| Mali     | 2005 | Male   | 90 to 94 | 3.8%<br>(2.3-5.9%)             | 96%<br>(94-98%)          | 0.16<br>(0.071-0.3)                         | 0.63%<br>(0.33-1.2%)                 | 0.69%<br>(0.33-1.4%)                | 3<br>(1.4-6.1)      | 17<br>(8.9-32)         |
| Mali     | 2005 | Male   | 95 plus  | 4.4%<br>(2.4-7.3%)             | 96%<br>(93-98%)          | 0.15<br>(0.054-0.32)                        | 0.5%<br>(0.23-1.1%)                  | 0.49%<br>(0.15-1.3%)                | 0.46<br>(0.14-1.2)  | 1.9<br>(0.85-4.2)      |
| Mali     | 2010 | Female | All Ages | 5%<br>(4.1-5.9%)               | 95%<br>(94-96%)          | 0.33<br>(0.22-0.46)                         | 0.56%<br>(0.39-0.75%)                | 1.1%<br>(0.64-1.6%)                 | 820<br>(480-1200)   | 31000<br>(21000-41000) |
| Mali     | 2010 | Female | 15 to 19 | 4.8%<br>(3-7.1%)               | 95%<br>(93-97%)          | 0.3<br>(0.14-0.56)                          | 0.69%<br>(0.43-1%)                   | 0.46%<br>(0.2-0.88%)                | 5.8<br>(2.2-12)     | 1100<br>(680-1700)     |
| Mali     | 2010 | Female | 20 to 24 | 6.2%<br>(3.8-9.3%)             | 94%<br>(91-96%)          | 0.5<br>(0.24-0.89)                          | 1.4%<br>(0.93-2%)                    | 0.78%<br>(0.38-1.3%)                | 11<br>(5.4-20)      | 2200<br>(1400-3200)    |
| Mali     | 2010 | Female | 25 to 29 | 6.9%<br>(4.1-10%)              | 93%<br>(90-96%)          | 0.6<br>(0.3-0.99)                           | 1.6%<br>(1.1-2.1%)                   | 1.1%<br>(0.6-1.8%)                  | 18<br>(9.8-30)      | 2400<br>(1600-3400)    |
| Mali     | 2010 | Female | 30 to 34 | 7.7%<br>(4.5-12%)              | 92%<br>(88-95%)          | 0.69<br>(0.37-1.2)                          | 1.7%<br>(1.2-2.3%)                   | 1.6%<br>(0.92-2.3%)                 | 26<br>(15-40)       | 2500<br>(1700-3400)    |
| Mali     | 2010 | Female | 35 to 39 | 8.8%<br>(5.2-13%)              | 91%<br>(87-95%)          | 0.79<br>(0.38-1.3)                          | 2%<br>(1.3-2.7%)                     | 2.2%<br>(1.3-3.3%)                  | 37<br>(22-56)       | 2600<br>(1700-3600)    |
| Mali     | 2010 | Female | 40 to 44 | 9.2%<br>(5.6-13%)              | 91%<br>(87-94%)          | 0.8<br>(0.38-1.4)                           | 2.3%<br>(1.5-3.2%)                   | 3%<br>(1.8-4.4%)                    | 45<br>(27-68)       | 2500<br>(1600-3600)    |
| Mali     | 2010 | Female | 45 to 49 | 9%<br>(5.2-13%)                | 91%<br>(87-95%)          | 0.75<br>(0.34-1.3)                          | 2.6%<br>(1.5-3.9%)                   | 3.4%<br>(1.9-5.3%)                  | 51<br>(28-81)       | 2400<br>(1400-3600)    |
| Mali     | 2010 | Female | 50 to 54 | 9%<br>(5.7-13%)                | 91%<br>(87-94%)          | 0.76<br>(0.35-1.4)                          | 2.8%<br>(1.7-4.3%)                   | 3.8%<br>(2.2-5.8%)                  | 63<br>(35-99)       | 2500<br>(1500-3800)    |
| Mali     | 2010 | Female | 55 to 59 | 9.3%<br>(5.8-14%)              | 91%<br>(86-94%)          | 0.88<br>(0.42-1.6)                          | 3.1%<br>(1.7-4.7%)                   | 4%<br>(2.2-6.3%)                    | 84<br>(46-140)      | 2800<br>(1600-4500)    |
| Mali     | 2010 | Female | 60 to 64 | 10%<br>(6.1-15%)               | 90%<br>(85-94%)          | 0.96<br>(0.44-1.8)                          | 3.1%<br>(1.7-4.9%)                   | 3.9%<br>(2.1-6.1%)                  | 96<br>(51-150)      | 2700<br>(1500-4200)    |
| Mali     | 2010 | Female | 65 to 69 | 11%<br>(7.3-16%)               | 89%<br>(84-93%)          | 0.97<br>(0.48-1.7)                          | 3.4%<br>(1.7-5.4%)                   | 4.2%<br>(2-6.7%)                    | 130<br>(64-220)     | 3100<br>(1500-5000)    |
| Mali     | 2010 | Female | 70 to 74 | 10%<br>(7-15%)                 | 90%<br>(85-93%)          | 0.78<br>(0.36-1.4)                          | 3%<br>(1.2-5.4%)                     | 3.6%<br>(1.4-6.5%)                  | 120<br>(47-220)     | 2200<br>(900-4000)     |
| Mali     | 2010 | Female | 75 to 79 | 8.2%<br>(4.9-13%)              | 92%<br>(87-95%)          | 0.56<br>(0.25-1.1)                          | 2.1%<br>(0.77-3.9%)                  | 2.5%<br>(0.89-4.6%)                 | 73<br>(26-140)      | 1000<br>(390-2000)     |
| Mali     | 2010 | Female | 80 to 84 | 7.2%<br>(4.3-11%)              | 93%<br>(89-96%)          | 0.47<br>(0.2-0.89)                          | 1.6%<br>(0.56-3%)                    | 1.8%<br>(0.63-3.4%)                 | 32<br>(11-63)       | 350<br>(130-660)       |
| Mali     | 2010 | Female | 85 to 89 | 7.5%<br>(4.4-11%)              | 93%<br>(89-96%)          | 0.47<br>(0.22-0.92)                         | 1.3%<br>(0.42-2.5%)                  | 1.5%<br>(0.44-3%)                   | 19<br>(5.8-38)      | 140<br>(47-280)        |
| Mali     | 2010 | Female | 90 to 94 | 8.3%<br>(5.1-13%)              | 92%<br>(87-95%)          | 0.5<br>(0.22-0.98)                          | 1.1%<br>(0.24-2.4%)                  | 1.2%<br>(0.2-2.8%)                  | 7<br>(1.1-16)       | 37<br>(8.2-83)         |
| Mali     | 2010 | Female | 95 plus  | 9.5%<br>(5.3-15%)              | 91%<br>(85-95%)          | 0.54<br>(0.2-1.1)                           | 1%<br>(0.13-2.5%)                    | 1.1%<br>(0.039-2.9%)                | 1.9<br>(0.068-5.2)  | 7.1<br>(0.91-18)       |
| Mali     | 2010 | Male   | All Ages | 2.6%<br>(2-3.2%)               | 97%<br>(97-98%)          | 0.18<br>(0.12-0.26)                         | 0.52%<br>(0.4-0.67%)                 | 0.88%<br>(0.63-1.2%)                | 710<br>(510-980)    | 32000<br>(25000-42000) |

| Location | Year | Sex    | Age      | Prevalence of current drinkers | Prevalence of abstainers | Population average of standard drinks daily | Percent of total attributable deaths | Percent of total attributable DALYs | Attributable deaths | Attributable DALYs     |
|----------|------|--------|----------|--------------------------------|--------------------------|---------------------------------------------|--------------------------------------|-------------------------------------|---------------------|------------------------|
| Mali     | 2010 | Male   | 15 to 19 | 2%<br>(1.1-3.2%)               | 98%<br>(97-99%)          | 0.11<br>(0.05-0.21)                         | 0.67%<br>(0.45-0.94%)                | 0.34%<br>(0.18-0.61%)               | 4.1<br>(2.1-7.5)    | 1000<br>(650-1500)     |
| Mali     | 2010 | Male   | 20 to 24 | 3.3%<br>(1.7-5%)               | 97%<br>(95-98%)          | 0.24<br>(0.11-0.43)                         | 1.6%<br>(1.1-2.2%)                   | 0.99%<br>(0.53-1.6%)                | 15<br>(8-25)        | 2500<br>(1700-3600)    |
| Mali     | 2010 | Male   | 25 to 29 | 4.2%<br>(2.4-6.7%)             | 96%<br>(93-98%)          | 0.37<br>(0.18-0.65)                         | 2.1%<br>(1.5-2.8%)                   | 1.8%<br>(1-2.8%)                    | 31<br>(18-50)       | 3400<br>(2300-4700)    |
| Mali     | 2010 | Male   | 30 to 34 | 4.8%<br>(2.7-8%)               | 95%<br>(92-97%)          | 0.45<br>(0.23-0.78)                         | 2.4%<br>(1.7-3.2%)                   | 2.3%<br>(1.4-3.4%)                  | 46<br>(28-69)       | 3700<br>(2600-5200)    |
| Mali     | 2010 | Male   | 35 to 39 | 5%<br>(2.8-7.6%)               | 95%<br>(92-97%)          | 0.48<br>(0.24-0.85)                         | 2.7%<br>(1.9-3.7%)                   | 3%<br>(1.9-4.4%)                    | 62<br>(40-91)       | 3900<br>(2700-5500)    |
| Mali     | 2010 | Male   | 40 to 44 | 5.2%<br>(3.1-7.8%)             | 95%<br>(92-97%)          | 0.49<br>(0.23-0.86)                         | 3%<br>(2.1-4.1%)                     | 3.6%<br>(2.5-5.1%)                  | 69<br>(45-99)       | 3600<br>(2500-5000)    |
| Mali     | 2010 | Male   | 45 to 49 | 5.4%<br>(3-8.1%)               | 95%<br>(92-97%)          | 0.51<br>(0.22-0.94)                         | 3.4%<br>(2.3-4.9%)                   | 4.3%<br>(2.7-6.3%)                  | 72<br>(46-110)      | 3300<br>(2200-4700)    |
| Mali     | 2010 | Male   | 50 to 54 | 5.5%<br>(3.3-8.1%)             | 94%<br>(92-97%)          | 0.51<br>(0.23-0.95)                         | 3.3%<br>(2.2-4.4%)                   | 4.1%<br>(2.8-5.7%)                  | 69<br>(44-100)      | 2700<br>(1800-3800)    |
| Mali     | 2010 | Male   | 55 to 59 | 5.4%<br>(3.1-8.1%)             | 95%<br>(92-97%)          | 0.49<br>(0.22-0.91)                         | 3.3%<br>(2.2-4.6%)                   | 4.1%<br>(2.7-5.9%)                  | 76<br>(48-110)      | 2600<br>(1700-3700)    |
| Mali     | 2010 | Male   | 60 to 64 | 5.2%<br>(3-8.3%)               | 95%<br>(92-97%)          | 0.45<br>(0.19-0.88)                         | 2.8%<br>(1.8-4.1%)                   | 3.5%<br>(2.2-5.1%)                  | 69<br>(43-100)      | 2000<br>(1300-2800)    |
| Mali     | 2010 | Male   | 65 to 69 | 5.3%<br>(3.1-7.8%)             | 95%<br>(92-97%)          | 0.4<br>(0.18-0.72)                          | 2.3%<br>(1.5-3.4%)                   | 2.8%<br>(1.8-4.1%)                  | 68<br>(43-100)      | 1600<br>(1000-2300)    |
| Mali     | 2010 | Male   | 70 to 74 | 5.1%<br>(3.2-7.6%)             | 95%<br>(92-97%)          | 0.33<br>(0.15-0.62)                         | 1.9%<br>(1.1-2.9%)                   | 2.3%<br>(1.4-3.6%)                  | 58<br>(34-92)       | 1100<br>(640-1700)     |
| Mali     | 2010 | Male   | 75 to 79 | 4.6%<br>(2.7-7.2%)             | 95%<br>(93-97%)          | 0.26<br>(0.11-0.5)                          | 1.4%<br>(0.77-2.3%)                  | 1.7%<br>(0.89-2.9%)                 | 41<br>(21-70)       | 590<br>(320-990)       |
| Mali     | 2010 | Male   | 80 to 84 | 4%<br>(2.3-5.9%)               | 96%<br>(94-98%)          | 0.2<br>(0.085-0.38)                         | 1.2%<br>(0.69-1.9%)                  | 1.4%<br>(0.78-2.2%)                 | 22<br>(12-35)       | 230<br>(140-370)       |
| Mali     | 2010 | Male   | 85 to 89 | 3.7%<br>(2-5.8%)               | 96%<br>(94-98%)          | 0.16<br>(0.073-0.31)                        | 0.84%<br>(0.49-1.4%)                 | 0.96%<br>(0.53-1.6%)                | 10<br>(5.8-18)      | 81<br>(47-130)         |
| Mali     | 2010 | Male   | 90 to 94 | 3.8%<br>(2.3-6%)               | 96%<br>(94-98%)          | 0.14<br>(0.063-0.28)                        | 0.5%<br>(0.26-0.92%)                 | 0.53%<br>(0.23-1.1%)                | 2.7<br>(1.1-5.2)    | 15<br>(7.8-28)         |
| Mali     | 2010 | Male   | 95 plus  | 4.4%<br>(2.3-7.4%)             | 96%<br>(93-98%)          | 0.14<br>(0.047-0.3)                         | 0.39%<br>(0.16-0.82%)                | 0.35%<br>(0.079-0.87%)              | 0.46<br>(0.1-1.1)   | 2.1<br>(0.89-4.3)      |
| Mali     | 2016 | Female | All Ages | 5.1%<br>(4.2-6.1%)             | 95%<br>(94-96%)          | 0.36<br>(0.19-0.61)                         | 0.63%<br>(0.4-0.89%)                 | 1.2%<br>(0.59-1.9%)                 | 900<br>(440-1500)   | 34000<br>(22000-49000) |
| Mali     | 2016 | Female | 15 to 19 | 4.9%<br>(3.1-7.3%)             | 95%<br>(93-97%)          | 0.33<br>(0.14-0.68)                         | 0.73%<br>(0.46-1%)                   | 0.48%<br>(0.18-0.93%)               | 6.7<br>(2.2-14)     | 1300<br>(810-2000)     |
| Mali     | 2016 | Female | 20 to 24 | 6.3%<br>(3.8-9.5%)             | 94%<br>(91-96%)          | 0.55<br>(0.23-1.1)                          | 1.5%<br>(0.98-2%)                    | 0.77%<br>(0.34-1.3%)                | 12<br>(4.8-23)      | 2600<br>(1600-3700)    |
| Mali     | 2016 | Female | 25 to 29 | 6.9%<br>(4.1-11%)              | 93%<br>(89-96%)          | 0.65<br>(0.28-1.3)                          | 1.6%<br>(1.2-2.2%)                   | 1.1%<br>(0.58-1.8%)                 | 18<br>(8.5-30)      | 2600<br>(1700-3700)    |
| Mali     | 2016 | Female | 30 to 34 | 7.8%<br>(4.6-12%)              | 92%<br>(88-95%)          | 0.76<br>(0.33-1.5)                          | 1.7%<br>(1.2-2.4%)                   | 1.6%<br>(0.87-2.5%)                 | 26<br>(14-43)       | 2700<br>(1700-3800)    |

| Location | Year | Sex    | Age      | Prevalence of current drinkers | Prevalence of abstainers | Population average of standard drinks daily | Percent of total attributable deaths | Percent of total attributable DALYs | Attributable deaths | Attributable DALYs     |
|----------|------|--------|----------|--------------------------------|--------------------------|---------------------------------------------|--------------------------------------|-------------------------------------|---------------------|------------------------|
| Mali     | 2016 | Female | 35 to 39 | 9%<br>(5.3-13%)                | 91%<br>(87-95%)          | 0.86<br>(0.35-1.6)                          | 2%<br>(1.3-2.8%)                     | 2.3%<br>(1.3-3.4%)                  | 40<br>(22-62)       | 2900<br>(1900-4100)    |
| Mali     | 2016 | Female | 40 to 44 | 9.4%<br>(5.8-14%)              | 91%<br>(86-94%)          | 0.88<br>(0.34-1.8)                          | 2.3%<br>(1.4-3.3%)                   | 3%<br>(1.7-4.5%)                    | 53<br>(29-83)       | 3000<br>(1900-4500)    |
| Mali     | 2016 | Female | 45 to 49 | 9.2%<br>(5.3-14%)              | 91%<br>(86-95%)          | 0.81<br>(0.31-1.7)                          | 2.5%<br>(1.5-3.8%)                   | 3.4%<br>(1.8-5.5%)                  | 60<br>(31-100)      | 2900<br>(1600-4500)    |
| Mali     | 2016 | Female | 50 to 54 | 9.2%<br>(5.8-13%)              | 91%<br>(87-94%)          | 0.83<br>(0.33-1.7)                          | 2.8%<br>(1.6-4.4%)                   | 3.7%<br>(2-5.9%)                    | 70<br>(37-120)      | 2800<br>(1600-4500)    |
| Mali     | 2016 | Female | 55 to 59 | 9.5%<br>(6-14%)                | 90%<br>(86-94%)          | 0.97<br>(0.4-2)                             | 3%<br>(1.6-4.6%)                     | 3.9%<br>(2-6.2%)                    | 86<br>(42-150)      | 2900<br>(1500-4800)    |
| Mali     | 2016 | Female | 60 to 64 | 10%<br>(6.2-16%)               | 90%<br>(84-94%)          | 1.1<br>(0.42-2.2)                           | 3%<br>(1.6-4.8%)                     | 3.8%<br>(1.9-6.1%)                  | 110<br>(50-180)     | 3100<br>(1500-5100)    |
| Mali     | 2016 | Female | 65 to 69 | 12%<br>(7.5-17%)               | 88%<br>(83-93%)          | 1.1<br>(0.44-2.2)                           | 3.4%<br>(1.5-5.4%)                   | 4.1%<br>(1.8-6.8%)                  | 130<br>(54-240)     | 3100<br>(1300-5400)    |
| Mali     | 2016 | Female | 70 to 74 | 11%<br>(7-16%)                 | 89%<br>(84-93%)          | 0.86<br>(0.34-1.8)                          | 3%<br>(1.1-5.4%)                     | 3.6%<br>(1.2-6.4%)                  | 140<br>(45-260)     | 2500<br>(870-4800)     |
| Mali     | 2016 | Female | 75 to 79 | 8.4%<br>(5.1-13%)              | 92%<br>(87-95%)          | 0.62<br>(0.23-1.3)                          | 2.1%<br>(0.67-4%)                    | 2.5%<br>(0.75-4.9%)                 | 83<br>(24-170)      | 1200<br>(370-2400)     |
| Mali     | 2016 | Female | 80 to 84 | 7.4%<br>(4.4-11%)              | 93%<br>(89-96%)          | 0.52<br>(0.2-1.1)                           | 1.6%<br>(0.51-3.1%)                  | 1.9%<br>(0.58-3.8%)                 | 35<br>(10-71)       | 380<br>(120-750)       |
| Mali     | 2016 | Female | 85 to 89 | 7.6%<br>(4.5-11%)              | 92%<br>(89-95%)          | 0.52<br>(0.2-1.1)                           | 1.3%<br>(0.36-2.8%)                  | 1.5%<br>(0.39-3.3%)                 | 21<br>(5.3-46)      | 160<br>(43-340)        |
| Mali     | 2016 | Female | 90 to 94 | 8.3%<br>(5.2-13%)              | 92%<br>(87-95%)          | 0.54<br>(0.21-1.2)                          | 1.2%<br>(0.2-2.7%)                   | 1.3%<br>(0.16-3.2%)                 | 8.6<br>(1-21)       | 46<br>(7.4-110)        |
| Mali     | 2016 | Female | 95 plus  | 9.5%<br>(5.4-15%)              | 90%<br>(85-95%)          | 0.59<br>(0.19-1.4)                          | 1.1%<br>(0.079-2.7%)                 | 1.2%<br>(-0.013-3.2%)               | 2.5<br>(-0.026-6.4) | 9.1<br>(0.66-22)       |
| Mali     | 2016 | Male   | All Ages | 2.5%<br>(2-3.2%)               | 97%<br>(97-98%)          | 0.19<br>(0.098-0.33)                        | 0.59%<br>(0.42-0.82%)                | 0.96%<br>(0.63-1.4%)                | 780<br>(510-1200)   | 37000<br>(26000-51000) |
| Mali     | 2016 | Male   | 15 to 19 | 2%<br>(1.2-3.3%)               | 98%<br>(97-99%)          | 0.12<br>(0.048-0.25)                        | 0.71%<br>(0.46-0.99%)                | 0.36%<br>(0.18-0.66%)               | 4.8<br>(2.3-8.9)    | 1200<br>(760-1800)     |
| Mali     | 2016 | Male   | 20 to 24 | 3.2%<br>(1.8-5%)               | 97%<br>(95-98%)          | 0.25<br>(0.096-0.49)                        | 1.7%<br>(1.2-2.3%)                   | 0.96%<br>(0.49-1.6%)                | 16<br>(8-28)        | 2800<br>(1800-4100)    |
| Mali     | 2016 | Male   | 25 to 29 | 4.2%<br>(2.4-6.6%)             | 96%<br>(93-98%)          | 0.39<br>(0.16-0.78)                         | 2.2%<br>(1.5-2.9%)                   | 1.7%<br>(0.95-2.7%)                 | 31<br>(17-51)       | 3600<br>(2400-5000)    |
| Mali     | 2016 | Male   | 30 to 34 | 4.7%<br>(2.7-7.7%)             | 95%<br>(92-97%)          | 0.47<br>(0.2-0.94)                          | 2.4%<br>(1.7-3.3%)                   | 2.3%<br>(1.4-3.5%)                  | 47<br>(28-75)       | 4000<br>(2700-5700)    |
| Mali     | 2016 | Male   | 35 to 39 | 5%<br>(2.8-7.6%)               | 95%<br>(92-97%)          | 0.51<br>(0.21-0.98)                         | 2.7%<br>(1.9-3.8%)                   | 3%<br>(1.9-4.5%)                    | 68<br>(40-110)      | 4400<br>(2900-6400)    |
| Mali     | 2016 | Male   | 40 to 44 | 5.1%<br>(3.1-7.7%)             | 95%<br>(92-97%)          | 0.52<br>(0.21-1.1)                          | 3%<br>(2.1-4.2%)                     | 3.7%<br>(2.4-5.3%)                  | 84<br>(52-130)      | 4500<br>(3000-6700)    |
| Mali     | 2016 | Male   | 45 to 49 | 5.4%<br>(3-8%)                 | 95%<br>(92-97%)          | 0.54<br>(0.2-1.1)                           | 3.4%<br>(2.2-4.9%)                   | 4.2%<br>(2.6-6.2%)                  | 90<br>(52-140)      | 4100<br>(2500-6300)    |
| Mali     | 2016 | Male   | 50 to 54 | 5.5%<br>(3.4-8.3%)             | 94%<br>(92-97%)          | 0.55<br>(0.2-1.1)                           | 3.2%<br>(2.1-4.4%)                   | 4%<br>(2.7-5.6%)                    | 78<br>(46-120)      | 3100<br>(1900-4600)    |

| Location   | Year | Sex    | Age      | Prevalence of current drinkers | Prevalence of abstainers | Population average of standard drinks daily | Percent of total attributable deaths | Percent of total attributable DALYs | Attributable deaths  | Attributable DALYs  |
|------------|------|--------|----------|--------------------------------|--------------------------|---------------------------------------------|--------------------------------------|-------------------------------------|----------------------|---------------------|
| Mali       | 2016 | Male   | 55 to 59 | 5.4%<br>(3.2-8%)               | 95%<br>(92-97%)          | 0.52<br>(0.2-1.1)                           | 3.2%<br>(2.1-4.5%)                   | 4.1%<br>(2.6-5.9%)                  | 77<br>(47-120)       | 2600<br>(1600-4000) |
| Mali       | 2016 | Male   | 60 to 64 | 5.2%<br>(3-8.2%)               | 95%<br>(92-97%)          | 0.47<br>(0.17-1)                            | 2.8%<br>(1.7-4%)                     | 3.4%<br>(2.1-5%)                    | 80<br>(47-130)       | 2300<br>(1400-3600) |
| Mali       | 2016 | Male   | 65 to 69 | 5.2%<br>(3.1-7.7%)             | 95%<br>(92-97%)          | 0.42<br>(0.16-0.86)                         | 2.2%<br>(1.4-3.2%)                   | 2.8%<br>(1.7-4%)                    | 66<br>(40-100)       | 1600<br>(960-2400)  |
| Mali       | 2016 | Male   | 70 to 74 | 5.1%<br>(3.2-7.3%)             | 95%<br>(93-97%)          | 0.35<br>(0.14-0.73)                         | 1.9%<br>(1.1-2.9%)                   | 2.3%<br>(1.3-3.6%)                  | 64<br>(35-100)       | 1200<br>(660-1900)  |
| Mali       | 2016 | Male   | 75 to 79 | 4.6%<br>(2.7-7.2%)             | 95%<br>(93-97%)          | 0.28<br>(0.097-0.59)                        | 1.4%<br>(0.73-2.4%)                  | 1.7%<br>(0.84-2.9%)                 | 42<br>(20-74)        | 600<br>(300-1000)   |
| Mali       | 2016 | Male   | 80 to 84 | 4%<br>(2.3-6%)                 | 96%<br>(94-98%)          | 0.21<br>(0.08-0.45)                         | 1.2%<br>(0.65-2%)                    | 1.4%<br>(0.74-2.4%)                 | 21<br>(11-37)        | 230<br>(120-390)    |
| Mali       | 2016 | Male   | 85 to 89 | 3.7%<br>(1.9-5.9%)             | 96%<br>(94-98%)          | 0.17<br>(0.063-0.37)                        | 0.87%<br>(0.44-1.6%)                 | 0.99%<br>(0.47-1.8%)                | 11<br>(5-20)         | 85<br>(42-150)      |
| Mali       | 2016 | Male   | 90 to 94 | 3.8%<br>(2.1-5.9%)             | 96%<br>(94-98%)          | 0.15<br>(0.055-0.33)                        | 0.54%<br>(0.24-1.1%)                 | 0.57%<br>(0.21-1.2%)                | 3<br>(1.1-6.3)       | 17<br>(7.5-34)      |
| Mali       | 2016 | Male   | 95 plus  | 4.3%<br>(2.3-7.1%)             | 96%<br>(93-98%)          | 0.14<br>(0.043-0.33)                        | 0.43%<br>(0.16-0.93%)                | 0.39%<br>(0.062-1%)                 | 0.58<br>(0.089-1.5)  | 2.6<br>(0.93-5.6)   |
| Mauritania | 1990 | Female | All Ages | 4.3%<br>(3.6-5.2%)             | 96%<br>(95-96%)          | 0.041<br>(0.034-0.049)                      | 0.38%<br>(0.3-0.47%)                 | 0.49%<br>(0.34-0.67%)               | 45<br>(31-61)        | 2200<br>(1700-2800) |
| Mauritania | 1990 | Female | 15 to 19 | 4.1%<br>(2.5-6.1%)             | 96%<br>(94-98%)          | 0.037<br>(0.019-0.065)                      | 0.44%<br>(0.28-0.66%)                | 0.068%<br>(0.015-0.14%)             | 0.12<br>(0.027-0.24) | 100<br>(60-160)     |
| Mauritania | 1990 | Female | 20 to 24 | 5.1%<br>(3-7.7%)               | 95%<br>(92-97%)          | 0.059<br>(0.03-0.097)                       | 0.95%<br>(0.6-1.4%)                  | 0.15%<br>(0.062-0.25%)              | 0.32<br>(0.13-0.53)  | 220<br>(130-350)    |
| Mauritania | 1990 | Female | 25 to 29 | 5.7%<br>(3.4-8.6%)             | 94%<br>(91-97%)          | 0.07<br>(0.038-0.11)                        | 1%<br>(0.73-1.4%)                    | 0.32%<br>(0.17-0.48%)               | 0.65<br>(0.35-0.99)  | 210<br>(140-300)    |
| Mauritania | 1990 | Female | 30 to 34 | 6.3%<br>(3.7-10%)              | 94%<br>(90-96%)          | 0.079<br>(0.044-0.12)                       | 1%<br>(0.74-1.4%)                    | 0.59%<br>(0.34-0.87%)               | 1.2<br>(0.7-1.8)     | 190<br>(130-260)    |
| Mauritania | 1990 | Female | 35 to 39 | 7%<br>(4-10%)                  | 93%<br>(90-96%)          | 0.085<br>(0.047-0.14)                       | 0.99%<br>(0.72-1.3%)                 | 0.79%<br>(0.49-1.1%)                | 1.7<br>(1-2.5)       | 170<br>(120-220)    |
| Mauritania | 1990 | Female | 40 to 44 | 7.3%<br>(4.4-11%)              | 93%<br>(89-96%)          | 0.087<br>(0.044-0.14)                       | 1.2%<br>(0.86-1.7%)                  | 1.4%<br>(0.86-2%)                   | 3.2<br>(2-4.8)       | 200<br>(140-280)    |
| Mauritania | 1990 | Female | 45 to 49 | 7.3%<br>(4-11%)                | 93%<br>(89-96%)          | 0.084<br>(0.042-0.14)                       | 1.1%<br>(0.75-1.5%)                  | 1.2%<br>(0.74-1.9%)                 | 3.5<br>(2-5.5)       | 180<br>(120-260)    |
| Mauritania | 1990 | Female | 50 to 54 | 7.3%<br>(4.5-11%)              | 93%<br>(89-95%)          | 0.089<br>(0.046-0.15)                       | 1.4%<br>(0.89-2%)                    | 1.7%<br>(0.99-2.5%)                 | 6<br>(3.5-9.3)       | 240<br>(150-360)    |
| Mauritania | 1990 | Female | 55 to 59 | 7.6%<br>(4.6-11%)              | 92%<br>(89-95%)          | 0.1<br>(0.053-0.18)                         | 1.1%<br>(0.68-1.6%)                  | 1.3%<br>(0.78-2%)                   | 5.7<br>(3.3-9)       | 190<br>(120-300)    |
| Mauritania | 1990 | Female | 60 to 64 | 8%<br>(4.8-12%)                | 92%<br>(88-95%)          | 0.11<br>(0.053-0.19)                        | 1.1%<br>(0.63-1.7%)                  | 1.3%<br>(0.73-2%)                   | 7.2<br>(4-11)        | 200<br>(120-300)    |
| Mauritania | 1990 | Female | 65 to 69 | 8.2%<br>(5.3-12%)              | 92%<br>(88-95%)          | 0.1<br>(0.051-0.17)                         | 0.81%<br>(0.44-1.2%)                 | 0.94%<br>(0.48-1.5%)                | 5.9<br>(2.9-9.4)     | 140<br>(72-220)     |
| Mauritania | 1990 | Female | 70 to 74 | 7.5%<br>(4.9-11%)              | 93%<br>(89-95%)          | 0.081<br>(0.041-0.14)                       | 0.68%<br>(0.31-1.1%)                 | 0.77%<br>(0.3-1.3%)                 | 5.2<br>(2.1-9.1)     | 97<br>(44-170)      |

| Location   | Year | Sex    | Age      | Prevalence of current drinkers | Prevalence of abstainers | Population average of standard drinks daily | Percent of total attributable deaths | Percent of total attributable DALYs | Attributable deaths       | Attributable DALYs     |
|------------|------|--------|----------|--------------------------------|--------------------------|---------------------------------------------|--------------------------------------|-------------------------------------|---------------------------|------------------------|
| Mauritania | 1990 | Female | 75 to 79 | 6.3%<br>(3.8-9.7%)             | 94%<br>(90-96%)          | 0.063<br>(0.029-0.11)                       | 0.47%<br>(0.16-0.8%)                 | 0.53%<br>(0.16-0.93%)               | 3.1<br>(0.97-5.5)         | 46<br>(15-79)          |
| Mauritania | 1990 | Female | 80 to 84 | 5.8%<br>(3.4-8.3%)             | 94%<br>(92-97%)          | 0.055<br>(0.026-0.096)                      | 0.28%<br>(0.048-0.51%)               | 0.31%<br>(0.032-0.59%)              | 1<br>(0.11-2)             | 11<br>(2-21)           |
| Mauritania | 1990 | Female | 85 to 89 | 6%<br>(3.6-9.3%)               | 94%<br>(91-96%)          | 0.056<br>(0.027-0.11)                       | 0.12%<br>(-0.089-0.31%)              | 0.13%<br>(-0.13-0.35%)              | 0.23<br>(-0.24-0.64)      | 2<br>(-1.3-4.9)        |
| Mauritania | 1990 | Female | 90 to 94 | 6.8%<br>(4.2-10%)              | 93%<br>(90-96%)          | 0.06<br>(0.028-0.12)                        | 0.0099%<br>(-0.21-0.19%)             | -0.022%<br>(-0.29-0.2%)             | -0.014<br>(-0.19-0.13)    | 0.039<br>(-0.82-0.74)  |
| Mauritania | 1990 | Female | 95 plus  | 7.9%<br>(4.5-13%)              | 92%<br>(87-96%)          | 0.068<br>(0.025-0.14)                       | 0.011%<br>(-0.26-0.22%)              | -0.047%<br>(-0.36-0.21%)            | -0.0072<br>(-0.057-0.033) | 0.0066<br>(-0.16-0.14) |
| Mauritania | 1990 | Male   | All Ages | 2.6%<br>(2.1-3.2%)             | 97%<br>(97-98%)          | 0.099<br>(0.085-0.12)                       | 0.74%<br>(0.57-0.93%)                | 1.1%<br>(0.81-1.5%)                 | 100<br>(70-130)           | 4600<br>(3500-5800)    |
| Mauritania | 1990 | Male   | 15 to 19 | 2.1%<br>(1.1-3.1%)             | 98%<br>(97-99%)          | 0.059<br>(0.028-0.11)                       | 0.59%<br>(0.39-0.85%)                | 0.27%<br>(0.16-0.44%)               | 0.56<br>(0.32-0.88)       | 140<br>(90-210)        |
| Mauritania | 1990 | Male   | 20 to 24 | 3.3%<br>(1.8-5%)               | 97%<br>(95-98%)          | 0.13<br>(0.063-0.21)                        | 1.3%<br>(0.92-1.9%)                  | 0.74%<br>(0.42-1.1%)                | 2<br>(1.2-3.2)            | 340<br>(240-480)       |
| Mauritania | 1990 | Male   | 25 to 29 | 4%<br>(2.4-6.3%)               | 96%<br>(94-98%)          | 0.19<br>(0.099-0.29)                        | 2%<br>(1.4-2.6%)                     | 1.5%<br>(0.85-2.3%)                 | 3.9<br>(2.1-6.2)          | 440<br>(300-600)       |
| Mauritania | 1990 | Male   | 30 to 34 | 4.6%<br>(2.7-7.4%)             | 95%<br>(93-97%)          | 0.23<br>(0.13-0.36)                         | 2.5%<br>(1.8-3.4%)                   | 2.4%<br>(1.4-3.6%)                  | 5.9<br>(3.3-9)            | 500<br>(330-700)       |
| Mauritania | 1990 | Male   | 35 to 39 | 5.1%<br>(2.9-7.7%)             | 95%<br>(92-97%)          | 0.25<br>(0.14-0.41)                         | 3.1%<br>(2.1-4.1%)                   | 3.4%<br>(2.1-4.9%)                  | 8.2<br>(4.8-12)           | 530<br>(340-720)       |
| Mauritania | 1990 | Male   | 40 to 44 | 5.2%<br>(3.1-8%)               | 95%<br>(92-97%)          | 0.26<br>(0.13-0.42)                         | 3.3%<br>(2.3-4.5%)                   | 3.9%<br>(2.6-5.6%)                  | 8.9<br>(5.5-13)           | 470<br>(320-650)       |
| Mauritania | 1990 | Male   | 45 to 49 | 5.2%<br>(2.9-8%)               | 95%<br>(92-97%)          | 0.26<br>(0.13-0.44)                         | 3.5%<br>(2.4-5%)                     | 4.3%<br>(2.8-6.3%)                  | 11<br>(6.7-16)            | 490<br>(320-710)       |
| Mauritania | 1990 | Male   | 50 to 54 | 5.3%<br>(3.1-7.9%)             | 95%<br>(92-97%)          | 0.27<br>(0.13-0.46)                         | 3.1%<br>(2.1-4.4%)                   | 3.7%<br>(2.4-5.4%)                  | 11<br>(6.8-16)            | 440<br>(280-620)       |
| Mauritania | 1990 | Male   | 55 to 59 | 5.3%<br>(3.1-8.2%)             | 95%<br>(92-97%)          | 0.26<br>(0.13-0.43)                         | 2.9%<br>(1.9-4.1%)                   | 3.4%<br>(2.2-5.1%)                  | 12<br>(7.4-18)            | 410<br>(270-590)       |
| Mauritania | 1990 | Male   | 60 to 64 | 5.2%<br>(3-8.2%)               | 95%<br>(92-97%)          | 0.23<br>(0.11-0.42)                         | 2.4%<br>(1.6-3.4%)                   | 2.8%<br>(1.8-4.1%)                  | 12<br>(7.6-18)            | 350<br>(230-500)       |
| Mauritania | 1990 | Male   | 65 to 69 | 5.3%<br>(3.2-7.7%)             | 95%<br>(92-97%)          | 0.2<br>(0.1-0.35)                           | 1.8%<br>(1.2-2.5%)                   | 2.1%<br>(1.4-3%)                    | 9.8<br>(6.2-15)           | 230<br>(150-340)       |
| Mauritania | 1990 | Male   | 70 to 74 | 5.1%<br>(3.2-7.5%)             | 95%<br>(92-97%)          | 0.17<br>(0.083-0.29)                        | 1.3%<br>(0.83-1.9%)                  | 1.5%<br>(0.95-2.3%)                 | 7.3<br>(4.6-11)           | 130<br>(87-210)        |
| Mauritania | 1990 | Male   | 75 to 79 | 4.7%<br>(2.7-7.4%)             | 95%<br>(93-97%)          | 0.13<br>(0.059-0.24)                        | 0.92%<br>(0.59-1.4%)                 | 1.1%<br>(0.66-1.7%)                 | 4.2<br>(2.6-6.5)          | 61<br>(39-92)          |
| Mauritania | 1990 | Male   | 80 to 84 | 4%<br>(2.2-6.1%)               | 96%<br>(94-98%)          | 0.098<br>(0.046-0.17)                       | 0.74%<br>(0.48-1.1%)                 | 0.84%<br>(0.52-1.3%)                | 1.9<br>(1.2-2.8)          | 20<br>(13-30)          |
| Mauritania | 1990 | Male   | 85 to 89 | 3.6%<br>(2-5.7%)               | 96%<br>(94-98%)          | 0.076<br>(0.036-0.14)                       | 0.56%<br>(0.36-0.81%)                | 0.62%<br>(0.38-0.93%)               | 0.74<br>(0.45-1.1)        | 5.8<br>(3.7-8.5)       |
| Mauritania | 1990 | Male   | 90 to 94 | 3.7%<br>(2.2-6%)               | 96%<br>(94-98%)          | 0.066<br>(0.03-0.12)                        | 0.33%<br>(0.19-0.49%)                | 0.33%<br>(0.16-0.53%)               | 0.14<br>(0.063-0.22)      | 0.81<br>(0.46-1.2)     |



| Location   | Year | Sex    | Age      | Prevalence of current drinkers | Prevalence of abstainers | Population average of standard drinks daily | Percent of total attributable deaths | Percent of total attributable DALYs | Attributable deaths       | Attributable DALYs    |
|------------|------|--------|----------|--------------------------------|--------------------------|---------------------------------------------|--------------------------------------|-------------------------------------|---------------------------|-----------------------|
| Mauritania | 1990 | Male   | 95 plus  | 4.2%<br>(2.3-6.9%)             | 96%<br>(93-98%)          | 0.062<br>(0.023-0.13)                       | 0.3%<br>(0.13-0.47%)                 | 0.26%<br>(0.041-0.47%)              | 0.023<br>(0.0035-0.041)   | 0.11<br>(0.043-0.17)  |
| Mauritania | 1995 | Female | All Ages | 4.3%<br>(3.5-5.1%)             | 96%<br>(95-97%)          | 0.03<br>(0.025-0.036)                       | 0.38%<br>(0.3-0.48%)                 | 0.47%<br>(0.32-0.64%)               | 46<br>(31-63)             | 2400<br>(1700-3000)   |
| Mauritania | 1995 | Female | 15 to 19 | 4%<br>(2.4-5.9%)               | 96%<br>(94-98%)          | 0.027<br>(0.013-0.046)                      | 0.46%<br>(0.28-0.68%)                | 0.059%<br>(0.008-0.13%)             | 0.11<br>(0.015-0.23)      | 110<br>(66-170)       |
| Mauritania | 1995 | Female | 20 to 24 | 5.1%<br>(2.9-7.6%)             | 95%<br>(92-97%)          | 0.043<br>(0.022-0.07)                       | 0.98%<br>(0.62-1.4%)                 | 0.12%<br>(0.041-0.21%)              | 0.28<br>(0.091-0.47)      | 240<br>(140-370)      |
| Mauritania | 1995 | Female | 25 to 29 | 5.6%<br>(3.3-8.7%)             | 94%<br>(91-97%)          | 0.051<br>(0.029-0.083)                      | 1%<br>(0.74-1.4%)                    | 0.28%<br>(0.13-0.44%)               | 0.61<br>(0.28-0.96)       | 240<br>(150-340)      |
| Mauritania | 1995 | Female | 30 to 34 | 6.2%<br>(3.6-10%)              | 94%<br>(90-96%)          | 0.058<br>(0.033-0.092)                      | 1%<br>(0.72-1.4%)                    | 0.51%<br>(0.24-0.79%)               | 1.2<br>(0.52-1.8)         | 210<br>(140-300)      |
| Mauritania | 1995 | Female | 35 to 39 | 6.8%<br>(3.9-10%)              | 93%<br>(90-96%)          | 0.062<br>(0.033-0.099)                      | 0.95%<br>(0.66-1.2%)                 | 0.7%<br>(0.35-1%)                   | 1.7<br>(0.86-2.6)         | 190<br>(130-250)      |
| Mauritania | 1995 | Female | 40 to 44 | 7%<br>(4.2-11%)                | 93%<br>(89-96%)          | 0.062<br>(0.032-0.1)                        | 1.1%<br>(0.76-1.5%)                  | 1.2%<br>(0.69-1.8%)                 | 3.1<br>(1.7-4.6)          | 200<br>(140-280)      |
| Mauritania | 1995 | Female | 45 to 49 | 7.1%<br>(3.9-11%)              | 93%<br>(89-96%)          | 0.061<br>(0.03-0.1)                         | 1%<br>(0.67-1.4%)                    | 1.1%<br>(0.64-1.7%)                 | 3.3<br>(1.8-5.2)          | 180<br>(120-260)      |
| Mauritania | 1995 | Female | 50 to 54 | 7.1%<br>(4.3-11%)              | 93%<br>(89-96%)          | 0.064<br>(0.032-0.11)                       | 1.3%<br>(0.8-1.8%)                   | 1.5%<br>(0.88-2.3%)                 | 5.9<br>(3.3-9.1)          | 240<br>(150-360)      |
| Mauritania | 1995 | Female | 55 to 59 | 7.4%<br>(4.6-11%)              | 93%<br>(89-95%)          | 0.074<br>(0.037-0.13)                       | 0.97%<br>(0.59-1.4%)                 | 1.1%<br>(0.65-1.8%)                 | 5.5<br>(3.1-8.5)          | 190<br>(110-290)      |
| Mauritania | 1995 | Female | 60 to 64 | 7.8%<br>(4.6-12%)              | 92%<br>(88-95%)          | 0.078<br>(0.039-0.14)                       | 1%<br>(0.6-1.5%)                     | 1.2%<br>(0.68-1.8%)                 | 7.2<br>(4-11)             | 200<br>(120-310)      |
| Mauritania | 1995 | Female | 65 to 69 | 8%<br>(5.1-12%)                | 92%<br>(88-95%)          | 0.072<br>(0.037-0.12)                       | 0.79%<br>(0.42-1.2%)                 | 0.91%<br>(0.45-1.4%)                | 6.4<br>(3.1-10)           | 150<br>(78-230)       |
| Mauritania | 1995 | Female | 70 to 74 | 7.3%<br>(4.8-11%)              | 93%<br>(89-95%)          | 0.058<br>(0.028-0.1)                        | 0.66%<br>(0.3-1.1%)                  | 0.74%<br>(0.31-1.3%)                | 5.7<br>(2.4-9.7)          | 110<br>(49-180)       |
| Mauritania | 1995 | Female | 75 to 79 | 6.2%<br>(3.6-9.5%)             | 94%<br>(91-96%)          | 0.045<br>(0.021-0.082)                      | 0.5%<br>(0.21-0.8%)                  | 0.56%<br>(0.2-0.92%)                | 3.8<br>(1.4-6.5)          | 56<br>(23-92)         |
| Mauritania | 1995 | Female | 80 to 84 | 5.6%<br>(3.3-8.3%)             | 94%<br>(92-97%)          | 0.04<br>(0.018-0.07)                        | 0.29%<br>(0.069-0.54%)               | 0.32%<br>(0.061-0.61%)              | 1.3<br>(0.23-2.5)         | 14<br>(3.3-27)        |
| Mauritania | 1995 | Female | 85 to 89 | 5.9%<br>(3.5-8.9%)             | 94%<br>(91-97%)          | 0.04<br>(0.019-0.075)                       | 0.14%<br>(-0.052-0.31%)              | 0.14%<br>(-0.091-0.35%)             | 0.33<br>(-0.21-0.81)      | 2.9<br>(-1.1-6.2)     |
| Mauritania | 1995 | Female | 90 to 94 | 6.5%<br>(4-9.9%)               | 93%<br>(90-96%)          | 0.043<br>(0.019-0.081)                      | 0.038%<br>(-0.16-0.2%)               | 0.008%<br>(-0.24-0.21%)             | 0.0068<br>(-0.2-0.18)     | 0.19<br>(-0.81-1.1)   |
| Mauritania | 1995 | Female | 95 plus  | 7.7%<br>(4.2-12%)              | 92%<br>(88-96%)          | 0.048<br>(0.018-0.1)                        | 0.049%<br>(-0.2-0.24%)               | -0.0052%<br>(-0.3-0.24%)            | -0.0011<br>(-0.066-0.052) | 0.042<br>(-0.17-0.21) |
| Mauritania | 1995 | Male   | All Ages | 2.9%<br>(2.3-3.5%)             | 97%<br>(96-98%)          | 0.08<br>(0.068-0.093)                       | 0.66%<br>(0.45-0.86%)                | 0.95%<br>(0.62-1.3%)                | 88<br>(55-120)            | 4300<br>(2800-5500)   |
| Mauritania | 1995 | Male   | 15 to 19 | 2.2%<br>(1.2-3.4%)             | 98%<br>(97-99%)          | 0.046<br>(0.023-0.082)                      | 0.63%<br>(0.42-0.89%)                | 0.26%<br>(0.16-0.41%)               | 0.5<br>(0.3-0.79)         | 150<br>(96-220)       |
| Mauritania | 1995 | Male   | 20 to 24 | 3.5%<br>(2-5.2%)               | 97%<br>(95-98%)          | 0.1<br>(0.051-0.16)                         | 1.4%<br>(1-2%)                       | 0.71%<br>(0.45-1.1%)                | 1.8<br>(1.1-2.7)          | 350<br>(240-500)      |

| Location   | Year | Sex    | Age      | Prevalence of current drinkers | Prevalence of abstainers | Population average of standard drinks daily | Percent of total attributable deaths | Percent of total attributable DALYs | Attributable deaths    | Attributable DALYs   |
|------------|------|--------|----------|--------------------------------|--------------------------|---------------------------------------------|--------------------------------------|-------------------------------------|------------------------|----------------------|
| Mauritania | 1995 | Male   | 25 to 29 | 4.3%<br>(2.4-6.5%)             | 96%<br>(93-98%)          | 0.15<br>(0.079-0.23)                        | 1.9%<br>(1.3-2.5%)                   | 1.3%<br>(0.45-2.1%)                 | 3.2<br>(1-5.1)         | 430<br>(280-590)     |
| Mauritania | 1995 | Male   | 30 to 34 | 4.9%<br>(2.8-8.1%)             | 95%<br>(92-97%)          | 0.18<br>(0.1-0.28)                          | 2.3%<br>(1.2-3.1%)                   | 2%<br>(0.26-3.2%)                   | 4.9<br>(0.63-7.9)      | 460<br>(240-650)     |
| Mauritania | 1995 | Male   | 35 to 39 | 5.4%<br>(3.3-8.2%)             | 95%<br>(92-97%)          | 0.2<br>(0.11-0.31)                          | 2.6%<br>(0.99-3.7%)                  | 2.9%<br>(0.38-4.4%)                 | 7.2<br>(0.95-12)       | 490<br>(190-700)     |
| Mauritania | 1995 | Male   | 40 to 44 | 5.6%<br>(3.4-8.4%)             | 94%<br>(92-97%)          | 0.2<br>(0.11-0.33)                          | 2.7%<br>(0.86-3.9%)                  | 3.3%<br>(0.43-4.9%)                 | 8.2<br>(1.1-13)        | 460<br>(150-660)     |
| Mauritania | 1995 | Male   | 45 to 49 | 5.6%<br>(3.1-8.3%)             | 94%<br>(92-97%)          | 0.21<br>(0.1-0.36)                          | 3%<br>(1.5-4.3%)                     | 3.6%<br>(1.6-5.5%)                  | 9.2<br>(4.2-14)        | 430<br>(220-620)     |
| Mauritania | 1995 | Male   | 50 to 54 | 5.7%<br>(3.5-8.4%)             | 94%<br>(92-97%)          | 0.21<br>(0.1-0.38)                          | 2.6%<br>(1.6-3.7%)                   | 3.1%<br>(1.9-4.6%)                  | 9.2<br>(5.3-14)        | 370<br>(230-530)     |
| Mauritania | 1995 | Male   | 55 to 59 | 5.6%<br>(3.3-8.3%)             | 94%<br>(92-97%)          | 0.2<br>(0.1-0.34)                           | 2.5%<br>(1.5-3.5%)                   | 3%<br>(1.8-4.5%)                    | 10<br>(6.1-15)         | 350<br>(220-510)     |
| Mauritania | 1995 | Male   | 60 to 64 | 5.6%<br>(3.3-8.6%)             | 94%<br>(91-97%)          | 0.19<br>(0.089-0.33)                        | 2%<br>(1.3-3%)                       | 2.4%<br>(1.5-3.7%)                  | 11<br>(6.6-17)         | 310<br>(200-460)     |
| Mauritania | 1995 | Male   | 65 to 69 | 5.6%<br>(3.4-8.3%)             | 94%<br>(92-97%)          | 0.16<br>(0.082-0.28)                        | 1.5%<br>(1-2.2%)                     | 1.8%<br>(1.2-2.7%)                  | 9<br>(5.9-14)          | 210<br>(140-320)     |
| Mauritania | 1995 | Male   | 70 to 74 | 5.4%<br>(3.5-8%)               | 95%<br>(92-97%)          | 0.13<br>(0.067-0.23)                        | 1.1%<br>(0.71-1.6%)                  | 1.3%<br>(0.81-2%)                   | 6.9<br>(4.3-11)        | 130<br>(82-200)      |
| Mauritania | 1995 | Male   | 75 to 79 | 4.9%<br>(2.9-7.9%)             | 95%<br>(92-97%)          | 0.1<br>(0.048-0.19)                         | 0.8%<br>(0.52-1.2%)                  | 0.93%<br>(0.59-1.4%)                | 4.2<br>(2.6-6.4)       | 60<br>(39-91)        |
| Mauritania | 1995 | Male   | 80 to 84 | 4.3%<br>(2.4-6.7%)             | 96%<br>(93-98%)          | 0.078<br>(0.036-0.14)                       | 0.66%<br>(0.42-0.96%)                | 0.75%<br>(0.45-1.1%)                | 1.9<br>(1.2-2.9)       | 21<br>(13-31)        |
| Mauritania | 1995 | Male   | 85 to 89 | 3.9%<br>(2.1-6.1%)             | 96%<br>(94-98%)          | 0.061<br>(0.028-0.11)                       | 0.51%<br>(0.34-0.74%)                | 0.56%<br>(0.35-0.85%)               | 0.83<br>(0.52-1.3)     | 6.6<br>(4.3-9.7)     |
| Mauritania | 1995 | Male   | 90 to 94 | 4%<br>(2.3-6.3%)               | 96%<br>(94-98%)          | 0.052<br>(0.024-0.099)                      | 0.31%<br>(0.16-0.48%)                | 0.31%<br>(0.14-0.52%)               | 0.17<br>(0.072-0.28)   | 1<br>(0.53-1.5)      |
| Mauritania | 1995 | Male   | 95 plus  | 4.5%<br>(2.5-7.2%)             | 96%<br>(93-98%)          | 0.048<br>(0.018-0.099)                      | 0.31%<br>(0.14-0.49%)                | 0.27%<br>(0.053-0.5%)               | 0.031<br>(0.0065-0.06) | 0.15<br>(0.065-0.24) |
| Mauritania | 2000 | Female | All Ages | 4%<br>(3.3-4.9%)               | 96%<br>(95-97%)          | 0.017<br>(0.014-0.02)                       | 0.4%<br>(0.31-0.5%)                  | 0.48%<br>(0.33-0.63%)               | 49<br>(34-67)          | 2600<br>(1900-3300)  |
| Mauritania | 2000 | Female | 15 to 19 | 3.9%<br>(2.4-5.8%)             | 96%<br>(94-98%)          | 0.016<br>(0.0081-0.027)                     | 0.47%<br>(0.3-0.72%)                 | 0.049%<br>(0.0053-0.098%)           | 0.099<br>(0.011-0.2)   | 130<br>(76-200)      |
| Mauritania | 2000 | Female | 20 to 24 | 4.9%<br>(3-7.5%)               | 95%<br>(93-97%)          | 0.025<br>(0.013-0.041)                      | 1%<br>(0.64-1.5%)                    | 0.11%<br>(0.036-0.19%)              | 0.26<br>(0.087-0.46)   | 280<br>(170-440)     |
| Mauritania | 2000 | Female | 25 to 29 | 5.1%<br>(3-7.9%)               | 95%<br>(92-97%)          | 0.029<br>(0.016-0.045)                      | 1.1%<br>(0.76-1.5%)                  | 0.28%<br>(0.13-0.45%)               | 0.66<br>(0.3-1.1)      | 280<br>(180-390)     |
| Mauritania | 2000 | Female | 30 to 34 | 5.3%<br>(3-8.6%)               | 95%<br>(91-97%)          | 0.03<br>(0.016-0.048)                       | 1.1%<br>(0.74-1.5%)                  | 0.52%<br>(0.19-0.82%)               | 1.3<br>(0.47-2)        | 250<br>(160-340)     |
| Mauritania | 2000 | Female | 35 to 39 | 6.2%<br>(3.5-9.1%)             | 94%<br>(91-96%)          | 0.035<br>(0.019-0.056)                      | 1%<br>(0.68-1.3%)                    | 0.72%<br>(0.25-1.1%)                | 1.9<br>(0.63-2.9)      | 220<br>(150-300)     |
| Mauritania | 2000 | Female | 40 to 44 | 6.8%<br>(4.2-9.8%)             | 93%<br>(90-96%)          | 0.037<br>(0.02-0.06)                        | 1.1%<br>(0.73-1.6%)                  | 1.2%<br>(0.56-1.8%)                 | 3.4<br>(1.6-5.3)       | 240<br>(140-330)     |

| Location   | Year | Sex    | Age      | Prevalence of current drinkers | Prevalence of abstainers | Population average of standard drinks daily | Percent of total attributable deaths | Percent of total attributable DALYs | Attributable deaths    | Attributable DALYs    |
|------------|------|--------|----------|--------------------------------|--------------------------|---------------------------------------------|--------------------------------------|-------------------------------------|------------------------|-----------------------|
| Mauritania | 2000 | Female | 45 to 49 | 6.4%<br>(3.8-9.2%)             | 94%<br>(91-96%)          | 0.034<br>(0.017-0.056)                      | 1%<br>(0.66-1.4%)                    | 1.1%<br>(0.61-1.7%)                 | 3.4<br>(1.8-5.3)       | 190<br>(120-280)      |
| Mauritania | 2000 | Female | 50 to 54 | 6.2%<br>(4-9.2%)               | 94%<br>(91-96%)          | 0.034<br>(0.018-0.059)                      | 1.2%<br>(0.75-1.7%)                  | 1.5%<br>(0.81-2.2%)                 | 5.7<br>(3.1-8.9)       | 240<br>(150-360)      |
| Mauritania | 2000 | Female | 55 to 59 | 6.8%<br>(4.2-10%)              | 93%<br>(90-96%)          | 0.041<br>(0.021-0.071)                      | 0.91%<br>(0.57-1.3%)                 | 1.1%<br>(0.62-1.6%)                 | 5.2<br>(2.9-8.1)       | 190<br>(110-280)      |
| Mauritania | 2000 | Female | 60 to 64 | 7.1%<br>(4.3-11%)              | 93%<br>(89-96%)          | 0.044<br>(0.021-0.081)                      | 0.98%<br>(0.59-1.4%)                 | 1.2%<br>(0.68-1.7%)                 | 7.1<br>(4.1-11)        | 200<br>(120-310)      |
| Mauritania | 2000 | Female | 65 to 69 | 7.5%<br>(4.8-10%)              | 93%<br>(90-95%)          | 0.041<br>(0.021-0.068)                      | 0.81%<br>(0.47-1.2%)                 | 0.94%<br>(0.53-1.4%)                | 6.9<br>(3.9-11)        | 160<br>(95-250)       |
| Mauritania | 2000 | Female | 70 to 74 | 7%<br>(4.6-10%)                | 93%<br>(90-95%)          | 0.034<br>(0.017-0.06)                       | 0.66%<br>(0.35-1%)                   | 0.75%<br>(0.37-1.2%)                | 6.1<br>(3-10)          | 120<br>(62-190)       |
| Mauritania | 2000 | Female | 75 to 79 | 5.9%<br>(3.5-9.2%)             | 94%<br>(91-96%)          | 0.026<br>(0.012-0.05)                       | 0.56%<br>(0.31-0.84%)                | 0.63%<br>(0.34-0.98%)               | 4.7<br>(2.5-7.4)       | 69<br>(38-110)        |
| Mauritania | 2000 | Female | 80 to 84 | 5.4%<br>(3.2-8.1%)             | 95%<br>(92-97%)          | 0.023<br>(0.011-0.041)                      | 0.34%<br>(0.15-0.53%)                | 0.37%<br>(0.14-0.61%)               | 1.8<br>(0.67-2.9)      | 20<br>(8.5-31)        |
| Mauritania | 2000 | Female | 85 to 89 | 5.7%<br>(3.3-8.7%)             | 94%<br>(91-97%)          | 0.023<br>(0.011-0.041)                      | 0.19%<br>(0.041-0.33%)               | 0.2%<br>(0.013-0.37%)               | 0.54<br>(0.035-1)      | 4.5<br>(0.98-7.9)     |
| Mauritania | 2000 | Female | 90 to 94 | 6.4%<br>(3.9-9.8%)             | 94%<br>(90-96%)          | 0.025<br>(0.011-0.048)                      | 0.1%<br>(-0.05-0.23%)                | 0.078%<br>(-0.11-0.24%)             | 0.079<br>(-0.11-0.24)  | 0.62<br>(-0.31-1.4)   |
| Mauritania | 2000 | Female | 95 plus  | 7.4%<br>(4.2-12%)              | 93%<br>(88-96%)          | 0.028<br>(0.011-0.058)                      | 0.12%<br>(-0.069-0.28%)              | 0.074%<br>(-0.16-0.26%)             | 0.02<br>(-0.043-0.072) | 0.13<br>(-0.074-0.29) |
| Mauritania | 2000 | Male   | All Ages | 3%<br>(2.5-3.7%)               | 97%<br>(96-98%)          | 0.053<br>(0.045-0.062)                      | 0.57%<br>(0.38-0.74%)                | 0.76%<br>(0.43-1.1%)                | 72<br>(40-100)         | 3800<br>(2500-5000)   |
| Mauritania | 2000 | Male   | 15 to 19 | 2.3%<br>(1.4-3.5%)             | 98%<br>(96-99%)          | 0.031<br>(0.015-0.053)                      | 0.62%<br>(0.41-0.92%)                | 0.2%<br>(0.12-0.32%)                | 0.38<br>(0.22-0.6)     | 160<br>(96-230)       |
| Mauritania | 2000 | Male   | 20 to 24 | 3.7%<br>(2.1-5.6%)             | 96%<br>(94-98%)          | 0.066<br>(0.033-0.11)                       | 1.4%<br>(0.94-1.9%)                  | 0.52%<br>(0.29-0.79%)               | 1.2<br>(0.69-1.9)      | 360<br>(230-510)      |
| Mauritania | 2000 | Male   | 25 to 29 | 4.5%<br>(2.6-7.1%)             | 95%<br>(93-97%)          | 0.096<br>(0.053-0.15)                       | 1.7%<br>(1.2-2.3%)                   | 0.95%<br>(0.22-1.5%)                | 2.3<br>(0.5-3.7)       | 410<br>(270-560)      |
| Mauritania | 2000 | Male   | 30 to 34 | 5.1%<br>(3-8.1%)               | 95%<br>(92-97%)          | 0.12<br>(0.067-0.19)                        | 1.9%<br>(1.1-2.6%)                   | 1.5%<br>(0.21-2.5%)                 | 3.6<br>(0.49-6.1)      | 420<br>(250-580)      |
| Mauritania | 2000 | Male   | 35 to 39 | 5.5%<br>(3.2-8.3%)             | 94%<br>(92-97%)          | 0.12<br>(0.069-0.19)                        | 2.1%<br>(0.95-3.1%)                  | 2.2%<br>(0.29-3.8%)                 | 5.5<br>(0.69-9.5)      | 430<br>(190-620)      |
| Mauritania | 2000 | Male   | 40 to 44 | 5.5%<br>(3.3-8.3%)             | 95%<br>(92-97%)          | 0.12<br>(0.063-0.2)                         | 2.2%<br>(0.77-3.2%)                  | 2.7%<br>(0.34-4.3%)                 | 6.9<br>(0.86-11)       | 410<br>(140-610)      |
| Mauritania | 2000 | Male   | 45 to 49 | 5.7%<br>(3.2-8.3%)             | 94%<br>(92-97%)          | 0.13<br>(0.066-0.23)                        | 2.4%<br>(0.75-3.6%)                  | 3%<br>(0.38-4.7%)                   | 8.1<br>(1-13)          | 400<br>(120-600)      |
| Mauritania | 2000 | Male   | 50 to 54 | 5.9%<br>(3.6-8.9%)             | 94%<br>(91-96%)          | 0.14<br>(0.067-0.24)                        | 2.2%<br>(1.2-3.2%)                   | 2.7%<br>(1.1-4.1%)                  | 7.4<br>(3.2-12)        | 310<br>(170-470)      |
| Mauritania | 2000 | Male   | 55 to 59 | 5.9%<br>(3.6-9.2%)             | 94%<br>(91-96%)          | 0.13<br>(0.064-0.22)                        | 2.1%<br>(1.3-3%)                     | 2.5%<br>(1.5-3.9%)                  | 8.1<br>(4.8-13)        | 290<br>(180-430)      |
| Mauritania | 2000 | Male   | 60 to 64 | 5.9%<br>(3.6-9.2%)             | 94%<br>(91-96%)          | 0.12<br>(0.056-0.23)                        | 1.7%<br>(1.2-2.5%)                   | 2.1%<br>(1.3-3.2%)                  | 8.4<br>(5.1-13)        | 250<br>(160-370)      |

| Location   | Year | Sex    | Age      | Prevalence of current drinkers | Prevalence of abstainers | Population average of standard drinks daily | Percent of total attributable deaths | Percent of total attributable DALYs | Attributable deaths   | Attributable DALYs  |
|------------|------|--------|----------|--------------------------------|--------------------------|---------------------------------------------|--------------------------------------|-------------------------------------|-----------------------|---------------------|
| Mauritania | 2000 | Male   | 65 to 69 | 6%<br>(3.6-8.8%)               | 94%<br>(91-96%)          | 0.11<br>(0.054-0.18)                        | 1.3%<br>(0.86-1.8%)                  | 1.5%<br>(1-2.3%)                    | 7.2<br>(4.7-11)       | 170<br>(120-250)    |
| Mauritania | 2000 | Male   | 70 to 74 | 5.7%<br>(3.6-8.3%)             | 94%<br>(92-96%)          | 0.086<br>(0.042-0.15)                       | 0.93%<br>(0.61-1.4%)                 | 1.1%<br>(0.73-1.7%)                 | 5.9<br>(3.7-8.7)      | 110<br>(73-160)     |
| Mauritania | 2000 | Male   | 75 to 79 | 5.3%<br>(3-8.4%)               | 95%<br>(92-97%)          | 0.067<br>(0.031-0.13)                       | 0.68%<br>(0.45-1%)                   | 0.8%<br>(0.51-1.2%)                 | 3.7<br>(2.3-5.6)      | 55<br>(35-80)       |
| Mauritania | 2000 | Male   | 80 to 84 | 4.6%<br>(2.6-7.1%)             | 95%<br>(93-97%)          | 0.052<br>(0.024-0.091)                      | 0.59%<br>(0.38-0.85%)                | 0.68%<br>(0.42-1%)                  | 1.9<br>(1.2-2.9)      | 21<br>(13-30)       |
| Mauritania | 2000 | Male   | 85 to 89 | 4.2%<br>(2.3-6.6%)             | 96%<br>(93-98%)          | 0.04<br>(0.02-0.072)                        | 0.47%<br>(0.31-0.69%)                | 0.52%<br>(0.31-0.79%)               | 0.88<br>(0.53-1.3)    | 7.1<br>(4.6-10)     |
| Mauritania | 2000 | Male   | 90 to 94 | 4.2%<br>(2.5-6.6%)             | 96%<br>(93-98%)          | 0.035<br>(0.016-0.064)                      | 0.31%<br>(0.17-0.45%)                | 0.3%<br>(0.13-0.49%)                | 0.2<br>(0.086-0.32)   | 1.2<br>(0.68-1.8)   |
| Mauritania | 2000 | Male   | 95 plus  | 4.8%<br>(2.6-7.9%)             | 95%<br>(92-97%)          | 0.032<br>(0.012-0.067)                      | 0.32%<br>(0.16-0.52%)                | 0.29%<br>(0.089-0.52%)              | 0.044<br>(0.014-0.08) | 0.2<br>(0.1-0.33)   |
| Mauritania | 2005 | Female | All Ages | 4%<br>(3.3-4.8%)               | 96%<br>(95-97%)          | 0.012<br>(0.0092-0.014)                     | 0.42%<br>(0.33-0.51%)                | 0.49%<br>(0.34-0.62%)               | 52<br>(36-69)         | 2900<br>(2200-3600) |
| Mauritania | 2005 | Female | 15 to 19 | 3.8%<br>(2.3-5.8%)             | 96%<br>(94-98%)          | 0.01<br>(0.0052-0.018)                      | 0.49%<br>(0.29-0.74%)                | 0.045%<br>(0.017-0.077%)            | 0.096<br>(0.035-0.17) | 140<br>(82-230)     |
| Mauritania | 2005 | Female | 20 to 24 | 4.9%<br>(2.9-7.2%)             | 95%<br>(93-97%)          | 0.017<br>(0.0088-0.028)                     | 1.1%<br>(0.7-1.6%)                   | 0.1%<br>(0.042-0.17%)               | 0.25<br>(0.11-0.43)   | 320<br>(190-500)    |
| Mauritania | 2005 | Female | 25 to 29 | 5.1%<br>(2.9-7.9%)             | 95%<br>(92-97%)          | 0.019<br>(0.01-0.03)                        | 1.2%<br>(0.82-1.6%)                  | 0.27%<br>(0.12-0.44%)               | 0.67<br>(0.3-1.1)     | 320<br>(210-470)    |
| Mauritania | 2005 | Female | 30 to 34 | 5.3%<br>(3.1-8.5%)             | 95%<br>(92-97%)          | 0.02<br>(0.011-0.033)                       | 1.1%<br>(0.78-1.5%)                  | 0.52%<br>(0.23-0.82%)               | 1.3<br>(0.57-2.1)     | 290<br>(190-410)    |
| Mauritania | 2005 | Female | 35 to 39 | 6.2%<br>(3.5-9.2%)             | 94%<br>(91-97%)          | 0.023<br>(0.012-0.037)                      | 1%<br>(0.73-1.3%)                    | 0.72%<br>(0.26-1.1%)                | 2<br>(0.73-3.1)       | 250<br>(170-340)    |
| Mauritania | 2005 | Female | 40 to 44 | 6.7%<br>(4.1-9.8%)             | 93%<br>(90-96%)          | 0.024<br>(0.012-0.04)                       | 1.1%<br>(0.73-1.6%)                  | 1.2%<br>(0.5-1.8%)                  | 3.6<br>(1.6-5.7)      | 260<br>(170-370)    |
| Mauritania | 2005 | Female | 45 to 49 | 6.3%<br>(3.6-9.1%)             | 94%<br>(91-96%)          | 0.022<br>(0.011-0.038)                      | 1%<br>(0.69-1.4%)                    | 1.1%<br>(0.64-1.6%)                 | 3.8<br>(2.1-5.8)      | 220<br>(150-310)    |
| Mauritania | 2005 | Female | 50 to 54 | 6.1%<br>(3.8-9%)               | 94%<br>(91-96%)          | 0.023<br>(0.012-0.038)                      | 1.2%<br>(0.79-1.7%)                  | 1.5%<br>(0.87-2.2%)                 | 5.8<br>(3.1-8.9)      | 250<br>(160-360)    |
| Mauritania | 2005 | Female | 55 to 59 | 6.6%<br>(4.1-9.8%)             | 93%<br>(90-96%)          | 0.027<br>(0.014-0.047)                      | 0.91%<br>(0.6-1.3%)                  | 1.1%<br>(0.65-1.6%)                 | 5.3<br>(3.1-8)        | 190<br>(120-280)    |
| Mauritania | 2005 | Female | 60 to 64 | 7%<br>(4.3-10%)                | 93%<br>(90-96%)          | 0.029<br>(0.014-0.052)                      | 0.97%<br>(0.63-1.4%)                 | 1.2%<br>(0.73-1.7%)                 | 7.2<br>(4.2-11)       | 210<br>(130-300)    |
| Mauritania | 2005 | Female | 65 to 69 | 7.3%<br>(4.7-10%)              | 93%<br>(90-95%)          | 0.027<br>(0.013-0.046)                      | 0.82%<br>(0.53-1.2%)                 | 0.96%<br>(0.6-1.4%)                 | 7.2<br>(4.2-11)       | 170<br>(110-260)    |
| Mauritania | 2005 | Female | 70 to 74 | 6.9%<br>(4.5-10%)              | 93%<br>(90-96%)          | 0.022<br>(0.011-0.04)                       | 0.68%<br>(0.41-1%)                   | 0.78%<br>(0.44-1.2%)                | 6.6<br>(3.6-10)       | 130<br>(75-190)     |
| Mauritania | 2005 | Female | 75 to 79 | 5.9%<br>(3.6-9.3%)             | 94%<br>(91-96%)          | 0.017<br>(0.0081-0.033)                     | 0.58%<br>(0.34-0.86%)                | 0.67%<br>(0.37-1%)                  | 5.2<br>(2.9-8.4)      | 78<br>(46-120)      |
| Mauritania | 2005 | Female | 80 to 84 | 5.4%<br>(3.2-7.9%)             | 95%<br>(92-97%)          | 0.015<br>(0.0073-0.027)                     | 0.36%<br>(0.2-0.55%)                 | 0.4%<br>(0.21-0.64%)                | 2.1<br>(1.1-3.2)      | 23<br>(13-35)       |

| Location   | Year | Sex    | Age      | Prevalence of current drinkers | Prevalence of abstainers | Population average of standard drinks daily | Percent of total attributable deaths | Percent of total attributable DALYs | Attributable deaths    | Attributable DALYs  |
|------------|------|--------|----------|--------------------------------|--------------------------|---------------------------------------------|--------------------------------------|-------------------------------------|------------------------|---------------------|
| Mauritania | 2005 | Female | 85 to 89 | 5.7%<br>(3.4-8.8%)             | 94%<br>(91-97%)          | 0.015<br>(0.0075-0.027)                     | 0.23%<br>(0.11-0.35%)                | 0.24%<br>(0.099-0.39%)              | 0.77<br>(0.31-1.3)     | 6.4<br>(3.1-10)     |
| Mauritania | 2005 | Female | 90 to 94 | 6.4%<br>(3.8-10%)              | 94%<br>(90-96%)          | 0.017<br>(0.0074-0.032)                     | 0.14%<br>(0.034-0.25%)               | 0.13%<br>(-0.016-0.26%)             | 0.15<br>(-0.019-0.31)  | 1<br>(0.24-1.8)     |
| Mauritania | 2005 | Female | 95 plus  | 7.5%<br>(4.1-12%)              | 93%<br>(88-96%)          | 0.019<br>(0.007-0.039)                      | 0.17%<br>(0.023-0.29%)               | 0.12%<br>(-0.041-0.28%)             | 0.04<br>(-0.013-0.089) | 0.21<br>(0.03-0.38) |
| Mauritania | 2005 | Male   | All Ages | 3.1%<br>(2.5-3.8%)             | 97%<br>(96-97%)          | 0.037<br>(0.03-0.045)                       | 0.56%<br>(0.38-0.74%)                | 0.73%<br>(0.41-1.1%)                | 72<br>(40-110)         | 4000<br>(2600-5500) |
| Mauritania | 2005 | Male   | 15 to 19 | 2.3%<br>(1.3-3.5%)             | 98%<br>(96-99%)          | 0.021<br>(0.0098-0.037)                     | 0.64%<br>(0.41-0.92%)                | 0.17%<br>(0.093-0.27%)              | 0.33<br>(0.17-0.54)    | 170<br>(110-250)    |
| Mauritania | 2005 | Male   | 20 to 24 | 3.7%<br>(2.1-5.6%)             | 96%<br>(94-98%)          | 0.044<br>(0.022-0.075)                      | 1.4%<br>(0.94-2%)                    | 0.44%<br>(0.23-0.67%)               | 1.1<br>(0.56-1.8)      | 390<br>(250-580)    |
| Mauritania | 2005 | Male   | 25 to 29 | 4.5%<br>(2.6-7%)               | 95%<br>(93-97%)          | 0.065<br>(0.035-0.1)                        | 1.6%<br>(1.1-2.2%)                   | 0.79%<br>(0.13-1.4%)                | 2<br>(0.33-3.5)        | 440<br>(280-610)    |
| Mauritania | 2005 | Male   | 30 to 34 | 5.1%<br>(3-8.3%)               | 95%<br>(92-97%)          | 0.079<br>(0.044-0.13)                       | 1.8%<br>(1.1-2.5%)                   | 1.3%<br>(0.18-2.4%)                 | 3.3<br>(0.48-6.1)      | 440<br>(260-630)    |
| Mauritania | 2005 | Male   | 35 to 39 | 5.5%<br>(3.2-8.3%)             | 94%<br>(92-97%)          | 0.084<br>(0.045-0.13)                       | 2%<br>(0.93-2.9%)                    | 2%<br>(0.27-3.6%)                   | 5.3<br>(0.73-9.4)      | 450<br>(200-660)    |
| Mauritania | 2005 | Male   | 40 to 44 | 5.5%<br>(3.4-8.2%)             | 95%<br>(92-97%)          | 0.083<br>(0.041-0.13)                       | 2%<br>(0.78-3.1%)                    | 2.4%<br>(0.32-4.2%)                 | 6.7<br>(0.85-12)       | 420<br>(160-650)    |
| Mauritania | 2005 | Male   | 45 to 49 | 5.7%<br>(3-8.6%)               | 94%<br>(91-97%)          | 0.087<br>(0.044-0.15)                       | 2.2%<br>(0.76-3.4%)                  | 2.8%<br>(0.38-4.6%)                 | 8.5<br>(1.1-14)        | 430<br>(150-680)    |
| Mauritania | 2005 | Male   | 50 to 54 | 6%<br>(3.6-9%)                 | 94%<br>(91-96%)          | 0.092<br>(0.047-0.16)                       | 2%<br>(1.1-3%)                       | 2.5%<br>(1.1-4.1%)                  | 8.2<br>(3.4-13)        | 350<br>(190-530)    |
| Mauritania | 2005 | Male   | 55 to 59 | 5.9%<br>(3.6-9.2%)             | 94%<br>(91-96%)          | 0.089<br>(0.043-0.15)                       | 1.9%<br>(1.3-2.9%)                   | 2.4%<br>(1.4-3.8%)                  | 8<br>(4.6-13)          | 290<br>(180-440)    |
| Mauritania | 2005 | Male   | 60 to 64 | 5.8%<br>(3.4-8.9%)             | 94%<br>(91-97%)          | 0.081<br>(0.037-0.15)                       | 1.6%<br>(1.1-2.4%)                   | 2%<br>(1.3-3.1%)                    | 8.1<br>(4.9-13)        | 240<br>(160-370)    |
| Mauritania | 2005 | Male   | 65 to 69 | 5.9%<br>(3.5-8.7%)             | 94%<br>(91-97%)          | 0.07<br>(0.035-0.12)                        | 1.2%<br>(0.79-1.7%)                  | 1.4%<br>(0.94-2.2%)                 | 6.7<br>(4.2-10)        | 160<br>(110-240)    |
| Mauritania | 2005 | Male   | 70 to 74 | 5.7%<br>(3.7-8.4%)             | 94%<br>(92-96%)          | 0.057<br>(0.029-0.1)                        | 0.9%<br>(0.58-1.3%)                  | 1.1%<br>(0.71-1.6%)                 | 5.9<br>(3.6-8.8)       | 110<br>(70-160)     |
| Mauritania | 2005 | Male   | 75 to 79 | 5.3%<br>(3.1-8.3%)             | 95%<br>(92-97%)          | 0.045<br>(0.021-0.083)                      | 0.67%<br>(0.45-0.98%)                | 0.8%<br>(0.52-1.2%)                 | 3.9<br>(2.4-6)         | 58<br>(37-84)       |
| Mauritania | 2005 | Male   | 80 to 84 | 4.6%<br>(2.6-7%)               | 95%<br>(93-97%)          | 0.035<br>(0.016-0.061)                      | 0.59%<br>(0.39-0.85%)                | 0.69%<br>(0.44-1%)                  | 2.1<br>(1.3-3.2)       | 23<br>(16-34)       |
| Mauritania | 2005 | Male   | 85 to 89 | 4.2%<br>(2.4-6.8%)             | 96%<br>(93-98%)          | 0.027<br>(0.013-0.049)                      | 0.48%<br>(0.33-0.67%)                | 0.54%<br>(0.35-0.78%)               | 1<br>(0.66-1.5)        | 8.3<br>(5.6-12)     |
| Mauritania | 2005 | Male   | 90 to 94 | 4.2%<br>(2.5-6.9%)             | 96%<br>(93-98%)          | 0.023<br>(0.011-0.044)                      | 0.32%<br>(0.2-0.47%)                 | 0.33%<br>(0.17-0.51%)               | 0.25<br>(0.13-0.4)     | 1.5<br>(0.95-2.2)   |
| Mauritania | 2005 | Male   | 95 plus  | 4.8%<br>(2.6-7.9%)             | 95%<br>(92-97%)          | 0.021<br>(0.008-0.045)                      | 0.34%<br>(0.21-0.52%)                | 0.31%<br>(0.14-0.52%)               | 0.059<br>(0.027-0.1)   | 0.27<br>(0.16-0.41) |
| Mauritania | 2010 | Female | All Ages | 4.4%<br>(3.6-5.2%)             | 96%<br>(95-96%)          | 0.012<br>(0.0078-0.016)                     | 0.48%<br>(0.38-0.59%)                | 0.53%<br>(0.38-0.68%)               | 55<br>(37-74)          | 3200<br>(2400-4000) |

| Location   | Year | Sex    | Age      | Prevalence of current drinkers | Prevalence of abstainers | Population average of standard drinks daily | Percent of total attributable deaths | Percent of total attributable DALYs | Attributable deaths     | Attributable DALYs  |
|------------|------|--------|----------|--------------------------------|--------------------------|---------------------------------------------|--------------------------------------|-------------------------------------|-------------------------|---------------------|
| Mauritania | 2010 | Female | 15 to 19 | 3.9%<br>(2.5-5.9%)             | 96%<br>(94-98%)          | 0.0096<br>(0.0043-0.018)                    | 0.54%<br>(0.33-0.82%)                | 0.05%<br>(0.022-0.081%)             | 0.094<br>(0.04-0.16)    | 160<br>(91-250)     |
| Mauritania | 2010 | Female | 20 to 24 | 5%<br>(2.9-7.6%)               | 95%<br>(92-97%)          | 0.016<br>(0.0072-0.029)                     | 1.2%<br>(0.76-1.8%)                  | 0.11%<br>(0.047-0.19%)              | 0.25<br>(0.1-0.42)      | 360<br>(210-550)    |
| Mauritania | 2010 | Female | 25 to 29 | 5.6%<br>(3.3-8.5%)             | 94%<br>(91-97%)          | 0.019<br>(0.0091-0.032)                     | 1.3%<br>(0.9-1.8%)                   | 0.29%<br>(0.098-0.48%)              | 0.65<br>(0.22-1.1)      | 360<br>(240-530)    |
| Mauritania | 2010 | Female | 30 to 34 | 6.2%<br>(3.6-9.8%)             | 94%<br>(90-96%)          | 0.021<br>(0.011-0.037)                      | 1.2%<br>(0.85-1.6%)                  | 0.56%<br>(0.25-0.87%)               | 1.3<br>(0.55-2.1)       | 330<br>(220-460)    |
| Mauritania | 2010 | Female | 35 to 39 | 6.8%<br>(3.9-10%)              | 93%<br>(90-96%)          | 0.023<br>(0.011-0.039)                      | 1.1%<br>(0.77-1.4%)                  | 0.78%<br>(0.35-1.2%)                | 2.1<br>(0.91-3.2)       | 290<br>(200-380)    |
| Mauritania | 2010 | Female | 40 to 44 | 7.1%<br>(4.3-10%)              | 93%<br>(90-96%)          | 0.023<br>(0.011-0.04)                       | 1.2%<br>(0.78-1.6%)                  | 1.3%<br>(0.63-1.9%)                 | 3.9<br>(1.9-6.1)        | 300<br>(190-410)    |
| Mauritania | 2010 | Female | 45 to 49 | 7.1%<br>(4-10%)                | 93%<br>(90-96%)          | 0.022<br>(0.01-0.041)                       | 1%<br>(0.72-1.4%)                    | 1.2%<br>(0.71-1.8%)                 | 4.3<br>(2.4-6.7)        | 250<br>(170-360)    |
| Mauritania | 2010 | Female | 50 to 54 | 7.1%<br>(4.5-11%)              | 93%<br>(89-96%)          | 0.023<br>(0.011-0.043)                      | 1.2%<br>(0.81-1.6%)                  | 1.5%<br>(0.92-2.1%)                 | 6.5<br>(3.7-9.9)        | 280<br>(180-400)    |
| Mauritania | 2010 | Female | 55 to 59 | 7.4%<br>(4.5-11%)              | 93%<br>(89-96%)          | 0.027<br>(0.012-0.05)                       | 0.9%<br>(0.59-1.3%)                  | 1.1%<br>(0.64-1.7%)                 | 5.4<br>(3.1-8.5)        | 200<br>(120-290)    |
| Mauritania | 2010 | Female | 60 to 64 | 7.8%<br>(4.7-12%)              | 92%<br>(88-95%)          | 0.029<br>(0.013-0.055)                      | 0.94%<br>(0.61-1.3%)                 | 1.2%<br>(0.72-1.7%)                 | 7.3<br>(4.2-11)         | 220<br>(130-320)    |
| Mauritania | 2010 | Female | 65 to 69 | 8%<br>(5-11%)                  | 92%<br>(89-95%)          | 0.026<br>(0.012-0.048)                      | 0.8%<br>(0.52-1.1%)                  | 0.95%<br>(0.59-1.4%)                | 7.3<br>(4.3-11)         | 180<br>(110-260)    |
| Mauritania | 2010 | Female | 70 to 74 | 7.3%<br>(4.7-10%)              | 93%<br>(90-95%)          | 0.021<br>(0.0094-0.039)                     | 0.67%<br>(0.41-1%)                   | 0.77%<br>(0.44-1.2%)                | 6.8<br>(3.6-11)         | 130<br>(76-210)     |
| Mauritania | 2010 | Female | 75 to 79 | 6.1%<br>(3.7-9.4%)             | 94%<br>(91-96%)          | 0.016<br>(0.0065-0.031)                     | 0.58%<br>(0.35-0.84%)                | 0.67%<br>(0.39-1%)                  | 5.6<br>(3.1-8.9)        | 84<br>(49-130)      |
| Mauritania | 2010 | Female | 80 to 84 | 5.5%<br>(3.1-8%)               | 94%<br>(92-97%)          | 0.014<br>(0.0062-0.026)                     | 0.37%<br>(0.21-0.55%)                | 0.41%<br>(0.21-0.64%)               | 2.3<br>(1.1-3.6)        | 26<br>(14-39)       |
| Mauritania | 2010 | Female | 85 to 89 | 5.8%<br>(3.4-8.9%)             | 94%<br>(91-97%)          | 0.014<br>(0.0064-0.027)                     | 0.24%<br>(0.12-0.36%)                | 0.26%<br>(0.1-0.4%)                 | 0.96<br>(0.39-1.6)      | 8<br>(4-12)         |
| Mauritania | 2010 | Female | 90 to 94 | 6.4%<br>(4-10%)                | 94%<br>(90-96%)          | 0.015<br>(0.0067-0.03)                      | 0.15%<br>(0.039-0.25%)               | 0.14%<br>(0.0052-0.27%)             | 0.22<br>(0.0088-0.41)   | 1.4<br>(0.4-2.4)    |
| Mauritania | 2010 | Female | 95 plus  | 7.6%<br>(4.3-12%)              | 92%<br>(88-96%)          | 0.017<br>(0.0062-0.038)                     | 0.18%<br>(0.043-0.3%)                | 0.14%<br>(-0.022-0.29%)             | 0.057<br>(-0.0094-0.12) | 0.3<br>(0.07-0.5)   |
| Mauritania | 2010 | Male   | All Ages | 3.2%<br>(2.6-3.9%)             | 97%<br>(96-97%)          | 0.035<br>(0.023-0.048)                      | 0.65%<br>(0.45-0.86%)                | 0.82%<br>(0.49-1.2%)                | 78<br>(44-120)          | 4500<br>(3000-6100) |
| Mauritania | 2010 | Male   | 15 to 19 | 2.3%<br>(1.4-3.5%)             | 98%<br>(96-99%)          | 0.019<br>(0.0084-0.036)                     | 0.68%<br>(0.43-1%)                   | 0.17%<br>(0.09-0.27%)               | 0.31<br>(0.15-0.51)     | 190<br>(110-310)    |
| Mauritania | 2010 | Male   | 20 to 24 | 3.7%<br>(2.1-5.6%)             | 96%<br>(94-98%)          | 0.04<br>(0.018-0.073)                       | 1.5%<br>(1-2.2%)                     | 0.45%<br>(0.24-0.7%)                | 1.1<br>(0.53-1.7)       | 430<br>(280-650)    |
| Mauritania | 2010 | Male   | 25 to 29 | 4.5%<br>(2.6-7%)               | 95%<br>(93-97%)          | 0.059<br>(0.028-0.1)                        | 1.8%<br>(1.2-2.4%)                   | 0.82%<br>(0.1-1.5%)                 | 2<br>(0.25-3.6)         | 480<br>(300-670)    |
| Mauritania | 2010 | Male   | 30 to 34 | 5.1%<br>(3-8.4%)               | 95%<br>(92-97%)          | 0.071<br>(0.036-0.12)                       | 1.9%<br>(1.2-2.6%)                   | 1.4%<br>(0.17-2.5%)                 | 3.4<br>(0.42-6.4)       | 490<br>(280-700)    |

| Location   | Year | Sex    | Age      | Prevalence of current drinkers | Prevalence of abstainers | Population average of standard drinks daily | Percent of total attributable deaths | Percent of total attributable DALYs | Attributable deaths   | Attributable DALYs  |
|------------|------|--------|----------|--------------------------------|--------------------------|---------------------------------------------|--------------------------------------|-------------------------------------|-----------------------|---------------------|
| Mauritania | 2010 | Male   | 35 to 39 | 5.7%<br>(3.3-8.5%)             | 94%<br>(91-97%)          | 0.078<br>(0.04-0.14)                        | 2.1%<br>(1.1-3%)                     | 2.1%<br>(0.31-3.8%)                 | 5.8<br>(0.83-10)      | 500<br>(260-750)    |
| Mauritania | 2010 | Male   | 40 to 44 | 5.9%<br>(3.6-8.8%)             | 94%<br>(91-96%)          | 0.081<br>(0.038-0.14)                       | 2.1%<br>(0.85-3.1%)                  | 2.6%<br>(0.36-4.3%)                 | 7.5<br>(0.96-13)      | 480<br>(190-740)    |
| Mauritania | 2010 | Male   | 45 to 49 | 5.9%<br>(3.2-8.8%)             | 94%<br>(91-97%)          | 0.083<br>(0.038-0.15)                       | 2.3%<br>(0.85-3.5%)                  | 3%<br>(0.47-5%)                     | 9.5<br>(1.5-17)       | 490<br>(180-780)    |
| Mauritania | 2010 | Male   | 50 to 54 | 5.9%<br>(3.6-8.9%)             | 94%<br>(91-96%)          | 0.083<br>(0.037-0.16)                       | 2%<br>(1.2-3%)                       | 2.6%<br>(1.4-4.2%)                  | 9.5<br>(4.5-15)       | 410<br>(240-630)    |
| Mauritania | 2010 | Male   | 55 to 59 | 5.9%<br>(3.5-8.7%)             | 94%<br>(91-96%)          | 0.08<br>(0.037-0.15)                        | 1.9%<br>(1.3-2.8%)                   | 2.5%<br>(1.5-3.8%)                  | 9.7<br>(5.4-15)       | 360<br>(220-530)    |
| Mauritania | 2010 | Male   | 60 to 64 | 5.8%<br>(3.5-8.9%)             | 94%<br>(91-97%)          | 0.073<br>(0.032-0.14)                       | 1.6%<br>(1.1-2.4%)                   | 2%<br>(1.3-3.1%)                    | 8.6<br>(5.1-13)       | 260<br>(170-390)    |
| Mauritania | 2010 | Male   | 65 to 69 | 5.9%<br>(3.6-8.7%)             | 94%<br>(91-96%)          | 0.064<br>(0.031-0.12)                       | 1.2%<br>(0.79-1.7%)                  | 1.4%<br>(0.95-2.1%)                 | 6.9<br>(4.2-10)       | 170<br>(110-250)    |
| Mauritania | 2010 | Male   | 70 to 74 | 5.7%<br>(3.7-8.5%)             | 94%<br>(91-96%)          | 0.052<br>(0.024-0.095)                      | 0.89%<br>(0.6-1.2%)                  | 1.1%<br>(0.74-1.6%)                 | 6<br>(3.7-8.8)        | 110<br>(73-160)     |
| Mauritania | 2010 | Male   | 75 to 79 | 5.2%<br>(3.1-8.3%)             | 95%<br>(92-97%)          | 0.041<br>(0.017-0.079)                      | 0.66%<br>(0.45-0.94%)                | 0.81%<br>(0.52-1.2%)                | 4.1<br>(2.6-6.2)      | 61<br>(40-88)       |
| Mauritania | 2010 | Male   | 80 to 84 | 4.6%<br>(2.7-7%)               | 95%<br>(93-97%)          | 0.032<br>(0.014-0.058)                      | 0.59%<br>(0.41-0.84%)                | 0.7%<br>(0.47-1%)                   | 2.4<br>(1.5-3.5)      | 26<br>(17-37)       |
| Mauritania | 2010 | Male   | 85 to 89 | 4.2%<br>(2.3-6.5%)             | 96%<br>(94-98%)          | 0.024<br>(0.011-0.047)                      | 0.48%<br>(0.33-0.65%)                | 0.54%<br>(0.34-0.76%)               | 1.2<br>(0.73-1.7)     | 9.6<br>(6.4-13)     |
| Mauritania | 2010 | Male   | 90 to 94 | 4.2%<br>(2.5-6.6%)             | 96%<br>(93-98%)          | 0.021<br>(0.0092-0.041)                     | 0.33%<br>(0.21-0.45%)                | 0.33%<br>(0.19-0.49%)               | 0.31<br>(0.17-0.47)   | 1.9<br>(1.2-2.7)    |
| Mauritania | 2010 | Male   | 95 plus  | 4.7%<br>(2.6-7.4%)             | 95%<br>(93-97%)          | 0.019<br>(0.007-0.042)                      | 0.35%<br>(0.22-0.49%)                | 0.31%<br>(0.15-0.49%)               | 0.074<br>(0.035-0.12) | 0.34<br>(0.21-0.49) |
| Mauritania | 2016 | Female | All Ages | 4.4%<br>(3.7-5.2%)             | 96%<br>(95-96%)          | 0.015<br>(0.0079-0.026)                     | 0.58%<br>(0.46-0.71%)                | 0.59%<br>(0.43-0.76%)               | 62<br>(40-88)         | 3700<br>(2700-4700) |
| Mauritania | 2016 | Female | 15 to 19 | 3.9%<br>(2.4-5.8%)             | 96%<br>(94-98%)          | 0.012<br>(0.0049-0.028)                     | 0.62%<br>(0.37-0.92%)                | 0.059%<br>(0.03-0.095%)             | 0.1<br>(0.046-0.17)   | 190<br>(110-300)    |
| Mauritania | 2016 | Female | 20 to 24 | 5%<br>(2.9-7.5%)               | 95%<br>(93-97%)          | 0.02<br>(0.0076-0.041)                      | 1.4%<br>(0.86-2.1%)                  | 0.13%<br>(0.061-0.23%)              | 0.26<br>(0.12-0.45)   | 430<br>(250-670)    |
| Mauritania | 2016 | Female | 25 to 29 | 5.5%<br>(3.2-8.6%)             | 94%<br>(91-97%)          | 0.023<br>(0.0093-0.047)                     | 1.5%<br>(1-2%)                       | 0.34%<br>(0.15-0.55%)               | 0.7<br>(0.3-1.2)      | 420<br>(270-610)    |
| Mauritania | 2016 | Female | 30 to 34 | 6.1%<br>(3.5-9.8%)             | 94%<br>(90-96%)          | 0.026<br>(0.011-0.052)                      | 1.3%<br>(0.92-1.8%)                  | 0.61%<br>(0.23-0.94%)               | 1.4<br>(0.5-2.4)      | 370<br>(250-540)    |
| Mauritania | 2016 | Female | 35 to 39 | 6.7%<br>(3.8-10%)              | 93%<br>(90-96%)          | 0.029<br>(0.012-0.057)                      | 1.2%<br>(0.83-1.5%)                  | 0.85%<br>(0.44-1.3%)                | 2.4<br>(1.1-3.8)      | 340<br>(230-460)    |
| Mauritania | 2016 | Female | 40 to 44 | 7%<br>(4.2-10%)                | 93%<br>(90-96%)          | 0.029<br>(0.011-0.055)                      | 1.2%<br>(0.85-1.7%)                  | 1.4%<br>(0.8-2.1%)                  | 4.6<br>(2.4-7.3)      | 360<br>(230-500)    |
| Mauritania | 2016 | Female | 45 to 49 | 6.9%<br>(3.8-10%)              | 93%<br>(90-96%)          | 0.028<br>(0.011-0.055)                      | 1.1%<br>(0.77-1.5%)                  | 1.3%<br>(0.77-1.9%)                 | 5.1<br>(2.9-8.3)      | 310<br>(210-440)    |
| Mauritania | 2016 | Female | 50 to 54 | 7%<br>(4.4-10%)                | 93%<br>(90-96%)          | 0.029<br>(0.012-0.061)                      | 1.2%<br>(0.86-1.7%)                  | 1.5%<br>(0.98-2.2%)                 | 7.6<br>(4.3-12)       | 340<br>(220-510)    |

| Location   | Year | Sex    | Age      | Prevalence of current drinkers | Prevalence of abstainers | Population average of standard drinks daily | Percent of total attributable deaths | Percent of total attributable DALYs | Attributable deaths    | Attributable DALYs   |
|------------|------|--------|----------|--------------------------------|--------------------------|---------------------------------------------|--------------------------------------|-------------------------------------|------------------------|----------------------|
| Mauritania | 2016 | Female | 55 to 59 | 7.2%<br>(4.4-11%)              | 93%<br>(89-96%)          | 0.034<br>(0.014-0.072)                      | 0.91%<br>(0.59-1.3%)                 | 1.1%<br>(0.66-1.7%)                 | 6.7<br>(3.5-11)        | 250<br>(150-390)     |
| Mauritania | 2016 | Female | 60 to 64 | 7.7%<br>(4.6-12%)              | 92%<br>(88-95%)          | 0.036<br>(0.014-0.08)                       | 0.94%<br>(0.59-1.4%)                 | 1.2%<br>(0.7-1.8%)                  | 8.1<br>(4.2-13)        | 240<br>(140-370)     |
| Mauritania | 2016 | Female | 65 to 69 | 7.9%<br>(5-11%)                | 92%<br>(89-95%)          | 0.033<br>(0.014-0.071)                      | 0.79%<br>(0.49-1.1%)                 | 0.94%<br>(0.56-1.4%)                | 7.8<br>(4.1-12)        | 190<br>(110-290)     |
| Mauritania | 2016 | Female | 70 to 74 | 7.1%<br>(4.6-10%)              | 93%<br>(90-95%)          | 0.026<br>(0.01-0.056)                       | 0.66%<br>(0.36-1%)                   | 0.76%<br>(0.38-1.2%)                | 7.2<br>(3.4-12)        | 140<br>(75-220)      |
| Mauritania | 2016 | Female | 75 to 79 | 5.9%<br>(3.5-9.2%)             | 94%<br>(91-97%)          | 0.02<br>(0.007-0.044)                       | 0.57%<br>(0.33-0.84%)                | 0.67%<br>(0.37-1%)                  | 6.2<br>(3.2-10)        | 93<br>(52-140)       |
| Mauritania | 2016 | Female | 80 to 84 | 5.4%<br>(3.1-7.9%)             | 95%<br>(92-97%)          | 0.018<br>(0.0068-0.038)                     | 0.35%<br>(0.18-0.55%)                | 0.39%<br>(0.17-0.64%)               | 2.4<br>(1-4.1)         | 28<br>(13-44)        |
| Mauritania | 2016 | Female | 85 to 89 | 5.6%<br>(3.2-8.7%)             | 94%<br>(91-97%)          | 0.018<br>(0.0068-0.038)                     | 0.23%<br>(0.076-0.36%)               | 0.24%<br>(0.053-0.41%)              | 1.1<br>(0.24-1.8)      | 9.1<br>(3-14)        |
| Mauritania | 2016 | Female | 90 to 94 | 6.3%<br>(3.8-9.9%)             | 94%<br>(90-96%)          | 0.019<br>(0.007-0.043)                      | 0.14%<br>(-0.0074-0.25%)             | 0.12%<br>(-0.061-0.26%)             | 0.24<br>(-0.14-0.52)   | 1.7<br>(-0.091-3.1)  |
| Mauritania | 2016 | Female | 95 plus  | 7.4%<br>(4.1-12%)              | 93%<br>(88-96%)          | 0.022<br>(0.0073-0.051)                     | 0.17%<br>(-0.017-0.3%)               | 0.11%<br>(-0.11-0.28%)              | 0.067<br>(-0.065-0.17) | 0.39<br>(-0.04-0.74) |
| Mauritania | 2016 | Male   | All Ages | 3.2%<br>(2.7-3.9%)             | 97%<br>(96-97%)          | 0.045<br>(0.024-0.077)                      | 0.84%<br>(0.59-1.1%)                 | 1%<br>(0.65-1.5%)                   | 100<br>(57-150)        | 5700<br>(3900-7800)  |
| Mauritania | 2016 | Male   | 15 to 19 | 2.3%<br>(1.3-3.6%)             | 98%<br>(96-99%)          | 0.024<br>(0.0093-0.054)                     | 0.73%<br>(0.47-1.1%)                 | 0.19%<br>(0.099-0.31%)              | 0.38<br>(0.19-0.65)    | 220<br>(130-350)     |
| Mauritania | 2016 | Male   | 20 to 24 | 3.6%<br>(2-5.6%)               | 96%<br>(94-98%)          | 0.051<br>(0.02-0.11)                        | 1.6%<br>(1.1-2.4%)                   | 0.52%<br>(0.29-0.84%)               | 1.3<br>(0.69-2.3)      | 510<br>(330-770)     |
| Mauritania | 2016 | Male   | 25 to 29 | 4.5%<br>(2.6-6.9%)             | 96%<br>(93-97%)          | 0.074<br>(0.03-0.14)                        | 2%<br>(1.4-2.6%)                     | 0.98%<br>(0.14-1.7%)                | 2.5<br>(0.37-4.6)      | 570<br>(380-820)     |
| Mauritania | 2016 | Male   | 30 to 34 | 5.1%<br>(2.9-8.1%)             | 95%<br>(92-97%)          | 0.09<br>(0.039-0.17)                        | 2.1%<br>(1.3-2.9%)                   | 1.6%<br>(0.19-2.8%)                 | 4.3<br>(0.49-8.1)      | 590<br>(340-840)     |
| Mauritania | 2016 | Male   | 35 to 39 | 5.7%<br>(3.2-8.7%)             | 94%<br>(91-97%)          | 0.099<br>(0.041-0.2)                        | 2.3%<br>(1.2-3.2%)                   | 2.4%<br>(0.34-4.2%)                 | 7.2<br>(0.9-13)        | 630<br>(320-930)     |
| Mauritania | 2016 | Male   | 40 to 44 | 5.9%<br>(3.5-8.7%)             | 94%<br>(91-96%)          | 0.1<br>(0.04-0.2)                           | 2.3%<br>(1.2-3.4%)                   | 2.9%<br>(0.98-4.7%)                 | 9.8<br>(2.9-16)        | 620<br>(320-930)     |
| Mauritania | 2016 | Male   | 45 to 49 | 5.8%<br>(3.2-8.6%)             | 94%<br>(91-97%)          | 0.1<br>(0.041-0.22)                         | 2.5%<br>(1.5-3.6%)                   | 3.3%<br>(1.6-5.2%)                  | 13<br>(5.9-21)         | 650<br>(350-980)     |
| Mauritania | 2016 | Male   | 50 to 54 | 5.9%<br>(3.6-8.8%)             | 94%<br>(91-96%)          | 0.11<br>(0.041-0.22)                        | 2.2%<br>(1.4-3.1%)                   | 2.8%<br>(1.6-4.4%)                  | 12<br>(6.3-20)         | 540<br>(310-810)     |
| Mauritania | 2016 | Male   | 55 to 59 | 5.9%<br>(3.5-8.7%)             | 94%<br>(91-96%)          | 0.1<br>(0.041-0.21)                         | 2.1%<br>(1.4-3.1%)                   | 2.7%<br>(1.7-4.2%)                  | 13<br>(7.5-22)         | 490<br>(290-750)     |
| Mauritania | 2016 | Male   | 60 to 64 | 5.8%<br>(3.4-9%)               | 94%<br>(91-97%)          | 0.093<br>(0.037-0.21)                       | 1.7%<br>(1.1-2.5%)                   | 2.2%<br>(1.4-3.3%)                  | 12<br>(7-20)           | 370<br>(230-570)     |
| Mauritania | 2016 | Male   | 65 to 69 | 5.9%<br>(3.5-8.7%)             | 94%<br>(91-97%)          | 0.082<br>(0.034-0.18)                       | 1.2%<br>(0.82-1.7%)                  | 1.5%<br>(0.98-2.2%)                 | 8.6<br>(5-14)          | 210<br>(130-320)     |
| Mauritania | 2016 | Male   | 70 to 74 | 5.7%<br>(3.6-8.4%)             | 94%<br>(92-96%)          | 0.066<br>(0.026-0.14)                       | 0.92%<br>(0.62-1.3%)                 | 1.2%<br>(0.75-1.7%)                 | 7<br>(4.2-11)          | 130<br>(84-200)      |



| Location   | Year | Sex    | Age      | Prevalence of current drinkers | Prevalence of abstainers | Population average of standard drinks daily | Percent of total attributable deaths | Percent of total attributable DALYs | Attributable deaths  | Attributable DALYs   |
|------------|------|--------|----------|--------------------------------|--------------------------|---------------------------------------------|--------------------------------------|-------------------------------------|----------------------|----------------------|
| Mauritania | 2016 | Male   | 75 to 79 | 5.2%<br>(3-8.2%)               | 95%<br>(92-97%)          | 0.052<br>(0.018-0.11)                       | 0.68%<br>(0.46-0.99%)                | 0.83%<br>(0.53-1.2%)                | 4.7<br>(2.8-7.3)     | 70<br>(44-100)       |
| Mauritania | 2016 | Male   | 80 to 84 | 4.5%<br>(2.6-6.7%)             | 95%<br>(93-97%)          | 0.039<br>(0.015-0.083)                      | 0.61%<br>(0.4-0.86%)                 | 0.72%<br>(0.45-1%)                  | 2.7<br>(1.6-4.1)     | 30<br>(19-43)        |
| Mauritania | 2016 | Male   | 85 to 89 | 4.1%<br>(2.3-6.5%)             | 96%<br>(94-98%)          | 0.031<br>(0.012-0.064)                      | 0.48%<br>(0.33-0.64%)                | 0.54%<br>(0.34-0.76%)               | 1.4<br>(0.89-2)      | 12<br>(7.6-16)       |
| Mauritania | 2016 | Male   | 90 to 94 | 4.1%<br>(2.5-6.6%)             | 96%<br>(93-97%)          | 0.026<br>(0.0099-0.058)                     | 0.33%<br>(0.2-0.46%)                 | 0.33%<br>(0.18-0.5%)                | 0.39<br>(0.21-0.61)  | 2.4<br>(1.5-3.4)     |
| Mauritania | 2016 | Male   | 95 plus  | 4.7%<br>(2.6-7.7%)             | 95%<br>(92-97%)          | 0.024<br>(0.0083-0.057)                     | 0.35%<br>(0.21-0.5%)                 | 0.31%<br>(0.14-0.5%)                | 0.097<br>(0.04-0.16) | 0.45<br>(0.26-0.66)  |
| Niger      | 1990 | Female | All Ages | 23%<br>(18-30%)                | 77%<br>(70-82%)          | 0.094<br>(0.063-0.13)                       | 0.1%<br>(0.023-0.19%)                | 0.09%<br>(-0.088-0.27%)             | 66<br>(-65-200)      | 6000<br>(1300-11000) |
| Niger      | 1990 | Female | 15 to 19 | 23%<br>(12-37%)                | 77%<br>(63-88%)          | 0.09<br>(0.033-0.18)                        | 0.42%<br>(0.19-0.7%)                 | 0.075%<br>(-0.23-0.42%)             | 0.6<br>(-1.8-3.4)    | 400<br>(160-680)     |
| Niger      | 1990 | Female | 20 to 24 | 28%<br>(14-45%)                | 72%<br>(55-86%)          | 0.14<br>(0.054-0.26)                        | 0.89%<br>(0.36-1.5%)                 | 0.15%<br>(-0.47-0.82%)              | 1.4<br>(-4.3-7.5)    | 840<br>(310-1500)    |
| Niger      | 1990 | Female | 25 to 29 | 30%<br>(15-49%)                | 70%<br>(51-85%)          | 0.17<br>(0.074-0.31)                        | 0.94%<br>(0.32-1.6%)                 | 0.31%<br>(-0.54-1.2%)               | 3<br>(-5-11)         | 840<br>(280-1500)    |
| Niger      | 1990 | Female | 30 to 34 | 33%<br>(17-52%)                | 67%<br>(48-83%)          | 0.19<br>(0.086-0.33)                        | 0.91%<br>(0.26-1.6%)                 | 0.49%<br>(-0.47-1.5%)               | 4.7<br>(-4.5-14)     | 730<br>(190-1300)    |
| Niger      | 1990 | Female | 35 to 39 | 36%<br>(20-56%)                | 64%<br>(44-80%)          | 0.2<br>(0.089-0.36)                         | 0.88%<br>(0.2-1.6%)                  | 0.68%<br>(-0.36-1.7%)               | 6.5<br>(-3.4-17)     | 640<br>(140-1200)    |
| Niger      | 1990 | Female | 40 to 44 | 38%<br>(22-57%)                | 62%<br>(43-78%)          | 0.21<br>(0.088-0.4)                         | 1%<br>(0.28-1.8%)                    | 1.1%<br>(-0.049-2.3%)               | 12<br>(-0.47-24)     | 750<br>(200-1300)    |
| Niger      | 1990 | Female | 45 to 49 | 39%<br>(20-59%)                | 61%<br>(41-80%)          | 0.22<br>(0.086-0.44)                        | 0.86%<br>(-0.00056-1.8%)             | 0.94%<br>(-0.33-2.3%)               | 11<br>(-3.6-27)      | 590<br>(-0.38-1200)  |
| Niger      | 1990 | Female | 50 to 54 | 40%<br>(22-60%)                | 60%<br>(40-78%)          | 0.24<br>(0.093-0.47)                        | 0.91%<br>(0.054-1.7%)                | 1.1%<br>(-0.089-2.2%)               | 13<br>(-1.1-28)      | 560<br>(34-1100)     |
| Niger      | 1990 | Female | 55 to 59 | 40%<br>(24-59%)                | 60%<br>(41-76%)          | 0.25<br>(0.099-0.5)                         | 0.62%<br>(-0.28-1.5%)                | 0.74%<br>(-0.45-1.9%)               | 10<br>(-6-26)        | 350<br>(-150-850)    |
| Niger      | 1990 | Female | 60 to 64 | 41%<br>(23-60%)                | 59%<br>(40-77%)          | 0.26<br>(0.097-0.52)                        | 0.44%<br>(-0.38-1.2%)                | 0.53%<br>(-0.56-1.5%)               | 8.2<br>(-8.4-24)     | 230<br>(-200-660)    |
| Niger      | 1990 | Female | 65 to 69 | 42%<br>(25-60%)                | 58%<br>(40-75%)          | 0.23<br>(0.09-0.47)                         | 0.11%<br>(-0.87-0.85%)               | 0.11%<br>(-1.1-1.1%)                | 1.8<br>(-19-19)      | 52<br>(-410-410)     |
| Niger      | 1990 | Female | 70 to 74 | 40%<br>(24-58%)                | 60%<br>(42-76%)          | 0.19<br>(0.069-0.45)                        | 0.033%<br>(-0.99-0.8%)               | 0.017%<br>(-1.2-0.96%)              | 0.29<br>(-22-17)     | 13<br>(-380-310)     |
| Niger      | 1990 | Female | 75 to 79 | 36%<br>(19-55%)                | 64%<br>(45-81%)          | 0.16<br>(0.046-0.36)                        | -0.13%<br>(-1.1-0.53%)               | -0.17%<br>(-1.3-0.61%)              | -2.4<br>(-18-8.3)    | -30<br>(-250-120)    |
| Niger      | 1990 | Female | 80 to 84 | 34%<br>(18-53%)                | 66%<br>(47-82%)          | 0.14<br>(0.044-0.3)                         | -0.22%<br>(-1-0.31%)                 | -0.27%<br>(-1.2-0.35%)              | -1.8<br>(-8-2.3)     | -17<br>(-82-25)      |
| Niger      | 1990 | Female | 85 to 89 | 34%<br>(19-52%)                | 66%<br>(48-81%)          | 0.14<br>(0.044-0.3)                         | -0.31%<br>(-1.1-0.17%)               | -0.39%<br>(-1.3-0.18%)              | -1.3<br>(-4.3-0.59)  | -8.6<br>(-30-4.6)    |
| Niger      | 1990 | Female | 90 to 94 | 37%<br>(21-55%)                | 63%<br>(45-79%)          | 0.15<br>(0.042-0.32)                        | -0.4%<br>(-1.1-0.1%)                 | -0.52%<br>(-1.4-0.091%)             | -0.56<br>(-1.6-0.1)  | -2.6<br>(-7.4-0.67)  |

| Location | Year | Sex    | Age      | Prevalence of current drinkers | Prevalence of abstainers | Population average of standard drinks daily | Percent of total attributable deaths | Percent of total attributable DALYs | Attributable deaths        | Attributable DALYs    |
|----------|------|--------|----------|--------------------------------|--------------------------|---------------------------------------------|--------------------------------------|-------------------------------------|----------------------------|-----------------------|
| Niger    | 1990 | Female | 95 plus  | 41%<br>(22-62%)                | 59%<br>(38-78%)          | 0.16<br>(0.038-0.38)                        | -0.4%<br>(-1.2-0.097%)               | -0.54%<br>(-1.5-0.057%)             | -0.17<br>(-0.47-0.018)     | -0.48<br>(-1.5-0.12)  |
| Niger    | 1990 | Male   | All Ages | 19%<br>(14-25%)                | 81%<br>(75-86%)          | 0.11<br>(0.074-0.15)                        | 0.21%<br>(0.11-0.32%)                | 0.32%<br>(0.12-0.54%)               | 250<br>(92-420)            | 13000<br>(7000-20000) |
| Niger    | 1990 | Male   | 15 to 19 | 15%<br>(7.8-26%)               | 85%<br>(74-92%)          | 0.068<br>(0.024-0.14)                       | 0.52%<br>(0.3-0.81%)                 | 0.23%<br>(0.013-0.55%)              | 1.7<br>(0.093-4.2)         | 430<br>(240-680)      |
| Niger    | 1990 | Male   | 20 to 24 | 23%<br>(12-37%)                | 77%<br>(63-88%)          | 0.14<br>(0.056-0.28)                        | 1.2%<br>(0.65-1.9%)                  | 0.58%<br>(0.035-1.3%)               | 4.7<br>(0.27-10)           | 860<br>(450-1400)     |
| Niger    | 1990 | Male   | 25 to 29 | 28%<br>(14-45%)                | 72%<br>(55-86%)          | 0.21<br>(0.085-0.38)                        | 1.6%<br>(0.75-2.5%)                  | 1.1%<br>(-0.02-2.3%)                | 12<br>(-0.26-26)           | 1500<br>(750-2400)    |
| Niger    | 1990 | Male   | 30 to 34 | 32%<br>(16-51%)                | 68%<br>(49-84%)          | 0.25<br>(0.12-0.46)                         | 1.9%<br>(0.88-3.1%)                  | 1.7%<br>(0.34-3.2%)                 | 18<br>(3.6-35)             | 1600<br>(740-2700)    |
| Niger    | 1990 | Male   | 35 to 39 | 35%<br>(19-54%)                | 65%<br>(46-81%)          | 0.28<br>(0.12-0.54)                         | 2.3%<br>(1.2-3.5%)                   | 2.3%<br>(0.88-4.1%)                 | 25<br>(9.2-45)             | 1700<br>(900-2700)    |
| Niger    | 1990 | Male   | 40 to 44 | 36%<br>(20-55%)                | 64%<br>(45-80%)          | 0.3<br>(0.12-0.59)                          | 2.3%<br>(1.1-3.8%)                   | 2.7%<br>(0.98-4.7%)                 | 29<br>(11-52)              | 1600<br>(760-2600)    |
| Niger    | 1990 | Male   | 45 to 49 | 36%<br>(20-55%)                | 64%<br>(45-80%)          | 0.32<br>(0.12-0.67)                         | 2.4%<br>(1.2-4.1%)                   | 2.9%<br>(1.2-5%)                    | 34<br>(14-58)              | 1600<br>(790-2600)    |
| Niger    | 1990 | Male   | 50 to 54 | 37%<br>(21-57%)                | 63%<br>(43-79%)          | 0.32<br>(0.13-0.66)                         | 2%<br>(0.8-3.5%)                     | 2.4%<br>(0.75-4.4%)                 | 29<br>(9-56)               | 1200<br>(440-2100)    |
| Niger    | 1990 | Male   | 55 to 59 | 37%<br>(21-57%)                | 63%<br>(43-79%)          | 0.31<br>(0.12-0.62)                         | 1.8%<br>(0.75-3.1%)                  | 2.1%<br>(0.74-3.8%)                 | 29<br>(9.8-53)             | 1000<br>(430-1800)    |
| Niger    | 1990 | Male   | 60 to 64 | 37%<br>(20-57%)                | 63%<br>(43-80%)          | 0.28<br>(0.097-0.61)                        | 1.5%<br>(0.57-2.6%)                  | 1.7%<br>(0.54-3%)                   | 27<br>(8.7-50)             | 800<br>(300-1400)     |
| Niger    | 1990 | Male   | 65 to 69 | 37%<br>(21-55%)                | 63%<br>(45-79%)          | 0.23<br>(0.086-0.51)                        | 0.98%<br>(0.19-1.8%)                 | 1.1%<br>(0.093-2.2%)                | 19<br>(1.6-36)             | 440<br>(80-840)       |
| Niger    | 1990 | Male   | 70 to 74 | 35%<br>(21-52%)                | 65%<br>(48-79%)          | 0.18<br>(0.058-0.42)                        | 0.67%<br>(-0.12-1.4%)                | 0.76%<br>(-0.18-1.6%)               | 11<br>(-2.7-24)            | 210<br>(-37-440)      |
| Niger    | 1990 | Male   | 75 to 79 | 32%<br>(17-51%)                | 68%<br>(49-83%)          | 0.14<br>(0.039-0.31)                        | 0.45%<br>(-0.2-1%)                   | 0.49%<br>(-0.28-1.2%)               | 5.4<br>(-3.2-13)           | 80<br>(-37-180)       |
| Niger    | 1990 | Male   | 80 to 84 | 29%<br>(15-47%)                | 71%<br>(53-85%)          | 0.11<br>(0.031-0.24)                        | 0.37%<br>(-0.2-0.82%)                | 0.4%<br>(-0.28-0.94%)               | 2.1<br>(-1.5-5)            | 24<br>(-13-53)        |
| Niger    | 1990 | Male   | 85 to 89 | 28%<br>(15-45%)                | 72%<br>(55-85%)          | 0.095<br>(0.029-0.22)                       | 0.27%<br>(-0.19-0.64%)               | 0.27%<br>(-0.28-0.72%)              | 0.64<br>(-0.67-1.8)        | 5.6<br>(-3.8-13)      |
| Niger    | 1990 | Male   | 90 to 94 | 30%<br>(15-48%)                | 70%<br>(52-85%)          | 0.09<br>(0.024-0.22)                        | 0.11%<br>(-0.28-0.39%)               | 0.067%<br>(-0.42-0.42%)             | 0.045<br>(-0.28-0.28)      | 0.46<br>(-1.1-1.6)    |
| Niger    | 1990 | Male   | 95 plus  | 34%<br>(16-56%)                | 66%<br>(44-84%)          | 0.092<br>(0.019-0.24)                       | 0.086%<br>(-0.4-0.38%)               | -0.006%<br>(-0.63-0.36%)            | -0.00074<br>(-0.077-0.044) | 0.042<br>(-0.2-0.18)  |
| Niger    | 1995 | Female | All Ages | 24%<br>(18-30%)                | 76%<br>(70-82%)          | 0.092<br>(0.062-0.13)                       | 0.11%<br>(0.014-0.2%)                | 0.088%<br>(-0.12-0.3%)              | 72<br>(-100-240)           | 6800<br>(860-13000)   |
| Niger    | 1995 | Female | 15 to 19 | 23%<br>(12-37%)                | 77%<br>(63-88%)          | 0.087<br>(0.033-0.18)                       | 0.4%<br>(0.16-0.68%)                 | 0.07%<br>(-0.26-0.42%)              | 0.7<br>(-2.5-4.4)          | 460<br>(180-820)      |
| Niger    | 1995 | Female | 20 to 24 | 28%<br>(15-45%)                | 72%<br>(55-85%)          | 0.14<br>(0.055-0.26)                        | 0.83%<br>(0.29-1.4%)                 | 0.14%<br>(-0.52-0.82%)              | 1.6<br>(-6.1-10)           | 980<br>(340-1700)     |

| Location | Year | Sex    | Age      | Prevalence of current drinkers | Prevalence of abstainers | Population average of standard drinks daily | Percent of total attributable deaths | Percent of total attributable DALYs | Attributable deaths  | Attributable DALYs    |
|----------|------|--------|----------|--------------------------------|--------------------------|---------------------------------------------|--------------------------------------|-------------------------------------|----------------------|-----------------------|
| Niger    | 1995 | Female | 25 to 29 | 31%<br>(16-49%)                | 69%<br>(51-84%)          | 0.17<br>(0.07-0.32)                         | 0.87%<br>(0.28-1.5%)                 | 0.28%<br>(-0.52-1.1%)               | 3.4<br>(-6.5-14)     | 960<br>(300-1700)     |
| Niger    | 1995 | Female | 30 to 34 | 34%<br>(17-52%)                | 66%<br>(48-83%)          | 0.18<br>(0.083-0.33)                        | 0.84%<br>(0.17-1.6%)                 | 0.43%<br>(-0.53-1.4%)               | 5.4<br>(-6.3-17)     | 870<br>(180-1600)     |
| Niger    | 1995 | Female | 35 to 39 | 37%<br>(20-57%)                | 63%<br>(43-80%)          | 0.2<br>(0.089-0.36)                         | 0.82%<br>(0.13-1.5%)                 | 0.59%<br>(-0.41-1.6%)               | 7.5<br>(-5.4-21)     | 760<br>(120-1400)     |
| Niger    | 1995 | Female | 40 to 44 | 39%<br>(22-58%)                | 61%<br>(42-78%)          | 0.21<br>(0.086-0.39)                        | 0.95%<br>(0.22-1.7%)                 | 0.96%<br>(-0.068-2.1%)              | 12<br>(-0.84-25)     | 770<br>(180-1400)     |
| Niger    | 1995 | Female | 45 to 49 | 39%<br>(21-58%)                | 61%<br>(42-79%)          | 0.22<br>(0.086-0.43)                        | 0.79%<br>(-0.15-1.7%)                | 0.84%<br>(-0.54-2.2%)               | 12<br>(-7.7-31)      | 640<br>(-120-1400)    |
| Niger    | 1995 | Female | 50 to 54 | 39%<br>(22-60%)                | 61%<br>(40-78%)          | 0.22<br>(0.09-0.45)                         | 0.85%<br>(-0.041-1.7%)               | 0.99%<br>(-0.23-2.1%)               | 16<br>(-3.6-35)      | 670<br>(-30-1300)     |
| Niger    | 1995 | Female | 55 to 59 | 40%<br>(23-59%)                | 60%<br>(41-77%)          | 0.24<br>(0.096-0.47)                        | 0.56%<br>(-0.31-1.4%)                | 0.65%<br>(-0.48-1.8%)               | 11<br>(-8.4-31)      | 400<br>(-220-1000)    |
| Niger    | 1995 | Female | 60 to 64 | 41%<br>(23-60%)                | 59%<br>(40-77%)          | 0.24<br>(0.092-0.5)                         | 0.4%<br>(-0.43-1.2%)                 | 0.47%<br>(-0.61-1.4%)               | 9.1<br>(-12-27)      | 260<br>(-280-760)     |
| Niger    | 1995 | Female | 65 to 69 | 42%<br>(25-60%)                | 58%<br>(40-75%)          | 0.22<br>(0.088-0.45)                        | 0.091%<br>(-0.86-0.82%)              | 0.082%<br>(-1.1-0.99%)              | 1.7<br>(-23-20)      | 53<br>(-490-460)      |
| Niger    | 1995 | Female | 70 to 74 | 40%<br>(24-57%)                | 60%<br>(43-76%)          | 0.18<br>(0.066-0.43)                        | 0.019%<br>(-0.98-0.77%)              | -0.0042%<br>(-1.2-0.94%)            | -0.11<br>(-28-20)    | 9.4<br>(-480-370)     |
| Niger    | 1995 | Female | 75 to 79 | 36%<br>(19-56%)                | 64%<br>(44-81%)          | 0.15<br>(0.047-0.36)                        | -0.1%<br>(-1.1-0.56%)                | -0.14%<br>(-1.3-0.64%)              | -2.6<br>(-24-11)     | -30<br>(-320-160)     |
| Niger    | 1995 | Female | 80 to 84 | 34%<br>(18-53%)                | 66%<br>(47-82%)          | 0.13<br>(0.041-0.29)                        | -0.21%<br>(-1.1-0.33%)               | -0.26%<br>(-1.3-0.38%)              | -2.4<br>(-12-3.4)    | -23<br>(-120-37)      |
| Niger    | 1995 | Female | 85 to 89 | 34%<br>(18-52%)                | 66%<br>(48-82%)          | 0.13<br>(0.042-0.3)                         | -0.31%<br>(-1.1-0.17%)               | -0.4%<br>(-1.4-0.2%)                | -1.9<br>(-6.7-0.92)  | -13<br>(-47-7.1)      |
| Niger    | 1995 | Female | 90 to 94 | 37%<br>(20-54%)                | 63%<br>(46-80%)          | 0.14<br>(0.041-0.32)                        | -0.39%<br>(-1.2-0.11%)               | -0.52%<br>(-1.5-0.096%)             | -0.79<br>(-2.3-0.15) | -3.6<br>(-11-1)       |
| Niger    | 1995 | Female | 95 plus  | 41%<br>(21-62%)                | 59%<br>(38-79%)          | 0.15<br>(0.036-0.37)                        | -0.39%<br>(-1.2-0.11%)               | -0.54%<br>(-1.6-0.069%)             | -0.2<br>(-0.6-0.026) | -0.58<br>(-1.9-0.17)  |
| Niger    | 1995 | Male   | All Ages | 19%<br>(15-25%)                | 81%<br>(75-85%)          | 0.11<br>(0.074-0.15)                        | 0.21%<br>(0.11-0.32%)                | 0.31%<br>(0.11-0.53%)               | 270<br>(92-460)      | 14000<br>(7400-21000) |
| Niger    | 1995 | Male   | 15 to 19 | 15%<br>(8-26%)                 | 85%<br>(74-92%)          | 0.07<br>(0.025-0.15)                        | 0.53%<br>(0.3-0.81%)                 | 0.21%<br>(-0.0042-0.55%)            | 2.1<br>(-0.04-5.4)   | 570<br>(320-900)      |
| Niger    | 1995 | Male   | 20 to 24 | 23%<br>(12-38%)                | 77%<br>(62-88%)          | 0.14<br>(0.055-0.29)                        | 1.2%<br>(0.64-1.8%)                  | 0.55%<br>(-0.001-1.3%)              | 4.8<br>(-0.0089-11)  | 950<br>(510-1500)     |
| Niger    | 1995 | Male   | 25 to 29 | 29%<br>(15-46%)                | 71%<br>(54-85%)          | 0.21<br>(0.086-0.4)                         | 1.6%<br>(0.77-2.4%)                  | 0.99%<br>(-0.033-2.1%)              | 8<br>(-0.26-17)      | 1100<br>(520-1700)    |
| Niger    | 1995 | Male   | 30 to 34 | 32%<br>(17-51%)                | 68%<br>(49-83%)          | 0.25<br>(0.11-0.45)                         | 1.8%<br>(0.84-2.8%)                  | 1.5%<br>(0.2-2.9%)                  | 19<br>(2.7-37)       | 1800<br>(830-2900)    |
| Niger    | 1995 | Male   | 35 to 39 | 35%<br>(19-55%)                | 65%<br>(45-81%)          | 0.28<br>(0.12-0.52)                         | 2.1%<br>(1.1-3.2%)                   | 2.1%<br>(0.69-3.7%)                 | 29<br>(9.1-52)       | 2000<br>(1000-3200)   |
| Niger    | 1995 | Male   | 40 to 44 | 36%<br>(21-55%)                | 64%<br>(45-79%)          | 0.3<br>(0.12-0.58)                          | 2.2%<br>(1-3.5%)                     | 2.4%<br>(0.87-4.3%)                 | 34<br>(12-61)        | 1900<br>(880-3100)    |

| Location | Year | Sex    | Age      | Prevalence of current drinkers | Prevalence of abstainers | Population average of standard drinks daily | Percent of total attributable deaths | Percent of total attributable DALYs | Attributable deaths     | Attributable DALYs    |
|----------|------|--------|----------|--------------------------------|--------------------------|---------------------------------------------|--------------------------------------|-------------------------------------|-------------------------|-----------------------|
| Niger    | 1995 | Male   | 45 to 49 | 37%<br>(20-55%)                | 63%<br>(45-80%)          | 0.31<br>(0.12-0.64)                         | 2.2%<br>(1.1-3.7%)                   | 2.6%<br>(0.96-4.6%)                 | 36<br>(14-64)           | 1700<br>(810-2900)    |
| Niger    | 1995 | Male   | 50 to 54 | 38%<br>(21-58%)                | 62%<br>(42-79%)          | 0.32<br>(0.13-0.64)                         | 1.9%<br>(0.7-3.3%)                   | 2.2%<br>(0.64-4.2%)                 | 33<br>(9.3-62)          | 1300<br>(480-2400)    |
| Niger    | 1995 | Male   | 55 to 59 | 38%<br>(22-57%)                | 62%<br>(43-78%)          | 0.31<br>(0.12-0.62)                         | 1.7%<br>(0.67-2.9%)                  | 2%<br>(0.67-3.6%)                   | 30<br>(9.4-55)          | 1000<br>(410-1800)    |
| Niger    | 1995 | Male   | 60 to 64 | 38%<br>(22-57%)                | 62%<br>(43-78%)          | 0.28<br>(0.096-0.59)                        | 1.4%<br>(0.53-2.4%)                  | 1.6%<br>(0.47-2.9%)                 | 27<br>(8.2-49)          | 790<br>(300-1400)     |
| Niger    | 1995 | Male   | 65 to 69 | 37%<br>(22-55%)                | 63%<br>(45-78%)          | 0.23<br>(0.087-0.49)                        | 0.94%<br>(0.14-1.7%)                 | 1.1%<br>(0.059-2.1%)                | 20<br>(1.2-39)          | 480<br>(71-900)       |
| Niger    | 1995 | Male   | 70 to 74 | 36%<br>(21-53%)                | 64%<br>(47-79%)          | 0.18<br>(0.06-0.41)                         | 0.65%<br>(-0.11-1.4%)                | 0.75%<br>(-0.17-1.6%)               | 14<br>(-3.1-29)         | 260<br>(-41-540)      |
| Niger    | 1995 | Male   | 75 to 79 | 33%<br>(18-52%)                | 67%<br>(48-82%)          | 0.13<br>(0.041-0.31)                        | 0.44%<br>(-0.17-0.99%)               | 0.48%<br>(-0.25-1.2%)               | 6.4<br>(-3.3-16)        | 96<br>(-36-220)       |
| Niger    | 1995 | Male   | 80 to 84 | 30%<br>(16-49%)                | 70%<br>(51-84%)          | 0.11<br>(0.03-0.25)                         | 0.36%<br>(-0.24-0.84%)               | 0.39%<br>(-0.35-0.97%)              | 2.6<br>(-2.3-6.6)       | 30<br>(-19-69)        |
| Niger    | 1995 | Male   | 85 to 89 | 29%<br>(15-46%)                | 71%<br>(54-85%)          | 0.097<br>(0.029-0.22)                       | 0.26%<br>(-0.19-0.66%)               | 0.26%<br>(-0.31-0.75%)              | 0.86<br>(-1-2.5)        | 7.6<br>(-5.5-19)      |
| Niger    | 1995 | Male   | 90 to 94 | 30%<br>(15-49%)                | 70%<br>(51-85%)          | 0.091<br>(0.024-0.23)                       | 0.12%<br>(-0.3-0.41%)                | 0.074%<br>(-0.45-0.43%)             | 0.076<br>(-0.47-0.45)   | 0.75<br>(-1.9-2.5)    |
| Niger    | 1995 | Male   | 95 plus  | 35%<br>(16-57%)                | 65%<br>(43-84%)          | 0.094<br>(0.019-0.26)                       | 0.11%<br>(-0.43-0.43%)               | 0.017%<br>(-0.66-0.43%)             | 0.0033<br>(-0.13-0.082) | 0.083<br>(-0.34-0.34) |
| Niger    | 2000 | Female | All Ages | 23%<br>(18-29%)                | 77%<br>(71-82%)          | 0.11<br>(0.073-0.15)                        | 0.12%<br>(0.01-0.22%)                | 0.079%<br>(-0.16-0.3%)              | 66<br>(-140-250)        | 7500<br>(670-14000)   |
| Niger    | 2000 | Female | 15 to 19 | 22%<br>(12-37%)                | 78%<br>(63-88%)          | 0.1<br>(0.038-0.2)                          | 0.44%<br>(0.17-0.74%)                | 0.081%<br>(-0.27-0.49%)             | 0.82<br>(-2.8-5)        | 540<br>(200-940)      |
| Niger    | 2000 | Female | 20 to 24 | 28%<br>(14-45%)                | 72%<br>(55-86%)          | 0.16<br>(0.064-0.31)                        | 0.87%<br>(0.38-1.5%)                 | 0.15%<br>(-0.49-0.8%)               | 2<br>(-6.1-11)          | 1200<br>(460-2000)    |
| Niger    | 2000 | Female | 25 to 29 | 30%<br>(16-48%)                | 70%<br>(52-84%)          | 0.2<br>(0.08-0.38)                          | 0.87%<br>(0.33-1.4%)                 | 0.28%<br>(-0.46-1%)                 | 4.1<br>(-6.4-15)        | 1100<br>(430-2000)    |
| Niger    | 2000 | Female | 30 to 34 | 33%<br>(18-52%)                | 67%<br>(48-82%)          | 0.22<br>(0.1-0.41)                          | 0.81%<br>(0.21-1.4%)                 | 0.39%<br>(-0.4-1.1%)                | 5.9<br>(-6-17)          | 980<br>(250-1700)     |
| Niger    | 2000 | Female | 35 to 39 | 37%<br>(21-56%)                | 63%<br>(44-79%)          | 0.24<br>(0.11-0.43)                         | 0.78%<br>(0.16-1.4%)                 | 0.55%<br>(-0.32-1.4%)               | 8.5<br>(-5-22)          | 890<br>(170-1600)     |
| Niger    | 2000 | Female | 40 to 44 | 39%<br>(23-57%)                | 61%<br>(43-77%)          | 0.25<br>(0.1-0.47)                          | 0.88%<br>(0.24-1.5%)                 | 0.86%<br>(-0.082-1.9%)              | 13<br>(-1.2-26)         | 870<br>(230-1500)     |
| Niger    | 2000 | Female | 45 to 49 | 39%<br>(21-58%)                | 61%<br>(42-79%)          | 0.26<br>(0.1-0.51)                          | 0.76%<br>(-0.11-1.6%)                | 0.8%<br>(-0.46-2.1%)                | 12<br>(-6-31)           | 650<br>(-96-1400)     |
| Niger    | 2000 | Female | 50 to 54 | 40%<br>(22-61%)                | 60%<br>(39-78%)          | 0.27<br>(0.11-0.53)                         | 0.8%<br>(-0.091-1.7%)                | 0.94%<br>(-0.34-2.2%)               | 16<br>(-6-38)           | 690<br>(-79-1500)     |
| Niger    | 2000 | Female | 55 to 59 | 40%<br>(23-59%)                | 60%<br>(41-77%)          | 0.29<br>(0.12-0.58)                         | 0.53%<br>(-0.35-1.4%)                | 0.62%<br>(-0.56-1.9%)               | 12<br>(-11-38)          | 440<br>(-300-1200)    |
| Niger    | 2000 | Female | 60 to 64 | 41%<br>(24-60%)                | 59%<br>(40-76%)          | 0.29<br>(0.11-0.61)                         | 0.32%<br>(-0.58-1.1%)                | 0.38%<br>(-0.75-1.4%)               | 8.4<br>(-17-32)         | 250<br>(-460-880)     |

| Location | Year | Sex    | Age      | Prevalence of current drinkers | Prevalence of abstainers | Population average of standard drinks daily | Percent of total attributable deaths | Percent of total attributable DALYs | Attributable deaths   | Attributable DALYs    |
|----------|------|--------|----------|--------------------------------|--------------------------|---------------------------------------------|--------------------------------------|-------------------------------------|-----------------------|-----------------------|
| Niger    | 2000 | Female | 65 to 69 | 42%<br>(25-59%)                | 58%<br>(41-75%)          | 0.27<br>(0.1-0.53)                          | 0.0079%<br>(-0.96-0.77%)             | -0.014%<br>(-1.2-0.95%)             | -0.37<br>(-29-23)     | 5.6<br>(-630-510)     |
| Niger    | 2000 | Female | 70 to 74 | 40%<br>(25-57%)                | 60%<br>(43-75%)          | 0.22<br>(0.081-0.5)                         | -0.079%<br>(-1.1-0.7%)               | -0.12%<br>(-1.3-0.81%)              | -2.9<br>(-33-20)      | -42<br>(-570-370)     |
| Niger    | 2000 | Female | 75 to 79 | 35%<br>(20-55%)                | 65%<br>(45-80%)          | 0.18<br>(0.054-0.43)                        | -0.18%<br>(-1.2-0.52%)               | -0.23%<br>(-1.5-0.61%)              | -4.7<br>(-30-12)      | -59<br>(-400-180)     |
| Niger    | 2000 | Female | 80 to 84 | 33%<br>(18-53%)                | 67%<br>(47-82%)          | 0.16<br>(0.049-0.35)                        | -0.28%<br>(-1.2-0.28%)               | -0.35%<br>(-1.4-0.31%)              | -3.9<br>(-16-3.5)     | -38<br>(-160-37)      |
| Niger    | 2000 | Female | 85 to 89 | 34%<br>(18-51%)                | 66%<br>(49-82%)          | 0.16<br>(0.05-0.35)                         | -0.39%<br>(-1.3-0.16%)               | -0.49%<br>(-1.6-0.16%)              | -3.1<br>(-10-1.1)     | -21<br>(-70-8.9)      |
| Niger    | 2000 | Female | 90 to 94 | 37%<br>(20-55%)                | 63%<br>(45-80%)          | 0.17<br>(0.047-0.39)                        | -0.47%<br>(-1.3-0.11%)               | -0.62%<br>(-1.7-0.1%)               | -1.3<br>(-3.7-0.22)   | -6.1<br>(-18-1.4)     |
| Niger    | 2000 | Female | 95 plus  | 41%<br>(21-62%)                | 59%<br>(38-79%)          | 0.18<br>(0.044-0.45)                        | -0.45%<br>(-1.4-0.13%)               | -0.63%<br>(-1.8-0.061%)             | -0.33<br>(-0.9-0.032) | -0.92<br>(-2.8-0.27)  |
| Niger    | 2000 | Male   | All Ages | 20%<br>(15-26%)                | 80%<br>(74-85%)          | 0.14<br>(0.095-0.19)                        | 0.26%<br>(0.14-0.39%)                | 0.38%<br>(0.14-0.65%)               | 340<br>(120-570)      | 18000<br>(9100-27000) |
| Niger    | 2000 | Male   | 15 to 19 | 16%<br>(8-27%)                 | 84%<br>(73-92%)          | 0.088<br>(0.031-0.18)                       | 0.58%<br>(0.34-0.91%)                | 0.26%<br>(0.015-0.65%)              | 2.4<br>(0.16-6.1)     | 620<br>(340-1000)     |
| Niger    | 2000 | Male   | 20 to 24 | 24%<br>(12-39%)                | 76%<br>(61-88%)          | 0.18<br>(0.068-0.35)                        | 1.3%<br>(0.7-2%)                     | 0.65%<br>(0.026-1.5%)               | 6.8<br>(0.28-15)      | 1300<br>(660-2000)    |
| Niger    | 2000 | Male   | 25 to 29 | 29%<br>(15-46%)                | 71%<br>(54-85%)          | 0.26<br>(0.11-0.48)                         | 1.6%<br>(0.85-2.5%)                  | 1.1%<br>(0.078-2.2%)                | 12<br>(0.83-25)       | 1500<br>(800-2400)    |
| Niger    | 2000 | Male   | 30 to 34 | 33%<br>(17-52%)                | 67%<br>(48-83%)          | 0.31<br>(0.14-0.57)                         | 1.8%<br>(0.88-2.8%)                  | 1.5%<br>(0.28-2.9%)                 | 20<br>(3.7-37)        | 1800<br>(880-2900)    |
| Niger    | 2000 | Male   | 35 to 39 | 36%<br>(20-56%)                | 64%<br>(44-80%)          | 0.34<br>(0.14-0.62)                         | 2%<br>(1-3.2%)                       | 2.3%<br>(0.71-3.6%)                 | 40<br>(13-72)         | 2700<br>(1400-4300)   |
| Niger    | 2000 | Male   | 40 to 44 | 37%<br>(22-56%)                | 63%<br>(44-78%)          | 0.37<br>(0.15-0.69)                         | 2.1%<br>(0.96-3.5%)                  | 2.4%<br>(0.82-4.3%)                 | 47<br>(15-83)         | 2600<br>(1200-4400)   |
| Niger    | 2000 | Male   | 45 to 49 | 38%<br>(20-56%)                | 62%<br>(44-80%)          | 0.38<br>(0.15-0.78)                         | 2.2%<br>(1-3.9%)                     | 2.6%<br>(0.94-4.8%)                 | 49<br>(17-90)         | 2300<br>(1000-4000)   |
| Niger    | 2000 | Male   | 50 to 54 | 38%<br>(21-58%)                | 62%<br>(42-79%)          | 0.39<br>(0.16-0.78)                         | 2%<br>(0.78-3.6%)                    | 2.3%<br>(0.69-4.5%)                 | 43<br>(13-82)         | 1700<br>(690-3200)    |
| Niger    | 2000 | Male   | 55 to 59 | 38%<br>(22-58%)                | 62%<br>(42-78%)          | 0.37<br>(0.14-0.75)                         | 1.8%<br>(0.68-3.1%)                  | 2.1%<br>(0.61-3.9%)                 | 38<br>(11-72)         | 1300<br>(500-2400)    |
| Niger    | 2000 | Male   | 60 to 64 | 38%<br>(21-57%)                | 62%<br>(43-79%)          | 0.33<br>(0.12-0.72)                         | 1.4%<br>(0.51-2.4%)                  | 1.6%<br>(0.5-3%)                    | 30<br>(10-58)         | 900<br>(340-1600)     |
| Niger    | 2000 | Male   | 65 to 69 | 38%<br>(21-56%)                | 62%<br>(44-79%)          | 0.28<br>(0.1-0.59)                          | 0.92%<br>(0.13-1.8%)                 | 1.1%<br>(0.042-2.1%)                | 21<br>(0.84-43)       | 520<br>(80-1000)      |
| Niger    | 2000 | Male   | 70 to 74 | 36%<br>(21-54%)                | 64%<br>(46-79%)          | 0.22<br>(0.075-0.49)                        | 0.63%<br>(-0.18-1.4%)                | 0.73%<br>(-0.27-1.6%)               | 16<br>(-6-37)         | 300<br>(-83-670)      |
| Niger    | 2000 | Male   | 75 to 79 | 33%<br>(18-51%)                | 67%<br>(49-82%)          | 0.17<br>(0.049-0.38)                        | 0.41%<br>(-0.26-0.98%)               | 0.45%<br>(-0.37-1.2%)               | 8<br>(-6.4-20)        | 120<br>(-77-290)      |
| Niger    | 2000 | Male   | 80 to 84 | 31%<br>(16-49%)                | 69%<br>(51-84%)          | 0.14<br>(0.039-0.31)                        | 0.34%<br>(-0.25-0.85%)               | 0.36%<br>(-0.36-0.97%)              | 3.2<br>(-3.2-8.8)     | 37<br>(-27-91)        |

| Location | Year | Sex    | Age      | Prevalence of current drinkers | Prevalence of abstainers | Population average of standard drinks daily | Percent of total attributable deaths | Percent of total attributable DALYs | Attributable deaths      | Attributable DALYs     |
|----------|------|--------|----------|--------------------------------|--------------------------|---------------------------------------------|--------------------------------------|-------------------------------------|--------------------------|------------------------|
| Niger    | 2000 | Male   | 85 to 89 | 29%<br>(15-47%)                | 71%<br>(53-85%)          | 0.12<br>(0.036-0.27)                        | 0.24%<br>(-0.28-0.67%)               | 0.23%<br>(-0.41-0.75%)              | 1<br>(-1.8-3.3)          | 9.1<br>(-11-25)        |
| Niger    | 2000 | Male   | 90 to 94 | 31%<br>(17-49%)                | 69%<br>(51-83%)          | 0.12<br>(0.031-0.29)                        | 0.097%<br>(-0.38-0.46%)              | 0.043%<br>(-0.54-0.48%)             | 0.063<br>(-0.79-0.71)    | 0.86<br>(-3.4-4)       |
| Niger    | 2000 | Male   | 95 plus  | 36%<br>(18-58%)                | 64%<br>(42-82%)          | 0.12<br>(0.024-0.32)                        | 0.095%<br>(-0.51-0.51%)              | -0.0017%<br>(-0.75-0.53%)           | -0.00048<br>(-0.23-0.16) | 0.11<br>(-0.6-0.62)    |
| Niger    | 2005 | Female | All Ages | 23%<br>(17-29%)                | 77%<br>(71-83%)          | 0.12<br>(0.08-0.16)                         | 0.13%<br>(0.028-0.24%)               | 0.071%<br>(-0.18-0.29%)             | 58<br>(-150-240)         | 8200<br>(1600-14000)   |
| Niger    | 2005 | Female | 15 to 19 | 22%<br>(12-36%)                | 78%<br>(64-88%)          | 0.11<br>(0.043-0.23)                        | 0.47%<br>(0.21-0.77%)                | 0.092%<br>(-0.25-0.44%)             | 0.96<br>(-2.6-4.9)       | 630<br>(270-1100)      |
| Niger    | 2005 | Female | 20 to 24 | 27%<br>(14-45%)                | 73%<br>(55-86%)          | 0.18<br>(0.072-0.35)                        | 0.97%<br>(0.43-1.6%)                 | 0.17%<br>(-0.4-0.74%)               | 2.2<br>(-5.1-10)         | 1300<br>(580-2200)     |
| Niger    | 2005 | Female | 25 to 29 | 30%<br>(15-47%)                | 70%<br>(53-85%)          | 0.22<br>(0.09-0.43)                         | 0.92%<br>(0.46-1.4%)                 | 0.28%<br>(-0.31-0.85%)              | 4.5<br>(-4.3-13)         | 1300<br>(650-2100)     |
| Niger    | 2005 | Female | 30 to 34 | 33%<br>(17-51%)                | 67%<br>(49-83%)          | 0.25<br>(0.11-0.46)                         | 0.8%<br>(0.34-1.3%)                  | 0.37%<br>(-0.22-0.92%)              | 6.4<br>(-3.9-16)         | 1100<br>(480-1800)     |
| Niger    | 2005 | Female | 35 to 39 | 37%<br>(20-56%)                | 63%<br>(44-80%)          | 0.27<br>(0.12-0.49)                         | 0.76%<br>(0.25-1.3%)                 | 0.51%<br>(-0.13-1.2%)               | 9.1<br>(-2.4-21)         | 980<br>(330-1600)      |
| Niger    | 2005 | Female | 40 to 44 | 38%<br>(22-57%)                | 62%<br>(43-78%)          | 0.28<br>(0.12-0.53)                         | 0.85%<br>(0.3-1.4%)                  | 0.82%<br>(-0.0019-1.6%)             | 15<br>(-0.034-29)        | 1000<br>(340-1700)     |
| Niger    | 2005 | Female | 45 to 49 | 39%<br>(21-58%)                | 61%<br>(42-79%)          | 0.3<br>(0.11-0.58)                          | 0.75%<br>(0.025-1.5%)                | 0.79%<br>(-0.2-1.8%)                | 14<br>(-3.6-32)          | 760<br>(25-1500)       |
| Niger    | 2005 | Female | 50 to 54 | 40%<br>(22-60%)                | 60%<br>(40-78%)          | 0.31<br>(0.13-0.61)                         | 0.77%<br>(-0.042-1.6%)               | 0.91%<br>(-0.18-2.1%)               | 16<br>(-3.1-36)          | 690<br>(-32-1400)      |
| Niger    | 2005 | Female | 55 to 59 | 40%<br>(23-58%)                | 60%<br>(42-77%)          | 0.33<br>(0.13-0.65)                         | 0.52%<br>(-0.32-1.4%)                | 0.62%<br>(-0.55-1.9%)               | 13<br>(-11-40)           | 470<br>(-280-1300)     |
| Niger    | 2005 | Female | 60 to 64 | 41%<br>(23-59%)                | 59%<br>(41-77%)          | 0.33<br>(0.12-0.67)                         | 0.26%<br>(-0.64-1.1%)                | 0.3%<br>(-0.84-1.4%)                | 7.7<br>(-22-36)          | 230<br>(-570-980)      |
| Niger    | 2005 | Female | 65 to 69 | 42%<br>(25-59%)                | 58%<br>(41-75%)          | 0.3<br>(0.11-0.61)                          | -0.09%<br>(-1.1-0.73%)               | -0.14%<br>(-1.4-0.88%)              | -3.8<br>(-38-24)         | -68<br>(-820-580)      |
| Niger    | 2005 | Female | 70 to 74 | 40%<br>(24-58%)                | 60%<br>(42-76%)          | 0.25<br>(0.094-0.57)                        | -0.17%<br>(-1.2-0.58%)               | -0.23%<br>(-1.5-0.69%)              | -6.5<br>(-40-20)         | -100<br>(-710-350)     |
| Niger    | 2005 | Female | 75 to 79 | 36%<br>(20-55%)                | 64%<br>(45-80%)          | 0.2<br>(0.061-0.46)                         | -0.26%<br>(-1.3-0.44%)               | -0.33%<br>(-1.6-0.5%)               | -7.5<br>(-36-11)         | -97<br>(-500-160)      |
| Niger    | 2005 | Female | 80 to 84 | 33%<br>(18-53%)                | 67%<br>(47-82%)          | 0.18<br>(0.056-0.39)                        | -0.35%<br>(-1.3-0.22%)               | -0.44%<br>(-1.5-0.25%)              | -5.6<br>(-20-3.2)        | -54<br>(-190-35)       |
| Niger    | 2005 | Female | 85 to 89 | 34%<br>(18-53%)                | 66%<br>(47-82%)          | 0.18<br>(0.056-0.39)                        | -0.44%<br>(-1.3-0.12%)               | -0.56%<br>(-1.6-0.11%)              | -4.3<br>(-13-0.88)       | -30<br>(-89-8)         |
| Niger    | 2005 | Female | 90 to 94 | 37%<br>(20-55%)                | 63%<br>(45-80%)          | 0.19<br>(0.054-0.43)                        | -0.53%<br>(-1.4-0.047%)              | -0.69%<br>(-1.7-0.014%)             | -2<br>(-5-0.04)          | -9.3<br>(-24-0.82)     |
| Niger    | 2005 | Female | 95 plus  | 41%<br>(21-62%)                | 59%<br>(38-79%)          | 0.2<br>(0.05-0.51)                          | -0.51%<br>(-1.5-0.081%)              | -0.71%<br>(-1.9-0.024%)             | -0.52<br>(-1.4-0.017)    | -1.5<br>(-4.2-0.25)    |
| Niger    | 2005 | Male   | All Ages | 19%<br>(15-25%)                | 81%<br>(75-85%)          | 0.15<br>(0.1-0.21)                          | 0.34%<br>(0.18-0.49%)                | 0.49%<br>(0.19-0.81%)               | 440<br>(160-730)         | 23000<br>(12000-33000) |

| Location | Year | Sex    | Age      | Prevalence of current drinkers | Prevalence of abstainers | Population average of standard drinks daily | Percent of total attributable deaths | Percent of total attributable DALYs | Attributable deaths     | Attributable DALYs   |
|----------|------|--------|----------|--------------------------------|--------------------------|---------------------------------------------|--------------------------------------|-------------------------------------|-------------------------|----------------------|
| Niger    | 2005 | Male   | 15 to 19 | 16%<br>(8-27%)                 | 84%<br>(73-92%)          | 0.096<br>(0.035-0.2)                        | 0.63%<br>(0.36-0.99%)                | 0.3%<br>(0.052-0.7%)                | 3.3<br>(0.58-7.8)       | 800<br>(450-1300)    |
| Niger    | 2005 | Male   | 20 to 24 | 23%<br>(12-39%)                | 77%<br>(61-88%)          | 0.19<br>(0.078-0.38)                        | 1.4%<br>(0.83-2.1%)                  | 0.76%<br>(0.14-1.6%)                | 8.6<br>(1.7-19)         | 1500<br>(870-2400)   |
| Niger    | 2005 | Male   | 25 to 29 | 29%<br>(15-46%)                | 71%<br>(54-85%)          | 0.29<br>(0.12-0.55)                         | 1.7%<br>(0.96-2.6%)                  | 1.2%<br>(0.23-2.4%)                 | 17<br>(3.4-33)          | 2000<br>(1100-3100)  |
| Niger    | 2005 | Male   | 30 to 34 | 32%<br>(17-50%)                | 68%<br>(50-83%)          | 0.35<br>(0.16-0.63)                         | 1.9%<br>(1-2.9%)                     | 1.6%<br>(0.48-2.9%)                 | 27<br>(7.8-48)          | 2400<br>(1200-3600)  |
| Niger    | 2005 | Male   | 35 to 39 | 35%<br>(19-55%)                | 65%<br>(45-81%)          | 0.38<br>(0.16-0.71)                         | 2.1%<br>(1.2-3.4%)                   | 2.2%<br>(0.89-3.9%)                 | 37<br>(15-65)           | 2500<br>(1400-3900)  |
| Niger    | 2005 | Male   | 40 to 44 | 36%<br>(21-55%)                | 64%<br>(45-79%)          | 0.41<br>(0.16-0.76)                         | 2.2%<br>(1.1-3.5%)                   | 2.5%<br>(0.97-4.2%)                 | 62<br>(23-110)          | 3400<br>(1500-5400)  |
| Niger    | 2005 | Male   | 45 to 49 | 37%<br>(19-57%)                | 63%<br>(43-81%)          | 0.42<br>(0.17-0.83)                         | 2.3%<br>(1.1-4%)                     | 2.7%<br>(1.1-4.9%)                  | 68<br>(27-120)          | 3200<br>(1500-5400)  |
| Niger    | 2005 | Male   | 50 to 54 | 38%<br>(21-59%)                | 62%<br>(41-79%)          | 0.43<br>(0.18-0.84)                         | 2.1%<br>(0.83-3.8%)                  | 2.5%<br>(0.81-4.7%)                 | 60<br>(19-110)          | 2400<br>(930-4300)   |
| Niger    | 2005 | Male   | 55 to 59 | 38%<br>(22-57%)                | 62%<br>(43-78%)          | 0.42<br>(0.16-0.84)                         | 1.9%<br>(0.73-3.4%)                  | 2.2%<br>(0.73-4.1%)                 | 52<br>(18-100)          | 1800<br>(710-3300)   |
| Niger    | 2005 | Male   | 60 to 64 | 38%<br>(22-57%)                | 62%<br>(43-78%)          | 0.38<br>(0.13-0.82)                         | 1.4%<br>(0.56-2.6%)                  | 1.7%<br>(0.5-3.1%)                  | 41<br>(13-80)           | 1200<br>(470-2300)   |
| Niger    | 2005 | Male   | 65 to 69 | 38%<br>(21-56%)                | 62%<br>(44-79%)          | 0.32<br>(0.12-0.68)                         | 0.93%<br>(0.15-1.8%)                 | 1.1%<br>(0.082-2.2%)                | 26<br>(1.9-53)          | 620<br>(100-1200)    |
| Niger    | 2005 | Male   | 70 to 74 | 36%<br>(21-54%)                | 64%<br>(46-79%)          | 0.25<br>(0.085-0.56)                        | 0.63%<br>(-0.12-1.4%)                | 0.72%<br>(-0.21-1.7%)               | 18<br>(-5-43)           | 340<br>(-68-780)     |
| Niger    | 2005 | Male   | 75 to 79 | 33%<br>(18-52%)                | 67%<br>(48-82%)          | 0.19<br>(0.055-0.44)                        | 0.41%<br>(-0.28-1%)                  | 0.45%<br>(-0.39-1.2%)               | 9.8<br>(-8-25)          | 150<br>(-99-360)     |
| Niger    | 2005 | Male   | 80 to 84 | 30%<br>(16-49%)                | 70%<br>(51-84%)          | 0.16<br>(0.044-0.34)                        | 0.34%<br>(-0.24-0.82%)               | 0.36%<br>(-0.35-0.93%)              | 4.2<br>(-4.4-11)        | 49<br>(-34-120)      |
| Niger    | 2005 | Male   | 85 to 89 | 29%<br>(15-46%)                | 71%<br>(54-85%)          | 0.13<br>(0.042-0.3)                         | 0.23%<br>(-0.29-0.64%)               | 0.22%<br>(-0.42-0.71%)              | 1.4<br>(-2.6-4.4)       | 12<br>(-15-34)       |
| Niger    | 2005 | Male   | 90 to 94 | 31%<br>(16-49%)                | 69%<br>(51-84%)          | 0.13<br>(0.035-0.32)                        | 0.089%<br>(-0.39-0.44%)              | 0.031%<br>(-0.56-0.46%)             | 0.063<br>(-1.1-0.94)    | 1.1<br>(-4.7-5.4)    |
| Niger    | 2005 | Male   | 95 plus  | 35%<br>(17-57%)                | 65%<br>(43-83%)          | 0.13<br>(0.027-0.34)                        | 0.094%<br>(-0.48-0.51%)              | -0.0087%<br>(-0.72-0.5%)            | -0.0039<br>(-0.32-0.22) | 0.17<br>(-0.84-0.89) |
| Niger    | 2010 | Female | All Ages | 22%<br>(17-28%)                | 78%<br>(72-83%)          | 0.11<br>(0.072-0.15)                        | 0.15%<br>(0.034-0.25%)               | 0.049%<br>(-0.23-0.27%)             | 39<br>(-190-220)        | 8700<br>(2000-15000) |
| Niger    | 2010 | Female | 15 to 19 | 22%<br>(12-35%)                | 78%<br>(65-88%)          | 0.11<br>(0.04-0.22)                         | 0.48%<br>(0.23-0.76%)                | 0.078%<br>(-0.2-0.39%)              | 0.97<br>(-2.7-4.9)      | 760<br>(360-1300)    |
| Niger    | 2010 | Female | 20 to 24 | 27%<br>(14-44%)                | 73%<br>(56-86%)          | 0.17<br>(0.067-0.33)                        | 1%<br>(0.53-1.6%)                    | 0.15%<br>(-0.34-0.68%)              | 2<br>(-4.9-9.4)         | 1500<br>(790-2500)   |
| Niger    | 2010 | Female | 25 to 29 | 30%<br>(16-48%)                | 70%<br>(52-84%)          | 0.2<br>(0.084-0.39)                         | 1%<br>(0.57-1.5%)                    | 0.27%<br>(-0.26-0.8%)               | 4.1<br>(-3.7-12)        | 1500<br>(770-2300)   |
| Niger    | 2010 | Female | 30 to 34 | 33%<br>(17-52%)                | 67%<br>(48-83%)          | 0.23<br>(0.1-0.42)                          | 0.85%<br>(0.46-1.3%)                 | 0.35%<br>(-0.16-0.87%)              | 6.1<br>(-2.6-15)        | 1200<br>(640-2000)   |

| Location | Year | Sex    | Age      | Prevalence of current drinkers | Prevalence of abstainers | Population average of standard drinks daily | Percent of total attributable deaths | Percent of total attributable DALYs | Attributable deaths  | Attributable DALYs     |
|----------|------|--------|----------|--------------------------------|--------------------------|---------------------------------------------|--------------------------------------|-------------------------------------|----------------------|------------------------|
| Niger    | 2010 | Female | 35 to 39 | 37%<br>(19-56%)                | 63%<br>(44-81%)          | 0.25<br>(0.11-0.45)                         | 0.76%<br>(0.32-1.2%)                 | 0.47%<br>(-0.12-1%)                 | 8.7<br>(-2.3-20)     | 1100<br>(440-1600)     |
| Niger    | 2010 | Female | 40 to 44 | 38%<br>(22-57%)                | 62%<br>(43-78%)          | 0.26<br>(0.1-0.5)                           | 0.82%<br>(0.35-1.3%)                 | 0.76%<br>(0.058-1.5%)               | 14<br>(1.1-27)       | 1000<br>(410-1700)     |
| Niger    | 2010 | Female | 45 to 49 | 39%<br>(20-57%)                | 61%<br>(43-80%)          | 0.27<br>(0.1-0.51)                          | 0.72%<br>(0.14-1.3%)                 | 0.72%<br>(-0.1-1.6%)                | 14<br>(-2.1-30)      | 820<br>(150-1500)      |
| Niger    | 2010 | Female | 50 to 54 | 39%<br>(21-60%)                | 61%<br>(40-79%)          | 0.28<br>(0.12-0.54)                         | 0.7%<br>(-0.015-1.4%)                | 0.8%<br>(-0.21-1.8%)                | 16<br>(-4.4-36)      | 710<br>(-16-1400)      |
| Niger    | 2010 | Female | 55 to 59 | 40%<br>(23-59%)                | 60%<br>(41-77%)          | 0.3<br>(0.12-0.59)                          | 0.44%<br>(-0.41-1.2%)                | 0.52%<br>(-0.66-1.7%)               | 11<br>(-14-36)       | 410<br>(-410-1200)     |
| Niger    | 2010 | Female | 60 to 64 | 41%<br>(23-59%)                | 59%<br>(41-77%)          | 0.3<br>(0.11-0.62)                          | 0.17%<br>(-0.7-0.91%)                | 0.18%<br>(-0.91-1.2%)               | 5<br>(-26-33)        | 160<br>(-670-910)      |
| Niger    | 2010 | Female | 65 to 69 | 41%<br>(24-59%)                | 59%<br>(41-76%)          | 0.28<br>(0.1-0.55)                          | -0.17%<br>(-1.2-0.56%)               | -0.24%<br>(-1.6-0.69%)              | -7.8<br>(-49-23)     | -150<br>(-1100-530)    |
| Niger    | 2010 | Female | 70 to 74 | 39%<br>(24-56%)                | 61%<br>(44-76%)          | 0.23<br>(0.082-0.52)                        | -0.22%<br>(-1.2-0.45%)               | -0.3%<br>(-1.5-0.52%)               | -9.9<br>(-51-17)     | -160<br>(-890-320)     |
| Niger    | 2010 | Female | 75 to 79 | 35%<br>(19-54%)                | 65%<br>(46-81%)          | 0.18<br>(0.055-0.44)                        | -0.27%<br>(-1.2-0.37%)               | -0.36%<br>(-1.6-0.41%)              | -9.5<br>(-40-11)     | -120<br>(-550-170)     |
| Niger    | 2010 | Female | 80 to 84 | 33%<br>(18-51%)                | 67%<br>(49-82%)          | 0.16<br>(0.049-0.35)                        | -0.36%<br>(-1.3-0.19%)               | -0.46%<br>(-1.5-0.2%)               | -6.9<br>(-23-3.1)    | -66<br>(-230-36)       |
| Niger    | 2010 | Female | 85 to 89 | 33%<br>(18-51%)                | 67%<br>(49-82%)          | 0.16<br>(0.053-0.36)                        | -0.42%<br>(-1.2-0.083%)              | -0.54%<br>(-1.5-0.066%)             | -5.1<br>(-14-0.61)   | -35<br>(-100-6.6)      |
| Niger    | 2010 | Female | 90 to 94 | 36%<br>(19-54%)                | 64%<br>(46-81%)          | 0.17<br>(0.053-0.4)                         | -0.51%<br>(-1.4-0.021%)              | -0.68%<br>(-1.7-0.016%)             | -2.6<br>(-6.4-0.062) | -12<br>(-31-0.49)      |
| Niger    | 2010 | Female | 95 plus  | 41%<br>(21-62%)                | 59%<br>(38-79%)          | 0.19<br>(0.045-0.46)                        | -0.49%<br>(-1.5-0.078%)              | -0.69%<br>(-1.9-0.0058%)            | -0.7<br>(-1.9-0.006) | -2<br>(-5.8-0.32)      |
| Niger    | 2010 | Male   | All Ages | 19%<br>(15-24%)                | 81%<br>(76-85%)          | 0.14<br>(0.091-0.19)                        | 0.38%<br>(0.21-0.58%)                | 0.53%<br>(0.19-0.93%)               | 470<br>(170-820)     | 25000<br>(14000-38000) |
| Niger    | 2010 | Male   | 15 to 19 | 16%<br>(8.2-27%)               | 84%<br>(73-92%)          | 0.09<br>(0.031-0.19)                        | 0.62%<br>(0.35-0.95%)                | 0.28%<br>(0.053-0.64%)              | 3.8<br>(0.74-8.6)    | 970<br>(520-1500)      |
| Niger    | 2010 | Male   | 20 to 24 | 23%<br>(12-39%)                | 77%<br>(61-88%)          | 0.18<br>(0.07-0.37)                         | 1.4%<br>(0.83-2.1%)                  | 0.71%<br>(0.17-1.5%)                | 9.9<br>(2.5-22)      | 1900<br>(1100-2900)    |
| Niger    | 2010 | Male   | 25 to 29 | 29%<br>(15-45%)                | 71%<br>(55-85%)          | 0.26<br>(0.11-0.5)                          | 1.8%<br>(1-2.7%)                     | 1.2%<br>(0.26-2.3%)                 | 17<br>(3.6-33)       | 2200<br>(1300-3300)    |
| Niger    | 2010 | Male   | 30 to 34 | 32%<br>(17-52%)                | 68%<br>(48-83%)          | 0.32<br>(0.15-0.57)                         | 1.9%<br>(1.1-2.9%)                   | 1.6%<br>(0.45-2.9%)                 | 29<br>(8-55)         | 2700<br>(1500-4200)    |
| Niger    | 2010 | Male   | 35 to 39 | 35%<br>(19-54%)                | 65%<br>(46-81%)          | 0.35<br>(0.14-0.67)                         | 2.1%<br>(1.1-3.2%)                   | 2.1%<br>(0.82-3.6%)                 | 41<br>(16-73)        | 2800<br>(1500-4400)    |
| Niger    | 2010 | Male   | 40 to 44 | 36%<br>(21-55%)                | 64%<br>(45-79%)          | 0.38<br>(0.14-0.71)                         | 2.1%<br>(1-3.5%)                     | 2.4%<br>(0.88-4.2%)                 | 48<br>(18-86)        | 2700<br>(1300-4400)    |
| Niger    | 2010 | Male   | 45 to 49 | 37%<br>(20-56%)                | 63%<br>(44-80%)          | 0.4<br>(0.15-0.78)                          | 2.3%<br>(1.1-3.8%)                   | 2.6%<br>(1-4.7%)                    | 77<br>(30-140)       | 3700<br>(1700-6300)    |
| Niger    | 2010 | Male   | 50 to 54 | 38%<br>(21-59%)                | 62%<br>(41-79%)          | 0.4<br>(0.16-0.8)                           | 2%<br>(0.79-3.6%)                    | 2.3%<br>(0.7-4.5%)                  | 72<br>(21-140)       | 2900<br>(1200-5400)    |



| Location | Year | Sex    | Age      | Prevalence of current drinkers | Prevalence of abstainers | Population average of standard drinks daily | Percent of total attributable deaths | Percent of total attributable DALYs | Attributable deaths    | Attributable DALYs    |
|----------|------|--------|----------|--------------------------------|--------------------------|---------------------------------------------|--------------------------------------|-------------------------------------|------------------------|-----------------------|
| Niger    | 2010 | Male   | 55 to 59 | 38%<br>(22-58%)                | 62%<br>(42-78%)          | 0.39<br>(0.15-0.78)                         | 1.8%<br>(0.63-3.2%)                  | 2.1%<br>(0.55-3.9%)                 | 62<br>(16-120)         | 2200<br>(800-4000)    |
| Niger    | 2010 | Male   | 60 to 64 | 38%<br>(21-58%)                | 62%<br>(42-79%)          | 0.35<br>(0.12-0.77)                         | 1.3%<br>(0.45-2.5%)                  | 1.5%<br>(0.37-3%)                   | 47<br>(12-96)          | 1400<br>(470-2700)    |
| Niger    | 2010 | Male   | 65 to 69 | 38%<br>(22-56%)                | 62%<br>(44-78%)          | 0.3<br>(0.11-0.63)                          | 0.83%<br>(0.085-1.6%)                | 0.93%<br>(-0.018-1.9%)              | 29<br>(-0.55-60)       | 720<br>(69-1400)      |
| Niger    | 2010 | Male   | 70 to 74 | 36%<br>(21-53%)                | 64%<br>(47-79%)          | 0.23<br>(0.079-0.54)                        | 0.56%<br>(-0.12-1.3%)                | 0.64%<br>(-0.22-1.5%)               | 19<br>(-6.2-44)        | 360<br>(-78-800)      |
| Niger    | 2010 | Male   | 75 to 79 | 33%<br>(18-51%)                | 67%<br>(49-82%)          | 0.17<br>(0.052-0.4)                         | 0.36%<br>(-0.28-0.9%)                | 0.39%<br>(-0.38-1.1%)               | 9.8<br>(-9.7-26)       | 150<br>(-110-370)     |
| Niger    | 2010 | Male   | 80 to 84 | 30%<br>(16-49%)                | 70%<br>(51-84%)          | 0.14<br>(0.039-0.3)                         | 0.31%<br>(-0.26-0.76%)               | 0.32%<br>(-0.36-0.87%)              | 4.6<br>(-5.1-13)       | 54<br>(-44-130)       |
| Niger    | 2010 | Male   | 85 to 89 | 29%<br>(15-46%)                | 71%<br>(54-85%)          | 0.12<br>(0.038-0.29)                        | 0.21%<br>(-0.28-0.58%)               | 0.19%<br>(-0.4-0.63%)               | 1.6<br>(-3.3-5.4)      | 15<br>(-20-44)        |
| Niger    | 2010 | Male   | 90 to 94 | 31%<br>(16-48%)                | 69%<br>(52-84%)          | 0.12<br>(0.034-0.29)                        | 0.08%<br>(-0.35-0.39%)               | 0.019%<br>(-0.5-0.4%)               | 0.057<br>(-1.5-1.2)    | 1.4<br>(-6.3-7.1)     |
| Niger    | 2010 | Male   | 95 plus  | 35%<br>(17-57%)                | 65%<br>(43-83%)          | 0.12<br>(0.026-0.33)                        | 0.081%<br>(-0.45-0.48%)              | -0.023%<br>(-0.7-0.45%)             | -0.015<br>(-0.46-0.29) | 0.21<br>(-1.2-1.2)    |
| Niger    | 2016 | Female | All Ages | 22%<br>(17-28%)                | 78%<br>(72-83%)          | 0.11<br>(0.058-0.17)                        | 0.18%<br>(0.042-0.32%)               | 0.053%<br>(-0.28-0.32%)             | 44<br>(-230-270)       | 11000<br>(2600-19000) |
| Niger    | 2016 | Female | 15 to 19 | 22%<br>(12-37%)                | 78%<br>(63-88%)          | 0.11<br>(0.037-0.24)                        | 0.5%<br>(0.26-0.8%)                  | 0.086%<br>(-0.16-0.41%)             | 1.4<br>(-2.7-6.7)      | 1000<br>(510-1700)    |
| Niger    | 2016 | Female | 20 to 24 | 28%<br>(14-44%)                | 72%<br>(56-86%)          | 0.17<br>(0.061-0.34)                        | 1.1%<br>(0.56-1.7%)                  | 0.16%<br>(-0.31-0.73%)              | 2.7<br>(-4.8-12)       | 2000<br>(1000-3200)   |
| Niger    | 2016 | Female | 25 to 29 | 30%<br>(16-49%)                | 70%<br>(51-84%)          | 0.2<br>(0.078-0.42)                         | 1.2%<br>(0.69-1.7%)                  | 0.33%<br>(-0.25-0.96%)              | 5<br>(-4-15)           | 1800<br>(1000-2800)   |
| Niger    | 2016 | Female | 30 to 34 | 33%<br>(17-53%)                | 67%<br>(47-83%)          | 0.23<br>(0.089-0.47)                        | 1%<br>(0.55-1.6%)                    | 0.46%<br>(-0.18-1.1%)               | 7.4<br>(-2.5-18)       | 1500<br>(800-2400)    |
| Niger    | 2016 | Female | 35 to 39 | 37%<br>(20-56%)                | 63%<br>(44-80%)          | 0.25<br>(0.1-0.49)                          | 0.9%<br>(0.42-1.4%)                  | 0.59%<br>(-0.093-1.3%)              | 11<br>(-1.6-23)        | 1300<br>(600-2000)    |
| Niger    | 2016 | Female | 40 to 44 | 39%<br>(22-58%)                | 61%<br>(42-78%)          | 0.26<br>(0.098-0.54)                        | 0.94%<br>(0.41-1.5%)                 | 0.89%<br>(0.088-1.8%)               | 17<br>(1.6-34)         | 1300<br>(560-2100)    |
| Niger    | 2016 | Female | 45 to 49 | 39%<br>(20-59%)                | 61%<br>(41-80%)          | 0.27<br>(0.095-0.57)                        | 0.8%<br>(0.17-1.5%)                  | 0.84%<br>(-0.053-1.9%)              | 17<br>(-1.2-39)        | 1000<br>(210-1900)    |
| Niger    | 2016 | Female | 50 to 54 | 40%<br>(22-60%)                | 60%<br>(40-78%)          | 0.28<br>(0.1-0.61)                          | 0.76%<br>(-0.0073-1.5%)              | 0.89%<br>(-0.18-2%)                 | 21<br>(-4.3-48)        | 920<br>(-9.4-1900)    |
| Niger    | 2016 | Female | 55 to 59 | 40%<br>(23-58%)                | 60%<br>(42-77%)          | 0.31<br>(0.11-0.63)                         | 0.48%<br>(-0.34-1.3%)                | 0.56%<br>(-0.53-1.7%)               | 15<br>(-15-49)         | 550<br>(-410-1600)    |
| Niger    | 2016 | Female | 60 to 64 | 41%<br>(24-61%)                | 59%<br>(39-76%)          | 0.31<br>(0.1-0.67)                          | 0.17%<br>(-0.71-0.95%)               | 0.18%<br>(-0.95-1.2%)               | 5.4<br>(-30-37)        | 180<br>(-780-1100)    |
| Niger    | 2016 | Female | 65 to 69 | 42%<br>(24-60%)                | 58%<br>(40-76%)          | 0.28<br>(0.1-0.6)                           | -0.18%<br>(-1.2-0.57%)               | -0.26%<br>(-1.6-0.67%)              | -10<br>(-61-26)        | -200<br>(-1400-600)   |
| Niger    | 2016 | Female | 70 to 74 | 39%<br>(23-57%)                | 61%<br>(43-77%)          | 0.23<br>(0.073-0.54)                        | -0.24%<br>(-1.2-0.43%)               | -0.33%<br>(-1.5-0.48%)              | -14<br>(-67-21)        | -230<br>(-1200-410)   |

| Location | Year | Sex    | Age      | Prevalence of current drinkers | Prevalence of abstainers | Population average of standard drinks daily | Percent of total attributable deaths | Percent of total attributable DALYs | Attributable deaths  | Attributable DALYs     |
|----------|------|--------|----------|--------------------------------|--------------------------|---------------------------------------------|--------------------------------------|-------------------------------------|----------------------|------------------------|
| Niger    | 2016 | Female | 75 to 79 | 35%<br>(20-54%)                | 65%<br>(46-80%)          | 0.18<br>(0.052-0.45)                        | -0.27%<br>(-1.2-0.36%)               | -0.36%<br>(-1.6-0.4%)               | -13<br>(-56-14)      | -170<br>(-760-210)     |
| Niger    | 2016 | Female | 80 to 84 | 33%<br>(17-51%)                | 67%<br>(49-83%)          | 0.16<br>(0.047-0.37)                        | -0.36%<br>(-1.2-0.19%)               | -0.46%<br>(-1.5-0.19%)              | -9.3<br>(-31-3.7)    | -90<br>(-310-48)       |
| Niger    | 2016 | Female | 85 to 89 | 33%<br>(19-51%)                | 67%<br>(49-81%)          | 0.16<br>(0.05-0.41)                         | -0.43%<br>(-1.3-0.088%)              | -0.56%<br>(-1.6-0.076%)             | -7<br>(-19-0.91)     | -47<br>(-140-9.3)      |
| Niger    | 2016 | Female | 90 to 94 | 37%<br>(19-54%)                | 63%<br>(46-81%)          | 0.18<br>(0.048-0.45)                        | -0.53%<br>(-1.4-0.021%)              | -0.7%<br>(-1.7--0.023%)             | -3.5<br>(-8.7--0.11) | -16<br>(-41-0.64)      |
| Niger    | 2016 | Female | 95 plus  | 41%<br>(21-62%)                | 59%<br>(38-79%)          | 0.19<br>(0.043-0.51)                        | -0.51%<br>(-1.5-0.068%)              | -0.71%<br>(-1.9-0.0092%)            | -1<br>(-2.7-0.013)   | -2.9<br>(-8.3-0.39)    |
| Niger    | 2016 | Male   | All Ages | 19%<br>(14-24%)                | 81%<br>(76-86%)          | 0.13<br>(0.074-0.21)                        | 0.46%<br>(0.24-0.71%)                | 0.62%<br>(0.2-1.1%)                 | 590<br>(200-1100)    | 31000<br>(16000-49000) |
| Niger    | 2016 | Male   | 15 to 19 | 16%<br>(8.1-26%)               | 84%<br>(74-92%)          | 0.09<br>(0.029-0.2)                         | 0.64%<br>(0.38-0.99%)                | 0.28%<br>(0.064-0.66%)              | 5<br>(1.2-11)        | 1300<br>(760-2100)     |
| Niger    | 2016 | Male   | 20 to 24 | 23%<br>(12-38%)                | 77%<br>(62-88%)          | 0.18<br>(0.062-0.38)                        | 1.5%<br>(0.89-2.2%)                  | 0.74%<br>(0.19-1.6%)                | 13<br>(3.5-29)       | 2600<br>(1500-4000)    |
| Niger    | 2016 | Male   | 25 to 29 | 29%<br>(15-46%)                | 71%<br>(54-85%)          | 0.26<br>(0.1-0.56)                          | 1.9%<br>(1.1-2.9%)                   | 1.3%<br>(0.33-2.6%)                 | 22<br>(5.4-46)       | 2900<br>(1700-4500)    |
| Niger    | 2016 | Male   | 30 to 34 | 33%<br>(17-51%)                | 67%<br>(49-83%)          | 0.32<br>(0.13-0.65)                         | 2.1%<br>(1.2-3.4%)                   | 1.8%<br>(0.58-3.6%)                 | 34<br>(11-65)        | 3100<br>(1700-5000)    |
| Niger    | 2016 | Male   | 35 to 39 | 36%<br>(20-54%)                | 64%<br>(46-80%)          | 0.36<br>(0.14-0.74)                         | 2.3%<br>(1.2-3.6%)                   | 2.3%<br>(0.92-4.1%)                 | 51<br>(20-90)        | 3500<br>(1900-5600)    |
| Niger    | 2016 | Male   | 40 to 44 | 37%<br>(21-55%)                | 63%<br>(45-79%)          | 0.38<br>(0.14-0.81)                         | 2.3%<br>(1.1-3.7%)                   | 2.5%<br>(0.98-4.6%)                 | 59<br>(24-110)       | 3300<br>(1700-5700)    |
| Niger    | 2016 | Male   | 45 to 49 | 37%<br>(19-56%)                | 63%<br>(44-81%)          | 0.4<br>(0.13-0.9)                           | 2.4%<br>(1.2-4.2%)                   | 2.8%<br>(1.1-5.2%)                  | 68<br>(27-130)       | 3200<br>(1500-5800)    |
| Niger    | 2016 | Male   | 50 to 54 | 38%<br>(20-59%)                | 62%<br>(41-80%)          | 0.4<br>(0.14-0.91)                          | 2.1%<br>(0.86-3.9%)                  | 2.5%<br>(0.82-4.8%)                 | 89<br>(30-180)       | 3600<br>(1500-7000)    |
| Niger    | 2016 | Male   | 55 to 59 | 38%<br>(22-57%)                | 62%<br>(43-78%)          | 0.39<br>(0.13-0.87)                         | 1.9%<br>(0.74-3.6%)                  | 2.2%<br>(0.68-4.3%)                 | 90<br>(27-170)       | 3100<br>(1200-5800)    |
| Niger    | 2016 | Male   | 60 to 64 | 38%<br>(21-57%)                | 62%<br>(43-79%)          | 0.35<br>(0.11-0.83)                         | 1.4%<br>(0.42-2.7%)                  | 1.6%<br>(0.36-3.4%)                 | 68<br>(16-140)       | 2000<br>(620-3900)     |
| Niger    | 2016 | Male   | 65 to 69 | 38%<br>(21-56%)                | 62%<br>(44-79%)          | 0.3<br>(0.097-0.67)                         | 0.87%<br>(0.078-1.8%)                | 0.98%<br>(-0.02-2.1%)               | 41<br>(-0.95-91)     | 1000<br>(87-2100)      |
| Niger    | 2016 | Male   | 70 to 74 | 36%<br>(21-54%)                | 64%<br>(46-79%)          | 0.23<br>(0.072-0.56)                        | 0.58%<br>(-0.099-1.3%)               | 0.66%<br>(-0.17-1.5%)               | 26<br>(-6.9-64)      | 510<br>(-84-1200)      |
| Niger    | 2016 | Male   | 75 to 79 | 33%<br>(19-51%)                | 67%<br>(49-81%)          | 0.18<br>(0.048-0.46)                        | 0.37%<br>(-0.26-0.9%)                | 0.4%<br>(-0.34-1%)                  | 13<br>(-11-33)       | 200<br>(-130-480)      |
| Niger    | 2016 | Male   | 80 to 84 | 30%<br>(16-49%)                | 70%<br>(51-84%)          | 0.14<br>(0.039-0.34)                        | 0.32%<br>(-0.21-0.77%)               | 0.33%<br>(-0.32-0.88%)              | 5.7<br>(-5.5-15)     | 67<br>(-45-160)        |
| Niger    | 2016 | Male   | 85 to 89 | 29%<br>(15-47%)                | 71%<br>(53-85%)          | 0.12<br>(0.035-0.32)                        | 0.22%<br>(-0.23-0.59%)               | 0.2%<br>(-0.33-0.66%)               | 2.1<br>(-3.6-6.9)    | 20<br>(-21-55)         |
| Niger    | 2016 | Male   | 90 to 94 | 31%<br>(16-49%)                | 69%<br>(51-84%)          | 0.12<br>(0.029-0.32)                        | 0.088%<br>(-0.33-0.41%)              | 0.026%<br>(-0.5-0.4%)               | 0.11<br>(-2.1-1.8)   | 2.3<br>(-8.6-10)       |

| Location | Year | Sex    | Age      | Prevalence of current drinkers | Prevalence of abstainers | Population average of standard drinks daily | Percent of total attributable deaths | Percent of total attributable DALYs | Attributable deaths    | Attributable DALYs        |
|----------|------|--------|----------|--------------------------------|--------------------------|---------------------------------------------|--------------------------------------|-------------------------------------|------------------------|---------------------------|
| Niger    | 2016 | Male   | 95 plus  | 36%<br>(17-59%)                | 64%<br>(41-83%)          | 0.12<br>(0.025-0.34)                        | 0.085%<br>(-0.47-0.46%)              | -0.021%<br>(-0.73-0.45%)            | -0.022<br>(-0.74-0.45) | 0.34<br>(-1.9-1.9)        |
| Nigeria  | 1990 | Female | All Ages | 39%<br>(33-45%)                | 61%<br>(55-67%)          | 0.67<br>(0.48-0.93)                         | 0.8%<br>(0.48-1.2%)                  | 1.5%<br>(0.78-2.6%)                 | 8800<br>(4400-15000)   | 340000<br>(200000-530000) |
| Nigeria  | 1990 | Female | 15 to 19 | 37%<br>(26-49%)                | 63%<br>(51-74%)          | 0.77<br>(0.42-1.3)                          | 1.4%<br>(0.65-2.4%)                  | 1.7%<br>(0.45-3.5%)                 | 130<br>(35-270)        | 14000<br>(6400-25000)     |
| Nigeria  | 1990 | Female | 20 to 24 | 45%<br>(32-58%)                | 55%<br>(42-68%)          | 1.1<br>(0.63-1.9)                           | 2.6%<br>(1.4-4.2%)                   | 2.7%<br>(1-5.3%)                    | 250<br>(89-510)        | 27000<br>(14000-45000)    |
| Nigeria  | 1990 | Female | 25 to 29 | 49%<br>(36-62%)                | 51%<br>(38-64%)          | 1.3<br>(0.72-2.1)                           | 3.2%<br>(1.7-5.2%)                   | 3.9%<br>(1.6-7%)                    | 370<br>(140-690)       | 31000<br>(16000-52000)    |
| Nigeria  | 1990 | Female | 30 to 34 | 53%<br>(40-65%)                | 47%<br>(35-60%)          | 1.3<br>(0.78-2.2)                           | 3.4%<br>(1.9-5.6%)                   | 4.4%<br>(2.1-7.6%)                  | 430<br>(190-770)       | 30000<br>(17000-50000)    |
| Nigeria  | 1990 | Female | 35 to 39 | 55%<br>(41-67%)                | 45%<br>(33-59%)          | 1.3<br>(0.78-2.1)                           | 3.8%<br>(2.1-6.1%)                   | 5.2%<br>(2.7-8.8%)                  | 540<br>(260-930)       | 32000<br>(17000-52000)    |
| Nigeria  | 1990 | Female | 40 to 44 | 57%<br>(44-68%)                | 43%<br>(32-56%)          | 1.3<br>(0.73-2.1)                           | 4.1%<br>(2.2-6.6%)                   | 6%<br>(3-9.8%)                      | 660<br>(320-1100)      | 33000<br>(17000-53000)    |
| Nigeria  | 1990 | Female | 45 to 49 | 58%<br>(44-69%)                | 42%<br>(31-56%)          | 1.1<br>(0.57-1.8)                           | 3.7%<br>(1.6-6.6%)                   | 5.4%<br>(2.2-9.5%)                  | 660<br>(260-1200)      | 29000<br>(12000-51000)    |
| Nigeria  | 1990 | Female | 50 to 54 | 58%<br>(44-70%)                | 42%<br>(30-56%)          | 1.1<br>(0.59-1.9)                           | 4%<br>(1.8-6.9%)                     | 5.6%<br>(2.5-9.8%)                  | 770<br>(350-1400)      | 29000<br>(14000-51000)    |
| Nigeria  | 1990 | Female | 55 to 59 | 56%<br>(42-70%)                | 44%<br>(30-58%)          | 1.5<br>(0.79-2.5)                           | 5.3%<br>(2.5-8.9%)                   | 7.2%<br>(3.4-12%)                   | 1200<br>(530-2000)     | 37000<br>(17000-65000)    |
| Nigeria  | 1990 | Female | 60 to 64 | 56%<br>(40-70%)                | 44%<br>(30-60%)          | 1.6<br>(0.84-2.7)                           | 4.9%<br>(2.1-8.7%)                   | 6.5%<br>(2.8-11%)                   | 1300<br>(540-2200)     | 34000<br>(15000-60000)    |
| Nigeria  | 1990 | Female | 65 to 69 | 56%<br>(40-71%)                | 44%<br>(29-60%)          | 1.4<br>(0.8-2.3)                            | 3.9%<br>(1.5-7.1%)                   | 5%<br>(1.8-9.1%)                    | 1100<br>(410-2100)     | 25000<br>(9400-47000)     |
| Nigeria  | 1990 | Female | 70 to 74 | 53%<br>(38-68%)                | 47%<br>(32-62%)          | 1.2<br>(0.62-2)                             | 3%<br>(0.38-6.5%)                    | 3.7%<br>(0.4-8%)                    | 860<br>(94-1900)       | 15000<br>(1900-34000)     |
| Nigeria  | 1990 | Female | 75 to 79 | 49%<br>(33-66%)                | 51%<br>(34-67%)          | 0.96<br>(0.46-1.7)                          | 1.8%<br>(-0.48-4.9%)                 | 2.1%<br>(-0.59-6%)                  | 390<br>(-110-1100)     | 5500<br>(-1500-15000)     |
| Nigeria  | 1990 | Female | 80 to 84 | 47%<br>(30-65%)                | 53%<br>(35-70%)          | 0.89<br>(0.46-1.6)                          | 1.1%<br>(-0.68-3.6%)                 | 1.3%<br>(-0.82-4.4%)                | 120<br>(-75-400)       | 1300<br>(-750-4100)       |
| Nigeria  | 1990 | Female | 85 to 89 | 47%<br>(31-64%)                | 53%<br>(36-69%)          | 0.9<br>(0.46-1.5)                           | 0.76%<br>(-0.82-3.1%)                | 0.88%<br>(-1-3.7%)                  | 52<br>(-64-210)        | 400<br>(-430-1600)        |
| Nigeria  | 1990 | Female | 90 to 94 | 50%<br>(35-67%)                | 50%<br>(33-65%)          | 0.94<br>(0.46-1.6)                          | 0.51%<br>(-1-2.9%)                   | 0.54%<br>(-1.4-3.4%)                | 13<br>(-34-85)         | 78<br>(-160-440)          |
| Nigeria  | 1990 | Female | 95 plus  | 53%<br>(34-73%)                | 47%<br>(27-66%)          | 0.97<br>(0.4-1.9)                           | 0.44%<br>(-1.1-3%)                   | 0.39%<br>(-1.5-3.4%)                | 3<br>(-11-26)          | 13<br>(-33-90)            |
| Nigeria  | 1990 | Male   | All Ages | 46%<br>(39-53%)                | 54%<br>(47-61%)          | 2.7<br>(2-3.6)                              | 2.9%<br>(2.2-3.8%)                   | 5.8%<br>(4.2-7.7%)                  | 37000<br>(26000-50000) | 140000<br>(110000-190000) |
| Nigeria  | 1990 | Male   | 15 to 19 | 39%<br>(27-53%)                | 61%<br>(47-73%)          | 1.8<br>(0.97-3)                             | 4.3%<br>(2.4-6.7%)                   | 6.4%<br>(3.4-10%)                   | 500<br>(260-830)       | 43000<br>(24000-66000)    |

| Location | Year | Sex    | Age      | Prevalence of current drinkers | Prevalence of abstainers | Population average of standard drinks daily | Percent of total attributable deaths | Percent of total attributable DALYs | Attributable deaths   | Attributable DALYs        |
|----------|------|--------|----------|--------------------------------|--------------------------|---------------------------------------------|--------------------------------------|-------------------------------------|-----------------------|---------------------------|
| Nigeria  | 1990 | Male   | 20 to 24 | 55%<br>(40-68%)                | 45%<br>(32-60%)          | 3.7<br>(2.2-5.9)                            | 11%<br>(7.1-15%)                     | 14%<br>(9.4-21%)                    | 1400<br>(870-2100)    | 110000<br>(69000-150000)  |
| Nigeria  | 1990 | Male   | 25 to 29 | 62%<br>(47-74%)                | 38%<br>(26-53%)          | 5.4<br>(3.3-8.2)                            | 15%<br>(9.7-21%)                     | 20%<br>(12-30%)                     | 2100<br>(1300-3100)   | 140000<br>(93000-200000)  |
| Nigeria  | 1990 | Male   | 30 to 34 | 65%<br>(50-76%)                | 35%<br>(24-50%)          | 6.1<br>(3.7-9.1)                            | 16%<br>(11-22%)                      | 22%<br>(14-31%)                     | 2300<br>(1500-3300)   | 140000<br>(97000-200000)  |
| Nigeria  | 1990 | Male   | 35 to 39 | 66%<br>(52-77%)                | 34%<br>(23-48%)          | 6<br>(3.7-9.3)                              | 16%<br>(11-22%)                      | 23%<br>(15-31%)                     | 2500<br>(1700-3500)   | 140000<br>(94000-190000)  |
| Nigeria  | 1990 | Male   | 40 to 44 | 67%<br>(54-78%)                | 33%<br>(22-46%)          | 6.3<br>(3.8-9.6)                            | 18%<br>(14-24%)                      | 26%<br>(19-34%)                     | 3100<br>(2200-4200)   | 150000<br>(110000-200000) |
| Nigeria  | 1990 | Male   | 45 to 49 | 68%<br>(55-78%)                | 32%<br>(22-45%)          | 7<br>(4.2-11)                               | 21%<br>(16-27%)                      | 29%<br>(22-37%)                     | 3800<br>(2700-5100)   | 160000<br>(120000-220000) |
| Nigeria  | 1990 | Male   | 50 to 54 | 70%<br>(57-80%)                | 30%<br>(20-43%)          | 7<br>(4.1-11)                               | 21%<br>(16-28%)                      | 29%<br>(21-38%)                     | 4100<br>(2900-5600)   | 150000<br>(110000-200000) |
| Nigeria  | 1990 | Male   | 55 to 59 | 69%<br>(56-80%)                | 31%<br>(20-44%)          | 6.3<br>(3.7-9.7)                            | 20%<br>(14-26%)                      | 26%<br>(19-35%)                     | 4000<br>(2700-5500)   | 130000<br>(89000-180000)  |
| Nigeria  | 1990 | Male   | 60 to 64 | 68%<br>(54-81%)                | 32%<br>(19-46%)          | 5.2<br>(2.8-8.5)                            | 16%<br>(11-22%)                      | 21%<br>(14-28%)                     | 3700<br>(2400-5200)   | 100000<br>(66000-140000)  |
| Nigeria  | 1990 | Male   | 65 to 69 | 66%<br>(49-79%)                | 34%<br>(21-51%)          | 4.4<br>(2.6-7)                              | 15%<br>(9.4-20%)                     | 19%<br>(12-26%)                     | 3500<br>(2200-5000)   | 80000<br>(51000-110000)   |
| Nigeria  | 1990 | Male   | 70 to 74 | 63%<br>(47-77%)                | 37%<br>(23-53%)          | 3.6<br>(2.1-5.9)                            | 13%<br>(7.7-20%)                     | 16%<br>(9.5-24%)                    | 3000<br>(1700-4600)   | 54000<br>(32000-84000)    |
| Nigeria  | 1990 | Male   | 75 to 79 | 60%<br>(43-74%)                | 40%<br>(26-57%)          | 2.8<br>(1.4-4.8)                            | 10%<br>(5.2-17%)                     | 13%<br>(6.1-20%)                    | 1700<br>(810-2900)    | 24000<br>(12000-40000)    |
| Nigeria  | 1990 | Male   | 80 to 84 | 57%<br>(38-73%)                | 43%<br>(27-62%)          | 2.2<br>(1.2-3.6)                            | 8.2%<br>(3.9-14%)                    | 9.9%<br>(4.8-17%)                   | 640<br>(300-1100)     | 6600<br>(3200-11000)      |
| Nigeria  | 1990 | Male   | 85 to 89 | 53%<br>(35-69%)                | 47%<br>(31-65%)          | 1.7<br>(0.9-2.8)                            | 5.9%<br>(2.7-11%)                    | 7.1%<br>(3.2-13%)                   | 280<br>(130-510)      | 2100<br>(970-3800)        |
| Nigeria  | 1990 | Male   | 90 to 94 | 53%<br>(37-70%)                | 47%<br>(30-63%)          | 1.3<br>(0.68-2.3)                           | 3.6%<br>(1.2-7.1%)                   | 4.2%<br>(1.2-8.4%)                  | 71<br>(21-140)        | 370<br>(120-730)          |
| Nigeria  | 1990 | Male   | 95 plus  | 57%<br>(35-75%)                | 43%<br>(25-65%)          | 1.1<br>(0.45-2.1)                           | 2.7%<br>(0.086-6.3%)                 | 3%<br>(-0.16-7.4%)                  | 14<br>(-0.75-35)      | 51<br>(1.5-120)           |
| Nigeria  | 1995 | Female | All Ages | 39%<br>(33-45%)                | 61%<br>(55-67%)          | 0.75<br>(0.55-1)                            | 0.91%<br>(0.57-1.3%)                 | 1.8%<br>(0.92-2.8%)                 | 12000<br>(5800-19000) | 440000<br>(270000-660000) |
| Nigeria  | 1995 | Female | 15 to 19 | 38%<br>(27-50%)                | 62%<br>(50-73%)          | 0.87<br>(0.46-1.4)                          | 1.5%<br>(0.73-2.7%)                  | 1.9%<br>(0.58-3.9%)                 | 180<br>(55-390)       | 19000<br>(8200-35000)     |
| Nigeria  | 1995 | Female | 20 to 24 | 46%<br>(33-59%)                | 54%<br>(41-67%)          | 1.3<br>(0.72-2.1)                           | 2.6%<br>(1.4-4.2%)                   | 2.8%<br>(1.1-5.1%)                  | 360<br>(130-660)      | 35000<br>(19000-56000)    |
| Nigeria  | 1995 | Female | 25 to 29 | 50%<br>(36-62%)                | 50%<br>(38-64%)          | 1.4<br>(0.85-2.3)                           | 3.1%<br>(1.6-4.9%)                   | 3.4%<br>(1.4-6.2%)                  | 480<br>(200-880)      | 39000<br>(21000-63000)    |
| Nigeria  | 1995 | Female | 30 to 34 | 53%<br>(39-66%)                | 47%<br>(34-61%)          | 1.5<br>(0.88-2.3)                           | 3.2%<br>(1.7-5%)                     | 3.8%<br>(1.8-6.5%)                  | 550<br>(260-950)      | 38000<br>(21000-61000)    |
| Nigeria  | 1995 | Female | 35 to 39 | 56%<br>(42-67%)                | 44%<br>(33-58%)          | 1.5<br>(0.89-2.4)                           | 3.7%<br>(1.9-5.9%)                   | 4.8%<br>(2.3-8%)                    | 700<br>(350-1200)     | 40000<br>(22000-65000)    |

| Location | Year | Sex    | Age      | Prevalence of current drinkers | Prevalence of abstainers | Population average of standard drinks daily | Percent of total attributable deaths | Percent of total attributable DALYs | Attributable deaths    | Attributable DALYs           |
|----------|------|--------|----------|--------------------------------|--------------------------|---------------------------------------------|--------------------------------------|-------------------------------------|------------------------|------------------------------|
| Nigeria  | 1995 | Female | 40 to 44 | 57%<br>(46-69%)                | 43%<br>(31-54%)          | 1.5<br>(0.81-2.3)                           | 4.2%<br>(2.2-6.5%)                   | 5.8%<br>(2.9-9.1%)                  | 820<br>(400-1300)      | 41000<br>(21000-65000)       |
| Nigeria  | 1995 | Female | 45 to 49 | 58%<br>(44-70%)                | 42%<br>(30-56%)          | 1.2<br>(0.65-2)                             | 3.9%<br>(1.7-6.8%)                   | 5.4%<br>(2.2-9.4%)                  | 820<br>(350-1500)      | 36000<br>(16000-62000)       |
| Nigeria  | 1995 | Female | 50 to 54 | 58%<br>(45-70%)                | 42%<br>(30-55%)          | 1.2<br>(0.67-2.1)                           | 4.3%<br>(2.1-7.4%)                   | 5.9%<br>(2.8-10%)                   | 1000<br>(450-1800)     | 37000<br>(17000-65000)       |
| Nigeria  | 1995 | Female | 55 to 59 | 57%<br>(42-70%)                | 43%<br>(30-58%)          | 1.7<br>(0.92-2.8)                           | 5.8%<br>(2.8-9.6%)                   | 7.8%<br>(4-13%)                     | 1500<br>(730-2600)     | 48000<br>(23000-83000)       |
| Nigeria  | 1995 | Female | 60 to 64 | 56%<br>(41-70%)                | 44%<br>(30-59%)          | 1.8<br>(1-2.9)                              | 5.6%<br>(2.7-9.3%)                   | 7.2%<br>(3.6-12%)                   | 1600<br>(750-2800)     | 44000<br>(20000-76000)       |
| Nigeria  | 1995 | Female | 65 to 69 | 56%<br>(40-71%)                | 44%<br>(29-60%)          | 1.6<br>(0.92-2.5)                           | 4.6%<br>(1.8-8%)                     | 5.8%<br>(2.2-9.9%)                  | 1500<br>(590-2600)     | 33000<br>(13000-60000)       |
| Nigeria  | 1995 | Female | 70 to 74 | 54%<br>(39-69%)                | 46%<br>(31-61%)          | 1.3<br>(0.69-2.2)                           | 3.5%<br>(0.57-7.3%)                  | 4.3%<br>(0.73-9.2%)                 | 1200<br>(180-2400)     | 21000<br>(3300-44000)        |
| Nigeria  | 1995 | Female | 75 to 79 | 50%<br>(35-67%)                | 50%<br>(33-65%)          | 1.1<br>(0.52-1.9)                           | 2.2%<br>(-0.22-5.5%)                 | 2.7%<br>(-0.29-6.6%)                | 570<br>(-61-1500)      | 8000<br>(-800-20000)         |
| Nigeria  | 1995 | Female | 80 to 84 | 48%<br>(31-66%)                | 52%<br>(34-69%)          | 1<br>(0.51-1.7)                             | 1.5%<br>(-0.5-4.1%)                  | 1.7%<br>(-0.62-5%)                  | 180<br>(-65-530)       | 1900<br>(-660-5500)          |
| Nigeria  | 1995 | Female | 85 to 89 | 48%<br>(32-64%)                | 52%<br>(36-68%)          | 0.99<br>(0.53-1.6)                          | 1.1%<br>(-0.68-3.3%)                 | 1.2%<br>(-0.87-4%)                  | 82<br>(-57-270)        | 630<br>(-380-2000)           |
| Nigeria  | 1995 | Female | 90 to 94 | 50%<br>(35-66%)                | 50%<br>(34-65%)          | 1<br>(0.51-1.7)                             | 0.77%<br>(-0.9-3.4%)                 | 0.84%<br>(-1.2-4%)                  | 24<br>(-35-110)        | 130<br>(-160-580)            |
| Nigeria  | 1995 | Female | 95 plus  | 53%<br>(35-72%)                | 47%<br>(28-65%)          | 1.1<br>(0.45-1.9)                           | 0.67%<br>(-1.1-3.5%)                 | 0.65%<br>(-1.4-4.1%)                | 5.5<br>(-12-35)        | 23<br>(-36-120)              |
| Nigeria  | 1995 | Male   | All Ages | 47%<br>(40-54%)                | 53%<br>(46-60%)          | 3<br>(2.2-3.9)                              | 3.1%<br>(2.2-4.1%)                   | 6.1%<br>(4.4-8.1%)                  | 43000<br>(30000-58000) | 1700000<br>(1200000-2200000) |
| Nigeria  | 1995 | Male   | 15 to 19 | 40%<br>(27-55%)                | 60%<br>(45-73%)          | 2<br>(1.1-3.3)                              | 4.8%<br>(2.7-7.4%)                   | 7.4%<br>(3.9-12%)                   | 670<br>(350-1100)      | 55000<br>(31000-86000)       |
| Nigeria  | 1995 | Male   | 20 to 24 | 55%<br>(40-69%)                | 45%<br>(31-60%)          | 4.2<br>(2.5-6.5)                            | 11%<br>(7.3-16%)                     | 15%<br>(9.5-22%)                    | 1800<br>(1100-2700)    | 130000<br>(85000-190000)     |
| Nigeria  | 1995 | Male   | 25 to 29 | 63%<br>(48-74%)                | 37%<br>(26-52%)          | 6<br>(3.7-8.8)                              | 13%<br>(8.3-19%)                     | 17%<br>(10-26%)                     | 2500<br>(1500-3600)    | 160000<br>(110000-230000)    |
| Nigeria  | 1995 | Male   | 30 to 34 | 65%<br>(52-76%)                | 35%<br>(24-48%)          | 6.7<br>(4.3-10)                             | 13%<br>(8.6-19%)                     | 17%<br>(10-26%)                     | 2700<br>(1700-3800)    | 160000<br>(110000-230000)    |
| Nigeria  | 1995 | Male   | 35 to 39 | 66%<br>(53-77%)                | 34%<br>(23-47%)          | 6.6<br>(4-10)                               | 14%<br>(9-20%)                       | 19%<br>(11-27%)                     | 2900<br>(1900-4000)    | 160000<br>(110000-210000)    |
| Nigeria  | 1995 | Male   | 40 to 44 | 67%<br>(55-79%)                | 33%<br>(21-45%)          | 7<br>(4.2-10)                               | 16%<br>(11-22%)                      | 21%<br>(14-30%)                     | 3300<br>(2200-4700)    | 160000<br>(110000-220000)    |
| Nigeria  | 1995 | Male   | 45 to 49 | 69%<br>(55-79%)                | 31%<br>(21-45%)          | 7.8<br>(4.8-12)                             | 19%<br>(14-25%)                      | 25%<br>(18-34%)                     | 4200<br>(2900-5800)    | 180000<br>(120000-240000)    |
| Nigeria  | 1995 | Male   | 50 to 54 | 70%<br>(58-80%)                | 30%<br>(20-42%)          | 7.9<br>(4.7-12)                             | 20%<br>(15-26%)                      | 27%<br>(20-36%)                     | 4700<br>(3300-6300)    | 180000<br>(120000-230000)    |

| Location | Year | Sex    | Age      | Prevalence of current drinkers | Prevalence of abstainers | Population average of standard drinks daily | Percent of total attributable deaths | Percent of total attributable DALYs | Attributable deaths   | Attributable DALYs        |
|----------|------|--------|----------|--------------------------------|--------------------------|---------------------------------------------|--------------------------------------|-------------------------------------|-----------------------|---------------------------|
| Nigeria  | 1995 | Male   | 55 to 59 | 70%<br>(58-80%)                | 30%<br>(20-42%)          | 7.1<br>(4.2-11)                             | 20%<br>(14-26%)                      | 26%<br>(19-35%)                     | 4700<br>(3100-6500)   | 150000<br>(100000-200000) |
| Nigeria  | 1995 | Male   | 60 to 64 | 69%<br>(55-81%)                | 31%<br>(19-45%)          | 5.9<br>(3.3-9.4)                            | 17%<br>(12-23%)                      | 22%<br>(15-29%)                     | 4400<br>(2900-6000)   | 120000<br>(79000-160000)  |
| Nigeria  | 1995 | Male   | 65 to 69 | 67%<br>(52-80%)                | 33%<br>(20-48%)          | 5<br>(3-7.8)                                | 16%<br>(10-21%)                      | 20%<br>(13-27%)                     | 4200<br>(2700-5800)   | 95000<br>(62000-130000)   |
| Nigeria  | 1995 | Male   | 70 to 74 | 65%<br>(49-77%)                | 35%<br>(23-51%)          | 4.1<br>(2.3-6.5)                            | 15%<br>(8.7-21%)                     | 18%<br>(11-26%)                     | 3700<br>(2100-5500)   | 68000<br>(39000-98000)    |
| Nigeria  | 1995 | Male   | 75 to 79 | 61%<br>(44-76%)                | 39%<br>(24-56%)          | 3.2<br>(1.6-5.4)                            | 12%<br>(5.7-18%)                     | 14%<br>(6.7-22%)                    | 2200<br>(1000-3600)   | 31000<br>(15000-49000)    |
| Nigeria  | 1995 | Male   | 80 to 84 | 58%<br>(39-74%)                | 42%<br>(26-61%)          | 2.5<br>(1.3-4.2)                            | 9.3%<br>(4.5-15%)                    | 11%<br>(5.4-18%)                    | 850<br>(410-1400)     | 8800<br>(4300-14000)      |
| Nigeria  | 1995 | Male   | 85 to 89 | 54%<br>(37-71%)                | 46%<br>(29-63%)          | 1.9<br>(1-3.2)                              | 6.9%<br>(3.2-12%)                    | 8.2%<br>(3.7-14%)                   | 380<br>(170-650)      | 2800<br>(1300-4700)       |
| Nigeria  | 1995 | Male   | 90 to 94 | 54%<br>(38-71%)                | 46%<br>(29-62%)          | 1.5<br>(0.78-2.6)                           | 4.3%<br>(1.5-8.3%)                   | 5.1%<br>(1.7-9.9%)                  | 97<br>(32-190)        | 500<br>(180-960)          |
| Nigeria  | 1995 | Male   | 95 plus  | 58%<br>(36-77%)                | 42%<br>(23-64%)          | 1.3<br>(0.52-2.3)                           | 3.3%<br>(0.42-7.4%)                  | 3.7%<br>(0.26-8.7%)                 | 19<br>(1.3-45)        | 67<br>(8.2-150)           |
| Nigeria  | 2000 | Female | All Ages | 38%<br>(32-44%)                | 62%<br>(56-68%)          | 0.77<br>(0.57-1)                            | 0.86%<br>(0.5-1.3%)                  | 1.6%<br>(0.81-2.7%)                 | 12000<br>(5800-20000) | 460000<br>(270000-690000) |
| Nigeria  | 2000 | Female | 15 to 19 | 39%<br>(28-50%)                | 61%<br>(50-72%)          | 0.92<br>(0.52-1.5)                          | 1.5%<br>(0.77-2.5%)                  | 1.9%<br>(0.65-3.6%)                 | 190<br>(58-400)       | 20000<br>(9800-36000)     |
| Nigeria  | 2000 | Female | 20 to 24 | 45%<br>(34-57%)                | 55%<br>(43-66%)          | 1.4<br>(0.78-2.1)                           | 2.4%<br>(1.4-3.8%)                   | 2.5%<br>(0.97-4.5%)                 | 370<br>(130-720)      | 38000<br>(20000-63000)    |
| Nigeria  | 2000 | Female | 25 to 29 | 49%<br>(38-59%)                | 51%<br>(41-62%)          | 1.5<br>(0.89-2.2)                           | 2.4%<br>(1.3-3.9%)                   | 2.5%<br>(1-4.6%)                    | 500<br>(210-910)      | 42000<br>(23000-67000)    |
| Nigeria  | 2000 | Female | 30 to 34 | 52%<br>(40-64%)                | 48%<br>(36-60%)          | 1.5<br>(0.92-2.4)                           | 2.4%<br>(1.3-3.8%)                   | 2.6%<br>(1.2-4.5%)                  | 540<br>(260-940)      | 39000<br>(22000-62000)    |
| Nigeria  | 2000 | Female | 35 to 39 | 54%<br>(43-65%)                | 46%<br>(35-57%)          | 1.5<br>(0.91-2.5)                           | 2.8%<br>(1.5-4.5%)                   | 3.3%<br>(1.6-5.7%)                  | 690<br>(340-1200)     | 41000<br>(23000-65000)    |
| Nigeria  | 2000 | Female | 40 to 44 | 56%<br>(45-66%)                | 44%<br>(34-55%)          | 1.5<br>(0.84-2.4)                           | 3.3%<br>(1.8-5.4%)                   | 4.3%<br>(2.1-7.2%)                  | 840<br>(410-1400)     | 42000<br>(22000-67000)    |
| Nigeria  | 2000 | Female | 45 to 49 | 57%<br>(45-68%)                | 43%<br>(32-55%)          | 1.2<br>(0.68-2)                             | 3.3%<br>(1.5-5.7%)                   | 4.4%<br>(1.9-7.7%)                  | 830<br>(350-1500)     | 36000<br>(16000-65000)    |
| Nigeria  | 2000 | Female | 50 to 54 | 56%<br>(43-68%)                | 44%<br>(32-57%)          | 1.2<br>(0.69-2.1)                           | 3.8%<br>(1.8-6.5%)                   | 5.1%<br>(2.4-8.8%)                  | 1000<br>(470-1800)    | 38000<br>(18000-67000)    |
| Nigeria  | 2000 | Female | 55 to 59 | 54%<br>(40-68%)                | 46%<br>(32-60%)          | 1.7<br>(0.91-2.7)                           | 5.3%<br>(2.6-8.8%)                   | 7.2%<br>(3.5-12%)                   | 1600<br>(750-2700)    | 50000<br>(24000-85000)    |
| Nigeria  | 2000 | Female | 60 to 64 | 54%<br>(39-69%)                | 46%<br>(31-61%)          | 1.8<br>(0.97-2.9)                           | 5.3%<br>(2.3-9%)                     | 6.8%<br>(3-12%)                     | 1700<br>(720-3000)    | 46000<br>(19000-80000)    |
| Nigeria  | 2000 | Female | 65 to 69 | 55%<br>(40-70%)                | 45%<br>(30-60%)          | 1.6<br>(0.93-2.6)                           | 4.4%<br>(1.8-8.1%)                   | 5.6%<br>(2.3-10%)                   | 1500<br>(600-2900)    | 34000<br>(14000-64000)    |
| Nigeria  | 2000 | Female | 70 to 74 | 54%<br>(38-69%)                | 46%<br>(31-62%)          | 1.4<br>(0.74-2.3)                           | 3.4%<br>(0.48-7.3%)                  | 4.2%<br>(0.57-9.1%)                 | 1200<br>(160-2600)    | 21000<br>(2900-47000)     |

| Location | Year | Sex    | Age      | Prevalence of current drinkers | Prevalence of abstainers | Population average of standard drinks daily | Percent of total attributable deaths | Percent of total attributable DALYs | Attributable deaths    | Attributable DALYs           |
|----------|------|--------|----------|--------------------------------|--------------------------|---------------------------------------------|--------------------------------------|-------------------------------------|------------------------|------------------------------|
| Nigeria  | 2000 | Female | 75 to 79 | 50%<br>(33-66%)                | 50%<br>(34-67%)          | 1.1<br>(0.56-2)                             | 2.1%<br>(-0.3-5.6%)                  | 2.5%<br>(-0.37-6.7%)                | 580<br>(-91-1500)      | 8100<br>(-1200-21000)        |
| Nigeria  | 2000 | Female | 80 to 84 | 47%<br>(30-65%)                | 53%<br>(35-70%)          | 1<br>(0.53-1.7)                             | 1.4%<br>(-0.52-4%)                   | 1.6%<br>(-0.68-4.9%)                | 190<br>(-80-550)       | 2000<br>(-750-5800)          |
| Nigeria  | 2000 | Female | 85 to 89 | 48%<br>(32-63%)                | 52%<br>(37-68%)          | 1<br>(0.53-1.7)                             | 0.99%<br>(-0.83-3.3%)                | 1.1%<br>(-1-4%)                     | 85<br>(-79-300)        | 660<br>(-540-2300)           |
| Nigeria  | 2000 | Female | 90 to 94 | 50%<br>(35-66%)                | 50%<br>(34-65%)          | 1.1<br>(0.54-1.8)                           | 0.71%<br>(-1.1-3.3%)                 | 0.75%<br>(-1.4-3.9%)                | 24<br>(-44-120)        | 140<br>(-210-630)            |
| Nigeria  | 2000 | Female | 95 plus  | 53%<br>(34-71%)                | 47%<br>(29-66%)          | 1.1<br>(0.46-2.1)                           | 0.62%<br>(-1.2-3.7%)                 | 0.56%<br>(-1.6-4.2%)                | 5.2<br>(-15-39)        | 23<br>(-44-140)              |
| Nigeria  | 2000 | Male   | All Ages | 49%<br>(43-56%)                | 51%<br>(44-57%)          | 3.3<br>(2.5-4.3)                            | 3.2%<br>(2.3-4.3%)                   | 6.2%<br>(4.4-8.2%)                  | 49000<br>(35000-65000) | 1900000<br>(1400000-2500000) |
| Nigeria  | 2000 | Male   | 15 to 19 | 47%<br>(34-60%)                | 53%<br>(40-66%)          | 2.6<br>(1.5-4)                              | 5.5%<br>(3.2-8.2%)                   | 8.4%<br>(4.6-13%)                   | 870<br>(470-1400)      | 72000<br>(43000-110000)      |
| Nigeria  | 2000 | Male   | 20 to 24 | 61%<br>(49-72%)                | 39%<br>(28-51%)          | 4.8<br>(3-7.5)                              | 11%<br>(7.8-16%)                     | 15%<br>(10-22%)                     | 2200<br>(1400-3300)    | 160000<br>(110000-230000)    |
| Nigeria  | 2000 | Male   | 25 to 29 | 65%<br>(54-75%)                | 35%<br>(25-46%)          | 6.5<br>(4.2-9.4)                            | 12%<br>(7.9-18%)                     | 15%<br>(9.3-23%)                    | 2900<br>(1900-4300)    | 190000<br>(130000-280000)    |
| Nigeria  | 2000 | Male   | 30 to 34 | 66%<br>(55-76%)                | 34%<br>(24-45%)          | 7.2<br>(4.8-10)                             | 11%<br>(7.7-16%)                     | 14%<br>(8.7-21%)                    | 3000<br>(2000-4400)    | 180000<br>(130000-260000)    |
| Nigeria  | 2000 | Male   | 35 to 39 | 67%<br>(56-77%)                | 33%<br>(23-44%)          | 7<br>(4.5-11)                               | 12%<br>(7.5-17%)                     | 15%<br>(8.7-22%)                    | 3300<br>(2200-4600)    | 180000<br>(120000-250000)    |
| Nigeria  | 2000 | Male   | 40 to 44 | 68%<br>(57-78%)                | 32%<br>(22-43%)          | 7.4<br>(4.6-11)                             | 13%<br>(9.3-19%)                     | 17%<br>(11-24%)                     | 3800<br>(2600-5300)    | 180000<br>(130000-250000)    |
| Nigeria  | 2000 | Male   | 45 to 49 | 70%<br>(59-79%)                | 30%<br>(21-41%)          | 8.2<br>(5.1-12)                             | 16%<br>(12-22%)                      | 21%<br>(14-29%)                     | 4500<br>(3100-6300)    | 190000<br>(130000-260000)    |
| Nigeria  | 2000 | Male   | 50 to 54 | 71%<br>(60-80%)                | 29%<br>(20-40%)          | 8.3<br>(5-13)                               | 19%<br>(14-25%)                      | 25%<br>(18-32%)                     | 5200<br>(3600-7100)    | 190000<br>(140000-260000)    |
| Nigeria  | 2000 | Male   | 55 to 59 | 70%<br>(60-80%)                | 30%<br>(20-40%)          | 7.4<br>(4.5-11)                             | 19%<br>(14-25%)                      | 25%<br>(18-32%)                     | 5300<br>(3600-7400)    | 170000<br>(120000-240000)    |
| Nigeria  | 2000 | Male   | 60 to 64 | 68%<br>(54-80%)                | 32%<br>(20-46%)          | 6.1<br>(3.4-9.6)                            | 16%<br>(11-21%)                      | 21%<br>(15-27%)                     | 4900<br>(3300-6800)    | 130000<br>(92000-190000)     |
| Nigeria  | 2000 | Male   | 65 to 69 | 67%<br>(52-80%)                | 33%<br>(20-48%)          | 5.2<br>(3.1-7.9)                            | 16%<br>(11-21%)                      | 20%<br>(13-26%)                     | 4600<br>(3000-6400)    | 110000<br>(70000-150000)     |
| Nigeria  | 2000 | Male   | 70 to 74 | 65%<br>(50-77%)                | 35%<br>(23-50%)          | 4.3<br>(2.5-6.8)                            | 14%<br>(8.6-20%)                     | 18%<br>(11-25%)                     | 4200<br>(2400-6100)    | 76000<br>(45000-110000)      |
| Nigeria  | 2000 | Male   | 75 to 79 | 61%<br>(45-76%)                | 39%<br>(24-55%)          | 3.3<br>(1.8-5.6)                            | 12%<br>(6.1-18%)                     | 14%<br>(7.4-22%)                    | 2500<br>(1300-4000)    | 36000<br>(18000-55000)       |
| Nigeria  | 2000 | Male   | 80 to 84 | 58%<br>(40-73%)                | 42%<br>(27-60%)          | 2.6<br>(1.5-4.3)                            | 9.4%<br>(4.8-15%)                    | 11%<br>(5.7-18%)                    | 980<br>(490-1600)      | 10000<br>(5200-17000)        |
| Nigeria  | 2000 | Male   | 85 to 89 | 55%<br>(37-71%)                | 45%<br>(29-63%)          | 2<br>(1.1-3.3)                              | 6.9%<br>(3.2-12%)                    | 8.2%<br>(3.8-14%)                   | 440<br>(200-770)       | 3300<br>(1500-5600)          |

| Location | Year | Sex    | Age      | Prevalence of current drinkers | Prevalence of abstainers | Population average of standard drinks daily | Percent of total attributable deaths | Percent of total attributable DALYs | Attributable deaths    | Attributable DALYs        |
|----------|------|--------|----------|--------------------------------|--------------------------|---------------------------------------------|--------------------------------------|-------------------------------------|------------------------|---------------------------|
| Nigeria  | 2000 | Male   | 90 to 94 | 55%<br>(39-72%)                | 45%<br>(28-61%)          | 1.6<br>(0.84-2.7)                           | 4.4%<br>(1.6-8.2%)                   | 5.1%<br>(1.7-9.8%)                  | 110<br>(37-210)        | 580<br>(210-1100)         |
| Nigeria  | 2000 | Male   | 95 plus  | 58%<br>(37-77%)                | 42%<br>(23-63%)          | 1.3<br>(0.56-2.4)                           | 3.3%<br>(0.35-7.6%)                  | 3.7%<br>(0.082-8.9%)                | 21<br>(0.47-51)        | 75<br>(7.8-170)           |
| Nigeria  | 2005 | Female | All Ages | 38%<br>(32-44%)                | 62%<br>(56-68%)          | 0.73<br>(0.53-0.98)                         | 0.69%<br>(0.42-1.1%)                 | 1.2%<br>(0.6-2.1%)                  | 9400<br>(4300-16000)   | 380000<br>(220000-580000) |
| Nigeria  | 2005 | Female | 15 to 19 | 38%<br>(28-50%)                | 62%<br>(50-72%)          | 0.87<br>(0.49-1.4)                          | 1.2%<br>(0.68-2.9%)                  | 1.4%<br>(0.47-2.9%)                 | 130<br>(38-290)        | 17000<br>(8500-28000)     |
| Nigeria  | 2005 | Female | 20 to 24 | 45%<br>(34-57%)                | 55%<br>(43-66%)          | 1.3<br>(0.71-2)                             | 2.1%<br>(1.2-3.1%)                   | 1.9%<br>(0.74-3.5%)                 | 260<br>(94-500)        | 32000<br>(18000-51000)    |
| Nigeria  | 2005 | Female | 25 to 29 | 49%<br>(37-59%)                | 51%<br>(41-63%)          | 1.4<br>(0.85-2.1)                           | 1.8%<br>(1-2.9%)                     | 1.7%<br>(0.64-3.2%)                 | 370<br>(150-660)       | 36000<br>(20000-54000)    |
| Nigeria  | 2005 | Female | 30 to 34 | 52%<br>(40-63%)                | 48%<br>(37-60%)          | 1.5<br>(0.87-2.2)                           | 1.7%<br>(0.92-2.7%)                  | 1.6%<br>(0.71-3%)                   | 430<br>(190-770)       | 34000<br>(19000-53000)    |
| Nigeria  | 2005 | Female | 35 to 39 | 54%<br>(42-65%)                | 46%<br>(35-58%)          | 1.5<br>(0.87-2.3)                           | 1.9%<br>(1.1-3.1%)                   | 2.1%<br>(0.98-3.7%)                 | 540<br>(270-950)       | 34000<br>(19000-55000)    |
| Nigeria  | 2005 | Female | 40 to 44 | 55%<br>(44-66%)                | 45%<br>(34-56%)          | 1.4<br>(0.79-2.3)                           | 2.3%<br>(1.2-3.7%)                   | 2.8%<br>(1.4-4.7%)                  | 690<br>(330-1100)      | 36000<br>(19000-57000)    |
| Nigeria  | 2005 | Female | 45 to 49 | 57%<br>(44-67%)                | 43%<br>(33-56%)          | 1.1<br>(0.64-1.9)                           | 2.5%<br>(1.1-4.2%)                   | 3.2%<br>(1.4-5.6%)                  | 710<br>(290-1200)      | 32000<br>(14000-54000)    |
| Nigeria  | 2005 | Female | 50 to 54 | 56%<br>(43-68%)                | 44%<br>(32-57%)          | 1.2<br>(0.63-1.9)                           | 3%<br>(1.4-5.1%)                     | 4%<br>(1.8-6.9%)                    | 840<br>(370-1500)      | 32000<br>(15000-55000)    |
| Nigeria  | 2005 | Female | 55 to 59 | 54%<br>(40-68%)                | 46%<br>(32-60%)          | 1.6<br>(0.87-2.6)                           | 4.3%<br>(2.1-7.2%)                   | 5.9%<br>(2.9-9.7%)                  | 1300<br>(600-2200)     | 41000<br>(19000-72000)    |
| Nigeria  | 2005 | Female | 60 to 64 | 54%<br>(39-69%)                | 46%<br>(31-61%)          | 1.7<br>(0.93-2.7)                           | 4.3%<br>(1.8-7.4%)                   | 5.7%<br>(2.5-9.9%)                  | 1400<br>(580-2400)     | 38000<br>(16000-66000)    |
| Nigeria  | 2005 | Female | 65 to 69 | 55%<br>(40-71%)                | 45%<br>(29-60%)          | 1.6<br>(0.9-2.4)                            | 3.6%<br>(1.3-6.8%)                   | 4.7%<br>(1.7-8.7%)                  | 1200<br>(450-2400)     | 28000<br>(10000-53000)    |
| Nigeria  | 2005 | Female | 70 to 74 | 53%<br>(38-69%)                | 47%<br>(31-62%)          | 1.3<br>(0.7-2.2)                            | 2.7%<br>(0.11-6.1%)                  | 3.3%<br>(0.084-7.6%)                | 900<br>(24-2100)       | 16000<br>(700-39000)      |
| Nigeria  | 2005 | Female | 75 to 79 | 49%<br>(35-66%)                | 51%<br>(34-65%)          | 1.1<br>(0.54-1.9)                           | 1.6%<br>(-0.6-4.6%)                  | 1.9%<br>(-0.76-5.5%)                | 420<br>(-170-1200)     | 6000<br>(-2300-17000)     |
| Nigeria  | 2005 | Female | 80 to 84 | 47%<br>(31-64%)                | 53%<br>(36-69%)          | 0.98<br>(0.52-1.7)                          | 0.95%<br>(-0.81-3.3%)                | 1.1%<br>(-0.99-3.9%)                | 130<br>(-110-440)      | 1400<br>(-1100-4600)      |
| Nigeria  | 2005 | Female | 85 to 89 | 47%<br>(32-63%)                | 53%<br>(37-68%)          | 0.98<br>(0.52-1.7)                          | 0.61%<br>(-1-2.8%)                   | 0.66%<br>(-1.3-3.2%)                | 53<br>(-110-260)       | 440<br>(-740-1900)        |
| Nigeria  | 2005 | Female | 90 to 94 | 50%<br>(35-66%)                | 50%<br>(34-65%)          | 1<br>(0.52-1.8)                             | 0.35%<br>(-1.4-2.5%)                 | 0.3%<br>(-1.8-2.9%)                 | 11<br>(-63-100)        | 75<br>(-280-530)          |
| Nigeria  | 2005 | Female | 95 plus  | 53%<br>(34-73%)                | 47%<br>(27-66%)          | 1<br>(0.46-2)                               | 0.32%<br>(-1.5-3%)                   | 0.19%<br>(-2-3.3%)                  | 2<br>(-20-34)          | 13<br>(-58-120)           |
| Nigeria  | 2005 | Male   | All Ages | 49%<br>(42-56%)                | 51%<br>(44-58%)          | 3.1<br>(2.4-4.1)                            | 2.9%<br>(2.2-3.8%)                   | 5.5%<br>(4.2-7.4%)                  | 46000<br>(33000-61000) | 180000<br>(140000-230000) |



| Location | Year | Sex    | Age      | Prevalence of current drinkers | Prevalence of abstainers | Population average of standard drinks daily | Percent of total attributable deaths | Percent of total attributable DALYs | Attributable deaths  | Attributable DALYs        |
|----------|------|--------|----------|--------------------------------|--------------------------|---------------------------------------------|--------------------------------------|-------------------------------------|----------------------|---------------------------|
| Nigeria  | 2005 | Male   | 15 to 19 | 47%<br>(34-60%)                | 53%<br>(40-66%)          | 2.4<br>(1.4-3.9)                            | 4.6%<br>(2.7-6.9%)                   | 7.1%<br>(3.9-11%)                   | 740<br>(400-1200)    | 64000<br>(38000-97000)    |
| Nigeria  | 2005 | Male   | 20 to 24 | 60%<br>(48-71%)                | 40%<br>(29-52%)          | 4.6<br>(2.9-7.1)                            | 10%<br>(7.1-14%)                     | 14%<br>(9.2-20%)                    | 2000<br>(1300-2900)  | 150000<br>(100000-210000) |
| Nigeria  | 2005 | Male   | 25 to 29 | 65%<br>(52-74%)                | 35%<br>(26-48%)          | 6.2<br>(4-8.7)                              | 11%<br>(7.4-15%)                     | 14%<br>(8.6-21%)                    | 2800<br>(1800-4000)  | 190000<br>(130000-260000) |
| Nigeria  | 2005 | Male   | 30 to 34 | 66%<br>(54-76%)                | 34%<br>(24-46%)          | 6.8<br>(4.6-9.6)                            | 9.7%<br>(6.8-13%)                    | 12%<br>(7.6-17%)                    | 2900<br>(2100-4200)  | 180000<br>(130000-250000) |
| Nigeria  | 2005 | Male   | 35 to 39 | 67%<br>(55-76%)                | 33%<br>(24-45%)          | 6.6<br>(4.1-10)                             | 9.7%<br>(6.8-14%)                    | 12%<br>(7.8-17%)                    | 3000<br>(2100-4200)  | 170000<br>(120000-230000) |
| Nigeria  | 2005 | Male   | 40 to 44 | 68%<br>(57-78%)                | 32%<br>(22-43%)          | 7<br>(4.4-11)                               | 11%<br>(8-15%)                       | 14%<br>(9.5-19%)                    | 3600<br>(2500-4900)  | 170000<br>(130000-230000) |
| Nigeria  | 2005 | Male   | 45 to 49 | 70%<br>(59-79%)                | 30%<br>(21-41%)          | 7.9<br>(5.1-12)                             | 14%<br>(10-19%)                      | 18%<br>(13-24%)                     | 4300<br>(3100-6000)  | 190000<br>(140000-250000) |
| Nigeria  | 2005 | Male   | 50 to 54 | 71%<br>(61-80%)                | 29%<br>(20-39%)          | 8<br>(4.8-12)                               | 16%<br>(12-22%)                      | 21%<br>(16-28%)                     | 4700<br>(3400-6400)  | 180000<br>(130000-240000) |
| Nigeria  | 2005 | Male   | 55 to 59 | 70%<br>(60-80%)                | 30%<br>(20-40%)          | 7.1<br>(4.2-10)                             | 17%<br>(13-22%)                      | 22%<br>(17-29%)                     | 4900<br>(3500-6700)  | 160000<br>(120000-210000) |
| Nigeria  | 2005 | Male   | 60 to 64 | 68%<br>(54-80%)                | 32%<br>(20-46%)          | 5.7<br>(3.3-9.2)                            | 15%<br>(10-19%)                      | 19%<br>(13-25%)                     | 4700<br>(3300-6500)  | 130000<br>(93000-180000)  |
| Nigeria  | 2005 | Male   | 65 to 69 | 66%<br>(50-79%)                | 34%<br>(21-50%)          | 5<br>(3-7.5)                                | 14%<br>(9.4-18%)                     | 18%<br>(12-23%)                     | 4400<br>(2900-6100)  | 100000<br>(67000-140000)  |
| Nigeria  | 2005 | Male   | 70 to 74 | 65%<br>(49-77%)                | 35%<br>(23-51%)          | 4.1<br>(2.4-6.6)                            | 13%<br>(7.6-18%)                     | 16%<br>(9.5-22%)                    | 3800<br>(2200-5600)  | 69000<br>(41000-100000)   |
| Nigeria  | 2005 | Male   | 75 to 79 | 61%<br>(44-76%)                | 39%<br>(24-56%)          | 3.2<br>(1.8-5.4)                            | 10%<br>(4.9-16%)                     | 12%<br>(5.9-19%)                    | 2300<br>(1100-3700)  | 32000<br>(16000-52000)    |
| Nigeria  | 2005 | Male   | 80 to 84 | 58%<br>(40-74%)                | 42%<br>(26-60%)          | 2.5<br>(1.4-4.3)                            | 8.1%<br>(4-13%)                      | 9.8%<br>(4.6-16%)                   | 890<br>(420-1500)    | 9400<br>(4400-16000)      |
| Nigeria  | 2005 | Male   | 85 to 89 | 55%<br>(37-71%)                | 45%<br>(29-63%)          | 2<br>(1.1-3.2)                              | 5.8%<br>(2.6-10%)                    | 6.9%<br>(3.1-12%)                   | 420<br>(190-760)     | 3100<br>(1500-5600)       |
| Nigeria  | 2005 | Male   | 90 to 94 | 55%<br>(38-72%)                | 45%<br>(28-62%)          | 1.6<br>(0.83-2.6)                           | 3.6%<br>(1.2-7.2%)                   | 4.2%<br>(1.2-8.5%)                  | 110<br>(30-220)      | 560<br>(180-1100)         |
| Nigeria  | 2005 | Male   | 95 plus  | 58%<br>(37-77%)                | 42%<br>(23-63%)          | 1.3<br>(0.54-2.4)                           | 2.6%<br>(0.25-6.3%)                  | 2.9%<br>(-0.043-7.2%)               | 18<br>(-0.28-46)     | 69<br>(6.7-160)           |
| Nigeria  | 2010 | Female | All Ages | 39%<br>(33-45%)                | 61%<br>(55-67%)          | 0.68<br>(0.43-0.98)                         | 0.55%<br>(0.3-0.87%)                 | 0.92%<br>(0.33-1.7%)                | 6600<br>(2400-13000) | 300000<br>(160000-480000) |
| Nigeria  | 2010 | Female | 15 to 19 | 38%<br>(26-50%)                | 62%<br>(50-74%)          | 0.78<br>(0.39-1.4)                          | 1%<br>(0.58-1.6%)                    | 0.9%<br>(0.27-1.9%)                 | 76<br>(23-170)       | 14000<br>(7300-22000)     |
| Nigeria  | 2010 | Female | 20 to 24 | 46%<br>(32-59%)                | 54%<br>(41-68%)          | 1.2<br>(0.61-2.1)                           | 1.8%<br>(1.1-2.8%)                   | 1.3%<br>(0.44-2.8%)                 | 150<br>(49-300)      | 26000<br>(15000-40000)    |
| Nigeria  | 2010 | Female | 25 to 29 | 50%<br>(36-62%)                | 50%<br>(38-64%)          | 1.3<br>(0.68-2.1)                           | 1.6%<br>(0.9-2.5%)                   | 1.2%<br>(0.41-2.4%)                 | 220<br>(86-430)      | 29000<br>(17000-43000)    |
| Nigeria  | 2010 | Female | 30 to 34 | 53%<br>(39-65%)                | 47%<br>(35-61%)          | 1.4<br>(0.74-2.2)                           | 1.3%<br>(0.76-2.1%)                  | 1.1%<br>(0.47-2%)                   | 280<br>(120-520)     | 27000<br>(16000-43000)    |

| Location | Year | Sex    | Age      | Prevalence of current drinkers | Prevalence of abstainers | Population average of standard drinks daily | Percent of total attributable deaths | Percent of total attributable DALYs | Attributable deaths    | Attributable DALYs           |
|----------|------|--------|----------|--------------------------------|--------------------------|---------------------------------------------|--------------------------------------|-------------------------------------|------------------------|------------------------------|
| Nigeria  | 2010 | Female | 35 to 39 | 56%<br>(42-67%)                | 44%<br>(33-58%)          | 1.4<br>(0.74-2.3)                           | 1.4%<br>(0.78-2.3%)                  | 1.4%<br>(0.62-2.5%)                 | 370<br>(170-670)       | 26000<br>(15000-42000)       |
| Nigeria  | 2010 | Female | 40 to 44 | 57%<br>(45-68%)                | 43%<br>(32-55%)          | 1.3<br>(0.68-2.3)                           | 1.7%<br>(0.96-2.8%)                  | 2%<br>(0.96-3.5%)                   | 490<br>(230-860)       | 27000<br>(15000-45000)       |
| Nigeria  | 2010 | Female | 45 to 49 | 58%<br>(43-70%)                | 42%<br>(30-57%)          | 1.1<br>(0.56-1.9)                           | 1.9%<br>(0.9-3.4%)                   | 2.4%<br>(1.1-4.4%)                  | 530<br>(230-960)       | 25000<br>(12000-43000)       |
| Nigeria  | 2010 | Female | 50 to 54 | 58%<br>(45-70%)                | 42%<br>(30-55%)          | 1.1<br>(0.56-1.9)                           | 2.4%<br>(1.2-4.2%)                   | 3.4%<br>(1.5-5.9%)                  | 660<br>(290-1200)      | 26000<br>(12000-46000)       |
| Nigeria  | 2010 | Female | 55 to 59 | 57%<br>(43-70%)                | 43%<br>(30-57%)          | 1.5<br>(0.79-2.6)                           | 3.5%<br>(1.5-6.1%)                   | 5%<br>(2.3-8.6%)                    | 960<br>(410-1700)      | 32000<br>(14000-57000)       |
| Nigeria  | 2010 | Female | 60 to 64 | 56%<br>(41-70%)                | 44%<br>(30-59%)          | 1.6<br>(0.86-2.8)                           | 3.4%<br>(1.3-6.5%)                   | 4.7%<br>(1.8-8.8%)                  | 1000<br>(370-2100)     | 29000<br>(10000-58000)       |
| Nigeria  | 2010 | Female | 65 to 69 | 56%<br>(40-72%)                | 44%<br>(28-60%)          | 1.4<br>(0.78-2.4)                           | 2.8%<br>(0.74-5.8%)                  | 3.7%<br>(0.99-7.7%)                 | 900<br>(230-2000)      | 21000<br>(5500-45000)        |
| Nigeria  | 2010 | Female | 70 to 74 | 53%<br>(38-69%)                | 47%<br>(31-62%)          | 1.2<br>(0.58-2.1)                           | 1.9%<br>(-0.23-4.9%)                 | 2.4%<br>(-0.34-6.3%)                | 610<br>(-85-1600)      | 11000<br>(-1500-30000)       |
| Nigeria  | 2010 | Female | 75 to 79 | 49%<br>(34-65%)                | 51%<br>(35-66%)          | 0.95<br>(0.44-1.8)                          | 1%<br>(-0.81-3.7%)                   | 1.2%<br>(-1-4.5%)                   | 260<br>(-220-980)      | 3800<br>(-3100-14000)        |
| Nigeria  | 2010 | Female | 80 to 84 | 47%<br>(31-65%)                | 53%<br>(35-69%)          | 0.87<br>(0.42-1.5)                          | 0.49%<br>(-1-2.6%)                   | 0.55%<br>(-1.3-3.1%)                | 59<br>(-150-350)       | 680<br>(-1500-3700)          |
| Nigeria  | 2010 | Female | 85 to 89 | 47%<br>(32-64%)                | 53%<br>(36-68%)          | 0.87<br>(0.44-1.6)                          | 0.2%<br>(-1.2-2.1%)                  | 0.16%<br>(-1.6-2.6%)                | 13<br>(-130-210)       | 150<br>(-930-1600)           |
| Nigeria  | 2010 | Female | 90 to 94 | 50%<br>(34-65%)                | 50%<br>(35-66%)          | 0.9<br>(0.43-1.7)                           | -0.022%<br>(-1.5-2.2%)               | -0.16%<br>(-2-2.6%)                 | -6.3<br>(-78-98)       | -4.9<br>(-370-540)           |
| Nigeria  | 2010 | Female | 95 plus  | 53%<br>(34-72%)                | 47%<br>(28-66%)          | 0.93<br>(0.37-1.9)                          | 0.024%<br>(-1.5-2.6%)                | -0.18%<br>(-2-2.8%)                 | -2.1<br>(-24-33)       | 1.2<br>(-70-120)             |
| Nigeria  | 2010 | Male   | All Ages | 47%<br>(40-54%)                | 53%<br>(46-60%)          | 2.7<br>(1.8-3.8)                            | 2.5%<br>(1.9-3.4%)                   | 4.8%<br>(3.4-6.4%)                  | 38000<br>(27000-53000) | 1600000<br>(1200000-2100000) |
| Nigeria  | 2010 | Male   | 15 to 19 | 40%<br>(27-55%)                | 60%<br>(45-73%)          | 1.8<br>(0.91-3.4)                           | 3.3%<br>(1.8-5.4%)                   | 4.6%<br>(2.3-8.4%)                  | 520<br>(250-950)       | 49000<br>(27000-80000)       |
| Nigeria  | 2010 | Male   | 20 to 24 | 56%<br>(41-69%)                | 44%<br>(31-59%)          | 3.7<br>(2.1-6.2)                            | 8%<br>(5.2-11%)                      | 11%<br>(6.5-16%)                    | 1400<br>(860-2200)     | 120000<br>(75000-170000)     |
| Nigeria  | 2010 | Male   | 25 to 29 | 63%<br>(49-74%)                | 37%<br>(26-51%)          | 5.4<br>(3-8.6)                              | 9.5%<br>(6.3-13%)                    | 12%<br>(7.5-18%)                    | 2300<br>(1400-3300)    | 160000<br>(110000-220000)    |
| Nigeria  | 2010 | Male   | 30 to 34 | 65%<br>(51-76%)                | 35%<br>(24-49%)          | 6<br>(3.5-9.6)                              | 8.8%<br>(6.2-12%)                    | 11%<br>(6.9-15%)                    | 2500<br>(1700-3600)    | 160000<br>(120000-220000)    |
| Nigeria  | 2010 | Male   | 35 to 39 | 66%<br>(54-77%)                | 34%<br>(23-46%)          | 6<br>(3.4-9.4)                              | 8.5%<br>(5.9-12%)                    | 10%<br>(6.8-15%)                    | 2700<br>(1800-3800)    | 150000<br>(110000-210000)    |
| Nigeria  | 2010 | Male   | 40 to 44 | 67%<br>(55-78%)                | 33%<br>(22-45%)          | 6.3<br>(3.7-10)                             | 9.6%<br>(7-13%)                      | 12%<br>(8.5-16%)                    | 3000<br>(2100-4200)    | 150000<br>(110000-200000)    |
| Nigeria  | 2010 | Male   | 45 to 49 | 69%<br>(56-80%)                | 31%<br>(20-44%)          | 7<br>(3.9-11)                               | 12%<br>(8.6-16%)                     | 16%<br>(11-21%)                     | 3800<br>(2600-5200)    | 160000<br>(120000-220000)    |

| Location | Year | Sex    | Age      | Prevalence of current drinkers | Prevalence of abstainers | Population average of standard drinks daily | Percent of total attributable deaths | Percent of total attributable DALYs | Attributable deaths  | Attributable DALYs        |
|----------|------|--------|----------|--------------------------------|--------------------------|---------------------------------------------|--------------------------------------|-------------------------------------|----------------------|---------------------------|
| Nigeria  | 2010 | Male   | 50 to 54 | 70%<br>(59-80%)                | 30%<br>(20-41%)          | 7<br>(3.9-11)                               | 14%<br>(10-18%)                      | 19%<br>(13-24%)                     | 4100<br>(2900-5700)  | 160000<br>(110000-210000) |
| Nigeria  | 2010 | Male   | 55 to 59 | 70%<br>(58-81%)                | 30%<br>(19-42%)          | 6.4<br>(3.5-10)                             | 15%<br>(10-19%)                      | 20%<br>(14-25%)                     | 4100<br>(2800-5500)  | 140000<br>(96000-180000)  |
| Nigeria  | 2010 | Male   | 60 to 64 | 69%<br>(55-80%)                | 31%<br>(20-45%)          | 5.3<br>(2.9-8.9)                            | 13%<br>(8.3-17%)                     | 17%<br>(11-23%)                     | 4100<br>(2500-5800)  | 120000<br>(73000-160000)  |
| Nigeria  | 2010 | Male   | 65 to 69 | 67%<br>(51-80%)                | 33%<br>(20-49%)          | 4.5<br>(2.5-7.4)                            | 12%<br>(7-16%)                       | 15%<br>(8.9-21%)                    | 3800<br>(2300-5500)  | 88000<br>(54000-130000)   |
| Nigeria  | 2010 | Male   | 70 to 74 | 64%<br>(48-77%)                | 36%<br>(23-52%)          | 3.7<br>(2-6.2)                              | 10%<br>(5.4-16%)                     | 13%<br>(6.8-20%)                    | 3100<br>(1600-5000)  | 58000<br>(30000-92000)    |
| Nigeria  | 2010 | Male   | 75 to 79 | 61%<br>(44-76%)                | 39%<br>(24-56%)          | 2.9<br>(1.4-4.9)                            | 7.7%<br>(3.3-13%)                    | 9.6%<br>(4-17%)                     | 1800<br>(760-3200)   | 26000<br>(11000-45000)    |
| Nigeria  | 2010 | Male   | 80 to 84 | 58%<br>(39-75%)                | 42%<br>(25-61%)          | 2.2<br>(1.1-4)                              | 6.2%<br>(2.6-12%)                    | 7.4%<br>(3-14%)                     | 700<br>(280-1300)    | 7500<br>(3000-14000)      |
| Nigeria  | 2010 | Male   | 85 to 89 | 55%<br>(36-71%)                | 45%<br>(29-64%)          | 1.7<br>(0.89-3.1)                           | 4.4%<br>(1.7-8.8%)                   | 5.2%<br>(1.9-11%)                   | 340<br>(130-710)     | 2600<br>(1000-5300)       |
| Nigeria  | 2010 | Male   | 90 to 94 | 55%<br>(38-71%)                | 45%<br>(29-62%)          | 1.4<br>(0.7-2.5)                            | 2.6%<br>(0.46-6.1%)                  | 2.9%<br>(0.38-7.3%)                 | 87<br>(11-210)       | 480<br>(81-1100)          |
| Nigeria  | 2010 | Male   | 95 plus  | 57%<br>(37-76%)                | 43%<br>(24-63%)          | 1.1<br>(0.45-2.3)                           | 1.8%<br>(-0.24-5.1%)                 | 1.9%<br>(-0.63-5.8%)                | 14<br>(-4.8-46)      | 57<br>(-7.8-160)          |
| Nigeria  | 2016 | Female | All Ages | 39%<br>(33-45%)                | 61%<br>(55-67%)          | 0.58<br>(0.31-1)                            | 0.58%<br>(0.3-1.1%)                  | 0.9%<br>(0.24-2.1%)                 | 5600<br>(1500-13000) | 280000<br>(140000-510000) |
| Nigeria  | 2016 | Female | 15 to 19 | 38%<br>(27-50%)                | 62%<br>(50-73%)          | 0.67<br>(0.27-1.4)                          | 0.92%<br>(0.52-1.6%)                 | 0.67%<br>(0.13-1.7%)                | 63<br>(12-170)       | 14000<br>(7400-24000)     |
| Nigeria  | 2016 | Female | 20 to 24 | 46%<br>(32-59%)                | 54%<br>(41-68%)          | 1<br>(0.44-2)                               | 1.9%<br>(1.1-2.9%)                   | 1.1%<br>(0.26-2.7%)                 | 120<br>(27-280)      | 27000<br>(15000-43000)    |
| Nigeria  | 2016 | Female | 25 to 29 | 50%<br>(36-62%)                | 50%<br>(38-64%)          | 1.1<br>(0.48-2)                             | 1.8%<br>(1-2.8%)                     | 1.2%<br>(0.37-2.7%)                 | 180<br>(57-390)      | 28000<br>(16000-44000)    |
| Nigeria  | 2016 | Female | 30 to 34 | 53%<br>(40-65%)                | 47%<br>(35-60%)          | 1.2<br>(0.51-2.2)                           | 1.6%<br>(0.92-2.5%)                  | 1.3%<br>(0.53-2.6%)                 | 240<br>(95-500)      | 27000<br>(16000-45000)    |
| Nigeria  | 2016 | Female | 35 to 39 | 56%<br>(42-68%)                | 44%<br>(32-58%)          | 1.2<br>(0.55-2.2)                           | 1.7%<br>(0.97-2.8%)                  | 1.8%<br>(0.77-3.4%)                 | 350<br>(150-700)     | 27000<br>(15000-46000)    |
| Nigeria  | 2016 | Female | 40 to 44 | 57%<br>(45-69%)                | 43%<br>(31-55%)          | 1.1<br>(0.53-2.1)                           | 2%<br>(1.1-3.3%)                     | 2.5%<br>(1.2-4.6%)                  | 470<br>(210-900)     | 28000<br>(14000-49000)    |
| Nigeria  | 2016 | Female | 45 to 49 | 58%<br>(44-70%)                | 42%<br>(30-56%)          | 0.92<br>(0.41-1.9)                          | 2%<br>(1-3.8%)                       | 2.9%<br>(1.2-5.6%)                  | 490<br>(200-1000)    | 24000<br>(11000-45000)    |
| Nigeria  | 2016 | Female | 50 to 54 | 58%<br>(45-70%)                | 42%<br>(30-55%)          | 0.96<br>(0.41-1.9)                          | 2.4%<br>(1.2-4.6%)                   | 3.6%<br>(1.7-6.9%)                  | 610<br>(270-1200)    | 24000<br>(11000-46000)    |
| Nigeria  | 2016 | Female | 55 to 59 | 57%<br>(42-70%)                | 43%<br>(30-58%)          | 1.3<br>(0.61-2.5)                           | 3.1%<br>(1.2-6.2%)                   | 4.8%<br>(1.8-9.3%)                  | 850<br>(300-1700)    | 28000<br>(10000-57000)    |
| Nigeria  | 2016 | Female | 60 to 64 | 56%<br>(41-71%)                | 44%<br>(29-59%)          | 1.4<br>(0.65-2.7)                           | 2.9%<br>(0.83-6.3%)                  | 4.2%<br>(1.3-9.3%)                  | 870<br>(250-2000)    | 24000<br>(6700-56000)     |
| Nigeria  | 2016 | Female | 65 to 69 | 56%<br>(41-71%)                | 44%<br>(29-59%)          | 1.2<br>(0.55-2.4)                           | 2.2%<br>(0.22-5.7%)                  | 3%<br>(0.36-7.6%)                   | 730<br>(87-1900)     | 17000<br>(1700-45000)     |

| Location | Year | Sex    | Age      | Prevalence of current drinkers | Prevalence of abstainers | Population average of standard drinks daily | Percent of total attributable deaths | Percent of total attributable DALYs | Attributable deaths    | Attributable DALYs          |
|----------|------|--------|----------|--------------------------------|--------------------------|---------------------------------------------|--------------------------------------|-------------------------------------|------------------------|-----------------------------|
| Nigeria  | 2016 | Female | 70 to 74 | 54%<br>(39-68%)                | 46%<br>(32-61%)          | 1<br>(0.43-2)                               | 1.4%<br>(-0.55-5%)                   | 1.8%<br>(-0.69-6.5%)                | 480<br>(-200-1700)     | 8900<br>(-3600-33000)       |
| Nigeria  | 2016 | Female | 75 to 79 | 49%<br>(33-66%)                | 51%<br>(34-67%)          | 0.83<br>(0.32-1.7)                          | 0.63%<br>(-1-3.6%)                   | 0.78%<br>(-1.3-4.4%)                | 180<br>(-310-1100)     | 2700<br>(-4300-15000)       |
| Nigeria  | 2016 | Female | 80 to 84 | 47%<br>(30-66%)                | 53%<br>(34-70%)          | 0.76<br>(0.31-1.6)                          | 0.18%<br>(-1.2-2.7%)                 | 0.19%<br>(-1.6-3.3%)                | 22<br>(-180-370)       | 280<br>(-1900-4000)         |
| Nigeria  | 2016 | Female | 85 to 89 | 47%<br>(31-63%)                | 53%<br>(37-69%)          | 0.76<br>(0.31-1.5)                          | -0.066%<br>(-1.5-2.2%)               | -0.16%<br>(-1.8-2.5%)               | -13<br>(-170-220)      | -51<br>(-1200-1800)         |
| Nigeria  | 2016 | Female | 90 to 94 | 50%<br>(35-66%)                | 50%<br>(34-65%)          | 0.79<br>(0.32-1.7)                          | -0.26%<br>(-1.6-2.1%)                | -0.45%<br>(-2.1-2.4%)               | -21<br>(-97-110)       | -75<br>(-460-620)           |
| Nigeria  | 2016 | Female | 95 plus  | 53%<br>(34-72%)                | 47%<br>(28-66%)          | 0.81<br>(0.27-1.8)                          | -0.18%<br>(-1.6-2.4%)                | -0.42%<br>(-2.2-2.7%)               | -6.5<br>(-34-43)       | -11<br>(-100-160)           |
| Nigeria  | 2016 | Male   | All Ages | 47%<br>(40-55%)                | 53%<br>(45-60%)          | 2.4<br>(1.2-4.2)                            | 2.5%<br>(1.7-3.5%)                   | 4.7%<br>(2.9-6.7%)                  | 34000<br>(21000-50000) | 1400000<br>(930000-2000000) |
| Nigeria  | 2016 | Male   | 15 to 19 | 40%<br>(28-54%)                | 60%<br>(46-72%)          | 1.6<br>(0.66-3.2)                           | 2.7%<br>(1.4-4.8%)                   | 3.5%<br>(1.4-7%)                    | 450<br>(180-910)       | 45000<br>(23000-82000)      |
| Nigeria  | 2016 | Male   | 20 to 24 | 56%<br>(41-69%)                | 44%<br>(31-59%)          | 3.2<br>(1.5-6.3)                            | 6.7%<br>(3.9-9.9%)                   | 8.7%<br>(4.2-14%)                   | 1200<br>(580-2000)     | 100000<br>(59000-160000)    |
| Nigeria  | 2016 | Male   | 25 to 29 | 63%<br>(49-74%)                | 37%<br>(26-51%)          | 4.7<br>(2.2-8.6)                            | 8.4%<br>(5-12%)                      | 11%<br>(5.8-17%)                    | 1900<br>(1000-2900)    | 140000<br>(84000-200000)    |
| Nigeria  | 2016 | Male   | 30 to 34 | 66%<br>(51-76%)                | 34%<br>(24-49%)          | 5.2<br>(2.5-9.7)                            | 8.3%<br>(5.4-12%)                    | 10%<br>(6.2-15%)                    | 2300<br>(1400-3300)    | 150000<br>(97000-210000)    |
| Nigeria  | 2016 | Male   | 35 to 39 | 66%<br>(53-77%)                | 34%<br>(23-47%)          | 5.2<br>(2.6-9.4)                            | 8.3%<br>(5.5-12%)                    | 11%<br>(6.6-15%)                    | 2500<br>(1600-3700)    | 150000<br>(95000-210000)    |
| Nigeria  | 2016 | Male   | 40 to 44 | 67%<br>(55-78%)                | 33%<br>(22-45%)          | 5.5<br>(2.8-9.8)                            | 9.1%<br>(6.2-12%)                    | 12%<br>(7.8-16%)                    | 2900<br>(1900-4300)    | 150000<br>(97000-210000)    |
| Nigeria  | 2016 | Male   | 45 to 49 | 69%<br>(55-79%)                | 31%<br>(21-45%)          | 6<br>(2.8-11)                               | 11%<br>(7.5-16%)                     | 15%<br>(9.9-20%)                    | 3500<br>(2200-5000)    | 150000<br>(98000-220000)    |
| Nigeria  | 2016 | Male   | 50 to 54 | 70%<br>(58-80%)                | 30%<br>(20-42%)          | 6.1<br>(2.9-11)                             | 13%<br>(8.3-17%)                     | 17%<br>(11-22%)                     | 3800<br>(2300-5300)    | 150000<br>(92000-200000)    |
| Nigeria  | 2016 | Male   | 55 to 59 | 70%<br>(57-81%)                | 30%<br>(19-43%)          | 5.5<br>(2.7-10)                             | 13%<br>(8-17%)                       | 17%<br>(11-23%)                     | 3700<br>(2300-5300)    | 130000<br>(78000-180000)    |
| Nigeria  | 2016 | Male   | 60 to 64 | 69%<br>(55-81%)                | 31%<br>(19-45%)          | 4.6<br>(2.1-9.2)                            | 11%<br>(6.1-15%)                     | 14%<br>(8.1-20%)                    | 3400<br>(1800-5200)    | 98000<br>(53000-140000)     |
| Nigeria  | 2016 | Male   | 65 to 69 | 67%<br>(51-80%)                | 33%<br>(20-49%)          | 3.9<br>(1.8-7.5)                            | 9.4%<br>(4.8-14%)                    | 12%<br>(6.1-19%)                    | 3200<br>(1500-5000)    | 75000<br>(36000-120000)     |
| Nigeria  | 2016 | Male   | 70 to 74 | 64%<br>(48-77%)                | 36%<br>(23-52%)          | 3.2<br>(1.5-6.1)                            | 8.1%<br>(3.4-14%)                    | 10%<br>(4.4-18%)                    | 2700<br>(1200-4800)    | 51000<br>(22000-90000)      |
| Nigeria  | 2016 | Male   | 75 to 79 | 61%<br>(44-76%)                | 39%<br>(24-56%)          | 2.5<br>(1-4.7)                              | 6%<br>(2.1-12%)                      | 7.5%<br>(2.6-15%)                   | 1600<br>(540-3200)     | 23000<br>(8000-46000)       |
| Nigeria  | 2016 | Male   | 80 to 84 | 58%<br>(40-74%)                | 42%<br>(26-60%)          | 1.9<br>(0.82-3.8)                           | 4.8%<br>(1.5-10%)                    | 5.8%<br>(1.8-13%)                   | 600<br>(180-1300)      | 6400<br>(2000-14000)        |

| Location              | Year | Sex    | Age      | Prevalence of current drinkers | Prevalence of abstainers | Population average of standard drinks daily | Percent of total attributable deaths | Percent of total attributable DALYs | Attributable deaths  | Attributable DALYs  |
|-----------------------|------|--------|----------|--------------------------------|--------------------------|---------------------------------------------|--------------------------------------|-------------------------------------|----------------------|---------------------|
| Nigeria               | 2016 | Male   | 85 to 89 | 55%<br>(37-71%)                | 45%<br>(29-63%)          | 1.5<br>(0.65-2.9)                           | 3.4%<br>(0.85-7.8%)                  | 3.9%<br>(0.9-9.5%)                  | 290<br>(65-690)      | 2200<br>(570-5200)  |
| Nigeria               | 2016 | Male   | 90 to 94 | 55%<br>(38-72%)                | 45%<br>(28-62%)          | 1.2<br>(0.49-2.4)                           | 1.9%<br>(-0.025-5.7%)                | 2.1%<br>(-0.27-6.7%)                | 73<br>(-9.4-230)     | 410<br>(-5.5-1200)  |
| Nigeria               | 2016 | Male   | 95 plus  | 58%<br>(37-77%)                | 42%<br>(23-63%)          | 0.99<br>(0.35-2.2)                          | 1.2%<br>(-0.51-4.5%)                 | 1.2%<br>(-0.94-5.2%)                | 11<br>(-9.1-50)      | 50<br>(-20-180)     |
| Sao Tome and Principe | 1990 | Female | All Ages | 12%<br>(8.9-16%)               | 88%<br>(84-91%)          | 0.94<br>(0.71-1.2)                          | 1.6%<br>(1.2-2.1%)                   | 3.6%<br>(2.3-5%)                    | 19<br>(12-27)        | 510<br>(380-660)    |
| Sao Tome and Principe | 1990 | Female | 15 to 19 | 11%<br>(5.3-21%)               | 89%<br>(79-95%)          | 0.85<br>(0.31-1.7)                          | 1.6%<br>(0.87-2.6%)                  | 1.9%<br>(0.71-3.5%)                 | 0.14<br>(0.053-0.28) | 17<br>(8.8-28)      |
| Sao Tome and Principe | 1990 | Female | 20 to 24 | 15%<br>(6.5-26%)               | 85%<br>(74-93%)          | 1.3<br>(0.52-2.6)                           | 2.9%<br>(1.8-4.2%)                   | 2.9%<br>(1.3-5%)                    | 0.25<br>(0.11-0.44)  | 29<br>(17-44)       |
| Sao Tome and Principe | 1990 | Female | 25 to 29 | 17%<br>(7.3-29%)               | 83%<br>(71-93%)          | 1.7<br>(0.69-3.1)                           | 3.2%<br>(2.1-4.6%)                   | 3.6%<br>(1.9-5.6%)                  | 0.3<br>(0.15-0.48)   | 29<br>(18-42)       |
| Sao Tome and Principe | 1990 | Female | 30 to 34 | 19%<br>(8.2-33%)               | 81%<br>(67-92%)          | 1.9<br>(0.81-3.4)                           | 3.8%<br>(2.5-5.3%)                   | 4.8%<br>(2.8-7.2%)                  | 0.37<br>(0.22-0.58)  | 29<br>(19-43)       |
| Sao Tome and Principe | 1990 | Female | 35 to 39 | 21%<br>(9.3-36%)               | 79%<br>(64-91%)          | 2.1<br>(0.83-3.9)                           | 4.5%<br>(2.7-6.3%)                   | 6.2%<br>(3.5-9%)                    | 0.44<br>(0.25-0.65)  | 27<br>(17-39)       |
| Sao Tome and Principe | 1990 | Female | 40 to 44 | 22%<br>(11-39%)                | 78%<br>(61-89%)          | 2.3<br>(0.86-4.5)                           | 5.2%<br>(3.3-7.4%)                   | 7.5%<br>(4.7-11%)                   | 0.48<br>(0.29-0.7)   | 25<br>(15-36)       |
| Sao Tome and Principe | 1990 | Female | 45 to 49 | 23%<br>(9.9-39%)               | 77%<br>(61-90%)          | 2.4<br>(0.85-4.9)                           | 5.8%<br>(3.5-8.5%)                   | 8.4%<br>(4.9-12%)                   | 0.66<br>(0.38-0.98)  | 29<br>(18-43)       |
| Sao Tome and Principe | 1990 | Female | 50 to 54 | 24%<br>(11-41%)                | 76%<br>(59-89%)          | 2.5<br>(0.99-4.9)                           | 6.5%<br>(4-9.4%)                     | 9%<br>(5.6-13%)                     | 1.2<br>(0.7-1.7)     | 45<br>(28-66)       |
| Sao Tome and Principe | 1990 | Female | 55 to 59 | 24%<br>(12-42%)                | 76%<br>(58-88%)          | 2.7<br>(1-5.4)                              | 6.7%<br>(4.1-9.9%)                   | 9%<br>(5.4-13%)                     | 1.6<br>(0.97-2.5)    | 53<br>(32-80)       |
| Sao Tome and Principe | 1990 | Female | 60 to 64 | 25%<br>(12-44%)                | 75%<br>(56-88%)          | 2.8<br>(1-5.7)                              | 6.5%<br>(3.9-10%)                    | 8.3%<br>(4.9-13%)                   | 2.1<br>(1.2-3.2)     | 58<br>(34-89)       |
| Sao Tome and Principe | 1990 | Female | 65 to 69 | 26%<br>(13-43%)                | 74%<br>(57-87%)          | 2.6<br>(1-5.1)                              | 6.8%<br>(3.8-11%)                    | 8.4%<br>(4.6-13%)                   | 2.7<br>(1.4-4.3)     | 62<br>(34-99)       |
| Sao Tome and Principe | 1990 | Female | 70 to 74 | 24%<br>(13-41%)                | 76%<br>(59-87%)          | 2.1<br>(0.72-4.6)                           | 6.2%<br>(3-10%)                      | 7.5%<br>(3.6-12%)                   | 2.6<br>(1.2-4.5)     | 49<br>(22-82)       |
| Sao Tome and Principe | 1990 | Female | 75 to 79 | 21%<br>(9.8-39%)               | 79%<br>(61-90%)          | 1.6<br>(0.47-3.9)                           | 4.8%<br>(1.8-8.6%)                   | 5.7%<br>(2.2-10%)                   | 2<br>(0.74-3.6)      | 28<br>(11-51)       |
| Sao Tome and Principe | 1990 | Female | 80 to 84 | 19%<br>(8.4-35%)               | 81%<br>(65-92%)          | 1.4<br>(0.44-3.2)                           | 4.3%<br>(1.5-8%)                     | 5.1%<br>(1.8-9.6%)                  | 1.7<br>(0.61-3.3)    | 18<br>(6.5-35)      |
| Sao Tome and Principe | 1990 | Female | 85 to 89 | 20%<br>(9.2-35%)               | 80%<br>(65-91%)          | 1.4<br>(0.44-3.5)                           | 4%<br>(1.3-8%)                       | 4.7%<br>(1.4-9.4%)                  | 1.4<br>(0.42-2.8)    | 10<br>(3.2-20)      |
| Sao Tome and Principe | 1990 | Female | 90 to 94 | 22%<br>(10-39%)                | 78%<br>(61-90%)          | 1.6<br>(0.44-3.7)                           | 3.8%<br>(0.93-7.7%)                  | 4.4%<br>(1-9.3%)                    | 0.6<br>(0.14-1.3)    | 3.1<br>(0.75-6.3)   |
| Sao Tome and Principe | 1990 | Female | 95 plus  | 27%<br>(10-49%)                | 73%<br>(51-90%)          | 1.8<br>(0.4-4.7)                            | 3.8%<br>(0.55-8.7%)                  | 4.5%<br>(0.55-10%)                  | 0.17<br>(0.021-0.39) | 0.57<br>(0.083-1.3) |
| Sao Tome and Principe | 1990 | Male   | All Ages | 9.2%<br>(6.8-12%)              | 91%<br>(88-93%)          | 1<br>(0.77-1.3)                             | 2%<br>(1.5-2.4%)                     | 3.8%<br>(2.8-4.8%)                  | 21<br>(15-27)        | 700<br>(550-870)    |

| Location              | Year | Sex    | Age      | Prevalence of current drinkers | Prevalence of abstainers | Population average of standard drinks daily | Percent of total attributable deaths | Percent of total attributable DALYs | Attributable deaths    | Attributable DALYs   |
|-----------------------|------|--------|----------|--------------------------------|--------------------------|---------------------------------------------|--------------------------------------|-------------------------------------|------------------------|----------------------|
| Sao Tome and Principe | 1990 | Male   | 15 to 19 | 7.5%<br>(3.5-14%)              | 93%<br>(86-97%)          | 0.64<br>(0.22-1.3)                          | 2%<br>(1.1-3.3%)                     | 2.4%<br>(1.1-4.4%)                  | 0.21<br>(0.092-0.39)   | 22<br>(12-36)        |
| Sao Tome and Principe | 1990 | Male   | 20 to 24 | 12%<br>(5.1-21%)               | 88%<br>(79-95%)          | 1.3<br>(0.51-2.6)                           | 4.6%<br>(2.8-7%)                     | 5.2%<br>(2.7-8.7%)                  | 0.56<br>(0.29-0.95)    | 51<br>(30-79)        |
| Sao Tome and Principe | 1990 | Male   | 25 to 29 | 15%<br>(6.9-27%)               | 85%<br>(73-93%)          | 2<br>(0.83-3.8)                             | 6.5%<br>(3.9-9.4%)                   | 8%<br>(4.1-12%)                     | 0.76<br>(0.38-1.2)     | 59<br>(35-86)        |
| Sao Tome and Principe | 1990 | Male   | 30 to 34 | 18%<br>(7.6-32%)               | 82%<br>(68-92%)          | 2.6<br>(1.1-4.9)                            | 7.7%<br>(4.6-11%)                    | 10%<br>(5.3-15%)                    | 0.81<br>(0.4-1.2)      | 55<br>(31-78)        |
| Sao Tome and Principe | 1990 | Male   | 35 to 39 | 20%<br>(9-35%)                 | 80%<br>(65-91%)          | 2.9<br>(1.1-5.5)                            | 8.8%<br>(5.1-12%)                    | 12%<br>(6.3-17%)                    | 0.87<br>(0.46-1.3)     | 50<br>(29-71)        |
| Sao Tome and Principe | 1990 | Male   | 40 to 44 | 21%<br>(10-37%)                | 79%<br>(63-90%)          | 3.2<br>(1.2-6.2)                            | 9.7%<br>(6.2-13%)                    | 14%<br>(8.5-18%)                    | 0.85<br>(0.52-1.2)     | 42<br>(27-58)        |
| Sao Tome and Principe | 1990 | Male   | 45 to 49 | 21%<br>(9.4-36%)               | 79%<br>(64-91%)          | 3.3<br>(1.2-7)                              | 11%<br>(7.3-15%)                     | 15%<br>(9.8-20%)                    | 1.2<br>(0.75-1.6)      | 51<br>(33-70)        |
| Sao Tome and Principe | 1990 | Male   | 50 to 54 | 22%<br>(10-38%)                | 78%<br>(62-90%)          | 3.3<br>(1.3-7)                              | 9.4%<br>(6.2-13%)                    | 13%<br>(8.4-17%)                    | 2<br>(1.3-2.9)         | 76<br>(50-110)       |
| Sao Tome and Principe | 1990 | Male   | 55 to 59 | 22%<br>(10-38%)                | 78%<br>(62-90%)          | 3.2<br>(1.2-6.5)                            | 9.1%<br>(6.2-12%)                    | 12%<br>(8.1-16%)                    | 2.4<br>(1.6-3.5)       | 80<br>(54-110)       |
| Sao Tome and Principe | 1990 | Male   | 60 to 64 | 21%<br>(10-38%)                | 79%<br>(62-90%)          | 2.9<br>(1-5.9)                              | 7.7%<br>(5.1-11%)                    | 9.7%<br>(6.4-14%)                   | 2.6<br>(1.6-3.7)       | 71<br>(46-100)       |
| Sao Tome and Principe | 1990 | Male   | 65 to 69 | 21%<br>(10-36%)                | 79%<br>(64-90%)          | 2.4<br>(0.88-4.9)                           | 6.7%<br>(4.1-9.8%)                   | 8.3%<br>(5.1-12%)                   | 2.6<br>(1.6-3.9)       | 61<br>(37-90)        |
| Sao Tome and Principe | 1990 | Male   | 70 to 74 | 20%<br>(10-34%)                | 80%<br>(66-90%)          | 1.8<br>(0.62-4)                             | 5.6%<br>(3-8.8%)                     | 6.8%<br>(3.6-11%)                   | 2.3<br>(1.2-3.7)       | 43<br>(22-68)        |
| Sao Tome and Principe | 1990 | Male   | 75 to 79 | 18%<br>(8.6-32%)               | 82%<br>(68-91%)          | 1.4<br>(0.39-3.2)                           | 4.2%<br>(1.8-7.3%)                   | 5%<br>(2.1-8.6%)                    | 1.7<br>(0.68-2.9)      | 24<br>(9.7-42)       |
| Sao Tome and Principe | 1990 | Male   | 80 to 84 | 16%<br>(7.1-30%)               | 84%<br>(70-93%)          | 1.1<br>(0.33-2.4)                           | 3.5%<br>(1.4-6.3%)                   | 4.1%<br>(1.7-7.4%)                  | 1.1<br>(0.46-2)        | 12<br>(4.9-21)       |
| Sao Tome and Principe | 1990 | Male   | 85 to 89 | 15%<br>(6.7-28%)               | 85%<br>(72-93%)          | 0.93<br>(0.27-2.2)                          | 3%<br>(1-5.8%)                       | 3.5%<br>(1.2-6.8%)                  | 0.62<br>(0.21-1.2)     | 4.6<br>(1.7-9)       |
| Sao Tome and Principe | 1990 | Male   | 90 to 94 | 16%<br>(7.3-30%)               | 84%<br>(70-93%)          | 0.89<br>(0.24-2.3)                          | 2.3%<br>(0.63-4.9%)                  | 2.7%<br>(0.67-5.9%)                 | 0.18<br>(0.046-0.4)    | 0.96<br>(0.26-2.1)   |
| Sao Tome and Principe | 1990 | Male   | 95 plus  | 20%<br>(7.6-39%)               | 80%<br>(61-92%)          | 0.93<br>(0.19-2.6)                          | 2%<br>(0.33-4.8%)                    | 2.2%<br>(0.25-5.5%)                 | 0.035<br>(0.004-0.088) | 0.13<br>(0.021-0.31) |
| Sao Tome and Principe | 1995 | Female | All Ages | 12%<br>(9.2-17%)               | 88%<br>(83-91%)          | 1.3<br>(1-1.7)                              | 2.1%<br>(1.5-2.7%)                   | 4.6%<br>(3.1-6.2%)                  | 26<br>(17-36)          | 690<br>(480-890)     |
| Sao Tome and Principe | 1995 | Female | 15 to 19 | 12%<br>(5.8-21%)               | 88%<br>(79-94%)          | 1.2<br>(0.45-2.3)                           | 1.9%<br>(1-3%)                       | 2.4%<br>(1-4.1%)                    | 0.26<br>(0.11-0.46)    | 28<br>(15-45)        |
| Sao Tome and Principe | 1995 | Female | 20 to 24 | 15%<br>(6.7-28%)               | 85%<br>(72-93%)          | 1.9<br>(0.73-3.6)                           | 3.2%<br>(1.9-4.7%)                   | 3.3%<br>(1.6-5.7%)                  | 0.34<br>(0.16-0.58)    | 37<br>(22-55)        |
| Sao Tome and Principe | 1995 | Female | 25 to 29 | 17%<br>(7.7-30%)               | 83%<br>(70-92%)          | 2.3<br>(1-4.3)                              | 3.4%<br>(1.6-5%)                     | 3.8%<br>(0.58-6.2%)                 | 0.35<br>(0.053-0.57)   | 34<br>(17-50)        |
| Sao Tome and Principe | 1995 | Female | 30 to 34 | 19%<br>(8.6-35%)               | 81%<br>(65-91%)          | 2.7<br>(1.2-4.9)                            | 4%<br>(1.4-5.9%)                     | 5.1%<br>(0.65-7.8%)                 | 0.49<br>(0.063-0.79)   | 37<br>(14-56)        |

| Location              | Year | Sex    | Age      | Prevalence of current drinkers | Prevalence of abstainers | Population average of standard drinks daily | Percent of total attributable deaths | Percent of total attributable DALYs | Attributable deaths  | Attributable DALYs |
|-----------------------|------|--------|----------|--------------------------------|--------------------------|---------------------------------------------|--------------------------------------|-------------------------------------|----------------------|--------------------|
| Sao Tome and Principe | 1995 | Female | 35 to 39 | 22%<br>(10-39%)                | 78%<br>(61-90%)          | 3<br>(1.2-5.4)                              | 4.8%<br>(1.4-7%)                     | 6.6%<br>(0.85-10%)                  | 0.65<br>(0.086-1)    | 40<br>(12-59)      |
| Sao Tome and Principe | 1995 | Female | 40 to 44 | 23%<br>(11-39%)                | 77%<br>(61-89%)          | 3.2<br>(1.2-6.2)                            | 5.5%<br>(1.5-8.1%)                   | 7.9%<br>(1.1-12%)                   | 0.69<br>(0.096-1)    | 36<br>(10-52)      |
| Sao Tome and Principe | 1995 | Female | 45 to 49 | 24%<br>(11-40%)                | 76%<br>(60-89%)          | 3.3<br>(1.2-7.2)                            | 6.4%<br>(2.7-9.5%)                   | 9%<br>(3.3-14%)                     | 0.76<br>(0.29-1.2)   | 34<br>(15-52)      |
| Sao Tome and Principe | 1995 | Female | 50 to 54 | 24%<br>(11-43%)                | 76%<br>(57-89%)          | 3.5<br>(1.4-7.3)                            | 7.3%<br>(3.9-11%)                    | 9.8%<br>(5-14%)                     | 1.2<br>(0.58-1.8)    | 44<br>(24-66)      |
| Sao Tome and Principe | 1995 | Female | 55 to 59 | 25%<br>(12-44%)                | 75%<br>(56-88%)          | 3.8<br>(1.4-7.7)                            | 7.7%<br>(4.6-11%)                    | 9.9%<br>(6.1-15%)                   | 2<br>(1.2-3.1)       | 67<br>(40-100)     |
| Sao Tome and Principe | 1995 | Female | 60 to 64 | 26%<br>(13-45%)                | 74%<br>(55-87%)          | 3.9<br>(1.4-8.2)                            | 7.5%<br>(4.8-11%)                    | 9.3%<br>(5.9-14%)                   | 2.7<br>(1.6-4.2)     | 76<br>(46-120)     |
| Sao Tome and Principe | 1995 | Female | 65 to 69 | 27%<br>(14-45%)                | 73%<br>(55-86%)          | 3.6<br>(1.4-7)                              | 8%<br>(4.7-12%)                      | 9.7%<br>(5.6-15%)                   | 3.8<br>(2.2-6)       | 88<br>(50-140)     |
| Sao Tome and Principe | 1995 | Female | 70 to 74 | 25%<br>(13-42%)                | 75%<br>(58-87%)          | 2.9<br>(0.98-6.3)                           | 7.6%<br>(4-12%)                      | 9%<br>(4.8-14%)                     | 4.4<br>(2.3-7)       | 80<br>(43-130)     |
| Sao Tome and Principe | 1995 | Female | 75 to 79 | 22%<br>(9.9-39%)               | 78%<br>(61-90%)          | 2.3<br>(0.67-5.3)                           | 6%<br>(2.9-9.8%)                     | 7%<br>(3.3-12%)                     | 3.2<br>(1.4-5.3)     | 45<br>(21-75)      |
| Sao Tome and Principe | 1995 | Female | 80 to 84 | 20%<br>(8.8-35%)               | 80%<br>(65-91%)          | 2<br>(0.59-4.4)                             | 5.4%<br>(2.3-9.3%)                   | 6.4%<br>(2.7-11%)                   | 2.4<br>(0.98-4.3)    | 25<br>(10-45)      |
| Sao Tome and Principe | 1995 | Female | 85 to 89 | 20%<br>(9.3-36%)               | 80%<br>(64-91%)          | 1.9<br>(0.59-4.6)                           | 4.9%<br>(2-9.1%)                     | 5.8%<br>(2.3-11%)                   | 1.7<br>(0.67-3.2)    | 13<br>(5-24)       |
| Sao Tome and Principe | 1995 | Female | 90 to 94 | 23%<br>(10-40%)                | 77%<br>(60-90%)          | 2.1<br>(0.59-5.2)                           | 4.6%<br>(1.7-8.9%)                   | 5.5%<br>(1.9-11%)                   | 0.85<br>(0.29-1.7)   | 4.3<br>(1.5-8.5)   |
| Sao Tome and Principe | 1995 | Female | 95 plus  | 27%<br>(11-50%)                | 73%<br>(50-89%)          | 2.4<br>(0.51-6.3)                           | 4.7%<br>(1.1-9.6%)                   | 5.5%<br>(1.2-11%)                   | 0.27<br>(0.061-0.58) | 0.94<br>(0.21-1.9) |
| Sao Tome and Principe | 1995 | Male   | All Ages | 9.6%<br>(7.1-13%)              | 90%<br>(87-93%)          | 1.5<br>(1.1-1.8)                            | 2.2%<br>(1.2-2.8%)                   | 4.3%<br>(2.6-5.6%)                  | 24<br>(14-32)        | 770<br>(420-1000)  |
| Sao Tome and Principe | 1995 | Male   | 15 to 19 | 7.8%<br>(3.7-14%)              | 92%<br>(86-96%)          | 0.9<br>(0.33-1.8)                           | 2.3%<br>(1.3-3.6%)                   | 2.9%<br>(1.4-5%)                    | 0.32<br>(0.15-0.56)  | 32<br>(18-50)      |
| Sao Tome and Principe | 1995 | Male   | 20 to 24 | 12%<br>(5.4-22%)               | 88%<br>(78-95%)          | 1.9<br>(0.74-3.6)                           | 4.7%<br>(2.7-7.2%)                   | 5.5%<br>(2.4-9.2%)                  | 0.62<br>(0.26-1.1)   | 56<br>(31-89)      |
| Sao Tome and Principe | 1995 | Male   | 25 to 29 | 16%<br>(7.1-28%)               | 84%<br>(72-93%)          | 2.8<br>(1.2-5.2)                            | 6%<br>(2.1-9.5%)                     | 7.3%<br>(0.91-12%)                  | 0.79<br>(0.098-1.4)  | 63<br>(22-100)     |
| Sao Tome and Principe | 1995 | Male   | 30 to 34 | 18%<br>(8.3-33%)               | 82%<br>(67-92%)          | 3.6<br>(1.6-6.5)                            | 6.8%<br>(2-11%)                      | 8.7%<br>(1.1-15%)                   | 0.85<br>(0.1-1.5)    | 60<br>(18-95)      |
| Sao Tome and Principe | 1995 | Male   | 35 to 39 | 20%<br>(9.4-36%)               | 80%<br>(64-91%)          | 4.1<br>(1.7-7.6)                            | 7.9%<br>(1.9-12%)                    | 11%<br>(1.3-17%)                    | 0.95<br>(0.11-1.6)   | 56<br>(14-88)      |
| Sao Tome and Principe | 1995 | Male   | 40 to 44 | 21%<br>(11-38%)                | 79%<br>(62-89%)          | 4.5<br>(1.7-8.9)                            | 8.9%<br>(1.9-13%)                    | 12%<br>(1.5-19%)                    | 0.99<br>(0.12-1.5)   | 50<br>(11-76)      |
| Sao Tome and Principe | 1995 | Male   | 45 to 49 | 22%<br>(9.8-37%)               | 78%<br>(63-90%)          | 4.8<br>(1.8-11)                             | 10%<br>(2.1-15%)                     | 14%<br>(1.8-21%)                    | 1.1<br>(0.13-1.6)    | 47<br>(9.4-69)     |
| Sao Tome and Principe | 1995 | Male   | 50 to 54 | 22%<br>(10-40%)                | 78%<br>(60-90%)          | 4.9<br>(1.8-11)                             | 9.6%<br>(2.8-14%)                    | 13%<br>(2.8-19%)                    | 1.2<br>(0.27-1.9)    | 48<br>(14-70)      |

| Location              | Year | Sex    | Age      | Prevalence of current drinkers | Prevalence of abstainers | Population average of standard drinks daily | Percent of total attributable deaths | Percent of total attributable DALYs | Attributable deaths   | Attributable DALYs  |
|-----------------------|------|--------|----------|--------------------------------|--------------------------|---------------------------------------------|--------------------------------------|-------------------------------------|-----------------------|---------------------|
| Sao Tome and Principe | 1995 | Male   | 55 to 59 | 23%<br>(11-40%)                | 77%<br>(60-89%)          | 4.7<br>(1.7-9.6)                            | 9.7%<br>(4.9-14%)                    | 13%<br>(6-18%)                      | 2.6<br>(1.2-3.7)      | 84<br>(41-120)      |
| Sao Tome and Principe | 1995 | Male   | 60 to 64 | 23%<br>(11-40%)                | 77%<br>(60-89%)          | 4.2<br>(1.5-9)                              | 8.6%<br>(5.4-12%)                    | 11%<br>(6.7-15%)                    | 3.1<br>(1.8-4.4)      | 86<br>(50-120)      |
| Sao Tome and Principe | 1995 | Male   | 65 to 69 | 22%<br>(11-38%)                | 78%<br>(62-89%)          | 3.5<br>(1.3-7.2)                            | 7.6%<br>(4.7-11%)                    | 9.4%<br>(5.8-14%)                   | 3.2<br>(1.9-4.7)      | 73<br>(44-110)      |
| Sao Tome and Principe | 1995 | Male   | 70 to 74 | 21%<br>(11-36%)                | 79%<br>(64-89%)          | 2.6<br>(0.89-5.6)                           | 6.7%<br>(3.9-10%)                    | 8.1%<br>(4.7-12%)                   | 3.2<br>(1.9-5)        | 60<br>(35-92)       |
| Sao Tome and Principe | 1995 | Male   | 75 to 79 | 19%<br>(9.1-34%)               | 81%<br>(66-91%)          | 2<br>(0.57-4.7)                             | 5.2%<br>(2.5-8.6%)                   | 6.2%<br>(2.9-10%)                   | 2.3<br>(1.1-3.8)      | 32<br>(16-53)       |
| Sao Tome and Principe | 1995 | Male   | 80 to 84 | 17%<br>(7.3-32%)               | 83%<br>(68-93%)          | 1.6<br>(0.49-3.6)                           | 4.5%<br>(2.1-7.5%)                   | 5.3%<br>(2.4-8.8%)                  | 1.5<br>(0.68-2.5)     | 16<br>(7.3-26)      |
| Sao Tome and Principe | 1995 | Male   | 85 to 89 | 16%<br>(7.1-30%)               | 84%<br>(70-93%)          | 1.4<br>(0.4-3.3)                            | 4%<br>(1.6-7.1%)                     | 4.6%<br>(1.9-8.4%)                  | 0.9<br>(0.36-1.6)     | 6.7<br>(2.8-12)     |
| Sao Tome and Principe | 1995 | Male   | 90 to 94 | 17%<br>(7.9-32%)               | 83%<br>(68-92%)          | 1.3<br>(0.35-3.3)                           | 3.2%<br>(1-6.2%)                     | 3.7%<br>(1.1-7.3%)                  | 0.31<br>(0.096-0.61)  | 1.6<br>(0.53-3.1)   |
| Sao Tome and Principe | 1995 | Male   | 95 plus  | 21%<br>(8.2-41%)               | 79%<br>(59-92%)          | 1.4<br>(0.27-3.8)                           | 2.8%<br>(0.62-5.9%)                  | 3.1%<br>(0.61-6.9%)                 | 0.066<br>(0.013-0.14) | 0.23<br>(0.053-0.5) |
| Sao Tome and Principe | 2000 | Female | All Ages | 13%<br>(9.4-17%)               | 87%<br>(83-91%)          | 1.6<br>(1.2-2)                              | 2.5%<br>(1.8-3.3%)                   | 5.4%<br>(3.7-7.3%)                  | 32<br>(21-43)         | 820<br>(560-1100)   |
| Sao Tome and Principe | 2000 | Female | 15 to 19 | 12%<br>(5.8-22%)               | 88%<br>(78-94%)          | 1.4<br>(0.53-2.8)                           | 2%<br>(1.2-3.1%)                     | 2.7%<br>(1.2-4.6%)                  | 0.23<br>(0.11-0.41)   | 26<br>(15-41)       |
| Sao Tome and Principe | 2000 | Female | 20 to 24 | 16%<br>(7-28%)                 | 84%<br>(72-93%)          | 2.2<br>(0.89-4.1)                           | 3.3%<br>(2.1-4.9%)                   | 3.6%<br>(1.7-6.1%)                  | 0.45<br>(0.2-0.76)    | 49<br>(30-74)       |
| Sao Tome and Principe | 2000 | Female | 25 to 29 | 18%<br>(7.6-32%)               | 82%<br>(68-92%)          | 2.8<br>(1.2-5.2)                            | 3.4%<br>(1.7-5%)                     | 3.8%<br>(0.56-6.4%)                 | 0.36<br>(0.052-0.61)  | 36<br>(18-53)       |
| Sao Tome and Principe | 2000 | Female | 30 to 34 | 20%<br>(8.6-37%)               | 80%<br>(63-91%)          | 3.3<br>(1.4-5.9)                            | 4%<br>(1.5-6%)                       | 5.2%<br>(0.64-8.3%)                 | 0.51<br>(0.061-0.82)  | 39<br>(14-59)       |
| Sao Tome and Principe | 2000 | Female | 35 to 39 | 23%<br>(10-39%)                | 77%<br>(61-90%)          | 3.6<br>(1.5-6.5)                            | 4.9%<br>(1.4-7.4%)                   | 6.9%<br>(0.83-11%)                  | 0.78<br>(0.094-1.3)   | 48<br>(14-74)       |
| Sao Tome and Principe | 2000 | Female | 40 to 44 | 24%<br>(12-42%)                | 76%<br>(58-88%)          | 3.8<br>(1.5-7.4)                            | 5.7%<br>(1.5-8.4%)                   | 8.1%<br>(1-12%)                     | 0.98<br>(0.13-1.5)    | 51<br>(13-76)       |
| Sao Tome and Principe | 2000 | Female | 45 to 49 | 25%<br>(11-42%)                | 75%<br>(58-89%)          | 4<br>(1.5-8.6)                              | 6.8%<br>(1.8-10%)                    | 9.5%<br>(1.7-14%)                   | 1.1<br>(0.21-1.8)     | 50<br>(13-75)       |
| Sao Tome and Principe | 2000 | Female | 50 to 54 | 25%<br>(12-44%)                | 75%<br>(56-88%)          | 4.2<br>(1.6-8.9)                            | 8%<br>(4.2-12%)                      | 11%<br>(5.6-15%)                    | 1.4<br>(0.65-2)       | 51<br>(26-76)       |
| Sao Tome and Principe | 2000 | Female | 55 to 59 | 26%<br>(12-44%)                | 74%<br>(56-88%)          | 4.7<br>(1.7-9.3)                            | 8.4%<br>(5.2-12%)                    | 11%<br>(6.4-16%)                    | 1.9<br>(1.1-2.8)      | 62<br>(37-92)       |
| Sao Tome and Principe | 2000 | Female | 60 to 64 | 27%<br>(13-45%)                | 73%<br>(55-87%)          | 4.7<br>(1.7-9.8)                            | 8.2%<br>(5.3-12%)                    | 10%<br>(6.4-15%)                    | 3.2<br>(2-4.8)        | 88<br>(56-130)      |
| Sao Tome and Principe | 2000 | Female | 65 to 69 | 27%<br>(14-44%)                | 73%<br>(56-86%)          | 4.3<br>(1.6-8.5)                            | 8.7%<br>(5.3-13%)                    | 10%<br>(6.3-15%)                    | 4.6<br>(2.7-6.8)      | 100<br>(62-150)     |
| Sao Tome and Principe | 2000 | Female | 70 to 74 | 25%<br>(13-42%)                | 75%<br>(58-87%)          | 3.4<br>(1.1-7.7)                            | 8.2%<br>(4.5-13%)                    | 9.6%<br>(5.4-15%)                   | 5.4<br>(2.9-8.3)      | 98<br>(53-150)      |



| Location              | Year | Sex    | Age      | Prevalence of current drinkers | Prevalence of abstainers | Population average of standard drinks daily | Percent of total attributable deaths | Percent of total attributable DALYs | Attributable deaths  | Attributable DALYs |
|-----------------------|------|--------|----------|--------------------------------|--------------------------|---------------------------------------------|--------------------------------------|-------------------------------------|----------------------|--------------------|
| Sao Tome and Principe | 2000 | Female | 75 to 79 | 22%<br>(11-39%)                | 78%<br>(61-89%)          | 2.6<br>(0.76-6.4)                           | 6.5%<br>(3.2-11%)                    | 7.6%<br>(3.8-13%)                   | 4.5<br>(2.2-7.5)     | 64<br>(31-110)     |
| Sao Tome and Principe | 2000 | Female | 80 to 84 | 20%<br>(9.1-36%)               | 80%<br>(64-91%)          | 2.3<br>(0.67-5.2)                           | 6%<br>(2.8-10%)                      | 7%<br>(3.2-12%)                     | 3.3<br>(1.5-5.7)     | 35<br>(16-60)      |
| Sao Tome and Principe | 2000 | Female | 85 to 89 | 20%<br>(9.4-37%)               | 80%<br>(63-91%)          | 2.3<br>(0.72-5.6)                           | 5.5%<br>(2.5-9.7%)                   | 6.4%<br>(2.9-11%)                   | 1.9<br>(0.84-3.3)    | 14<br>(6.2-24)     |
| Sao Tome and Principe | 2000 | Female | 90 to 94 | 23%<br>(10-40%)                | 77%<br>(60-90%)          | 2.5<br>(0.69-6.1)                           | 5.3%<br>(2.1-9.5%)                   | 6.2%<br>(2.4-11%)                   | 0.88<br>(0.35-1.6)   | 4.5<br>(1.8-8.2)   |
| Sao Tome and Principe | 2000 | Female | 95 plus  | 28%<br>(11-50%)                | 72%<br>(50-89%)          | 2.9<br>(0.65-7.6)                           | 5.4%<br>(1.7-10%)                    | 6.3%<br>(1.9-12%)                   | 0.33<br>(0.099-0.65) | 1.1<br>(0.36-2.2)  |
| Sao Tome and Principe | 2000 | Male   | All Ages | 10%<br>(7.6-14%)               | 90%<br>(86-92%)          | 1.9<br>(1.4-2.3)                            | 2.6%<br>(1.5-3.4%)                   | 5%<br>(3.2-6.6%)                    | 29<br>(18-38)        | 920<br>(530-1200)  |
| Sao Tome and Principe | 2000 | Male   | 15 to 19 | 8.3%<br>(4.1-15%)              | 92%<br>(85-96%)          | 1.1<br>(0.43-2.3)                           | 2.6%<br>(1.6-4.3%)                   | 3.5%<br>(1.7-6.2%)                  | 0.35<br>(0.17-0.63)  | 34<br>(19-56)      |
| Sao Tome and Principe | 2000 | Male   | 20 to 24 | 13%<br>(5.8-24%)               | 87%<br>(76-94%)          | 2.4<br>(0.96-4.5)                           | 5.1%<br>(2.9-8%)                     | 6.1%<br>(2.8-10%)                   | 0.93<br>(0.41-1.6)   | 82<br>(45-130)     |
| Sao Tome and Principe | 2000 | Male   | 25 to 29 | 16%<br>(7.7-30%)               | 84%<br>(70-92%)          | 3.6<br>(1.5-6.5)                            | 6.1%<br>(2.2-9.6%)                   | 7.5%<br>(0.99-13%)                  | 0.89<br>(0.12-1.6)   | 71<br>(25-110)     |
| Sao Tome and Principe | 2000 | Male   | 30 to 34 | 19%<br>(8.7-35%)               | 81%<br>(65-91%)          | 4.6<br>(2-8)                                | 6.6%<br>(2.1-11%)                    | 8.3%<br>(1.1-15%)                   | 0.98<br>(0.13-1.8)   | 69<br>(21-110)     |
| Sao Tome and Principe | 2000 | Male   | 35 to 39 | 22%<br>(10-38%)                | 78%<br>(62-90%)          | 5.1<br>(2.2-9.4)                            | 7.6%<br>(2-13%)                      | 10%<br>(1.4-18%)                    | 1.2<br>(0.16-2.1)    | 70<br>(18-120)     |
| Sao Tome and Principe | 2000 | Male   | 40 to 44 | 22%<br>(11-39%)                | 78%<br>(61-89%)          | 5.6<br>(2.2-11)                             | 8.8%<br>(2-14%)                      | 12%<br>(1.6-20%)                    | 1.3<br>(0.17-2.2)    | 66<br>(15-110)     |
| Sao Tome and Principe | 2000 | Male   | 45 to 49 | 23%<br>(11-39%)                | 77%<br>(61-89%)          | 5.9<br>(2.2-13)                             | 11%<br>(2.1-16%)                     | 15%<br>(1.8-22%)                    | 1.5<br>(0.18-2.3)    | 67<br>(13-100)     |
| Sao Tome and Principe | 2000 | Male   | 50 to 54 | 23%<br>(11-41%)                | 77%<br>(59-89%)          | 6<br>(2.2-13)                               | 10%<br>(2.2-15%)                     | 14%<br>(1.8-20%)                    | 1.4<br>(0.19-2)      | 52<br>(11-77)      |
| Sao Tome and Principe | 2000 | Male   | 55 to 59 | 23%<br>(11-41%)                | 77%<br>(59-89%)          | 5.8<br>(2-12)                               | 11%<br>(5.5-15%)                     | 14%<br>(7.1-19%)                    | 1.8<br>(0.87-2.6)    | 60<br>(30-83)      |
| Sao Tome and Principe | 2000 | Male   | 60 to 64 | 23%<br>(11-40%)                | 77%<br>(60-89%)          | 5.2<br>(1.7-11)                             | 9.4%<br>(5.7-13%)                    | 12%<br>(7.1-16%)                    | 3.6<br>(2.1-5)       | 99<br>(59-140)     |
| Sao Tome and Principe | 2000 | Male   | 65 to 69 | 23%<br>(12-39%)                | 77%<br>(61-88%)          | 4.3<br>(1.6-9.2)                            | 8.5%<br>(5.4-12%)                    | 10%<br>(6.6-15%)                    | 4.1<br>(2.5-5.9)     | 94<br>(59-140)     |
| Sao Tome and Principe | 2000 | Male   | 70 to 74 | 22%<br>(11-38%)                | 78%<br>(62-89%)          | 3.3<br>(1.1-7.2)                            | 7.5%<br>(4.4-11%)                    | 9%<br>(5.3-13%)                     | 4<br>(2.4-6)         | 74<br>(44-110)     |
| Sao Tome and Principe | 2000 | Male   | 75 to 79 | 20%<br>(9.9-35%)               | 80%<br>(65-90%)          | 2.5<br>(0.69-5.8)                           | 5.9%<br>(3-9.3%)                     | 7%<br>(3.6-11%)                     | 3.2<br>(1.7-5.1)     | 46<br>(24-73)      |
| Sao Tome and Principe | 2000 | Male   | 80 to 84 | 18%<br>(8.1-32%)               | 82%<br>(68-92%)          | 2<br>(0.59-4.7)                             | 5.1%<br>(2.6-8.4%)                   | 5.9%<br>(2.9-9.7%)                  | 2<br>(1-3.3)         | 21<br>(11-35)      |
| Sao Tome and Principe | 2000 | Male   | 85 to 89 | 17%<br>(7.7-31%)               | 83%<br>(69-92%)          | 1.7<br>(0.5-4.1)                            | 4.5%<br>(2-7.8%)                     | 5.3%<br>(2.4-9.2%)                  | 1.1<br>(0.5-1.9)     | 8.3<br>(3.8-14)    |
| Sao Tome and Principe | 2000 | Male   | 90 to 94 | 18%<br>(8.5-33%)               | 82%<br>(67-91%)          | 1.6<br>(0.42-4)                             | 3.7%<br>(1.5-6.8%)                   | 4.3%<br>(1.7-8%)                    | 0.4<br>(0.15-0.75)   | 2.1<br>(0.82-3.8)  |

| Location              | Year | Sex    | Age      | Prevalence of current drinkers | Prevalence of abstainers | Population average of standard drinks daily | Percent of total attributable deaths | Percent of total attributable DALYs | Attributable deaths  | Attributable DALYs   |
|-----------------------|------|--------|----------|--------------------------------|--------------------------|---------------------------------------------|--------------------------------------|-------------------------------------|----------------------|----------------------|
| Sao Tome and Principe | 2000 | Male   | 95 plus  | 22%<br>(8.6-41%)               | 78%<br>(59-91%)          | 1.7<br>(0.34-4.6)                           | 3.2%<br>(0.86-6.6%)                  | 3.7%<br>(0.88-7.6%)                 | 0.095<br>(0.023-0.2) | 0.34<br>(0.089-0.67) |
| Sao Tome and Principe | 2005 | Female | All Ages | 13%<br>(9.8-18%)               | 87%<br>(82-90%)          | 1.7<br>(1.3-2.1)                            | 2.7%<br>(1.8-3.4%)                   | 5.6%<br>(3.6-7.5%)                  | 31<br>(20-43)        | 820<br>(550-1000)    |
| Sao Tome and Principe | 2005 | Female | 15 to 19 | 12%<br>(5.9-23%)               | 88%<br>(77-94%)          | 1.4<br>(0.56-2.9)                           | 2%<br>(1.1-3.3%)                     | 2.7%<br>(1.1-4.9%)                  | 0.24<br>(0.093-0.43) | 28<br>(16-45)        |
| Sao Tome and Principe | 2005 | Female | 20 to 24 | 16%<br>(7.2-29%)               | 84%<br>(71-93%)          | 2.3<br>(0.89-4.2)                           | 3.4%<br>(2.1-5%)                     | 3.9%<br>(1.5-6.5%)                  | 0.35<br>(0.13-0.59)  | 41<br>(25-62)        |
| Sao Tome and Principe | 2005 | Female | 25 to 29 | 18%<br>(8.1-32%)               | 82%<br>(68-92%)          | 2.8<br>(1.2-5.2)                            | 3.5%<br>(1.8-5.2%)                   | 3.9%<br>(0.58-6.8%)                 | 0.44<br>(0.065-0.78) | 47<br>(23-71)        |
| Sao Tome and Principe | 2005 | Female | 30 to 34 | 21%<br>(9.2-36%)               | 79%<br>(64-91%)          | 3.3<br>(1.4-5.7)                            | 4%<br>(1.5-6.1%)                     | 5.3%<br>(0.72-8.7%)                 | 0.5<br>(0.067-0.82)  | 40<br>(16-61)        |
| Sao Tome and Principe | 2005 | Female | 35 to 39 | 23%<br>(11-39%)                | 77%<br>(61-89%)          | 3.7<br>(1.6-6.5)                            | 4.8%<br>(1.5-7.3%)                   | 7%<br>(0.89-11%)                    | 0.73<br>(0.094-1.2)  | 46<br>(15-71)        |
| Sao Tome and Principe | 2005 | Female | 40 to 44 | 24%<br>(13-42%)                | 76%<br>(58-87%)          | 3.9<br>(1.5-7.5)                            | 5.7%<br>(1.5-8.3%)                   | 8.4%<br>(1.1-13%)                   | 1.1<br>(0.14-1.7)    | 56<br>(15-84)        |
| Sao Tome and Principe | 2005 | Female | 45 to 49 | 25%<br>(12-41%)                | 75%<br>(59-88%)          | 4.1<br>(1.5-8.4)                            | 6.8%<br>(2.3-10%)                    | 9.7%<br>(2.8-14%)                   | 1.4<br>(0.39-2.2)    | 64<br>(22-95)        |
| Sao Tome and Principe | 2005 | Female | 50 to 54 | 26%<br>(12-45%)                | 74%<br>(55-88%)          | 4.3<br>(1.7-8.5)                            | 7.9%<br>(4.1-12%)                    | 11%<br>(5.5-16%)                    | 1.6<br>(0.83-2.4)    | 63<br>(34-92)        |
| Sao Tome and Principe | 2005 | Female | 55 to 59 | 26%<br>(13-45%)                | 74%<br>(55-87%)          | 4.7<br>(1.8-9.4)                            | 8.3%<br>(5.1-12%)                    | 11%<br>(6.6-16%)                    | 1.7<br>(1-2.6)       | 57<br>(35-83)        |
| Sao Tome and Principe | 2005 | Female | 60 to 64 | 27%<br>(14-47%)                | 73%<br>(53-86%)          | 4.8<br>(1.7-10)                             | 8%<br>(5.1-12%)                      | 10%<br>(6.2-15%)                    | 2.3<br>(1.4-3.4)     | 63<br>(39-94)        |
| Sao Tome and Principe | 2005 | Female | 65 to 69 | 28%<br>(15-46%)                | 72%<br>(54-85%)          | 4.4<br>(1.7-9.2)                            | 8.6%<br>(5.2-13%)                    | 10%<br>(6.2-15%)                    | 4.2<br>(2.5-6.3)     | 97<br>(57-140)       |
| Sao Tome and Principe | 2005 | Female | 70 to 74 | 26%<br>(14-43%)                | 74%<br>(57-86%)          | 3.5<br>(1.2-8)                              | 8.1%<br>(4.4-13%)                    | 9.7%<br>(5.3-15%)                   | 5<br>(2.7-7.8)       | 92<br>(51-140)       |
| Sao Tome and Principe | 2005 | Female | 75 to 79 | 22%<br>(11-40%)                | 78%<br>(60-89%)          | 2.7<br>(0.79-6.7)                           | 6.5%<br>(3.2-11%)                    | 7.6%<br>(3.7-13%)                   | 4.6<br>(2.2-7.6)     | 64<br>(32-110)       |
| Sao Tome and Principe | 2005 | Female | 80 to 84 | 20%<br>(9.1-37%)               | 80%<br>(63-91%)          | 2.4<br>(0.69-5.3)                           | 6%<br>(2.8-10%)                      | 7%<br>(3.3-12%)                     | 3.8<br>(1.8-6.4)     | 39<br>(18-67)        |
| Sao Tome and Principe | 2005 | Female | 85 to 89 | 21%<br>(9.6-37%)               | 79%<br>(63-90%)          | 2.4<br>(0.71-5.7)                           | 5.6%<br>(2.5-9.7%)                   | 6.5%<br>(2.8-11%)                   | 2.1<br>(0.93-3.7)    | 16<br>(6.9-28)       |
| Sao Tome and Principe | 2005 | Female | 90 to 94 | 24%<br>(11-41%)                | 76%<br>(59-89%)          | 2.6<br>(0.69-6.5)                           | 5.3%<br>(2.2-9.6%)                   | 6.2%<br>(2.5-11%)                   | 0.82<br>(0.33-1.5)   | 4.2<br>(1.7-7.6)     |
| Sao Tome and Principe | 2005 | Female | 95 plus  | 29%<br>(12-51%)                | 71%<br>(49-88%)          | 3<br>(0.64-8)                               | 5.4%<br>(1.8-11%)                    | 6.3%<br>(2.1-12%)                   | 0.28<br>(0.092-0.55) | 0.96<br>(0.32-1.9)   |
| Sao Tome and Principe | 2005 | Male   | All Ages | 11%<br>(7.9-15%)               | 89%<br>(85-92%)          | 1.9<br>(1.5-2.4)                            | 2.9%<br>(1.6-3.9%)                   | 5.4%<br>(3.3-7%)                    | 31<br>(19-41)        | 1000<br>(570-1400)   |
| Sao Tome and Principe | 2005 | Male   | 15 to 19 | 8.6%<br>(4-16%)                | 91%<br>(84-96%)          | 1.2<br>(0.43-2.5)                           | 2.7%<br>(1.5-4.4%)                   | 3.5%<br>(1.7-6.4%)                  | 0.45<br>(0.21-0.8)   | 43<br>(24-70)        |
| Sao Tome and Principe | 2005 | Male   | 20 to 24 | 13%<br>(5.9-24%)               | 87%<br>(76-94%)          | 2.4<br>(0.96-4.6)                           | 5.4%<br>(2.9-8.2%)                   | 6.4%<br>(2.9-11%)                   | 0.93<br>(0.4-1.6)    | 80<br>(42-130)       |

| Location              | Year | Sex    | Age      | Prevalence of current drinkers | Prevalence of abstainers | Population average of standard drinks daily | Percent of total attributable deaths | Percent of total attributable DALYs | Attributable deaths  | Attributable DALYs   |
|-----------------------|------|--------|----------|--------------------------------|--------------------------|---------------------------------------------|--------------------------------------|-------------------------------------|----------------------|----------------------|
| Sao Tome and Principe | 2005 | Male   | 25 to 29 | 17%<br>(7.8-30%)               | 83%<br>(70-92%)          | 3.6<br>(1.5-6.6)                            | 6.3%<br>(2.2-10%)                    | 7.6%<br>(1.1-13%)                   | 1.3<br>(0.19-2.3)    | 100<br>(37-170)      |
| Sao Tome and Principe | 2005 | Male   | 30 to 34 | 20%<br>(8.7-35%)               | 80%<br>(65-91%)          | 4.5<br>(2-8)                                | 6.7%<br>(2.1-11%)                    | 8.5%<br>(1.2-15%)                   | 1.1<br>(0.15-2.1)    | 81<br>(25-130)       |
| Sao Tome and Principe | 2005 | Male   | 35 to 39 | 22%<br>(11-38%)                | 78%<br>(62-89%)          | 5.1<br>(2.1-9.2)                            | 7.7%<br>(2.1-13%)                    | 10%<br>(1.4-17%)                    | 1.5<br>(0.2-2.6)     | 88<br>(23-150)       |
| Sao Tome and Principe | 2005 | Male   | 40 to 44 | 23%<br>(12-40%)                | 77%<br>(60-88%)          | 5.6<br>(2.3-11)                             | 8.8%<br>(2.1-14%)                    | 12%<br>(1.7-20%)                    | 1.7<br>(0.24-3)      | 88<br>(20-140)       |
| Sao Tome and Principe | 2005 | Male   | 45 to 49 | 24%<br>(11-40%)                | 76%<br>(60-89%)          | 6<br>(2.3-13)                               | 11%<br>(2.2-16%)                     | 15%<br>(1.9-22%)                    | 2.2<br>(0.27-3.3)    | 94<br>(18-140)       |
| Sao Tome and Principe | 2005 | Male   | 50 to 54 | 24%<br>(12-44%)                | 76%<br>(56-88%)          | 6.1<br>(2.2-13)                             | 11%<br>(2.4-15%)                     | 14%<br>(2-20%)                      | 2<br>(0.31-2.9)      | 74<br>(16-110)       |
| Sao Tome and Principe | 2005 | Male   | 55 to 59 | 24%<br>(12-42%)                | 76%<br>(58-88%)          | 5.9<br>(2.1-12)                             | 11%<br>(6.2-15%)                     | 14%<br>(7.6-19%)                    | 1.8<br>(0.98-2.5)    | 60<br>(33-83)        |
| Sao Tome and Principe | 2005 | Male   | 60 to 64 | 24%<br>(11-41%)                | 76%<br>(59-89%)          | 5.3<br>(1.7-12)                             | 9.5%<br>(6.2-13%)                    | 12%<br>(7.5-16%)                    | 2.2<br>(1.4-3)       | 60<br>(38-84)        |
| Sao Tome and Principe | 2005 | Male   | 65 to 69 | 24%<br>(12-40%)                | 76%<br>(60-88%)          | 4.4<br>(1.6-9.6)                            | 8.5%<br>(5.5-12%)                    | 10%<br>(6.6-15%)                    | 4<br>(2.6-5.8)       | 93<br>(60-130)       |
| Sao Tome and Principe | 2005 | Male   | 70 to 74 | 22%<br>(11-37%)                | 78%<br>(63-89%)          | 3.3<br>(1.1-7.3)                            | 7.4%<br>(4.4-11%)                    | 8.9%<br>(5.3-13%)                   | 4.3<br>(2.5-6.5)     | 79<br>(47-120)       |
| Sao Tome and Principe | 2005 | Male   | 75 to 79 | 20%<br>(9.9-36%)               | 80%<br>(64-90%)          | 2.5<br>(0.7-6.1)                            | 5.9%<br>(3-9.3%)                     | 7%<br>(3.6-11%)                     | 3.3<br>(1.7-5.2)     | 47<br>(24-74)        |
| Sao Tome and Principe | 2005 | Male   | 80 to 84 | 18%<br>(8.5-33%)               | 82%<br>(67-92%)          | 2<br>(0.61-4.6)                             | 5.1%<br>(2.6-8.1%)                   | 6%<br>(3-9.6%)                      | 2.3<br>(1.2-3.7)     | 24<br>(12-39)        |
| Sao Tome and Principe | 2005 | Male   | 85 to 89 | 17%<br>(8-31%)                 | 83%<br>(69-92%)          | 1.7<br>(0.5-4.1)                            | 4.6%<br>(2.1-7.8%)                   | 5.4%<br>(2.4-9.3%)                  | 1.3<br>(0.58-2.2)    | 9.7<br>(4.4-16)      |
| Sao Tome and Principe | 2005 | Male   | 90 to 94 | 19%<br>(8.5-33%)               | 81%<br>(67-92%)          | 1.7<br>(0.41-4.1)                           | 3.8%<br>(1.4-6.8%)                   | 4.4%<br>(1.6-8.1%)                  | 0.43<br>(0.16-0.79)  | 2.2<br>(0.85-4)      |
| Sao Tome and Principe | 2005 | Male   | 95 plus  | 23%<br>(8.6-43%)               | 77%<br>(57-91%)          | 1.7<br>(0.35-4.7)                           | 3.3%<br>(0.87-6.8%)                  | 3.7%<br>(0.88-7.9%)                 | 0.1<br>(0.025-0.22)  | 0.37<br>(0.094-0.75) |
| Sao Tome and Principe | 2010 | Female | All Ages | 13%<br>(9.8-18%)               | 87%<br>(82-90%)          | 1.5<br>(1.1-2)                              | 3%<br>(2.1-3.8%)                     | 5.8%<br>(3.9-7.9%)                  | 29<br>(19-40)        | 800<br>(580-1000)    |
| Sao Tome and Principe | 2010 | Female | 15 to 19 | 13%<br>(6-22%)                 | 87%<br>(78-94%)          | 1.3<br>(0.47-2.7)                           | 1.9%<br>(1.1-2.9%)                   | 2.6%<br>(0.76-4.8%)                 | 0.17<br>(0.051-0.33) | 23<br>(13-38)        |
| Sao Tome and Principe | 2010 | Female | 20 to 24 | 16%<br>(7.5-29%)               | 84%<br>(71-93%)          | 2.1<br>(0.83-4)                             | 3.4%<br>(2.2-4.8%)                   | 3.9%<br>(1.8-6.6%)                  | 0.34<br>(0.15-0.57)  | 45<br>(29-66)        |
| Sao Tome and Principe | 2010 | Female | 25 to 29 | 18%<br>(8-33%)                 | 82%<br>(67-92%)          | 2.6<br>(1.1-4.7)                            | 3.6%<br>(1.9-5.2%)                   | 4.3%<br>(0.57-7.2%)                 | 0.35<br>(0.046-0.6)  | 40<br>(21-59)        |
| Sao Tome and Principe | 2010 | Female | 30 to 34 | 21%<br>(9.2-37%)               | 79%<br>(63-91%)          | 3<br>(1.3-5.2)                              | 4.1%<br>(1.7-5.9%)                   | 5.8%<br>(0.77-9.1%)                 | 0.65<br>(0.084-1.1)  | 54<br>(23-81)        |
| Sao Tome and Principe | 2010 | Female | 35 to 39 | 23%<br>(11-40%)                | 77%<br>(60-89%)          | 3.3<br>(1.4-5.9)                            | 5%<br>(2.1-7.3%)                     | 7.7%<br>(1.9-11%)                   | 0.79<br>(0.18-1.2)   | 51<br>(21-75)        |
| Sao Tome and Principe | 2010 | Female | 40 to 44 | 24%<br>(12-41%)                | 76%<br>(59-88%)          | 3.5<br>(1.5-6.5)                            | 5.9%<br>(2.3-8.4%)                   | 9.1%<br>(2.5-13%)                   | 1.1<br>(0.32-1.6)    | 58<br>(22-85)        |

| Location              | Year | Sex    | Age      | Prevalence of current drinkers | Prevalence of abstainers | Population average of standard drinks daily | Percent of total attributable deaths | Percent of total attributable DALYs | Attributable deaths  | Attributable DALYs |
|-----------------------|------|--------|----------|--------------------------------|--------------------------|---------------------------------------------|--------------------------------------|-------------------------------------|----------------------|--------------------|
| Sao Tome and Principe | 2010 | Female | 45 to 49 | 25%<br>(12-42%)                | 75%<br>(58-88%)          | 3.6<br>(1.4-7.3)                            | 6.8%<br>(3.6-10%)                    | 10%<br>(5.1-15%)                    | 1.6<br>(0.82-2.5)    | 71<br>(38-110)     |
| Sao Tome and Principe | 2010 | Female | 50 to 54 | 25%<br>(12-44%)                | 75%<br>(56-88%)          | 3.8<br>(1.5-7.6)                            | 7.7%<br>(4.6-11%)                    | 11%<br>(6.3-15%)                    | 2<br>(1.2-3)         | 78<br>(47-110)     |
| Sao Tome and Principe | 2010 | Female | 55 to 59 | 26%<br>(13-46%)                | 74%<br>(54-87%)          | 4.2<br>(1.5-8.6)                            | 7.9%<br>(5-12%)                      | 10%<br>(6.5-15%)                    | 2<br>(1.2-3)         | 66<br>(41-99)      |
| Sao Tome and Principe | 2010 | Female | 60 to 64 | 27%<br>(14-46%)                | 73%<br>(54-86%)          | 4.3<br>(1.5-9.3)                            | 7.6%<br>(4.8-11%)                    | 9.7%<br>(6.1-14%)                   | 2<br>(1.2-3)         | 54<br>(33-82)      |
| Sao Tome and Principe | 2010 | Female | 65 to 69 | 28%<br>(14-46%)                | 72%<br>(54-86%)          | 3.9<br>(1.4-8)                              | 8.1%<br>(4.8-12%)                    | 10%<br>(5.7-15%)                    | 2.8<br>(1.7-4.2)     | 65<br>(38-97)      |
| Sao Tome and Principe | 2010 | Female | 70 to 74 | 26%<br>(13-43%)                | 74%<br>(57-87%)          | 3.1<br>(1-7.2)                              | 7.5%<br>(4.1-12%)                    | 9.1%<br>(4.9-14%)                   | 4.3<br>(2.2-6.7)     | 79<br>(42-120)     |
| Sao Tome and Principe | 2010 | Female | 75 to 79 | 22%<br>(10-39%)                | 78%<br>(61-90%)          | 2.5<br>(0.69-6.3)                           | 6.1%<br>(2.9-10%)                    | 7.2%<br>(3.3-12%)                   | 4<br>(1.9-6.7)       | 57<br>(27-95)      |
| Sao Tome and Principe | 2010 | Female | 80 to 84 | 20%<br>(9-37%)                 | 80%<br>(63-91%)          | 2.2<br>(0.64-4.9)                           | 5.6%<br>(2.5-9.4%)                   | 6.6%<br>(2.9-11%)                   | 3.6<br>(1.6-6.2)     | 38<br>(17-64)      |
| Sao Tome and Principe | 2010 | Female | 85 to 89 | 21%<br>(9.9-37%)               | 79%<br>(63-90%)          | 2.1<br>(0.66-5)                             | 5.2%<br>(2.2-9.3%)                   | 6.1%<br>(2.6-11%)                   | 2.3<br>(0.99-4.2)    | 17<br>(7.4-31)     |
| Sao Tome and Principe | 2010 | Female | 90 to 94 | 24%<br>(11-42%)                | 76%<br>(58-89%)          | 2.3<br>(0.61-5.7)                           | 5%<br>(1.8-9.4%)                     | 5.8%<br>(2.1-11%)                   | 0.9<br>(0.33-1.7)    | 4.6<br>(1.7-8.7)   |
| Sao Tome and Principe | 2010 | Female | 95 plus  | 28%<br>(11-51%)                | 72%<br>(49-89%)          | 2.6<br>(0.57-7.2)                           | 5.1%<br>(1.4-10%)                    | 5.9%<br>(1.6-12%)                   | 0.25<br>(0.065-0.51) | 0.85<br>(0.23-1.7) |
| Sao Tome and Principe | 2010 | Male   | All Ages | 11%<br>(8-15%)                 | 89%<br>(85-92%)          | 1.8<br>(1.4-2.4)                            | 3.4%<br>(1.9-4.3%)                   | 5.8%<br>(3.4-7.3%)                  | 30<br>(17-39)        | 1100<br>(600-1400) |
| Sao Tome and Principe | 2010 | Male   | 15 to 19 | 8.5%<br>(4.1-16%)              | 91%<br>(84-96%)          | 1.1<br>(0.38-2.2)                           | 2.5%<br>(1.4-4.1%)                   | 3.4%<br>(1.4-6.1%)                  | 0.36<br>(0.15-0.65)  | 37<br>(20-59)      |
| Sao Tome and Principe | 2010 | Male   | 20 to 24 | 13%<br>(6-23%)                 | 87%<br>(77-94%)          | 2.2<br>(0.87-4.3)                           | 5.4%<br>(3.3-8%)                     | 6.5%<br>(3.3-11%)                   | 1<br>(0.49-1.7)      | 90<br>(53-140)     |
| Sao Tome and Principe | 2010 | Male   | 25 to 29 | 17%<br>(7.9-30%)               | 83%<br>(70-92%)          | 3.3<br>(1.4-5.9)                            | 6.6%<br>(2.5-10%)                    | 8.2%<br>(1.1-14%)                   | 1.1<br>(0.16-1.9)    | 91<br>(33-140)     |
| Sao Tome and Principe | 2010 | Male   | 30 to 34 | 20%<br>(8.7-36%)               | 80%<br>(64-91%)          | 4.2<br>(1.8-7.4)                            | 7.1%<br>(2.3-11%)                    | 9.2%<br>(1.2-16%)                   | 1.6<br>(0.2-2.8)     | 110<br>(36-180)    |
| Sao Tome and Principe | 2010 | Male   | 35 to 39 | 22%<br>(10-39%)                | 78%<br>(61-90%)          | 4.7<br>(2-8.9)                              | 8.3%<br>(2.2-13%)                    | 11%<br>(1.5-19%)                    | 1.6<br>(0.2-2.7)     | 98<br>(26-150)     |
| Sao Tome and Principe | 2010 | Male   | 40 to 44 | 23%<br>(12-39%)                | 77%<br>(61-88%)          | 5.1<br>(2-9.8)                              | 9.3%<br>(2.2-14%)                    | 13%<br>(1.7-20%)                    | 2<br>(0.25-3.3)      | 100<br>(23-160)    |
| Sao Tome and Principe | 2010 | Male   | 45 to 49 | 23%<br>(11-39%)                | 77%<br>(61-89%)          | 5.3<br>(2-11)                               | 11%<br>(2.4-16%)                     | 16%<br>(2-22%)                      | 2.6<br>(0.32-3.9)    | 110<br>(23-170)    |
| Sao Tome and Principe | 2010 | Male   | 50 to 54 | 24%<br>(11-43%)                | 76%<br>(57-89%)          | 5.4<br>(2-12)                               | 10%<br>(3.3-15%)                     | 14%<br>(3.6-20%)                    | 2.3<br>(0.57-3.4)    | 88<br>(27-130)     |
| Sao Tome and Principe | 2010 | Male   | 55 to 59 | 24%<br>(12-42%)                | 76%<br>(58-88%)          | 5.3<br>(1.8-11)                             | 11%<br>(6.6-15%)                     | 14%<br>(8.5-19%)                    | 2.3<br>(1.3-3.2)     | 75<br>(45-100)     |
| Sao Tome and Principe | 2010 | Male   | 60 to 64 | 24%<br>(12-42%)                | 76%<br>(58-88%)          | 4.8<br>(1.6-11)                             | 9.3%<br>(6-13%)                      | 12%<br>(7.5-16%)                    | 1.8<br>(1.1-2.6)     | 51<br>(33-71)      |

| Location              | Year | Sex    | Age      | Prevalence of current drinkers | Prevalence of abstainers | Population average of standard drinks daily | Percent of total attributable deaths | Percent of total attributable DALYs | Attributable deaths   | Attributable DALYs   |
|-----------------------|------|--------|----------|--------------------------------|--------------------------|---------------------------------------------|--------------------------------------|-------------------------------------|-----------------------|----------------------|
| Sao Tome and Principe | 2010 | Male   | 65 to 69 | 24%<br>(12-40%)                | 76%<br>(60-88%)          | 4<br>(1.4-8.5)                              | 8.1%<br>(5.3-11%)                    | 10%<br>(6.4-14%)                    | 2.1<br>(1.3-3)        | 48<br>(31-69)        |
| Sao Tome and Principe | 2010 | Male   | 70 to 74 | 22%<br>(11-38%)                | 78%<br>(62-89%)          | 3<br>(1-6.7)                                | 7%<br>(4.1-10%)                      | 8.5%<br>(5-13%)                     | 3.7<br>(2.1-5.5)      | 68<br>(40-100)       |
| Sao Tome and Principe | 2010 | Male   | 75 to 79 | 20%<br>(9.9-35%)               | 80%<br>(65-90%)          | 2.2<br>(0.6-5.4)                            | 5.4%<br>(2.7-8.6%)                   | 6.5%<br>(3.2-10%)                   | 3.1<br>(1.5-5)        | 44<br>(22-71)        |
| Sao Tome and Principe | 2010 | Male   | 80 to 84 | 18%<br>(8.2-32%)               | 82%<br>(68-92%)          | 1.8<br>(0.51-4.1)                           | 4.7%<br>(2.2-7.6%)                   | 5.5%<br>(2.7-8.8%)                  | 2.2<br>(1.1-3.6)      | 24<br>(11-38)        |
| Sao Tome and Principe | 2010 | Male   | 85 to 89 | 17%<br>(7.9-31%)               | 83%<br>(69-92%)          | 1.6<br>(0.45-3.7)                           | 4.2%<br>(1.9-7.2%)                   | 4.9%<br>(2.2-8.6%)                  | 1.3<br>(0.57-2.2)     | 9.7<br>(4.3-17)      |
| Sao Tome and Principe | 2010 | Male   | 90 to 94 | 19%<br>(8.6-34%)               | 81%<br>(66-91%)          | 1.5<br>(0.38-3.8)                           | 3.4%<br>(1.2-6.4%)                   | 4%<br>(1.3-7.6%)                    | 0.45<br>(0.15-0.84)   | 2.3<br>(0.79-4.3)    |
| Sao Tome and Principe | 2010 | Male   | 95 plus  | 22%<br>(9.2-42%)               | 78%<br>(58-91%)          | 1.6<br>(0.31-4.3)                           | 3%<br>(0.77-6.4%)                    | 3.4%<br>(0.72-7.6%)                 | 0.098<br>(0.021-0.22) | 0.35<br>(0.087-0.76) |
| Sao Tome and Principe | 2016 | Female | All Ages | 14%<br>(9.9-18%)               | 86%<br>(82-90%)          | 1.5<br>(0.89-2.4)                           | 3.1%<br>(2.3-3.8%)                   | 5.7%<br>(3.9-7.6%)                  | 27<br>(18-37)         | 800<br>(610-1000)    |
| Sao Tome and Principe | 2016 | Female | 15 to 19 | 12%<br>(6-22%)                 | 88%<br>(78-94%)          | 1.3<br>(0.4-3)                              | 1.8%<br>(1-2.7%)                     | 2.3%<br>(0.87-4.3%)                 | 0.15<br>(0.058-0.29)  | 24<br>(13-38)        |
| Sao Tome and Principe | 2016 | Female | 20 to 24 | 16%<br>(7.1-28%)               | 84%<br>(72-93%)          | 2<br>(0.67-4.2)                             | 3.3%<br>(2.2-4.6%)                   | 3.7%<br>(1.9-6%)                    | 0.26<br>(0.13-0.44)   | 40<br>(26-59)        |
| Sao Tome and Principe | 2016 | Female | 25 to 29 | 18%<br>(8-31%)                 | 82%<br>(69-92%)          | 2.5<br>(0.93-5)                             | 3.6%<br>(2.5-5%)                     | 4.4%<br>(2.5-6.9%)                  | 0.38<br>(0.2-0.61)    | 46<br>(31-66)        |
| Sao Tome and Principe | 2016 | Female | 30 to 34 | 21%<br>(8.8-37%)               | 79%<br>(63-91%)          | 2.9<br>(1.2-5.9)                            | 4.1%<br>(2.7-5.5%)                   | 5.9%<br>(3.4-8.6%)                  | 0.52<br>(0.29-0.81)   | 46<br>(30-66)        |
| Sao Tome and Principe | 2016 | Female | 35 to 39 | 23%<br>(11-40%)                | 77%<br>(60-89%)          | 3.2<br>(1.2-6.1)                            | 4.9%<br>(3.3-6.8%)                   | 7.9%<br>(5.1-11%)                   | 1<br>(0.61-1.6)       | 68<br>(44-99)        |
| Sao Tome and Principe | 2016 | Female | 40 to 44 | 24%<br>(12-42%)                | 76%<br>(58-88%)          | 3.3<br>(1.4-6.8)                            | 5.7%<br>(3.9-7.9%)                   | 9.2%<br>(6.2-13%)                   | 1.2<br>(0.82-1.9)     | 67<br>(45-98)        |
| Sao Tome and Principe | 2016 | Female | 45 to 49 | 25%<br>(11-42%)                | 75%<br>(58-89%)          | 3.5<br>(1.2-7.4)                            | 6.5%<br>(4.3-9.2%)                   | 9.8%<br>(6.4-14%)                   | 1.5<br>(0.95-2.3)     | 69<br>(45-100)       |
| Sao Tome and Principe | 2016 | Female | 50 to 54 | 25%<br>(12-45%)                | 75%<br>(55-88%)          | 3.7<br>(1.2-8.4)                            | 7.1%<br>(4.7-10%)                    | 10%<br>(6.6-14%)                    | 2.1<br>(1.3-3.2)      | 83<br>(53-120)       |
| Sao Tome and Principe | 2016 | Female | 55 to 59 | 26%<br>(13-44%)                | 74%<br>(56-87%)          | 4<br>(1.4-8.7)                              | 7.3%<br>(4.7-11%)                    | 9.9%<br>(6.3-14%)                   | 2.5<br>(1.5-3.7)      | 83<br>(51-120)       |
| Sao Tome and Principe | 2016 | Female | 60 to 64 | 27%<br>(13-46%)                | 73%<br>(54-87%)          | 4.1<br>(1.4-9.5)                            | 7.1%<br>(4.4-11%)                    | 9.1%<br>(5.7-14%)                   | 2.4<br>(1.4-3.6)      | 66<br>(41-99)        |
| Sao Tome and Principe | 2016 | Female | 65 to 69 | 28%<br>(14-45%)                | 72%<br>(55-86%)          | 3.8<br>(1.3-8.4)                            | 7.4%<br>(4.1-11%)                    | 9.2%<br>(5.1-14%)                   | 2.4<br>(1.3-3.7)      | 55<br>(31-86)        |
| Sao Tome and Principe | 2016 | Female | 70 to 74 | 26%<br>(13-42%)                | 74%<br>(58-87%)          | 3<br>(0.89-7.6)                             | 6.8%<br>(3.5-11%)                    | 8.3%<br>(4.1-13%)                   | 2.7<br>(1.4-4.2)      | 49<br>(26-78)        |
| Sao Tome and Principe | 2016 | Female | 75 to 79 | 22%<br>(11-38%)                | 78%<br>(62-89%)          | 2.3<br>(0.64-6)                             | 5.4%<br>(2.6-9.2%)                   | 6.5%<br>(3-11%)                     | 3.2<br>(1.5-5.4)      | 46<br>(22-78)        |
| Sao Tome and Principe | 2016 | Female | 80 to 84 | 20%<br>(9.2-37%)               | 80%<br>(63-91%)          | 2<br>(0.61-5.3)                             | 5%<br>(2.2-8.5%)                     | 5.9%<br>(2.6-10%)                   | 3.2<br>(1.4-5.5)      | 34<br>(15-58)        |

| Location              | Year | Sex    | Age      | Prevalence of current drinkers | Prevalence of abstainers | Population average of standard drinks daily | Percent of total attributable deaths | Percent of total attributable DALYs | Attributable deaths  | Attributable DALYs     |
|-----------------------|------|--------|----------|--------------------------------|--------------------------|---------------------------------------------|--------------------------------------|-------------------------------------|----------------------|------------------------|
| Sao Tome and Principe | 2016 | Female | 85 to 89 | 21%<br>(9.8-36%)               | 79%<br>(64-90%)          | 2<br>(0.56-5.2)                             | 4.6%<br>(1.9-8.4%)                   | 5.4%<br>(2.2-9.9%)                  | 2.2<br>(0.88-4.1)    | 16<br>(6.7-30)         |
| Sao Tome and Principe | 2016 | Female | 90 to 94 | 24%<br>(11-41%)                | 76%<br>(59-89%)          | 2.2<br>(0.56-6)                             | 4.4%<br>(1.5-8.4%)                   | 5.2%<br>(1.7-10%)                   | 0.99<br>(0.32-1.9)   | 5<br>(1.7-9.7)         |
| Sao Tome and Principe | 2016 | Female | 95 plus  | 29%<br>(12-51%)                | 71%<br>(49-88%)          | 2.6<br>(0.53-7.4)                           | 4.6%<br>(1.2-9.3%)                   | 5.3%<br>(1.3-11%)                   | 0.28<br>(0.071-0.59) | 0.97<br>(0.25-2)       |
| Sao Tome and Principe | 2016 | Male   | All Ages | 11%<br>(8.1-15%)               | 89%<br>(85-92%)          | 1.8<br>(1.1-2.8)                            | 4.1%<br>(2.8-5%)                     | 6.5%<br>(4.7-8.1%)                  | 33<br>(23-44)        | 1300<br>(870-1600)     |
| Sao Tome and Principe | 2016 | Male   | 15 to 19 | 8.4%<br>(4-16%)                | 92%<br>(84-96%)          | 1<br>(0.31-2.4)                             | 2.4%<br>(1.4-3.9%)                   | 3.1%<br>(1.4-5.7%)                  | 0.38<br>(0.17-0.69)  | 39<br>(23-66)          |
| Sao Tome and Principe | 2016 | Male   | 20 to 24 | 13%<br>(5.9-24%)               | 87%<br>(76-94%)          | 2.1<br>(0.71-4.5)                           | 5.3%<br>(3.4-7.8%)                   | 6.3%<br>(3.5-10%)                   | 0.95<br>(0.5-1.6)    | 86<br>(53-130)         |
| Sao Tome and Principe | 2016 | Male   | 25 to 29 | 17%<br>(7.9-30%)               | 83%<br>(70-92%)          | 3.1<br>(1.1-6.5)                            | 7%<br>(4.3-10%)                      | 9%<br>(4.7-14%)                     | 1.5<br>(0.72-2.4)    | 120<br>(70-180)        |
| Sao Tome and Principe | 2016 | Male   | 30 to 34 | 20%<br>(8.6-35%)               | 80%<br>(65-91%)          | 3.9<br>(1.6-7.9)                            | 7.8%<br>(3.4-11%)                    | 11%<br>(2.5-16%)                    | 1.6<br>(0.35-2.5)    | 110<br>(45-160)        |
| Sao Tome and Principe | 2016 | Male   | 35 to 39 | 22%<br>(9.9-37%)               | 78%<br>(63-90%)          | 4.4<br>(1.7-9)                              | 9%<br>(4.5-13%)                      | 13%<br>(5.3-18%)                    | 2.5<br>(0.98-3.8)    | 150<br>(69-210)        |
| Sao Tome and Principe | 2016 | Male   | 40 to 44 | 23%<br>(12-40%)                | 77%<br>(60-88%)          | 4.8<br>(1.8-9.7)                            | 10%<br>(6-14%)                       | 15%<br>(8.2-20%)                    | 2.7<br>(1.4-3.8)     | 140<br>(77-190)        |
| Sao Tome and Principe | 2016 | Male   | 45 to 49 | 24%<br>(11-39%)                | 76%<br>(61-89%)          | 5.1<br>(1.7-12)                             | 12%<br>(7.5-16%)                     | 17%<br>(11-22%)                     | 3.4<br>(1.9-4.8)     | 150<br>(90-210)        |
| Sao Tome and Principe | 2016 | Male   | 50 to 54 | 24%<br>(11-43%)                | 76%<br>(57-89%)          | 5.2<br>(1.7-12)                             | 11%<br>(6.9-14%)                     | 14%<br>(9.6-19%)                    | 3.3<br>(2-4.7)       | 130<br>(80-180)        |
| Sao Tome and Principe | 2016 | Male   | 55 to 59 | 24%<br>(12-42%)                | 76%<br>(58-88%)          | 5.1<br>(1.6-12)                             | 11%<br>(7.6-14%)                     | 14%<br>(9.9-18%)                    | 3.3<br>(2.1-4.6)     | 110<br>(71-150)        |
| Sao Tome and Principe | 2016 | Male   | 60 to 64 | 24%<br>(11-40%)                | 76%<br>(60-89%)          | 4.6<br>(1.4-11)                             | 9.1%<br>(6.4-12%)                    | 11%<br>(8-16%)                      | 2.7<br>(1.8-4)       | 77<br>(50-110)         |
| Sao Tome and Principe | 2016 | Male   | 65 to 69 | 24%<br>(12-40%)                | 76%<br>(60-88%)          | 3.8<br>(1.2-9)                              | 7.7%<br>(5-11%)                      | 9.5%<br>(6.1-13%)                   | 2<br>(1.2-3.1)       | 47<br>(29-71)          |
| Sao Tome and Principe | 2016 | Male   | 70 to 74 | 22%<br>(12-39%)                | 78%<br>(61-88%)          | 2.9<br>(0.87-7)                             | 6.4%<br>(3.7-9.6%)                   | 7.8%<br>(4.5-11%)                   | 1.9<br>(1-3)         | 35<br>(19-56)          |
| Sao Tome and Principe | 2016 | Male   | 75 to 79 | 20%<br>(9.5-35%)               | 80%<br>(65-90%)          | 2.2<br>(0.57-5.5)                           | 5.1%<br>(2.5-8.1%)                   | 6.1%<br>(3-9.8%)                    | 2.7<br>(1.3-4.5)     | 39<br>(18-64)          |
| Sao Tome and Principe | 2016 | Male   | 80 to 84 | 18%<br>(8.2-33%)               | 82%<br>(67-92%)          | 1.8<br>(0.47-4.5)                           | 4.3%<br>(2.1-7.1%)                   | 5.1%<br>(2.4-8.3%)                  | 2.4<br>(1.1-4)       | 25<br>(12-43)          |
| Sao Tome and Principe | 2016 | Male   | 85 to 89 | 17%<br>(7.9-31%)               | 83%<br>(69-92%)          | 1.5<br>(0.41-3.9)                           | 3.8%<br>(1.6-6.7%)                   | 4.5%<br>(1.9-7.9%)                  | 1.4<br>(0.55-2.4)    | 10<br>(4.2-18)         |
| Sao Tome and Principe | 2016 | Male   | 90 to 94 | 19%<br>(8.5-34%)               | 81%<br>(66-92%)          | 1.5<br>(0.34-4.1)                           | 3.1%<br>(1-5.9%)                     | 3.6%<br>(1.1-7.1%)                  | 0.46<br>(0.14-0.91)  | 2.4<br>(0.77-4.8)      |
| Sao Tome and Principe | 2016 | Male   | 95 plus  | 23%<br>(8.9-42%)               | 77%<br>(58-91%)          | 1.5<br>(0.27-4.8)                           | 2.7%<br>(0.63-5.8%)                  | 3.1%<br>(0.57-6.8%)                 | 0.11<br>(0.019-0.24) | 0.38<br>(0.083-0.83)   |
| Senegal               | 1990 | Female | All Ages | 2.9%<br>(2.4-3.5%)             | 97%<br>(97-98%)          | 0.2<br>(0.15-0.25)                          | 0.74%<br>(0.57-0.97%)                | 1.5%<br>(1-2%)                      | 560<br>(380-770)     | 20000<br>(15000-26000) |

| Location | Year | Sex    | Age      | Prevalence of current drinkers | Prevalence of abstainers | Population average of standard drinks daily | Percent of total attributable deaths | Percent of total attributable DALYs | Attributable deaths | Attributable DALYs     |
|----------|------|--------|----------|--------------------------------|--------------------------|---------------------------------------------|--------------------------------------|-------------------------------------|---------------------|------------------------|
| Senegal  | 1990 | Female | 15 to 19 | 2.7%<br>(1.6-4.1%)             | 97%<br>(96-98%)          | 0.18<br>(0.09-0.31)                         | 0.84%<br>(0.51-1.3%)                 | 0.7%<br>(0.3-1.4%)                  | 5.1<br>(2.1-9.9)    | 730<br>(430-1100)      |
| Senegal  | 1990 | Female | 20 to 24 | 3.5%<br>(2-5.3%)               | 96%<br>(95-98%)          | 0.29<br>(0.14-0.5)                          | 1.7%<br>(1.1-2.5%)                   | 1.3%<br>(0.62-2.5%)                 | 10<br>(4.9-20)      | 1400<br>(870-2100)     |
| Senegal  | 1990 | Female | 25 to 29 | 4%<br>(2.3-6.2%)               | 96%<br>(94-98%)          | 0.35<br>(0.18-0.6)                          | 2%<br>(1.4-3%)                       | 1.9%<br>(0.98-3.2%)                 | 14<br>(7.1-25)      | 1500<br>(970-2200)     |
| Senegal  | 1990 | Female | 30 to 34 | 4.4%<br>(2.5-7.2%)             | 96%<br>(93-97%)          | 0.4<br>(0.2-0.69)                           | 2.2%<br>(1.5-3.3%)                   | 2.4%<br>(1.3-4%)                    | 17<br>(9.6-30)      | 1400<br>(950-2200)     |
| Senegal  | 1990 | Female | 35 to 39 | 4.9%<br>(2.7-7.4%)             | 95%<br>(93-97%)          | 0.43<br>(0.22-0.75)                         | 2.4%<br>(1.6-3.5%)                   | 2.9%<br>(1.7-4.6%)                  | 22<br>(13-35)       | 1400<br>(930-2100)     |
| Senegal  | 1990 | Female | 40 to 44 | 5.1%<br>(3-7.7%)               | 95%<br>(92-97%)          | 0.44<br>(0.21-0.76)                         | 2.8%<br>(1.8-4.1%)                   | 3.6%<br>(2.2-5.6%)                  | 27<br>(17-41)       | 1500<br>(970-2100)     |
| Senegal  | 1990 | Female | 45 to 49 | 5%<br>(2.8-7.6%)               | 95%<br>(92-97%)          | 0.43<br>(0.21-0.77)                         | 3%<br>(1.9-4.5%)                     | 4%<br>(2.5-6.4%)                    | 36<br>(22-56)       | 1600<br>(1000-2500)    |
| Senegal  | 1990 | Female | 50 to 54 | 5%<br>(3-7.5%)                 | 95%<br>(92-97%)          | 0.46<br>(0.23-0.77)                         | 3.4%<br>(2.2-5.2%)                   | 4.5%<br>(2.7-6.9%)                  | 50<br>(30-77)       | 1900<br>(1200-2900)    |
| Senegal  | 1990 | Female | 55 to 59 | 5.2%<br>(3.1-8%)               | 95%<br>(92-97%)          | 0.54<br>(0.28-0.96)                         | 3.7%<br>(2.2-5.6%)                   | 4.7%<br>(2.8-7.4%)                  | 65<br>(38-100)      | 2100<br>(1300-3300)    |
| Senegal  | 1990 | Female | 60 to 64 | 5.7%<br>(3.3-8.8%)             | 94%<br>(91-97%)          | 0.59<br>(0.28-1.1)                          | 3.5%<br>(2.1-5.5%)                   | 4.3%<br>(2.6-6.7%)                  | 73<br>(43-110)      | 2000<br>(1200-3100)    |
| Senegal  | 1990 | Female | 65 to 69 | 6.1%<br>(3.7-8.9%)             | 94%<br>(91-96%)          | 0.56<br>(0.28-0.98)                         | 3.4%<br>(2-5.4%)                     | 4.2%<br>(2.4-6.6%)                  | 83<br>(48-130)      | 1900<br>(1100-3000)    |
| Senegal  | 1990 | Female | 70 to 74 | 5.5%<br>(3.5-8.2%)             | 94%<br>(92-96%)          | 0.45<br>(0.22-0.78)                         | 3.2%<br>(1.7-5.4%)                   | 3.8%<br>(2-6.4%)                    | 80<br>(43-130)      | 1500<br>(790-2400)     |
| Senegal  | 1990 | Female | 75 to 79 | 4.5%<br>(2.6-7.1%)             | 96%<br>(93-97%)          | 0.33<br>(0.15-0.62)                         | 2.2%<br>(1.1-3.8%)                   | 2.6%<br>(1.2-4.6%)                  | 44<br>(21-79)       | 620<br>(310-1100)      |
| Senegal  | 1990 | Female | 80 to 84 | 4%<br>(2.2-5.9%)               | 96%<br>(94-98%)          | 0.28<br>(0.13-0.51)                         | 1.6%<br>(0.78-2.9%)                  | 1.9%<br>(0.9-3.4%)                  | 18<br>(8.5-33)      | 190<br>(91-340)        |
| Senegal  | 1990 | Female | 85 to 89 | 4.2%<br>(2.4-6.6%)             | 96%<br>(93-98%)          | 0.28<br>(0.14-0.5)                          | 1.4%<br>(0.61-2.5%)                  | 1.6%<br>(0.7-3%)                    | 8.3<br>(3.7-16)     | 62<br>(28-110)         |
| Senegal  | 1990 | Female | 90 to 94 | 4.7%<br>(2.9-7.5%)             | 95%<br>(92-97%)          | 0.3<br>(0.14-0.56)                          | 1.2%<br>(0.49-2.4%)                  | 1.4%<br>(0.53-2.9%)                 | 2.5<br>(0.95-5.1)   | 13<br>(5.2-26)         |
| Senegal  | 1990 | Female | 95 plus  | 5.5%<br>(3.1-9%)               | 94%<br>(91-97%)          | 0.33<br>(0.13-0.69)                         | 1.1%<br>(0.39-2.6%)                  | 1.3%<br>(0.38-3%)                   | 0.56<br>(0.16-1.3)  | 2<br>(0.69-4.6)        |
| Senegal  | 1990 | Male   | All Ages | 2.9%<br>(2.4-3.6%)             | 97%<br>(96-98%)          | 0.085<br>(0.064-0.11)                       | 0.61%<br>(0.46-0.79%)                | 0.96%<br>(0.66-1.3%)                | 410<br>(280-560)    | 18000<br>(14000-24000) |
| Senegal  | 1990 | Male   | 15 to 19 | 2.2%<br>(1.3-3.5%)             | 98%<br>(97-99%)          | 0.048<br>(0.023-0.086)                      | 0.61%<br>(0.39-0.86%)                | 0.31%<br>(0.16-0.56%)               | 2.4<br>(1.2-4.2)    | 530<br>(330-770)       |
| Senegal  | 1990 | Male   | 20 to 24 | 3.6%<br>(2.1-5.4%)             | 96%<br>(95-98%)          | 0.11<br>(0.054-0.19)                        | 1.4%<br>(1-2%)                       | 0.89%<br>(0.46-1.5%)                | 8.4<br>(4.3-14)     | 1200<br>(840-1800)     |
| Senegal  | 1990 | Male   | 25 to 29 | 4.7%<br>(2.7-7.3%)             | 95%<br>(93-97%)          | 0.17<br>(0.085-0.29)                        | 2.2%<br>(1.5-3.1%)                   | 1.8%<br>(0.98-3%)                   | 16<br>(8.7-27)      | 1700<br>(1100-2400)    |
| Senegal  | 1990 | Male   | 30 to 34 | 5.4%<br>(3.1-8.7%)             | 95%<br>(91-97%)          | 0.21<br>(0.11-0.35)                         | 2.7%<br>(1.8-3.9%)                   | 2.7%<br>(1.5-4.3%)                  | 24<br>(13-37)       | 1900<br>(1200-2600)    |

| Location | Year | Sex    | Age      | Prevalence of current drinkers | Prevalence of abstainers | Population average of standard drinks daily | Percent of total attributable deaths | Percent of total attributable DALYs | Attributable deaths   | Attributable DALYs     |
|----------|------|--------|----------|--------------------------------|--------------------------|---------------------------------------------|--------------------------------------|-------------------------------------|-----------------------|------------------------|
| Senegal  | 1990 | Male   | 35 to 39 | 5.9%<br>(3.3-8.8%)             | 94%<br>(91-97%)          | 0.22<br>(0.11-0.39)                         | 3.2%<br>(2.1-4.5%)                   | 3.5%<br>(2.1-5.3%)                  | 32<br>(19-49)         | 2000<br>(1300-2900)    |
| Senegal  | 1990 | Male   | 40 to 44 | 6%<br>(3.5-9%)                 | 94%<br>(91-96%)          | 0.23<br>(0.11-0.4)                          | 3.3%<br>(2.2-4.7%)                   | 3.9%<br>(2.4-5.7%)                  | 36<br>(22-54)         | 1900<br>(1300-2700)    |
| Senegal  | 1990 | Male   | 45 to 49 | 6.1%<br>(3.3-9.3%)             | 94%<br>(91-97%)          | 0.24<br>(0.12-0.43)                         | 3.5%<br>(2.3-5%)                     | 4.2%<br>(2.5-6.2%)                  | 48<br>(29-72)         | 2200<br>(1400-3100)    |
| Senegal  | 1990 | Male   | 50 to 54 | 6.3%<br>(3.8-9.4%)             | 94%<br>(91-96%)          | 0.25<br>(0.12-0.42)                         | 3.1%<br>(1.9-4.5%)                   | 3.7%<br>(2.2-5.5%)                  | 51<br>(30-77)         | 2000<br>(1200-2900)    |
| Senegal  | 1990 | Male   | 55 to 59 | 6.4%<br>(3.8-9.8%)             | 94%<br>(90-96%)          | 0.24<br>(0.13-0.42)                         | 2.8%<br>(1.8-4.2%)                   | 3.4%<br>(2.1-5.1%)                  | 53<br>(33-82)         | 1800<br>(1200-2700)    |
| Senegal  | 1990 | Male   | 60 to 64 | 6.2%<br>(3.7-9.8%)             | 94%<br>(90-96%)          | 0.22<br>(0.11-0.39)                         | 2.3%<br>(1.4-3.4%)                   | 2.7%<br>(1.6-4.1%)                  | 50<br>(30-76)         | 1400<br>(870-2100)     |
| Senegal  | 1990 | Male   | 65 to 69 | 6%<br>(3.7-8.8%)               | 94%<br>(91-96%)          | 0.18<br>(0.088-0.31)                        | 1.7%<br>(1.1-2.4%)                   | 1.9%<br>(1.2-2.9%)                  | 38<br>(23-56)         | 880<br>(560-1300)      |
| Senegal  | 1990 | Male   | 70 to 74 | 5.7%<br>(3.7-8.5%)             | 94%<br>(92-96%)          | 0.14<br>(0.069-0.24)                        | 1.2%<br>(0.72-1.9%)                  | 1.4%<br>(0.8-2.2%)                  | 26<br>(15-42)         | 480<br>(290-760)       |
| Senegal  | 1990 | Male   | 75 to 79 | 5.1%<br>(3-8%)                 | 95%<br>(92-97%)          | 0.1<br>(0.049-0.19)                         | 0.86%<br>(0.5-1.3%)                  | 0.97%<br>(0.54-1.5%)                | 14<br>(7.7-22)        | 210<br>(120-310)       |
| Senegal  | 1990 | Male   | 80 to 84 | 4.4%<br>(2.5-6.6%)             | 96%<br>(93-98%)          | 0.078<br>(0.034-0.15)                       | 0.7%<br>(0.41-1%)                    | 0.78%<br>(0.44-1.2%)                | 5.7<br>(3.2-8.7)      | 61<br>(36-91)          |
| Senegal  | 1990 | Male   | 85 to 89 | 4%<br>(2.3-6.3%)               | 96%<br>(94-98%)          | 0.061<br>(0.029-0.11)                       | 0.53%<br>(0.32-0.76%)                | 0.58%<br>(0.32-0.85%)               | 2.2<br>(1.2-3.2)      | 17<br>(10-24)          |
| Senegal  | 1990 | Male   | 90 to 94 | 4.1%<br>(2.4-6.4%)             | 96%<br>(94-98%)          | 0.052<br>(0.023-0.098)                      | 0.32%<br>(0.15-0.48%)                | 0.32%<br>(0.11-0.52%)               | 0.41<br>(0.14-0.66)   | 2.4<br>(1.1-3.7)       |
| Senegal  | 1990 | Male   | 95 plus  | 4.7%<br>(2.5-7.6%)             | 95%<br>(92-97%)          | 0.048<br>(0.018-0.1)                        | 0.31%<br>(0.12-0.5%)                 | 0.27%<br>(0.044-0.49%)              | 0.074<br>(0.012-0.14) | 0.34<br>(0.13-0.56)    |
| Senegal  | 1995 | Female | All Ages | 3%<br>(2.5-3.6%)               | 97%<br>(96-98%)          | 0.17<br>(0.13-0.21)                         | 0.71%<br>(0.53-0.91%)                | 1.3%<br>(0.89-1.9%)                 | 560<br>(370-790)      | 20000<br>(15000-27000) |
| Senegal  | 1995 | Female | 15 to 19 | 2.8%<br>(1.6-4.2%)             | 97%<br>(96-98%)          | 0.15<br>(0.073-0.25)                        | 0.74%<br>(0.46-1.1%)                 | 0.56%<br>(0.23-1.1%)                | 4.8<br>(2-9.3)        | 780<br>(460-1200)      |
| Senegal  | 1995 | Female | 20 to 24 | 3.6%<br>(2.1-5.5%)             | 96%<br>(94-98%)          | 0.24<br>(0.12-0.41)                         | 1.6%<br>(0.99-2.3%)                  | 1.1%<br>(0.49-2%)                   | 11<br>(4.8-20)        | 1600<br>(1000-2400)    |
| Senegal  | 1995 | Female | 25 to 29 | 4.1%<br>(2.4-6.4%)             | 96%<br>(94-98%)          | 0.29<br>(0.15-0.49)                         | 1.9%<br>(1.3-2.6%)                   | 1.6%<br>(0.83-2.7%)                 | 14<br>(7.3-25)        | 1600<br>(1000-2400)    |
| Senegal  | 1995 | Female | 30 to 34 | 4.6%<br>(2.6-7.4%)             | 95%<br>(93-97%)          | 0.34<br>(0.17-0.55)                         | 2%<br>(1.3-2.9%)                     | 2%<br>(1.2-3.3%)                    | 18<br>(9.9-29)        | 1500<br>(1000-2200)    |
| Senegal  | 1995 | Female | 35 to 39 | 5.1%<br>(2.8-7.5%)             | 95%<br>(92-97%)          | 0.36<br>(0.18-0.63)                         | 2.1%<br>(1.4-3.2%)                   | 2.5%<br>(1.5-4%)                    | 22<br>(13-36)         | 1500<br>(980-2200)     |
| Senegal  | 1995 | Female | 40 to 44 | 5.2%<br>(3.1-7.9%)             | 95%<br>(92-97%)          | 0.37<br>(0.18-0.63)                         | 2.4%<br>(1.6-3.5%)                   | 3.1%<br>(1.9-4.7%)                  | 28<br>(17-43)         | 1600<br>(1000-2200)    |
| Senegal  | 1995 | Female | 45 to 49 | 5.2%<br>(2.8-7.8%)             | 95%<br>(92-97%)          | 0.36<br>(0.18-0.63)                         | 2.6%<br>(1.6-4%)                     | 3.4%<br>(2-5.5%)                    | 33<br>(19-53)         | 1500<br>(940-2300)     |
| Senegal  | 1995 | Female | 50 to 54 | 5.2%<br>(3.2-7.9%)             | 95%<br>(92-97%)          | 0.39<br>(0.2-0.65)                          | 3%<br>(1.8-4.5%)                     | 3.9%<br>(2.3-5.9%)                  | 48<br>(28-74)         | 1900<br>(1100-2800)    |



| Location | Year | Sex    | Age      | Prevalence of current drinkers | Prevalence of abstainers | Population average of standard drinks daily | Percent of total attributable deaths | Percent of total attributable DALYs | Attributable deaths | Attributable DALYs     |
|----------|------|--------|----------|--------------------------------|--------------------------|---------------------------------------------|--------------------------------------|-------------------------------------|---------------------|------------------------|
| Senegal  | 1995 | Female | 55 to 59 | 5.4%<br>(3.3-8.2%)             | 95%<br>(92-97%)          | 0.45<br>(0.23-0.8)                          | 3.2%<br>(2-5%)                       | 4.1%<br>(2.4-6.6%)                  | 65<br>(38-100)      | 2100<br>(1300-3400)    |
| Senegal  | 1995 | Female | 60 to 64 | 5.8%<br>(3.5-9%)               | 94%<br>(91-97%)          | 0.49<br>(0.24-0.86)                         | 3%<br>(1.8-4.8%)                     | 3.7%<br>(2.2-5.9%)                  | 74<br>(42-120)      | 2100<br>(1200-3300)    |
| Senegal  | 1995 | Female | 65 to 69 | 6.2%<br>(3.9-9.1%)             | 94%<br>(91-96%)          | 0.47<br>(0.24-0.81)                         | 2.9%<br>(1.7-4.7%)                   | 3.5%<br>(1.9-5.7%)                  | 83<br>(46-140)      | 1900<br>(1100-3100)    |
| Senegal  | 1995 | Female | 70 to 74 | 5.7%<br>(3.6-8.4%)             | 94%<br>(92-96%)          | 0.37<br>(0.18-0.66)                         | 2.6%<br>(1.3-4.6%)                   | 3.1%<br>(1.5-5.5%)                  | 79<br>(39-140)      | 1400<br>(720-2500)     |
| Senegal  | 1995 | Female | 75 to 79 | 4.6%<br>(2.6-7%)               | 95%<br>(93-97%)          | 0.27<br>(0.12-0.51)                         | 1.8%<br>(0.88-3.3%)                  | 2.1%<br>(1-3.7%)                    | 45<br>(22-84)       | 640<br>(320-1200)      |
| Senegal  | 1995 | Female | 80 to 84 | 4.1%<br>(2.2-6%)               | 96%<br>(94-98%)          | 0.23<br>(0.1-0.41)                          | 1.3%<br>(0.6-2.3%)                   | 1.5%<br>(0.66-2.7%)                 | 19<br>(8.4-34)      | 200<br>(91-350)        |
| Senegal  | 1995 | Female | 85 to 89 | 4.3%<br>(2.4-6.6%)             | 96%<br>(93-98%)          | 0.23<br>(0.11-0.42)                         | 1%<br>(0.45-2%)                      | 1.2%<br>(0.5-2.3%)                  | 8.6<br>(3.5-16)     | 65<br>(28-120)         |
| Senegal  | 1995 | Female | 90 to 94 | 4.8%<br>(2.9-7.6%)             | 95%<br>(92-97%)          | 0.25<br>(0.12-0.46)                         | 0.89%<br>(0.31-2%)                   | 1%<br>(0.32-2.3%)                   | 2.6<br>(0.82-5.7)   | 14<br>(4.7-29)         |
| Senegal  | 1995 | Female | 95 plus  | 5.6%<br>(3.2-9.1%)             | 94%<br>(91-97%)          | 0.27<br>(0.11-0.57)                         | 0.85%<br>(0.25-2%)                   | 0.93%<br>(0.21-2.3%)                | 0.57<br>(0.13-1.5)  | 2.1<br>(0.61-5)        |
| Senegal  | 1995 | Male   | All Ages | 3.1%<br>(2.5-3.7%)             | 97%<br>(96-97%)          | 0.074<br>(0.056-0.097)                      | 0.57%<br>(0.43-0.75%)                | 0.88%<br>(0.6-1.2%)                 | 400<br>(270-570)    | 18000<br>(14000-24000) |
| Senegal  | 1995 | Male   | 15 to 19 | 2.3%<br>(1.4-3.6%)             | 98%<br>(96-99%)          | 0.042<br>(0.021-0.075)                      | 0.56%<br>(0.37-0.8%)                 | 0.24%<br>(0.13-0.44%)               | 2.2<br>(1.2-4)      | 580<br>(370-880)       |
| Senegal  | 1995 | Male   | 20 to 24 | 3.8%<br>(2.2-5.8%)             | 96%<br>(94-98%)          | 0.095<br>(0.047-0.16)                       | 1.3%<br>(0.88-1.8%)                  | 0.71%<br>(0.37-1.2%)                | 8.4<br>(4.4-14)     | 1400<br>(910-2000)     |
| Senegal  | 1995 | Male   | 25 to 29 | 4.9%<br>(2.9-7.8%)             | 95%<br>(92-97%)          | 0.15<br>(0.073-0.26)                        | 1.9%<br>(1.3-2.6%)                   | 1.5%<br>(0.77-2.4%)                 | 16<br>(8.4-27)      | 1800<br>(1200-2500)    |
| Senegal  | 1995 | Male   | 30 to 34 | 5.6%<br>(3.3-9.4%)             | 94%<br>(91-97%)          | 0.18<br>(0.092-0.3)                         | 2.3%<br>(1.6-3.3%)                   | 2.2%<br>(1.2-3.4%)                  | 24<br>(13-37)       | 1900<br>(1300-2700)    |
| Senegal  | 1995 | Male   | 35 to 39 | 6.1%<br>(3.5-9.1%)             | 94%<br>(91-97%)          | 0.19<br>(0.096-0.34)                        | 2.7%<br>(1.8-3.9%)                   | 3%<br>(1.8-4.5%)                    | 32<br>(20-50)       | 2000<br>(1400-2900)    |
| Senegal  | 1995 | Male   | 40 to 44 | 6.3%<br>(3.8-9.3%)             | 94%<br>(91-96%)          | 0.2<br>(0.095-0.35)                         | 2.8%<br>(1.9-4%)                     | 3.3%<br>(2-4.8%)                    | 37<br>(23-55)       | 1900<br>(1300-2800)    |
| Senegal  | 1995 | Male   | 45 to 49 | 6.4%<br>(3.5-9.5%)             | 94%<br>(91-97%)          | 0.21<br>(0.11-0.37)                         | 3%<br>(2-4.3%)                       | 3.6%<br>(2.2-5.3%)                  | 42<br>(26-64)       | 1900<br>(1200-2800)    |
| Senegal  | 1995 | Male   | 50 to 54 | 6.5%<br>(4-9.9%)               | 93%<br>(90-96%)          | 0.21<br>(0.11-0.37)                         | 2.7%<br>(1.7-3.9%)                   | 3.2%<br>(1.9-4.8%)                  | 47<br>(28-70)       | 1800<br>(1200-2700)    |
| Senegal  | 1995 | Male   | 55 to 59 | 6.6%<br>(4-9.9%)               | 93%<br>(90-96%)          | 0.21<br>(0.11-0.37)                         | 2.5%<br>(1.6-3.8%)                   | 3%<br>(1.8-4.6%)                    | 52<br>(32-80)       | 1800<br>(1100-2600)    |
| Senegal  | 1995 | Male   | 60 to 64 | 6.5%<br>(3.9-10%)              | 93%<br>(90-96%)          | 0.19<br>(0.093-0.35)                        | 2.1%<br>(1.3-3.2%)                   | 2.4%<br>(1.4-3.8%)                  | 51<br>(29-80)       | 1400<br>(880-2200)     |
| Senegal  | 1995 | Male   | 65 to 69 | 6.3%<br>(3.9-9.4%)             | 94%<br>(91-96%)          | 0.16<br>(0.079-0.28)                        | 1.5%<br>(0.95-2.2%)                  | 1.7%<br>(1-2.6%)                    | 40<br>(24-60)       | 930<br>(580-1400)      |
| Senegal  | 1995 | Male   | 70 to 74 | 6%<br>(3.8-8.7%)               | 94%<br>(91-96%)          | 0.12<br>(0.061-0.22)                        | 1.1%<br>(0.62-1.7%)                  | 1.2%<br>(0.69-2%)                   | 28<br>(16-44)       | 520<br>(300-810)       |

| Location | Year | Sex    | Age      | Prevalence of current drinkers | Prevalence of abstainers | Population average of standard drinks daily | Percent of total attributable deaths | Percent of total attributable DALYs | Attributable deaths   | Attributable DALYs     |
|----------|------|--------|----------|--------------------------------|--------------------------|---------------------------------------------|--------------------------------------|-------------------------------------|-----------------------|------------------------|
| Senegal  | 1995 | Male   | 75 to 79 | 5.4%<br>(3.2-8.3%)             | 95%<br>(92-97%)          | 0.091<br>(0.043-0.17)                       | 0.76%<br>(0.44-1.2%)                 | 0.87%<br>(0.47-1.4%)                | 16<br>(8.5-25)        | 230<br>(130-360)       |
| Senegal  | 1995 | Male   | 80 to 84 | 4.6%<br>(2.7-6.8%)             | 95%<br>(93-97%)          | 0.069<br>(0.031-0.13)                       | 0.63%<br>(0.37-0.94%)                | 0.71%<br>(0.39-1.1%)                | 6.6<br>(3.7-10)       | 72<br>(43-110)         |
| Senegal  | 1995 | Male   | 85 to 89 | 4.2%<br>(2.4-6.5%)             | 96%<br>(93-98%)          | 0.054<br>(0.026-0.098)                      | 0.49%<br>(0.27-0.72%)                | 0.53%<br>(0.27-0.81%)               | 2.6<br>(1.3-4)        | 21<br>(11-31)          |
| Senegal  | 1995 | Male   | 90 to 94 | 4.3%<br>(2.5-6.7%)             | 96%<br>(93-97%)          | 0.046<br>(0.02-0.086)                       | 0.3%<br>(0.13-0.46%)                 | 0.3%<br>(0.088-0.5%)                | 0.51<br>(0.15-0.85)   | 3.1<br>(1.3-4.8)       |
| Senegal  | 1995 | Male   | 95 plus  | 4.9%<br>(2.7-8.1%)             | 95%<br>(92-97%)          | 0.042<br>(0.016-0.088)                      | 0.3%<br>(0.12-0.48%)                 | 0.26%<br>(0.037-0.49%)              | 0.098<br>(0.014-0.18) | 0.46<br>(0.18-0.73)    |
| Senegal  | 2000 | Female | All Ages | 2.9%<br>(2.4-3.5%)             | 97%<br>(97-98%)          | 0.15<br>(0.11-0.18)                         | 0.74%<br>(0.56-0.94%)                | 1.3%<br>(0.86-1.8%)                 | 570<br>(370-810)      | 21000<br>(16000-28000) |
| Senegal  | 2000 | Female | 15 to 19 | 2.7%<br>(1.6-4%)               | 97%<br>(96-98%)          | 0.13<br>(0.064-0.22)                        | 0.71%<br>(0.46-1.1%)                 | 0.48%<br>(0.21-0.94%)               | 4.4<br>(1.8-8.5)      | 800<br>(490-1200)      |
| Senegal  | 2000 | Female | 20 to 24 | 3.4%<br>(2-5.2%)               | 97%<br>(95-98%)          | 0.21<br>(0.11-0.35)                         | 1.5%<br>(0.96-2.1%)                  | 0.91%<br>(0.43-1.6%)                | 9.9<br>(4.7-18)       | 1700<br>(1100-2500)    |
| Senegal  | 2000 | Female | 25 to 29 | 3.8%<br>(2.2-5.9%)             | 96%<br>(94-98%)          | 0.25<br>(0.13-0.41)                         | 1.7%<br>(1.2-2.4%)                   | 1.4%<br>(0.73-2.4%)                 | 14<br>(7.7-25)        | 1800<br>(1200-2600)    |
| Senegal  | 2000 | Female | 30 to 34 | 4.1%<br>(2.4-6.6%)             | 96%<br>(93-98%)          | 0.28<br>(0.14-0.46)                         | 1.8%<br>(1.2-2.5%)                   | 1.7%<br>(0.98-2.7%)                 | 17<br>(9.9-28)        | 1600<br>(1100-2300)    |
| Senegal  | 2000 | Female | 35 to 39 | 4.4%<br>(2.5-6.7%)             | 96%<br>(93-97%)          | 0.29<br>(0.15-0.5)                          | 1.9%<br>(1.3-2.7%)                   | 2.1%<br>(1.3-3.3%)                  | 22<br>(13-35)         | 1500<br>(1100-2200)    |
| Senegal  | 2000 | Female | 40 to 44 | 4.9%<br>(3-7.2%)               | 95%<br>(93-97%)          | 0.32<br>(0.15-0.54)                         | 2.2%<br>(1.5-3.1%)                   | 2.8%<br>(1.7-4.2%)                  | 30<br>(18-46)         | 1700<br>(1100-2400)    |
| Senegal  | 2000 | Female | 45 to 49 | 5.1%<br>(3-7.5%)               | 95%<br>(92-97%)          | 0.33<br>(0.17-0.57)                         | 2.4%<br>(1.5-3.6%)                   | 3.1%<br>(1.8-4.9%)                  | 36<br>(21-57)         | 1700<br>(1100-2600)    |
| Senegal  | 2000 | Female | 50 to 54 | 5%<br>(3.1-7.5%)               | 95%<br>(92-97%)          | 0.34<br>(0.17-0.58)                         | 2.7%<br>(1.6-4.1%)                   | 3.5%<br>(2-5.3%)                    | 47<br>(26-70)         | 1800<br>(1100-2700)    |
| Senegal  | 2000 | Female | 55 to 59 | 5.1%<br>(3.1-7.6%)             | 95%<br>(92-97%)          | 0.39<br>(0.2-0.66)                          | 2.9%<br>(1.7-4.6%)                   | 3.7%<br>(2.1-5.9%)                  | 64<br>(36-100)        | 2100<br>(1200-3300)    |
| Senegal  | 2000 | Female | 60 to 64 | 5.7%<br>(3.4-8.5%)             | 94%<br>(91-97%)          | 0.43<br>(0.21-0.78)                         | 2.8%<br>(1.6-4.4%)                   | 3.4%<br>(2-5.4%)                    | 76<br>(42-120)        | 2100<br>(1200-3300)    |
| Senegal  | 2000 | Female | 65 to 69 | 6.2%<br>(3.8-8.9%)             | 94%<br>(91-96%)          | 0.42<br>(0.21-0.72)                         | 2.7%<br>(1.5-4.3%)                   | 3.2%<br>(1.8-5.1%)                  | 87<br>(48-140)        | 2000<br>(1100-3200)    |
| Senegal  | 2000 | Female | 70 to 74 | 5.6%<br>(3.7-8.2%)             | 94%<br>(92-96%)          | 0.34<br>(0.16-0.59)                         | 2.4%<br>(1.2-4.1%)                   | 2.8%<br>(1.4-4.9%)                  | 82<br>(41-150)        | 1500<br>(770-2700)     |
| Senegal  | 2000 | Female | 75 to 79 | 4.5%<br>(2.6-7.1%)             | 95%<br>(93-97%)          | 0.25<br>(0.11-0.47)                         | 1.6%<br>(0.81-2.9%)                  | 1.9%<br>(0.91-3.4%)                 | 49<br>(23-91)         | 700<br>(340-1300)      |
| Senegal  | 2000 | Female | 80 to 84 | 4.1%<br>(2.2-6%)               | 96%<br>(94-98%)          | 0.21<br>(0.094-0.36)                        | 1.1%<br>(0.53-2%)                    | 1.3%<br>(0.59-2.4%)                 | 21<br>(9.2-39)        | 220<br>(99-400)        |
| Senegal  | 2000 | Female | 85 to 89 | 4.3%<br>(2.5-6.8%)             | 96%<br>(93-97%)          | 0.21<br>(0.1-0.38)                          | 0.92%<br>(0.38-1.8%)                 | 1.1%<br>(0.41-2%)                   | 9.7<br>(3.8-19)       | 73<br>(30-140)         |
| Senegal  | 2000 | Female | 90 to 94 | 4.8%<br>(2.9-7.4%)             | 95%<br>(93-97%)          | 0.22<br>(0.11-0.41)                         | 0.77%<br>(0.23-1.7%)                 | 0.87%<br>(0.22-2%)                  | 2.9<br>(0.75-6.6)     | 15<br>(4.6-34)         |

| Location | Year | Sex    | Age      | Prevalence of current drinkers | Prevalence of abstainers | Population average of standard drinks daily | Percent of total attributable deaths | Percent of total attributable DALYs | Attributable deaths | Attributable DALYs     |
|----------|------|--------|----------|--------------------------------|--------------------------|---------------------------------------------|--------------------------------------|-------------------------------------|---------------------|------------------------|
| Senegal  | 2000 | Female | 95 plus  | 5.5%<br>(3.1-8.9%)             | 94%<br>(91-97%)          | 0.24<br>(0.093-0.5)                         | 0.73%<br>(0.18-1.9%)                 | 0.78%<br>(0.12-2.1%)                | 0.66<br>(0.1-1.8)   | 2.5<br>(0.62-6.2)      |
| Senegal  | 2000 | Male   | All Ages | 3.3%<br>(2.7-3.9%)             | 97%<br>(96-97%)          | 0.072<br>(0.056-0.09)                       | 0.6%<br>(0.45-0.77%)                 | 0.87%<br>(0.6-1.2%)                 | 410<br>(280-580)    | 19000<br>(15000-25000) |
| Senegal  | 2000 | Male   | 15 to 19 | 2.7%<br>(1.7-4%)               | 97%<br>(96-98%)          | 0.045<br>(0.023-0.078)                      | 0.58%<br>(0.38-0.83%)                | 0.25%<br>(0.12-0.44%)               | 2.4<br>(1.2-4.3)    | 660<br>(420-980)       |
| Senegal  | 2000 | Male   | 20 to 24 | 4%<br>(2.4-6%)                 | 96%<br>(94-98%)          | 0.094<br>(0.049-0.15)                       | 1.3%<br>(0.9-1.8%)                   | 0.69%<br>(0.37-1.2%)                | 9<br>(4.9-15)       | 1600<br>(1100-2300)    |
| Senegal  | 2000 | Male   | 25 to 29 | 5.6%<br>(3.4-8.1%)             | 94%<br>(92-97%)          | 0.16<br>(0.083-0.26)                        | 1.9%<br>(1.3-2.6%)                   | 1.4%<br>(0.76-2.4%)                 | 18<br>(9.8-30)      | 2000<br>(1400-2800)    |
| Senegal  | 2000 | Male   | 30 to 34 | 6.3%<br>(3.9-9.4%)             | 94%<br>(91-96%)          | 0.19<br>(0.1-0.3)                           | 2.2%<br>(1.5-3.2%)                   | 2.1%<br>(1.2-3.2%)                  | 26<br>(14-41)       | 2100<br>(1400-3000)    |
| Senegal  | 2000 | Male   | 35 to 39 | 5.8%<br>(3.4-8.7%)             | 94%<br>(91-97%)          | 0.17<br>(0.087-0.29)                        | 2.5%<br>(1.7-3.4%)                   | 2.6%<br>(1.6-3.8%)                  | 32<br>(20-48)       | 2100<br>(1500-2900)    |
| Senegal  | 2000 | Male   | 40 to 44 | 5.9%<br>(3.7-8.5%)             | 94%<br>(92-96%)          | 0.17<br>(0.089-0.3)                         | 2.6%<br>(1.8-3.5%)                   | 2.9%<br>(1.9-4.1%)                  | 37<br>(24-53)       | 2000<br>(1300-2800)    |
| Senegal  | 2000 | Male   | 45 to 49 | 6.5%<br>(4.9-1%)               | 94%<br>(91-96%)          | 0.2<br>(0.11-0.34)                          | 2.9%<br>(1.9-4.1%)                   | 3.3%<br>(2-4.9%)                    | 45<br>(27-67)       | 2100<br>(1400-3000)    |
| Senegal  | 2000 | Male   | 50 to 54 | 6.6%<br>(4.3-9.7%)             | 93%<br>(90-96%)          | 0.2<br>(0.1-0.35)                           | 2.5%<br>(1.7-3.7%)                   | 3%<br>(1.8-4.4%)                    | 43<br>(27-65)       | 1700<br>(1100-2500)    |
| Senegal  | 2000 | Male   | 55 to 59 | 6.4%<br>(3.9-9.5%)             | 94%<br>(91-96%)          | 0.19<br>(0.1-0.33)                          | 2.4%<br>(1.5-3.5%)                   | 2.8%<br>(1.6-4.2%)                  | 50<br>(30-76)       | 1700<br>(1100-2500)    |
| Senegal  | 2000 | Male   | 60 to 64 | 6.4%<br>(3.9-9.7%)             | 94%<br>(90-96%)          | 0.17<br>(0.085-0.31)                        | 2%<br>(1.2-2.9%)                     | 2.3%<br>(1.3-3.5%)                  | 51<br>(29-81)       | 1500<br>(890-2300)     |
| Senegal  | 2000 | Male   | 65 to 69 | 6.8%<br>(4.4-9.7%)             | 93%<br>(90-96%)          | 0.16<br>(0.081-0.26)                        | 1.4%<br>(0.9-2.1%)                   | 1.6%<br>(0.99-2.5%)                 | 41<br>(24-63)       | 970<br>(610-1500)      |
| Senegal  | 2000 | Male   | 70 to 74 | 6.7%<br>(4.5-9.7%)             | 93%<br>(90-95%)          | 0.13<br>(0.066-0.22)                        | 1%<br>(0.6-1.6%)                     | 1.2%<br>(0.66-1.8%)                 | 31<br>(17-48)       | 570<br>(330-880)       |
| Senegal  | 2000 | Male   | 75 to 79 | 5.8%<br>(3.5-8.9%)             | 94%<br>(91-97%)          | 0.09<br>(0.043-0.17)                        | 0.72%<br>(0.41-1.1%)                 | 0.81%<br>(0.44-1.3%)                | 17<br>(9.5-28)      | 250<br>(140-400)       |
| Senegal  | 2000 | Male   | 80 to 84 | 4.8%<br>(2.8-7.1%)             | 95%<br>(93-97%)          | 0.066<br>(0.03-0.12)                        | 0.61%<br>(0.36-0.9%)                 | 0.68%<br>(0.38-1%)                  | 7.8<br>(4.3-12)     | 85<br>(50-120)         |
| Senegal  | 2000 | Male   | 85 to 89 | 4.4%<br>(2.5-6.9%)             | 96%<br>(93-98%)          | 0.052<br>(0.025-0.094)                      | 0.47%<br>(0.27-0.7%)                 | 0.51%<br>(0.26-0.77%)               | 3.2<br>(1.6-4.8)    | 26<br>(14-37)          |
| Senegal  | 2000 | Male   | 90 to 94 | 4.4%<br>(2.7-6.8%)             | 96%<br>(93-97%)          | 0.044<br>(0.02-0.086)                       | 0.3%<br>(0.14-0.48%)                 | 0.3%<br>(0.1-0.5%)                  | 0.65<br>(0.22-1.1)  | 4<br>(1.9-6.2)         |
| Senegal  | 2000 | Male   | 95 plus  | 5%<br>(2.8-8.2%)               | 95%<br>(92-97%)          | 0.04<br>(0.015-0.083)                       | 0.3%<br>(0.12-0.49%)                 | 0.26%<br>(0.021-0.49%)              | 0.13<br>(0.01-0.24) | 0.61<br>(0.23-0.97)    |
| Senegal  | 2005 | Female | All Ages | 2.9%<br>(2.4-3.5%)             | 97%<br>(96-98%)          | 0.14<br>(0.11-0.17)                         | 0.74%<br>(0.57-0.94%)                | 1.2%<br>(0.84-1.8%)                 | 560<br>(380-800)    | 22000<br>(17000-28000) |
| Senegal  | 2005 | Female | 15 to 19 | 2.7%<br>(1.6-4.2%)             | 97%<br>(96-98%)          | 0.12<br>(0.06-0.2)                          | 0.68%<br>(0.44-1%)                   | 0.41%<br>(0.17-0.79%)               | 3.7<br>(1.5-7.2)    | 820<br>(510-1200)      |
| Senegal  | 2005 | Female | 20 to 24 | 3.4%<br>(2-5.2%)               | 97%<br>(95-98%)          | 0.19<br>(0.1-0.31)                          | 1.4%<br>(0.94-2%)                    | 0.75%<br>(0.36-1.3%)                | 8.1<br>(3.8-14)     | 1700<br>(1100-2600)    |

| Location | Year | Sex    | Age      | Prevalence of current drinkers | Prevalence of abstainers | Population average of standard drinks daily | Percent of total attributable deaths | Percent of total attributable DALYs | Attributable deaths | Attributable DALYs     |
|----------|------|--------|----------|--------------------------------|--------------------------|---------------------------------------------|--------------------------------------|-------------------------------------|---------------------|------------------------|
| Senegal  | 2005 | Female | 25 to 29 | 3.8%<br>(2.2-6%)               | 96%<br>(94-98%)          | 0.23<br>(0.12-0.38)                         | 1.6%<br>(1.1-2.2%)                   | 1.1%<br>(0.63-1.9%)                 | 13<br>(7.2-22)      | 1900<br>(1200-2700)    |
| Senegal  | 2005 | Female | 30 to 34 | 4.1%<br>(2.3-6.7%)             | 96%<br>(93-98%)          | 0.25<br>(0.13-0.42)                         | 1.6%<br>(1.1-2.2%)                   | 1.4%<br>(0.84-2.2%)                 | 16<br>(9.8-26)      | 1700<br>(1100-2400)    |
| Senegal  | 2005 | Female | 35 to 39 | 4.5%<br>(2.5-6.8%)             | 96%<br>(93-97%)          | 0.27<br>(0.14-0.45)                         | 1.7%<br>(1.2-2.4%)                   | 1.8%<br>(1.1-2.8%)                  | 21<br>(13-33)       | 1600<br>(1100-2200)    |
| Senegal  | 2005 | Female | 40 to 44 | 4.9%<br>(3-7.2%)               | 95%<br>(93-97%)          | 0.29<br>(0.15-0.5)                          | 2%<br>(1.3-2.9%)                     | 2.5%<br>(1.6-3.8%)                  | 30<br>(18-46)       | 1700<br>(1200-2500)    |
| Senegal  | 2005 | Female | 45 to 49 | 5.2%<br>(3-7.5%)               | 95%<br>(92-97%)          | 0.3<br>(0.15-0.52)                          | 2.2%<br>(1.4-3.2%)                   | 2.8%<br>(1.7-4.2%)                  | 37<br>(22-57)       | 1700<br>(1100-2600)    |
| Senegal  | 2005 | Female | 50 to 54 | 5.1%<br>(3.1-7.6%)             | 95%<br>(92-97%)          | 0.31<br>(0.15-0.54)                         | 2.5%<br>(1.6-3.6%)                   | 3.2%<br>(1.9-4.7%)                  | 50<br>(29-77)       | 2000<br>(1200-2900)    |
| Senegal  | 2005 | Female | 55 to 59 | 5.2%<br>(3.1-7.8%)             | 95%<br>(92-97%)          | 0.36<br>(0.18-0.62)                         | 2.6%<br>(1.5-4%)                     | 3.3%<br>(1.9-5.1%)                  | 60<br>(33-97)       | 2000<br>(1200-3100)    |
| Senegal  | 2005 | Female | 60 to 64 | 5.7%<br>(3.4-8.9%)             | 94%<br>(91-97%)          | 0.4<br>(0.2-0.73)                           | 2.5%<br>(1.4-4.2%)                   | 3.1%<br>(1.8-5.2%)                  | 74<br>(42-120)      | 2100<br>(1200-3400)    |
| Senegal  | 2005 | Female | 65 to 69 | 6.3%<br>(3.8-9.3%)             | 94%<br>(91-96%)          | 0.39<br>(0.2-0.66)                          | 2.4%<br>(1.4-4%)                     | 2.9%<br>(1.6-4.8%)                  | 85<br>(47-150)      | 2000<br>(1100-3300)    |
| Senegal  | 2005 | Female | 70 to 74 | 5.7%<br>(3.6-8.5%)             | 94%<br>(92-96%)          | 0.31<br>(0.15-0.56)                         | 2%<br>(1-3.5%)                       | 2.4%<br>(1.2-4.2%)                  | 78<br>(39-140)      | 1400<br>(740-2600)     |
| Senegal  | 2005 | Female | 75 to 79 | 4.6%<br>(2.6-7.1%)             | 95%<br>(93-97%)          | 0.22<br>(0.1-0.44)                          | 1.4%<br>(0.72-2.7%)                  | 1.6%<br>(0.81-3.1%)                 | 49<br>(24-92)       | 710<br>(360-1300)      |
| Senegal  | 2005 | Female | 80 to 84 | 4.1%<br>(2.3-6%)               | 96%<br>(94-98%)          | 0.19<br>(0.089-0.34)                        | 1%<br>(0.48-1.8%)                    | 1.1%<br>(0.53-2.1%)                 | 22<br>(9.7-41)      | 230<br>(110-430)       |
| Senegal  | 2005 | Female | 85 to 89 | 4.3%<br>(2.6-6.7%)             | 96%<br>(93-97%)          | 0.19<br>(0.09-0.35)                         | 0.8%<br>(0.34-1.6%)                  | 0.9%<br>(0.36-1.8%)                 | 10<br>(4-21)        | 77<br>(32-150)         |
| Senegal  | 2005 | Female | 90 to 94 | 4.8%<br>(3-7.5%)               | 95%<br>(92-97%)          | 0.2<br>(0.097-0.38)                         | 0.65%<br>(0.19-1.5%)                 | 0.72%<br>(0.17-1.7%)                | 3<br>(0.69-7.1)     | 16<br>(4.7-37)         |
| Senegal  | 2005 | Female | 95 plus  | 5.6%<br>(3.2-9%)               | 94%<br>(91-97%)          | 0.22<br>(0.09-0.46)                         | 0.63%<br>(0.13-1.5%)                 | 0.66%<br>(0.061-1.7%)               | 0.72<br>(0.066-1.9) | 2.7<br>(0.57-6.6)      |
| Senegal  | 2005 | Male   | All Ages | 3.3%<br>(2.7-3.9%)             | 97%<br>(96-97%)          | 0.066<br>(0.051-0.084)                      | 0.64%<br>(0.48-0.81%)                | 0.91%<br>(0.62-1.2%)                | 440<br>(310-610)    | 21000<br>(16000-27000) |
| Senegal  | 2005 | Male   | 15 to 19 | 2.7%<br>(1.6-4%)               | 97%<br>(96-98%)          | 0.041<br>(0.021-0.072)                      | 0.6%<br>(0.4-0.86%)                  | 0.24%<br>(0.13-0.42%)               | 2.6<br>(1.4-4.3)    | 740<br>(480-1100)      |
| Senegal  | 2005 | Male   | 20 to 24 | 4.1%<br>(2.4-6%)               | 96%<br>(94-98%)          | 0.086<br>(0.045-0.14)                       | 1.3%<br>(0.95-1.9%)                  | 0.68%<br>(0.38-1.1%)                | 9.4<br>(5.3-15)     | 1800<br>(1200-2500)    |
| Senegal  | 2005 | Male   | 25 to 29 | 5.6%<br>(3.5-8.1%)             | 94%<br>(92-97%)          | 0.14<br>(0.078-0.23)                        | 1.8%<br>(1.3-2.5%)                   | 1.3%<br>(0.76-2.1%)                 | 20<br>(11-32)       | 2300<br>(1600-3100)    |
| Senegal  | 2005 | Male   | 30 to 34 | 6.2%<br>(3.9-9.4%)             | 94%<br>(91-96%)          | 0.17<br>(0.095-0.27)                        | 2.1%<br>(1.5-2.9%)                   | 1.9%<br>(1.1-3%)                    | 29<br>(17-43)       | 2400<br>(1700-3300)    |
| Senegal  | 2005 | Male   | 35 to 39 | 5.8%<br>(3.3-8.7%)             | 94%<br>(91-97%)          | 0.16<br>(0.082-0.26)                        | 2.4%<br>(1.7-3.3%)                   | 2.5%<br>(1.6-3.7%)                  | 35<br>(23-53)       | 2300<br>(1600-3200)    |
| Senegal  | 2005 | Male   | 40 to 44 | 5.9%<br>(3.7-8.6%)             | 94%<br>(91-96%)          | 0.16<br>(0.08-0.27)                         | 2.5%<br>(1.7-3.5%)                   | 2.8%<br>(1.8-4.1%)                  | 40<br>(26-60)       | 2200<br>(1500-3100)    |

| Location | Year | Sex    | Age      | Prevalence of current drinkers | Prevalence of abstainers | Population average of standard drinks daily | Percent of total attributable deaths | Percent of total attributable DALYs | Attributable deaths  | Attributable DALYs     |
|----------|------|--------|----------|--------------------------------|--------------------------|---------------------------------------------|--------------------------------------|-------------------------------------|----------------------|------------------------|
| Senegal  | 2005 | Male   | 45 to 49 | 6.5%<br>(3.9-9.3%)             | 94%<br>(91-96%)          | 0.18<br>(0.096-0.31)                        | 2.8%<br>(1.8-3.9%)                   | 3.2%<br>(2-4.7%)                    | 48<br>(30-70)        | 2200<br>(1500-3100)    |
| Senegal  | 2005 | Male   | 50 to 54 | 6.6%<br>(4.2-9.8%)             | 93%<br>(90-96%)          | 0.18<br>(0.093-0.31)                        | 2.5%<br>(1.6-3.6%)                   | 2.9%<br>(1.8-4.4%)                  | 47<br>(28-71)        | 1900<br>(1200-2700)    |
| Senegal  | 2005 | Male   | 55 to 59 | 6.4%<br>(4-9.4%)               | 94%<br>(91-96%)          | 0.17<br>(0.089-0.29)                        | 2.4%<br>(1.5-3.5%)                   | 2.8%<br>(1.6-4.1%)                  | 48<br>(29-72)        | 1600<br>(1000-2400)    |
| Senegal  | 2005 | Male   | 60 to 64 | 6.3%<br>(3.9-9.6%)             | 94%<br>(90-96%)          | 0.16<br>(0.079-0.29)                        | 1.9%<br>(1.2-3%)                     | 2.3%<br>(1.4-3.5%)                  | 52<br>(31-82)        | 1500<br>(930-2300)     |
| Senegal  | 2005 | Male   | 65 to 69 | 6.7%<br>(4.4-9.5%)             | 93%<br>(90-96%)          | 0.14<br>(0.07-0.24)                         | 1.4%<br>(0.88-2%)                    | 1.6%<br>(0.98-2.4%)                 | 43<br>(26-64)        | 1000<br>(650-1500)     |
| Senegal  | 2005 | Male   | 70 to 74 | 6.7%<br>(4.5-9.7%)             | 93%<br>(90-96%)          | 0.12<br>(0.058-0.2)                         | 1%<br>(0.61-1.5%)                    | 1.2%<br>(0.69-1.8%)                 | 33<br>(19-52)        | 620<br>(370-940)       |
| Senegal  | 2005 | Male   | 75 to 79 | 5.8%<br>(3.5-8.9%)             | 94%<br>(91-96%)          | 0.082<br>(0.039-0.15)                       | 0.72%<br>(0.43-1.1%)                 | 0.82%<br>(0.47-1.3%)                | 20<br>(11-30)        | 290<br>(170-430)       |
| Senegal  | 2005 | Male   | 80 to 84 | 4.8%<br>(2.9-7.1%)             | 95%<br>(93-97%)          | 0.061<br>(0.029-0.11)                       | 0.63%<br>(0.38-0.92%)                | 0.71%<br>(0.41-1.1%)                | 9.4<br>(5.3-14)      | 100<br>(61-150)        |
| Senegal  | 2005 | Male   | 85 to 89 | 4.4%<br>(2.5-6.8%)             | 96%<br>(93-97%)          | 0.047<br>(0.023-0.086)                      | 0.49%<br>(0.3-0.71%)                 | 0.53%<br>(0.29-0.8%)                | 4.1<br>(2.2-6)       | 32<br>(19-46)          |
| Senegal  | 2005 | Male   | 90 to 94 | 4.5%<br>(2.7-7%)               | 96%<br>(93-97%)          | 0.04<br>(0.019-0.078)                       | 0.31%<br>(0.16-0.48%)                | 0.31%<br>(0.11-0.52%)               | 0.87<br>(0.31-1.5)   | 5.3<br>(2.6-8.1)       |
| Senegal  | 2005 | Male   | 95 plus  | 5.1%<br>(2.8-8.3%)             | 95%<br>(92-97%)          | 0.037<br>(0.014-0.078)                      | 0.32%<br>(0.13-0.51%)                | 0.28%<br>(0.048-0.5%)               | 0.18<br>(0.032-0.32) | 0.84<br>(0.33-1.3)     |
| Senegal  | 2010 | Female | All Ages | 2.6%<br>(2.1-3.2%)             | 97%<br>(97-98%)          | 0.12<br>(0.086-0.15)                        | 0.77%<br>(0.6-0.98%)                 | 1.2%<br>(0.82-1.7%)                 | 550<br>(370-790)     | 22000<br>(17000-28000) |
| Senegal  | 2010 | Female | 15 to 19 | 2.2%<br>(1.4-3.4%)             | 98%<br>(97-99%)          | 0.093<br>(0.045-0.16)                       | 0.66%<br>(0.43-0.95%)                | 0.31%<br>(0.13-0.62%)               | 2.5<br>(1-5.2)       | 800<br>(490-1200)      |
| Senegal  | 2010 | Female | 20 to 24 | 2.9%<br>(1.8-4.4%)             | 97%<br>(96-98%)          | 0.16<br>(0.078-0.27)                        | 1.4%<br>(0.95-2.1%)                  | 0.6%<br>(0.28-1.1%)                 | 6<br>(2.7-11)        | 1800<br>(1100-2700)    |
| Senegal  | 2010 | Female | 25 to 29 | 3.6%<br>(2.3-5.2%)             | 96%<br>(95-98%)          | 0.2<br>(0.11-0.33)                          | 1.6%<br>(1.1-2.1%)                   | 1%<br>(0.54-1.7%)                   | 11<br>(5.9-18)       | 1900<br>(1300-2600)    |
| Senegal  | 2010 | Female | 30 to 34 | 3.9%<br>(2.4-6.1%)             | 96%<br>(94-98%)          | 0.23<br>(0.12-0.36)                         | 1.6%<br>(1.2-2.1%)                   | 1.3%<br>(0.83-2.1%)                 | 16<br>(9.5-25)       | 1800<br>(1300-2500)    |
| Senegal  | 2010 | Female | 35 to 39 | 4%<br>(2.4-6.1%)               | 96%<br>(94-98%)          | 0.23<br>(0.12-0.38)                         | 1.6%<br>(1.1-2.2%)                   | 1.7%<br>(1.1-2.5%)                  | 21<br>(13-31)        | 1700<br>(1200-2300)    |
| Senegal  | 2010 | Female | 40 to 44 | 4.1%<br>(2.6-5.8%)             | 96%<br>(94-97%)          | 0.23<br>(0.11-0.38)                         | 1.9%<br>(1.3-2.6%)                   | 2.3%<br>(1.6-3.5%)                  | 30<br>(19-45)        | 1800<br>(1200-2500)    |
| Senegal  | 2010 | Female | 45 to 49 | 3.9%<br>(2.4-5.7%)             | 96%<br>(94-98%)          | 0.21<br>(0.11-0.38)                         | 1.9%<br>(1.3-2.6%)                   | 2.4%<br>(1.5-3.5%)                  | 35<br>(22-52)        | 1700<br>(1100-2400)    |
| Senegal  | 2010 | Female | 50 to 54 | 4%<br>(2.6-5.9%)               | 96%<br>(94-97%)          | 0.24<br>(0.12-0.4)                          | 2.1%<br>(1.4-3%)                     | 2.7%<br>(1.7-4%)                    | 50<br>(30-74)        | 2000<br>(1300-2800)    |
| Senegal  | 2010 | Female | 55 to 59 | 4.7%<br>(3.1-6.6%)             | 95%<br>(93-97%)          | 0.31<br>(0.16-0.53)                         | 2.3%<br>(1.4-3.6%)                   | 2.9%<br>(1.7-4.5%)                  | 62<br>(36-100)       | 2100<br>(1200-3200)    |
| Senegal  | 2010 | Female | 60 to 64 | 5.6%<br>(3.8-8%)               | 94%<br>(92-96%)          | 0.37<br>(0.19-0.65)                         | 2.3%<br>(1.4-3.7%)                   | 2.9%<br>(1.6-4.5%)                  | 72<br>(41-120)       | 2000<br>(1200-3200)    |

| Location | Year | Sex    | Age      | Prevalence of current drinkers | Prevalence of abstainers | Population average of standard drinks daily | Percent of total attributable deaths | Percent of total attributable DALYs | Attributable deaths | Attributable DALYs     |
|----------|------|--------|----------|--------------------------------|--------------------------|---------------------------------------------|--------------------------------------|-------------------------------------|---------------------|------------------------|
| Senegal  | 2010 | Female | 65 to 69 | 6.6%<br>(4.5-9%)               | 93%<br>(91-96%)          | 0.39<br>(0.21-0.65)                         | 2.3%<br>(1.3-3.7%)                   | 2.7%<br>(1.5-4.4%)                  | 88<br>(48-150)      | 2000<br>(1100-3400)    |
| Senegal  | 2010 | Female | 70 to 74 | 5.8%<br>(4-8.5%)               | 94%<br>(92-96%)          | 0.3<br>(0.15-0.52)                          | 1.8%<br>(0.87-3.2%)                  | 2.1%<br>(1-3.8%)                    | 77<br>(37-140)      | 1400<br>(720-2600)     |
| Senegal  | 2010 | Female | 75 to 79 | 4.1%<br>(2.5-6.4%)             | 96%<br>(94-97%)          | 0.19<br>(0.088-0.36)                        | 1.2%<br>(0.62-2.2%)                  | 1.4%<br>(0.69-2.6%)                 | 49<br>(24-90)       | 700<br>(360-1300)      |
| Senegal  | 2010 | Female | 80 to 84 | 3.7%<br>(2.2-5.5%)             | 96%<br>(95-98%)          | 0.16<br>(0.078-0.29)                        | 0.87%<br>(0.42-1.6%)                 | 0.98%<br>(0.46-1.8%)                | 22<br>(10-41)       | 240<br>(120-430)       |
| Senegal  | 2010 | Female | 85 to 89 | 4%<br>(2.3-6.1%)               | 96%<br>(94-98%)          | 0.17<br>(0.078-0.31)                        | 0.69%<br>(0.29-1.4%)                 | 0.77%<br>(0.31-1.5%)                | 11<br>(4.2-22)      | 82<br>(35-160)         |
| Senegal  | 2010 | Female | 90 to 94 | 4.5%<br>(2.7-6.8%)             | 96%<br>(93-97%)          | 0.18<br>(0.083-0.33)                        | 0.55%<br>(0.16-1.2%)                 | 0.6%<br>(0.12-1.4%)                 | 3.2<br>(0.66-7.5)   | 18<br>(4.9-40)         |
| Senegal  | 2010 | Female | 95 plus  | 5.2%<br>(2.9-8.3%)             | 95%<br>(92-97%)          | 0.19<br>(0.077-0.38)                        | 0.53%<br>(0.096-1.3%)                | 0.54%<br>(0.021-1.4%)               | 0.77<br>(0.029-2.1) | 3<br>(0.54-7.3)        |
| Senegal  | 2010 | Male   | All Ages | 3.1%<br>(2.7-3.7%)             | 97%<br>(96-97%)          | 0.063<br>(0.047-0.083)                      | 0.74%<br>(0.56-0.94%)                | 1%<br>(0.69-1.4%)                   | 490<br>(330-680)    | 24000<br>(18000-31000) |
| Senegal  | 2010 | Male   | 15 to 19 | 2%<br>(1.3-2.9%)               | 98%<br>(97-99%)          | 0.03<br>(0.015-0.052)                       | 0.58%<br>(0.39-0.83%)                | 0.21%<br>(0.12-0.34%)               | 2.3<br>(1.3-3.8)    | 790<br>(500-1200)      |
| Senegal  | 2010 | Male   | 20 to 24 | 3%<br>(2.1-4.3%)               | 97%<br>(96-98%)          | 0.061<br>(0.033-0.1)                        | 1.3%<br>(0.91-1.8%)                  | 0.58%<br>(0.35-0.9%)                | 8.8<br>(5.3-14)     | 1900<br>(1300-2700)    |
| Senegal  | 2010 | Male   | 25 to 29 | 3.9%<br>(2.7-5.6%)             | 96%<br>(94-97%)          | 0.096<br>(0.052-0.15)                       | 1.7%<br>(1.2-2.3%)                   | 1.1%<br>(0.68-1.8%)                 | 18<br>(11-28)       | 2400<br>(1700-3300)    |
| Senegal  | 2010 | Male   | 30 to 34 | 5%<br>(3.3-7.1%)               | 95%<br>(93-97%)          | 0.13<br>(0.074-0.21)                        | 2.1%<br>(1.5-2.8%)                   | 1.8%<br>(1.1-2.7%)                  | 30<br>(18-44)       | 2700<br>(1900-3600)    |
| Senegal  | 2010 | Male   | 35 to 39 | 6.3%<br>(4.3-8.5%)             | 94%<br>(91-96%)          | 0.16<br>(0.089-0.26)                        | 2.4%<br>(1.8-3.3%)                   | 2.6%<br>(1.6-3.8%)                  | 43<br>(26-65)       | 2800<br>(2000-3900)    |
| Senegal  | 2010 | Male   | 40 to 44 | 7.9%<br>(5.7-10%)              | 92%<br>(90-94%)          | 0.2<br>(0.11-0.33)                          | 2.7%<br>(1.8-3.8%)                   | 3.1%<br>(2-4.5%)                    | 50<br>(31-73)       | 2700<br>(1800-3700)    |
| Senegal  | 2010 | Male   | 45 to 49 | 8.3%<br>(5.8-11%)              | 92%<br>(89-94%)          | 0.22<br>(0.12-0.37)                         | 2.9%<br>(2-4.1%)                     | 3.4%<br>(2.2-5.1%)                  | 58<br>(35-86)       | 2700<br>(1700-3800)    |
| Senegal  | 2010 | Male   | 50 to 54 | 8.3%<br>(5.9-11%)              | 92%<br>(89-94%)          | 0.22<br>(0.12-0.36)                         | 2.6%<br>(1.7-3.8%)                   | 3.1%<br>(1.9-4.6%)                  | 55<br>(33-84)       | 2200<br>(1400-3200)    |
| Senegal  | 2010 | Male   | 55 to 59 | 9.1%<br>(6.4-12%)              | 91%<br>(88-94%)          | 0.24<br>(0.13-0.38)                         | 2.5%<br>(1.6-3.6%)                   | 3%<br>(1.7-4.4%)                    | 59<br>(34-87)       | 2000<br>(1200-2900)    |
| Senegal  | 2010 | Male   | 60 to 64 | 8.8%<br>(6.2-12%)              | 91%<br>(88-94%)          | 0.21<br>(0.11-0.35)                         | 2%<br>(1.3-3.2%)                     | 2.3%<br>(1.4-3.8%)                  | 52<br>(31-82)       | 1500<br>(920-2300)     |
| Senegal  | 2010 | Male   | 65 to 69 | 7.9%<br>(5.6-10%)              | 92%<br>(90-94%)          | 0.16<br>(0.088-0.26)                        | 1.4%<br>(0.85-2%)                    | 1.6%<br>(0.93-2.4%)                 | 44<br>(26-66)       | 1000<br>(640-1500)     |
| Senegal  | 2010 | Male   | 70 to 74 | 7.2%<br>(5.1-10%)              | 93%<br>(90-95%)          | 0.12<br>(0.062-0.2)                         | 0.99%<br>(0.59-1.5%)                 | 1.2%<br>(0.66-1.8%)                 | 35<br>(20-53)       | 650<br>(390-980)       |
| Senegal  | 2010 | Male   | 75 to 79 | 6.3%<br>(4.1-9.1%)             | 94%<br>(91-96%)          | 0.086<br>(0.041-0.16)                       | 0.71%<br>(0.41-1.1%)                 | 0.81%<br>(0.45-1.2%)                | 21<br>(12-33)       | 310<br>(180-460)       |
| Senegal  | 2010 | Male   | 80 to 84 | 5.1%<br>(3.1-7.4%)             | 95%<br>(93-97%)          | 0.062<br>(0.029-0.11)                       | 0.63%<br>(0.37-0.9%)                 | 0.71%<br>(0.4-1%)                   | 11<br>(5.9-16)      | 110<br>(68-170)        |

| Location | Year | Sex    | Age      | Prevalence of current drinkers | Prevalence of abstainers | Population average of standard drinks daily | Percent of total attributable deaths | Percent of total attributable DALYs | Attributable deaths | Attributable DALYs     |
|----------|------|--------|----------|--------------------------------|--------------------------|---------------------------------------------|--------------------------------------|-------------------------------------|---------------------|------------------------|
| Senegal  | 2010 | Male   | 85 to 89 | 4.4%<br>(2.5-6.7%)             | 96%<br>(93-98%)          | 0.046<br>(0.022-0.083)                      | 0.49%<br>(0.3-0.71%)                 | 0.53%<br>(0.29-0.8%)                | 4.8<br>(2.7-7.3)    | 39<br>(23-56)          |
| Senegal  | 2010 | Male   | 90 to 94 | 4.5%<br>(2.8-6.9%)             | 96%<br>(93-97%)          | 0.039<br>(0.018-0.074)                      | 0.31%<br>(0.16-0.47%)                | 0.31%<br>(0.12-0.5%)                | 1.1<br>(0.42-1.8)   | 6.7<br>(3.4-10)        |
| Senegal  | 2010 | Male   | 95 plus  | 5.1%<br>(2.9-8.1%)             | 95%<br>(92-97%)          | 0.036<br>(0.013-0.075)                      | 0.32%<br>(0.14-0.5%)                 | 0.27%<br>(0.058-0.49%)              | 0.23<br>(0.05-0.42) | 1.1<br>(0.48-1.7)      |
| Senegal  | 2016 | Female | All Ages | 2.6%<br>(2.2-3.2%)             | 97%<br>(97-98%)          | 0.12<br>(0.068-0.19)                        | 0.92%<br>(0.65-1.2%)                 | 1.4%<br>(0.77-2.1%)                 | 630<br>(340-980)    | 26000<br>(17000-36000) |
| Senegal  | 2016 | Female | 15 to 19 | 2.2%<br>(1.4-3.4%)             | 98%<br>(97-99%)          | 0.098<br>(0.042-0.19)                       | 0.72%<br>(0.46-1%)                   | 0.32%<br>(0.12-0.72%)               | 2.5<br>(0.89-5.5)   | 890<br>(530-1300)      |
| Senegal  | 2016 | Female | 20 to 24 | 2.9%<br>(1.8-4.4%)             | 97%<br>(96-98%)          | 0.16<br>(0.075-0.32)                        | 1.6%<br>(1-2.2%)                     | 0.63%<br>(0.27-1.3%)                | 5.8<br>(2.4-11)     | 2000<br>(1200-3000)    |
| Senegal  | 2016 | Female | 25 to 29 | 3.6%<br>(2.2-5.3%)             | 96%<br>(95-98%)          | 0.21<br>(0.1-0.38)                          | 1.7%<br>(1.2-2.3%)                   | 1%<br>(0.53-1.9%)                   | 11<br>(5.4-20)      | 2200<br>(1400-3100)    |
| Senegal  | 2016 | Female | 30 to 34 | 3.9%<br>(2.4-5.9%)             | 96%<br>(94-98%)          | 0.23<br>(0.11-0.44)                         | 1.7%<br>(1.2-2.3%)                   | 1.4%<br>(0.77-2.3%)                 | 17<br>(9.2-28)      | 2100<br>(1400-3000)    |
| Senegal  | 2016 | Female | 35 to 39 | 4%<br>(2.4-6%)                 | 96%<br>(94-98%)          | 0.24<br>(0.1-0.44)                          | 1.6%<br>(1.2-2.3%)                   | 1.7%<br>(1-2.7%)                    | 25<br>(14-40)       | 2100<br>(1400-2900)    |
| Senegal  | 2016 | Female | 40 to 44 | 4.1%<br>(2.7-6%)               | 96%<br>(94-97%)          | 0.24<br>(0.1-0.46)                          | 1.9%<br>(1.3-2.7%)                   | 2.4%<br>(1.4-3.6%)                  | 38<br>(22-58)       | 2300<br>(1500-3300)    |
| Senegal  | 2016 | Female | 45 to 49 | 3.9%<br>(2.5-5.7%)             | 96%<br>(94-98%)          | 0.22<br>(0.096-0.42)                        | 1.9%<br>(1.2-2.8%)                   | 2.4%<br>(1.4-3.7%)                  | 43<br>(24-70)       | 2100<br>(1300-3200)    |
| Senegal  | 2016 | Female | 50 to 54 | 4%<br>(2.6-5.9%)               | 96%<br>(94-97%)          | 0.24<br>(0.11-0.45)                         | 2.1%<br>(1.3-3.1%)                   | 2.7%<br>(1.5-4%)                    | 58<br>(32-90)       | 2300<br>(1400-3500)    |
| Senegal  | 2016 | Female | 55 to 59 | 4.7%<br>(3.1-6.8%)             | 95%<br>(93-97%)          | 0.32<br>(0.15-0.61)                         | 2.3%<br>(1.2-3.6%)                   | 2.8%<br>(1.5-4.6%)                  | 72<br>(36-120)      | 2400<br>(1300-3800)    |
| Senegal  | 2016 | Female | 60 to 64 | 5.6%<br>(3.8-7.9%)             | 94%<br>(92-96%)          | 0.39<br>(0.17-0.72)                         | 2.3%<br>(1.2-3.7%)                   | 2.8%<br>(1.5-4.6%)                  | 84<br>(43-140)      | 2400<br>(1200-3800)    |
| Senegal  | 2016 | Female | 65 to 69 | 6.6%<br>(4.5-8.9%)             | 93%<br>(91-96%)          | 0.4<br>(0.19-0.75)                          | 2.2%<br>(1-3.8%)                     | 2.7%<br>(1.2-4.6%)                  | 90<br>(40-150)      | 2100<br>(960-3600)     |
| Senegal  | 2016 | Female | 70 to 74 | 5.8%<br>(4-8.2%)               | 94%<br>(92-96%)          | 0.31<br>(0.14-0.62)                         | 1.8%<br>(0.78-3.4%)                  | 2.1%<br>(0.87-4.1%)                 | 82<br>(34-160)      | 1500<br>(660-3000)     |
| Senegal  | 2016 | Female | 75 to 79 | 4.1%<br>(2.6-6.4%)             | 96%<br>(94-97%)          | 0.2<br>(0.081-0.41)                         | 1.2%<br>(0.54-2.3%)                  | 1.4%<br>(0.6-2.7%)                  | 55<br>(23-110)      | 790<br>(350-1600)      |
| Senegal  | 2016 | Female | 80 to 84 | 3.7%<br>(2.1-5.5%)             | 96%<br>(94-98%)          | 0.17<br>(0.07-0.33)                         | 0.88%<br>(0.36-1.7%)                 | 1%<br>(0.38-2%)                     | 27<br>(10-54)       | 290<br>(120-570)       |
| Senegal  | 2016 | Female | 85 to 89 | 4%<br>(2.3-6.2%)               | 96%<br>(94-98%)          | 0.18<br>(0.067-0.35)                        | 0.71%<br>(0.23-1.6%)                 | 0.8%<br>(0.24-1.8%)                 | 13<br>(4-30)        | 100<br>(34-220)        |
| Senegal  | 2016 | Female | 90 to 94 | 4.5%<br>(2.8-7.1%)             | 95%<br>(93-97%)          | 0.19<br>(0.075-0.39)                        | 0.58%<br>(0.12-1.5%)                 | 0.63%<br>(0.089-1.7%)               | 4.3<br>(0.61-12)    | 24<br>(5-61)           |
| Senegal  | 2016 | Female | 95 plus  | 5.2%<br>(2.9-8.2%)             | 95%<br>(92-97%)          | 0.2<br>(0.07-0.46)                          | 0.57%<br>(0.088-1.6%)                | 0.57%<br>(0.0054-1.8%)              | 1.1<br>(0.0098-3.4) | 4.2<br>(0.66-12)       |
| Senegal  | 2016 | Male   | All Ages | 3.2%<br>(2.8-3.8%)             | 97%<br>(96-97%)          | 0.067<br>(0.039-0.11)                       | 0.9%<br>(0.63-1.2%)                  | 1.2%<br>(0.68-1.7%)                 | 570<br>(320-840)    | 29000<br>(19000-39000) |

| Location     | Year | Sex    | Age      | Prevalence of current drinkers | Prevalence of abstainers | Population average of standard drinks daily | Percent of total attributable deaths | Percent of total attributable DALYs | Attributable deaths | Attributable DALYs     |
|--------------|------|--------|----------|--------------------------------|--------------------------|---------------------------------------------|--------------------------------------|-------------------------------------|---------------------|------------------------|
| Senegal      | 2016 | Male   | 15 to 19 | 2%<br>(1.3-2.9%)               | 98%<br>(97-99%)          | 0.031<br>(0.014-0.059)                      | 0.61%<br>(0.4-0.88%)                 | 0.21%<br>(0.11-0.36%)               | 2.6<br>(1.4-4.3)    | 900<br>(570-1400)      |
| Senegal      | 2016 | Male   | 20 to 24 | 3.1%<br>(2-4.4%)               | 97%<br>(96-98%)          | 0.064<br>(0.031-0.13)                       | 1.4%<br>(0.93-1.9%)                  | 0.59%<br>(0.33-0.97%)               | 10<br>(5.4-17)      | 2200<br>(1500-3300)    |
| Senegal      | 2016 | Male   | 25 to 29 | 4%<br>(2.8-5.6%)               | 96%<br>(94-97%)          | 0.1<br>(0.048-0.18)                         | 1.8%<br>(1.3-2.5%)                   | 1.2%<br>(0.69-2%)                   | 22<br>(13-37)       | 2900<br>(2000-4100)    |
| Senegal      | 2016 | Male   | 30 to 34 | 5%<br>(3.4-7.3%)               | 95%<br>(93-97%)          | 0.13<br>(0.068-0.25)                        | 2.2%<br>(1.5-3%)                     | 2%<br>(1.1-3%)                      | 37<br>(20-59)       | 3300<br>(2200-4700)    |
| Senegal      | 2016 | Male   | 35 to 39 | 6.3%<br>(4.2-8.5%)             | 94%<br>(91-96%)          | 0.17<br>(0.078-0.3)                         | 2.6%<br>(1.7-3.7%)                   | 2.7%<br>(1.5-4.3%)                  | 54<br>(29-85)       | 3600<br>(2300-5200)    |
| Senegal      | 2016 | Male   | 40 to 44 | 7.9%<br>(5.8-11%)              | 92%<br>(89-94%)          | 0.21<br>(0.1-0.39)                          | 2.8%<br>(1.7-4%)                     | 3.2%<br>(1.8-5%)                    | 64<br>(35-100)      | 3500<br>(2100-5200)    |
| Senegal      | 2016 | Male   | 45 to 49 | 8.4%<br>(5.6-11%)              | 92%<br>(89-94%)          | 0.23<br>(0.11-0.43)                         | 3%<br>(1.8-4.5%)                     | 3.6%<br>(1.9-5.6%)                  | 71<br>(37-110)      | 3300<br>(1900-5000)    |
| Senegal      | 2016 | Male   | 50 to 54 | 8.4%<br>(5.9-11%)              | 92%<br>(89-94%)          | 0.23<br>(0.11-0.42)                         | 2.6%<br>(1.6-4%)                     | 3.1%<br>(1.7-4.9%)                  | 65<br>(34-100)      | 2600<br>(1500-3900)    |
| Senegal      | 2016 | Male   | 55 to 59 | 9.2%<br>(6.5-12%)              | 91%<br>(88-94%)          | 0.25<br>(0.11-0.45)                         | 2.5%<br>(1.4-4%)                     | 3%<br>(1.6-4.8%)                    | 67<br>(34-110)      | 2300<br>(1300-3500)    |
| Senegal      | 2016 | Male   | 60 to 64 | 8.9%<br>(6.2-12%)              | 91%<br>(88-94%)          | 0.22<br>(0.097-0.4)                         | 2%<br>(1.1-3.2%)                     | 2.3%<br>(1.2-3.9%)                  | 59<br>(28-100)      | 1700<br>(900-2800)     |
| Senegal      | 2016 | Male   | 65 to 69 | 8%<br>(5.7-10%)                | 92%<br>(90-94%)          | 0.17<br>(0.079-0.31)                        | 1.3%<br>(0.75-2.1%)                  | 1.5%<br>(0.82-2.5%)                 | 42<br>(21-68)       | 990<br>(540-1600)      |
| Senegal      | 2016 | Male   | 70 to 74 | 7.2%<br>(5.2-10%)              | 93%<br>(90-95%)          | 0.12<br>(0.058-0.24)                        | 0.95%<br>(0.52-1.5%)                 | 1.1%<br>(0.56-1.8%)                 | 35<br>(17-56)       | 650<br>(350-1000)      |
| Senegal      | 2016 | Male   | 75 to 79 | 6.3%<br>(4.2-9.1%)             | 94%<br>(91-96%)          | 0.09<br>(0.038-0.18)                        | 0.69%<br>(0.36-1.1%)                 | 0.78%<br>(0.37-1.3%)                | 23<br>(11-38)       | 340<br>(180-530)       |
| Senegal      | 2016 | Male   | 80 to 84 | 5.2%<br>(3.2-7.6%)             | 95%<br>(92-97%)          | 0.064<br>(0.027-0.13)                       | 0.61%<br>(0.31-0.95%)                | 0.68%<br>(0.31-1.1%)                | 12<br>(5.6-20)      | 130<br>(68-210)        |
| Senegal      | 2016 | Male   | 85 to 89 | 4.4%<br>(2.5-6.7%)             | 96%<br>(93-97%)          | 0.048<br>(0.018-0.094)                      | 0.47%<br>(0.24-0.72%)                | 0.51%<br>(0.22-0.82%)               | 5.7<br>(2.5-9.2)    | 46<br>(23-70)          |
| Senegal      | 2016 | Male   | 90 to 94 | 4.5%<br>(2.8-6.8%)             | 96%<br>(93-97%)          | 0.04<br>(0.016-0.086)                       | 0.31%<br>(0.14-0.49%)                | 0.3%<br>(0.079-0.52%)               | 1.4<br>(0.35-2.4)   | 8.5<br>(3.6-14)        |
| Senegal      | 2016 | Male   | 95 plus  | 5.1%<br>(2.8-8%)               | 95%<br>(92-97%)          | 0.036<br>(0.012-0.085)                      | 0.31%<br>(0.12-0.51%)                | 0.26%<br>(0.026-0.5%)               | 0.31<br>(0.03-0.59) | 1.5<br>(0.56-2.4)      |
| Sierra Leone | 1990 | Female | All Ages | 25%<br>(19-31%)                | 75%<br>(69-81%)          | 1.4<br>(1-1.9)                              | 1.3%<br>(0.88-1.7%)                  | 2.9%<br>(1.7-4%)                    | 780<br>(470-1100)   | 27000<br>(18000-35000) |
| Sierra Leone | 1990 | Female | 15 to 19 | 23%<br>(12-37%)                | 77%<br>(63-88%)          | 1.2<br>(0.5-2.4)                            | 1.8%<br>(0.85-3.1%)                  | 2.2%<br>(0.77-4.2%)                 | 7.3<br>(2.5-15)     | 740<br>(350-1300)      |
| Sierra Leone | 1990 | Female | 20 to 24 | 28%<br>(15-45%)                | 72%<br>(55-85%)          | 1.9<br>(0.79-3.8)                           | 3.4%<br>(1.9-5.3%)                   | 4%<br>(1.6-6.9%)                    | 15<br>(6.1-27)      | 1400<br>(740-2300)     |
| Sierra Leone | 1990 | Female | 25 to 29 | 31%<br>(16-49%)                | 69%<br>(51-84%)          | 2.4<br>(0.99-4.4)                           | 4.4%<br>(2.6-6.6%)                   | 5.7%<br>(2.9-9.2%)                  | 22<br>(11-37)       | 1700<br>(980-2600)     |
| Sierra Leone | 1990 | Female | 30 to 34 | 34%<br>(17-53%)                | 66%<br>(47-83%)          | 2.7<br>(1.2-4.8)                            | 4.9%<br>(3-7.3%)                     | 6.7%<br>(3.7-10%)                   | 27<br>(14-43)       | 1800<br>(1100-2700)    |



| Location     | Year | Sex    | Age      | Prevalence of current drinkers | Prevalence of abstainers | Population average of standard drinks daily | Percent of total attributable deaths | Percent of total attributable DALYs | Attributable deaths  | Attributable DALYs     |
|--------------|------|--------|----------|--------------------------------|--------------------------|---------------------------------------------|--------------------------------------|-------------------------------------|----------------------|------------------------|
| Sierra Leone | 1990 | Female | 35 to 39 | 37%<br>(20-56%)                | 63%<br>(44-80%)          | 2.8<br>(1.3-4.9)                            | 5.8%<br>(3.4-8.4%)                   | 8.2%<br>(4.5-12%)                   | 37<br>(20-56)        | 2100<br>(1200-3100)    |
| Sierra Leone | 1990 | Female | 40 to 44 | 39%<br>(22-57%)                | 61%<br>(43-78%)          | 2.9<br>(1.3-5.3)                            | 6.6%<br>(3.9-9.5%)                   | 9.6%<br>(5.4-14%)                   | 47<br>(26-68)        | 2300<br>(1400-3400)    |
| Sierra Leone | 1990 | Female | 45 to 49 | 39%<br>(21-59%)                | 61%<br>(41-79%)          | 3<br>(1.3-5.9)                              | 7.9%<br>(4.5-12%)                    | 11%<br>(6.2-16%)                    | 61<br>(33-93)        | 2600<br>(1500-4000)    |
| Sierra Leone | 1990 | Female | 50 to 54 | 40%<br>(22-61%)                | 60%<br>(39-78%)          | 3.2<br>(1.3-5.9)                            | 8.9%<br>(4.8-13%)                    | 12%<br>(6.6-18%)                    | 77<br>(40-120)       | 2900<br>(1500-4300)    |
| Sierra Leone | 1990 | Female | 55 to 59 | 40%<br>(23-59%)                | 60%<br>(41-77%)          | 3.5<br>(1.5-6.6)                            | 9.6%<br>(5.1-14%)                    | 13%<br>(6.8-19%)                    | 95<br>(50-140)       | 3100<br>(1600-4500)    |
| Sierra Leone | 1990 | Female | 60 to 64 | 41%<br>(23-61%)                | 59%<br>(39-77%)          | 3.5<br>(1.4-7)                              | 8.8%<br>(4.4-13%)                    | 11%<br>(5.8-17%)                    | 100<br>(50-160)      | 2800<br>(1400-4200)    |
| Sierra Leone | 1990 | Female | 65 to 69 | 42%<br>(25-60%)                | 58%<br>(40-75%)          | 3.2<br>(1.4-5.9)                            | 9%<br>(3.9-14%)                      | 11%<br>(4.9-18%)                    | 110<br>(48-180)      | 2500<br>(1100-4000)    |
| Sierra Leone | 1990 | Female | 70 to 74 | 40%<br>(25-58%)                | 60%<br>(42-75%)          | 2.6<br>(1-5.2)                              | 8.1%<br>(2.7-15%)                    | 9.8%<br>(3.3-18%)                   | 96<br>(31-180)       | 1700<br>(570-3200)     |
| Sierra Leone | 1990 | Female | 75 to 79 | 36%<br>(20-55%)                | 64%<br>(45-80%)          | 2.2<br>(0.74-4.7)                           | 6.3%<br>(1.3-12%)                    | 7.5%<br>(1.6-15%)                   | 52<br>(11-99)        | 720<br>(150-1400)      |
| Sierra Leone | 1990 | Female | 80 to 84 | 34%<br>(18-52%)                | 66%<br>(48-82%)          | 2<br>(0.65-4.3)                             | 5.4%<br>(1-11%)                      | 6.4%<br>(1.2-13%)                   | 17<br>(3.2-35)       | 170<br>(34-360)        |
| Sierra Leone | 1990 | Female | 85 to 89 | 34%<br>(18-52%)                | 66%<br>(48-82%)          | 2<br>(0.68-4.3)                             | 4.7%<br>(0.76-10%)                   | 5.6%<br>(0.78-12%)                  | 9.8<br>(1.4-21)      | 73<br>(12-160)         |
| Sierra Leone | 1990 | Female | 90 to 94 | 37%<br>(20-55%)                | 63%<br>(45-80%)          | 2.1<br>(0.66-4.5)                           | 4.3%<br>(0.35-9.6%)                  | 5.1%<br>(0.31-12%)                  | 3.6<br>(0.23-8.3)    | 19<br>(1.5-42)         |
| Sierra Leone | 1990 | Female | 95 plus  | 41%<br>(21-62%)                | 59%<br>(38-79%)          | 2.2<br>(0.59-5.2)                           | 4.6%<br>(-0.18-9.7%)                 | 4.6%<br>(-0.35-12%)                 | 0.97<br>(-0.073-2.5) | 3.4<br>(-0.15-8.3)     |
| Sierra Leone | 1990 | Male   | All Ages | 20%<br>(16-26%)                | 80%<br>(74-84%)          | 1.7<br>(1.2-2.3)                            | 2.2%<br>(1.7-2.8%)                   | 4.3%<br>(3.2-5.6%)                  | 1400<br>(980-1800)   | 52000<br>(40000-65000) |
| Sierra Leone | 1990 | Male   | 15 to 19 | 15%<br>(8-26%)                 | 85%<br>(74-92%)          | 0.93<br>(0.35-1.9)                          | 2.3%<br>(1.1-4%)                     | 2.8%<br>(1.1-5.4%)                  | 12<br>(4.6-24)       | 1100<br>(490-2000)     |
| Sierra Leone | 1990 | Male   | 20 to 24 | 23%<br>(12-38%)                | 77%<br>(62-88%)          | 1.9<br>(0.74-3.8)                           | 6%<br>(3.2-9.3%)                     | 7.2%<br>(3.4-12%)                   | 37<br>(17-61)        | 2800<br>(1500-4400)    |
| Sierra Leone | 1990 | Male   | 25 to 29 | 28%<br>(15-45%)                | 72%<br>(55-85%)          | 2.8<br>(1.1-5.1)                            | 9.2%<br>(5.2-13%)                    | 12%<br>(6.2-17%)                    | 57<br>(30-86)        | 3900<br>(2200-5600)    |
| Sierra Leone | 1990 | Male   | 30 to 34 | 32%<br>(17-51%)                | 68%<br>(49-83%)          | 3.5<br>(1.5-6.1)                            | 11%<br>(7.3-16%)                     | 15%<br>(9.1-20%)                    | 75<br>(46-110)       | 4500<br>(2900-6300)    |
| Sierra Leone | 1990 | Male   | 35 to 39 | 35%<br>(19-54%)                | 65%<br>(46-81%)          | 3.8<br>(1.7-6.9)                            | 13%<br>(8.5-17%)                     | 16%<br>(11-22%)                     | 94<br>(62-130)       | 5000<br>(3400-7000)    |
| Sierra Leone | 1990 | Male   | 40 to 44 | 36%<br>(21-55%)                | 64%<br>(45-79%)          | 4.1<br>(1.7-7.8)                            | 14%<br>(8.9-19%)                     | 18%<br>(11-24%)                     | 120<br>(80-170)      | 5900<br>(3900-8000)    |
| Sierra Leone | 1990 | Male   | 45 to 49 | 37%<br>(19-56%)                | 63%<br>(44-81%)          | 4.3<br>(1.7-8.5)                            | 15%<br>(9.5-20%)                     | 19%<br>(12-26%)                     | 150<br>(99-210)      | 6500<br>(4200-8800)    |
| Sierra Leone | 1990 | Male   | 50 to 54 | 37%<br>(20-58%)                | 63%<br>(42-80%)          | 4.4<br>(1.8-8.4)                            | 14%<br>(9.1-19%)                     | 18%<br>(11-24%)                     | 160<br>(100-230)     | 6000<br>(3800-8300)    |

| Location     | Year | Sex    | Age      | Prevalence of current drinkers | Prevalence of abstainers | Population average of standard drinks daily | Percent of total attributable deaths | Percent of total attributable DALYs | Attributable deaths  | Attributable DALYs     |
|--------------|------|--------|----------|--------------------------------|--------------------------|---------------------------------------------|--------------------------------------|-------------------------------------|----------------------|------------------------|
| Sierra Leone | 1990 | Male   | 55 to 59 | 38%<br>(22-57%)                | 62%<br>(43-78%)          | 4.3<br>(1.8-8.1)                            | 13%<br>(8.2-17%)                     | 16%<br>(10-22%)                     | 160<br>(100-230)     | 5300<br>(3400-7300)    |
| Sierra Leone | 1990 | Male   | 60 to 64 | 37%<br>(21-57%)                | 63%<br>(43-79%)          | 3.9<br>(1.4-8)                              | 11%<br>(6.3-16%)                     | 13%<br>(7.6-19%)                    | 150<br>(90-230)      | 4200<br>(2500-6100)    |
| Sierra Leone | 1990 | Male   | 65 to 69 | 37%<br>(21-55%)                | 63%<br>(45-79%)          | 3.2<br>(1.3-6.5)                            | 9.8%<br>(5.1-15%)                    | 12%<br>(6.1-18%)                    | 140<br>(73-220)      | 3300<br>(1700-5000)    |
| Sierra Leone | 1990 | Male   | 70 to 74 | 35%<br>(21-53%)                | 65%<br>(47-79%)          | 2.5<br>(0.92-5.1)                           | 8.2%<br>(3.1-14%)                    | 9.7%<br>(3.7-16%)                   | 110<br>(42-190)      | 2100<br>(770-3500)     |
| Sierra Leone | 1990 | Male   | 75 to 79 | 32%<br>(18-52%)                | 68%<br>(48-82%)          | 1.9<br>(0.61-4.3)                           | 6.1%<br>(1.7-11%)                    | 7.1%<br>(2-13%)                     | 60<br>(16-110)       | 840<br>(230-1600)      |
| Sierra Leone | 1990 | Male   | 80 to 84 | 30%<br>(15-48%)                | 70%<br>(52-85%)          | 1.6<br>(0.51-3.5)                           | 5.1%<br>(1.4-10%)                    | 5.9%<br>(1.6-12%)                   | 21<br>(5.7-43)       | 220<br>(62-440)        |
| Sierra Leone | 1990 | Male   | 85 to 89 | 28%<br>(15-46%)                | 72%<br>(54-85%)          | 1.4<br>(0.44-3.1)                           | 4.1%<br>(1.1-8.9%)                   | 4.8%<br>(1.2-11%)                   | 9.4<br>(2.3-21)      | 70<br>(18-150)         |
| Sierra Leone | 1990 | Male   | 90 to 94 | 30%<br>(15-48%)                | 70%<br>(52-85%)          | 1.3<br>(0.39-3.2)                           | 3%<br>(0.49-7.4%)                    | 3.5%<br>(0.48-8.7%)                 | 2.4<br>(0.32-6)      | 12<br>(2-31)           |
| Sierra Leone | 1990 | Male   | 95 plus  | 34%<br>(16-56%)                | 66%<br>(44-84%)          | 1.3<br>(0.29-3.7)                           | 2.6%<br>(0.13-7.4%)                  | 3%<br>(-0.077-8.7%)                 | 0.47<br>(-0.012-1.4) | 1.7<br>(0.078-4.7)     |
| Sierra Leone | 1995 | Female | All Ages | 25%<br>(19-31%)                | 75%<br>(69-81%)          | 1.5<br>(1.1-2.1)                            | 1.4%<br>(1-1.9%)                     | 3.1%<br>(2-4.2%)                    | 830<br>(530-1100)    | 29000<br>(21000-38000) |
| Sierra Leone | 1995 | Female | 15 to 19 | 23%<br>(12-38%)                | 77%<br>(62-88%)          | 1.4<br>(0.58-2.8)                           | 1.7%<br>(0.83-3%)                    | 2%<br>(0.71-3.8%)                   | 9.5<br>(3.3-18)      | 910<br>(420-1600)      |
| Sierra Leone | 1995 | Female | 20 to 24 | 29%<br>(15-46%)                | 71%<br>(54-85%)          | 2.2<br>(0.89-4.2)                           | 3.4%<br>(1.8-5.3%)                   | 3.8%<br>(1.7-6.5%)                  | 19<br>(8.2-34)       | 1700<br>(900-2700)     |
| Sierra Leone | 1995 | Female | 25 to 29 | 31%<br>(16-49%)                | 69%<br>(51-84%)          | 2.6<br>(1.1-4.8)                            | 4.5%<br>(2.7-6.6%)                   | 5.5%<br>(2.9-8.7%)                  | 26<br>(13-41)        | 1900<br>(1100-2900)    |
| Sierra Leone | 1995 | Female | 30 to 34 | 34%<br>(19-53%)                | 66%<br>(47-81%)          | 3<br>(1.4-5.3)                              | 5%<br>(3.1-7.2%)                     | 6.5%<br>(3.6-9.7%)                  | 30<br>(17-46)        | 2000<br>(1200-2900)    |
| Sierra Leone | 1995 | Female | 35 to 39 | 38%<br>(21-56%)                | 62%<br>(44-79%)          | 3.2<br>(1.5-5.6)                            | 6.1%<br>(3.6-8.8%)                   | 8.2%<br>(4.8-12%)                   | 41<br>(23-62)        | 2300<br>(1400-3400)    |
| Sierra Leone | 1995 | Female | 40 to 44 | 39%<br>(23-58%)                | 61%<br>(42-77%)          | 3.4<br>(1.5-5.9)                            | 7%<br>(4.3-9.8%)                     | 9.8%<br>(5.8-14%)                   | 50<br>(30-72)        | 2500<br>(1500-3500)    |
| Sierra Leone | 1995 | Female | 45 to 49 | 40%<br>(21-59%)                | 60%<br>(41-79%)          | 3.4<br>(1.5-6.5)                            | 8.4%<br>(5-12%)                      | 12%<br>(6.9-17%)                    | 66<br>(39-98)        | 2800<br>(1700-4200)    |
| Sierra Leone | 1995 | Female | 50 to 54 | 40%<br>(22-60%)                | 60%<br>(40-78%)          | 3.6<br>(1.6-6.8)                            | 9.6%<br>(5.5-14%)                    | 13%<br>(7.5-19%)                    | 84<br>(46-120)       | 3100<br>(1700-4500)    |
| Sierra Leone | 1995 | Female | 55 to 59 | 41%<br>(23-59%)                | 59%<br>(41-77%)          | 3.9<br>(1.6-7.2)                            | 10%<br>(5.6-15%)                     | 14%<br>(7.4-20%)                    | 100<br>(55-150)      | 3300<br>(1800-4800)    |
| Sierra Leone | 1995 | Female | 60 to 64 | 42%<br>(24-61%)                | 58%<br>(39-76%)          | 3.9<br>(1.6-7.8)                            | 9.5%<br>(4.9-14%)                    | 12%<br>(6.2-18%)                    | 100<br>(53-160)      | 2900<br>(1500-4300)    |
| Sierra Leone | 1995 | Female | 65 to 69 | 43%<br>(25-60%)                | 57%<br>(40-75%)          | 3.6<br>(1.6-6.5)                            | 9.9%<br>(4.6-15%)                    | 12%<br>(5.8-19%)                    | 120<br>(53-180)      | 2600<br>(1200-4100)    |
| Sierra Leone | 1995 | Female | 70 to 74 | 40%<br>(25-58%)                | 60%<br>(42-75%)          | 3<br>(1.2-5.9)                              | 9%<br>(3.1-16%)                      | 11%<br>(3.7-19%)                    | 98<br>(32-170)       | 1800<br>(590-3100)     |

| Location     | Year | Sex    | Age      | Prevalence of current drinkers | Prevalence of abstainers | Population average of standard drinks daily | Percent of total attributable deaths | Percent of total attributable DALYs | Attributable deaths | Attributable DALYs     |
|--------------|------|--------|----------|--------------------------------|--------------------------|---------------------------------------------|--------------------------------------|-------------------------------------|---------------------|------------------------|
| Sierra Leone | 1995 | Female | 75 to 79 | 36%<br>(20-56%)                | 64%<br>(44-80%)          | 2.4<br>(0.8-5.3)                            | 7%<br>(1.7-13%)                      | 8.4%<br>(2-16%)                     | 50<br>(12-95)       | 710<br>(170-1300)      |
| Sierra Leone | 1995 | Female | 80 to 84 | 34%<br>(18-53%)                | 66%<br>(47-82%)          | 2.2<br>(0.74-4.6)                           | 6.1%<br>(1.4-12%)                    | 7.3%<br>(1.7-14%)                   | 16<br>(3.6-31)      | 170<br>(39-320)        |
| Sierra Leone | 1995 | Female | 85 to 89 | 35%<br>(20-52%)                | 65%<br>(48-80%)          | 2.2<br>(0.77-4.5)                           | 5.6%<br>(1.2-11%)                    | 6.6%<br>(1.3-13%)                   | 11<br>(2.2-23)      | 83<br>(17-170)         |
| Sierra Leone | 1995 | Female | 90 to 94 | 38%<br>(21-55%)                | 62%<br>(45-79%)          | 2.3<br>(0.74-4.9)                           | 5.2%<br>(0.78-11%)                   | 6.2%<br>(0.79-13%)                  | 4.5<br>(0.58-10)    | 23<br>(3.5-50)         |
| Sierra Leone | 1995 | Female | 95 plus  | 42%<br>(23-62%)                | 58%<br>(38-77%)          | 2.4<br>(0.68-6)                             | 4.7%<br>(0.18-11%)                   | 5.5%<br>(0.013-13%)                 | 1.2<br>(0.0028-2.8) | 4.2<br>(0.15-9.5)      |
| Sierra Leone | 1995 | Male   | All Ages | 21%<br>(16-26%)                | 79%<br>(74-84%)          | 1.9<br>(1.4-2.6)                            | 2.3%<br>(1.8-2.9%)                   | 4.5%<br>(3.4-5.7%)                  | 1400<br>(1100-1800) | 54000<br>(43000-67000) |
| Sierra Leone | 1995 | Male   | 15 to 19 | 16%<br>(8.1-27%)               | 84%<br>(73-92%)          | 1.1<br>(0.42-2.2)                           | 2%<br>(0.92-3.4%)                    | 2.2%<br>(0.86-4.1%)                 | 16<br>(6.2-30)      | 1300<br>(620-2400)     |
| Sierra Leone | 1995 | Male   | 20 to 24 | 24%<br>(13-40%)                | 76%<br>(60-87%)          | 2.3<br>(0.88-4.3)                           | 4.3%<br>(2.4-6.6%)                   | 4.5%<br>(2.3-7.4%)                  | 45<br>(23-72)       | 3400<br>(1900-5200)    |
| Sierra Leone | 1995 | Male   | 25 to 29 | 30%<br>(16-47%)                | 70%<br>(53-84%)          | 3.4<br>(1.3-6.1)                            | 7.2%<br>(4.2-11%)                    | 8.1%<br>(4.6-12%)                   | 65<br>(37-97)       | 4400<br>(2500-6200)    |
| Sierra Leone | 1995 | Male   | 30 to 34 | 33%<br>(17-52%)                | 67%<br>(48-83%)          | 4.1<br>(1.8-7.3)                            | 9.4%<br>(6.2-13%)                    | 11%<br>(7-16%)                      | 81<br>(51-110)      | 4900<br>(3200-6700)    |
| Sierra Leone | 1995 | Male   | 35 to 39 | 36%<br>(20-54%)                | 64%<br>(46-80%)          | 4.4<br>(2-8.1)                              | 11%<br>(7.8-15%)                     | 14%<br>(9.6-19%)                    | 99<br>(66-140)      | 5300<br>(3600-7200)    |
| Sierra Leone | 1995 | Male   | 40 to 44 | 37%<br>(22-56%)                | 63%<br>(44-78%)          | 4.7<br>(2-8.7)                              | 13%<br>(8.8-18%)                     | 16%<br>(11-22%)                     | 120<br>(76-160)     | 5600<br>(3600-7500)    |
| Sierra Leone | 1995 | Male   | 45 to 49 | 38%<br>(20-56%)                | 62%<br>(44-80%)          | 5<br>(2-9.5)                                | 15%<br>(9.9-20%)                     | 18%<br>(12-24%)                     | 160<br>(100-210)    | 6500<br>(4300-8900)    |
| Sierra Leone | 1995 | Male   | 50 to 54 | 39%<br>(22-59%)                | 61%<br>(41-78%)          | 5.1<br>(2.1-10)                             | 14%<br>(9.6-19%)                     | 18%<br>(12-24%)                     | 170<br>(110-230)    | 6300<br>(4200-8600)    |
| Sierra Leone | 1995 | Male   | 55 to 59 | 39%<br>(23-58%)                | 61%<br>(42-77%)          | 5<br>(2-9.5)                                | 14%<br>(9-18%)                       | 17%<br>(11-23%)                     | 170<br>(110-230)    | 5500<br>(3600-7400)    |
| Sierra Leone | 1995 | Male   | 60 to 64 | 39%<br>(21-58%)                | 61%<br>(42-79%)          | 4.5<br>(1.7-9.4)                            | 12%<br>(7-16%)                       | 14%<br>(8.4-19%)                    | 160<br>(95-220)     | 4300<br>(2600-6000)    |
| Sierra Leone | 1995 | Male   | 65 to 69 | 38%<br>(23-56%)                | 62%<br>(44-77%)          | 3.8<br>(1.5-7.4)                            | 11%<br>(5.9-16%)                     | 13%<br>(7-19%)                      | 150<br>(80-210)     | 3300<br>(1800-4800)    |
| Sierra Leone | 1995 | Male   | 70 to 74 | 37%<br>(22-54%)                | 63%<br>(46-78%)          | 2.9<br>(1.1-6)                              | 9.2%<br>(3.7-15%)                    | 11%<br>(4.3-18%)                    | 110<br>(45-190)     | 2100<br>(810-3400)     |
| Sierra Leone | 1995 | Male   | 75 to 79 | 34%<br>(19-54%)                | 66%<br>(46-81%)          | 2.2<br>(0.71-5)                             | 7%<br>(2.1-12%)                      | 8.1%<br>(2.5-15%)                   | 58<br>(18-110)      | 820<br>(250-1500)      |
| Sierra Leone | 1995 | Male   | 80 to 84 | 31%<br>(17-50%)                | 69%<br>(50-83%)          | 1.9<br>(0.61-4.1)                           | 6%<br>(1.9-11%)                      | 7%<br>(2.1-13%)                     | 21<br>(6.4-40)      | 220<br>(69-410)        |
| Sierra Leone | 1995 | Male   | 85 to 89 | 29%<br>(15-46%)                | 71%<br>(54-85%)          | 1.6<br>(0.52-3.5)                           | 5%<br>(1.4-9.9%)                     | 5.9%<br>(1.6-12%)                   | 11<br>(3-22)        | 81<br>(24-160)         |
| Sierra Leone | 1995 | Male   | 90 to 94 | 31%<br>(16-50%)                | 69%<br>(50-84%)          | 1.5<br>(0.47-3.5)                           | 3.9%<br>(0.78-8.5%)                  | 4.5%<br>(0.76-10%)                  | 3<br>(0.51-6.9)     | 16<br>(3.2-35)         |

| Location     | Year | Sex    | Age      | Prevalence of current drinkers | Prevalence of abstainers | Population average of standard drinks daily | Percent of total attributable deaths | Percent of total attributable DALYs | Attributable deaths | Attributable DALYs     |
|--------------|------|--------|----------|--------------------------------|--------------------------|---------------------------------------------|--------------------------------------|-------------------------------------|---------------------|------------------------|
| Sierra Leone | 1995 | Male   | 95 plus  | 36%<br>(17-58%)                | 64%<br>(42-83%)          | 1.6<br>(0.36-4.1)                           | 3.5%<br>(0.36-8.6%)                  | 4%<br>(0.26-10%)                    | 0.66<br>(0.043-1.7) | 2.3<br>(0.25-5.8)      |
| Sierra Leone | 2000 | Female | All Ages | 25%<br>(19-32%)                | 75%<br>(68-81%)          | 1.8<br>(1.3-2.4)                            | 1.9%<br>(1.4-2.5%)                   | 4.2%<br>(2.9-5.5%)                  | 1100<br>(750-1500)  | 38000<br>(28000-49000) |
| Sierra Leone | 2000 | Female | 15 to 19 | 23%<br>(13-38%)                | 77%<br>(62-87%)          | 1.6<br>(0.66-3.1)                           | 2.4%<br>(1.1-4%)                     | 3%<br>(1.2-5.5%)                    | 15<br>(5.7-27)      | 1300<br>(590-2300)     |
| Sierra Leone | 2000 | Female | 20 to 24 | 29%<br>(15-47%)                | 71%<br>(53-85%)          | 2.5<br>(1.1-4.6)                            | 4.3%<br>(2.5-6.6%)                   | 5.1%<br>(2.5-8.4%)                  | 30<br>(14-50)       | 2500<br>(1400-3800)    |
| Sierra Leone | 2000 | Female | 25 to 29 | 32%<br>(16-50%)                | 68%<br>(50-84%)          | 3<br>(1.3-5.4)                              | 5.4%<br>(3.2-8%)                     | 6.7%<br>(3.6-11%)                   | 39<br>(21-61)       | 2800<br>(1700-4200)    |
| Sierra Leone | 2000 | Female | 30 to 34 | 34%<br>(17-53%)                | 66%<br>(47-83%)          | 3.4<br>(1.6-6.1)                            | 5.8%<br>(3.6-8.4%)                   | 7.6%<br>(4.4-11%)                   | 42<br>(24-62)       | 2600<br>(1600-3800)    |
| Sierra Leone | 2000 | Female | 35 to 39 | 38%<br>(21-57%)                | 62%<br>(43-79%)          | 3.7<br>(1.7-6.3)                            | 7%<br>(4.4-10%)                      | 9.5%<br>(5.6-14%)                   | 54<br>(32-79)       | 3000<br>(1800-4300)    |
| Sierra Leone | 2000 | Female | 40 to 44 | 40%<br>(23-58%)                | 60%<br>(42-77%)          | 3.8<br>(1.7-6.8)                            | 8%<br>(4.9-11%)                      | 11%<br>(6.7-16%)                    | 64<br>(39-92)       | 3100<br>(1900-4400)    |
| Sierra Leone | 2000 | Female | 45 to 49 | 40%<br>(22-59%)                | 60%<br>(41-78%)          | 3.9<br>(1.6-7.4)                            | 9.8%<br>(6.1-14%)                    | 13%<br>(8.2-19%)                    | 85<br>(52-120)      | 3600<br>(2200-5200)    |
| Sierra Leone | 2000 | Female | 50 to 54 | 40%<br>(23-61%)                | 60%<br>(39-77%)          | 4.1<br>(1.8-7.9)                            | 11%<br>(6.6-16%)                     | 15%<br>(8.9-21%)                    | 110<br>(66-160)     | 4100<br>(2500-5800)    |
| Sierra Leone | 2000 | Female | 55 to 59 | 41%<br>(24-59%)                | 59%<br>(41-76%)          | 4.5<br>(1.9-8.5)                            | 12%<br>(7.1-17%)                     | 16%<br>(9.2-23%)                    | 140<br>(79-200)     | 4400<br>(2500-6300)    |
| Sierra Leone | 2000 | Female | 60 to 64 | 42%<br>(24-61%)                | 58%<br>(39-76%)          | 4.5<br>(1.8-8.7)                            | 11%<br>(6.3-16%)                     | 14%<br>(7.9-20%)                    | 140<br>(77-210)     | 3800<br>(2100-5600)    |
| Sierra Leone | 2000 | Female | 65 to 69 | 43%<br>(26-60%)                | 57%<br>(40-74%)          | 4.1<br>(1.8-7.5)                            | 12%<br>(6.4-18%)                     | 14%<br>(7.7-21%)                    | 150<br>(79-230)     | 3400<br>(1800-5100)    |
| Sierra Leone | 2000 | Female | 70 to 74 | 41%<br>(25-58%)                | 59%<br>(42-75%)          | 3.4<br>(1.3-7)                              | 11%<br>(4.4-18%)                     | 13%<br>(5.1-21%)                    | 120<br>(48-200)     | 2200<br>(860-3700)     |
| Sierra Leone | 2000 | Female | 75 to 79 | 37%<br>(20-55%)                | 63%<br>(45-80%)          | 2.8<br>(0.9-6.2)                            | 8.4%<br>(2.4-15%)                    | 10%<br>(2.8-18%)                    | 61<br>(17-110)      | 850<br>(240-1500)      |
| Sierra Leone | 2000 | Female | 80 to 84 | 34%<br>(19-53%)                | 66%<br>(47-81%)          | 2.5<br>(0.85-5.1)                           | 7.5%<br>(2.1-13%)                    | 8.8%<br>(2.4-16%)                   | 18<br>(5-33)        | 190<br>(53-330)        |
| Sierra Leone | 2000 | Female | 85 to 89 | 35%<br>(19-53%)                | 65%<br>(47-81%)          | 2.5<br>(0.84-5.2)                           | 6.9%<br>(1.8-13%)                    | 8.2%<br>(2-15%)                     | 14<br>(3.5-26)      | 100<br>(27-190)        |
| Sierra Leone | 2000 | Female | 90 to 94 | 38%<br>(20-55%)                | 62%<br>(45-80%)          | 2.6<br>(0.83-5.7)                           | 6.6%<br>(1.3-13%)                    | 7.9%<br>(1.4-16%)                   | 6.6<br>(1.2-13)     | 33<br>(6.5-66)         |
| Sierra Leone | 2000 | Female | 95 plus  | 42%<br>(22-62%)                | 58%<br>(38-78%)          | 2.7<br>(0.73-6.7)                           | 6%<br>(0.6-13%)                      | 7%<br>(0.52-15%)                    | 1.9<br>(0.14-3.9)   | 6.3<br>(0.63-13)       |
| Sierra Leone | 2000 | Male   | All Ages | 21%<br>(17-27%)                | 79%<br>(73-83%)          | 2.2<br>(1.6-2.9)                            | 2.9%<br>(2.3-3.5%)                   | 5.5%<br>(4.3-6.9%)                  | 1700<br>(1300-2100) | 63000<br>(50000-79000) |
| Sierra Leone | 2000 | Male   | 15 to 19 | 17%<br>(8.6-28%)               | 83%<br>(72-91%)          | 1.3<br>(0.49-2.7)                           | 2.9%<br>(1.4-5%)                     | 3.6%<br>(1.5-6.5%)                  | 22<br>(8.7-38)      | 1800<br>(840-3000)     |
| Sierra Leone | 2000 | Male   | 20 to 24 | 25%<br>(13-40%)                | 75%<br>(60-87%)          | 2.6<br>(1.1-4.9)                            | 6.5%<br>(3.8-10%)                    | 7.6%<br>(4-12%)                     | 59<br>(32-92)       | 4300<br>(2500-6600)    |

| Location     | Year | Sex    | Age      | Prevalence of current drinkers | Prevalence of abstainers | Population average of standard drinks daily | Percent of total attributable deaths | Percent of total attributable DALYs | Attributable deaths | Attributable DALYs     |
|--------------|------|--------|----------|--------------------------------|--------------------------|---------------------------------------------|--------------------------------------|-------------------------------------|---------------------|------------------------|
| Sierra Leone | 2000 | Male   | 25 to 29 | 30%<br>(17-48%)                | 70%<br>(52-83%)          | 3.9<br>(1.6-7.1)                            | 9.7%<br>(6-14%)                      | 12%<br>(6.8-17%)                    | 85<br>(49-120)      | 5600<br>(3400-8000)    |
| Sierra Leone | 2000 | Male   | 30 to 34 | 34%<br>(18-53%)                | 66%<br>(47-82%)          | 4.7<br>(2.1-8.3)                            | 12%<br>(7.9-16%)                     | 15%<br>(9.6-20%)                    | 100<br>(65-140)     | 6000<br>(4000-8100)    |
| Sierra Leone | 2000 | Male   | 35 to 39 | 37%<br>(20-56%)                | 63%<br>(44-80%)          | 5.2<br>(2.3-9.6)                            | 13%<br>(9.3-18%)                     | 17%<br>(12-23%)                     | 120<br>(80-160)     | 6300<br>(4300-8600)    |
| Sierra Leone | 2000 | Male   | 40 to 44 | 38%<br>(22-58%)                | 62%<br>(42-78%)          | 5.5<br>(2.4-10)                             | 15%<br>(10-20%)                      | 19%<br>(13-25%)                     | 140<br>(94-190)     | 6600<br>(4500-8800)    |
| Sierra Leone | 2000 | Male   | 45 to 49 | 39%<br>(21-58%)                | 61%<br>(42-79%)          | 5.8<br>(2.3-11)                             | 16%<br>(11-22%)                      | 21%<br>(14-27%)                     | 170<br>(110-220)    | 6900<br>(4600-9200)    |
| Sierra Leone | 2000 | Male   | 50 to 54 | 39%<br>(22-59%)                | 61%<br>(41-78%)          | 5.9<br>(2.3-12)                             | 16%<br>(11-22%)                      | 20%<br>(14-27%)                     | 200<br>(130-270)    | 7200<br>(4800-9700)    |
| Sierra Leone | 2000 | Male   | 55 to 59 | 39%<br>(23-59%)                | 61%<br>(41-77%)          | 5.7<br>(2.3-11)                             | 15%<br>(10-21%)                      | 19%<br>(13-25%)                     | 200<br>(140-280)    | 6500<br>(4400-8800)    |
| Sierra Leone | 2000 | Male   | 60 to 64 | 39%<br>(22-58%)                | 61%<br>(42-78%)          | 5.2<br>(1.9-11)                             | 13%<br>(8.3-18%)                     | 16%<br>(9.9-21%)                    | 180<br>(120-260)    | 4900<br>(3200-6900)    |
| Sierra Leone | 2000 | Male   | 65 to 69 | 39%<br>(22-56%)                | 61%<br>(44-78%)          | 4.4<br>(1.8-8.3)                            | 12%<br>(7.4-17%)                     | 15%<br>(8.8-20%)                    | 170<br>(100-240)    | 3800<br>(2300-5300)    |
| Sierra Leone | 2000 | Male   | 70 to 74 | 37%<br>(22-55%)                | 63%<br>(45-78%)          | 3.4<br>(1.3-7.2)                            | 11%<br>(4.8-17%)                     | 13%<br>(5.7-19%)                    | 130<br>(59-200)     | 2300<br>(1100-3500)    |
| Sierra Leone | 2000 | Male   | 75 to 79 | 34%<br>(19-53%)                | 66%<br>(47-81%)          | 2.6<br>(0.83-5.8)                           | 8.3%<br>(2.8-14%)                    | 9.7%<br>(3.3-16%)                   | 65<br>(22-110)      | 910<br>(300-1500)      |
| Sierra Leone | 2000 | Male   | 80 to 84 | 32%<br>(17-50%)                | 68%<br>(50-83%)          | 2.2<br>(0.69-4.8)                           | 7.4%<br>(2.6-13%)                    | 8.6%<br>(3-15%)                     | 22<br>(7.5-38)      | 230<br>(78-390)        |
| Sierra Leone | 2000 | Male   | 85 to 89 | 30%<br>(16-48%)                | 70%<br>(52-84%)          | 1.9<br>(0.59-4.1)                           | 6.4%<br>(2-12%)                      | 7.4%<br>(2.3-14%)                   | 13<br>(4-24)        | 96<br>(31-180)         |
| Sierra Leone | 2000 | Male   | 90 to 94 | 32%<br>(17-50%)                | 68%<br>(50-83%)          | 1.9<br>(0.56-4.3)                           | 5.2%<br>(1.2-11%)                    | 6.1%<br>(1.2-13%)                   | 4.4<br>(0.89-9.1)   | 22<br>(5-46)           |
| Sierra Leone | 2000 | Male   | 95 plus  | 37%<br>(17-59%)                | 63%<br>(41-83%)          | 1.9<br>(0.42-5)                             | 5%<br>(0.85-11%)                     | 5.9%<br>(0.82-13%)                  | 1.1<br>(0.15-2.3)   | 3.6<br>(0.62-8)        |
| Sierra Leone | 2005 | Female | All Ages | 25%<br>(19-32%)                | 75%<br>(68-81%)          | 1.8<br>(1.3-2.5)                            | 2.3%<br>(1.7-2.9%)                   | 4.7%<br>(3.2-6.2%)                  | 1400<br>(970-1900)  | 50000<br>(37000-64000) |
| Sierra Leone | 2005 | Female | 15 to 19 | 23%<br>(13-37%)                | 77%<br>(63-87%)          | 1.6<br>(0.63-3.2)                           | 2.5%<br>(1.1-4.3%)                   | 3.3%<br>(1.2-6%)                    | 20<br>(7.1-36)      | 1700<br>(760-3000)     |
| Sierra Leone | 2005 | Female | 20 to 24 | 29%<br>(15-46%)                | 71%<br>(54-85%)          | 2.5<br>(1.1-4.6)                            | 4.4%<br>(2.5-6.8%)                   | 5.2%<br>(2.4-8.6%)                  | 41<br>(19-68)       | 3300<br>(1800-5100)    |
| Sierra Leone | 2005 | Female | 25 to 29 | 31%<br>(16-49%)                | 69%<br>(51-84%)          | 3.1<br>(1.4-5.4)                            | 5.2%<br>(3.1-7.7%)                   | 6.3%<br>(3.5-9.7%)                  | 54<br>(30-83)       | 3800<br>(2300-5700)    |
| Sierra Leone | 2005 | Female | 30 to 34 | 35%<br>(17-52%)                | 65%<br>(48-83%)          | 3.5<br>(1.7-6.1)                            | 5.6%<br>(3.6-8%)                     | 6.9%<br>(4.1-10%)                   | 58<br>(35-88)       | 3700<br>(2300-5400)    |
| Sierra Leone | 2005 | Female | 35 to 39 | 38%<br>(21-57%)                | 62%<br>(43-79%)          | 3.7<br>(1.8-6.6)                            | 6.8%<br>(4.2-9.7%)                   | 8.8%<br>(5.2-13%)                   | 71<br>(43-100)      | 3900<br>(2500-5600)    |
| Sierra Leone | 2005 | Female | 40 to 44 | 40%<br>(23-58%)                | 60%<br>(42-77%)          | 3.9<br>(1.7-7.2)                            | 7.8%<br>(4.7-11%)                    | 10%<br>(6.2-15%)                    | 82<br>(48-120)      | 4000<br>(2400-5700)    |

| Location     | Year | Sex    | Age      | Prevalence of current drinkers | Prevalence of abstainers | Population average of standard drinks daily | Percent of total attributable deaths | Percent of total attributable DALYs | Attributable deaths | Attributable DALYs     |
|--------------|------|--------|----------|--------------------------------|--------------------------|---------------------------------------------|--------------------------------------|-------------------------------------|---------------------|------------------------|
| Sierra Leone | 2005 | Female | 45 to 49 | 40%<br>(22-59%)                | 60%<br>(41-78%)          | 4.1<br>(1.6-7.9)                            | 9.6%<br>(5.7-14%)                    | 13%<br>(7.5-18%)                    | 110<br>(62-150)     | 4600<br>(2700-6600)    |
| Sierra Leone | 2005 | Female | 50 to 54 | 41%<br>(23-61%)                | 59%<br>(39-77%)          | 4.3<br>(1.7-8.4)                            | 11%<br>(6.5-16%)                     | 15%<br>(8.5-21%)                    | 140<br>(80-210)     | 5300<br>(3000-7600)    |
| Sierra Leone | 2005 | Female | 55 to 59 | 41%<br>(24-59%)                | 59%<br>(41-76%)          | 4.6<br>(1.9-8.7)                            | 12%<br>(7.5-18%)                     | 16%<br>(9.2-22%)                    | 180<br>(100-260)    | 5700<br>(3300-8200)    |
| Sierra Leone | 2005 | Female | 60 to 64 | 42%<br>(24-60%)                | 58%<br>(40-76%)          | 4.6<br>(1.8-8.9)                            | 11%<br>(6.3-16%)                     | 14%<br>(7.7-20%)                    | 180<br>(100-270)    | 5000<br>(2800-7200)    |
| Sierra Leone | 2005 | Female | 65 to 69 | 43%<br>(26-60%)                | 57%<br>(40-74%)          | 4.2<br>(1.8-7.8)                            | 12%<br>(6.1-18%)                     | 14%<br>(7.4-21%)                    | 200<br>(100-300)    | 4600<br>(2300-6700)    |
| Sierra Leone | 2005 | Female | 70 to 74 | 41%<br>(25-58%)                | 59%<br>(42-75%)          | 3.5<br>(1.4-7.3)                            | 11%<br>(4.4-17%)                     | 13%<br>(5.1-20%)                    | 170<br>(68-280)     | 3000<br>(1200-4900)    |
| Sierra Leone | 2005 | Female | 75 to 79 | 37%<br>(20-56%)                | 63%<br>(44-80%)          | 2.9<br>(0.93-6.3)                           | 8.6%<br>(2.5-15%)                    | 10%<br>(2.9-18%)                    | 88<br>(25-150)      | 1200<br>(350-2200)     |
| Sierra Leone | 2005 | Female | 80 to 84 | 34%<br>(19-53%)                | 66%<br>(47-81%)          | 2.6<br>(0.86-5.6)                           | 7.6%<br>(2.2-14%)                    | 8.9%<br>(2.4-16%)                   | 26<br>(7.3-48)      | 280<br>(79-490)        |
| Sierra Leone | 2005 | Female | 85 to 89 | 35%<br>(19-53%)                | 65%<br>(47-81%)          | 2.5<br>(0.81-5.5)                           | 6.9%<br>(1.8-13%)                    | 8.1%<br>(2.1-15%)                   | 15<br>(3.9-29)      | 110<br>(29-210)        |
| Sierra Leone | 2005 | Female | 90 to 94 | 38%<br>(20-55%)                | 62%<br>(45-80%)          | 2.7<br>(0.82-5.8)                           | 6.7%<br>(1.4-13%)                    | 8%<br>(1.6-15%)                     | 8<br>(1.6-15)       | 41<br>(8.4-77)         |
| Sierra Leone | 2005 | Female | 95 plus  | 42%<br>(22-62%)                | 58%<br>(38-78%)          | 2.8<br>(0.72-6.6)                           | 6.1%<br>(0.71-13%)                   | 7.2%<br>(0.58-15%)                  | 2.6<br>(0.21-5.6)   | 9<br>(1-19)            |
| Sierra Leone | 2005 | Male   | All Ages | 21%<br>(16-27%)                | 79%<br>(73-84%)          | 2.3<br>(1.6-3.1)                            | 3.2%<br>(2.6-4%)                     | 6.1%<br>(4.7-7.6%)                  | 2100<br>(1600-2600) | 78000<br>(62000-96000) |
| Sierra Leone | 2005 | Male   | 15 to 19 | 16%<br>(8.6-28%)               | 84%<br>(72-91%)          | 1.3<br>(0.47-2.8)                           | 3.2%<br>(1.5-5.5%)                   | 4.2%<br>(1.7-7.4%)                  | 26<br>(11-45)       | 2100<br>(1000-3600)    |
| Sierra Leone | 2005 | Male   | 20 to 24 | 24%<br>(13-41%)                | 76%<br>(59-87%)          | 2.7<br>(1.1-5.3)                            | 7.4%<br>(4.4-11%)                    | 9.1%<br>(4.9-14%)                   | 74<br>(39-120)      | 5500<br>(3100-8200)    |
| Sierra Leone | 2005 | Male   | 25 to 29 | 30%<br>(15-47%)                | 70%<br>(53-85%)          | 3.9<br>(1.7-7)                              | 10%<br>(6.4-15%)                     | 13%<br>(7.7-18%)                    | 110<br>(68-160)     | 7300<br>(4700-10000)   |
| Sierra Leone | 2005 | Male   | 30 to 34 | 34%<br>(18-52%)                | 66%<br>(48-82%)          | 4.8<br>(2.3-8.1)                            | 12%<br>(8-16%)                       | 15%<br>(9.7-20%)                    | 130<br>(85-180)     | 7800<br>(5200-11000)   |
| Sierra Leone | 2005 | Male   | 35 to 39 | 37%<br>(20-56%)                | 63%<br>(44-80%)          | 5.3<br>(2.5-9.9)                            | 13%<br>(9-18%)                       | 16%<br>(11-22%)                     | 150<br>(100-200)    | 7800<br>(5400-11000)   |
| Sierra Leone | 2005 | Male   | 40 to 44 | 38%<br>(22-57%)                | 62%<br>(43-78%)          | 5.6<br>(2.4-11)                             | 14%<br>(9.8-19%)                     | 18%<br>(13-24%)                     | 170<br>(110-230)    | 8100<br>(5500-11000)   |
| Sierra Leone | 2005 | Male   | 45 to 49 | 39%<br>(20-57%)                | 61%<br>(43-80%)          | 6<br>(2.3-12)                               | 16%<br>(11-21%)                      | 20%<br>(14-27%)                     | 200<br>(140-270)    | 8500<br>(5900-11000)   |
| Sierra Leone | 2005 | Male   | 50 to 54 | 39%<br>(22-60%)                | 61%<br>(40-78%)          | 6.1<br>(2.3-13)                             | 16%<br>(11-22%)                      | 20%<br>(14-27%)                     | 220<br>(150-290)    | 8000<br>(5300-11000)   |
| Sierra Leone | 2005 | Male   | 55 to 59 | 39%<br>(23-59%)                | 61%<br>(41-77%)          | 6<br>(2.4-12)                               | 16%<br>(11-21%)                      | 19%<br>(13-25%)                     | 250<br>(170-340)    | 7800<br>(5400-11000)   |
| Sierra Leone | 2005 | Male   | 60 to 64 | 39%<br>(23-59%)                | 61%<br>(41-77%)          | 5.4<br>(2.1-11)                             | 13%<br>(8.5-18%)                     | 16%<br>(10-21%)                     | 230<br>(150-310)    | 6200<br>(4000-8500)    |

| Location     | Year | Sex    | Age      | Prevalence of current drinkers | Prevalence of abstainers | Population average of standard drinks daily | Percent of total attributable deaths | Percent of total attributable DALYs | Attributable deaths | Attributable DALYs     |
|--------------|------|--------|----------|--------------------------------|--------------------------|---------------------------------------------|--------------------------------------|-------------------------------------|---------------------|------------------------|
| Sierra Leone | 2005 | Male   | 65 to 69 | 39%<br>(22-57%)                | 61%<br>(43-78%)          | 4.5<br>(1.8-9)                              | 12%<br>(7.5-17%)                     | 15%<br>(8.7-20%)                    | 210<br>(130-300)    | 4600<br>(2800-6600)    |
| Sierra Leone | 2005 | Male   | 70 to 74 | 37%<br>(22-55%)                | 63%<br>(45-78%)          | 3.5<br>(1.3-7.2)                            | 11%<br>(5.2-16%)                     | 13%<br>(6-19%)                      | 160<br>(76-240)     | 2900<br>(1400-4300)    |
| Sierra Leone | 2005 | Male   | 75 to 79 | 34%<br>(19-53%)                | 66%<br>(47-81%)          | 2.7<br>(0.83-6.1)                           | 8.2%<br>(2.7-14%)                    | 9.6%<br>(3.2-16%)                   | 80<br>(27-140)      | 1100<br>(380-1900)     |
| Sierra Leone | 2005 | Male   | 80 to 84 | 32%<br>(17-50%)                | 68%<br>(50-83%)          | 2.3<br>(0.71-5)                             | 7.4%<br>(2.5-13%)                    | 8.6%<br>(2.9-15%)                   | 26<br>(8.9-45)      | 280<br>(95-470)        |
| Sierra Leone | 2005 | Male   | 85 to 89 | 30%<br>(16-49%)                | 70%<br>(51-84%)          | 2<br>(0.6-4.4)                              | 6.3%<br>(2-11%)                      | 7.3%<br>(2.2-13%)                   | 13<br>(3.9-23)      | 94<br>(29-170)         |
| Sierra Leone | 2005 | Male   | 90 to 94 | 32%<br>(17-49%)                | 68%<br>(51-83%)          | 1.9<br>(0.57-4.5)                           | 5.2%<br>(1.2-10%)                    | 6.1%<br>(1.4-13%)                   | 4.9<br>(1.1-9.9)    | 25<br>(5.9-50)         |
| Sierra Leone | 2005 | Male   | 95 plus  | 36%<br>(18-57%)                | 64%<br>(43-82%)          | 1.9<br>(0.42-5)                             | 5.1%<br>(0.99-11%)                   | 5.9%<br>(1-13%)                     | 1.3<br>(0.22-2.9)   | 4.6<br>(0.9-9.6)       |
| Sierra Leone | 2010 | Female | All Ages | 25%<br>(19-31%)                | 75%<br>(69-81%)          | 1.7<br>(1.1-2.5)                            | 2.3%<br>(1.5-3%)                     | 4.6%<br>(2.8-6.4%)                  | 1500<br>(890-2100)  | 51000<br>(34000-68000) |
| Sierra Leone | 2010 | Female | 15 to 19 | 23%<br>(13-37%)                | 77%<br>(63-87%)          | 1.5<br>(0.56-3.2)                           | 2.3%<br>(1-3.8%)                     | 2.9%<br>(1-5.3%)                    | 18<br>(6.5-33)      | 1600<br>(750-2800)     |
| Sierra Leone | 2010 | Female | 20 to 24 | 29%<br>(15-46%)                | 71%<br>(54-85%)          | 2.4<br>(0.94-4.6)                           | 4.1%<br>(2.2-6.3%)                   | 4.7%<br>(2.1-7.8%)                  | 38<br>(17-64)       | 3200<br>(1700-5000)    |
| Sierra Leone | 2010 | Female | 25 to 29 | 31%<br>(16-49%)                | 69%<br>(51-84%)          | 2.9<br>(1.3-5.3)                            | 4.6%<br>(2.7-6.8%)                   | 5.5%<br>(2.9-8.6%)                  | 52<br>(28-81)       | 3800<br>(2200-5600)    |
| Sierra Leone | 2010 | Female | 30 to 34 | 34%<br>(17-53%)                | 66%<br>(47-83%)          | 3.2<br>(1.5-5.9)                            | 4.8%<br>(3-6.9%)                     | 5.7%<br>(3.3-8.7%)                  | 57<br>(34-86)       | 3700<br>(2300-5400)    |
| Sierra Leone | 2010 | Female | 35 to 39 | 38%<br>(21-56%)                | 62%<br>(44-79%)          | 3.5<br>(1.6-6.4)                            | 5.9%<br>(3.6-8.4%)                   | 7.4%<br>(4.3-11%)                   | 73<br>(44-110)      | 4100<br>(2500-5900)    |
| Sierra Leone | 2010 | Female | 40 to 44 | 39%<br>(22-59%)                | 61%<br>(41-78%)          | 3.7<br>(1.5-7.2)                            | 6.9%<br>(4-9.9%)                     | 9%<br>(5.2-13%)                     | 84<br>(47-120)      | 4100<br>(2400-5900)    |
| Sierra Leone | 2010 | Female | 45 to 49 | 40%<br>(21-58%)                | 60%<br>(42-79%)          | 3.8<br>(1.4-7.6)                            | 8.6%<br>(4.8-12%)                    | 11%<br>(6.2-17%)                    | 110<br>(58-160)     | 4600<br>(2500-6800)    |
| Sierra Leone | 2010 | Female | 50 to 54 | 40%<br>(22-61%)                | 60%<br>(39-78%)          | 4<br>(1.5-8.2)                              | 10%<br>(5.3-15%)                     | 13%<br>(6.9-19%)                    | 140<br>(72-220)     | 5300<br>(2700-8000)    |
| Sierra Leone | 2010 | Female | 55 to 59 | 40%<br>(24-59%)                | 60%<br>(41-76%)          | 4.3<br>(1.7-8.7)                            | 11%<br>(6.1-16%)                     | 14%<br>(7.6-21%)                    | 180<br>(90-270)     | 5600<br>(2900-8400)    |
| Sierra Leone | 2010 | Female | 60 to 64 | 41%<br>(24-61%)                | 59%<br>(39-76%)          | 4.3<br>(1.6-8.7)                            | 10%<br>(5.1-15%)                     | 13%<br>(6.1-19%)                    | 180<br>(88-280)     | 5000<br>(2400-7700)    |
| Sierra Leone | 2010 | Female | 65 to 69 | 42%<br>(25-60%)                | 58%<br>(40-75%)          | 3.9<br>(1.6-7.6)                            | 11%<br>(4.9-17%)                     | 13%<br>(5.6-20%)                    | 210<br>(92-320)     | 4700<br>(2100-7200)    |
| Sierra Leone | 2010 | Female | 70 to 74 | 40%<br>(24-58%)                | 60%<br>(42-76%)          | 3.2<br>(1.2-6.9)                            | 9.7%<br>(3.4-16%)                    | 11%<br>(3.8-19%)                    | 170<br>(59-300)     | 3100<br>(1100-5400)    |
| Sierra Leone | 2010 | Female | 75 to 79 | 36%<br>(20-55%)                | 64%<br>(45-80%)          | 2.6<br>(0.78-5.9)                           | 7.7%<br>(1.6-14%)                    | 8.9%<br>(1.8-17%)                   | 95<br>(20-180)      | 1300<br>(280-2500)     |
| Sierra Leone | 2010 | Female | 80 to 84 | 34%<br>(17-52%)                | 66%<br>(48-83%)          | 2.4<br>(0.7-5)                              | 6.9%<br>(1.5-13%)                    | 8%<br>(1.7-15%)                     | 36<br>(6.8-69)      | 370<br>(74-710)        |

| Location     | Year | Sex    | Age      | Prevalence of current drinkers | Prevalence of abstainers | Population average of standard drinks daily | Percent of total attributable deaths | Percent of total attributable DALYs | Attributable deaths | Attributable DALYs     |
|--------------|------|--------|----------|--------------------------------|--------------------------|---------------------------------------------|--------------------------------------|-------------------------------------|---------------------|------------------------|
| Sierra Leone | 2010 | Female | 85 to 89 | 34%<br>(18-52%)                | 66%<br>(48-82%)          | 2.4<br>(0.7-5.2)                            | 6.1%<br>(1.2-12%)                    | 7.1%<br>(1.3-14%)                   | 16<br>(2.9-32)      | 120<br>(23-230)        |
| Sierra Leone | 2010 | Female | 90 to 94 | 37%<br>(21-54%)                | 63%<br>(46-79%)          | 2.5<br>(0.75-5.6)                           | 5.9%<br>(0.77-12%)                   | 7%<br>(0.8-14%)                     | 6.3<br>(0.72-13)    | 32<br>(4.2-65)         |
| Sierra Leone | 2010 | Female | 95 plus  | 41%<br>(22-62%)                | 59%<br>(38-78%)          | 2.6<br>(0.68-6.4)                           | 5.5%<br>(0.4-12%)                    | 6.3%<br>(0.27-14%)                  | 2.3<br>(0.095-5.1)  | 7.8<br>(0.57-17)       |
| Sierra Leone | 2010 | Male   | All Ages | 21%<br>(16-27%)                | 79%<br>(73-84%)          | 2.1<br>(1.3-3.1)                            | 3.1%<br>(2.4-3.9%)                   | 5.8%<br>(4.2-7.3%)                  | 2000<br>(1400-2500) | 76000<br>(58000-95000) |
| Sierra Leone | 2010 | Male   | 15 to 19 | 16%<br>(8.3-28%)               | 84%<br>(72-92%)          | 1.2<br>(0.43-2.6)                           | 2.9%<br>(1.3-4.9%)                   | 3.7%<br>(1.4-6.8%)                  | 23<br>(8.2-41)      | 1900<br>(880-3400)     |
| Sierra Leone | 2010 | Male   | 20 to 24 | 24%<br>(13-41%)                | 76%<br>(59-87%)          | 2.5<br>(0.98-4.8)                           | 6.9%<br>(3.8-11%)                    | 8.2%<br>(4.2-13%)                   | 69<br>(35-110)      | 5200<br>(2900-8000)    |
| Sierra Leone | 2010 | Male   | 25 to 29 | 30%<br>(16-47%)                | 70%<br>(53-84%)          | 3.7<br>(1.6-6.8)                            | 9.4%<br>(5.7-13%)                    | 12%<br>(6.8-17%)                    | 110<br>(65-160)     | 7300<br>(4600-10000)   |
| Sierra Leone | 2010 | Male   | 30 to 34 | 34%<br>(18-52%)                | 66%<br>(48-82%)          | 4.5<br>(2-8.2)                              | 11%<br>(7.1-15%)                     | 13%<br>(8.4-18%)                    | 130<br>(84-190)     | 8100<br>(5200-11000)   |
| Sierra Leone | 2010 | Male   | 35 to 39 | 37%<br>(20-56%)                | 63%<br>(44-80%)          | 4.9<br>(2.2-9.6)                            | 12%<br>(8-16%)                       | 14%<br>(9.7-19%)                    | 150<br>(100-210)    | 8100<br>(5600-11000)   |
| Sierra Leone | 2010 | Male   | 40 to 44 | 38%<br>(23-57%)                | 62%<br>(43-77%)          | 5.3<br>(2.1-11)                             | 13%<br>(8.7-17%)                     | 16%<br>(11-21%)                     | 160<br>(110-220)    | 7800<br>(5300-11000)   |
| Sierra Leone | 2010 | Male   | 45 to 49 | 39%<br>(21-57%)                | 61%<br>(43-79%)          | 5.6<br>(2.1-12)                             | 15%<br>(9.4-19%)                     | 18%<br>(12-24%)                     | 190<br>(120-260)    | 8200<br>(5300-11000)   |
| Sierra Leone | 2010 | Male   | 50 to 54 | 39%<br>(22-60%)                | 61%<br>(40-78%)          | 5.7<br>(2.1-12)                             | 15%<br>(9.5-20%)                     | 18%<br>(12-24%)                     | 210<br>(130-280)    | 7600<br>(4800-10000)   |
| Sierra Leone | 2010 | Male   | 55 to 59 | 39%<br>(23-59%)                | 61%<br>(41-77%)          | 5.5<br>(2.1-11)                             | 14%<br>(9.3-19%)                     | 17%<br>(11-23%)                     | 210<br>(140-290)    | 6800<br>(4400-9300)    |
| Sierra Leone | 2010 | Male   | 60 to 64 | 39%<br>(22-59%)                | 61%<br>(41-78%)          | 5<br>(1.8-11)                               | 12%<br>(7.1-17%)                     | 14%<br>(8.5-20%)                    | 210<br>(130-300)    | 5800<br>(3400-8100)    |
| Sierra Leone | 2010 | Male   | 65 to 69 | 39%<br>(23-57%)                | 61%<br>(43-77%)          | 4.2<br>(1.6-8.8)                            | 11%<br>(5.9-16%)                     | 13%<br>(7.1-19%)                    | 200<br>(110-290)    | 4500<br>(2500-6500)    |
| Sierra Leone | 2010 | Male   | 70 to 74 | 37%<br>(23-55%)                | 63%<br>(45-77%)          | 3.2<br>(1.1-7.2)                            | 9.5%<br>(3.8-15%)                    | 11%<br>(4.4-18%)                    | 160<br>(63-250)     | 2800<br>(1100-4600)    |
| Sierra Leone | 2010 | Male   | 75 to 79 | 34%<br>(19-53%)                | 66%<br>(47-81%)          | 2.5<br>(0.73-6)                             | 7.2%<br>(1.9-13%)                    | 8.4%<br>(2.2-15%)                   | 82<br>(21-140)      | 1100<br>(300-2000)     |
| Sierra Leone | 2010 | Male   | 80 to 84 | 31%<br>(16-50%)                | 69%<br>(50-84%)          | 2.1<br>(0.61-4.8)                           | 6.3%<br>(1.7-12%)                    | 7.4%<br>(2-13%)                     | 30<br>(7.9-55)      | 310<br>(83-570)        |
| Sierra Leone | 2010 | Male   | 85 to 89 | 30%<br>(16-48%)                | 70%<br>(52-84%)          | 1.8<br>(0.53-4.2)                           | 5.3%<br>(1.4-10%)                    | 6.1%<br>(1.6-12%)                   | 12<br>(3.1-24)      | 92<br>(24-180)         |
| Sierra Leone | 2010 | Male   | 90 to 94 | 32%<br>(17-49%)                | 68%<br>(51-83%)          | 1.7<br>(0.46-4.3)                           | 4.3%<br>(0.83-9.3%)                  | 5.1%<br>(0.84-11%)                  | 3.8<br>(0.64-8.4)   | 20<br>(3.7-43)         |
| Sierra Leone | 2010 | Male   | 95 plus  | 36%<br>(18-58%)                | 64%<br>(42-82%)          | 1.7<br>(0.38-4.6)                           | 4.2%<br>(0.55-9.7%)                  | 4.9%<br>(0.46-11%)                  | 1.1<br>(0.11-2.7)   | 3.9<br>(0.51-9.2)      |
| Sierra Leone | 2016 | Female | All Ages | 25%<br>(19-31%)                | 75%<br>(69-81%)          | 1.5<br>(0.78-2.6)                           | 2.2%<br>(1.2-3.1%)                   | 4.5%<br>(2.1-6.6%)                  | 1300<br>(600-2000)  | 46000<br>(26000-64000) |



| Location     | Year | Sex    | Age      | Prevalence of current drinkers | Prevalence of abstainers | Population average of standard drinks daily | Percent of total attributable deaths | Percent of total attributable DALYs | Attributable deaths | Attributable DALYs     |
|--------------|------|--------|----------|--------------------------------|--------------------------|---------------------------------------------|--------------------------------------|-------------------------------------|---------------------|------------------------|
| Sierra Leone | 2016 | Female | 15 to 19 | 23%<br>(13-37%)                | 77%<br>(63-87%)          | 1.3<br>(0.42-3)                             | 1.9%<br>(0.81-3.3%)                  | 2.3%<br>(0.67-4.5%)                 | 14<br>(4.2-29)      | 1400<br>(610-2600)     |
| Sierra Leone | 2016 | Female | 20 to 24 | 28%<br>(15-45%)                | 72%<br>(55-85%)          | 2.1<br>(0.72-4.5)                           | 3.6%<br>(1.8-5.6%)                   | 4%<br>(1.5-7%)                      | 30<br>(11-52)       | 2800<br>(1400-4400)    |
| Sierra Leone | 2016 | Female | 25 to 29 | 31%<br>(16-49%)                | 69%<br>(51-84%)          | 2.5<br>(0.9-5.1)                            | 4.2%<br>(2.3-6.3%)                   | 5%<br>(2.3-8.2%)                    | 41<br>(18-67)       | 3300<br>(1700-4900)    |
| Sierra Leone | 2016 | Female | 30 to 34 | 34%<br>(17-53%)                | 66%<br>(47-83%)          | 2.8<br>(1.1-5.6)                            | 4.4%<br>(2.5-6.7%)                   | 5.4%<br>(2.7-8.4%)                  | 49<br>(25-79)       | 3400<br>(1900-5200)    |
| Sierra Leone | 2016 | Female | 35 to 39 | 38%<br>(20-57%)                | 62%<br>(43-80%)          | 3.1<br>(1.2-6.4)                            | 5.3%<br>(3-7.9%)                     | 6.9%<br>(3.7-10%)                   | 67<br>(35-100)      | 3800<br>(2100-5600)    |
| Sierra Leone | 2016 | Female | 40 to 44 | 39%<br>(23-59%)                | 61%<br>(41-77%)          | 3.2<br>(1.2-7)                              | 6.2%<br>(3.3-9.2%)                   | 8.4%<br>(4.4-12%)                   | 79<br>(41-120)      | 4000<br>(2100-5900)    |
| Sierra Leone | 2016 | Female | 45 to 49 | 40%<br>(22-59%)                | 60%<br>(41-78%)          | 3.3<br>(1.2-7.5)                            | 7.7%<br>(3.6-12%)                    | 10%<br>(4.8-16%)                    | 98<br>(44-160)      | 4200<br>(2000-6700)    |
| Sierra Leone | 2016 | Female | 50 to 54 | 40%<br>(23-61%)                | 60%<br>(39-77%)          | 3.5<br>(1.2-8.1)                            | 9%<br>(3.8-14%)                      | 12%<br>(5.2-18%)                    | 130<br>(52-200)     | 4700<br>(1900-7400)    |
| Sierra Leone | 2016 | Female | 55 to 59 | 41%<br>(24-59%)                | 59%<br>(41-76%)          | 3.9<br>(1.4-8.4)                            | 9.8%<br>(4.3-15%)                    | 13%<br>(5.5-19%)                    | 160<br>(64-250)     | 5000<br>(2100-7900)    |
| Sierra Leone | 2016 | Female | 60 to 64 | 42%<br>(25-61%)                | 58%<br>(39-75%)          | 3.9<br>(1.3-8.5)                            | 8.9%<br>(3.7-14%)                    | 11%<br>(4.4-18%)                    | 160<br>(63-260)     | 4400<br>(1700-7100)    |
| Sierra Leone | 2016 | Female | 65 to 69 | 43%<br>(25-61%)                | 57%<br>(39-75%)          | 3.5<br>(1.3-7.6)                            | 9.2%<br>(3-15%)                      | 11%<br>(3.6-18%)                    | 180<br>(58-310)     | 4100<br>(1300-6900)    |
| Sierra Leone | 2016 | Female | 70 to 74 | 41%<br>(25-59%)                | 59%<br>(41-75%)          | 2.9<br>(0.94-6.5)                           | 8%<br>(1.6-15%)                      | 9.4%<br>(1.8-18%)                   | 160<br>(28-290)     | 2800<br>(530-5300)     |
| Sierra Leone | 2016 | Female | 75 to 79 | 36%<br>(21-55%)                | 64%<br>(45-79%)          | 2.4<br>(0.63-5.5)                           | 6.3%<br>(0.59-13%)                   | 7.3%<br>(0.69-15%)                  | 92<br>(8.1-190)     | 1300<br>(120-2700)     |
| Sierra Leone | 2016 | Female | 80 to 84 | 34%<br>(19-53%)                | 66%<br>(47-81%)          | 2.1<br>(0.56-4.9)                           | 5.6%<br>(0.5-12%)                    | 6.5%<br>(0.55-14%)                  | 37<br>(2.9-81)      | 390<br>(34-840)        |
| Sierra Leone | 2016 | Female | 85 to 89 | 34%<br>(19-53%)                | 66%<br>(47-81%)          | 2.1<br>(0.57-5.1)                           | 5%<br>(0.26-11%)                     | 5.8%<br>(0.24-13%)                  | 18<br>(0.72-39)     | 130<br>(7-290)         |
| Sierra Leone | 2016 | Female | 90 to 94 | 37%<br>(21-55%)                | 63%<br>(45-79%)          | 2.3<br>(0.57-5.6)                           | 4.7%<br>(0.071-11%)                  | 5.5%<br>(-0.05-13%)                 | 5.4<br>(-0.05-13)   | 28<br>(0.41-64)        |
| Sierra Leone | 2016 | Female | 95 plus  | 41%<br>(22-62%)                | 59%<br>(38-78%)          | 2.4<br>(0.53-6.3)                           | 4.3%<br>(-0.2-10%)                   | 4.9%<br>(-0.42-12%)                 | 1.3<br>(-0.11-3.2)  | 4.5<br>(-0.21-11)      |
| Sierra Leone | 2016 | Male   | All Ages | 21%<br>(16-28%)                | 79%<br>(72-84%)          | 1.9<br>(0.99-3.2)                           | 3.1%<br>(2.2-4%)                     | 5.5%<br>(3.7-7.3%)                  | 1800<br>(1200-2400) | 70000<br>(49000-91000) |
| Sierra Leone | 2016 | Male   | 15 to 19 | 17%<br>(8.5-28%)               | 83%<br>(72-92%)          | 1.1<br>(0.36-2.6)                           | 2.5%<br>(1.1-4.4%)                   | 3%<br>(1.1-5.8%)                    | 19<br>(6.8-37)      | 1800<br>(800-3100)     |
| Sierra Leone | 2016 | Male   | 20 to 24 | 24%<br>(13-41%)                | 76%<br>(59-87%)          | 2.2<br>(0.71-4.9)                           | 5.9%<br>(2.9-9.1%)                   | 6.9%<br>(2.9-11%)                   | 56<br>(24-95)       | 4500<br>(2200-7100)    |
| Sierra Leone | 2016 | Male   | 25 to 29 | 30%<br>(16-47%)                | 70%<br>(53-84%)          | 3.2<br>(1.1-6.5)                            | 8.3%<br>(4.9-12%)                    | 10%<br>(5.5-15%)                    | 94<br>(49-140)      | 6500<br>(3700-9600)    |
| Sierra Leone | 2016 | Male   | 30 to 34 | 34%<br>(18-52%)                | 66%<br>(48-82%)          | 4<br>(1.5-7.8)                              | 9.5%<br>(5.8-13%)                    | 12%<br>(6.8-17%)                    | 120<br>(71-180)     | 7600<br>(4600-11000)   |

| Location     | Year | Sex    | Age      | Prevalence of current drinkers | Prevalence of abstainers | Population average of standard drinks daily | Percent of total attributable deaths | Percent of total attributable DALYs | Attributable deaths | Attributable DALYs     |
|--------------|------|--------|----------|--------------------------------|--------------------------|---------------------------------------------|--------------------------------------|-------------------------------------|---------------------|------------------------|
| Sierra Leone | 2016 | Male   | 35 to 39 | 37%<br>(20-55%)                | 63%<br>(45-80%)          | 4.4<br>(1.7-9.2)                            | 10%<br>(6.5-14%)                     | 13%<br>(7.8-17%)                    | 140<br>(89-200)     | 7800<br>(4900-11000)   |
| Sierra Leone | 2016 | Male   | 40 to 44 | 38%<br>(22-57%)                | 62%<br>(43-78%)          | 4.7<br>(1.6-10)                             | 11%<br>(7.2-15%)                     | 14%<br>(8.9-19%)                    | 160<br>(97-220)     | 7600<br>(4700-11000)   |
| Sierra Leone | 2016 | Male   | 45 to 49 | 39%<br>(20-58%)                | 61%<br>(42-80%)          | 5<br>(1.6-12)                               | 13%<br>(7.8-18%)                     | 16%<br>(9.8-22%)                    | 180<br>(110-260)    | 7700<br>(4600-11000)   |
| Sierra Leone | 2016 | Male   | 50 to 54 | 39%<br>(21-60%)                | 61%<br>(40-79%)          | 5.1<br>(1.6-12)                             | 12%<br>(7.3-17%)                     | 16%<br>(8.9-21%)                    | 180<br>(110-260)    | 6800<br>(4000-9600)    |
| Sierra Leone | 2016 | Male   | 55 to 59 | 39%<br>(23-58%)                | 61%<br>(42-77%)          | 4.9<br>(1.7-11)                             | 12%<br>(7.1-17%)                     | 15%<br>(8.7-21%)                    | 190<br>(110-270)    | 6200<br>(3500-8800)    |
| Sierra Leone | 2016 | Male   | 60 to 64 | 39%<br>(22-58%)                | 61%<br>(42-78%)          | 4.4<br>(1.4-10)                             | 10%<br>(5.3-15%)                     | 12%<br>(6.3-18%)                    | 170<br>(89-260)     | 4800<br>(2500-7100)    |
| Sierra Leone | 2016 | Male   | 65 to 69 | 39%<br>(22-57%)                | 61%<br>(43-78%)          | 3.7<br>(1.3-8.5)                            | 9.1%<br>(4.2-14%)                    | 11%<br>(5-16%)                      | 180<br>(80-270)     | 4000<br>(1800-6000)    |
| Sierra Leone | 2016 | Male   | 70 to 74 | 37%<br>(22-55%)                | 63%<br>(45-78%)          | 2.9<br>(0.89-6.7)                           | 7.8%<br>(2.5-13%)                    | 9.3%<br>(3-16%)                     | 150<br>(47-250)     | 2700<br>(860-4600)     |
| Sierra Leone | 2016 | Male   | 75 to 79 | 34%<br>(19-53%)                | 66%<br>(47-81%)          | 2.3<br>(0.55-5.6)                           | 5.8%<br>(1.2-11%)                    | 6.8%<br>(1.4-13%)                   | 81<br>(16-160)      | 1100<br>(230-2200)     |
| Sierra Leone | 2016 | Male   | 80 to 84 | 31%<br>(16-50%)                | 69%<br>(50-84%)          | 1.9<br>(0.47-4.6)                           | 5.1%<br>(1.1-10%)                    | 5.9%<br>(1.2-12%)                   | 30<br>(5.9-60)      | 310<br>(66-630)        |
| Sierra Leone | 2016 | Male   | 85 to 89 | 30%<br>(16-48%)                | 70%<br>(52-84%)          | 1.7<br>(0.44-4.2)                           | 4.3%<br>(0.8-9.4%)                   | 5%<br>(0.86-11%)                    | 14<br>(2.4-30)      | 100<br>(19-230)        |
| Sierra Leone | 2016 | Male   | 90 to 94 | 32%<br>(17-51%)                | 68%<br>(49-83%)          | 1.6<br>(0.39-4.2)                           | 3.5%<br>(0.38-8.3%)                  | 4%<br>(0.3-9.8%)                    | 3.8<br>(0.28-9.2)   | 20<br>(2.1-48)         |
| Sierra Leone | 2016 | Male   | 95 plus  | 37%<br>(18-59%)                | 63%<br>(41-82%)          | 1.6<br>(0.32-4.5)                           | 3.3%<br>(0.24-8.4%)                  | 3.7%<br>(0.082-9.9%)                | 0.82<br>(0.018-2.2) | 2.9<br>(0.21-7.3)      |
| Togo         | 1990 | Female | All Ages | 14%<br>(10-19%)                | 86%<br>(81-90%)          | 0.82<br>(0.61-1.1)                          | 1.5%<br>(1.1-2%)                     | 3.2%<br>(2.1-4.5%)                  | 640<br>(400-900)    | 21000<br>(16000-28000) |
| Togo         | 1990 | Female | 15 to 19 | 13%<br>(6.2-23%)               | 87%<br>(77-94%)          | 0.73<br>(0.25-1.5)                          | 1.7%<br>(0.8-3%)                     | 2%<br>(0.62-4.1%)                   | 7.6<br>(2.3-15)     | 770<br>(350-1300)      |
| Togo         | 1990 | Female | 20 to 24 | 17%<br>(7.4-30%)               | 83%<br>(70-93%)          | 1.2<br>(0.45-2.3)                           | 3%<br>(1.7-5%)                       | 3.3%<br>(1.4-6%)                    | 14<br>(6-27)        | 1400<br>(750-2200)     |
| Togo         | 1990 | Female | 25 to 29 | 19%<br>(8.7-33%)               | 81%<br>(67-91%)          | 1.4<br>(0.56-2.7)                           | 3.7%<br>(2.1-5.7%)                   | 4.5%<br>(2.1-7.5%)                  | 18<br>(9-31)        | 1500<br>(870-2300)     |
| Togo         | 1990 | Female | 30 to 34 | 21%<br>(9.7-37%)               | 79%<br>(63-90%)          | 1.7<br>(0.71-3.1)                           | 4.5%<br>(2.7-6.9%)                   | 6%<br>(3.2-9.7%)                    | 24<br>(13-39)       | 1600<br>(970-2500)     |
| Togo         | 1990 | Female | 35 to 39 | 24%<br>(11-41%)                | 76%<br>(59-89%)          | 1.8<br>(0.75-3.3)                           | 4.7%<br>(2.8-7.1%)                   | 6.3%<br>(3.5-9.8%)                  | 27<br>(15-41)       | 1500<br>(950-2300)     |
| Togo         | 1990 | Female | 40 to 44 | 25%<br>(13-42%)                | 75%<br>(58-87%)          | 1.9<br>(0.78-3.6)                           | 5.6%<br>(3.3-8.2%)                   | 7.8%<br>(4.5-12%)                   | 34<br>(20-51)       | 1700<br>(1000-2500)    |
| Togo         | 1990 | Female | 45 to 49 | 26%<br>(12-43%)                | 74%<br>(57-88%)          | 2<br>(0.77-3.9)                             | 6.5%<br>(3.7-9.7%)                   | 9.1%<br>(5.1-14%)                   | 44<br>(24-67)       | 1900<br>(1100-2900)    |
| Togo         | 1990 | Female | 50 to 54 | 26%<br>(12-45%)                | 74%<br>(55-88%)          | 2<br>(0.78-4)                               | 7.1%<br>(3.9-11%)                    | 9.5%<br>(5.3-14%)                   | 55<br>(30-86)       | 2100<br>(1200-3200)    |

| Location | Year | Sex    | Age      | Prevalence of current drinkers | Prevalence of abstainers | Population average of standard drinks daily | Percent of total attributable deaths | Percent of total attributable DALYs | Attributable deaths | Attributable DALYs     |
|----------|------|--------|----------|--------------------------------|--------------------------|---------------------------------------------|--------------------------------------|-------------------------------------|---------------------|------------------------|
| Togo     | 1990 | Female | 55 to 59 | 27%<br>(14-46%)                | 73%<br>(54-86%)          | 2.3<br>(0.82-4.5)                           | 7.5%<br>(3.8-12%)                    | 9.7%<br>(4.9-15%)                   | 67<br>(34-110)      | 2200<br>(1100-3400)    |
| Togo     | 1990 | Female | 60 to 64 | 28%<br>(14-47%)                | 72%<br>(53-86%)          | 2.3<br>(0.8-4.9)                            | 6.9%<br>(3.5-11%)                    | 8.5%<br>(4.4-14%)                   | 74<br>(37-120)      | 2000<br>(1000-3200)    |
| Togo     | 1990 | Female | 65 to 69 | 29%<br>(15-46%)                | 71%<br>(54-85%)          | 2.1<br>(0.8-4.3)                            | 7.2%<br>(3.4-12%)                    | 8.7%<br>(4.1-14%)                   | 90<br>(42-150)      | 2000<br>(970-3400)     |
| Togo     | 1990 | Female | 70 to 74 | 27%<br>(14-44%)                | 73%<br>(56-86%)          | 1.7<br>(0.56-3.8)                           | 6.5%<br>(2.6-12%)                    | 7.7%<br>(3.1-14%)                   | 87<br>(34-160)      | 1600<br>(620-2900)     |
| Togo     | 1990 | Female | 75 to 79 | 23%<br>(11-41%)                | 77%<br>(59-89%)          | 1.4<br>(0.37-3.3)                           | 4.9%<br>(1.5-9.6%)                   | 5.7%<br>(1.8-11%)                   | 57<br>(17-110)      | 800<br>(240-1600)      |
| Togo     | 1990 | Female | 80 to 84 | 21%<br>(9.6-38%)               | 79%<br>(62-90%)          | 1.2<br>(0.33-2.8)                           | 4.1%<br>(1.2-8.3%)                   | 4.8%<br>(1.3-9.9%)                  | 27<br>(7.3-54)      | 280<br>(77-560)        |
| Togo     | 1990 | Female | 85 to 89 | 22%<br>(10-37%)                | 78%<br>(63-90%)          | 1.2<br>(0.34-2.8)                           | 3.7%<br>(0.83-7.7%)                  | 4.3%<br>(0.93-9.1%)                 | 13<br>(2.9-28)      | 97<br>(22-200)         |
| Togo     | 1990 | Female | 90 to 94 | 25%<br>(11-43%)                | 75%<br>(57-89%)          | 1.3<br>(0.36-3.1)                           | 3.4%<br>(0.58-7.2%)                  | 4%<br>(0.63-8.6%)                   | 4.4<br>(0.71-9.8)   | 23<br>(3.8-50)         |
| Togo     | 1990 | Female | 95 plus  | 30%<br>(12-53%)                | 70%<br>(47-88%)          | 1.6<br>(0.36-3.9)                           | 3.3%<br>(0.26-7.6%)                  | 3.8%<br>(0.21-9%)                   | 1.2<br>(0.065-2.8)  | 4.1<br>(0.32-9.6)      |
| Togo     | 1990 | Male   | All Ages | 11%<br>(8.1-15%)               | 89%<br>(85-92%)          | 0.94<br>(0.7-1.2)                           | 1.9%<br>(1.5-2.4%)                   | 3.6%<br>(2.8-4.6%)                  | 760<br>(580-960)    | 30000<br>(24000-36000) |
| Togo     | 1990 | Male   | 15 to 19 | 8.4%<br>(4-16%)                | 92%<br>(84-96%)          | 0.54<br>(0.19-1.2)                          | 1.8%<br>(0.9-3.1%)                   | 2.1%<br>(0.82-4%)                   | 7.6<br>(2.9-15)     | 750<br>(380-1300)      |
| Togo     | 1990 | Male   | 20 to 24 | 13%<br>(6-23%)                 | 87%<br>(77-94%)          | 1.1<br>(0.42-2.2)                           | 4.3%<br>(2.4-6.8%)                   | 4.8%<br>(2.3-8.2%)                  | 23<br>(11-39)       | 1900<br>(1100-3000)    |
| Togo     | 1990 | Male   | 25 to 29 | 17%<br>(7.8-29%)               | 83%<br>(71-92%)          | 1.7<br>(0.66-3.3)                           | 6.5%<br>(3.9-9.7%)                   | 7.7%<br>(4.2-12%)                   | 37<br>(20-59)       | 2700<br>(1600-4000)    |
| Togo     | 1990 | Male   | 30 to 34 | 20%<br>(8.8-36%)               | 80%<br>(64-91%)          | 2.2<br>(0.93-4)                             | 8%<br>(5.1-12%)                      | 9.9%<br>(5.9-15%)                   | 47<br>(28-70)       | 3000<br>(1900-4300)    |
| Togo     | 1990 | Male   | 35 to 39 | 22%<br>(10-38%)                | 78%<br>(62-90%)          | 2.5<br>(0.97-4.6)                           | 9.1%<br>(6.1-13%)                    | 12%<br>(7.5-16%)                    | 58<br>(37-82)       | 3200<br>(2100-4400)    |
| Togo     | 1990 | Male   | 40 to 44 | 23%<br>(12-40%)                | 77%<br>(60-88%)          | 2.6<br>(1.1-5.1)                            | 10%<br>(6.7-14%)                     | 13%<br>(8.5-18%)                    | 68<br>(44-95)       | 3300<br>(2200-4600)    |
| Togo     | 1990 | Male   | 45 to 49 | 24%<br>(11-40%)                | 76%<br>(60-89%)          | 2.8<br>(1.1-5.5)                            | 11%<br>(7.1-15%)                     | 14%<br>(9-19%)                      | 80<br>(52-110)      | 3400<br>(2200-4700)    |
| Togo     | 1990 | Male   | 50 to 54 | 24%<br>(11-43%)                | 76%<br>(57-89%)          | 2.8<br>(1.1-5.7)                            | 10%<br>(6.5-14%)                     | 13%<br>(8.1-18%)                    | 80<br>(51-110)      | 3000<br>(1900-4200)    |
| Togo     | 1990 | Male   | 55 to 59 | 24%<br>(12-42%)                | 76%<br>(58-88%)          | 2.7<br>(0.97-5.6)                           | 9.4%<br>(5.9-13%)                    | 12%<br>(7.4-16%)                    | 82<br>(51-120)      | 2700<br>(1700-3800)    |
| Togo     | 1990 | Male   | 60 to 64 | 24%<br>(12-42%)                | 76%<br>(58-88%)          | 2.4<br>(0.79-5.2)                           | 7.8%<br>(4.6-11%)                    | 9.4%<br>(5.4-14%)                   | 76<br>(43-120)      | 2100<br>(1200-3100)    |
| Togo     | 1990 | Male   | 65 to 69 | 24%<br>(12-39%)                | 76%<br>(61-88%)          | 2<br>(0.7-4.1)                              | 6.9%<br>(3.7-11%)                    | 8.3%<br>(4.5-13%)                   | 73<br>(38-110)      | 1700<br>(890-2600)     |
| Togo     | 1990 | Male   | 70 to 74 | 22%<br>(12-38%)                | 78%<br>(62-88%)          | 1.5<br>(0.48-3.6)                           | 5.8%<br>(2.4-10%)                    | 6.8%<br>(2.9-12%)                   | 62<br>(27-110)      | 1100<br>(490-2000)     |

| Location | Year | Sex    | Age      | Prevalence of current drinkers | Prevalence of abstainers | Population average of standard drinks daily | Percent of total attributable deaths | Percent of total attributable DALYs | Attributable deaths | Attributable DALYs     |
|----------|------|--------|----------|--------------------------------|--------------------------|---------------------------------------------|--------------------------------------|-------------------------------------|---------------------|------------------------|
| Togo     | 1990 | Male   | 75 to 79 | 20%<br>(9.7-35%)               | 80%<br>(65-90%)          | 1.1<br>(0.29-2.8)                           | 4.3%<br>(1.4-8.2%)                   | 5%<br>(1.7-9.6%)                    | 37<br>(12-71)       | 520<br>(170-990)       |
| Togo     | 1990 | Male   | 80 to 84 | 18%<br>(8.3-33%)               | 82%<br>(67-92%)          | 0.92<br>(0.25-2.2)                          | 3.6%<br>(1.3-7%)                     | 4.2%<br>(1.5-8%)                    | 16<br>(5.6-30)      | 170<br>(59-320)        |
| Togo     | 1990 | Male   | 85 to 89 | 17%<br>(7.9-30%)               | 83%<br>(70-92%)          | 0.79<br>(0.22-1.9)                          | 2.9%<br>(0.95-6%)                    | 3.4%<br>(1-7%)                      | 7.1<br>(2.2-14)     | 53<br>(17-110)         |
| Togo     | 1990 | Male   | 90 to 94 | 18%<br>(8.6-33%)               | 82%<br>(67-91%)          | 0.75<br>(0.18-1.9)                          | 2.2%<br>(0.54-5%)                    | 2.5%<br>(0.55-5.9%)                 | 2<br>(0.44-4.7)     | 10<br>(2.6-23)         |
| Togo     | 1990 | Male   | 95 plus  | 22%<br>(8.4-42%)               | 78%<br>(58-92%)          | 0.79<br>(0.15-2.2)                          | 2%<br>(0.33-5.3%)                    | 2.2%<br>(0.22-6.2%)                 | 0.46<br>(0.045-1.3) | 1.7<br>(0.26-4.4)      |
| Togo     | 1995 | Female | All Ages | 14%<br>(10-19%)                | 86%<br>(81-90%)          | 0.63<br>(0.47-0.81)                         | 1.4%<br>(0.95-1.8%)                  | 2.7%<br>(1.6-4.1%)                  | 590<br>(330-870)    | 20000<br>(14000-27000) |
| Togo     | 1995 | Female | 15 to 19 | 13%<br>(6.5-23%)               | 87%<br>(77-94%)          | 0.55<br>(0.21-1.1)                          | 1.4%<br>(0.66-2.6%)                  | 1.6%<br>(0.51-3.5%)                 | 6.9<br>(2.2-15)     | 740<br>(350-1400)      |
| Togo     | 1995 | Female | 20 to 24 | 17%<br>(7.7-30%)               | 83%<br>(70-92%)          | 0.88<br>(0.34-1.7)                          | 2.4%<br>(1.3-4%)                     | 2.5%<br>(0.94-4.6%)                 | 14<br>(5.4-26)      | 1400<br>(760-2300)     |
| Togo     | 1995 | Female | 25 to 29 | 19%<br>(8.3-34%)               | 81%<br>(66-92%)          | 1.1<br>(0.44-2)                             | 2.8%<br>(1.6-4.4%)                   | 3.1%<br>(1.3-5.4%)                  | 18<br>(8-32)        | 1500<br>(850-2400)     |
| Togo     | 1995 | Female | 30 to 34 | 21%<br>(9.2-37%)               | 79%<br>(63-91%)          | 1.3<br>(0.54-2.3)                           | 3.4%<br>(2-5.5%)                     | 4.2%<br>(2.1-7.2%)                  | 24<br>(12-40)       | 1600<br>(930-2600)     |
| Togo     | 1995 | Female | 35 to 39 | 24%<br>(11-41%)                | 76%<br>(59-89%)          | 1.4<br>(0.56-2.6)                           | 3.6%<br>(2.1-5.8%)                   | 4.6%<br>(2.3-7.8%)                  | 25<br>(13-42)       | 1500<br>(860-2400)     |
| Togo     | 1995 | Female | 40 to 44 | 25%<br>(13-43%)                | 75%<br>(57-87%)          | 1.5<br>(0.59-2.8)                           | 4.4%<br>(2.5-6.8%)                   | 6%<br>(3.2-9.4%)                    | 32<br>(18-51)       | 1600<br>(950-2500)     |
| Togo     | 1995 | Female | 45 to 49 | 26%<br>(12-42%)                | 74%<br>(58-88%)          | 1.5<br>(0.61-2.8)                           | 5.2%<br>(2.7-8.3%)                   | 7.1%<br>(3.5-11%)                   | 41<br>(20-67)       | 1800<br>(940-2900)     |
| Togo     | 1995 | Female | 50 to 54 | 26%<br>(12-46%)                | 74%<br>(54-88%)          | 1.5<br>(0.61-3)                             | 5.8%<br>(3-9.4%)                     | 7.7%<br>(4-13%)                     | 52<br>(26-85)       | 2000<br>(1000-3200)    |
| Togo     | 1995 | Female | 55 to 59 | 27%<br>(13-45%)                | 73%<br>(55-87%)          | 1.7<br>(0.63-3.5)                           | 6.3%<br>(2.9-10%)                    | 8.1%<br>(3.8-13%)                   | 64<br>(29-110)      | 2100<br>(960-3400)     |
| Togo     | 1995 | Female | 60 to 64 | 28%<br>(14-47%)                | 72%<br>(53-86%)          | 1.8<br>(0.66-3.7)                           | 5.9%<br>(2.7-9.8%)                   | 7.3%<br>(3.4-12%)                   | 70<br>(29-120)      | 1900<br>(820-3200)     |
| Togo     | 1995 | Female | 65 to 69 | 29%<br>(15-47%)                | 71%<br>(53-85%)          | 1.6<br>(0.58-3.3)                           | 5.9%<br>(2.3-10%)                    | 7.1%<br>(2.9-13%)                   | 80<br>(31-140)      | 1800<br>(720-3300)     |
| Togo     | 1995 | Female | 70 to 74 | 27%<br>(14-44%)                | 73%<br>(56-86%)          | 1.3<br>(0.44-2.8)                           | 5.1%<br>(1.7-9.8%)                   | 6%<br>(2-12%)                       | 74<br>(25-150)      | 1300<br>(450-2700)     |
| Togo     | 1995 | Female | 75 to 79 | 23%<br>(11-40%)                | 77%<br>(60-89%)          | 1<br>(0.28-2.5)                             | 3.7%<br>(0.95-8.1%)                  | 4.4%<br>(1.1-9.8%)                  | 47<br>(11-110)      | 660<br>(170-1500)      |
| Togo     | 1995 | Female | 80 to 84 | 22%<br>(10-38%)                | 78%<br>(62-90%)          | 0.9<br>(0.25-2.1)                           | 3.1%<br>(0.67-7%)                    | 3.6%<br>(0.75-8.4%)                 | 23<br>(4.8-53)      | 240<br>(53-550)        |
| Togo     | 1995 | Female | 85 to 89 | 22%<br>(11-38%)                | 78%<br>(62-89%)          | 0.91<br>(0.27-2.1)                          | 2.7%<br>(0.49-6.6%)                  | 3.2%<br>(0.53-7.9%)                 | 12<br>(1.9-30)      | 90<br>(15-220)         |
| Togo     | 1995 | Female | 90 to 94 | 25%<br>(12-43%)                | 75%<br>(57-88%)          | 0.99<br>(0.27-2.4)                          | 2.5%<br>(0.2-6.6%)                   | 2.9%<br>(0.18-7.7%)                 | 4<br>(0.24-10)      | 20<br>(1.6-52)         |

| Location | Year | Sex    | Age      | Prevalence of current drinkers | Prevalence of abstainers | Population average of standard drinks daily | Percent of total attributable deaths | Percent of total attributable DALYs | Attributable deaths  | Attributable DALYs     |
|----------|------|--------|----------|--------------------------------|--------------------------|---------------------------------------------|--------------------------------------|-------------------------------------|----------------------|------------------------|
| Togo     | 1995 | Female | 95 plus  | 29%<br>(12-53%)                | 71%<br>(47-88%)          | 1.1<br>(0.26-2.9)                           | 2.4%<br>(0.0086-6.6%)                | 2.8%<br>(-0.098-7.7%)               | 0.99<br>(-0.034-2.8) | 3.4<br>(0.012-9.2)     |
| Togo     | 1995 | Male   | All Ages | 11%<br>(8.1-15%)               | 89%<br>(85-92%)          | 0.72<br>(0.54-0.92)                         | 1.9%<br>(1.5-2.4%)                   | 3.4%<br>(2.5-4.5%)                  | 810<br>(600-1000)    | 32000<br>(25000-39000) |
| Togo     | 1995 | Male   | 15 to 19 | 8.7%<br>(4.1-16%)              | 91%<br>(84-96%)          | 0.43<br>(0.15-0.92)                         | 1.6%<br>(0.79-2.7%)                  | 1.8%<br>(0.65-3.6%)                 | 8.1<br>(3-16)        | 810<br>(400-1400)      |
| Togo     | 1995 | Male   | 20 to 24 | 13%<br>(6.2-24%)               | 87%<br>(76-94%)          | 0.9<br>(0.34-1.8)                           | 3.8%<br>(2-6%)                       | 4.1%<br>(1.8-7%)                    | 26<br>(11-45)        | 2100<br>(1100-3400)    |
| Togo     | 1995 | Male   | 25 to 29 | 17%<br>(7.5-31%)               | 83%<br>(69-92%)          | 1.4<br>(0.5-2.5)                            | 5.4%<br>(3-8.5%)                     | 6%<br>(3-10%)                       | 40<br>(20-67)        | 2900<br>(1600-4500)    |
| Togo     | 1995 | Male   | 30 to 34 | 20%<br>(8.7-36%)               | 80%<br>(64-91%)          | 1.7<br>(0.75-3.1)                           | 6.5%<br>(3.9-9.7%)                   | 7.6%<br>(4.2-12%)                   | 51<br>(30-79)        | 3200<br>(2000-4800)    |
| Togo     | 1995 | Male   | 35 to 39 | 22%<br>(11-38%)                | 78%<br>(62-89%)          | 1.9<br>(0.74-3.4)                           | 7.4%<br>(4.6-11%)                    | 8.9%<br>(5.3-13%)                   | 61<br>(37-92)        | 3400<br>(2100-4900)    |
| Togo     | 1995 | Male   | 40 to 44 | 23%<br>(12-40%)                | 77%<br>(60-88%)          | 2<br>(0.81-3.9)                             | 8.3%<br>(5.2-12%)                    | 10%<br>(6.2-15%)                    | 73<br>(42-110)       | 3500<br>(2100-5000)    |
| Togo     | 1995 | Male   | 45 to 49 | 24%<br>(11-40%)                | 76%<br>(60-89%)          | 2.1<br>(0.8-4.1)                            | 9.4%<br>(5.8-13%)                    | 12%<br>(7.1-16%)                    | 87<br>(51-120)       | 3700<br>(2200-5300)    |
| Togo     | 1995 | Male   | 50 to 54 | 24%<br>(11-43%)                | 76%<br>(57-89%)          | 2.2<br>(0.82-4.4)                           | 9%<br>(5.4-13%)                      | 11%<br>(6.6-16%)                    | 89<br>(53-130)       | 3300<br>(2000-4900)    |
| Togo     | 1995 | Male   | 55 to 59 | 25%<br>(13-42%)                | 75%<br>(58-87%)          | 2.1<br>(0.76-4.3)                           | 8.6%<br>(4.9-13%)                    | 10%<br>(5.9-15%)                    | 91<br>(51-140)       | 2900<br>(1700-4300)    |
| Togo     | 1995 | Male   | 60 to 64 | 24%<br>(12-42%)                | 76%<br>(58-88%)          | 1.9<br>(0.66-4.1)                           | 7%<br>(3.6-11%)                      | 8.3%<br>(4.1-13%)                   | 82<br>(42-130)       | 2300<br>(1200-3500)    |
| Togo     | 1995 | Male   | 65 to 69 | 24%<br>(12-40%)                | 76%<br>(60-88%)          | 1.6<br>(0.54-3.2)                           | 6%<br>(2.8-9.9%)                     | 7.1%<br>(3.3-12%)                   | 75<br>(35-120)       | 1700<br>(790-2800)     |
| Togo     | 1995 | Male   | 70 to 74 | 23%<br>(12-39%)                | 77%<br>(61-88%)          | 1.2<br>(0.38-2.8)                           | 4.8%<br>(1.8-9.1%)                   | 5.6%<br>(2.2-11%)                   | 61<br>(24-120)       | 1100<br>(430-2100)     |
| Togo     | 1995 | Male   | 75 to 79 | 20%<br>(9.9-37%)               | 80%<br>(63-90%)          | 0.89<br>(0.24-2.3)                          | 3.5%<br>(1.1-7.3%)                   | 4.1%<br>(1.2-8.5%)                  | 36<br>(11-76)        | 510<br>(150-1100)      |
| Togo     | 1995 | Male   | 80 to 84 | 19%<br>(8.3-34%)               | 81%<br>(66-92%)          | 0.73<br>(0.2-1.8)                           | 2.9%<br>(0.98-6.2%)                  | 3.4%<br>(1.1-7%)                    | 16<br>(5.1-32)       | 160<br>(55-340)        |
| Togo     | 1995 | Male   | 85 to 89 | 18%<br>(8.1-31%)               | 82%<br>(69-92%)          | 0.63<br>(0.17-1.6)                          | 2.4%<br>(0.71-5.4%)                  | 2.7%<br>(0.79-6.2%)                 | 7.2<br>(2.1-16)      | 54<br>(16-120)         |
| Togo     | 1995 | Male   | 90 to 94 | 19%<br>(8.6-34%)               | 81%<br>(66-91%)          | 0.61<br>(0.14-1.6)                          | 1.8%<br>(0.37-4.6%)                  | 2%<br>(0.34-5.4%)                   | 1.9<br>(0.33-5.2)    | 10<br>(2.1-26)         |
| Togo     | 1995 | Male   | 95 plus  | 23%<br>(9.1-43%)               | 77%<br>(57-91%)          | 0.64<br>(0.12-1.8)                          | 1.7%<br>(0.21-4.8%)                  | 1.9%<br>(0.11-5.7%)                 | 0.45<br>(0.026-1.3)  | 1.6<br>(0.2-4.5)       |
| Togo     | 2000 | Female | All Ages | 14%<br>(10-19%)                | 86%<br>(81-90%)          | 0.53<br>(0.4-0.69)                          | 1.2%<br>(0.78-1.7%)                  | 2.3%<br>(1.2-3.7%)                  | 550<br>(280-910)     | 20000<br>(13000-28000) |
| Togo     | 2000 | Female | 15 to 19 | 13%<br>(6.3-24%)               | 87%<br>(76-94%)          | 0.45<br>(0.16-0.93)                         | 1.2%<br>(0.58-2.2%)                  | 1.3%<br>(0.35-2.8%)                 | 5.9<br>(1.7-13)      | 700<br>(340-1300)      |
| Togo     | 2000 | Female | 20 to 24 | 17%<br>(7.7-30%)               | 83%<br>(70-92%)          | 0.71<br>(0.28-1.4)                          | 1.9%<br>(1-3.3%)                     | 1.8%<br>(0.61-3.5%)                 | 13<br>(4.4-25)       | 1400<br>(750-2300)     |

| Location | Year | Sex    | Age      | Prevalence of current drinkers | Prevalence of abstainers | Population average of standard drinks daily | Percent of total attributable deaths | Percent of total attributable DALYs | Attributable deaths | Attributable DALYs     |
|----------|------|--------|----------|--------------------------------|--------------------------|---------------------------------------------|--------------------------------------|-------------------------------------|---------------------|------------------------|
| Togo     | 2000 | Female | 25 to 29 | 19%<br>(8.8-34%)               | 81%<br>(66-91%)          | 0.88<br>(0.37-1.6)                          | 1.9%<br>(1-3.1%)                     | 1.8%<br>(0.68-3.4%)                 | 17<br>(7.1-32)      | 1500<br>(850-2500)     |
| Togo     | 2000 | Female | 30 to 34 | 22%<br>(9.6-38%)               | 78%<br>(62-90%)          | 1<br>(0.44-1.9)                             | 2.2%<br>(1.2-3.7%)                   | 2.3%<br>(1.1-4.4%)                  | 23<br>(11-41)       | 1600<br>(910-2700)     |
| Togo     | 2000 | Female | 35 to 39 | 24%<br>(11-42%)                | 76%<br>(58-89%)          | 1.1<br>(0.46-2.1)                           | 2.4%<br>(1.3-4.1%)                   | 2.7%<br>(1.3-5%)                    | 25<br>(12-43)       | 1500<br>(850-2500)     |
| Togo     | 2000 | Female | 40 to 44 | 26%<br>(13-44%)                | 74%<br>(56-87%)          | 1.2<br>(0.49-2.3)                           | 3.1%<br>(1.7-5.2%)                   | 3.8%<br>(1.9-6.7%)                  | 32<br>(16-55)       | 1600<br>(870-2700)     |
| Togo     | 2000 | Female | 45 to 49 | 26%<br>(12-44%)                | 74%<br>(56-88%)          | 1.2<br>(0.48-2.4)                           | 3.9%<br>(1.9-6.5%)                   | 5%<br>(2.3-8.4%)                    | 40<br>(19-69)       | 1800<br>(900-3000)     |
| Togo     | 2000 | Female | 50 to 54 | 27%<br>(12-47%)                | 73%<br>(53-88%)          | 1.3<br>(0.52-2.5)                           | 4.7%<br>(2.3-7.9%)                   | 6%<br>(2.9-10%)                     | 52<br>(23-90)       | 2000<br>(930-3300)     |
| Togo     | 2000 | Female | 55 to 59 | 28%<br>(14-47%)                | 72%<br>(53-86%)          | 1.4<br>(0.53-3)                             | 5.3%<br>(2.3-9.5%)                   | 6.8%<br>(2.9-12%)                   | 65<br>(26-120)      | 2100<br>(850-3800)     |
| Togo     | 2000 | Female | 60 to 64 | 29%<br>(14-48%)                | 71%<br>(52-86%)          | 1.5<br>(0.54-3.1)                           | 5%<br>(2-9%)                         | 6.2%<br>(2.5-11%)                   | 69<br>(25-130)      | 1900<br>(700-3500)     |
| Togo     | 2000 | Female | 65 to 69 | 29%<br>(15-47%)                | 71%<br>(53-85%)          | 1.3<br>(0.47-2.7)                           | 4.9%<br>(1.7-9.3%)                   | 5.9%<br>(2.1-11%)                   | 74<br>(24-150)      | 1700<br>(550-3300)     |
| Togo     | 2000 | Female | 70 to 74 | 27%<br>(14-45%)                | 73%<br>(55-86%)          | 1.1<br>(0.35-2.3)                           | 4.1%<br>(1.1-8.7%)                   | 4.8%<br>(1.3-10%)                   | 63<br>(17-140)      | 1200<br>(310-2500)     |
| Togo     | 2000 | Female | 75 to 79 | 24%<br>(12-41%)                | 76%<br>(59-88%)          | 0.83<br>(0.25-2)                            | 3%<br>(0.57-7.3%)                    | 3.5%<br>(0.64-8.7%)                 | 40<br>(7.3-99)      | 560<br>(110-1400)      |
| Togo     | 2000 | Female | 80 to 84 | 22%<br>(10-38%)                | 78%<br>(62-90%)          | 0.74<br>(0.2-1.6)                           | 2.4%<br>(0.4-6.1%)                   | 2.9%<br>(0.47-7.3%)                 | 19<br>(3.1-49)      | 200<br>(33-510)        |
| Togo     | 2000 | Female | 85 to 89 | 22%<br>(10-38%)                | 78%<br>(62-90%)          | 0.74<br>(0.22-1.7)                          | 2.1%<br>(0.26-5.7%)                  | 2.3%<br>(0.26-6.8%)                 | 11<br>(1.1-30)      | 79<br>(9.1-220)        |
| Togo     | 2000 | Female | 90 to 94 | 25%<br>(12-43%)                | 75%<br>(57-88%)          | 0.82<br>(0.22-2)                            | 2%<br>(0.041-5.9%)                   | 2.3%<br>(-0.033-7%)                 | 3.9<br>(-0.055-12)  | 20<br>(0.41-60)        |
| Togo     | 2000 | Female | 95 plus  | 30%<br>(13-53%)                | 70%<br>(47-87%)          | 0.94<br>(0.22-2.5)                          | 2%<br>(-0.22-6.3%)                   | 2.3%<br>(-0.39-7.3%)                | 0.96<br>(-0.17-3.2) | 3.4<br>(-0.36-11)      |
| Togo     | 2000 | Male   | All Ages | 12%<br>(8.4-16%)               | 88%<br>(84-92%)          | 0.62<br>(0.47-0.8)                          | 1.9%<br>(1.5-2.5%)                   | 3.2%<br>(2.3-4.3%)                  | 870<br>(620-1200)   | 35000<br>(27000-45000) |
| Togo     | 2000 | Male   | 15 to 19 | 9%<br>(4.3-16%)                | 91%<br>(84-96%)          | 0.37<br>(0.13-0.77)                         | 1.4%<br>(0.73-2.6%)                  | 1.6%<br>(0.55-3.2%)                 | 8.8<br>(3.1-18)     | 900<br>(440-1600)      |
| Togo     | 2000 | Male   | 20 to 24 | 14%<br>(6.3-25%)               | 86%<br>(75-94%)          | 0.75<br>(0.29-1.5)                          | 3.4%<br>(1.8-5.6%)                   | 3.5%<br>(1.5-6.3%)                  | 30<br>(13-54)       | 2500<br>(1300-4300)    |
| Togo     | 2000 | Male   | 25 to 29 | 18%<br>(8.3-32%)               | 82%<br>(68-92%)          | 1.1<br>(0.44-2.1)                           | 4.4%<br>(2.3-7%)                     | 4.7%<br>(2.1-8%)                    | 48<br>(22-82)       | 3400<br>(1800-5500)    |
| Togo     | 2000 | Male   | 30 to 34 | 21%<br>(9.5-38%)               | 79%<br>(62-91%)          | 1.4<br>(0.62-2.6)                           | 5.1%<br>(3-7.9%)                     | 5.6%<br>(3.1-9%)                    | 60<br>(32-96)       | 3800<br>(2200-5800)    |
| Togo     | 2000 | Male   | 35 to 39 | 23%<br>(11-40%)                | 77%<br>(60-89%)          | 1.6<br>(0.64-3)                             | 5.8%<br>(3.5-8.7%)                   | 6.6%<br>(3.8-10%)                   | 69<br>(39-100)      | 3800<br>(2200-5600)    |
| Togo     | 2000 | Male   | 40 to 44 | 24%<br>(12-42%)                | 76%<br>(58-88%)          | 1.7<br>(0.73-3.3)                           | 6.7%<br>(3.9-10%)                    | 7.7%<br>(4.5-12%)                   | 82<br>(47-120)      | 3900<br>(2300-5800)    |

| Location | Year | Sex    | Age      | Prevalence of current drinkers | Prevalence of abstainers | Population average of standard drinks daily | Percent of total attributable deaths | Percent of total attributable DALYs | Attributable deaths | Attributable DALYs     |
|----------|------|--------|----------|--------------------------------|--------------------------|---------------------------------------------|--------------------------------------|-------------------------------------|---------------------|------------------------|
| Togo     | 2000 | Male   | 45 to 49 | 25%<br>(12-41%)                | 75%<br>(59-88%)          | 1.8<br>(0.71-3.6)                           | 7.8%<br>(4.5-12%)                    | 9.2%<br>(5.2-14%)                   | 97<br>(53-150)      | 4100<br>(2300-6100)    |
| Togo     | 2000 | Male   | 50 to 54 | 25%<br>(12-45%)                | 75%<br>(55-88%)          | 1.8<br>(0.69-3.8)                           | 7.9%<br>(4.4-12%)                    | 9.4%<br>(5.2-14%)                   | 99<br>(53-160)      | 3700<br>(2000-5700)    |
| Togo     | 2000 | Male   | 55 to 59 | 25%<br>(12-43%)                | 75%<br>(57-88%)          | 1.8<br>(0.64-3.6)                           | 7.7%<br>(4.1-12%)                    | 9.2%<br>(4.8-14%)                   | 100<br>(53-160)     | 3300<br>(1700-5100)    |
| Togo     | 2000 | Male   | 60 to 64 | 25%<br>(12-42%)                | 75%<br>(58-88%)          | 1.6<br>(0.55-3.6)                           | 6.2%<br>(2.9-10%)                    | 7.3%<br>(3.3-12%)                   | 88<br>(39-150)      | 2400<br>(1100-4000)    |
| Togo     | 2000 | Male   | 65 to 69 | 25%<br>(12-41%)                | 75%<br>(59-88%)          | 1.3<br>(0.46-2.8)                           | 5.2%<br>(2.1-9.1%)                   | 6.1%<br>(2.5-11%)                   | 76<br>(31-130)      | 1700<br>(720-3000)     |
| Togo     | 2000 | Male   | 70 to 74 | 23%<br>(12-39%)                | 77%<br>(61-88%)          | 1<br>(0.33-2.4)                             | 4.1%<br>(1.4-8.4%)                   | 4.7%<br>(1.6-9.9%)                  | 58<br>(20-120)      | 1100<br>(360-2200)     |
| Togo     | 2000 | Male   | 75 to 79 | 21%<br>(10-37%)                | 79%<br>(63-90%)          | 0.76<br>(0.21-1.9)                          | 2.9%<br>(0.85-6.5%)                  | 3.3%<br>(0.95-7.5%)                 | 33<br>(9.2-74)      | 470<br>(130-1000)      |
| Togo     | 2000 | Male   | 80 to 84 | 19%<br>(8.7-35%)               | 81%<br>(65-91%)          | 0.63<br>(0.17-1.5)                          | 2.4%<br>(0.77-5.6%)                  | 2.8%<br>(0.84-6.5%)                 | 14<br>(4.3-33)      | 150<br>(48-340)        |
| Togo     | 2000 | Male   | 85 to 89 | 18%<br>(8.7-33%)               | 82%<br>(67-91%)          | 0.55<br>(0.15-1.4)                          | 2%<br>(0.58-4.8%)                    | 2.3%<br>(0.62-5.5%)                 | 6.8<br>(1.9-17)     | 51<br>(15-120)         |
| Togo     | 2000 | Male   | 90 to 94 | 20%<br>(9.3-35%)               | 80%<br>(65-91%)          | 0.52<br>(0.12-1.4)                          | 1.5%<br>(0.31-4.2%)                  | 1.7%<br>(0.28-4.9%)                 | 1.9<br>(0.32-5.6)   | 10<br>(2.2-29)         |
| Togo     | 2000 | Male   | 95 plus  | 23%<br>(9.5-45%)               | 77%<br>(55-91%)          | 0.55<br>(0.11-1.6)                          | 1.6%<br>(0.18-4.8%)                  | 1.8%<br>(0.073-5.6%)                | 0.48<br>(0.02-1.5)  | 1.7<br>(0.19-5.2)      |
| Togo     | 2005 | Female | All Ages | 14%<br>(10-19%)                | 86%<br>(81-90%)          | 0.52<br>(0.38-0.67)                         | 1.1%<br>(0.71-1.6%)                  | 2%<br>(1-3.3%)                      | 550<br>(280-910)    | 20000<br>(13000-29000) |
| Togo     | 2005 | Female | 15 to 19 | 13%<br>(5.9-24%)               | 87%<br>(76-94%)          | 0.43<br>(0.14-0.9)                          | 1.1%<br>(0.54-1.9%)                  | 1.1%<br>(0.29-2.4%)                 | 5.4<br>(1.5-12)     | 690<br>(350-1300)      |
| Togo     | 2005 | Female | 20 to 24 | 16%<br>(7.4-29%)               | 84%<br>(71-93%)          | 0.68<br>(0.27-1.3)                          | 1.9%<br>(1-3.1%)                     | 1.6%<br>(0.54-3.2%)                 | 12<br>(4-23)        | 1500<br>(810-2300)     |
| Togo     | 2005 | Female | 25 to 29 | 19%<br>(8.4-33%)               | 81%<br>(67-92%)          | 0.85<br>(0.34-1.5)                          | 1.6%<br>(0.86-2.6%)                  | 1.4%<br>(0.53-2.7%)                 | 16<br>(6.7-30)      | 1600<br>(900-2500)     |
| Togo     | 2005 | Female | 30 to 34 | 21%<br>(8.8-37%)               | 79%<br>(63-91%)          | 0.99<br>(0.41-1.9)                          | 1.6%<br>(0.91-2.6%)                  | 1.6%<br>(0.7-2.9%)                  | 22<br>(11-38)       | 1600<br>(950-2700)     |
| Togo     | 2005 | Female | 35 to 39 | 24%<br>(11-41%)                | 76%<br>(59-89%)          | 1.1<br>(0.44-2)                             | 1.8%<br>(0.96-3%)                    | 1.9%<br>(0.84-3.4%)                 | 25<br>(12-43)       | 1500<br>(860-2500)     |
| Togo     | 2005 | Female | 40 to 44 | 25%<br>(13-43%)                | 75%<br>(57-87%)          | 1.2<br>(0.48-2.3)                           | 2.4%<br>(1.2-4%)                     | 2.7%<br>(1.3-4.7%)                  | 32<br>(15-56)       | 1700<br>(880-2800)     |
| Togo     | 2005 | Female | 45 to 49 | 26%<br>(11-43%)                | 74%<br>(57-89%)          | 1.2<br>(0.45-2.4)                           | 3.1%<br>(1.5-5.3%)                   | 3.8%<br>(1.8-6.7%)                  | 40<br>(18-72)       | 1800<br>(870-3100)     |
| Togo     | 2005 | Female | 50 to 54 | 26%<br>(12-46%)                | 74%<br>(54-88%)          | 1.3<br>(0.49-2.5)                           | 4.1%<br>(2-6.8%)                     | 5.1%<br>(2.3-8.7%)                  | 53<br>(23-92)       | 2000<br>(920-3400)     |
| Togo     | 2005 | Female | 55 to 59 | 27%<br>(13-47%)                | 73%<br>(53-87%)          | 1.4<br>(0.49-2.8)                           | 4.8%<br>(2-8.6%)                     | 6.1%<br>(2.4-11%)                   | 66<br>(25-120)      | 2100<br>(820-3900)     |
| Togo     | 2005 | Female | 60 to 64 | 28%<br>(14-48%)                | 72%<br>(52-86%)          | 1.4<br>(0.5-3.1)                            | 4.5%<br>(1.7-8.1%)                   | 5.6%<br>(2.1-10%)                   | 68<br>(23-130)      | 1900<br>(650-3500)     |

| Location | Year | Sex    | Age      | Prevalence of current drinkers | Prevalence of abstainers | Population average of standard drinks daily | Percent of total attributable deaths | Percent of total attributable DALYs | Attributable deaths | Attributable DALYs     |
|----------|------|--------|----------|--------------------------------|--------------------------|---------------------------------------------|--------------------------------------|-------------------------------------|---------------------|------------------------|
| Togo     | 2005 | Female | 65 to 69 | 29%<br>(15-47%)                | 71%<br>(53-85%)          | 1.3<br>(0.46-2.7)                           | 4.5%<br>(1.5-8.7%)                   | 5.4%<br>(1.8-11%)                   | 74<br>(23-150)      | 1700<br>(550-3400)     |
| Togo     | 2005 | Female | 70 to 74 | 27%<br>(14-43%)                | 73%<br>(57-86%)          | 1<br>(0.34-2.3)                             | 3.7%<br>(0.98-8.3%)                  | 4.5%<br>(1.1-9.7%)                  | 62<br>(15-140)      | 1100<br>(280-2600)     |
| Togo     | 2005 | Female | 75 to 79 | 23%<br>(11-40%)                | 77%<br>(60-89%)          | 0.81<br>(0.24-2)                            | 2.8%<br>(0.55-6.7%)                  | 3.3%<br>(0.62-8%)                   | 38<br>(6.9-98)      | 540<br>(100-1400)      |
| Togo     | 2005 | Female | 80 to 84 | 21%<br>(9.4-38%)               | 79%<br>(62-91%)          | 0.71<br>(0.19-1.6)                          | 2.3%<br>(0.37-5.9%)                  | 2.7%<br>(0.39-7.1%)                 | 18<br>(2.7-46)      | 190<br>(31-470)        |
| Togo     | 2005 | Female | 85 to 89 | 22%<br>(9.8-38%)               | 78%<br>(62-90%)          | 0.73<br>(0.2-1.6)                           | 2%<br>(0.19-5.6%)                    | 2.4%<br>(0.16-6.6%)                 | 10<br>(0.69-29)     | 78<br>(6.5-220)        |
| Togo     | 2005 | Female | 90 to 94 | 25%<br>(11-42%)                | 75%<br>(58-89%)          | 0.8<br>(0.21-2)                             | 1.9%<br>(0.0043-5.7%)                | 2.2%<br>(-0.067-6.7%)               | 4.1<br>(-0.13-13)   | 21<br>(0.05-65)        |
| Togo     | 2005 | Female | 95 plus  | 29%<br>(12-53%)                | 71%<br>(47-88%)          | 0.93<br>(0.21-2.4)                          | 1.9%<br>(-0.24-6%)                   | 2.2%<br>(-0.42-7%)                  | 1.1<br>(-0.21-3.6)  | 3.9<br>(-0.49-12)      |
| Togo     | 2005 | Male   | All Ages | 11%<br>(8.4-16%)               | 89%<br>(84-92%)          | 0.62<br>(0.47-0.79)                         | 2%<br>(1.5-2.6%)                     | 3.2%<br>(2.2-4.3%)                  | 970<br>(670-1300)   | 40000<br>(31000-51000) |
| Togo     | 2005 | Male   | 15 to 19 | 8.8%<br>(4.2-16%)              | 91%<br>(84-96%)          | 0.36<br>(0.12-0.78)                         | 1.3%<br>(0.67-2.4%)                  | 1.4%<br>(0.48-2.9%)                 | 9.7<br>(3.3-20)     | 1000<br>(480-1800)     |
| Togo     | 2005 | Male   | 20 to 24 | 14%<br>(6.1-24%)               | 86%<br>(76-94%)          | 0.73<br>(0.28-1.4)                          | 3.2%<br>(1.7-5.2%)                   | 3.2%<br>(1.3-5.8%)                  | 33<br>(14-60)       | 2800<br>(1500-4700)    |
| Togo     | 2005 | Male   | 25 to 29 | 17%<br>(8.4-30%)               | 83%<br>(70-92%)          | 1.1<br>(0.44-2)                             | 4.1%<br>(2.2-6.5%)                   | 4.3%<br>(2-7.5%)                    | 56<br>(26-95)       | 4100<br>(2200-6500)    |
| Togo     | 2005 | Male   | 30 to 34 | 20%<br>(9.5-36%)               | 80%<br>(64-91%)          | 1.4<br>(0.62-2.6)                           | 4.5%<br>(2.7-7%)                     | 4.8%<br>(2.6-7.9%)                  | 72<br>(41-110)      | 4500<br>(2800-6900)    |
| Togo     | 2005 | Male   | 35 to 39 | 22%<br>(11-39%)                | 78%<br>(61-89%)          | 1.6<br>(0.64-3)                             | 5.1%<br>(3-7.7%)                     | 5.7%<br>(3.1-8.7%)                  | 81<br>(46-120)      | 4400<br>(2600-6600)    |
| Togo     | 2005 | Male   | 40 to 44 | 23%<br>(12-40%)                | 77%<br>(60-88%)          | 1.7<br>(0.67-3.2)                           | 5.8%<br>(3.4-8.8%)                   | 6.6%<br>(3.8-10%)                   | 93<br>(51-140)      | 4500<br>(2500-6600)    |
| Togo     | 2005 | Male   | 45 to 49 | 24%<br>(11-40%)                | 76%<br>(60-89%)          | 1.8<br>(0.65-3.5)                           | 7%<br>(3.8-10%)                      | 8.1%<br>(4.3-12%)                   | 110<br>(58-160)     | 4600<br>(2500-6900)    |
| Togo     | 2005 | Male   | 50 to 54 | 25%<br>(12-44%)                | 75%<br>(56-88%)          | 1.8<br>(0.67-3.6)                           | 7.3%<br>(3.9-11%)                    | 8.5%<br>(4.6-13%)                   | 110<br>(58-170)     | 4000<br>(2200-6200)    |
| Togo     | 2005 | Male   | 55 to 59 | 25%<br>(12-43%)                | 75%<br>(57-88%)          | 1.7<br>(0.59-3.5)                           | 7.4%<br>(3.7-12%)                    | 8.7%<br>(4.3-13%)                   | 110<br>(55-180)     | 3600<br>(1800-5700)    |
| Togo     | 2005 | Male   | 60 to 64 | 25%<br>(12-42%)                | 75%<br>(58-88%)          | 1.6<br>(0.53-3.4)                           | 6%<br>(2.7-9.8%)                     | 6.9%<br>(3-11%)                     | 98<br>(44-160)      | 2700<br>(1200-4400)    |
| Togo     | 2005 | Male   | 65 to 69 | 24%<br>(12-41%)                | 76%<br>(59-88%)          | 1.3<br>(0.43-2.7)                           | 5%<br>(2-8.6%)                       | 5.8%<br>(2.4-10%)                   | 82<br>(33-140)      | 1900<br>(750-3300)     |
| Togo     | 2005 | Male   | 70 to 74 | 23%<br>(12-39%)                | 77%<br>(61-88%)          | 0.98<br>(0.32-2.3)                          | 3.8%<br>(1.3-8.1%)                   | 4.4%<br>(1.5-9.3%)                  | 62<br>(21-130)      | 1100<br>(380-2400)     |
| Togo     | 2005 | Male   | 75 to 79 | 21%<br>(10-37%)                | 79%<br>(63-90%)          | 0.75<br>(0.2-1.9)                           | 2.7%<br>(0.75-6.3%)                  | 3.1%<br>(0.84-7.3%)                 | 34<br>(9.1-80)      | 480<br>(130-1100)      |
| Togo     | 2005 | Male   | 80 to 84 | 19%<br>(8.4-33%)               | 81%<br>(67-92%)          | 0.62<br>(0.17-1.4)                          | 2.3%<br>(0.74-5.4%)                  | 2.6%<br>(0.82-6.3%)                 | 15<br>(4.6-35)      | 160<br>(50-370)        |



| Location | Year | Sex    | Age      | Prevalence of current drinkers | Prevalence of abstainers | Population average of standard drinks daily | Percent of total attributable deaths | Percent of total attributable DALYs | Attributable deaths | Attributable DALYs     |
|----------|------|--------|----------|--------------------------------|--------------------------|---------------------------------------------|--------------------------------------|-------------------------------------|---------------------|------------------------|
| Togo     | 2005 | Male   | 85 to 89 | 18%<br>(8.4-32%)               | 82%<br>(68-92%)          | 0.53<br>(0.15-1.3)                          | 1.9%<br>(0.55-4.6%)                  | 2.1%<br>(0.57-5.3%)                 | 6.9<br>(1.8-17)     | 52<br>(15-130)         |
| Togo     | 2005 | Male   | 90 to 94 | 19%<br>(9.1-34%)               | 81%<br>(66-91%)          | 0.52<br>(0.12-1.4)                          | 1.4%<br>(0.29-4.1%)                  | 1.6%<br>(0.25-4.8%)                 | 2<br>(0.32-6.1)     | 11<br>(2.1-31)         |
| Togo     | 2005 | Male   | 95 plus  | 23%<br>(9.2-44%)               | 77%<br>(56-91%)          | 0.55<br>(0.1-1.6)                           | 1.5%<br>(0.18-4.6%)                  | 1.7%<br>(0.034-5.4%)                | 0.53<br>(0.011-1.7) | 1.9<br>(0.23-6)        |
| Togo     | 2010 | Female | All Ages | 14%<br>(10-19%)                | 86%<br>(81-90%)          | 0.54<br>(0.37-0.74)                         | 1.3%<br>(0.79-1.8%)                  | 2.2%<br>(1.1-3.6%)                  | 600<br>(300-980)    | 22000<br>(14000-32000) |
| Togo     | 2010 | Female | 15 to 19 | 13%<br>(6.1-23%)               | 87%<br>(77-94%)          | 0.45<br>(0.15-0.98)                         | 1%<br>(0.52-1.8%)                    | 1%<br>(0.26-2.2%)                   | 5.6<br>(1.5-12)     | 730<br>(360-1300)      |
| Togo     | 2010 | Female | 20 to 24 | 17%<br>(7.7-30%)               | 83%<br>(70-92%)          | 0.72<br>(0.27-1.4)                          | 2.2%<br>(1.2-3.6%)                   | 2%<br>(0.69-4%)                     | 14<br>(4.5-27)      | 1600<br>(890-2600)     |
| Togo     | 2010 | Female | 25 to 29 | 19%<br>(8.2-34%)               | 81%<br>(66-92%)          | 0.88<br>(0.36-1.7)                          | 2%<br>(1.1-3.2%)                     | 1.8%<br>(0.75-3.5%)                 | 18<br>(8-33)        | 1800<br>(1000-2800)    |
| Togo     | 2010 | Female | 30 to 34 | 21%<br>(9.2-38%)               | 79%<br>(62-91%)          | 1<br>(0.42-1.9)                             | 1.9%<br>(1.1-3%)                     | 1.9%<br>(0.9-3.3%)                  | 25<br>(13-43)       | 1900<br>(1100-3000)    |
| Togo     | 2010 | Female | 35 to 39 | 23%<br>(11-39%)                | 77%<br>(61-89%)          | 1.1<br>(0.45-2.1)                           | 2%<br>(1.1-3.3%)                     | 2.1%<br>(0.99-3.7%)                 | 29<br>(14-49)       | 1800<br>(1000-2900)    |
| Togo     | 2010 | Female | 40 to 44 | 25%<br>(13-42%)                | 75%<br>(58-87%)          | 1.2<br>(0.46-2.3)                           | 2.5%<br>(1.3-4.1%)                   | 3%<br>(1.4-4.9%)                    | 38<br>(18-62)       | 2000<br>(1000-3100)    |
| Togo     | 2010 | Female | 45 to 49 | 26%<br>(12-43%)                | 74%<br>(57-88%)          | 1.2<br>(0.46-2.5)                           | 3.3%<br>(1.6-5.4%)                   | 4.1%<br>(1.9-6.9%)                  | 46<br>(21-80)       | 2100<br>(1000-3500)    |
| Togo     | 2010 | Female | 50 to 54 | 26%<br>(12-46%)                | 74%<br>(54-88%)          | 1.3<br>(0.49-2.7)                           | 4.2%<br>(1.9-7.2%)                   | 5.3%<br>(2.4-9.2%)                  | 59<br>(25-110)      | 2200<br>(980-4000)     |
| Togo     | 2010 | Female | 55 to 59 | 26%<br>(13-46%)                | 74%<br>(54-87%)          | 1.4<br>(0.49-3)                             | 4.9%<br>(2-8.8%)                     | 6.3%<br>(2.5-11%)                   | 73<br>(28-140)      | 2400<br>(930-4400)     |
| Togo     | 2010 | Female | 60 to 64 | 28%<br>(14-47%)                | 72%<br>(53-86%)          | 1.5<br>(0.5-3.1)                            | 4.6%<br>(1.7-8.2%)                   | 5.7%<br>(2.1-10%)                   | 75<br>(27-140)      | 2100<br>(750-3800)     |
| Togo     | 2010 | Female | 65 to 69 | 29%<br>(14-47%)                | 71%<br>(53-86%)          | 1.3<br>(0.45-2.8)                           | 4.5%<br>(1.5-8.5%)                   | 5.5%<br>(1.8-10%)                   | 80<br>(25-160)      | 1800<br>(580-3600)     |
| Togo     | 2010 | Female | 70 to 74 | 26%<br>(14-43%)                | 74%<br>(57-86%)          | 1.1<br>(0.33-2.5)                           | 3.7%<br>(0.94-8.4%)                  | 4.4%<br>(1.1-10%)                   | 66<br>(16-160)      | 1200<br>(300-2900)     |
| Togo     | 2010 | Female | 75 to 79 | 23%<br>(11-40%)                | 77%<br>(60-89%)          | 0.81<br>(0.23-2)                            | 2.7%<br>(0.49-6.9%)                  | 3.2%<br>(0.52-8.1%)                 | 40<br>(6.8-110)     | 570<br>(100-1500)      |
| Togo     | 2010 | Female | 80 to 84 | 21%<br>(9.4-37%)               | 79%<br>(63-91%)          | 0.72<br>(0.21-1.7)                          | 2.2%<br>(0.39-5.8%)                  | 2.6%<br>(0.41-6.9%)                 | 19<br>(2.7-50)      | 200<br>(31-510)        |
| Togo     | 2010 | Female | 85 to 89 | 21%<br>(10-38%)                | 79%<br>(62-90%)          | 0.73<br>(0.19-1.7)                          | 2%<br>(0.15-5.8%)                    | 2.3%<br>(0.1-6.8%)                  | 11<br>(0.51-33)     | 83<br>(6.1-240)        |
| Togo     | 2010 | Female | 90 to 94 | 24%<br>(11-43%)                | 76%<br>(57-89%)          | 0.8<br>(0.2-1.9)                            | 1.9%<br>(-0.045-5.6%)                | 2.2%<br>(-0.13-6.8%)                | 4.4<br>(-0.25-14)   | 23<br>(-0.55-68)       |
| Togo     | 2010 | Female | 95 plus  | 29%<br>(12-53%)                | 71%<br>(47-88%)          | 0.93<br>(0.21-2.5)                          | 1.9%<br>(-0.23-6.1%)                 | 2.2%<br>(-0.42-7.1%)                | 1.3<br>(-0.25-4.1)  | 4.5<br>(-0.56-14)      |
| Togo     | 2010 | Male   | All Ages | 12%<br>(8.6-16%)               | 88%<br>(84-91%)          | 0.65<br>(0.46-0.88)                         | 2.3%<br>(1.7-3%)                     | 3.6%<br>(2.4-4.8%)                  | 1100<br>(740-1500)  | 46000<br>(34000-59000) |

| Location | Year | Sex    | Age      | Prevalence of current drinkers | Prevalence of abstainers | Population average of standard drinks daily | Percent of total attributable deaths | Percent of total attributable DALYs | Attributable deaths  | Attributable DALYs     |
|----------|------|--------|----------|--------------------------------|--------------------------|---------------------------------------------|--------------------------------------|-------------------------------------|----------------------|------------------------|
| Togo     | 2010 | Male   | 15 to 19 | 8.9%<br>(4.2-16%)              | 91%<br>(84-96%)          | 0.37<br>(0.12-0.82)                         | 1.3%<br>(0.66-2.4%)                  | 1.3%<br>(0.48-2.8%)                 | 10<br>(3.6-22)       | 1100<br>(520-1900)     |
| Togo     | 2010 | Male   | 20 to 24 | 14%<br>(6.1-25%)               | 86%<br>(75-94%)          | 0.75<br>(0.27-1.5)                          | 3.5%<br>(1.9-5.7%)                   | 3.6%<br>(1.5-6.5%)                  | 37<br>(15-66)        | 3200<br>(1700-5200)    |
| Togo     | 2010 | Male   | 25 to 29 | 17%<br>(7.9-31%)               | 83%<br>(69-92%)          | 1.1<br>(0.43-2.1)                           | 4.8%<br>(2.6-7.5%)                   | 5.2%<br>(2.4-8.8%)                  | 65<br>(31-110)       | 4700<br>(2500-7500)    |
| Togo     | 2010 | Male   | 30 to 34 | 20%<br>(8.9-36%)               | 80%<br>(64-91%)          | 1.4<br>(0.57-2.6)                           | 5.3%<br>(3-8.1%)                     | 5.8%<br>(3.1-9.3%)                  | 87<br>(47-140)       | 5500<br>(3300-8300)    |
| Togo     | 2010 | Male   | 35 to 39 | 23%<br>(10-39%)                | 77%<br>(61-90%)          | 1.6<br>(0.61-3.1)                           | 5.6%<br>(3.3-8.5%)                   | 6.3%<br>(3.5-9.8%)                  | 99<br>(54-150)       | 5500<br>(3100-8200)    |
| Togo     | 2010 | Male   | 40 to 44 | 23%<br>(12-40%)                | 77%<br>(60-88%)          | 1.7<br>(0.64-3.4)                           | 6.3%<br>(3.5-9.6%)                   | 7.2%<br>(3.9-11%)                   | 110<br>(59-170)      | 5300<br>(2900-8200)    |
| Togo     | 2010 | Male   | 45 to 49 | 24%<br>(11-41%)                | 76%<br>(59-89%)          | 1.8<br>(0.65-3.7)                           | 7.5%<br>(4.1-11%)                    | 8.7%<br>(4.6-13%)                   | 120<br>(65-190)      | 5300<br>(2800-8000)    |
| Togo     | 2010 | Male   | 50 to 54 | 25%<br>(11-43%)                | 75%<br>(57-89%)          | 1.8<br>(0.66-4)                             | 7.5%<br>(4-12%)                      | 8.8%<br>(4.6-14%)                   | 120<br>(63-190)      | 4500<br>(2400-7100)    |
| Togo     | 2010 | Male   | 55 to 59 | 25%<br>(13-43%)                | 75%<br>(57-87%)          | 1.8<br>(0.58-3.8)                           | 7.6%<br>(3.7-12%)                    | 8.9%<br>(4.3-14%)                   | 120<br>(60-200)      | 4000<br>(2000-6400)    |
| Togo     | 2010 | Male   | 60 to 64 | 25%<br>(12-43%)                | 75%<br>(57-88%)          | 1.6<br>(0.52-3.5)                           | 6.1%<br>(2.7-10%)                    | 7.1%<br>(3.1-12%)                   | 110<br>(47-180)      | 3000<br>(1300-5000)    |
| Togo     | 2010 | Male   | 65 to 69 | 24%<br>(12-41%)                | 76%<br>(59-88%)          | 1.3<br>(0.41-2.9)                           | 5%<br>(2-8.8%)                       | 5.8%<br>(2.3-10%)                   | 92<br>(36-170)       | 2100<br>(830-3700)     |
| Togo     | 2010 | Male   | 70 to 74 | 23%<br>(11-38%)                | 77%<br>(62-89%)          | 1<br>(0.31-2.5)                             | 3.8%<br>(1.2-8.2%)                   | 4.4%<br>(1.4-9.5%)                  | 68<br>(22-140)       | 1200<br>(400-2600)     |
| Togo     | 2010 | Male   | 75 to 79 | 21%<br>(9.9-37%)               | 79%<br>(63-90%)          | 0.76<br>(0.21-1.9)                          | 2.7%<br>(0.68-6.3%)                  | 3%<br>(0.75-7.3%)                   | 36<br>(9.2-87)       | 510<br>(140-1200)      |
| Togo     | 2010 | Male   | 80 to 84 | 19%<br>(8.5-34%)               | 81%<br>(66-92%)          | 0.62<br>(0.18-1.5)                          | 2.2%<br>(0.69-5.2%)                  | 2.5%<br>(0.74-6%)                   | 16<br>(4.7-38)       | 170<br>(52-400)        |
| Togo     | 2010 | Male   | 85 to 89 | 18%<br>(8.6-32%)               | 82%<br>(68-91%)          | 0.53<br>(0.14-1.3)                          | 1.8%<br>(0.53-4.4%)                  | 2%<br>(0.54-5.1%)                   | 7.2<br>(1.9-18)      | 55<br>(16-140)         |
| Togo     | 2010 | Male   | 90 to 94 | 19%<br>(8.5-34%)               | 81%<br>(66-92%)          | 0.51<br>(0.11-1.3)                          | 1.3%<br>(0.26-3.8%)                  | 1.5%<br>(0.21-4.4%)                 | 2.1<br>(0.28-6.1)    | 11<br>(2.2-32)         |
| Togo     | 2010 | Male   | 95 plus  | 23%<br>(9.2-44%)               | 77%<br>(56-91%)          | 0.53<br>(0.098-1.6)                         | 1.4%<br>(0.15-4.6%)                  | 1.5%<br>(0.027-5.2%)                | 0.56<br>(0.0098-1.9) | 2.1<br>(0.21-6.6)      |
| Togo     | 2016 | Female | All Ages | 14%<br>(11-20%)                | 86%<br>(80-89%)          | 0.61<br>(0.35-0.98)                         | 1.6%<br>(0.94-2.4%)                  | 2.9%<br>(1.2-4.8%)                  | 720<br>(300-1200)    | 26000<br>(15000-39000) |
| Togo     | 2016 | Female | 15 to 19 | 13%<br>(6-23%)                 | 87%<br>(77-94%)          | 0.48<br>(0.15-1.1)                          | 1%<br>(0.52-1.8%)                    | 0.91%<br>(0.22-2%)                  | 5.5<br>(1.3-13)      | 790<br>(390-1400)      |
| Togo     | 2016 | Female | 20 to 24 | 16%<br>(7.3-29%)               | 84%<br>(71-93%)          | 0.78<br>(0.24-1.7)                          | 2.4%<br>(1.4-3.8%)                   | 2.1%<br>(0.63-4.2%)                 | 13<br>(3.7-25)       | 1700<br>(930-2700)     |
| Togo     | 2016 | Female | 25 to 29 | 19%<br>(8.2-33%)               | 81%<br>(67-92%)          | 0.96<br>(0.35-2)                            | 2.6%<br>(1.5-4.2%)                   | 2.6%<br>(1-5.2%)                    | 19<br>(7.7-36)       | 1900<br>(1100-3100)    |
| Togo     | 2016 | Female | 30 to 34 | 21%<br>(9.5-37%)               | 79%<br>(63-90%)          | 1.1<br>(0.41-2.3)                           | 2.6%<br>(1.5-4.1%)                   | 2.8%<br>(1.3-5.2%)                  | 27<br>(13-47)        | 2100<br>(1200-3300)    |

| Location | Year | Sex    | Age      | Prevalence of current drinkers | Prevalence of abstainers | Population average of standard drinks daily | Percent of total attributable deaths | Percent of total attributable DALYs | Attributable deaths | Attributable DALYs     |
|----------|------|--------|----------|--------------------------------|--------------------------|---------------------------------------------|--------------------------------------|-------------------------------------|---------------------|------------------------|
| Togo     | 2016 | Female | 35 to 39 | 24%<br>(11-41%)                | 76%<br>(59-89%)          | 1.2<br>(0.44-2.5)                           | 2.7%<br>(1.5-4.4%)                   | 3.3%<br>(1.5-5.6%)                  | 35<br>(16-59)       | 2200<br>(1200-3500)    |
| Togo     | 2016 | Female | 40 to 44 | 25%<br>(13-43%)                | 75%<br>(57-87%)          | 1.3<br>(0.45-2.6)                           | 3.4%<br>(1.7-5.4%)                   | 4.4%<br>(2-7.3%)                    | 46<br>(21-77)       | 2400<br>(1200-3800)    |
| Togo     | 2016 | Female | 45 to 49 | 26%<br>(12-42%)                | 74%<br>(58-88%)          | 1.3<br>(0.45-3)                             | 4.2%<br>(1.9-7.1%)                   | 5.6%<br>(2.5-9.5%)                  | 57<br>(25-100)      | 2500<br>(1200-4400)    |
| Togo     | 2016 | Female | 50 to 54 | 26%<br>(12-45%)                | 74%<br>(55-88%)          | 1.4<br>(0.47-3.1)                           | 4.8%<br>(2.1-8.1%)                   | 6.4%<br>(2.6-11%)                   | 71<br>(29-120)      | 2700<br>(1200-4700)    |
| Togo     | 2016 | Female | 55 to 59 | 27%<br>(13-45%)                | 73%<br>(55-87%)          | 1.6<br>(0.47-3.6)                           | 5.3%<br>(2-9.3%)                     | 6.9%<br>(2.6-12%)                   | 85<br>(31-160)      | 2800<br>(1000-5000)    |
| Togo     | 2016 | Female | 60 to 64 | 28%<br>(14-47%)                | 72%<br>(53-86%)          | 1.6<br>(0.49-3.8)                           | 4.8%<br>(1.6-8.7%)                   | 5.9%<br>(2.1-11%)                   | 87<br>(27-160)      | 2400<br>(780-4400)     |
| Togo     | 2016 | Female | 65 to 69 | 29%<br>(15-47%)                | 71%<br>(53-85%)          | 1.4<br>(0.42-3.3)                           | 4.7%<br>(1.4-9.3%)                   | 5.7%<br>(1.6-11%)                   | 97<br>(27-200)      | 2200<br>(630-4500)     |
| Togo     | 2016 | Female | 70 to 74 | 26%<br>(14-43%)                | 74%<br>(57-86%)          | 1.2<br>(0.33-2.7)                           | 3.9%<br>(0.83-8.6%)                  | 4.6%<br>(0.92-10%)                  | 81<br>(17-190)      | 1500<br>(320-3300)     |
| Togo     | 2016 | Female | 75 to 79 | 23%<br>(11-39%)                | 77%<br>(61-89%)          | 0.9<br>(0.24-2.4)                           | 2.9%<br>(0.38-7.3%)                  | 3.4%<br>(0.43-8.6%)                 | 52<br>(6.3-130)     | 740<br>(99-1900)       |
| Togo     | 2016 | Female | 80 to 84 | 21%<br>(9.3-37%)               | 79%<br>(63-91%)          | 0.79<br>(0.21-2)                            | 2.4%<br>(0.26-6.3%)                  | 2.8%<br>(0.26-7.4%)                 | 24<br>(2.2-66)      | 260<br>(28-680)        |
| Togo     | 2016 | Female | 85 to 89 | 21%<br>(10-38%)                | 79%<br>(62-90%)          | 0.8<br>(0.2-2)                              | 2.2%<br>(0.099-6.1%)                 | 2.5%<br>(0.061-7.2%)                | 14<br>(0.34-40)     | 110<br>(4.6-290)       |
| Togo     | 2016 | Female | 90 to 94 | 25%<br>(12-43%)                | 75%<br>(57-88%)          | 0.89<br>(0.2-2.2)                           | 2.1%<br>(-0.12-5.9%)                 | 2.4%<br>(-0.22-7%)                  | 5.8<br>(-0.54-17)   | 30<br>(-1.7-86)        |
| Togo     | 2016 | Female | 95 plus  | 30%<br>(12-53%)                | 70%<br>(47-88%)          | 1<br>(0.2-2.8)                              | 2.1%<br>(-0.26-6.6%)                 | 2.4%<br>(-0.46-7.5%)                | 1.7<br>(-0.33-5.4)  | 5.9<br>(-0.73-18)      |
| Togo     | 2016 | Male   | All Ages | 12%<br>(8.6-16%)               | 88%<br>(84-91%)          | 0.73<br>(0.42-1.2)                          | 2.6%<br>(1.8-3.5%)                   | 4%<br>(2.4-5.5%)                    | 1200<br>(730-1700)  | 50000<br>(34000-67000) |
| Togo     | 2016 | Male   | 15 to 19 | 8.7%<br>(4.2-16%)              | 91%<br>(84-96%)          | 0.39<br>(0.12-0.93)                         | 1.3%<br>(0.62-2.3%)                  | 1.2%<br>(0.39-2.6%)                 | 11<br>(3.4-22)      | 1200<br>(550-2100)     |
| Togo     | 2016 | Male   | 20 to 24 | 13%<br>(6.3-24%)               | 87%<br>(76-94%)          | 0.8<br>(0.26-1.8)                           | 3.4%<br>(1.8-5.6%)                   | 3.5%<br>(1.3-6.3%)                  | 35<br>(13-65)       | 3200<br>(1600-5300)    |
| Togo     | 2016 | Male   | 25 to 29 | 17%<br>(8-31%)                 | 83%<br>(69-92%)          | 1.2<br>(0.42-2.6)                           | 5%<br>(2.7-7.9%)                     | 5.5%<br>(2.5-9.3%)                  | 64<br>(29-110)      | 4800<br>(2500-7700)    |
| Togo     | 2016 | Male   | 30 to 34 | 20%<br>(9.1-36%)               | 80%<br>(64-91%)          | 1.5<br>(0.57-3.1)                           | 5.9%<br>(3.3-9.1%)                   | 6.6%<br>(3.4-11%)                   | 91<br>(47-150)      | 5900<br>(3500-9000)    |
| Togo     | 2016 | Male   | 35 to 39 | 23%<br>(11-39%)                | 77%<br>(61-89%)          | 1.7<br>(0.61-3.4)                           | 6.1%<br>(3.5-9.3%)                   | 7%<br>(3.8-11%)                     | 110<br>(58-170)     | 6200<br>(3500-9400)    |
| Togo     | 2016 | Male   | 40 to 44 | 24%<br>(12-41%)                | 76%<br>(59-88%)          | 1.9<br>(0.66-4)                             | 6.6%<br>(3.5-9.9%)                   | 7.7%<br>(4-11%)                     | 130<br>(64-200)     | 6100<br>(3300-9400)    |
| Togo     | 2016 | Male   | 45 to 49 | 24%<br>(11-40%)                | 76%<br>(60-89%)          | 2<br>(0.65-4.6)                             | 7.7%<br>(4.2-12%)                    | 9.1%<br>(4.8-14%)                   | 140<br>(72-220)     | 5900<br>(3200-9200)    |
| Togo     | 2016 | Male   | 50 to 54 | 25%<br>(11-43%)                | 75%<br>(57-89%)          | 2<br>(0.65-4.7)                             | 7.4%<br>(3.8-11%)                    | 8.8%<br>(4.4-14%)                   | 130<br>(64-210)     | 4900<br>(2500-7600)    |

| Location       | Year | Sex    | Age      | Prevalence of current drinkers | Prevalence of abstainers | Population average of standard drinks daily | Percent of total attributable deaths | Percent of total attributable DALYs | Attributable deaths     | Attributable DALYs  |
|----------------|------|--------|----------|--------------------------------|--------------------------|---------------------------------------------|--------------------------------------|-------------------------------------|-------------------------|---------------------|
| Togo           | 2016 | Male   | 55 to 59 | 25%<br>(12-42%)                | 75%<br>(58-88%)          | 2<br>(0.59-4.4)                             | 7.4%<br>(3.6-12%)                    | 8.7%<br>(4.2-14%)                   | 130<br>(61-210)         | 4200<br>(2000-6800) |
| Togo           | 2016 | Male   | 60 to 64 | 25%<br>(12-42%)                | 75%<br>(58-88%)          | 1.8<br>(0.53-4.2)                           | 5.9%<br>(2.7-10%)                    | 7%<br>(3-12%)                       | 110<br>(50-200)         | 3100<br>(1400-5400) |
| Togo           | 2016 | Male   | 65 to 69 | 24%<br>(12-42%)                | 76%<br>(58-88%)          | 1.5<br>(0.43-3.3)                           | 4.9%<br>(1.9-8.6%)                   | 5.8%<br>(2.2-10%)                   | 98<br>(38-180)          | 2300<br>(890-4000)  |
| Togo           | 2016 | Male   | 70 to 74 | 23%<br>(12-39%)                | 77%<br>(61-88%)          | 1.1<br>(0.3-2.6)                            | 3.8%<br>(1.1-7.7%)                   | 4.4%<br>(1.2-9.2%)                  | 76<br>(21-160)          | 1400<br>(400-2900)  |
| Togo           | 2016 | Male   | 75 to 79 | 21%<br>(10-36%)                | 79%<br>(64-90%)          | 0.83<br>(0.21-2.2)                          | 2.7%<br>(0.64-6.3%)                  | 3.1%<br>(0.71-7.4%)                 | 42<br>(9.5-100)         | 600<br>(140-1400)   |
| Togo           | 2016 | Male   | 80 to 84 | 19%<br>(8.6-33%)               | 81%<br>(67-91%)          | 0.67<br>(0.17-1.7)                          | 2.3%<br>(0.59-5.3%)                  | 2.6%<br>(0.63-6.2%)                 | 19<br>(4.6-43)          | 200<br>(52-460)     |
| Togo           | 2016 | Male   | 85 to 89 | 18%<br>(8.2-32%)               | 82%<br>(68-92%)          | 0.58<br>(0.14-1.5)                          | 1.8%<br>(0.41-4.7%)                  | 2.1%<br>(0.4-5.6%)                  | 8.4<br>(1.7-22)         | 64<br>(14-160)      |
| Togo           | 2016 | Male   | 90 to 94 | 19%<br>(9.1-34%)               | 81%<br>(66-91%)          | 0.56<br>(0.12-1.5)                          | 1.4%<br>(0.22-4.2%)                  | 1.6%<br>(0.16-4.9%)                 | 2.5<br>(0.26-7.6)       | 13<br>(2.1-39)      |
| Togo           | 2016 | Male   | 95 plus  | 23%<br>(9.7-43%)               | 77%<br>(57-90%)          | 0.6<br>(0.1-1.7)                            | 1.5%<br>(0.1-4.7%)                   | 1.6%<br>(-0.016-5.5%)               | 0.65<br>(-0.0062-2.2)   | 2.4<br>(0.16-7.5)   |
| American Samoa | 1990 | Female | All Ages | 18%<br>(12-25%)                | 82%<br>(75-88%)          | 0.35<br>(0.18-0.61)                         | 0.52%<br>(0.1-1.2%)                  | 0.38%<br>(-0.37-1.6%)               | 0.32<br>(-0.3-1.4)      | 26<br>(4.9-60)      |
| American Samoa | 1990 | Female | 15 to 19 | 19%<br>(8.2-35%)               | 81%<br>(65-92%)          | 0.4<br>(0.13-0.86)                          | 0.93%<br>(0.46-1.8%)                 | 1.5%<br>(0.45-3.7%)                 | 0.019<br>(0.0058-0.047) | 2.5<br>(1.2-4.8)    |
| American Samoa | 1990 | Female | 20 to 24 | 23%<br>(9.7-41%)               | 77%<br>(59-90%)          | 0.63<br>(0.23-1.4)                          | 1.6%<br>(0.89-2.7%)                  | 2.1%<br>(0.66-4.7%)                 | 0.034<br>(0.01-0.075)   | 4.9<br>(2.6-8.7)    |
| American Samoa | 1990 | Female | 25 to 29 | 25%<br>(10-44%)                | 75%<br>(56-90%)          | 0.65<br>(0.23-1.3)                          | 1.6%<br>(0.98-2.8%)                  | 2.3%<br>(0.95-4.7%)                 | 0.042<br>(0.017-0.088)  | 5.2<br>(3-8.9)      |
| American Samoa | 1990 | Female | 30 to 34 | 25%<br>(10-45%)                | 75%<br>(55-90%)          | 0.67<br>(0.24-1.4)                          | 1.4%<br>(0.73-2.5%)                  | 2%<br>(0.72-4.3%)                   | 0.039<br>(0.014-0.087)  | 4.1<br>(2.1-7.5)    |
| American Samoa | 1990 | Female | 35 to 39 | 26%<br>(10-44%)                | 74%<br>(56-90%)          | 0.69<br>(0.25-1.5)                          | 1.3%<br>(0.57-2.8%)                  | 2.1%<br>(0.75-4.7%)                 | 0.049<br>(0.017-0.11)   | 3.7<br>(1.6-7.7)    |
| American Samoa | 1990 | Female | 40 to 44 | 25%<br>(12-43%)                | 75%<br>(57-88%)          | 0.64<br>(0.23-1.4)                          | 1.1%<br>(0.27-2.7%)                  | 1.9%<br>(0.46-4.5%)                 | 0.052<br>(0.011-0.13)   | 3<br>(0.7-7.3)      |
| American Samoa | 1990 | Female | 45 to 49 | 25%<br>(11-42%)                | 75%<br>(58-89%)          | 0.55<br>(0.17-1.2)                          | 0.75%<br>(-0.088-2.2%)               | 1.4%<br>(0.12-3.6%)                 | 0.042<br>(0.0037-0.11)  | 1.8<br>(-0.21-5.2)  |
| American Samoa | 1990 | Female | 50 to 54 | 24%<br>(11-43%)                | 76%<br>(57-89%)          | 0.49<br>(0.15-1.1)                          | 0.42%<br>(-0.51-1.9%)                | 0.9%<br>(-0.33-3%)                  | 0.036<br>(-0.014-0.12)  | 1.1<br>(-1.4-4.8)   |
| American Samoa | 1990 | Female | 55 to 59 | 24%<br>(11-43%)                | 76%<br>(57-89%)          | 0.44<br>(0.14-1)                            | 0.24%<br>(-0.76-1.7%)                | 0.64%<br>(-0.56-2.7%)               | 0.028<br>(-0.024-0.12)  | 0.53<br>(-1.8-3.8)  |
| American Samoa | 1990 | Female | 60 to 64 | 24%<br>(11-44%)                | 76%<br>(56-89%)          | 0.42<br>(0.13-1)                            | -0.073%<br>(-1.1-1.4%)               | 0.17%<br>(-1-2.1%)                  | 0.01<br>(-0.065-0.13)   | -0.19<br>(-2.8-3.5) |
| American Samoa | 1990 | Female | 65 to 69 | 25%<br>(11-42%)                | 75%<br>(58-89%)          | 0.42<br>(0.13-0.98)                         | -0.1%<br>(-1.2-1.2%)                 | 0.11%<br>(-1.2-1.8%)                | 0.0083<br>(-0.084-0.13) | -0.25<br>(-2.8-2.8) |
| American Samoa | 1990 | Female | 70 to 74 | 25%<br>(11-41%)                | 75%<br>(59-89%)          | 0.41<br>(0.13-0.93)                         | -0.23%<br>(-1.2-1.1%)                | -0.12%<br>(-1.3-1.5%)               | -0.0084<br>(-0.087-0.1) | -0.39<br>(-2.1-1.8) |

| Location       | Year | Sex    | Age      | Prevalence of current drinkers | Prevalence of abstainers | Population average of standard drinks daily | Percent of total attributable deaths | Percent of total attributable DALYs | Attributable deaths        | Attributable DALYs       |
|----------------|------|--------|----------|--------------------------------|--------------------------|---------------------------------------------|--------------------------------------|-------------------------------------|----------------------------|--------------------------|
| American Samoa | 1990 | Female | 75 to 79 | 24%<br>(10-43%)                | 76%<br>(57-90%)          | 0.39<br>(0.11-1)                            | -0.099%<br>(-1.1-1.3%)               | 0.013%<br>(-1.1-1.7%)               | 0.0008<br>(-0.072-0.11)    | -0.12<br>(-1.3-1.5)      |
| American Samoa | 1990 | Female | 80 to 84 | 23%<br>(9.3-43%)               | 77%<br>(57-91%)          | 0.37<br>(0.11-0.94)                         | -0.18%<br>(-1.1-1.1%)                | -0.13%<br>(-1.2-1.4%)               | -0.013<br>(-0.12-0.13)     | -0.23<br>(-1.4-1.5)      |
| American Samoa | 1990 | Female | 85 to 89 | 24%<br>(10-43%)                | 76%<br>(57-90%)          | 0.38<br>(0.11-0.9)                          | -0.25%<br>(-1.2-0.96%)               | -0.24%<br>(-1.3-1.1%)               | -0.016<br>(-0.091-0.077)   | -0.15<br>(-0.74-0.58)    |
| American Samoa | 1990 | Female | 90 to 94 | 27%<br>(12-47%)                | 73%<br>(53-88%)          | 0.43<br>(0.13-1.1)                          | -0.23%<br>(-1.1-1.1%)                | -0.23%<br>(-1.3-1.3%)               | -0.0065<br>(-0.035-0.036)  | -0.039<br>(-0.19-0.2)    |
| American Samoa | 1990 | Female | 95 plus  | 32%<br>(13-54%)                | 68%<br>(46-87%)          | 0.5<br>(0.15-1.3)                           | -0.38%<br>(-1.6-1.2%)                | -0.47%<br>(-1.8-1.2%)               | -0.0038<br>(-0.015-0.0099) | -0.012<br>(-0.051-0.038) |
| American Samoa | 1990 | Male   | All Ages | 38%<br>(30-48%)                | 62%<br>(52-70%)          | 0.79<br>(0.43-1.3)                          | 2.2%<br>(1.1-3.9%)                   | 2%<br>(0.68-4.2%)                   | 3<br>(0.99-6.3)            | 170<br>(79-300)          |
| American Samoa | 1990 | Male   | 15 to 19 | 35%<br>(20-53%)                | 65%<br>(47-80%)          | 0.49<br>(0.19-1)                            | 1.8%<br>(0.95-3.3%)                  | 2.4%<br>(0.93-4.6%)                 | 0.082<br>(0.032-0.16)      | 7.5<br>(3.8-13)          |
| American Samoa | 1990 | Male   | 20 to 24 | 53%<br>(34-71%)                | 47%<br>(29-66%)          | 1.3<br>(0.6-2.4)                            | 4.9%<br>(2.6-8.2%)                   | 6.1%<br>(2.8-11%)                   | 0.31<br>(0.14-0.56)        | 25<br>(13-42)            |
| American Samoa | 1990 | Male   | 25 to 29 | 61%<br>(41-77%)                | 39%<br>(23-59%)          | 1.9<br>(0.93-3.4)                           | 6.1%<br>(3.4-10%)                    | 7.6%<br>(3.9-14%)                   | 0.39<br>(0.19-0.7)         | 29<br>(16-49)            |
| American Samoa | 1990 | Male   | 30 to 34 | 62%<br>(41-79%)                | 38%<br>(21-59%)          | 2<br>(0.91-3.6)                             | 5.4%<br>(2.7-9.4%)                   | 6.6%<br>(3-12%)                     | 0.38<br>(0.16-0.72)        | 26<br>(13-46)            |
| American Samoa | 1990 | Male   | 35 to 39 | 60%<br>(42-77%)                | 40%<br>(23-58%)          | 1.8<br>(0.78-3.4)                           | 4.6%<br>(2.1-8.9%)                   | 5.7%<br>(2.2-11%)                   | 0.32<br>(0.12-0.67)        | 20<br>(9-38)             |
| American Samoa | 1990 | Male   | 40 to 44 | 57%<br>(39-75%)                | 43%<br>(25-61%)          | 1.5<br>(0.64-3)                             | 3.5%<br>(1.1-7.4%)                   | 4.1%<br>(1.1-9.3%)                  | 0.28<br>(0.068-0.66)       | 16<br>(5.2-34)           |
| American Samoa | 1990 | Male   | 45 to 49 | 54%<br>(32-72%)                | 46%<br>(28-68%)          | 1.3<br>(0.55-2.7)                           | 2.8%<br>(0.78-6.5%)                  | 3.2%<br>(0.59-7.7%)                 | 0.26<br>(0.044-0.63)       | 13<br>(3.6-30)           |
| American Samoa | 1990 | Male   | 50 to 54 | 51%<br>(32-70%)                | 49%<br>(30-68%)          | 1.1<br>(0.44-2.2)                           | 2.4%<br>(0.52-5.7%)                  | 2.6%<br>(0.36-6.9%)                 | 0.27<br>(0.04-0.72)        | 12<br>(2.6-30)           |
| American Samoa | 1990 | Male   | 55 to 59 | 48%<br>(31-68%)                | 52%<br>(32-69%)          | 0.88<br>(0.35-1.8)                          | 1.5%<br>(0.059-4.4%)                 | 1.6%<br>(-0.076-5.2%)               | 0.18<br>(-0.0084-0.56)     | 6.8<br>(0.25-20)         |
| American Samoa | 1990 | Male   | 60 to 64 | 46%<br>(27-66%)                | 54%<br>(34-73%)          | 0.74<br>(0.29-1.6)                          | 1.2%<br>(-0.065-3.8%)                | 1.3%<br>(-0.17-4.2%)                | 0.16<br>(-0.021-0.54)      | 5<br>(-0.27-16)          |
| American Samoa | 1990 | Male   | 65 to 69 | 44%<br>(26-63%)                | 56%<br>(37-74%)          | 0.67<br>(0.26-1.3)                          | 0.92%<br>(-0.13-2.9%)                | 1%<br>(-0.18-3.3%)                  | 0.13<br>(-0.023-0.43)      | 3.3<br>(-0.44-10)        |
| American Samoa | 1990 | Male   | 70 to 74 | 41%<br>(24-59%)                | 59%<br>(41-76%)          | 0.59<br>(0.24-1.2)                          | 0.69%<br>(-0.25-2.8%)                | 0.75%<br>(-0.3-3.1%)                | 0.099<br>(-0.042-0.41)     | 2<br>(-0.7-7.9)          |
| American Samoa | 1990 | Male   | 75 to 79 | 38%<br>(22-57%)                | 62%<br>(43-78%)          | 0.5<br>(0.19-1.1)                           | 0.52%<br>(-0.21-2.2%)                | 0.55%<br>(-0.3-2.4%)                | 0.067<br>(-0.037-0.28)     | 1.1<br>(-0.45-4.3)       |
| American Samoa | 1990 | Male   | 80 to 84 | 35%<br>(19-53%)                | 65%<br>(47-81%)          | 0.44<br>(0.17-0.95)                         | 0.46%<br>(-0.13-1.7%)                | 0.47%<br>(-0.19-1.9%)               | 0.046<br>(-0.018-0.18)     | 0.55<br>(-0.16-2)        |
| American Samoa | 1990 | Male   | 85 to 89 | 33%<br>(19-50%)                | 67%<br>(50-81%)          | 0.42<br>(0.17-0.87)                         | 0.32%<br>(-0.24-1.4%)                | 0.32%<br>(-0.33-1.5%)               | 0.015<br>(-0.016-0.072)    | 0.14<br>(-0.1-0.58)      |
| American Samoa | 1990 | Male   | 90 to 94 | 35%<br>(21-52%)                | 65%<br>(48-79%)          | 0.43<br>(0.17-0.92)                         | 0.21%<br>(-0.32-1.2%)                | 0.18%<br>(-0.42-1.2%)               | 0.0026<br>(-0.0059-0.018)  | 0.018<br>(-0.028-0.1)    |

| Location       | Year | Sex    | Age      | Prevalence of current drinkers | Prevalence of abstainers | Population average of standard drinks daily | Percent of total attributable deaths | Percent of total attributable DALYs | Attributable deaths       | Attributable DALYs        |
|----------------|------|--------|----------|--------------------------------|--------------------------|---------------------------------------------|--------------------------------------|-------------------------------------|---------------------------|---------------------------|
| American Samoa | 1990 | Male   | 95 plus  | 38%<br>(20-59%)                | 62%<br>(41-80%)          | 0.47<br>(0.17-1)                            | 0.14%<br>(-0.51-1.4%)                | 0.044%<br>(-0.7-1.4%)               | 0.00012<br>(-0.002-0.004) | 0.0016<br>(-0.0058-0.016) |
| American Samoa | 1995 | Female | All Ages | 18%<br>(12-25%)                | 82%<br>(75-88%)          | 0.35<br>(0.18-0.6)                          | 0.53%<br>(0.043-1.3%)                | 0.36%<br>(-0.45-1.6%)               | 0.36<br>(-0.45-1.5)       | 30<br>(2.5-71)            |
| American Samoa | 1995 | Female | 15 to 19 | 19%<br>(8.8-33%)               | 81%<br>(67-91%)          | 0.4<br>(0.14-0.9)                           | 0.95%<br>(0.47-1.8%)                 | 1.6%<br>(0.47-3.8%)                 | 0.021<br>(0.0064-0.051)   | 2.7<br>(1.3-5.1)          |
| American Samoa | 1995 | Female | 20 to 24 | 23%<br>(10-41%)                | 77%<br>(59-90%)          | 0.64<br>(0.23-1.3)                          | 1.6%<br>(0.9-2.8%)                   | 2.1%<br>(0.7-4.7%)                  | 0.036<br>(0.012-0.082)    | 5<br>(2.7-8.8)            |
| American Samoa | 1995 | Female | 25 to 29 | 24%<br>(10-42%)                | 76%<br>(58-90%)          | 0.65<br>(0.24-1.4)                          | 1.7%<br>(0.98-3%)                    | 2.3%<br>(0.96-4.8%)                 | 0.05<br>(0.02-0.1)        | 5.6<br>(3.2-9.9)          |
| American Samoa | 1995 | Female | 30 to 34 | 25%<br>(9.8-46%)               | 75%<br>(54-90%)          | 0.68<br>(0.23-1.4)                          | 1.5%<br>(0.71-2.7%)                  | 2%<br>(0.67-4.3%)                   | 0.053<br>(0.017-0.11)     | 5.1<br>(2.4-9.5)          |
| American Samoa | 1995 | Female | 35 to 39 | 26%<br>(11-44%)                | 74%<br>(56-89%)          | 0.7<br>(0.25-1.5)                           | 1.4%<br>(0.57-2.9%)                  | 2.1%<br>(0.73-4.6%)                 | 0.072<br>(0.024-0.16)     | 5.1<br>(2.1-10)           |
| American Samoa | 1995 | Female | 40 to 44 | 25%<br>(12-42%)                | 75%<br>(58-88%)          | 0.64<br>(0.24-1.4)                          | 1.1%<br>(0.23-2.8%)                  | 1.8%<br>(0.37-4.4%)                 | 0.072<br>(0.014-0.18)     | 4.1<br>(0.8-9.8)          |
| American Samoa | 1995 | Female | 45 to 49 | 24%<br>(10-42%)                | 76%<br>(58-90%)          | 0.55<br>(0.16-1.2)                          | 0.73%<br>(-0.2-2.2%)                 | 1.3%<br>(-0.011-3.6%)               | 0.058<br>(-0.00052-0.17)  | 2.5<br>(-0.73-7.7)        |
| American Samoa | 1995 | Female | 50 to 54 | 24%<br>(10-42%)                | 76%<br>(58-90%)          | 0.48<br>(0.15-1.1)                          | 0.37%<br>(-0.7-1.9%)                 | 0.78%<br>(-0.56-2.8%)               | 0.043<br>(-0.031-0.16)    | 1.2<br>(-2.3-6.4)         |
| American Samoa | 1995 | Female | 55 to 59 | 23%<br>(11-41%)                | 77%<br>(59-89%)          | 0.44<br>(0.14-1)                            | 0.18%<br>(-0.93-1.6%)                | 0.53%<br>(-0.72-2.5%)               | 0.03<br>(-0.04-0.14)      | 0.5<br>(-2.5-4.4)         |
| American Samoa | 1995 | Female | 60 to 64 | 23%<br>(10-42%)                | 77%<br>(58-90%)          | 0.42<br>(0.13-1)                            | -0.14%<br>(-1.3-1.3%)                | 0.074%<br>(-1.2-1.8%)               | 0.0055<br>(-0.09-0.14)    | -0.41<br>(-3.8-3.8)       |
| American Samoa | 1995 | Female | 65 to 69 | 25%<br>(11-44%)                | 75%<br>(56-89%)          | 0.43<br>(0.13-1)                            | -0.18%<br>(-1.4-1.2%)                | 0.009%<br>(-1.4-1.7%)               | 0.0007<br>(-0.11-0.14)    | -0.47<br>(-3.5-3)         |
| American Samoa | 1995 | Female | 70 to 74 | 25%<br>(12-43%)                | 75%<br>(57-88%)          | 0.41<br>(0.12-0.94)                         | -0.31%<br>(-1.4-1.1%)                | -0.22%<br>(-1.5-1.6%)               | -0.021<br>(-0.14-0.13)    | -0.7<br>(-3.1-2.4)        |
| American Samoa | 1995 | Female | 75 to 79 | 24%<br>(10-42%)                | 76%<br>(58-90%)          | 0.38<br>(0.11-0.96)                         | -0.15%<br>(-1.1-1.2%)                | -0.055%<br>(-1.2-1.5%)              | -0.0042<br>(-0.087-0.11)  | -0.21<br>(-1.5-1.6)       |
| American Samoa | 1995 | Female | 80 to 84 | 23%<br>(9.9-43%)               | 77%<br>(57-90%)          | 0.37<br>(0.11-0.93)                         | -0.23%<br>(-1.1-0.98%)               | -0.19%<br>(-1.2-1.2%)               | -0.02<br>(-0.13-0.14)     | -0.31<br>(-1.5-1.4)       |
| American Samoa | 1995 | Female | 85 to 89 | 24%<br>(10-42%)                | 76%<br>(58-90%)          | 0.38<br>(0.12-0.9)                          | -0.3%<br>(-1.2-0.84%)                | -0.31%<br>(-1.4-1%)                 | -0.025<br>(-0.11-0.079)   | -0.22<br>(-0.92-0.61)     |
| American Samoa | 1995 | Female | 90 to 94 | 27%<br>(12-47%)                | 73%<br>(53-88%)          | 0.43<br>(0.13-1)                            | -0.28%<br>(-1.2-1%)                  | -0.29%<br>(-1.3-1.1%)               | -0.01<br>(-0.046-0.041)   | -0.06<br>(-0.26-0.21)     |
| American Samoa | 1995 | Female | 95 plus  | 32%<br>(14-55%)                | 68%<br>(45-86%)          | 0.51<br>(0.15-1.2)                          | -0.45%<br>(-1.7-1.2%)                | -0.55%<br>(-2-1.3%)                 | -0.0053<br>(-0.019-0.013) | -0.017<br>(-0.066-0.048)  |
| American Samoa | 1995 | Male   | All Ages | 38%<br>(30-47%)                | 62%<br>(53-70%)          | 0.8<br>(0.45-1.4)                           | 2.2%<br>(1.1-4.1%)                   | 2.1%<br>(0.72-4.5%)                 | 3.2<br>(1.1-6.7)          | 180<br>(85-330)           |
| American Samoa | 1995 | Male   | 15 to 19 | 35%<br>(20-53%)                | 65%<br>(47-80%)          | 0.5<br>(0.19-1)                             | 1.9%<br>(0.94-3.3%)                  | 2.4%<br>(0.97-4.8%)                 | 0.087<br>(0.035-0.17)     | 8<br>(4-14)               |
| American Samoa | 1995 | Male   | 20 to 24 | 53%<br>(34-70%)                | 47%<br>(30-66%)          | 1.4<br>(0.62-2.6)                           | 5%<br>(2.6-8.6%)                     | 6.2%<br>(2.8-11%)                   | 0.3<br>(0.14-0.56)        | 25<br>(13-43)             |

| Location       | Year | Sex    | Age      | Prevalence of current drinkers | Prevalence of abstainers | Population average of standard drinks daily | Percent of total attributable deaths | Percent of total attributable DALYs | Attributable deaths         | Attributable DALYs       |
|----------------|------|--------|----------|--------------------------------|--------------------------|---------------------------------------------|--------------------------------------|-------------------------------------|-----------------------------|--------------------------|
| American Samoa | 1995 | Male   | 25 to 29 | 60%<br>(41-77%)                | 40%<br>(23-59%)          | 1.9<br>(0.93-3.4)                           | 6.1%<br>(3.3-10%)                    | 7.8%<br>(3.8-14%)                   | 0.39<br>(0.19-0.71)         | 29<br>(16-51)            |
| American Samoa | 1995 | Male   | 30 to 34 | 61%<br>(40-78%)                | 39%<br>(22-60%)          | 2<br>(0.9-3.6)                              | 5.4%<br>(2.8-9.4%)                   | 6.6%<br>(3.1-12%)                   | 0.38<br>(0.16-0.72)         | 27<br>(13-48)            |
| American Samoa | 1995 | Male   | 35 to 39 | 60%<br>(42-77%)                | 40%<br>(23-58%)          | 1.8<br>(0.81-3.4)                           | 4.6%<br>(2.2-8.6%)                   | 5.7%<br>(2.3-11%)                   | 0.36<br>(0.14-0.75)         | 23<br>(10-44)            |
| American Samoa | 1995 | Male   | 40 to 44 | 58%<br>(40-75%)                | 42%<br>(25-60%)          | 1.6<br>(0.66-3)                             | 3.5%<br>(1.2-7.5%)                   | 4.1%<br>(1.2-9.3%)                  | 0.31<br>(0.081-0.73)        | 18<br>(6-39)             |
| American Samoa | 1995 | Male   | 45 to 49 | 53%<br>(32-72%)                | 47%<br>(28-68%)          | 1.3<br>(0.52-2.7)                           | 2.8%<br>(0.81-6.4%)                  | 3.2%<br>(0.73-7.8%)                 | 0.29<br>(0.062-0.69)        | 15<br>(4.1-33)           |
| American Samoa | 1995 | Male   | 50 to 54 | 50%<br>(30-69%)                | 50%<br>(31-70%)          | 1.1<br>(0.43-2.2)                           | 2.4%<br>(0.53-5.7%)                  | 2.7%<br>(0.36-6.8%)                 | 0.29<br>(0.041-0.76)        | 13<br>(3-31)             |
| American Samoa | 1995 | Male   | 55 to 59 | 48%<br>(30-68%)                | 52%<br>(32-70%)          | 0.9<br>(0.34-1.9)                           | 1.5%<br>(0.05-4.3%)                  | 1.7%<br>(-0.085-5%)                 | 0.2<br>(-0.0098-0.62)       | 7.7<br>(0.25-22)         |
| American Samoa | 1995 | Male   | 60 to 64 | 46%<br>(27-66%)                | 54%<br>(34-73%)          | 0.75<br>(0.29-1.7)                          | 1.2%<br>(-0.082-3.9%)                | 1.3%<br>(-0.17-4.4%)                | 0.19<br>(-0.024-0.63)       | 5.7<br>(-0.37-19)        |
| American Samoa | 1995 | Male   | 65 to 69 | 45%<br>(26-63%)                | 55%<br>(37-74%)          | 0.68<br>(0.27-1.4)                          | 0.94%<br>(-0.14-3.1%)                | 1%<br>(-0.19-3.6%)                  | 0.14<br>(-0.027-0.5)        | 3.5<br>(-0.5-12)         |
| American Samoa | 1995 | Male   | 70 to 74 | 42%<br>(25-60%)                | 58%<br>(40-75%)          | 0.6<br>(0.24-1.2)                           | 0.69%<br>(-0.27-2.7%)                | 0.75%<br>(-0.32-3%)                 | 0.096<br>(-0.042-0.39)      | 1.9<br>(-0.72-7.6)       |
| American Samoa | 1995 | Male   | 75 to 79 | 38%<br>(22-56%)                | 62%<br>(44-78%)          | 0.51<br>(0.19-1.1)                          | 0.53%<br>(-0.22-2.2%)                | 0.55%<br>(-0.26-2.3%)               | 0.062<br>(-0.029-0.27)      | 1<br>(-0.4-4.1)          |
| American Samoa | 1995 | Male   | 80 to 84 | 35%<br>(19-53%)                | 65%<br>(47-81%)          | 0.45<br>(0.18-0.94)                         | 0.47%<br>(-0.14-1.7%)                | 0.48%<br>(-0.19-1.8%)               | 0.041<br>(-0.015-0.16)      | 0.49<br>(-0.15-1.8)      |
| American Samoa | 1995 | Male   | 85 to 89 | 34%<br>(19-50%)                | 66%<br>(50-81%)          | 0.42<br>(0.17-0.87)                         | 0.33%<br>(-0.23-1.3%)                | 0.33%<br>(-0.32-1.5%)               | 0.017<br>(-0.016-0.074)     | 0.15<br>(-0.1-0.59)      |
| American Samoa | 1995 | Male   | 90 to 94 | 35%<br>(21-52%)                | 65%<br>(48-79%)          | 0.44<br>(0.17-0.94)                         | 0.22%<br>(-0.32-1.2%)                | 0.19%<br>(-0.43-1.2%)               | 0.0033<br>(-0.0075-0.021)   | 0.023<br>(-0.033-0.12)   |
| American Samoa | 1995 | Male   | 95 plus  | 39%<br>(21-60%)                | 61%<br>(40-79%)          | 0.48<br>(0.17-1.1)                          | 0.16%<br>(-0.54-1.5%)                | 0.064%<br>(-0.73-1.6%)              | 0.00021<br>(-0.0025-0.0053) | 0.0021<br>(-0.0072-0.02) |
| American Samoa | 2000 | Female | All Ages | 18%<br>(13-25%)                | 82%<br>(75-87%)          | 0.36<br>(0.18-0.61)                         | 0.51%<br>(-0.021-1.3%)               | 0.32%<br>(-0.52-1.6%)               | 0.36<br>(-0.57-1.7)         | 31<br>(-1.2-79)          |
| American Samoa | 2000 | Female | 15 to 19 | 19%<br>(8.3-33%)               | 81%<br>(67-92%)          | 0.42<br>(0.14-0.92)                         | 0.96%<br>(0.46-1.9%)                 | 1.6%<br>(0.46-3.6%)                 | 0.021<br>(0.0063-0.051)     | 2.7<br>(1.3-5.4)         |
| American Samoa | 2000 | Female | 20 to 24 | 23%<br>(9.9-40%)               | 77%<br>(60-90%)          | 0.65<br>(0.23-1.4)                          | 1.6%<br>(0.86-2.7%)                  | 2.2%<br>(0.71-4.7%)                 | 0.035<br>(0.011-0.076)      | 4.8<br>(2.5-8.3)         |
| American Samoa | 2000 | Female | 25 to 29 | 24%<br>(10-43%)                | 76%<br>(57-90%)          | 0.67<br>(0.24-1.4)                          | 1.7%<br>(0.97-2.9%)                  | 2.3%<br>(0.93-4.7%)                 | 0.05<br>(0.02-0.1)          | 5.6<br>(3.1-10)          |
| American Samoa | 2000 | Female | 30 to 34 | 25%<br>(9.9-45%)               | 75%<br>(55-90%)          | 0.69<br>(0.24-1.5)                          | 1.4%<br>(0.7-2.8%)                   | 2%<br>(0.71-4.3%)                   | 0.061<br>(0.02-0.14)        | 5.8<br>(2.6-11)          |
| American Samoa | 2000 | Female | 35 to 39 | 26%<br>(10-45%)                | 74%<br>(55-90%)          | 0.72<br>(0.27-1.5)                          | 1.4%<br>(0.55-2.9%)                  | 2.1%<br>(0.76-4.5%)                 | 0.09<br>(0.03-0.2)          | 6.4<br>(2.5-14)          |
| American Samoa | 2000 | Female | 40 to 44 | 25%<br>(12-43%)                | 75%<br>(57-88%)          | 0.67<br>(0.24-1.4)                          | 1.1%<br>(0.13-2.9%)                  | 1.8%<br>(0.34-4.5%)                 | 0.09<br>(0.017-0.23)        | 5<br>(0.59-12)           |

| Location       | Year | Sex    | Age      | Prevalence of current drinkers | Prevalence of abstainers | Population average of standard drinks daily | Percent of total attributable deaths | Percent of total attributable DALYs | Attributable deaths       | Attributable DALYs       |
|----------------|------|--------|----------|--------------------------------|--------------------------|---------------------------------------------|--------------------------------------|-------------------------------------|---------------------------|--------------------------|
| American Samoa | 2000 | Female | 45 to 49 | 25%<br>(11-42%)                | 75%<br>(58-89%)          | 0.57<br>(0.19-1.2)                          | 0.68%<br>(-0.31-2.2%)                | 1.2%<br>(-0.084-3.5%)               | 0.073<br>(-0.0043-0.2)    | 3<br>(-1.3-9.3)          |
| American Samoa | 2000 | Female | 50 to 54 | 24%<br>(11-42%)                | 76%<br>(58-89%)          | 0.5<br>(0.16-1.1)                           | 0.3%<br>(-0.82-1.9%)                 | 0.71%<br>(-0.68-2.8%)               | 0.047<br>(-0.048-0.19)    | 1.2<br>(-3.4-7.3)        |
| American Samoa | 2000 | Female | 55 to 59 | 24%<br>(11-42%)                | 76%<br>(58-89%)          | 0.46<br>(0.14-1.1)                          | 0.093%<br>(-1.1-1.5%)                | 0.43%<br>(-0.91-2.3%)               | 0.028<br>(-0.058-0.15)    | 0.29<br>(-3.4-4.8)       |
| American Samoa | 2000 | Female | 60 to 64 | 24%<br>(11-43%)                | 76%<br>(57-89%)          | 0.43<br>(0.13-1)                            | -0.21%<br>(-1.5-1.2%)                | -0.011%<br>(-1.4-1.7%)              | -0.00099<br>(-0.12-0.14)  | -0.69<br>(-4.8-3.9)      |
| American Samoa | 2000 | Female | 65 to 69 | 25%<br>(12-42%)                | 75%<br>(58-88%)          | 0.44<br>(0.14-1)                            | -0.26%<br>(-1.4-1.1%)                | -0.093%<br>(-1.5-1.6%)              | -0.0081<br>(-0.13-0.14)   | -0.71<br>(-4-3.1)        |
| American Samoa | 2000 | Female | 70 to 74 | 25%<br>(12-41%)                | 75%<br>(59-88%)          | 0.42<br>(0.13-0.96)                         | -0.38%<br>(-1.4-1%)                  | -0.32%<br>(-1.6-1.3%)               | -0.036<br>(-0.18-0.15)    | -1.1<br>(-4.1-2.8)       |
| American Samoa | 2000 | Female | 75 to 79 | 23%<br>(10-42%)                | 77%<br>(58-90%)          | 0.39<br>(0.12-0.94)                         | -0.22%<br>(-1.3-1.1%)                | -0.14%<br>(-1.3-1.4%)               | -0.011<br>(-0.1-0.11)     | -0.32<br>(-1.9-1.6)      |
| American Samoa | 2000 | Female | 80 to 84 | 23%<br>(9.5-42%)               | 77%<br>(58-91%)          | 0.37<br>(0.12-0.94)                         | -0.28%<br>(-1.3-0.94%)               | -0.27%<br>(-1.4-1.2%)               | -0.029<br>(-0.15-0.12)    | -0.4<br>(-1.8-1.3)       |
| American Samoa | 2000 | Female | 85 to 89 | 23%<br>(10-41%)                | 77%<br>(59-90%)          | 0.38<br>(0.12-0.91)                         | -0.33%<br>(-1.3-0.9%)                | -0.36%<br>(-1.5-1%)                 | -0.032<br>(-0.13-0.097)   | -0.27<br>(-1.1-0.73)     |
| American Samoa | 2000 | Female | 90 to 94 | 27%<br>(12-46%)                | 73%<br>(54-88%)          | 0.44<br>(0.13-1)                            | -0.31%<br>(-1.2-1%)                  | -0.35%<br>(-1.4-1.2%)               | -0.015<br>(-0.063-0.054)  | -0.087<br>(-0.35-0.29)   |
| American Samoa | 2000 | Female | 95 plus  | 31%<br>(13-55%)                | 69%<br>(45-87%)          | 0.52<br>(0.14-1.3)                          | -0.48%<br>(-1.8-1.2%)                | -0.6%<br>(-2.1-1.2%)                | -0.0076<br>(-0.027-0.016) | -0.024<br>(-0.092-0.058) |
| American Samoa | 2000 | Male   | All Ages | 38%<br>(30-47%)                | 62%<br>(53-70%)          | 0.83<br>(0.45-1.4)                          | 2.2%<br>(1.1-4%)                     | 2.1%<br>(0.69-4.3%)                 | 3.1<br>(1-6.4)            | 180<br>(86-330)          |
| American Samoa | 2000 | Male   | 15 to 19 | 35%<br>(20-52%)                | 65%<br>(48-80%)          | 0.52<br>(0.2-1)                             | 1.9%<br>(0.95-3.4%)                  | 2.5%<br>(0.98-4.9%)                 | 0.092<br>(0.037-0.18)     | 8.6<br>(4.2-15)          |
| American Samoa | 2000 | Male   | 20 to 24 | 52%<br>(33-70%)                | 48%<br>(30-67%)          | 1.4<br>(0.63-2.7)                           | 5%<br>(2.6-8.7%)                     | 6.4%<br>(2.8-12%)                   | 0.3<br>(0.13-0.55)        | 24<br>(12-42)            |
| American Samoa | 2000 | Male   | 25 to 29 | 60%<br>(40-76%)                | 40%<br>(24-60%)          | 1.9<br>(0.93-3.5)                           | 6.1%<br>(3.3-10%)                    | 7.8%<br>(3.8-14%)                   | 0.38<br>(0.18-0.66)       | 29<br>(16-48)            |
| American Samoa | 2000 | Male   | 30 to 34 | 61%<br>(40-78%)                | 39%<br>(22-60%)          | 2<br>(0.98-3.7)                             | 5.2%<br>(2.7-9%)                     | 6.5%<br>(2.9-12%)                   | 0.37<br>(0.16-0.69)       | 27<br>(14-47)            |
| American Samoa | 2000 | Male   | 35 to 39 | 60%<br>(42-76%)                | 40%<br>(24-58%)          | 1.8<br>(0.82-3.4)                           | 4.5%<br>(2.1-8.5%)                   | 5.7%<br>(2.3-11%)                   | 0.38<br>(0.15-0.77)       | 25<br>(11-47)            |
| American Samoa | 2000 | Male   | 40 to 44 | 57%<br>(40-74%)                | 43%<br>(26-60%)          | 1.6<br>(0.68-3.1)                           | 3.4%<br>(1.2-7.2%)                   | 4.1%<br>(1.2-9%)                    | 0.32<br>(0.087-0.76)      | 19<br>(6.5-41)           |
| American Samoa | 2000 | Male   | 45 to 49 | 53%<br>(32-71%)                | 47%<br>(29-68%)          | 1.4<br>(0.55-2.7)                           | 2.8%<br>(0.83-6.1%)                  | 3.2%<br>(0.63-7.4%)                 | 0.3<br>(0.062-0.73)       | 16<br>(4.5-35)           |
| American Samoa | 2000 | Male   | 50 to 54 | 50%<br>(31-68%)                | 50%<br>(32-69%)          | 1.1<br>(0.45-2.2)                           | 2.3%<br>(0.54-5.4%)                  | 2.6%<br>(0.37-6.3%)                 | 0.3<br>(0.042-0.73)       | 13<br>(2.9-31)           |
| American Samoa | 2000 | Male   | 55 to 59 | 48%<br>(31-66%)                | 52%<br>(34-69%)          | 0.93<br>(0.35-1.9)                          | 1.5%<br>(-0.024-4.4%)                | 1.7%<br>(-0.17-5.2%)                | 0.21<br>(-0.022-0.65)     | 8.3<br>(-0.13-24)        |
| American Samoa | 2000 | Male   | 60 to 64 | 45%<br>(26-65%)                | 55%<br>(35-74%)          | 0.77<br>(0.29-1.7)                          | 1.2%<br>(-0.094-3.9%)                | 1.3%<br>(-0.19-4.6%)                | 0.19<br>(-0.029-0.65)     | 6<br>(-0.5-20)           |



| Location       | Year | Sex    | Age      | Prevalence of current drinkers | Prevalence of abstainers | Population average of standard drinks daily | Percent of total attributable deaths | Percent of total attributable DALYs | Attributable deaths          | Attributable DALYs       |
|----------------|------|--------|----------|--------------------------------|--------------------------|---------------------------------------------|--------------------------------------|-------------------------------------|------------------------------|--------------------------|
| American Samoa | 2000 | Male   | 65 to 69 | 44%<br>(25-63%)                | 56%<br>(37-75%)          | 0.7<br>(0.28-1.5)                           | 0.88%<br>(-0.21-3.2%)                | 0.97%<br>(-0.33-3.6%)               | 0.14<br>(-0.045-0.49)        | 3.5<br>(-0.86-12)        |
| American Samoa | 2000 | Male   | 70 to 74 | 41%<br>(24-59%)                | 59%<br>(41-76%)          | 0.61<br>(0.25-1.3)                          | 0.65%<br>(-0.29-2.7%)                | 0.69%<br>(-0.35-3%)                 | 0.083<br>(-0.043-0.35)       | 1.7<br>(-0.78-7.1)       |
| American Samoa | 2000 | Male   | 75 to 79 | 37%<br>(22-56%)                | 63%<br>(44-78%)          | 0.52<br>(0.19-1.1)                          | 0.49%<br>(-0.26-2.2%)                | 0.5%<br>(-0.34-2.3%)                | 0.05<br>(-0.035-0.23)        | 0.84<br>(-0.45-3.6)      |
| American Samoa | 2000 | Male   | 80 to 84 | 35%<br>(19-53%)                | 65%<br>(47-81%)          | 0.46<br>(0.19-0.97)                         | 0.43%<br>(-0.18-1.6%)                | 0.43%<br>(-0.26-1.8%)               | 0.031<br>(-0.019-0.13)       | 0.38<br>(-0.16-1.5)      |
| American Samoa | 2000 | Male   | 85 to 89 | 33%<br>(19-50%)                | 67%<br>(50-81%)          | 0.44<br>(0.17-0.92)                         | 0.29%<br>(-0.29-1.3%)                | 0.27%<br>(-0.39-1.4%)               | 0.014<br>(-0.02-0.076)       | 0.14<br>(-0.14-0.65)     |
| American Samoa | 2000 | Male   | 90 to 94 | 35%<br>(22-52%)                | 65%<br>(48-78%)          | 0.45<br>(0.16-0.95)                         | 0.19%<br>(-0.37-1.1%)                | 0.14%<br>(-0.5-1.2%)                | 0.003<br>(-0.011-0.025)      | 0.024<br>(-0.047-0.15)   |
| American Samoa | 2000 | Male   | 95 plus  | 38%<br>(20-59%)                | 62%<br>(41-80%)          | 0.49<br>(0.16-1.1)                          | 0.094%<br>(-0.59-1.3%)               | -0.023%<br>(-0.82-1.3%)             | -0.00011<br>(-0.0039-0.0062) | 0.0018<br>(-0.011-0.025) |
| American Samoa | 2005 | Female | All Ages | 17%<br>(12-24%)                | 83%<br>(76-88%)          | 0.37<br>(0.19-0.65)                         | 0.55%<br>(-0.037-1.5%)               | 0.38%<br>(-0.53-1.8%)               | 0.47<br>(-0.66-2.3)          | 37<br>(-2.5-100)         |
| American Samoa | 2005 | Female | 15 to 19 | 18%<br>(8-31%)                 | 82%<br>(69-92%)          | 0.42<br>(0.14-0.96)                         | 0.96%<br>(0.46-1.9%)                 | 1.6%<br>(0.46-3.7%)                 | 0.022<br>(0.0066-0.053)      | 2.8<br>(1.3-5.6)         |
| American Samoa | 2005 | Female | 20 to 24 | 22%<br>(9.2-40%)               | 78%<br>(60-91%)          | 0.68<br>(0.23-1.6)                          | 1.7%<br>(0.9-3%)                     | 2.2%<br>(0.71-5%)                   | 0.033<br>(0.011-0.075)       | 4.6<br>(2.4-8.5)         |
| American Samoa | 2005 | Female | 25 to 29 | 23%<br>(9.4-42%)               | 77%<br>(58-91%)          | 0.69<br>(0.24-1.5)                          | 1.7%<br>(0.96-3.1%)                  | 2.3%<br>(0.89-5%)                   | 0.048<br>(0.019-0.11)        | 5.6<br>(3-10)            |
| American Samoa | 2005 | Female | 30 to 34 | 24%<br>(8.9-42%)               | 76%<br>(58-91%)          | 0.71<br>(0.24-1.5)                          | 1.5%<br>(0.74-2.8%)                  | 2%<br>(0.68-4.4%)                   | 0.071<br>(0.023-0.16)        | 6.8<br>(3.3-13)          |
| American Samoa | 2005 | Female | 35 to 39 | 25%<br>(9.6-42%)               | 75%<br>(58-90%)          | 0.74<br>(0.27-1.5)                          | 1.4%<br>(0.57-3%)                    | 2.1%<br>(0.74-4.7%)                 | 0.11<br>(0.037-0.26)         | 8.2<br>(3.2-18)          |
| American Samoa | 2005 | Female | 40 to 44 | 24%<br>(11-40%)                | 76%<br>(60-89%)          | 0.68<br>(0.25-1.4)                          | 1.1%<br>(0.13-2.9%)                  | 1.8%<br>(0.3-4.4%)                  | 0.11<br>(0.018-0.28)         | 6.3<br>(0.71-16)         |
| American Samoa | 2005 | Female | 45 to 49 | 23%<br>(10-42%)                | 77%<br>(58-90%)          | 0.58<br>(0.19-1.2)                          | 0.71%<br>(-0.29-2.2%)                | 1.3%<br>(-0.055-3.4%)               | 0.098<br>(-0.004-0.28)       | 4.1<br>(-1.6-13)         |
| American Samoa | 2005 | Female | 50 to 54 | 23%<br>(9.8-41%)               | 77%<br>(59-90%)          | 0.51<br>(0.16-1.1)                          | 0.32%<br>(-0.81-2%)                  | 0.73%<br>(-0.65-3%)                 | 0.059<br>(-0.053-0.25)       | 1.6<br>(-3.9-10)         |
| American Samoa | 2005 | Female | 55 to 59 | 22%<br>(9.8-42%)               | 78%<br>(58-90%)          | 0.46<br>(0.14-1)                            | 0.12%<br>(-1.1-1.8%)                 | 0.45%<br>(-0.84-2.5%)               | 0.034<br>(-0.065-0.19)       | 0.45<br>(-4-6.4)         |
| American Samoa | 2005 | Female | 60 to 64 | 23%<br>(9.7-41%)               | 77%<br>(59-90%)          | 0.44<br>(0.13-1.1)                          | -0.16%<br>(-1.4-1.4%)                | 0.034%<br>(-1.4-1.9%)               | 0.0032<br>(-0.13-0.18)       | -0.6<br>(-5.3-5.2)       |
| American Samoa | 2005 | Female | 65 to 69 | 24%<br>(10-42%)                | 76%<br>(58-90%)          | 0.45<br>(0.14-1)                            | -0.21%<br>(-1.5-1.4%)                | -0.042%<br>(-1.6-1.8%)              | -0.0036<br>(-0.14-0.17)      | -0.59<br>(-4.6-3.8)      |
| American Samoa | 2005 | Female | 70 to 74 | 24%<br>(10-40%)                | 76%<br>(60-90%)          | 0.43<br>(0.13-1.1)                          | -0.29%<br>(-1.4-1.2%)                | -0.22%<br>(-1.5-1.5%)               | -0.031<br>(-0.22-0.23)       | -1<br>(-5-4.3)           |
| American Samoa | 2005 | Female | 75 to 79 | 22%<br>(9.6-40%)               | 78%<br>(60-90%)          | 0.4<br>(0.11-1)                             | -0.16%<br>(-1.3-1.1%)                | -0.089%<br>(-1.4-1.4%)              | -0.0074<br>(-0.12-0.12)      | -0.25<br>(-2-1.9)        |
| American Samoa | 2005 | Female | 80 to 84 | 22%<br>(9.3-41%)               | 78%<br>(59-91%)          | 0.39<br>(0.11-0.94)                         | -0.22%<br>(-1.3-1%)                  | -0.2%<br>(-1.4-1.3%)                | -0.023<br>(-0.16-0.15)       | -0.33<br>(-1.9-1.6)      |

| Location       | Year | Sex    | Age      | Prevalence of current drinkers | Prevalence of abstainers | Population average of standard drinks daily | Percent of total attributable deaths | Percent of total attributable DALYs | Attributable deaths         | Attributable DALYs       |
|----------------|------|--------|----------|--------------------------------|--------------------------|---------------------------------------------|--------------------------------------|-------------------------------------|-----------------------------|--------------------------|
| American Samoa | 2005 | Female | 85 to 89 | 23%<br>(9.5-41%)               | 77%<br>(59-91%)          | 0.41<br>(0.12-1)                            | -0.29%<br>(-1.4-1%)                  | -0.32%<br>(-1.5-1.2%)               | -0.03<br>(-0.15-0.11)       | -0.25<br>(-1.2-0.86)     |
| American Samoa | 2005 | Female | 90 to 94 | 26%<br>(12-45%)                | 74%<br>(55-88%)          | 0.47<br>(0.14-1.1)                          | -0.28%<br>(-1.3-1.2%)                | -0.32%<br>(-1.5-1.3%)               | -0.016<br>(-0.074-0.066)    | -0.088<br>(-0.41-0.37)   |
| American Samoa | 2005 | Female | 95 plus  | 31%<br>(13-53%)                | 69%<br>(47-87%)          | 0.54<br>(0.15-1.3)                          | -0.45%<br>(-1.8-1.3%)                | -0.58%<br>(-2.1-1.3%)               | -0.0095<br>(-0.035-0.022)   | -0.03<br>(-0.12-0.084)   |
| American Samoa | 2005 | Male   | All Ages | 37%<br>(29-46%)                | 63%<br>(54-71%)          | 0.86<br>(0.48-1.5)                          | 2.4%<br>(1.1-4.4%)                   | 2.2%<br>(0.75-4.7%)                 | 3.6<br>(1.2-7.8)            | 210<br>(98-400)          |
| American Samoa | 2005 | Male   | 15 to 19 | 33%<br>(19-51%)                | 67%<br>(49-81%)          | 0.53<br>(0.19-1.1)                          | 1.9%<br>(0.95-3.4%)                  | 2.5%<br>(0.95-4.9%)                 | 0.097<br>(0.037-0.19)       | 9.1<br>(4.4-16)          |
| American Samoa | 2005 | Male   | 20 to 24 | 51%<br>(33-69%)                | 49%<br>(31-67%)          | 1.4<br>(0.64-2.8)                           | 5.2%<br>(2.7-9%)                     | 6.5%<br>(3-12%)                     | 0.3<br>(0.14-0.57)          | 25<br>(13-43)            |
| American Samoa | 2005 | Male   | 25 to 29 | 59%<br>(40-76%)                | 41%<br>(24-60%)          | 2<br>(0.97-3.7)                             | 5.6%<br>(3-9.4%)                     | 6.7%<br>(3.2-12%)                   | 0.41<br>(0.19-0.74)         | 32<br>(17-54)            |
| American Samoa | 2005 | Male   | 30 to 34 | 60%<br>(39-77%)                | 40%<br>(23-61%)          | 2.2<br>(1-4)                                | 5.5%<br>(2.8-9.3%)                   | 6.7%<br>(3.1-12%)                   | 0.42<br>(0.19-0.79)         | 31<br>(16-54)            |
| American Samoa | 2005 | Male   | 35 to 39 | 59%<br>(40-76%)                | 41%<br>(24-60%)          | 1.9<br>(0.89-3.6)                           | 4.7%<br>(2.2-8.5%)                   | 5.9%<br>(2.5-11%)                   | 0.48<br>(0.19-0.96)         | 31<br>(14-59)            |
| American Samoa | 2005 | Male   | 40 to 44 | 56%<br>(38-73%)                | 44%<br>(27-62%)          | 1.6<br>(0.7-3.1)                            | 3.5%<br>(1.2-7.2%)                   | 4.2%<br>(1.2-9%)                    | 0.39<br>(0.11-0.87)         | 23<br>(8.1-48)           |
| American Samoa | 2005 | Male   | 45 to 49 | 52%<br>(31-70%)                | 48%<br>(30-69%)          | 1.4<br>(0.58-2.7)                           | 2.7%<br>(0.65-5.8%)                  | 3%<br>(0.65-6.8%)                   | 0.36<br>(0.069-0.82)        | 19<br>(4.5-41)           |
| American Samoa | 2005 | Male   | 50 to 54 | 49%<br>(30-68%)                | 51%<br>(32-70%)          | 1.1<br>(0.45-2.2)                           | 2.4%<br>(0.46-5.4%)                  | 2.7%<br>(0.38-6.4%)                 | 0.34<br>(0.046-0.87)        | 16<br>(2.9-37)           |
| American Samoa | 2005 | Male   | 55 to 59 | 47%<br>(29-66%)                | 53%<br>(34-71%)          | 0.94<br>(0.36-2)                            | 1.6%<br>(0.075-4.3%)                 | 1.7%<br>(-0.038-4.9%)               | 0.26<br>(-0.0059-0.74)      | 10<br>(0.45-27)          |
| American Samoa | 2005 | Male   | 60 to 64 | 44%<br>(26-65%)                | 56%<br>(35-74%)          | 0.79<br>(0.3-1.7)                           | 1.2%<br>(-0.097-3.9%)                | 1.3%<br>(-0.21-4.4%)                | 0.23<br>(-0.036-0.76)       | 7.2<br>(-0.59-23)        |
| American Samoa | 2005 | Male   | 65 to 69 | 42%<br>(24-61%)                | 58%<br>(39-76%)          | 0.71<br>(0.29-1.6)                          | 0.95%<br>(-0.18-3.4%)                | 1%<br>(-0.25-3.8%)                  | 0.16<br>(-0.038-0.57)       | 4.2<br>(-0.76-14)        |
| American Samoa | 2005 | Male   | 70 to 74 | 40%<br>(23-57%)                | 60%<br>(43-77%)          | 0.62<br>(0.24-1.4)                          | 0.68%<br>(-0.23-2.6%)                | 0.73%<br>(-0.29-2.9%)               | 0.087<br>(-0.035-0.34)      | 1.8<br>(-0.61-7)         |
| American Samoa | 2005 | Male   | 75 to 79 | 36%<br>(21-55%)                | 64%<br>(45-79%)          | 0.52<br>(0.19-1.1)                          | 0.52%<br>(-0.22-2.1%)                | 0.53%<br>(-0.3-2.3%)                | 0.051<br>(-0.028-0.21)      | 0.86<br>(-0.36-3.3)      |
| American Samoa | 2005 | Male   | 80 to 84 | 33%<br>(18-51%)                | 67%<br>(49-82%)          | 0.46<br>(0.17-0.93)                         | 0.46%<br>(-0.15-1.7%)                | 0.45%<br>(-0.24-1.8%)               | 0.03<br>(-0.016-0.12)       | 0.38<br>(-0.12-1.4)      |
| American Samoa | 2005 | Male   | 85 to 89 | 32%<br>(18-48%)                | 68%<br>(52-82%)          | 0.44<br>(0.17-0.9)                          | 0.32%<br>(-0.26-1.5%)                | 0.3%<br>(-0.36-1.6%)                | 0.015<br>(-0.018-0.079)     | 0.14<br>(-0.12-0.65)     |
| American Samoa | 2005 | Male   | 90 to 94 | 33%<br>(19-50%)                | 67%<br>(50-81%)          | 0.45<br>(0.16-0.95)                         | 0.22%<br>(-0.31-1.2%)                | 0.18%<br>(-0.4-1.3%)                | 0.0043<br>(-0.0099-0.032)   | 0.033<br>(-0.047-0.19)   |
| American Samoa | 2005 | Male   | 95 plus  | 36%<br>(19-57%)                | 64%<br>(43-81%)          | 0.49<br>(0.16-1.1)                          | 0.15%<br>(-0.53-1.4%)                | 0.037%<br>(-0.76-1.4%)              | 0.00024<br>(-0.0047-0.0093) | 0.0039<br>(-0.014-0.037) |
| American Samoa | 2010 | Female | All Ages | 18%<br>(12-24%)                | 82%<br>(76-88%)          | 0.4<br>(0.21-0.7)                           | 0.63%<br>(-0.029-1.7%)               | 0.51%<br>(-0.47-2.1%)               | 0.69<br>(-0.65-2.9)         | 48<br>(-2.1-120)         |

| Location       | Year | Sex    | Age      | Prevalence of current drinkers | Prevalence of abstainers | Population average of standard drinks daily | Percent of total attributable deaths | Percent of total attributable DALYs | Attributable deaths       | Attributable DALYs     |
|----------------|------|--------|----------|--------------------------------|--------------------------|---------------------------------------------|--------------------------------------|-------------------------------------|---------------------------|------------------------|
| American Samoa | 2010 | Female | 15 to 19 | 18%<br>(8.1-33%)               | 82%<br>(67-92%)          | 0.46<br>(0.14-1.1)                          | 1%<br>(0.47-2%)                      | 1.7%<br>(0.47-4%)                   | 0.023<br>(0.0065-0.057)   | 3<br>(1.3-5.9)         |
| American Samoa | 2010 | Female | 20 to 24 | 22%<br>(9-39%)                 | 78%<br>(61-91%)          | 0.71<br>(0.24-1.7)                          | 1.7%<br>(0.9-3.1%)                   | 2.3%<br>(0.72-5.5%)                 | 0.032<br>(0.0098-0.077)   | 4.5<br>(2.3-8.2)       |
| American Samoa | 2010 | Female | 25 to 29 | 23%<br>(9.2-43%)               | 77%<br>(57-91%)          | 0.72<br>(0.25-1.5)                          | 1.8%<br>(0.96-3.1%)                  | 2.3%<br>(0.92-5%)                   | 0.048<br>(0.018-0.1)      | 5.6<br>(3-10)          |
| American Samoa | 2010 | Female | 30 to 34 | 24%<br>(9-44%)                 | 76%<br>(56-91%)          | 0.74<br>(0.24-1.6)                          | 1.6%<br>(0.73-3%)                    | 2.1%<br>(0.7-4.7%)                  | 0.082<br>(0.027-0.18)     | 7.9<br>(3.8-15)        |
| American Samoa | 2010 | Female | 35 to 39 | 24%<br>(9.1-42%)               | 76%<br>(58-91%)          | 0.76<br>(0.27-1.6)                          | 1.5%<br>(0.6-3%)                     | 2.2%<br>(0.79-4.7%)                 | 0.15<br>(0.049-0.32)      | 11<br>(4.2-22)         |
| American Samoa | 2010 | Female | 40 to 44 | 23%<br>(11-41%)                | 77%<br>(59-89%)          | 0.7<br>(0.26-1.6)                           | 1.2%<br>(0.2-3%)                     | 1.9%<br>(0.31-4.6%)                 | 0.15<br>(0.025-0.38)      | 8.4<br>(1.3-22)        |
| American Samoa | 2010 | Female | 45 to 49 | 23%<br>(9.7-41%)               | 77%<br>(59-90%)          | 0.61<br>(0.21-1.4)                          | 0.83%<br>(-0.24-2.6%)                | 1.4%<br>(-0.016-4%)                 | 0.14<br>(-0.0015-0.39)    | 6.1<br>(-1.6-19)       |
| American Samoa | 2010 | Female | 50 to 54 | 23%<br>(10-41%)                | 77%<br>(59-90%)          | 0.54<br>(0.17-1.2)                          | 0.43%<br>(-0.7-2.2%)                 | 0.87%<br>(-0.54-3.2%)               | 0.085<br>(-0.051-0.31)    | 2.6<br>(-4.2-13)       |
| American Samoa | 2010 | Female | 55 to 59 | 22%<br>(10-41%)                | 78%<br>(59-90%)          | 0.48<br>(0.16-1.1)                          | 0.21%<br>(-0.97-1.8%)                | 0.57%<br>(-0.72-2.6%)               | 0.048<br>(-0.061-0.23)    | 0.88<br>(-4-7.9)       |
| American Samoa | 2010 | Female | 60 to 64 | 22%<br>(10-40%)                | 78%<br>(60-90%)          | 0.46<br>(0.15-1.1)                          | -0.1%<br>(-1.4-1.5%)                 | 0.11%<br>(-1.4-2.1%)                | 0.011<br>(-0.14-0.22)     | -0.42<br>(-5.9-6.5)    |
| American Samoa | 2010 | Female | 65 to 69 | 23%<br>(11-41%)                | 77%<br>(59-89%)          | 0.47<br>(0.14-1.1)                          | -0.12%<br>(-1.5-1.6%)                | 0.072%<br>(-1.5-2.1%)               | 0.0071<br>(-0.14-0.2)     | -0.34<br>(-4.5-5)      |
| American Samoa | 2010 | Female | 70 to 74 | 23%<br>(10-40%)                | 77%<br>(60-90%)          | 0.45<br>(0.13-1.1)                          | -0.19%<br>(-1.3-1.4%)                | -0.094%<br>(-1.4-1.9%)              | -0.017<br>(-0.25-0.33)    | -0.86<br>(-5.9-6.4)    |
| American Samoa | 2010 | Female | 75 to 79 | 22%<br>(9.2-40%)               | 78%<br>(60-91%)          | 0.42<br>(0.12-0.99)                         | -0.08%<br>(-1.3-1.4%)                | 0.0085%<br>(-1.3-1.7%)              | 0.001<br>(-0.12-0.16)     | -0.13<br>(-2.1-2.4)    |
| American Samoa | 2010 | Female | 80 to 84 | 21%<br>(8.6-40%)               | 79%<br>(60-91%)          | 0.4<br>(0.11-0.97)                          | -0.15%<br>(-1.3-1.3%)                | -0.12%<br>(-1.4-1.6%)               | -0.015<br>(-0.16-0.19)    | -0.24<br>(-2-2)        |
| American Samoa | 2010 | Female | 85 to 89 | 22%<br>(9.6-40%)               | 78%<br>(60-90%)          | 0.42<br>(0.13-1)                            | -0.21%<br>(-1.3-1.3%)                | -0.23%<br>(-1.5-1.5%)               | -0.023<br>(-0.15-0.15)    | -0.2<br>(-1.2-1.2)     |
| American Samoa | 2010 | Female | 90 to 94 | 25%<br>(11-44%)                | 75%<br>(56-89%)          | 0.47<br>(0.15-1.1)                          | -0.21%<br>(-1.3-1.3%)                | -0.24%<br>(-1.4-1.5%)               | -0.013<br>(-0.079-0.078)  | -0.07<br>(-0.43-0.42)  |
| American Samoa | 2010 | Female | 95 plus  | 30%<br>(13-52%)                | 70%<br>(48-87%)          | 0.55<br>(0.16-1.4)                          | -0.35%<br>(-1.8-1.5%)                | -0.47%<br>(-2.1-1.5%)               | -0.0089<br>(-0.039-0.029) | -0.027<br>(-0.13-0.11) |
| American Samoa | 2010 | Male   | All Ages | 37%<br>(29-46%)                | 63%<br>(54-71%)          | 0.91<br>(0.49-1.6)                          | 2.6%<br>(1.2-4.6%)                   | 2.5%<br>(0.84-5.1%)                 | 4<br>(1.4-8.5)            | 230<br>(110-420)       |
| American Samoa | 2010 | Male   | 15 to 19 | 33%<br>(18-51%)                | 67%<br>(49-82%)          | 0.54<br>(0.19-1.1)                          | 1.9%<br>(0.97-3.5%)                  | 2.5%<br>(0.98-5.1%)                 | 0.1<br>(0.038-0.2)        | 9.5<br>(4.7-17)        |
| American Samoa | 2010 | Male   | 20 to 24 | 51%<br>(32-68%)                | 49%<br>(32-68%)          | 1.5<br>(0.65-3)                             | 5.3%<br>(2.8-9.2%)                   | 6.7%<br>(3.1-12%)                   | 0.29<br>(0.13-0.54)       | 24<br>(12-43)          |
| American Samoa | 2010 | Male   | 25 to 29 | 58%<br>(38-75%)                | 42%<br>(25-62%)          | 2.1<br>(0.98-3.9)                           | 6.4%<br>(3.5-10%)                    | 8.2%<br>(4-14%)                     | 0.42<br>(0.2-0.73)        | 33<br>(18-54)          |
| American Samoa | 2010 | Male   | 30 to 34 | 59%<br>(38-76%)                | 41%<br>(24-62%)          | 2.2<br>(1-4.1)                              | 5.5%<br>(2.8-9.4%)                   | 6.9%<br>(3.1-12%)                   | 0.44<br>(0.2-0.81)        | 33<br>(17-57)          |

| Location       | Year | Sex    | Age      | Prevalence of current drinkers | Prevalence of abstainers | Population average of standard drinks daily | Percent of total attributable deaths | Percent of total attributable DALYs | Attributable deaths      | Attributable DALYs      |
|----------------|------|--------|----------|--------------------------------|--------------------------|---------------------------------------------|--------------------------------------|-------------------------------------|--------------------------|-------------------------|
| American Samoa | 2010 | Male   | 35 to 39 | 58%<br>(39-76%)                | 42%<br>(24-61%)          | 1.9<br>(0.91-3.6)                           | 4.7%<br>(2.2-8.4%)                   | 5.9%<br>(2.6-11%)                   | 0.55<br>(0.23-1.1)       | 37<br>(17-65)           |
| American Samoa | 2010 | Male   | 40 to 44 | 55%<br>(38-74%)                | 45%<br>(26-62%)          | 1.7<br>(0.77-3.2)                           | 3.6%<br>(1.3-7.3%)                   | 4.3%<br>(1.4-9%)                    | 0.45<br>(0.14-0.98)      | 27<br>(9.9-56)          |
| American Samoa | 2010 | Male   | 45 to 49 | 52%<br>(31-71%)                | 48%<br>(29-69%)          | 1.4<br>(0.61-2.8)                           | 3%<br>(0.86-6.4%)                    | 3.4%<br>(0.84-7.7%)                 | 0.41<br>(0.1-0.94)       | 22<br>(6.2-47)          |
| American Samoa | 2010 | Male   | 50 to 54 | 49%<br>(30-68%)                | 51%<br>(32-70%)          | 1.2<br>(0.48-2.3)                           | 2.5%<br>(0.57-5.8%)                  | 2.9%<br>(0.46-6.9%)                 | 0.4<br>(0.066-0.96)      | 18<br>(3.9-42)          |
| American Samoa | 2010 | Male   | 55 to 59 | 46%<br>(29-66%)                | 54%<br>(34-71%)          | 0.98<br>(0.37-1.9)                          | 1.7%<br>(0.14-4.5%)                  | 1.9%<br>(0.011-5.1%)                | 0.31<br>(0.0017-0.9)     | 12<br>(1.1-33)          |
| American Samoa | 2010 | Male   | 60 to 64 | 44%<br>(25-63%)                | 56%<br>(37-75%)          | 0.81<br>(0.31-1.8)                          | 1.3%<br>(-0.036-3.8%)                | 1.5%<br>(-0.1-4.4%)                 | 0.28<br>(-0.021-0.87)    | 8.8<br>(-0.24-26)       |
| American Samoa | 2010 | Male   | 65 to 69 | 42%<br>(24-61%)                | 58%<br>(39-76%)          | 0.74<br>(0.29-1.6)                          | 1.1%<br>(-0.046-3.6%)                | 1.2%<br>(-0.093-4.1%)               | 0.2<br>(-0.015-0.69)     | 5.1<br>(-0.21-17)       |
| American Samoa | 2010 | Male   | 70 to 74 | 40%<br>(23-58%)                | 60%<br>(42-77%)          | 0.64<br>(0.23-1.4)                          | 0.78%<br>(-0.16-2.7%)                | 0.84%<br>(-0.21-3%)                 | 0.096<br>(-0.025-0.35)   | 2<br>(-0.41-7.1)        |
| American Samoa | 2010 | Male   | 75 to 79 | 36%<br>(21-54%)                | 64%<br>(46-79%)          | 0.54<br>(0.2-1.2)                           | 0.59%<br>(-0.17-2.2%)                | 0.61%<br>(-0.26-2.4%)               | 0.053<br>(-0.022-0.22)   | 0.9<br>(-0.27-3.4)      |
| American Samoa | 2010 | Male   | 80 to 84 | 33%<br>(19-51%)                | 67%<br>(49-81%)          | 0.48<br>(0.19-0.98)                         | 0.51%<br>(-0.12-1.9%)                | 0.52%<br>(-0.2-2%)                  | 0.031<br>(-0.012-0.12)   | 0.39<br>(-0.091-1.4)    |
| American Samoa | 2010 | Male   | 85 to 89 | 32%<br>(18-48%)                | 68%<br>(52-82%)          | 0.45<br>(0.17-0.93)                         | 0.37%<br>(-0.23-1.7%)                | 0.35%<br>(-0.33-1.8%)               | 0.017<br>(-0.016-0.084)  | 0.16<br>(-0.099-0.71)   |
| American Samoa | 2010 | Male   | 90 to 94 | 33%<br>(19-50%)                | 67%<br>(50-81%)          | 0.46<br>(0.16-1)                            | 0.26%<br>(-0.27-1.4%)                | 0.22%<br>(-0.37-1.4%)               | 0.0052<br>(-0.009-0.034) | 0.039<br>(-0.04-0.2)    |
| American Samoa | 2010 | Male   | 95 plus  | 36%<br>(19-57%)                | 64%<br>(43-81%)          | 0.5<br>(0.16-1.2)                           | 0.21%<br>(-0.45-1.5%)                | 0.094%<br>(-0.67-1.6%)              | 0.0069<br>(-0.005-0.012) | 0.062<br>(-0.014-0.047) |
| American Samoa | 2016 | Female | All Ages | 18%<br>(13-25%)                | 82%<br>(75-87%)          | 0.41<br>(0.22-0.73)                         | 0.67%<br>(-0.0099-1.7%)              | 0.55%<br>(-0.47-2.2%)               | 0.9<br>(-0.75-3.6)       | 60<br>(-0.79-150)       |
| American Samoa | 2016 | Female | 15 to 19 | 18%<br>(7.7-33%)               | 82%<br>(67-92%)          | 0.46<br>(0.15-1.1)                          | 1%<br>(0.48-2%)                      | 1.7%<br>(0.51-4.1%)                 | 0.025<br>(0.0072-0.06)   | 3.2<br>(1.5-6.4)        |
| American Samoa | 2016 | Female | 20 to 24 | 22%<br>(8.9-39%)               | 78%<br>(61-91%)          | 0.73<br>(0.23-1.7)                          | 1.8%<br>(0.97-3.2%)                  | 2.4%<br>(0.76-5.5%)                 | 0.032<br>(0.0094-0.079)  | 4.4<br>(2.2-8.2)        |
| American Samoa | 2016 | Female | 25 to 29 | 23%<br>(9-41%)                 | 77%<br>(59-91%)          | 0.74<br>(0.24-1.6)                          | 1.8%<br>(1-3.2%)                     | 2.4%<br>(0.96-5.2%)                 | 0.05<br>(0.019-0.11)     | 5.8<br>(3.1-11)         |
| American Samoa | 2016 | Female | 30 to 34 | 24%<br>(8.7-45%)               | 76%<br>(55-91%)          | 0.76<br>(0.25-1.6)                          | 1.6%<br>(0.77-3%)                    | 2.2%<br>(0.72-5.1%)                 | 0.1<br>(0.033-0.23)      | 9.7<br>(4.5-19)         |
| American Samoa | 2016 | Female | 35 to 39 | 25%<br>(9.7-43%)               | 75%<br>(57-90%)          | 0.78<br>(0.28-1.7)                          | 1.6%<br>(0.67-3.2%)                  | 2.3%<br>(0.87-5%)                   | 0.21<br>(0.071-0.46)     | 15<br>(5.9-31)          |
| American Samoa | 2016 | Female | 40 to 44 | 24%<br>(12-41%)                | 76%<br>(59-88%)          | 0.72<br>(0.28-1.5)                          | 1.3%<br>(0.21-3%)                    | 1.9%<br>(0.34-4.7%)                 | 0.2<br>(0.034-0.49)      | 12<br>(1.9-28)          |
| American Samoa | 2016 | Female | 45 to 49 | 23%<br>(9.9-41%)               | 77%<br>(59-90%)          | 0.61<br>(0.21-1.3)                          | 0.83%<br>(-0.21-2.6%)                | 1.4%<br>(-0.021-3.8%)               | 0.2<br>(-0.0026-0.55)    | 8.6<br>(-2.2-27)        |
| American Samoa | 2016 | Female | 50 to 54 | 23%<br>(10-42%)                | 77%<br>(58-90%)          | 0.55<br>(0.18-1.2)                          | 0.43%<br>(-0.79-2.3%)                | 0.85%<br>(-0.58-3.4%)               | 0.11<br>(-0.08-0.46)     | 3.3<br>(-6-19)          |

| Location       | Year | Sex    | Age      | Prevalence of current drinkers | Prevalence of abstainers | Population average of standard drinks daily | Percent of total attributable deaths | Percent of total attributable DALYs | Attributable deaths      | Attributable DALYs     |
|----------------|------|--------|----------|--------------------------------|--------------------------|---------------------------------------------|--------------------------------------|-------------------------------------|--------------------------|------------------------|
| American Samoa | 2016 | Female | 55 to 59 | 22%<br>(10-41%)                | 78%<br>(59-90%)          | 0.49<br>(0.16-1.1)                          | 0.22%<br>(-0.99-1.9%)                | 0.57%<br>(-0.85-2.7%)               | 0.06<br>(-0.088-0.3)     | 1.1<br>(-5.1-9.8)      |
| American Samoa | 2016 | Female | 60 to 64 | 23%<br>(10-41%)                | 77%<br>(59-90%)          | 0.47<br>(0.16-1.1)                          | -0.087%<br>(-1.4-1.6%)               | 0.11%<br>(-1.4-2.3%)                | 0.014<br>(-0.18-0.29)    | -0.41<br>(-7.4-7.9)    |
| American Samoa | 2016 | Female | 65 to 69 | 24%<br>(11-42%)                | 76%<br>(58-89%)          | 0.49<br>(0.15-1.1)                          | -0.11%<br>(-1.5-1.6%)                | 0.064%<br>(-1.5-2.2%)               | 0.0068<br>(-0.17-0.23)   | -0.38<br>(-5.5-5.5)    |
| American Samoa | 2016 | Female | 70 to 74 | 24%<br>(11-41%)                | 76%<br>(59-89%)          | 0.47<br>(0.14-1.1)                          | -0.2%<br>(-1.4-1.4%)                 | -0.11%<br>(-1.5-1.8%)               | -0.028<br>(-0.4-0.46)    | -1.2<br>(-8.9-9)       |
| American Samoa | 2016 | Female | 75 to 79 | 22%<br>(9.8-40%)               | 78%<br>(60-90%)          | 0.43<br>(0.13-1)                            | -0.081%<br>(-1.2-1.4%)               | 0.0007%<br>(-1.3-1.7%)              | -0.00022<br>(-0.13-0.18) | -0.15<br>(-2.3-2.5)    |
| American Samoa | 2016 | Female | 80 to 84 | 22%<br>(9.3-40%)               | 78%<br>(60-91%)          | 0.41<br>(0.12-0.99)                         | -0.15%<br>(-1.3-1.4%)                | -0.13%<br>(-1.4-1.7%)               | -0.018<br>(-0.19-0.24)   | -0.27<br>(-2.3-2.5)    |
| American Samoa | 2016 | Female | 85 to 89 | 23%<br>(9.9-40%)               | 77%<br>(60-90%)          | 0.43<br>(0.13-1.1)                          | -0.21%<br>(-1.3-1.4%)                | -0.24%<br>(-1.5-1.6%)               | -0.027<br>(-0.17-0.17)   | -0.22<br>(-1.3-1.4)    |
| American Samoa | 2016 | Female | 90 to 94 | 26%<br>(11-46%)                | 74%<br>(54-89%)          | 0.5<br>(0.15-1.2)                           | -0.21%<br>(-1.3-1.5%)                | -0.25%<br>(-1.5-1.7%)               | -0.016<br>(-0.092-0.1)   | -0.08<br>(-0.49-0.56)  |
| American Samoa | 2016 | Female | 95 plus  | 31%<br>(12-53%)                | 69%<br>(47-88%)          | 0.59<br>(0.17-1.5)                          | -0.39%<br>(-1.9-1.7%)                | -0.51%<br>(-2.3-1.8%)               | -0.011<br>(-0.048-0.038) | -0.032<br>(-0.16-0.14) |
| American Samoa | 2016 | Male   | All Ages | 37%<br>(30-47%)                | 63%<br>(53-70%)          | 0.95<br>(0.5-1.6)                           | 2.7%<br>(1.3-4.8%)                   | 2.7%<br>(0.93-5.2%)                 | 4.8<br>(1.6-10)          | 270<br>(120-500)       |
| American Samoa | 2016 | Male   | 15 to 19 | 33%<br>(19-51%)                | 67%<br>(49-81%)          | 0.57<br>(0.2-1.2)                           | 1.9%<br>(0.95-3.5%)                  | 2.6%<br>(1-5.3%)                    | 0.1<br>(0.039-0.21)      | 9.9<br>(4.9-18)        |
| American Samoa | 2016 | Male   | 20 to 24 | 51%<br>(32-69%)                | 49%<br>(31-68%)          | 1.6<br>(0.68-3.1)                           | 5.4%<br>(2.8-9.3%)                   | 6.9%<br>(3-13%)                     | 0.28<br>(0.12-0.53)      | 24<br>(12-41)          |
| American Samoa | 2016 | Male   | 25 to 29 | 59%<br>(38-75%)                | 41%<br>(25-62%)          | 2.2<br>(1-4.1)                              | 6.4%<br>(3.4-10%)                    | 8.2%<br>(3.8-14%)                   | 0.43<br>(0.19-0.76)      | 34<br>(18-57)          |
| American Samoa | 2016 | Male   | 30 to 34 | 60%<br>(38-77%)                | 40%<br>(23-62%)          | 2.3<br>(1.1-4.3)                            | 5.6%<br>(2.9-9.3%)                   | 7%<br>(3.2-13%)                     | 0.49<br>(0.2-0.94)       | 37<br>(18-66)          |
| American Samoa | 2016 | Male   | 35 to 39 | 58%<br>(40-76%)                | 42%<br>(24-60%)          | 2<br>(0.99-3.7)                             | 4.9%<br>(2.3-8.4%)                   | 6.1%<br>(2.7-11%)                   | 0.71<br>(0.28-1.4)       | 47<br>(22-85)          |
| American Samoa | 2016 | Male   | 40 to 44 | 56%<br>(37-74%)                | 44%<br>(26-63%)          | 1.7<br>(0.77-3.3)                           | 3.7%<br>(1.4-7%)                     | 4.4%<br>(1.5-9%)                    | 0.57<br>(0.18-1.2)       | 35<br>(13-68)          |
| American Samoa | 2016 | Male   | 45 to 49 | 51%<br>(30-70%)                | 49%<br>(30-70%)          | 1.5<br>(0.63-2.8)                           | 3.1%<br>(1-6.4%)                     | 3.5%<br>(0.98-7.6%)                 | 0.52<br>(0.14-1.2)       | 28<br>(8.9-60)         |
| American Samoa | 2016 | Male   | 50 to 54 | 48%<br>(29-68%)                | 52%<br>(32-71%)          | 1.2<br>(0.49-2.5)                           | 2.7%<br>(0.7-6%)                     | 3.1%<br>(0.64-7.2%)                 | 0.49<br>(0.11-1.2)       | 22<br>(5.7-52)         |
| American Samoa | 2016 | Male   | 55 to 59 | 46%<br>(28-66%)                | 54%<br>(34-72%)          | 1<br>(0.39-2.1)                             | 1.8%<br>(0.16-4.8%)                  | 2%<br>(0.094-5.4%)                  | 0.41<br>(0.018-1.1)      | 16<br>(1.4-42)         |
| American Samoa | 2016 | Male   | 60 to 64 | 44%<br>(26-65%)                | 56%<br>(35-74%)          | 0.83<br>(0.33-1.8)                          | 1.4%<br>(-0.0083-4%)                 | 1.5%<br>(-0.076-4.6%)               | 0.35<br>(-0.018-1.1)     | 11<br>(-0.069-33)      |
| American Samoa | 2016 | Male   | 65 to 69 | 42%<br>(25-61%)                | 58%<br>(39-75%)          | 0.74<br>(0.29-1.6)                          | 1.1%<br>(-0.0074-3.5%)               | 1.3%<br>(-0.05-4%)                  | 0.23<br>(-0.0094-0.75)   | 6<br>(-0.039-19)       |
| American Samoa | 2016 | Male   | 70 to 74 | 39%<br>(23-57%)                | 61%<br>(43-77%)          | 0.66<br>(0.25-1.4)                          | 0.83%<br>(-0.13-2.9%)                | 0.9%<br>(-0.17-3.2%)                | 0.1<br>(-0.02-0.37)      | 2.2<br>(-0.34-7.5)     |

| Location       | Year | Sex    | Age      | Prevalence of current drinkers | Prevalence of abstainers | Population average of standard drinks daily | Percent of total attributable deaths | Percent of total attributable DALYs | Attributable deaths       | Attributable DALYs      |
|----------------|------|--------|----------|--------------------------------|--------------------------|---------------------------------------------|--------------------------------------|-------------------------------------|---------------------------|-------------------------|
| American Samoa | 2016 | Male   | 75 to 79 | 36%<br>(21-55%)                | 64%<br>(45-79%)          | 0.56<br>(0.21-1.2)                          | 0.63%<br>(-0.14-2.3%)                | 0.65%<br>(-0.23-2.6%)               | 0.054<br>(-0.019-0.21)    | 0.91<br>(-0.21-3.4)     |
| American Samoa | 2016 | Male   | 80 to 84 | 33%<br>(18-51%)                | 67%<br>(49-82%)          | 0.5<br>(0.19-1)                             | 0.57%<br>(-0.092-2%)                 | 0.57%<br>(-0.17-2.1%)               | 0.032<br>(-0.0091-0.12)   | 0.4<br>(-0.067-1.4)     |
| American Samoa | 2016 | Male   | 85 to 89 | 31%<br>(17-47%)                | 69%<br>(53-83%)          | 0.47<br>(0.18-0.98)                         | 0.42%<br>(-0.2-1.7%)                 | 0.4%<br>(-0.29-1.9%)                | 0.018<br>(-0.013-0.084)   | 0.17<br>(-0.085-0.7)    |
| American Samoa | 2016 | Male   | 90 to 94 | 33%<br>(20-51%)                | 67%<br>(49-80%)          | 0.49<br>(0.18-1.1)                          | 0.31%<br>(-0.24-1.5%)                | 0.26%<br>(-0.36-1.6%)               | 0.0063<br>(-0.0085-0.038) | 0.045<br>(-0.036-0.22)  |
| American Samoa | 2016 | Male   | 95 plus  | 37%<br>(19-58%)                | 63%<br>(42-81%)          | 0.54<br>(0.18-1.3)                          | 0.26%<br>(-0.45-1.8%)                | 0.14%<br>(-0.66-1.9%)               | 0.0011<br>(-0.0051-0.015) | 0.008<br>(-0.014-0.058) |
| Bermuda        | 1990 | Female | All Ages | 32%<br>(26-39%)                | 68%<br>(61-74%)          | 2.6<br>(2.3-2.9)                            | 5.6%<br>(4.1-7.4%)                   | 7.4%<br>(4.8-11%)                   | 15<br>(9.7-22)            | 380<br>(280-510)        |
| Bermuda        | 1990 | Female | 15 to 19 | 37%<br>(24-53%)                | 63%<br>(47-76%)          | 3<br>(1.6-4.9)                              | 4.1%<br>(2.6-5.9%)                   | 10%<br>(6-14%)                      | 0.14<br>(0.082-0.2)       | 13<br>(8.3-19)          |
| Bermuda        | 1990 | Female | 20 to 24 | 43%<br>(28-60%)                | 57%<br>(40-72%)          | 4.5<br>(2.6-6.9)                            | 4.7%<br>(3.4-6.1%)                   | 12%<br>(8.4-16%)                    | 0.12<br>(0.083-0.16)      | 15<br>(10-20)           |
| Bermuda        | 1990 | Female | 25 to 29 | 43%<br>(27-60%)                | 57%<br>(40-73%)          | 4.7<br>(2.8-7.1)                            | 5.9%<br>(4.4-7.7%)                   | 12%<br>(8.3-15%)                    | 0.24<br>(0.17-0.32)       | 21<br>(16-27)           |
| Bermuda        | 1990 | Female | 30 to 34 | 41%<br>(25-59%)                | 59%<br>(41-75%)          | 4.5<br>(2.6-7)                              | 6.5%<br>(4.7-8.7%)                   | 12%<br>(8.2-16%)                    | 0.31<br>(0.21-0.43)       | 22<br>(16-30)           |
| Bermuda        | 1990 | Female | 35 to 39 | 40%<br>(26-58%)                | 60%<br>(42-74%)          | 4.2<br>(2.4-6.7)                            | 5.9%<br>(4.1-8.2%)                   | 11%<br>(7.7-16%)                    | 0.28<br>(0.19-0.42)       | 19<br>(13-26)           |
| Bermuda        | 1990 | Female | 40 to 44 | 39%<br>(25-57%)                | 61%<br>(43-75%)          | 3.9<br>(2.1-6.4)                            | 7%<br>(4.8-10%)                      | 13%<br>(8.4-18%)                    | 0.42<br>(0.27-0.63)       | 23<br>(15-33)           |
| Bermuda        | 1990 | Female | 45 to 49 | 37%<br>(22-54%)                | 63%<br>(46-78%)          | 3.8<br>(1.9-6.5)                            | 7.3%<br>(4.7-11%)                    | 12%<br>(8-18%)                      | 0.51<br>(0.33-0.77)       | 24<br>(16-36)           |
| Bermuda        | 1990 | Female | 50 to 54 | 34%<br>(20-50%)                | 66%<br>(50-80%)          | 3.4<br>(1.8-5.8)                            | 8.1%<br>(5.1-12%)                    | 12%<br>(7.5-17%)                    | 0.79<br>(0.5-1.2)         | 31<br>(20-47)           |
| Bermuda        | 1990 | Female | 55 to 59 | 30%<br>(18-46%)                | 70%<br>(54-82%)          | 2.9<br>(1.5-5)                              | 8.1%<br>(4.9-12%)                    | 11%<br>(6.6-16%)                    | 1.1<br>(0.66-1.6)         | 36<br>(22-55)           |
| Bermuda        | 1990 | Female | 60 to 64 | 26%<br>(16-41%)                | 74%<br>(59-84%)          | 2.5<br>(1.2-4.4)                            | 7.4%<br>(4.2-12%)                    | 9.2%<br>(5.2-14%)                   | 1.3<br>(0.75-2.2)         | 38<br>(21-61)           |
| Bermuda        | 1990 | Female | 65 to 69 | 24%<br>(15-37%)                | 76%<br>(63-85%)          | 2.1<br>(1.1-3.5)                            | 6.9%<br>(4-11%)                      | 8.4%<br>(4.9-13%)                   | 1.5<br>(0.86-2.4)         | 35<br>(20-56)           |
| Bermuda        | 1990 | Female | 70 to 74 | 22%<br>(13-35%)                | 78%<br>(65-87%)          | 1.8<br>(0.87-3.2)                           | 6.1%<br>(3.1-10%)                    | 7.2%<br>(3.7-12%)                   | 1.7<br>(0.84-2.8)         | 31<br>(16-52)           |
| Bermuda        | 1990 | Female | 75 to 79 | 19%<br>(11-32%)                | 81%<br>(68-89%)          | 1.5<br>(0.68-2.8)                           | 5.4%<br>(2.4-9.4%)                   | 6.2%<br>(2.7-11%)                   | 1.8<br>(0.79-3.2)         | 26<br>(11-46)           |
| Bermuda        | 1990 | Female | 80 to 84 | 18%<br>(9.8-29%)               | 82%<br>(71-90%)          | 1.4<br>(0.68-2.5)                           | 5.5%<br>(2.5-9.4%)                   | 6.1%<br>(2.7-11%)                   | 2.2<br>(1-3.9)            | 23<br>(11-40)           |
| Bermuda        | 1990 | Female | 85 to 89 | 18%<br>(10-28%)                | 82%<br>(72-90%)          | 1.5<br>(0.67-2.6)                           | 5.4%<br>(2.4-9.2%)                   | 6%<br>(2.7-10%)                     | 1.7<br>(0.72-2.9)         | 12<br>(5.6-21)          |
| Bermuda        | 1990 | Female | 90 to 94 | 20%<br>(11-31%)                | 80%<br>(69-89%)          | 1.7<br>(0.75-3.1)                           | 5.6%<br>(2.4-10%)                    | 6.3%<br>(2.6-11%)                   | 0.79<br>(0.32-1.5)        | 4<br>(1.7-7.3)          |

| Location | Year | Sex    | Age      | Prevalence of current drinkers | Prevalence of abstainers | Population average of standard drinks daily | Percent of total attributable deaths | Percent of total attributable DALYs | Attributable deaths   | Attributable DALYs |
|----------|------|--------|----------|--------------------------------|--------------------------|---------------------------------------------|--------------------------------------|-------------------------------------|-----------------------|--------------------|
| Bermuda  | 1990 | Female | 95 plus  | 23%<br>(12-40%)                | 77%<br>(60-88%)          | 2<br>(0.73-4.1)                             | 6%<br>(2-11%)                        | 6.7%<br>(2.1-13%)                   | 0.25<br>(0.077-0.48)  | 0.87<br>(0.28-1.6) |
| Bermuda  | 1990 | Male   | All Ages | 54%<br>(46-63%)                | 46%<br>(37-54%)          | 5.8<br>(5.3-6.3)                            | 12%<br>(9.3-15%)                     | 13%<br>(9.5-16%)                    | 31<br>(23-41)         | 1000<br>(800-1300) |
| Bermuda  | 1990 | Male   | 15 to 19 | 55%<br>(37-72%)                | 45%<br>(28-63%)          | 4.5<br>(2.5-7.1)                            | 9.1%<br>(5.8-13%)                    | 16%<br>(9.7-23%)                    | 0.36<br>(0.22-0.53)   | 32<br>(21-46)      |
| Bermuda  | 1990 | Male   | 20 to 24 | 66%<br>(48-80%)                | 34%<br>(20-52%)          | 8.6<br>(5.5-12)                             | 16%<br>(11-21%)                      | 23%<br>(15-31%)                     | 0.85<br>(0.54-1.2)    | 70<br>(48-92)      |
| Bermuda  | 1990 | Male   | 25 to 29 | 69%<br>(50-82%)                | 31%<br>(18-50%)          | 10<br>(6.8-14)                              | 16%<br>(11-20%)                      | 22%<br>(14-29%)                     | 0.95<br>(0.63-1.3)    | 73<br>(52-93)      |
| Bermuda  | 1990 | Male   | 30 to 34 | 70%<br>(50-83%)                | 30%<br>(17-50%)          | 11<br>(6.9-15)                              | 15%<br>(11-19%)                      | 20%<br>(14-26%)                     | 1<br>(0.74-1.4)       | 70<br>(51-89)      |
| Bermuda  | 1990 | Male   | 35 to 39 | 69%<br>(53-83%)                | 31%<br>(17-47%)          | 10<br>(6.4-15)                              | 16%<br>(12-20%)                      | 19%<br>(15-24%)                     | 1.7<br>(1.2-2.2)      | 95<br>(72-120)     |
| Bermuda  | 1990 | Male   | 40 to 44 | 68%<br>(52-82%)                | 32%<br>(18-48%)          | 9.7<br>(5.6-15)                             | 15%<br>(12-19%)                      | 19%<br>(14-24%)                     | 1.7<br>(1.3-2.1)      | 85<br>(64-110)     |
| Bermuda  | 1990 | Male   | 45 to 49 | 66%<br>(46-81%)                | 34%<br>(19-54%)          | 9.1<br>(5.1-15)                             | 15%<br>(12-19%)                      | 18%<br>(14-23%)                     | 2<br>(1.5-2.5)        | 88<br>(66-110)     |
| Bermuda  | 1990 | Male   | 50 to 54 | 65%<br>(46-81%)                | 35%<br>(19-54%)          | 8.4<br>(4.8-14)                             | 15%<br>(11-19%)                      | 17%<br>(12-22%)                     | 2.6<br>(1.9-3.5)      | 100<br>(74-130)    |
| Bermuda  | 1990 | Male   | 55 to 59 | 63%<br>(44-79%)                | 37%<br>(21-56%)          | 7.7<br>(4.2-12)                             | 14%<br>(10-19%)                      | 16%<br>(12-21%)                     | 2.9<br>(2.1-3.9)      | 96<br>(69-130)     |
| Bermuda  | 1990 | Male   | 60 to 64 | 61%<br>(40-78%)                | 39%<br>(22-60%)          | 6.9<br>(3.6-12)                             | 13%<br>(8.5-17%)                     | 14%<br>(9.5-20%)                    | 3.4<br>(2.3-4.8)      | 96<br>(65-130)     |
| Bermuda  | 1990 | Male   | 65 to 69 | 59%<br>(40-76%)                | 41%<br>(24-60%)          | 6.1<br>(3.3-9.9)                            | 12%<br>(7.9-17%)                     | 13%<br>(8.7-19%)                    | 3.5<br>(2.3-5.1)      | 82<br>(53-120)     |
| Bermuda  | 1990 | Male   | 70 to 74 | 55%<br>(37-71%)                | 45%<br>(29-63%)          | 5<br>(2.6-8.6)                              | 10%<br>(6.4-15%)                     | 11%<br>(7-16%)                      | 3.3<br>(2-4.7)        | 61<br>(39-88)      |
| Bermuda  | 1990 | Male   | 75 to 79 | 50%<br>(31-69%)                | 50%<br>(31-69%)          | 4.2<br>(2-7.1)                              | 8.6%<br>(5.5-13%)                    | 9.5%<br>(5.9-14%)                   | 3<br>(1.8-4.3)        | 43<br>(26-62)      |
| Bermuda  | 1990 | Male   | 80 to 84 | 45%<br>(27-62%)                | 55%<br>(38-73%)          | 3.5<br>(1.7-5.6)                            | 7.5%<br>(4.5-11%)                    | 8.3%<br>(5-13%)                     | 2.2<br>(1.3-3.2)      | 23<br>(14-35)      |
| Bermuda  | 1990 | Male   | 85 to 89 | 40%<br>(24-56%)                | 60%<br>(44-76%)          | 3.1<br>(1.5-5.2)                            | 6.7%<br>(4.1-10%)                    | 7.4%<br>(4.4-12%)                   | 1.2<br>(0.73-1.9)     | 9.5<br>(5.7-14)    |
| Bermuda  | 1990 | Male   | 90 to 94 | 40%<br>(25-57%)                | 60%<br>(43-75%)          | 3.1<br>(1.5-5.6)                            | 6.3%<br>(3.7-9.7%)                   | 6.9%<br>(3.8-11%)                   | 0.44<br>(0.25-0.71)   | 2.4<br>(1.4-3.7)   |
| Bermuda  | 1990 | Male   | 95 plus  | 44%<br>(25-64%)                | 56%<br>(36-75%)          | 3.4<br>(1.4-6.4)                            | 6.6%<br>(3.3-11%)                    | 7.2%<br>(3.4-12%)                   | 0.1<br>(0.049-0.17)   | 0.37<br>(0.19-0.6) |
| Bermuda  | 1995 | Female | All Ages | 31%<br>(25-38%)                | 69%<br>(62-75%)          | 2.8<br>(2.5-3.1)                            | 5.5%<br>(4-7.4%)                     | 7.5%<br>(4.9-11%)                   | 16<br>(11-23)         | 390<br>(280-520)   |
| Bermuda  | 1995 | Female | 15 to 19 | 37%<br>(24-53%)                | 63%<br>(47-76%)          | 3.2<br>(1.6-5.1)                            | 3.8%<br>(2.4-5.4%)                   | 9.8%<br>(5.8-14%)                   | 0.11<br>(0.066-0.16)  | 11<br>(7.1-16)     |
| Bermuda  | 1995 | Female | 20 to 24 | 43%<br>(27-59%)                | 57%<br>(41-73%)          | 4.8<br>(2.7-7.2)                            | 3.9%<br>(2.8-5.1%)                   | 9.2%<br>(6.4-12%)                   | 0.07<br>(0.047-0.099) | 11<br>(7.9-15)     |

| Location | Year | Sex    | Age      | Prevalence of current drinkers | Prevalence of abstainers | Population average of standard drinks daily | Percent of total attributable deaths | Percent of total attributable DALYs | Attributable deaths | Attributable DALYs |
|----------|------|--------|----------|--------------------------------|--------------------------|---------------------------------------------|--------------------------------------|-------------------------------------|---------------------|--------------------|
| Bermuda  | 1995 | Female | 25 to 29 | 42%<br>(26-59%)                | 58%<br>(41-74%)          | 4.9<br>(3-7.2)                              | 4.7%<br>(3.6-6.1%)                   | 9.2%<br>(6.6-12%)                   | 0.14<br>(0.098-0.2) | 15<br>(11-21)      |
| Bermuda  | 1995 | Female | 30 to 34 | 40%<br>(24-58%)                | 60%<br>(42-76%)          | 4.7<br>(2.9-7.1)                            | 5.8%<br>(4.1-7.9%)                   | 11%<br>(7.2-15%)                    | 0.31<br>(0.2-0.45)  | 23<br>(16-32)      |
| Bermuda  | 1995 | Female | 35 to 39 | 40%<br>(25-57%)                | 60%<br>(43-75%)          | 4.4<br>(2.5-7)                              | 6.2%<br>(4.2-8.8%)                   | 11%<br>(7.1-16%)                    | 0.37<br>(0.23-0.53) | 23<br>(16-33)      |
| Bermuda  | 1995 | Female | 40 to 44 | 38%<br>(24-56%)                | 62%<br>(44-76%)          | 4.1<br>(2.2-6.7)                            | 6.9%<br>(4.6-9.9%)                   | 12%<br>(7.8-18%)                    | 0.49<br>(0.31-0.74) | 27<br>(17-39)      |
| Bermuda  | 1995 | Female | 45 to 49 | 36%<br>(22-53%)                | 64%<br>(47-78%)          | 4<br>(2.1-6.9)                              | 7.3%<br>(4.6-11%)                    | 12%<br>(7.5-18%)                    | 0.57<br>(0.35-0.88) | 27<br>(17-41)      |
| Bermuda  | 1995 | Female | 50 to 54 | 33%<br>(20-49%)                | 67%<br>(51-80%)          | 3.6<br>(1.9-6)                              | 7.8%<br>(4.9-12%)                    | 11%<br>(7.2-17%)                    | 0.78<br>(0.48-1.2)  | 31<br>(20-47)      |
| Bermuda  | 1995 | Female | 55 to 59 | 29%<br>(17-45%)                | 71%<br>(55-83%)          | 3<br>(1.5-5.1)                              | 7.7%<br>(4.7-11%)                    | 10%<br>(6.4-16%)                    | 1<br>(0.63-1.6)     | 36<br>(22-55)      |
| Bermuda  | 1995 | Female | 60 to 64 | 26%<br>(15-41%)                | 74%<br>(59-85%)          | 2.5<br>(1.3-4.5)                            | 7.1%<br>(4.2-11%)                    | 9%<br>(5.3-14%)                     | 1.2<br>(0.72-2)     | 36<br>(21-56)      |
| Bermuda  | 1995 | Female | 65 to 69 | 23%<br>(14-37%)                | 77%<br>(63-86%)          | 2.2<br>(1.2-3.6)                            | 6.9%<br>(4.1-11%)                    | 8.5%<br>(5.1-13%)                   | 1.6<br>(0.95-2.4)   | 37<br>(22-57)      |
| Bermuda  | 1995 | Female | 70 to 74 | 21%<br>(13-34%)                | 79%<br>(66-87%)          | 1.9<br>(0.94-3.4)                           | 6.2%<br>(3.4-10%)                    | 7.4%<br>(4.1-12%)                   | 1.8<br>(0.97-2.9)   | 33<br>(18-54)      |
| Bermuda  | 1995 | Female | 75 to 79 | 19%<br>(11-31%)                | 81%<br>(69-89%)          | 1.6<br>(0.74-3)                             | 5.5%<br>(2.7-9.2%)                   | 6.4%<br>(3.1-11%)                   | 1.8<br>(0.86-3.2)   | 27<br>(12-45)      |
| Bermuda  | 1995 | Female | 80 to 84 | 17%<br>(9.8-27%)               | 83%<br>(73-90%)          | 1.5<br>(0.73-2.6)                           | 5.6%<br>(2.7-9.2%)                   | 6.3%<br>(3-11%)                     | 2.3<br>(1.1-3.9)    | 24<br>(12-41)      |
| Bermuda  | 1995 | Female | 85 to 89 | 17%<br>(9.9-27%)               | 83%<br>(73-90%)          | 1.6<br>(0.72-2.8)                           | 5.7%<br>(2.8-9.7%)                   | 6.3%<br>(3-11%)                     | 2.2<br>(1.1-3.9)    | 17<br>(8-29)       |
| Bermuda  | 1995 | Female | 90 to 94 | 19%<br>(11-30%)                | 81%<br>(70-89%)          | 1.8<br>(0.77-3.3)                           | 5.8%<br>(2.7-10%)                    | 6.5%<br>(2.9-12%)                   | 1.1<br>(0.49-2)     | 5.7<br>(2.5-10)    |
| Bermuda  | 1995 | Female | 95 plus  | 23%<br>(12-39%)                | 77%<br>(61-88%)          | 2.1<br>(0.75-4.3)                           | 6.2%<br>(2.3-12%)                    | 6.9%<br>(2.4-13%)                   | 0.39<br>(0.14-0.74) | 1.4<br>(0.5-2.5)   |
| Bermuda  | 1995 | Male   | All Ages | 54%<br>(45-62%)                | 46%<br>(38-55%)          | 6.1<br>(5.7-6.6)                            | 11%<br>(8.4-13%)                     | 12%<br>(8.8-15%)                    | 28<br>(21-37)       | 890<br>(690-1100)  |
| Bermuda  | 1995 | Male   | 15 to 19 | 54%<br>(36-71%)                | 46%<br>(29-64%)          | 4.7<br>(2.6-7.5)                            | 8%<br>(5.4-11%)                      | 15%<br>(9.4-22%)                    | 0.23<br>(0.14-0.34) | 23<br>(15-32)      |
| Bermuda  | 1995 | Male   | 20 to 24 | 65%<br>(47-80%)                | 35%<br>(20-53%)          | 9<br>(5.7-13)                               | 14%<br>(10-18%)                      | 20%<br>(13-27%)                     | 0.6<br>(0.38-0.82)  | 53<br>(37-70)      |
| Bermuda  | 1995 | Male   | 25 to 29 | 68%<br>(49-82%)                | 32%<br>(18-51%)          | 11<br>(7.2-15)                              | 12%<br>(9-16%)                       | 17%<br>(11-23%)                     | 0.58<br>(0.37-0.79) | 50<br>(35-65)      |
| Bermuda  | 1995 | Male   | 30 to 34 | 69%<br>(49-83%)                | 31%<br>(17-51%)          | 11<br>(7.4-16)                              | 13%<br>(9.4-16%)                     | 17%<br>(12-21%)                     | 0.88<br>(0.62-1.2)  | 62<br>(46-80)      |
| Bermuda  | 1995 | Male   | 35 to 39 | 69%<br>(52-83%)                | 31%<br>(17-48%)          | 11<br>(6.7-16)                              | 13%<br>(10-17%)                      | 18%<br>(14-22%)                     | 1.1<br>(0.79-1.4)   | 65<br>(48-83)      |
| Bermuda  | 1995 | Male   | 40 to 44 | 68%<br>(51-82%)                | 32%<br>(18-49%)          | 10<br>(5.8-16)                              | 13%<br>(10-17%)                      | 17%<br>(13-21%)                     | 1.3<br>(1-1.7)      | 70<br>(54-89)      |



| Location | Year | Sex    | Age      | Prevalence of current drinkers | Prevalence of abstainers | Population average of standard drinks daily | Percent of total attributable deaths | Percent of total attributable DALYs | Attributable deaths    | Attributable DALYs |
|----------|------|--------|----------|--------------------------------|--------------------------|---------------------------------------------|--------------------------------------|-------------------------------------|------------------------|--------------------|
| Bermuda  | 1995 | Male   | 45 to 49 | 66%<br>(45-81%)                | 34%<br>(19-55%)          | 9.6<br>(5.4-16)                             | 14%<br>(11-18%)                      | 17%<br>(13-22%)                     | 1.8<br>(1.3-2.4)       | 82<br>(60-110)     |
| Bermuda  | 1995 | Male   | 50 to 54 | 64%<br>(44-80%)                | 36%<br>(20-56%)          | 8.8<br>(4.9-14)                             | 13%<br>(9.8-17%)                     | 16%<br>(12-21%)                     | 2.1<br>(1.5-2.8)       | 83<br>(61-110)     |
| Bermuda  | 1995 | Male   | 55 to 59 | 62%<br>(44-78%)                | 38%<br>(22-56%)          | 8<br>(4.3-13)                               | 13%<br>(9.8-18%)                     | 16%<br>(11-20%)                     | 2.9<br>(2-3.9)         | 96<br>(69-130)     |
| Bermuda  | 1995 | Male   | 60 to 64 | 60%<br>(40-78%)                | 40%<br>(22-60%)          | 7.2<br>(3.9-12)                             | 12%<br>(8.4-16%)                     | 14%<br>(9.4-19%)                    | 2.9<br>(2-4.1)         | 83<br>(58-120)     |
| Bermuda  | 1995 | Male   | 65 to 69 | 58%<br>(39-76%)                | 42%<br>(24-61%)          | 6.3<br>(3.5-10)                             | 12%<br>(7.7-16%)                     | 13%<br>(8.7-18%)                    | 3.3<br>(2.2-4.7)       | 77<br>(52-110)     |
| Bermuda  | 1995 | Male   | 70 to 74 | 54%<br>(36-71%)                | 46%<br>(29-64%)          | 5.2<br>(2.8-9)                              | 9.7%<br>(6.3-14%)                    | 11%<br>(6.9-16%)                    | 3.2<br>(2.1-4.6)       | 60<br>(39-86)      |
| Bermuda  | 1995 | Male   | 75 to 79 | 49%<br>(31-68%)                | 51%<br>(32-69%)          | 4.3<br>(2.1-7.4)                            | 8.4%<br>(5.4-12%)                    | 9.3%<br>(5.8-13%)                   | 2.9<br>(1.8-4.3)       | 43<br>(27-61)      |
| Bermuda  | 1995 | Male   | 80 to 84 | 43%<br>(26-62%)                | 57%<br>(38-74%)          | 3.6<br>(1.8-5.9)                            | 7.3%<br>(4.3-11%)                    | 8.1%<br>(4.7-12%)                   | 2.4<br>(1.4-3.5)       | 25<br>(15-38)      |
| Bermuda  | 1995 | Male   | 85 to 89 | 39%<br>(23-56%)                | 61%<br>(44-77%)          | 3.1<br>(1.6-5.4)                            | 6.5%<br>(3.9-9.9%)                   | 7.2%<br>(4.2-11%)                   | 1.3<br>(0.78-2.1)      | 10<br>(6.3-16)     |
| Bermuda  | 1995 | Male   | 90 to 94 | 39%<br>(24-56%)                | 61%<br>(44-76%)          | 3.2<br>(1.5-5.8)                            | 6.4%<br>(3.8-9.7%)                   | 7%<br>(4-11%)                       | 0.69<br>(0.39-1.1)     | 3.6<br>(2.1-5.6)   |
| Bermuda  | 1995 | Male   | 95 plus  | 43%<br>(24-63%)                | 57%<br>(37-76%)          | 3.5<br>(1.4-6.6)                            | 6.7%<br>(3.6-11%)                    | 7.2%<br>(3.7-12%)                   | 0.18<br>(0.093-0.3)    | 0.65<br>(0.34-1)   |
| Bermuda  | 2000 | Female | All Ages | 30%<br>(24-37%)                | 70%<br>(63-76%)          | 2.8<br>(2.5-3.1)                            | 5%<br>(3.6-6.7%)                     | 6.9%<br>(4.5-9.8%)                  | 16<br>(10-23)          | 350<br>(250-480)   |
| Bermuda  | 2000 | Female | 15 to 19 | 35%<br>(23-52%)                | 65%<br>(48-77%)          | 3.2<br>(1.7-5.3)                            | 3.3%<br>(2.1-4.6%)                   | 8.9%<br>(5.3-13%)                   | 0.088<br>(0.052-0.13)  | 9.6<br>(6.2-14)    |
| Bermuda  | 2000 | Female | 20 to 24 | 41%<br>(26-58%)                | 59%<br>(42-74%)          | 4.8<br>(2.7-7.5)                            | 3.4%<br>(2.4-4.4%)                   | 6.4%<br>(4-8.9%)                    | 0.045<br>(0.028-0.065) | 8.9<br>(6.2-12)    |
| Bermuda  | 2000 | Female | 25 to 29 | 41%<br>(25-57%)                | 59%<br>(43-75%)          | 5<br>(3-7.5)                                | 3.8%<br>(2.9-5%)                     | 6.5%<br>(4.4-8.8%)                  | 0.085<br>(0.057-0.12)  | 12<br>(8.5-16)     |
| Bermuda  | 2000 | Female | 30 to 34 | 39%<br>(23-56%)                | 61%<br>(44-77%)          | 4.8<br>(2.8-7.2)                            | 3.9%<br>(2.8-5.3%)                   | 6.4%<br>(4.1-9.3%)                  | 0.15<br>(0.09-0.22)    | 15<br>(10-20)      |
| Bermuda  | 2000 | Female | 35 to 39 | 38%<br>(24-55%)                | 62%<br>(45-76%)          | 4.4<br>(2.6-6.9)                            | 4.2%<br>(2.8-5.9%)                   | 7%<br>(4.3-10%)                     | 0.23<br>(0.13-0.35)    | 17<br>(11-25)      |
| Bermuda  | 2000 | Female | 40 to 44 | 37%<br>(23-55%)                | 63%<br>(45-77%)          | 4.2<br>(2.2-6.6)                            | 5.4%<br>(3.5-7.8%)                   | 9.3%<br>(5.8-14%)                   | 0.36<br>(0.22-0.56)    | 21<br>(13-31)      |
| Bermuda  | 2000 | Female | 45 to 49 | 35%<br>(21-52%)                | 65%<br>(48-79%)          | 4.1<br>(2.1-6.9)                            | 6%<br>(3.7-9.1%)                     | 9.9%<br>(6.2-15%)                   | 0.48<br>(0.29-0.75)    | 24<br>(15-36)      |
| Bermuda  | 2000 | Female | 50 to 54 | 32%<br>(19-48%)                | 68%<br>(52-81%)          | 3.6<br>(2-5.9)                              | 6.8%<br>(4.2-10%)                    | 10%<br>(6.4-16%)                    | 0.68<br>(0.41-1)       | 28<br>(17-43)      |
| Bermuda  | 2000 | Female | 55 to 59 | 28%<br>(16-43%)                | 72%<br>(57-84%)          | 3<br>(1.5-5.1)                              | 7%<br>(4.3-11%)                      | 9.7%<br>(5.9-15%)                   | 0.95<br>(0.59-1.5)     | 33<br>(20-50)      |
| Bermuda  | 2000 | Female | 60 to 64 | 24%<br>(14-39%)                | 76%<br>(61-86%)          | 2.6<br>(1.3-4.6)                            | 6.6%<br>(3.9-10%)                    | 8.5%<br>(5-13%)                     | 1.3<br>(0.74-2)        | 36<br>(22-57)      |

| Location | Year | Sex    | Age      | Prevalence of current drinkers | Prevalence of abstainers | Population average of standard drinks daily | Percent of total attributable deaths | Percent of total attributable DALYs | Attributable deaths | Attributable DALYs |
|----------|------|--------|----------|--------------------------------|--------------------------|---------------------------------------------|--------------------------------------|-------------------------------------|---------------------|--------------------|
| Bermuda  | 2000 | Female | 65 to 69 | 22%<br>(14-36%)                | 78%<br>(64-86%)          | 2.2<br>(1.2-3.7)                            | 6.4%<br>(3.8-9.9%)                   | 7.9%<br>(4.7-12%)                   | 1.5<br>(0.88-2.3)   | 35<br>(21-54)      |
| Bermuda  | 2000 | Female | 70 to 74 | 20%<br>(12-32%)                | 80%<br>(68-88%)          | 1.9<br>(0.93-3.4)                           | 5.8%<br>(3.3-9.1%)                   | 7%<br>(4-11%)                       | 1.7<br>(0.93-2.7)   | 31<br>(18-50)      |
| Bermuda  | 2000 | Female | 75 to 79 | 18%<br>(10-29%)                | 82%<br>(71-90%)          | 1.6<br>(0.74-3)                             | 5.2%<br>(2.7-8.4%)                   | 6.1%<br>(3.1-10%)                   | 1.8<br>(0.89-3)     | 26<br>(13-43)      |
| Bermuda  | 2000 | Female | 80 to 84 | 16%<br>(9.2-27%)               | 84%<br>(73-91%)          | 1.5<br>(0.74-2.7)                           | 5.4%<br>(2.8-8.8%)                   | 6.1%<br>(3.1-10%)                   | 2.5<br>(1.2-4.2)    | 26<br>(13-44)      |
| Bermuda  | 2000 | Female | 85 to 89 | 16%<br>(9.3-26%)               | 84%<br>(74-91%)          | 1.5<br>(0.71-2.8)                           | 5.4%<br>(2.8-9.1%)                   | 6%<br>(3-10%)                       | 2.3<br>(1.2-4)      | 17<br>(8.7-29)     |
| Bermuda  | 2000 | Female | 90 to 94 | 18%<br>(11-29%)                | 82%<br>(71-89%)          | 1.7<br>(0.76-3.2)                           | 5.6%<br>(2.7-9.5%)                   | 6.2%<br>(3-11%)                     | 1.2<br>(0.59-2.2)   | 6.4<br>(3.1-11)    |
| Bermuda  | 2000 | Female | 95 plus  | 22%<br>(11-37%)                | 78%<br>(63-89%)          | 2.1<br>(0.74-4.2)                           | 6%<br>(2.4-11%)                      | 6.6%<br>(2.7-12%)                   | 0.47<br>(0.19-0.87) | 1.6<br>(0.66-3)    |
| Bermuda  | 2000 | Male   | All Ages | 53%<br>(44-61%)                | 47%<br>(39-56%)          | 6.4<br>(5.9-6.8)                            | 9%<br>(7.1-11%)                      | 10%<br>(7.7-13%)                    | 26<br>(20-34)       | 750<br>(580-940)   |
| Bermuda  | 2000 | Male   | 15 to 19 | 52%<br>(35-70%)                | 48%<br>(30-65%)          | 4.8<br>(2.6-7.9)                            | 6.1%<br>(4.1-8.4%)                   | 13%<br>(7.6-18%)                    | 0.14<br>(0.08-0.2)  | 16<br>(11-23)      |
| Bermuda  | 2000 | Male   | 20 to 24 | 64%<br>(45-79%)                | 36%<br>(21-55%)          | 9.3<br>(5.7-14)                             | 11%<br>(8.2-14%)                     | 16%<br>(10-22%)                     | 0.34<br>(0.21-0.47) | 35<br>(25-47)      |
| Bermuda  | 2000 | Male   | 25 to 29 | 67%<br>(48-81%)                | 33%<br>(19-52%)          | 11<br>(7.3-16)                              | 8.2%<br>(6.1-11%)                    | 8.8%<br>(4.7-13%)                   | 0.22<br>(0.11-0.34) | 28<br>(19-39)      |
| Bermuda  | 2000 | Male   | 30 to 34 | 68%<br>(48-82%)                | 32%<br>(18-52%)          | 12<br>(7.5-17)                              | 9%<br>(6.6-12%)                      | 11%<br>(7-15%)                      | 0.51<br>(0.33-0.75) | 42<br>(30-57)      |
| Bermuda  | 2000 | Male   | 35 to 39 | 68%<br>(50-82%)                | 32%<br>(18-50%)          | 11<br>(7-16)                                | 7.6%<br>(5.5-9.7%)                   | 9%<br>(5.8-12%)                     | 0.4<br>(0.24-0.56)  | 33<br>(24-44)      |
| Bermuda  | 2000 | Male   | 40 to 44 | 66%<br>(50-81%)                | 34%<br>(19-50%)          | 10<br>(5.9-16)                              | 8.9%<br>(6.7-11%)                    | 11%<br>(8-14%)                      | 0.73<br>(0.5-0.98)  | 43<br>(32-57)      |
| Bermuda  | 2000 | Male   | 45 to 49 | 64%<br>(44-80%)                | 36%<br>(20-56%)          | 9.8<br>(5.6-16)                             | 12%<br>(8.8-15%)                     | 14%<br>(10-17%)                     | 1.7<br>(1.2-2.2)    | 79<br>(58-100)     |
| Bermuda  | 2000 | Male   | 50 to 54 | 63%<br>(44-79%)                | 37%<br>(21-56%)          | 8.9<br>(5-15)                               | 12%<br>(8.8-15%)                     | 14%<br>(11-19%)                     | 1.6<br>(1.2-2.1)    | 66<br>(49-86)      |
| Bermuda  | 2000 | Male   | 55 to 59 | 60%<br>(42-78%)                | 40%<br>(22-58%)          | 8.1<br>(4.4-13)                             | 12%<br>(9-16%)                       | 14%<br>(11-19%)                     | 2.7<br>(1.9-3.6)    | 91<br>(65-120)     |
| Bermuda  | 2000 | Male   | 60 to 64 | 58%<br>(38-77%)                | 42%<br>(23-62%)          | 7.3<br>(3.8-12)                             | 11%<br>(7.7-15%)                     | 13%<br>(9-17%)                      | 2.6<br>(1.8-3.6)    | 75<br>(53-100)     |
| Bermuda  | 2000 | Male   | 65 to 69 | 57%<br>(37-74%)                | 43%<br>(26-63%)          | 6.4<br>(3.5-10)                             | 11%<br>(7.3-15%)                     | 12%<br>(8.2-17%)                    | 3.4<br>(2.3-4.7)    | 80<br>(54-110)     |
| Bermuda  | 2000 | Male   | 70 to 74 | 53%<br>(35-70%)                | 47%<br>(30-65%)          | 5.3<br>(2.8-8.8)                            | 9.3%<br>(6-13%)                      | 10%<br>(6.7-15%)                    | 3.5<br>(2.2-4.9)    | 65<br>(43-92)      |
| Bermuda  | 2000 | Male   | 75 to 79 | 48%<br>(30-67%)                | 52%<br>(33-70%)          | 4.3<br>(2.1-7.4)                            | 8%<br>(5.2-11%)                      | 8.8%<br>(5.6-13%)                   | 3.1<br>(2-4.5)      | 45<br>(29-64)      |
| Bermuda  | 2000 | Male   | 80 to 84 | 42%<br>(25-60%)                | 58%<br>(40-75%)          | 3.6<br>(1.8-5.9)                            | 7%<br>(4.3-10%)                      | 7.7%<br>(4.7-11%)                   | 2.6<br>(1.6-3.8)    | 28<br>(17-41)      |

| Location | Year | Sex    | Age      | Prevalence of current drinkers | Prevalence of abstainers | Population average of standard drinks daily | Percent of total attributable deaths | Percent of total attributable DALYs | Attributable deaths    | Attributable DALYs |
|----------|------|--------|----------|--------------------------------|--------------------------|---------------------------------------------|--------------------------------------|-------------------------------------|------------------------|--------------------|
| Bermuda  | 2000 | Male   | 85 to 89 | 38%<br>(22-54%)                | 62%<br>(46-78%)          | 3.2<br>(1.6-5.5)                            | 6.3%<br>(3.8-9.5%)                   | 6.9%<br>(4.1-11%)                   | 1.5<br>(0.89-2.3)      | 12<br>(7-18)       |
| Bermuda  | 2000 | Male   | 90 to 94 | 38%<br>(24-55%)                | 62%<br>(45-76%)          | 3.2<br>(1.5-5.8)                            | 6.3%<br>(3.8-9.6%)                   | 6.8%<br>(3.9-11%)                   | 0.92<br>(0.54-1.4)     | 4.9<br>(2.9-7.5)   |
| Bermuda  | 2000 | Male   | 95 plus  | 41%<br>(23-61%)                | 59%<br>(39-77%)          | 3.6<br>(1.4-6.7)                            | 6.7%<br>(3.7-11%)                    | 7.2%<br>(3.8-12%)                   | 0.26<br>(0.14-0.43)    | 0.95<br>(0.52-1.5) |
| Bermuda  | 2005 | Female | All Ages | 29%<br>(24-36%)                | 71%<br>(64-76%)          | 2.7<br>(2.4-3)                              | 4.5%<br>(3.3-6.1%)                   | 6.6%<br>(4.3-9.3%)                  | 13<br>(8.8-19)         | 300<br>(220-410)   |
| Bermuda  | 2005 | Female | 15 to 19 | 35%<br>(22-51%)                | 65%<br>(49-78%)          | 3.1<br>(1.6-5.1)                            | 2.9%<br>(1.9-4.1%)                   | 9.1%<br>(5.5-13%)                   | 0.07<br>(0.041-0.1)    | 8.4<br>(5.3-12)    |
| Bermuda  | 2005 | Female | 20 to 24 | 40%<br>(25-57%)                | 60%<br>(43-75%)          | 4.6<br>(2.5-7.2)                            | 3.2%<br>(2.3-4.3%)                   | 6.4%<br>(4-9.2%)                    | 0.038<br>(0.022-0.057) | 8.8<br>(6-12)      |
| Bermuda  | 2005 | Female | 25 to 29 | 40%<br>(24-57%)                | 60%<br>(43-76%)          | 4.7<br>(2.8-7.3)                            | 3.5%<br>(2.6-4.6%)                   | 6.2%<br>(4-8.5%)                    | 0.056<br>(0.034-0.08)  | 9.5<br>(6.7-13)    |
| Bermuda  | 2005 | Female | 30 to 34 | 38%<br>(23-55%)                | 62%<br>(45-77%)          | 4.5<br>(2.6-6.9)                            | 4%<br>(2.9-5.3%)                     | 7.7%<br>(5.1-11%)                   | 0.12<br>(0.079-0.18)   | 13<br>(9-18)       |
| Bermuda  | 2005 | Female | 35 to 39 | 37%<br>(23-55%)                | 63%<br>(45-77%)          | 4.2<br>(2.5-6.6)                            | 3.9%<br>(2.7-5.5%)                   | 7.8%<br>(4.9-11%)                   | 0.16<br>(0.099-0.25)   | 14<br>(9.6-20)     |
| Bermuda  | 2005 | Female | 40 to 44 | 36%<br>(23-55%)                | 64%<br>(45-77%)          | 4<br>(2.1-6.2)                              | 4.8%<br>(3.2-7.1%)                   | 9.8%<br>(6.2-15%)                   | 0.32<br>(0.2-0.49)     | 20<br>(13-30)      |
| Bermuda  | 2005 | Female | 45 to 49 | 34%<br>(20-50%)                | 66%<br>(50-80%)          | 3.8<br>(2-6.4)                              | 5.4%<br>(3.4-8.2%)                   | 10%<br>(6.3-16%)                    | 0.38<br>(0.23-0.61)    | 20<br>(13-30)      |
| Bermuda  | 2005 | Female | 50 to 54 | 31%<br>(18-47%)                | 69%<br>(53-82%)          | 3.4<br>(1.8-5.6)                            | 6.1%<br>(3.7-9.3%)                   | 10%<br>(6.3-16%)                    | 0.58<br>(0.36-0.89)    | 25<br>(16-38)      |
| Bermuda  | 2005 | Female | 55 to 59 | 27%<br>(16-43%)                | 73%<br>(57-84%)          | 2.9<br>(1.5-5)                              | 6.3%<br>(3.8-9.6%)                   | 9.5%<br>(5.8-14%)                   | 0.77<br>(0.47-1.2)     | 27<br>(17-42)      |
| Bermuda  | 2005 | Female | 60 to 64 | 24%<br>(14-39%)                | 76%<br>(61-86%)          | 2.4<br>(1.2-4.4)                            | 6.1%<br>(3.6-9.3%)                   | 8.2%<br>(5-13%)                     | 1<br>(0.61-1.6)        | 30<br>(18-47)      |
| Bermuda  | 2005 | Female | 65 to 69 | 22%<br>(13-34%)                | 78%<br>(66-87%)          | 2.1<br>(1.1-3.6)                            | 5.8%<br>(3.4-8.8%)                   | 7.6%<br>(4.6-11%)                   | 1.2<br>(0.73-1.9)      | 30<br>(18-46)      |
| Bermuda  | 2005 | Female | 70 to 74 | 20%<br>(12-31%)                | 80%<br>(69-88%)          | 1.8<br>(0.89-3.2)                           | 5.2%<br>(2.9-8.1%)                   | 6.6%<br>(3.8-10%)                   | 1.3<br>(0.73-2.1)      | 25<br>(14-40)      |
| Bermuda  | 2005 | Female | 75 to 79 | 17%<br>(10-28%)                | 83%<br>(72-90%)          | 1.5<br>(0.68-2.8)                           | 4.7%<br>(2.4-7.7%)                   | 5.8%<br>(3-9.3%)                    | 1.4<br>(0.72-2.4)      | 21<br>(11-35)      |
| Bermuda  | 2005 | Female | 80 to 84 | 16%<br>(9-26%)                 | 84%<br>(74-91%)          | 1.4<br>(0.7-2.5)                            | 5%<br>(2.5-8.1%)                     | 5.8%<br>(2.9-9.4%)                  | 2.2<br>(1.1-3.6)       | 23<br>(12-38)      |
| Bermuda  | 2005 | Female | 85 to 89 | 16%<br>(9.3-25%)               | 84%<br>(75-91%)          | 1.5<br>(0.69-2.6)                           | 5.1%<br>(2.6-8.4%)                   | 5.7%<br>(2.9-9.4%)                  | 2.1<br>(1.1-3.5)       | 16<br>(8.1-26)     |
| Bermuda  | 2005 | Female | 90 to 94 | 18%<br>(10-28%)                | 82%<br>(72-90%)          | 1.7<br>(0.74-3)                             | 5.2%<br>(2.6-8.8%)                   | 5.9%<br>(2.8-10%)                   | 1.2<br>(0.56-2)        | 6.1<br>(3-10)      |
| Bermuda  | 2005 | Female | 95 plus  | 21%<br>(11-36%)                | 79%<br>(64-89%)          | 2<br>(0.72-4)                               | 5.7%<br>(2.3-10%)                    | 6.4%<br>(2.4-12%)                   | 0.49<br>(0.19-0.91)    | 1.7<br>(0.67-3.1)  |
| Bermuda  | 2005 | Male   | All Ages | 52%<br>(44-61%)                | 48%<br>(39-56%)          | 6.2<br>(5.7-6.6)                            | 9.5%<br>(7.6-12%)                    | 11%<br>(8.3-13%)                    | 24<br>(18-30)          | 730<br>(580-910)   |

| Location | Year | Sex    | Age      | Prevalence of current drinkers | Prevalence of abstainers | Population average of standard drinks daily | Percent of total attributable deaths | Percent of total attributable DALYs | Attributable deaths    | Attributable DALYs |
|----------|------|--------|----------|--------------------------------|--------------------------|---------------------------------------------|--------------------------------------|-------------------------------------|------------------------|--------------------|
| Bermuda  | 2005 | Male   | 15 to 19 | 52%<br>(34-69%)                | 48%<br>(31-66%)          | 4.6<br>(2.5-7.4)                            | 6.4%<br>(4.3-8.8%)                   | 15%<br>(9.2-22%)                    | 0.14<br>(0.088-0.22)   | 17<br>(12-24)      |
| Bermuda  | 2005 | Male   | 20 to 24 | 63%<br>(44-79%)                | 37%<br>(21-56%)          | 8.8<br>(5.3-13)                             | 14%<br>(9.8-18%)                     | 21%<br>(13-29%)                     | 0.54<br>(0.34-0.76)    | 49<br>(34-65)      |
| Bermuda  | 2005 | Male   | 25 to 29 | 66%<br>(48-81%)                | 34%<br>(19-52%)          | 11<br>(6.8-15)                              | 13%<br>(9.1-16%)                     | 19%<br>(12-26%)                     | 0.46<br>(0.29-0.63)    | 42<br>(29-54)      |
| Bermuda  | 2005 | Male   | 30 to 34 | 67%<br>(47-82%)                | 33%<br>(18-53%)          | 11<br>(7-16)                                | 10%<br>(7.7-13%)                     | 15%<br>(10-20%)                     | 0.44<br>(0.29-0.6)     | 38<br>(28-50)      |
| Bermuda  | 2005 | Male   | 35 to 39 | 67%<br>(49-82%)                | 33%<br>(18-51%)          | 11<br>(6.7-15)                              | 11%<br>(8-14%)                       | 17%<br>(12-21%)                     | 0.59<br>(0.42-0.78)    | 43<br>(31-54)      |
| Bermuda  | 2005 | Male   | 40 to 44 | 66%<br>(49-81%)                | 34%<br>(19-51%)          | 10<br>(5.6-15)                              | 12%<br>(9.2-15%)                     | 17%<br>(13-21%)                     | 1.2<br>(0.87-1.5)      | 65<br>(49-83)      |
| Bermuda  | 2005 | Male   | 45 to 49 | 64%<br>(43-79%)                | 36%<br>(21-57%)          | 9.4<br>(5.4-15)                             | 12%<br>(9.2-15%)                     | 16%<br>(12-20%)                     | 1.4<br>(1-1.7)         | 65<br>(49-84)      |
| Bermuda  | 2005 | Male   | 50 to 54 | 62%<br>(42-78%)                | 38%<br>(22-58%)          | 8.5<br>(4.7-13)                             | 12%<br>(9-15%)                       | 15%<br>(12-20%)                     | 1.7<br>(1.3-2.3)       | 71<br>(53-92)      |
| Bermuda  | 2005 | Male   | 55 to 59 | 60%<br>(42-77%)                | 40%<br>(23-58%)          | 7.7<br>(4.2-13)                             | 12%<br>(9-16%)                       | 15%<br>(11-19%)                     | 2.4<br>(1.8-3.2)       | 82<br>(61-110)     |
| Bermuda  | 2005 | Male   | 60 to 64 | 58%<br>(37-76%)                | 42%<br>(24-63%)          | 6.9<br>(3.7-12)                             | 11%<br>(7.7-14%)                     | 13%<br>(9.2-17%)                    | 2.2<br>(1.6-2.9)       | 65<br>(46-87)      |
| Bermuda  | 2005 | Male   | 65 to 69 | 56%<br>(36-74%)                | 44%<br>(26-64%)          | 6.1<br>(3.3-9.8)                            | 10%<br>(7.2-14%)                     | 12%<br>(8.5-16%)                    | 2.5<br>(1.7-3.4)       | 60<br>(42-81)      |
| Bermuda  | 2005 | Male   | 70 to 74 | 52%<br>(33-70%)                | 48%<br>(30-67%)          | 5.1<br>(2.7-8.6)                            | 8.9%<br>(6-12%)                      | 10%<br>(7-14%)                      | 2.8<br>(1.9-3.8)       | 53<br>(36-73)      |
| Bermuda  | 2005 | Male   | 75 to 79 | 47%<br>(28-66%)                | 53%<br>(34-72%)          | 4.1<br>(2-7.1)                              | 7.7%<br>(5-11%)                      | 8.7%<br>(5.6-12%)                   | 2.8<br>(1.8-3.9)       | 41<br>(26-58)      |
| Bermuda  | 2005 | Male   | 80 to 84 | 41%<br>(24-59%)                | 59%<br>(41-76%)          | 3.4<br>(1.7-5.7)                            | 6.7%<br>(4.2-9.8%)                   | 7.5%<br>(4.6-11%)                   | 2.2<br>(1.4-3.3)       | 24<br>(15-36)      |
| Bermuda  | 2005 | Male   | 85 to 89 | 37%<br>(21-53%)                | 63%<br>(47-79%)          | 3<br>(1.5-5.1)                              | 5.8%<br>(3.6-8.8%)                   | 6.6%<br>(4-10%)                     | 1.2<br>(0.78-1.9)      | 9.9<br>(6.4-15)    |
| Bermuda  | 2005 | Male   | 90 to 94 | 37%<br>(23-54%)                | 63%<br>(46-77%)          | 3<br>(1.5-5.6)                              | 5.9%<br>(3.6-9%)                     | 6.4%<br>(3.8-9.9%)                  | 0.88<br>(0.52-1.4)     | 4.7<br>(2.8-7.1)   |
| Bermuda  | 2005 | Male   | 95 plus  | 40%<br>(22-61%)                | 60%<br>(39-78%)          | 3.3<br>(1.3-6.4)                            | 6.3%<br>(3.4-10%)                    | 6.8%<br>(3.6-11%)                   | 0.27<br>(0.14-0.44)    | 0.97<br>(0.53-1.5) |
| Bermuda  | 2010 | Female | All Ages | 29%<br>(23-35%)                | 71%<br>(65-77%)          | 2.4<br>(2.1-2.7)                            | 4%<br>(2.9-5.4%)                     | 5.8%<br>(3.8-8.2%)                  | 11<br>(6.9-15)         | 260<br>(190-340)   |
| Bermuda  | 2010 | Female | 15 to 19 | 34%<br>(22-50%)                | 66%<br>(50-78%)          | 2.7<br>(1.4-4.5)                            | 2.6%<br>(1.7-3.8%)                   | 8.7%<br>(4.9-13%)                   | 0.056<br>(0.031-0.088) | 7.3<br>(4.6-11)    |
| Bermuda  | 2010 | Female | 20 to 24 | 40%<br>(25-56%)                | 60%<br>(44-75%)          | 4.1<br>(2.3-6.4)                            | 3.4%<br>(2.5-4.5%)                   | 7.5%<br>(4.8-11%)                   | 0.044<br>(0.027-0.067) | 9.5<br>(6.4-14)    |
| Bermuda  | 2010 | Female | 25 to 29 | 39%<br>(24-56%)                | 61%<br>(44-76%)          | 4.2<br>(2.4-6.6)                            | 3.7%<br>(2.7-4.8%)                   | 7.3%<br>(4.8-10%)                   | 0.063<br>(0.039-0.091) | 10<br>(7.1-14)     |
| Bermuda  | 2010 | Female | 30 to 34 | 38%<br>(23-54%)                | 62%<br>(46-77%)          | 4<br>(2.3-6.2)                              | 3.8%<br>(2.7-5.2%)                   | 7.9%<br>(5.2-11%)                   | 0.1<br>(0.062-0.15)    | 11<br>(8-16)       |

| Location | Year | Sex    | Age      | Prevalence of current drinkers | Prevalence of abstainers | Population average of standard drinks daily | Percent of total attributable deaths | Percent of total attributable DALYs | Attributable deaths  | Attributable DALYs |
|----------|------|--------|----------|--------------------------------|--------------------------|---------------------------------------------|--------------------------------------|-------------------------------------|----------------------|--------------------|
| Bermuda  | 2010 | Female | 35 to 39 | 37%<br>(23-54%)                | 63%<br>(46-77%)          | 3.7<br>(2.1-5.8)                            | 3.7%<br>(2.6-5.2%)                   | 8.1%<br>(5.2-12%)                   | 0.14<br>(0.085-0.22) | 13<br>(8.7-18)     |
| Bermuda  | 2010 | Female | 40 to 44 | 35%<br>(22-54%)                | 65%<br>(46-78%)          | 3.5<br>(1.9-5.6)                            | 4.3%<br>(2.8-6.2%)                   | 9.2%<br>(5.8-14%)                   | 0.25<br>(0.15-0.38)  | 17<br>(11-25)      |
| Bermuda  | 2010 | Female | 45 to 49 | 34%<br>(19-50%)                | 66%<br>(50-81%)          | 3.3<br>(1.7-5.8)                            | 4.7%<br>(2.9-7.2%)                   | 9.5%<br>(5.9-15%)                   | 0.35<br>(0.21-0.57)  | 20<br>(12-30)      |
| Bermuda  | 2010 | Female | 50 to 54 | 30%<br>(18-46%)                | 70%<br>(54-82%)          | 3<br>(1.6-5)                                | 5.3%<br>(3.3-8.1%)                   | 9.4%<br>(5.8-15%)                   | 0.49<br>(0.3-0.77)   | 22<br>(14-34)      |
| Bermuda  | 2010 | Female | 55 to 59 | 26%<br>(16-42%)                | 74%<br>(58-84%)          | 2.5<br>(1.3-4.3)                            | 5.4%<br>(3.2-8.2%)                   | 8.6%<br>(5.3-13%)                   | 0.67<br>(0.4-1)      | 25<br>(15-38)      |
| Bermuda  | 2010 | Female | 60 to 64 | 23%<br>(14-37%)                | 77%<br>(63-86%)          | 2.1<br>(1-3.7)                              | 5.2%<br>(3-8%)                       | 7.4%<br>(4.4-11%)                   | 0.79<br>(0.46-1.2)   | 24<br>(14-38)      |
| Bermuda  | 2010 | Female | 65 to 69 | 21%<br>(13-34%)                | 79%<br>(66-87%)          | 1.9<br>(0.98-3.2)                           | 4.9%<br>(2.9-7.6%)                   | 6.8%<br>(4.1-10%)                   | 0.91<br>(0.53-1.4)   | 23<br>(13-36)      |
| Bermuda  | 2010 | Female | 70 to 74 | 19%<br>(12-31%)                | 81%<br>(69-88%)          | 1.6<br>(0.79-2.9)                           | 4.4%<br>(2.4-7.1%)                   | 5.8%<br>(3.2-9.2%)                  | 1<br>(0.56-1.7)      | 20<br>(11-33)      |
| Bermuda  | 2010 | Female | 75 to 79 | 17%<br>(9.8-28%)               | 83%<br>(72-90%)          | 1.3<br>(0.61-2.4)                           | 4%<br>(2-6.5%)                       | 5%<br>(2.5-8.2%)                    | 1.1<br>(0.55-1.8)    | 17<br>(8.3-28)     |
| Bermuda  | 2010 | Female | 80 to 84 | 16%<br>(8.5-26%)               | 84%<br>(74-92%)          | 1.3<br>(0.59-2.2)                           | 4.2%<br>(2.1-6.7%)                   | 5%<br>(2.5-8.1%)                    | 1.6<br>(0.75-2.6)    | 17<br>(8.3-29)     |
| Bermuda  | 2010 | Female | 85 to 89 | 16%<br>(8.9-25%)               | 84%<br>(75-91%)          | 1.3<br>(0.6-2.3)                            | 4.2%<br>(2.1-7%)                     | 4.9%<br>(2.4-8.1%)                  | 1.6<br>(0.74-2.6)    | 12<br>(5.8-20)     |
| Bermuda  | 2010 | Female | 90 to 94 | 17%<br>(10-28%)                | 83%<br>(72-90%)          | 1.5<br>(0.64-2.7)                           | 4.4%<br>(1.9-7.6%)                   | 5.1%<br>(2.2-9.1%)                  | 0.99<br>(0.43-1.8)   | 5.2<br>(2.3-9.1)   |
| Bermuda  | 2010 | Female | 95 plus  | 21%<br>(10-35%)                | 79%<br>(65-90%)          | 1.8<br>(0.63-3.6)                           | 4.8%<br>(1.8-8.7%)                   | 5.5%<br>(1.9-10%)                   | 0.43<br>(0.15-0.82)  | 1.5<br>(0.55-2.8)  |
| Bermuda  | 2010 | Male   | All Ages | 52%<br>(43-60%)                | 48%<br>(40-57%)          | 5.5<br>(5-6)                                | 9.4%<br>(7.6-11%)                    | 10%<br>(8.2-13%)                    | 23<br>(18-29)        | 730<br>(590-900)   |
| Bermuda  | 2010 | Male   | 15 to 19 | 51%<br>(33-69%)                | 49%<br>(31-67%)          | 4<br>(2.2-6.4)                              | 6.8%<br>(4.4-9.5%)                   | 15%<br>(8.5-22%)                    | 0.18<br>(0.1-0.27)   | 20<br>(13-27)      |
| Bermuda  | 2010 | Male   | 20 to 24 | 62%<br>(43-78%)                | 38%<br>(22-57%)          | 7.8<br>(4.7-11)                             | 14%<br>(10-19%)                      | 21%<br>(13-30%)                     | 0.64<br>(0.4-0.91)   | 57<br>(38-76)      |
| Bermuda  | 2010 | Male   | 25 to 29 | 65%<br>(46-81%)                | 35%<br>(19-54%)          | 9.4<br>(5.9-13)                             | 14%<br>(10-18%)                      | 21%<br>(13-28%)                     | 0.69<br>(0.44-0.94)  | 56<br>(40-74)      |
| Bermuda  | 2010 | Male   | 30 to 34 | 67%<br>(46-82%)                | 33%<br>(18-54%)          | 9.9<br>(6.1-14)                             | 11%<br>(8.1-14%)                     | 17%<br>(11-22%)                     | 0.43<br>(0.29-0.57)  | 36<br>(26-47)      |
| Bermuda  | 2010 | Male   | 35 to 39 | 66%<br>(49-81%)                | 34%<br>(19-51%)          | 9.3<br>(5.8-14)                             | 11%<br>(8.2-14%)                     | 16%<br>(12-21%)                     | 0.6<br>(0.43-0.78)   | 43<br>(32-55)      |
| Bermuda  | 2010 | Male   | 40 to 44 | 65%<br>(48-80%)                | 35%<br>(20-52%)          | 8.9<br>(5.1-13)                             | 12%<br>(8.9-15%)                     | 16%<br>(13-21%)                     | 1<br>(0.78-1.3)      | 59<br>(45-76)      |
| Bermuda  | 2010 | Male   | 45 to 49 | 63%<br>(42-79%)                | 37%<br>(21-58%)          | 8.2<br>(4.7-13)                             | 11%<br>(8.7-14%)                     | 16%<br>(12-19%)                     | 1.3<br>(1-1.7)       | 67<br>(51-85)      |
| Bermuda  | 2010 | Male   | 50 to 54 | 61%<br>(41-78%)                | 39%<br>(22-59%)          | 7.5<br>(4.2-12)                             | 11%<br>(8.4-14%)                     | 15%<br>(11-18%)                     | 1.4<br>(1.1-1.9)     | 61<br>(47-80)      |

| Location | Year | Sex    | Age      | Prevalence of current drinkers | Prevalence of abstainers | Population average of standard drinks daily | Percent of total attributable deaths | Percent of total attributable DALYs | Attributable deaths    | Attributable DALYs |
|----------|------|--------|----------|--------------------------------|--------------------------|---------------------------------------------|--------------------------------------|-------------------------------------|------------------------|--------------------|
| Bermuda  | 2010 | Male   | 55 to 59 | 59%<br>(40-76%)                | 41%<br>(24-60%)          | 6.8<br>(3.6-11)                             | 12%<br>(8.8-15%)                     | 14%<br>(11-18%)                     | 2.4<br>(1.8-3.1)       | 83<br>(62-110)     |
| Bermuda  | 2010 | Male   | 60 to 64 | 57%<br>(37-76%)                | 43%<br>(24-63%)          | 6.1<br>(3.2-11)                             | 10%<br>(7.5-14%)                     | 12%<br>(9.1-16%)                    | 2.2<br>(1.6-3)         | 65<br>(47-87)      |
| Bermuda  | 2010 | Male   | 65 to 69 | 55%<br>(36-73%)                | 45%<br>(27-64%)          | 5.4<br>(2.9-8.7)                            | 9.7%<br>(6.8-13%)                    | 12%<br>(8.4-15%)                    | 2.3<br>(1.6-3.1)       | 57<br>(39-76)      |
| Bermuda  | 2010 | Male   | 70 to 74 | 51%<br>(32-68%)                | 49%<br>(32-68%)          | 4.4<br>(2.3-7.6)                            | 8.4%<br>(5.7-12%)                    | 9.8%<br>(6.6-14%)                   | 2.5<br>(1.7-3.6)       | 49<br>(33-69)      |
| Bermuda  | 2010 | Male   | 75 to 79 | 46%<br>(28-66%)                | 54%<br>(34-72%)          | 3.6<br>(1.8-6.3)                            | 7.2%<br>(4.6-10%)                    | 8.1%<br>(5.2-11%)                   | 2.6<br>(1.7-3.8)       | 39<br>(25-56)      |
| Bermuda  | 2010 | Male   | 80 to 84 | 41%<br>(24-59%)                | 59%<br>(41-76%)          | 3<br>(1.5-5)                                | 6.3%<br>(4-9%)                       | 7.1%<br>(4.5-10%)                   | 2.2<br>(1.4-3.3)       | 25<br>(16-36)      |
| Bermuda  | 2010 | Male   | 85 to 89 | 36%<br>(21-53%)                | 64%<br>(47-79%)          | 2.6<br>(1.3-4.5)                            | 5.6%<br>(3.4-8.4%)                   | 6.2%<br>(3.8-9.6%)                  | 1.4<br>(0.84-2.1)      | 11<br>(6.7-17)     |
| Bermuda  | 2010 | Male   | 90 to 94 | 36%<br>(22-53%)                | 64%<br>(47-78%)          | 2.7<br>(1.3-4.9)                            | 5.6%<br>(3.3-8.4%)                   | 6.1%<br>(3.5-9.3%)                  | 0.92<br>(0.53-1.4)     | 4.9<br>(3-7.5)     |
| Bermuda  | 2010 | Male   | 95 plus  | 39%<br>(22-60%)                | 61%<br>(40-78%)          | 2.9<br>(1.2-5.7)                            | 5.8%<br>(3-9.4%)                     | 6.3%<br>(3.1-10%)                   | 0.28<br>(0.14-0.46)    | 1<br>(0.52-1.6)    |
| Bermuda  | 2016 | Female | All Ages | 28%<br>(22-34%)                | 72%<br>(66-78%)          | 2.3<br>(1.8-2.9)                            | 3.5%<br>(2.6-4.8%)                   | 5.3%<br>(3.5-7.5%)                  | 8.7<br>(5.5-13)        | 230<br>(160-310)   |
| Bermuda  | 2016 | Female | 15 to 19 | 33%<br>(21-49%)                | 67%<br>(51-79%)          | 2.6<br>(1.2-4.4)                            | 2.4%<br>(1.5-3.6%)                   | 8.2%<br>(4.4-12%)                   | 0.05<br>(0.026-0.08)   | 6.9<br>(4.3-9.9)   |
| Bermuda  | 2016 | Female | 20 to 24 | 38%<br>(23-55%)                | 62%<br>(45-77%)          | 3.8<br>(2-6.3)                              | 3.3%<br>(2.4-4.5%)                   | 7.6%<br>(4.8-11%)                   | 0.042<br>(0.025-0.065) | 9.5<br>(6.3-13)    |
| Bermuda  | 2016 | Female | 25 to 29 | 38%<br>(22-55%)                | 62%<br>(45-78%)          | 3.9<br>(2.1-6.3)                            | 3.5%<br>(2.6-4.6%)                   | 7%<br>(4.5-9.7%)                    | 0.06<br>(0.038-0.09)   | 11<br>(7.6-15)     |
| Bermuda  | 2016 | Female | 30 to 34 | 36%<br>(22-54%)                | 64%<br>(46-78%)          | 3.8<br>(2.1-6)                              | 3.6%<br>(2.6-4.8%)                   | 7.4%<br>(4.9-11%)                   | 0.091<br>(0.056-0.14)  | 12<br>(8.2-16)     |
| Bermuda  | 2016 | Female | 35 to 39 | 35%<br>(22-52%)                | 65%<br>(48-78%)          | 3.5<br>(1.9-5.6)                            | 3.4%<br>(2.4-4.7%)                   | 7.4%<br>(4.7-11%)                   | 0.11<br>(0.063-0.17)   | 11<br>(7.3-15)     |
| Bermuda  | 2016 | Female | 40 to 44 | 34%<br>(21-52%)                | 66%<br>(48-79%)          | 3.3<br>(1.7-5.6)                            | 3.8%<br>(2.5-5.6%)                   | 8.6%<br>(5.4-13%)                   | 0.2<br>(0.11-0.33)     | 15<br>(9.1-22)     |
| Bermuda  | 2016 | Female | 45 to 49 | 32%<br>(18-48%)                | 68%<br>(52-82%)          | 3.2<br>(1.6-5.6)                            | 4.3%<br>(2.7-6.7%)                   | 8.9%<br>(5.4-14%)                   | 0.32<br>(0.19-0.54)    | 19<br>(11-29)      |
| Bermuda  | 2016 | Female | 50 to 54 | 29%<br>(17-45%)                | 71%<br>(55-83%)          | 2.8<br>(1.4-4.9)                            | 4.7%<br>(2.9-7.4%)                   | 8.7%<br>(5.4-13%)                   | 0.52<br>(0.29-0.82)    | 24<br>(15-38)      |
| Bermuda  | 2016 | Female | 55 to 59 | 25%<br>(15-40%)                | 75%<br>(60-85%)          | 2.4<br>(1.1-4.1)                            | 4.6%<br>(2.8-7.1%)                   | 7.8%<br>(4.8-12%)                   | 0.58<br>(0.34-0.91)    | 23<br>(13-35)      |
| Bermuda  | 2016 | Female | 60 to 64 | 22%<br>(13-37%)                | 78%<br>(63-87%)          | 2<br>(0.95-3.6)                             | 4.3%<br>(2.6-6.8%)                   | 6.7%<br>(4-10%)                     | 0.67<br>(0.38-1.1)     | 21<br>(12-34)      |
| Bermuda  | 2016 | Female | 65 to 69 | 20%<br>(12-33%)                | 80%<br>(67-88%)          | 1.7<br>(0.88-3)                             | 4.1%<br>(2.4-6.5%)                   | 6.1%<br>(3.6-9.3%)                  | 0.72<br>(0.4-1.1)      | 19<br>(11-30)      |
| Bermuda  | 2016 | Female | 70 to 74 | 18%<br>(11-29%)                | 82%<br>(71-89%)          | 1.5<br>(0.7-2.8)                            | 3.7%<br>(1.9-6.2%)                   | 5.2%<br>(2.8-8.5%)                  | 0.79<br>(0.41-1.3)     | 16<br>(8.5-27)     |

| Location | Year | Sex    | Age      | Prevalence of current drinkers | Prevalence of abstainers | Population average of standard drinks daily | Percent of total attributable deaths | Percent of total attributable DALYs | Attributable deaths  | Attributable DALYs |
|----------|------|--------|----------|--------------------------------|--------------------------|---------------------------------------------|--------------------------------------|-------------------------------------|----------------------|--------------------|
| Bermuda  | 2016 | Female | 75 to 79 | 16%<br>(9.2-27%)               | 84%<br>(73-91%)          | 1.3<br>(0.56-2.3)                           | 3.4%<br>(1.7-5.8%)                   | 4.5%<br>(2.2-7.8%)                  | 0.92<br>(0.44-1.6)   | 15<br>(6.8-25)     |
| Bermuda  | 2016 | Female | 80 to 84 | 15%<br>(8.1-25%)               | 85%<br>(75-92%)          | 1.2<br>(0.54-2.1)                           | 3.4%<br>(1.7-5.7%)                   | 4.4%<br>(2.1-7.2%)                  | 1.1<br>(0.53-1.9)    | 13<br>(6-22)       |
| Bermuda  | 2016 | Female | 85 to 89 | 15%<br>(8.4-23%)               | 85%<br>(77-92%)          | 1.2<br>(0.53-2.2)                           | 3.5%<br>(1.7-6%)                     | 4.3%<br>(2-7.4%)                    | 1.2<br>(0.54-2.1)    | 9.4<br>(4.3-16)    |
| Bermuda  | 2016 | Female | 90 to 94 | 17%<br>(9.4-26%)               | 83%<br>(74-91%)          | 1.4<br>(0.58-2.7)                           | 3.8%<br>(1.7-6.6%)                   | 4.5%<br>(1.9-8%)                    | 0.9<br>(0.38-1.6)    | 4.8<br>(2.1-8.5)   |
| Bermuda  | 2016 | Female | 95 plus  | 20%<br>(9.9-34%)               | 80%<br>(66-90%)          | 1.6<br>(0.56-3.4)                           | 4.2%<br>(1.5-7.8%)                   | 4.9%<br>(1.6-9.4%)                  | 0.42<br>(0.14-0.83)  | 1.5<br>(0.53-2.8)  |
| Bermuda  | 2016 | Male   | All Ages | 51%<br>(43-60%)                | 49%<br>(40-57%)          | 5.4<br>(4.2-6.8)                            | 8.7%<br>(7-11%)                      | 9.6%<br>(7.7-12%)                   | 23<br>(17-29)        | 720<br>(570-910)   |
| Bermuda  | 2016 | Male   | 15 to 19 | 50%<br>(32-68%)                | 50%<br>(32-68%)          | 3.8<br>(1.9-6.5)                            | 5.8%<br>(3.9-8%)                     | 14%<br>(7.9-21%)                    | 0.12<br>(0.067-0.19) | 16<br>(10-22)      |
| Bermuda  | 2016 | Male   | 20 to 24 | 61%<br>(42-77%)                | 39%<br>(23-58%)          | 7.4<br>(4.1-11)                             | 13%<br>(9.2-16%)                     | 20%<br>(13-28%)                     | 0.46<br>(0.28-0.66)  | 46<br>(32-63)      |
| Bermuda  | 2016 | Male   | 25 to 29 | 64%<br>(44-80%)                | 36%<br>(20-56%)          | 9<br>(5.3-14)                               | 12%<br>(9.2-16%)                     | 19%<br>(12-26%)                     | 0.51<br>(0.31-0.73)  | 48<br>(34-64)      |
| Bermuda  | 2016 | Male   | 30 to 34 | 65%<br>(45-81%)                | 35%<br>(19-55%)          | 9.5<br>(5.6-14)                             | 11%<br>(7.9-14%)                     | 16%<br>(11-22%)                     | 0.44<br>(0.28-0.63)  | 40<br>(28-53)      |
| Bermuda  | 2016 | Male   | 35 to 39 | 65%<br>(48-80%)                | 35%<br>(20-52%)          | 8.9<br>(5.3-14)                             | 9.8%<br>(7.6-13%)                    | 15%<br>(11-19%)                     | 0.46<br>(0.31-0.65)  | 36<br>(26-48)      |
| Bermuda  | 2016 | Male   | 40 to 44 | 64%<br>(47-79%)                | 36%<br>(21-53%)          | 8.4<br>(4.5-13)                             | 11%<br>(8.1-13%)                     | 15%<br>(12-19%)                     | 0.85<br>(0.59-1.1)   | 51<br>(37-68)      |
| Bermuda  | 2016 | Male   | 45 to 49 | 62%<br>(40-78%)                | 38%<br>(22-60%)          | 7.8<br>(4.1-13)                             | 11%<br>(8.1-14%)                     | 15%<br>(11-19%)                     | 1.3<br>(0.91-1.8)    | 65<br>(48-86)      |
| Bermuda  | 2016 | Male   | 50 to 54 | 60%<br>(41-77%)                | 40%<br>(23-59%)          | 7.1<br>(3.7-12)                             | 10%<br>(7.8-13%)                     | 14%<br>(11-18%)                     | 1.7<br>(1.2-2.3)     | 72<br>(53-97)      |
| Bermuda  | 2016 | Male   | 55 to 59 | 58%<br>(39-76%)                | 42%<br>(24-61%)          | 6.4<br>(3.3-11)                             | 11%<br>(8-14%)                       | 14%<br>(10-18%)                     | 2.4<br>(1.7-3.3)     | 85<br>(61-120)     |
| Bermuda  | 2016 | Male   | 60 to 64 | 56%<br>(35-74%)                | 44%<br>(26-65%)          | 5.8<br>(3-10)                               | 9.5%<br>(6.8-13%)                    | 12%<br>(8.5-16%)                    | 2.3<br>(1.6-3.3)     | 70<br>(49-97)      |
| Bermuda  | 2016 | Male   | 65 to 69 | 54%<br>(35-72%)                | 46%<br>(28-65%)          | 5.1<br>(2.7-8.7)                            | 9.1%<br>(6.4-12%)                    | 11%<br>(7.9-15%)                    | 2.4<br>(1.7-3.4)     | 60<br>(42-82)      |
| Bermuda  | 2016 | Male   | 70 to 74 | 50%<br>(32-67%)                | 50%<br>(33-68%)          | 4.2<br>(2.1-7.4)                            | 7.8%<br>(5.3-11%)                    | 9.2%<br>(6.3-13%)                   | 2.5<br>(1.7-3.6)     | 50<br>(33-70)      |
| Bermuda  | 2016 | Male   | 75 to 79 | 45%<br>(27-64%)                | 55%<br>(36-73%)          | 3.4<br>(1.6-6)                              | 6.6%<br>(4.3-9.4%)                   | 7.6%<br>(4.8-11%)                   | 2.6<br>(1.7-3.8)     | 40<br>(25-57)      |
| Bermuda  | 2016 | Male   | 80 to 84 | 39%<br>(22-58%)                | 61%<br>(42-78%)          | 2.8<br>(1.4-4.9)                            | 5.8%<br>(3.7-8.5%)                   | 6.6%<br>(4.2-9.7%)                  | 2.1<br>(1.3-3.1)     | 23<br>(15-34)      |
| Bermuda  | 2016 | Male   | 85 to 89 | 35%<br>(20-51%)                | 65%<br>(49-80%)          | 2.5<br>(1.2-4.5)                            | 5.1%<br>(3.2-7.8%)                   | 5.8%<br>(3.5-9%)                    | 1.3<br>(0.79-2)      | 11<br>(6.5-16)     |
| Bermuda  | 2016 | Male   | 90 to 94 | 35%<br>(21-52%)                | 65%<br>(48-79%)          | 2.5<br>(1.1-4.7)                            | 5.2%<br>(2.9-7.8%)                   | 5.7%<br>(3.1-8.7%)                  | 0.96<br>(0.54-1.5)   | 5.2<br>(3-7.8)     |

| Location  | Year | Sex    | Age      | Prevalence of current drinkers | Prevalence of abstainers | Population average of standard drinks daily | Percent of total attributable deaths | Percent of total attributable DALYs | Attributable deaths       | Attributable DALYs    |
|-----------|------|--------|----------|--------------------------------|--------------------------|---------------------------------------------|--------------------------------------|-------------------------------------|---------------------------|-----------------------|
| Bermuda   | 2016 | Male   | 95 plus  | 38%<br>(20-59%)                | 62%<br>(41-80%)          | 2.7<br>(1-5.4)                              | 5.4%<br>(2.6-8.9%)                   | 5.9%<br>(2.6-9.9%)                  | 0.31<br>(0.13-0.51)       | 1.1<br>(0.52-1.8)     |
| Greenland | 1990 | Female | All Ages | 74%<br>(67-80%)                | 26%<br>(20-33%)          | 1.8<br>(1.1-2.8)                            | 5.1%<br>(2.8-8.3%)                   | 5%<br>(1.9-9.4%)                    | 9.1<br>(3.5-18)           | 450<br>(240-720)      |
| Greenland | 1990 | Female | 15 to 19 | 64%<br>(48-79%)                | 36%<br>(21-52%)          | 1.6<br>(0.75-2.8)                           | 7.2%<br>(1.9-15%)                    | 11%<br>(2.3-22%)                    | 0.4<br>(0.091-0.85)       | 30<br>(8.1-62)        |
| Greenland | 1990 | Female | 20 to 24 | 80%<br>(66-90%)                | 20%<br>(10-34%)          | 3<br>(1.6-5.1)                              | 9.8%<br>(4.2-17%)                    | 19%<br>(6.3-33%)                    | 0.71<br>(0.24-1.3)        | 55<br>(24-95)         |
| Greenland | 1990 | Female | 25 to 29 | 84%<br>(74-91%)                | 16%<br>(8.6-26%)         | 3<br>(1.7-5.1)                              | 10%<br>(4.5-17%)                     | 19%<br>(7.1-33%)                    | 0.98<br>(0.38-1.7)        | 68<br>(31-110)        |
| Greenland | 1990 | Female | 30 to 34 | 86%<br>(77-93%)                | 14%<br>(6.9-23%)         | 2.9<br>(1.6-4.8)                            | 8.8%<br>(4.2-14%)                    | 17%<br>(6.7-28%)                    | 0.69<br>(0.29-1.2)        | 45<br>(21-74)         |
| Greenland | 1990 | Female | 35 to 39 | 87%<br>(78-94%)                | 13%<br>(6.3-22%)         | 2.6<br>(1.4-4.5)                            | 8.5%<br>(4.6-13%)                    | 15%<br>(7.2-24%)                    | 0.63<br>(0.3-1.1)         | 38<br>(21-61)         |
| Greenland | 1990 | Female | 40 to 44 | 87%<br>(78-93%)                | 13%<br>(6.6-22%)         | 2.5<br>(1.3-4.4)                            | 9.9%<br>(5.7-15%)                    | 15%<br>(7.8-23%)                    | 0.86<br>(0.46-1.4)        | 44<br>(25-72)         |
| Greenland | 1990 | Female | 45 to 49 | 86%<br>(76-93%)                | 14%<br>(6.9-24%)         | 2.4<br>(1.3-4)                              | 9.2%<br>(5.6-14%)                    | 13%<br>(7.9-20%)                    | 0.93<br>(0.54-1.5)        | 43<br>(26-66)         |
| Greenland | 1990 | Female | 50 to 54 | 85%<br>(75-92%)                | 15%<br>(8-25%)           | 2.2<br>(1.1-3.8)                            | 8.2%<br>(4.7-13%)                    | 11%<br>(6.4-18%)                    | 0.86<br>(0.48-1.4)        | 34<br>(19-55)         |
| Greenland | 1990 | Female | 55 to 59 | 83%<br>(71-91%)                | 17%<br>(8.8-29%)         | 2<br>(1-3.4)                                | 7%<br>(3.6-12%)                      | 8.6%<br>(4.4-14%)                   | 1.3<br>(0.65-2.2)         | 42<br>(21-72)         |
| Greenland | 1990 | Female | 60 to 64 | 80%<br>(67-90%)                | 20%<br>(9.9-33%)         | 1.8<br>(0.92-3.3)                           | 4.8%<br>(1.6-9.4%)                   | 5.8%<br>(2-11%)                     | 0.99<br>(0.34-1.9)        | 27<br>(9.2-55)        |
| Greenland | 1990 | Female | 65 to 69 | 77%<br>(62-88%)                | 23%<br>(12-38%)          | 1.6<br>(0.82-2.8)                           | 3%<br>(0.28-7.2%)                    | 3.6%<br>(0.37-8.3%)                 | 0.58<br>(0.061-1.4)       | 13<br>(1.2-32)        |
| Greenland | 1990 | Female | 70 to 74 | 74%<br>(60-85%)                | 26%<br>(15-40%)          | 1.4<br>(0.66-2.6)                           | 1.6%<br>(-0.97-6.2%)                 | 1.9%<br>(-1-6.9%)                   | 0.37<br>(-0.2-1.4)        | 6.5<br>(-3.9-26)      |
| Greenland | 1990 | Female | 75 to 79 | 72%<br>(56-84%)                | 28%<br>(16-44%)          | 1.3<br>(0.62-2.4)                           | 0.32%<br>(-2.4-4.8%)                 | 0.38%<br>(-2.7-5.3%)                | 0.076<br>(-0.53-1)        | 1<br>(-7.5-15)        |
| Greenland | 1990 | Female | 80 to 84 | 69%<br>(51-82%)                | 31%<br>(18-49%)          | 1.3<br>(0.61-2.3)                           | -0.8%<br>(-4-4.1%)                   | -0.87%<br>(-4.2-4.2%)               | -0.17<br>(-0.83-0.82)     | -1.7<br>(-8.5-8.6)    |
| Greenland | 1990 | Female | 85 to 89 | 67%<br>(49-80%)                | 33%<br>(20-51%)          | 1.2<br>(0.6-2.3)                            | -0.96%<br>(-3.8-3.4%)                | -1.1%<br>(-4.2-3.5%)                | -0.095<br>(-0.36-0.31)    | -0.66<br>(-2.6-2.4)   |
| Greenland | 1990 | Female | 90 to 94 | 67%<br>(51-80%)                | 33%<br>(20-49%)          | 1.3<br>(0.63-2.5)                           | -1%<br>(-4.4-3.6%)                   | -1.2%<br>(-4.8-3.8%)                | -0.033<br>(-0.13-0.1)     | -0.16<br>(-0.65-0.54) |
| Greenland | 1990 | Female | 95 plus  | 69%<br>(51-84%)                | 31%<br>(16-49%)          | 1.4<br>(0.62-2.7)                           | -1.4%<br>(-5-4.7%)                   | -1.6%<br>(-5.7-4.9%)                | -0.0094<br>(-0.033-0.028) | -0.03<br>(-0.11-0.1)  |
| Greenland | 1990 | Male   | All Ages | 82%<br>(76-87%)                | 18%<br>(13-24%)          | 2.2<br>(1.4-3.3)                            | 11%<br>(6.1-16%)                     | 10%<br>(5.3-16%)                    | 30<br>(15-47)             | 1600<br>(880-2500)    |
| Greenland | 1990 | Male   | 15 to 19 | 68%<br>(52-82%)                | 32%<br>(18-48%)          | 1.7<br>(0.78-3.1)                           | 11%<br>(2.9-22%)                     | 12%<br>(2.8-24%)                    | 1.9<br>(0.41-3.6)         | 130<br>(34-260)       |
| Greenland | 1990 | Male   | 20 to 24 | 84%<br>(74-91%)                | 16%<br>(8.5-26%)         | 3.4<br>(1.8-5.8)                            | 21%<br>(9.2-34%)                     | 23%<br>(9.1-39%)                    | 5.7<br>(2.2-9.7)          | 400<br>(170-660)      |



| Location  | Year | Sex    | Age      | Prevalence of current drinkers | Prevalence of abstainers | Population average of standard drinks daily | Percent of total attributable deaths | Percent of total attributable DALYs | Attributable deaths        | Attributable DALYs      |
|-----------|------|--------|----------|--------------------------------|--------------------------|---------------------------------------------|--------------------------------------|-------------------------------------|----------------------------|-------------------------|
| Greenland | 1990 | Male   | 25 to 29 | 89%<br>(82-94%)                | 11%<br>(5.9-18%)         | 3.6<br>(2-5.9)                              | 20%<br>(9.8-32%)                     | 23%<br>(9.5-37%)                    | 4.4<br>(1.9-7)             | 300<br>(140-460)        |
| Greenland | 1990 | Male   | 30 to 34 | 92%<br>(85-96%)                | 8.2%<br>(4-15%)          | 3.4<br>(1.9-5.6)                            | 19%<br>(9.8-28%)                     | 22%<br>(10-34%)                     | 3.3<br>(1.5-5.2)           | 210<br>(110-310)        |
| Greenland | 1990 | Male   | 35 to 39 | 92%<br>(87-96%)                | 7.5%<br>(3.6-13%)        | 3<br>(1.6-5.2)                              | 16%<br>(9.7-24%)                     | 20%<br>(11-31%)                     | 2.4<br>(1.3-3.8)           | 140<br>(80-210)         |
| Greenland | 1990 | Male   | 40 to 44 | 93%<br>(87-96%)                | 7.3%<br>(3.5-13%)        | 2.8<br>(1.4-4.9)                            | 14%<br>(8.4-22%)                     | 18%<br>(9.3-28%)                    | 2.5<br>(1.3-4)             | 130<br>(71-200)         |
| Greenland | 1990 | Male   | 45 to 49 | 93%<br>(85-96%)                | 7.4%<br>(3.5-15%)        | 2.7<br>(1.4-4.5)                            | 12%<br>(7.6-19%)                     | 16%<br>(8.9-25%)                    | 1.9<br>(1-3.1)             | 89<br>(54-140)          |
| Greenland | 1990 | Male   | 50 to 54 | 92%<br>(84-96%)                | 7.8%<br>(3.7-16%)        | 2.5<br>(1.3-4.3)                            | 10%<br>(5.6-17%)                     | 12%<br>(6-20%)                      | 2.1<br>(1.1-3.7)           | 82<br>(45-140)          |
| Greenland | 1990 | Male   | 55 to 59 | 92%<br>(84-96%)                | 8.5%<br>(4-16%)          | 2.3<br>(1.2-3.9)                            | 8.2%<br>(4.5-14%)                    | 9.2%<br>(4.8-16%)                   | 1.9<br>(0.99-3.3)          | 64<br>(35-110)          |
| Greenland | 1990 | Male   | 60 to 64 | 91%<br>(82-96%)                | 9.4%<br>(4.2-18%)        | 2.1<br>(1.1-3.7)                            | 6%<br>(2.6-11%)                      | 6.5%<br>(2.6-12%)                   | 1.8<br>(0.7-3.4)           | 50<br>(21-94)           |
| Greenland | 1990 | Male   | 65 to 69 | 89%<br>(81-95%)                | 11%<br>(4.7-19%)         | 1.9<br>(1-3.3)                              | 4.1%<br>(1-8.5%)                     | 4.3%<br>(1-9%)                      | 1<br>(0.24-2.2)            | 24<br>(6-50)            |
| Greenland | 1990 | Male   | 70 to 74 | 88%<br>(80-94%)                | 12%<br>(5.8-20%)         | 1.6<br>(0.79-3.1)                           | 2.4%<br>(-0.082-6.5%)                | 2.5%<br>(-0.2-6.9%)                 | 0.62<br>(-0.049-1.7)       | 12<br>(-0.41-32)        |
| Greenland | 1990 | Male   | 75 to 79 | 87%<br>(78-94%)                | 13%<br>(6.3-22%)         | 1.5<br>(0.7-2.8)                            | 1.4%<br>(-0.84-5.6%)                 | 1.4%<br>(-1-5.7%)                   | 0.31<br>(-0.24-1.3)        | 4.7<br>(-3-19)          |
| Greenland | 1990 | Male   | 80 to 84 | 86%<br>(75-93%)                | 14%<br>(6.9-25%)         | 1.4<br>(0.72-2.5)                           | 0.75%<br>(-1.8-4.6%)                 | 0.68%<br>(-1.9-4.7%)                | 0.063<br>(-0.18-0.44)      | 0.76<br>(-1.8-4.7)      |
| Greenland | 1990 | Male   | 85 to 89 | 85%<br>(74-92%)                | 15%<br>(8.3-26%)         | 1.4<br>(0.69-2.4)                           | 0.39%<br>(-1.7-3.6%)                 | 0.25%<br>(-2-3.6%)                  | 0.01<br>(-0.081-0.14)      | 0.12<br>(-0.55-1.1)     |
| Greenland | 1990 | Male   | 90 to 94 | 85%<br>(75-92%)                | 15%<br>(7.8-25%)         | 1.4<br>(0.68-2.6)                           | -0.23%<br>(-2.4-3%)                  | -0.48%<br>(-2.9-3%)                 | -0.0068<br>(-0.041-0.042)  | -0.018<br>(-0.19-0.23)  |
| Greenland | 1990 | Male   | 95 plus  | 85%<br>(73-93%)                | 15%<br>(6.8-27%)         | 1.4<br>(0.64-2.7)                           | -0.82%<br>(-3.3-2.9%)                | -1.2%<br>(-4-2.7%)                  | -0.0041<br>(-0.014-0.0091) | -0.01<br>(-0.043-0.037) |
| Greenland | 1995 | Female | All Ages | 74%<br>(67-80%)                | 26%<br>(20-33%)          | 1.7<br>(1-2.6)                              | 5.3%<br>(2.9-8.5%)                   | 5%<br>(1.9-9.4%)                    | 8.8<br>(3.4-17)            | 420<br>(230-690)        |
| Greenland | 1995 | Female | 15 to 19 | 65%<br>(49-79%)                | 35%<br>(21-51%)          | 1.5<br>(0.7-2.8)                            | 7%<br>(1.7-14%)                      | 11%<br>(2-23%)                      | 0.35<br>(0.062-0.75)       | 26<br>(6-55)            |
| Greenland | 1995 | Female | 20 to 24 | 80%<br>(66-89%)                | 20%<br>(11-34%)          | 2.9<br>(1.5-4.9)                            | 9.6%<br>(4-17%)                      | 19%<br>(6-34%)                      | 0.37<br>(0.12-0.67)        | 29<br>(11-49)           |
| Greenland | 1995 | Female | 25 to 29 | 84%<br>(74-91%)                | 16%<br>(8.8-26%)         | 3<br>(1.6-5)                                | 10%<br>(4.4-17%)                     | 20%<br>(7.2-34%)                    | 0.84<br>(0.27-1.5)         | 59<br>(25-98)           |
| Greenland | 1995 | Female | 30 to 34 | 86%<br>(77-93%)                | 14%<br>(6.9-23%)         | 2.9<br>(1.6-4.8)                            | 8.8%<br>(4.2-14%)                    | 17%<br>(6.8-29%)                    | 0.81<br>(0.31-1.4)         | 53<br>(25-87)           |
| Greenland | 1995 | Female | 35 to 39 | 87%<br>(78-94%)                | 13%<br>(6.4-22%)         | 2.6<br>(1.4-4.3)                            | 8.3%<br>(4.3-13%)                    | 15%<br>(6.9-24%)                    | 0.69<br>(0.31-1.2)         | 42<br>(22-67)           |
| Greenland | 1995 | Female | 40 to 44 | 87%<br>(79-93%)                | 13%<br>(6.5-21%)         | 2.4<br>(1.3-4.2)                            | 9.5%<br>(5.6-14%)                    | 15%<br>(7.9-23%)                    | 0.93<br>(0.5-1.5)          | 48<br>(27-74)           |

| Location  | Year | Sex    | Age      | Prevalence of current drinkers | Prevalence of abstainers | Population average of standard drinks daily | Percent of total attributable deaths | Percent of total attributable DALYs | Attributable deaths      | Attributable DALYs     |
|-----------|------|--------|----------|--------------------------------|--------------------------|---------------------------------------------|--------------------------------------|-------------------------------------|--------------------------|------------------------|
| Greenland | 1995 | Female | 45 to 49 | 86%<br>(76-93%)                | 14%<br>(7-24%)           | 2.4<br>(1.3-4)                              | 9%<br>(5.4-13%)                      | 14%<br>(8-21%)                      | 0.78<br>(0.44-1.2)       | 36<br>(21-55)          |
| Greenland | 1995 | Female | 50 to 54 | 85%<br>(74-92%)                | 15%<br>(8.1-26%)         | 2.2<br>(1.1-3.8)                            | 8.1%<br>(4.8-13%)                    | 11%<br>(6.5-17%)                    | 1<br>(0.58-1.6)          | 39<br>(23-62)          |
| Greenland | 1995 | Female | 55 to 59 | 83%<br>(71-91%)                | 17%<br>(8.8-29%)         | 2<br>(1-3.4)                                | 7%<br>(3.7-11%)                      | 8.6%<br>(4.5-14%)                   | 1.2<br>(0.62-1.9)        | 39<br>(21-64)          |
| Greenland | 1995 | Female | 60 to 64 | 80%<br>(67-90%)                | 20%<br>(10-33%)          | 1.7<br>(0.89-3.1)                           | 4.7%<br>(1.8-8.7%)                   | 5.8%<br>(2.3-10%)                   | 0.97<br>(0.39-1.8)       | 27<br>(11-50)          |
| Greenland | 1995 | Female | 65 to 69 | 77%<br>(62-88%)                | 23%<br>(12-38%)          | 1.5<br>(0.81-2.7)                           | 2.9%<br>(0.35-6.8%)                  | 3.5%<br>(0.49-7.7%)                 | 0.74<br>(0.1-1.7)        | 17<br>(2.1-39)         |
| Greenland | 1995 | Female | 70 to 74 | 74%<br>(60-85%)                | 26%<br>(15-40%)          | 1.4<br>(0.64-2.4)                           | 1.5%<br>(-1-5.7%)                    | 1.8%<br>(-1.1-6.5%)                 | 0.35<br>(-0.2-1.3)       | 6.1<br>(-4.1-23)       |
| Greenland | 1995 | Female | 75 to 79 | 72%<br>(56-84%)                | 28%<br>(16-44%)          | 1.2<br>(0.59-2.4)                           | 0.24%<br>(-2.4-4.5%)                 | 0.29%<br>(-2.6-5%)                  | 0.064<br>(-0.58-1.1)     | 0.83<br>(-7.9-15)      |
| Greenland | 1995 | Female | 80 to 84 | 69%<br>(51-82%)                | 31%<br>(18-49%)          | 1.2<br>(0.59-2.2)                           | -0.79%<br>(-3.8-3.9%)                | -0.87%<br>(-4-3.9%)                 | -0.15<br>(-0.68-0.67)    | -1.5<br>(-7-7)         |
| Greenland | 1995 | Female | 85 to 89 | 67%<br>(49-80%)                | 33%<br>(20-51%)          | 1.2<br>(0.58-2.2)                           | -0.95%<br>(-3.7-3.1%)                | -1.1%<br>(-4-3.2%)                  | -0.089<br>(-0.33-0.26)   | -0.62<br>(-2.4-2)      |
| Greenland | 1995 | Female | 90 to 94 | 67%<br>(52-80%)                | 33%<br>(20-48%)          | 1.3<br>(0.61-2.4)                           | -1%<br>(-4.1-3.5%)                   | -1.2%<br>(-4.6-3.7%)                | -0.035<br>(-0.13-0.11)   | -0.17<br>(-0.67-0.59)  |
| Greenland | 1995 | Female | 95 plus  | 68%<br>(51-84%)                | 32%<br>(16-49%)          | 1.4<br>(0.6-2.7)                            | -1.4%<br>(-5-4.3%)                   | -1.6%<br>(-5.5-4.5%)                | -0.012<br>(-0.042-0.034) | -0.039<br>(-0.14-0.12) |
| Greenland | 1995 | Male   | All Ages | 81%<br>(76-86%)                | 19%<br>(14-24%)          | 2.1<br>(1.3-3.1)                            | 10%<br>(5.9-15%)                     | 9.2%<br>(5-14%)                     | 23<br>(13-37)            | 1200<br>(700-1800)     |
| Greenland | 1995 | Male   | 15 to 19 | 68%<br>(52-81%)                | 32%<br>(19-48%)          | 1.6<br>(0.75-2.9)                           | 11%<br>(2.7-20%)                     | 12%<br>(2.6-23%)                    | 1.2<br>(0.26-2.4)        | 90<br>(23-170)         |
| Greenland | 1995 | Male   | 20 to 24 | 84%<br>(74-91%)                | 16%<br>(8.6-26%)         | 3.3<br>(1.7-5.5)                            | 20%<br>(8.7-33%)                     | 23%<br>(8.5-38%)                    | 2.4<br>(0.88-4.1)        | 170<br>(70-280)        |
| Greenland | 1995 | Male   | 25 to 29 | 89%<br>(82-94%)                | 11%<br>(5.9-18%)         | 3.5<br>(1.9-5.8)                            | 20%<br>(10-30%)                      | 23%<br>(10-37%)                     | 3.3<br>(1.4-5.4)         | 230<br>(110-350)       |
| Greenland | 1995 | Male   | 30 to 34 | 92%<br>(85-96%)                | 8.3%<br>(4-15%)          | 3.3<br>(1.9-5.6)                            | 18%<br>(9.7-26%)                     | 21%<br>(10-34%)                     | 2.9<br>(1.4-4.7)         | 190<br>(100-290)       |
| Greenland | 1995 | Male   | 35 to 39 | 92%<br>(87-96%)                | 7.5%<br>(3.6-13%)        | 3<br>(1.6-5)                                | 15%<br>(9.6-23%)                     | 20%<br>(11-30%)                     | 2.1<br>(1.1-3.2)         | 120<br>(77-180)        |
| Greenland | 1995 | Male   | 40 to 44 | 93%<br>(87-97%)                | 7.3%<br>(3.5-13%)        | 2.7<br>(1.4-4.7)                            | 14%<br>(8.5-21%)                     | 17%<br>(9.6-27%)                    | 2<br>(1.1-3.2)           | 110<br>(62-160)        |
| Greenland | 1995 | Male   | 45 to 49 | 93%<br>(85-97%)                | 7.4%<br>(3.5-15%)        | 2.6<br>(1.4-4.4)                            | 12%<br>(7.6-18%)                     | 16%<br>(9.2-25%)                    | 1.4<br>(0.85-2.3)        | 70<br>(45-110)         |
| Greenland | 1995 | Male   | 50 to 54 | 92%<br>(84-96%)                | 7.9%<br>(3.8-16%)        | 2.4<br>(1.2-4.1)                            | 9.8%<br>(5.7-16%)                    | 12%<br>(6.3-19%)                    | 2.2<br>(1.2-3.7)         | 87<br>(51-140)         |
| Greenland | 1995 | Male   | 55 to 59 | 91%<br>(84-96%)                | 8.5%<br>(4.1-16%)        | 2.2<br>(1.2-3.8)                            | 8.1%<br>(4.8-13%)                    | 9.4%<br>(5.3-16%)                   | 1.7<br>(0.96-2.9)        | 58<br>(34-96)          |
| Greenland | 1995 | Male   | 60 to 64 | 91%<br>(82-96%)                | 9.5%<br>(4.2-18%)        | 2<br>(1-3.5)                                | 6%<br>(2.8-11%)                      | 6.6%<br>(3-12%)                     | 1.7<br>(0.75-3)          | 48<br>(22-85)          |

| Location  | Year | Sex    | Age      | Prevalence of current drinkers | Prevalence of abstainers | Population average of standard drinks daily | Percent of total attributable deaths | Percent of total attributable DALYs | Attributable deaths       | Attributable DALYs       |
|-----------|------|--------|----------|--------------------------------|--------------------------|---------------------------------------------|--------------------------------------|-------------------------------------|---------------------------|--------------------------|
| Greenland | 1995 | Male   | 65 to 69 | 89%<br>(81-95%)                | 11%<br>(4.6-19%)         | 1.9<br>(0.98-3.2)                           | 4.1%<br>(1.5-8%)                     | 4.4%<br>(1.4-8.7%)                  | 1.3<br>(0.42-2.5)         | 30<br>(11-58)            |
| Greenland | 1995 | Male   | 70 to 74 | 88%<br>(80-94%)                | 12%<br>(5.8-20%)         | 1.6<br>(0.77-2.9)                           | 2.5%<br>(0.038-6.2%)                 | 2.6%<br>(-0.1-6.6%)                 | 0.6<br>(-0.024-1.6)       | 11<br>(0.17-29)          |
| Greenland | 1995 | Male   | 75 to 79 | 87%<br>(78-94%)                | 13%<br>(6.3-22%)         | 1.4<br>(0.68-2.7)                           | 1.4%<br>(-0.69-5.1%)                 | 1.4%<br>(-0.89-5.3%)                | 0.3<br>(-0.19-1.1)        | 4.5<br>(-2.2-16)         |
| Greenland | 1995 | Male   | 80 to 84 | 86%<br>(76-93%)                | 14%<br>(6.9-24%)         | 1.4<br>(0.69-2.4)                           | 0.69%<br>(-1.7-4.2%)                 | 0.63%<br>(-1.9-4.3%)                | 0.057<br>(-0.18-0.39)     | 0.69<br>(-1.7-4.2)       |
| Greenland | 1995 | Male   | 85 to 89 | 84%<br>(74-92%)                | 16%<br>(8.4-26%)         | 1.3<br>(0.66-2.3)                           | 0.28%<br>(-1.8-3.5%)                 | 0.16%<br>(-2.1-3.5%)                | 0.0062<br>(-0.081-0.14)   | 0.088<br>(-0.56-1.1)     |
| Greenland | 1995 | Male   | 90 to 94 | 85%<br>(75-92%)                | 15%<br>(7.8-25%)         | 1.4<br>(0.65-2.5)                           | -0.34%<br>(-2.5-2.8%)                | -0.57%<br>(-2.9-2.7%)               | -0.0085<br>(-0.043-0.04)  | -0.028<br>(-0.21-0.23)   |
| Greenland | 1995 | Male   | 95 plus  | 85%<br>(73-93%)                | 15%<br>(6.6-27%)         | 1.4<br>(0.6-2.7)                            | -0.94%<br>(-3.4-2.3%)                | -1.3%<br>(-4.1-2.2%)                | -0.005<br>(-0.015-0.0083) | -0.014<br>(-0.049-0.033) |
| Greenland | 2000 | Female | All Ages | 74%<br>(67-80%)                | 26%<br>(20-33%)          | 1.7<br>(1-2.6)                              | 5.9%<br>(3.3-9.3%)                   | 5.4%<br>(2.4-10%)                   | 10<br>(4.3-18)            | 460<br>(260-740)         |
| Greenland | 2000 | Female | 15 to 19 | 65%<br>(49-79%)                | 35%<br>(21-51%)          | 1.5<br>(0.71-2.8)                           | 7.1%<br>(1.7-15%)                    | 11%<br>(2.1-23%)                    | 0.41<br>(0.077-0.84)      | 31<br>(7.4-61)           |
| Greenland | 2000 | Female | 20 to 24 | 80%<br>(67-89%)                | 20%<br>(11-33%)          | 2.9<br>(1.4-5)                              | 11%<br>(4.4-18%)                     | 19%<br>(6.1-34%)                    | 0.49<br>(0.16-0.88)       | 37<br>(15-63)            |
| Greenland | 2000 | Female | 25 to 29 | 84%<br>(74-91%)                | 16%<br>(8.7-26%)         | 3<br>(1.6-5.2)                              | 12%<br>(5.5-19%)                     | 21%<br>(8.1-35%)                    | 0.64<br>(0.24-1.1)        | 43<br>(19-71)            |
| Greenland | 2000 | Female | 30 to 34 | 86%<br>(77-93%)                | 14%<br>(6.9-23%)         | 2.9<br>(1.6-4.9)                            | 9.4%<br>(4.4-16%)                    | 18%<br>(7.3-30%)                    | 0.86<br>(0.35-1.5)        | 55<br>(26-91)            |
| Greenland | 2000 | Female | 35 to 39 | 87%<br>(78-94%)                | 13%<br>(6.4-22%)         | 2.6<br>(1.4-4.3)                            | 8.1%<br>(4.4-13%)                    | 15%<br>(7.2-24%)                    | 0.81<br>(0.38-1.3)        | 50<br>(27-79)            |
| Greenland | 2000 | Female | 40 to 44 | 87%<br>(79-94%)                | 13%<br>(6.3-21%)         | 2.4<br>(1.3-4.2)                            | 9.3%<br>(5.8-14%)                    | 15%<br>(8.8-23%)                    | 0.97<br>(0.56-1.5)        | 51<br>(31-77)            |
| Greenland | 2000 | Female | 45 to 49 | 86%<br>(76-93%)                | 14%<br>(6.9-24%)         | 2.3<br>(1.3-4)                              | 9.5%<br>(6.2-14%)                    | 14%<br>(8.8-21%)                    | 1.1<br>(0.68-1.7)         | 50<br>(32-74)            |
| Greenland | 2000 | Female | 50 to 54 | 85%<br>(74-92%)                | 15%<br>(8.2-26%)         | 2.2<br>(1.1-3.8)                            | 9.1%<br>(5.7-14%)                    | 12%<br>(7.4-18%)                    | 1.2<br>(0.73-1.9)         | 47<br>(29-72)            |
| Greenland | 2000 | Female | 55 to 59 | 83%<br>(72-91%)                | 17%<br>(8.9-28%)         | 2<br>(1-3.5)                                | 7.2%<br>(4.1-11%)                    | 9%<br>(5.1-14%)                     | 1.3<br>(0.75-2.1)         | 44<br>(25-71)            |
| Greenland | 2000 | Female | 60 to 64 | 80%<br>(68-90%)                | 20%<br>(10-32%)          | 1.8<br>(0.87-3.1)                           | 5.2%<br>(2.3-9.4%)                   | 6.3%<br>(2.8-11%)                   | 1<br>(0.45-1.9)           | 29<br>(13-53)            |
| Greenland | 2000 | Female | 65 to 69 | 77%<br>(63-88%)                | 23%<br>(12-37%)          | 1.6<br>(0.79-2.7)                           | 3.3%<br>(0.74-7%)                    | 3.9%<br>(0.96-8.2%)                 | 0.88<br>(0.22-1.9)        | 20<br>(4.5-44)           |
| Greenland | 2000 | Female | 70 to 74 | 74%<br>(59-85%)                | 26%<br>(15-41%)          | 1.4<br>(0.66-2.4)                           | 1.7%<br>(-0.72-5.6%)                 | 2%<br>(-0.78-6.5%)                  | 0.52<br>(-0.2-1.6)        | 9.2<br>(-3.9-30)         |
| Greenland | 2000 | Female | 75 to 79 | 72%<br>(56-84%)                | 28%<br>(16-44%)          | 1.3<br>(0.59-2.3)                           | 0.25%<br>(-2.2-4.3%)                 | 0.29%<br>(-2.5-4.7%)                | 0.067<br>(-0.56-1)        | 0.92<br>(-8-15)          |
| Greenland | 2000 | Female | 80 to 84 | 69%<br>(52-82%)                | 31%<br>(18-48%)          | 1.2<br>(0.6-2.2)                            | -0.57%<br>(-3.5-3.8%)                | -0.64%<br>(-3.7-4%)                 | -0.092<br>(-0.52-0.57)    | -0.89<br>(-5.3-6)        |

| Location  | Year | Sex    | Age      | Prevalence of current drinkers | Prevalence of abstainers | Population average of standard drinks daily | Percent of total attributable deaths | Percent of total attributable DALYs | Attributable deaths        | Attributable DALYs      |
|-----------|------|--------|----------|--------------------------------|--------------------------|---------------------------------------------|--------------------------------------|-------------------------------------|----------------------------|-------------------------|
| Greenland | 2000 | Female | 85 to 89 | 67%<br>(50-80%)                | 33%<br>(20-50%)          | 1.2<br>(0.58-2.2)                           | -0.89%<br>(-3.7-3.3%)                | -1%<br>(-4-3.4%)                    | -0.1<br>(-0.4-0.35)        | -0.69<br>(-3-2.6)       |
| Greenland | 2000 | Female | 90 to 94 | 67%<br>(52-81%)                | 33%<br>(19-48%)          | 1.3<br>(0.62-2.3)                           | -0.85%<br>(-3.8-3.6%)                | -1%<br>(-4.3-3.8%)                  | -0.032<br>(-0.13-0.12)     | -0.15<br>(-0.67-0.63)   |
| Greenland | 2000 | Female | 95 plus  | 69%<br>(50-84%)                | 31%<br>(16-50%)          | 1.4<br>(0.6-2.6)                            | -1.2%<br>(-4.8-4.6%)                 | -1.5%<br>(-5.3-4.8%)                | -0.013<br>(-0.048-0.042)   | -0.04<br>(-0.16-0.15)   |
| Greenland | 2000 | Male   | All Ages | 81%<br>(76-87%)                | 19%<br>(13-24%)          | 2<br>(1.2-3.1)                              | 10%<br>(6.3-15%)                     | 9.5%<br>(5.5-15%)                   | 24<br>(13-37)              | 1200<br>(710-1700)      |
| Greenland | 2000 | Male   | 15 to 19 | 68%<br>(53-82%)                | 32%<br>(18-47%)          | 1.6<br>(0.78-3)                             | 11%<br>(2.8-20%)                     | 12%<br>(2.7-24%)                    | 1.1<br>(0.23-2.2)          | 82<br>(21-160)          |
| Greenland | 2000 | Male   | 20 to 24 | 84%<br>(73-92%)                | 16%<br>(8.4-27%)         | 3.4<br>(1.7-5.9)                            | 21%<br>(9.1-34%)                     | 24%<br>(8.8-39%)                    | 2.2<br>(0.85-3.7)          | 160<br>(69-260)         |
| Greenland | 2000 | Male   | 25 to 29 | 89%<br>(82-94%)                | 11%<br>(6.2-18%)         | 3.6<br>(1.9-6)                              | 20%<br>(11-30%)                      | 24%<br>(11-38%)                     | 1.7<br>(0.77-2.7)          | 120<br>(62-180)         |
| Greenland | 2000 | Male   | 30 to 34 | 92%<br>(85-96%)                | 8.4%<br>(4.2-15%)        | 3.4<br>(1.8-5.8)                            | 18%<br>(10-27%)                      | 23%<br>(11-36%)                     | 2.5<br>(1.3-4)             | 160<br>(94-250)         |
| Greenland | 2000 | Male   | 35 to 39 | 92%<br>(86-96%)                | 7.6%<br>(3.6-14%)        | 3<br>(1.6-5)                                | 16%<br>(9.9-23%)                     | 21%<br>(11-31%)                     | 2.1<br>(1.1-3.3)           | 130<br>(80-190)         |
| Greenland | 2000 | Male   | 40 to 44 | 93%<br>(87-97%)                | 7.3%<br>(3.4-13%)        | 2.7<br>(1.5-4.7)                            | 15%<br>(8.9-21%)                     | 19%<br>(10-28%)                     | 2.4<br>(1.4-3.6)           | 130<br>(78-180)         |
| Greenland | 2000 | Male   | 45 to 49 | 93%<br>(85-97%)                | 7.3%<br>(3.4-15%)        | 2.6<br>(1.4-4.4)                            | 13%<br>(8.6-19%)                     | 17%<br>(10-25%)                     | 2.1<br>(1.3-3.2)           | 97<br>(62-140)          |
| Greenland | 2000 | Male   | 50 to 54 | 92%<br>(84-96%)                | 7.7%<br>(3.8-16%)        | 2.5<br>(1.2-4.1)                            | 11%<br>(6.8-17%)                     | 13%<br>(7.9-21%)                    | 2.1<br>(1.2-3.4)           | 84<br>(52-130)          |
| Greenland | 2000 | Male   | 55 to 59 | 92%<br>(84-96%)                | 8.5%<br>(4-16%)          | 2.3<br>(1.2-3.9)                            | 8.9%<br>(5.5-14%)                    | 10%<br>(6.2-16%)                    | 2.5<br>(1.5-4.1)           | 85<br>(51-130)          |
| Greenland | 2000 | Male   | 60 to 64 | 91%<br>(82-96%)                | 9.4%<br>(4.3-18%)        | 2.1<br>(1-3.7)                              | 6.6%<br>(3.5-11%)                    | 7.4%<br>(3.8-13%)                   | 2<br>(1-3.6)               | 57<br>(29-98)           |
| Greenland | 2000 | Male   | 65 to 69 | 89%<br>(81-95%)                | 11%<br>(4.7-19%)         | 1.9<br>(0.95-3.2)                           | 4.8%<br>(2-8.7%)                     | 5.3%<br>(2.2-9.6%)                  | 1.5<br>(0.61-2.8)          | 35<br>(16-64)           |
| Greenland | 2000 | Male   | 70 to 74 | 88%<br>(80-94%)                | 12%<br>(5.8-20%)         | 1.6<br>(0.81-2.9)                           | 2.9%<br>(0.56-6.6%)                  | 3.1%<br>(0.49-7%)                   | 0.98<br>(0.15-2.2)         | 18<br>(3.4-42)          |
| Greenland | 2000 | Male   | 75 to 79 | 87%<br>(78-94%)                | 13%<br>(6.4-22%)         | 1.5<br>(0.7-2.7)                            | 1.7%<br>(-0.37-5.1%)                 | 1.8%<br>(-0.57-5.4%)                | 0.38<br>(-0.12-1.2)        | 5.6<br>(-1.2-17)        |
| Greenland | 2000 | Male   | 80 to 84 | 86%<br>(76-93%)                | 14%<br>(6.9-24%)         | 1.4<br>(0.72-2.4)                           | 0.91%<br>(-1.3-4.5%)                 | 0.86%<br>(-1.4-4.6%)                | 0.066<br>(-0.11-0.35)      | 0.77<br>(-1.1-3.8)      |
| Greenland | 2000 | Male   | 85 to 89 | 85%<br>(75-92%)                | 15%<br>(8.5-25%)         | 1.3<br>(0.67-2.4)                           | 0.28%<br>(-1.9-3.7%)                 | 0.18%<br>(-2.2-3.7%)                | 0.0093<br>(-0.11-0.19)     | 0.12<br>(-0.79-1.5)     |
| Greenland | 2000 | Male   | 90 to 94 | 85%<br>(76-92%)                | 15%<br>(7.8-24%)         | 1.4<br>(0.65-2.5)                           | -0.17%<br>(-2.3-2.9%)                | -0.38%<br>(-2.7-2.9%)               | -0.0057<br>(-0.041-0.044)  | -0.014<br>(-0.19-0.25)  |
| Greenland | 2000 | Male   | 95 plus  | 85%<br>(73-94%)                | 15%<br>(6.4-27%)         | 1.4<br>(0.62-2.8)                           | -0.81%<br>(-3.3-2.4%)                | -1.2%<br>(-3.9-2.3%)                | -0.0047<br>(-0.016-0.0095) | -0.012<br>(-0.05-0.037) |
| Greenland | 2005 | Female | All Ages | 74%<br>(67-80%)                | 26%<br>(20-33%)          | 1.7<br>(1.1-2.7)                            | 6%<br>(3.6-9%)                       | 5.8%<br>(3-9.7%)                    | 11<br>(5.4-19)             | 480<br>(290-720)        |

| Location  | Year | Sex    | Age      | Prevalence of current drinkers | Prevalence of abstainers | Population average of standard drinks daily | Percent of total attributable deaths | Percent of total attributable DALYs | Attributable deaths       | Attributable DALYs     |
|-----------|------|--------|----------|--------------------------------|--------------------------|---------------------------------------------|--------------------------------------|-------------------------------------|---------------------------|------------------------|
| Greenland | 2005 | Female | 15 to 19 | 65%<br>(49-79%)                | 35%<br>(21-51%)          | 1.6<br>(0.75-2.8)                           | 7.1%<br>(1.7-14%)                    | 11%<br>(2.1-23%)                    | 0.44<br>(0.083-0.93)      | 33<br>(8.1-68)         |
| Greenland | 2005 | Female | 20 to 24 | 80%<br>(67-89%)                | 20%<br>(11-33%)          | 3<br>(1.5-5.2)                              | 11%<br>(4.5-20%)                     | 20%<br>(6-35%)                      | 0.64<br>(0.19-1.1)        | 47<br>(18-81)          |
| Greenland | 2005 | Female | 25 to 29 | 84%<br>(74-91%)                | 16%<br>(8.9-26%)         | 3.1<br>(1.7-5.4)                            | 9.5%<br>(4.6-15%)                    | 21%<br>(8.1-36%)                    | 0.36<br>(0.13-0.6)        | 27<br>(12-42)          |
| Greenland | 2005 | Female | 30 to 34 | 86%<br>(77-93%)                | 14%<br>(7.1-23%)         | 3<br>(1.6-5.2)                              | 11%<br>(5-17%)                       | 18%<br>(7.4-30%)                    | 0.66<br>(0.26-1.1)        | 41<br>(19-66)          |
| Greenland | 2005 | Female | 35 to 39 | 87%<br>(78-93%)                | 13%<br>(7.1-22%)         | 2.7<br>(1.5-4.4)                            | 7.8%<br>(4.5-12%)                    | 16%<br>(8.2-25%)                    | 0.64<br>(0.33-1)          | 40<br>(23-60)          |
| Greenland | 2005 | Female | 40 to 44 | 87%<br>(79-93%)                | 13%<br>(6.9-21%)         | 2.5<br>(1.4-4.3)                            | 9%<br>(5.8-13%)                      | 16%<br>(9.9-24%)                    | 1<br>(0.62-1.5)           | 55<br>(35-79)          |
| Greenland | 2005 | Female | 45 to 49 | 86%<br>(75-93%)                | 14%<br>(7-25%)           | 2.4<br>(1.4-4.1)                            | 10%<br>(6.9-15%)                     | 15%<br>(10-22%)                     | 1.4<br>(0.92-2.1)         | 64<br>(44-92)          |
| Greenland | 2005 | Female | 50 to 54 | 85%<br>(74-92%)                | 15%<br>(8.2-26%)         | 2.3<br>(1.2-3.9)                            | 9.8%<br>(6.4-14%)                    | 13%<br>(8.5-19%)                    | 1.6<br>(1-2.4)            | 62<br>(40-92)          |
| Greenland | 2005 | Female | 55 to 59 | 83%<br>(71-91%)                | 17%<br>(8.9-29%)         | 2<br>(1.1-3.4)                              | 7.8%<br>(4.7-12%)                    | 10%<br>(6.2-15%)                    | 1.2<br>(0.73-1.9)         | 41<br>(25-62)          |
| Greenland | 2005 | Female | 60 to 64 | 80%<br>(67-90%)                | 20%<br>(9.9-33%)         | 1.8<br>(0.87-3.1)                           | 5.6%<br>(2.9-9.4%)                   | 6.9%<br>(3.7-11%)                   | 1.2<br>(0.67-2)           | 35<br>(18-59)          |
| Greenland | 2005 | Female | 65 to 69 | 77%<br>(62-88%)                | 23%<br>(12-38%)          | 1.6<br>(0.82-2.8)                           | 3.7%<br>(1.5-6.9%)                   | 4.5%<br>(1.8-8.1%)                  | 0.93<br>(0.37-1.7)        | 21<br>(8.1-39)         |
| Greenland | 2005 | Female | 70 to 74 | 74%<br>(60-85%)                | 26%<br>(15-40%)          | 1.4<br>(0.7-2.5)                            | 2.1%<br>(-0.23-5.5%)                 | 2.4%<br>(-0.18-6.2%)                | 0.67<br>(-0.052-1.7)      | 12<br>(-1.3-32)        |
| Greenland | 2005 | Female | 75 to 79 | 72%<br>(57-84%)                | 28%<br>(16-43%)          | 1.3<br>(0.63-2.3)                           | 0.62%<br>(-1.6-4.4%)                 | 0.71%<br>(-1.8-4.7%)                | 0.21<br>(-0.55-1.4)       | 2.9<br>(-7.8-20)       |
| Greenland | 2005 | Female | 80 to 84 | 69%<br>(52-82%)                | 31%<br>(18-48%)          | 1.3<br>(0.63-2.3)                           | -0.22%<br>(-3-3.9%)                  | -0.27%<br>(-3.2-4%)                 | -0.037<br>(-0.43-0.55)    | -0.33<br>(-4.4-5.8)    |
| Greenland | 2005 | Female | 85 to 89 | 67%<br>(50-80%)                | 33%<br>(20-50%)          | 1.3<br>(0.62-2.2)                           | -0.57%<br>(-3.3-3.8%)                | -0.67%<br>(-3.6-3.9%)               | -0.06<br>(-0.32-0.35)     | -0.4<br>(-2.3-2.6)     |
| Greenland | 2005 | Female | 90 to 94 | 67%<br>(52-80%)                | 33%<br>(20-48%)          | 1.4<br>(0.64-2.4)                           | -0.51%<br>(-3.6-3.9%)                | -0.66%<br>(-3.9-4.2%)               | -0.02<br>(-0.12-0.12)     | -0.087<br>(-0.59-0.66) |
| Greenland | 2005 | Female | 95 plus  | 69%<br>(50-84%)                | 31%<br>(16-50%)          | 1.5<br>(0.64-2.7)                           | -0.83%<br>(-4.4-4.8%)                | -1.1%<br>(-5-5.1%)                  | -0.0094<br>(-0.044-0.045) | -0.028<br>(-0.15-0.16) |
| Greenland | 2005 | Male   | All Ages | 82%<br>(76-87%)                | 18%<br>(13-24%)          | 2.1<br>(1.3-3.2)                            | 11%<br>(6.4-15%)                     | 9.7%<br>(5.8-15%)                   | 25<br>(15-38)             | 1200<br>(700-1700)     |
| Greenland | 2005 | Male   | 15 to 19 | 68%<br>(53-82%)                | 32%<br>(18-47%)          | 1.7<br>(0.82-3.1)                           | 10%<br>(2.8-20%)                     | 13%<br>(2.6-25%)                    | 0.98<br>(0.2-2)           | 74<br>(20-140)         |
| Greenland | 2005 | Male   | 20 to 24 | 85%<br>(74-91%)                | 15%<br>(8.5-26%)         | 3.5<br>(1.8-6)                              | 22%<br>(9.4-35%)                     | 24%<br>(9.3-41%)                    | 2.9<br>(1.1-5)            | 200<br>(85-340)        |
| Greenland | 2005 | Male   | 25 to 29 | 89%<br>(82-94%)                | 11%<br>(6-18%)           | 3.7<br>(1.9-6.4)                            | 21%<br>(11-31%)                      | 25%<br>(11-40%)                     | 1.4<br>(0.6-2.2)          | 100<br>(51-150)        |
| Greenland | 2005 | Male   | 30 to 34 | 92%<br>(85-96%)                | 8.2%<br>(4-15%)          | 3.5<br>(1.9-6.2)                            | 18%<br>(10-27%)                      | 24%<br>(11-37%)                     | 1.3<br>(0.61-2)           | 87<br>(49-130)         |

| Location  | Year | Sex    | Age      | Prevalence of current drinkers | Prevalence of abstainers | Population average of standard drinks daily | Percent of total attributable deaths | Percent of total attributable DALYs | Attributable deaths         | Attributable DALYs        |
|-----------|------|--------|----------|--------------------------------|--------------------------|---------------------------------------------|--------------------------------------|-------------------------------------|-----------------------------|---------------------------|
| Greenland | 2005 | Male   | 35 to 39 | 92%<br>(86-96%)                | 7.5%<br>(3.7-14%)        | 3.1<br>(1.7-5.1)                            | 17%<br>(10-24%)                      | 22%<br>(12-33%)                     | 2.3<br>(1.2-3.4)            | 130<br>(82-190)           |
| Greenland | 2005 | Male   | 40 to 44 | 93%<br>(87-97%)                | 7.3%<br>(3.5-13%)        | 2.8<br>(1.6-4.9)                            | 15%<br>(9.4-22%)                     | 19%<br>(11-29%)                     | 2.6<br>(1.5-4)              | 140<br>(86-200)           |
| Greenland | 2005 | Male   | 45 to 49 | 93%<br>(86-97%)                | 7.4%<br>(3.5-14%)        | 2.7<br>(1.6-4.5)                            | 14%<br>(8.9-20%)                     | 18%<br>(11-26%)                     | 2.5<br>(1.5-3.6)            | 110<br>(74-160)           |
| Greenland | 2005 | Male   | 50 to 54 | 92%<br>(85-96%)                | 7.8%<br>(3.7-15%)        | 2.6<br>(1.4-4.3)                            | 11%<br>(7.4-17%)                     | 14%<br>(8.9-23%)                    | 2<br>(1.3-3.2)              | 83<br>(54-130)            |
| Greenland | 2005 | Male   | 55 to 59 | 92%<br>(84-96%)                | 8.5%<br>(4-16%)          | 2.3<br>(1.2-4)                              | 9.7%<br>(6.2-15%)                    | 12%<br>(7.3-18%)                    | 2.7<br>(1.7-4.2)            | 92<br>(59-140)            |
| Greenland | 2005 | Male   | 60 to 64 | 91%<br>(82-96%)                | 9.4%<br>(4.2-18%)        | 2.1<br>(1.1-3.6)                            | 7%<br>(3.9-12%)                      | 8.1%<br>(4.4-14%)                   | 2.3<br>(1.2-3.9)            | 66<br>(36-110)            |
| Greenland | 2005 | Male   | 65 to 69 | 90%<br>(81-95%)                | 10%<br>(4.7-19%)         | 1.9<br>(1-3.3)                              | 5.2%<br>(2.3-9.1%)                   | 5.7%<br>(2.5-10%)                   | 1.8<br>(0.76-3.2)           | 42<br>(18-74)             |
| Greenland | 2005 | Male   | 70 to 74 | 88%<br>(81-94%)                | 12%<br>(5.8-19%)         | 1.7<br>(0.86-2.9)                           | 3.3%<br>(0.8-7%)                     | 3.5%<br>(0.77-7.6%)                 | 1.2<br>(0.28-2.7)           | 23<br>(5.8-50)            |
| Greenland | 2005 | Male   | 75 to 79 | 87%<br>(78-94%)                | 13%<br>(6.2-22%)         | 1.5<br>(0.77-2.7)                           | 1.8%<br>(-0.34-5.3%)                 | 1.9%<br>(-0.46-5.7%)                | 0.55<br>(-0.14-1.6)         | 8.1<br>(-1.6-23)          |
| Greenland | 2005 | Male   | 80 to 84 | 86%<br>(75-93%)                | 14%<br>(6.8-25%)         | 1.4<br>(0.74-2.5)                           | 1.1%<br>(-1.1-4.4%)                  | 1%<br>(-1.3-4.6%)                   | 0.087<br>(-0.11-0.38)       | 0.98<br>(-1-4)            |
| Greenland | 2005 | Male   | 85 to 89 | 85%<br>(74-92%)                | 15%<br>(8.3-26%)         | 1.4<br>(0.7-2.4)                            | 0.62%<br>(-1.4-3.9%)                 | 0.55%<br>(-1.6-4.1%)                | 0.019<br>(-0.054-0.14)      | 0.17<br>(-0.36-1.1)       |
| Greenland | 2005 | Male   | 90 to 94 | 85%<br>(75-92%)                | 15%<br>(7.7-25%)         | 1.4<br>(0.7-2.6)                            | 0.18%<br>(-1.8-3.3%)                 | -0.0061%<br>(-2.2-3.4%)             | -0.000086<br>(-0.027-0.041) | 0.012<br>(-0.12-0.23)     |
| Greenland | 2005 | Male   | 95 plus  | 85%<br>(72-93%)                | 15%<br>(6.8-28%)         | 1.4<br>(0.66-2.8)                           | -0.41%<br>(-2.8-3%)                  | -0.75%<br>(-3.5-3%)                 | -0.0023<br>(-0.011-0.0091)  | -0.0048<br>(-0.033-0.035) |
| Greenland | 2010 | Female | All Ages | 75%<br>(68-80%)                | 25%<br>(20-32%)          | 1.9<br>(1.2-2.8)                            | 6%<br>(3.7-8.9%)                     | 6.3%<br>(3.6-10%)                   | 11<br>(6-17)                | 450<br>(280-670)          |
| Greenland | 2010 | Female | 15 to 19 | 64%<br>(47-79%)                | 36%<br>(21-53%)          | 1.6<br>(0.76-2.9)                           | 7.5%<br>(1.8-15%)                    | 12%<br>(2.1-24%)                    | 0.53<br>(0.092-1.2)         | 40<br>(9-83)              |
| Greenland | 2010 | Female | 20 to 24 | 80%<br>(65-89%)                | 20%<br>(11-35%)          | 3.1<br>(1.6-5.4)                            | 10%<br>(4.2-17%)                     | 20%<br>(6.4-35%)                    | 0.52<br>(0.17-0.94)         | 40<br>(17-69)             |
| Greenland | 2010 | Female | 25 to 29 | 84%<br>(73-91%)                | 16%<br>(8.7-27%)         | 3.2<br>(1.7-5.5)                            | 7.5%<br>(3.9-12%)                    | 22%<br>(8.9-36%)                    | 0.25<br>(0.1-0.43)          | 20<br>(10-32)             |
| Greenland | 2010 | Female | 30 to 34 | 86%<br>(77-93%)                | 14%<br>(6.9-23%)         | 3.1<br>(1.7-5.5)                            | 9.4%<br>(4.4-15%)                    | 19%<br>(7.7-31%)                    | 0.47<br>(0.19-0.79)         | 30<br>(14-49)             |
| Greenland | 2010 | Female | 35 to 39 | 87%<br>(78-94%)                | 13%<br>(6.5-22%)         | 2.8<br>(1.5-4.7)                            | 8%<br>(4.6-12%)                      | 17%<br>(8.6-26%)                    | 0.38<br>(0.2-0.61)          | 23<br>(14-37)             |
| Greenland | 2010 | Female | 40 to 44 | 87%<br>(78-93%)                | 13%<br>(6.6-22%)         | 2.6<br>(1.4-4.4)                            | 8.4%<br>(5.6-12%)                    | 17%<br>(10-24%)                     | 0.81<br>(0.48-1.2)          | 45<br>(29-66)             |
| Greenland | 2010 | Female | 45 to 49 | 86%<br>(76-93%)                | 14%<br>(6.8-24%)         | 2.5<br>(1.4-4.2)                            | 9.8%<br>(6.7-14%)                    | 15%<br>(10-21%)                     | 1.7<br>(1.1-2.4)            | 76<br>(51-110)            |
| Greenland | 2010 | Female | 50 to 54 | 85%<br>(74-92%)                | 15%<br>(8.3-26%)         | 2.3<br>(1.2-3.9)                            | 8.6%<br>(5.8-12%)                    | 13%<br>(8.5-18%)                    | 1.3<br>(0.87-1.9)           | 53<br>(36-77)             |

| Location  | Year | Sex    | Age      | Prevalence of current drinkers | Prevalence of abstainers | Population average of standard drinks daily | Percent of total attributable deaths | Percent of total attributable DALYs | Attributable deaths      | Attributable DALYs       |
|-----------|------|--------|----------|--------------------------------|--------------------------|---------------------------------------------|--------------------------------------|-------------------------------------|--------------------------|--------------------------|
| Greenland | 2010 | Female | 55 to 59 | 83%<br>(71-91%)                | 17%<br>(9-29%)           | 2.1<br>(1.1-3.5)                            | 7.5%<br>(4.6-11%)                    | 9.9%<br>(6.3-15%)                   | 1.4<br>(0.89-2.2)        | 48<br>(30-73)            |
| Greenland | 2010 | Female | 60 to 64 | 80%<br>(67-90%)                | 20%<br>(10-33%)          | 1.9<br>(0.95-3.2)                           | 5.5%<br>(3-9%)                       | 7%<br>(4-11%)                       | 1<br>(0.58-1.7)          | 29<br>(16-48)            |
| Greenland | 2010 | Female | 65 to 69 | 77%<br>(62-88%)                | 23%<br>(12-38%)          | 1.7<br>(0.86-2.8)                           | 3.8%<br>(1.6-7%)                     | 4.7%<br>(2.1-8%)                    | 1.1<br>(0.49-1.9)        | 25<br>(11-45)            |
| Greenland | 2010 | Female | 70 to 74 | 74%<br>(59-85%)                | 26%<br>(15-41%)          | 1.4<br>(0.71-2.6)                           | 2.3%<br>(0.12-5.7%)                  | 2.7%<br>(0.22-6.5%)                 | 0.67<br>(0.053-1.6)      | 12<br>(0.59-30)          |
| Greenland | 2010 | Female | 75 to 79 | 71%<br>(55-84%)                | 29%<br>(16-45%)          | 1.3<br>(0.63-2.4)                           | 0.98%<br>(-1.1-4.3%)                 | 1.1%<br>(-1.2-4.8%)                 | 0.32<br>(-0.35-1.3)      | 4.5<br>(-5.1-19)         |
| Greenland | 2010 | Female | 80 to 84 | 68%<br>(50-82%)                | 32%<br>(18-50%)          | 1.3<br>(0.64-2.3)                           | 0.38%<br>(-1.9-3.7%)                 | 0.4%<br>(-2.1-4%)                   | 0.035<br>(-0.18-0.37)    | 0.39<br>(-1.8-4)         |
| Greenland | 2010 | Female | 85 to 89 | 65%<br>(48-79%)                | 35%<br>(21-52%)          | 1.3<br>(0.63-2.3)                           | 0.11%<br>(-2.2-3.6%)                 | 0.049%<br>(-2.4-3.8%)               | 0.0022<br>(-0.11-0.17)   | 0.039<br>(-0.75-1.3)     |
| Greenland | 2010 | Female | 90 to 94 | 66%<br>(52-79%)                | 34%<br>(21-48%)          | 1.4<br>(0.66-2.5)                           | 0.031%<br>(-2.6-3.9%)                | -0.087%<br>(-3-4.2%)                | -0.0014<br>(-0.05-0.071) | 0.0032<br>(-0.25-0.38)   |
| Greenland | 2010 | Female | 95 plus  | 68%<br>(50-84%)                | 32%<br>(16-50%)          | 1.5<br>(0.67-2.9)                           | -0.2%<br>(-3.6-5%)                   | -0.41%<br>(-4.2-5.5%)               | -0.0023<br>(-0.024-0.03) | -0.0043<br>(-0.077-0.11) |
| Greenland | 2010 | Male   | All Ages | 82%<br>(77-87%)                | 18%<br>(13-23%)          | 2.2<br>(1.4-3.3)                            | 10%<br>(6.5-14%)                     | 9.6%<br>(5.8-14%)                   | 23<br>(14-36)            | 1100<br>(680-1600)       |
| Greenland | 2010 | Male   | 15 to 19 | 68%<br>(52-81%)                | 32%<br>(19-48%)          | 1.8<br>(0.86-3.3)                           | 10%<br>(3.1-20%)                     | 13%<br>(3-26%)                      | 0.88<br>(0.19-1.8)       | 67<br>(19-130)           |
| Greenland | 2010 | Male   | 20 to 24 | 84%<br>(73-91%)                | 16%<br>(8.6-27%)         | 3.6<br>(1.9-6.4)                            | 21%<br>(9.4-34%)                     | 25%<br>(9.4-41%)                    | 2.3<br>(0.88-3.9)        | 170<br>(73-270)          |
| Greenland | 2010 | Male   | 25 to 29 | 89%<br>(82-94%)                | 11%<br>(6.1-18%)         | 3.8<br>(2.1-6.4)                            | 21%<br>(11-31%)                      | 25%<br>(11-40%)                     | 1.7<br>(0.76-2.7)        | 120<br>(61-180)          |
| Greenland | 2010 | Male   | 30 to 34 | 92%<br>(85-96%)                | 8.4%<br>(4.2-15%)        | 3.6<br>(2-6.4)                              | 18%<br>(10-26%)                      | 24%<br>(12-38%)                     | 1.1<br>(0.56-1.7)        | 76<br>(43-110)           |
| Greenland | 2010 | Male   | 35 to 39 | 92%<br>(86-96%)                | 7.6%<br>(3.6-14%)        | 3.2<br>(1.8-5.3)                            | 16%<br>(10-23%)                      | 23%<br>(13-34%)                     | 1.2<br>(0.69-1.8)        | 74<br>(47-110)           |
| Greenland | 2010 | Male   | 40 to 44 | 93%<br>(86-97%)                | 7.3%<br>(3.4-14%)        | 2.9<br>(1.6-4.9)                            | 14%<br>(9.3-21%)                     | 20%<br>(12-31%)                     | 1.9<br>(1.1-2.9)         | 100<br>(64-150)          |
| Greenland | 2010 | Male   | 45 to 49 | 93%<br>(85-97%)                | 7.3%<br>(3.4-15%)        | 2.8<br>(1.6-4.6)                            | 14%<br>(9-20%)                       | 18%<br>(11-27%)                     | 2.7<br>(1.6-4.1)         | 120<br>(80-190)          |
| Greenland | 2010 | Male   | 50 to 54 | 92%<br>(85-96%)                | 7.8%<br>(3.8-15%)        | 2.6<br>(1.4-4.5)                            | 11%<br>(7.4-17%)                     | 15%<br>(9.2-23%)                    | 2.5<br>(1.5-3.9)         | 100<br>(66-160)          |
| Greenland | 2010 | Male   | 55 to 59 | 91%<br>(84-96%)                | 8.5%<br>(4-16%)          | 2.4<br>(1.3-4)                              | 9.7%<br>(6.4-14%)                    | 12%<br>(7.7-18%)                    | 2.7<br>(1.7-4.2)         | 93<br>(61-140)           |
| Greenland | 2010 | Male   | 60 to 64 | 90%<br>(82-96%)                | 9.5%<br>(4.4-18%)        | 2.2<br>(1.2-3.8)                            | 7.2%<br>(4.1-12%)                    | 8.6%<br>(4.9-14%)                   | 2.1<br>(1.2-3.4)         | 60<br>(34-99)            |
| Greenland | 2010 | Male   | 65 to 69 | 89%<br>(81-95%)                | 11%<br>(4.6-19%)         | 2<br>(1.1-3.3)                              | 5.5%<br>(2.8-8.9%)                   | 6.2%<br>(3.1-10%)                   | 2.3<br>(1.1-3.8)         | 53<br>(26-88)            |
| Greenland | 2010 | Male   | 70 to 74 | 88%<br>(80-94%)                | 12%<br>(5.9-20%)         | 1.7<br>(0.89-3.1)                           | 3.5%<br>(0.98-7%)                    | 3.8%<br>(0.99-7.7%)                 | 1.3<br>(0.32-2.7)        | 24<br>(6.6-50)           |

| Location  | Year | Sex    | Age      | Prevalence of current drinkers | Prevalence of abstainers | Population average of standard drinks daily | Percent of total attributable deaths | Percent of total attributable DALYs | Attributable deaths         | Attributable DALYs         |
|-----------|------|--------|----------|--------------------------------|--------------------------|---------------------------------------------|--------------------------------------|-------------------------------------|-----------------------------|----------------------------|
| Greenland | 2010 | Male   | 75 to 79 | 87%<br>(78-94%)                | 13%<br>(6.5-22%)         | 1.6<br>(0.81-2.8)                           | 2%<br>(-0.28-5.4%)                   | 2.1%<br>(-0.38-5.8%)                | 0.73<br>(-0.14-2.1)         | 11<br>(-1.5-30)            |
| Greenland | 2010 | Male   | 80 to 84 | 86%<br>(75-93%)                | 14%<br>(6.9-25%)         | 1.5<br>(0.77-2.6)                           | 1.5%<br>(-0.42-4.4%)                 | 1.5%<br>(-0.59-4.7%)                | 0.08<br>(-0.033-0.25)       | 0.92<br>(-0.26-2.8)        |
| Greenland | 2010 | Male   | 85 to 89 | 85%<br>(75-91%)                | 15%<br>(8.5-25%)         | 1.4<br>(0.76-2.5)                           | 1%<br>(-0.79-3.8%)                   | 0.94%<br>(-1.1-4%)                  | 0.023<br>(-0.026-0.097)     | 0.2<br>(-0.16-0.77)        |
| Greenland | 2010 | Male   | 90 to 94 | 85%<br>(76-92%)                | 15%<br>(7.9-24%)         | 1.5<br>(0.74-2.6)                           | 0.53%<br>(-1.4-3.6%)                 | 0.35%<br>(-1.9-3.8%)                | 0.003<br>(-0.015-0.031)     | 0.025<br>(-0.068-0.18)     |
| Greenland | 2010 | Male   | 95 plus  | 85%<br>(73-94%)                | 15%<br>(6.5-27%)         | 1.5<br>(0.69-2.8)                           | -0.029%<br>(-2.3-3.1%)               | -0.37%<br>(-3-3.1%)                 | -0.00088<br>(-0.007-0.0073) | -0.00024<br>(-0.021-0.028) |
| Greenland | 2016 | Female | All Ages | 75%<br>(68-81%)                | 25%<br>(19-32%)          | 2<br>(1.2-3.1)                              | 5.5%<br>(3.5-8.2%)                   | 6.2%<br>(3.7-9.7%)                  | 9.2<br>(4.9-15)             | 380<br>(220-590)           |
| Greenland | 2016 | Female | 15 to 19 | 63%<br>(47-78%)                | 37%<br>(22-53%)          | 1.6<br>(0.78-2.9)                           | 7%<br>(1.8-14%)                      | 12%<br>(2.4-24%)                    | 0.37<br>(0.073-0.8)         | 28<br>(7.1-58)             |
| Greenland | 2016 | Female | 20 to 24 | 80%<br>(67-89%)                | 20%<br>(11-33%)          | 3.2<br>(1.6-5.5)                            | 9.2%<br>(4.1-16%)                    | 20%<br>(7-35%)                      | 0.41<br>(0.14-0.74)         | 33<br>(14-54)              |
| Greenland | 2016 | Female | 25 to 29 | 84%<br>(74-92%)                | 16%<br>(8.2-26%)         | 3.3<br>(1.9-5.5)                            | 6.4%<br>(3.5-9.9%)                   | 21%<br>(8.8-35%)                    | 0.22<br>(0.087-0.39)        | 20<br>(11-31)              |
| Greenland | 2016 | Female | 30 to 34 | 86%<br>(77-93%)                | 14%<br>(7.1-23%)         | 3.2<br>(1.8-5.4)                            | 8.3%<br>(4.2-13%)                    | 18%<br>(8.3-31%)                    | 0.44<br>(0.19-0.79)         | 30<br>(15-50)              |
| Greenland | 2016 | Female | 35 to 39 | 87%<br>(77-93%)                | 13%<br>(6.8-23%)         | 2.9<br>(1.6-5)                              | 7.2%<br>(4.3-11%)                    | 17%<br>(8.9-25%)                    | 0.31<br>(0.15-0.53)         | 20<br>(11-32)              |
| Greenland | 2016 | Female | 40 to 44 | 87%<br>(77-93%)                | 13%<br>(7.1-23%)         | 2.7<br>(1.5-4.6)                            | 7.9%<br>(5.2-11%)                    | 17%<br>(11-25%)                     | 0.34<br>(0.2-0.53)          | 20<br>(13-29)              |
| Greenland | 2016 | Female | 45 to 49 | 86%<br>(75-93%)                | 14%<br>(7.1-25%)         | 2.6<br>(1.4-4.4)                            | 9.4%<br>(6.3-13%)                    | 16%<br>(11-22%)                     | 1.2<br>(0.73-1.9)           | 56<br>(35-84)              |
| Greenland | 2016 | Female | 50 to 54 | 85%<br>(73-92%)                | 15%<br>(8.1-27%)         | 2.4<br>(1.3-4)                              | 7.7%<br>(5-11%)                      | 12%<br>(8.2-18%)                    | 1.3<br>(0.79-2.2)           | 56<br>(34-86)              |
| Greenland | 2016 | Female | 55 to 59 | 83%<br>(70-91%)                | 17%<br>(9.2-30%)         | 2.1<br>(1.2-3.6)                            | 6.8%<br>(4.2-10%)                    | 9.6%<br>(6.1-14%)                   | 1.4<br>(0.83-2.2)           | 49<br>(28-76)              |
| Greenland | 2016 | Female | 60 to 64 | 80%<br>(66-90%)                | 20%<br>(10-34%)          | 1.9<br>(1-3.3)                              | 5.2%<br>(2.9-8.4%)                   | 6.9%<br>(4-11%)                     | 1.2<br>(0.64-2)             | 34<br>(18-57)              |
| Greenland | 2016 | Female | 65 to 69 | 77%<br>(62-88%)                | 23%<br>(12-38%)          | 1.7<br>(0.9-2.9)                            | 3.8%<br>(1.7-6.8%)                   | 4.8%<br>(2.3-8.3%)                  | 0.76<br>(0.35-1.4)          | 17<br>(7.5-33)             |
| Greenland | 2016 | Female | 70 to 74 | 74%<br>(59-85%)                | 26%<br>(15-41%)          | 1.5<br>(0.71-2.6)                           | 2.3%<br>(0.43-5.6%)                  | 2.9%<br>(0.67-6.6%)                 | 0.77<br>(0.17-1.8)          | 14<br>(2.5-32)             |
| Greenland | 2016 | Female | 75 to 79 | 70%<br>(54-83%)                | 30%<br>(17-46%)          | 1.3<br>(0.63-2.4)                           | 1.2%<br>(-0.73-4.4%)                 | 1.5%<br>(-0.78-5.2%)                | 0.31<br>(-0.16-1.1)         | 4.3<br>(-2.6-16)           |
| Greenland | 2016 | Female | 80 to 84 | 68%<br>(50-82%)                | 32%<br>(18-50%)          | 1.3<br>(0.67-2.3)                           | 0.58%<br>(-1.6-4.1%)                 | 0.64%<br>(-1.8-4.4%)                | 0.041<br>(-0.12-0.29)       | 0.44<br>(-1.3-3.1)         |
| Greenland | 2016 | Female | 85 to 89 | 65%<br>(50-79%)                | 35%<br>(21-50%)          | 1.3<br>(0.65-2.4)                           | 0.27%<br>(-1.9-3.7%)                 | 0.24%<br>(-2.3-4%)                  | 0.012<br>(-0.12-0.21)       | 0.12<br>(-0.86-1.7)        |
| Greenland | 2016 | Female | 90 to 94 | 66%<br>(51-80%)                | 34%<br>(20-49%)          | 1.4<br>(0.69-2.6)                           | 0.17%<br>(-2.3-4%)                   | 0.078%<br>(-2.8-4.3%)               | 0.0016<br>(-0.054-0.088)    | 0.02<br>(-0.27-0.48)       |



| Location  | Year | Sex    | Age      | Prevalence of current drinkers | Prevalence of abstainers | Population average of standard drinks daily | Percent of total attributable deaths | Percent of total attributable DALYs | Attributable deaths          | Attributable DALYs       |
|-----------|------|--------|----------|--------------------------------|--------------------------|---------------------------------------------|--------------------------------------|-------------------------------------|------------------------------|--------------------------|
| Greenland | 2016 | Female | 95 plus  | 69%<br>(50-83%)                | 31%<br>(17-50%)          | 1.5<br>(0.69-3)                             | -0.048%<br>(-3.3-5%)                 | -0.24%<br>(-3.8-5.4%)               | -0.0013<br>(-0.02-0.029)     | -0.00099<br>(-0.067-0.1) |
| Greenland | 2016 | Male   | All Ages | 83%<br>(77-88%)                | 17%<br>(12-23%)          | 2.3<br>(1.4-3.6)                            | 9.9%<br>(6.5-14%)                    | 9.2%<br>(5.7-14%)                   | 24<br>(13-38)                | 1000<br>(610-1600)       |
| Greenland | 2016 | Male   | 15 to 19 | 67%<br>(51-81%)                | 33%<br>(19-49%)          | 1.8<br>(0.86-3.2)                           | 10%<br>(3-20%)                       | 13%<br>(3.1-26%)                    | 0.69<br>(0.16-1.5)           | 53<br>(15-100)           |
| Greenland | 2016 | Male   | 20 to 24 | 84%<br>(73-92%)                | 16%<br>(8.3-27%)         | 3.7<br>(2-6.4)                              | 21%<br>(9.6-33%)                     | 25%<br>(10-42%)                     | 2.1<br>(0.78-3.7)            | 150<br>(65-260)          |
| Greenland | 2016 | Male   | 25 to 29 | 89%<br>(82-94%)                | 11%<br>(6-18%)           | 3.9<br>(2.2-6.6)                            | 20%<br>(11-30%)                      | 26%<br>(12-41%)                     | 1.7<br>(0.74-2.8)            | 120<br>(62-190)          |
| Greenland | 2016 | Male   | 30 to 34 | 92%<br>(85-96%)                | 8.5%<br>(4.2-15%)        | 3.8<br>(2.1-6.4)                            | 18%<br>(10-27%)                      | 25%<br>(12-38%)                     | 1.3<br>(0.6-2.1)             | 86<br>(47-130)           |
| Greenland | 2016 | Male   | 35 to 39 | 92%<br>(86-96%)                | 7.6%<br>(3.7-14%)        | 3.3<br>(1.8-5.7)                            | 16%<br>(10-23%)                      | 23%<br>(14-35%)                     | 1<br>(0.53-1.6)              | 62<br>(37-94)            |
| Greenland | 2016 | Male   | 40 to 44 | 93%<br>(87-97%)                | 7.3%<br>(3.5-13%)        | 3<br>(1.7-5.2)                              | 14%<br>(9.2-21%)                     | 21%<br>(13-33%)                     | 1<br>(0.56-1.7)              | 56<br>(34-87)            |
| Greenland | 2016 | Male   | 45 to 49 | 93%<br>(85-97%)                | 7.5%<br>(3.4-15%)        | 2.9<br>(1.6-4.7)                            | 14%<br>(9.2-21%)                     | 19%<br>(12-28%)                     | 2.4<br>(1.3-3.8)             | 110<br>(66-170)          |
| Greenland | 2016 | Male   | 50 to 54 | 92%<br>(84-96%)                | 8%<br>(3.9-16%)          | 2.7<br>(1.5-4.5)                            | 11%<br>(7.3-17%)                     | 15%<br>(9.5-23%)                    | 2.7<br>(1.5-4.8)             | 110<br>(66-180)          |
| Greenland | 2016 | Male   | 55 to 59 | 91%<br>(84-96%)                | 8.7%<br>(4.1-16%)        | 2.5<br>(1.4-4.1)                            | 9.5%<br>(6.3-15%)                    | 12%<br>(7.7-19%)                    | 3.3<br>(1.9-5.5)             | 110<br>(67-180)          |
| Greenland | 2016 | Male   | 60 to 64 | 90%<br>(82-96%)                | 9.6%<br>(4.2-18%)        | 2.3<br>(1.2-3.9)                            | 7.1%<br>(4.2-12%)                    | 8.8%<br>(5.1-15%)                   | 2.5<br>(1.3-4.3)             | 71<br>(40-120)           |
| Greenland | 2016 | Male   | 65 to 69 | 89%<br>(81-95%)                | 11%<br>(4.8-19%)         | 2<br>(1.1-3.4)                              | 5.5%<br>(2.8-9.4%)                   | 6.3%<br>(3.2-11%)                   | 2.1<br>(0.95-3.7)            | 49<br>(23-85)            |
| Greenland | 2016 | Male   | 70 to 74 | 88%<br>(79-94%)                | 12%<br>(6.1-21%)         | 1.8<br>(0.9-3.1)                            | 3.5%<br>(1.1-7.4%)                   | 3.9%<br>(1.1-8.3%)                  | 1.9<br>(0.54-4.1)            | 36<br>(10-76)            |
| Greenland | 2016 | Male   | 75 to 79 | 87%<br>(78-94%)                | 13%<br>(6.3-22%)         | 1.6<br>(0.77-2.9)                           | 2.1%<br>(-0.062-5.4%)                | 2.2%<br>(-0.13-5.7%)                | 0.76<br>(-0.056-2)           | 11<br>(-0.37-29)         |
| Greenland | 2016 | Male   | 80 to 84 | 86%<br>(75-93%)                | 14%<br>(7.3-25%)         | 1.5<br>(0.77-2.6)                           | 1.5%<br>(-0.32-4.5%)                 | 1.6%<br>(-0.45-4.8%)                | 0.075<br>(-0.021-0.23)       | 0.86<br>(-0.17-2.5)      |
| Greenland | 2016 | Male   | 85 to 89 | 84%<br>(74-91%)                | 16%<br>(8.6-26%)         | 1.5<br>(0.78-2.6)                           | 1.1%<br>(-0.72-4%)                   | 1%<br>(-0.99-4.2%)                  | 0.028<br>(-0.026-0.11)       | 0.24<br>(-0.16-0.9)      |
| Greenland | 2016 | Male   | 90 to 94 | 85%<br>(75-92%)                | 15%<br>(8-25%)           | 1.5<br>(0.79-2.7)                           | 0.58%<br>(-1.4-3.7%)                 | 0.42%<br>(-1.7-3.8%)                | 0.0045<br>(-0.019-0.041)     | 0.036<br>(-0.086-0.23)   |
| Greenland | 2016 | Male   | 95 plus  | 85%<br>(73-94%)                | 15%<br>(6.5-27%)         | 1.5<br>(0.75-2.8)                           | 0.022%<br>(-2.3-3.7%)                | -0.31%<br>(-3-3.6%)                 | -0.00071<br>(-0.0068-0.0081) | 0.00017<br>(-0.02-0.03)  |
| Guam      | 1990 | Female | All Ages | 36%<br>(31-43%)                | 64%<br>(57-69%)          | 0.31<br>(0.08-0.65)                         | 0.28%<br>(-0.075-0.82%)              | -0.14%<br>(-0.82-0.62%)             | -0.3<br>(-1.8-1.3)           | 36<br>(-9.7-99)          |
| Guam      | 1990 | Female | 15 to 19 | 39%<br>(27-54%)                | 61%<br>(46-73%)          | 0.45<br>(0.11-1)                            | 1.1%<br>(0.37-2.3%)                  | 2.1%<br>(0.15-5.4%)                 | 0.057<br>(0.0041-0.15)       | 6.6<br>(2.3-13)          |
| Guam      | 1990 | Female | 20 to 24 | 46%<br>(32-61%)                | 54%<br>(39-68%)          | 0.66<br>(0.16-1.4)                          | 1.8%<br>(0.83-3.3%)                  | 2.9%<br>(0.48-6.7%)                 | 0.1<br>(0.017-0.23)          | 13<br>(5.6-23)           |

| Location | Year | Sex    | Age      | Prevalence of current drinkers | Prevalence of abstainers | Population average of standard drinks daily | Percent of total attributable deaths | Percent of total attributable DALYs | Attributable deaths       | Attributable DALYs       |
|----------|------|--------|----------|--------------------------------|--------------------------|---------------------------------------------|--------------------------------------|-------------------------------------|---------------------------|--------------------------|
| Guam     | 1990 | Female | 25 to 29 | 46%<br>(33-62%)                | 54%<br>(38-67%)          | 0.53<br>(0.14-1.2)                          | 1.6%<br>(0.87-2.7%)                  | 2.5%<br>(0.72-5.2%)                 | 0.11<br>(0.03-0.23)       | 13<br>(6.9-22)           |
| Guam     | 1990 | Female | 30 to 34 | 45%<br>(30-61%)                | 55%<br>(39-70%)          | 0.48<br>(0.11-1.1)                          | 1.1%<br>(0.56-2%)                    | 1.5%<br>(0.37-3.6%)                 | 0.078<br>(0.018-0.2)      | 9.1<br>(4.3-17)          |
| Guam     | 1990 | Female | 35 to 39 | 44%<br>(30-60%)                | 56%<br>(40-70%)          | 0.51<br>(0.12-1.1)                          | 1%<br>(0.45-2.2%)                    | 1.7%<br>(0.53-4.1%)                 | 0.11<br>(0.033-0.27)      | 8.4<br>(3.6-18)          |
| Guam     | 1990 | Female | 40 to 44 | 42%<br>(29-59%)                | 58%<br>(41-71%)          | 0.47<br>(0.11-1.1)                          | 0.69%<br>(0.052-1.7%)                | 1.2%<br>(0.13-3.3%)                 | 0.096<br>(0.01-0.27)      | 5.6<br>(0.45-14)         |
| Guam     | 1990 | Female | 45 to 49 | 42%<br>(27-59%)                | 58%<br>(41-73%)          | 0.38<br>(0.096-0.84)                        | 0.21%<br>(-0.41-0.99%)               | 0.52%<br>(-0.43-1.9%)               | 0.042<br>(-0.035-0.16)    | 1.4<br>(-2.8-6.6)        |
| Guam     | 1990 | Female | 50 to 54 | 42%<br>(28-58%)                | 58%<br>(42-72%)          | 0.32<br>(0.081-0.72)                        | -0.16%<br>(-0.93-0.52%)              | 0.022%<br>(-0.99-1.1%)              | 0.0026<br>(-0.12-0.13)    | -1.2<br>(-7.1-3.9)       |
| Guam     | 1990 | Female | 55 to 59 | 39%<br>(26-56%)                | 61%<br>(44-74%)          | 0.27<br>(0.065-0.59)                        | -0.27%<br>(-1.1-0.39%)               | -0.093%<br>(-1.1-0.76%)             | -0.014<br>(-0.17-0.12)    | -2.2<br>(-8.2-3.1)       |
| Guam     | 1990 | Female | 60 to 64 | 37%<br>(24-54%)                | 63%<br>(46-76%)          | 0.23<br>(0.055-0.53)                        | -0.49%<br>(-1.5-0.22%)               | -0.43%<br>(-1.6-0.44%)              | -0.086<br>(-0.32-0.088)   | -4<br>(-12-1.9)          |
| Guam     | 1990 | Female | 65 to 69 | 38%<br>(26-52%)                | 62%<br>(48-74%)          | 0.23<br>(0.06-0.51)                         | -0.49%<br>(-1.3-0.24%)               | -0.41%<br>(-1.5-0.48%)              | -0.086<br>(-0.31-0.1)     | -3.4<br>(-9.4-1.7)       |
| Guam     | 1990 | Female | 70 to 74 | 39%<br>(27-54%)                | 61%<br>(46-73%)          | 0.22<br>(0.054-0.49)                        | -0.76%<br>(-1.7--0.015%)             | -0.82%<br>(-2-0.068%)               | -0.18<br>(-0.43-0.016)    | -4.3<br>(-9.2--0.092)    |
| Guam     | 1990 | Female | 75 to 79 | 39%<br>(26-54%)                | 61%<br>(46-74%)          | 0.22<br>(0.052-0.5)                         | -0.59%<br>(-1.5-0.13%)               | -0.59%<br>(-1.7-0.29%)              | -0.13<br>(-0.36-0.062)    | -2.4<br>(-5.9-0.49)      |
| Guam     | 1990 | Female | 80 to 84 | 38%<br>(25-54%)                | 62%<br>(46-75%)          | 0.22<br>(0.052-0.5)                         | -0.78%<br>(-1.7--0.069%)             | -0.86%<br>(-2--0.051%)              | -0.17<br>(-0.39--0.011)   | -2.1<br>(-4.6--0.19)     |
| Guam     | 1990 | Female | 85 to 89 | 39%<br>(26-53%)                | 61%<br>(47-74%)          | 0.23<br>(0.054-0.52)                        | -0.79%<br>(-1.8--0.012%)             | -0.89%<br>(-2.1-0.033%)             | -0.14<br>(-0.33-0.005)    | -1.1<br>(-2.6--0.016)    |
| Guam     | 1990 | Female | 90 to 94 | 41%<br>(28-54%)                | 59%<br>(46-72%)          | 0.25<br>(0.059-0.58)                        | -0.73%<br>(-1.6--0.021%)             | -0.82%<br>(-1.8-0.0035%)            | -0.06<br>(-0.13-0.00026)  | -0.33<br>(-0.71--0.01)   |
| Guam     | 1990 | Female | 95 plus  | 44%<br>(28-61%)                | 56%<br>(39-72%)          | 0.29<br>(0.067-0.69)                        | -0.76%<br>(-1.9-0.12%)               | -0.89%<br>(-2.2-0.18%)              | -0.018<br>(-0.044-0.0034) | -0.061<br>(-0.15-0.0092) |
| Guam     | 1990 | Male   | All Ages | 54%<br>(46-62%)                | 46%<br>(38-54%)          | 0.69<br>(0.19-1.4)                          | 2.6%<br>(1.2-4.9%)                   | 2.2%<br>(0.74-4.6%)                 | 7.8<br>(2.7-16)           | 470<br>(220-890)         |
| Guam     | 1990 | Male   | 15 to 19 | 47%<br>(30-64%)                | 53%<br>(36-70%)          | 0.53<br>(0.14-1.2)                          | 2.4%<br>(0.83-5%)                    | 3.3%<br>(0.67-7.6%)                 | 0.27<br>(0.054-0.64)      | 24<br>(8.4-51)           |
| Guam     | 1990 | Male   | 20 to 24 | 64%<br>(46-79%)                | 36%<br>(21-54%)          | 1.2<br>(0.33-2.7)                           | 5.9%<br>(2.1-12%)                    | 7.5%<br>(1.7-16%)                   | 1.1<br>(0.27-2.4)         | 91<br>(33-180)           |
| Guam     | 1990 | Male   | 25 to 29 | 70%<br>(53-82%)                | 30%<br>(18-47%)          | 1.3<br>(0.33-2.7)                           | 6%<br>(2.6-11%)                      | 7.5%<br>(2.1-15%)                   | 1.1<br>(0.3-2.1)          | 82<br>(35-150)           |
| Guam     | 1990 | Male   | 30 to 34 | 71%<br>(52-84%)                | 29%<br>(16-48%)          | 1.2<br>(0.32-2.7)                           | 5.2%<br>(2.4-9.6%)                   | 6.4%<br>(2.2-13%)                   | 0.92<br>(0.29-1.9)        | 67<br>(31-130)           |
| Guam     | 1990 | Male   | 35 to 39 | 69%<br>(52-83%)                | 31%<br>(17-48%)          | 1.1<br>(0.27-2.5)                           | 4.8%<br>(2.4-8.6%)                   | 6%<br>(2.4-12%)                     | 0.91<br>(0.37-1.8)        | 59<br>(30-110)           |
| Guam     | 1990 | Male   | 40 to 44 | 67%<br>(50-82%)                | 33%<br>(18-50%)          | 1<br>(0.25-2.3)                             | 3.8%<br>(1.9-7.1%)                   | 4.5%<br>(1.9-9.2%)                  | 0.8<br>(0.33-1.6)         | 47<br>(23-89)            |

| Location | Year | Sex    | Age      | Prevalence of current drinkers | Prevalence of abstainers | Population average of standard drinks daily | Percent of total attributable deaths | Percent of total attributable DALYs | Attributable deaths         | Attributable DALYs        |
|----------|------|--------|----------|--------------------------------|--------------------------|---------------------------------------------|--------------------------------------|-------------------------------------|-----------------------------|---------------------------|
| Guam     | 1990 | Male   | 45 to 49 | 64%<br>(43-80%)                | 36%<br>(20-57%)          | 0.91<br>(0.24-2)                            | 3.1%<br>(1.4-5.8%)                   | 3.6%<br>(1.3-7.2%)                  | 0.64<br>(0.23-1.3)          | 33<br>(15-62)             |
| Guam     | 1990 | Male   | 50 to 54 | 62%<br>(43-79%)                | 38%<br>(21-57%)          | 0.75<br>(0.19-1.7)                          | 2.5%<br>(1.1-5%)                     | 2.8%<br>(0.92-6.1%)                 | 0.64<br>(0.21-1.3)          | 29<br>(12-56)             |
| Guam     | 1990 | Male   | 55 to 59 | 61%<br>(42-78%)                | 39%<br>(22-58%)          | 0.58<br>(0.14-1.2)                          | 1.4%<br>(0.26-3.3%)                  | 1.4%<br>(0.056-3.8%)                | 0.43<br>(0.017-1.1)         | 17<br>(3.4-40)            |
| Guam     | 1990 | Male   | 60 to 64 | 58%<br>(38-77%)                | 42%<br>(23-62%)          | 0.49<br>(0.12-1.1)                          | 0.83%<br>(-0.1-2.4%)                 | 0.85%<br>(-0.3-2.7%)                | 0.34<br>(-0.12-1.1)         | 11<br>(-1.4-33)           |
| Guam     | 1990 | Male   | 65 to 69 | 56%<br>(37-74%)                | 44%<br>(26-63%)          | 0.46<br>(0.11-1)                            | 0.68%<br>(-0.16-2.2%)                | 0.73%<br>(-0.28-2.4%)               | 0.31<br>(-0.12-1)           | 7.9<br>(-1.7-25)          |
| Guam     | 1990 | Male   | 70 to 74 | 54%<br>(35-70%)                | 46%<br>(30-65%)          | 0.42<br>(0.096-0.95)                        | 0.41%<br>(-0.37-1.7%)                | 0.42%<br>(-0.48-1.9%)               | 0.13<br>(-0.15-0.57)        | 2.7<br>(-2.3-11)          |
| Guam     | 1990 | Male   | 75 to 79 | 50%<br>(32-69%)                | 50%<br>(31-68%)          | 0.37<br>(0.087-0.86)                        | 0.33%<br>(-0.38-1.5%)                | 0.32%<br>(-0.52-1.6%)               | 0.081<br>(-0.13-0.42)       | 1.4<br>(-1.6-6.4)         |
| Guam     | 1990 | Male   | 80 to 84 | 47%<br>(28-65%)                | 53%<br>(35-72%)          | 0.34<br>(0.08-0.78)                         | 0.36%<br>(-0.3-1.3%)                 | 0.36%<br>(-0.41-1.5%)               | 0.071<br>(-0.079-0.28)      | 0.87<br>(-0.72-3.2)       |
| Guam     | 1990 | Male   | 85 to 89 | 45%<br>(29-62%)                | 55%<br>(38-71%)          | 0.32<br>(0.074-0.77)                        | 0.16%<br>(-0.48-1%)                  | 0.13%<br>(-0.61-1.1%)               | 0.013<br>(-0.061-0.12)      | 0.15<br>(-0.42-0.93)      |
| Guam     | 1990 | Male   | 90 to 94 | 47%<br>(31-64%)                | 53%<br>(36-69%)          | 0.34<br>(0.078-0.77)                        | 0.13%<br>(-0.5-0.88%)                | 0.086%<br>(-0.65-0.92%)             | 0.0028<br>(-0.022-0.03)     | 0.026<br>(-0.097-0.18)    |
| Guam     | 1990 | Male   | 95 plus  | 50%<br>(30-70%)                | 50%<br>(30-70%)          | 0.38<br>(0.086-0.94)                        | -0.11%<br>(-0.88-0.87%)              | -0.26%<br>(-1.2-0.81%)              | -0.0019<br>(-0.0088-0.0061) | -0.0032<br>(-0.027-0.026) |
| Guam     | 1995 | Female | All Ages | 36%<br>(31-43%)                | 64%<br>(57-69%)          | 0.32<br>(0.071-0.63)                        | 0.23%<br>(-0.17-0.75%)               | -0.22%<br>(-0.93-0.53%)             | -0.6<br>(-2.5-1.4)          | 33<br>(-23-110)           |
| Guam     | 1995 | Female | 15 to 19 | 39%<br>(28-54%)                | 61%<br>(46-72%)          | 0.46<br>(0.098-1)                           | 1.1%<br>(0.4-2.3%)                   | 2.2%<br>(0.17-5.4%)                 | 0.061<br>(0.0048-0.15)      | 6.9<br>(2.5-14)           |
| Guam     | 1995 | Female | 20 to 24 | 46%<br>(32-61%)                | 54%<br>(39-68%)          | 0.67<br>(0.14-1.4)                          | 1.8%<br>(0.83-3.2%)                  | 2.9%<br>(0.5-6.6%)                  | 0.1<br>(0.017-0.23)         | 13<br>(5.9-23)            |
| Guam     | 1995 | Female | 25 to 29 | 46%<br>(32-62%)                | 54%<br>(38-68%)          | 0.55<br>(0.11-1.2)                          | 1.6%<br>(0.84-2.7%)                  | 2.5%<br>(0.74-5.3%)                 | 0.12<br>(0.033-0.25)        | 13<br>(6.9-23)            |
| Guam     | 1995 | Female | 30 to 34 | 45%<br>(31-61%)                | 55%<br>(39-69%)          | 0.5<br>(0.1-1.1)                            | 1.1%<br>(0.54-2%)                    | 1.5%<br>(0.37-3.7%)                 | 0.095<br>(0.022-0.24)       | 11<br>(4.8-20)            |
| Guam     | 1995 | Female | 35 to 39 | 44%<br>(29-60%)                | 56%<br>(40-71%)          | 0.52<br>(0.11-1.2)                          | 1%<br>(0.41-2.2%)                    | 1.7%<br>(0.53-4%)                   | 0.13<br>(0.04-0.33)         | 10<br>(3.8-21)            |
| Guam     | 1995 | Female | 40 to 44 | 42%<br>(29-59%)                | 58%<br>(41-71%)          | 0.48<br>(0.11-1)                            | 0.65%<br>(-0.0035-1.8%)              | 1.2%<br>(0.087-3.1%)                | 0.12<br>(0.0083-0.32)       | 6.6<br>(-0.037-18)        |
| Guam     | 1995 | Female | 45 to 49 | 42%<br>(27-59%)                | 58%<br>(41-73%)          | 0.39<br>(0.084-0.83)                        | 0.16%<br>(-0.52-0.95%)               | 0.45%<br>(-0.52-1.8%)               | 0.055<br>(-0.064-0.22)      | 1.6<br>(-5.3-9.3)         |
| Guam     | 1995 | Female | 50 to 54 | 42%<br>(28-59%)                | 58%<br>(41-72%)          | 0.33<br>(0.069-0.72)                        | -0.22%<br>(-1.1-0.53%)               | -0.043%<br>(-1.1-1.1%)              | -0.0059<br>(-0.15-0.14)     | -1.8<br>(-8.9-4.4)        |
| Guam     | 1995 | Female | 55 to 59 | 39%<br>(26-55%)                | 61%<br>(45-74%)          | 0.28<br>(0.06-0.61)                         | -0.34%<br>(-1.1-0.39%)               | -0.17%<br>(-1.2-0.77%)              | -0.032<br>(-0.22-0.14)      | -3.2<br>(-11-3.7)         |
| Guam     | 1995 | Female | 60 to 64 | 37%<br>(24-54%)                | 63%<br>(46-76%)          | 0.24<br>(0.049-0.51)                        | -0.56%<br>(-1.5-0.21%)               | -0.51%<br>(-1.7-0.4%)               | -0.12<br>(-0.42-0.098)      | -5.5<br>(-15-2)           |

| Location | Year | Sex    | Age      | Prevalence of current drinkers | Prevalence of abstainers | Population average of standard drinks daily | Percent of total attributable deaths | Percent of total attributable DALYs | Attributable deaths       | Attributable DALYs      |
|----------|------|--------|----------|--------------------------------|--------------------------|---------------------------------------------|--------------------------------------|-------------------------------------|---------------------------|-------------------------|
| Guam     | 1995 | Female | 65 to 69 | 38%<br>(26-54%)                | 62%<br>(46-74%)          | 0.24<br>(0.05-0.52)                         | -0.58%<br>(-1.6-0.24%)               | -0.52%<br>(-1.7-0.44%)              | -0.15<br>(-0.48-0.12)     | -5.4<br>(-14-2.1)       |
| Guam     | 1995 | Female | 70 to 74 | 40%<br>(27-55%)                | 60%<br>(45-73%)          | 0.23<br>(0.052-0.5)                         | -0.85%<br>(-1.9--0.024%)             | -0.93%<br>(-2.2-0.047%)             | -0.26<br>(-0.63-0.012)    | -6<br>(-13--0.16)       |
| Guam     | 1995 | Female | 75 to 79 | 39%<br>(27-55%)                | 61%<br>(45-73%)          | 0.22<br>(0.047-0.52)                        | -0.63%<br>(-1.5-0.14%)               | -0.63%<br>(-1.7-0.29%)              | -0.17<br>(-0.48-0.079)    | -3.2<br>(-7.8-0.75)     |
| Guam     | 1995 | Female | 80 to 84 | 38%<br>(26-54%)                | 62%<br>(46-74%)          | 0.23<br>(0.047-0.51)                        | -0.81%<br>(-1.8--0.04%)              | -0.9%<br>(-2--0.00095%)             | -0.23<br>(-0.52--0.00022) | -2.8<br>(-6--0.14)      |
| Guam     | 1995 | Female | 85 to 89 | 39%<br>(26-53%)                | 61%<br>(47-74%)          | 0.24<br>(0.049-0.52)                        | -0.83%<br>(-1.8-0.022%)              | -0.93%<br>(-2.2-0.016%)             | -0.19<br>(-0.42-0.0032)   | -1.5<br>(-3.4--0.041)   |
| Guam     | 1995 | Female | 90 to 94 | 41%<br>(28-55%)                | 59%<br>(45-72%)          | 0.26<br>(0.056-0.62)                        | -0.77%<br>(-1.6--0.04%)              | -0.87%<br>(-1.9--0.02%)             | -0.088<br>(-0.19--0.0021) | -0.48<br>(-1-0.026)     |
| Guam     | 1995 | Female | 95 plus  | 44%<br>(28-61%)                | 56%<br>(39-72%)          | 0.29<br>(0.058-0.69)                        | -0.77%<br>(-1.9-0.14%)               | -0.91%<br>(-2.3-0.14%)              | -0.028<br>(-0.069-0.0041) | -0.095<br>(-0.23-0.018) |
| Guam     | 1995 | Male   | All Ages | 53%<br>(45-61%)                | 47%<br>(39-55%)          | 0.69<br>(0.15-1.4)                          | 2.6%<br>(1.2-4.7%)                   | 2.1%<br>(0.75-4.5%)                 | 8.7<br>(3.1-19)           | 520<br>(240-980)        |
| Guam     | 1995 | Male   | 15 to 19 | 47%<br>(29-64%)                | 53%<br>(36-71%)          | 0.53<br>(0.11-1.2)                          | 2.5%<br>(0.77-5.2%)                  | 3.4%<br>(0.63-7.9%)                 | 0.26<br>(0.049-0.63)      | 23<br>(7.2-49)          |
| Guam     | 1995 | Male   | 20 to 24 | 63%<br>(45-78%)                | 37%<br>(22-55%)          | 1.2<br>(0.26-2.6)                           | 6%<br>(2-12%)                        | 7.6%<br>(1.7-16%)                   | 1<br>(0.23-2.1)           | 78<br>(26-150)          |
| Guam     | 1995 | Male   | 25 to 29 | 69%<br>(52-82%)                | 31%<br>(18-48%)          | 1.3<br>(0.3-2.7)                            | 6%<br>(2.4-11%)                      | 7.5%<br>(2.1-15%)                   | 1.2<br>(0.33-2.5)         | 94<br>(38-170)          |
| Guam     | 1995 | Male   | 30 to 34 | 70%<br>(52-84%)                | 30%<br>(16-48%)          | 1.3<br>(0.3-2.7)                            | 5.2%<br>(2.3-9.6%)                   | 6.3%<br>(2-13%)                     | 1.1<br>(0.34-2.2)         | 78<br>(35-150)          |
| Guam     | 1995 | Male   | 35 to 39 | 69%<br>(52-83%)                | 31%<br>(17-48%)          | 1.2<br>(0.24-2.6)                           | 4.7%<br>(2.4-8.5%)                   | 5.9%<br>(2.4-11%)                   | 1<br>(0.41-2)             | 67<br>(34-120)          |
| Guam     | 1995 | Male   | 40 to 44 | 67%<br>(51-82%)                | 33%<br>(18-49%)          | 1.1<br>(0.22-2.3)                           | 3.8%<br>(1.9-7%)                     | 4.5%<br>(1.9-8.9%)                  | 0.95<br>(0.4-1.9)         | 55<br>(27-100)          |
| Guam     | 1995 | Male   | 45 to 49 | 64%<br>(43-79%)                | 36%<br>(21-57%)          | 0.92<br>(0.2-2)                             | 3.1%<br>(1.5-5.6%)                   | 3.5%<br>(1.4-7%)                    | 0.8<br>(0.3-1.6)          | 42<br>(20-78)           |
| Guam     | 1995 | Male   | 50 to 54 | 62%<br>(42-78%)                | 38%<br>(22-58%)          | 0.76<br>(0.17-1.7)                          | 2.6%<br>(1.2-5.2%)                   | 2.9%<br>(1.1-6.4%)                  | 0.68<br>(0.24-1.4)        | 31<br>(14-61)           |
| Guam     | 1995 | Male   | 55 to 59 | 60%<br>(42-78%)                | 40%<br>(22-58%)          | 0.59<br>(0.13-1.3)                          | 1.4%<br>(0.34-3.2%)                  | 1.5%<br>(0.076-3.8%)                | 0.48<br>(0.024-1.2)       | 19<br>(4.5-43)          |
| Guam     | 1995 | Male   | 60 to 64 | 58%<br>(38-76%)                | 42%<br>(24-62%)          | 0.49<br>(0.1-1.1)                           | 0.91%<br>(0.006-2.3%)                | 0.96%<br>(-0.2-2.7%)                | 0.34<br>(-0.071-0.95)     | 11<br>(0.076-29)        |
| Guam     | 1995 | Male   | 65 to 69 | 56%<br>(37-74%)                | 44%<br>(26-63%)          | 0.46<br>(0.09-1)                            | 0.72%<br>(-0.1-2.1%)                 | 0.77%<br>(-0.2-2.5%)                | 0.41<br>(-0.11-1.3)       | 11<br>(-1.5-31)         |
| Guam     | 1995 | Male   | 70 to 74 | 54%<br>(35-71%)                | 46%<br>(29-65%)          | 0.42<br>(0.089-0.96)                        | 0.45%<br>(-0.38-1.7%)                | 0.47%<br>(-0.5-2%)                  | 0.22<br>(-0.24-0.92)      | 4.7<br>(-3.7-18)        |
| Guam     | 1995 | Male   | 75 to 79 | 50%<br>(33-68%)                | 50%<br>(32-67%)          | 0.38<br>(0.074-0.84)                        | 0.37%<br>(-0.4-1.5%)                 | 0.36%<br>(-0.52-1.7%)               | 0.11<br>(-0.15-0.48)      | 1.8<br>(-2-7.5)         |
| Guam     | 1995 | Male   | 80 to 84 | 47%<br>(29-65%)                | 53%<br>(35-71%)          | 0.34<br>(0.07-0.77)                         | 0.39%<br>(-0.26-1.4%)                | 0.4%<br>(-0.38-1.5%)                | 0.097<br>(-0.09-0.37)     | 1.2<br>(-0.79-4.2)      |

| Location | Year | Sex    | Age      | Prevalence of current drinkers | Prevalence of abstainers | Population average of standard drinks daily | Percent of total attributable deaths | Percent of total attributable DALYs | Attributable deaths        | Attributable DALYs        |
|----------|------|--------|----------|--------------------------------|--------------------------|---------------------------------------------|--------------------------------------|-------------------------------------|----------------------------|---------------------------|
| Guam     | 1995 | Male   | 85 to 89 | 45%<br>(28-62%)                | 55%<br>(38-72%)          | 0.33<br>(0.069-0.74)                        | 0.18%<br>(-0.45-1%)                  | 0.15%<br>(-0.6-1.1%)                | 0.022<br>(-0.088-0.16)     | 0.24<br>(-0.58-1.3)       |
| Guam     | 1995 | Male   | 90 to 94 | 46%<br>(31-64%)                | 54%<br>(36-69%)          | 0.34<br>(0.075-0.86)                        | 0.15%<br>(-0.46-0.95%)               | 0.11%<br>(-0.61-1%)                 | 0.0055<br>(-0.032-0.052)   | 0.046<br>(-0.14-0.29)     |
| Guam     | 1995 | Male   | 95 plus  | 50%<br>(30-69%)                | 50%<br>(31-70%)          | 0.38<br>(0.074-0.93)                        | -0.098%<br>(-0.83-0.92%)             | -0.24%<br>(-1.1-0.88%)              | -0.0026<br>(-0.012-0.0091) | -0.0042<br>(-0.035-0.038) |
| Guam     | 2000 | Female | All Ages | 33%<br>(29-38%)                | 67%<br>(62-71%)          | 0.32<br>(0.099-0.61)                        | 0.11%<br>(-0.26-0.61%)               | -0.43%<br>(-1.2-0.35%)              | -1.3<br>(-3.5-1.1)         | 17<br>(-42-96)            |
| Guam     | 2000 | Female | 15 to 19 | 37%<br>(26-51%)                | 63%<br>(49-74%)          | 0.49<br>(0.15-1)                            | 1.1%<br>(0.4-2.1%)                   | 2.1%<br>(0.24-5.4%)                 | 0.062<br>(0.0069-0.15)     | 7.2<br>(2.7-14)           |
| Guam     | 2000 | Female | 20 to 24 | 43%<br>(32-57%)                | 57%<br>(43-68%)          | 0.71<br>(0.2-1.4)                           | 1.7%<br>(0.84-3.1%)                  | 2.9%<br>(0.59-6.4%)                 | 0.095<br>(0.019-0.21)      | 12<br>(5.9-22)            |
| Guam     | 2000 | Female | 25 to 29 | 42%<br>(32-56%)                | 58%<br>(44-68%)          | 0.57<br>(0.17-1.1)                          | 1.5%<br>(0.83-2.5%)                  | 2.3%<br>(0.67-4.7%)                 | 0.098<br>(0.027-0.21)      | 12<br>(6.6-21)            |
| Guam     | 2000 | Female | 30 to 34 | 41%<br>(31-55%)                | 59%<br>(45-69%)          | 0.51<br>(0.16-1)                            | 1.1%<br>(0.49-1.9%)                  | 1.4%<br>(0.31-3.3%)                 | 0.078<br>(0.017-0.19)      | 9.9<br>(4.6-18)           |
| Guam     | 2000 | Female | 35 to 39 | 39%<br>(29-53%)                | 61%<br>(47-71%)          | 0.52<br>(0.15-1.1)                          | 0.96%<br>(0.4-1.9%)                  | 1.5%<br>(0.44-3.6%)                 | 0.13<br>(0.034-0.28)       | 10<br>(4.3-20)            |
| Guam     | 2000 | Female | 40 to 44 | 34%<br>(24-47%)                | 66%<br>(53-76%)          | 0.43<br>(0.12-0.91)                         | 0.62%<br>(0.068-1.5%)                | 1.1%<br>(0.12-2.6%)                 | 0.11<br>(0.011-0.28)       | 6.8<br>(0.76-16)          |
| Guam     | 2000 | Female | 45 to 49 | 34%<br>(24-49%)                | 66%<br>(51-76%)          | 0.35<br>(0.11-0.7)                          | 0.17%<br>(-0.39-0.86%)               | 0.41%<br>(-0.45-1.6%)               | 0.056<br>(-0.064-0.22)     | 1.9<br>(-4.5-9.9)         |
| Guam     | 2000 | Female | 50 to 54 | 38%<br>(28-51%)                | 62%<br>(49-72%)          | 0.33<br>(0.1-0.67)                          | -0.27%<br>(-0.99-0.44%)              | -0.12%<br>(-1.1-0.96%)              | -0.021<br>(-0.2-0.17)      | -3.3<br>(-12-5.3)         |
| Guam     | 2000 | Female | 55 to 59 | 37%<br>(27-50%)                | 63%<br>(50-73%)          | 0.29<br>(0.093-0.6)                         | -0.48%<br>(-1.3-0.22%)               | -0.35%<br>(-1.4-0.62%)              | -0.065<br>(-0.26-0.11)     | -4.7<br>(-12-2.2)         |
| Guam     | 2000 | Female | 60 to 64 | 35%<br>(24-50%)                | 65%<br>(50-76%)          | 0.25<br>(0.078-0.52)                        | -0.72%<br>(-1.6-0.015%)              | -0.72%<br>(-1.9-0.19%)              | -0.2<br>(-0.52-0.052)      | -8.3<br>(-19-0.18)        |
| Guam     | 2000 | Female | 65 to 69 | 36%<br>(24-50%)                | 64%<br>(50-76%)          | 0.25<br>(0.075-0.53)                        | -0.72%<br>(-1.6--0.0037%)            | -0.7%<br>(-1.8-0.21%)               | -0.23<br>(-0.61-0.066)     | -7.8<br>(-18--0.038)      |
| Guam     | 2000 | Female | 70 to 74 | 36%<br>(25-51%)                | 64%<br>(49-75%)          | 0.23<br>(0.069-0.5)                         | -0.93%<br>(-1.9--0.15%)              | -1%<br>(-2.2--0.1%)                 | -0.32<br>(-0.7-0.031)      | -7.3<br>(-15--1.2)        |
| Guam     | 2000 | Female | 75 to 79 | 36%<br>(25-52%)                | 64%<br>(48-75%)          | 0.23<br>(0.071-0.49)                        | -0.75%<br>(-1.6--0.051%)             | -0.8%<br>(-1.8-0.023%)              | -0.27<br>(-0.63-0.0082)    | -4.8<br>(-11--0.34)       |
| Guam     | 2000 | Female | 80 to 84 | 36%<br>(24-51%)                | 64%<br>(49-76%)          | 0.24<br>(0.069-0.5)                         | -0.91%<br>(-1.8--0.17%)              | -1%<br>(-2.1--0.15%)                | -0.38<br>(-0.78--0.054)    | -4.5<br>(-9--0.82)        |
| Guam     | 2000 | Female | 85 to 89 | 36%<br>(24-50%)                | 64%<br>(50-76%)          | 0.25<br>(0.07-0.54)                         | -0.93%<br>(-1.9--0.16%)              | -1.1%<br>(-2.3--0.15%)              | -0.29<br>(-0.61--0.038)    | -2.3<br>(-4.9--0.38)      |
| Guam     | 2000 | Female | 90 to 94 | 38%<br>(26-52%)                | 62%<br>(48-74%)          | 0.28<br>(0.078-0.62)                        | -0.88%<br>(-1.7--0.14%)              | -1%<br>(-2--0.14%)                  | -0.14<br>(-0.28--0.02)     | -0.78<br>(-1.5--0.12)     |
| Guam     | 2000 | Female | 95 plus  | 41%<br>(26-58%)                | 59%<br>(42-74%)          | 0.31<br>(0.082-0.72)                        | -0.88%<br>(-2-0.032%)                | -1%<br>(-2.4-0.056%)                | -0.049<br>(-0.11-0.0027)   | -0.17<br>(-0.38-0.006)    |
| Guam     | 2000 | Male   | All Ages | 58%<br>(51-66%)                | 42%<br>(34-49%)          | 0.83<br>(0.27-1.6)                          | 2.4%<br>(1-4.9%)                     | 1.8%<br>(0.36-4.2%)                 | 8.3<br>(1.7-20)            | 520<br>(220-1000)         |

| Location | Year | Sex    | Age      | Prevalence of current drinkers | Prevalence of abstainers | Population average of standard drinks daily | Percent of total attributable deaths | Percent of total attributable DALYs | Attributable deaths       | Attributable DALYs      |
|----------|------|--------|----------|--------------------------------|--------------------------|---------------------------------------------|--------------------------------------|-------------------------------------|---------------------------|-------------------------|
| Guam     | 2000 | Male   | 15 to 19 | 53%<br>(37-69%)                | 47%<br>(31-63%)          | 0.71<br>(0.21-1.5)                          | 3%<br>(0.93-6%)                      | 4.3%<br>(0.82-9.5%)                 | 0.33<br>(0.063-0.73)      | 28<br>(8.6-58)          |
| Guam     | 2000 | Male   | 20 to 24 | 69%<br>(53-81%)                | 31%<br>(19-47%)          | 1.6<br>(0.5-3.2)                            | 7%<br>(2.6-13%)                      | 9.4%<br>(2.8-18%)                   | 1<br>(0.28-2)             | 78<br>(30-150)          |
| Guam     | 2000 | Male   | 25 to 29 | 73%<br>(61-84%)                | 27%<br>(16-39%)          | 1.6<br>(0.52-3.2)                           | 6.5%<br>(2.8-12%)                    | 8.5%<br>(2.7-17%)                   | 1.1<br>(0.32-2.1)         | 80<br>(34-140)          |
| Guam     | 2000 | Male   | 30 to 34 | 74%<br>(61-85%)                | 26%<br>(15-39%)          | 1.5<br>(0.51-3)                             | 5.4%<br>(2.4-9.9%)                   | 6.7%<br>(2.2-13%)                   | 1<br>(0.32-2.1)           | 75<br>(32-140)          |
| Guam     | 2000 | Male   | 35 to 39 | 74%<br>(61-85%)                | 26%<br>(15-39%)          | 1.4<br>(0.43-2.9)                           | 4.8%<br>(2.3-8.6%)                   | 6.1%<br>(2.3-12%)                   | 1.1<br>(0.42-2.2)         | 75<br>(36-140)          |
| Guam     | 2000 | Male   | 40 to 44 | 72%<br>(59-83%)                | 28%<br>(17-41%)          | 1.3<br>(0.4-2.6)                            | 3.8%<br>(1.8-7.3%)                   | 4.6%<br>(1.7-9.3%)                  | 0.97<br>(0.35-2)          | 57<br>(26-110)          |
| Guam     | 2000 | Male   | 45 to 49 | 71%<br>(55-82%)                | 29%<br>(18-45%)          | 1.2<br>(0.36-2.4)                           | 3%<br>(1.1-6.1%)                     | 3.5%<br>(1.1-7.7%)                  | 0.91<br>(0.26-2)          | 48<br>(19-98)           |
| Guam     | 2000 | Male   | 50 to 54 | 71%<br>(56-83%)                | 29%<br>(17-44%)          | 1.1<br>(0.34-2.1)                           | 2.3%<br>(0.55-5.4%)                  | 2.6%<br>(0.23-6.3%)                 | 0.85<br>(0.075-2.2)       | 39<br>(9.5-91)          |
| Guam     | 2000 | Male   | 55 to 59 | 68%<br>(53-81%)                | 32%<br>(19-47%)          | 0.81<br>(0.25-1.6)                          | 1%<br>(-0.35-3.1%)                   | 0.99%<br>(-0.71-3.5%)               | 0.34<br>(-0.24-1.2)       | 15<br>(-5-45)           |
| Guam     | 2000 | Male   | 60 to 64 | 62%<br>(42-78%)                | 38%<br>(22-58%)          | 0.61<br>(0.19-1.3)                          | 0.61%<br>(-0.53-2.2%)                | 0.58%<br>(-0.86-2.5%)               | 0.25<br>(-0.38-1.1)       | 9.2<br>(-8.3-34)        |
| Guam     | 2000 | Male   | 65 to 69 | 59%<br>(40-76%)                | 41%<br>(24-60%)          | 0.56<br>(0.17-1.1)                          | 0.54%<br>(-0.43-2%)                  | 0.55%<br>(-0.64-2.3%)               | 0.27<br>(-0.31-1.1)       | 7.4<br>(-5.8-28)        |
| Guam     | 2000 | Male   | 70 to 74 | 57%<br>(39-73%)                | 43%<br>(27-61%)          | 0.52<br>(0.15-1.1)                          | 0.24%<br>(-0.72-1.6%)                | 0.21%<br>(-0.97-1.7%)               | 0.1<br>(-0.5-0.9)         | 2.7<br>(-8.3-18)        |
| Guam     | 2000 | Male   | 75 to 79 | 53%<br>(35-71%)                | 47%<br>(29-65%)          | 0.46<br>(0.14-0.97)                         | 0.11%<br>(-0.8-1.3%)                 | 0.046%<br>(-1-1.4%)                 | 0.022<br>(-0.5-0.65)      | 0.93<br>(-6.3-11)       |
| Guam     | 2000 | Male   | 80 to 84 | 50%<br>(31-69%)                | 50%<br>(31-69%)          | 0.42<br>(0.13-0.89)                         | 0.15%<br>(-0.62-1.2%)                | 0.1%<br>(-0.75-1.3%)                | 0.041<br>(-0.31-0.5)      | 0.76<br>(-3-5.8)        |
| Guam     | 2000 | Male   | 85 to 89 | 48%<br>(31-66%)                | 52%<br>(34-69%)          | 0.41<br>(0.11-0.9)                          | 0.015%<br>(-0.72-0.96%)              | -0.06%<br>(-0.94-1%)                | -0.012<br>(-0.19-0.21)    | 0.027<br>(-1.3-1.7)     |
| Guam     | 2000 | Male   | 90 to 94 | 50%<br>(34-68%)                | 50%<br>(32-66%)          | 0.42<br>(0.11-0.97)                         | 0.009%<br>(-0.67-0.84%)              | -0.066%<br>(-0.88-0.86%)            | -0.0055<br>(-0.072-0.071) | 0.0047<br>(-0.34-0.42)  |
| Guam     | 2000 | Male   | 95 plus  | 53%<br>(32-72%)                | 47%<br>(28-68%)          | 0.46<br>(0.12-1.1)                          | -0.24%<br>(-1.1-0.82%)               | -0.43%<br>(-1.4-0.77%)              | -0.0079<br>(-0.027-0.014) | -0.018<br>(-0.08-0.061) |
| Guam     | 2005 | Female | All Ages | 30%<br>(26-35%)                | 70%<br>(65-74%)          | 0.33<br>(0.12-0.64)                         | 0.036%<br>(-0.36-0.54%)              | -0.52%<br>(-1.2-0.21%)              | -2<br>(-4.7-0.77)         | 6.5<br>(-60-93)         |
| Guam     | 2005 | Female | 15 to 19 | 35%<br>(25-49%)                | 65%<br>(51-75%)          | 0.53<br>(0.18-1.1)                          | 1.1%<br>(0.42-2.1%)                  | 2.2%<br>(0.32-5%)                   | 0.07<br>(0.0095-0.16)     | 8.1<br>(3.1-16)         |
| Guam     | 2005 | Female | 20 to 24 | 40%<br>(31-53%)                | 60%<br>(47-69%)          | 0.74<br>(0.25-1.5)                          | 1.8%<br>(0.88-3.2%)                  | 2.9%<br>(0.68-6.4%)                 | 0.095<br>(0.023-0.21)     | 12<br>(6-23)            |
| Guam     | 2005 | Female | 25 to 29 | 40%<br>(31-53%)                | 60%<br>(47-69%)          | 0.61<br>(0.22-1.2)                          | 1.5%<br>(0.84-2.6%)                  | 2.3%<br>(0.64-4.7%)                 | 0.084<br>(0.025-0.18)     | 11<br>(5.8-19)          |
| Guam     | 2005 | Female | 30 to 34 | 39%<br>(30-52%)                | 61%<br>(48-70%)          | 0.54<br>(0.2-1.1)                           | 1.1%<br>(0.5-2%)                     | 1.4%<br>(0.31-3.4%)                 | 0.074<br>(0.017-0.18)     | 9.4<br>(4.2-17)         |

| Location | Year | Sex    | Age      | Prevalence of current drinkers | Prevalence of abstainers | Population average of standard drinks daily | Percent of total attributable deaths | Percent of total attributable DALYs | Attributable deaths       | Attributable DALYs         |
|----------|------|--------|----------|--------------------------------|--------------------------|---------------------------------------------|--------------------------------------|-------------------------------------|---------------------------|----------------------------|
| Guam     | 2005 | Female | 35 to 39 | 35%<br>(27-49%)                | 65%<br>(51-73%)          | 0.53<br>(0.19-1.1)                          | 0.95%<br>(0.41-1.9%)                 | 1.5%<br>(0.43-3.5%)                 | 0.11<br>(0.031-0.27)      | 9.7<br>(4.1-20)            |
| Guam     | 2005 | Female | 40 to 44 | 29%<br>(21-41%)                | 71%<br>(59-79%)          | 0.41<br>(0.13-0.83)                         | 0.62%<br>(0.1-1.5%)                  | 0.99%<br>(0.12-2.6%)                | 0.11<br>(0.013-0.29)      | 7.6<br>(1.2-18)            |
| Guam     | 2005 | Female | 45 to 49 | 29%<br>(20-42%)                | 71%<br>(58-80%)          | 0.33<br>(0.11-0.67)                         | 0.22%<br>(-0.28-0.87%)               | 0.45%<br>(-0.34-1.6%)               | 0.067<br>(-0.051-0.23)    | 2.7<br>(-3.6-11)           |
| Guam     | 2005 | Female | 50 to 54 | 34%<br>(25-47%)                | 66%<br>(53-75%)          | 0.33<br>(0.11-0.68)                         | -0.27%<br>(-0.95-0.38%)              | -0.13%<br>(-1-0.93%)                | -0.026<br>(-0.21-0.18)    | -3.6<br>(-13-5.1)          |
| Guam     | 2005 | Female | 55 to 59 | 34%<br>(25-48%)                | 66%<br>(52-75%)          | 0.3<br>(0.1-0.6)                            | -0.53%<br>(-1.2-0.13%)               | -0.43%<br>(-1.4-0.48%)              | -0.11<br>(-0.36-0.13)     | -7.3<br>(-17-1.8)          |
| Guam     | 2005 | Female | 60 to 64 | 31%<br>(21-46%)                | 69%<br>(54-79%)          | 0.26<br>(0.084-0.52)                        | -0.7%<br>(-1.6--0.034%)              | -0.7%<br>(-1.8-0.14%)               | -0.19<br>(-0.48-0.036)    | -7.7<br>(-17--0.38)        |
| Guam     | 2005 | Female | 65 to 69 | 32%<br>(22-47%)                | 68%<br>(53-78%)          | 0.25<br>(0.081-0.52)                        | -0.72%<br>(-1.6--0.053%)             | -0.73%<br>(-1.8-0.13%)              | -0.28<br>(-0.7-0.05)      | -9.2<br>(-20--0.68)        |
| Guam     | 2005 | Female | 70 to 74 | 33%<br>(22-49%)                | 67%<br>(51-78%)          | 0.24<br>(0.081-0.52)                        | -0.91%<br>(-1.8--0.2%)               | -1%<br>(-2.1--0.16%)                | -0.46<br>(-0.97--0.071)   | -11<br>(-21--2.4)          |
| Guam     | 2005 | Female | 75 to 79 | 33%<br>(22-48%)                | 67%<br>(52-78%)          | 0.24<br>(0.08-0.5)                          | -0.77%<br>(-1.6--0.086%)             | -0.83%<br>(-1.9--0.018%)            | -0.34<br>(-0.78--0.0077)  | -6<br>(-13--0.69)          |
| Guam     | 2005 | Female | 80 to 84 | 32%<br>(21-47%)                | 68%<br>(53-79%)          | 0.24<br>(0.081-0.5)                         | -0.9%<br>(-1.8--0.22%)               | -1%<br>(-2.1--0.22%)                | -0.47<br>(-0.96--0.1)     | -5.5<br>(-11--1.4)         |
| Guam     | 2005 | Female | 85 to 89 | 33%<br>(21-45%)                | 67%<br>(55-79%)          | 0.26<br>(0.081-0.54)                        | -0.96%<br>(-1.9--0.22%)              | -1.1%<br>(-2.2--0.23%)              | -0.46<br>(-0.93--0.093)   | -3.6<br>(-7.1--0.82)       |
| Guam     | 2005 | Female | 90 to 94 | 34%<br>(23-48%)                | 66%<br>(52-77%)          | 0.28<br>(0.087-0.64)                        | -0.9%<br>(-1.7--0.16%)               | -1%<br>(-2--0.18%)                  | -0.21<br>(-0.4--0.036)    | -1.1<br>(-2.1--0.19)       |
| Guam     | 2005 | Female | 95 plus  | 37%<br>(23-55%)                | 63%<br>(45-77%)          | 0.32<br>(0.091-0.74)                        | -0.9%<br>(-2--0.00031%)              | -1.1%<br>(-2.4--0.055%)             | -0.073<br>(-0.16--0.0037) | -0.24<br>(-0.53--0.000083) |
| Guam     | 2005 | Male   | All Ages | 58%<br>(51-65%)                | 42%<br>(35-49%)          | 0.94<br>(0.33-1.8)                          | 2.4%<br>(0.94-5.1%)                  | 1.7%<br>(0.17-4.5%)                 | 9.5<br>(0.95-26)          | 580<br>(220-1200)          |
| Guam     | 2005 | Male   | 15 to 19 | 55%<br>(40-69%)                | 45%<br>(31-60%)          | 0.85<br>(0.3-1.7)                           | 3.4%<br>(1.1-6.6%)                   | 4.9%<br>(1.3-10%)                   | 0.43<br>(0.11-0.88)       | 35<br>(12-70)              |
| Guam     | 2005 | Male   | 20 to 24 | 70%<br>(56-82%)                | 30%<br>(18-44%)          | 1.9<br>(0.66-3.8)                           | 7.4%<br>(2.9-13%)                    | 9.7%<br>(3.1-19%)                   | 1.1<br>(0.35-2.2)         | 87<br>(35-160)             |
| Guam     | 2005 | Male   | 25 to 29 | 74%<br>(61-84%)                | 26%<br>(16-39%)          | 1.8<br>(0.67-3.7)                           | 7.2%<br>(3.1-13%)                    | 9.4%<br>(3.2-18%)                   | 1.1<br>(0.35-2)           | 79<br>(35-140)             |
| Guam     | 2005 | Male   | 30 to 34 | 74%<br>(61-85%)                | 26%<br>(15-39%)          | 1.8<br>(0.63-3.5)                           | 5.7%<br>(2.6-11%)                    | 7.2%<br>(2.7-14%)                   | 1<br>(0.34-2)             | 72<br>(32-140)             |
| Guam     | 2005 | Male   | 35 to 39 | 72%<br>(60-84%)                | 28%<br>(16-40%)          | 1.6<br>(0.56-3.2)                           | 5.1%<br>(2.4-9.5%)                   | 6.5%<br>(2.5-13%)                   | 1.2<br>(0.44-2.4)         | 76<br>(36-140)             |
| Guam     | 2005 | Male   | 40 to 44 | 71%<br>(59-82%)                | 29%<br>(18-41%)          | 1.5<br>(0.5-2.9)                            | 4%<br>(1.7-7.9%)                     | 4.8%<br>(1.7-10%)                   | 1.2<br>(0.42-2.6)         | 70<br>(30-140)             |
| Guam     | 2005 | Male   | 45 to 49 | 69%<br>(53-81%)                | 31%<br>(19-47%)          | 1.3<br>(0.46-2.6)                           | 3.4%<br>(1.4-6.9%)                   | 3.9%<br>(1.3-8.8%)                  | 1.2<br>(0.38-2.6)         | 60<br>(24-130)             |
| Guam     | 2005 | Male   | 50 to 54 | 69%<br>(53-81%)                | 31%<br>(19-47%)          | 1.2<br>(0.4-2.3)                            | 2.5%<br>(0.67-6.1%)                  | 2.8%<br>(0.36-7.1%)                 | 1.1<br>(0.14-2.8)         | 49<br>(12-110)             |

| Location | Year | Sex    | Age      | Prevalence of current drinkers | Prevalence of abstainers | Population average of standard drinks daily | Percent of total attributable deaths | Percent of total attributable DALYs | Attributable deaths      | Attributable DALYs     |
|----------|------|--------|----------|--------------------------------|--------------------------|---------------------------------------------|--------------------------------------|-------------------------------------|--------------------------|------------------------|
| Guam     | 2005 | Male   | 55 to 59 | 68%<br>(53-81%)                | 32%<br>(19-47%)          | 0.94<br>(0.34-1.9)                          | 1.2%<br>(-0.3-3.8%)                  | 1.2%<br>(-0.72-4.3%)                | 0.56<br>(-0.35-2.1)      | 24<br>(-6.2-79)        |
| Guam     | 2005 | Male   | 60 to 64 | 66%<br>(48-81%)                | 34%<br>(19-52%)          | 0.78<br>(0.27-1.6)                          | 0.55%<br>(-0.77-2.6%)                | 0.49%<br>(-1.1-3%)                  | 0.23<br>(-0.56-1.4)      | 8.9<br>(-13-44)        |
| Guam     | 2005 | Male   | 65 to 69 | 61%<br>(42-78%)                | 39%<br>(22-58%)          | 0.68<br>(0.22-1.4)                          | 0.54%<br>(-0.6-2.5%)                 | 0.54%<br>(-0.81-2.8%)               | 0.32<br>(-0.49-1.7)      | 9<br>(-10-42)          |
| Guam     | 2005 | Male   | 70 to 74 | 56%<br>(37-72%)                | 44%<br>(28-63%)          | 0.59<br>(0.2-1.2)                           | 0.27%<br>(-0.75-2%)                  | 0.23%<br>(-1-2.2%)                  | 0.14<br>(-0.64-1.4)      | 3.7<br>(-11-27)        |
| Guam     | 2005 | Male   | 75 to 79 | 52%<br>(34-70%)                | 48%<br>(30-66%)          | 0.52<br>(0.17-1.1)                          | 0.14%<br>(-0.82-1.5%)                | 0.065%<br>(-1.1-1.7%)               | 0.037<br>(-0.64-0.95)    | 1.4<br>(-8.2-15)       |
| Guam     | 2005 | Male   | 80 to 84 | 49%<br>(31-67%)                | 51%<br>(33-69%)          | 0.47<br>(0.16-0.97)                         | 0.14%<br>(-0.68-1.3%)                | 0.075%<br>(-0.88-1.4%)              | 0.038<br>(-0.47-0.73)    | 0.89<br>(-4.4-8.6)     |
| Guam     | 2005 | Male   | 85 to 89 | 47%<br>(30-64%)                | 53%<br>(36-70%)          | 0.45<br>(0.15-0.99)                         | -0.0014%<br>(-0.8-1.1%)              | -0.09%<br>(-1-1.2%)                 | -0.03<br>(-0.34-0.4)     | -0.0018<br>(-2.3-3.3)  |
| Guam     | 2005 | Male   | 90 to 94 | 49%<br>(33-66%)                | 51%<br>(34-67%)          | 0.47<br>(0.14-1.1)                          | -0.024%<br>(-0.74-0.92%)             | -0.12%<br>(-0.96-0.94%)             | -0.013<br>(-0.1-0.1)     | -0.015<br>(-0.47-0.6)  |
| Guam     | 2005 | Male   | 95 plus  | 52%<br>(31-72%)                | 48%<br>(28-69%)          | 0.51<br>(0.15-1.2)                          | -0.21%<br>(-1.1-0.95%)               | -0.4%<br>(-1.5-0.86%)               | -0.011<br>(-0.041-0.025) | -0.023<br>(-0.12-0.11) |
| Guam     | 2010 | Female | All Ages | 31%<br>(27-36%)                | 69%<br>(64-73%)          | 0.35<br>(0.12-0.7)                          | -0.012%<br>(-0.43-0.56%)             | -0.62%<br>(-1.4-0.18%)              | -3.1<br>(-6.8-0.87)      | -2.3<br>(-8.7-110)     |
| Guam     | 2010 | Female | 15 to 19 | 36%<br>(26-50%)                | 64%<br>(50-74%)          | 0.56<br>(0.2-1.2)                           | 1.1%<br>(0.37-2.3%)                  | 1.8%<br>(0.26-4.4%)                 | 0.083<br>(0.012-0.2)     | 9.1<br>(3.1-18)        |
| Guam     | 2010 | Female | 20 to 24 | 40%<br>(30-53%)                | 60%<br>(47-70%)          | 0.75<br>(0.26-1.5)                          | 1.8%<br>(0.89-3.3%)                  | 3%<br>(0.64-6.9%)                   | 0.12<br>(0.026-0.27)     | 15<br>(6.7-27)         |
| Guam     | 2010 | Female | 25 to 29 | 40%<br>(29-54%)                | 60%<br>(46-71%)          | 0.61<br>(0.21-1.3)                          | 1.6%<br>(0.84-2.7%)                  | 2.3%<br>(0.73-4.8%)                 | 0.099<br>(0.03-0.21)     | 12<br>(6.1-20)         |
| Guam     | 2010 | Female | 30 to 34 | 39%<br>(29-53%)                | 61%<br>(47-71%)          | 0.56<br>(0.19-1.1)                          | 1.1%<br>(0.48-2.1%)                  | 1.4%<br>(0.31-3.5%)                 | 0.078<br>(0.017-0.2)     | 9<br>(3.9-17)          |
| Guam     | 2010 | Female | 35 to 39 | 38%<br>(29-52%)                | 62%<br>(48-71%)          | 0.59<br>(0.2-1.2)                           | 1%<br>(0.39-2.3%)                    | 1.7%<br>(0.46-3.9%)                 | 0.14<br>(0.04-0.34)      | 11<br>(3.9-24)         |
| Guam     | 2010 | Female | 40 to 44 | 36%<br>(27-51%)                | 64%<br>(49-73%)          | 0.53<br>(0.18-1.1)                          | 0.65%<br>(-0.039-1.8%)               | 1.1%<br>(0.024-3.1%)                | 0.14<br>(0.0034-0.4)     | 8.2<br>(-0.47-23)      |
| Guam     | 2010 | Female | 45 to 49 | 33%<br>(24-47%)                | 67%<br>(53-76%)          | 0.39<br>(0.14-0.81)                         | 0.22%<br>(-0.39-1.1%)                | 0.49%<br>(-0.38-1.9%)               | 0.094<br>(-0.073-0.36)   | 3.2<br>(-5.8-16)       |
| Guam     | 2010 | Female | 50 to 54 | 34%<br>(24-47%)                | 66%<br>(53-76%)          | 0.34<br>(0.12-0.68)                         | -0.24%<br>(-0.91-0.49%)              | -0.11%<br>(-1-1%)                   | -0.026<br>(-0.25-0.24)   | -3.6<br>(-14-7.6)      |
| Guam     | 2010 | Female | 55 to 59 | 31%<br>(22-43%)                | 69%<br>(57-78%)          | 0.28<br>(0.093-0.59)                        | -0.39%<br>(-1.1-0.24%)               | -0.29%<br>(-1.2-0.57%)              | -0.093<br>(-0.39-0.18)   | -6.3<br>(-18-3.8)      |
| Guam     | 2010 | Female | 60 to 64 | 27%<br>(18-41%)                | 73%<br>(59-82%)          | 0.22<br>(0.074-0.46)                        | -0.51%<br>(-1.3-0.056%)              | -0.5%<br>(-1.5-0.25%)               | -0.2<br>(-0.6-0.1)       | -8.4<br>(-21-0.93)     |
| Guam     | 2010 | Female | 65 to 69 | 31%<br>(21-44%)                | 69%<br>(56-79%)          | 0.24<br>(0.08-0.51)                         | -0.66%<br>(-1.5-0.0012%)             | -0.66%<br>(-1.7-0.17%)              | -0.26<br>(-0.67-0.067)   | -8.4<br>(-19-0.015)    |
| Guam     | 2010 | Female | 70 to 74 | 35%<br>(23-50%)                | 65%<br>(50-77%)          | 0.26<br>(0.087-0.55)                        | -1%<br>(-2--0.23%)                   | -1.1%<br>(-2.3--0.18%)              | -0.66<br>(-1.4-0.1)      | -15<br>(-29--3.3)      |



| Location | Year | Sex    | Age      | Prevalence of current drinkers | Prevalence of abstainers | Population average of standard drinks daily | Percent of total attributable deaths | Percent of total attributable DALYs | Attributable deaths     | Attributable DALYs      |
|----------|------|--------|----------|--------------------------------|--------------------------|---------------------------------------------|--------------------------------------|-------------------------------------|-------------------------|-------------------------|
| Guam     | 2010 | Female | 75 to 79 | 35%<br>(24-51%)                | 65%<br>(49-76%)          | 0.27<br>(0.089-0.56)                        | -0.94%<br>(-1.9--0.18%)              | -1%<br>(-2.2--0.11%)                | -0.68<br>(-1.5--0.075)  | -12<br>(-23--2.1)       |
| Guam     | 2010 | Female | 80 to 84 | 35%<br>(23-50%)                | 65%<br>(50-77%)          | 0.27<br>(0.093-0.58)                        | -1%<br>(-2--0.28%)                   | -1.2%<br>(-2.4--0.3%)               | -0.8<br>(-1.6--0.2)     | -9.3<br>(-18--2.5)      |
| Guam     | 2010 | Female | 85 to 89 | 36%<br>(24-49%)                | 64%<br>(51-76%)          | 0.29<br>(0.097-0.62)                        | -1.1%<br>(-2.2--0.28%)               | -1.3%<br>(-2.5--0.32%)              | -0.64<br>(-1.3--0.16)   | -5.1<br>(-9.8--1.3)     |
| Guam     | 2010 | Female | 90 to 94 | 37%<br>(25-51%)                | 63%<br>(49-75%)          | 0.32<br>(0.098-0.71)                        | -1.1%<br>(-2.1--0.28%)               | -1.2%<br>(-2.4--0.3%)               | -0.36<br>(-0.69--0.086) | -1.9<br>(-3.6--0.49)    |
| Guam     | 2010 | Female | 95 plus  | 40%<br>(26-57%)                | 60%<br>(43-74%)          | 0.36<br>(0.11-0.83)                         | -1.1%<br>(-2.3--0.086%)              | -1.3%<br>(-2.8--0.12%)              | -0.12<br>(-0.25--0.011) | -0.39<br>(-0.84--0.031) |
| Guam     | 2010 | Male   | All Ages | 57%<br>(50-65%)                | 43%<br>(35-50%)          | 0.97<br>(0.34-1.9)                          | 2.5%<br>(0.9-5.1%)                   | 1.7%<br>(0.17-4.4%)                 | 12<br>(1.2-31)          | 680<br>(260-1500)       |
| Guam     | 2010 | Male   | 15 to 19 | 52%<br>(37-67%)                | 48%<br>(33-63%)          | 0.84<br>(0.28-1.7)                          | 3.4%<br>(1.2-6.7%)                   | 4.9%<br>(1.1-11%)                   | 0.48<br>(0.11-1.1)      | 40<br>(14-81)           |
| Guam     | 2010 | Male   | 20 to 24 | 69%<br>(54-81%)                | 31%<br>(19-46%)          | 1.9<br>(0.69-3.9)                           | 7.7%<br>(2.9-14%)                    | 10%<br>(3.3-20%)                    | 1.4<br>(0.42-2.7)       | 100<br>(38-190)         |
| Guam     | 2010 | Male   | 25 to 29 | 74%<br>(61-84%)                | 26%<br>(16-39%)          | 2<br>(0.67-3.9)                             | 7.6%<br>(3.3-14%)                    | 9.9%<br>(3.5-19%)                   | 1.2<br>(0.41-2.3)       | 87<br>(38-160)          |
| Guam     | 2010 | Male   | 30 to 34 | 73%<br>(59-84%)                | 27%<br>(16-41%)          | 1.8<br>(0.62-3.5)                           | 6%<br>(2.6-11%)                      | 7.4%<br>(2.5-15%)                   | 1<br>(0.34-2.2)         | 73<br>(32-140)          |
| Guam     | 2010 | Male   | 35 to 39 | 72%<br>(58-84%)                | 28%<br>(16-42%)          | 1.7<br>(0.55-3.2)                           | 5.4%<br>(2.4-10%)                    | 6.7%<br>(2.6-13%)                   | 1.3<br>(0.49-2.6)       | 80<br>(37-150)          |
| Guam     | 2010 | Male   | 40 to 44 | 73%<br>(59-84%)                | 27%<br>(16-41%)          | 1.6<br>(0.54-3.1)                           | 4.3%<br>(1.8-9%)                     | 5.2%<br>(1.8-11%)                   | 1.4<br>(0.48-3.1)       | 81<br>(34-170)          |
| Guam     | 2010 | Male   | 45 to 49 | 69%<br>(53-81%)                | 31%<br>(19-47%)          | 1.4<br>(0.51-2.8)                           | 3.7%<br>(1.4-9.7%)                   | 4.2%<br>(1.4-9.1%)                  | 1.7<br>(0.53-3.9)       | 84<br>(33-180)          |
| Guam     | 2010 | Male   | 50 to 54 | 67%<br>(51-80%)                | 33%<br>(20-49%)          | 1.2<br>(0.41-2.4)                           | 2.8%<br>(0.86-6.5%)                  | 3.1%<br>(0.63-7.6%)                 | 1.5<br>(0.31-3.7)       | 65<br>(19-150)          |
| Guam     | 2010 | Male   | 55 to 59 | 66%<br>(50-79%)                | 34%<br>(21-50%)          | 0.95<br>(0.34-1.9)                          | 1.4%<br>(-0.21-4.1%)                 | 1.4%<br>(-0.59-4.6%)                | 0.83<br>(-0.36-2.9)     | 33<br>(-4.8-100)        |
| Guam     | 2010 | Male   | 60 to 64 | 64%<br>(47-79%)                | 36%<br>(21-53%)          | 0.79<br>(0.27-1.6)                          | 0.6%<br>(-0.75-3%)                   | 0.54%<br>(-1.1-3.3%)                | 0.39<br>(-0.83-2.4)     | 14<br>(-19-72)          |
| Guam     | 2010 | Male   | 65 to 69 | 59%<br>(42-75%)                | 41%<br>(25-58%)          | 0.69<br>(0.24-1.4)                          | 0.57%<br>(-0.61-2.6%)                | 0.57%<br>(-0.85-2.9%)               | 0.38<br>(-0.56-2)       | 11<br>(-12-49)          |
| Guam     | 2010 | Male   | 70 to 74 | 54%<br>(36-70%)                | 46%<br>(30-64%)          | 0.57<br>(0.19-1.2)                          | 0.32%<br>(-0.7-2.1%)                 | 0.29%<br>(-0.89-2.3%)               | 0.23<br>(-0.7-1.8)      | 5.6<br>(-12-35)         |
| Guam     | 2010 | Male   | 75 to 79 | 50%<br>(33-67%)                | 50%<br>(33-67%)          | 0.51<br>(0.16-1.1)                          | 0.16%<br>(-0.8-1.6%)                 | 0.084%<br>(-1-1.7%)                 | 0.064<br>(-0.81-1.3)    | 2<br>(-10-21)           |
| Guam     | 2010 | Male   | 80 to 84 | 47%<br>(29-65%)                | 53%<br>(35-71%)          | 0.46<br>(0.15-0.99)                         | 0.17%<br>(-0.61-1.3%)                | 0.11%<br>(-0.81-1.4%)               | 0.07<br>(-0.53-0.9)     | 1.3<br>(-5-11)          |
| Guam     | 2010 | Male   | 85 to 89 | 45%<br>(28-62%)                | 55%<br>(38-72%)          | 0.44<br>(0.14-0.97)                         | 0.026%<br>(-0.74-1%)                 | -0.059%<br>(-0.93-1.1%)             | -0.025<br>(-0.4-0.47)   | 0.096<br>(-2.7-3.9)     |
| Guam     | 2010 | Male   | 90 to 94 | 46%<br>(31-64%)                | 54%<br>(36-69%)          | 0.45<br>(0.14-1.1)                          | -0.016%<br>(-0.73-0.93%)             | -0.11%<br>(-0.98-0.9%)              | -0.02<br>(-0.17-0.16)   | -0.017<br>(-0.77-1)     |

| Location | Year | Sex    | Age      | Prevalence of current drinkers | Prevalence of abstainers | Population average of standard drinks daily | Percent of total attributable deaths | Percent of total attributable DALYs | Attributable deaths     | Attributable DALYs     |
|----------|------|--------|----------|--------------------------------|--------------------------|---------------------------------------------|--------------------------------------|-------------------------------------|-------------------------|------------------------|
| Guam     | 2010 | Male   | 95 plus  | 49%<br>(29-69%)                | 51%<br>(31-71%)          | 0.49<br>(0.14-1.1)                          | -0.19%<br>(-1.1-0.94%)               | -0.38%<br>(-1.4-0.83%)              | -0.013<br>(-0.052-0.03) | -0.027<br>(-0.15-0.13) |
| Guam     | 2016 | Female | All Ages | 33%<br>(29-38%)                | 67%<br>(62-71%)          | 0.37<br>(0.13-0.76)                         | -0.1%<br>(-0.6-0.52%)                | -0.76%<br>(-1.6-0.096%)             | -4.6<br>(-10-0.63)      | -23<br>(-130-120)      |
| Guam     | 2016 | Female | 15 to 19 | 37%<br>(27-51%)                | 63%<br>(49-73%)          | 0.59<br>(0.2-1.3)                           | 1.2%<br>(0.4-2.4%)                   | 2.4%<br>(0.31-6.1%)                 | 0.086<br>(0.01-0.22)    | 9.6<br>(3.3-20)        |
| Guam     | 2016 | Female | 20 to 24 | 41%<br>(31-54%)                | 59%<br>(46-69%)          | 0.79<br>(0.26-1.7)                          | 1.9%<br>(0.9-3.6%)                   | 3.1%<br>(0.69-7.2%)                 | 0.13<br>(0.026-0.31)    | 16<br>(7.6-32)         |
| Guam     | 2016 | Female | 25 to 29 | 40%<br>(29-54%)                | 60%<br>(46-71%)          | 0.62<br>(0.2-1.2)                           | 1.6%<br>(0.83-2.8%)                  | 2.3%<br>(0.71-4.9%)                 | 0.11<br>(0.033-0.25)    | 14<br>(7.2-25)         |
| Guam     | 2016 | Female | 30 to 34 | 40%<br>(30-54%)                | 60%<br>(46-70%)          | 0.57<br>(0.2-1.2)                           | 1.1%<br>(0.48-2.1%)                  | 1.4%<br>(0.3-3.6%)                  | 0.084<br>(0.016-0.22)   | 9.8<br>(4.1-20)        |
| Guam     | 2016 | Female | 35 to 39 | 42%<br>(32-57%)                | 58%<br>(43-68%)          | 0.65<br>(0.22-1.3)                          | 1%<br>(0.34-2.4%)                    | 1.7%<br>(0.43-4.2%)                 | 0.14<br>(0.03-0.36)     | 10<br>(3.2-24)         |
| Guam     | 2016 | Female | 40 to 44 | 41%<br>(32-56%)                | 59%<br>(44-68%)          | 0.62<br>(0.21-1.3)                          | 0.61%<br>(-0.17-2%)                  | 1.1%<br>(-0.22-3.6%)                | 0.14<br>(-0.026-0.44)   | 7.8<br>(-2-26)         |
| Guam     | 2016 | Female | 45 to 49 | 37%<br>(27-51%)                | 63%<br>(49-73%)          | 0.45<br>(0.16-0.92)                         | 0.12%<br>(-0.61-1.1%)                | 0.4%<br>(-0.69-2%)                  | 0.076<br>(-0.13-0.38)   | 1.9<br>(-9.3-17)       |
| Guam     | 2016 | Female | 50 to 54 | 35%<br>(25-49%)                | 65%<br>(51-75%)          | 0.36<br>(0.12-0.74)                         | -0.28%<br>(-1.1-0.5%)                | -0.16%<br>(-1.2-1%)                 | -0.046<br>(-0.37-0.29)  | -5.3<br>(-20-9.3)      |
| Guam     | 2016 | Female | 55 to 59 | 30%<br>(21-44%)                | 70%<br>(56-79%)          | 0.27<br>(0.088-0.59)                        | -0.37%<br>(-1.1-0.25%)               | -0.28%<br>(-1.3-0.58%)              | -0.1<br>(-0.46-0.22)    | -7<br>(-20-4.8)        |
| Guam     | 2016 | Female | 60 to 64 | 26%<br>(18-40%)                | 74%<br>(60-82%)          | 0.22<br>(0.073-0.46)                        | -0.48%<br>(-1.2-0.094%)              | -0.47%<br>(-1.4-0.24%)              | -0.22<br>(-0.68-0.11)   | -9.4<br>(-24-1.9)      |
| Guam     | 2016 | Female | 65 to 69 | 31%<br>(21-46%)                | 69%<br>(54-79%)          | 0.25<br>(0.082-0.52)                        | -0.67%<br>(-1.6-0.016%)              | -0.68%<br>(-1.8-0.17%)              | -0.41<br>(-1.1-0.11)    | -13<br>(-31-0.32)      |
| Guam     | 2016 | Female | 70 to 74 | 37%<br>(25-52%)                | 63%<br>(48-75%)          | 0.28<br>(0.091-0.6)                         | -1.1%<br>(-2.2--0.26%)               | -1.2%<br>(-2.5--0.24%)              | -0.75<br>(-1.6--0.15)   | -17<br>(-34--4.3)      |
| Guam     | 2016 | Female | 75 to 79 | 38%<br>(25-54%)                | 62%<br>(46-75%)          | 0.3<br>(0.097-0.65)                         | -1%<br>(-2.1--0.21%)                 | -1.2%<br>(-2.5--0.15%)              | -0.92<br>(-2--0.13)     | -15<br>(-31--3.3)      |
| Guam     | 2016 | Female | 80 to 84 | 38%<br>(25-54%)                | 62%<br>(46-75%)          | 0.3<br>(0.097-0.67)                         | -1.2%<br>(-2.3--0.35%)               | -1.3%<br>(-2.7--0.31%)              | -1.3<br>(-2.6--0.31)    | -15<br>(-29--4.6)      |
| Guam     | 2016 | Female | 85 to 89 | 38%<br>(26-52%)                | 62%<br>(48-74%)          | 0.32<br>(0.098-0.69)                        | -1.2%<br>(-2.4--0.34%)               | -1.4%<br>(-2.9--0.36%)              | -1<br>(-2.1--0.27)      | -8.2<br>(-16--2.3)     |
| Guam     | 2016 | Female | 90 to 94 | 40%<br>(27-54%)                | 60%<br>(46-73%)          | 0.35<br>(0.1-0.8)                           | -1.2%<br>(-2.2--0.26%)               | -1.4%<br>(-2.6--0.29%)              | -0.46<br>(-0.88--0.099) | -2.4<br>(-4.6--0.56)   |
| Guam     | 2016 | Female | 95 plus  | 43%<br>(27-60%)                | 57%<br>(40-73%)          | 0.4<br>(0.12-0.92)                          | -1.2%<br>(-2.5--0.087%)              | -1.5%<br>(-3-0.14%)                 | -0.19<br>(-0.4-0.019)   | -0.63<br>(-1.3--0.043) |
| Guam     | 2016 | Male   | All Ages | 56%<br>(49-64%)                | 44%<br>(36-51%)          | 0.98<br>(0.34-2)                            | 2.4%<br>(0.84-5.3%)                  | 1.6%<br>(0.16-4.5%)                 | 14<br>(1.4-38)          | 760<br>(260-1700)      |
| Guam     | 2016 | Male   | 15 to 19 | 47%<br>(32-63%)                | 53%<br>(37-68%)          | 0.75<br>(0.24-1.6)                          | 3.1%<br>(1.1-6.4%)                   | 4.5%<br>(1.1-9.9%)                  | 0.47<br>(0.12-1)        | 39<br>(14-80)          |
| Guam     | 2016 | Male   | 20 to 24 | 66%<br>(51-79%)                | 34%<br>(21-49%)          | 1.8<br>(0.63-3.7)                           | 7.8%<br>(3-15%)                      | 10%<br>(3.4-21%)                    | 1.5<br>(0.5-3.1)        | 120<br>(45-220)        |

| Location                 | Year | Sex    | Age      | Prevalence of current drinkers | Prevalence of abstainers | Population average of standard drinks daily | Percent of total attributable deaths | Percent of total attributable DALYs | Attributable deaths      | Attributable DALYs     |
|--------------------------|------|--------|----------|--------------------------------|--------------------------|---------------------------------------------|--------------------------------------|-------------------------------------|--------------------------|------------------------|
| Guam                     | 2016 | Male   | 25 to 29 | 73%<br>(60-84%)                | 27%<br>(16-40%)          | 2<br>(0.65-3.9)                             | 7.5%<br>(3-14%)                      | 9.7%<br>(3.1-19%)                   | 1.4<br>(0.46-2.7)        | 100<br>(42-190)        |
| Guam                     | 2016 | Male   | 30 to 34 | 72%<br>(58-83%)                | 28%<br>(17-42%)          | 1.8<br>(0.59-3.8)                           | 6%<br>(2.6-11%)                      | 7.4%<br>(2.5-15%)                   | 1.1<br>(0.35-2.3)        | 77<br>(32-150)         |
| Guam                     | 2016 | Male   | 35 to 39 | 72%<br>(59-84%)                | 28%<br>(16-41%)          | 1.7<br>(0.57-3.5)                           | 5.5%<br>(2.5-10%)                    | 6.8%<br>(2.7-14%)                   | 1.2<br>(0.44-2.5)        | 77<br>(35-150)         |
| Guam                     | 2016 | Male   | 40 to 44 | 73%<br>(59-84%)                | 27%<br>(16-41%)          | 1.6<br>(0.54-3.3)                           | 4.5%<br>(1.9-9%)                     | 5.3%<br>(1.8-11%)                   | 1.4<br>(0.45-3.1)        | 80<br>(32-160)         |
| Guam                     | 2016 | Male   | 45 to 49 | 69%<br>(52-82%)                | 31%<br>(18-48%)          | 1.4<br>(0.48-3)                             | 3.8%<br>(1.4-8.2%)                   | 4.4%<br>(1.3-9.9%)                  | 1.7<br>(0.49-4)          | 87<br>(33-190)         |
| Guam                     | 2016 | Male   | 50 to 54 | 67%<br>(51-80%)                | 33%<br>(20-49%)          | 1.2<br>(0.41-2.5)                           | 2.9%<br>(0.8-7%)                     | 3.2%<br>(0.6-8.2%)                  | 1.9<br>(0.35-4.8)        | 84<br>(23-200)         |
| Guam                     | 2016 | Male   | 55 to 59 | 64%<br>(48-78%)                | 36%<br>(22-52%)          | 0.92<br>(0.3-1.9)                           | 1.5%<br>(-0.17-4.3%)                 | 1.5%<br>(-0.48-4.9%)                | 1.1<br>(-0.36-3.5)       | 43<br>(-5.5-130)       |
| Guam                     | 2016 | Male   | 60 to 64 | 62%<br>(44-78%)                | 38%<br>(22-56%)          | 0.75<br>(0.25-1.6)                          | 0.72%<br>(-0.58-3.1%)                | 0.68%<br>(-0.89-3.4%)               | 0.59<br>(-0.78-2.9)      | 21<br>(-17-92)         |
| Guam                     | 2016 | Male   | 65 to 69 | 59%<br>(42-75%)                | 41%<br>(25-58%)          | 0.68<br>(0.23-1.4)                          | 0.66%<br>(-0.5-2.7%)                 | 0.67%<br>(-0.7-3%)                  | 0.68<br>(-0.75-3.1)      | 18<br>(-15-75)         |
| Guam                     | 2016 | Male   | 70 to 74 | 53%<br>(35-69%)                | 47%<br>(31-65%)          | 0.56<br>(0.18-1.2)                          | 0.39%<br>(-0.61-2.1%)                | 0.37%<br>(-0.82-2.4%)               | 0.34<br>(-0.75-2.2)      | 8<br>(-12-42)          |
| Guam                     | 2016 | Male   | 75 to 79 | 48%<br>(30-66%)                | 52%<br>(34-70%)          | 0.49<br>(0.15-1.1)                          | 0.25%<br>(-0.73-1.7%)                | 0.19%<br>(-0.95-1.9%)               | 0.18<br>(-0.87-1.8)      | 3.9<br>(-11-28)        |
| Guam                     | 2016 | Male   | 80 to 84 | 45%<br>(27-63%)                | 55%<br>(37-73%)          | 0.44<br>(0.14-0.97)                         | 0.24%<br>(-0.53-1.5%)                | 0.19%<br>(-0.67-1.7%)               | 0.17<br>(-0.59-1.4)      | 2.5<br>(-5.6-16)       |
| Guam                     | 2016 | Male   | 85 to 89 | 43%<br>(26-60%)                | 57%<br>(40-74%)          | 0.43<br>(0.13-0.94)                         | 0.092%<br>(-0.65-1.4%)               | 0.019%<br>(-0.85-1.4%)              | 0.0093<br>(-0.44-0.74)   | 0.41<br>(-2.9-6.2)     |
| Guam                     | 2016 | Male   | 90 to 94 | 45%<br>(29-62%)                | 55%<br>(38-71%)          | 0.45<br>(0.13-1)                            | 0.036%<br>(-0.68-0.99%)              | -0.051%<br>(-0.92-0.98%)            | -0.011<br>(-0.2-0.21)    | 0.048<br>(-0.92-1.3)   |
| Guam                     | 2016 | Male   | 95 plus  | 48%<br>(28-68%)                | 52%<br>(32-72%)          | 0.49<br>(0.13-1.1)                          | -0.13%<br>(-1-1%)                    | -0.31%<br>(-1.4-0.96%)              | -0.019<br>(-0.085-0.06)  | -0.032<br>(-0.25-0.25) |
| Northern Mariana Islands | 1990 | Female | All Ages | 21%<br>(13-30%)                | 79%<br>(70-87%)          | 0.25<br>(0.033-0.58)                        | 0.83%<br>(0.45-1.7%)                 | 0.74%<br>(0.15-2.1%)                | 0.4<br>(0.078-1.1)       | 33<br>(17-67)          |
| Northern Mariana Islands | 1990 | Female | 15 to 19 | 20%<br>(8.6-36%)               | 80%<br>(64-91%)          | 0.24<br>(0.026-0.67)                        | 0.79%<br>(0.34-1.6%)                 | 1.1%<br>(0.14-3.1%)                 | 0.0088<br>(0.0011-0.028) | 1.4<br>(0.56-3.1)      |
| Northern Mariana Islands | 1990 | Female | 20 to 24 | 24%<br>(10-44%)                | 76%<br>(56-90%)          | 0.37<br>(0.043-0.96)                        | 1.4%<br>(0.77-2.6%)                  | 1.6%<br>(0.28-4%)                   | 0.042<br>(0.007-0.12)    | 6.9<br>(3.5-13)        |
| Northern Mariana Islands | 1990 | Female | 25 to 29 | 26%<br>(11-45%)                | 74%<br>(55-89%)          | 0.38<br>(0.046-1)                           | 1.5%<br>(0.87-2.6%)                  | 1.8%<br>(0.53-4.1%)                 | 0.05<br>(0.015-0.12)     | 6.5<br>(3.7-12)        |
| Northern Mariana Islands | 1990 | Female | 30 to 34 | 26%<br>(11-48%)                | 74%<br>(52-89%)          | 0.39<br>(0.049-0.99)                        | 1.3%<br>(0.72-2.5%)                  | 1.7%<br>(0.57-3.8%)                 | 0.057<br>(0.018-0.14)    | 5.9<br>(3.2-11)        |
| Northern Mariana Islands | 1990 | Female | 35 to 39 | 27%<br>(12-46%)                | 73%<br>(54-88%)          | 0.41<br>(0.05-1.1)                          | 1.3%<br>(0.64-2.7%)                  | 1.8%<br>(0.63-4.2%)                 | 0.064<br>(0.021-0.16)    | 4.8<br>(2.3-10)        |
| Northern Mariana Islands | 1990 | Female | 40 to 44 | 26%<br>(12-44%)                | 74%<br>(56-88%)          | 0.38<br>(0.043-1)                           | 1.2%<br>(0.5-2.6%)                   | 1.7%<br>(0.64-4.2%)                 | 0.058<br>(0.019-0.15)    | 3.3<br>(1.3-7.9)       |

| Location                 | Year | Sex    | Age      | Prevalence of current drinkers | Prevalence of abstainers | Population average of standard drinks daily | Percent of total attributable deaths | Percent of total attributable DALYs | Attributable deaths          | Attributable DALYs         |
|--------------------------|------|--------|----------|--------------------------------|--------------------------|---------------------------------------------|--------------------------------------|-------------------------------------|------------------------------|----------------------------|
| Northern Mariana Islands | 1990 | Female | 45 to 49 | 26%<br>(11-45%)                | 74%<br>(55-89%)          | 0.33<br>(0.031-1)                           | 0.87%<br>(0.25-2.4%)                 | 1.3%<br>(0.44-3.6%)                 | 0.035<br>(0.011-0.1)         | 1.6<br>(0.44-4.6)          |
| Northern Mariana Islands | 1990 | Female | 50 to 54 | 26%<br>(12-46%)                | 74%<br>(54-88%)          | 0.3<br>(0.025-0.91)                         | 0.62%<br>(-0.059-2%)                 | 1%<br>(0.095-3.1%)                  | 0.026<br>(0.0023-0.085)      | 0.95<br>(-0.082-3.2)       |
| Northern Mariana Islands | 1990 | Female | 55 to 59 | 25%<br>(11-45%)                | 75%<br>(55-89%)          | 0.26<br>(0.023-0.83)                        | 0.47%<br>(-0.27-1.9%)                | 0.8%<br>(-0.12-2.7%)                | 0.025<br>(-0.0035-0.083)     | 0.69<br>(-0.37-2.8)        |
| Northern Mariana Islands | 1990 | Female | 60 to 64 | 25%<br>(12-45%)                | 75%<br>(55-88%)          | 0.25<br>(0.026-0.78)                        | 0.19%<br>(-0.58-1.3%)                | 0.41%<br>(-0.45-1.9%)               | 0.012<br>(-0.013-0.055)      | 0.22<br>(-0.65-1.5)        |
| Northern Mariana Islands | 1990 | Female | 65 to 69 | 26%<br>(12-44%)                | 74%<br>(56-88%)          | 0.25<br>(0.028-0.75)                        | 0.17%<br>(-0.59-1.4%)                | 0.37%<br>(-0.53-2%)                 | 0.013<br>(-0.019-0.074)      | 0.18<br>(-0.65-1.6)        |
| Northern Mariana Islands | 1990 | Female | 70 to 74 | 26%<br>(12-43%)                | 74%<br>(57-88%)          | 0.24<br>(0.027-0.71)                        | 0.027%<br>(-0.61-1.2%)               | 0.14%<br>(-0.62-1.6%)               | 0.0054<br>(-0.024-0.06)      | 0.026<br>(-0.59-1.1)       |
| Northern Mariana Islands | 1990 | Female | 75 to 79 | 25%<br>(11-43%)                | 75%<br>(57-89%)          | 0.22<br>(0.022-0.65)                        | 0.11%<br>(-0.53-1.1%)                | 0.23%<br>(-0.51-1.5%)               | 0.011<br>(-0.026-0.071)      | 0.1<br>(-0.47-1)           |
| Northern Mariana Islands | 1990 | Female | 80 to 84 | 24%<br>(11-43%)                | 76%<br>(57-89%)          | 0.21<br>(0.021-0.59)                        | -0.055%<br>(-0.69-0.94%)             | -0.019%<br>(-0.75-1.1%)             | -0.00081<br>(-0.034-0.054)   | -0.032<br>(-0.41-0.56)     |
| Northern Mariana Islands | 1990 | Female | 85 to 89 | 25%<br>(11-43%)                | 75%<br>(57-89%)          | 0.22<br>(0.023-0.65)                        | -0.086%<br>(-0.8-0.83%)              | -0.068%<br>(-0.89-0.99%)            | -0.002<br>(-0.026-0.031)     | -0.023<br>(-0.21-0.23)     |
| Northern Mariana Islands | 1990 | Female | 90 to 94 | 28%<br>(13-49%)                | 72%<br>(51-87%)          | 0.25<br>(0.024-0.73)                        | -0.12%<br>(-0.75-0.75%)              | -0.11%<br>(-0.83-0.84%)             | -0.0014<br>(-0.01-0.011)     | -0.0086<br>(-0.057-0.059)  |
| Northern Mariana Islands | 1990 | Female | 95 plus  | 33%<br>(14-56%)                | 67%<br>(44-86%)          | 0.29<br>(0.031-0.85)                        | -0.034%<br>(-0.99-1%)                | -0.051%<br>(-1.2-1.1%)              | -0.00015<br>(-0.0034-0.0033) | -0.00039<br>(-0.012-0.012) |
| Northern Mariana Islands | 1990 | Male   | All Ages | 47%<br>(38-57%)                | 53%<br>(43-62%)          | 0.61<br>(0.084-1.3)                         | 3.3%<br>(2-5.7%)                     | 3.6%<br>(1.8-6.8%)                  | 2.8<br>(1.3-5.4)             | 170<br>(97-300)            |
| Northern Mariana Islands | 1990 | Male   | 15 to 19 | 37%<br>(22-54%)                | 63%<br>(46-78%)          | 0.28<br>(0.033-0.75)                        | 1.8%<br>(0.88-3.4%)                  | 2.4%<br>(0.78-5.3%)                 | 0.027<br>(0.0082-0.062)      | 2.8<br>(1.3-5.6)           |
| Northern Mariana Islands | 1990 | Male   | 20 to 24 | 55%<br>(36-73%)                | 45%<br>(27-64%)          | 0.75<br>(0.09-1.8)                          | 4.4%<br>(2-8.1%)                     | 5.4%<br>(1.4-11%)                   | 0.14<br>(0.035-0.3)          | 13<br>(5.5-24)             |
| Northern Mariana Islands | 1990 | Male   | 25 to 29 | 62%<br>(43-78%)                | 38%<br>(22-57%)          | 1<br>(0.13-2.4)                             | 5.5%<br>(2.7-9.7%)                   | 6.9%<br>(2.4-14%)                   | 0.34<br>(0.11-0.67)          | 29<br>(14-52)              |
| Northern Mariana Islands | 1990 | Male   | 30 to 34 | 63%<br>(42-80%)                | 37%<br>(20-58%)          | 1.1<br>(0.15-2.6)                           | 5.4%<br>(2.9-9.3%)                   | 6.7%<br>(2.7-13%)                   | 0.42<br>(0.15-0.84)          | 33<br>(17-58)              |
| Northern Mariana Islands | 1990 | Male   | 35 to 39 | 62%<br>(44-78%)                | 38%<br>(22-56%)          | 0.96<br>(0.13-2.3)                          | 5.1%<br>(3-8.6%)                     | 6.6%<br>(3.2-12%)                   | 0.43<br>(0.18-0.83)          | 29<br>(16-50)              |
| Northern Mariana Islands | 1990 | Male   | 40 to 44 | 59%<br>(41-76%)                | 41%<br>(24-59%)          | 0.84<br>(0.1-2.1)                           | 4.4%<br>(2.6-7.5%)                   | 5.5%<br>(2.9-9.9%)                  | 0.4<br>(0.18-0.76)           | 24<br>(13-43)              |
| Northern Mariana Islands | 1990 | Male   | 45 to 49 | 55%<br>(34-74%)                | 45%<br>(26-66%)          | 0.73<br>(0.078-2)                           | 4.1%<br>(2.5-7.1%)                   | 4.9%<br>(2.7-9.2%)                  | 0.35<br>(0.18-0.68)          | 18<br>(10-33)              |
| Northern Mariana Islands | 1990 | Male   | 50 to 54 | 52%<br>(33-72%)                | 48%<br>(28-67%)          | 0.61<br>(0.066-1.7)                         | 3.5%<br>(2.1-6.5%)                   | 4.2%<br>(2.2-8.3%)                  | 0.29<br>(0.14-0.58)          | 13<br>(6.8-24)             |
| Northern Mariana Islands | 1990 | Male   | 55 to 59 | 50%<br>(32-70%)                | 50%<br>(30-68%)          | 0.49<br>(0.055-1.4)                         | 2.2%<br>(1.2-4.7%)                   | 2.5%<br>(1.2-5.6%)                  | 0.14<br>(0.06-0.32)          | 5.3<br>(2.6-12)            |
| Northern Mariana Islands | 1990 | Male   | 60 to 64 | 48%<br>(27-68%)                | 52%<br>(32-73%)          | 0.41<br>(0.052-1.2)                         | 1.5%<br>(0.71-3.7%)                  | 1.7%<br>(0.71-4.4%)                 | 0.081<br>(0.033-0.2)         | 2.6<br>(1.2-6.1)           |

| Location                 | Year | Sex    | Age      | Prevalence of current drinkers | Prevalence of abstainers | Population average of standard drinks daily | Percent of total attributable deaths | Percent of total attributable DALYs | Attributable deaths          | Attributable DALYs        |
|--------------------------|------|--------|----------|--------------------------------|--------------------------|---------------------------------------------|--------------------------------------|-------------------------------------|------------------------------|---------------------------|
| Northern Mariana Islands | 1990 | Male   | 65 to 69 | 46%<br>(27-66%)                | 54%<br>(34-73%)          | 0.38<br>(0.046-1.1)                         | 1.3%<br>(0.58-3.2%)                  | 1.5%<br>(0.65-3.8%)                 | 0.081<br>(0.032-0.21)        | 2<br>(0.87-5.1)           |
| Northern Mariana Islands | 1990 | Male   | 70 to 74 | 43%<br>(26-61%)                | 57%<br>(39-74%)          | 0.33<br>(0.038-0.93)                        | 1%<br>(0.39-2.6%)                    | 1.1%<br>(0.4-3%)                    | 0.04<br>(0.014-0.11)         | 0.81<br>(0.3-2.1)         |
| Northern Mariana Islands | 1990 | Male   | 75 to 79 | 39%<br>(23-58%)                | 61%<br>(42-77%)          | 0.29<br>(0.034-0.78)                        | 0.8%<br>(0.27-2.1%)                  | 0.87%<br>(0.28-2.4%)                | 0.029<br>(0.0092-0.078)      | 0.47<br>(0.16-1.2)        |
| Northern Mariana Islands | 1990 | Male   | 80 to 84 | 37%<br>(21-55%)                | 63%<br>(45-79%)          | 0.25<br>(0.03-0.66)                         | 0.87%<br>(0.4-1.9%)                  | 0.97%<br>(0.42-2.2%)                | 0.021<br>(0.0091-0.048)      | 0.24<br>(0.11-0.54)       |
| Northern Mariana Islands | 1990 | Male   | 85 to 89 | 35%<br>(21-52%)                | 65%<br>(48-79%)          | 0.24<br>(0.026-0.67)                        | 0.54%<br>(0.12-1.5%)                 | 0.56%<br>(0.089-1.6%)               | 0.0069<br>(0.0011-0.02)      | 0.059<br>(0.013-0.17)     |
| Northern Mariana Islands | 1990 | Male   | 90 to 94 | 37%<br>(22-54%)                | 63%<br>(46-78%)          | 0.25<br>(0.026-0.65)                        | 0.54%<br>(0.14-1.4%)                 | 0.57%<br>(0.13-1.5%)                | 0.0031<br>(0.0007-0.0082)    | 0.018<br>(0.0048-0.046)   |
| Northern Mariana Islands | 1990 | Male   | 95 plus  | 40%<br>(22-62%)                | 60%<br>(38-78%)          | 0.28<br>(0.031-0.77)                        | 0.31%<br>(-0.13-1.2%)                | 0.24%<br>(-0.29-1.2%)               | 0.00041<br>(-0.00049-0.0021) | 0.0022<br>(-0.001-0.0085) |
| Northern Mariana Islands | 1995 | Female | All Ages | 20%<br>(13-29%)                | 80%<br>(71-87%)          | 0.27<br>(0.036-0.66)                        | 0.89%<br>(0.49-1.7%)                 | 0.85%<br>(0.25-2.3%)                | 0.55<br>(0.15-1.6)           | 46<br>(24-91)             |
| Northern Mariana Islands | 1995 | Female | 15 to 19 | 19%<br>(9-36%)                 | 81%<br>(64-91%)          | 0.25<br>(0.031-0.68)                        | 0.81%<br>(0.36-1.6%)                 | 1.2%<br>(0.18-3.4%)                 | 0.009<br>(0.0013-0.028)      | 1.4<br>(0.63-3.1)         |
| Northern Mariana Islands | 1995 | Female | 20 to 24 | 24%<br>(10-41%)                | 76%<br>(59-90%)          | 0.38<br>(0.042-1)                           | 1.4%<br>(0.78-2.5%)                  | 1.6%<br>(0.3-4.1%)                  | 0.04<br>(0.0076-0.11)        | 7.3<br>(3.8-13)           |
| Northern Mariana Islands | 1995 | Female | 25 to 29 | 25%<br>(10-43%)                | 75%<br>(57-90%)          | 0.39<br>(0.047-1.1)                         | 1.5%<br>(0.9-2.6%)                   | 1.8%<br>(0.56-4.2%)                 | 0.074<br>(0.022-0.18)        | 11<br>(6.2-19)            |
| Northern Mariana Islands | 1995 | Female | 30 to 34 | 26%<br>(9.9-46%)               | 74%<br>(54-90%)          | 0.41<br>(0.048-1.1)                         | 1.4%<br>(0.76-2.5%)                  | 1.7%<br>(0.59-4%)                   | 0.074<br>(0.024-0.18)        | 8.4<br>(4.5-15)           |
| Northern Mariana Islands | 1995 | Female | 35 to 39 | 27%<br>(11-45%)                | 73%<br>(55-89%)          | 0.43<br>(0.054-1.1)                         | 1.3%<br>(0.64-2.6%)                  | 1.9%<br>(0.66-4.2%)                 | 0.093<br>(0.031-0.22)        | 7.3<br>(3.5-15)           |
| Northern Mariana Islands | 1995 | Female | 40 to 44 | 26%<br>(12-44%)                | 74%<br>(56-88%)          | 0.41<br>(0.048-1.1)                         | 1.2%<br>(0.53-2.5%)                  | 1.8%<br>(0.72-4.2%)                 | 0.084<br>(0.031-0.2)         | 5<br>(2.2-11)             |
| Northern Mariana Islands | 1995 | Female | 45 to 49 | 26%<br>(11-45%)                | 74%<br>(55-89%)          | 0.35<br>(0.039-1)                           | 0.87%<br>(0.25-2.3%)                 | 1.4%<br>(0.47-3.6%)                 | 0.063<br>(0.02-0.18)         | 3<br>(0.83-8.5)           |
| Northern Mariana Islands | 1995 | Female | 50 to 54 | 25%<br>(11-45%)                | 75%<br>(55-89%)          | 0.31<br>(0.032-0.97)                        | 0.62%<br>(-0.066-2.1%)               | 1.1%<br>(0.14-3.2%)                 | 0.035<br>(0.0047-0.12)       | 1.3<br>(-0.13-4.5)        |
| Northern Mariana Islands | 1995 | Female | 55 to 59 | 24%<br>(11-44%)                | 76%<br>(56-89%)          | 0.28<br>(0.026-0.88)                        | 0.47%<br>(-0.25-1.8%)                | 0.85%<br>(-0.042-2.8%)              | 0.029<br>(-0.0015-0.096)     | 0.81<br>(-0.43-3.2)       |
| Northern Mariana Islands | 1995 | Female | 60 to 64 | 25%<br>(11-45%)                | 75%<br>(55-89%)          | 0.27<br>(0.023-0.86)                        | 0.22%<br>(-0.56-1.5%)                | 0.47%<br>(-0.45-2.2%)               | 0.016<br>(-0.016-0.076)      | 0.31<br>(-0.77-2)         |
| Northern Mariana Islands | 1995 | Female | 65 to 69 | 26%<br>(12-45%)                | 74%<br>(55-88%)          | 0.27<br>(0.028-0.88)                        | 0.19%<br>(-0.58-1.6%)                | 0.42%<br>(-0.49-2.3%)               | 0.015<br>(-0.018-0.078)      | 0.21<br>(-0.67-1.8)       |
| Northern Mariana Islands | 1995 | Female | 70 to 74 | 26%<br>(11-44%)                | 74%<br>(56-89%)          | 0.25<br>(0.027-0.76)                        | 0.05%<br>(-0.62-1.3%)                | 0.18%<br>(-0.61-1.7%)               | 0.0075<br>(-0.024-0.075)     | 0.053<br>(-0.65-1.3)      |
| Northern Mariana Islands | 1995 | Female | 75 to 79 | 24%<br>(10-43%)                | 76%<br>(57-90%)          | 0.23<br>(0.024-0.67)                        | 0.15%<br>(-0.49-1.2%)                | 0.29%<br>(-0.46-1.7%)               | 0.013<br>(-0.02-0.072)       | 0.13<br>(-0.39-1)         |

| Location                 | Year | Sex    | Age      | Prevalence of current drinkers | Prevalence of abstainers | Population average of standard drinks daily | Percent of total attributable deaths | Percent of total attributable DALYs | Attributable deaths         | Attributable DALYs         |
|--------------------------|------|--------|----------|--------------------------------|--------------------------|---------------------------------------------|--------------------------------------|-------------------------------------|-----------------------------|----------------------------|
| Northern Mariana Islands | 1995 | Female | 80 to 84 | 23%<br>(11-42%)                | 77%<br>(58-89%)          | 0.21<br>(0.022-0.6)                         | -0.0072%<br>(-0.63-1%)               | 0.039%<br>(-0.67-1.3%)              | 0.002<br>(-0.031-0.061)     | -0.0039<br>(-0.39-0.68)    |
| Northern Mariana Islands | 1995 | Female | 85 to 89 | 24%<br>(11-42%)                | 76%<br>(58-89%)          | 0.22<br>(0.024-0.64)                        | -0.032%<br>(-0.71-0.95%)             | -0.0041%<br>(-0.75-1.2%)            | -0.00012<br>(-0.031-0.044)  | -0.011<br>(-0.26-0.33)     |
| Northern Mariana Islands | 1995 | Female | 90 to 94 | 28%<br>(12-47%)                | 72%<br>(53-88%)          | 0.25<br>(0.026-0.74)                        | -0.065%<br>(-0.66-0.93%)             | -0.058%<br>(-0.71-1.1%)             | -0.00099<br>(-0.012-0.019)  | -0.007<br>(-0.069-0.098)   |
| Northern Mariana Islands | 1995 | Female | 95 plus  | 32%<br>(13-54%)                | 68%<br>(46-87%)          | 0.3<br>(0.031-0.88)                         | 0.052%<br>(-0.9-1.2%)                | 0.041%<br>(-1-1.3%)                 | 0.00019<br>(-0.0047-0.0058) | 0.00095<br>(-0.016-0.021)  |
| Northern Mariana Islands | 1995 | Male   | All Ages | 45%<br>(36-55%)                | 55%<br>(45-64%)          | 0.61<br>(0.078-1.4)                         | 3.3%<br>(2-5.6%)                     | 3.7%<br>(2-6.7%)                    | 3.2<br>(1.6-6.3)            | 200<br>(120-350)           |
| Northern Mariana Islands | 1995 | Male   | 15 to 19 | 36%<br>(21-54%)                | 64%<br>(46-79%)          | 0.29<br>(0.035-0.8)                         | 1.8%<br>(0.87-3.4%)                  | 2.5%<br>(0.83-5.4%)                 | 0.031<br>(0.0098-0.073)     | 3.4<br>(1.6-6.8)           |
| Northern Mariana Islands | 1995 | Male   | 20 to 24 | 54%<br>(35-71%)                | 46%<br>(29-65%)          | 0.78<br>(0.095-2)                           | 4.4%<br>(2-8%)                       | 5.6%<br>(1.5-11%)                   | 0.15<br>(0.041-0.32)        | 14<br>(6.2-27)             |
| Northern Mariana Islands | 1995 | Male   | 25 to 29 | 61%<br>(42-78%)                | 39%<br>(22-58%)          | 1.1<br>(0.14-2.6)                           | 5.5%<br>(2.8-9.3%)                   | 7.1%<br>(2.5-14%)                   | 0.34<br>(0.12-0.69)         | 31<br>(15-54)              |
| Northern Mariana Islands | 1995 | Male   | 30 to 34 | 62%<br>(42-79%)                | 38%<br>(21-58%)          | 1.2<br>(0.16-2.9)                           | 5.4%<br>(3-8.9%)                     | 7%<br>(2.8-13%)                     | 0.43<br>(0.16-0.86)         | 36<br>(18-63)              |
| Northern Mariana Islands | 1995 | Male   | 35 to 39 | 61%<br>(42-77%)                | 39%<br>(23-58%)          | 1<br>(0.12-2.4)                             | 5.2%<br>(3.1-8.6%)                   | 6.9%<br>(3.4-12%)                   | 0.52<br>(0.23-0.99)         | 37<br>(20-64)              |
| Northern Mariana Islands | 1995 | Male   | 40 to 44 | 58%<br>(41-76%)                | 42%<br>(24-59%)          | 0.88<br>(0.11-2.1)                          | 4.5%<br>(2.8-7.6%)                   | 5.8%<br>(3.2-10%)                   | 0.46<br>(0.22-0.88)         | 28<br>(16-50)              |
| Northern Mariana Islands | 1995 | Male   | 45 to 49 | 55%<br>(33-73%)                | 45%<br>(27-67%)          | 0.76<br>(0.089-2)                           | 4.2%<br>(2.6-7.1%)                   | 5.2%<br>(3-9.2%)                    | 0.45<br>(0.23-0.83)         | 24<br>(14-42)              |
| Northern Mariana Islands | 1995 | Male   | 50 to 54 | 52%<br>(32-71%)                | 48%<br>(29-68%)          | 0.63<br>(0.071-1.7)                         | 3.7%<br>(2.2-6.5%)                   | 4.5%<br>(2.5-8.3%)                  | 0.32<br>(0.16-0.63)         | 14<br>(8-27)               |
| Northern Mariana Islands | 1995 | Male   | 55 to 59 | 49%<br>(31-69%)                | 51%<br>(31-69%)          | 0.51<br>(0.053-1.4)                         | 2.3%<br>(1.3-4.7%)                   | 2.7%<br>(1.4-5.8%)                  | 0.18<br>(0.085-0.42)        | 7.2<br>(3.7-15)            |
| Northern Mariana Islands | 1995 | Male   | 60 to 64 | 47%<br>(28-67%)                | 53%<br>(33-72%)          | 0.43<br>(0.043-1.3)                         | 1.6%<br>(0.79-3.7%)                  | 1.8%<br>(0.83-4.4%)                 | 0.11<br>(0.046-0.28)        | 3.5<br>(1.6-8.4)           |
| Northern Mariana Islands | 1995 | Male   | 65 to 69 | 45%<br>(27-64%)                | 55%<br>(36-73%)          | 0.4<br>(0.044-1.1)                          | 1.4%<br>(0.65-3.5%)                  | 1.7%<br>(0.73-4.1%)                 | 0.088<br>(0.037-0.22)       | 2.2<br>(1-5.5)             |
| Northern Mariana Islands | 1995 | Male   | 70 to 74 | 43%<br>(26-61%)                | 57%<br>(39-74%)          | 0.35<br>(0.046-0.96)                        | 1.1%<br>(0.43-2.8%)                  | 1.2%<br>(0.46-3.3%)                 | 0.058<br>(0.022-0.15)       | 1.2<br>(0.47-3.1)          |
| Northern Mariana Islands | 1995 | Male   | 75 to 79 | 39%<br>(23-58%)                | 61%<br>(42-77%)          | 0.3<br>(0.038-0.84)                         | 0.87%<br>(0.35-2.3%)                 | 0.96%<br>(0.34-2.7%)                | 0.033<br>(0.011-0.091)      | 0.53<br>(0.21-1.4)         |
| Northern Mariana Islands | 1995 | Male   | 80 to 84 | 36%<br>(20-54%)                | 64%<br>(46-80%)          | 0.27<br>(0.033-0.72)                        | 0.92%<br>(0.43-2.2%)                 | 1%<br>(0.47-2.5%)                   | 0.03<br>(0.013-0.073)       | 0.34<br>(0.16-0.83)        |
| Northern Mariana Islands | 1995 | Male   | 85 to 89 | 34%<br>(20-51%)                | 66%<br>(49-80%)          | 0.25<br>(0.03-0.71)                         | 0.59%<br>(0.17-1.8%)                 | 0.62%<br>(0.14-2%)                  | 0.012<br>(0.0025-0.039)     | 0.1<br>(0.028-0.31)        |
| Northern Mariana Islands | 1995 | Male   | 90 to 94 | 36%<br>(22-53%)                | 64%<br>(47-78%)          | 0.26<br>(0.03-0.74)                         | 0.58%<br>(0.17-1.7%)                 | 0.63%<br>(0.17-1.8%)                | 0.0047<br>(0.0012-0.014)    | 0.027<br>(0.0082-0.076)    |
| Northern Mariana Islands | 1995 | Male   | 95 plus  | 40%<br>(22-60%)                | 60%<br>(40-78%)          | 0.3<br>(0.033-0.82)                         | 0.36%<br>(-0.083-1.5%)               | 0.29%<br>(-0.23-1.5%)               | 0.00058<br>(-0.00046-0.003) | 0.0029<br>(-0.00068-0.012) |

| Location                 | Year | Sex    | Age      | Prevalence of current drinkers | Prevalence of abstainers | Population average of standard drinks daily | Percent of total attributable deaths | Percent of total attributable DALYs | Attributable deaths         | Attributable DALYs        |
|--------------------------|------|--------|----------|--------------------------------|--------------------------|---------------------------------------------|--------------------------------------|-------------------------------------|-----------------------------|---------------------------|
| Northern Mariana Islands | 2000 | Female | All Ages | 20%<br>(13-29%)                | 80%<br>(71-87%)          | 0.34<br>(0.1-0.76)                          | 0.95%<br>(0.48-1.9%)                 | 0.92%<br>(0.19-2.5%)                | 0.65<br>(0.12-1.7)          | 56<br>(28-110)            |
| Northern Mariana Islands | 2000 | Female | 15 to 19 | 19%<br>(8.6-35%)               | 81%<br>(65-91%)          | 0.32<br>(0.067-0.81)                        | 0.89%<br>(0.44-1.7%)                 | 1.5%<br>(0.34-3.7%)                 | 0.012<br>(0.0026-0.034)     | 1.8<br>(0.86-3.7)         |
| Northern Mariana Islands | 2000 | Female | 20 to 24 | 24%<br>(10-42%)                | 76%<br>(58-90%)          | 0.5<br>(0.11-1.2)                           | 1.6%<br>(0.85-2.8%)                  | 2.1%<br>(0.51-4.9%)                 | 0.053<br>(0.013-0.14)       | 9.2<br>(4.8-16)           |
| Northern Mariana Islands | 2000 | Female | 25 to 29 | 25%<br>(11-44%)                | 75%<br>(56-89%)          | 0.51<br>(0.12-1.3)                          | 1.6%<br>(0.96-2.9%)                  | 2.2%<br>(0.77-4.9%)                 | 0.1<br>(0.036-0.23)         | 14<br>(7.8-25)            |
| Northern Mariana Islands | 2000 | Female | 30 to 34 | 26%<br>(10-45%)                | 74%<br>(55-90%)          | 0.52<br>(0.12-1.3)                          | 1.5%<br>(0.76-2.7%)                  | 2%<br>(0.73-4.5%)                   | 0.092<br>(0.032-0.21)       | 10<br>(5-18)              |
| Northern Mariana Islands | 2000 | Female | 35 to 39 | 27%<br>(11-46%)                | 73%<br>(54-89%)          | 0.54<br>(0.13-1.2)                          | 1.4%<br>(0.66-2.6%)                  | 2.1%<br>(0.77-4.4%)                 | 0.11<br>(0.038-0.25)        | 8.7<br>(4-17)             |
| Northern Mariana Islands | 2000 | Female | 40 to 44 | 26%<br>(13-44%)                | 74%<br>(56-87%)          | 0.51<br>(0.11-1.3)                          | 1.2%<br>(0.45-2.6%)                  | 2%<br>(0.76-4.4%)                   | 0.096<br>(0.035-0.22)       | 5.7<br>(2.1-12)           |
| Northern Mariana Islands | 2000 | Female | 45 to 49 | 26%<br>(11-43%)                | 74%<br>(57-89%)          | 0.44<br>(0.094-1.1)                         | 0.85%<br>(0.1-2.2%)                  | 1.5%<br>(0.41-3.8%)                 | 0.083<br>(0.021-0.23)       | 3.8<br>(0.46-10)          |
| Northern Mariana Islands | 2000 | Female | 50 to 54 | 25%<br>(12-43%)                | 75%<br>(57-88%)          | 0.39<br>(0.077-1.1)                         | 0.57%<br>(-0.22-2.1%)                | 1.1%<br>(-0.048-3.5%)               | 0.043<br>(-0.0018-0.14)     | 1.4<br>(-0.53-5.6)        |
| Northern Mariana Islands | 2000 | Female | 55 to 59 | 24%<br>(11-43%)                | 76%<br>(57-89%)          | 0.35<br>(0.064-0.97)                        | 0.38%<br>(-0.43-1.8%)                | 0.81%<br>(-0.16-2.7%)               | 0.029<br>(-0.0058-0.1)      | 0.7<br>(-0.77-3.3)        |
| Northern Mariana Islands | 2000 | Female | 60 to 64 | 24%<br>(11-43%)                | 76%<br>(57-89%)          | 0.33<br>(0.066-0.93)                        | 0.1%<br>(-0.75-1.4%)                 | 0.38%<br>(-0.64-2.2%)               | 0.016<br>(-0.025-0.091)     | 0.18<br>(-1.3-2.4)        |
| Northern Mariana Islands | 2000 | Female | 65 to 69 | 25%<br>(11-43%)                | 75%<br>(57-89%)          | 0.33<br>(0.067-0.95)                        | 0.057%<br>(-0.81-1.5%)               | 0.3%<br>(-0.78-2.3%)                | 0.011<br>(-0.029-0.082)     | 0.071<br>(-0.99-1.9)      |
| Northern Mariana Islands | 2000 | Female | 70 to 74 | 25%<br>(11-42%)                | 75%<br>(58-89%)          | 0.31<br>(0.061-0.81)                        | -0.075%<br>(-0.92-1.4%)              | 0.056%<br>(-0.9-2%)                 | 0.0026<br>(-0.039-0.087)    | -0.082<br>(-1-1.7)        |
| Northern Mariana Islands | 2000 | Female | 75 to 79 | 24%<br>(10-41%)                | 76%<br>(59-90%)          | 0.29<br>(0.056-0.79)                        | 0.06%<br>(-0.76-1.3%)                | 0.2%<br>(-0.73-1.7%)                | 0.0081<br>(-0.03-0.068)     | 0.047<br>(-0.59-1)        |
| Northern Mariana Islands | 2000 | Female | 80 to 84 | 24%<br>(9.6-43%)               | 76%<br>(57-90%)          | 0.28<br>(0.052-0.73)                        | -0.086%<br>(-0.9-1.2%)               | -0.038%<br>(-0.98-1.4%)             | -0.0017<br>(-0.047-0.07)    | -0.055<br>(-0.59-0.74)    |
| Northern Mariana Islands | 2000 | Female | 85 to 89 | 25%<br>(11-44%)                | 75%<br>(56-89%)          | 0.3<br>(0.059-0.77)                         | -0.12%<br>(-0.99-1.1%)               | -0.1%<br>(-1.1-1.4%)                | -0.0047<br>(-0.052-0.062)   | -0.052<br>(-0.44-0.48)    |
| Northern Mariana Islands | 2000 | Female | 90 to 94 | 28%<br>(13-47%)                | 72%<br>(53-87%)          | 0.34<br>(0.062-0.89)                        | -0.13%<br>(-0.86-1.2%)               | -0.13%<br>(-0.95-1.3%)              | -0.0033<br>(-0.024-0.034)   | -0.021<br>(-0.13-0.19)    |
| Northern Mariana Islands | 2000 | Female | 95 plus  | 33%<br>(14-56%)                | 67%<br>(44-86%)          | 0.4<br>(0.074-1.1)                          | -0.043%<br>(-1.1-1.5%)               | -0.071%<br>(-1.3-1.6%)              | -0.00051<br>(-0.0094-0.012) | -0.0012<br>(-0.032-0.044) |
| Northern Mariana Islands | 2000 | Male   | All Ages | 45%<br>(37-55%)                | 55%<br>(45-63%)          | 0.81<br>(0.25-1.6)                          | 3.8%<br>(2.3-6.2%)                   | 4.4%<br>(2.3-7.8%)                  | 4.2<br>(2.1-7.7)            | 260<br>(150-420)          |
| Northern Mariana Islands | 2000 | Male   | 15 to 19 | 36%<br>(21-54%)                | 64%<br>(46-79%)          | 0.39<br>(0.093-1)                           | 2%<br>(1-3.6%)                       | 3.1%<br>(1.2-6.4%)                  | 0.04<br>(0.015-0.085)       | 4.2<br>(2.1-7.8)          |
| Northern Mariana Islands | 2000 | Male   | 20 to 24 | 54%<br>(35-71%)                | 46%<br>(29-65%)          | 1.1<br>(0.28-2.4)                           | 5.1%<br>(2.6-9%)                     | 7.1%<br>(2.5-14%)                   | 0.2<br>(0.068-0.4)          | 18<br>(8.9-33)            |
| Northern Mariana Islands | 2000 | Male   | 25 to 29 | 61%<br>(41-77%)                | 39%<br>(23-59%)          | 1.4<br>(0.43-3.1)                           | 6.2%<br>(3.4-10%)                    | 8.7%<br>(3.6-16%)                   | 0.46<br>(0.18-0.89)         | 40<br>(21-68)             |

| Location                 | Year | Sex    | Age      | Prevalence of current drinkers | Prevalence of abstainers | Population average of standard drinks daily | Percent of total attributable deaths | Percent of total attributable DALYs | Attributable deaths          | Attributable DALYs        |
|--------------------------|------|--------|----------|--------------------------------|--------------------------|---------------------------------------------|--------------------------------------|-------------------------------------|------------------------------|---------------------------|
| Northern Mariana Islands | 2000 | Male   | 30 to 34 | 62%<br>(41-78%)                | 38%<br>(22-59%)          | 1.5<br>(0.45-3.2)                           | 6%<br>(3.4-9.6%)                     | 8.4%<br>(3.8-15%)                   | 0.54<br>(0.23-1)             | 44<br>(24-73)             |
| Northern Mariana Islands | 2000 | Male   | 35 to 39 | 61%<br>(43-77%)                | 39%<br>(23-57%)          | 1.3<br>(0.35-2.8)                           | 5.7%<br>(3.3-9.3%)                   | 8%<br>(4.1-13%)                     | 0.65<br>(0.3-1.2)            | 45<br>(25-75)             |
| Northern Mariana Islands | 2000 | Male   | 40 to 44 | 58%<br>(41-76%)                | 42%<br>(24-59%)          | 1.2<br>(0.29-2.5)                           | 4.9%<br>(2.9-8.2%)                   | 6.6%<br>(3.6-11%)                   | 0.56<br>(0.27-1)             | 34<br>(19-59)             |
| Northern Mariana Islands | 2000 | Male   | 45 to 49 | 55%<br>(33-73%)                | 45%<br>(27-67%)          | 1<br>(0.23-2.4)                             | 4.5%<br>(2.7-7.7%)                   | 5.9%<br>(3.3-10%)                   | 0.63<br>(0.31-1.2)           | 33<br>(19-58)             |
| Northern Mariana Islands | 2000 | Male   | 50 to 54 | 52%<br>(32-69%)                | 48%<br>(31-68%)          | 0.84<br>(0.19-2)                            | 4%<br>(2.3-7.2%)                     | 5%<br>(2.8-9.4%)                    | 0.44<br>(0.22-0.87)          | 20<br>(11-37)             |
| Northern Mariana Islands | 2000 | Male   | 55 to 59 | 49%<br>(31-68%)                | 51%<br>(32-69%)          | 0.68<br>(0.15-1.7)                          | 2.5%<br>(1.3-5.2%)                   | 3%<br>(1.4-6.6%)                    | 0.22<br>(0.096-0.5)          | 8.5<br>(4.1-19)           |
| Northern Mariana Islands | 2000 | Male   | 60 to 64 | 47%<br>(28-67%)                | 53%<br>(33-72%)          | 0.57<br>(0.13-1.5)                          | 1.7%<br>(0.7-4.2%)                   | 2.1%<br>(0.78-5.1%)                 | 0.15<br>(0.054-0.38)         | 4.7<br>(1.9-12)           |
| Northern Mariana Islands | 2000 | Male   | 65 to 69 | 45%<br>(26-64%)                | 55%<br>(36-74%)          | 0.51<br>(0.13-1.3)                          | 1.5%<br>(0.61-3.8%)                  | 1.8%<br>(0.69-4.6%)                 | 0.1<br>(0.037-0.26)          | 2.6<br>(1-6.7)            |
| Northern Mariana Islands | 2000 | Male   | 70 to 74 | 42%<br>(25-60%)                | 58%<br>(40-75%)          | 0.45<br>(0.11-1.1)                          | 1.1%<br>(0.37-3%)                    | 1.4%<br>(0.42-3.5%)                 | 0.07<br>(0.021-0.19)         | 1.4<br>(0.45-3.8)         |
| Northern Mariana Islands | 2000 | Male   | 75 to 79 | 39%<br>(23-57%)                | 61%<br>(43-77%)          | 0.39<br>(0.096-0.94)                        | 0.95%<br>(0.3-2.5%)                  | 1.1%<br>(0.3-2.9%)                  | 0.034<br>(0.01-0.096)        | 0.56<br>(0.17-1.5)        |
| Northern Mariana Islands | 2000 | Male   | 80 to 84 | 36%<br>(20-55%)                | 64%<br>(45-80%)          | 0.35<br>(0.086-0.83)                        | 1%<br>(0.42-2.5%)                    | 1.2%<br>(0.47-2.8%)                 | 0.034<br>(0.013-0.082)       | 0.39<br>(0.16-0.93)       |
| Northern Mariana Islands | 2000 | Male   | 85 to 89 | 35%<br>(20-52%)                | 65%<br>(48-80%)          | 0.33<br>(0.08-0.8)                          | 0.65%<br>(0.12-2%)                   | 0.69%<br>(0.082-2.2%)               | 0.016<br>(0.0019-0.052)      | 0.14<br>(0.024-0.43)      |
| Northern Mariana Islands | 2000 | Male   | 90 to 94 | 36%<br>(22-54%)                | 64%<br>(46-78%)          | 0.34<br>(0.076-0.87)                        | 0.62%<br>(0.13-1.8%)                 | 0.66%<br>(0.095-2%)                 | 0.0073<br>(0.001-0.022)      | 0.042<br>(0.0091-0.12)    |
| Northern Mariana Islands | 2000 | Male   | 95 plus  | 40%<br>(22-60%)                | 60%<br>(40-78%)          | 0.38<br>(0.076-1)                           | 0.41%<br>(-0.15-1.8%)                | 0.33%<br>(-0.33-1.9%)               | 0.00086<br>(-0.00083-0.0048) | 0.0044<br>(-0.0016-0.019) |
| Northern Mariana Islands | 2005 | Female | All Ages | 20%<br>(12-29%)                | 80%<br>(71-88%)          | 0.42<br>(0.17-0.85)                         | 1.1%<br>(0.54-2%)                    | 1.1%<br>(0.19-2.7%)                 | 0.87<br>(0.16-2.3)           | 72<br>(35-140)            |
| Northern Mariana Islands | 2005 | Female | 15 to 19 | 19%<br>(8.5-34%)               | 81%<br>(66-91%)          | 0.39<br>(0.1-0.99)                          | 0.98%<br>(0.5-1.9%)                  | 1.8%<br>(0.51-4.3%)                 | 0.016<br>(0.0045-0.04)       | 2.3<br>(1.1-4.6)          |
| Northern Mariana Islands | 2005 | Female | 20 to 24 | 23%<br>(9.8-41%)               | 77%<br>(59-90%)          | 0.61<br>(0.16-1.4)                          | 1.8%<br>(0.98-3%)                    | 2.5%<br>(0.75-5.6%)                 | 0.073<br>(0.021-0.17)        | 12<br>(6.2-21)            |
| Northern Mariana Islands | 2005 | Female | 25 to 29 | 24%<br>(10-42%)                | 76%<br>(58-90%)          | 0.62<br>(0.18-1.5)                          | 1.8%<br>(1.1-3%)                     | 2.5%<br>(0.98-5.3%)                 | 0.14<br>(0.05-0.3)           | 18<br>(11-31)             |
| Northern Mariana Islands | 2005 | Female | 30 to 34 | 25%<br>(9.6-45%)               | 75%<br>(55-90%)          | 0.64<br>(0.2-1.5)                           | 1.6%<br>(0.88-2.9%)                  | 2.4%<br>(0.93-5.2%)                 | 0.12<br>(0.046-0.27)         | 13<br>(6.6-23)            |
| Northern Mariana Islands | 2005 | Female | 35 to 39 | 25%<br>(11-44%)                | 75%<br>(56-89%)          | 0.66<br>(0.2-1.4)                           | 1.5%<br>(0.73-3.1%)                  | 2.4%<br>(0.95-5.1%)                 | 0.15<br>(0.053-0.33)         | 11<br>(5.2-22)            |
| Northern Mariana Islands | 2005 | Female | 40 to 44 | 25%<br>(12-42%)                | 75%<br>(58-88%)          | 0.6<br>(0.17-1.4)                           | 1.3%<br>(0.47-2.8%)                  | 2.2%<br>(0.78-4.7%)                 | 0.12<br>(0.041-0.26)         | 7<br>(2.6-15)             |



| Location                 | Year | Sex    | Age      | Prevalence of current drinkers | Prevalence of abstainers | Population average of standard drinks daily | Percent of total attributable deaths | Percent of total attributable DALYs | Attributable deaths       | Attributable DALYs        |
|--------------------------|------|--------|----------|--------------------------------|--------------------------|---------------------------------------------|--------------------------------------|-------------------------------------|---------------------------|---------------------------|
| Northern Mariana Islands | 2005 | Female | 45 to 49 | 24%<br>(11-41%)                | 76%<br>(59-89%)          | 0.52<br>(0.13-1.3)                          | 0.93%<br>(0.099-2.5%)                | 1.6%<br>(0.42-4.1%)                 | 0.12<br>(0.031-0.31)      | 5.5<br>(0.59-15)          |
| Northern Mariana Islands | 2005 | Female | 50 to 54 | 24%<br>(11-42%)                | 76%<br>(58-89%)          | 0.46<br>(0.12-1.2)                          | 0.6%<br>(-0.38-2.3%)                 | 1.1%<br>(-0.097-3.6%)               | 0.058<br>(-0.0053-0.19)   | 2<br>(-1.3-7.9)           |
| Northern Mariana Islands | 2005 | Female | 55 to 59 | 23%<br>(11-42%)                | 77%<br>(58-89%)          | 0.42<br>(0.1-1.1)                           | 0.4%<br>(-0.55-2%)                   | 0.84%<br>(-0.3-3%)                  | 0.033<br>(-0.012-0.12)    | 0.83<br>(-1.1-4)          |
| Northern Mariana Islands | 2005 | Female | 60 to 64 | 23%<br>(10-42%)                | 77%<br>(58-90%)          | 0.4<br>(0.095-1.1)                          | 0.14%<br>(-0.87-1.6%)                | 0.45%<br>(-0.7-2.4%)                | 0.023<br>(-0.036-0.12)    | 0.31<br>(-1.8-3.5)        |
| Northern Mariana Islands | 2005 | Female | 65 to 69 | 25%<br>(11-43%)                | 75%<br>(57-89%)          | 0.41<br>(0.092-1)                           | 0.09%<br>(-0.95-1.7%)                | 0.36%<br>(-0.89-2.3%)               | 0.014<br>(-0.035-0.091)   | 0.12<br>(-1.3-2.1)        |
| Northern Mariana Islands | 2005 | Female | 70 to 74 | 24%<br>(11-41%)                | 76%<br>(59-89%)          | 0.38<br>(0.091-0.94)                        | -0.05%<br>(-0.96-1.5%)               | 0.091%<br>(-0.99-1.9%)              | 0.0046<br>(-0.05-0.1)     | -0.063<br>(-1.3-2)        |
| Northern Mariana Islands | 2005 | Female | 75 to 79 | 23%<br>(10-42%)                | 77%<br>(58-90%)          | 0.36<br>(0.083-0.91)                        | 0.086%<br>(-0.86-1.4%)               | 0.23%<br>(-0.82-1.9%)               | 0.0091<br>(-0.033-0.071)  | 0.066<br>(-0.65-1)        |
| Northern Mariana Islands | 2005 | Female | 80 to 84 | 23%<br>(9.2-43%)               | 77%<br>(57-91%)          | 0.35<br>(0.079-0.86)                        | -0.032%<br>(-1.1-3%)                 | 0.028%<br>(-1.1-1.6%)               | 0.0015<br>(-0.057-0.079)  | -0.022<br>(-0.72-0.85)    |
| Northern Mariana Islands | 2005 | Female | 85 to 89 | 24%<br>(11-43%)                | 76%<br>(57-89%)          | 0.37<br>(0.087-0.9)                         | -0.076%<br>(-1.1-3%)                 | -0.057%<br>(-1.2-1.6%)              | -0.003<br>(-0.059-0.08)   | -0.037<br>(-0.48-0.64)    |
| Northern Mariana Islands | 2005 | Female | 90 to 94 | 27%<br>(12-47%)                | 73%<br>(53-88%)          | 0.42<br>(0.095-1)                           | -0.075%<br>(-0.91-1.3%)              | -0.076%<br>(-1.1-5%)                | -0.0026<br>(-0.034-0.052) | -0.016<br>(-0.19-0.28)    |
| Northern Mariana Islands | 2005 | Female | 95 plus  | 32%<br>(13-55%)                | 68%<br>(45-87%)          | 0.5<br>(0.11-1.3)                           | -0.074%<br>(-1.4-1.7%)               | -0.13%<br>(-1.6-1.9%)               | -0.0015<br>(-0.02-0.023)  | -0.0035<br>(-0.065-0.083) |
| Northern Mariana Islands | 2005 | Male   | All Ages | 45%<br>(36-54%)                | 55%<br>(46-64%)          | 1<br>(0.4-1.9)                              | 4.2%<br>(2.5-6.8%)                   | 4.8%<br>(2.5-8.4%)                  | 5.6<br>(2.7-10)           | 340<br>(190-570)          |
| Northern Mariana Islands | 2005 | Male   | 15 to 19 | 35%<br>(20-52%)                | 65%<br>(48-80%)          | 0.47<br>(0.14-1.1)                          | 2.1%<br>(1.1-4%)                     | 3.5%<br>(1.3-7.2%)                  | 0.05<br>(0.018-0.11)      | 5.2<br>(2.6-9.6)          |
| Northern Mariana Islands | 2005 | Male   | 20 to 24 | 53%<br>(34-71%)                | 47%<br>(29-66%)          | 1.3<br>(0.42-2.7)                           | 5.7%<br>(2.9-9.7%)                   | 8.2%<br>(3.1-16%)                   | 0.26<br>(0.1-0.51)        | 23<br>(12-41)             |
| Northern Mariana Islands | 2005 | Male   | 25 to 29 | 60%<br>(41-77%)                | 40%<br>(23-59%)          | 1.8<br>(0.67-3.5)                           | 6.4%<br>(3.5-10%)                    | 8.6%<br>(3.7-15%)                   | 0.65<br>(0.27-1.2)        | 56<br>(29-91)             |
| Northern Mariana Islands | 2005 | Male   | 30 to 34 | 61%<br>(40-78%)                | 39%<br>(22-60%)          | 1.9<br>(0.71-3.7)                           | 6.3%<br>(3.4-10%)                    | 8.4%<br>(3.7-14%)                   | 0.74<br>(0.32-1.3)        | 58<br>(31-94)             |
| Northern Mariana Islands | 2005 | Male   | 35 to 39 | 60%<br>(41-76%)                | 40%<br>(24-59%)          | 1.6<br>(0.56-3.2)                           | 6.2%<br>(3.6-10%)                    | 8.7%<br>(4.3-15%)                   | 0.86<br>(0.4-1.6)         | 59<br>(32-97)             |
| Northern Mariana Islands | 2005 | Male   | 40 to 44 | 57%<br>(40-75%)                | 43%<br>(25-60%)          | 1.4<br>(0.47-3)                             | 5.3%<br>(3-8.9%)                     | 7.1%<br>(3.7-12%)                   | 0.71<br>(0.33-1.3)        | 43<br>(23-74)             |
| Northern Mariana Islands | 2005 | Male   | 45 to 49 | 53%<br>(32-72%)                | 47%<br>(28-68%)          | 1.3<br>(0.38-2.8)                           | 4.8%<br>(2.7-8.3%)                   | 6.1%<br>(3.2-11%)                   | 0.92<br>(0.45-1.7)        | 48<br>(26-85)             |
| Northern Mariana Islands | 2005 | Male   | 50 to 54 | 50%<br>(31-69%)                | 50%<br>(31-69%)          | 1<br>(0.3-2.3)                              | 4.2%<br>(2.2-7.7%)                   | 5.2%<br>(2.6-10%)                   | 0.63<br>(0.3-1.3)         | 28<br>(14-54)             |
| Northern Mariana Islands | 2005 | Male   | 55 to 59 | 48%<br>(30-67%)                | 52%<br>(33-70%)          | 0.83<br>(0.25-2)                            | 2.6%<br>(1.2-5.7%)                   | 3.1%<br>(1.3-6.9%)                  | 0.27<br>(0.1-0.61)        | 10<br>(4.5-23)            |
| Northern Mariana Islands | 2005 | Male   | 60 to 64 | 46%<br>(27-66%)                | 54%<br>(34-73%)          | 0.69<br>(0.2-1.7)                           | 1.9%<br>(0.71-4.6%)                  | 2.2%<br>(0.77-5.6%)                 | 0.21<br>(0.071-0.55)      | 6.8<br>(2.5-17)           |

| Location                 | Year | Sex    | Age      | Prevalence of current drinkers | Prevalence of abstainers | Population average of standard drinks daily | Percent of total attributable deaths | Percent of total attributable DALYs | Attributable deaths       | Attributable DALYs        |
|--------------------------|------|--------|----------|--------------------------------|--------------------------|---------------------------------------------|--------------------------------------|-------------------------------------|---------------------------|---------------------------|
| Northern Mariana Islands | 2005 | Male   | 65 to 69 | 44%<br>(25-62%)                | 56%<br>(38-75%)          | 0.63<br>(0.19-1.5)                          | 1.7%<br>(0.57-4.3%)                  | 2%<br>(0.66-4.9%)                   | 0.13<br>(0.039-0.32)      | 3.2<br>(1.1-8.1)          |
| Northern Mariana Islands | 2005 | Male   | 70 to 74 | 41%<br>(24-58%)                | 59%<br>(42-76%)          | 0.55<br>(0.18-1.3)                          | 1.3%<br>(0.34-3.4%)                  | 1.5%<br>(0.39-4%)                   | 0.092<br>(0.023-0.24)     | 1.9<br>(0.46-4.9)         |
| Northern Mariana Islands | 2005 | Male   | 75 to 79 | 37%<br>(22-56%)                | 63%<br>(44-78%)          | 0.47<br>(0.15-1.1)                          | 1.1%<br>(0.3-2.8%)                   | 1.2%<br>(0.31-3.2%)                 | 0.039<br>(0.0099-0.1)     | 0.64<br>(0.18-1.7)        |
| Northern Mariana Islands | 2005 | Male   | 80 to 84 | 34%<br>(19-53%)                | 66%<br>(47-81%)          | 0.41<br>(0.12-0.95)                         | 1.1%<br>(0.42-2.5%)                  | 1.3%<br>(0.45-2.9%)                 | 0.04<br>(0.014-0.09)      | 0.46<br>(0.17-1.1)        |
| Northern Mariana Islands | 2005 | Male   | 85 to 89 | 33%<br>(19-50%)                | 67%<br>(50-81%)          | 0.39<br>(0.11-0.89)                         | 0.75%<br>(0.13-2.1%)                 | 0.8%<br>(0.098-2.4%)                | 0.022<br>(0.0027-0.066)   | 0.19<br>(0.033-0.54)      |
| Northern Mariana Islands | 2005 | Male   | 90 to 94 | 34%<br>(21-51%)                | 66%<br>(49-79%)          | 0.4<br>(0.12-0.93)                          | 0.68%<br>(0.14-1.9%)                 | 0.71%<br>(0.093-2.1%)               | 0.011<br>(0.0014-0.032)   | 0.065<br>(0.013-0.19)     |
| Northern Mariana Islands | 2005 | Male   | 95 plus  | 38%<br>(20-59%)                | 62%<br>(41-80%)          | 0.44<br>(0.11-1.1)                          | 0.52%<br>(-0.094-2%)                 | 0.43%<br>(-0.29-2.1%)               | 0.0018<br>(-0.0012-0.009) | 0.0091<br>(-0.0017-0.036) |
| Northern Mariana Islands | 2010 | Female | All Ages | 20%<br>(13-29%)                | 80%<br>(71-87%)          | 0.47<br>(0.2-0.86)                          | 1.2%<br>(0.59-2.2%)                  | 1.2%<br>(0.28-3.1%)                 | 1.2<br>(0.25-2.9)         | 92<br>(45-170)            |
| Northern Mariana Islands | 2010 | Female | 15 to 19 | 18%<br>(8.3-33%)               | 82%<br>(67-92%)          | 0.42<br>(0.12-1)                            | 0.99%<br>(0.52-1.9%)                 | 1.9%<br>(0.63-4.5%)                 | 0.018<br>(0.0056-0.044)   | 2.7<br>(1.4-5.3)          |
| Northern Mariana Islands | 2010 | Female | 20 to 24 | 23%<br>(9.3-41%)               | 77%<br>(59-91%)          | 0.64<br>(0.19-1.5)                          | 1.8%<br>(0.99-2.9%)                  | 2.6%<br>(0.86-5.7%)                 | 0.082<br>(0.026-0.19)     | 14<br>(7.4-23)            |
| Northern Mariana Islands | 2010 | Female | 25 to 29 | 24%<br>(9.7-42%)               | 76%<br>(58-90%)          | 0.66<br>(0.22-1.4)                          | 1.8%<br>(1.1-3%)                     | 2.5%<br>(0.96-5.1%)                 | 0.16<br>(0.065-0.34)      | 23<br>(13-38)             |
| Northern Mariana Islands | 2010 | Female | 30 to 34 | 25%<br>(9.4-44%)               | 75%<br>(56-91%)          | 0.69<br>(0.23-1.5)                          | 1.7%<br>(0.96-2.9%)                  | 2.5%<br>(1.1-5%)                    | 0.14<br>(0.06-0.3)        | 15<br>(8.3-27)            |
| Northern Mariana Islands | 2010 | Female | 35 to 39 | 25%<br>(11-44%)                | 75%<br>(56-89%)          | 0.72<br>(0.24-1.6)                          | 1.7%<br>(0.8-3.3%)                   | 2.6%<br>(1.1-5.5%)                  | 0.19<br>(0.071-0.4)       | 14<br>(6.5-28)            |
| Northern Mariana Islands | 2010 | Female | 40 to 44 | 25%<br>(12-42%)                | 75%<br>(58-88%)          | 0.67<br>(0.21-1.5)                          | 1.4%<br>(0.54-3%)                    | 2.4%<br>(0.86-5%)                   | 0.15<br>(0.052-0.33)      | 8.8<br>(3.3-19)           |
| Northern Mariana Islands | 2010 | Female | 45 to 49 | 25%<br>(11-43%)                | 75%<br>(57-89%)          | 0.59<br>(0.17-1.4)                          | 1.1%<br>(0.18-2.8%)                  | 1.9%<br>(0.52-4.6%)                 | 0.18<br>(0.051-0.48)      | 8.5<br>(1.5-23)           |
| Northern Mariana Islands | 2010 | Female | 50 to 54 | 25%<br>(11-44%)                | 75%<br>(56-89%)          | 0.52<br>(0.15-1.3)                          | 0.73%<br>(-0.32-2.6%)                | 1.3%<br>(-0.042-4%)                 | 0.09<br>(-0.0028-0.28)    | 3.2<br>(-1.5-12)          |
| Northern Mariana Islands | 2010 | Female | 55 to 59 | 24%<br>(11-44%)                | 76%<br>(56-89%)          | 0.48<br>(0.13-1.2)                          | 0.51%<br>(-0.6-2.2%)                 | 1%<br>(-0.37-3.2%)                  | 0.045<br>(-0.017-0.16)    | 1.2<br>(-1.4-5.3)         |
| Northern Mariana Islands | 2010 | Female | 60 to 64 | 24%<br>(11-43%)                | 76%<br>(57-89%)          | 0.46<br>(0.13-1.2)                          | 0.22%<br>(-0.86-1.9%)                | 0.56%<br>(-0.67-2.7%)               | 0.037<br>(-0.048-0.18)    | 0.61<br>(-2.5-5.5)        |
| Northern Mariana Islands | 2010 | Female | 65 to 69 | 25%<br>(11-43%)                | 75%<br>(57-89%)          | 0.46<br>(0.12-1.1)                          | 0.18%<br>(-0.95-1.9%)                | 0.48%<br>(-0.84-2.8%)               | 0.021<br>(-0.038-0.12)    | 0.26<br>(-1.4-2.8)        |
| Northern Mariana Islands | 2010 | Female | 70 to 74 | 24%<br>(11-42%)                | 76%<br>(58-89%)          | 0.43<br>(0.11-1.1)                          | 0.04%<br>(-0.93-1.7%)                | 0.21%<br>(-0.95-2.4%)               | 0.012<br>(-0.056-0.15)    | 0.062<br>(-1.4-2.8)       |
| Northern Mariana Islands | 2010 | Female | 75 to 79 | 23%<br>(10-42%)                | 77%<br>(58-90%)          | 0.4<br>(0.1-0.97)                           | 0.18%<br>(-0.81-1.7%)                | 0.34%<br>(-0.76-2.1%)               | 0.014<br>(-0.029-0.082)   | 0.13<br>(-0.61-1.3)       |
| Northern Mariana Islands | 2010 | Female | 80 to 84 | 23%<br>(9.4-43%)               | 77%<br>(57-91%)          | 0.39<br>(0.097-0.99)                        | 0.04%<br>(-0.93-1.4%)                | 0.11%<br>(-0.97-1.8%)               | 0.0066<br>(-0.057-0.11)   | 0.032<br>(-0.73-1.2)      |

| Location                 | Year | Sex    | Age      | Prevalence of current drinkers | Prevalence of abstainers | Population average of standard drinks daily | Percent of total attributable deaths | Percent of total attributable DALYs | Attributable deaths        | Attributable DALYs       |
|--------------------------|------|--------|----------|--------------------------------|--------------------------|---------------------------------------------|--------------------------------------|-------------------------------------|----------------------------|--------------------------|
| Northern Mariana Islands | 2010 | Female | 85 to 89 | 24%<br>(11-44%)                | 76%<br>(56-89%)          | 0.41<br>(0.1-1)                             | -0.0031%<br>(-1-1.5%)                | 0.025%<br>(-1.1-1.7%)               | 0.0016<br>(-0.068-0.11)    | -0.0014<br>(-0.57-0.84)  |
| Northern Mariana Islands | 2010 | Female | 90 to 94 | 28%<br>(13-47%)                | 72%<br>(53-87%)          | 0.47<br>(0.12-1.1)                          | -0.018%<br>(-0.95-1.6%)              | -0.018%<br>(-1.1-1.8%)              | -0.00073<br>(-0.044-0.075) | -0.0047<br>(-0.24-0.42)  |
| Northern Mariana Islands | 2010 | Female | 95 plus  | 33%<br>(14-54%)                | 67%<br>(46-86%)          | 0.55<br>(0.13-1.3)                          | 0.021%<br>(-1.3-1.9%)                | -0.025%<br>(-1.6-2%)                | -0.00043<br>(-0.028-0.036) | 0.0015<br>(-0.092-0.13)  |
| Northern Mariana Islands | 2010 | Male   | All Ages | 45%<br>(36-55%)                | 55%<br>(45-64%)          | 1.1<br>(0.51-2)                             | 4.8%<br>(2.9-7.6%)                   | 5.6%<br>(3-9.3%)                    | 8<br>(4.1-14)              | 470<br>(270-770)         |
| Northern Mariana Islands | 2010 | Male   | 15 to 19 | 35%<br>(20-53%)                | 65%<br>(47-80%)          | 0.51<br>(0.16-1.2)                          | 2.2%<br>(1.2-3.8%)                   | 3.8%<br>(1.6-7.5%)                  | 0.058<br>(0.024-0.12)      | 6.1<br>(3.4-11)          |
| Northern Mariana Islands | 2010 | Male   | 20 to 24 | 53%<br>(34-70%)                | 47%<br>(30-66%)          | 1.4<br>(0.52-2.8)                           | 5.9%<br>(3.2-10%)                    | 8.8%<br>(3.8-16%)                   | 0.32<br>(0.14-0.62)        | 29<br>(15-50)            |
| Northern Mariana Islands | 2010 | Male   | 25 to 29 | 60%<br>(40-76%)                | 40%<br>(24-60%)          | 1.9<br>(0.81-3.8)                           | 7.3%<br>(4.2-11%)                    | 11%<br>(5.1-18%)                    | 0.92<br>(0.4-1.6)          | 76<br>(42-120)           |
| Northern Mariana Islands | 2010 | Male   | 30 to 34 | 61%<br>(40-78%)                | 39%<br>(22-60%)          | 2<br>(0.86-3.8)                             | 7.2%<br>(4.1-11%)                    | 10%<br>(5-17%)                      | 1<br>(0.46-1.8)            | 77<br>(42-120)           |
| Northern Mariana Islands | 2010 | Male   | 35 to 39 | 60%<br>(41-77%)                | 40%<br>(23-59%)          | 1.8<br>(0.71-3.5)                           | 6.7%<br>(3.8-11%)                    | 9.4%<br>(4.8-16%)                   | 1.2<br>(0.56-2.1)          | 79<br>(42-130)           |
| Northern Mariana Islands | 2010 | Male   | 40 to 44 | 57%<br>(39-75%)                | 43%<br>(25-61%)          | 1.6<br>(0.58-3.3)                           | 5.8%<br>(3.3-9.7%)                   | 7.7%<br>(4-13%)                     | 0.98<br>(0.46-1.8)         | 57<br>(30-98)            |
| Northern Mariana Islands | 2010 | Male   | 45 to 49 | 54%<br>(33-72%)                | 46%<br>(28-67%)          | 1.4<br>(0.49-2.9)                           | 5.2%<br>(2.9-8.9%)                   | 6.6%<br>(3.6-12%)                   | 1.5<br>(0.72-2.8)          | 75<br>(40-130)           |
| Northern Mariana Islands | 2010 | Male   | 50 to 54 | 51%<br>(32-69%)                | 49%<br>(31-68%)          | 1.1<br>(0.38-2.4)                           | 4.5%<br>(2.4-8.2%)                   | 5.6%<br>(2.8-10%)                   | 0.98<br>(0.44-1.9)         | 43<br>(20-81)            |
| Northern Mariana Islands | 2010 | Male   | 55 to 59 | 48%<br>(30-68%)                | 52%<br>(32-70%)          | 0.92<br>(0.3-2.1)                           | 2.8%<br>(1.2-6%)                     | 3.3%<br>(1.3-7.1%)                  | 0.35<br>(0.13-0.79)        | 13<br>(5.6-29)           |
| Northern Mariana Islands | 2010 | Male   | 60 to 64 | 46%<br>(26-66%)                | 54%<br>(34-74%)          | 0.77<br>(0.24-1.8)                          | 2.1%<br>(0.69-5.1%)                  | 2.4%<br>(0.72-6.1%)                 | 0.32<br>(0.097-0.83)       | 10<br>(3.3-25)           |
| Northern Mariana Islands | 2010 | Male   | 65 to 69 | 44%<br>(26-63%)                | 56%<br>(37-74%)          | 0.69<br>(0.24-1.5)                          | 1.9%<br>(0.57-4.5%)                  | 2.2%<br>(0.68-5.3%)                 | 0.16<br>(0.049-0.4)        | 4.1<br>(1.2-9.7)         |
| Northern Mariana Islands | 2010 | Male   | 70 to 74 | 41%<br>(25-59%)                | 59%<br>(41-75%)          | 0.6<br>(0.21-1.3)                           | 1.4%<br>(0.35-3.7%)                  | 1.7%<br>(0.4-4.3%)                  | 0.12<br>(0.029-0.32)       | 2.4<br>(0.58-6.4)        |
| Northern Mariana Islands | 2010 | Male   | 75 to 79 | 38%<br>(23-56%)                | 62%<br>(44-77%)          | 0.51<br>(0.17-1.2)                          | 1.2%<br>(0.34-3.1%)                  | 1.4%<br>(0.34-3.6%)                 | 0.044<br>(0.011-0.11)      | 0.71<br>(0.19-1.8)       |
| Northern Mariana Islands | 2010 | Male   | 80 to 84 | 35%<br>(20-53%)                | 65%<br>(47-80%)          | 0.46<br>(0.15-0.98)                         | 1.2%<br>(0.44-2.8%)                  | 1.4%<br>(0.5-3.2%)                  | 0.049<br>(0.017-0.11)      | 0.56<br>(0.2-1.3)        |
| Northern Mariana Islands | 2010 | Male   | 85 to 89 | 33%<br>(19-50%)                | 67%<br>(50-81%)          | 0.43<br>(0.14-0.96)                         | 0.83%<br>(0.15-2.3%)                 | 0.89%<br>(0.12-2.5%)                | 0.028<br>(0.0035-0.083)    | 0.24<br>(0.044-0.68)     |
| Northern Mariana Islands | 2010 | Male   | 90 to 94 | 35%<br>(21-52%)                | 65%<br>(48-79%)          | 0.44<br>(0.14-0.97)                         | 0.73%<br>(0.15-2%)                   | 0.76%<br>(0.1-2.2%)                 | 0.015<br>(0.002-0.042)     | 0.087<br>(0.017-0.24)    |
| Northern Mariana Islands | 2010 | Male   | 95 plus  | 38%<br>(20-59%)                | 62%<br>(41-80%)          | 0.48<br>(0.13-1.1)                          | 0.59%<br>(-0.095-2.2%)               | 0.5%<br>(-0.28-2.2%)                | 0.0031<br>(-0.0018-0.013)  | 0.015<br>(-0.0025-0.054) |
| Northern Mariana Islands | 2016 | Female | All Ages | 21%<br>(13-30%)                | 79%<br>(70-87%)          | 0.49<br>(0.22-0.89)                         | 1.2%<br>(0.6-2.2%)                   | 1.3%<br>(0.29-3.2%)                 | 1.5<br>(0.3-3.9)           | 120<br>(57-220)          |

| Location                 | Year | Sex    | Age      | Prevalence of current drinkers | Prevalence of abstainers | Population average of standard drinks daily | Percent of total attributable deaths | Percent of total attributable DALYs | Attributable deaths       | Attributable DALYs      |
|--------------------------|------|--------|----------|--------------------------------|--------------------------|---------------------------------------------|--------------------------------------|-------------------------------------|---------------------------|-------------------------|
| Northern Mariana Islands | 2016 | Female | 15 to 19 | 19%<br>(8.9-33%)               | 81%<br>(67-91%)          | 0.44<br>(0.14-1)                            | 1%<br>(0.52-1.9%)                    | 2%<br>(0.65-4.6%)                   | 0.024<br>(0.0074-0.056)   | 3.4<br>(1.7-6.5)        |
| Northern Mariana Islands | 2016 | Female | 20 to 24 | 23%<br>(9.7-40%)               | 77%<br>(60-90%)          | 0.68<br>(0.21-1.5)                          | 1.8%<br>(1-3%)                       | 2.7%<br>(0.89-5.8%)                 | 0.11<br>(0.034-0.24)      | 17<br>(9.5-28)          |
| Northern Mariana Islands | 2016 | Female | 25 to 29 | 24%<br>(10-43%)                | 76%<br>(57-90%)          | 0.69<br>(0.23-1.4)                          | 1.8%<br>(1.1-3%)                     | 2.6%<br>(1-5.2%)                    | 0.22<br>(0.082-0.47)      | 30<br>(17-52)           |
| Northern Mariana Islands | 2016 | Female | 30 to 34 | 25%<br>(9-45%)                 | 75%<br>(55-91%)          | 0.7<br>(0.24-1.5)                           | 1.7%<br>(0.96-2.9%)                  | 2.6%<br>(1.1-5.2%)                  | 0.18<br>(0.07-0.37)       | 19<br>(10-34)           |
| Northern Mariana Islands | 2016 | Female | 35 to 39 | 26%<br>(10-45%)                | 74%<br>(55-90%)          | 0.74<br>(0.27-1.6)                          | 1.7%<br>(0.84-3.3%)                  | 2.7%<br>(1.1-5.7%)                  | 0.23<br>(0.086-0.5)       | 18<br>(8.2-34)          |
| Northern Mariana Islands | 2016 | Female | 40 to 44 | 26%<br>(12-43%)                | 74%<br>(57-88%)          | 0.7<br>(0.23-1.5)                           | 1.5%<br>(0.55-3.2%)                  | 2.5%<br>(0.87-5.3%)                 | 0.18<br>(0.058-0.4)       | 11<br>(3.9-23)          |
| Northern Mariana Islands | 2016 | Female | 45 to 49 | 25%<br>(11-43%)                | 75%<br>(57-89%)          | 0.6<br>(0.18-1.4)                           | 1.1%<br>(0.15-3%)                    | 1.8%<br>(0.46-4.7%)                 | 0.26<br>(0.063-0.68)      | 12<br>(1.6-33)          |
| Northern Mariana Islands | 2016 | Female | 50 to 54 | 24%<br>(11-43%)                | 76%<br>(57-89%)          | 0.53<br>(0.15-1.3)                          | 0.73%<br>(-0.3-2.6%)                 | 1.3%<br>(-0.099-4.1%)               | 0.12<br>(-0.0083-0.39)    | 4.4<br>(-1.7-16)        |
| Northern Mariana Islands | 2016 | Female | 55 to 59 | 24%<br>(11-43%)                | 76%<br>(57-89%)          | 0.47<br>(0.13-1.2)                          | 0.51%<br>(-0.56-2.1%)                | 0.97%<br>(-0.35-3.3%)               | 0.051<br>(-0.019-0.17)    | 1.4<br>(-1.5-6)         |
| Northern Mariana Islands | 2016 | Female | 60 to 64 | 24%<br>(11-43%)                | 76%<br>(57-89%)          | 0.46<br>(0.13-1.1)                          | 0.21%<br>(-0.84-1.8%)                | 0.52%<br>(-0.74-2.6%)               | 0.047<br>(-0.069-0.25)    | 0.8<br>(-3.5-7.3)       |
| Northern Mariana Islands | 2016 | Female | 65 to 69 | 25%<br>(11-43%)                | 75%<br>(57-89%)          | 0.47<br>(0.12-1.1)                          | 0.16%<br>(-1-2%)                     | 0.43%<br>(-0.98-2.7%)               | 0.022<br>(-0.05-0.13)     | 0.27<br>(-1.7-3.2)      |
| Northern Mariana Islands | 2016 | Female | 70 to 74 | 25%<br>(11-42%)                | 75%<br>(58-89%)          | 0.45<br>(0.12-1.1)                          | 0.024%<br>(-1-1.9%)                  | 0.18%<br>(-1.1-2.5%)                | 0.012<br>(-0.077-0.17)    | 0.046<br>(-1.8-3.5)     |
| Northern Mariana Islands | 2016 | Female | 75 to 79 | 24%<br>(11-42%)                | 76%<br>(58-89%)          | 0.42<br>(0.12-1.1)                          | 0.18%<br>(-0.79-1.8%)                | 0.34%<br>(-0.81-2.3%)               | 0.013<br>(-0.031-0.088)   | 0.14<br>(-0.61-1.4)     |
| Northern Mariana Islands | 2016 | Female | 80 to 84 | 23%<br>(10-41%)                | 77%<br>(59-90%)          | 0.4<br>(0.1-0.99)                           | 0.043%<br>(-0.89-1.6%)               | 0.11%<br>(-0.98-2%)                 | 0.0074<br>(-0.067-0.14)   | 0.041<br>(-0.83-1.5)    |
| Northern Mariana Islands | 2016 | Female | 85 to 89 | 24%<br>(11-43%)                | 76%<br>(57-89%)          | 0.42<br>(0.11-1)                            | 0.0046%<br>(-0.95-1.8%)              | 0.024%<br>(-1.1-2%)                 | 0.0018<br>(-0.08-0.14)    | 0.003<br>(-0.65-1.1)    |
| Northern Mariana Islands | 2016 | Female | 90 to 94 | 28%<br>(12-47%)                | 72%<br>(53-88%)          | 0.48<br>(0.12-1.1)                          | -0.015%<br>(-1-1.7%)                 | -0.025%<br>(-1.1-2%)                | -0.0013<br>(-0.056-0.1)   | -0.0049<br>(-0.3-0.54)  |
| Northern Mariana Islands | 2016 | Female | 95 plus  | 33%<br>(13-55%)                | 67%<br>(45-87%)          | 0.56<br>(0.13-1.4)                          | 0.005%<br>(-1.4-2%)                  | -0.052%<br>(-1.8-2.2%)              | -0.0011<br>(-0.038-0.048) | 0.00047<br>(-0.13-0.17) |
| Northern Mariana Islands | 2016 | Male   | All Ages | 46%<br>(37-56%)                | 54%<br>(44-63%)          | 1.2<br>(0.56-2.1)                           | 4.9%<br>(2.9-7.6%)                   | 5.7%<br>(3-9.4%)                    | 11<br>(5.1-19)            | 620<br>(350-1000)       |
| Northern Mariana Islands | 2016 | Male   | 15 to 19 | 35%<br>(20-53%)                | 65%<br>(47-80%)          | 0.53<br>(0.19-1.2)                          | 2.2%<br>(1.2-4.1%)                   | 3.9%<br>(1.7-8%)                    | 0.075<br>(0.032-0.16)     | 7.8<br>(4.2-14)         |
| Northern Mariana Islands | 2016 | Male   | 20 to 24 | 53%<br>(34-71%)                | 47%<br>(29-66%)          | 1.4<br>(0.58-2.8)                           | 6.1%<br>(3.3-10%)                    | 9%<br>(4.2-16%)                     | 0.42<br>(0.19-0.79)       | 37<br>(20-62)           |
| Northern Mariana Islands | 2016 | Male   | 25 to 29 | 60%<br>(40-76%)                | 40%<br>(24-60%)          | 2<br>(0.88-3.8)                             | 7.3%<br>(4.2-12%)                    | 11%<br>(5-18%)                      | 1.2<br>(0.52-2.2)         | 100<br>(54-160)         |
| Northern Mariana Islands | 2016 | Male   | 30 to 34 | 61%<br>(40-78%)                | 39%<br>(22-60%)          | 2.1<br>(0.88-3.9)                           | 7.3%<br>(4.1-11%)                    | 10%<br>(4.9-17%)                    | 1.3<br>(0.55-2.3)         | 96<br>(52-160)          |

| Location                 | Year | Sex    | Age      | Prevalence of current drinkers | Prevalence of abstainers | Population average of standard drinks daily | Percent of total attributable deaths | Percent of total attributable DALYs | Attributable deaths       | Attributable DALYs       |
|--------------------------|------|--------|----------|--------------------------------|--------------------------|---------------------------------------------|--------------------------------------|-------------------------------------|---------------------------|--------------------------|
| Northern Mariana Islands | 2016 | Male   | 35 to 39 | 60%<br>(41-78%)                | 40%<br>(22-59%)          | 1.9<br>(0.79-3.8)                           | 6.9%<br>(4-11%)                      | 9.5%<br>(4.9-16%)                   | 1.5<br>(0.7-2.8)          | 100<br>(54-170)          |
| Northern Mariana Islands | 2016 | Male   | 40 to 44 | 58%<br>(39-76%)                | 42%<br>(24-61%)          | 1.6<br>(0.61-3.4)                           | 5.9%<br>(3.2-9.9%)                   | 7.7%<br>(4-14%)                     | 1.2<br>(0.53-2.3)         | 70<br>(36-130)           |
| Northern Mariana Islands | 2016 | Male   | 45 to 49 | 53%<br>(32-72%)                | 47%<br>(28-68%)          | 1.4<br>(0.49-2.9)                           | 5.2%<br>(2.9-8.9%)                   | 6.6%<br>(3.4-12%)                   | 2.2<br>(1-4)              | 110<br>(58-190)          |
| Northern Mariana Islands | 2016 | Male   | 50 to 54 | 50%<br>(31-69%)                | 50%<br>(31-69%)          | 1.2<br>(0.4-2.5)                            | 4.6%<br>(2.3-8.2%)                   | 5.6%<br>(2.7-10%)                   | 1.4<br>(0.6-2.7)          | 61<br>(28-110)           |
| Northern Mariana Islands | 2016 | Male   | 55 to 59 | 48%<br>(30-68%)                | 52%<br>(32-70%)          | 0.94<br>(0.31-2.1)                          | 2.8%<br>(1.1-6%)                     | 3.3%<br>(1.2-7.1%)                  | 0.42<br>(0.14-0.94)       | 16<br>(6.4-35)           |
| Northern Mariana Islands | 2016 | Male   | 60 to 64 | 46%<br>(27-66%)                | 54%<br>(34-73%)          | 0.77<br>(0.27-1.8)                          | 2.1%<br>(0.68-4.9%)                  | 2.4%<br>(0.72-5.8%)                 | 0.45<br>(0.13-1.1)        | 14<br>(4.7-33)           |
| Northern Mariana Islands | 2016 | Male   | 65 to 69 | 44%<br>(26-63%)                | 56%<br>(37-74%)          | 0.69<br>(0.25-1.5)                          | 1.9%<br>(0.63-4.3%)                  | 2.2%<br>(0.68-5.1%)                 | 0.19<br>(0.061-0.45)      | 4.8<br>(1.6-11)          |
| Northern Mariana Islands | 2016 | Male   | 70 to 74 | 41%<br>(25-59%)                | 59%<br>(41-75%)          | 0.61<br>(0.21-1.4)                          | 1.5%<br>(0.36-4%)                    | 1.7%<br>(0.4-4.6%)                  | 0.15<br>(0.035-0.4)       | 3<br>(0.71-8.2)          |
| Northern Mariana Islands | 2016 | Male   | 75 to 79 | 38%<br>(22-57%)                | 62%<br>(43-78%)          | 0.53<br>(0.18-1.2)                          | 1.3%<br>(0.37-3.3%)                  | 1.4%<br>(0.37-3.7%)                 | 0.046<br>(0.012-0.12)     | 0.75<br>(0.21-1.9)       |
| Northern Mariana Islands | 2016 | Male   | 80 to 84 | 35%<br>(19-53%)                | 65%<br>(47-81%)          | 0.47<br>(0.16-1)                            | 1.3%<br>(0.47-3%)                    | 1.4%<br>(0.52-3.3%)                 | 0.059<br>(0.021-0.14)     | 0.68<br>(0.25-1.6)       |
| Northern Mariana Islands | 2016 | Male   | 85 to 89 | 33%<br>(19-49%)                | 67%<br>(51-81%)          | 0.45<br>(0.15-1)                            | 0.87%<br>(0.16-2.5%)                 | 0.92%<br>(0.12-2.7%)                | 0.035<br>(0.0046-0.1)     | 0.3<br>(0.054-0.82)      |
| Northern Mariana Islands | 2016 | Male   | 90 to 94 | 35%<br>(21-53%)                | 65%<br>(47-79%)          | 0.46<br>(0.15-1)                            | 0.78%<br>(0.16-2.2%)                 | 0.8%<br>(0.095-2.4%)                | 0.019<br>(0.0022-0.056)   | 0.11<br>(0.022-0.31)     |
| Northern Mariana Islands | 2016 | Male   | 95 plus  | 39%<br>(20-59%)                | 61%<br>(41-80%)          | 0.51<br>(0.14-1.2)                          | 0.64%<br>(-0.1-2.2%)                 | 0.53%<br>(-0.33-2.3%)               | 0.0044<br>(-0.0027-0.019) | 0.021<br>(-0.0036-0.077) |
| Puerto Rico              | 1990 | Female | All Ages | 35%<br>(29-42%)                | 65%<br>(58-71%)          | 1.2<br>(0.77-1.8)                           | 2.3%<br>(1.3-3.6%)                   | 2.2%<br>(0.88-4.2%)                 | 240<br>(93-450)           | 9600<br>(5700-15000)     |
| Puerto Rico              | 1990 | Female | 15 to 19 | 42%<br>(28-58%)                | 58%<br>(42-72%)          | 1.5<br>(0.85-2.6)                           | 2.6%<br>(1.7-3.9%)                   | 6.9%<br>(4-11%)                     | 4.1<br>(2.4-6.5)          | 450<br>(290-660)         |
| Puerto Rico              | 1990 | Female | 20 to 24 | 48%<br>(32-64%)                | 52%<br>(36-68%)          | 2.3<br>(1.3-3.6)                            | 4.4%<br>(3-6.2%)                     | 8.3%<br>(4.9-13%)                   | 7.6<br>(4.4-12)           | 820<br>(540-1200)        |
| Puerto Rico              | 1990 | Female | 25 to 29 | 47%<br>(31-64%)                | 53%<br>(36-69%)          | 2.1<br>(1.2-3.5)                            | 4.3%<br>(2.9-6.1%)                   | 6.8%<br>(4.1-10%)                   | 9.4<br>(5.5-14)           | 900<br>(600-1300)        |
| Puerto Rico              | 1990 | Female | 30 to 34 | 46%<br>(29-63%)                | 54%<br>(37-71%)          | 1.9<br>(1.1-3.2)                            | 4%<br>(2.7-5.8%)                     | 6.6%<br>(4.3-9.8%)                  | 11<br>(6.9-16)            | 910<br>(610-1300)        |
| Puerto Rico              | 1990 | Female | 35 to 39 | 45%<br>(30-62%)                | 55%<br>(38-70%)          | 1.9<br>(1-3.1)                              | 3.9%<br>(2.7-5.6%)                   | 7%<br>(4.7-10%)                     | 13<br>(8.4-19)            | 910<br>(600-1300)        |
| Puerto Rico              | 1990 | Female | 40 to 44 | 43%<br>(28-62%)                | 57%<br>(38-72%)          | 1.8<br>(0.95-2.9)                           | 4.1%<br>(2.7-6%)                     | 7.8%<br>(5.2-12%)                   | 17<br>(11-25)             | 1000<br>(670-1500)       |
| Puerto Rico              | 1990 | Female | 45 to 49 | 42%<br>(26-59%)                | 58%<br>(41-74%)          | 1.6<br>(0.86-2.7)                           | 3.7%<br>(2.3-5.9%)                   | 7%<br>(4.6-11%)                     | 18<br>(11-27)             | 880<br>(550-1300)        |
| Puerto Rico              | 1990 | Female | 50 to 54 | 38%<br>(24-55%)                | 62%<br>(45-76%)          | 1.4<br>(0.74-2.3)                           | 3.4%<br>(2-5.5%)                     | 6%<br>(3.6-9.2%)                    | 19<br>(11-30)             | 810<br>(460-1300)        |

| Location    | Year | Sex    | Age      | Prevalence of current drinkers | Prevalence of abstainers | Population average of standard drinks daily | Percent of total attributable deaths | Percent of total attributable DALYs | Attributable deaths | Attributable DALYs     |
|-------------|------|--------|----------|--------------------------------|--------------------------|---------------------------------------------|--------------------------------------|-------------------------------------|---------------------|------------------------|
| Puerto Rico | 1990 | Female | 55 to 59 | 33%<br>(20-50%)                | 67%<br>(50-80%)          | 1.2<br>(0.59-2.1)                           | 3%<br>(1.5-5.2%)                     | 4.7%<br>(2.6-7.8%)                  | 21<br>(12-35)       | 740<br>(390-1300)      |
| Puerto Rico | 1990 | Female | 60 to 64 | 30%<br>(18-46%)                | 70%<br>(54-82%)          | 1<br>(0.51-1.8)                             | 2.3%<br>(0.88-4.4%)                  | 3.4%<br>(1.4-6.2%)                  | 22<br>(9.1-40)      | 640<br>(250-1200)      |
| Puerto Rico | 1990 | Female | 65 to 69 | 27%<br>(17-42%)                | 73%<br>(58-83%)          | 0.89<br>(0.45-1.6)                          | 1.8%<br>(0.43-3.7%)                  | 2.5%<br>(0.72-4.9%)                 | 23<br>(6.5-45)      | 560<br>(140-1100)      |
| Puerto Rico | 1990 | Female | 70 to 74 | 25%<br>(16-37%)                | 75%<br>(63-84%)          | 0.75<br>(0.38-1.4)                          | 1.4%<br>(0.21-3.1%)                  | 1.8%<br>(0.3-4.1%)                  | 21<br>(3.6-48)      | 400<br>(65-940)        |
| Puerto Rico | 1990 | Female | 75 to 79 | 22%<br>(13-34%)                | 78%<br>(66-87%)          | 0.65<br>(0.32-1.2)                          | 0.98%<br>(-0.097-2.4%)               | 1.2%<br>(-0.11-3.1%)                | 18<br>(-1.6-46)     | 280<br>(-28-700)       |
| Puerto Rico | 1990 | Female | 80 to 84 | 20%<br>(11-32%)                | 80%<br>(68-89%)          | 0.59<br>(0.28-1)                            | 0.83%<br>(-0.025-2.2%)               | 1%<br>(-0.091-2.7%)                 | 15<br>(-1.4-41)     | 170<br>(-5.7-460)      |
| Puerto Rico | 1990 | Female | 85 to 89 | 20%<br>(12-30%)                | 80%<br>(70-88%)          | 0.58<br>(0.28-1)                            | 0.69%<br>(-0.21-2.1%)                | 0.76%<br>(-0.37-2.4%)               | 11<br>(-5-33)       | 90<br>(-28-270)        |
| Puerto Rico | 1990 | Female | 90 to 94 | 22%<br>(13-34%)                | 78%<br>(66-87%)          | 0.65<br>(0.31-1.2)                          | 0.67%<br>(-0.38-2.3%)                | 0.66%<br>(-0.63-2.6%)               | 5.7<br>(-5.5-22)    | 36<br>(-21-120)        |
| Puerto Rico | 1990 | Female | 95 plus  | 25%<br>(14-41%)                | 75%<br>(59-86%)          | 0.75<br>(0.31-1.5)                          | 0.65%<br>(-0.72-2.8%)                | 0.56%<br>(-1.1-3.1%)                | 1.4<br>(-2.9-8)     | 6.8<br>(-7.9-29)       |
| Puerto Rico | 1990 | Male   | All Ages | 57%<br>(49-65%)                | 43%<br>(35-51%)          | 2.7<br>(1.8-4.1)                            | 10%<br>(7.4-13%)                     | 9.9%<br>(6.6-14%)                   | 1500<br>(1000-2100) | 60000<br>(43000-77000) |
| Puerto Rico | 1990 | Male   | 15 to 19 | 57%<br>(40-73%)                | 43%<br>(27-60%)          | 2.5<br>(1.4-4.1)                            | 8.9%<br>(5.6-13%)                    | 13%<br>(7.7-21%)                    | 28<br>(16-44)       | 2300<br>(1500-3600)    |
| Puerto Rico | 1990 | Male   | 20 to 24 | 67%<br>(50-81%)                | 33%<br>(19-50%)          | 4.6<br>(2.7-7.2)                            | 17%<br>(11-24%)                      | 22%<br>(14-32%)                     | 70<br>(43-100)      | 5300<br>(3600-7400)    |
| Puerto Rico | 1990 | Male   | 25 to 29 | 71%<br>(53-83%)                | 29%<br>(17-47%)          | 4.6<br>(2.8-7.3)                            | 15%<br>(10-20%)                      | 17%<br>(11-24%)                     | 76<br>(49-110)      | 5500<br>(3800-7500)    |
| Puerto Rico | 1990 | Male   | 30 to 34 | 71%<br>(53-84%)                | 29%<br>(16-47%)          | 4.7<br>(2.8-7.7)                            | 13%<br>(9.2-17%)                     | 15%<br>(10-20%)                     | 82<br>(55-110)      | 5300<br>(3800-7200)    |
| Puerto Rico | 1990 | Male   | 35 to 39 | 71%<br>(55-84%)                | 29%<br>(16-45%)          | 5<br>(2.9-7.8)                              | 15%<br>(11-18%)                      | 17%<br>(13-22%)                     | 110<br>(78-140)     | 6200<br>(4700-8000)    |
| Puerto Rico | 1990 | Male   | 40 to 44 | 70%<br>(55-84%)                | 30%<br>(16-45%)          | 4.7<br>(2.7-7.4)                            | 16%<br>(13-20%)                      | 20%<br>(15-24%)                     | 120<br>(94-160)     | 6500<br>(5000-8000)    |
| Puerto Rico | 1990 | Male   | 45 to 49 | 68%<br>(49-82%)                | 32%<br>(18-51%)          | 4<br>(2.4-6.3)                              | 16%<br>(12-20%)                      | 20%<br>(15-24%)                     | 120<br>(93-150)     | 5700<br>(4300-7200)    |
| Puerto Rico | 1990 | Male   | 50 to 54 | 67%<br>(48-82%)                | 33%<br>(18-52%)          | 3.6<br>(2-5.6)                              | 14%<br>(10-18%)                      | 18%<br>(13-23%)                     | 120<br>(90-160)     | 4900<br>(3700-6400)    |
| Puerto Rico | 1990 | Male   | 55 to 59 | 65%<br>(48-81%)                | 35%<br>(19-52%)          | 3.4<br>(1.9-5.5)                            | 13%<br>(8.9-17%)                     | 16%<br>(11-21%)                     | 130<br>(91-180)     | 4600<br>(3200-6200)    |
| Puerto Rico | 1990 | Male   | 60 to 64 | 63%<br>(44-80%)                | 37%<br>(20-56%)          | 3.1<br>(1.7-5.1)                            | 11%<br>(6.8-15%)                     | 13%<br>(8.1-18%)                    | 150<br>(92-200)     | 4200<br>(2700-5900)    |
| Puerto Rico | 1990 | Male   | 65 to 69 | 62%<br>(42-78%)                | 38%<br>(22-58%)          | 2.6<br>(1.4-4.4)                            | 8.8%<br>(5.3-13%)                    | 10%<br>(6.2-15%)                    | 150<br>(90-220)     | 3600<br>(2200-5300)    |
| Puerto Rico | 1990 | Male   | 70 to 74 | 58%<br>(40-74%)                | 42%<br>(26-60%)          | 2.2<br>(1.2-3.7)                            | 6.4%<br>(3.5-10%)                    | 7.4%<br>(4-12%)                     | 120<br>(66-200)     | 2400<br>(1300-3900)    |

| Location    | Year | Sex    | Age      | Prevalence of current drinkers | Prevalence of abstainers | Population average of standard drinks daily | Percent of total attributable deaths | Percent of total attributable DALYs | Attributable deaths | Attributable DALYs    |
|-------------|------|--------|----------|--------------------------------|--------------------------|---------------------------------------------|--------------------------------------|-------------------------------------|---------------------|-----------------------|
| Puerto Rico | 1990 | Male   | 75 to 79 | 53%<br>(34-71%)                | 47%<br>(29-66%)          | 1.8<br>(0.91-3.1)                           | 4.9%<br>(2.4-8.4%)                   | 5.6%<br>(2.6-9.8%)                  | 100<br>(49-180)     | 1600<br>(760-2700)    |
| Puerto Rico | 1990 | Male   | 80 to 84 | 47%<br>(29-66%)                | 53%<br>(34-71%)          | 1.6<br>(0.79-2.9)                           | 3.9%<br>(1.7-6.9%)                   | 4.4%<br>(1.9-8%)                    | 71<br>(32-130)      | 820<br>(380-1400)     |
| Puerto Rico | 1990 | Male   | 85 to 89 | 43%<br>(26-60%)                | 57%<br>(40-74%)          | 1.5<br>(0.7-2.6)                            | 3.2%<br>(1.2-6.1%)                   | 3.6%<br>(1.2-6.9%)                  | 47<br>(16-91)       | 380<br>(150-720)      |
| Puerto Rico | 1990 | Male   | 90 to 94 | 43%<br>(28-61%)                | 57%<br>(39-72%)          | 1.5<br>(0.77-2.8)                           | 3%<br>(0.82-6.1%)                    | 3.2%<br>(0.69-6.9%)                 | 21<br>(4.4-45)      | 120<br>(32-240)       |
| Puerto Rico | 1990 | Male   | 95 plus  | 46%<br>(27-67%)                | 54%<br>(33-73%)          | 1.7<br>(0.79-3.2)                           | 3.2%<br>(0.59-6.9%)                  | 3.3%<br>(0.25-7.7%)                 | 5<br>(0.38-12)      | 20<br>(3.6-42)        |
| Puerto Rico | 1995 | Female | All Ages | 32%<br>(26-39%)                | 68%<br>(61-74%)          | 1.1<br>(0.7-1.6)                            | 2.2%<br>(1.3-3.4%)                   | 2.3%<br>(1-4.1%)                    | 270<br>(120-500)    | 10000<br>(6000-16000) |
| Puerto Rico | 1995 | Female | 15 to 19 | 39%<br>(26-56%)                | 61%<br>(44-74%)          | 1.5<br>(0.85-2.6)                           | 2.6%<br>(1.6-4%)                     | 6.5%<br>(3.6-11%)                   | 4.2<br>(2.3-6.7)    | 450<br>(290-680)      |
| Puerto Rico | 1995 | Female | 20 to 24 | 44%<br>(29-60%)                | 56%<br>(40-71%)          | 2.2<br>(1.2-3.5)                            | 4%<br>(2.6-5.6%)                     | 7.4%<br>(4.3-12%)                   | 6.3<br>(3.7-10)     | 730<br>(490-1100)     |
| Puerto Rico | 1995 | Female | 25 to 29 | 43%<br>(28-60%)                | 57%<br>(40-72%)          | 1.9<br>(1.1-3.1)                            | 3.6%<br>(2.4-5.1%)                   | 5.2%<br>(3-8%)                      | 6.8<br>(3.9-10)     | 720<br>(490-1000)     |
| Puerto Rico | 1995 | Female | 30 to 34 | 40%<br>(25-57%)                | 60%<br>(43-75%)          | 1.7<br>(0.92-2.9)                           | 3.3%<br>(2.2-4.8%)                   | 4.7%<br>(2.9-7.3%)                  | 9.2<br>(5.7-14)     | 820<br>(550-1200)     |
| Puerto Rico | 1995 | Female | 35 to 39 | 38%<br>(25-56%)                | 62%<br>(44-75%)          | 1.6<br>(0.87-2.7)                           | 3.4%<br>(2.3-4.9%)                   | 5.3%<br>(3.4-8%)                    | 13<br>(8.1-20)      | 930<br>(620-1300)     |
| Puerto Rico | 1995 | Female | 40 to 44 | 38%<br>(24-56%)                | 62%<br>(44-76%)          | 1.5<br>(0.82-2.6)                           | 3.4%<br>(2.3-5.1%)                   | 6%<br>(4-8.8%)                      | 15<br>(10-23)       | 940<br>(620-1400)     |
| Puerto Rico | 1995 | Female | 45 to 49 | 36%<br>(23-52%)                | 64%<br>(48-77%)          | 1.4<br>(0.76-2.3)                           | 3.4%<br>(2.1-5.2%)                   | 6%<br>(3.9-9%)                      | 19<br>(13-30)       | 980<br>(620-1500)     |
| Puerto Rico | 1995 | Female | 50 to 54 | 33%<br>(20-49%)                | 67%<br>(51-80%)          | 1.2<br>(0.64-2.1)                           | 3.2%<br>(1.9-5%)                     | 5.5%<br>(3.5-8.2%)                  | 22<br>(14-33)       | 920<br>(560-1400)     |
| Puerto Rico | 1995 | Female | 55 to 59 | 29%<br>(18-45%)                | 71%<br>(55-82%)          | 1.1<br>(0.54-1.9)                           | 2.7%<br>(1.4-4.5%)                   | 4.3%<br>(2.4-7%)                    | 21<br>(12-35)       | 760<br>(400-1300)     |
| Puerto Rico | 1995 | Female | 60 to 64 | 27%<br>(16-42%)                | 73%<br>(58-84%)          | 0.95<br>(0.48-1.7)                          | 2.3%<br>(1-4.3%)                     | 3.4%<br>(1.7-6.2%)                  | 25<br>(12-44)       | 730<br>(330-1400)     |
| Puerto Rico | 1995 | Female | 65 to 69 | 26%<br>(17-40%)                | 74%<br>(60-83%)          | 0.88<br>(0.43-1.5)                          | 2%<br>(0.73-3.7%)                    | 2.8%<br>(1.2-5.1%)                  | 27<br>(12-50)       | 650<br>(250-1200)     |
| Puerto Rico | 1995 | Female | 70 to 74 | 24%<br>(15-38%)                | 76%<br>(62-85%)          | 0.76<br>(0.38-1.4)                          | 1.5%<br>(0.43-3.2%)                  | 2.1%<br>(0.65-4.3%)                 | 27<br>(8.5-57)      | 520<br>(150-1100)     |
| Puerto Rico | 1995 | Female | 75 to 79 | 21%<br>(13-34%)                | 79%<br>(66-87%)          | 0.66<br>(0.33-1.2)                          | 1.2%<br>(0.19-2.7%)                  | 1.5%<br>(0.29-3.6%)                 | 24<br>(4.4-55)      | 350<br>(58-830)       |
| Puerto Rico | 1995 | Female | 80 to 84 | 20%<br>(12-31%)                | 80%<br>(69-88%)          | 0.6<br>(0.28-1.1)                           | 1%<br>(0.14-2.4%)                    | 1.3%<br>(0.19-3%)                   | 23<br>(3.4-55)      | 260<br>(37-610)       |
| Puerto Rico | 1995 | Female | 85 to 89 | 20%<br>(12-30%)                | 80%<br>(70-88%)          | 0.59<br>(0.27-1.1)                          | 0.86%<br>(-0.0034-2.2%)              | 1%<br>(-0.089-2.6%)                 | 16<br>(-1.5-41)     | 140<br>(-0.54-330)    |
| Puerto Rico | 1995 | Female | 90 to 94 | 21%<br>(13-33%)                | 79%<br>(67-87%)          | 0.66<br>(0.32-1.2)                          | 0.88%<br>(-0.16-2.5%)                | 0.93%<br>(-0.31-2.9%)               | 10<br>(-3.5-32)     | 61<br>(-11-180)       |

| Location    | Year | Sex    | Age      | Prevalence of current drinkers | Prevalence of abstainers | Population average of standard drinks daily | Percent of total attributable deaths | Percent of total attributable DALYs | Attributable deaths | Attributable DALYs     |
|-------------|------|--------|----------|--------------------------------|--------------------------|---------------------------------------------|--------------------------------------|-------------------------------------|---------------------|------------------------|
| Puerto Rico | 1995 | Female | 95 plus  | 25%<br>(14-40%)                | 75%<br>(60-86%)          | 0.77<br>(0.31-1.5)                          | 0.85%<br>(-0.52-2.9%)                | 0.82%<br>(-0.8-3.2%)                | 3.4<br>(-3.3-13)    | 14<br>(-8.5-48)        |
| Puerto Rico | 1995 | Male   | All Ages | 57%<br>(50-65%)                | 43%<br>(35-50%)          | 3.1<br>(2-4.6)                              | 10%<br>(7.5-13%)                     | 10%<br>(6.8-13%)                    | 1800<br>(1200-2400) | 68000<br>(49000-87000) |
| Puerto Rico | 1995 | Male   | 15 to 19 | 58%<br>(40-74%)                | 42%<br>(26-60%)          | 2.7<br>(1.6-4.5)                            | 10%<br>(6.3-15%)                     | 14%<br>(8.2-22%)                    | 42<br>(24-67)       | 3300<br>(2000-5100)    |
| Puerto Rico | 1995 | Male   | 20 to 24 | 69%<br>(53-82%)                | 31%<br>(18-47%)          | 5.3<br>(3.2-8)                              | 19%<br>(12-26%)                      | 23%<br>(15-33%)                     | 100<br>(65-150)     | 7400<br>(5000-10000)   |
| Puerto Rico | 1995 | Male   | 25 to 29 | 72%<br>(57-84%)                | 28%<br>(16-43%)          | 5.3<br>(3.3-8.2)                            | 16%<br>(11-21%)                      | 19%<br>(13-27%)                     | 84<br>(54-120)      | 5900<br>(4000-8100)    |
| Puerto Rico | 1995 | Male   | 30 to 34 | 72%<br>(57-84%)                | 28%<br>(16-43%)          | 5.3<br>(3.2-8.2)                            | 12%<br>(8.5-16%)                     | 13%<br>(9.1-18%)                    | 77<br>(51-110)      | 5200<br>(3600-6900)    |
| Puerto Rico | 1995 | Male   | 35 to 39 | 71%<br>(58-84%)                | 29%<br>(16-42%)          | 5.4<br>(3.3-8.3)                            | 13%<br>(9.5-15%)                     | 14%<br>(11-18%)                     | 97<br>(69-130)      | 5800<br>(4300-7400)    |
| Puerto Rico | 1995 | Male   | 40 to 44 | 70%<br>(55-82%)                | 30%<br>(18-45%)          | 5.1<br>(3-7.9)                              | 14%<br>(11-17%)                      | 17%<br>(13-20%)                     | 120<br>(92-150)     | 6400<br>(4900-8000)    |
| Puerto Rico | 1995 | Male   | 45 to 49 | 68%<br>(52-81%)                | 32%<br>(19-48%)          | 4.4<br>(2.6-6.8)                            | 15%<br>(12-18%)                      | 18%<br>(14-22%)                     | 140<br>(110-180)    | 6800<br>(5300-8400)    |
| Puerto Rico | 1995 | Male   | 50 to 54 | 68%<br>(52-82%)                | 32%<br>(18-48%)          | 4<br>(2.4-6.3)                              | 15%<br>(11-18%)                      | 18%<br>(14-23%)                     | 160<br>(120-210)    | 6600<br>(4900-8300)    |
| Puerto Rico | 1995 | Male   | 55 to 59 | 65%<br>(50-80%)                | 35%<br>(20-50%)          | 3.6<br>(2.2-5.9)                            | 14%<br>(9.7-18%)                     | 17%<br>(12-21%)                     | 170<br>(120-220)    | 5800<br>(4100-7500)    |
| Puerto Rico | 1995 | Male   | 60 to 64 | 61%<br>(42-78%)                | 39%<br>(22-58%)          | 3.1<br>(1.8-5.1)                            | 11%<br>(7.4-15%)                     | 13%<br>(8.8-18%)                    | 170<br>(110-230)    | 4900<br>(3200-6700)    |
| Puerto Rico | 1995 | Male   | 65 to 69 | 58%<br>(39-76%)                | 42%<br>(24-61%)          | 2.6<br>(1.4-4.3)                            | 8.9%<br>(5.5-13%)                    | 11%<br>(6.6-15%)                    | 160<br>(98-230)     | 3800<br>(2400-5500)    |
| Puerto Rico | 1995 | Male   | 70 to 74 | 54%<br>(36-71%)                | 46%<br>(29-64%)          | 2.1<br>(1.1-3.8)                            | 6.6%<br>(3.7-10%)                    | 7.7%<br>(4.3-12%)                   | 150<br>(81-240)     | 2800<br>(1600-4600)    |
| Puerto Rico | 1995 | Male   | 75 to 79 | 49%<br>(31-68%)                | 51%<br>(32-69%)          | 1.8<br>(0.94-3.1)                           | 5.1%<br>(2.7-8.5%)                   | 5.9%<br>(3.1-9.9%)                  | 120<br>(59-190)     | 1700<br>(910-2900)     |
| Puerto Rico | 1995 | Male   | 80 to 84 | 44%<br>(26-61%)                | 56%<br>(39-74%)          | 1.6<br>(0.77-2.7)                           | 4.2%<br>(2.1-7.1%)                   | 4.8%<br>(2.3-8.2%)                  | 95<br>(46-160)      | 1100<br>(530-1800)     |
| Puerto Rico | 1995 | Male   | 85 to 89 | 39%<br>(24-55%)                | 61%<br>(45-76%)          | 1.4<br>(0.69-2.5)                           | 3.4%<br>(1.6-6%)                     | 3.8%<br>(1.7-6.9%)                  | 59<br>(26-110)      | 480<br>(220-850)       |
| Puerto Rico | 1995 | Male   | 90 to 94 | 40%<br>(25-56%)                | 60%<br>(44-75%)          | 1.5<br>(0.76-2.7)                           | 3.1%<br>(1.2-5.9%)                   | 3.4%<br>(1.1-6.7%)                  | 28<br>(9.3-55)      | 160<br>(59-300)        |
| Puerto Rico | 1995 | Male   | 95 plus  | 43%<br>(24-63%)                | 57%<br>(37-76%)          | 1.7<br>(0.76-3)                             | 3.3%<br>(1-6.6%)                     | 3.5%<br>(0.8-7.4%)                  | 8.1<br>(1.8-17)     | 32<br>(9.7-61)         |
| Puerto Rico | 2000 | Female | All Ages | 28%<br>(23-34%)                | 72%<br>(66-77%)          | 1<br>(0.63-1.5)                             | 2%<br>(1.2-3.2%)                     | 2.2%<br>(1-3.8%)                    | 270<br>(120-470)    | 9400<br>(5700-15000)   |
| Puerto Rico | 2000 | Female | 15 to 19 | 38%<br>(26-54%)                | 62%<br>(46-74%)          | 1.5<br>(0.85-2.5)                           | 2.4%<br>(1.5-3.6%)                   | 6.3%<br>(3.6-11%)                   | 3.3<br>(1.8-5.4)    | 380<br>(240-570)       |
| Puerto Rico | 2000 | Female | 20 to 24 | 41%<br>(27-55%)                | 59%<br>(45-73%)          | 2<br>(1.2-3.2)                              | 3.7%<br>(2.5-5.3%)                   | 7.2%<br>(4.2-12%)                   | 5.2<br>(3-8.4)      | 660<br>(440-940)       |



| Location    | Year | Sex    | Age      | Prevalence of current drinkers | Prevalence of abstainers | Population average of standard drinks daily | Percent of total attributable deaths | Percent of total attributable DALYs | Attributable deaths | Attributable DALYs     |
|-------------|------|--------|----------|--------------------------------|--------------------------|---------------------------------------------|--------------------------------------|-------------------------------------|---------------------|------------------------|
| Puerto Rico | 2000 | Female | 25 to 29 | 37%<br>(25-53%)                | 63%<br>(47-75%)          | 1.7<br>(0.94-2.7)                           | 3.4%<br>(2.4-4.7%)                   | 5.7%<br>(3.4-8.6%)                  | 5.1<br>(3-7.9)      | 620<br>(430-870)       |
| Puerto Rico | 2000 | Female | 30 to 34 | 34%<br>(22-49%)                | 66%<br>(51-78%)          | 1.5<br>(0.84-2.4)                           | 3.1%<br>(2.1-4.4%)                   | 4.9%<br>(3.2-7.6%)                  | 6.7<br>(4.2-10)     | 650<br>(440-960)       |
| Puerto Rico | 2000 | Female | 35 to 39 | 35%<br>(24-50%)                | 65%<br>(50-76%)          | 1.5<br>(0.84-2.4)                           | 3.1%<br>(2.1-4.4%)                   | 5.3%<br>(3.5-7.9%)                  | 9.7<br>(6.4-14)     | 760<br>(520-1100)      |
| Puerto Rico | 2000 | Female | 40 to 44 | 34%<br>(23-50%)                | 66%<br>(50-77%)          | 1.4<br>(0.8-2.3)                            | 3.3%<br>(2.1-4.9%)                   | 6.3%<br>(4.2-9%)                    | 14<br>(9.4-21)      | 890<br>(580-1300)      |
| Puerto Rico | 2000 | Female | 45 to 49 | 32%<br>(21-47%)                | 68%<br>(53-79%)          | 1.3<br>(0.71-2)                             | 3.2%<br>(1.9-4.9%)                   | 5.8%<br>(3.7-8.7%)                  | 18<br>(11-27)       | 920<br>(570-1400)      |
| Puerto Rico | 2000 | Female | 50 to 54 | 28%<br>(18-41%)                | 72%<br>(59-82%)          | 1<br>(0.59-1.7)                             | 2.8%<br>(1.7-4.6%)                   | 5%<br>(3.1-7.5%)                    | 21<br>(14-33)       | 920<br>(560-1500)      |
| Puerto Rico | 2000 | Female | 55 to 59 | 23%<br>(15-36%)                | 77%<br>(64-85%)          | 0.84<br>(0.44-1.5)                          | 2.4%<br>(1.3-4.1%)                   | 3.9%<br>(2.3-6.3%)                  | 22<br>(13-35)       | 780<br>(440-1300)      |
| Puerto Rico | 2000 | Female | 60 to 64 | 22%<br>(13-35%)                | 78%<br>(65-87%)          | 0.76<br>(0.4-1.3)                           | 2.1%<br>(1-3.8%)                     | 3.2%<br>(1.7-5.5%)                  | 23<br>(12-40)       | 700<br>(340-1200)      |
| Puerto Rico | 2000 | Female | 65 to 69 | 22%<br>(14-34%)                | 78%<br>(66-86%)          | 0.75<br>(0.39-1.3)                          | 1.9%<br>(0.85-3.4%)                  | 2.7%<br>(1.4-4.8%)                  | 28<br>(14-49)       | 660<br>(300-1200)      |
| Puerto Rico | 2000 | Female | 70 to 74 | 21%<br>(13-33%)                | 79%<br>(67-87%)          | 0.67<br>(0.35-1.2)                          | 1.5%<br>(0.51-3%)                    | 2.1%<br>(0.79-4%)                   | 27<br>(10-51)       | 520<br>(180-1000)      |
| Puerto Rico | 2000 | Female | 75 to 79 | 18%<br>(11-29%)                | 82%<br>(71-89%)          | 0.59<br>(0.29-1.1)                          | 1.2%<br>(0.33-2.6%)                  | 1.6%<br>(0.51-3.4%)                 | 27<br>(8.6-56)      | 400<br>(110-860)       |
| Puerto Rico | 2000 | Female | 80 to 84 | 17%<br>(10-28%)                | 83%<br>(72-90%)          | 0.54<br>(0.27-0.95)                         | 1%<br>(0.24-2.2%)                    | 1.3%<br>(0.33-2.8%)                 | 25<br>(6-52)        | 280<br>(66-590)        |
| Puerto Rico | 2000 | Female | 85 to 89 | 17%<br>(10-26%)                | 83%<br>(74-90%)          | 0.53<br>(0.24-0.97)                         | 0.91%<br>(0.13-2.1%)                 | 1.1%<br>(0.13-2.5%)                 | 20<br>(2.3-45)      | 160<br>(24-370)        |
| Puerto Rico | 2000 | Female | 90 to 94 | 19%<br>(11-29%)                | 81%<br>(71-89%)          | 0.58<br>(0.29-1.1)                          | 0.91%<br>(0.026-2.3%)                | 1%<br>(-0.08-2.7%)                  | 12<br>(-0.95-32)    | 71<br>(2.1-180)        |
| Puerto Rico | 2000 | Female | 95 plus  | 21%<br>(12-36%)                | 79%<br>(64-88%)          | 0.68<br>(0.29-1.3)                          | 0.93%<br>(-0.17-2.6%)                | 0.95%<br>(-0.44-3.1%)               | 4.3<br>(-2-14)      | 18<br>(-3.2-50)        |
| Puerto Rico | 2000 | Male   | All Ages | 59%<br>(52-67%)                | 41%<br>(33-48%)          | 3.3<br>(2.2-4.9)                            | 11%<br>(7.9-14%)                     | 11%<br>(7.2-14%)                    | 1700<br>(1200-2300) | 64000<br>(47000-83000) |
| Puerto Rico | 2000 | Male   | 15 to 19 | 57%<br>(42-73%)                | 43%<br>(27-58%)          | 2.7<br>(1.6-4.3)                            | 9.5%<br>(6-14%)                      | 14%<br>(8.4-22%)                    | 31<br>(18-49)       | 2500<br>(1600-3800)    |
| Puerto Rico | 2000 | Male   | 20 to 24 | 71%<br>(57-83%)                | 29%<br>(17-43%)          | 5.6<br>(3.4-8.5)                            | 18%<br>(13-25%)                      | 23%<br>(15-34%)                     | 89<br>(59-130)      | 6600<br>(4600-9300)    |
| Puerto Rico | 2000 | Male   | 25 to 29 | 74%<br>(61-84%)                | 26%<br>(16-39%)          | 5.6<br>(3.5-8.4)                            | 16%<br>(12-22%)                      | 21%<br>(14-29%)                     | 72<br>(48-100)      | 5200<br>(3800-7100)    |
| Puerto Rico | 2000 | Male   | 30 to 34 | 72%<br>(59-84%)                | 28%<br>(16-41%)          | 5.4<br>(3.4-8.2)                            | 14%<br>(10-18%)                      | 17%<br>(12-24%)                     | 64<br>(45-88)       | 4500<br>(3200-5900)    |
| Puerto Rico | 2000 | Male   | 35 to 39 | 73%<br>(61-84%)                | 27%<br>(16-39%)          | 5.8<br>(3.6-8.8)                            | 14%<br>(10-17%)                      | 17%<br>(13-22%)                     | 84<br>(61-110)      | 5200<br>(3900-6500)    |
| Puerto Rico | 2000 | Male   | 40 to 44 | 72%<br>(59-83%)                | 28%<br>(17-41%)          | 5.6<br>(3.3-8.6)                            | 14%<br>(11-18%)                      | 18%<br>(14-22%)                     | 100<br>(79-130)     | 5600<br>(4400-6900)    |

| Location    | Year | Sex    | Age      | Prevalence of current drinkers | Prevalence of abstainers | Population average of standard drinks daily | Percent of total attributable deaths | Percent of total attributable DALYs | Attributable deaths | Attributable DALYs   |
|-------------|------|--------|----------|--------------------------------|--------------------------|---------------------------------------------|--------------------------------------|-------------------------------------|---------------------|----------------------|
| Puerto Rico | 2000 | Male   | 45 to 49 | 71%<br>(55-82%)                | 29%<br>(18-45%)          | 4.8<br>(2.9-7.2)                            | 15%<br>(12-19%)                      | 19%<br>(15-23%)                     | 130<br>(99-160)     | 6200<br>(4800-7700)  |
| Puerto Rico | 2000 | Male   | 50 to 54 | 70%<br>(55-83%)                | 30%<br>(17-45%)          | 4.3<br>(2.5-6.7)                            | 15%<br>(11-19%)                      | 19%<br>(14-24%)                     | 170<br>(120-210)    | 6800<br>(5000-8600)  |
| Puerto Rico | 2000 | Male   | 55 to 59 | 69%<br>(53-81%)                | 31%<br>(19-47%)          | 4.1<br>(2.5-6.4)                            | 14%<br>(9.9-18%)                     | 17%<br>(12-23%)                     | 180<br>(130-230)    | 6200<br>(4500-8100)  |
| Puerto Rico | 2000 | Male   | 60 to 64 | 64%<br>(48-79%)                | 36%<br>(21-52%)          | 3.5<br>(2.1-5.6)                            | 11%<br>(7.7-15%)                     | 14%<br>(9.5-19%)                    | 170<br>(120-230)    | 5100<br>(3500-6900)  |
| Puerto Rico | 2000 | Male   | 65 to 69 | 60%<br>(42-76%)                | 40%<br>(24-58%)          | 2.8<br>(1.6-4.6)                            | 9.1%<br>(5.7-13%)                    | 11%<br>(7-16%)                      | 160<br>(100-230)    | 4000<br>(2500-5600)  |
| Puerto Rico | 2000 | Male   | 70 to 74 | 56%<br>(38-72%)                | 44%<br>(28-62%)          | 2.3<br>(1.3-4)                              | 6.7%<br>(3.7-11%)                    | 8.1%<br>(4.4-13%)                   | 140<br>(75-220)     | 2700<br>(1500-4300)  |
| Puerto Rico | 2000 | Male   | 75 to 79 | 51%<br>(32-70%)                | 49%<br>(30-68%)          | 1.9<br>(1-3.3)                              | 5.3%<br>(2.7-8.6%)                   | 6.2%<br>(3-10%)                     | 120<br>(60-200)     | 1800<br>(930-3000)   |
| Puerto Rico | 2000 | Male   | 80 to 84 | 45%<br>(28-63%)                | 55%<br>(37-72%)          | 1.7<br>(0.81-2.8)                           | 4.3%<br>(2.1-7.1%)                   | 5%<br>(2.5-8.3%)                    | 95<br>(46-160)      | 1100<br>(540-1800)   |
| Puerto Rico | 2000 | Male   | 85 to 89 | 41%<br>(24-57%)                | 59%<br>(43-76%)          | 1.5<br>(0.74-2.6)                           | 3.7%<br>(1.7-6.3%)                   | 4.2%<br>(1.9-7.3%)                  | 67<br>(30-120)      | 540<br>(260-930)     |
| Puerto Rico | 2000 | Male   | 90 to 94 | 41%<br>(26-59%)                | 59%<br>(41-74%)          | 1.6<br>(0.81-2.9)                           | 3.3%<br>(1.3-6.1%)                   | 3.7%<br>(1.4-7%)                    | 32<br>(12-60)       | 180<br>(74-340)      |
| Puerto Rico | 2000 | Male   | 95 plus  | 44%<br>(25-65%)                | 56%<br>(35-75%)          | 1.8<br>(0.81-3.2)                           | 3.6%<br>(1.2-6.7%)                   | 3.9%<br>(1-7.7%)                    | 10<br>(2.8-20)      | 40<br>(14-76)        |
| Puerto Rico | 2005 | Female | All Ages | 29%<br>(25-34%)                | 71%<br>(66-75%)          | 1.1<br>(0.69-1.7)                           | 2.1%<br>(1.3-3.3%)                   | 2.2%<br>(1.2-3.7%)                  | 280<br>(150-480)    | 9500<br>(5700-15000) |
| Puerto Rico | 2005 | Female | 15 to 19 | 38%<br>(26-54%)                | 62%<br>(46-74%)          | 1.5<br>(0.88-2.6)                           | 2.1%<br>(1.4-3.2%)                   | 6.4%<br>(3.7-11%)                   | 2.4<br>(1.4-4)      | 310<br>(200-470)     |
| Puerto Rico | 2005 | Female | 20 to 24 | 42%<br>(30-56%)                | 58%<br>(44-70%)          | 2.2<br>(1.3-3.5)                            | 3.8%<br>(2.6-5.5%)                   | 7.7%<br>(4.5-12%)                   | 5.2<br>(3-8.3)      | 650<br>(430-930)     |
| Puerto Rico | 2005 | Female | 25 to 29 | 40%<br>(29-56%)                | 60%<br>(44-71%)          | 1.9<br>(1.1-3)                              | 3.5%<br>(2.4-5%)                     | 6.5%<br>(3.8-10%)                   | 4.9<br>(2.9-7.6)    | 600<br>(400-880)     |
| Puerto Rico | 2005 | Female | 30 to 34 | 37%<br>(26-52%)                | 63%<br>(48-74%)          | 1.7<br>(1-2.7)                              | 3.1%<br>(2.1-4.3%)                   | 5.5%<br>(3.5-8.4%)                  | 5.5<br>(3.4-8.3)    | 580<br>(390-850)     |
| Puerto Rico | 2005 | Female | 35 to 39 | 36%<br>(26-51%)                | 64%<br>(49-74%)          | 1.6<br>(0.94-2.7)                           | 3%<br>(2-4.3%)                       | 5.5%<br>(3.7-8.2%)                  | 8.3<br>(5.4-12)     | 680<br>(460-1000)    |
| Puerto Rico | 2005 | Female | 40 to 44 | 35%<br>(25-51%)                | 65%<br>(49-75%)          | 1.5<br>(0.87-2.5)                           | 3.1%<br>(2-4.8%)                     | 6.1%<br>(4-9.1%)                    | 13<br>(8.3-19)      | 810<br>(530-1200)    |
| Puerto Rico | 2005 | Female | 45 to 49 | 34%<br>(24-47%)                | 66%<br>(53-76%)          | 1.4<br>(0.8-2.3)                            | 3.2%<br>(2-5.1%)                     | 6%<br>(3.9-9.1%)                    | 18<br>(11-27)       | 920<br>(560-1400)    |
| Puerto Rico | 2005 | Female | 50 to 54 | 30%<br>(21-43%)                | 70%<br>(57-79%)          | 1.2<br>(0.69-1.9)                           | 2.9%<br>(1.7-4.7%)                   | 5.2%<br>(3.2-8%)                    | 21<br>(13-33)       | 920<br>(520-1500)    |
| Puerto Rico | 2005 | Female | 55 to 59 | 25%<br>(17-37%)                | 75%<br>(63-83%)          | 0.96<br>(0.54-1.7)                          | 2.6%<br>(1.4-4.5%)                   | 4.4%<br>(2.6-7%)                    | 25<br>(15-42)       | 910<br>(510-1600)    |
| Puerto Rico | 2005 | Female | 60 to 64 | 22%<br>(15-35%)                | 78%<br>(65-85%)          | 0.82<br>(0.46-1.4)                          | 2.2%<br>(1.1-4.2%)                   | 3.4%<br>(1.8-6%)                    | 27<br>(14-48)       | 810<br>(400-1500)    |

| Location    | Year | Sex    | Age      | Prevalence of current drinkers | Prevalence of abstainers | Population average of standard drinks daily | Percent of total attributable deaths | Percent of total attributable DALYs | Attributable deaths | Attributable DALYs     |
|-------------|------|--------|----------|--------------------------------|--------------------------|---------------------------------------------|--------------------------------------|-------------------------------------|---------------------|------------------------|
| Puerto Rico | 2005 | Female | 65 to 69 | 21%<br>(14-32%)                | 79%<br>(68-86%)          | 0.73<br>(0.4-1.2)                           | 1.9%<br>(0.94-3.5%)                  | 2.9%<br>(1.6-5%)                    | 29<br>(15-50)       | 690<br>(340-1300)      |
| Puerto Rico | 2005 | Female | 70 to 74 | 18%<br>(12-26%)                | 82%<br>(74-88%)          | 0.59<br>(0.31-1)                            | 1.6%<br>(0.66-2.9%)                  | 2.2%<br>(1.1-4%)                    | 29<br>(14-52)       | 560<br>(250-1000)      |
| Puerto Rico | 2005 | Female | 75 to 79 | 14%<br>(9.1-22%)               | 86%<br>(78-91%)          | 0.46<br>(0.24-0.82)                         | 1.2%<br>(0.54-2.3%)                  | 1.7%<br>(0.78-3.1%)                 | 27<br>(13-50)       | 410<br>(180-780)       |
| Puerto Rico | 2005 | Female | 80 to 84 | 13%<br>(7.6-21%)               | 87%<br>(79-92%)          | 0.42<br>(0.21-0.75)                         | 1%<br>(0.41-2.1%)                    | 1.3%<br>(0.56-2.6%)                 | 27<br>(11-54)       | 310<br>(120-600)       |
| Puerto Rico | 2005 | Female | 85 to 89 | 13%<br>(7.8-20%)               | 87%<br>(80-92%)          | 0.42<br>(0.2-0.76)                          | 0.88%<br>(0.3-1.9%)                  | 1.1%<br>(0.35-2.3%)                 | 21<br>(6.7-45)      | 170<br>(60-360)        |
| Puerto Rico | 2005 | Female | 90 to 94 | 14%<br>(8.5-21%)               | 86%<br>(79-91%)          | 0.45<br>(0.22-0.81)                         | 0.89%<br>(0.19-2%)                   | 1%<br>(0.17-2.4%)                   | 14<br>(2.3-34)      | 84<br>(18-190)         |
| Puerto Rico | 2005 | Female | 95 plus  | 16%<br>(8.8-28%)               | 84%<br>(72-91%)          | 0.52<br>(0.22-0.96)                         | 0.88%<br>(0.04-2.3%)                 | 0.92%<br>(-0.11-2.6%)               | 5.5<br>(-0.69-16)   | 23<br>(1-58)           |
| Puerto Rico | 2005 | Male   | All Ages | 59%<br>(52-66%)                | 41%<br>(34-48%)          | 3.4<br>(2.2-5.1)                            | 10%<br>(7.5-13%)                     | 10%<br>(6.7-14%)                    | 1600<br>(1100-2200) | 59000<br>(43000-76000) |
| Puerto Rico | 2005 | Male   | 15 to 19 | 57%<br>(41-72%)                | 43%<br>(28-59%)          | 2.8<br>(1.6-4.3)                            | 8.9%<br>(5.6-13%)                    | 14%<br>(8.4-22%)                    | 24<br>(14-36)       | 2000<br>(1300-2900)    |
| Puerto Rico | 2005 | Male   | 20 to 24 | 71%<br>(56-82%)                | 29%<br>(18-44%)          | 5.7<br>(3.5-8.7)                            | 18%<br>(13-26%)                      | 24%<br>(16-35%)                     | 86<br>(57-120)      | 6400<br>(4400-9000)    |
| Puerto Rico | 2005 | Male   | 25 to 29 | 73%<br>(60-84%)                | 27%<br>(16-40%)          | 5.7<br>(3.5-8.6)                            | 17%<br>(12-23%)                      | 22%<br>(15-32%)                     | 75<br>(50-110)      | 5400<br>(3800-7400)    |
| Puerto Rico | 2005 | Male   | 30 to 34 | 71%<br>(58-83%)                | 29%<br>(17-42%)          | 5.4<br>(3.4-8.2)                            | 14%<br>(10-19%)                      | 19%<br>(13-26%)                     | 59<br>(40-83)       | 4100<br>(3000-5500)    |
| Puerto Rico | 2005 | Male   | 35 to 39 | 73%<br>(60-84%)                | 27%<br>(16-40%)          | 5.9<br>(3.6-9.1)                            | 13%<br>(10-17%)                      | 18%<br>(13-24%)                     | 66<br>(49-88)       | 4200<br>(3200-5300)    |
| Puerto Rico | 2005 | Male   | 40 to 44 | 72%<br>(60-83%)                | 28%<br>(17-40%)          | 5.7<br>(3.4-8.7)                            | 14%<br>(11-17%)                      | 18%<br>(14-23%)                     | 83<br>(62-100)      | 4600<br>(3500-5700)    |
| Puerto Rico | 2005 | Male   | 45 to 49 | 69%<br>(54-81%)                | 31%<br>(19-46%)          | 4.7<br>(2.9-7.3)                            | 14%<br>(10-17%)                      | 18%<br>(13-22%)                     | 110<br>(80-130)     | 5200<br>(3900-6400)    |
| Puerto Rico | 2005 | Male   | 50 to 54 | 68%<br>(52-81%)                | 32%<br>(19-48%)          | 4.2<br>(2.5-6.6)                            | 14%<br>(10-17%)                      | 18%<br>(13-22%)                     | 140<br>(100-180)    | 5800<br>(4400-7400)    |
| Puerto Rico | 2005 | Male   | 55 to 59 | 67%<br>(51-80%)                | 33%<br>(20-49%)          | 4<br>(2.4-6.3)                              | 13%<br>(9.1-17%)                     | 16%<br>(12-21%)                     | 170<br>(120-220)    | 6100<br>(4300-7900)    |
| Puerto Rico | 2005 | Male   | 60 to 64 | 63%<br>(47-78%)                | 37%<br>(22-53%)          | 3.5<br>(2.1-5.6)                            | 11%<br>(7.1-15%)                     | 13%<br>(8.8-18%)                    | 170<br>(110-230)    | 5100<br>(3400-6900)    |
| Puerto Rico | 2005 | Male   | 65 to 69 | 60%<br>(43-75%)                | 40%<br>(25-57%)          | 2.9<br>(1.7-4.7)                            | 8.8%<br>(5.5-12%)                    | 11%<br>(6.7-15%)                    | 160<br>(99-220)     | 3900<br>(2500-5600)    |
| Puerto Rico | 2005 | Male   | 70 to 74 | 58%<br>(42-73%)                | 42%<br>(27-58%)          | 2.5<br>(1.4-4.1)                            | 6.8%<br>(3.7-10%)                    | 8.2%<br>(4.4-12%)                   | 140<br>(73-210)     | 2700<br>(1500-4200)    |
| Puerto Rico | 2005 | Male   | 75 to 79 | 52%<br>(35-69%)                | 48%<br>(31-65%)          | 2<br>(1.1-3.3)                              | 5.3%<br>(2.6-8.7%)                   | 6.2%<br>(3-10%)                     | 120<br>(57-190)     | 1800<br>(890-2900)     |
| Puerto Rico | 2005 | Male   | 80 to 84 | 44%<br>(27-62%)                | 56%<br>(38-73%)          | 1.7<br>(0.87-2.8)                           | 4.3%<br>(2.1-7.2%)                   | 5%<br>(2.4-8.4%)                    | 98<br>(48-160)      | 1100<br>(550-1800)     |

| Location    | Year | Sex    | Age      | Prevalence of current drinkers | Prevalence of abstainers | Population average of standard drinks daily | Percent of total attributable deaths | Percent of total attributable DALYs | Attributable deaths | Attributable DALYs     |
|-------------|------|--------|----------|--------------------------------|--------------------------|---------------------------------------------|--------------------------------------|-------------------------------------|---------------------|------------------------|
| Puerto Rico | 2005 | Male   | 85 to 89 | 39%<br>(24-55%)                | 61%<br>(45-76%)          | 1.5<br>(0.75-2.6)                           | 3.6%<br>(1.7-6.2%)                   | 4.2%<br>(1.9-7.2%)                  | 67<br>(30-120)      | 550<br>(260-950)       |
| Puerto Rico | 2005 | Male   | 90 to 94 | 40%<br>(26-56%)                | 60%<br>(44-74%)          | 1.6<br>(0.83-2.7)                           | 3.5%<br>(1.4-6.3%)                   | 3.9%<br>(1.5-7.2%)                  | 40<br>(15-74)       | 220<br>(92-400)        |
| Puerto Rico | 2005 | Male   | 95 plus  | 43%<br>(25-63%)                | 57%<br>(37-75%)          | 1.8<br>(0.8-3.2)                            | 3.7%<br>(1.3-7.1%)                   | 4.1%<br>(1.2-8.1%)                  | 14<br>(4.2-28)      | 55<br>(19-100)         |
| Puerto Rico | 2010 | Female | All Ages | 30%<br>(26-35%)                | 70%<br>(65-74%)          | 1.2<br>(0.72-1.8)                           | 2%<br>(1.3-3.3%)                     | 2.1%<br>(1.2-3.6%)                  | 270<br>(150-470)    | 9200<br>(5600-14000)   |
| Puerto Rico | 2010 | Female | 15 to 19 | 38%<br>(27-54%)                | 62%<br>(46-73%)          | 1.6<br>(0.86-2.6)                           | 2%<br>(1.3-3%)                       | 6.5%<br>(3.8-11%)                   | 1.9<br>(1.1-3.2)    | 280<br>(180-440)       |
| Puerto Rico | 2010 | Female | 20 to 24 | 45%<br>(33-58%)                | 55%<br>(42-67%)          | 2.4<br>(1.4-3.8)                            | 3.8%<br>(2.6-5.5%)                   | 8.3%<br>(4.8-13%)                   | 4.3<br>(2.4-6.8)    | 580<br>(380-850)       |
| Puerto Rico | 2010 | Female | 25 to 29 | 45%<br>(34-60%)                | 55%<br>(40-66%)          | 2.2<br>(1.3-3.5)                            | 3.7%<br>(2.5-5.3%)                   | 7.5%<br>(4.5-12%)                   | 4.6<br>(2.6-7.1)    | 580<br>(380-840)       |
| Puerto Rico | 2010 | Female | 30 to 34 | 42%<br>(31-57%)                | 58%<br>(43-69%)          | 2<br>(1.2-3.2)                              | 3.3%<br>(2.2-4.8%)                   | 6.4%<br>(4-9.6%)                    | 5.6<br>(3.4-8.5)    | 600<br>(400-880)       |
| Puerto Rico | 2010 | Female | 35 to 39 | 38%<br>(28-53%)                | 62%<br>(47-72%)          | 1.7<br>(1-2.9)                              | 3.1%<br>(2.1-4.5%)                   | 6.2%<br>(4-9.2%)                    | 7.9<br>(5-12)       | 650<br>(430-970)       |
| Puerto Rico | 2010 | Female | 40 to 44 | 35%<br>(25-51%)                | 65%<br>(49-75%)          | 1.5<br>(0.89-2.5)                           | 3%<br>(1.9-4.7%)                     | 6.2%<br>(4-9.3%)                    | 11<br>(7.4-17)      | 750<br>(470-1100)      |
| Puerto Rico | 2010 | Female | 45 to 49 | 35%<br>(25-48%)                | 65%<br>(52-75%)          | 1.5<br>(0.85-2.4)                           | 3.1%<br>(1.8-5.1%)                   | 6%<br>(3.8-9.2%)                    | 17<br>(10-26)       | 880<br>(510-1400)      |
| Puerto Rico | 2010 | Female | 50 to 54 | 31%<br>(22-43%)                | 69%<br>(57-78%)          | 1.2<br>(0.68-2)                             | 2.9%<br>(1.6-4.9%)                   | 5.2%<br>(3.1-8.3%)                  | 21<br>(12-33)       | 920<br>(510-1500)      |
| Puerto Rico | 2010 | Female | 55 to 59 | 26%<br>(18-37%)                | 74%<br>(63-82%)          | 0.98<br>(0.55-1.7)                          | 2.6%<br>(1.4-4.5%)                   | 4.4%<br>(2.6-7.3%)                  | 24<br>(14-41)       | 890<br>(490-1500)      |
| Puerto Rico | 2010 | Female | 60 to 64 | 22%<br>(15-34%)                | 78%<br>(66-85%)          | 0.8<br>(0.43-1.4)                           | 2.1%<br>(1-3.8%)                     | 3.4%<br>(1.8-5.7%)                  | 27<br>(14-46)       | 820<br>(410-1500)      |
| Puerto Rico | 2010 | Female | 65 to 69 | 18%<br>(13-28%)                | 82%<br>(72-87%)          | 0.64<br>(0.35-1.1)                          | 1.9%<br>(0.99-3.3%)                  | 2.8%<br>(1.6-4.7%)                  | 28<br>(16-47)       | 690<br>(370-1200)      |
| Puerto Rico | 2010 | Female | 70 to 74 | 16%<br>(11-24%)                | 84%<br>(76-89%)          | 0.53<br>(0.28-0.91)                         | 1.5%<br>(0.67-2.7%)                  | 2.2%<br>(1.1-3.7%)                  | 27<br>(13-47)       | 520<br>(240-940)       |
| Puerto Rico | 2010 | Female | 75 to 79 | 13%<br>(8.4-19%)               | 87%<br>(81-92%)          | 0.42<br>(0.21-0.76)                         | 1.2%<br>(0.55-2.2%)                  | 1.6%<br>(0.84-3%)                   | 27<br>(13-48)       | 400<br>(180-750)       |
| Puerto Rico | 2010 | Female | 80 to 84 | 11%<br>(6.5-18%)               | 89%<br>(82-93%)          | 0.36<br>(0.18-0.68)                         | 0.95%<br>(0.42-1.9%)                 | 1.3%<br>(0.6-2.4%)                  | 25<br>(12-48)       | 280<br>(120-550)       |
| Puerto Rico | 2010 | Female | 85 to 89 | 11%<br>(6.6-17%)               | 89%<br>(83-93%)          | 0.36<br>(0.17-0.64)                         | 0.84%<br>(0.35-1.7%)                 | 1%<br>(0.41-2.1%)                   | 22<br>(8.8-44)      | 180<br>(75-360)        |
| Puerto Rico | 2010 | Female | 90 to 94 | 12%<br>(7.4-18%)               | 88%<br>(82-93%)          | 0.39<br>(0.19-0.67)                         | 0.84%<br>(0.28-1.8%)                 | 0.96%<br>(0.26-2.1%)                | 15<br>(4.2-34)      | 91<br>(30-200)         |
| Puerto Rico | 2010 | Female | 95 plus  | 14%<br>(7.6-24%)               | 86%<br>(76-92%)          | 0.44<br>(0.19-0.84)                         | 0.85%<br>(0.19-2%)                   | 0.88%<br>(0.04-2.4%)                | 6.1<br>(0.28-17)    | 26<br>(5.9-63)         |
| Puerto Rico | 2010 | Male   | All Ages | 59%<br>(52-67%)                | 41%<br>(33-48%)          | 3.5<br>(2.2-5.2)                            | 10%<br>(7.2-13%)                     | 9.9%<br>(6.5-13%)                   | 1500<br>(1000-2100) | 57000<br>(40000-74000) |

| Location    | Year | Sex    | Age      | Prevalence of current drinkers | Prevalence of abstainers | Population average of standard drinks daily | Percent of total attributable deaths | Percent of total attributable DALYs | Attributable deaths | Attributable DALYs   |
|-------------|------|--------|----------|--------------------------------|--------------------------|---------------------------------------------|--------------------------------------|-------------------------------------|---------------------|----------------------|
| Puerto Rico | 2010 | Male   | 15 to 19 | 56%<br>(40-71%)                | 44%<br>(29-60%)          | 2.7<br>(1.6-4.4)                            | 8.8%<br>(5.6-14%)                    | 14%<br>(8.4-23%)                    | 22<br>(13-35)       | 1900<br>(1200-2800)  |
| Puerto Rico | 2010 | Male   | 20 to 24 | 71%<br>(56-82%)                | 29%<br>(18-44%)          | 5.7<br>(3.4-8.7)                            | 19%<br>(13-27%)                      | 25%<br>(16-37%)                     | 82<br>(53-120)      | 6100<br>(4100-8700)  |
| Puerto Rico | 2010 | Male   | 25 to 29 | 75%<br>(62-85%)                | 25%<br>(15-38%)          | 5.9<br>(3.6-8.8)                            | 18%<br>(13-25%)                      | 24%<br>(16-35%)                     | 81<br>(54-120)      | 5600<br>(3900-7900)  |
| Puerto Rico | 2010 | Male   | 30 to 34 | 74%<br>(61-85%)                | 26%<br>(15-39%)          | 5.7<br>(3.5-8.7)                            | 15%<br>(11-21%)                      | 21%<br>(15-30%)                     | 67<br>(46-93)       | 4500<br>(3200-6100)  |
| Puerto Rico | 2010 | Male   | 35 to 39 | 72%<br>(59-84%)                | 28%<br>(16-41%)          | 5.7<br>(3.6-8.9)                            | 13%<br>(10-17%)                      | 20%<br>(14-26%)                     | 57<br>(42-77)       | 3700<br>(2700-4800)  |
| Puerto Rico | 2010 | Male   | 40 to 44 | 71%<br>(58-82%)                | 29%<br>(18-42%)          | 5.5<br>(3.4-8.6)                            | 13%<br>(10-17%)                      | 19%<br>(14-24%)                     | 72<br>(53-91)       | 4100<br>(3100-5100)  |
| Puerto Rico | 2010 | Male   | 45 to 49 | 69%<br>(53-81%)                | 31%<br>(19-47%)          | 4.7<br>(2.8-7.3)                            | 13%<br>(9.5-17%)                     | 17%<br>(13-22%)                     | 91<br>(66-120)      | 4500<br>(3300-5700)  |
| Puerto Rico | 2010 | Male   | 50 to 54 | 66%<br>(50-79%)                | 34%<br>(21-50%)          | 4<br>(2.4-6.3)                              | 13%<br>(9.1-16%)                     | 17%<br>(12-21%)                     | 120<br>(88-160)     | 5300<br>(3700-6800)  |
| Puerto Rico | 2010 | Male   | 55 to 59 | 65%<br>(49-78%)                | 35%<br>(22-51%)          | 3.8<br>(2.3-6)                              | 12%<br>(8.3-16%)                     | 16%<br>(11-20%)                     | 150<br>(100-200)    | 5400<br>(3700-7000)  |
| Puerto Rico | 2010 | Male   | 60 to 64 | 62%<br>(45-77%)                | 38%<br>(23-55%)          | 3.4<br>(1.9-5.4)                            | 10%<br>(6.8-14%)                     | 13%<br>(8.6-17%)                    | 170<br>(110-230)    | 5100<br>(3400-6900)  |
| Puerto Rico | 2010 | Male   | 65 to 69 | 61%<br>(45-76%)                | 39%<br>(24-55%)          | 3<br>(1.7-4.8)                              | 8.8%<br>(5.4-12%)                    | 11%<br>(6.8-15%)                    | 170<br>(100-230)    | 4100<br>(2500-5800)  |
| Puerto Rico | 2010 | Male   | 70 to 74 | 58%<br>(42-72%)                | 42%<br>(28-58%)          | 2.5<br>(1.4-4)                              | 6.7%<br>(3.6-10%)                    | 8.1%<br>(4.4-12%)                   | 140<br>(74-210)     | 2700<br>(1500-4100)  |
| Puerto Rico | 2010 | Male   | 75 to 79 | 51%<br>(34-68%)                | 49%<br>(32-66%)          | 2<br>(1.1-3.3)                              | 5.1%<br>(2.5-8.3%)                   | 6%<br>(3-9.7%)                      | 110<br>(56-180)     | 1800<br>(880-2800)   |
| Puerto Rico | 2010 | Male   | 80 to 84 | 43%<br>(26-60%)                | 57%<br>(40-74%)          | 1.6<br>(0.87-2.9)                           | 4.1%<br>(2.1-7%)                     | 4.8%<br>(2.4-8.3%)                  | 93<br>(46-160)      | 1100<br>(540-1800)   |
| Puerto Rico | 2010 | Male   | 85 to 89 | 38%<br>(24-53%)                | 62%<br>(47-76%)          | 1.5<br>(0.73-2.5)                           | 3.5%<br>(1.7-6%)                     | 4.1%<br>(1.8-7.1%)                  | 70<br>(32-120)      | 570<br>(270-980)     |
| Puerto Rico | 2010 | Male   | 90 to 94 | 39%<br>(25-55%)                | 61%<br>(45-75%)          | 1.5<br>(0.77-2.7)                           | 3.4%<br>(1.4-6%)                     | 3.8%<br>(1.4-7%)                    | 40<br>(15-73)       | 230<br>(96-400)      |
| Puerto Rico | 2010 | Male   | 95 plus  | 42%<br>(24-62%)                | 58%<br>(38-76%)          | 1.7<br>(0.77-3.2)                           | 3.6%<br>(1.3-6.6%)                   | 4%<br>(1.2-7.7%)                    | 14<br>(4.3-27)      | 54<br>(20-98)        |
| Puerto Rico | 2016 | Female | All Ages | 30%<br>(26-36%)                | 70%<br>(64-74%)          | 1.2<br>(0.71-1.9)                           | 2.1%<br>(1.2-3.5%)                   | 2.3%<br>(1.1-4.1%)                  | 320<br>(150-570)    | 9700<br>(5400-15000) |
| Puerto Rico | 2016 | Female | 15 to 19 | 39%<br>(27-55%)                | 61%<br>(45-73%)          | 1.7<br>(0.85-2.8)                           | 2.1%<br>(1.3-3.2%)                   | 6.9%<br>(3.6-11%)                   | 1.7<br>(0.89-2.9)   | 250<br>(150-380)     |
| Puerto Rico | 2016 | Female | 20 to 24 | 45%<br>(32-59%)                | 55%<br>(41-68%)          | 2.5<br>(1.4-4.2)                            | 3.9%<br>(2.5-5.4%)                   | 8.9%<br>(4.8-14%)                   | 4.2<br>(2.2-6.7)    | 570<br>(360-820)     |
| Puerto Rico | 2016 | Female | 25 to 29 | 45%<br>(32-61%)                | 55%<br>(39-68%)          | 2.3<br>(1.2-3.8)                            | 3.7%<br>(2.4-5.2%)                   | 7.7%<br>(4.2-12%)                   | 4.3<br>(2.2-7.1)    | 560<br>(350-810)     |
| Puerto Rico | 2016 | Female | 30 to 34 | 43%<br>(30-59%)                | 57%<br>(41-70%)          | 2.1<br>(1.1-3.6)                            | 3.3%<br>(2.1-4.9%)                   | 7.1%<br>(4.2-11%)                   | 5.4<br>(3.1-8.5)    | 580<br>(370-860)     |

| Location    | Year | Sex    | Age      | Prevalence of current drinkers | Prevalence of abstainers | Population average of standard drinks daily | Percent of total attributable deaths | Percent of total attributable DALYs | Attributable deaths | Attributable DALYs     |
|-------------|------|--------|----------|--------------------------------|--------------------------|---------------------------------------------|--------------------------------------|-------------------------------------|---------------------|------------------------|
| Puerto Rico | 2016 | Female | 35 to 39 | 39%<br>(28-56%)                | 61%<br>(44-72%)          | 1.9<br>(1-3.2)                              | 3.2%<br>(2.1-4.9%)                   | 6.8%<br>(4.2-10%)                   | 8<br>(4.8-12)       | 670<br>(420-990)       |
| Puerto Rico | 2016 | Female | 40 to 44 | 36%<br>(24-52%)                | 64%<br>(48-76%)          | 1.6<br>(0.89-2.7)                           | 3.1%<br>(1.9-4.8%)                   | 6.6%<br>(4.1-9.7%)                  | 11<br>(6.4-17)      | 730<br>(430-1100)      |
| Puerto Rico | 2016 | Female | 45 to 49 | 34%<br>(23-49%)                | 66%<br>(51-77%)          | 1.5<br>(0.81-2.6)                           | 3.2%<br>(1.9-5.3%)                   | 6.4%<br>(3.9-10%)                   | 17<br>(9.9-26)      | 880<br>(510-1400)      |
| Puerto Rico | 2016 | Female | 50 to 54 | 29%<br>(19-43%)                | 71%<br>(57-81%)          | 1.2<br>(0.62-2.1)                           | 3%<br>(1.6-5.1%)                     | 5.5%<br>(3.2-8.9%)                  | 21<br>(12-35)       | 940<br>(510-1600)      |
| Puerto Rico | 2016 | Female | 55 to 59 | 24%<br>(16-36%)                | 76%<br>(64-84%)          | 0.97<br>(0.47-1.7)                          | 2.7%<br>(1.4-4.7%)                   | 4.6%<br>(2.6-7.7%)                  | 25<br>(14-42)       | 910<br>(480-1600)      |
| Puerto Rico | 2016 | Female | 60 to 64 | 21%<br>(14-33%)                | 79%<br>(67-86%)          | 0.8<br>(0.39-1.4)                           | 2.2%<br>(1.1-4.1%)                   | 3.6%<br>(1.9-6.3%)                  | 27<br>(15-48)       | 840<br>(420-1500)      |
| Puerto Rico | 2016 | Female | 65 to 69 | 18%<br>(11-28%)                | 82%<br>(72-89%)          | 0.64<br>(0.32-1.1)                          | 2%<br>(0.98-3.5%)                    | 3%<br>(1.6-5.1%)                    | 33<br>(18-56)       | 830<br>(410-1400)      |
| Puerto Rico | 2016 | Female | 70 to 74 | 16%<br>(9.5-26%)               | 84%<br>(74-91%)          | 0.56<br>(0.27-1)                            | 1.6%<br>(0.76-3.1%)                  | 2.4%<br>(1.2-4.3%)                  | 33<br>(17-61)       | 640<br>(310-1200)      |
| Puerto Rico | 2016 | Female | 75 to 79 | 15%<br>(8.8-24%)               | 85%<br>(76-91%)          | 0.5<br>(0.23-1)                             | 1.4%<br>(0.55-2.7%)                  | 1.9%<br>(0.83-3.6%)                 | 32<br>(14-65)       | 490<br>(190-1000)      |
| Puerto Rico | 2016 | Female | 80 to 84 | 14%<br>(7.7-23%)               | 86%<br>(77-92%)          | 0.46<br>(0.22-0.88)                         | 1.1%<br>(0.41-2.4%)                  | 1.5%<br>(0.56-3.1%)                 | 32<br>(12-66)       | 360<br>(130-790)       |
| Puerto Rico | 2016 | Female | 85 to 89 | 14%<br>(7.6-21%)               | 86%<br>(79-92%)          | 0.46<br>(0.21-0.87)                         | 0.99%<br>(0.32-2.2%)                 | 1.2%<br>(0.37-2.8%)                 | 28<br>(8.7-64)      | 230<br>(74-510)        |
| Puerto Rico | 2016 | Female | 90 to 94 | 15%<br>(8.6-23%)               | 85%<br>(77-91%)          | 0.5<br>(0.23-0.94)                          | 1%<br>(0.26-2.5%)                    | 1.2%<br>(0.24-3%)                   | 23<br>(4.7-56)      | 130<br>(34-320)        |
| Puerto Rico | 2016 | Female | 95 plus  | 17%<br>(9.2-30%)               | 83%<br>(70-91%)          | 0.57<br>(0.22-1.1)                          | 1.1%<br>(0.17-2.7%)                  | 1.1%<br>(0.004-3.3%)                | 10<br>(0.039-29)    | 42<br>(7-110)          |
| Puerto Rico | 2016 | Male   | All Ages | 59%<br>(52-66%)                | 41%<br>(34-48%)          | 3.6<br>(2.1-5.7)                            | 10%<br>(7-13%)                       | 9.8%<br>(6.3-13%)                   | 1600<br>(960-2200)  | 55000<br>(37000-73000) |
| Puerto Rico | 2016 | Male   | 15 to 19 | 56%<br>(39-72%)                | 44%<br>(28-61%)          | 2.8<br>(1.5-4.6)                            | 8.4%<br>(5.2-13%)                    | 15%<br>(8.1-23%)                    | 18<br>(9.6-29)      | 1500<br>(940-2300)     |
| Puerto Rico | 2016 | Male   | 20 to 24 | 70%<br>(55-82%)                | 30%<br>(18-45%)          | 5.8<br>(3.4-9.5)                            | 18%<br>(12-26%)                      | 25%<br>(15-36%)                     | 73<br>(45-110)      | 5500<br>(3600-7900)    |
| Puerto Rico | 2016 | Male   | 25 to 29 | 75%<br>(63-86%)                | 25%<br>(14-37%)          | 6.2<br>(3.5-9.9)                            | 18%<br>(12-24%)                      | 24%<br>(15-34%)                     | 68<br>(43-98)       | 4900<br>(3200-6700)    |
| Puerto Rico | 2016 | Male   | 30 to 34 | 75%<br>(62-86%)                | 25%<br>(14-38%)          | 6.1<br>(3.4-9.8)                            | 15%<br>(11-20%)                      | 22%<br>(14-30%)                     | 57<br>(38-81)       | 4000<br>(2700-5400)    |
| Puerto Rico | 2016 | Male   | 35 to 39 | 70%<br>(56-82%)                | 30%<br>(18-44%)          | 5.7<br>(3.2-9.3)                            | 13%<br>(9.8-17%)                     | 19%<br>(14-26%)                     | 56<br>(38-75)       | 3600<br>(2600-4700)    |
| Puerto Rico | 2016 | Male   | 40 to 44 | 69%<br>(55-81%)                | 31%<br>(19-45%)          | 5.4<br>(3.1-8.9)                            | 13%<br>(9.9-17%)                     | 19%<br>(14-24%)                     | 67<br>(47-88)       | 3800<br>(2800-4800)    |
| Puerto Rico | 2016 | Male   | 45 to 49 | 69%<br>(52-81%)                | 31%<br>(19-48%)          | 4.8<br>(2.7-7.8)                            | 13%<br>(9.9-17%)                     | 18%<br>(13-23%)                     | 91<br>(65-120)      | 4500<br>(3200-5800)    |
| Puerto Rico | 2016 | Male   | 50 to 54 | 65%<br>(49-78%)                | 35%<br>(22-51%)          | 4<br>(2.2-6.7)                              | 13%<br>(9-17%)                       | 17%<br>(12-22%)                     | 120<br>(84-160)     | 5100<br>(3500-6600)    |

| Location             | Year | Sex    | Age      | Prevalence of current drinkers | Prevalence of abstainers | Population average of standard drinks daily | Percent of total attributable deaths | Percent of total attributable DALYs | Attributable deaths  | Attributable DALYs  |
|----------------------|------|--------|----------|--------------------------------|--------------------------|---------------------------------------------|--------------------------------------|-------------------------------------|----------------------|---------------------|
| Puerto Rico          | 2016 | Male   | 55 to 59 | 63%<br>(47-77%)                | 37%<br>(23-53%)          | 3.8<br>(2-6.3)                              | 12%<br>(8.4-16%)                     | 16%<br>(11-20%)                     | 160<br>(110-210)     | 5600<br>(3800-7300) |
| Puerto Rico          | 2016 | Male   | 60 to 64 | 60%<br>(44-76%)                | 40%<br>(24-56%)          | 3.4<br>(1.8-5.7)                            | 10%<br>(6.7-14%)                     | 13%<br>(8.6-18%)                    | 160<br>(100-220)     | 4900<br>(3200-6700) |
| Puerto Rico          | 2016 | Male   | 65 to 69 | 61%<br>(45-76%)                | 39%<br>(24-55%)          | 3.1<br>(1.7-5.1)                            | 9.2%<br>(5.4-13%)                    | 11%<br>(7-16%)                      | 190<br>(110-270)     | 4700<br>(2700-6600) |
| Puerto Rico          | 2016 | Male   | 70 to 74 | 58%<br>(41-73%)                | 42%<br>(27-59%)          | 2.6<br>(1.3-4.5)                            | 6.9%<br>(3.7-11%)                    | 8.4%<br>(4.5-13%)                   | 160<br>(82-240)      | 3100<br>(1600-4700) |
| Puerto Rico          | 2016 | Male   | 75 to 79 | 49%<br>(30-67%)                | 51%<br>(33-70%)          | 1.9<br>(0.94-3.5)                           | 5.1%<br>(2.5-8.5%)                   | 6.1%<br>(3-10%)                     | 120<br>(57-210)      | 1900<br>(890-3100)  |
| Puerto Rico          | 2016 | Male   | 80 to 84 | 43%<br>(26-61%)                | 57%<br>(39-74%)          | 1.7<br>(0.81-3.1)                           | 4.2%<br>(2-7.1%)                     | 5%<br>(2.4-8.4%)                    | 100<br>(47-170)      | 1200<br>(550-1900)  |
| Puerto Rico          | 2016 | Male   | 85 to 89 | 38%<br>(24-54%)                | 62%<br>(46-76%)          | 1.5<br>(0.69-2.7)                           | 3.7%<br>(1.7-6.3%)                   | 4.3%<br>(1.9-7.4%)                  | 76<br>(34-130)       | 620<br>(290-1100)   |
| Puerto Rico          | 2016 | Male   | 90 to 94 | 38%<br>(24-55%)                | 62%<br>(45-76%)          | 1.6<br>(0.73-2.9)                           | 3.5%<br>(1.4-6.2%)                   | 4%<br>(1.5-7.2%)                    | 47<br>(18-85)        | 270<br>(110-470)    |
| Puerto Rico          | 2016 | Male   | 95 plus  | 41%<br>(24-62%)                | 59%<br>(38-76%)          | 1.8<br>(0.71-3.4)                           | 3.7%<br>(1.3-6.7%)                   | 4.1%<br>(1.2-7.9%)                  | 18<br>(5.3-35)       | 70<br>(25-130)      |
| Virgin Islands, U.S. | 1990 | Female | All Ages | 47%<br>(41-54%)                | 53%<br>(46-59%)          | 1.5<br>(0.95-2.2)                           | 2.9%<br>(1.6-4.7%)                   | 3.4%<br>(1.2-6.5%)                  | 9.1<br>(3.3-17)      | 360<br>(190-590)    |
| Virgin Islands, U.S. | 1990 | Female | 15 to 19 | 54%<br>(40-69%)                | 46%<br>(31-60%)          | 1.9<br>(1.1-3)                              | 3.2%<br>(2.1-4.7%)                   | 7.6%<br>(4.6-11%)                   | 0.18<br>(0.11-0.27)  | 18<br>(12-27)       |
| Virgin Islands, U.S. | 1990 | Female | 20 to 24 | 58%<br>(45-71%)                | 42%<br>(29-55%)          | 2.5<br>(1.6-3.9)                            | 4.8%<br>(3.4-6.5%)                   | 9.6%<br>(6.3-14%)                   | 0.21<br>(0.13-0.3)   | 22<br>(15-31)       |
| Virgin Islands, U.S. | 1990 | Female | 25 to 29 | 57%<br>(44-72%)                | 43%<br>(28-56%)          | 2.4<br>(1.4-3.7)                            | 4.6%<br>(3.3-6.3%)                   | 8.7%<br>(5.8-12%)                   | 0.24<br>(0.15-0.35)  | 23<br>(17-33)       |
| Virgin Islands, U.S. | 1990 | Female | 30 to 34 | 56%<br>(42-71%)                | 44%<br>(29-58%)          | 2.3<br>(1.4-3.6)                            | 4.5%<br>(3.1-6.1%)                   | 8.6%<br>(5.8-12%)                   | 0.32<br>(0.2-0.47)   | 26<br>(18-36)       |
| Virgin Islands, U.S. | 1990 | Female | 35 to 39 | 56%<br>(42-71%)                | 44%<br>(29-58%)          | 2.2<br>(1.3-3.4)                            | 4.4%<br>(3.1-6.1%)                   | 8.5%<br>(6-12%)                     | 0.45<br>(0.31-0.65)  | 31<br>(21-44)       |
| Virgin Islands, U.S. | 1990 | Female | 40 to 44 | 55%<br>(41-72%)                | 45%<br>(28-59%)          | 2.2<br>(1.3-3.4)                            | 4.7%<br>(3.1-6.9%)                   | 8.7%<br>(5.9-12%)                   | 0.74<br>(0.48-1.1)   | 42<br>(27-61)       |
| Virgin Islands, U.S. | 1990 | Female | 45 to 49 | 54%<br>(38-69%)                | 46%<br>(31-62%)          | 2.1<br>(1.3-3.3)                            | 4.9%<br>(3-7.5%)                     | 8.3%<br>(5.3-12%)                   | 0.95<br>(0.58-1.5)   | 45<br>(27-70)       |
| Virgin Islands, U.S. | 1990 | Female | 50 to 54 | 51%<br>(36-67%)                | 49%<br>(33-64%)          | 2<br>(1.1-3.1)                              | 4.8%<br>(2.6-7.7%)                   | 7.4%<br>(4.1-12%)                   | 1.1<br>(0.61-1.8)    | 46<br>(24-76)       |
| Virgin Islands, U.S. | 1990 | Female | 55 to 59 | 47%<br>(32-64%)                | 53%<br>(36-68%)          | 1.8<br>(0.98-2.9)                           | 4.2%<br>(1.9-7.2%)                   | 6.1%<br>(2.8-10%)                   | 0.92<br>(0.43-1.6)   | 32<br>(14-56)       |
| Virgin Islands, U.S. | 1990 | Female | 60 to 64 | 44%<br>(29-61%)                | 56%<br>(39-71%)          | 1.5<br>(0.82-2.5)                           | 3.3%<br>(1-6.4%)                     | 4.5%<br>(1.5-8.3%)                  | 0.93<br>(0.31-1.8)   | 27<br>(8.7-52)      |
| Virgin Islands, U.S. | 1990 | Female | 65 to 69 | 41%<br>(28-57%)                | 59%<br>(43-72%)          | 1.4<br>(0.76-2.2)                           | 2.5%<br>(0.32-5.5%)                  | 3.3%<br>(0.51-7.3%)                 | 0.79<br>(0.12-1.8)   | 19<br>(2.4-42)      |
| Virgin Islands, U.S. | 1990 | Female | 70 to 74 | 38%<br>(25-53%)                | 62%<br>(47-75%)          | 1.2<br>(0.62-2)                             | 1.7%<br>(-0.25-4.5%)                 | 2.2%<br>(-0.29-5.6%)                | 0.67<br>(-0.092-1.7) | 13<br>(-1.8-33)     |

| Location             | Year | Sex    | Age      | Prevalence of current drinkers | Prevalence of abstainers | Population average of standard drinks daily | Percent of total attributable deaths | Percent of total attributable DALYs | Attributable deaths    | Attributable DALYs    |
|----------------------|------|--------|----------|--------------------------------|--------------------------|---------------------------------------------|--------------------------------------|-------------------------------------|------------------------|-----------------------|
| Virgin Islands, U.S. | 1990 | Female | 75 to 79 | 34%<br>(22-51%)                | 66%<br>(49-78%)          | 1<br>(0.54-1.7)                             | 1.3%<br>(-0.45-3.8%)                 | 1.6%<br>(-0.52-4.6%)                | 0.56<br>(-0.18-1.6)    | 8.3<br>(-2.8-24)      |
| Virgin Islands, U.S. | 1990 | Female | 80 to 84 | 32%<br>(20-46%)                | 68%<br>(54-80%)          | 0.98<br>(0.5-1.6)                           | 1.3%<br>(-0.54-3.6%)                 | 1.4%<br>(-0.69-4.3%)                | 0.43<br>(-0.21-1.3)    | 4.8<br>(-2-14)        |
| Virgin Islands, U.S. | 1990 | Female | 85 to 89 | 31%<br>(21-44%)                | 69%<br>(56-79%)          | 1<br>(0.51-1.8)                             | 1.3%<br>(-0.6-3.7%)                  | 1.4%<br>(-0.83-4.3%)                | 0.33<br>(-0.2-1)       | 2.7<br>(-1.2-8)       |
| Virgin Islands, U.S. | 1990 | Female | 90 to 94 | 34%<br>(22-48%)                | 66%<br>(52-78%)          | 1.1<br>(0.6-2)                              | 1.4%<br>(-0.7-4.2%)                  | 1.4%<br>(-0.98-4.7%)                | 0.16<br>(-0.11-0.51)   | 0.89<br>(-0.44-2.7)   |
| Virgin Islands, U.S. | 1990 | Female | 95 plus  | 38%<br>(24-56%)                | 62%<br>(44-76%)          | 1.3<br>(0.67-2.3)                           | 1.6%<br>(-0.7-5%)                    | 1.6%<br>(-1.1-5.8%)                 | 0.053<br>(-0.036-0.19) | 0.21<br>(-0.092-0.66) |
| Virgin Islands, U.S. | 1990 | Male   | All Ages | 60%<br>(52-68%)                | 40%<br>(32-48%)          | 2.4<br>(1.6-3.5)                            | 9.3%<br>(6.7-12%)                    | 10%<br>(6.7-14%)                    | 36<br>(24-52)          | 1500<br>(1000-2000)   |
| Virgin Islands, U.S. | 1990 | Male   | 15 to 19 | 62%<br>(45-76%)                | 38%<br>(24-55%)          | 2.2<br>(1.3-3.5)                            | 8.3%<br>(5.7-11%)                    | 11%<br>(7.3-16%)                    | 0.79<br>(0.49-1.2)     | 68<br>(46-98)         |
| Virgin Islands, U.S. | 1990 | Male   | 20 to 24 | 71%<br>(54-84%)                | 29%<br>(16-46%)          | 4<br>(2.5-6.2)                              | 16%<br>(11-21%)                      | 19%<br>(13-27%)                     | 1.4<br>(0.89-2)        | 110<br>(79-160)       |
| Virgin Islands, U.S. | 1990 | Male   | 25 to 29 | 73%<br>(57-85%)                | 27%<br>(15-43%)          | 4.2<br>(2.6-6.2)                            | 16%<br>(11-20%)                      | 19%<br>(13-27%)                     | 1.4<br>(0.93-2.1)      | 110<br>(80-160)       |
| Virgin Islands, U.S. | 1990 | Male   | 30 to 34 | 74%<br>(58-86%)                | 26%<br>(14-42%)          | 4.1<br>(2.6-6.4)                            | 15%<br>(11-19%)                      | 19%<br>(13-26%)                     | 1.6<br>(1-2.3)         | 120<br>(81-150)       |
| Virgin Islands, U.S. | 1990 | Male   | 35 to 39 | 74%<br>(59-86%)                | 26%<br>(14-41%)          | 3.9<br>(2.4-6)                              | 15%<br>(11-19%)                      | 19%<br>(14-25%)                     | 1.8<br>(1.2-2.6)       | 120<br>(82-150)       |
| Virgin Islands, U.S. | 1990 | Male   | 40 to 44 | 73%<br>(59-85%)                | 27%<br>(15-41%)          | 3.8<br>(2.3-5.8)                            | 15%<br>(11-19%)                      | 19%<br>(14-25%)                     | 3<br>(2.1-4.1)         | 160<br>(120-220)      |
| Virgin Islands, U.S. | 1990 | Male   | 45 to 49 | 72%<br>(55-85%)                | 28%<br>(15-45%)          | 3.7<br>(2.2-5.7)                            | 14%<br>(10-19%)                      | 18%<br>(12-24%)                     | 3.9<br>(2.7-5.4)       | 190<br>(130-250)      |
| Virgin Islands, U.S. | 1990 | Male   | 50 to 54 | 70%<br>(54-84%)                | 30%<br>(16-46%)          | 3.4<br>(2.1-5.4)                            | 13%<br>(9.3-18%)                     | 16%<br>(11-22%)                     | 4.1<br>(2.8-5.8)       | 170<br>(120-230)      |
| Virgin Islands, U.S. | 1990 | Male   | 55 to 59 | 69%<br>(52-83%)                | 31%<br>(17-48%)          | 3<br>(1.8-4.8)                              | 11%<br>(7.5-16%)                     | 14%<br>(8.7-19%)                    | 3.5<br>(2.2-5.1)       | 120<br>(79-170)       |
| Virgin Islands, U.S. | 1990 | Male   | 60 to 64 | 67%<br>(48-83%)                | 33%<br>(17-52%)          | 2.8<br>(1.6-4.4)                            | 9.3%<br>(5.7-14%)                    | 11%<br>(6.4-16%)                    | 4<br>(2.3-6.1)         | 120<br>(69-180)       |
| Virgin Islands, U.S. | 1990 | Male   | 65 to 69 | 66%<br>(48-81%)                | 34%<br>(19-52%)          | 2.7<br>(1.6-4.3)                            | 8.5%<br>(4.9-13%)                    | 9.7%<br>(5.5-15%)                   | 3.7<br>(2-5.7)         | 88<br>(50-140)        |
| Virgin Islands, U.S. | 1990 | Male   | 70 to 74 | 63%<br>(45-77%)                | 37%<br>(23-55%)          | 2.5<br>(1.3-4.1)                            | 6.9%<br>(3.5-11%)                    | 7.7%<br>(3.8-13%)                   | 3.2<br>(1.6-5.4)       | 62<br>(31-100)        |
| Virgin Islands, U.S. | 1990 | Male   | 75 to 79 | 58%<br>(39-75%)                | 42%<br>(25-61%)          | 2.1<br>(1.1-3.4)                            | 5.4%<br>(2.4-9.2%)                   | 6%<br>(2.6-10%)                     | 2.3<br>(1-4.1)         | 35<br>(15-59)         |
| Virgin Islands, U.S. | 1990 | Male   | 80 to 84 | 53%<br>(34-70%)                | 47%<br>(30-66%)          | 1.7<br>(0.86-2.8)                           | 3.9%<br>(1.5-7.3%)                   | 4.2%<br>(1.6-8.2%)                  | 1.1<br>(0.39-2.1)      | 12<br>(4.7-23)        |
| Virgin Islands, U.S. | 1990 | Male   | 85 to 89 | 48%<br>(31-65%)                | 52%<br>(35-69%)          | 1.4<br>(0.69-2.4)                           | 2.8%<br>(1.1-6%)                     | 3%<br>(0.99-6.5%)                   | 0.45<br>(0.15-0.99)    | 3.6<br>(1.4-7.6)      |
| Virgin Islands, U.S. | 1990 | Male   | 90 to 94 | 48%<br>(33-66%)                | 52%<br>(34-67%)          | 1.2<br>(0.63-2.2)                           | 1.9%<br>(0.46-4.5%)                  | 1.9%<br>(0.17-4.9%)                 | 0.095<br>(0.0088-0.25) | 0.57<br>(0.14-1.4)    |



| Location             | Year | Sex    | Age      | Prevalence of current drinkers | Prevalence of abstainers | Population average of standard drinks daily | Percent of total attributable deaths | Percent of total attributable DALYs | Attributable deaths    | Attributable DALYs     |
|----------------------|------|--------|----------|--------------------------------|--------------------------|---------------------------------------------|--------------------------------------|-------------------------------------|------------------------|------------------------|
| Virgin Islands, U.S. | 1990 | Male   | 95 plus  | 51%<br>(32-71%)                | 49%<br>(29-68%)          | 1.2<br>(0.54-2.1)                           | 1.3%<br>(-0.36-3.9%)                 | 1.1%<br>(-1-4.1%)                   | 0.011<br>(-0.01-0.043) | 0.054<br>(-0.015-0.17) |
| Virgin Islands, U.S. | 1995 | Female | All Ages | 47%<br>(42-54%)                | 53%<br>(46-58%)          | 1.5<br>(0.97-2.3)                           | 2.9%<br>(1.6-4.9%)                   | 3.3%<br>(1.1-6.5%)                  | 10<br>(3.4-20)         | 390<br>(200-650)       |
| Virgin Islands, U.S. | 1995 | Female | 15 to 19 | 54%<br>(40-69%)                | 46%<br>(31-60%)          | 1.9<br>(1.1-3.1)                            | 3.2%<br>(2-4.6%)                     | 7.2%<br>(4.4-11%)                   | 0.15<br>(0.092-0.24)   | 15<br>(9.6-22)         |
| Virgin Islands, U.S. | 1995 | Female | 20 to 24 | 58%<br>(45-71%)                | 42%<br>(29-55%)          | 2.6<br>(1.6-4.1)                            | 4.5%<br>(3.2-6.3%)                   | 8.8%<br>(5.6-13%)                   | 0.22<br>(0.14-0.31)    | 23<br>(16-32)          |
| Virgin Islands, U.S. | 1995 | Female | 25 to 29 | 57%<br>(44-72%)                | 43%<br>(28-56%)          | 2.4<br>(1.5-3.9)                            | 4.3%<br>(3-5.9%)                     | 7.8%<br>(4.4-11%)                   | 0.21<br>(0.12-0.31)    | 21<br>(14-30)          |
| Virgin Islands, U.S. | 1995 | Female | 30 to 34 | 56%<br>(41-71%)                | 44%<br>(29-59%)          | 2.3<br>(1.3-3.6)                            | 4.1%<br>(2.9-5.7%)                   | 7.8%<br>(4.9-11%)                   | 0.31<br>(0.2-0.46)     | 27<br>(18-37)          |
| Virgin Islands, U.S. | 1995 | Female | 35 to 39 | 56%<br>(42-71%)                | 44%<br>(29-58%)          | 2.2<br>(1.3-3.4)                            | 4.1%<br>(2.8-5.9%)                   | 7.9%<br>(5.3-11%)                   | 0.44<br>(0.28-0.64)    | 30<br>(20-43)          |
| Virgin Islands, U.S. | 1995 | Female | 40 to 44 | 55%<br>(41-71%)                | 45%<br>(29-59%)          | 2.2<br>(1.3-3.5)                            | 4.5%<br>(3-6.5%)                     | 8.3%<br>(5.5-12%)                   | 0.68<br>(0.44-1)       | 39<br>(25-57)          |
| Virgin Islands, U.S. | 1995 | Female | 45 to 49 | 54%<br>(38-70%)                | 46%<br>(30-62%)          | 2.2<br>(1.2-3.4)                            | 4.8%<br>(2.9-7.5%)                   | 8.1%<br>(5.1-12%)                   | 1.1<br>(0.66-1.6)      | 51<br>(30-80)          |
| Virgin Islands, U.S. | 1995 | Female | 50 to 54 | 51%<br>(36-66%)                | 49%<br>(34-64%)          | 2<br>(1.2-3.1)                              | 4.7%<br>(2.5-7.7%)                   | 7.3%<br>(4.1-12%)                   | 1.3<br>(0.7-2)         | 52<br>(28-84)          |
| Virgin Islands, U.S. | 1995 | Female | 55 to 59 | 47%<br>(33-64%)                | 53%<br>(36-67%)          | 1.8<br>(0.98-2.9)                           | 4.1%<br>(1.8-7.2%)                   | 6%<br>(2.9-10%)                     | 1.3<br>(0.61-2.2)      | 45<br>(20-78)          |
| Virgin Islands, U.S. | 1995 | Female | 60 to 64 | 43%<br>(29-60%)                | 57%<br>(40-71%)          | 1.6<br>(0.83-2.6)                           | 3.3%<br>(1-6.4%)                     | 4.5%<br>(1.5-8.7%)                  | 0.98<br>(0.32-1.9)     | 29<br>(8.9-57)         |
| Virgin Islands, U.S. | 1995 | Female | 65 to 69 | 40%<br>(28-56%)                | 60%<br>(44-72%)          | 1.4<br>(0.74-2.3)                           | 2.5%<br>(0.35-5.5%)                  | 3.3%<br>(0.56-7%)                   | 1<br>(0.17-2.1)        | 24<br>(3.4-51)         |
| Virgin Islands, U.S. | 1995 | Female | 70 to 74 | 37%<br>(25-53%)                | 63%<br>(47-75%)          | 1.2<br>(0.61-2)                             | 1.8%<br>(-0.22-4.5%)                 | 2.3%<br>(-0.23-5.7%)                | 0.74<br>(-0.072-1.9)   | 14<br>(-1.7-36)        |
| Virgin Islands, U.S. | 1995 | Female | 75 to 79 | 34%<br>(22-49%)                | 66%<br>(51-78%)          | 1<br>(0.52-1.7)                             | 1.4%<br>(-0.35-3.9%)                 | 1.7%<br>(-0.51-4.9%)                | 0.67<br>(-0.2-1.9)     | 9.9<br>(-2.6-28)       |
| Virgin Islands, U.S. | 1995 | Female | 80 to 84 | 32%<br>(20-46%)                | 68%<br>(54-80%)          | 0.99<br>(0.51-1.7)                          | 1.3%<br>(-0.47-3.8%)                 | 1.5%<br>(-0.64-4.5%)                | 0.65<br>(-0.27-1.9)    | 7.2<br>(-2.5-21)       |
| Virgin Islands, U.S. | 1995 | Female | 85 to 89 | 31%<br>(20-45%)                | 69%<br>(55-80%)          | 1<br>(0.52-1.8)                             | 1.3%<br>(-0.51-3.9%)                 | 1.5%<br>(-0.75-4.5%)                | 0.45<br>(-0.23-1.4)    | 3.6<br>(-1.4-10)       |
| Virgin Islands, U.S. | 1995 | Female | 90 to 94 | 34%<br>(22-47%)                | 66%<br>(53-78%)          | 1.1<br>(0.58-2)                             | 1.4%<br>(-0.6-4.5%)                  | 1.5%<br>(-0.93-5.2%)                | 0.24<br>(-0.15-0.85)   | 1.4<br>(-0.59-4.5)     |
| Virgin Islands, U.S. | 1995 | Female | 95 plus  | 38%<br>(23-57%)                | 62%<br>(43-77%)          | 1.3<br>(0.67-2.4)                           | 1.7%<br>(-0.7-5.5%)                  | 1.7%<br>(-1.2-6.2%)                 | 0.084<br>(-0.057-0.3)  | 0.33<br>(-0.14-1.1)    |
| Virgin Islands, U.S. | 1995 | Male   | All Ages | 61%<br>(53-69%)                | 39%<br>(31-47%)          | 2.5<br>(1.6-3.8)                            | 9.6%<br>(6.7-13%)                    | 10%<br>(6.4-14%)                    | 42<br>(26-60)          | 1700<br>(1100-2200)    |
| Virgin Islands, U.S. | 1995 | Male   | 15 to 19 | 61%<br>(45-76%)                | 39%<br>(24-55%)          | 2.2<br>(1.3-3.6)                            | 8.3%<br>(5.6-11%)                    | 11%<br>(7-16%)                      | 0.7<br>(0.44-1)        | 59<br>(41-84)          |
| Virgin Islands, U.S. | 1995 | Male   | 20 to 24 | 70%<br>(54-83%)                | 30%<br>(17-46%)          | 4.1<br>(2.5-6.2)                            | 16%<br>(11-21%)                      | 19%<br>(12-26%)                     | 1.6<br>(0.99-2.2)      | 130<br>(88-170)        |

| Location             | Year | Sex    | Age      | Prevalence of current drinkers | Prevalence of abstainers | Population average of standard drinks daily | Percent of total attributable deaths | Percent of total attributable DALYs | Attributable deaths     | Attributable DALYs  |
|----------------------|------|--------|----------|--------------------------------|--------------------------|---------------------------------------------|--------------------------------------|-------------------------------------|-------------------------|---------------------|
| Virgin Islands, U.S. | 1995 | Male   | 25 to 29 | 73%<br>(57-85%)                | 27%<br>(15-43%)          | 4.3<br>(2.6-6.6)                            | 15%<br>(11-20%)                      | 18%<br>(12-26%)                     | 1.4<br>(0.87-2)         | 110<br>(75-150)     |
| Virgin Islands, U.S. | 1995 | Male   | 30 to 34 | 74%<br>(58-86%)                | 26%<br>(14-42%)          | 4.2<br>(2.6-6.6)                            | 14%<br>(9.7-19%)                     | 17%<br>(11-24%)                     | 1.8<br>(1-2.6)          | 130<br>(83-170)     |
| Virgin Islands, U.S. | 1995 | Male   | 35 to 39 | 74%<br>(59-86%)                | 26%<br>(14-41%)          | 4<br>(2.4-6.3)                              | 14%<br>(9.8-18%)                     | 18%<br>(11-24%)                     | 2.1<br>(1.3-3)          | 130<br>(89-180)     |
| Virgin Islands, U.S. | 1995 | Male   | 40 to 44 | 73%<br>(59-85%)                | 27%<br>(15-41%)          | 3.9<br>(2.3-6.2)                            | 14%<br>(10-19%)                      | 18%<br>(13-24%)                     | 2.6<br>(1.7-3.7)        | 140<br>(98-190)     |
| Virgin Islands, U.S. | 1995 | Male   | 45 to 49 | 72%<br>(53-85%)                | 28%<br>(15-47%)          | 3.8<br>(2.3-6)                              | 14%<br>(9.9-18%)                     | 17%<br>(12-23%)                     | 4.3<br>(2.8-5.9)        | 200<br>(140-270)    |
| Virgin Islands, U.S. | 1995 | Male   | 50 to 54 | 70%<br>(54-84%)                | 30%<br>(16-46%)          | 3.5<br>(2-5.4)                              | 13%<br>(9.1-18%)                     | 16%<br>(11-21%)                     | 5.4<br>(3.6-7.5)        | 220<br>(150-300)    |
| Virgin Islands, U.S. | 1995 | Male   | 55 to 59 | 69%<br>(52-83%)                | 31%<br>(17-48%)          | 3.1<br>(1.8-5.1)                            | 11%<br>(7.5-16%)                     | 14%<br>(8.6-19%)                    | 5.1<br>(3.2-7.3)        | 180<br>(110-250)    |
| Virgin Islands, U.S. | 1995 | Male   | 60 to 64 | 67%<br>(48-83%)                | 33%<br>(17-52%)          | 2.9<br>(1.6-4.5)                            | 9.4%<br>(5.5-14%)                    | 11%<br>(6.2-16%)                    | 4.1<br>(2.3-6.1)        | 120<br>(70-170)     |
| Virgin Islands, U.S. | 1995 | Male   | 65 to 69 | 66%<br>(47-81%)                | 34%<br>(19-53%)          | 2.7<br>(1.6-4.5)                            | 8.7%<br>(4.8-13%)                    | 9.9%<br>(5.4-15%)                   | 4.8<br>(2.6-7.5)        | 120<br>(63-180)     |
| Virgin Islands, U.S. | 1995 | Male   | 70 to 74 | 63%<br>(45-77%)                | 37%<br>(23-55%)          | 2.5<br>(1.3-4.2)                            | 7%<br>(3.5-11%)                      | 7.8%<br>(3.7-13%)                   | 3.5<br>(1.6-5.7)        | 67<br>(33-110)      |
| Virgin Islands, U.S. | 1995 | Male   | 75 to 79 | 58%<br>(39-76%)                | 42%<br>(24-61%)          | 2.1<br>(1.1-3.5)                            | 5.5%<br>(2.4-9.3%)                   | 6.1%<br>(2.6-11%)                   | 2.7<br>(1.1-4.7)        | 41<br>(18-70)       |
| Virgin Islands, U.S. | 1995 | Male   | 80 to 84 | 52%<br>(33-70%)                | 48%<br>(30-67%)          | 1.7<br>(0.86-2.9)                           | 3.9%<br>(1.6-7.4%)                   | 4.3%<br>(1.6-8.2%)                  | 1.6<br>(0.59-3)         | 18<br>(7.1-33)      |
| Virgin Islands, U.S. | 1995 | Male   | 85 to 89 | 48%<br>(31-64%)                | 52%<br>(36-69%)          | 1.4<br>(0.69-2.4)                           | 2.9%<br>(1.1-6%)                     | 3.1%<br>(1-6.5%)                    | 0.65<br>(0.22-1.4)      | 5.2<br>(2-11)       |
| Virgin Islands, U.S. | 1995 | Male   | 90 to 94 | 48%<br>(32-65%)                | 52%<br>(35-68%)          | 1.2<br>(0.63-2.2)                           | 2%<br>(0.43-5%)                      | 2%<br>(0.22-5.5%)                   | 0.16<br>(0.017-0.44)    | 0.97<br>(0.21-2.4)  |
| Virgin Islands, U.S. | 1995 | Male   | 95 plus  | 51%<br>(31-70%)                | 49%<br>(30-69%)          | 1.2<br>(0.55-2.1)                           | 1.4%<br>(-0.3-4.1%)                  | 1.2%<br>(-0.81-4.4%)                | 0.021<br>(-0.014-0.078) | 0.1<br>(-0.021-0.3) |
| Virgin Islands, U.S. | 2000 | Female | All Ages | 43%<br>(38-49%)                | 57%<br>(51-62%)          | 1.3<br>(0.87-2)                             | 2.7%<br>(1.3-4.5%)                   | 2.9%<br>(0.86-5.8%)                 | 11<br>(3.2-21)          | 370<br>(180-630)    |
| Virgin Islands, U.S. | 2000 | Female | 15 to 19 | 50%<br>(37-65%)                | 50%<br>(35-63%)          | 1.8<br>(1-2.9)                              | 2.9%<br>(1.9-4.3%)                   | 6.9%<br>(4.3-11%)                   | 0.14<br>(0.088-0.23)    | 15<br>(9.5-22)      |
| Virgin Islands, U.S. | 2000 | Female | 20 to 24 | 52%<br>(39-65%)                | 48%<br>(35-61%)          | 2.2<br>(1.3-3.4)                            | 4.1%<br>(2.8-5.7%)                   | 7.9%<br>(4.6-12%)                   | 0.13<br>(0.078-0.21)    | 15<br>(11-22)       |
| Virgin Islands, U.S. | 2000 | Female | 25 to 29 | 52%<br>(41-67%)                | 48%<br>(33-59%)          | 2.2<br>(1.3-3.4)                            | 3.8%<br>(2.5-5.2%)                   | 6.6%<br>(2.9-10%)                   | 0.15<br>(0.068-0.23)    | 17<br>(11-25)       |
| Virgin Islands, U.S. | 2000 | Female | 30 to 34 | 53%<br>(41-66%)                | 47%<br>(34-59%)          | 2.1<br>(1.3-3.3)                            | 3.7%<br>(2.4-5.2%)                   | 7%<br>(3.7-10%)                     | 0.23<br>(0.13-0.35)     | 21<br>(14-30)       |
| Virgin Islands, U.S. | 2000 | Female | 35 to 39 | 51%<br>(40-66%)                | 49%<br>(34-60%)          | 2<br>(1.2-3.1)                              | 3.7%<br>(2.5-5.2%)                   | 7%<br>(4.4-9.7%)                    | 0.37<br>(0.23-0.52)     | 27<br>(17-38)       |
| Virgin Islands, U.S. | 2000 | Female | 40 to 44 | 48%<br>(37-63%)                | 52%<br>(37-63%)          | 1.8<br>(1.1-2.9)                            | 3.8%<br>(2.5-5.5%)                   | 7.1%<br>(4.7-10%)                   | 0.55<br>(0.35-0.81)     | 33<br>(21-48)       |

| Location             | Year | Sex    | Age      | Prevalence of current drinkers | Prevalence of abstainers | Population average of standard drinks daily | Percent of total attributable deaths | Percent of total attributable DALYs | Attributable deaths   | Attributable DALYs  |
|----------------------|------|--------|----------|--------------------------------|--------------------------|---------------------------------------------|--------------------------------------|-------------------------------------|-----------------------|---------------------|
| Virgin Islands, U.S. | 2000 | Female | 45 to 49 | 47%<br>(36-62%)                | 53%<br>(38-64%)          | 1.8<br>(1.1-2.8)                            | 4.2%<br>(2.5-6.4%)                   | 7.1%<br>(4.4-11%)                   | 0.87<br>(0.52-1.3)    | 42<br>(25-64)       |
| Virgin Islands, U.S. | 2000 | Female | 50 to 54 | 46%<br>(34-59%)                | 54%<br>(41-66%)          | 1.7<br>(1-2.7)                              | 4.1%<br>(2.3-6.7%)                   | 6.5%<br>(3.8-10%)                   | 1.3<br>(0.73-2)       | 53<br>(29-86)       |
| Virgin Islands, U.S. | 2000 | Female | 55 to 59 | 42%<br>(32-57%)                | 58%<br>(43-68%)          | 1.6<br>(0.94-2.4)                           | 3.7%<br>(1.8-6.4%)                   | 5.4%<br>(2.8-9.1%)                  | 1.4<br>(0.69-2.3)     | 48<br>(22-82)       |
| Virgin Islands, U.S. | 2000 | Female | 60 to 64 | 43%<br>(32-58%)                | 57%<br>(42-68%)          | 1.5<br>(0.89-2.4)                           | 3%<br>(0.94-5.9%)                    | 4.2%<br>(1.4-8%)                    | 1.2<br>(0.38-2.3)     | 34<br>(11-67)       |
| Virgin Islands, U.S. | 2000 | Female | 65 to 69 | 39%<br>(28-55%)                | 61%<br>(45-72%)          | 1.3<br>(0.73-2.2)                           | 2.3%<br>(0.25-5%)                    | 3.1%<br>(0.53-6.7%)                 | 1.1<br>(0.17-2.2)     | 25<br>(2.7-53)      |
| Virgin Islands, U.S. | 2000 | Female | 70 to 74 | 34%<br>(23-49%)                | 66%<br>(51-77%)          | 1.1<br>(0.56-1.9)                           | 1.6%<br>(-0.11-4%)                   | 2.1%<br>(-0.14-5.2%)                | 0.75<br>(-0.053-1.9)  | 14<br>(-0.98-37)    |
| Virgin Islands, U.S. | 2000 | Female | 75 to 79 | 31%<br>(21-45%)                | 69%<br>(55-79%)          | 0.94<br>(0.5-1.6)                           | 1.3%<br>(-0.26-3.6%)                 | 1.6%<br>(-0.34-4.5%)                | 0.7<br>(-0.15-2)      | 10<br>(-2.1-29)     |
| Virgin Islands, U.S. | 2000 | Female | 80 to 84 | 29%<br>(19-43%)                | 71%<br>(57-81%)          | 0.9<br>(0.46-1.5)                           | 1.2%<br>(-0.35-3.5%)                 | 1.4%<br>(-0.52-4.2%)                | 0.73<br>(-0.27-2.2)   | 8.3<br>(-2.4-24)    |
| Virgin Islands, U.S. | 2000 | Female | 85 to 89 | 29%<br>(18-41%)                | 71%<br>(59-82%)          | 0.92<br>(0.48-1.6)                          | 1.2%<br>(-0.36-3.6%)                 | 1.4%<br>(-0.55-4.1%)                | 0.64<br>(-0.25-1.9)   | 5.2<br>(-1.5-15)    |
| Virgin Islands, U.S. | 2000 | Female | 90 to 94 | 31%<br>(20-44%)                | 69%<br>(56-80%)          | 1<br>(0.54-1.8)                             | 1.4%<br>(-0.4-4%)                    | 1.4%<br>(-0.65-4.5%)                | 0.33<br>(-0.14-1)     | 1.9<br>(-0.55-5.5)  |
| Virgin Islands, U.S. | 2000 | Female | 95 plus  | 35%<br>(21-53%)                | 65%<br>(47-79%)          | 1.2<br>(0.6-2.1)                            | 1.6%<br>(-0.47-5%)                   | 1.6%<br>(-0.81-5.6%)                | 0.13<br>(-0.065-0.44) | 0.51<br>(-0.15-1.6) |
| Virgin Islands, U.S. | 2000 | Male   | All Ages | 64%<br>(57-71%)                | 36%<br>(29-43%)          | 2.8<br>(1.8-4.1)                            | 10%<br>(6.9-14%)                     | 10%<br>(6.4-15%)                    | 50<br>(31-70)         | 1800<br>(1200-2500) |
| Virgin Islands, U.S. | 2000 | Male   | 15 to 19 | 63%<br>(47-78%)                | 37%<br>(22-53%)          | 2.4<br>(1.4-3.8)                            | 8.8%<br>(5.8-12%)                    | 7.2%<br>(7.6-18%)                   | 0.76<br>(0.46-1.1)    | 64<br>(43-90)       |
| Virgin Islands, U.S. | 2000 | Male   | 20 to 24 | 73%<br>(59-84%)                | 27%<br>(16-41%)          | 4.5<br>(2.8-6.7)                            | 17%<br>(12-22%)                      | 20%<br>(14-29%)                     | 1.2<br>(0.79-1.7)     | 98<br>(69-130)      |
| Virgin Islands, U.S. | 2000 | Male   | 25 to 29 | 76%<br>(64-86%)                | 24%<br>(14-36%)          | 4.7<br>(2.9-7)                              | 16%<br>(11-21%)                      | 19%<br>(12-27%)                     | 1.3<br>(0.77-1.9)     | 98<br>(67-140)      |
| Virgin Islands, U.S. | 2000 | Male   | 30 to 34 | 78%<br>(66-88%)                | 22%<br>(12-34%)          | 4.7<br>(2.9-7.4)                            | 15%<br>(10-20%)                      | 19%<br>(11-26%)                     | 1.6<br>(0.99-2.4)     | 120<br>(78-160)     |
| Virgin Islands, U.S. | 2000 | Male   | 35 to 39 | 78%<br>(66-88%)                | 22%<br>(12-34%)          | 4.5<br>(2.8-6.9)                            | 14%<br>(9.9-19%)                     | 18%<br>(11-25%)                     | 2.2<br>(1.3-3.2)      | 140<br>(92-190)     |
| Virgin Islands, U.S. | 2000 | Male   | 40 to 44 | 76%<br>(64-86%)                | 24%<br>(14-36%)          | 4.3<br>(2.6-6.6)                            | 15%<br>(10-19%)                      | 18%<br>(12-25%)                     | 3<br>(1.9-4.2)        | 170<br>(110-220)    |
| Virgin Islands, U.S. | 2000 | Male   | 45 to 49 | 74%<br>(60-85%)                | 26%<br>(15-40%)          | 4.2<br>(2.6-6.4)                            | 15%<br>(10-19%)                      | 18%<br>(12-24%)                     | 4<br>(2.7-5.4)        | 190<br>(130-250)    |
| Virgin Islands, U.S. | 2000 | Male   | 50 to 54 | 74%<br>(59-85%)                | 26%<br>(15-41%)          | 3.9<br>(2.4-6)                              | 14%<br>(9.6-18%)                     | 17%<br>(11-22%)                     | 6.1<br>(4.1-8.3)      | 250<br>(170-330)    |
| Virgin Islands, U.S. | 2000 | Male   | 55 to 59 | 71%<br>(57-83%)                | 29%<br>(17-43%)          | 3.4<br>(2.1-5.2)                            | 12%<br>(7.7-16%)                     | 14%<br>(8.9-19%)                    | 6.9<br>(4.3-9.6)      | 240<br>(150-330)    |
| Virgin Islands, U.S. | 2000 | Male   | 60 to 64 | 70%<br>(54-84%)                | 30%<br>(16-46%)          | 3.2<br>(1.8-4.8)                            | 9.8%<br>(5.6-14%)                    | 11%<br>(6.3-17%)                    | 5.8<br>(3.3-8.6)      | 170<br>(98-250)     |

| Location             | Year | Sex    | Age      | Prevalence of current drinkers | Prevalence of abstainers | Population average of standard drinks daily | Percent of total attributable deaths | Percent of total attributable DALYs | Attributable deaths    | Attributable DALYs    |
|----------------------|------|--------|----------|--------------------------------|--------------------------|---------------------------------------------|--------------------------------------|-------------------------------------|------------------------|-----------------------|
| Virgin Islands, U.S. | 2000 | Male   | 65 to 69 | 69%<br>(52-83%)                | 31%<br>(17-48%)          | 3.1<br>(1.7-4.8)                            | 9.1%<br>(4.9-14%)                    | 10%<br>(5.6-16%)                    | 5.4<br>(2.9-8.3)       | 130<br>(71-200)       |
| Virgin Islands, U.S. | 2000 | Male   | 70 to 74 | 66%<br>(49-80%)                | 34%<br>(20-51%)          | 2.8<br>(1.5-4.5)                            | 7.4%<br>(3.6-12%)                    | 8.4%<br>(4-14%)                     | 4.7<br>(2.2-7.7)       | 90<br>(43-140)        |
| Virgin Islands, U.S. | 2000 | Male   | 75 to 79 | 61%<br>(43-77%)                | 39%<br>(23-57%)          | 2.4<br>(1.3-4)                              | 5.8%<br>(2.5-10%)                    | 6.5%<br>(2.7-11%)                   | 3.1<br>(1.3-5.4)       | 46<br>(20-79)         |
| Virgin Islands, U.S. | 2000 | Male   | 80 to 84 | 55%<br>(36-73%)                | 45%<br>(27-64%)          | 1.9<br>(0.96-3.2)                           | 4.2%<br>(1.7-8%)                     | 4.6%<br>(1.7-8.9%)                  | 2.1<br>(0.77-4)        | 24<br>(9.1-45)        |
| Virgin Islands, U.S. | 2000 | Male   | 85 to 89 | 50%<br>(33-67%)                | 50%<br>(33-67%)          | 1.5<br>(0.76-2.7)                           | 3.1%<br>(1.1-6.3%)                   | 3.3%<br>(1.1-6.9%)                  | 1.1<br>(0.34-2.2)      | 8.7<br>(3.1-18)       |
| Virgin Islands, U.S. | 2000 | Male   | 90 to 94 | 51%<br>(35-69%)                | 49%<br>(31-65%)          | 1.4<br>(0.72-2.5)                           | 2.1%<br>(0.35-5.1%)                  | 2.1%<br>(0.12-5.7%)                 | 0.26<br>(0.015-0.7)    | 1.6<br>(0.26-3.9)     |
| Virgin Islands, U.S. | 2000 | Male   | 95 plus  | 54%<br>(34-73%)                | 46%<br>(27-66%)          | 1.3<br>(0.61-2.4)                           | 1.6%<br>(-0.29-4.6%)                 | 1.4%<br>(-0.82-5%)                  | 0.041<br>(-0.025-0.15) | 0.19<br>(-0.034-0.55) |
| Virgin Islands, U.S. | 2005 | Female | All Ages | 42%<br>(37-48%)                | 58%<br>(52-63%)          | 1.4<br>(0.88-2)                             | 2.7%<br>(1.3-4.5%)                   | 2.9%<br>(0.87-5.6%)                 | 12<br>(3.6-24)         | 390<br>(190-650)      |
| Virgin Islands, U.S. | 2005 | Female | 15 to 19 | 48%<br>(36-64%)                | 52%<br>(36-64%)          | 1.7<br>(1-2.8)                              | 2.9%<br>(1.9-4.3%)                   | 7%<br>(4.2-11%)                     | 0.13<br>(0.074-0.2)    | 13<br>(8.4-19)        |
| Virgin Islands, U.S. | 2005 | Female | 20 to 24 | 50%<br>(38-63%)                | 50%<br>(37-62%)          | 2.2<br>(1.3-3.3)                            | 3.9%<br>(2.6-5.5%)                   | 7.5%<br>(3.6-11%)                   | 0.15<br>(0.074-0.24)   | 18<br>(12-26)         |
| Virgin Islands, U.S. | 2005 | Female | 25 to 29 | 51%<br>(40-66%)                | 49%<br>(34-60%)          | 2.1<br>(1.3-3.3)                            | 3.6%<br>(2.2-5.1%)                   | 6.1%<br>(1.1-9.7%)                  | 0.12<br>(0.023-0.2)    | 15<br>(8.6-21)        |
| Virgin Islands, U.S. | 2005 | Female | 30 to 34 | 50%<br>(39-64%)                | 50%<br>(36-61%)          | 2<br>(1.3-3.1)                              | 3.4%<br>(2-4.9%)                     | 6.2%<br>(2-9.5%)                    | 0.19<br>(0.066-0.29)   | 17<br>(10-26)         |
| Virgin Islands, U.S. | 2005 | Female | 35 to 39 | 50%<br>(40-64%)                | 50%<br>(36-60%)          | 2<br>(1.2-3)                                | 3.5%<br>(2.3-5%)                     | 6.7%<br>(3.9-9.3%)                  | 0.32<br>(0.19-0.48)    | 23<br>(15-34)         |
| Virgin Islands, U.S. | 2005 | Female | 40 to 44 | 47%<br>(36-62%)                | 53%<br>(38-64%)          | 1.8<br>(1.1-2.8)                            | 3.7%<br>(2.4-5.5%)                   | 7%<br>(4.6-9.8%)                    | 0.54<br>(0.34-0.79)    | 32<br>(20-47)         |
| Virgin Islands, U.S. | 2005 | Female | 45 to 49 | 47%<br>(36-61%)                | 53%<br>(39-64%)          | 1.9<br>(1.1-2.9)                            | 4.1%<br>(2.5-6.1%)                   | 7.1%<br>(4.5-10%)                   | 0.85<br>(0.54-1.2)     | 42<br>(25-61)         |
| Virgin Islands, U.S. | 2005 | Female | 50 to 54 | 46%<br>(35-59%)                | 54%<br>(41-65%)          | 1.8<br>(1.1-2.8)                            | 4.2%<br>(2.4-6.8%)                   | 6.8%<br>(4-11%)                     | 1.2<br>(0.72-1.9)      | 50<br>(28-80)         |
| Virgin Islands, U.S. | 2005 | Female | 55 to 59 | 41%<br>(31-55%)                | 59%<br>(45-69%)          | 1.5<br>(0.95-2.4)                           | 3.6%<br>(1.8-6.2%)                   | 5.4%<br>(2.9-8.9%)                  | 1.6<br>(0.83-2.5)      | 54<br>(27-92)         |
| Virgin Islands, U.S. | 2005 | Female | 60 to 64 | 42%<br>(32-57%)                | 58%<br>(43-68%)          | 1.5<br>(0.91-2.4)                           | 3.1%<br>(1-5.8%)                     | 4.3%<br>(1.6-7.9%)                  | 1.6<br>(0.58-2.8)      | 45<br>(15-85)         |
| Virgin Islands, U.S. | 2005 | Female | 65 to 69 | 38%<br>(29-53%)                | 62%<br>(47-71%)          | 1.3<br>(0.77-2.1)                           | 2.4%<br>(0.47-5%)                    | 3.2%<br>(0.67-6.5%)                 | 1.2<br>(0.26-2.5)      | 30<br>(5.7-61)        |
| Virgin Islands, U.S. | 2005 | Female | 70 to 74 | 33%<br>(24-46%)                | 67%<br>(54-76%)          | 1<br>(0.57-1.7)                             | 1.7%<br>(0.082-3.9%)                 | 2.2%<br>(0.082-4.9%)                | 0.96<br>(0.035-2.1)    | 18<br>(0.98-42)       |
| Virgin Islands, U.S. | 2005 | Female | 75 to 79 | 33%<br>(24-46%)                | 67%<br>(54-76%)          | 1<br>(0.57-1.6)                             | 1.4%<br>(-0.28-3.6%)                 | 1.7%<br>(-0.33-4.5%)                | 0.75<br>(-0.14-2)      | 11<br>(-2.2-30)       |
| Virgin Islands, U.S. | 2005 | Female | 80 to 84 | 31%<br>(21-44%)                | 69%<br>(56-79%)          | 0.99<br>(0.52-1.7)                          | 1.4%<br>(-0.34-3.7%)                 | 1.6%<br>(-0.45-4.4%)                | 0.99<br>(-0.27-2.7)    | 11<br>(-2.8-29)       |

| Location             | Year | Sex    | Age      | Prevalence of current drinkers | Prevalence of abstainers | Population average of standard drinks daily | Percent of total attributable deaths | Percent of total attributable DALYs | Attributable deaths    | Attributable DALYs    |
|----------------------|------|--------|----------|--------------------------------|--------------------------|---------------------------------------------|--------------------------------------|-------------------------------------|------------------------|-----------------------|
| Virgin Islands, U.S. | 2005 | Female | 85 to 89 | 30%<br>(19-41%)                | 70%<br>(59-81%)          | 0.97<br>(0.52-1.6)                          | 1.3%<br>(-0.26-3.8%)                 | 1.5%<br>(-0.44-4.4%)                | 0.84<br>(-0.25-2.5)    | 6.8<br>(-1.3-19)      |
| Virgin Islands, U.S. | 2005 | Female | 90 to 94 | 32%<br>(21-45%)                | 68%<br>(55-79%)          | 1.1<br>(0.58-1.9)                           | 1.5%<br>(-0.25-4.3%)                 | 1.6%<br>(-0.48-4.9%)                | 0.55<br>(-0.16-1.7)    | 3.1<br>(-0.52-9.1)    |
| Virgin Islands, U.S. | 2005 | Female | 95 plus  | 36%<br>(23-53%)                | 64%<br>(47-77%)          | 1.3<br>(0.63-2.3)                           | 1.7%<br>(-0.37-5.3%)                 | 1.8%<br>(-0.72-5.9%)                | 0.19<br>(-0.08-0.65)   | 0.76<br>(-0.16-2.3)   |
| Virgin Islands, U.S. | 2005 | Male   | All Ages | 65%<br>(58-72%)                | 35%<br>(28-42%)          | 2.9<br>(1.9-4.3)                            | 10%<br>(7-14%)                       | 10%<br>(6.3-15%)                    | 57<br>(35-82)          | 2000<br>(1400-2700)   |
| Virgin Islands, U.S. | 2005 | Male   | 15 to 19 | 62%<br>(46-76%)                | 38%<br>(24-54%)          | 2.3<br>(1.4-3.7)                            | 8.8%<br>(5.7-12%)                    | 13%<br>(7.4-18%)                    | 0.64<br>(0.37-0.93)    | 53<br>(35-75)         |
| Virgin Islands, U.S. | 2005 | Male   | 20 to 24 | 73%<br>(58-84%)                | 27%<br>(16-42%)          | 4.5<br>(2.8-6.7)                            | 15%<br>(11-21%)                      | 18%<br>(11-26%)                     | 1.5<br>(0.93-2.1)      | 120<br>(83-170)       |
| Virgin Islands, U.S. | 2005 | Male   | 25 to 29 | 77%<br>(65-86%)                | 23%<br>(14-35%)          | 4.8<br>(3-7.2)                              | 16%<br>(9.9-22%)                     | 20%<br>(10-29%)                     | 1.2<br>(0.63-1.8)      | 94<br>(59-130)        |
| Virgin Islands, U.S. | 2005 | Male   | 30 to 34 | 78%<br>(66-87%)                | 22%<br>(13-34%)          | 4.7<br>(3-7.2)                              | 15%<br>(9.4-20%)                     | 18%<br>(10-27%)                     | 1.4<br>(0.78-2.1)      | 100<br>(63-140)       |
| Virgin Islands, U.S. | 2005 | Male   | 35 to 39 | 77%<br>(66-87%)                | 23%<br>(13-34%)          | 4.5<br>(2.8-6.8)                            | 14%<br>(9.8-19%)                     | 18%<br>(12-25%)                     | 2.1<br>(1.3-2.9)       | 130<br>(85-180)       |
| Virgin Islands, U.S. | 2005 | Male   | 40 to 44 | 76%<br>(65-86%)                | 24%<br>(14-35%)          | 4.4<br>(2.8-6.6)                            | 15%<br>(10-19%)                      | 19%<br>(12-25%)                     | 3<br>(1.9-4.1)         | 160<br>(110-220)      |
| Virgin Islands, U.S. | 2005 | Male   | 45 to 49 | 73%<br>(59-84%)                | 27%<br>(16-41%)          | 4.2<br>(2.6-6.3)                            | 15%<br>(10-19%)                      | 18%<br>(12-24%)                     | 4.3<br>(3-5.9)         | 210<br>(150-270)      |
| Virgin Islands, U.S. | 2005 | Male   | 50 to 54 | 73%<br>(60-85%)                | 27%<br>(15-40%)          | 4<br>(2.5-6)                                | 14%<br>(9.8-18%)                     | 17%<br>(12-22%)                     | 5.5<br>(3.8-7.3)       | 220<br>(160-290)      |
| Virgin Islands, U.S. | 2005 | Male   | 55 to 59 | 72%<br>(58-84%)                | 28%<br>(16-42%)          | 3.6<br>(2.2-5.5)                            | 12%<br>(8-17%)                       | 15%<br>(9.5-20%)                    | 7.8<br>(5-11)          | 270<br>(180-360)      |
| Virgin Islands, U.S. | 2005 | Male   | 60 to 64 | 70%<br>(54-83%)                | 30%<br>(17-46%)          | 3.2<br>(1.9-5)                              | 10%<br>(5.9-15%)                     | 12%<br>(6.7-17%)                    | 7.9<br>(4.5-12)        | 230<br>(140-340)      |
| Virgin Islands, U.S. | 2005 | Male   | 65 to 69 | 68%<br>(52-81%)                | 32%<br>(19-48%)          | 3<br>(1.8-4.7)                              | 9.2%<br>(5-14%)                      | 11%<br>(5.8-16%)                    | 6.9<br>(3.8-10)        | 170<br>(93-240)       |
| Virgin Islands, U.S. | 2005 | Male   | 70 to 74 | 66%<br>(50-79%)                | 34%<br>(21-50%)          | 2.8<br>(1.6-4.5)                            | 7.6%<br>(3.8-12%)                    | 8.6%<br>(4.2-14%)                   | 5.4<br>(2.6-8.5)       | 110<br>(54-160)       |
| Virgin Islands, U.S. | 2005 | Male   | 75 to 79 | 67%<br>(51-80%)                | 33%<br>(20-49%)          | 2.8<br>(1.6-4.4)                            | 6.4%<br>(2.7-11%)                    | 7.2%<br>(2.9-12%)                   | 4.4<br>(1.8-7.4)       | 67<br>(29-110)        |
| Virgin Islands, U.S. | 2005 | Male   | 80 to 84 | 61%<br>(44-76%)                | 39%<br>(24-56%)          | 2.2<br>(1.2-3.6)                            | 4.8%<br>(1.8-8.9%)                   | 5.3%<br>(1.9-10%)                   | 2.9<br>(1.1-5.5)       | 33<br>(12-60)         |
| Virgin Islands, U.S. | 2005 | Male   | 85 to 89 | 52%<br>(35-68%)                | 48%<br>(32-65%)          | 1.6<br>(0.86-2.7)                           | 3.3%<br>(1.2-6.4%)                   | 3.5%<br>(1.1-7.1%)                  | 1.3<br>(0.4-2.6)       | 10<br>(3.7-20)        |
| Virgin Islands, U.S. | 2005 | Male   | 90 to 94 | 53%<br>(37-69%)                | 47%<br>(31-63%)          | 1.5<br>(0.79-2.5)                           | 2.3%<br>(0.39-5.2%)                  | 2.3%<br>(0.11-5.8%)                 | 0.4<br>(0.02-1)        | 2.4<br>(0.42-5.4)     |
| Virgin Islands, U.S. | 2005 | Male   | 95 plus  | 55%<br>(37-73%)                | 45%<br>(27-63%)          | 1.4<br>(0.67-2.5)                           | 1.7%<br>(-0.25-5%)                   | 1.5%<br>(-0.79-5.4%)                | 0.064<br>(-0.032-0.22) | 0.29<br>(-0.042-0.85) |
| Virgin Islands, U.S. | 2010 | Female | All Ages | 41%<br>(36-47%)                | 59%<br>(53-64%)          | 1.4<br>(0.94-2.2)                           | 2.7%<br>(1.4-4.8%)                   | 3%<br>(0.92-6.2%)                   | 14<br>(4.3-29)         | 420<br>(200-730)      |

| Location             | Year | Sex    | Age      | Prevalence of current drinkers | Prevalence of abstainers | Population average of standard drinks daily | Percent of total attributable deaths | Percent of total attributable DALYs | Attributable deaths  | Attributable DALYs  |
|----------------------|------|--------|----------|--------------------------------|--------------------------|---------------------------------------------|--------------------------------------|-------------------------------------|----------------------|---------------------|
| Virgin Islands, U.S. | 2010 | Female | 15 to 19 | 48%<br>(36-64%)                | 52%<br>(36-64%)          | 1.8<br>(1.1-2.9)                            | 2.9%<br>(1.8-4.3%)                   | 7%<br>(4.1-11%)                     | 0.12<br>(0.069-0.19) | 12<br>(7.7-18)      |
| Virgin Islands, U.S. | 2010 | Female | 20 to 24 | 50%<br>(39-64%)                | 50%<br>(36-61%)          | 2.3<br>(1.4-3.5)                            | 4%<br>(2.6-5.7%)                     | 7.6%<br>(3.3-12%)                   | 0.12<br>(0.055-0.19) | 15<br>(9.1-21)      |
| Virgin Islands, U.S. | 2010 | Female | 25 to 29 | 51%<br>(40-65%)                | 49%<br>(35-60%)          | 2.2<br>(1.4-3.4)                            | 3.4%<br>(1.9-5%)                     | 5.5%<br>(0.84-9.7%)                 | 0.11<br>(0.017-0.2)  | 14<br>(7.6-21)      |
| Virgin Islands, U.S. | 2010 | Female | 30 to 34 | 49%<br>(38-63%)                | 51%<br>(37-62%)          | 2<br>(1.3-3.1)                              | 3.2%<br>(1.8-4.8%)                   | 5.7%<br>(0.94-9.2%)                 | 0.16<br>(0.025-0.26) | 16<br>(8.4-23)      |
| Virgin Islands, U.S. | 2010 | Female | 35 to 39 | 49%<br>(38-64%)                | 51%<br>(36-62%)          | 2<br>(1.2-3)                                | 3.4%<br>(2-5%)                       | 6.3%<br>(3-9.1%)                    | 0.27<br>(0.12-0.4)   | 20<br>(12-30)       |
| Virgin Islands, U.S. | 2010 | Female | 40 to 44 | 47%<br>(36-62%)                | 53%<br>(38-64%)          | 1.9<br>(1.2-3)                              | 3.7%<br>(2.5-5.6%)                   | 7.1%<br>(4.6-10%)                   | 0.51<br>(0.31-0.76)  | 30<br>(19-44)       |
| Virgin Islands, U.S. | 2010 | Female | 45 to 49 | 47%<br>(36-61%)                | 53%<br>(39-64%)          | 1.9<br>(1.2-3)                              | 4.1%<br>(2.6-6.3%)                   | 7.3%<br>(4.7-11%)                   | 0.82<br>(0.5-1.2)    | 41<br>(25-63)       |
| Virgin Islands, U.S. | 2010 | Female | 50 to 54 | 46%<br>(35-59%)                | 54%<br>(41-65%)          | 1.9<br>(1.1-3)                              | 4.3%<br>(2.5-6.9%)                   | 7%<br>(4.2-11%)                     | 1.2<br>(0.75-1.9)    | 52<br>(29-84)       |
| Virgin Islands, U.S. | 2010 | Female | 55 to 59 | 41%<br>(31-55%)                | 59%<br>(45-69%)          | 1.6<br>(0.95-2.6)                           | 3.7%<br>(1.9-6.3%)                   | 5.6%<br>(3-9.4%)                    | 1.5<br>(0.77-2.4)    | 51<br>(26-88)       |
| Virgin Islands, U.S. | 2010 | Female | 60 to 64 | 40%<br>(31-55%)                | 60%<br>(45-69%)          | 1.5<br>(0.92-2.5)                           | 3.1%<br>(1.2-5.9%)                   | 4.4%<br>(1.8-8.2%)                  | 1.8<br>(0.76-3.4)    | 54<br>(21-100)      |
| Virgin Islands, U.S. | 2010 | Female | 65 to 69 | 38%<br>(29-52%)                | 62%<br>(48-71%)          | 1.3<br>(0.8-2.2)                            | 2.5%<br>(0.62-5.3%)                  | 3.4%<br>(0.91-7%)                   | 1.7<br>(0.45-3.5)    | 41<br>(9.6-88)      |
| Virgin Islands, U.S. | 2010 | Female | 70 to 74 | 33%<br>(24-46%)                | 67%<br>(54-76%)          | 1.1<br>(0.6-1.8)                            | 1.8%<br>(0.3-4.3%)                   | 2.4%<br>(0.46-5.5%)                 | 1.2<br>(0.24-2.8)    | 24<br>(3.8-56)      |
| Virgin Islands, U.S. | 2010 | Female | 75 to 79 | 33%<br>(23-47%)                | 67%<br>(53-77%)          | 1.1<br>(0.6-1.7)                            | 1.5%<br>(-0.11-4%)                   | 1.9%<br>(-0.14-4.9%)                | 1.1<br>(-0.079-2.7)  | 16<br>(-1.2-41)     |
| Virgin Islands, U.S. | 2010 | Female | 80 to 84 | 32%<br>(22-46%)                | 68%<br>(54-78%)          | 1.1<br>(0.57-1.8)                           | 1.6%<br>(-0.096-4.3%)                | 1.9%<br>(-0.15-5.1%)                | 1.3<br>(-0.1-3.4)    | 14<br>(-0.87-38)    |
| Virgin Islands, U.S. | 2010 | Female | 85 to 89 | 31%<br>(20-43%)                | 69%<br>(57-80%)          | 1<br>(0.55-1.7)                             | 1.6%<br>(-0.075-4.2%)                | 1.8%<br>(-0.21-4.8%)                | 1.2<br>(-0.14-3.1)   | 9.5<br>(-0.45-24)   |
| Virgin Islands, U.S. | 2010 | Female | 90 to 94 | 33%<br>(22-46%)                | 67%<br>(54-78%)          | 1.2<br>(0.6-2)                              | 1.8%<br>(-0.071-4.6%)                | 1.9%<br>(-0.29-5.3%)                | 0.78<br>(-0.12-2.2)  | 4.4<br>(-0.18-12)   |
| Virgin Islands, U.S. | 2010 | Female | 95 plus  | 37%<br>(23-55%)                | 63%<br>(45-77%)          | 1.4<br>(0.67-2.4)                           | 2.1%<br>(-0.14-5.6%)                 | 2.2%<br>(-0.46-6.2%)                | 0.35<br>(-0.073-1)   | 1.3<br>(-0.087-3.6) |
| Virgin Islands, U.S. | 2010 | Male   | All Ages | 65%<br>(58-72%)                | 35%<br>(28-42%)          | 3.1<br>(2.1-4.7)                            | 11%<br>(7.2-14%)                     | 11%<br>(6.5-15%)                    | 68<br>(42-98)        | 2200<br>(1500-3000) |
| Virgin Islands, U.S. | 2010 | Male   | 15 to 19 | 61%<br>(45-76%)                | 39%<br>(24-55%)          | 2.4<br>(1.4-3.8)                            | 8.8%<br>(5.6-12%)                    | 13%<br>(7.5-19%)                    | 0.64<br>(0.37-0.94)  | 54<br>(35-75)       |
| Virgin Islands, U.S. | 2010 | Male   | 20 to 24 | 73%<br>(58-84%)                | 27%<br>(16-42%)          | 4.8<br>(3-7.2)                              | 17%<br>(12-23%)                      | 21%<br>(14-31%)                     | 1.2<br>(0.76-1.7)    | 94<br>(65-130)      |
| Virgin Islands, U.S. | 2010 | Male   | 25 to 29 | 77%<br>(66-87%)                | 23%<br>(13-34%)          | 5.2<br>(3.3-7.9)                            | 16%<br>(8.2-22%)                     | 20%<br>(7.8-29%)                    | 1.2<br>(0.45-1.8)    | 91<br>(46-130)      |
| Virgin Islands, U.S. | 2010 | Male   | 30 to 34 | 77%<br>(65-87%)                | 23%<br>(13-35%)          | 5<br>(3.2-7.7)                              | 15%<br>(8.3-21%)                     | 18%<br>(8.4-27%)                    | 1.4<br>(0.62-2.1)    | 96<br>(52-140)      |

| Location             | Year | Sex    | Age      | Prevalence of current drinkers | Prevalence of abstainers | Population average of standard drinks daily | Percent of total attributable deaths | Percent of total attributable DALYs | Attributable deaths   | Attributable DALYs    |
|----------------------|------|--------|----------|--------------------------------|--------------------------|---------------------------------------------|--------------------------------------|-------------------------------------|-----------------------|-----------------------|
| Virgin Islands, U.S. | 2010 | Male   | 35 to 39 | 77%<br>(65-87%)                | 23%<br>(13-35%)          | 4.8<br>(3-7.1)                              | 15%<br>(9.7-19%)                     | 19%<br>(11-26%)                     | 1.9<br>(1.2-2.8)      | 120<br>(79-160)       |
| Virgin Islands, U.S. | 2010 | Male   | 40 to 44 | 77%<br>(65-86%)                | 23%<br>(14-35%)          | 4.8<br>(3-7.2)                              | 15%<br>(11-20%)                      | 19%<br>(14-26%)                     | 3.1<br>(2.1-4.3)      | 170<br>(120-230)      |
| Virgin Islands, U.S. | 2010 | Male   | 45 to 49 | 73%<br>(58-84%)                | 27%<br>(16-42%)          | 4.4<br>(2.8-6.7)                            | 15%<br>(11-19%)                      | 19%<br>(13-24%)                     | 4.6<br>(3.2-6.3)      | 210<br>(150-290)      |
| Virgin Islands, U.S. | 2010 | Male   | 50 to 54 | 73%<br>(59-85%)                | 27%<br>(15-41%)          | 4.2<br>(2.7-6.5)                            | 15%<br>(10-19%)                      | 18%<br>(12-23%)                     | 6.6<br>(4.7-9)        | 270<br>(190-360)      |
| Virgin Islands, U.S. | 2010 | Male   | 55 to 59 | 73%<br>(59-84%)                | 27%<br>(16-41%)          | 3.8<br>(2.4-5.9)                            | 13%<br>(8.7-18%)                     | 16%<br>(10-21%)                     | 7.6<br>(5-10)         | 260<br>(170-360)      |
| Virgin Islands, U.S. | 2010 | Male   | 60 to 64 | 70%<br>(54-83%)                | 30%<br>(17-46%)          | 3.4<br>(2.1-5.3)                            | 11%<br>(6.5-15%)                     | 12%<br>(7.3-18%)                    | 9.3<br>(5.6-13)       | 270<br>(160-390)      |
| Virgin Islands, U.S. | 2010 | Male   | 65 to 69 | 68%<br>(52-82%)                | 32%<br>(18-48%)          | 3.2<br>(1.9-5)                              | 9.8%<br>(5.5-14%)                    | 11%<br>(6.2-17%)                    | 10<br>(5.9-16)        | 250<br>(140-370)      |
| Virgin Islands, U.S. | 2010 | Male   | 70 to 74 | 66%<br>(51-79%)                | 34%<br>(21-49%)          | 3.1<br>(1.8-5)                              | 8.3%<br>(4.4-12%)                    | 9.4%<br>(4.9-14%)                   | 7.8<br>(4-12)         | 150<br>(80-230)       |
| Virgin Islands, U.S. | 2010 | Male   | 75 to 79 | 67%<br>(51-80%)                | 33%<br>(20-49%)          | 3<br>(1.8-4.9)                              | 7.1%<br>(3.3-11%)                    | 7.9%<br>(3.5-13%)                   | 5.9<br>(2.6-9.6)      | 89<br>(42-140)        |
| Virgin Islands, U.S. | 2010 | Male   | 80 to 84 | 61%<br>(42-76%)                | 39%<br>(24-58%)          | 2.4<br>(1.3-3.9)                            | 5.4%<br>(2.2-9.7%)                   | 5.9%<br>(2.3-11%)                   | 4.2<br>(1.6-7.6)      | 46<br>(19-82)         |
| Virgin Islands, U.S. | 2010 | Male   | 85 to 89 | 52%<br>(34-68%)                | 48%<br>(32-66%)          | 1.7<br>(0.9-2.9)                            | 3.7%<br>(1.4-7.1%)                   | 4%<br>(1.4-7.9%)                    | 1.8<br>(0.63-3.6)     | 15<br>(5.4-28)        |
| Virgin Islands, U.S. | 2010 | Male   | 90 to 94 | 52%<br>(36-69%)                | 48%<br>(31-64%)          | 1.5<br>(0.81-2.7)                           | 2.6%<br>(0.62-5.7%)                  | 2.7%<br>(0.41-6.2%)                 | 0.52<br>(0.079-1.2)   | 3<br>(0.72-6.6)       |
| Virgin Islands, U.S. | 2010 | Male   | 95 plus  | 54%<br>(35-73%)                | 46%<br>(27-65%)          | 1.4<br>(0.66-2.6)                           | 2%<br>(-0.016-5.3%)                  | 1.9%<br>(-0.49-5.7%)                | 0.11<br>(-0.028-0.34) | 0.47<br>(-0.0035-1.3) |
| Virgin Islands, U.S. | 2016 | Female | All Ages | 46%<br>(40-52%)                | 54%<br>(48-60%)          | 1.7<br>(1.1-2.4)                            | 2.8%<br>(1.3-5%)                     | 3.1%<br>(0.95-6.2%)                 | 17<br>(5.2-35)        | 450<br>(200-820)      |
| Virgin Islands, U.S. | 2016 | Female | 15 to 19 | 53%<br>(40-68%)                | 47%<br>(32-60%)          | 2.1<br>(1.2-3.3)                            | 2.9%<br>(1.9-4.4%)                   | 7.6%<br>(4.3-12%)                   | 0.098<br>(0.054-0.16) | 10<br>(6.4-16)        |
| Virgin Islands, U.S. | 2016 | Female | 20 to 24 | 57%<br>(43-71%)                | 43%<br>(29-57%)          | 2.8<br>(1.6-4.2)                            | 4.1%<br>(2.6-5.9%)                   | 8.2%<br>(3.1-13%)                   | 0.14<br>(0.051-0.22)  | 17<br>(10-24)         |
| Virgin Islands, U.S. | 2016 | Female | 25 to 29 | 57%<br>(43-72%)                | 43%<br>(28-57%)          | 2.6<br>(1.6-3.9)                            | 3.4%<br>(1.8-5.2%)                   | 5.5%<br>(0.83-10%)                  | 0.091<br>(0.013-0.18) | 12<br>(6.1-19)        |
| Virgin Islands, U.S. | 2016 | Female | 30 to 34 | 56%<br>(41-71%)                | 44%<br>(29-59%)          | 2.5<br>(1.5-3.7)                            | 3.2%<br>(1.6-5%)                     | 5.5%<br>(0.83-9.9%)                 | 0.13<br>(0.018-0.24)  | 14<br>(6.4-22)        |
| Virgin Islands, U.S. | 2016 | Female | 35 to 39 | 55%<br>(42-70%)                | 45%<br>(30-58%)          | 2.4<br>(1.5-3.7)                            | 3.4%<br>(1.7-5.3%)                   | 6.5%<br>(1.4-10%)                   | 0.23<br>(0.051-0.4)   | 18<br>(8.7-28)        |
| Virgin Islands, U.S. | 2016 | Female | 40 to 44 | 54%<br>(41-71%)                | 46%<br>(29-59%)          | 2.4<br>(1.4-3.7)                            | 4%<br>(2.5-6.1%)                     | 7.7%<br>(4.5-11%)                   | 0.44<br>(0.24-0.7)    | 27<br>(16-41)         |
| Virgin Islands, U.S. | 2016 | Female | 45 to 49 | 53%<br>(37-69%)                | 47%<br>(31-63%)          | 2.3<br>(1.4-3.6)                            | 4.4%<br>(2.6-6.9%)                   | 7.9%<br>(4.8-12%)                   | 0.81<br>(0.44-1.3)    | 40<br>(22-64)         |
| Virgin Islands, U.S. | 2016 | Female | 50 to 54 | 50%<br>(35-66%)                | 50%<br>(34-65%)          | 2.2<br>(1.2-3.4)                            | 4.5%<br>(2.5-7.5%)                   | 7.6%<br>(4.6-12%)                   | 1.2<br>(0.68-2)       | 51<br>(29-85)         |

| Location             | Year | Sex    | Age      | Prevalence of current drinkers | Prevalence of abstainers | Population average of standard drinks daily | Percent of total attributable deaths | Percent of total attributable DALYs | Attributable deaths  | Attributable DALYs  |
|----------------------|------|--------|----------|--------------------------------|--------------------------|---------------------------------------------|--------------------------------------|-------------------------------------|----------------------|---------------------|
| Virgin Islands, U.S. | 2016 | Female | 55 to 59 | 46%<br>(31-63%)                | 54%<br>(37-69%)          | 1.9<br>(1-2.9)                              | 4.1%<br>(2-7%)                       | 6.3%<br>(3.4-10%)                   | 1.6<br>(0.83-2.7)    | 57<br>(28-98)       |
| Virgin Islands, U.S. | 2016 | Female | 60 to 64 | 42%<br>(28-60%)                | 58%<br>(40-72%)          | 1.7<br>(0.95-2.7)                           | 3.3%<br>(1.3-6.1%)                   | 4.8%<br>(2.1-8.6%)                  | 1.8<br>(0.74-3.2)    | 52<br>(20-97)       |
| Virgin Islands, U.S. | 2016 | Female | 65 to 69 | 40%<br>(27-55%)                | 60%<br>(45-73%)          | 1.5<br>(0.8-2.4)                            | 2.7%<br>(0.59-5.6%)                  | 3.7%<br>(0.95-7.4%)                 | 2.1<br>(0.57-4.4)    | 52<br>(12-110)      |
| Virgin Islands, U.S. | 2016 | Female | 70 to 74 | 37%<br>(25-53%)                | 63%<br>(47-75%)          | 1.2<br>(0.68-2.1)                           | 2%<br>(0.23-4.7%)                    | 2.7%<br>(0.35-6.1%)                 | 2<br>(0.27-4.5)      | 38<br>(4.4-89)      |
| Virgin Islands, U.S. | 2016 | Female | 75 to 79 | 33%<br>(21-49%)                | 67%<br>(51-79%)          | 1.1<br>(0.6-1.9)                            | 1.7%<br>(0.015-4.1%)                 | 2.1%<br>(-0.0087-5.2%)              | 1.6<br>(-0.0067-4)   | 24<br>(0.2-62)      |
| Virgin Islands, U.S. | 2016 | Female | 80 to 84 | 31%<br>(20-45%)                | 69%<br>(55-80%)          | 1.1<br>(0.56-1.9)                           | 1.7%<br>(0.026-4.2%)                 | 2%<br>(-0.01-5.1%)                  | 1.8<br>(-0.0095-4.7) | 21<br>(0.32-53)     |
| Virgin Islands, U.S. | 2016 | Female | 85 to 89 | 31%<br>(20-44%)                | 69%<br>(56-80%)          | 1.1<br>(0.55-1.9)                           | 1.7%<br>(-0.045-4.4%)                | 1.9%<br>(-0.2-5.1%)                 | 1.5<br>(-0.15-3.8)   | 12<br>(-0.29-30)    |
| Virgin Islands, U.S. | 2016 | Female | 90 to 94 | 33%<br>(22-47%)                | 67%<br>(53-78%)          | 1.2<br>(0.63-2.1)                           | 1.9%<br>(-0.12-4.9%)                 | 2.1%<br>(-0.34-5.7%)                | 0.98<br>(-0.16-2.7)  | 5.5<br>(-0.34-14)   |
| Virgin Islands, U.S. | 2016 | Female | 95 plus  | 37%<br>(23-56%)                | 63%<br>(44-77%)          | 1.4<br>(0.67-2.6)                           | 2.2%<br>(-0.068-6.2%)                | 2.4%<br>(-0.4-7.2%)                 | 0.46<br>(-0.079-1.4) | 1.8<br>(-0.057-5)   |
| Virgin Islands, U.S. | 2016 | Male   | All Ages | 62%<br>(54-69%)                | 38%<br>(31-46%)          | 3<br>(2-4.5)                                | 9.9%<br>(6.9-13%)                    | 9.7%<br>(5.8-13%)                   | 71<br>(43-100)       | 2100<br>(1400-2900) |
| Virgin Islands, U.S. | 2016 | Male   | 15 to 19 | 61%<br>(44-76%)                | 39%<br>(24-56%)          | 2.6<br>(1.5-4.1)                            | 8.6%<br>(5.6-12%)                    | 13%<br>(7.7-19%)                    | 0.56<br>(0.32-0.82)  | 47<br>(30-67)       |
| Virgin Islands, U.S. | 2016 | Male   | 20 to 24 | 70%<br>(53-83%)                | 30%<br>(17-47%)          | 4.8<br>(2.9-7.4)                            | 16%<br>(11-22%)                      | 20%<br>(13-30%)                     | 1.3<br>(0.77-2)      | 110<br>(68-150)     |
| Virgin Islands, U.S. | 2016 | Male   | 25 to 29 | 73%<br>(56-85%)                | 27%<br>(15-44%)          | 4.9<br>(3-7.4)                              | 14%<br>(6-21%)                       | 18%<br>(3.4-28%)                    | 0.92<br>(0.18-1.5)   | 73<br>(31-110)      |
| Virgin Islands, U.S. | 2016 | Male   | 30 to 34 | 74%<br>(57-85%)                | 26%<br>(15-43%)          | 4.9<br>(3-7.4)                              | 13%<br>(4.9-19%)                     | 17%<br>(2.6-26%)                    | 0.96<br>(0.15-1.6)   | 70<br>(25-100)      |
| Virgin Islands, U.S. | 2016 | Male   | 35 to 39 | 74%<br>(58-86%)                | 26%<br>(14-42%)          | 4.7<br>(2.8-6.9)                            | 14%<br>(7.4-19%)                     | 17%<br>(7.3-25%)                    | 1.4<br>(0.55-2.1)    | 89<br>(47-130)      |
| Virgin Islands, U.S. | 2016 | Male   | 40 to 44 | 73%<br>(57-85%)                | 27%<br>(15-43%)          | 4.6<br>(2.7-7)                              | 15%<br>(10-19%)                      | 19%<br>(12-25%)                     | 2.3<br>(1.4-3.4)     | 130<br>(83-180)     |
| Virgin Islands, U.S. | 2016 | Male   | 45 to 49 | 71%<br>(53-84%)                | 29%<br>(16-47%)          | 4.4<br>(2.7-6.7)                            | 15%<br>(11-19%)                      | 18%<br>(13-24%)                     | 3.9<br>(2.6-5.6)     | 190<br>(130-250)    |
| Virgin Islands, U.S. | 2016 | Male   | 50 to 54 | 70%<br>(52-83%)                | 30%<br>(17-48%)          | 4.1<br>(2.4-6.3)                            | 14%<br>(10-18%)                      | 17%<br>(12-22%)                     | 5.8<br>(3.8-8.1)     | 240<br>(160-320)    |
| Virgin Islands, U.S. | 2016 | Male   | 55 to 59 | 68%<br>(51-82%)                | 32%<br>(18-49%)          | 3.6<br>(2.1-5.6)                            | 13%<br>(8.6-17%)                     | 15%<br>(10-20%)                     | 7.9<br>(5.1-11)      | 270<br>(180-370)    |
| Virgin Islands, U.S. | 2016 | Male   | 60 to 64 | 66%<br>(47-82%)                | 34%<br>(18-53%)          | 3.3<br>(1.9-5.3)                            | 10%<br>(6.6-15%)                     | 12%<br>(7.6-17%)                    | 8.1<br>(4.9-12)      | 240<br>(140-340)    |
| Virgin Islands, U.S. | 2016 | Male   | 65 to 69 | 65%<br>(47-81%)                | 35%<br>(19-53%)          | 3.2<br>(1.8-5.1)                            | 9.8%<br>(5.9-14%)                    | 11%<br>(6.7-16%)                    | 11<br>(6.3-16)       | 260<br>(150-390)    |
| Virgin Islands, U.S. | 2016 | Male   | 70 to 74 | 62%<br>(44-77%)                | 38%<br>(23-56%)          | 2.9<br>(1.7-4.7)                            | 8%<br>(4.4-12%)                      | 9.2%<br>(4.8-14%)                   | 11<br>(5.9-17)       | 210<br>(120-330)    |



| Location             | Year | Sex    | Age      | Prevalence of current drinkers | Prevalence of abstainers | Population average of standard drinks daily | Percent of total attributable deaths | Percent of total attributable DALYs | Attributable deaths   | Attributable DALYs  |
|----------------------|------|--------|----------|--------------------------------|--------------------------|---------------------------------------------|--------------------------------------|-------------------------------------|-----------------------|---------------------|
| Virgin Islands, U.S. | 2016 | Male   | 75 to 79 | 57%<br>(38-75%)                | 43%<br>(25-62%)          | 2.4<br>(1.3-4.1)                            | 6.3%<br>(3.1-10%)                    | 7.1%<br>(3.4-11%)                   | 7.5<br>(3.5-12)       | 110<br>(53-180)     |
| Virgin Islands, U.S. | 2016 | Male   | 80 to 84 | 51%<br>(33-69%)                | 49%<br>(31-67%)          | 1.9<br>(1-3.4)                              | 4.8%<br>(2-8.2%)                     | 5.3%<br>(2.1-9.3%)                  | 4.9<br>(2.1-8.7)      | 55<br>(24-95)       |
| Virgin Islands, U.S. | 2016 | Male   | 85 to 89 | 47%<br>(29-64%)                | 53%<br>(36-71%)          | 1.6<br>(0.75-2.7)                           | 3.6%<br>(1.4-6.9%)                   | 3.9%<br>(1.4-7.8%)                  | 2.3<br>(0.85-4.5)     | 19<br>(7.5-35)      |
| Virgin Islands, U.S. | 2016 | Male   | 90 to 94 | 47%<br>(31-64%)                | 53%<br>(36-69%)          | 1.4<br>(0.7-2.5)                            | 2.6%<br>(0.76-5.5%)                  | 2.7%<br>(0.56-6.1%)                 | 0.7<br>(0.15-1.6)     | 4.1<br>(1.2-8.7)    |
| Virgin Islands, U.S. | 2016 | Male   | 95 plus  | 49%<br>(30-69%)                | 51%<br>(31-70%)          | 1.3<br>(0.58-2.5)                           | 2.1%<br>(0.17-5.3%)                  | 2%<br>(-0.28-5.8%)                  | 0.13<br>(-0.019-0.38) | 0.56<br>(0.045-1.4) |
| South Sudan          | 1990 | Female | All Ages | 33%<br>(27-39%)                | 67%<br>(61-73%)          | 0.12<br>(0.054-0.25)                        | 0.11%<br>(0.029-0.19%)               | 0.098%<br>(-0.079-0.26%)            | 46<br>(-38-120)       | 3800<br>(1000-6700) |
| South Sudan          | 1990 | Female | 15 to 19 | 35%<br>(22-50%)                | 65%<br>(50-78%)          | 0.16<br>(0.055-0.35)                        | 0.31%<br>(0.093-0.59%)               | 0.14%<br>(-0.18-0.54%)              | 1<br>(-1.4-4.4)       | 270<br>(77-540)     |
| South Sudan          | 1990 | Female | 20 to 24 | 41%<br>(26-57%)                | 59%<br>(43-74%)          | 0.21<br>(0.078-0.5)                         | 0.55%<br>(0.24-0.95%)                | 0.16%<br>(-0.23-0.63%)              | 1.5<br>(-2-5.8)       | 510<br>(210-900)    |
| South Sudan          | 1990 | Female | 25 to 29 | 43%<br>(28-59%)                | 57%<br>(41-72%)          | 0.26<br>(0.092-0.59)                        | 0.67%<br>(0.26-1.1%)                 | 0.33%<br>(-0.24-0.98%)              | 2.9<br>(-1.9-8.3)     | 530<br>(200-890)    |
| South Sudan          | 1990 | Female | 30 to 34 | 45%<br>(30-62%)                | 55%<br>(38-70%)          | 0.27<br>(0.095-0.63)                        | 0.68%<br>(0.25-1.2%)                 | 0.45%<br>(-0.15-1.2%)               | 3.6<br>(-1.3-9.3)     | 470<br>(170-850)    |
| South Sudan          | 1990 | Female | 35 to 39 | 48%<br>(33-63%)                | 52%<br>(37-67%)          | 0.25<br>(0.094-0.56)                        | 0.65%<br>(0.23-1.1%)                 | 0.55%<br>(-0.036-1.3%)              | 4.3<br>(-0.27-9.8)    | 400<br>(140-690)    |
| South Sudan          | 1990 | Female | 40 to 44 | 50%<br>(35-65%)                | 50%<br>(35-65%)          | 0.25<br>(0.088-0.55)                        | 0.67%<br>(0.29-1.1%)                 | 0.71%<br>(0.18-1.3%)                | 6.3<br>(1.5-12)       | 410<br>(180-680)    |
| South Sudan          | 1990 | Female | 45 to 49 | 49%<br>(32-66%)                | 51%<br>(34-68%)          | 0.26<br>(0.093-0.58)                        | 0.62%<br>(0.18-1.1%)                 | 0.71%<br>(0.095-1.4%)               | 7.1<br>(0.97-15)      | 370<br>(110-680)    |
| South Sudan          | 1990 | Female | 50 to 54 | 48%<br>(32-65%)                | 52%<br>(35-68%)          | 0.26<br>(0.09-0.6)                          | 0.64%<br>(0.11-1.3%)                 | 0.79%<br>(0.067-1.7%)               | 9<br>(0.76-19)        | 370<br>(59-710)     |
| South Sudan          | 1990 | Female | 55 to 59 | 46%<br>(31-63%)                | 54%<br>(37-69%)          | 0.27<br>(0.089-0.63)                        | 0.36%<br>(-0.17-0.99%)               | 0.46%<br>(-0.22-1.3%)               | 6.1<br>(-3-18)        | 200<br>(-97-550)    |
| South Sudan          | 1990 | Female | 60 to 64 | 47%<br>(31-64%)                | 53%<br>(36-69%)          | 0.27<br>(0.085-0.63)                        | 0.28%<br>(-0.31-0.8%)                | 0.37%<br>(-0.35-1.1%)               | 5.6<br>(-5.7-16)      | 140<br>(-150-440)   |
| South Sudan          | 1990 | Female | 65 to 69 | 48%<br>(33-64%)                | 52%<br>(36-67%)          | 0.25<br>(0.078-0.58)                        | 0.22%<br>(-0.4-0.72%)                | 0.26%<br>(-0.47-0.89%)              | 4.2<br>(-7.6-15)      | 100<br>(-170-340)   |
| South Sudan          | 1990 | Female | 70 to 74 | 47%<br>(33-62%)                | 53%<br>(38-67%)          | 0.22<br>(0.067-0.48)                        | -0.055%<br>(-0.77-0.47%)             | -0.1%<br>(-0.93-0.5%)               | -1.7<br>(-15-8.4)     | -19<br>(-270-160)   |
| South Sudan          | 1990 | Female | 75 to 79 | 44%<br>(28-61%)                | 56%<br>(39-72%)          | 0.19<br>(0.058-0.42)                        | -0.043%<br>(-0.83-0.48%)             | -0.054%<br>(-0.98-0.57%)            | -0.67<br>(-13-7.3)    | -9<br>(-180-100)    |
| South Sudan          | 1990 | Female | 80 to 84 | 43%<br>(27-60%)                | 57%<br>(40-73%)          | 0.17<br>(0.056-0.41)                        | -0.19%<br>(-0.92-0.25%)              | -0.22%<br>(-1.1-0.3%)               | -1.6<br>(-7.7-2.2)    | -17<br>(-80-23)     |
| South Sudan          | 1990 | Female | 85 to 89 | 43%<br>(28-59%)                | 57%<br>(41-72%)          | 0.17<br>(0.051-0.38)                        | -0.23%<br>(-0.83-0.15%)              | -0.27%<br>(-0.98-0.17%)             | -1.1<br>(-4-0.69)     | -8.1<br>(-29-5.3)   |
| South Sudan          | 1990 | Female | 90 to 94 | 45%<br>(29-59%)                | 55%<br>(41-71%)          | 0.16<br>(0.053-0.39)                        | -0.31%<br>(-1-0.1%)                  | -0.41%<br>(-1.3-0.095%)             | -0.59<br>(-1.9-0.14)  | -2.8<br>(-9.2-0.93) |

| Location    | Year | Sex    | Age      | Prevalence of current drinkers | Prevalence of abstainers | Population average of standard drinks daily | Percent of total attributable deaths | Percent of total attributable DALYs | Attributable deaths    | Attributable DALYs    |
|-------------|------|--------|----------|--------------------------------|--------------------------|---------------------------------------------|--------------------------------------|-------------------------------------|------------------------|-----------------------|
| South Sudan | 1990 | Female | 95 plus  | 47%<br>(29-64%)                | 53%<br>(36-71%)          | 0.16<br>(0.048-0.4)                         | -0.057%<br>(-0.74-0.36%)             | -0.13%<br>(-0.95-0.37%)             | -0.057<br>(-0.41-0.16) | -0.099<br>(-1.3-0.64) |
| South Sudan | 1990 | Male   | All Ages | 41%<br>(35-48%)                | 59%<br>(52-65%)          | 0.15<br>(0.065-0.3)                         | 0.25%<br>(0.1-0.42%)                 | 0.27%<br>(0.0081-0.55%)             | 140<br>(4.4-290)       | 10000<br>(4000-17000) |
| South Sudan | 1990 | Male   | 15 to 19 | 41%<br>(29-57%)                | 59%<br>(43-71%)          | 0.18<br>(0.065-0.41)                        | 0.68%<br>(0.37-1.1%)                 | 0.28%<br>(-0.032-0.83%)             | 2.6<br>(-0.33-7.3)     | 670<br>(360-1100)     |
| South Sudan | 1990 | Male   | 20 to 24 | 52%<br>(38-67%)                | 48%<br>(33-62%)          | 0.24<br>(0.09-0.55)                         | 1.1%<br>(0.57-1.9%)                  | 0.35%<br>(-0.17-1.1%)               | 4.9<br>(-2.3-15)       | 1400<br>(670-2300)    |
| South Sudan | 1990 | Male   | 25 to 29 | 56%<br>(40-70%)                | 44%<br>(30-60%)          | 0.29<br>(0.11-0.66)                         | 1.3%<br>(0.57-2.2%)                  | 0.56%<br>(-0.32-1.7%)               | 7<br>(-3.7-20)         | 1300<br>(560-2200)    |
| South Sudan | 1990 | Male   | 30 to 34 | 58%<br>(43-72%)                | 42%<br>(28-57%)          | 0.33<br>(0.12-0.73)                         | 1.3%<br>(0.36-2.5%)                  | 0.72%<br>(-0.48-2.2%)               | 8.1<br>(-5.4-24)       | 1100<br>(290-2000)    |
| South Sudan | 1990 | Male   | 35 to 39 | 60%<br>(46-74%)                | 40%<br>(26-54%)          | 0.35<br>(0.13-0.75)                         | 1.3%<br>(0.33-2.6%)                  | 1%<br>(-0.28-2.6%)                  | 10<br>(-3.1-25)        | 930<br>(220-1700)     |
| South Sudan | 1990 | Male   | 40 to 44 | 60%<br>(47-75%)                | 40%<br>(25-53%)          | 0.36<br>(0.14-0.78)                         | 1.4%<br>(0.49-2.6%)                  | 1.3%<br>(0.11-2.8%)                 | 15<br>(1.2-32)         | 1000<br>(340-1900)    |
| South Sudan | 1990 | Male   | 45 to 49 | 61%<br>(45-76%)                | 39%<br>(24-55%)          | 0.36<br>(0.13-0.82)                         | 1.5%<br>(0.53-2.6%)                  | 1.5%<br>(0.21-3.1%)                 | 18<br>(2.6-39)         | 1000<br>(340-1900)    |
| South Sudan | 1990 | Male   | 50 to 54 | 61%<br>(45-75%)                | 39%<br>(25-55%)          | 0.35<br>(0.13-0.82)                         | 1.5%<br>(0.41-2.6%)                  | 1.6%<br>(0.18-3.1%)                 | 19<br>(2.3-40)         | 880<br>(240-1600)     |
| South Sudan | 1990 | Male   | 55 to 59 | 60%<br>(46-75%)                | 40%<br>(25-54%)          | 0.34<br>(0.12-0.79)                         | 1.3%<br>(0.3-2.3%)                   | 1.4%<br>(0.1-2.7%)                  | 18<br>(1.3-36)         | 680<br>(160-1300)     |
| South Sudan | 1990 | Male   | 60 to 64 | 59%<br>(44-75%)                | 41%<br>(25-56%)          | 0.31<br>(0.11-0.74)                         | 1.1%<br>(0.33-2%)                    | 1.2%<br>(0.21-2.4%)                 | 17<br>(2.7-33)         | 540<br>(150-980)      |
| South Sudan | 1990 | Male   | 65 to 69 | 58%<br>(43-73%)                | 42%<br>(27-57%)          | 0.26<br>(0.088-0.59)                        | 0.64%<br>(0.042-1.2%)                | 0.68%<br>(-0.077-1.4%)              | 9.7<br>(-0.95-21)      | 250<br>(16-500)       |
| South Sudan | 1990 | Male   | 70 to 74 | 56%<br>(41-70%)                | 44%<br>(30-59%)          | 0.21<br>(0.069-0.48)                        | 0.47%<br>(-0.11-0.95%)               | 0.52%<br>(-0.18-1.1%)               | 7<br>(-2.6-15)         | 140<br>(-32-290)      |
| South Sudan | 1990 | Male   | 75 to 79 | 55%<br>(41-70%)                | 45%<br>(30-59%)          | 0.18<br>(0.058-0.4)                         | 0.39%<br>(-0.13-0.8%)                | 0.43%<br>(-0.21-0.95%)              | 4.4<br>(-2.2-9.7)      | 67<br>(-22-140)       |
| South Sudan | 1990 | Male   | 80 to 84 | 53%<br>(36-69%)                | 47%<br>(31-64%)          | 0.16<br>(0.055-0.37)                        | 0.25%<br>(-0.16-0.56%)               | 0.25%<br>(-0.24-0.61%)              | 1.3<br>(-1.3-3.2)      | 16<br>(-9.9-37)       |
| South Sudan | 1990 | Male   | 85 to 89 | 51%<br>(35-65%)                | 49%<br>(35-65%)          | 0.14<br>(0.047-0.32)                        | 0.25%<br>(-0.11-0.5%)                | 0.22%<br>(-0.2-0.54%)               | 0.66<br>(-0.6-1.6)     | 6.4<br>(-2.9-13)      |
| South Sudan | 1990 | Male   | 90 to 94 | 51%<br>(36-66%)                | 49%<br>(34-64%)          | 0.13<br>(0.044-0.3)                         | 0.16%<br>(-0.21-0.41%)               | 0.092%<br>(-0.39-0.39%)             | 0.1<br>(-0.43-0.43)    | 1<br>(-1.5-2.7)       |
| South Sudan | 1990 | Male   | 95 plus  | 53%<br>(34-71%)                | 47%<br>(29-66%)          | 0.12<br>(0.037-0.29)                        | 0.24%<br>(-0.15-0.5%)                | 0.15%<br>(-0.34-0.5%)               | 0.046<br>(-0.1-0.15)   | 0.3<br>(-0.18-0.63)   |
| South Sudan | 1995 | Female | All Ages | 32%<br>(27-39%)                | 68%<br>(61-73%)          | 0.12<br>(0.05-0.25)                         | 0.12%<br>(0.028-0.22%)               | 0.11%<br>(-0.12-0.3%)               | 44<br>(-46-120)        | 3600<br>(790-6500)    |
| South Sudan | 1995 | Female | 15 to 19 | 35%<br>(22-50%)                | 65%<br>(50-78%)          | 0.15<br>(0.05-0.34)                         | 0.33%<br>(0.072-0.66%)               | 0.16%<br>(-0.25-0.62%)              | 0.95<br>(-1.5-3.9)     | 250<br>(54-490)       |
| South Sudan | 1995 | Female | 20 to 24 | 41%<br>(26-57%)                | 59%<br>(43-74%)          | 0.21<br>(0.074-0.47)                        | 0.56%<br>(0.21-0.95%)                | 0.17%<br>(-0.29-0.68%)              | 1.4<br>(-2.4-5.7)      | 470<br>(170-820)      |

| Location    | Year | Sex    | Age      | Prevalence of current drinkers | Prevalence of abstainers | Population average of standard drinks daily | Percent of total attributable deaths | Percent of total attributable DALYs | Attributable deaths   | Attributable DALYs   |
|-------------|------|--------|----------|--------------------------------|--------------------------|---------------------------------------------|--------------------------------------|-------------------------------------|-----------------------|----------------------|
| South Sudan | 1995 | Female | 25 to 29 | 43%<br>(28-59%)                | 57%<br>(41-72%)          | 0.25<br>(0.089-0.57)                        | 0.64%<br>(0.22-1.2%)                 | 0.31%<br>(-0.28-0.97%)              | 2.7<br>(-2.3-8.3)     | 520<br>(170-920)     |
| South Sudan | 1995 | Female | 30 to 34 | 45%<br>(30-61%)                | 55%<br>(39-70%)          | 0.26<br>(0.095-0.61)                        | 0.63%<br>(0.21-1.1%)                 | 0.4%<br>(-0.18-1.1%)                | 3.5<br>(-1.6-9.5)     | 460<br>(150-840)     |
| South Sudan | 1995 | Female | 35 to 39 | 48%<br>(33-63%)                | 52%<br>(37-67%)          | 0.25<br>(0.092-0.54)                        | 0.62%<br>(0.19-1.2%)                 | 0.52%<br>(-0.13-1.3%)               | 4.4<br>(-1.1-11)      | 400<br>(120-730)     |
| South Sudan | 1995 | Female | 40 to 44 | 49%<br>(35-65%)                | 51%<br>(35-65%)          | 0.25<br>(0.086-0.56)                        | 0.65%<br>(0.25-1.1%)                 | 0.68%<br>(0.088-1.3%)               | 5.4<br>(0.62-11)      | 350<br>(130-590)     |
| South Sudan | 1995 | Female | 45 to 49 | 49%<br>(32-66%)                | 51%<br>(34-68%)          | 0.25<br>(0.093-0.58)                        | 0.61%<br>(0.15-1.1%)                 | 0.69%<br>(0.052-1.4%)               | 6.6<br>(0.43-14)      | 340<br>(81-650)      |
| South Sudan | 1995 | Female | 50 to 54 | 48%<br>(32-64%)                | 52%<br>(36-68%)          | 0.26<br>(0.089-0.62)                        | 0.64%<br>(0.052-1.3%)                | 0.78%<br>(0.0051-1.7%)              | 9.1<br>(0.055-20)     | 370<br>(27-760)      |
| South Sudan | 1995 | Female | 55 to 59 | 46%<br>(31-63%)                | 54%<br>(37-69%)          | 0.26<br>(0.086-0.64)                        | 0.35%<br>(-0.24-0.96%)               | 0.44%<br>(-0.34-1.3%)               | 5.8<br>(-4.1-19)      | 190<br>(-130-580)    |
| South Sudan | 1995 | Female | 60 to 64 | 47%<br>(31-65%)                | 53%<br>(35-69%)          | 0.26<br>(0.087-0.61)                        | 0.29%<br>(-0.29-0.86%)               | 0.38%<br>(-0.34-1.1%)               | 5.9<br>(-5.1-17)      | 150<br>(-150-460)    |
| South Sudan | 1995 | Female | 65 to 69 | 48%<br>(33-64%)                | 52%<br>(36-67%)          | 0.24<br>(0.081-0.55)                        | 0.24%<br>(-0.41-0.78%)               | 0.28%<br>(-0.48-0.95%)              | 4.7<br>(-8.2-16)      | 110<br>(-180-370)    |
| South Sudan | 1995 | Female | 70 to 74 | 47%<br>(33-62%)                | 53%<br>(38-67%)          | 0.21<br>(0.067-0.49)                        | -0.055%<br>(-0.77-0.48%)             | -0.1%<br>(-0.95-0.57%)              | -1.7<br>(-16-9)       | -19<br>(-290-170)    |
| South Sudan | 1995 | Female | 75 to 79 | 45%<br>(29-61%)                | 55%<br>(39-71%)          | 0.19<br>(0.06-0.44)                         | -0.038%<br>(-0.86-0.52%)             | -0.047%<br>(-1-0.62%)               | -0.63<br>(-14-8)      | -8.4<br>(-190-120)   |
| South Sudan | 1995 | Female | 80 to 84 | 44%<br>(28-61%)                | 56%<br>(39-72%)          | 0.17<br>(0.059-0.4)                         | -0.21%<br>(-0.99-0.28%)              | -0.24%<br>(-1.2-0.33%)              | -2<br>(-9.5-2.7)      | -21<br>(-100-28)     |
| South Sudan | 1995 | Female | 85 to 89 | 44%<br>(28-58%)                | 56%<br>(42-72%)          | 0.17<br>(0.053-0.4)                         | -0.26%<br>(-0.96-0.17%)              | -0.31%<br>(-1.1-0.2%)               | -1.5<br>(-5.5-1)      | -11<br>(-41-7.6)     |
| South Sudan | 1995 | Female | 90 to 94 | 45%<br>(29-60%)                | 55%<br>(40-71%)          | 0.16<br>(0.054-0.38)                        | -0.31%<br>(-1-0.11%)                 | -0.41%<br>(-1.2-0.1%)               | -0.75<br>(-2.3-0.19)  | -3.5<br>(-11-1.2)    |
| South Sudan | 1995 | Female | 95 plus  | 47%<br>(30-65%)                | 53%<br>(35-70%)          | 0.16<br>(0.049-0.37)                        | -0.05%<br>(-0.73-0.38%)              | -0.12%<br>(-0.97-0.41%)             | -0.063<br>(-0.5-0.21) | -0.1<br>(-1.5-0.81)  |
| South Sudan | 1995 | Male   | All Ages | 40%<br>(34-48%)                | 60%<br>(52-66%)          | 0.15<br>(0.059-0.31)                        | 0.29%<br>(0.099-0.5%)                | 0.33%<br>(-0.0041-0.72%)            | 150<br>(-2-320)       | 9900<br>(3400-17000) |
| South Sudan | 1995 | Male   | 15 to 19 | 42%<br>(29-58%)                | 58%<br>(42-71%)          | 0.18<br>(0.061-0.41)                        | 0.83%<br>(0.44-1.3%)                 | 0.39%<br>(-0.078-1.1%)              | 2.6<br>(-0.45-7.4)    | 630<br>(320-1000)    |
| South Sudan | 1995 | Male   | 20 to 24 | 52%<br>(38-66%)                | 48%<br>(34-62%)          | 0.24<br>(0.084-0.53)                        | 1.4%<br>(0.64-2.4%)                  | 0.52%<br>(-0.33-1.6%)               | 5.1<br>(-3.4-16)      | 1300<br>(570-2100)   |
| South Sudan | 1995 | Male   | 25 to 29 | 56%<br>(40-70%)                | 44%<br>(30-60%)          | 0.29<br>(0.11-0.63)                         | 1.5%<br>(0.55-2.6%)                  | 0.69%<br>(-0.49-2%)                 | 7.5<br>(-5-22)        | 1300<br>(490-2300)   |
| South Sudan | 1995 | Male   | 30 to 34 | 58%<br>(42-73%)                | 42%<br>(27-58%)          | 0.32<br>(0.12-0.69)                         | 1.3%<br>(0.28-2.5%)                  | 0.75%<br>(-0.6-2.2%)                | 8.7<br>(-6.7-26)      | 1100<br>(230-2100)   |
| South Sudan | 1995 | Male   | 35 to 39 | 60%<br>(46-74%)                | 40%<br>(26-54%)          | 0.34<br>(0.13-0.71)                         | 1.4%<br>(0.31-2.7%)                  | 1.1%<br>(-0.34-2.7%)                | 11<br>(-3.3-31)       | 990<br>(210-2000)    |
| South Sudan | 1995 | Male   | 40 to 44 | 60%<br>(46-76%)                | 40%<br>(24-54%)          | 0.35<br>(0.13-0.77)                         | 1.4%<br>(0.37-2.5%)                  | 1.3%<br>(-0.053-2.8%)               | 13<br>(-0.45-31)      | 850<br>(230-1600)    |

| Location    | Year | Sex    | Age      | Prevalence of current drinkers | Prevalence of abstainers | Population average of standard drinks daily | Percent of total attributable deaths | Percent of total attributable DALYs | Attributable deaths  | Attributable DALYs |
|-------------|------|--------|----------|--------------------------------|--------------------------|---------------------------------------------|--------------------------------------|-------------------------------------|----------------------|--------------------|
| South Sudan | 1995 | Male   | 45 to 49 | 61%<br>(45-76%)                | 39%<br>(24-55%)          | 0.35<br>(0.14-0.8)                          | 1.5%<br>(0.43-2.7%)                  | 1.5%<br>(0.095-3.1%)                | 18<br>(1.2-39)       | 940<br>(270-1800)  |
| South Sudan | 1995 | Male   | 50 to 54 | 61%<br>(46-76%)                | 39%<br>(24-54%)          | 0.34<br>(0.12-0.81)                         | 1.5%<br>(0.33-2.6%)                  | 1.6%<br>(0.094-3.1%)                | 20<br>(1.3-42)       | 890<br>(200-1700)  |
| South Sudan | 1995 | Male   | 55 to 59 | 61%<br>(45-75%)                | 39%<br>(25-55%)          | 0.34<br>(0.12-0.79)                         | 1.3%<br>(0.22-2.3%)                  | 1.4%<br>(0.0096-2.8%)               | 18<br>(0.11-38)      | 690<br>(120-1300)  |
| South Sudan | 1995 | Male   | 60 to 64 | 60%<br>(44-75%)                | 40%<br>(25-56%)          | 0.31<br>(0.11-0.72)                         | 1.2%<br>(0.3-2.1%)                   | 1.3%<br>(0.19-2.5%)                 | 18<br>(2.4-36)       | 560<br>(130-1000)  |
| South Sudan | 1995 | Male   | 65 to 69 | 58%<br>(43-75%)                | 42%<br>(25-57%)          | 0.26<br>(0.086-0.57)                        | 0.71%<br>(0.017-1.4%)                | 0.77%<br>(-0.089-1.7%)              | 11<br>(-0.98-23)     | 280<br>(7.1-550)   |
| South Sudan | 1995 | Male   | 70 to 74 | 56%<br>(42-72%)                | 44%<br>(28-58%)          | 0.21<br>(0.069-0.46)                        | 0.5%<br>(-0.12-1%)                   | 0.56%<br>(-0.2-1.2%)                | 7.7<br>(-2.2-17)     | 150<br>(-33-310)   |
| South Sudan | 1995 | Male   | 75 to 79 | 55%<br>(41-71%)                | 45%<br>(29-59%)          | 0.17<br>(0.058-0.39)                        | 0.44%<br>(-0.13-0.9%)                | 0.49%<br>(-0.19-1.1%)               | 5.1<br>(-2.1-11)     | 78<br>(-24-160)    |
| South Sudan | 1995 | Male   | 80 to 84 | 53%<br>(36-70%)                | 47%<br>(30-64%)          | 0.16<br>(0.056-0.35)                        | 0.29%<br>(-0.16-0.64%)               | 0.29%<br>(-0.25-0.7%)               | 1.7<br>(-1.4-4)      | 20<br>(-11-45)     |
| South Sudan | 1995 | Male   | 85 to 89 | 51%<br>(35-65%)                | 49%<br>(35-65%)          | 0.14<br>(0.048-0.31)                        | 0.3%<br>(-0.097-0.58%)               | 0.29%<br>(-0.18-0.63%)              | 1<br>(-0.64-2.3)     | 9.2<br>(-2.9-18)   |
| South Sudan | 1995 | Male   | 90 to 94 | 51%<br>(36-66%)                | 49%<br>(34-64%)          | 0.13<br>(0.044-0.29)                        | 0.17%<br>(-0.19-0.42%)               | 0.12%<br>(-0.34-0.43%)              | 0.16<br>(-0.46-0.58) | 1.4<br>(-1.6-3.5)  |
| South Sudan | 1995 | Male   | 95 plus  | 53%<br>(34-72%)                | 47%<br>(28-66%)          | 0.12<br>(0.036-0.28)                        | 0.28%<br>(-0.12-0.55%)               | 0.21%<br>(-0.29-0.55%)              | 0.071<br>(-0.1-0.19) | 0.4<br>(-0.17-0.8) |
| South Sudan | 2000 | Female | All Ages | 32%<br>(27-39%)                | 68%<br>(61-73%)          | 0.12<br>(0.05-0.25)                         | 0.13%<br>(-0.00036-0.26%)            | 0.11%<br>(-0.17-0.37%)              | 48<br>(-76-170)      | 4100<br>(-11-8300) |
| South Sudan | 2000 | Female | 15 to 19 | 34%<br>(22-50%)                | 66%<br>(50-78%)          | 0.15<br>(0.05-0.34)                         | 0.33%<br>(0.054-0.63%)               | 0.13%<br>(-0.31-0.64%)              | 0.91<br>(-2.1-4.4)   | 280<br>(48-560)    |
| South Sudan | 2000 | Female | 20 to 24 | 41%<br>(26-57%)                | 59%<br>(43-74%)          | 0.2<br>(0.07-0.46)                          | 0.56%<br>(0.17-1%)                   | 0.14%<br>(-0.36-0.69%)              | 1.4<br>(-3.4-6.3)    | 550<br>(160-1000)  |
| South Sudan | 2000 | Female | 25 to 29 | 43%<br>(28-59%)                | 57%<br>(41-72%)          | 0.25<br>(0.086-0.56)                        | 0.56%<br>(0.15-1%)                   | 0.23%<br>(-0.3-0.83%)               | 2.8<br>(-3.3-9.8)    | 590<br>(160-1100)  |
| South Sudan | 2000 | Female | 30 to 34 | 45%<br>(30-61%)                | 55%<br>(39-70%)          | 0.26<br>(0.091-0.6)                         | 0.54%<br>(0.12-1%)                   | 0.3%<br>(-0.24-0.9%)                | 3.8<br>(-3.1-12)     | 540<br>(130-1000)  |
| South Sudan | 2000 | Female | 35 to 39 | 48%<br>(33-63%)                | 52%<br>(37-67%)          | 0.24<br>(0.084-0.55)                        | 0.52%<br>(0.061-1%)                  | 0.38%<br>(-0.25-1.1%)               | 4.9<br>(-3.1-14)     | 470<br>(60-930)    |
| South Sudan | 2000 | Female | 40 to 44 | 49%<br>(35-65%)                | 51%<br>(35-65%)          | 0.24<br>(0.08-0.54)                         | 0.56%<br>(0.15-1.1%)                 | 0.54%<br>(-0.036-1.2%)              | 6.3<br>(-0.45-14)    | 420<br>(110-790)   |
| South Sudan | 2000 | Female | 45 to 49 | 49%<br>(32-65%)                | 51%<br>(35-68%)          | 0.25<br>(0.088-0.56)                        | 0.53%<br>(-0.015-1.1%)               | 0.57%<br>(-0.17-1.4%)               | 6.4<br>(-1.7-16)     | 340<br>(-9.3-710)  |
| South Sudan | 2000 | Female | 50 to 54 | 47%<br>(32-65%)                | 53%<br>(35-68%)          | 0.25<br>(0.088-0.57)                        | 0.57%<br>(-0.14-1.3%)                | 0.68%<br>(-0.26-1.7%)               | 9.6<br>(-4.1-25)     | 390<br>(-96-910)   |
| South Sudan | 2000 | Female | 55 to 59 | 46%<br>(31-63%)                | 54%<br>(37-69%)          | 0.26<br>(0.089-0.61)                        | 0.32%<br>(-0.38-1.1%)                | 0.4%<br>(-0.53-1.4%)                | 6.8<br>(-8.9-24)     | 220<br>(-280-730)  |
| South Sudan | 2000 | Female | 60 to 64 | 47%<br>(31-63%)                | 53%<br>(37-69%)          | 0.26<br>(0.086-0.59)                        | 0.28%<br>(-0.36-0.93%)               | 0.36%<br>(-0.45-1.2%)               | 6.9<br>(-8.3-24)     | 180<br>(-230-610)  |

| Location    | Year | Sex    | Age      | Prevalence of current drinkers | Prevalence of abstainers | Population average of standard drinks daily | Percent of total attributable deaths | Percent of total attributable DALYs | Attributable deaths    | Attributable DALYs    |
|-------------|------|--------|----------|--------------------------------|--------------------------|---------------------------------------------|--------------------------------------|-------------------------------------|------------------------|-----------------------|
| South Sudan | 2000 | Female | 65 to 69 | 48%<br>(33-64%)                | 52%<br>(36-67%)          | 0.24<br>(0.079-0.54)                        | 0.24%<br>(-0.45-0.84%)               | 0.29%<br>(-0.51-1%)                 | 6.2<br>(-11-23)        | 140<br>(-250-510)     |
| South Sudan | 2000 | Female | 70 to 74 | 47%<br>(33-62%)                | 53%<br>(38-67%)          | 0.21<br>(0.066-0.51)                        | -0.051%<br>(-0.85-0.56%)             | -0.094%<br>(-1-0.65%)               | -2<br>(-23-14)         | -23<br>(-400-250)     |
| South Sudan | 2000 | Female | 75 to 79 | 45%<br>(29-61%)                | 55%<br>(39-71%)          | 0.18<br>(0.057-0.44)                        | -0.024%<br>(-0.89-0.56%)             | -0.028%<br>(-1-0.65%)               | -0.49<br>(-18-11)      | -6.9<br>(-260-160)    |
| South Sudan | 2000 | Female | 80 to 84 | 44%<br>(27-61%)                | 56%<br>(39-73%)          | 0.17<br>(0.054-0.39)                        | -0.19%<br>(-0.96-0.29%)              | -0.22%<br>(-1.1-0.36%)              | -2.3<br>(-12-3.7)      | -25<br>(-120-38)      |
| South Sudan | 2000 | Female | 85 to 89 | 43%<br>(28-58%)                | 57%<br>(42-72%)          | 0.16<br>(0.05-0.39)                         | -0.23%<br>(-0.91-0.2%)               | -0.28%<br>(-1.1-0.24%)              | -1.7<br>(-6.4-1.4)     | -12<br>(-47-10)       |
| South Sudan | 2000 | Female | 90 to 94 | 45%<br>(29-60%)                | 55%<br>(40-71%)          | 0.16<br>(0.05-0.38)                         | -0.29%<br>(-1-0.14%)                 | -0.38%<br>(-1.2-0.14%)              | -0.95<br>(-3.1-0.34)   | -4.4<br>(-15-2)       |
| South Sudan | 2000 | Female | 95 plus  | 47%<br>(29-65%)                | 53%<br>(35-71%)          | 0.15<br>(0.046-0.37)                        | -0.0061%<br>(-0.67-0.44%)            | -0.076%<br>(-0.9-0.45%)             | -0.054<br>(-0.62-0.32) | -0.016<br>(-1.9-1.3)  |
| South Sudan | 2000 | Male   | All Ages | 41%<br>(35-48%)                | 59%<br>(52-65%)          | 0.14<br>(0.06-0.31)                         | 0.33%<br>(0.091-0.59%)               | 0.35%<br>(-0.078-0.82%)             | 170<br>(-38-410)       | 12000<br>(3200-21000) |
| South Sudan | 2000 | Male   | 15 to 19 | 41%<br>(29-57%)                | 59%<br>(43-71%)          | 0.18<br>(0.06-0.41)                         | 0.82%<br>(0.4-1.4%)                  | 0.34%<br>(-0.16-1.1%)               | 2.8<br>(-1.4-8.8)      | 750<br>(350-1300)     |
| South Sudan | 2000 | Male   | 20 to 24 | 52%<br>(39-66%)                | 48%<br>(34-61%)          | 0.24<br>(0.084-0.52)                        | 1.4%<br>(0.58-2.4%)                  | 0.47%<br>(-0.42-1.6%)               | 5.7<br>(-4.9-20)       | 1600<br>(640-2800)    |
| South Sudan | 2000 | Male   | 25 to 29 | 56%<br>(40-70%)                | 44%<br>(30-60%)          | 0.28<br>(0.099-0.62)                        | 1.4%<br>(0.48-2.5%)                  | 0.59%<br>(-0.53-1.8%)               | 8.4<br>(-6.8-27)       | 1600<br>(530-2900)    |
| South Sudan | 2000 | Male   | 30 to 34 | 58%<br>(42-72%)                | 42%<br>(28-58%)          | 0.32<br>(0.11-0.69)                         | 1.2%<br>(0.16-2.4%)                  | 0.66%<br>(-0.65-2.1%)               | 10<br>(-10-34)         | 1400<br>(180-2800)    |
| South Sudan | 2000 | Male   | 35 to 39 | 59%<br>(45-74%)                | 41%<br>(26-55%)          | 0.34<br>(0.12-0.72)                         | 1.2%<br>(0.18-2.4%)                  | 0.85%<br>(-0.46-2.5%)               | 14<br>(-7.5-41)        | 1200<br>(180-2600)    |
| South Sudan | 2000 | Male   | 40 to 44 | 60%<br>(46-75%)                | 40%<br>(25-54%)          | 0.34<br>(0.12-0.76)                         | 1.2%<br>(0.21-2.5%)                  | 1.1%<br>(-0.19-2.7%)                | 16<br>(-3.1-41)        | 1100<br>(180-2200)    |
| South Sudan | 2000 | Male   | 45 to 49 | 61%<br>(45-76%)                | 39%<br>(24-55%)          | 0.34<br>(0.13-0.77)                         | 1.3%<br>(0.22-2.5%)                  | 1.3%<br>(-0.11-2.8%)                | 17<br>(-1.7-40)        | 930<br>(160-1900)     |
| South Sudan | 2000 | Male   | 50 to 54 | 61%<br>(45-76%)                | 39%<br>(24-55%)          | 0.34<br>(0.12-0.77)                         | 1.4%<br>(0.14-2.7%)                  | 1.4%<br>(-0.2-3.1%)                 | 22<br>(-3-51)          | 990<br>(93-2000)      |
| South Sudan | 2000 | Male   | 55 to 59 | 61%<br>(45-75%)                | 39%<br>(25-55%)          | 0.33<br>(0.12-0.76)                         | 1.2%<br>(0.038-2.4%)                 | 1.3%<br>(-0.22-2.9%)                | 22<br>(-3.7-50)        | 840<br>(26-1700)      |
| South Sudan | 2000 | Male   | 60 to 64 | 59%<br>(44-75%)                | 41%<br>(25-56%)          | 0.3<br>(0.11-0.7)                           | 1.2%<br>(0.21-2.2%)                  | 1.2%<br>(0.009-2.6%)                | 22<br>(0.16-48)        | 700<br>(110-1400)     |
| South Sudan | 2000 | Male   | 65 to 69 | 58%<br>(43-73%)                | 42%<br>(27-57%)          | 0.25<br>(0.085-0.56)                        | 0.68%<br>(-0.1-1.5%)                 | 0.73%<br>(-0.24-1.8%)               | 13<br>(-3.7-32)        | 340<br>(-51-760)      |
| South Sudan | 2000 | Male   | 70 to 74 | 56%<br>(42-70%)                | 44%<br>(30-58%)          | 0.2<br>(0.07-0.49)                          | 0.49%<br>(-0.19-1.1%)                | 0.54%<br>(-0.28-1.3%)               | 9.5<br>(-4.9-24)       | 190<br>(-71-440)      |
| South Sudan | 2000 | Male   | 75 to 79 | 55%<br>(40-70%)                | 45%<br>(30-60%)          | 0.17<br>(0.056-0.38)                        | 0.44%<br>(-0.16-0.95%)               | 0.48%<br>(-0.24-1.1%)               | 6.8<br>(-3.3-16)       | 100<br>(-36-230)      |
| South Sudan | 2000 | Male   | 80 to 84 | 53%<br>(36-70%)                | 47%<br>(30-64%)          | 0.15<br>(0.054-0.34)                        | 0.29%<br>(-0.19-0.71%)               | 0.3%<br>(-0.27-0.79%)               | 2.3<br>(-2-6)          | 28<br>(-17-66)        |

| Location    | Year | Sex    | Age      | Prevalence of current drinkers | Prevalence of abstainers | Population average of standard drinks daily | Percent of total attributable deaths | Percent of total attributable DALYs | Attributable deaths    | Attributable DALYs    |
|-------------|------|--------|----------|--------------------------------|--------------------------|---------------------------------------------|--------------------------------------|-------------------------------------|------------------------|-----------------------|
| South Sudan | 2000 | Male   | 85 to 89 | 51%<br>(35-65%)                | 49%<br>(35-65%)          | 0.13<br>(0.047-0.32)                        | 0.3%<br>(-0.12-0.62%)                | 0.3%<br>(-0.21-0.67%)               | 1.3<br>(-0.91-2.9)     | 12<br>(-4.6-24)       |
| South Sudan | 2000 | Male   | 90 to 94 | 51%<br>(36-66%)                | 49%<br>(34-64%)          | 0.12<br>(0.043-0.31)                        | 0.19%<br>(-0.18-0.45%)               | 0.14%<br>(-0.32-0.47%)              | 0.26<br>(-0.57-0.84)   | 2.2<br>(-2-5.1)       |
| South Sudan | 2000 | Male   | 95 plus  | 53%<br>(33-71%)                | 47%<br>(29-67%)          | 0.12<br>(0.034-0.28)                        | 0.31%<br>(-0.12-0.6%)                | 0.24%<br>(-0.32-0.6%)               | 0.12<br>(-0.15-0.29)   | 0.61<br>(-0.24-1.2)   |
| South Sudan | 2005 | Female | All Ages | 32%<br>(27-39%)                | 68%<br>(61-73%)          | 0.12<br>(0.049-0.26)                        | 0.14%<br>(-0.012-0.3%)               | 0.11%<br>(-0.23-0.43%)              | 53<br>(-110-220)       | 4800<br>(-370-10000)  |
| South Sudan | 2005 | Female | 15 to 19 | 34%<br>(22-50%)                | 66%<br>(50-78%)          | 0.16<br>(0.051-0.36)                        | 0.37%<br>(0.043-0.75%)               | 0.15%<br>(-0.36-0.78%)              | 1.2<br>(-2.7-6.1)      | 360<br>(40-730)       |
| South Sudan | 2005 | Female | 20 to 24 | 41%<br>(26-57%)                | 59%<br>(43-74%)          | 0.22<br>(0.07-0.5)                          | 0.63%<br>(0.21-1.1%)                 | 0.17%<br>(-0.43-0.78%)              | 1.7<br>(-4.1-7.8)      | 660<br>(200-1200)     |
| South Sudan | 2005 | Female | 25 to 29 | 43%<br>(27-60%)                | 57%<br>(40-73%)          | 0.26<br>(0.091-0.58)                        | 0.6%<br>(0.16-1.1%)                  | 0.25%<br>(-0.32-0.89%)              | 3.3<br>(-4.1-11)       | 710<br>(190-1300)     |
| South Sudan | 2005 | Female | 30 to 34 | 45%<br>(29-61%)                | 55%<br>(39-71%)          | 0.27<br>(0.095-0.63)                        | 0.52%<br>(0.12-0.98%)                | 0.28%<br>(-0.27-0.91%)              | 4.4<br>(-4.4-14)       | 640<br>(140-1200)     |
| South Sudan | 2005 | Female | 35 to 39 | 48%<br>(32-64%)                | 52%<br>(36-68%)          | 0.25<br>(0.088-0.57)                        | 0.5%<br>(0.022-1%)                   | 0.35%<br>(-0.29-1.1%)               | 5.8<br>(-4.6-17)       | 570<br>(29-1200)      |
| South Sudan | 2005 | Female | 40 to 44 | 49%<br>(35-65%)                | 51%<br>(35-65%)          | 0.25<br>(0.083-0.58)                        | 0.51%<br>(0.056-1%)                  | 0.46%<br>(-0.13-1.1%)               | 7.4<br>(-2.1-18)       | 510<br>(53-990)       |
| South Sudan | 2005 | Female | 45 to 49 | 49%<br>(32-66%)                | 51%<br>(34-68%)          | 0.26<br>(0.089-0.59)                        | 0.51%<br>(-0.095-1.1%)               | 0.54%<br>(-0.25-1.4%)               | 7.9<br>(-3.7-20)       | 420<br>(-78-930)      |
| South Sudan | 2005 | Female | 50 to 54 | 47%<br>(32-64%)                | 53%<br>(36-68%)          | 0.26<br>(0.094-0.62)                        | 0.55%<br>(-0.25-1.4%)                | 0.66%<br>(-0.4-1.8%)                | 9.7<br>(-6.2-27)       | 400<br>(-180-1000)    |
| South Sudan | 2005 | Female | 55 to 59 | 46%<br>(31-62%)                | 54%<br>(38-69%)          | 0.27<br>(0.093-0.64)                        | 0.31%<br>(-0.52-1.2%)                | 0.39%<br>(-0.72-1.6%)               | 7.2<br>(-13-30)        | 230<br>(-390-920)     |
| South Sudan | 2005 | Female | 60 to 64 | 47%<br>(30-63%)                | 53%<br>(37-70%)          | 0.27<br>(0.092-0.67)                        | 0.25%<br>(-0.52-1%)                  | 0.34%<br>(-0.61-1.4%)               | 7.5<br>(-13-31)        | 190<br>(-380-770)     |
| South Sudan | 2005 | Female | 65 to 69 | 48%<br>(32-64%)                | 52%<br>(36-68%)          | 0.25<br>(0.082-0.6)                         | 0.23%<br>(-0.56-0.92%)               | 0.28%<br>(-0.7-1.2%)                | 7<br>(-17-29)          | 160<br>(-370-640)     |
| South Sudan | 2005 | Female | 70 to 74 | 47%<br>(33-62%)                | 53%<br>(38-67%)          | 0.22<br>(0.069-0.57)                        | -0.051%<br>(-0.87-0.61%)             | -0.096%<br>(-1.1-0.7%)              | -2.4<br>(-28-18)       | -28<br>(-480-340)     |
| South Sudan | 2005 | Female | 75 to 79 | 45%<br>(28-61%)                | 55%<br>(39-72%)          | 0.19<br>(0.058-0.49)                        | -0.031%<br>(-0.95-0.6%)              | -0.035%<br>(-1.1-0.71%)             | -0.73<br>(-24-16)      | -11<br>(-340-220)     |
| South Sudan | 2005 | Female | 80 to 84 | 43%<br>(27-61%)                | 57%<br>(39-73%)          | 0.18<br>(0.054-0.43)                        | -0.2%<br>(-0.98-0.35%)               | -0.23%<br>(-1.1-0.42%)              | -3.4<br>(-17-6.3)      | -37<br>(-180-64)      |
| South Sudan | 2005 | Female | 85 to 89 | 43%<br>(27-58%)                | 57%<br>(42-73%)          | 0.17<br>(0.052-0.43)                        | -0.24%<br>(-0.98-0.22%)              | -0.29%<br>(-1.2-0.26%)              | -2<br>(-7.9-1.9)       | -15<br>(-60-14)       |
| South Sudan | 2005 | Female | 90 to 94 | 45%<br>(29-60%)                | 55%<br>(40-71%)          | 0.17<br>(0.051-0.39)                        | -0.3%<br>(-1.1-0.17%)                | -0.4%<br>(-1.3-0.2%)                | -1.1<br>(-3.5-0.52)    | -5<br>(-17-2.9)       |
| South Sudan | 2005 | Female | 95 plus  | 47%<br>(30-65%)                | 53%<br>(35-70%)          | 0.16<br>(0.045-0.42)                        | -0.0015%<br>(-0.67-0.46%)            | -0.067%<br>(-0.9-0.49%)             | -0.058<br>(-0.79-0.43) | -0.0013<br>(-2.5-1.6) |
| South Sudan | 2005 | Male   | All Ages | 40%<br>(34-48%)                | 60%<br>(52-66%)          | 0.15<br>(0.059-0.32)                        | 0.38%<br>(0.079-0.68%)               | 0.4%<br>(-0.12-0.93%)               | 210<br>(-60-510)       | 14000<br>(3100-26000) |

| Location    | Year | Sex    | Age      | Prevalence of current drinkers | Prevalence of abstainers | Population average of standard drinks daily | Percent of total attributable deaths | Percent of total attributable DALYs | Attributable deaths  | Attributable DALYs    |
|-------------|------|--------|----------|--------------------------------|--------------------------|---------------------------------------------|--------------------------------------|-------------------------------------|----------------------|-----------------------|
| South Sudan | 2005 | Male   | 15 to 19 | 41%<br>(28-57%)                | 59%<br>(43-72%)          | 0.18<br>(0.062-0.42)                        | 0.96%<br>(0.43-1.6%)                 | 0.44%<br>(-0.23-1.4%)               | 3.6<br>(-1.7-11)     | 950<br>(420-1600)     |
| South Sudan | 2005 | Male   | 20 to 24 | 52%<br>(38-66%)                | 48%<br>(34-62%)          | 0.24<br>(0.08-0.57)                         | 1.8%<br>(0.75-3.1%)                  | 0.64%<br>(-0.68-2.2%)               | 6.9<br>(-7-24)       | 1900<br>(740-3300)    |
| South Sudan | 2005 | Male   | 25 to 29 | 56%<br>(40-70%)                | 44%<br>(30-60%)          | 0.29<br>(0.11-0.67)                         | 1.7%<br>(0.51-3%)                    | 0.77%<br>(-0.74-2.4%)               | 11<br>(-10-34)       | 1900<br>(540-3500)    |
| South Sudan | 2005 | Male   | 30 to 34 | 58%<br>(42-72%)                | 42%<br>(28-58%)          | 0.33<br>(0.12-0.73)                         | 1.4%<br>(0.17-2.6%)                  | 0.76%<br>(-0.7-2.4%)                | 13<br>(-13-41)       | 1700<br>(230-3400)    |
| South Sudan | 2005 | Male   | 35 to 39 | 59%<br>(46-74%)                | 41%<br>(26-54%)          | 0.35<br>(0.12-0.79)                         | 1.3%<br>(0.18-2.7%)                  | 0.94%<br>(-0.51-2.7%)               | 17<br>(-9.5-50)      | 1600<br>(200-3300)    |
| South Sudan | 2005 | Male   | 40 to 44 | 60%<br>(46-75%)                | 40%<br>(25-54%)          | 0.36<br>(0.12-0.84)                         | 1.3%<br>(0.17-2.6%)                  | 1.1%<br>(-0.21-2.8%)                | 21<br>(-4-53)        | 1400<br>(180-2800)    |
| South Sudan | 2005 | Male   | 45 to 49 | 61%<br>(45-76%)                | 39%<br>(24-55%)          | 0.35<br>(0.12-0.79)                         | 1.3%<br>(0.15-2.6%)                  | 1.3%<br>(-0.25-3.1%)                | 23<br>(-4.6-53)      | 1200<br>(130-2400)    |
| South Sudan | 2005 | Male   | 50 to 54 | 61%<br>(45-75%)                | 39%<br>(25-55%)          | 0.35<br>(0.13-0.84)                         | 1.4%<br>(-0.069-2.8%)                | 1.4%<br>(-0.51-3.3%)                | 22<br>(-7.2-53)      | 1000<br>(-58-2100)    |
| South Sudan | 2005 | Male   | 55 to 59 | 60%<br>(45-75%)                | 40%<br>(25-55%)          | 0.34<br>(0.12-0.81)                         | 1.3%<br>(-0.013-2.7%)                | 1.3%<br>(-0.35-3.2%)                | 25<br>(-6.2-61)      | 950<br>(-8.1-2100)    |
| South Sudan | 2005 | Male   | 60 to 64 | 59%<br>(44-75%)                | 41%<br>(25-56%)          | 0.31<br>(0.11-0.78)                         | 1.2%<br>(0.084-2.3%)                 | 1.3%<br>(-0.095-2.7%)               | 28<br>(-1.9-58)      | 860<br>(63-1700)      |
| South Sudan | 2005 | Male   | 65 to 69 | 58%<br>(43-73%)                | 42%<br>(27-57%)          | 0.26<br>(0.087-0.62)                        | 0.7%<br>(-0.14-1.6%)                 | 0.75%<br>(-0.31-1.8%)               | 17<br>(-6.1-41)      | 430<br>(-85-970)      |
| South Sudan | 2005 | Male   | 70 to 74 | 56%<br>(41-70%)                | 44%<br>(30-59%)          | 0.21<br>(0.071-0.52)                        | 0.5%<br>(-0.29-1.2%)                 | 0.55%<br>(-0.38-1.4%)               | 12<br>(-8.6-31)      | 230<br>(-130-560)     |
| South Sudan | 2005 | Male   | 75 to 79 | 54%<br>(40-70%)                | 46%<br>(30-60%)          | 0.17<br>(0.056-0.43)                        | 0.45%<br>(-0.23-1%)                  | 0.49%<br>(-0.34-1.2%)               | 8.7<br>(-5.8-21)     | 130<br>(-66-300)      |
| South Sudan | 2005 | Male   | 80 to 84 | 52%<br>(36-69%)                | 48%<br>(31-64%)          | 0.16<br>(0.051-0.38)                        | 0.3%<br>(-0.25-0.79%)                | 0.31%<br>(-0.36-0.88%)              | 3.3<br>(-4-9.5)      | 41<br>(-34-110)       |
| South Sudan | 2005 | Male   | 85 to 89 | 50%<br>(35-64%)                | 50%<br>(36-65%)          | 0.14<br>(0.045-0.36)                        | 0.31%<br>(-0.17-0.66%)               | 0.3%<br>(-0.29-0.73%)               | 1.6<br>(-1.6-3.9)    | 14<br>(-7.7-31)       |
| South Sudan | 2005 | Male   | 90 to 94 | 51%<br>(35-66%)                | 49%<br>(34-65%)          | 0.13<br>(0.042-0.31)                        | 0.2%<br>(-0.21-0.51%)                | 0.15%<br>(-0.34-0.52%)              | 0.31<br>(-0.71-1.1)  | 2.6<br>(-2.7-6.3)     |
| South Sudan | 2005 | Male   | 95 plus  | 52%<br>(32-71%)                | 48%<br>(29-68%)          | 0.12<br>(0.035-0.31)                        | 0.32%<br>(-0.15-0.67%)               | 0.25%<br>(-0.35-0.68%)              | 0.15<br>(-0.21-0.41) | 0.78<br>(-0.38-1.6)   |
| South Sudan | 2010 | Female | All Ages | 33%<br>(27-39%)                | 67%<br>(61-73%)          | 0.13<br>(0.054-0.28)                        | 0.16%<br>(-0.027-0.34%)              | 0.11%<br>(-0.28-0.47%)              | 63<br>(-160-280)     | 6000<br>(-1000-13000) |
| South Sudan | 2010 | Female | 15 to 19 | 35%<br>(22-50%)                | 65%<br>(50-78%)          | 0.17<br>(0.051-0.38)                        | 0.4%<br>(0.029-0.78%)                | 0.18%<br>(-0.39-0.86%)              | 1.7<br>(-4-7.7)      | 480<br>(32-980)       |
| South Sudan | 2010 | Female | 20 to 24 | 41%<br>(26-57%)                | 59%<br>(43-74%)          | 0.23<br>(0.071-0.52)                        | 0.7%<br>(0.2-1.2%)                   | 0.2%<br>(-0.46-0.89%)               | 2.3<br>(-5.4-10)     | 880<br>(250-1600)     |
| South Sudan | 2010 | Female | 25 to 29 | 43%<br>(27-59%)                | 57%<br>(41-73%)          | 0.27<br>(0.092-0.6)                         | 0.67%<br>(0.18-1.2%)                 | 0.29%<br>(-0.35-1%)                 | 4.3<br>(-5.6-15)     | 890<br>(260-1600)     |
| South Sudan | 2010 | Female | 30 to 34 | 45%<br>(29-61%)                | 55%<br>(39-71%)          | 0.28<br>(0.099-0.66)                        | 0.57%<br>(0.12-1.1%)                 | 0.31%<br>(-0.26-1.1%)               | 5.7<br>(-4.8-19)     | 810<br>(170-1600)     |

| Location    | Year | Sex    | Age      | Prevalence of current drinkers | Prevalence of abstainers | Population average of standard drinks daily | Percent of total attributable deaths | Percent of total attributable DALYs | Attributable deaths    | Attributable DALYs    |
|-------------|------|--------|----------|--------------------------------|--------------------------|---------------------------------------------|--------------------------------------|-------------------------------------|------------------------|-----------------------|
| South Sudan | 2010 | Female | 35 to 39 | 48%<br>(33-63%)                | 52%<br>(37-67%)          | 0.27<br>(0.09-0.6)                          | 0.51%<br>(0.00098-1.1%)              | 0.36%<br>(-0.3-1.1%)                | 7.1<br>(-5.9-23)       | 700<br>(1.5-1500)     |
| South Sudan | 2010 | Female | 40 to 44 | 49%<br>(35-65%)                | 51%<br>(35-65%)          | 0.26<br>(0.085-0.59)                        | 0.54%<br>(0.025-1.1%)                | 0.49%<br>(-0.16-1.2%)               | 9.6<br>(-3.3-24)       | 660<br>(33-1300)      |
| South Sudan | 2010 | Female | 45 to 49 | 49%<br>(32-65%)                | 51%<br>(35-68%)          | 0.27<br>(0.091-0.63)                        | 0.52%<br>(-0.091-1.2%)               | 0.55%<br>(-0.27-1.5%)               | 10<br>(-4.9-29)        | 550<br>(-96-1300)     |
| South Sudan | 2010 | Female | 50 to 54 | 47%<br>(32-64%)                | 53%<br>(36-68%)          | 0.27<br>(0.095-0.64)                        | 0.59%<br>(-0.28-1.6%)                | 0.7%<br>(-0.41-2%)                  | 13<br>(-8.8-38)        | 530<br>(-270-1400)    |
| South Sudan | 2010 | Female | 55 to 59 | 46%<br>(31-62%)                | 54%<br>(38-69%)          | 0.28<br>(0.096-0.66)                        | 0.32%<br>(-0.59-1.4%)                | 0.41%<br>(-0.8-1.9%)                | 7.9<br>(-16-35)        | 250<br>(-480-1100)    |
| South Sudan | 2010 | Female | 60 to 64 | 47%<br>(31-64%)                | 53%<br>(36-69%)          | 0.28<br>(0.097-0.66)                        | 0.25%<br>(-0.56-1.1%)                | 0.34%<br>(-0.68-1.5%)               | 8.4<br>(-18-36)        | 210<br>(-500-920)     |
| South Sudan | 2010 | Female | 65 to 69 | 48%<br>(33-64%)                | 52%<br>(36-67%)          | 0.26<br>(0.091-0.62)                        | 0.22%<br>(-0.59-0.94%)               | 0.26%<br>(-0.71-1.2%)               | 7.9<br>(-22-37)        | 180<br>(-520-800)     |
| South Sudan | 2010 | Female | 70 to 74 | 47%<br>(33-62%)                | 53%<br>(38-67%)          | 0.23<br>(0.075-0.57)                        | -0.082%<br>(-0.94-0.62%)             | -0.13%<br>(-1.2-0.73%)              | -4<br>(-36-23)         | -56<br>(-640-410)     |
| South Sudan | 2010 | Female | 75 to 79 | 45%<br>(30-61%)                | 55%<br>(39-70%)          | 0.2<br>(0.065-0.51)                         | -0.056%<br>(-1-0.62%)                | -0.062%<br>(-1.2-0.74%)             | -1.7<br>(-35-21)       | -26<br>(-490-290)     |
| South Sudan | 2010 | Female | 80 to 84 | 44%<br>(27-60%)                | 56%<br>(40-73%)          | 0.19<br>(0.061-0.47)                        | -0.23%<br>(-1-0.35%)                 | -0.26%<br>(-1.2-0.41%)              | -5.3<br>(-24-8.6)      | -58<br>(-260-87)      |
| South Sudan | 2010 | Female | 85 to 89 | 43%<br>(27-58%)                | 57%<br>(42-73%)          | 0.18<br>(0.054-0.44)                        | -0.27%<br>(-1-0.24%)                 | -0.32%<br>(-1.2-0.3%)               | -3.1<br>(-12-3)        | -23<br>(-88-21)       |
| South Sudan | 2010 | Female | 90 to 94 | 45%<br>(30-59%)                | 55%<br>(41-70%)          | 0.17<br>(0.054-0.41)                        | -0.33%<br>(-1.1-0.16%)               | -0.43%<br>(-1.4-0.17%)              | -1.4<br>(-4.4-0.51)    | -6.5<br>(-22-3.3)     |
| South Sudan | 2010 | Female | 95 plus  | 47%<br>(29-65%)                | 53%<br>(35-71%)          | 0.17<br>(0.047-0.43)                        | -0.01%<br>(-0.7-0.48%)               | -0.083%<br>(-0.93-0.54%)            | -0.075<br>(-0.83-0.49) | -0.033<br>(-2.5-1.8)  |
| South Sudan | 2010 | Male   | All Ages | 40%<br>(34-48%)                | 60%<br>(52-66%)          | 0.16<br>(0.063-0.33)                        | 0.44%<br>(0.092-0.8%)                | 0.45%<br>(-0.14-1.1%)               | 280<br>(-79-660)       | 19000<br>(4300-34000) |
| South Sudan | 2010 | Male   | 15 to 19 | 40%<br>(27-55%)                | 60%<br>(45-73%)          | 0.19<br>(0.058-0.44)                        | 1%<br>(0.46-1.7%)                    | 0.47%<br>(-0.26-1.5%)               | 5<br>(-2.9-15)         | 1300<br>(550-2200)    |
| South Sudan | 2010 | Male   | 20 to 24 | 51%<br>(37-66%)                | 49%<br>(34-63%)          | 0.25<br>(0.081-0.57)                        | 1.9%<br>(0.77-3.3%)                  | 0.73%<br>(-0.74-2.4%)               | 9.9<br>(-10-35)        | 2500<br>(920-4500)    |
| South Sudan | 2010 | Male   | 25 to 29 | 55%<br>(39-70%)                | 45%<br>(30-61%)          | 0.3<br>(0.11-0.69)                          | 1.9%<br>(0.52-3.4%)                  | 0.92%<br>(-0.92-2.9%)               | 14<br>(-14-46)         | 2500<br>(690-4500)    |
| South Sudan | 2010 | Male   | 30 to 34 | 58%<br>(43-73%)                | 42%<br>(27-57%)          | 0.34<br>(0.13-0.77)                         | 1.6%<br>(0.26-3.1%)                  | 0.93%<br>(-0.82-2.8%)               | 17<br>(-16-55)         | 2200<br>(360-4300)    |
| South Sudan | 2010 | Male   | 35 to 39 | 59%<br>(45-74%)                | 41%<br>(26-55%)          | 0.37<br>(0.13-0.83)                         | 1.4%<br>(0.18-2.9%)                  | 1.1%<br>(-0.59-2.9%)                | 23<br>(-12-63)         | 2000<br>(250-4100)    |
| South Sudan | 2010 | Male   | 40 to 44 | 60%<br>(46-75%)                | 40%<br>(25-54%)          | 0.38<br>(0.12-0.86)                         | 1.4%<br>(0.2-2.8%)                   | 1.3%<br>(-0.25-3.1%)                | 29<br>(-5.9-71)        | 1900<br>(260-3700)    |
| South Sudan | 2010 | Male   | 45 to 49 | 60%<br>(45-75%)                | 40%<br>(25-55%)          | 0.37<br>(0.13-0.83)                         | 1.4%<br>(0.13-2.9%)                  | 1.4%<br>(-0.24-3.2%)                | 31<br>(-5.6-71)        | 1600<br>(150-3300)    |
| South Sudan | 2010 | Male   | 50 to 54 | 60%<br>(45-74%)                | 40%<br>(26-55%)          | 0.37<br>(0.13-0.83)                         | 1.5%<br>(-0.095-3.1%)                | 1.5%<br>(-0.47-3.6%)                | 31<br>(-10-74)         | 1400<br>(-86-2900)    |



| Location    | Year | Sex    | Age      | Prevalence of current drinkers | Prevalence of abstainers | Population average of standard drinks daily | Percent of total attributable deaths | Percent of total attributable DALYs | Attributable deaths  | Attributable DALYs    |
|-------------|------|--------|----------|--------------------------------|--------------------------|---------------------------------------------|--------------------------------------|-------------------------------------|----------------------|-----------------------|
| South Sudan | 2010 | Male   | 55 to 59 | 60%<br>(45-75%)                | 40%<br>(25-55%)          | 0.36<br>(0.13-0.81)                         | 1.4%<br>(-0.098-3%)                  | 1.4%<br>(-0.45-3.6%)                | 28<br>(-9-69)        | 1100<br>(-78-2300)    |
| South Sudan | 2010 | Male   | 60 to 64 | 59%<br>(43-76%)                | 41%<br>(24-57%)          | 0.32<br>(0.11-0.73)                         | 1.3%<br>(0.15-2.5%)                  | 1.4%<br>(-0.072-2.9%)               | 34<br>(-1.9-72)      | 1000<br>(110-2100)    |
| South Sudan | 2010 | Male   | 65 to 69 | 58%<br>(43-73%)                | 42%<br>(27-57%)          | 0.27<br>(0.096-0.62)                        | 0.73%<br>(-0.2-1.6%)                 | 0.78%<br>(-0.35-1.9%)               | 22<br>(-11-54)       | 560<br>(-150-1300)    |
| South Sudan | 2010 | Male   | 70 to 74 | 56%<br>(41-70%)                | 44%<br>(30-59%)          | 0.22<br>(0.076-0.54)                        | 0.51%<br>(-0.29-1.2%)                | 0.57%<br>(-0.41-1.5%)               | 16<br>(-11-40)       | 310<br>(-170-750)     |
| South Sudan | 2010 | Male   | 75 to 79 | 54%<br>(39-70%)                | 46%<br>(30-61%)          | 0.18<br>(0.064-0.46)                        | 0.45%<br>(-0.32-1.1%)                | 0.5%<br>(-0.43-1.2%)                | 12<br>(-10-29)       | 170<br>(-110-410)     |
| South Sudan | 2010 | Male   | 80 to 84 | 52%<br>(35-69%)                | 48%<br>(31-65%)          | 0.16<br>(0.057-0.39)                        | 0.31%<br>(-0.27-0.82%)               | 0.31%<br>(-0.39-0.93%)              | 4.6<br>(-5.7-14)     | 57<br>(-51-150)       |
| South Sudan | 2010 | Male   | 85 to 89 | 50%<br>(34-64%)                | 50%<br>(36-66%)          | 0.14<br>(0.049-0.34)                        | 0.31%<br>(-0.18-0.71%)               | 0.3%<br>(-0.31-0.78%)               | 2.2<br>(-2.2-5.8)    | 20<br>(-12-46)        |
| South Sudan | 2010 | Male   | 90 to 94 | 50%<br>(35-67%)                | 50%<br>(33-65%)          | 0.13<br>(0.045-0.32)                        | 0.2%<br>(-0.23-0.53%)                | 0.15%<br>(-0.37-0.55%)              | 0.37<br>(-0.95-1.4)  | 3.1<br>(-3.4-8.3)     |
| South Sudan | 2010 | Male   | 95 plus  | 52%<br>(33-71%)                | 48%<br>(29-67%)          | 0.13<br>(0.035-0.33)                        | 0.32%<br>(-0.18-0.73%)               | 0.24%<br>(-0.38-0.75%)              | 0.16<br>(-0.25-0.49) | 0.85<br>(-0.47-2)     |
| South Sudan | 2016 | Female | All Ages | 33%<br>(27-39%)                | 67%<br>(61-73%)          | 0.14<br>(0.057-0.3)                         | 0.18%<br>(-0.032-0.41%)              | 0.12%<br>(-0.34-0.57%)              | 80<br>(-240-400)     | 8100<br>(-1500-18000) |
| South Sudan | 2016 | Female | 15 to 19 | 34%<br>(22-51%)                | 66%<br>(49-78%)          | 0.17<br>(0.057-0.4)                         | 0.41%<br>(0.05-0.8%)                 | 0.19%<br>(-0.39-0.84%)              | 2.2<br>(-4.7-10)     | 620<br>(68-1300)      |
| South Sudan | 2016 | Female | 20 to 24 | 41%<br>(26-57%)                | 59%<br>(43-74%)          | 0.24<br>(0.079-0.52)                        | 0.76%<br>(0.25-1.3%)                 | 0.23%<br>(-0.47-0.99%)              | 3.2<br>(-6.9-14)     | 1200<br>(400-2100)    |
| South Sudan | 2016 | Female | 25 to 29 | 43%<br>(28-59%)                | 57%<br>(41-72%)          | 0.28<br>(0.1-0.63)                          | 0.77%<br>(0.25-1.4%)                 | 0.35%<br>(-0.36-1.2%)               | 6<br>(-6.6-20)       | 1200<br>(400-2300)    |
| South Sudan | 2016 | Female | 30 to 34 | 45%<br>(29-61%)                | 55%<br>(39-71%)          | 0.3<br>(0.1-0.7)                            | 0.68%<br>(0.11-1.3%)                 | 0.4%<br>(-0.34-1.3%)                | 7.8<br>(-6.6-24)     | 1100<br>(170-2100)    |
| South Sudan | 2016 | Female | 35 to 39 | 48%<br>(32-63%)                | 52%<br>(37-68%)          | 0.28<br>(0.097-0.67)                        | 0.62%<br>(0.034-1.3%)                | 0.47%<br>(-0.32-1.4%)               | 9.8<br>(-6.3-29)     | 940<br>(50-2000)      |
| South Sudan | 2016 | Female | 40 to 44 | 49%<br>(35-65%)                | 51%<br>(35-65%)          | 0.28<br>(0.096-0.66)                        | 0.64%<br>(0.072-1.3%)                | 0.61%<br>(-0.13-1.5%)               | 13<br>(-2.7-32)      | 880<br>(92-1700)      |
| South Sudan | 2016 | Female | 45 to 49 | 49%<br>(32-64%)                | 51%<br>(36-68%)          | 0.29<br>(0.098-0.64)                        | 0.62%<br>(-0.14-1.4%)                | 0.67%<br>(-0.37-1.9%)               | 15<br>(-7.6-42)      | 780<br>(-160-1900)    |
| South Sudan | 2016 | Female | 50 to 54 | 47%<br>(32-64%)                | 53%<br>(36-68%)          | 0.29<br>(0.1-0.66)                          | 0.66%<br>(-0.35-1.8%)                | 0.79%<br>(-0.5-2.3%)                | 19<br>(-12-56)       | 760<br>(-400-2100)    |
| South Sudan | 2016 | Female | 55 to 59 | 46%<br>(31-62%)                | 54%<br>(38-69%)          | 0.29<br>(0.11-0.7)                          | 0.35%<br>(-0.71-1.5%)                | 0.45%<br>(-0.98-2%)                 | 12<br>(-25-52)       | 370<br>(-780-1600)    |
| South Sudan | 2016 | Female | 60 to 64 | 47%<br>(30-63%)                | 53%<br>(37-70%)          | 0.29<br>(0.1-0.68)                          | 0.26%<br>(-0.65-1.1%)                | 0.36%<br>(-0.79-1.6%)               | 10<br>(-21-42)       | 250<br>(-630-1100)    |
| South Sudan | 2016 | Female | 65 to 69 | 48%<br>(33-64%)                | 52%<br>(36-67%)          | 0.27<br>(0.096-0.65)                        | 0.21%<br>(-0.72-1%)                  | 0.26%<br>(-0.88-1.2%)               | 9.1<br>(-31-47)      | 210<br>(-700-1000)    |
| South Sudan | 2016 | Female | 70 to 74 | 47%<br>(32-62%)                | 53%<br>(38-68%)          | 0.24<br>(0.082-0.57)                        | -0.1%<br>(-1.1-0.68%)                | -0.15%<br>(-1.3-0.78%)              | -6.4<br>(-54-33)     | -90<br>(-970-620)     |

| Location    | Year | Sex    | Age      | Prevalence of current drinkers | Prevalence of abstainers | Population average of standard drinks daily | Percent of total attributable deaths | Percent of total attributable DALYs | Attributable deaths  | Attributable DALYs    |
|-------------|------|--------|----------|--------------------------------|--------------------------|---------------------------------------------|--------------------------------------|-------------------------------------|----------------------|-----------------------|
| South Sudan | 2016 | Female | 75 to 79 | 45%<br>(29-61%)                | 55%<br>(39-71%)          | 0.21<br>(0.067-0.51)                        | -0.082%<br>(-1.1-0.61%)              | -0.093%<br>(-1.3-0.72%)             | -3.7<br>(-50-29)     | -53<br>(-720-410)     |
| South Sudan | 2016 | Female | 80 to 84 | 44%<br>(27-61%)                | 56%<br>(39-73%)          | 0.2<br>(0.059-0.46)                         | -0.27%<br>(-1.1-0.35%)               | -0.3%<br>(-1.3-0.42%)               | -8.9<br>(-37-12)     | -97<br>(-390-120)     |
| South Sudan | 2016 | Female | 85 to 89 | 43%<br>(28-58%)                | 57%<br>(42-72%)          | 0.19<br>(0.059-0.46)                        | -0.3%<br>(-1.1-0.24%)                | -0.36%<br>(-1.3-0.29%)              | -5.4<br>(-19-4.5)    | -40<br>(-140-31)      |
| South Sudan | 2016 | Female | 90 to 94 | 45%<br>(29-60%)                | 55%<br>(40-71%)          | 0.18<br>(0.055-0.45)                        | -0.38%<br>(-1.2-0.15%)               | -0.48%<br>(-1.5-0.15%)              | -2.4<br>(-7.3-0.72)  | -11<br>(-36-4.4)      |
| South Sudan | 2016 | Female | 95 plus  | 47%<br>(29-65%)                | 53%<br>(35-71%)          | 0.18<br>(0.05-0.46)                         | -0.033%<br>(-0.75-0.5%)              | -0.11%<br>(-1-0.55%)                | -0.13<br>(-1.1-0.64) | -0.15<br>(-3.5-2.4)   |
| South Sudan | 2016 | Male   | All Ages | 41%<br>(34-48%)                | 59%<br>(52-66%)          | 0.17<br>(0.068-0.36)                        | 0.52%<br>(0.099-1%)                  | 0.53%<br>(-0.17-1.3%)               | 390<br>(-130-940)    | 26000<br>(5000-49000) |
| South Sudan | 2016 | Male   | 15 to 19 | 41%<br>(28-56%)                | 59%<br>(44-72%)          | 0.2<br>(0.065-0.45)                         | 1%<br>(0.48-1.8%)                    | 0.5%<br>(-0.27-1.5%)                | 7.1<br>(-3.6-22)     | 1700<br>(740-2900)    |
| South Sudan | 2016 | Male   | 20 to 24 | 52%<br>(37-66%)                | 48%<br>(34-63%)          | 0.26<br>(0.089-0.58)                        | 2%<br>(0.75-3.5%)                    | 0.8%<br>(-0.86-2.6%)                | 15<br>(-14-49)       | 3500<br>(1200-6100)   |
| South Sudan | 2016 | Male   | 25 to 29 | 56%<br>(40-70%)                | 44%<br>(30-60%)          | 0.32<br>(0.12-0.72)                         | 2.1%<br>(0.58-3.8%)                  | 1.1%<br>(-1-3.4%)                   | 21<br>(-20-69)       | 3500<br>(940-6600)    |
| South Sudan | 2016 | Male   | 30 to 34 | 58%<br>(42-73%)                | 42%<br>(27-58%)          | 0.36<br>(0.13-0.85)                         | 1.8%<br>(0.22-3.6%)                  | 1.1%<br>(-0.94-3.4%)                | 25<br>(-22-77)       | 3000<br>(360-6200)    |
| South Sudan | 2016 | Male   | 35 to 39 | 59%<br>(46-75%)                | 41%<br>(25-54%)          | 0.38<br>(0.14-0.88)                         | 1.7%<br>(0.069-3.5%)                 | 1.3%<br>(-0.71-3.6%)                | 32<br>(-16-89)       | 2700<br>(120-5600)    |
| South Sudan | 2016 | Male   | 40 to 44 | 60%<br>(45-75%)                | 40%<br>(25-55%)          | 0.39<br>(0.14-0.96)                         | 1.6%<br>(0.13-3.3%)                  | 1.5%<br>(-0.39-3.7%)                | 39<br>(-9.2-97)      | 2500<br>(190-5300)    |
| South Sudan | 2016 | Male   | 45 to 49 | 61%<br>(45-76%)                | 39%<br>(24-55%)          | 0.39<br>(0.13-0.87)                         | 1.7%<br>(0.13-3.3%)                  | 1.7%<br>(-0.28-3.8%)                | 45<br>(-7.3-110)     | 2300<br>(180-4800)    |
| South Sudan | 2016 | Male   | 50 to 54 | 61%<br>(45-75%)                | 39%<br>(25-55%)          | 0.38<br>(0.14-0.88)                         | 1.6%<br>(-0.072-3.4%)                | 1.7%<br>(-0.49-4%)                  | 45<br>(-12-110)      | 2000<br>(-79-4300)    |
| South Sudan | 2016 | Male   | 55 to 59 | 60%<br>(45-75%)                | 40%<br>(25-55%)          | 0.38<br>(0.14-0.86)                         | 1.5%<br>(-0.18-3.3%)                 | 1.6%<br>(-0.57-3.9%)                | 41<br>(-15-100)      | 1600<br>(-180-3500)   |
| South Sudan | 2016 | Male   | 60 to 64 | 59%<br>(44-75%)                | 41%<br>(25-56%)          | 0.34<br>(0.12-0.77)                         | 1.3%<br>(0.097-2.6%)                 | 1.5%<br>(-0.085-3%)                 | 40<br>(-2.5-84)      | 1200<br>(87-2400)     |
| South Sudan | 2016 | Male   | 65 to 69 | 58%<br>(43-73%)                | 42%<br>(27-57%)          | 0.28<br>(0.1-0.65)                          | 0.76%<br>(-0.21-1.7%)                | 0.81%<br>(-0.38-2%)                 | 27<br>(-12-66)       | 680<br>(-180-1500)    |
| South Sudan | 2016 | Male   | 70 to 74 | 56%<br>(41-70%)                | 44%<br>(30-59%)          | 0.23<br>(0.081-0.53)                        | 0.54%<br>(-0.36-1.4%)                | 0.6%<br>(-0.51-1.6%)                | 22<br>(-18-58)       | 430<br>(-290-1100)    |
| South Sudan | 2016 | Male   | 75 to 79 | 54%<br>(40-71%)                | 46%<br>(29-60%)          | 0.19<br>(0.067-0.43)                        | 0.48%<br>(-0.31-1.1%)                | 0.53%<br>(-0.42-1.3%)               | 17<br>(-13-42)       | 250<br>(-160-620)     |
| South Sudan | 2016 | Male   | 80 to 84 | 52%<br>(35-69%)                | 48%<br>(31-65%)          | 0.17<br>(0.06-0.39)                         | 0.32%<br>(-0.32-0.87%)               | 0.32%<br>(-0.43-1%)                 | 6.8<br>(-9.4-21)     | 84<br>(-79-240)       |
| South Sudan | 2016 | Male   | 85 to 89 | 50%<br>(35-66%)                | 50%<br>(34-65%)          | 0.15<br>(0.05-0.36)                         | 0.32%<br>(-0.22-0.78%)               | 0.31%<br>(-0.35-0.87%)              | 3.3<br>(-3.7-9.2)    | 30<br>(-21-73)        |
| South Sudan | 2016 | Male   | 90 to 94 | 51%<br>(35-66%)                | 49%<br>(34-65%)          | 0.14<br>(0.045-0.34)                        | 0.21%<br>(-0.28-0.57%)               | 0.15%<br>(-0.44-0.6%)               | 0.55<br>(-1.6-2.2)   | 4.6<br>(-6.1-13)      |

| Location    | Year | Sex    | Age      | Prevalence of current drinkers | Prevalence of abstainers | Population average of standard drinks daily | Percent of total attributable deaths | Percent of total attributable DALYs | Attributable deaths  | Attributable DALYs      |
|-------------|------|--------|----------|--------------------------------|--------------------------|---------------------------------------------|--------------------------------------|-------------------------------------|----------------------|-------------------------|
| South Sudan | 2016 | Male   | 95 plus  | 52%<br>(32-71%)                | 48%<br>(29-68%)          | 0.13<br>(0.037-0.33)                        | 0.32%<br>(-0.25-0.77%)               | 0.25%<br>(-0.48-0.81%)              | 0.21<br>(-0.41-0.68) | 1.1<br>(-0.87-2.6)      |
| Sudan       | 1990 | Female | All Ages | 11%<br>(6.8-17%)               | 89%<br>(83-93%)          | 0.52<br>(0.37-0.69)                         | 1.3%<br>(0.65-1.9%)                  | 2.4%<br>(0.91-4.5%)                 | 2100<br>(810-3900)   | 76000<br>(39000-120000) |
| Sudan       | 1990 | Female | 15 to 19 | 9.9%<br>(3.3-21%)              | 90%<br>(79-97%)          | 0.41<br>(0.13-0.91)                         | 1.3%<br>(0.41-2.9%)                  | 2%<br>(0.51-4.8%)                   | 40<br>(10-94)        | 3300<br>(990-7100)      |
| Sudan       | 1990 | Female | 20 to 24 | 13%<br>(4-26%)                 | 87%<br>(74-96%)          | 0.66<br>(0.21-1.4)                          | 2.5%<br>(0.88-4.9%)                  | 3.6%<br>(1-7.6%)                    | 81<br>(22-170)       | 6200<br>(2200-12000)    |
| Sudan       | 1990 | Female | 25 to 29 | 14%<br>(4.5-29%)               | 86%<br>(71-96%)          | 0.81<br>(0.25-1.6)                          | 3%<br>(1.1-5.7%)                     | 4.6%<br>(1.5-9.2%)                  | 95<br>(31-190)       | 6600<br>(2600-13000)    |
| Sudan       | 1990 | Female | 30 to 34 | 16%<br>(4.2-33%)               | 84%<br>(67-96%)          | 0.96<br>(0.31-1.8)                          | 3.5%<br>(1.4-6.4%)                   | 5.5%<br>(1.9-11%)                   | 110<br>(38-220)      | 6900<br>(2700-13000)    |
| Sudan       | 1990 | Female | 35 to 39 | 18%<br>(5.2-35%)               | 82%<br>(65-95%)          | 1.1<br>(0.35-2.1)                           | 3.6%<br>(1.4-6.9%)                   | 5.6%<br>(1.8-11%)                   | 120<br>(40-240)      | 6600<br>(2400-13000)    |
| Sudan       | 1990 | Female | 40 to 44 | 19%<br>(7-35%)                 | 81%<br>(65-93%)          | 1.3<br>(0.44-2.4)                           | 4.1%<br>(1.5-7.6%)                   | 6.4%<br>(2.1-12%)                   | 140<br>(46-260)      | 6700<br>(2400-13000)    |
| Sudan       | 1990 | Female | 45 to 49 | 19%<br>(7-36%)                 | 81%<br>(64-93%)          | 1.3<br>(0.45-2.8)                           | 4.4%<br>(1.6-8.7%)                   | 6.8%<br>(2.3-13%)                   | 160<br>(52-310)      | 6700<br>(2300-13000)    |
| Sudan       | 1990 | Female | 50 to 54 | 20%<br>(8.1-39%)               | 80%<br>(61-92%)          | 1.4<br>(0.45-3)                             | 4.8%<br>(1.4-9.6%)                   | 6.9%<br>(2-14%)                     | 190<br>(54-390)      | 7100<br>(2100-14000)    |
| Sudan       | 1990 | Female | 55 to 59 | 21%<br>(8.8-41%)               | 79%<br>(59-91%)          | 1.4<br>(0.41-3)                             | 4.9%<br>(1.1-10%)                    | 6.7%<br>(1.5-14%)                   | 220<br>(51-460)      | 7100<br>(1700-15000)    |
| Sudan       | 1990 | Female | 60 to 64 | 22%<br>(9.1-41%)               | 78%<br>(59-91%)          | 1.3<br>(0.37-3.1)                           | 4.6%<br>(0.6-9.9%)                   | 6%<br>(0.76-13%)                    | 240<br>(31-530)      | 6600<br>(870-15000)     |
| Sudan       | 1990 | Female | 65 to 69 | 23%<br>(10-40%)                | 77%<br>(60-90%)          | 1.2<br>(0.34-2.6)                           | 3.8%<br>(0.33-8.9%)                  | 4.8%<br>(0.43-11%)                  | 230<br>(20-550)      | 5100<br>(460-12000)     |
| Sudan       | 1990 | Female | 70 to 74 | 21%<br>(9.2-38%)               | 79%<br>(62-91%)          | 0.94<br>(0.25-2.3)                          | 2.9%<br>(-0.21-8.9%)                 | 3.6%<br>(-0.25-11%)                 | 190<br>(-13-560)     | 3400<br>(-230-10000)    |
| Sudan       | 1990 | Female | 75 to 79 | 19%<br>(7.5-37%)               | 81%<br>(63-93%)          | 0.77<br>(0.17-2.1)                          | 2.3%<br>(-0.34-7.6%)                 | 2.8%<br>(-0.4-9.1%)                 | 130<br>(-19-440)     | 1800<br>(-280-6200)     |
| Sudan       | 1990 | Female | 80 to 84 | 17%<br>(6.1-38%)               | 83%<br>(62-94%)          | 0.7<br>(0.15-2)                             | 2.4%<br>(-0.16-7.8%)                 | 2.9%<br>(-0.21-9.7%)                | 100<br>(-7.6-360)    | 1100<br>(-73-3700)      |
| Sudan       | 1990 | Female | 85 to 89 | 18%<br>(6.1-39%)               | 82%<br>(61-94%)          | 0.71<br>(0.14-2.1)                          | 2.3%<br>(-0.17-8.1%)                 | 2.7%<br>(-0.23-9.6%)                | 60<br>(-4.9-210)     | 440<br>(-32-1500)       |
| Sudan       | 1990 | Female | 90 to 94 | 21%<br>(6.7-43%)               | 79%<br>(57-93%)          | 0.8<br>(0.15-2.3)                           | 2.1%<br>(-0.42-7.6%)                 | 2.5%<br>(-0.54-9.4%)                | 21<br>(-4.5-82)      | 110<br>(-21-400)        |
| Sudan       | 1990 | Female | 95 plus  | 25%<br>(7.6-50%)               | 75%<br>(50-92%)          | 0.94<br>(0.16-2.8)                          | 2.1%<br>(-0.85-8.3%)                 | 2.5%<br>(-1-10%)                    | 5.7<br>(-2.4-23)     | 19<br>(-7.5-76)         |
| Sudan       | 1990 | Male   | All Ages | 8.7%<br>(5.9-12%)              | 91%<br>(88-94%)          | 0.58<br>(0.44-0.75)                         | 1.3%<br>(0.9-1.8%)                   | 2.2%<br>(1.4-3.3%)                  | 2100<br>(1300-3000)  | 85000<br>(60000-120000) |
| Sudan       | 1990 | Male   | 15 to 19 | 7.2%<br>(3.1-14%)              | 93%<br>(86-97%)          | 0.29<br>(0.097-0.64)                        | 1.1%<br>(0.55-2.2%)                  | 1.5%<br>(0.54-3.2%)                 | 29<br>(11-63)        | 2700<br>(1300-5400)     |
| Sudan       | 1990 | Male   | 20 to 24 | 11%<br>(4.6-22%)               | 89%<br>(78-95%)          | 0.66<br>(0.24-1.3)                          | 2.9%<br>(1.4-5.1%)                   | 3.6%<br>(1.4-6.9%)                  | 93<br>(37-180)       | 7400<br>(3600-13000)    |

| Location | Year | Sex    | Age      | Prevalence of current drinkers | Prevalence of abstainers | Population average of standard drinks daily | Percent of total attributable deaths | Percent of total attributable DALYs | Attributable deaths | Attributable DALYs       |
|----------|------|--------|----------|--------------------------------|--------------------------|---------------------------------------------|--------------------------------------|-------------------------------------|---------------------|--------------------------|
| Sudan    | 1990 | Male   | 25 to 29 | 14%<br>(5.4-26%)               | 86%<br>(74-95%)          | 1<br>(0.41-2)                               | 4.2%<br>(2-7.2%)                     | 5.6%<br>(2.4-10%)                   | 130<br>(57-250)     | 9300<br>(4500-16000)     |
| Sudan    | 1990 | Male   | 30 to 34 | 15%<br>(5.9-30%)               | 85%<br>(70-94%)          | 1.3<br>(0.54-2.4)                           | 4.9%<br>(2.5-8.2%)                   | 6.6%<br>(3.2-11%)                   | 160<br>(74-270)     | 9700<br>(5000-16000)     |
| Sudan    | 1990 | Male   | 35 to 39 | 17%<br>(6.7-31%)               | 83%<br>(69-93%)          | 1.5<br>(0.59-2.8)                           | 5.3%<br>(2.7-8.7%)                   | 7.2%<br>(3.4-12%)                   | 180<br>(83-300)     | 9800<br>(5000-16000)     |
| Sudan    | 1990 | Male   | 40 to 44 | 17%<br>(7.9-31%)               | 83%<br>(69-92%)          | 1.6<br>(0.62-3.2)                           | 5%<br>(2.5-8.5%)                     | 6.8%<br>(3.2-12%)                   | 170<br>(81-300)     | 8700<br>(4300-14000)     |
| Sudan    | 1990 | Male   | 45 to 49 | 17%<br>(6.6-31%)               | 83%<br>(69-93%)          | 1.6<br>(0.53-3.4)                           | 5.1%<br>(2.3-8.6%)                   | 6.8%<br>(2.8-12%)                   | 190<br>(80-320)     | 8100<br>(3600-14000)     |
| Sudan    | 1990 | Male   | 50 to 54 | 16%<br>(7-32%)                 | 84%<br>(68-93%)          | 1.6<br>(0.55-3.5)                           | 4.6%<br>(2-7.9%)                     | 5.9%<br>(2.5-10%)                   | 180<br>(77-320)     | 7000<br>(3000-12000)     |
| Sudan    | 1990 | Male   | 55 to 59 | 16%<br>(7-29%)                 | 84%<br>(71-93%)          | 1.5<br>(0.51-3.2)                           | 4.5%<br>(2-8%)                       | 5.7%<br>(2.5-10%)                   | 200<br>(86-350)     | 6400<br>(2900-11000)     |
| Sudan    | 1990 | Male   | 60 to 64 | 15%<br>(6.5-28%)               | 85%<br>(72-94%)          | 1.4<br>(0.42-3)                             | 4.1%<br>(1.6-7.7%)                   | 5.1%<br>(2-9.5%)                    | 200<br>(80-380)     | 5700<br>(2200-11000)     |
| Sudan    | 1990 | Male   | 65 to 69 | 14%<br>(6.4-26%)               | 86%<br>(74-94%)          | 1.1<br>(0.36-2.4)                           | 3.6%<br>(1.3-7%)                     | 4.4%<br>(1.5-8.7%)                  | 190<br>(67-370)     | 4400<br>(1600-8400)      |
| Sudan    | 1990 | Male   | 70 to 74 | 13%<br>(6.1-24%)               | 87%<br>(76-94%)          | 0.87<br>(0.26-2.1)                          | 2.9%<br>(0.71-6.4%)                  | 3.5%<br>(0.83-7.8%)                 | 160<br>(37-360)     | 3000<br>(710-6600)       |
| Sudan    | 1990 | Male   | 75 to 79 | 11%<br>(4.9-22%)               | 89%<br>(78-95%)          | 0.67<br>(0.17-1.7)                          | 2.2%<br>(0.37-5.2%)                  | 2.5%<br>(0.41-6.2%)                 | 100<br>(17-260)     | 1500<br>(250-3600)       |
| Sudan    | 1990 | Male   | 80 to 84 | 10%<br>(4.1-20%)               | 90%<br>(80-96%)          | 0.55<br>(0.14-1.4)                          | 1.9%<br>(0.38-4.6%)                  | 2.3%<br>(0.44-5.4%)                 | 65<br>(13-160)      | 680<br>(140-1600)        |
| Sudan    | 1990 | Male   | 85 to 89 | 9.8%<br>(4-19%)                | 90%<br>(81-96%)          | 0.5<br>(0.14-1.3)                           | 1.6%<br>(0.28-4%)                    | 1.8%<br>(0.31-4.6%)                 | 29<br>(5-75)        | 220<br>(40-560)          |
| Sudan    | 1990 | Male   | 90 to 94 | 11%<br>(4.5-22%)               | 89%<br>(78-95%)          | 0.53<br>(0.13-1.4)                          | 1.3%<br>(0.16-3.8%)                  | 1.5%<br>(0.13-4.5%)                 | 9.8<br>(0.82-28)    | 51<br>(6.3-140)          |
| Sudan    | 1990 | Male   | 95 plus  | 14%<br>(5-29%)                 | 86%<br>(71-95%)          | 0.6<br>(0.12-1.7)                           | 1.3%<br>(0.0043-4.1%)                | 1.5%<br>(-0.072-4.8%)               | 2.3<br>(-0.11-7.2)  | 8<br>(0.025-25)          |
| Sudan    | 1995 | Female | All Ages | 11%<br>(6.6-17%)               | 89%<br>(83-93%)          | 0.63<br>(0.49-0.79)                         | 1.6%<br>(0.93-2.4%)                  | 3.1%<br>(1.4-5.2%)                  | 3000<br>(1400-5200) | 110000<br>(63000-160000) |
| Sudan    | 1995 | Female | 15 to 19 | 9.9%<br>(3-22%)                | 90%<br>(78-97%)          | 0.5<br>(0.14-1.1)                           | 1.5%<br>(0.52-3.2%)                  | 2.5%<br>(0.66-5.5%)                 | 54<br>(15-120)      | 4400<br>(1500-9300)      |
| Sudan    | 1995 | Female | 20 to 24 | 13%<br>(4-28%)                 | 87%<br>(72-96%)          | 0.81<br>(0.26-1.7)                          | 2.8%<br>(1-5.4%)                     | 4.3%<br>(1.2-9%)                    | 110<br>(32-230)     | 8300<br>(3200-16000)     |
| Sudan    | 1995 | Female | 25 to 29 | 14%<br>(3.8-30%)               | 86%<br>(70-96%)          | 0.98<br>(0.29-1.9)                          | 3.3%<br>(1.3-6%)                     | 5.3%<br>(1.7-10%)                   | 130<br>(41-250)     | 8900<br>(3400-16000)     |
| Sudan    | 1995 | Female | 30 to 34 | 16%<br>(4.1-32%)               | 84%<br>(68-96%)          | 1.2<br>(0.35-2.2)                           | 3.8%<br>(1.5-6.8%)                   | 6.2%<br>(2.2-11%)                   | 150<br>(51-270)     | 9200<br>(3700-16000)     |
| Sudan    | 1995 | Female | 35 to 39 | 18%<br>(5-34%)                 | 82%<br>(66-95%)          | 1.3<br>(0.44-2.6)                           | 4%<br>(1.6-7.1%)                     | 6.3%<br>(2.3-12%)                   | 160<br>(55-290)     | 8700<br>(3300-15000)     |
| Sudan    | 1995 | Female | 40 to 44 | 18%<br>(6.7-35%)               | 82%<br>(65-93%)          | 1.5<br>(0.54-2.8)                           | 4.5%<br>(1.9-8.2%)                   | 7.3%<br>(2.8-13%)                   | 190<br>(72-340)     | 9100<br>(3700-16000)     |

| Location | Year | Sex    | Age      | Prevalence of current drinkers | Prevalence of abstainers | Population average of standard drinks daily | Percent of total attributable deaths | Percent of total attributable DALYs | Attributable deaths | Attributable DALYs       |
|----------|------|--------|----------|--------------------------------|--------------------------|---------------------------------------------|--------------------------------------|-------------------------------------|---------------------|--------------------------|
| Sudan    | 1995 | Female | 45 to 49 | 19%<br>(6.9-36%)               | 81%<br>(64-93%)          | 1.6<br>(0.56-3.4)                           | 5%<br>(1.9-9.3%)                     | 7.8%<br>(2.9-14%)                   | 220<br>(81-410)     | 9400<br>(3600-17000)     |
| Sudan    | 1995 | Female | 50 to 54 | 20%<br>(7.8-38%)               | 80%<br>(62-92%)          | 1.7<br>(0.56-3.6)                           | 5.5%<br>(1.9-10%)                    | 7.9%<br>(2.7-15%)                   | 270<br>(88-510)     | 9900<br>(3300-19000)     |
| Sudan    | 1995 | Female | 55 to 59 | 21%<br>(8.2-40%)               | 79%<br>(60-92%)          | 1.7<br>(0.5-3.7)                            | 5.6%<br>(1.7-11%)                    | 7.7%<br>(2.4-15%)                   | 310<br>(96-600)     | 9900<br>(3100-19000)     |
| Sudan    | 1995 | Female | 60 to 64 | 22%<br>(8.2-41%)               | 78%<br>(59-92%)          | 1.6<br>(0.43-3.7)                           | 5.3%<br>(1.1-11%)                    | 6.9%<br>(1.4-14%)                   | 340<br>(68-700)     | 9300<br>(1900-19000)     |
| Sudan    | 1995 | Female | 65 to 69 | 22%<br>(9.5-40%)               | 78%<br>(60-91%)          | 1.4<br>(0.38-3)                             | 4.6%<br>(0.81-10%)                   | 5.9%<br>(1-13%)                     | 340<br>(56-760)     | 7700<br>(1300-17000)     |
| Sudan    | 1995 | Female | 70 to 74 | 21%<br>(8.4-38%)               | 79%<br>(62-92%)          | 1.1<br>(0.27-2.8)                           | 3.6%<br>(0.077-9.4%)                 | 4.5%<br>(0.079-12%)                 | 280<br>(5-760)      | 5200<br>(110-13000)      |
| Sudan    | 1995 | Female | 75 to 79 | 19%<br>(6.8-38%)               | 81%<br>(62-93%)          | 0.92<br>(0.19-2.6)                          | 2.9%<br>(-0.16-8.6%)                 | 3.5%<br>(-0.18-10%)                 | 200<br>(-10-620)    | 2900<br>(-150-8600)      |
| Sudan    | 1995 | Female | 80 to 84 | 17%<br>(6.3-38%)               | 83%<br>(62-94%)          | 0.84<br>(0.18-2.5)                          | 3%<br>(0.06-9.1%)                    | 3.6%<br>(0.071-11%)                 | 160<br>(3-490)      | 1700<br>(31-5000)        |
| Sudan    | 1995 | Female | 85 to 89 | 18%<br>(6.2-39%)               | 82%<br>(61-94%)          | 0.86<br>(0.18-2.5)                          | 2.9%<br>(0.032-9.3%)                 | 3.5%<br>(0.037-11%)                 | 94<br>(1-300)       | 680<br>(7.1-2100)        |
| Sudan    | 1995 | Female | 90 to 94 | 21%<br>(7-44%)                 | 79%<br>(56-93%)          | 0.98<br>(0.19-2.9)                          | 2.7%<br>(-0.15-8.9%)                 | 3.3%<br>(-0.21-11%)                 | 34<br>(-2.1-110)    | 170<br>(-8.9-560)        |
| Sudan    | 1995 | Female | 95 plus  | 26%<br>(8-50%)                 | 74%<br>(50-92%)          | 1.2<br>(0.19-3.6)                           | 2.8%<br>(-0.5-9.7%)                  | 3.3%<br>(-0.65-12%)                 | 9.6<br>(-1.8-34)    | 32<br>(-5.5-110)         |
| Sudan    | 1995 | Male   | All Ages | 8.6%<br>(5.9-12%)              | 91%<br>(88-94%)          | 0.69<br>(0.54-0.87)                         | 1.5%<br>(1.1-2%)                     | 2.6%<br>(1.8-3.7%)                  | 2800<br>(1900-3900) | 110000<br>(84000-150000) |
| Sudan    | 1995 | Male   | 15 to 19 | 7%<br>(2.9-14%)                | 93%<br>(86-97%)          | 0.34<br>(0.11-0.73)                         | 1.3%<br>(0.61-2.6%)                  | 1.8%<br>(0.64-3.9%)                 | 39<br>(14-88)       | 3600<br>(1700-7300)      |
| Sudan    | 1995 | Male   | 20 to 24 | 11%<br>(4.2-21%)               | 89%<br>(79-96%)          | 0.77<br>(0.28-1.5)                          | 3.4%<br>(1.6-5.8%)                   | 4.4%<br>(1.7-8.2%)                  | 130<br>(52-240)     | 10000<br>(4900-18000)    |
| Sudan    | 1995 | Male   | 25 to 29 | 14%<br>(5.5-26%)               | 86%<br>(74-94%)          | 1.2<br>(0.51-2.2)                           | 4.7%<br>(2.4-7.8%)                   | 6.4%<br>(2.9-11%)                   | 180<br>(84-320)     | 13000<br>(6600-21000)    |
| Sudan    | 1995 | Male   | 30 to 34 | 15%<br>(6.1-29%)               | 85%<br>(71-94%)          | 1.5<br>(0.66-2.7)                           | 5.3%<br>(2.8-8.8%)                   | 7.3%<br>(3.7-13%)                   | 210<br>(110-360)    | 13000<br>(6900-21000)    |
| Sudan    | 1995 | Male   | 35 to 39 | 17%<br>(6.7-31%)               | 83%<br>(69-93%)          | 1.8<br>(0.7-3.2)                            | 5.7%<br>(3.1-9.3%)                   | 7.9%<br>(4-13%)                     | 230<br>(120-390)    | 13000<br>(6800-21000)    |
| Sudan    | 1995 | Male   | 40 to 44 | 17%<br>(7.7-30%)               | 83%<br>(70-92%)          | 1.9<br>(0.74-3.6)                           | 5.5%<br>(2.8-8.8%)                   | 7.4%<br>(3.6-12%)                   | 230<br>(110-380)    | 11000<br>(5900-18000)    |
| Sudan    | 1995 | Male   | 45 to 49 | 17%<br>(6.8-31%)               | 83%<br>(69-93%)          | 1.9<br>(0.63-4)                             | 5.5%<br>(2.7-9%)                     | 7.3%<br>(3.4-12%)                   | 250<br>(120-420)    | 11000<br>(5200-18000)    |
| Sudan    | 1995 | Male   | 50 to 54 | 16%<br>(7-31%)                 | 84%<br>(69-93%)          | 1.9<br>(0.64-3.9)                           | 5%<br>(2.4-8.3%)                     | 6.5%<br>(3.1-11%)                   | 240<br>(110-410)    | 9200<br>(4400-15000)     |
| Sudan    | 1995 | Male   | 55 to 59 | 15%<br>(7-29%)                 | 85%<br>(71-93%)          | 1.8<br>(0.62-3.8)                           | 4.9%<br>(2.4-8.4%)                   | 6.2%<br>(3.1-11%)                   | 260<br>(130-450)    | 8500<br>(4200-15000)     |
| Sudan    | 1995 | Male   | 60 to 64 | 15%<br>(6.5-28%)               | 85%<br>(72-93%)          | 1.6<br>(0.5-3.5)                            | 4.5%<br>(2-8.4%)                     | 5.6%<br>(2.5-10%)                   | 270<br>(120-500)    | 7400<br>(3400-14000)     |

| Location | Year | Sex    | Age      | Prevalence of current drinkers | Prevalence of abstainers | Population average of standard drinks daily | Percent of total attributable deaths | Percent of total attributable DALYs | Attributable deaths | Attributable DALYs       |
|----------|------|--------|----------|--------------------------------|--------------------------|---------------------------------------------|--------------------------------------|-------------------------------------|---------------------|--------------------------|
| Sudan    | 1995 | Male   | 65 to 69 | 14%<br>(6.4-27%)               | 86%<br>(73-94%)          | 1.3<br>(0.43-2.8)                           | 4%<br>(1.6-7.3%)                     | 4.9%<br>(2-8.9%)                    | 260<br>(100-470)    | 5900<br>(2400-11000)     |
| Sudan    | 1995 | Male   | 70 to 74 | 13%<br>(5.7-23%)               | 87%<br>(77-94%)          | 0.99<br>(0.29-2.3)                          | 3.3%<br>(0.92-6.6%)                  | 3.9%<br>(1.1-8%)                    | 220<br>(60-450)     | 4000<br>(1100-8200)      |
| Sudan    | 1995 | Male   | 75 to 79 | 11%<br>(4.7-21%)               | 89%<br>(79-95%)          | 0.75<br>(0.19-1.9)                          | 2.4%<br>(0.52-5.4%)                  | 2.8%<br>(0.6-6.4%)                  | 140<br>(31-320)     | 2000<br>(430-4500)       |
| Sudan    | 1995 | Male   | 80 to 84 | 9.9%<br>(4-20%)                | 90%<br>(80-96%)          | 0.63<br>(0.17-1.6)                          | 2.2%<br>(0.55-5%)                    | 2.6%<br>(0.65-5.8%)                 | 91<br>(22-200)      | 960<br>(240-2100)        |
| Sudan    | 1995 | Male   | 85 to 89 | 9.7%<br>(3.8-19%)              | 90%<br>(81-96%)          | 0.58<br>(0.16-1.5)                          | 1.8%<br>(0.39-4.4%)                  | 2.2%<br>(0.42-5.2%)                 | 44<br>(8.5-110)     | 330<br>(70-780)          |
| Sudan    | 1995 | Male   | 90 to 94 | 11%<br>(4.4-21%)               | 89%<br>(79-96%)          | 0.61<br>(0.16-1.6)                          | 1.6%<br>(0.26-4.3%)                  | 1.9%<br>(0.26-5.1%)                 | 14<br>(2-38)        | 72<br>(12-190)           |
| Sudan    | 1995 | Male   | 95 plus  | 13%<br>(5.1-28%)               | 87%<br>(72-95%)          | 0.71<br>(0.14-2)                            | 1.6%<br>(0.067-4.6%)                 | 1.8%<br>(-0.0044-5.3%)              | 3.4<br>(-0.0083-10) | 12<br>(0.5-35)           |
| Sudan    | 2000 | Female | All Ages | 11%<br>(6.5-17%)               | 89%<br>(83-94%)          | 0.63<br>(0.5-0.78)                          | 1.5%<br>(0.92-2.3%)                  | 3%<br>(1.4-5%)                      | 3100<br>(1400-5200) | 110000<br>(63000-160000) |
| Sudan    | 2000 | Female | 15 to 19 | 9.7%<br>(3.1-21%)              | 90%<br>(79-97%)          | 0.49<br>(0.14-1.1)                          | 1.3%<br>(0.48-2.8%)                  | 2.2%<br>(0.6-4.8%)                  | 47<br>(13-100)      | 4000<br>(1400-8400)      |
| Sudan    | 2000 | Female | 20 to 24 | 12%<br>(3.7-27%)               | 88%<br>(73-96%)          | 0.78<br>(0.24-1.6)                          | 2.4%<br>(0.98-4.6%)                  | 3.7%<br>(1.1-7.7%)                  | 96<br>(29-200)      | 7700<br>(3100-15000)     |
| Sudan    | 2000 | Female | 25 to 29 | 14%<br>(4.1-29%)               | 86%<br>(71-96%)          | 0.95<br>(0.3-1.9)                           | 2.9%<br>(1.2-5.3%)                   | 4.7%<br>(1.6-9%)                    | 120<br>(40-230)     | 8500<br>(3500-15000)     |
| Sudan    | 2000 | Female | 30 to 34 | 16%<br>(4.3-32%)               | 84%<br>(68-96%)          | 1.1<br>(0.39-2.1)                           | 3.4%<br>(1.4-6%)                     | 5.6%<br>(2.1-10%)                   | 140<br>(52-260)     | 9000<br>(3800-16000)     |
| Sudan    | 2000 | Female | 35 to 39 | 18%<br>(5.1-34%)               | 82%<br>(66-95%)          | 1.3<br>(0.46-2.5)                           | 3.6%<br>(1.5-6.1%)                   | 5.9%<br>(2.2-10%)                   | 150<br>(59-270)     | 8600<br>(3600-14000)     |
| Sudan    | 2000 | Female | 40 to 44 | 19%<br>(6.5-35%)               | 81%<br>(65-93%)          | 1.5<br>(0.55-2.9)                           | 4.2%<br>(1.7-7.5%)                   | 6.8%<br>(2.6-12%)                   | 180<br>(71-330)     | 9100<br>(3700-16000)     |
| Sudan    | 2000 | Female | 45 to 49 | 19%<br>(6.7-36%)               | 81%<br>(64-93%)          | 1.6<br>(0.56-3.4)                           | 4.5%<br>(1.9-8.2%)                   | 7.2%<br>(2.8-13%)                   | 210<br>(86-390)     | 9300<br>(3900-17000)     |
| Sudan    | 2000 | Female | 50 to 54 | 20%<br>(8.2-38%)               | 80%<br>(62-92%)          | 1.7<br>(0.57-3.5)                           | 5.1%<br>(1.9-9.5%)                   | 7.5%<br>(2.6-14%)                   | 270<br>(94-500)     | 10000<br>(3600-19000)    |
| Sudan    | 2000 | Female | 55 to 59 | 21%<br>(8.8-40%)               | 79%<br>(60-91%)          | 1.7<br>(0.54-3.8)                           | 5.4%<br>(1.7-10%)                    | 7.6%<br>(2.4-15%)                   | 320<br>(100-620)    | 10000<br>(3300-20000)    |
| Sudan    | 2000 | Female | 60 to 64 | 22%<br>(9-42%)                 | 78%<br>(58-91%)          | 1.7<br>(0.46-3.9)                           | 5.1%<br>(1.1-11%)                    | 6.7%<br>(1.4-14%)                   | 350<br>(74-740)     | 9600<br>(2100-20000)     |
| Sudan    | 2000 | Female | 65 to 69 | 22%<br>(9.7-40%)               | 78%<br>(60-90%)          | 1.4<br>(0.4-3.2)                            | 4.5%<br>(0.79-9.9%)                  | 5.7%<br>(1-13%)                     | 350<br>(63-770)     | 8000<br>(1400-17000)     |
| Sudan    | 2000 | Female | 70 to 74 | 21%<br>(9.2-38%)               | 79%<br>(62-91%)          | 1.1<br>(0.29-2.8)                           | 3.4%<br>(0.07-8.8%)                  | 4.2%<br>(0.077-11%)                 | 290<br>(5.4-750)    | 5300<br>(110-14000)      |
| Sudan    | 2000 | Female | 75 to 79 | 19%<br>(7.4-38%)               | 81%<br>(62-93%)          | 0.93<br>(0.2-2.6)                           | 2.7%<br>(-0.25-8.1%)                 | 3.3%<br>(-0.31-9.9%)                | 210<br>(-21-630)    | 2900<br>(-270-8900)      |
| Sudan    | 2000 | Female | 80 to 84 | 17%<br>(6.1-39%)               | 83%<br>(61-94%)          | 0.85<br>(0.17-2.6)                          | 2.8%<br>(0.028-8.6%)                 | 3.3%<br>(0.019-10%)                 | 170<br>(0.92-520)   | 1700<br>(17-5400)        |

| Location | Year | Sex    | Age      | Prevalence of current drinkers | Prevalence of abstainers | Population average of standard drinks daily | Percent of total attributable deaths | Percent of total attributable DALYs | Attributable deaths | Attributable DALYs       |
|----------|------|--------|----------|--------------------------------|--------------------------|---------------------------------------------|--------------------------------------|-------------------------------------|---------------------|--------------------------|
| Sudan    | 2000 | Female | 85 to 89 | 18%<br>(6.2-39%)               | 82%<br>(61-94%)          | 0.85<br>(0.18-2.6)                          | 2.7%<br>(-0.0056-8.5%)               | 3.2%<br>(-0.02-10%)                 | 96<br>(-0.63-310)   | 700<br>(-1.4-2200)       |
| Sudan    | 2000 | Female | 90 to 94 | 20%<br>(6.9-42%)               | 80%<br>(58-93%)          | 0.96<br>(0.19-2.9)                          | 2.5%<br>(-0.19-8.3%)                 | 3%<br>(-0.25-10%)                   | 35<br>(-3-120)      | 180<br>(-13-590)         |
| Sudan    | 2000 | Female | 95 plus  | 25%<br>(7.6-49%)               | 75%<br>(51-92%)          | 1.1<br>(0.19-3.5)                           | 2.5%<br>(-0.54-8.7%)                 | 3%<br>(-0.73-11%)                   | 9.7<br>(-2.4-35)    | 33<br>(-7.2-110)         |
| Sudan    | 2000 | Male   | All Ages | 8.5%<br>(5.9-12%)              | 91%<br>(88-94%)          | 0.69<br>(0.55-0.85)                         | 1.6%<br>(1.1-2.1%)                   | 2.6%<br>(1.8-3.7%)                  | 3000<br>(2000-4100) | 120000<br>(90000-160000) |
| Sudan    | 2000 | Male   | 15 to 19 | 7%<br>(2.9-13%)                | 93%<br>(87-97%)          | 0.33<br>(0.11-0.72)                         | 1.3%<br>(0.62-2.4%)                  | 1.7%<br>(0.63-3.7%)                 | 40<br>(15-91)       | 3800<br>(1800-7400)      |
| Sudan    | 2000 | Male   | 20 to 24 | 11%<br>(4.1-21%)               | 89%<br>(79-96%)          | 0.75<br>(0.27-1.5)                          | 3.1%<br>(1.5-5.4%)                   | 4%<br>(1.6-7.4%)                    | 130<br>(54-250)     | 11000<br>(5200-19000)    |
| Sudan    | 2000 | Male   | 25 to 29 | 13%<br>(5.3-25%)               | 87%<br>(75-95%)          | 1.2<br>(0.5-2.2)                            | 4.4%<br>(2.3-7.4%)                   | 6%<br>(2.7-10%)                     | 190<br>(89-340)     | 14000<br>(7100-23000)    |
| Sudan    | 2000 | Male   | 30 to 34 | 15%<br>(5.8-30%)               | 85%<br>(70-94%)          | 1.5<br>(0.66-2.7)                           | 4.9%<br>(2.7-8.2%)                   | 6.9%<br>(3.4-12%)                   | 220<br>(110-380)    | 14000<br>(7500-23000)    |
| Sudan    | 2000 | Male   | 35 to 39 | 17%<br>(6.7-30%)               | 83%<br>(70-93%)          | 1.8<br>(0.72-3.2)                           | 5.4%<br>(2.9-8.6%)                   | 7.4%<br>(3.8-12%)                   | 250<br>(120-410)    | 14000<br>(7400-22000)    |
| Sudan    | 2000 | Male   | 40 to 44 | 17%<br>(7.8-30%)               | 83%<br>(70-92%)          | 1.9<br>(0.74-3.6)                           | 5.2%<br>(2.8-8.5%)                   | 7.1%<br>(3.6-12%)                   | 240<br>(120-400)    | 12000<br>(6200-19000)    |
| Sudan    | 2000 | Male   | 45 to 49 | 17%<br>(6.7-30%)               | 83%<br>(70-93%)          | 2<br>(0.63-4)                               | 5.2%<br>(2.6-8.6%)                   | 7.1%<br>(3.3-12%)                   | 260<br>(130-430)    | 11000<br>(5600-18000)    |
| Sudan    | 2000 | Male   | 50 to 54 | 16%<br>(6.7-31%)               | 84%<br>(69-93%)          | 1.9<br>(0.63-3.9)                           | 4.8%<br>(2.4-7.9%)                   | 6.3%<br>(3.1-10%)                   | 260<br>(120-430)    | 9900<br>(4900-16000)     |
| Sudan    | 2000 | Male   | 55 to 59 | 15%<br>(6.5-29%)               | 85%<br>(71-94%)          | 1.8<br>(0.6-3.9)                            | 4.7%<br>(2.4-8%)                     | 6%<br>(2.9-10%)                     | 270<br>(130-470)    | 9000<br>(4500-15000)     |
| Sudan    | 2000 | Male   | 60 to 64 | 15%<br>(6.1-28%)               | 85%<br>(72-94%)          | 1.6<br>(0.5-3.6)                            | 4.3%<br>(1.9-7.8%)                   | 5.3%<br>(2.3-9.9%)                  | 290<br>(130-530)    | 7900<br>(3500-15000)     |
| Sudan    | 2000 | Male   | 65 to 69 | 14%<br>(6.3-26%)               | 86%<br>(74-94%)          | 1.3<br>(0.42-2.7)                           | 3.8%<br>(1.5-6.8%)                   | 4.7%<br>(1.9-8.5%)                  | 270<br>(110-490)    | 6300<br>(2600-11000)     |
| Sudan    | 2000 | Male   | 70 to 74 | 13%<br>(6-22%)                 | 87%<br>(78-94%)          | 0.99<br>(0.29-2.4)                          | 3.1%<br>(0.92-6.3%)                  | 3.7%<br>(1.1-7.7%)                  | 230<br>(68-480)     | 4300<br>(1300-8800)      |
| Sudan    | 2000 | Male   | 75 to 79 | 11%<br>(4.8-21%)               | 89%<br>(79-95%)          | 0.76<br>(0.18-2)                            | 2.3%<br>(0.49-5.4%)                  | 2.7%<br>(0.55-6.3%)                 | 150<br>(31-350)     | 2200<br>(470-5000)       |
| Sudan    | 2000 | Male   | 80 to 84 | 9.9%<br>(4-20%)                | 90%<br>(80-96%)          | 0.64<br>(0.16-1.6)                          | 2.1%<br>(0.53-4.8%)                  | 2.5%<br>(0.61-5.6%)                 | 100<br>(24-230)     | 1100<br>(260-2400)       |
| Sudan    | 2000 | Male   | 85 to 89 | 9.7%<br>(3.8-19%)              | 90%<br>(81-96%)          | 0.59<br>(0.16-1.6)                          | 1.8%<br>(0.37-4.2%)                  | 2.1%<br>(0.39-5%)                   | 50<br>(9.6-120)     | 370<br>(77-890)          |
| Sudan    | 2000 | Male   | 90 to 94 | 11%<br>(4.4-21%)               | 89%<br>(79-96%)          | 0.63<br>(0.16-1.7)                          | 1.5%<br>(0.23-4%)                    | 1.8%<br>(0.22-4.8%)                 | 17<br>(2.1-45)      | 88<br>(13-230)           |
| Sudan    | 2000 | Male   | 95 plus  | 13%<br>(4.9-29%)               | 87%<br>(71-95%)          | 0.72<br>(0.14-2.1)                          | 1.5%<br>(0.055-4.5%)                 | 1.7%<br>(-0.025-5.2%)               | 3.8<br>(-0.056-12)  | 14<br>(0.49-40)          |
| Sudan    | 2005 | Female | All Ages | 11%<br>(6.6-16%)               | 89%<br>(84-93%)          | 0.6<br>(0.47-0.75)                          | 1.5%<br>(0.86-2.2%)                  | 2.8%<br>(1.2-4.8%)                  | 2800<br>(1200-4700) | 98000<br>(59000-140000)  |

| Location | Year | Sex    | Age      | Prevalence of current drinkers | Prevalence of abstainers | Population average of standard drinks daily | Percent of total attributable deaths | Percent of total attributable DALYs | Attributable deaths | Attributable DALYs       |
|----------|------|--------|----------|--------------------------------|--------------------------|---------------------------------------------|--------------------------------------|-------------------------------------|---------------------|--------------------------|
| Sudan    | 2005 | Female | 15 to 19 | 9.6%<br>(3.2-21%)              | 90%<br>(79-97%)          | 0.47<br>(0.14-1)                            | 1.2%<br>(0.47-2.3%)                  | 1.9%<br>(0.59-4.2%)                 | 39<br>(12-85)       | 3500<br>(1400-7100)      |
| Sudan    | 2005 | Female | 20 to 24 | 12%<br>(3.7-27%)               | 88%<br>(73-96%)          | 0.75<br>(0.24-1.6)                          | 2.1%<br>(0.9-4%)                     | 3.4%<br>(1.1-7%)                    | 83<br>(26-170)      | 6900<br>(2900-13000)     |
| Sudan    | 2005 | Female | 25 to 29 | 14%<br>(4-29%)                 | 86%<br>(71-96%)          | 0.9<br>(0.28-1.8)                           | 2.6%<br>(1.1-4.5%)                   | 4.2%<br>(1.5-8.4%)                  | 100<br>(35-200)     | 7700<br>(3400-14000)     |
| Sudan    | 2005 | Female | 30 to 34 | 15%<br>(4-33%)                 | 85%<br>(67-96%)          | 1.1<br>(0.36-2)                             | 2.9%<br>(1.3-5.1%)                   | 5%<br>(1.9-9.4%)                    | 120<br>(46-230)     | 8200<br>(3700-14000)     |
| Sudan    | 2005 | Female | 35 to 39 | 17%<br>(4.6-33%)               | 83%<br>(67-95%)          | 1.3<br>(0.43-2.3)                           | 3.1%<br>(1.3-5.3%)                   | 5.3%<br>(2.9-2%)                    | 140<br>(51-250)     | 8100<br>(3400-14000)     |
| Sudan    | 2005 | Female | 40 to 44 | 18%<br>(6.3-34%)               | 82%<br>(66-94%)          | 1.4<br>(0.51-2.6)                           | 3.6%<br>(1.5-6.4%)                   | 6%<br>(2.3-11%)                     | 170<br>(65-300)     | 8500<br>(3500-15000)     |
| Sudan    | 2005 | Female | 45 to 49 | 18%<br>(6.5-34%)               | 82%<br>(66-93%)          | 1.5<br>(0.5-3.1)                            | 3.8%<br>(1.5-7.1%)                   | 6.2%<br>(2.4-12%)                   | 190<br>(76-360)     | 8500<br>(3500-16000)     |
| Sudan    | 2005 | Female | 50 to 54 | 19%<br>(7.5-36%)               | 81%<br>(64-92%)          | 1.6<br>(0.5-3.3)                            | 4.4%<br>(1.4-8.3%)                   | 6.6%<br>(2.2-12%)                   | 250<br>(79-470)     | 9500<br>(3100-18000)     |
| Sudan    | 2005 | Female | 55 to 59 | 20%<br>(8.1-40%)               | 80%<br>(60-92%)          | 1.6<br>(0.48-3.6)                           | 4.8%<br>(1.4-9.3%)                   | 6.7%<br>(1.9-13%)                   | 300<br>(84-600)     | 9800<br>(2800-20000)     |
| Sudan    | 2005 | Female | 60 to 64 | 21%<br>(8.7-41%)               | 79%<br>(59-91%)          | 1.6<br>(0.43-3.7)                           | 4.4%<br>(0.88-9.6%)                  | 6%<br>(1.1-13%)                     | 320<br>(61-690)     | 9000<br>(1800-19000)     |
| Sudan    | 2005 | Female | 65 to 69 | 22%<br>(9.4-39%)               | 78%<br>(61-91%)          | 1.4<br>(0.39-3)                             | 3.9%<br>(0.62-8.7%)                  | 5.1%<br>(0.79-11%)                  | 320<br>(50-720)     | 7500<br>(1100-16000)     |
| Sudan    | 2005 | Female | 70 to 74 | 21%<br>(8.4-37%)               | 79%<br>(63-92%)          | 1.1<br>(0.27-2.7)                           | 3%<br>(-0.024-8%)                    | 3.8%<br>(-0.053-10%)                | 270<br>(-3.9-730)   | 5000<br>(-39-13000)      |
| Sudan    | 2005 | Female | 75 to 79 | 19%<br>(7-38%)                 | 81%<br>(62-93%)          | 0.9<br>(0.19-2.6)                           | 2.3%<br>(-0.29-7.4%)                 | 2.9%<br>(-0.36-9.1%)                | 200<br>(-25-620)    | 2800<br>(-340-8900)      |
| Sudan    | 2005 | Female | 80 to 84 | 17%<br>(6-38%)                 | 83%<br>(62-94%)          | 0.82<br>(0.17-2.4)                          | 2.4%<br>(-0.033-7.5%)                | 2.9%<br>(-0.032-9%)                 | 160<br>(-1.8-500)   | 1600<br>(-22-5100)       |
| Sudan    | 2005 | Female | 85 to 89 | 18%<br>(5.9-38%)               | 82%<br>(62-94%)          | 0.81<br>(0.16-2.4)                          | 2.2%<br>(-0.091-7.5%)                | 2.7%<br>(-0.12-9.2%)                | 96<br>(-4.2-330)    | 710<br>(-28-2400)        |
| Sudan    | 2005 | Female | 90 to 94 | 20%<br>(6.9-43%)               | 80%<br>(57-93%)          | 0.92<br>(0.17-2.8)                          | 2.1%<br>(-0.27-7.4%)                 | 2.5%<br>(-0.38-9.2%)                | 36<br>(-5.2-130)    | 180<br>(-22-630)         |
| Sudan    | 2005 | Female | 95 plus  | 25%<br>(7.4-49%)               | 75%<br>(51-93%)          | 1.1<br>(0.19-3.4)                           | 2.2%<br>(-0.67-8%)                   | 2.5%<br>(-0.86-9.6%)                | 9.8<br>(-3.3-37)    | 33<br>(-10-120)          |
| Sudan    | 2005 | Male   | All Ages | 8.6%<br>(5.9-12%)              | 91%<br>(88-94%)          | 0.67<br>(0.54-0.82)                         | 1.6%<br>(1.2-2.1%)                   | 2.7%<br>(1.8-3.7%)                  | 3000<br>(2000-4100) | 120000<br>(92000-160000) |
| Sudan    | 2005 | Male   | 15 to 19 | 6.9%<br>(2.8-14%)              | 93%<br>(86-97%)          | 0.32<br>(0.098-0.71)                        | 1.2%<br>(0.62-2.4%)                  | 1.6%<br>(0.62-3.6%)                 | 39<br>(15-88)       | 3800<br>(1900-7500)      |
| Sudan    | 2005 | Male   | 20 to 24 | 11%<br>(4.2-21%)               | 89%<br>(79-96%)          | 0.72<br>(0.27-1.4)                          | 3%<br>(1.6-5.2%)                     | 3.9%<br>(1.6-7.2%)                  | 120<br>(51-230)     | 10000<br>(5400-18000)    |
| Sudan    | 2005 | Male   | 25 to 29 | 13%<br>(5.4-25%)               | 87%<br>(75-95%)          | 1.1<br>(0.47-2.1)                           | 4.2%<br>(2.2-7%)                     | 5.8%<br>(2.6-11%)                   | 190<br>(83-330)     | 14000<br>(6900-23000)    |
| Sudan    | 2005 | Male   | 30 to 34 | 15%<br>(5.6-29%)               | 85%<br>(71-94%)          | 1.5<br>(0.62-2.6)                           | 4.6%<br>(2.5-7.6%)                   | 6.6%<br>(3.3-11%)                   | 220<br>(110-380)    | 14000<br>(7700-23000)    |



| Location | Year | Sex    | Age      | Prevalence of current drinkers | Prevalence of abstainers | Population average of standard drinks daily | Percent of total attributable deaths | Percent of total attributable DALYs | Attributable deaths | Attributable DALYs       |
|----------|------|--------|----------|--------------------------------|--------------------------|---------------------------------------------|--------------------------------------|-------------------------------------|---------------------|--------------------------|
| Sudan    | 2005 | Male   | 35 to 39 | 17%<br>(6.4-30%)               | 83%<br>(70-94%)          | 1.7<br>(0.67-3)                             | 5%<br>(2.7-8%)                       | 7%<br>(3.5-12%)                     | 250<br>(120-400)    | 14000<br>(7400-22000)    |
| Sudan    | 2005 | Male   | 40 to 44 | 17%<br>(7.5-30%)               | 83%<br>(70-92%)          | 1.8<br>(0.7-3.4)                            | 4.8%<br>(2.6-7.9%)                   | 6.7%<br>(3.4-11%)                   | 240<br>(120-410)    | 12000<br>(6500-20000)    |
| Sudan    | 2005 | Male   | 45 to 49 | 17%<br>(6.9-31%)               | 83%<br>(69-93%)          | 1.8<br>(0.6-3.7)                            | 4.9%<br>(2.4-8%)                     | 6.6%<br>(3.2-11%)                   | 260<br>(120-420)    | 11000<br>(5600-18000)    |
| Sudan    | 2005 | Male   | 50 to 54 | 16%<br>(6.8-31%)               | 84%<br>(69-93%)          | 1.8<br>(0.62-3.8)                           | 4.5%<br>(2.2-7.5%)                   | 5.9%<br>(2.9-10%)                   | 260<br>(130-440)    | 10000<br>(5100-17000)    |
| Sudan    | 2005 | Male   | 55 to 59 | 15%<br>(6.5-29%)               | 85%<br>(71-93%)          | 1.7<br>(0.56-3.6)                           | 4.4%<br>(2.1-7.6%)                   | 5.7%<br>(2.8-9.7%)                  | 280<br>(140-500)    | 9400<br>(4700-16000)     |
| Sudan    | 2005 | Male   | 60 to 64 | 15%<br>(6.2-28%)               | 85%<br>(72-94%)          | 1.6<br>(0.47-3.4)                           | 4%<br>(1.7-7.2%)                     | 5%<br>(2.1-9.1%)                    | 290<br>(120-530)    | 8100<br>(3500-15000)     |
| Sudan    | 2005 | Male   | 65 to 69 | 14%<br>(6.3-26%)               | 86%<br>(74-94%)          | 1.3<br>(0.4-2.6)                            | 3.6%<br>(1.4-6.4%)                   | 4.4%<br>(1.8-7.9%)                  | 280<br>(110-510)    | 6500<br>(2700-12000)     |
| Sudan    | 2005 | Male   | 70 to 74 | 13%<br>(5.7-23%)               | 87%<br>(77-94%)          | 0.95<br>(0.28-2.3)                          | 2.9%<br>(0.8-5.9%)                   | 3.4%<br>(0.95-7.2%)                 | 230<br>(64-480)     | 4300<br>(1200-8900)      |
| Sudan    | 2005 | Male   | 75 to 79 | 11%<br>(4.7-20%)               | 89%<br>(80-95%)          | 0.72<br>(0.18-1.9)                          | 2.1%<br>(0.44-4.8%)                  | 2.5%<br>(0.51-5.7%)                 | 150<br>(31-350)     | 2200<br>(460-5000)       |
| Sudan    | 2005 | Male   | 80 to 84 | 9.7%<br>(3.8-19%)              | 90%<br>(81-96%)          | 0.6<br>(0.15-1.5)                           | 1.9%<br>(0.46-4.4%)                  | 2.2%<br>(0.51-5.1%)                 | 100<br>(24-230)     | 1100<br>(260-2500)       |
| Sudan    | 2005 | Male   | 85 to 89 | 9.5%<br>(3.9-19%)              | 90%<br>(81-96%)          | 0.55<br>(0.15-1.4)                          | 1.6%<br>(0.31-3.9%)                  | 1.8%<br>(0.33-4.5%)                 | 53<br>(9.8-130)     | 400<br>(78-990)          |
| Sudan    | 2005 | Male   | 90 to 94 | 11%<br>(4.3-21%)               | 89%<br>(79-96%)          | 0.58<br>(0.15-1.5)                          | 1.4%<br>(0.16-3.7%)                  | 1.6%<br>(0.13-4.2%)                 | 18<br>(1.6-49)      | 96<br>(11-250)           |
| Sudan    | 2005 | Male   | 95 plus  | 13%<br>(4.9-28%)               | 87%<br>(72-95%)          | 0.67<br>(0.13-1.9)                          | 1.3%<br>(-0.0045-4.2%)               | 1.5%<br>(-0.1-4.8%)                 | 4.3<br>(-0.29-14)   | 15<br>(-0.051-49)        |
| Sudan    | 2010 | Female | All Ages | 11%<br>(6.9-17%)               | 89%<br>(83-93%)          | 0.65<br>(0.51-0.84)                         | 1.5%<br>(0.88-2.2%)                  | 2.9%<br>(1.3-4.8%)                  | 2800<br>(1300-4700) | 100000<br>(62000-140000) |
| Sudan    | 2010 | Female | 15 to 19 | 9.6%<br>(3.2-21%)              | 90%<br>(79-97%)          | 0.49<br>(0.15-1.1)                          | 1.1%<br>(0.47-2.3%)                  | 2%<br>(0.57-4.3%)                   | 39<br>(12-87)       | 3700<br>(1500-7400)      |
| Sudan    | 2010 | Female | 20 to 24 | 12%<br>(3.8-26%)               | 88%<br>(74-96%)          | 0.78<br>(0.24-1.6)                          | 2%<br>(0.92-3.8%)                    | 3.3%<br>(1.1-6.7%)                  | 78<br>(26-160)      | 6800<br>(3100-13000)     |
| Sudan    | 2010 | Female | 25 to 29 | 14%<br>(4-29%)                 | 86%<br>(71-96%)          | 0.96<br>(0.3-1.9)                           | 2.4%<br>(1.1-4.3%)                   | 4.2%<br>(1.4-8.1%)                  | 99<br>(33-190)      | 7700<br>(3600-14000)     |
| Sudan    | 2010 | Female | 30 to 34 | 16%<br>(4.2-32%)               | 84%<br>(68-96%)          | 1.1<br>(0.37-2.1)                           | 2.8%<br>(1.3-4.7%)                   | 5%<br>(1.9-8.9%)                    | 120<br>(47-220)     | 8500<br>(3800-14000)     |
| Sudan    | 2010 | Female | 35 to 39 | 18%<br>(4.7-34%)               | 82%<br>(66-95%)          | 1.3<br>(0.42-2.5)                           | 3%<br>(1.3-5.3%)                     | 5.3%<br>(2-9.5%)                    | 150<br>(56-270)     | 8800<br>(3900-15000)     |
| Sudan    | 2010 | Female | 40 to 44 | 18%<br>(6.1-35%)               | 82%<br>(65-94%)          | 1.5<br>(0.53-2.8)                           | 3.4%<br>(1.4-6%)                     | 5.9%<br>(2.3-10%)                   | 180<br>(69-310)     | 9100<br>(3800-16000)     |
| Sudan    | 2010 | Female | 45 to 49 | 19%<br>(7-35%)                 | 81%<br>(65-93%)          | 1.6<br>(0.54-3.3)                           | 3.7%<br>(1.5-6.7%)                   | 6.2%<br>(2.4-11%)                   | 200<br>(81-370)     | 9200<br>(3800-17000)     |
| Sudan    | 2010 | Female | 50 to 54 | 20%<br>(8.2-38%)               | 80%<br>(62-92%)          | 1.7<br>(0.56-3.5)                           | 4.2%<br>(1.5-7.8%)                   | 6.6%<br>(2.3-12%)                   | 250<br>(87-480)     | 9800<br>(3300-18000)     |

| Location | Year | Sex    | Age      | Prevalence of current drinkers | Prevalence of abstainers | Population average of standard drinks daily | Percent of total attributable deaths | Percent of total attributable DALYs | Attributable deaths | Attributable DALYs       |
|----------|------|--------|----------|--------------------------------|--------------------------|---------------------------------------------|--------------------------------------|-------------------------------------|---------------------|--------------------------|
| Sudan    | 2010 | Female | 55 to 59 | 21%<br>(8.6-40%)               | 79%<br>(60-91%)          | 1.7<br>(0.51-3.7)                           | 4.5%<br>(1.3-8.8%)                   | 6.7%<br>(2-13%)                     | 300<br>(85-580)     | 10000<br>(3000-19000)    |
| Sudan    | 2010 | Female | 60 to 64 | 22%<br>(9-42%)                 | 78%<br>(58-91%)          | 1.6<br>(0.46-3.9)                           | 4.3%<br>(0.83-9.1%)                  | 5.9%<br>(1.1-13%)                   | 320<br>(61-680)     | 9000<br>(1700-19000)     |
| Sudan    | 2010 | Female | 65 to 69 | 22%<br>(9.9-40%)               | 78%<br>(60-90%)          | 1.4<br>(0.43-3.2)                           | 3.8%<br>(0.64-8.3%)                  | 5.1%<br>(0.85-11%)                  | 320<br>(53-720)     | 7500<br>(1300-16000)     |
| Sudan    | 2010 | Female | 70 to 74 | 21%<br>(9.3-37%)               | 79%<br>(63-91%)          | 1.1<br>(0.3-2.8)                            | 2.9%<br>(-0.047-7.6%)                | 3.7%<br>(-0.036-9.8%)               | 270<br>(-2.5-700)   | 5000<br>(-81-13000)      |
| Sudan    | 2010 | Female | 75 to 79 | 18%<br>(7.2-37%)               | 82%<br>(63-93%)          | 0.91<br>(0.2-2.4)                           | 2.2%<br>(-0.28-6.7%)                 | 2.7%<br>(-0.37-8.4%)                | 190<br>(-27-600)    | 2800<br>(-380-8600)      |
| Sudan    | 2010 | Female | 80 to 84 | 17%<br>(5.8-36%)               | 83%<br>(64-94%)          | 0.82<br>(0.17-2.5)                          | 2.2%<br>(-0.029-6.9%)                | 2.7%<br>(-0.05-8.4%)                | 160<br>(-3-500)     | 1600<br>(-22-5200)       |
| Sudan    | 2010 | Female | 85 to 89 | 17%<br>(6-38%)                 | 83%<br>(62-94%)          | 0.83<br>(0.16-2.5)                          | 2.2%<br>(-0.091-7.4%)                | 2.6%<br>(-0.16-8.9%)                | 100<br>(-6.1-350)   | 770<br>(-33-2600)        |
| Sudan    | 2010 | Female | 90 to 94 | 20%<br>(6.8-42%)               | 80%<br>(58-93%)          | 0.94<br>(0.18-2.9)                          | 2.1%<br>(-0.27-7.1%)                 | 2.5%<br>(-0.39-8.7%)                | 43<br>(-6.7-150)    | 220<br>(-30-770)         |
| Sudan    | 2010 | Female | 95 plus  | 24%<br>(7.7-49%)               | 76%<br>(51-92%)          | 1.1<br>(0.19-3.6)                           | 2.1%<br>(-0.63-7.9%)                 | 2.5%<br>(-0.79-9.5%)                | 12<br>(-3.8-44)     | 41<br>(-11-150)          |
| Sudan    | 2010 | Male   | All Ages | 8.6%<br>(5.8-12%)              | 91%<br>(88-94%)          | 0.7<br>(0.54-0.87)                          | 1.7%<br>(1.2-2.2%)                   | 2.7%<br>(1.8-3.8%)                  | 3200<br>(2100-4400) | 130000<br>(98000-170000) |
| Sudan    | 2010 | Male   | 15 to 19 | 6.9%<br>(2.9-13%)              | 93%<br>(87-97%)          | 0.32<br>(0.096-0.72)                        | 1.3%<br>(0.63-2.5%)                  | 1.7%<br>(0.62-4%)                   | 44<br>(16-100)      | 4300<br>(2100-8800)      |
| Sudan    | 2010 | Male   | 20 to 24 | 11%<br>(4.2-20%)               | 89%<br>(80-96%)          | 0.73<br>(0.25-1.5)                          | 3%<br>(1.5-5.2%)                     | 3.9%<br>(1.6-7.5%)                  | 130<br>(52-240)     | 11000<br>(5500-19000)    |
| Sudan    | 2010 | Male   | 25 to 29 | 13%<br>(5.1-25%)               | 87%<br>(75-95%)          | 1.1<br>(0.47-2.2)                           | 4.1%<br>(2.1-6.7%)                   | 5.7%<br>(2.5-10%)                   | 190<br>(86-340)     | 14000<br>(7300-24000)    |
| Sudan    | 2010 | Male   | 30 to 34 | 15%<br>(5.6-29%)               | 85%<br>(71-94%)          | 1.5<br>(0.61-2.6)                           | 4.5%<br>(2.4-7.3%)                   | 6.5%<br>(3.2-11%)                   | 230<br>(110-390)    | 15000<br>(8200-24000)    |
| Sudan    | 2010 | Male   | 35 to 39 | 16%<br>(6.3-30%)               | 84%<br>(70-94%)          | 1.7<br>(0.68-3)                             | 4.8%<br>(2.6-7.7%)                   | 6.9%<br>(3.4-11%)                   | 260<br>(130-430)    | 15000<br>(8100-24000)    |
| Sudan    | 2010 | Male   | 40 to 44 | 17%<br>(7.5-30%)               | 83%<br>(70-93%)          | 1.8<br>(0.7-3.4)                            | 4.6%<br>(2.5-7.7%)                   | 6.5%<br>(3.3-11%)                   | 260<br>(130-430)    | 13000<br>(7100-21000)    |
| Sudan    | 2010 | Male   | 45 to 49 | 16%<br>(6.4-30%)               | 84%<br>(70-94%)          | 1.8<br>(0.61-3.7)                           | 4.7%<br>(2.4-7.5%)                   | 6.4%<br>(3.1-11%)                   | 270<br>(130-440)    | 12000<br>(6200-19000)    |
| Sudan    | 2010 | Male   | 50 to 54 | 16%<br>(6.8-30%)               | 84%<br>(70-93%)          | 1.8<br>(0.61-3.7)                           | 4.3%<br>(2.2-7.1%)                   | 5.8%<br>(2.9-9.6%)                  | 270<br>(130-460)    | 11000<br>(5400-17000)    |
| Sudan    | 2010 | Male   | 55 to 59 | 15%<br>(6.7-28%)               | 85%<br>(72-93%)          | 1.8<br>(0.59-3.5)                           | 4.2%<br>(2.2-7.3%)                   | 5.6%<br>(2.8-9.4%)                  | 290<br>(150-500)    | 9700<br>(5000-17000)     |
| Sudan    | 2010 | Male   | 60 to 64 | 14%<br>(6-28%)                 | 86%<br>(72-94%)          | 1.6<br>(0.5-3.6)                            | 3.9%<br>(1.8-6.9%)                   | 4.9%<br>(2.3-8.9%)                  | 300<br>(140-540)    | 8600<br>(4000-15000)     |
| Sudan    | 2010 | Male   | 65 to 69 | 14%<br>(6.2-26%)               | 86%<br>(74-94%)          | 1.3<br>(0.41-2.8)                           | 3.5%<br>(1.4-6.3%)                   | 4.3%<br>(1.8-7.7%)                  | 300<br>(120-530)    | 6900<br>(2900-12000)     |
| Sudan    | 2010 | Male   | 70 to 74 | 13%<br>(5.8-22%)               | 87%<br>(78-94%)          | 0.98<br>(0.28-2.3)                          | 2.8%<br>(0.85-5.6%)                  | 3.4%<br>(1-6.9%)                    | 250<br>(73-500)     | 4600<br>(1400-9400)      |

| Location | Year | Sex    | Age      | Prevalence of current drinkers | Prevalence of abstainers | Population average of standard drinks daily | Percent of total attributable deaths | Percent of total attributable DALYs | Attributable deaths | Attributable DALYs       |
|----------|------|--------|----------|--------------------------------|--------------------------|---------------------------------------------|--------------------------------------|-------------------------------------|---------------------|--------------------------|
| Sudan    | 2010 | Male   | 75 to 79 | 11%<br>(4.7-21%)               | 89%<br>(79-95%)          | 0.74<br>(0.19-2)                            | 2%<br>(0.43-4.6%)                    | 2.4%<br>(0.51-5.5%)                 | 170<br>(35-380)     | 2400<br>(520-5500)       |
| Sudan    | 2010 | Male   | 80 to 84 | 9.8%<br>(3.9-20%)              | 90%<br>(80-96%)          | 0.63<br>(0.16-1.6)                          | 1.9%<br>(0.42-4.3%)                  | 2.2%<br>(0.48-4.9%)                 | 110<br>(25-260)     | 1200<br>(280-2700)       |
| Sudan    | 2010 | Male   | 85 to 89 | 9.6%<br>(3.7-20%)              | 90%<br>(80-96%)          | 0.58<br>(0.16-1.6)                          | 1.6%<br>(0.32-3.9%)                  | 1.8%<br>(0.34-4.6%)                 | 61<br>(12-150)      | 460<br>(95-1100)         |
| Sudan    | 2010 | Male   | 90 to 94 | 11%<br>(4.3-21%)               | 89%<br>(79-96%)          | 0.6<br>(0.15-1.6)                           | 1.4%<br>(0.17-3.6%)                  | 1.6%<br>(0.14-4.3%)                 | 23<br>(2-63)        | 120<br>(16-320)          |
| Sudan    | 2010 | Male   | 95 plus  | 13%<br>(5-28%)                 | 87%<br>(72-95%)          | 0.69<br>(0.14-2)                            | 1.3%<br>(-0.009-4.2%)                | 1.5%<br>(-0.11-4.8%)                | 5.5<br>(-0.39-18)   | 20<br>(-0.14-61)         |
| Sudan    | 2016 | Female | All Ages | 12%<br>(7.2-18%)               | 88%<br>(82-93%)          | 0.73<br>(0.45-1.1)                          | 1.6%<br>(0.86-2.6%)                  | 3.1%<br>(1.1-5.6%)                  | 3000<br>(1100-5400) | 110000<br>(58000-160000) |
| Sudan    | 2016 | Female | 15 to 19 | 10%<br>(3.1-22%)               | 90%<br>(78-97%)          | 0.54<br>(0.15-1.2)                          | 1.1%<br>(0.45-2.2%)                  | 2.1%<br>(0.58-4.7%)                 | 39<br>(11-87)       | 3800<br>(1500-7500)      |
| Sudan    | 2016 | Female | 20 to 24 | 13%<br>(4-28%)                 | 87%<br>(72-96%)          | 0.86<br>(0.26-1.9)                          | 2%<br>(0.91-3.7%)                    | 3.4%<br>(1.1-7.3%)                  | 75<br>(23-160)      | 6900<br>(3100-13000)     |
| Sudan    | 2016 | Female | 25 to 29 | 14%<br>(4.3-30%)               | 86%<br>(70-96%)          | 1<br>(0.29-2.3)                             | 2.3%<br>(1.1-4.3%)                   | 4.2%<br>(1.4-8.6%)                  | 93<br>(32-190)      | 7600<br>(3600-14000)     |
| Sudan    | 2016 | Female | 30 to 34 | 16%<br>(4.4-33%)               | 84%<br>(67-96%)          | 1.2<br>(0.36-2.5)                           | 2.6%<br>(1.2-4.6%)                   | 4.9%<br>(1.8-9.3%)                  | 120<br>(44-220)     | 8400<br>(3800-15000)     |
| Sudan    | 2016 | Female | 35 to 39 | 17%<br>(4.7-33%)               | 83%<br>(67-95%)          | 1.4<br>(0.41-2.8)                           | 2.8%<br>(1.1-5%)                     | 5.2%<br>(1.8-9.7%)                  | 150<br>(51-280)     | 9000<br>(3600-16000)     |
| Sudan    | 2016 | Female | 40 to 44 | 18%<br>(6.5-34%)               | 82%<br>(66-94%)          | 1.6<br>(0.49-3.2)                           | 3.2%<br>(1.3-5.7%)                   | 5.9%<br>(2.3-10%)                   | 190<br>(75-340)     | 9900<br>(4200-17000)     |
| Sudan    | 2016 | Female | 45 to 49 | 19%<br>(6.6-36%)               | 81%<br>(64-93%)          | 1.7<br>(0.54-3.5)                           | 3.5%<br>(1.3-6.6%)                   | 6.1%<br>(2.2-11%)                   | 220<br>(78-420)     | 10000<br>(3800-19000)    |
| Sudan    | 2016 | Female | 50 to 54 | 20%<br>(6.9-39%)               | 80%<br>(61-93%)          | 1.7<br>(0.52-3.8)                           | 4%<br>(1.2-7.6%)                     | 6.4%<br>(2.1-12%)                   | 270<br>(85-520)     | 11000<br>(3400-21000)    |
| Sudan    | 2016 | Female | 55 to 59 | 20%<br>(7.5-40%)               | 80%<br>(60-93%)          | 1.7<br>(0.48-3.9)                           | 4.2%<br>(1.2-8.3%)                   | 6.4%<br>(1.8-13%)                   | 310<br>(85-620)     | 11000<br>(3000-21000)    |
| Sudan    | 2016 | Female | 60 to 64 | 22%<br>(8.4-40%)               | 78%<br>(60-92%)          | 1.7<br>(0.46-4.2)                           | 4%<br>(0.7-8.6%)                     | 5.6%<br>(1-12%)                     | 340<br>(61-720)     | 9600<br>(1700-20000)     |
| Sudan    | 2016 | Female | 65 to 69 | 22%<br>(9.3-40%)               | 78%<br>(60-91%)          | 1.5<br>(0.41-3.4)                           | 3.7%<br>(0.45-8.1%)                  | 5%<br>(0.7-11%)                     | 340<br>(48-770)     | 8000<br>(1000-18000)     |
| Sudan    | 2016 | Female | 70 to 74 | 21%<br>(8.9-38%)               | 79%<br>(62-91%)          | 1.2<br>(0.3-3.1)                            | 2.9%<br>(-0.064-7.5%)                | 3.8%<br>(-0.06-9.7%)                | 290<br>(-4.5-770)   | 5400<br>(-120-14000)     |
| Sudan    | 2016 | Female | 75 to 79 | 19%<br>(7.6-39%)               | 81%<br>(61-92%)          | 1<br>(0.21-2.8)                             | 2.2%<br>(-0.32-6.6%)                 | 2.8%<br>(-0.39-8.4%)                | 220<br>(-31-650)    | 3200<br>(-460-9400)      |
| Sudan    | 2016 | Female | 80 to 84 | 18%<br>(6-39%)                 | 82%<br>(61-94%)          | 0.93<br>(0.17-2.9)                          | 2.3%<br>(-0.083-7.3%)                | 2.8%<br>(-0.13-9.1%)                | 180<br>(-8.1-590)   | 1900<br>(-67-6200)       |
| Sudan    | 2016 | Female | 85 to 89 | 18%<br>(6.3-40%)               | 82%<br>(60-94%)          | 0.93<br>(0.17-2.8)                          | 2.3%<br>(-0.17-7.7%)                 | 2.7%<br>(-0.23-9.2%)                | 130<br>(-11-440)    | 970<br>(-72-3300)        |
| Sudan    | 2016 | Female | 90 to 94 | 21%<br>(7-43%)                 | 79%<br>(57-93%)          | 1<br>(0.19-3.3)                             | 2.2%<br>(-0.32-7.3%)                 | 2.6%<br>(-0.45-8.8%)                | 57<br>(-9.7-190)    | 290<br>(-44-960)         |

| Location | Year | Sex    | Age      | Prevalence of current drinkers | Prevalence of abstainers | Population average of standard drinks daily | Percent of total attributable deaths | Percent of total attributable DALYs | Attributable deaths | Attributable DALYs        |
|----------|------|--------|----------|--------------------------------|--------------------------|---------------------------------------------|--------------------------------------|-------------------------------------|---------------------|---------------------------|
| Sudan    | 2016 | Female | 95 plus  | 25%<br>(7.9-51%)               | 75%<br>(49-92%)          | 1.2<br>(0.21-4)                             | 2.3%<br>(-0.68-7.9%)                 | 2.7%<br>(-0.85-9.6%)                | 17<br>(-5.7-62)     | 60<br>(-18-210)           |
| Sudan    | 2016 | Male   | All Ages | 9.1%<br>(6.2-13%)              | 91%<br>(87-94%)          | 0.78<br>(0.49-1.2)                          | 1.9%<br>(1.3-2.7%)                   | 2.9%<br>(1.8-4.2%)                  | 3500<br>(2200-4900) | 140000<br>(100000-200000) |
| Sudan    | 2016 | Male   | 15 to 19 | 7%<br>(2.8-14%)                | 93%<br>(86-97%)          | 0.35<br>(0.1-0.82)                          | 1.3%<br>(0.62-2.7%)                  | 1.8%<br>(0.59-4.3%)                 | 50<br>(17-120)      | 5000<br>(2400-10000)      |
| Sudan    | 2016 | Male   | 20 to 24 | 11%<br>(4.2-20%)               | 89%<br>(80-96%)          | 0.78<br>(0.27-1.7)                          | 3%<br>(1.5-5.3%)                     | 3.9%<br>(1.5-7.8%)                  | 140<br>(57-280)     | 12000<br>(6300-22000)     |
| Sudan    | 2016 | Male   | 25 to 29 | 13%<br>(5.3-25%)               | 87%<br>(75-95%)          | 1.2<br>(0.44-2.5)                           | 4%<br>(2-6.7%)                       | 5.6%<br>(2.4-10%)                   | 210<br>(85-370)     | 15000<br>(7700-26000)     |
| Sudan    | 2016 | Male   | 30 to 34 | 15%<br>(5.8-29%)               | 85%<br>(71-94%)          | 1.6<br>(0.6-3.1)                            | 4.4%<br>(2.4-7.3%)                   | 6.4%<br>(3-11%)                     | 240<br>(110-420)    | 16000<br>(8400-26000)     |
| Sudan    | 2016 | Male   | 35 to 39 | 17%<br>(6.5-30%)               | 83%<br>(70-93%)          | 1.8<br>(0.62-3.6)                           | 4.7%<br>(2.4-7.6%)                   | 6.8%<br>(3.2-11%)                   | 280<br>(140-480)    | 17000<br>(8600-27000)     |
| Sudan    | 2016 | Male   | 40 to 44 | 17%<br>(7.5-30%)               | 83%<br>(70-92%)          | 1.9<br>(0.65-3.9)                           | 4.5%<br>(2.3-7.7%)                   | 6.5%<br>(3.1-11%)                   | 290<br>(140-500)    | 15000<br>(7900-25000)     |
| Sudan    | 2016 | Male   | 45 to 49 | 17%<br>(6.6-30%)               | 83%<br>(70-93%)          | 2<br>(0.6-4.3)                              | 4.5%<br>(2.2-7.3%)                   | 6.4%<br>(2.9-11%)                   | 310<br>(140-500)    | 14000<br>(6900-22000)     |
| Sudan    | 2016 | Male   | 50 to 54 | 16%<br>(6.6-30%)               | 84%<br>(70-93%)          | 1.9<br>(0.61-4.2)                           | 4.2%<br>(2-6.9%)                     | 5.7%<br>(2.6-9.4%)                  | 300<br>(140-500)    | 12000<br>(5800-20000)     |
| Sudan    | 2016 | Male   | 55 to 59 | 15%<br>(6.6-29%)               | 85%<br>(71-93%)          | 1.8<br>(0.56-4)                             | 4.1%<br>(2-7%)                       | 5.4%<br>(2.6-9.3%)                  | 320<br>(150-550)    | 11000<br>(5300-18000)     |
| Sudan    | 2016 | Male   | 60 to 64 | 14%<br>(6.1-28%)               | 86%<br>(72-94%)          | 1.6<br>(0.49-3.8)                           | 3.7%<br>(1.6-6.6%)                   | 4.7%<br>(2-8.6%)                    | 320<br>(140-600)    | 9200<br>(4100-17000)      |
| Sudan    | 2016 | Male   | 65 to 69 | 14%<br>(6-25%)                 | 86%<br>(75-94%)          | 1.3<br>(0.39-3)                             | 3.3%<br>(1.3-5.9%)                   | 4.1%<br>(1.6-7.4%)                  | 320<br>(120-570)    | 7500<br>(3000-14000)      |
| Sudan    | 2016 | Male   | 70 to 74 | 12%<br>(5.6-22%)               | 88%<br>(78-94%)          | 1<br>(0.27-2.4)                             | 2.6%<br>(0.74-5.1%)                  | 3.2%<br>(0.88-6.2%)                 | 270<br>(73-520)     | 5000<br>(1400-9800)       |
| Sudan    | 2016 | Male   | 75 to 79 | 11%<br>(4.5-21%)               | 89%<br>(79-96%)          | 0.76<br>(0.18-2)                            | 1.9%<br>(0.39-4.3%)                  | 2.3%<br>(0.45-5.1%)                 | 180<br>(35-410)     | 2600<br>(530-5900)        |
| Sudan    | 2016 | Male   | 80 to 84 | 9.5%<br>(3.8-19%)              | 90%<br>(81-96%)          | 0.64<br>(0.14-1.6)                          | 1.8%<br>(0.38-4%)                    | 2.1%<br>(0.43-4.7%)                 | 120<br>(26-290)     | 1300<br>(290-3100)        |
| Sudan    | 2016 | Male   | 85 to 89 | 9.4%<br>(3.8-18%)              | 91%<br>(82-96%)          | 0.59<br>(0.15-1.5)                          | 1.5%<br>(0.26-3.7%)                  | 1.7%<br>(0.27-4.3%)                 | 71<br>(11-180)      | 550<br>(94-1300)          |
| Sudan    | 2016 | Male   | 90 to 94 | 11%<br>(4.2-22%)               | 89%<br>(78-96%)          | 0.63<br>(0.15-1.7)                          | 1.4%<br>(0.1-3.5%)                   | 1.6%<br>(0.061-4.2%)                | 28<br>(1.1-77)      | 150<br>(11-400)           |
| Sudan    | 2016 | Male   | 95 plus  | 13%<br>(4.9-27%)               | 87%<br>(73-95%)          | 0.73<br>(0.13-2.2)                          | 1.3%<br>(-0.023-4.1%)                | 1.5%<br>(-0.15-4.7%)                | 7.4<br>(-0.77-23)   | 27<br>(-0.46-81)          |

Supplemental Results Figure 1: Attributable DALY rate disaggregated by cause by location, sex, and age in 2016

Attributable DALY rate disaggregated by cause, China, by sex and age in 2016.

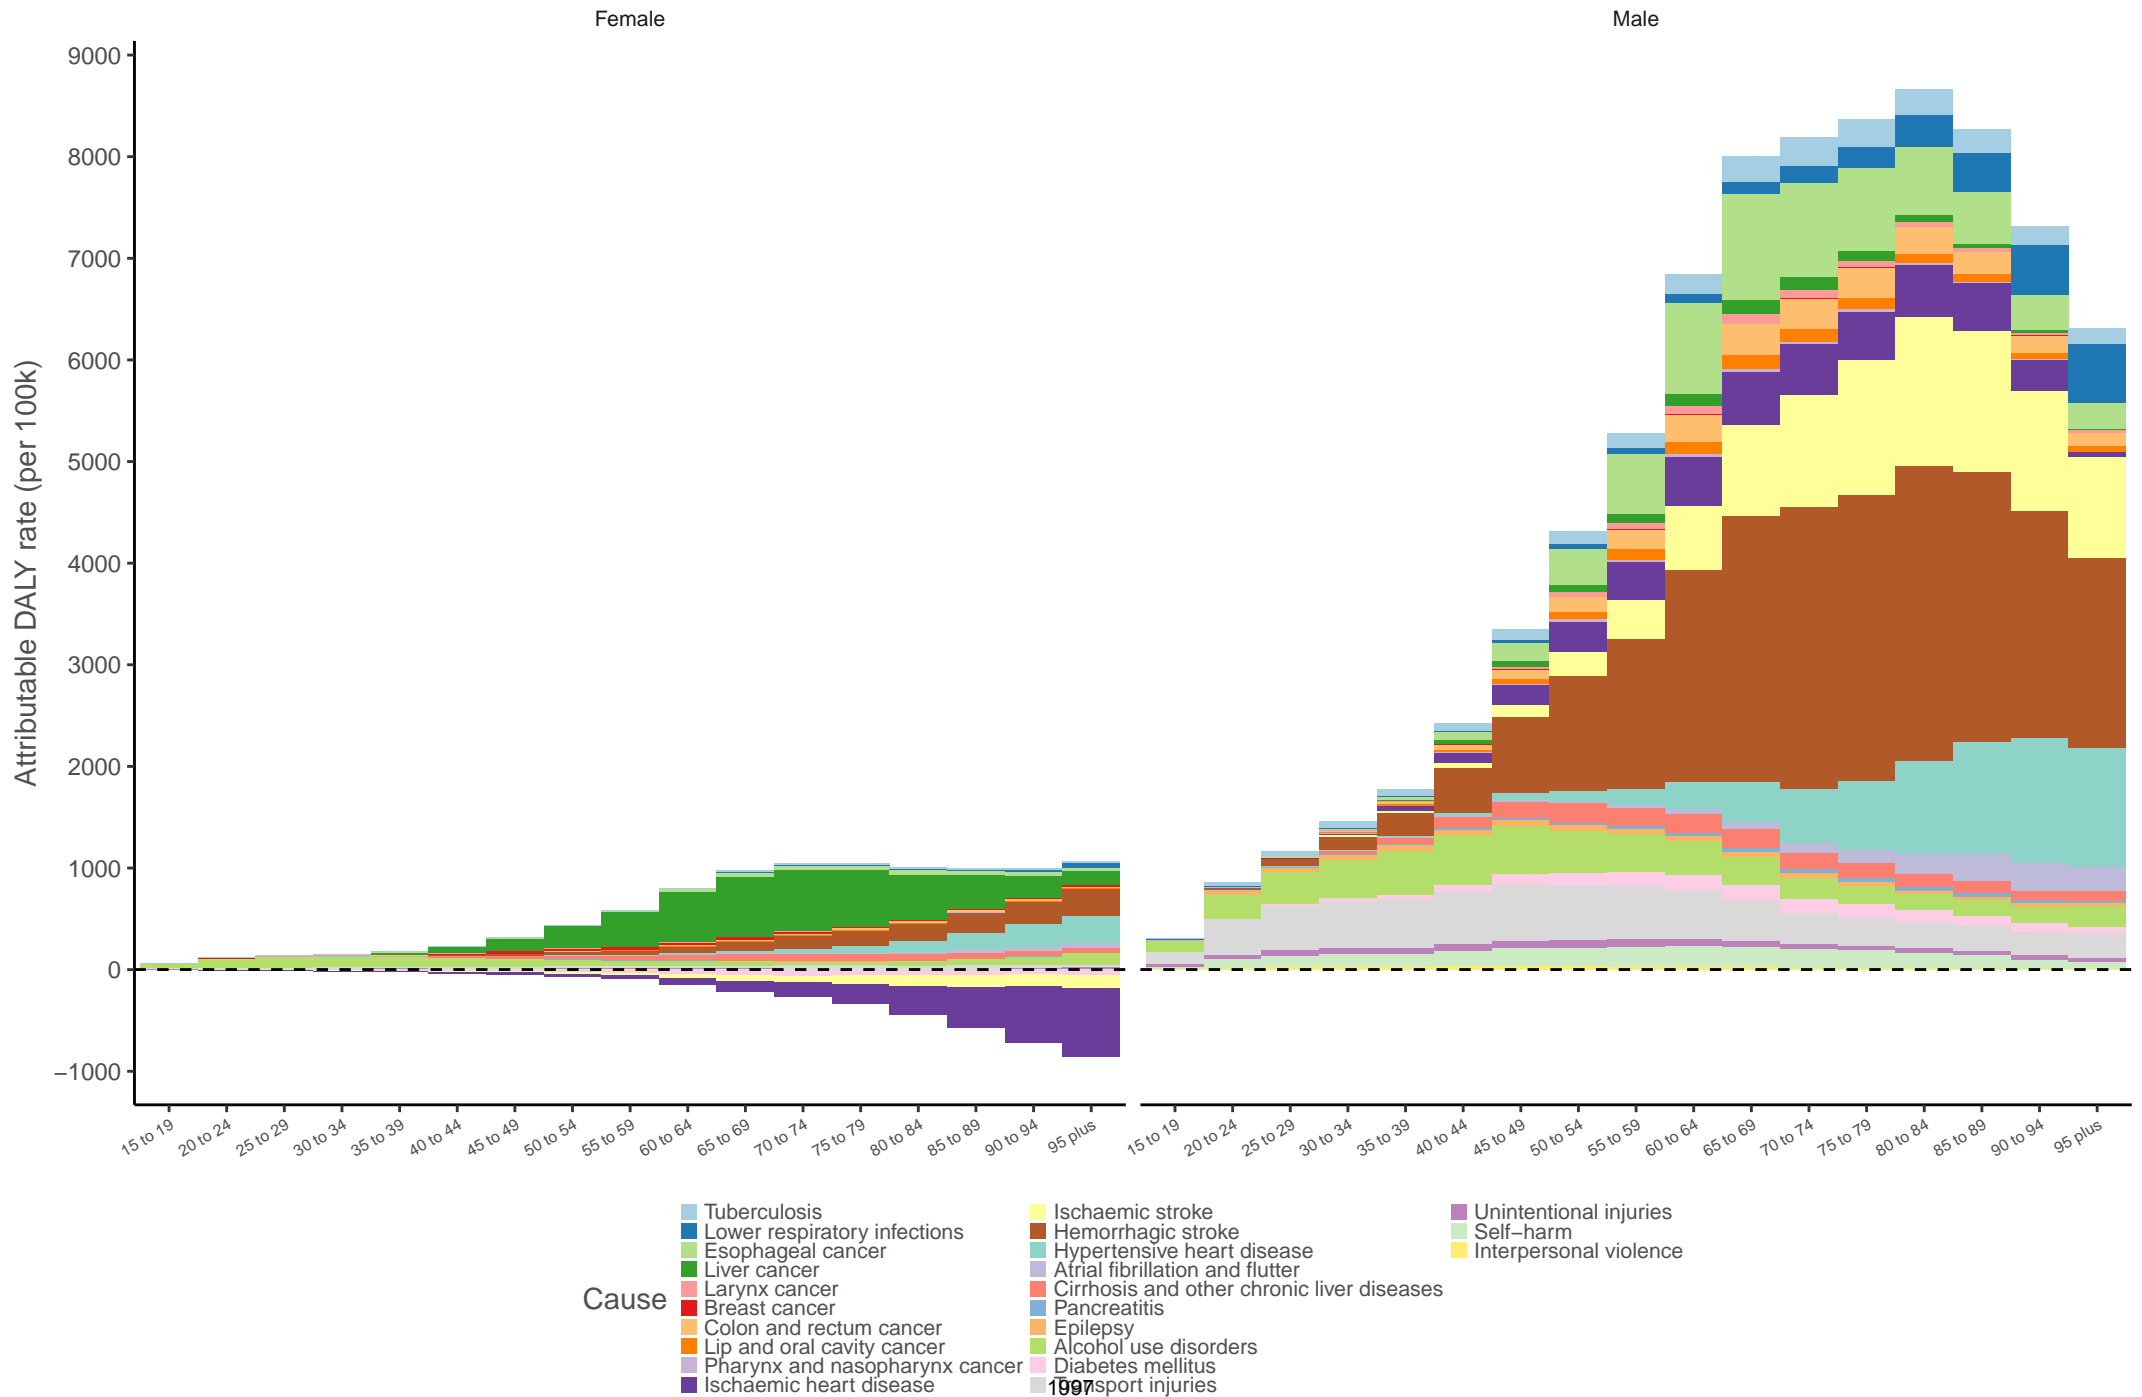

Attributable DALY rate disaggregated by cause, North Korea, by sex and age in 2016.

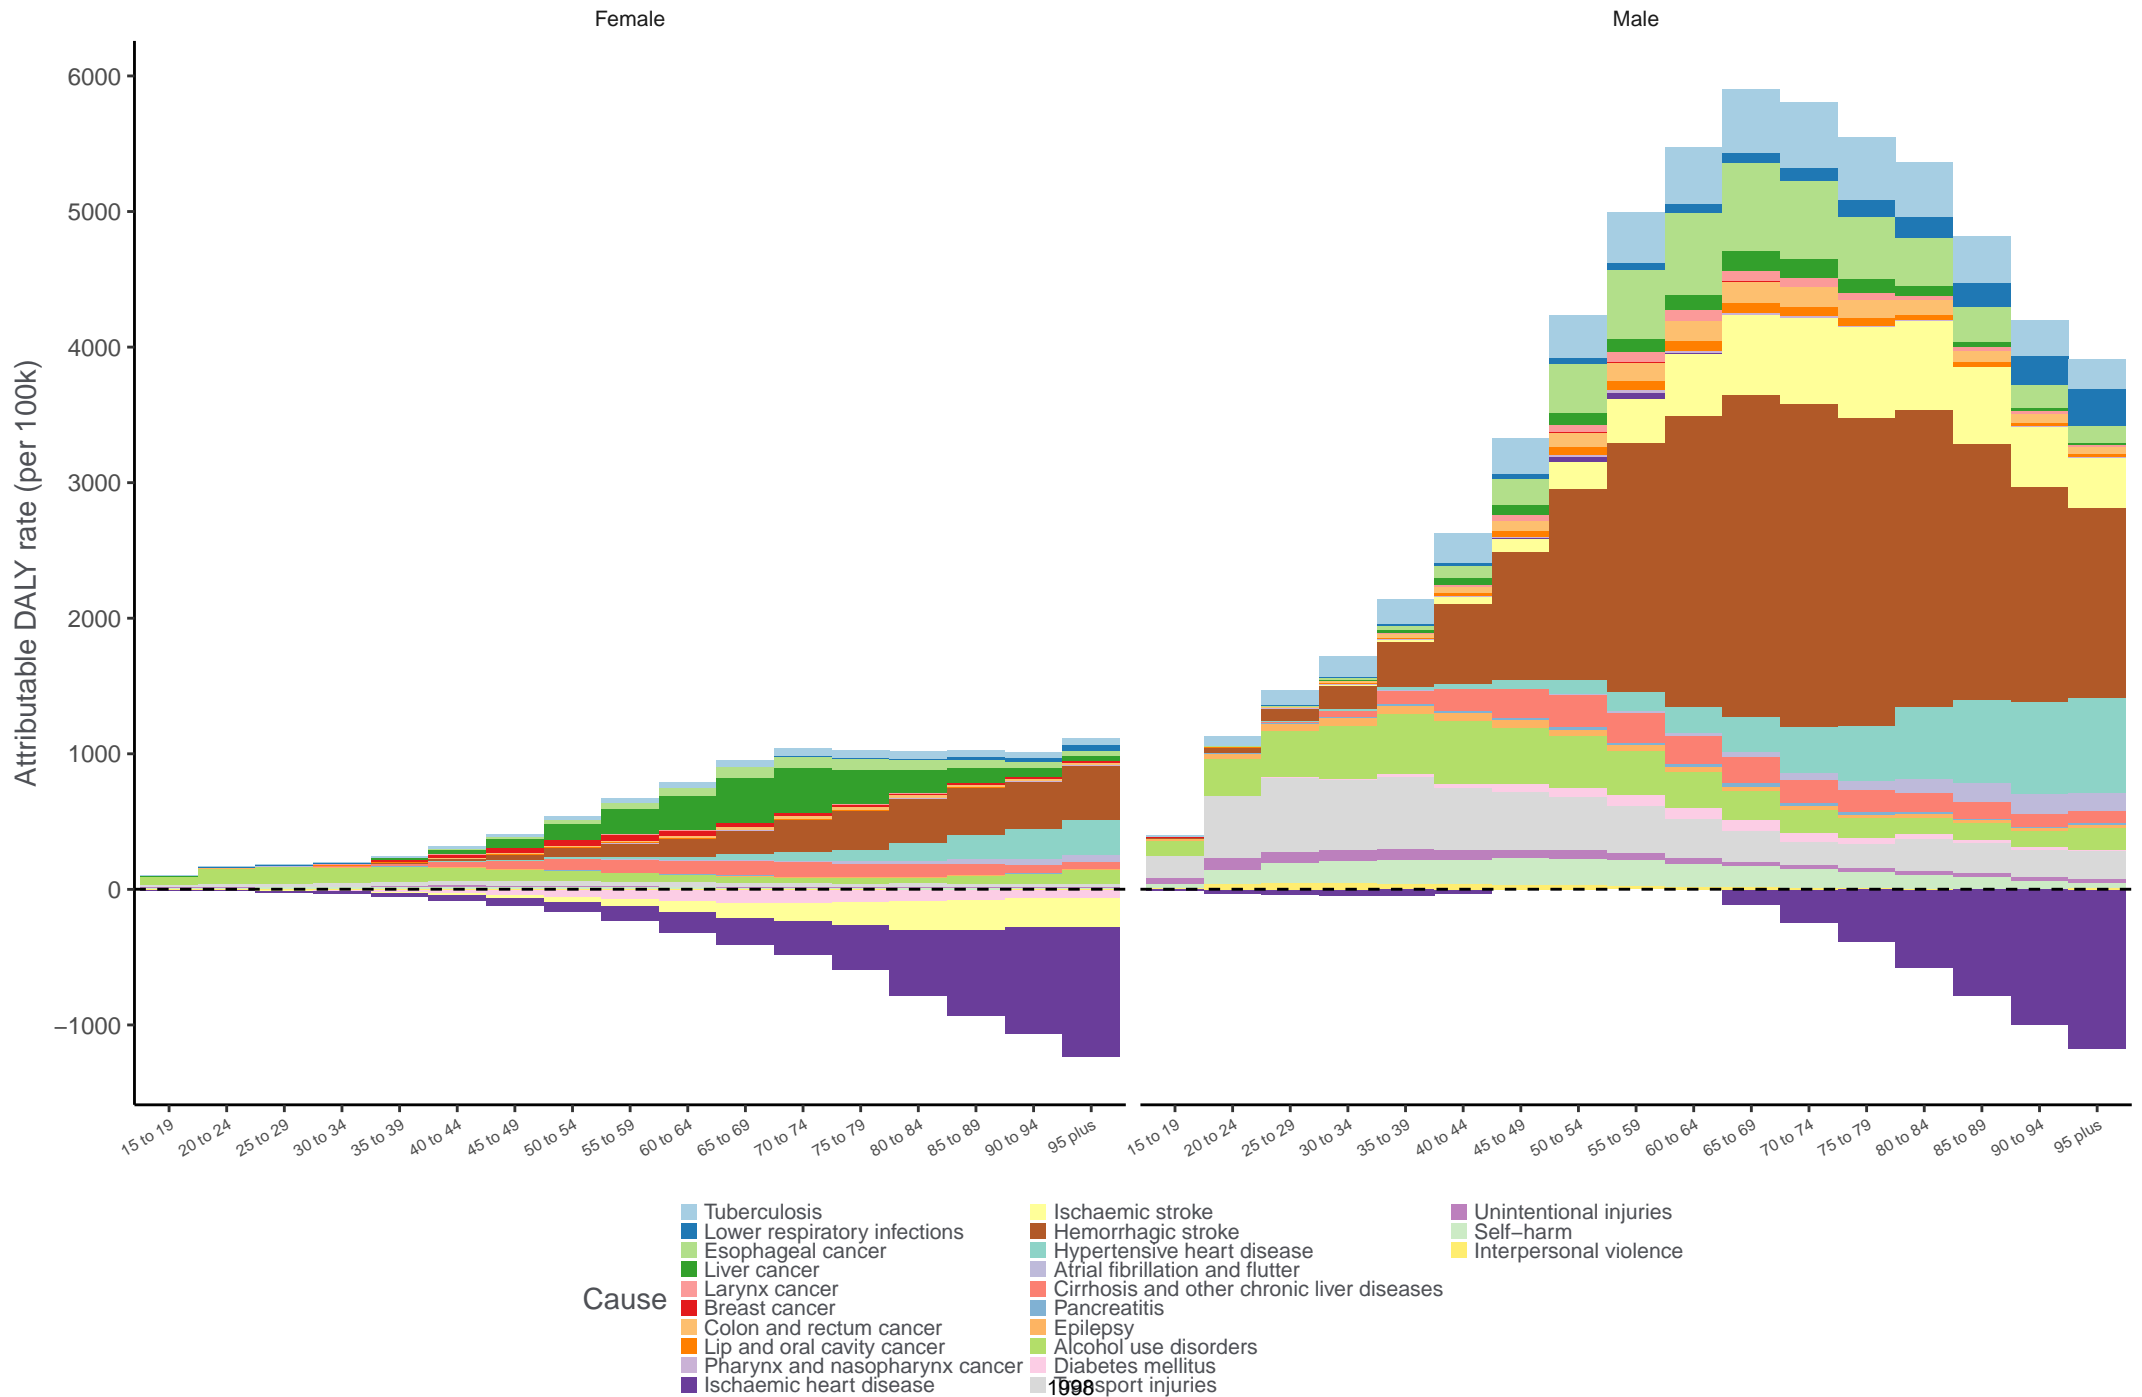

Attributable DALY rate disaggregated by cause, Taiwan, by sex and age in 2016.

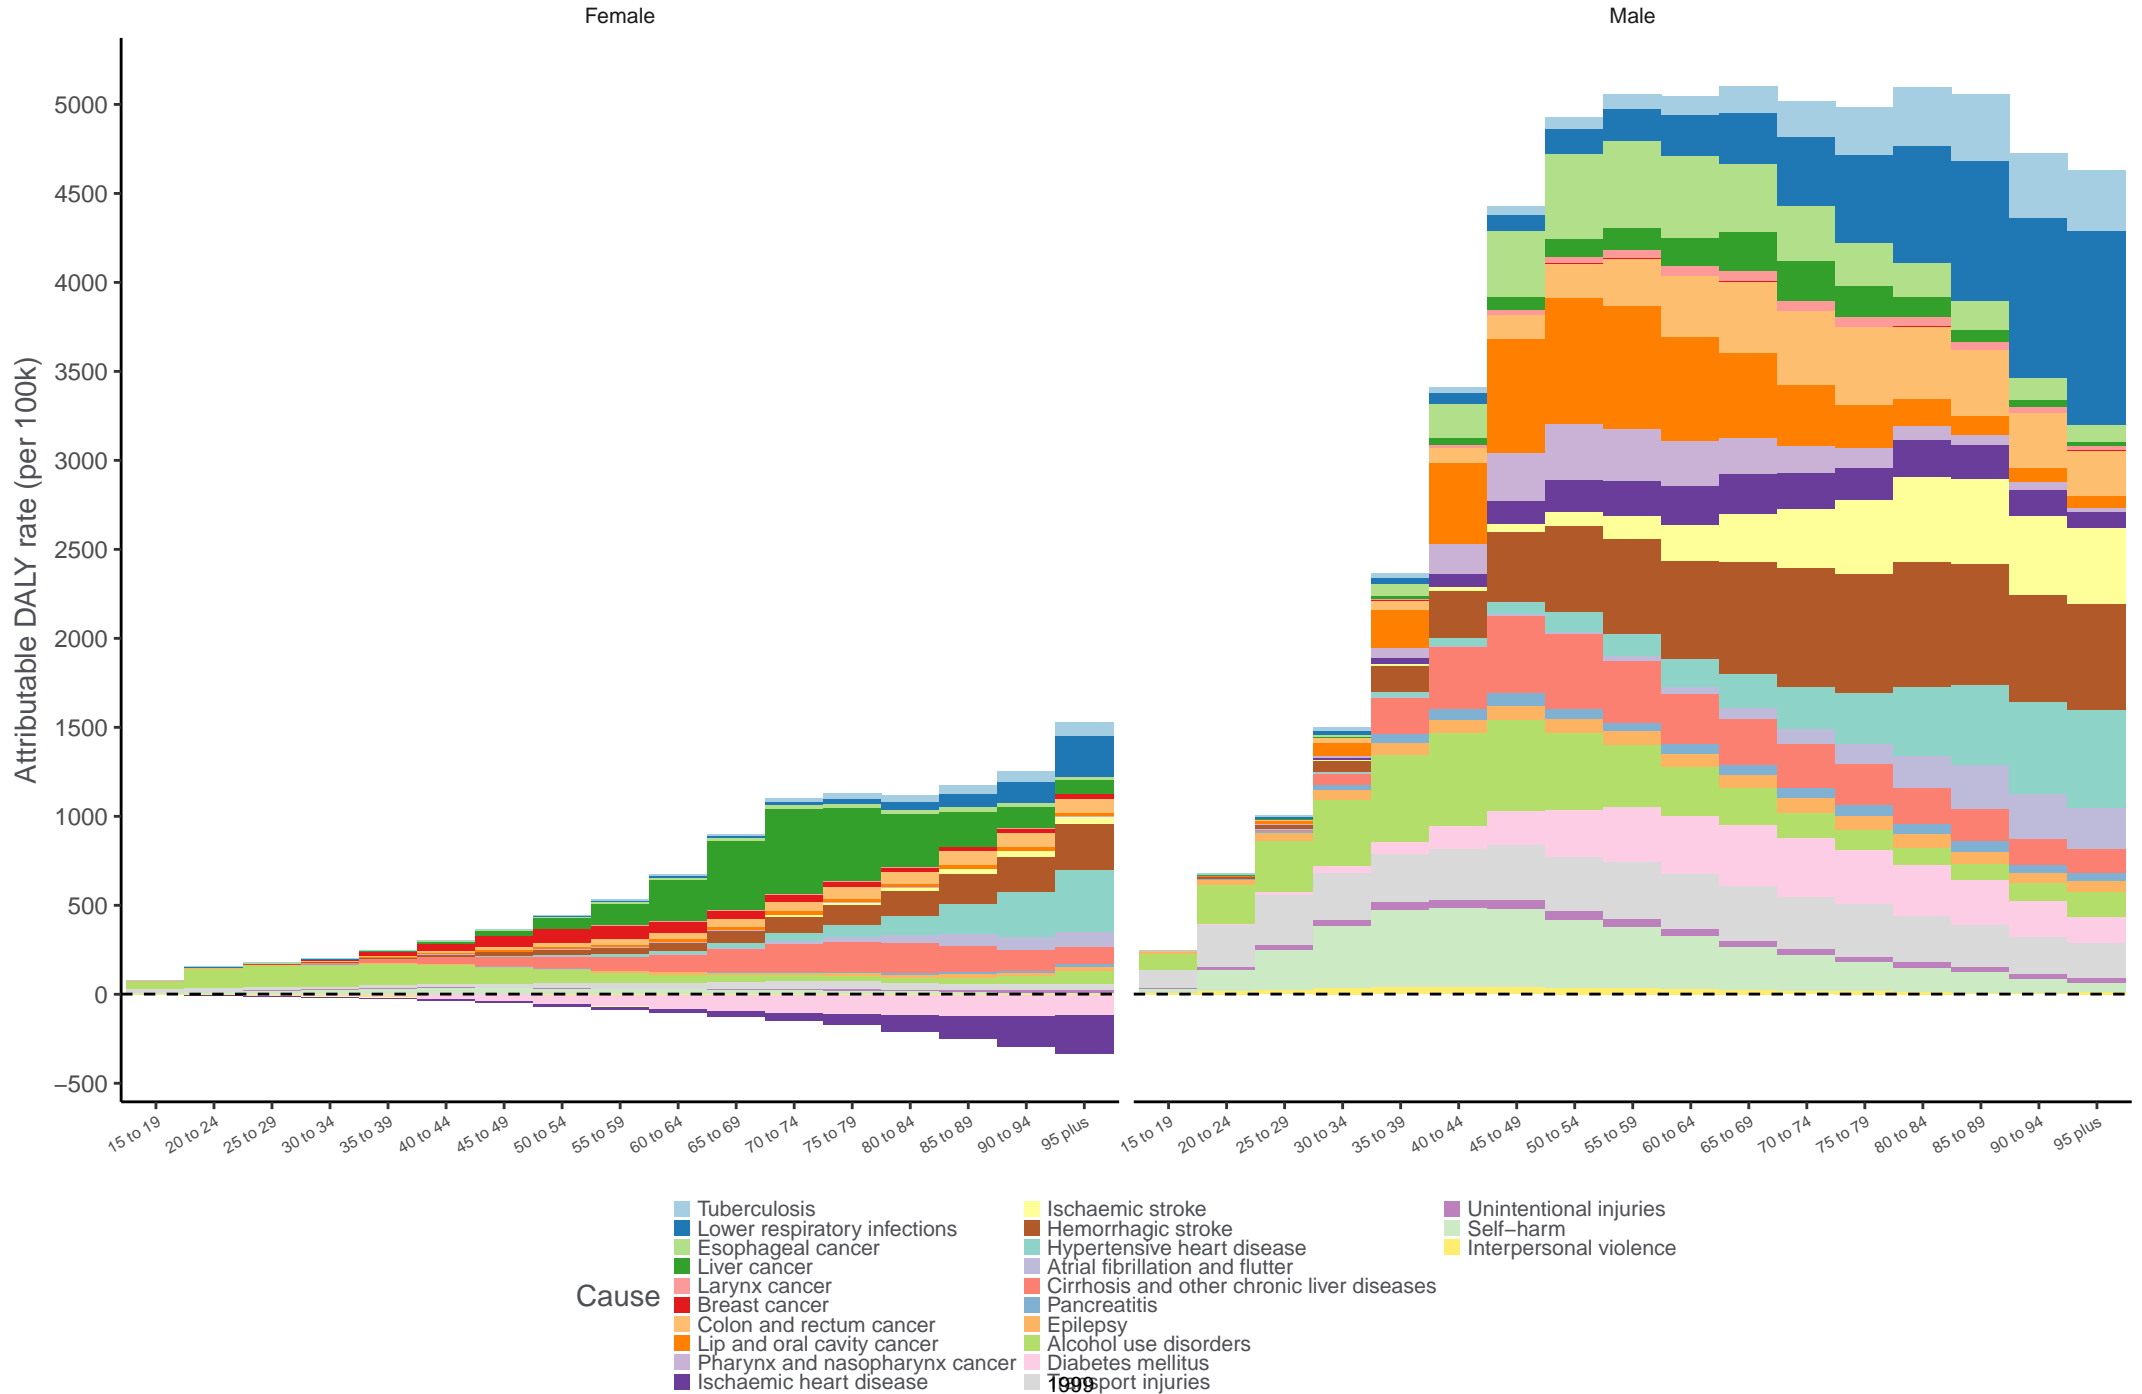





Attributable DALY rate disaggregated by cause, Indonesia, by sex and age in 2016.

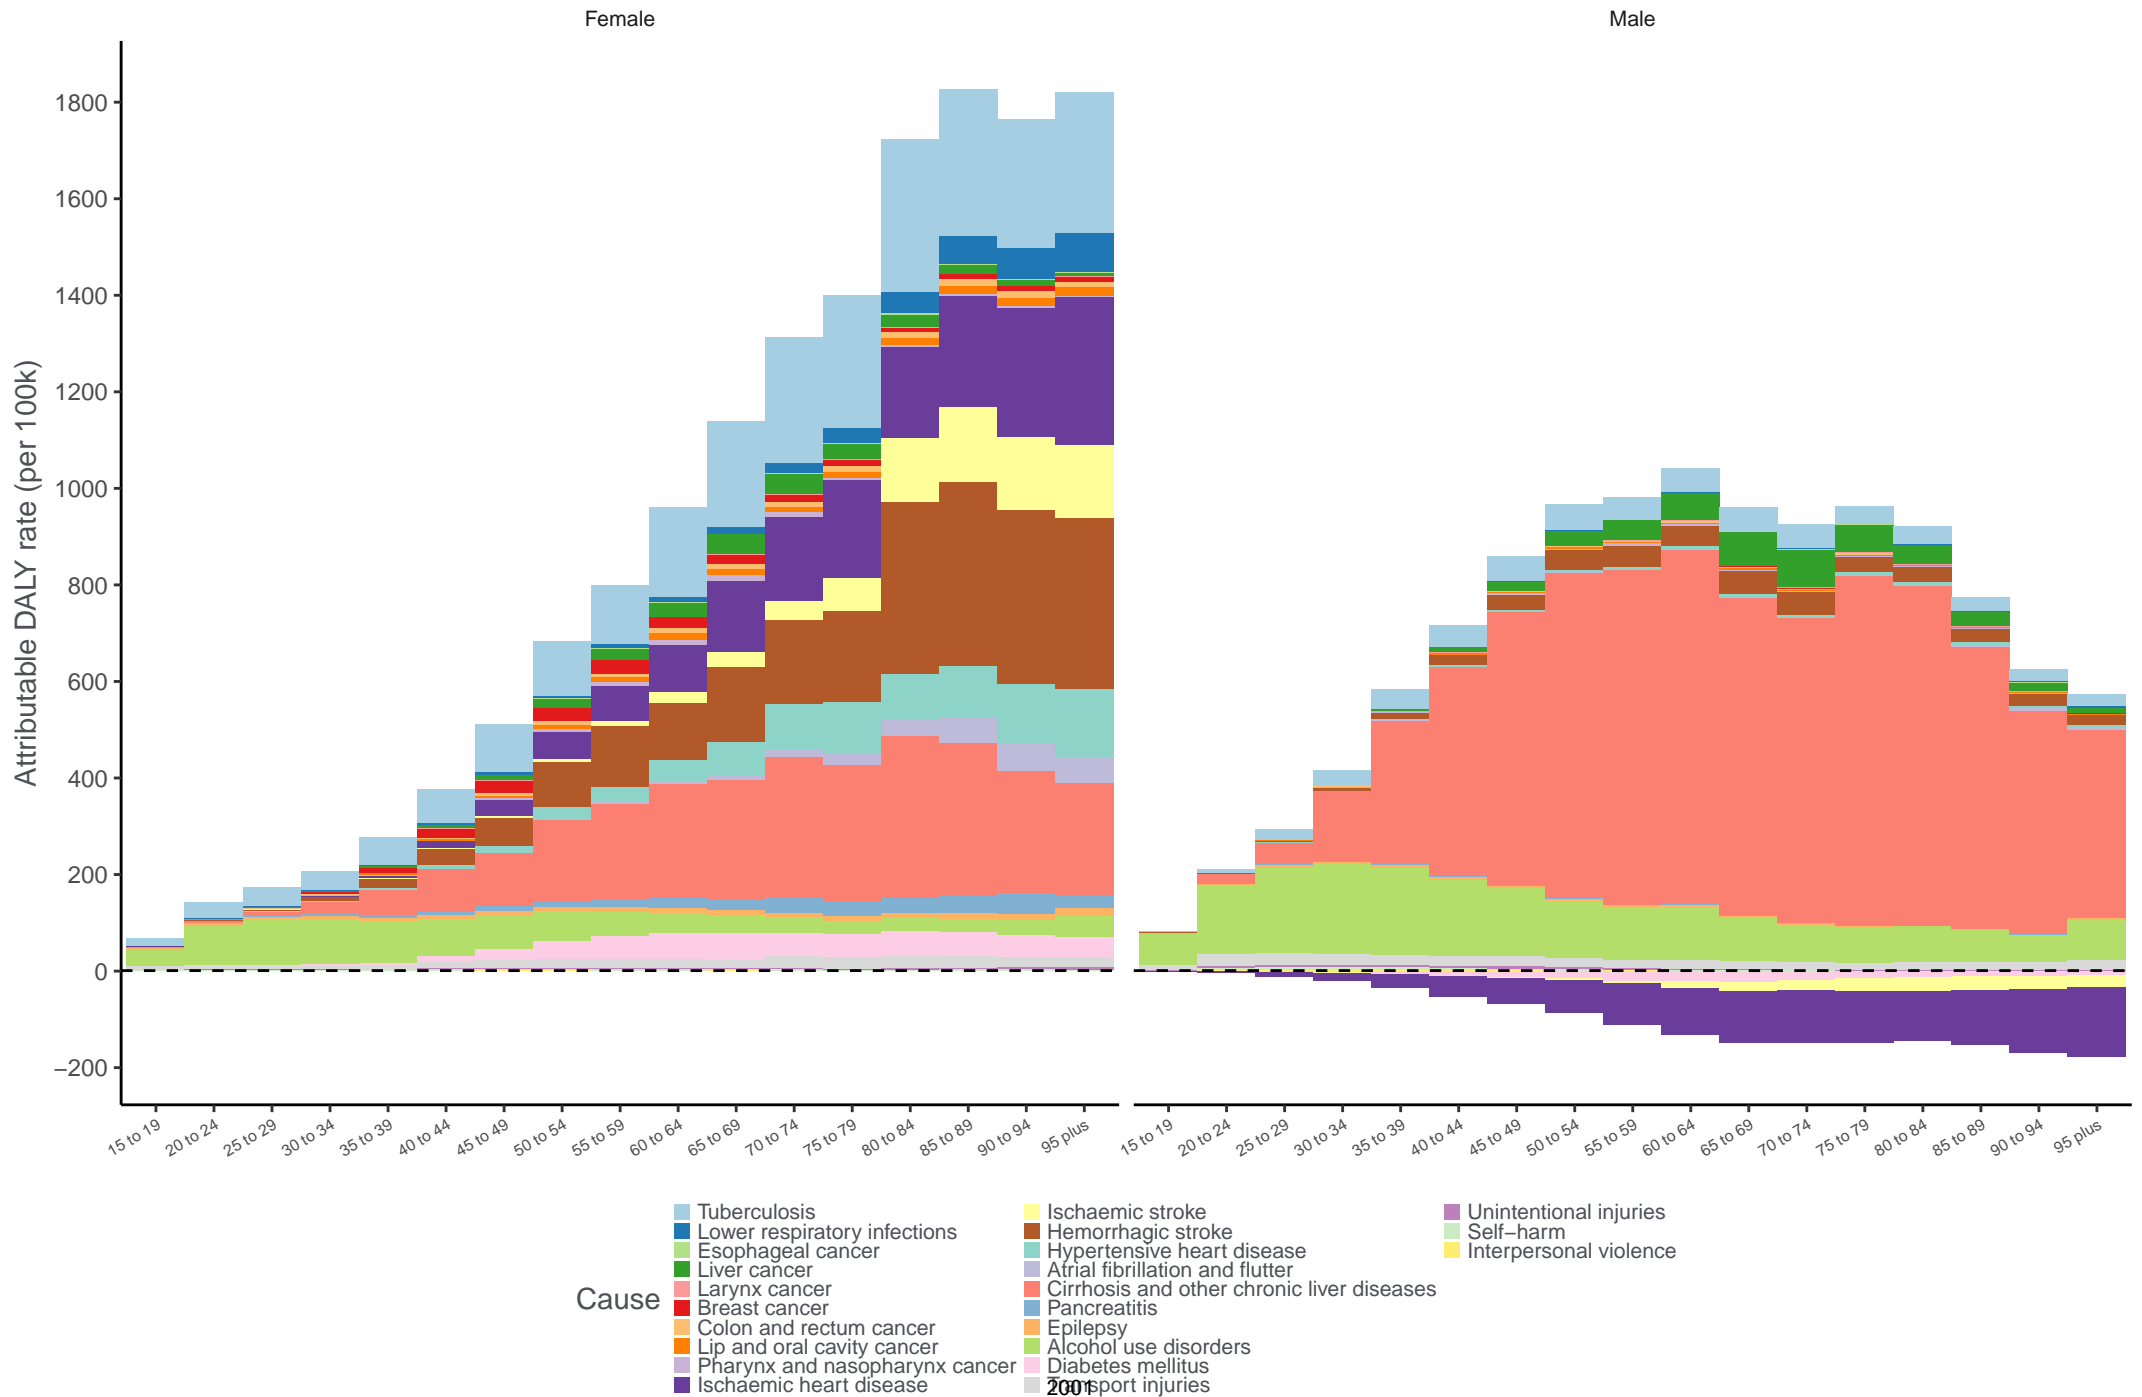

Attributable DALY rate disaggregated by cause, Laos, by sex and age in 2016.

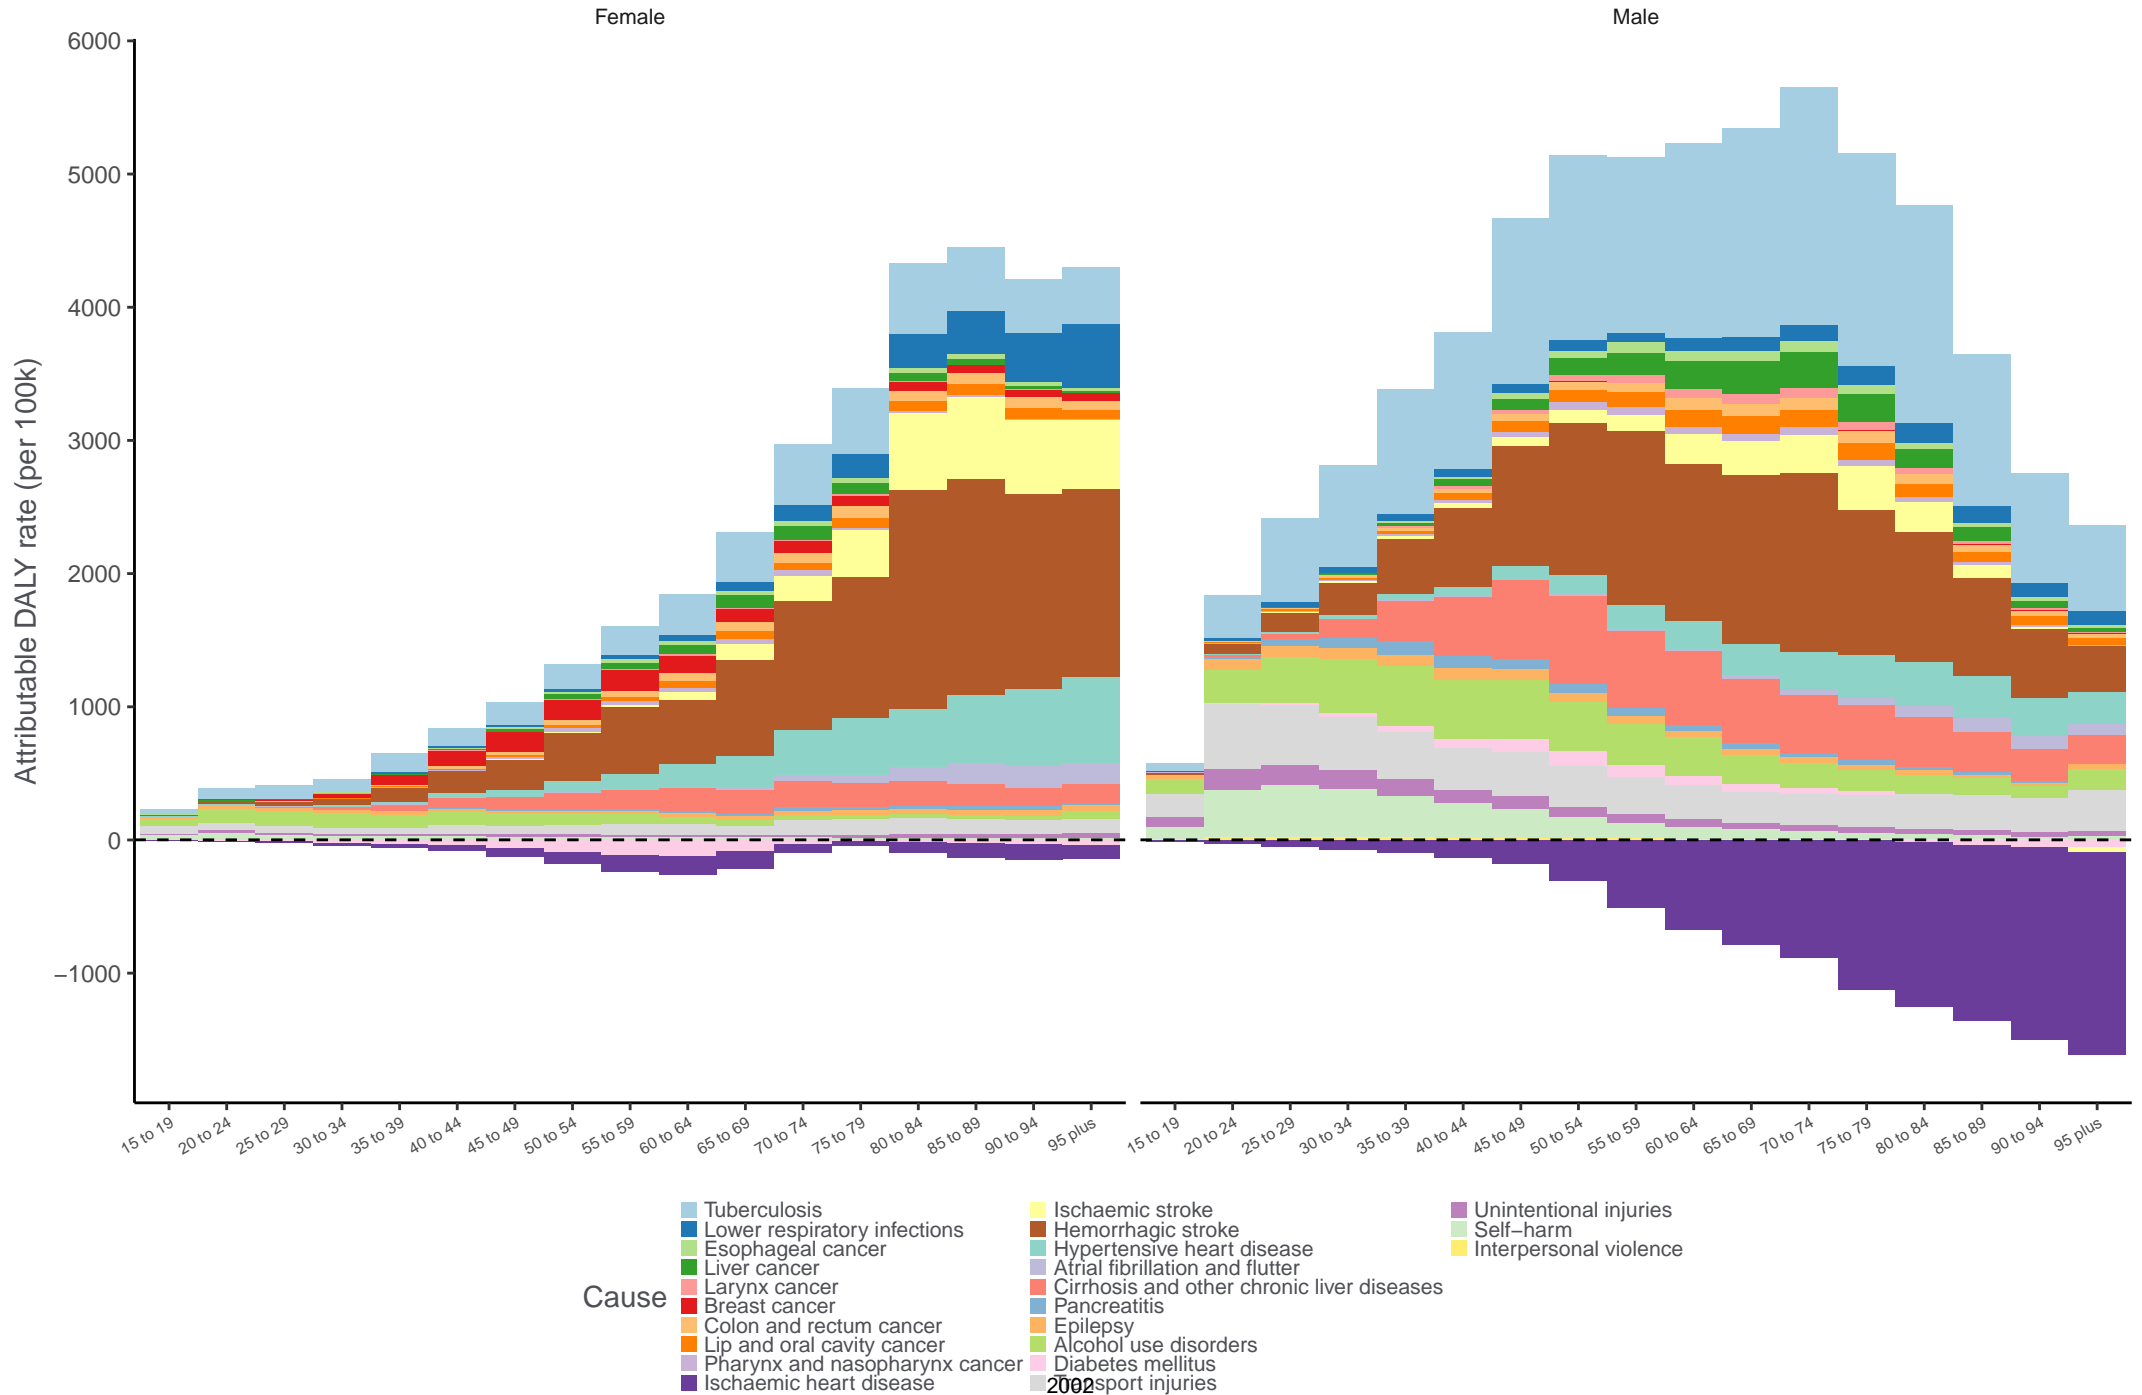

Attributable DALY rate disaggregated by cause, Malaysia, by sex and age in 2016.

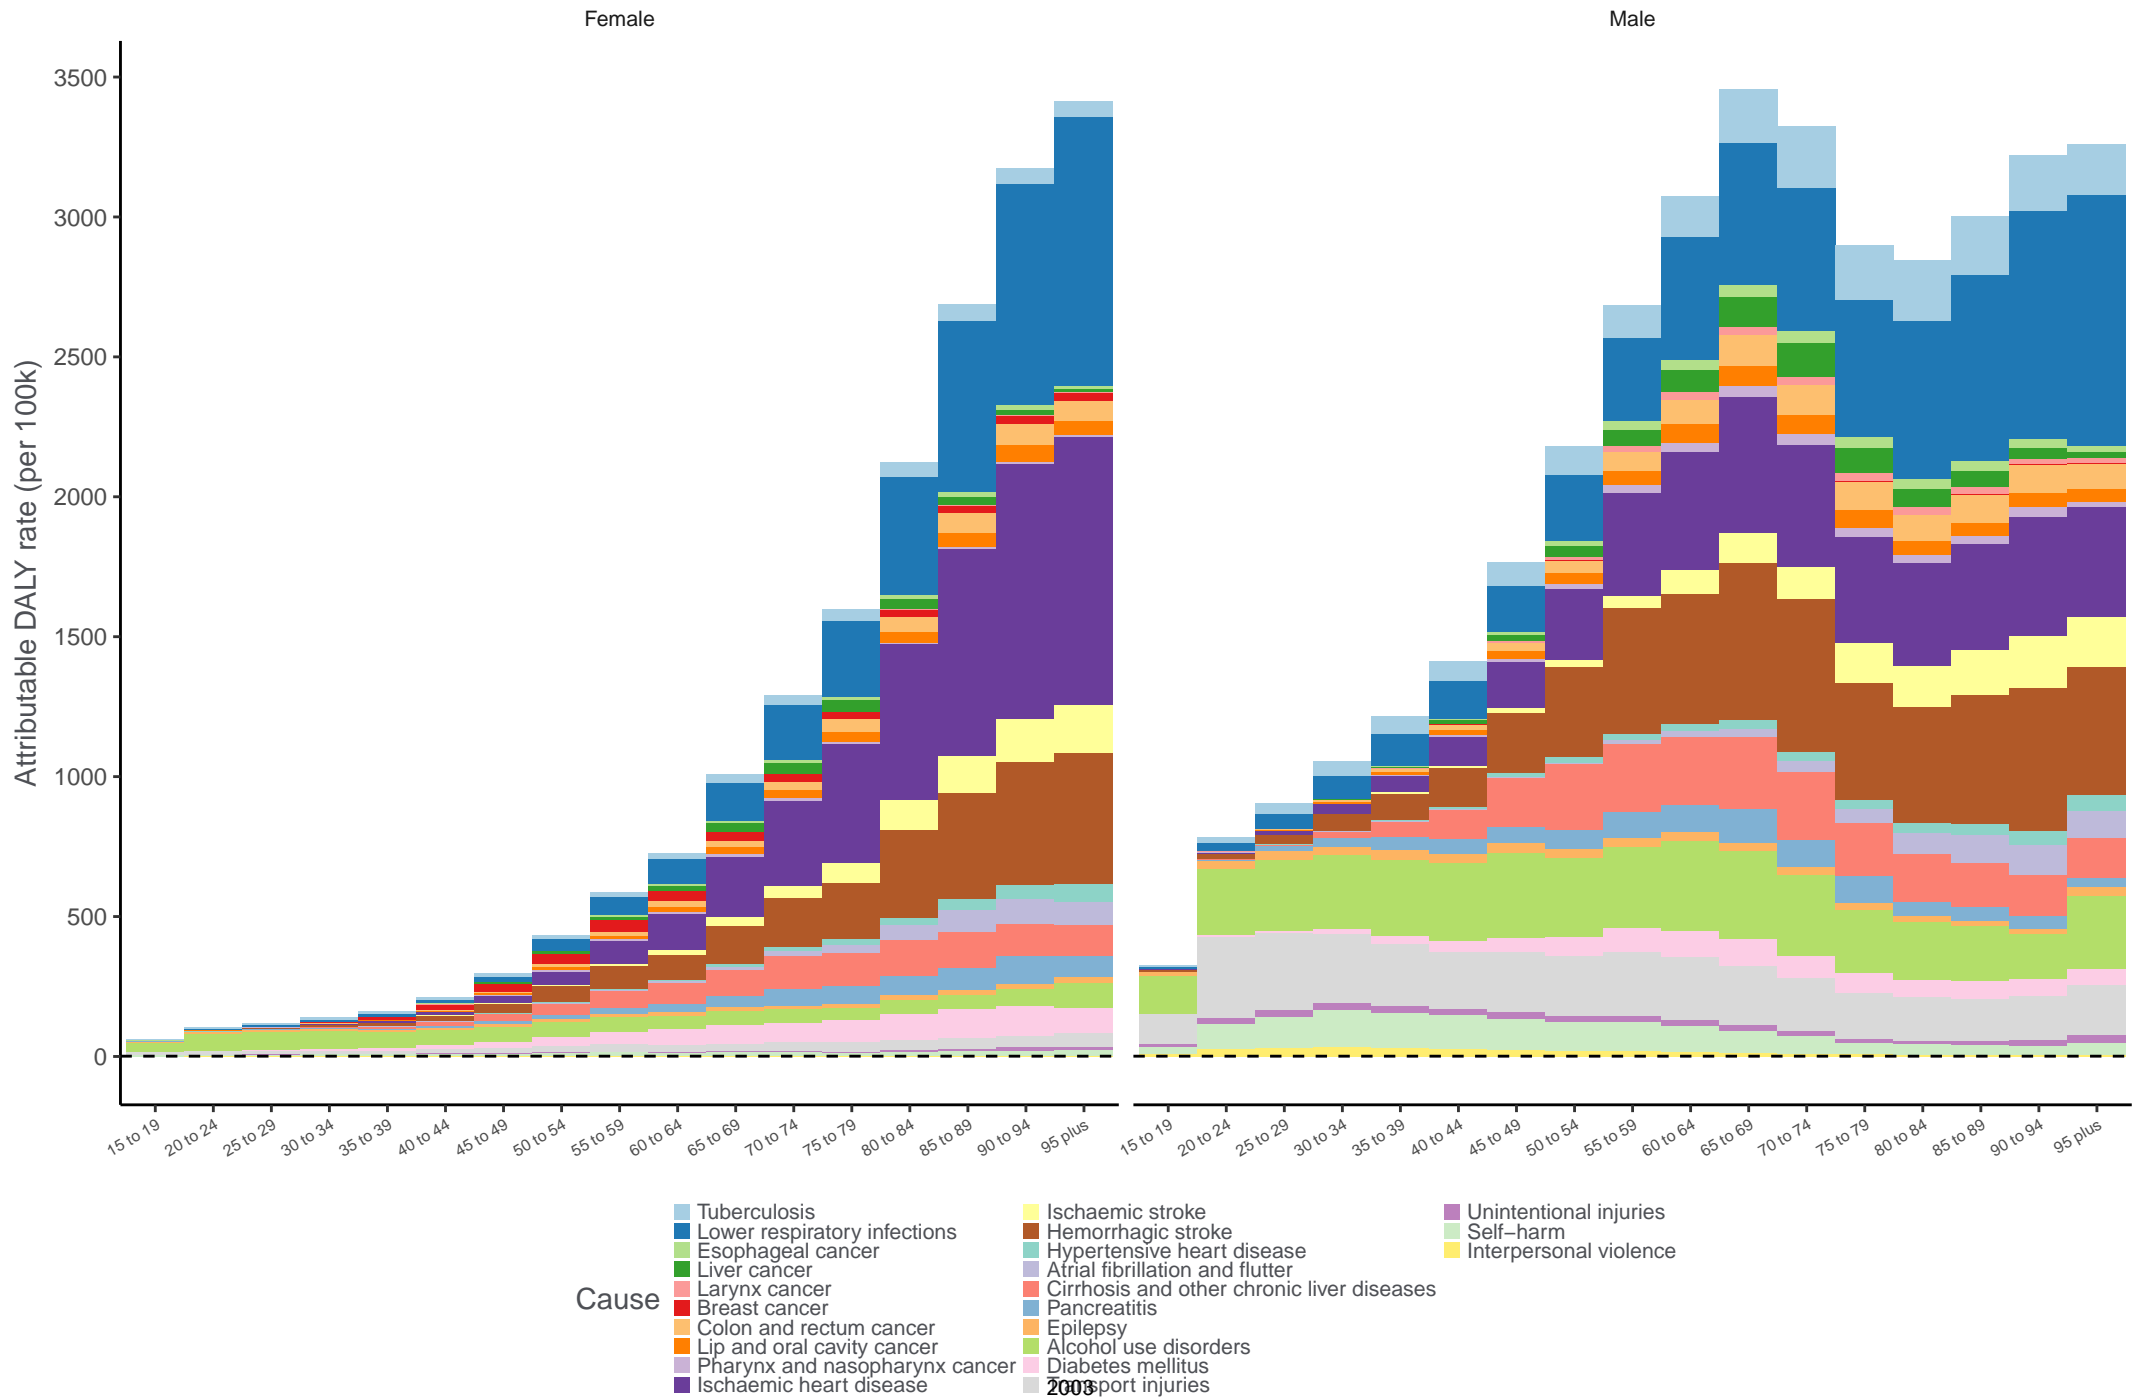

Cause

- Tuberculosis
  - Lower respiratory infections
  - Esophageal cancer
  - Liver cancer
  - Larynx cancer
  - Breast cancer
  - Colon and rectum cancer
  - Lip and oral cavity cancer
  - Pharynx and nasopharynx cancer
  - Ischaemic heart disease
- Ischaemic stroke
  - Hemorrhagic stroke
  - Hypertensive heart disease
  - Atrial fibrillation and flutter
  - Cirrhosis and other chronic liver diseases
  - Pancreatitis
  - Epilepsy
  - Alcohol use disorders
  - Diabetes mellitus
  - Transport injuries
- Unintentional injuries
  - Self-harm
  - Interpersonal violence

Attributable DALY rate disaggregated by cause, Maldives, by sex and age in 2016.

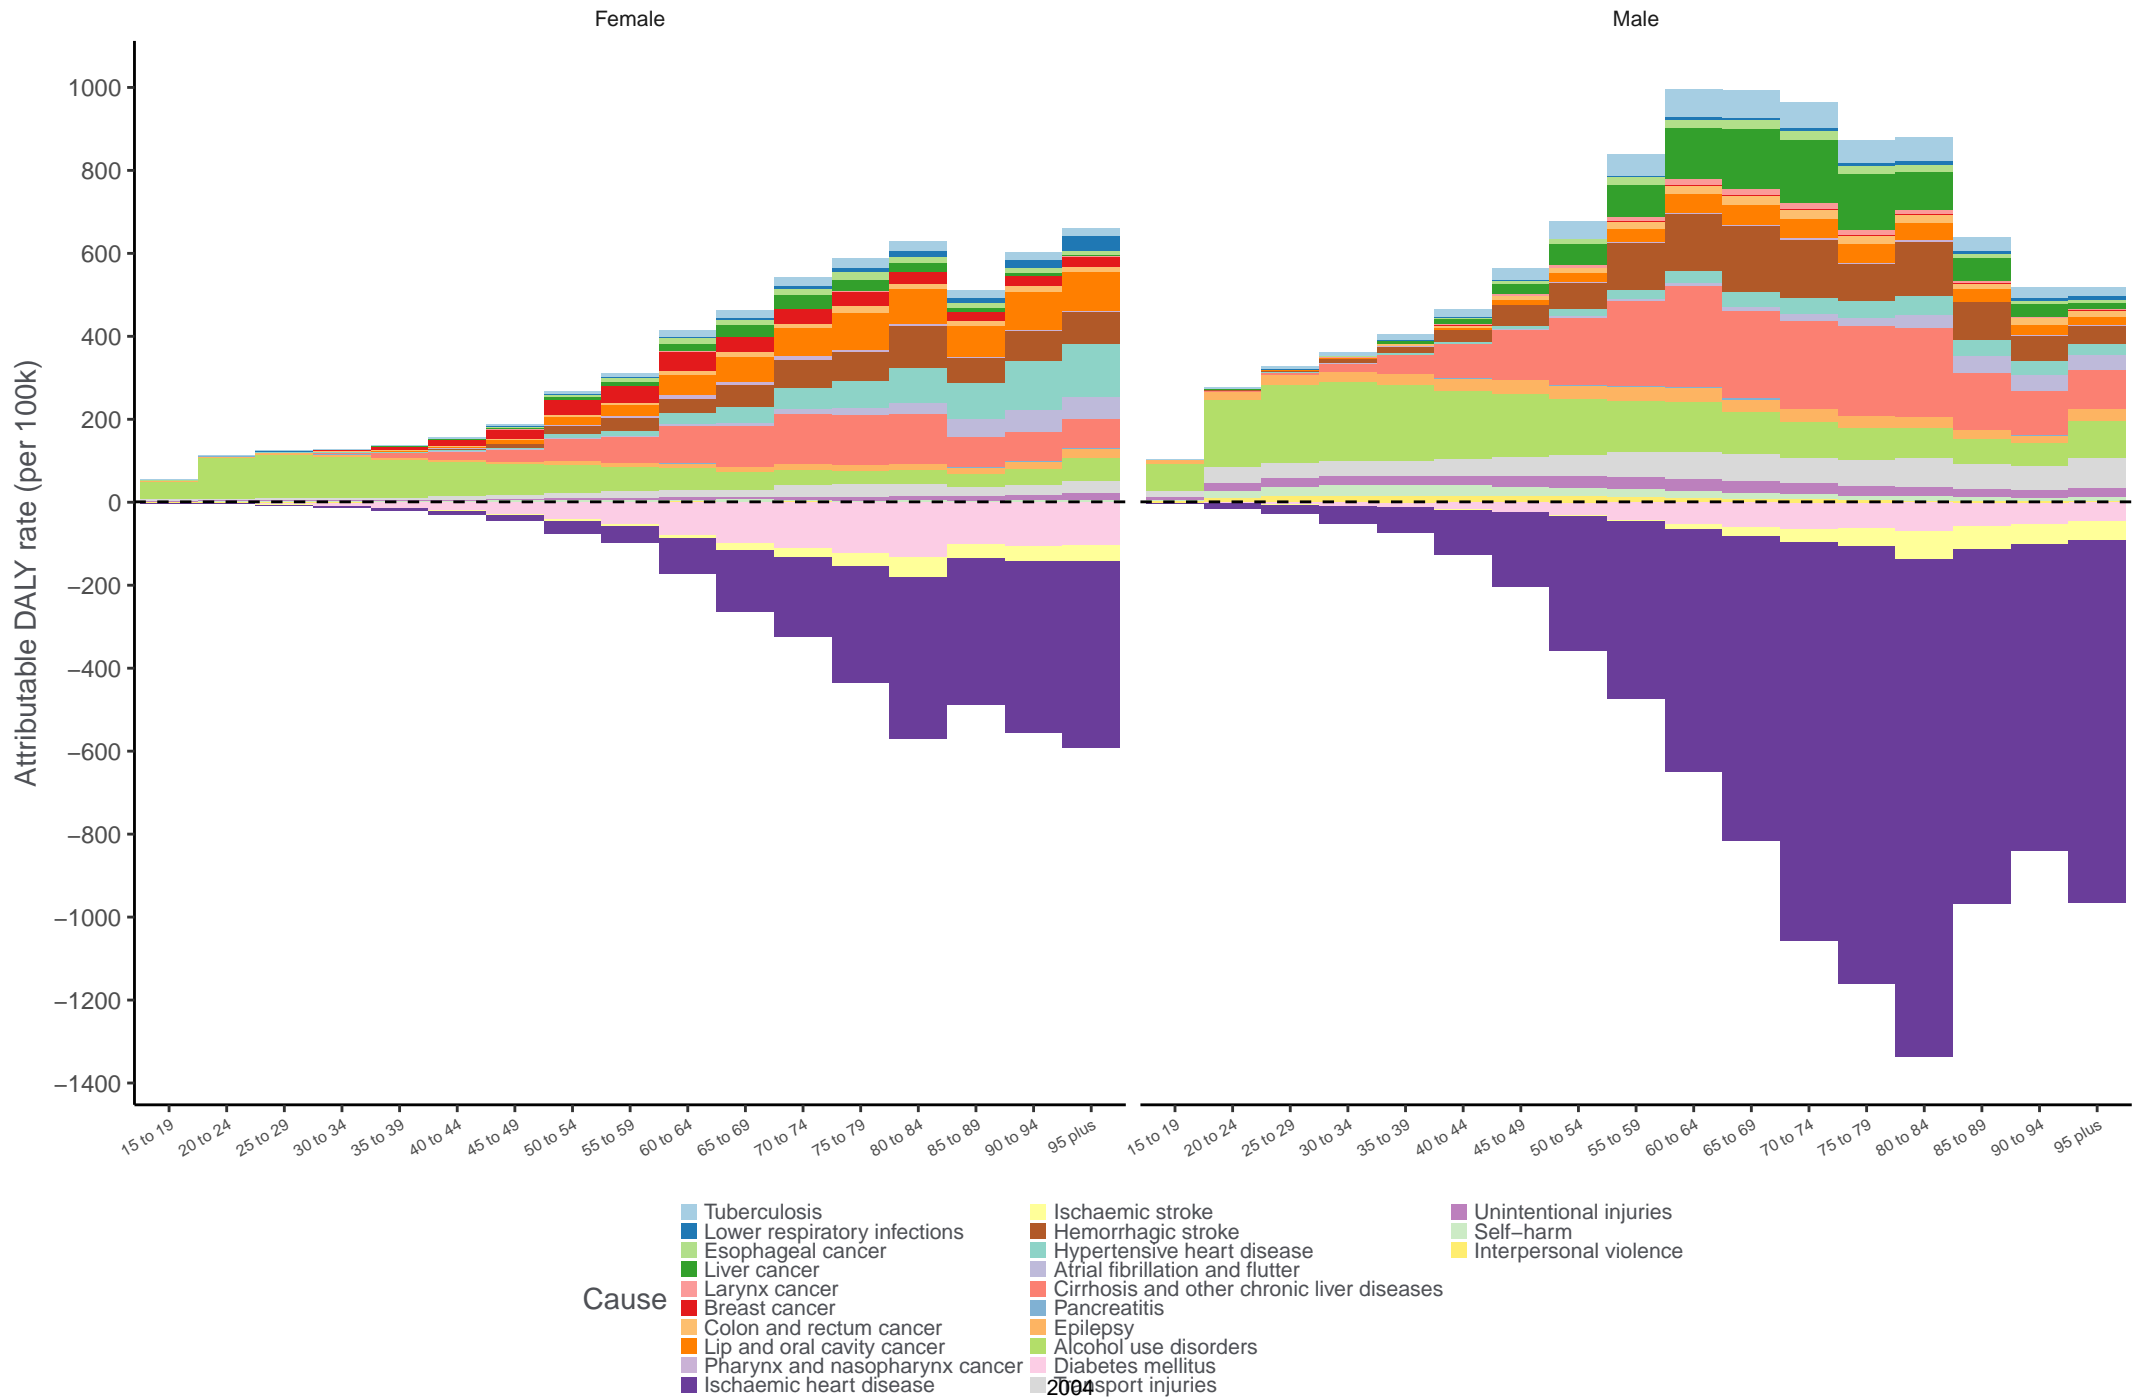

Attributable DALY rate disaggregated by cause, Mauritius, by sex and age in 2016.

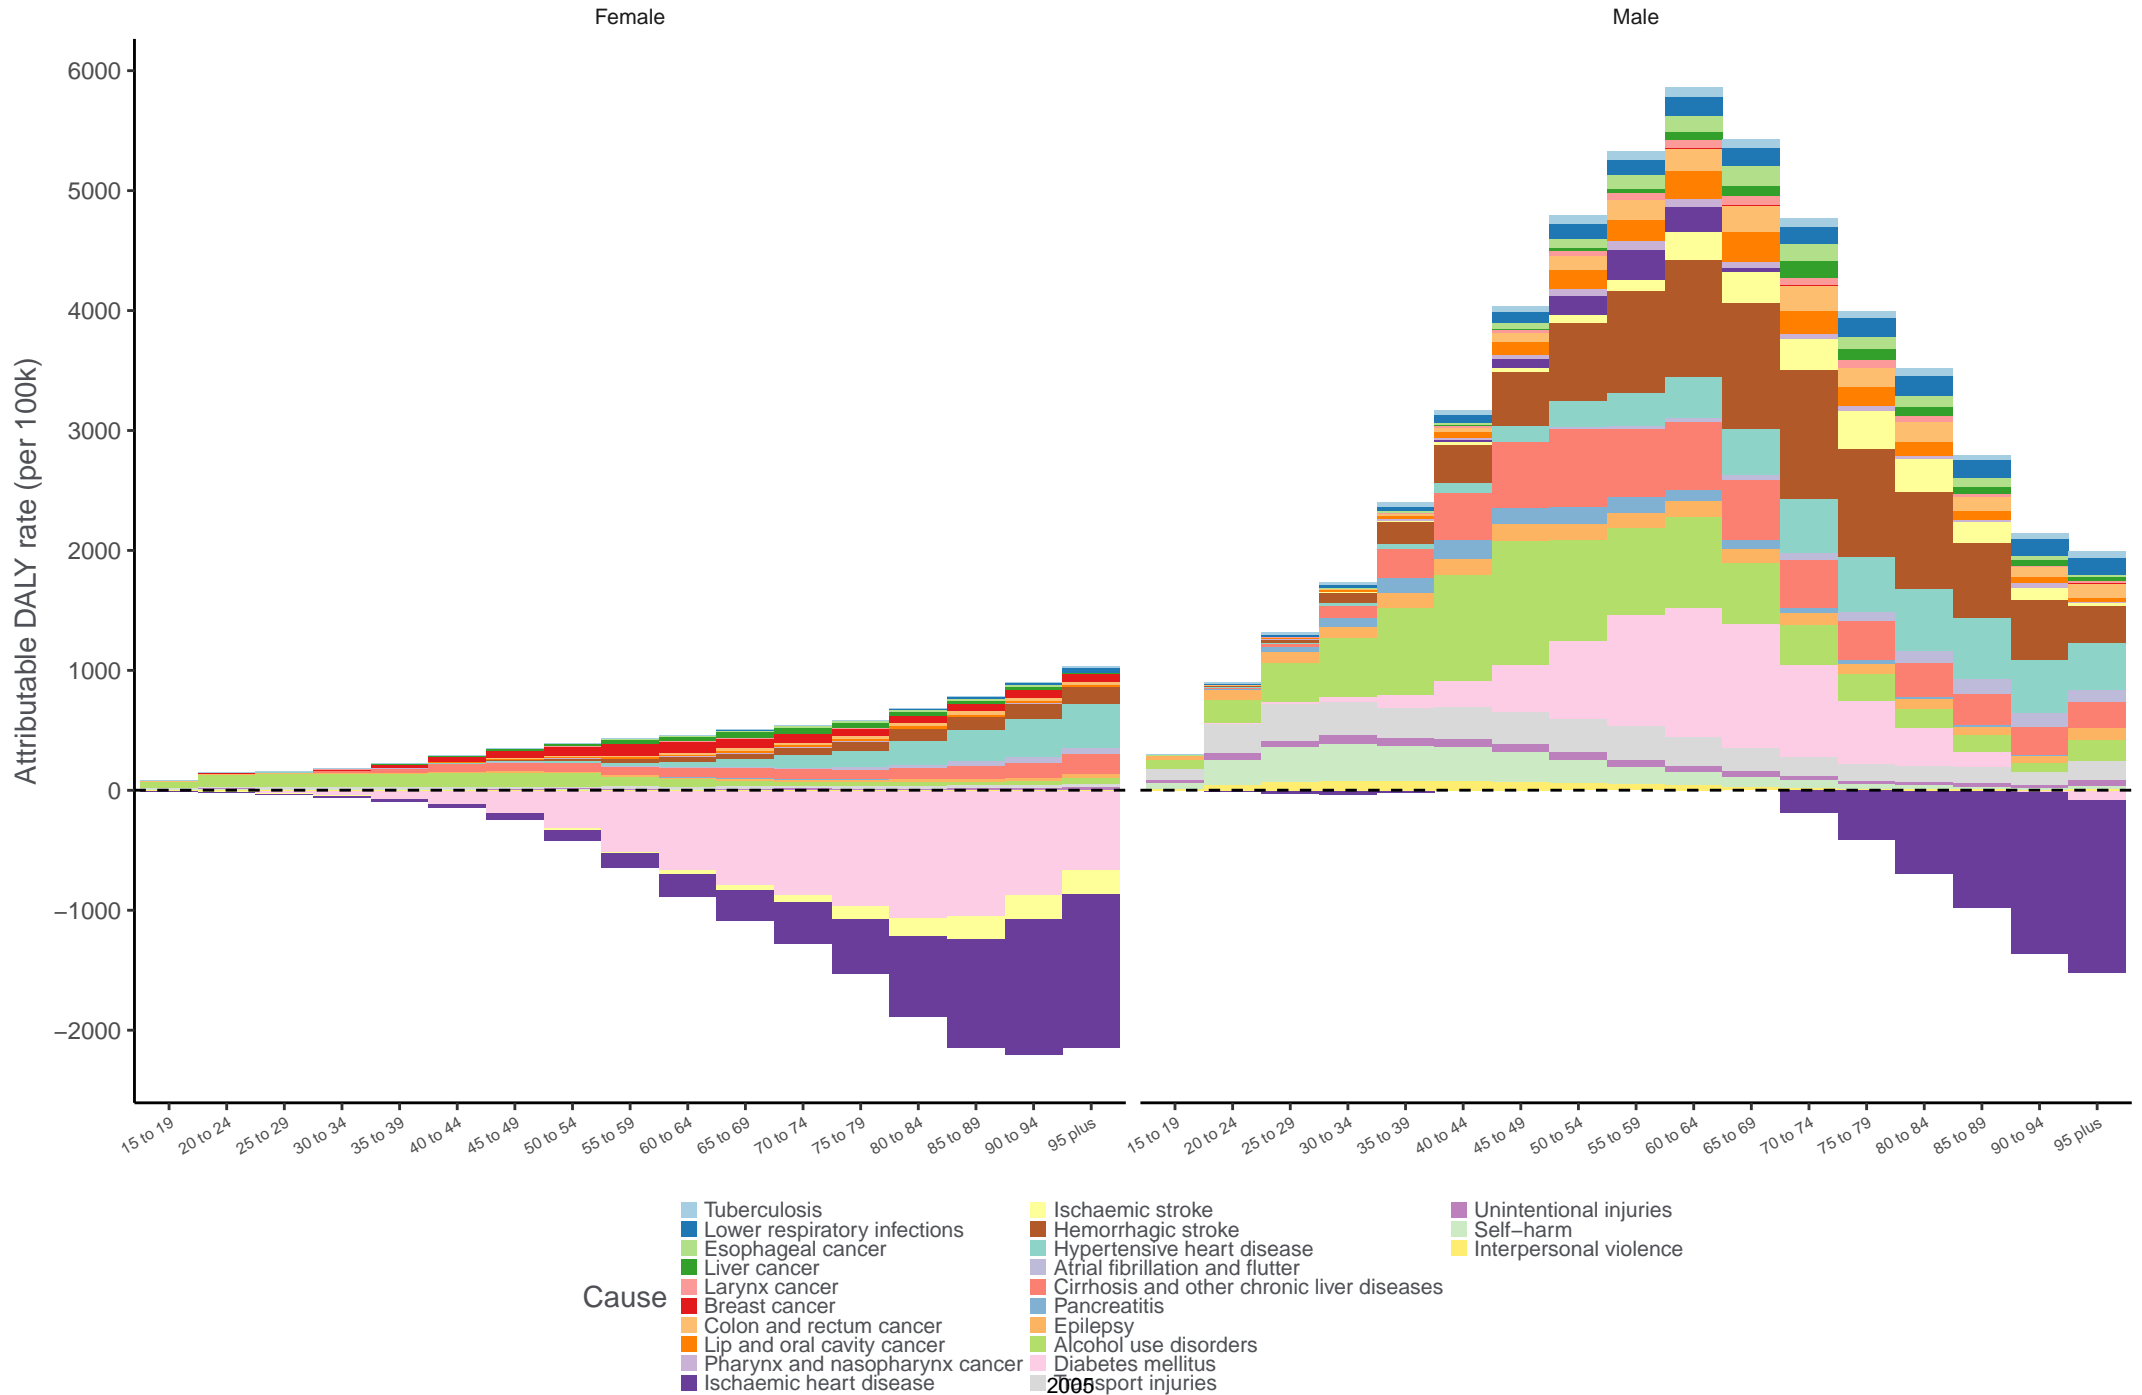



# Attributable DALY rate disaggregated by cause, Philippines, by sex and age in 2016.

Female

Male

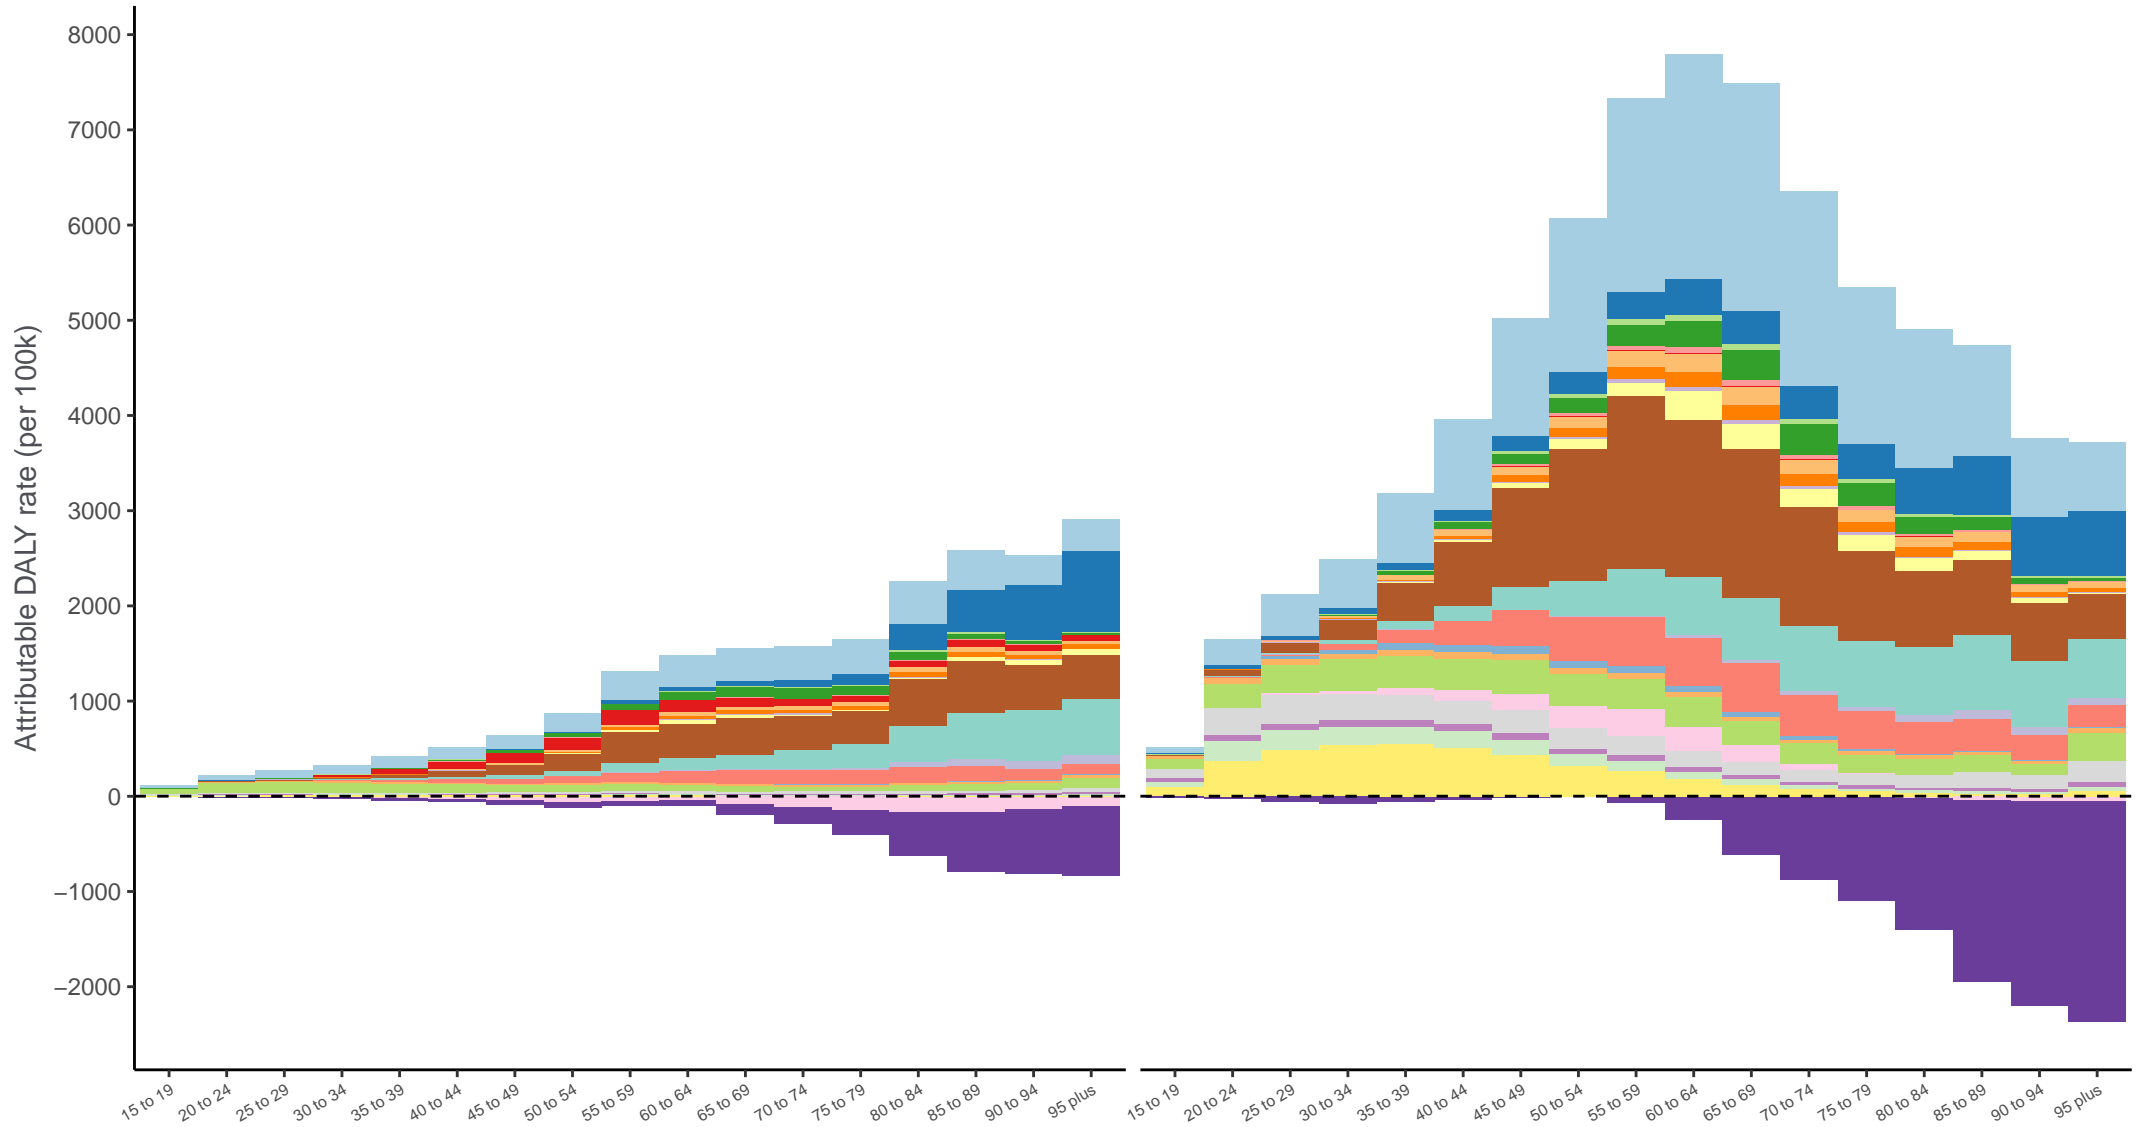

- Cause**
- Tuberculosis
  - Ischaemic stroke
  - Unintentional injuries
  - Lower respiratory infections
  - Hemorrhagic stroke
  - Self-harm
  - Esophageal cancer
  - Hypertensive heart disease
  - Interpersonal violence
  - Liver cancer
  - Atrial fibrillation and flutter
  - Larynx cancer
  - Cirrhosis and other chronic liver diseases
  - Breast cancer
  - Pancreatitis
  - Colon and rectum cancer
  - Epilepsy
  - Alcohol use disorders
  - Lip and oral cavity cancer
  - Diabetes mellitus
  - Pharynx and nasopharynx cancer
  - Ischaemic heart disease
  - Sport injuries



Attributable DALY rate disaggregated by cause, Sri Lanka, by sex and age in 2016.

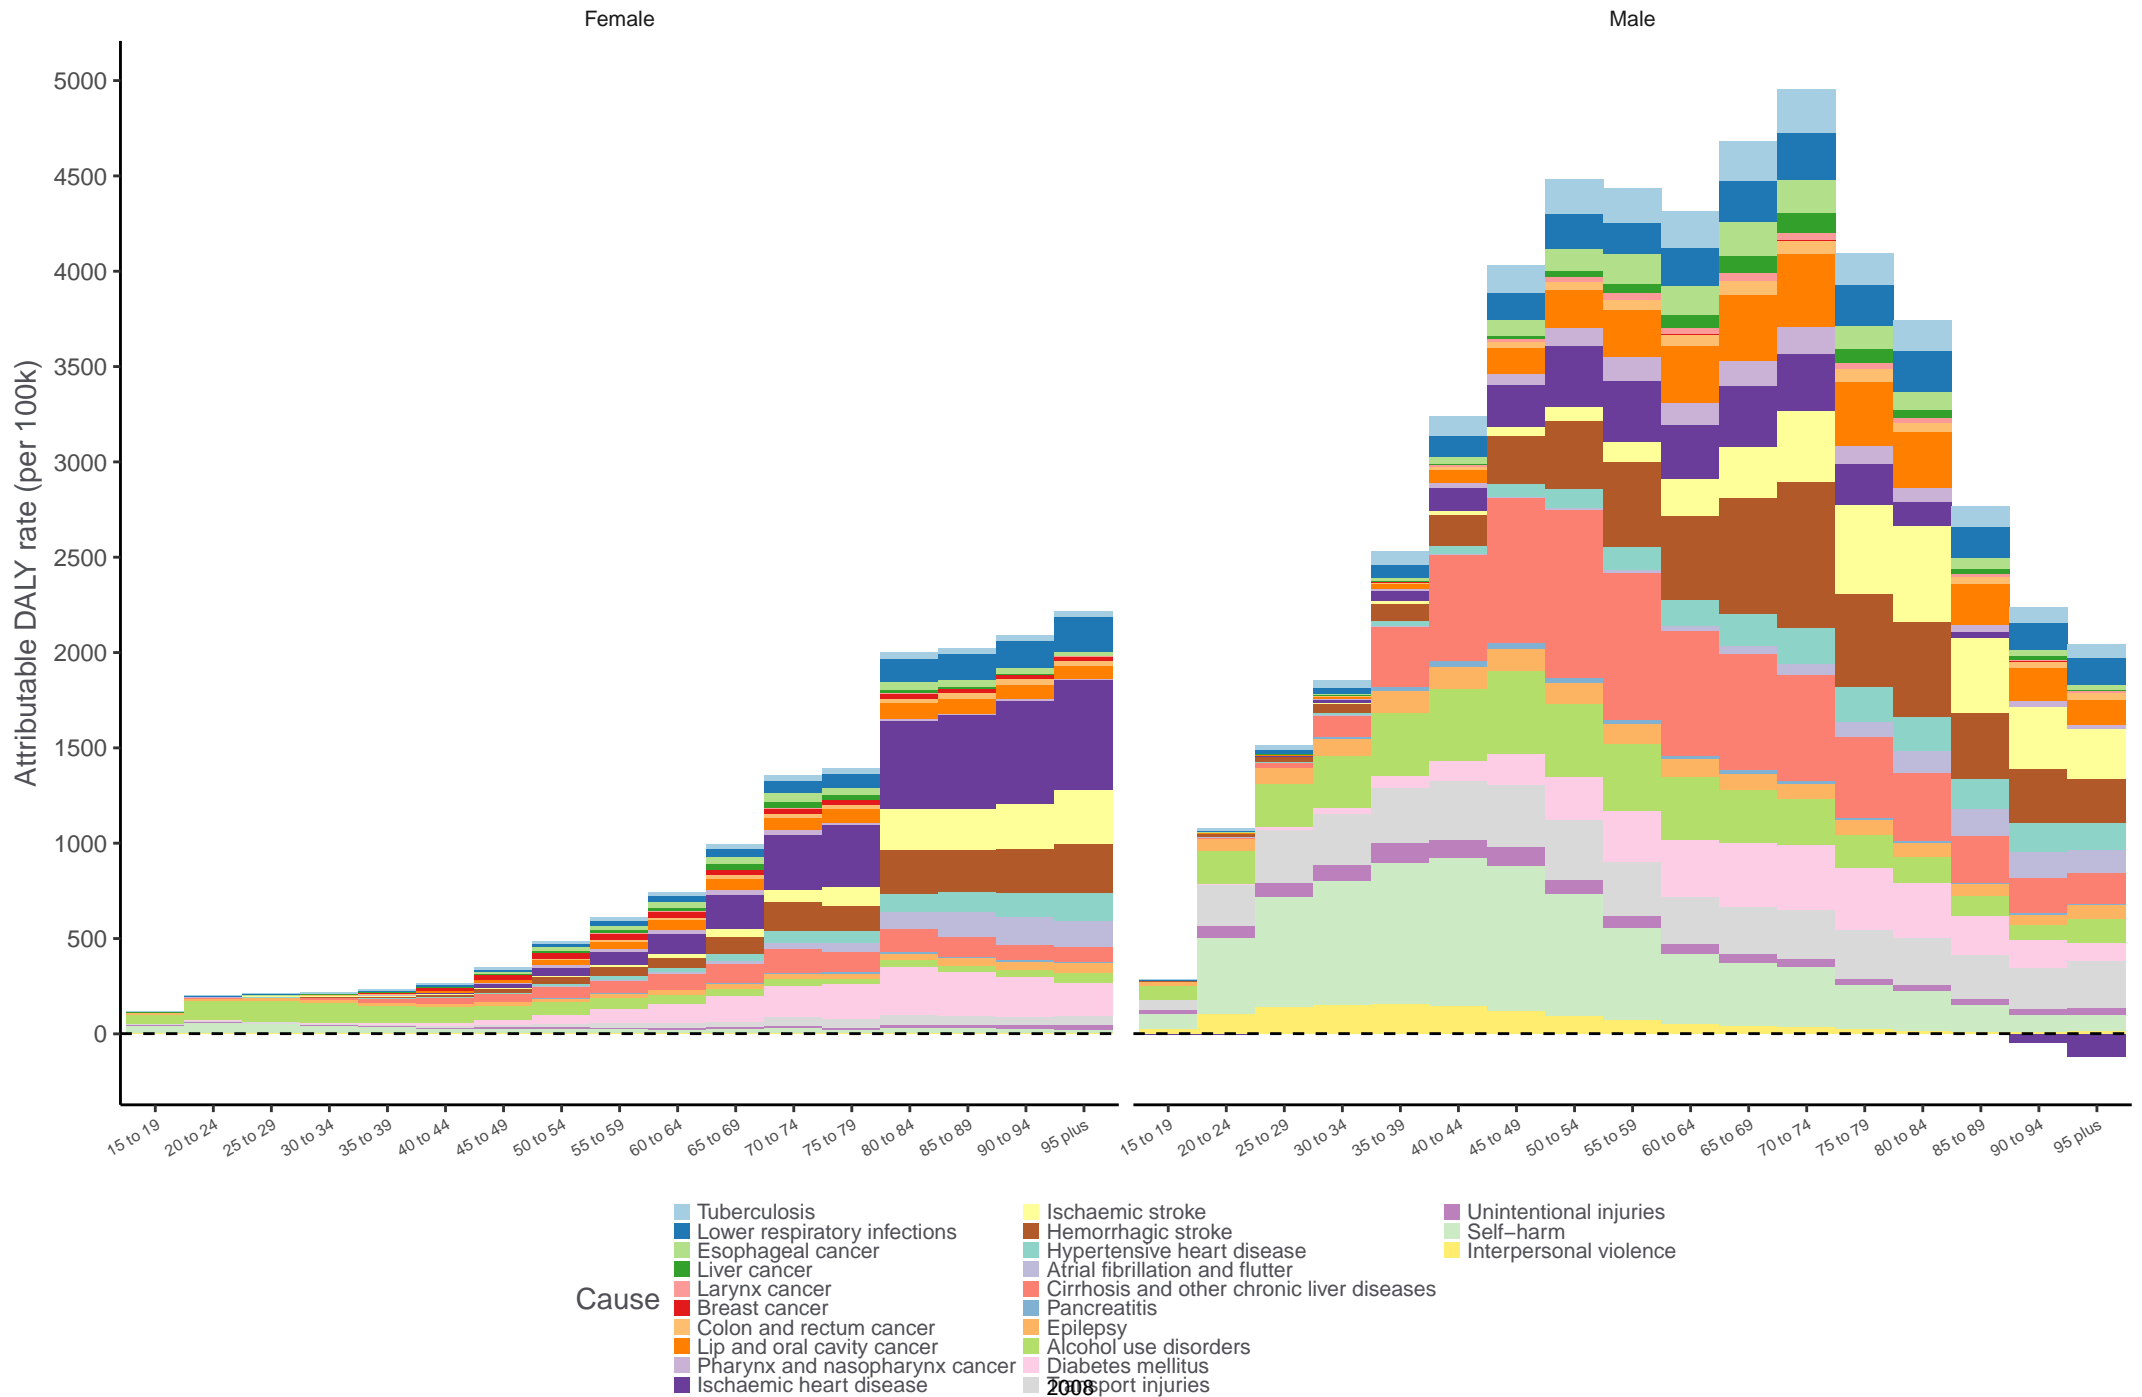

Attributable DALY rate disaggregated by cause, Seychelles, by sex and age in 2016.

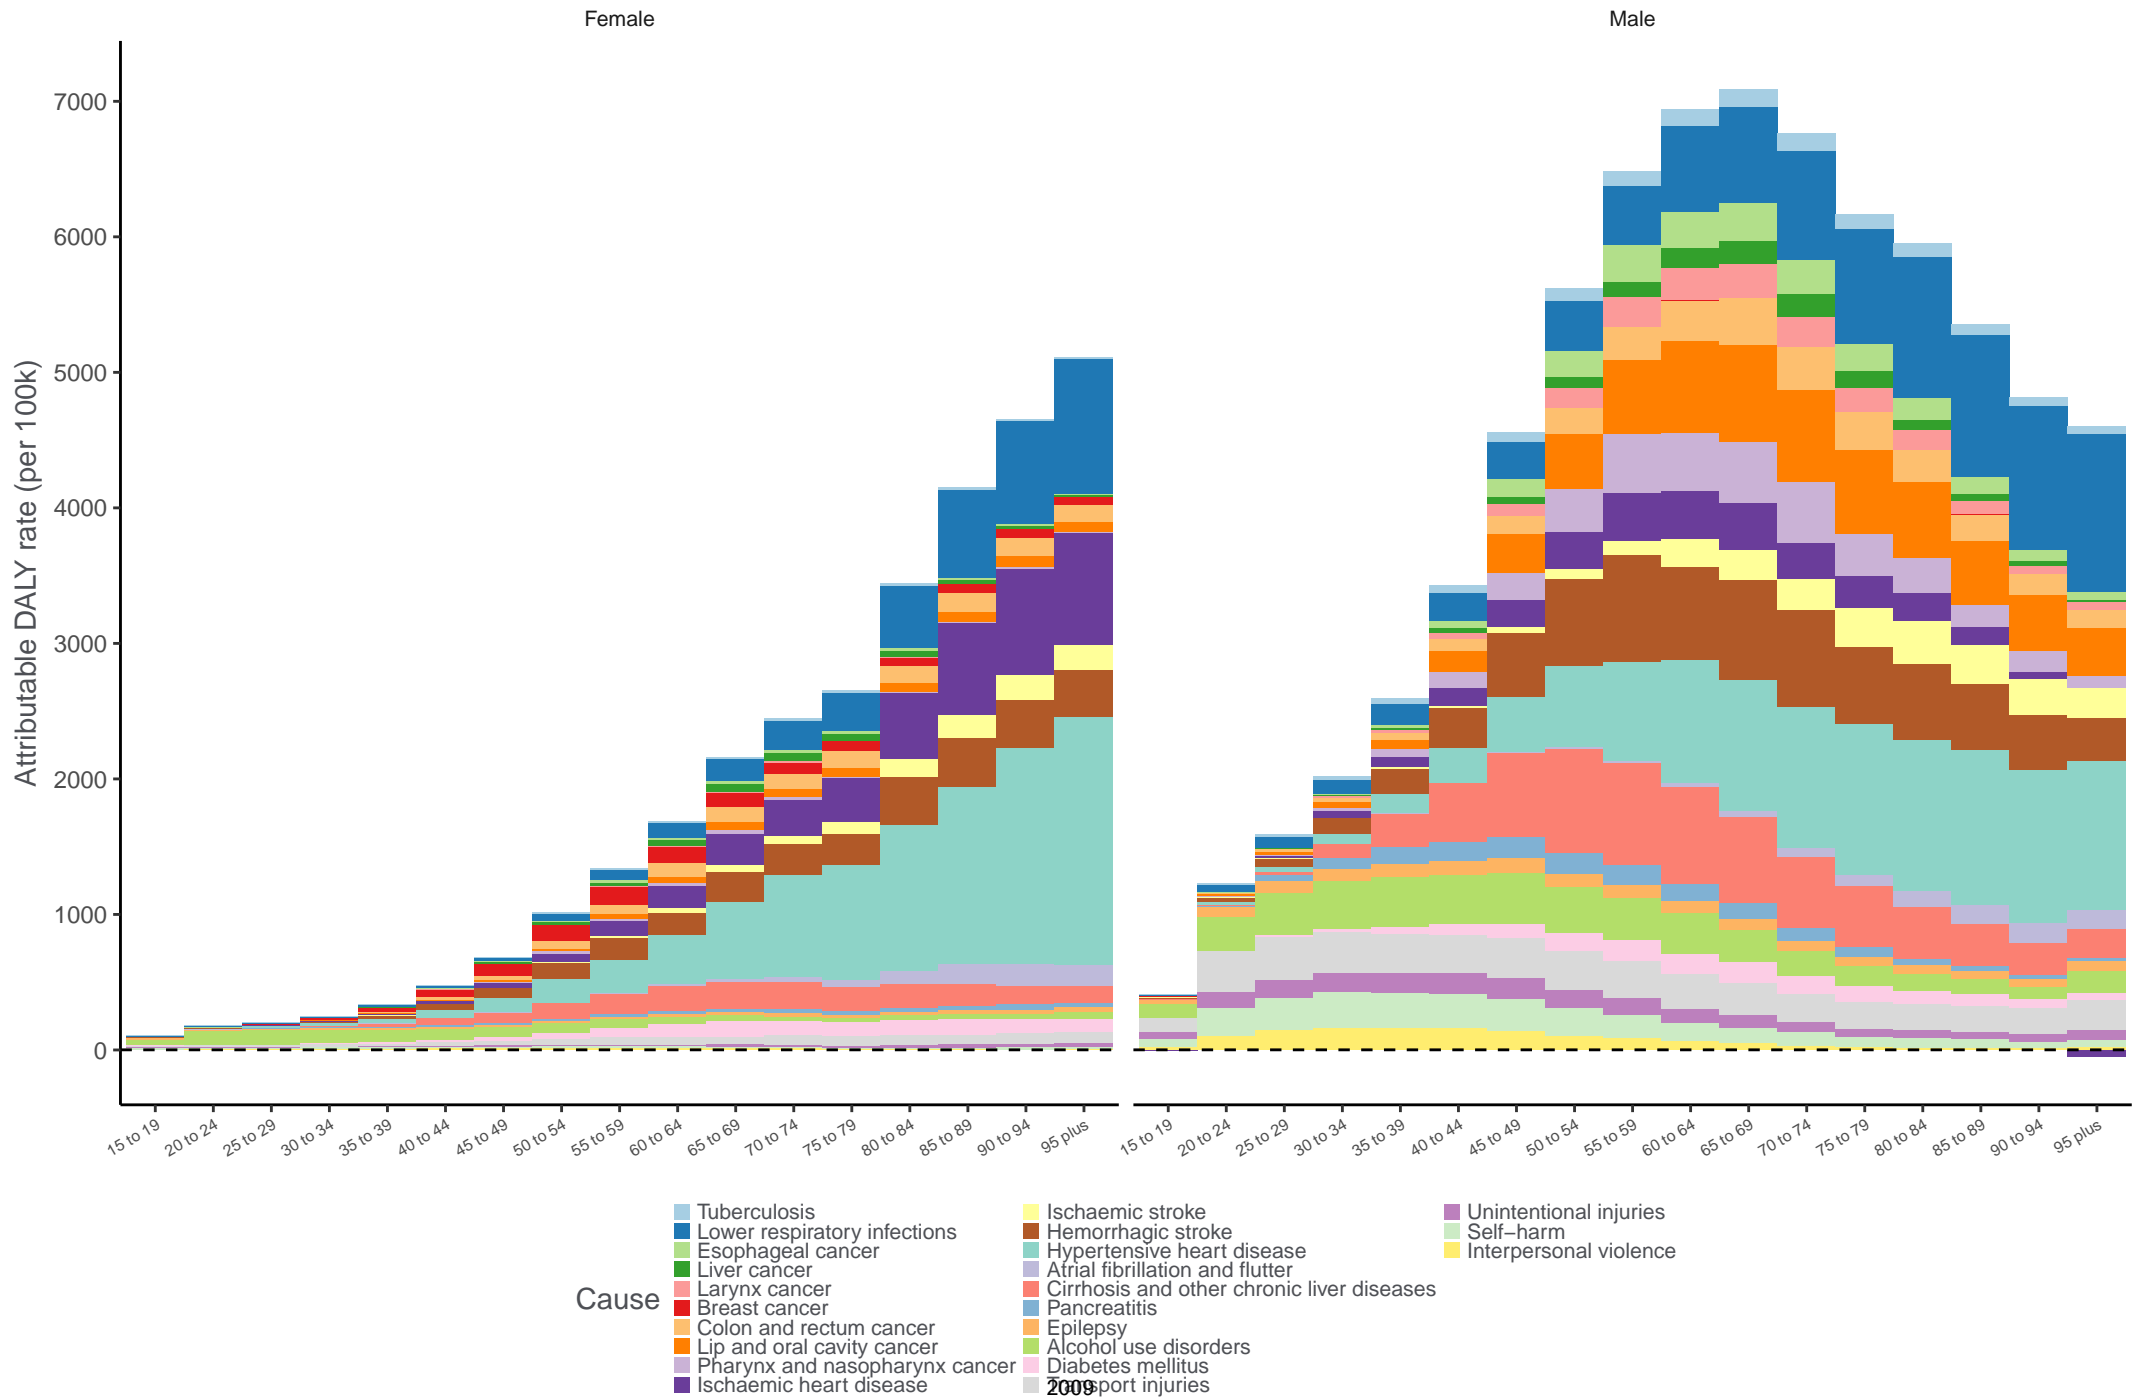

Attributable DALY rate disaggregated by cause, Thailand, by sex and age in 2016.

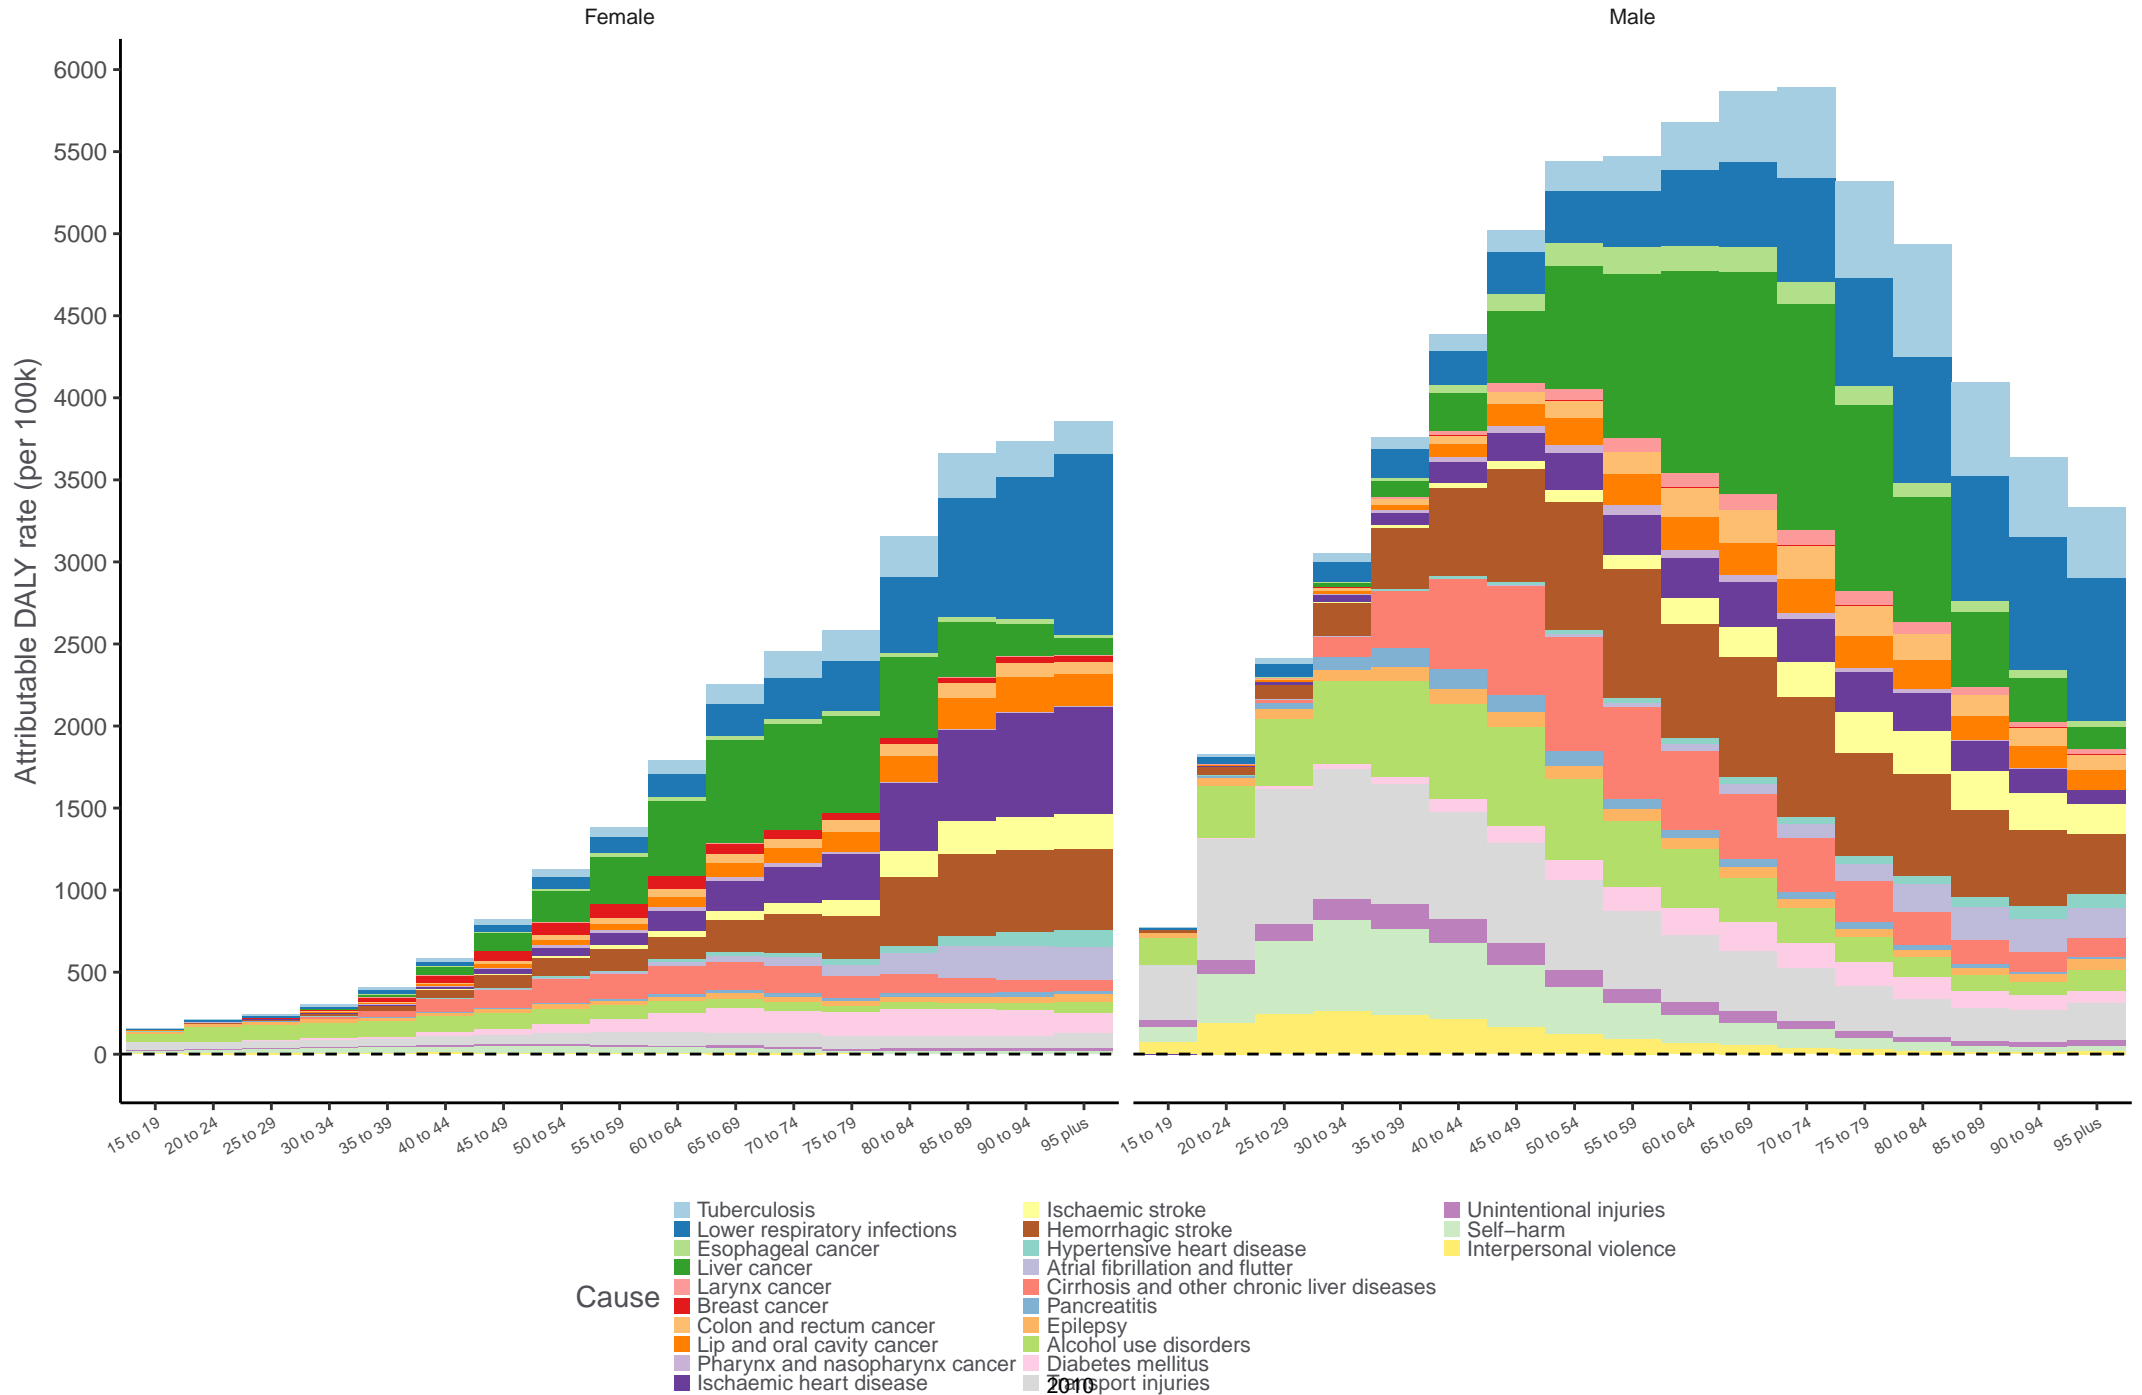

Attributable DALY rate disaggregated by cause, Timor-Leste, by sex and age in 2016.

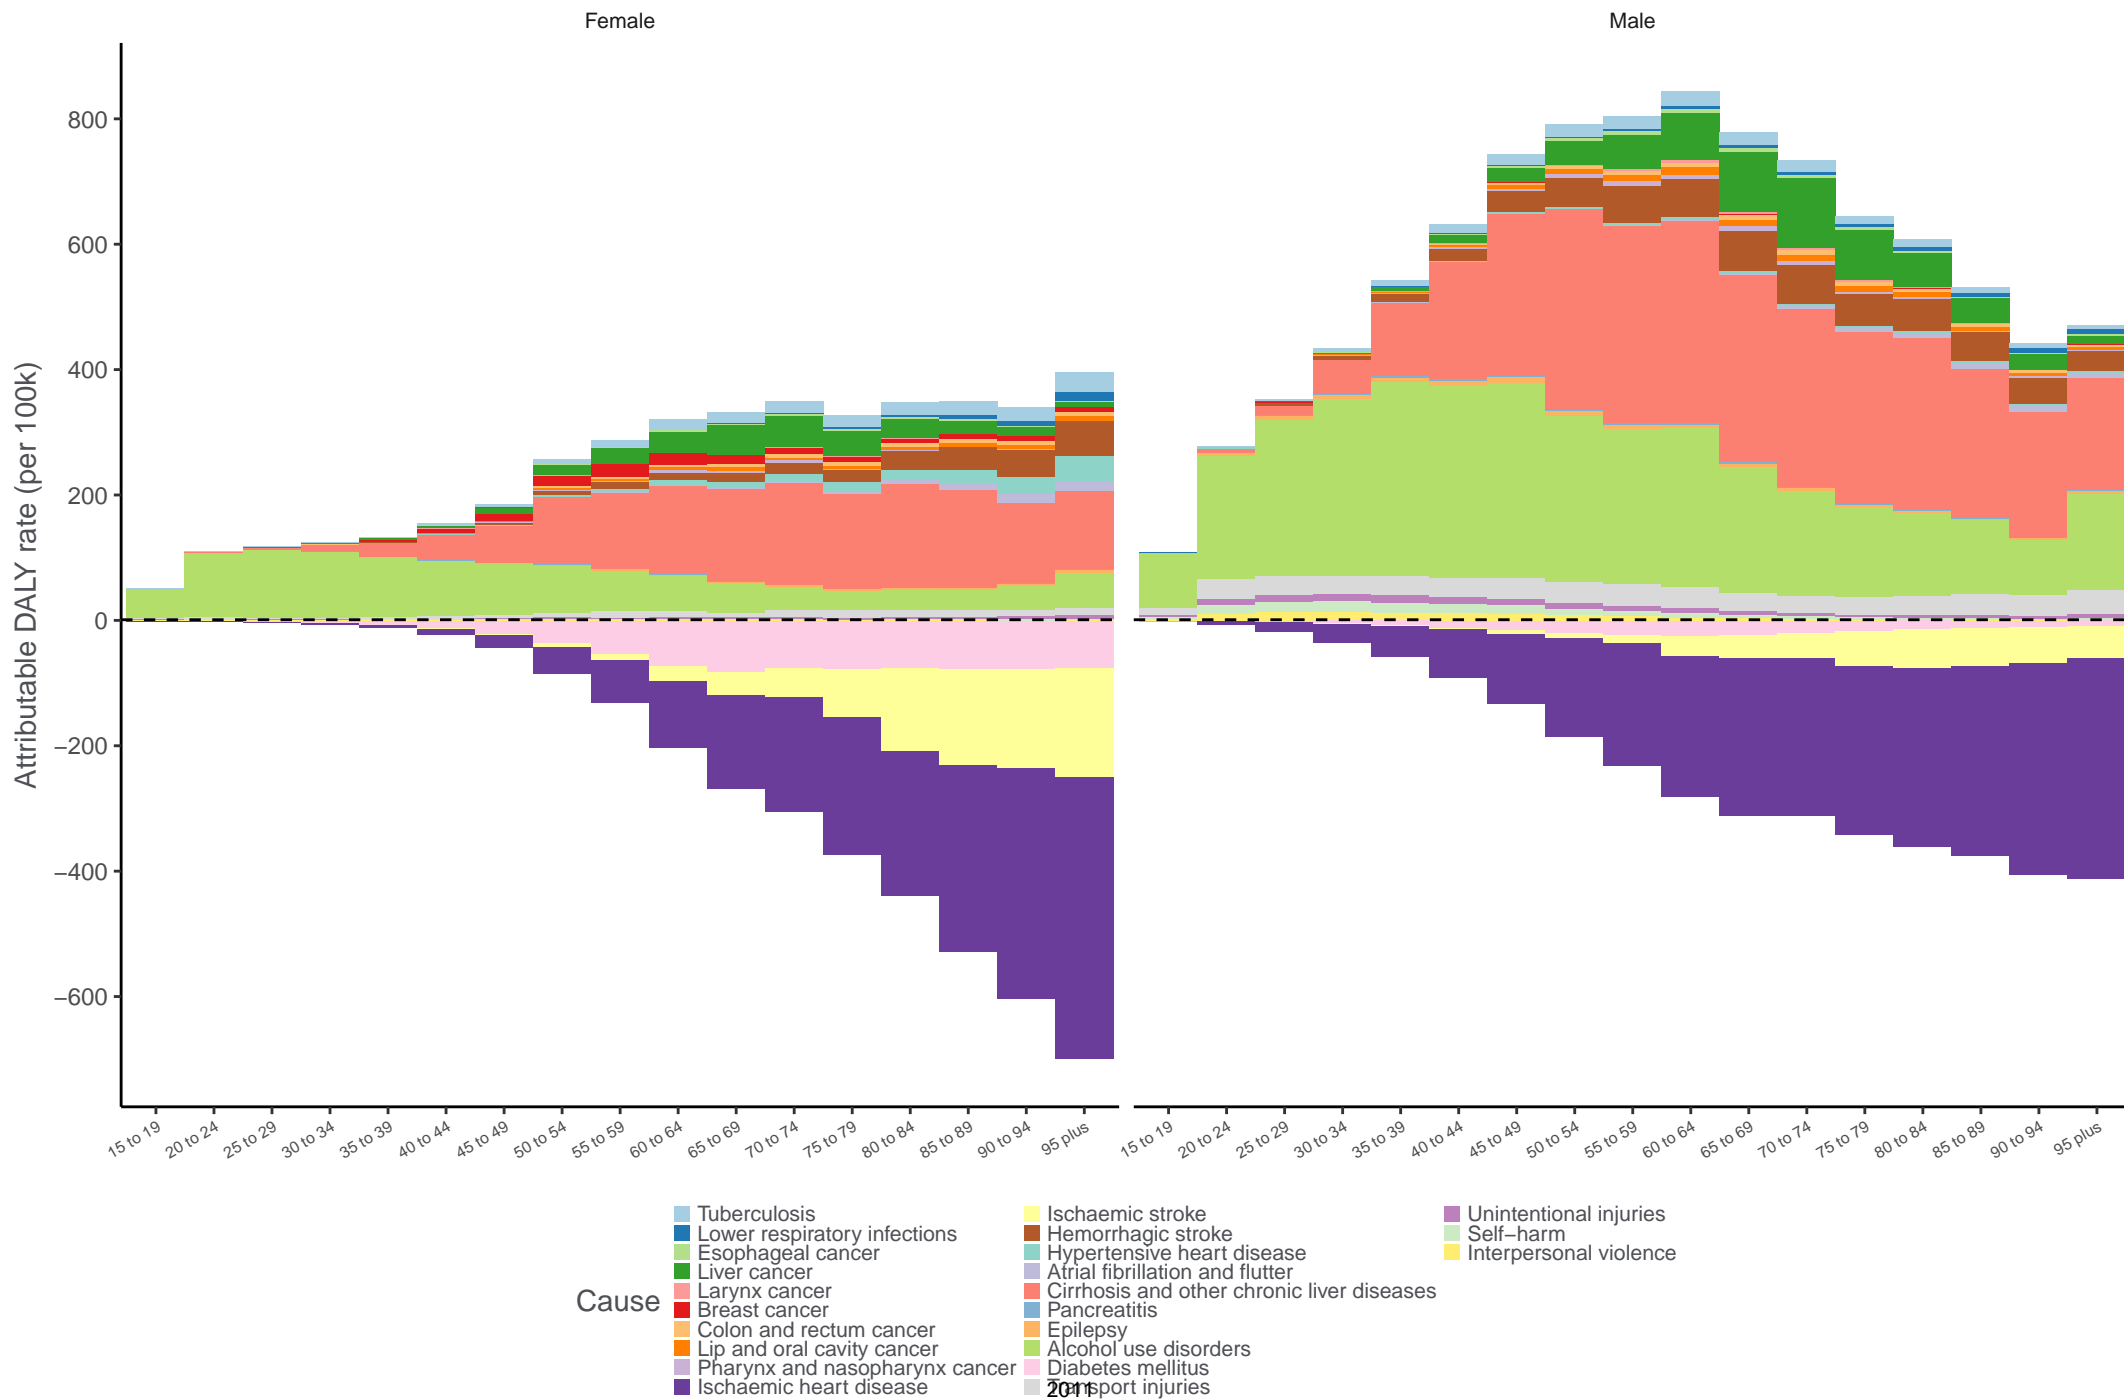

Attributable DALY rate disaggregated by cause, Vietnam, by sex and age in 2016.

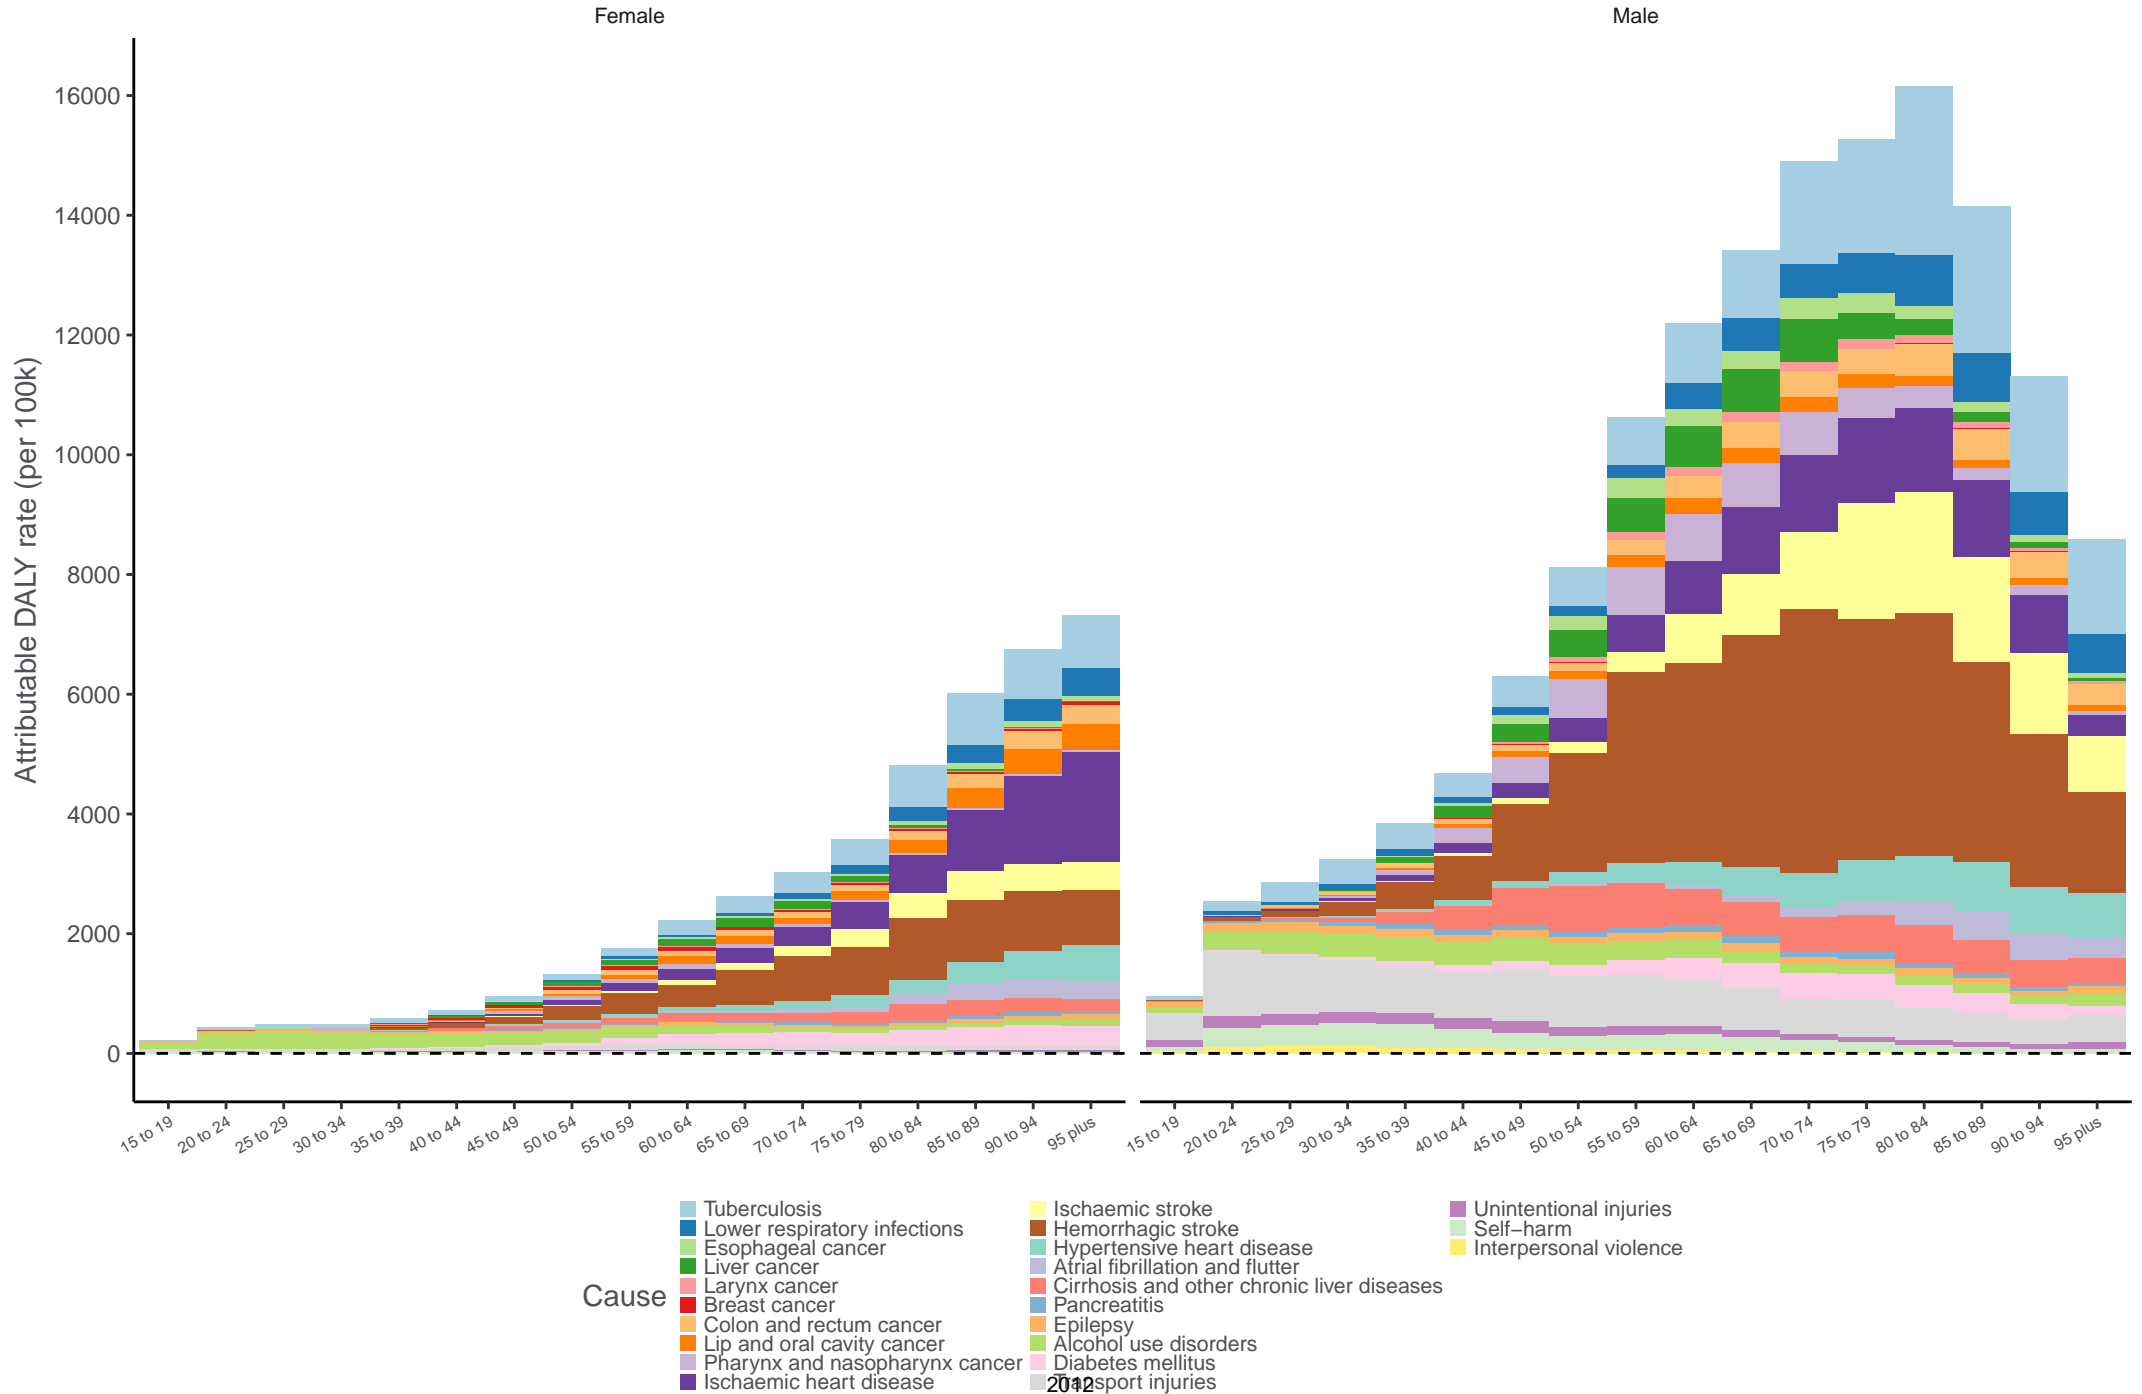

Attributable DALY rate disaggregated by cause, Federated States of Micronesia, by sex and age in 2016.

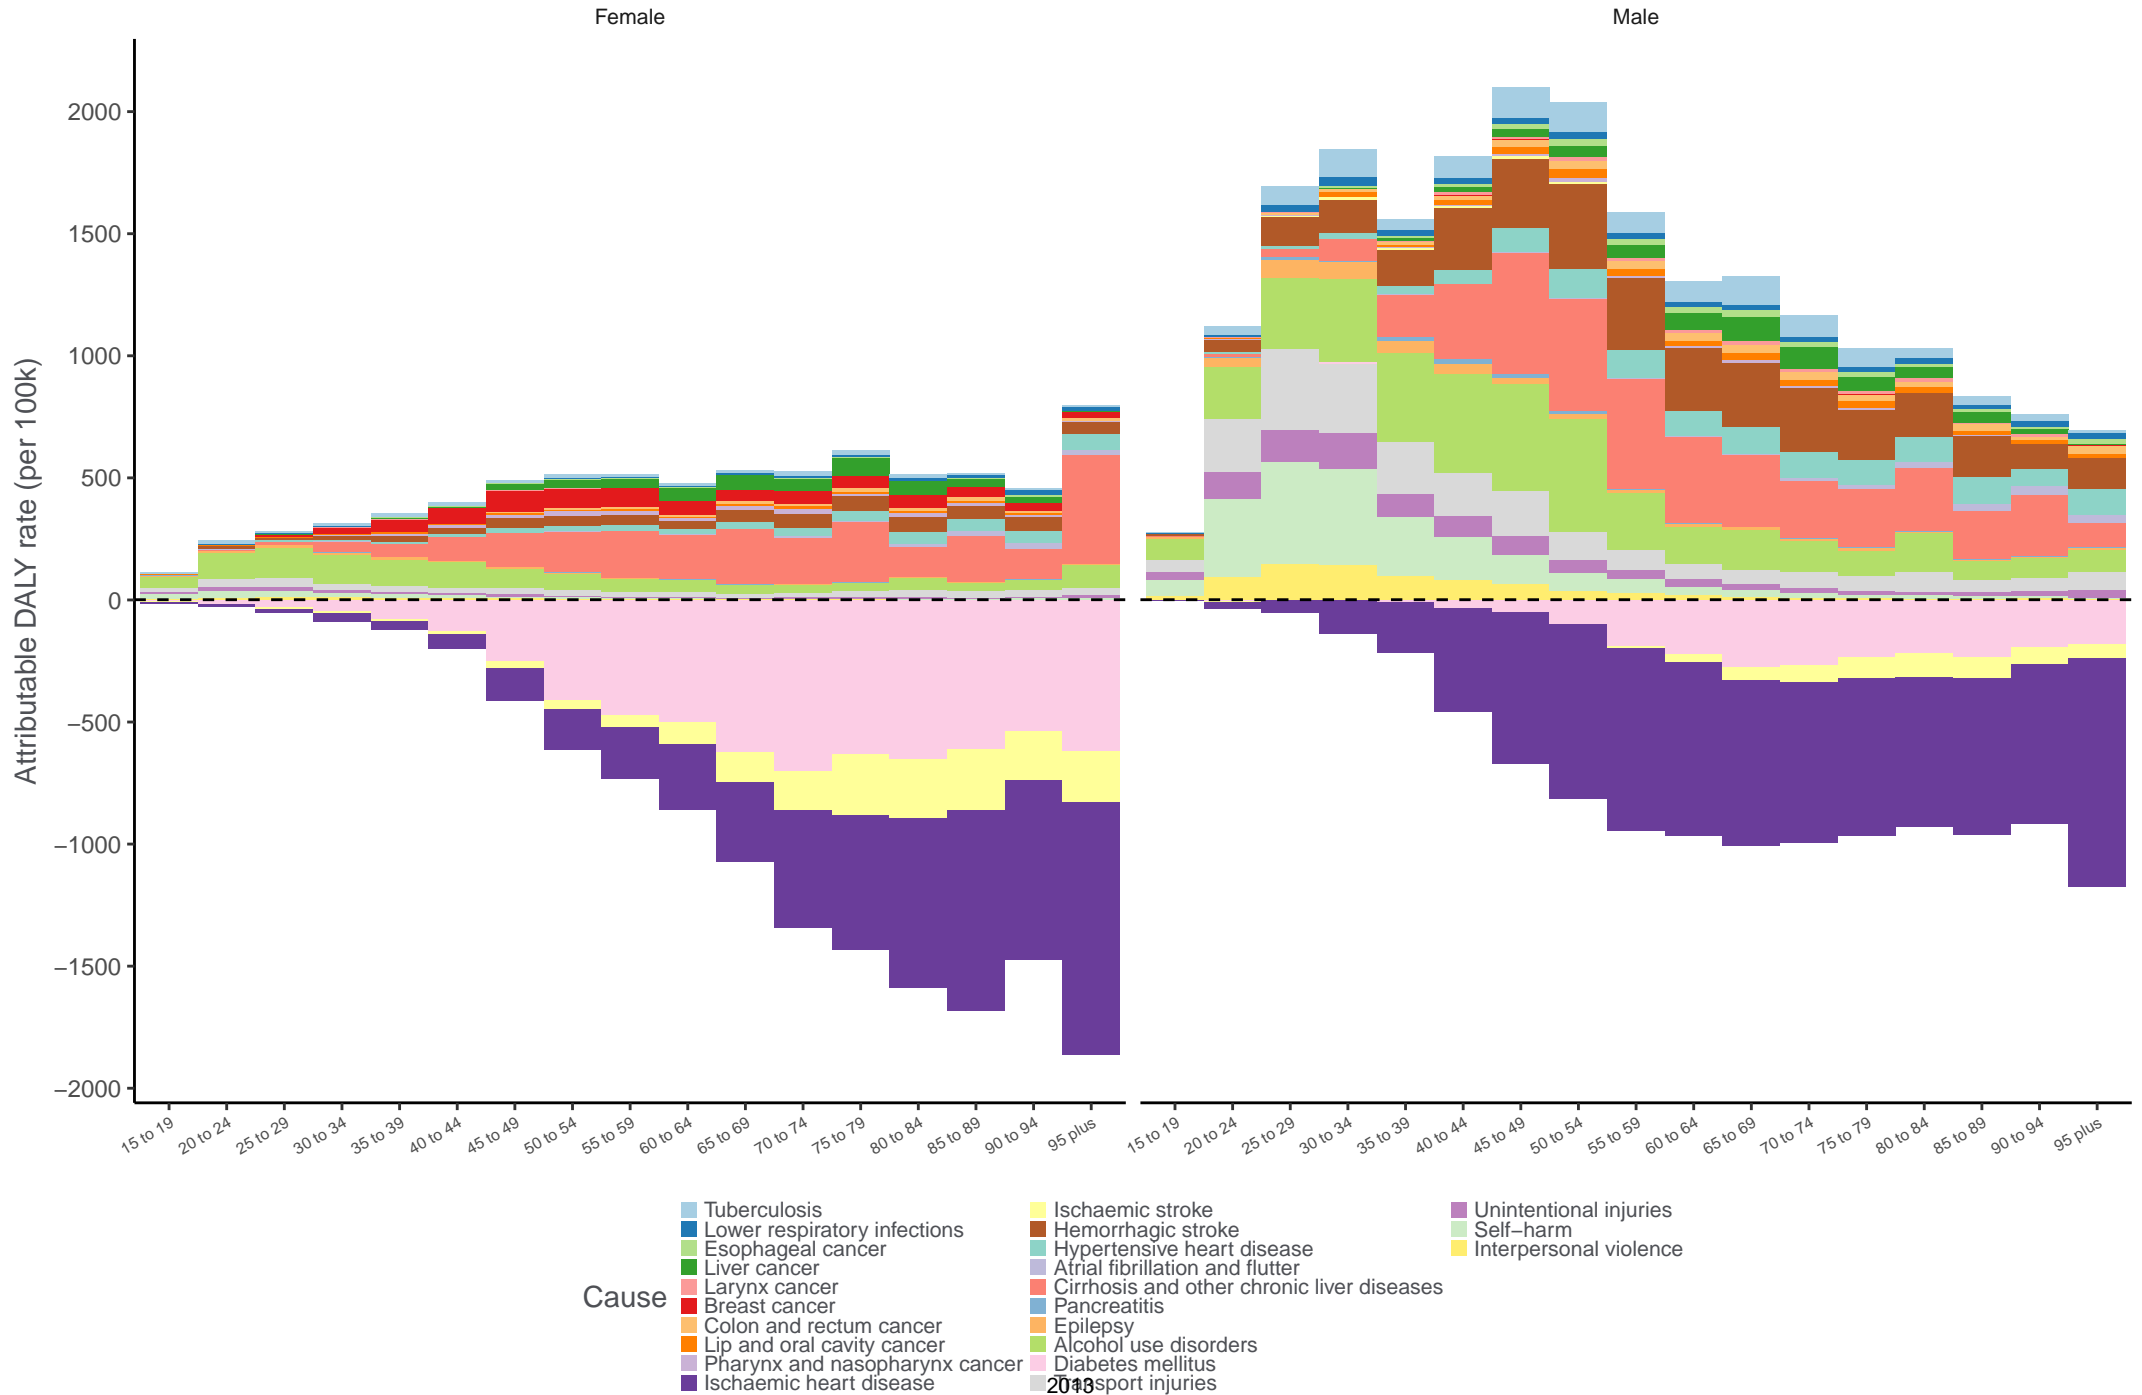

# Attributable DALY rate disaggregated by cause, Fiji, by sex and age in 2016.

Female

Male

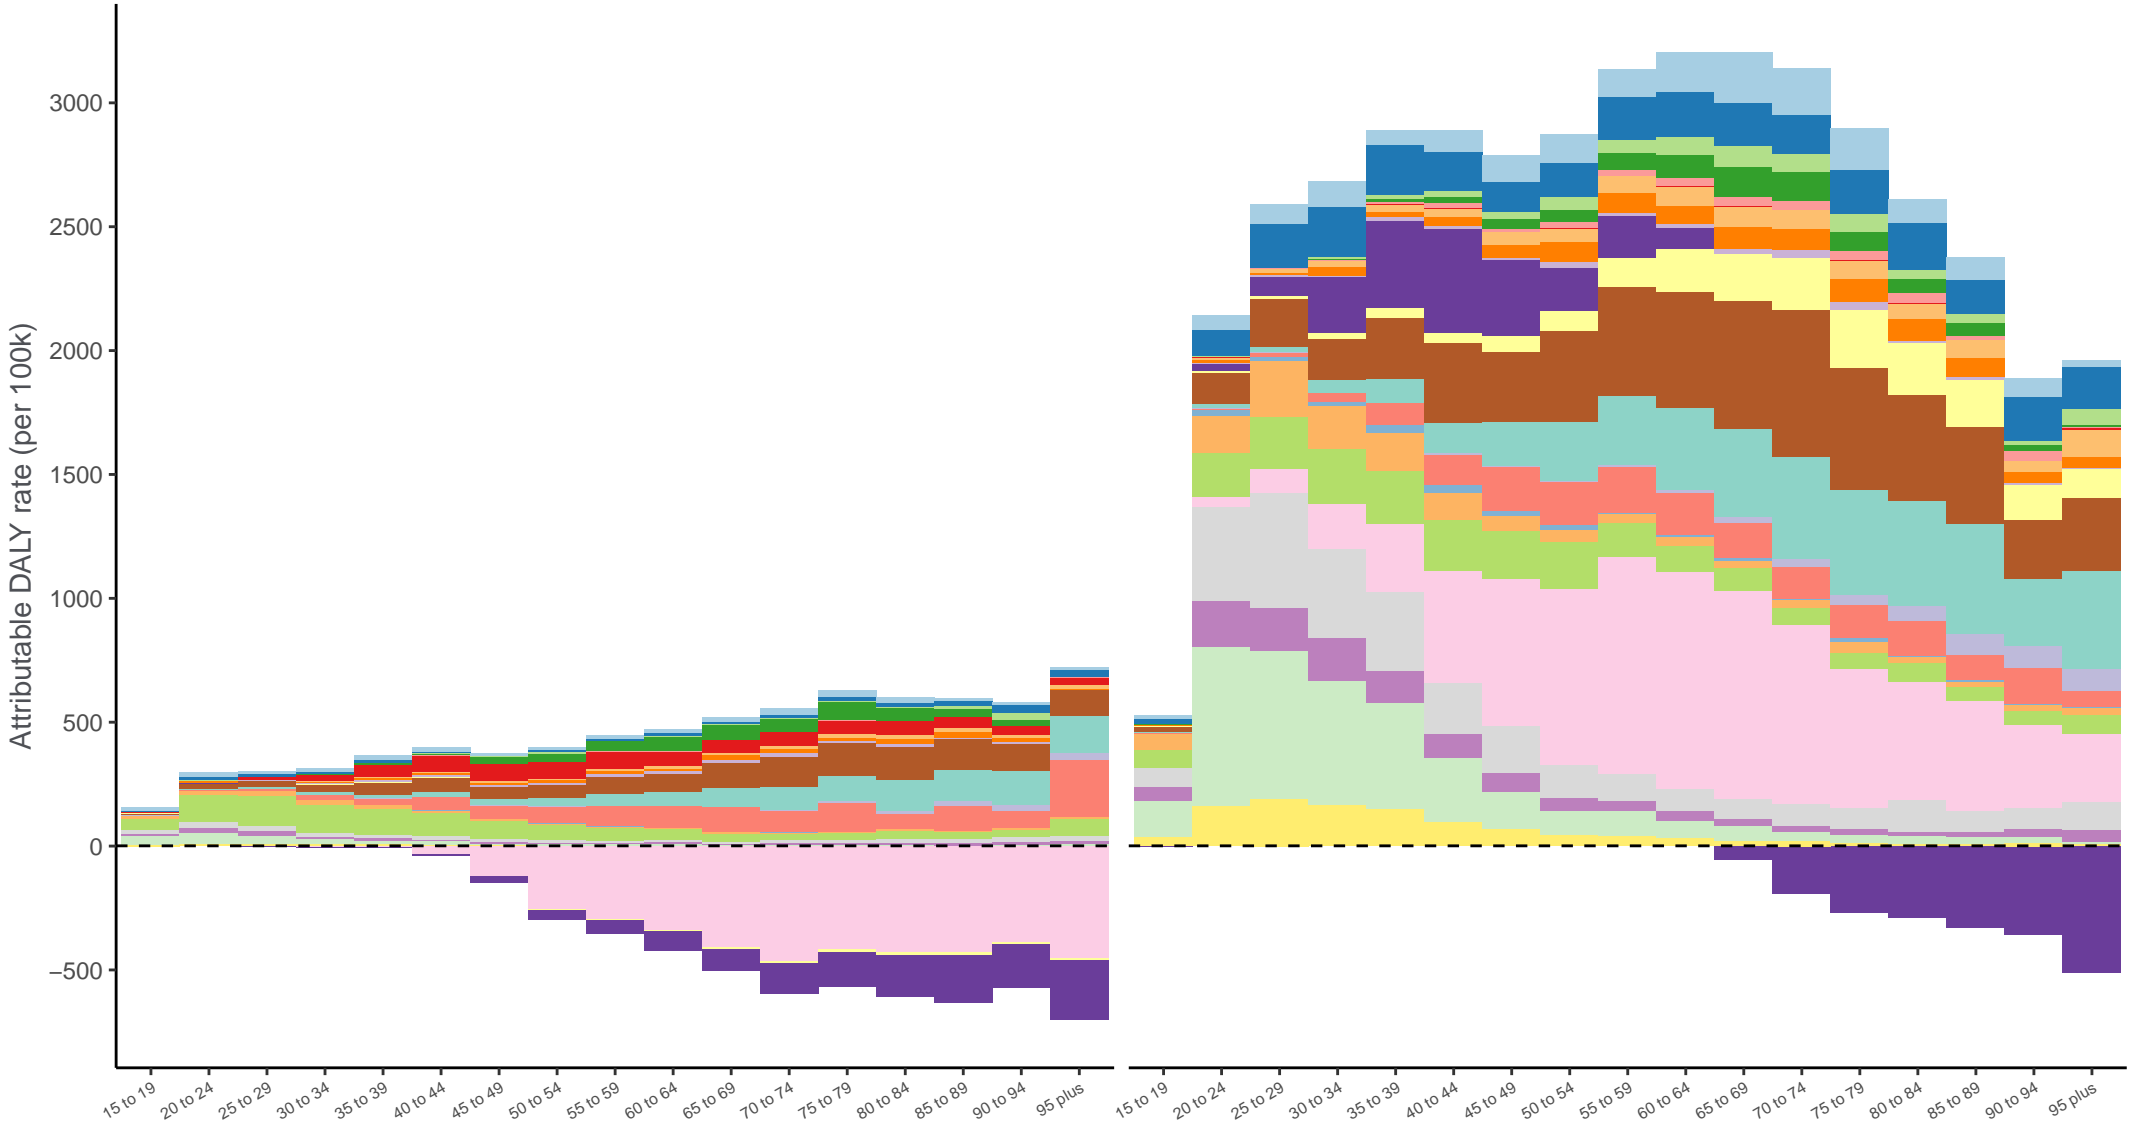

Cause

- Tuberculosis
- Lower respiratory infections
- Esophageal cancer
- Liver cancer
- Larynx cancer
- Breast cancer
- Colon and rectum cancer
- Lip and oral cavity cancer
- Pharynx and nasopharynx cancer
- Ischaemic heart disease
- Ischaemic stroke
- Hemorrhagic stroke
- Hypertensive heart disease
- Atrial fibrillation and flutter
- Cirrhosis and other chronic liver diseases
- Pancreatitis
- Epilepsy
- Alcohol use disorders
- Diabetes mellitus
- Unintentional injuries
- Self-harm
- Interpersonal violence

# Attributable DALY rate disaggregated by cause, Kiribati, by sex and age in 2016.

Female

Male

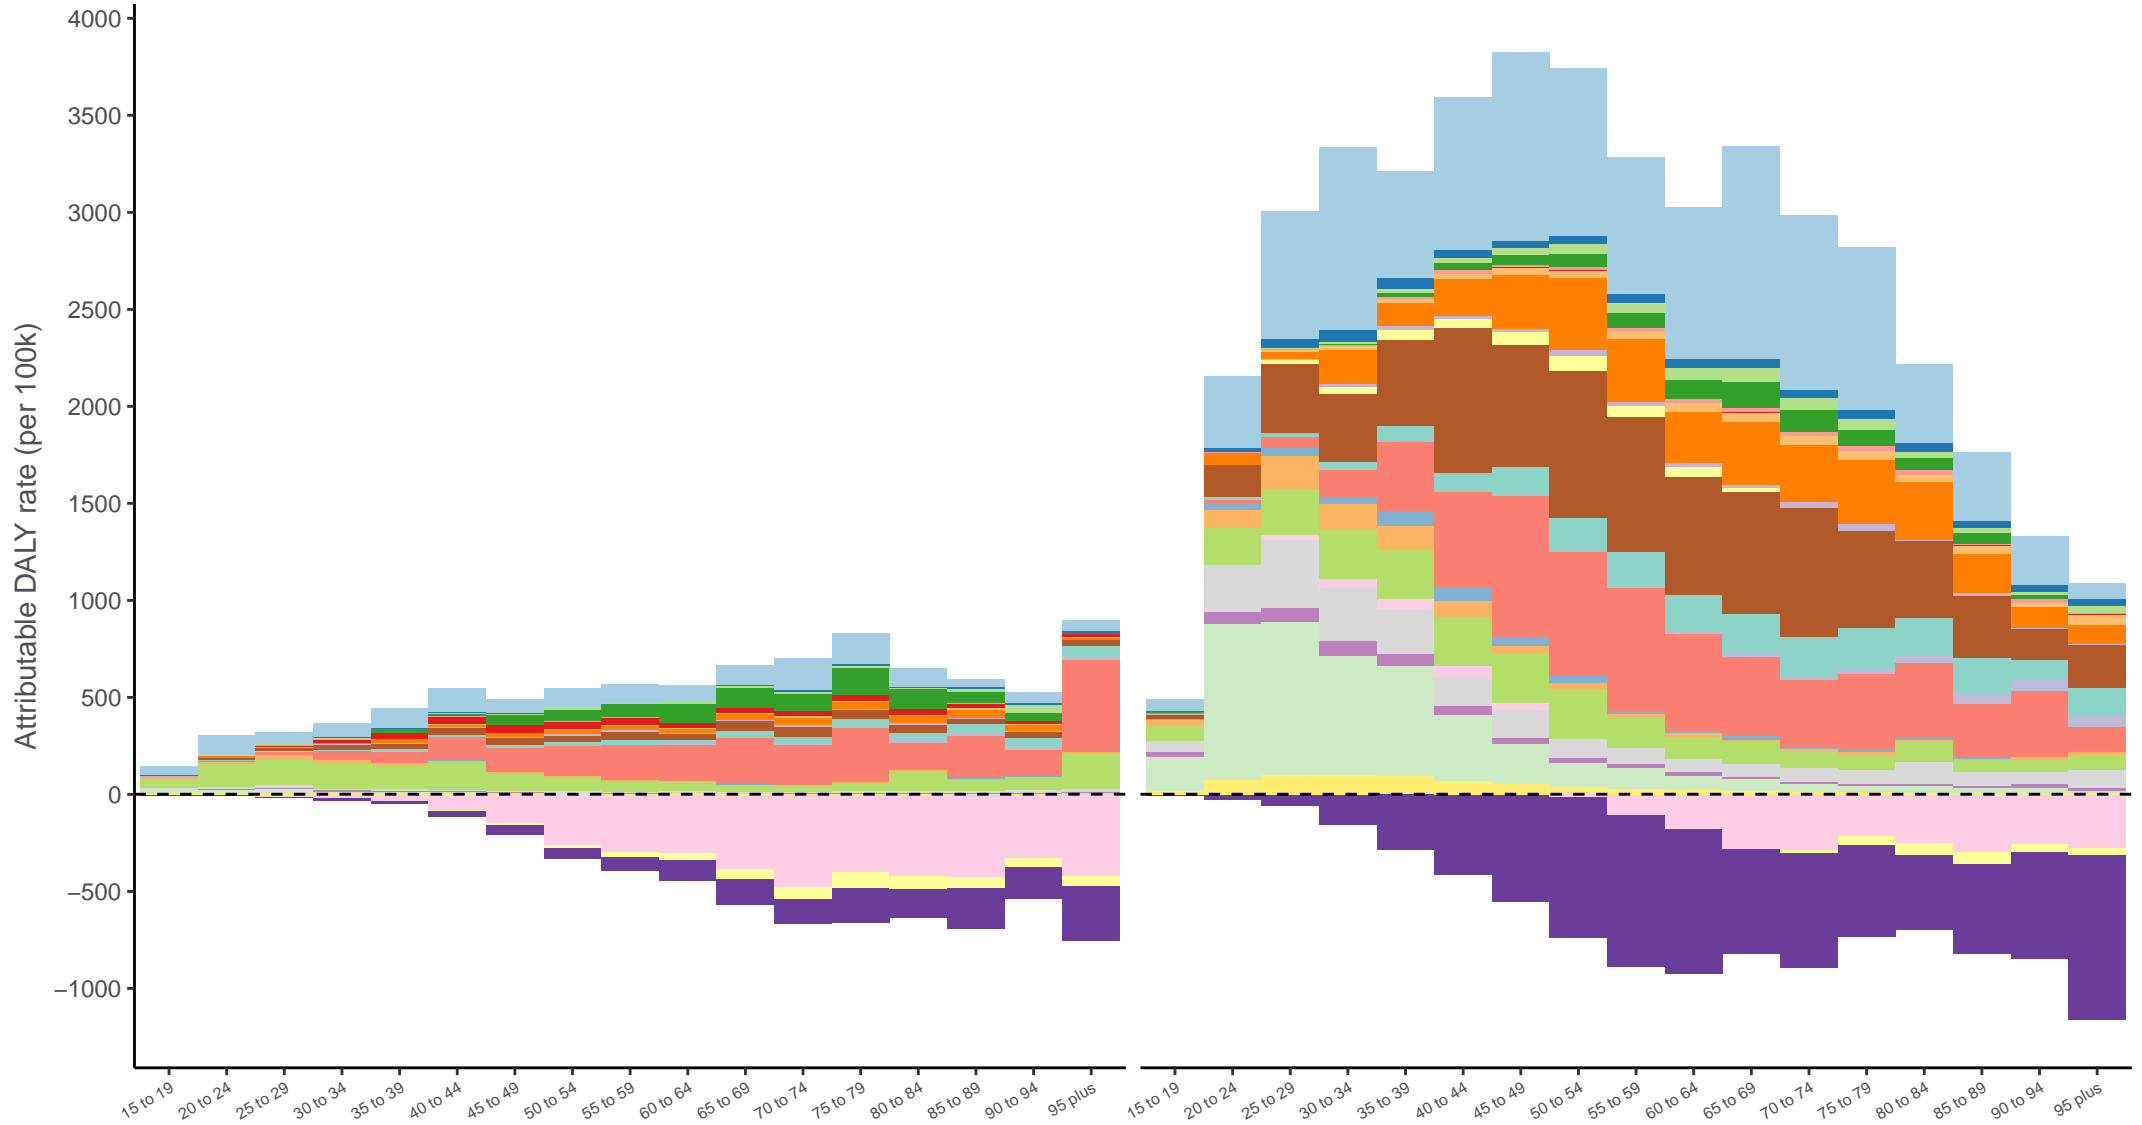

- Cause**
- Tuberculosis
  - Lower respiratory infections
  - Esophageal cancer
  - Liver cancer
  - Larynx cancer
  - Breast cancer
  - Colon and rectum cancer
  - Lip and oral cavity cancer
  - Pharynx and nasopharynx cancer
  - Ischaemic heart disease
  - Ischaemic stroke
  - Hemorrhagic stroke
  - Hypertensive heart disease
  - Atrial fibrillation and flutter
  - Cirrhosis and other chronic liver diseases
  - Pancreatitis
  - Epilepsy
  - Alcohol use disorders
  - Diabetes mellitus
  - 2015 sport injuries
  - Unintentional injuries
  - Self-harm
  - Interpersonal violence



Attributable DALY rate disaggregated by cause, Marshall Islands, by sex and age in 2016.

Female

Male

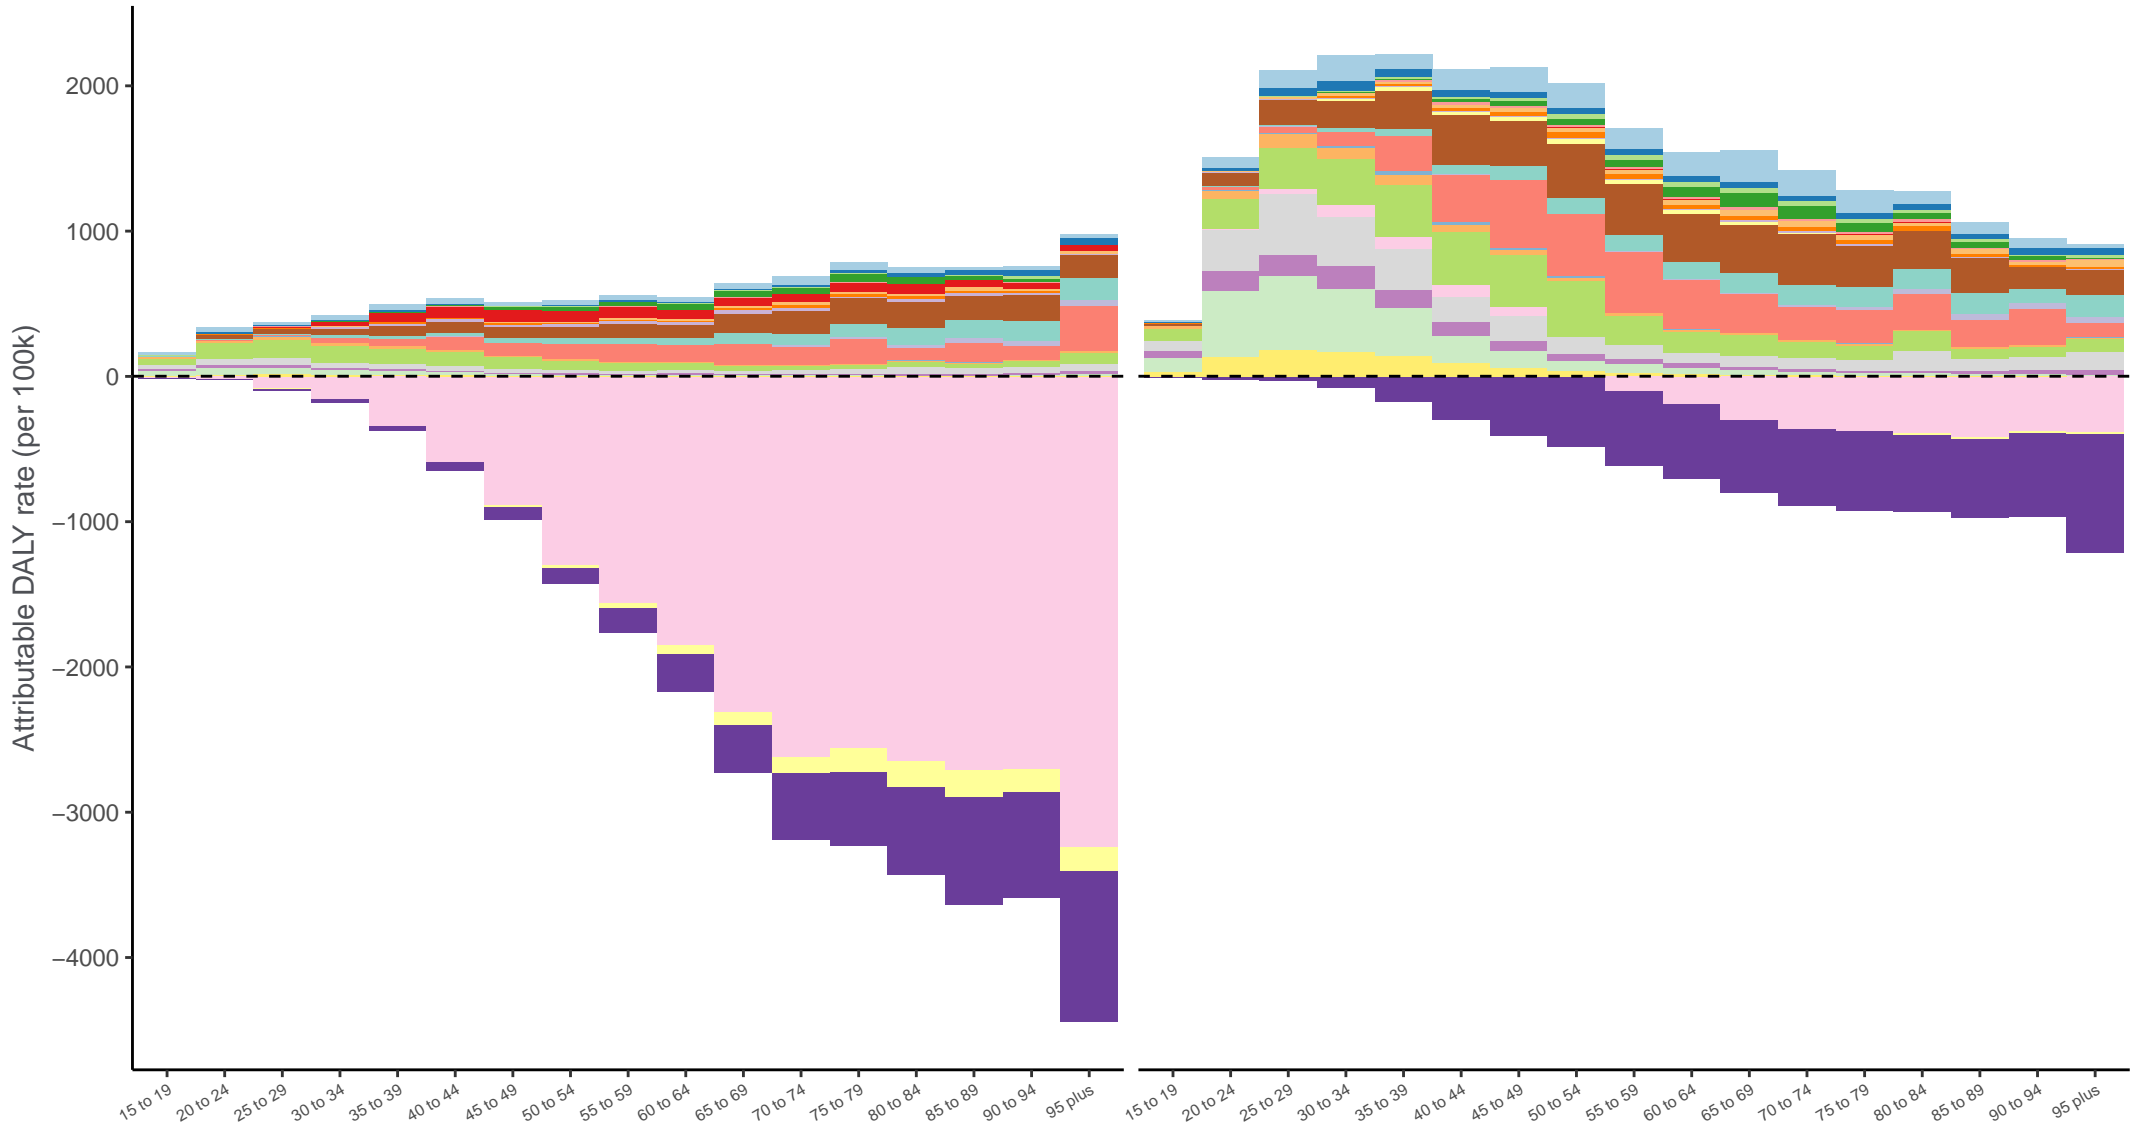

- Cause**
- Tuberculosis
  - Ischaemic stroke
  - Unintentional injuries
  - Lower respiratory infections
  - Hemorrhagic stroke
  - Self-harm
  - Esophageal cancer
  - Hypertensive heart disease
  - Liver cancer
  - Atrial fibrillation and flutter
  - Larynx cancer
  - Cirrhosis and other chronic liver diseases
  - Breast cancer
  - Pancreatitis
  - Colon and rectum cancer
  - Epilepsy
  - Lip and oral cavity cancer
  - Alcohol use disorders
  - Pharynx and nasopharynx cancer
  - Diabetes mellitus
  - Ischaemic heart disease
  - 2016 sport injuries

# Attributable DALY rate disaggregated by cause, Papua New Guinea, by sex and age in 2016.

Female

Male

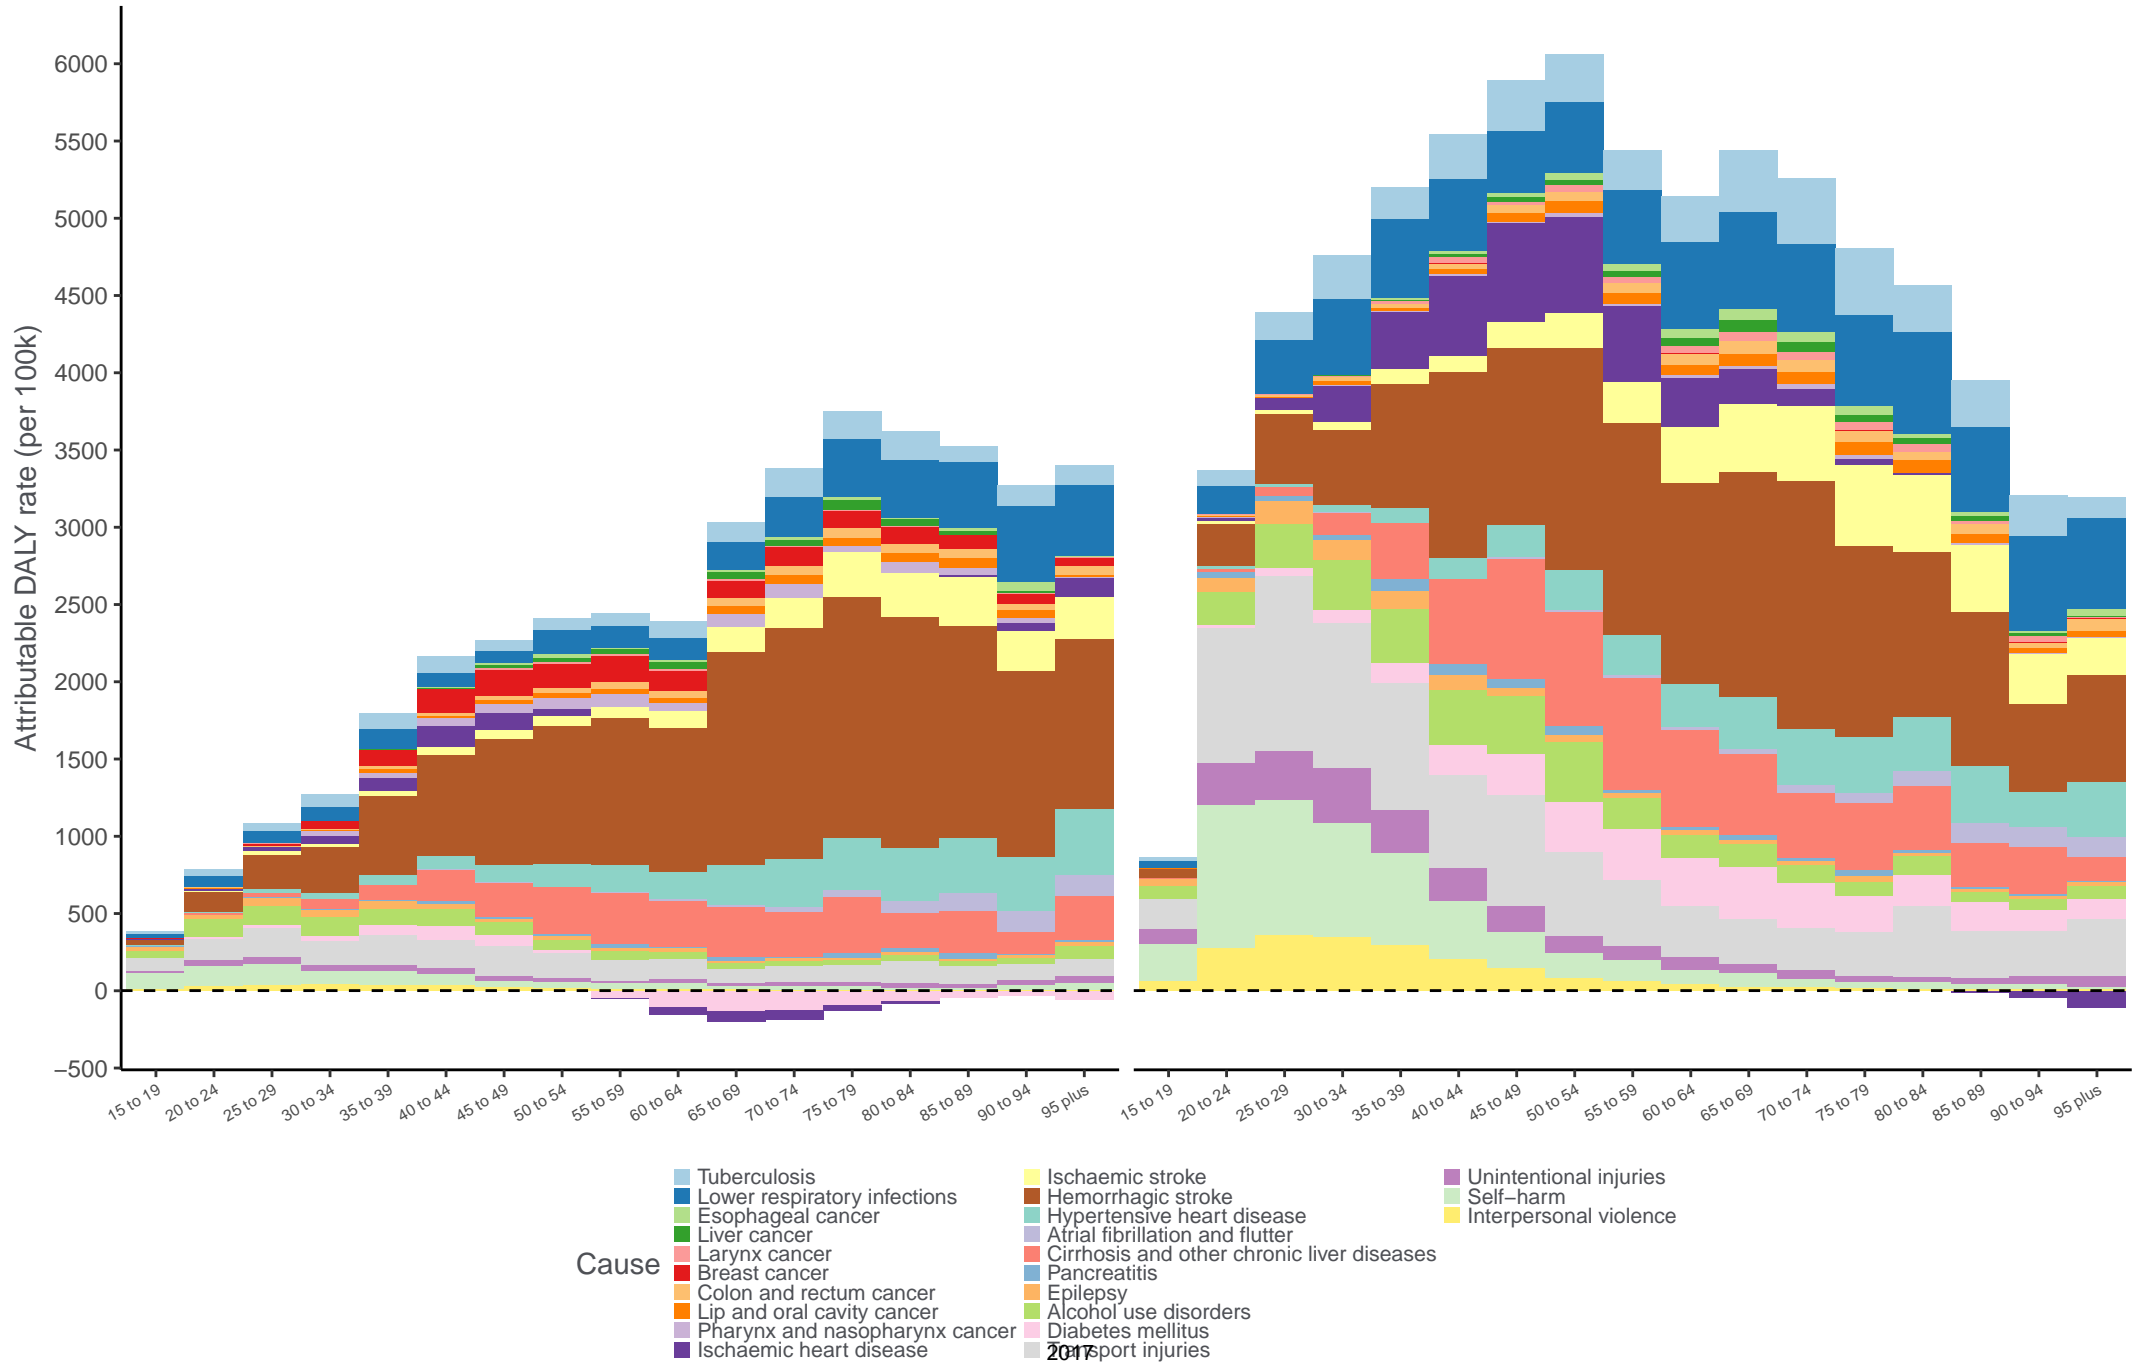

# Attributable DALY rate disaggregated by cause, Samoa, by sex and age in 2016.

Female

Male

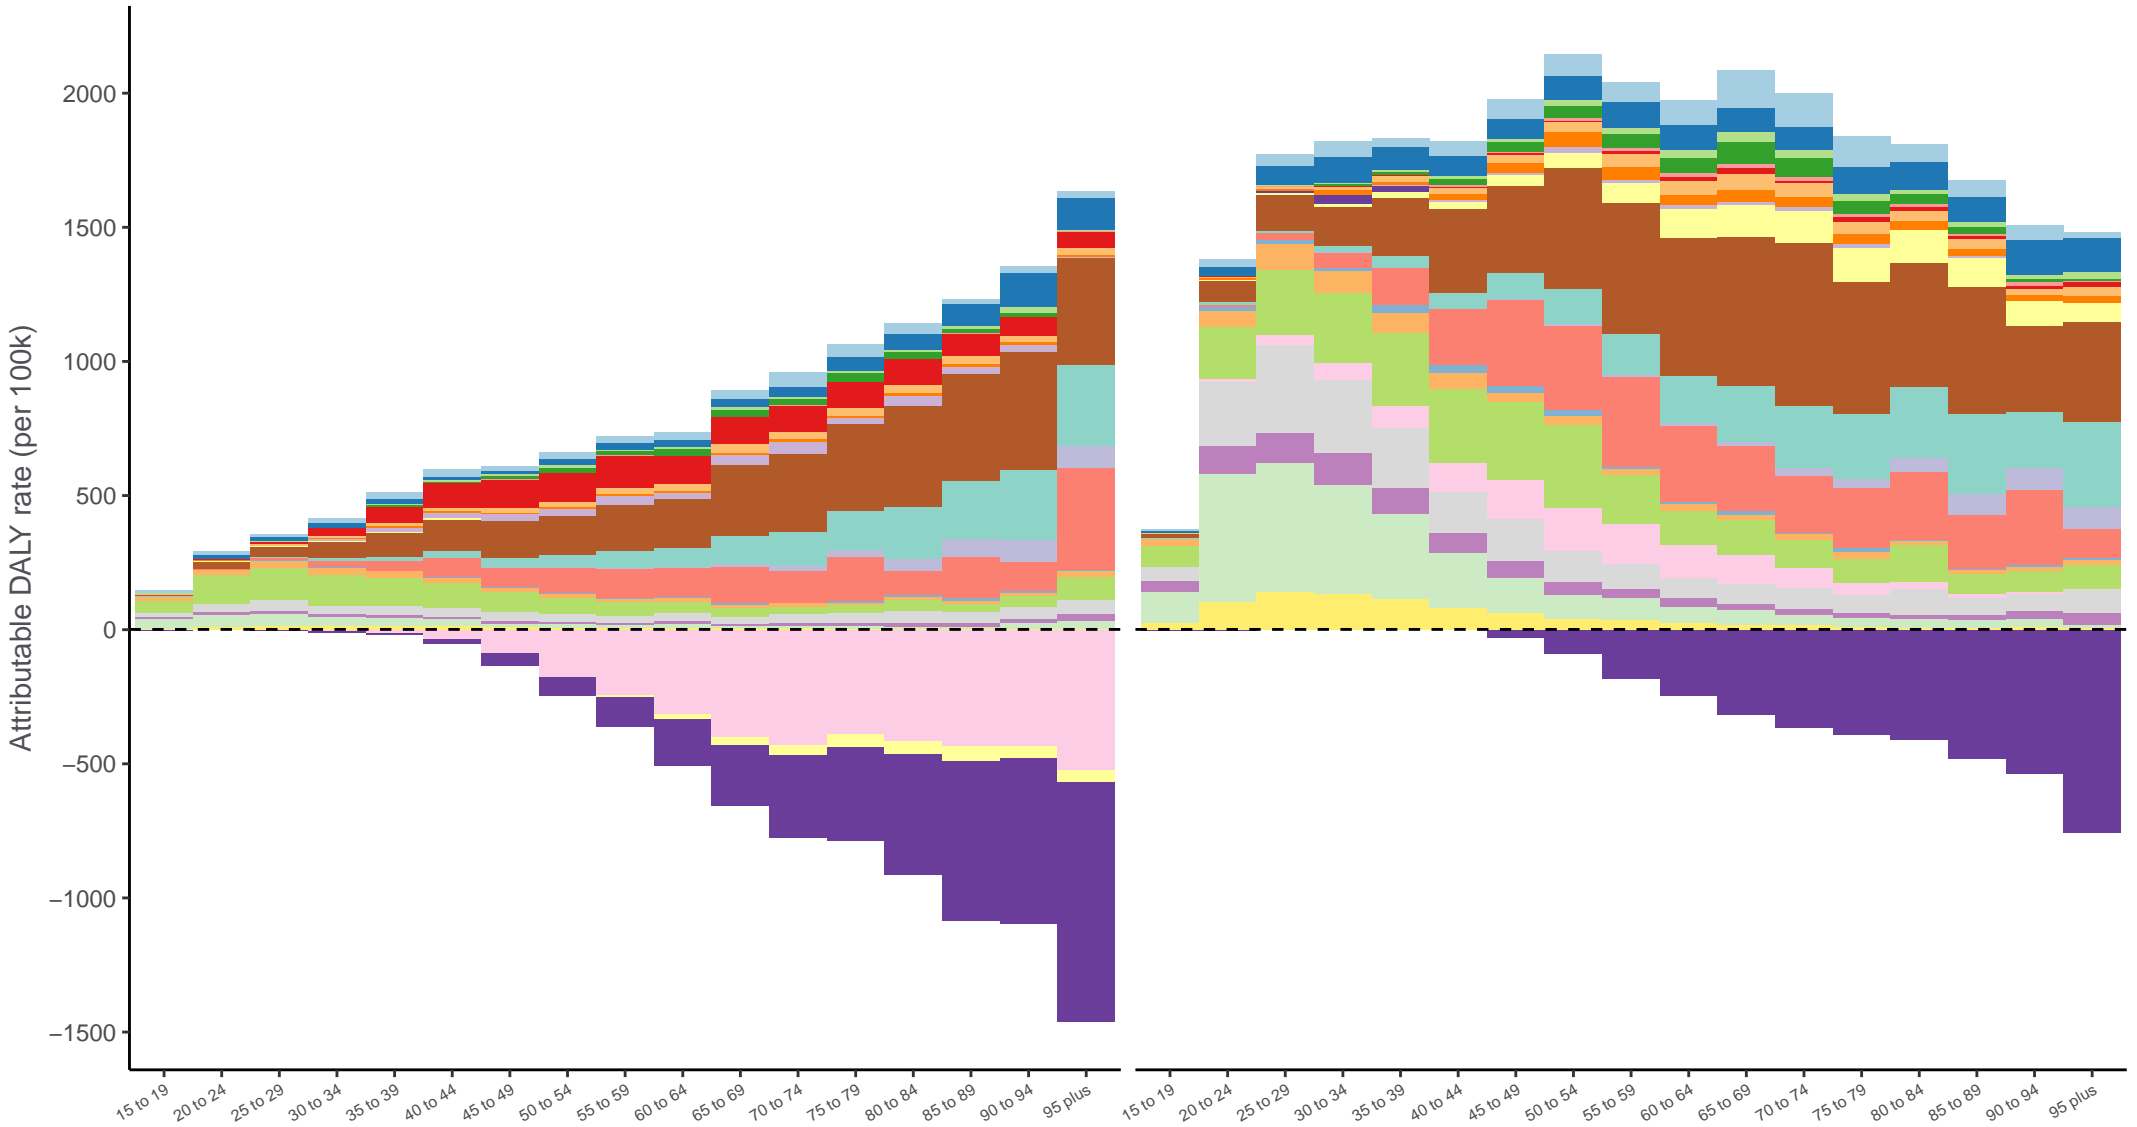

- Cause**
- Tuberculosis
  - Ischaemic stroke
  - Unintentional injuries
  - Lower respiratory infections
  - Hemorrhagic stroke
  - Self-harm
  - Esophageal cancer
  - Hypertensive heart disease
  - Interpersonal violence
  - Liver cancer
  - Atrial fibrillation and flutter
  - Larynx cancer
  - Cirrhosis and other chronic liver diseases
  - Breast cancer
  - Pancreatitis
  - Colon and rectum cancer
  - Epilepsy
  - Lip and oral cavity cancer
  - Alcohol use disorders
  - Pharynx and nasopharynx cancer
  - Diabetes mellitus
  - Ischaemic heart disease
  - 2018 sport injuries

Attributable DALY rate disaggregated by cause, Solomon Islands, by sex and age in 2016.

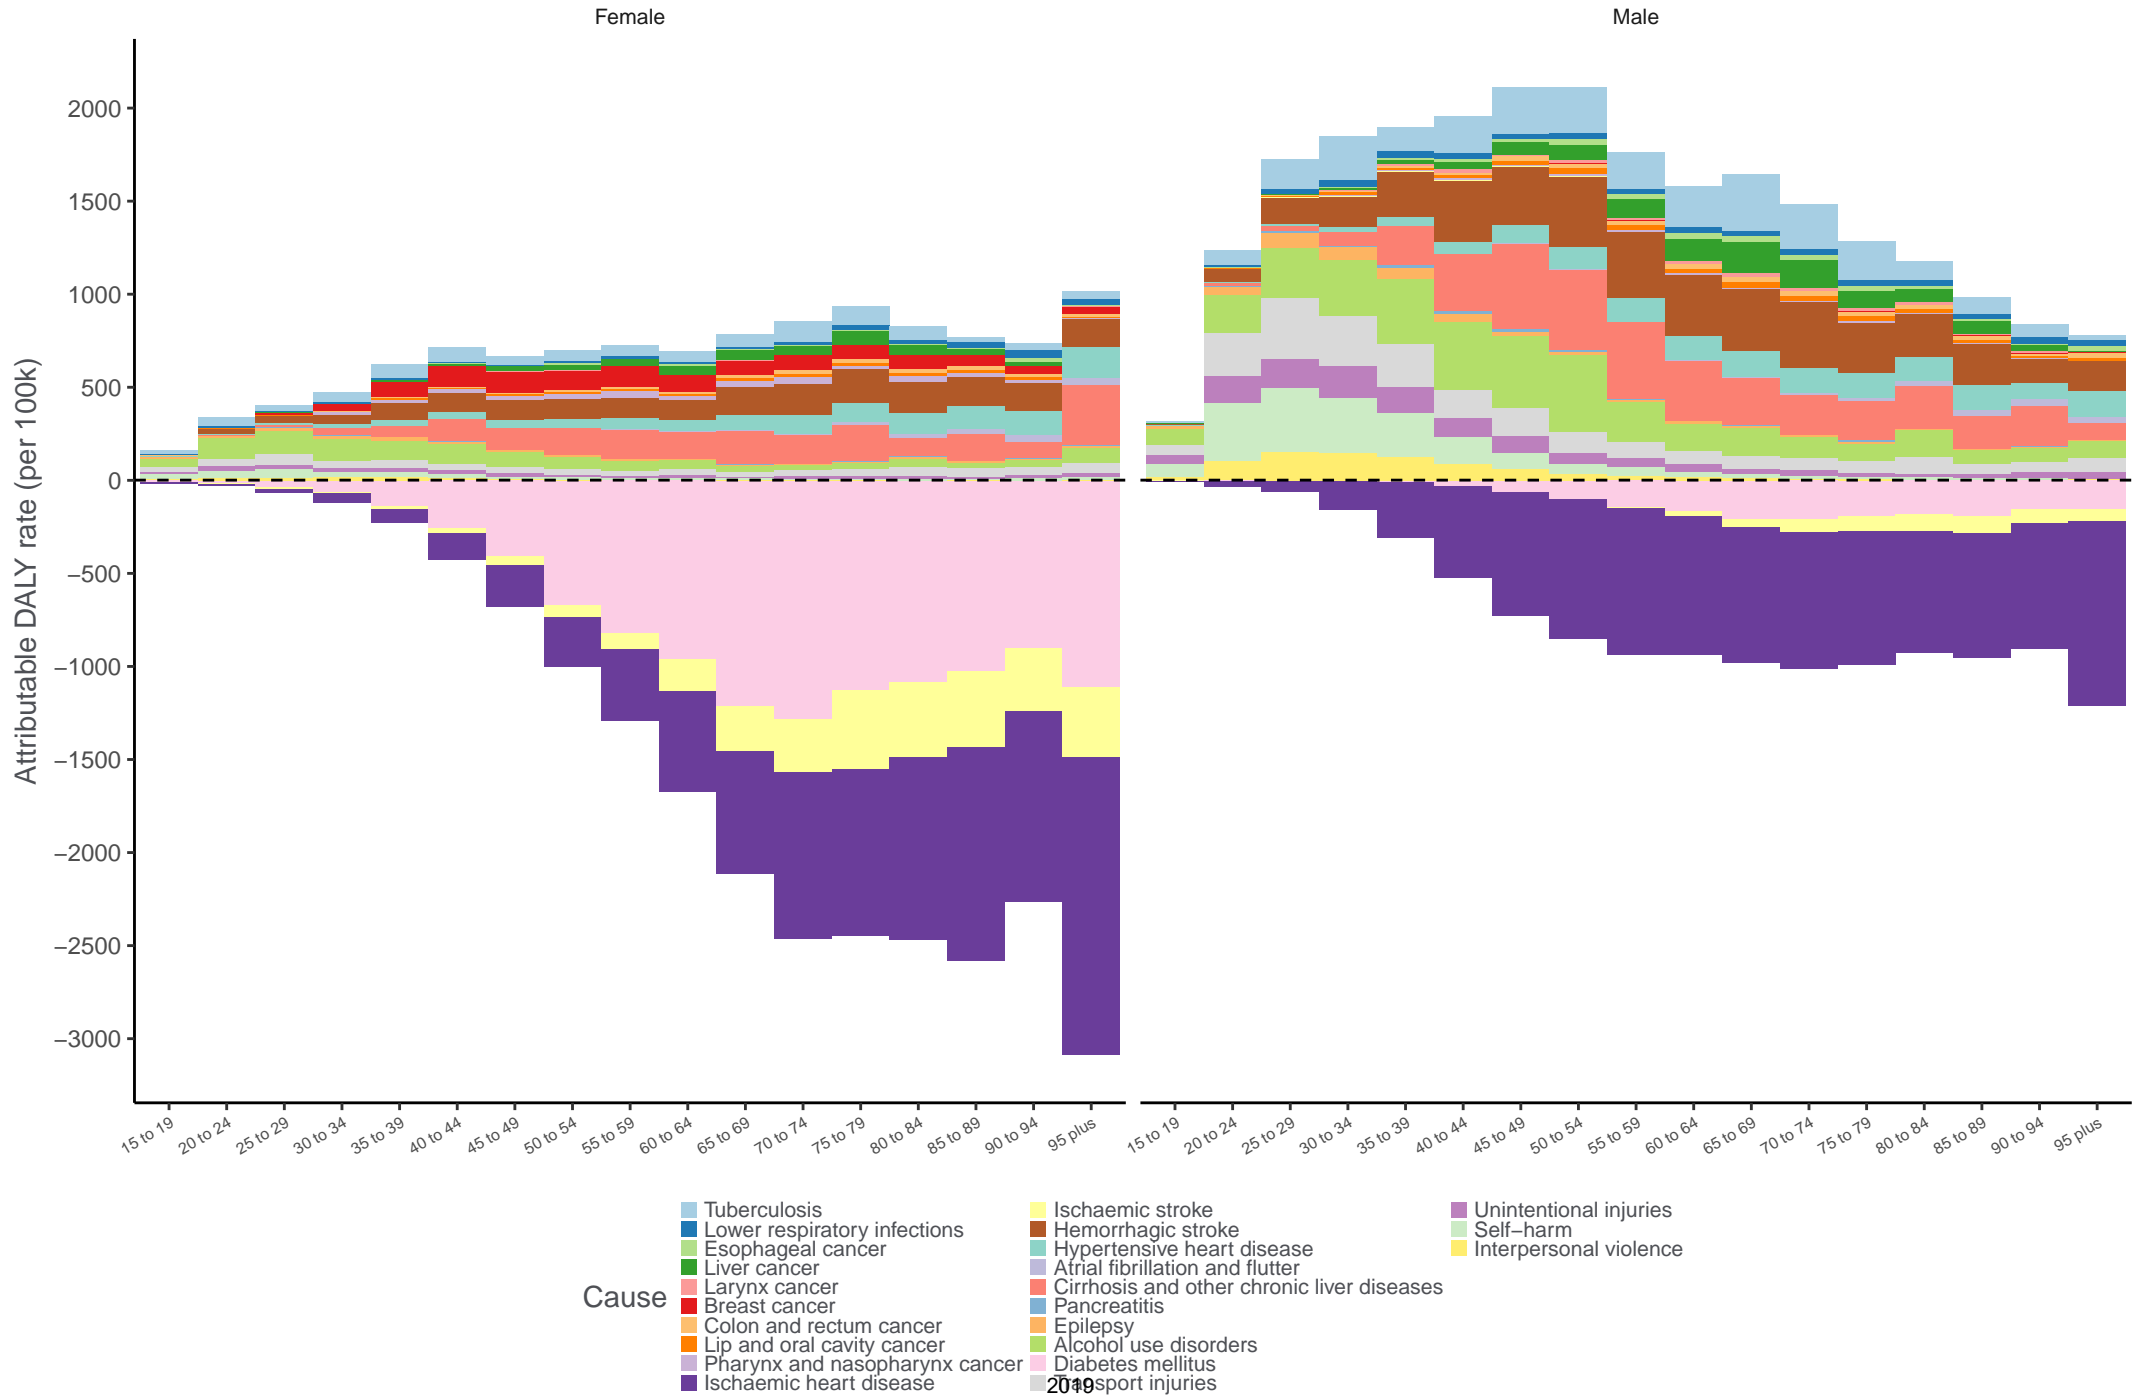

# Attributable DALY rate disaggregated by cause, Tonga, by sex and age in 2016.

Female

Male

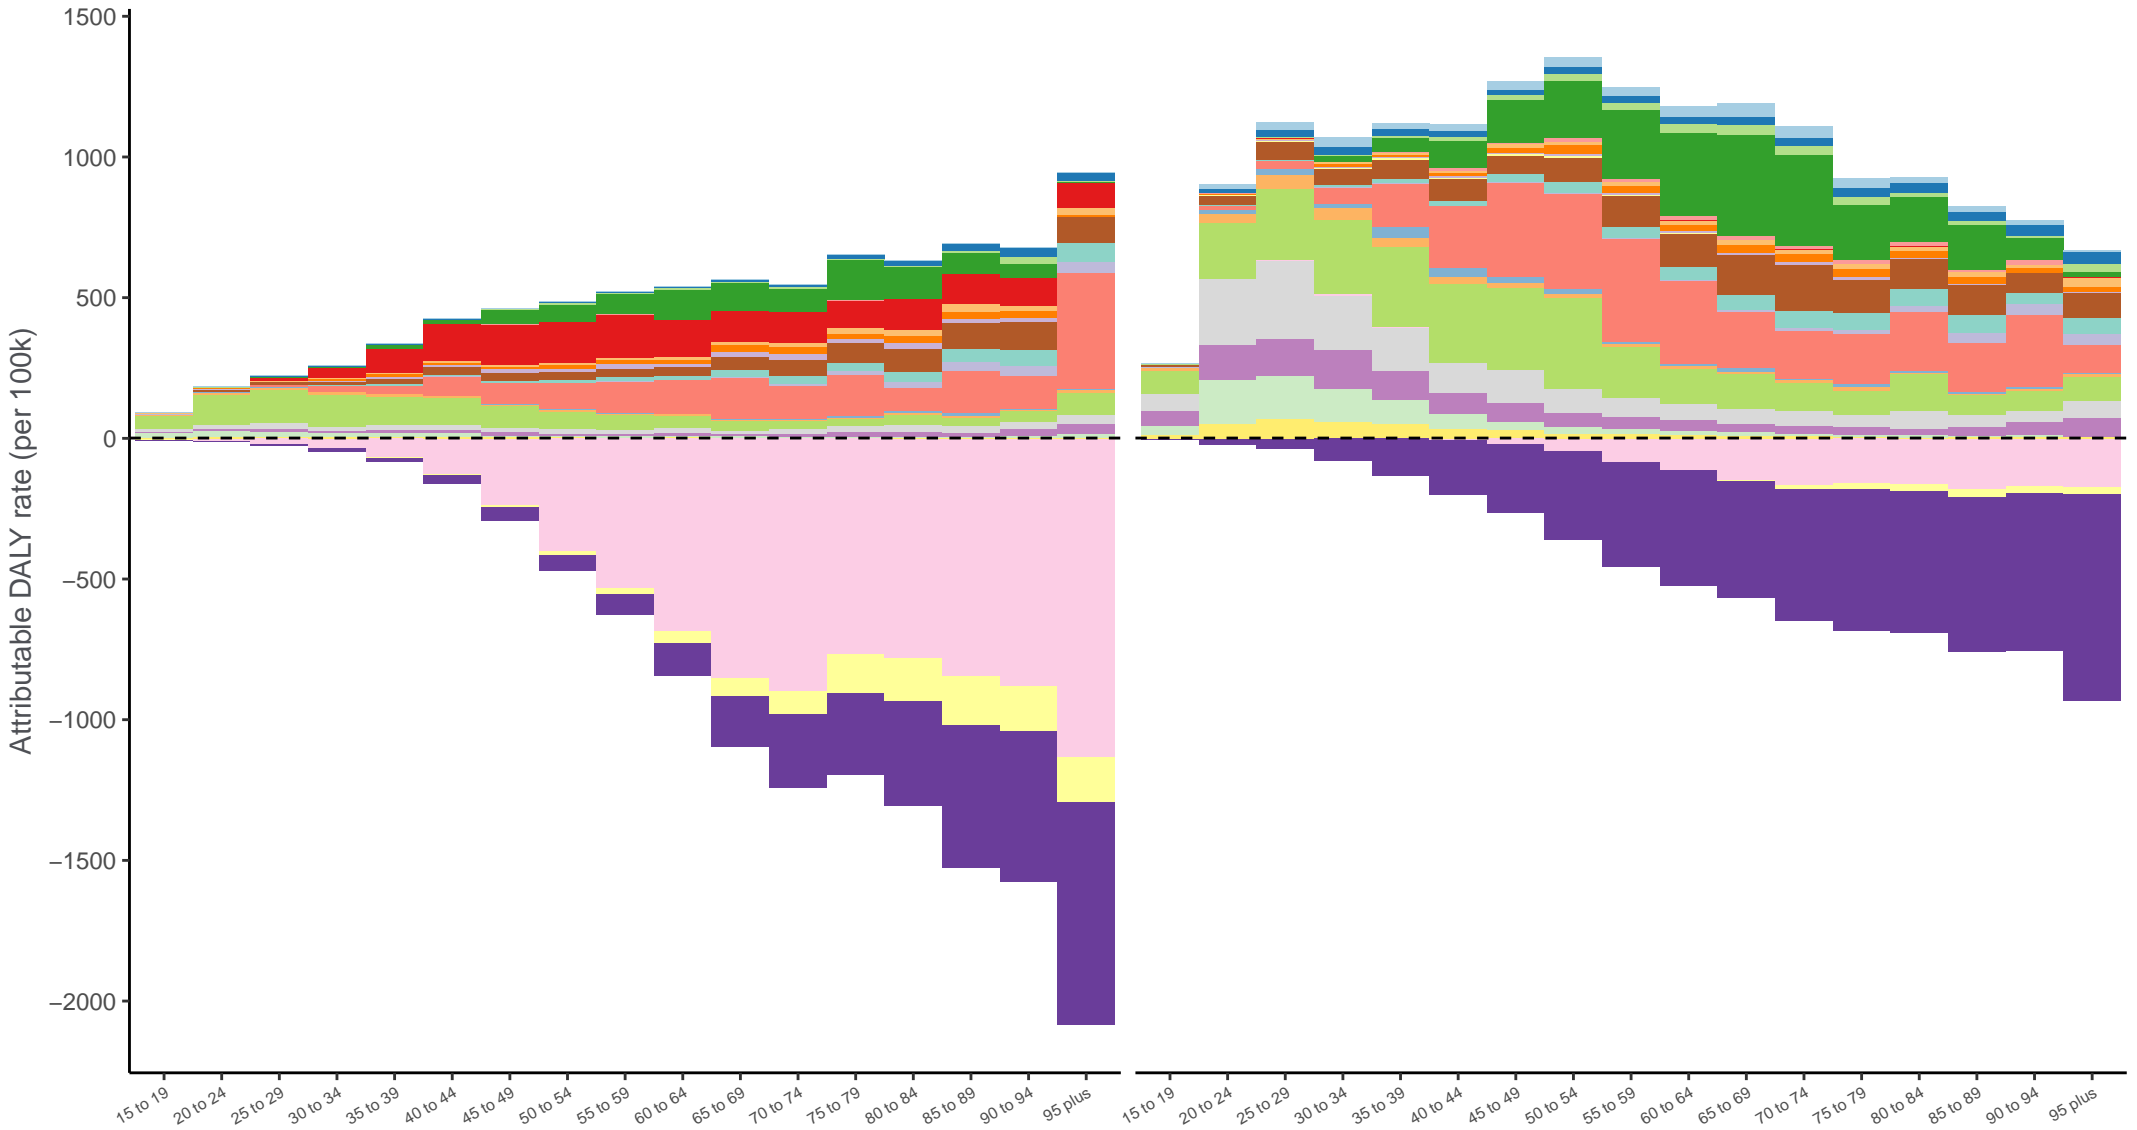

- Cause**
- Tuberculosis
  - Ischaemic stroke
  - Unintentional injuries
  - Lower respiratory infections
  - Hemorrhagic stroke
  - Self-harm
  - Esophageal cancer
  - Hypertensive heart disease
  - Interpersonal violence
  - Liver cancer
  - Atrial fibrillation and flutter
  - Larynx cancer
  - Cirrhosis and other chronic liver diseases
  - Breast cancer
  - Pancreatitis
  - Colon and rectum cancer
  - Epilepsy
  - Lip and oral cavity cancer
  - Alcohol use disorders
  - Pharynx and nasopharynx cancer
  - Diabetes mellitus
  - Ischaemic heart disease
  - 2020 sport injuries

Attributable DALY rate disaggregated by cause, Vanuatu, by sex and age in 2016.

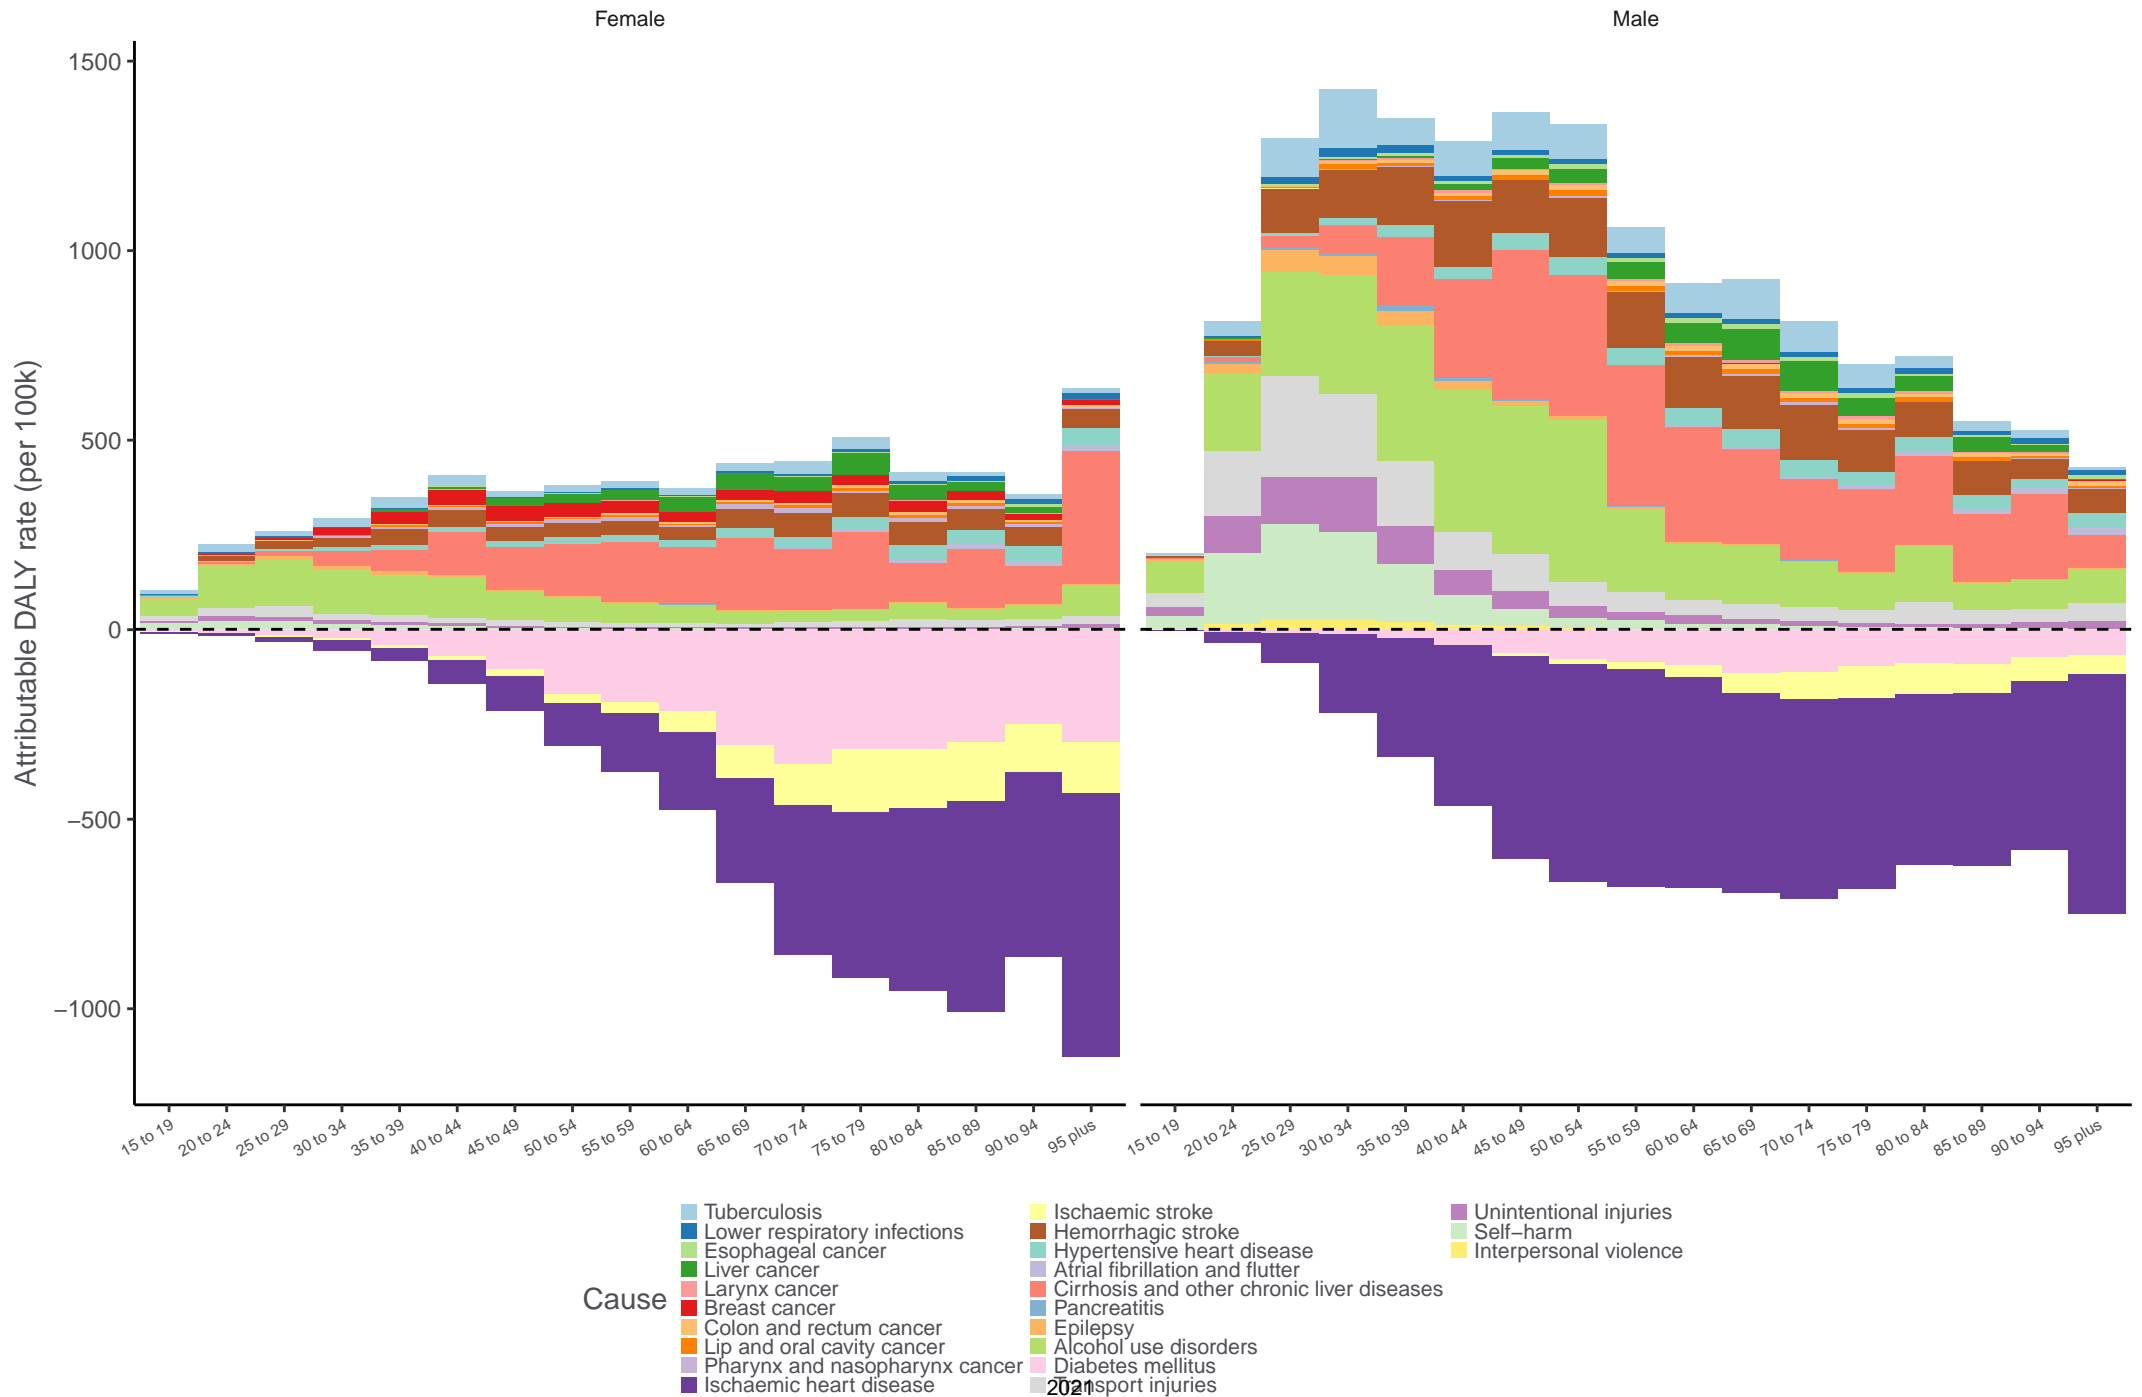

Attributable DALY rate disaggregated by cause, Armenia, by sex and age in 2016.

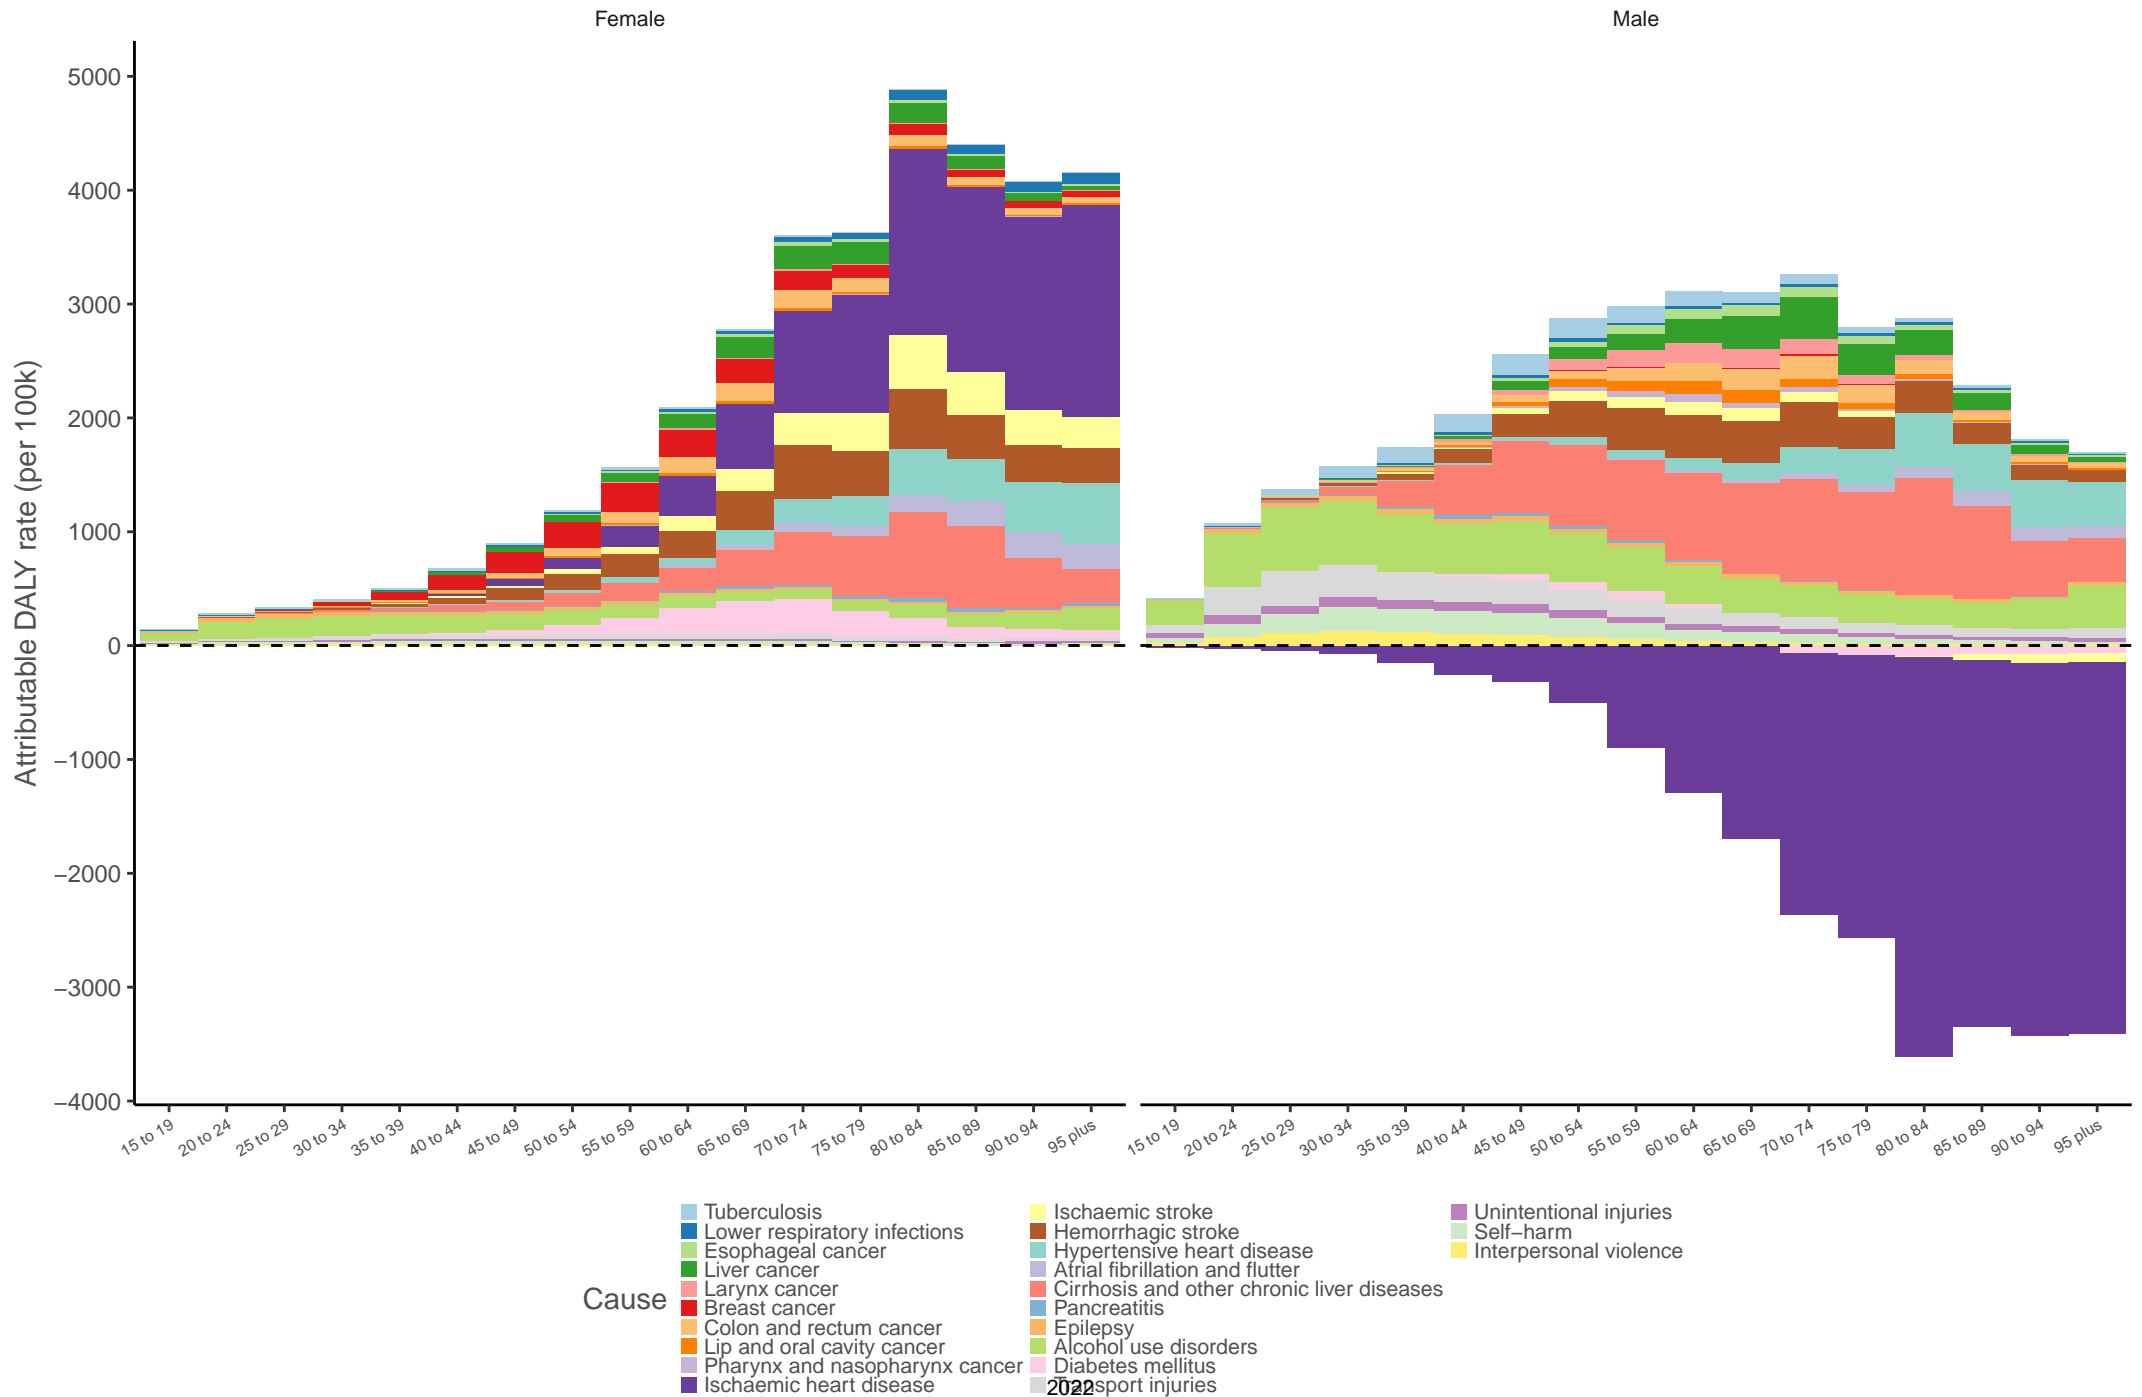

Attributable DALY rate disaggregated by cause, Azerbaijan, by sex and age in 2016.

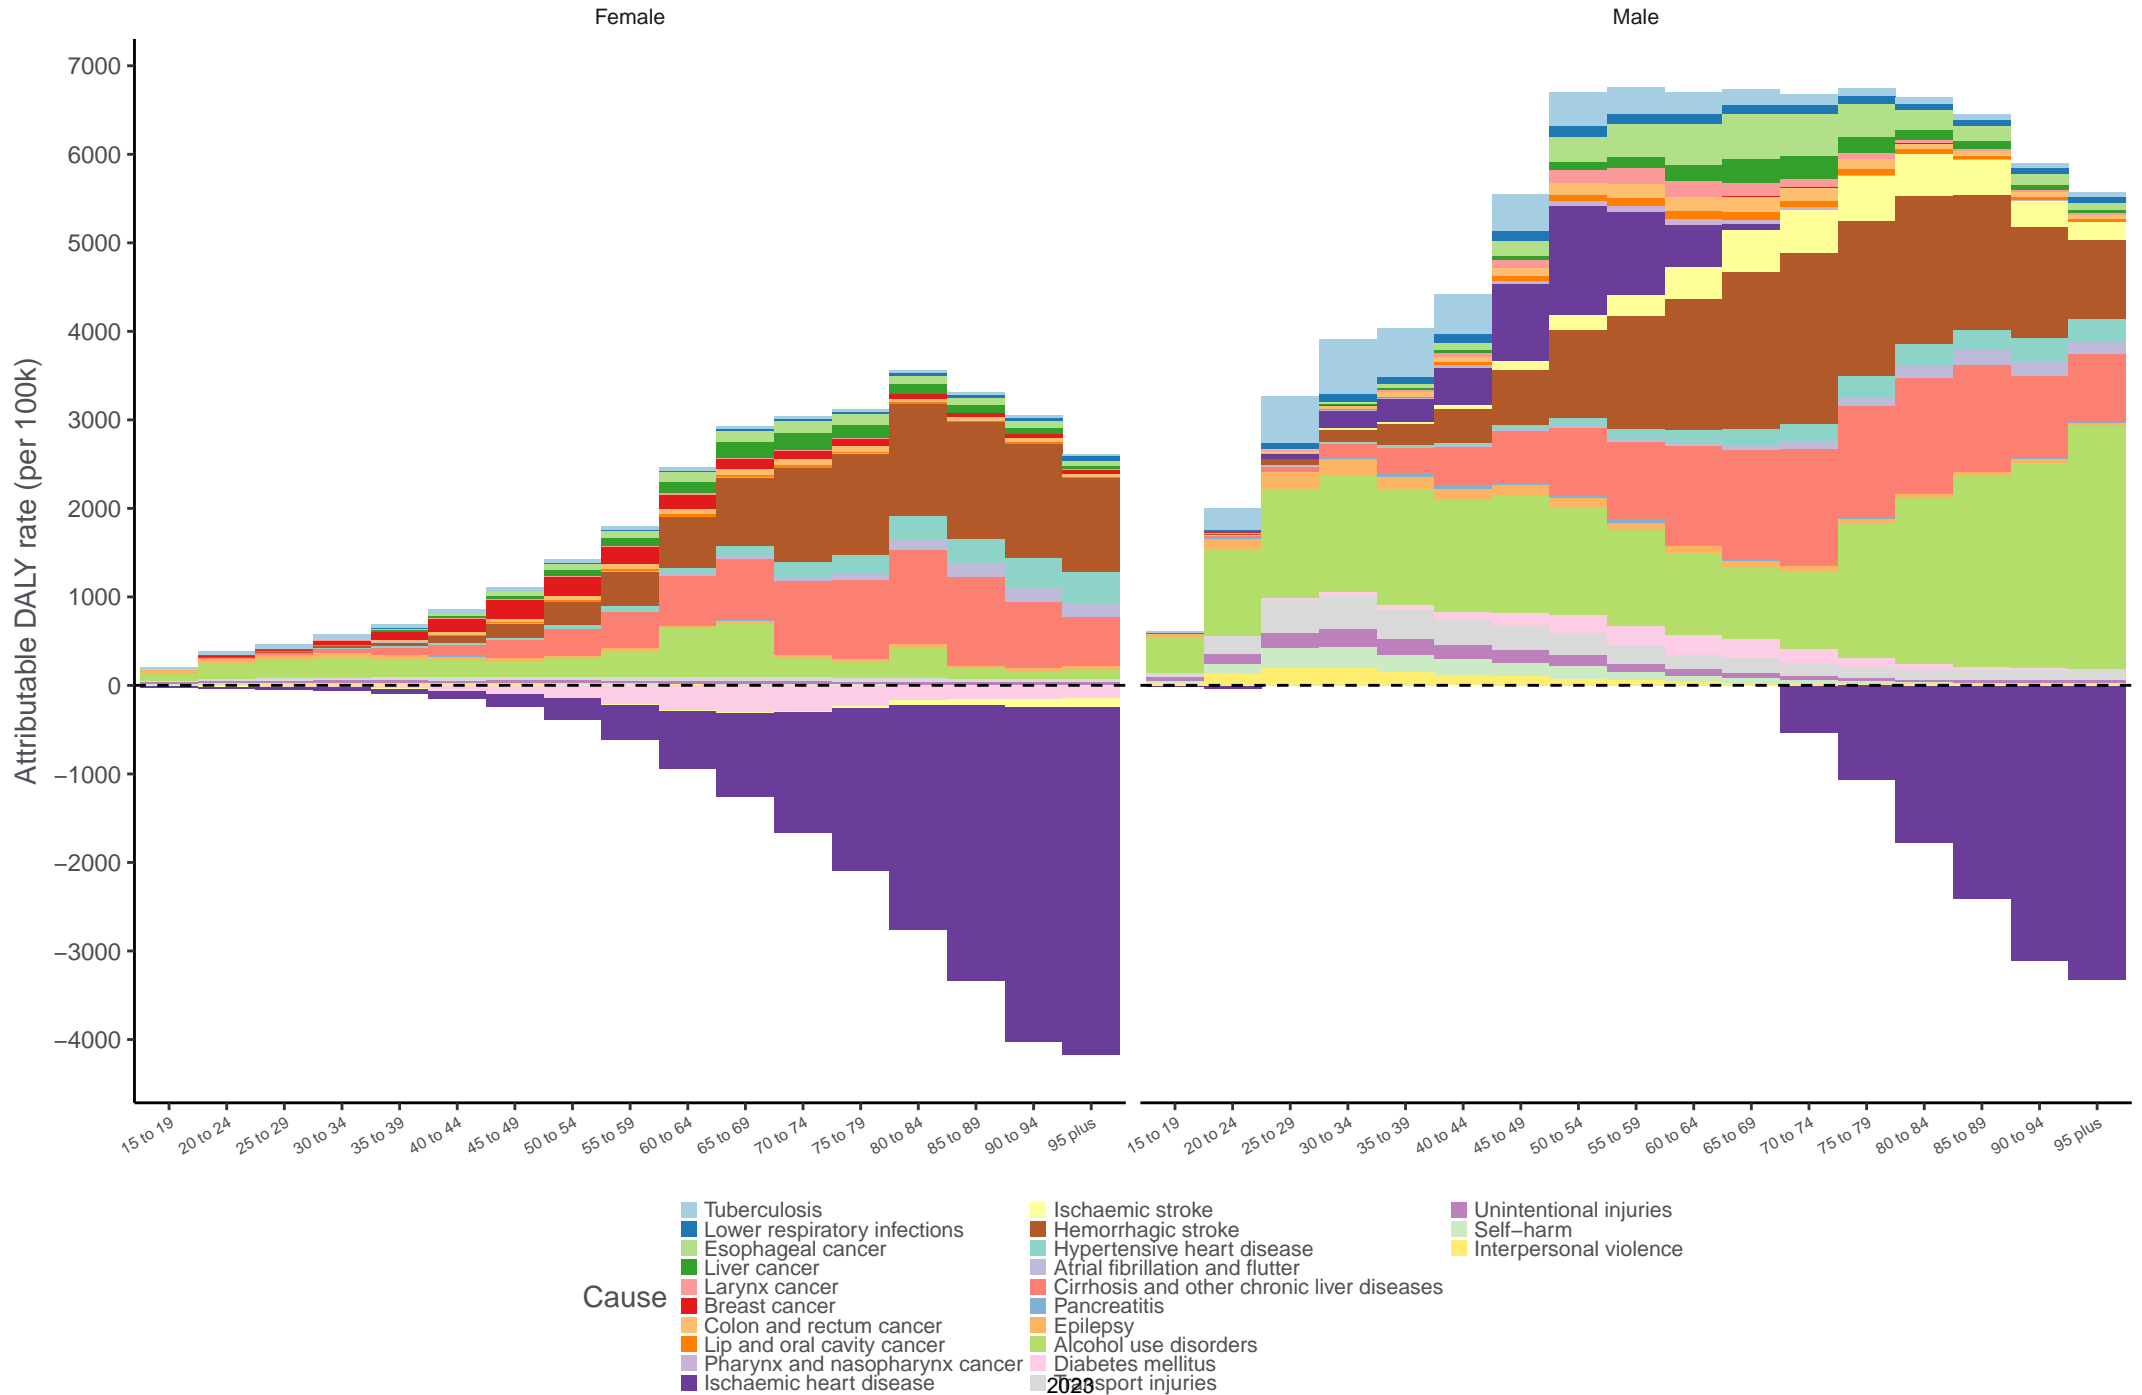



Attributable DALY rate disaggregated by cause, Georgia, by sex and age in 2016.

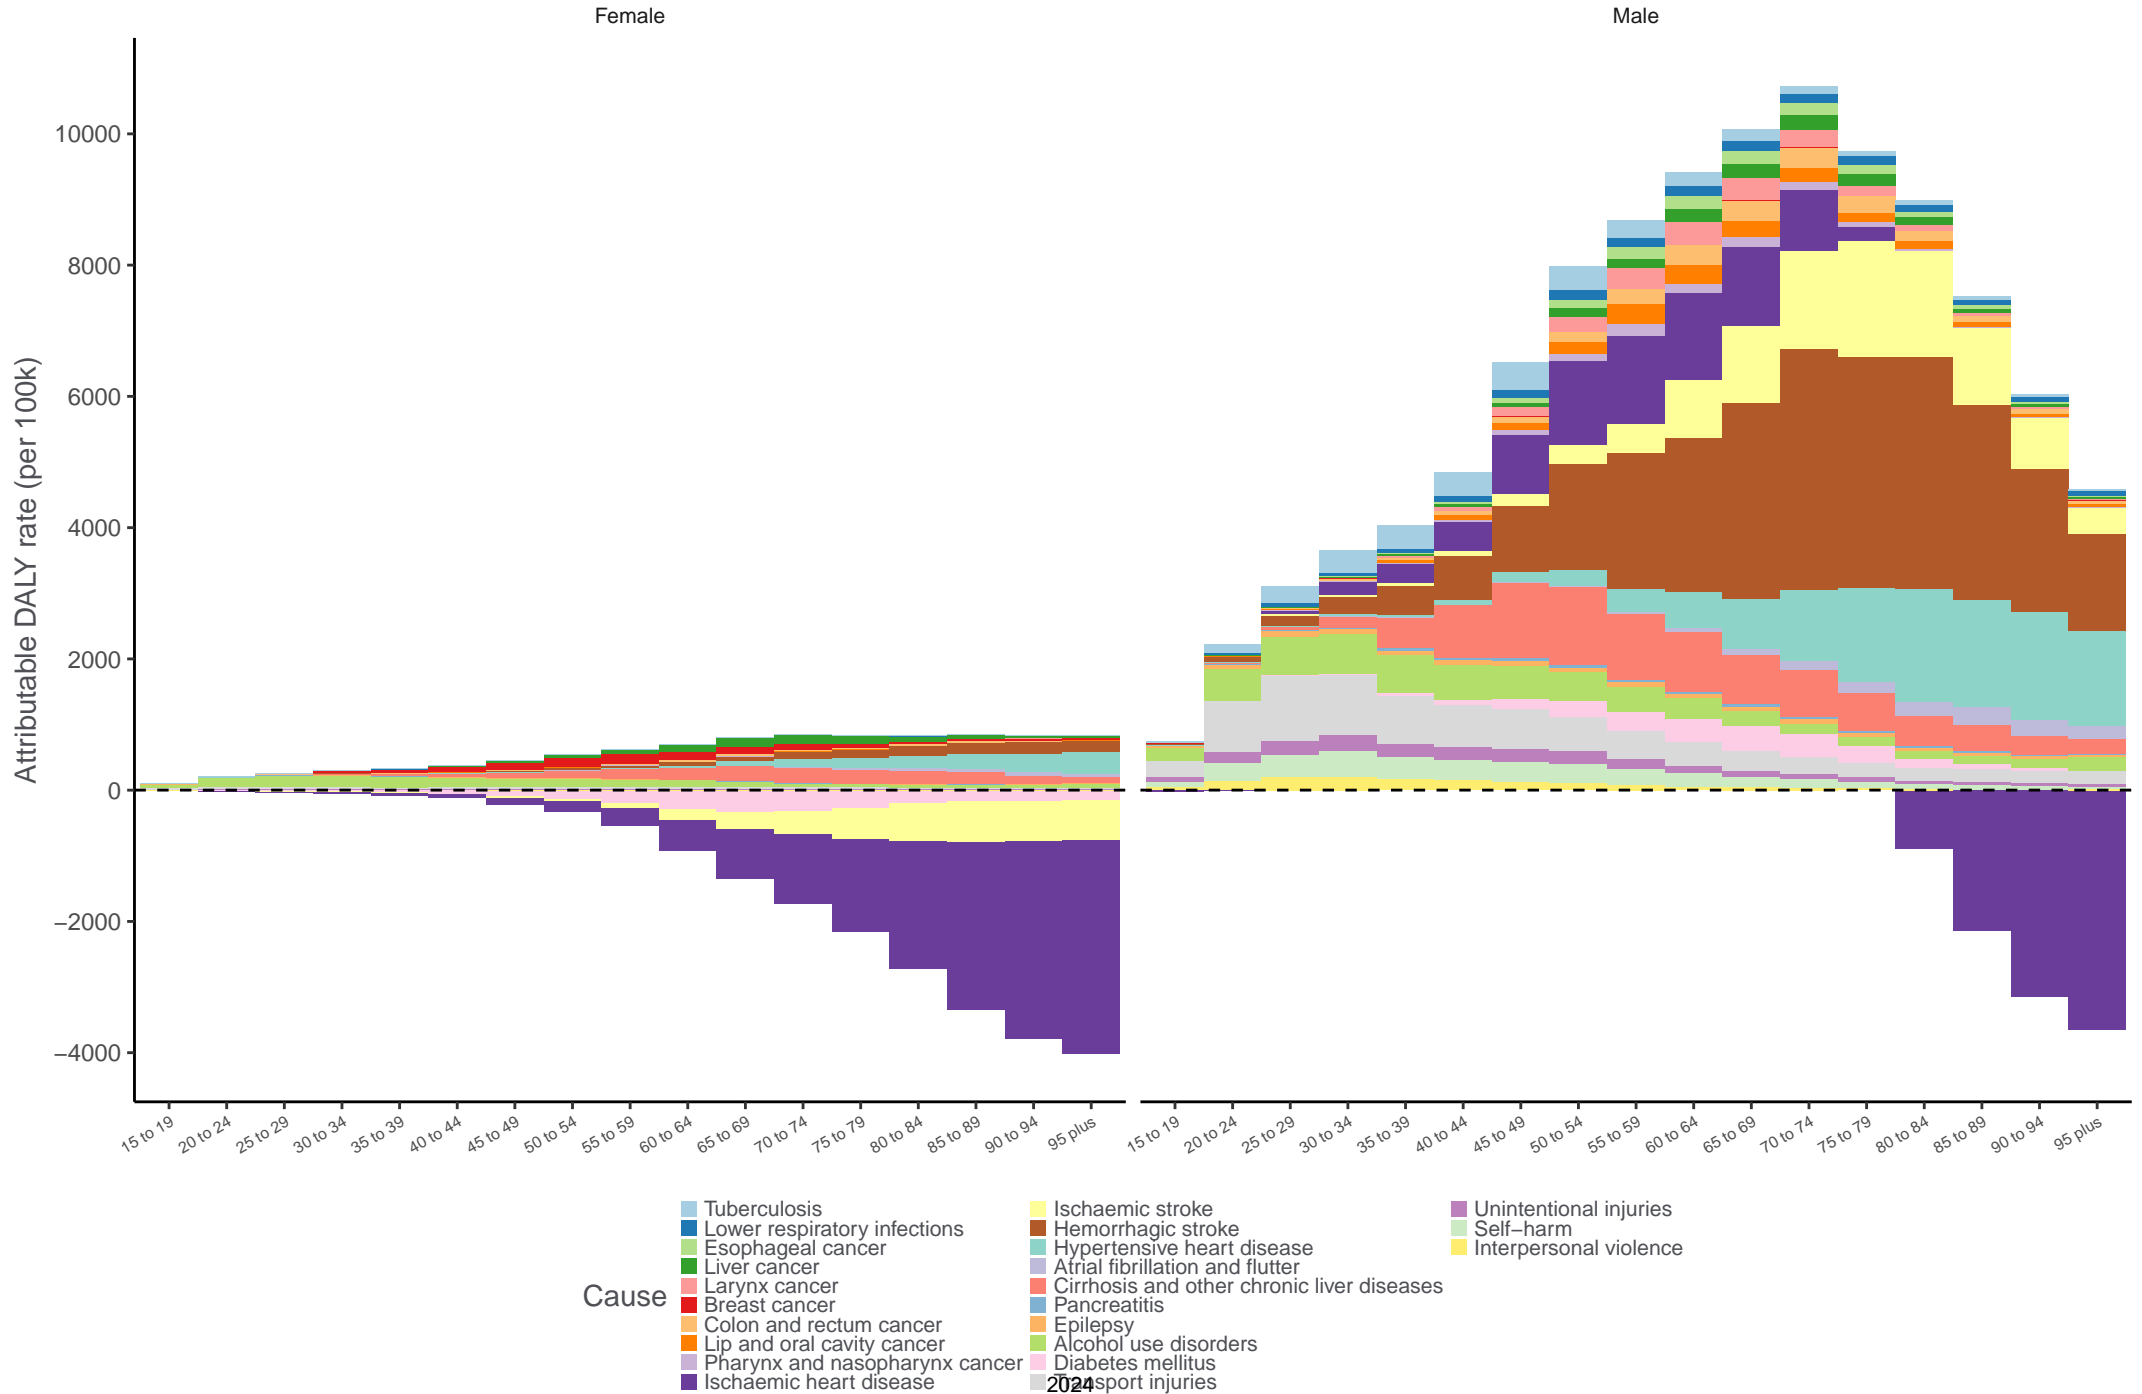

Attributable DALY rate disaggregated by cause, Kazakhstan, by sex and age in 2016.

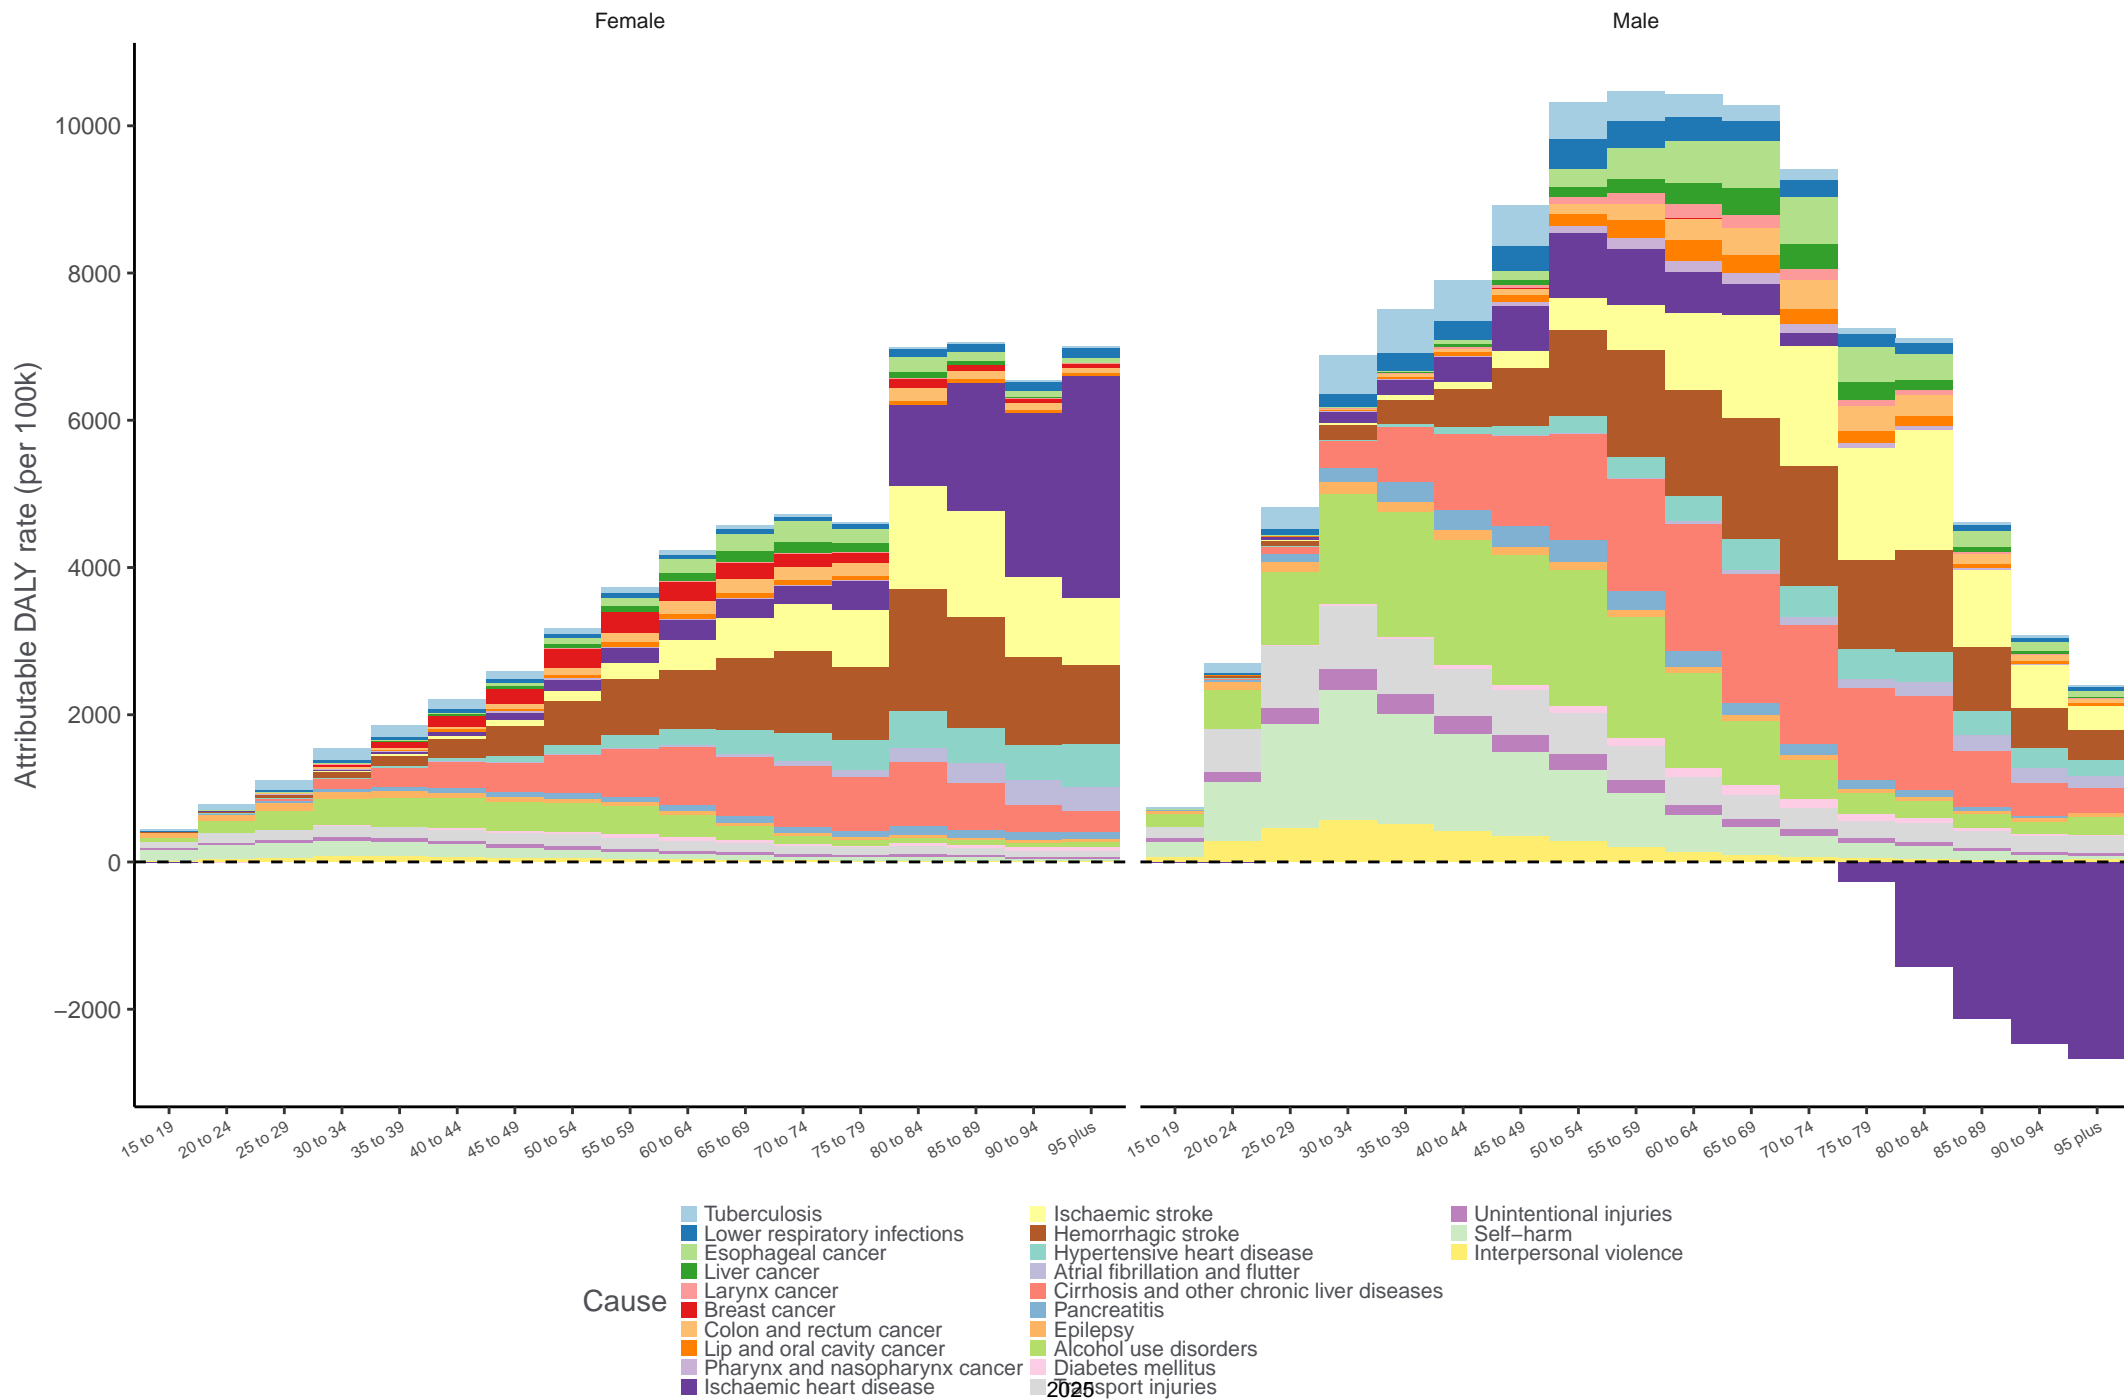

# Attributable DALY rate disaggregated by cause, Kyrgyzstan, by sex and age in 2016.

Female

Male

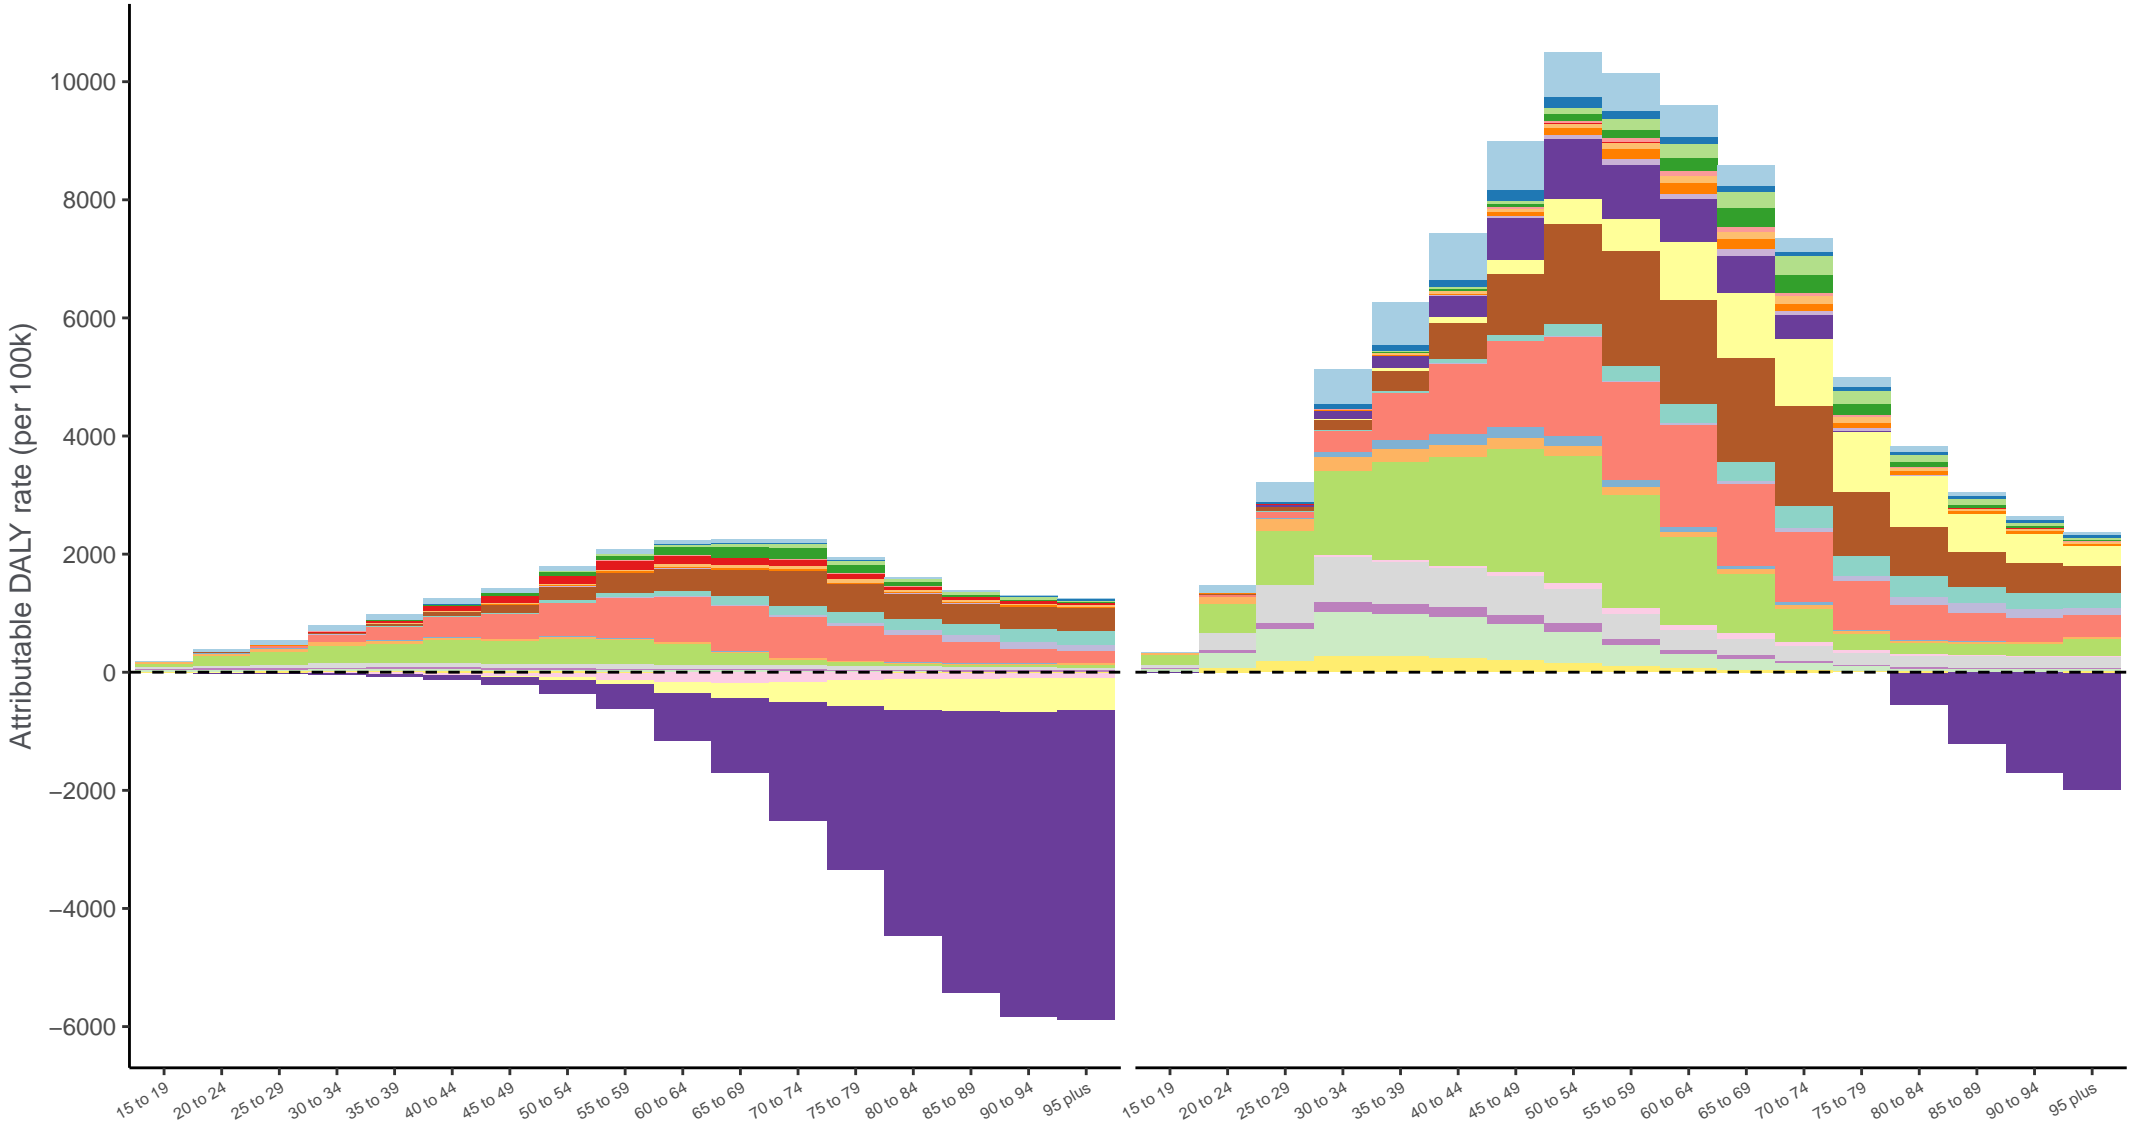

- Cause**
- Tuberculosis
  - Ischaemic stroke
  - Unintentional injuries
  - Lower respiratory infections
  - Hemorrhagic stroke
  - Self-harm
  - Esophageal cancer
  - Hypertensive heart disease
  - Liver cancer
  - Atrial fibrillation and flutter
  - Larynx cancer
  - Cirrhosis and other chronic liver diseases
  - Breast cancer
  - Pancreatitis
  - Colon and rectum cancer
  - Epilepsy
  - Lip and oral cavity cancer
  - Alcohol use disorders
  - Pharynx and nasopharynx cancer
  - Diabetes mellitus
  - Ischaemic heart disease
  - 2026 sport injuries

Attributable DALY rate disaggregated by cause, Mongolia, by sex and age in 2016.

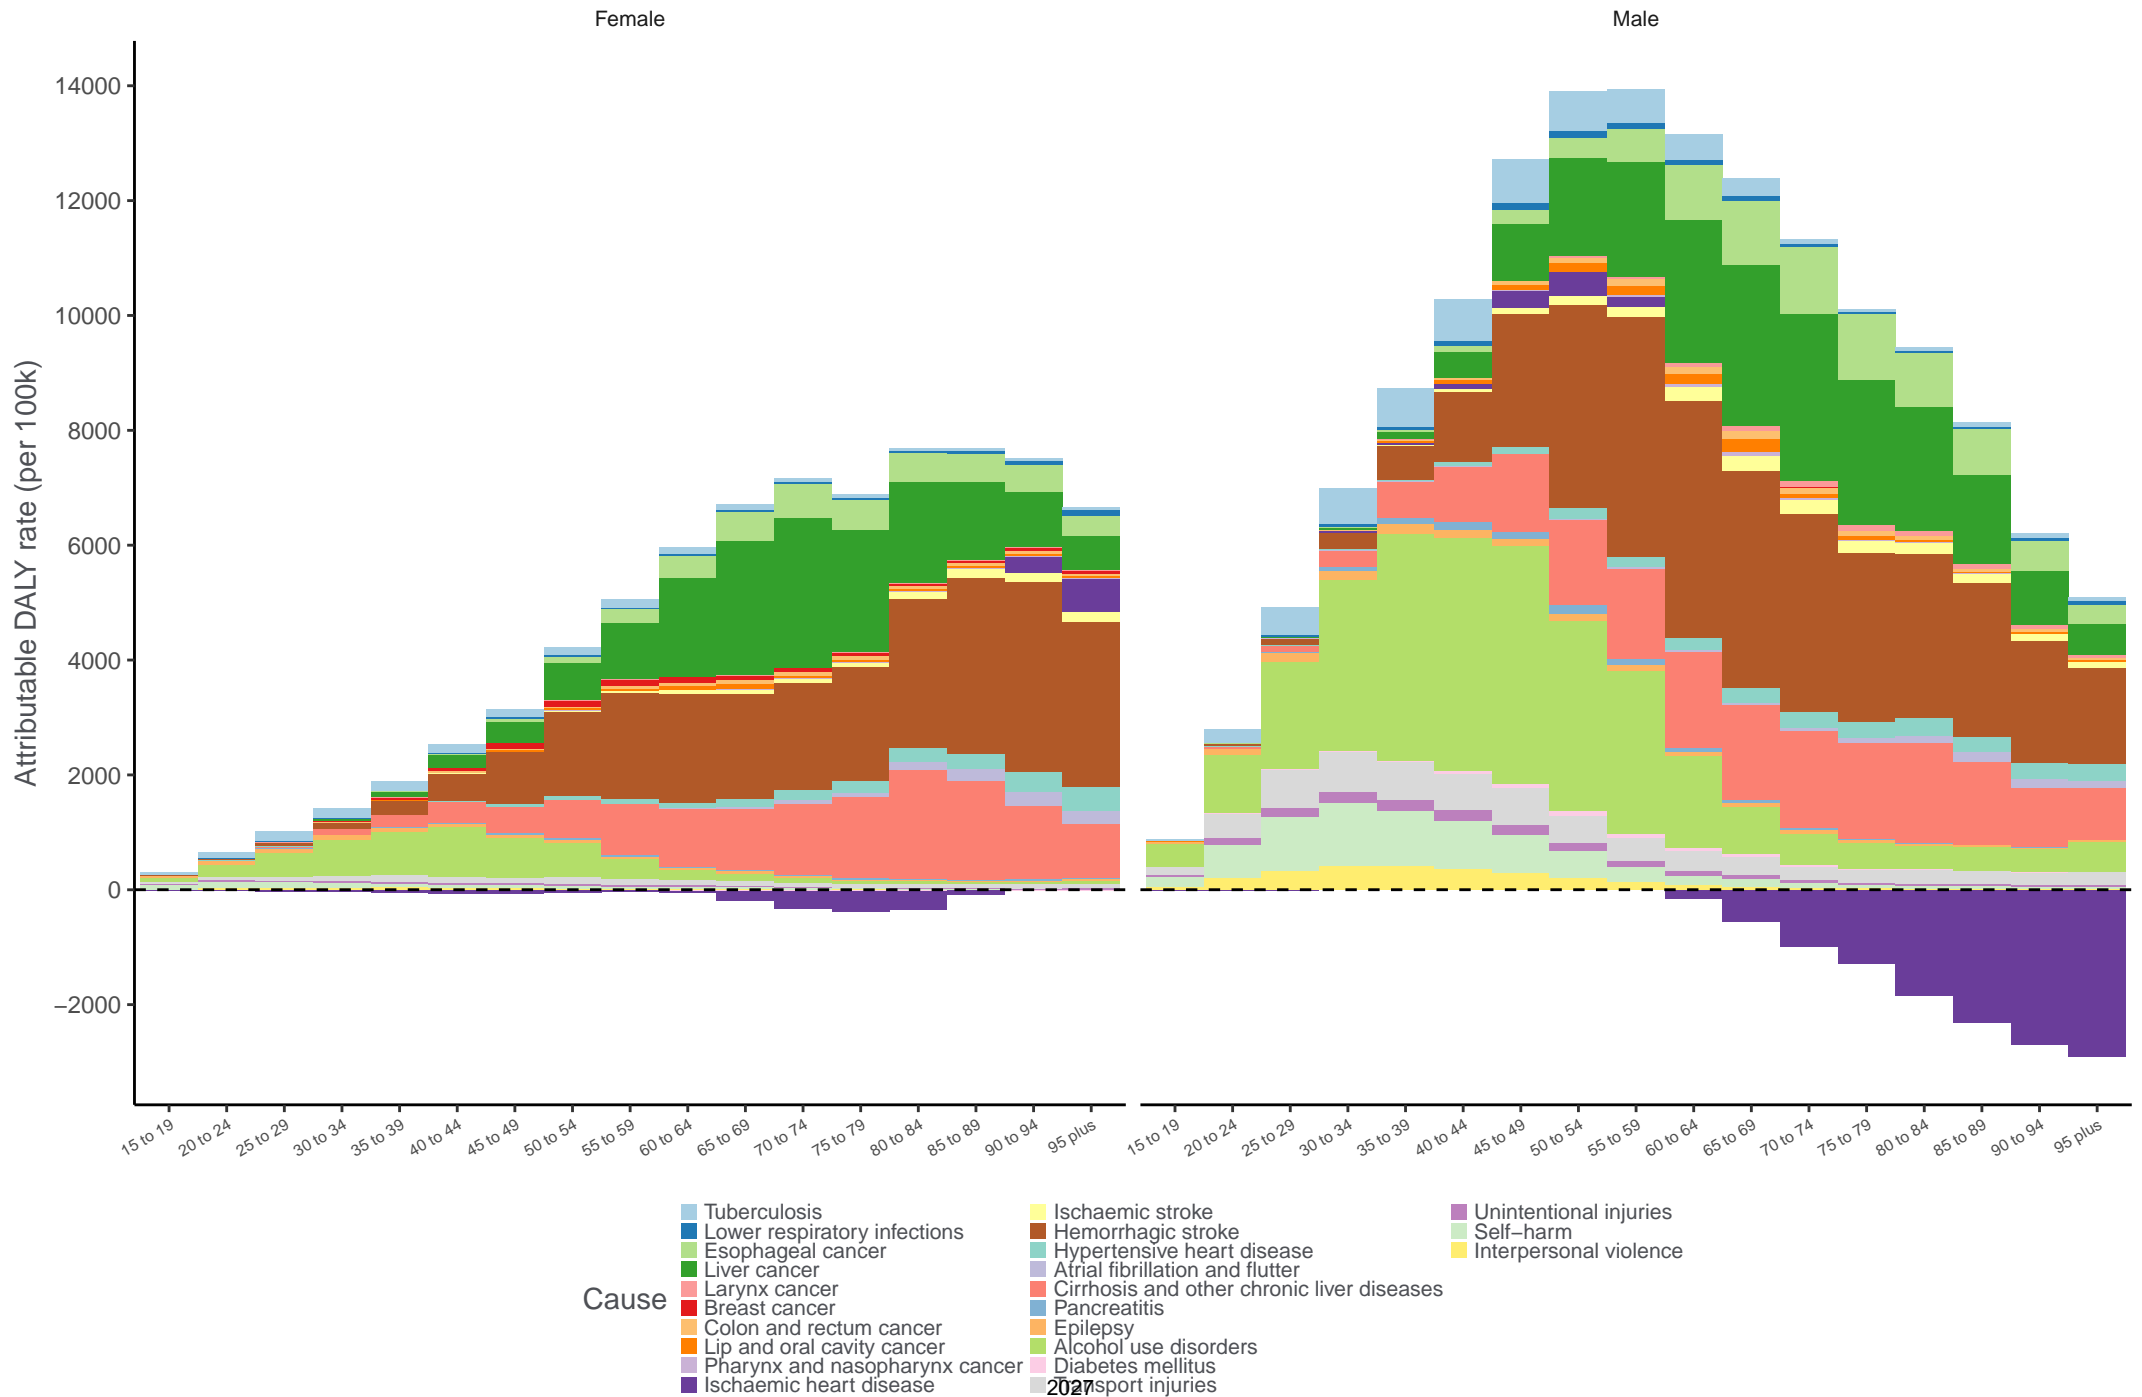

Attributable DALY rate disaggregated by cause, Tajikistan, by sex and age in 2016.

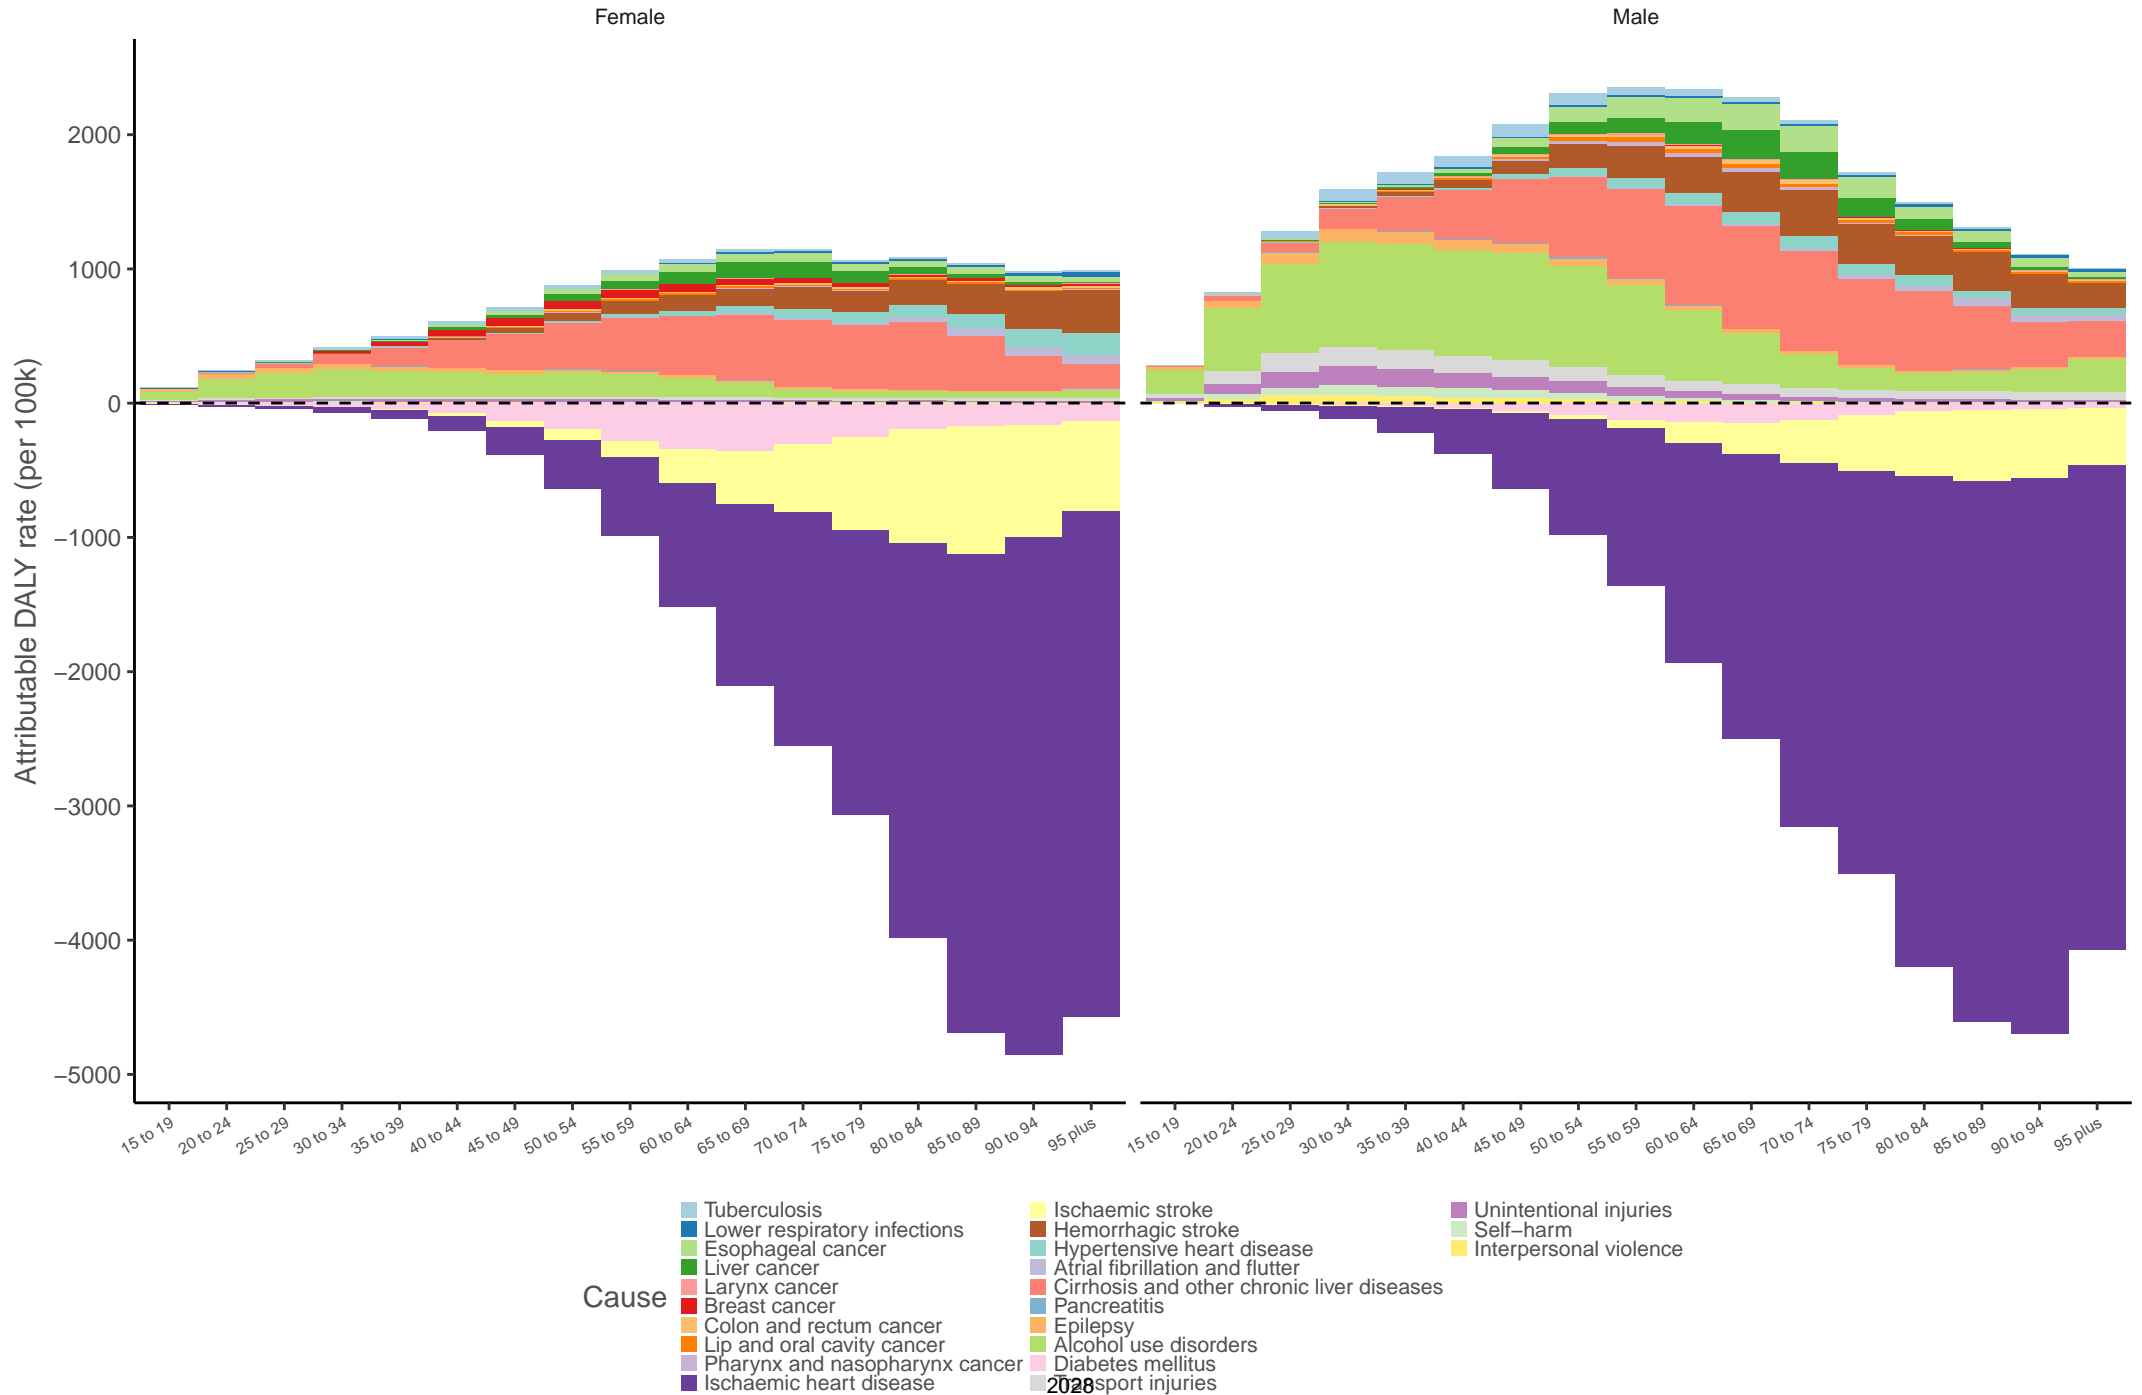

Attributable DALY rate disaggregated by cause, Turkmenistan, by sex and age in 2016.

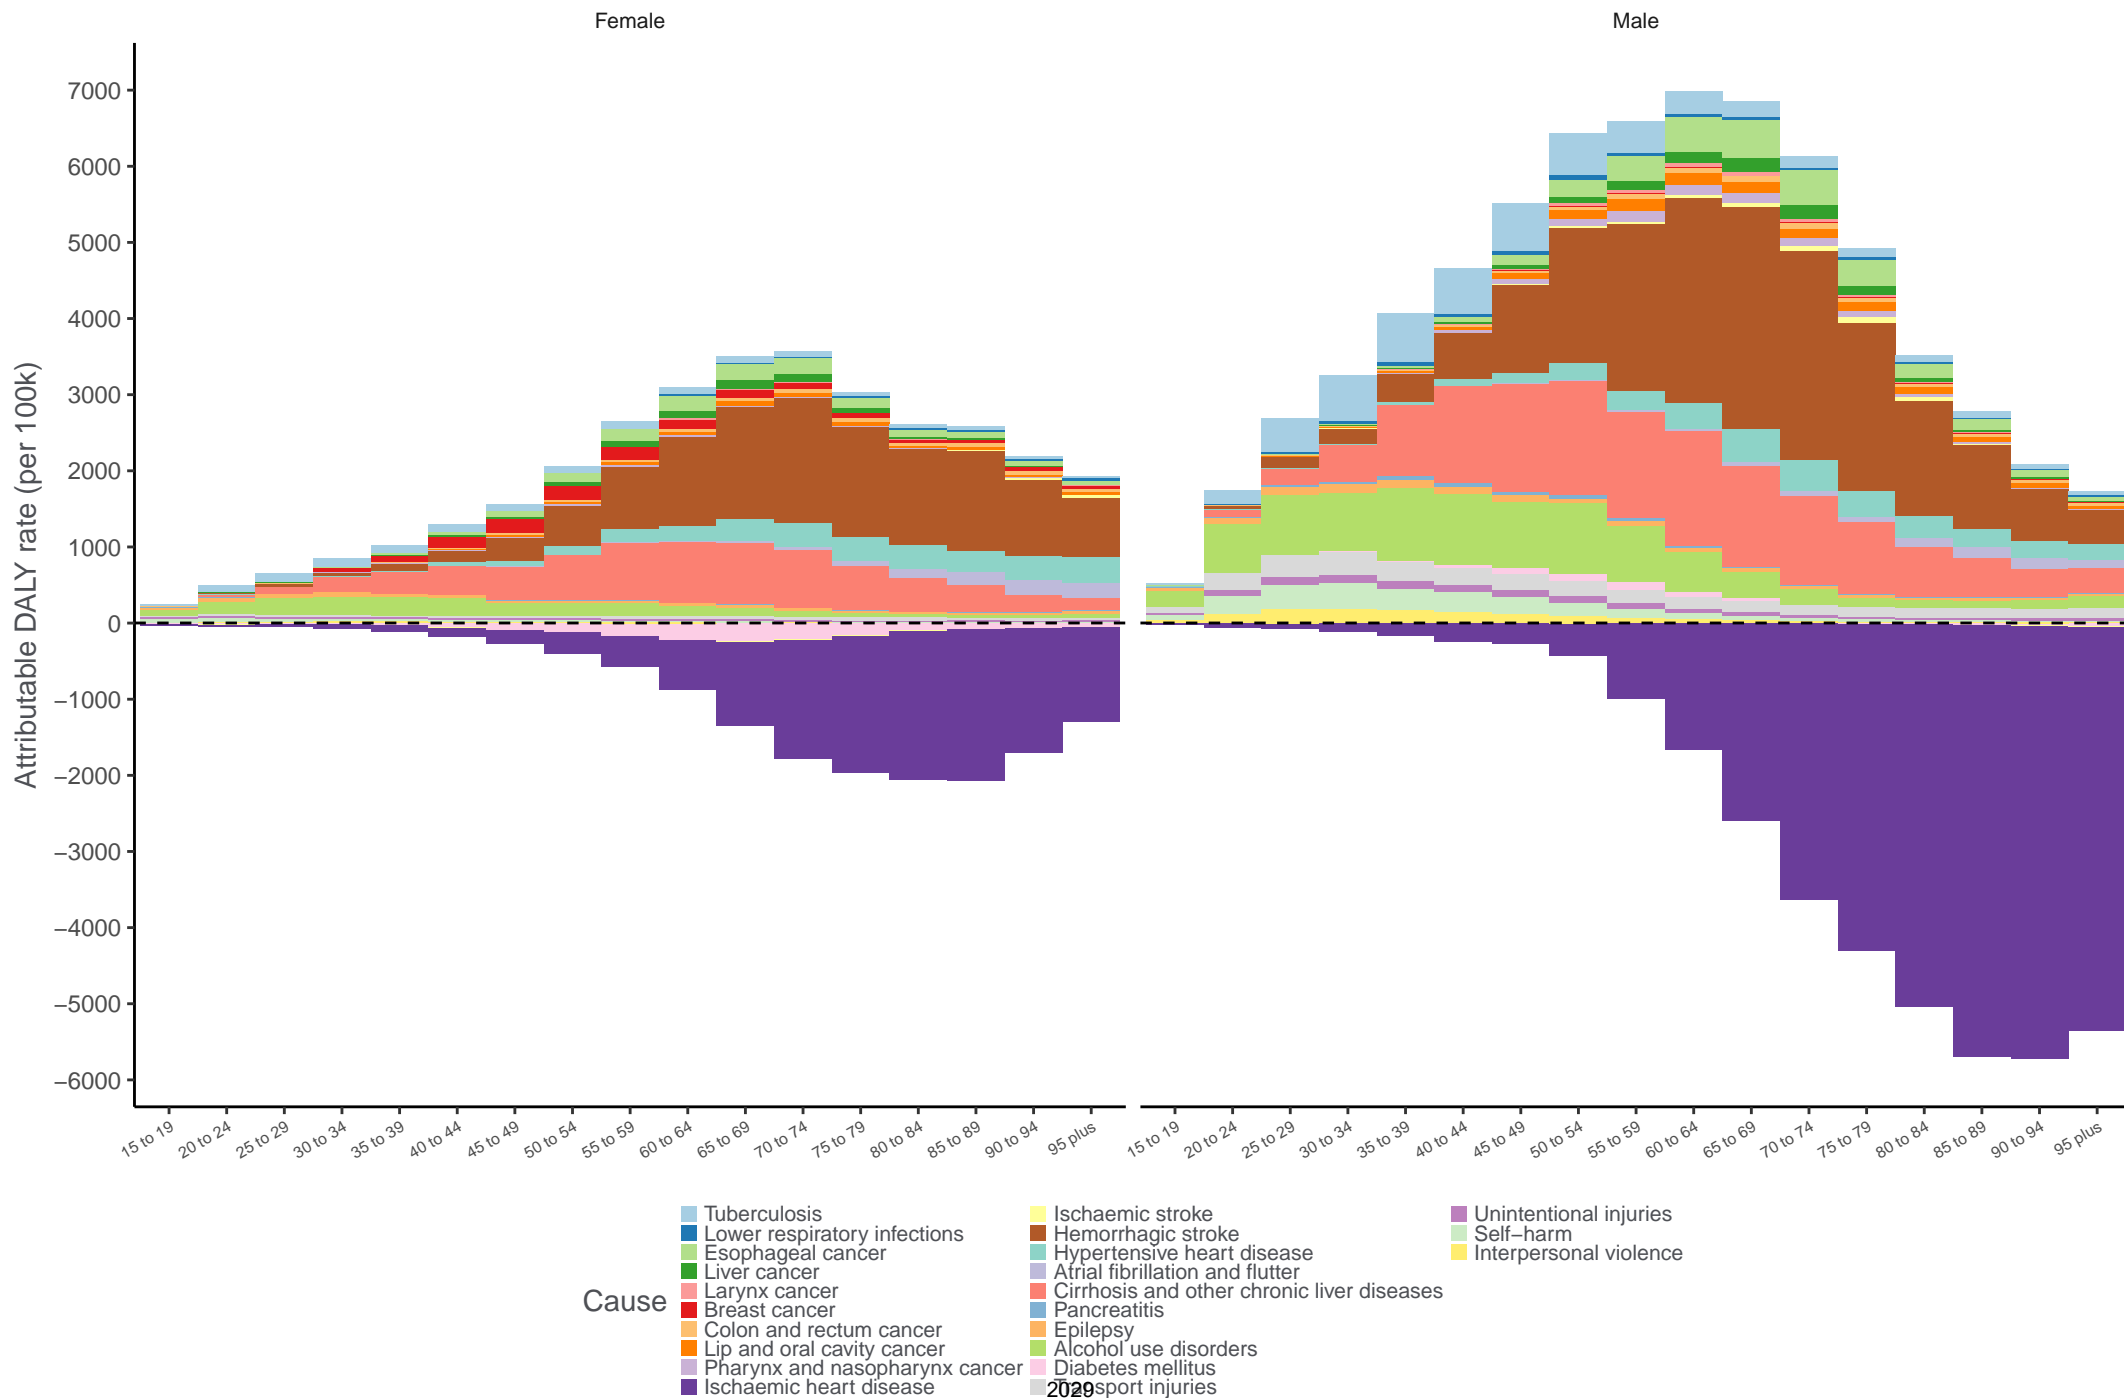

Attributable DALY rate disaggregated by cause, Uzbekistan, by sex and age in 2016.

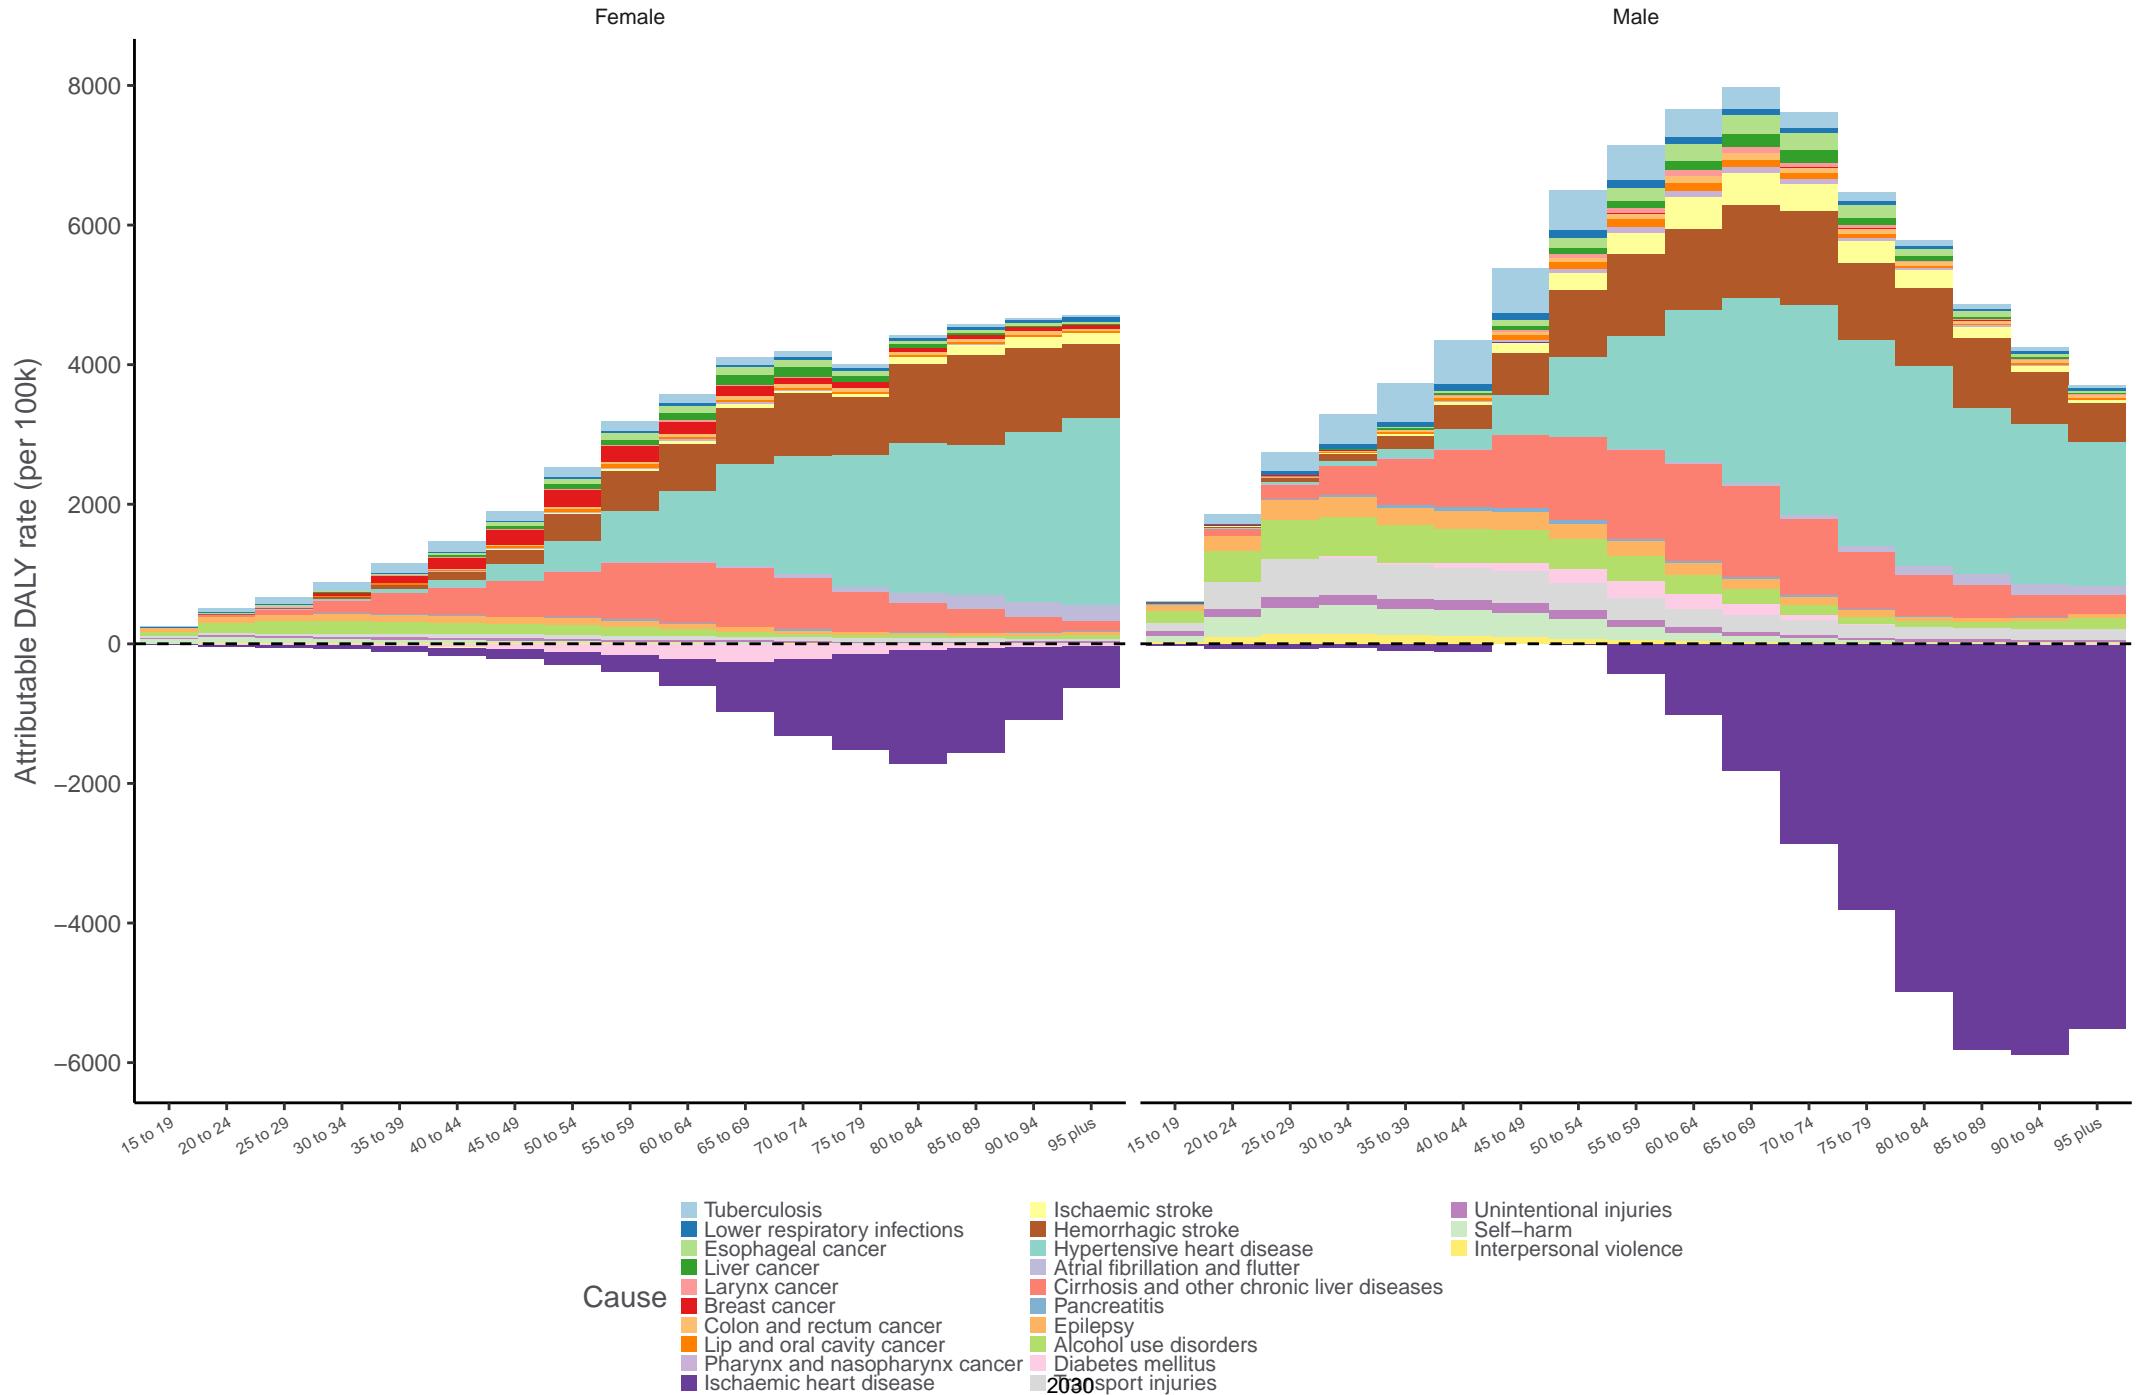

Attributable DALY rate disaggregated by cause, Albania, by sex and age in 2016.

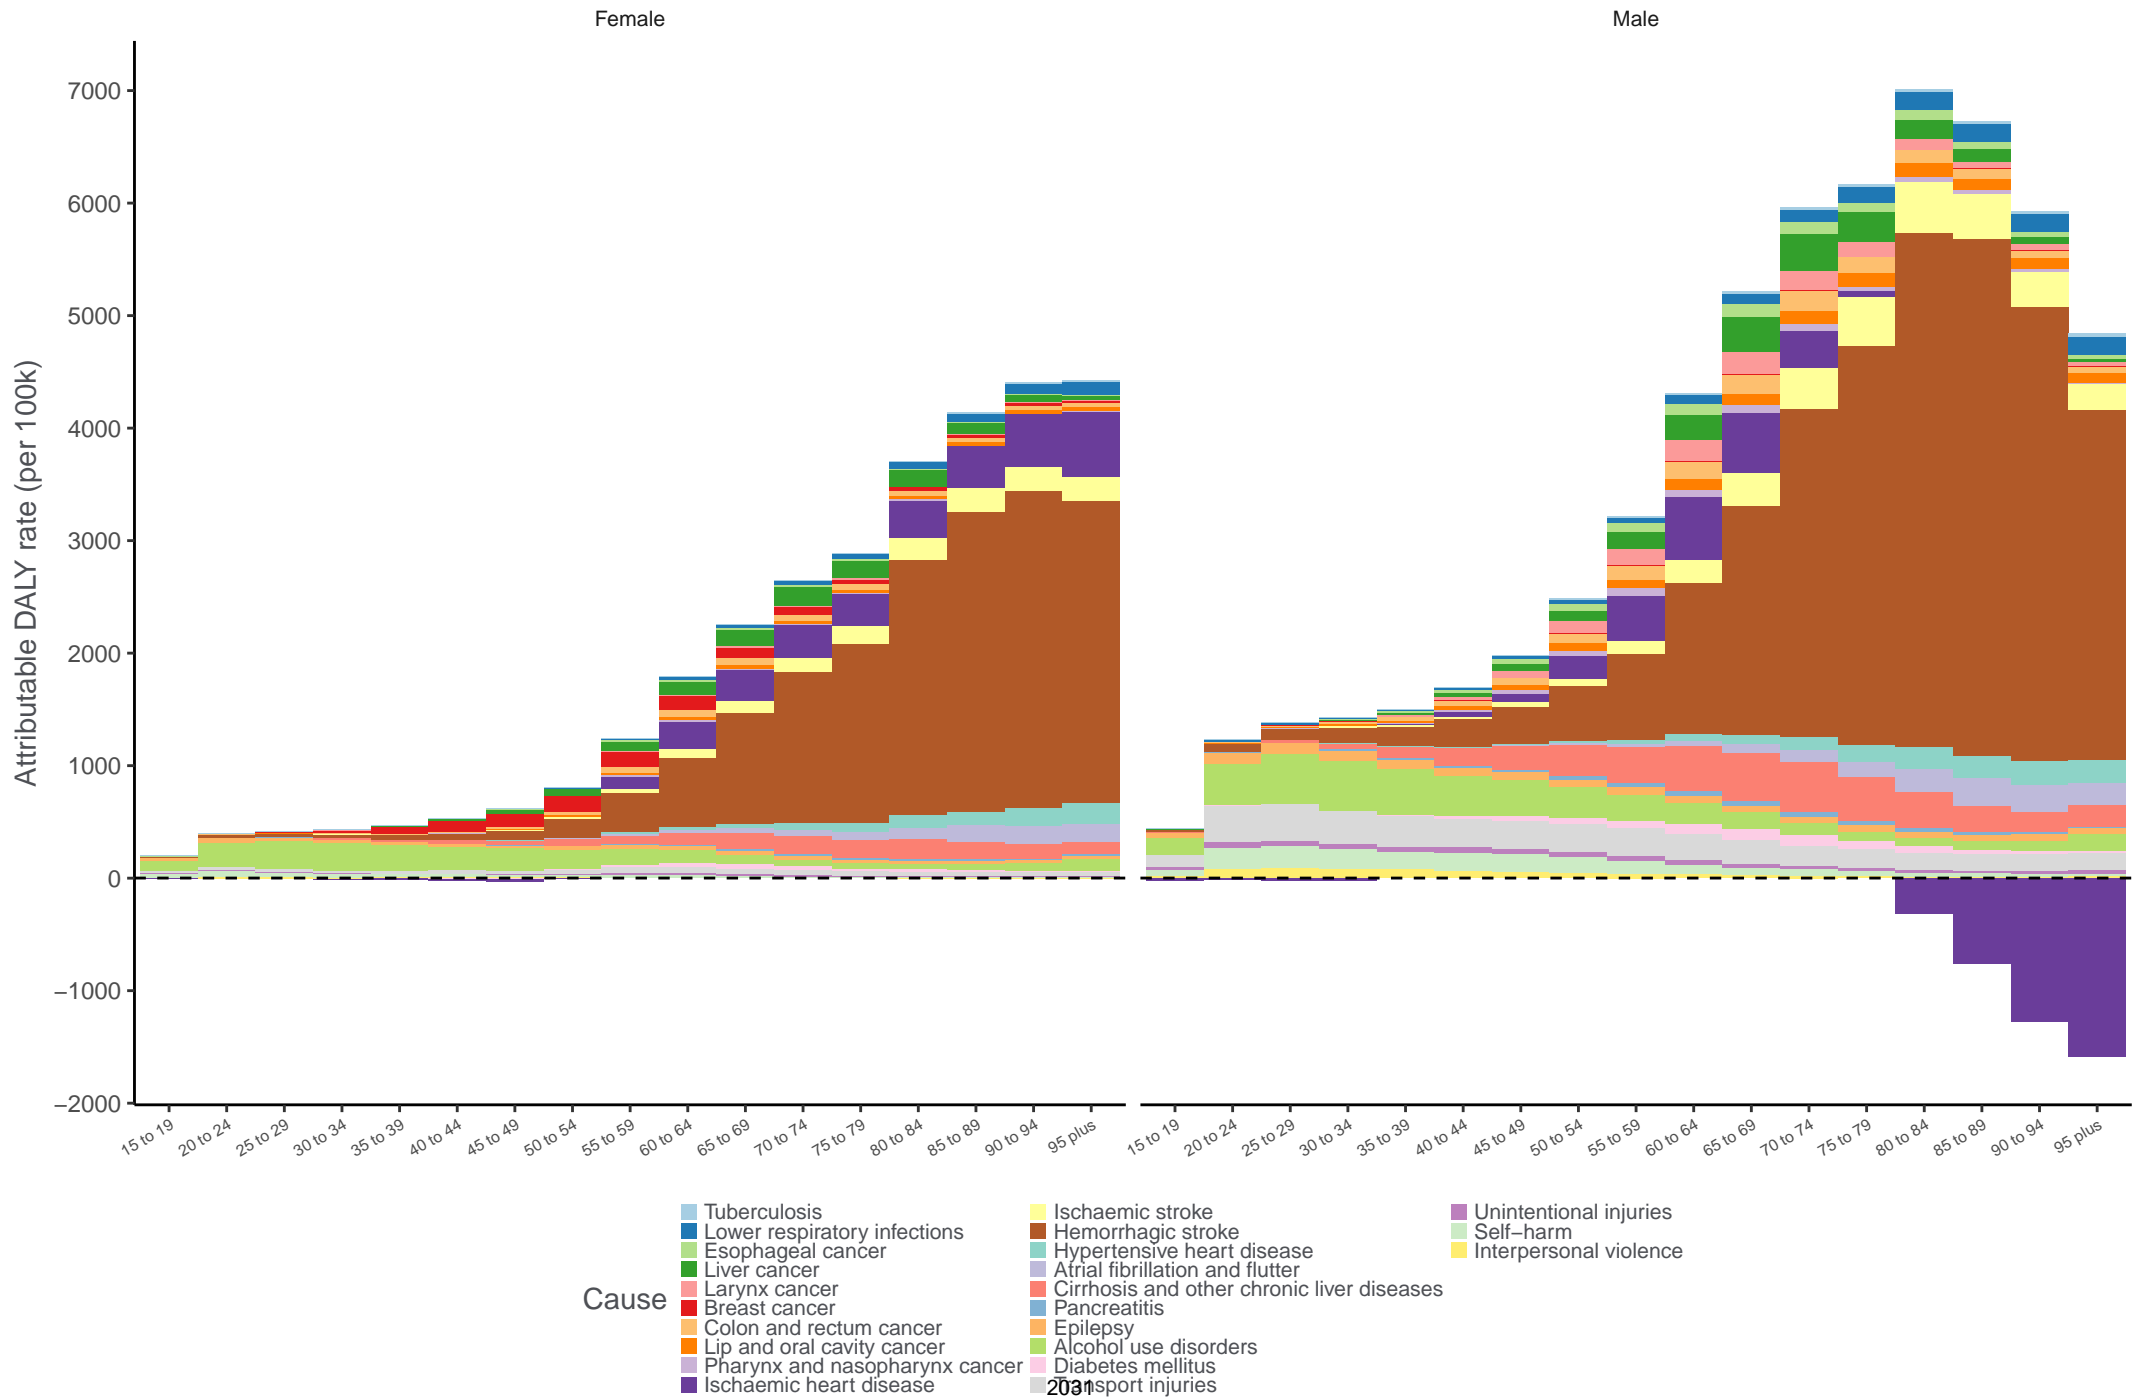



# Attributable DALY rate disaggregated by cause, Bosnia and Herzegovina, by sex and age in 2016.

Female

Male

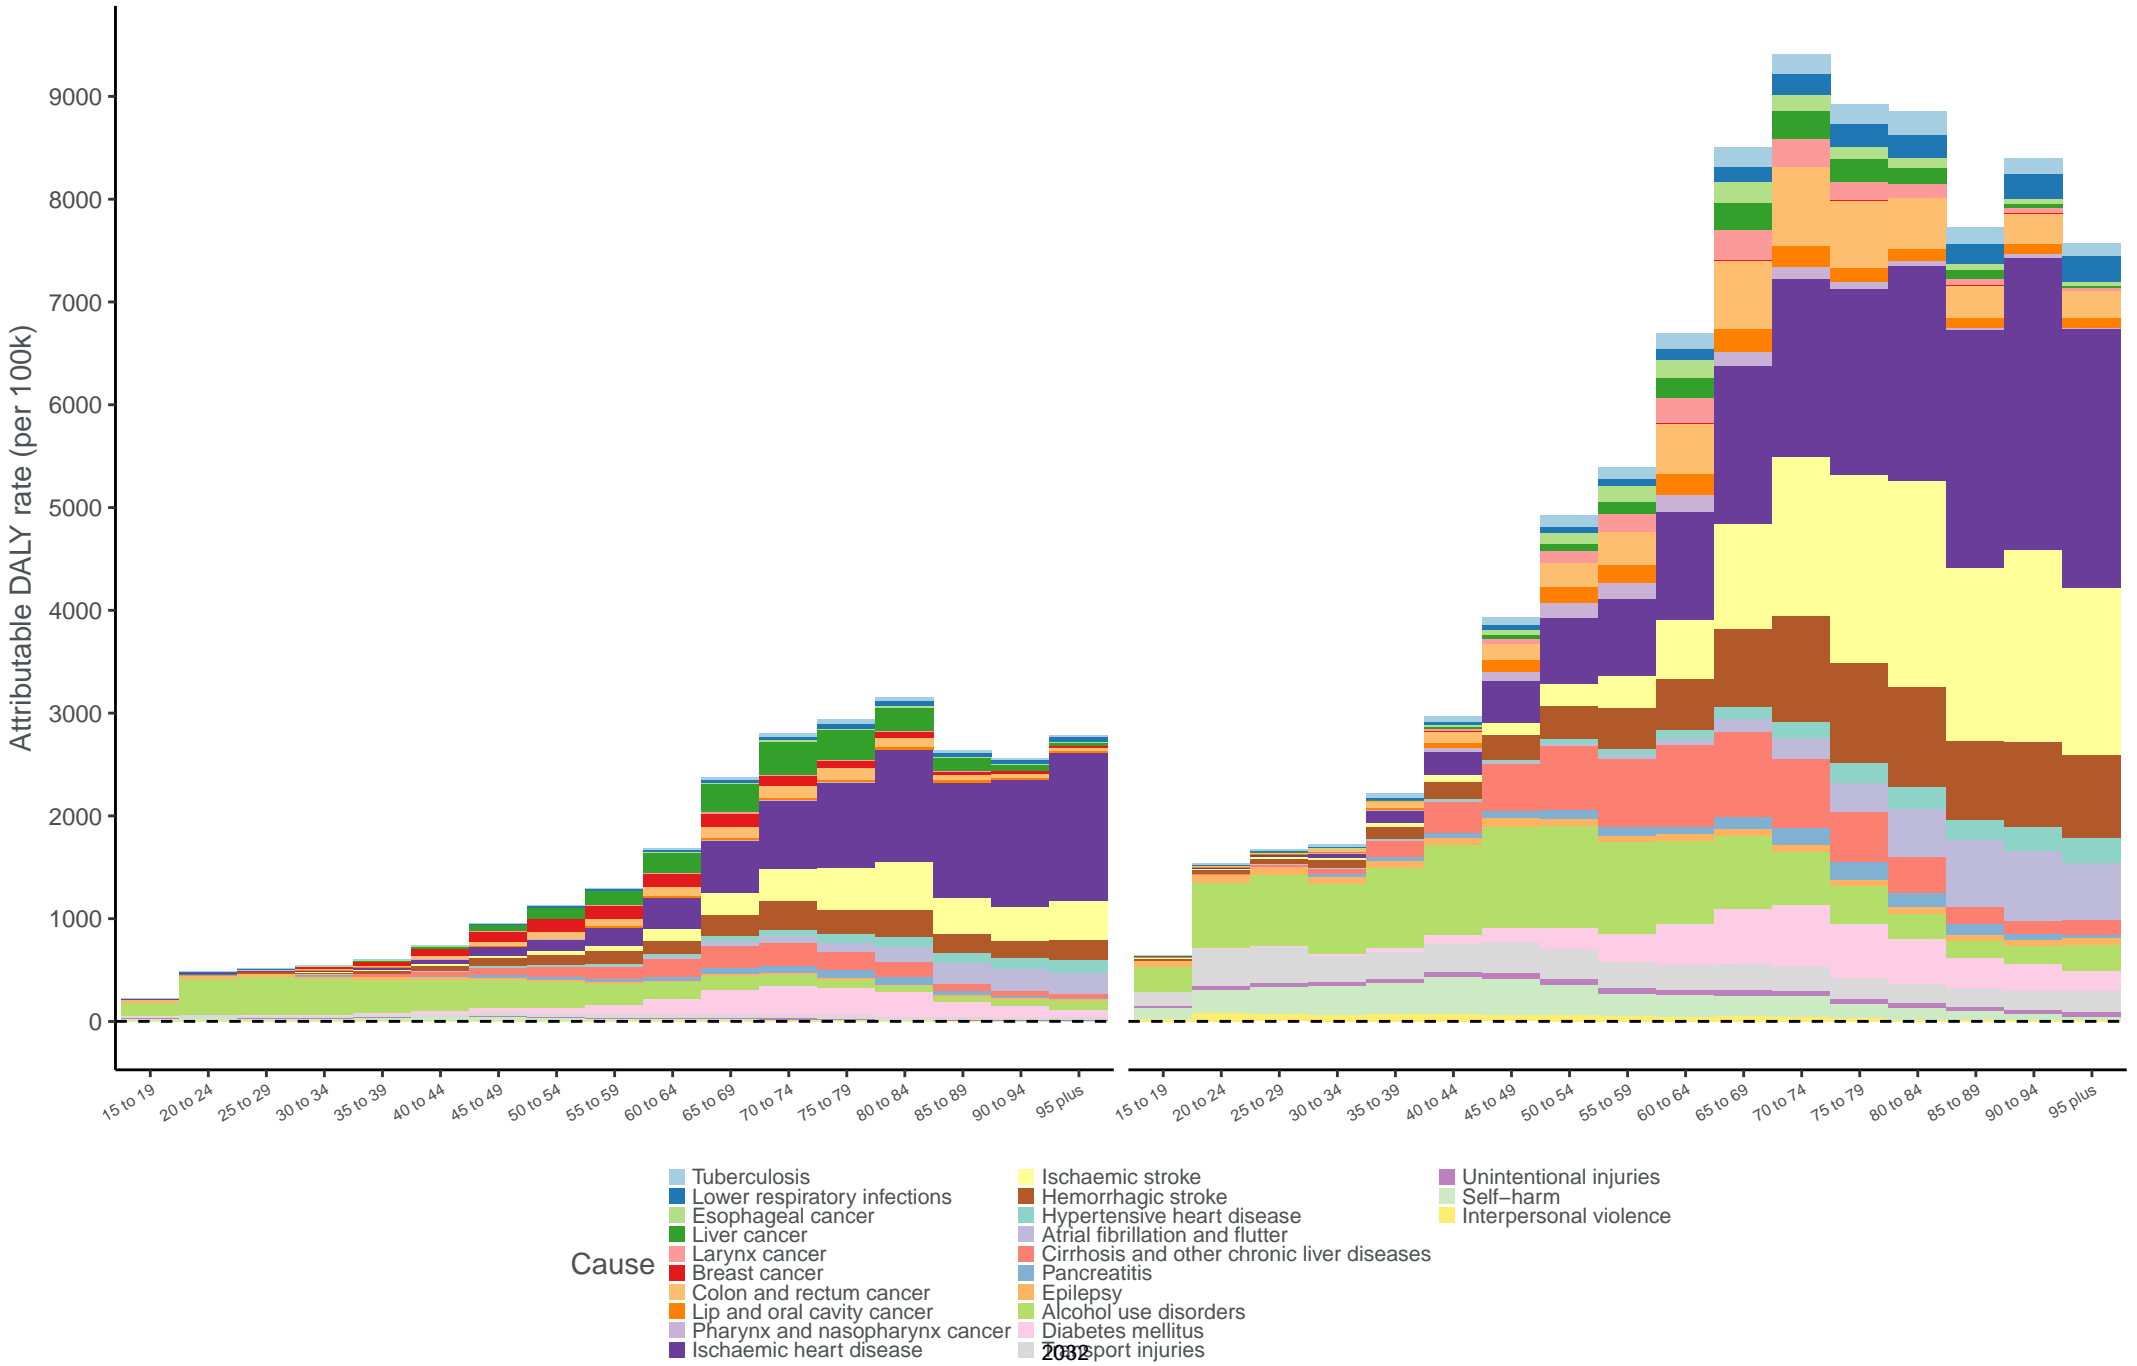

Cause

- Tuberculosis
- Ischaemic stroke
- Unintentional injuries
- Lower respiratory infections
- Hemorrhagic stroke
- Self-harm
- Esophageal cancer
- Hypertensive heart disease
- Interpersonal violence
- Liver cancer
- Atrial fibrillation and flutter
- Pharynx and nasopharynx cancer
- Larynx cancer
- Cirrhosis and other chronic liver diseases
- 2012
- Breast cancer
- Pancreatitis
- Transport injuries
- Colon and rectum cancer
- Epilepsy
- 2012
- Lip and oral cavity cancer
- Alcohol use disorders
- 2012
- Pharynx and nasopharynx cancer
- 2012
- Ischaemic heart disease
- 2012

Attributable DALY rate disaggregated by cause, Bulgaria, by sex and age in 2016.

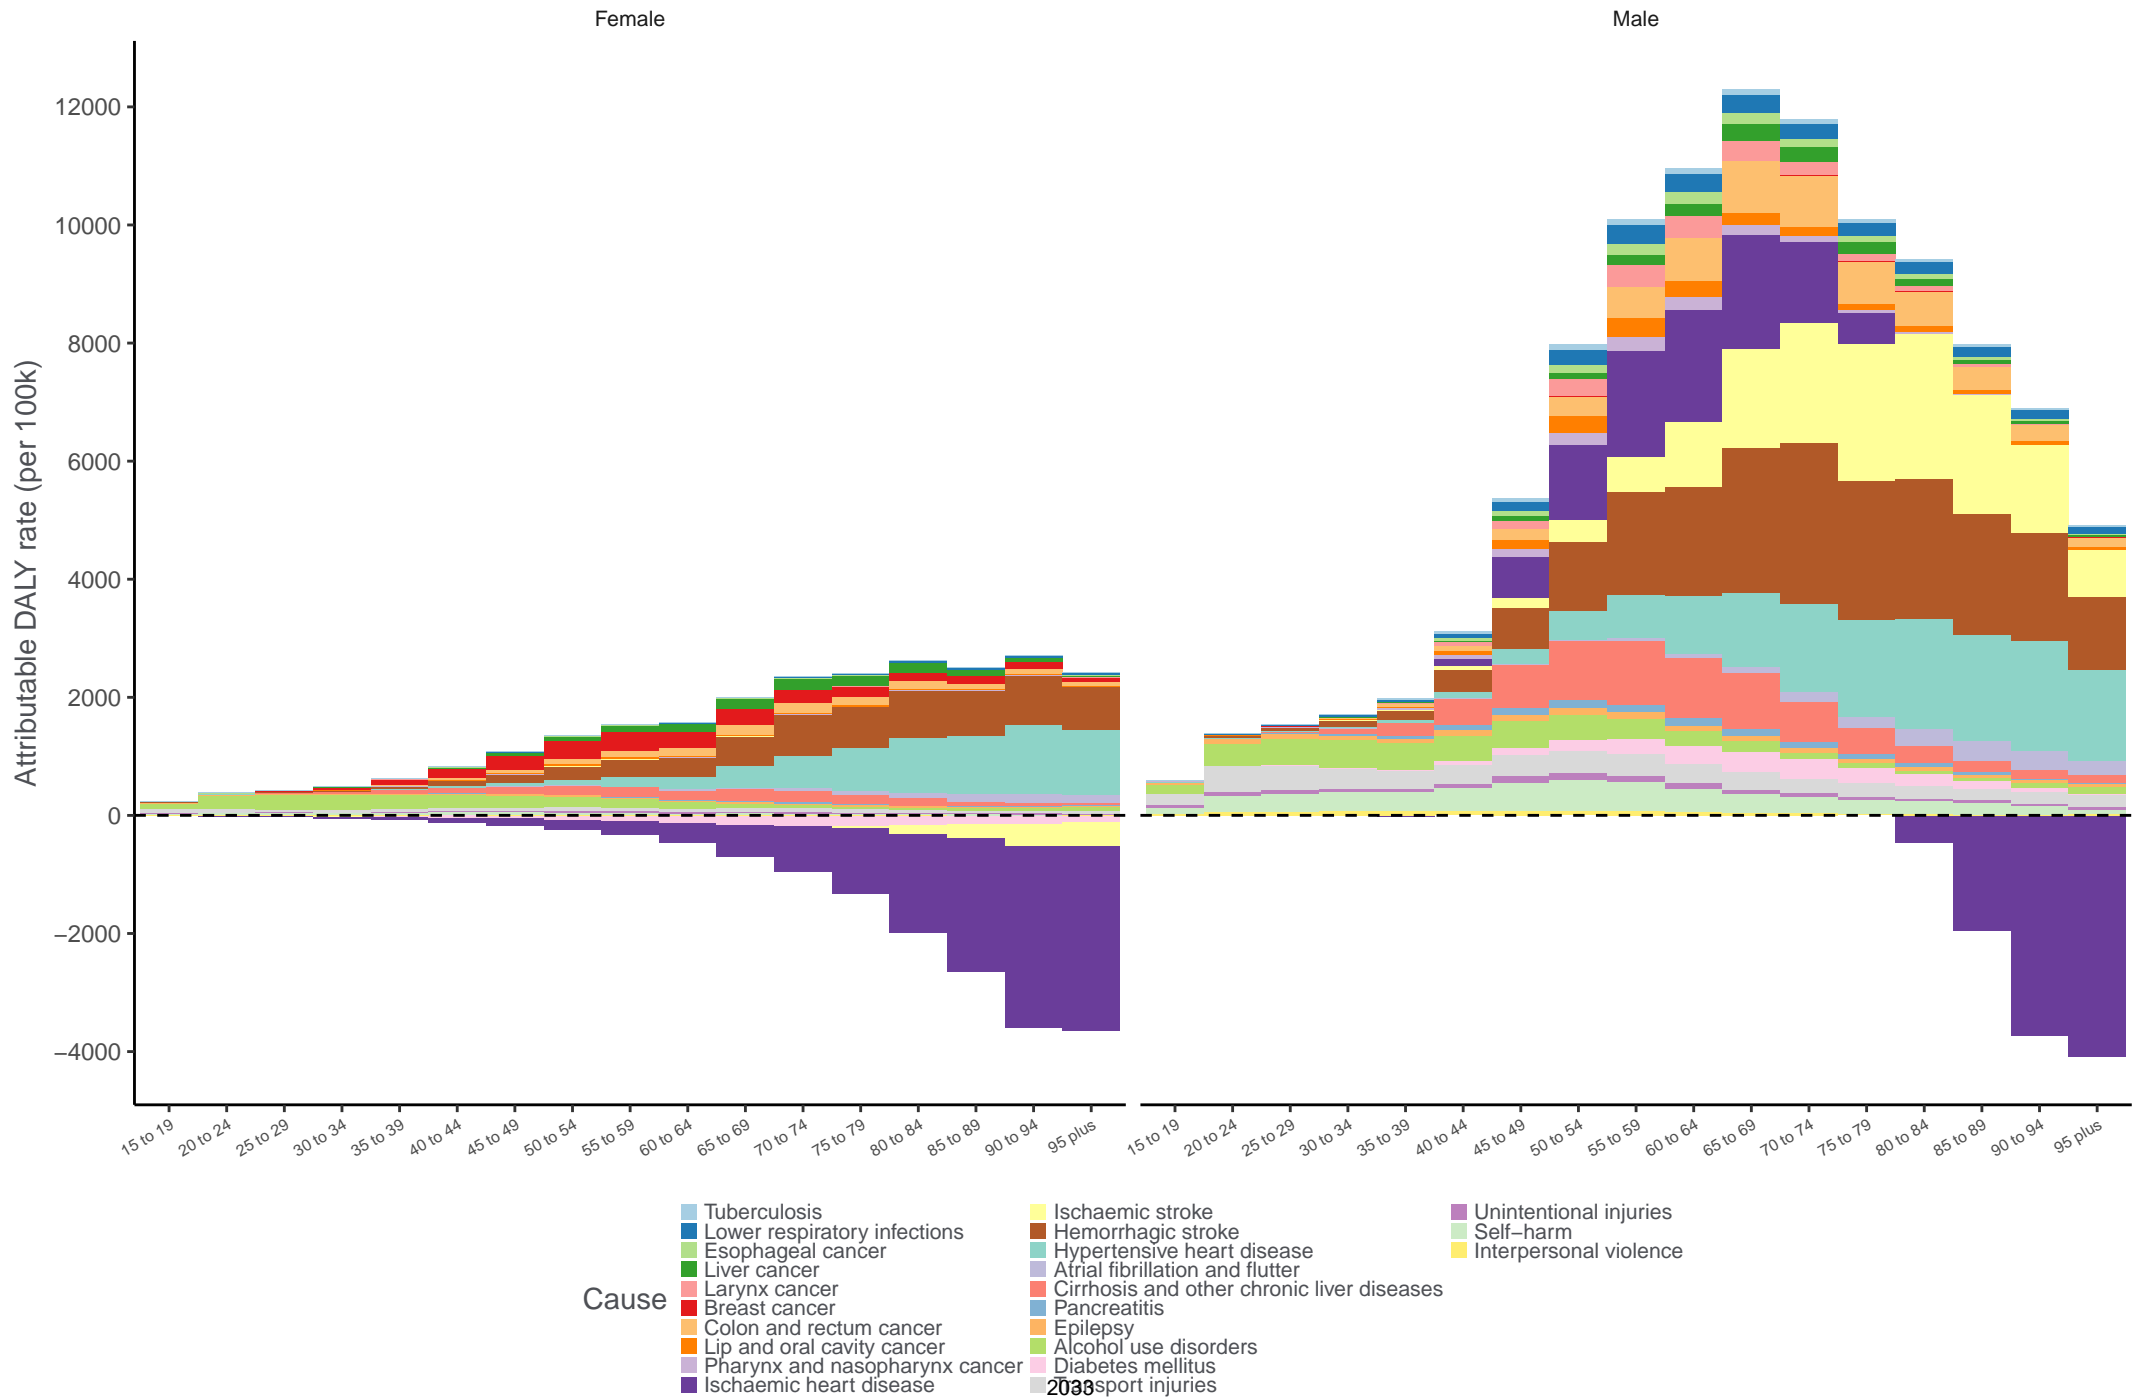

Attributable DALY rate disaggregated by cause, Croatia, by sex and age in 2016.

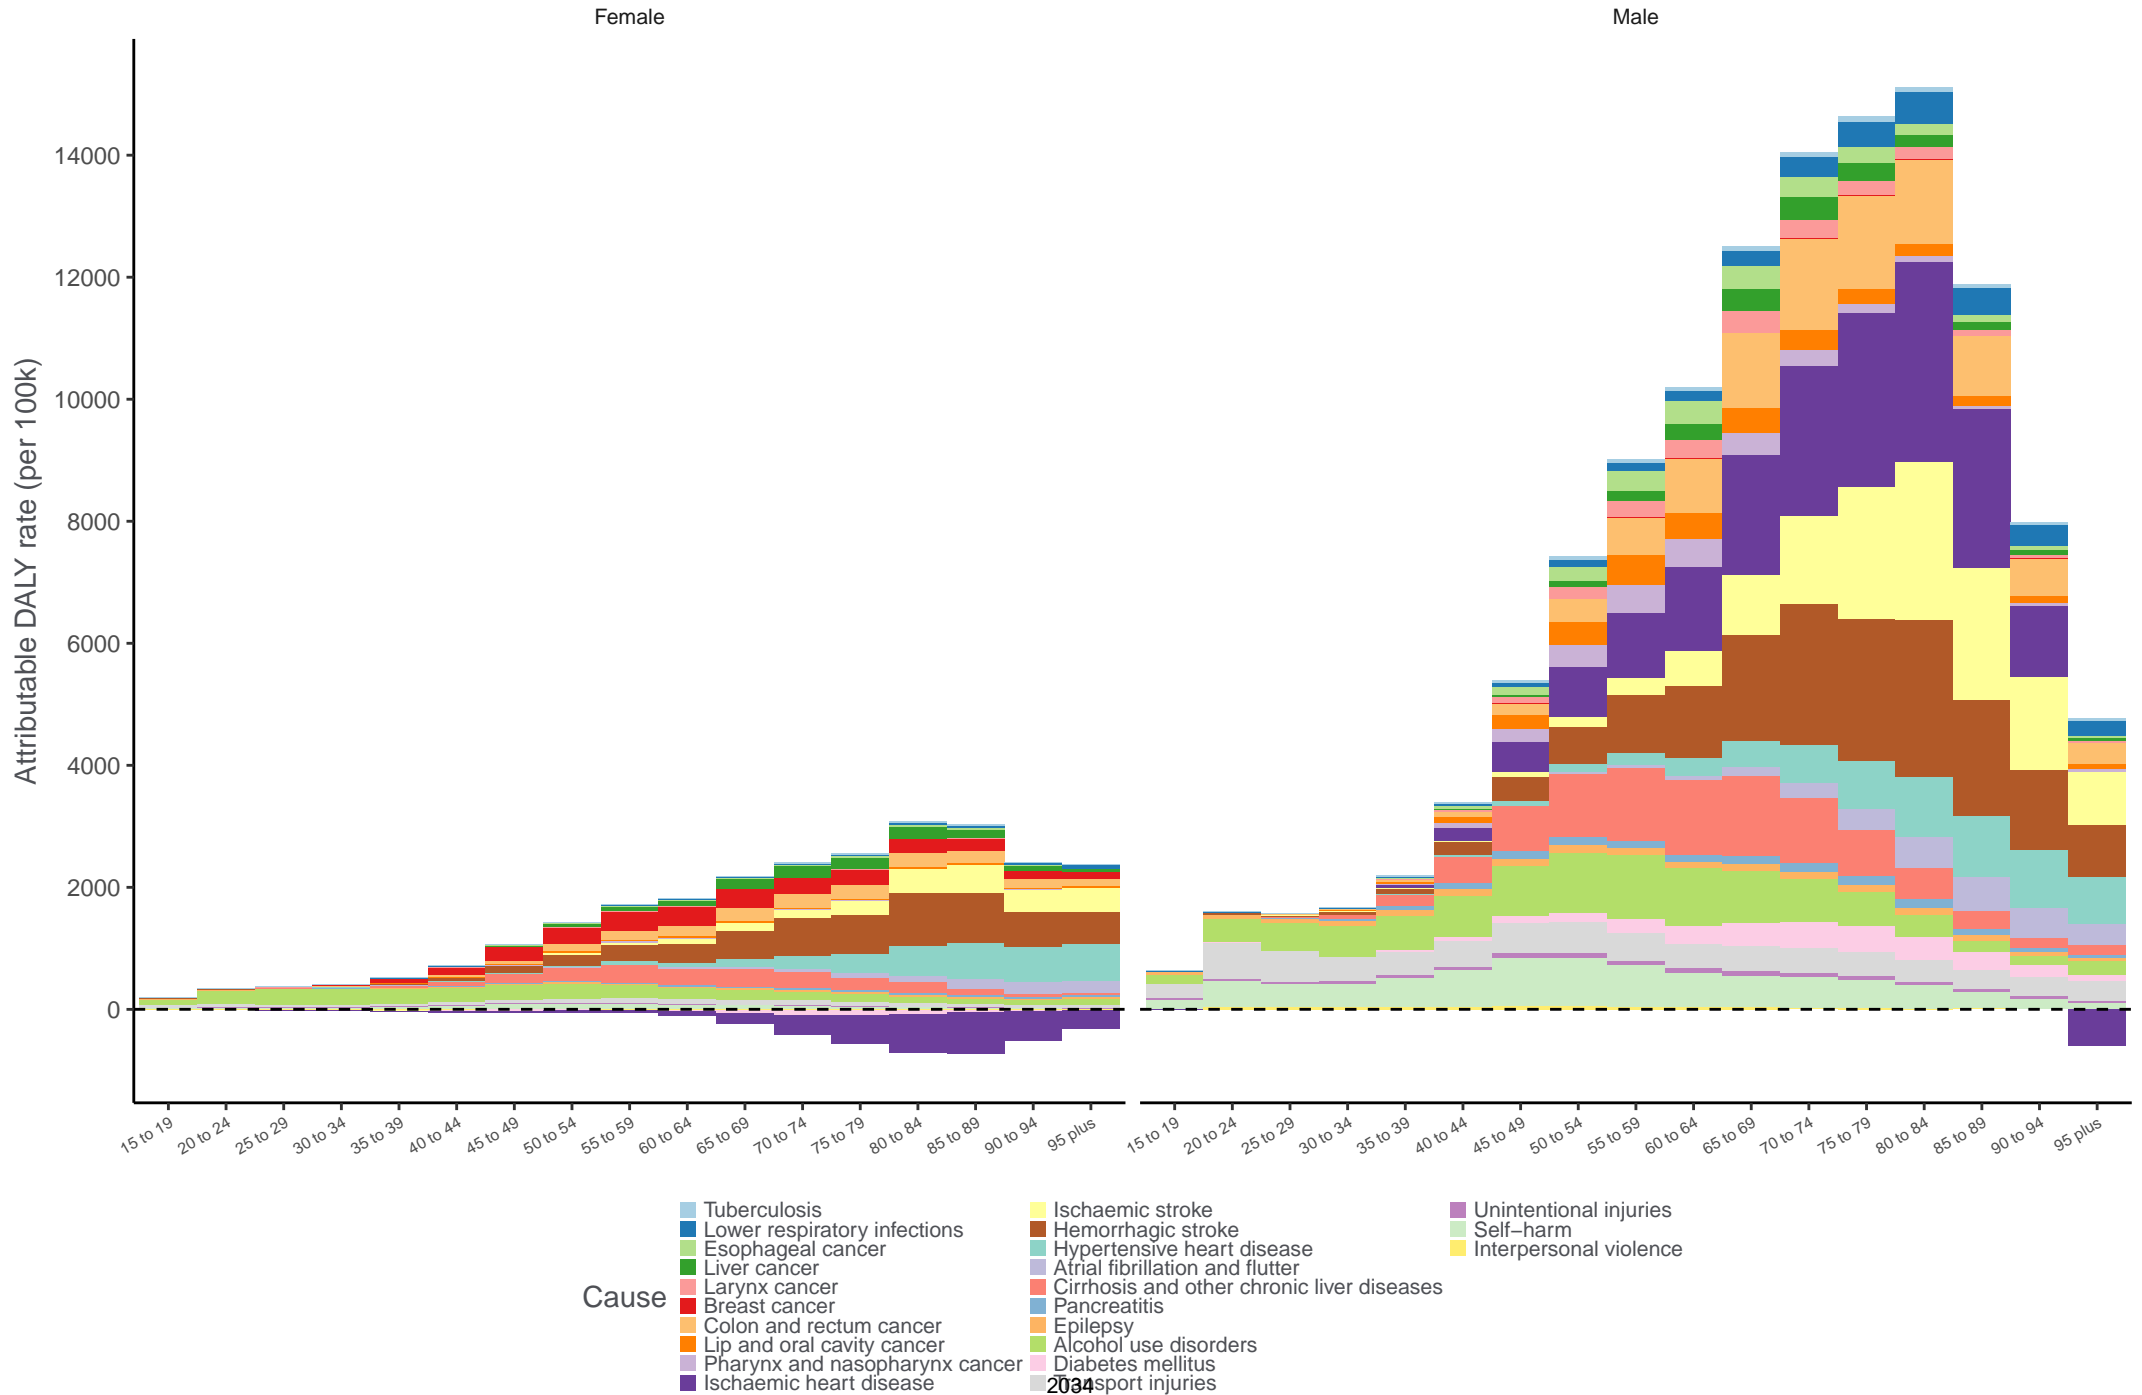

Attributable DALY rate disaggregated by cause, Czech Republic, by sex and age in 2016.

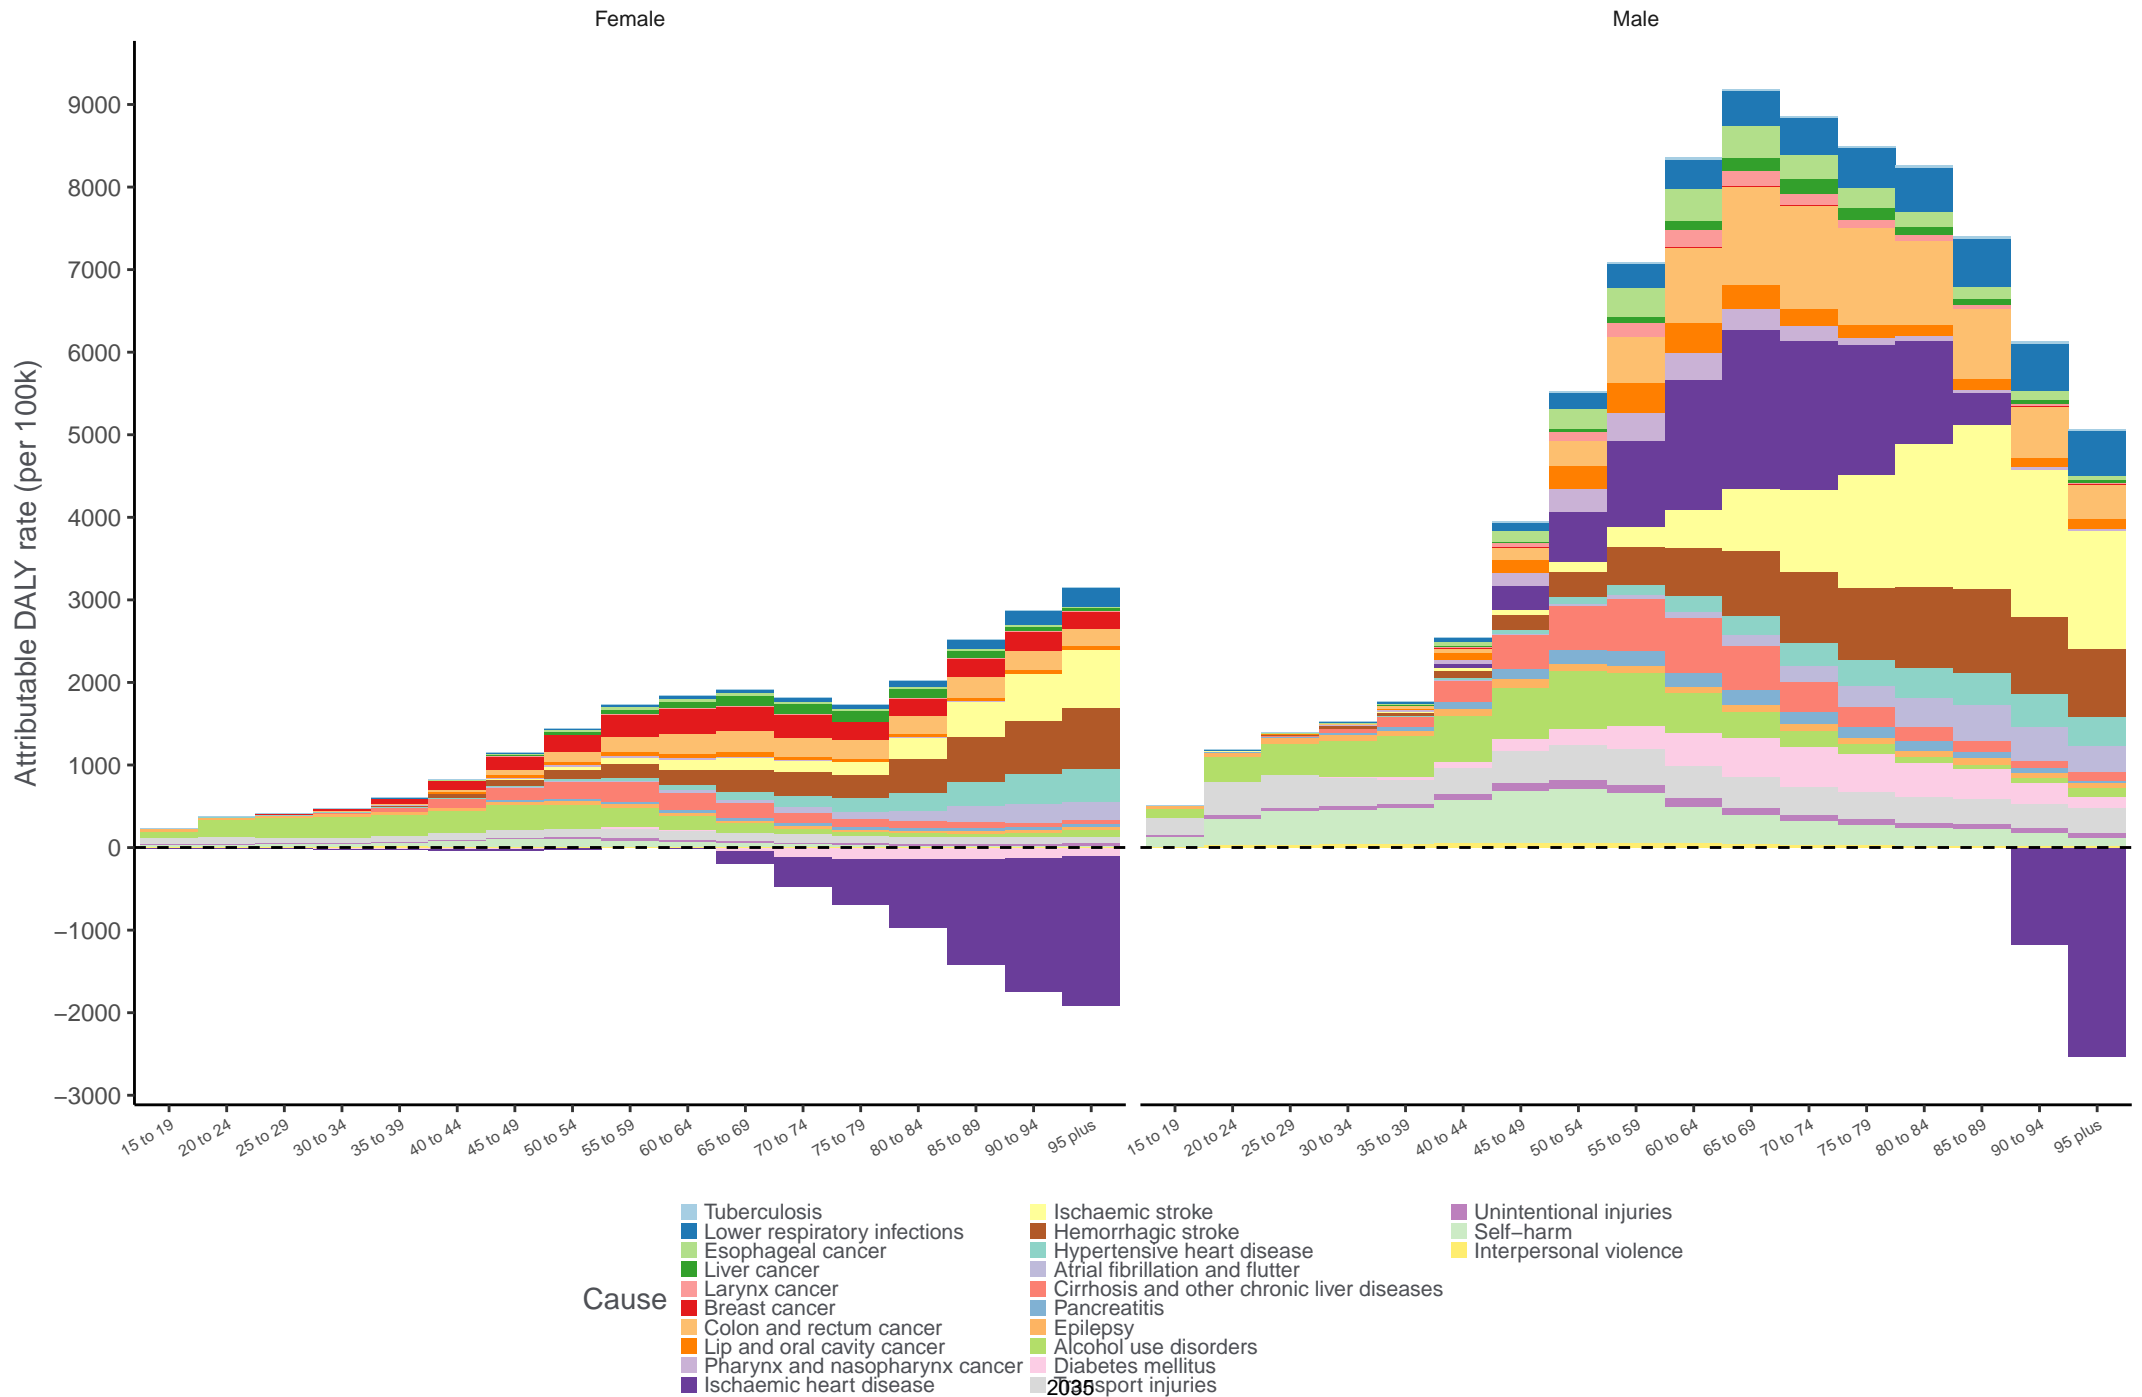

Attributable DALY rate disaggregated by cause, Hungary, by sex and age in 2016.

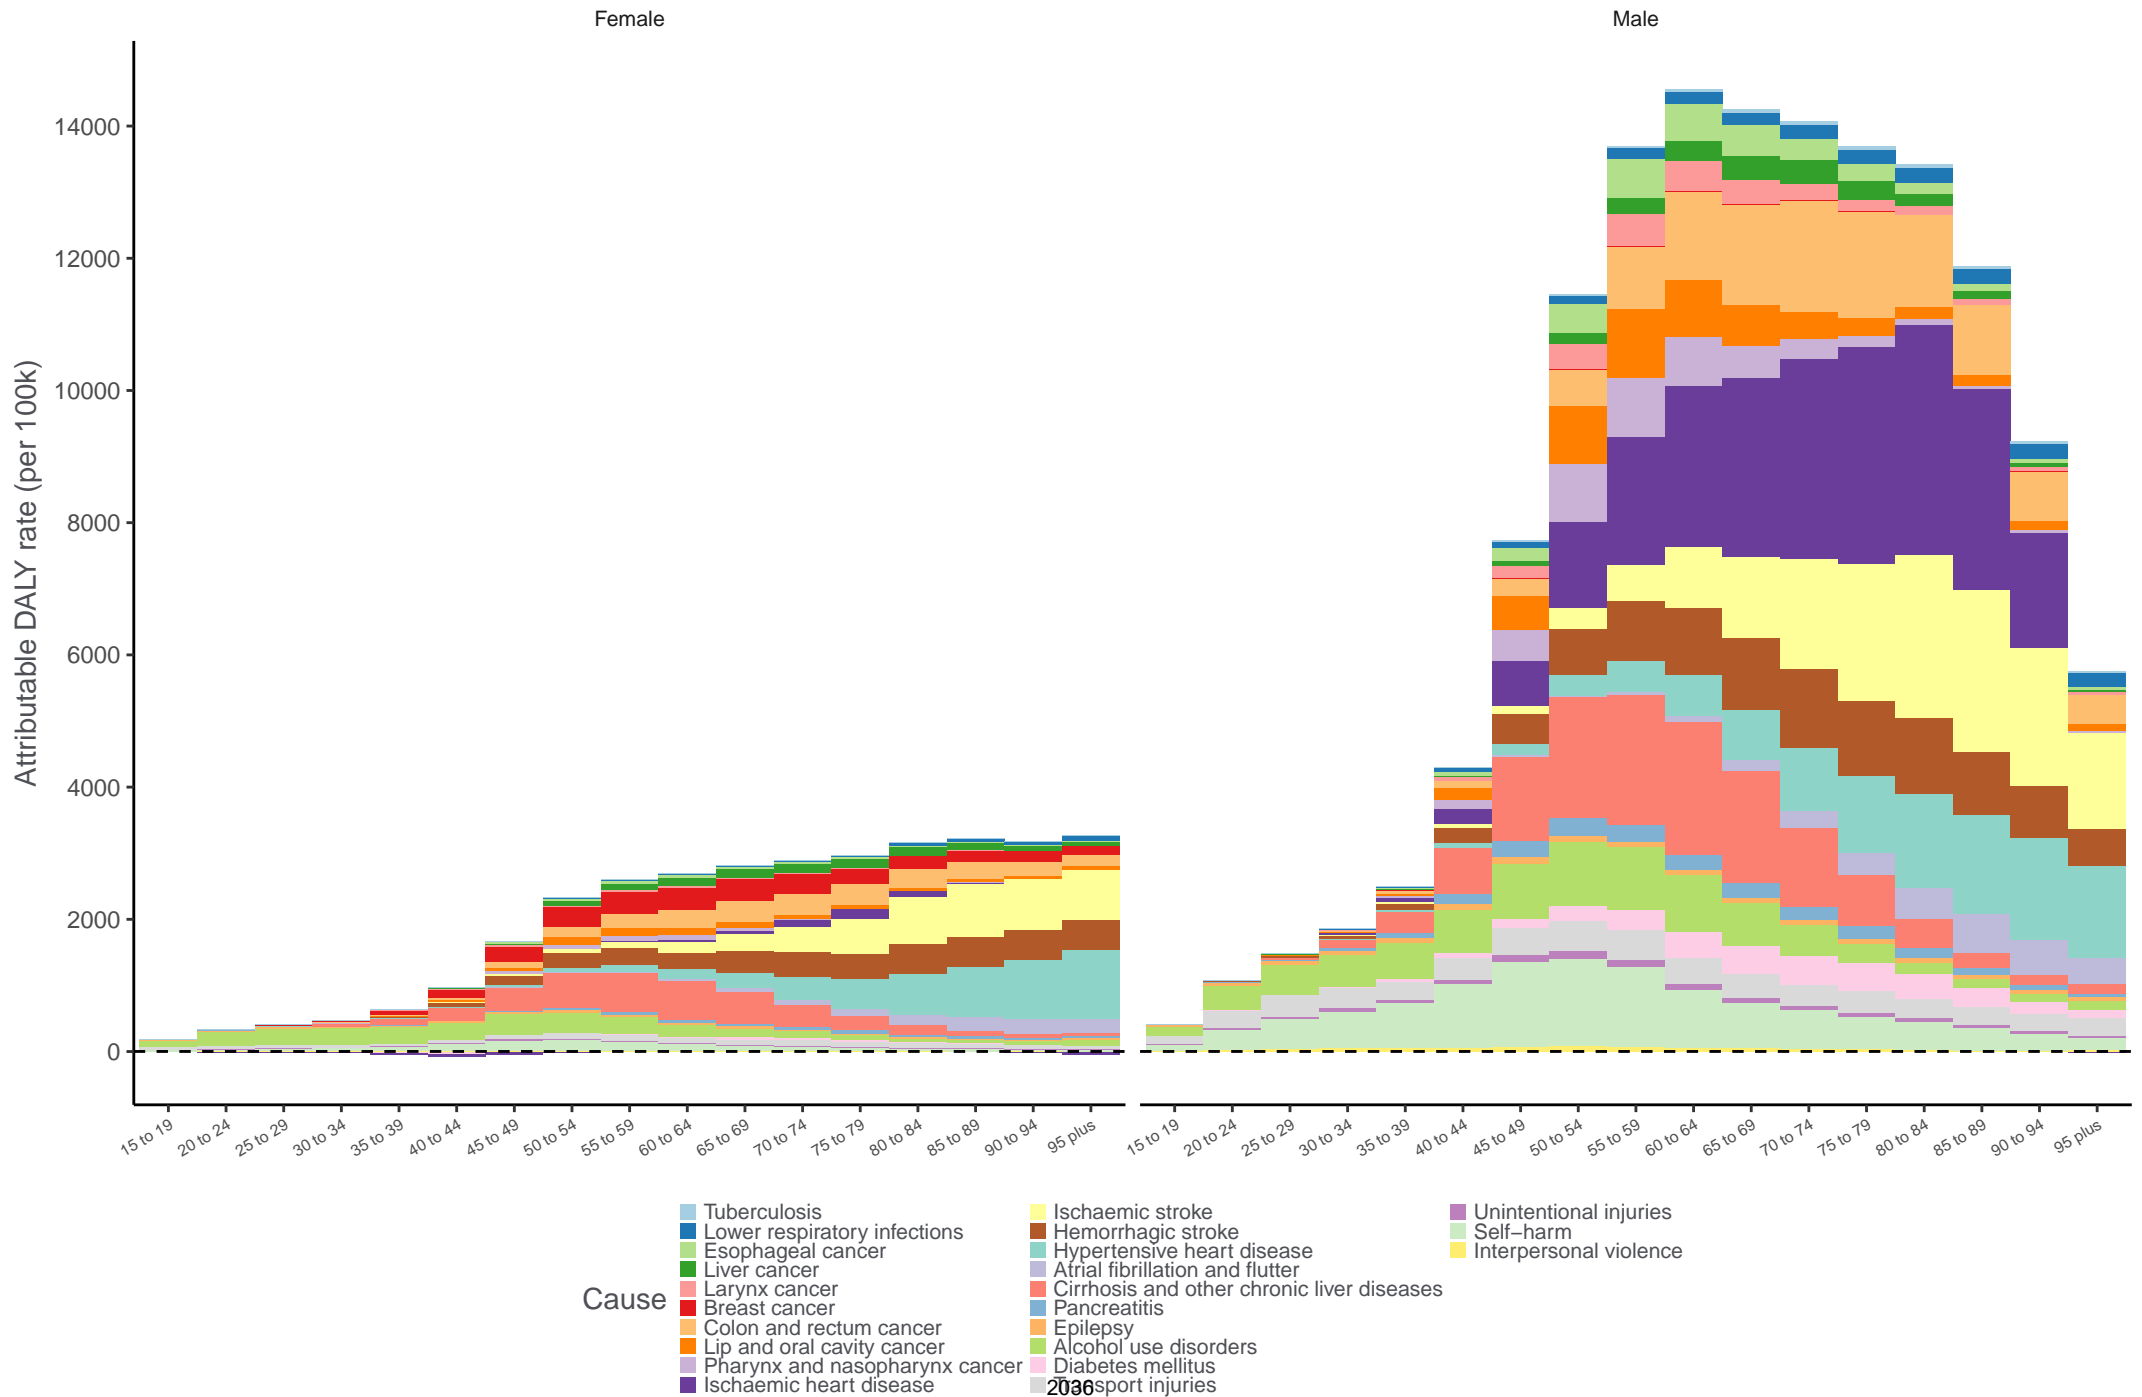

# Attributable DALY rate disaggregated by cause, Macedonia, by sex and age in 2016.

Female

Male

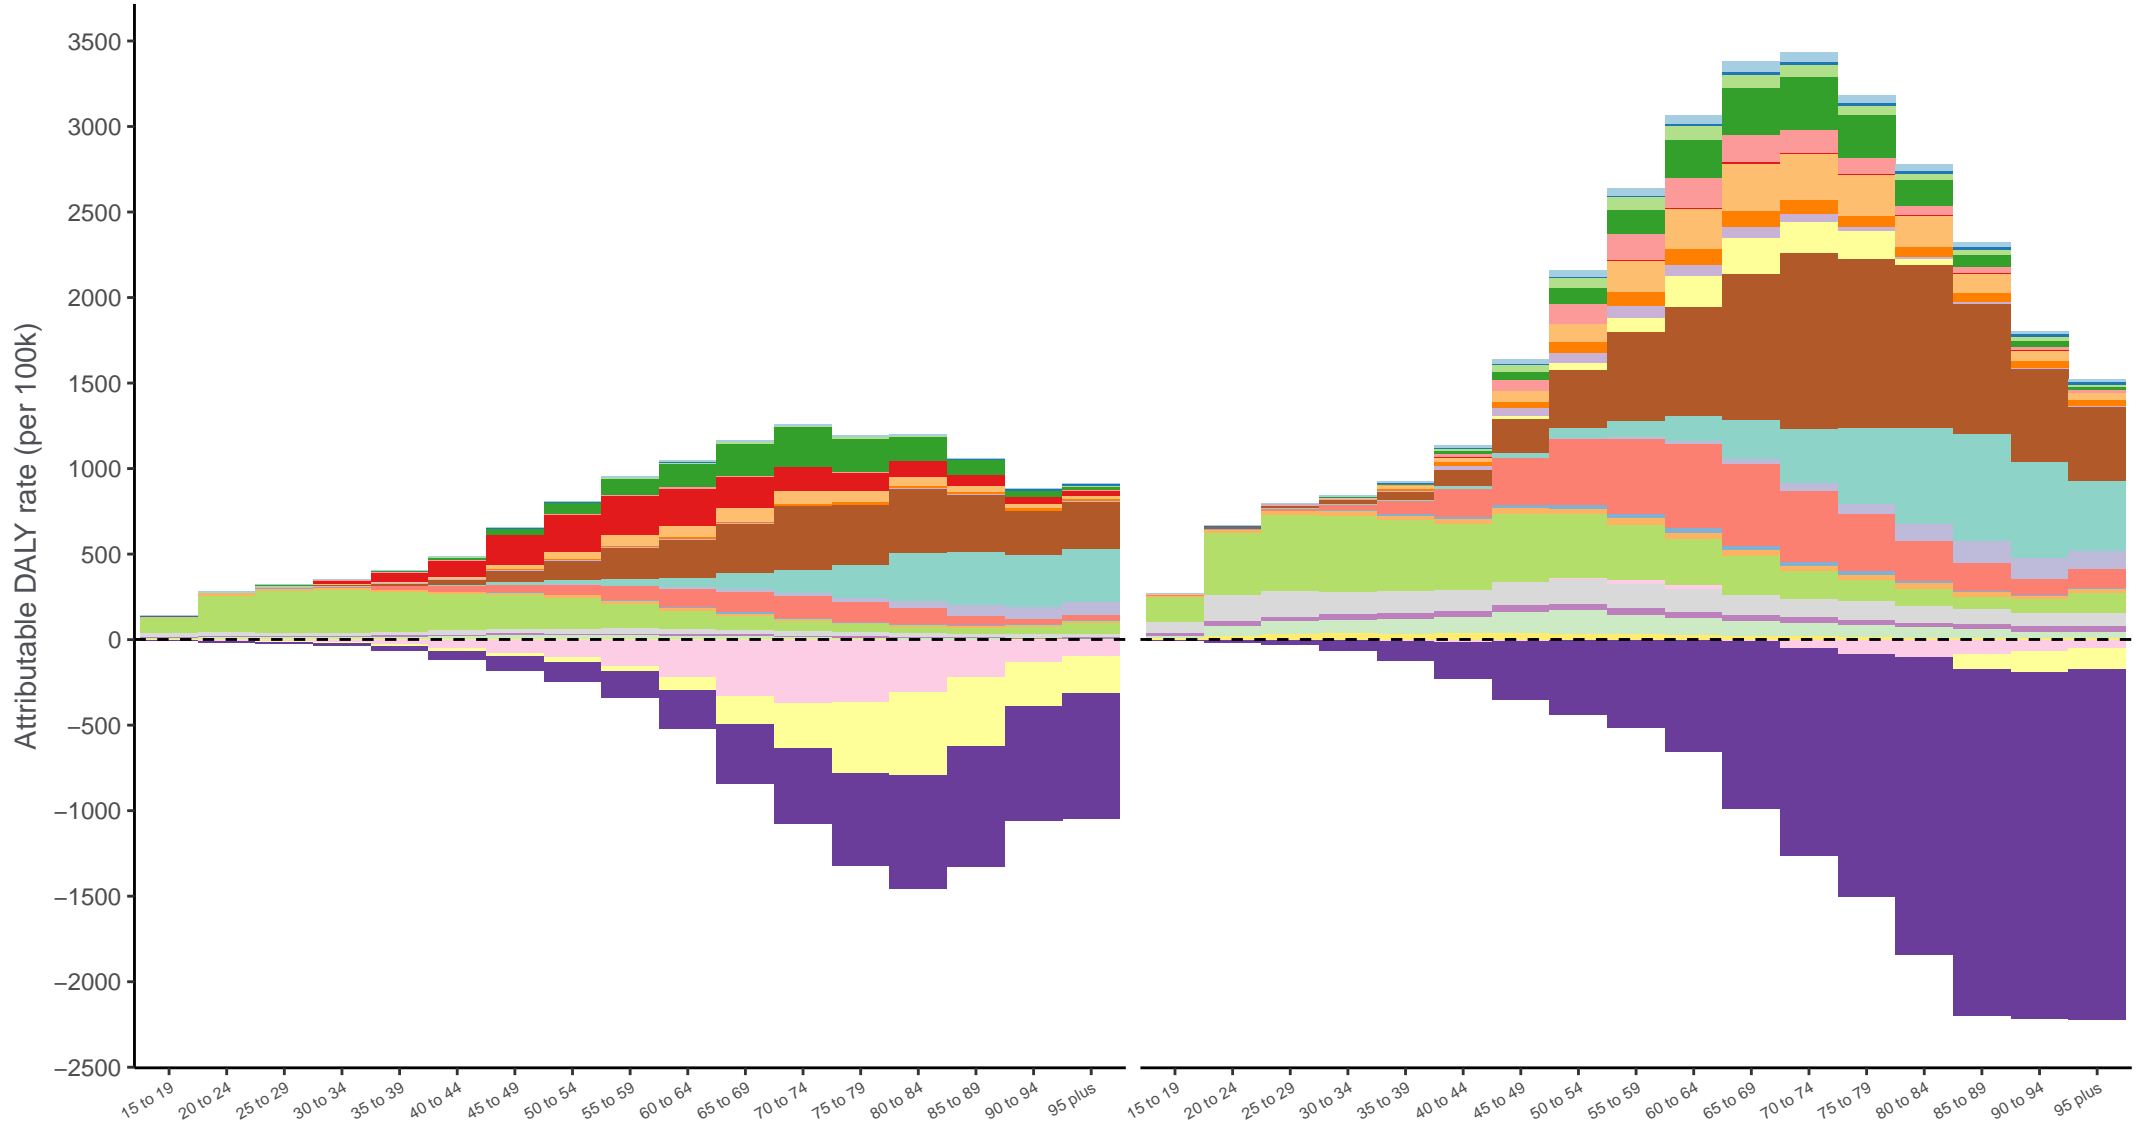

- Cause**
- Tuberculosis
  - Ischaemic stroke
  - Unintentional injuries
  - Lower respiratory infections
  - Hemorrhagic stroke
  - Self-harm
  - Esophageal cancer
  - Hypertensive heart disease
  - Interpersonal violence
  - Liver cancer
  - Atrial fibrillation and flutter
  - Larynx cancer
  - Cirrhosis and other chronic liver diseases
  - Breast cancer
  - Pancreatitis
  - Colon and rectum cancer
  - Epilepsy
  - Lip and oral cavity cancer
  - Alcohol use disorders
  - Pharynx and nasopharynx cancer
  - Diabetes mellitus
  - Ischaemic heart disease
  - Sport injuries

Attributable DALY rate disaggregated by cause, Montenegro, by sex and age in 2016.

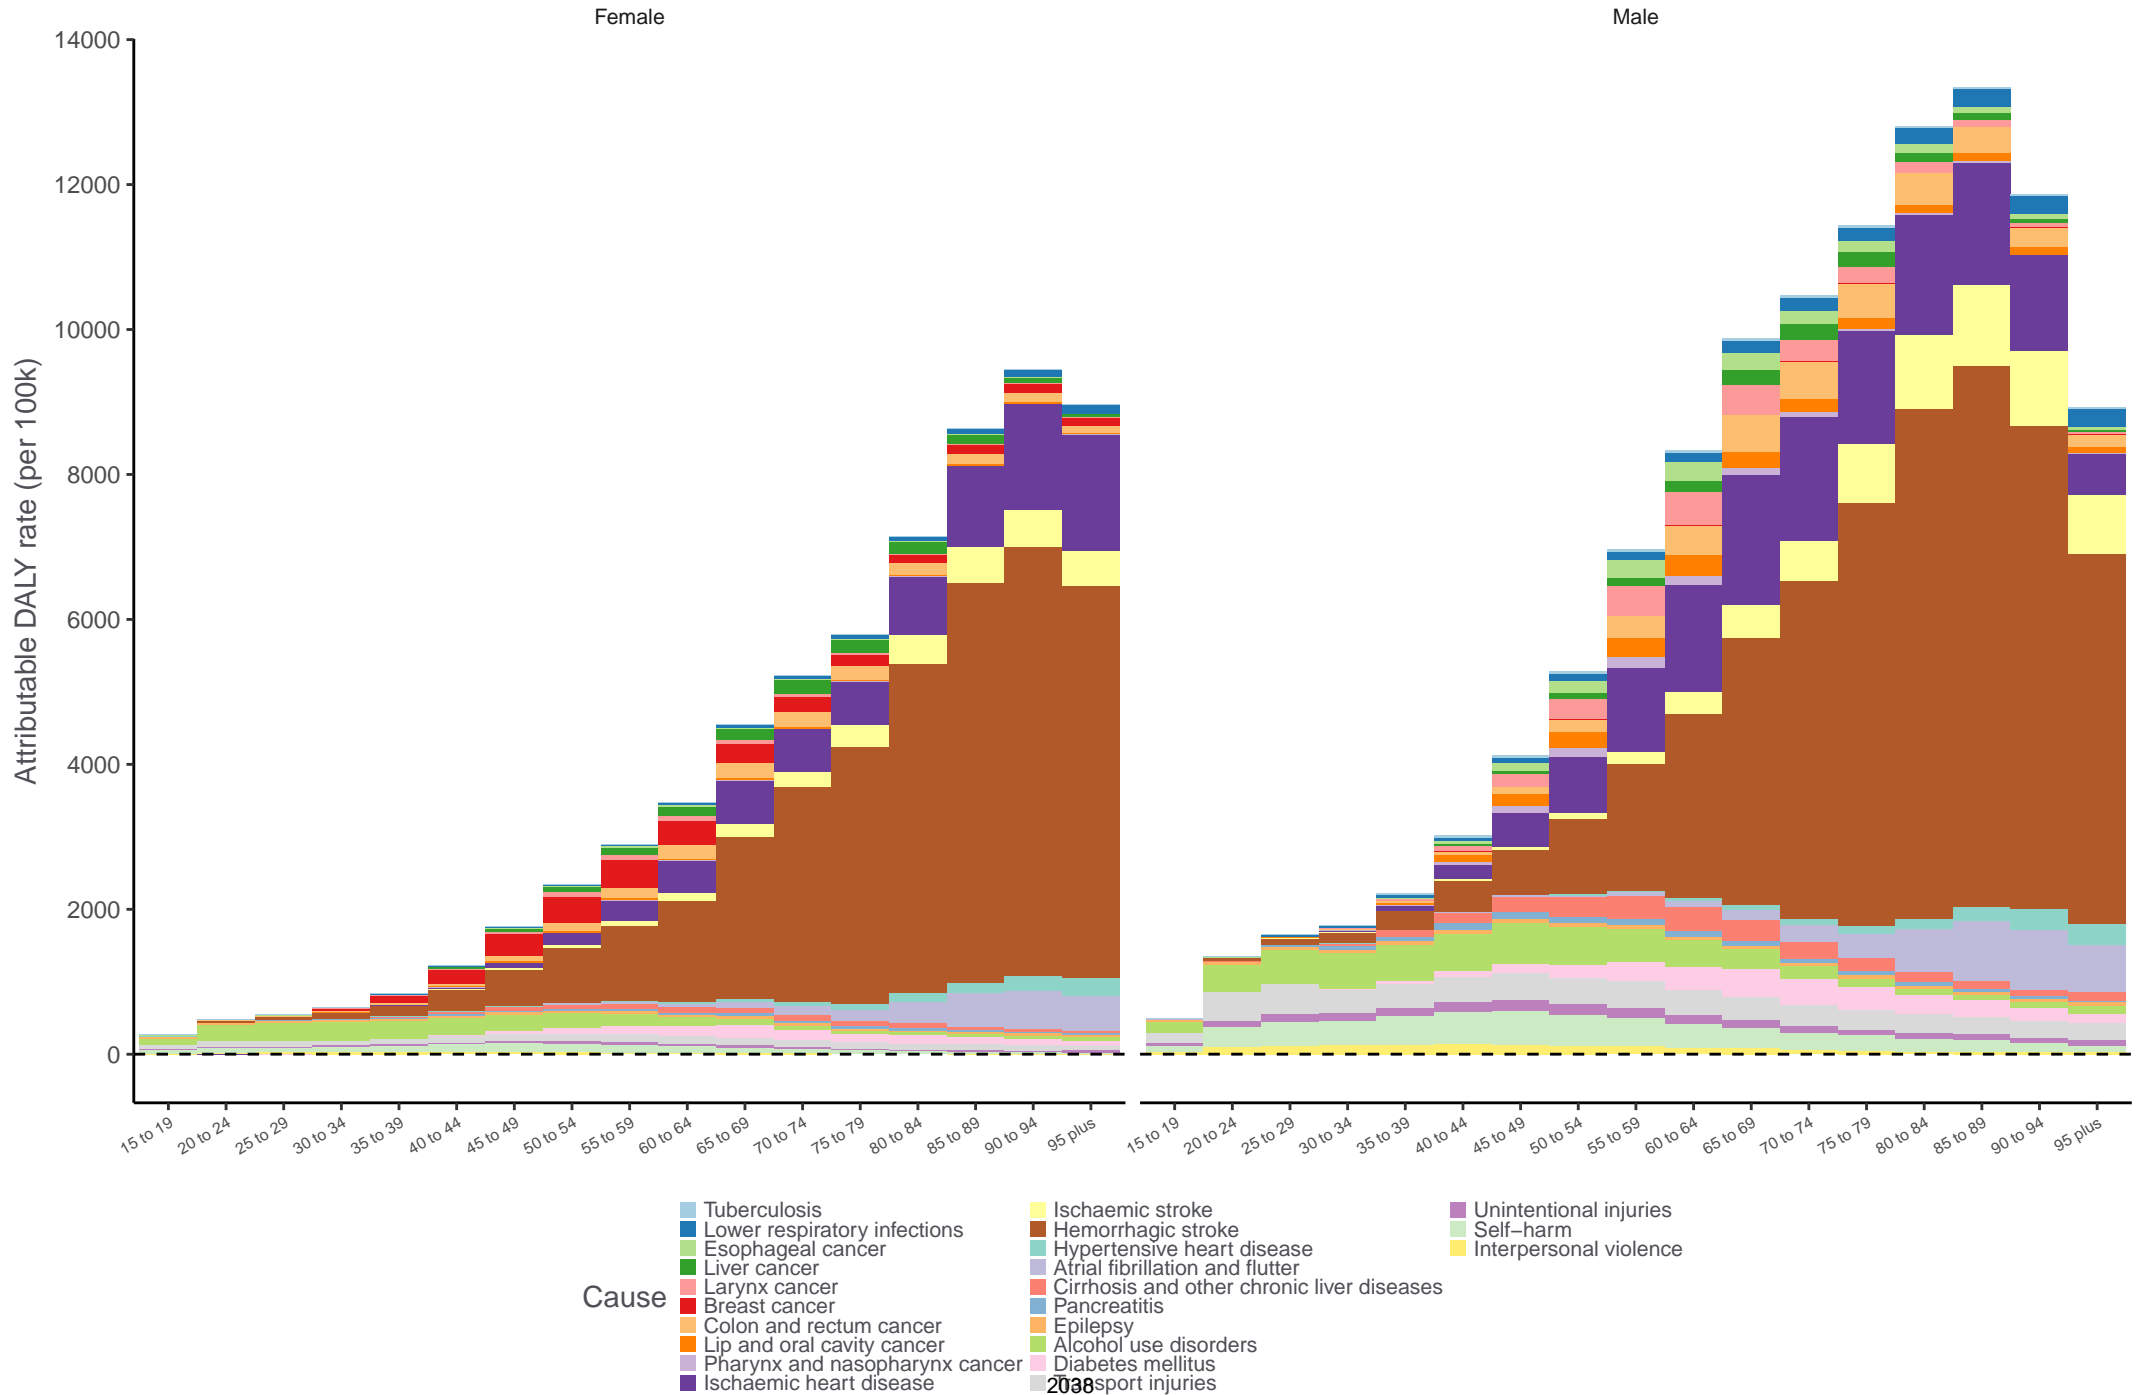

# Attributable DALY rate disaggregated by cause, Poland, by sex and age in 2016.

Female

Male

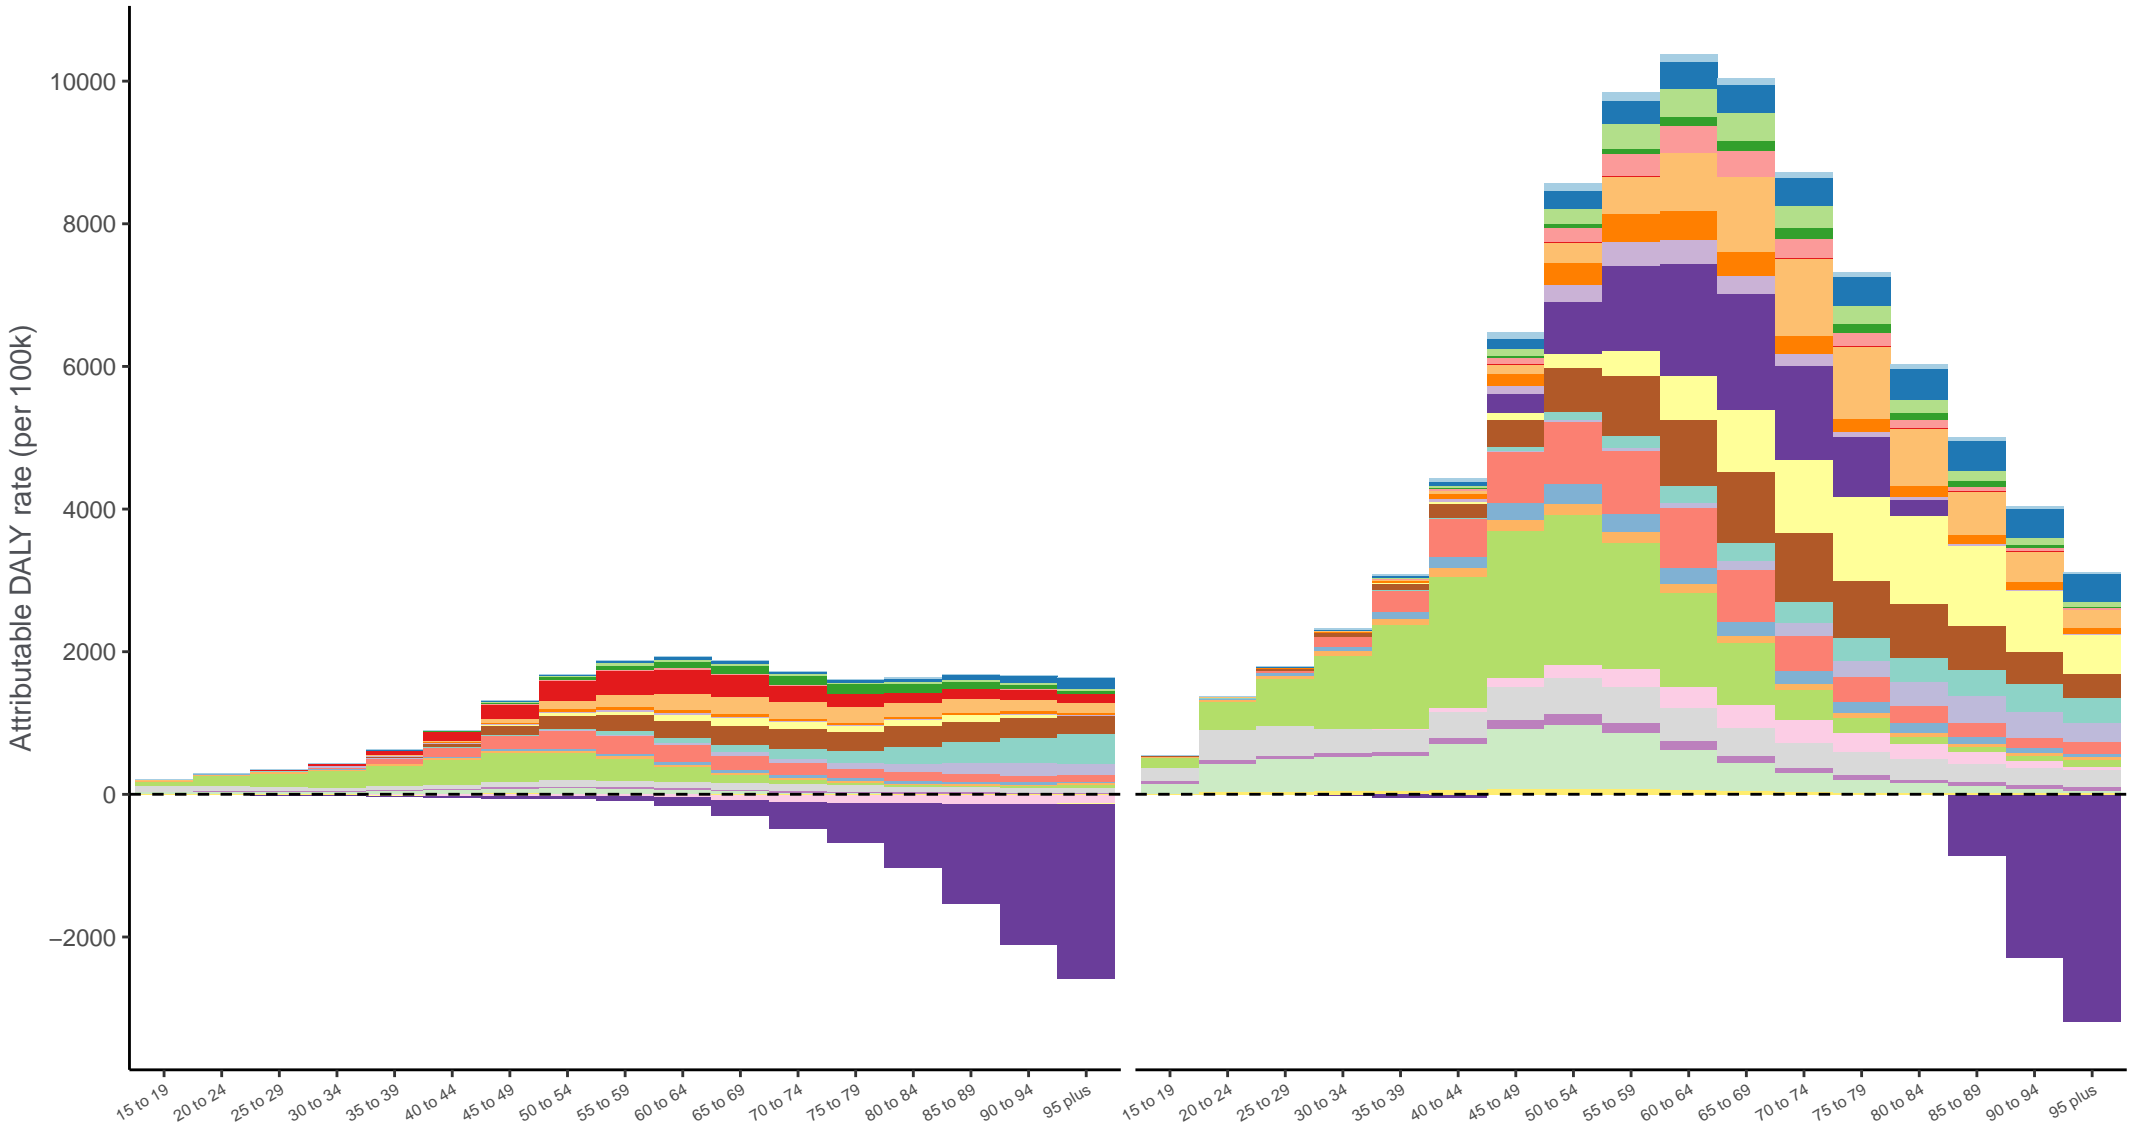

Cause

- |                                                                                                                                                                                                                                                                                                                                                                                                                                                                                                                                                                                                                                                                                                                                                         |                                                                                                                                                                                                                                                                                                                                                                                                                                                                                                                                                                                                                                                                                                                                                                         |                                                                                                                                                                                                                                          |
|---------------------------------------------------------------------------------------------------------------------------------------------------------------------------------------------------------------------------------------------------------------------------------------------------------------------------------------------------------------------------------------------------------------------------------------------------------------------------------------------------------------------------------------------------------------------------------------------------------------------------------------------------------------------------------------------------------------------------------------------------------|-------------------------------------------------------------------------------------------------------------------------------------------------------------------------------------------------------------------------------------------------------------------------------------------------------------------------------------------------------------------------------------------------------------------------------------------------------------------------------------------------------------------------------------------------------------------------------------------------------------------------------------------------------------------------------------------------------------------------------------------------------------------------|------------------------------------------------------------------------------------------------------------------------------------------------------------------------------------------------------------------------------------------|
| <ul style="list-style-type: none"> <li><span style="color: #ADD8E6;">■</span> Tuberculosis</li> <li><span style="color: #0070C0;">■</span> Lower respiratory infections</li> <li><span style="color: #90EE90;">■</span> Esophageal cancer</li> <li><span style="color: #008000;">■</span> Liver cancer</li> <li><span style="color: #F08080;">■</span> Larynx cancer</li> <li><span style="color: #DC143C;">■</span> Breast cancer</li> <li><span style="color: #FFD700;">■</span> Colon and rectum cancer</li> <li><span style="color: #FF8C00;">■</span> Lip and oral cavity cancer</li> <li><span style="color: #9370DB;">■</span> Pharynx and nasopharynx cancer</li> <li><span style="color: #483D8B;">■</span> Ischaemic heart disease</li> </ul> | <ul style="list-style-type: none"> <li><span style="color: #FFD700;">■</span> Ischaemic stroke</li> <li><span style="color: #8B4513;">■</span> Hemorrhagic stroke</li> <li><span style="color: #4682B4;">■</span> Hypertensive heart disease</li> <li><span style="color: #6A5ACD;">■</span> Atrial fibrillation and flutter</li> <li><span style="color: #4682B4;">■</span> Cirrhosis and other chronic liver diseases</li> <li><span style="color: #4682B4;">■</span> Pancreatitis</li> <li><span style="color: #FF8C00;">■</span> Epilepsy</li> <li><span style="color: #90EE90;">■</span> Alcohol use disorders</li> <li><span style="color: #FFB6C1;">■</span> Diabetes mellitus</li> <li><span style="color: #A9A9A9;">■</span> Unintentional injuries</li> </ul> | <ul style="list-style-type: none"> <li><span style="color: #90EE90;">■</span> Self-harm</li> <li><span style="color: #FFD700;">■</span> Interpersonal violence</li> <li><span style="color: #808080;">■</span> Sport injuries</li> </ul> |
|---------------------------------------------------------------------------------------------------------------------------------------------------------------------------------------------------------------------------------------------------------------------------------------------------------------------------------------------------------------------------------------------------------------------------------------------------------------------------------------------------------------------------------------------------------------------------------------------------------------------------------------------------------------------------------------------------------------------------------------------------------|-------------------------------------------------------------------------------------------------------------------------------------------------------------------------------------------------------------------------------------------------------------------------------------------------------------------------------------------------------------------------------------------------------------------------------------------------------------------------------------------------------------------------------------------------------------------------------------------------------------------------------------------------------------------------------------------------------------------------------------------------------------------------|------------------------------------------------------------------------------------------------------------------------------------------------------------------------------------------------------------------------------------------|



# Attributable DALY rate disaggregated by cause, Romania, by sex and age in 2016.

Female

Male

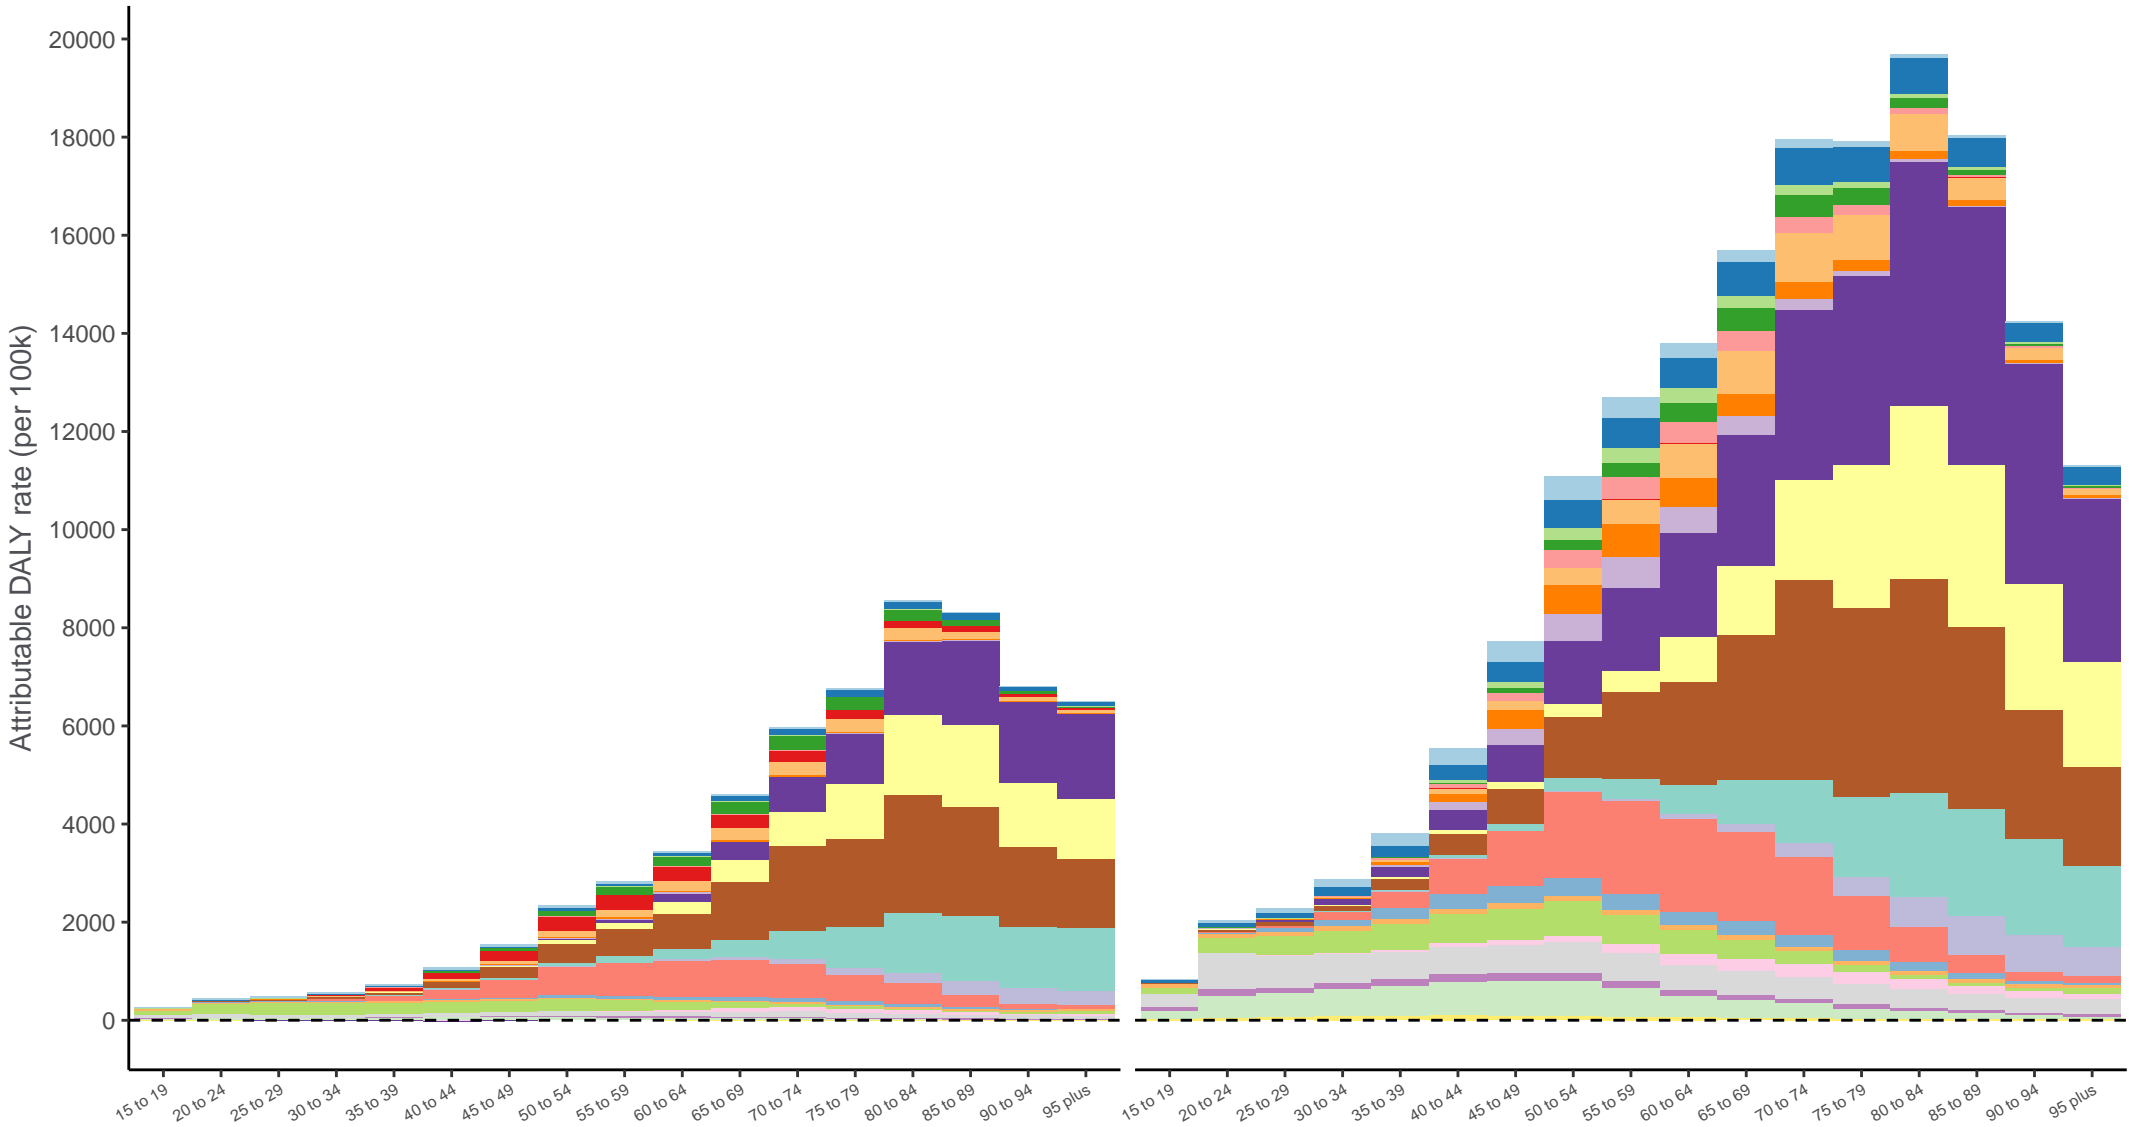

- Cause**
- Tuberculosis
  - Lower respiratory infections
  - Esophageal cancer
  - Liver cancer
  - Larynx cancer
  - Breast cancer
  - Colon and rectum cancer
  - Lip and oral cavity cancer
  - Pharynx and nasopharynx cancer
  - Ischaemic heart disease
  - Ischaemic stroke
  - Hemorrhagic stroke
  - Hypertensive heart disease
  - Atrial fibrillation and flutter
  - Cirrhosis and other chronic liver diseases
  - Pancreatitis
  - Epilepsy
  - Alcohol use disorders
  - Diabetes mellitus
  - 2040 sport injuries
  - Unintentional injuries
  - Self-harm
  - Interpersonal violence

Attributable DALY rate disaggregated by cause, Serbia, by sex and age in 2016.

Female

Male

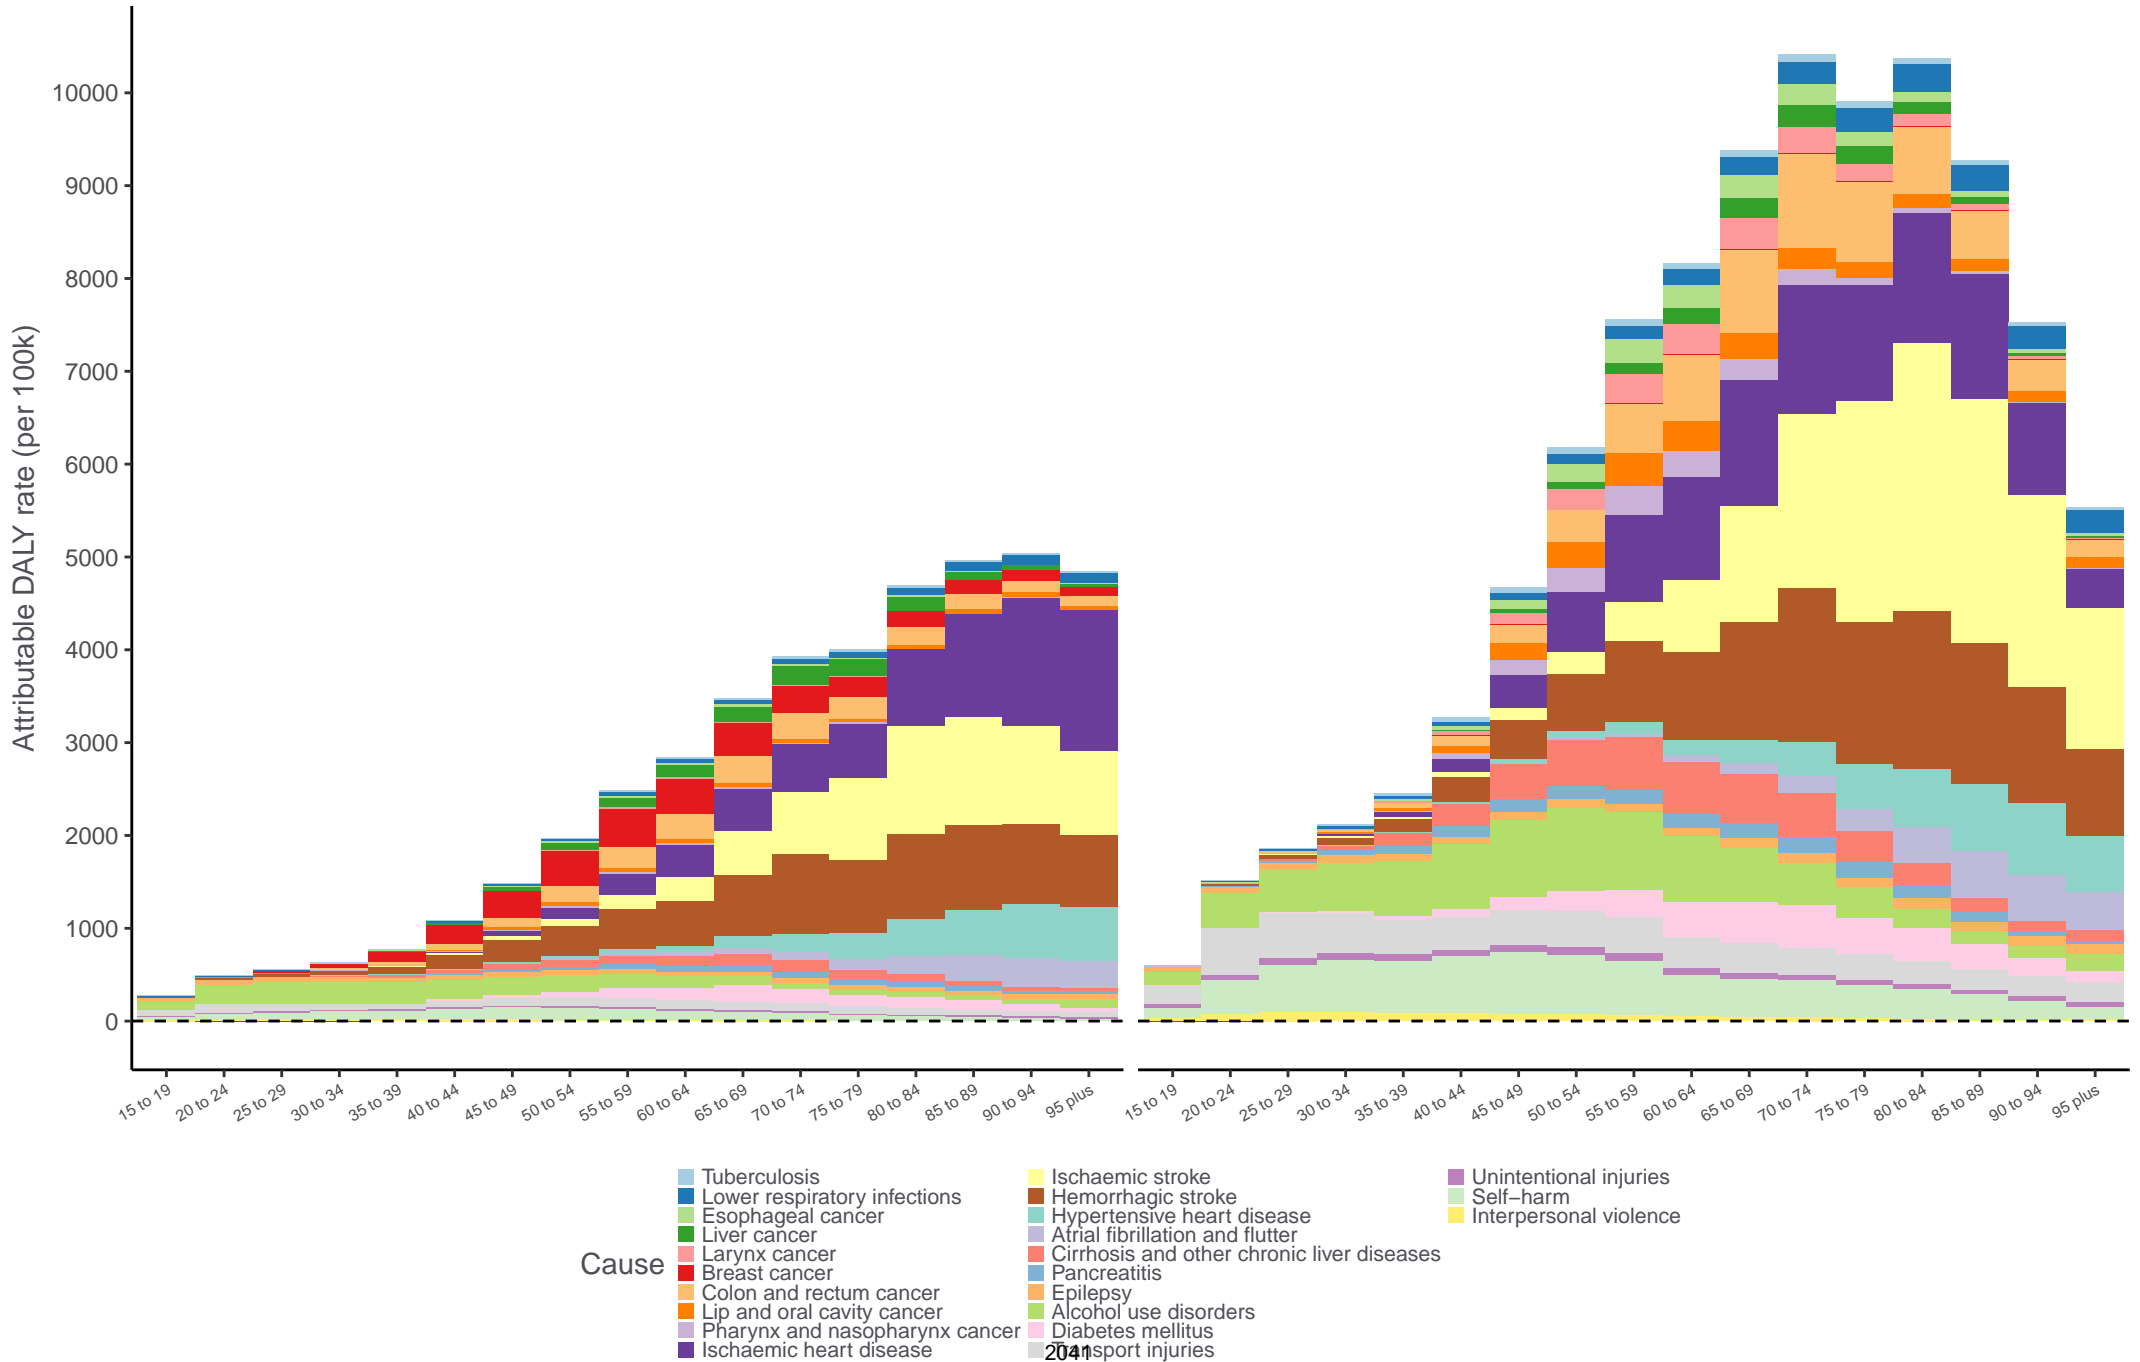

Attributable DALY rate disaggregated by cause, Slovakia, by sex and age in 2016.

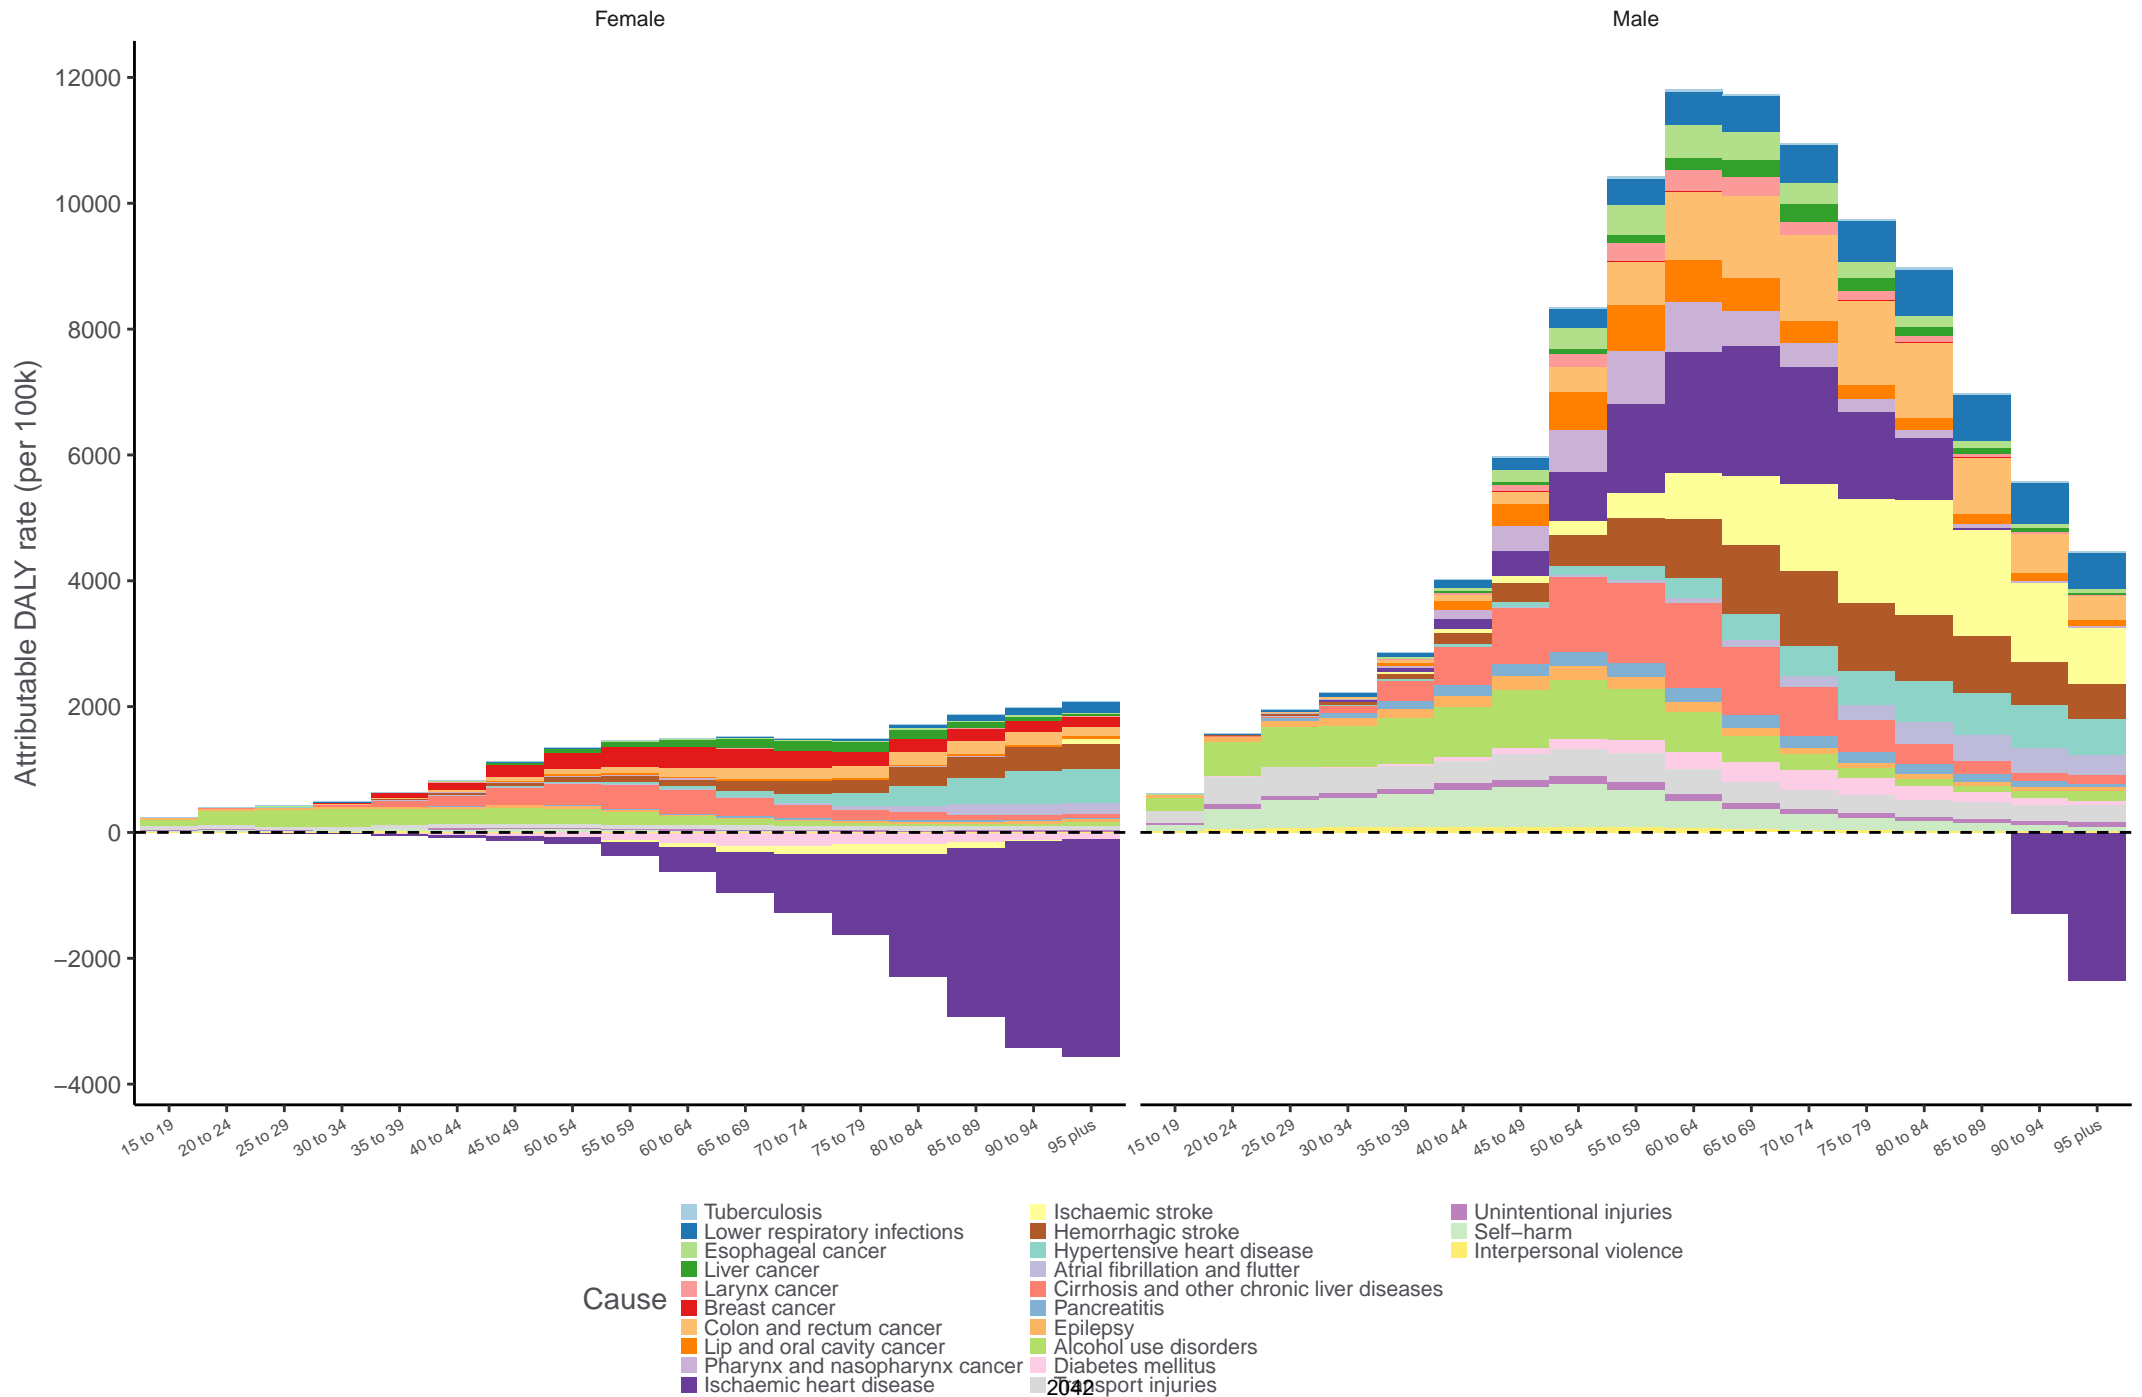

Attributable DALY rate disaggregated by cause, Slovenia, by sex and age in 2016.

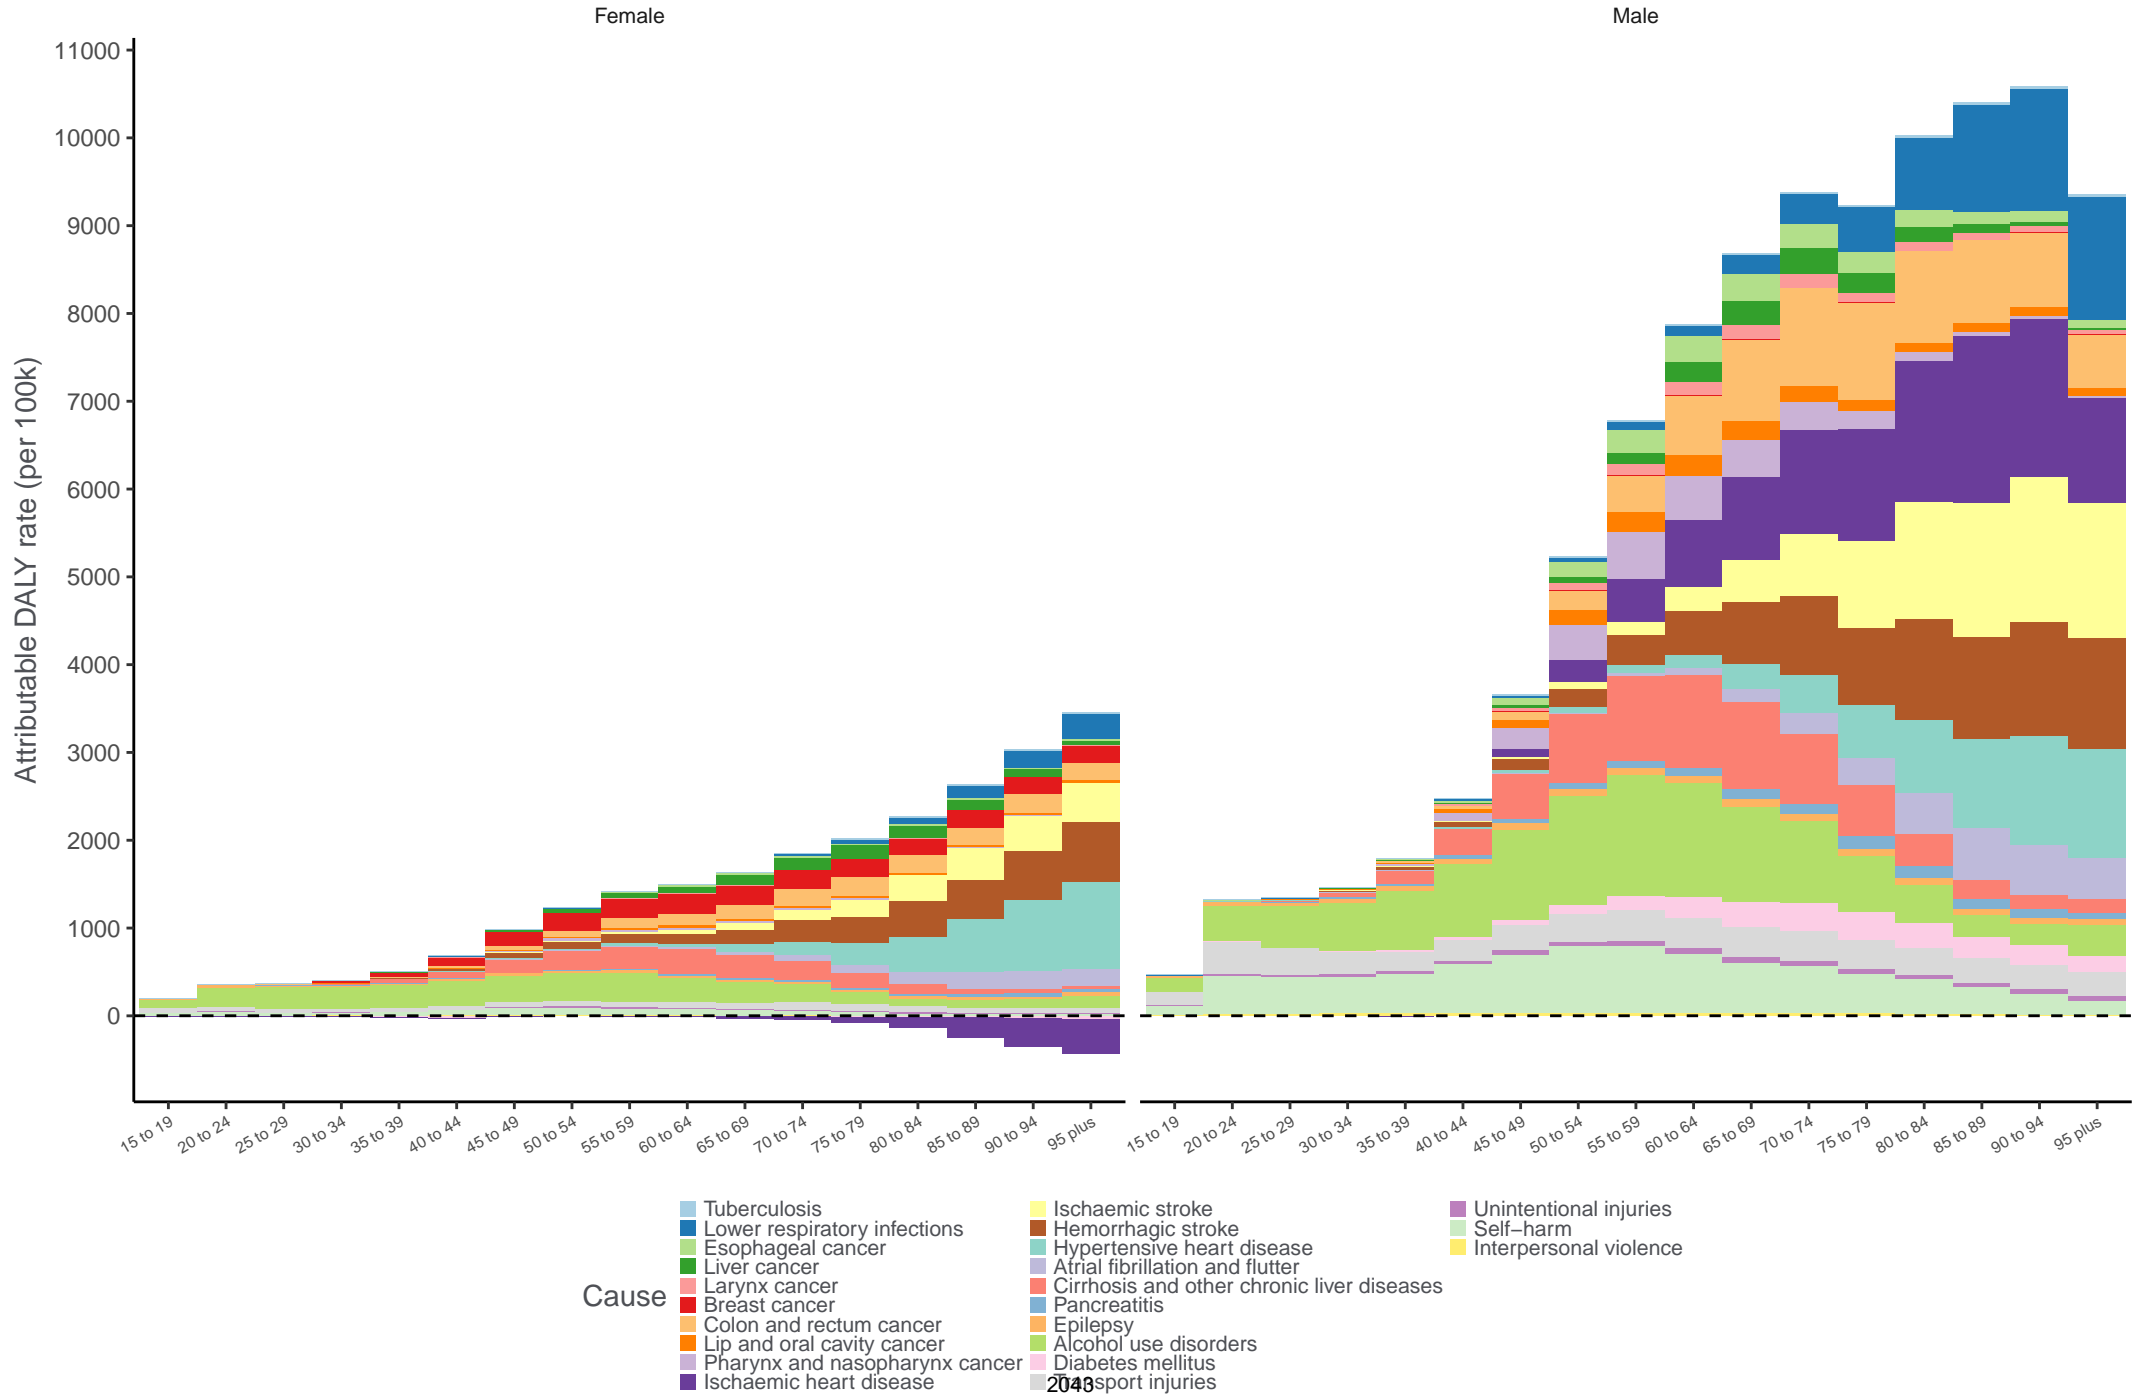

Attributable DALY rate disaggregated by cause, Belarus, by sex and age in 2016.

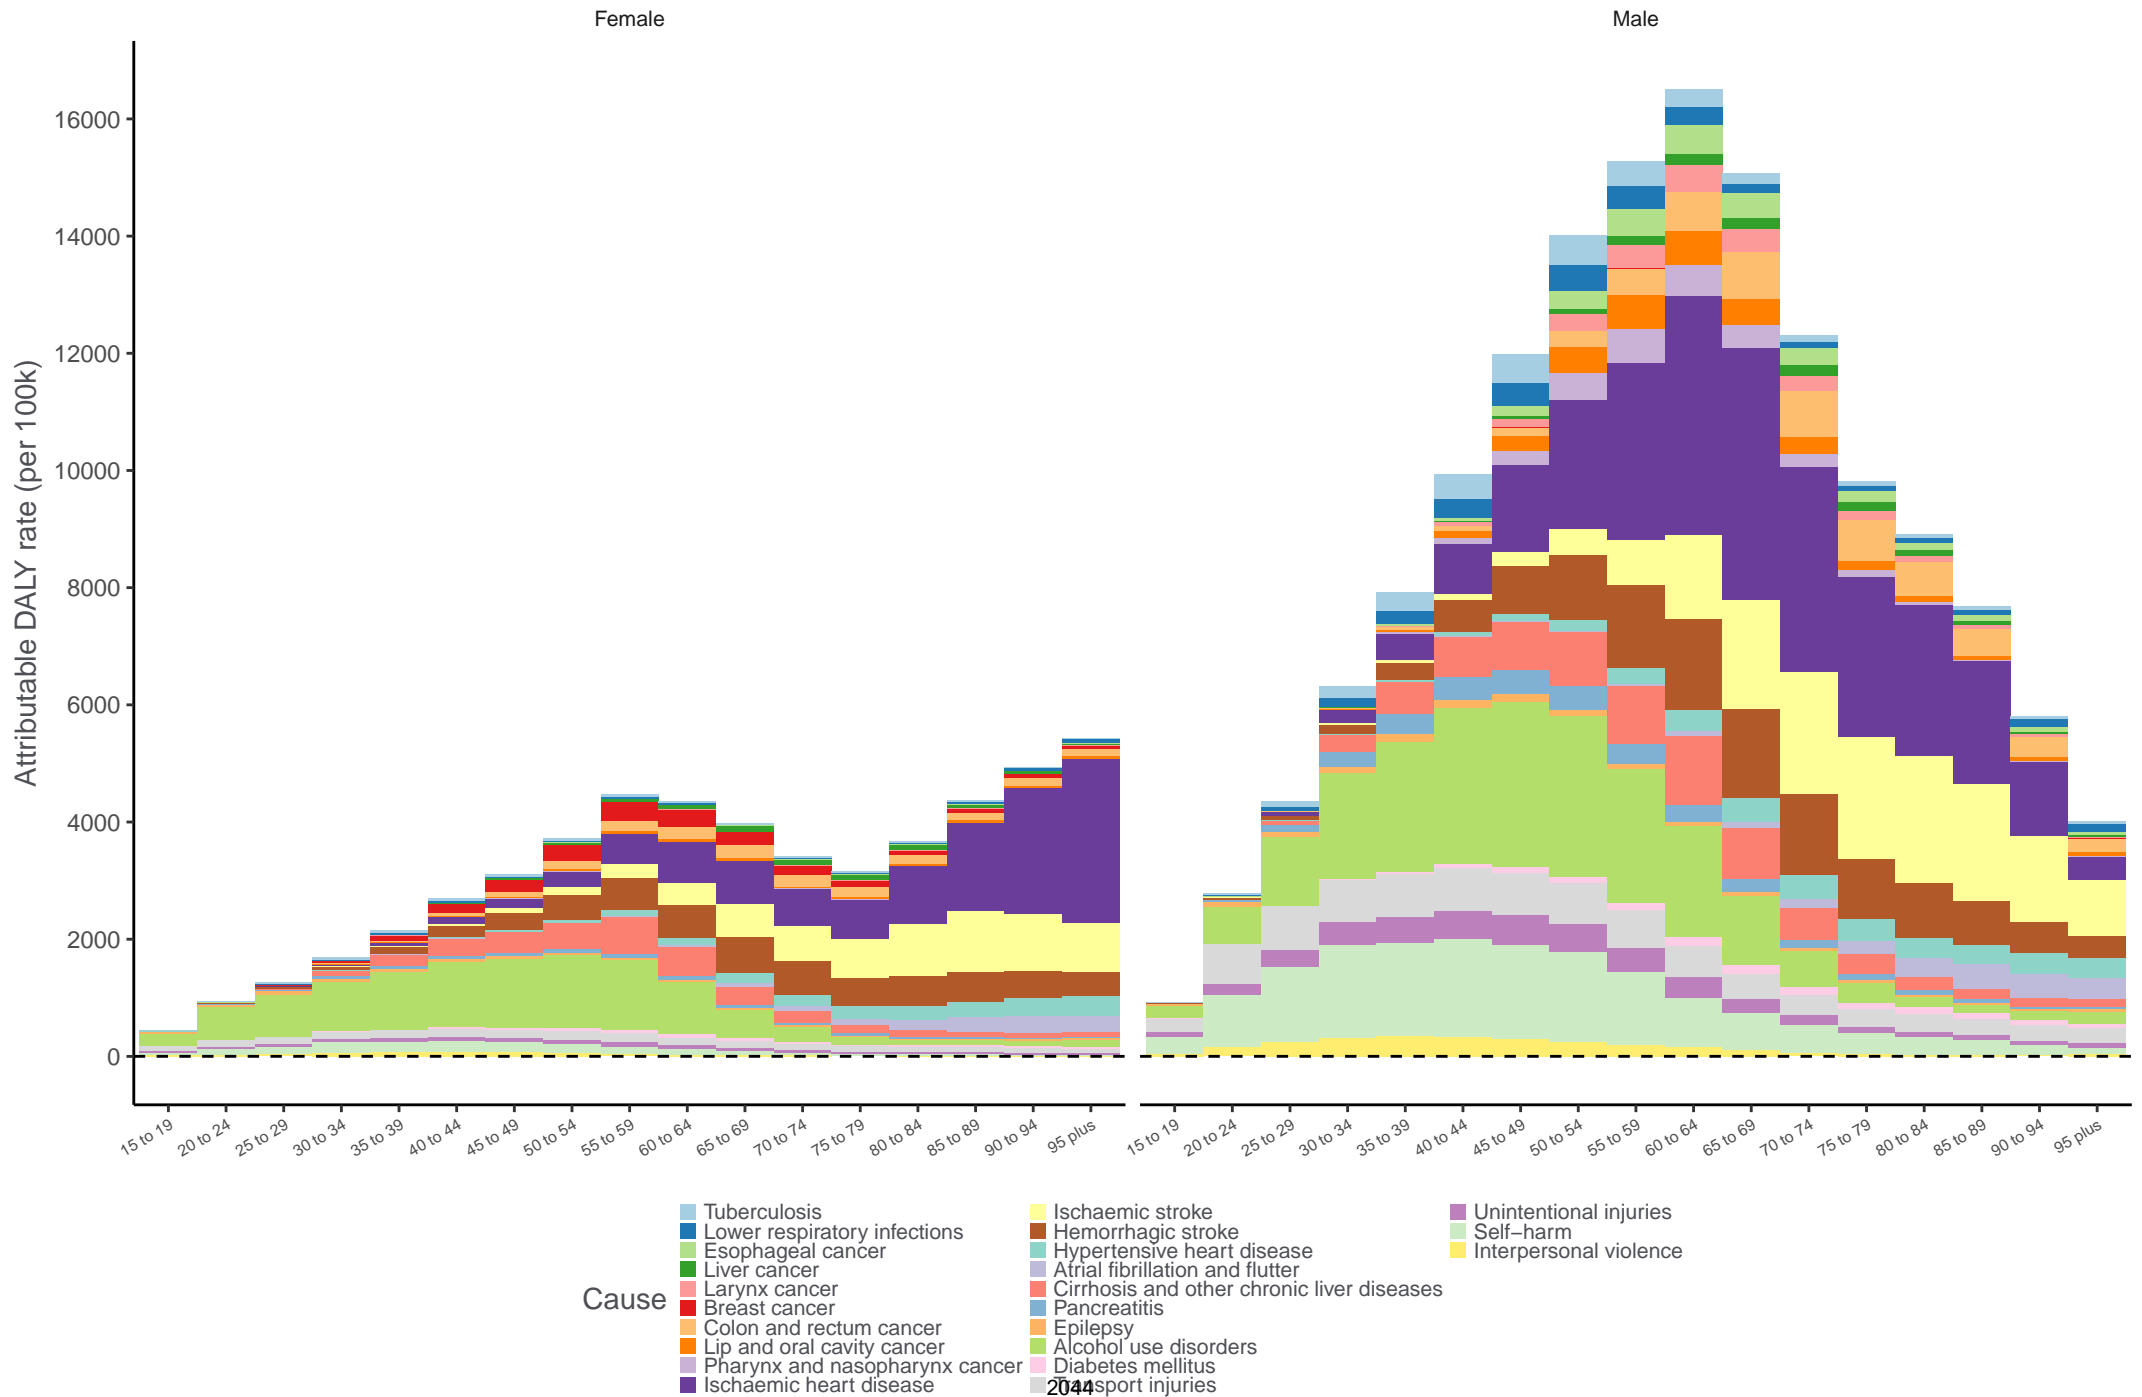

Attributable DALY rate disaggregated by cause, Estonia, by sex and age in 2016.

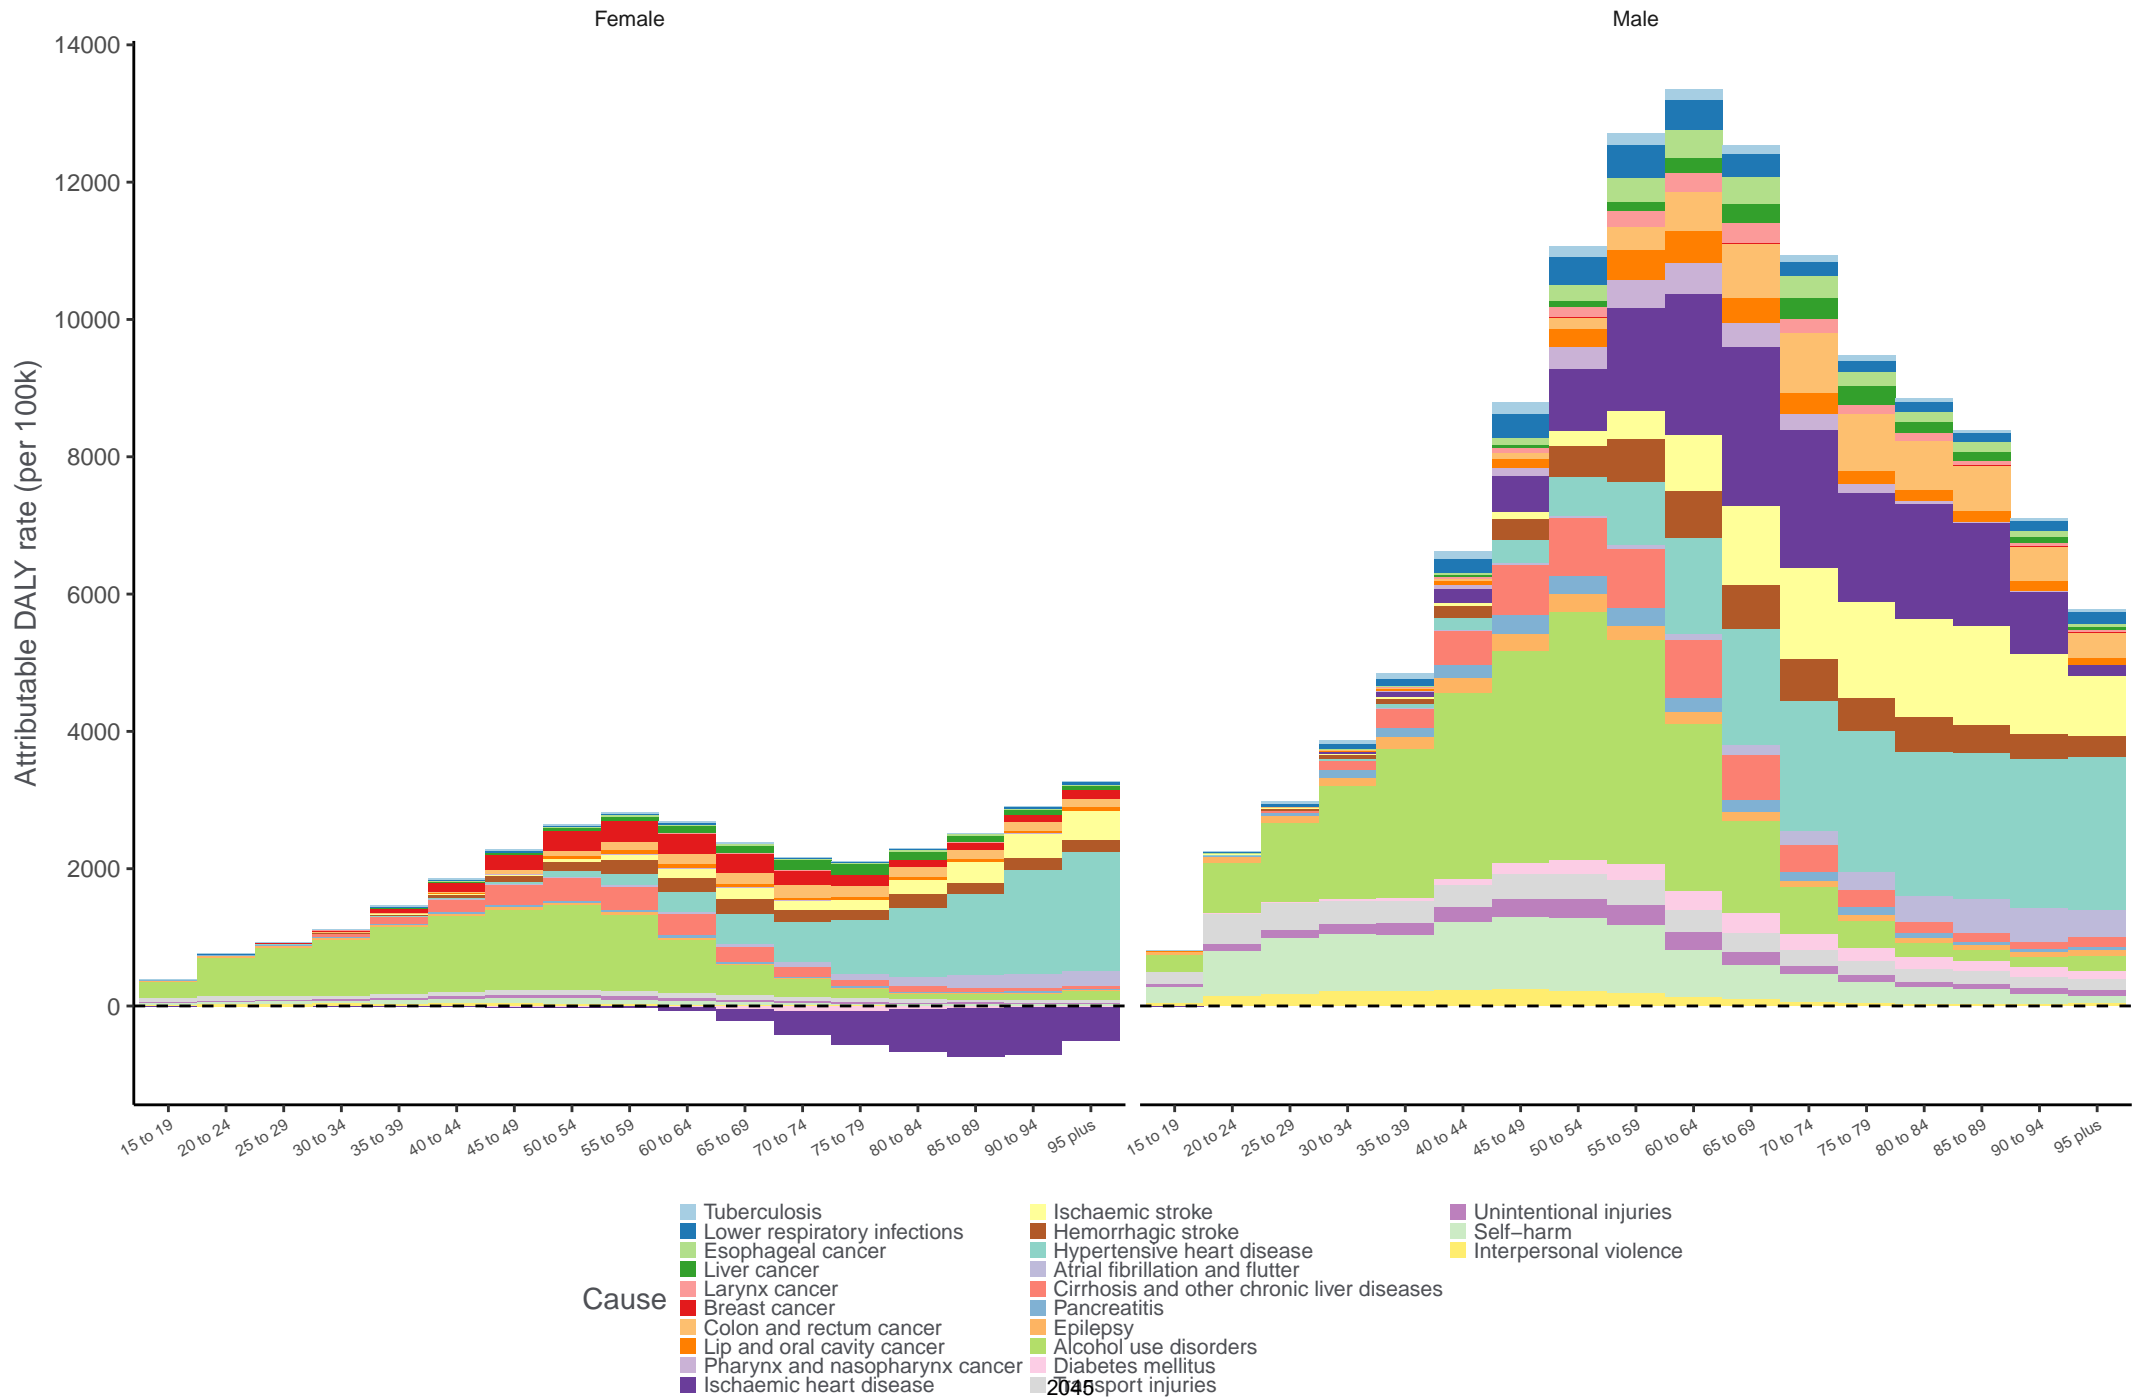

Attributable DALY rate disaggregated by cause, Latvia, by sex and age in 2016.

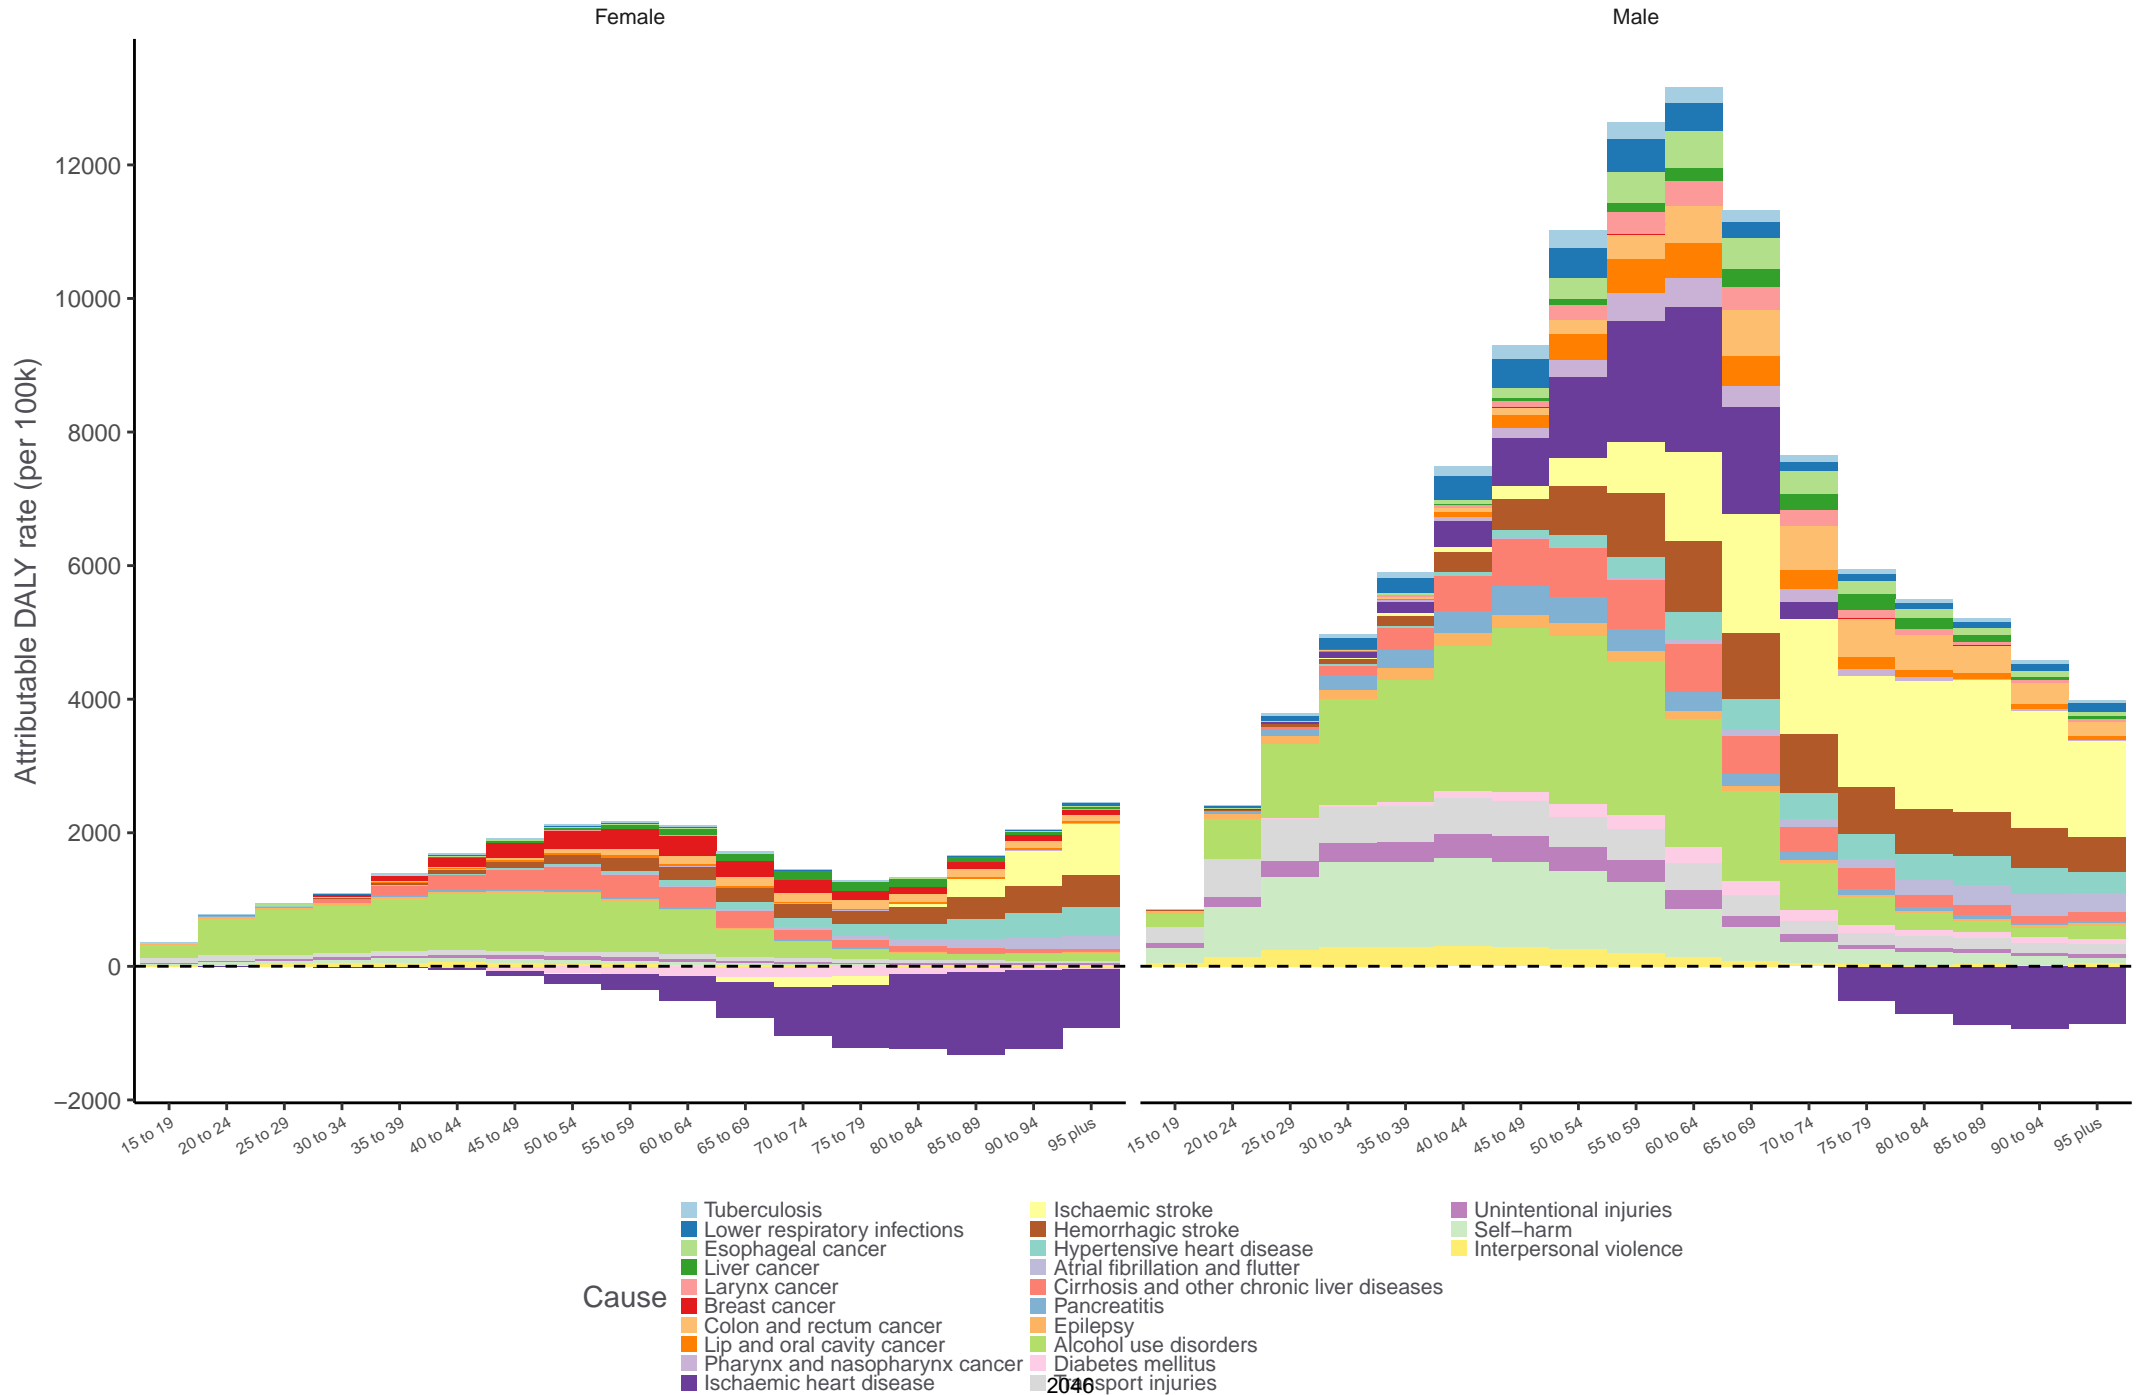

# Attributable DALY rate disaggregated by cause, Lithuania, by sex and age in 2016.

Female

Male

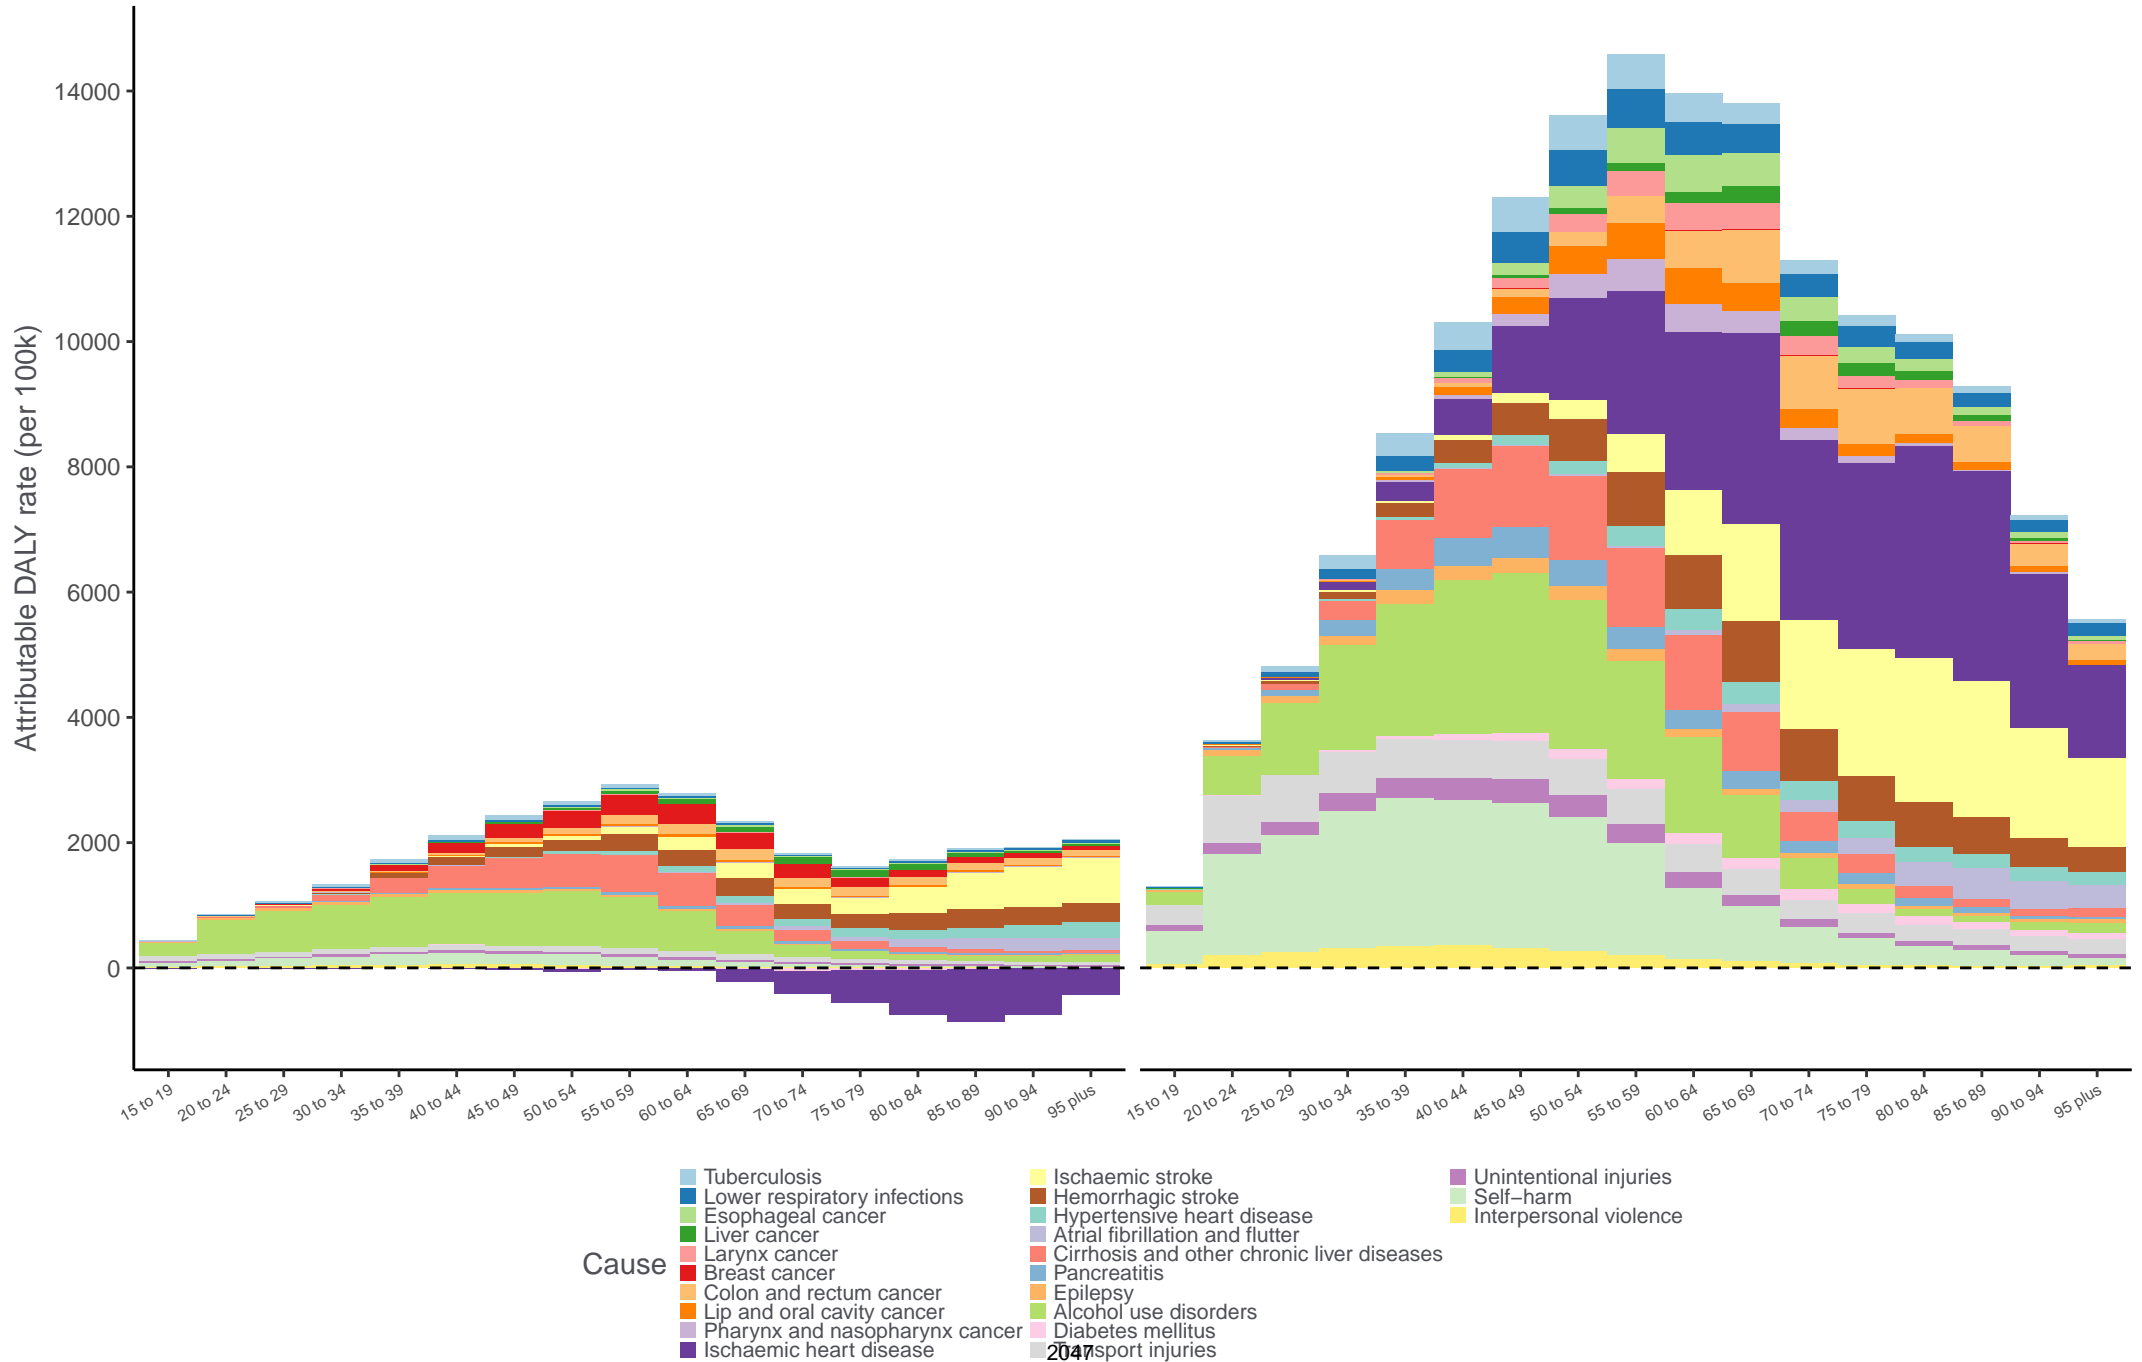

Cause

- Tuberculosis
- Ischaemic stroke
- Unintentional injuries
- Lower respiratory infections
- Hemorrhagic stroke
- Self-harm
- Esophageal cancer
- Hypertensive heart disease
- Interpersonal violence
- Liver cancer
- Atrial fibrillation and flutter
- Larynx cancer
- Cirrhosis and other chronic liver diseases
- Breast cancer
- Pancreatitis
- Colon and rectum cancer
- Epilepsy
- Lip and oral cavity cancer
- Alcohol use disorders
- Pharynx and nasopharynx cancer
- Diabetes mellitus
- Ischaemic heart disease
- Sport injuries



Attributable DALY rate disaggregated by cause, Moldova, by sex and age in 2016.

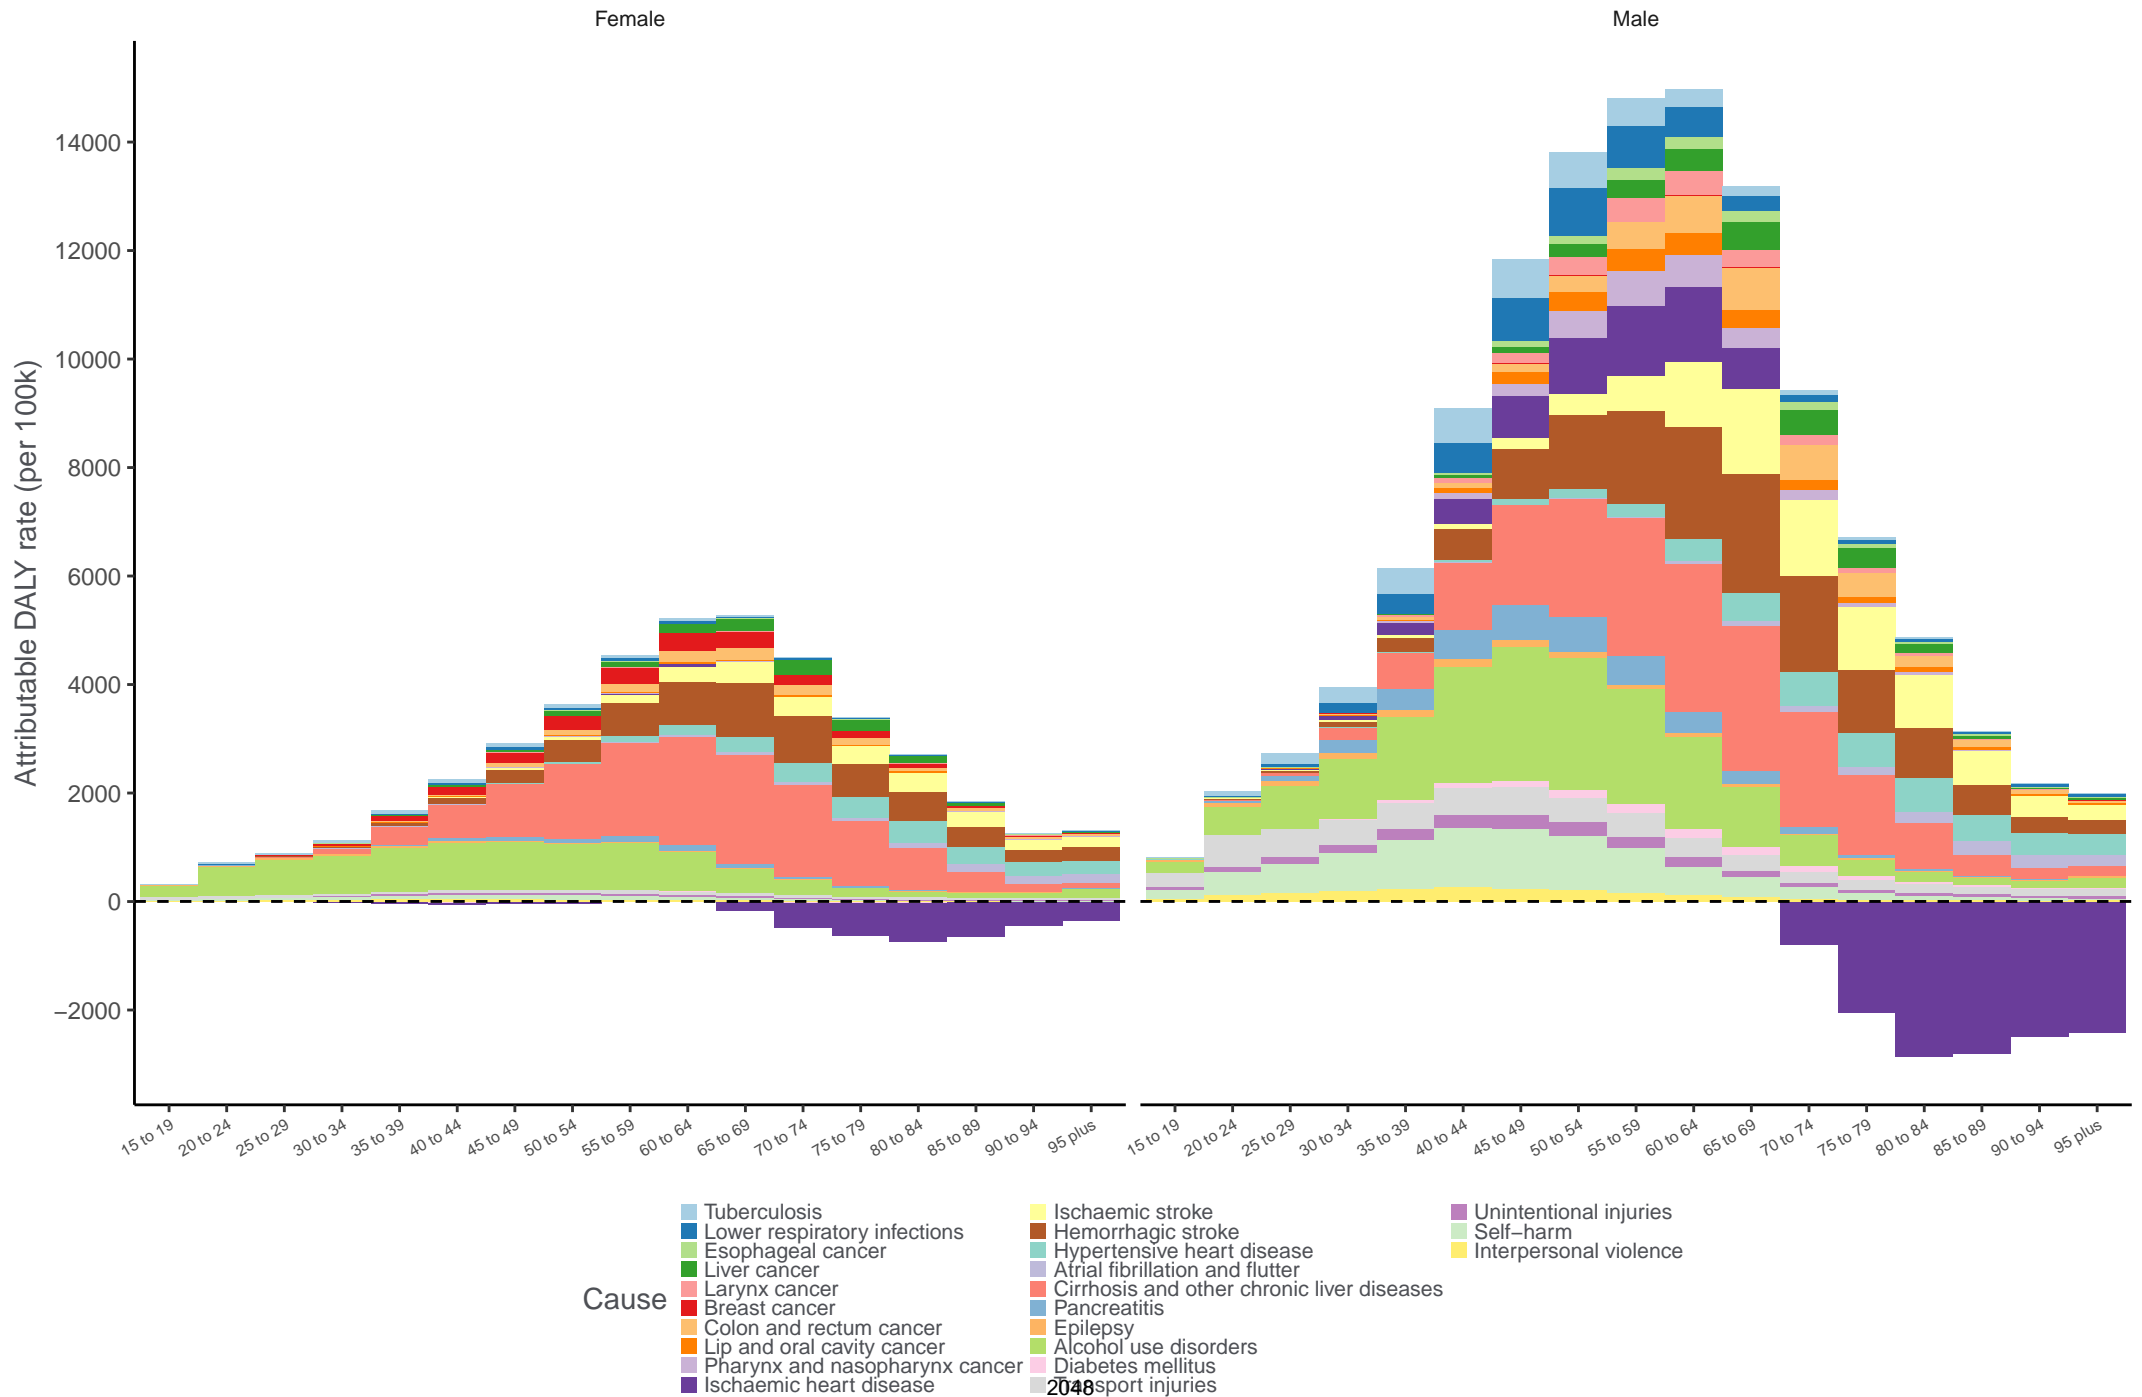

# Attributable DALY rate disaggregated by cause, Russia, by sex and age in 2016.

Female

Male

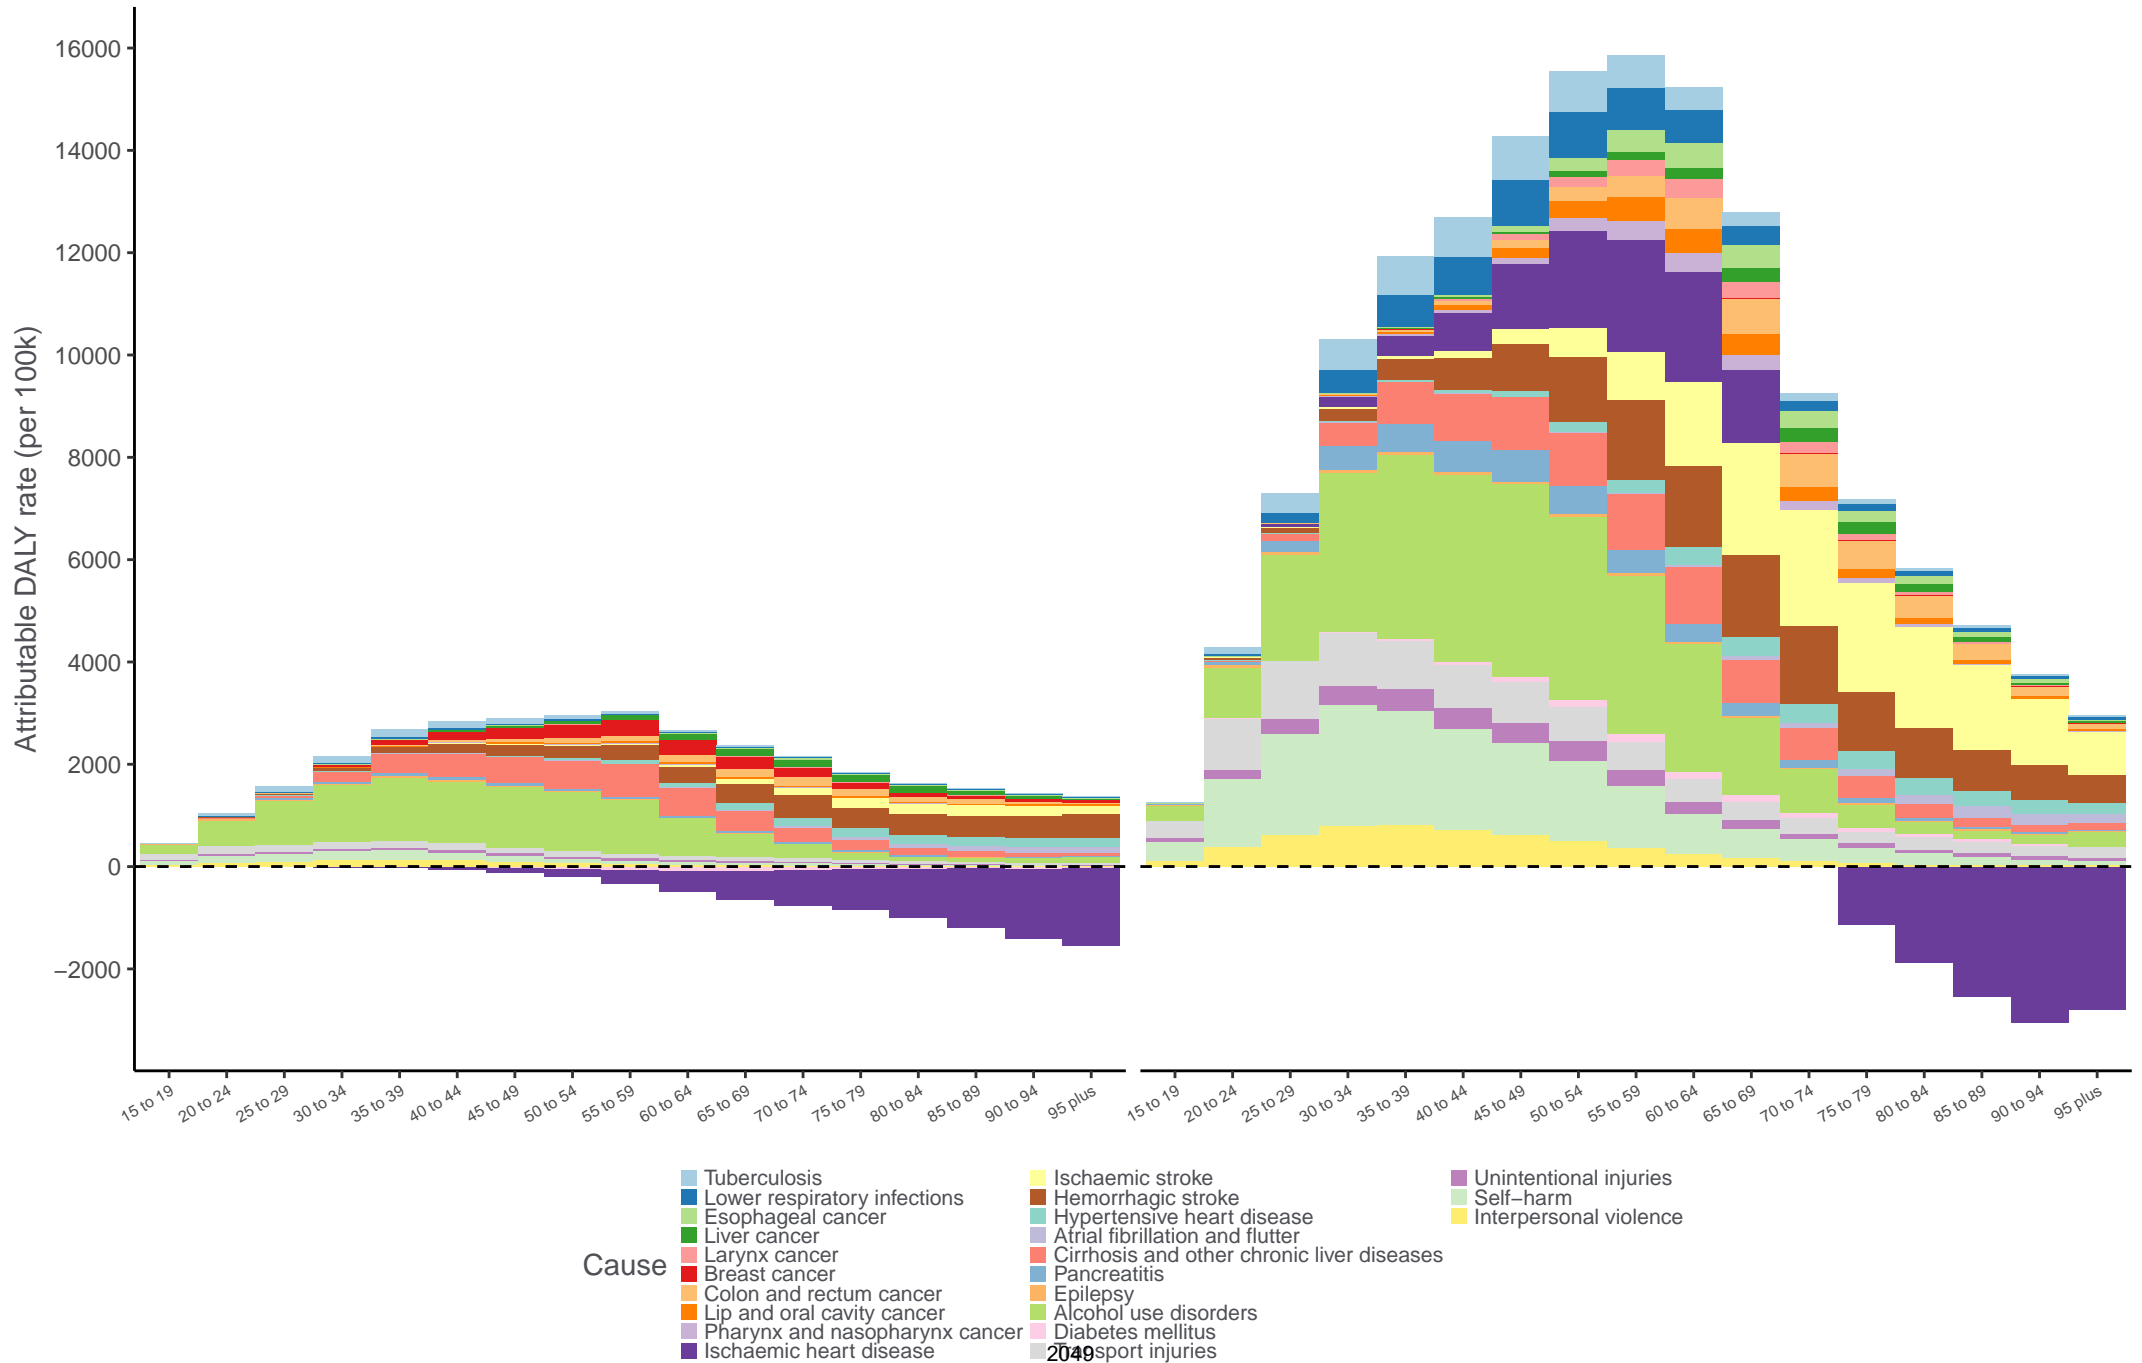

Attributable DALY rate disaggregated by cause, Ukraine, by sex and age in 2016.

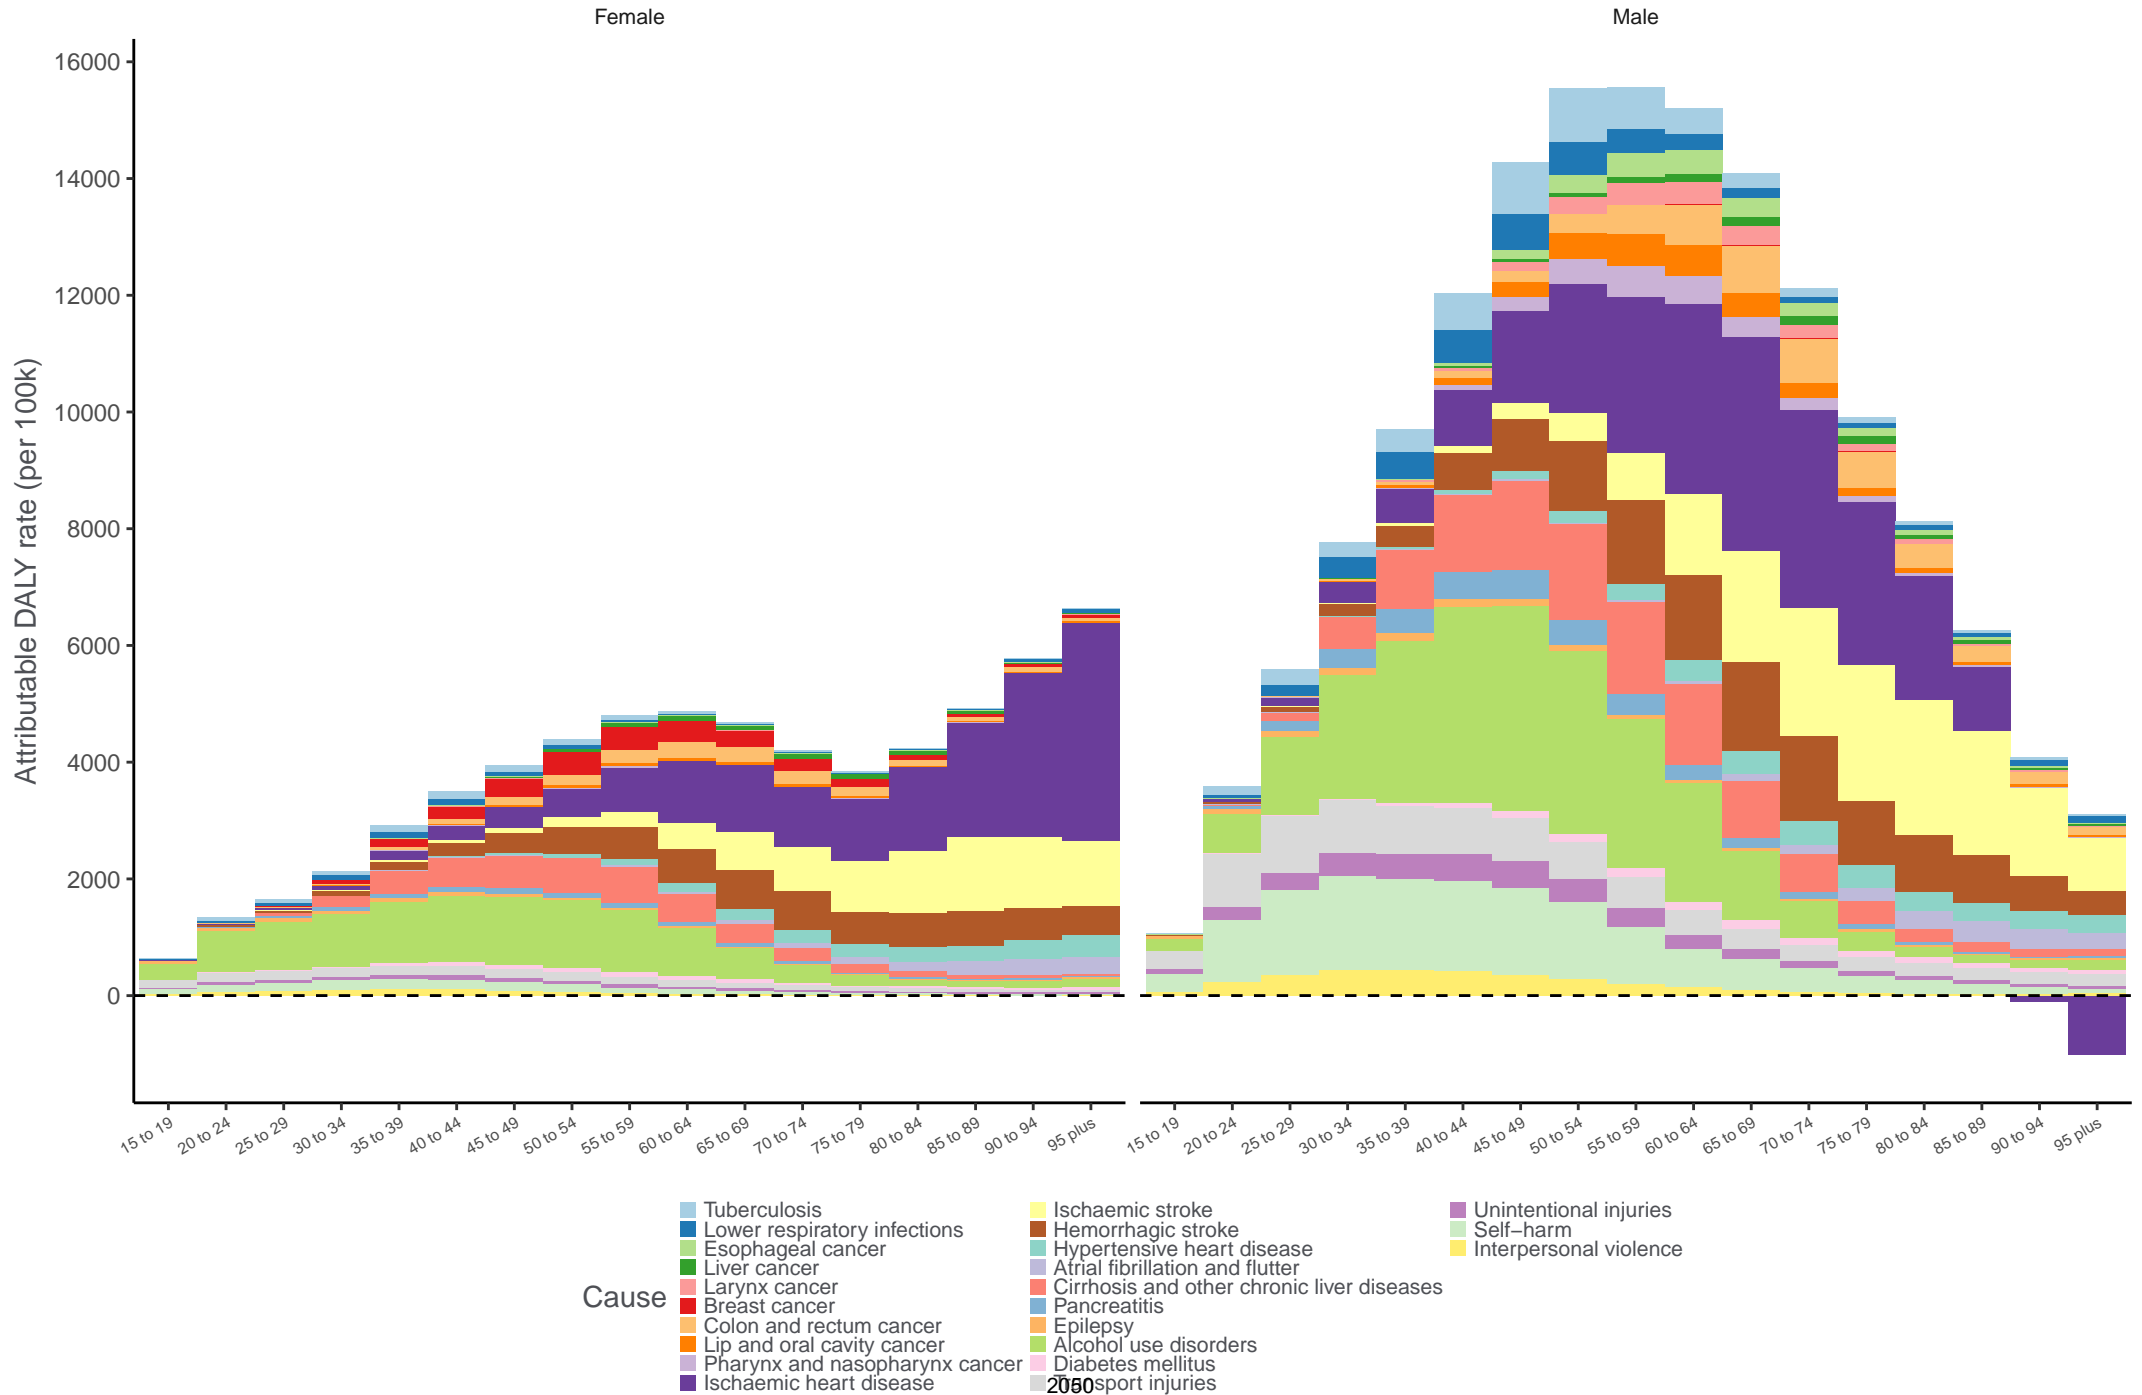

Attributable DALY rate disaggregated by cause, Brunei, by sex and age in 2016.

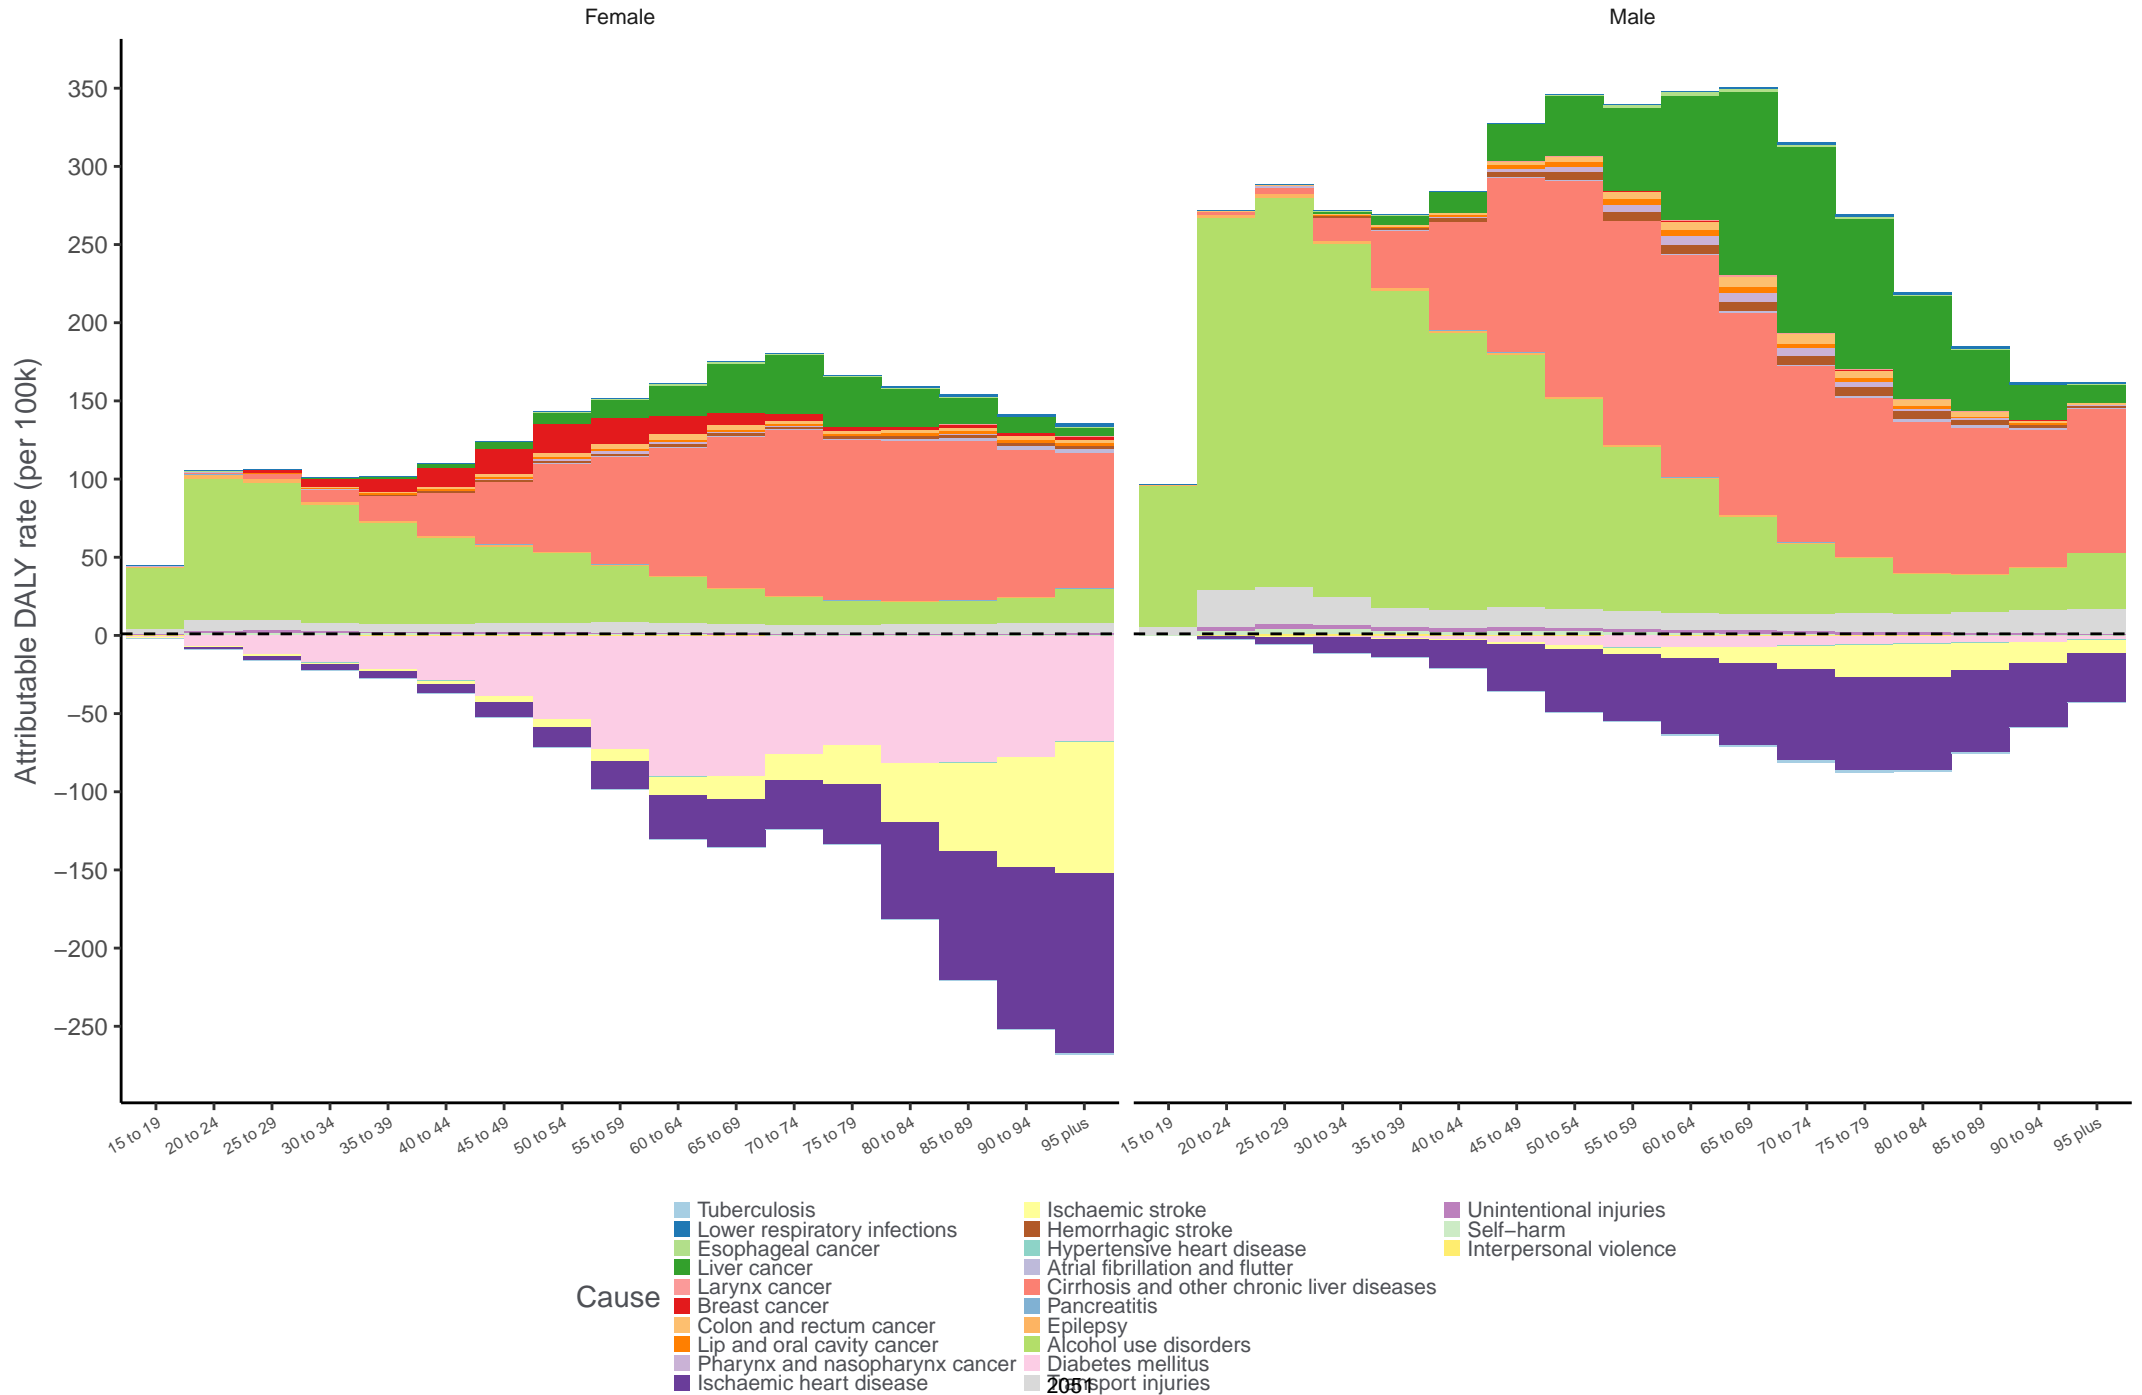

Attributable DALY rate disaggregated by cause, Japan, by sex and age in 2016.

Female

Male

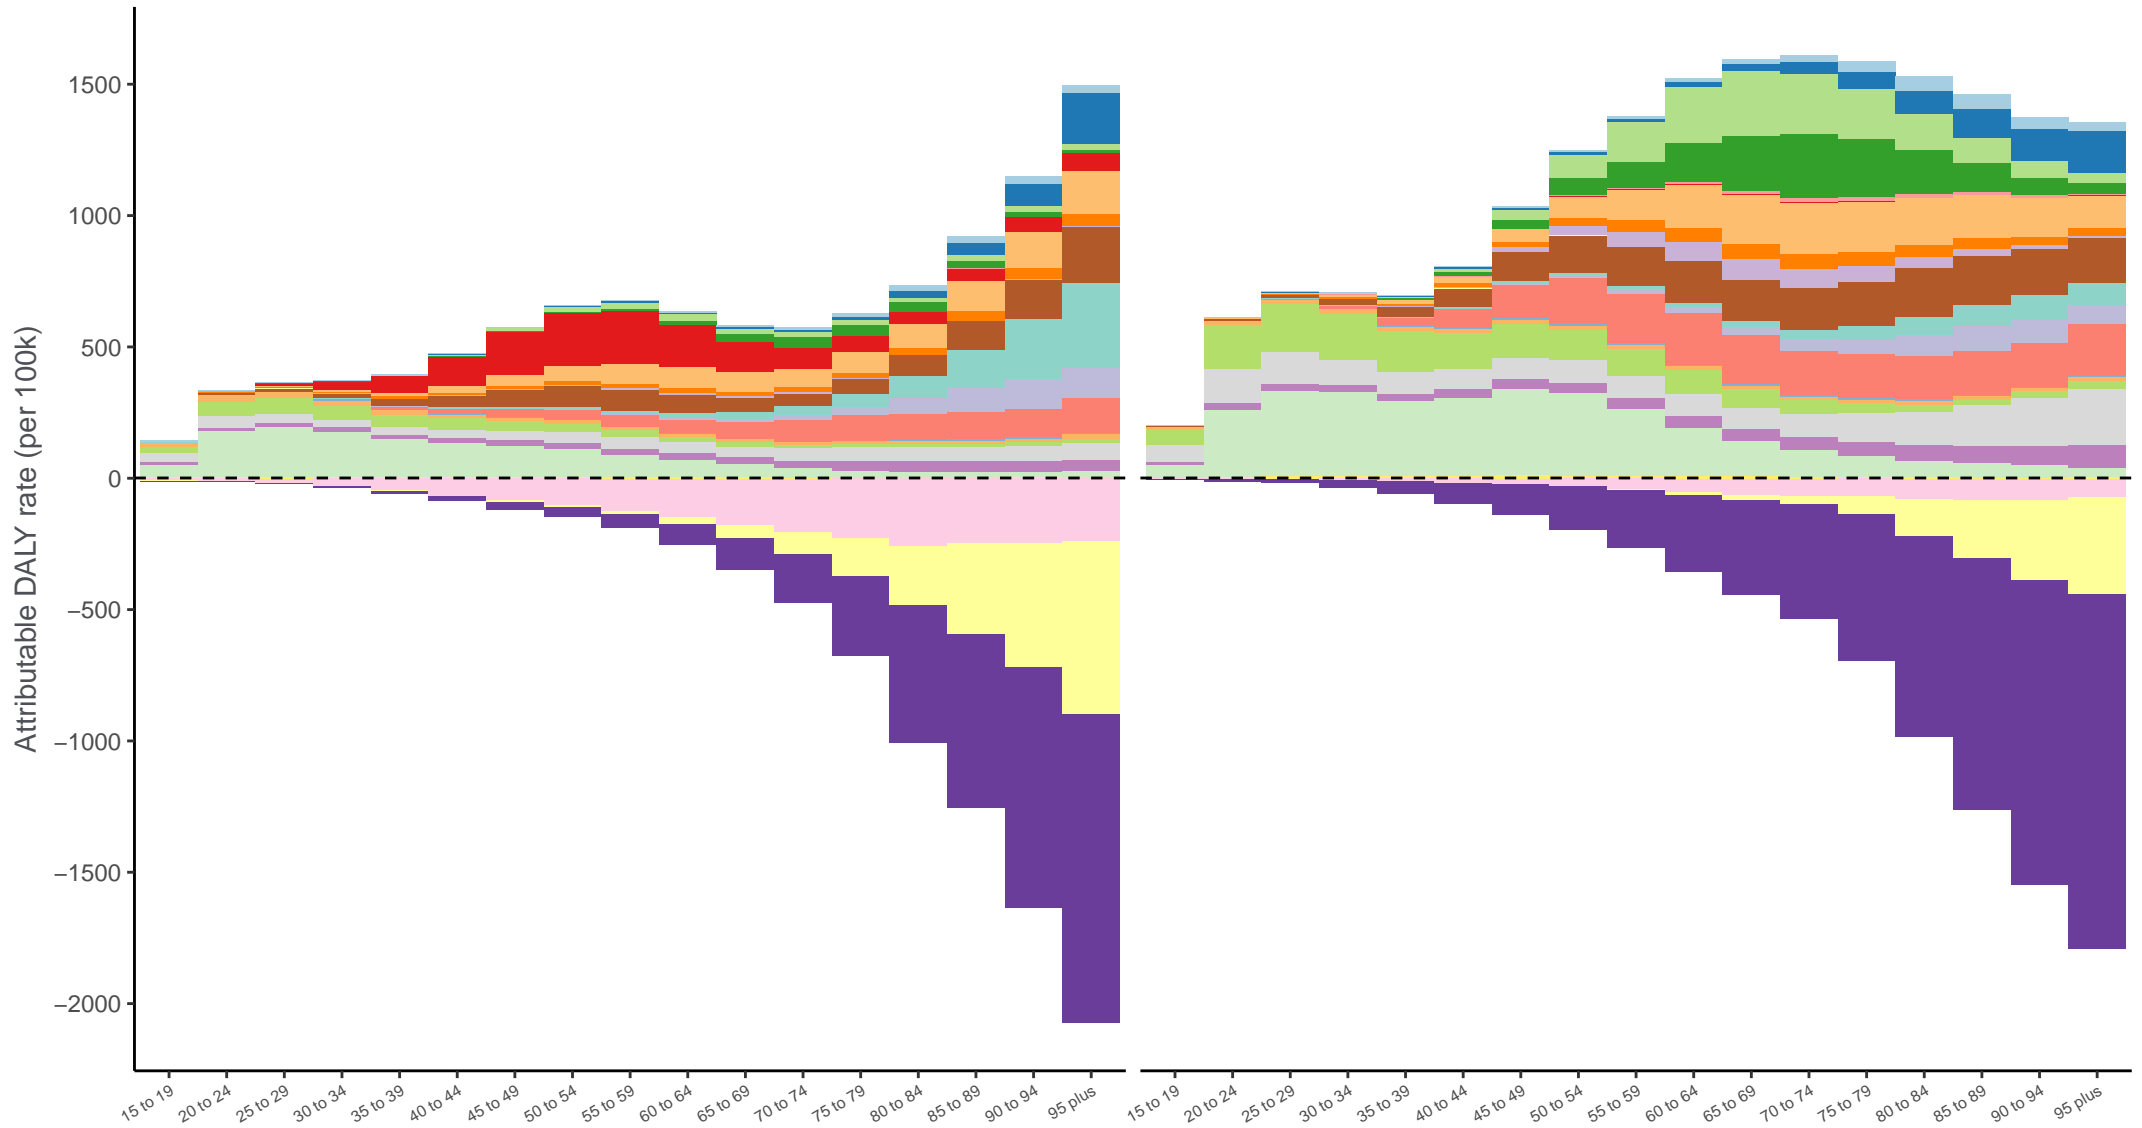

Cause

- |                                                                       |                                                                                   |                                                               |
|-----------------------------------------------------------------------|-----------------------------------------------------------------------------------|---------------------------------------------------------------|
| <span style="color: #add8e6;">■</span> Tuberculosis                   | <span style="color: #ffff00;">■</span> Ischaemic stroke                           | <span style="color: #800080;">■</span> Unintentional injuries |
| <span style="color: #000080;">■</span> Lower respiratory infections   | <span style="color: #800000;">■</span> Hemorrhagic stroke                         | <span style="color: #c1e1c1;">■</span> Self-harm              |
| <span style="color: #90ee90;">■</span> Esophageal cancer              | <span style="color: #4682b4;">■</span> Hypertensive heart disease                 | <span style="color: #ffff00;">■</span> Interpersonal violence |
| <span style="color: #008000;">■</span> Liver cancer                   | <span style="color: #b0c4de;">■</span> Atrial fibrillation and flutter            |                                                               |
| <span style="color: #f08080;">■</span> Larynx cancer                  | <span style="color: #4682b4;">■</span> Pancreatitis                               |                                                               |
| <span style="color: #ff0000;">■</span> Breast cancer                  | <span style="color: #ff6347;">■</span> Cirrhosis and other chronic liver diseases |                                                               |
| <span style="color: #ffa500;">■</span> Colon and rectum cancer        | <span style="color: #ffa500;">■</span> Epilepsy                                   |                                                               |
| <span style="color: #ffa500;">■</span> Lip and oral cavity cancer     | <span style="color: #90ee90;">■</span> Alcohol use disorders                      |                                                               |
| <span style="color: #9370db;">■</span> Pharynx and nasopharynx cancer | <span style="color: #f08080;">■</span> Diabetes mellitus                          |                                                               |
| <span style="color: #483d8b;">■</span> Ischaemic heart disease        | <span style="color: #a9a9a9;">■</span> 2012 sport injuries                        |                                                               |

Attributable DALY rate disaggregated by cause, South Korea, by sex and age in 2016.

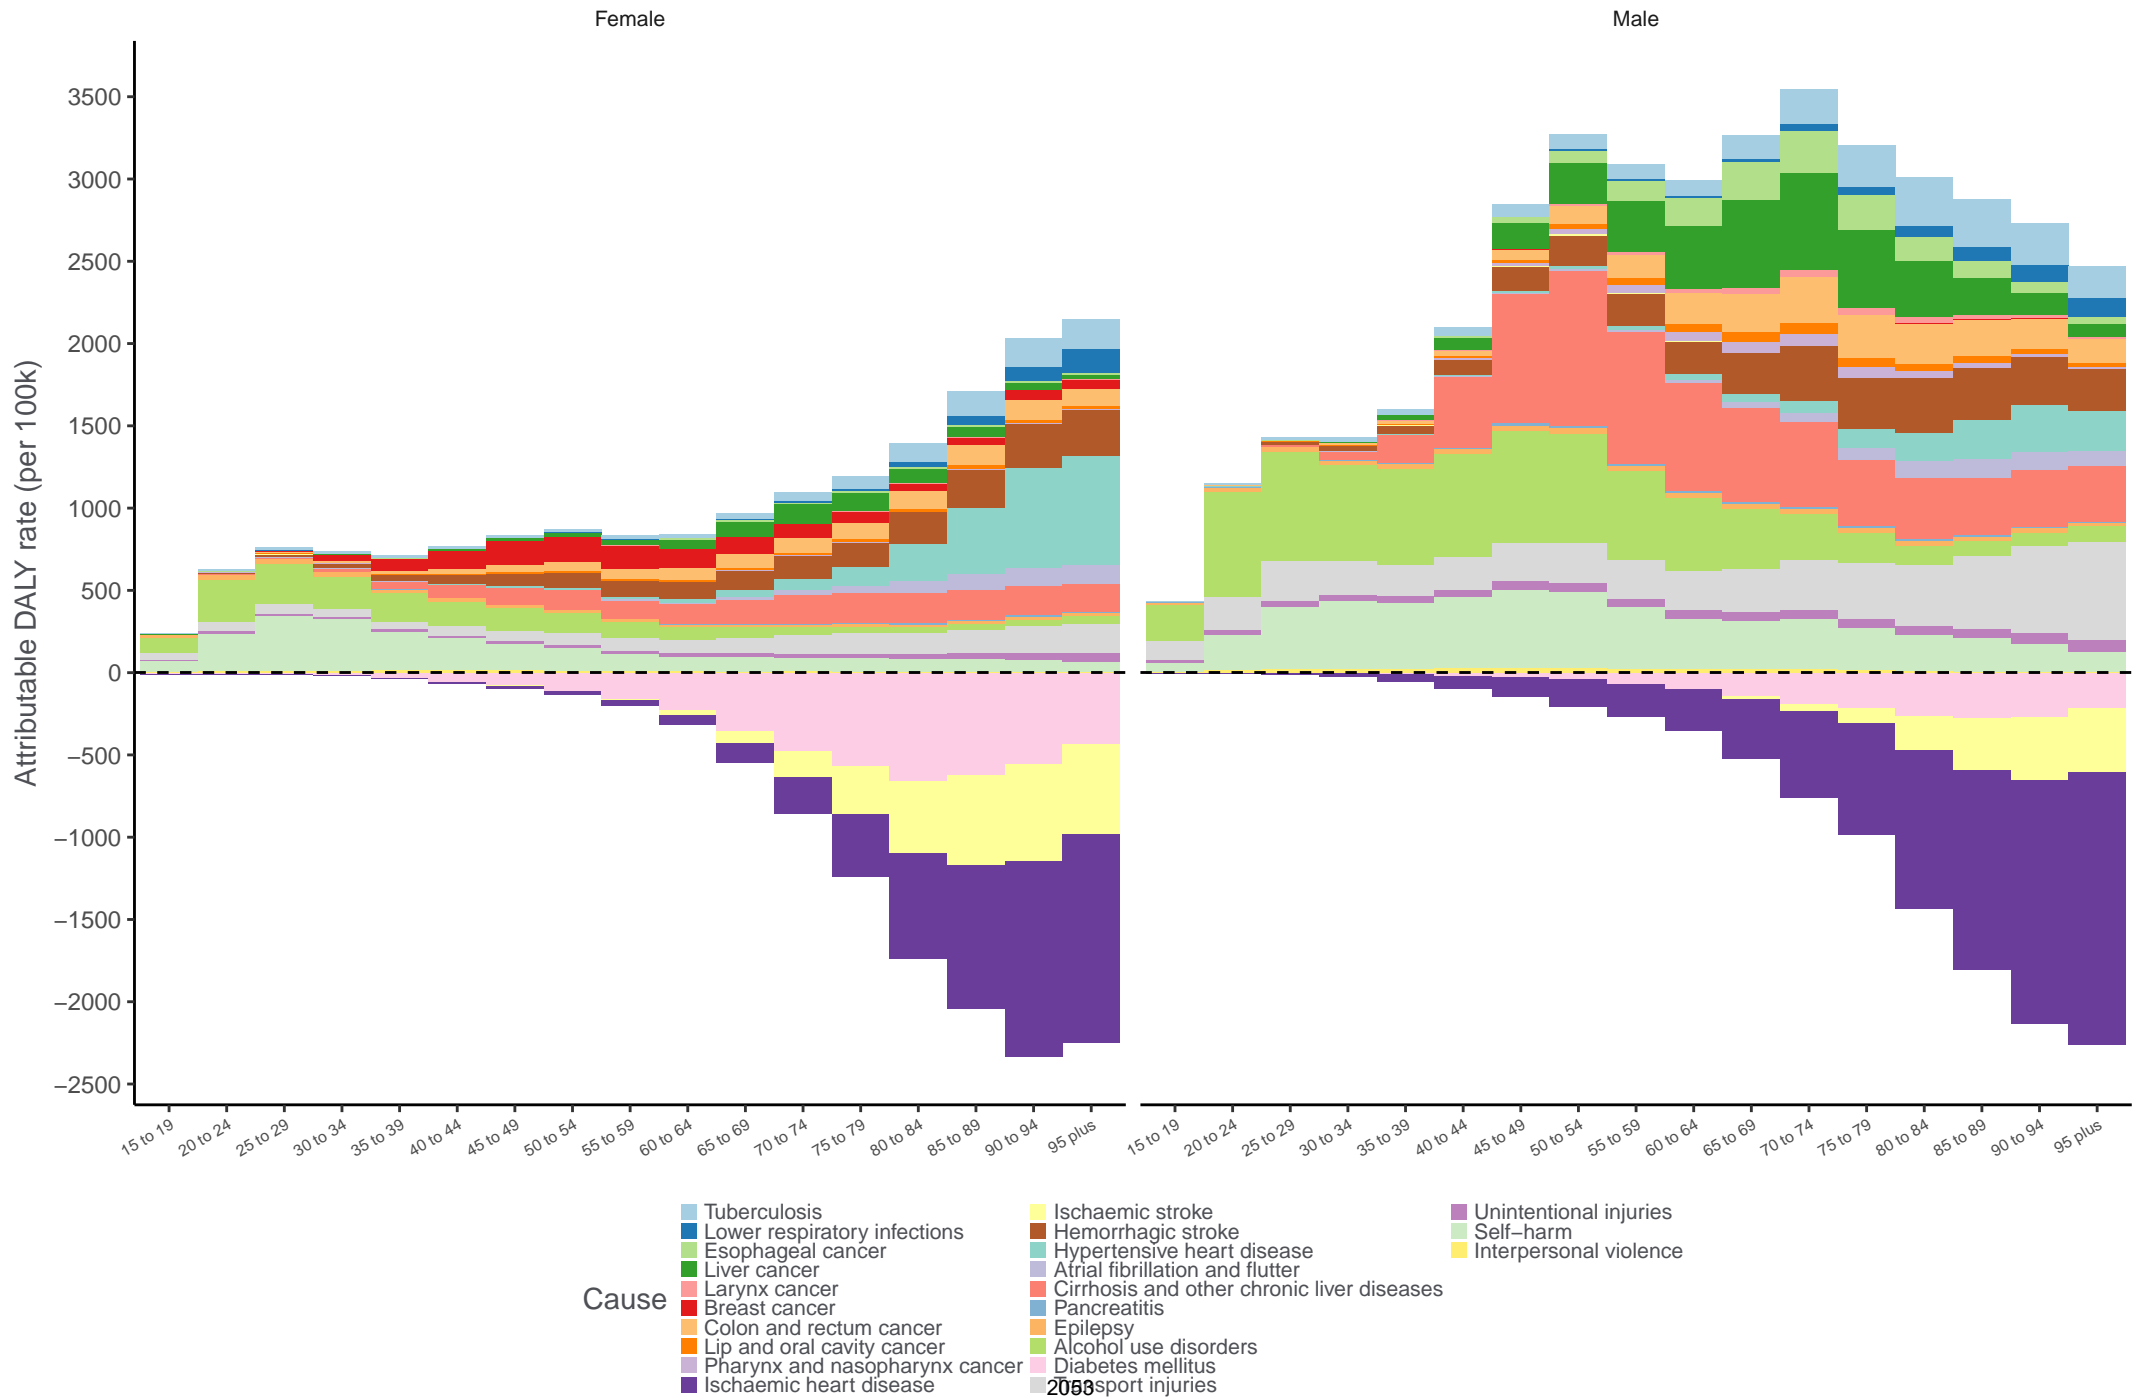

Attributable DALY rate disaggregated by cause, Singapore, by sex and age in 2016.

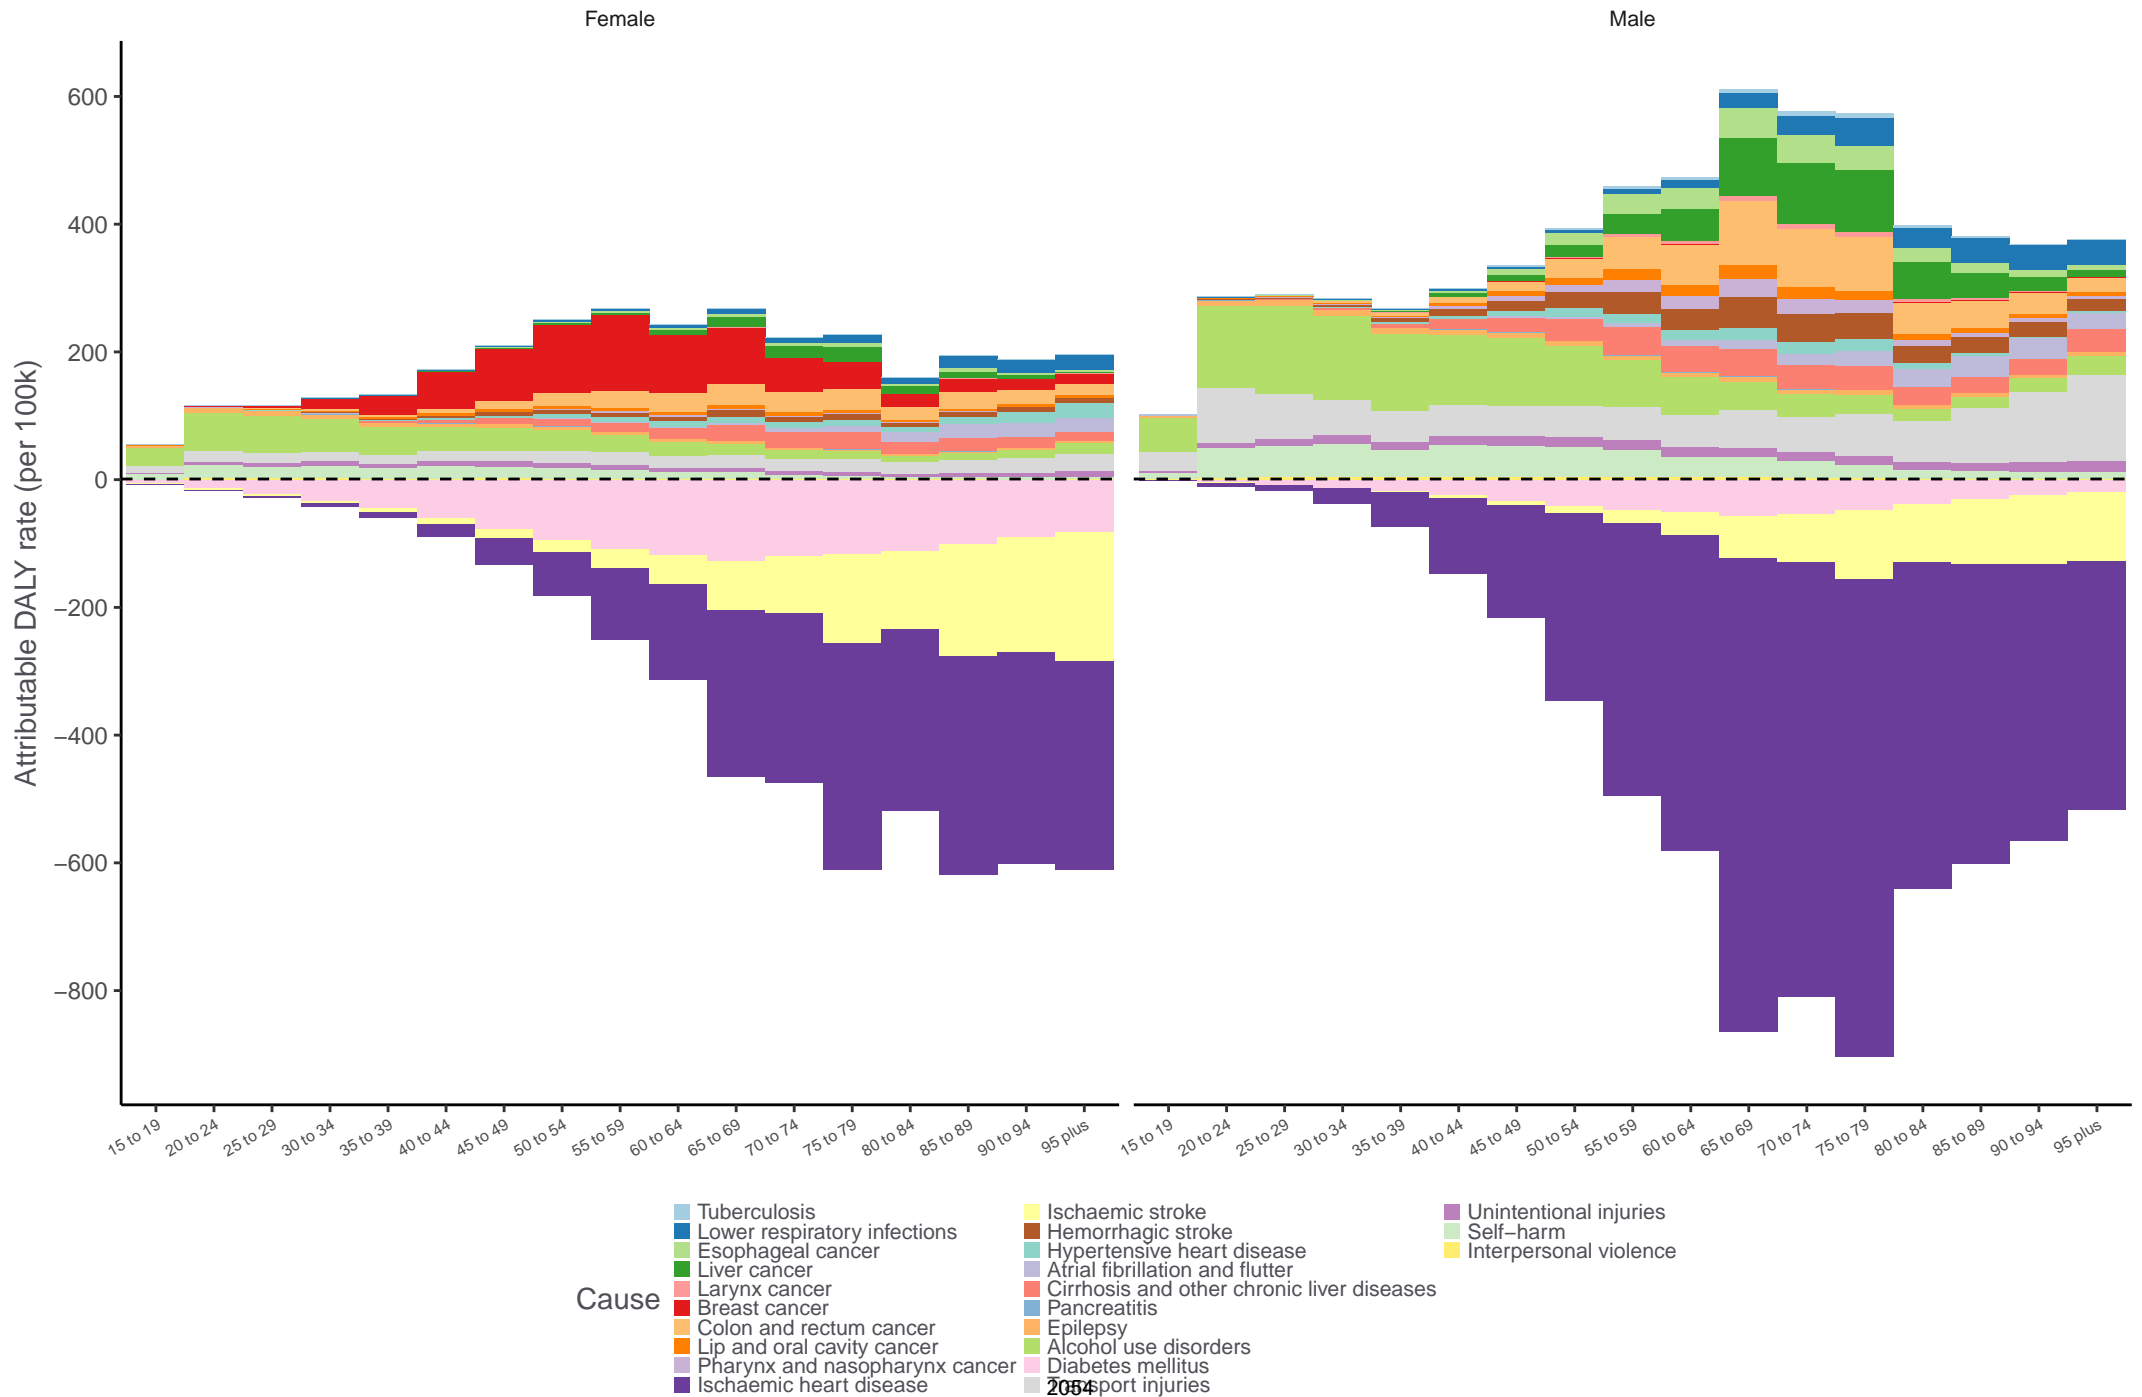

Attributable DALY rate disaggregated by cause, Australia, by sex and age in 2016.

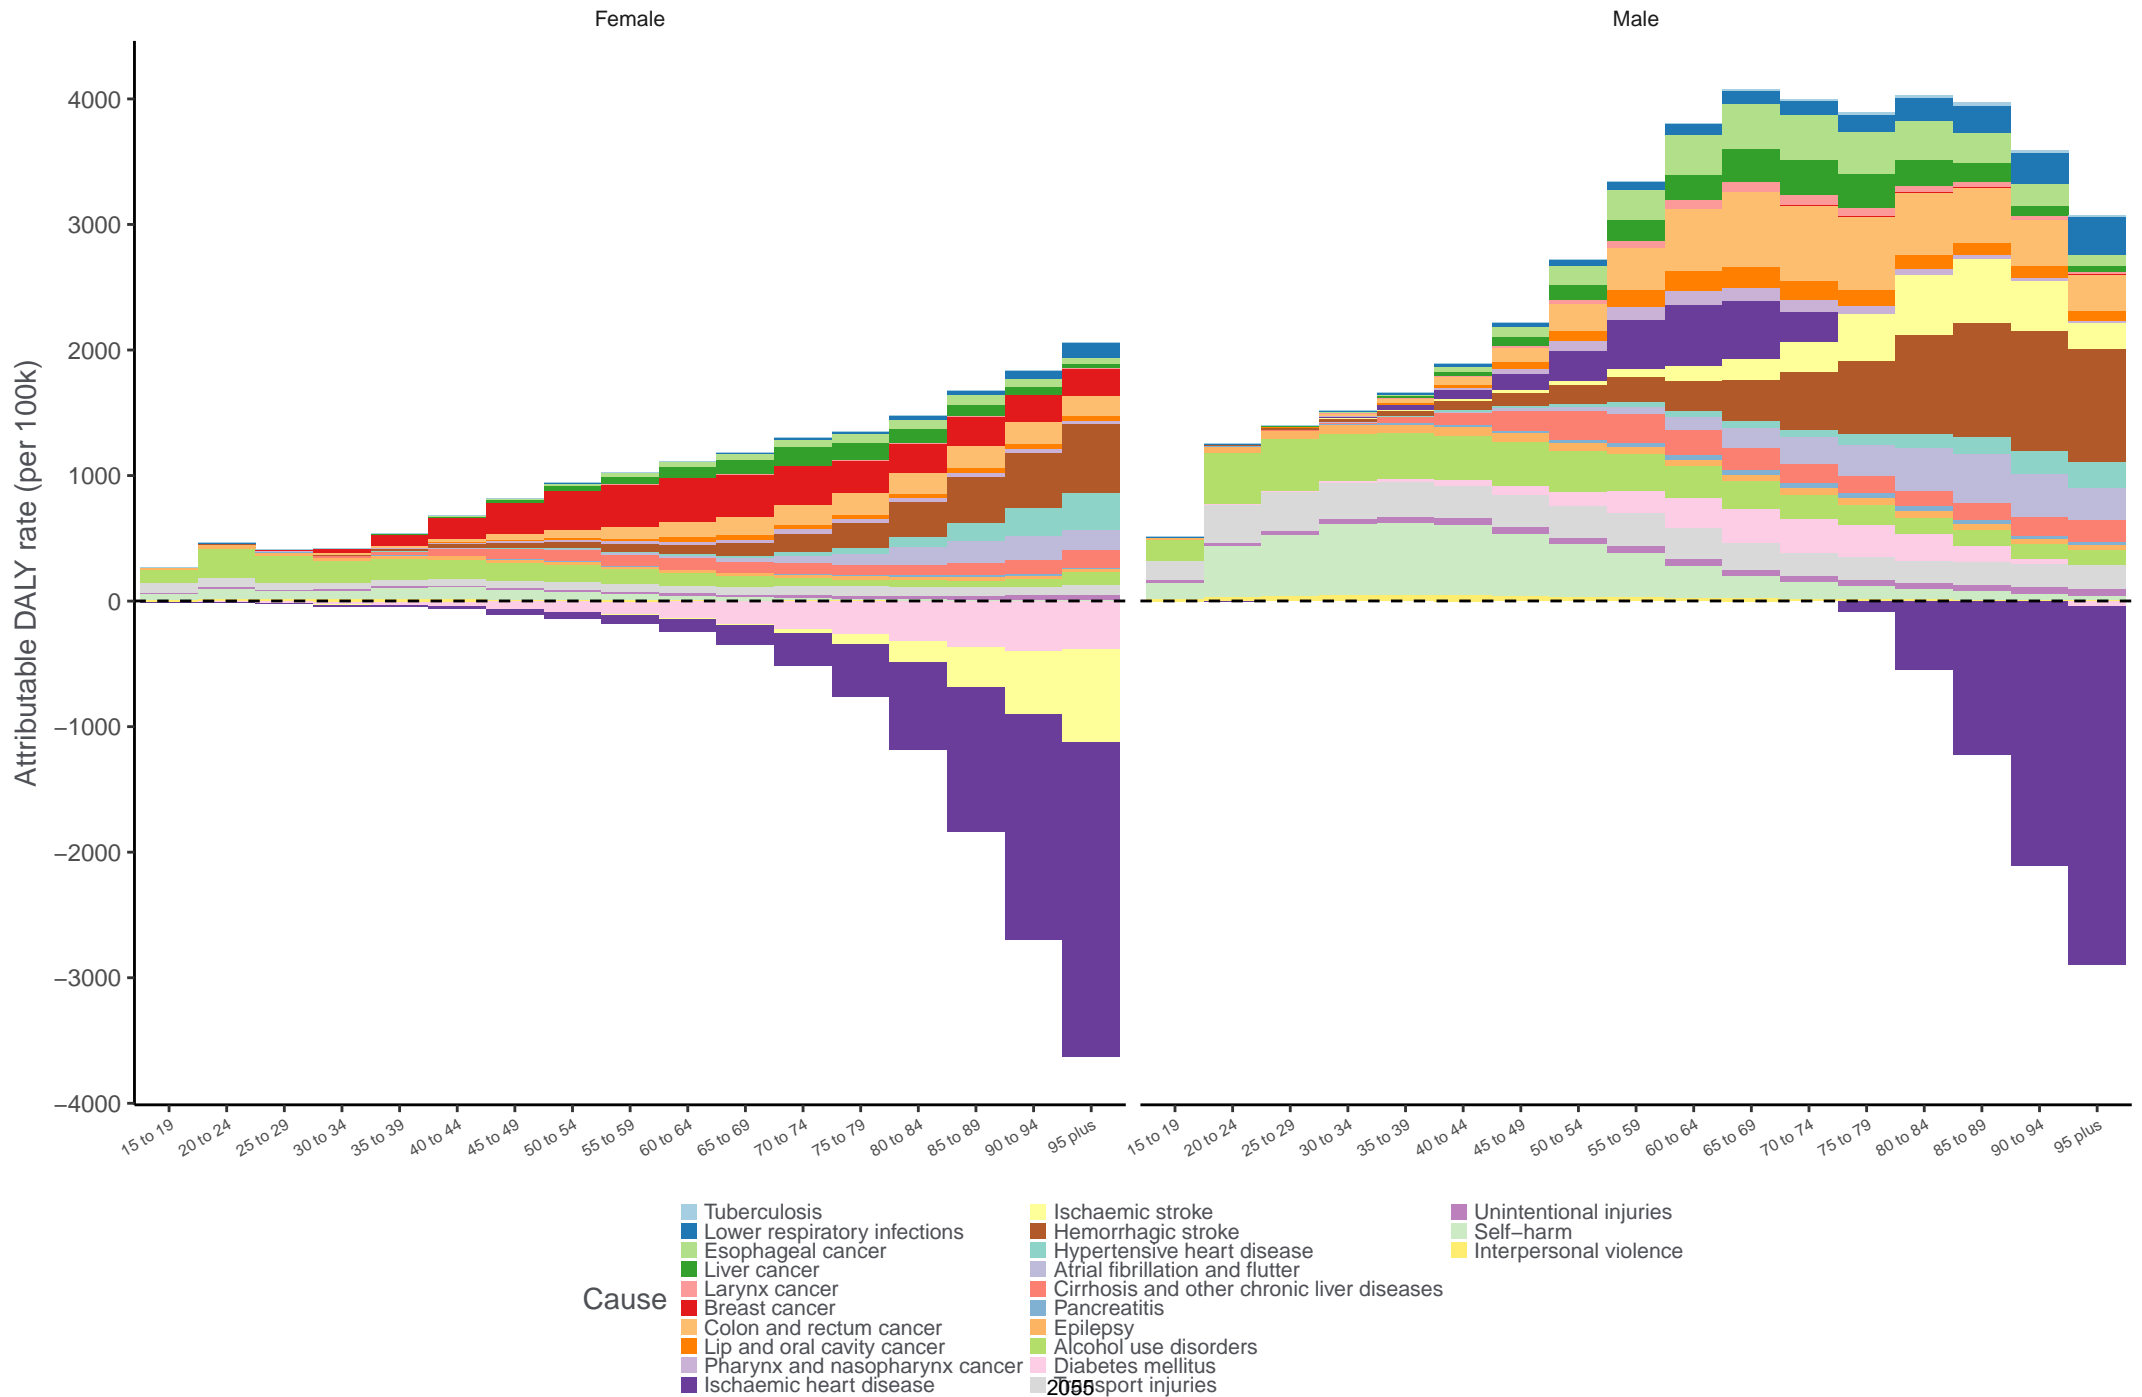



# Attributable DALY rate disaggregated by cause, New Zealand, by sex and age in 2016.

Female

Male

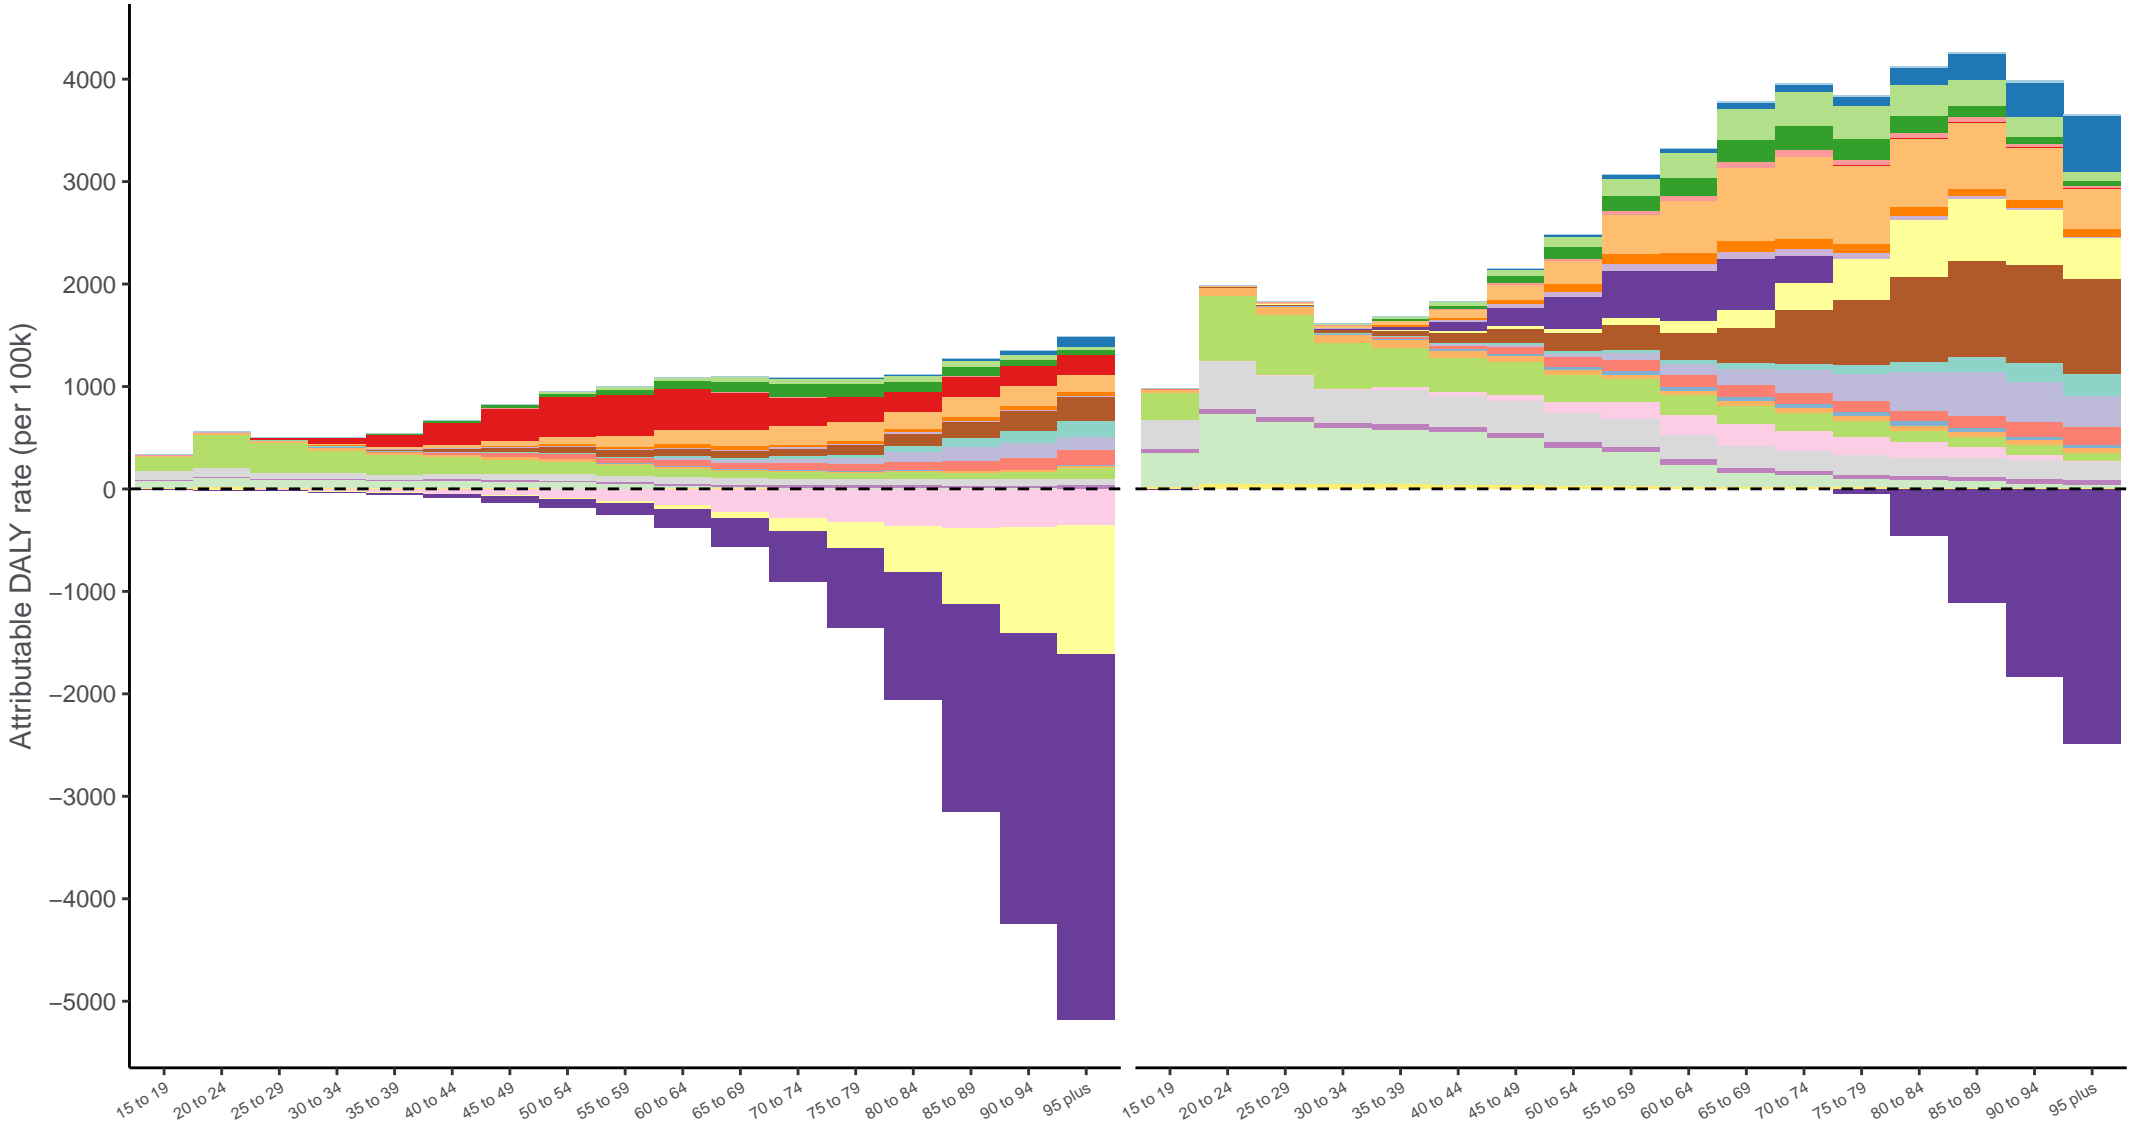

- Cause**
- Tuberculosis
  - Ischaemic stroke
  - Unintentional injuries
  - Lower respiratory infections
  - Hemorrhagic stroke
  - Self-harm
  - Esophageal cancer
  - Hypertensive heart disease
  - Interpersonal violence
  - Liver cancer
  - Atrial fibrillation and flutter
  - Larynx cancer
  - Cirrhosis and other chronic liver diseases
  - Breast cancer
  - Pancreatitis
  - Colon and rectum cancer
  - Epilepsy
  - Lip and oral cavity cancer
  - Alcohol use disorders
  - Pharynx and nasopharynx cancer
  - Diabetes mellitus
  - Ischaemic heart disease
  - Sport injuries

Attributable DALY rate disaggregated by cause, Andorra, by sex and age in 2016.

Female

Male

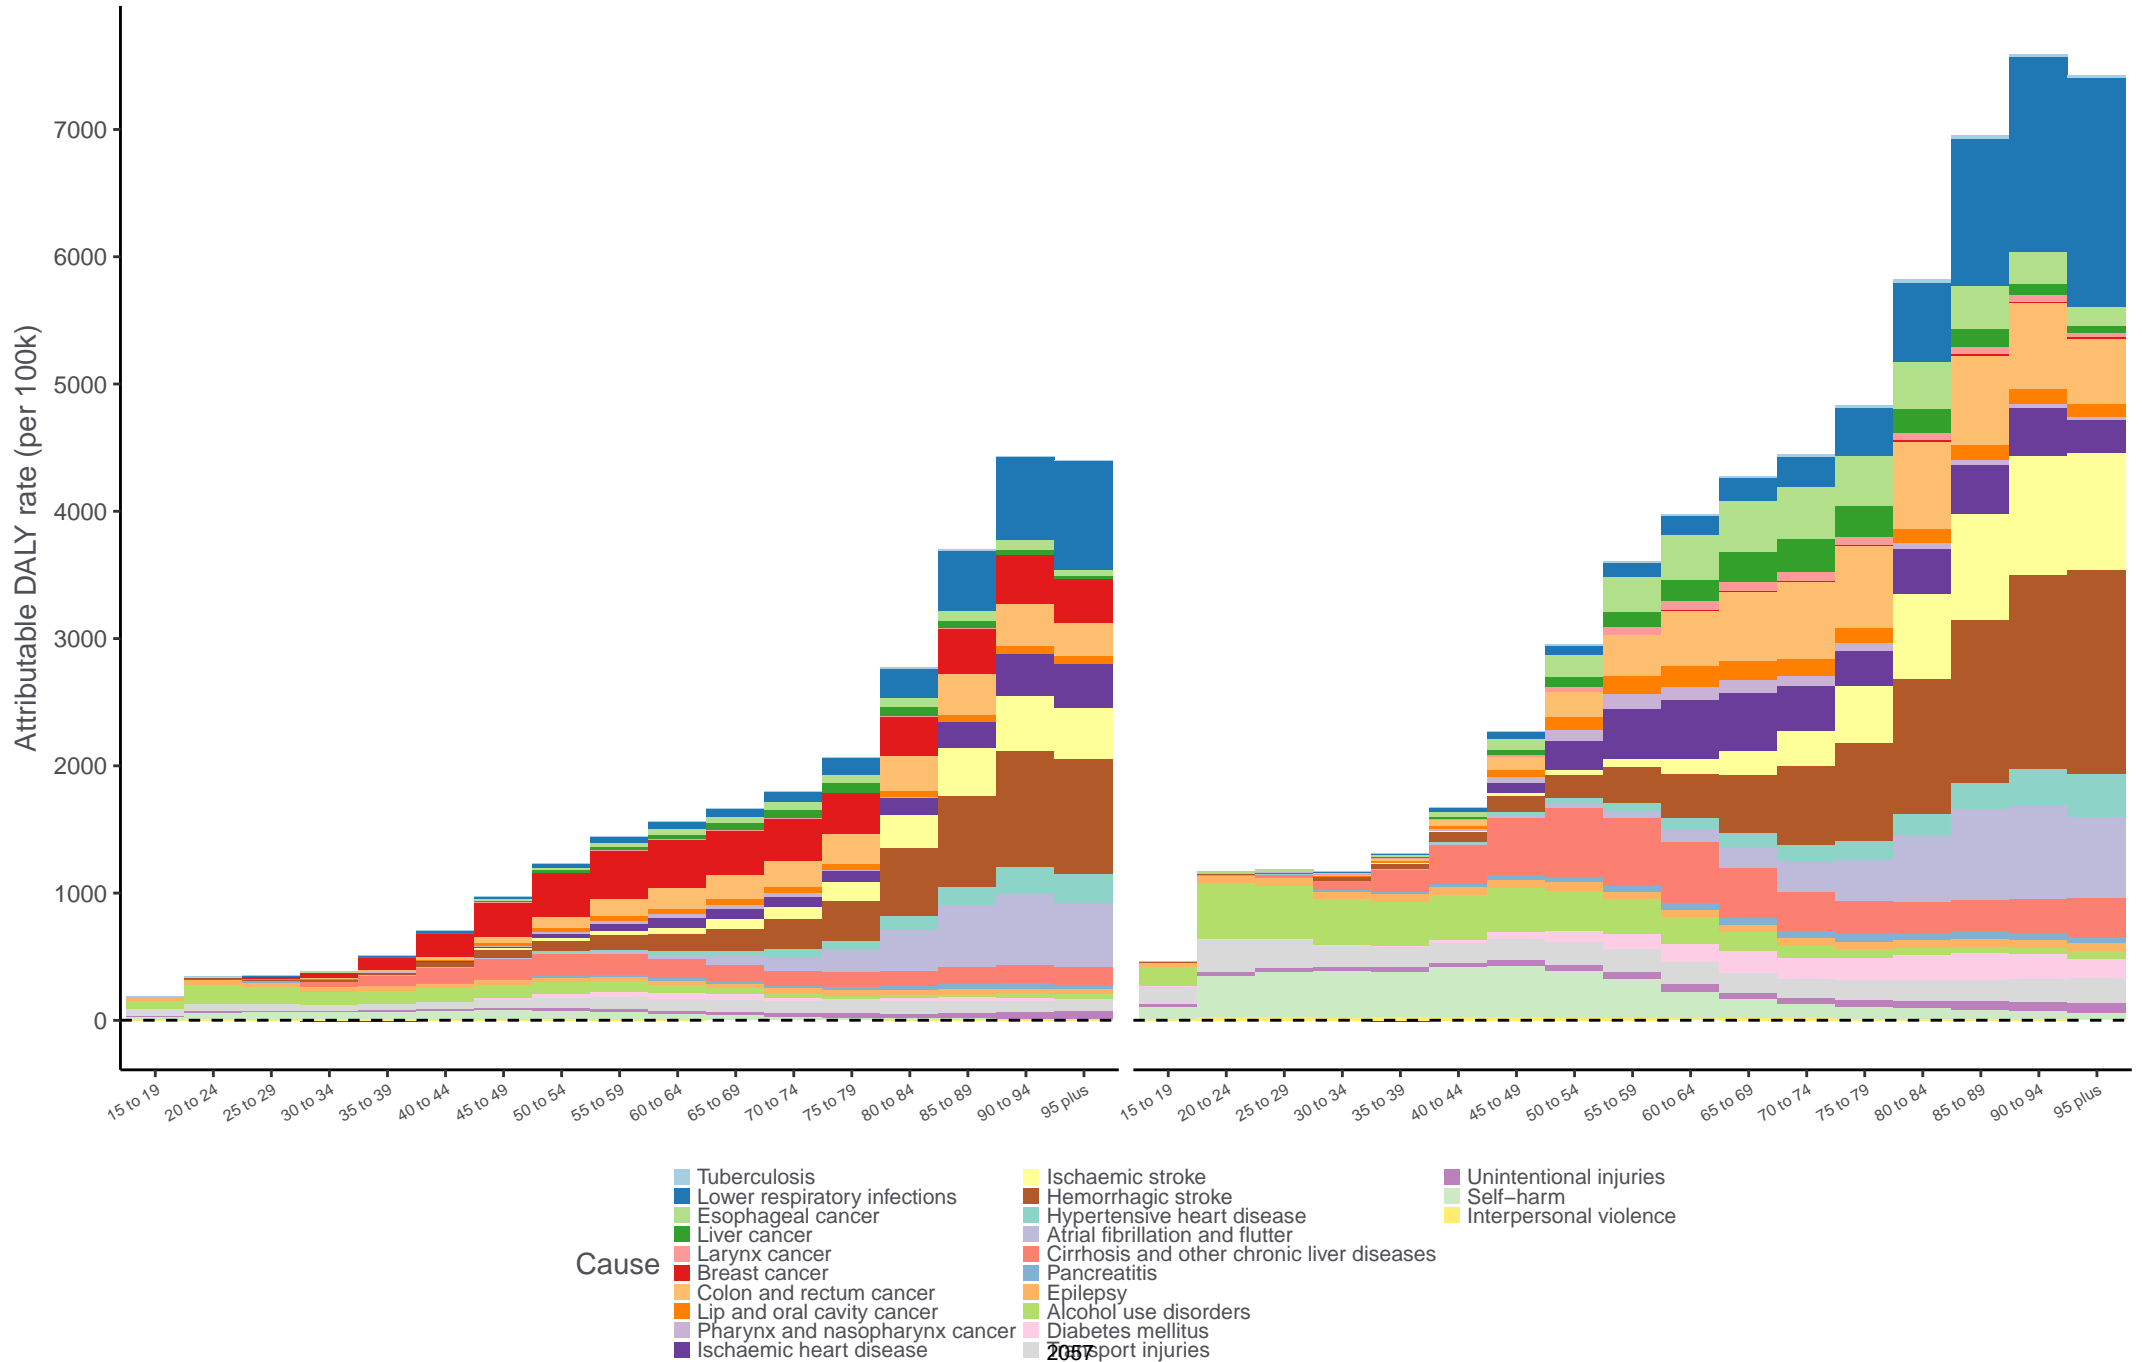

Attributable DALY rate disaggregated by cause, Austria, by sex and age in 2016.

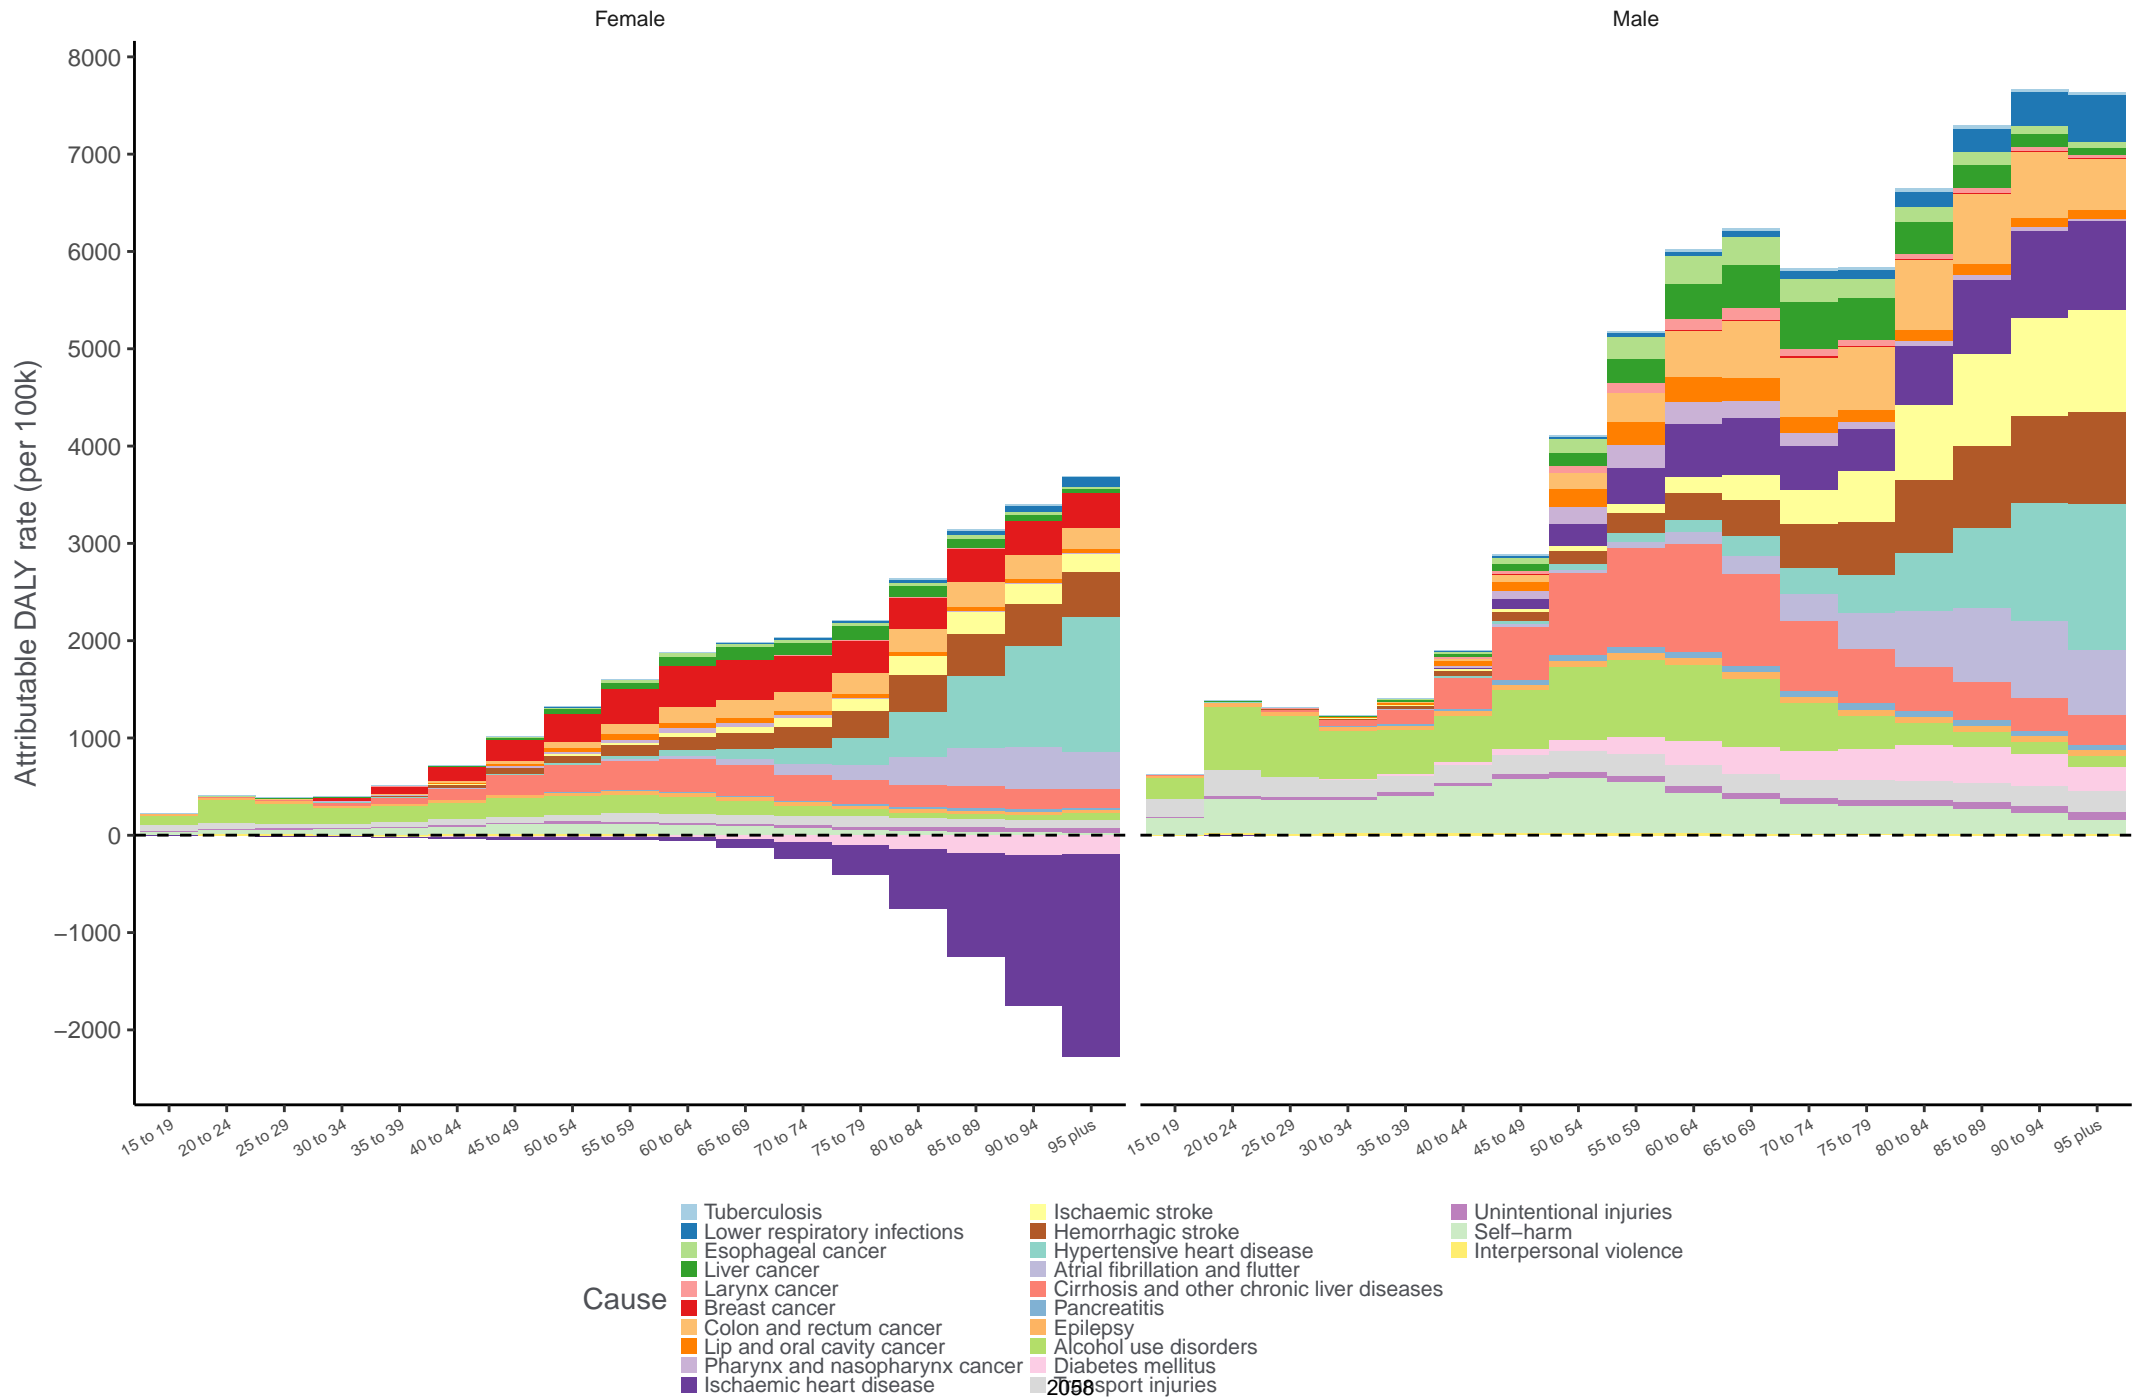

Attributable DALY rate disaggregated by cause, Belgium, by sex and age in 2016.

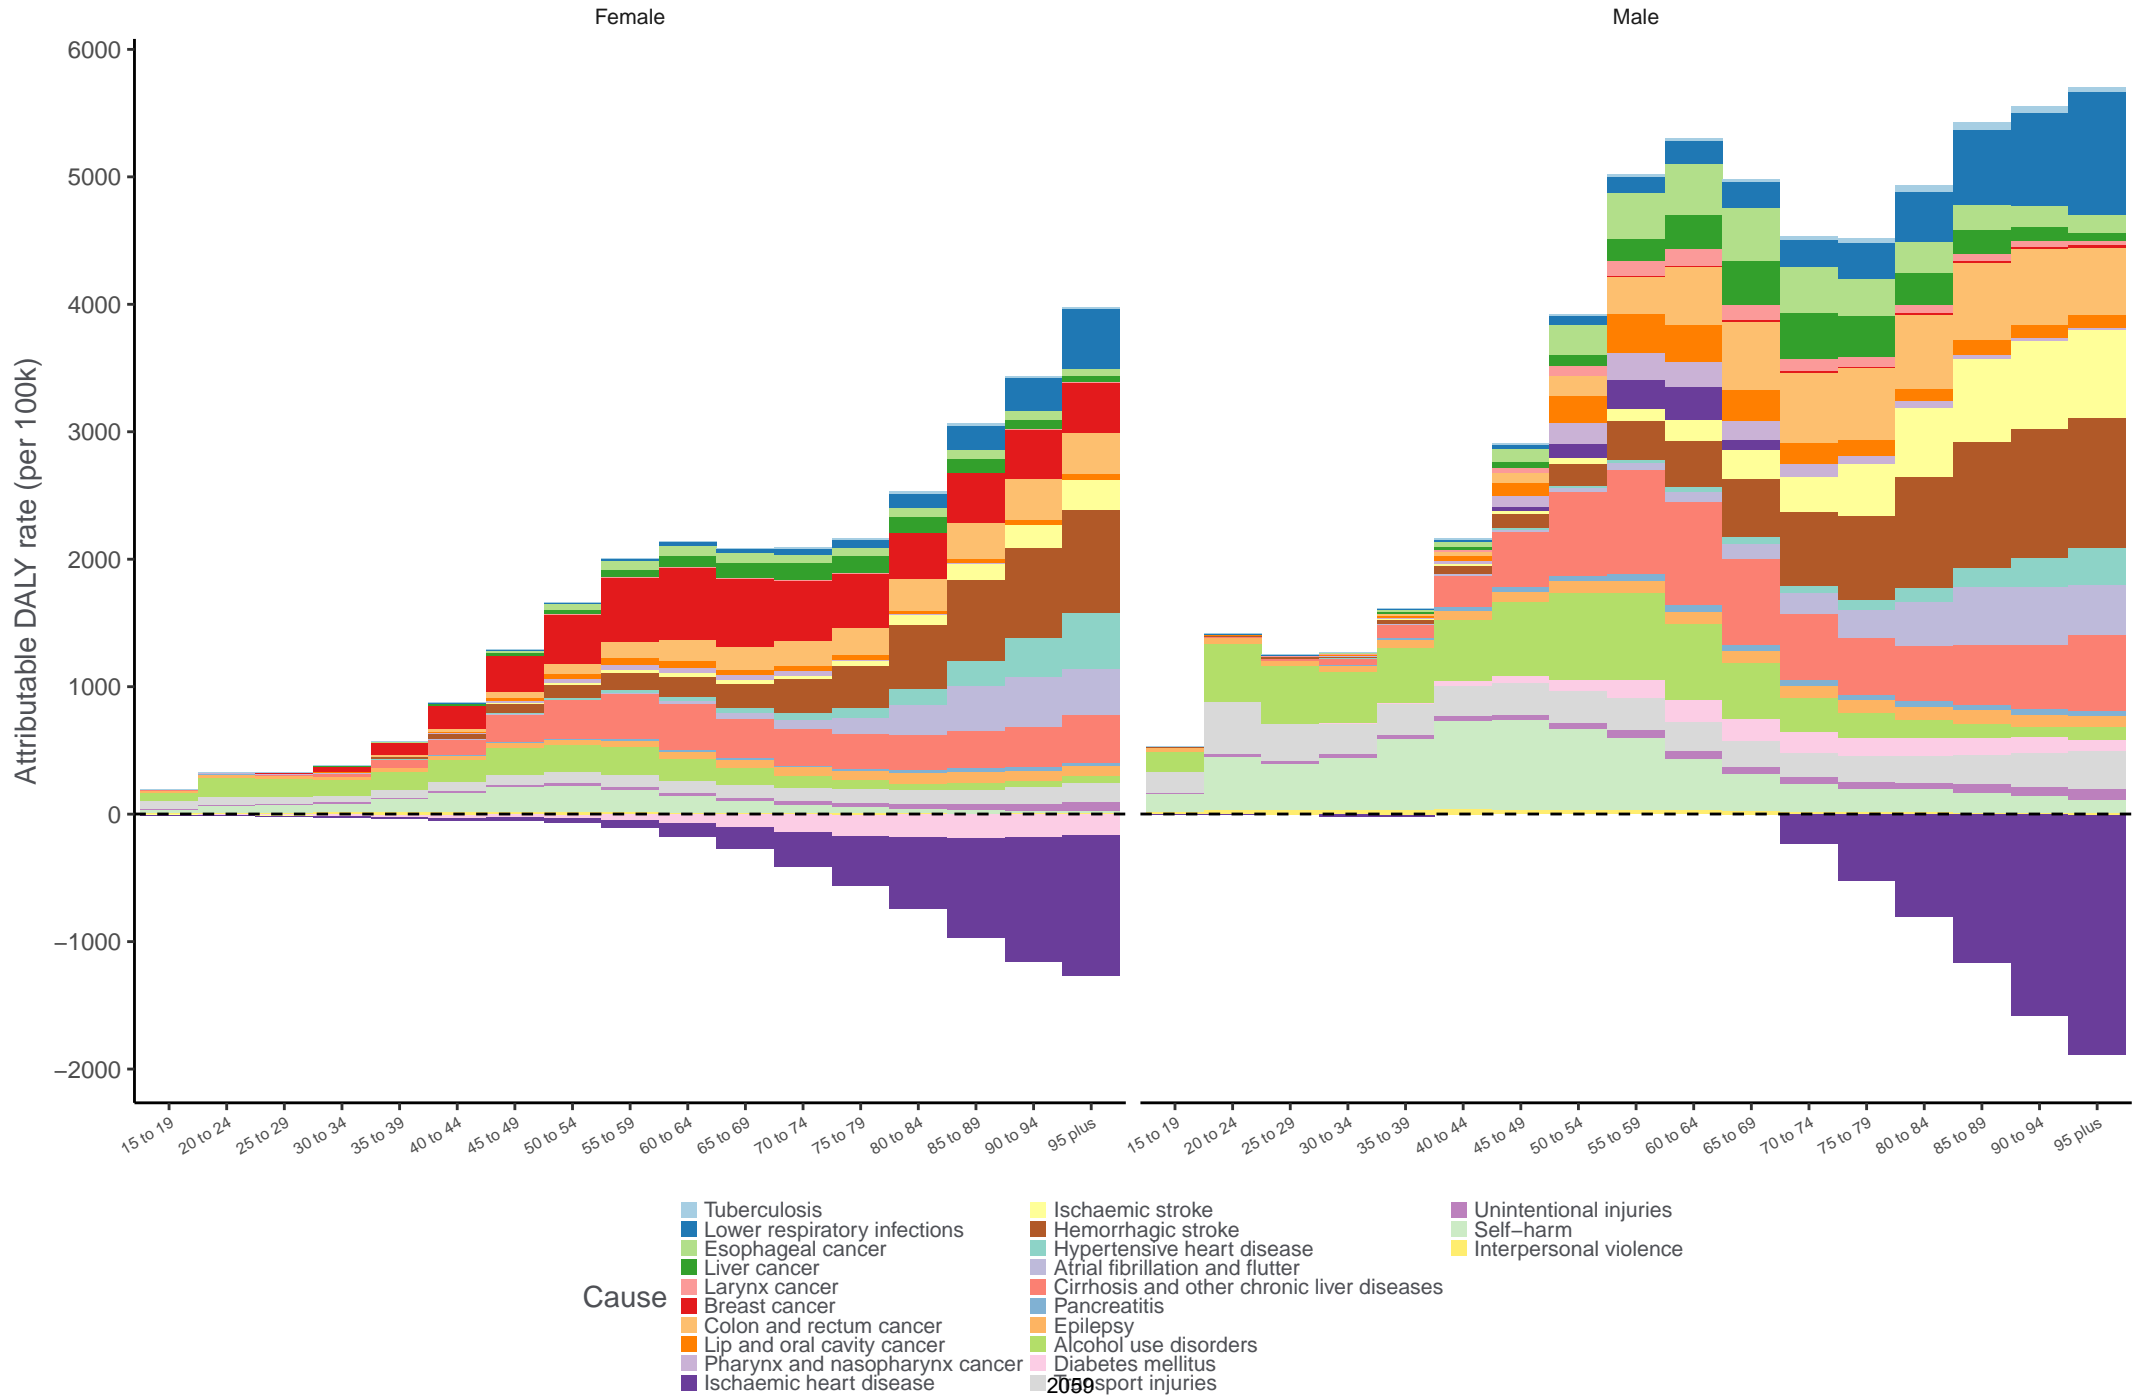

Attributable DALY rate disaggregated by cause, Cyprus, by sex and age in 2016.

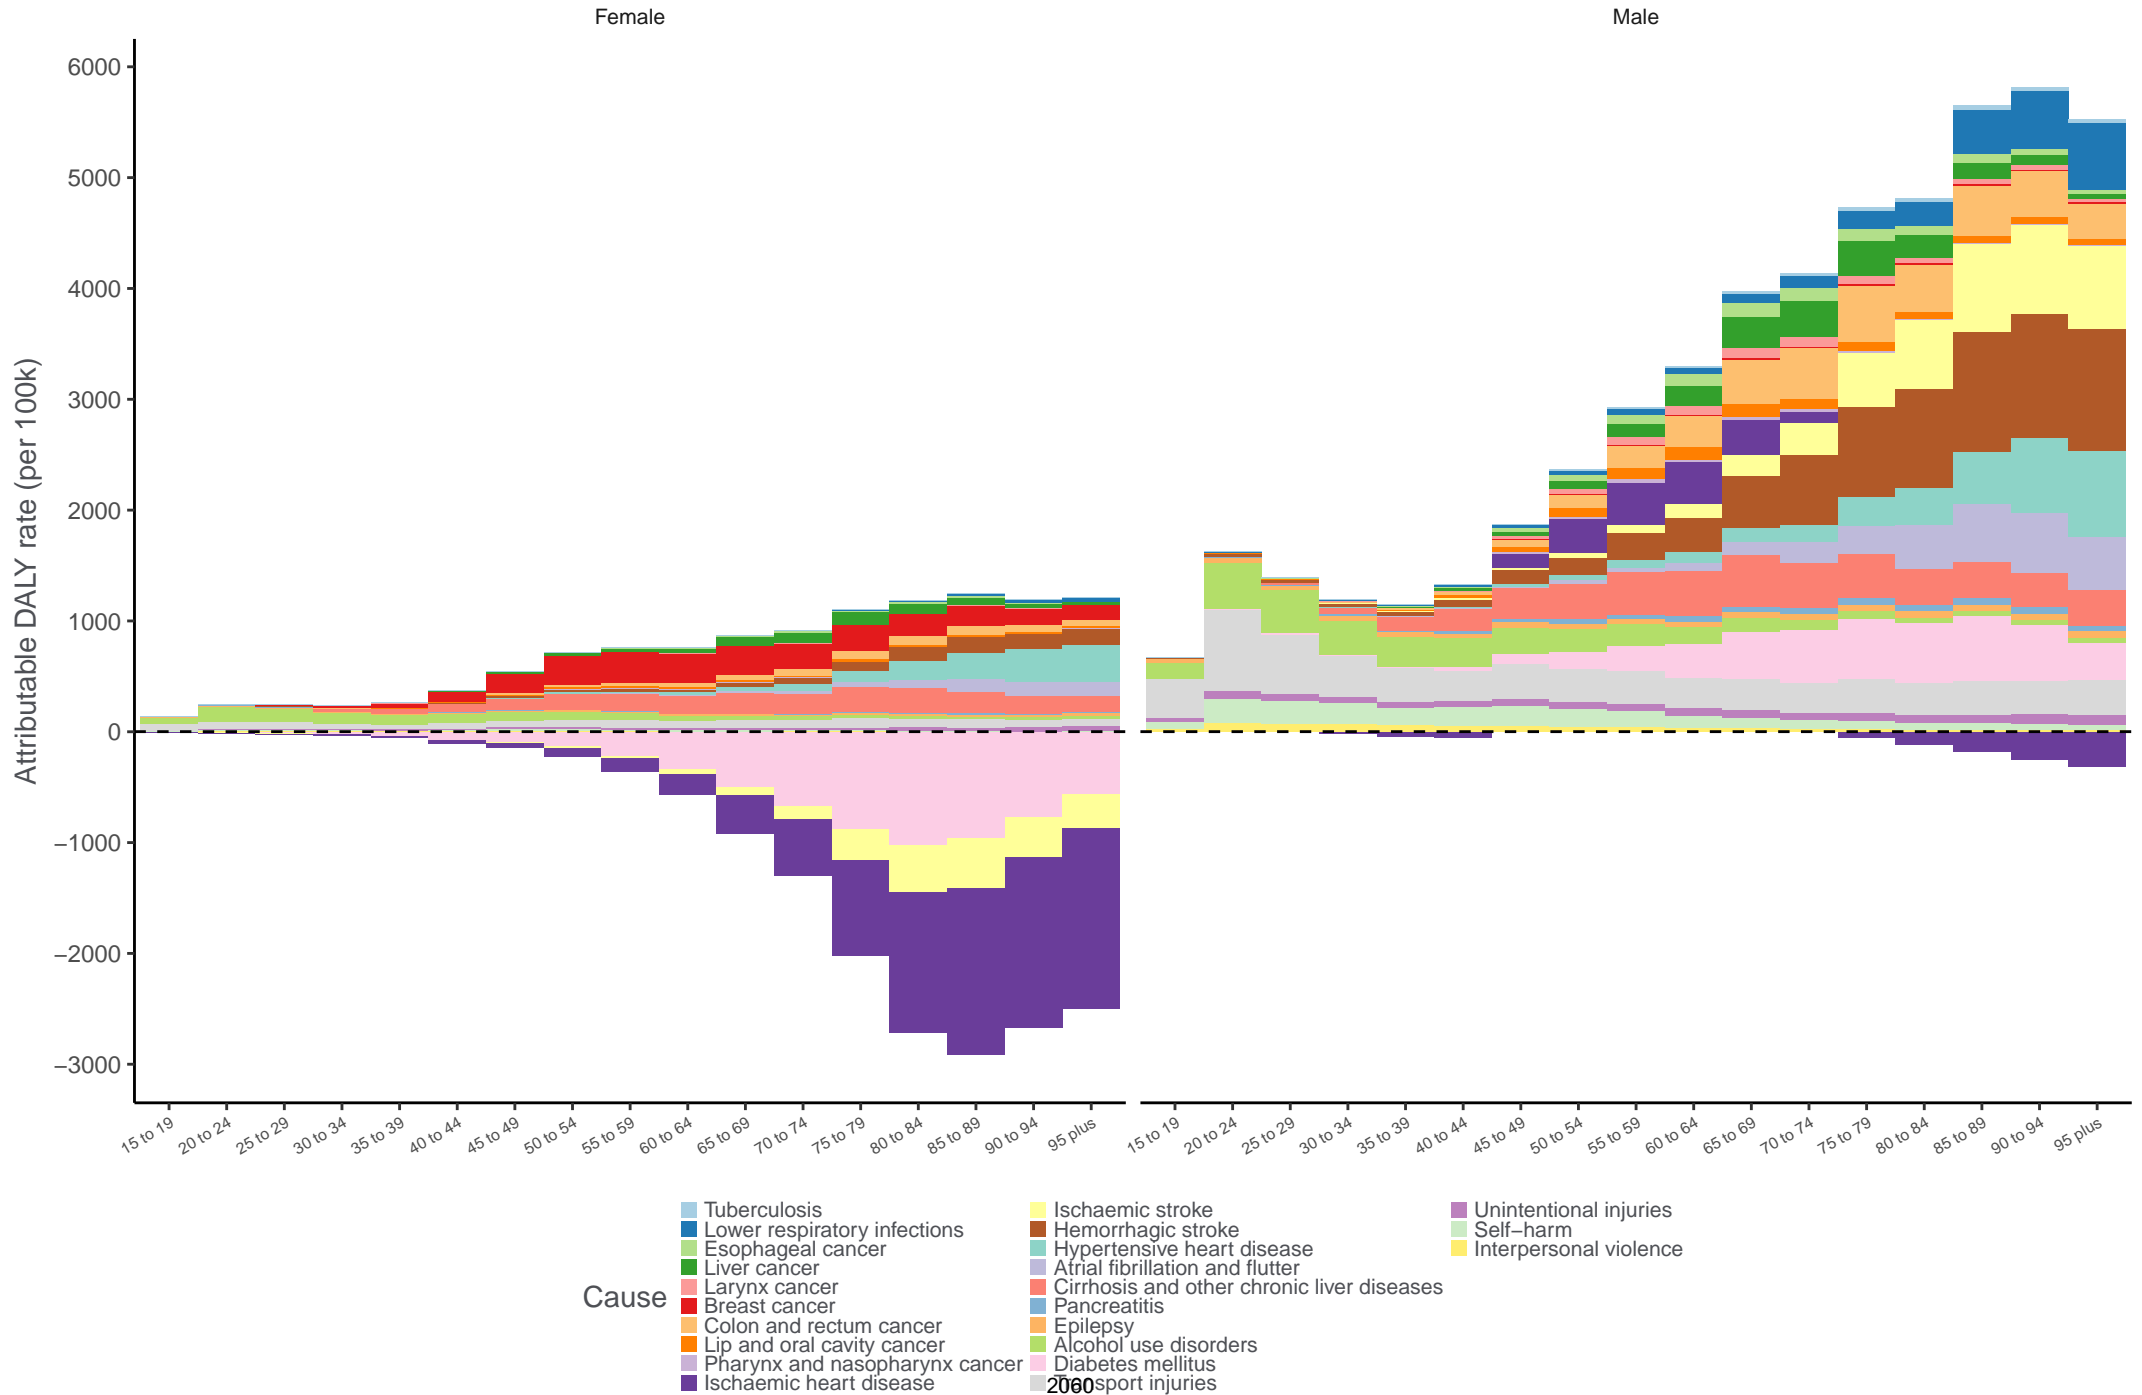



Attributable DALY rate disaggregated by cause, Finland, by sex and age in 2016.

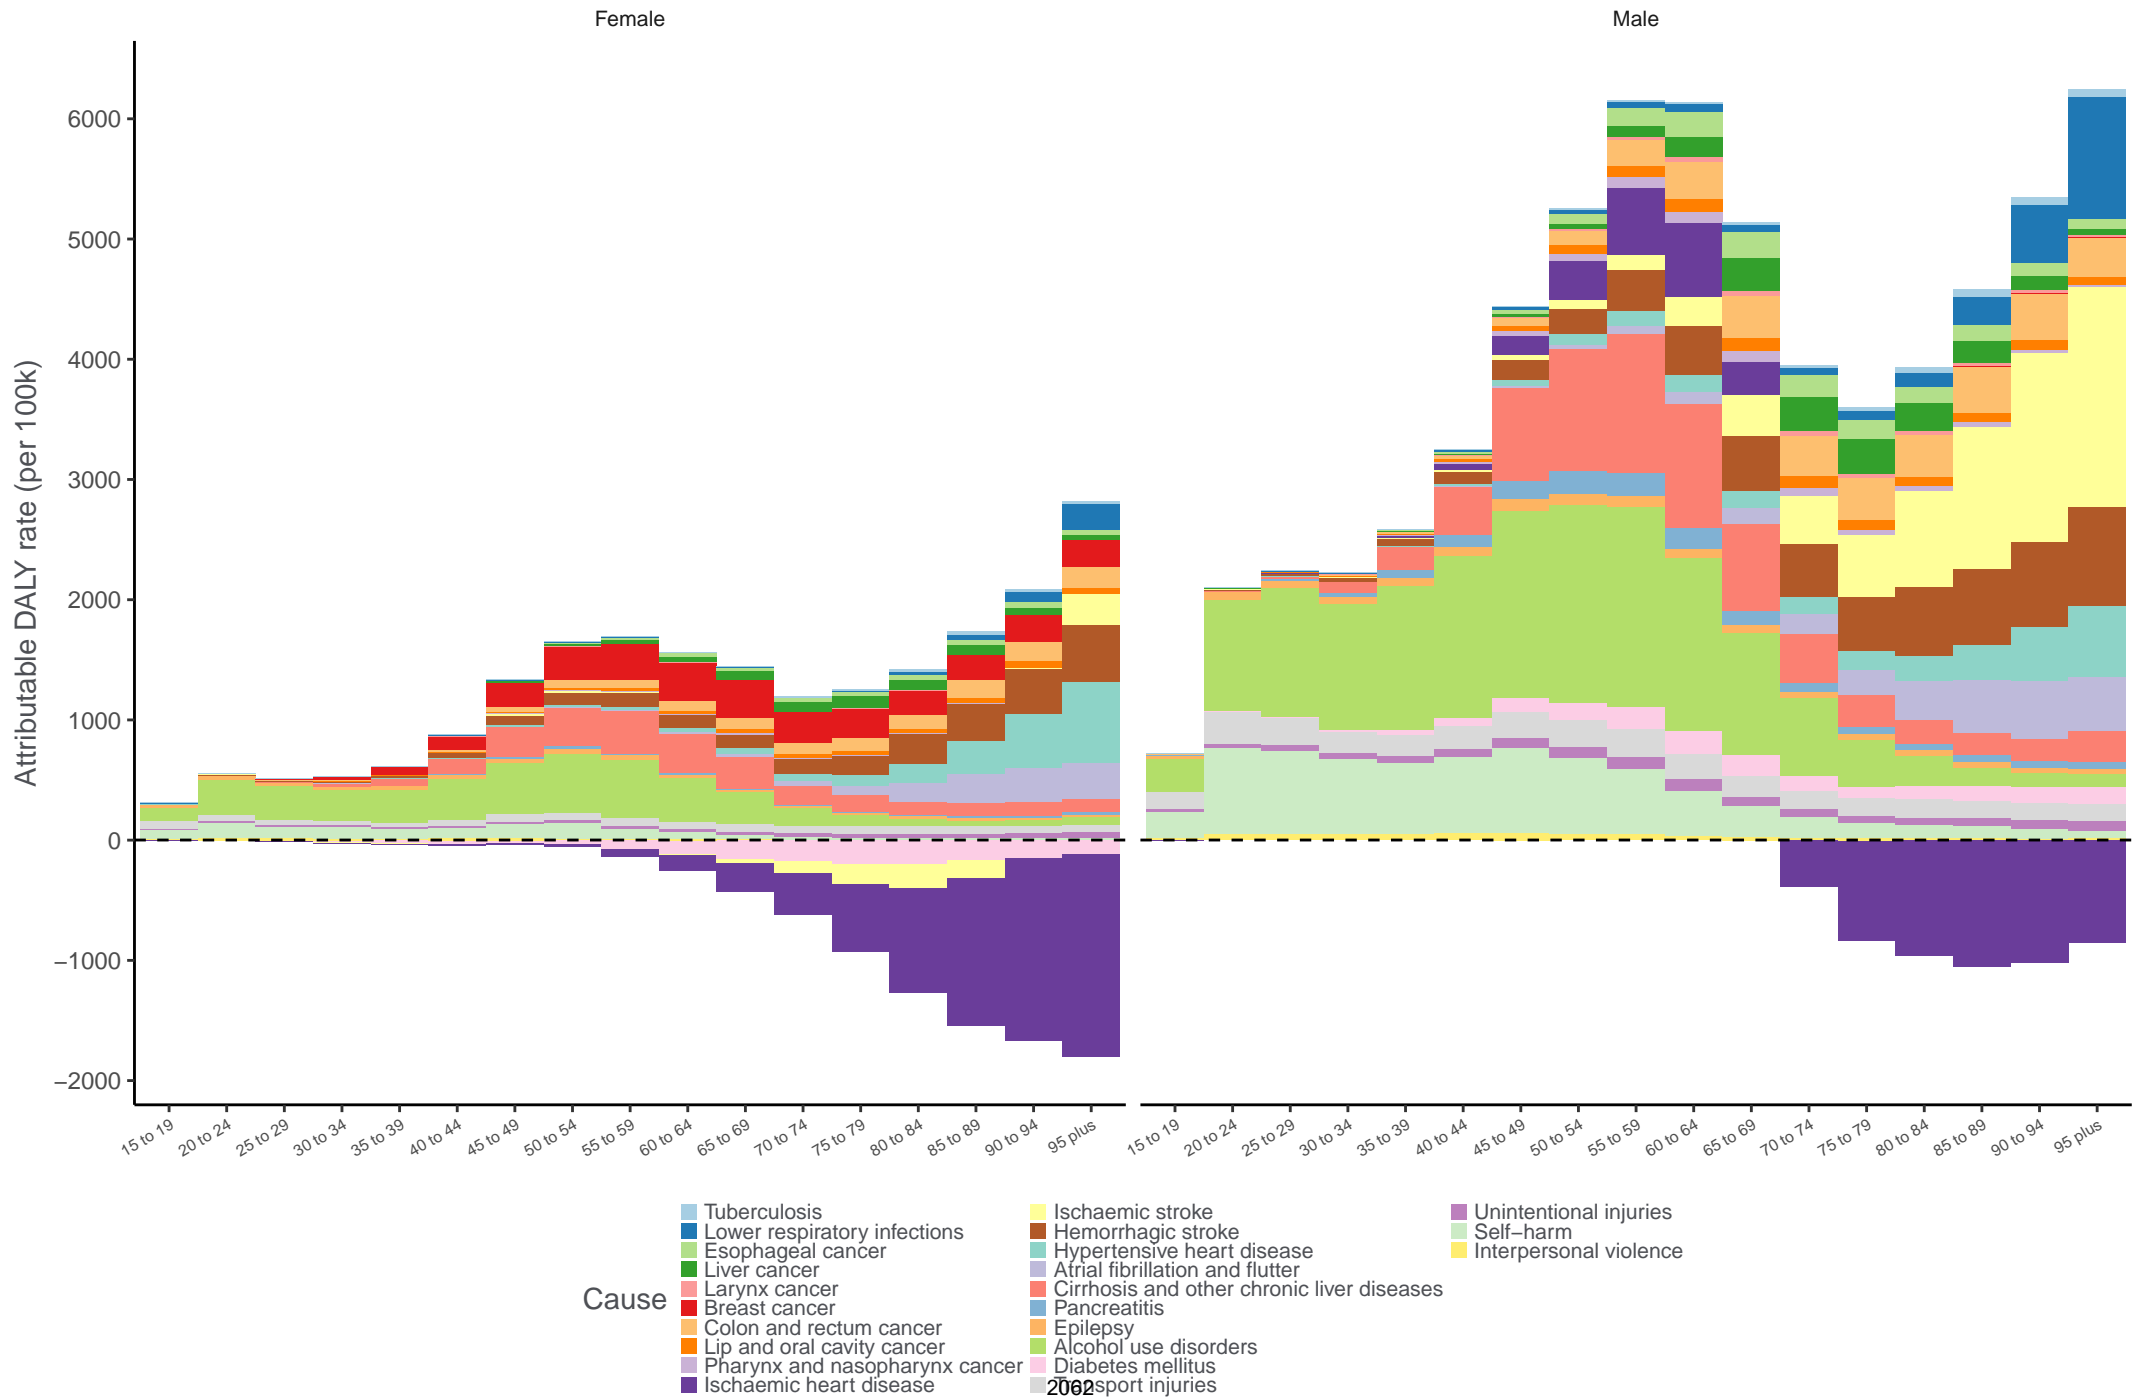

Attributable DALY rate disaggregated by cause, France, by sex and age in 2016.

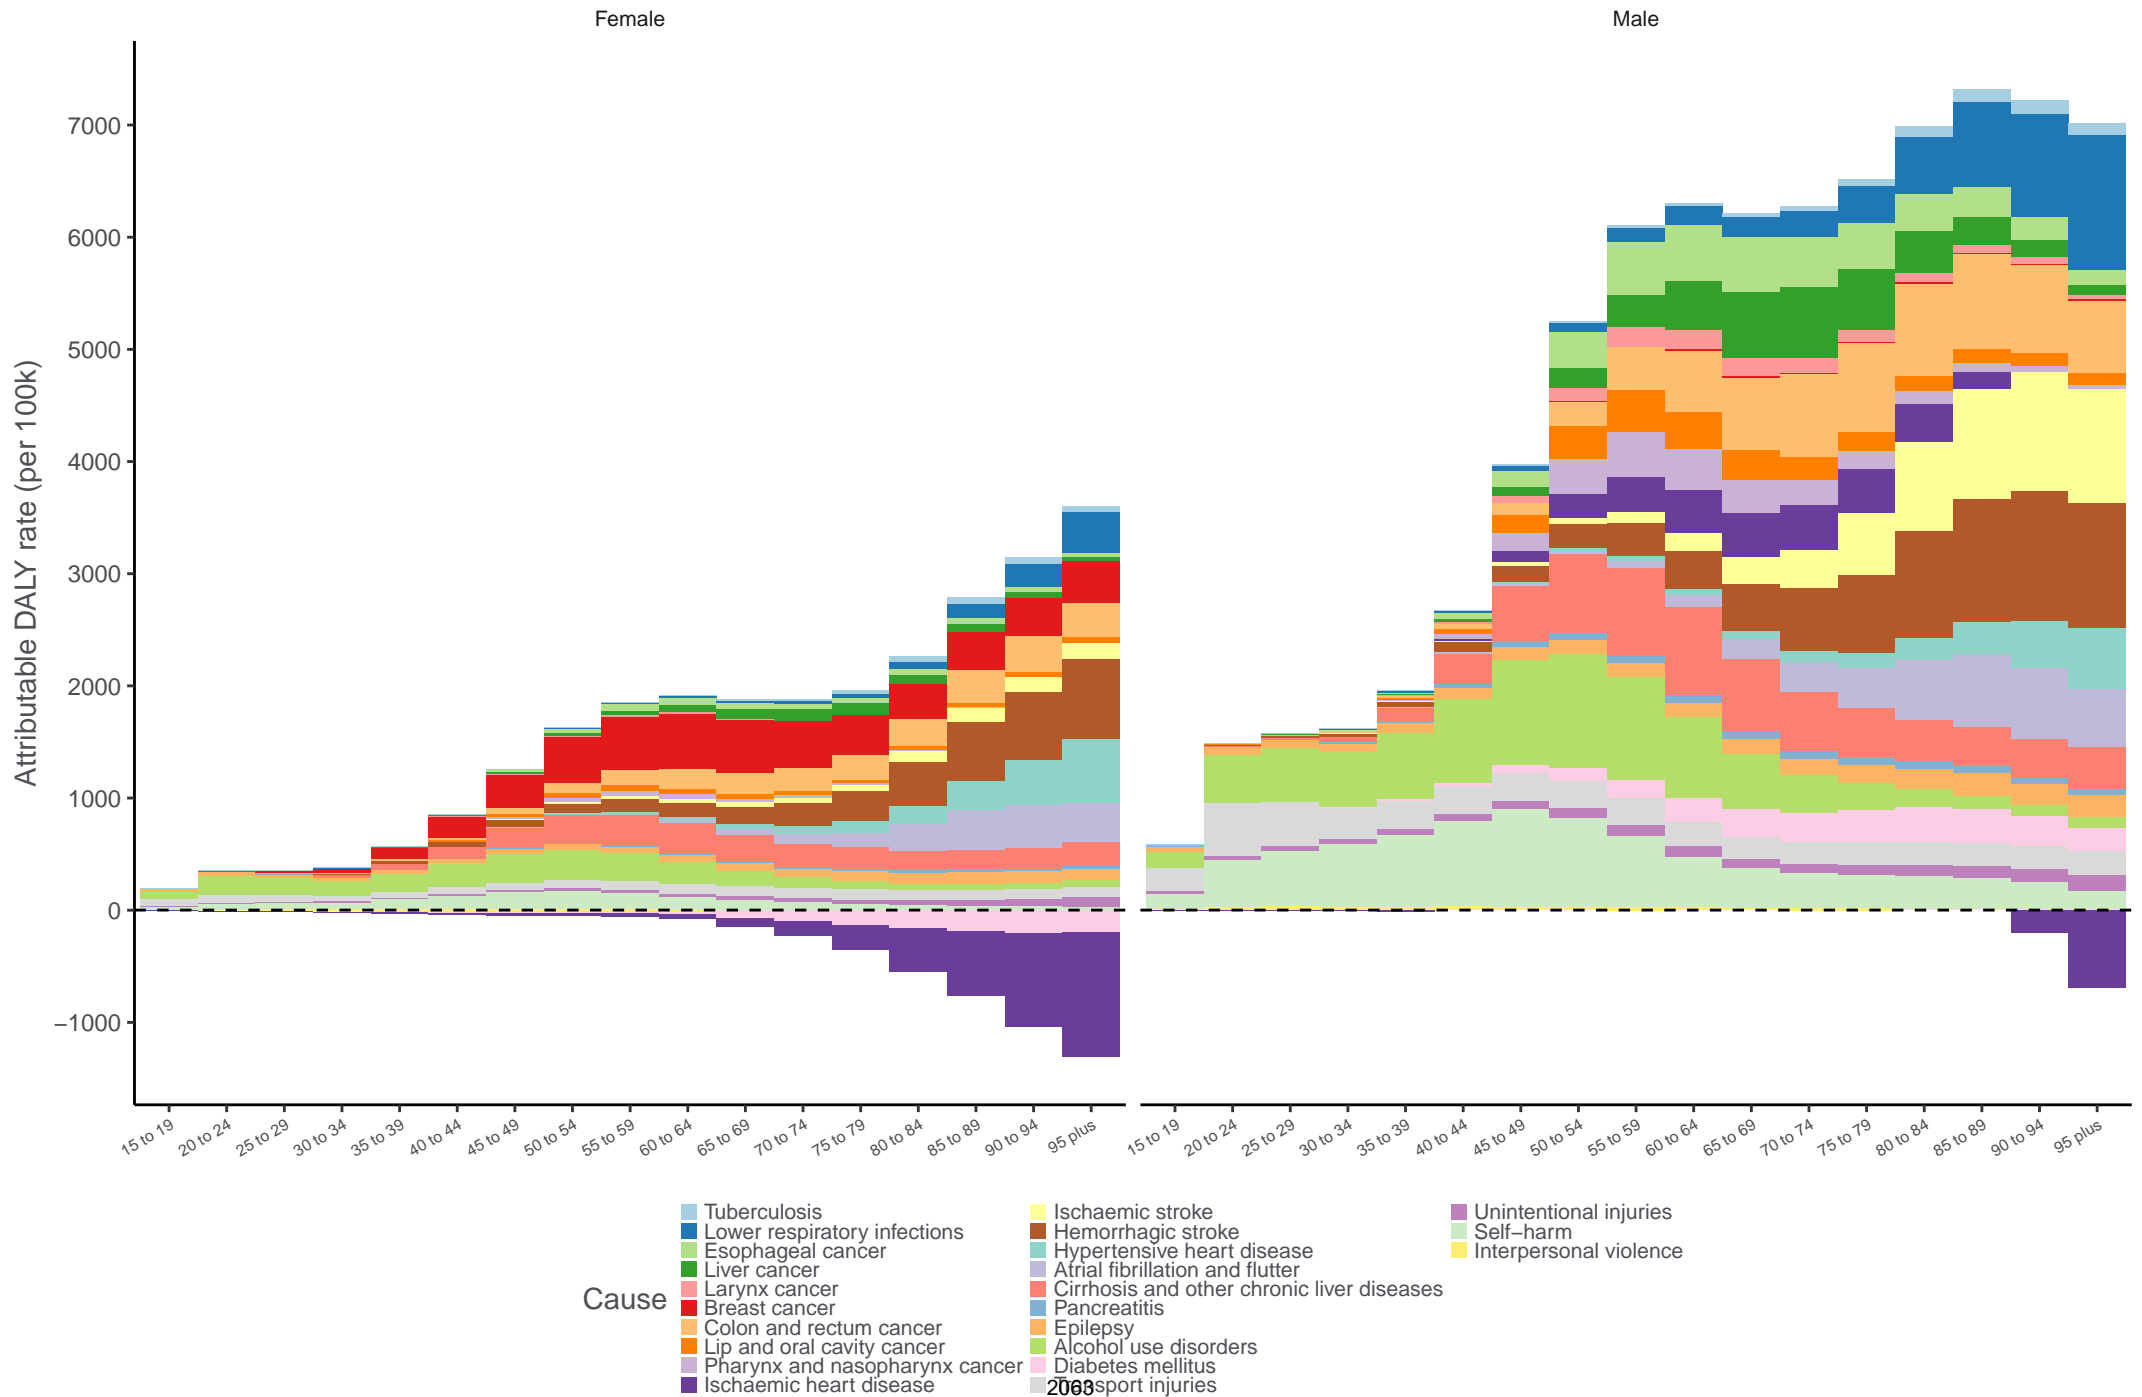



Attributable DALY rate disaggregated by cause, Germany, by sex and age in 2016.

Female

Male

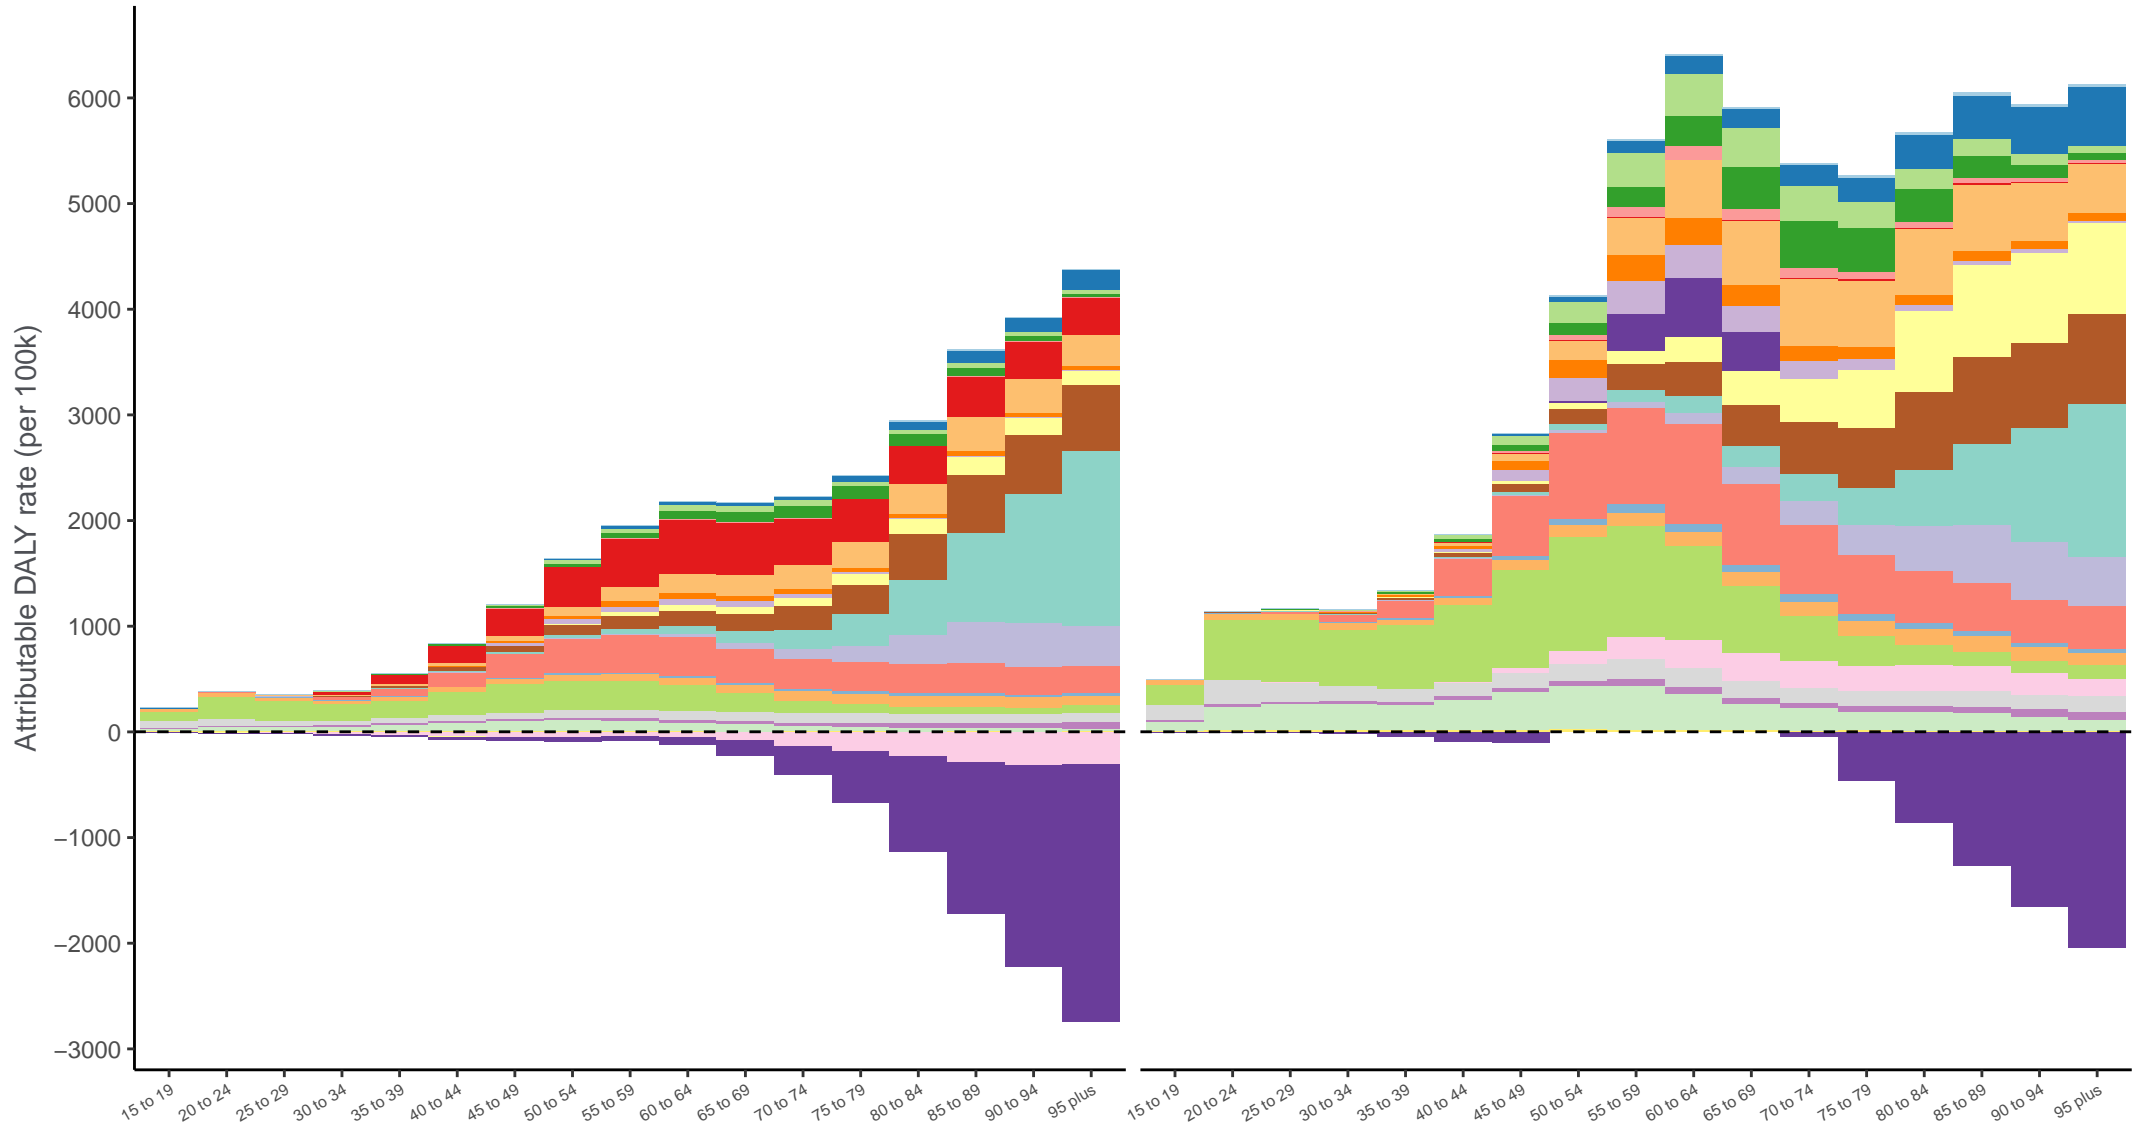

- Cause
- Tuberculosis
  - Lower respiratory infections
  - Esophageal cancer
  - Liver cancer
  - Larynx cancer
  - Breast cancer
  - Colon and rectum cancer
  - Lip and oral cavity cancer
  - Pharynx and nasopharynx cancer
  - Ischaemic heart disease
  - Ischaemic stroke
  - Hemorrhagic stroke
  - Hypertensive heart disease
  - Atrial fibrillation and flutter
  - Cirrhosis and other chronic liver diseases
  - Pancreatitis
  - Epilepsy
  - Alcohol use disorders
  - Diabetes mellitus
  - Unintentional injuries
  - Self-harm
  - Interpersonal violence

Attributable DALY rate disaggregated by cause, Greece, by sex and age in 2016.

Female

Male

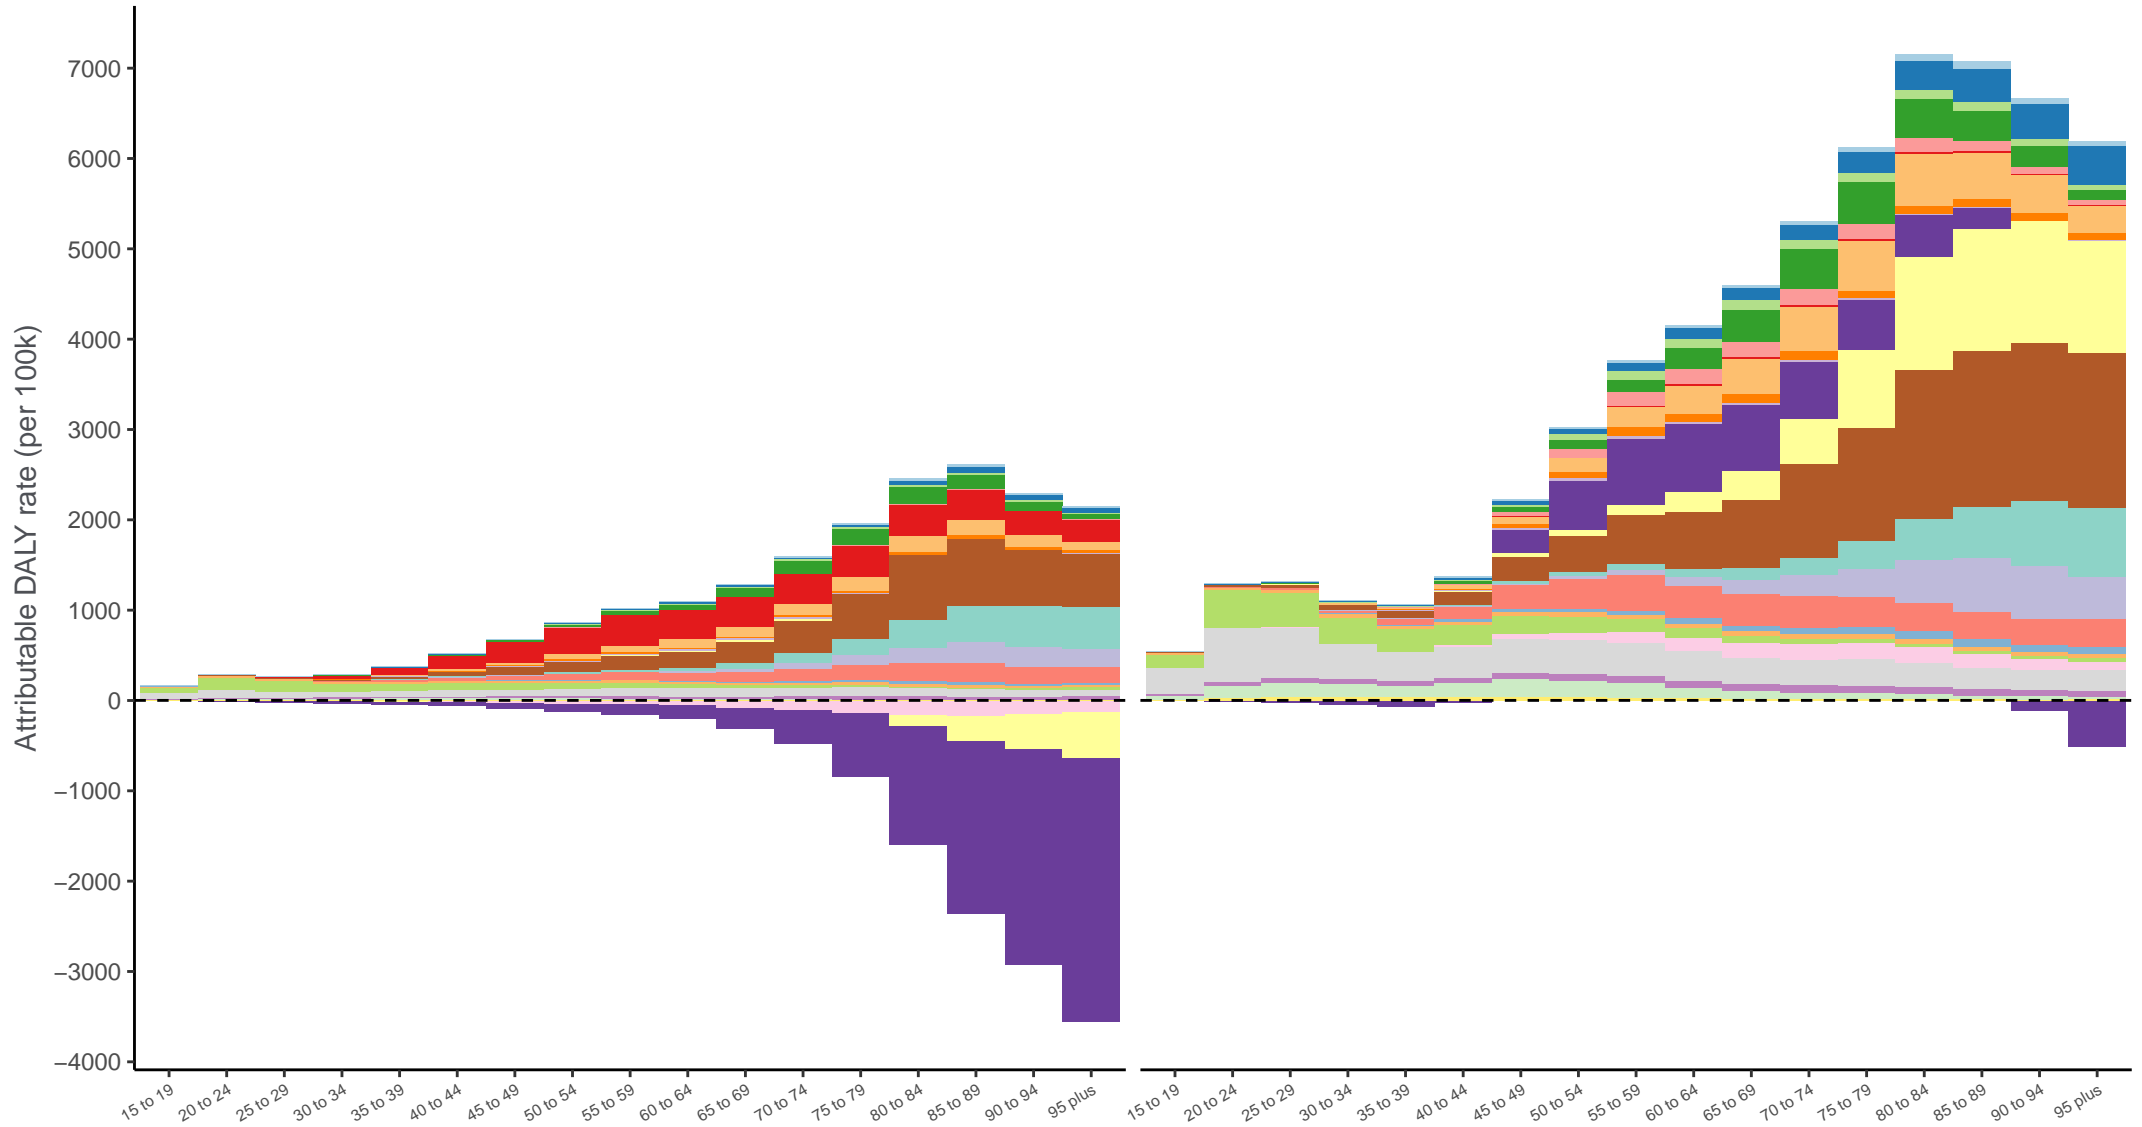

Cause

- |                                                                       |                                                                                   |                                                               |
|-----------------------------------------------------------------------|-----------------------------------------------------------------------------------|---------------------------------------------------------------|
| <span style="color: #ADD8E6;">■</span> Tuberculosis                   | <span style="color: #FFFF00;">■</span> Ischaemic stroke                           | <span style="color: #800080;">■</span> Unintentional injuries |
| <span style="color: #000080;">■</span> Lower respiratory infections   | <span style="color: #8B4513;">■</span> Hemorrhagic stroke                         | <span style="color: #90EE90;">■</span> Self-harm              |
| <span style="color: #90EE90;">■</span> Esophageal cancer              | <span style="color: #4682B4;">■</span> Hypertensive heart disease                 | <span style="color: #FFFF00;">■</span> Interpersonal violence |
| <span style="color: #008000;">■</span> Liver cancer                   | <span style="color: #A9A9A9;">■</span> Atrial fibrillation and flutter            |                                                               |
| <span style="color: #F08080;">■</span> Larynx cancer                  | <span style="color: #FF6347;">■</span> Cirrhosis and other chronic liver diseases |                                                               |
| <span style="color: #FF0000;">■</span> Breast cancer                  | <span style="color: #4682B4;">■</span> Pancreatitis                               |                                                               |
| <span style="color: #FFD700;">■</span> Colon and rectum cancer        | <span style="color: #FF8C00;">■</span> Epilepsy                                   |                                                               |
| <span style="color: #FFA500;">■</span> Lip and oral cavity cancer     | <span style="color: #90EE90;">■</span> Alcohol use disorders                      |                                                               |
| <span style="color: #9370DB;">■</span> Pharynx and nasopharynx cancer | <span style="color: #FFB6C1;">■</span> Diabetes mellitus                          |                                                               |
| <span style="color: #483D8B;">■</span> Ischaemic heart disease        | <span style="color: #A9A9A9;">■</span> Sport injuries                             |                                                               |

# Attributable DALY rate disaggregated by cause, Greenland, by sex and age in 2016.

Female

Male

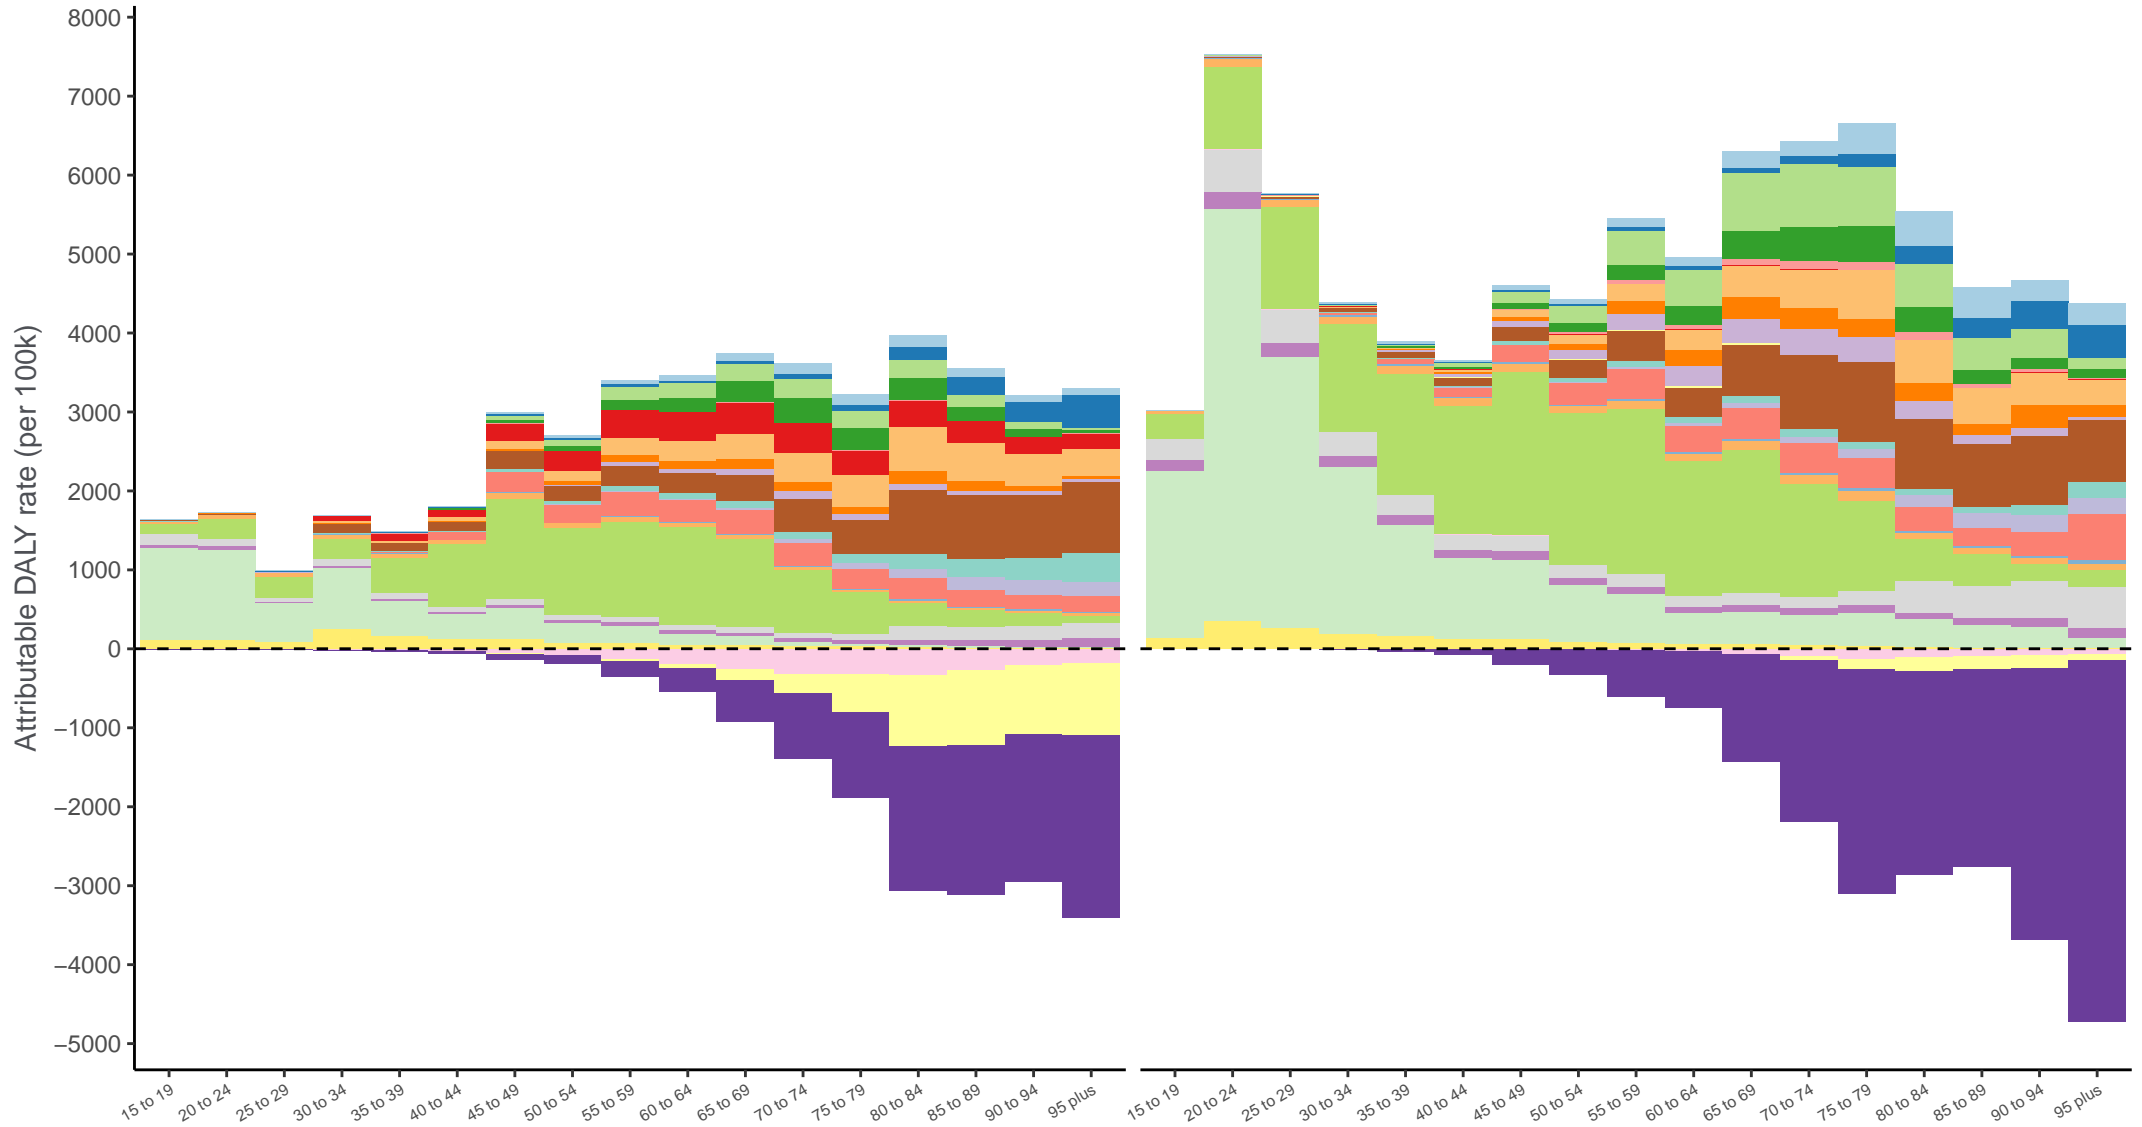

- Cause**
- Tuberculosis
  - Ischaemic stroke
  - Unintentional injuries
  - Lower respiratory infections
  - Hemorrhagic stroke
  - Self-harm
  - Esophageal cancer
  - Hypertensive heart disease
  - Interpersonal violence
  - Liver cancer
  - Atrial fibrillation and flutter
  - Larynx cancer
  - Cirrhosis and other chronic liver diseases
  - Breast cancer
  - Pancreatitis
  - Colon and rectum cancer
  - Epilepsy
  - Alcohol use disorders
  - Pharynx and nasopharynx cancer
  - Diabetes mellitus
  - Ischaemic heart disease
  - Sport injuries

Attributable DALY rate disaggregated by cause, Iceland, by sex and age in 2016.

Female

Male

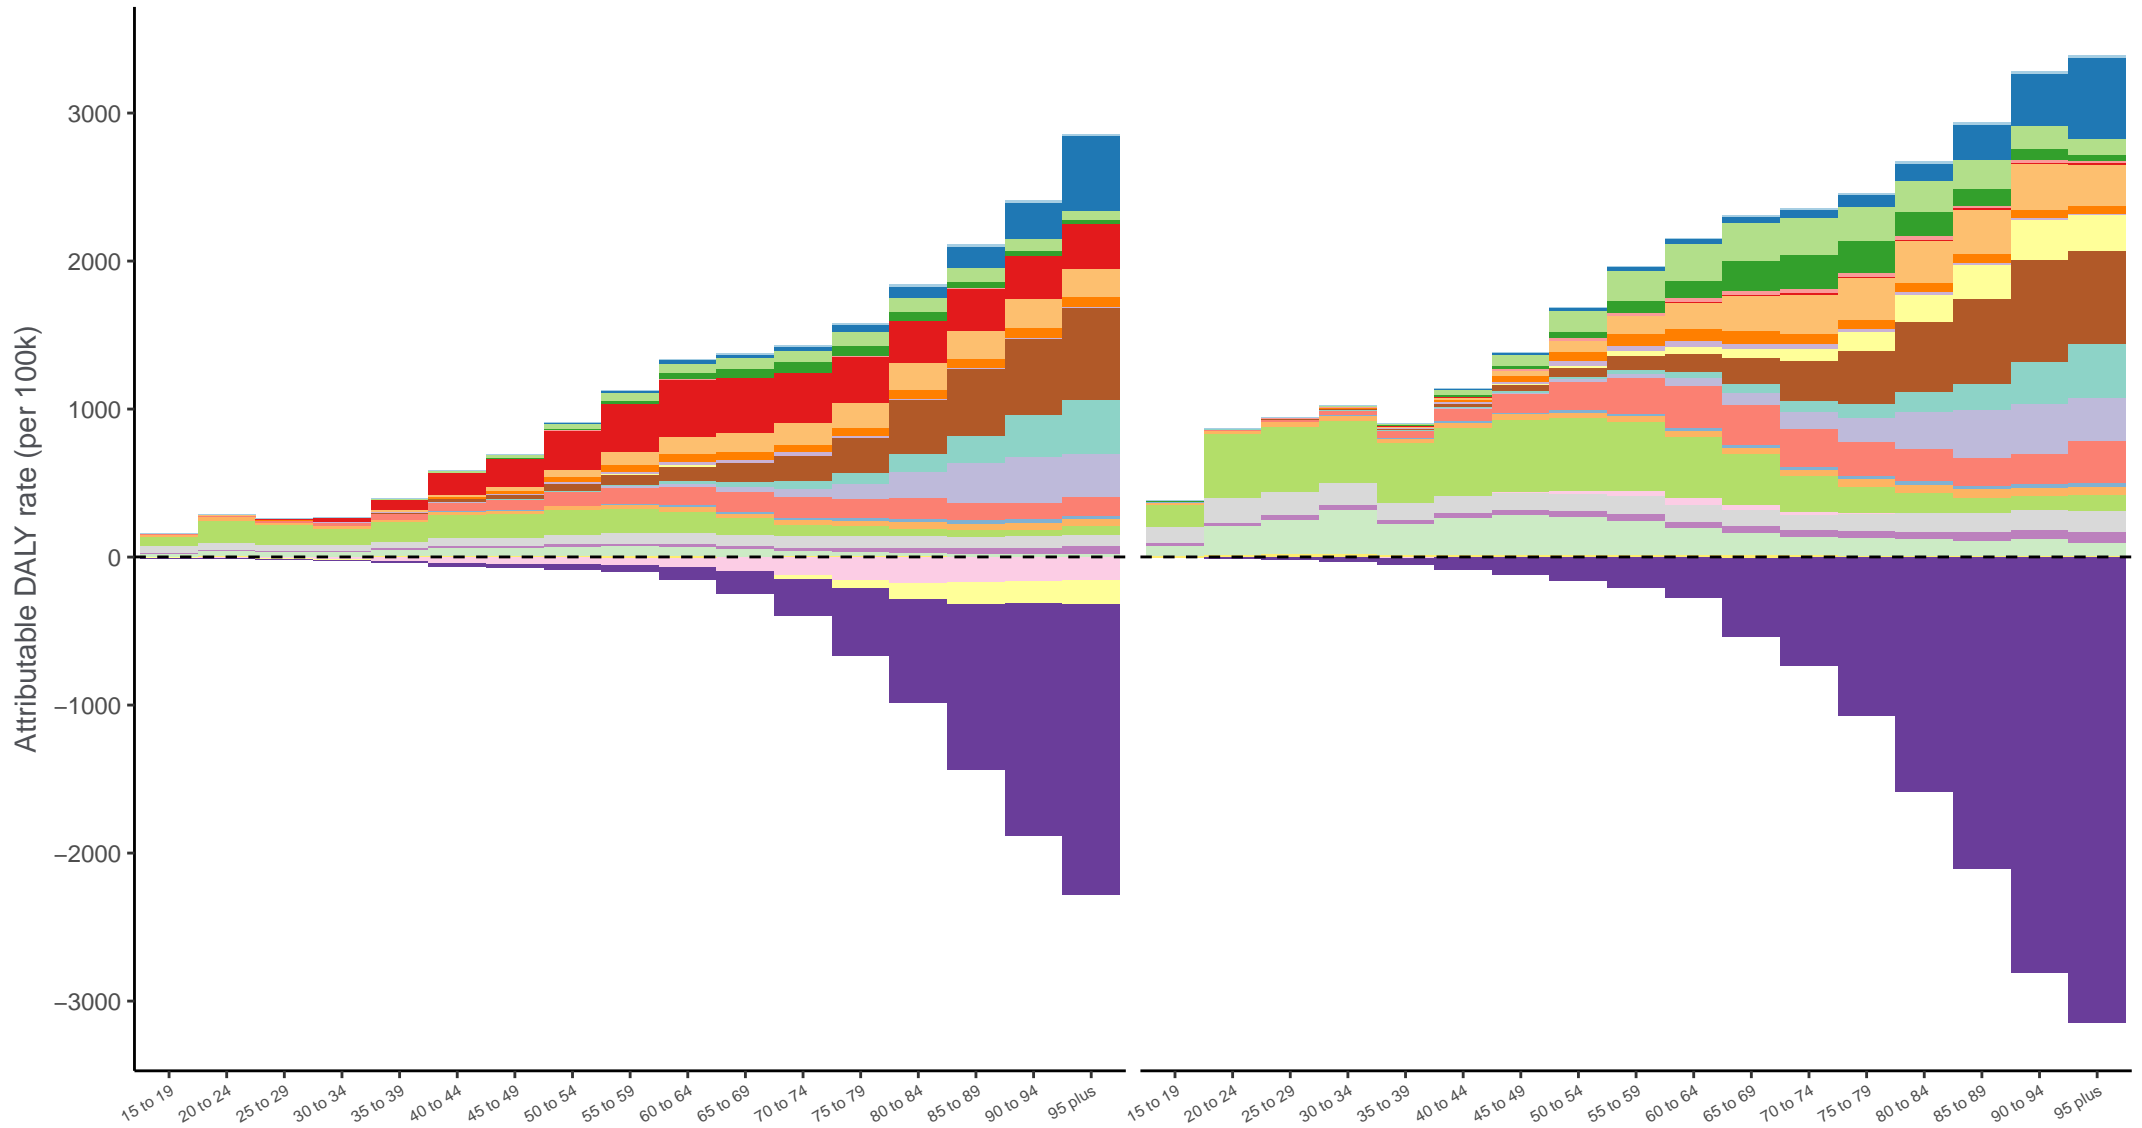

- Cause
- Tuberculosis
  - Lower respiratory infections
  - Esophageal cancer
  - Liver cancer
  - Larynx cancer
  - Breast cancer
  - Colon and rectum cancer
  - Lip and oral cavity cancer
  - Pharynx and nasopharynx cancer
  - Ischaemic heart disease
  - Ischaemic stroke
  - Hemorrhagic stroke
  - Hypertensive heart disease
  - Atrial fibrillation and flutter
  - Cirrhosis and other chronic liver diseases
  - Pancreatitis
  - Epilepsy
  - Alcohol use disorders
  - Diabetes mellitus
  - Unintentional injuries
  - Self-harm
  - Interpersonal violence
  - Sport injuries

# Attributable DALY rate disaggregated by cause, Ireland, by sex and age in 2016.

Female

Male

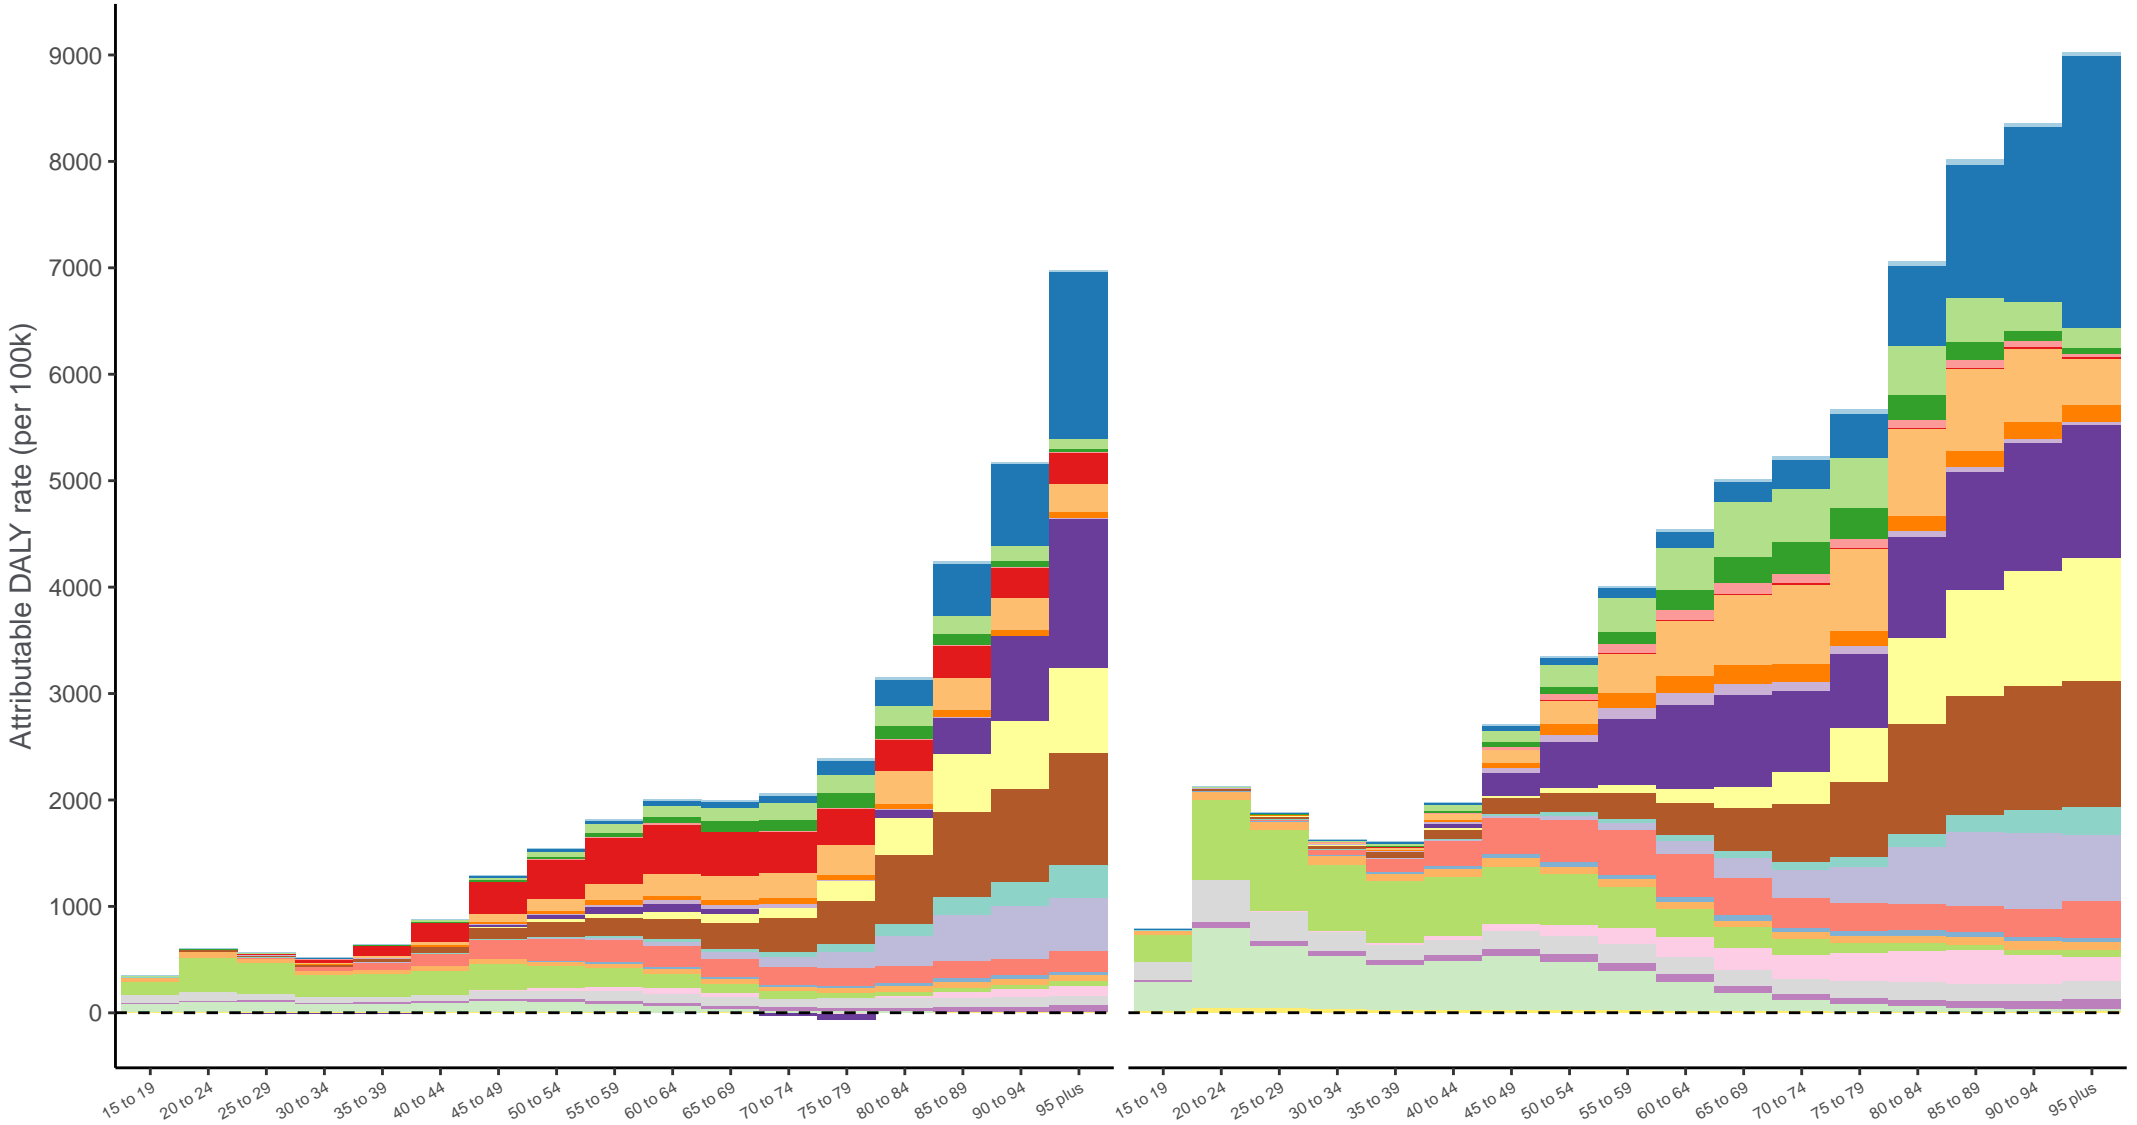

- Cause
- Tuberculosis
  - Lower respiratory infections
  - Esophageal cancer
  - Liver cancer
  - Larynx cancer
  - Breast cancer
  - Colon and rectum cancer
  - Lip and oral cavity cancer
  - Pharynx and nasopharynx cancer
  - Ischaemic heart disease
  - Ischaemic stroke
  - Hemorrhagic stroke
  - Hypertensive heart disease
  - Atrial fibrillation and flutter
  - Cirrhosis and other chronic liver diseases
  - Pancreatitis
  - Epilepsy
  - Alcohol use disorders
  - Diabetes mellitus
  - Unintentional injuries
  - Self-harm
  - Interpersonal violence
  - Transport injuries

Attributable DALY rate disaggregated by cause, Israel, by sex and age in 2016.

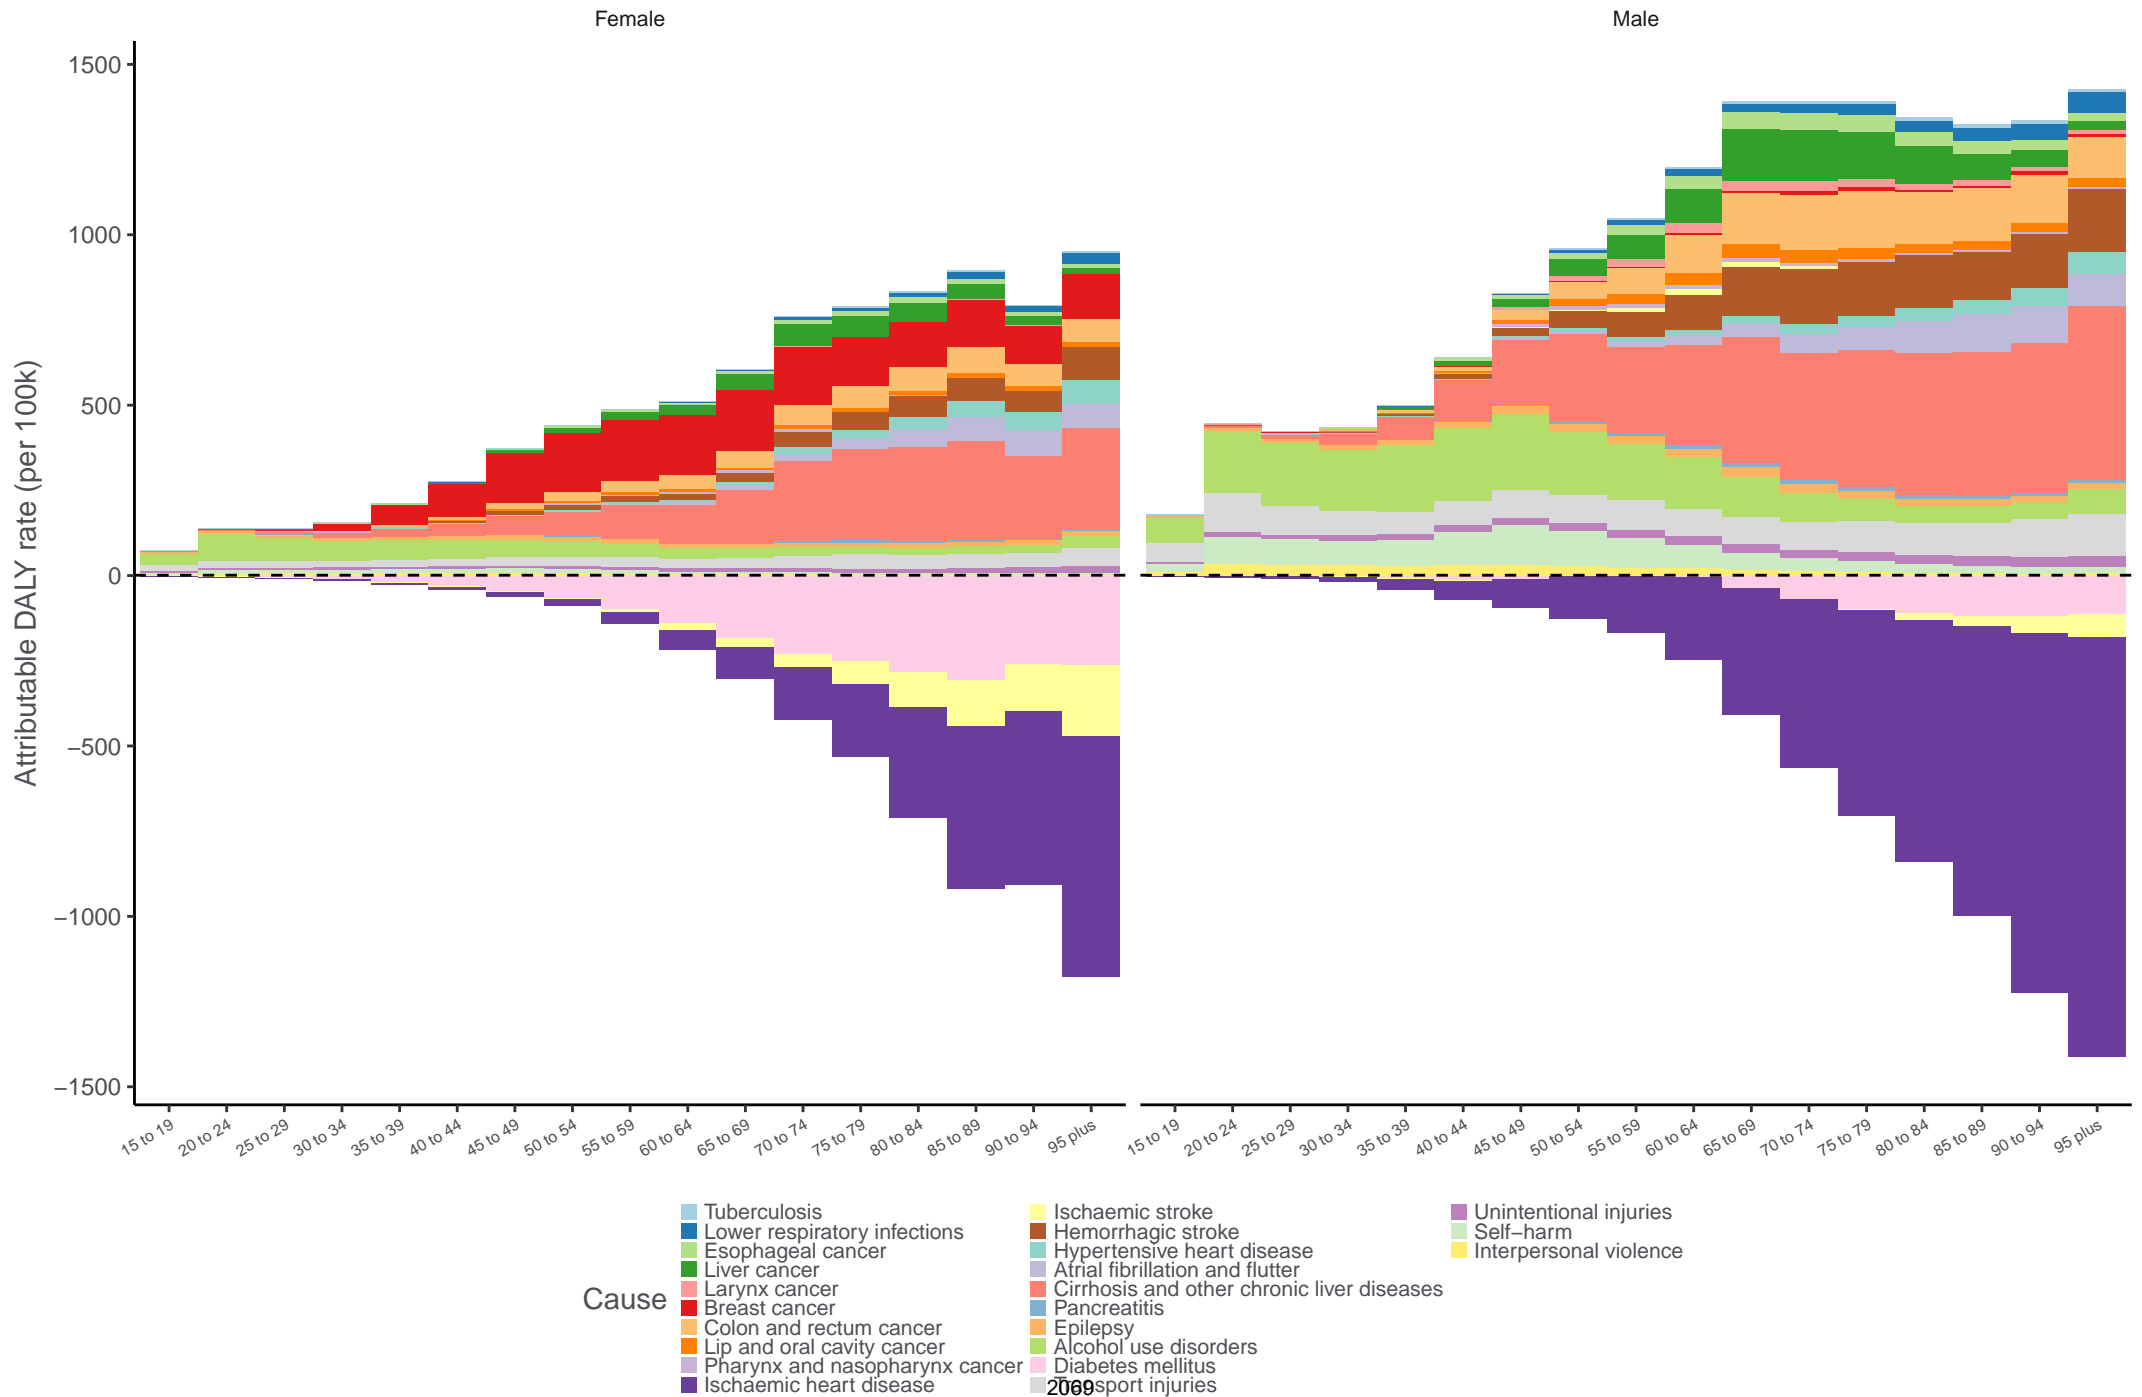

Attributable DALY rate disaggregated by cause, Italy, by sex and age in 2016.

Female

Male

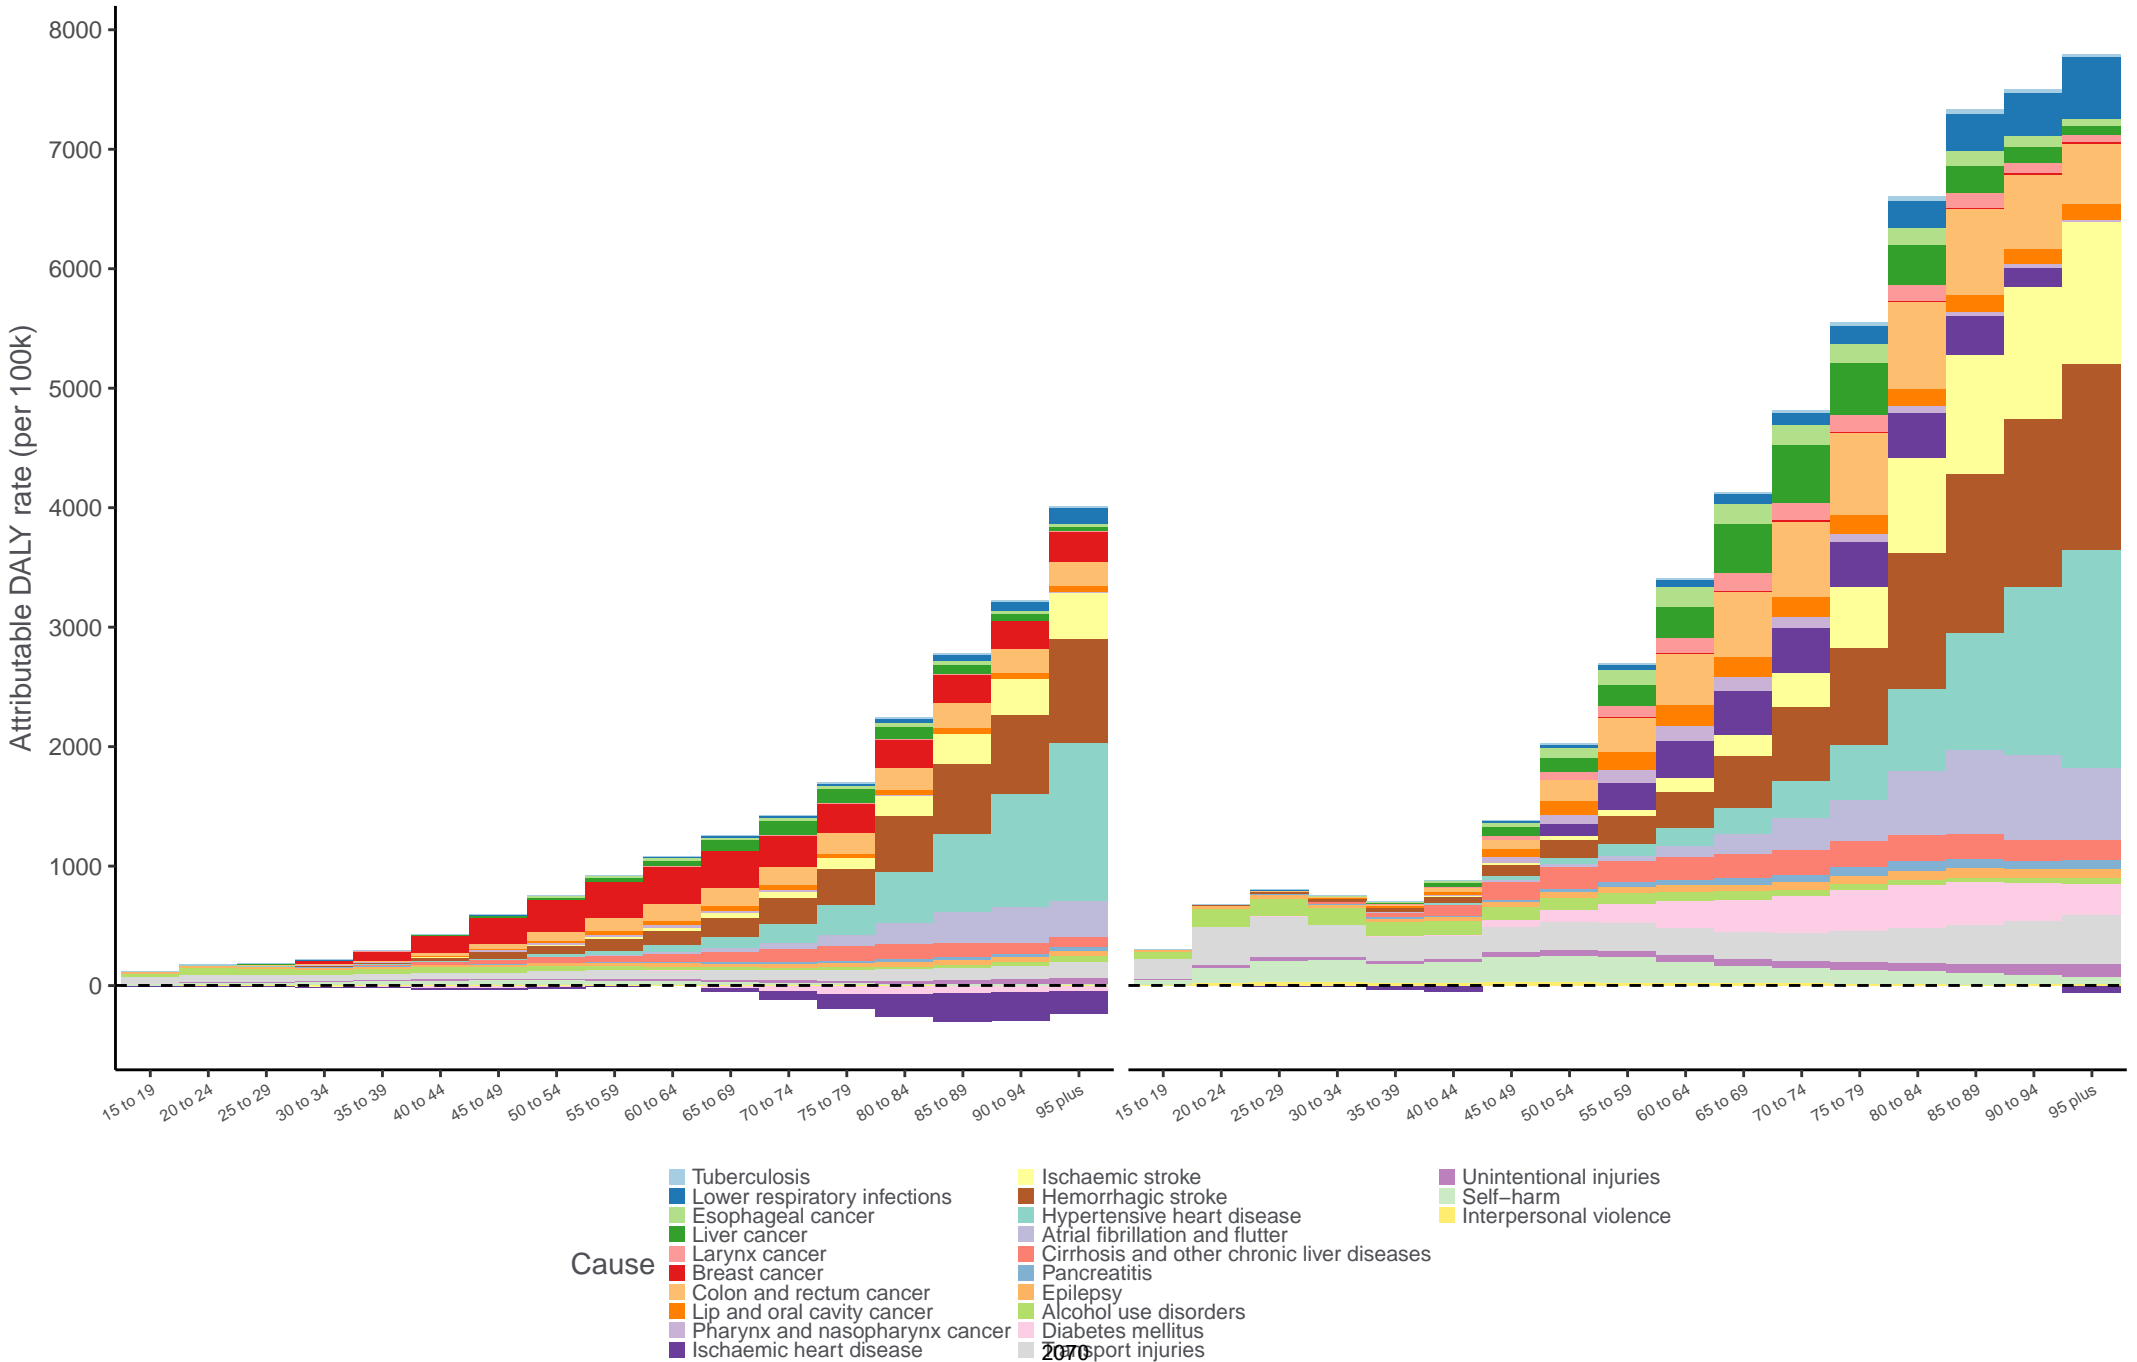

Attributable DALY rate disaggregated by cause, Luxembourg, by sex and age in 2016.

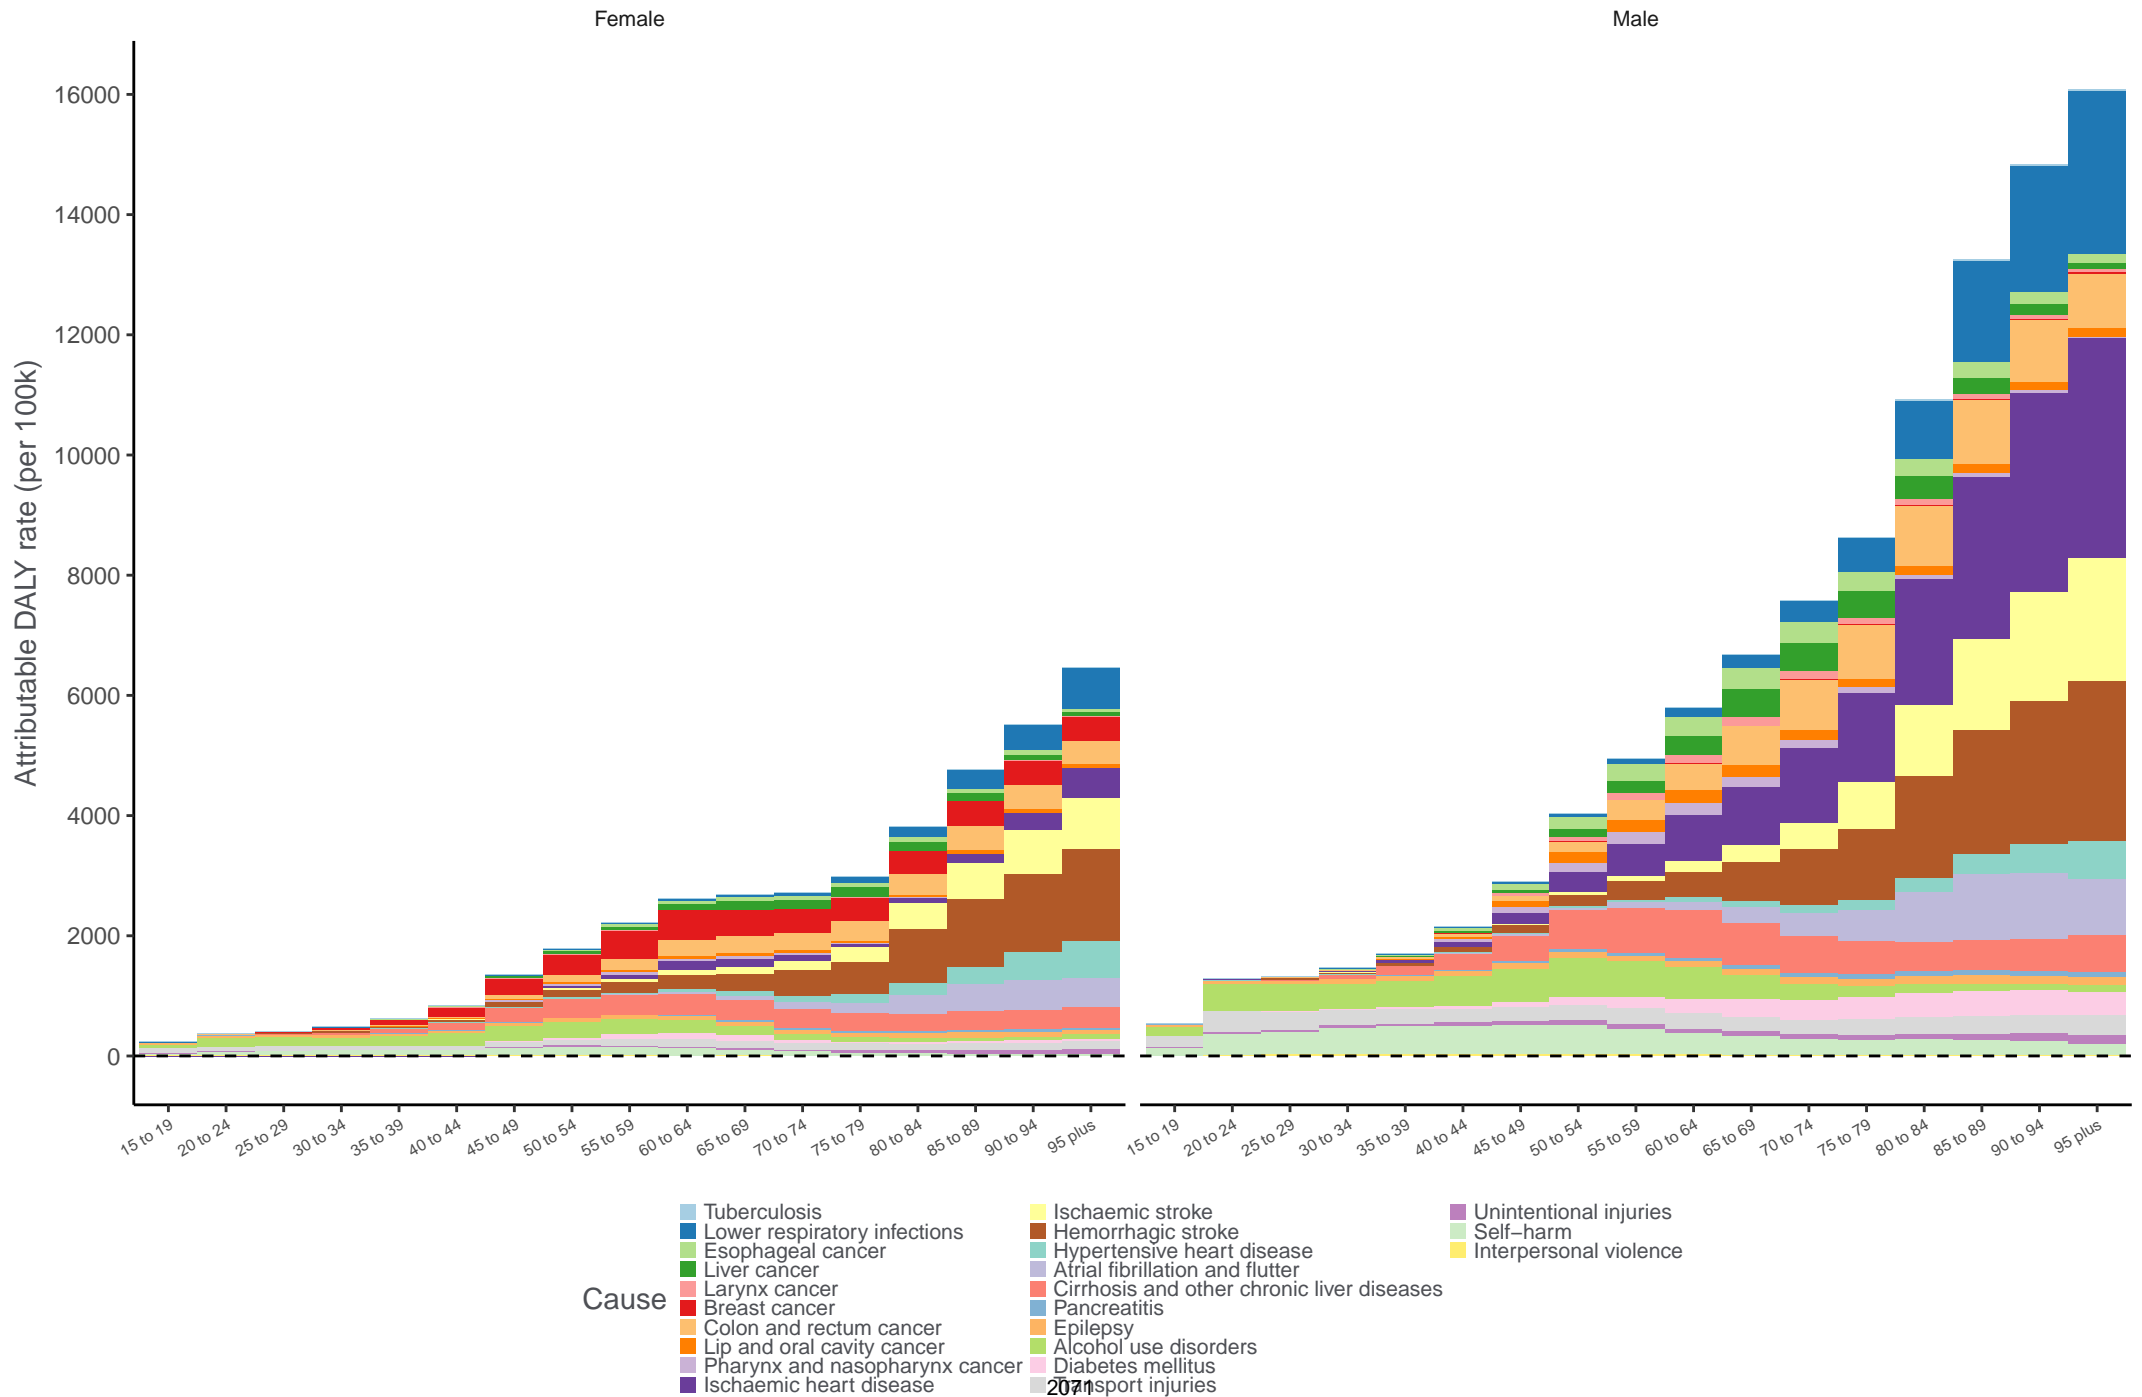



Attributable DALY rate disaggregated by cause, Malta, by sex and age in 2016.

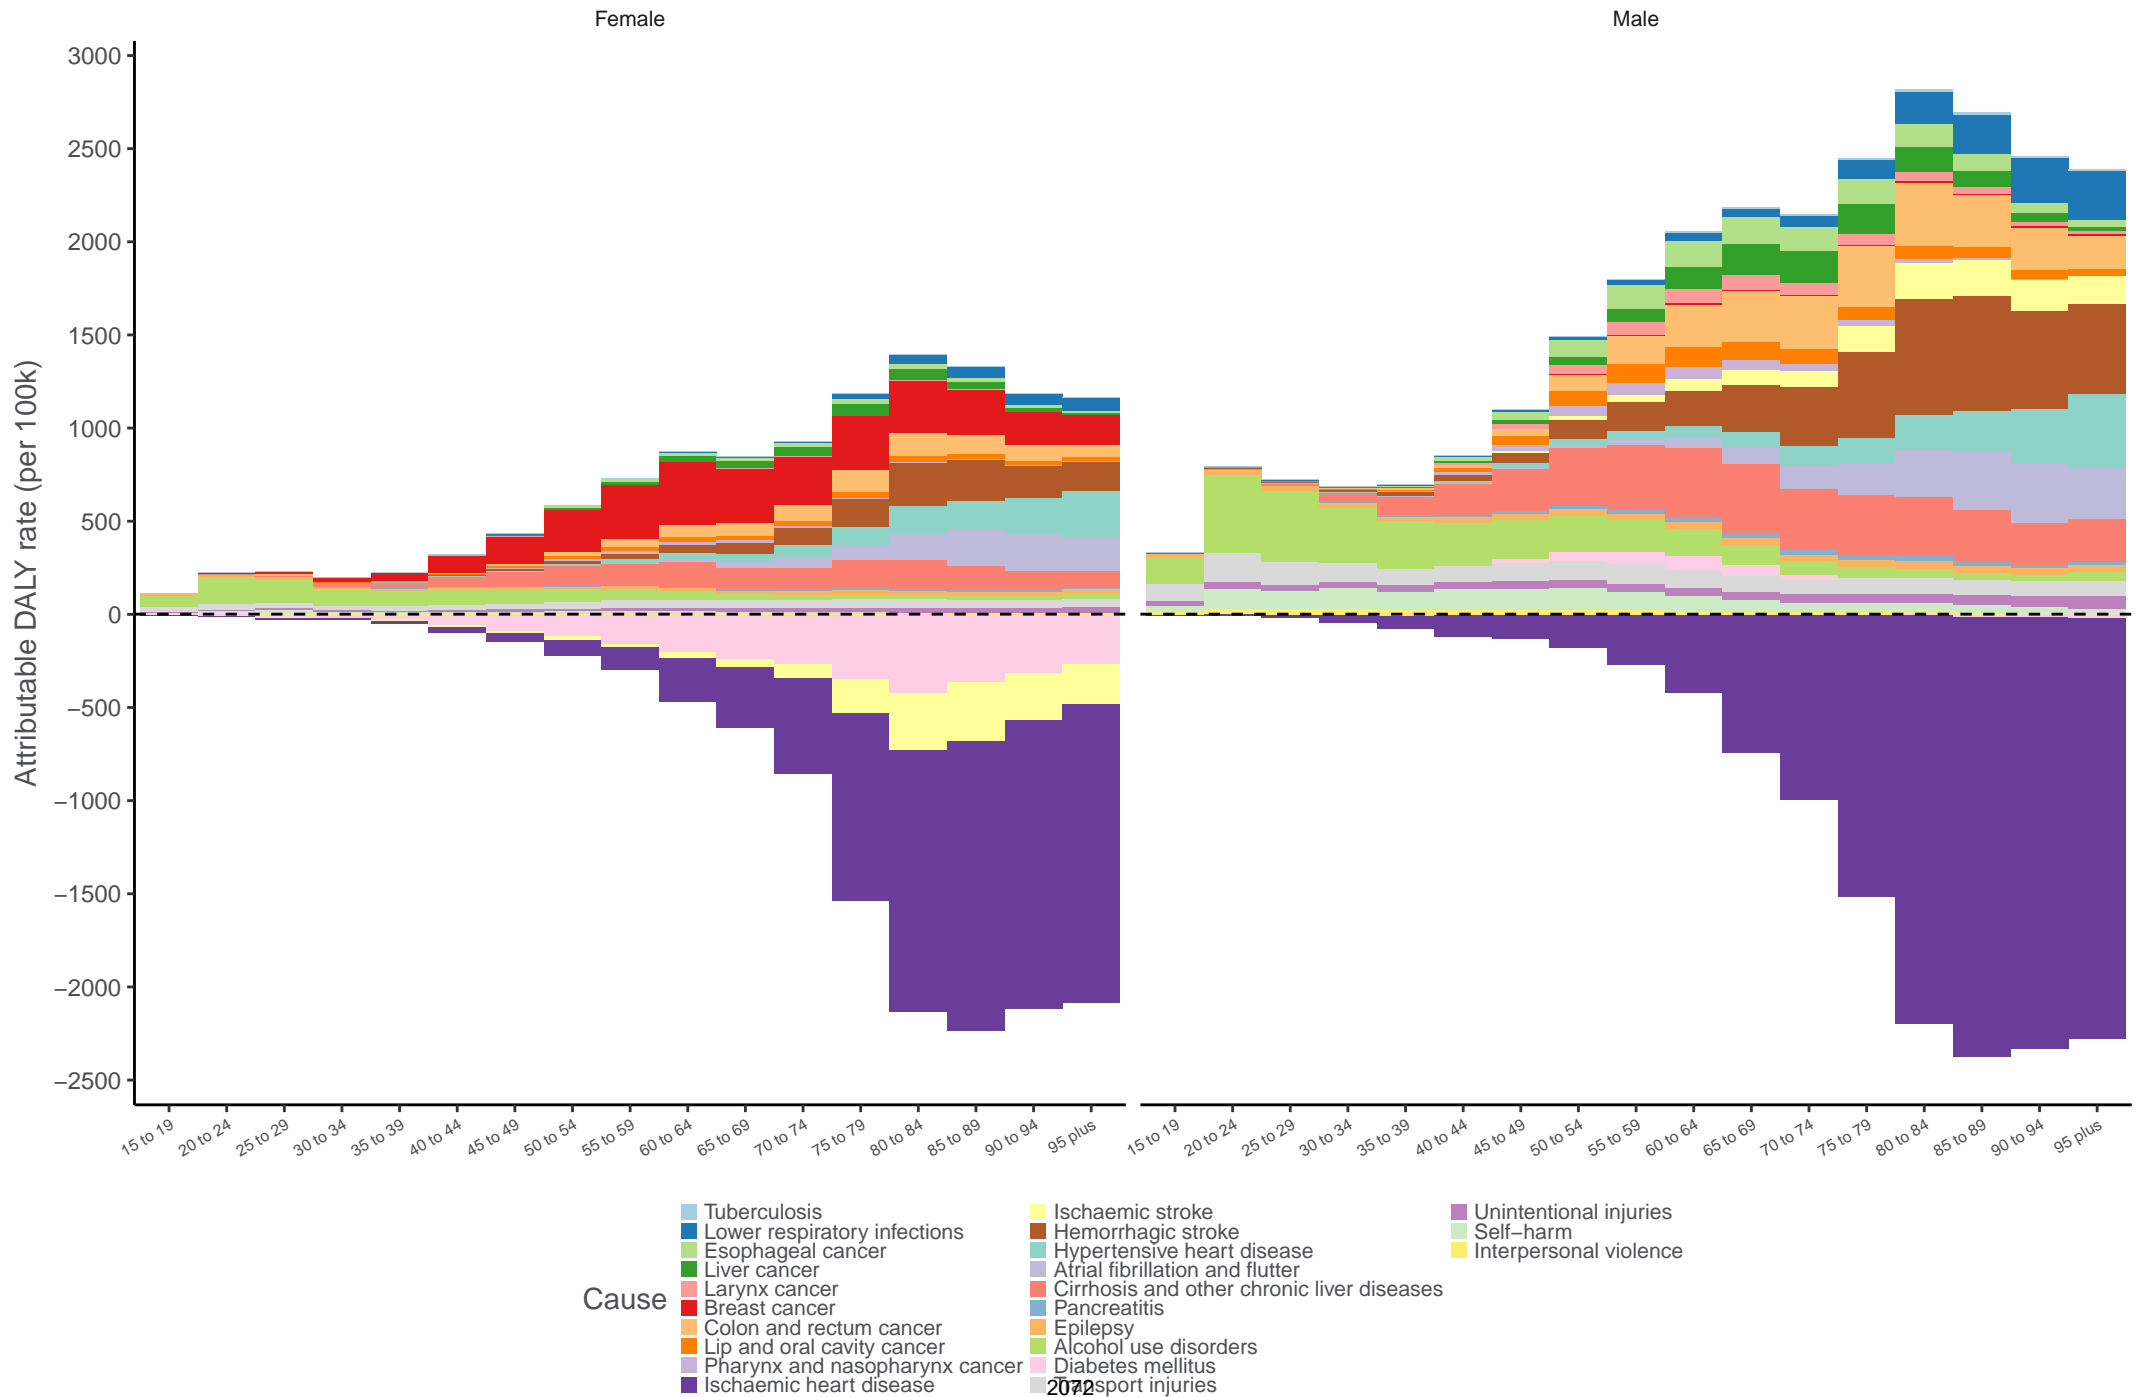

Attributable DALY rate disaggregated by cause, Netherlands, by sex and age in 2016.

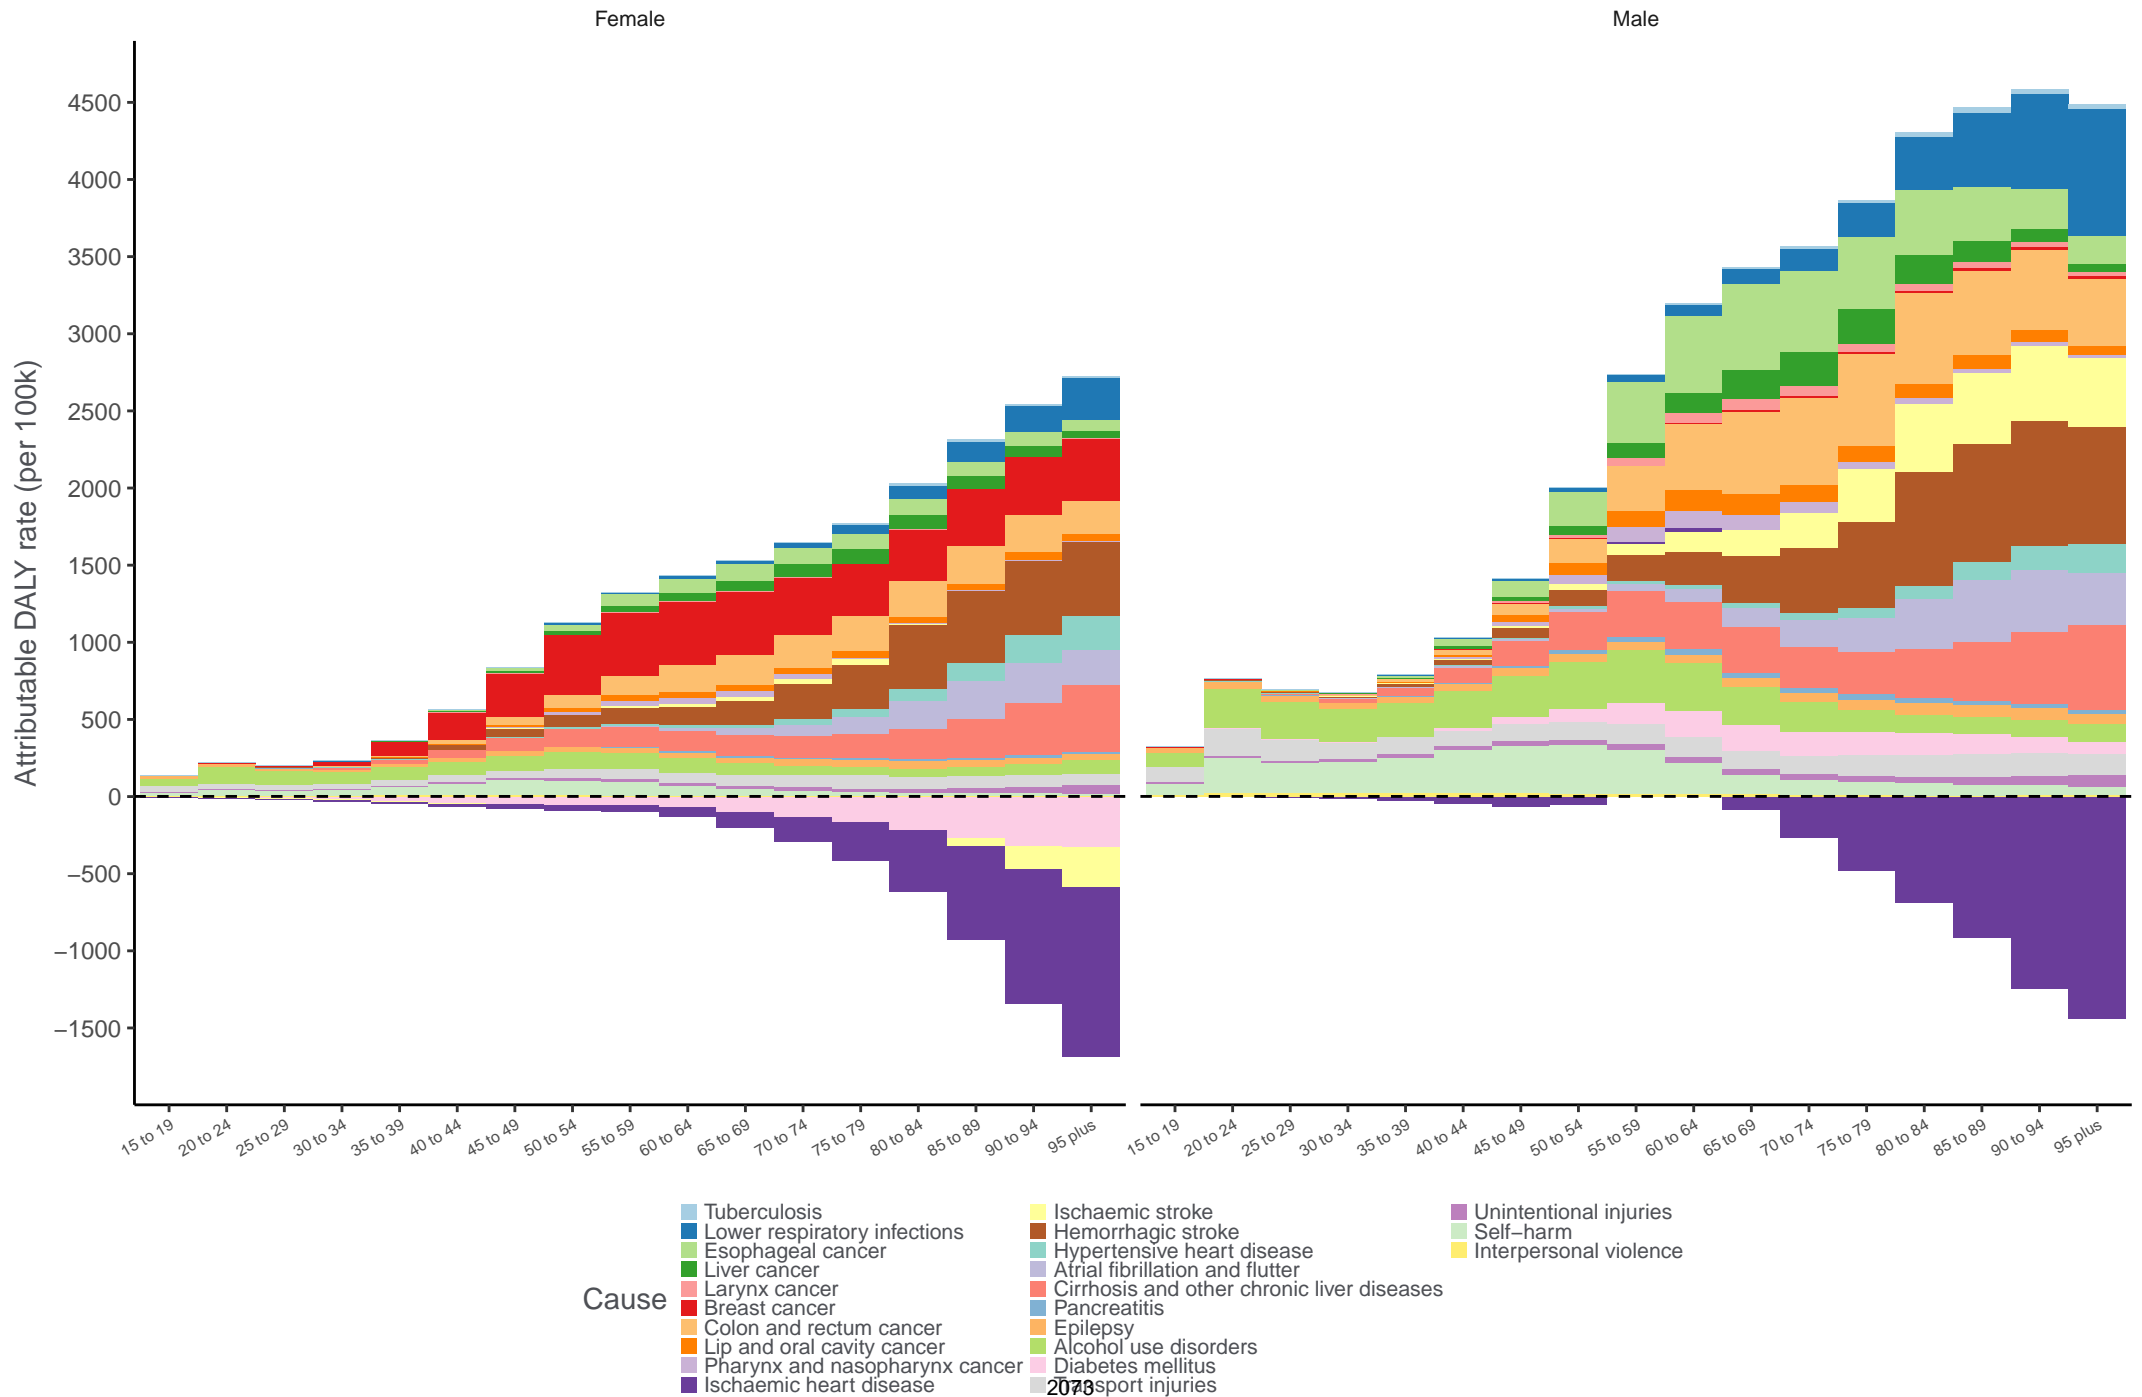

Attributable DALY rate disaggregated by cause, Norway, by sex and age in 2016.

Female

Male

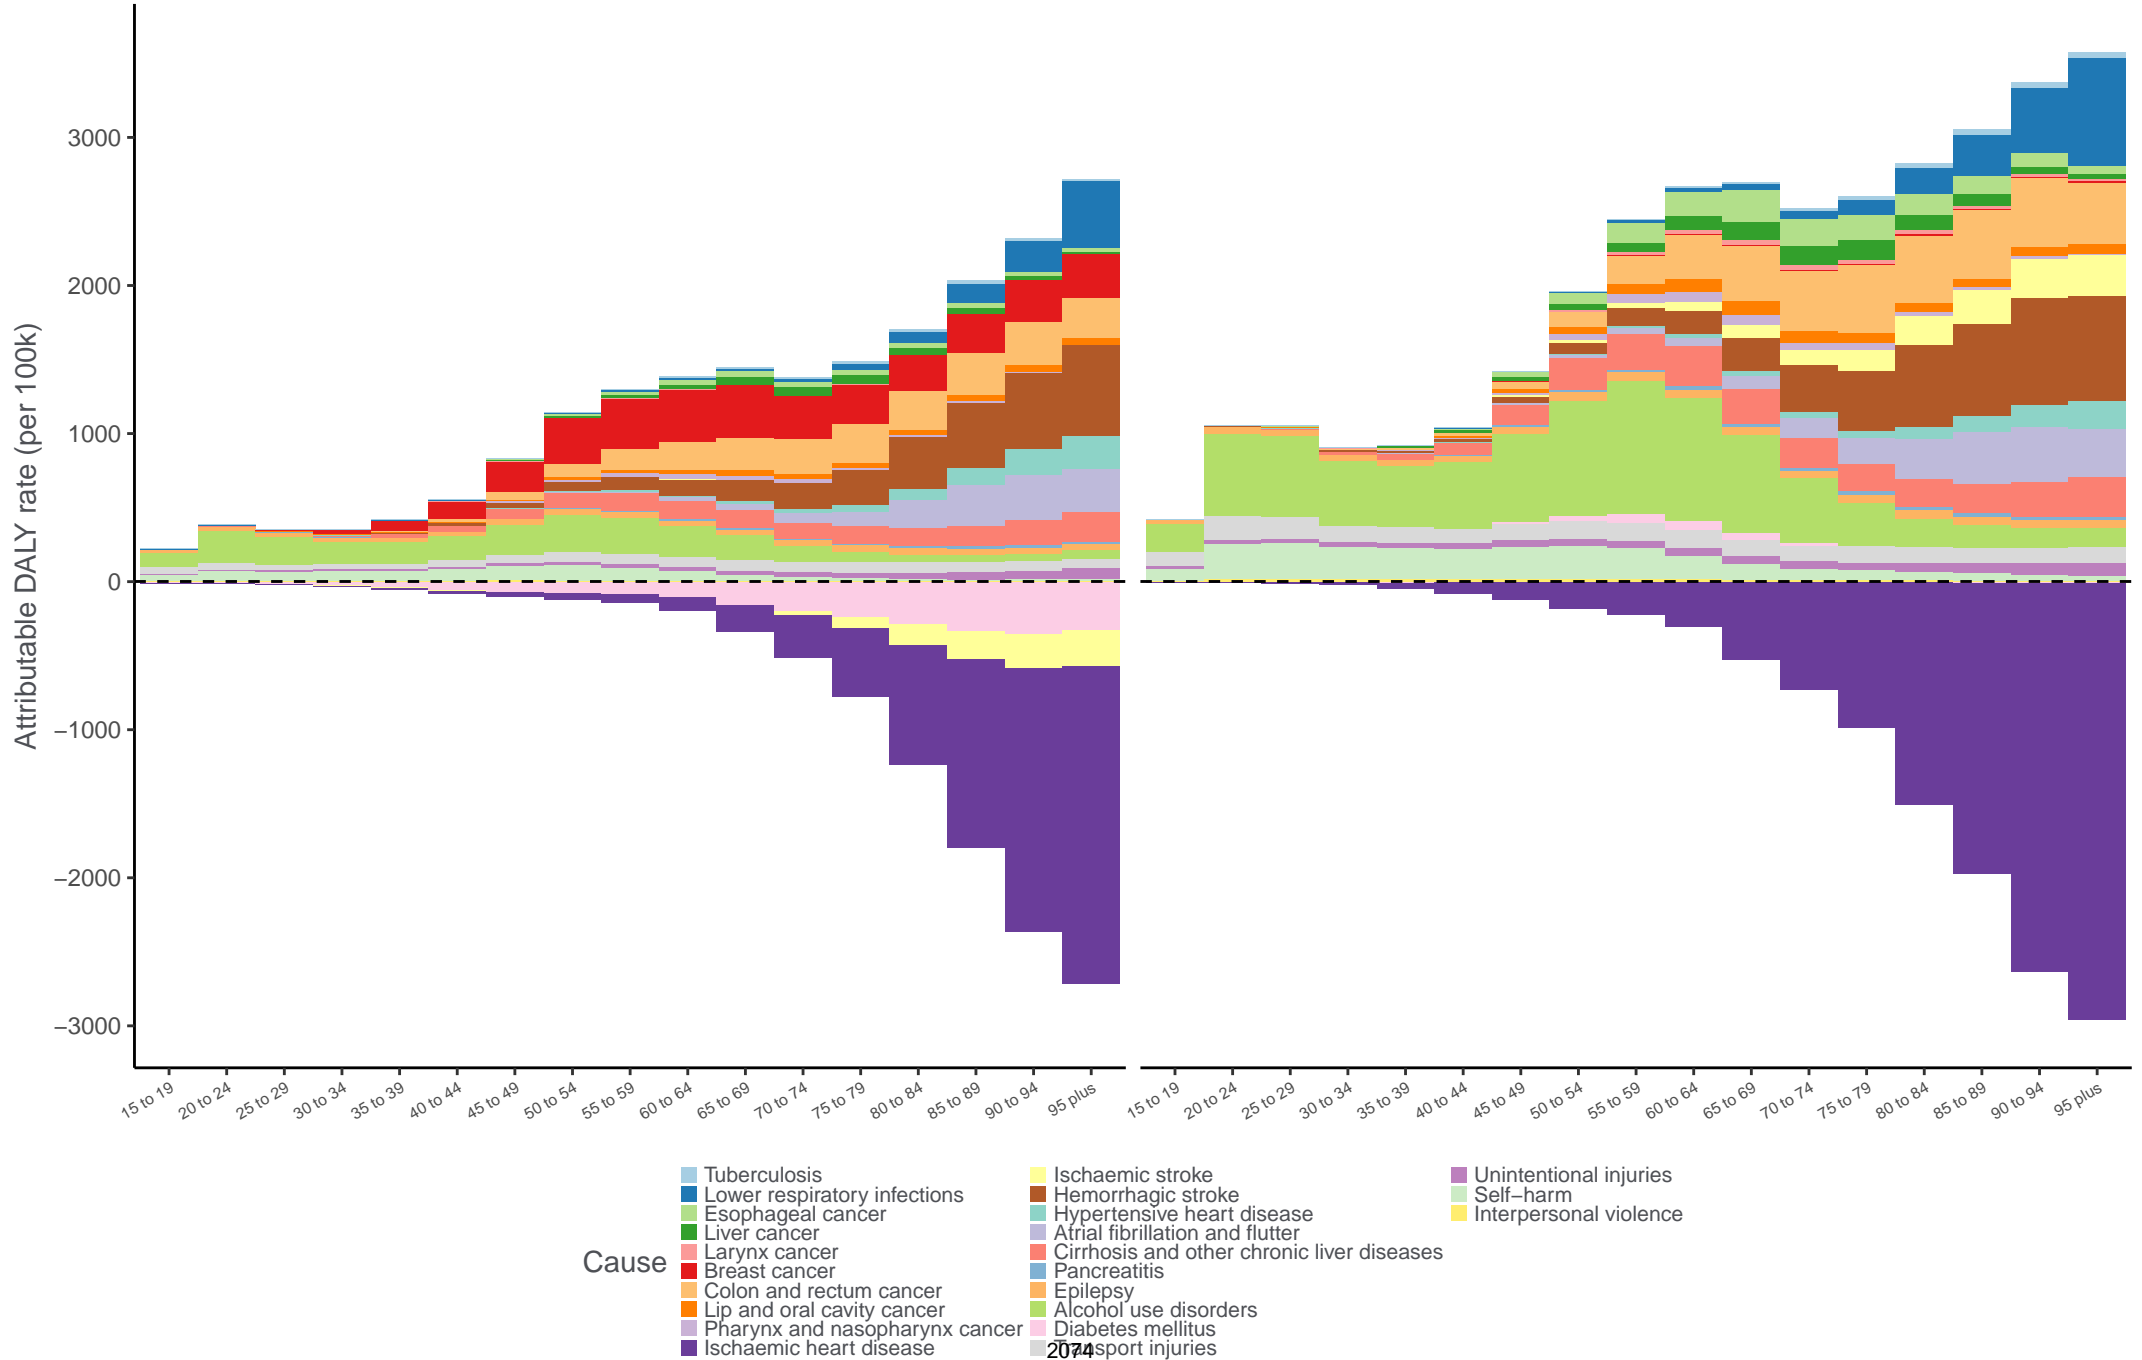

Attributable DALY rate disaggregated by cause, Portugal, by sex and age in 2016.

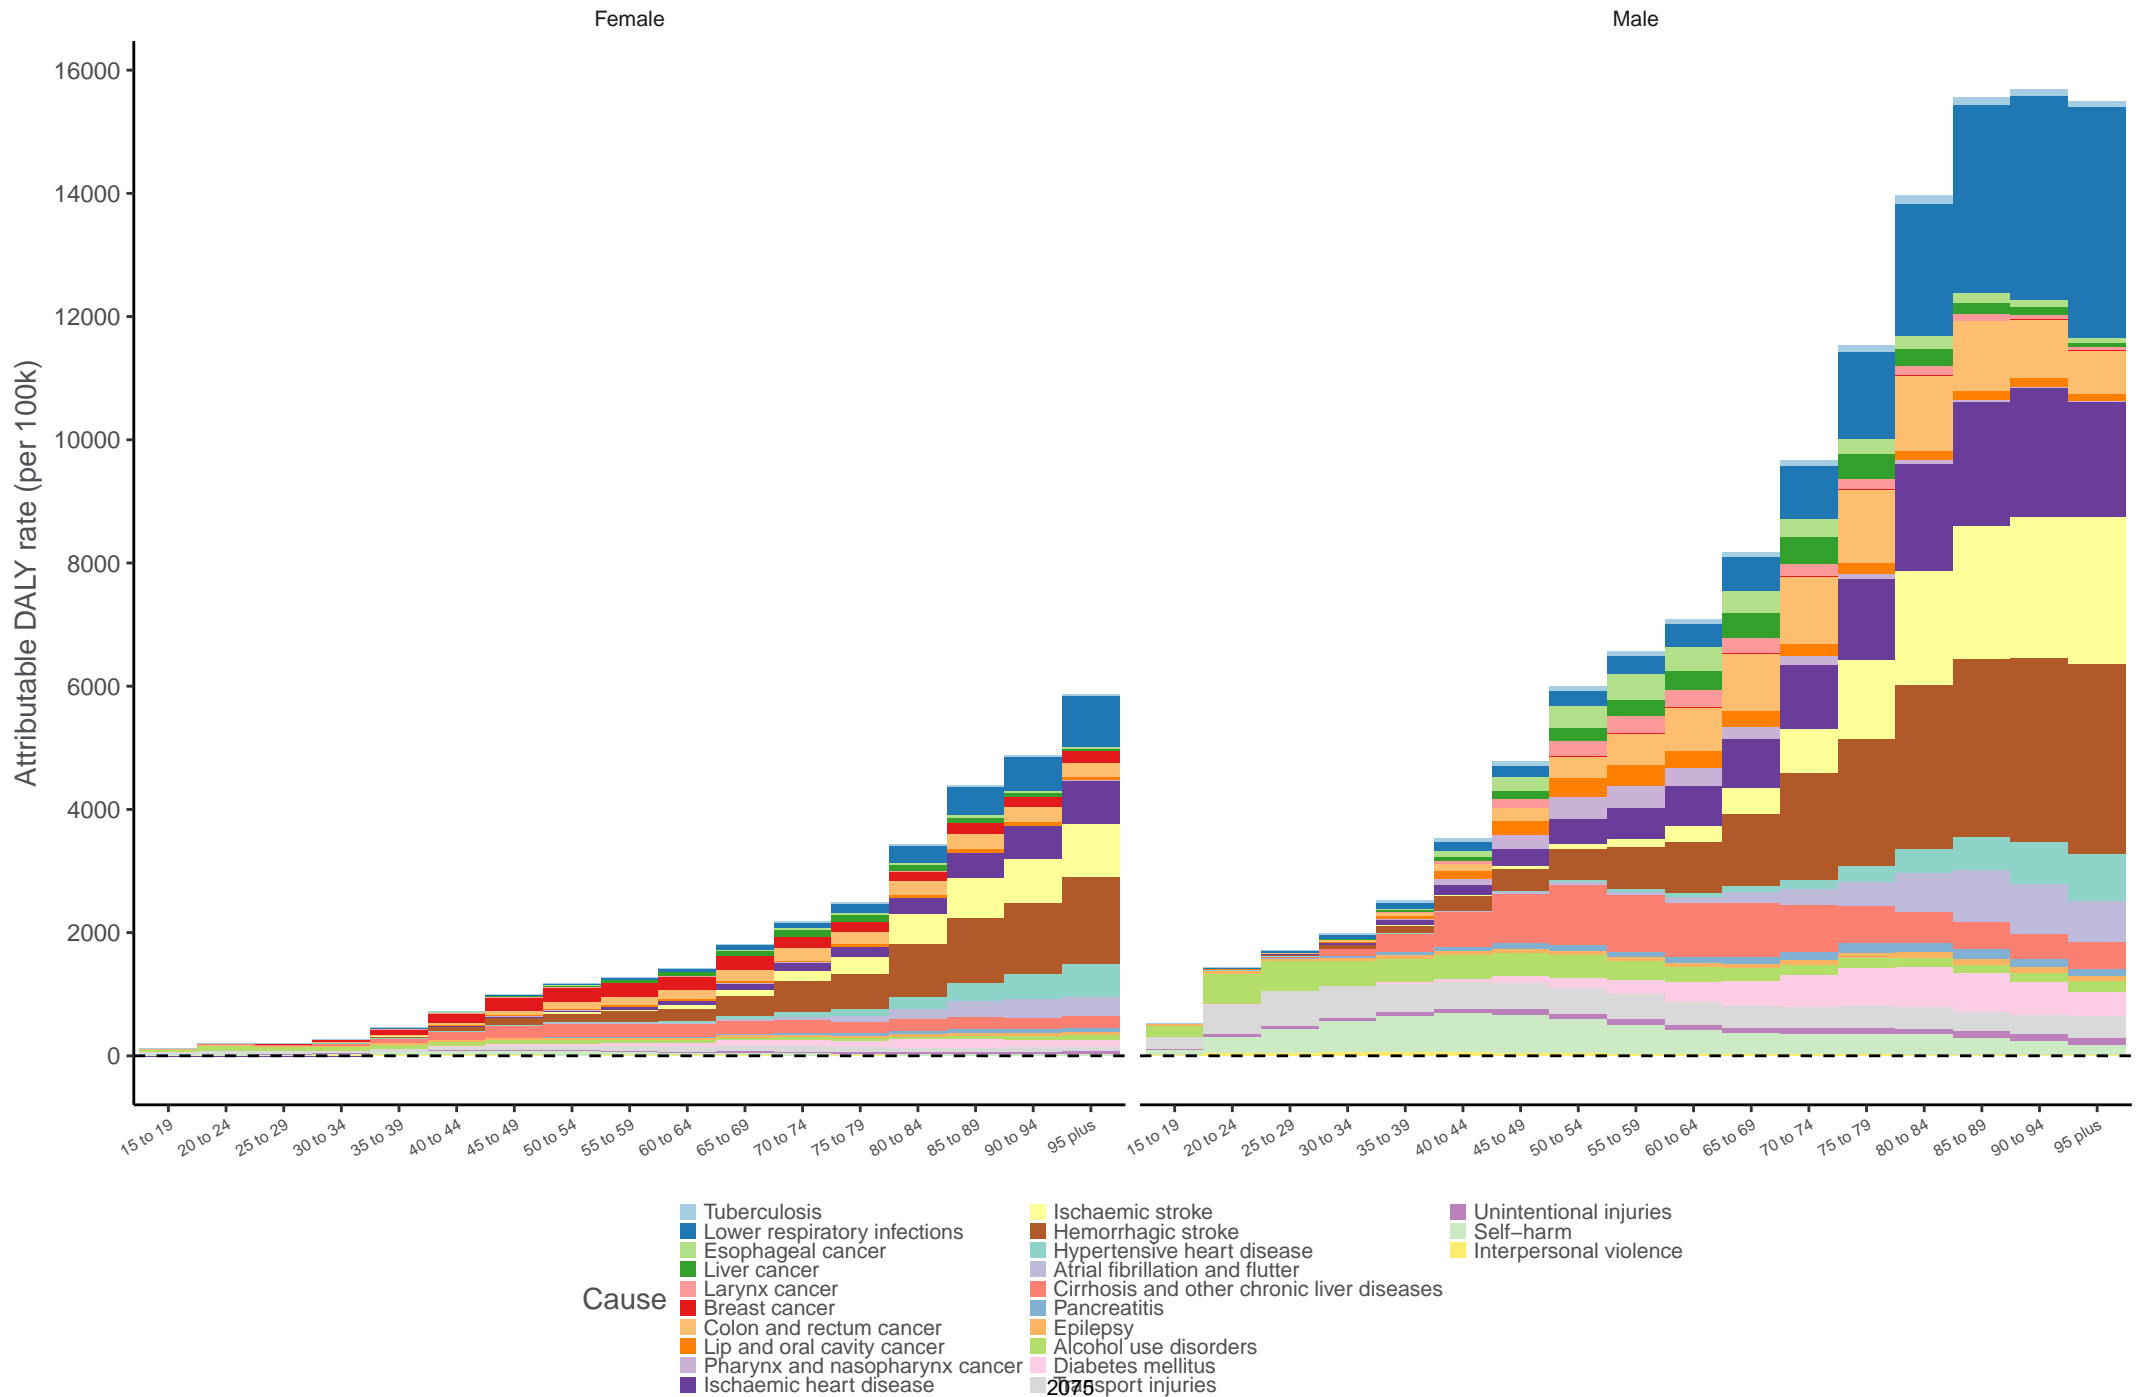

Attributable DALY rate disaggregated by cause, Spain, by sex and age in 2016.

Female

Male

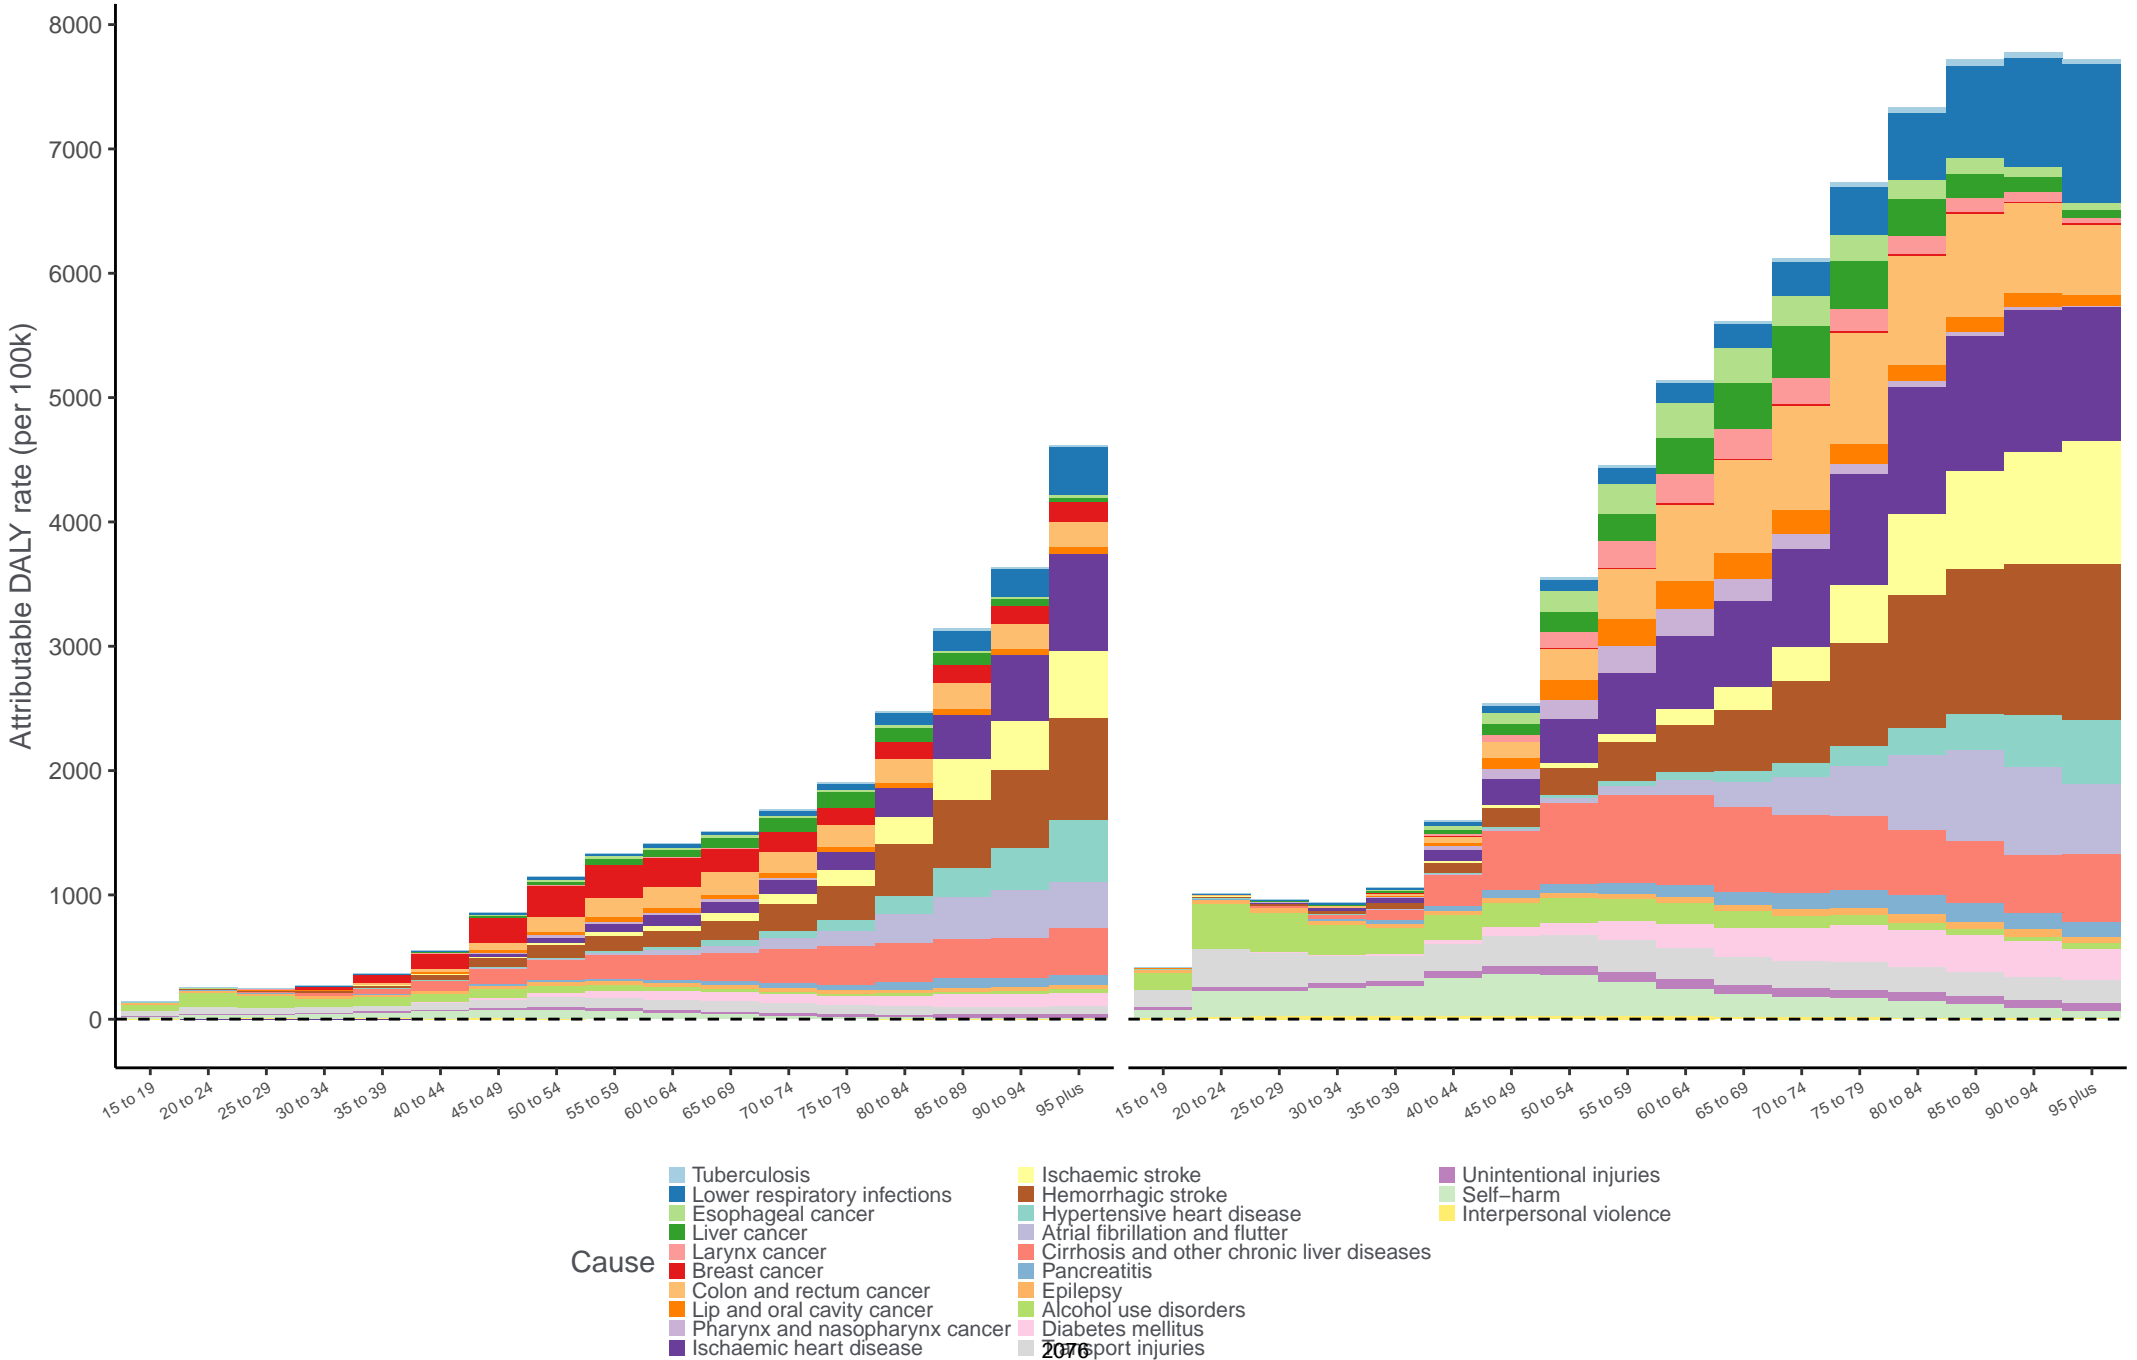

Attributable DALY rate disaggregated by cause, Sweden, by sex and age in 2016.

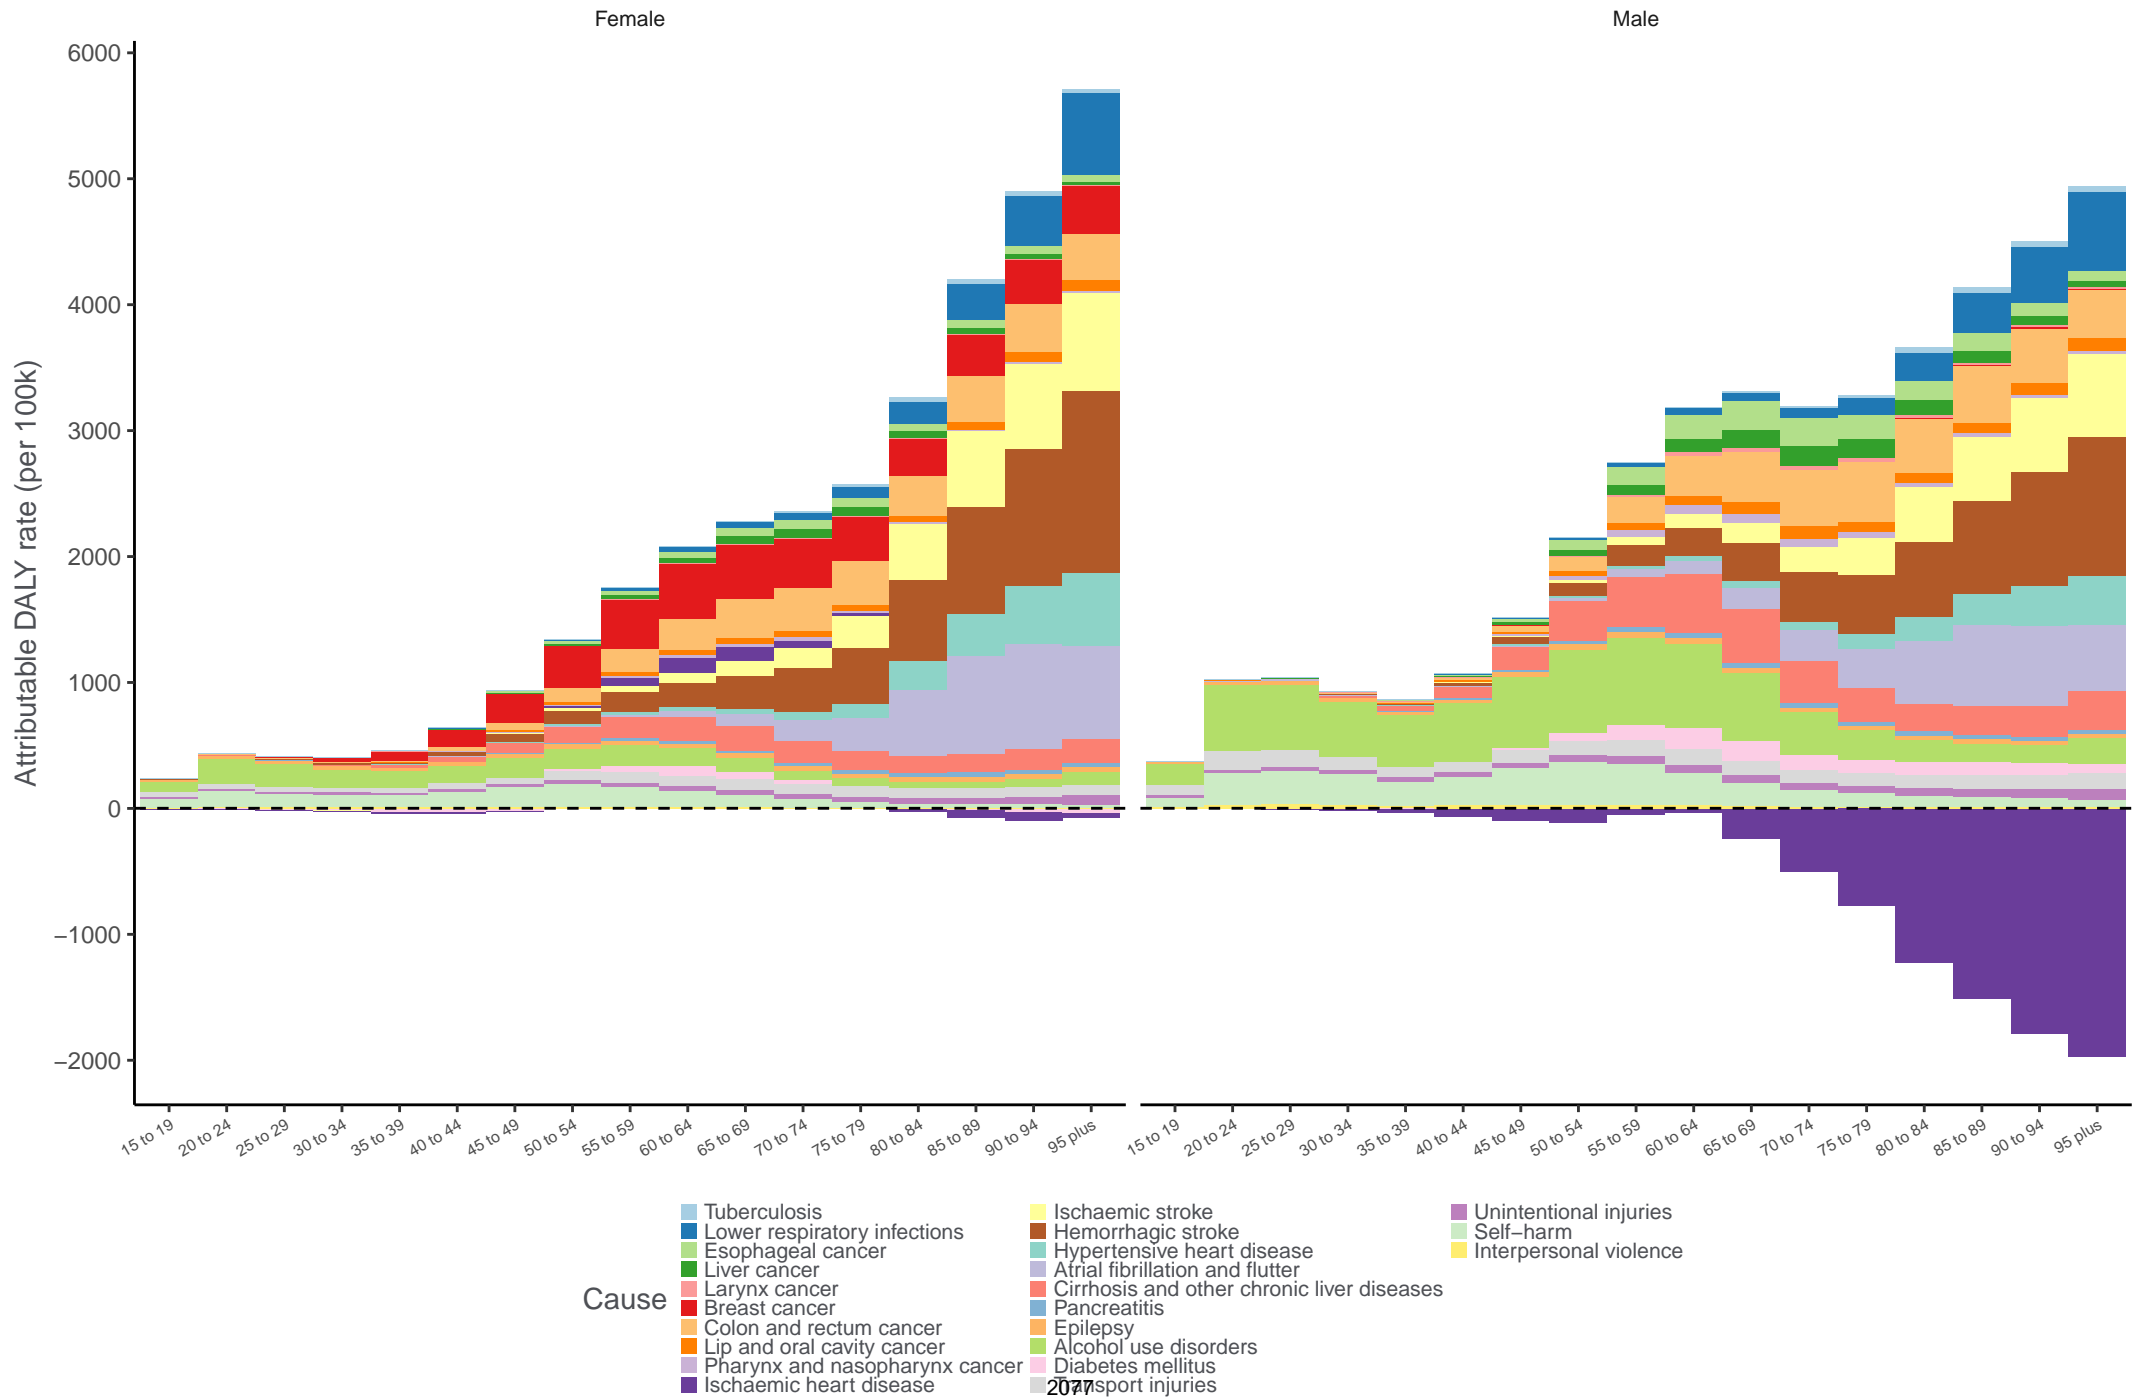

Attributable DALY rate disaggregated by cause, Switzerland, by sex and age in 2016.

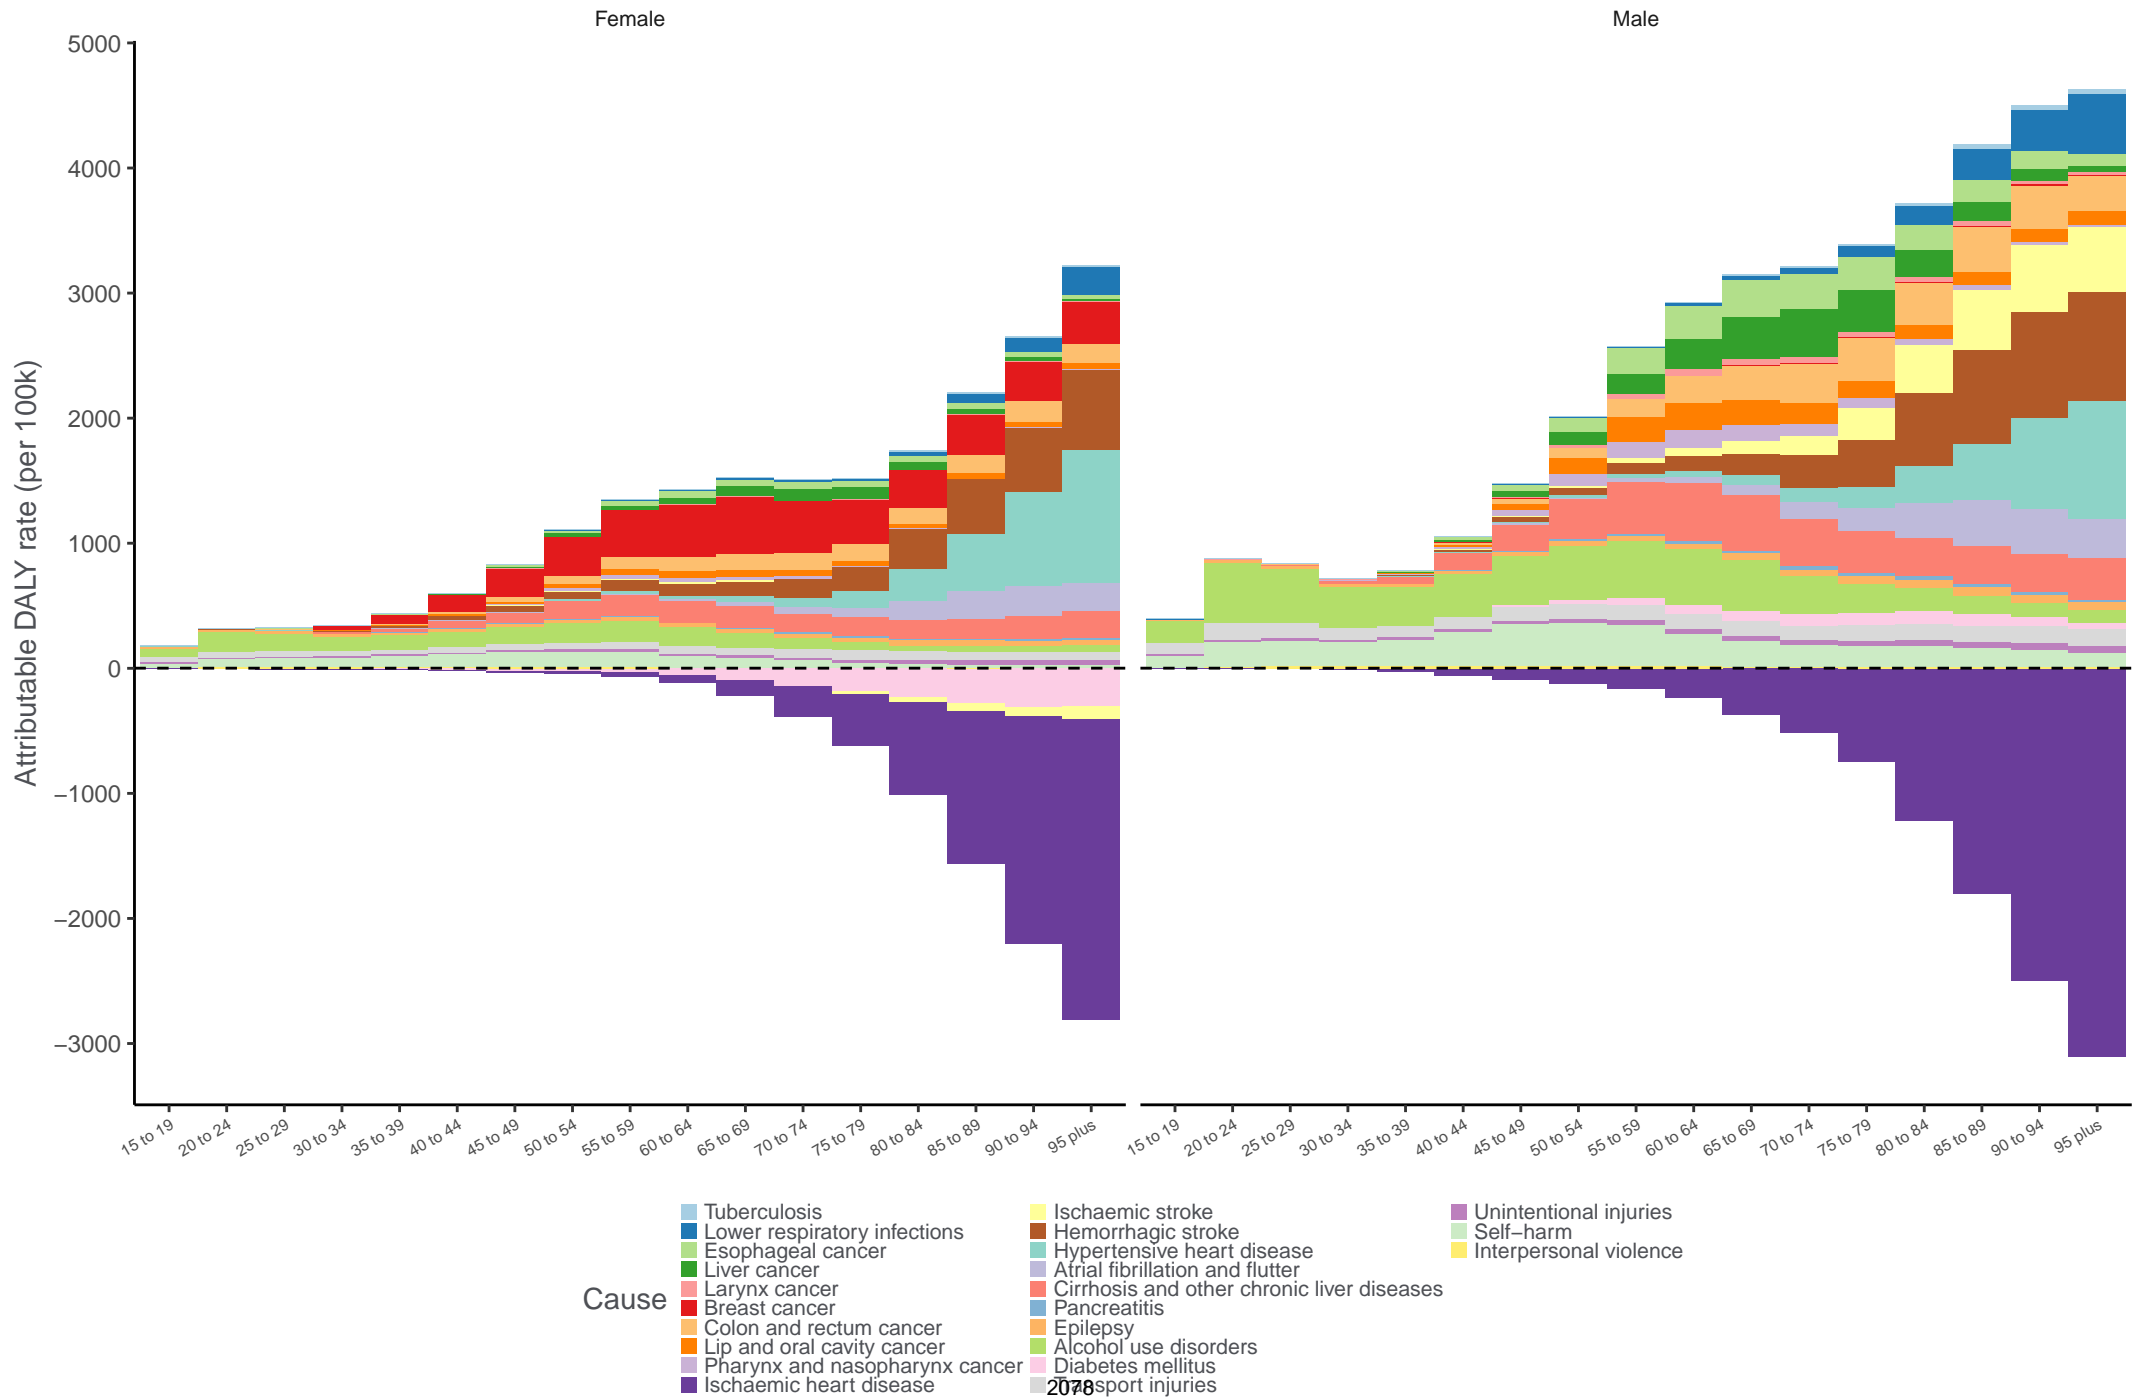

Attributable DALY rate disaggregated by cause, United Kingdom, by sex and age in 2016.

Female

Male

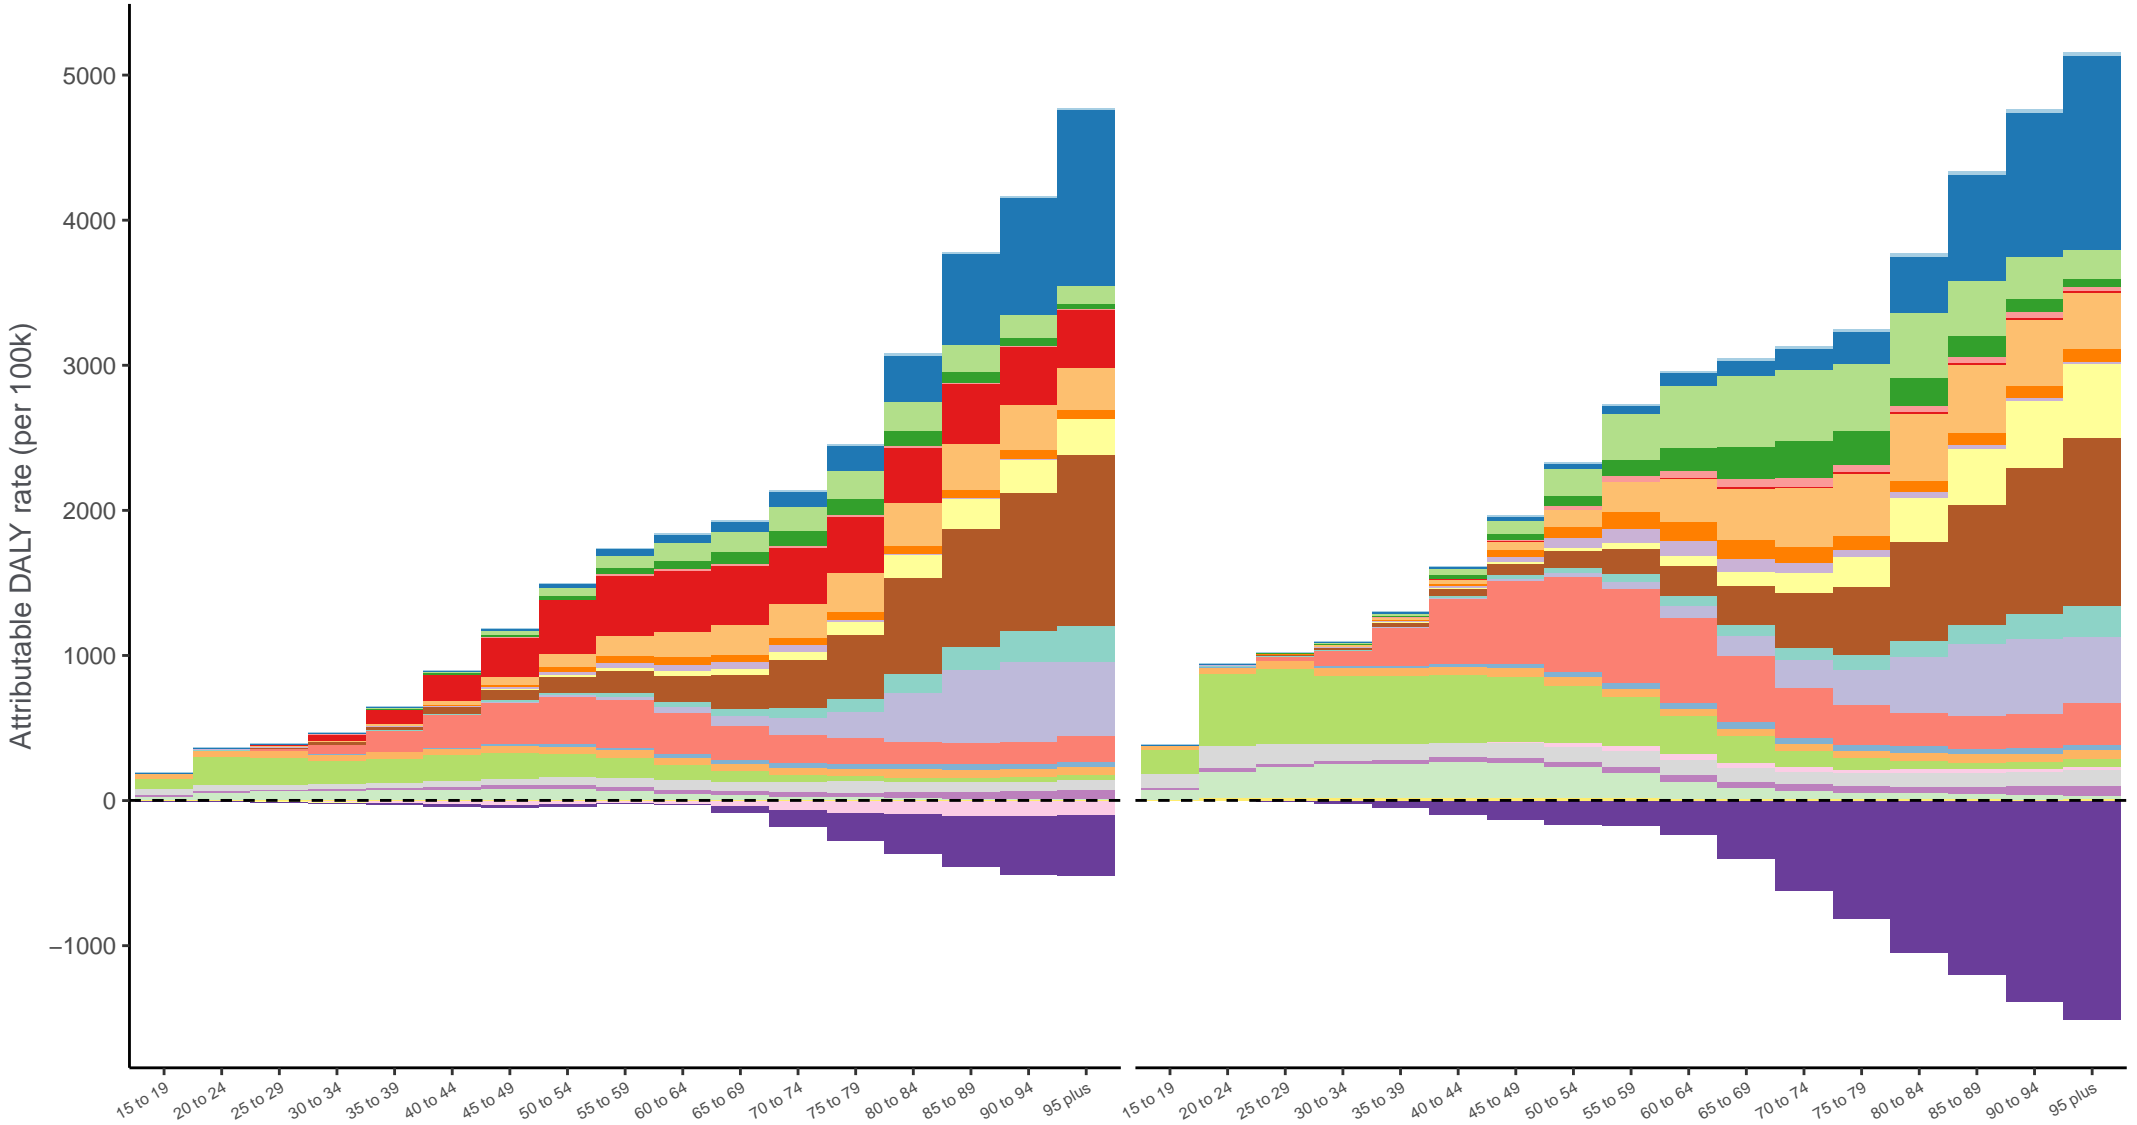

- Cause
- Tuberculosis
  - Ischaemic stroke
  - Unintentional injuries
  - Lower respiratory infections
  - Hemorrhagic stroke
  - Self-harm
  - Esophageal cancer
  - Hypertensive heart disease
  - Interpersonal violence
  - Liver cancer
  - Atrial fibrillation and flutter
  - Larynx cancer
  - Cirrhosis and other chronic liver diseases
  - Breast cancer
  - Pancreatitis
  - Colon and rectum cancer
  - Epilepsy
  - Alcohol use disorders
  - Lip and oral cavity cancer
  - Diabetes mellitus
  - Pharynx and nasopharynx cancer
  - Ischaemic heart disease
  - 2019 sport injuries



Attributable DALY rate disaggregated by cause, Argentina, by sex and age in 2016.

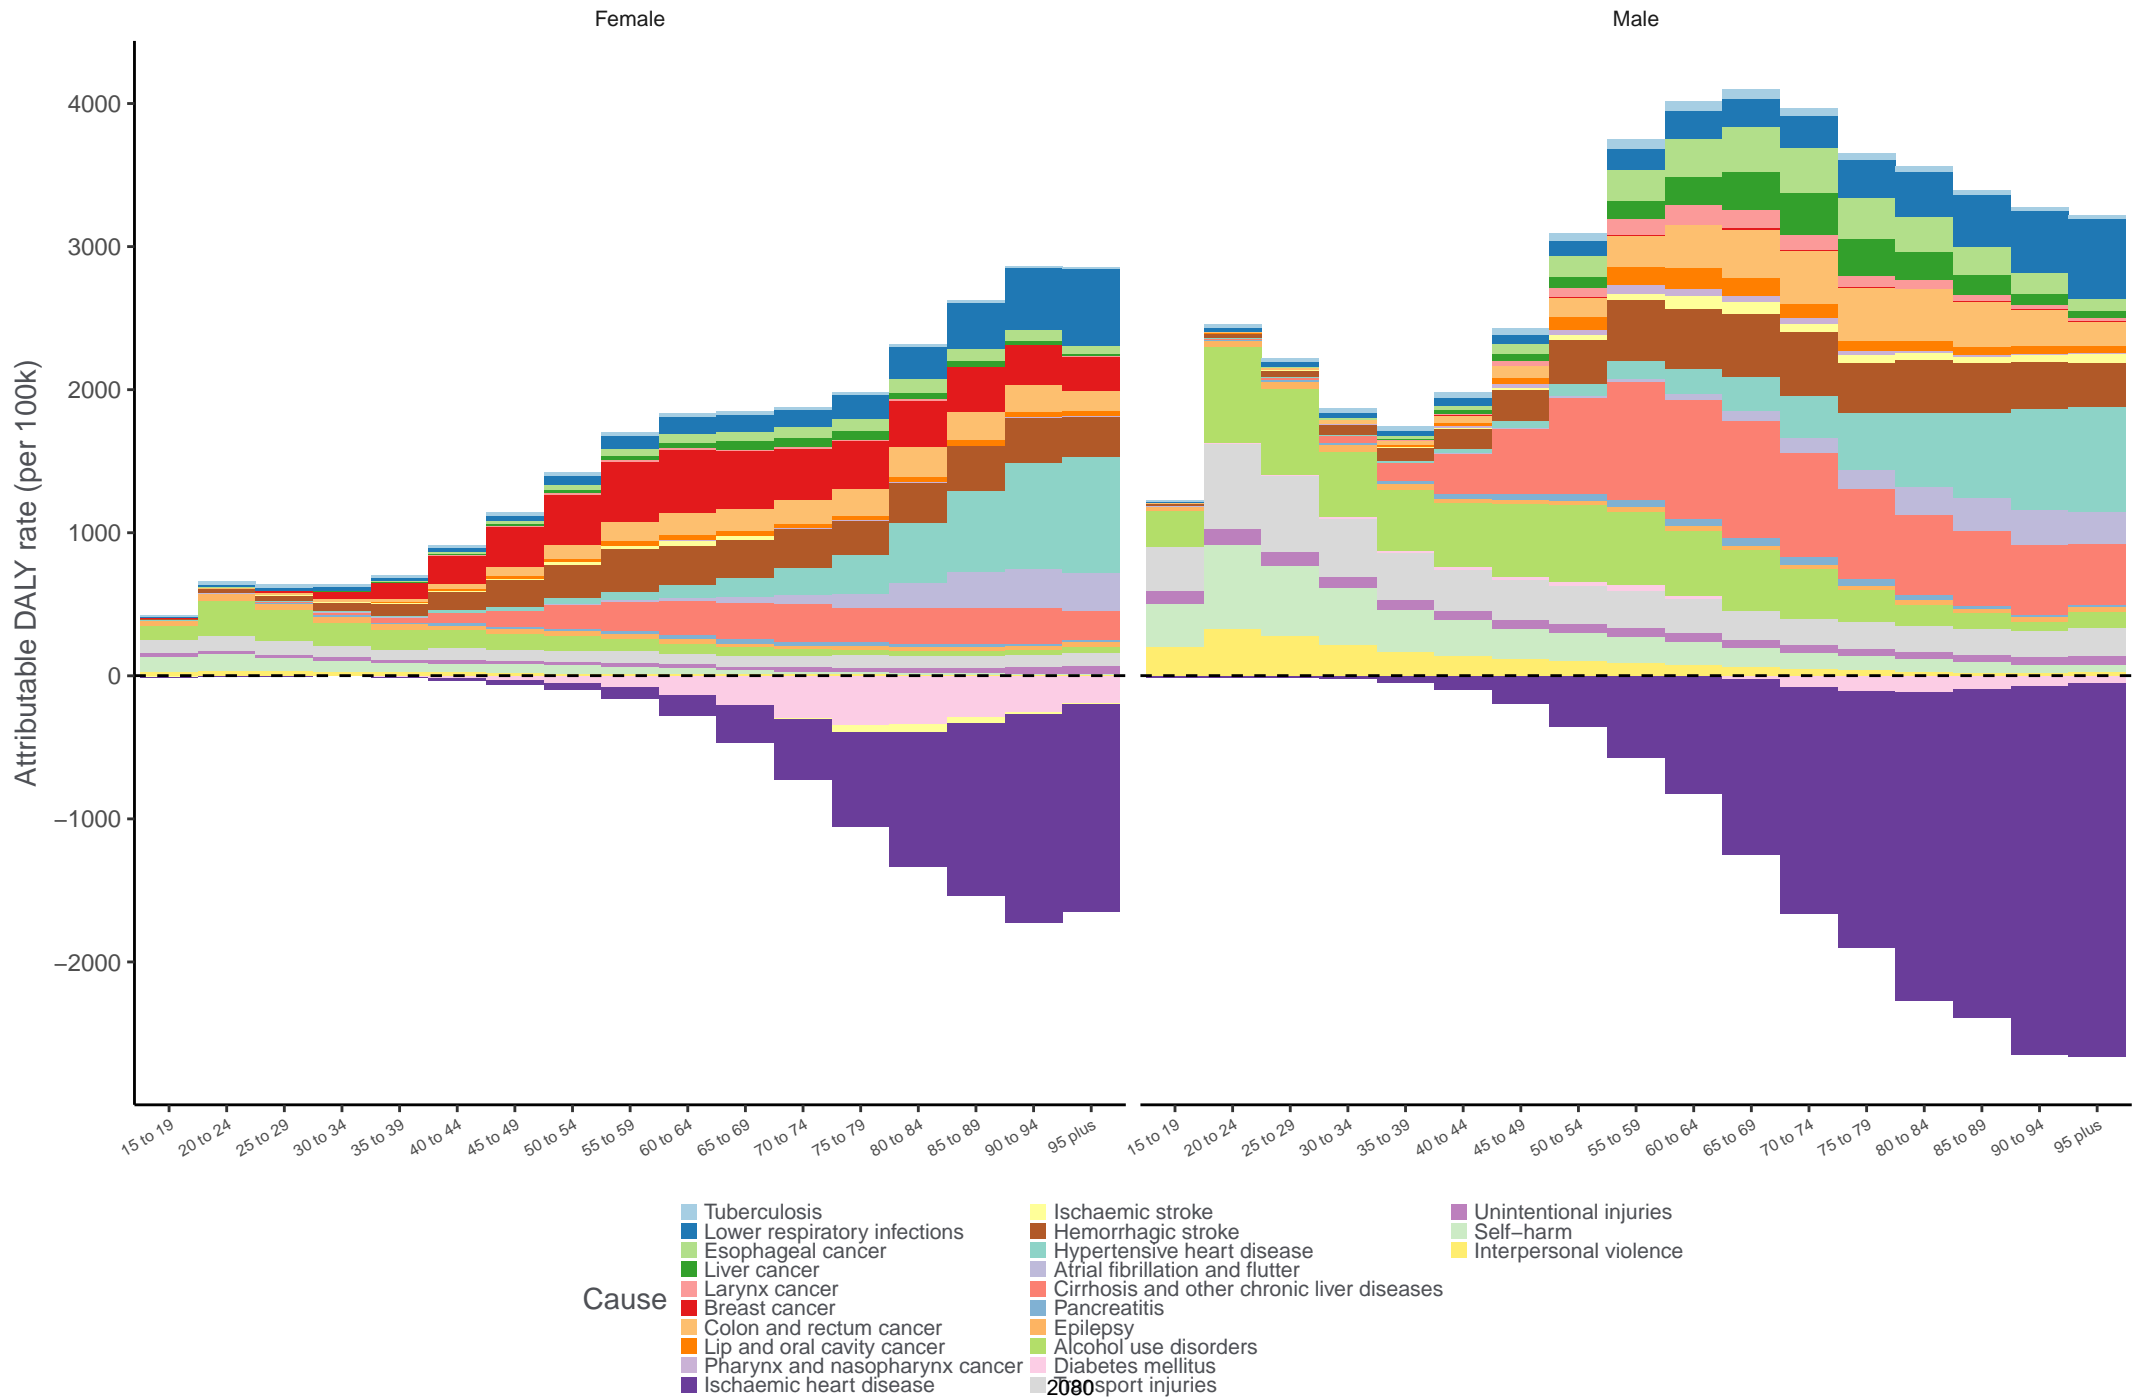

Attributable DALY rate disaggregated by cause, Chile, by sex and age in 2016.

Female

Male

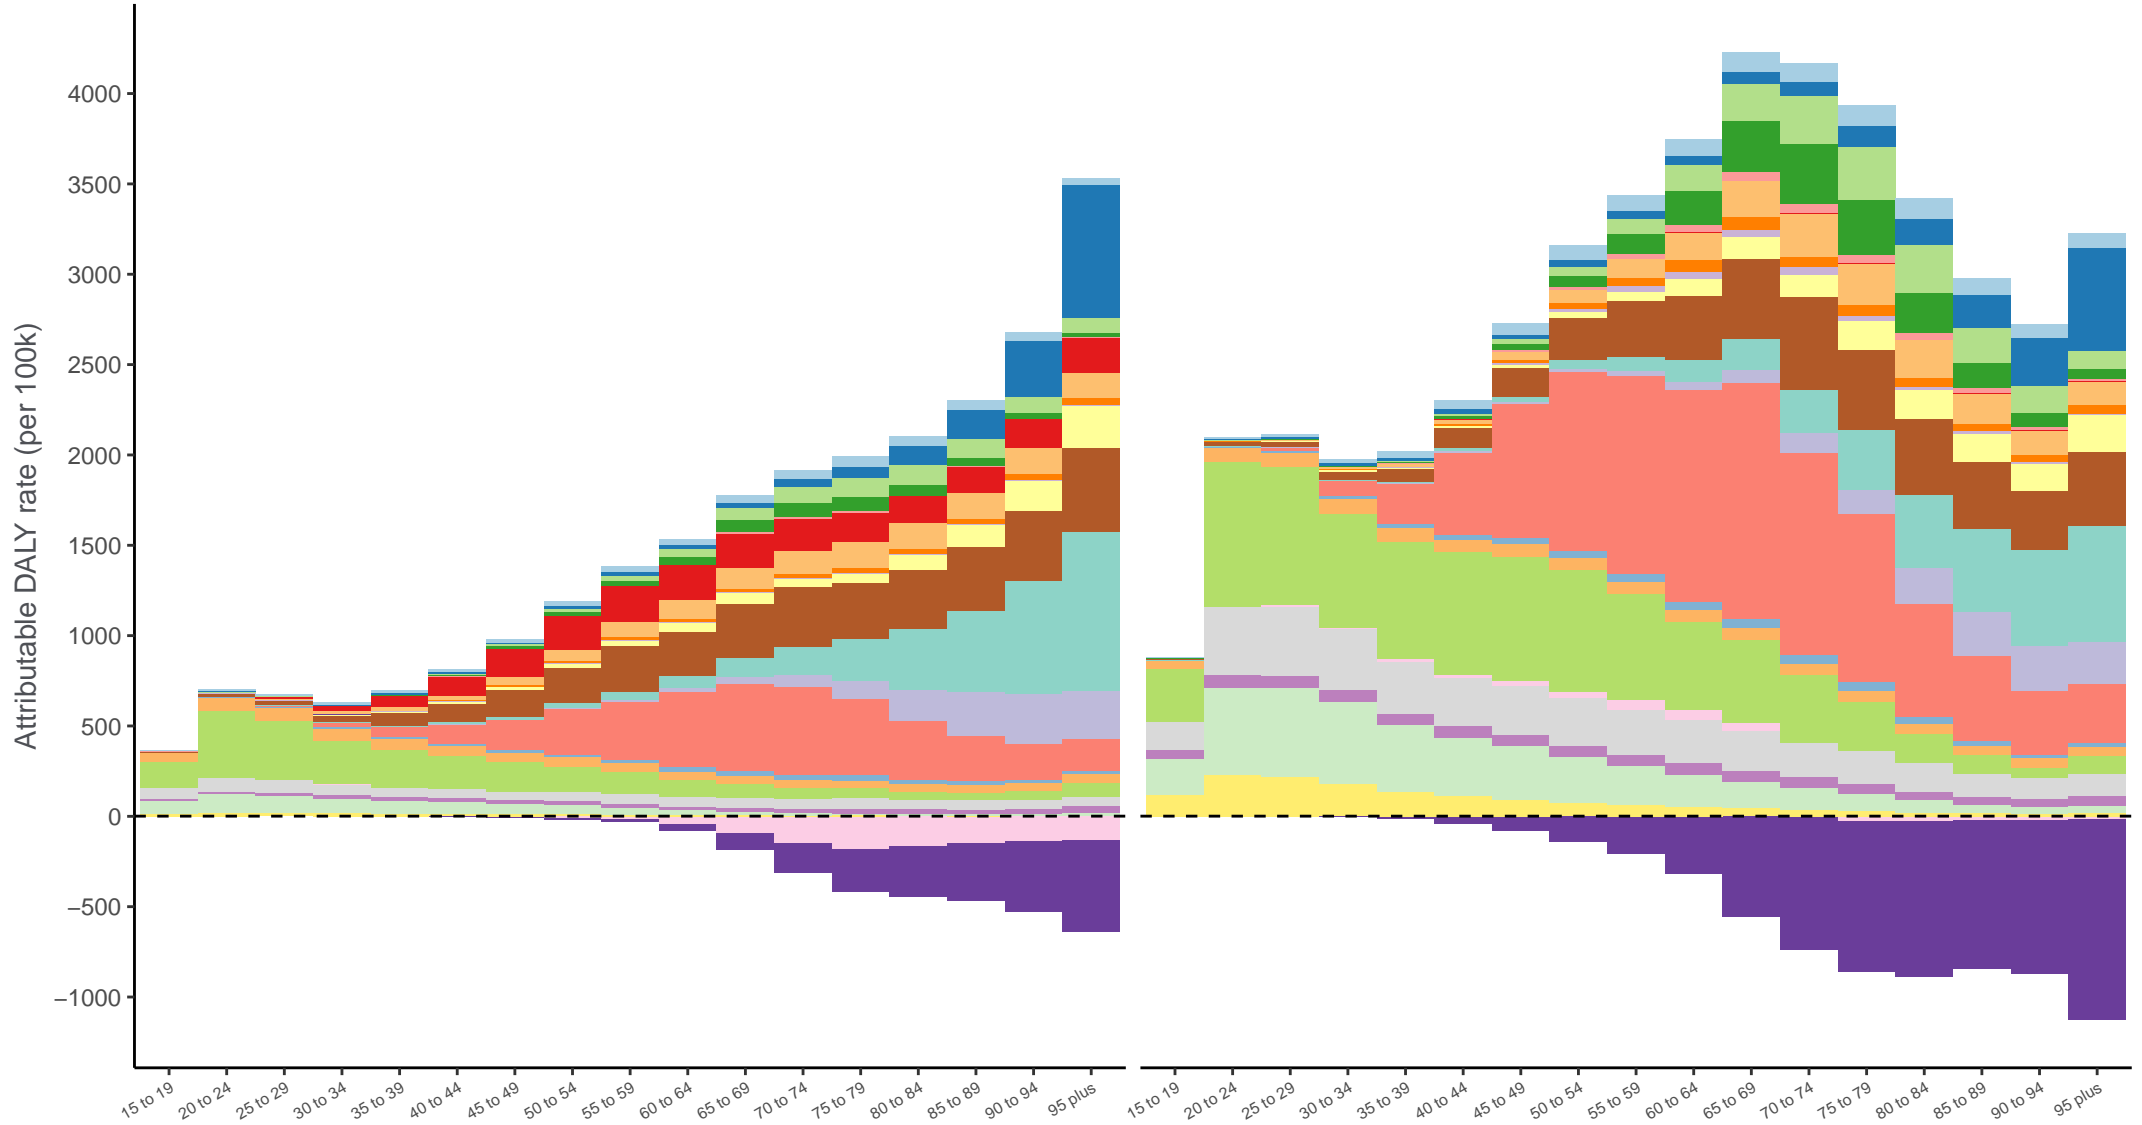

- Cause
- Tuberculosis
  - Ischaemic stroke
  - Unintentional injuries
  - Lower respiratory infections
  - Hemorrhagic stroke
  - Self-harm
  - Esophageal cancer
  - Hypertensive heart disease
  - Interpersonal violence
  - Liver cancer
  - Atrial fibrillation and flutter
  - Larynx cancer
  - Cirrhosis and other chronic liver diseases
  - Breast cancer
  - Pancreatitis
  - Colon and rectum cancer
  - Epilepsy
  - Lip and oral cavity cancer
  - Alcohol use disorders
  - Pharynx and nasopharynx cancer
  - Diabetes mellitus
  - Ischaemic heart disease
  - 2011 sport injuries

Attributable DALY rate disaggregated by cause, Uruguay, by sex and age in 2016.

Female

Male

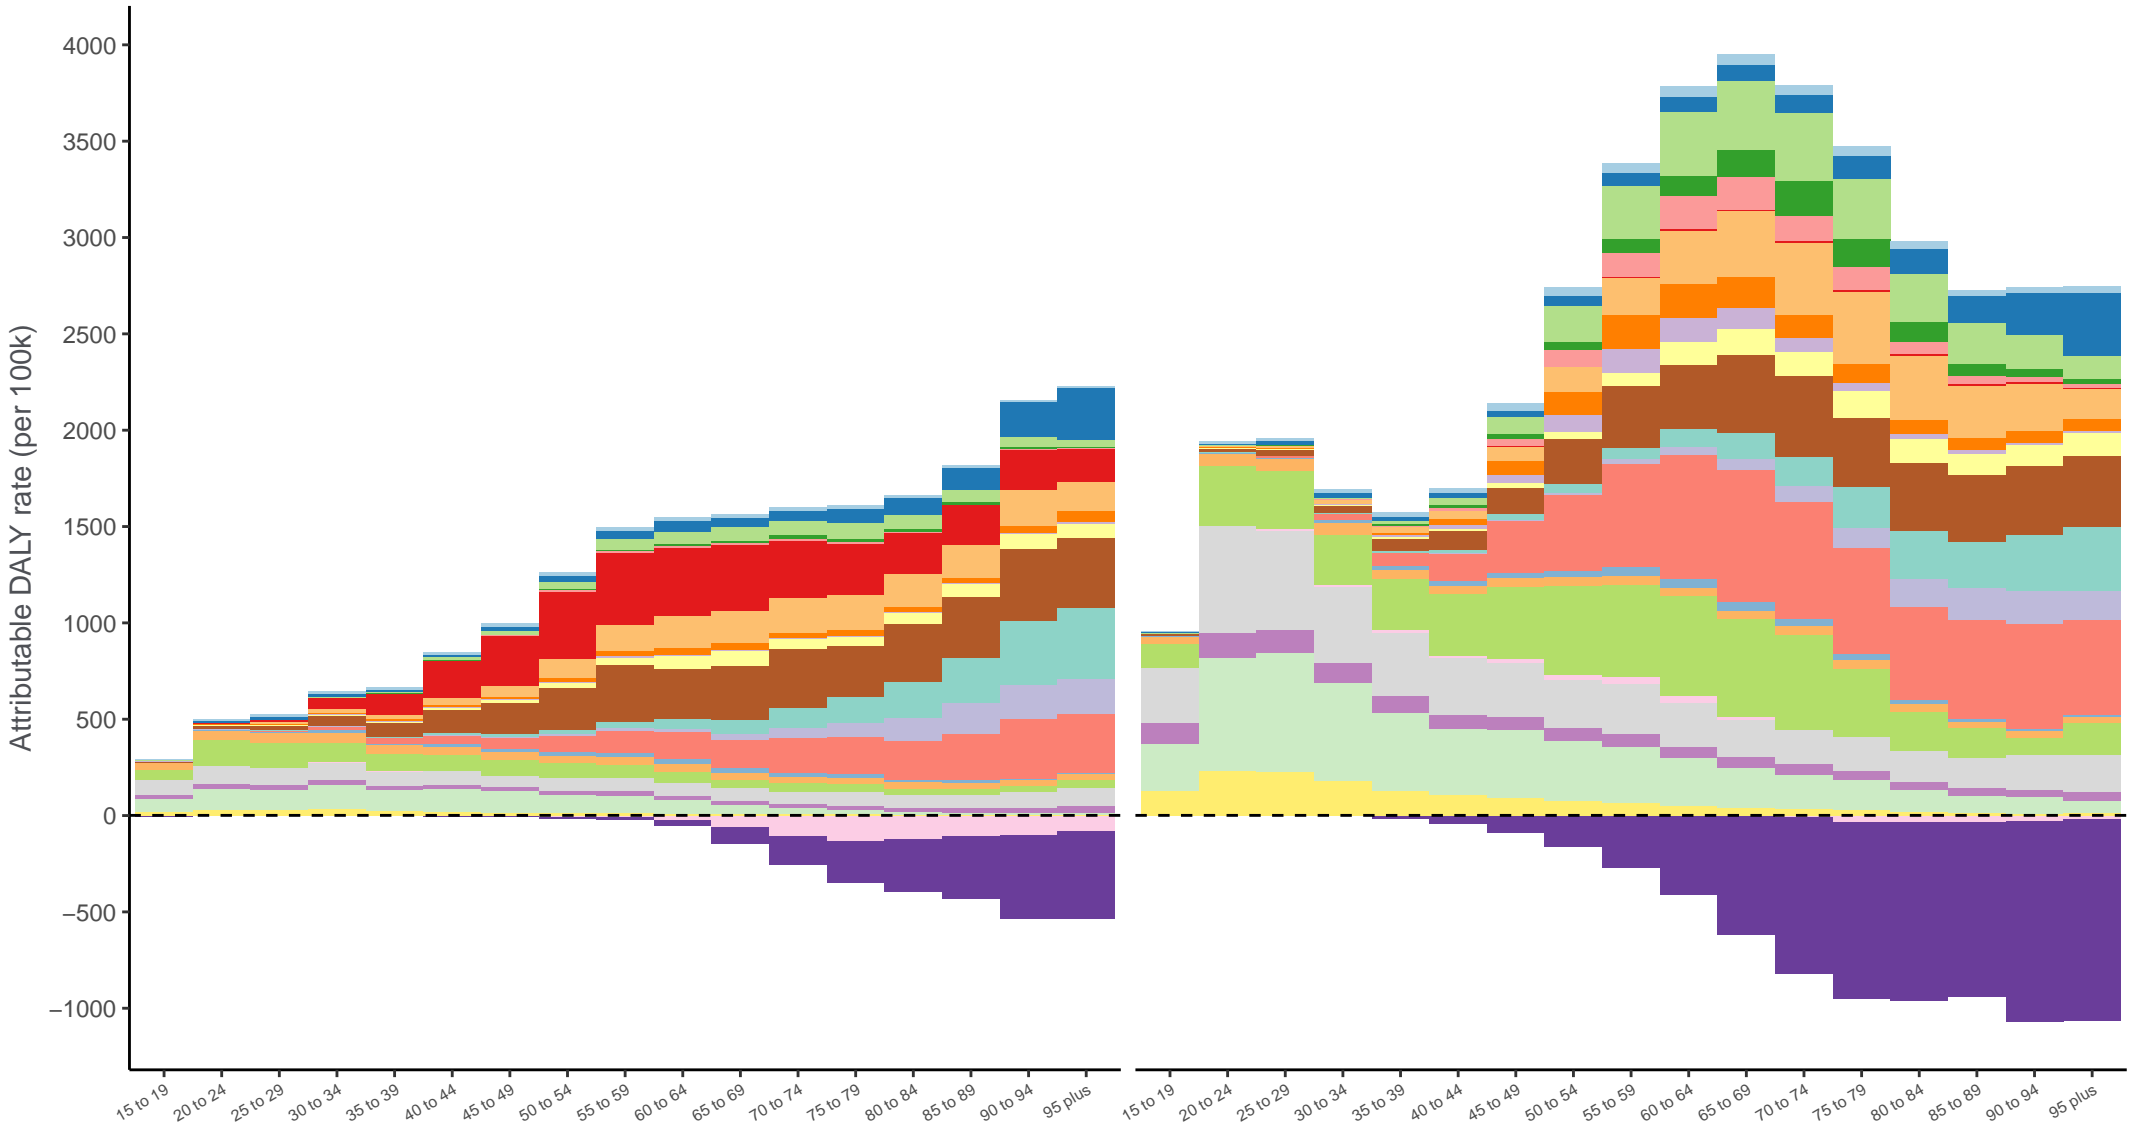

Cause

- |                                                                       |                                                                                   |                                                               |
|-----------------------------------------------------------------------|-----------------------------------------------------------------------------------|---------------------------------------------------------------|
| <span style="color: #add8e6;">■</span> Tuberculosis                   | <span style="color: #ffff00;">■</span> Ischaemic stroke                           | <span style="color: #800080;">■</span> Unintentional injuries |
| <span style="color: #000080;">■</span> Lower respiratory infections   | <span style="color: #8b4513;">■</span> Hemorrhagic stroke                         | <span style="color: #c1e1c1;">■</span> Self-harm              |
| <span style="color: #90ee90;">■</span> Esophageal cancer              | <span style="color: #4682b4;">■</span> Hypertensive heart disease                 | <span style="color: #ffff00;">■</span> Interpersonal violence |
| <span style="color: #008000;">■</span> Liver cancer                   | <span style="color: #9370db;">■</span> Atrial fibrillation and flutter            |                                                               |
| <span style="color: #f08080;">■</span> Larynx cancer                  | <span style="color: #4682b4;">■</span> Cirrhosis and other chronic liver diseases |                                                               |
| <span style="color: #ff0000;">■</span> Breast cancer                  | <span style="color: #4682b4;">■</span> Pancreatitis                               |                                                               |
| <span style="color: #ffa500;">■</span> Colon and rectum cancer        | <span style="color: #ffa500;">■</span> Epilepsy                                   |                                                               |
| <span style="color: #ffa500;">■</span> Lip and oral cavity cancer     | <span style="color: #90ee90;">■</span> Alcohol use disorders                      |                                                               |
| <span style="color: #9370db;">■</span> Pharynx and nasopharynx cancer | <span style="color: #f08080;">■</span> Diabetes mellitus                          |                                                               |
| <span style="color: #483d8b;">■</span> Ischaemic heart disease        | <span style="color: #a9a9a9;">■</span> 2012 sport injuries                        |                                                               |

Attributable DALY rate disaggregated by cause, Canada, by sex and age in 2016.

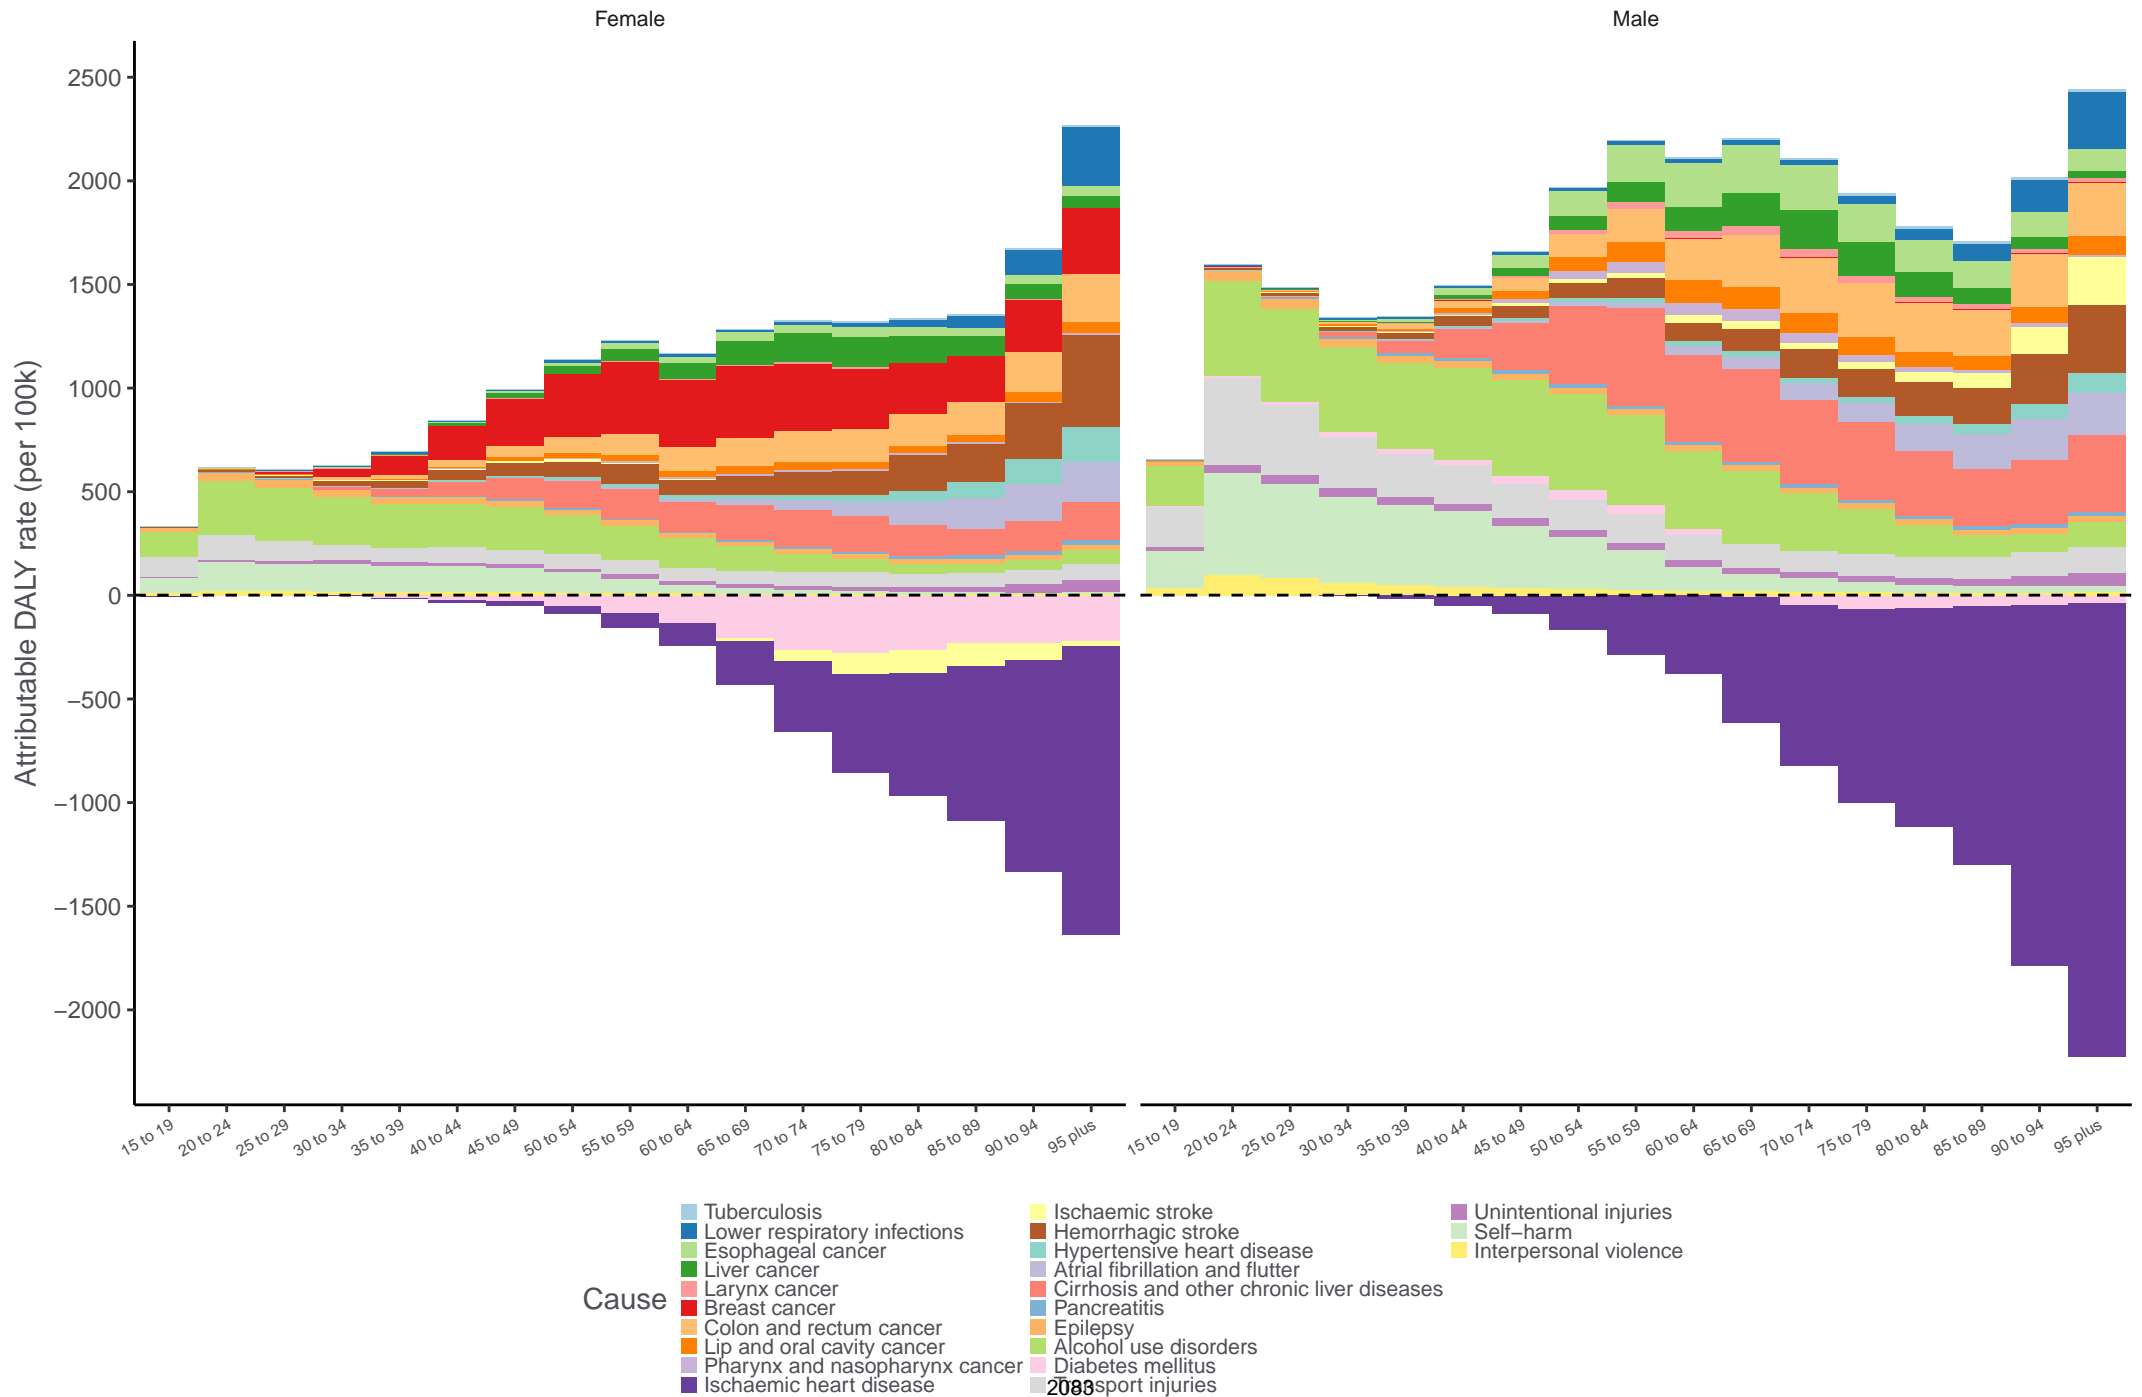

Attributable DALY rate disaggregated by cause, United States, by sex and age in 2016.

Female

Male

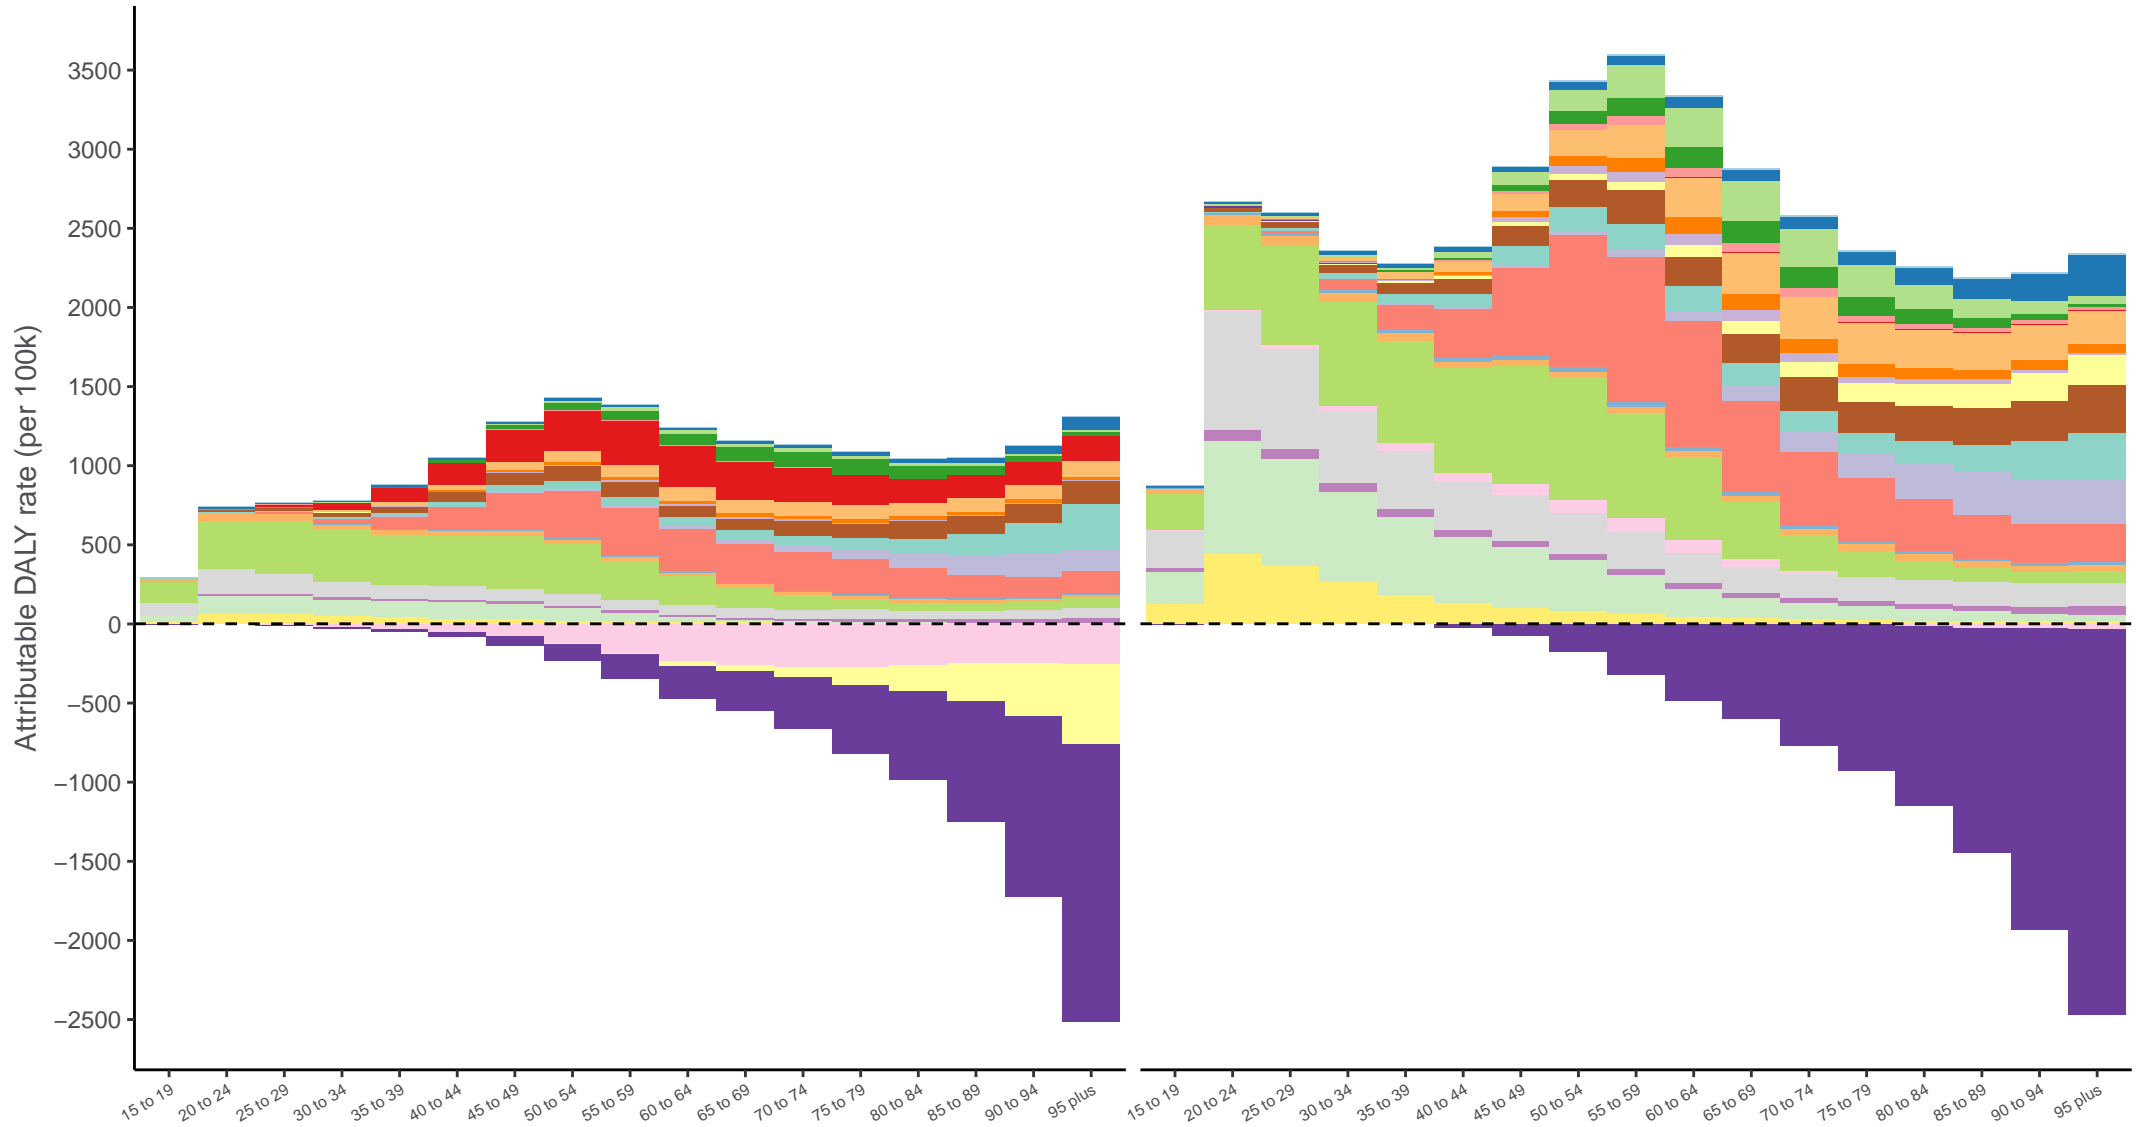

Cause

- |                                                                       |                                                                                   |                                                               |
|-----------------------------------------------------------------------|-----------------------------------------------------------------------------------|---------------------------------------------------------------|
| <span style="color: #ADD8E6;">■</span> Tuberculosis                   | <span style="color: #FFFF00;">■</span> Ischaemic stroke                           | <span style="color: #800080;">■</span> Unintentional injuries |
| <span style="color: #000080;">■</span> Lower respiratory infections   | <span style="color: #8B4513;">■</span> Hemorrhagic stroke                         | <span style="color: #90EE90;">■</span> Self-harm              |
| <span style="color: #90EE90;">■</span> Esophageal cancer              | <span style="color: #4682B4;">■</span> Hypertensive heart disease                 | <span style="color: #FFD700;">■</span> Interpersonal violence |
| <span style="color: #008000;">■</span> Liver cancer                   | <span style="color: #A9A9A9;">■</span> Atrial fibrillation and flutter            |                                                               |
| <span style="color: #F08080;">■</span> Larynx cancer                  | <span style="color: #FF6347;">■</span> Cirrhosis and other chronic liver diseases |                                                               |
| <span style="color: #FF0000;">■</span> Breast cancer                  | <span style="color: #4682B4;">■</span> Pancreatitis                               |                                                               |
| <span style="color: #FFDAB9;">■</span> Colon and rectum cancer        | <span style="color: #FF8C00;">■</span> Epilepsy                                   |                                                               |
| <span style="color: #FFA500;">■</span> Lip and oral cavity cancer     | <span style="color: #90EE90;">■</span> Alcohol use disorders                      |                                                               |
| <span style="color: #9370DB;">■</span> Pharynx and nasopharynx cancer | <span style="color: #FFB6C1;">■</span> Diabetes mellitus                          |                                                               |
| <span style="color: #483D8B;">■</span> Ischaemic heart disease        | <span style="color: #A9A9A9;">■</span> 2014 sport injuries                        |                                                               |

Attributable DALY rate disaggregated by cause, Antigua and Barbuda, by sex and age in 2016.

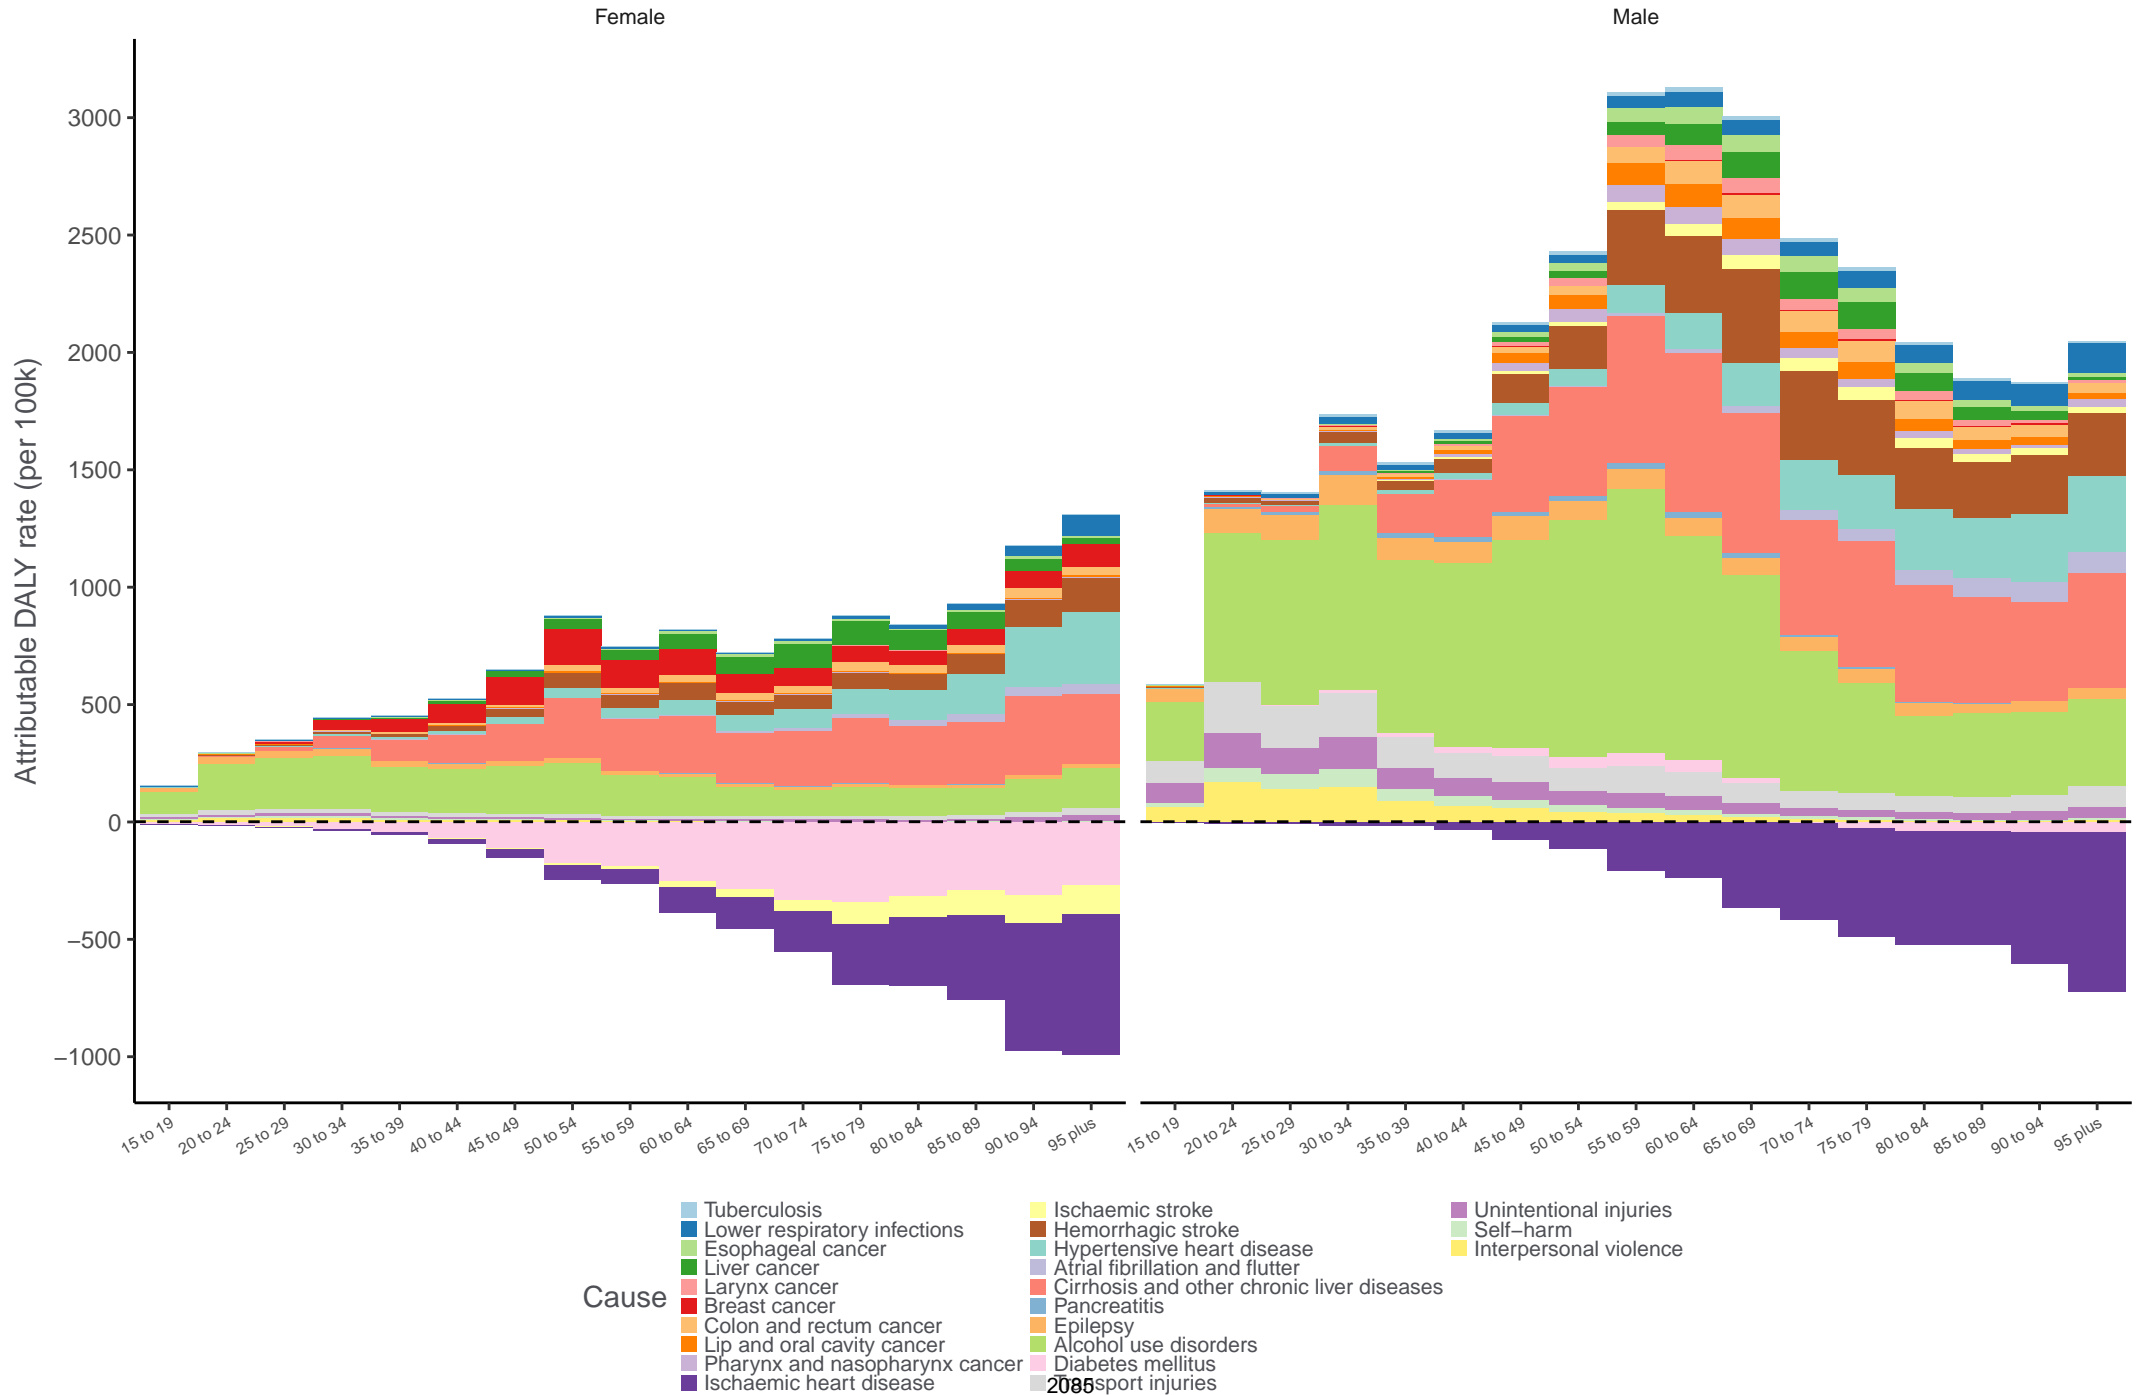

Attributable DALY rate disaggregated by cause, The Bahamas, by sex and age in 2016.

Female

Male

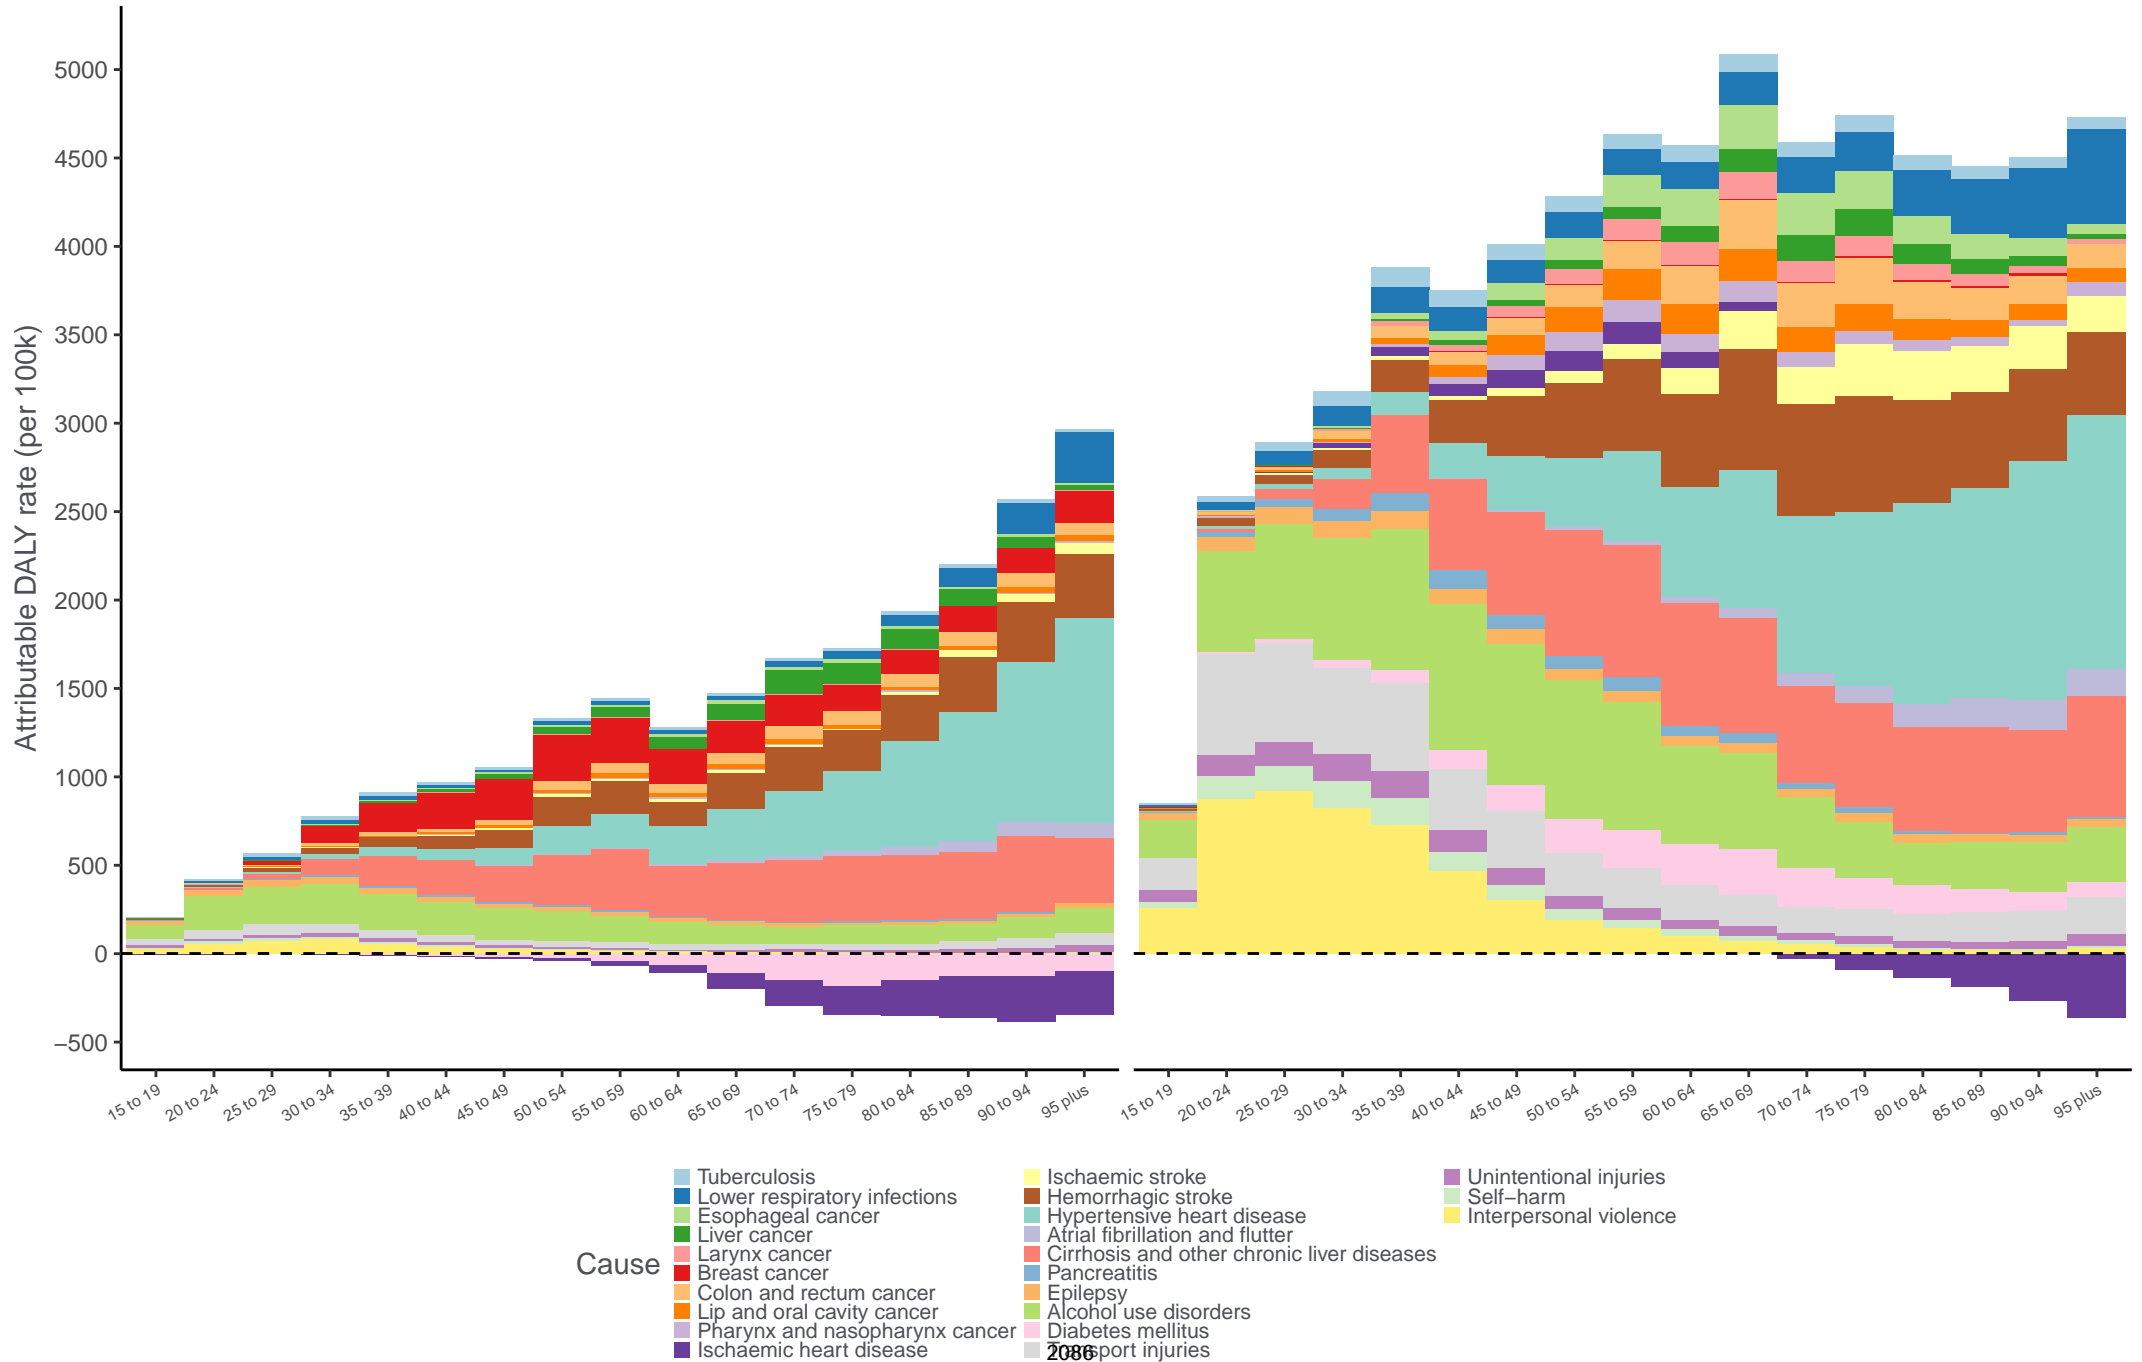

Cause

2016

Attributable DALY rate disaggregated by cause, Barbados, by sex and age in 2016.

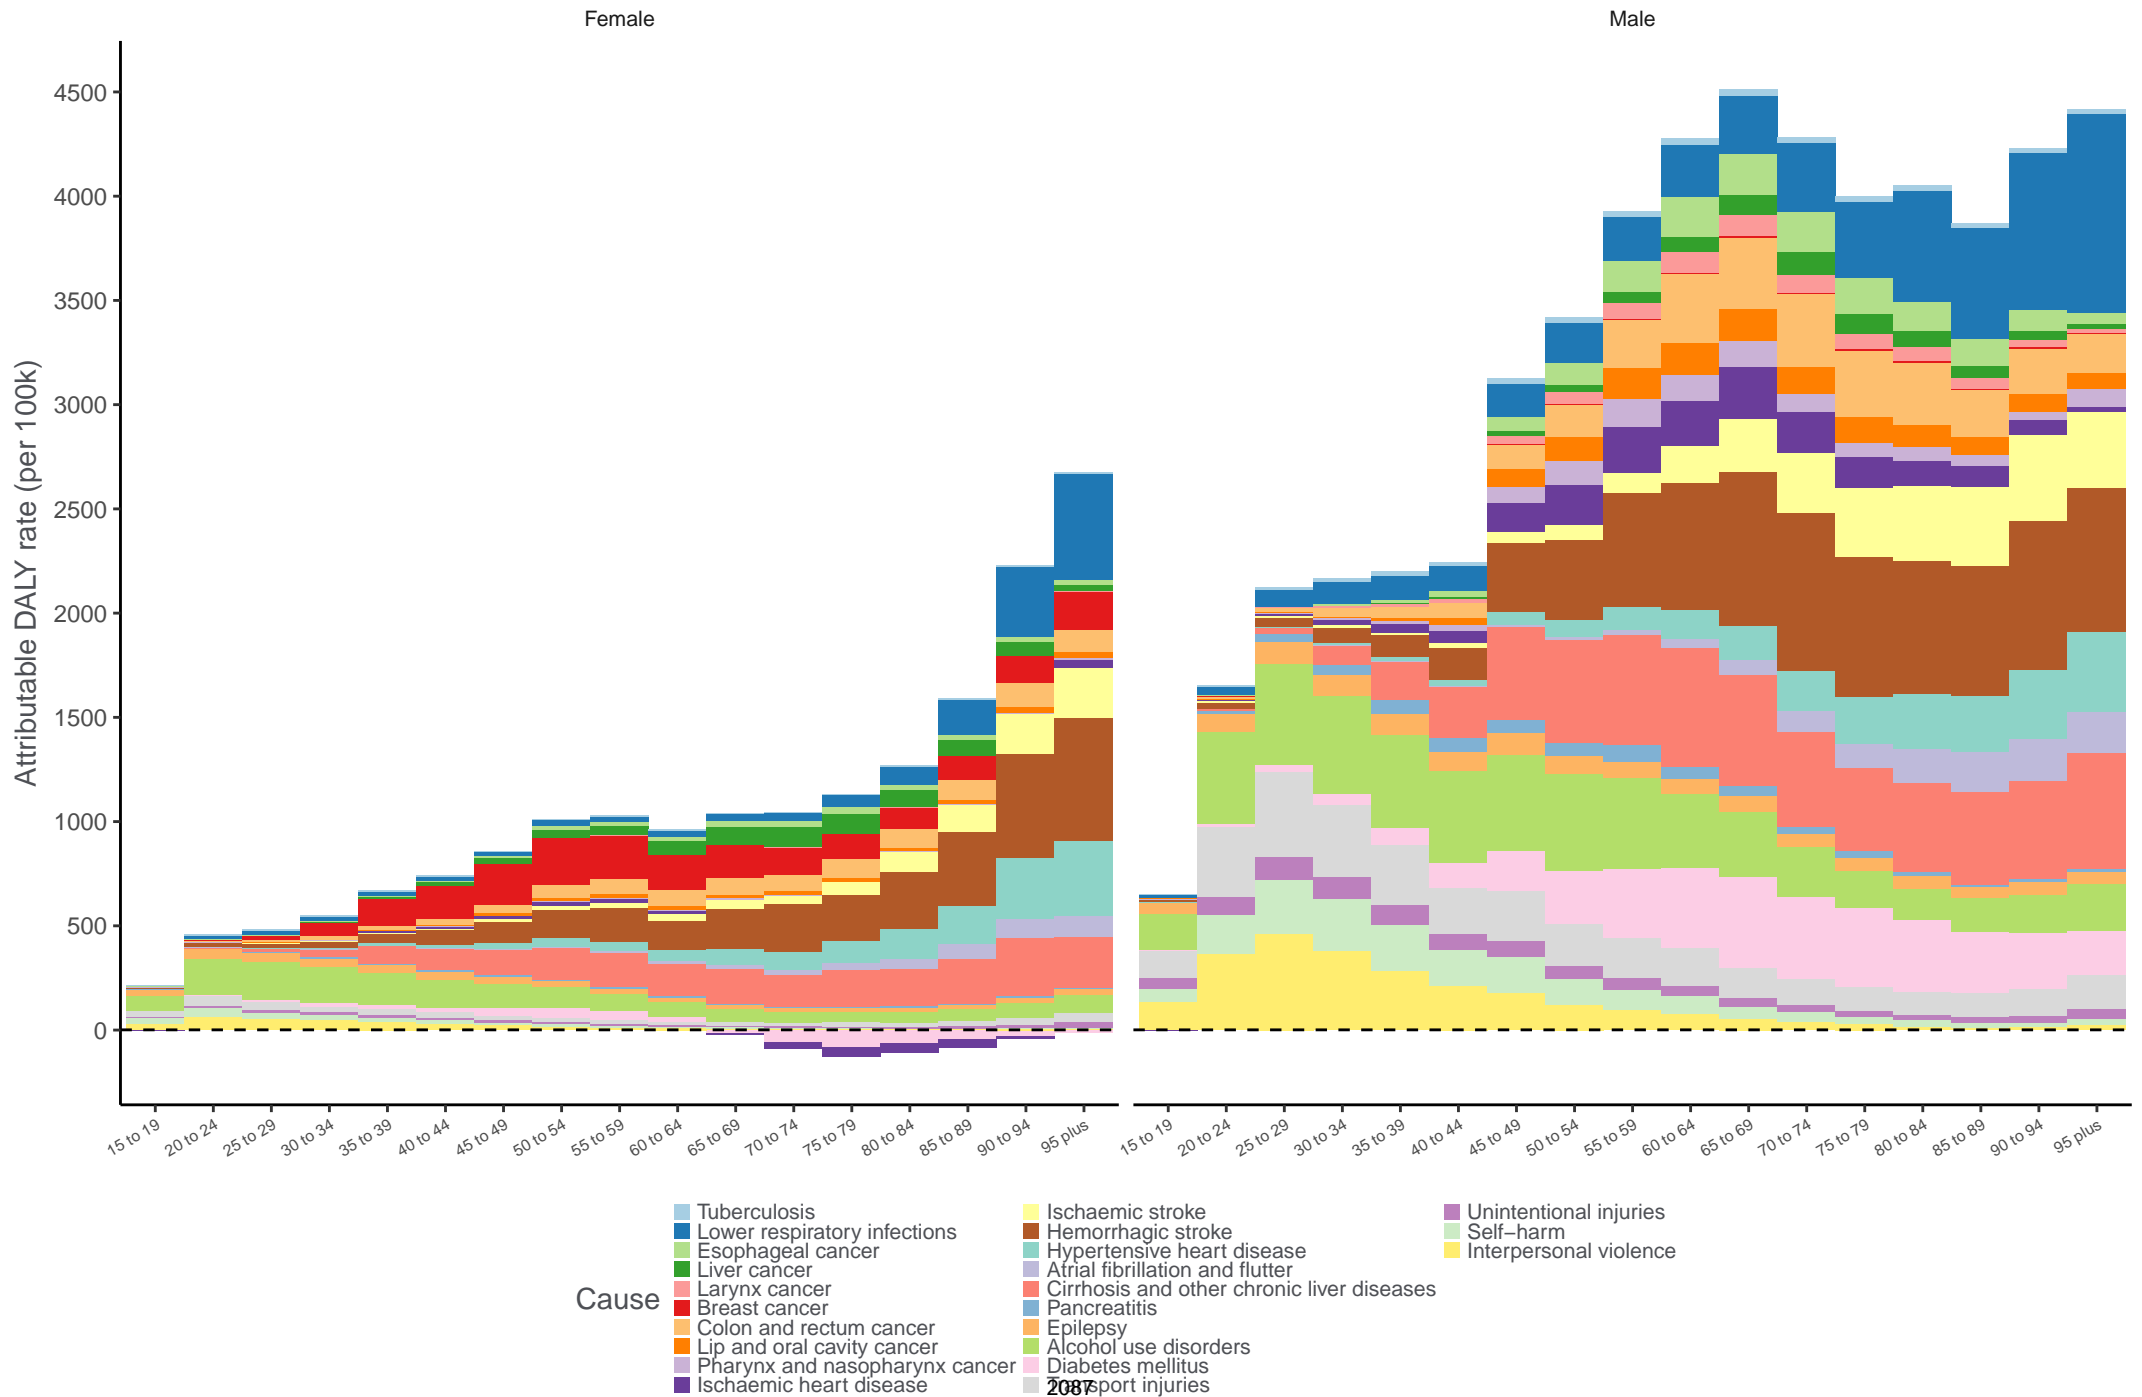



# Attributable DALY rate disaggregated by cause, Belize, by sex and age in 2016.

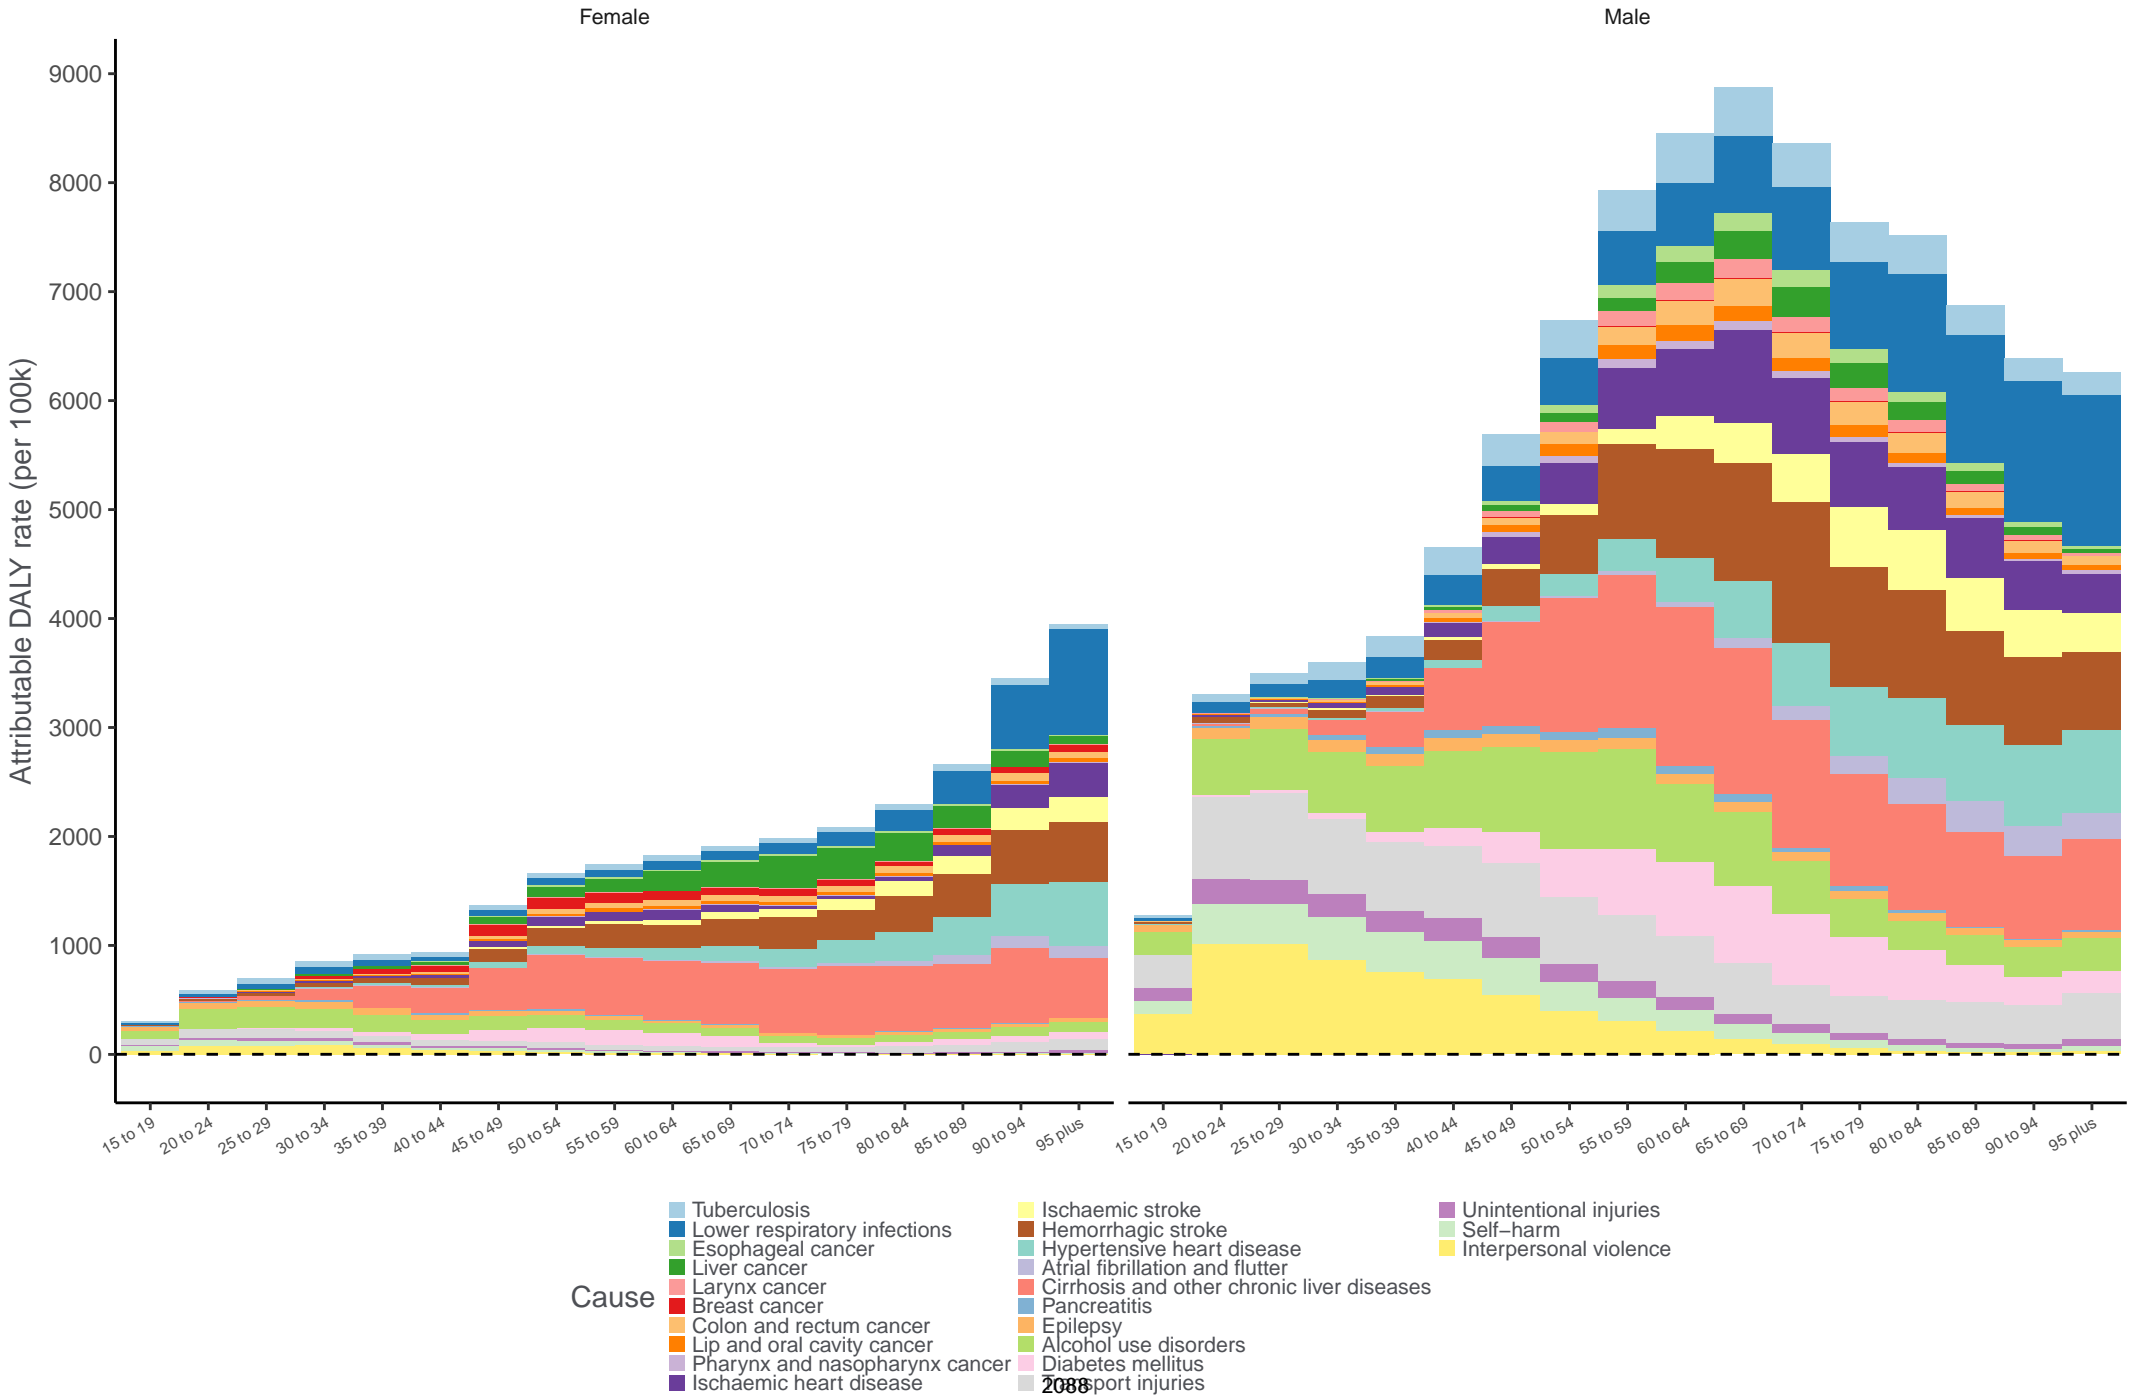

# Attributable DALY rate disaggregated by cause, Bermuda, by sex and age in 2016.

Female

Male

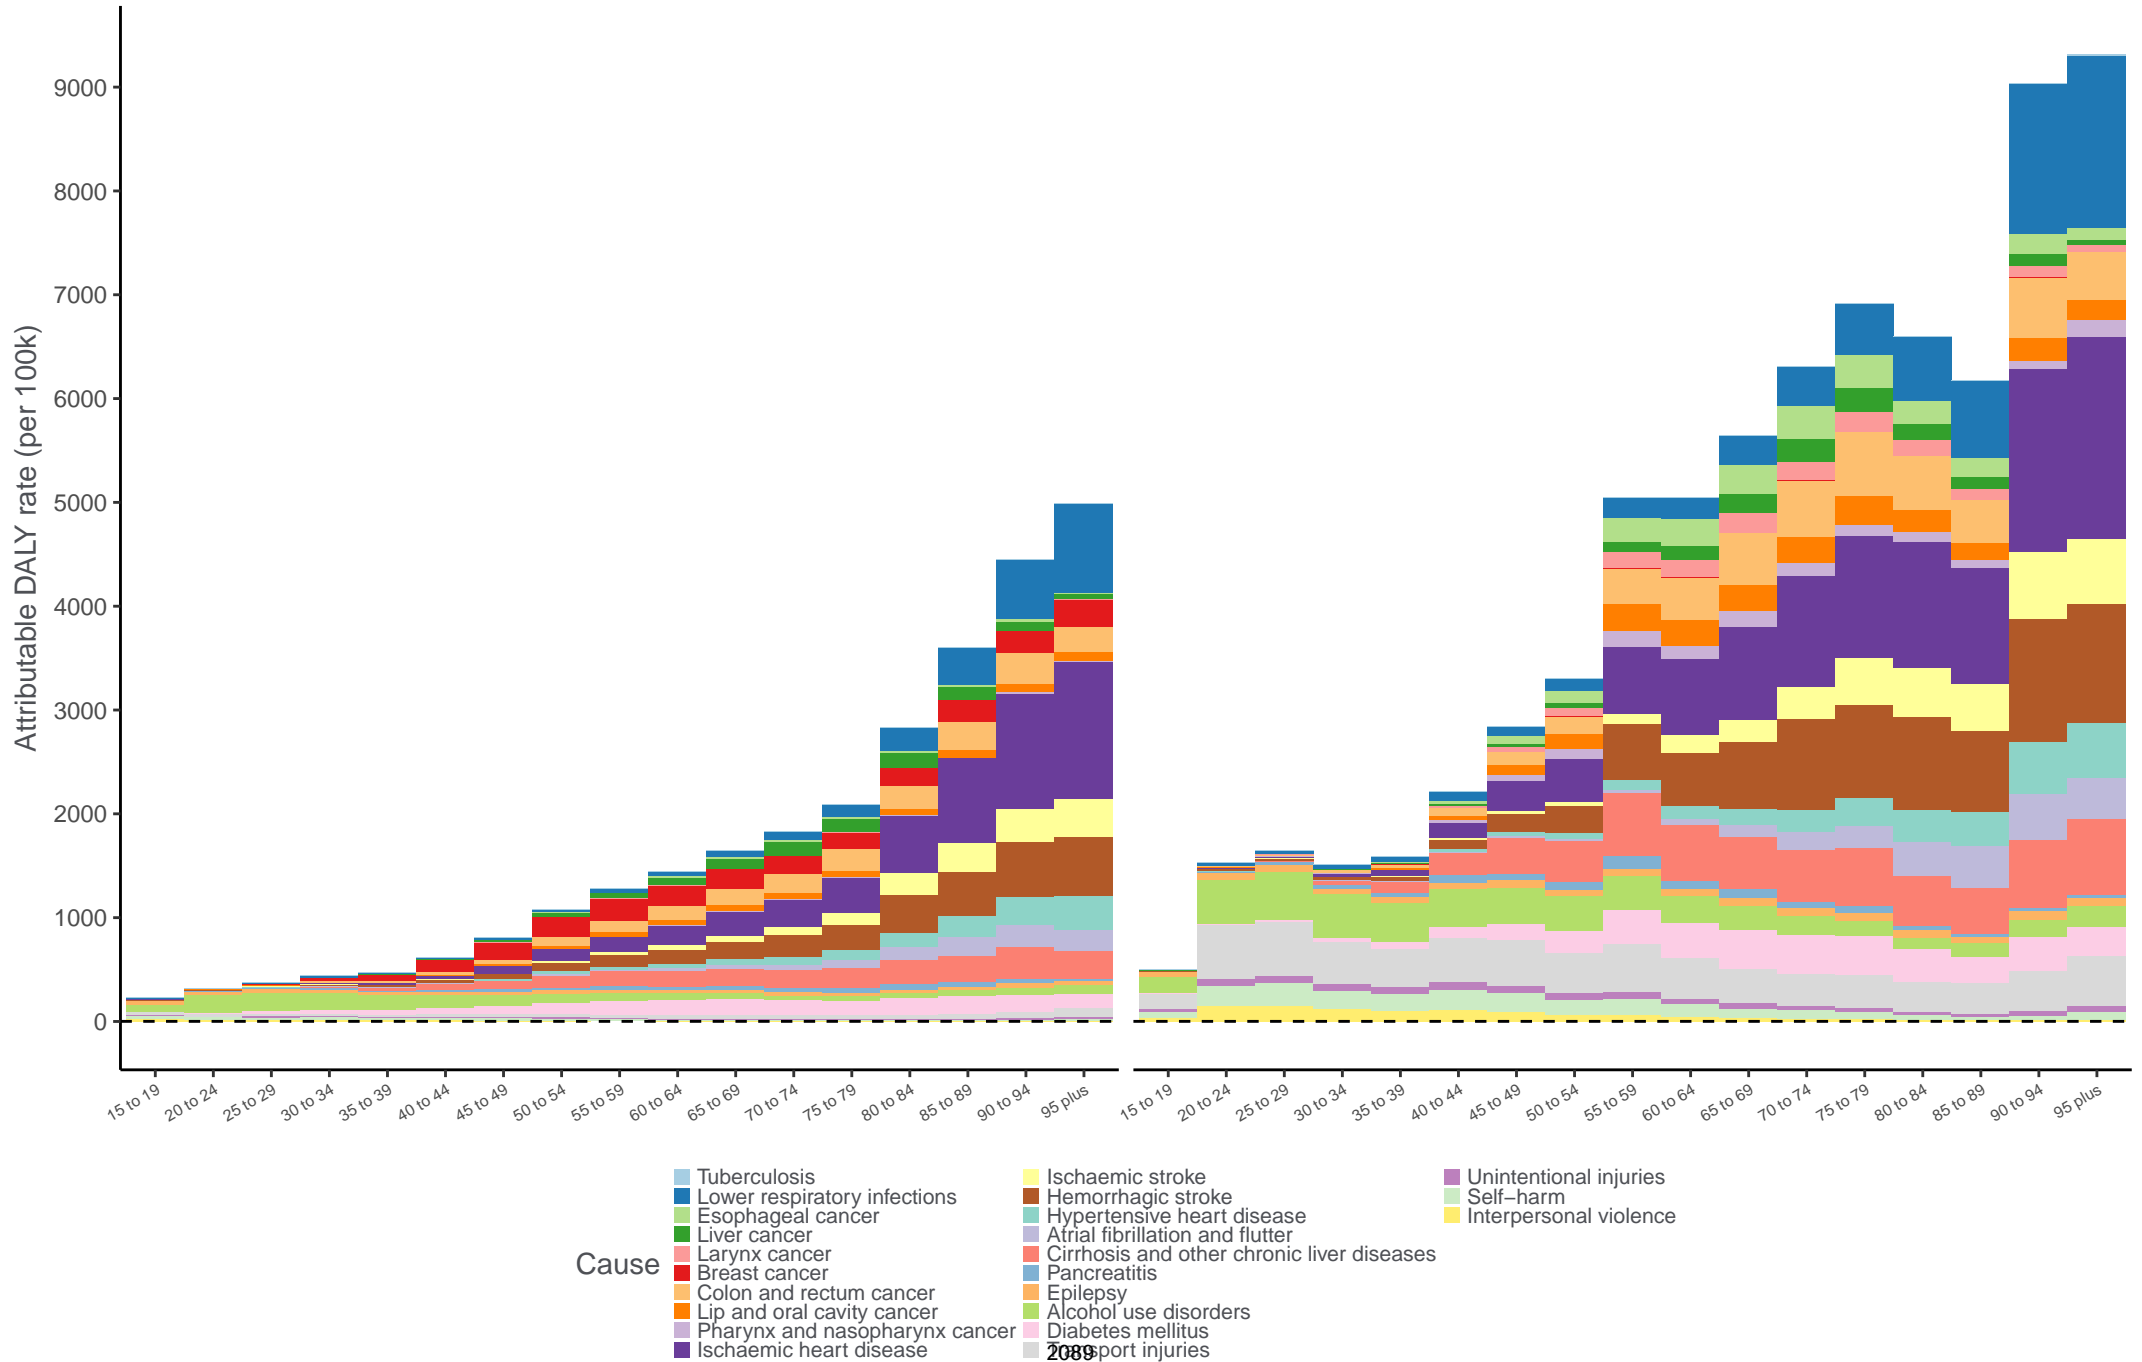

Attributable DALY rate disaggregated by cause, Cuba, by sex and age in 2016.

Female

Male

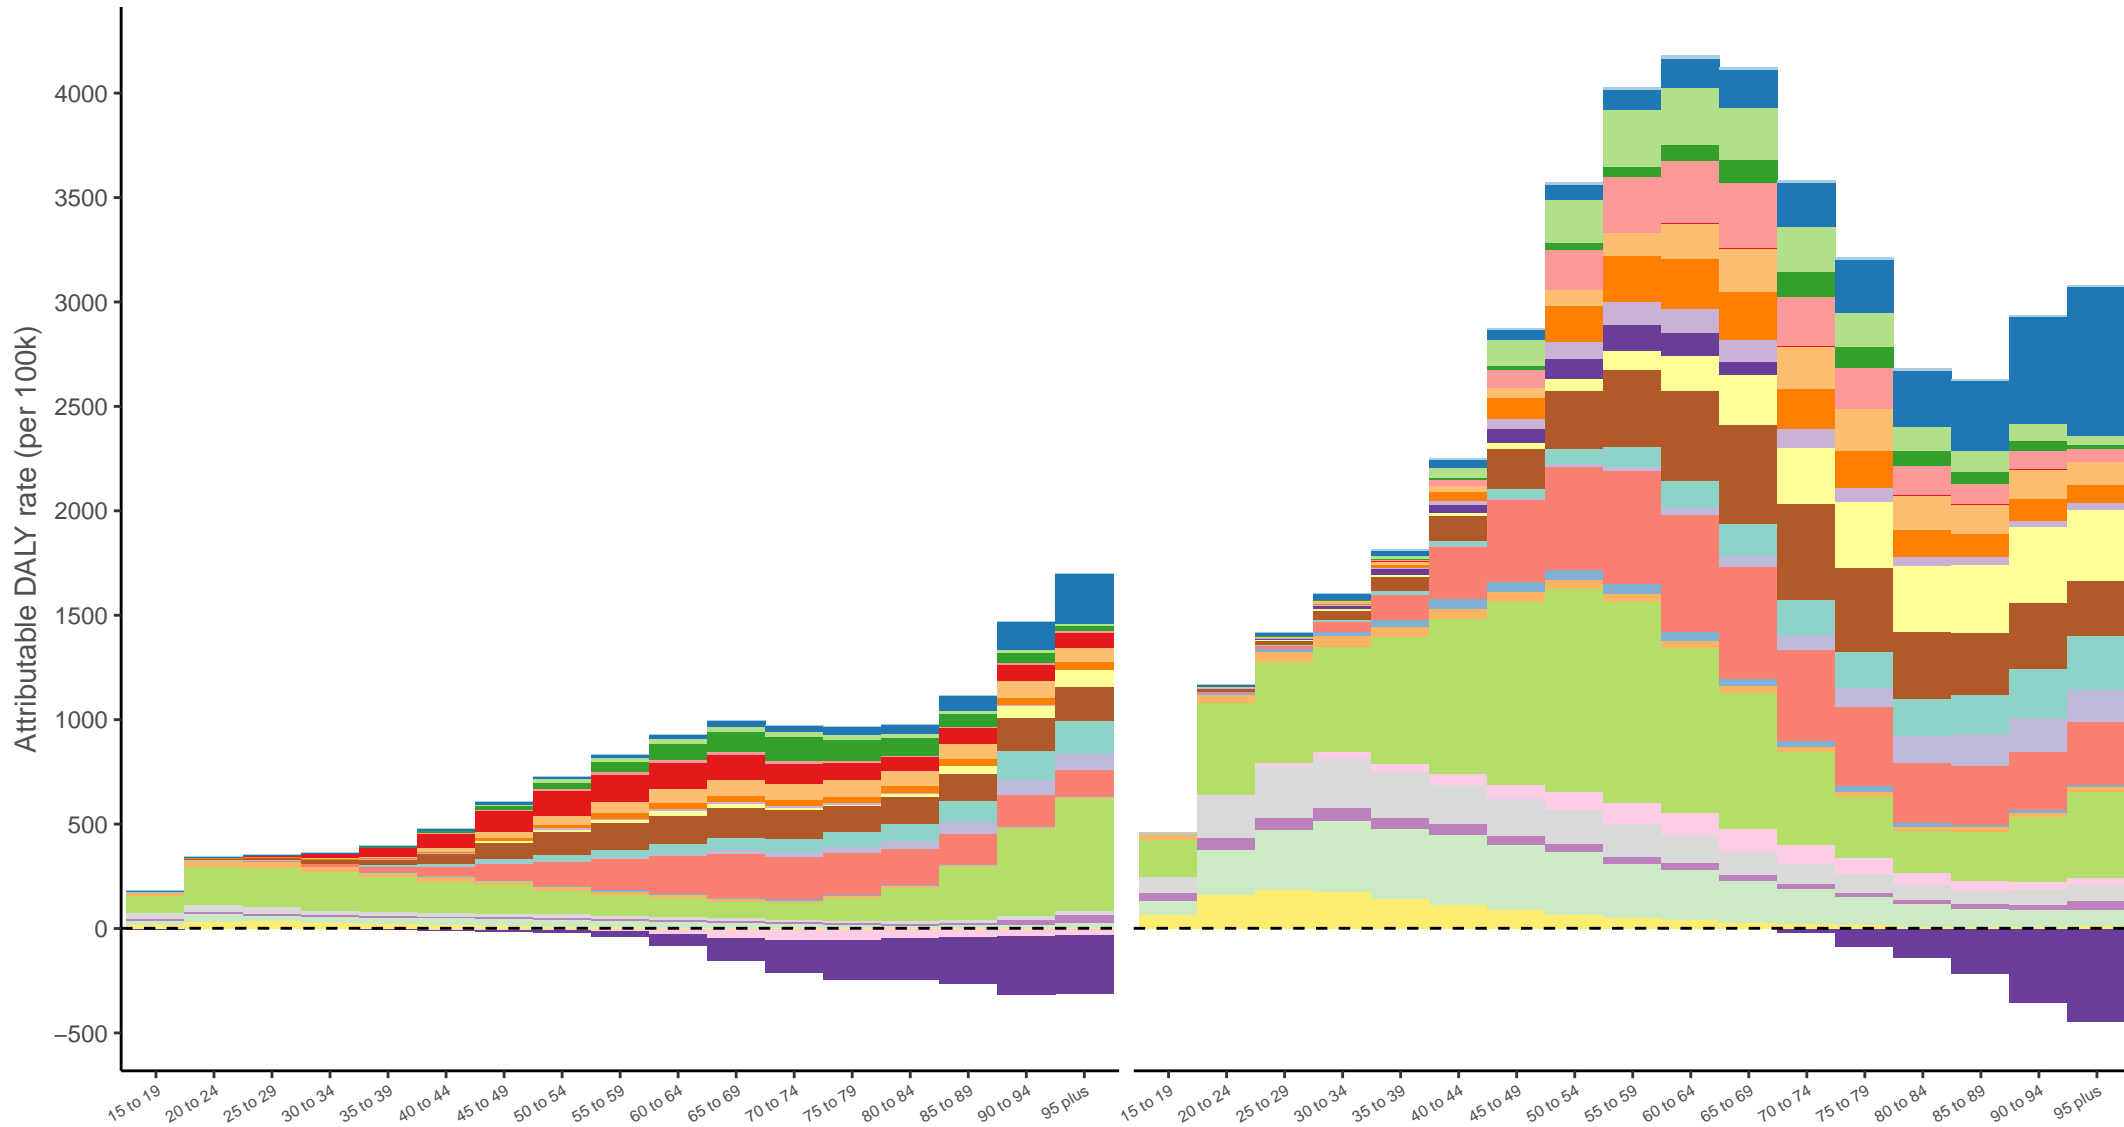

Cause

- |                                                                       |                                                                                   |                                                               |
|-----------------------------------------------------------------------|-----------------------------------------------------------------------------------|---------------------------------------------------------------|
| <span style="color: #4682B4;">■</span> Tuberculosis                   | <span style="color: #FFFF00;">■</span> Ischaemic stroke                           | <span style="color: #800080;">■</span> Unintentional injuries |
| <span style="color: #000080;">■</span> Lower respiratory infections   | <span style="color: #8B4513;">■</span> Hemorrhagic stroke                         | <span style="color: #90EE90;">■</span> Self-harm              |
| <span style="color: #3CB371;">■</span> Esophageal cancer              | <span style="color: #66CDAA;">■</span> Hypertensive heart disease                 | <span style="color: #FFD700;">■</span> Interpersonal violence |
| <span style="color: #008000;">■</span> Liver cancer                   | <span style="color: #9370DB;">■</span> Atrial fibrillation and flutter            |                                                               |
| <span style="color: #F08080;">■</span> Larynx cancer                  | <span style="color: #FF6347;">■</span> Cirrhosis and other chronic liver diseases |                                                               |
| <span style="color: #FF0000;">■</span> Breast cancer                  | <span style="color: #4682B4;">■</span> Pancreatitis                               |                                                               |
| <span style="color: #FFA500;">■</span> Colon and rectum cancer        | <span style="color: #FF8C00;">■</span> Epilepsy                                   |                                                               |
| <span style="color: #FF4500;">■</span> Lip and oral cavity cancer     | <span style="color: #9ACD32;">■</span> Alcohol use disorders                      |                                                               |
| <span style="color: #9370DB;">■</span> Pharynx and nasopharynx cancer | <span style="color: #FFB6C1;">■</span> Diabetes mellitus                          |                                                               |
| <span style="color: #483D8B;">■</span> Ischaemic heart disease        | <span style="color: #D3D3D3;">■</span> Transport injuries                         |                                                               |

Attributable DALY rate disaggregated by cause, Dominica, by sex and age in 2016.

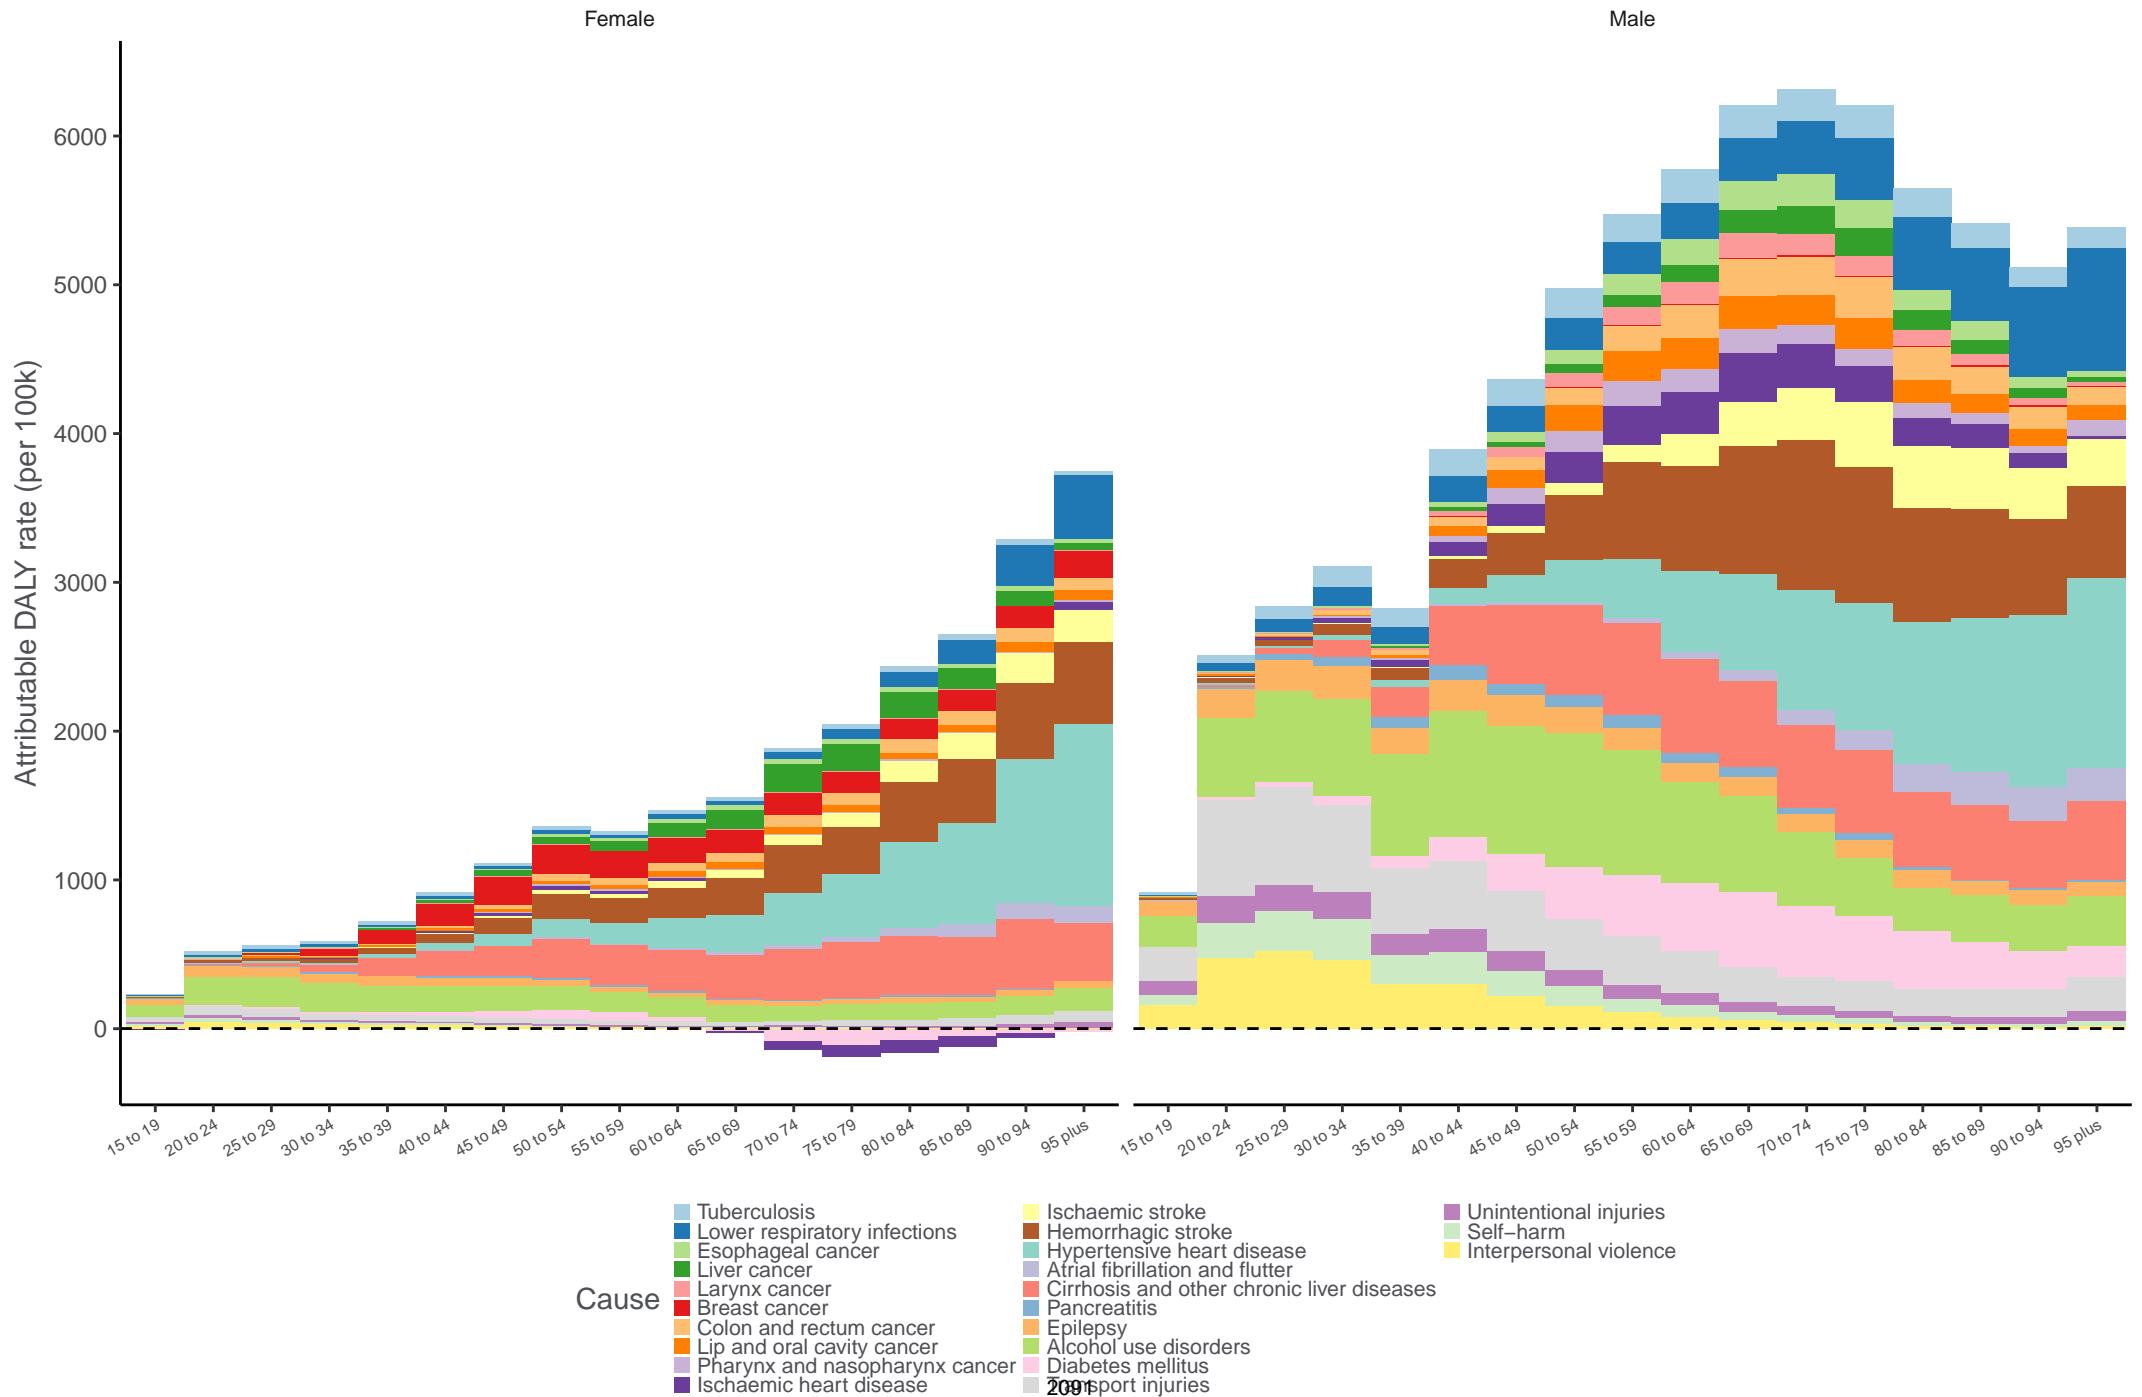

Attributable DALY rate disaggregated by cause, Dominican Republic, by sex and age in 2016.

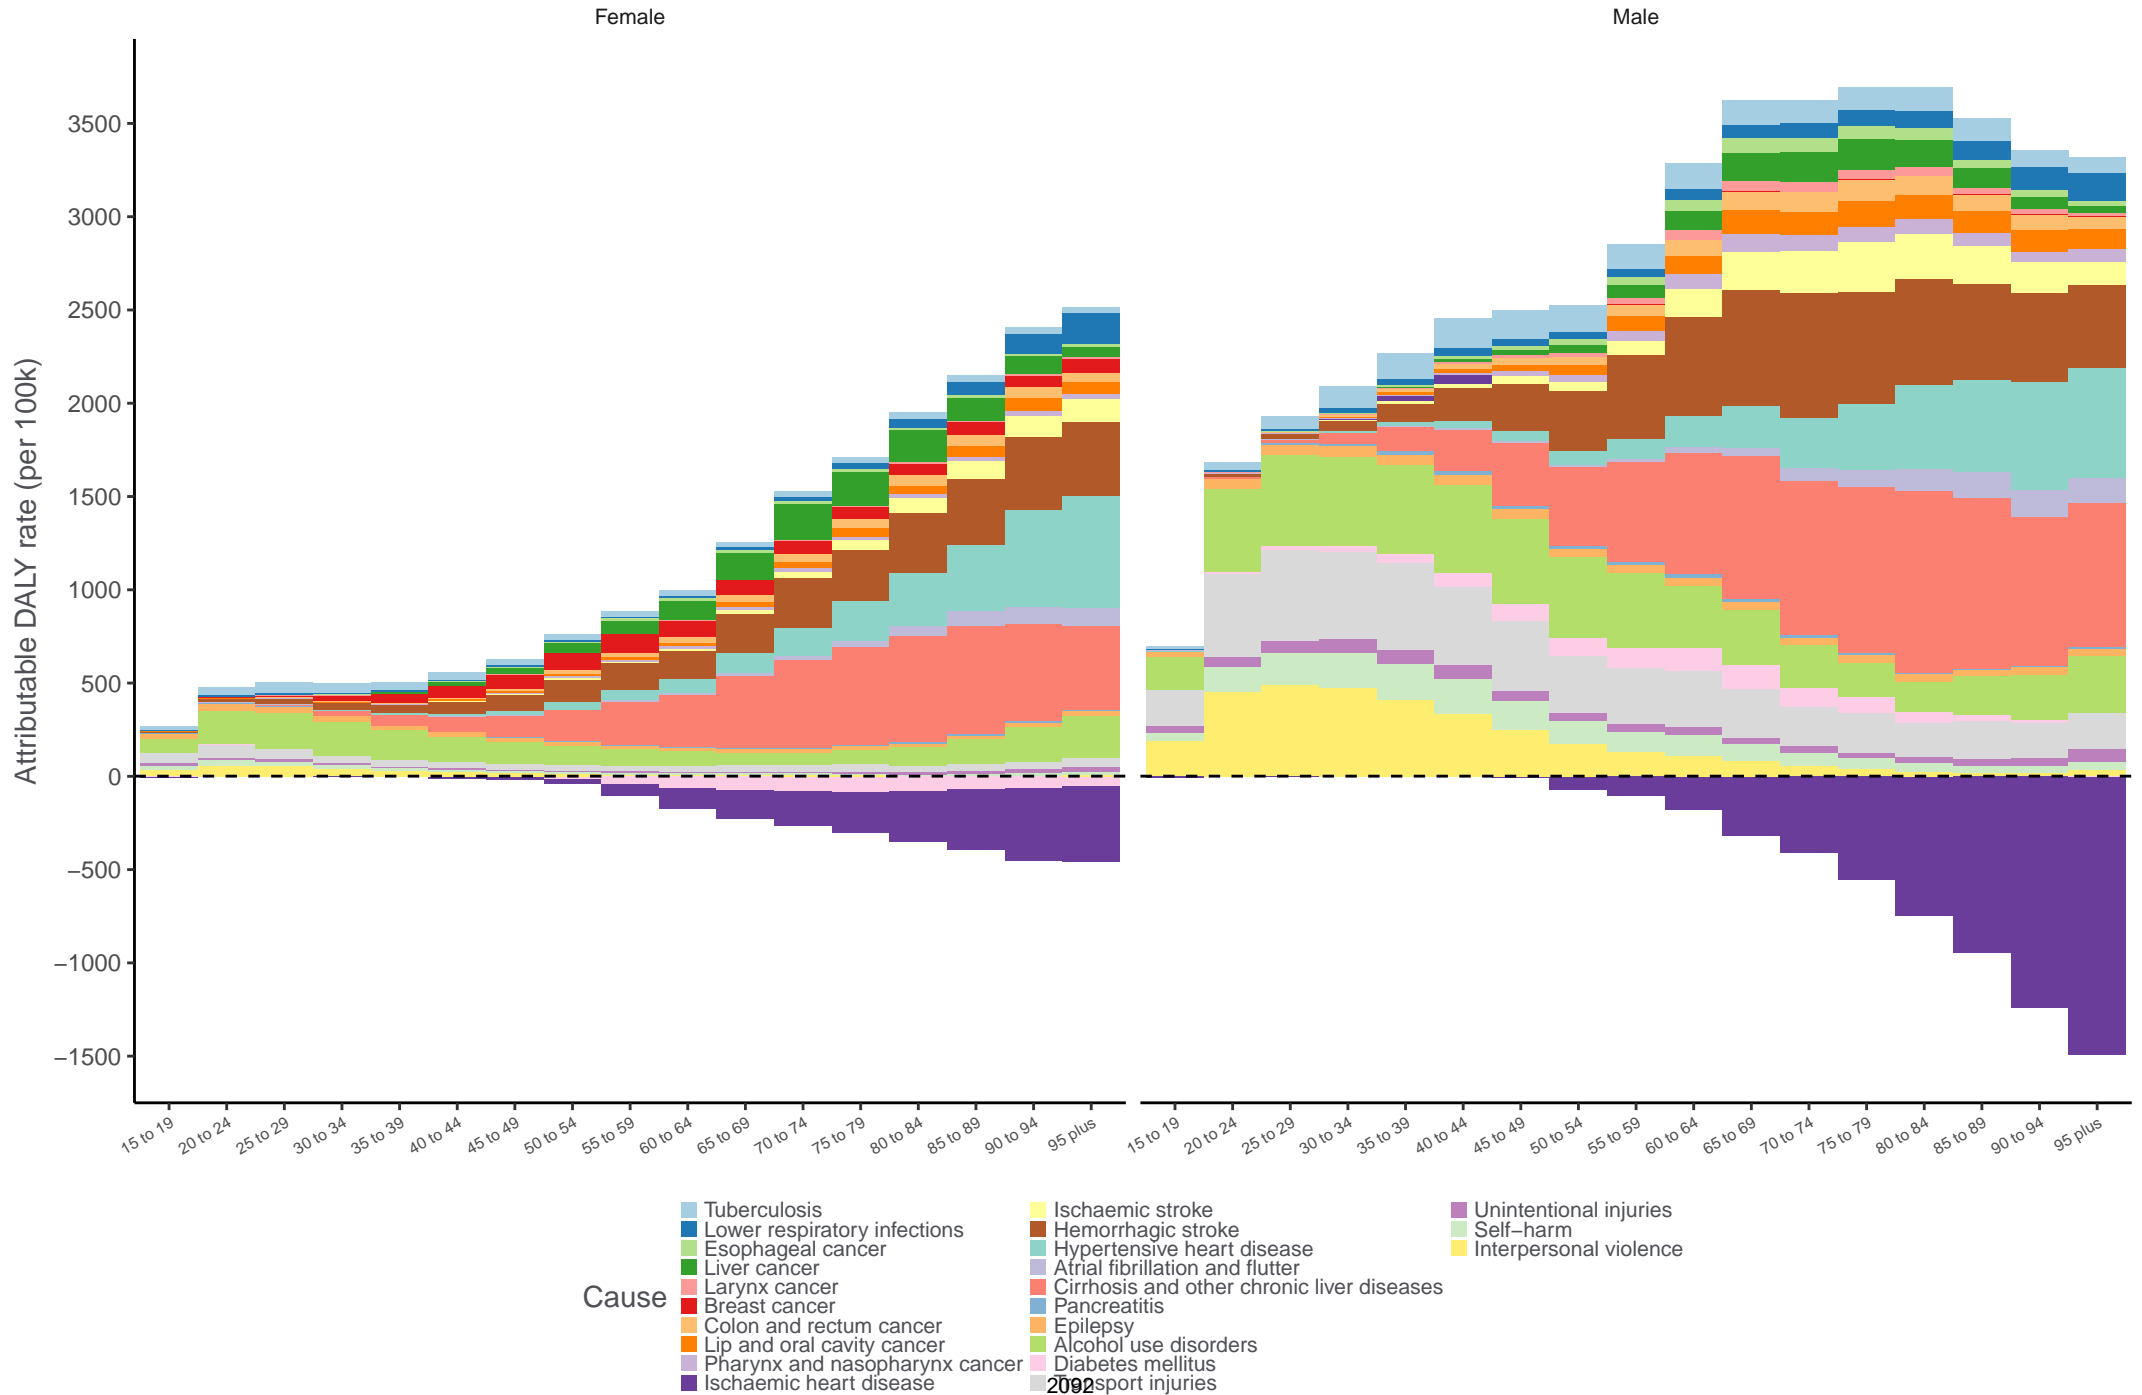

Attributable DALY rate disaggregated by cause, Grenada, by sex and age in 2016.

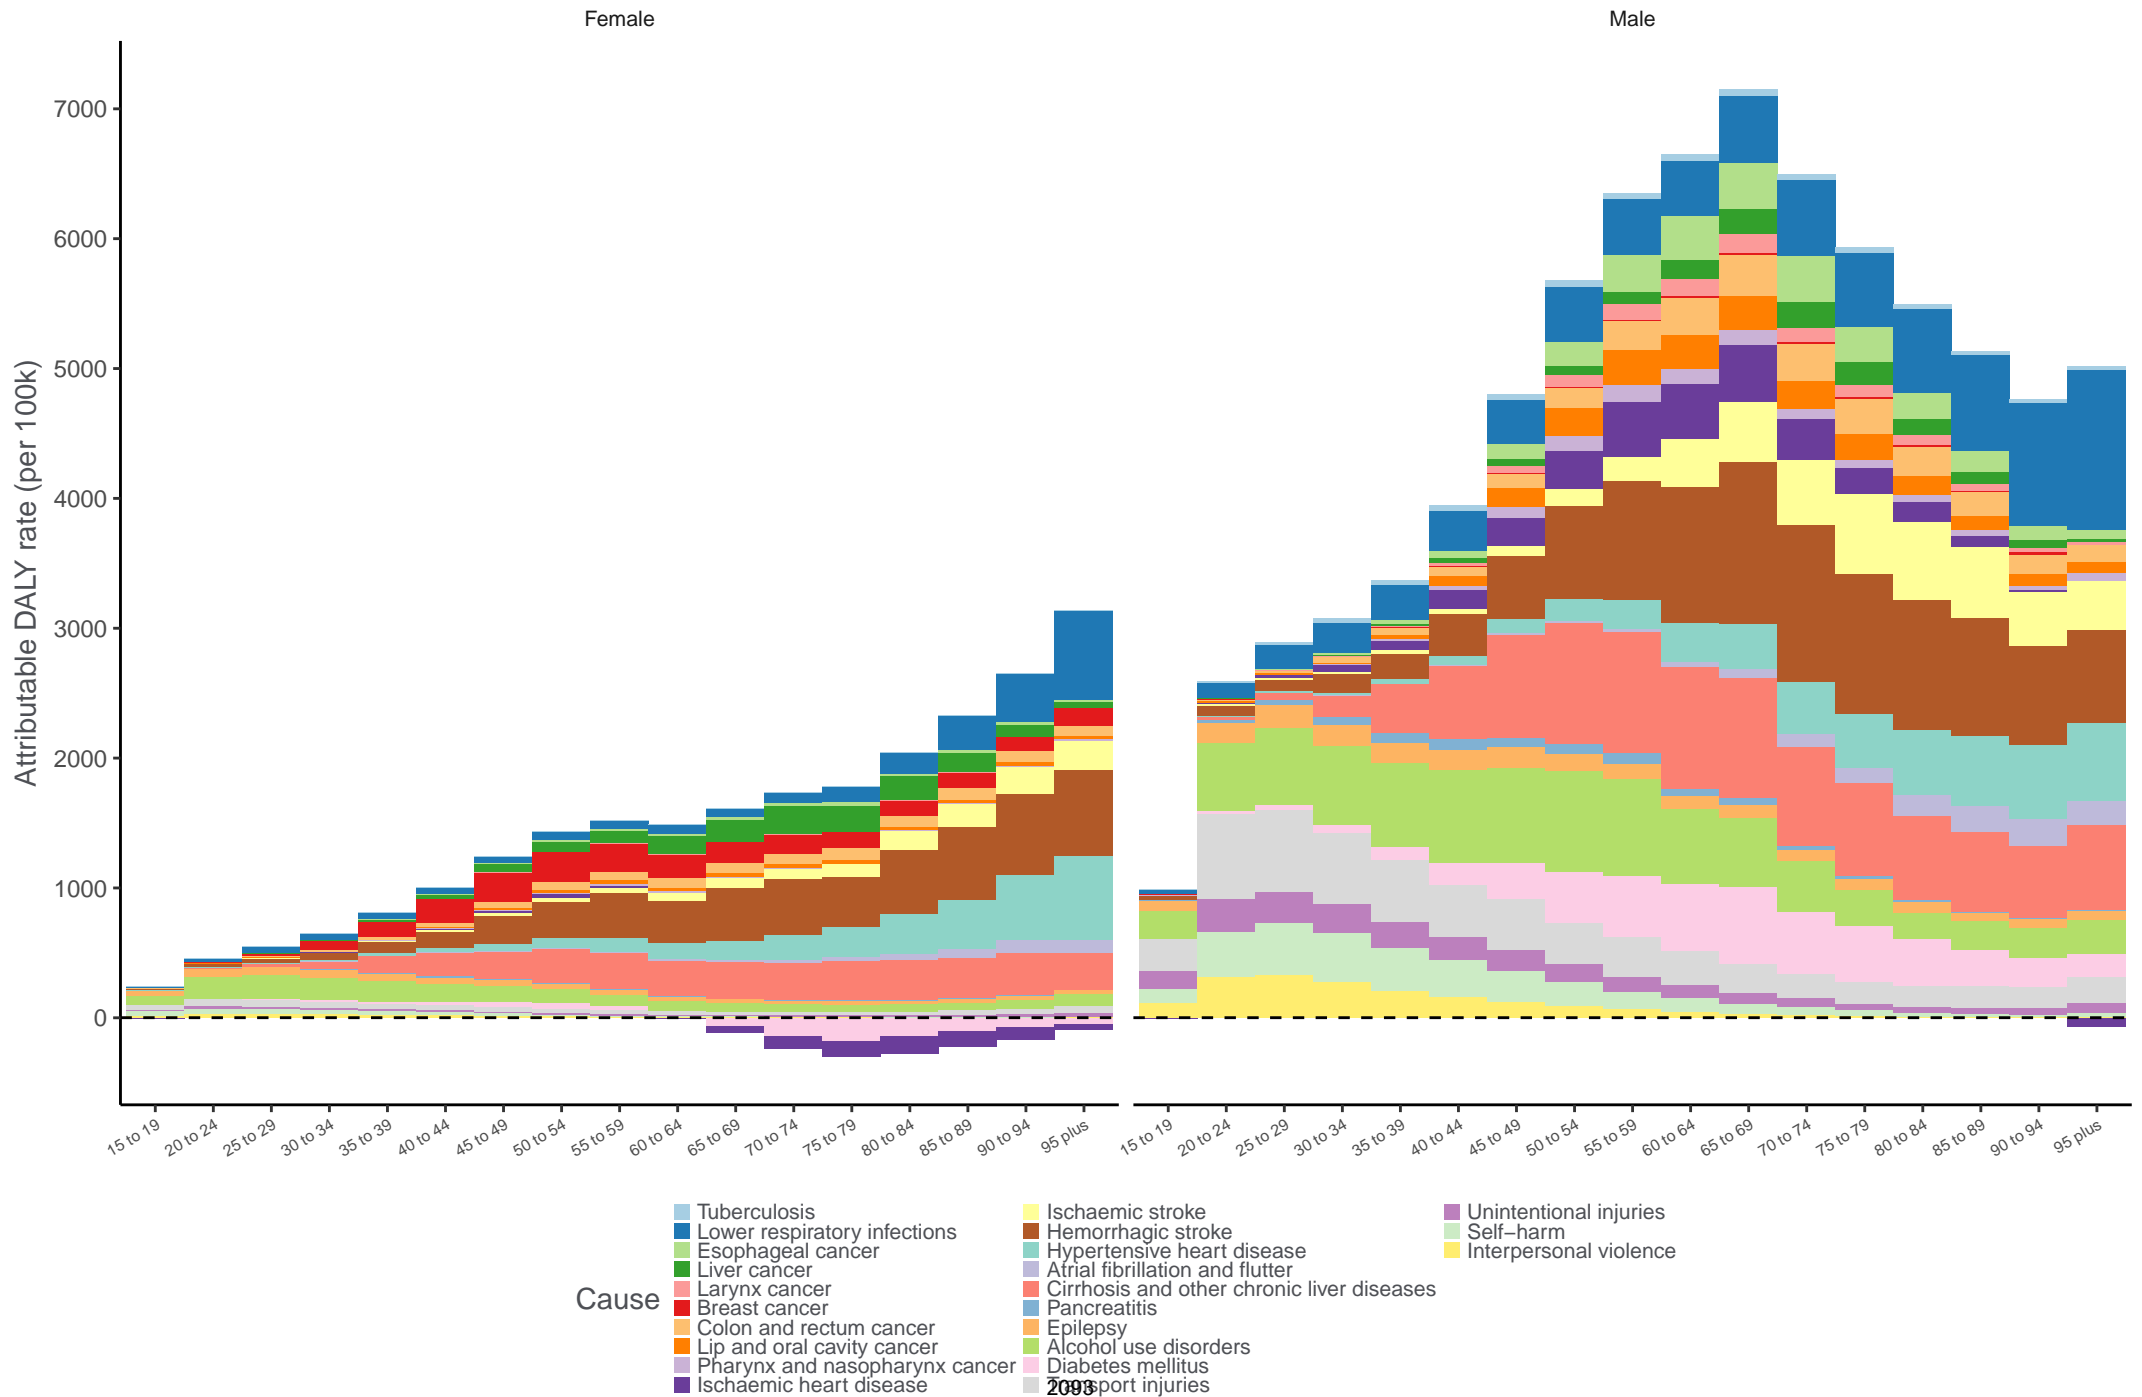

Attributable DALY rate disaggregated by cause, Guyana, by sex and age in 2016.

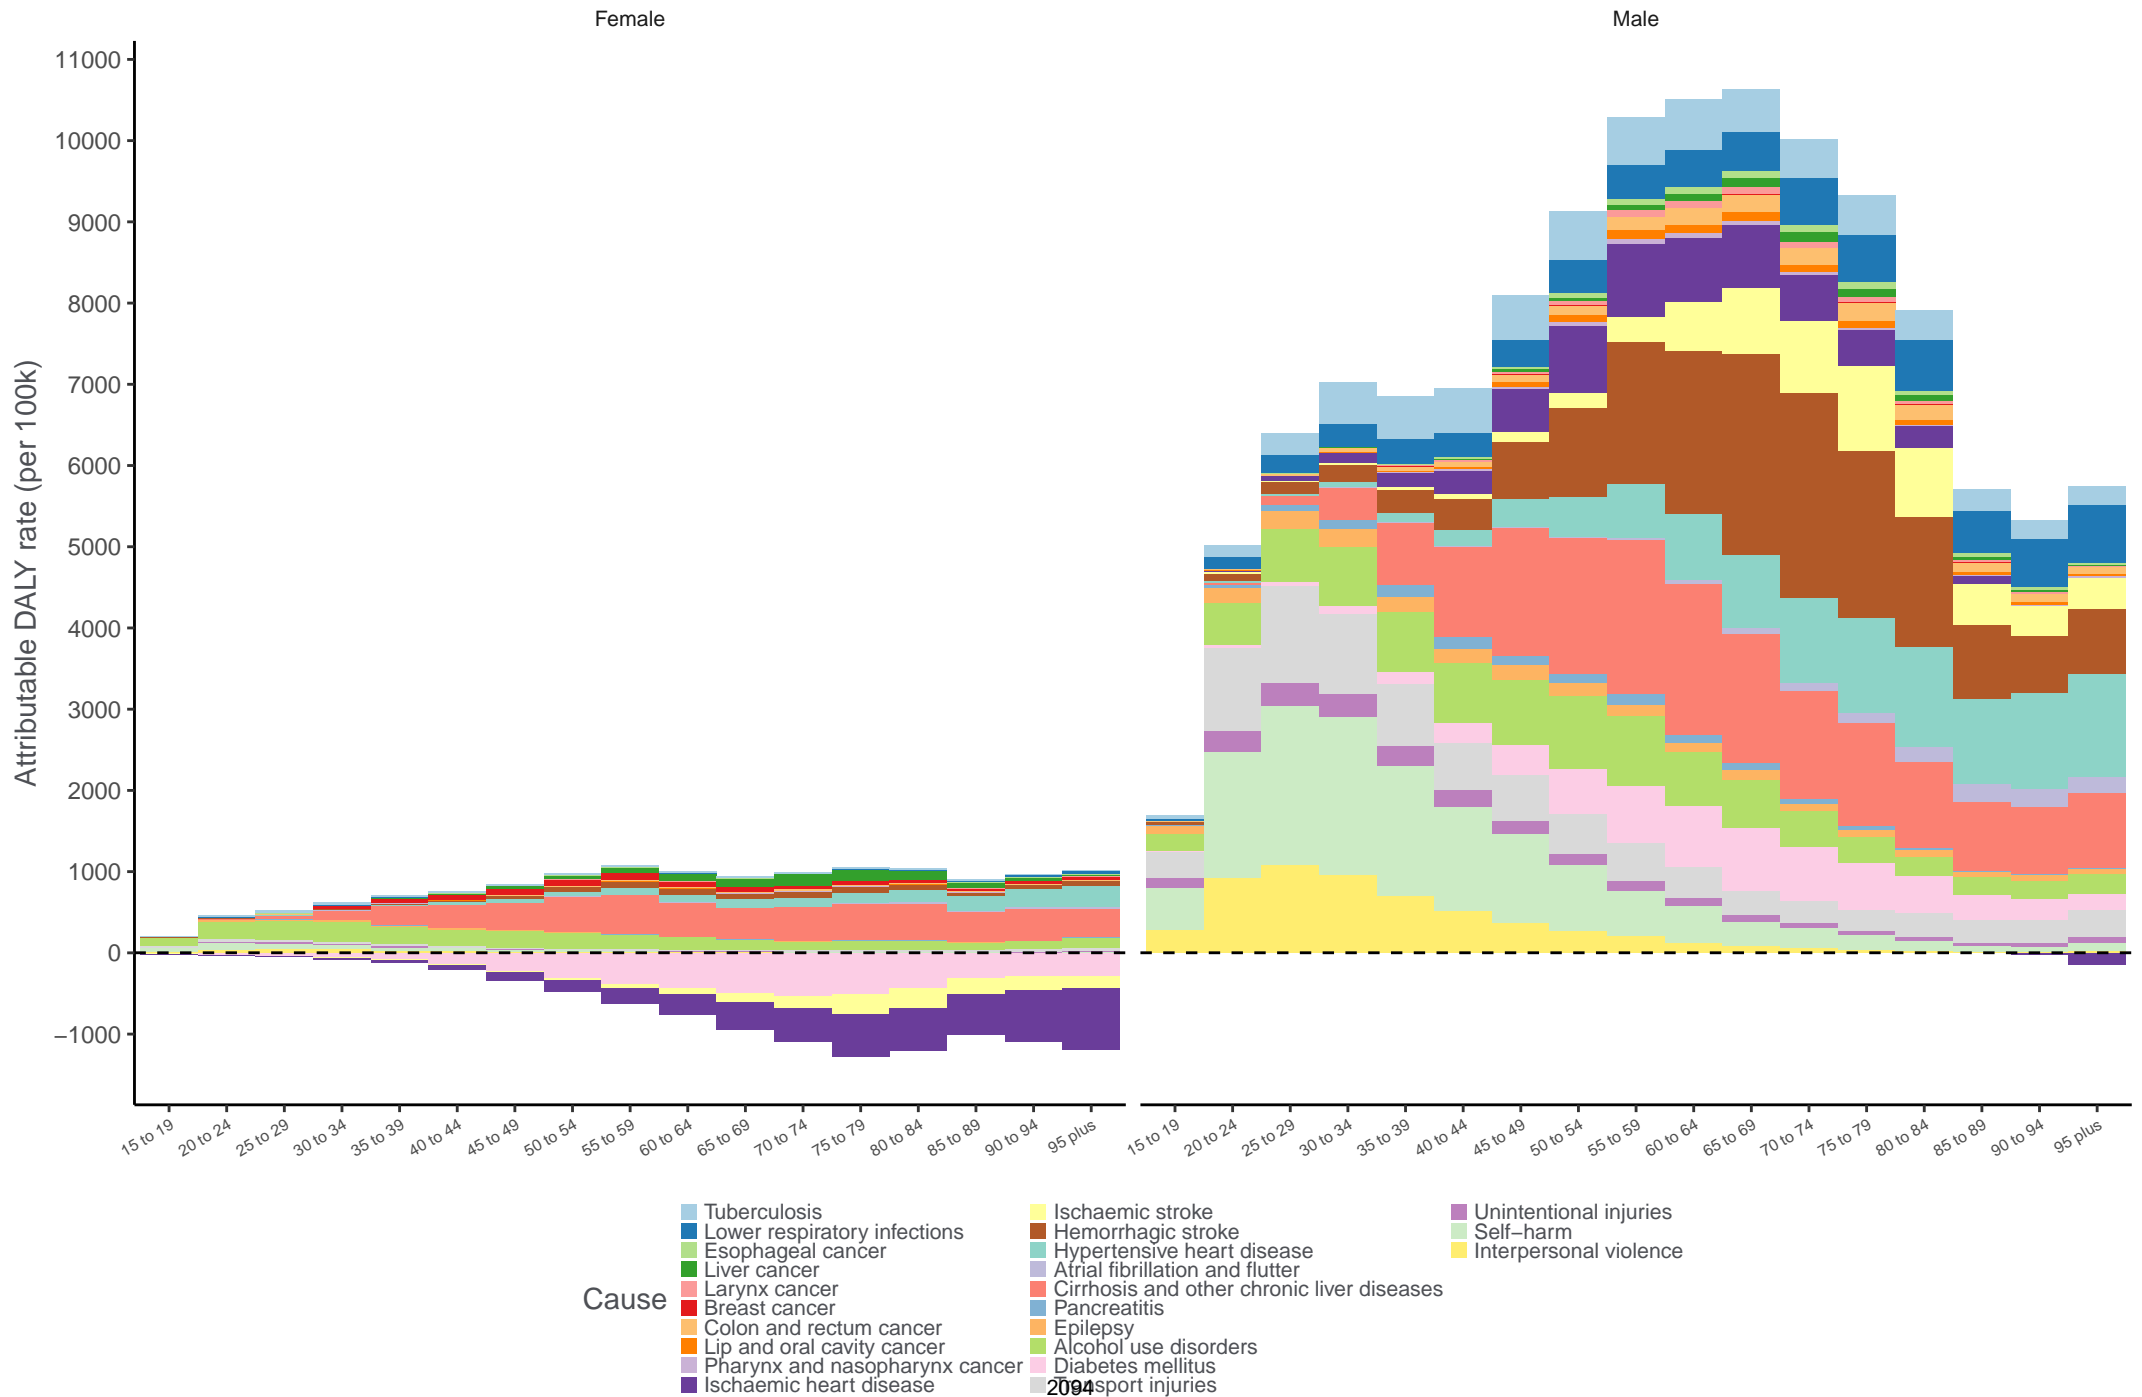

Attributable DALY rate disaggregated by cause, Haiti, by sex and age in 2016.

Female

Male

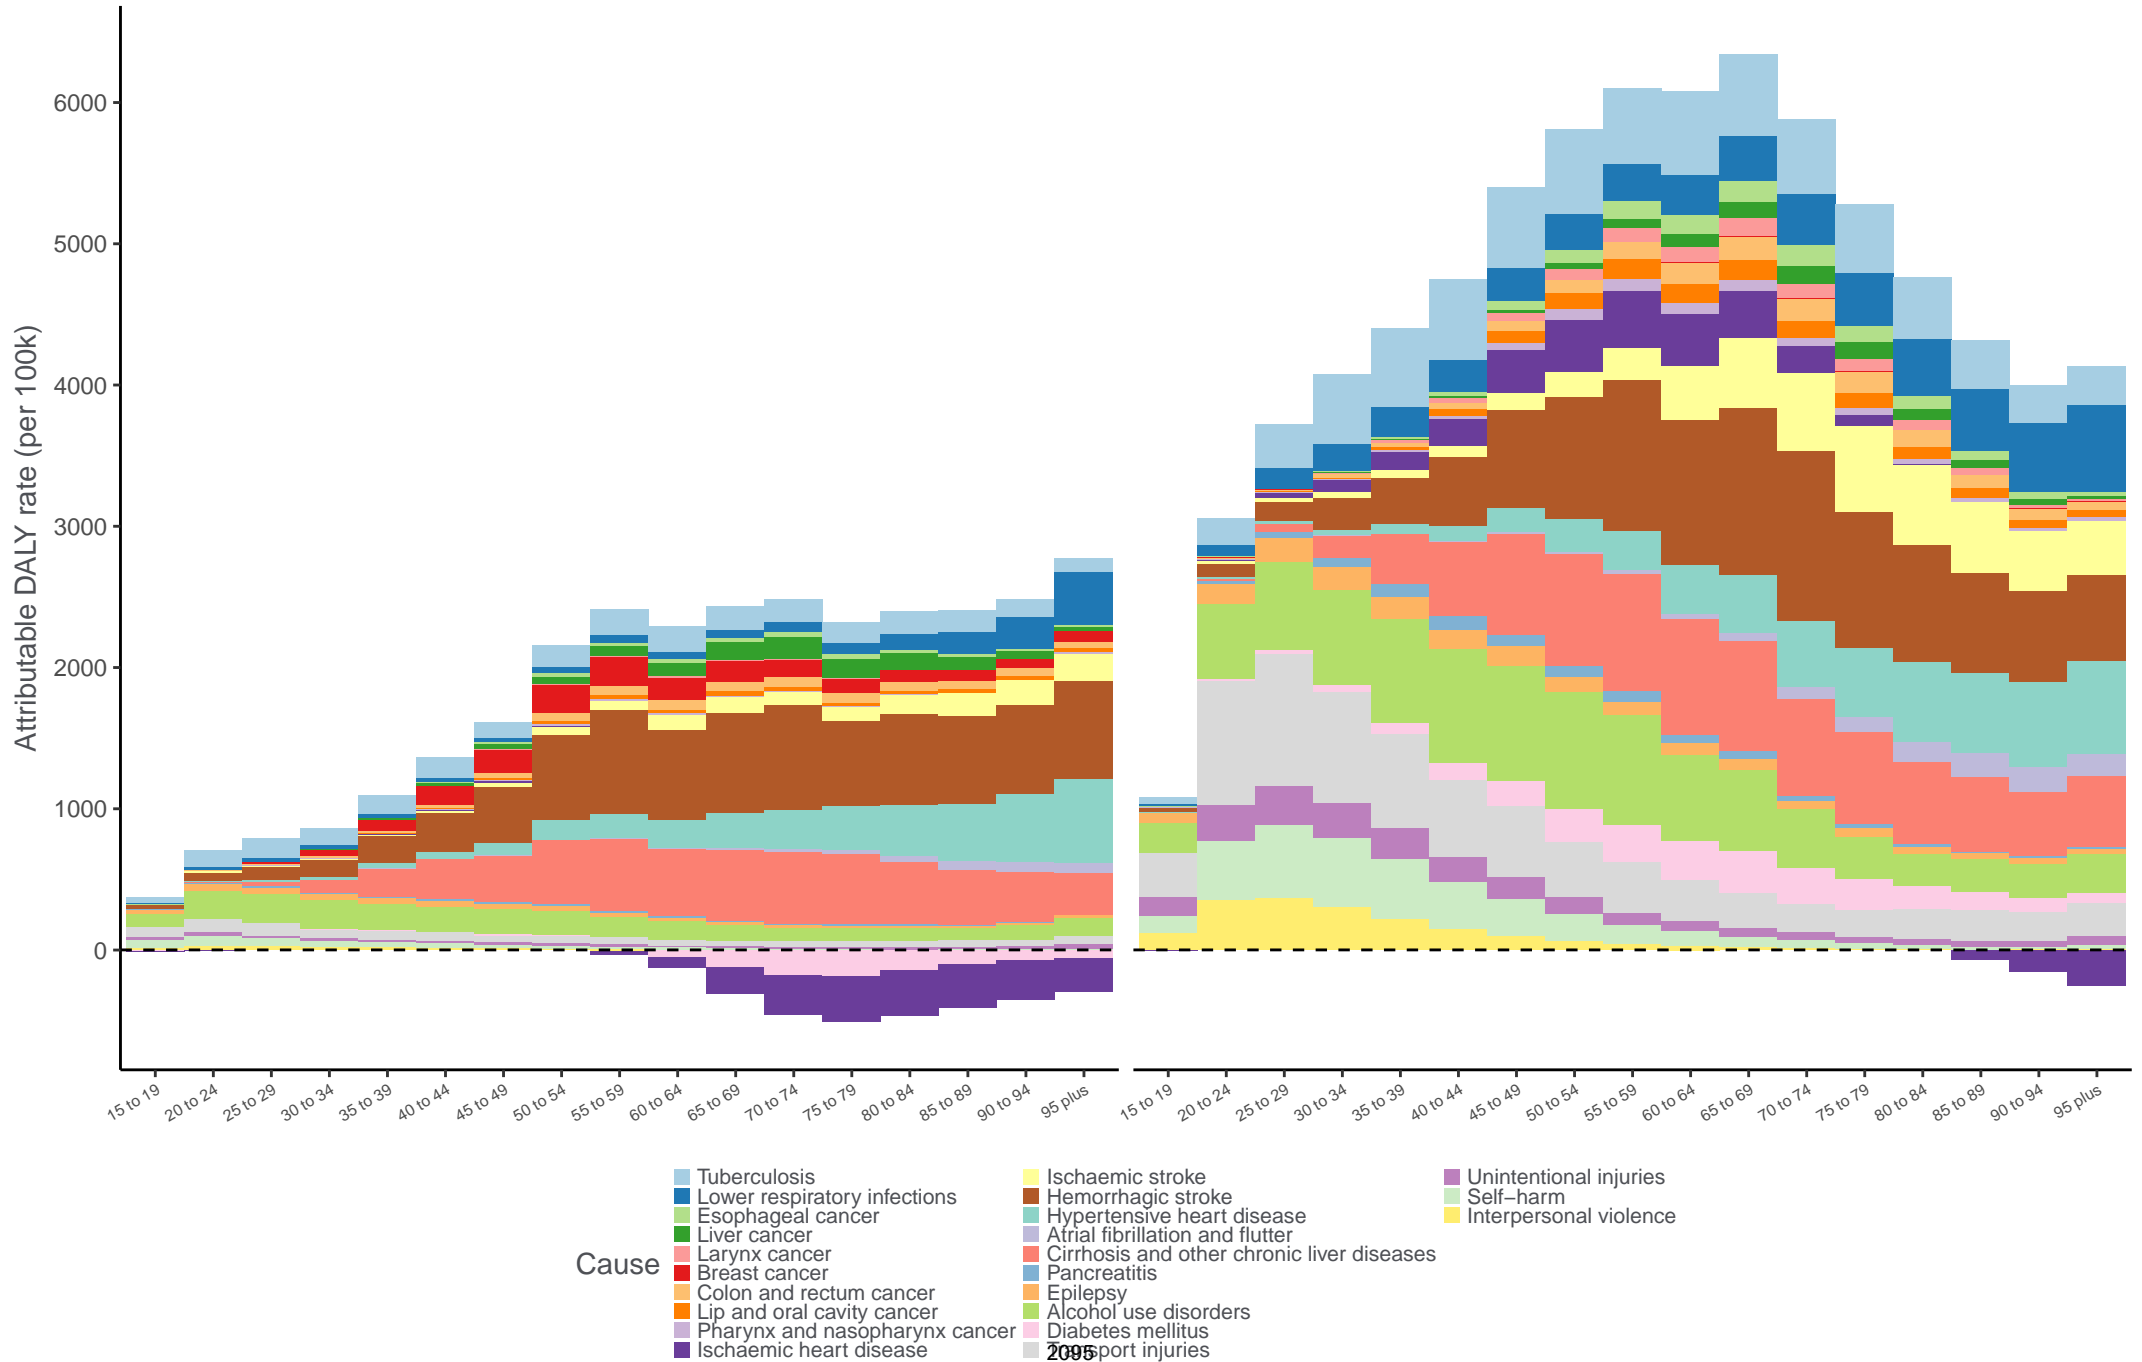



Attributable DALY rate disaggregated by cause, Jamaica, by sex and age in 2016.

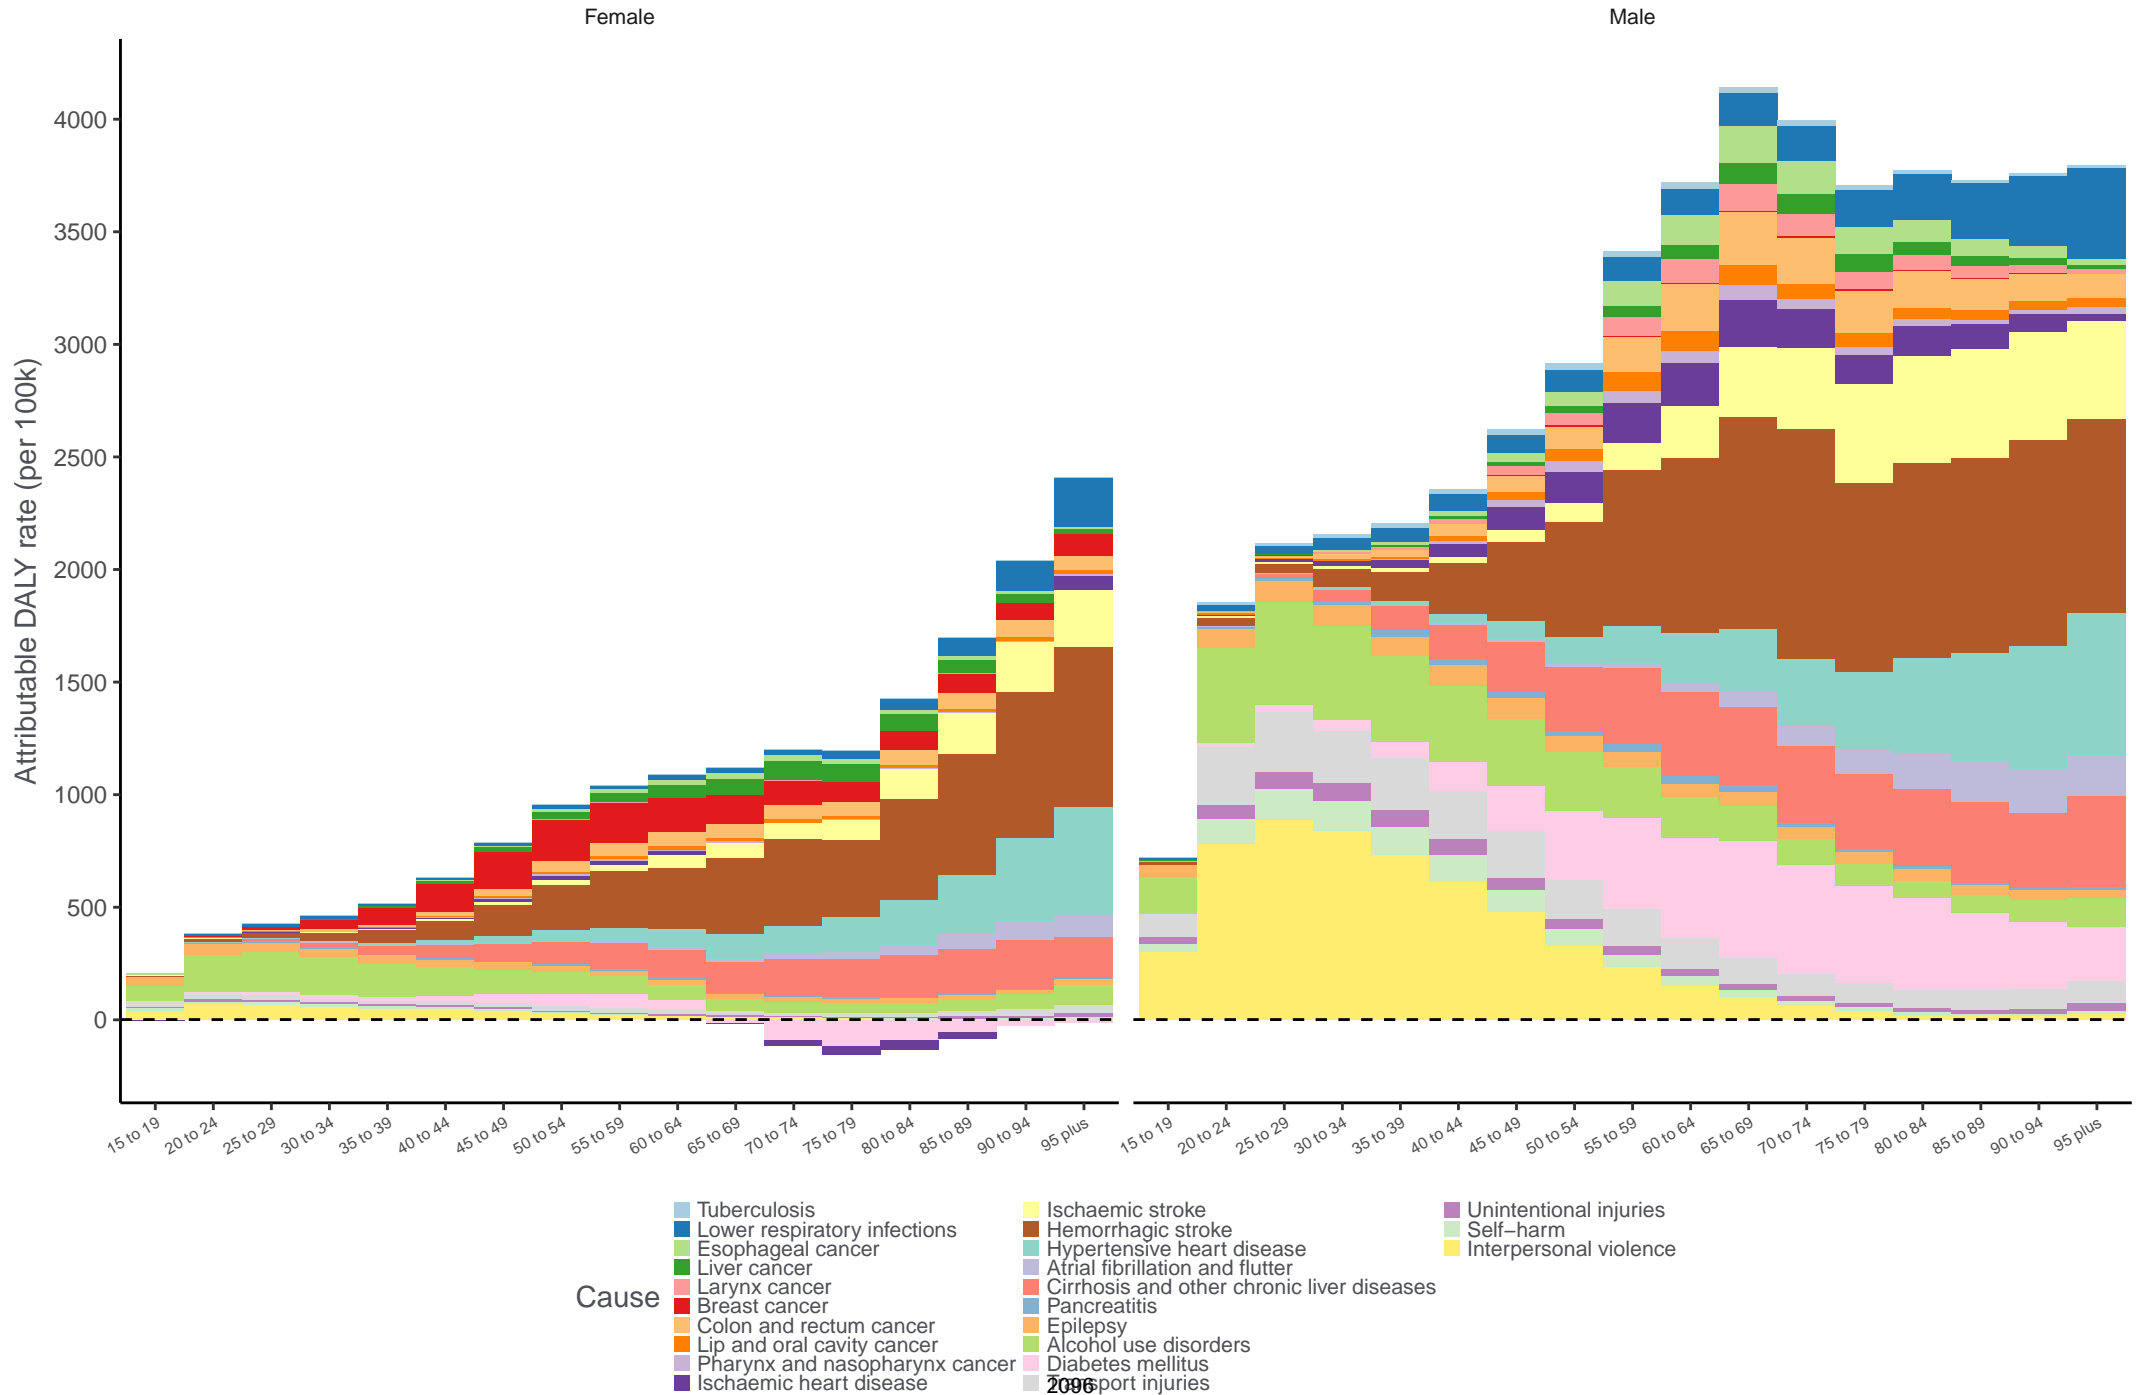

# Attributable DALY rate disaggregated by cause, Saint Lucia, by sex and age in 2016.

Female

Male

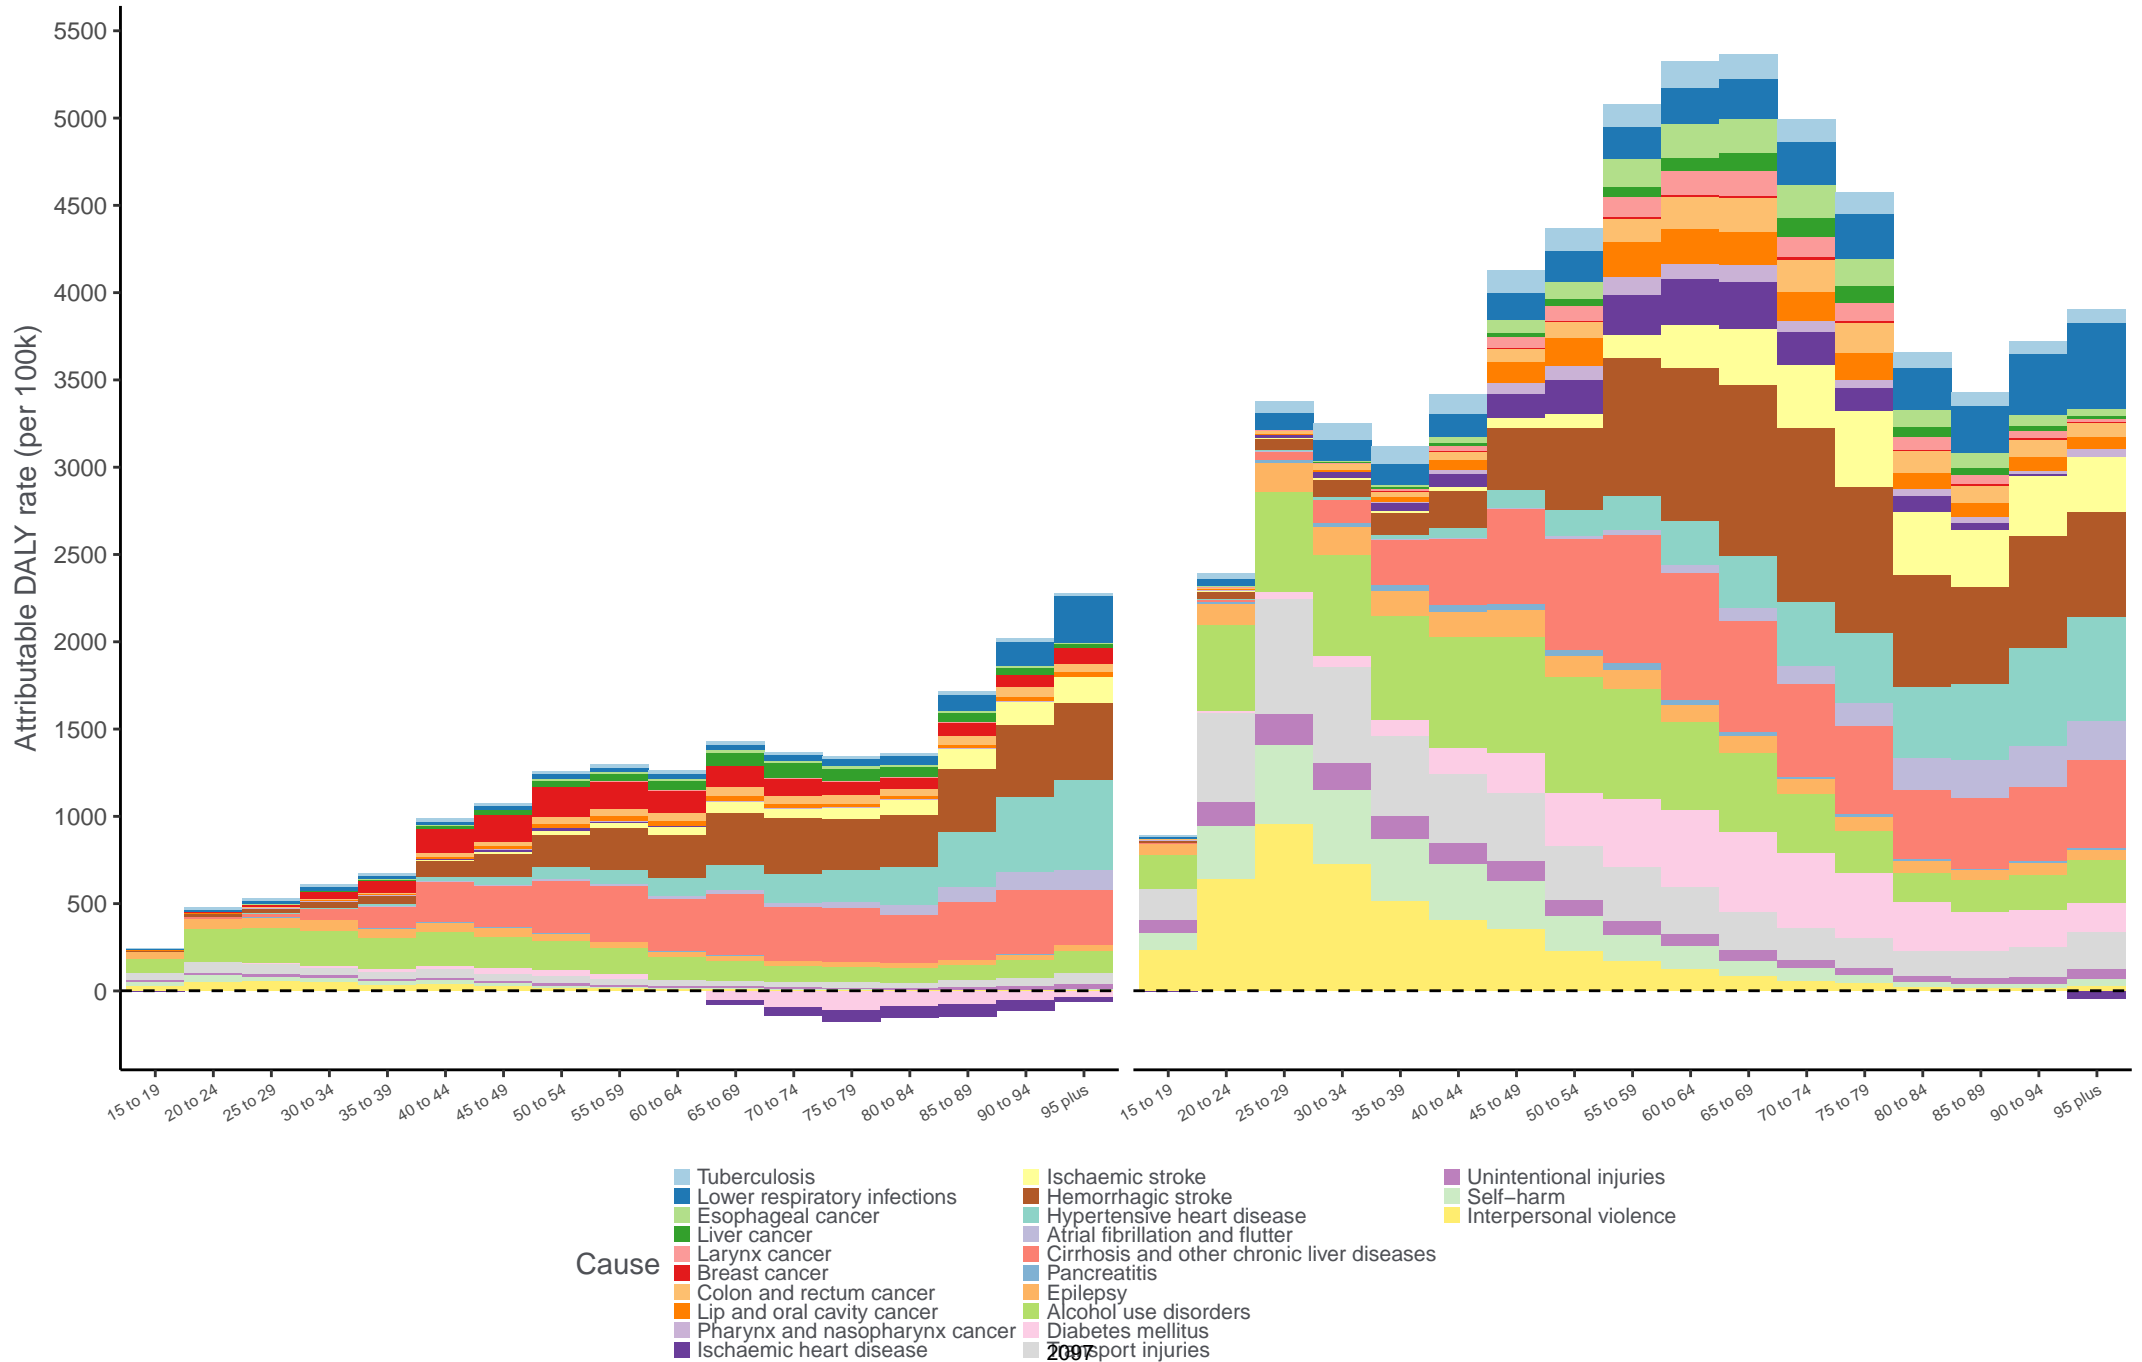

Attributable DALY rate disaggregated by cause, Saint Vincent and the Grenadines, by sex and age in 2016.

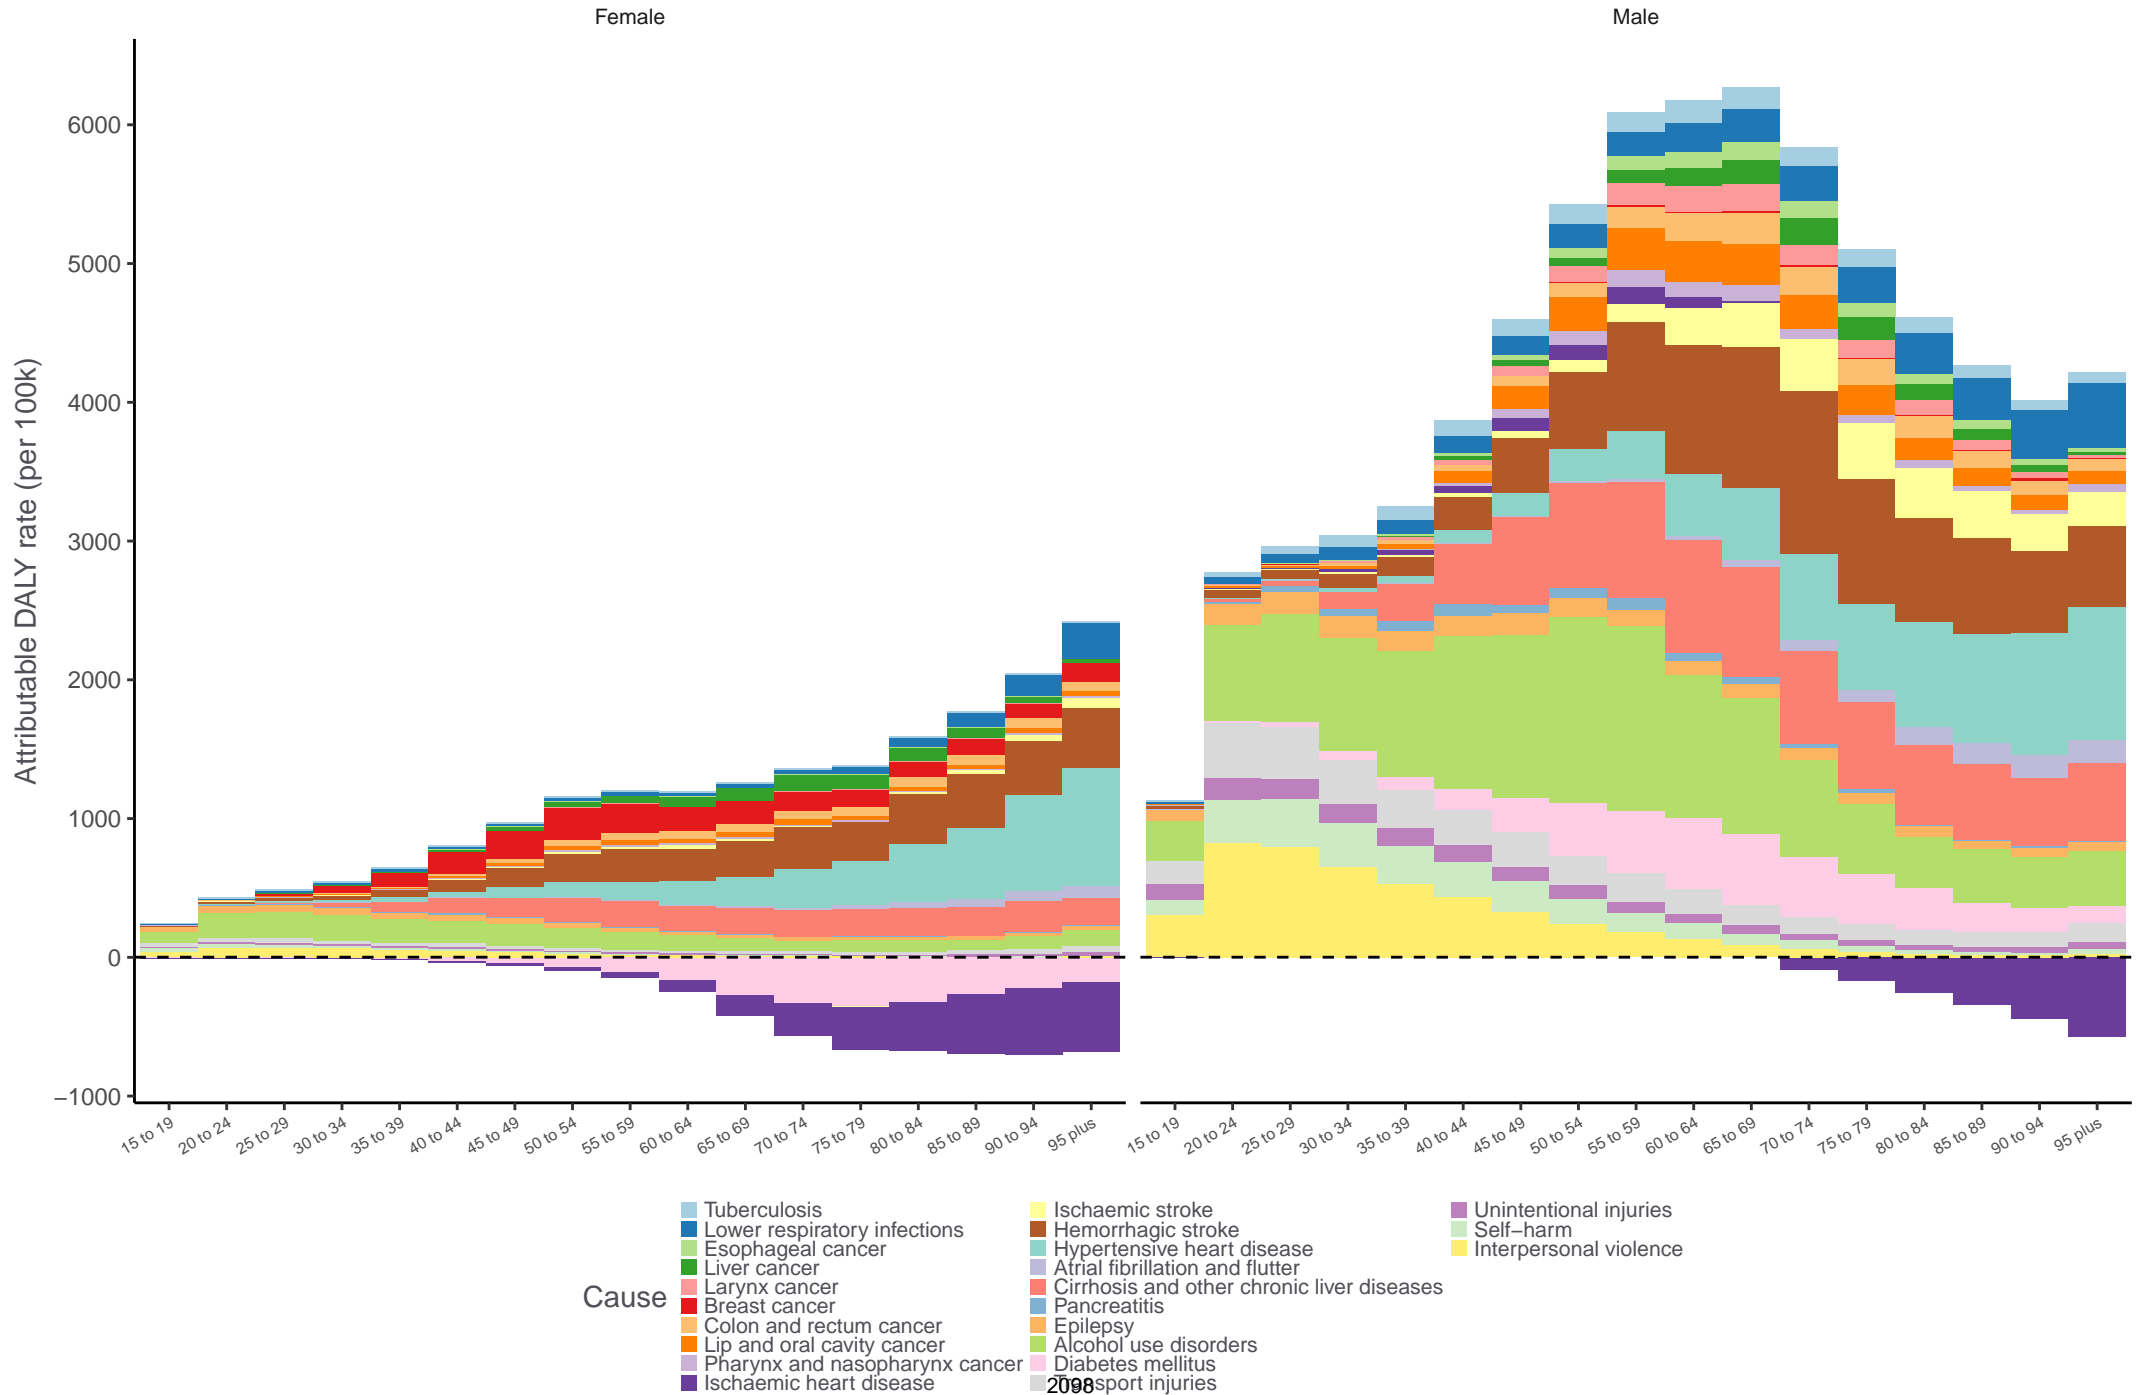

# Attributable DALY rate disaggregated by cause, Suriname, by sex and age in 2016.

Female

Male

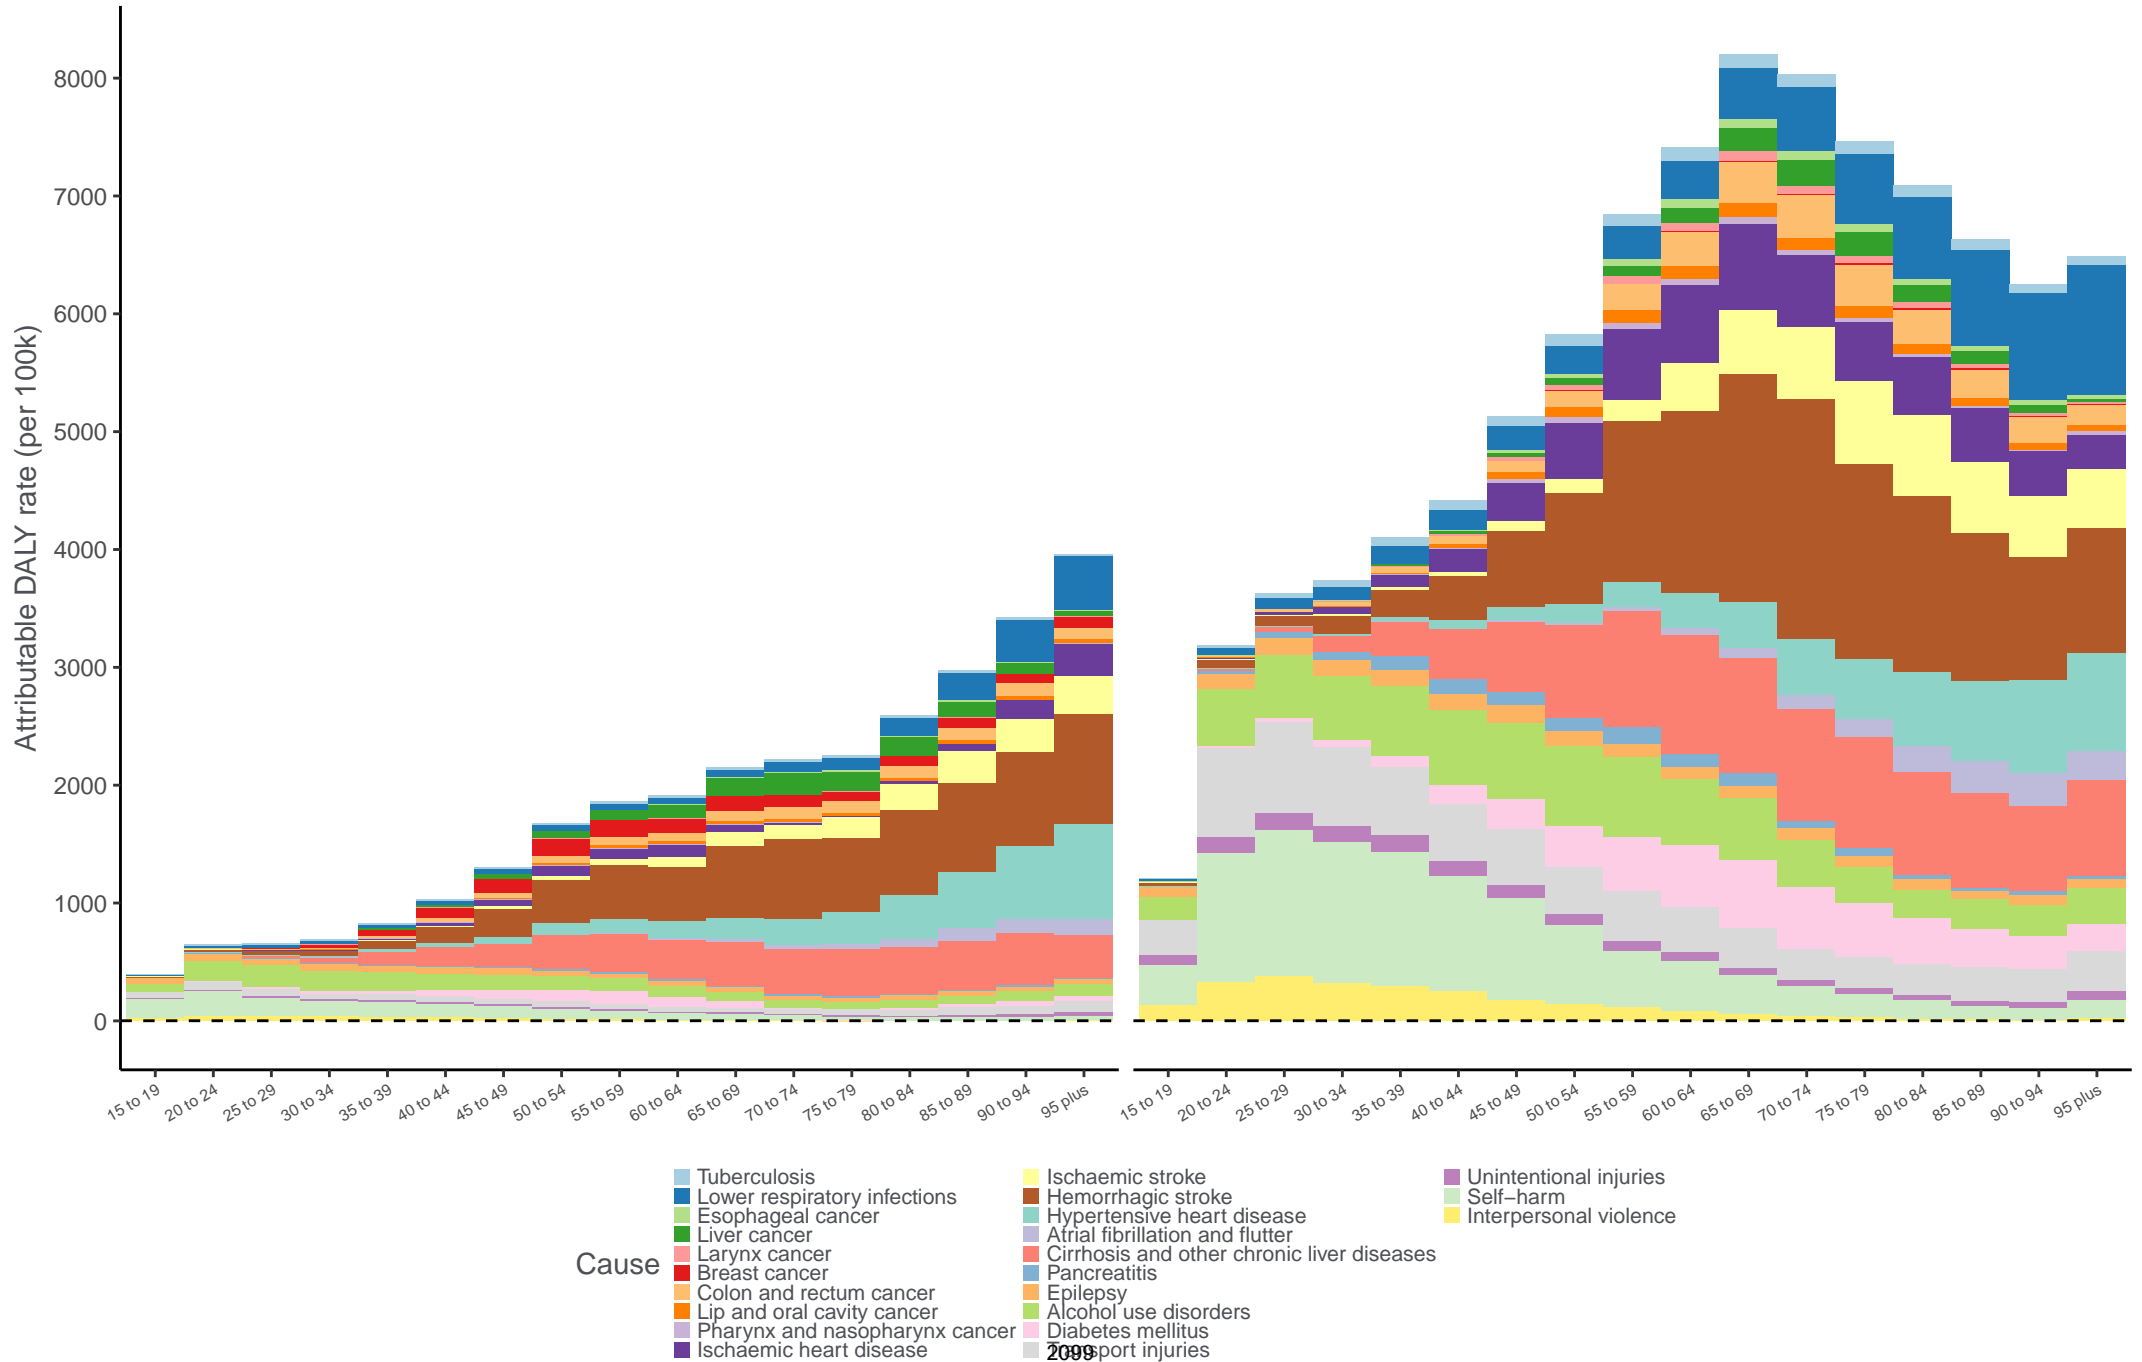

Attributable DALY rate disaggregated by cause, Trinidad and Tobago, by sex and age in 2016.

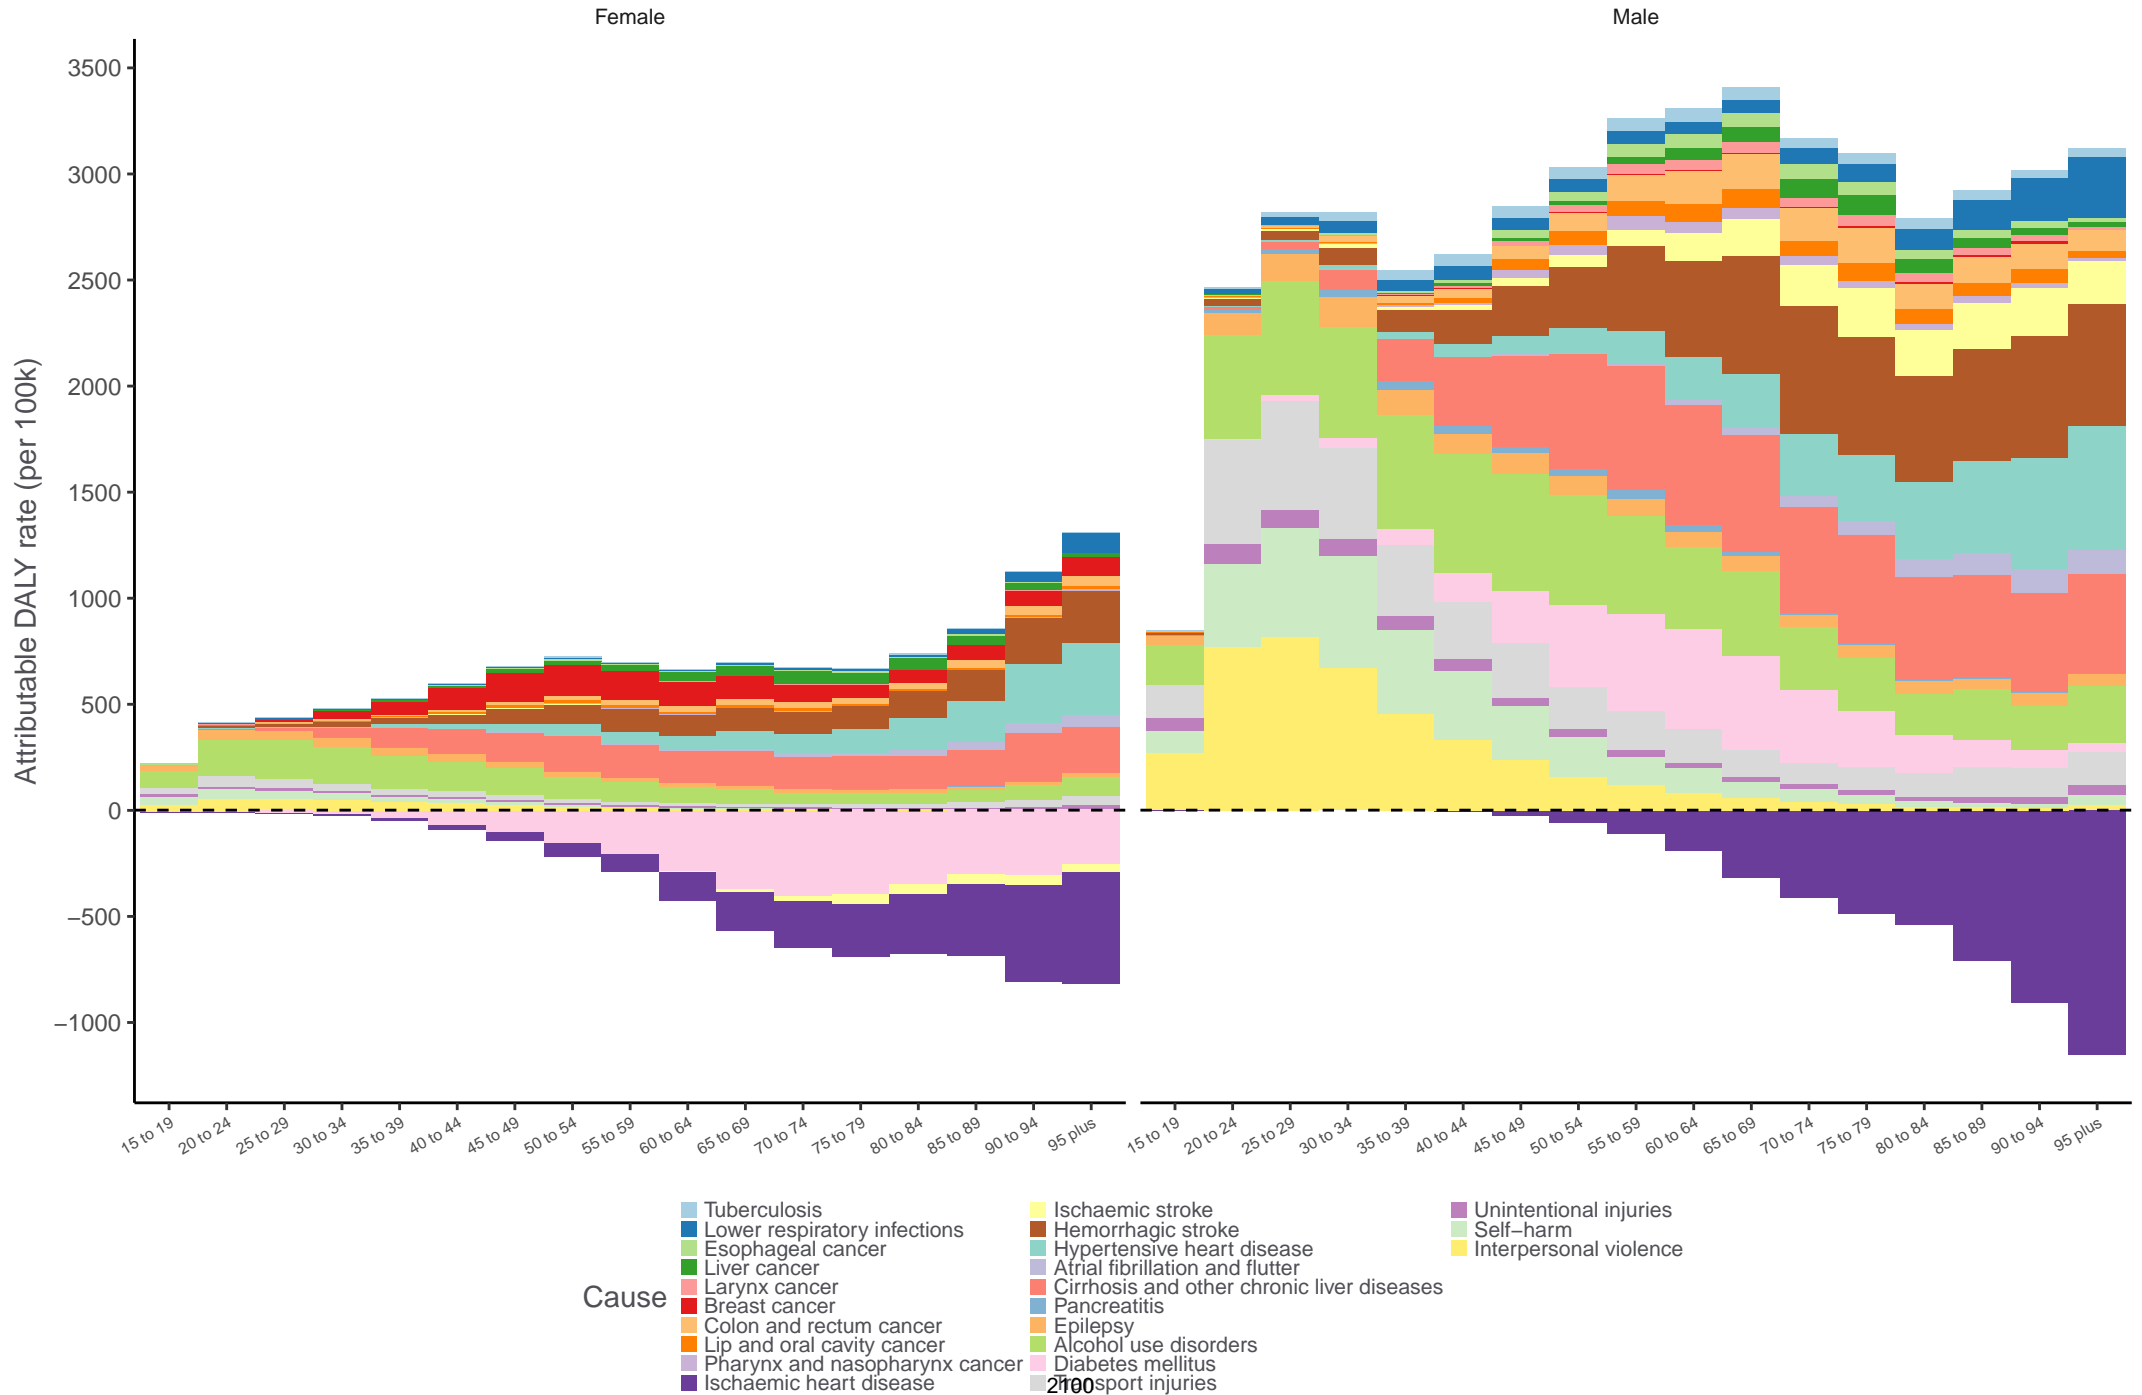

# Attributable DALY rate disaggregated by cause, Bolivia, by sex and age in 2016.

Female

Male

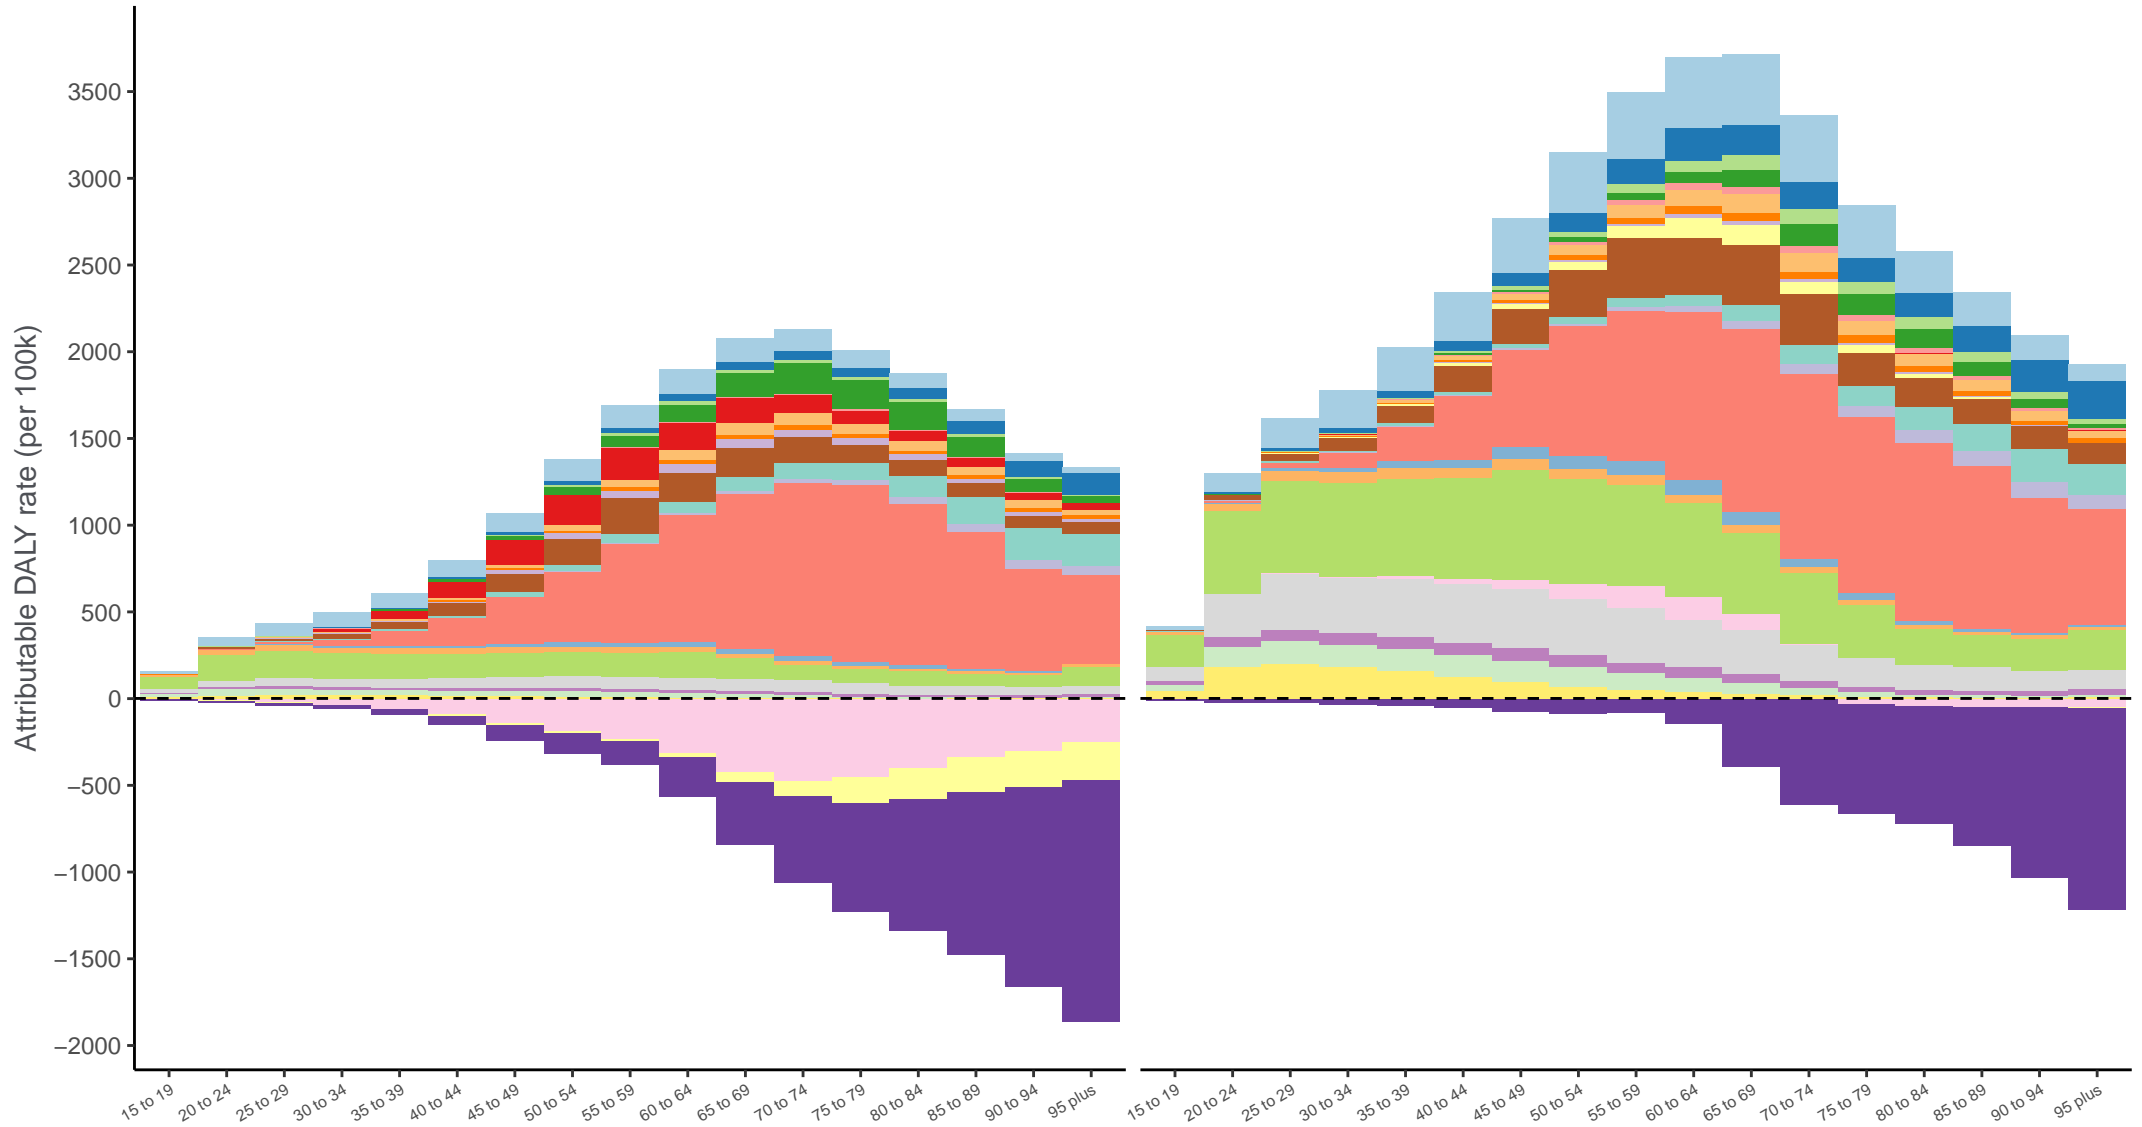

- |                                                                                                                                                                                                                                                                                                                                                                                                                                                                                                                                                                                                                                                                                                                                                         |                                                                                                                                                                                                                                                                                                                                                                                                                                                                                                                                                                                                                                                                                                                                                                     |                                                                                                                                                                                                                                                  |
|---------------------------------------------------------------------------------------------------------------------------------------------------------------------------------------------------------------------------------------------------------------------------------------------------------------------------------------------------------------------------------------------------------------------------------------------------------------------------------------------------------------------------------------------------------------------------------------------------------------------------------------------------------------------------------------------------------------------------------------------------------|---------------------------------------------------------------------------------------------------------------------------------------------------------------------------------------------------------------------------------------------------------------------------------------------------------------------------------------------------------------------------------------------------------------------------------------------------------------------------------------------------------------------------------------------------------------------------------------------------------------------------------------------------------------------------------------------------------------------------------------------------------------------|--------------------------------------------------------------------------------------------------------------------------------------------------------------------------------------------------------------------------------------------------|
| <ul style="list-style-type: none"> <li><span style="color: #add8e6;">■</span> Tuberculosis</li> <li><span style="color: #0070c0;">■</span> Lower respiratory infections</li> <li><span style="color: #90ee90;">■</span> Esophageal cancer</li> <li><span style="color: #008000;">■</span> Liver cancer</li> <li><span style="color: #ff4500;">■</span> Larynx cancer</li> <li><span style="color: #ff0000;">■</span> Breast cancer</li> <li><span style="color: #ffa500;">■</span> Colon and rectum cancer</li> <li><span style="color: #ff8c00;">■</span> Lip and oral cavity cancer</li> <li><span style="color: #d8bfd8;">■</span> Pharynx and nasopharynx cancer</li> <li><span style="color: #483d8b;">■</span> Ischaemic heart disease</li> </ul> | <ul style="list-style-type: none"> <li><span style="color: #ffff00;">■</span> Ischaemic stroke</li> <li><span style="color: #8b4513;">■</span> Hemorrhagic stroke</li> <li><span style="color: #66c2e0;">■</span> Hypertensive heart disease</li> <li><span style="color: #add8e6;">■</span> Atrial fibrillation and flutter</li> <li><span style="color: #ff6347;">■</span> Cirrhosis and other chronic liver diseases</li> <li><span style="color: #4682b4;">■</span> Pancreatitis</li> <li><span style="color: #ffa500;">■</span> Epilepsy</li> <li><span style="color: #90ee90;">■</span> Alcohol use disorders</li> <li><span style="color: #ffb6c1;">■</span> Diabetes mellitus</li> <li><span style="color: #a9a9a9;">■</span> Transport injuries</li> </ul> | <ul style="list-style-type: none"> <li><span style="color: #800080;">■</span> Unintentional injuries</li> <li><span style="color: #c1e1c1;">■</span> Self-harm</li> <li><span style="color: #ffff00;">■</span> Interpersonal violence</li> </ul> |
|---------------------------------------------------------------------------------------------------------------------------------------------------------------------------------------------------------------------------------------------------------------------------------------------------------------------------------------------------------------------------------------------------------------------------------------------------------------------------------------------------------------------------------------------------------------------------------------------------------------------------------------------------------------------------------------------------------------------------------------------------------|---------------------------------------------------------------------------------------------------------------------------------------------------------------------------------------------------------------------------------------------------------------------------------------------------------------------------------------------------------------------------------------------------------------------------------------------------------------------------------------------------------------------------------------------------------------------------------------------------------------------------------------------------------------------------------------------------------------------------------------------------------------------|--------------------------------------------------------------------------------------------------------------------------------------------------------------------------------------------------------------------------------------------------|

Attributable DALY rate disaggregated by cause, Ecuador, by sex and age in 2016.

Female

Male

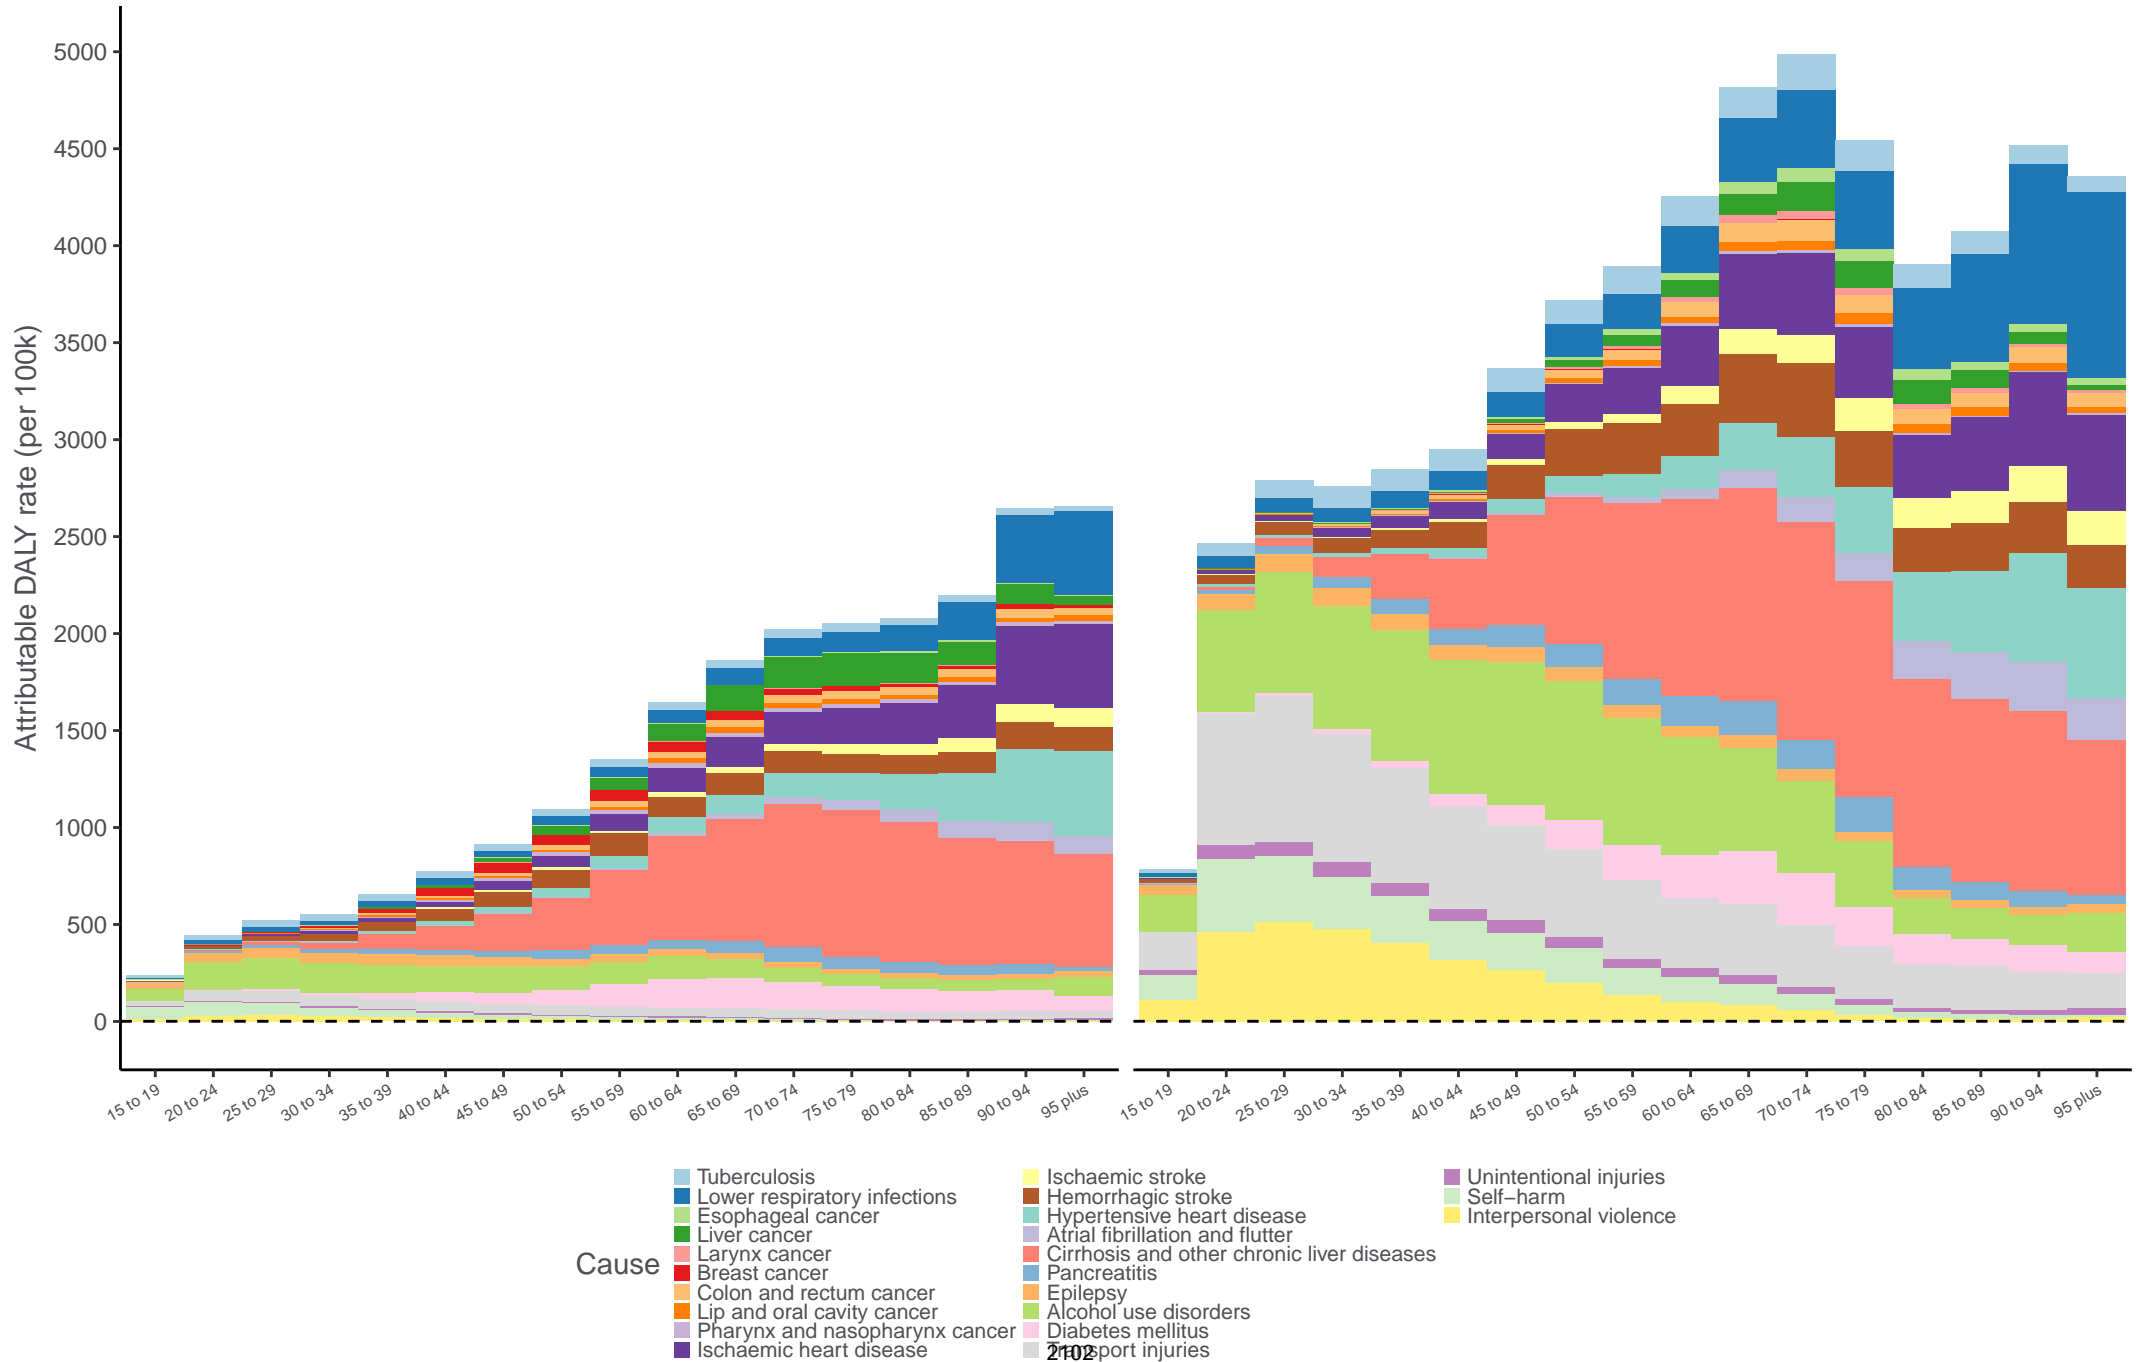

# Attributable DALY rate disaggregated by cause, Peru, by sex and age in 2016.

Female

Male

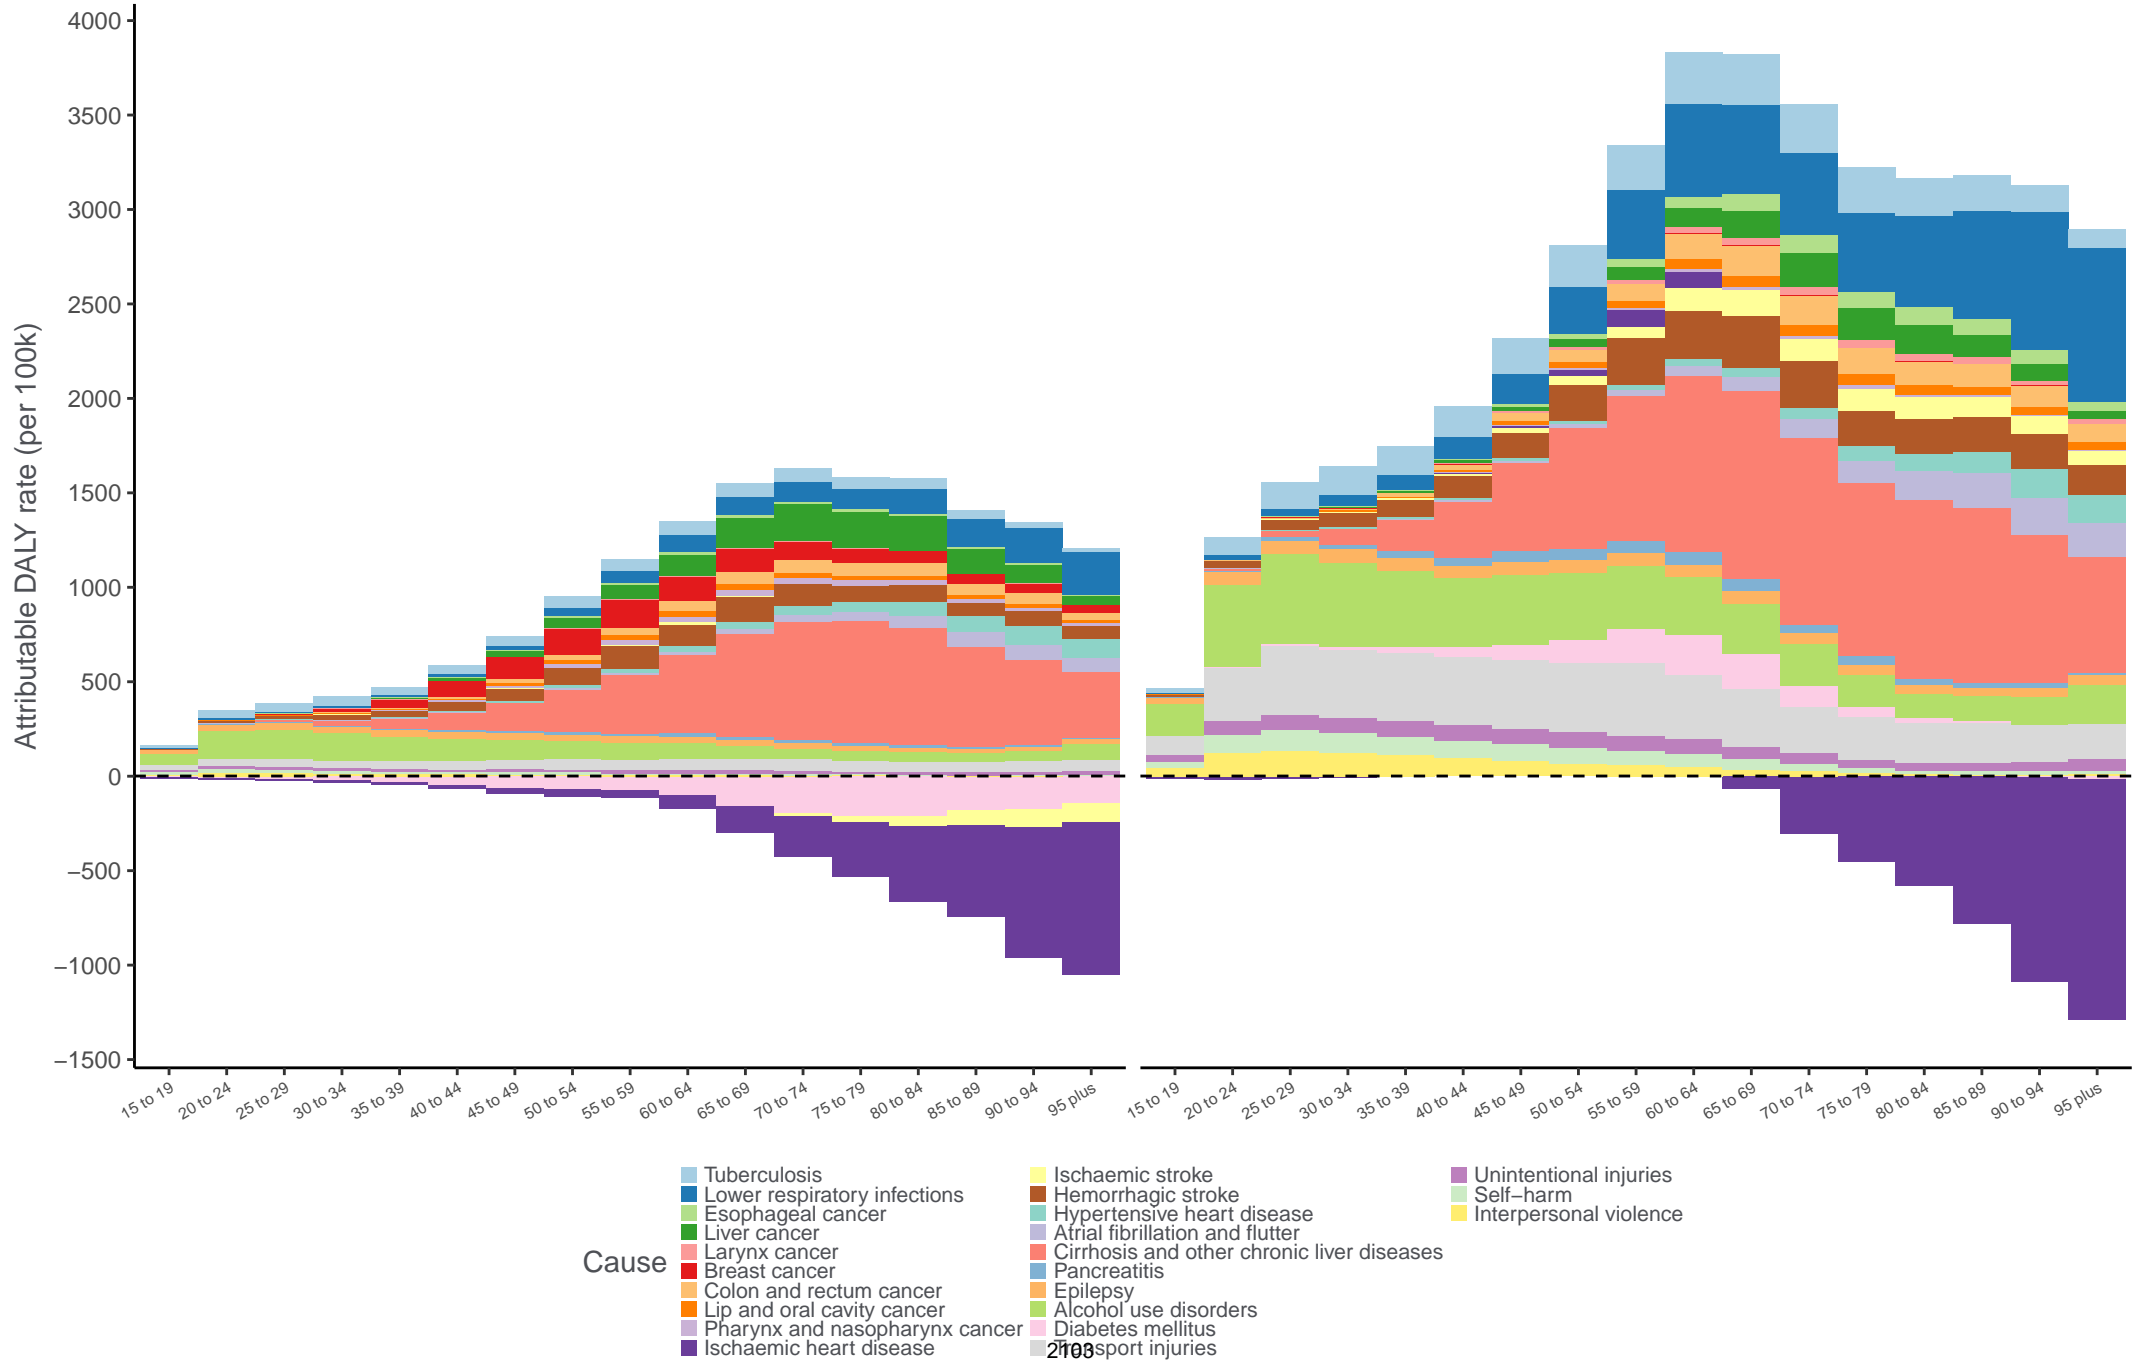



Attributable DALY rate disaggregated by cause, Colombia, by sex and age in 2016.

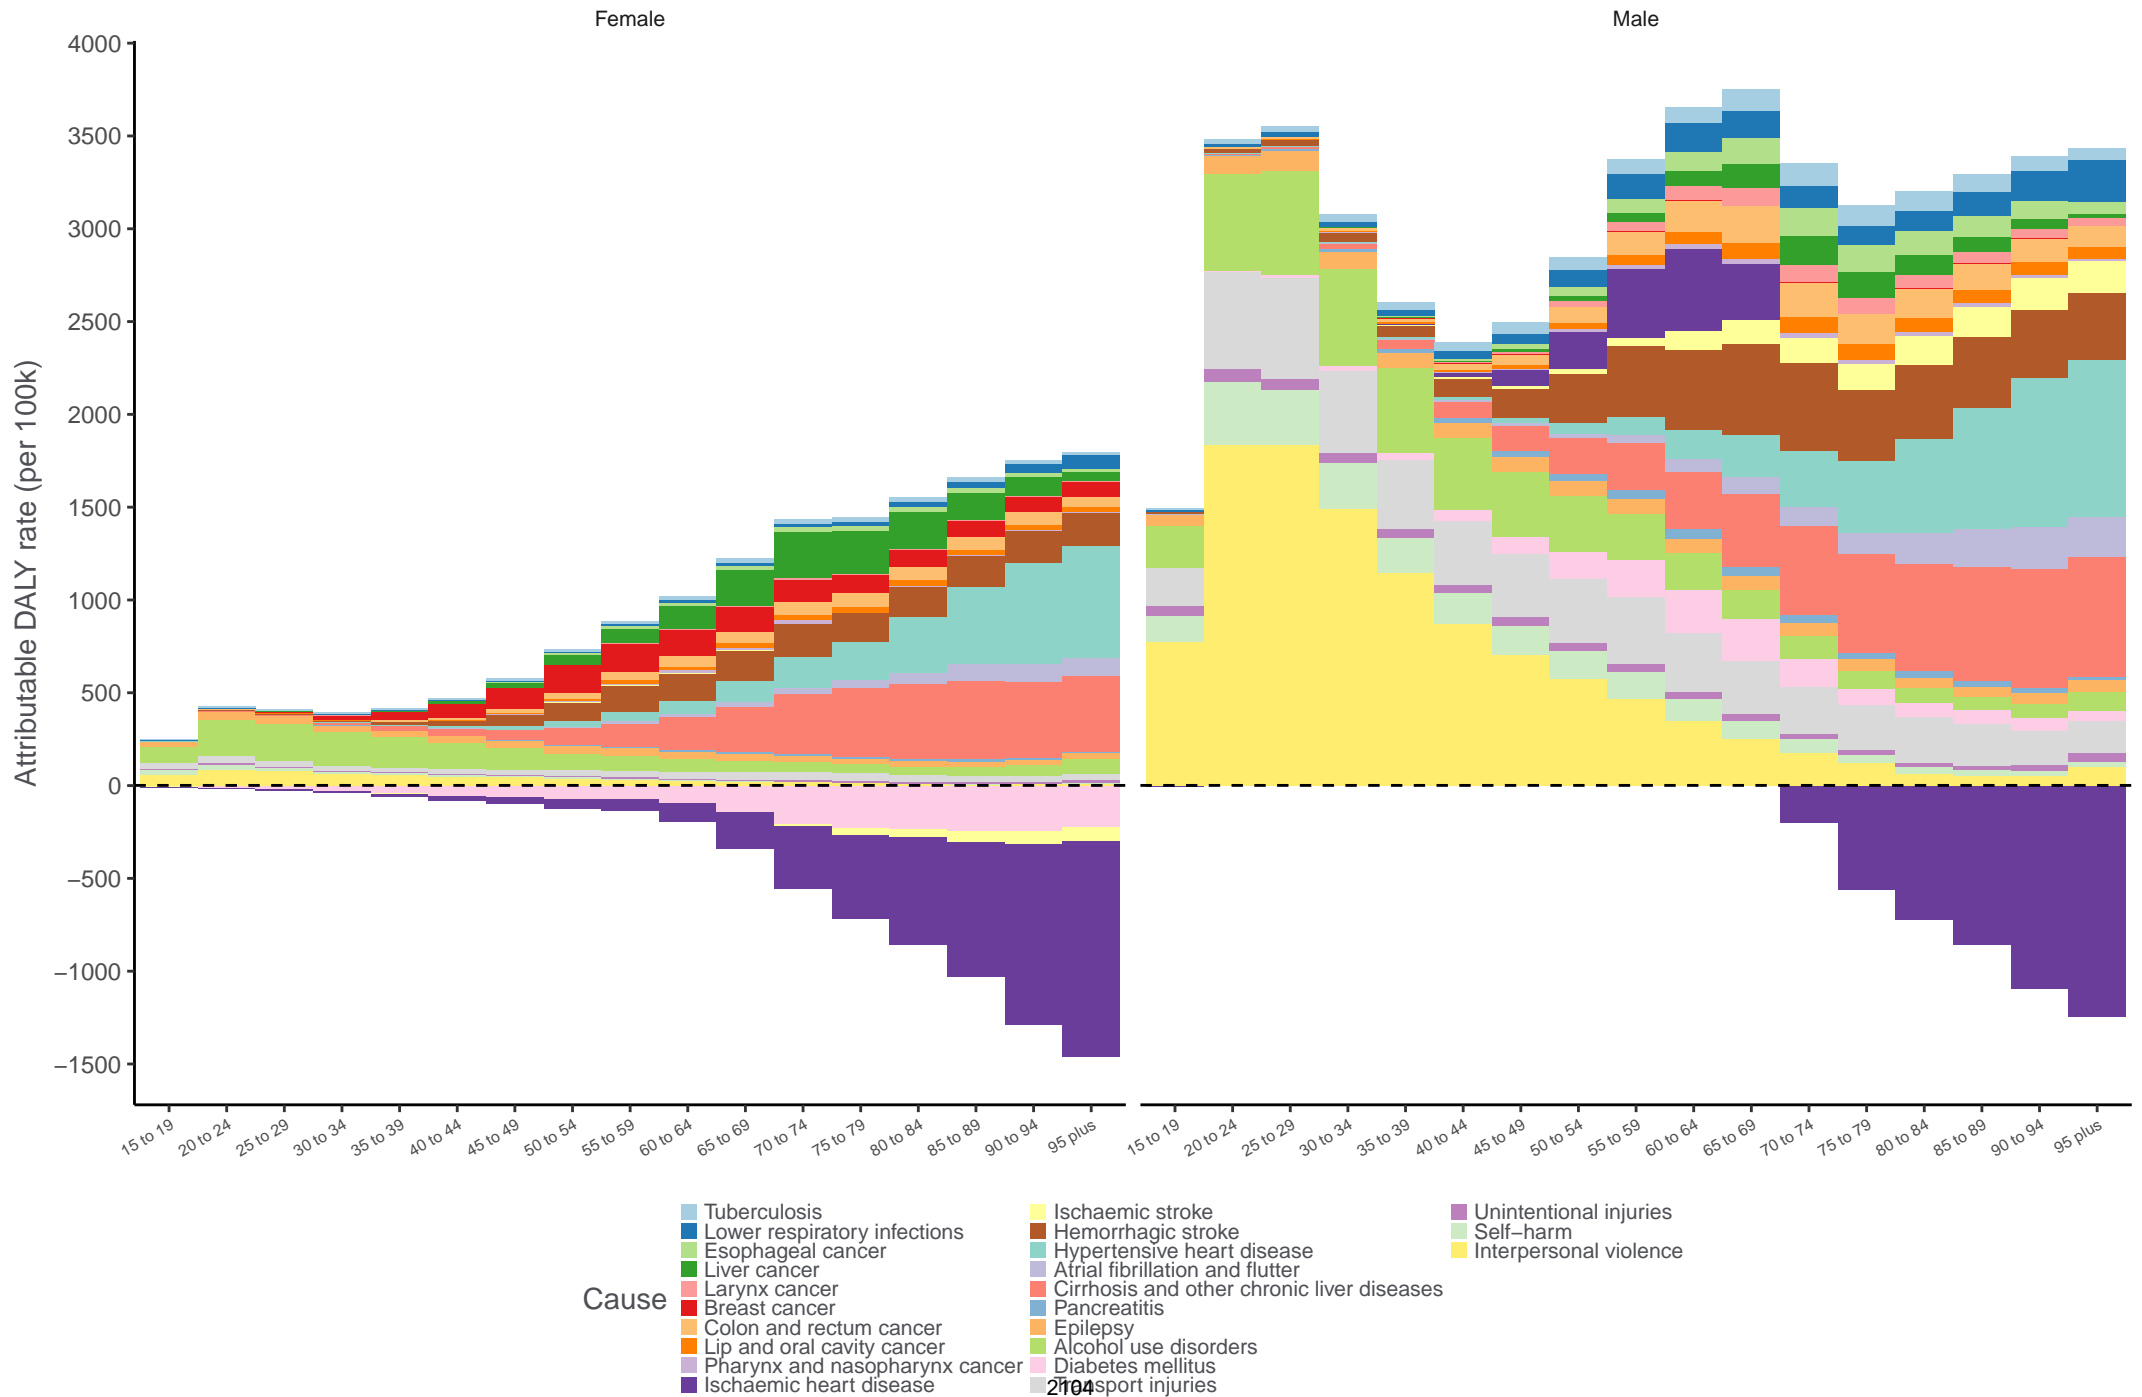

Attributable DALY rate disaggregated by cause, Costa Rica, by sex and age in 2016.

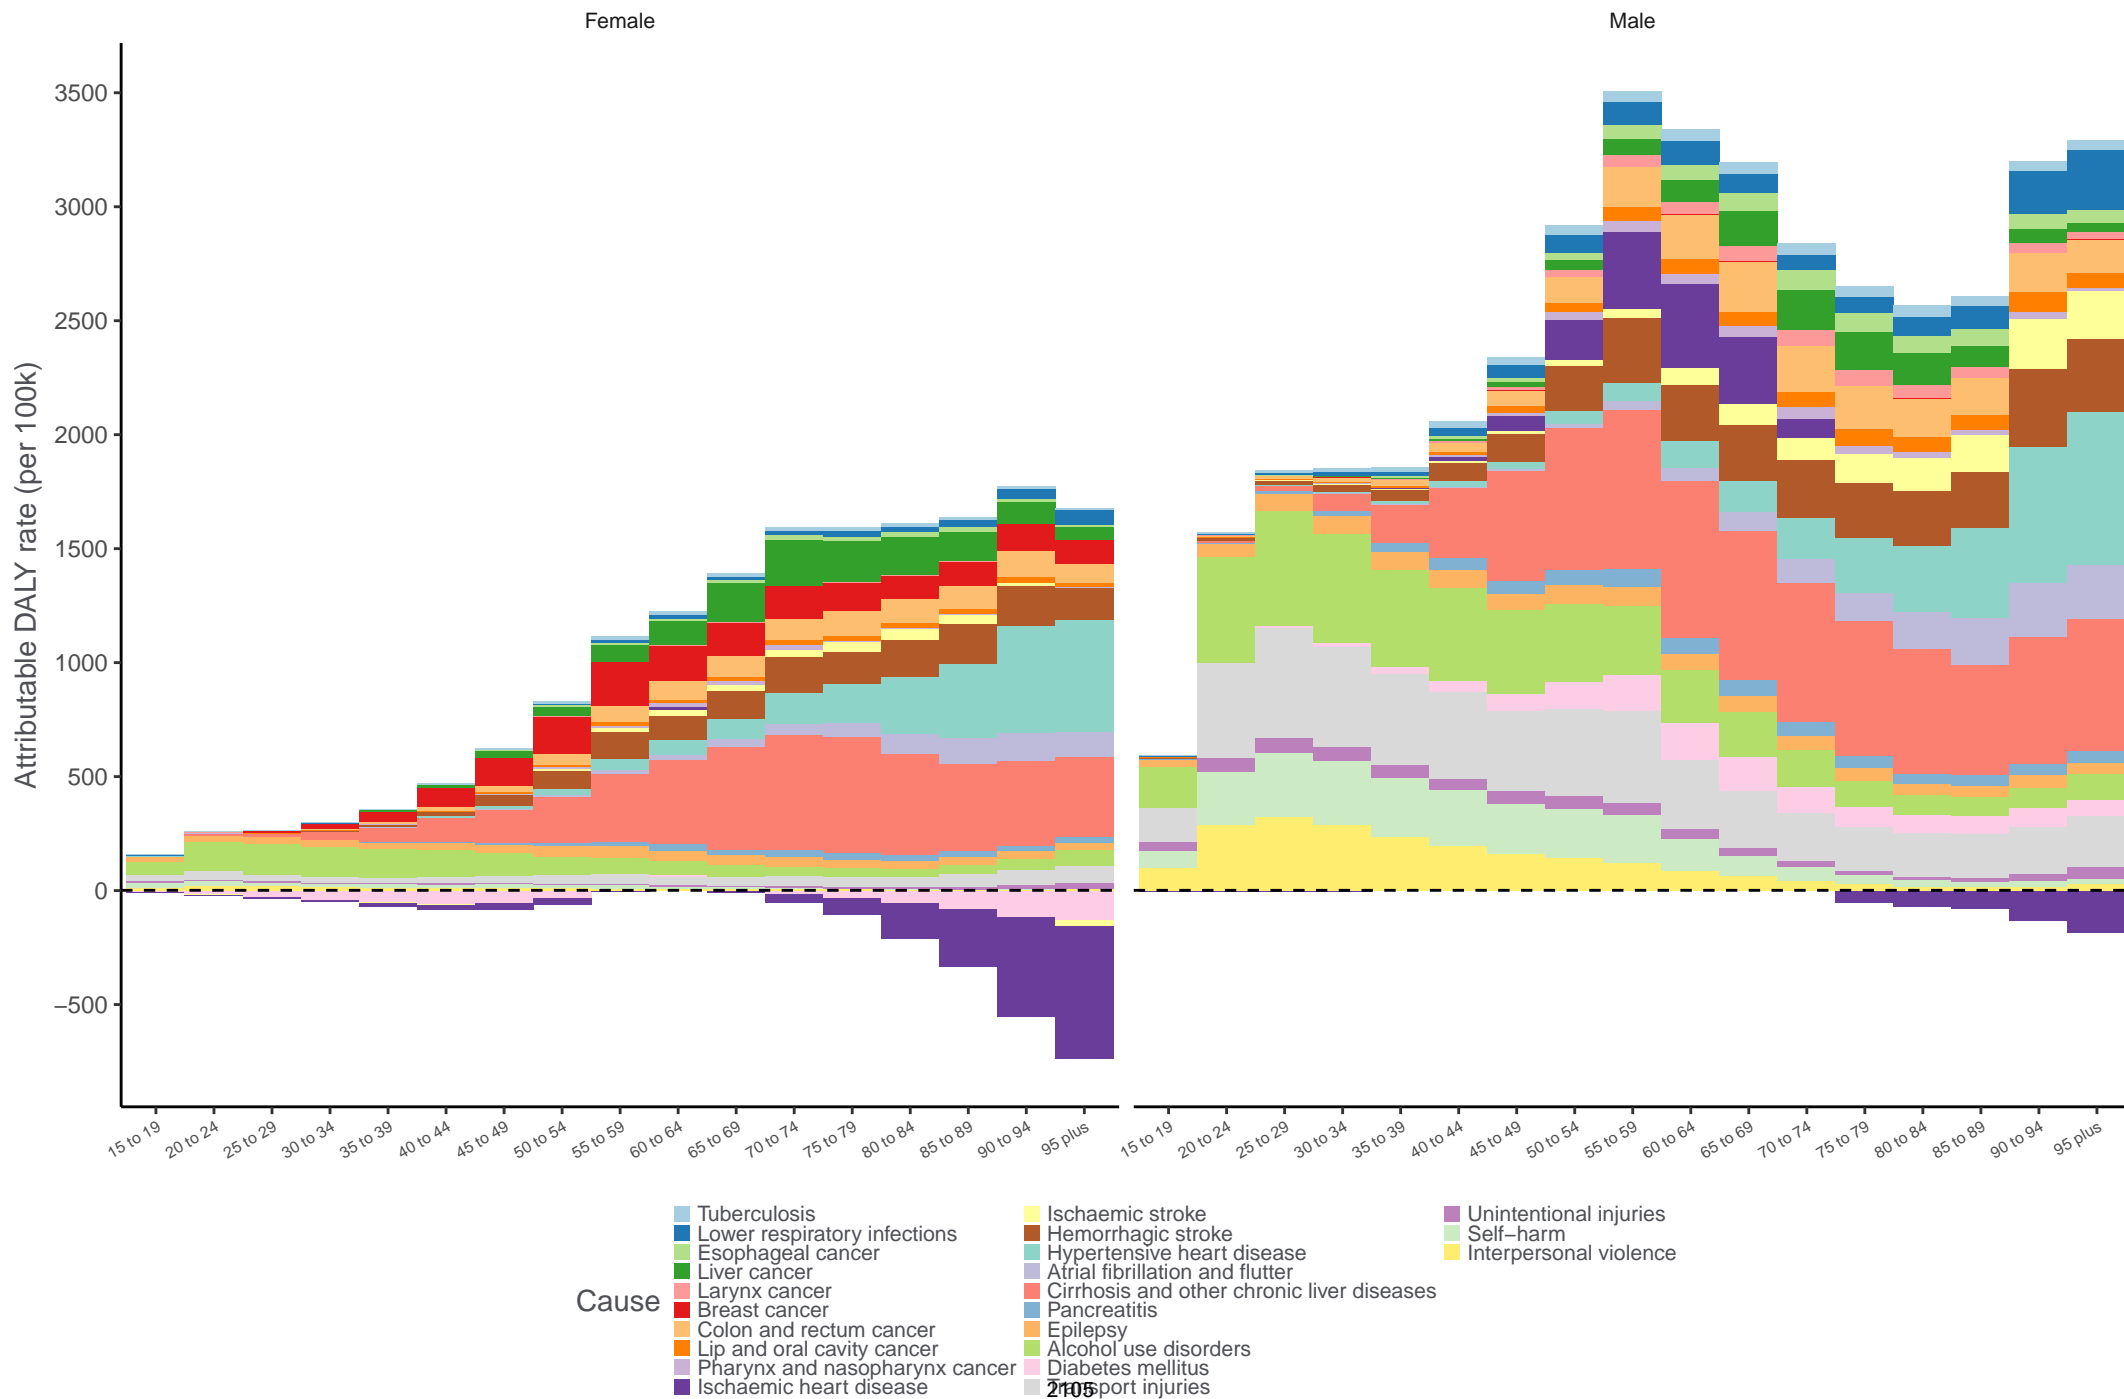

Attributable DALY rate disaggregated by cause, El Salvador, by sex and age in 2016.

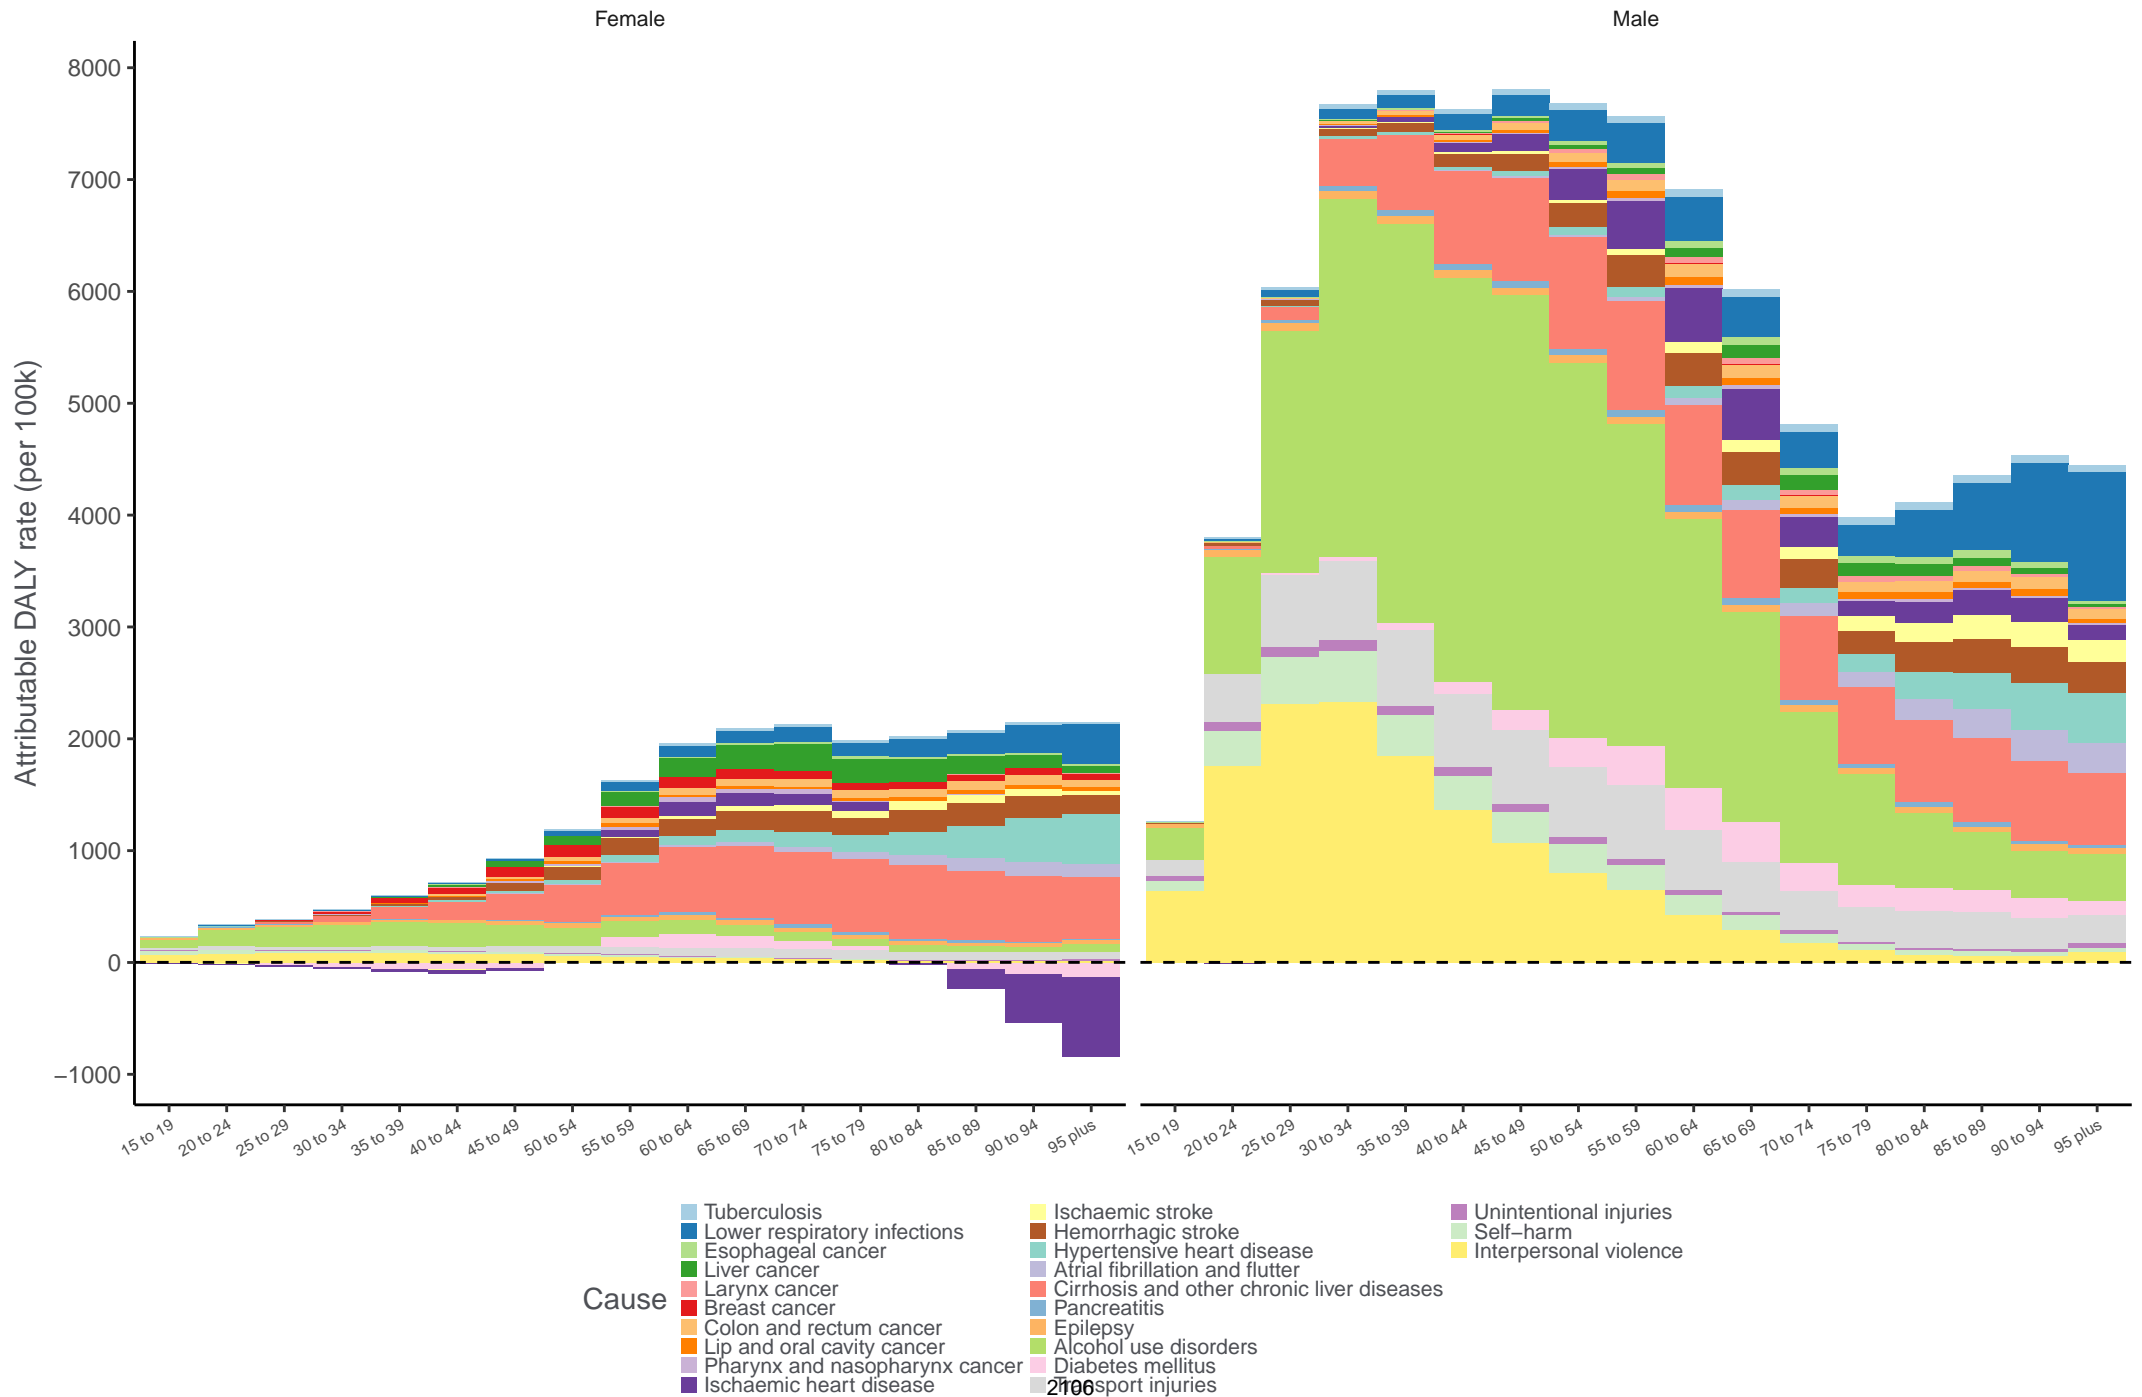

Attributable DALY rate disaggregated by cause, Guatemala, by sex and age in 2016.

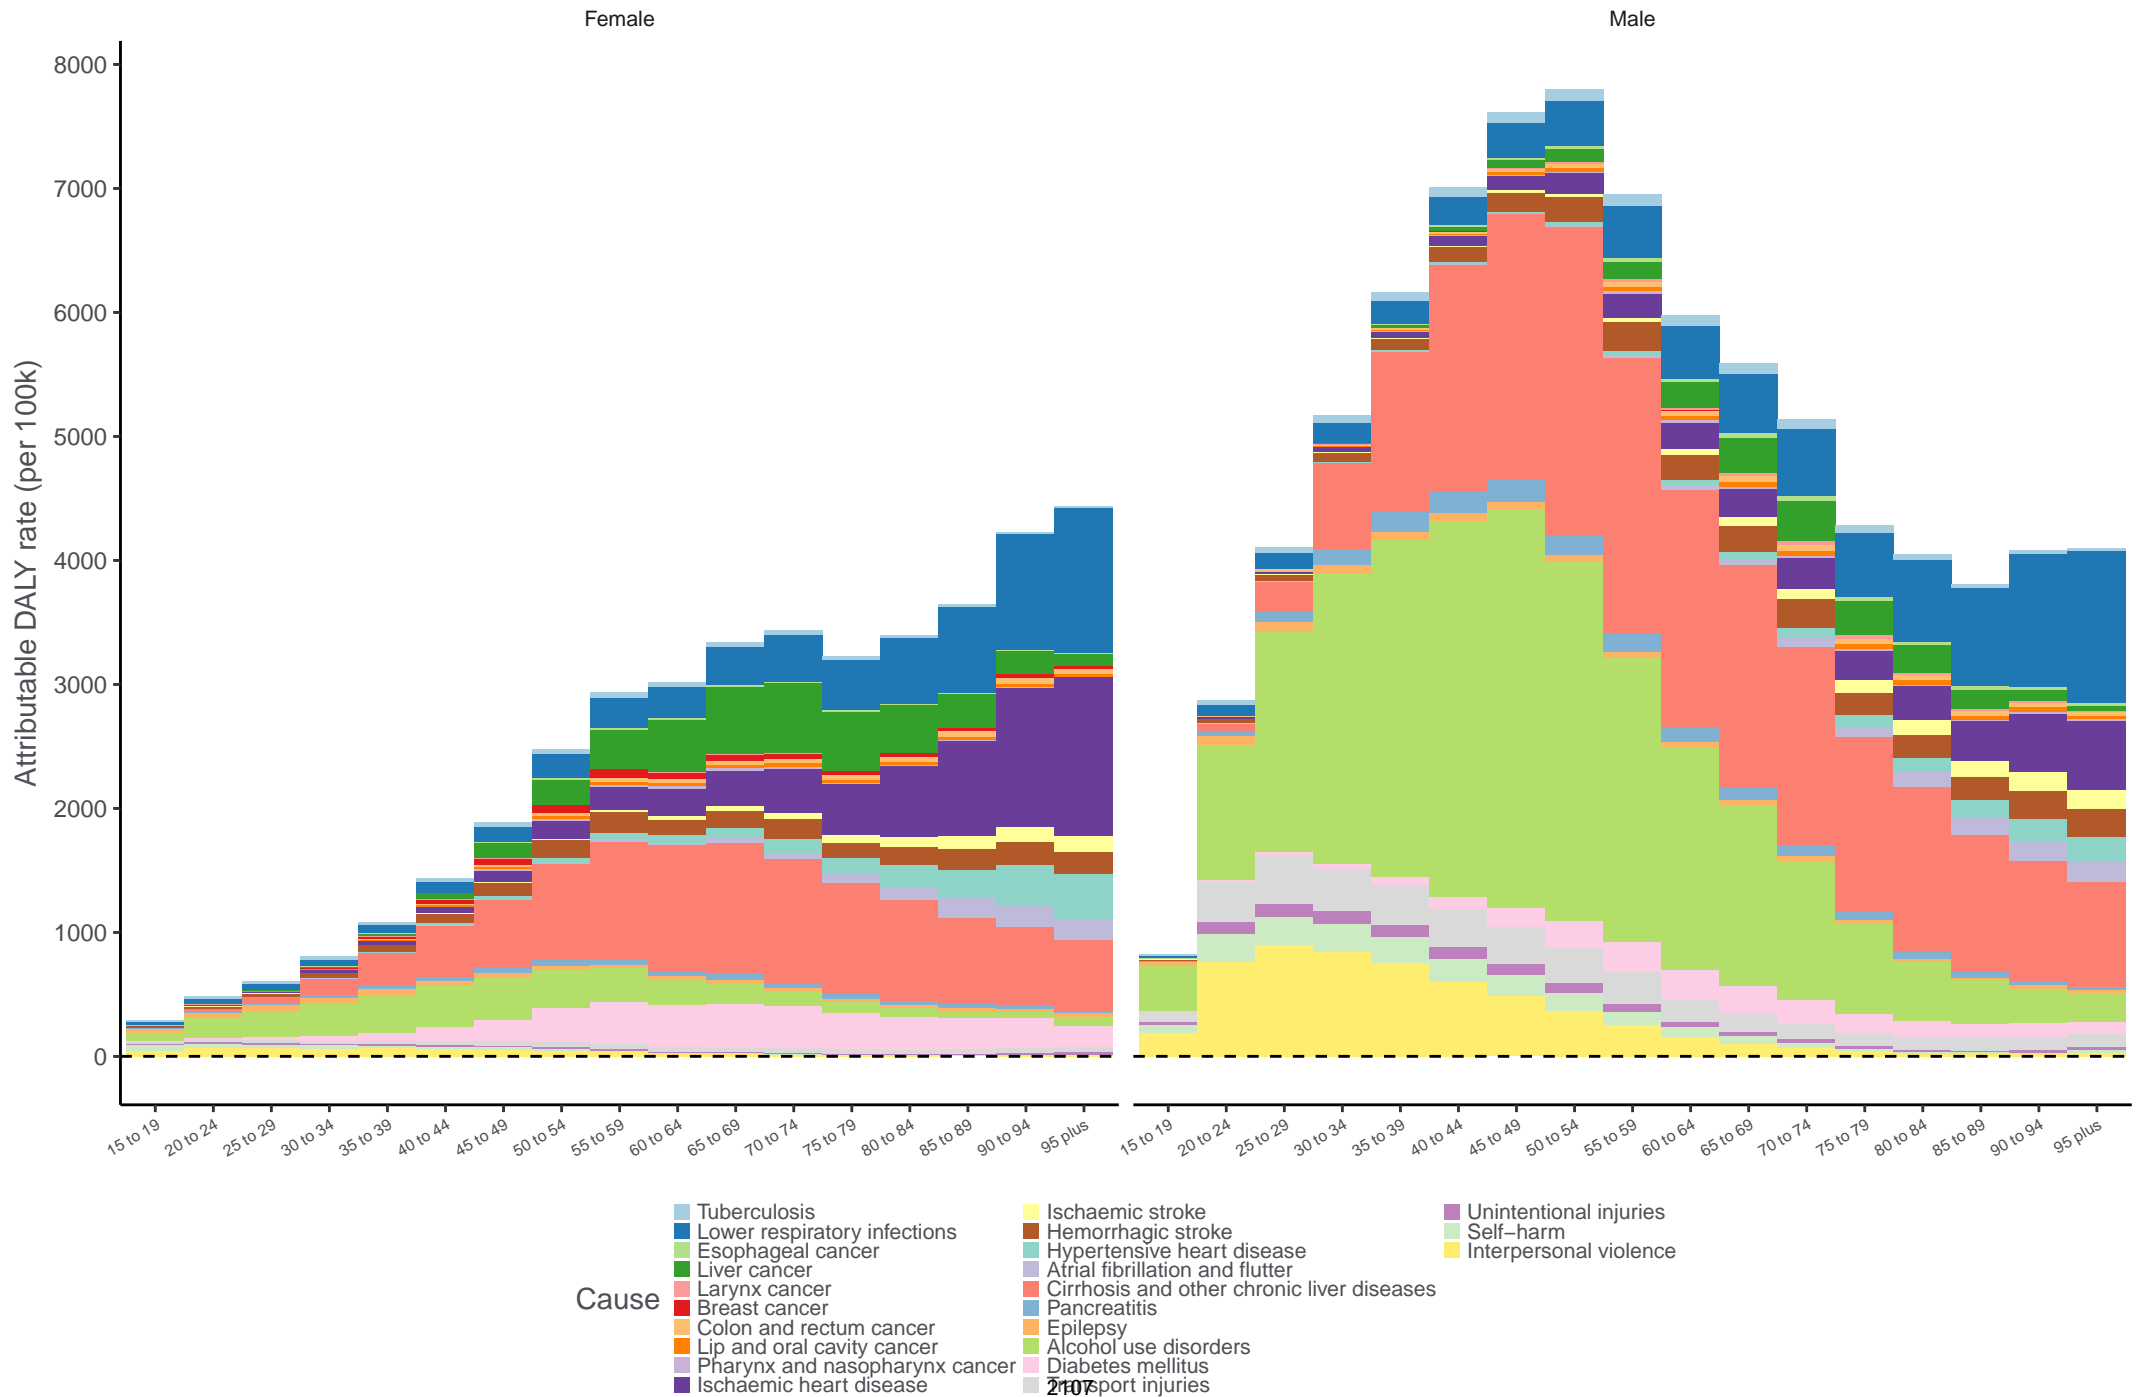

Attributable DALY rate disaggregated by cause, Honduras, by sex and age in 2016.

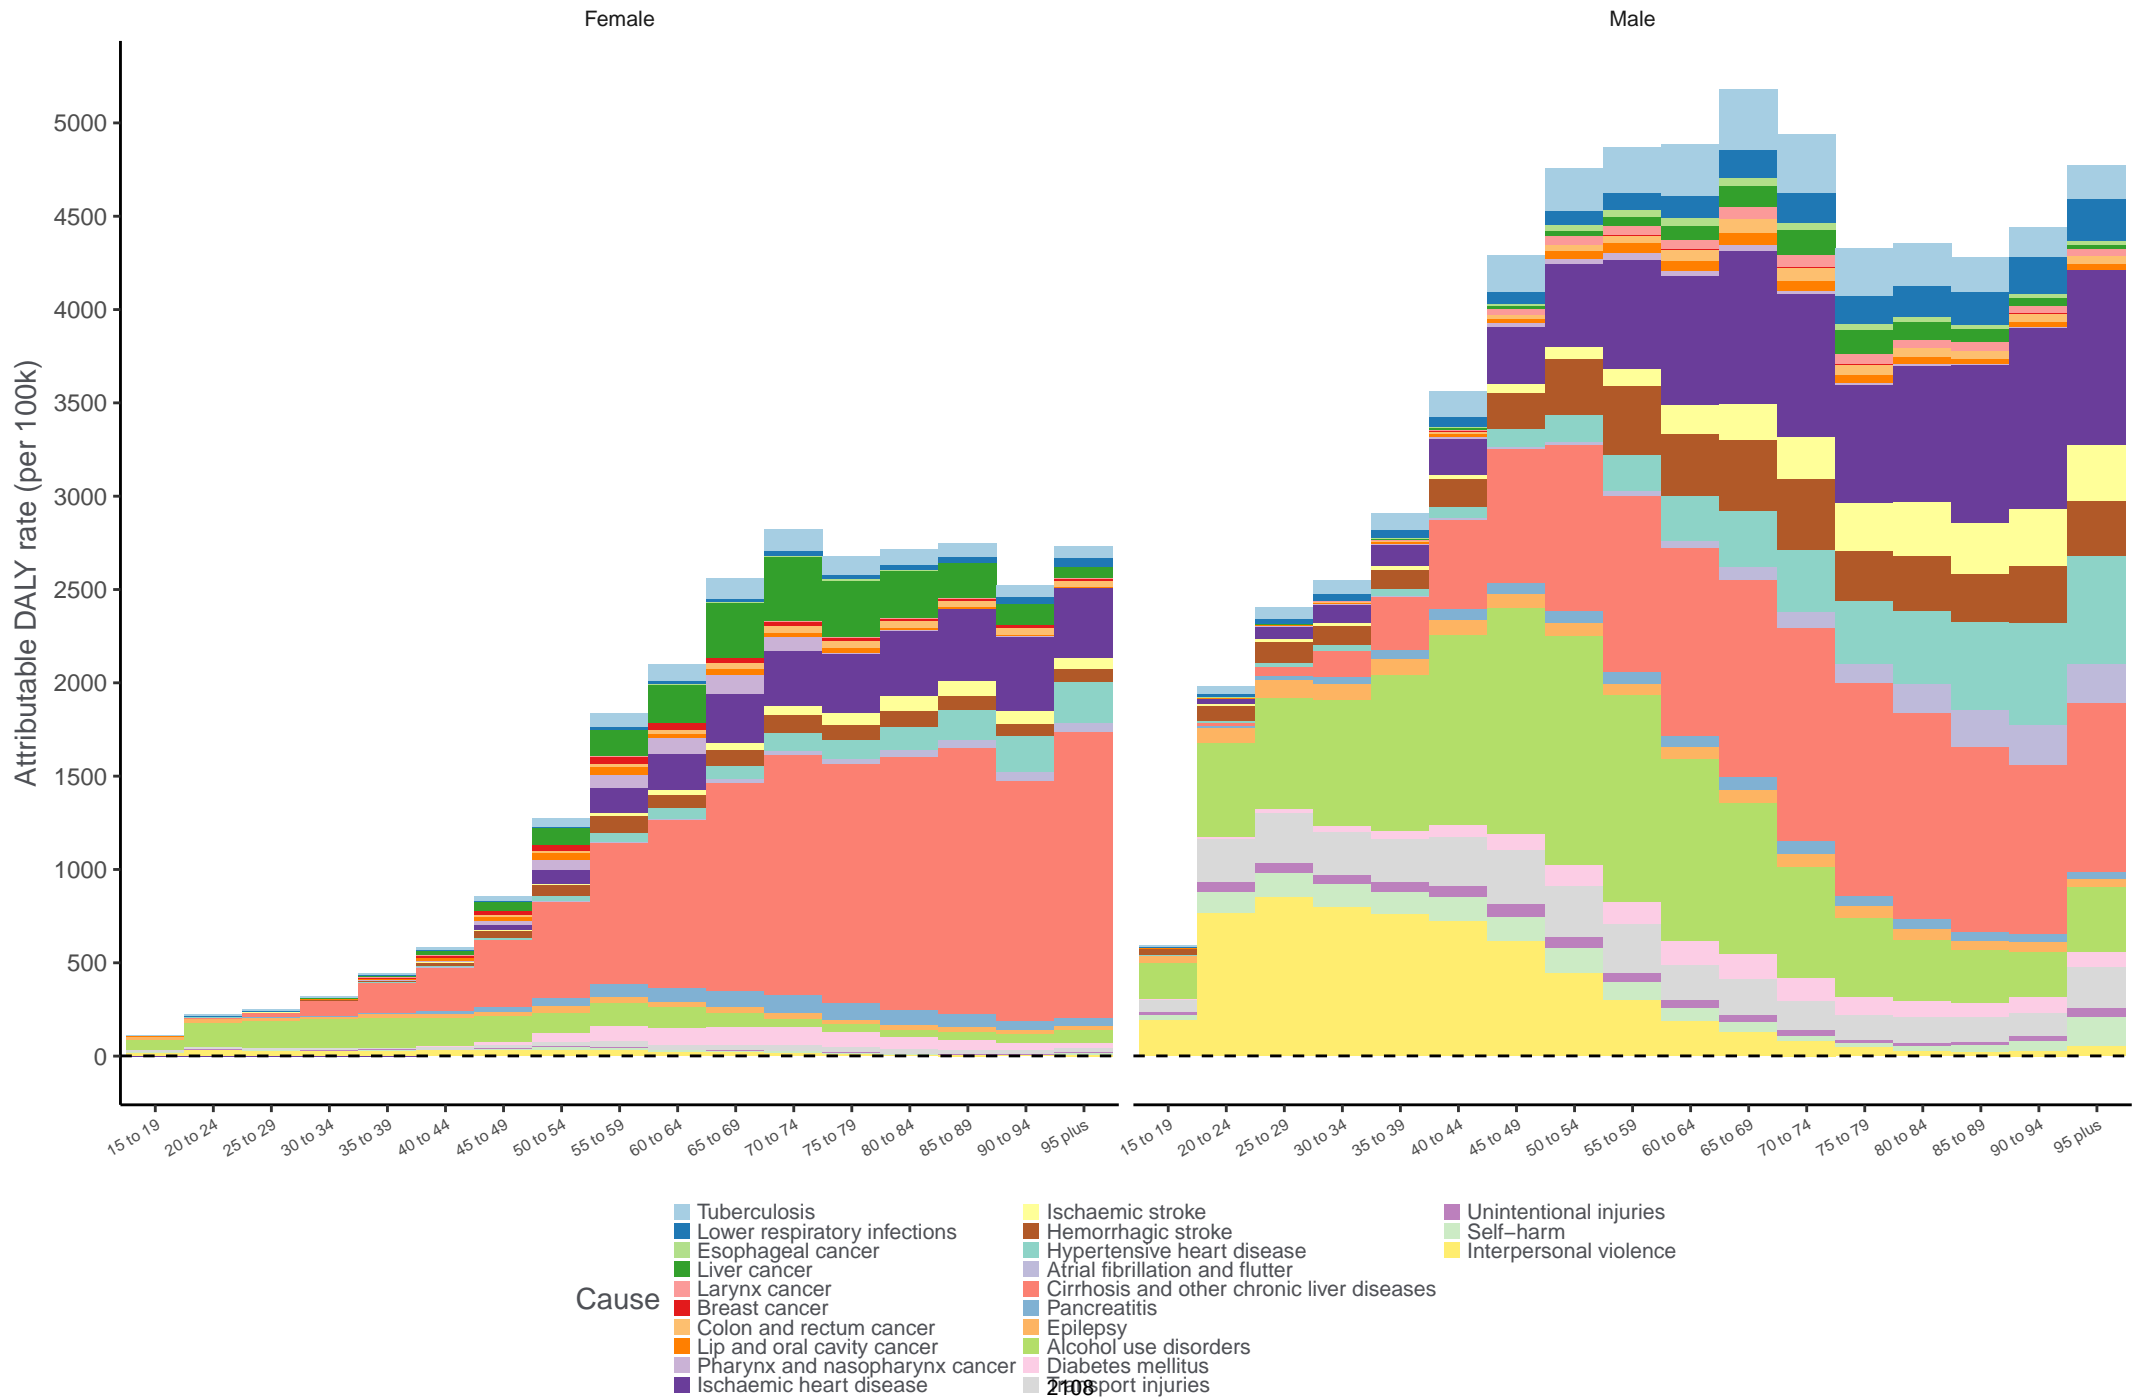

Attributable DALY rate disaggregated by cause, Mexico, by sex and age in 2016.

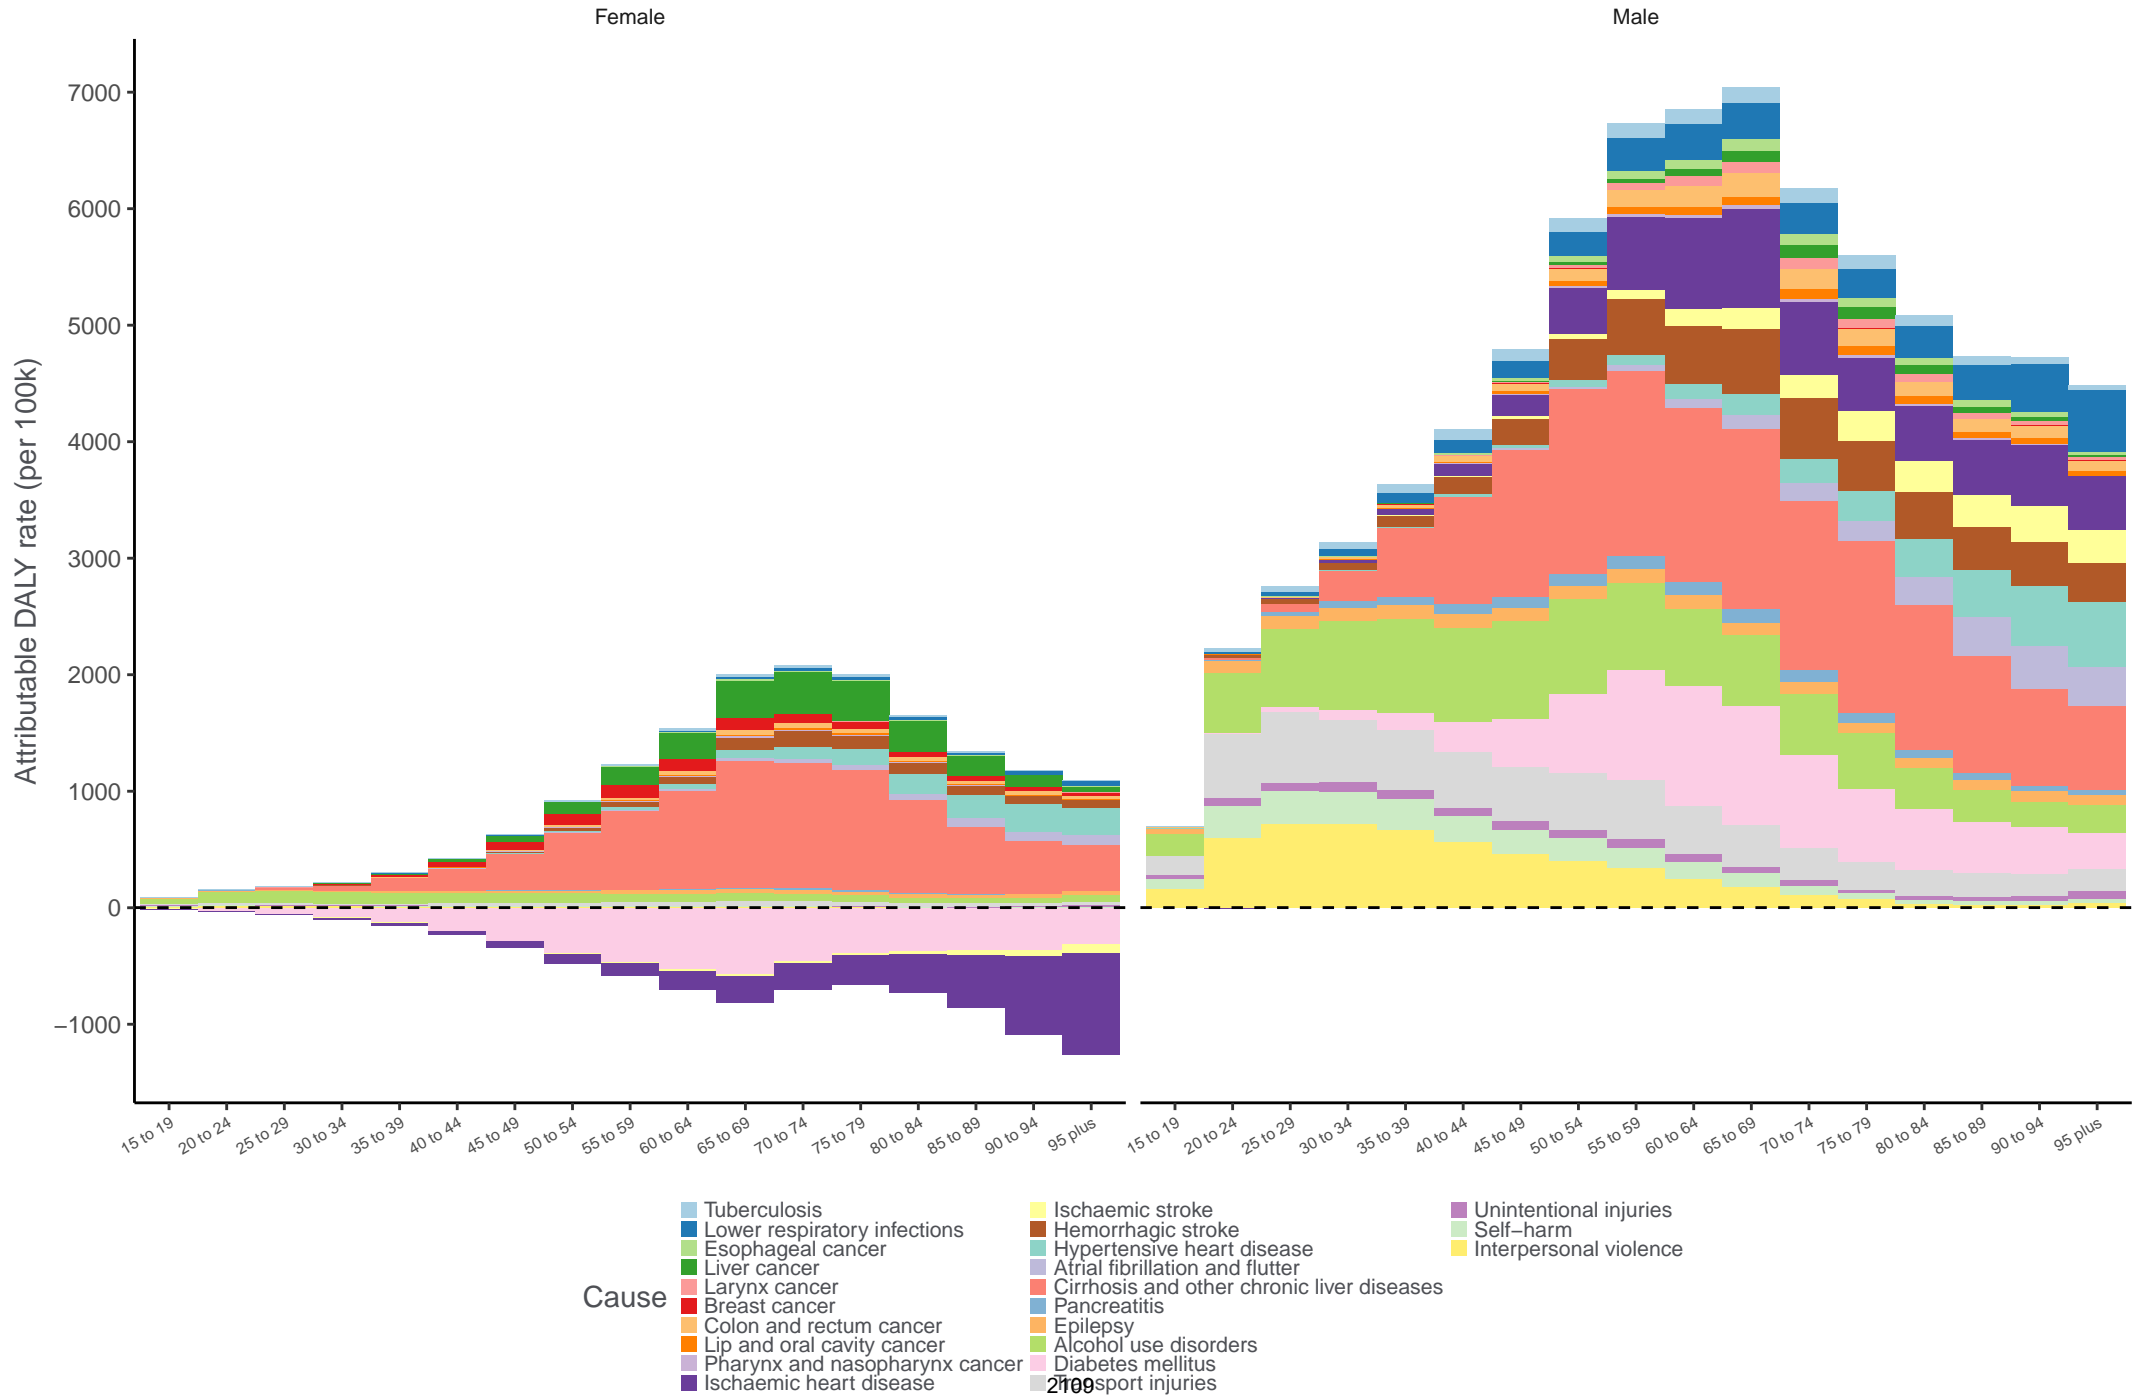

Attributable DALY rate disaggregated by cause, Nicaragua, by sex and age in 2016.

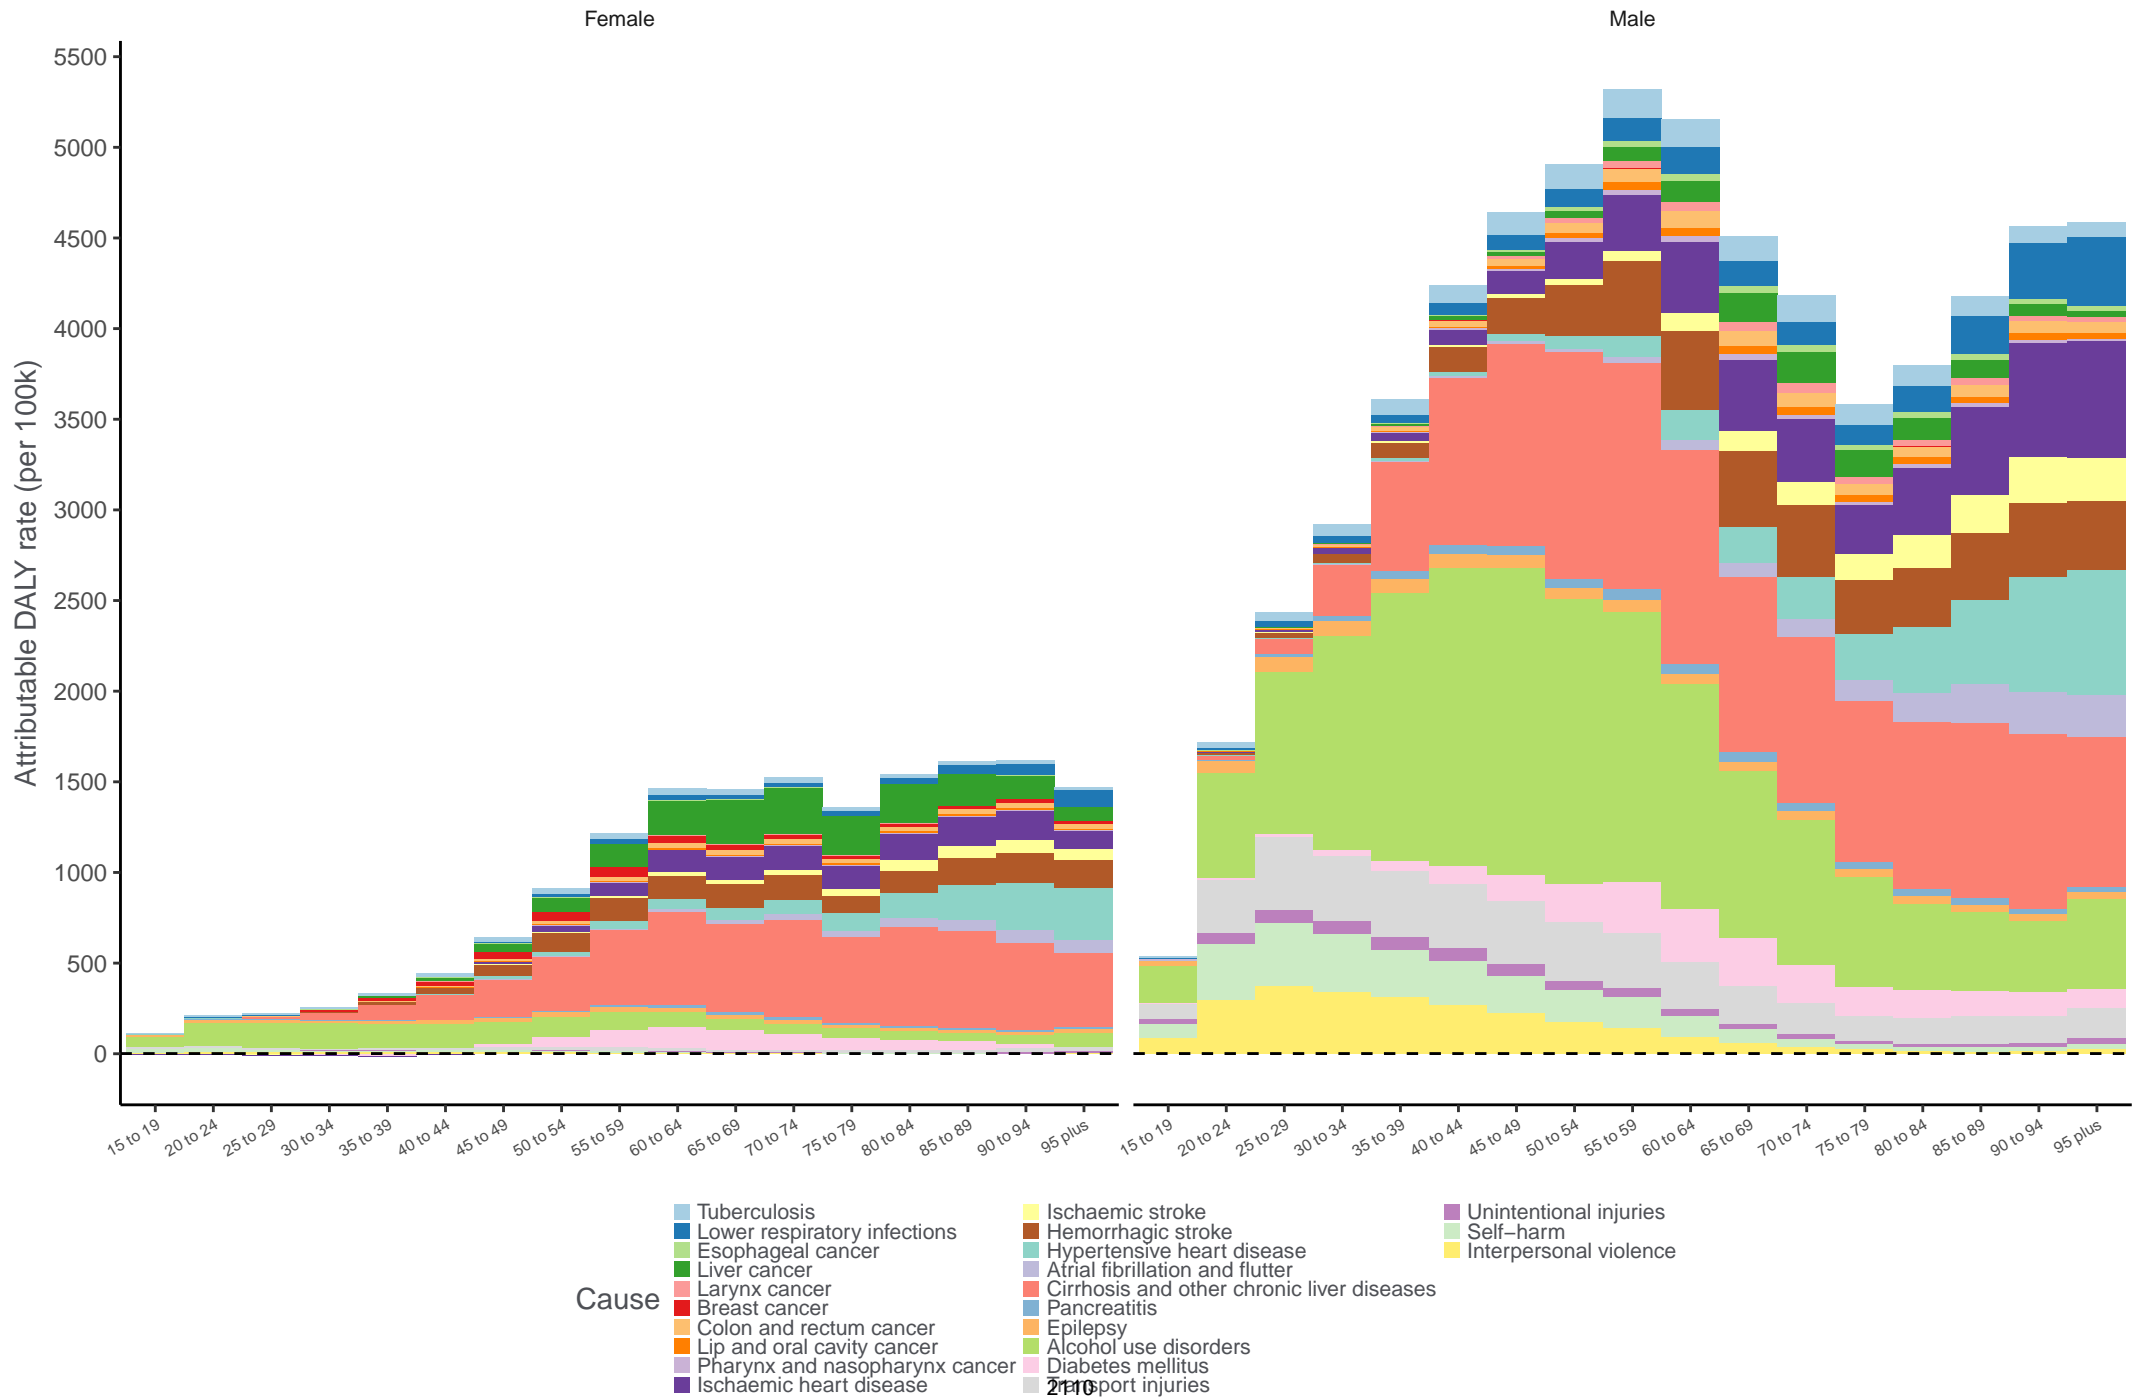

Attributable DALY rate disaggregated by cause, Panama, by sex and age in 2016.

Female

Male

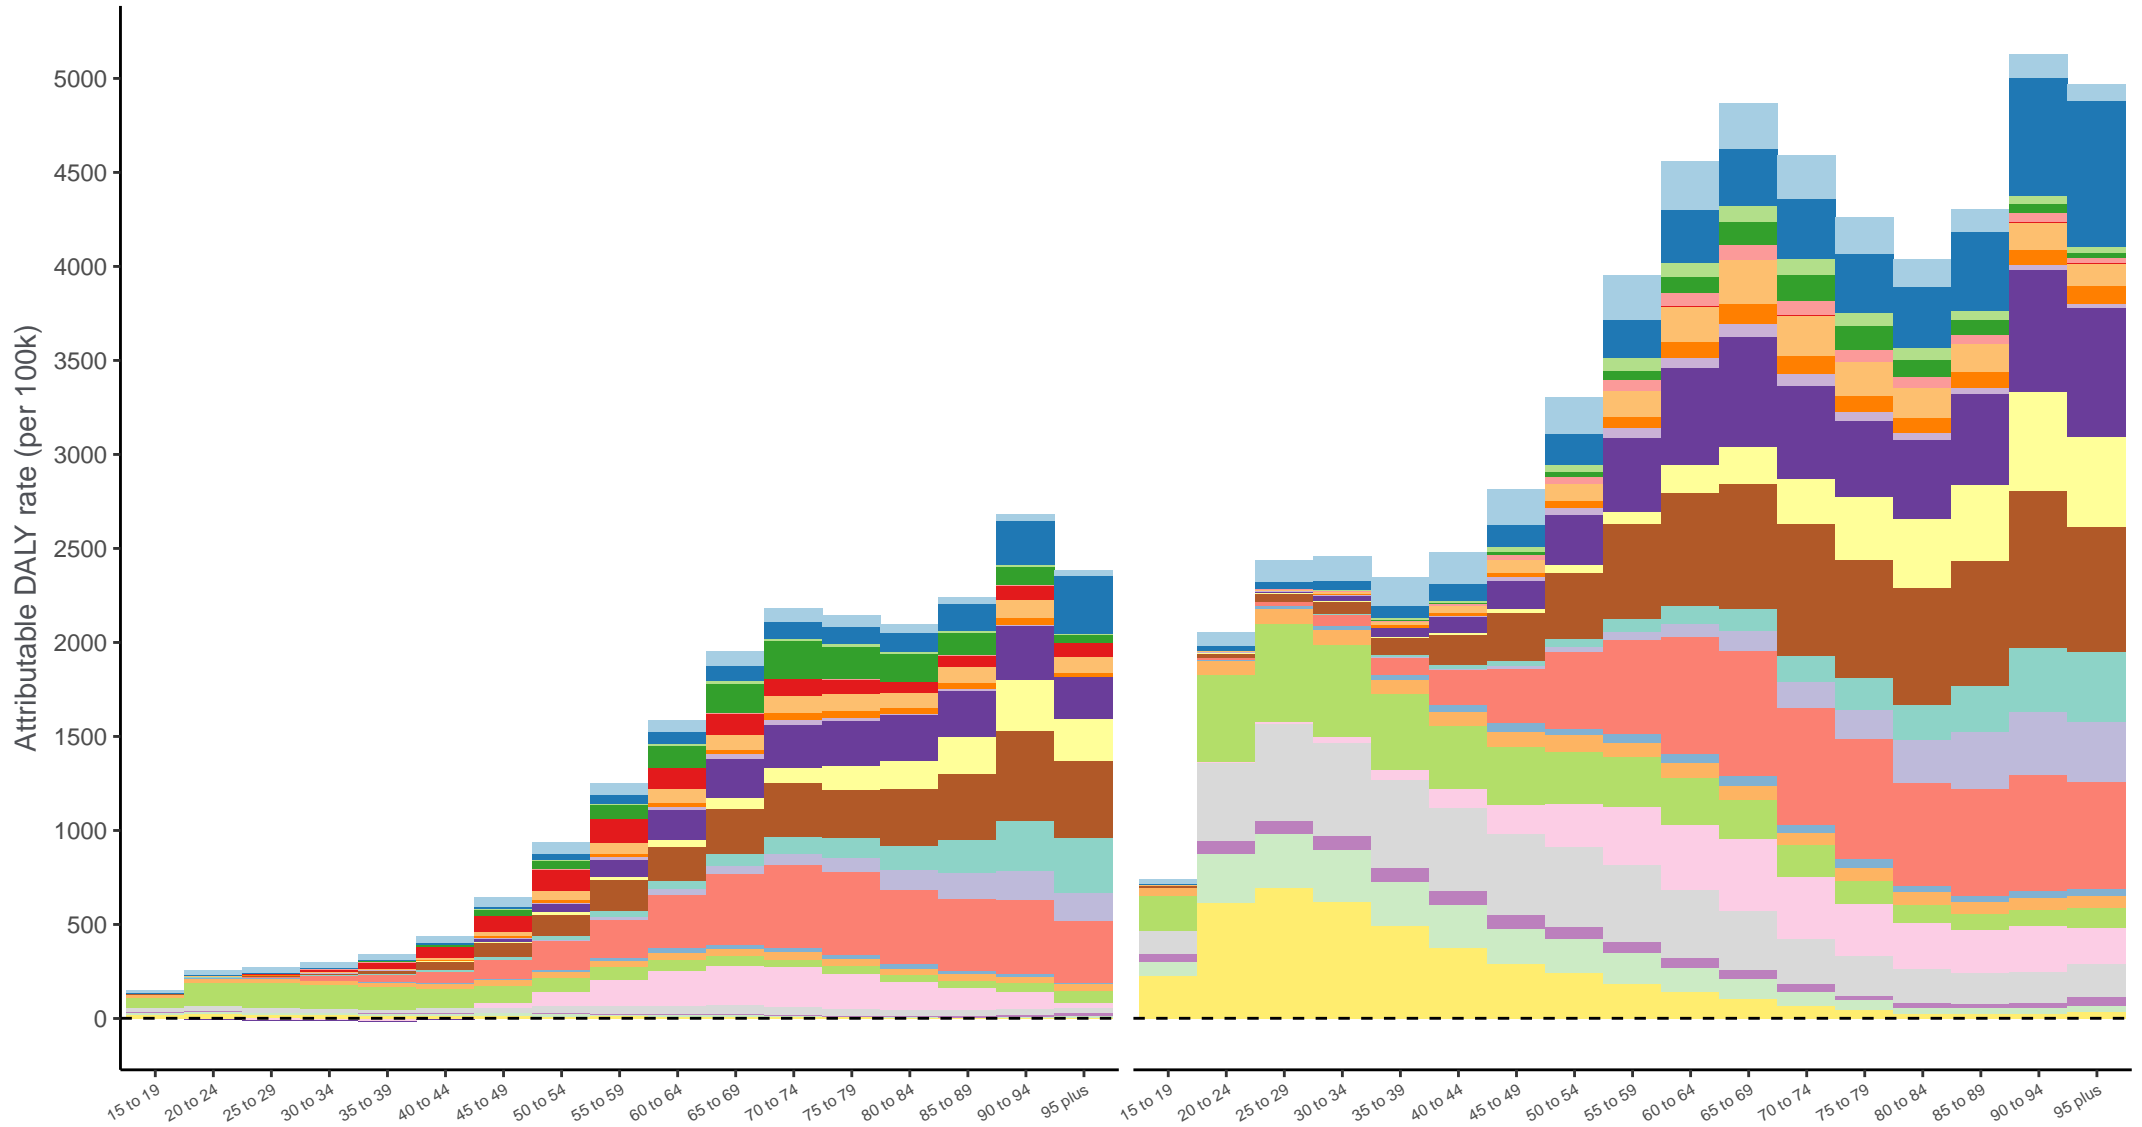

- Cause
- Tuberculosis
  - Lower respiratory infections
  - Esophageal cancer
  - Liver cancer
  - Larynx cancer
  - Breast cancer
  - Colon and rectum cancer
  - Lip and oral cavity cancer
  - Pharynx and nasopharynx cancer
  - Ischaemic heart disease
  - Ischaemic stroke
  - Hemorrhagic stroke
  - Hypertensive heart disease
  - Atrial fibrillation and flutter
  - Cirrhosis and other chronic liver diseases
  - Pancreatitis
  - Epilepsy
  - Alcohol use disorders
  - Diabetes mellitus
  - Transport injuries
  - Unintentional injuries
  - Self-harm
  - Interpersonal violence



# Attributable DALY rate disaggregated by cause, Venezuela, by sex and age in 2016.

Female

Male

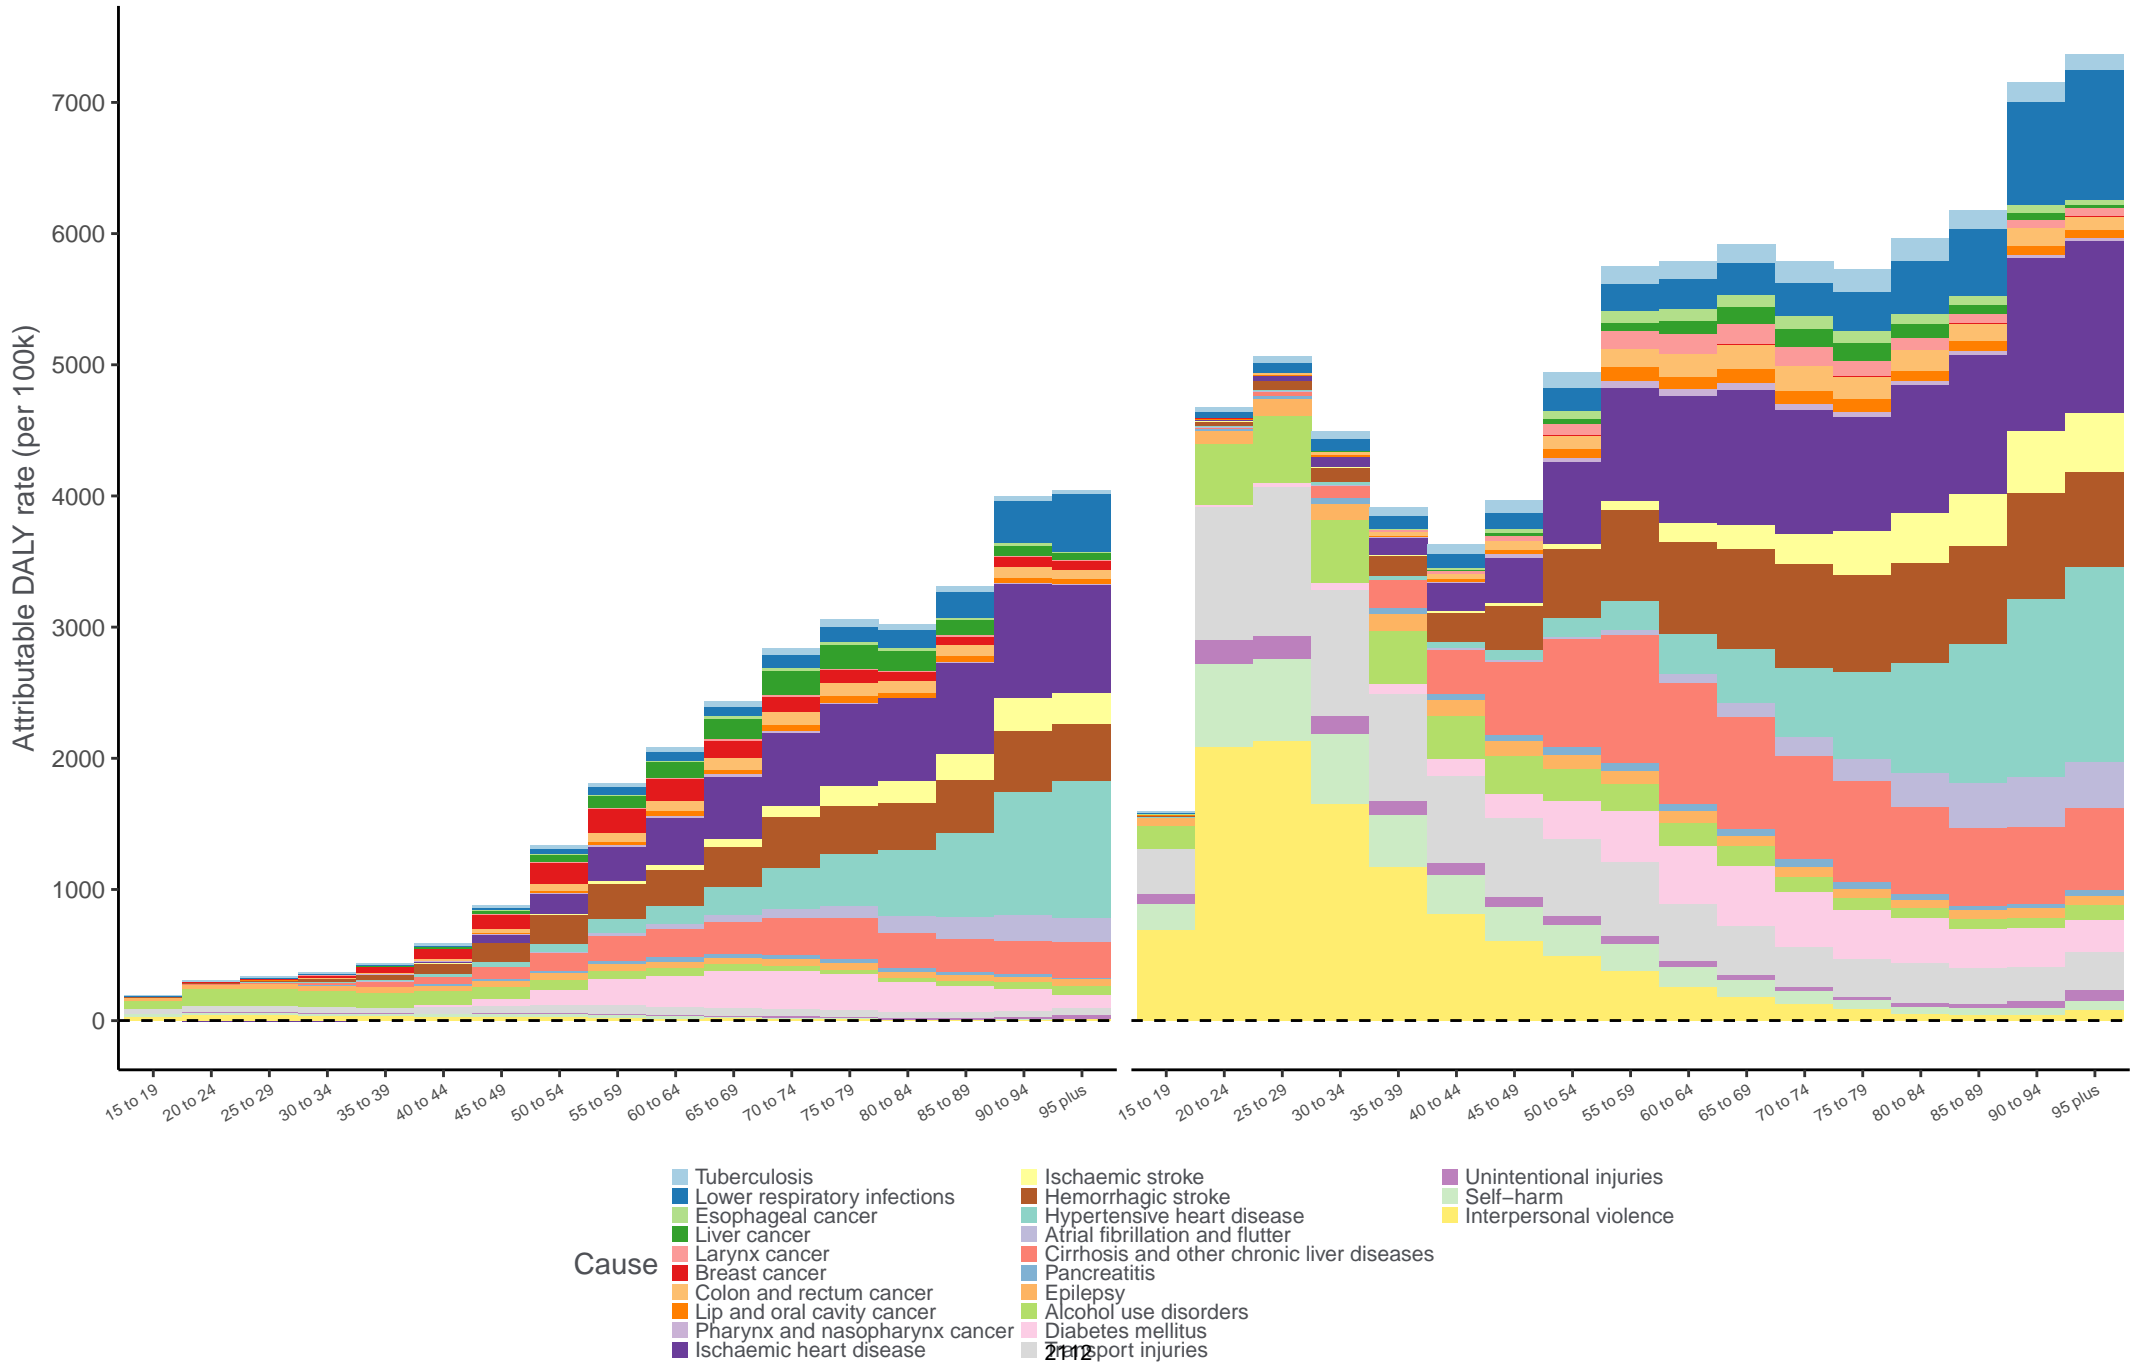

Attributable DALY rate disaggregated by cause, Brazil, by sex and age in 2016.

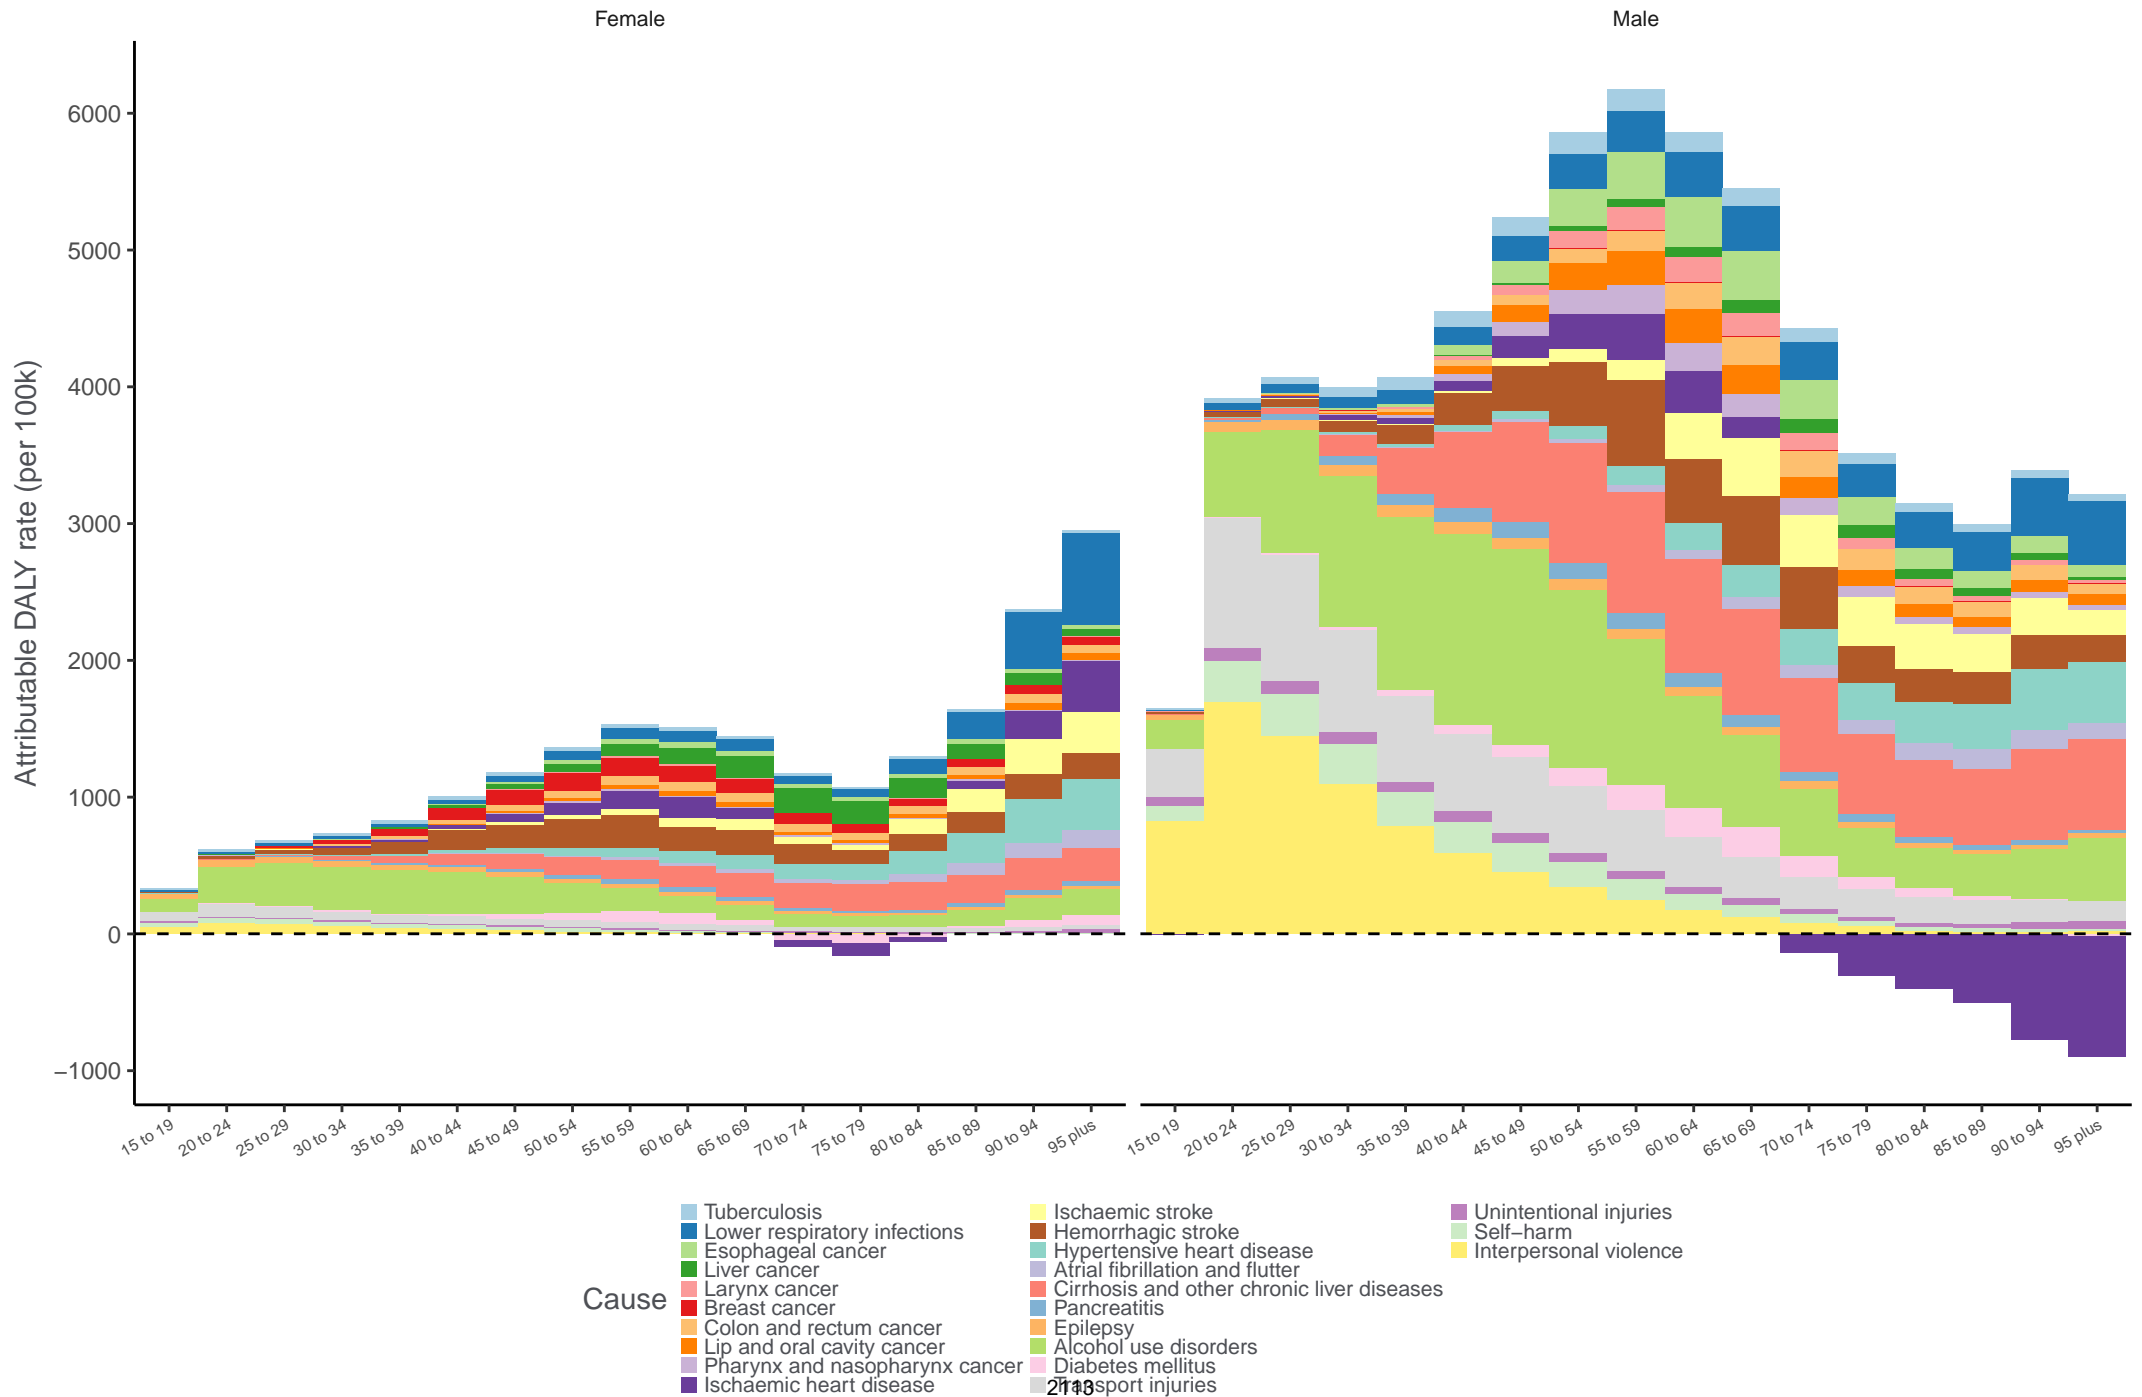

Attributable DALY rate disaggregated by cause, Paraguay, by sex and age in 2016.

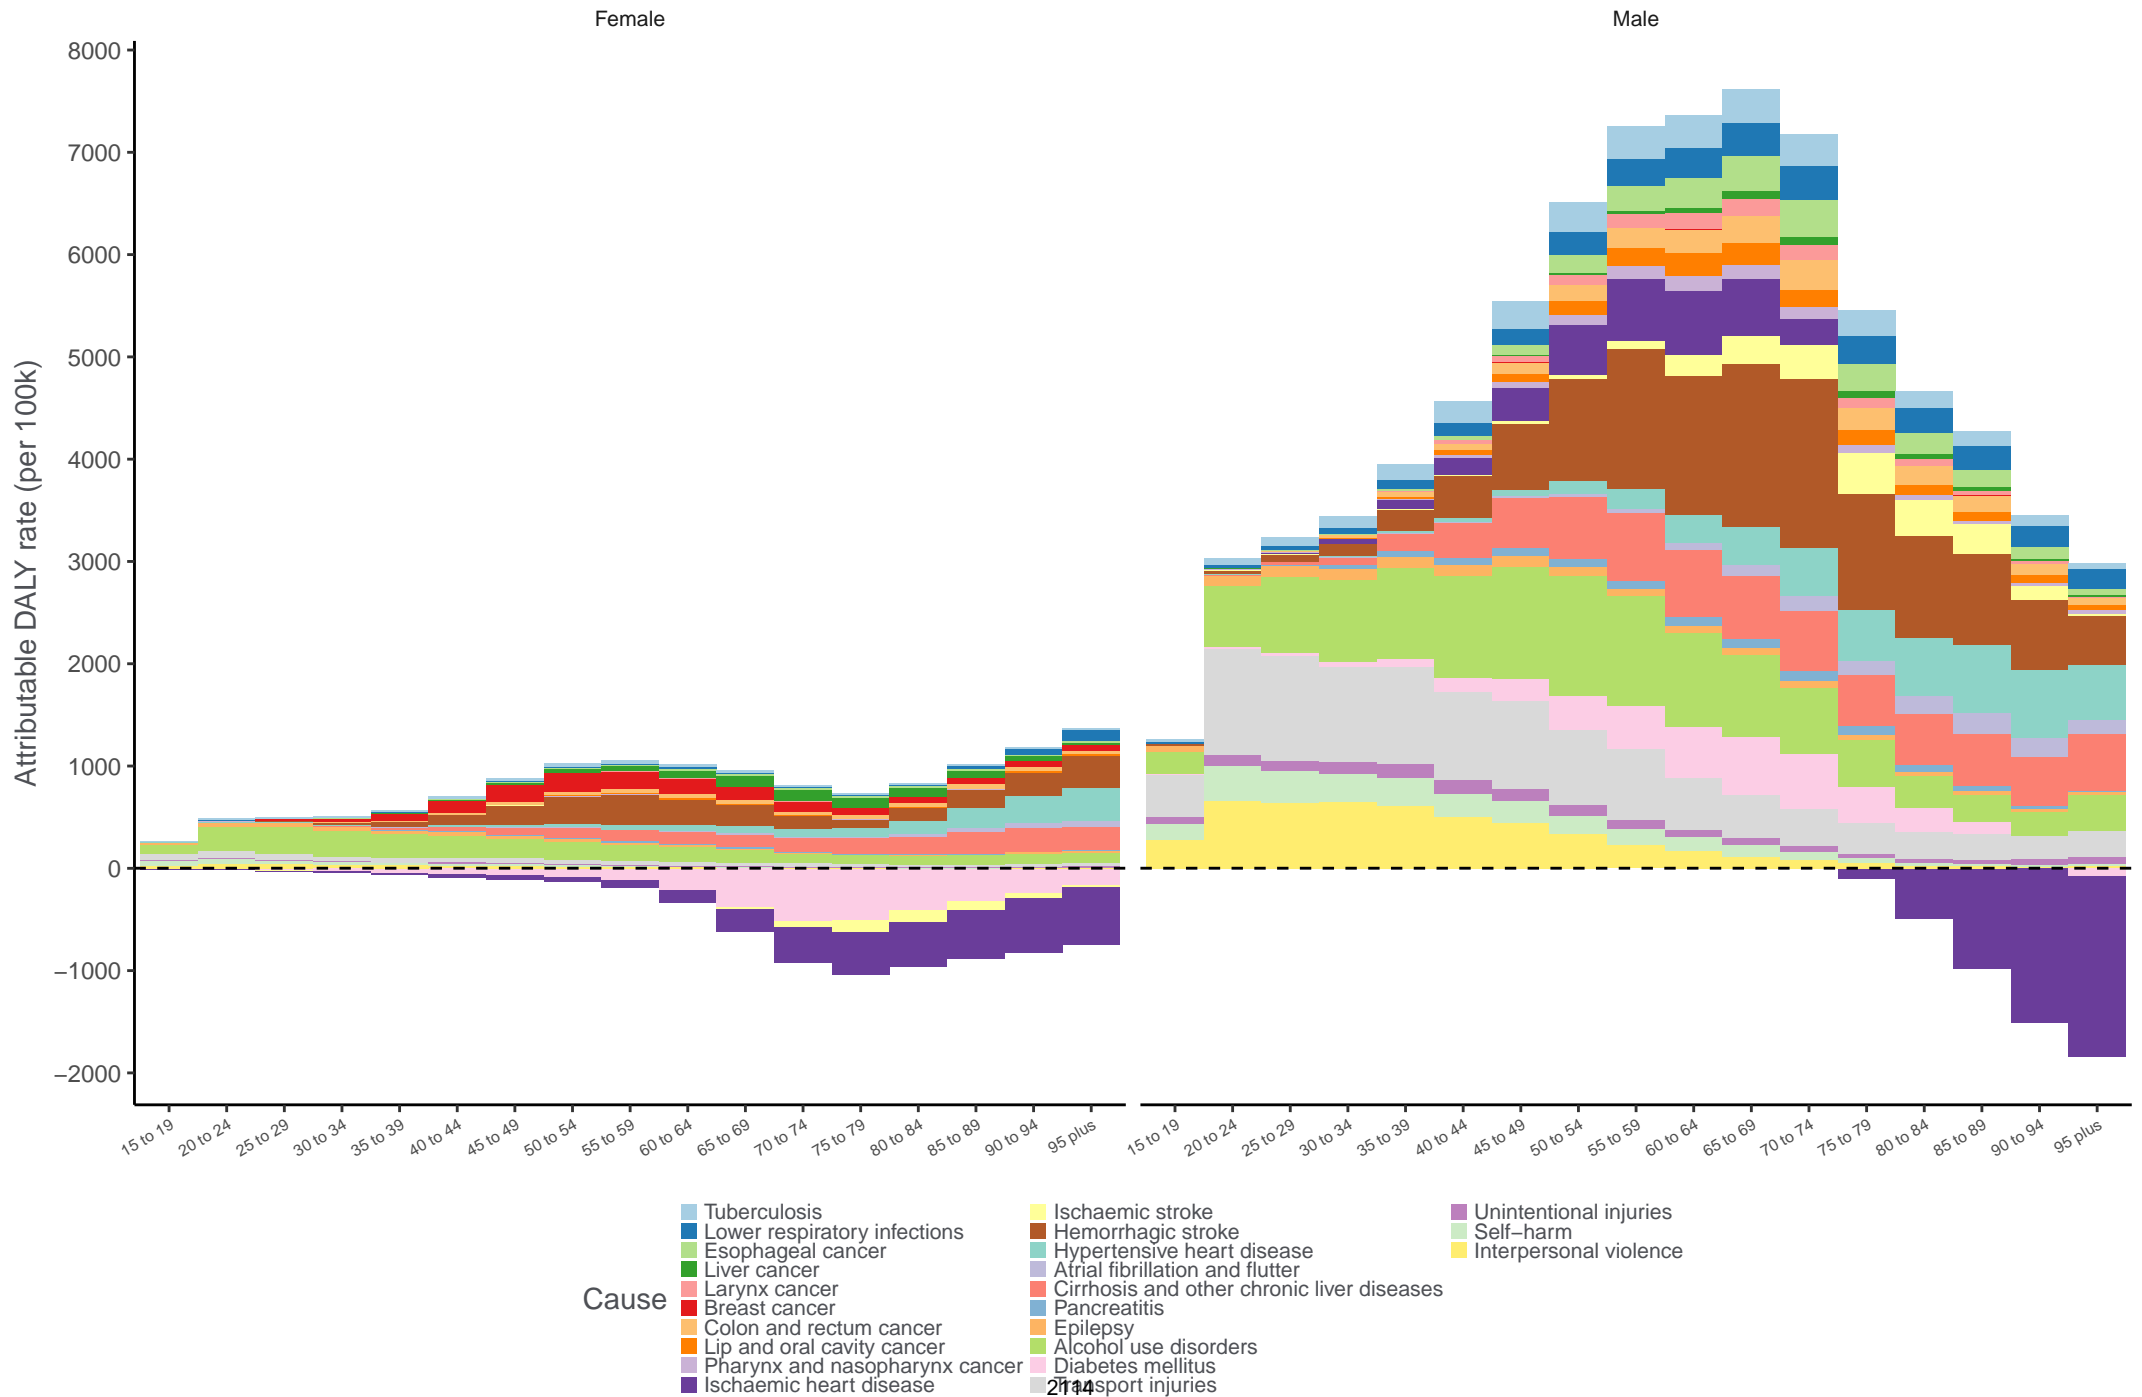

Attributable DALY rate disaggregated by cause, Afghanistan, by sex and age in 2016.

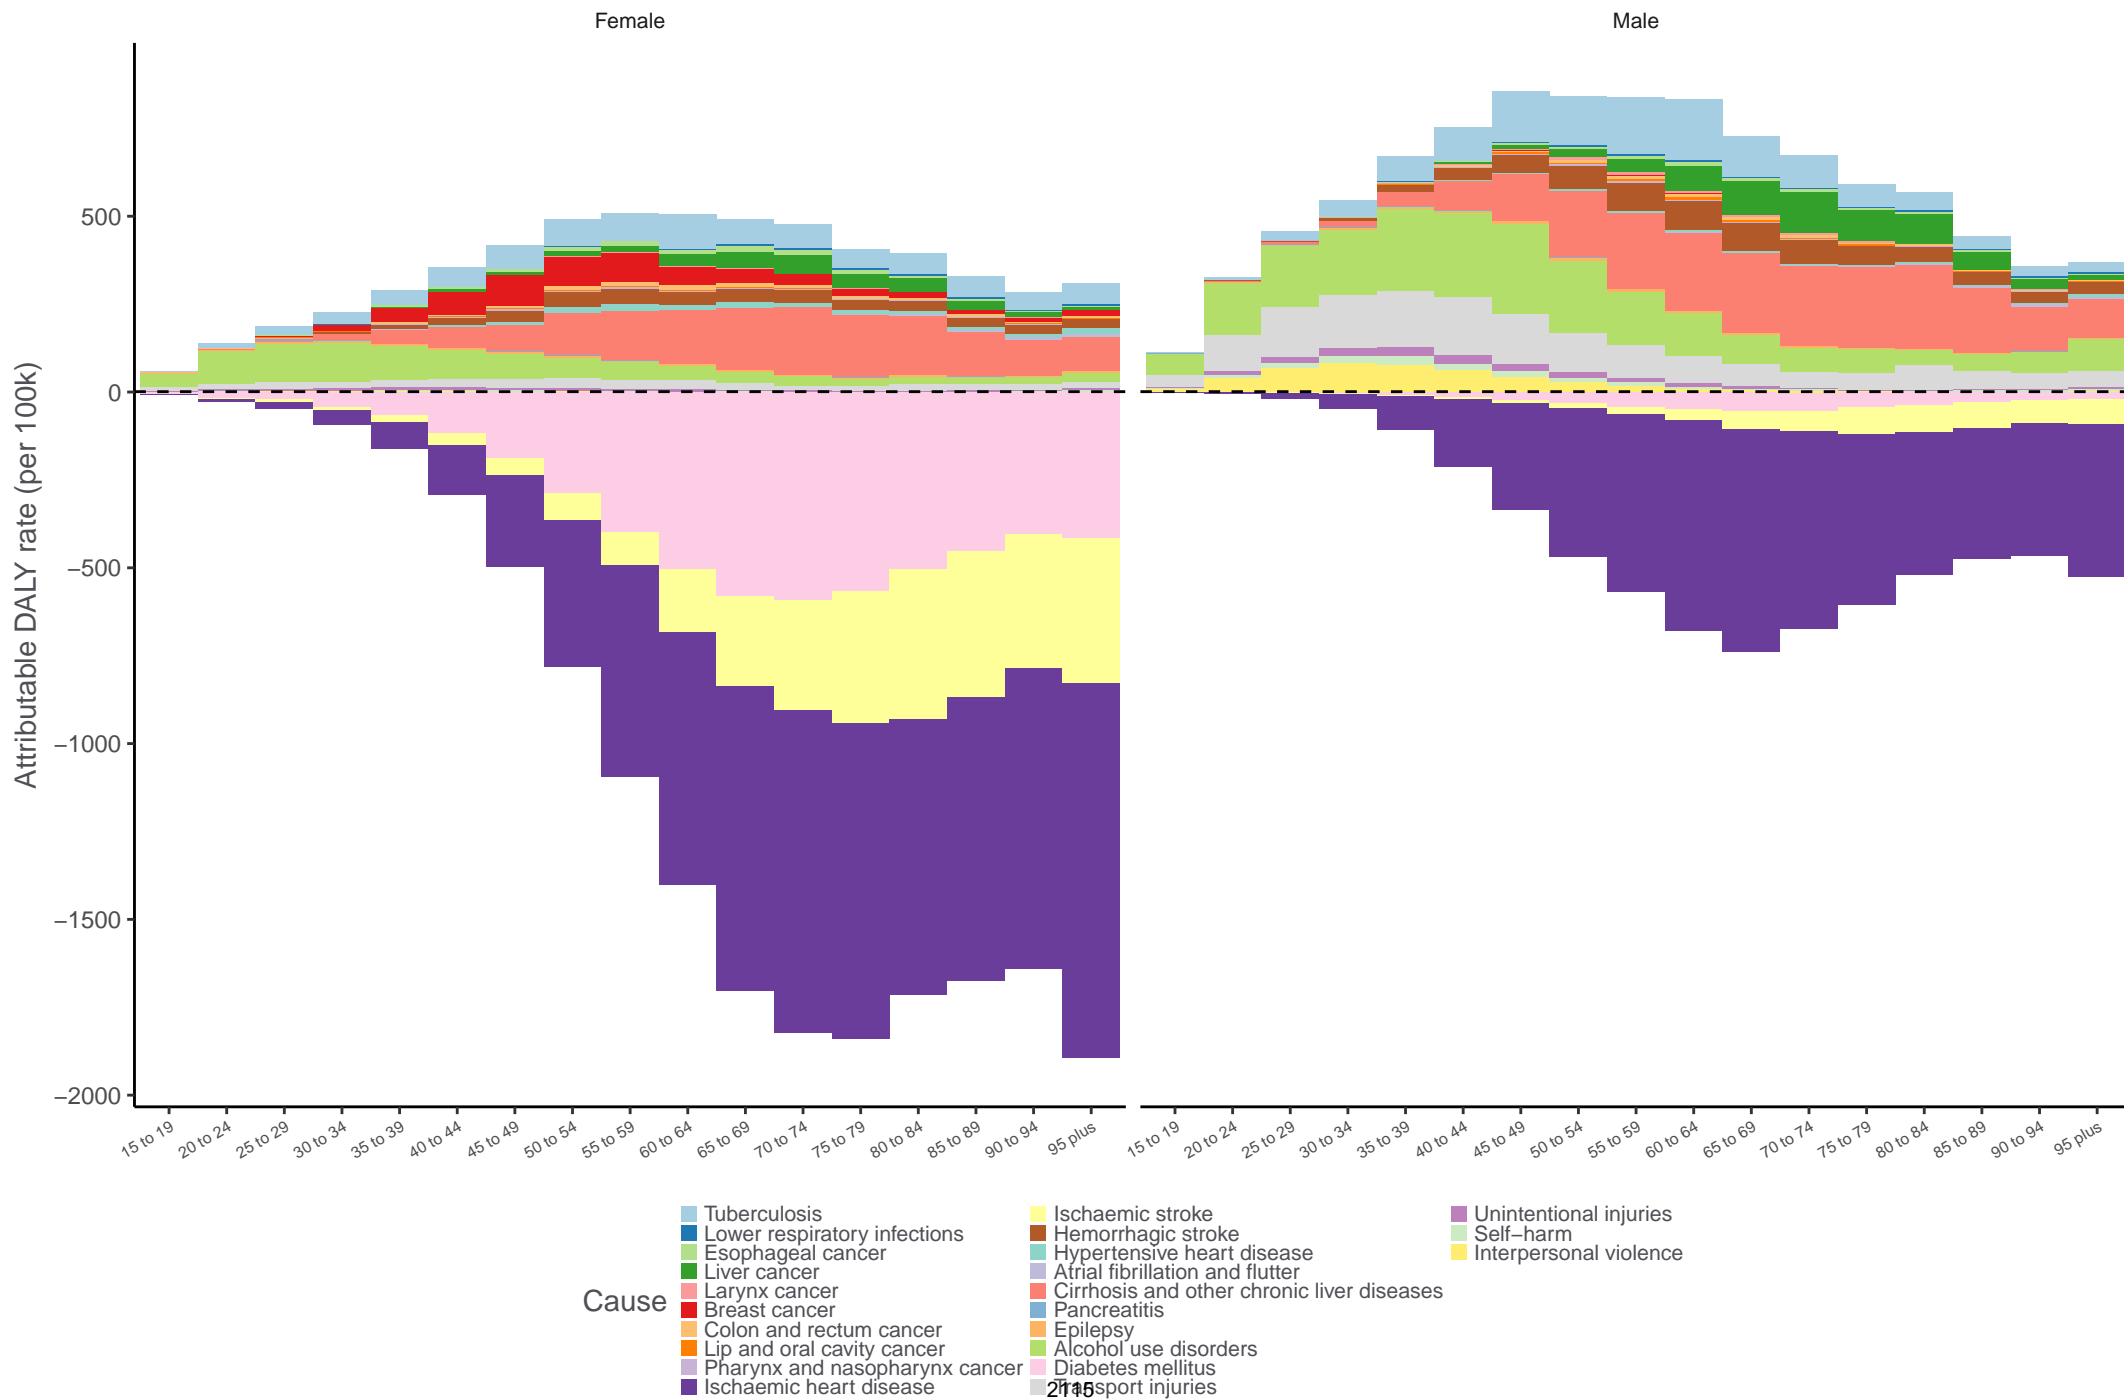

Attributable DALY rate disaggregated by cause, Algeria, by sex and age in 2016.

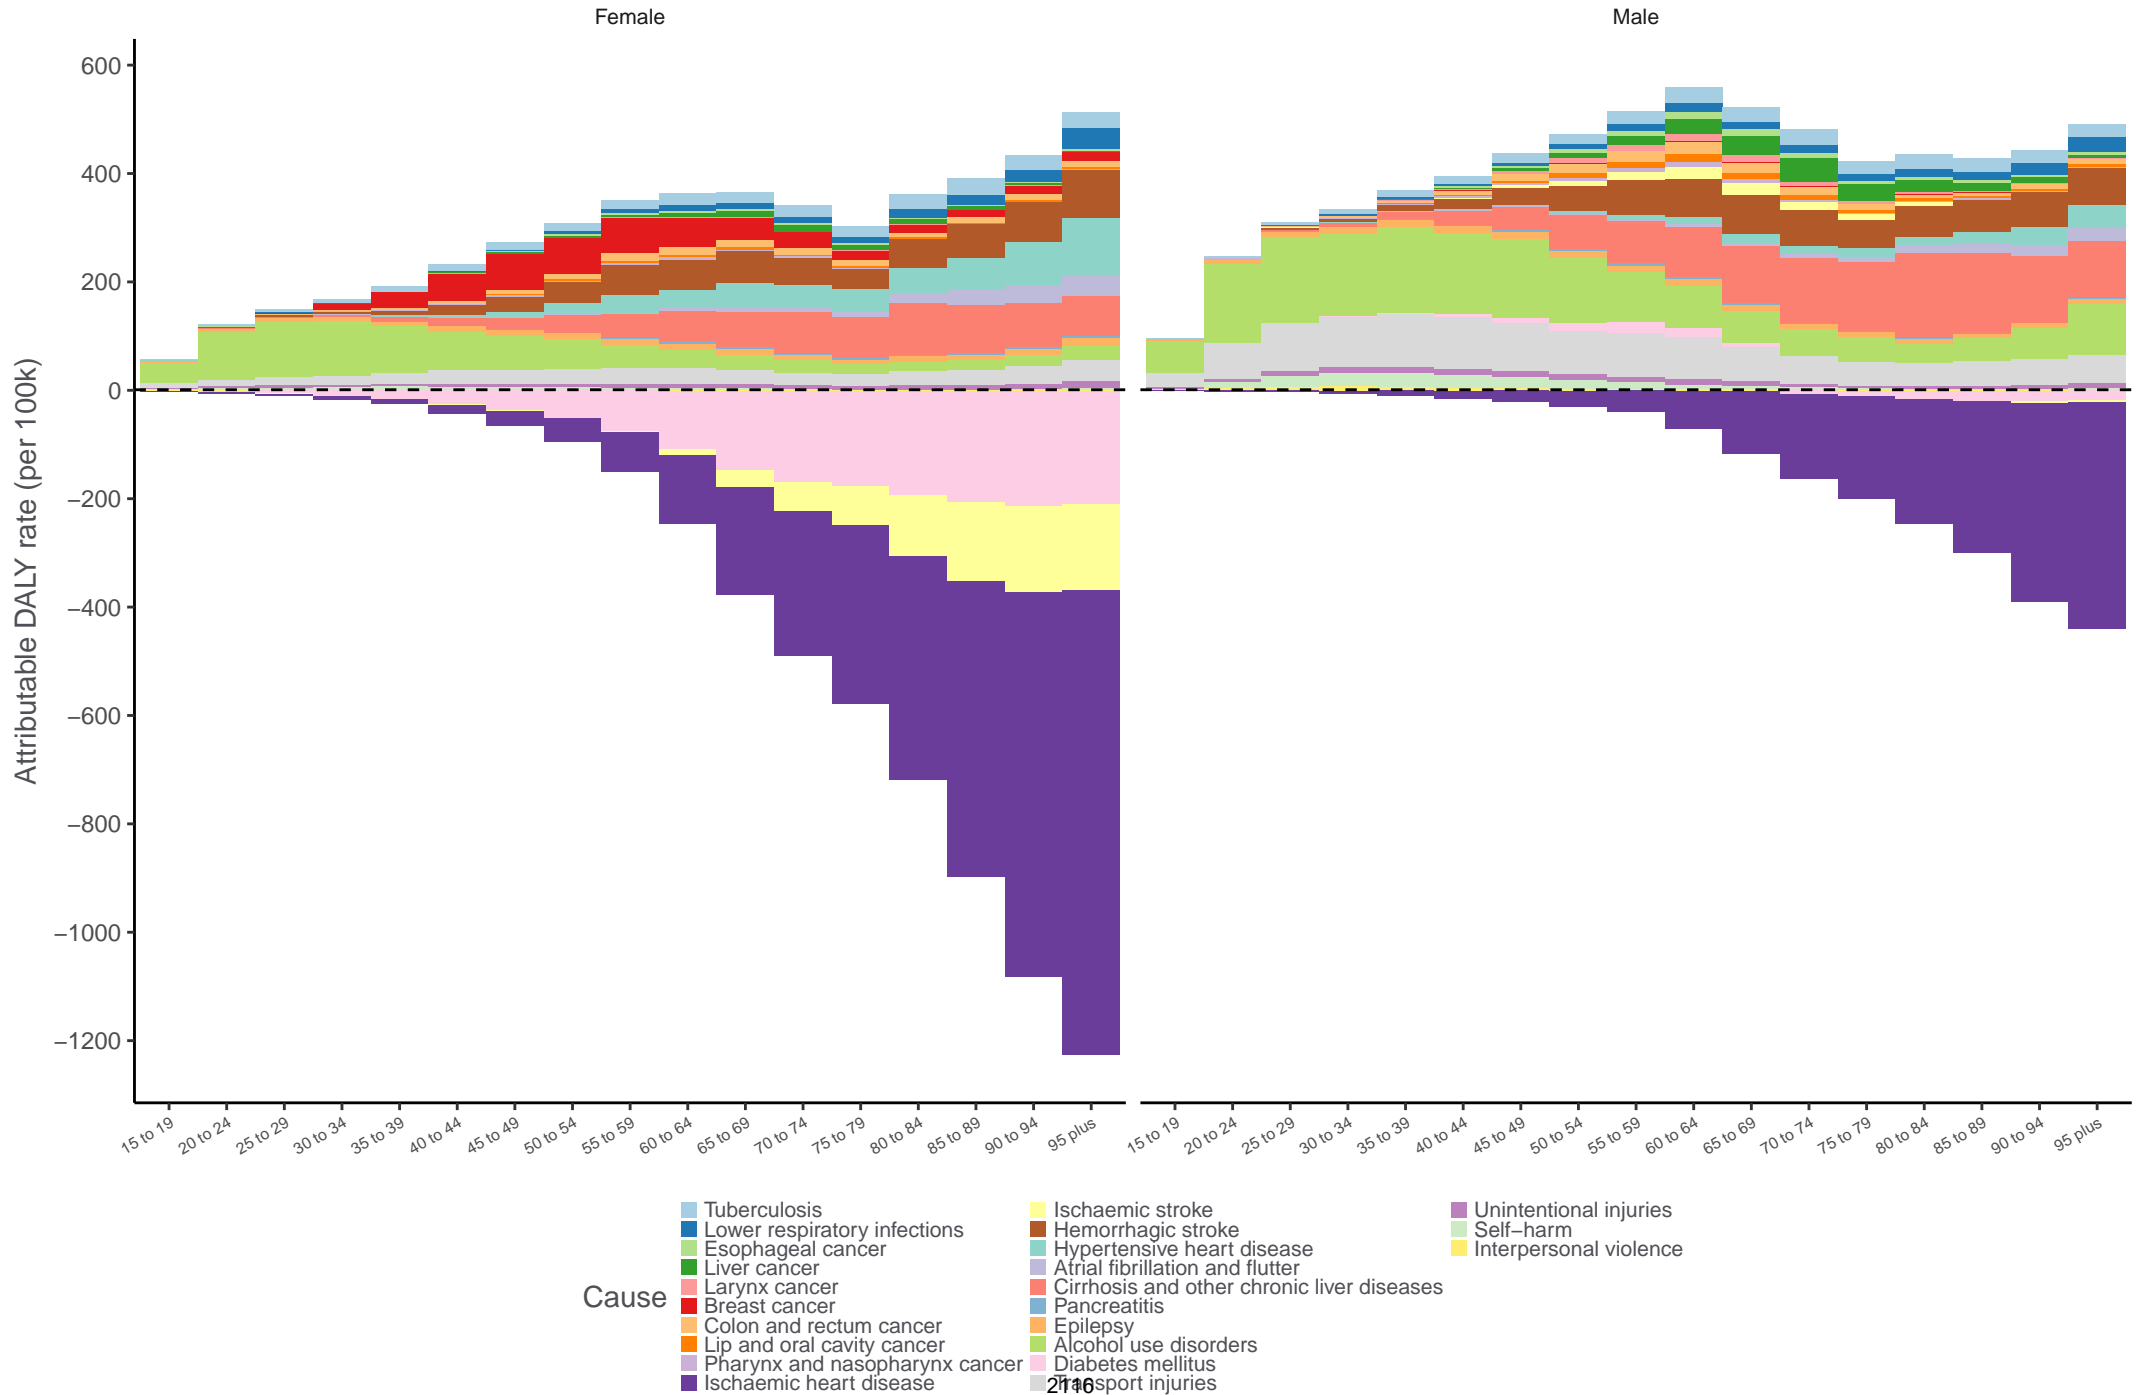

Attributable DALY rate disaggregated by cause, Bahrain, by sex and age in 2016.

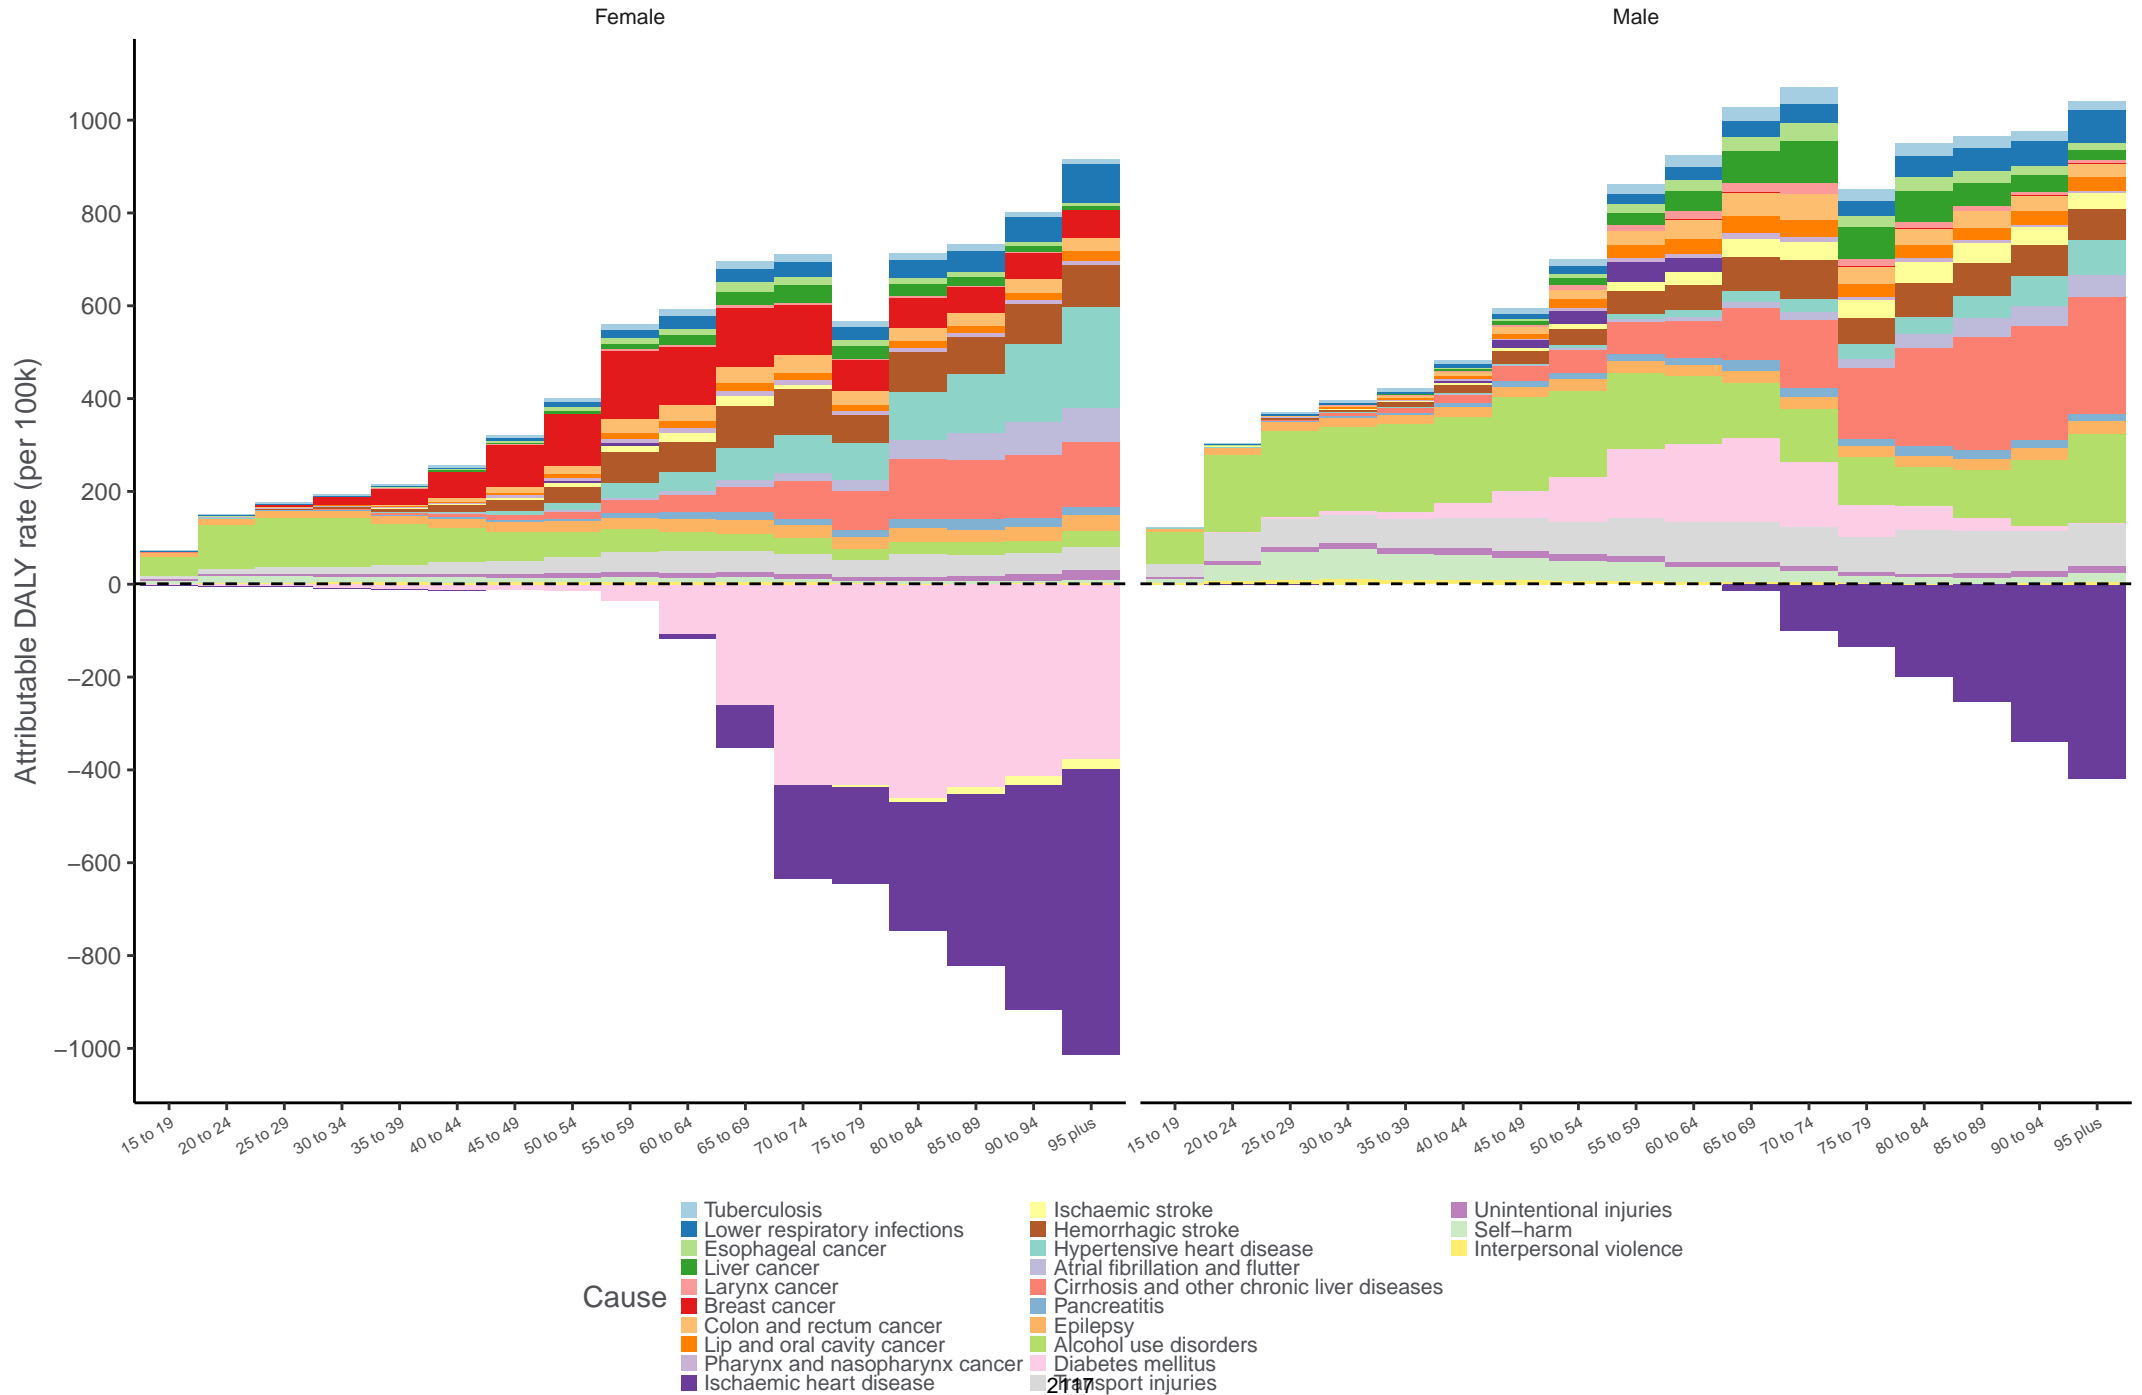

Attributable DALY rate disaggregated by cause, Egypt, by sex and age in 2016.

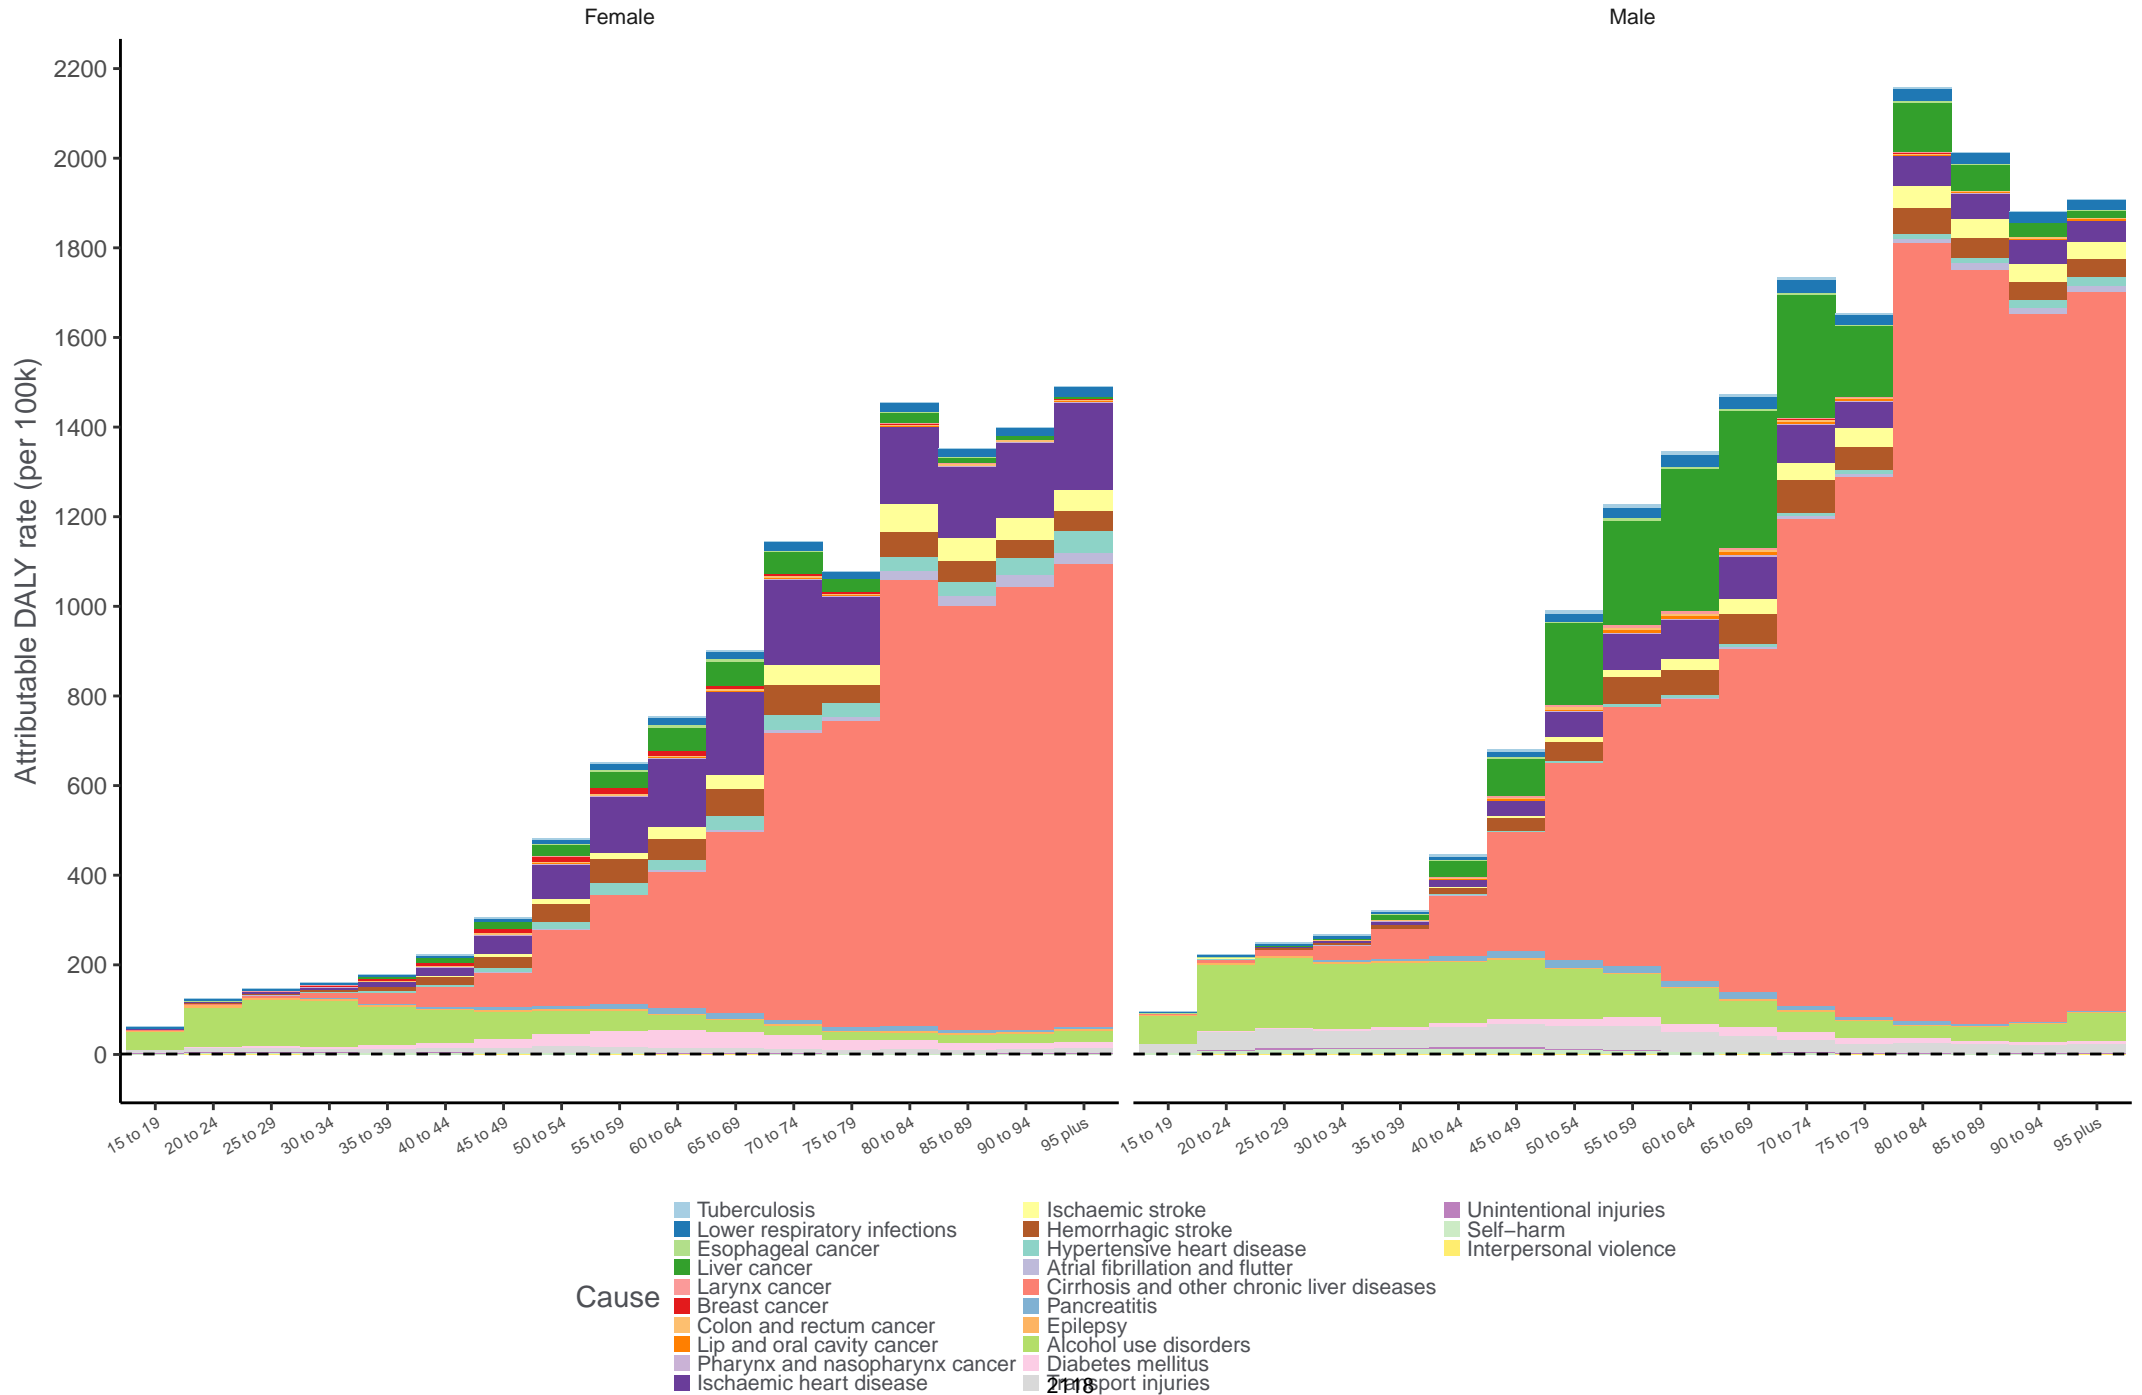

# Attributable DALY rate disaggregated by cause, Iran, by sex and age in 2016.

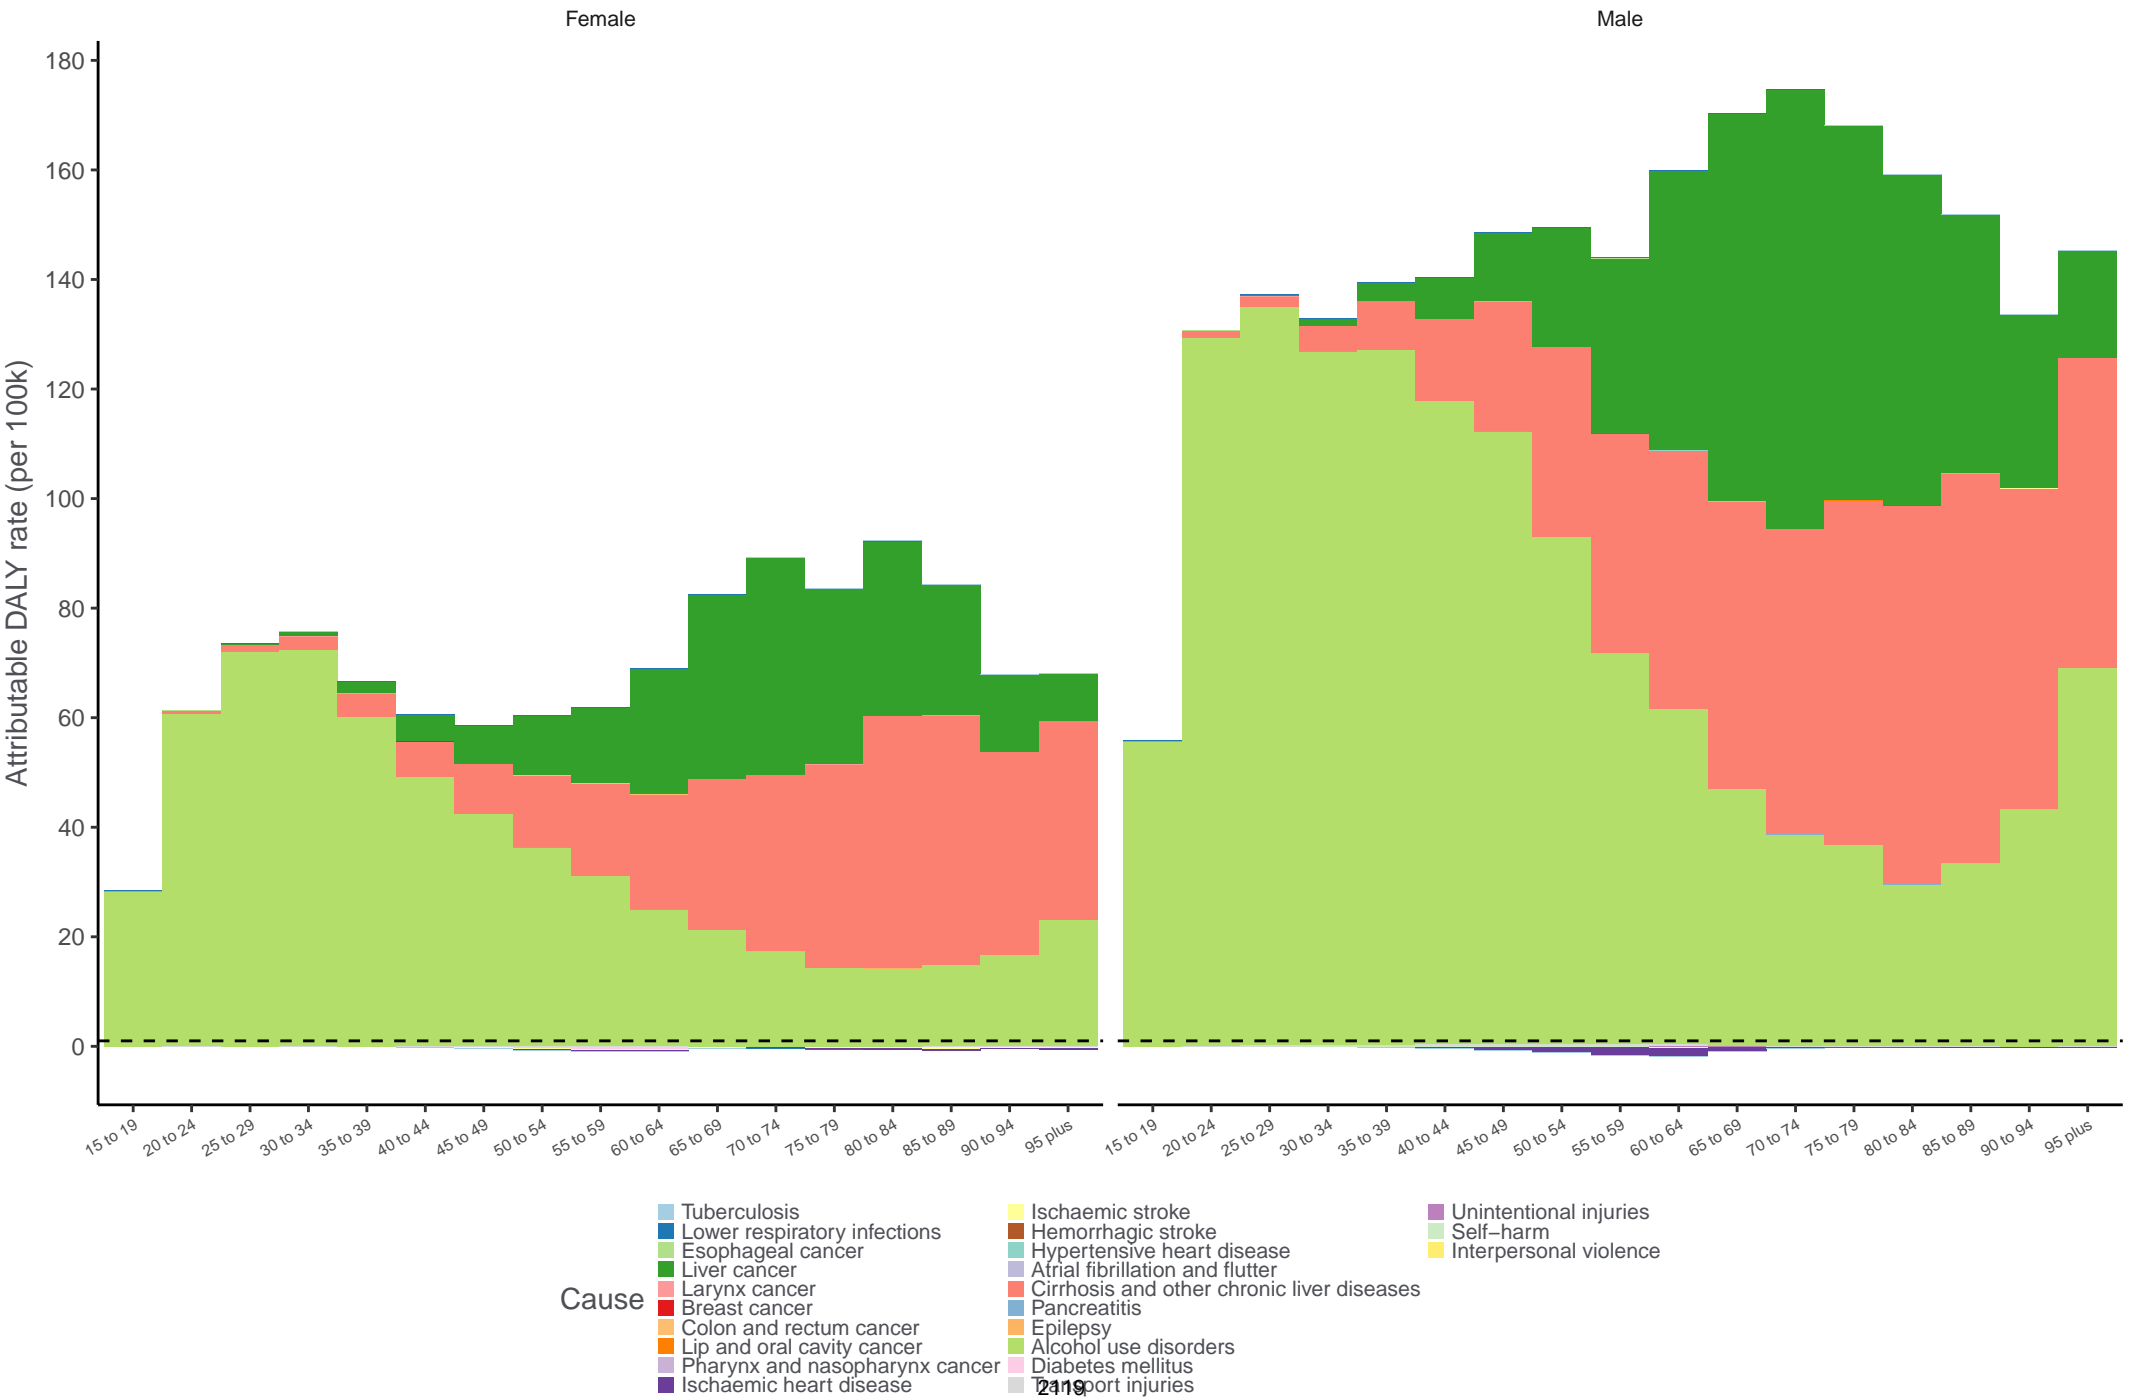



# Attributable DALY rate disaggregated by cause, Iraq, by sex and age in 2016.

Female

Male

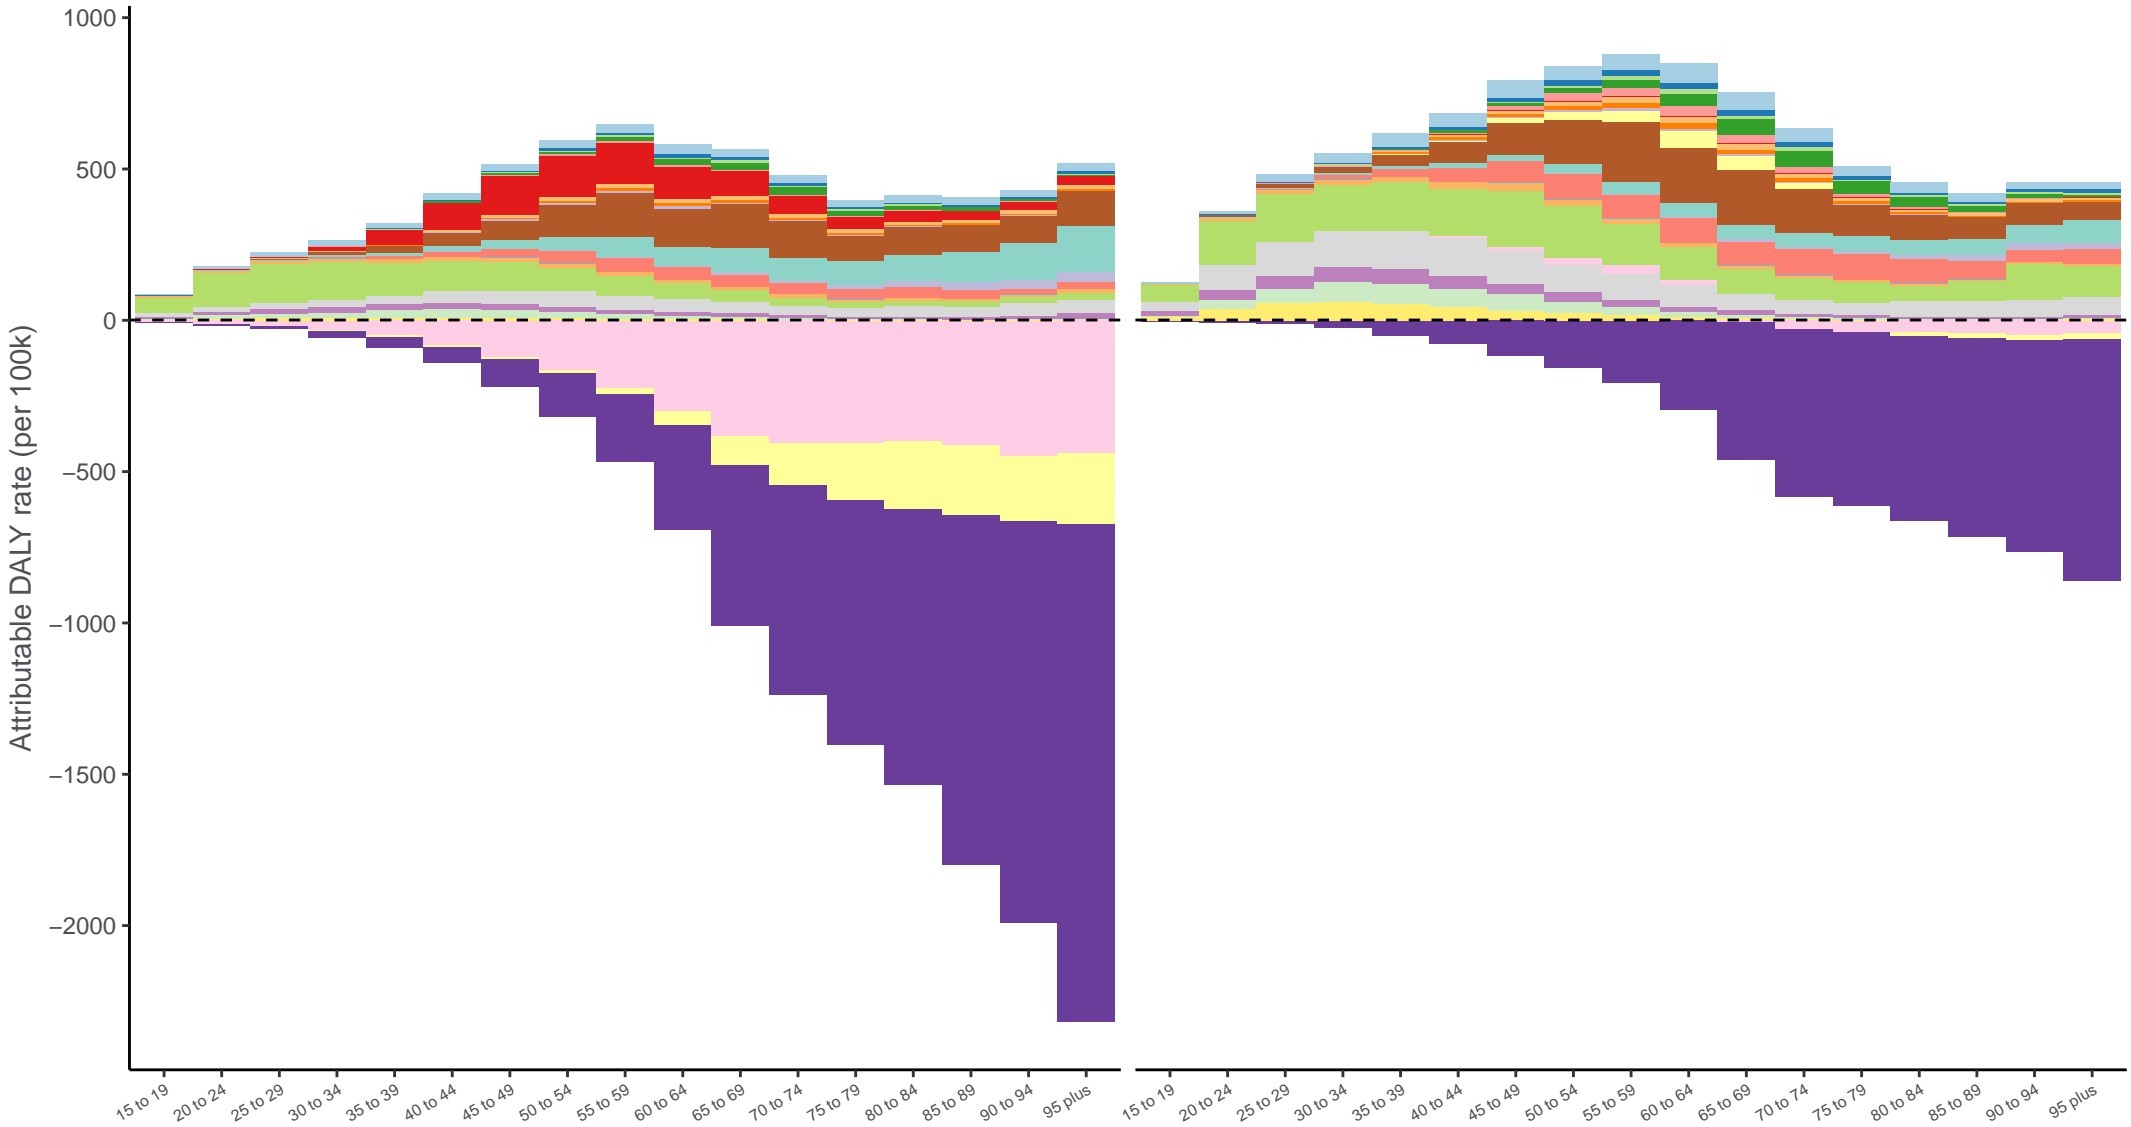

- Cause**
- Tuberculosis
  - Lower respiratory infections
  - Esophageal cancer
  - Liver cancer
  - Larynx cancer
  - Breast cancer
  - Colon and rectum cancer
  - Lip and oral cavity cancer
  - Pharynx and nasopharynx cancer
  - Ischaemic heart disease
  - Ischaemic stroke
  - Hemorrhagic stroke
  - Hypertensive heart disease
  - Atrial fibrillation and flutter
  - Cirrhosis and other chronic liver diseases
  - Pancreatitis
  - Epilepsy
  - Alcohol use disorders
  - Diabetes mellitus
  - Unintentional injuries
  - Self-harm
  - Interpersonal violence
  - Sport injuries

Attributable DALY rate disaggregated by cause, Jordan, by sex and age in 2016.

Female

Male

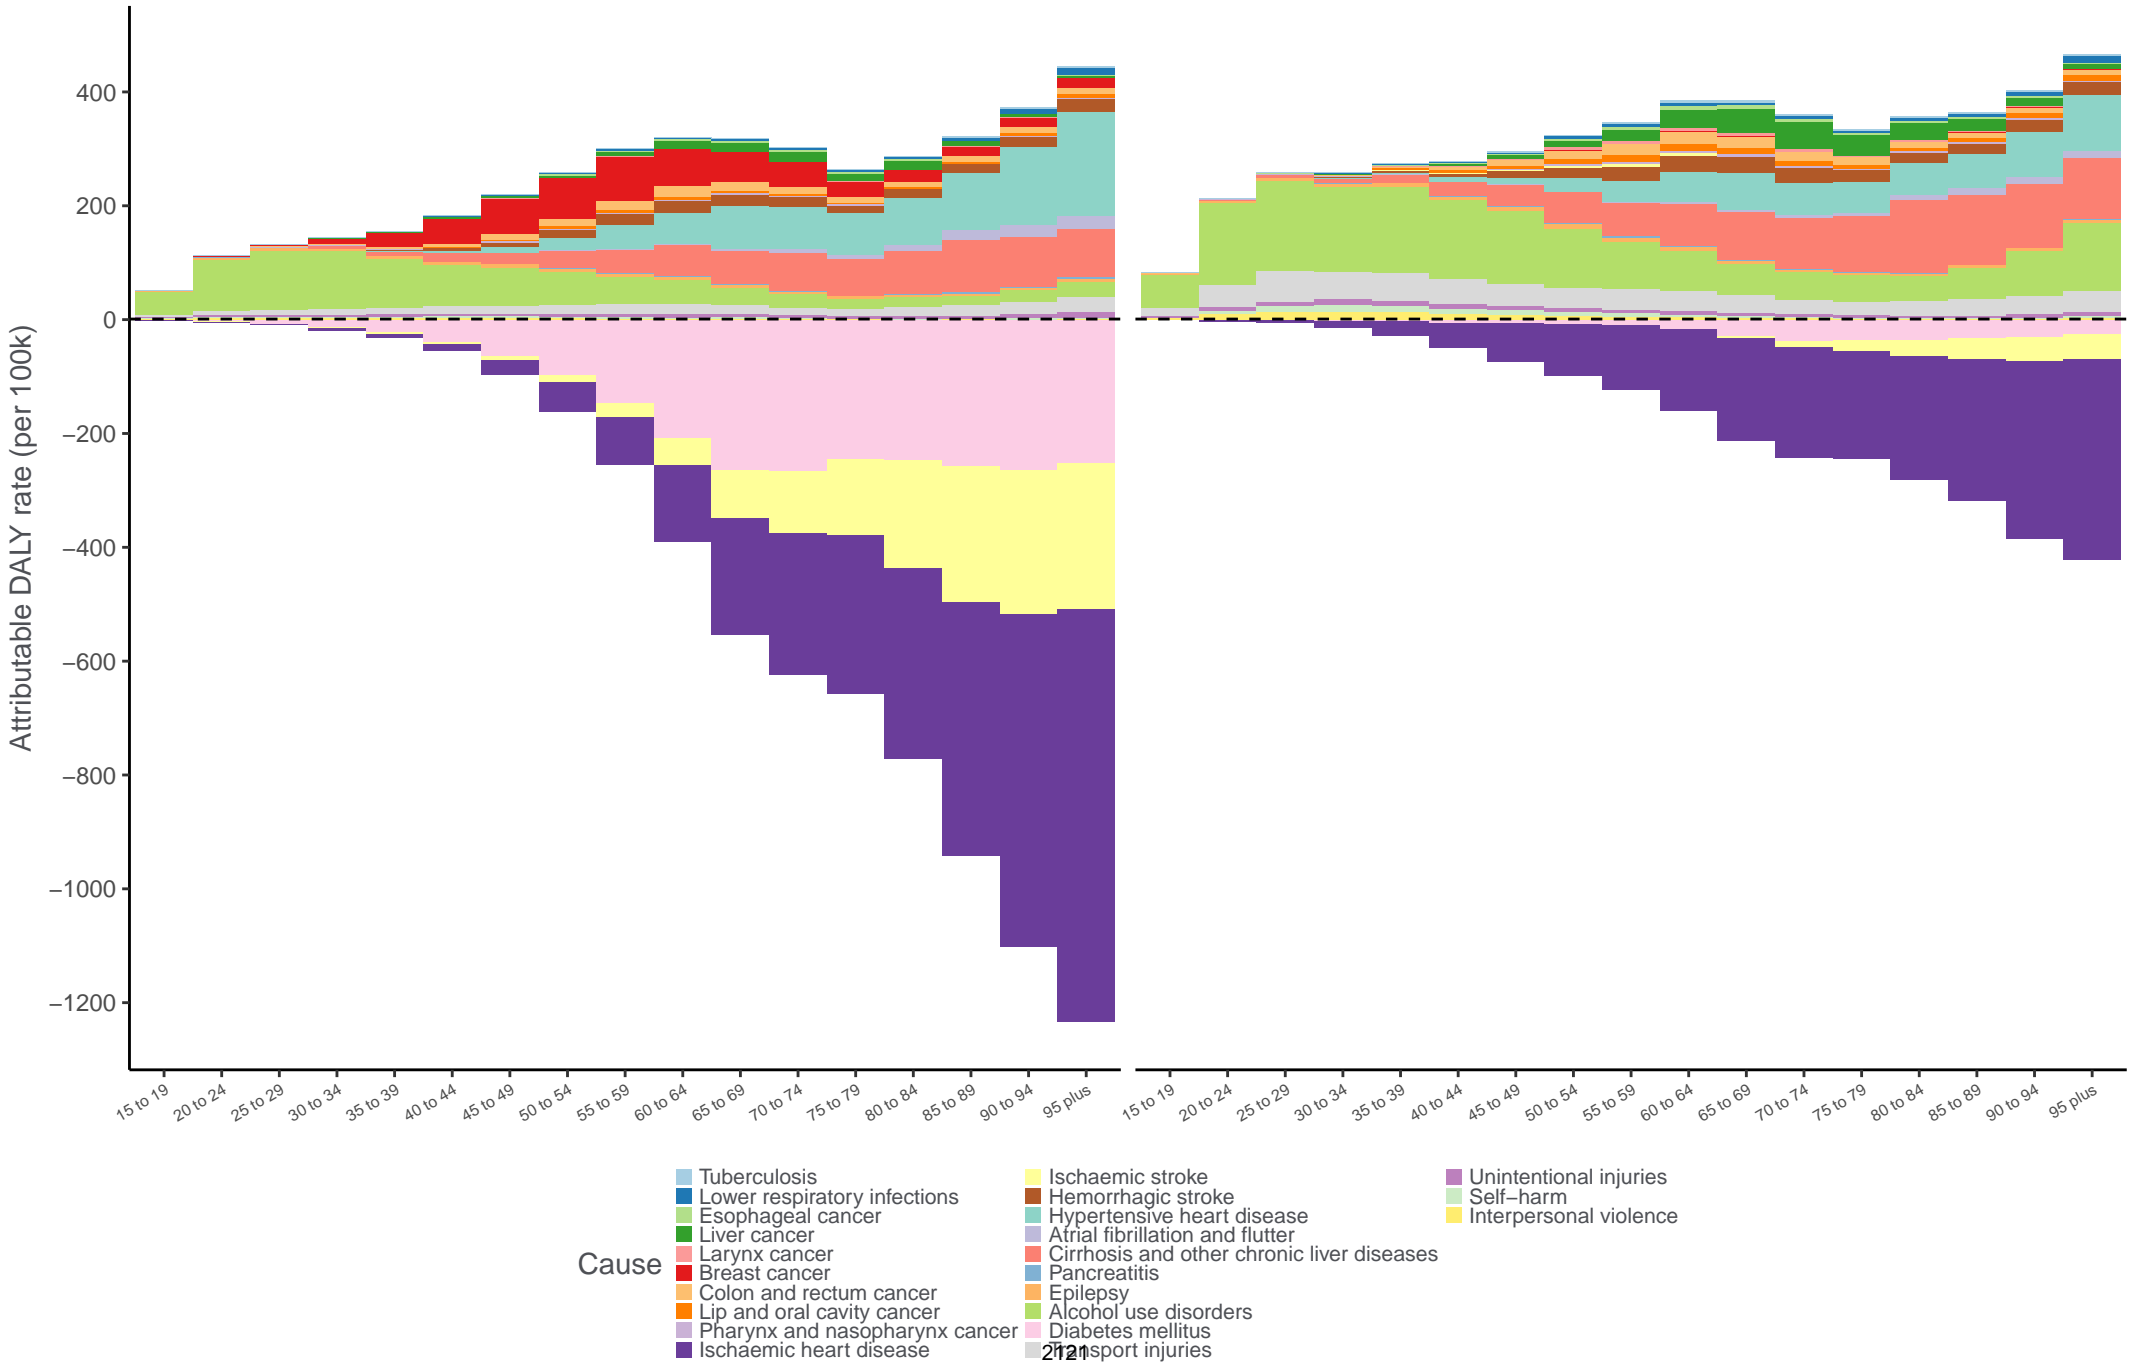

Cause

# Attributable DALY rate disaggregated by cause, Kuwait, by sex and age in 2016.

Female

Male

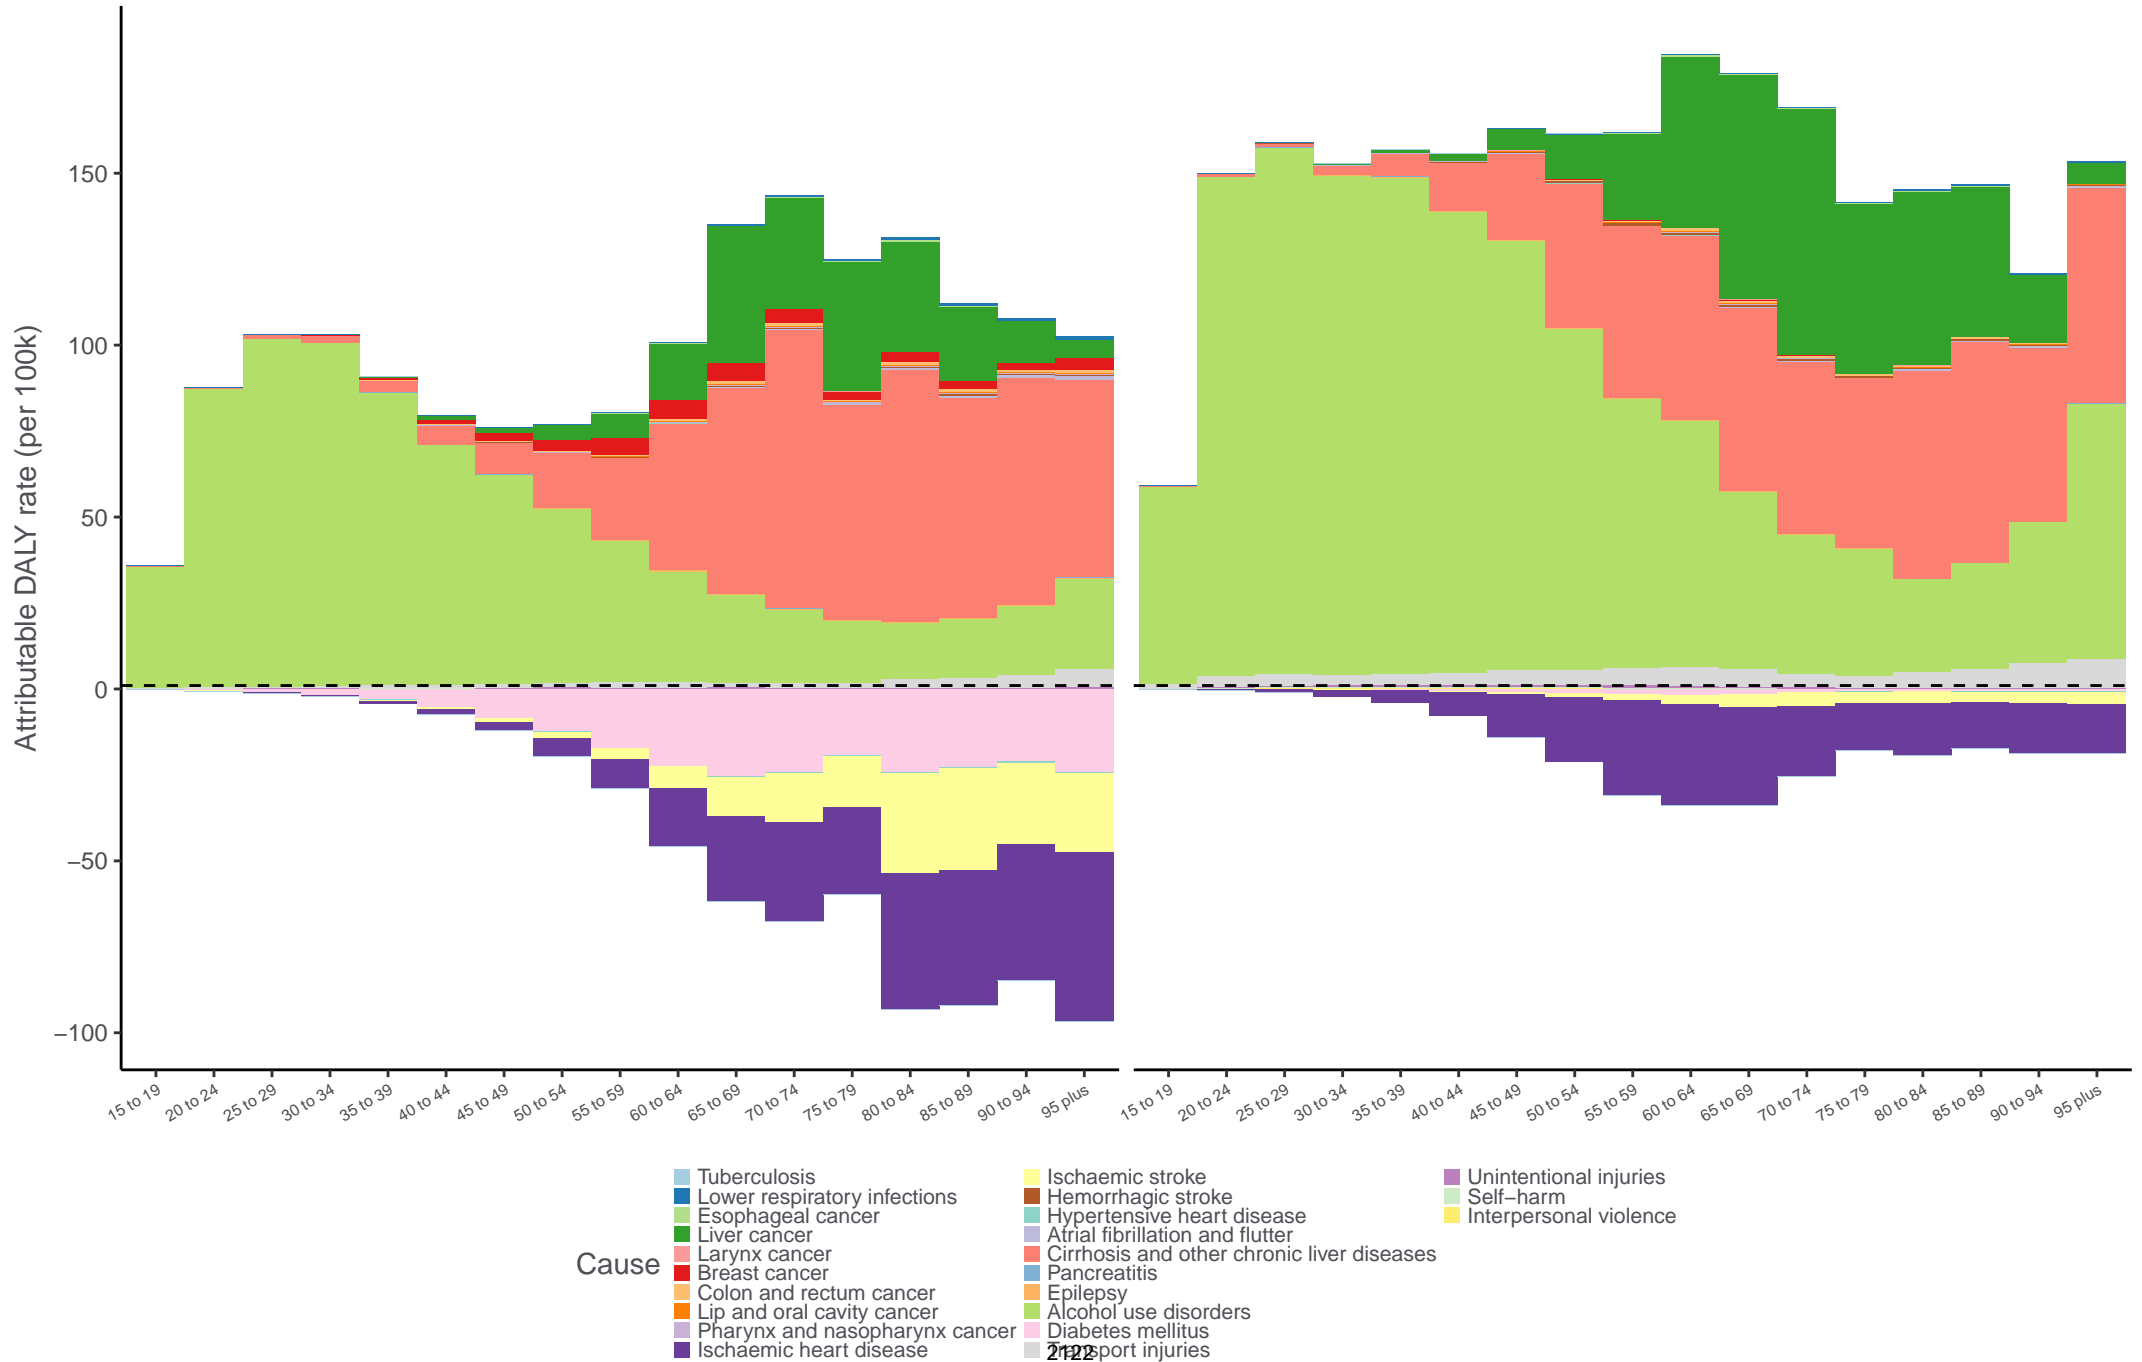

Attributable DALY rate disaggregated by cause, Lebanon, by sex and age in 2016.

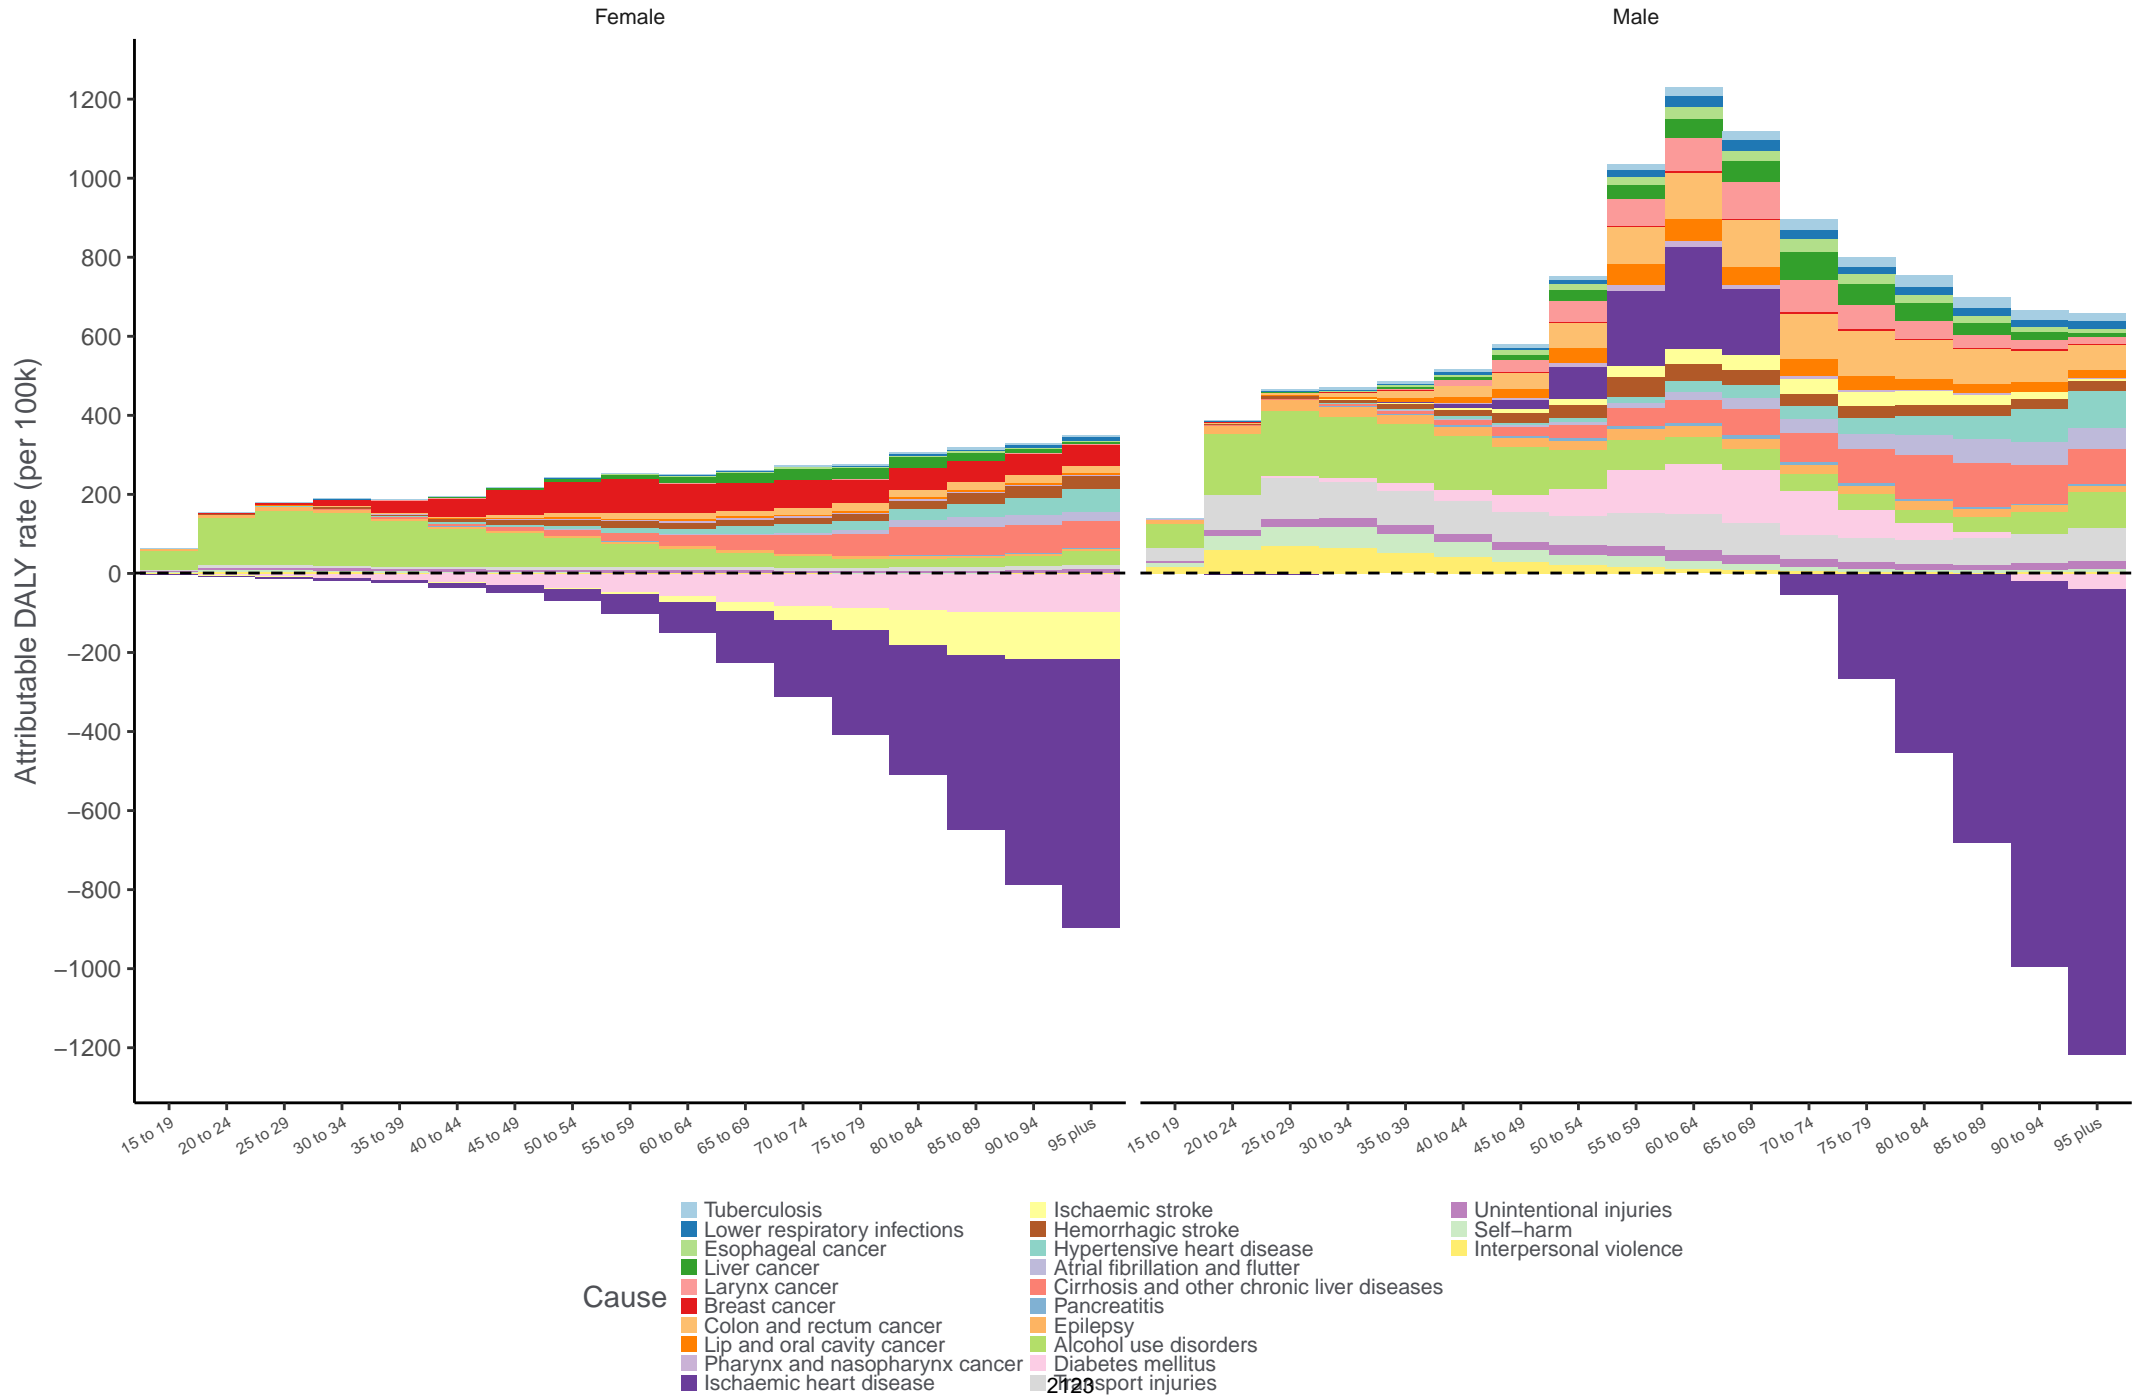

# Attributable DALY rate disaggregated by cause, Libya, by sex and age in 2016.

Female

Male

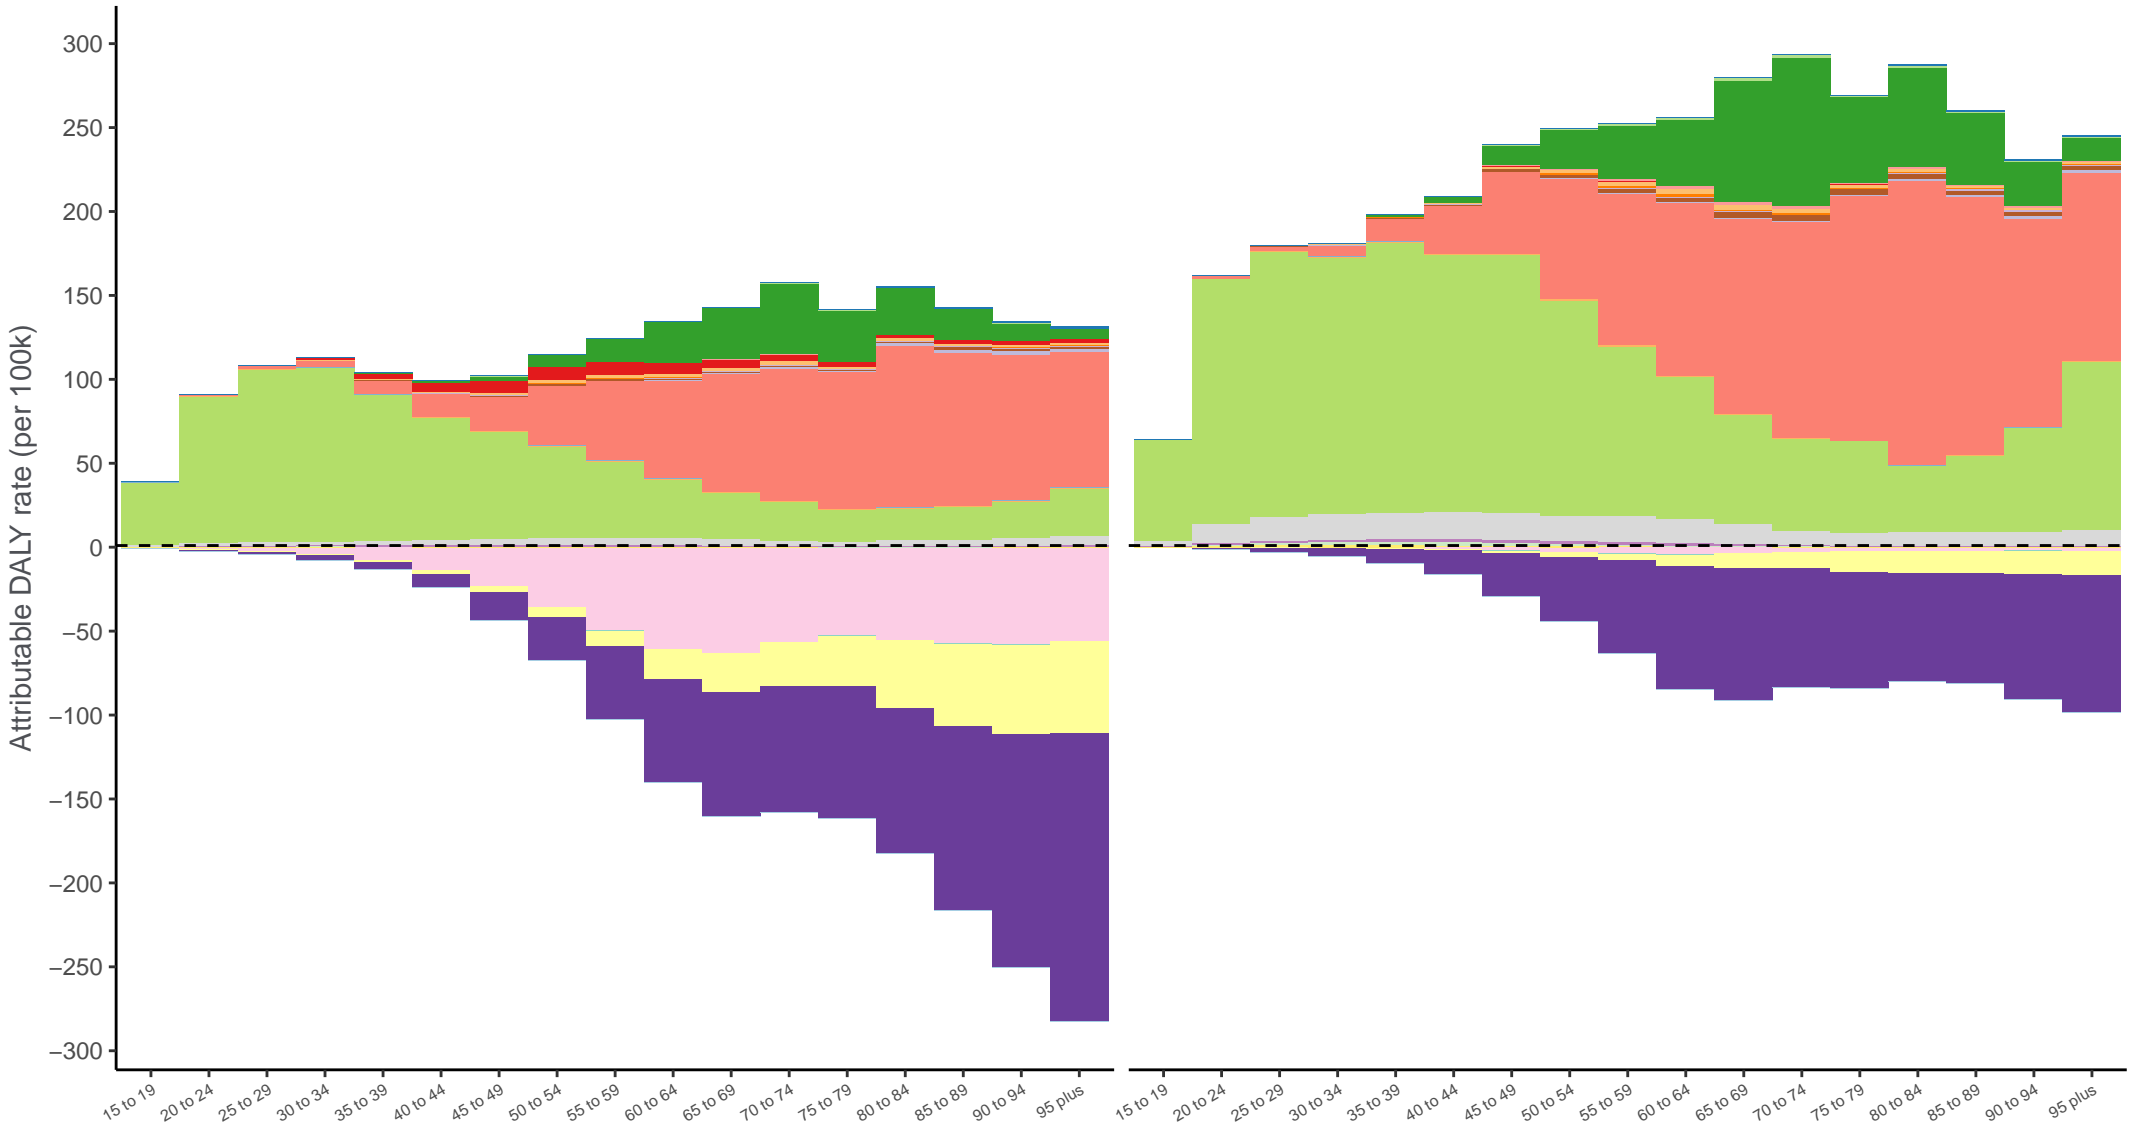

- |                                                                                                                                                                                                                                                                                                                                                                                                                                                                                                                                                                                                                                                                                                                                                         |                                                                                                                                                                                                                                                                                                                                                                                                                                                                                                                                                                                                                                                                                                                                                                     |                                                                                                                                                                                                                                                  |
|---------------------------------------------------------------------------------------------------------------------------------------------------------------------------------------------------------------------------------------------------------------------------------------------------------------------------------------------------------------------------------------------------------------------------------------------------------------------------------------------------------------------------------------------------------------------------------------------------------------------------------------------------------------------------------------------------------------------------------------------------------|---------------------------------------------------------------------------------------------------------------------------------------------------------------------------------------------------------------------------------------------------------------------------------------------------------------------------------------------------------------------------------------------------------------------------------------------------------------------------------------------------------------------------------------------------------------------------------------------------------------------------------------------------------------------------------------------------------------------------------------------------------------------|--------------------------------------------------------------------------------------------------------------------------------------------------------------------------------------------------------------------------------------------------|
| <ul style="list-style-type: none"> <li><span style="color: #4682B4;">■</span> Tuberculosis</li> <li><span style="color: #000080;">■</span> Lower respiratory infections</li> <li><span style="color: #90EE90;">■</span> Esophageal cancer</li> <li><span style="color: #008000;">■</span> Liver cancer</li> <li><span style="color: #FF6347;">■</span> Larynx cancer</li> <li><span style="color: #DC143C;">■</span> Breast cancer</li> <li><span style="color: #FFA500;">■</span> Colon and rectum cancer</li> <li><span style="color: #FF69B4;">■</span> Lip and oral cavity cancer</li> <li><span style="color: #800080;">■</span> Pharynx and nasopharynx cancer</li> <li><span style="color: #483D8B;">■</span> Ischaemic heart disease</li> </ul> | <ul style="list-style-type: none"> <li><span style="color: #FFFF00;">■</span> Ischaemic stroke</li> <li><span style="color: #8B4513;">■</span> Hemorrhagic stroke</li> <li><span style="color: #66CDAA;">■</span> Hypertensive heart disease</li> <li><span style="color: #B0C4DE;">■</span> Atrial fibrillation and flutter</li> <li><span style="color: #FF6347;">■</span> Cirrhosis and other chronic liver diseases</li> <li><span style="color: #4682B4;">■</span> Pancreatitis</li> <li><span style="color: #FFA500;">■</span> Epilepsy</li> <li><span style="color: #90EE90;">■</span> Alcohol use disorders</li> <li><span style="color: #FFB6C1;">■</span> Diabetes mellitus</li> <li><span style="color: #A9A9A9;">■</span> Transport injuries</li> </ul> | <ul style="list-style-type: none"> <li><span style="color: #800080;">■</span> Unintentional injuries</li> <li><span style="color: #90EE90;">■</span> Self-harm</li> <li><span style="color: #FFFF00;">■</span> Interpersonal violence</li> </ul> |
|---------------------------------------------------------------------------------------------------------------------------------------------------------------------------------------------------------------------------------------------------------------------------------------------------------------------------------------------------------------------------------------------------------------------------------------------------------------------------------------------------------------------------------------------------------------------------------------------------------------------------------------------------------------------------------------------------------------------------------------------------------|---------------------------------------------------------------------------------------------------------------------------------------------------------------------------------------------------------------------------------------------------------------------------------------------------------------------------------------------------------------------------------------------------------------------------------------------------------------------------------------------------------------------------------------------------------------------------------------------------------------------------------------------------------------------------------------------------------------------------------------------------------------------|--------------------------------------------------------------------------------------------------------------------------------------------------------------------------------------------------------------------------------------------------|



Attributable DALY rate disaggregated by cause, Palestine, by sex and age in 2016.

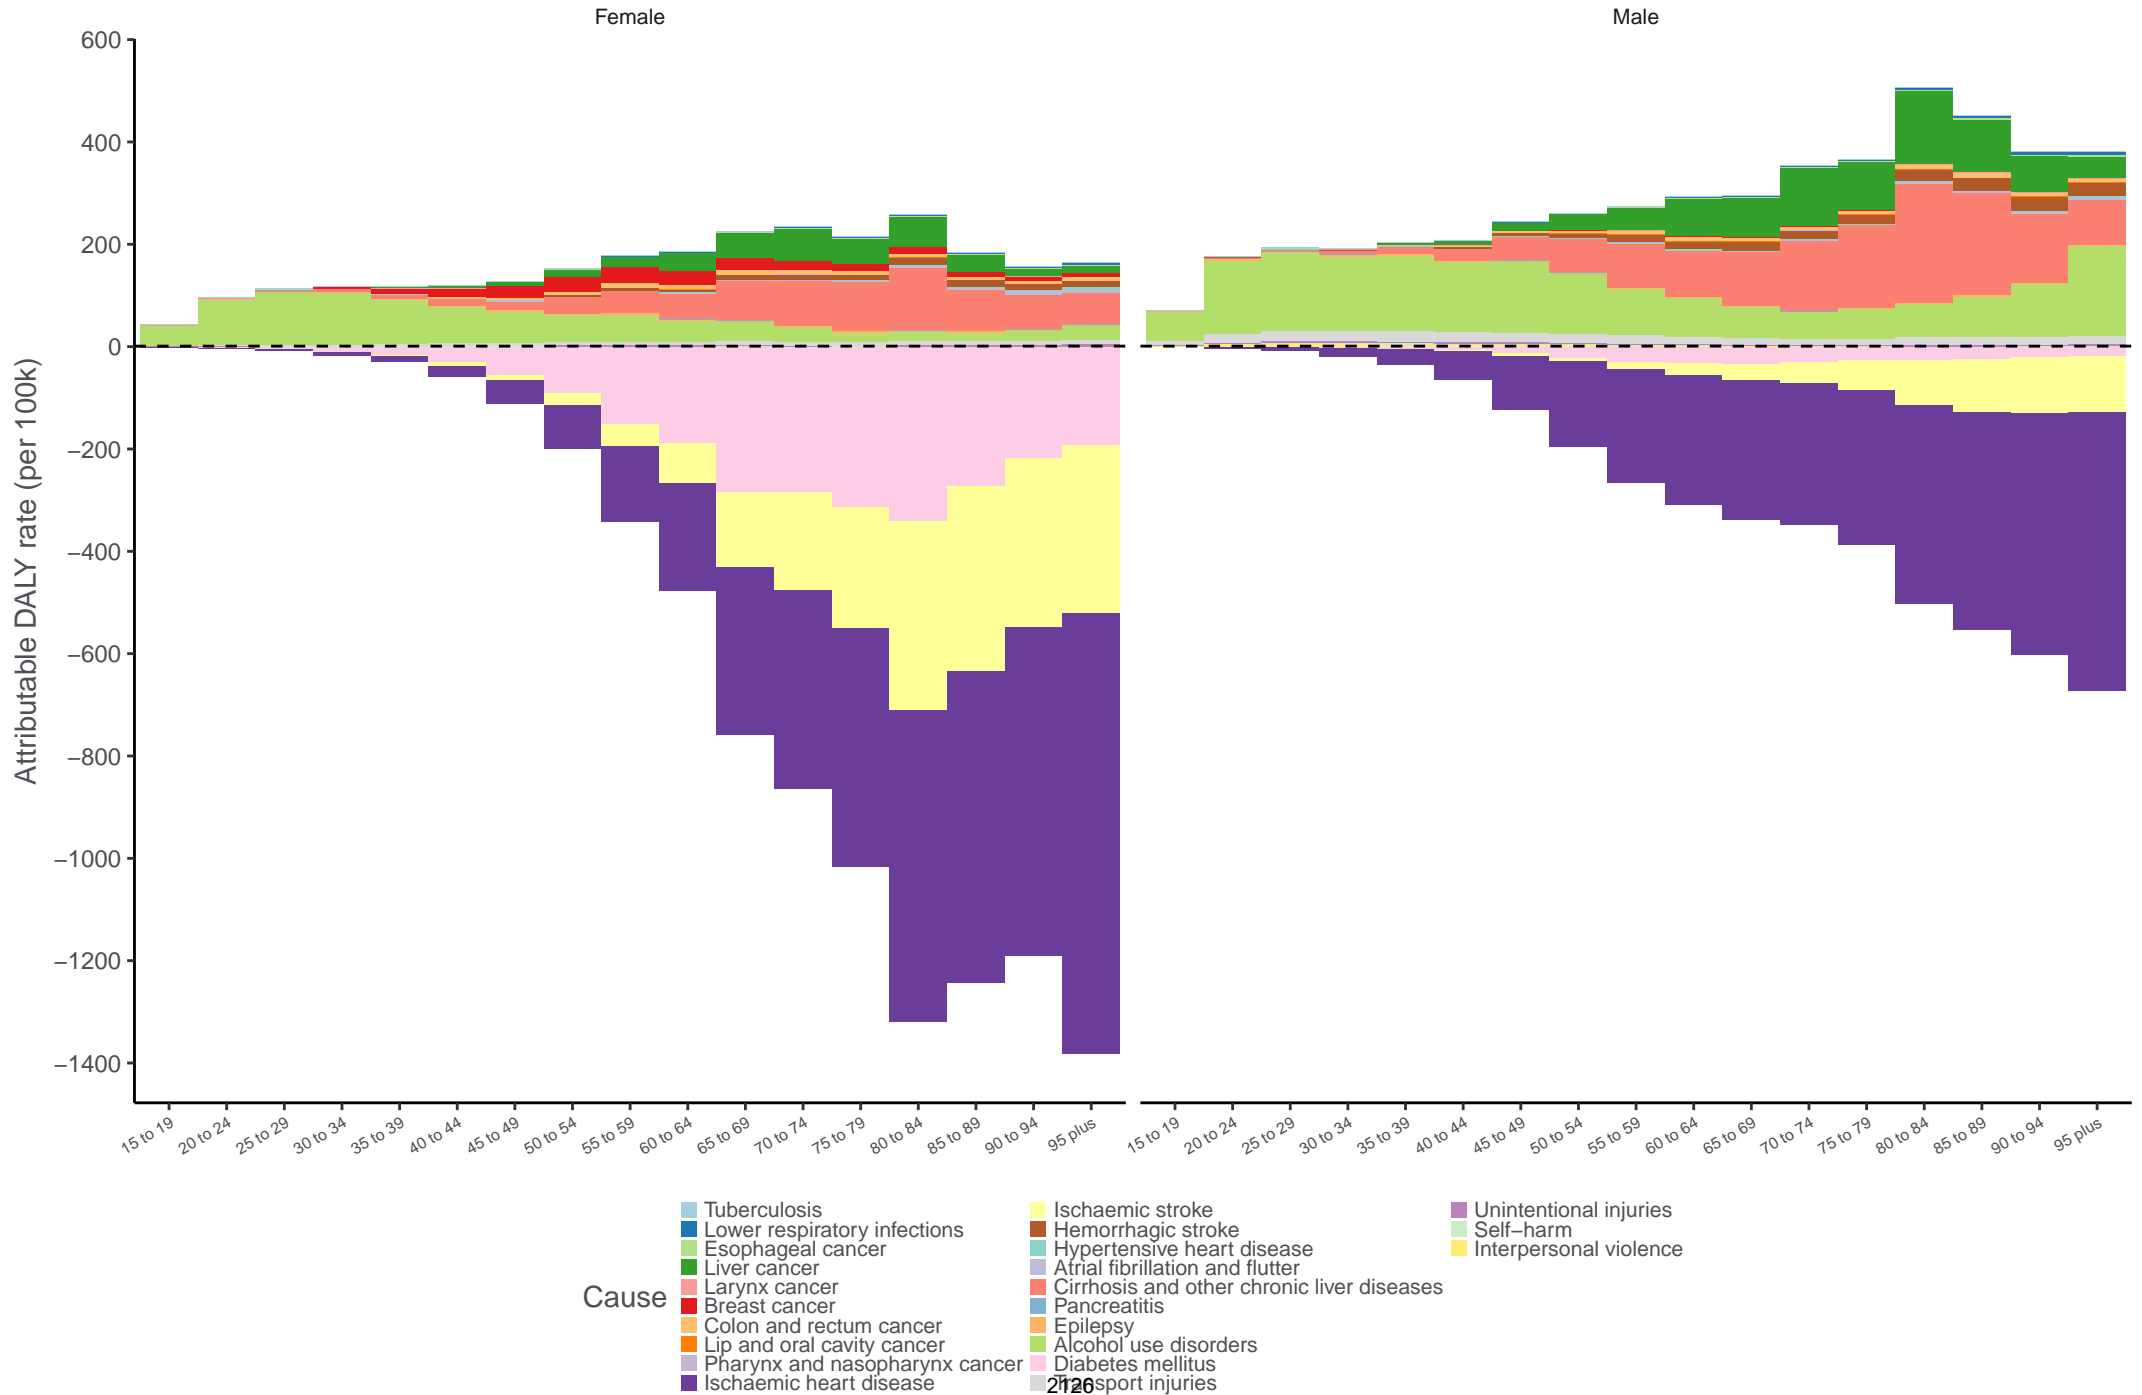

# Attributable DALY rate disaggregated by cause, Oman, by sex and age in 2016.

Female

Male

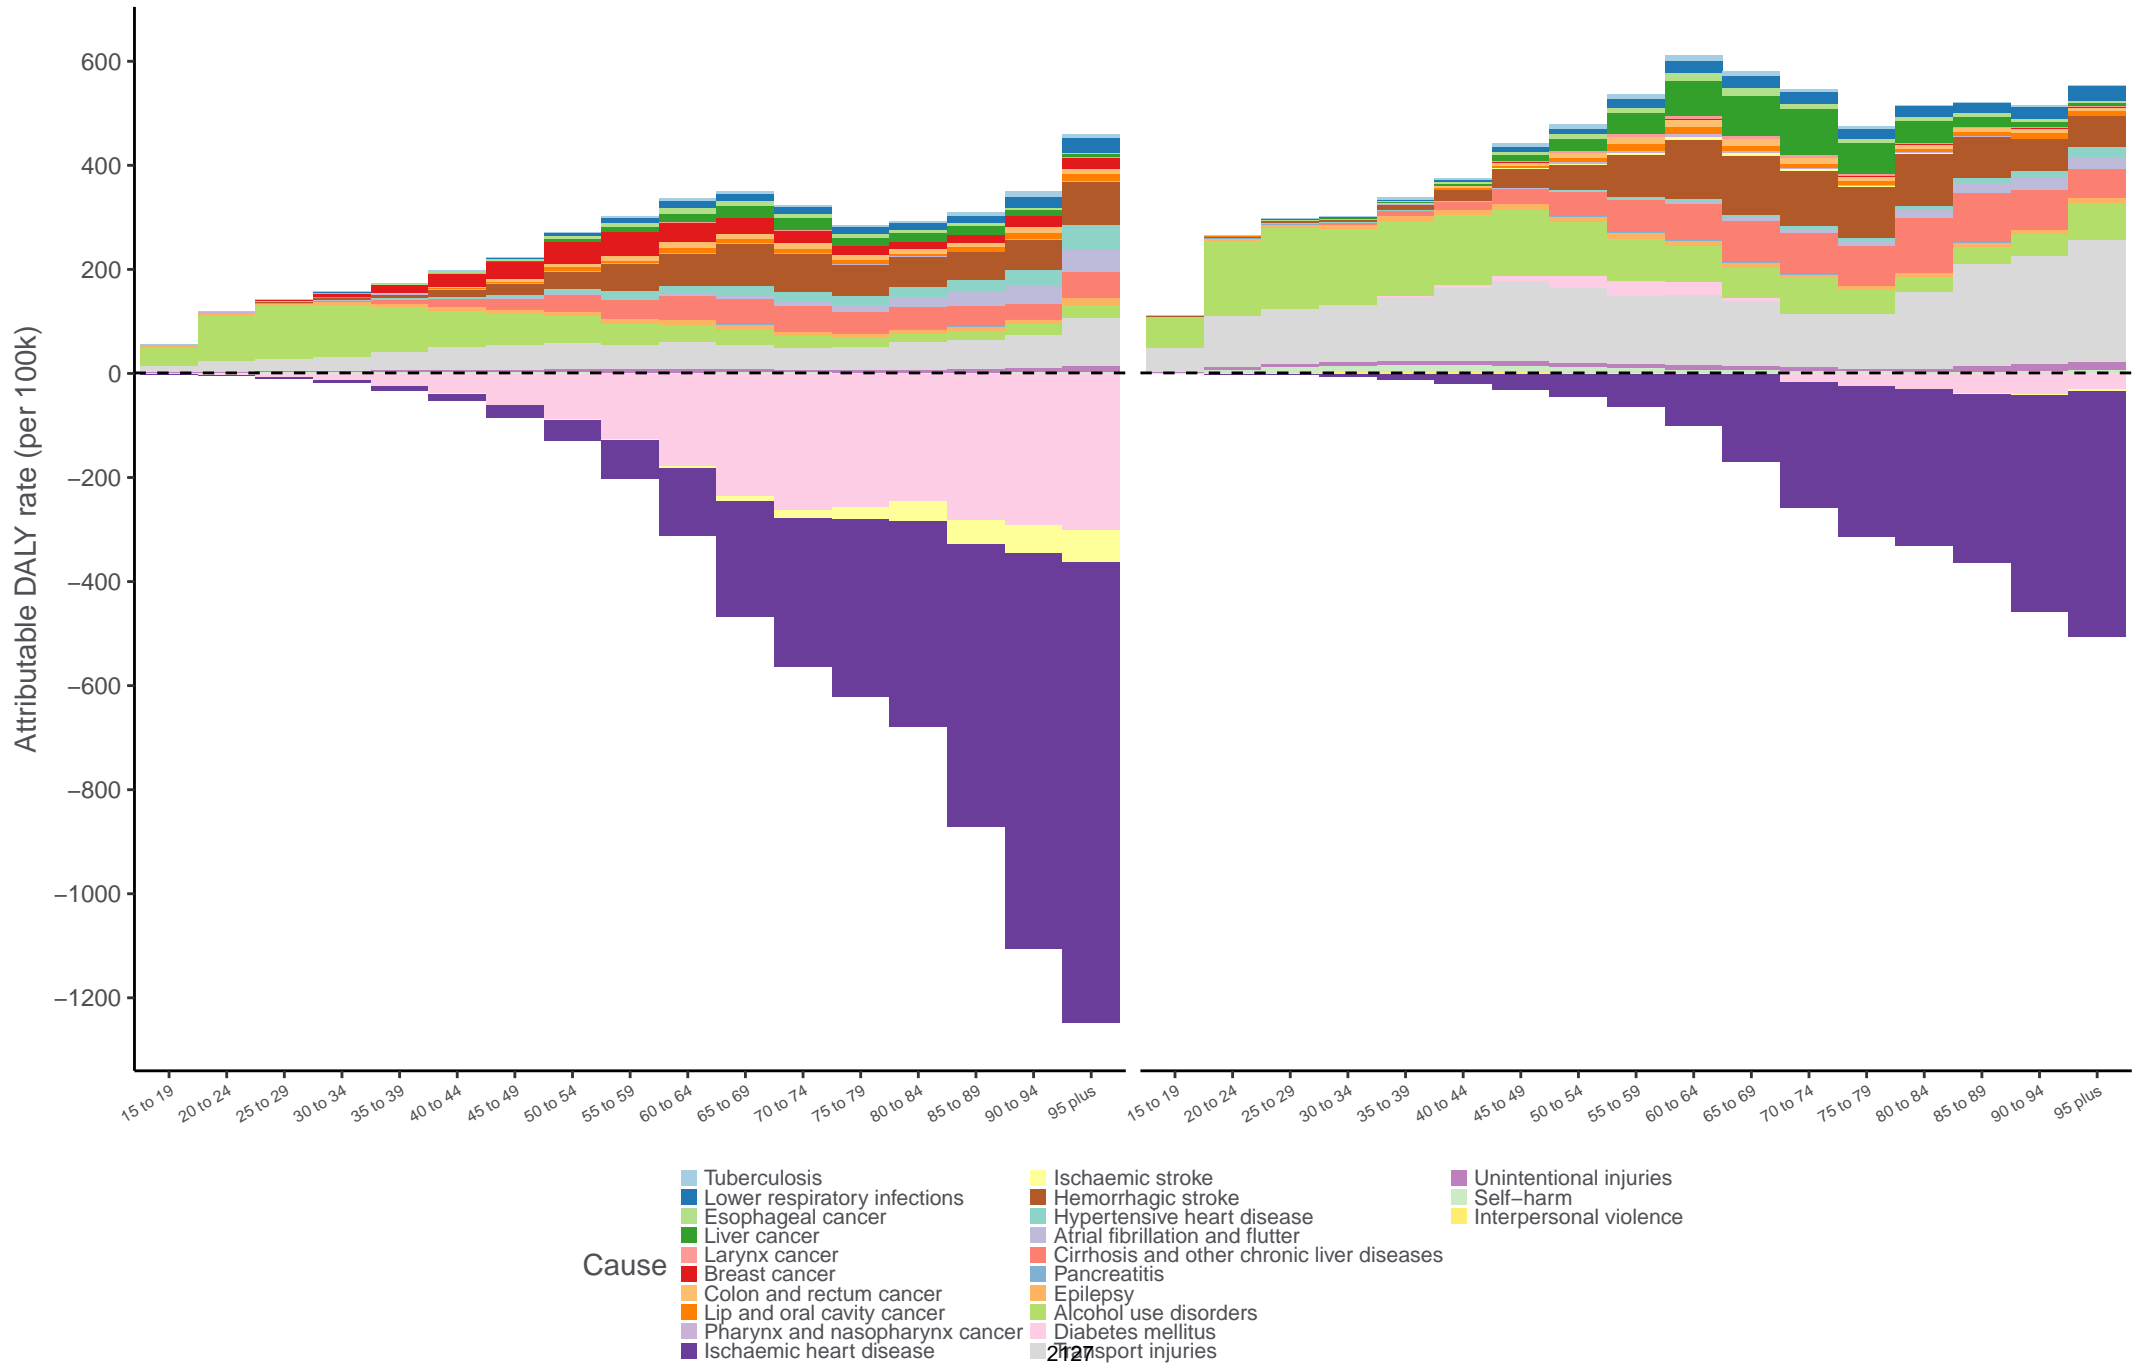



# Attributable DALY rate disaggregated by cause, Qatar, by sex and age in 2016.

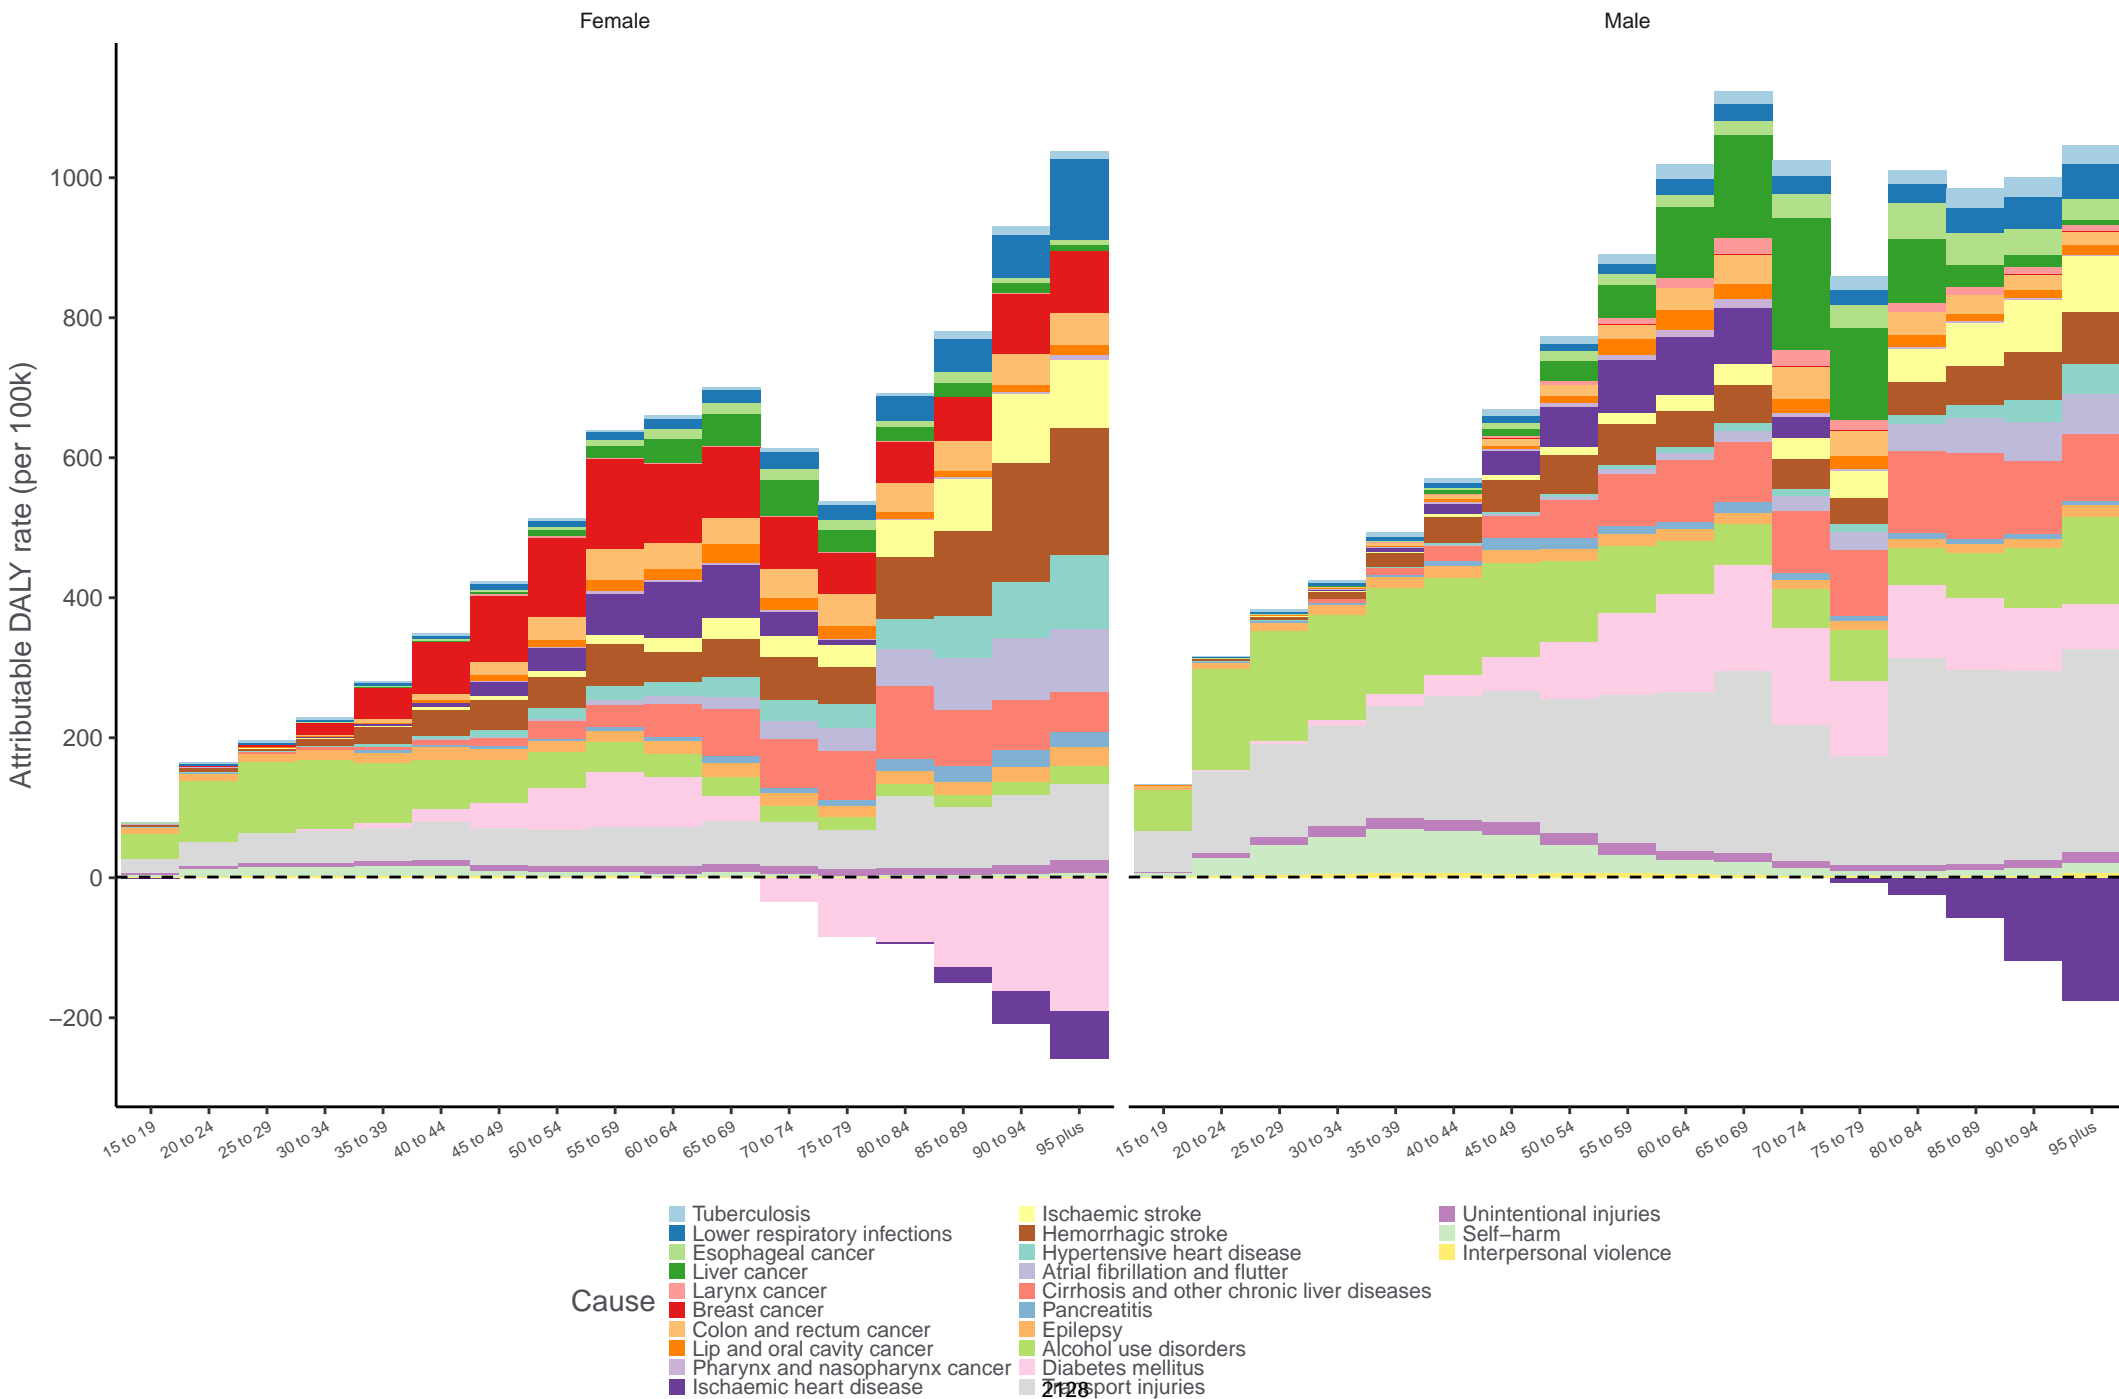

# Attributable DALY rate disaggregated by cause, Sudan, by sex and age in 2016.

Female

Male

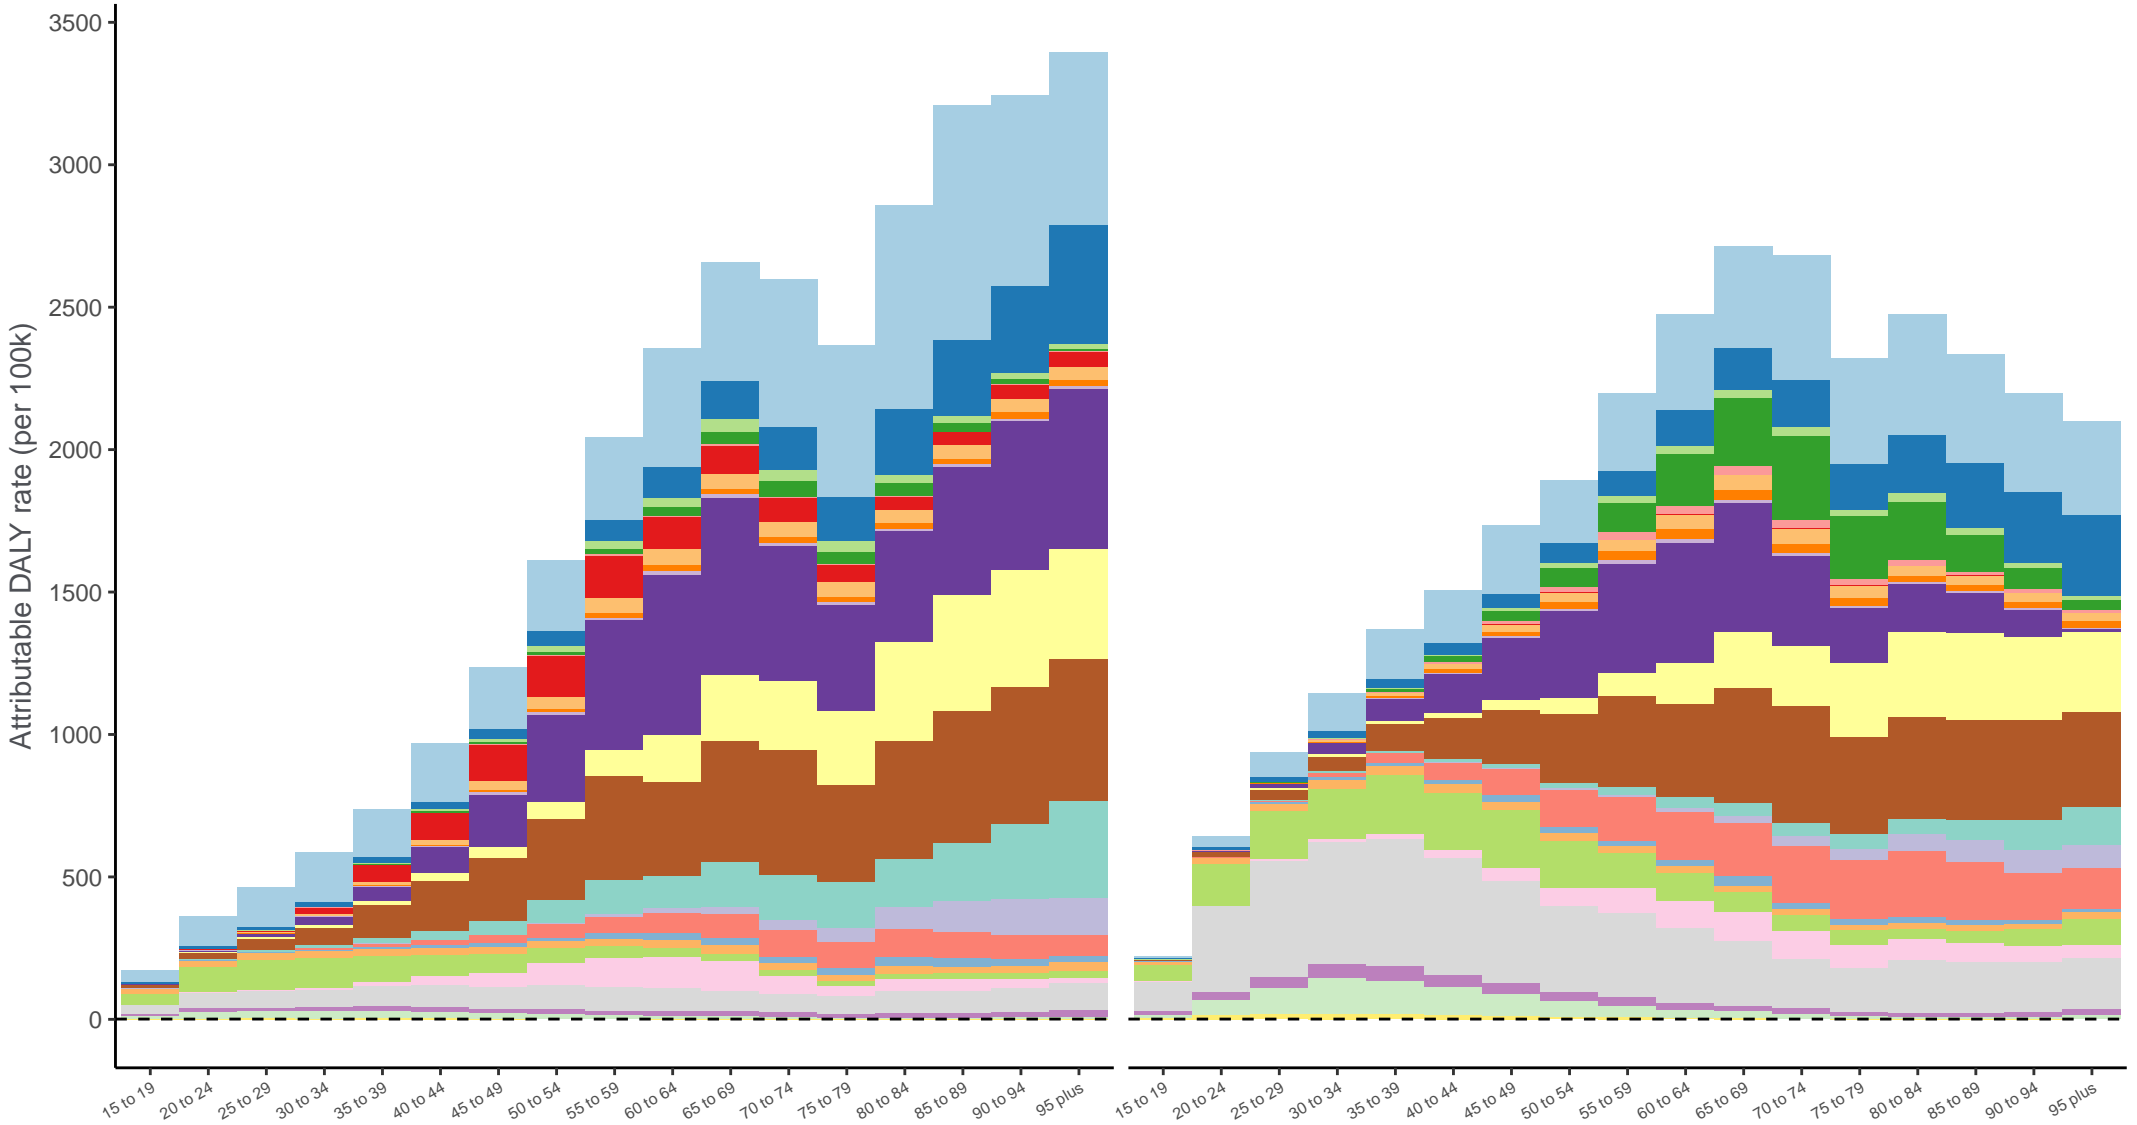

- Cause**
- Tuberculosis
  - Ischaemic stroke
  - Unintentional injuries
  - Lower respiratory infections
  - Hemorrhagic stroke
  - Self-harm
  - Esophageal cancer
  - Hypertensive heart disease
  - Liver cancer
  - Atrial fibrillation and flutter
  - Larynx cancer
  - Cirrhosis and other chronic liver diseases
  - Breast cancer
  - Pancreatitis
  - Colon and rectum cancer
  - Epilepsy
  - Lip and oral cavity cancer
  - Alcohol use disorders
  - Pharynx and nasopharynx cancer
  - Diabetes mellitus
  - Ischaemic heart disease
  - Transport injuries
  - Interpersonal violence

Attributable DALY rate disaggregated by cause, Saudi Arabia, by sex and age in 2016.

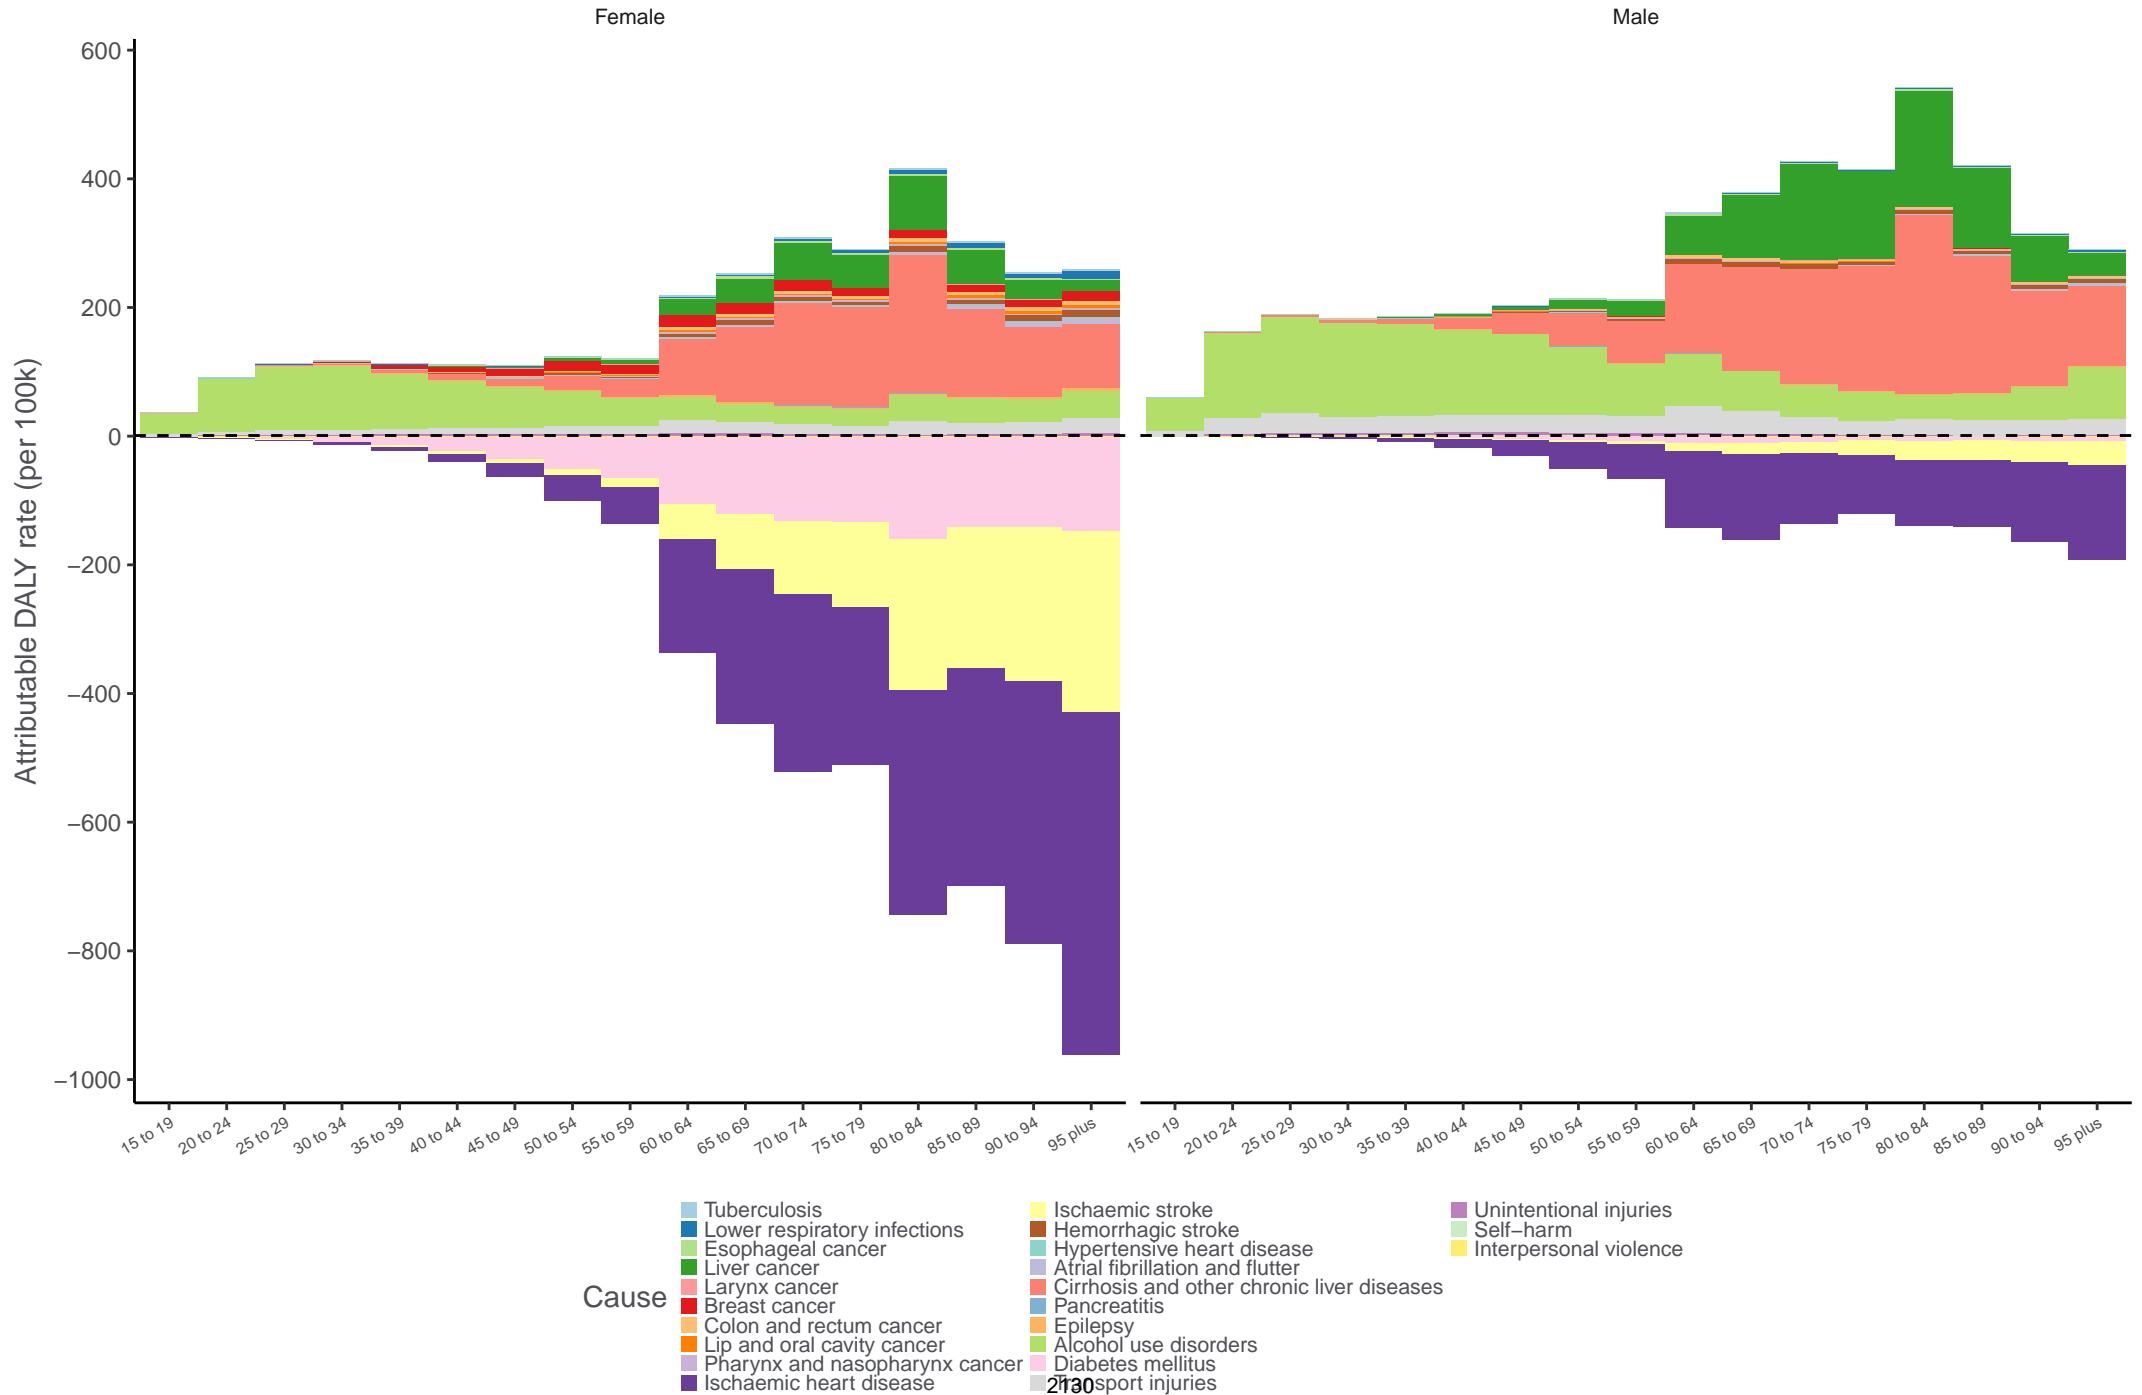

Attributable DALY rate disaggregated by cause, Syria, by sex and age in 2016.

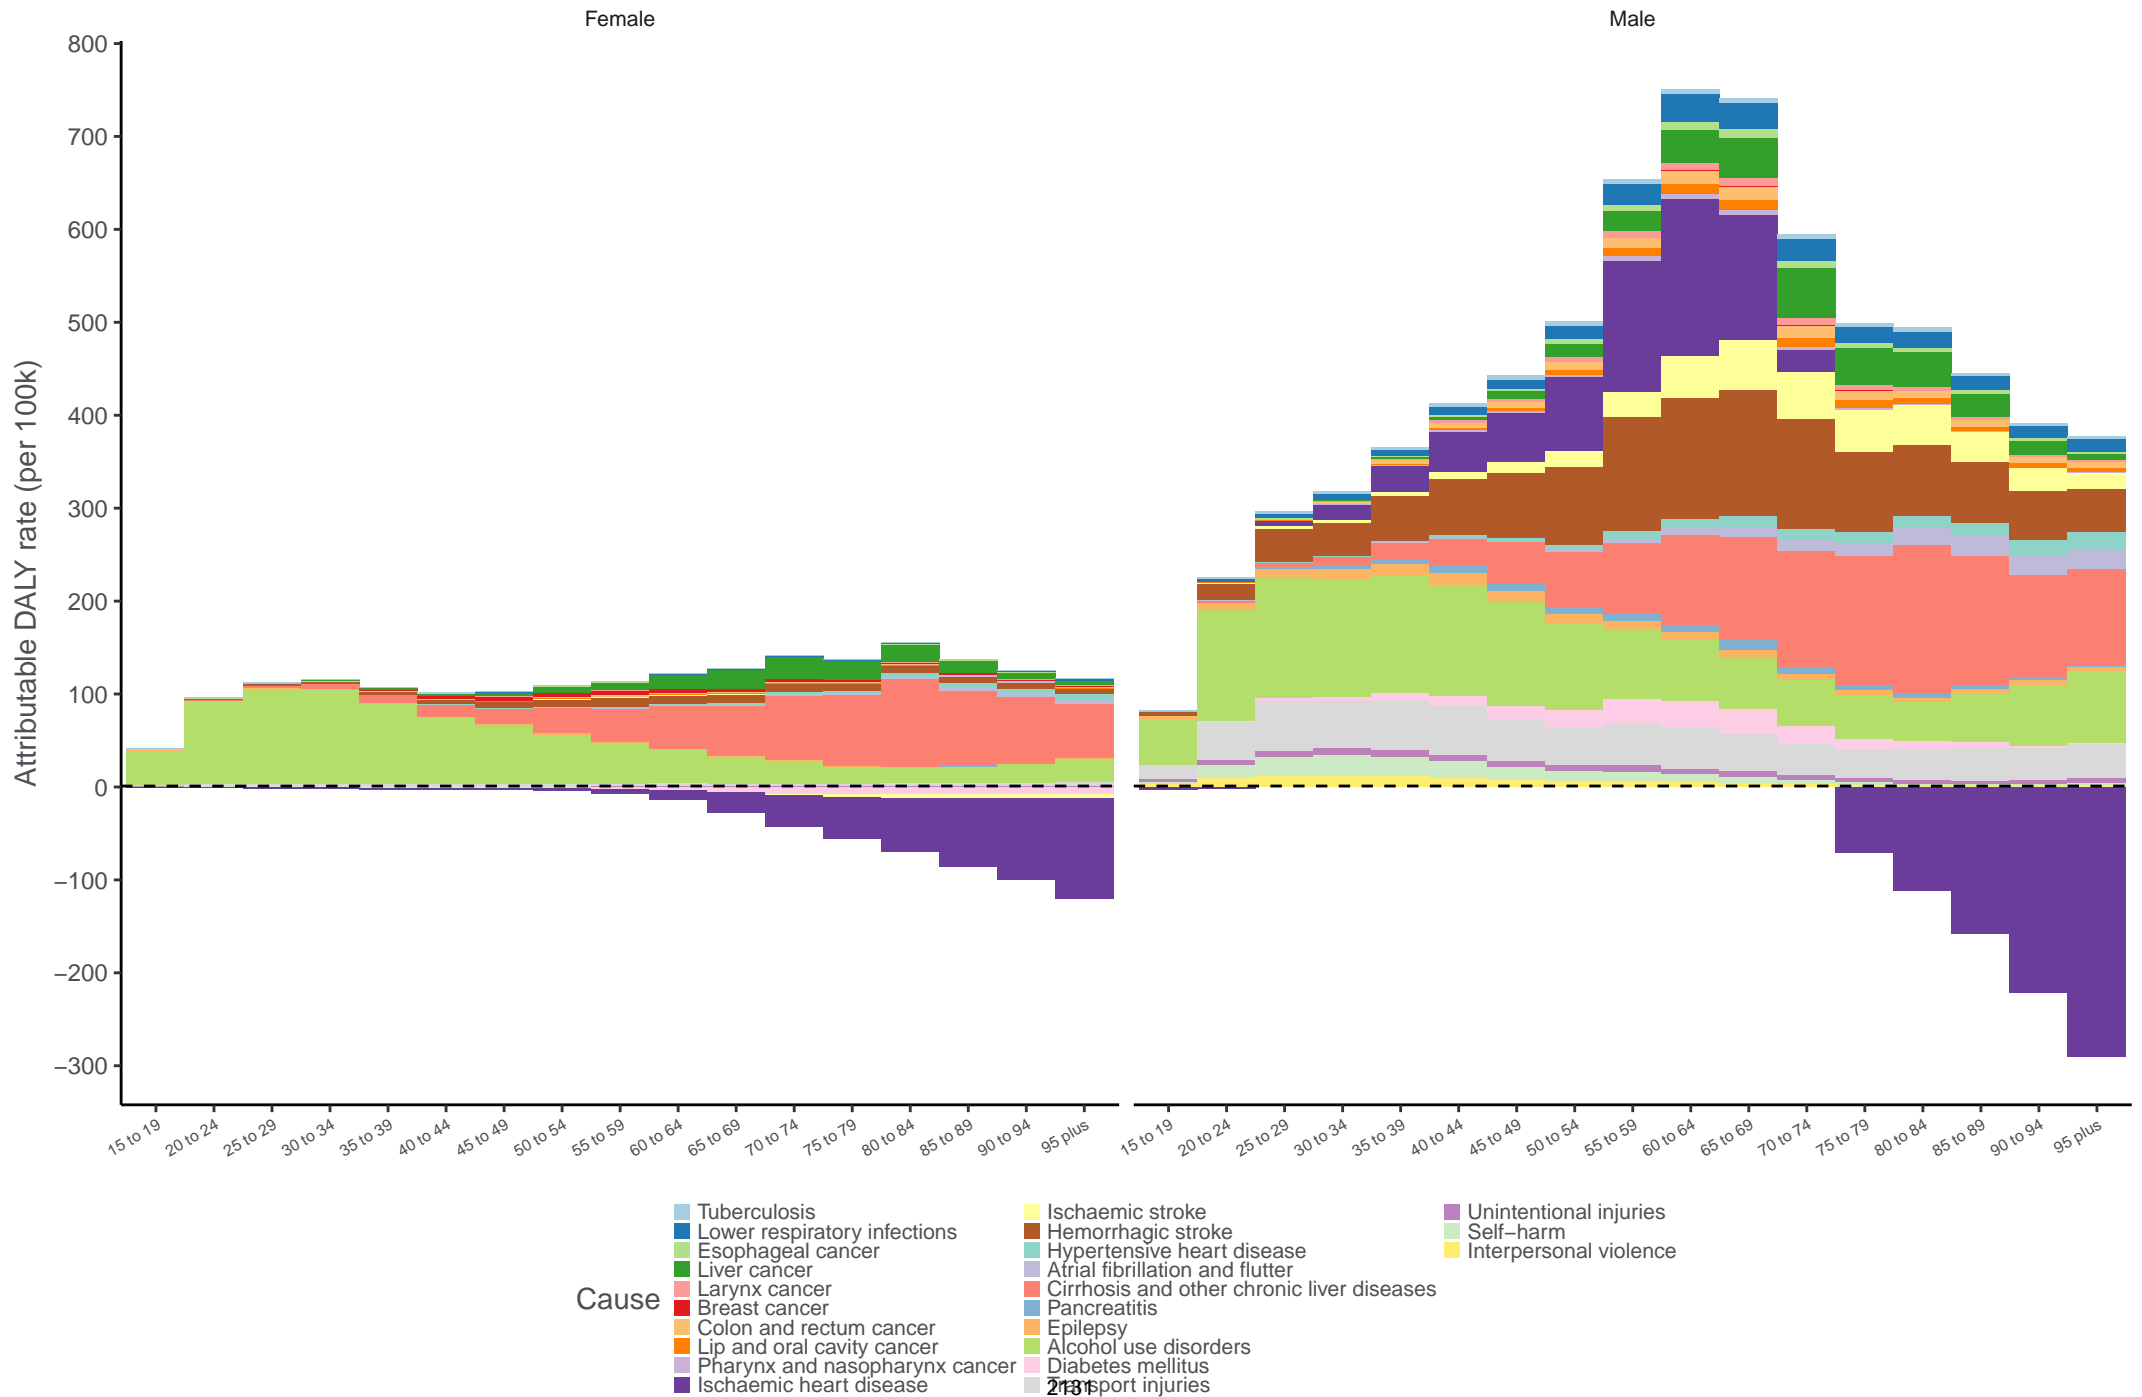

# Attributable DALY rate disaggregated by cause, Tunisia, by sex and age in 2016.

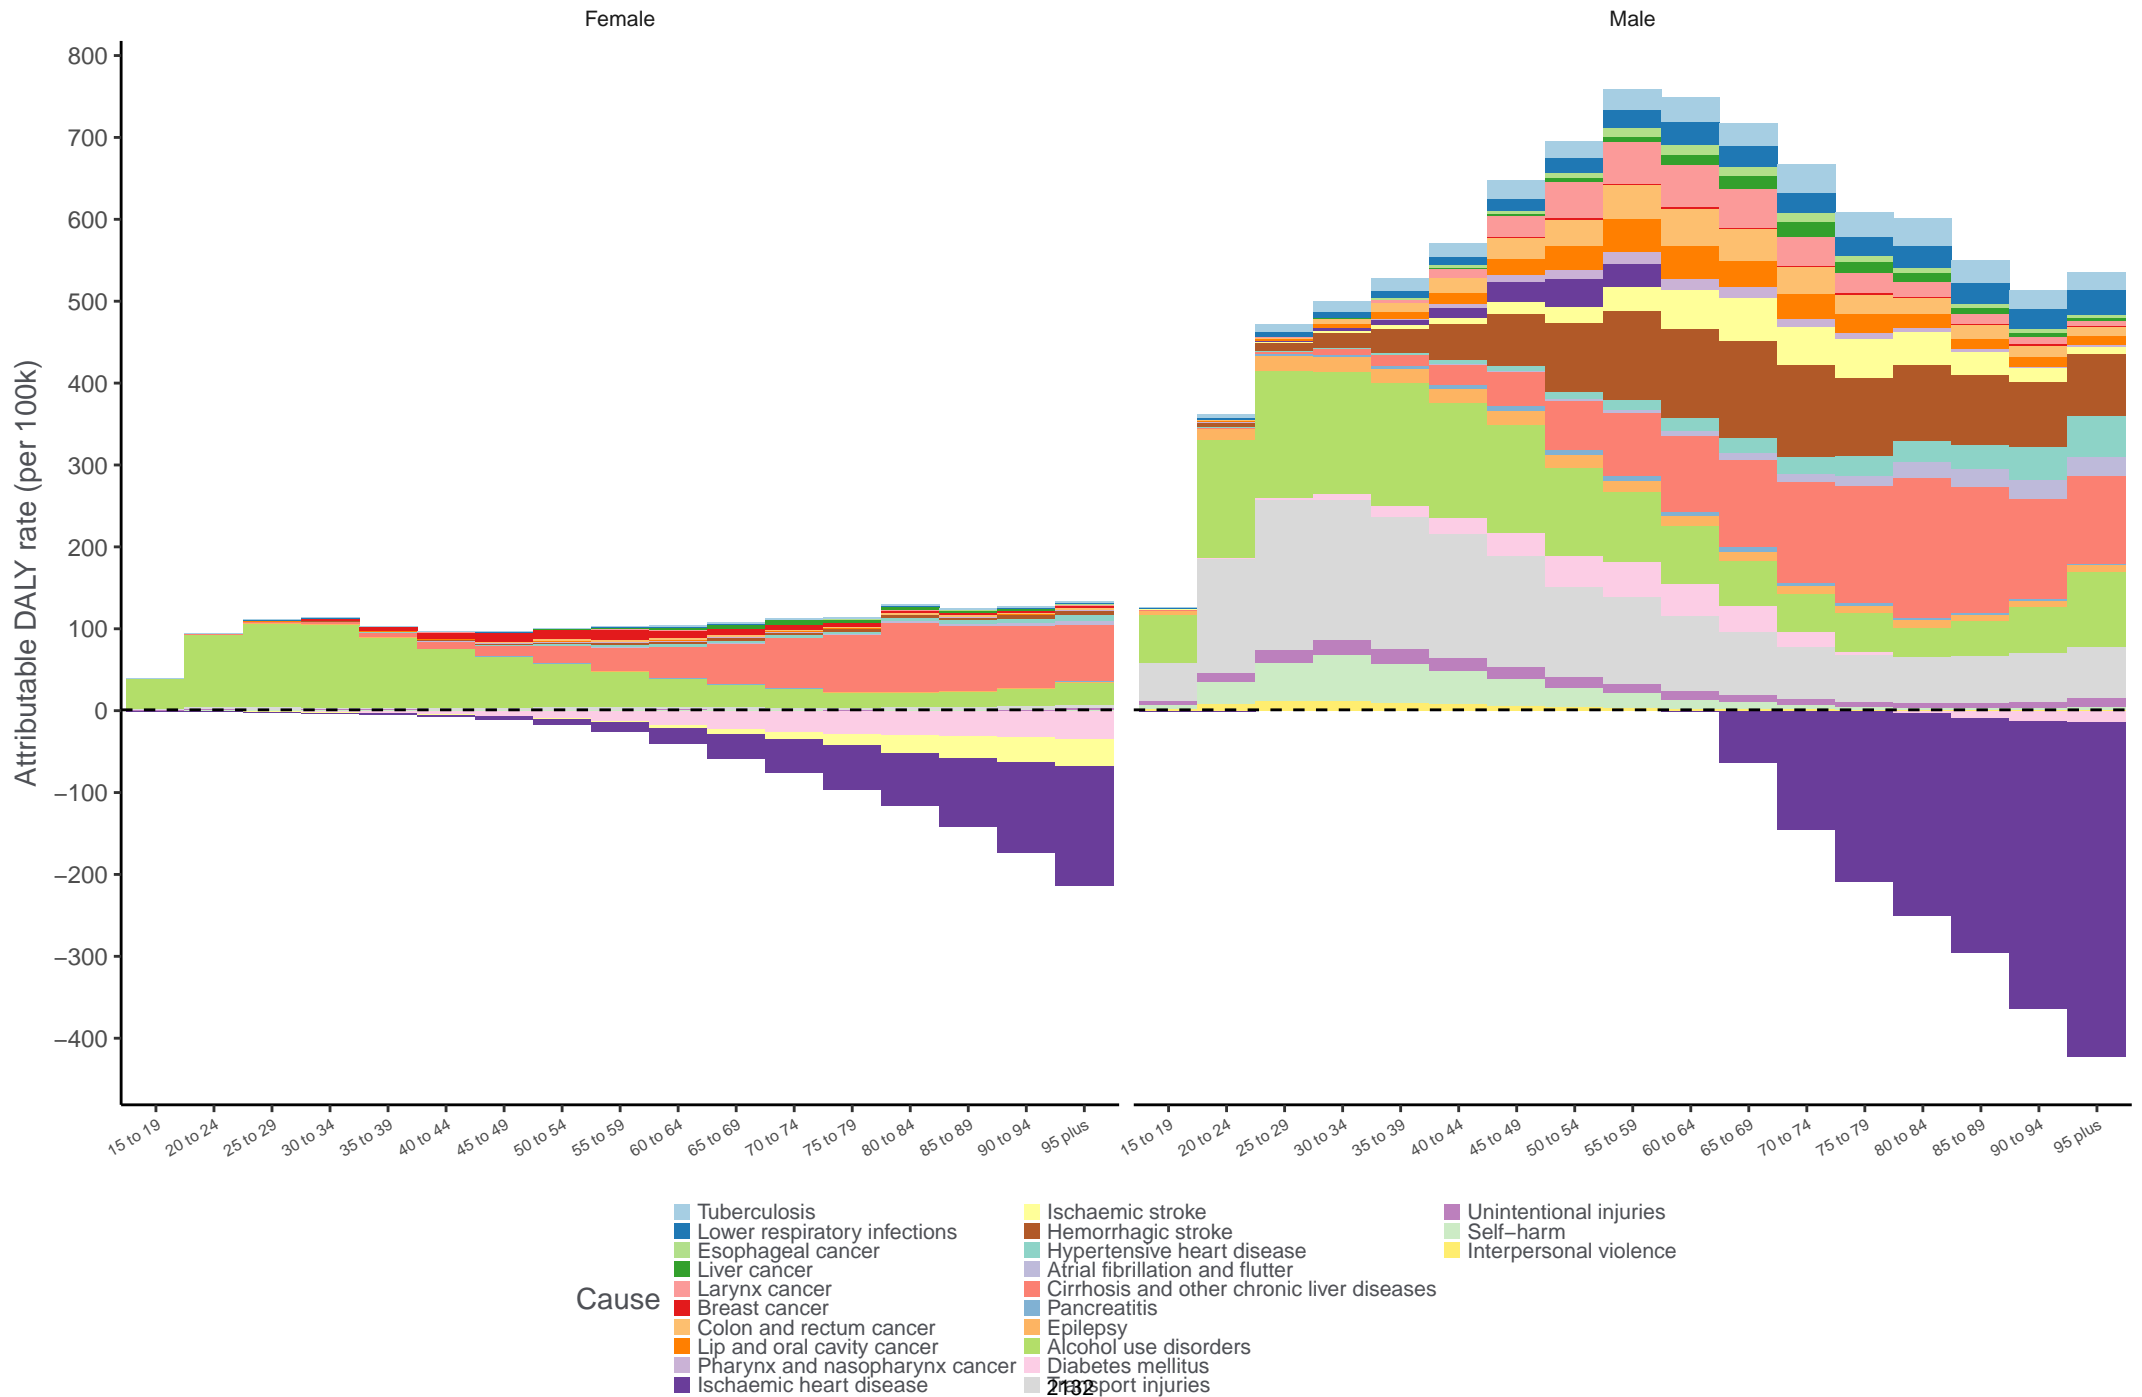

# Attributable DALY rate disaggregated by cause, Turkey, by sex and age in 2016.

Female

Male

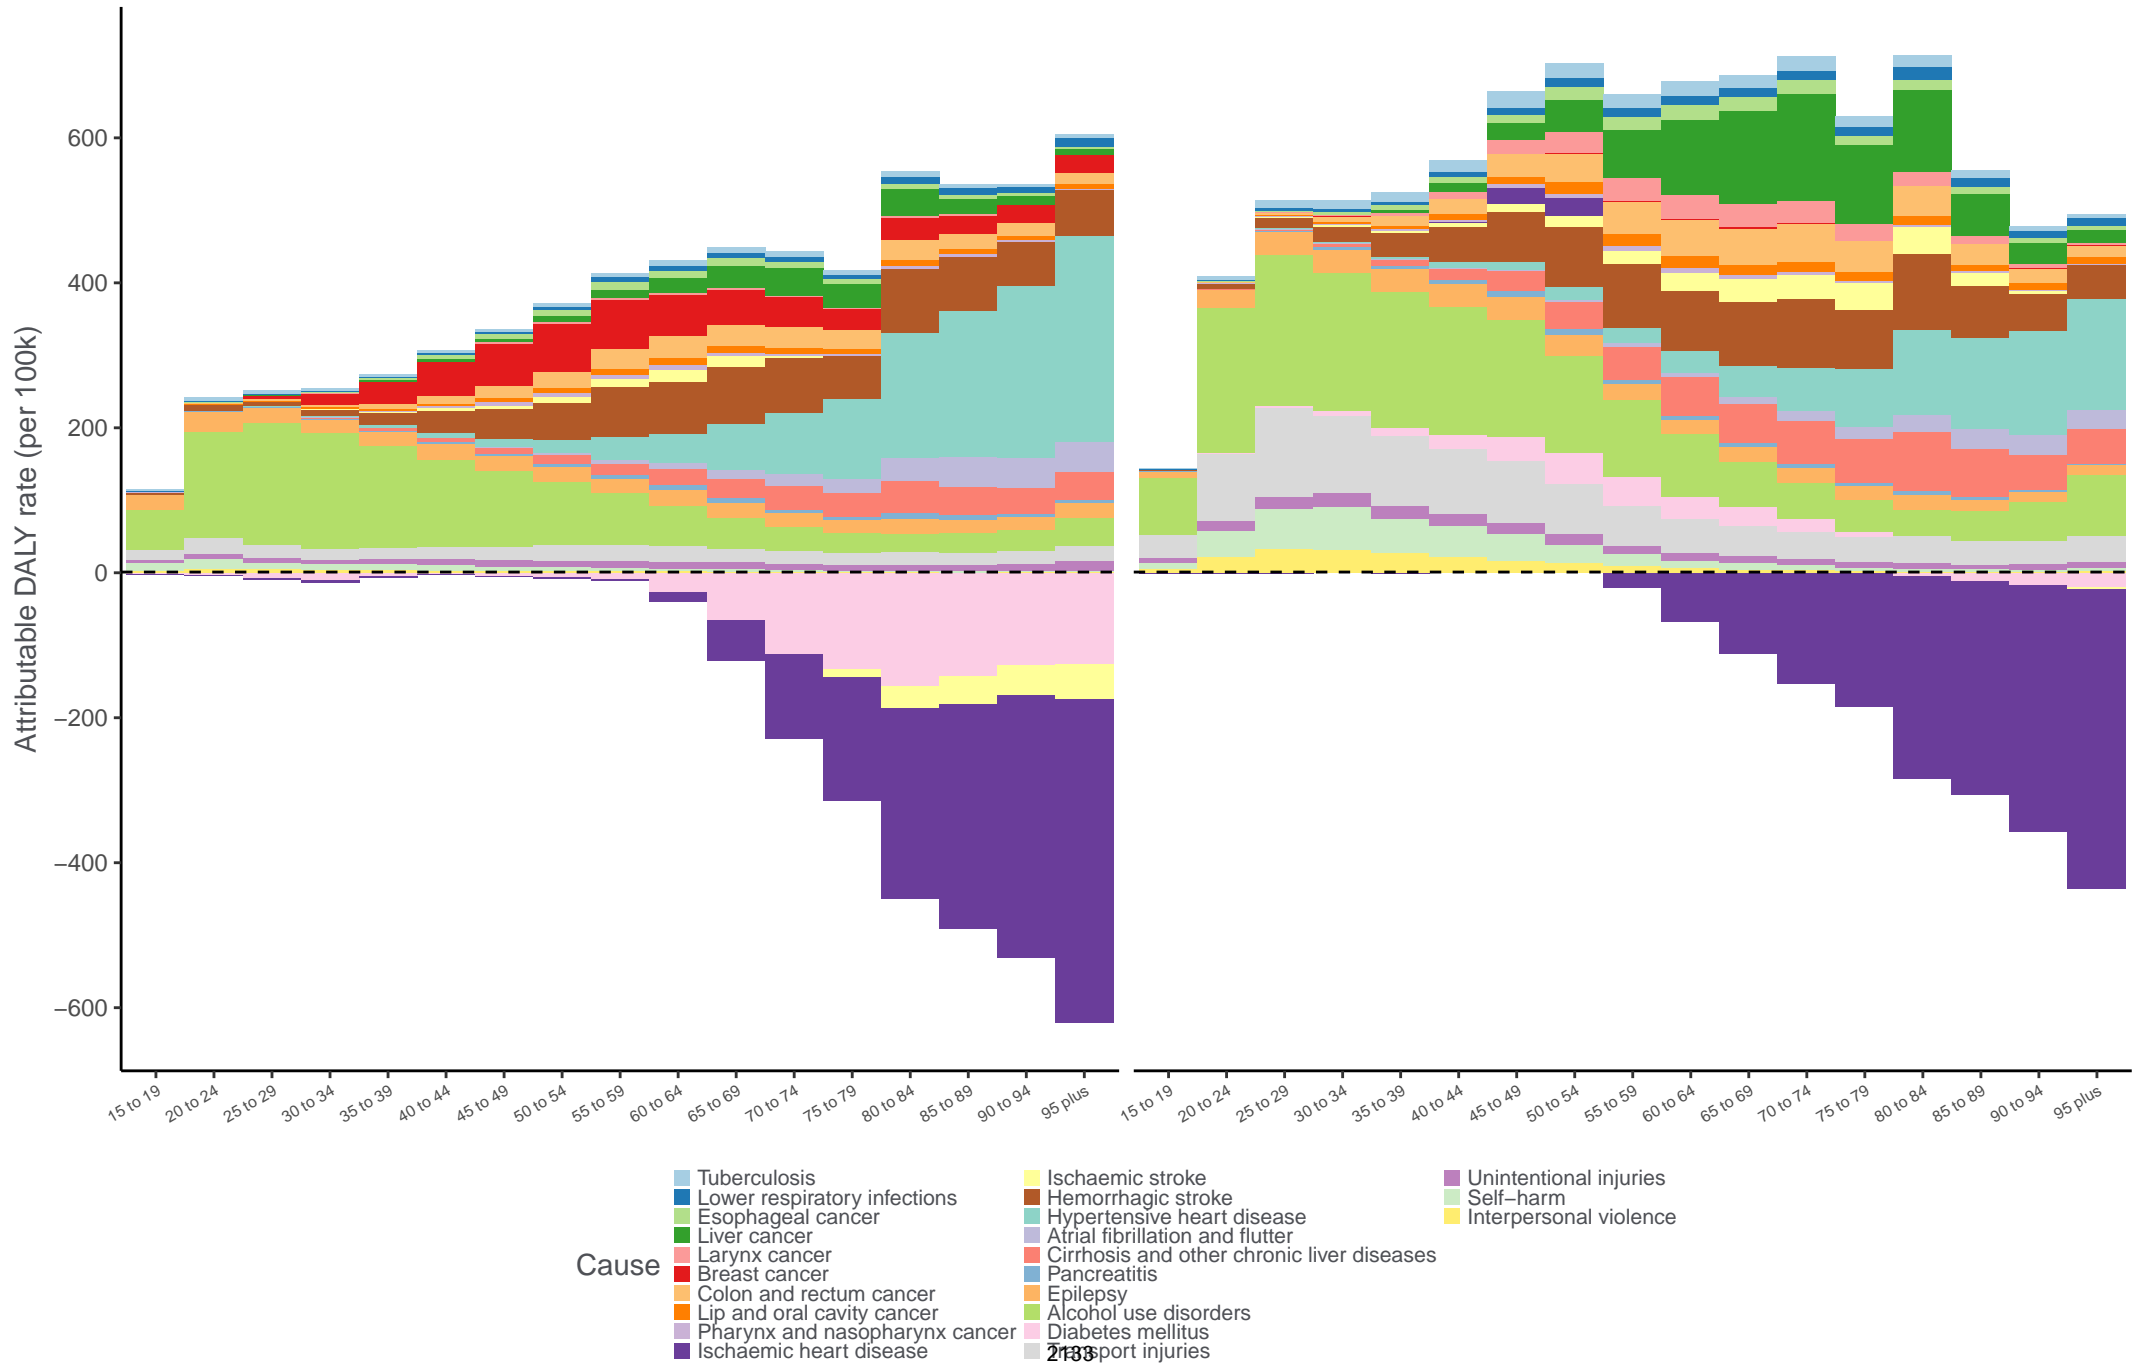

Attributable DALY rate disaggregated by cause, United Arab Emirates, by sex and age in 2016.

Female

Male

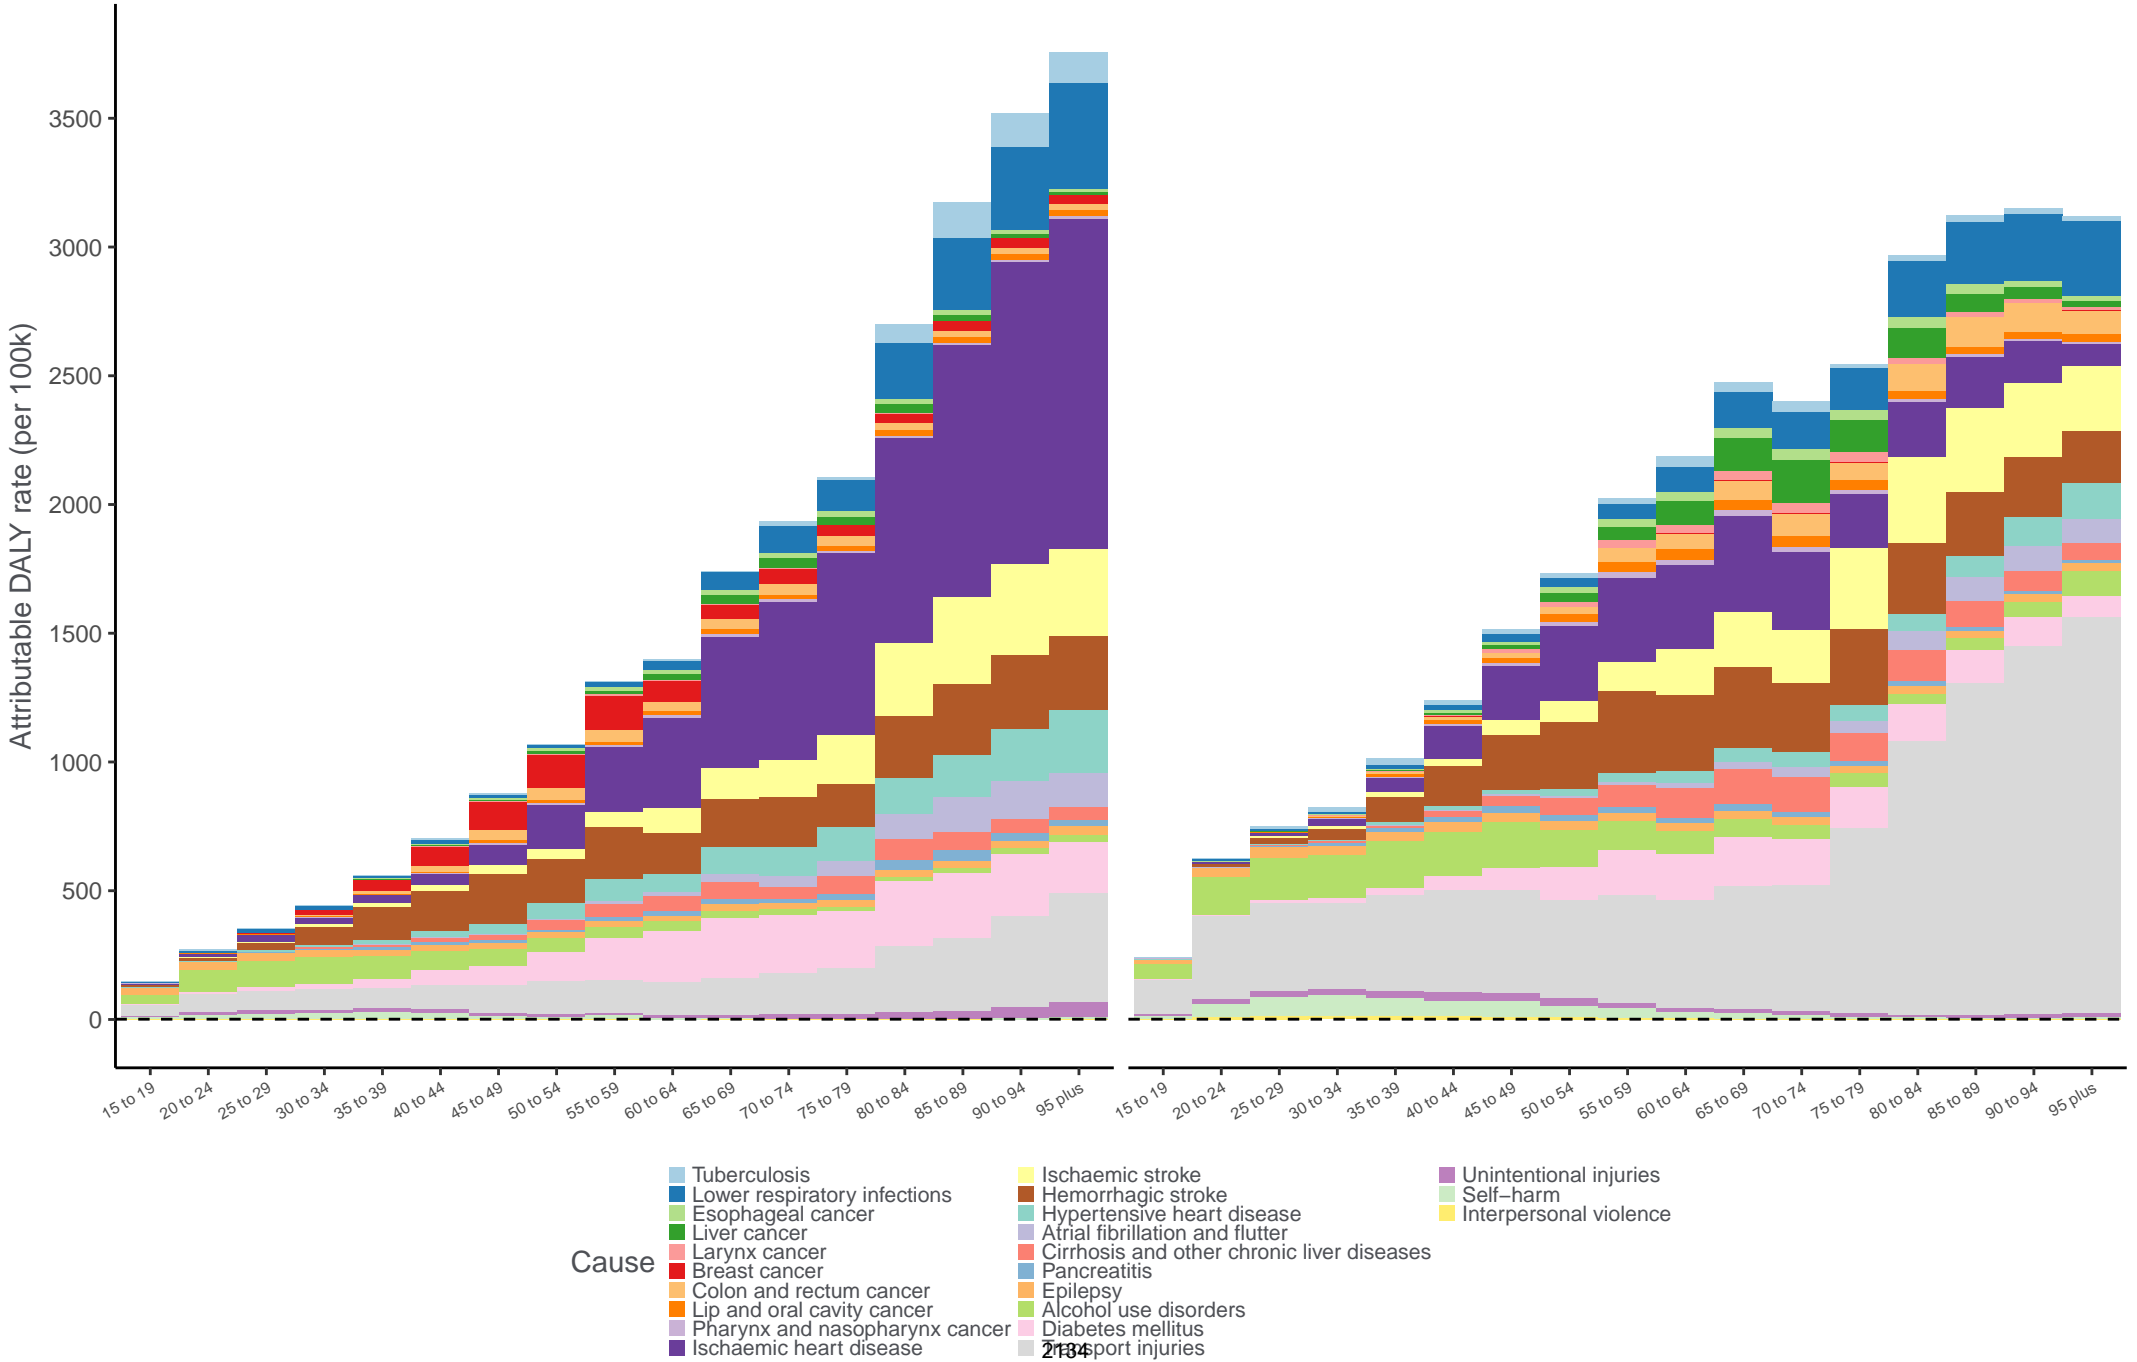

Cause

- Tuberculosis
  - Lower respiratory infections
  - Esophageal cancer
  - Liver cancer
  - Larynx cancer
  - Breast cancer
  - Colon and rectum cancer
  - Lip and oral cavity cancer
  - Pharynx and nasopharynx cancer
  - Ischaemic heart disease
- Ischaemic stroke
  - Hemorrhagic stroke
  - Hypertensive heart disease
  - Atrial fibrillation and flutter
  - Cirrhosis and other chronic liver diseases
  - Pancreatitis
  - Epilepsy
  - Alcohol use disorders
  - Diabetes mellitus
  - Transport injuries
- Unintentional injuries
  - Self-harm
  - Interpersonal violence

Attributable DALY rate disaggregated by cause, Yemen, by sex and age in 2016.

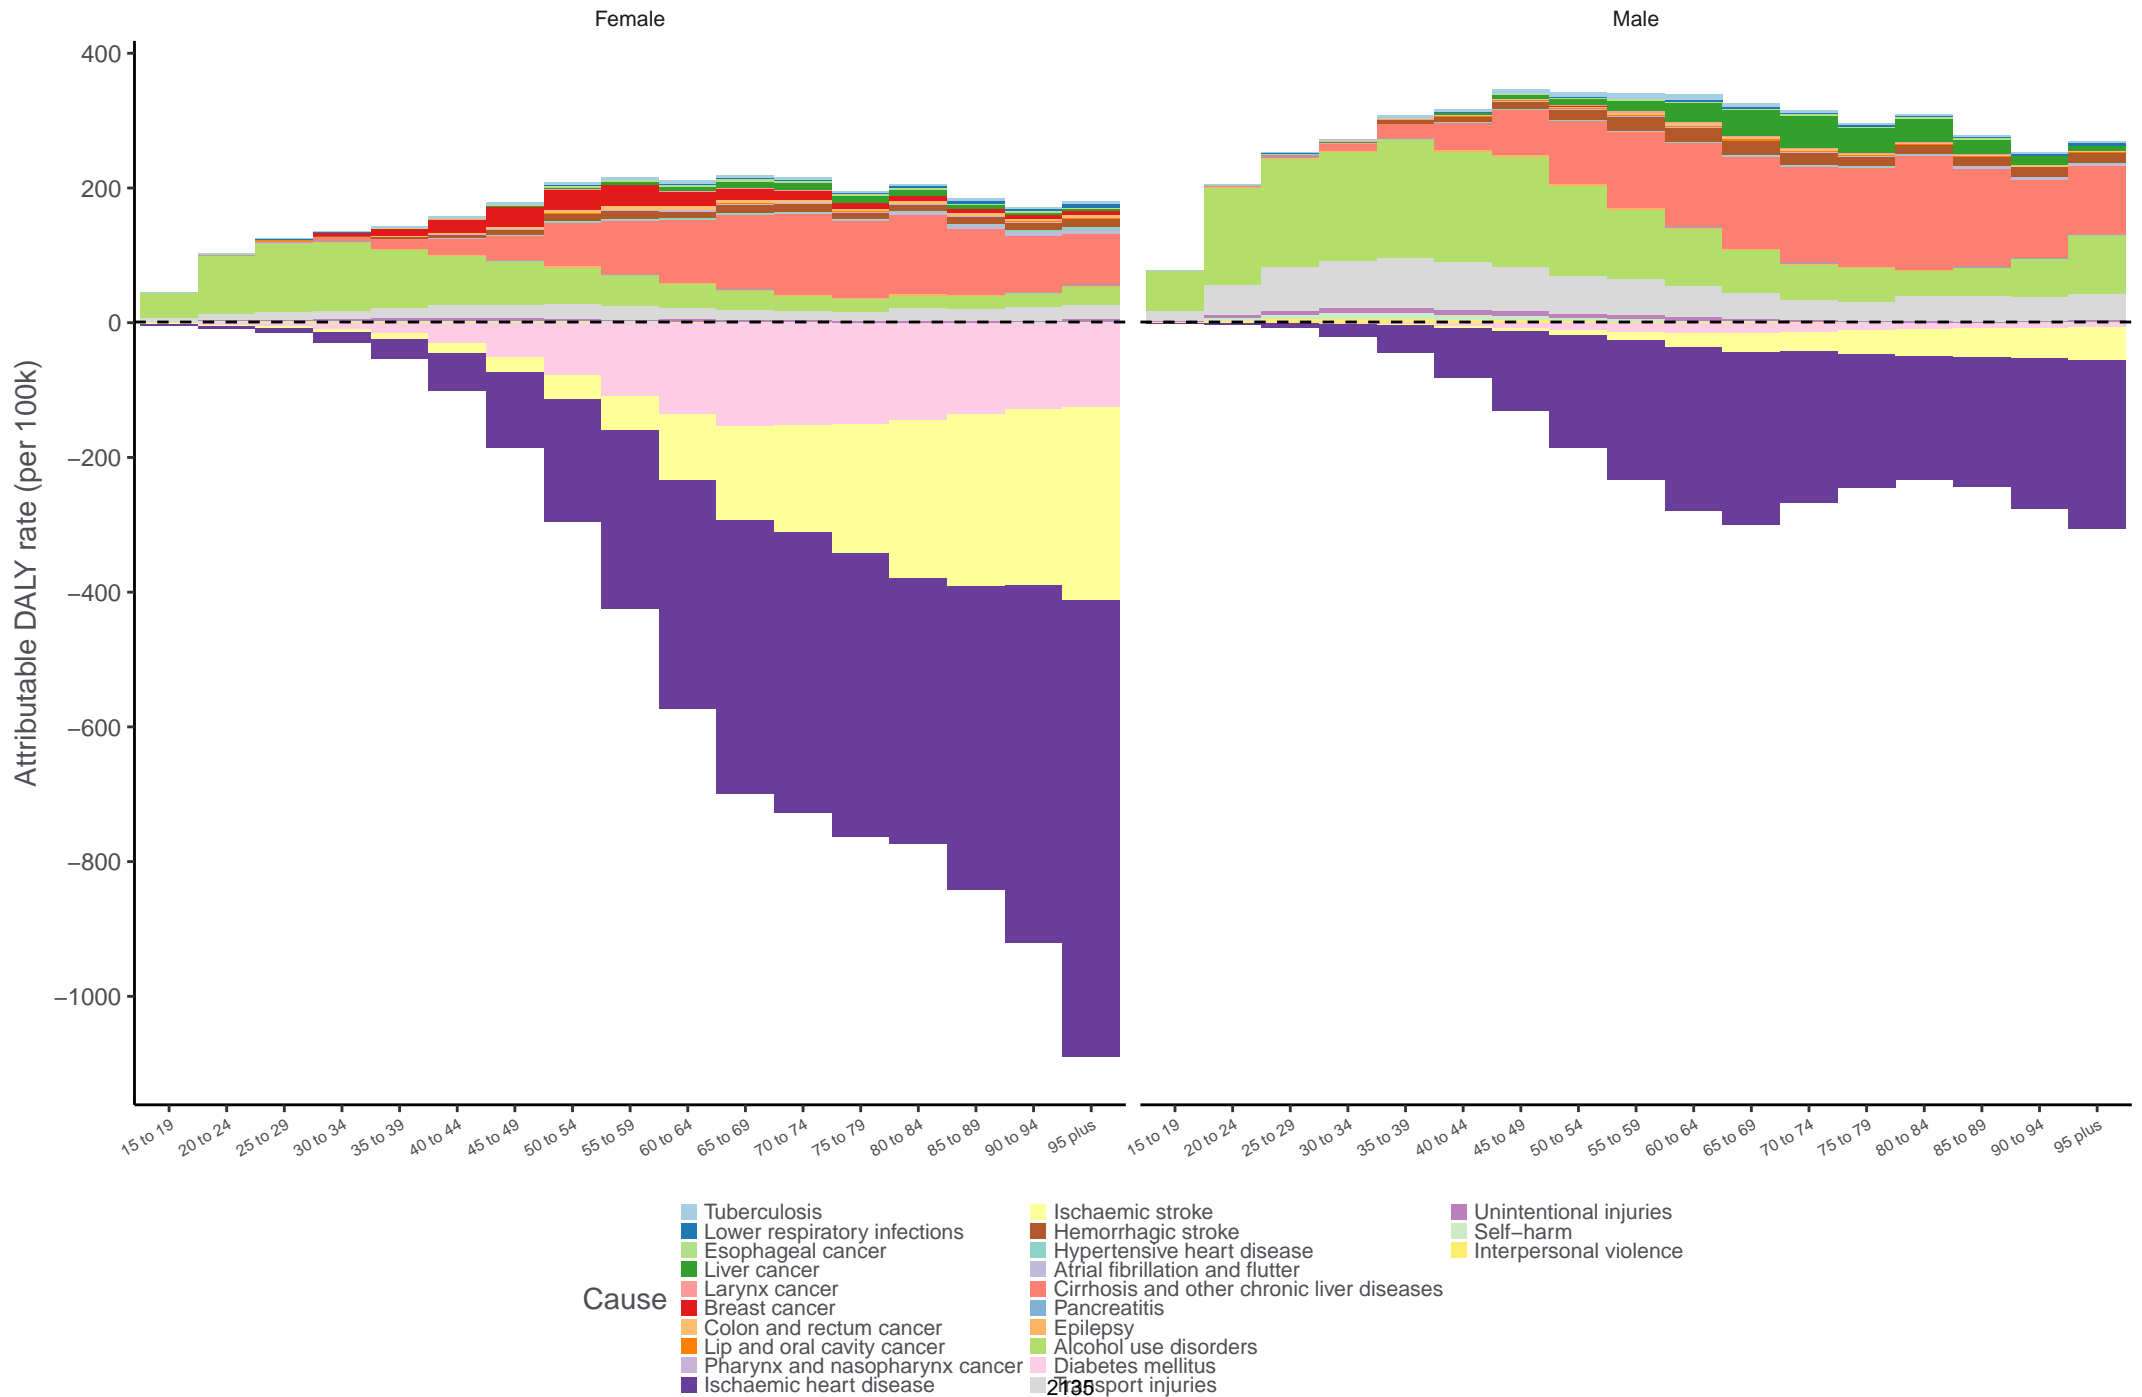



# Attributable DALY rate disaggregated by cause, Bangladesh, by sex and age in 2016.

Female

Male

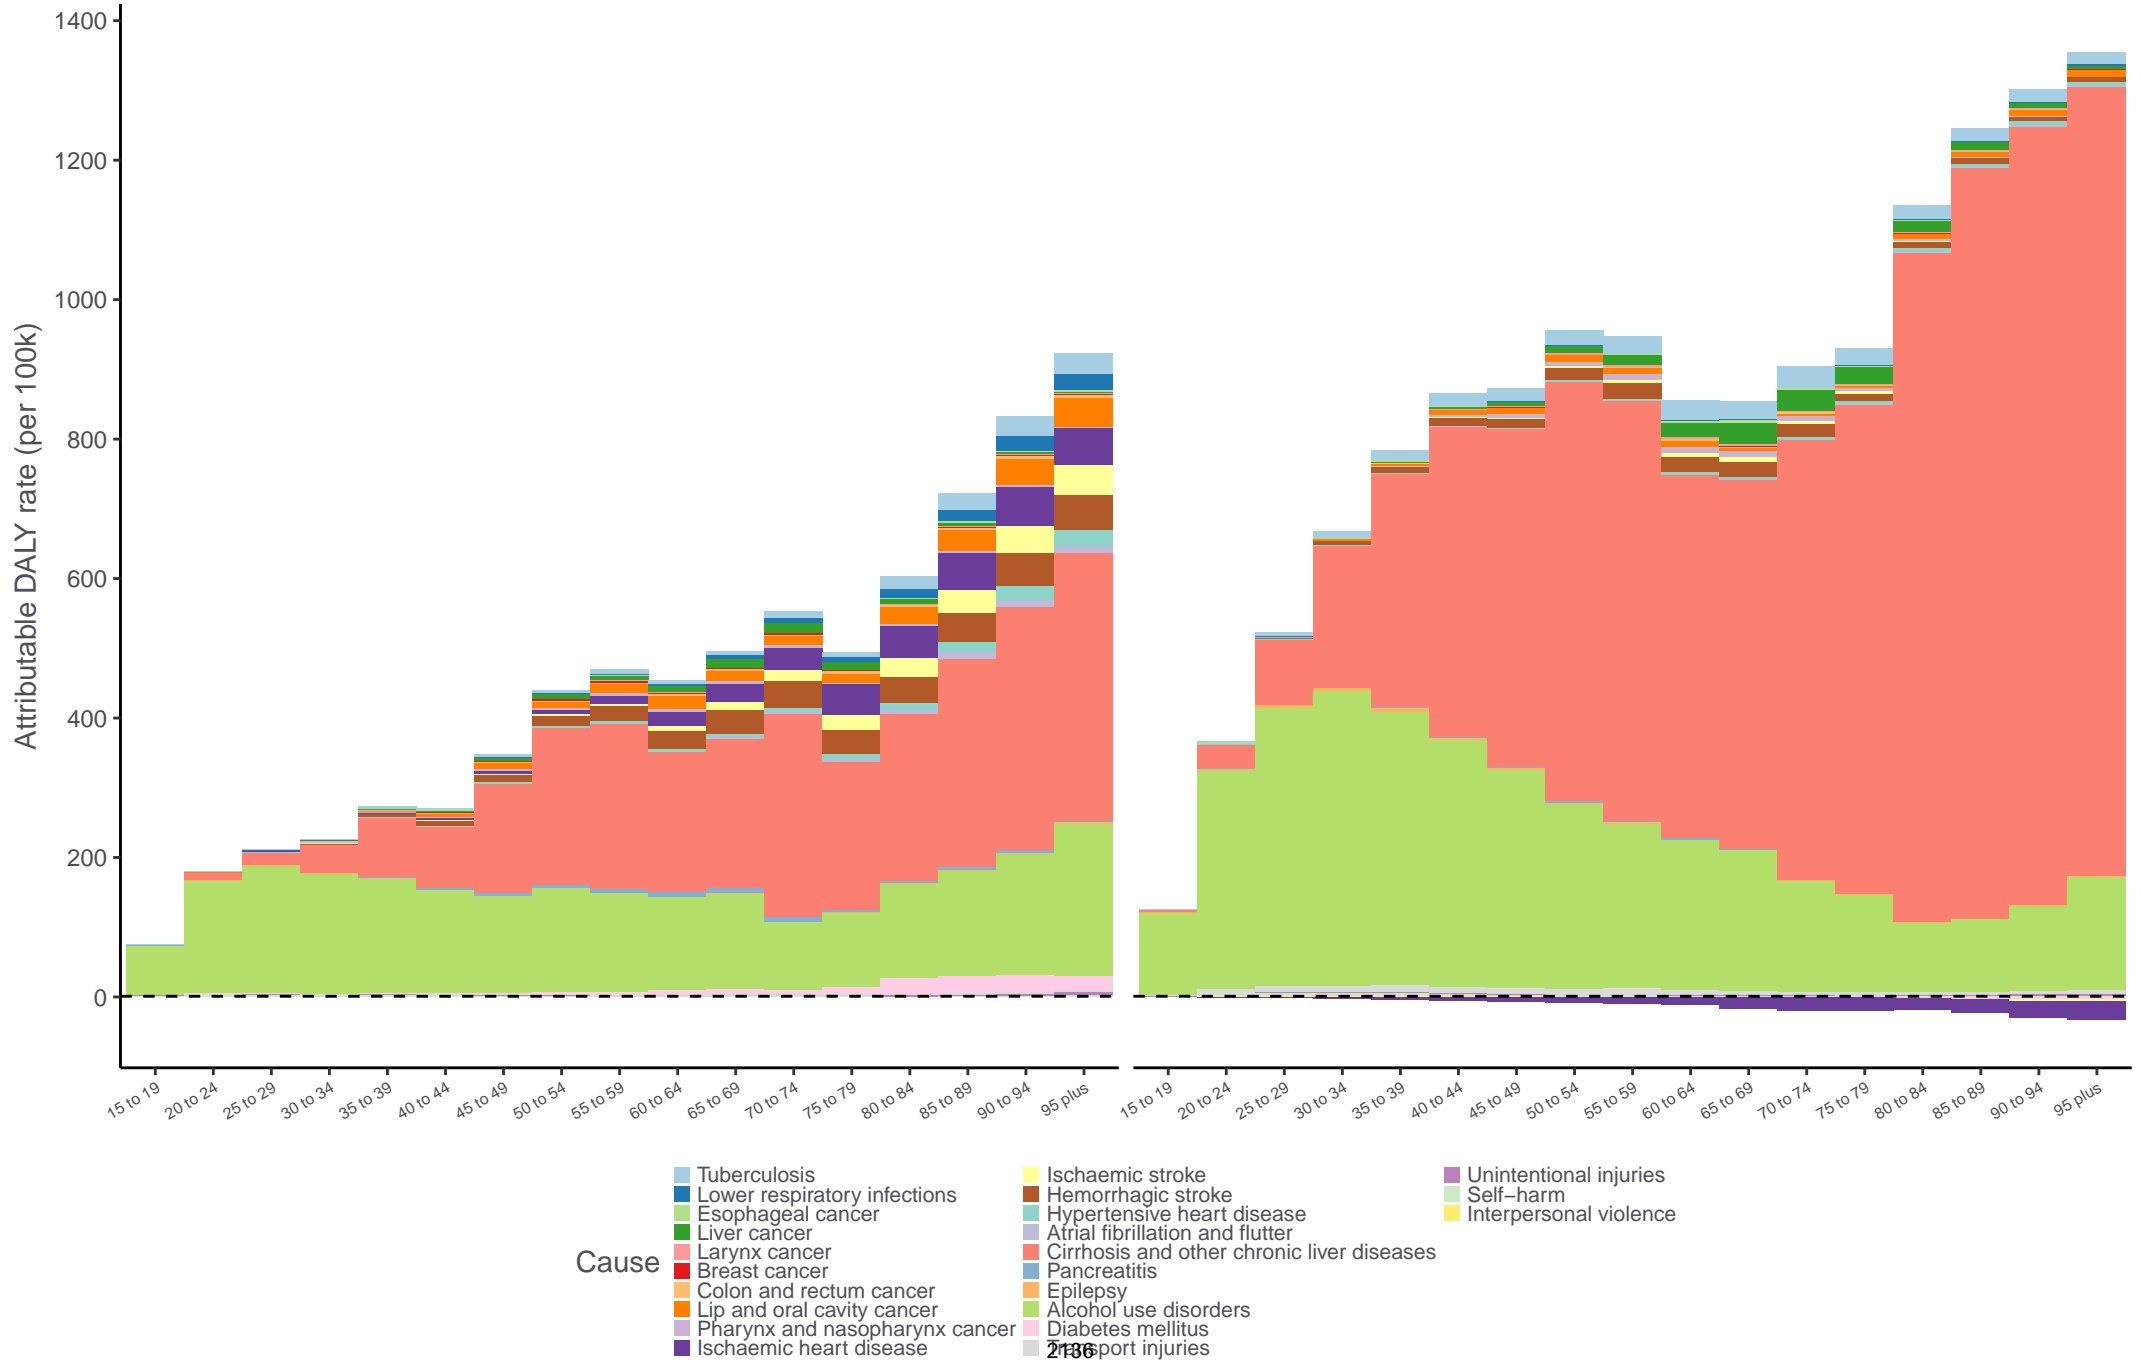

Cause

- Tuberculosis
- Lower respiratory infections
- Esophageal cancer
- Liver cancer
- Larynx cancer
- Breast cancer
- Colon and rectum cancer
- Lip and oral cavity cancer
- Pharynx and nasopharynx cancer
- Ischaemic heart disease
- Ischaemic stroke
- Hemorrhagic stroke
- Hypertensive heart disease
- Atrial fibrillation and flutter
- Cirrhosis and other chronic liver diseases
- Pancreatitis
- Epilepsy
- Alcohol use disorders
- Diabetes mellitus
- Transport injuries
- Unintentional injuries
- Self-harm
- Interpersonal violence

# Attributable DALY rate disaggregated by cause, Bhutan, by sex and age in 2016.

Female

Male

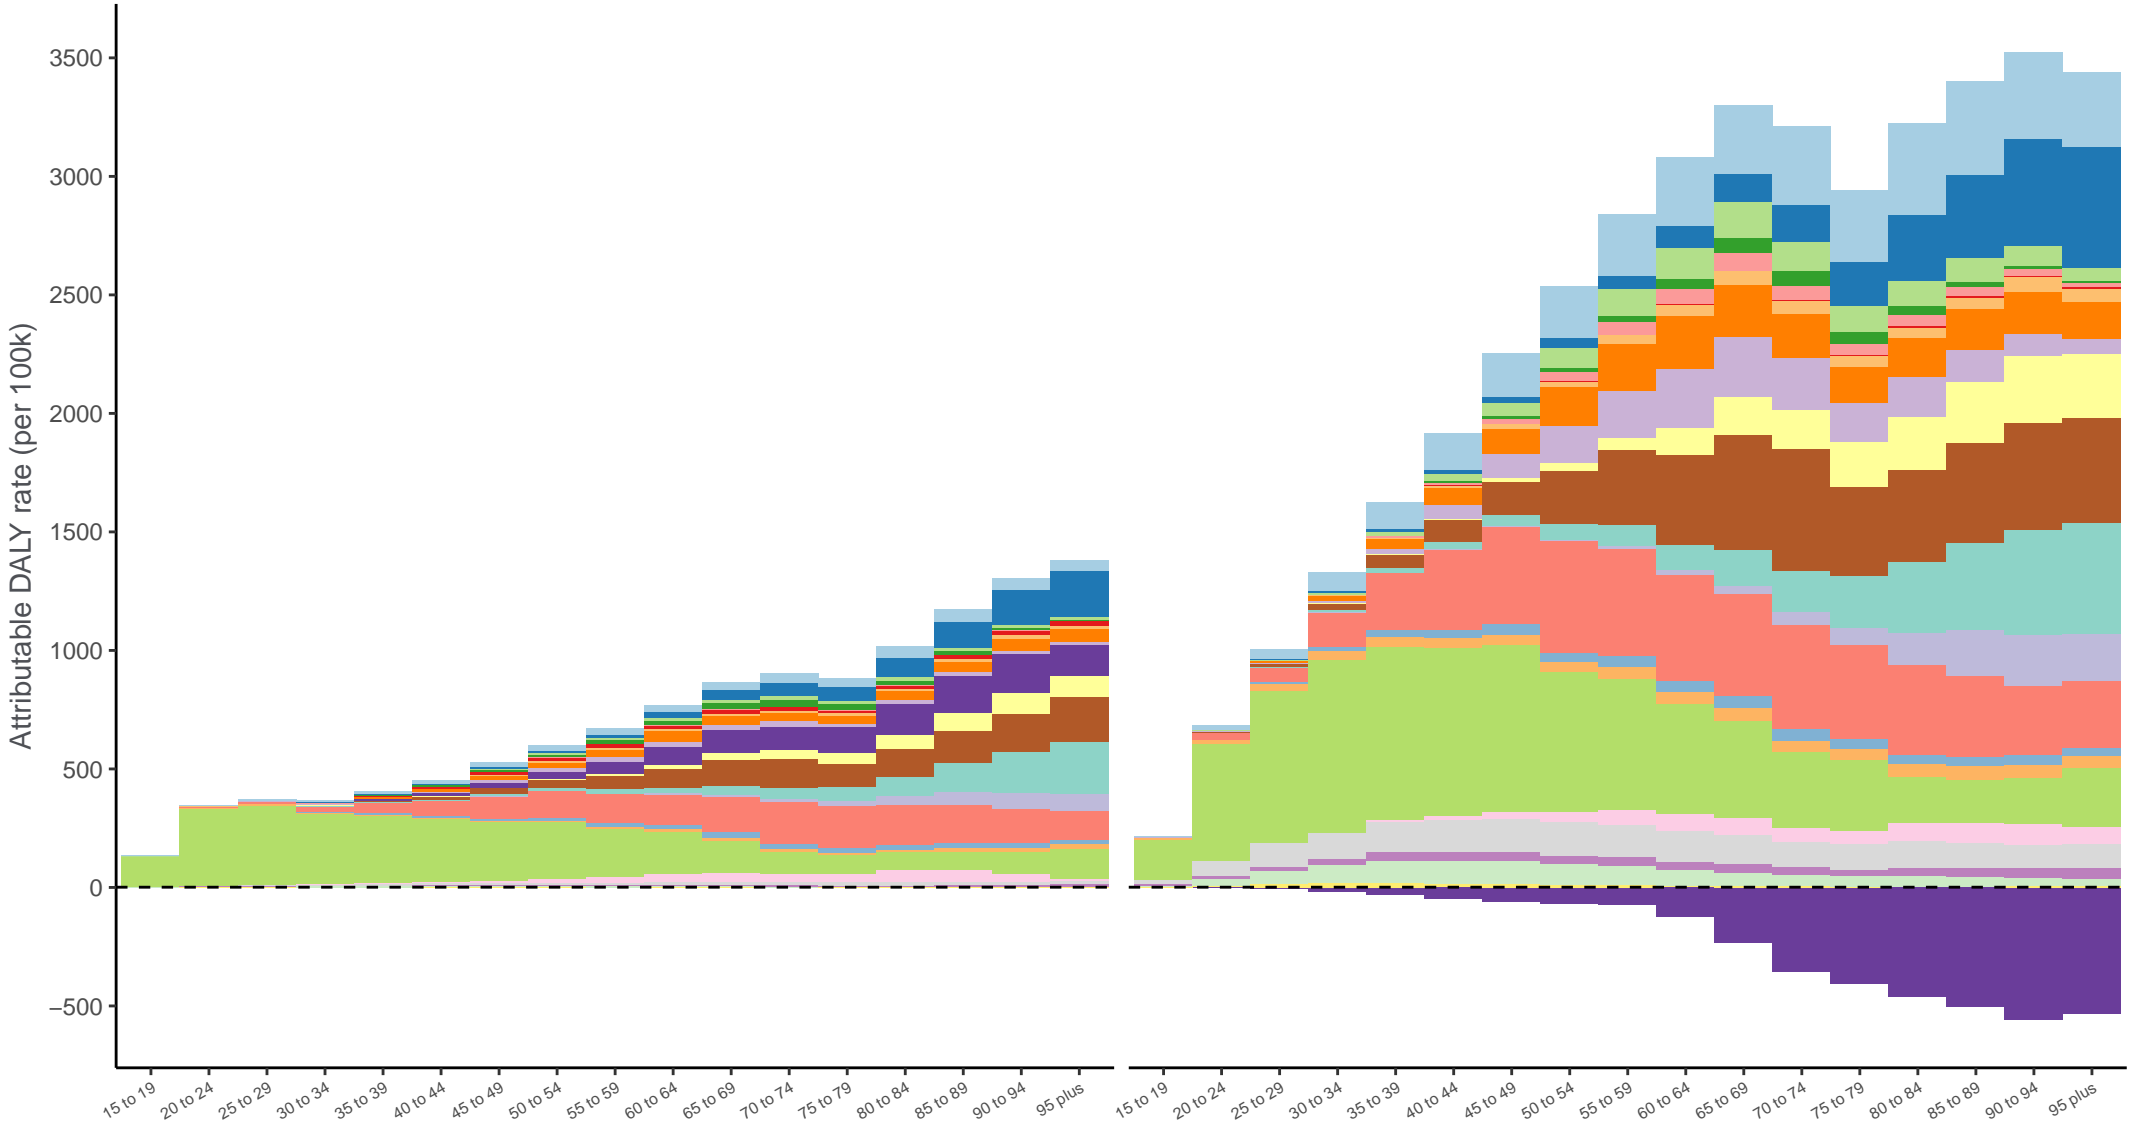

- Cause**
- Tuberculosis
  - Ischaemic stroke
  - Unintentional injuries
  - Lower respiratory infections
  - Hemorrhagic stroke
  - Self-harm
  - Esophageal cancer
  - Atrial fibrillation and flutter
  - Interpersonal violence
  - Liver cancer
  - Hypertensive heart disease
  - Larynx cancer
  - Cirrhosis and other chronic liver diseases
  - Breast cancer
  - Pancreatitis
  - Colon and rectum cancer
  - Epilepsy
  - Lip and oral cavity cancer
  - Alcohol use disorders
  - Pharynx and nasopharynx cancer
  - Diabetes mellitus
  - Ischaemic heart disease
  - Transport injuries

Attributable DALY rate disaggregated by cause, India, by sex and age in 2016.

Female

Male

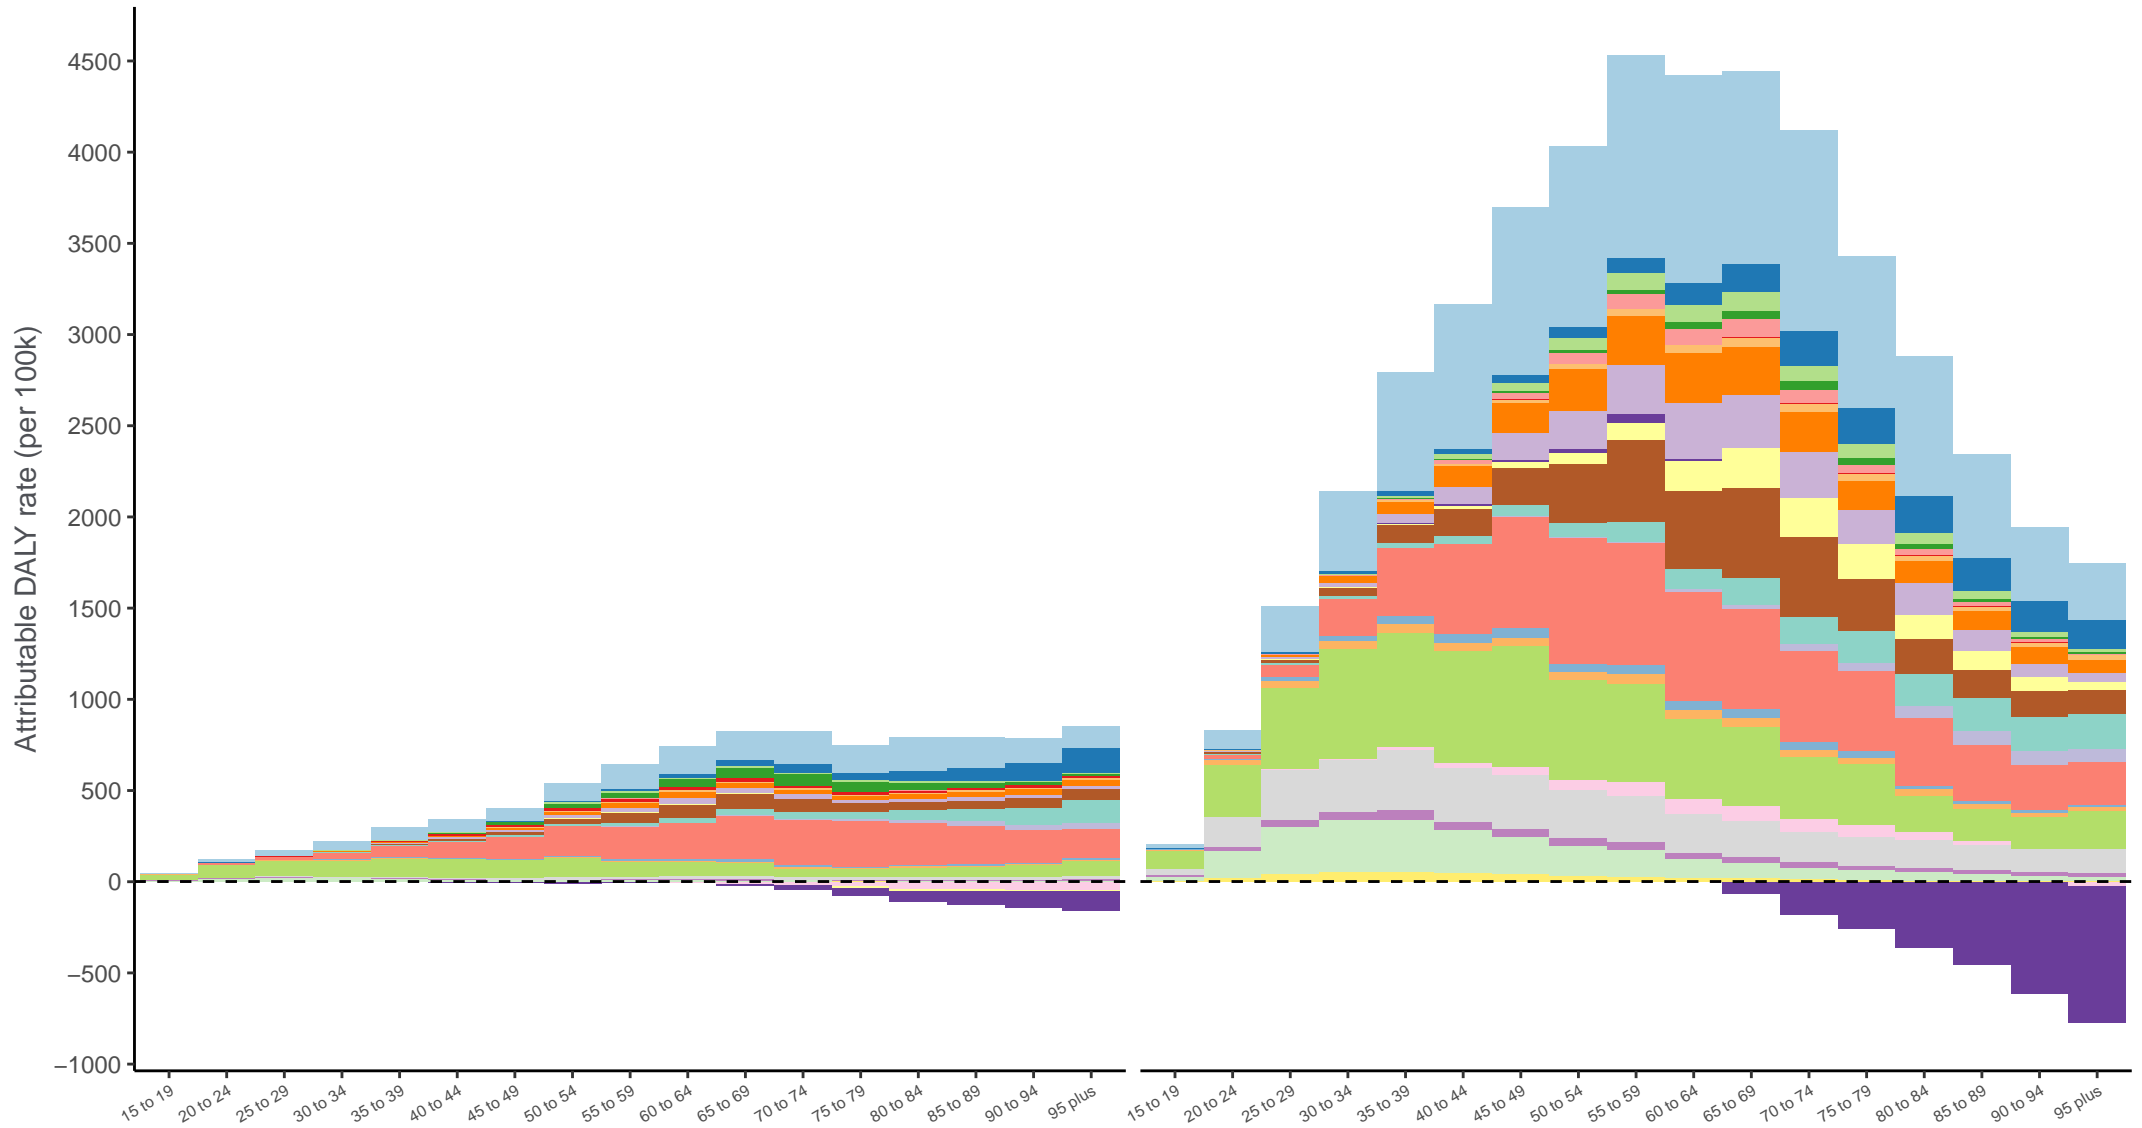

- Cause
- Tuberculosis
  - Lower respiratory infections
  - Esophageal cancer
  - Liver cancer
  - Larynx cancer
  - Breast cancer
  - Colon and rectum cancer
  - Lip and oral cavity cancer
  - Pharynx and nasopharynx cancer
  - Ischaemic heart disease
  - Ischaemic stroke
  - Hemorrhagic stroke
  - Hypertensive heart disease
  - Atrial fibrillation and flutter
  - Cirrhosis and other chronic liver diseases
  - Pancreatitis
  - Epilepsy
  - Alcohol use disorders
  - Diabetes mellitus
  - Unintentional injuries
  - Self-harm
  - Interpersonal violence
  - Sport injuries

# Attributable DALY rate disaggregated by cause, Nepal, by sex and age in 2016.

Female

Male

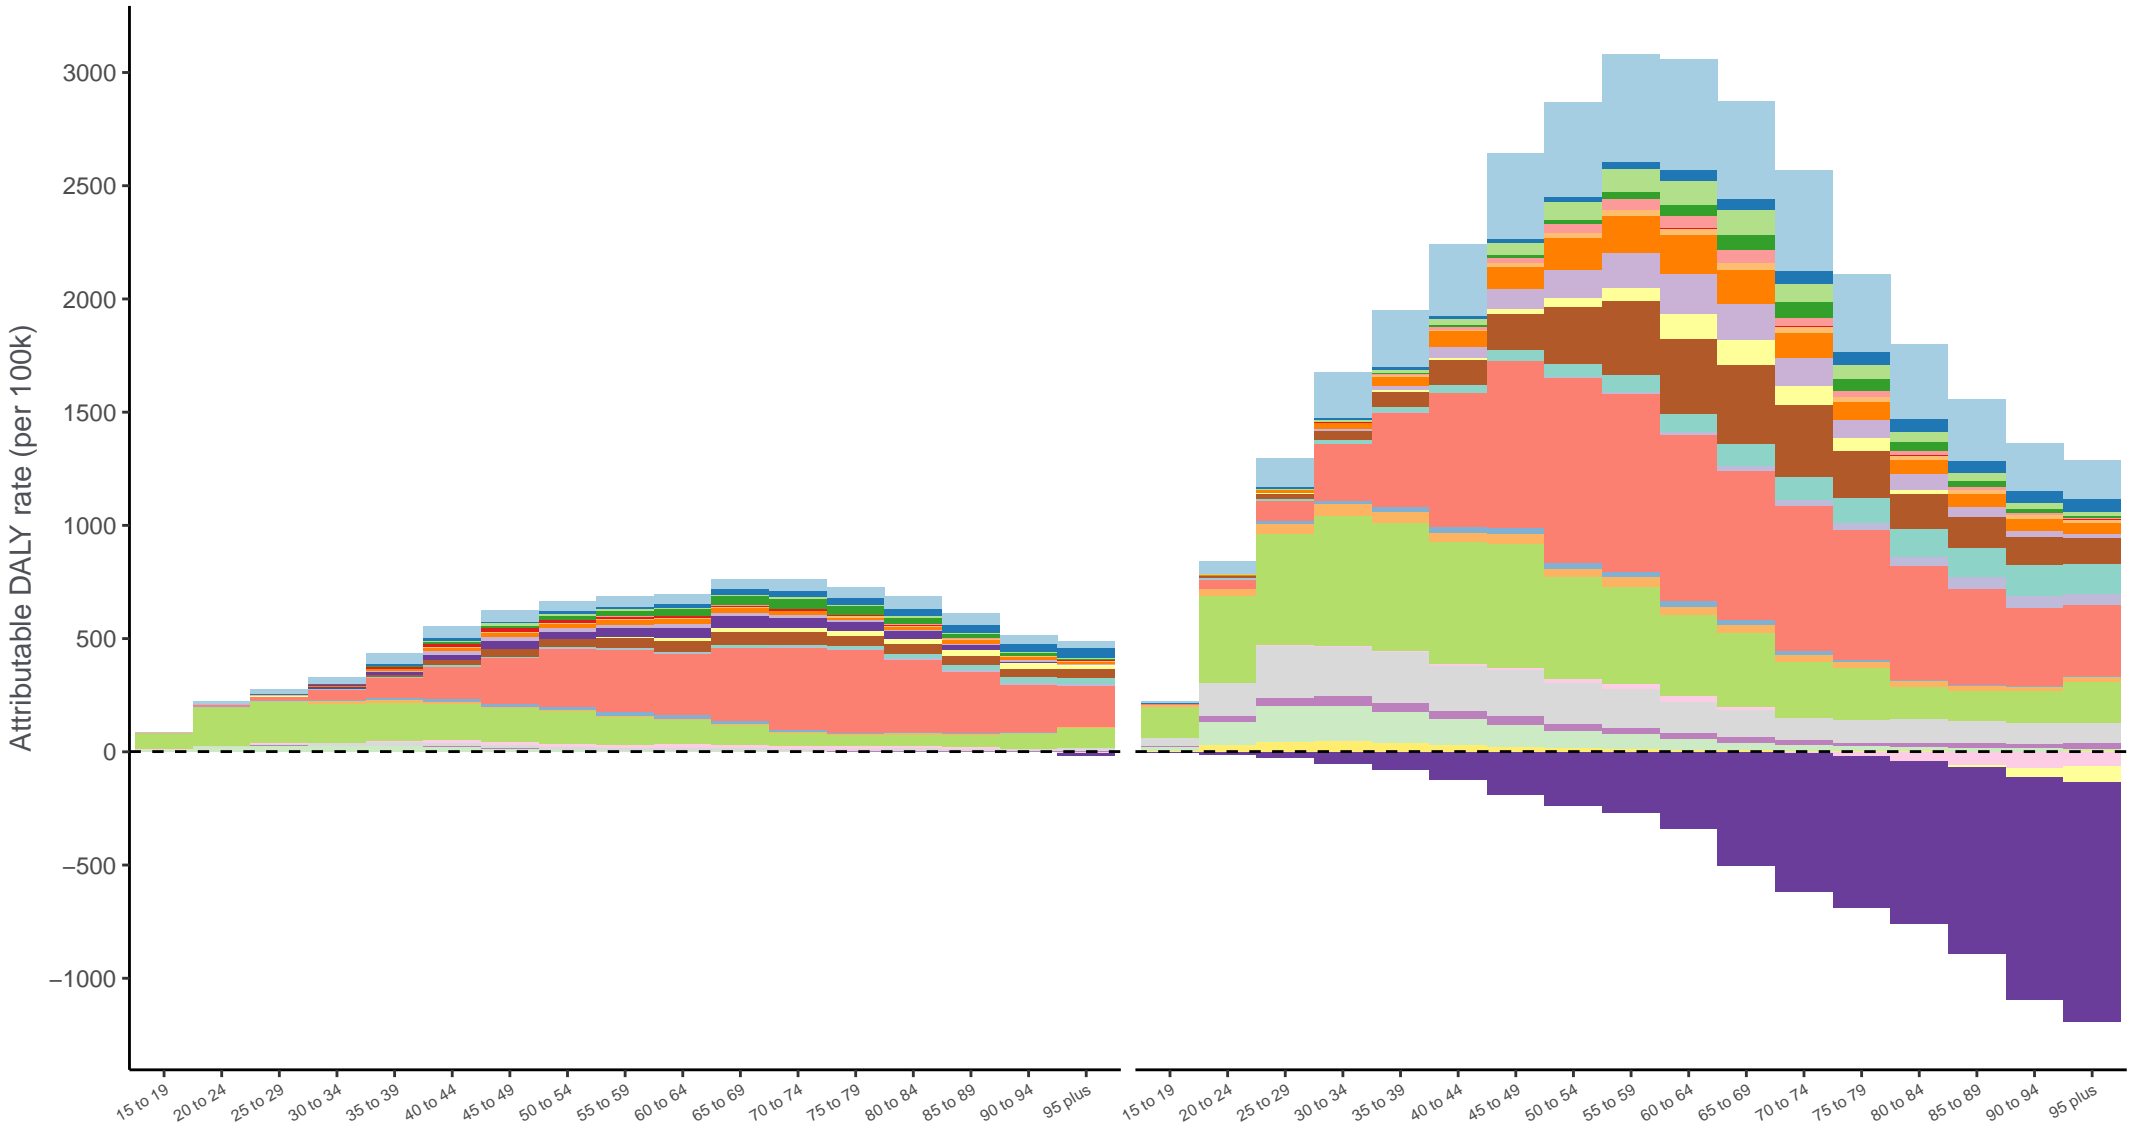

- |                                                                                                                                                                                                                                                                                                                                                                                                                                                                                                                                                                                                                                                                                                                                                         |                                                                                                                                                                                                                                                                                                                                                                                                                                                                                                                                                                                                                                                                                                                                                                     |                                                                                                                                                                                                                                                  |
|---------------------------------------------------------------------------------------------------------------------------------------------------------------------------------------------------------------------------------------------------------------------------------------------------------------------------------------------------------------------------------------------------------------------------------------------------------------------------------------------------------------------------------------------------------------------------------------------------------------------------------------------------------------------------------------------------------------------------------------------------------|---------------------------------------------------------------------------------------------------------------------------------------------------------------------------------------------------------------------------------------------------------------------------------------------------------------------------------------------------------------------------------------------------------------------------------------------------------------------------------------------------------------------------------------------------------------------------------------------------------------------------------------------------------------------------------------------------------------------------------------------------------------------|--------------------------------------------------------------------------------------------------------------------------------------------------------------------------------------------------------------------------------------------------|
| <ul style="list-style-type: none"> <li><span style="color: #add8e6;">■</span> Tuberculosis</li> <li><span style="color: #00008b;">■</span> Lower respiratory infections</li> <li><span style="color: #90ee90;">■</span> Esophageal cancer</li> <li><span style="color: #008000;">■</span> Liver cancer</li> <li><span style="color: #f08080;">■</span> Larynx cancer</li> <li><span style="color: #ff0000;">■</span> Breast cancer</li> <li><span style="color: #ffa500;">■</span> Colon and rectum cancer</li> <li><span style="color: #ffa500;">■</span> Lip and oral cavity cancer</li> <li><span style="color: #9370db;">■</span> Pharynx and nasopharynx cancer</li> <li><span style="color: #4b0082;">■</span> Ischaemic heart disease</li> </ul> | <ul style="list-style-type: none"> <li><span style="color: #ffff00;">■</span> Ischaemic stroke</li> <li><span style="color: #8b0000;">■</span> Hemorrhagic stroke</li> <li><span style="color: #4682b4;">■</span> Hypertensive heart disease</li> <li><span style="color: #66c2e0;">■</span> Atrial fibrillation and flutter</li> <li><span style="color: #f08080;">■</span> Cirrhosis and other chronic liver diseases</li> <li><span style="color: #4682b4;">■</span> Pancreatitis</li> <li><span style="color: #ffa500;">■</span> Epilepsy</li> <li><span style="color: #90ee90;">■</span> Alcohol use disorders</li> <li><span style="color: #f08080;">■</span> Diabetes mellitus</li> <li><span style="color: #808080;">■</span> Transport injuries</li> </ul> | <ul style="list-style-type: none"> <li><span style="color: #800080;">■</span> Unintentional injuries</li> <li><span style="color: #90ee90;">■</span> Self-harm</li> <li><span style="color: #ffff00;">■</span> Interpersonal violence</li> </ul> |
|---------------------------------------------------------------------------------------------------------------------------------------------------------------------------------------------------------------------------------------------------------------------------------------------------------------------------------------------------------------------------------------------------------------------------------------------------------------------------------------------------------------------------------------------------------------------------------------------------------------------------------------------------------------------------------------------------------------------------------------------------------|---------------------------------------------------------------------------------------------------------------------------------------------------------------------------------------------------------------------------------------------------------------------------------------------------------------------------------------------------------------------------------------------------------------------------------------------------------------------------------------------------------------------------------------------------------------------------------------------------------------------------------------------------------------------------------------------------------------------------------------------------------------------|--------------------------------------------------------------------------------------------------------------------------------------------------------------------------------------------------------------------------------------------------|

Attributable DALY rate disaggregated by cause, Pakistan, by sex and age in 2016.

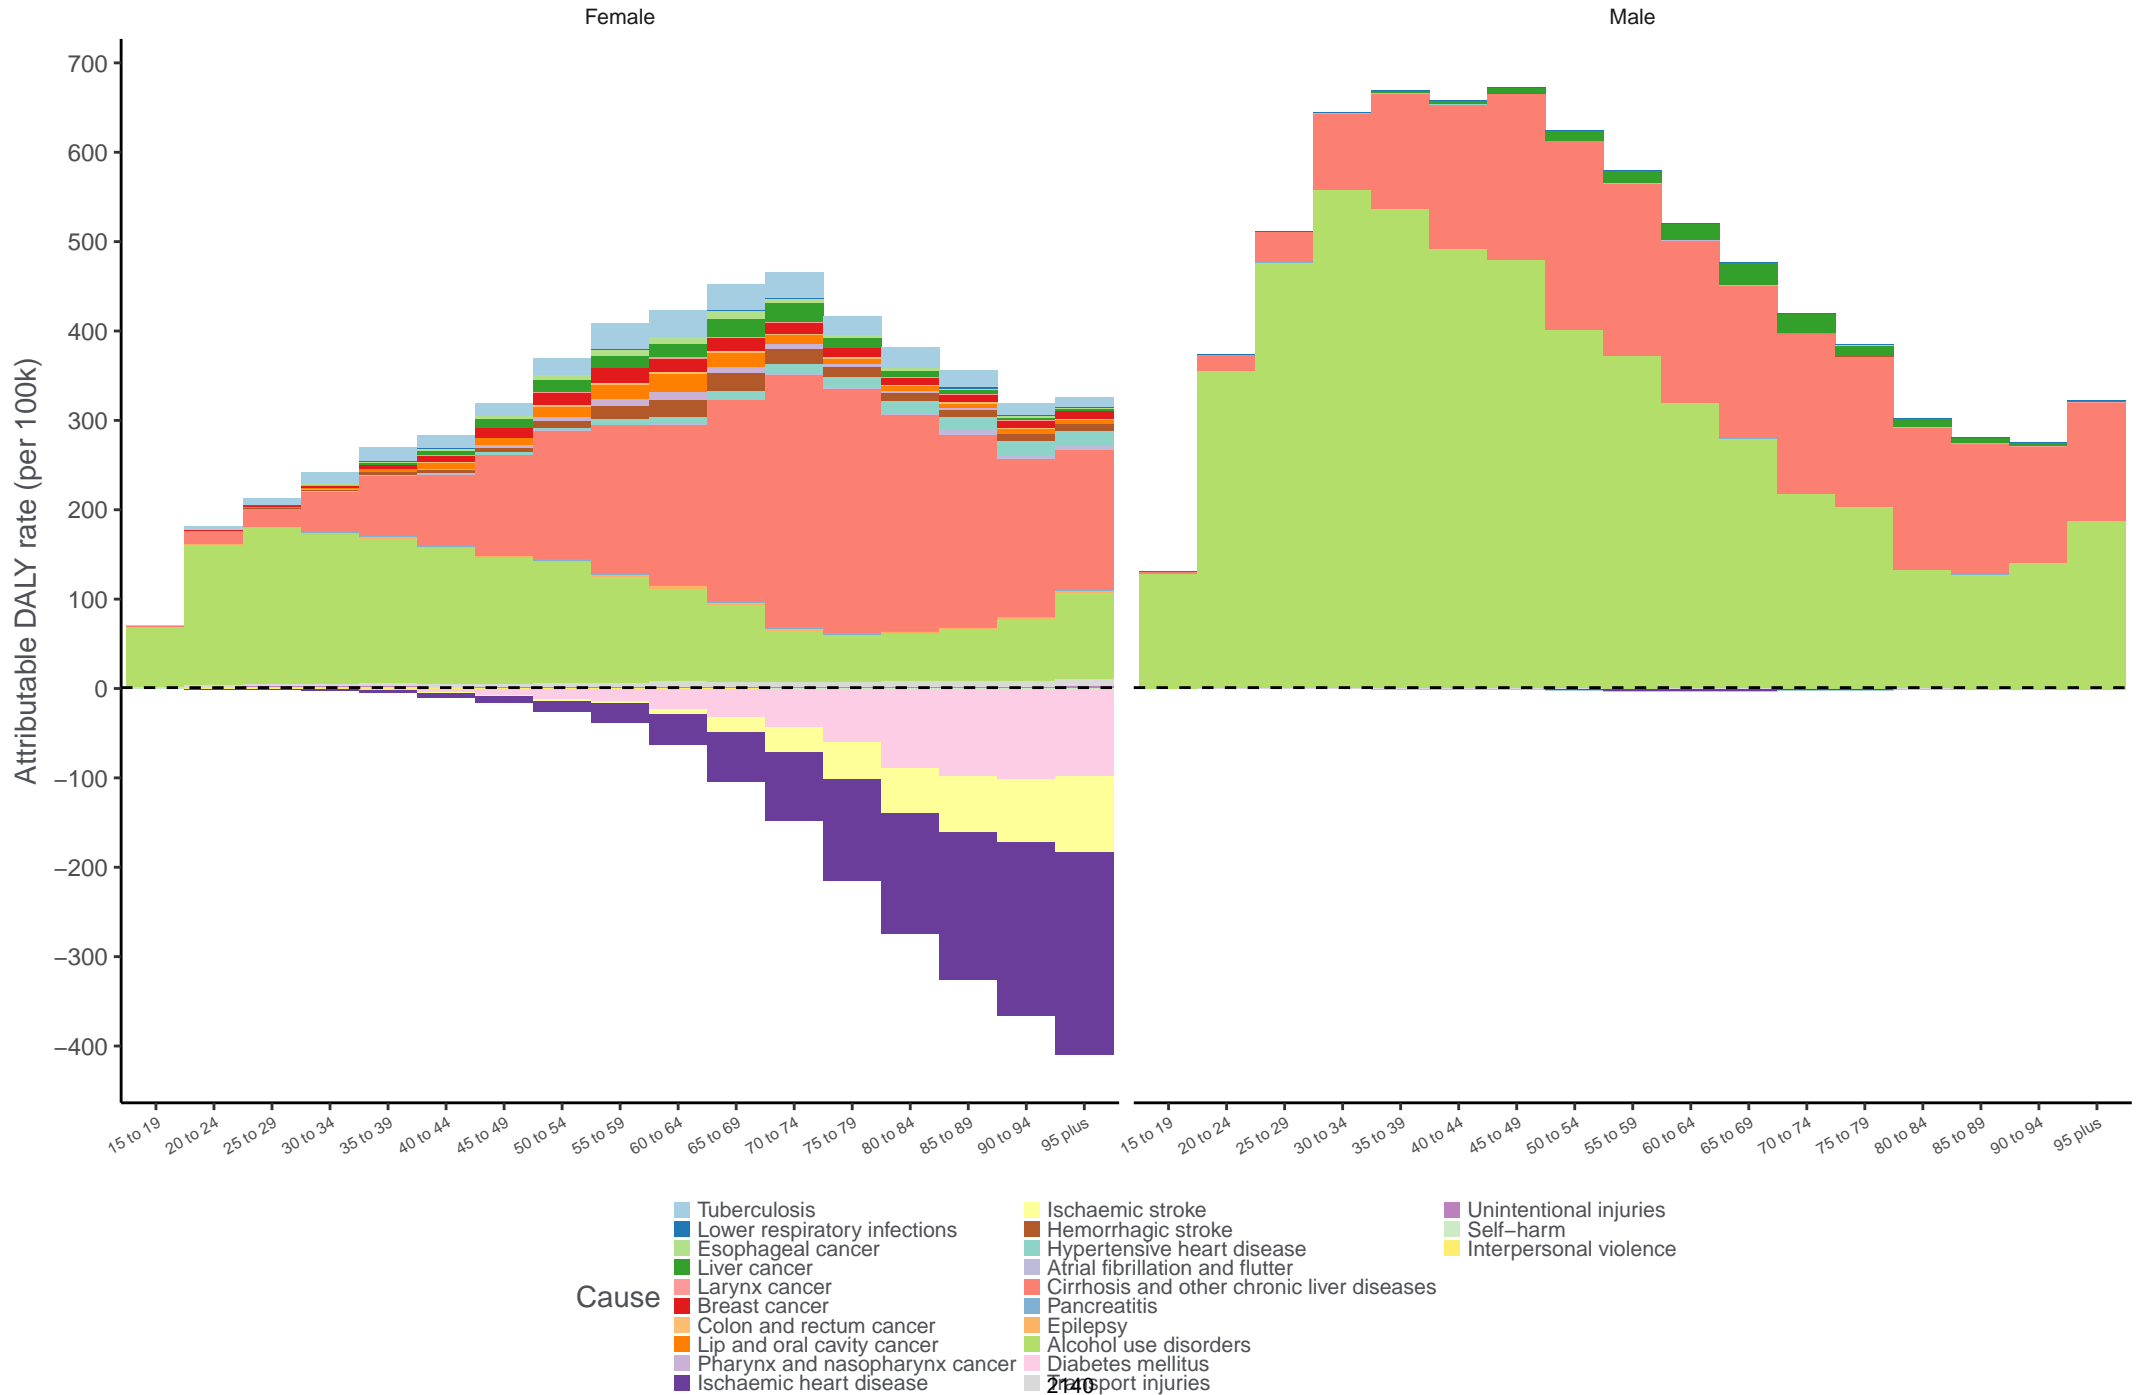

Attributable DALY rate disaggregated by cause, Angola, by sex and age in 2016.

Female

Male

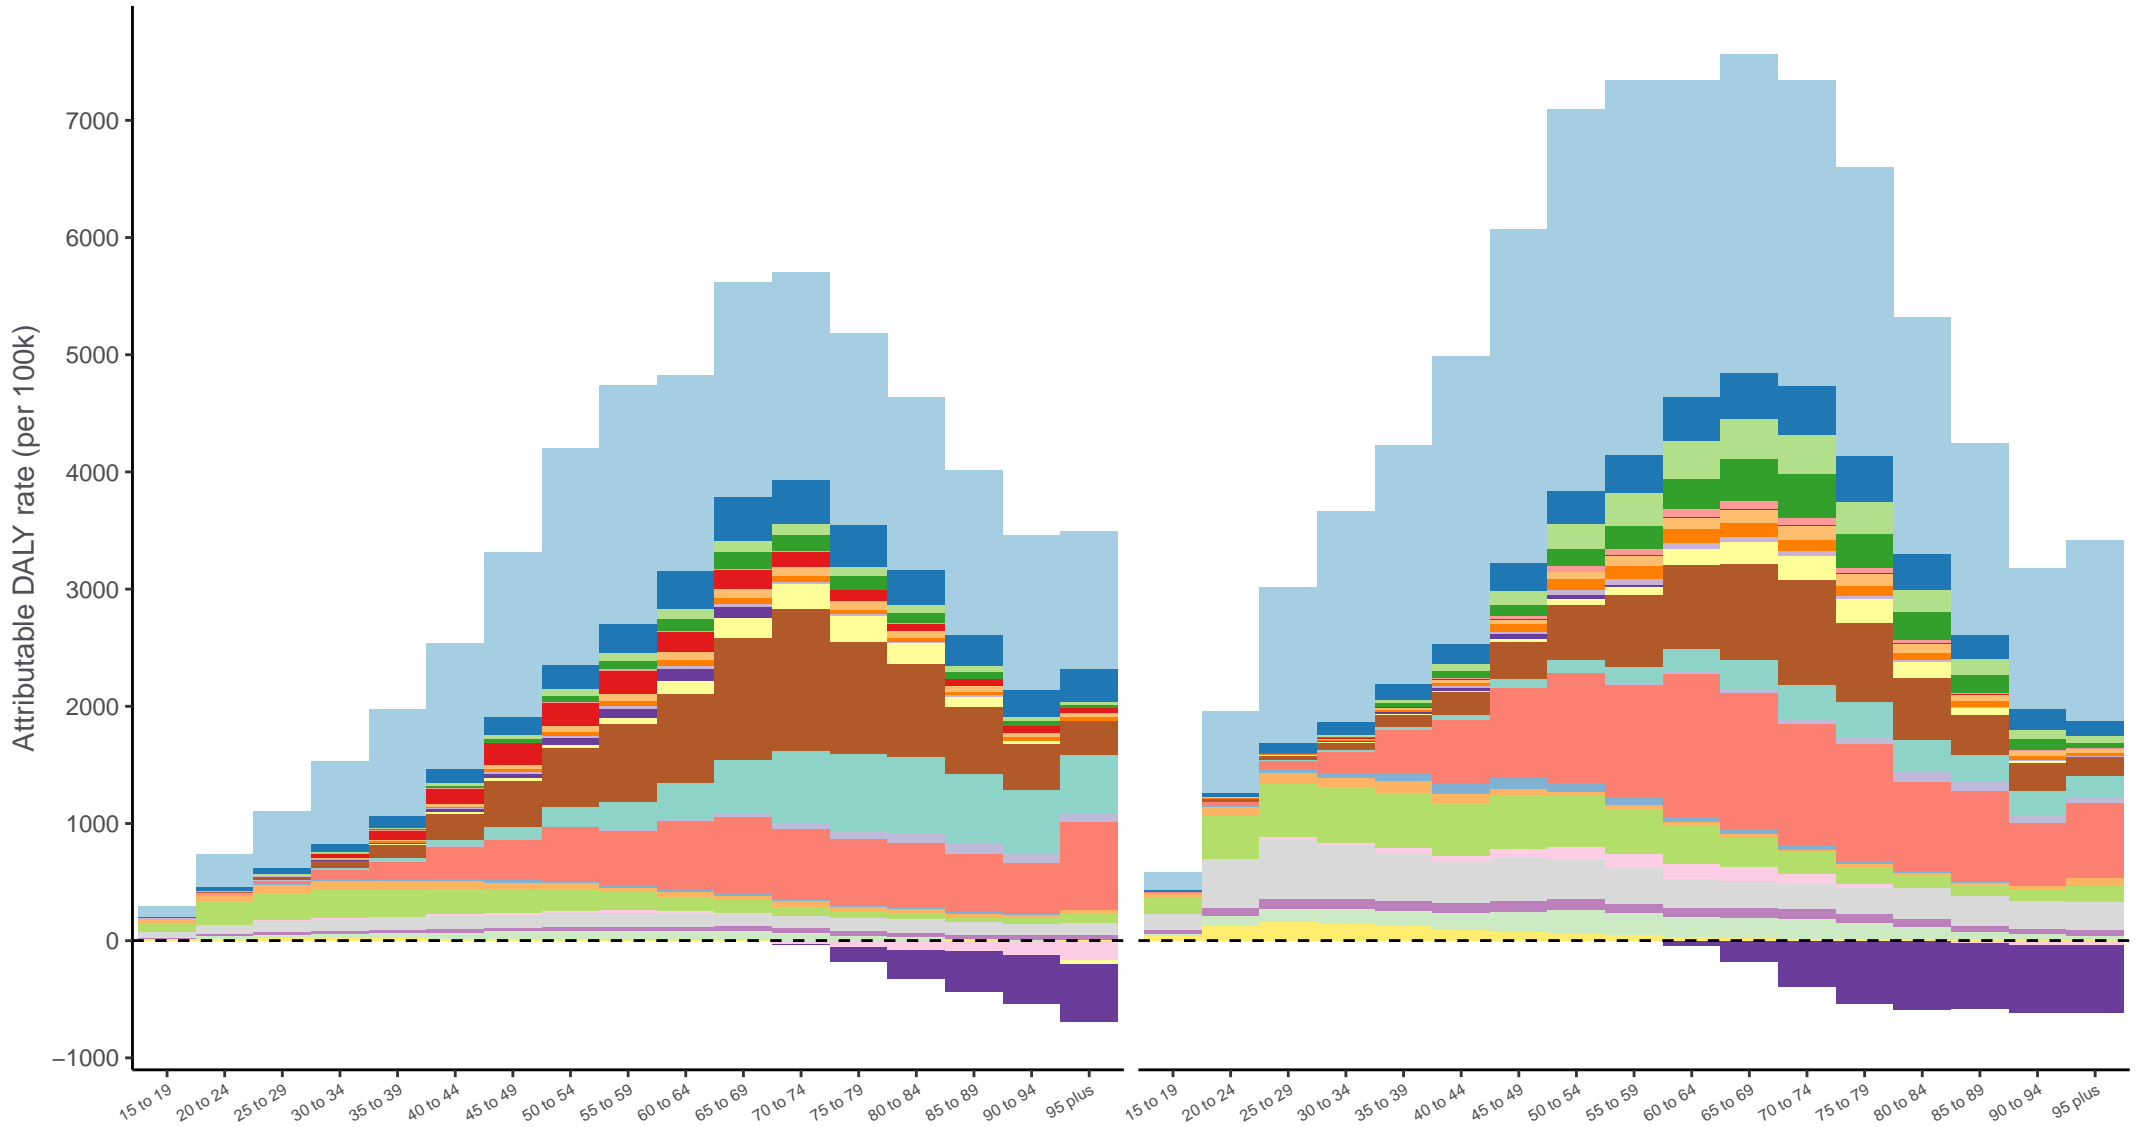

- Cause
- Tuberculosis
  - Ischaemic stroke
  - Unintentional injuries
  - Lower respiratory infections
  - Hemorrhagic stroke
  - Self-harm
  - Esophageal cancer
  - Hypertensive heart disease
  - Interpersonal violence
  - Liver cancer
  - Atrial fibrillation and flutter
  - Larynx cancer
  - Cirrhosis and other chronic liver diseases
  - Breast cancer
  - Pancreatitis
  - Colon and rectum cancer
  - Epilepsy
  - Lip and oral cavity cancer
  - Alcohol use disorders
  - Pharynx and nasopharynx cancer
  - Diabetes mellitus
  - Ischaemic heart disease
  - Traumatic transport injuries



Attributable DALY rate disaggregated by cause, Congo, by sex and age in 2016.

Female

Male

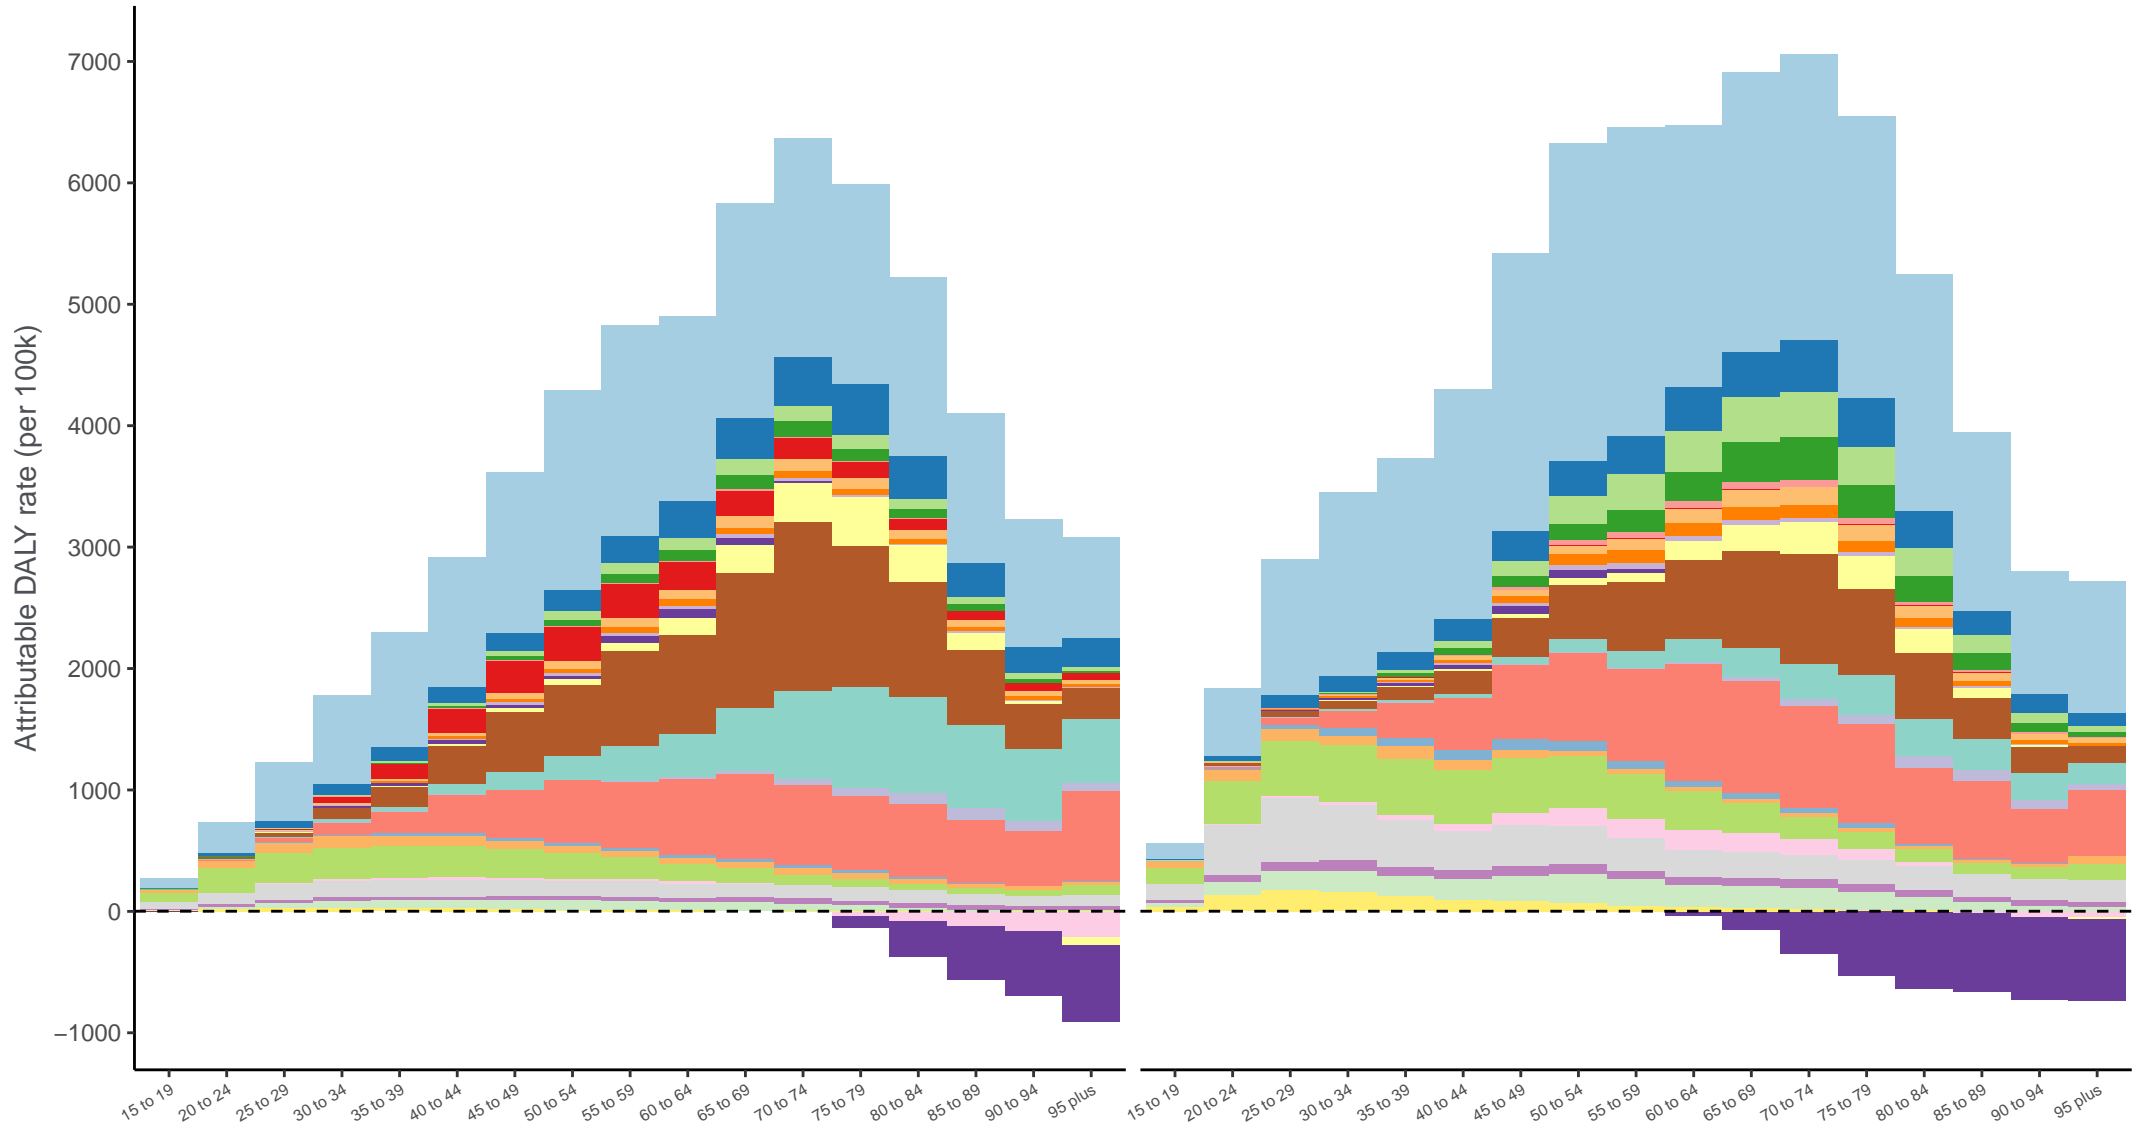

- |                                                                                                                                                                                                                                                                                                                                                                                                                                                                                                                                                                                                                                                                                                                                                         |                                                                                                                                                                                                                                                                                                                                                                                                                                                                                                                                                                                                                                                                                                                                                                         |                                                                                                                                                                           |
|---------------------------------------------------------------------------------------------------------------------------------------------------------------------------------------------------------------------------------------------------------------------------------------------------------------------------------------------------------------------------------------------------------------------------------------------------------------------------------------------------------------------------------------------------------------------------------------------------------------------------------------------------------------------------------------------------------------------------------------------------------|-------------------------------------------------------------------------------------------------------------------------------------------------------------------------------------------------------------------------------------------------------------------------------------------------------------------------------------------------------------------------------------------------------------------------------------------------------------------------------------------------------------------------------------------------------------------------------------------------------------------------------------------------------------------------------------------------------------------------------------------------------------------------|---------------------------------------------------------------------------------------------------------------------------------------------------------------------------|
| <ul style="list-style-type: none"> <li><span style="color: #8eb9e0;">■</span> Tuberculosis</li> <li><span style="color: #1f77b4;">■</span> Lower respiratory infections</li> <li><span style="color: #9edae5;">■</span> Esophageal cancer</li> <li><span style="color: #2ca02c;">■</span> Liver cancer</li> <li><span style="color: #d62728;">■</span> Larynx cancer</li> <li><span style="color: #d62728;">■</span> Breast cancer</li> <li><span style="color: #ffc107;">■</span> Colon and rectum cancer</li> <li><span style="color: #ffc107;">■</span> Lip and oral cavity cancer</li> <li><span style="color: #9467bd;">■</span> Pharynx and nasopharynx cancer</li> <li><span style="color: #8c564b;">■</span> Ischaemic heart disease</li> </ul> | <ul style="list-style-type: none"> <li><span style="color: #ffff99;">■</span> Ischaemic stroke</li> <li><span style="color: #8c564b;">■</span> Hemorrhagic stroke</li> <li><span style="color: #1f77b4;">■</span> Hypertensive heart disease</li> <li><span style="color: #1f77b4;">■</span> Atrial fibrillation and flutter</li> <li><span style="color: #d62728;">■</span> Cirrhosis and other chronic liver diseases</li> <li><span style="color: #1f77b4;">■</span> Pancreatitis</li> <li><span style="color: #ffc107;">■</span> Epilepsy</li> <li><span style="color: #9edae5;">■</span> Alcohol use disorders</li> <li><span style="color: #f7b6d2;">■</span> Diabetes mellitus</li> <li><span style="color: #cccccc;">■</span> Unintentional injuries</li> </ul> | <ul style="list-style-type: none"> <li><span style="color: #9edae5;">■</span> Self-harm</li> <li><span style="color: #ffff99;">■</span> Interpersonal violence</li> </ul> |
|---------------------------------------------------------------------------------------------------------------------------------------------------------------------------------------------------------------------------------------------------------------------------------------------------------------------------------------------------------------------------------------------------------------------------------------------------------------------------------------------------------------------------------------------------------------------------------------------------------------------------------------------------------------------------------------------------------------------------------------------------------|-------------------------------------------------------------------------------------------------------------------------------------------------------------------------------------------------------------------------------------------------------------------------------------------------------------------------------------------------------------------------------------------------------------------------------------------------------------------------------------------------------------------------------------------------------------------------------------------------------------------------------------------------------------------------------------------------------------------------------------------------------------------------|---------------------------------------------------------------------------------------------------------------------------------------------------------------------------|



Attributable DALY rate disaggregated by cause, Democratic Republic of the Congo, by sex and age in 2016.

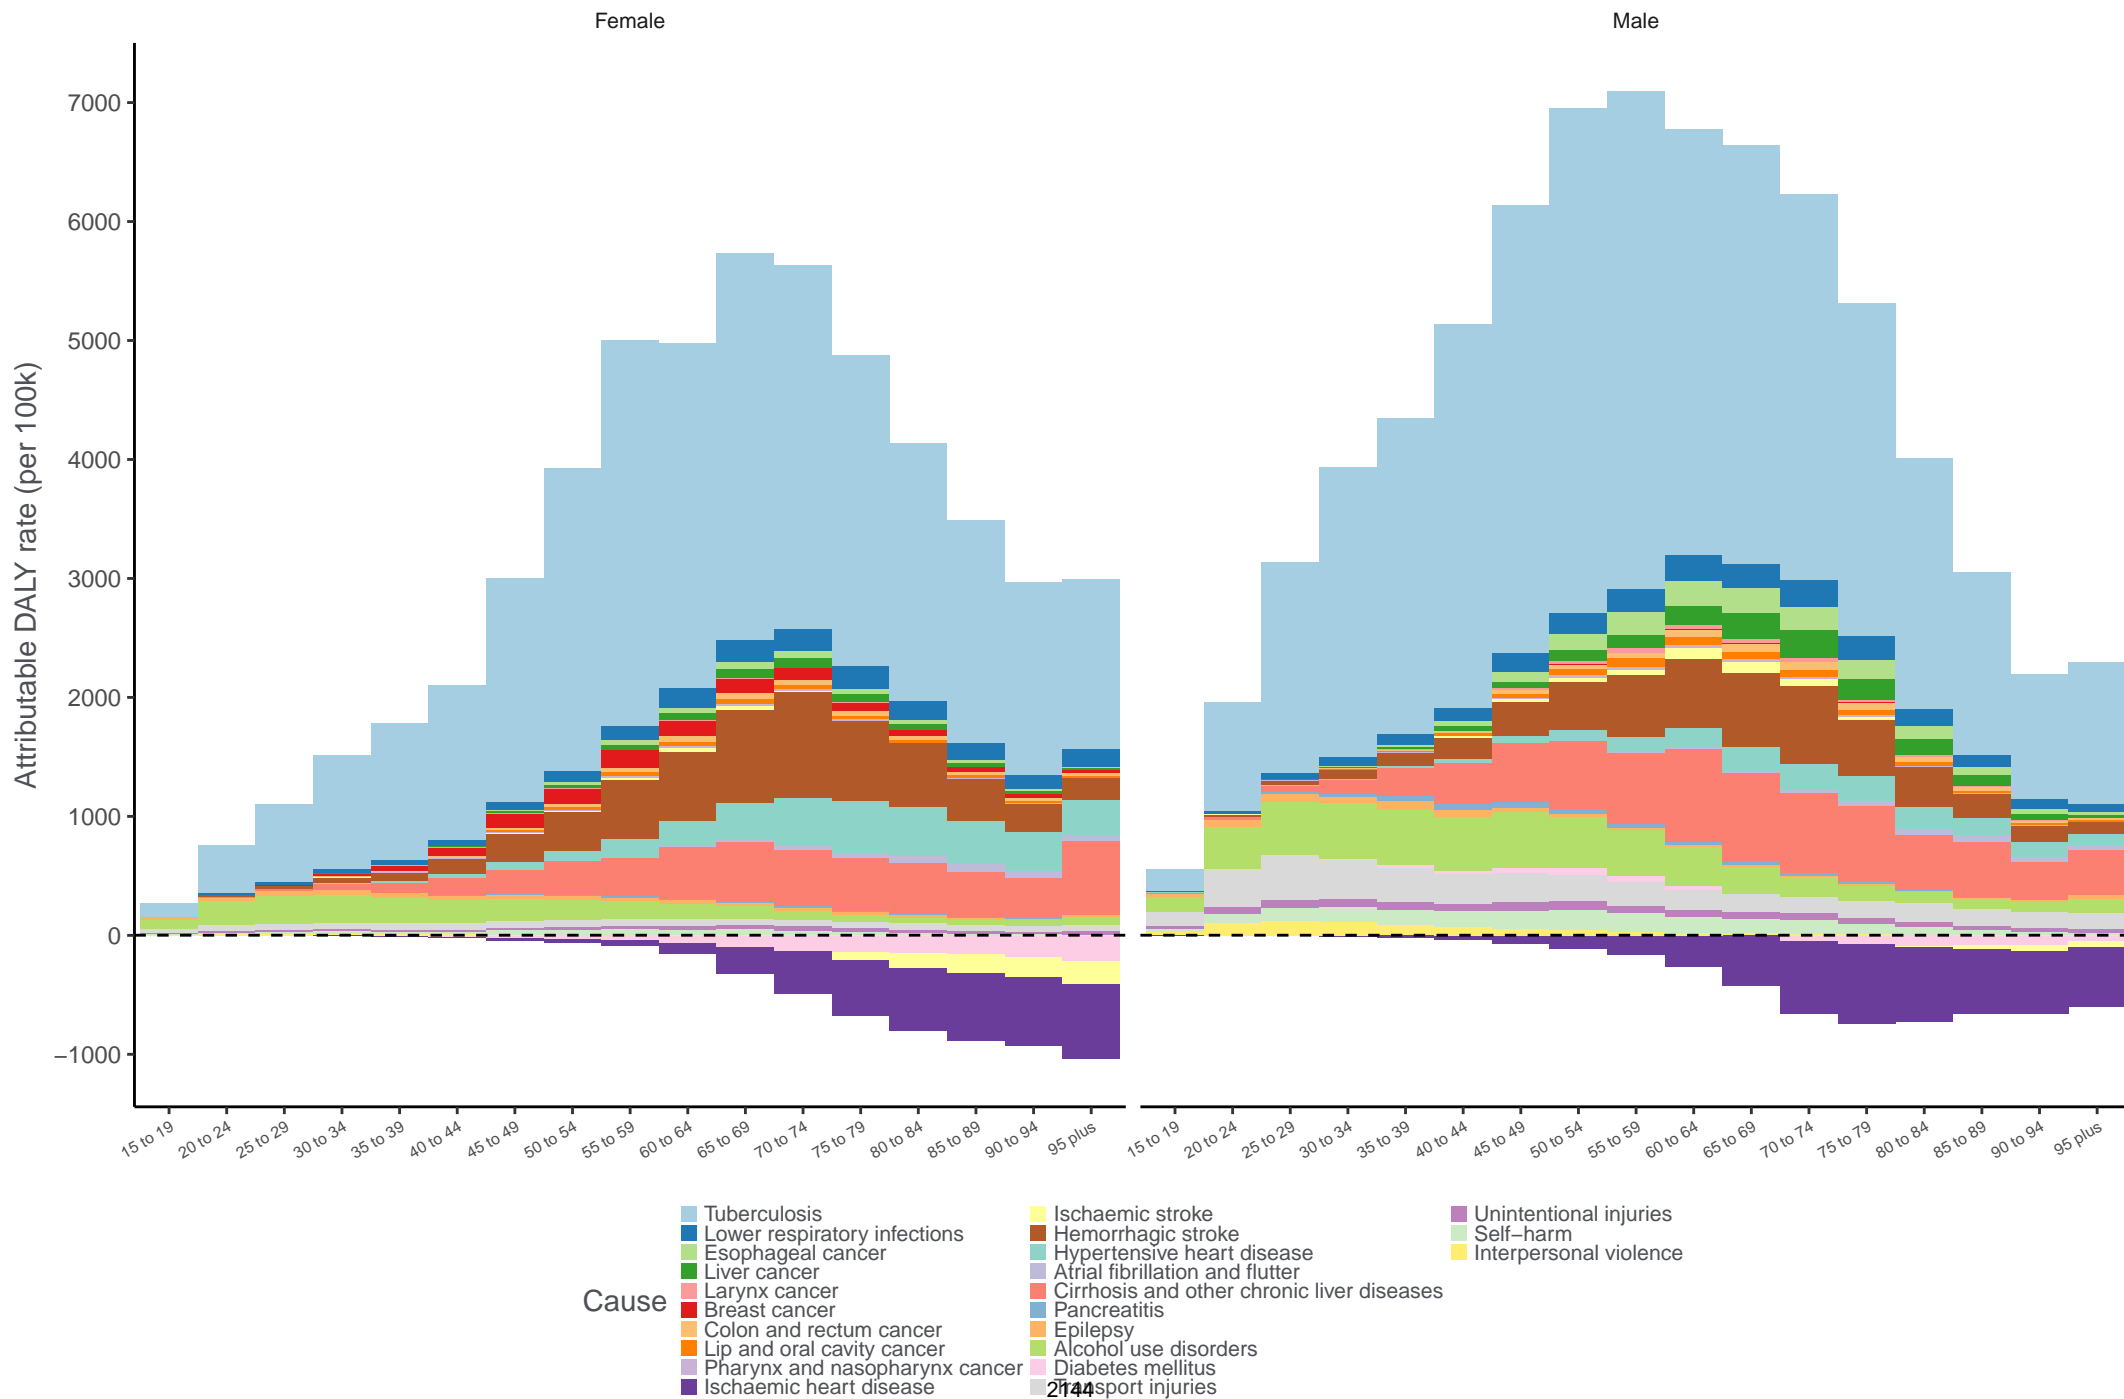

Attributable DALY rate disaggregated by cause, Equatorial Guinea, by sex and age in 2016.

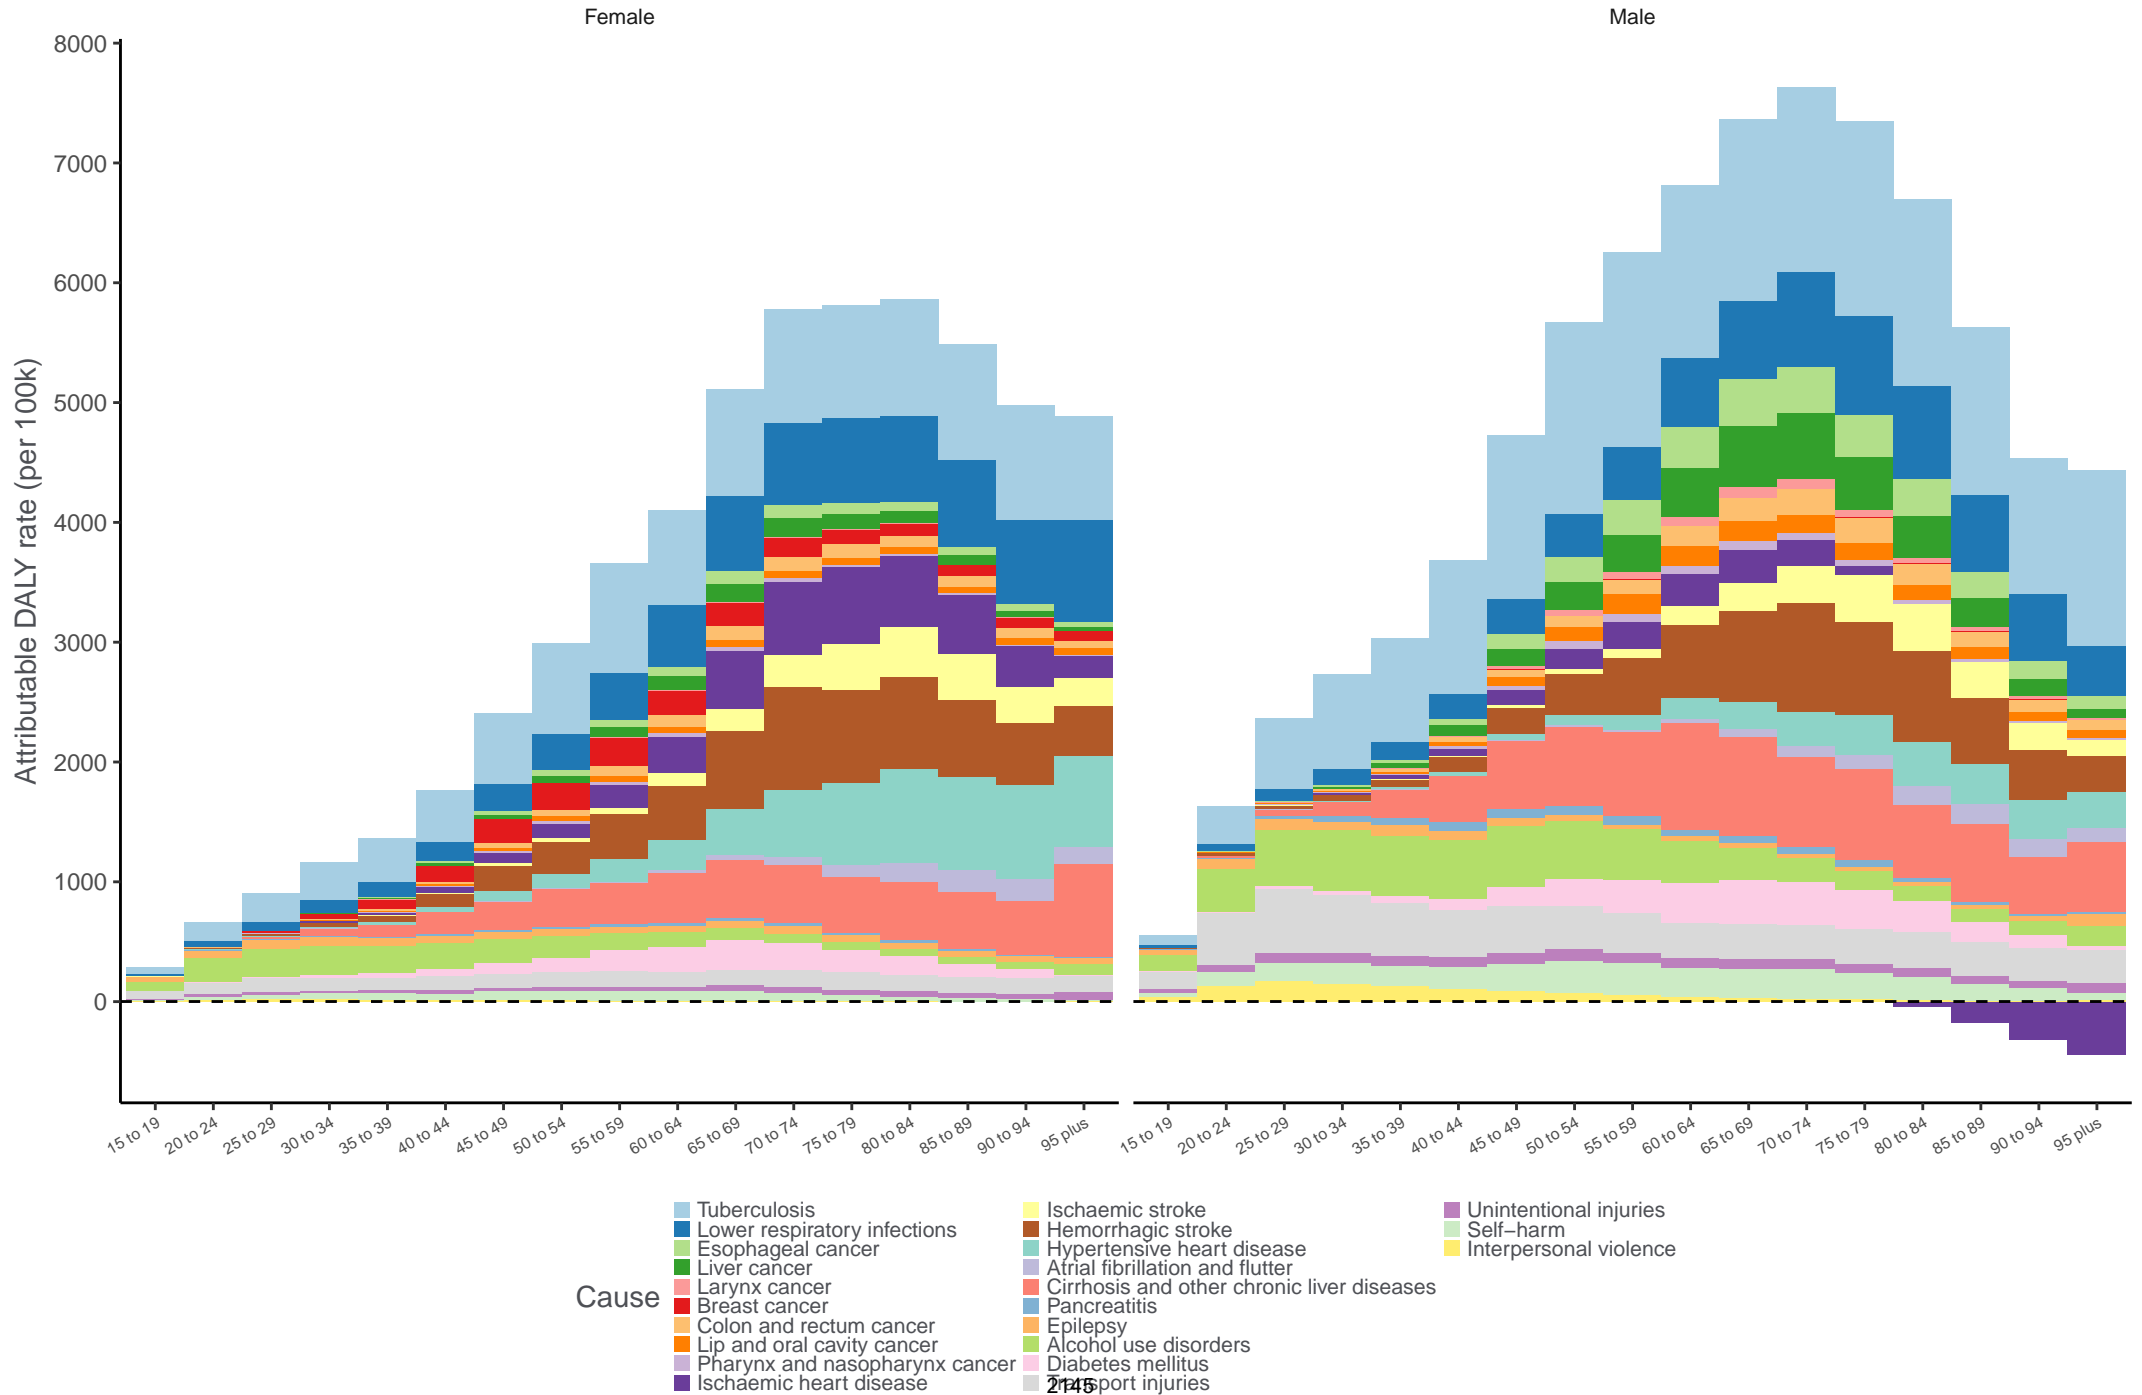

Attributable DALY rate disaggregated by cause, Gabon, by sex and age in 2016.

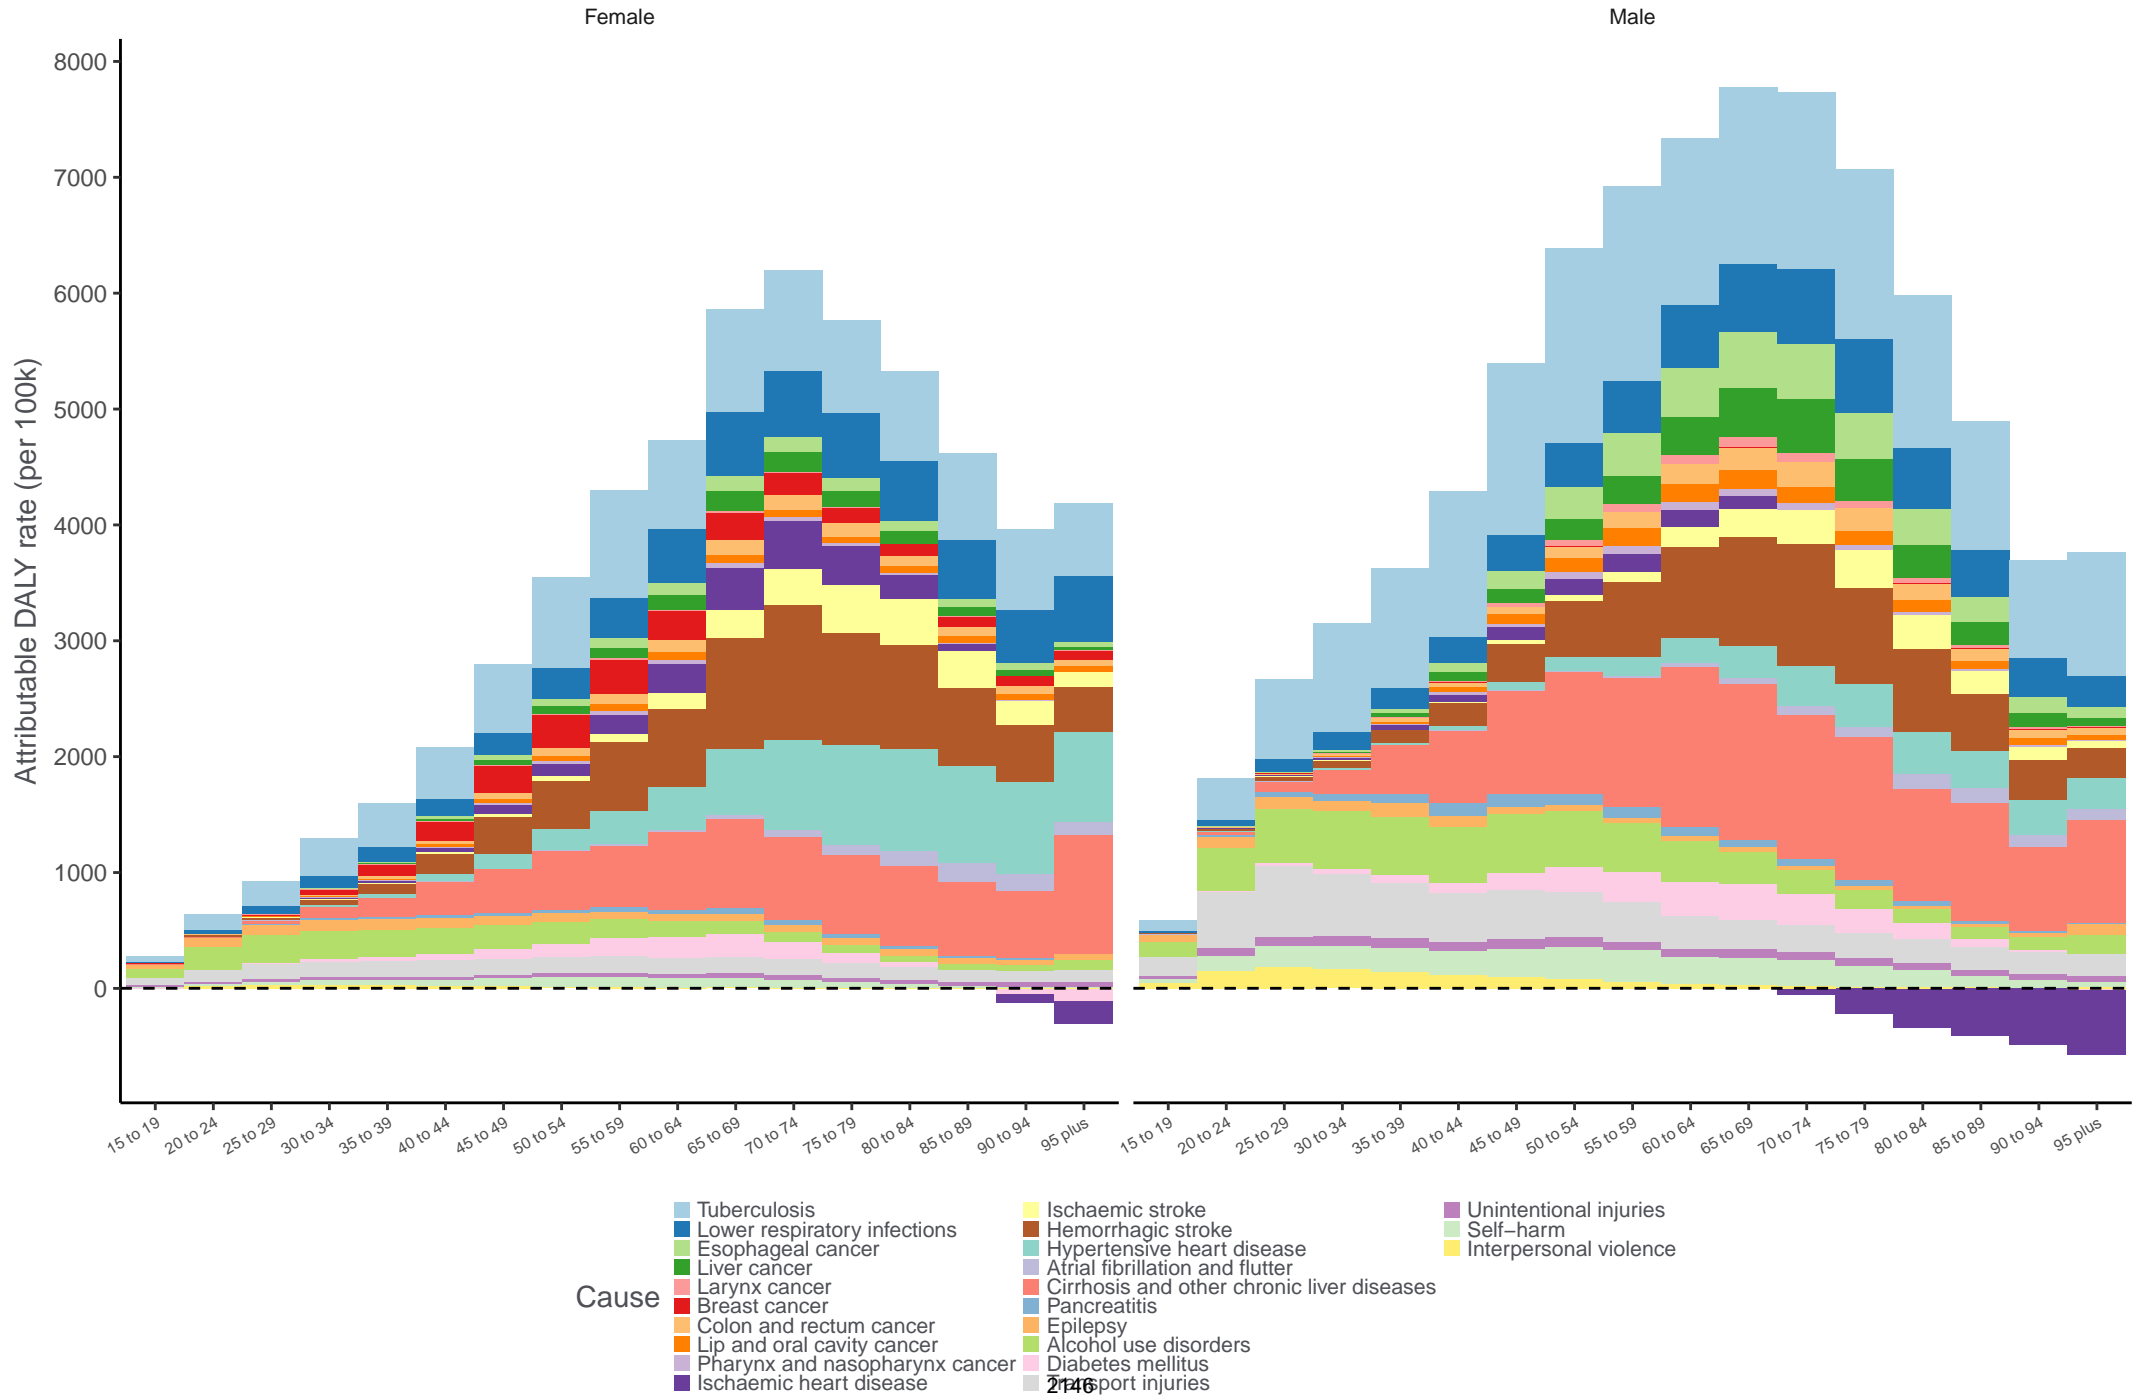

Cause

2146

Attributable DALY rate disaggregated by cause, Burundi, by sex and age in 2016.

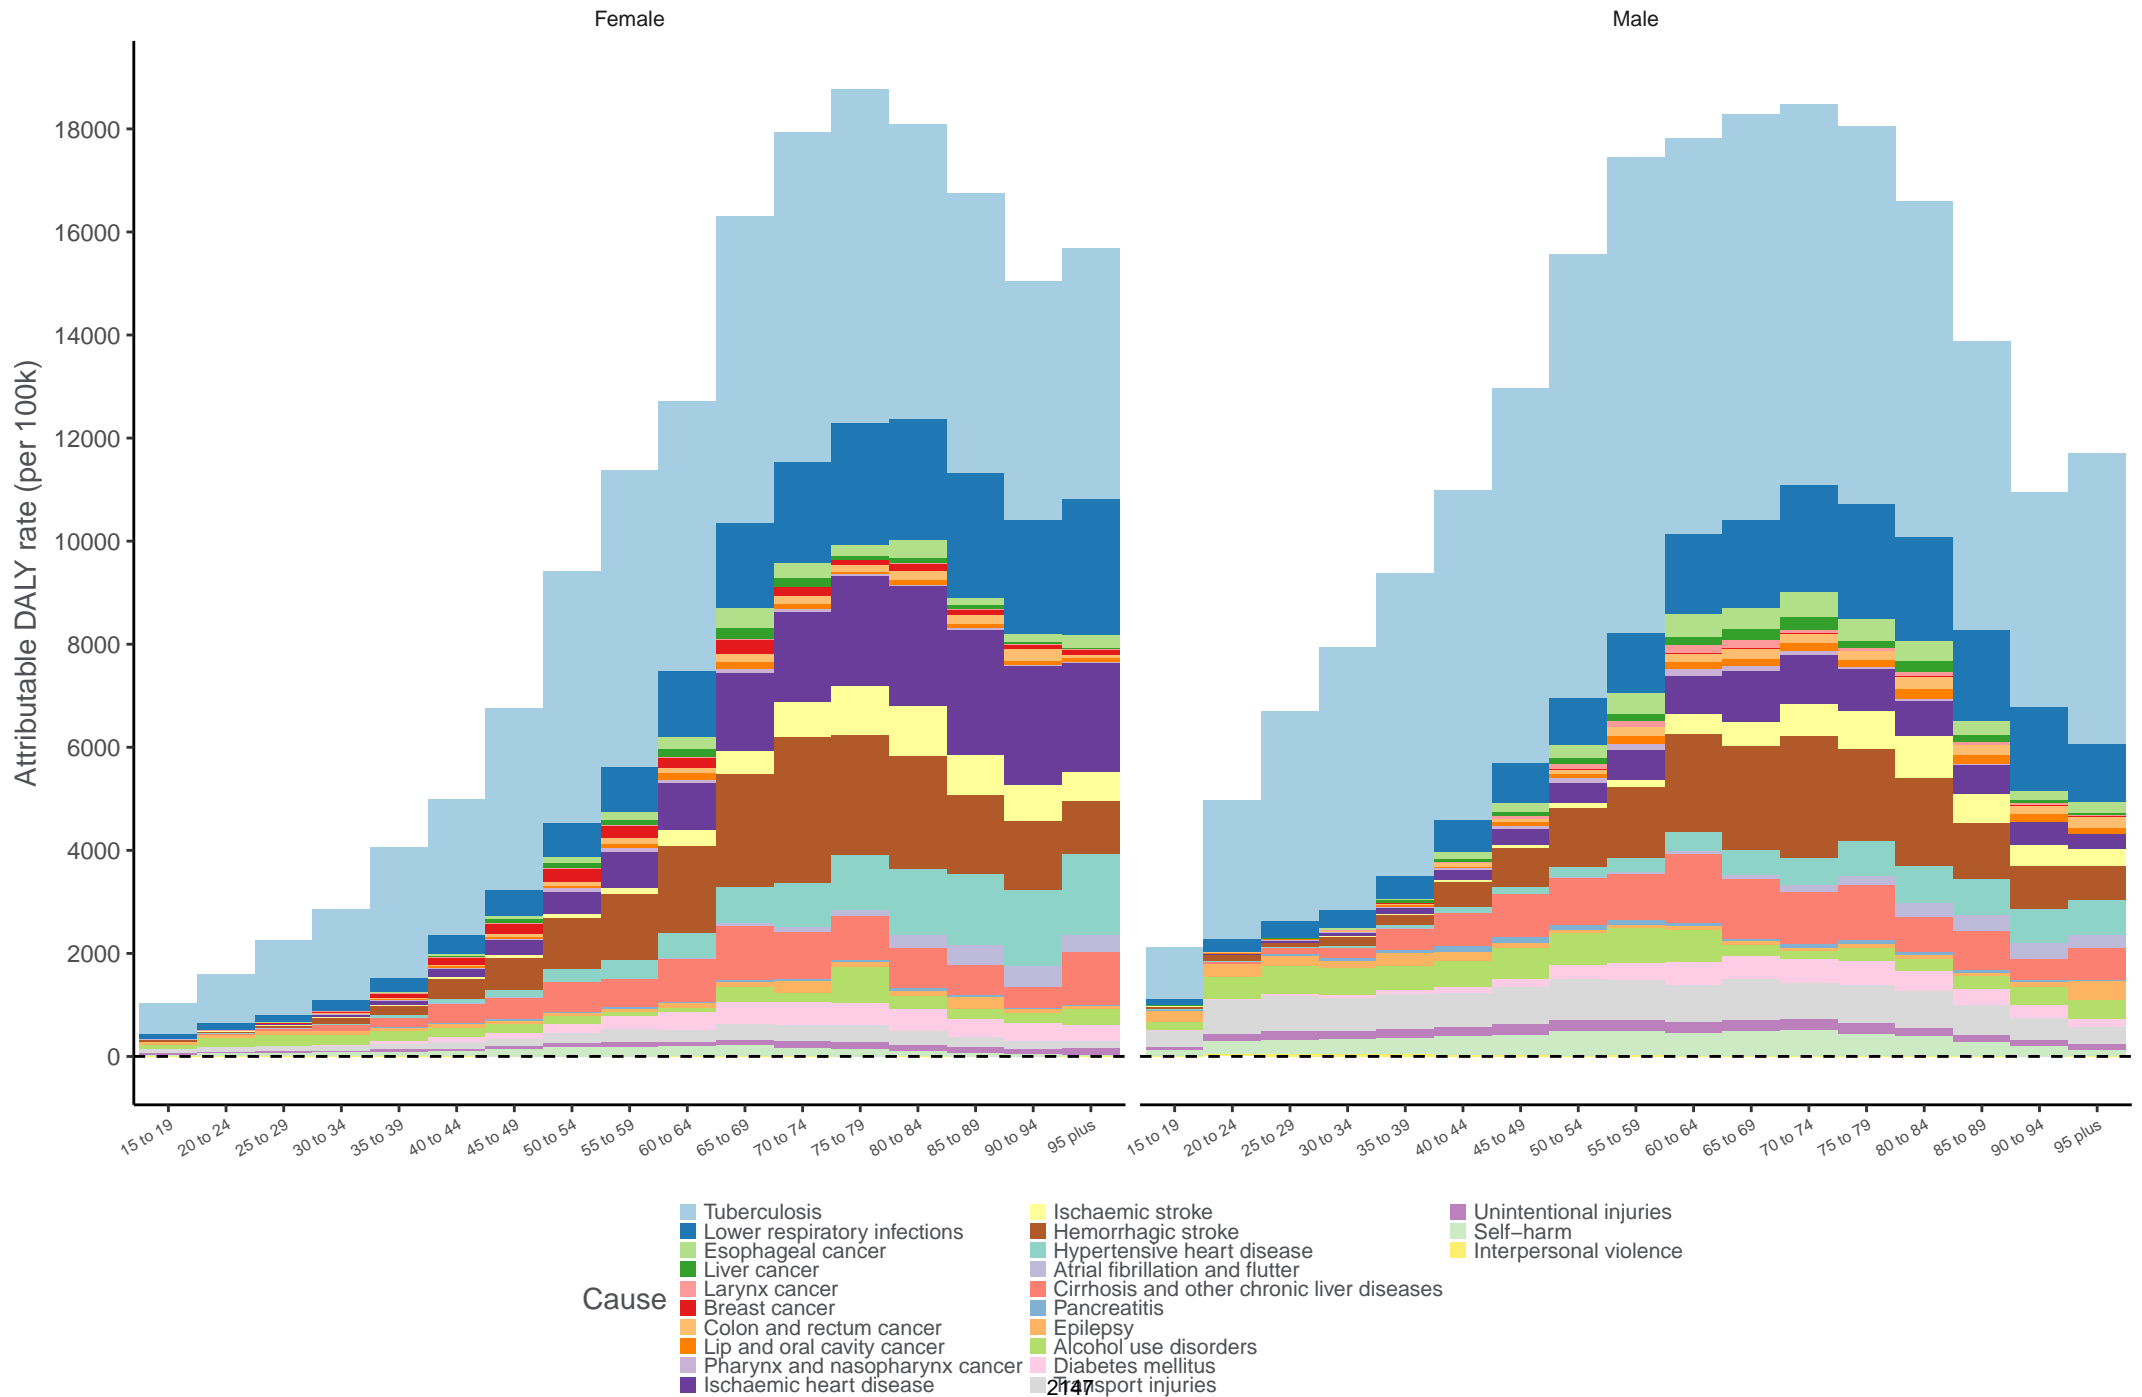

Attributable DALY rate disaggregated by cause, Comoros, by sex and age in 2016.

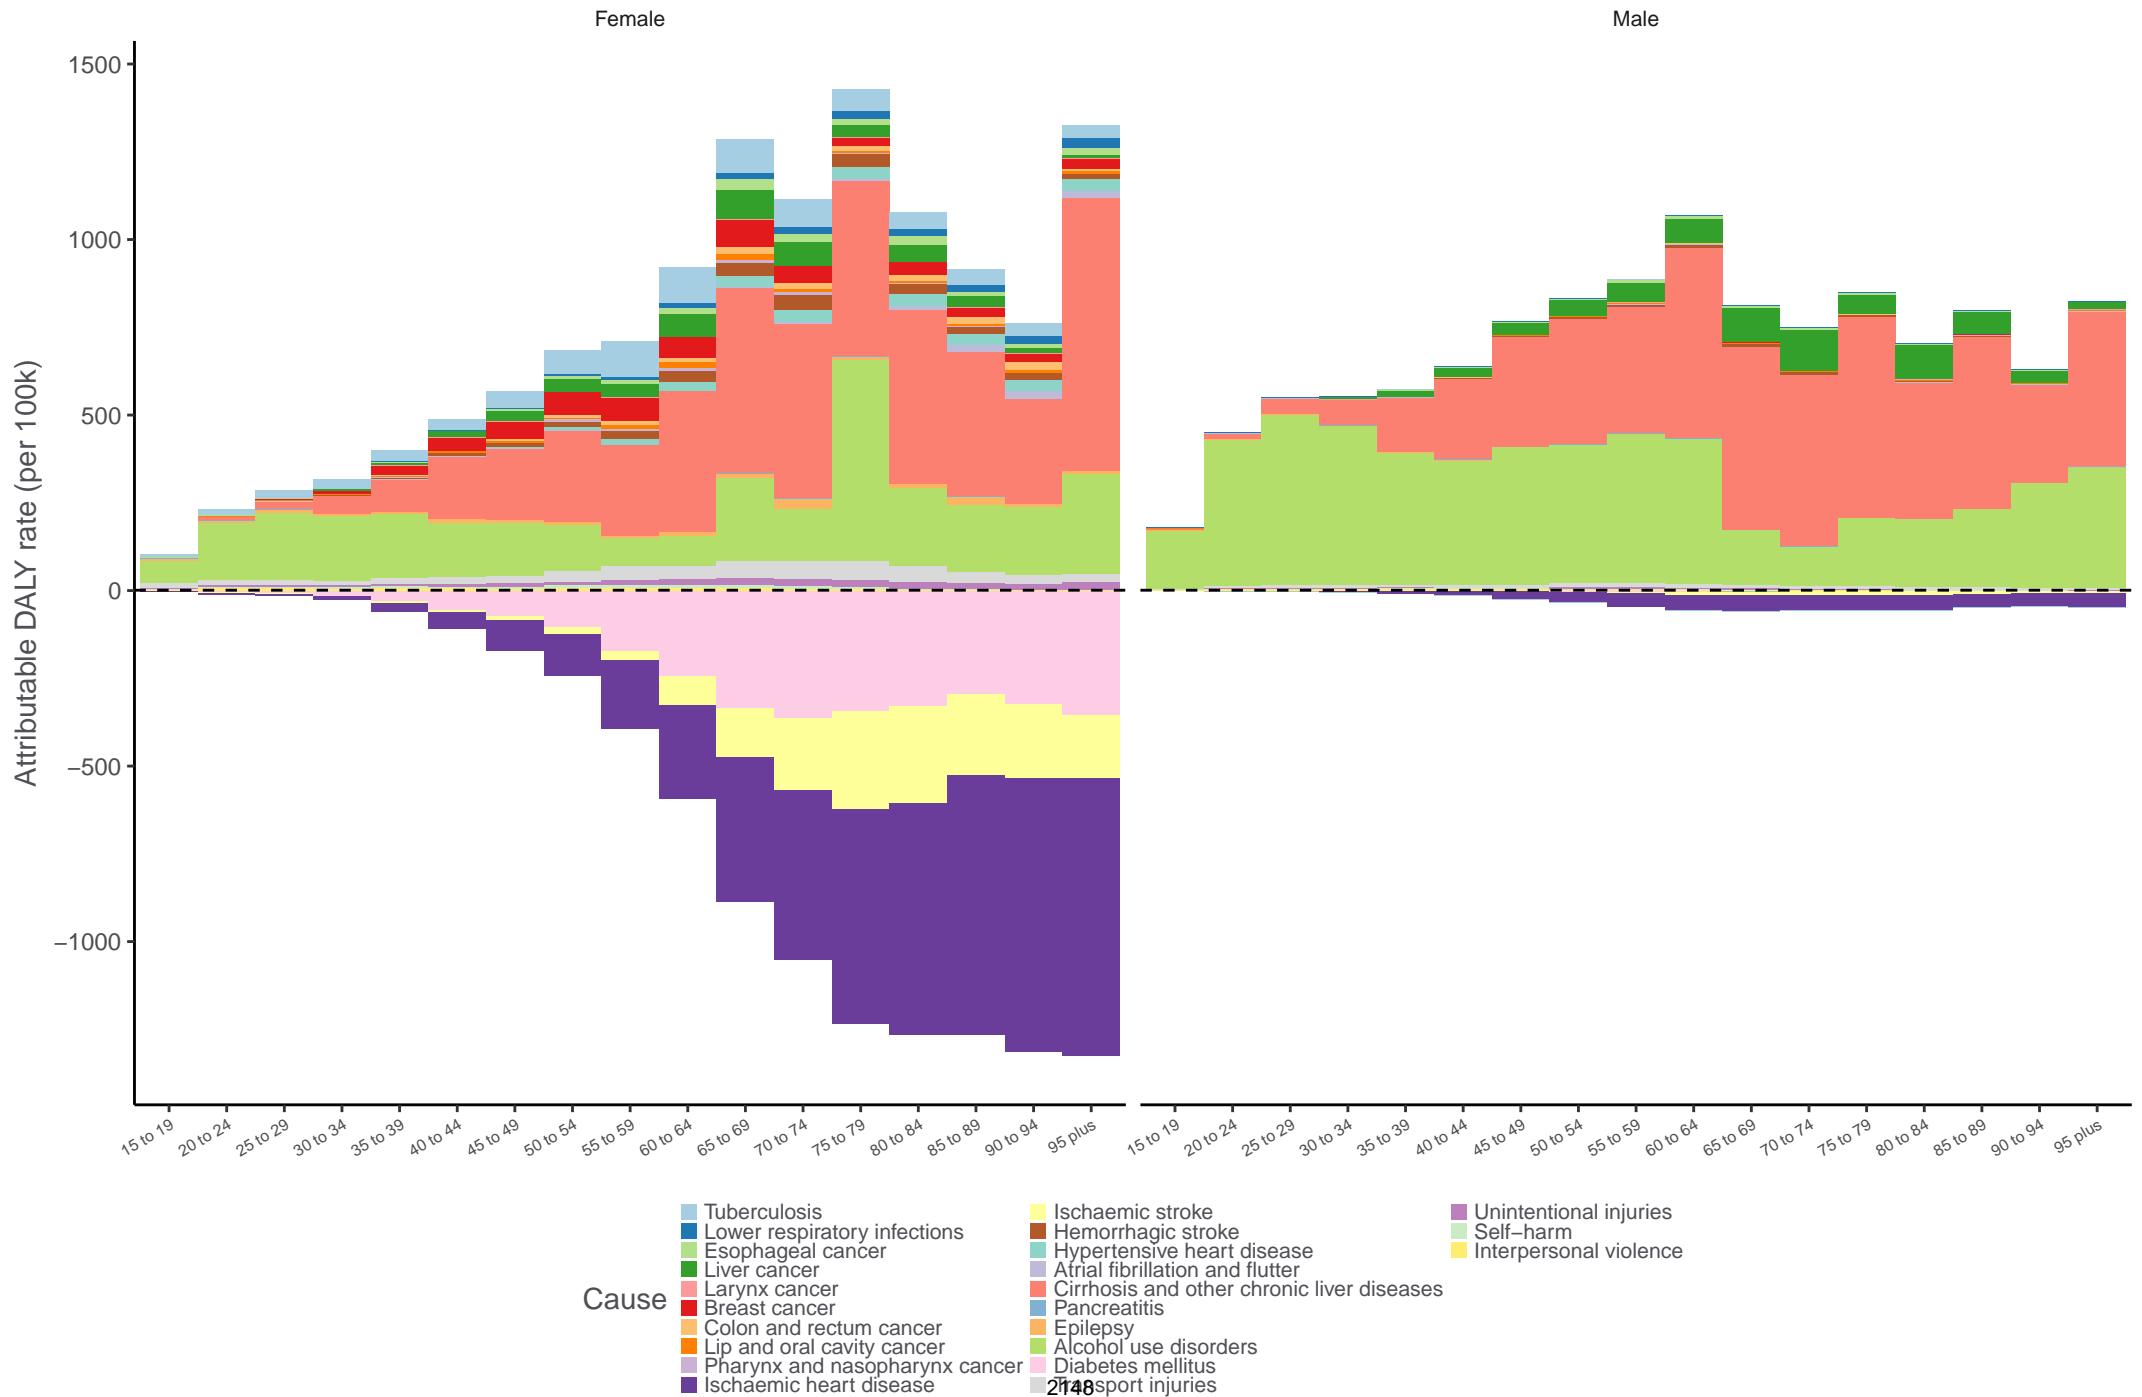

Attributable DALY rate disaggregated by cause, Djibouti, by sex and age in 2016.

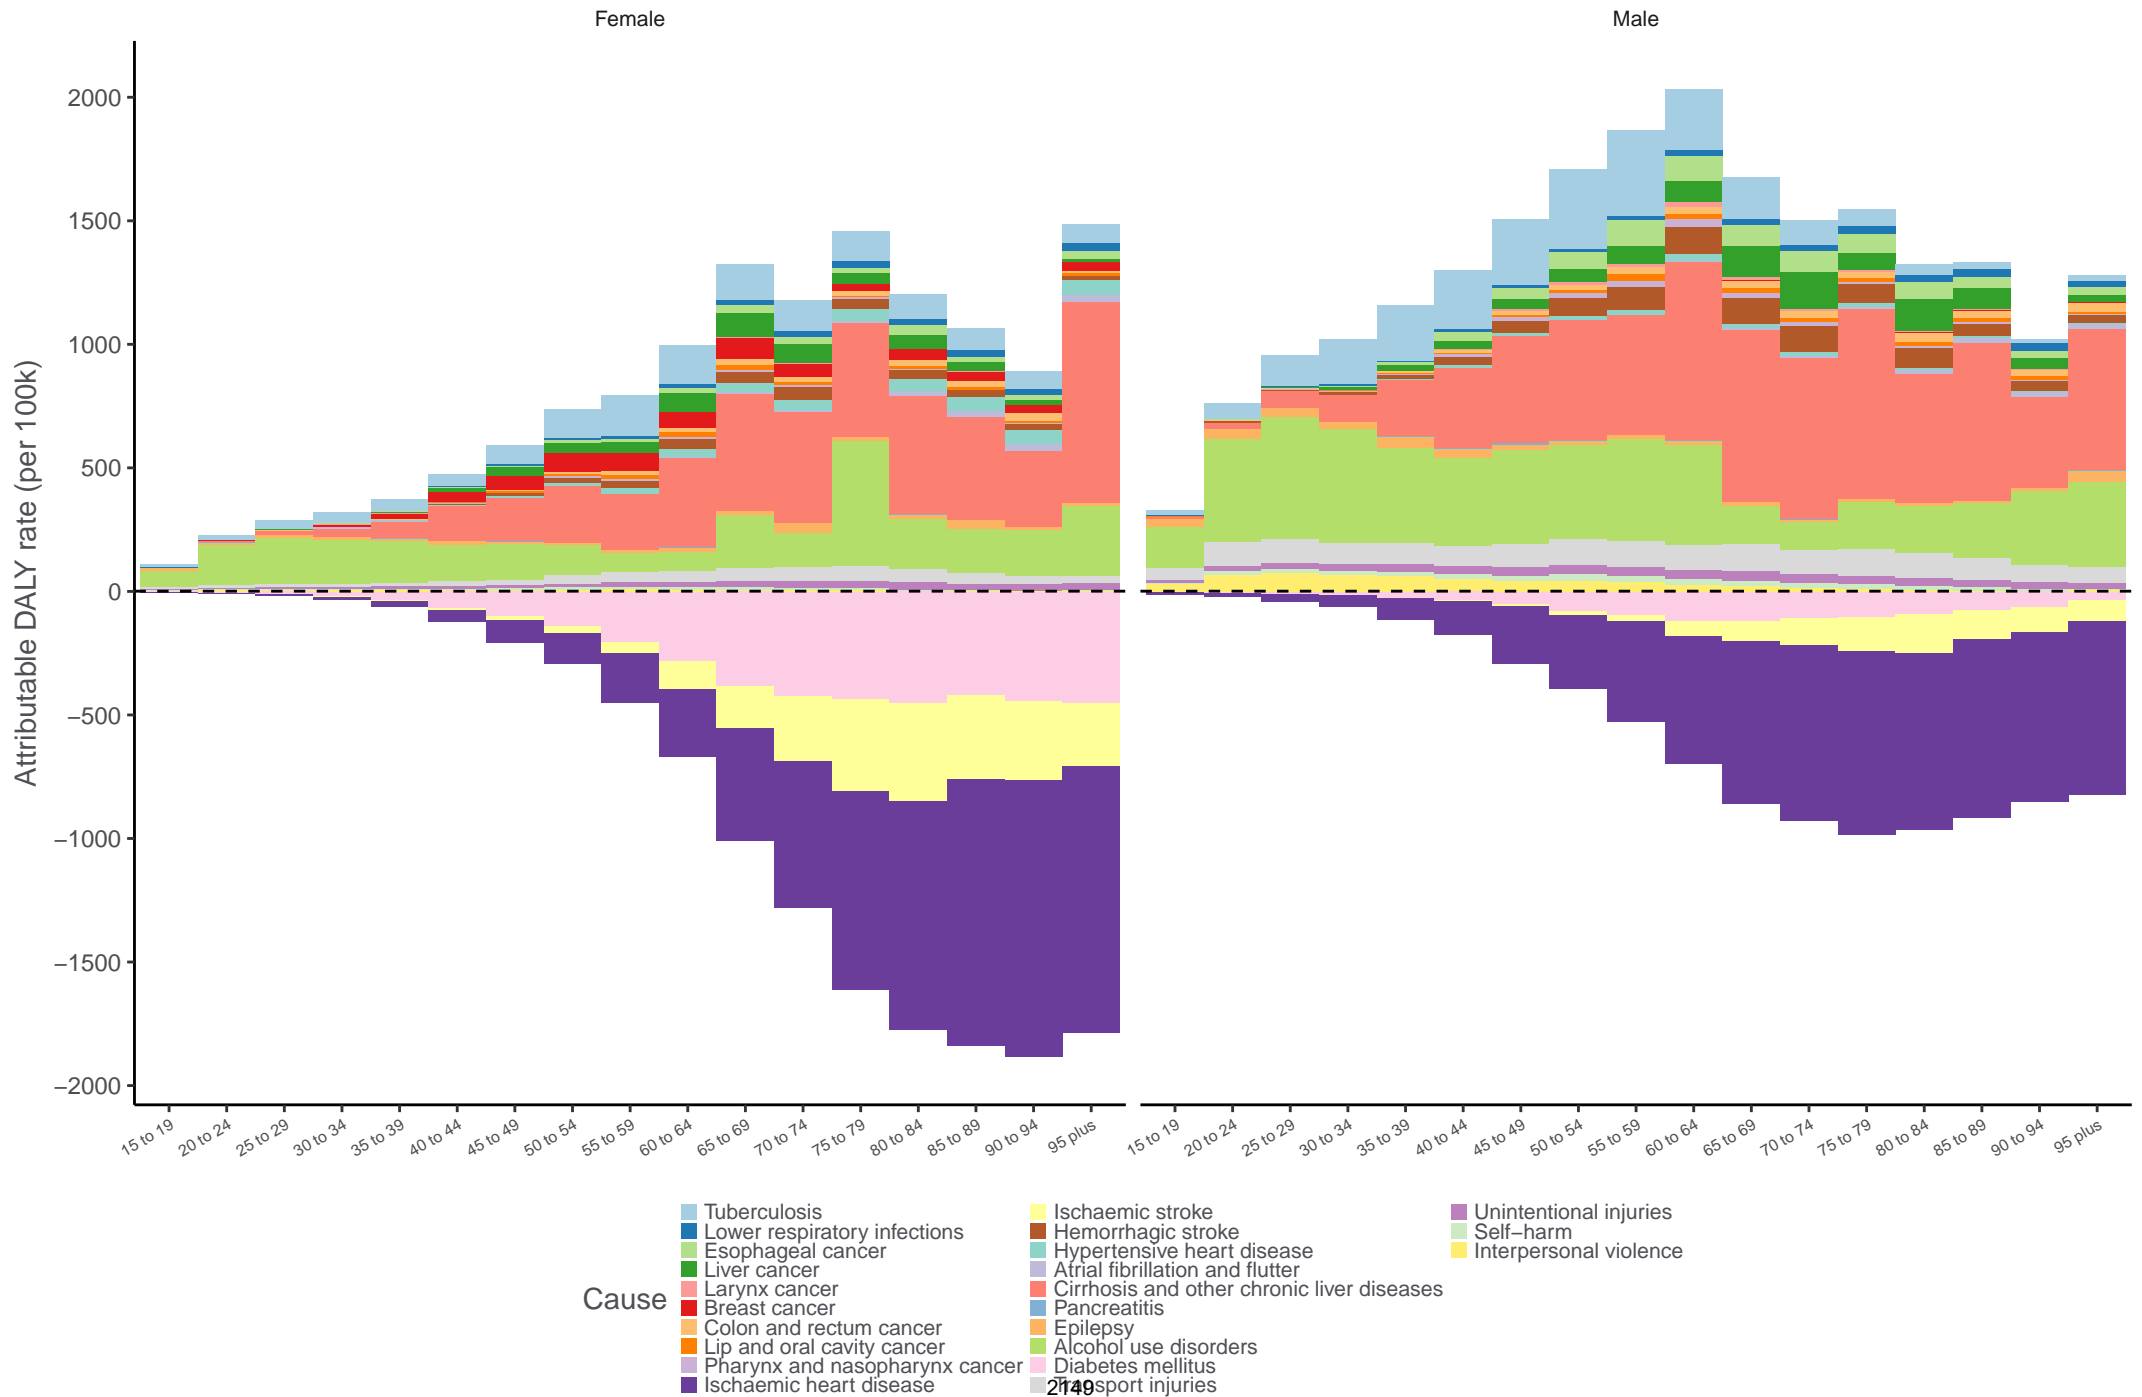

Attributable DALY rate disaggregated by cause, Eritrea, by sex and age in 2016.

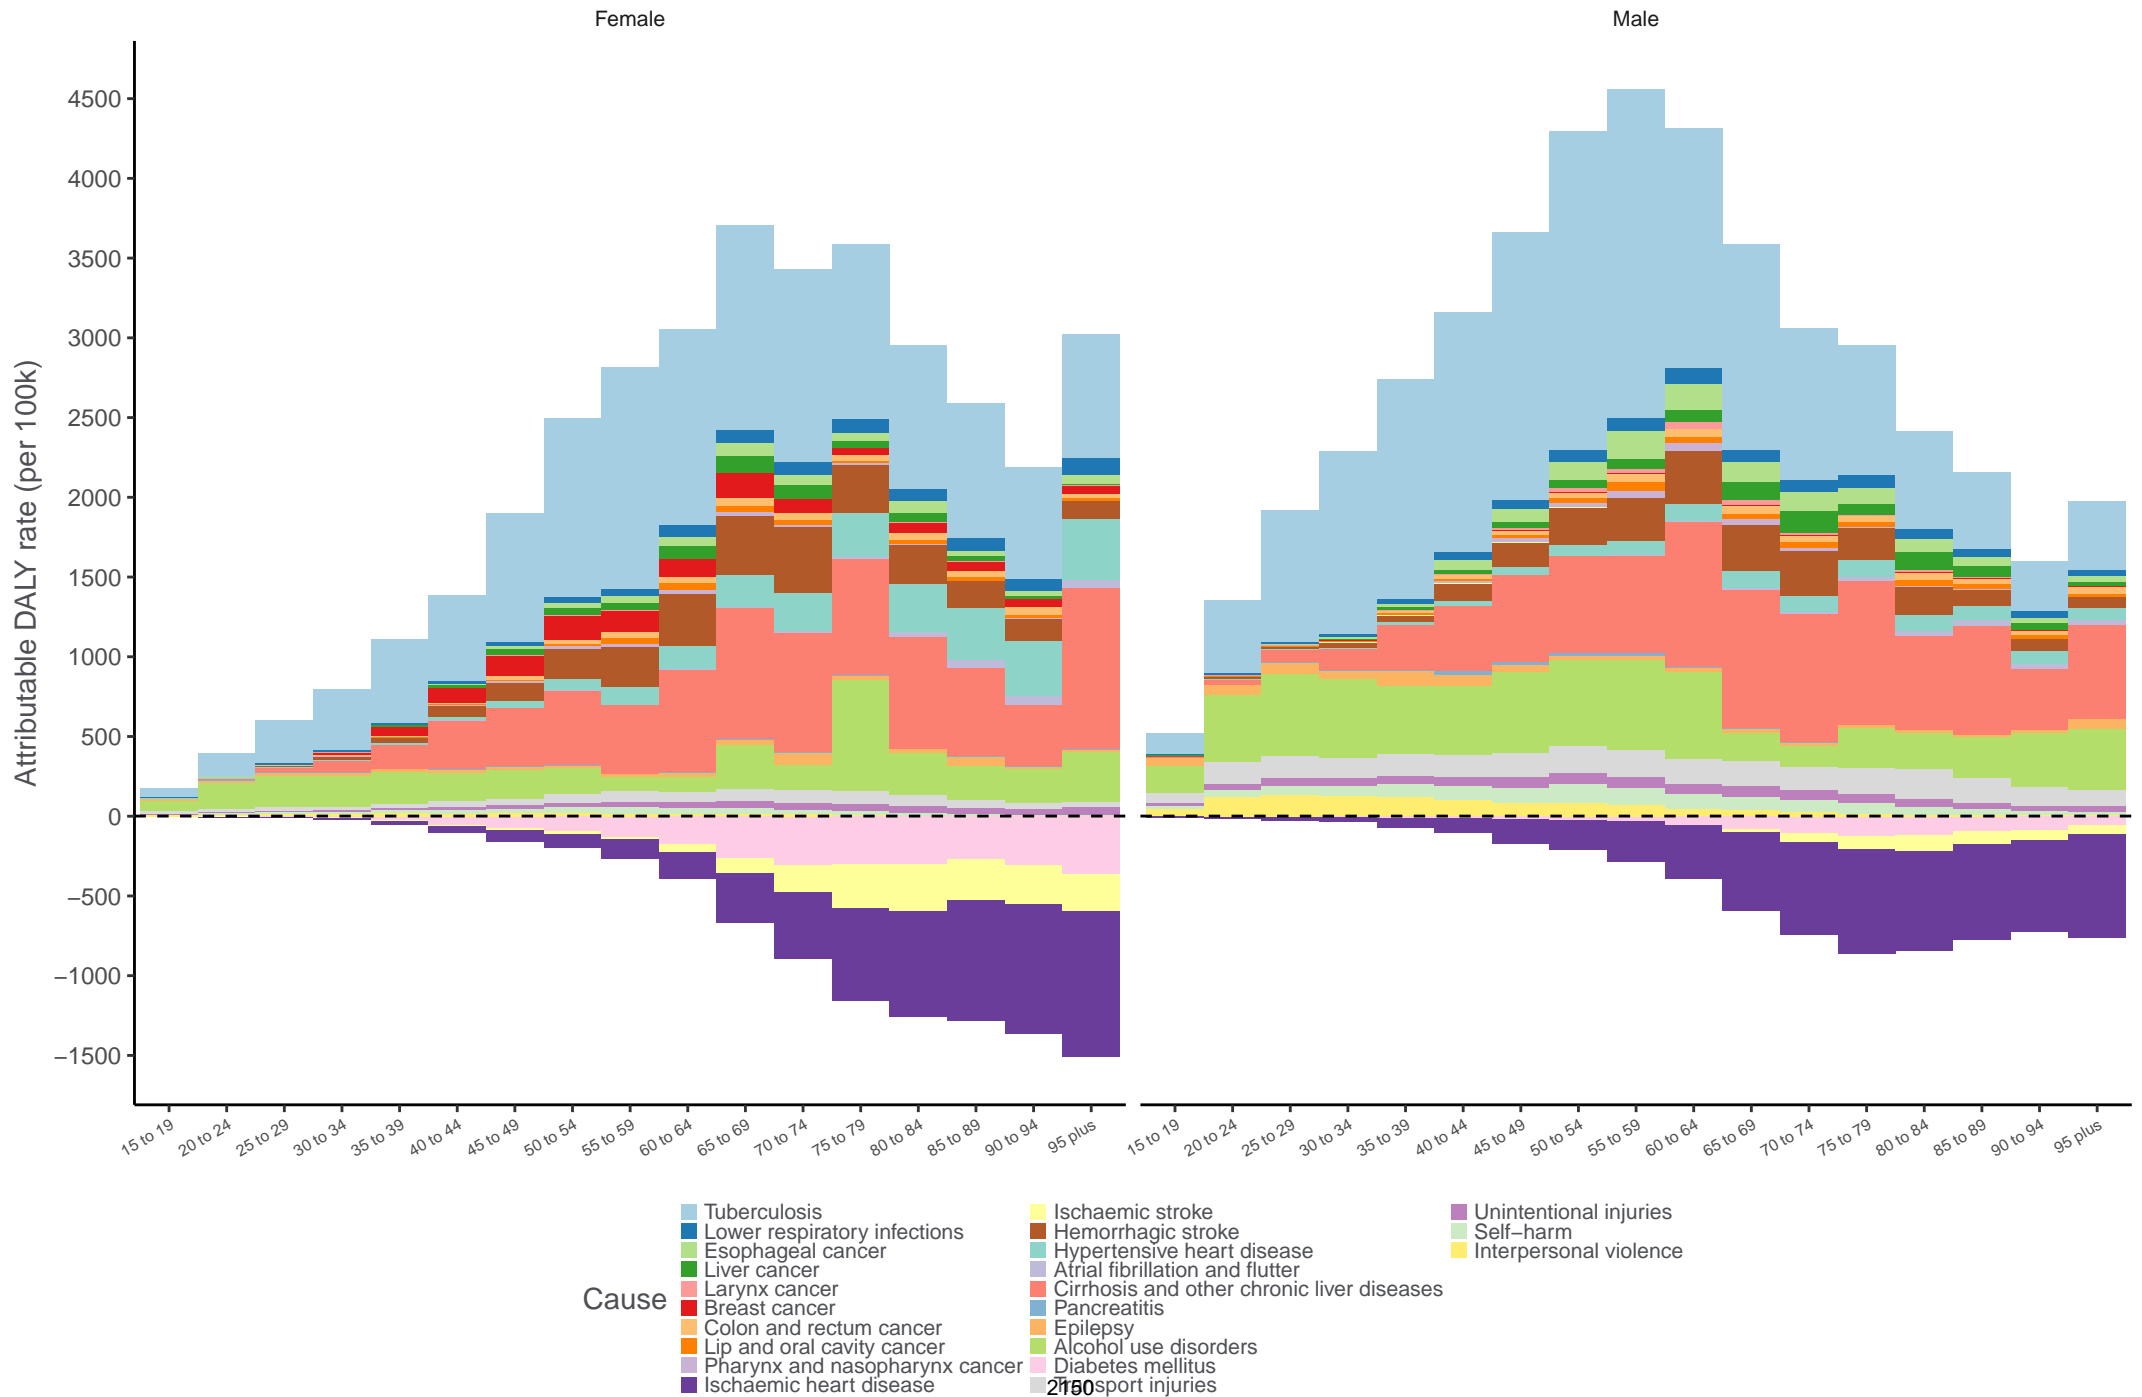

Attributable DALY rate disaggregated by cause, Ethiopia, by sex and age in 2016.

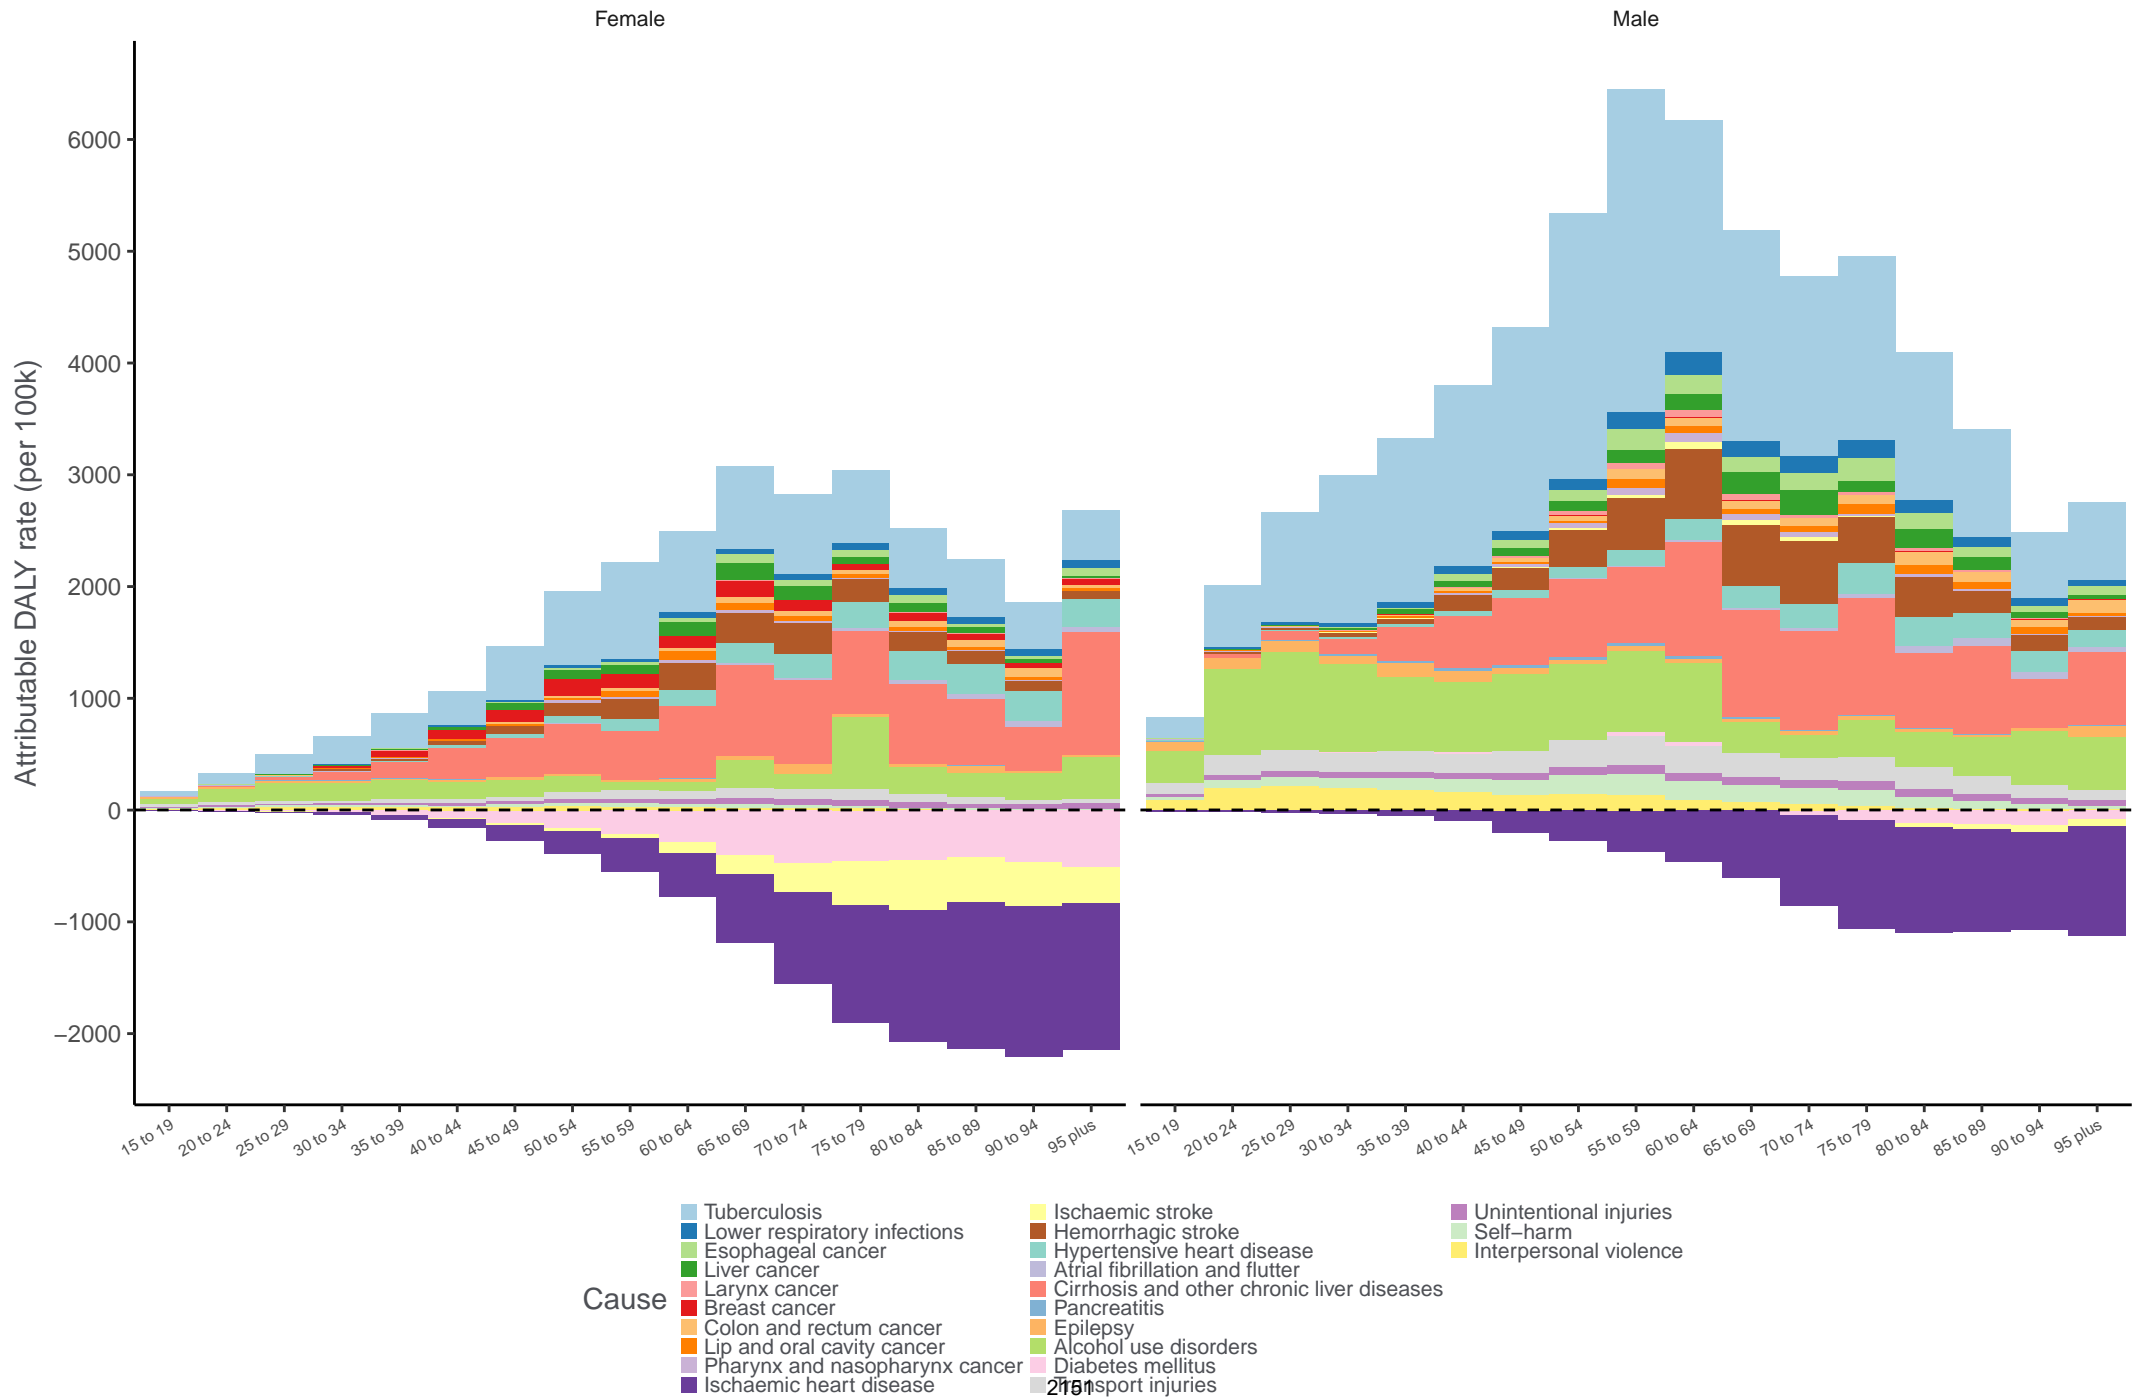



Attributable DALY rate disaggregated by cause, Kenya, by sex and age in 2016.

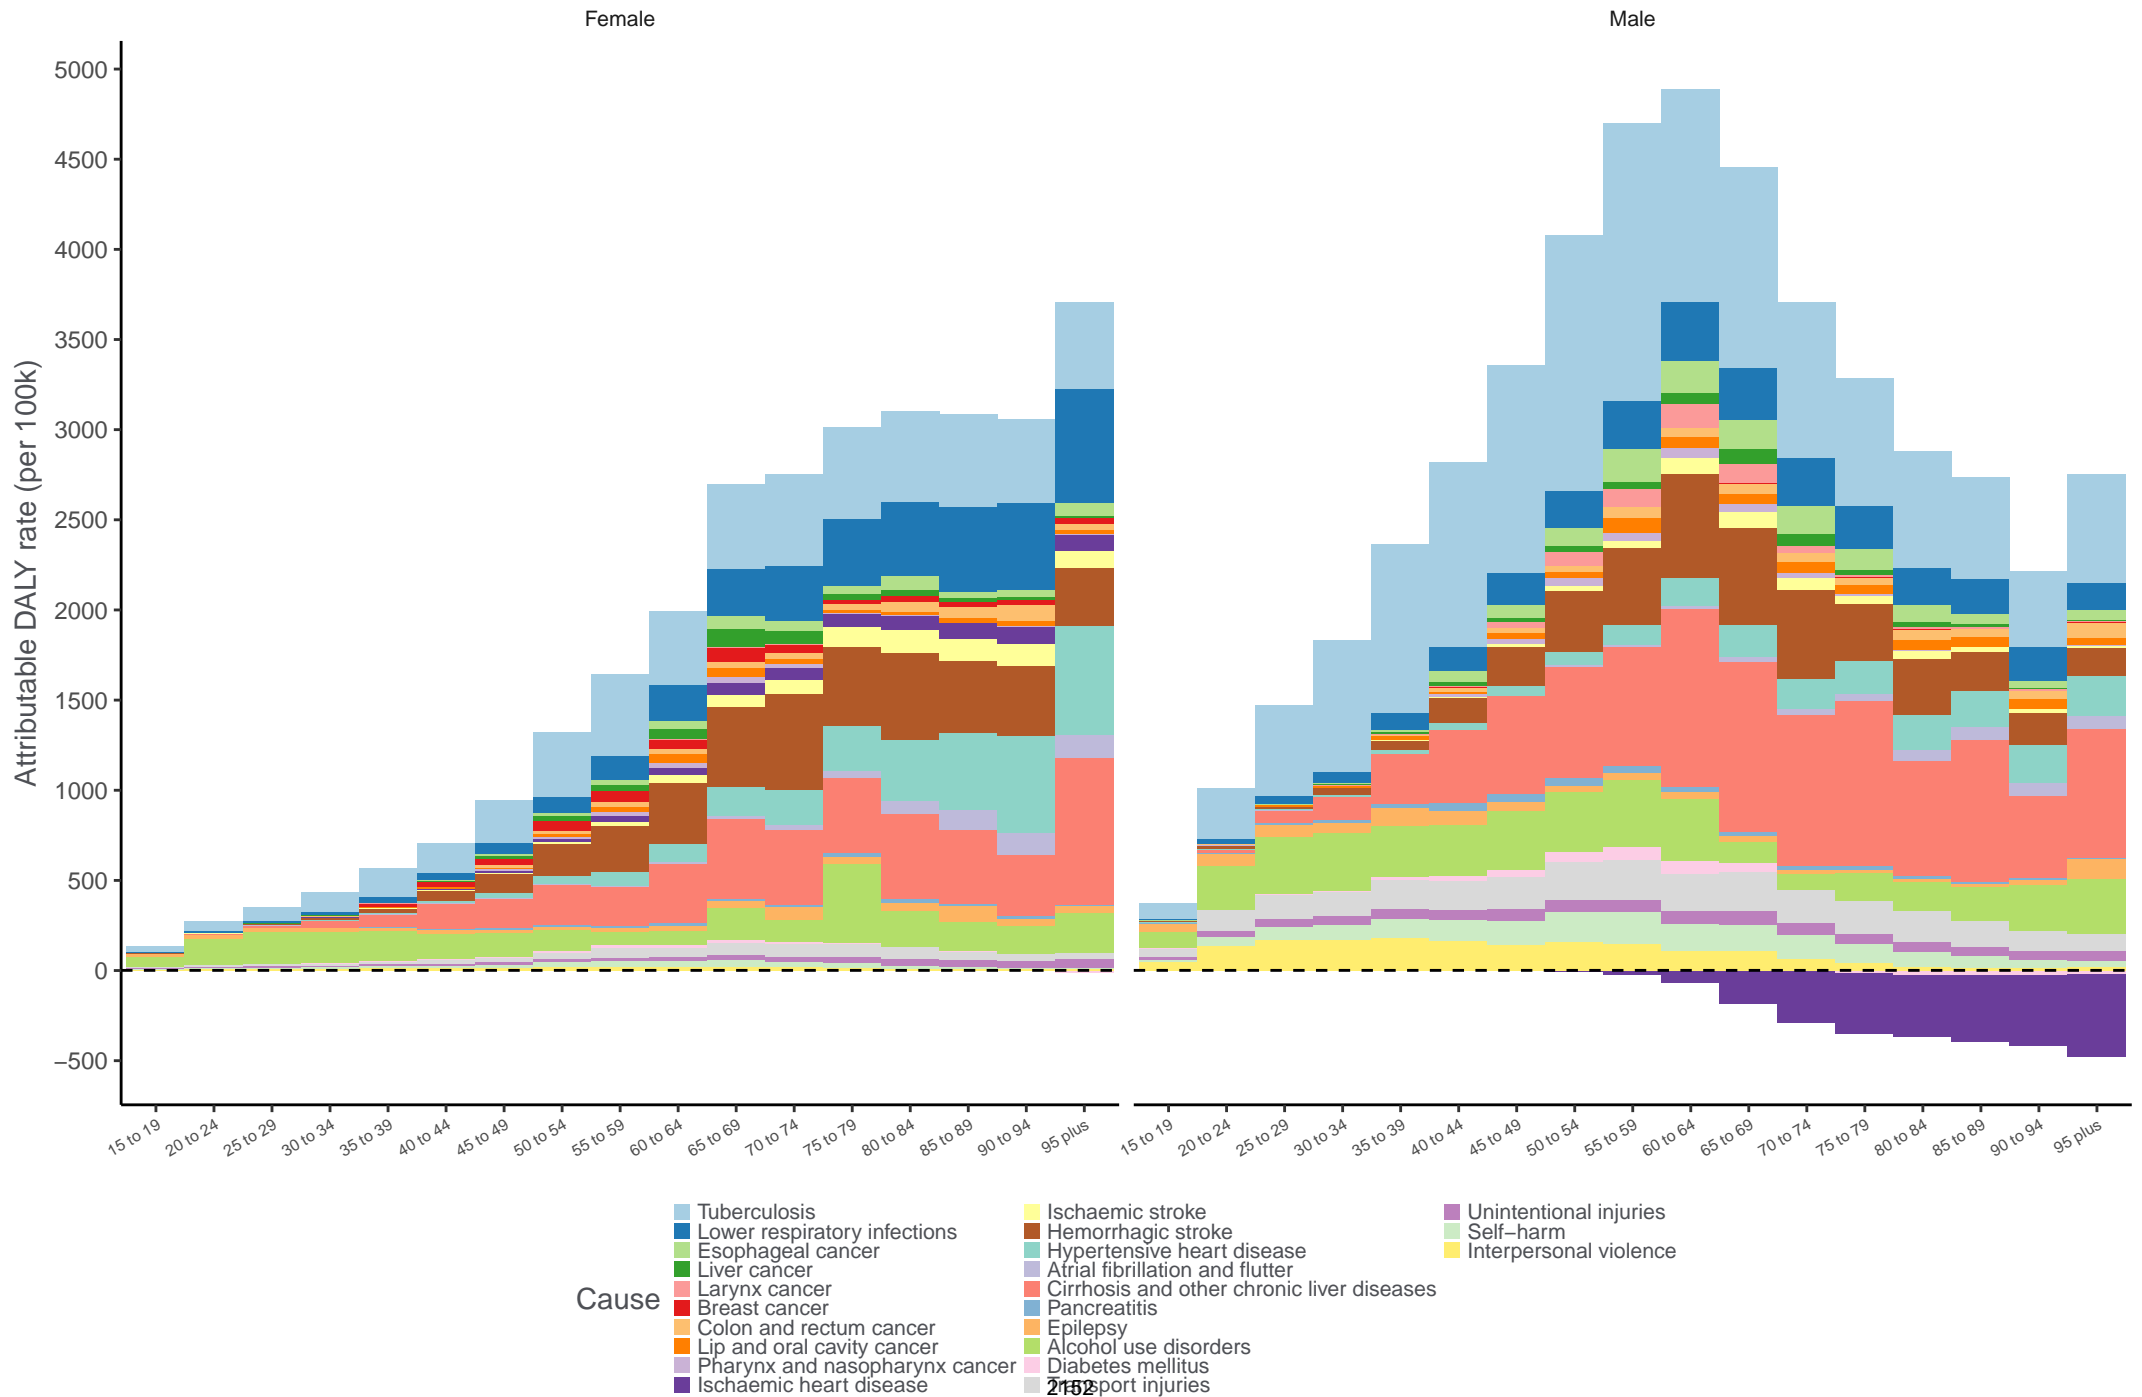

Attributable DALY rate disaggregated by cause, Madagascar, by sex and age in 2016.

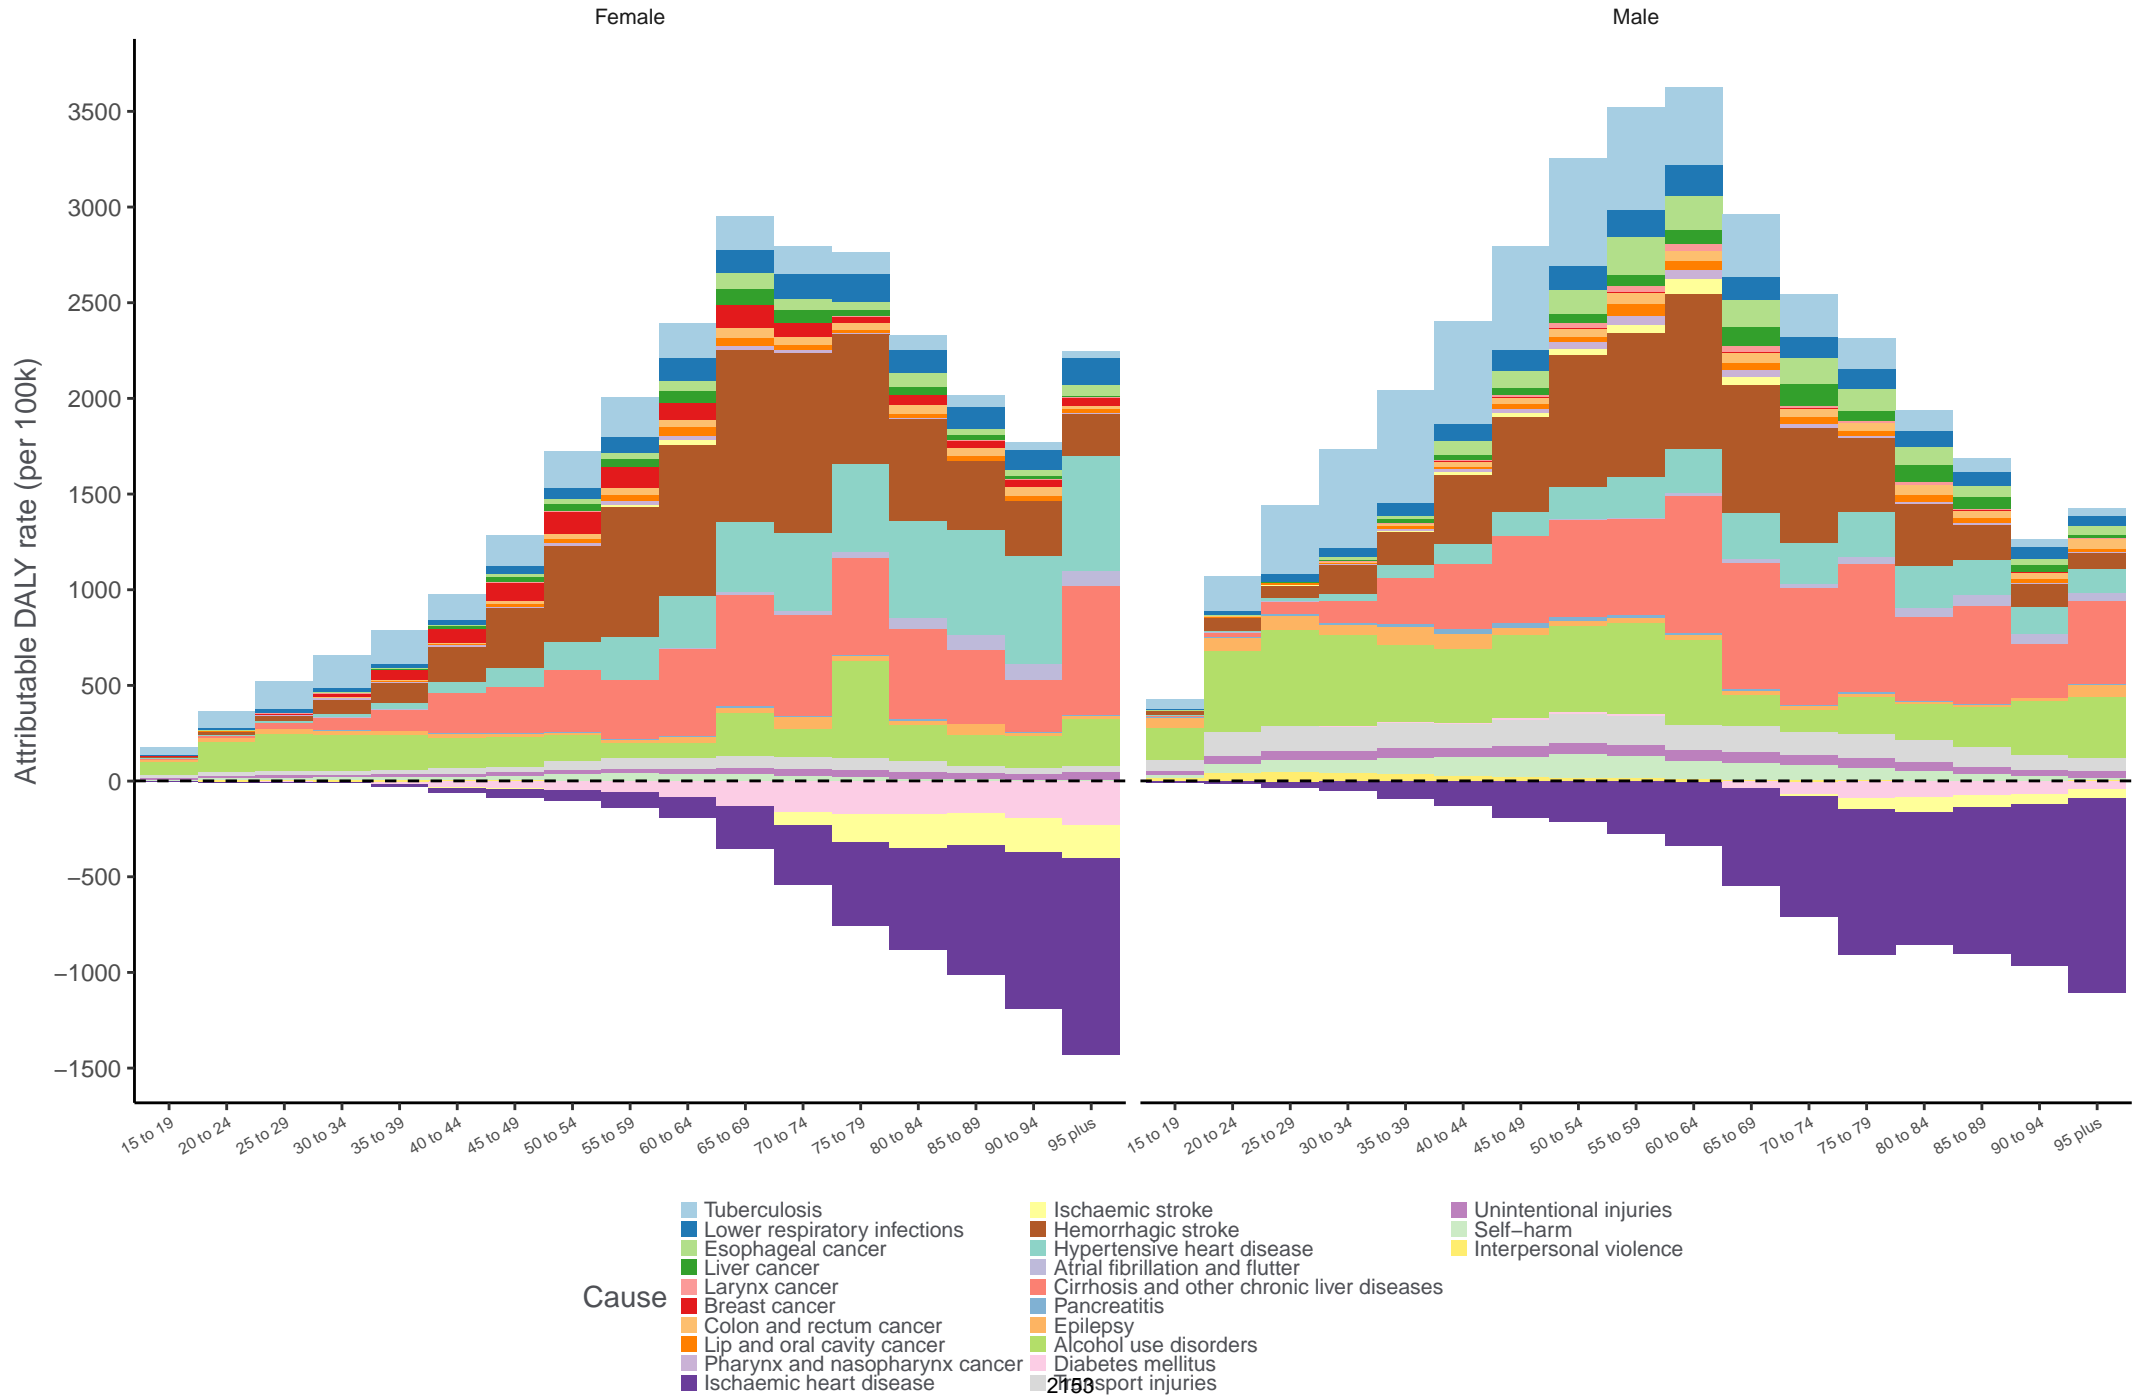

# Attributable DALY rate disaggregated by cause, Malawi, by sex and age in 2016.

Female

Male

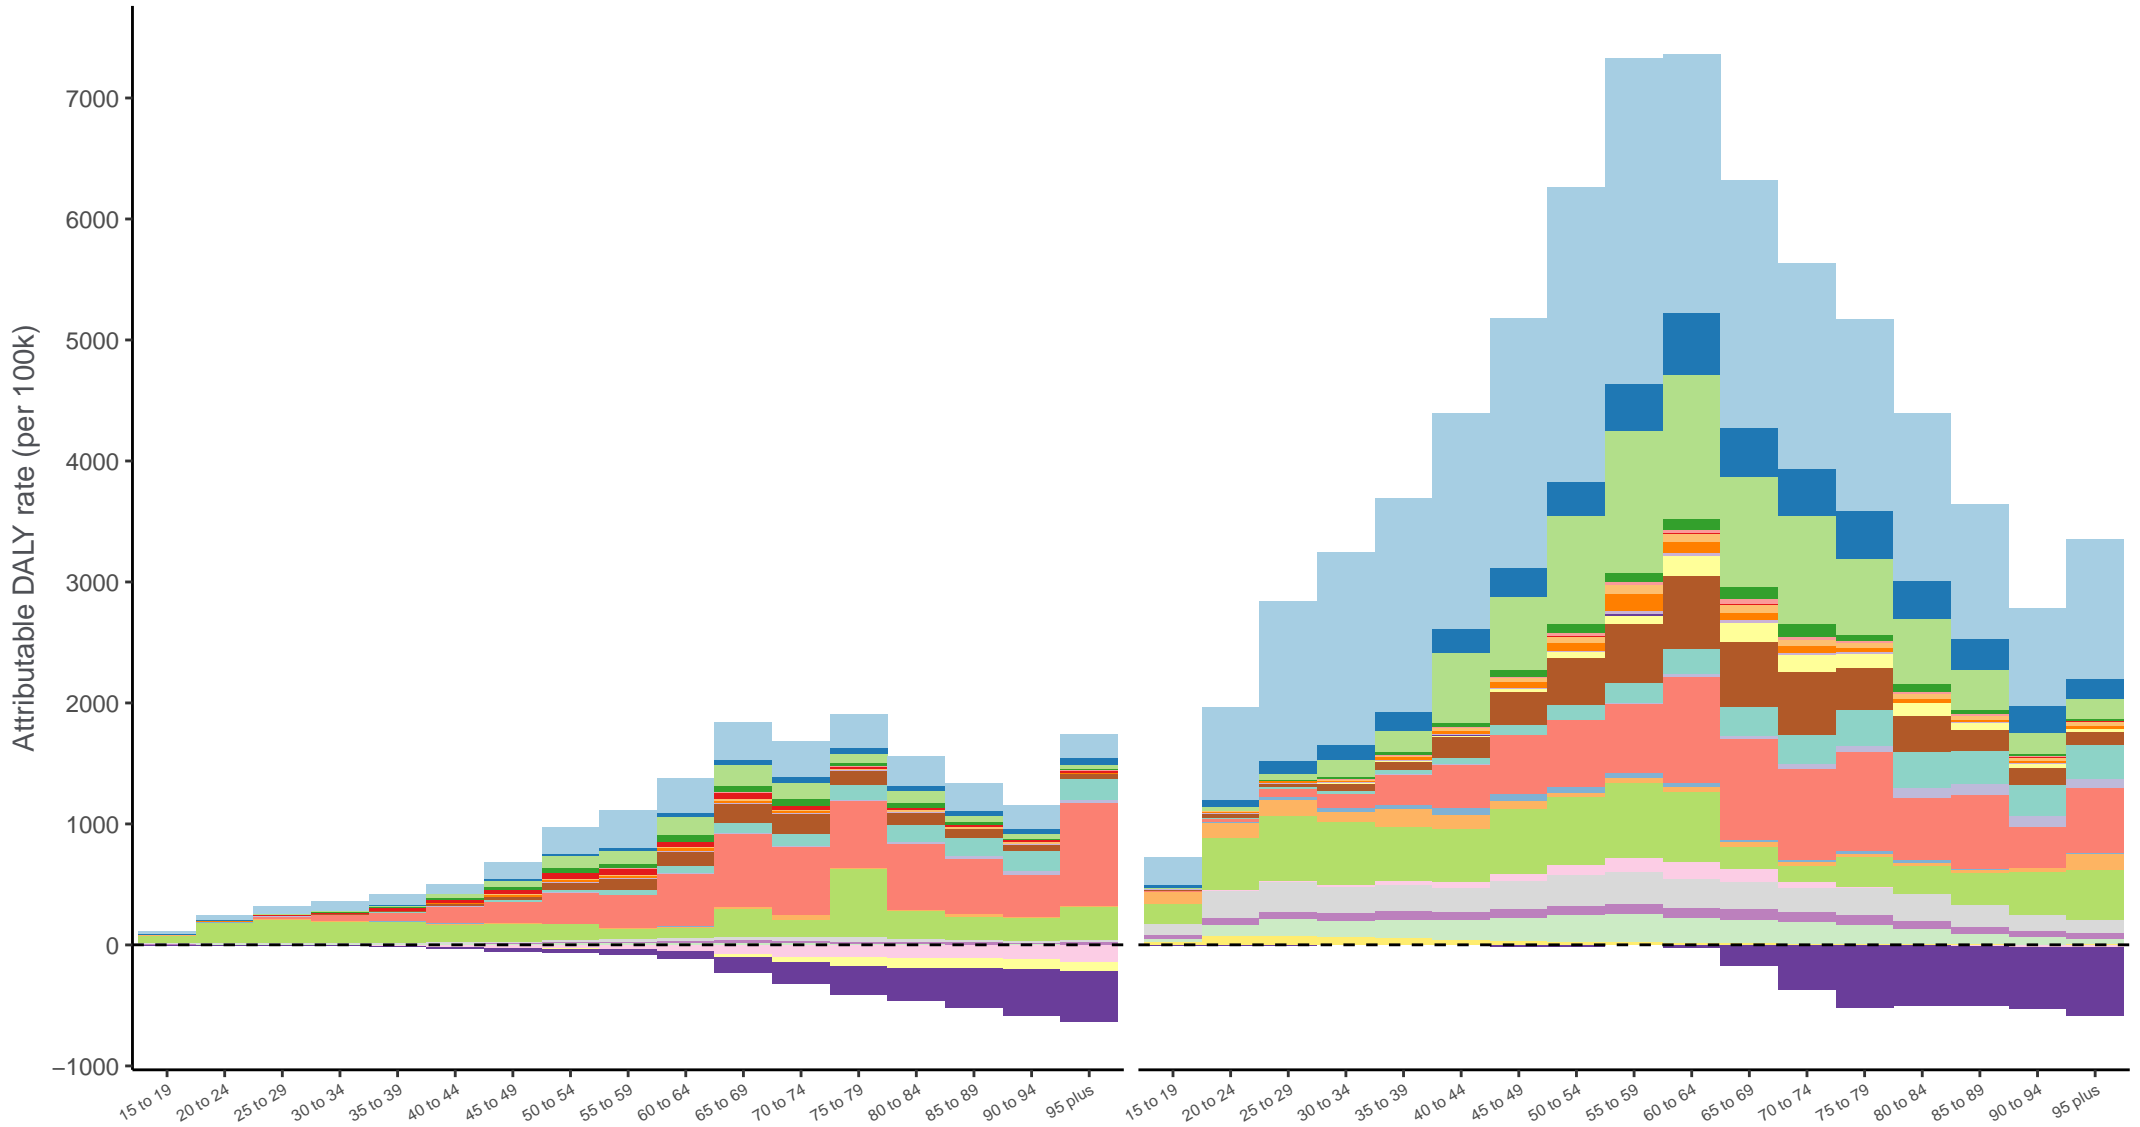

- |                                                                                                                                                                                                                                                                                                                                                                       |                                                                                                                                                                                                                                                                                                                                                                                                                                              |
|-----------------------------------------------------------------------------------------------------------------------------------------------------------------------------------------------------------------------------------------------------------------------------------------------------------------------------------------------------------------------|----------------------------------------------------------------------------------------------------------------------------------------------------------------------------------------------------------------------------------------------------------------------------------------------------------------------------------------------------------------------------------------------------------------------------------------------|
| <p><b>Cause</b></p> <ul style="list-style-type: none"> <li>Tuberculosis</li> <li>Lower respiratory infections</li> <li>Esophageal cancer</li> <li>Liver cancer</li> <li>Larynx cancer</li> <li>Breast cancer</li> <li>Colon and rectum cancer</li> <li>Lip and oral cavity cancer</li> <li>Pharynx and nasopharynx cancer</li> <li>Ischaemic heart disease</li> </ul> | <ul style="list-style-type: none"> <li>Ischaemic stroke</li> <li>Hemorrhagic stroke</li> <li>Hypertensive heart disease</li> <li>Atrial fibrillation and flutter</li> <li>Cirrhosis and other chronic liver diseases</li> <li>Pancreatitis</li> <li>Epilepsy</li> <li>Alcohol use disorders</li> <li>Diabetes mellitus</li> <li>Unintentional injuries</li> <li>Self-harm</li> <li>Interpersonal violence</li> <li>Sport injuries</li> </ul> |
|-----------------------------------------------------------------------------------------------------------------------------------------------------------------------------------------------------------------------------------------------------------------------------------------------------------------------------------------------------------------------|----------------------------------------------------------------------------------------------------------------------------------------------------------------------------------------------------------------------------------------------------------------------------------------------------------------------------------------------------------------------------------------------------------------------------------------------|

Attributable DALY rate disaggregated by cause, Mozambique, by sex and age in 2016.

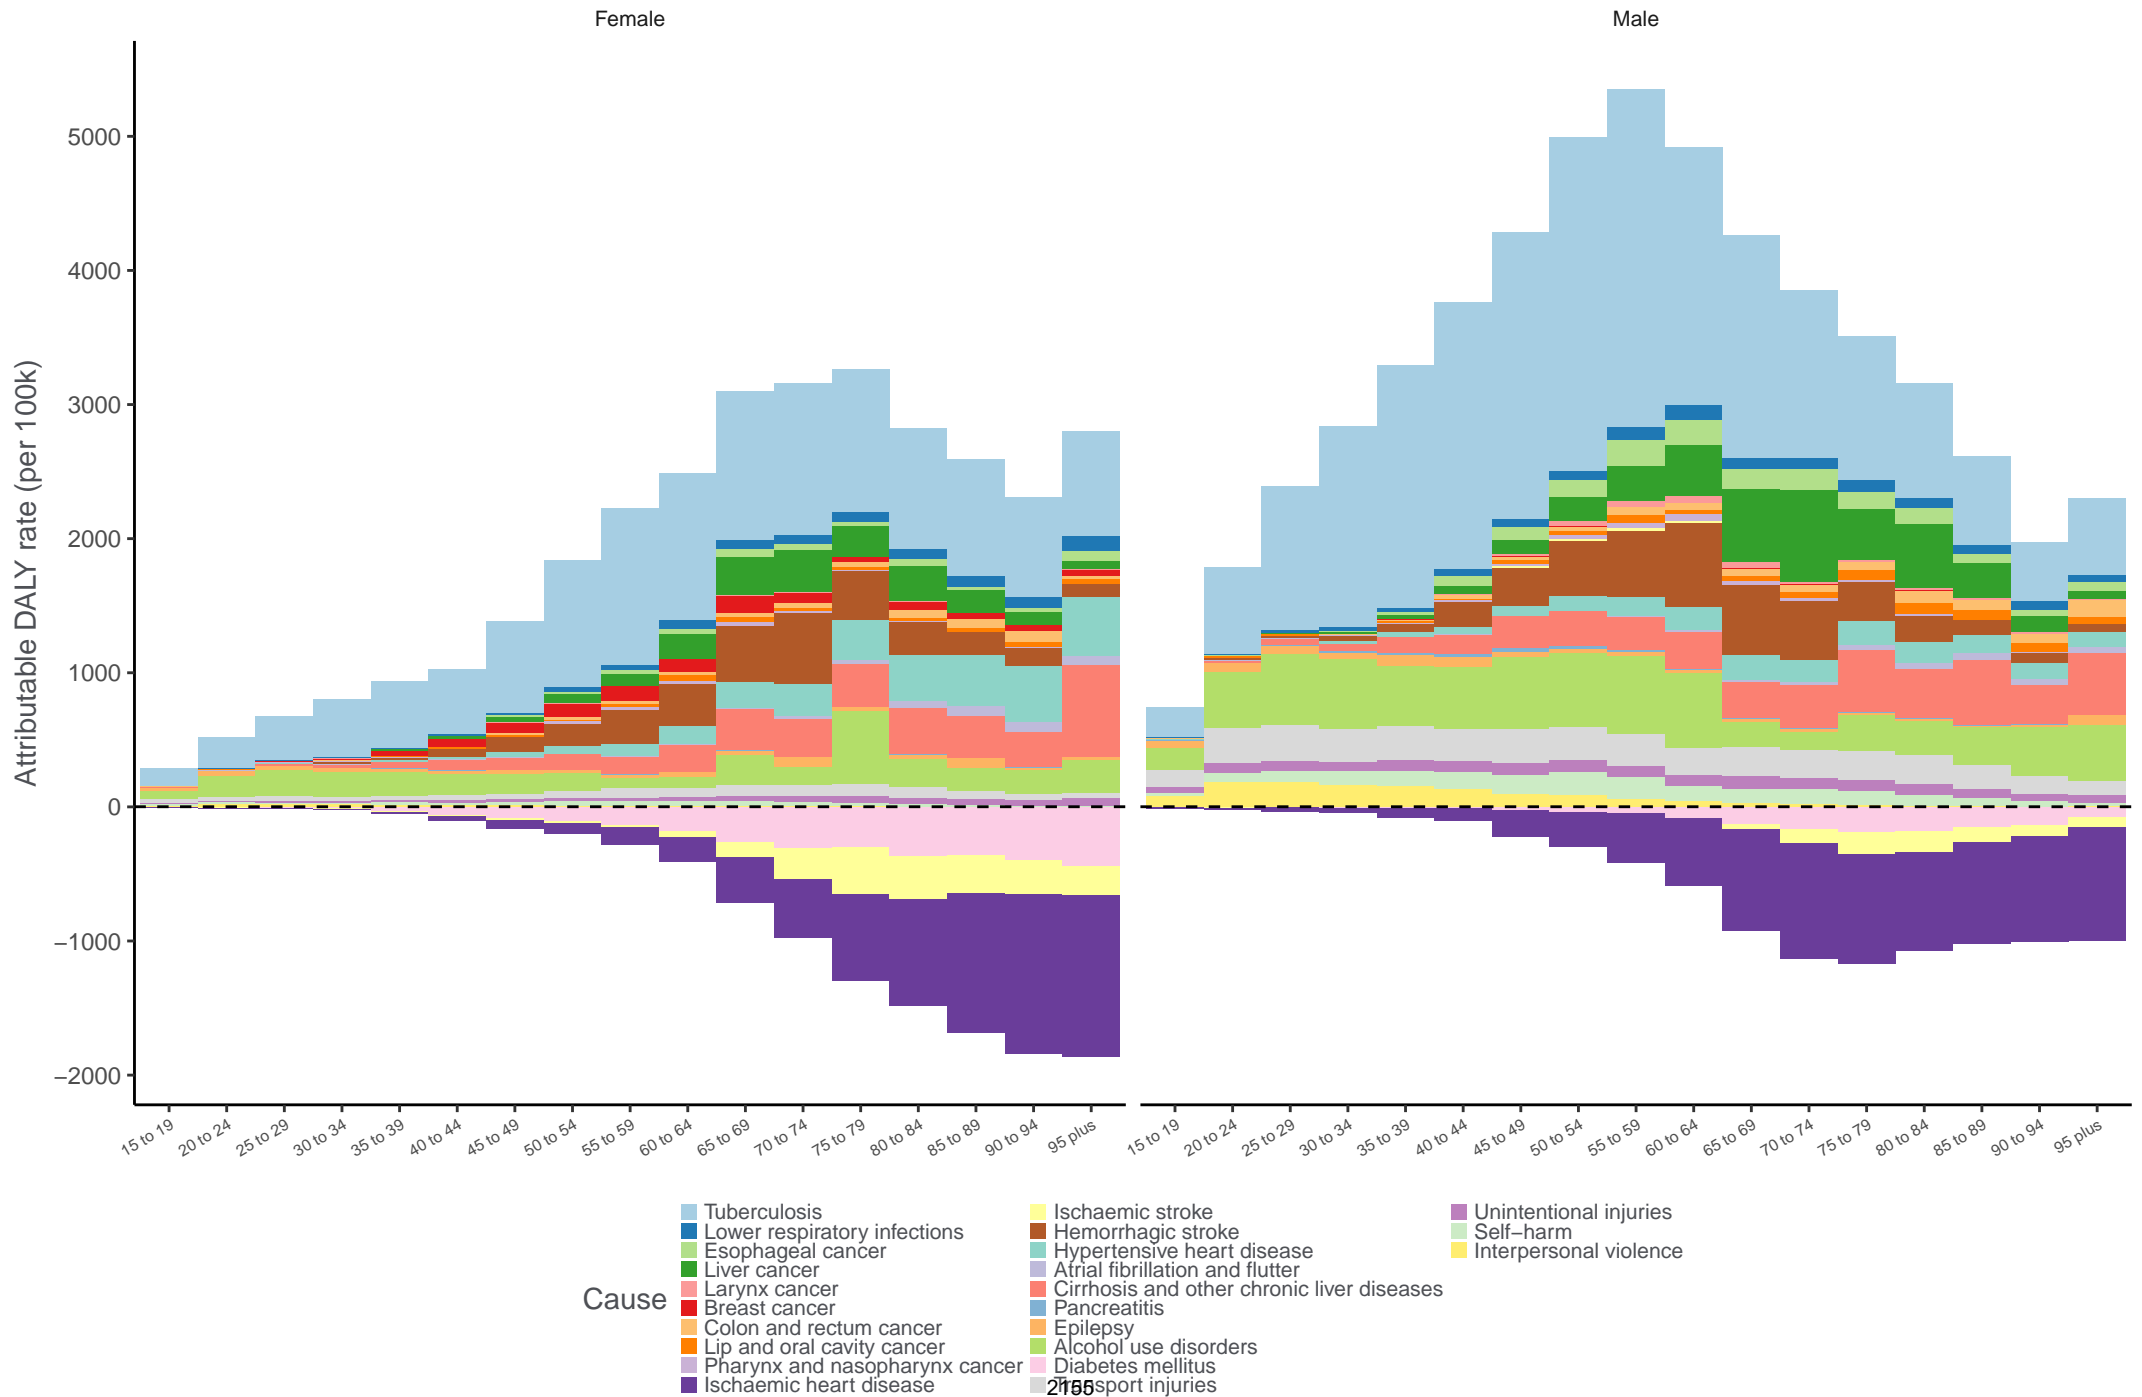

Attributable DALY rate disaggregated by cause, Rwanda, by sex and age in 2016.

Female

Male

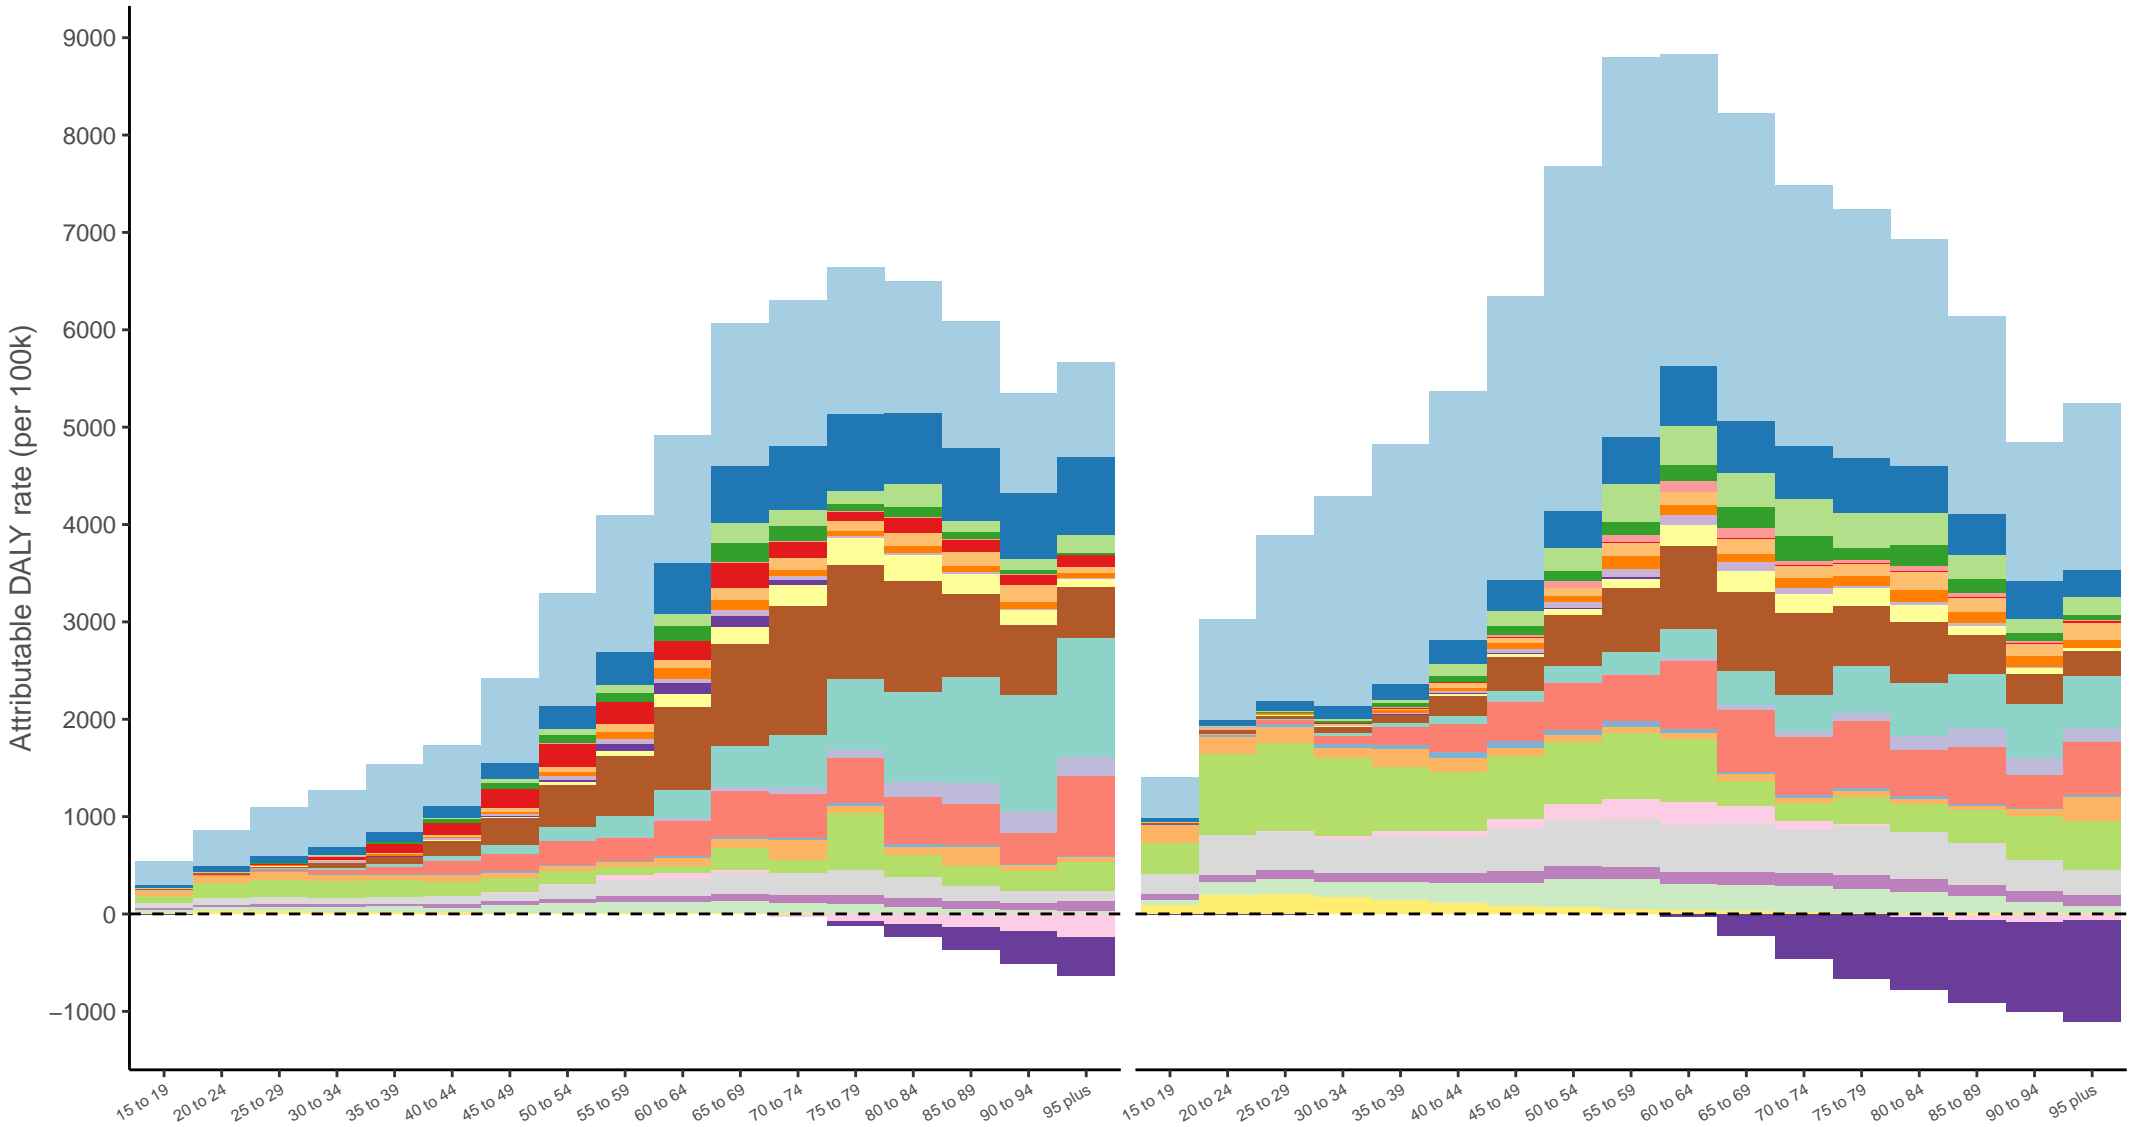

- Cause**
- Tuberculosis
  - Ischaemic stroke
  - Unintentional injuries
  - Lower respiratory infections
  - Hemorrhagic stroke
  - Self-harm
  - Esophageal cancer
  - Hypertensive heart disease
  - Liver cancer
  - Atrial fibrillation and flutter
  - Interpersonal violence
  - Larynx cancer
  - Cirrhosis and other chronic liver diseases
  - Breast cancer
  - Pancreatitis
  - Colon and rectum cancer
  - Epilepsy
  - Lip and oral cavity cancer
  - Alcohol use disorders
  - Pharynx and nasopharynx cancer
  - Diabetes mellitus
  - Ischaemic heart disease
  - Sport injuries

Attributable DALY rate disaggregated by cause, Somalia, by sex and age in 2016.

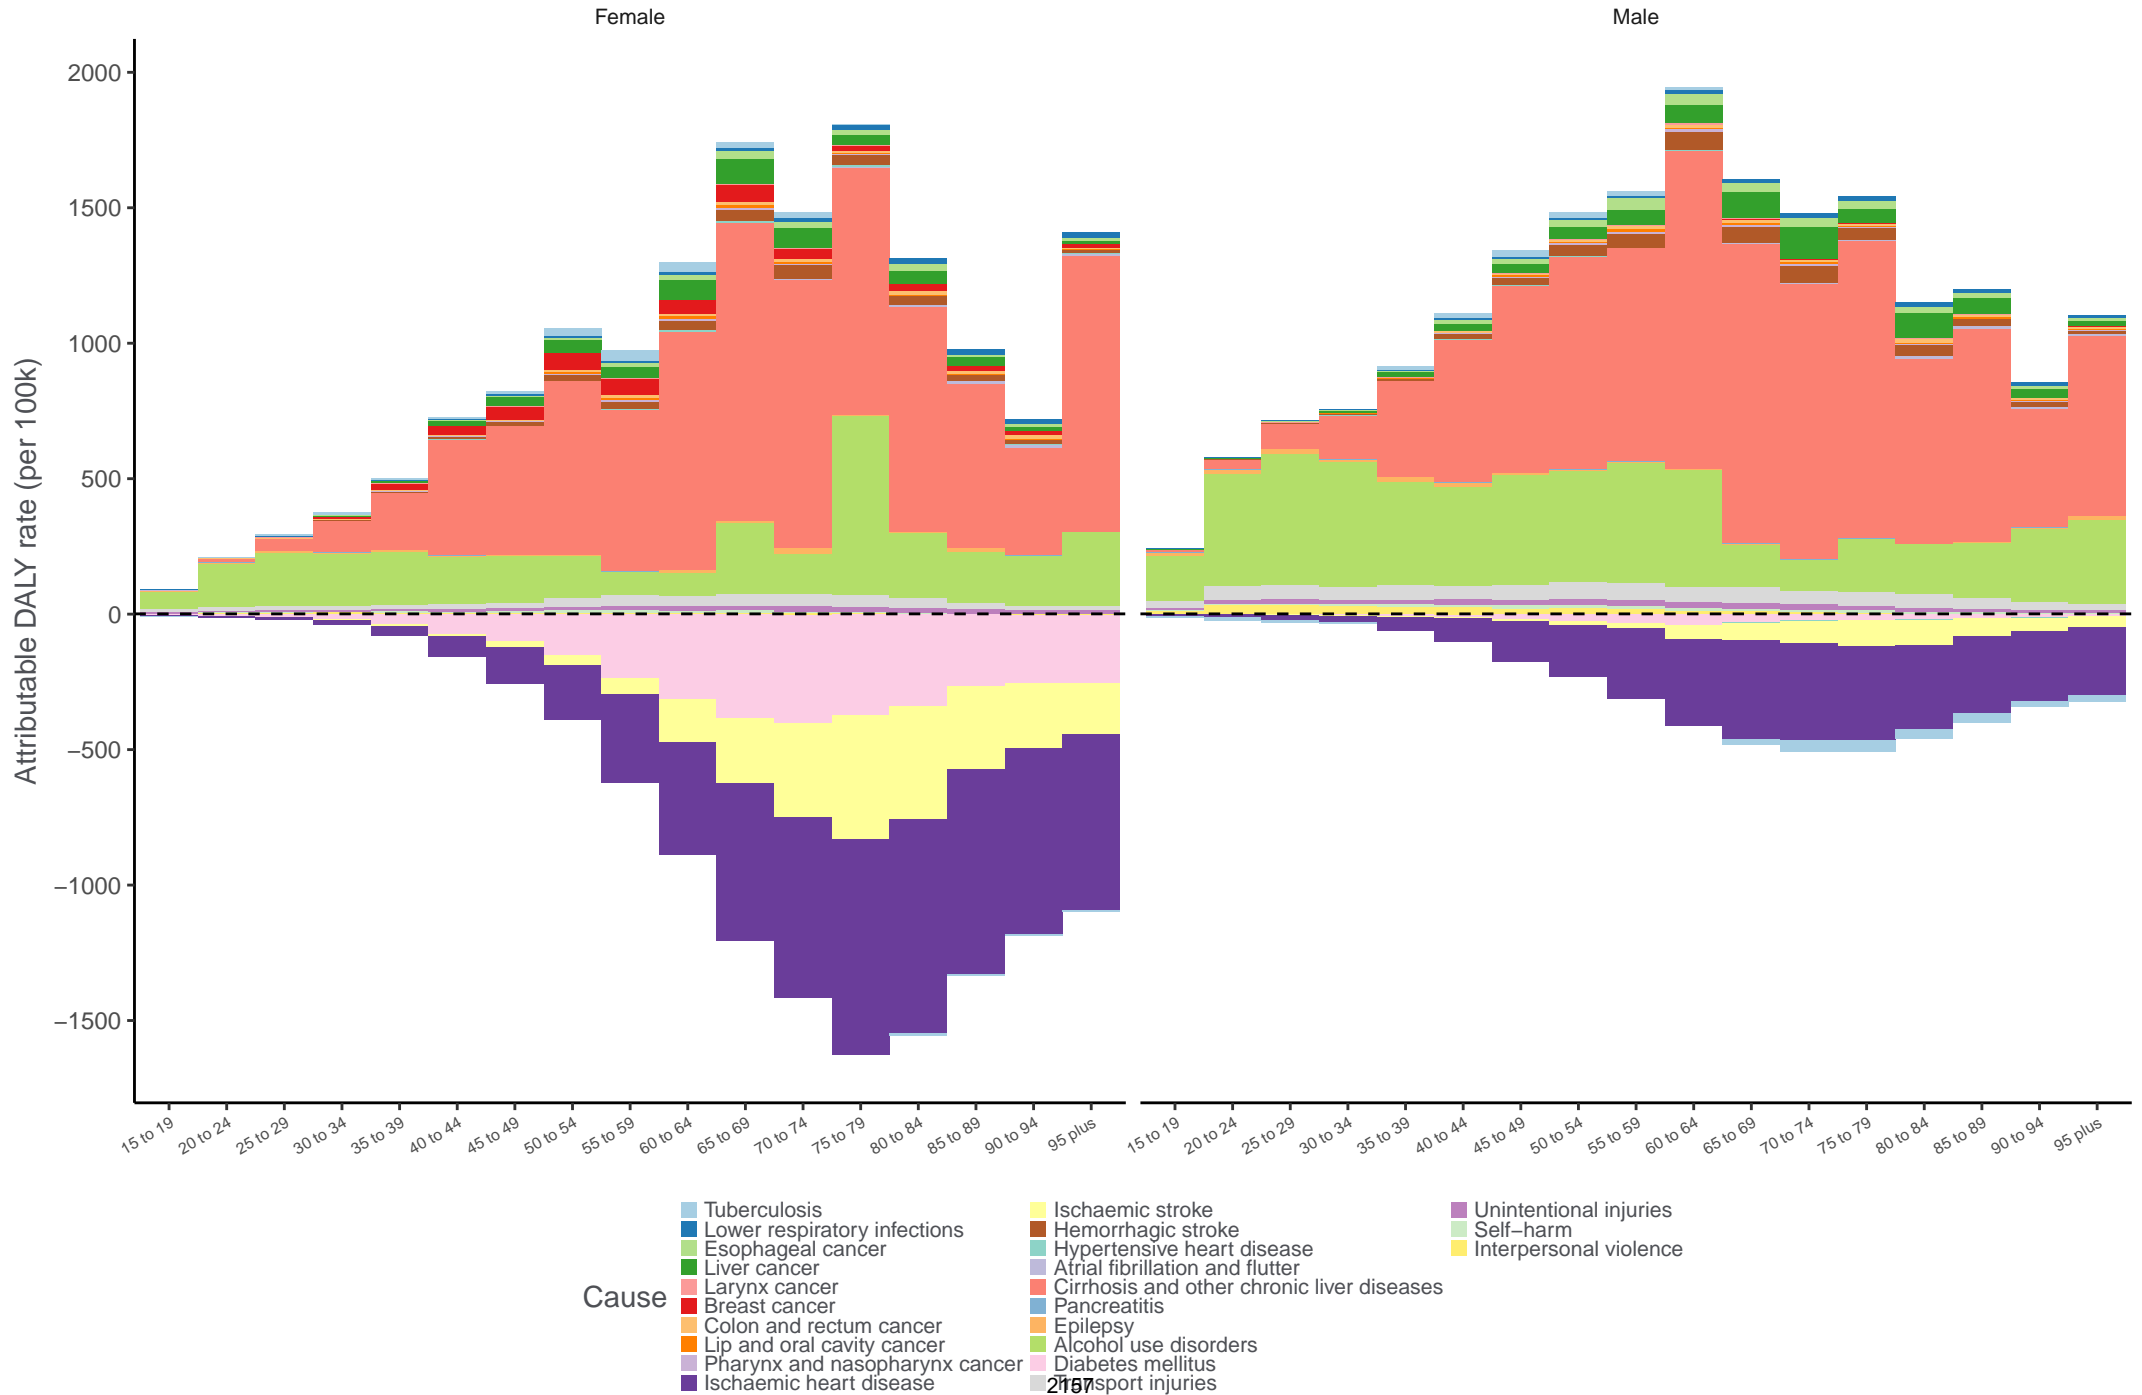

Attributable DALY rate disaggregated by cause, South Sudan, by sex and age in 2016.

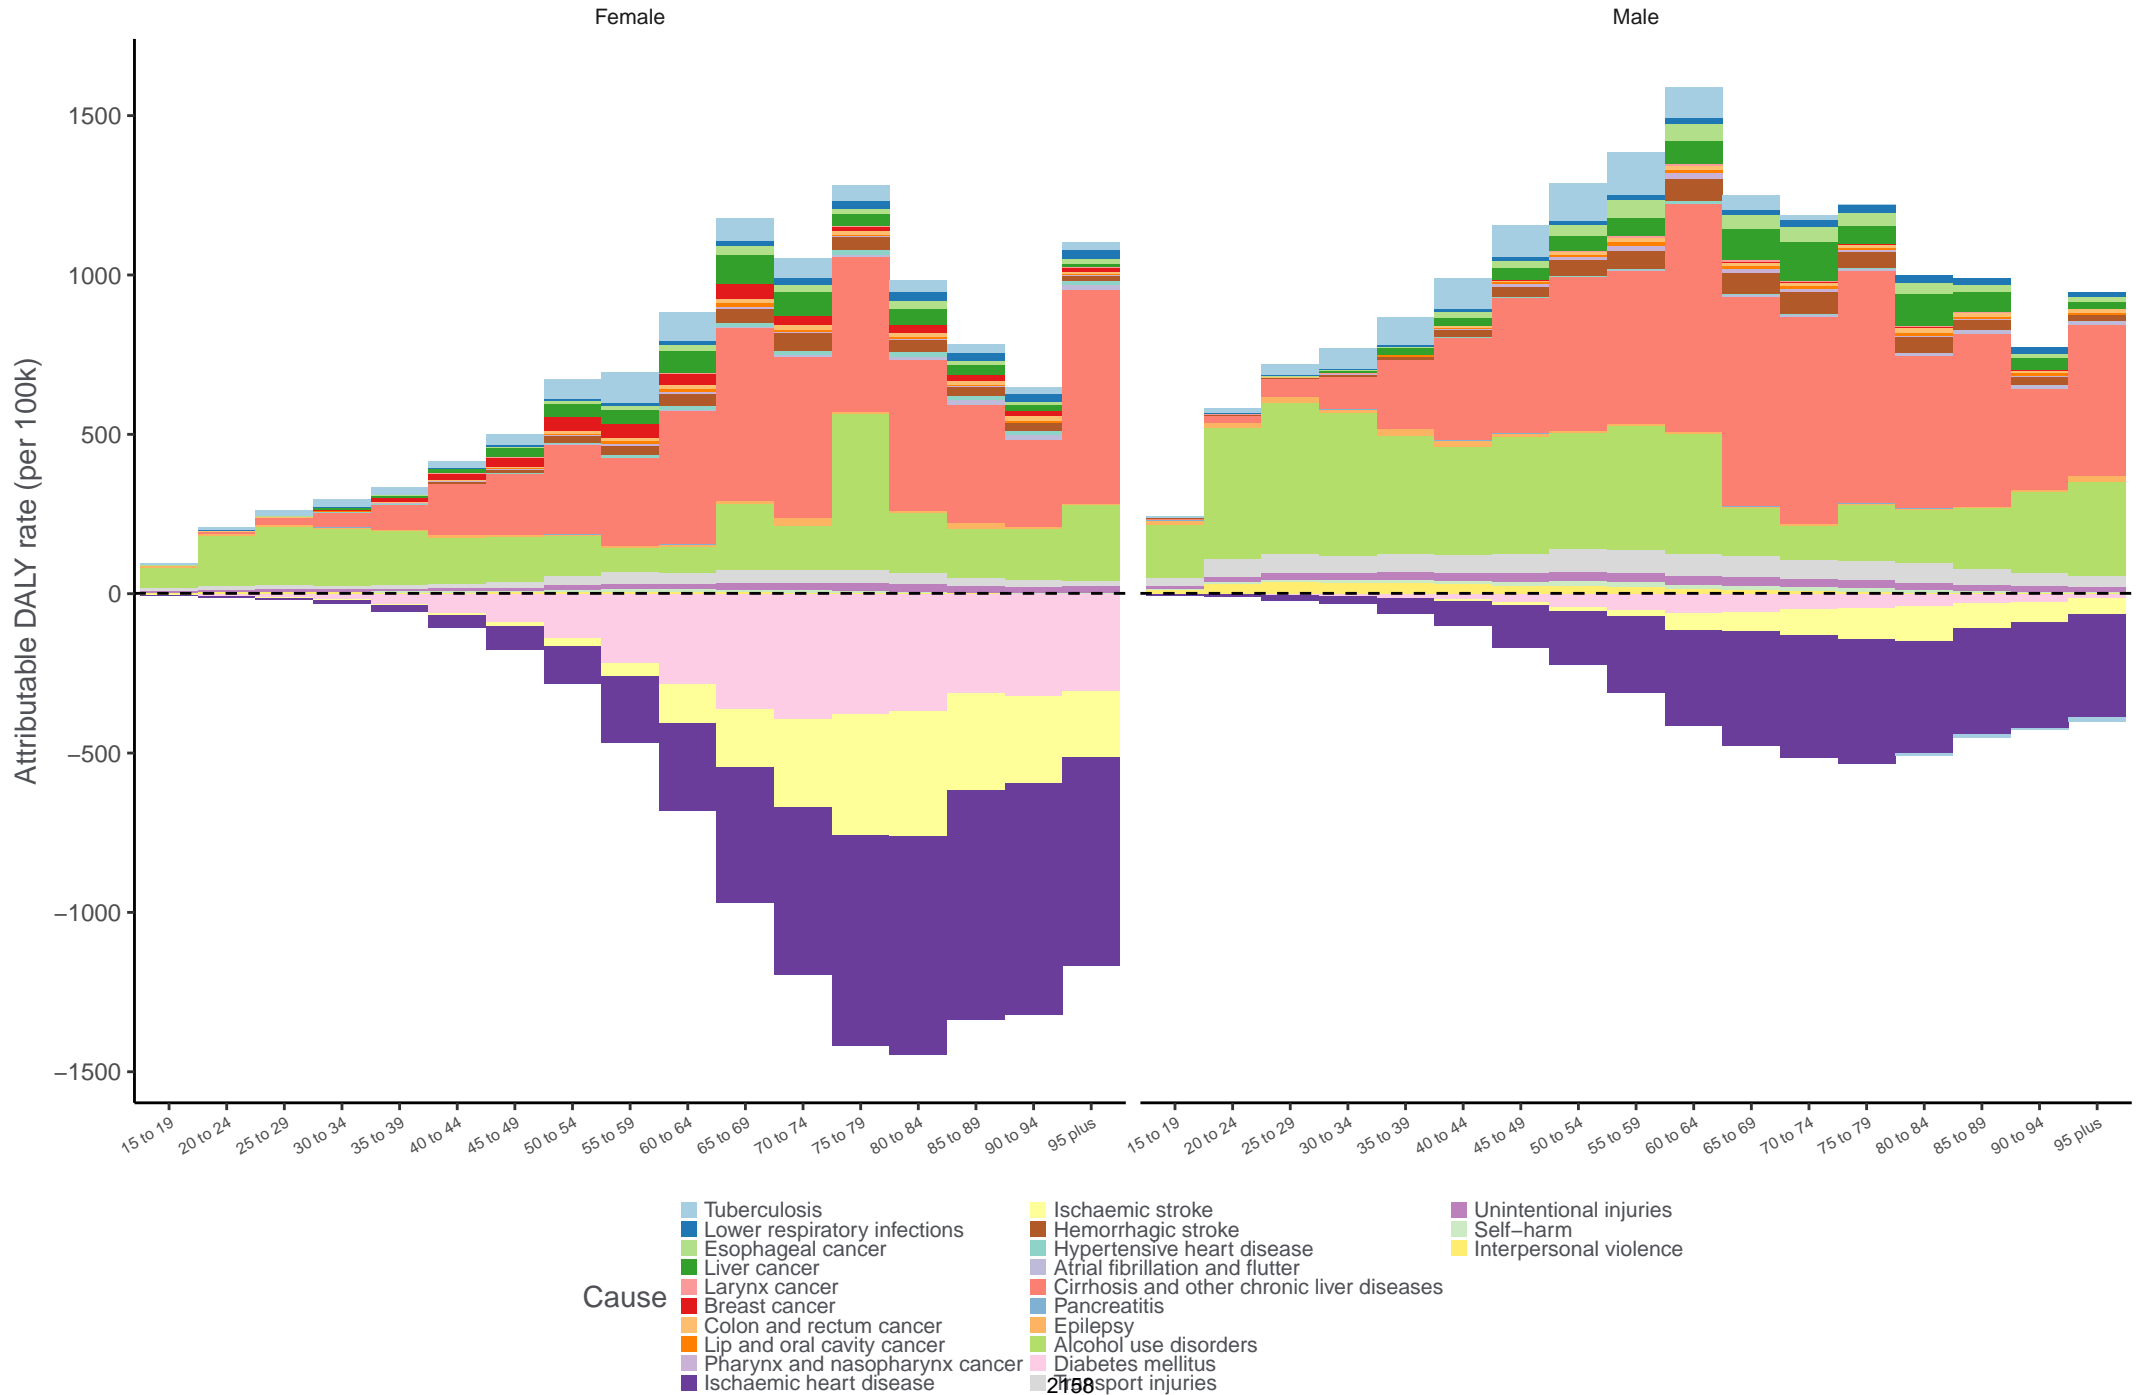

Attributable DALY rate disaggregated by cause, Tanzania, by sex and age in 2016.

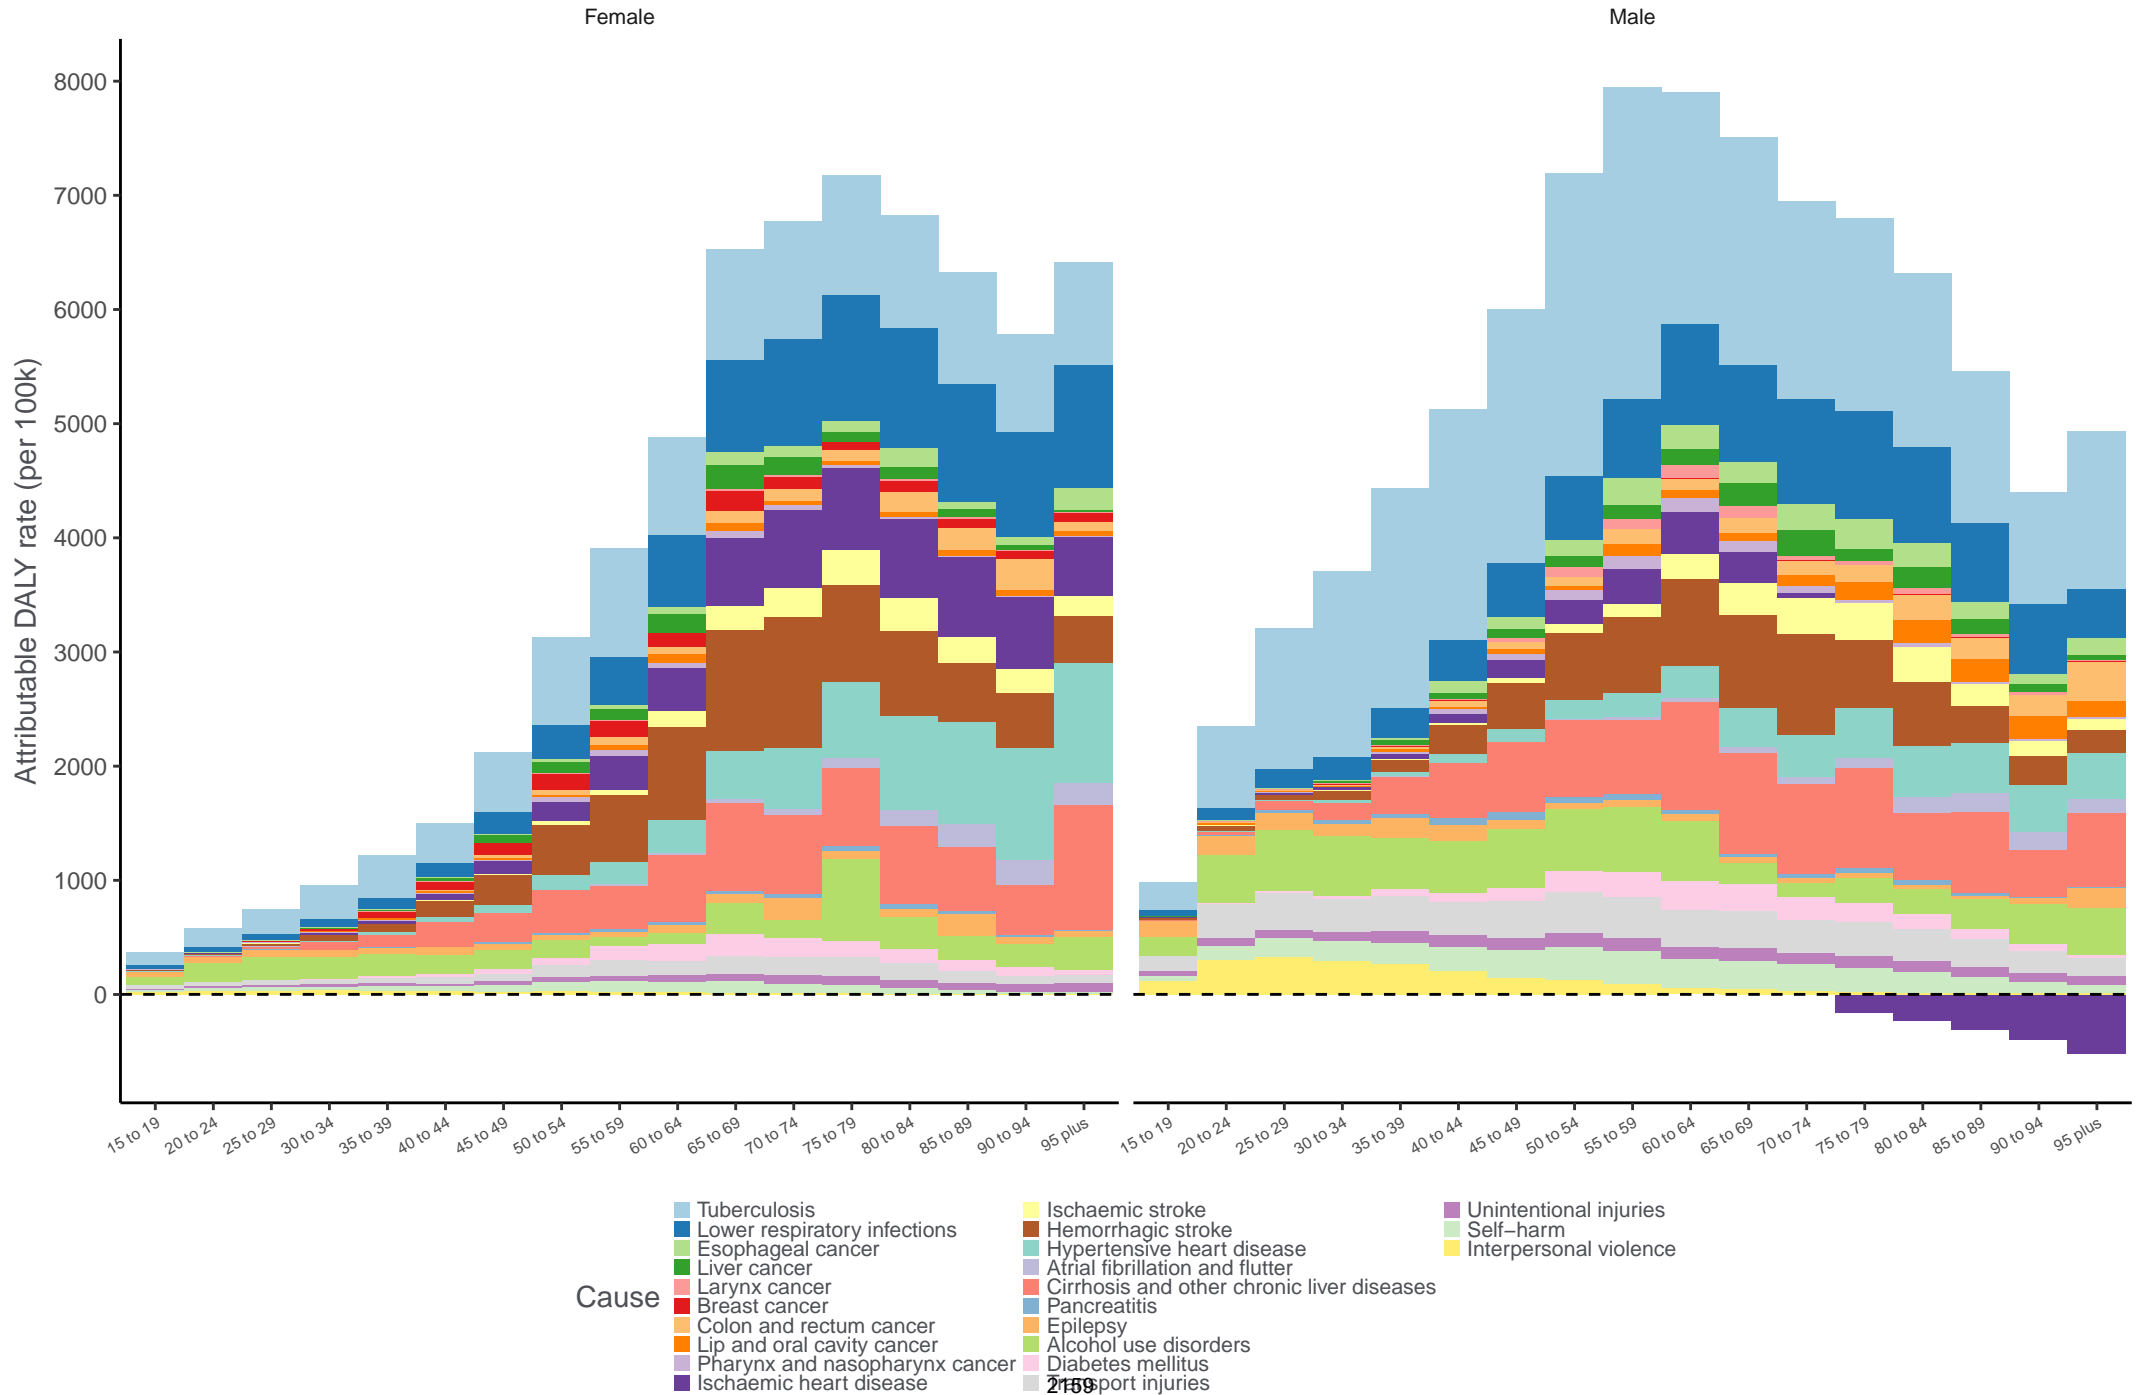





Attributable DALY rate disaggregated by cause, Zambia, by sex and age in 2016.

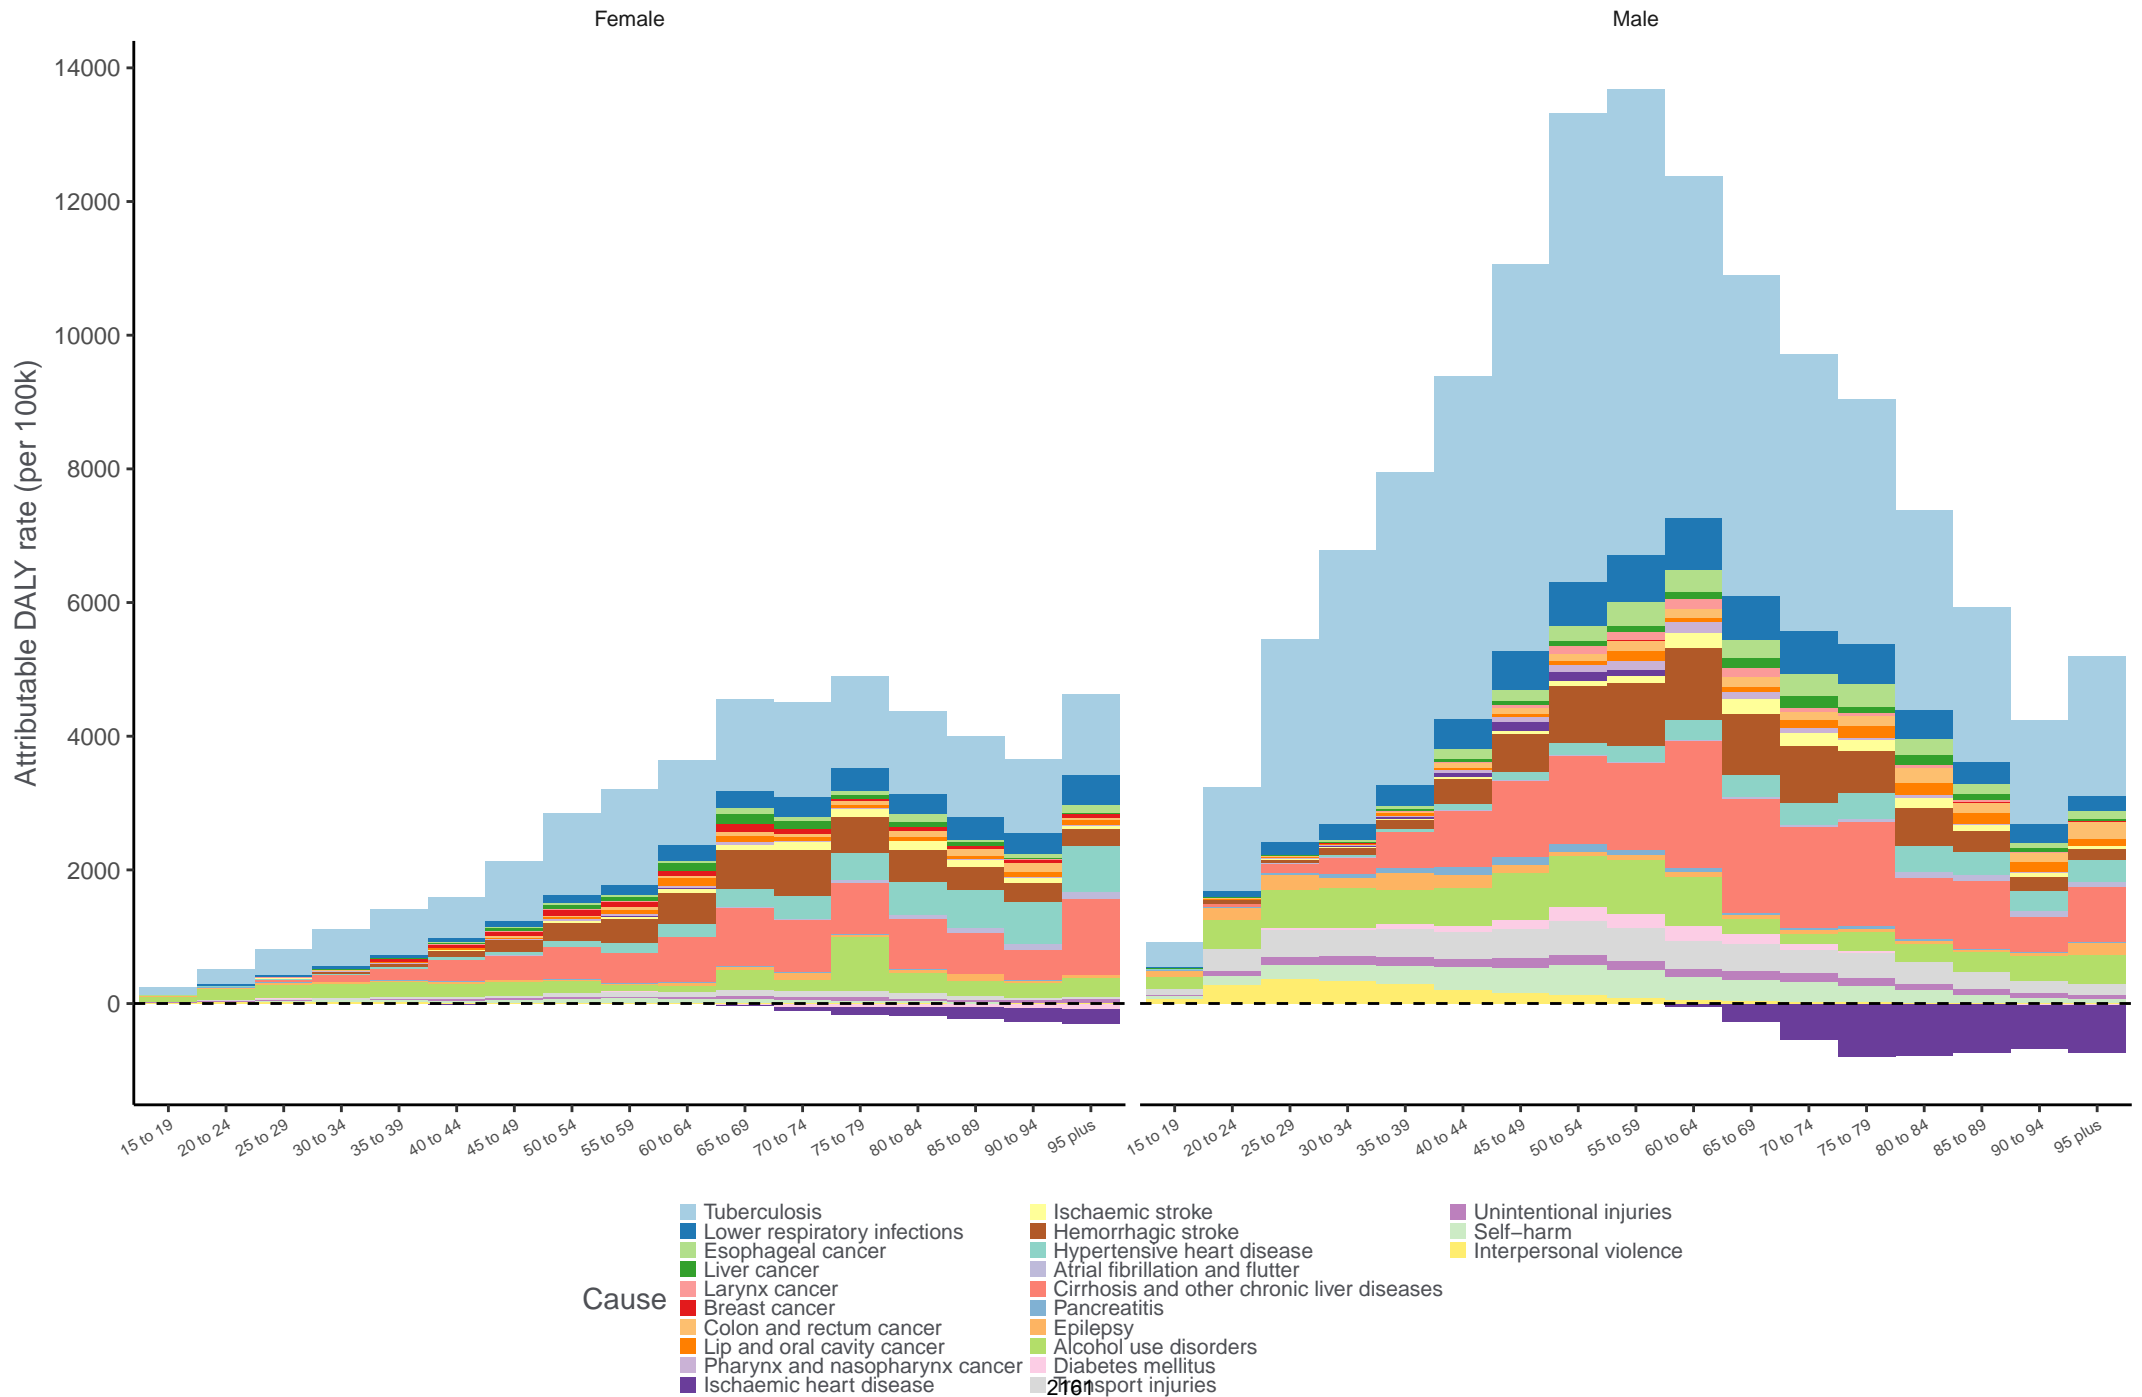

Attributable DALY rate disaggregated by cause, Botswana, by sex and age in 2016.

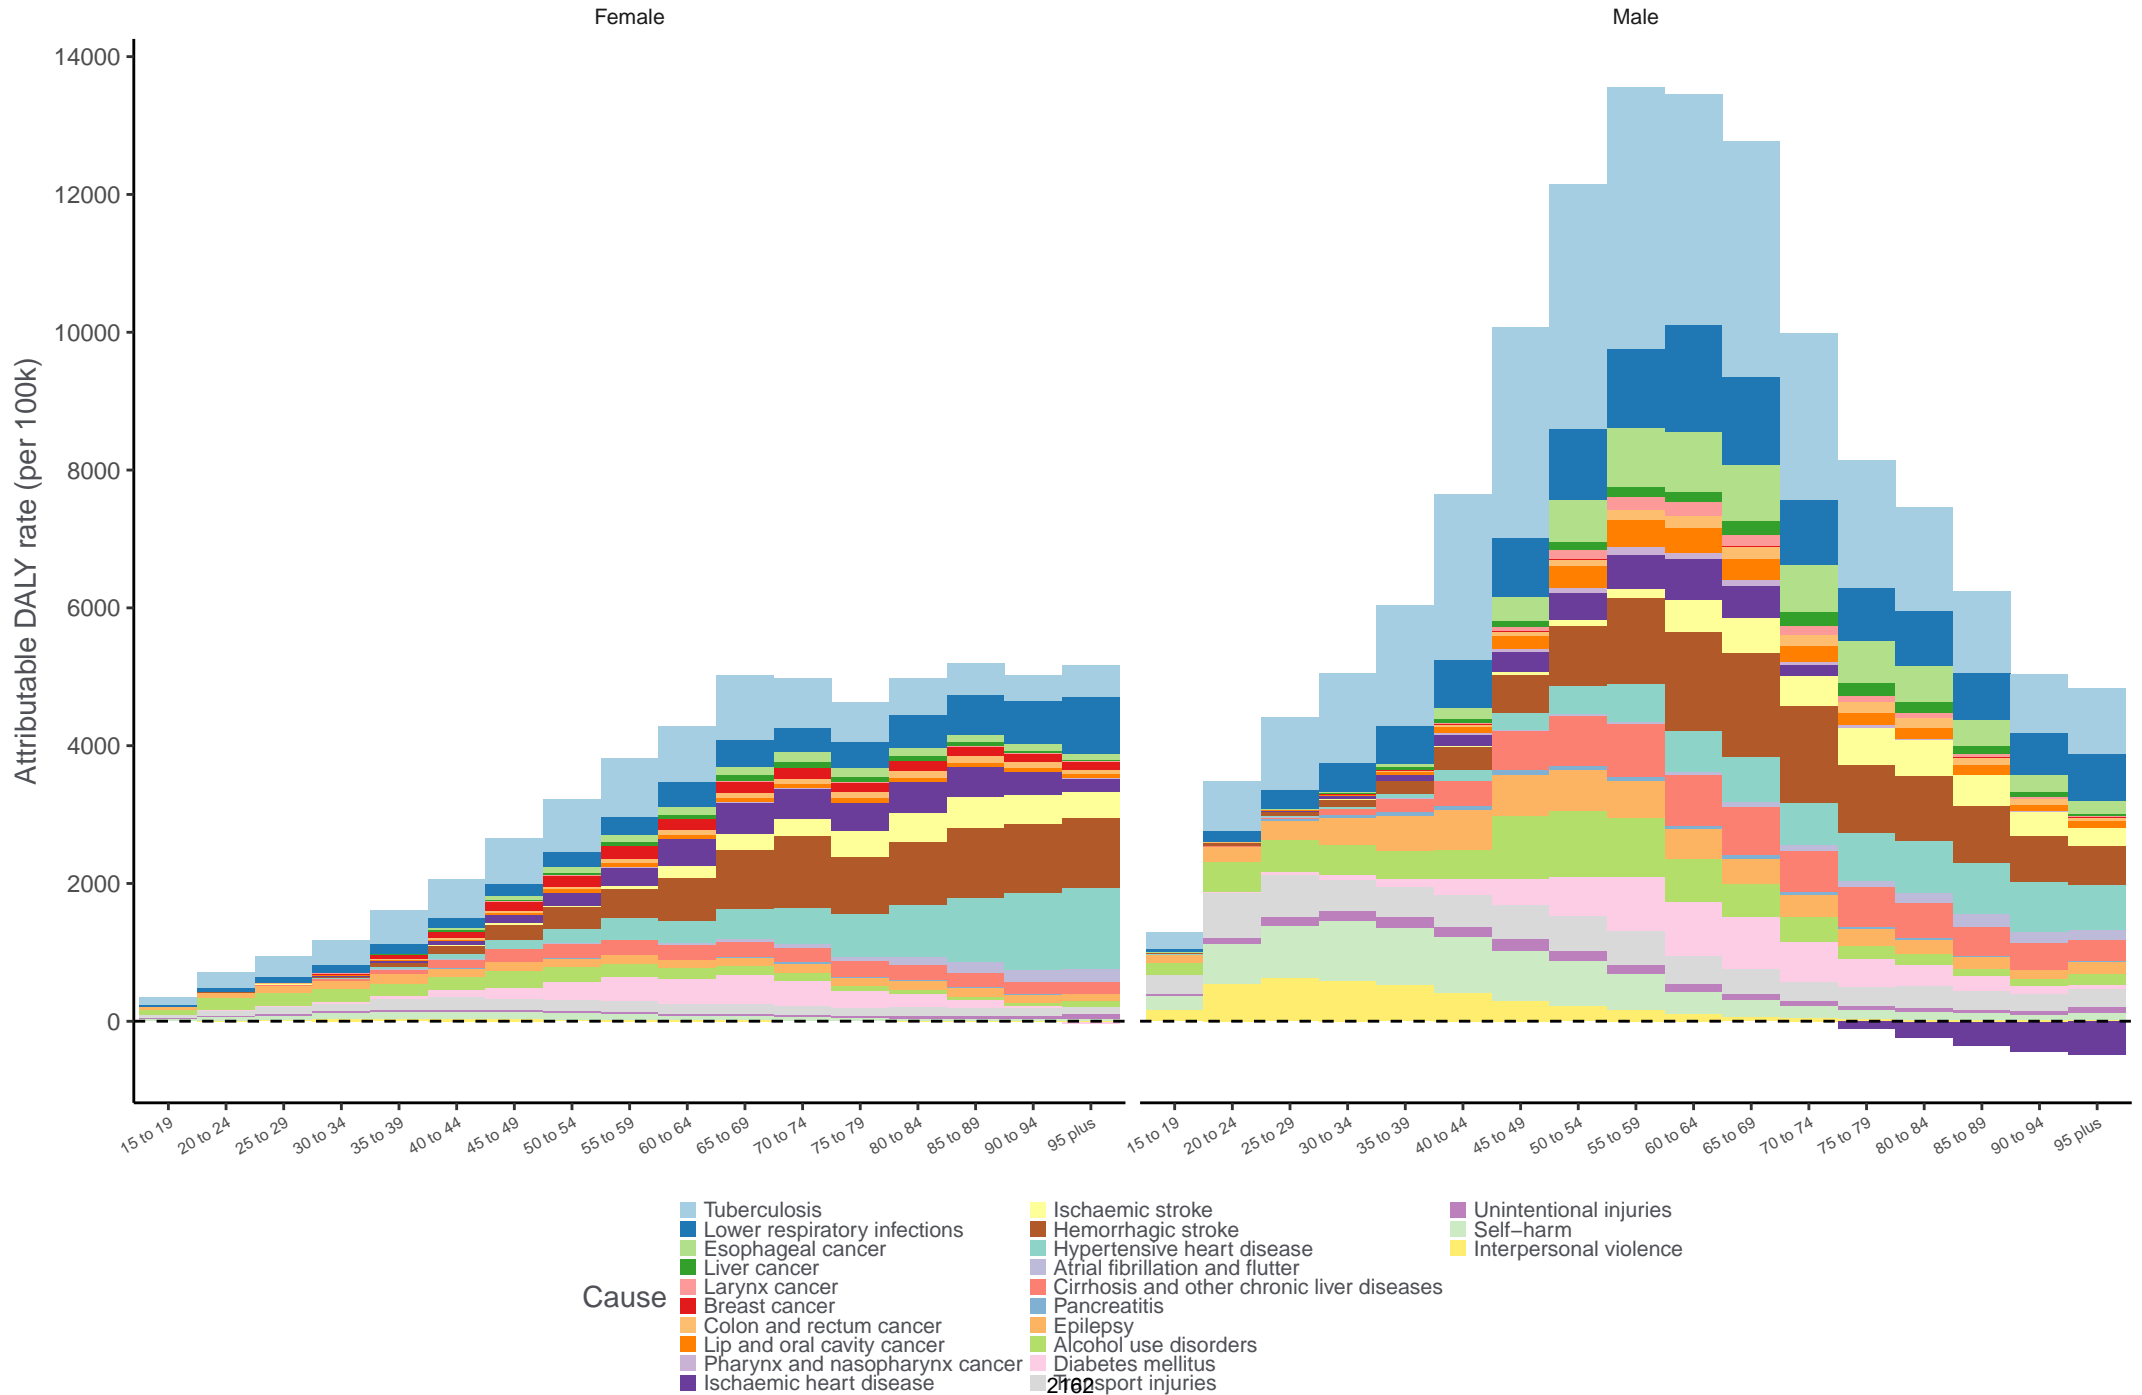

Attributable DALY rate disaggregated by cause, Lesotho, by sex and age in 2016.

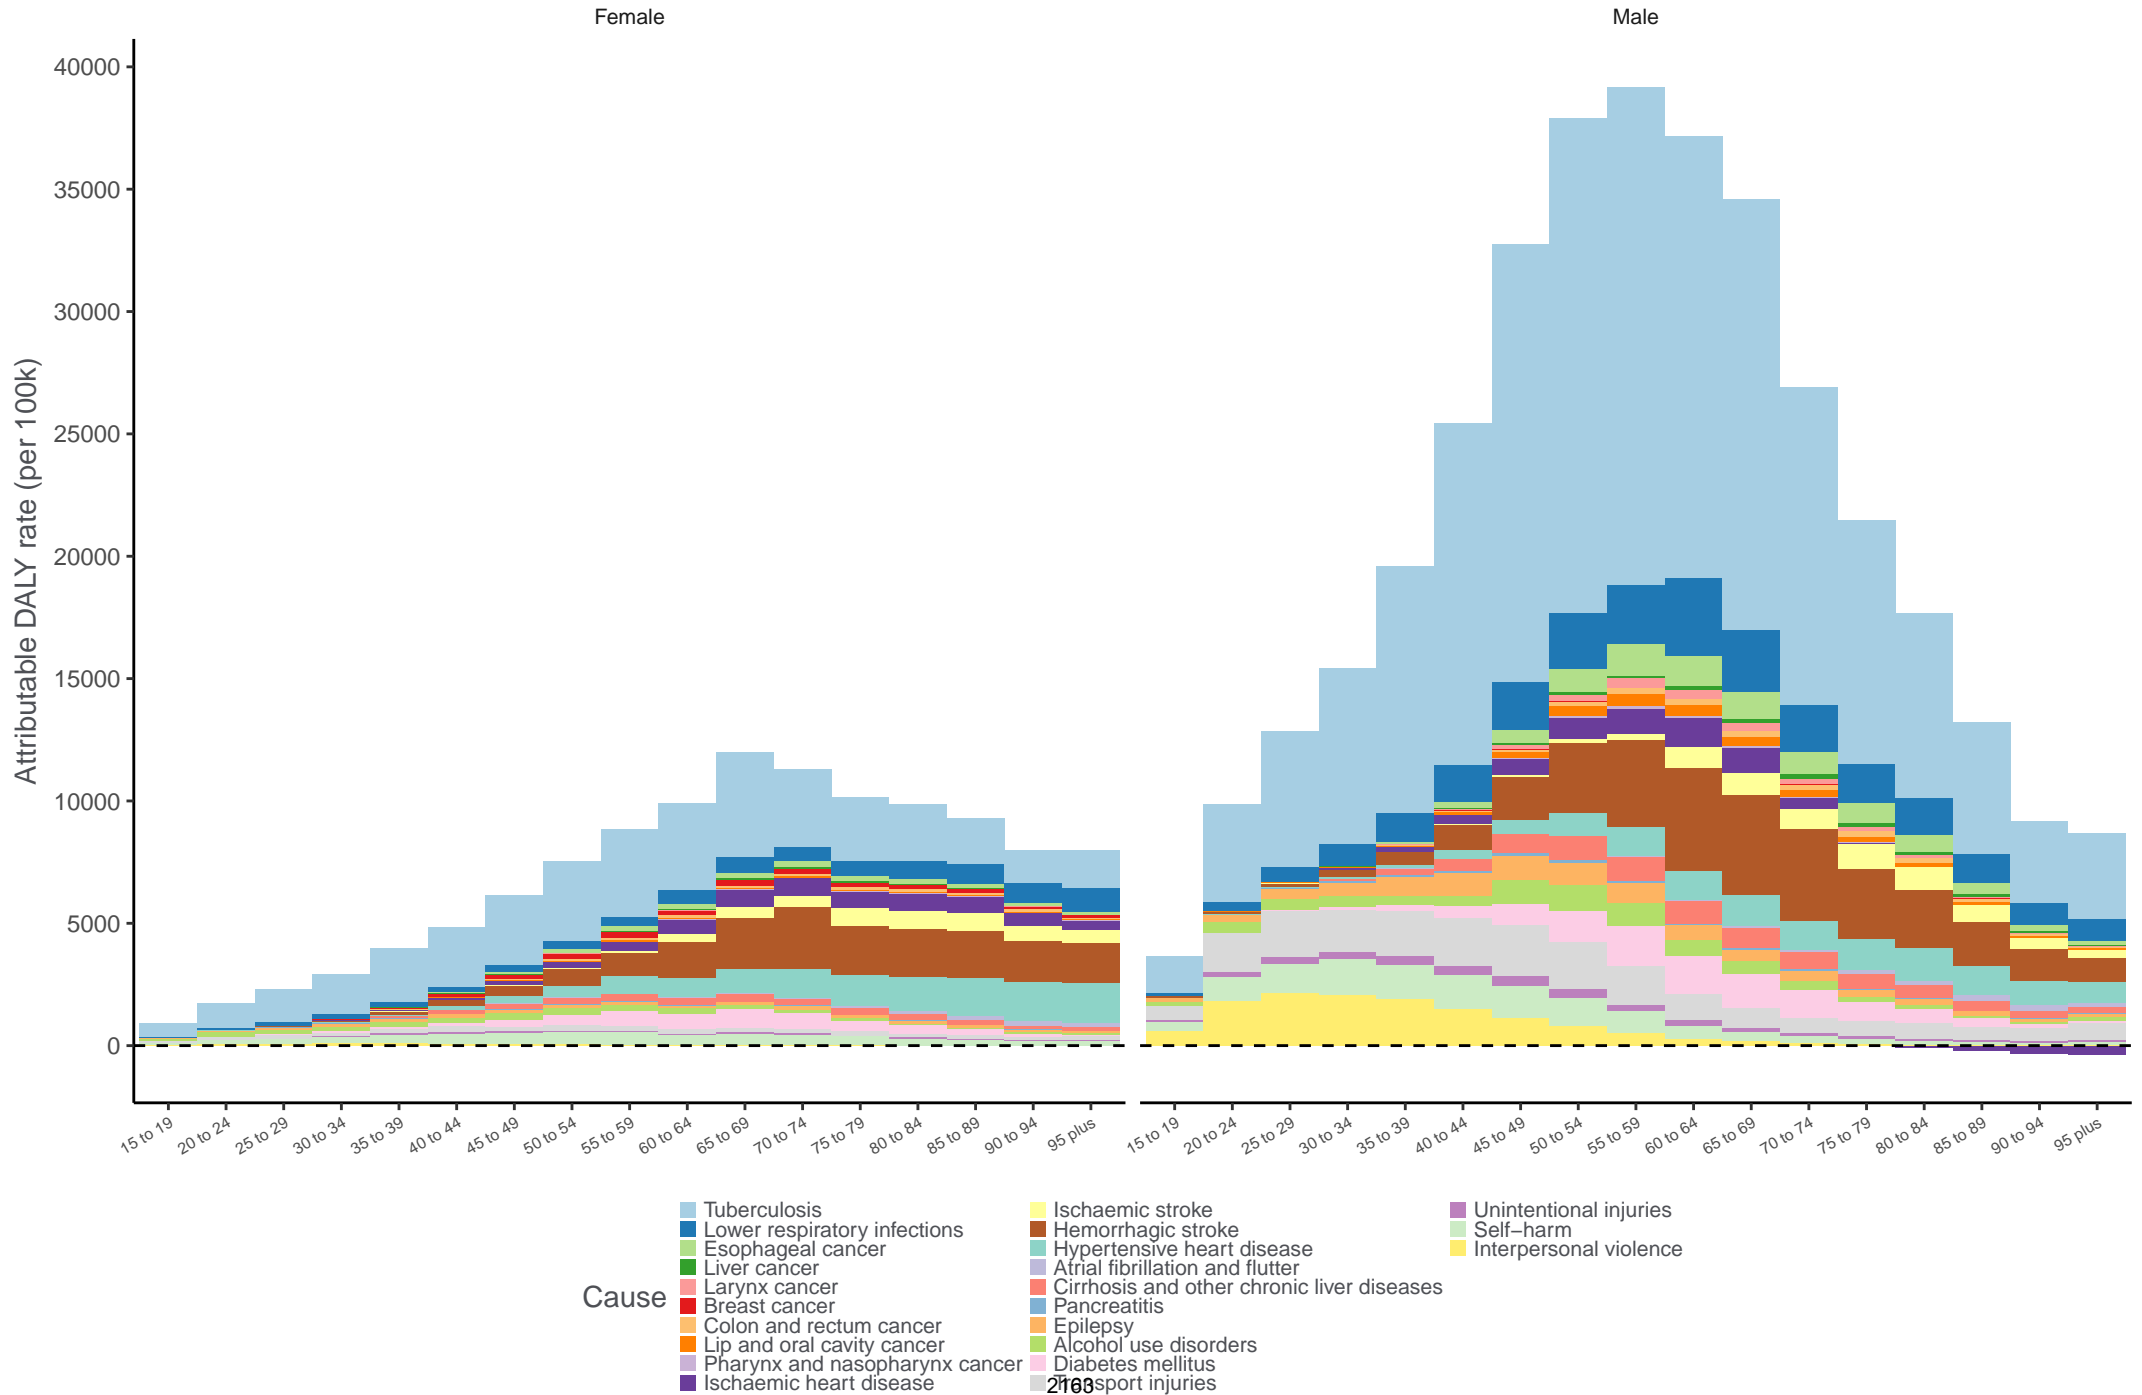



Attributable DALY rate disaggregated by cause, South Africa, by sex and age in 2016.

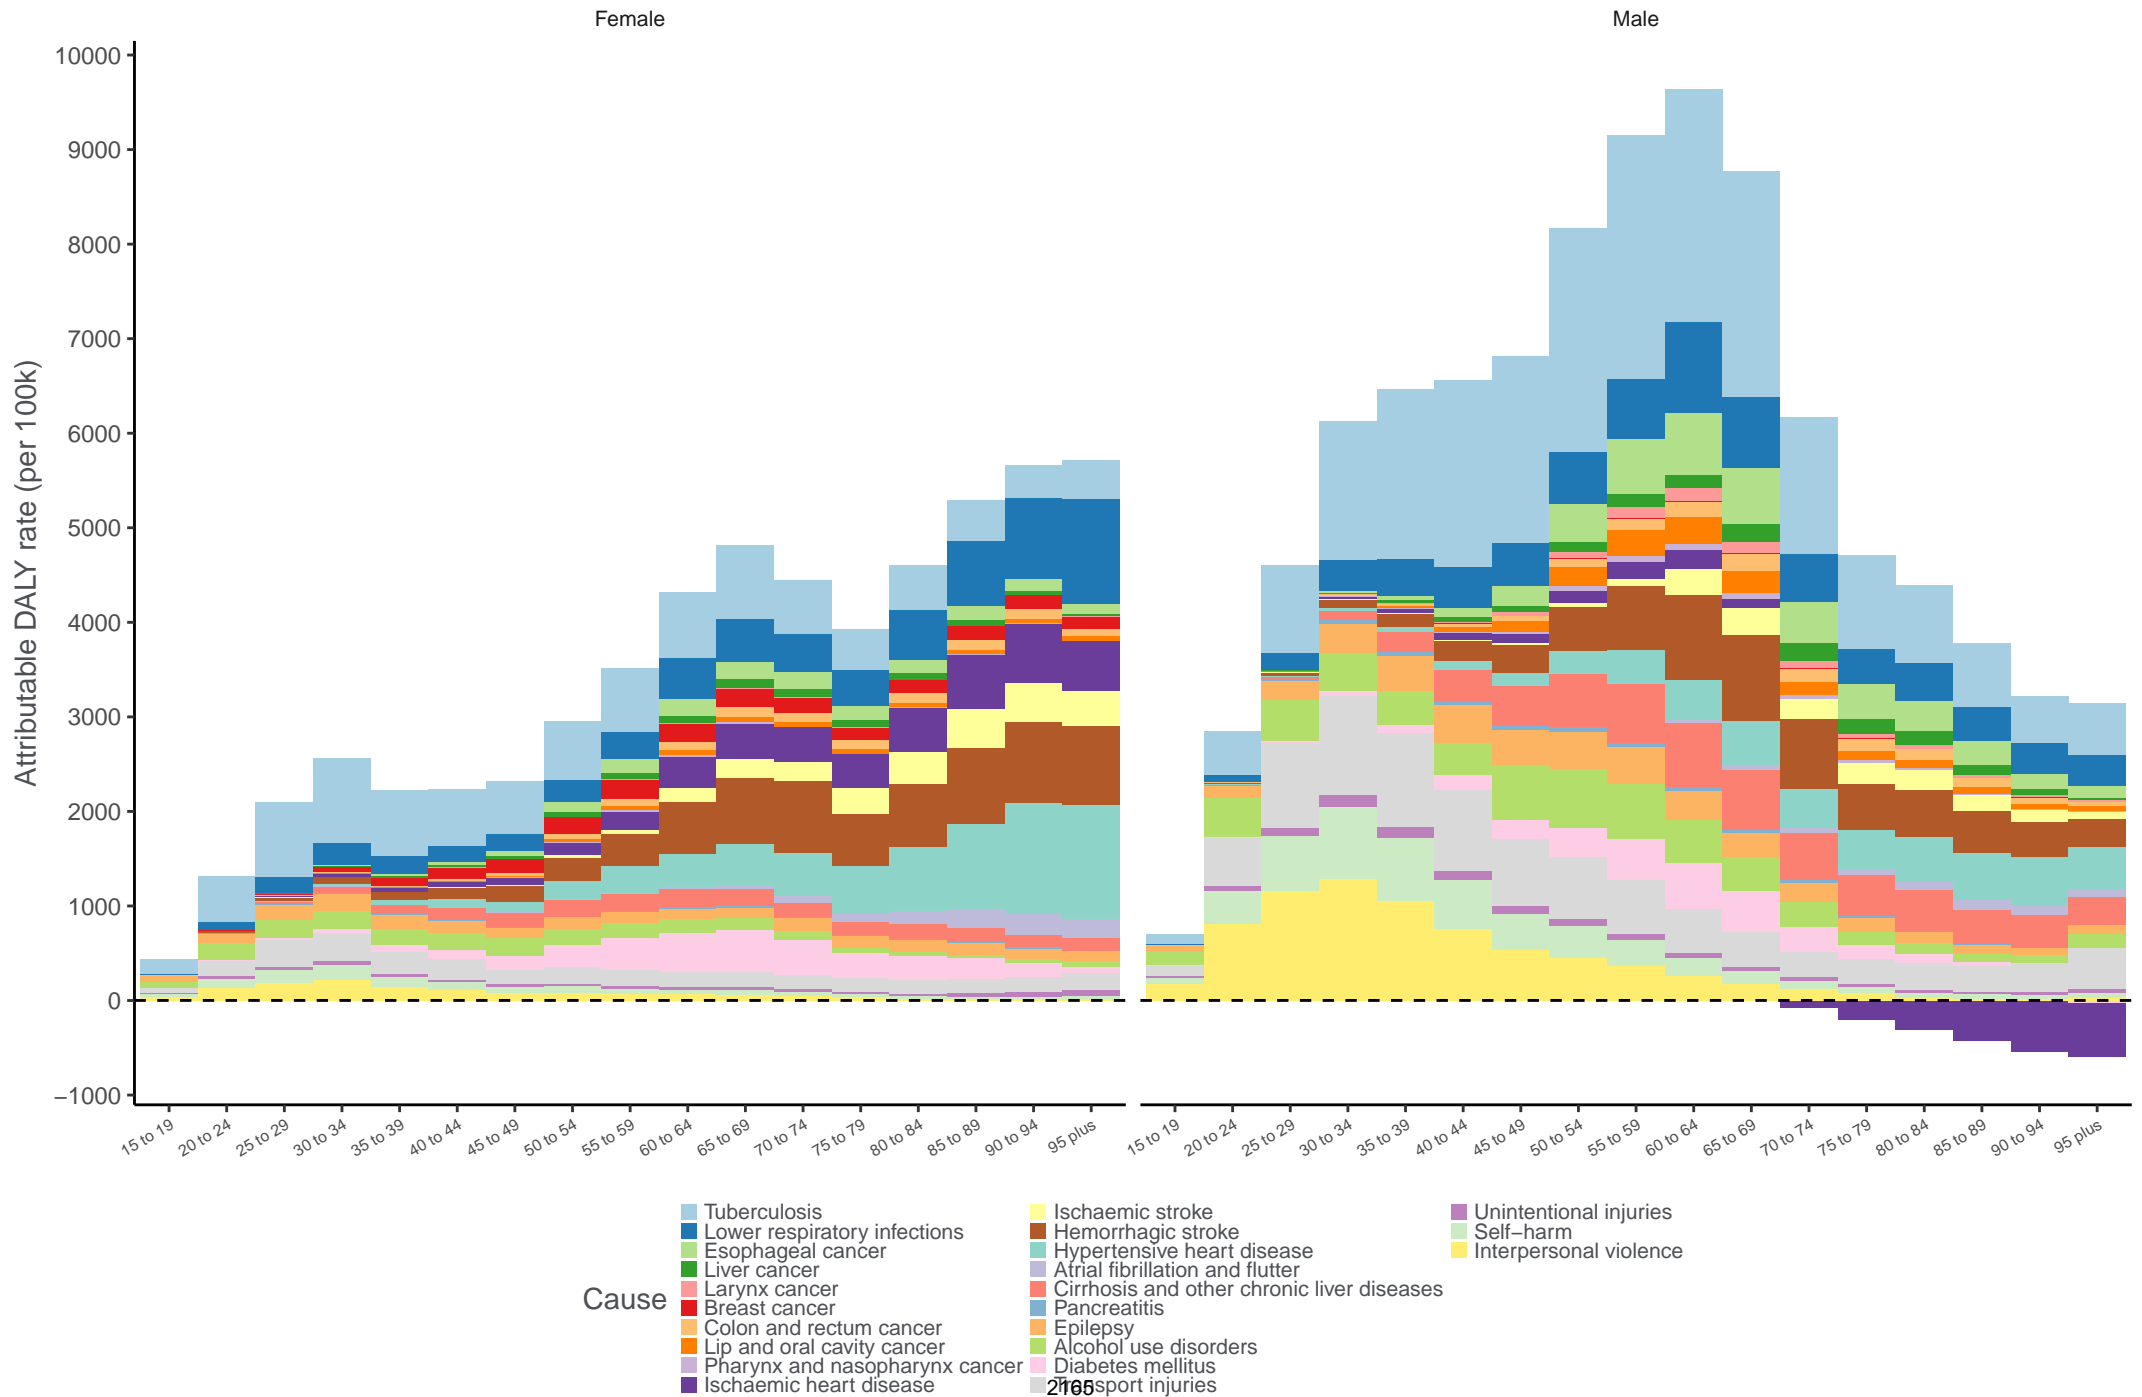

Attributable DALY rate disaggregated by cause, Swaziland, by sex and age in 2016.

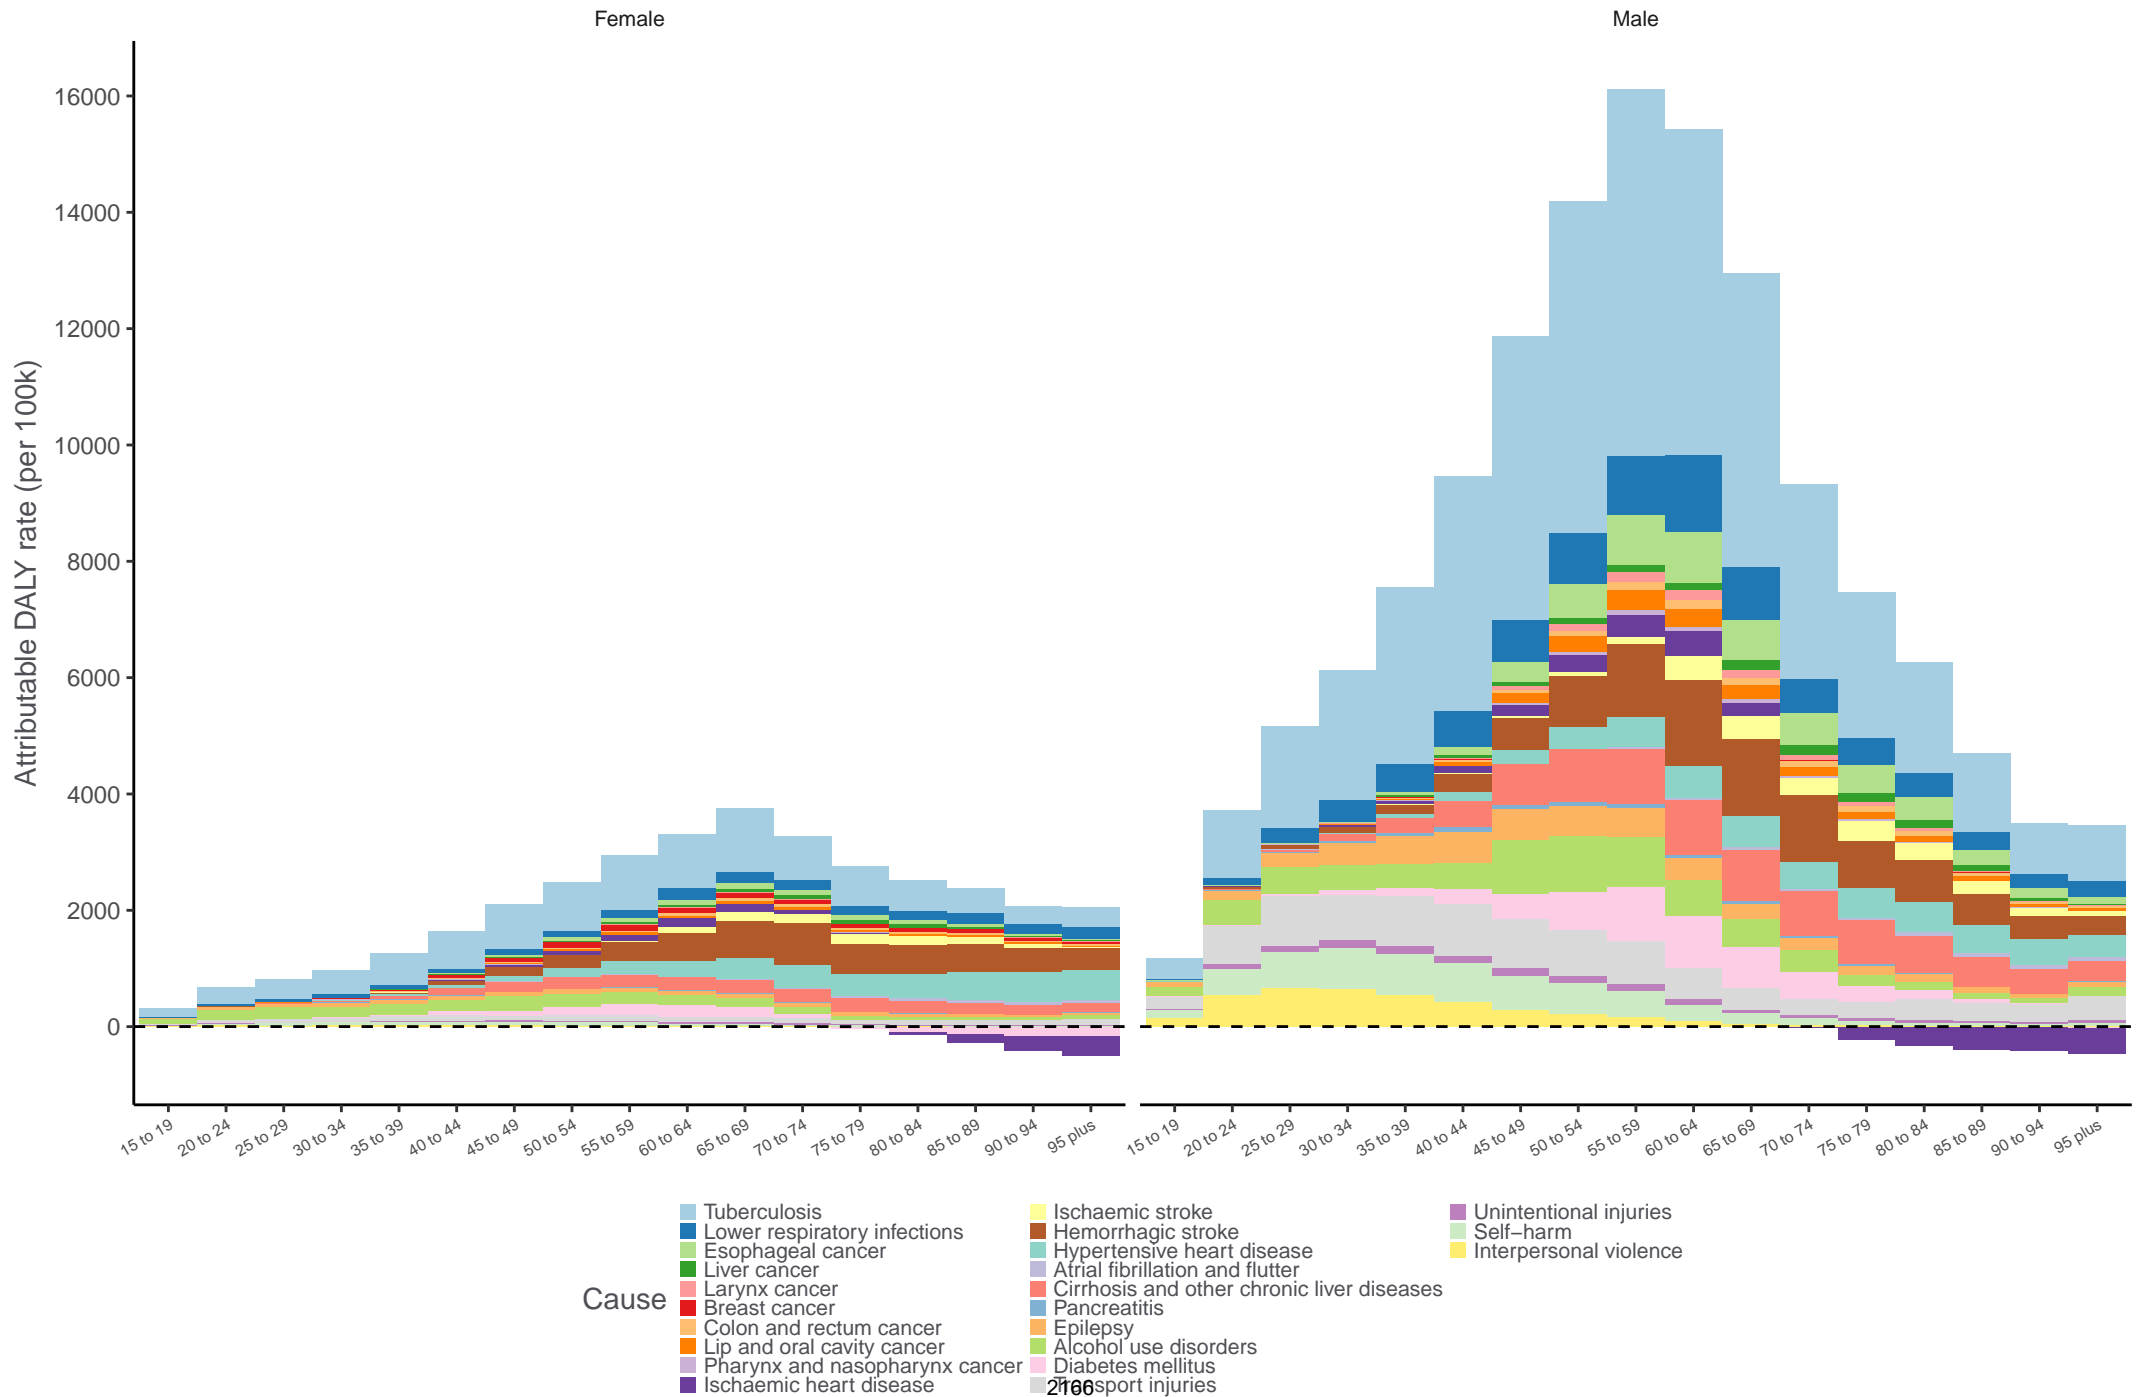





Attributable DALY rate disaggregated by cause, Benin, by sex and age in 2016.

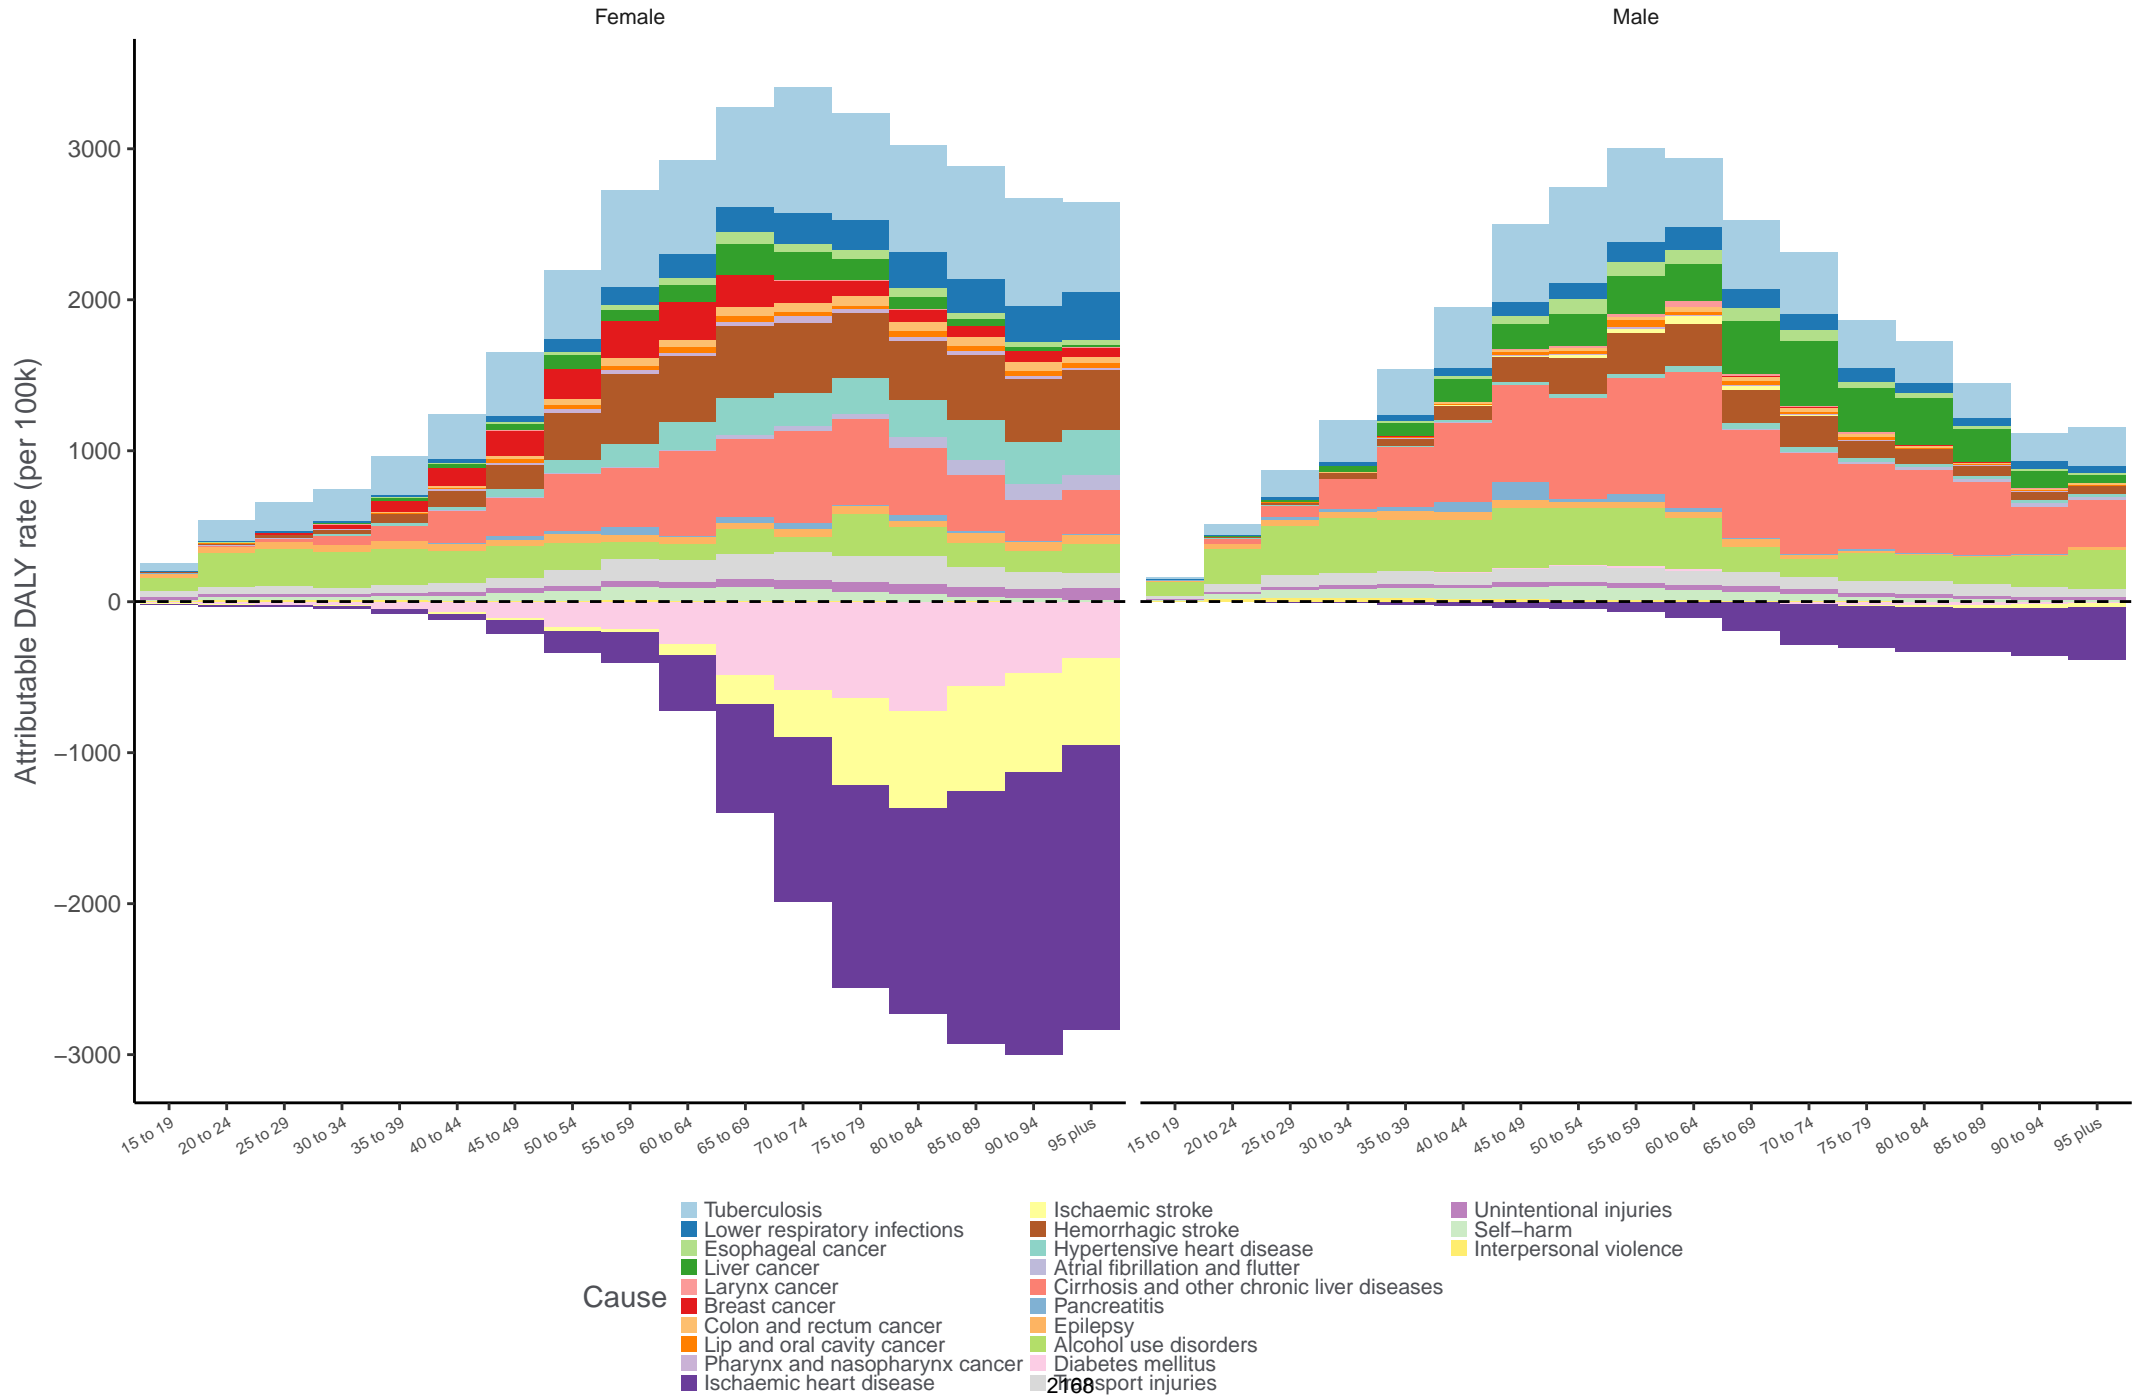

Attributable DALY rate disaggregated by cause, Burkina Faso, by sex and age in 2016.

Female

Male

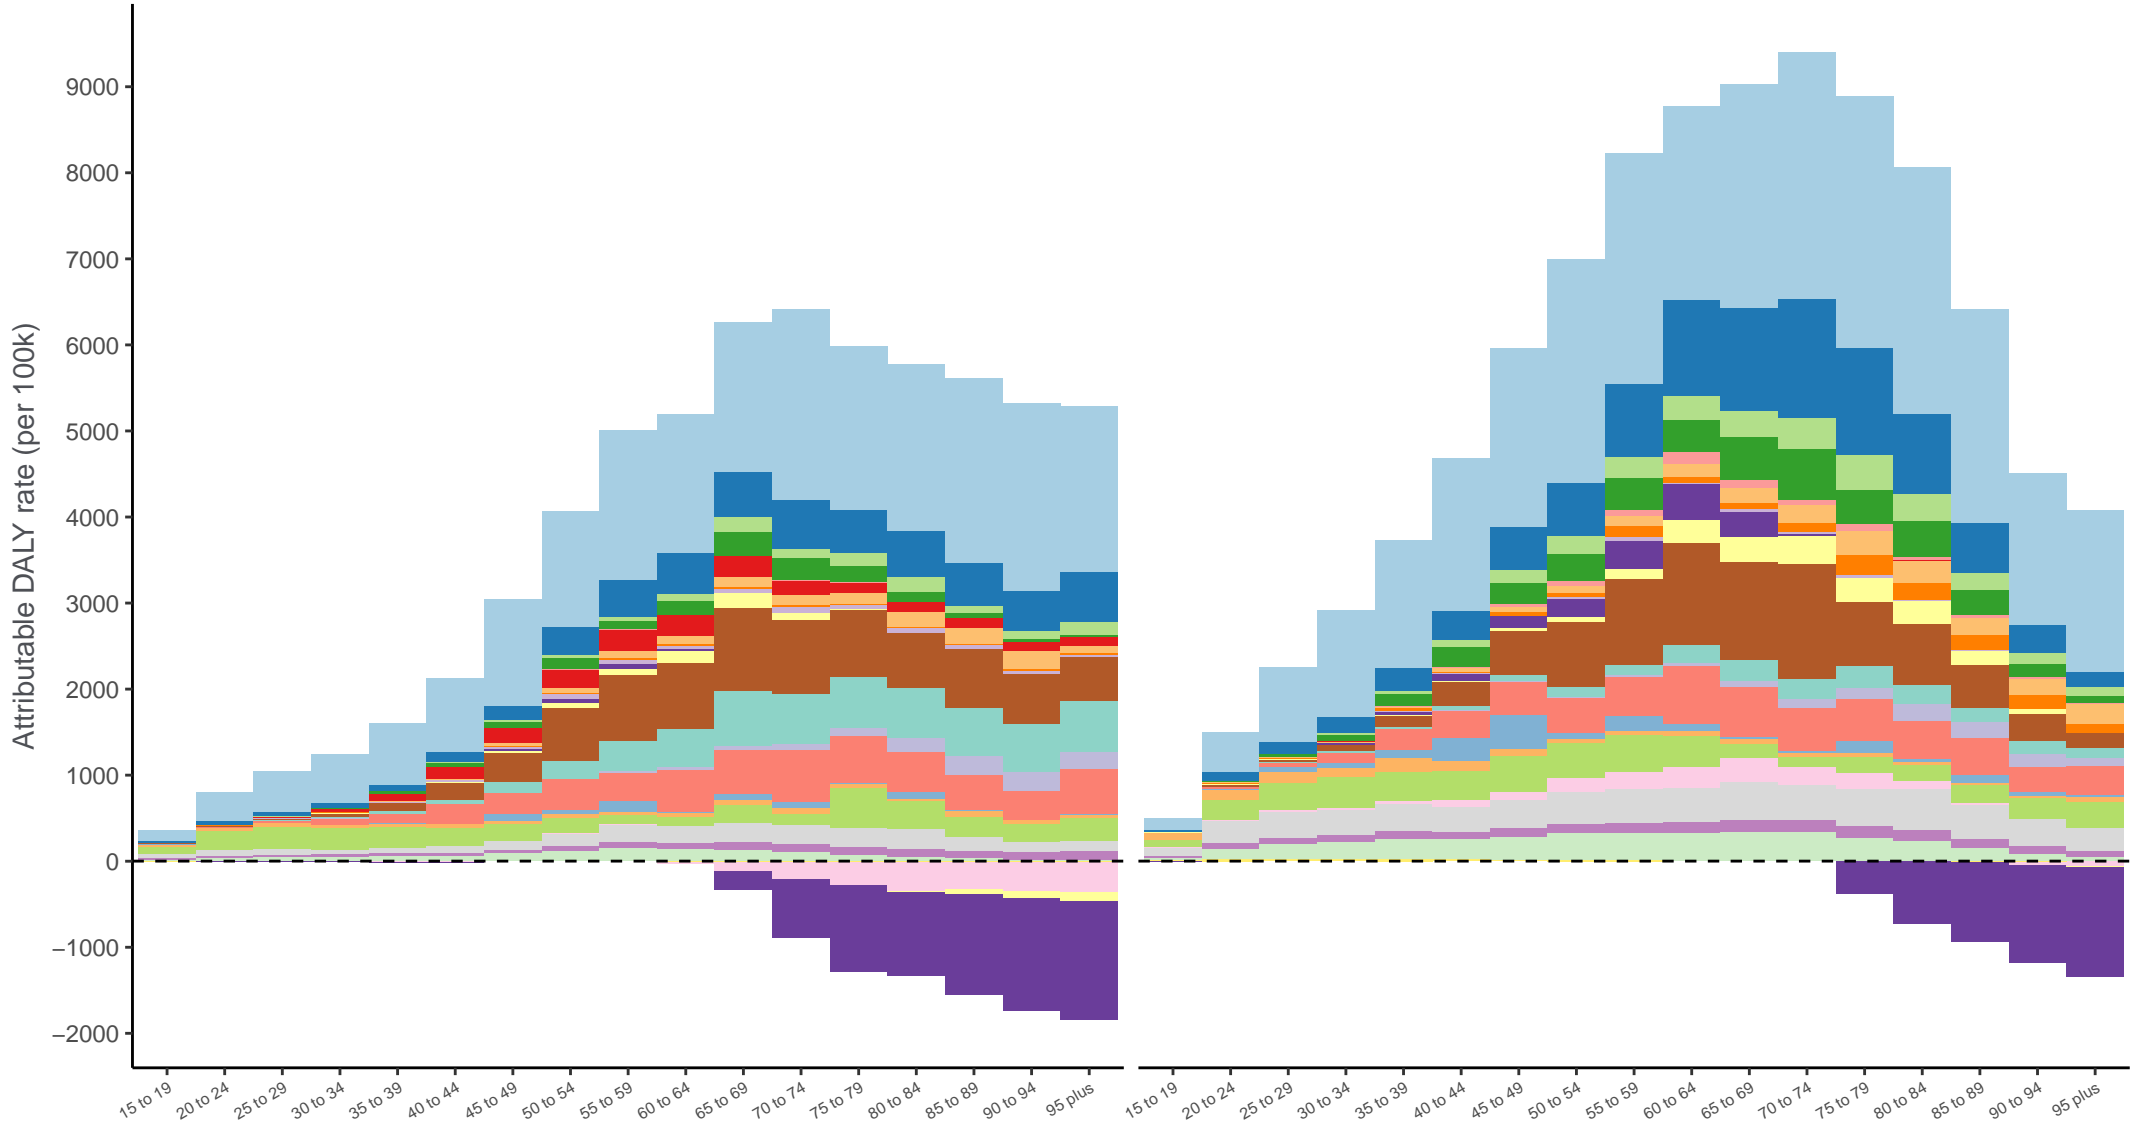

- |                                                                                                                                                                                                                                                                                                                                                                       |                                                                                                                                                                                                                                                                                                                                                           |                                                                                                                             |
|-----------------------------------------------------------------------------------------------------------------------------------------------------------------------------------------------------------------------------------------------------------------------------------------------------------------------------------------------------------------------|-----------------------------------------------------------------------------------------------------------------------------------------------------------------------------------------------------------------------------------------------------------------------------------------------------------------------------------------------------------|-----------------------------------------------------------------------------------------------------------------------------|
| <p><b>Cause</b></p> <ul style="list-style-type: none"> <li>Tuberculosis</li> <li>Lower respiratory infections</li> <li>Esophageal cancer</li> <li>Liver cancer</li> <li>Larynx cancer</li> <li>Breast cancer</li> <li>Colon and rectum cancer</li> <li>Lip and oral cavity cancer</li> <li>Pharynx and nasopharynx cancer</li> <li>Ischaemic heart disease</li> </ul> | <ul style="list-style-type: none"> <li>Ischaemic stroke</li> <li>Hemorrhagic stroke</li> <li>Hypertensive heart disease</li> <li>Atrial fibrillation and flutter</li> <li>Cirrhosis and other chronic liver diseases</li> <li>Pancreatitis</li> <li>Epilepsy</li> <li>Alcohol use disorders</li> <li>Diabetes mellitus</li> <li>Sport injuries</li> </ul> | <ul style="list-style-type: none"> <li>Unintentional injuries</li> <li>Self-harm</li> <li>Interpersonal violence</li> </ul> |
|-----------------------------------------------------------------------------------------------------------------------------------------------------------------------------------------------------------------------------------------------------------------------------------------------------------------------------------------------------------------------|-----------------------------------------------------------------------------------------------------------------------------------------------------------------------------------------------------------------------------------------------------------------------------------------------------------------------------------------------------------|-----------------------------------------------------------------------------------------------------------------------------|

Attributable DALY rate disaggregated by cause, Cameroon, by sex and age in 2016.

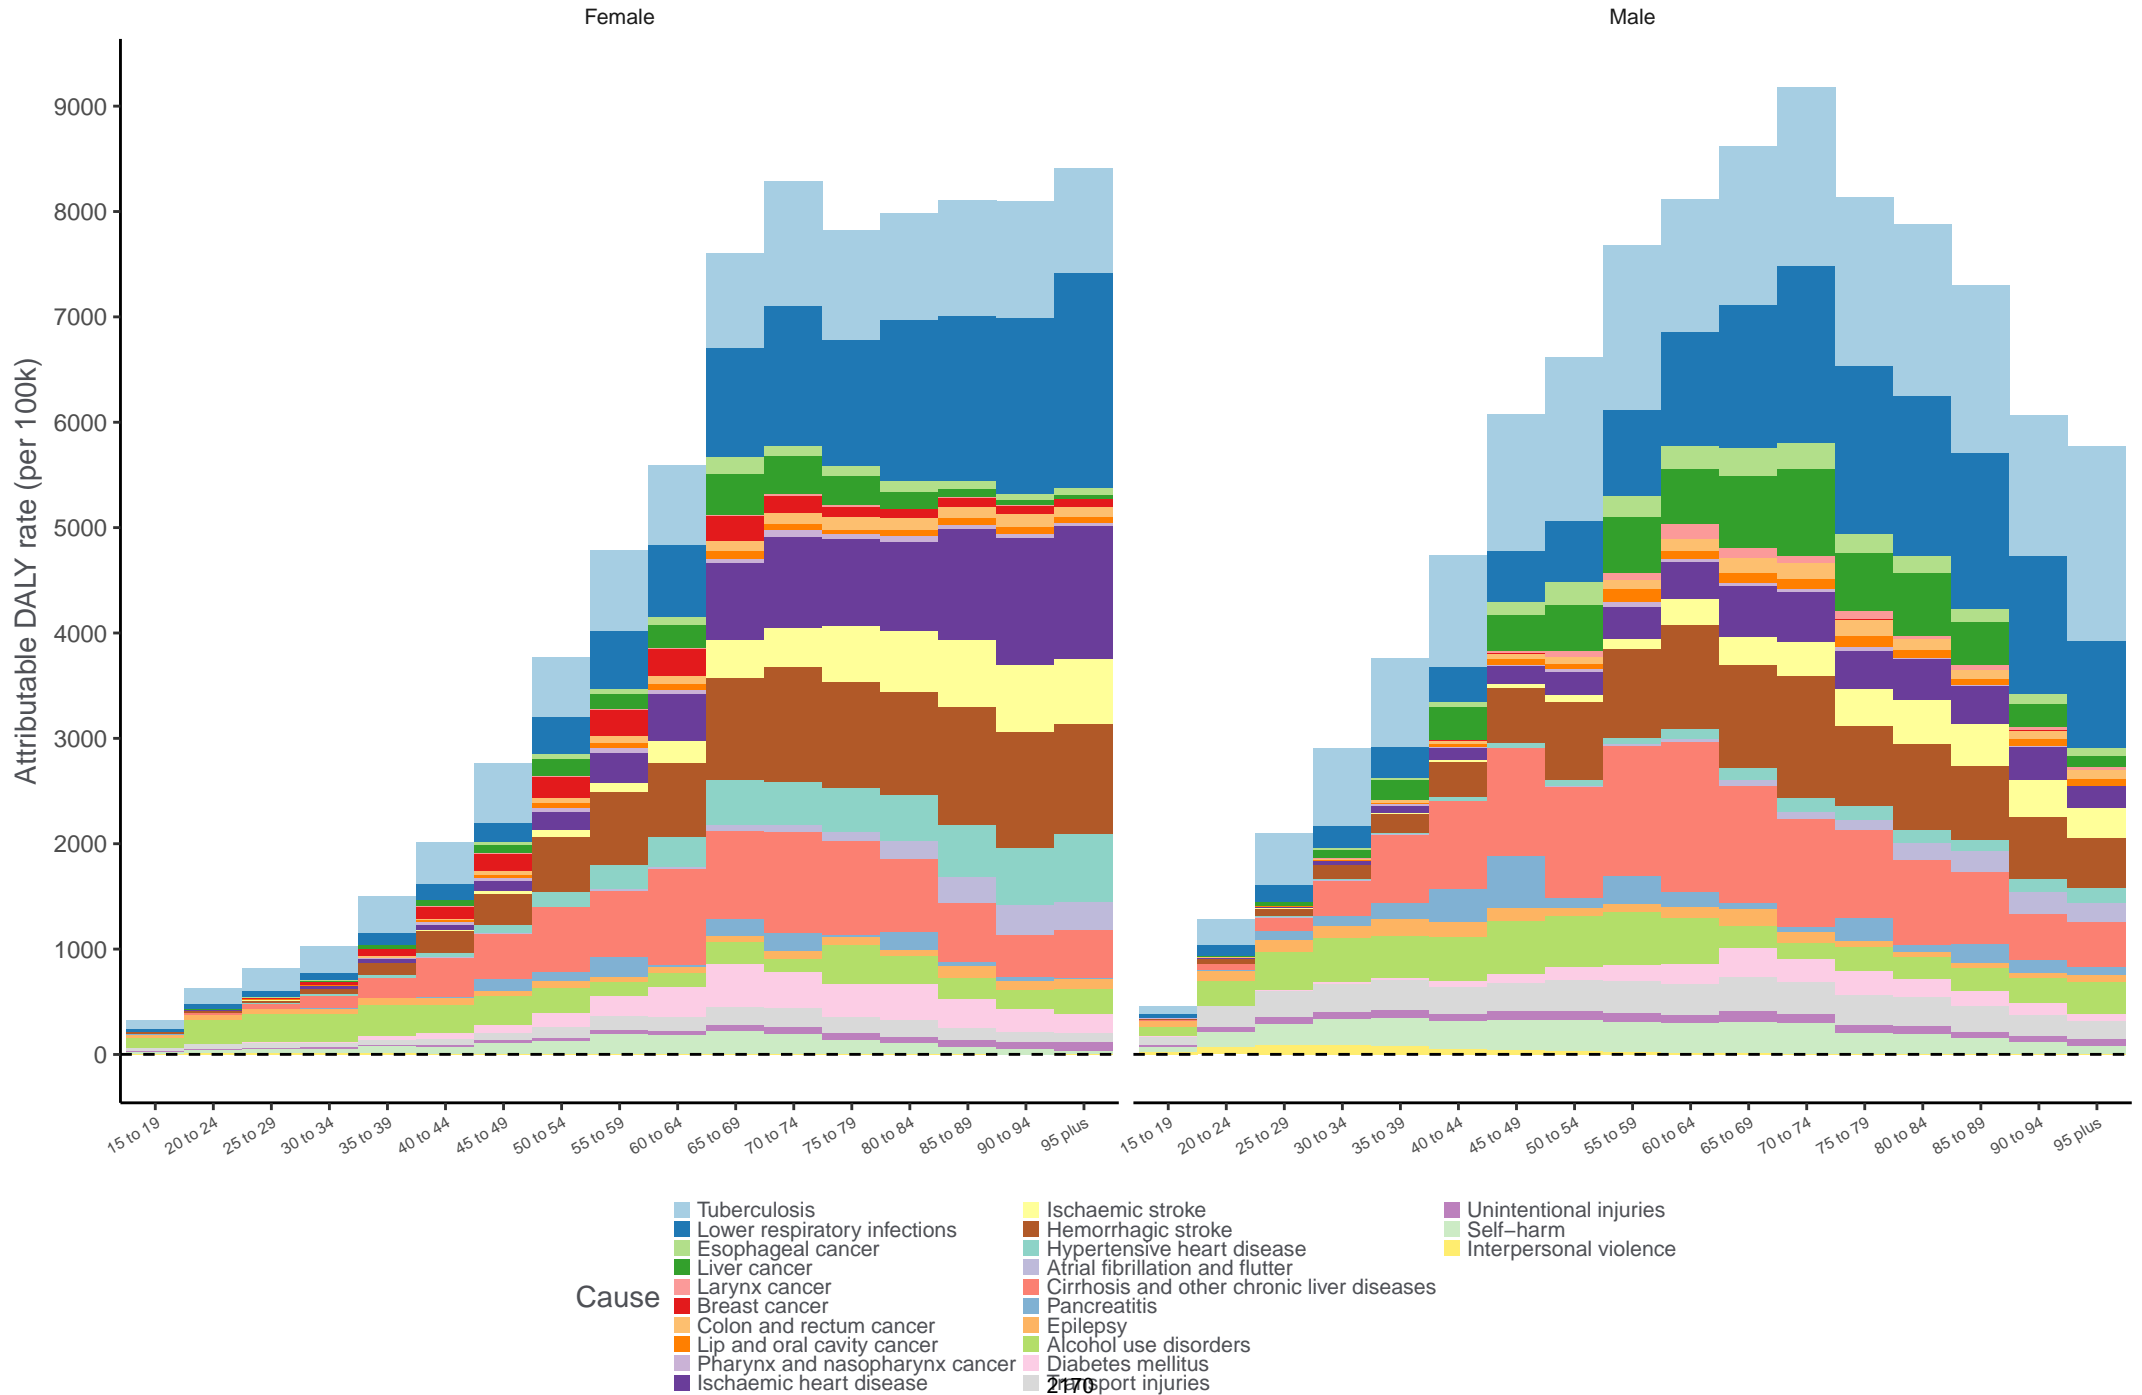

Attributable DALY rate disaggregated by cause, Cape Verde, by sex and age in 2016.

Female

Male

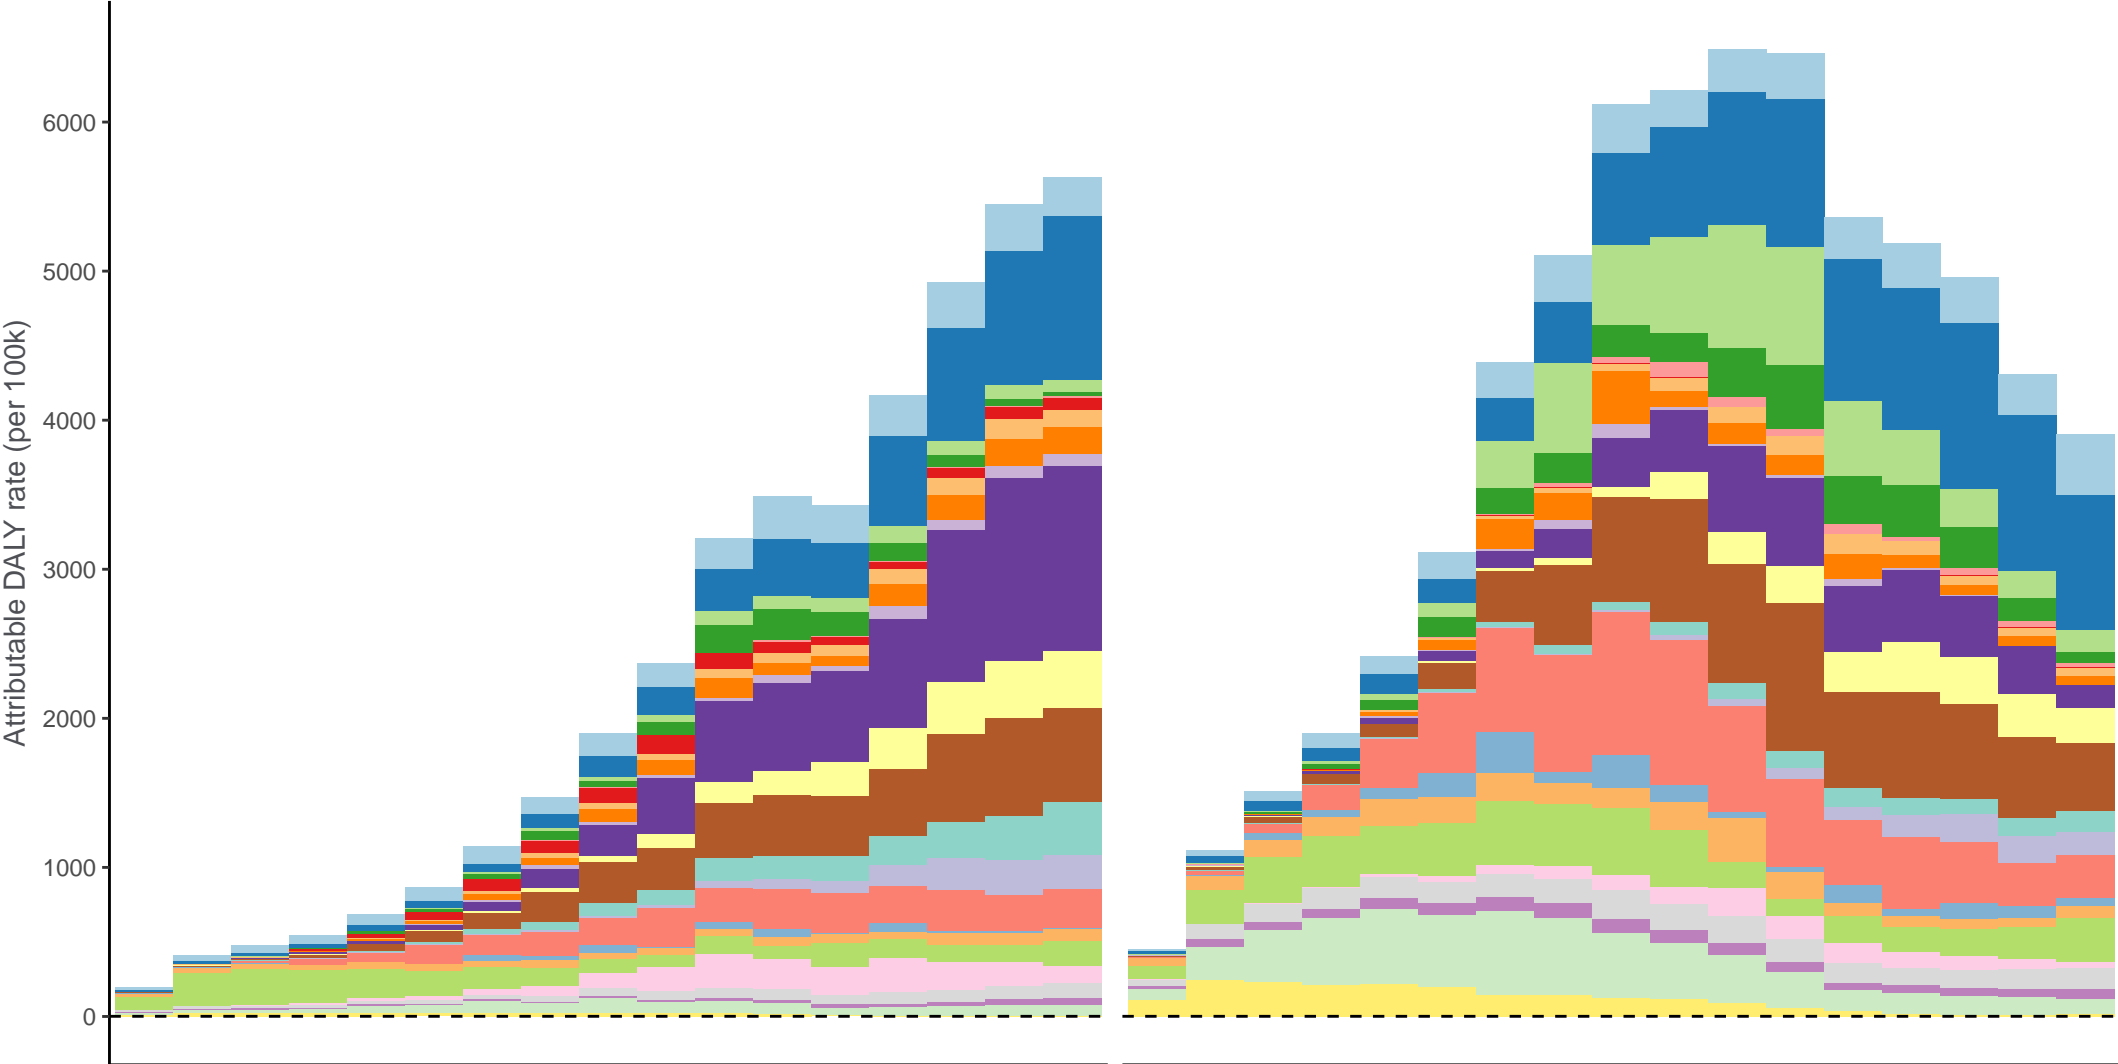

- |                                                                                                                                                                                                                                                                                                                                                                                                                                                                                                                                                                                                                                                                                                                                                         |                                                                                                                                                                                                                                                                                                                                                                                                                                                                                                                                                                                                                                                                                                                                                                     |                                                                                                                                                                                                                                                  |
|---------------------------------------------------------------------------------------------------------------------------------------------------------------------------------------------------------------------------------------------------------------------------------------------------------------------------------------------------------------------------------------------------------------------------------------------------------------------------------------------------------------------------------------------------------------------------------------------------------------------------------------------------------------------------------------------------------------------------------------------------------|---------------------------------------------------------------------------------------------------------------------------------------------------------------------------------------------------------------------------------------------------------------------------------------------------------------------------------------------------------------------------------------------------------------------------------------------------------------------------------------------------------------------------------------------------------------------------------------------------------------------------------------------------------------------------------------------------------------------------------------------------------------------|--------------------------------------------------------------------------------------------------------------------------------------------------------------------------------------------------------------------------------------------------|
| <ul style="list-style-type: none"> <li><span style="color: #add8e6;">■</span> Tuberculosis</li> <li><span style="color: #0056b3;">■</span> Lower respiratory infections</li> <li><span style="color: #90ee90;">■</span> Esophageal cancer</li> <li><span style="color: #32cd32;">■</span> Liver cancer</li> <li><span style="color: #ff6347;">■</span> Larynx cancer</li> <li><span style="color: #ff0000;">■</span> Breast cancer</li> <li><span style="color: #ffa500;">■</span> Colon and rectum cancer</li> <li><span style="color: #800080;">■</span> Lip and oral cavity cancer</li> <li><span style="color: #ff69b4;">■</span> Pharynx and nasopharynx cancer</li> <li><span style="color: #4b0082;">■</span> Ischaemic heart disease</li> </ul> | <ul style="list-style-type: none"> <li><span style="color: #ffff00;">■</span> Ischaemic stroke</li> <li><span style="color: #8b4513;">■</span> Hemorrhagic stroke</li> <li><span style="color: #66c2e0;">■</span> Hypertensive heart disease</li> <li><span style="color: #c0c0c0;">■</span> Atrial fibrillation and flutter</li> <li><span style="color: #ff6347;">■</span> Cirrhosis and other chronic liver diseases</li> <li><span style="color: #4682b4;">■</span> Pancreatitis</li> <li><span style="color: #ffa500;">■</span> Epilepsy</li> <li><span style="color: #90ee90;">■</span> Alcohol use disorders</li> <li><span style="color: #ff69b4;">■</span> Diabetes mellitus</li> <li><span style="color: #a9a9a9;">■</span> Transport injuries</li> </ul> | <ul style="list-style-type: none"> <li><span style="color: #800080;">■</span> Unintentional injuries</li> <li><span style="color: #90ee90;">■</span> Self-harm</li> <li><span style="color: #ffff00;">■</span> Interpersonal violence</li> </ul> |
|---------------------------------------------------------------------------------------------------------------------------------------------------------------------------------------------------------------------------------------------------------------------------------------------------------------------------------------------------------------------------------------------------------------------------------------------------------------------------------------------------------------------------------------------------------------------------------------------------------------------------------------------------------------------------------------------------------------------------------------------------------|---------------------------------------------------------------------------------------------------------------------------------------------------------------------------------------------------------------------------------------------------------------------------------------------------------------------------------------------------------------------------------------------------------------------------------------------------------------------------------------------------------------------------------------------------------------------------------------------------------------------------------------------------------------------------------------------------------------------------------------------------------------------|--------------------------------------------------------------------------------------------------------------------------------------------------------------------------------------------------------------------------------------------------|

Attributable DALY rate disaggregated by cause, Chad, by sex and age in 2016.

Female

Male

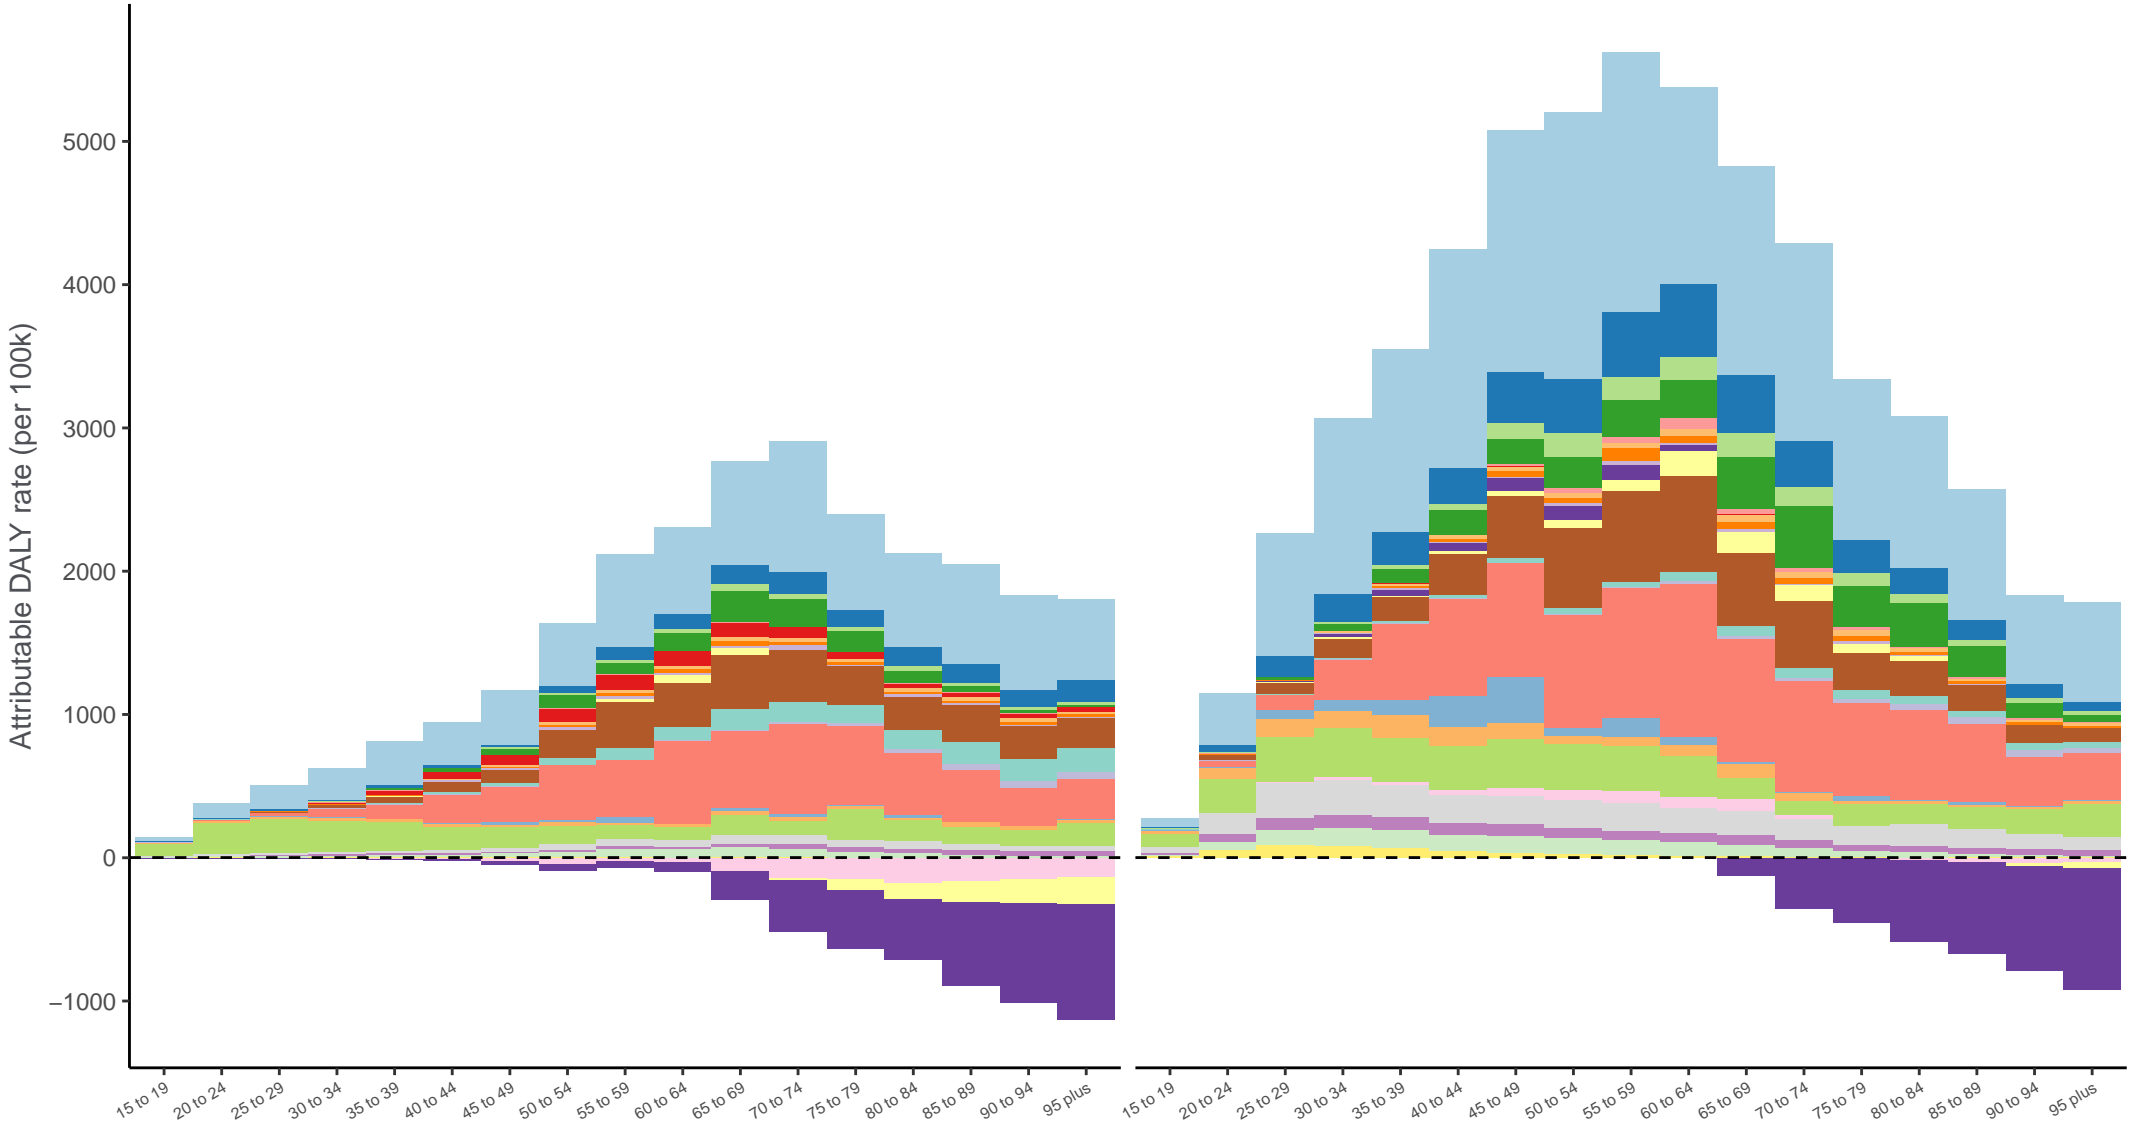

- |                                                                                                                                                                                                                                                                                                                                                                                                                                                                                                                                                                                                                                                                                                                                                         |                                                                                                                                                                                                                                                                                                                                                                                                                                                                                                                                                                                                                                                                                                                                                                  |                                                                                                                                                                                                                                                  |
|---------------------------------------------------------------------------------------------------------------------------------------------------------------------------------------------------------------------------------------------------------------------------------------------------------------------------------------------------------------------------------------------------------------------------------------------------------------------------------------------------------------------------------------------------------------------------------------------------------------------------------------------------------------------------------------------------------------------------------------------------------|------------------------------------------------------------------------------------------------------------------------------------------------------------------------------------------------------------------------------------------------------------------------------------------------------------------------------------------------------------------------------------------------------------------------------------------------------------------------------------------------------------------------------------------------------------------------------------------------------------------------------------------------------------------------------------------------------------------------------------------------------------------|--------------------------------------------------------------------------------------------------------------------------------------------------------------------------------------------------------------------------------------------------|
| <ul style="list-style-type: none"> <li><span style="color: #A6C9EC;">■</span> Tuberculosis</li> <li><span style="color: #1F77B4;">■</span> Lower respiratory infections</li> <li><span style="color: #9ACD32;">■</span> Esophageal cancer</li> <li><span style="color: #2CA02C;">■</span> Liver cancer</li> <li><span style="color: #FF7F0E;">■</span> Larynx cancer</li> <li><span style="color: #D62728;">■</span> Breast cancer</li> <li><span style="color: #FF7F0E;">■</span> Colon and rectum cancer</li> <li><span style="color: #FF7F0E;">■</span> Lip and oral cavity cancer</li> <li><span style="color: #9ACD32;">■</span> Pharynx and nasopharynx cancer</li> <li><span style="color: #8C564B;">■</span> Ischaemic heart disease</li> </ul> | <ul style="list-style-type: none"> <li><span style="color: #FFD700;">■</span> Ischaemic stroke</li> <li><span style="color: #8C564B;">■</span> Hemorrhagic stroke</li> <li><span style="color: #A6C9EC;">■</span> Hypertensive heart disease</li> <li><span style="color: #9ACD32;">■</span> Atrial fibrillation and flutter</li> <li><span style="color: #D62728;">■</span> Cirrhosis and other chronic liver diseases</li> <li><span style="color: #1F77B4;">■</span> Pancreatitis</li> <li><span style="color: #FF7F0E;">■</span> Epilepsy</li> <li><span style="color: #9ACD32;">■</span> Alcohol use disorders</li> <li><span style="color: #FFD700;">■</span> Diabetes mellitus</li> <li><span style="color: #8C564B;">■</span> Sports injuries</li> </ul> | <ul style="list-style-type: none"> <li><span style="color: #9467BD;">■</span> Unintentional injuries</li> <li><span style="color: #9ACD32;">■</span> Self-harm</li> <li><span style="color: #FFD700;">■</span> Interpersonal violence</li> </ul> |
|---------------------------------------------------------------------------------------------------------------------------------------------------------------------------------------------------------------------------------------------------------------------------------------------------------------------------------------------------------------------------------------------------------------------------------------------------------------------------------------------------------------------------------------------------------------------------------------------------------------------------------------------------------------------------------------------------------------------------------------------------------|------------------------------------------------------------------------------------------------------------------------------------------------------------------------------------------------------------------------------------------------------------------------------------------------------------------------------------------------------------------------------------------------------------------------------------------------------------------------------------------------------------------------------------------------------------------------------------------------------------------------------------------------------------------------------------------------------------------------------------------------------------------|--------------------------------------------------------------------------------------------------------------------------------------------------------------------------------------------------------------------------------------------------|

Attributable DALY rate disaggregated by cause, Cote d'Ivoire, by sex and age in 2016.

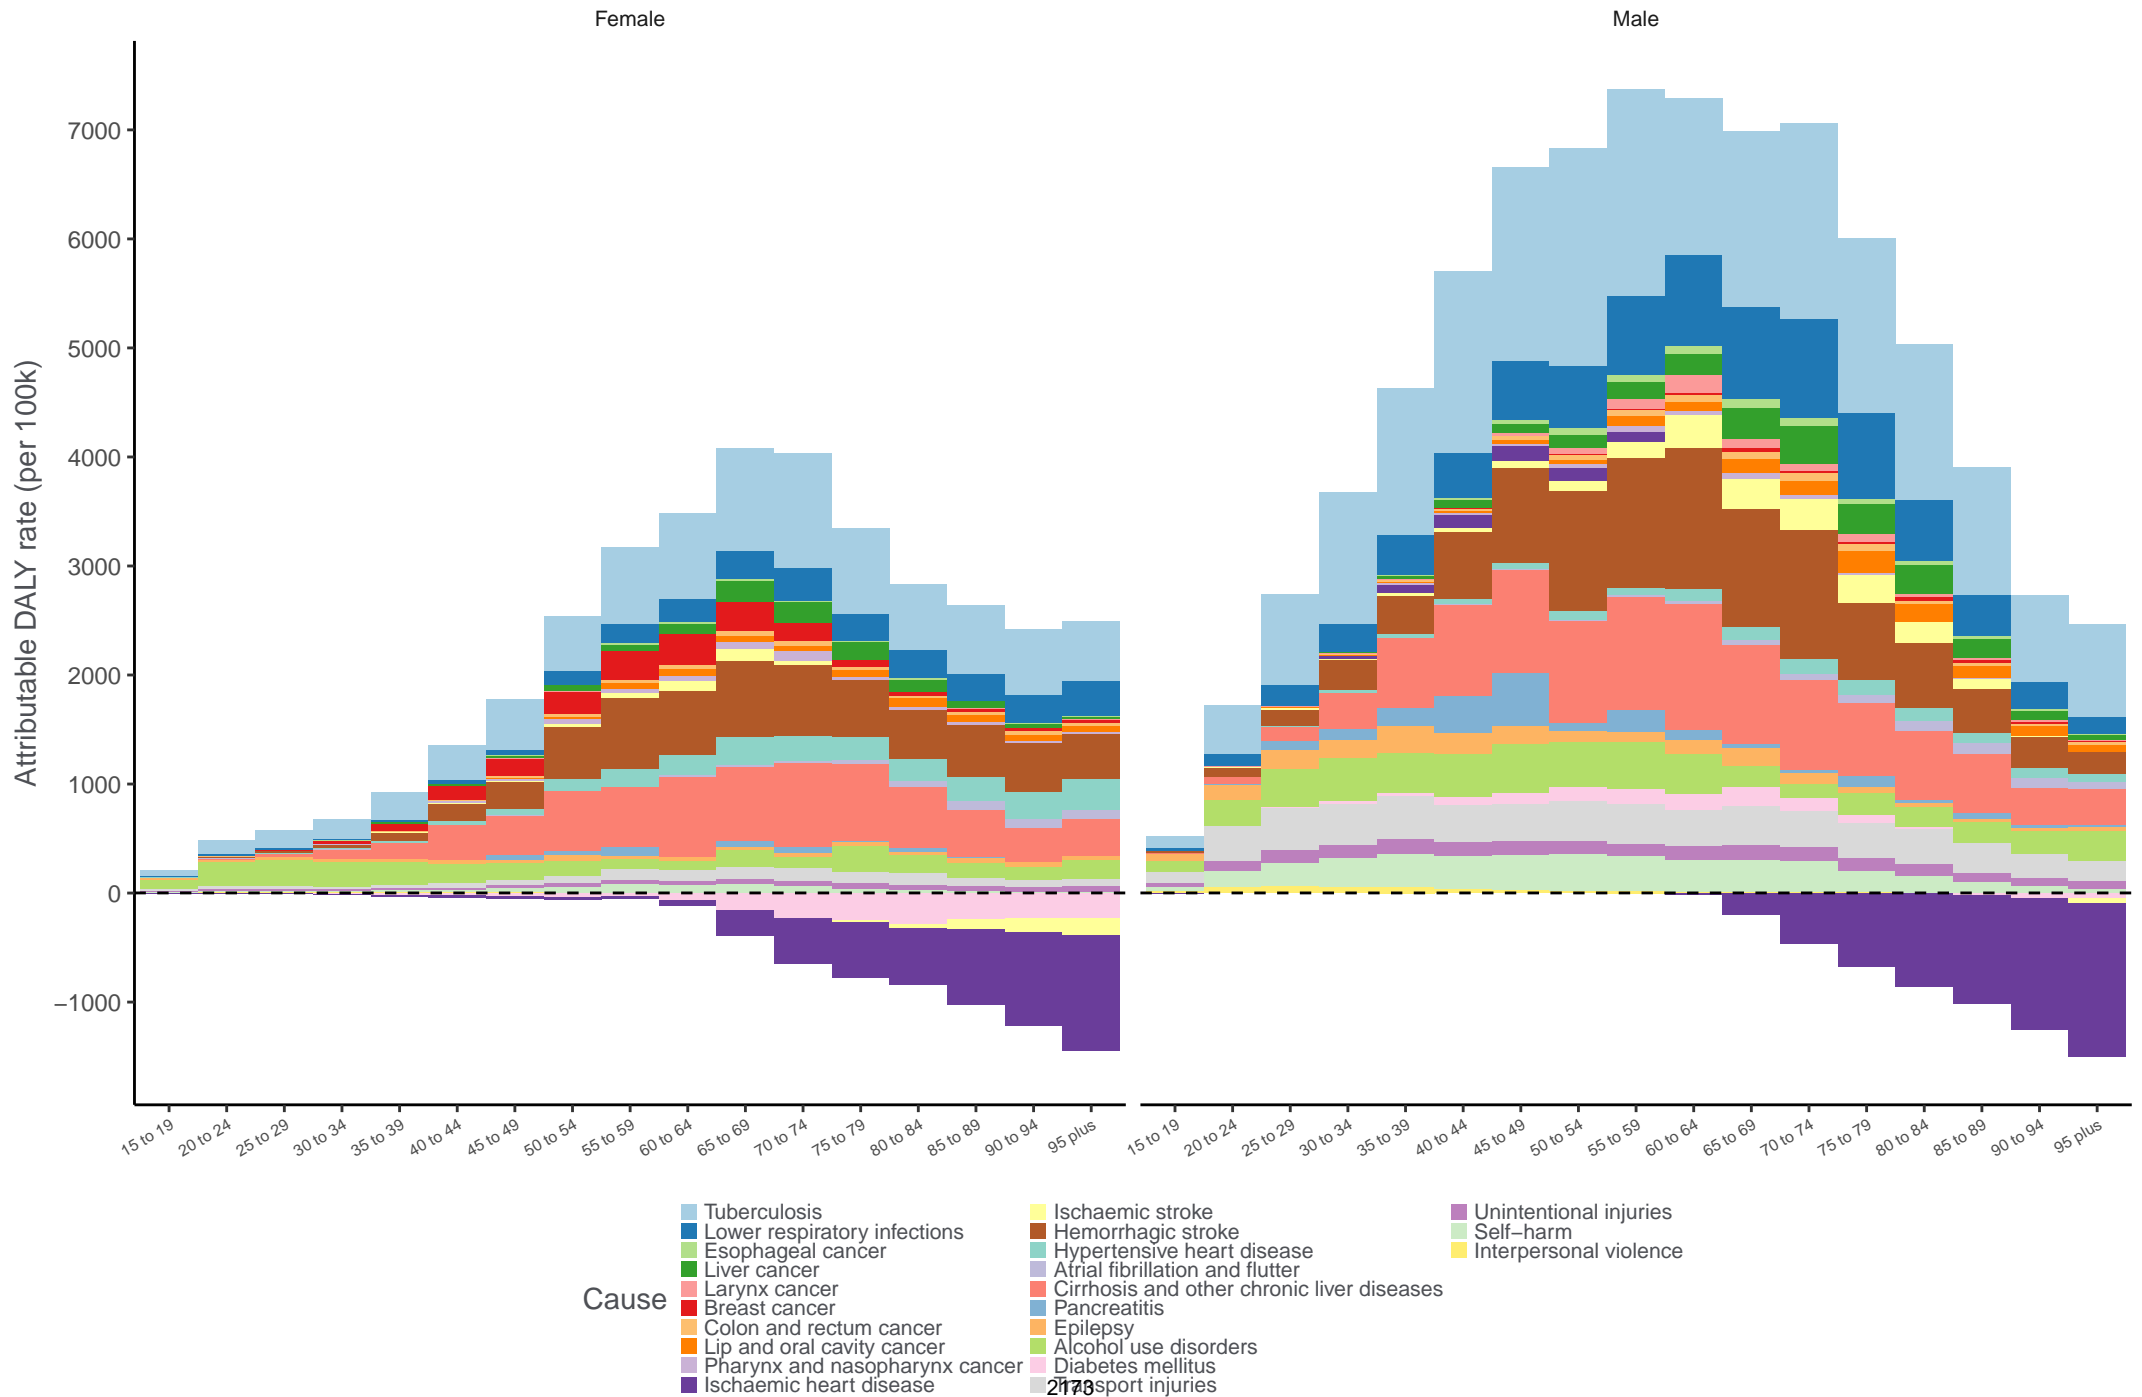

Attributable DALY rate disaggregated by cause, The Gambia, by sex and age in 2016.

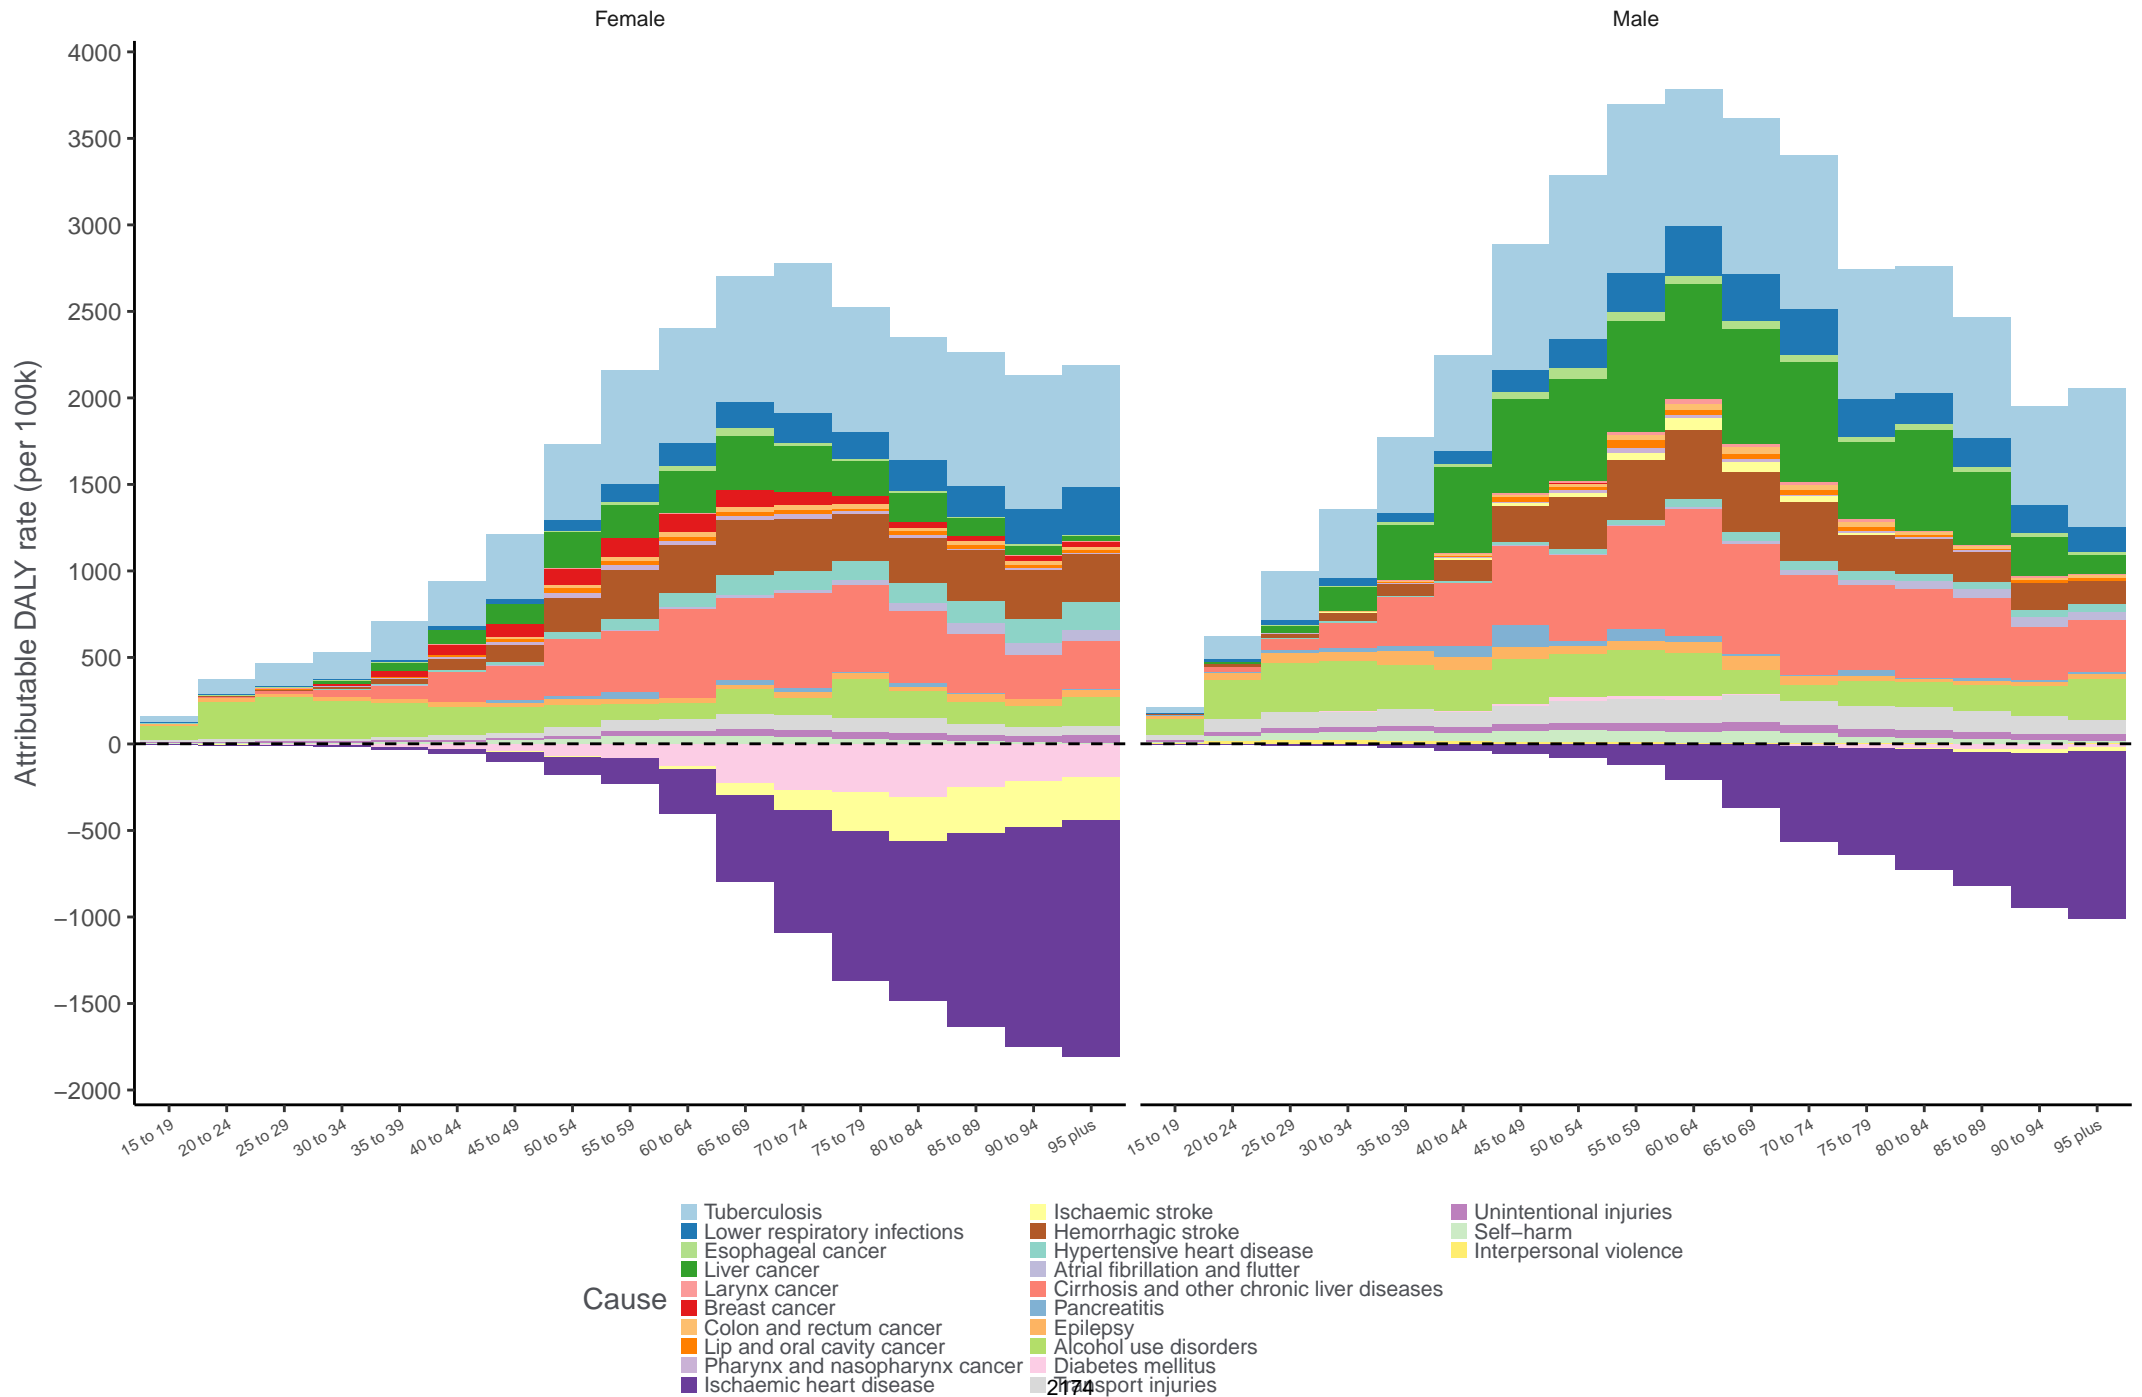





Attributable DALY rate disaggregated by cause, Guinea, by sex and age in 2016.

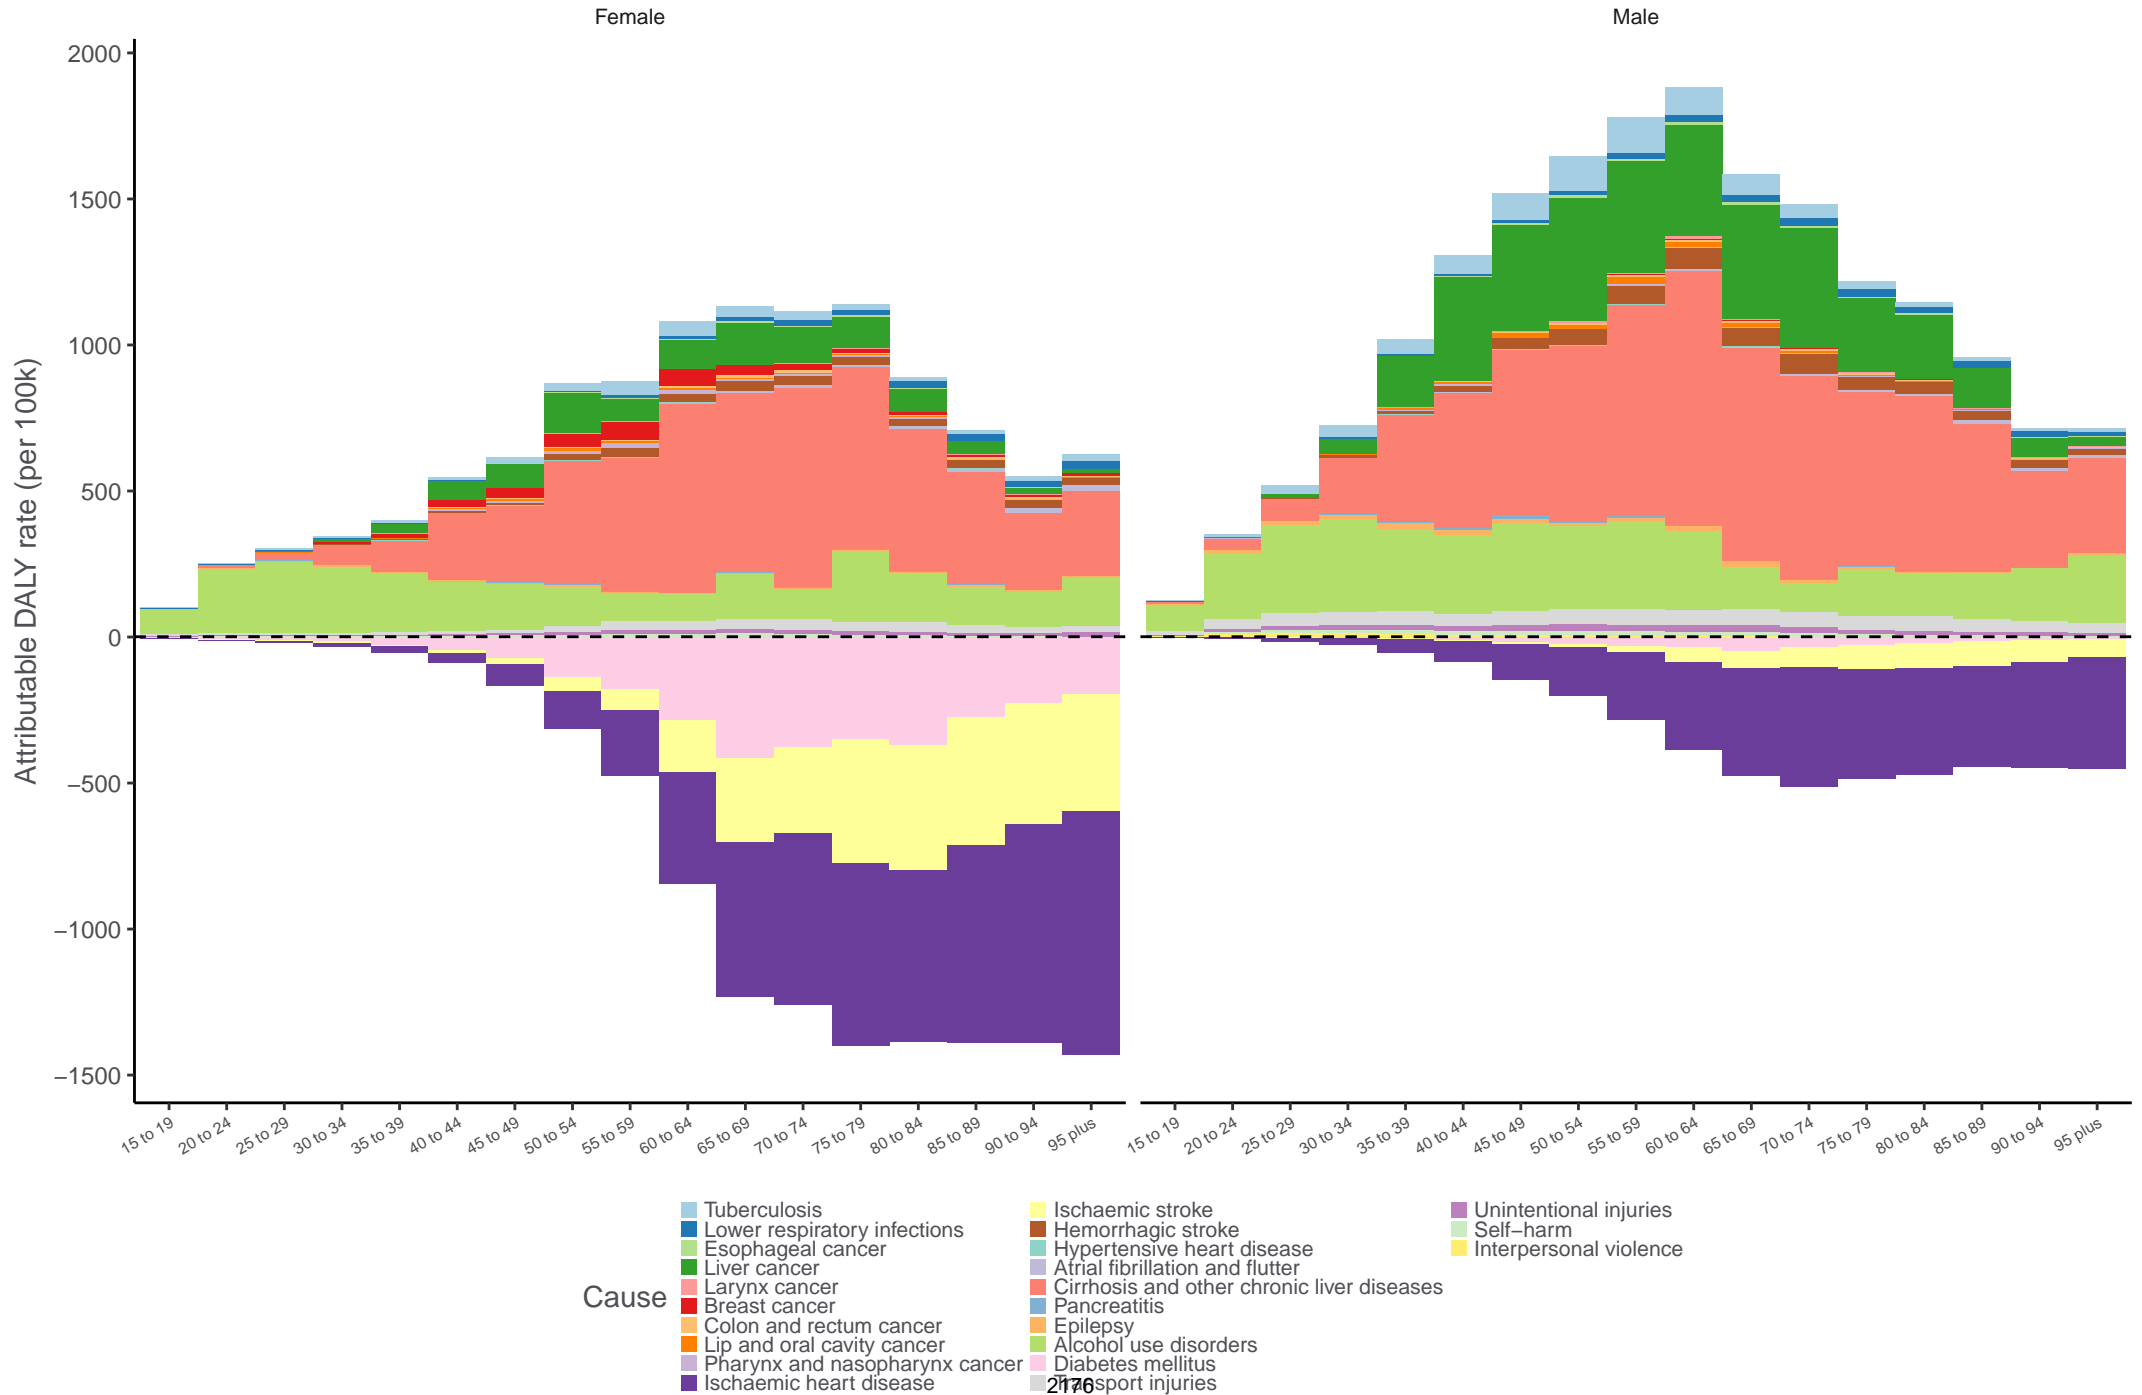

Attributable DALY rate disaggregated by cause, Guinea-Bissau, by sex and age in 2016.

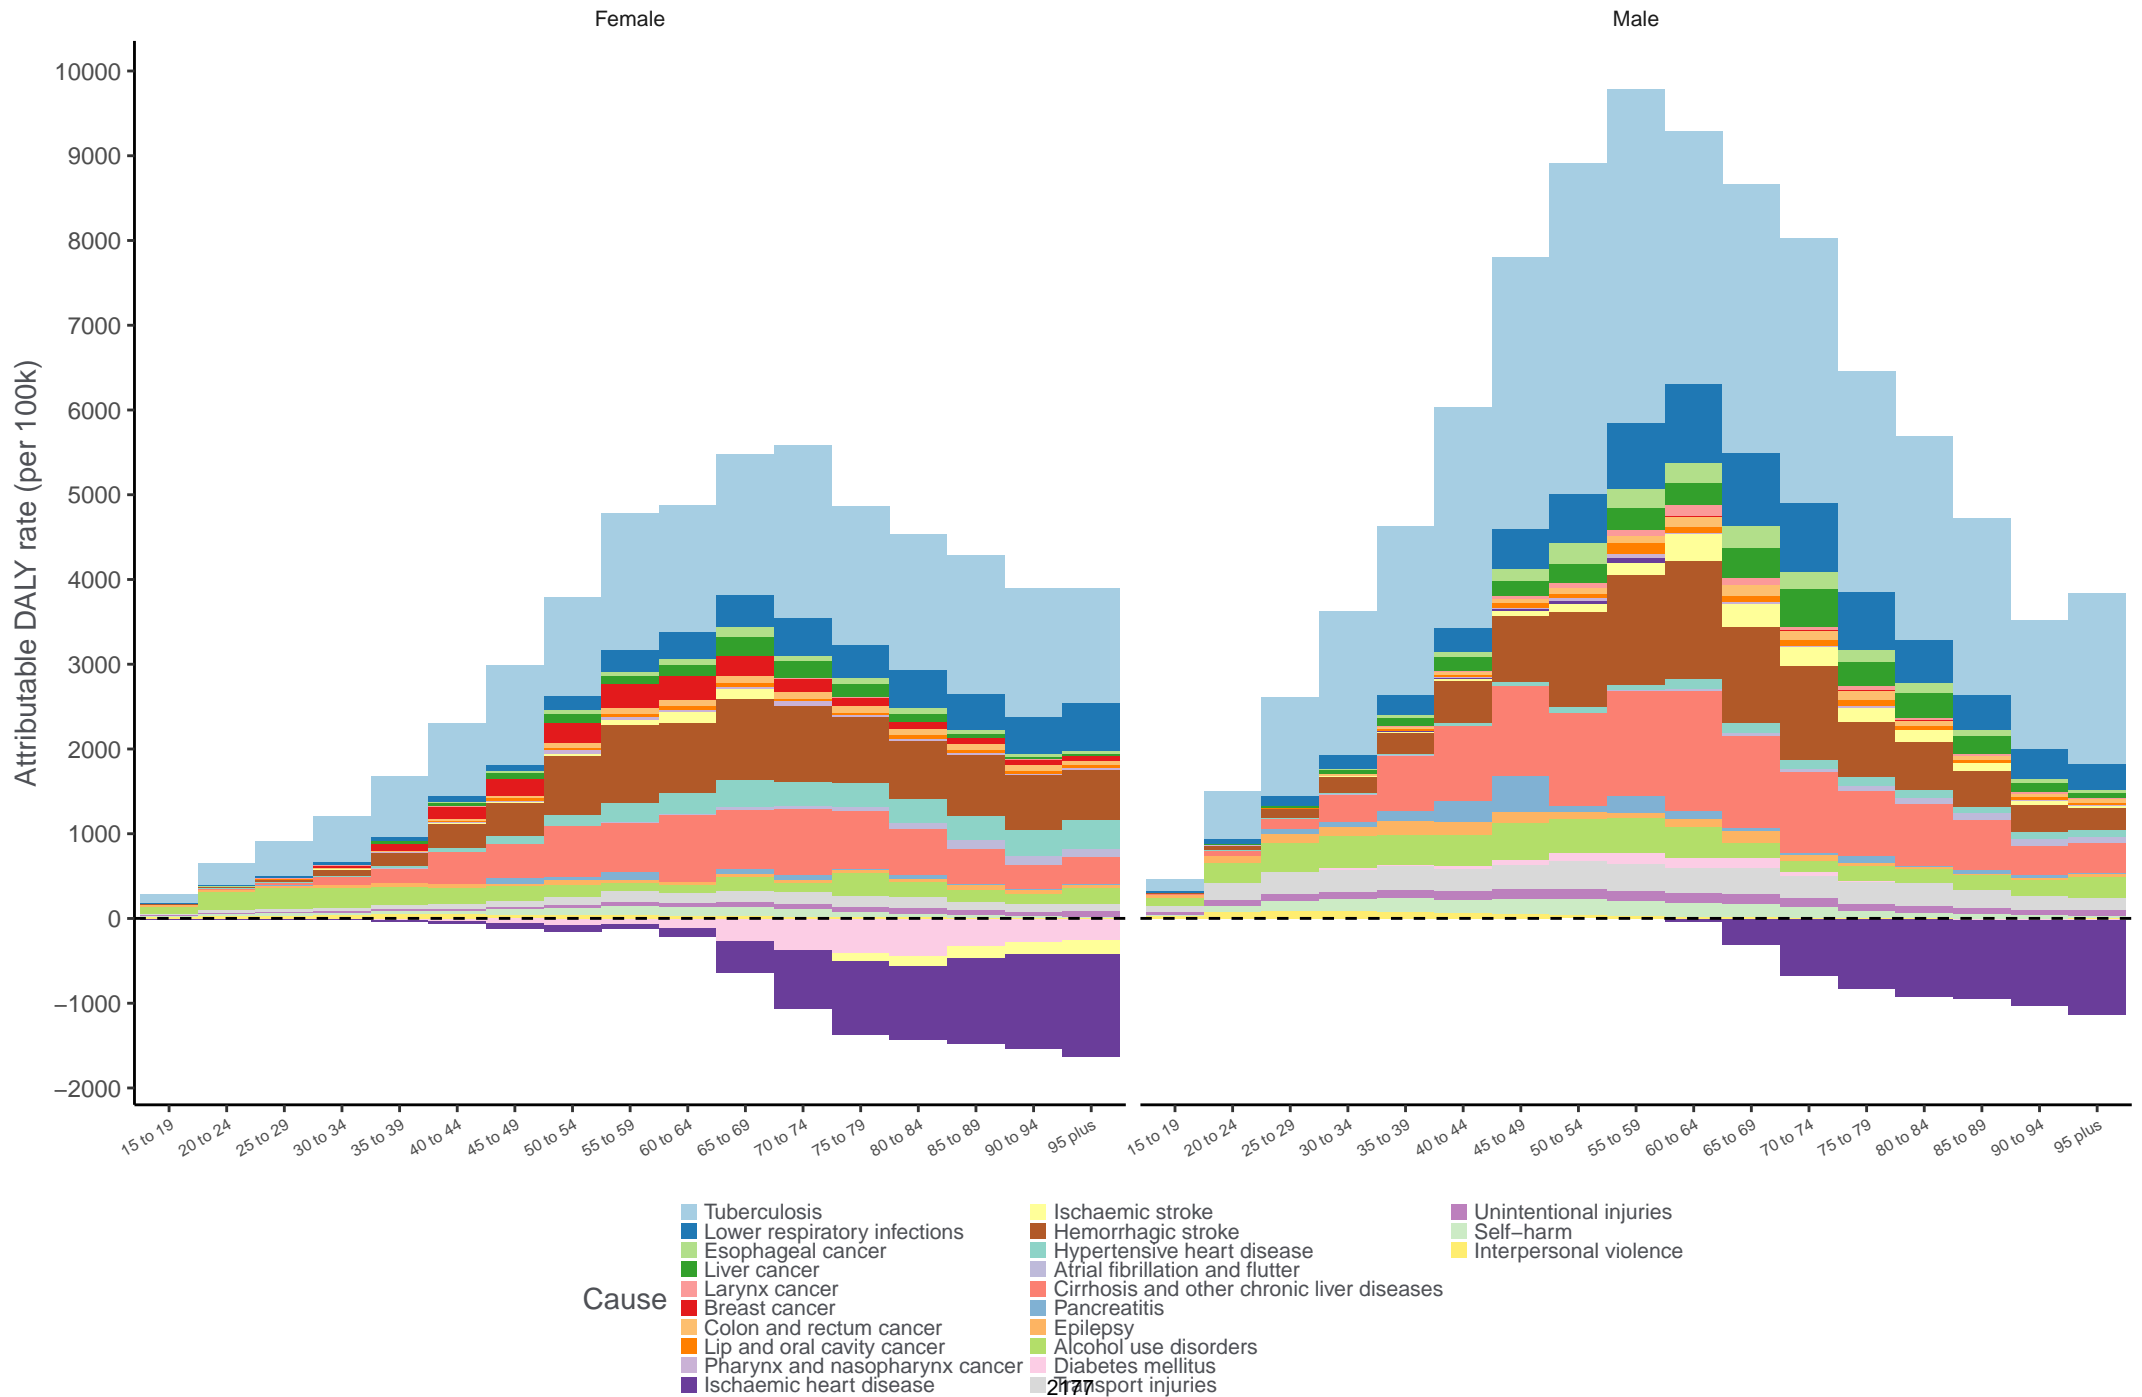

Attributable DALY rate disaggregated by cause, Liberia, by sex and age in 2016.

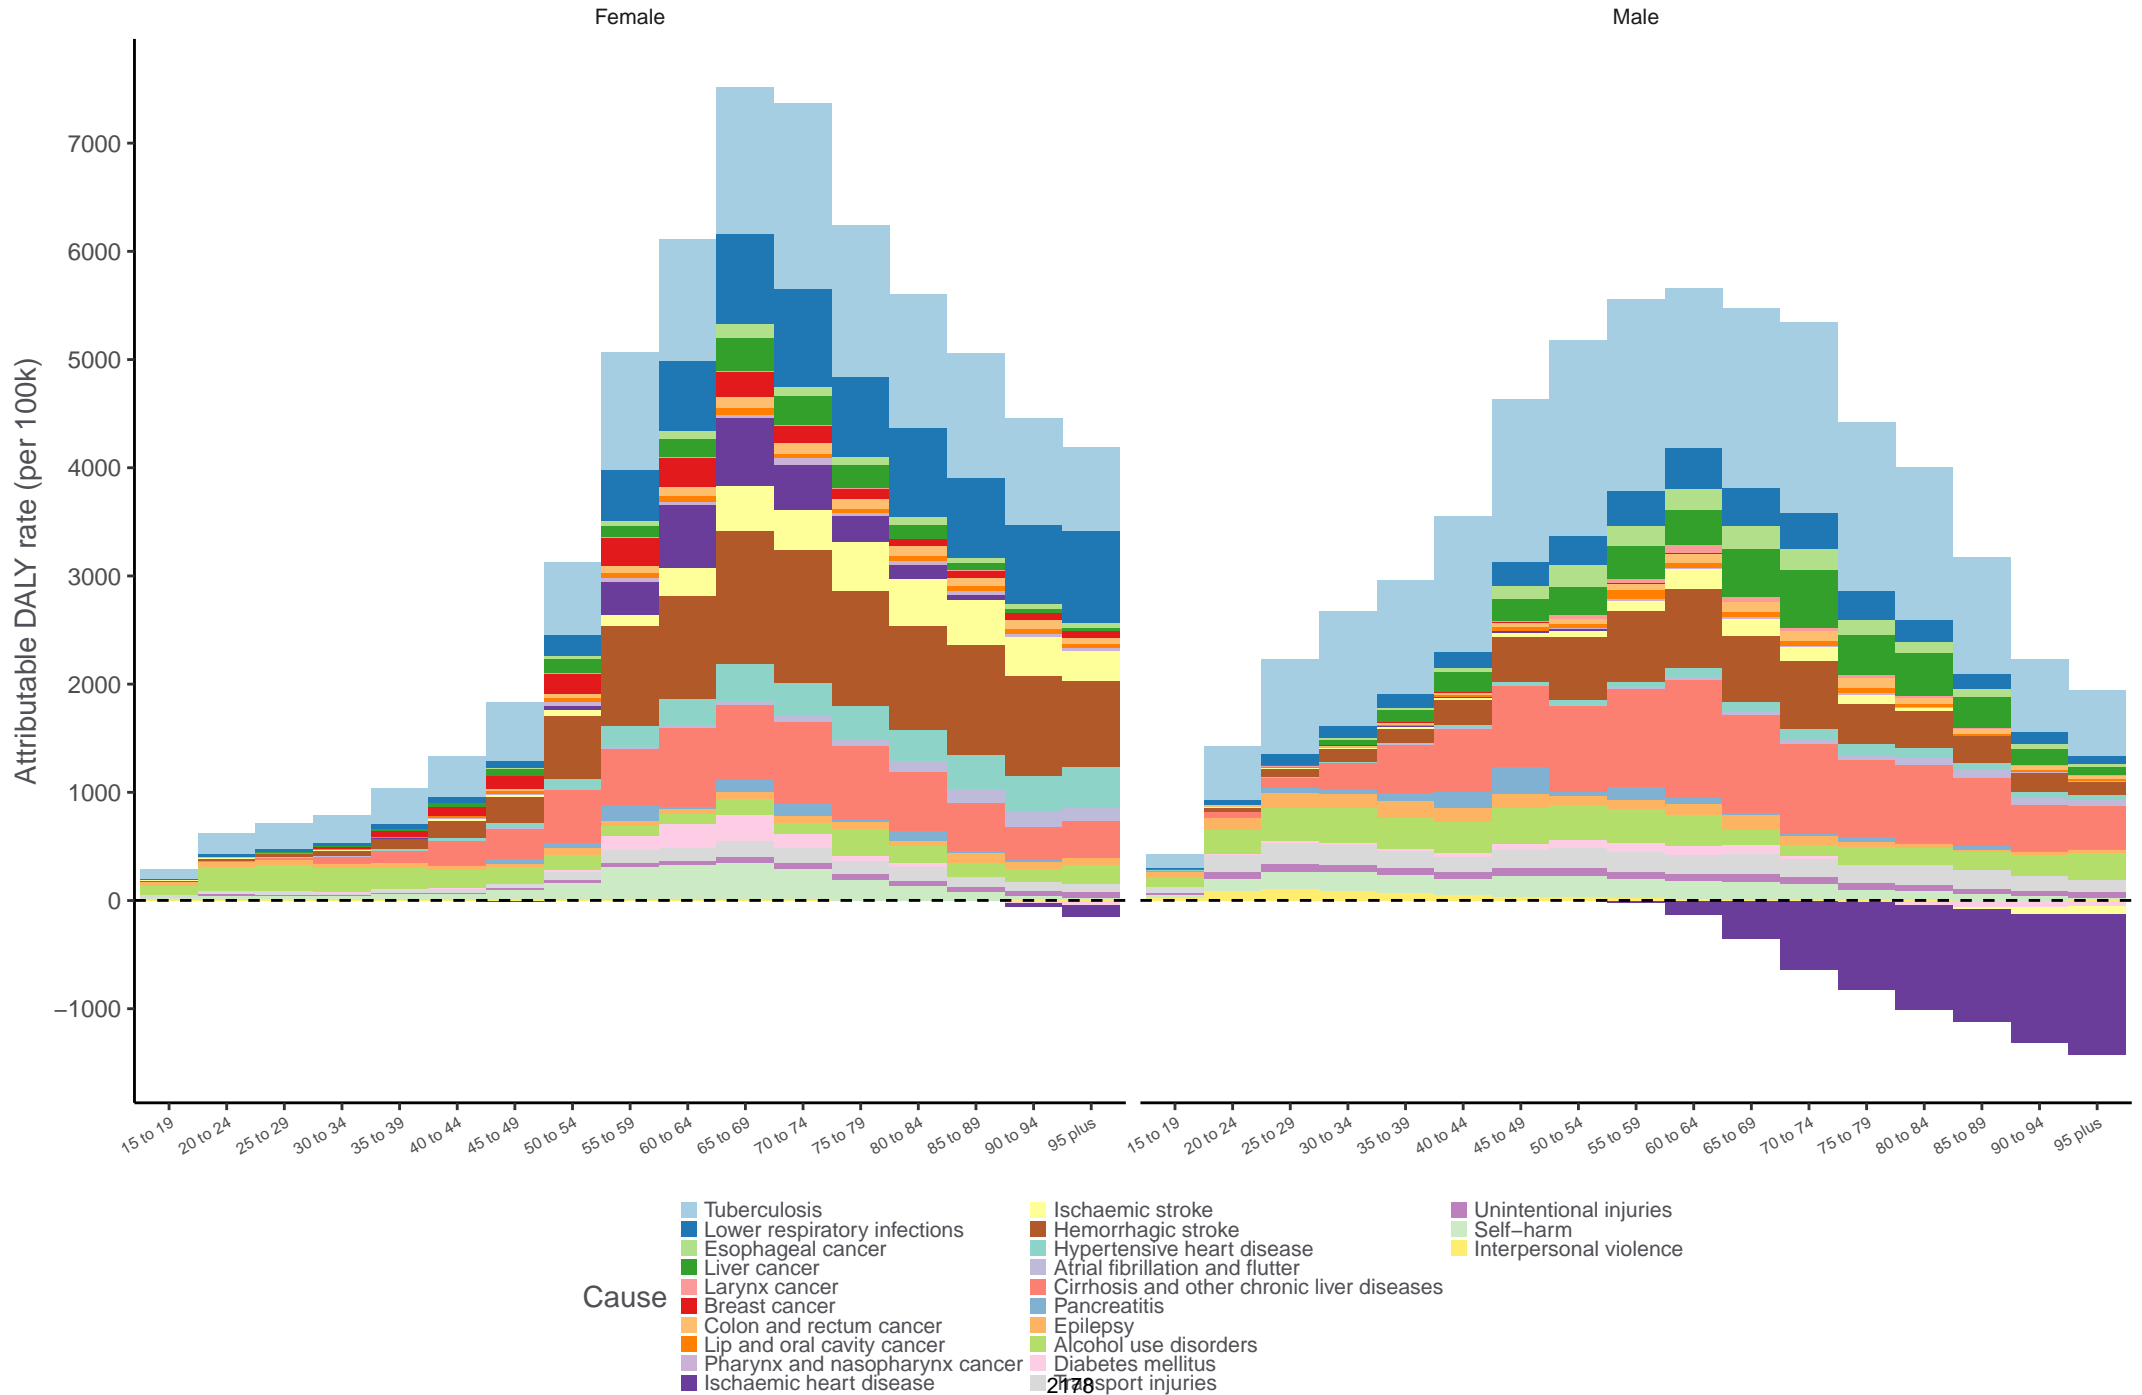

Attributable DALY rate disaggregated by cause, Mali, by sex and age in 2016.

Female

Male

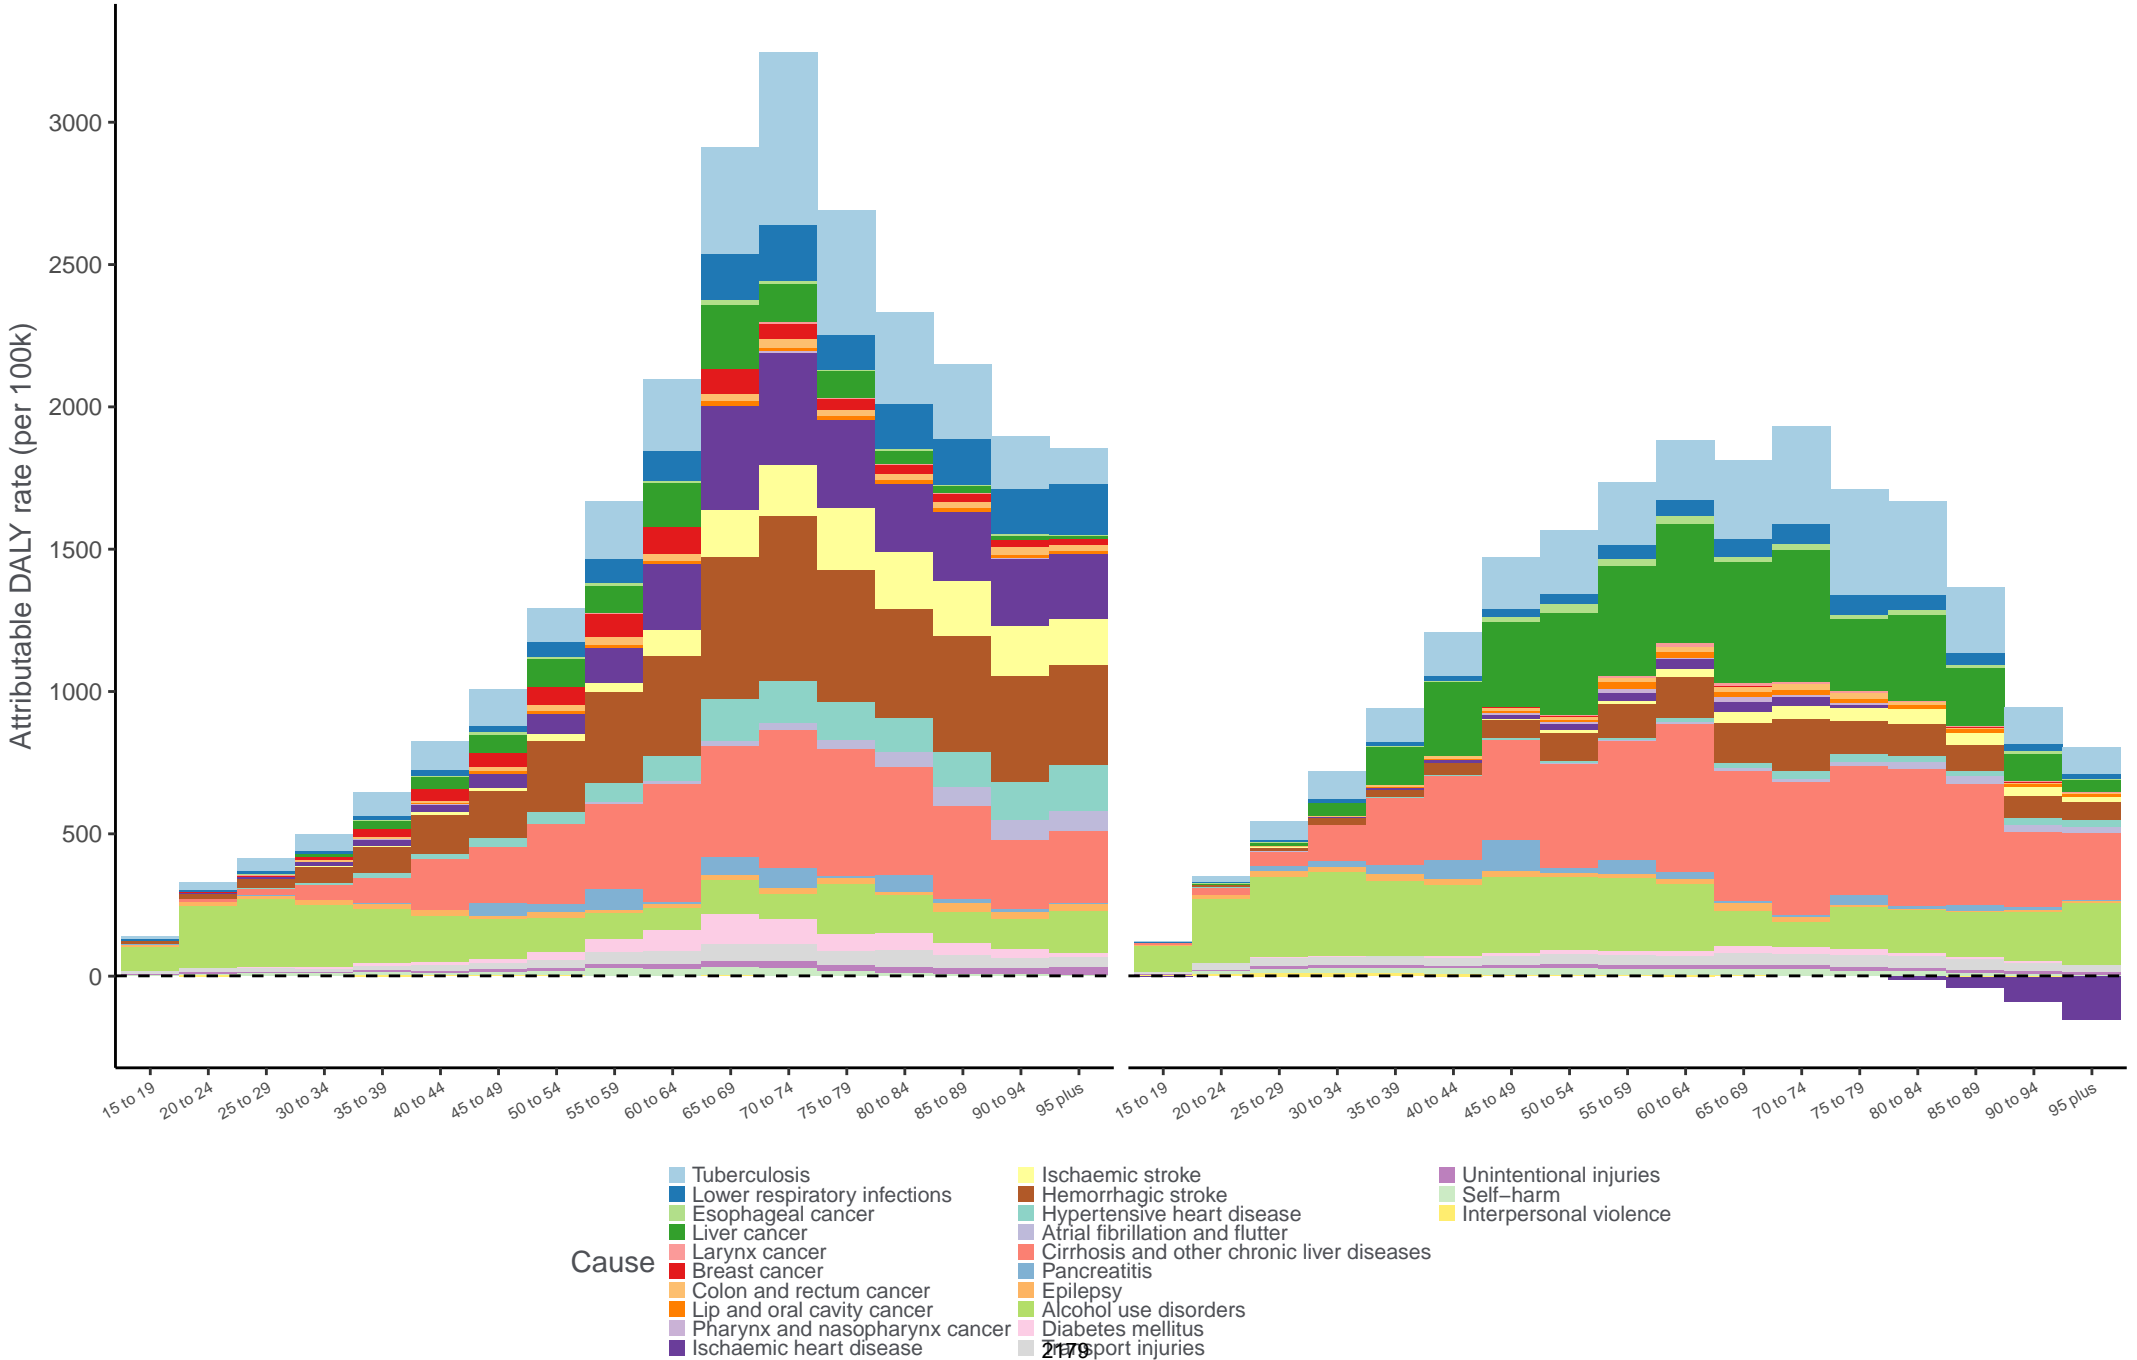

Attributable DALY rate disaggregated by cause, Mauritania, by sex and age in 2016.

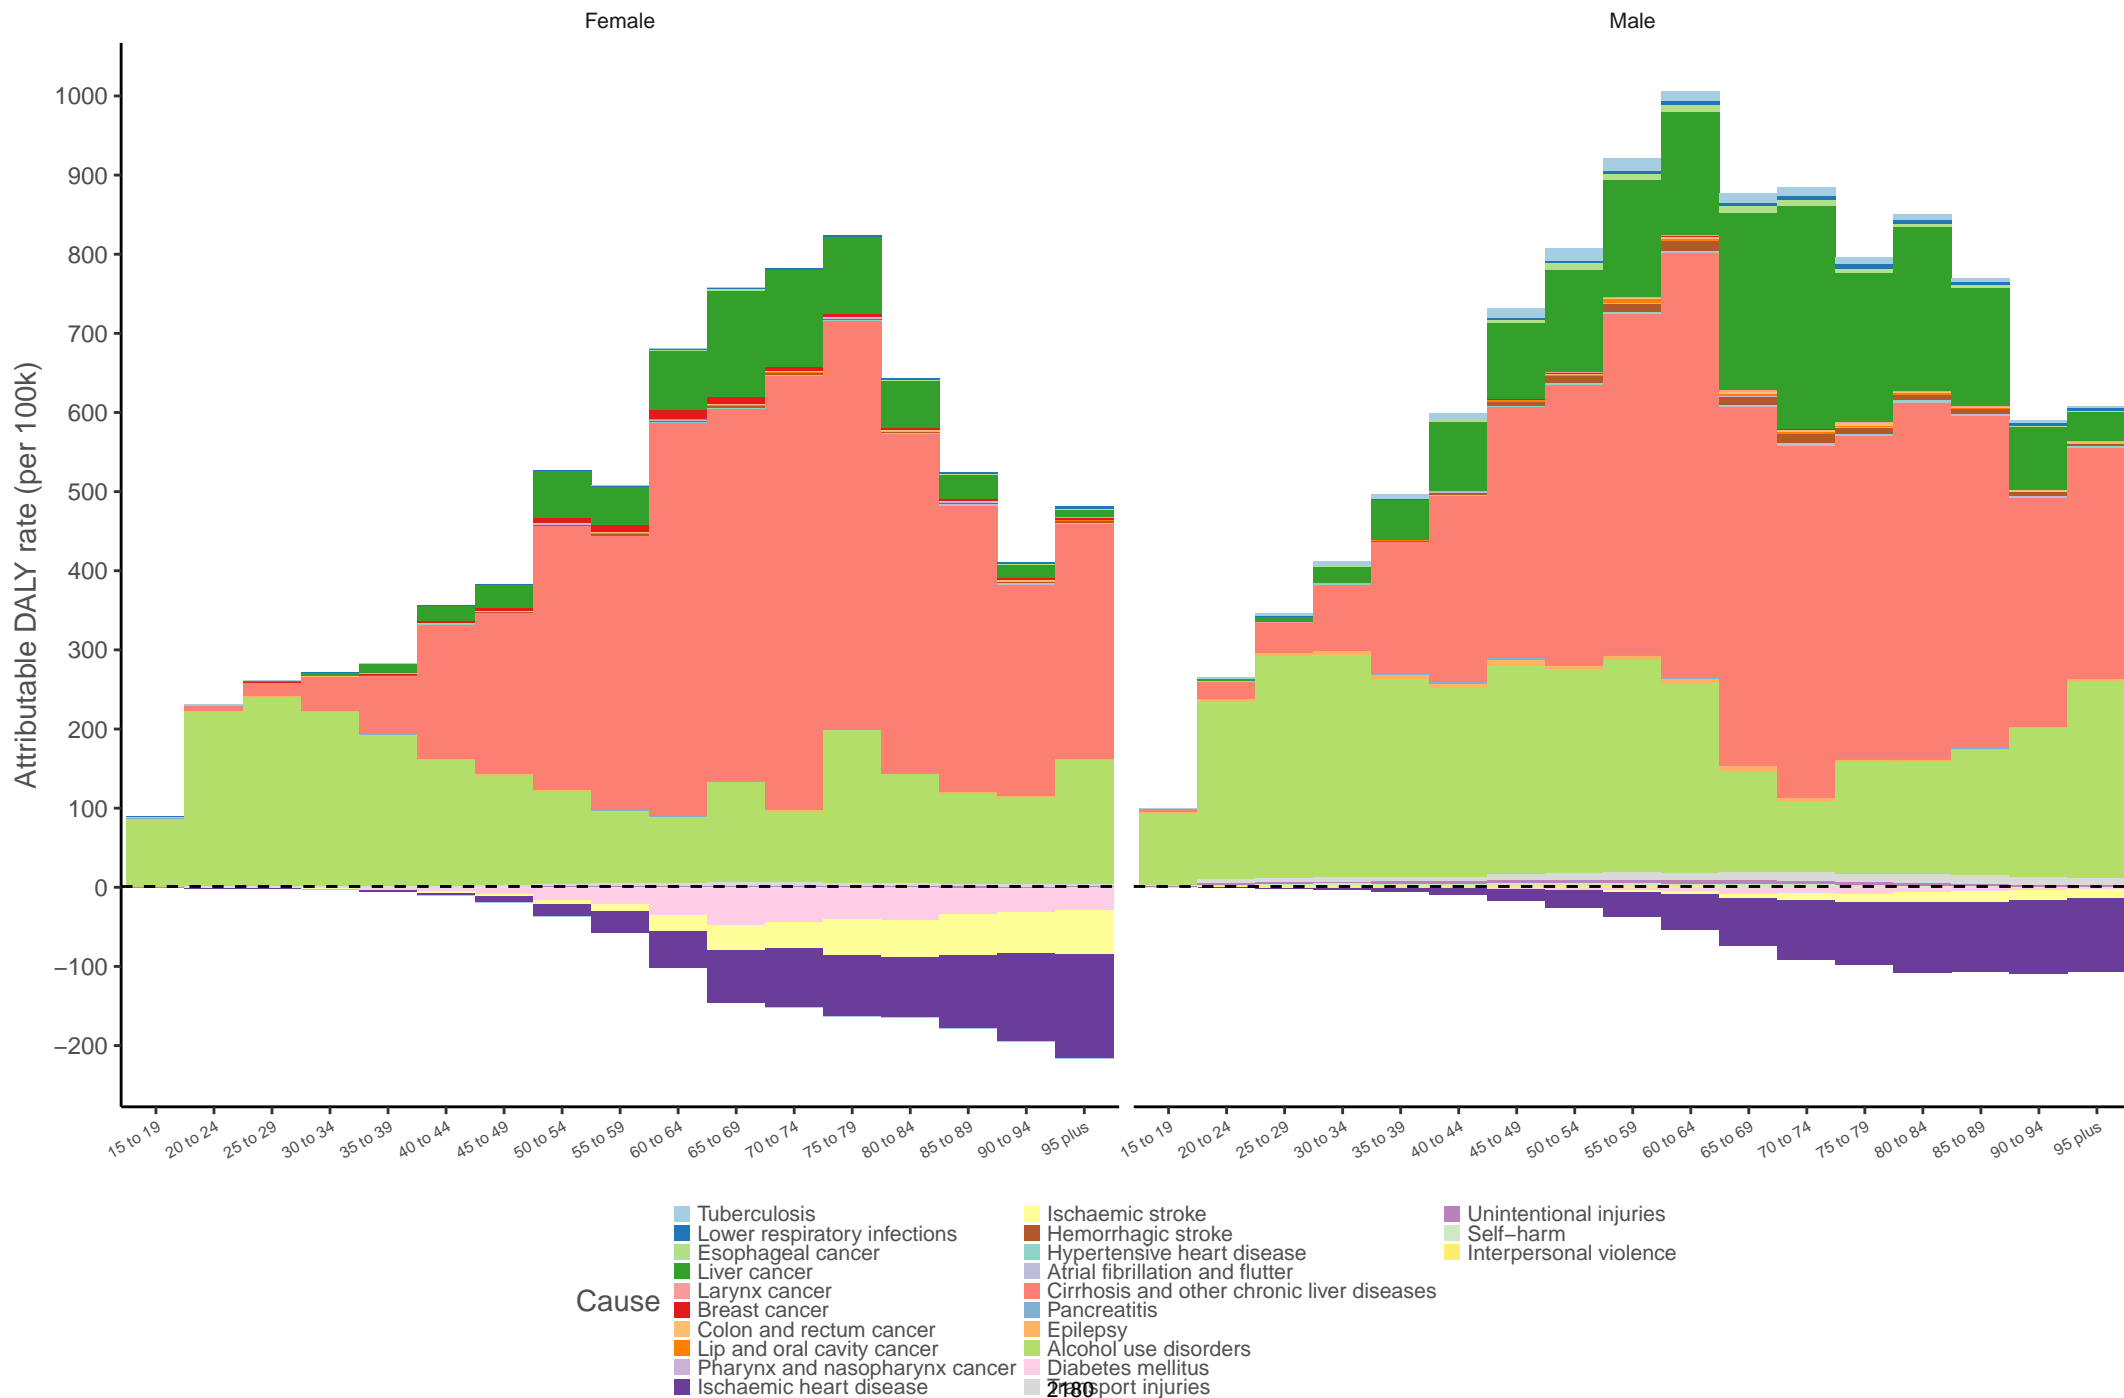

Attributable DALY rate disaggregated by cause, Niger, by sex and age in 2016.

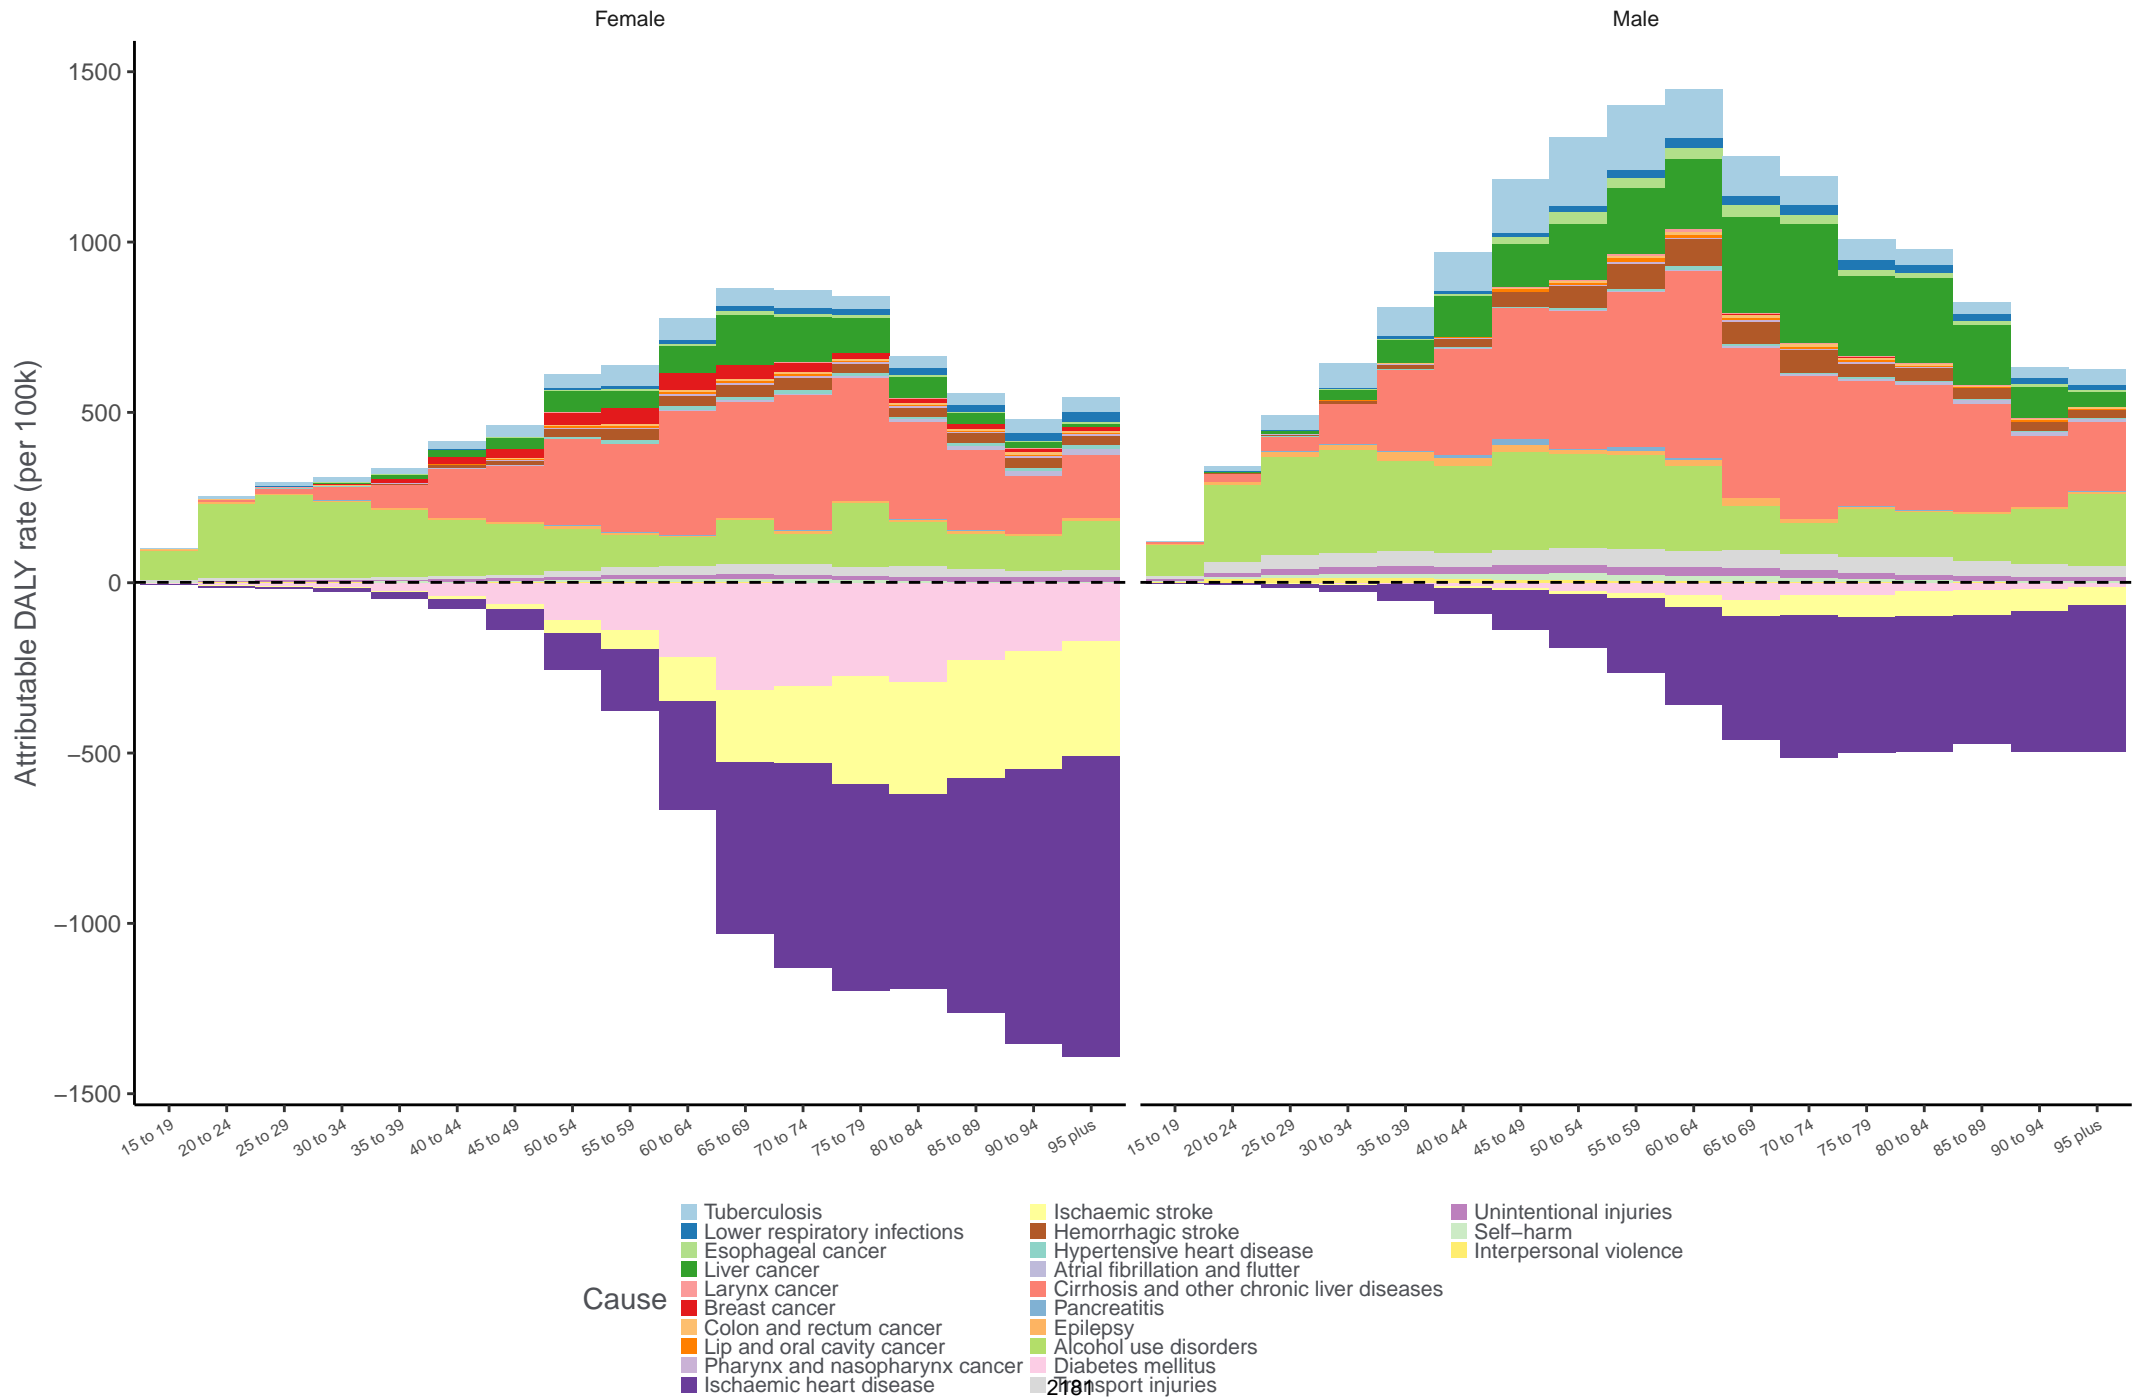

Attributable DALY rate disaggregated by cause, Nigeria, by sex and age in 2016.

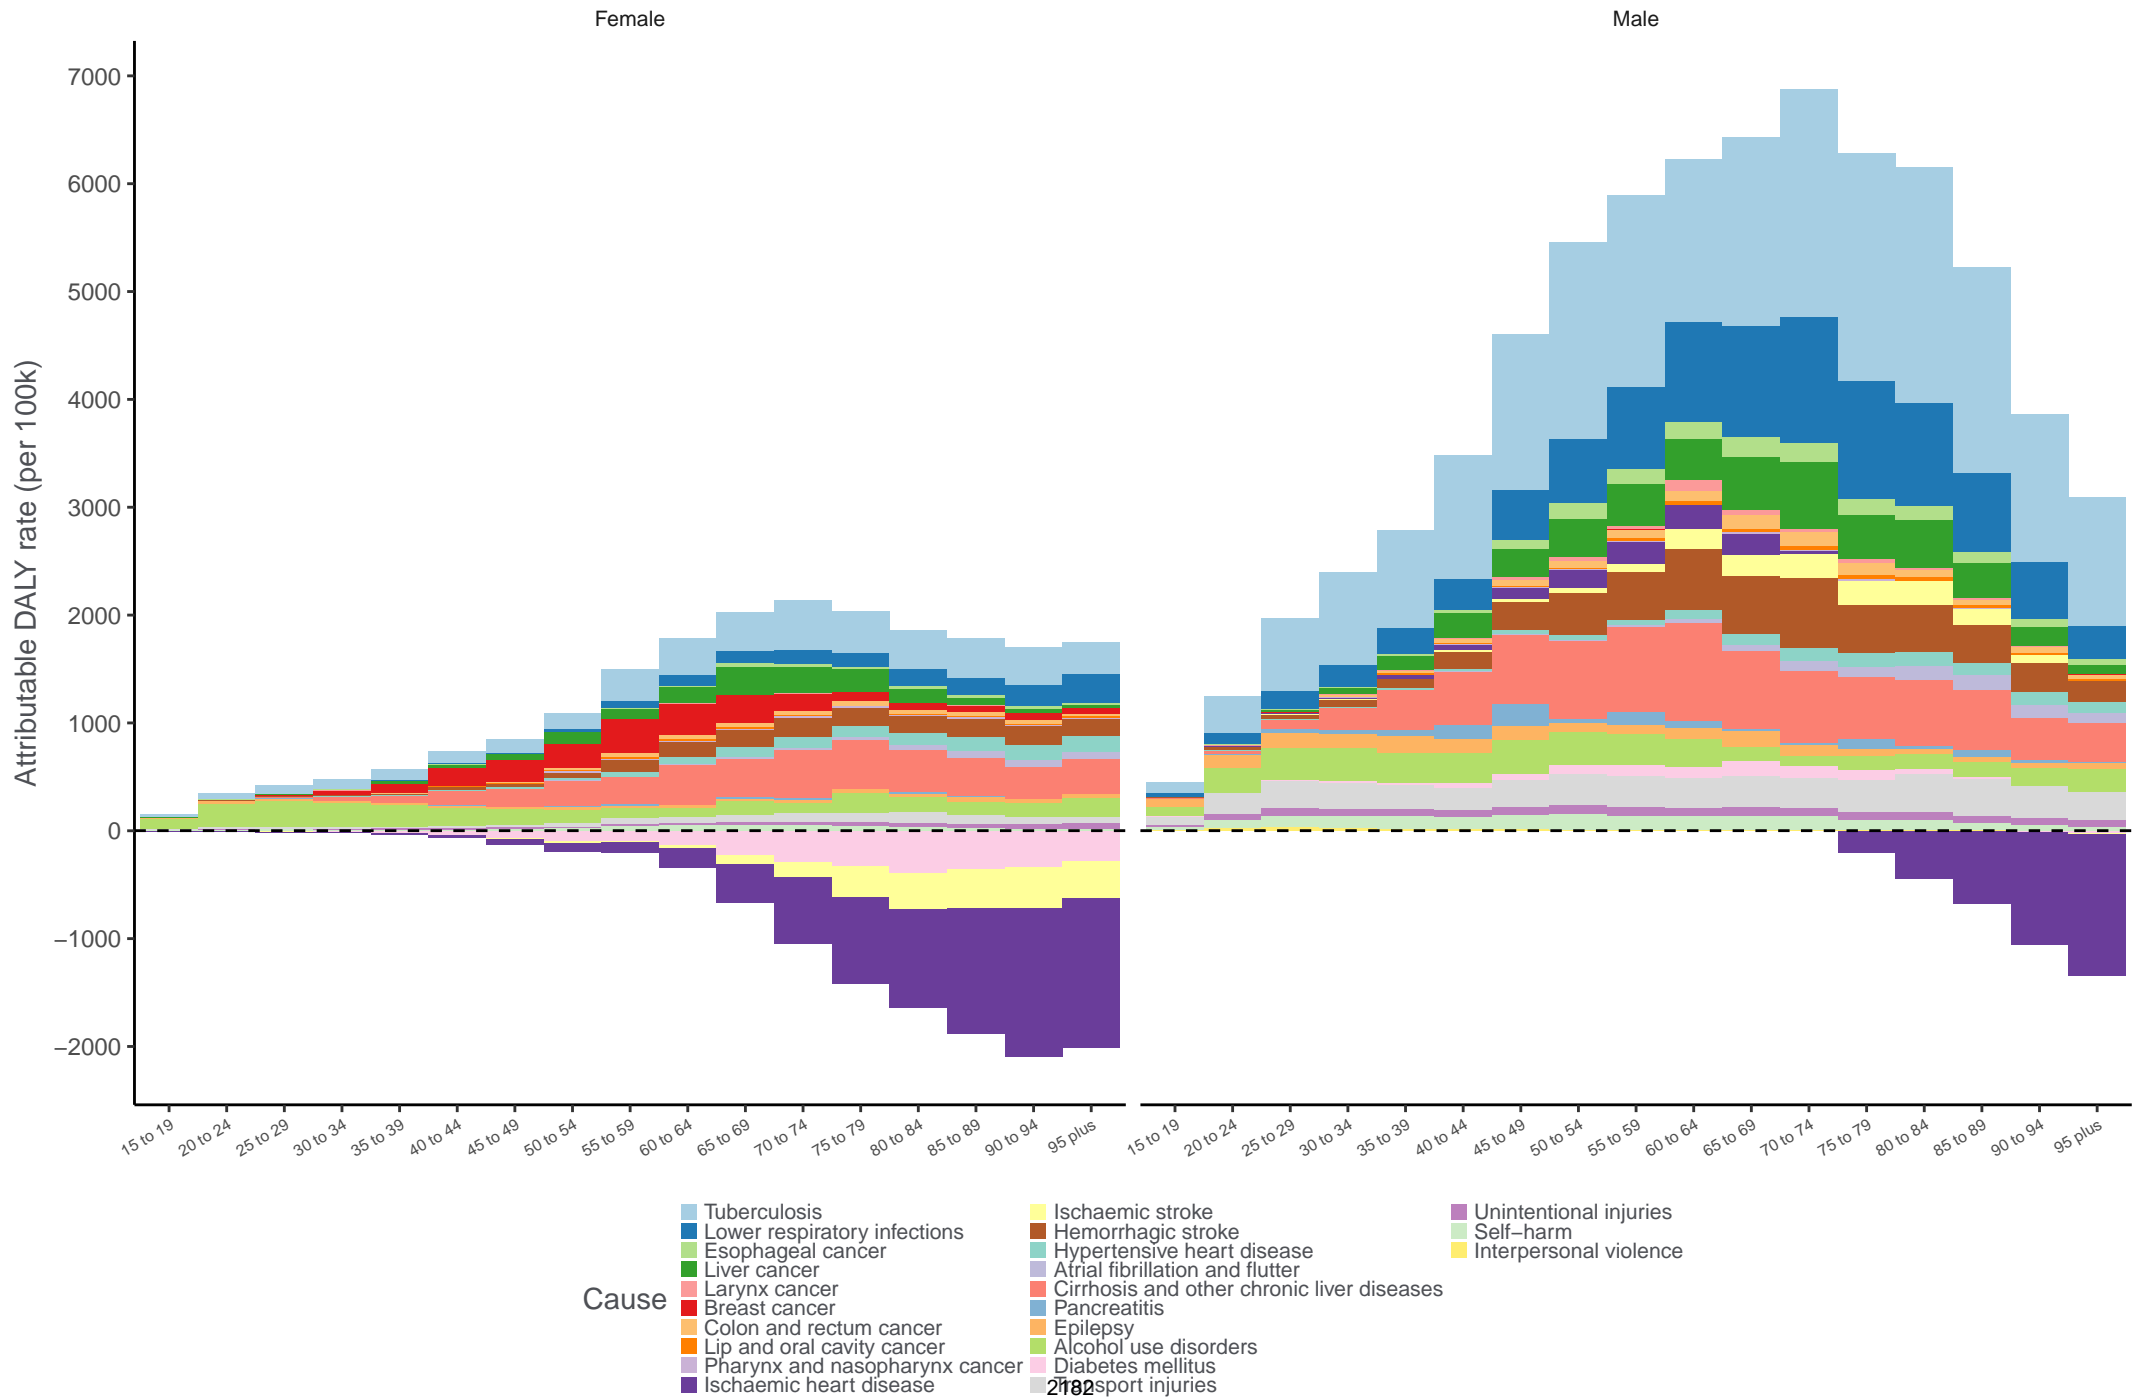

Attributable DALY rate disaggregated by cause, Sao Tome and Principe, by sex and age in 2016.

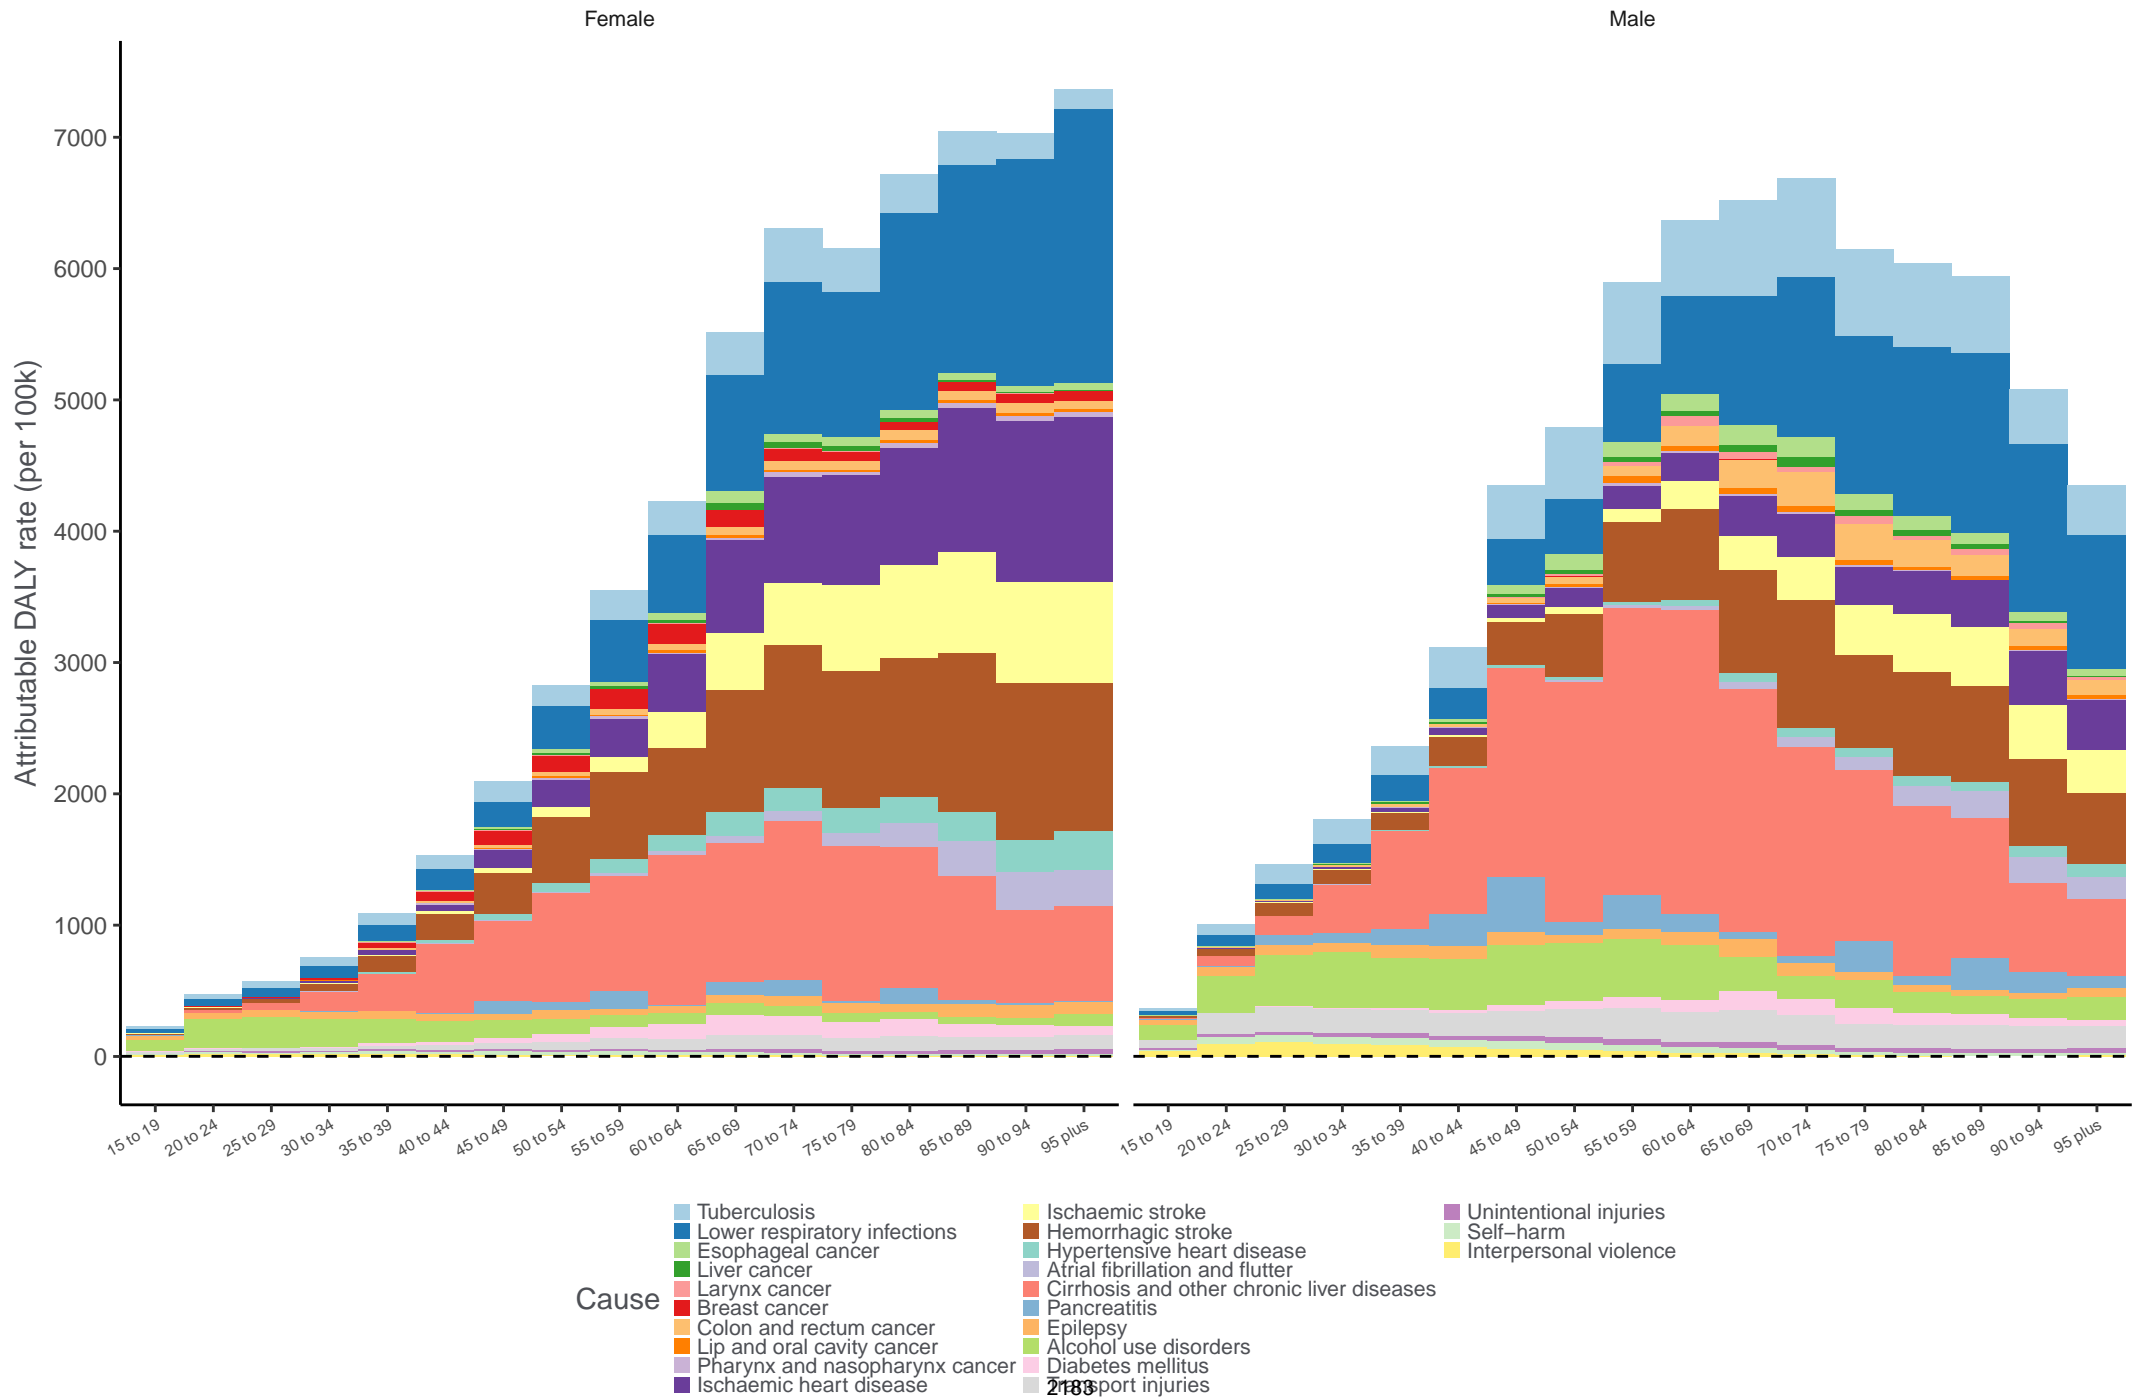

Cause

2183
